# Supplementary material for: Functional development of a V3/glycan-specific broadly neutralizing antibody isolated from a case of HIV superinfection
Source: eLife journal article supplement (doi:10.7554/elife.68110), 2021-07-15
Supplement: fig2-data2 [file A1.xls]

Vers 3.43 Data Simulation
Conc1	2E-06	2E-06	2E-06	2E-06	2E-06
Start1	199.99	730	1259.99	1790	2320
Stop1	559.79	1089.8	1619.79	2149.8	2679.8
Time1	Data1	Sim1	Time2	Data2	Sim2	Time3	Data3	Sim3	Time4	Data4	Sim4	Time5	Data5	Sim5
199.99	0.00914427		730	-0.00350857		1259.99	-0.00691779		1790	0.00117348		2320	0.00035215
200.19	0.00997262		730.2	-0.00498425		1260.19	-0.00825968		1790.2	0.00126388		2320.2	-0.00067935
200.39	0.01166187		730.4	-0.00692734		1260.39	-0.00910046		1790.4	0.00211305		2320.4	-0.00101255
200.59	0.01423411		730.6	-0.00785059		1260.59	-0.01025743		1790.6	0.00279602		2320.6	-0.00105162
200.79	0.01705046		730.8	-0.00914322		1260.79	-0.01119027		1790.8	0.00365826		2320.8	-0.0027324
200.99	0.02010947		731	-0.00912869		1260.99	-0.01208736		1791	0.00365967		2321	-0.00331278
201.19	0.02359125		731.2	-0.00957054		1261.19	-0.01218656		1791.2	0.0038623		2321.2	-0.00338167
201.39	0.0269072		731.4	-0.0092302		1261.39	-0.01244681		1791.4	0.00474251		2321.4	-0.00307954
201.59	0.03020548		731.6	-0.00932559		1261.59	-0.01238453		1791.6	0.00547842		2321.6	-0.00297953
201.79	0.03386453		731.8	-0.00903261		1261.79	-0.0119902		1791.8	0.00651063		2321.8	-0.00289921
201.99	0.03759523		732	-0.00883464		1261.99	-0.0114876		1792	0.00668785		2322	-0.00210227
202.19	0.0410937		732.2	-0.00819338		1262.19	-0.01121224		1792.2	0.00755563		2322.2	-0.00149831
202.39	0.0437556		732.4	-0.00860463		1262.39	-0.01151665		1792.4	0.00791573		2322.4	-0.00152838
202.59	0.04611513		732.6	-0.00896709		1262.59	-0.01134269		1792.6	0.00900041		2322.6	-0.00195702
202.79	0.04837048		732.8	-0.00936388		1262.79	-0.01028174		1792.8	0.00960847		2322.8	-0.0016698
202.99	0.05114874		733	-0.00936898		1262.99	-0.01074985		1793	0.00988583		2323	-0.00114778
203.19	0.05265414		733.2	-0.00963923		1263.19	-0.01019001		1793.2	0.01016939		2323.2	-0.00051621
203.39	0.05515914		733.4	-0.00902795		1263.39	-0.00925305		1793.4	0.01094326		2323.4	-0.00093726
203.59	0.05661256		733.6	-0.00980497		1263.59	-0.01020273		1793.6	0.01168914		2323.6	-0.00140386
203.79	0.05875317		733.8	-0.01050953		1263.79	-0.00972427		1793.8	0.01102243		2323.8	-0.00176517
203.99	0.06112216		734	-0.01046809		1263.99	-0.0104669		1794	0.01125566		2324	-0.0016032
204.19	0.06240082		734.2	-0.0095587		1264.19	-0.01171071		1794.2	0.01110236		2324.2	-0.0025906
204.39	0.06464954		734.4	-0.0098057		1264.39	-0.01244628		1794.4	0.01146296		2324.4	-0.00217643
204.59	0.06633775		734.6	-0.00805005		1264.59	-0.01344858		1794.6	0.01142233		2324.6	-0.00270308
204.79	0.06760301		734.8	-0.00815731		1264.79	-0.01358643		1794.8	0.01102549		2324.8	-0.00470322
204.99	0.06875727		735	-0.00715598		1264.99	-0.01382355		1795	0.01045129		2325	-0.00404475
205.19	0.07029897		735.2	-0.00749423		1265.19	-0.01307589		1795.2	0.00998222		2325.2	-0.00388504
205.39	0.07082368		735.4	-0.0068636		1265.39	-0.01334959		1795.4	0.0100623		2325.4	-0.00295348
205.59	0.07210129		735.6	-0.00706369		1265.59	-0.01304017		1795.6	0.00988856		2325.6	-0.00272395
205.79	0.07339662		735.8	-0.00735172		1265.79	-0.01300899		1795.8	0.00996881		2325.8	-0.00203367
205.99	0.07461075		736	-0.00770487		1265.99	-0.01282701		1796	0.00892325		2326	-0.00102879
206.19	0.07552496		736.2	-0.00748708		1266.19	-0.01263381		1796.2	0.00884738		2326.2	-0.00045225
206.39	0.07691079		736.4	-0.00746323		1266.39	-0.01250648		1796.4	0.00824535		2326.4	-0.00054899
206.59	0.07832793		736.6	-0.00785685		1266.59	-0.0111695		1796.6	0.00885074		2326.6	-0.00106501
206.79	0.07903616		736.8	-0.0070851		1266.79	-0.01021428		1796.8	0.00851428		2326.8	-0.00057211
206.99	0.08106662		737	-0.0068432		1266.99	-0.01063159		1797	0.00828377		2327	-0.00004221
207.19	0.08173665		737.2	-0.00660692		1267.19	-0.0109312		1797.2	0.00890563		2327.2	0.00026221
207.39	0.08317124		737.4	-0.00712335		1267.39	-0.00992349		1797.4	0.00836008		2327.4	-0.00025974
207.59	0.0844183		737.6	-0.00702604		1267.59	-0.00977958		1797.6	0.00791637		2327.6	-0.0010147
207.79	0.0861709		737.8	-0.00659178		1267.79	-0.0096312		1797.8	0.00704689		2327.8	-0.00200962
207.99	0.08774895		738	-0.00624743		1267.99	-0.01017379		1798	0.00708923		2328	-0.00179821
208.19	0.08760479		738.2	-0.00665094		1268.19	-0.01109946		1798.2	0.0059135		2328.2	-0.00142813
208.39	0.08870008		738.4	-0.00769148		1268.39	-0.01128114		1798.4	0.00612281		2328.4	-0.00188678
208.59	0.08938414		738.6	-0.00698103		1268.59	-0.01122173		1798.6	0.00628396		2328.6	-0.00188754
208.79	0.08919656		738.8	-0.00833917		1268.79	-0.01075879		1798.8	0.00620326		2328.8	-0.00283857
208.99	0.08964122		739	-0.0083572		1268.99	-0.01077081		1799	0.00659598		2329	-0.00237593
209.19	0.08966345		739.2	-0.00898435		1269.19	-0.01069774		1799.2	0.00623011		2329.2	-0.00190903
209.39	0.08992135		739.4	-0.00961003		1269.39	-0.01110457		1799.4	0.00633601		2329.4	-0.00103767
209.59	0.09062087		739.6	-0.00885988		1269.59	-0.01091619		1799.6	0.00699973		2329.6	-0.00104453
209.79	0.09083103		739.8	-0.00922522		1269.79	-0.01108297		1799.8	0.00761852		2329.8	-0.00143048
209.99	0.09187771		740	-0.00863207		1269.99	-0.01081694		1800	0.00745301		2330	-0.00206189
210.19	0.09209103		740.2	-0.00846084		1270.19	-0.01046579		1800.2	0.0080693		2330.2	-0.00232495
210.39	0.09284406		740.4	-0.00815291		1270.39	-0.01113812		1800.4	0.00832216		2330.4	-0.0027073
210.59	0.09319287		740.6	-0.00737319		1270.59	-0.01037448		1800.6	0.00871146		2330.6	-0.00315763
210.79	0.09319349		740.8	-0.00589601		1270.79	-0.01075926		1800.8	0.00827607		2330.8	-0.00310922
210.99	0.09420383		741	-0.00510479		1270.99	-0.01154241		1801	0.00827573		2331	-0.00234014
211.19	0.09493998		741.2	-0.0045149		1271.19	-0.01170561		1801.2	0.00853477		2331.2	-0.00238196
211.39	0.09614458		741.4	-0.0050748		1271.39	-0.01077049		1801.4	0.0077798		2331.4	-0.00254488
211.59	0.09605931		741.6	-0.00430569		1271.59	-0.01097124		1801.6	0.00718966		2331.6	-0.00367433
211.79	0.09705024		741.8	-0.00455835		1271.79	-0.0109804		1801.8	0.00608458		2331.8	-0.0038636
211.99	0.09761309		742	-0.0051775		1271.99	-0.01135457		1802	0.00562705		2332	-0.00299513
212.19	0.09804792		742.2	-0.00542694		1272.19	-0.01118425		1802.2	0.00509109		2332.2	-0.00212278
212.39	0.09928482		742.4	-0.00510509		1272.39	-0.01082534		1802.4	0.00526458		2332.4	-0.00212096
212.59	0.10037152		742.6	-0.00495095		1272.59	-0.01034168		1802.6	0.00537616		2332.6	-0.00160595
212.79	0.09989693		742.8	-0.00540063		1272.79	-0.01006883		1802.8	0.00578142		2332.8	-0.00225322
212.99	0.10026412		743	-0.00520647		1272.99	-0.01062142		1803	0.00631802		2333	-0.00209336
213.19	0.10057842		743.2	-0.00582818		1273.19	-0.01154294		1803.2	0.00671503		2333.2	-0.00241527
213.39	0.10098482		743.4	-0.00655572		1273.39	-0.01064746		1803.4	0.00740826		2333.4	-0.00310808
213.59	0.10117953		743.6	-0.0058263		1273.59	-0.01068179		1803.6	0.00792023		2333.6	-0.00367623
213.79	0.10196801		743.8	-0.0063907		1273.79	-0.01118056		1803.8	0.00847291		2333.8	-0.00441927
213.99	0.10270534		744	-0.00533003		1273.99	-0.01119595		1804	0.00858655		2334	-0.00483794
214.19	0.102864		744.2	-0.0053182		1274.19	-0.01120497		1804.2	0.00900312		2334.2	-0.0045086
214.39	0.10343458		744.4	-0.00511582		1274.39	-0.01154375		1804.4	0.00889518		2334.4	-0.00428923
214.59	0.10345511		744.6	-0.00462049		1274.59	-0.010767		1804.6	0.00906922		2334.6	-0.00471456
214.79	0.10326572		744.8	-0.00472157		1274.79	-0.01119092		1804.8	0.00856604		2334.8	-0.00492768
214.99	0.10348273		745	-0.00475046		1274.99	-0.01229513		1805	0.00867044		2335	-0.0040677
215.19	0.10433989		745.2	-0.00514594		1275.19	-0.01211619		1805.2	0.008046		2335.2	-0.0041329
215.39	0.10445318		745.4	-0.00593248		1275.39	-0.01139697		1805.4	0.00670194		2335.4	-0.00411516
215.59	0.10393951		745.6	-0.00570265		1275.59	-0.01117207		1805.6	0.0057349		2335.6	-0.00413071
215.79	0.10568609		745.8	-0.00612898		1275.79	-0.01062747		1805.8	0.00483212		2335.8	-0.00362905
215.99	0.10705178		746	-0.00682667		1275.99	-0.01000759		1806	0.00545606		2336	-0.0030731
216.19	0.10853117		746.2	-0.00599105		1276.19	-0.00890031		1806.2	0.00545011		2336.2	-0.00344474
216.39	0.110065		746.4	-0.00610609		1276.39	-0.00849046		1806.4	0.00486797		2336.4	-0.00354714
216.59	0.11124825		746.6	-0.00702566		1276.59	-0.00799208		1806.6	0.00532211		2336.6	-0.00378494
216.79	0.11084058		746.8	-0.0070341		1276.79	-0.00795025		1806.8	0.00539944		2336.8	-0.0041652
216.99	0.11146429		747	-0.00751914		1276.99	-0.00859184		1807	0.00604801		2337	-0.0045447
217.19	0.1128649		747.2	-0.008058		1277.19	-0.00883057		1807.2	0.00660319		2337.2	-0.00553266
217.39	0.11342087		747.4	-0.00883823		1277.39	-0.00772933		1807.4	0.00724223		2337.4	-0.00570819
217.59	0.11379859		747.6	-0.0083212		1277.59	-0.00795758		1807.6	0.00754219		2337.6	-0.00565721
217.79	0.11434753		747.8	-0.00767668		1277.79	-0.00849517		1807.8	0.00805679		2337.8	-0.00615094
217.99	0.11373191		748	-0.00722018		1277.99	-0.00852981		1808	0.008701		2338	-0.00614259
218.19	0.11339212		748.2	-0.00732388		1278.19	-0.00876757		1808.2	0.00919327		2338.2	-0.0061508
218.39	0.11329678		748.4	-0.00792097		1278.39	-0.0093502		1808.4	0.00981013		2338.4	-0.00550106
218.59	0.11241752		748.6	-0.00698671		1278.59	-0.01018512		1808.6	0.01017468		2338.6	-0.00525825
218.79	0.1122504		748.8	-0.0070192		1278.79	-0.0107305		1808.8	0.00996153		2338.8	-0.00565219
218.99	0.11231125		749	-0.00683747		1278.99	-0.01127675		1809	0.01008238		2339	-0.00493998
219.19	0.11244806		749.2	-0.00647264		1279.19	-0.01049578		1809.2	0.00938175		2339.2	-0.00393494
219.39	0.11157048		749.4	-0.00603735		1279.39	-0.00983969		1809.4	0.00867107		2339.4	-0.00328586
219.59	0.11195805		749.6	-0.00550689		1279.59	-0.00965807		1809.6	0.00861533		2339.6	-0.00269873
219.79	0.11257911		749.8	-0.0052012		1279.79	-0.01002619		1809.8	0.00823886		2339.8	-0.00227328
219.99	0.112548		750	-0.00455496		1279.99	-0.00918042		1810	0.00842922		2340	-0.00208125
220.19	0.11253615		750.2	-0.00412658		1280.19	-0.00972542		1810.2	0.00816334		2340.2	-0.00129062
220.39	0.11239928		750.4	-0.0048205		1280.39	-0.0096061		1810.4	0.0070427		2340.4	-0.00028524
220.59	0.11204641		750.6	-0.00494983		1280.59	-0.00987641		1810.6	0.00699553		2340.6	-0.00012312
220.79	0.11223877		750.8	-0.00510859		1280.79	-0.00942308		1810.8	0.00621232		2340.8	0.00006511
220.99	0.1127439		751	-0.00583239		1280.99	-0.01023082		1811	0.00686009		2341	-0.00021105
221.19	0.11355905		751.2	-0.00652136		1281.19	-0.01039779		1811.2	0.00727239		2341.2	-0.00115564
221.39	0.11336428		751.4	-0.00711221		1281.39	-0.00965138		1811.4	0.00745024		2341.4	-0.00095154
221.59	0.11248969		751.6	-0.00770838		1281.59	-0.00929321		1811.6	0.00767417		2341.6	-0.00106823
221.79	0.113259		751.8	-0.00748292		1281.79	-0.01015403		1811.8	0.00816064		2341.8	-0.00213132
221.99	0.11317899		752	-0.00763766		1281.99	-0.01054948		1812	0.00948396		2342	-0.00210037
222.19	0.11388564		752.2	-0.00651063		1282.19	-0.01047777		1812.2	0.00921738		2342.2	-0.00308646
222.39	0.11550292		752.4	-0.00643621		1282.39	-0.01175463		1812.4	0.01020287		2342.4	-0.00405484
222.59	0.11573537		752.6	-0.0050299		1282.59	-0.011179		1812.6	0.00990097		2342.6	-0.00486813
222.79	0.11601579		752.8	-0.00503839		1282.79	-0.01109793		1812.8	0.0095365		2342.8	-0.00642825
222.99	0.11707103		753	-0.00473553		1282.99	-0.01124283		1813	0.00990632		2343	-0.00665703
223.19	0.11783855		753.2	-0.00342611		1283.19	-0.01019744		1813.2	0.00992513		2343.2	-0.00630682
223.39	0.11832137		753.4	-0.00274876		1283.39	-0.01026207		1813.4	0.00935315		2343.4	-0.00668765
223.59	0.11933768		753.6	-0.00273273		1283.59	-0.01063532		1813.6	0.00979068		2343.6	-0.0064505
223.79	0.11906979		753.8	-0.00284929		1283.79	-0.01034487		1813.8	0.00993937		2343.8	-0.00595329
223.99	0.11920746		754	-0.00328399		1283.99	-0.00970953		1814	0.00970613		2344	-0.00495502
224.19	0.11955292		754.2	-0.00312064		1284.19	-0.00961783		1814.2	0.00994722		2344.2	-0.00425064
224.39	0.11967201		754.4	-0.00368069		1284.39	-0.00931656		1814.4	0.0095702		2344.4	-0.00427992
224.59	0.1200096		754.6	-0.00350798		1284.59	-0.00892534		1814.6	0.00984777		2344.6	-0.00375893
224.79	0.12078146		754.8	-0.00438001		1284.79	-0.00847793		1814.8	0.00952194		2344.8	-0.00304609
224.99	0.1210635		755	-0.00519346		1284.99	-0.00854002		1815	0.00972512		2345	-0.00326044
225.19	0.12120849		755.2	-0.00594793		1285.19	-0.00816242		1815.2	0.00925177		2345.2	-0.0033092
225.39	0.12057514		755.4	-0.00720418		1285.39	-0.00712472		1815.4	0.00880385		2345.4	-0.00389924
225.59	0.12067378		755.6	-0.00801556		1285.59	-0.00763377		1815.6	0.00919164		2345.6	-0.00380832
225.79	0.12152361		755.8	-0.00817379		1285.79	-0.00802885		1815.8	0.00899935		2345.8	-0.00424297
225.99	0.12153013		756	-0.00840359		1285.99	-0.00855791		1816	0.0091882		2346	-0.00376488
226.19	0.12248532		756.2	-0.00805467		1286.19	-0.00896795		1816.2	0.0083728		2346.2	-0.00463969
226.39	0.12326908		756.4	-0.00803002		1286.39	-0.00958155		1816.4	0.00839413		2346.4	-0.00505253
226.59	0.12244594		756.6	-0.00786291		1286.59	-0.00893624		1816.6	0.00836754		2346.6	-0.00517153
226.79	0.12234918		756.8	-0.00789636		1286.79	-0.00918671		1816.8	0.00859759		2346.8	-0.00529914
226.99	0.1232046		757	-0.00730291		1286.99	-0.00947868		1817	0.00957034		2347	-0.00472817
227.19	0.12340372		757.2	-0.00691529		1287.19	-0.00860337		1817.2	0.00971373		2347.2	-0.00443543
227.39	0.12343044		757.4	-0.0072039		1287.39	-0.00931066		1817.4	0.00949466		2347.4	-0.00390881
227.59	0.12282476		757.6	-0.00765788		1287.59	-0.00901914		1817.6	0.01021593		2347.6	-0.0035473
227.79	0.12244596		757.8	-0.00794329		1287.79	-0.00886525		1817.8	0.00986267		2347.8	-0.00319226
227.99	0.12227701		758	-0.00739301		1287.99	-0.00956746		1818	0.01010453		2348	-0.00310771
228.19	0.12231456		758.2	-0.00677382		1288.19	-0.00949555		1818.2	0.01123335		2348.2	-0.00355019
228.39	0.12243417		758.4	-0.00689702		1288.39	-0.00959974		1818.4	0.01152641		2348.4	-0.00424137
228.59	0.1226228		758.6	-0.00653234		1288.59	-0.00959658		1818.6	0.01212735		2348.6	-0.00420808
228.79	0.12329285		758.8	-0.00637561		1288.79	-0.00937986		1818.8	0.0113808		2348.8	-0.00492507
228.99	0.12343528		759	-0.00680438		1288.99	-0.00936911		1819	0.01142216		2349	-0.00545039
229.19	0.12287058		759.2	-0.00687441		1289.19	-0.00950923		1819.2	0.01098386		2349.2	-0.0064063
229.39	0.12271595		759.4	-0.00691258		1289.39	-0.00988509		1819.4	0.01089136		2349.4	-0.00724228
229.59	0.12280658		759.6	-0.00627849		1289.59	-0.01029694		1819.6	0.01104281		2349.6	-0.00629067
229.79	0.12250558		759.8	-0.00597988		1289.79	-0.01015983		1819.8	0.01051862		2349.8	-0.00579369
229.99	0.12244256		760	-0.00571323		1289.99	-0.01017055		1820	0.01079021		2350	-0.00571385
230.19	0.1230391		760.2	-0.00521727		1290.19	-0.00971475		1820.2	0.01036535		2350.2	-0.00565554
230.39	0.12346641		760.4	-0.00526415		1290.39	-0.00871845		1820.4	0.00952015		2350.4	-0.0051847
230.59	0.12348047		760.6	-0.0050015		1290.59	-0.00829947		1820.6	0.01069825		2350.6	-0.00436041
230.79	0.12409482		760.8	-0.00518128		1290.79	-0.00805343		1820.8	0.01017256		2350.8	-0.00389329
230.99	0.12500892		761	-0.00508039		1290.99	-0.00886056		1821	0.01063093		2351	-0.00379562
231.19	0.12590309		761.2	-0.0060312		1291.19	-0.00889324		1821.2	0.01056677		2351.2	-0.00337759
231.39	0.12601584		761.4	-0.00539384		1291.39	-0.00966187		1821.4	0.01067436		2351.4	-0.00342957
231.59	0.12618177		761.6	-0.00555896		1291.59	-0.01034203		1821.6	0.01044797		2351.6	-0.00414705
231.79	0.12661152		761.8	-0.00532946		1291.79	-0.01074213		1821.8	0.01109034		2351.8	-0.0043382
231.99	0.12724817		762	-0.00506105		1291.99	-0.01174239		1822	0.01135879		2352	-0.00451028
232.19	0.12857142		762.2	-0.00640389		1292.19	-0.01118949		1822.2	0.01109168		2352.2	-0.00495198
232.39	0.12949376		762.4	-0.00673841		1292.39	-0.01126685		1822.4	0.011402		2352.4	-0.00574254
232.59	0.13031859		762.6	-0.00691916		1292.59	-0.01146562		1822.6	0.01142031		2352.6	-0.00564936
232.79	0.13042412		762.8	-0.00611907		1292.79	-0.0112564		1822.8	0.01095242		2352.8	-0.00601664
232.99	0.13024669		763	-0.00649584		1292.99	-0.01129735		1823	0.01089238		2353	-0.00548736
233.19	0.12963096		763.2	-0.00537288		1293.19	-0.01070709		1823.2	0.01037624		2353.2	-0.0057643
233.39	0.12951859		763.4	-0.00430081		1293.39	-0.01024914		1823.4	0.01075107		2353.4	-0.00409934
233.59	0.12831227		763.6	-0.00432521		1293.59	-0.00970774		1823.6	0.01088517		2353.6	-0.00321127
233.79	0.12841223		763.8	-0.00466676		1293.79	-0.00860981		1823.8	0.01041937		2353.8	-0.00248974
233.99	0.12802012		764	-0.00492444		1293.99	-0.00757507		1824	0.01044636		2354	-0.00204603
234.19	0.12804145		764.2	-0.00439856		1294.19	-0.00699319		1824.2	0.00995432		2354.2	-0.00123664
234.39	0.12799447		764.4	-0.00477147		1294.39	-0.0061997		1824.4	0.00934698		2354.4	-0.00053777
234.59	0.12689167		764.6	-0.00524391		1294.59	-0.00604539		1824.6	0.00942926		2354.6	-0.00050821
234.79	0.12686402		764.8	-0.00593309		1294.79	-0.00657745		1824.8	0.00994307		2354.8	-0.00121143
234.99	0.12669029		765	-0.0055536		1294.99	-0.00743852		1825	0.0112914		2355	-0.00107507
235.19	0.1263386		765.2	-0.00615988		1295.19	-0.00818403		1825.2	0.01181085		2355.2	-0.00184791
235.39	0.12630564		765.4	-0.00532146		1295.39	-0.00795158		1825.4	0.01130668		2355.4	-0.00219702
235.59	0.12660581		765.6	-0.00565353		1295.59	-0.00831113		1825.6	0.01174024		2355.6	-0.00327914
235.79	0.12725753		765.8	-0.00664401		1295.79	-0.00803681		1825.8	0.01239817		2355.8	-0.00314365
235.99	0.12845362		766	-0.00716495		1295.99	-0.00844149		1826	0.01215225		2356	-0.00317054
236.19	0.12945121		766.2	-0.00753698		1296.19	-0.0075371		1826.2	0.01125082		2356.2	-0.0033125
236.39	0.13009107		766.4	-0.00785833		1296.39	-0.00708133		1826.4	0.01155338		2356.4	-0.00365677
236.59	0.13067198		766.6	-0.00736849		1296.59	-0.00690473		1826.6	0.01122865		2356.6	-0.00385862
236.79	0.13085583		766.8	-0.00657273		1296.79	-0.00634059		1826.8	0.01087208		2356.8	-0.00408684
236.99	0.13106393		767	-0.00688835		1296.99	-0.00664982		1827	0.01039047		2357	-0.00359145
237.19	0.13210114		767.2	-0.00719073		1297.19	-0.00661621		1827.2	0.01031075		2357.2	-0.00345675
237.39	0.13296046		767.4	-0.00747895		1297.39	-0.0069812		1827.4	0.01047303		2357.4	-0.0023503
237.59	0.13292453		767.6	-0.0074868		1297.59	-0.00761701		1827.6	0.00981379		2357.6	-0.00287818
237.79	0.13307444		767.8	-0.00826803		1297.79	-0.00689025		1827.8	0.00945244		2357.8	-0.00229085
237.99	0.13205438		768	-0.00819664		1297.99	-0.0074071		1828	0.00843914		2358	-0.00202323
238.19	0.13121762		768.2	-0.00800402		1298.19	-0.00719855		1828.2	0.00728825		2358.2	-0.00237442
238.39	0.13062637		768.4	-0.00819304		1298.39	-0.00687699		1828.4	0.0067226		2358.4	-0.00329253
238.59	0.12941579		768.6	-0.00881884		1298.59	-0.00661536		1828.6	0.00686289		2358.6	-0.0039079
238.79	0.12922186		768.8	-0.0080063		1298.79	-0.00681456		1828.8	0.00745431		2358.8	-0.0042108
238.99	0.12811799		769	-0.00741269		1298.99	-0.00702342		1829	0.0071751		2359	-0.00464551
239.19	0.12863123		769.2	-0.00717446		1299.19	-0.00679935		1829.2	0.00708543		2359.2	-0.00556996
239.39	0.12920362		769.4	-0.00615652		1299.39	-0.00693729		1829.4	0.00667371		2359.4	-0.00519934
239.59	0.1294087		769.6	-0.00608874		1299.59	-0.00731455		1829.6	0.00723318		2359.6	-0.00573474
239.79	0.13002619		769.8	-0.00622648		1299.79	-0.00721748		1829.8	0.00681215		2359.8	-0.00510142
239.99	0.12982172		770	-0.00456461		1299.99	-0.00715687		1830	0.00654941		2360	-0.00550045
240.19	0.13032494		770.2	-0.00421264		1300.19	-0.00657306		1830.2	0.00612782		2360.2	-0.00524995
240.39	0.13085544		770.4	-0.00383571		1300.39	-0.00630473		1830.4	0.00712994		2360.4	-0.00537695
240.59	0.13129345		770.6	-0.00259498		1300.59	-0.00726225		1830.6	0.00784081		2360.6	-0.00490247
240.79	0.13112922		770.8	-0.00241601		1300.79	-0.00748305		1830.8	0.00707548		2360.8	-0.00524335
240.99	0.13122412		771	-0.00238754		1300.99	-0.00841455		1831	0.0072286		2361	-0.00450356
241.19	0.13259292		771.2	-0.0028685		1301.19	-0.008513		1831.2	0.00729556		2361.2	-0.00417192
241.39	0.13236916		771.4	-0.00221181		1301.39	-0.00929778		1831.4	0.00753086		2361.4	-0.00369141
241.59	0.13173172		771.6	-0.00225424		1301.59	-0.00924574		1831.6	0.00814979		2361.6	-0.0036089
241.79	0.13225854		771.8	-0.00337106		1301.79	-0.00883908		1831.8	0.00810834		2361.8	-0.00317073
241.99	0.13273465		772	-0.00360921		1301.99	-0.00920298		1832	0.0072273		2362	-0.00308735
242.19	0.13318759		772.2	-0.00400724		1302.19	-0.008303		1832.2	0.00740548		2362.2	-0.00380098
242.39	0.13342879		772.4	-0.00486073		1302.39	-0.00763717		1832.4	0.00818591		2362.4	-0.00338156
242.59	0.13341246		772.6	-0.00562695		1302.59	-0.00711624		1832.6	0.00849146		2362.6	-0.00269152
242.79	0.13398346		772.8	-0.0058154		1302.79	-0.00686034		1832.8	0.00828615		2362.8	-0.00281937
242.99	0.13443648		773	-0.00714627		1302.99	-0.00758975		1833	0.00869118		2363	-0.00267172
243.19	0.13552793		773.2	-0.00727074		1303.19	-0.00685397		1833.2	0.00872375		2363.2	-0.00277234
243.39	0.13589758		773.4	-0.00836325		1303.39	-0.0072987		1833.4	0.0091195		2363.4	-0.00208433
243.59	0.13611161		773.6	-0.00901876		1303.59	-0.00742909		1833.6	0.00883091		2363.6	-0.00208516
243.79	0.13610583		773.8	-0.00841442		1303.79	-0.00665583		1833.8	0.00810126		2363.8	-0.00161242
243.99	0.13595579		774	-0.00690273		1303.99	-0.00596061		1834	0.00852153		2364	-0.00144788
244.19	0.13668422		774.2	-0.00701368		1304.19	-0.00515655		1834.2	0.00864574		2364.2	-0.00076875
244.39	0.13547707		774.4	-0.00657387		1304.39	-0.00575213		1834.4	0.00888126		2364.4	-0.00028356
244.59	0.13469073		774.6	-0.00620264		1304.59	-0.00560267		1834.6	0.0084375		2364.6	-0.00002955
244.79	0.13343401		774.8	-0.00604477		1304.79	-0.00674146		1834.8	0.00727311		2364.8	-0.00104501
244.99	0.13261411		775	-0.00603614		1304.99	-0.00698669		1835	0.00761989		2365	-0.00153691
245.19	0.13228998		775.2	-0.00536641		1305.19	-0.00694661		1835.2	0.00782359		2365.2	-0.00193271
245.39	0.13217387		775.4	-0.00546193		1305.39	-0.00842434		1835.4	0.00824731		2365.4	-0.00213064
245.59	0.13202613		775.6	-0.00479799		1305.59	-0.00880174		1835.6	0.00895161		2365.6	-0.00226678
245.79	0.13308156		775.8	-0.00457059		1305.79	-0.00866479		1835.8	0.00885498		2365.8	-0.00253631
245.99	0.13336101		776	-0.00475791		1305.99	-0.00877597		1836	0.00907812		2366	-0.00269361
246.19	0.13356352		776.2	-0.00478423		1306.19	-0.00832528		1836.2	0.00956012		2366.2	-0.00281918
246.39	0.13385565		776.4	-0.00487615		1306.39	-0.00846475		1836.4	0.01041431		2366.4	-0.00282495
246.59	0.13411062		776.6	-0.0051643		1306.59	-0.00817038		1836.6	0.01085026		2366.6	-0.00295455
246.79	0.13402199		776.8	-0.00520334		1306.79	-0.00816752		1836.8	0.01066819		2366.8	-0.00292941
246.99	0.13458383		777	-0.00542822		1306.99	-0.00814359		1837	0.01051514		2367	-0.00298657
247.19	0.13488207		777.2	-0.00525119		1307.19	-0.00677535		1837.2	0.01056054		2367.2	-0.00293508
247.39	0.13533729		777.4	-0.00472059		1307.39	-0.0073382		1837.4	0.01062106		2367.4	-0.00323327
247.59	0.13611105		777.6	-0.00458265		1307.59	-0.00701076		1837.6	0.01007421		2367.6	-0.00296962
247.79	0.13682486		777.8	-0.00363026		1307.79	-0.00617084		1837.8	0.00955167		2367.8	-0.00307394
247.99	0.13693986		778	-0.00331164		1307.99	-0.00615555		1838	0.00962841		2368	-0.00291608
248.19	0.13779834		778.2	-0.00354925		1308.19	-0.00646021		1838.2	0.00912296		2368.2	-0.00273714
248.39	0.13693295		778.4	-0.00405572		1308.39	-0.00684938		1838.4	0.00909742		2368.4	-0.0033621
248.59	0.13755391		778.6	-0.00460759		1308.59	-0.00708177		1838.6	0.00862626		2368.6	-0.00337536
248.79	0.13795307		778.8	-0.00533381		1308.79	-0.00783227		1838.8	0.00853602		2368.8	-0.0038589
248.99	0.13856251		779	-0.00528362		1308.99	-0.00667836		1839	0.00932799		2369	-0.0044964
249.19	0.13878625		779.2	-0.00520986		1309.19	-0.00668422		1839.2	0.00950971		2369.2	-0.00400953
249.39	0.1386474		779.4	-0.00506387		1309.39	-0.00681303		1839.4	0.00969022		2369.4	-0.00316678
249.59	0.13867076		779.6	-0.00465867		1309.59	-0.00583138		1839.6	0.00999773		2369.6	-0.00360805
249.79	0.13874311		779.8	-0.00540881		1309.79	-0.00470333		1839.8	0.0105143		2369.8	-0.00323734
249.99	0.13879559		780	-0.00526946		1309.99	-0.00395263		1840	0.01018936		2370	-0.0024134
250.19	0.13828011		780.2	-0.00490316		1310.19	-0.00348533		1840.2	0.01005488		2370.2	-0.00243204
250.39	0.1387041		780.4	-0.00453115		1310.39	-0.00335619		1840.4	0.01054286		2370.4	-0.00221013
250.59	0.13743312		780.6	-0.00452046		1310.59	-0.00292841		1840.6	0.01085291		2370.6	-0.00129873
250.79	0.13726018		780.8	-0.00407056		1310.79	-0.00271714		1840.8	0.00980514		2370.8	-0.00153882
250.99	0.13829527		781	-0.00319795		1310.99	-0.00265529		1841	0.00990972		2371	-0.00267427
251.19	0.13825863		781.2	-0.00370145		1311.19	-0.00274488		1841.2	0.00987544		2371.2	-0.00379294
251.39	0.13819484		781.4	-0.0029732		1311.39	-0.00285202		1841.4	0.0099543		2371.4	-0.00480678
251.59	0.13870709		781.6	-0.00364194		1311.59	-0.00217338		1841.6	0.00992464		2371.6	-0.00497201
251.79	0.13860134		781.8	-0.00326287		1311.79	-0.0025521		1841.8	0.00906376		2371.8	-0.00646901
251.99	0.13903288		782	-0.0041067		1311.99	-0.00307922		1842	0.00909236		2372	-0.00696661
252.19	0.14041869		782.2	-0.00498173		1312.19	-0.00330764		1842.2	0.00917417		2372.2	-0.00678189
252.39	0.13976473		782.4	-0.00600165		1312.39	-0.00364763		1842.4	0.00934725		2372.4	-0.00612192
252.59	0.14020843		782.6	-0.00612783		1312.59	-0.00446315		1842.6	0.00874788		2372.6	-0.00461257
252.79	0.140457		782.8	-0.00563241		1312.79	-0.00460081		1842.8	0.00812014		2372.8	-0.00440372
252.99	0.14054649		783	-0.0051845		1312.99	-0.00486676		1843	0.0078644		2373	-0.00377037
253.19	0.13954961		783.2	-0.00628063		1313.19	-0.00506136		1843.2	0.00748945		2373.2	-0.00278753
253.39	0.13915019		783.4	-0.00602095		1313.39	-0.00519789		1843.4	0.00707009		2373.4	-0.00240217
253.59	0.13994744		783.6	-0.00647012		1313.59	-0.00551843		1843.6	0.00760517		2373.6	-0.00140287
253.79	0.13960377		783.8	-0.00698456		1313.79	-0.00517046		1843.8	0.00807617		2373.8	-0.00064137
253.99	0.13957143		784	-0.00621029		1313.99	-0.00503267		1844	0.00831062		2374	0.00009822
254.19	0.13984492		784.2	-0.00576259		1314.19	-0.00536479		1844.2	0.00786121		2374.2	-0.0004485
254.39	0.14028976		784.4	-0.00488402		1314.39	-0.00552599		1844.4	0.00832138		2374.4	0.00004194
254.59	0.14017122		784.6	-0.00487931		1314.59	-0.00615487		1844.6	0.0084733		2374.6	0.00047607
254.79	0.14110859		784.8	-0.00456189		1314.79	-0.00611354		1844.8	0.00845982		2374.8	-0.00029883
254.99	0.14114266		785	-0.00412733		1314.99	-0.0063359		1845	0.0083803		2375	-0.00105667
255.19	0.14022022		785.2	-0.00441879		1315.19	-0.00610229		1845.2	0.00813069		2375.2	-0.00171314
255.39	0.14063377		785.4	-0.00382198		1315.39	-0.00535026		1845.4	0.00874753		2375.4	-0.0022399
255.59	0.14098521		785.6	-0.00371898		1315.59	-0.00484341		1845.6	0.00850186		2375.6	-0.00297966
255.79	0.14085584		785.8	-0.00437816		1315.79	-0.00442272		1845.8	0.00885909		2375.8	-0.00426972
255.99	0.14068408		786	-0.00530767		1315.99	-0.00483602		1846	0.00960751		2376	-0.00420409
256.19	0.14023596		786.2	-0.00485155		1316.19	-0.00497623		1846.2	0.0100632		2376.2	-0.00348827
256.39	0.13958047		786.4	-0.00442183		1316.39	-0.00587973		1846.4	0.00992104		2376.4	-0.0028338
256.59	0.13960978		786.6	-0.0050379		1316.59	-0.00643649		1846.6	0.00863577		2376.6	-0.00284615
256.79	0.13893714		786.8	-0.00471254		1316.79	-0.00655654		1846.8	0.00863247		2376.8	-0.002186
256.99	0.13888957		787	-0.00584488		1316.99	-0.00634042		1847	0.00927972		2377	-0.00241806
257.19	0.13837411		787.2	-0.00715355		1317.19	-0.00686092		1847.2	0.00932961		2377.2	-0.00263883
257.39	0.13840624		787.4	-0.00693947		1317.39	-0.00724373		1847.4	0.00974761		2377.4	-0.00209816
257.59	0.13867992		787.6	-0.00712652		1317.59	-0.00768719		1847.6	0.01017212		2377.6	-0.00148916
257.79	0.13868937		787.8	-0.0072475		1317.79	-0.00750068		1847.8	0.00948534		2377.8	-0.00249084
257.99	0.13904105		788	-0.00641946		1317.99	-0.00707188		1848	0.00920468		2378	-0.00247558
258.19	0.13928536		788.2	-0.00599872		1318.19	-0.0070284		1848.2	0.00868035		2378.2	-0.00306574
258.39	0.13908166		788.4	-0.00519571		1318.39	-0.00729183		1848.4	0.00911665		2378.4	-0.00271809
258.59	0.14045596		788.6	-0.00498118		1318.59	-0.00761209		1848.6	0.00899076		2378.6	-0.00219544
258.79	0.14034743		788.8	-0.00457533		1318.79	-0.00702353		1848.8	0.00877631		2378.8	-0.00295562
258.99	0.140956		789	-0.0037716		1318.99	-0.00628376		1849	0.00846625		2379	-0.00291355
259.19	0.14092363		789.2	-0.00314131		1319.19	-0.00638918		1849.2	0.00869844		2379.2	-0.00358649
259.39	0.14203765		789.4	-0.00252932		1319.39	-0.00522221		1849.4	0.00917135		2379.4	-0.00408624
259.59	0.14210824		789.6	-0.00271169		1319.59	-0.00459787		1849.6	0.00895281		2379.6	-0.00384061
259.79	0.14199605		789.8	-0.0028598		1319.79	-0.00361979		1849.8	0.00865526		2379.8	-0.00394858
259.99	0.14234475		790	-0.00263341		1319.99	-0.00432782		1850	0.0089099		2380	-0.00387587
260.19	0.14244901		790.2	-0.0017236		1320.19	-0.00348377		1850.2	0.00943403		2380.2	-0.00347434
260.39	0.14194702		790.4	-0.0020932		1320.39	-0.00314246		1850.4	0.00927328		2380.4	-0.00193433
260.59	0.14146989		790.6	-0.00285936		1320.59	-0.00383715		1850.6	0.00788256		2380.6	-0.00155034
260.79	0.14116413		790.8	-0.00177309		1320.79	-0.00363043		1850.8	0.00798073		2380.8	-0.00097131
260.99	0.14117461		791	-0.00268595		1320.99	-0.00401348		1851	0.00764222		2381	-0.00158347
261.19	0.13988106		791.2	-0.00227432		1321.19	-0.00527176		1851.2	0.00665006		2381.2	-0.00123632
261.39	0.14083294		791.4	-0.00207323		1321.39	-0.00547247		1851.4	0.00630398		2381.4	-0.00132182
261.59	0.14115796		791.6	-0.00213376		1321.59	-0.00615081		1851.6	0.00518066		2381.6	-0.0014151
261.79	0.141799		791.8	-0.00234038		1321.79	-0.00623132		1851.8	0.00462127		2381.8	-0.00163927
261.99	0.14111857		792	-0.00272206		1321.99	-0.00602002		1852	0.00483864		2382	-0.00160568
262.19	0.14088848		792.2	-0.00278153		1322.19	-0.00693295		1852.2	0.00555437		2382.2	-0.0015719
262.39	0.14094493		792.4	-0.00250875		1322.39	-0.00693536		1852.4	0.00583598		2382.4	-0.00168569
262.59	0.14218612		792.6	-0.00256957		1322.59	-0.00723712		1852.6	0.00609426		2382.6	-0.00214002
262.79	0.14183496		792.8	-0.00344325		1322.79	-0.00712394		1852.8	0.00652671		2382.8	-0.00269901
262.99	0.1421956		793	-0.0039746		1322.99	-0.00690785		1853	0.00724271		2383	-0.00356358
263.19	0.14215174		793.2	-0.00402801		1323.19	-0.00648246		1853.2	0.00713564		2383.2	-0.00464262
263.39	0.14327699		793.4	-0.00348477		1323.39	-0.00571142		1853.4	0.00814833		2383.4	-0.00449537
263.59	0.14375895		793.6	-0.00383398		1323.59	-0.00570342		1853.6	0.0090863		2383.6	-0.00421796
263.79	0.14366694		793.8	-0.00385407		1323.79	-0.0055722		1853.8	0.00924243		2383.8	-0.00439883
263.99	0.14398163		794	-0.00307153		1323.99	-0.00502729		1854	0.01031017		2384	-0.00436916
264.19	0.14369508		794.2	-0.00302202		1324.19	-0.00403069		1854.2	0.01086987		2384.2	-0.00337758
264.39	0.14335206		794.4	-0.00288042		1324.39	-0.00437051		1854.4	0.01045685		2384.4	-0.00286813
264.59	0.14379269		794.6	-0.00327661		1324.59	-0.00522042		1854.6	0.00946383		2384.6	-0.00371215
264.79	0.14398546		794.8	-0.00346475		1324.79	-0.00434804		1854.8	0.01003625		2384.8	-0.00366309
264.99	0.14351993		795	-0.00399547		1324.99	-0.00446164		1855	0.01049956		2385	-0.0035965
265.19	0.14493654		795.2	-0.00401972		1325.19	-0.00463313		1855.2	0.01075394		2385.2	-0.00375718
265.39	0.14741951		795.4	-0.00454942		1325.39	-0.00382089		1855.4	0.01018435		2385.4	-0.00361161
265.59	0.14725749		795.6	-0.00563847		1325.59	-0.00341708		1855.6	0.01048831		2385.6	-0.00281549
265.79	0.14693285		795.8	-0.00623767		1325.79	-0.00374671		1855.8	0.01042119		2385.8	-0.00290379
265.99	0.14648726		796	-0.00581106		1325.99	-0.00431174		1856	0.01003636		2386	-0.00281359
266.19	0.14721779		796.2	-0.00590672		1326.19	-0.00457878		1856.2	0.01052233		2386.2	-0.00263594
266.39	0.14771436		796.4	-0.006403		1326.39	-0.004871		1856.4	0.01050591		2386.4	-0.00176764
266.59	0.14821295		796.6	-0.00671992		1326.59	-0.00579132		1856.6	0.01030072		2386.6	-0.00207994
266.79	0.14730461		796.8	-0.00729732		1326.79	-0.00533378		1856.8	0.01079174		2386.8	-0.00195001
266.99	0.14713558		797	-0.00640215		1326.99	-0.00465512		1857	0.01019014		2387	-0.00244693
267.19	0.14769999		797.2	-0.00558135		1327.19	-0.00397204		1857.2	0.01059832		2387.2	-0.0029135
267.39	0.14720457		797.4	-0.00470094		1327.39	-0.00404771		1857.4	0.01174619		2387.4	-0.00268015
267.59	0.14660939		797.6	-0.00447321		1327.59	-0.00446495		1857.6	0.01170197		2387.6	-0.00293454
267.79	0.14562891		797.8	-0.00410406		1327.79	-0.00339859		1857.8	0.01078513		2387.8	-0.00259759
267.99	0.14492036		798	-0.00355241		1327.99	-0.00224978		1858	0.01089915		2388	-0.00208578
268.19	0.14533552		798.2	-0.0037698		1328.19	-0.00259417		1858.2	0.01049575		2388.2	-0.00250063
268.39	0.14509238		798.4	-0.00362331		1328.39	-0.00324873		1858.4	0.01020674		2388.4	-0.00282242
268.59	0.14418556		798.6	-0.00515337		1328.59	-0.00325734		1858.6	0.01037556		2388.6	-0.00251961
268.79	0.14376785		798.8	-0.00525648		1328.79	-0.00333167		1858.8	0.01060412		2388.8	-0.00230299
268.99	0.14385674		799	-0.00566352		1328.99	-0.00355888		1859	0.01063284		2389	-0.00210387
269.19	0.14480996		799.2	-0.00660689		1329.19	-0.00331809		1859.2	0.01076522		2389.2	-0.00191411
269.39	0.14420563		799.4	-0.00661794		1329.39	-0.00279336		1859.4	0.00979714		2389.4	-0.00186463
269.59	0.14300471		799.6	-0.0063777		1329.59	-0.00317576		1859.6	0.01048927		2389.6	-0.00224832
269.79	0.14265748		799.8	-0.00580504		1329.79	-0.00324589		1859.8	0.00966863		2389.8	-0.00295068
269.99	0.14348478		800	-0.00550772		1329.99	-0.00411257		1860	0.0100735		2390	-0.00268478
270.19	0.1442716		800.2	-0.00625373		1330.19	-0.00458896		1860.2	0.01032271		2390.2	-0.00231853
270.39	0.14438774		800.4	-0.00627763		1330.39	-0.00503683		1860.4	0.0102013		2390.4	-0.00215341
270.59	0.14445955		800.6	-0.0056705		1330.59	-0.00505442		1860.6	0.01108313		2390.6	-0.0030846
270.79	0.14432395		800.8	-0.00563307		1330.79	-0.00452931		1860.8	0.01152152		2390.8	-0.00304649
270.99	0.14486999		801	-0.00566882		1330.99	-0.00389041		1861	0.01128521		2391	-0.00447958
271.19	0.14560691		801.2	-0.0066083		1331.19	-0.00404567		1861.2	0.01196755		2391.2	-0.00566383
271.39	0.14592376		801.4	-0.00644138		1331.39	-0.00348275		1861.4	0.01191374		2391.4	-0.00574038
271.59	0.14624238		801.6	-0.0069452		1331.59	-0.00300822		1861.6	0.01131162		2391.6	-0.00526752
271.79	0.1464733		801.8	-0.00710051		1331.79	-0.00172685		1861.8	0.01030486		2391.8	-0.00519055
271.99	0.14774061		802	-0.00772835		1331.99	-0.0014495		1862	0.01038041		2392	-0.00495425
272.19	0.14819685		802.2	-0.0084827		1332.19	-0.00219483		1862.2	0.00992465		2392.2	-0.00462415
272.39	0.14759015		802.4	-0.00876727		1332.39	-0.00292609		1862.4	0.00971509		2392.4	-0.0041972
272.59	0.14740769		802.6	-0.0096037		1332.59	-0.00280874		1862.6	0.00856639		2392.6	-0.00356048
272.79	0.14778067		802.8	-0.00998906		1332.79	-0.00305777		1862.8	0.00827286		2392.8	-0.00346619
272.99	0.14881075		803	-0.01048391		1332.99	-0.0031627		1863	0.00857264		2393	-0.00278715
273.19	0.14986336		803.2	-0.00913647		1333.19	-0.00317417		1863.2	0.00926156		2393.2	-0.00252349
273.39	0.14932711		803.4	-0.00776845		1333.39	-0.00426892		1863.4	0.00906311		2393.4	-0.00295685
273.59	0.14893721		803.6	-0.00691221		1333.59	-0.00415131		1863.6	0.00986792		2393.6	-0.00343625
273.79	0.14923484		803.8	-0.00661426		1333.79	-0.00370873		1863.8	0.00988268		2393.8	-0.00386063
273.99	0.14966503		804	-0.00545834		1333.99	-0.00542537		1864	0.01053505		2394	-0.00308383
274.19	0.14873946		804.2	-0.00466733		1334.19	-0.00650209		1864.2	0.0106929		2394.2	-0.0038168
274.39	0.14841545		804.4	-0.00332555		1334.39	-0.00665376		1864.4	0.01143667		2394.4	-0.00418507
274.59	0.14754112		804.6	-0.00188388		1334.59	-0.00699299		1864.6	0.01172691		2394.6	-0.00444448
274.79	0.14630276		804.8	-0.00170267		1334.79	-0.00714585		1864.8	0.01145788		2394.8	-0.00479464
274.99	0.14554235		805	-0.00161949		1334.99	-0.00731864		1865	0.01192013		2395	-0.00566607
275.19	0.14520319		805.2	-0.00138774		1335.19	-0.00751138		1865.2	0.01153491		2395.2	-0.00483026
275.39	0.14471846		805.4	-0.00083952		1335.39	-0.00690723		1865.4	0.01141465		2395.4	-0.00381336
275.59	0.14448558		805.6	-0.00034801		1335.59	-0.00721637		1865.6	0.01086061		2395.6	-0.00316097
275.79	0.14492549		805.8	-0.00008708		1335.79	-0.0065468		1865.8	0.01039315		2395.8	-0.00302322
275.99	0.14536106		806	-0.00106209		1335.99	-0.00579273		1866	0.01079984		2396	-0.00191585
276.19	0.14504968		806.2	-0.00088772		1336.19	-0.00591278		1866.2	0.01003419		2396.2	-0.00054978
276.39	0.14596879		806.4	-0.00144764		1336.39	-0.00518582		1866.4	0.00935332		2396.4	-0.00113777
276.59	0.14683435		806.6	-0.00235572		1336.59	-0.00424231		1866.6	0.00973143		2396.6	-0.00110878
276.79	0.1477183		806.8	-0.00241906		1336.79	-0.00367079		1866.8	0.01159754		2396.8	-0.00181305
276.99	0.14939784		807	-0.00263781		1336.99	-0.00415258		1867	0.01231395		2397	-0.00286476
277.19	0.15034907		807.2	-0.0024423		1337.19	-0.00352713		1867.2	0.01232603		2397.2	-0.00401344
277.39	0.14978174		807.4	-0.00416698		1337.39	-0.00336099		1867.4	0.01250907		2397.4	-0.00578479
277.59	0.15057964		807.6	-0.0044699		1337.59	-0.00223065		1867.6	0.01307415		2397.6	-0.0069428
277.79	0.15130483		807.8	-0.00504279		1337.79	-0.00229748		1867.8	0.01340477		2397.8	-0.00794035
277.99	0.15122332		808	-0.00544522		1337.99	-0.00310389		1868	0.01367703		2398	-0.00871105
278.19	0.15073269		808.2	-0.00541054		1338.19	-0.00305706		1868.2	0.01375196		2398.2	-0.01031886
278.39	0.15063101		808.4	-0.00535711		1338.39	-0.00196545		1868.4	0.0131697		2398.4	-0.01037913
278.59	0.14875054		808.6	-0.00507123		1338.59	-0.00159091		1868.6	0.01145667		2398.6	-0.01079699
278.79	0.14882547		808.8	-0.00620127		1338.79	-0.00127408		1868.8	0.010695		2398.8	-0.01027875
278.99	0.14862165		809	-0.0064493		1338.99	-0.00089752		1869	0.01031842		2399	-0.00984266
279.19	0.14862235		809.2	-0.00593721		1339.19	-0.00042133		1869.2	0.00894007		2399.2	-0.00878692
279.39	0.14818082		809.4	-0.00517631		1339.39	-0.0008945		1869.4	0.00863404		2399.4	-0.00769084
279.59	0.14775727		809.6	-0.00457232		1339.59	-0.0012414		1869.6	0.0082231		2399.6	-0.00651074
279.79	0.14709555		809.8	-0.00524719		1339.79	-0.00068233		1869.8	0.00807598		2399.8	-0.00520679
279.99	0.14682335		810	-0.00520316		1339.99	-0.00051863		1870	0.00827449		2400	-0.00320315
280.19	0.14702234		810.2	-0.00505773		1340.19	-0.00075964		1870.2	0.00820768		2400.2	-0.00181777
280.39	0.1462514		810.4	-0.00539069		1340.39	-0.00064257		1870.4	0.00896499		2400.4	-0.0016722
280.59	0.14630347		810.6	-0.00478207		1340.59	-0.00025535		1870.6	0.01009508		2400.6	-0.00145965
280.79	0.14634651		810.8	-0.0038596		1340.79	-0.00069967		1870.8	0.01070365		2400.8	-0.00165974
280.99	0.14671043		811	-0.00462033		1340.99	-0.00163104		1871	0.01116796		2401	-0.00174802
281.19	0.14653133		811.2	-0.00476517		1341.19	-0.00218432		1871.2	0.01079887		2401.2	-0.00152194
281.39	0.14647527		811.4	-0.00522213		1341.39	-0.00321094		1871.4	0.01191887		2401.4	-0.00213181
281.59	0.14687333		811.6	-0.00467821		1341.59	-0.00423819		1871.6	0.01196421		2401.6	-0.00196598
281.79	0.1472503		811.8	-0.00452648		1341.79	-0.004343		1871.8	0.01238202		2401.8	-0.00264396
281.99	0.14758645		812	-0.00423344		1341.99	-0.00454508		1872	0.01234529		2402	-0.00337013
282.19	0.14754545		812.2	-0.00378939		1342.19	-0.00506032		1872.2	0.01211828		2402.2	-0.00319291
282.39	0.14786601		812.4	-0.00413986		1342.39	-0.00536308		1872.4	0.01178016		2402.4	-0.00326178
282.59	0.14851481		812.6	-0.00440449		1342.59	-0.00473304		1872.6	0.0105321		2402.6	-0.00304197
282.79	0.14978094		812.8	-0.00490563		1342.79	-0.00446613		1872.8	0.01023928		2402.8	-0.00214831
282.99	0.14993425		813	-0.00431398		1342.99	-0.00391317		1873	0.01036212		2403	-0.00270859
283.19	0.15110258		813.2	-0.00374534		1343.19	-0.00382314		1873.2	0.01072898		2403.2	-0.00218536
283.39	0.1512234		813.4	-0.00375957		1343.39	-0.00500094		1873.4	0.01099541		2403.4	-0.00160058
283.59	0.15159218		813.6	-0.00447067		1343.59	-0.00420451		1873.6	0.0112773		2403.6	-0.0014654
283.79	0.15177861		813.8	-0.00489623		1343.79	-0.00396846		1873.8	0.01155767		2403.8	-0.00132149
283.99	0.15294307		814	-0.00453047		1343.99	-0.00344541		1874	0.01231548		2404	-0.00015922
284.19	0.15327815		814.2	-0.00534605		1344.19	-0.00321046		1874.2	0.012676		2404.2	-0.00030452
284.39	0.15297863		814.4	-0.00492406		1344.39	-0.00234421		1874.4	0.01295993		2404.4	0.00029042
284.59	0.15405649		814.6	-0.00416016		1344.59	-0.00275591		1874.6	0.01324446		2404.6	-0.00021092
284.79	0.15399871		814.8	-0.00310398		1344.79	-0.00291223		1874.8	0.01348281		2404.8	-0.00028275
284.99	0.15472731		815	-0.00333923		1344.99	-0.00364916		1875	0.01374997		2405	-0.00091196
285.19	0.15458402		815.2	-0.00329042		1345.19	-0.00368495		1875.2	0.01279294		2405.2	-0.00036559
285.39	0.15432305		815.4	-0.00323966		1345.39	-0.00369728		1875.4	0.01273611		2405.4	-0.00112302
285.59	0.15376129		815.6	-0.00296208		1345.59	-0.0041574		1875.6	0.01220458		2405.6	-0.00176138
285.79	0.15373621		815.8	-0.00208678		1345.79	-0.00413785		1875.8	0.01282949		2405.8	-0.00278644
285.99	0.15333576		816	-0.00151399		1345.99	-0.00438156		1876	0.01215705		2406	-0.00368265
286.19	0.15228001		816.2	-0.00165351		1346.19	-0.00520513		1876.2	0.01219392		2406.2	-0.00440398
286.39	0.15253112		816.4	-0.00142428		1346.39	-0.00543387		1876.4	0.01265975		2406.4	-0.00497047
286.59	0.1523064		816.6	-0.00136323		1346.59	-0.00464469		1876.6	0.0127419		2406.6	-0.00511312
286.79	0.15178557		816.8	-0.00124277		1346.79	-0.00505726		1876.8	0.01310177		2406.8	-0.00551831
286.99	0.15119733		817	-0.00233944		1346.99	-0.00493044		1877	0.01261204		2407	-0.00709168
287.19	0.15117703		817.2	-0.00241743		1347.19	-0.00554095		1877.2	0.01261207		2407.2	-0.00742737
287.39	0.15086473		817.4	-0.00321323		1347.39	-0.00630818		1877.4	0.01169586		2407.4	-0.00780186
287.59	0.15025474		817.6	-0.00385471		1347.59	-0.00518488		1877.6	0.01159952		2407.6	-0.00787101
287.79	0.14988226		817.8	-0.0039026		1347.79	-0.00534175		1877.8	0.0109226		2407.8	-0.00759149
287.99	0.15047102		818	-0.0043999		1347.99	-0.00481765		1878	0.01089358		2408	-0.00766188
288.19	0.15037522		818.2	-0.0051129		1348.19	-0.00415512		1878.2	0.01055247		2408.2	-0.00748347
288.39	0.15064113		818.4	-0.00499		1348.39	-0.00419388		1878.4	0.01011608		2408.4	-0.00675862
288.59	0.1511625		818.6	-0.00514639		1348.59	-0.0046708		1878.6	0.01027294		2408.6	-0.00714605
288.79	0.15175984		818.8	-0.00591416		1348.79	-0.00394305		1878.8	0.00975472		2408.8	-0.00681343
288.99	0.15225209		819	-0.00598476		1348.99	-0.0040504		1879	0.00910557		2409	-0.00598464
289.19	0.15207311		819.2	-0.00588295		1349.19	-0.00325956		1879.2	0.00890359		2409.2	-0.00490689
289.39	0.15188501		819.4	-0.00495584		1349.39	-0.00383271		1879.4	0.00928922		2409.4	-0.00486549
289.59	0.15198927		819.6	-0.00442367		1349.59	-0.00417884		1879.6	0.00965965		2409.6	-0.00470996
289.79	0.1514749		819.8	-0.00301516		1349.79	-0.00315316		1879.8	0.01027203		2409.8	-0.00461419
289.99	0.15166248		820	-0.00245962		1349.99	-0.00292241		1880	0.00982716		2410	-0.00451505
290.19	0.15187035		820.2	-0.00276382		1350.19	-0.00268792		1880.2	0.01126624		2410.2	-0.00445137
290.39	0.1526017		820.4	-0.00190633		1350.39	-0.00262691		1880.4	0.01189629		2410.4	-0.00413371
290.59	0.15183601		820.6	-0.00225466		1350.59	-0.00216936		1880.6	0.01193464		2410.6	-0.00472726
290.79	0.15141974		820.8	-0.00259887		1350.79	-0.00167892		1880.8	0.01221822		2410.8	-0.00525284
290.99	0.15123837		821	-0.00322764		1350.99	-0.00233208		1881	0.01192681		2411	-0.00613405
291.19	0.15103761		821.2	-0.00264021		1351.19	-0.00369506		1881.2	0.01277947		2411.2	-0.00640206
291.39	0.15128122		821.4	-0.00322142		1351.39	-0.00393764		1881.4	0.01267899		2411.4	-0.00641267
291.59	0.15165341		821.6	-0.00263493		1351.59	-0.00426572		1881.6	0.01248497		2411.6	-0.00667857
291.79	0.15187083		821.8	-0.00249255		1351.79	-0.00389707		1881.8	0.01247093		2411.8	-0.00707583
291.99	0.15240331		822	-0.00339874		1351.99	-0.00384541		1882	0.01257114		2412	-0.00724012
292.19	0.15256315		822.2	-0.00369934		1352.19	-0.0047451		1882.2	0.01215415		2412.2	-0.00673714
292.39	0.15308221		822.4	-0.0040183		1352.39	-0.00599608		1882.4	0.01161094		2412.4	-0.00634728
292.59	0.15345258		822.6	-0.00398255		1352.59	-0.0067769		1882.6	0.0118235		2412.6	-0.00637247
292.79	0.15375391		822.8	-0.00412484		1352.79	-0.00680603		1882.8	0.01092611		2412.8	-0.00657884
292.99	0.15413172		823	-0.00373024		1352.99	-0.00658197		1883	0.0104511		2413	-0.0054215
293.19	0.15432265		823.2	-0.00359355		1353.19	-0.00596822		1883.2	0.01031397		2413.2	-0.00571091
293.39	0.15534772		823.4	-0.00363823		1353.39	-0.00627167		1883.4	0.01019553		2413.4	-0.00495423
293.59	0.1562876		823.6	-0.00399794		1353.59	-0.00597651		1883.6	0.00998025		2413.6	-0.00496739
293.79	0.15607134		823.8	-0.00404411		1353.79	-0.00529631		1883.8	0.01038461		2413.8	-0.00433369
293.99	0.15702445		824	-0.00295929		1353.99	-0.00535318		1884	0.01019085		2414	-0.00373823
294.19	0.15721358		824.2	-0.00232327		1354.19	-0.00415554		1884.2	0.01133055		2414.2	-0.00398764
294.39	0.15668832		824.4	-0.00208109		1354.39	-0.00380707		1884.4	0.0117219		2414.4	-0.00386318
294.59	0.1558685		824.6	-0.00188164		1354.59	-0.00276571		1884.6	0.01249738		2414.6	-0.00432795
294.79	0.15632657		824.8	-0.00179945		1354.79	-0.00185344		1884.8	0.01411903		2414.8	-0.00389964
294.99	0.15562042		825	-0.00183606		1354.99	-0.00200716		1885	0.01432443		2415	-0.00386615
295.19	0.15435225		825.2	-0.00190273		1355.19	-0.0020753		1885.2	0.01499852		2415.2	-0.00450455
295.39	0.15427098		825.4	-0.00133125		1355.39	-0.00198196		1885.4	0.01506916		2415.4	-0.00440109
295.59	0.15326346		825.6	-0.00108679		1355.59	-0.00186233		1885.6	0.01545379		2415.6	-0.00449575
295.79	0.15239373		825.8	-0.00205295		1355.79	-0.00105959		1885.8	0.01628581		2415.8	-0.00389577
295.99	0.1519926		826	-0.00216595		1355.99	-0.00163519		1886	0.0161131		2416	-0.00388537
296.19	0.1525209		826.2	-0.00177164		1356.19	-0.00218971		1886.2	0.01603379		2416.2	-0.00466273
296.39	0.15287244		826.4	-0.00170142		1356.39	-0.00237677		1886.4	0.01603461		2416.4	-0.00508305
296.59	0.15252846		826.6	-0.00156764		1356.59	-0.00231106		1886.6	0.0158761		2416.6	-0.00626135
296.79	0.1513832		826.8	-0.00283717		1356.79	-0.00210735		1886.8	0.01483951		2416.8	-0.00716229
296.99	0.15140287		827	-0.00275784		1356.99	-0.00232802		1887	0.01367934		2417	-0.00635912
297.19	0.15206234		827.2	-0.00288667		1357.19	-0.00246905		1887.2	0.01281032		2417.2	-0.0068039
297.39	0.15244669		827.4	-0.00359734		1357.39	-0.0033247		1887.4	0.01272939		2417.4	-0.00650205
297.59	0.15239014		827.6	-0.00285419		1357.59	-0.00365209		1887.6	0.01252991		2417.6	-0.00608344
297.79	0.15213409		827.8	-0.00137276		1357.79	-0.00354679		1887.8	0.01188021		2417.8	-0.00573134
297.99	0.1523672		828	0.00021682		1357.99	-0.00303019		1888	0.01167611		2418	-0.00563911
298.19	0.15245573		828.2	-0.00019265		1358.19	-0.00229973		1888.2	0.01174894		2418.2	-0.00506777
298.39	0.15213226		828.4	-0.00015442		1358.39	-0.00191679		1888.4	0.01121136		2418.4	-0.00495036
298.59	0.15213571		828.6	0.00043884		1358.59	-0.00134609		1888.6	0.01159863		2418.6	-0.00542176
298.79	0.1516936		828.8	-0.00082229		1358.79	-0.00121452		1888.8	0.01106385		2418.8	-0.00477802
298.99	0.15082587		829	-0.00221682		1358.99	-0.00229956		1889	0.00997813		2419	-0.00553936
299.19	0.15108079		829.2	-0.00282081		1359.19	-0.00274703		1889.2	0.01034269		2419.2	-0.00588681
299.39	0.15152988		829.4	-0.00315571		1359.39	-0.00356384		1889.4	0.01068424		2419.4	-0.00551328
299.59	0.1518262		829.6	-0.00380935		1359.59	-0.00374659		1889.6	0.01105292		2419.6	-0.0054904
299.79	0.15267202		829.8	-0.00472001		1359.79	-0.00416244		1889.8	0.01141462		2419.8	-0.00549612
299.99	0.15322899		830	-0.00388645		1359.99	-0.00422162		1890	0.01086189		2420	-0.00633265
300.19	0.15383827		830.2	-0.0039588		1360.19	-0.00426165		1890.2	0.01168132		2420.2	-0.00767769
300.39	0.1543819		830.4	-0.0037746		1360.39	-0.00491824		1890.4	0.01283306		2420.4	-0.00773234
300.59	0.15397216		830.6	-0.0034707		1360.59	-0.00533976		1890.6	0.01262598		2420.6	-0.00805022
300.79	0.15345992		830.8	-0.00340037		1360.79	-0.00554299		1890.8	0.01213673		2420.8	-0.00774774
300.99	0.15351317		831	-0.00257384		1360.99	-0.0052322		1891	0.01192757		2421	-0.00717191
301.19	0.15392192		831.2	-0.00301718		1361.19	-0.00527288		1891.2	0.01192458		2421.2	-0.00692497
301.39	0.15353958		831.4	-0.00262755		1361.39	-0.00534398		1891.4	0.01223669		2421.4	-0.0068177
301.59	0.1540541		831.6	-0.00112799		1361.59	-0.00478255		1891.6	0.01215968		2421.6	-0.00636997
301.79	0.15499535		831.8	-0.00064287		1361.79	-0.00372198		1891.8	0.01277745		2421.8	-0.00624382
301.99	0.15535663		832	-0.00055305		1361.99	-0.00349386		1892	0.01335359		2422	-0.00553635
302.19	0.1548044		832.2	-0.00052236		1362.19	-0.00289204		1892.2	0.01404193		2422.2	-0.00457147
302.39	0.15490979		832.4	-0.00023747		1362.39	-0.00264731		1892.4	0.01444589		2422.4	-0.00505926
302.59	0.15440358		832.6	0.00047454		1362.59	-0.00235721		1892.6	0.01509944		2422.6	-0.0057002
302.79	0.15436487		832.8	-0.00094727		1362.79	-0.0022673		1892.8	0.01391197		2422.8	-0.00513185
302.99	0.1545101		833	-0.00181735		1362.99	-0.0023845		1893	0.01377119		2423	-0.00545938
303.19	0.15468928		833.2	-0.00191255		1363.19	-0.00269303		1893.2	0.01462047		2423.2	-0.00542981
303.39	0.15495553		833.4	-0.00262496		1363.39	-0.00317331		1893.4	0.01452437		2423.4	-0.00495774
303.59	0.15565333		833.6	-0.00228836		1363.59	-0.00285353		1893.6	0.01395982		2423.6	-0.00450192
303.79	0.15551107		833.8	-0.0026571		1363.79	-0.00280313		1893.8	0.01346842		2423.8	-0.00435834
303.99	0.15551382		834	-0.00211166		1363.99	-0.00295651		1894	0.013036		2424	-0.00436128
304.19	0.15536076		834.2	-0.00222891		1364.19	-0.00334197		1894.2	0.01294651		2424.2	-0.00454634
304.39	0.1567672		834.4	-0.0023007		1364.39	-0.00405573		1894.4	0.01183745		2424.4	-0.00405034
304.59	0.15576301		834.6	-0.00218578		1364.59	-0.0041799		1894.6	0.01066514		2424.6	-0.00482108
304.79	0.15544896		834.8	-0.00161033		1364.79	-0.00393763		1894.8	0.00996566		2424.8	-0.00572371
304.99	0.15507914		835	-0.001786		1364.99	-0.00334704		1895	0.00985124		2425	-0.00653992
305.19	0.1562043		835.2	-0.00133883		1365.19	-0.00382482		1895.2	0.00906955		2425.2	-0.0068787
305.39	0.15620788		835.4	-0.00055774		1365.39	-0.00363993		1895.4	0.00953995		2425.4	-0.00686069
305.59	0.15589342		835.6	0.00001436		1365.59	-0.003896		1895.6	0.00968192		2425.6	-0.00700771
305.79	0.15619944		835.8	0.00027043		1365.79	-0.00386871		1895.8	0.0108514		2425.8	-0.00608156
305.99	0.15618674		836	0.00105693		1365.99	-0.00404371		1896	0.01182622		2426	-0.00607478
306.19	0.15477867		836.2	0.00087731		1366.19	-0.00336971		1896.2	0.01304752		2426.2	-0.00540362
306.39	0.15443119		836.4	0.00147849		1366.39	-0.00278955		1896.4	0.01280972		2426.4	-0.0057718
306.59	0.15417206		836.6	0.0016688		1366.59	-0.00177249		1896.6	0.01216538		2426.6	-0.00616852
306.79	0.15395954		836.8	0.00038702		1366.79	-0.00243421		1896.8	0.01183816		2426.8	-0.00491257
306.99	0.15340329		837	-0.00044355		1366.99	-0.00272636		1897	0.01306949		2427	-0.0052684
307.19	0.15320187		837.2	-0.00085076		1367.19	-0.00363434		1897.2	0.01382903		2427.2	-0.0051146
307.39	0.15316359		837.4	-0.00161775		1367.39	-0.00325155		1897.4	0.01345035		2427.4	-0.00447012
307.59	0.15413546		837.6	-0.00171492		1367.59	-0.0028133		1897.6	0.01304558		2427.6	-0.00385159
307.79	0.15364181		837.8	-0.0030833		1367.79	-0.00260651		1897.8	0.0125279		2427.8	-0.00410369
307.99	0.15381137		838	-0.0038712		1367.99	-0.00260943		1898	0.01219722		2428	-0.00473976
308.19	0.1540678		838.2	-0.00471989		1368.19	-0.00227435		1898.2	0.01088573		2428.2	-0.00474549
308.39	0.15484084		838.4	-0.00482096		1368.39	-0.00226859		1898.4	0.01035582		2428.4	-0.00616113
308.59	0.15494704		838.6	-0.00536782		1368.59	-0.00228664		1898.6	0.00998765		2428.6	-0.0062144
308.79	0.15518756		838.8	-0.00446827		1368.79	-0.00178546		1898.8	0.00966905		2428.8	-0.00741357
308.99	0.15580759		839	-0.00507356		1368.99	-0.00129919		1899	0.00966511		2429	-0.00657982
309.19	0.15642638		839.2	-0.00491641		1369.19	-0.00120372		1899.2	0.00995388		2429.2	-0.00604325
309.39	0.1560495		839.4	-0.00480617		1369.39	-0.00126144		1899.4	0.01085031		2429.4	-0.00523236
309.59	0.15696278		839.6	-0.00455106		1369.59	-0.00118639		1899.6	0.0109577		2429.6	-0.00500723
309.79	0.15724833		839.8	-0.0042388		1369.79	-0.00158744		1899.8	0.01199753		2429.8	-0.00415904
309.99	0.15712763		840	-0.00456526		1369.99	-0.00163952		1900	0.01310842		2430	-0.00474587
310.19	0.15612666		840.2	-0.00456258		1370.19	-0.002161		1900.2	0.01286587		2430.2	-0.00455539
310.39	0.15646541		840.4	-0.00379491		1370.39	-0.00238786		1900.4	0.01205007		2430.4	-0.00473864
310.59	0.15698126		840.6	-0.00341478		1370.59	-0.00305128		1900.6	0.01278941		2430.6	-0.00382885
310.79	0.15681008		840.8	-0.0026883		1370.79	-0.00438907		1900.8	0.01410322		2430.8	-0.00315901
310.99	0.15651252		841	-0.00250526		1370.99	-0.00474577		1901	0.01497597		2431	-0.00417844
311.19	0.15621588		841.2	-0.0017103		1371.19	-0.00460736		1901.2	0.01472117		2431.2	-0.00449899
311.39	0.15601664		841.4	-0.00148618		1371.39	-0.00432673		1901.4	0.01437566		2431.4	-0.00480172
311.59	0.15611853		841.6	-0.00108674		1371.59	-0.00425358		1901.6	0.01420369		2431.6	-0.0054476
311.79	0.15518822		841.8	-0.001371		1371.79	-0.005091		1901.8	0.01324235		2431.8	-0.00633244
311.99	0.15560185		842	-0.00107575		1371.99	-0.00497215		1902	0.01272175		2432	-0.00712166
312.19	0.15586032		842.2	-0.00126388		1372.19	-0.00483822		1902.2	0.01191669		2432.2	-0.00718863
312.39	0.15557067		842.4	-0.00064758		1372.39	-0.00521814		1902.4	0.01078621		2432.4	-0.00699281
312.59	0.15598062		842.6	-0.00016208		1372.59	-0.00511992		1902.6	0.00989242		2432.6	-0.00586261
312.79	0.15555908		842.8	0.00053338		1372.79	-0.0042469		1902.8	0.00977736		2432.8	-0.0063092
312.99	0.15616217		843	-0.00076309		1372.99	-0.00364023		1903	0.00922689		2433	-0.00560104
313.19	0.15676125		843.2	-0.00126742		1373.19	-0.00329314		1903.2	0.00835642		2433.2	-0.00524993
313.39	0.15743348		843.4	-0.00114214		1373.39	-0.00323455		1903.4	0.00785267		2433.4	-0.00463331
313.59	0.15809384		843.6	-0.00084802		1373.59	-0.00333878		1903.6	0.0078274		2433.6	-0.00409544
313.79	0.15784295		843.8	-0.00053314		1373.79	-0.0037364		1903.8	0.00900061		2433.8	-0.00380275
313.99	0.15790805		844	-0.00161832		1373.99	-0.00310639		1904	0.00949435		2434	-0.00410234
314.19	0.15795062		844.2	-0.00118428		1374.19	-0.00279408		1904.2	0.00947966		2434.2	-0.00325117
314.39	0.15809611		844.4	-0.00023023		1374.39	-0.0026585		1904.4	0.01017367		2434.4	-0.00240063
314.59	0.15823333		844.6	-0.00042567		1374.59	-0.00285488		1904.6	0.01109329		2434.6	-0.00237432
314.79	0.15820661		844.8	-0.00051759		1374.79	-0.00294544		1904.8	0.01176074		2434.8	-0.00296881
314.99	0.15740592		845	-0.00051838		1374.99	-0.00280685		1905	0.01153236		2435	-0.00343247
315.19	0.1563111		845.2	-0.00063433		1375.19	-0.00294576		1905.2	0.01172898		2435.2	-0.00355791
315.39	0.15623445		845.4	-0.0005907		1375.39	-0.00354058		1905.4	0.01276242		2435.4	-0.00349892
315.59	0.15633279		845.6	-0.00115242		1375.59	-0.00465123		1905.6	0.01366361		2435.6	-0.00355296
315.79	0.15673542		845.8	-0.00185335		1375.79	-0.00526988		1905.8	0.01347971		2435.8	-0.00350294
315.99	0.15744647		846	-0.00208504		1375.99	-0.00456596		1906	0.01424806		2436	-0.00388756
316.19	0.15730416		846.2	-0.00242754		1376.19	-0.00395249		1906.2	0.01425248		2436.2	-0.00288701
316.39	0.1567296		846.4	-0.00201541		1376.39	-0.00436925		1906.4	0.01364798		2436.4	-0.00265828
316.59	0.1569279		846.6	-0.00168454		1376.59	-0.00348168		1906.6	0.01301529		2436.6	-0.00373425
316.79	0.15686525		846.8	-0.00301169		1376.79	-0.00293305		1906.8	0.01222352		2436.8	-0.00361519
316.99	0.15782014		847	-0.00331866		1376.99	-0.00219167		1907	0.01153072		2437	-0.00369381
317.19	0.15790826		847.2	-0.00387652		1377.19	-0.00159195		1907.2	0.01181749		2437.2	-0.00411577
317.39	0.15756146		847.4	-0.0035819		1377.39	-0.00083569		1907.4	0.0132208		2437.4	-0.00448443
317.59	0.15780203		847.6	-0.00262999		1377.59	0.00023207		1907.6	0.0141232		2437.6	-0.0044474
317.79	0.15848745		847.8	-0.00297773		1377.79	0.00148568		1907.8	0.01470344		2437.8	-0.00504944
317.99	0.15854047		848	-0.0033218		1377.99	0.00148916		1908	0.01424541		2438	-0.00511145
318.19	0.15805803		848.2	-0.00274843		1378.19	0.00182855		1908.2	0.01471843		2438.2	-0.00476782
318.39	0.15779678		848.4	-0.0022841		1378.39	0.00108994		1908.4	0.01466142		2438.4	-0.00503692
318.59	0.15792831		848.6	-0.00285523		1378.59	0.00037786		1908.6	0.0141537		2438.6	-0.00581686
318.79	0.15692565		848.8	-0.00269057		1378.79	0.00077398		1908.8	0.01458647		2438.8	-0.00590131
318.99	0.15629374		849	-0.00217775		1378.99	0.00112795		1909	0.01496329		2439	-0.00579916
319.19	0.15655258		849.2	-0.002321		1379.19	0.00090789		1909.2	0.01509562		2439.2	-0.00549387
319.39	0.15776679		849.4	-0.00214749		1379.39	0.00002156		1909.4	0.0157518		2439.4	-0.00535378
319.59	0.15824379		849.6	-0.00236712		1379.59	-0.00111598		1909.6	0.01527305		2439.6	-0.00517728
319.79	0.15845689		849.8	-0.00241485		1379.79	-0.00105275		1909.8	0.01451005		2439.8	-0.00372892
319.99	0.15889362		850	-0.00236688		1379.99	-0.00222839		1910	0.01453193		2440	-0.00387867
320.19	0.15906709		850.2	-0.00212249		1380.19	-0.00254682		1910.2	0.01393395		2440.2	-0.00242174
320.39	0.15908973		850.4	-0.00188009		1380.39	-0.00336687		1910.4	0.01316026		2440.4	-0.0028846
320.59	0.15886196		850.6	-0.0017857		1380.59	-0.00332769		1910.6	0.01279653		2440.6	-0.0031635
320.79	0.15932367		850.8	-0.00203683		1380.79	-0.00330222		1910.8	0.01344832		2440.8	-0.00266026
320.99	0.15975128		851	-0.00183809		1380.99	-0.00308132		1911	0.01391428		2441	-0.00326288
321.19	0.15886736		851.2	-0.00289197		1381.19	-0.00333004		1911.2	0.0144586		2441.2	-0.00412258
321.39	0.15895338		851.4	-0.00208182		1381.39	-0.00400233		1911.4	0.01470322		2441.4	-0.00344144
321.59	0.15895484		851.6	-0.00163188		1381.59	-0.00432845		1911.6	0.0145696		2441.6	-0.00360613
321.79	0.15832815		851.8	-0.0017844		1381.79	-0.00523287		1911.8	0.01484065		2441.8	-0.0038755
321.99	0.15796138		852	-0.0009526		1381.99	-0.00555464		1912	0.01492593		2442	-0.00404666
322.19	0.15734992		852.2	-0.00098459		1382.19	-0.00532439		1912.2	0.01491928		2442.2	-0.00454539
322.39	0.15696782		852.4	-0.00080009		1382.39	-0.00484271		1912.4	0.01499396		2442.4	-0.00538266
322.59	0.15722522		852.6	-0.00087858		1382.59	-0.00443579		1912.6	0.01492309		2442.6	-0.00641377
322.79	0.15672945		852.8	-0.00132016		1382.79	-0.00265937		1912.8	0.01472442		2442.8	-0.00676596
322.99	0.15723849		853	-0.00105125		1382.99	-0.00250075		1913	0.01514922		2443	-0.00703728
323.19	0.1579013		853.2	-0.00119084		1383.19	-0.00192958		1913.2	0.01441571		2443.2	-0.00711471
323.39	0.15887544		853.4	-0.00142659		1383.39	-0.00232454		1913.4	0.01388525		2443.4	-0.00656822
323.59	0.15940248		853.6	-0.00123185		1383.59	-0.00206796		1913.6	0.01370033		2443.6	-0.00519258
323.79	0.1591443		853.8	-0.00176028		1383.79	-0.00189128		1913.8	0.01326463		2443.8	-0.00402872
323.99	0.16060007		854	-0.00213385		1383.99	-0.00305442		1914	0.01339149		2444	-0.00480051
324.19	0.16086842		854.2	-0.00247575		1384.19	-0.00254105		1914.2	0.01286853		2444.2	-0.00401479
324.39	0.16111785		854.4	-0.0031899		1384.39	-0.00187741		1914.4	0.01274389		2444.4	-0.00309719
324.59	0.16085118		854.6	-0.00345673		1384.59	-0.00171753		1914.6	0.01301291		2444.6	-0.00240832
324.79	0.16103851		854.8	-0.00263982		1384.79	-0.00194924		1914.8	0.01374892		2444.8	-0.00134651
324.99	0.16026065		855	-0.00244117		1384.99	-0.00257691		1915	0.01347546		2445	-0.00086827
325.19	0.15981415		855.2	-0.00232396		1385.19	-0.00293275		1915.2	0.01387117		2445.2	-0.00074478
325.39	0.15928968		855.4	-0.00162699		1385.39	-0.00304075		1915.4	0.01415527		2445.4	0.00018554
325.59	0.15877603		855.6	-0.00159668		1385.59	-0.00302786		1915.6	0.0145224		2445.6	0.0000139
325.79	0.15815454		855.8	-0.00118544		1385.79	-0.00348913		1915.8	0.01490633		2445.8	-0.00000361
325.99	0.15901886		856	-0.00066786		1385.99	-0.00370429		1916	0.01362906		2446	-0.00067855
326.19	0.15884761		856.2	-0.00129309		1386.19	-0.00361723		1916.2	0.01320873		2446.2	-0.00191845
326.39	0.15890173		856.4	-0.00165746		1386.39	-0.0031179		1916.4	0.01334522		2446.4	-0.00379068
326.59	0.15901225		856.6	-0.00130967		1386.59	-0.00359299		1916.6	0.01280638		2446.6	-0.00441562
326.79	0.1580537		856.8	-0.00142415		1386.79	-0.00336355		1916.8	0.01290026		2446.8	-0.00455938
326.99	0.1585806		857	-0.00081442		1386.99	-0.00300334		1917	0.01405689		2447	-0.00441426
327.19	0.15839332		857.2	-0.00097581		1387.19	-0.00208425		1917.2	0.01392213		2447.2	-0.00455636
327.39	0.15929506		857.4	-0.00099075		1387.39	-0.00262781		1917.4	0.01337746		2447.4	-0.00441495
327.59	0.15879628		857.6	-0.00146801		1387.59	-0.00281021		1917.6	0.01406512		2447.6	-0.00467561
327.79	0.15864601		857.8	-0.00205534		1387.79	-0.0032194		1917.8	0.01378912		2447.8	-0.00501498
327.99	0.15936009		858	-0.00202645		1387.99	-0.00287235		1918	0.01386627		2448	-0.00521709
328.19	0.15871302		858.2	-0.00266701		1388.19	-0.00237591		1918.2	0.01316937		2448.2	-0.00488047
328.39	0.15877914		858.4	-0.00237206		1388.39	-0.00195169		1918.4	0.01376296		2448.4	-0.00394678
328.59	0.1581097		858.6	-0.00178891		1388.59	-0.00191418		1918.6	0.01425584		2448.6	-0.00444907
328.79	0.15759979		858.8	-0.00088299		1388.79	-0.00246108		1918.8	0.01472121		2448.8	-0.0045055
328.99	0.15742944		859	-0.00180831		1388.99	-0.00166697		1919	0.01443175		2449	-0.00433275
329.19	0.15845311		859.2	-0.00170153		1389.19	-0.00101014		1919.2	0.01434668		2449.2	-0.0047235
329.39	0.15799616		859.4	-0.00209529		1389.39	-0.0010256		1919.4	0.01419416		2449.4	-0.00386271
329.59	0.15843207		859.6	-0.00333424		1389.59	-0.00147963		1919.6	0.01399638		2449.6	-0.00397896
329.79	0.15832825		859.8	-0.00338798		1389.79	-0.00202371		1919.8	0.01354748		2449.8	-0.00515622
329.99	0.15883485		860	-0.00333881		1389.99	-0.00137119		1920	0.01235165		2450	-0.00561152
330.19	0.15843994		860.2	-0.00363325		1390.19	-0.00151903		1920.2	0.01250189		2450.2	-0.00660145
330.39	0.15849619		860.4	-0.00334847		1390.39	-0.00127538		1920.4	0.01208262		2450.4	-0.00621353
330.59	0.15805584		860.6	-0.00258221		1390.59	-0.00116345		1920.6	0.01243925		2450.6	-0.00535626
330.79	0.15831039		860.8	-0.00228268		1390.79	-0.00082116		1920.8	0.01267578		2450.8	-0.00450006
330.99	0.15872785		861	-0.00218613		1390.99	0.00020999		1921	0.0130079		2451	-0.00428382
331.19	0.15831753		861.2	-0.0019787		1391.19	0.00019961		1921.2	0.01298926		2451.2	-0.00452114
331.39	0.15889695		861.4	-0.00207296		1391.39	-0.00001788		1921.4	0.01270673		2451.4	-0.00393557
331.59	0.15900851		861.6	-0.00230839		1391.59	0.00074588		1921.6	0.01372918		2451.6	-0.00386727
331.79	0.15941023		861.8	-0.00184194		1391.79	0.00105234		1921.8	0.01442646		2451.8	-0.00372501
331.99	0.15938007		862	-0.00132047		1391.99	0.001862		1922	0.01417332		2452	-0.00339633
332.19	0.15904897		862.2	-0.00116616		1392.19	0.00217862		1922.2	0.01529015		2452.2	-0.00233982
332.39	0.15895939		862.4	-0.00071058		1392.39	0.0027357		1922.4	0.01590873		2452.4	-0.00277755
332.59	0.15945723		862.6	-0.00067505		1392.59	0.00274968		1922.6	0.01547278		2452.6	-0.00307748
332.79	0.16016855		862.8	-0.00033967		1392.79	0.00225086		1922.8	0.01465481		2452.8	-0.00288258
332.99	0.16063729		863	-0.00088188		1392.99	0.00197987		1923	0.01457778		2453	-0.00273582
333.19	0.16085155		863.2	-0.0000707		1393.19	0.0017798		1923.2	0.01455796		2453.2	-0.00312282
333.39	0.16007675		863.4	-0.00030358		1393.39	0.0011498		1923.4	0.01489682		2453.4	-0.00295164
333.59	0.15980645		863.6	-0.00084087		1393.59	0.00147051		1923.6	0.01515553		2453.6	-0.00277037
333.79	0.16031742		863.8	0.00044429		1393.79	0.00159945		1923.8	0.01555195		2453.8	-0.00300661
333.99	0.16080336		864	0.00096501		1393.99	0.00090444		1924	0.01505011		2454	-0.00277793
334.19	0.15989667		864.2	0.00204149		1394.19	0.00060365		1924.2	0.01427155		2454.2	-0.00232098
334.39	0.16058628		864.4	0.00220152		1394.39	0.0000576		1924.4	0.01386849		2454.4	-0.00131829
334.59	0.16135542		864.6	0.00249628		1394.59	-0.00052103		1924.6	0.0129062		2454.6	-0.00217994
334.79	0.16177482		864.8	0.00261435		1394.79	-0.0007577		1924.8	0.01228083		2454.8	-0.00218873
334.99	0.16169994		865	0.00177098		1394.99	-0.00026304		1925	0.0121175		2455	-0.00237881
335.19	0.16183994		865.2	0.00077709		1395.19	-0.00004467		1925.2	0.01181061		2455.2	-0.00169071
335.39	0.16283572		865.4	-0.00055621		1395.39	0.00045475		1925.4	0.01107187		2455.4	-0.00179796
335.59	0.16364274		865.6	-0.00112005		1395.59	0.0008439		1925.6	0.01158468		2455.6	-0.00251546
335.79	0.16407373		865.8	-0.00171589		1395.79	0.00156807		1925.8	0.01236563		2455.8	-0.0018532
335.99	0.16348442		866	-0.00140875		1395.99	0.00144867		1926	0.01208873		2456	-0.00122373
336.19	0.16253076		866.2	-0.00160488		1396.19	0.00184455		1926.2	0.0123457		2456.2	-0.00085248
336.39	0.16272047		866.4	-0.00252235		1396.39	0.00123497		1926.4	0.01121973		2456.4	-0.00184789
336.59	0.16295057		866.6	-0.0024606		1396.59	0.00069204		1926.6	0.01075879		2456.6	-0.00123712
336.79	0.16317354		866.8	-0.00309987		1396.79	0.00006026		1926.8	0.01063214		2456.8	-0.00125163
336.99	0.16300345		867	-0.00335639		1396.99	0.00017714		1927	0.01171429		2457	-0.00187624
337.19	0.16292941		867.2	-0.00216028		1397.19	0.00040604		1927.2	0.01254998		2457.2	-0.00214831
337.39	0.16216561		867.4	-0.00200043		1397.39	0.00022957		1927.4	0.01333923		2457.4	-0.00251178
337.59	0.16144907		867.6	-0.00141522		1397.59	0.00063482		1927.6	0.0145316		2457.6	-0.00257803
337.79	0.16167152		867.8	-0.00077002		1397.79	-0.00032403		1927.8	0.01512563		2457.8	-0.00263087
337.99	0.16140174		868	-0.00021806		1397.99	-0.00137188		1928	0.01422574		2458	-0.00317305
338.19	0.16023067		868.2	0.00020216		1398.19	-0.0015449		1928.2	0.01384067		2458.2	-0.00301702
338.39	0.16058263		868.4	-0.00013064		1398.39	-0.0028682		1928.4	0.01410594		2458.4	-0.00295265
338.59	0.16005974		868.6	-0.00062993		1398.59	-0.00284708		1928.6	0.01284051		2458.6	-0.00421017
338.79	0.15928477		868.8	-0.00053596		1398.79	-0.00287799		1928.8	0.01343107		2458.8	-0.00440391
338.99	0.15864278		869	-0.00122621		1398.99	-0.00364352		1929	0.01356854		2459	-0.00509236
339.19	0.15874698		869.2	-0.00123169		1399.19	-0.0038317		1929.2	0.01337298		2459.2	-0.00575066
339.39	0.16019009		869.4	-0.00121367		1399.39	-0.00319773		1929.4	0.01375694		2459.4	-0.00659382
339.59	0.16018468		869.6	-0.00155064		1399.59	-0.00290069		1929.6	0.01388824		2459.6	-0.00682545
339.79	0.16004564		869.8	-0.00169947		1399.79	-0.00220613		1929.8	0.01402588		2459.8	-0.00604762
339.99	0.15919236		870	-0.00171026		1399.99	-0.00171275		1930	0.01395205		2460	-0.00619254
340.19	0.15925288		870.2	-0.00271025		1400.19	-0.0017942		1930.2	0.01364171		2460.2	-0.00663598
340.39	0.16001009		870.4	-0.00375985		1400.39	-0.00229079		1930.4	0.01404719		2460.4	-0.006228
340.59	0.16086311		870.6	-0.00436442		1400.59	-0.00142704		1930.6	0.01365659		2460.6	-0.00640721
340.79	0.16173909		870.8	-0.00474866		1400.79	-0.00048425		1930.8	0.01372901		2460.8	-0.00648684
340.99	0.16294686		871	-0.00436873		1400.99	0.00030237		1931	0.01543801		2461	-0.00637418
341.19	0.16371382		871.2	-0.00413493		1401.19	0.00093268		1931.2	0.01537268		2461.2	-0.00596522
341.39	0.16440424		871.4	-0.00426336		1401.39	0.00182577		1931.4	0.01572246		2461.4	-0.0057752
341.59	0.16447052		871.6	-0.00411226		1401.59	0.00160266		1931.6	0.01542467		2461.6	-0.00504704
341.79	0.164341		871.8	-0.0036711		1401.79	0.00170319		1931.8	0.01578919		2461.8	-0.00353297
341.99	0.16449298		872	-0.00362525		1401.99	0.00137098		1932	0.01478176		2462	-0.00413361
342.19	0.16348946		872.2	-0.00403381		1402.19	0.00090044		1932.2	0.01573774		2462.2	-0.00363614
342.39	0.16336249		872.4	-0.00429347		1402.39	0.00071796		1932.4	0.01572494		2462.4	-0.00312084
342.59	0.16287825		872.6	-0.00350942		1402.59	0.00082345		1932.6	0.01528373		2462.6	-0.00324047
342.79	0.16244218		872.8	-0.00194544		1402.79	0.00069943		1932.8	0.01522339		2462.8	-0.00324202
342.99	0.16243762		873	-0.00107791		1402.99	0.00074347		1933	0.01496818		2463	-0.00341126
343.19	0.16262773		873.2	0.00006653		1403.19	0.00092063		1933.2	0.01435774		2463.2	-0.00303588
343.39	0.16230665		873.4	0.00043602		1403.39	0.00093768		1933.4	0.01398347		2463.4	-0.00239104
343.59	0.16236219		873.6	0.00042786		1403.59	0.00084381		1933.6	0.01342095		2463.6	-0.00306816
343.79	0.16294094		873.8	0.00059692		1403.79	0.0004354		1933.8	0.01404212		2463.8	-0.00261335
343.99	0.16321849		874	0.00074945		1403.99	0.00057288		1934	0.01410835		2464	-0.00380542
344.19	0.16397045		874.2	0.00007746		1404.19	-0.00019314		1934.2	0.01404893		2464.2	-0.00438365
344.39	0.16402373		874.4	0.00042281		1404.39	0.00036166		1934.4	0.01379622		2464.4	-0.00374466
344.59	0.16311633		874.6	0.00046582		1404.59	0.00107154		1934.6	0.01294401		2464.6	-0.00470269
344.79	0.16235565		874.8	-0.00029208		1404.79	0.00069609		1934.8	0.01357155		2464.8	-0.0037794
344.99	0.16320121		875	-0.00045051		1404.99	0.00081996		1935	0.014604		2465	-0.00423314
345.19	0.16344664		875.2	-0.00068843		1405.19	0.00143449		1935.2	0.0137975		2465.2	-0.00513732
345.39	0.16291365		875.4	-0.00069694		1405.39	0.00151634		1935.4	0.0138994		2465.4	-0.00536801
345.59	0.16252126		875.6	-0.0016506		1405.59	0.00048913		1935.6	0.01340827		2465.6	-0.00526255
345.79	0.1626514		875.8	-0.00179343		1405.79	-0.00014999		1935.8	0.01447593		2465.8	-0.00494324
345.99	0.16212084		876	-0.00307497		1405.99	-0.000715		1936	0.01476075		2466	-0.00588337
346.19	0.16154288		876.2	-0.00370894		1406.19	-0.00057634		1936.2	0.01564961		2466.2	-0.0040944
346.39	0.1614785		876.4	-0.0041103		1406.39	-0.00074873		1936.4	0.01516833		2466.4	-0.00401581
346.59	0.16121781		876.6	-0.00362098		1406.59	-0.00071955		1936.6	0.01494037		2466.6	-0.00345107
346.79	0.16061425		876.8	-0.00373128		1406.79	-0.00055155		1936.8	0.01514596		2466.8	-0.00313025
346.99	0.16043439		877	-0.00352651		1406.99	-0.00103571		1937	0.01536326		2467	-0.00246336
347.19	0.15999902		877.2	-0.0033584		1407.19	-0.00194883		1937.2	0.0156618		2467.2	-0.00227221
347.39	0.16027818		877.4	-0.00201974		1407.39	-0.00208415		1937.4	0.01585217		2467.4	-0.00206823
347.59	0.16151607		877.6	-0.00145604		1407.59	-0.00179489		1937.6	0.0164264		2467.6	-0.00258461
347.79	0.16189321		877.8	-0.00070771		1407.79	-0.00161096		1937.8	0.01667516		2467.8	-0.00215921
347.99	0.16240323		878	-0.0003122		1407.99	-0.00039809		1938	0.01659457		2468	-0.00286604
348.19	0.16216586		878.2	-0.0005067		1408.19	0.00008683		1938.2	0.01652868		2468.2	-0.00269277
348.39	0.1615285		878.4	0.00001765		1408.39	0.00029772		1938.4	0.0163739		2468.4	-0.00316248
348.59	0.16115694		878.6	-0.00066021		1408.59	0.00026579		1938.6	0.01647108		2468.6	-0.00424778
348.79	0.16252166		878.8	-0.00127398		1408.79	0.00029548		1938.8	0.01675832		2468.8	-0.00445364
348.99	0.16368248		879	-0.0010328		1408.99	0.00134451		1939	0.01607164		2469	-0.00570457
349.19	0.16500573		879.2	-0.00133536		1409.19	0.00208949		1939.2	0.01535062		2469.2	-0.00686229
349.39	0.16439799		879.4	-0.00142372		1409.39	0.0020232		1939.4	0.01461137		2469.4	-0.00702497
349.59	0.16518675		879.6	-0.00125409		1409.59	0.00153926		1939.6	0.01374639		2469.6	-0.00723517
349.79	0.16450452		879.8	-0.00081693		1409.79	0.00147061		1939.8	0.01318698		2469.8	-0.00743289
349.99	0.16382077		880	-0.00108992		1409.99	0.00199424		1940	0.01340433		2470	-0.00784133
350.19	0.16335421		880.2	-0.00132212		1410.19	0.00161552		1940.2	0.01318758		2470.2	-0.00668681
350.39	0.16329156		880.4	-0.00107445		1410.39	0.00058498		1940.4	0.01298498		2470.4	-0.0067129
350.59	0.16312657		880.6	-0.00102252		1410.59	0.00036289		1940.6	0.01209496		2470.6	-0.00579824
350.79	0.16203765		880.8	-0.00050066		1410.79	0.00078866		1940.8	0.01223816		2470.8	-0.00534506
350.99	0.16214393		881	0.00099364		1410.99	0.00103969		1941	0.0121572		2471	-0.00487706
351.19	0.16230116		881.2	0.00184882		1411.19	0.00086482		1941.2	0.01210333		2471.2	-0.00563574
351.39	0.16231914		881.4	0.00286873		1411.39	0.00075767		1941.4	0.01208626		2471.4	-0.00487907
351.59	0.16223976		881.6	0.00269279		1411.59	0.00101549		1941.6	0.01231088		2471.6	-0.00483924
351.79	0.16141629		881.8	0.00269613		1411.79	0.00143508		1941.8	0.01176163		2471.8	-0.00441283
351.99	0.16216802		882	0.00229572		1411.99	0.00172311		1942	0.01228746		2472	-0.00462261
352.19	0.16223927		882.2	0.0019235		1412.19	0.00146912		1942.2	0.01254389		2472.2	-0.00510527
352.39	0.16330209		882.4	0.00127703		1412.39	0.00243663		1942.4	0.0134458		2472.4	-0.00517894
352.59	0.16405298		882.6	0.00096316		1412.59	0.00297113		1942.6	0.01384453		2472.6	-0.00502389
352.79	0.16485518		882.8	0.00081141		1412.79	0.00322996		1942.8	0.01446893		2472.8	-0.00475887
352.99	0.16521375		883	0.00024526		1412.99	0.00429271		1943	0.01386406		2473	-0.00514237
353.19	0.16537731		883.2	-0.00016806		1413.19	0.00447113		1943.2	0.01471942		2473.2	-0.00547447
353.39	0.16428047		883.4	0.00053743		1413.39	0.00392337		1943.4	0.01515278		2473.4	-0.00465795
353.59	0.16464088		883.6	0.00049394		1413.59	0.00306138		1943.6	0.01600277		2473.6	-0.00450081
353.79	0.16439039		883.8	-0.00020768		1413.79	0.00349988		1943.8	0.01647364		2473.8	-0.00497885
353.99	0.16385902		884	-0.00030725		1413.99	0.00334729		1944	0.01718406		2474	-0.00405278
354.19	0.16260315		884.2	0.00000898		1414.19	0.00290163		1944.2	0.01666822		2474.2	-0.00326492
354.39	0.1619996		884.4	0.00054851		1414.39	0.00243049		1944.4	0.0159765		2474.4	-0.00269067
354.59	0.16159299		884.6	0.00011167		1414.59	0.00267208		1944.6	0.01511805		2474.6	-0.00233311
354.79	0.16066489		884.8	0.00088214		1414.79	0.00315674		1944.8	0.01547622		2474.8	-0.00258085
354.99	0.16155316		885	0.00128205		1414.99	0.00238088		1945	0.01550842		2475	-0.00217254
355.19	0.16157107		885.2	0.00092324		1415.19	0.00097987		1945.2	0.01495764		2475.2	-0.00259713
355.39	0.16105327		885.4	0.00012789		1415.39	0.00049186		1945.4	0.01463989		2475.4	-0.00236328
355.59	0.16093586		885.6	0.00034545		1415.59	0.00033729		1945.6	0.01316118		2475.6	-0.00294173
355.79	0.16073385		885.8	0.00078303		1415.79	0.00035019		1945.8	0.01300105		2475.8	-0.0032206
355.99	0.16140981		886	0.00188864		1415.99	0.00015354		1946	0.01354637		2476	-0.00461656
356.19	0.16201447		886.2	0.00189761		1416.19	0.00008339		1946.2	0.01308755		2476.2	-0.00502897
356.39	0.16234312		886.4	0.0022628		1416.39	-0.00034808		1946.4	0.01259763		2476.4	-0.00519134
356.59	0.162939		886.6	0.0025574		1416.59	-0.00068331		1946.6	0.01305		2476.6	-0.00540613
356.79	0.1635609		886.8	0.00344011		1416.79	-0.00015934		1946.8	0.01345397		2476.8	-0.00664835
356.99	0.16414062		887	0.00260297		1416.99	-0.00029805		1947	0.0132197		2477	-0.00751844
357.19	0.1640997		887.2	0.00159785		1417.19	-0.00132398		1947.2	0.01524138		2477.2	-0.00732998
357.39	0.16390588		887.4	0.00229592		1417.39	-0.00169739		1947.4	0.01680687		2477.4	-0.00719084
357.59	0.16401184		887.6	0.00099287		1417.59	-0.00182393		1947.6	0.01789606		2477.6	-0.00784513
357.79	0.16421386		887.8	0.00119902		1417.79	-0.00048006		1947.8	0.01805568		2477.8	-0.00767383
357.99	0.16271086		888	0.00117544		1417.99	-0.0007034		1948	0.01863477		2478	-0.00676581
358.19	0.16201445		888.2	0.00061154		1418.19	-0.00085412		1948.2	0.01851637		2478.2	-0.00678182
358.39	0.16175497		888.4	0.00041799		1418.39	0.00079821		1948.4	0.01912318		2478.4	-0.00621602
358.59	0.16192347		888.6	0.00059791		1418.59	0.0016469		1948.6	0.01920113		2478.6	-0.00526374
358.79	0.16160777		888.8	0.00134226		1418.79	0.00195217		1948.8	0.01899456		2478.8	-0.00429797
358.99	0.16258176		889	0.00062151		1418.99	0.00117545		1949	0.01888085		2479	-0.00295135
359.19	0.16234713		889.2	0.00024304		1419.19	0.00165016		1949.2	0.01868697		2479.2	-0.00264908
359.39	0.16192723		889.4	-0.0006387		1419.39	0.00250868		1949.4	0.01813437		2479.4	-0.00302773
359.59	0.16225549		889.6	0.00041827		1419.59	0.00300441		1949.6	0.01771304		2479.6	-0.00256531
359.79	0.1619643		889.8	0.00102543		1419.79	0.00305733		1949.8	0.01832495		2479.8	-0.00357066
359.99	0.16220501		890	0.00156481		1419.99	0.00289621		1950	0.01743629		2480	-0.00382442
360.19	0.16260553		890.2	0.00059726		1420.19	0.00249721		1950.2	0.0158683		2480.2	-0.00359204
360.39	0.16246344		890.4	0.00073951		1420.39	0.00237943		1950.4	0.0154211		2480.4	-0.00388865
360.59	0.1629865		890.6	0.00006585		1420.59	0.00322404		1950.6	0.0153656		2480.6	-0.00423199
360.79	0.16316101		890.8	0.00031245		1420.79	0.00363964		1950.8	0.01468107		2480.8	-0.00468508
360.99	0.16310004		891	-0.00177248		1420.99	0.00270616		1951	0.01463052		2481	-0.004457
361.19	0.16339709		891.2	-0.00185611		1421.19	0.00226503		1951.2	0.01541531		2481.2	-0.00412088
361.39	0.16269381		891.4	-0.00170988		1421.39	0.00209845		1951.4	0.01582256		2481.4	-0.00421857
361.59	0.16313405		891.6	-0.00224287		1421.59	0.00168176		1951.6	0.01594288		2481.6	-0.00364141
361.79	0.16326784		891.8	-0.00189186		1421.79	0.00134731		1951.8	0.01520953		2481.8	-0.00343209
361.99	0.16179152		892	-0.00154345		1421.99	0.0014706		1952	0.01472551		2482	-0.00373907
362.19	0.16164467		892.2	-0.00159613		1422.19	0.0015223		1952.2	0.01456428		2482.2	-0.0040326
362.39	0.16134586		892.4	-0.00104774		1422.39	0.00294431		1952.4	0.01482059		2482.4	-0.00373364
362.59	0.16164871		892.6	-0.00062142		1422.59	0.00230868		1952.6	0.01447278		2482.6	-0.00326196
362.79	0.16232943		892.8	-0.00032447		1422.79	0.00282347		1952.8	0.01443975		2482.8	-0.0031326
362.99	0.16281547		893	-0.00000533		1422.99	0.00305363		1953	0.01451713		2483	-0.00300736
363.19	0.16259521		893.2	0.00104159		1423.19	0.0031343		1953.2	0.01492234		2483.2	-0.00311353
363.39	0.16213194		893.4	0.00066514		1423.39	0.00355984		1953.4	0.01532573		2483.4	-0.00379268
363.59	0.16252814		893.6	0.00150279		1423.59	0.0026074		1953.6	0.01579942		2483.6	-0.00392916
363.79	0.16252928		893.8	0.00090023		1423.79	0.0015644		1953.8	0.01604875		2483.8	-0.00435082
363.99	0.16335923		894	0.0006978		1423.99	0.00159884		1954	0.01555092		2484	-0.00371374
364.19	0.16297694		894.2	-0.0002671		1424.19	0.00123585		1954.2	0.01599269		2484.2	-0.00423688
364.39	0.16314255		894.4	-0.000467		1424.39	0.00142455		1954.4	0.01594174		2484.4	-0.00415863
364.59	0.16289147		894.6	-0.00051096		1424.59	0.00059626		1954.6	0.01607393		2484.6	-0.00451932
364.79	0.16301384		894.8	-0.00063034		1424.79	0.00055961		1954.8	0.01620608		2484.8	-0.00458257
364.99	0.16317692		895	-0.00219689		1424.99	-0.0004416		1955	0.01634722		2485	-0.00447675
365.19	0.16330867		895.2	-0.00190716		1425.19	-0.00112548		1955.2	0.01630202		2485.2	-0.00485217
365.39	0.16259909		895.4	-0.00274575		1425.39	-0.00127553		1955.4	0.01569905		2485.4	-0.00506786
365.59	0.16357908		895.6	-0.0024775		1425.59	-0.00191791		1955.6	0.01495815		2485.6	-0.00519232
365.79	0.1639016		895.8	-0.00222884		1425.79	-0.00146648		1955.8	0.01452199		2485.8	-0.00581944
365.99	0.16294919		896	-0.00208755		1425.99	-0.00077616		1956	0.01496394		2486	-0.00627555
366.19	0.16307378		896.2	-0.0024823		1426.19	0.00020699		1956.2	0.01543752		2486.2	-0.00645557
366.39	0.16318585		896.4	-0.00293642		1426.39	0.00106468		1956.4	0.01555721		2486.4	-0.00687271
366.59	0.16441861		896.6	-0.0026928		1426.59	0.00085825		1956.6	0.01587911		2486.6	-0.00691059
366.79	0.16445283		896.8	-0.0017545		1426.79	0.00159209		1956.8	0.01575609		2486.8	-0.00709059
366.99	0.16481201		897	-0.00085779		1426.99	0.00126301		1957	0.01570332		2487	-0.00705745
367.19	0.16420607		897.2	-0.00040851		1427.19	0.00107604		1957.2	0.01634665		2487.2	-0.00666076
367.39	0.16369472		897.4	-0.00160908		1427.39	0.00173305		1957.4	0.01580213		2487.4	-0.00646548
367.59	0.16376077		897.6	-0.00083318		1427.59	0.00091012		1957.6	0.01547329		2487.6	-0.00650721
367.79	0.1641533		897.8	-0.00064441		1427.79	0.00076408		1957.8	0.01524179		2487.8	-0.00644275
367.99	0.16467012		898	-0.00072037		1427.99	0.00051965		1958	0.01427939		2488	-0.00697655
368.19	0.16414257		898.2	-0.00126583		1428.19	0.00026207		1958.2	0.01472545		2488.2	-0.00666518
368.39	0.16457016		898.4	-0.00054879		1428.39	0.00020024		1958.4	0.01455549		2488.4	-0.00655021
368.59	0.16427773		898.6	-0.00036476		1428.59	-0.00006364		1958.6	0.01515162		2488.6	-0.00723237
368.79	0.16478873		898.8	-0.0007913		1428.79	0.00017818		1958.8	0.01527669		2488.8	-0.00703676
368.99	0.16490454		899	-0.00164688		1428.99	0.00023991		1959	0.01472772		2489	-0.00654453
369.19	0.16473411		899.2	-0.00135467		1429.19	0.00041797		1959.2	0.01412851		2489.2	-0.0067892
369.39	0.16525171		899.4	-0.00080891		1429.39	0.00054955		1959.4	0.01370644		2489.4	-0.00609332
369.59	0.1658438		899.6	-0.00095354		1429.59	0.00039575		1959.6	0.01445217		2489.6	-0.00588584
369.79	0.16662964		899.8	-0.00047239		1429.79	0.00186525		1959.8	0.01543839		2489.8	-0.00565456
369.99	0.16644988		900	-0.00082668		1429.99	0.00244534		1960	0.01518581		2490	-0.00559232
370.19	0.16734082		900.2	-0.00081214		1430.19	0.00370149		1960.2	0.01561425		2490.2	-0.00508113
370.39	0.16812755		900.4	-0.00142797		1430.39	0.00319888		1960.4	0.01658055		2490.4	-0.00483123
370.59	0.16895651		900.6	0.0000126		1430.59	0.00363568		1960.6	0.01675411		2490.6	-0.00410736
370.79	0.1686644		900.8	-0.00006433		1430.79	0.0042862		1960.8	0.01667972		2490.8	-0.00389919
370.99	0.16906864		901	0.00104826		1430.99	0.00471243		1961	0.01705489		2491	-0.00294024
371.19	0.16855046		901.2	0.00122122		1431.19	0.00424205		1961.2	0.01599574		2491.2	-0.00215298
371.39	0.16875856		901.4	0.00116349		1431.39	0.00366599		1961.4	0.01521007		2491.4	-0.00237581
371.59	0.16849322		901.6	0.00241172		1431.59	0.00214515		1961.6	0.01541494		2491.6	-0.00264267
371.79	0.16828662		901.8	0.00301602		1431.79	0.00160502		1961.8	0.01530822		2491.8	-0.00208494
371.99	0.1682217		902	0.00271859		1431.99	0.00052544		1962	0.01507275		2492	-0.00082776
372.19	0.16750178		902.2	0.0023219		1432.19	0.00074592		1962.2	0.0152718		2492.2	0.00014128
372.39	0.16708008		902.4	0.00288979		1432.39	0.00011991		1962.4	0.01650956		2492.4	-0.00013271
372.59	0.16527891		902.6	0.002913		1432.59	-0.00008139		1962.6	0.01596771		2492.6	-0.00040016
372.79	0.16394365		902.8	0.00272209		1432.79	-0.00083068		1962.8	0.01610646		2492.8	-0.00021263
372.99	0.16303101		903	0.00235832		1432.99	-0.00062276		1963	0.01573915		2493	-0.00032296
373.19	0.16294049		903.2	0.00270119		1433.19	-0.00114773		1963.2	0.01677266		2493.2	-0.00076298
373.39	0.16276725		903.4	0.00234972		1433.39	-0.00093665		1963.4	0.017159		2493.4	-0.00147858
373.59	0.16245881		903.6	0.00164889		1433.59	0.00004219		1963.6	0.01809798		2493.6	-0.00225558
373.79	0.16322449		903.8	0.00178293		1433.79	0.00108204		1963.8	0.01832867		2493.8	-0.00308116
373.99	0.16319393		904	0.00052286		1433.99	0.00188486		1964	0.01791717		2494	-0.00342521
374.19	0.16403928		904.2	-0.00023972		1434.19	0.00261908		1964.2	0.01863667		2494.2	-0.00409908
374.39	0.16536339		904.4	-0.00020151		1434.39	0.00387577		1964.4	0.01816816		2494.4	-0.00475255
374.59	0.16581535		904.6	0.00078556		1434.59	0.00439492		1964.6	0.01723567		2494.6	-0.00470569
374.79	0.1658458		904.8	0.00030772		1434.79	0.00428885		1964.8	0.01745996		2494.8	-0.00473838
374.99	0.16639167		905	0.0008224		1434.99	0.00367747		1965	0.01723953		2495	-0.00472818
375.19	0.16681618		905.2	0.00008735		1435.19	0.00276445		1965.2	0.01626219		2495.2	-0.0052081
375.39	0.16763017		905.4	-0.00026178		1435.39	0.00285108		1965.4	0.01687295		2495.4	-0.00532227
375.59	0.16681849		905.6	-0.00051417		1435.59	0.00216984		1965.6	0.01621577		2495.6	-0.0043959
375.79	0.16673556		905.8	-0.00103363		1435.79	0.00224446		1965.8	0.01569608		2495.8	-0.00282216
375.99	0.16694469		906	-0.00175062		1435.99	0.00162834		1966	0.01517739		2496	-0.00195152
376.19	0.16640645		906.2	-0.00179299		1436.19	0.00179725		1966.2	0.01501741		2496.2	-0.00279094
376.39	0.16552759		906.4	-0.00123466		1436.39	0.000993		1966.4	0.01565399		2496.4	-0.00260074
376.59	0.1646956		906.6	-0.00135473		1436.59	0.00063397		1966.6	0.01481922		2496.6	-0.00266991
376.79	0.1646618		906.8	-0.00120061		1436.79	-0.00044946		1966.8	0.01548027		2496.8	-0.00261453
376.99	0.16549729		907	-0.00098883		1436.99	-0.00082767		1967	0.01557857		2497	-0.00326797
377.19	0.1659331		907.2	-0.00085704		1437.19	-0.00093646		1967.2	0.01625885		2497.2	-0.00354389
377.39	0.16596783		907.4	-0.00151359		1437.39	-0.00093159		1967.4	0.01585406		2497.4	-0.00401818
377.59	0.16635035		907.6	-0.00125768		1437.59	-0.00023413		1967.6	0.01659234		2497.6	-0.00425993
377.79	0.16735194		907.8	-0.00191765		1437.79	-0.00053069		1967.8	0.01647045		2497.8	-0.00466725
377.99	0.16814148		908	-0.00209315		1437.99	-0.00011239		1968	0.01626207		2498	-0.00477305
378.19	0.16919729		908.2	-0.00139336		1438.19	0.00010447		1968.2	0.01627226		2498.2	-0.00525695
378.39	0.17004207		908.4	-0.00017016		1438.39	0.00081211		1968.4	0.01583642		2498.4	-0.00528104
378.59	0.16973398		908.6	0.00088303		1438.59	0.00020742		1968.6	0.01599244		2498.6	-0.00522592
378.79	0.16958983		908.8	0.00152227		1438.79	0.00050814		1968.8	0.01667849		2498.8	-0.00568017
378.99	0.16984402		909	0.0020768		1438.99	0.00077844		1969	0.0166702		2499	-0.00596573
379.19	0.16969729		909.2	0.00278986		1439.19	0.00144556		1969.2	0.01659353		2499.2	-0.00604124
379.39	0.16963553		909.4	0.0034128		1439.39	0.00201516		1969.4	0.01663557		2499.4	-0.0058743
379.59	0.16857303		909.6	0.0042724		1439.59	0.00219405		1969.6	0.01619558		2499.6	-0.00566972
379.79	0.16833917		909.8	0.00525163		1439.79	0.00269411		1969.8	0.01654972		2499.8	-0.0056843
379.99	0.16833917		910	0.00525163		1439.99	0.00269411		1970	0.01654972		2500	-0.0056843
380.19	0.16702061		910.2	0.00519711		1440.19	0.00286068		1970.2	0.01561509		2500.2	-0.00565413
380.39	0.16549932		910.4	0.00578211		1440.39	0.00359832		1970.4	0.01494829		2500.4	-0.00558581
380.59	0.16378028		910.6	0.00593251		1440.59	0.00466347		1970.6	0.01446076		2500.6	-0.00676506
380.79	0.16195992		910.8	0.00612425		1440.79	0.00579769		1970.8	0.01385249		2500.8	-0.00713778
380.99	0.15942745		911	0.00608749		1440.99	0.00625933		1971	0.01358505		2501	-0.00733365
381.19	0.15763676		911.2	0.00651306		1441.19	0.00740035		1971.2	0.01338936		2501.2	-0.007952
381.39	0.15488128		911.4	0.00716523		1441.39	0.00802674		1971.4	0.01304141		2501.4	-0.00836363
381.59	0.15285164		911.6	0.00761044		1441.59	0.00914714		1971.6	0.0132034		2501.6	-0.00842237
381.79	0.15114382		911.8	0.00761255		1441.79	0.00998529		1971.8	0.01353937		2501.8	-0.00891697
381.99	0.14880163		912	0.00799181		1441.99	0.01066399		1972	0.01355209		2502	-0.00935911
382.19	0.14684864		912.2	0.00767443		1442.19	0.01135322		1972.2	0.01382381		2502.2	-0.00998439
382.39	0.14473134		912.4	0.00725488		1442.39	0.01119735		1972.4	0.01481643		2502.4	-0.01083672
382.59	0.14315223		912.6	0.00641016		1442.59	0.01113686		1972.6	0.01543299		2502.6	-0.01145129
382.79	0.14170198		912.8	0.00642986		1442.79	0.01184621		1972.8	0.0150251		2502.8	-0.01188913
382.99	0.1395882		913	0.00657488		1442.99	0.01196868		1973	0.01428618		2503	-0.01159673
383.19	0.13853444		913.2	0.00658975		1443.19	0.01181524		1973.2	0.01402317		2503.2	-0.0120727
383.39	0.13771318		913.4	0.00634424		1443.39	0.01268583		1973.4	0.01375693		2503.4	-0.01137851
383.59	0.13640656		913.6	0.00592789		1443.59	0.01310993		1973.6	0.01430618		2503.6	-0.01065832
383.79	0.13505076		913.8	0.00576221		1443.79	0.01282484		1973.8	0.01357344		2503.8	-0.0099227
383.99	0.13386746		914	0.00618426		1443.99	0.01185482		1974	0.01409522		2504	-0.01029578
384.19	0.13276471		914.2	0.00676273		1444.19	0.01047129		1974.2	0.01420689		2504.2	-0.01041531
384.39	0.13236947		914.4	0.00715247		1444.39	0.01036318		1974.4	0.01430518		2504.4	-0.01103771
384.59	0.13129629		914.6	0.00626699		1444.59	0.01019114		1974.6	0.01402431		2504.6	-0.01079289
384.79	0.13032013		914.8	0.00626744		1444.79	0.0095943		1974.8	0.01432303		2504.8	-0.00996512
384.99	0.12850604		915	0.0058333		1444.99	0.00884005		1975	0.01437075		2505	-0.009757
385.19	0.12867174		915.2	0.00647556		1445.19	0.00862675		1975.2	0.01436734		2505.2	-0.01000425
385.39	0.12736717		915.4	0.00617889		1445.39	0.0081764		1975.4	0.01383408		2505.4	-0.00936395
385.59	0.12818881		915.6	0.00627357		1445.59	0.00840712		1975.6	0.01403614		2505.6	-0.00838739
385.79	0.1282895		915.8	0.00568515		1445.79	0.00888049		1975.8	0.01376816		2505.8	-0.00843018
385.99	0.12754978		916	0.005057		1445.99	0.00931612		1976	0.01276154		2506	-0.00841591
386.19	0.12718604		916.2	0.00372871		1446.19	0.0097918		1976.2	0.01303217		2506.2	-0.00793825
386.39	0.12673806		916.4	0.00373602		1446.39	0.0096062		1976.4	0.01337136		2506.4	-0.00774971
386.59	0.12629065		916.6	0.00351874		1446.59	0.00974568		1976.6	0.01333684		2506.6	-0.00730401
386.79	0.12543302		916.8	0.00357733		1446.79	0.01045465		1976.8	0.01314266		2506.8	-0.00664269
386.99	0.12475753		917	0.00429143		1446.99	0.01050833		1977	0.01269155		2507	-0.00628721
387.19	0.12373932		917.2	0.0046202		1447.19	0.01042764		1977.2	0.01211056		2507.2	-0.0066066
387.39	0.12282541		917.4	0.00468133		1447.39	0.01111012		1977.4	0.01268952		2507.4	-0.00640304
387.59	0.12105778		917.6	0.00504321		1447.59	0.01154679		1977.6	0.01329259		2507.6	-0.00681323
387.79	0.11921308		917.8	0.00552636		1447.79	0.01150691		1977.8	0.01295601		2507.8	-0.00736139
387.99	0.11871484		918	0.00620859		1447.99	0.01195429		1978	0.01412239		2508	-0.00814555
388.19	0.11810173		918.2	0.00695541		1448.19	0.01228856		1978.2	0.01397195		2508.2	-0.00862126
388.39	0.11680151		918.4	0.00712476		1448.39	0.01252781		1978.4	0.01382102		2508.4	-0.00784185
388.59	0.11518421		918.6	0.00679696		1448.59	0.01177063		1978.6	0.01489496		2508.6	-0.00664573
388.79	0.11488942		918.8	0.00710056		1448.79	0.01160598		1978.8	0.015481		2508.8	-0.0075421
388.99	0.11376663		919	0.00691097		1448.99	0.01132852		1979	0.01516583		2509	-0.00789136
389.19	0.11395258		919.2	0.00767115		1449.19	0.01096585		1979.2	0.01472814		2509.2	-0.00820566
389.39	0.11292394		919.4	0.00749525		1449.39	0.01038264		1979.4	0.01416132		2509.4	-0.00735125
389.59	0.11466591		919.6	0.00851818		1449.59	0.01068384		1979.6	0.01451476		2509.6	-0.00675514
389.79	0.11439923		919.8	0.00716565		1449.79	0.01118416		1979.8	0.0143384		2509.8	-0.00714613
389.99	0.11410583		920	0.00607059		1449.99	0.01159305		1980	0.01379891		2510	-0.007224
390.19	0.11350007		920.2	0.00573973		1450.19	0.01210747		1980.2	0.01414201		2510.2	-0.00630494
390.39	0.11335326		920.4	0.00587626		1450.39	0.01123507		1980.4	0.01402109		2510.4	-0.00596362
390.59	0.11338829		920.6	0.0055832		1450.59	0.01047393		1980.6	0.01458006		2510.6	-0.00527379
390.79	0.11328849		920.8	0.00485999		1450.79	0.01051695		1980.8	0.01423864		2510.8	-0.00511289
390.99	0.11209341		921	0.00568176		1450.99	0.00979379		1981	0.01321313		2511	-0.00449258
391.19	0.11131821		921.2	0.00551228		1451.19	0.00907958		1981.2	0.01364822		2511.2	-0.0044605
391.39	0.11156276		921.4	0.00633428		1451.39	0.00954786		1981.4	0.01419402		2511.4	-0.0049645
391.59	0.11084313		921.6	0.00686076		1451.59	0.00979072		1981.6	0.01388464		2511.6	-0.00512793
391.79	0.11055279		921.8	0.00716877		1451.79	0.00974823		1981.8	0.01342435		2511.8	-0.00559411
391.99	0.11010547		922	0.00793036		1451.99	0.01021511		1982	0.0139823		2512	-0.00649172
392.19	0.10890138		922.2	0.00795909		1452.19	0.01076594		1982.2	0.01311281		2512.2	-0.00615945
392.39	0.10776131		922.4	0.00740126		1452.39	0.00990644		1982.4	0.01311568		2512.4	-0.00613789
392.59	0.10765088		922.6	0.00737337		1452.59	0.00950516		1982.6	0.01424193		2512.6	-0.00751512
392.79	0.1072436		922.8	0.00748		1452.79	0.01047801		1982.8	0.01397338		2512.8	-0.00916433
392.99	0.10590285		923	0.00814381		1452.99	0.00985122		1983	0.01380446		2513	-0.01025026
393.19	0.10540391		923.2	0.00846802		1453.19	0.00942421		1983.2	0.01355688		2513.2	-0.01149546
393.39	0.10483618		923.4	0.00805815		1453.39	0.00906471		1983.4	0.01435658		2513.4	-0.01181123
393.59	0.10568162		923.6	0.00769188		1453.59	0.00923164		1983.6	0.01470659		2513.6	-0.0125665
393.79	0.10472471		923.8	0.00701787		1453.79	0.0094068		1983.8	0.01394848		2513.8	-0.01340119
393.99	0.10472588		924	0.00654781		1453.99	0.01054476		1984	0.01379464		2514	-0.01383187
394.19	0.10482846		924.2	0.00700945		1454.19	0.00985195		1984.2	0.01391581		2514.2	-0.01321045
394.39	0.10568019		924.4	0.00609213		1454.39	0.00934461		1984.4	0.01387029		2514.4	-0.01215987
394.59	0.10535939		924.6	0.00646643		1454.59	0.00966319		1984.6	0.01389003		2514.6	-0.01239448
394.79	0.1050408		924.8	0.00628454		1454.79	0.0097403		1984.8	0.0132069		2514.8	-0.01143169
394.99	0.10469276		925	0.00719793		1454.99	0.00928481		1985	0.01363712		2515	-0.01027322
395.19	0.10526268		925.2	0.00786071		1455.19	0.00925036		1985.2	0.01410476		2515.2	-0.00979537
395.39	0.10643912		925.4	0.00916712		1455.39	0.01010911		1985.4	0.01322923		2515.4	-0.00907481
395.59	0.10682067		925.6	0.00916744		1455.59	0.01010536		1985.6	0.01247359		2515.6	-0.00812063
395.79	0.10574161		925.8	0.0083417		1455.79	0.01013358		1985.8	0.01209312		2515.8	-0.007345
395.99	0.10477515		926	0.00845428		1455.99	0.01066341		1986	0.01268279		2516	-0.0066168
396.19	0.10444264		926.2	0.00816566		1456.19	0.01098237		1986.2	0.01215033		2516.2	-0.00581054
396.39	0.10430238		926.4	0.00807271		1456.39	0.01042376		1986.4	0.01329827		2516.4	-0.00542526
396.59	0.10449667		926.6	0.00819813		1456.59	0.01104322		1986.6	0.0143119		2516.6	-0.00521679
396.79	0.10336408		926.8	0.00771113		1456.79	0.01105032		1986.8	0.0147475		2516.8	-0.00571276
396.99	0.10261985		927	0.00786308		1456.99	0.01024267		1987	0.0149634		2517	-0.00596434
397.19	0.10188494		927.2	0.0066768		1457.19	0.00990587		1987.2	0.01526234		2517.2	-0.00579328
397.39	0.10144496		927.4	0.00590126		1457.39	0.00962307		1987.4	0.01518579		2517.4	-0.00571831
397.59	0.10094171		927.6	0.00542472		1457.59	0.00905767		1987.6	0.01480156		2517.6	-0.00603377
397.79	0.10045692		927.8	0.00605056		1457.79	0.00973221		1987.8	0.01385633		2517.8	-0.00705182
397.99	0.10070887		928	0.00516899		1457.99	0.01015801		1988	0.01410777		2518	-0.00738804
398.19	0.10115645		928.2	0.00468644		1458.19	0.00962894		1988.2	0.01384618		2518.2	-0.00722683
398.39	0.1011001		928.4	0.00444411		1458.39	0.01082311		1988.4	0.01490886		2518.4	-0.00729403
398.59	0.10015877		928.6	0.00531106		1458.59	0.01172891		1988.6	0.01501348		2518.6	-0.00810223
398.79	0.09978333		928.8	0.00569442		1458.79	0.01129132		1988.8	0.01501915		2518.8	-0.00752807
398.99	0.09929322		929	0.00632184		1458.99	0.01064777		1989	0.01523156		2519	-0.00741088
399.19	0.09947861		929.2	0.00677615		1459.19	0.01018529		1989.2	0.01479573		2519.2	-0.00735581
399.39	0.09986948		929.4	0.00679416		1459.39	0.01024614		1989.4	0.01410834		2519.4	-0.00743628
399.59	0.09908275		929.6	0.00587019		1459.59	0.01059236		1989.6	0.01451096		2519.6	-0.00699764
399.79	0.09782621		929.8	0.00508157		1459.79	0.01125291		1989.8	0.01476806		2519.8	-0.00726414
399.99	0.09790598		930	0.00637761		1459.99	0.01171811		1990	0.01544562		2520	-0.00809446
400.19	0.09801038		930.2	0.00684839		1460.19	0.01224817		1990.2	0.01465169		2520.2	-0.00815885
400.39	0.09779388		930.4	0.00645942		1460.39	0.01292025		1990.4	0.01487894		2520.4	-0.0077194
400.59	0.09736196		930.6	0.00609723		1460.59	0.01255739		1990.6	0.01458747		2520.6	-0.00843669
400.79	0.09646013		930.8	0.00609901		1460.79	0.01193938		1990.8	0.01467499		2520.8	-0.00948969
400.99	0.09606426		931	0.00686416		1460.99	0.01151491		1991	0.01422877		2521	-0.00875526
401.19	0.09610086		931.2	0.00664228		1461.19	0.01063781		1991.2	0.01389774		2521.2	-0.00958264
401.39	0.09554004		931.4	0.00714631		1461.39	0.00973592		1991.4	0.0127737		2521.4	-0.00921984
401.59	0.09452188		931.6	0.0081453		1461.59	0.00957463		1991.6	0.0127032		2521.6	-0.0095789
401.79	0.09435727		931.8	0.00860319		1461.79	0.00911787		1991.8	0.01182842		2521.8	-0.00911292
401.99	0.09457939		932	0.00835131		1461.99	0.00931748		1992	0.01228276		2522	-0.00854829
402.19	0.09467959		932.2	0.00862419		1462.19	0.00972032		1992.2	0.01254843		2522.2	-0.0085866
402.39	0.09428511		932.4	0.00900312		1462.39	0.01071291		1992.4	0.01332857		2522.4	-0.00817473
402.59	0.09422746		932.6	0.00850046		1462.59	0.01080483		1992.6	0.01249738		2522.6	-0.00687797
402.79	0.09342024		932.8	0.00874556		1462.79	0.01039513		1992.8	0.01310302		2522.8	-0.0067348
402.99	0.09392262		933	0.00863597		1462.99	0.01058627		1993	0.01349		2523	-0.00639445
403.19	0.09373162		933.2	0.0075591		1463.19	0.01164915		1993.2	0.01379668		2523.2	-0.00627595
403.39	0.09315274		933.4	0.0069771		1463.39	0.01235843		1993.4	0.01331239		2523.4	-0.00691176
403.59	0.09244481		933.6	0.00570654		1463.59	0.01275085		1993.6	0.01416032		2523.6	-0.00675084
403.79	0.09300317		933.8	0.00536424		1463.79	0.01333662		1993.8	0.01390781		2523.8	-0.00719193
403.99	0.09303443		934	0.0055137		1463.99	0.01383838		1994	0.01377136		2524	-0.00695558
404.19	0.09297969		934.2	0.00543832		1464.19	0.01376385		1994.2	0.01347428		2524.2	-0.00722137
404.39	0.09318796		934.4	0.00482194		1464.39	0.01382629		1994.4	0.01360473		2524.4	-0.00767387
404.59	0.09287422		934.6	0.00471563		1464.59	0.01370248		1994.6	0.01378064		2524.6	-0.00889199
404.79	0.09295379		934.8	0.00596055		1464.79	0.01388218		1994.8	0.01330071		2524.8	-0.00940489
404.99	0.09272581		935	0.00653105		1464.99	0.01386723		1995	0.01355525		2525	-0.00968549
405.19	0.09148451		935.2	0.00688529		1465.19	0.01380486		1995.2	0.01371117		2525.2	-0.01056095
405.39	0.09011911		935.4	0.00806678		1465.39	0.01375186		1995.4	0.01309838		2525.4	-0.00994164
405.59	0.08958561		935.6	0.00796543		1465.59	0.01318726		1995.6	0.0138191		2525.6	-0.00924997
405.79	0.08990407		935.8	0.00836385		1465.79	0.01240787		1995.8	0.01403848		2525.8	-0.00855456
405.99	0.08989747		936	0.00920448		1465.99	0.01284409		1996	0.01447224		2526	-0.00894003
406.19	0.09051897		936.2	0.0091595		1466.19	0.01290546		1996.2	0.01486284		2526.2	-0.00919644
406.39	0.09113178		936.4	0.0082785		1466.39	0.0136585		1996.4	0.01461125		2526.4	-0.00867295
406.59	0.09115655		936.6	0.00831107		1466.59	0.01322399		1996.6	0.01433129		2526.6	-0.00839616
406.79	0.09108907		936.8	0.00819859		1466.79	0.0140482		1996.8	0.01494388		2526.8	-0.00876029
406.99	0.09145207		937	0.0073863		1466.99	0.01406273		1997	0.01524752		2527	-0.00835889
407.19	0.09004694		937.2	0.00645649		1467.19	0.013446		1997.2	0.01492352		2527.2	-0.0090342
407.39	0.08937317		937.4	0.00660011		1467.39	0.0120116		1997.4	0.01508051		2527.4	-0.00905731
407.59	0.08962226		937.6	0.00618312		1467.59	0.01079289		1997.6	0.01586621		2527.6	-0.00872762
407.79	0.09037904		937.8	0.00673401		1467.79	0.01130361		1997.8	0.0150823		2527.8	-0.00818996
407.99	0.08995815		938	0.00773264		1467.99	0.01128559		1998	0.0143971		2528	-0.00881405
408.19	0.08954989		938.2	0.00815795		1468.19	0.01086319		1998.2	0.01410411		2528.2	-0.00982496
408.39	0.08974614		938.4	0.00861081		1468.39	0.01214331		1998.4	0.01413433		2528.4	-0.00931559
408.59	0.08922479		938.6	0.00952234		1468.59	0.01352838		1998.6	0.01378202		2528.6	-0.00975431
408.79	0.0894774		938.8	0.0102366		1468.79	0.01331454		1998.8	0.0131467		2528.8	-0.00922765
408.99	0.08866046		939	0.00919878		1468.99	0.01336461		1999	0.01335583		2529	-0.00940921
409.19	0.08741532		939.2	0.00878099		1469.19	0.01345548		1999.2	0.01349126		2529.2	-0.0086699
409.39	0.08759546		939.4	0.00893286		1469.39	0.01270622		1999.4	0.01298976		2529.4	-0.00823543
409.59	0.08718001		939.6	0.00796152		1469.59	0.0121607		1999.6	0.01325842		2529.6	-0.00724764
409.79	0.08763655		939.8	0.00886637		1469.79	0.01315655		1999.8	0.01289355		2529.8	-0.00836222
409.99	0.08774646		940	0.00857528		1469.99	0.01351651		2000	0.01349769		2530	-0.00831261
410.19	0.08769187		940.2	0.00846679		1470.19	0.01382874		2000.2	0.01367847		2530.2	-0.00774047
410.39	0.08813167		940.4	0.00748592		1470.39	0.0136355		2000.4	0.01379841		2530.4	-0.00755876
410.59	0.08788043		940.6	0.00650693		1470.59	0.01246789		2000.6	0.0139459		2530.6	-0.0076558
410.79	0.08792574		940.8	0.00593584		1470.79	0.01291243		2000.8	0.01412692		2530.8	-0.00723664
410.99	0.08688829		941	0.00518362		1470.99	0.01176093		2001	0.01438446		2531	-0.00716251
411.19	0.08693432		941.2	0.00523673		1471.19	0.01080146		2001.2	0.01506464		2531.2	-0.0074865
411.39	0.0861844		941.4	0.00515902		1471.39	0.00982024		2001.4	0.01566148		2531.4	-0.00661552
411.59	0.08613026		941.6	0.00546969		1471.59	0.01000817		2001.6	0.01625116		2531.6	-0.0074923
411.79	0.08560948		941.8	0.00617068		1471.79	0.01078255		2001.8	0.01543146		2531.8	-0.00773478
411.99	0.08469756		942	0.00648859		1471.99	0.01124149		2002	0.01540075		2532	-0.00803217
412.19	0.08455149		942.2	0.00659625		1472.19	0.01147941		2002.2	0.01564583		2532.2	-0.00811019
412.39	0.08482504		942.4	0.00701336		1472.39	0.01244061		2002.4	0.01626668		2532.4	-0.00760655
412.59	0.08513666		942.6	0.00575449		1472.59	0.0129126		2002.6	0.01519733		2532.6	-0.00780096
412.79	0.08470989		942.8	0.0048104		1472.79	0.01302927		2002.8	0.01506617		2532.8	-0.00793012
412.99	0.08382499		943	0.00431424		1472.99	0.01313277		2003	0.01441617		2533	-0.00823745
413.19	0.08338722		943.2	0.00420413		1473.19	0.0134945		2003.2	0.01417365		2533.2	-0.00832822
413.39	0.0837917		943.4	0.00496432		1473.39	0.01397881		2003.4	0.01309233		2533.4	-0.00813666
413.59	0.08365626		943.6	0.00456303		1473.59	0.01407506		2003.6	0.01208893		2533.6	-0.00826391
413.79	0.08373552		943.8	0.00555901		1473.79	0.0140821		2003.8	0.0116787		2533.8	-0.00853631
413.99	0.08407629		944	0.00584635		1473.99	0.01394524		2004	0.01200978		2534	-0.00742892
414.19	0.08362255		944.2	0.00561675		1474.19	0.01375454		2004.2	0.01166943		2534.2	-0.00681802
414.39	0.08397108		944.4	0.0047615		1474.39	0.0125998		2004.4	0.01228935		2534.4	-0.0069679
414.59	0.08379557		944.6	0.00512221		1474.59	0.01214894		2004.6	0.01160305		2534.6	-0.00659224
414.79	0.08417326		944.8	0.00685619		1474.79	0.01130089		2004.8	0.01151712		2534.8	-0.00670315
414.99	0.08463749		945	0.00664635		1474.99	0.0109204		2005	0.01229368		2535	-0.00696027
415.19	0.0850552		945.2	0.0076407		1475.19	0.01028593		2005.2	0.01307015		2535.2	-0.00756465
415.39	0.0836916		945.4	0.00804594		1475.39	0.0098935		2005.4	0.01336997		2535.4	-0.0073479
415.59	0.08387484		945.6	0.00820445		1475.59	0.00988292		2005.6	0.01337147		2535.6	-0.00803113
415.79	0.08387091		945.8	0.00834549		1475.79	0.00961497		2005.8	0.01381558		2535.8	-0.00766677
415.99	0.08379333		946	0.00860618		1475.99	0.00971801		2006	0.01497712		2536	-0.00751927
416.19	0.08414597		946.2	0.00833088		1476.19	0.00953108		2006.2	0.01568824		2536.2	-0.00880029
416.39	0.08380745		946.4	0.00795315		1476.39	0.00956987		2006.4	0.01600485		2536.4	-0.00800544
416.59	0.08371968		946.6	0.0072585		1476.59	0.01015935		2006.6	0.01580454		2536.6	-0.00851545
416.79	0.08425343		946.8	0.00779019		1476.79	0.01086898		2006.8	0.01652437		2536.8	-0.00876994
416.99	0.08431091		947	0.008408		1476.99	0.01138083		2007	0.0151834		2537	-0.00938095
417.19	0.08452699		947.2	0.00889661		1477.19	0.01158279		2007.2	0.01494831		2537.2	-0.00937156
417.39	0.08481049		947.4	0.0096262		1477.39	0.01196205		2007.4	0.01409409		2537.4	-0.00885711
417.59	0.083807		947.6	0.00947175		1477.59	0.01190832		2007.6	0.01256382		2537.6	-0.0085495
417.79	0.08292547		947.8	0.00964756		1477.79	0.01230925		2007.8	0.01248571		2537.8	-0.00858259
417.99	0.08309263		948	0.00958391		1477.99	0.01379855		2008	0.01217371		2538	-0.00809886
418.19	0.08282927		948.2	0.00979919		1478.19	0.01444127		2008.2	0.01130127		2538.2	-0.00817138
418.39	0.08229683		948.4	0.01048271		1478.39	0.01467821		2008.4	0.01202436		2538.4	-0.0081041
418.59	0.08276043		948.6	0.01114615		1478.59	0.01531467		2008.6	0.0119189		2538.6	-0.00776635
418.79	0.0834049		948.8	0.01155937		1478.79	0.01546002		2008.8	0.0120609		2538.8	-0.00764273
418.99	0.08416033		949	0.0108332		1478.99	0.01626402		2009	0.01234589		2539	-0.00794938
419.19	0.08348754		949.2	0.01124742		1479.19	0.01593127		2009.2	0.01346008		2539.2	-0.00747321
419.39	0.08365898		949.4	0.01079755		1479.39	0.01582302		2009.4	0.01399274		2539.4	-0.00574197
419.59	0.08385873		949.6	0.00958355		1479.59	0.01567788		2009.6	0.01331397		2539.6	-0.00561562
419.79	0.08329598		949.8	0.00929078		1479.79	0.01569593		2009.8	0.01442593		2539.8	-0.00606732
419.99	0.08332284		950	0.00827135		1479.99	0.01534267		2010	0.01477911		2540	-0.0056684
420.19	0.08305285		950.2	0.00727299		1480.19	0.01477508		2010.2	0.01544597		2540.2	-0.00559456
420.39	0.08297123		950.4	0.00729307		1480.39	0.01452876		2010.4	0.01580757		2540.4	-0.00476653
420.59	0.08280659		950.6	0.00737064		1480.59	0.01536094		2010.6	0.01549637		2540.6	-0.00472117
420.79	0.08204716		950.8	0.00715093		1480.79	0.0159569		2010.8	0.01546208		2540.8	-0.00482704
420.99	0.08081498		951	0.00795255		1480.99	0.0157193		2011	0.01494595		2541	-0.00551564
421.19	0.07976754		951.2	0.00796788		1481.19	0.01519454		2011.2	0.01501968		2541.2	-0.00591703
421.39	0.07903661		951.4	0.00759013		1481.39	0.01522373		2011.4	0.01425623		2541.4	-0.00615957
421.59	0.07783309		951.6	0.0066724		1481.59	0.0155409		2011.6	0.01371744		2541.6	-0.00611151
421.79	0.07731609		951.8	0.00627786		1481.79	0.01517011		2011.8	0.0136258		2541.8	-0.0070677
421.99	0.07707726		952	0.00662222		1481.99	0.01638548		2012	0.01284937		2542	-0.00703822
422.19	0.0769297		952.2	0.00703781		1482.19	0.01612955		2012.2	0.01239895		2542.2	-0.00708919
422.39	0.07704013		952.4	0.00696486		1482.39	0.01603215		2012.4	0.0126301		2542.4	-0.0069463
422.59	0.07764408		952.6	0.0070187		1482.59	0.01545486		2012.6	0.01203451		2542.6	-0.0060961
422.79	0.07799479		952.8	0.00748177		1482.79	0.01410131		2012.8	0.01170482		2542.8	-0.00672718
422.99	0.07817099		953	0.00766029		1482.99	0.01337166		2013	0.01221205		2543	-0.0066532
423.19	0.07787988		953.2	0.00752608		1483.19	0.01240385		2013.2	0.0129062		2543.2	-0.00506365
423.39	0.07851767		953.4	0.00710774		1483.39	0.01235649		2013.4	0.01185483		2543.4	-0.0040529
423.59	0.07863047		953.6	0.0065524		1483.59	0.0119		2013.6	0.0113414		2543.6	-0.00419425
423.79	0.07948126		953.8	0.00676133		1483.79	0.011637		2013.8	0.01189556		2543.8	-0.00425315
423.99	0.08021112		954	0.00654015		1483.99	0.01083192		2014	0.01206232		2544	-0.00327344
424.19	0.07990938		954.2	0.00685995		1484.19	0.01027328		2014.2	0.01228781		2544.2	-0.00302373
424.39	0.07963324		954.4	0.00677718		1484.39	0.01124146		2014.4	0.01264335		2544.4	-0.00277219
424.59	0.07872192		954.6	0.00721936		1484.59	0.01137048		2014.6	0.01229225		2544.6	-0.00332773
424.79	0.0780251		954.8	0.00709243		1484.79	0.01189204		2014.8	0.0133967		2544.8	-0.00465134
424.99	0.07793898		955	0.00760721		1484.99	0.01174045		2015	0.01367688		2545	-0.00587101
425.19	0.07748891		955.2	0.0062637		1485.19	0.01187777		2015.2	0.01312983		2545.2	-0.00624978
425.39	0.07719035		955.4	0.00639927		1485.39	0.01231995		2015.4	0.01306258		2545.4	-0.00707895
425.59	0.07596402		955.6	0.00552044		1485.59	0.01287879		2015.6	0.01281611		2545.6	-0.00842466
425.79	0.07574083		955.8	0.00591871		1485.79	0.01310727		2015.8	0.01340748		2545.8	-0.01008132
425.99	0.07586224		956	0.00614592		1485.99	0.01374459		2016	0.01311208		2546	-0.01007555
426.19	0.07559088		956.2	0.00715436		1486.19	0.01338096		2016.2	0.01406088		2546.2	-0.01041739
426.39	0.07587281		956.4	0.00776622		1486.39	0.01292445		2016.4	0.01416436		2546.4	-0.01035759
426.59	0.07546953		956.6	0.00801064		1486.59	0.01232816		2016.6	0.014529		2546.6	-0.01030514
426.79	0.07556507		956.8	0.00825001		1486.79	0.01209962		2016.8	0.0146366		2546.8	-0.01083408
426.99	0.07534816		957	0.00804977		1486.99	0.01308596		2017	0.01535822		2547	-0.00965836
427.19	0.07597304		957.2	0.00777088		1487.19	0.0126521		2017.2	0.01496341		2547.2	-0.00887052
427.39	0.07663898		957.4	0.00863628		1487.39	0.01284446		2017.4	0.01434797		2547.4	-0.00839958
427.59	0.07734886		957.6	0.00904703		1487.59	0.01218032		2017.6	0.01488935		2547.6	-0.0076467
427.79	0.07784832		957.8	0.00919877		1487.79	0.01192444		2017.8	0.01501577		2547.8	-0.00686808
427.99	0.07840314		958	0.00909155		1487.99	0.01113754		2018	0.01494956		2548	-0.00587027
428.19	0.07779054		958.2	0.00837588		1488.19	0.01145105		2018.2	0.0151489		2548.2	-0.00575738
428.39	0.07797002		958.4	0.00803073		1488.39	0.01154243		2018.4	0.01530143		2548.4	-0.00530826
428.59	0.07782899		958.6	0.00798368		1488.59	0.01119117		2018.6	0.0154555		2548.6	-0.00600482
428.79	0.07826276		958.8	0.00791738		1488.79	0.0120303		2018.8	0.015898		2548.8	-0.00576749
428.99	0.07767615		959	0.00756284		1488.99	0.01174795		2019	0.01531109		2549	-0.00535572
429.19	0.07811974		959.2	0.00678899		1489.19	0.01127422		2019.2	0.01409533		2549.2	-0.00585988
429.39	0.07732917		959.4	0.00735167		1489.39	0.01180606		2019.4	0.01369862		2549.4	-0.00724549
429.59	0.07709031		959.6	0.00699187		1489.59	0.0121459		2019.6	0.01329101		2549.6	-0.00751035
429.79	0.0774625		959.8	0.00757739		1489.79	0.01264275		2019.8	0.01354704		2549.8	-0.00807473
429.99	0.07681589		960	0.00858465		1489.99	0.01287861		2020	0.01290822		2550	-0.00793145
430.19	0.07592578		960.2	0.00880347		1490.19	0.01294982		2020.2	0.01393151		2550.2	-0.00803073
430.39	0.07645198		960.4	0.008861		1490.39	0.01294478		2020.4	0.01339088		2550.4	-0.00856258
430.59	0.07557916		960.6	0.00837319		1490.59	0.01359245		2020.6	0.01321623		2550.6	-0.00897979
430.79	0.07461159		960.8	0.0083765		1490.79	0.01468205		2020.8	0.01267646		2550.8	-0.00889689
430.99	0.07414191		961	0.00843403		1490.99	0.0144541		2021	0.01251691		2551	-0.00917609
431.19	0.07423156		961.2	0.00876638		1491.19	0.01310404		2021.2	0.01192862		2551.2	-0.00879947
431.39	0.07462956		961.4	0.00788642		1491.39	0.01319223		2021.4	0.01148774		2551.4	-0.00797827
431.59	0.07435973		961.6	0.00635813		1491.59	0.01278294		2021.6	0.01176669		2551.6	-0.00700075
431.79	0.07491598		961.8	0.00603607		1491.79	0.01219759		2021.8	0.01216179		2551.8	-0.00620989
431.99	0.07588791		962	0.00530688		1491.99	0.01205624		2022	0.01268456		2552	-0.00596161
432.19	0.07466404		962.2	0.00483917		1492.19	0.01137835		2022.2	0.01317195		2552.2	-0.00579306
432.39	0.07524755		962.4	0.00431094		1492.39	0.01168034		2022.4	0.0127697		2552.4	-0.00477765
432.59	0.07545784		962.6	0.00401689		1492.59	0.01279168		2022.6	0.01389807		2552.6	-0.00449541
432.79	0.07630616		962.8	0.00390684		1492.79	0.01296538		2022.8	0.01411917		2552.8	-0.00388389
432.99	0.07547264		963	0.00333488		1492.99	0.01243132		2023	0.01365992		2553	-0.00365749
433.19	0.07590837		963.2	0.00380662		1493.19	0.01279515		2023.2	0.01335216		2553.2	-0.0044725
433.39	0.07560985		963.4	0.00491702		1493.39	0.01332042		2023.4	0.01305914		2553.4	-0.00514713
433.59	0.07611829		963.6	0.00475992		1493.59	0.01394957		2023.6	0.01323906		2553.6	-0.00532187
433.79	0.07602082		963.8	0.00515194		1493.79	0.01392606		2023.8	0.01342678		2553.8	-0.00657003
433.99	0.07564197		964	0.00608625		1493.99	0.01420084		2024	0.0131761		2554	-0.00691231
434.19	0.07608664		964.2	0.00633748		1494.19	0.01423034		2024.2	0.01329338		2554.2	-0.007568
434.39	0.07582235		964.4	0.00717566		1494.39	0.01477601		2024.4	0.01295663		2554.4	-0.00842633
434.59	0.07512759		964.6	0.0077894		1494.59	0.01503235		2024.6	0.01356024		2554.6	-0.00811845
434.79	0.07529749		964.8	0.00830125		1494.79	0.01510935		2024.8	0.01267224		2554.8	-0.00884358
434.99	0.07532365		965	0.00829663		1494.99	0.0144186		2025	0.01300485		2555	-0.00885391
435.19	0.07495405		965.2	0.00847122		1495.19	0.01422662		2025.2	0.01395117		2555.2	-0.00789092
435.39	0.07457283		965.4	0.00806858		1495.39	0.0145803		2025.4	0.01322359		2555.4	-0.00843507
435.59	0.07415032		965.6	0.00830186		1495.59	0.01416218		2025.6	0.01409973		2555.6	-0.00890731
435.79	0.07454098		965.8	0.00959013		1495.79	0.01356944		2025.8	0.01472797		2555.8	-0.00840756
435.99	0.07368422		966	0.01017261		1495.99	0.01344149		2026	0.01479072		2556	-0.00782347
436.19	0.07234009		966.2	0.01084193		1496.19	0.01335755		2026.2	0.01477917		2556.2	-0.00721408
436.39	0.07230546		966.4	0.01067594		1496.39	0.01458415		2026.4	0.01443062		2556.4	-0.00673478
436.59	0.07185852		966.6	0.01080891		1496.59	0.01443633		2026.6	0.01503871		2556.6	-0.00598026
436.79	0.07165509		966.8	0.0103225		1496.79	0.01406132		2026.8	0.01448016		2556.8	-0.00665736
436.99	0.0712062		967	0.01003844		1496.99	0.01404928		2027	0.01421695		2557	-0.00695235
437.19	0.07128616		967.2	0.01062459		1497.19	0.0136264		2027.2	0.01480541		2557.2	-0.0077119
437.39	0.07233008		967.4	0.01015656		1497.39	0.01310862		2027.4	0.01440558		2557.4	-0.00854493
437.59	0.07307307		967.6	0.00905599		1497.59	0.01342009		2027.6	0.01466856		2557.6	-0.00891713
437.79	0.07411014		967.8	0.00861382		1497.79	0.01320564		2027.8	0.0140508		2557.8	-0.00964082
437.99	0.07485013		968	0.00847184		1497.99	0.01315873		2028	0.0132705		2558	-0.00997676
438.19	0.07522458		968.2	0.00856879		1498.19	0.01202789		2028.2	0.01347295		2558.2	-0.01066665
438.39	0.0748501		968.4	0.00819767		1498.39	0.01186844		2028.4	0.01347134		2558.4	-0.0108324
438.59	0.07423385		968.6	0.00797844		1498.59	0.01114061		2028.6	0.01350284		2558.6	-0.01111767
438.79	0.07402399		968.8	0.00710983		1498.79	0.01150016		2028.8	0.01322804		2558.8	-0.01110472
438.99	0.07336878		969	0.00708721		1498.99	0.01174525		2029	0.01434885		2559	-0.01030939
439.19	0.07308035		969.2	0.00729317		1499.19	0.01128734		2029.2	0.01469865		2559.2	-0.01052439
439.39	0.0728135		969.4	0.00774208		1499.39	0.01122373		2029.4	0.01339031		2559.4	-0.01108523
439.59	0.07291817		969.6	0.00789252		1499.59	0.01166242		2029.6	0.01397657		2559.6	-0.01059254
439.79	0.07257366		969.8	0.00798164		1499.79	0.01220724		2029.8	0.013303		2559.8	-0.00915146
439.99	0.07201582		970	0.00800321		1499.99	0.01262975		2030	0.01403353		2560	-0.00849386
440.19	0.07141936		970.2	0.00758344		1500.19	0.01273192		2030.2	0.01434772		2560.2	-0.0078028
440.39	0.07060476		970.4	0.0069011		1500.39	0.01360494		2030.4	0.01402051		2560.4	-0.00730591
440.59	0.07017206		970.6	0.00725061		1500.59	0.01426368		2030.6	0.0142257		2560.6	-0.00695614
440.79	0.07025873		970.8	0.00744244		1500.79	0.01429224		2030.8	0.01438605		2560.8	-0.0067982
440.99	0.06997013		971	0.00775385		1500.99	0.01439468		2031	0.01472046		2561	-0.00710062
441.19	0.06956727		971.2	0.00793895		1501.19	0.01486853		2031.2	0.01518354		2561.2	-0.00708721
441.39	0.06992837		971.4	0.00752106		1501.39	0.01532262		2031.4	0.01473723		2561.4	-0.00787817
441.59	0.06993123		971.6	0.0073638		1501.59	0.01576263		2031.6	0.01480784		2561.6	-0.00832992
441.79	0.07052639		971.8	0.00787064		1501.79	0.0154115		2031.8	0.01444866		2561.8	-0.00871168
441.99	0.06980846		972	0.00828617		1501.99	0.01443871		2032	0.01460773		2562	-0.00882335
442.19	0.06892479		972.2	0.00973796		1502.19	0.01408291		2032.2	0.01491324		2562.2	-0.00902372
442.39	0.06858583		972.4	0.01051294		1502.39	0.0145501		2032.4	0.01468712		2562.4	-0.00895265
442.59	0.06788902		972.6	0.01078274		1502.59	0.01413649		2032.6	0.01461765		2562.6	-0.0096245
442.79	0.06820955		972.8	0.01027484		1502.79	0.01480117		2032.8	0.01487672		2562.8	-0.00923727
442.99	0.06772886		973	0.01123717		1502.99	0.01501977		2033	0.01465703		2563	-0.00973266
443.19	0.06754707		973.2	0.01144646		1503.19	0.01433251		2033.2	0.0139078		2563.2	-0.01003569
443.39	0.06800697		973.4	0.0120226		1503.39	0.01422739		2033.4	0.01372461		2563.4	-0.00992698
443.59	0.06832175		973.6	0.01174697		1503.59	0.0145801		2033.6	0.01370358		2563.6	-0.00995683
443.79	0.06772593		973.8	0.01126654		1503.79	0.01490674		2033.8	0.01349145		2563.8	-0.00979546
443.99	0.06759362		974	0.01051589		1503.99	0.01407361		2034	0.0144476		2564	-0.00926803
444.19	0.06760919		974.2	0.00932435		1504.19	0.01373619		2034.2	0.01403667		2564.2	-0.00830869
444.39	0.06791664		974.4	0.00901862		1504.39	0.01488753		2034.4	0.01398417		2564.4	-0.00772311
444.59	0.06790294		974.6	0.00917828		1504.59	0.01513897		2034.6	0.01416626		2564.6	-0.00729762
444.79	0.06749871		974.8	0.0081174		1504.79	0.01484508		2034.8	0.01444524		2564.8	-0.00690328
444.99	0.06733825		975	0.00690968		1504.99	0.01589913		2035	0.01433047		2565	-0.00717066
445.19	0.06759767		975.2	0.00622992		1505.19	0.01647403		2035.2	0.01374022		2565.2	-0.00682032
445.39	0.06809336		975.4	0.00628455		1505.39	0.01646302		2035.4	0.01391104		2565.4	-0.00702537
445.59	0.0689544		975.6	0.00588566		1505.59	0.01605538		2035.6	0.01401944		2565.6	-0.00690906
445.79	0.06922894		975.8	0.00647659		1505.79	0.01627856		2035.8	0.01477335		2565.8	-0.00736244
445.99	0.06948183		976	0.00652752		1505.99	0.01630783		2036	0.01488223		2566	-0.00700901
446.19	0.06939864		976.2	0.00721978		1506.19	0.01747419		2036.2	0.01522918		2566.2	-0.00701412
446.39	0.0698617		976.4	0.00682265		1506.39	0.01779148		2036.4	0.01442804		2566.4	-0.00695382
446.59	0.06900921		976.6	0.0062503		1506.59	0.0173263		2036.6	0.01424306		2566.6	-0.00753968
446.79	0.06876722		976.8	0.00592038		1506.79	0.01796665		2036.8	0.01466255		2566.8	-0.00822433
446.99	0.06817672		977	0.00703973		1506.99	0.01800946		2037	0.01460682		2567	-0.00863525
447.19	0.06850531		977.2	0.00658061		1507.19	0.01683214		2037.2	0.01499372		2567.2	-0.00833994
447.39	0.06844214		977.4	0.00731661		1507.39	0.01662948		2037.4	0.0151291		2567.4	-0.00830453
447.59	0.06806447		977.6	0.00774017		1507.59	0.0164558		2037.6	0.01494309		2567.6	-0.00865854
447.79	0.06713619		977.8	0.00748768		1507.79	0.01603267		2037.8	0.01543613		2567.8	-0.00898081
447.99	0.06804509		978	0.0063559		1507.99	0.01555799		2038	0.01567716		2568	-0.00847144
448.19	0.06792074		978.2	0.0058325		1508.19	0.01491553		2038.2	0.01503884		2568.2	-0.0077376
448.39	0.06691884		978.4	0.00590071		1508.39	0.01578229		2038.4	0.01573111		2568.4	-0.00767421
448.59	0.06588741		978.6	0.00569595		1508.59	0.01519246		2038.6	0.01600156		2568.6	-0.00775809
448.79	0.06551965		978.8	0.00564228		1508.79	0.01543604		2038.8	0.01725149		2568.8	-0.0077806
448.99	0.06540744		979	0.00608454		1508.99	0.01585015		2039	0.01782511		2569	-0.00793202
449.19	0.06582773		979.2	0.00639651		1509.19	0.015815		2039.2	0.01714442		2569.2	-0.00842547
449.39	0.06611792		979.4	0.00705151		1509.39	0.0156418		2039.4	0.01778248		2569.4	-0.00861717
449.59	0.06602351		979.6	0.00772216		1509.59	0.01535688		2039.6	0.01732391		2569.6	-0.00966439
449.79	0.06594913		979.8	0.00831805		1509.79	0.01600689		2039.8	0.01702932		2569.8	-0.00967366
449.99	0.06718304		980	0.00878635		1509.99	0.01623179		2040	0.01560348		2570	-0.00905218
450.19	0.06798233		980.2	0.00834737		1510.19	0.01640244		2040.2	0.01518441		2570.2	-0.00918006
450.39	0.06897972		980.4	0.00850367		1510.39	0.01586388		2040.4	0.01368015		2570.4	-0.00926902
450.59	0.06957471		980.6	0.00889228		1510.59	0.01603585		2040.6	0.01388355		2570.6	-0.00973496
450.79	0.07082154		980.8	0.00926043		1510.79	0.0162954		2040.8	0.01391176		2570.8	-0.01044958
450.99	0.07133229		981	0.00985934		1510.99	0.01579486		2041	0.01370152		2571	-0.01047443
451.19	0.07231027		981.2	0.00952244		1511.19	0.01560353		2041.2	0.01416553		2571.2	-0.01117079
451.39	0.07223525		981.4	0.01019792		1511.39	0.01543095		2041.4	0.01475253		2571.4	-0.01269071
451.59	0.07208603		981.6	0.0095901		1511.59	0.01474533		2041.6	0.01544566		2571.6	-0.01337764
451.79	0.0712663		981.8	0.00908197		1511.79	0.0139657		2041.8	0.0154428		2571.8	-0.01393785
451.99	0.07101468		982	0.00840585		1511.99	0.01377104		2042	0.01465271		2572	-0.01358642
452.19	0.06965943		982.2	0.00839938		1512.19	0.01376582		2042.2	0.01506949		2572.2	-0.01333187
452.39	0.06881603		982.4	0.0086932		1512.39	0.01452127		2042.4	0.01660585		2572.4	-0.01264076
452.59	0.0685185		982.6	0.00936216		1512.59	0.01464303		2042.6	0.01724977		2572.6	-0.01293169
452.79	0.06758152		982.8	0.0095076		1512.79	0.01521175		2042.8	0.01787339		2572.8	-0.01363772
452.99	0.06652323		983	0.00905603		1512.99	0.01553601		2043	0.01735923		2573	-0.01354891
453.19	0.06638417		983.2	0.00925885		1513.19	0.01558078		2043.2	0.01679636		2573.2	-0.01303302
453.39	0.06584298		983.4	0.00985861		1513.39	0.01534056		2043.4	0.01673361		2573.4	-0.01285641
453.59	0.06484804		983.6	0.00949539		1513.59	0.01504177		2043.6	0.01552676		2573.6	-0.01294034
453.79	0.06433399		983.8	0.00818589		1513.79	0.01386287		2043.8	0.01478165		2573.8	-0.01185398
453.99	0.06493306		984	0.00799023		1513.99	0.01335596		2044	0.01386262		2574	-0.01079546
454.19	0.06519797		984.2	0.00648957		1514.19	0.01267061		2044.2	0.01358003		2574.2	-0.00944204
454.39	0.06456214		984.4	0.00645911		1514.39	0.01202217		2044.4	0.01269852		2574.4	-0.00894522
454.59	0.06443912		984.6	0.00576672		1514.59	0.0119152		2044.6	0.01264654		2574.6	-0.0085579
454.79	0.06402236		984.8	0.00559905		1514.79	0.01165929		2044.8	0.01213017		2574.8	-0.00881572
454.99	0.06306167		985	0.00509174		1514.99	0.01084029		2045	0.01154644		2575	-0.00956749
455.19	0.06348882		985.2	0.00482577		1515.19	0.01099419		2045.2	0.01252932		2575.2	-0.00994028
455.39	0.06355425		985.4	0.00462471		1515.39	0.01067576		2045.4	0.01311283		2575.4	-0.00996274
455.59	0.06352509		985.6	0.00480477		1515.59	0.01005978		2045.6	0.01293598		2575.6	-0.00872804
455.79	0.06338138		985.8	0.00508317		1515.79	0.01073281		2045.8	0.0131648		2575.8	-0.00908814
455.99	0.06336876		986	0.00494382		1515.99	0.0125469		2046	0.01338561		2576	-0.00906934
456.19	0.06410027		986.2	0.00595924		1516.19	0.01407784		2046.2	0.01478944		2576.2	-0.00899676
456.39	0.06496014		986.4	0.00705872		1516.39	0.01470324		2046.4	0.01470911		2576.4	-0.00929306
456.59	0.0656665		986.6	0.00784103		1516.59	0.01541432		2046.6	0.01518698		2576.6	-0.00987407
456.79	0.06671617		986.8	0.00793115		1516.79	0.01617683		2046.8	0.01550386		2576.8	-0.01020589
456.99	0.0673882		987	0.00916273		1516.99	0.01693268		2047	0.01549836		2577	-0.00972929
457.19	0.0681881		987.2	0.01031957		1517.19	0.0177306		2047.2	0.01596874		2577.2	-0.00968452
457.39	0.06843259		987.4	0.0099563		1517.39	0.01820995		2047.4	0.01567594		2577.4	-0.01085259
457.59	0.06790137		987.6	0.00906889		1517.59	0.01705367		2047.6	0.01509493		2577.6	-0.01081203
457.79	0.06768654		987.8	0.00938986		1517.79	0.01617117		2047.8	0.01586429		2577.8	-0.01024642
457.99	0.06714316		988	0.00960154		1517.99	0.0156683		2048	0.01537511		2578	-0.00930446
458.19	0.06644934		988.2	0.00855934		1518.19	0.01497649		2048.2	0.0157384		2578.2	-0.00869664
458.39	0.06582128		988.4	0.00878742		1518.39	0.01471266		2048.4	0.01487305		2578.4	-0.008917
458.59	0.06560674		988.6	0.00813338		1518.59	0.01411779		2048.6	0.01405765		2578.6	-0.00867211
458.79	0.06574665		988.8	0.00851208		1518.79	0.01358342		2048.8	0.0129362		2578.8	-0.00826604
458.99	0.0653107		989	0.00795216		1518.99	0.01279876		2049	0.0132412		2579	-0.00788094
459.19	0.06683431		989.2	0.00905998		1519.19	0.01311141		2049.2	0.01429161		2579.2	-0.00805662
459.39	0.06682366		989.4	0.00828042		1519.39	0.01298648		2049.4	0.01379765		2579.4	-0.00801265
459.59	0.06732045		989.6	0.0087139		1519.59	0.01276469		2049.6	0.01389578		2579.6	-0.00809551
459.79	0.06737536		989.8	0.0088343		1519.79	0.01361586		2049.8	0.01406408		2579.8	-0.0094013
459.99	0.06731513		990	0.00892435		1519.99	0.01330108		2050	0.01367659		2580	-0.00947254
460.19	0.06714562		990.2	0.00966797		1520.19	0.01237762		2050.2	0.01356842		2580.2	-0.00879144
460.39	0.06687733		990.4	0.00982838		1520.39	0.01194248		2050.4	0.01357529		2580.4	-0.00983189
460.59	0.06739903		990.6	0.0097037		1520.59	0.0125905		2050.6	0.01444465		2580.6	-0.00876758
460.79	0.06750422		990.8	0.00943818		1520.79	0.01334921		2050.8	0.01526963		2580.8	-0.00850762
460.99	0.06697405		991	0.01016752		1520.99	0.01322406		2051	0.01523423		2581	-0.00872021
461.19	0.06680535		991.2	0.00947332		1521.19	0.01400721		2051.2	0.01563362		2581.2	-0.00929779
461.39	0.06651667		991.4	0.00929753		1521.39	0.01368922		2051.4	0.01689055		2581.4	-0.0096701
461.59	0.0655953		991.6	0.00949588		1521.59	0.01249258		2051.6	0.01684143		2581.6	-0.008973
461.79	0.06476221		991.8	0.00973716		1521.79	0.01368671		2051.8	0.01798467		2581.8	-0.00866631
461.99	0.06428577		992	0.00920209		1521.99	0.01391245		2052	0.01851052		2582	-0.00846147
462.19	0.06390763		992.2	0.00851047		1522.19	0.01446995		2052.2	0.0194807		2582.2	-0.00782764
462.39	0.06368814		992.4	0.00871438		1522.39	0.01627465		2052.4	0.01890288		2582.4	-0.00788606
462.59	0.06340306		992.6	0.00803197		1522.59	0.01531695		2052.6	0.01774576		2582.6	-0.00808464
462.79	0.06305293		992.8	0.00821854		1522.79	0.01671117		2052.8	0.01769467		2582.8	-0.00790189
462.99	0.06240651		993	0.00743373		1522.99	0.01738708		2053	0.01866194		2583	-0.00871954
463.19	0.06305868		993.2	0.00801696		1523.19	0.01765382		2053.2	0.018268		2583.2	-0.00919906
463.39	0.06315826		993.4	0.00730595		1523.39	0.01777858		2053.4	0.01761721		2583.4	-0.00976355
463.59	0.063496		993.6	0.00822843		1523.59	0.01808117		2053.6	0.0177405		2583.6	-0.00986032
463.79	0.06276324		993.8	0.00841256		1523.79	0.01786896		2053.8	0.01722014		2583.8	-0.01007477
463.99	0.06190672		994	0.00818376		1523.99	0.01784733		2054	0.016671		2584	-0.00952397
464.19	0.06123025		994.2	0.00824039		1524.19	0.01795541		2054.2	0.01615083		2584.2	-0.00959056
464.39	0.06147968		994.4	0.00810681		1524.39	0.01888021		2054.4	0.01532952		2584.4	-0.01009981
464.59	0.06213908		994.6	0.00751974		1524.59	0.01885685		2054.6	0.01463885		2584.6	-0.00878004
464.79	0.06171221		994.8	0.00726918		1524.79	0.01820322		2054.8	0.01506817		2584.8	-0.00897963
464.99	0.06291321		995	0.00744166		1524.99	0.01770629		2055	0.01451957		2585	-0.00942117
465.19	0.06308212		995.2	0.00737411		1525.19	0.01775721		2055.2	0.01434002		2585.2	-0.00982093
465.39	0.06355288		995.4	0.00772		1525.39	0.0170459		2055.4	0.01472064		2585.4	-0.00949877
465.59	0.06394492		995.6	0.00798491		1525.59	0.01608218		2055.6	0.01419243		2585.6	-0.00963692
465.79	0.06362568		995.8	0.00811441		1525.79	0.01596969		2055.8	0.0149396		2585.8	-0.0092338
465.99	0.06375847		996	0.00825543		1525.99	0.01451362		2056	0.01578027		2586	-0.00918966
466.19	0.0630233		996.2	0.00768437		1526.19	0.01414671		2056.2	0.01560809		2586.2	-0.00943154
466.39	0.06281601		996.4	0.00790197		1526.39	0.01385342		2056.4	0.01524888		2586.4	-0.01017166
466.59	0.0633869		996.6	0.00772832		1526.59	0.01241567		2056.6	0.01439399		2586.6	-0.00941714
466.79	0.06288075		996.8	0.00776656		1526.79	0.01347543		2056.8	0.01529607		2586.8	-0.00874214
466.99	0.062962		997	0.00672704		1526.99	0.01259775		2057	0.01622071		2587	-0.00930093
467.19	0.06262905		997.2	0.00661127		1527.19	0.01299745		2057.2	0.01649368		2587.2	-0.00935157
467.39	0.06265501		997.4	0.00608534		1527.39	0.01412567		2057.4	0.01666613		2587.4	-0.01025052
467.59	0.06188208		997.6	0.00630006		1527.59	0.01491521		2057.6	0.0174671		2587.6	-0.00908999
467.79	0.06203862		997.8	0.00580138		1527.79	0.01511559		2057.8	0.01704738		2587.8	-0.00874453
467.99	0.06111241		998	0.00591966		1527.99	0.01593734		2058	0.01679786		2588	-0.00831713
468.19	0.06085547		998.2	0.00489082		1528.19	0.01637573		2058.2	0.01611369		2588.2	-0.00753303
468.39	0.06041742		998.4	0.00440633		1528.39	0.01645203		2058.4	0.01496838		2588.4	-0.0072509
468.59	0.06014937		998.6	0.0032589		1528.59	0.0163343		2058.6	0.01492736		2588.6	-0.00681039
468.79	0.0595002		998.8	0.00356002		1528.79	0.01644828		2058.8	0.0145487		2588.8	-0.00759296
468.99	0.05999193		999	0.00308891		1528.99	0.01700499		2059	0.01372583		2589	-0.00783506
469.19	0.05993088		999.2	0.00270052		1529.19	0.01754722		2059.2	0.01328093		2589.2	-0.00897198
469.39	0.06053488		999.4	0.00288481		1529.39	0.01700433		2059.4	0.01345888		2589.4	-0.00964202
469.59	0.06031799		999.6	0.00454901		1529.59	0.01648972		2059.6	0.01307504		2589.6	-0.01009488
469.79	0.05995193		999.8	0.00438493		1529.79	0.01660537		2059.8	0.01346539		2589.8	-0.01030137
469.99	0.0603726		1000	0.00388629		1529.99	0.0167846		2060	0.01345234		2590	-0.01132439
470.19	0.06053069		1000.2	0.00348413		1530.19	0.01655246		2060.2	0.01324665		2590.2	-0.01240025
470.39	0.06059545		1000.4	0.0044704		1530.39	0.01684029		2060.4	0.0130693		2590.4	-0.01191357
470.59	0.0610538		1000.6	0.00373227		1530.59	0.0168935		2060.6	0.01287664		2590.6	-0.01165148
470.79	0.06047455		1000.8	0.00370066		1530.79	0.01727276		2060.8	0.01334398		2590.8	-0.0119652
470.99	0.06080383		1001	0.00331572		1530.99	0.01723671		2061	0.0143204		2591	-0.01223389
471.19	0.05998925		1001.2	0.00440913		1531.19	0.01720655		2061.2	0.01451443		2591.2	-0.01170667
471.39	0.06054125		1001.4	0.00527693		1531.39	0.01761128		2061.4	0.0157825		2591.4	-0.01138726
471.59	0.06059961		1001.6	0.00611543		1531.59	0.01725951		2061.6	0.01676005		2591.6	-0.01043372
471.79	0.06086715		1001.8	0.00647601		1531.79	0.01678638		2061.8	0.01718487		2591.8	-0.01079781
471.99	0.05986576		1002	0.00772265		1531.99	0.01638063		2062	0.01748391		2592	-0.0103119
472.19	0.06034107		1002.2	0.00766635		1532.19	0.01696568		2062.2	0.01812601		2592.2	-0.00930074
472.39	0.05963414		1002.4	0.00902668		1532.39	0.0167072		2062.4	0.01778042		2592.4	-0.00835921
472.59	0.06023077		1002.6	0.00958956		1532.59	0.01766569		2062.6	0.01789306		2592.6	-0.00832095
472.79	0.06002823		1002.8	0.01120588		1532.79	0.01719726		2062.8	0.01788373		2592.8	-0.00882774
472.99	0.06101062		1003	0.00997019		1532.99	0.01821339		2063	0.01785592		2593	-0.00934976
473.19	0.06132081		1003.2	0.01048537		1533.19	0.01818811		2063.2	0.01782912		2593.2	-0.01049856
473.39	0.06076156		1003.4	0.01195152		1533.39	0.01718875		2063.4	0.01785974		2593.4	-0.01135018
473.59	0.05987456		1003.6	0.01193004		1533.59	0.0178379		2063.6	0.01709711		2593.6	-0.0110972
473.79	0.06009319		1003.8	0.01116494		1533.79	0.01808843		2063.8	0.01681577		2593.8	-0.01170591
473.99	0.06055546		1004	0.01088067		1533.99	0.01851526		2064	0.01593581		2594	-0.01174135
474.19	0.06107364		1004.2	0.01058871		1534.19	0.01745102		2064.2	0.01518339		2594.2	-0.01145256
474.39	0.06092772		1004.4	0.01075019		1534.39	0.01730633		2064.4	0.01474584		2594.4	-0.01099947
474.59	0.06145332		1004.6	0.00908866		1534.59	0.0154114		2064.6	0.01503421		2594.6	-0.01147224
474.79	0.06158527		1004.8	0.00989949		1534.79	0.01463831		2064.8	0.01503787		2594.8	-0.01150862
474.99	0.06180041		1005	0.00948813		1534.99	0.01406568		2065	0.01551124		2595	-0.01149228
475.19	0.06148296		1005.2	0.00956458		1535.19	0.01335835		2065.2	0.01489433		2595.2	-0.01160678
475.39	0.06209014		1005.4	0.00883477		1535.39	0.01346803		2065.4	0.01579751		2595.4	-0.01136377
475.59	0.06202941		1005.6	0.00870865		1535.59	0.01345174		2065.6	0.01496027		2595.6	-0.01180711
475.79	0.0620022		1005.8	0.00823958		1535.79	0.01379765		2065.8	0.01511919		2595.8	-0.01233632
475.99	0.06248684		1006	0.00818724		1535.99	0.01403532		2066	0.01510256		2596	-0.01102843
476.19	0.06362665		1006.2	0.00771781		1536.19	0.01482161		2066.2	0.01548768		2596.2	-0.00954652
476.39	0.06345006		1006.4	0.00772802		1536.39	0.01378739		2066.4	0.0147568		2596.4	-0.00917781
476.59	0.06448885		1006.6	0.0071045		1536.59	0.01412722		2066.6	0.01452976		2596.6	-0.01075028
476.79	0.06342355		1006.8	0.00686681		1536.79	0.01310656		2066.8	0.01438255		2596.8	-0.01030332
476.99	0.06358374		1007	0.00529091		1536.99	0.0127673		2067	0.014109		2597	-0.01053983
477.19	0.0631478		1007.2	0.00601133		1537.19	0.01242597		2067.2	0.01411978		2597.2	-0.01040413
477.39	0.06264304		1007.4	0.00594539		1537.39	0.01288316		2067.4	0.01472149		2597.4	-0.01044592
477.59	0.06244508		1007.6	0.00560163		1537.59	0.01389014		2067.6	0.01471329		2597.6	-0.00979725
477.79	0.06295389		1007.8	0.00601008		1537.79	0.01415918		2067.8	0.01517487		2597.8	-0.00996701
477.99	0.06354244		1008	0.00542243		1537.99	0.01476303		2068	0.01563542		2598	-0.00887776
478.19	0.06380134		1008.2	0.00577585		1538.19	0.01387625		2068.2	0.01566227		2598.2	-0.00929649
478.39	0.06342208		1008.4	0.00531438		1538.39	0.0138292		2068.4	0.01523242		2598.4	-0.01011257
478.59	0.06277713		1008.6	0.00509832		1538.59	0.01324761		2068.6	0.01472668		2598.6	-0.01073827
478.79	0.06262573		1008.8	0.00557187		1538.79	0.01387701		2068.8	0.01474376		2598.8	-0.01075739
478.99	0.06152299		1009	0.00538458		1538.99	0.01441044		2069	0.0143591		2599	-0.01076599
479.19	0.06091037		1009.2	0.00489756		1539.19	0.01468747		2069.2	0.01457918		2599.2	-0.01031914
479.39	0.05955045		1009.4	0.00487573		1539.39	0.01535743		2069.4	0.0144433		2599.4	-0.01033888
479.59	0.0593846		1009.6	0.00516419		1539.59	0.01652463		2069.6	0.01385038		2599.6	-0.01166999
479.79	0.05937191		1009.8	0.00493079		1539.79	0.01690461		2069.8	0.01466533		2599.8	-0.01099499
479.99	0.05985326		1010	0.00512899		1539.99	0.01661383		2070	0.01499409		2600	-0.00990515
480.19	0.06045274		1010.2	0.0052688		1540.19	0.01647408		2070.2	0.01502809		2600.2	-0.00991357
480.39	0.05936829		1010.4	0.00483281		1540.39	0.01634157		2070.4	0.0151106		2600.4	-0.01055348
480.59	0.0592623		1010.6	0.00494812		1540.59	0.01621083		2070.6	0.01463182		2600.6	-0.01083999
480.79	0.05860901		1010.8	0.00469503		1540.79	0.01566514		2070.8	0.0150265		2600.8	-0.01025506
480.99	0.05930583		1011	0.00480621		1540.99	0.0157695		2071	0.01506616		2601	-0.01098552
481.19	0.05928384		1011.2	0.00517523		1541.19	0.01638275		2071.2	0.01543789		2601.2	-0.0108956
481.39	0.0590863		1011.4	0.00580573		1541.39	0.01681425		2071.4	0.01624785		2601.4	-0.01134877
481.59	0.05935494		1011.6	0.00620307		1541.59	0.01687054		2071.6	0.01623785		2601.6	-0.01063706
481.79	0.05982546		1011.8	0.00598719		1541.79	0.01714914		2071.8	0.01634128		2601.8	-0.01005566
481.99	0.06023242		1012	0.00595211		1541.99	0.01727157		2072	0.0155875		2602	-0.0088914
482.19	0.06029665		1012.2	0.00636731		1542.19	0.01631209		2072.2	0.0144922		2602.2	-0.00952041
482.39	0.06071359		1012.4	0.00606646		1542.39	0.01582856		2072.4	0.01310595		2602.4	-0.00926936
482.59	0.06046926		1012.6	0.00654225		1542.59	0.0151594		2072.6	0.01327976		2602.6	-0.00905492
482.79	0.06101442		1012.8	0.00681686		1542.79	0.0150012		2072.8	0.01397199		2602.8	-0.00866397
482.99	0.06017941		1013	0.00643998		1542.99	0.01461387		2073	0.01384107		2603	-0.0094213
483.19	0.06072334		1013.2	0.0063269		1543.19	0.01467488		2073.2	0.01466873		2603.2	-0.00953875
483.39	0.06066639		1013.4	0.0070308		1543.39	0.01473916		2073.4	0.01387817		2603.4	-0.00988015
483.59	0.06145481		1013.6	0.00764499		1543.59	0.01449559		2073.6	0.01449378		2603.6	-0.00943017
483.79	0.06156238		1013.8	0.00804747		1543.79	0.01399522		2073.8	0.01419269		2603.8	-0.00855094
483.99	0.06242166		1014	0.00807184		1543.99	0.01409877		2074	0.0142452		2604	-0.0089263
484.19	0.06312305		1014.2	0.00780574		1544.19	0.01349375		2074.2	0.0145596		2604.2	-0.00884445
484.39	0.06216902		1014.4	0.00680756		1544.39	0.01285208		2074.4	0.01389334		2604.4	-0.00866953
484.59	0.06196944		1014.6	0.00633335		1544.59	0.01272968		2074.6	0.0129247		2604.6	-0.00918006
484.79	0.06073634		1014.8	0.00583733		1544.79	0.01332591		2074.8	0.01328039		2604.8	-0.00996233
484.99	0.06079935		1015	0.00512588		1544.99	0.01330887		2075	0.01304602		2605	-0.01090301
485.19	0.05989543		1015.2	0.00499723		1545.19	0.01316706		2075.2	0.01344084		2605.2	-0.01105784
485.39	0.059213		1015.4	0.00546857		1545.39	0.01364185		2075.4	0.01343923		2605.4	-0.01100729
485.59	0.05928278		1015.6	0.00612613		1545.59	0.01396535		2075.6	0.01370988		2605.6	-0.01051795
485.79	0.05870133		1015.8	0.0064596		1545.79	0.01515389		2075.8	0.01327384		2605.8	-0.00979783
485.99	0.05805061		1016	0.00630927		1545.99	0.0153771		2076	0.01348537		2606	-0.00931103
486.19	0.05782059		1016.2	0.00640382		1546.19	0.01520903		2076.2	0.01392558		2606.2	-0.00984736
486.39	0.05785453		1016.4	0.00713335		1546.39	0.01534503		2076.4	0.01450094		2606.4	-0.01010308
486.59	0.05690827		1016.6	0.00658201		1546.59	0.01536904		2076.6	0.01616542		2606.6	-0.01106167
486.79	0.05630817		1016.8	0.00685368		1546.79	0.01572199		2076.8	0.01675689		2606.8	-0.0112346
486.99	0.05587541		1017	0.00642192		1546.99	0.01525832		2077	0.01776948		2607	-0.01194269
487.19	0.05539098		1017.2	0.00690928		1547.19	0.0158926		2077.2	0.01761121		2607.2	-0.01200698
487.39	0.05535086		1017.4	0.00726865		1547.39	0.015515		2077.4	0.0177179		2607.4	-0.01233547
487.59	0.05541896		1017.6	0.00699755		1547.59	0.01488556		2077.6	0.01750724		2607.6	-0.0117986
487.79	0.05493253		1017.8	0.00730739		1547.79	0.01417613		2077.8	0.01699621		2607.8	-0.01182378
487.99	0.05665754		1018	0.0067056		1547.99	0.0138463		2078	0.01748399		2608	-0.01093556
488.19	0.05703477		1018.2	0.00609826		1548.19	0.0124452		2078.2	0.01714253		2608.2	-0.01032319
488.39	0.05722131		1018.4	0.00565949		1548.39	0.01227497		2078.4	0.01594584		2608.4	-0.0097808
488.59	0.05743327		1018.6	0.00580176		1548.59	0.01235669		2078.6	0.01527704		2608.6	-0.01003215
488.79	0.05792496		1018.8	0.00601878		1548.79	0.01195877		2078.8	0.01565661		2608.8	-0.01015865
488.99	0.05899184		1019	0.00627667		1548.99	0.01151285		2079	0.01569647		2609	-0.00969114
489.19	0.05967143		1019.2	0.00769572		1549.19	0.01156441		2079.2	0.01465227		2609.2	-0.00970753
489.39	0.06013035		1019.4	0.00864234		1549.39	0.01174426		2079.4	0.01458244		2609.4	-0.0087702
489.59	0.06073413		1019.6	0.00985853		1549.59	0.01240136		2079.6	0.01456535		2609.6	-0.00973792
489.79	0.06074816		1019.8	0.01023775		1549.79	0.01265396		2079.8	0.01410929		2609.8	-0.00902185
489.99	0.06083741		1020	0.01026008		1549.99	0.01336377		2080	0.01408269		2610	-0.00970028
490.19	0.06188968		1020.2	0.00965654		1550.19	0.01366647		2080.2	0.01366668		2610.2	-0.01011949
490.39	0.0615905		1020.4	0.01016801		1550.39	0.01373155		2080.4	0.01428776		2610.4	-0.01081055
490.59	0.06123319		1020.6	0.00966749		1550.59	0.01421754		2080.6	0.01471353		2610.6	-0.01131061
490.79	0.06045793		1020.8	0.00936775		1550.79	0.01580277		2080.8	0.0145089		2610.8	-0.01120598
490.99	0.05920232		1021	0.00919814		1550.99	0.0165246		2081	0.01480089		2611	-0.01162463
491.19	0.05800462		1021.2	0.00913334		1551.19	0.01754128		2081.2	0.01408518		2611.2	-0.01173686
491.39	0.0572777		1021.4	0.00864127		1551.39	0.01734082		2081.4	0.0145675		2611.4	-0.01136292
491.59	0.05674437		1021.6	0.0088405		1551.59	0.01729805		2081.6	0.01411192		2611.6	-0.0111025
491.79	0.05593065		1021.8	0.0091248		1551.79	0.01664287		2081.8	0.01464146		2611.8	-0.01161595
491.99	0.05641549		1022	0.00832248		1551.99	0.01605843		2082	0.01490387		2612	-0.01105263
492.19	0.05535787		1022.2	0.00870239		1552.19	0.01532698		2082.2	0.01433137		2612.2	-0.01119062
492.39	0.05489456		1022.4	0.00896635		1552.39	0.01569761		2082.4	0.01437314		2612.4	-0.01064806
492.59	0.05407834		1022.6	0.00933686		1552.59	0.01449362		2082.6	0.01461621		2612.6	-0.01068091
492.79	0.05391294		1022.8	0.00946142		1552.79	0.01464145		2082.8	0.01562507		2612.8	-0.01045123
492.99	0.05371821		1023	0.01000239		1552.99	0.01323321		2083	0.01591491		2613	-0.01076628
493.19	0.05418054		1023.2	0.00951084		1553.19	0.01269174		2083.2	0.01566573		2613.2	-0.01044644
493.39	0.05393031		1023.4	0.00889715		1553.39	0.01154054		2083.4	0.01640548		2613.4	-0.01075156
493.59	0.05408565		1023.6	0.0089803		1553.59	0.01114163		2083.6	0.01633039		2613.6	-0.0121892
493.79	0.05426933		1023.8	0.00923938		1553.79	0.01147876		2083.8	0.01611148		2613.8	-0.01107635
493.99	0.05533971		1024	0.0080072		1553.99	0.01317428		2084	0.01603585		2614	-0.01180229
494.19	0.05649101		1024.2	0.00729384		1554.19	0.01290785		2084.2	0.01619621		2614.2	-0.01068714
494.39	0.05559715		1024.4	0.00767379		1554.39	0.01272228		2084.4	0.01626863		2614.4	-0.00962387
494.59	0.05593957		1024.6	0.00704677		1554.59	0.01398591		2084.6	0.01582502		2614.6	-0.0090849
494.79	0.05543942		1024.8	0.00598829		1554.79	0.01455394		2084.8	0.01484118		2614.8	-0.00849515
494.99	0.0557364		1025	0.00599171		1554.99	0.01473977		2085	0.01518121		2615	-0.00811713
495.19	0.05642653		1025.2	0.00554611		1555.19	0.01457141		2085.2	0.01476321		2615.2	-0.00741737
495.39	0.05678209		1025.4	0.00513612		1555.39	0.01480216		2085.4	0.01484432		2615.4	-0.00752853
495.59	0.05763335		1025.6	0.00608983		1555.59	0.0147226		2085.6	0.01529052		2615.6	-0.00924712
495.79	0.05723142		1025.8	0.00581562		1555.79	0.01381073		2085.8	0.01558413		2615.8	-0.0098086
495.99	0.05652043		1026	0.00566383		1555.99	0.01309153		2086	0.01559213		2616	-0.00934289
496.19	0.0554396		1026.2	0.00611572		1556.19	0.01286176		2086.2	0.01459112		2616.2	-0.0100766
496.39	0.05485405		1026.4	0.00622276		1556.39	0.01274202		2086.4	0.01506289		2616.4	-0.01038383
496.59	0.05482615		1026.6	0.00640004		1556.59	0.01194235		2086.6	0.01489045		2616.6	-0.01115475
496.79	0.05484774		1026.8	0.0068524		1556.79	0.0115235		2086.8	0.01541433		2616.8	-0.01253774
496.99	0.05492808		1027	0.00675378		1556.99	0.01054411		2087	0.01525162		2617	-0.01297061
497.19	0.05457273		1027.2	0.00612586		1557.19	0.0102121		2087.2	0.01503073		2617.2	-0.01380131
497.39	0.05455585		1027.4	0.00630956		1557.39	0.01021412		2087.4	0.01435066		2617.4	-0.01442954
497.59	0.05357167		1027.6	0.00685611		1557.59	0.01036213		2087.6	0.01470354		2617.6	-0.01440174
497.79	0.05377944		1027.8	0.00710802		1557.79	0.01093662		2087.8	0.01516554		2617.8	-0.01329323
497.99	0.05416151		1028	0.00690887		1557.99	0.0116236		2088	0.01581659		2618	-0.0131724
498.19	0.05386105		1028.2	0.00799145		1558.19	0.01153487		2088.2	0.01567191		2618.2	-0.01186891
498.39	0.05287014		1028.4	0.00840221		1558.39	0.01164953		2088.4	0.01578489		2618.4	-0.01058806
498.59	0.05297226		1028.6	0.00817837		1558.59	0.01284713		2088.6	0.01606559		2618.6	-0.01015895
498.79	0.0530256		1028.8	0.00794415		1558.79	0.01332353		2088.8	0.01558447		2618.8	-0.00957768
498.99	0.05325339		1029	0.00802547		1558.99	0.01443503		2089	0.01657116		2619	-0.00934066
499.19	0.05383833		1029.2	0.00880458		1559.19	0.0153707		2089.2	0.01656418		2619.2	-0.00881899
499.39	0.05447877		1029.4	0.00957717		1559.39	0.01672018		2089.4	0.01652241		2619.4	-0.00935338
499.59	0.05433002		1029.6	0.01007023		1559.59	0.01667271		2089.6	0.01641807		2619.6	-0.00989253
499.79	0.05356722		1029.8	0.01064689		1559.79	0.01659548		2089.8	0.01602817		2619.8	-0.00993726
499.99	0.05343915		1030	0.01034028		1559.99	0.01685852		2090	0.01511351		2620	-0.00999322
500.19	0.05319472		1030.2	0.0097008		1560.19	0.0164143		2090.2	0.01416805		2620.2	-0.01111903
500.39	0.05336272		1030.4	0.00941542		1560.39	0.01580558		2090.4	0.0143217		2620.4	-0.01121336
500.59	0.05410543		1030.6	0.00882894		1560.59	0.01603154		2090.6	0.01393765		2620.6	-0.01276203
500.79	0.05405576		1030.8	0.00878685		1560.79	0.01486183		2090.8	0.01384711		2620.8	-0.01370789
500.99	0.05408552		1031	0.00799118		1560.99	0.01448193		2091	0.0131739		2621	-0.01458765
501.19	0.05345502		1031.2	0.00712052		1561.19	0.01334209		2091.2	0.01320996		2621.2	-0.01545505
501.39	0.05424662		1031.4	0.00725078		1561.39	0.01309014		2091.4	0.01273394		2621.4	-0.01532091
501.59	0.05439363		1031.6	0.00709507		1561.59	0.01171775		2091.6	0.01332516		2621.6	-0.01608327
501.79	0.05532232		1031.8	0.00721998		1561.79	0.01201635		2091.8	0.01396231		2621.8	-0.01601753
501.99	0.05535669		1032	0.00789661		1561.99	0.01234417		2092	0.0144801		2622	-0.01598304
502.19	0.05576976		1032.2	0.00776813		1562.19	0.01237278		2092.2	0.01408138		2622.2	-0.01525551
502.39	0.05420228		1032.4	0.00779085		1562.39	0.01297439		2092.4	0.01390342		2622.4	-0.01414948
502.59	0.05327762		1032.6	0.00743993		1562.59	0.0125726		2092.6	0.01346411		2622.6	-0.01395943
502.79	0.05304961		1032.8	0.00814905		1562.79	0.01237758		2092.8	0.0137735		2622.8	-0.0139771
502.99	0.05211155		1033	0.00823634		1562.99	0.01285061		2093	0.01339326		2623	-0.01301792
503.19	0.05262101		1033.2	0.00968924		1563.19	0.01437272		2093.2	0.01369433		2623.2	-0.0118379
503.39	0.05276041		1033.4	0.00957896		1563.39	0.01483433		2093.4	0.01340884		2623.4	-0.01124427
503.59	0.05275692		1033.6	0.00985536		1563.59	0.01491403		2093.6	0.01351028		2623.6	-0.01069218
503.79	0.05297447		1033.8	0.01055447		1563.79	0.01528382		2093.8	0.01340095		2623.8	-0.01053567
503.99	0.05236776		1034	0.00998821		1563.99	0.01540812		2094	0.01295175		2624	-0.00974094
504.19	0.05236293		1034.2	0.00943835		1564.19	0.01492031		2094.2	0.01394838		2624.2	-0.00995957
504.39	0.05317046		1034.4	0.00934173		1564.39	0.01557433		2094.4	0.01441888		2624.4	-0.01014387
504.59	0.05363134		1034.6	0.00940179		1564.59	0.01621935		2094.6	0.01422424		2624.6	-0.01048271
504.79	0.05362056		1034.8	0.00963821		1564.79	0.0157167		2094.8	0.01407555		2624.8	-0.00946084
504.99	0.05447012		1035	0.00942549		1564.99	0.01581605		2095	0.01459877		2625	-0.01026566
505.19	0.05502026		1035.2	0.00907891		1565.19	0.01513473		2095.2	0.01534448		2625.2	-0.01014495
505.39	0.05579372		1035.4	0.00951462		1565.39	0.01482469		2095.4	0.01496844		2625.4	-0.01003008
505.59	0.0553952		1035.6	0.00952289		1565.59	0.01486335		2095.6	0.01465767		2625.6	-0.00980191
505.79	0.05511557		1035.8	0.00963784		1565.79	0.01504907		2095.8	0.01531874		2625.8	-0.00981672
505.99	0.05507394		1036	0.0096874		1565.99	0.01473016		2096	0.01425328		2626	-0.0099845
506.19	0.05460192		1036.2	0.00961181		1566.19	0.01371068		2096.2	0.01371642		2626.2	-0.00960569
506.39	0.05155933		1036.4	0.00988999		1566.39	0.013825		2096.4	0.0131412		2626.4	-0.01043802
506.59	0.05122621		1036.6	0.00997133		1566.59	0.01268633		2096.6	0.01347407		2626.6	-0.0109686
506.79	0.05122254		1036.8	0.00962383		1566.79	0.01310787		2096.8	0.01377289		2626.8	-0.0112593
506.99	0.05071599		1037	0.00957582		1566.99	0.01338422		2097	0.01363864		2627	-0.01065442
507.19	0.05100314		1037.2	0.01000781		1567.19	0.01365388		2097.2	0.01378784		2627.2	-0.01064205
507.39	0.05177149		1037.4	0.0094867		1567.39	0.01365916		2097.4	0.01329277		2627.4	-0.01032793
507.59	0.05225915		1037.6	0.00988578		1567.59	0.01293581		2097.6	0.01356509		2627.6	-0.01051098
507.79	0.05195632		1037.8	0.00891162		1567.79	0.01196061		2097.8	0.01348194		2627.8	-0.01094643
507.99	0.05152479		1038	0.00864305		1567.99	0.01233731		2098	0.01331967		2628	-0.01153586
508.19	0.05246342		1038.2	0.00833794		1568.19	0.01239072		2098.2	0.01435437		2628.2	-0.01184404
508.39	0.05340406		1038.4	0.00845533		1568.39	0.01252389		2098.4	0.01426275		2628.4	-0.01235368
508.59	0.05369225		1038.6	0.00876177		1568.59	0.0125436		2098.6	0.01407677		2628.6	-0.01192825
508.79	0.05408638		1038.8	0.00862795		1568.79	0.01233835		2098.8	0.0148768		2628.8	-0.01158752
508.99	0.05475824		1039	0.00788748		1568.99	0.01191358		2099	0.01555283		2629	-0.01234351
509.19	0.05433164		1039.2	0.00805671		1569.19	0.0121426		2099.2	0.0151899		2629.2	-0.01135143
509.39	0.05334442		1039.4	0.00898282		1569.39	0.01205052		2099.4	0.01451555		2629.4	-0.01096063
509.59	0.05220603		1039.6	0.00896075		1569.59	0.01243221		2099.6	0.01409255		2629.6	-0.01181663
509.79	0.05202179		1039.8	0.00822911		1569.79	0.01229151		2099.8	0.01449479		2629.8	-0.01222768
509.99	0.05236529		1040	0.00809866		1569.99	0.01269626		2100	0.0134771		2630	-0.01286981
510.19	0.05203946		1040.2	0.00764442		1570.19	0.0123055		2100.2	0.01411003		2630.2	-0.01294992
510.39	0.05133955		1040.4	0.00650387		1570.39	0.01300291		2100.4	0.01334417		2630.4	-0.01463687
510.59	0.05192793		1040.6	0.00597474		1570.59	0.01297521		2100.6	0.01305247		2630.6	-0.01399967
510.79	0.05213365		1040.8	0.00511196		1570.79	0.01349113		2100.8	0.01304501		2630.8	-0.01411241
510.99	0.05154488		1041	0.0052339		1570.99	0.01371867		2101	0.01267294		2631	-0.01385844
511.19	0.05099789		1041.2	0.00526658		1571.19	0.01392804		2101.2	0.01259495		2631.2	-0.01379065
511.39	0.05174358		1041.4	0.00533561		1571.39	0.01344179		2101.4	0.01206352		2631.4	-0.01295803
511.59	0.0521432		1041.6	0.00511898		1571.59	0.01271064		2101.6	0.01264081		2631.6	-0.01310432
511.79	0.05181436		1041.8	0.00470703		1571.79	0.01351461		2101.8	0.01293765		2631.8	-0.01291055
511.99	0.05095757		1042	0.00464747		1571.99	0.01489225		2102	0.01382993		2632	-0.01300946
512.19	0.05162622		1042.2	0.00470017		1572.19	0.01478103		2102.2	0.01488685		2632.2	-0.01235687
512.39	0.05167005		1042.4	0.00478121		1572.39	0.01461782		2102.4	0.01522759		2632.4	-0.01304116
512.59	0.05137335		1042.6	0.00498064		1572.59	0.01422398		2102.6	0.01492489		2632.6	-0.01319766
512.79	0.05137783		1042.8	0.00472574		1572.79	0.01367283		2102.8	0.0156003		2632.8	-0.01193167
512.99	0.05152475		1043	0.00512755		1572.99	0.0137066		2103	0.01548765		2633	-0.01216987
513.19	0.0511278		1043.2	0.00619553		1573.19	0.01435884		2103.2	0.01545056		2633.2	-0.01215907
513.39	0.05075894		1043.4	0.00663252		1573.39	0.01345957		2103.4	0.01532078		2633.4	-0.01220783
513.59	0.05096587		1043.6	0.00637765		1573.59	0.01329524		2103.6	0.01563734		2633.6	-0.01250712
513.79	0.05216367		1043.8	0.00642182		1573.79	0.01274178		2103.8	0.01498414		2633.8	-0.01253387
513.99	0.05343438		1044	0.00695735		1573.99	0.01314683		2104	0.014954		2634	-0.01245087
514.19	0.0537588		1044.2	0.0068323		1574.19	0.01231654		2104.2	0.01502855		2634.2	-0.01302766
514.39	0.05397141		1044.4	0.00629879		1574.39	0.01227374		2104.4	0.01395516		2634.4	-0.01300602
514.59	0.05412055		1044.6	0.00624845		1574.59	0.01251177		2104.6	0.01304133		2634.6	-0.01252202
514.79	0.05437411		1044.8	0.00642012		1574.79	0.01172791		2104.8	0.01306659		2634.8	-0.01253434
514.99	0.05333927		1045	0.00707965		1574.99	0.01121747		2105	0.01195694		2635	-0.01242746
515.19	0.05263114		1045.2	0.0081379		1575.19	0.0113586		2105.2	0.01191392		2635.2	-0.01204455
515.39	0.0531232		1045.4	0.00838249		1575.39	0.01122843		2105.4	0.01166613		2635.4	-0.01110927
515.59	0.05276756		1045.6	0.00880197		1575.59	0.01189096		2105.6	0.0120593		2635.6	-0.01165796
515.79	0.05238406		1045.8	0.00813431		1575.79	0.01236423		2105.8	0.01261422		2635.8	-0.01146675
515.99	0.05182879		1046	0.00789758		1575.99	0.01283227		2106	0.01291446		2636	-0.01181047
516.19	0.05253459		1046.2	0.00834685		1576.19	0.01214718		2106.2	0.01226797		2636.2	-0.01169381
516.39	0.05212618		1046.4	0.00770906		1576.39	0.01180298		2106.4	0.01195182		2636.4	-0.01119096
516.59	0.05203489		1046.6	0.00750366		1576.59	0.01171466		2106.6	0.01169376		2636.6	-0.01169376
516.79	0.05197308		1046.8	0.00718744		1576.79	0.01147807		2106.8	0.01247742		2636.8	-0.01116008
516.99	0.05203884		1047	0.00705429		1576.99	0.01127809		2107	0.01251932		2637	-0.01182038
517.19	0.05174142		1047.2	0.00660091		1577.19	0.01075355		2107.2	0.01232493		2637.2	-0.01200373
517.39	0.05190592		1047.4	0.0060337		1577.39	0.01018852		2107.4	0.01224246		2637.4	-0.01167411
517.59	0.05197534		1047.6	0.00636325		1577.59	0.01055909		2107.6	0.0126278		2637.6	-0.01220891
517.79	0.051958		1047.8	0.00614377		1577.79	0.01117535		2107.8	0.01249347		2637.8	-0.01224447
517.99	0.0520025		1048	0.00530406		1577.99	0.01189605		2108	0.01342751		2638	-0.01252884
518.19	0.05171481		1048.2	0.00455338		1578.19	0.01182934		2108.2	0.01309945		2638.2	-0.01354848
518.39	0.05236336		1048.4	0.00355202		1578.39	0.01229662		2108.4	0.01274461		2638.4	-0.01337694
518.59	0.05234789		1048.6	0.00388234		1578.59	0.01155988		2108.6	0.01286212		2638.6	-0.01368969
518.79	0.05202146		1048.8	0.00405946		1578.79	0.01100798		2108.8	0.01268042		2638.8	-0.01285302
518.99	0.05152647		1049	0.00453721		1578.99	0.01186359		2109	0.01288817		2639	-0.01308356
519.19	0.05119119		1049.2	0.00528775		1579.19	0.0125118		2109.2	0.01322773		2639.2	-0.01311517
519.39	0.05134223		1049.4	0.00479002		1579.39	0.01258741		2109.4	0.01417384		2639.4	-0.01343304
519.59	0.05145282		1049.6	0.00472074		1579.59	0.01343683		2109.6	0.01463106		2639.6	-0.0132347
519.79	0.05169866		1049.8	0.00424217		1579.79	0.01363917		2109.8	0.01524803		2639.8	-0.01283874
519.99	0.05133819		1050	0.00486247		1579.99	0.01444743		2110	0.01532895		2640	-0.01248454
520.19	0.05202577		1050.2	0.00533046		1580.19	0.01451679		2110.2	0.01512933		2640.2	-0.01255992
520.39	0.05250009		1050.4	0.00466733		1580.39	0.01395844		2110.4	0.01483015		2640.4	-0.01210267
520.59	0.05291821		1050.6	0.00490753		1580.59	0.0136763		2110.6	0.01516161		2640.6	-0.01286892
520.79	0.05336398		1050.8	0.00476168		1580.79	0.01310766		2110.8	0.01547631		2640.8	-0.01214178
520.99	0.05256605		1051	0.00553618		1580.99	0.01299777		2111	0.01569786		2641	-0.01195542
521.19	0.05233012		1051.2	0.00543478		1581.19	0.01275037		2111.2	0.01548644		2641.2	-0.01223568
521.39	0.05204245		1051.4	0.00591245		1581.39	0.01364351		2111.4	0.01606675		2641.4	-0.01198136
521.59	0.05125515		1051.6	0.00685648		1581.59	0.01377366		2111.6	0.01576276		2641.6	-0.0127005
521.79	0.05086901		1051.8	0.00735552		1581.79	0.01371333		2111.8	0.01590286		2641.8	-0.01277651
521.99	0.05094897		1052	0.00720208		1581.99	0.01373378		2112	0.01612421		2642	-0.0130291
522.19	0.0506306		1052.2	0.00663546		1582.19	0.01413242		2112.2	0.01595985		2642.2	-0.0122096
522.39	0.05036564		1052.4	0.00684808		1582.39	0.01487891		2112.4	0.01517779		2642.4	-0.01174517
522.59	0.05001506		1052.6	0.0071975		1582.59	0.01517791		2112.6	0.0153067		2642.6	-0.01100444
522.79	0.05005734		1052.8	0.00647321		1582.79	0.01514598		2112.8	0.01503958		2642.8	-0.01005711
522.99	0.04956981		1053	0.00639643		1582.99	0.01488968		2113	0.01527804		2643	-0.01057191
523.19	0.0484793		1053.2	0.0054974		1583.19	0.01472785		2113.2	0.01532669		2643.2	-0.0106876
523.39	0.04823833		1053.4	0.00483262		1583.39	0.01467031		2113.4	0.01555264		2643.4	-0.01057415
523.59	0.04862047		1053.6	0.00435086		1583.59	0.01423337		2113.6	0.01524606		2643.6	-0.00976694
523.79	0.04834831		1053.8	0.00399089		1583.79	0.01401051		2113.8	0.01526088		2643.8	-0.01083741
523.99	0.04791493		1054	0.00372163		1583.99	0.01425384		2114	0.01513469		2644	-0.01166065
524.19	0.04940359		1054.2	0.00414512		1584.19	0.01430491		2114.2	0.01521669		2644.2	-0.01178489
524.39	0.04986254		1054.4	0.00387589		1584.39	0.01332383		2114.4	0.01498424		2644.4	-0.01241756
524.59	0.0502206		1054.6	0.00389205		1584.59	0.01411346		2114.6	0.01566282		2644.6	-0.01200947
524.79	0.05004118		1054.8	0.00364346		1584.79	0.0139842		2114.8	0.01591331		2644.8	-0.01221851
524.99	0.04966458		1055	0.00445527		1584.99	0.01386087		2115	0.01575098		2645	-0.01219335
525.19	0.05069183		1055.2	0.00406608		1585.19	0.0144613		2115.2	0.01535663		2645.2	-0.01170697
525.39	0.05089639		1055.4	0.00461651		1585.39	0.01429841		2115.4	0.01514454		2645.4	-0.01211352
525.59	0.05009517		1055.6	0.00527478		1585.59	0.01317493		2115.6	0.01523438		2645.6	-0.01234987
525.79	0.04982617		1055.8	0.00509525		1585.79	0.01257441		2115.8	0.01564285		2645.8	-0.01196484
525.99	0.04996992		1056	0.00454893		1585.99	0.01294639		2116	0.01491153		2646	-0.01163174
526.19	0.0499055		1056.2	0.0046375		1586.19	0.01341651		2116.2	0.01473218		2646.2	-0.01107776
526.39	0.04957421		1056.4	0.00612905		1586.39	0.01414266		2116.4	0.01471264		2646.4	-0.01141983
526.59	0.0510062		1056.6	0.00633948		1586.59	0.01361523		2116.6	0.01550989		2646.6	-0.01097448
526.79	0.05098195		1056.8	0.0065763		1586.79	0.01265334		2116.8	0.01552965		2646.8	-0.01096005
526.99	0.05044708		1057	0.00609096		1586.99	0.01234369		2117	0.01516506		2647	-0.01151075
527.19	0.04964886		1057.2	0.0060723		1587.19	0.01210947		2117.2	0.01516789		2647.2	-0.01142416
527.39	0.04978037		1057.4	0.00662175		1587.39	0.01211451		2117.4	0.01497086		2647.4	-0.01096915
527.59	0.04986771		1057.6	0.00585735		1587.59	0.0113272		2117.6	0.01455183		2647.6	-0.01077637
527.79	0.04975322		1057.8	0.00583658		1587.79	0.01214598		2117.8	0.01488197		2647.8	-0.01190905
527.99	0.04957252		1058	0.00617569		1587.99	0.01238336		2118	0.01481326		2648	-0.01203196
528.19	0.05095086		1058.2	0.00657777		1588.19	0.01247984		2118.2	0.01475178		2648.2	-0.01198402
528.39	0.05076409		1058.4	0.00657944		1588.39	0.01275455		2118.4	0.01421059		2648.4	-0.01270459
528.59	0.05151355		1058.6	0.00595091		1588.59	0.01302317		2118.6	0.01382172		2648.6	-0.01236844
528.79	0.05193227		1058.8	0.00582946		1588.79	0.01281566		2118.8	0.01389482		2648.8	-0.01242659
528.99	0.05294371		1059	0.00553488		1588.99	0.01277732		2119	0.0141416		2649	-0.01124118
529.19	0.0525703		1059.2	0.00531209		1589.19	0.01300758		2119.2	0.01459522		2649.2	-0.01085428
529.39	0.05240759		1059.4	0.00499231		1589.39	0.01316293		2119.4	0.01473247		2649.4	-0.01141213
529.59	0.05181298		1059.6	0.00495371		1589.59	0.01360055		2119.6	0.0153893		2649.6	-0.01102211
529.79	0.05211091		1059.8	0.00452002		1589.79	0.01401194		2119.8	0.01528617		2649.8	-0.0108655
529.99	0.05253879		1060	0.0052922		1589.99	0.01443983		2120	0.01436383		2650	-0.01067486
530.19	0.05373774		1060.2	0.0060502		1590.19	0.0144794		2120.2	0.01443711		2650.2	-0.01048126
530.39	0.05315609		1060.4	0.00682755		1590.39	0.01426141		2120.4	0.01498771		2650.4	-0.01058572
530.59	0.05315219		1060.6	0.00706484		1590.59	0.01377209		2120.6	0.01501905		2650.6	-0.00942083
530.79	0.05210121		1060.8	0.00690248		1590.79	0.01388766		2120.8	0.01501534		2650.8	-0.00941506
530.99	0.05062566		1061	0.00645567		1590.99	0.01392242		2121	0.01417464		2651	-0.0091473
531.19	0.04968598		1061.2	0.00742886		1591.19	0.01369721		2121.2	0.01388822		2651.2	-0.00936693
531.39	0.04998482		1061.4	0.00843347		1591.39	0.01422054		2121.4	0.01301574		2651.4	-0.0093686
531.59	0.04956861		1061.6	0.00828023		1591.59	0.01371667		2121.6	0.01237004		2651.6	-0.01008053
531.79	0.04927266		1061.8	0.00850271		1591.79	0.01401485		2121.8	0.01199427		2651.8	-0.01142741
531.99	0.04872753		1062	0.00864589		1591.99	0.01383096		2122	0.01201746		2652	-0.01209808
532.19	0.04821209		1062.2	0.00805806		1592.19	0.01341148		2122.2	0.01150291		2652.2	-0.01278454
532.39	0.04825328		1062.4	0.00793647		1592.39	0.01461151		2122.4	0.01094661		2652.4	-0.01251602
532.59	0.04932106		1062.6	0.00705725		1592.59	0.01373051		2122.6	0.01115343		2652.6	-0.01262193
532.79	0.04957658		1062.8	0.00604712		1592.79	0.01394055		2122.8	0.01252974		2652.8	-0.01219334
532.99	0.0493813		1063	0.00578362		1592.99	0.01430922		2123	0.01315254		2653	-0.01248788
533.19	0.04815402		1063.2	0.00483011		1593.19	0.01516984		2123.2	0.01350466		2653.2	-0.01253681
533.39	0.04873365		1063.4	0.00350417		1593.39	0.01593509		2123.4	0.01392696		2653.4	-0.01254492
533.59	0.04826226		1063.6	0.0028292		1593.59	0.01588173		2123.6	0.0141856		2653.6	-0.01208272
533.79	0.04786575		1063.8	0.00249036		1593.79	0.01615609		2123.8	0.01392938		2653.8	-0.01081831
533.99	0.04812276		1064	0.00163609		1593.99	0.01502265		2124	0.01385251		2654	-0.01000255
534.19	0.04882468		1064.2	0.00111456		1594.19	0.01416547		2124.2	0.01380377		2654.2	-0.0095952
534.39	0.04777275		1064.4	0.00108833		1594.39	0.01428652		2124.4	0.01482969		2654.4	-0.00903199
534.59	0.04813389		1064.6	0.00176584		1594.59	0.01466		2124.6	0.01538119		2654.6	-0.00884422
534.79	0.04894615		1064.8	0.00236506		1594.79	0.01423275		2124.8	0.01562787		2654.8	-0.00989834
534.99	0.04889286		1065	0.00332834		1594.99	0.0143098		2125	0.01578172		2655	-0.00980669
535.19	0.04927971		1065.2	0.00486962		1595.19	0.01441725		2125.2	0.01581814		2655.2	-0.01032637
535.39	0.04940155		1065.4	0.00545054		1595.39	0.01422215		2125.4	0.01522885		2655.4	-0.01004371
535.59	0.04813865		1065.6	0.00580771		1595.59	0.01418469		2125.6	0.01530335		2655.6	-0.0103137
535.79	0.04769606		1065.8	0.00502603		1595.79	0.01349938		2125.8	0.01519484		2655.8	-0.01067477
535.99	0.04713184		1066	0.00478416		1595.99	0.01314572		2126	0.0153337		2656	-0.01125814
536.19	0.04698947		1066.2	0.00463473		1596.19	0.01314333		2126.2	0.0153111		2656.2	-0.01078464
536.39	0.04795578		1066.4	0.00486439		1596.39	0.01319331		2126.4	0.01510737		2656.4	-0.01095491
536.59	0.04801147		1066.6	0.0047578		1596.59	0.01213736		2126.6	0.01546905		2656.6	-0.01128375
536.79	0.04696235		1066.8	0.00452395		1596.79	0.0120497		2126.8	0.0152758		2656.8	-0.01189361
536.99	0.04596158		1067	0.00537163		1596.99	0.01248459		2127	0.01502265		2657	-0.01191379
537.19	0.04492339		1067.2	0.00486604		1597.19	0.01239347		2127.2	0.01475403		2657.2	-0.01175516
537.39	0.0453237		1067.4	0.00475107		1597.39	0.01257154		2127.4	0.01511907		2657.4	-0.01254877
537.59	0.04404444		1067.6	0.00496614		1597.59	0.01274185		2127.6	0.01374045		2657.6	-0.01263615
537.79	0.04392652		1067.8	0.00475591		1597.79	0.01310398		2127.8	0.01283437		2657.8	-0.01144578
537.99	0.04512097		1068	0.00404496		1597.99	0.01228611		2128	0.01259107		2658	-0.01117483
538.19	0.04597202		1068.2	0.00444131		1598.19	0.01243465		2128.2	0.01214605		2658.2	-0.01179356
538.39	0.04636354		1068.4	0.0048779		1598.39	0.01376184		2128.4	0.01236401		2658.4	-0.01211449
538.59	0.04726576		1068.6	0.00620729		1598.59	0.01370894		2128.6	0.01284949		2658.6	-0.01244567
538.79	0.04757928		1068.8	0.00651537		1598.79	0.01349939		2128.8	0.01288979		2658.8	-0.01207935
538.99	0.0469836		1069	0.00646068		1598.99	0.01487309		2129	0.01275761		2659	-0.01093818
539.19	0.04581451		1069.2	0.00668278		1599.19	0.0152986		2129.2	0.01238559		2659.2	-0.01075071
539.39	0.0453294		1069.4	0.00674748		1599.39	0.01537945		2129.4	0.01271536		2659.4	-0.01014132
539.59	0.0451268		1069.6	0.00617095		1599.59	0.0165781		2129.6	0.01237698		2659.6	-0.01027091
539.79	0.04509075		1069.8	0.0049295		1599.79	0.01593416		2129.8	0.0134384		2659.8	-0.00978114
539.99	0.04569175		1070	0.00561808		1599.99	0.01561683		2130	0.01375406		2660	-0.01008707
540.19	0.04653539		1070.2	0.00575237		1600.19	0.01559964		2130.2	0.01383271		2660.2	-0.00888402
540.39	0.04706567		1070.4	0.00597177		1600.39	0.0148327		2130.4	0.01341437		2660.4	-0.00944429
540.59	0.04748088		1070.6	0.00571763		1600.59	0.01540628		2130.6	0.01313623		2660.6	-0.00924308
540.79	0.0471532		1070.8	0.00586035		1600.79	0.01532506		2130.8	0.01255836		2660.8	-0.00970377
540.99	0.04742818		1071	0.00631712		1600.99	0.0155161		2131	0.01354855		2661	-0.01031793
541.19	0.04768511		1071.2	0.00662224		1601.19	0.01553109		2131.2	0.01387318		2661.2	-0.01083244
541.39	0.0483765		1071.4	0.00586709		1601.39	0.01484646		2131.4	0.01322625		2661.4	-0.01168382
541.59	0.04801735		1071.6	0.00562581		1601.59	0.01379266		2131.6	0.01167259		2661.6	-0.01154401
541.79	0.04837505		1071.8	0.00531998		1601.79	0.01332137		2131.8	0.0113356		2661.8	-0.01120725
541.99	0.04875495		1072	0.00539602		1601.99	0.01323006		2132	0.01128219		2662	-0.01191222
542.19	0.04817437		1072.2	0.0052049		1602.19	0.01293768		2132.2	0.01096003		2662.2	-0.01203417
542.39	0.04778078		1072.4	0.00464848		1602.39	0.01329238		2132.4	0.0114797		2662.4	-0.01250348
542.59	0.04687855		1072.6	0.00422745		1602.59	0.01273892		2132.6	0.01204436		2662.6	-0.01240226
542.79	0.04575182		1072.8	0.00362051		1602.79	0.01318091		2132.8	0.01225231		2662.8	-0.01305463
542.99	0.0445927		1073	0.00377659		1602.99	0.01359802		2133	0.01257498		2663	-0.01290397
543.19	0.04420685		1073.2	0.00459085		1603.19	0.01303126		2133.2	0.01291384		2663.2	-0.01383874
543.39	0.04358099		1073.4	0.00486313		1603.39	0.01260469		2133.4	0.01325219		2663.4	-0.01362624
543.59	0.04437359		1073.6	0.00460424		1603.59	0.01269945		2133.6	0.01380519		2663.6	-0.01345761
543.79	0.04485438		1073.8	0.00543418		1603.79	0.01137698		2133.8	0.01455312		2663.8	-0.01319043
543.99	0.04501535		1074	0.00547837		1603.99	0.01142904		2134	0.01411532		2664	-0.01364431
544.19	0.04481888		1074.2	0.00535883		1604.19	0.01174185		2134.2	0.01488905		2664.2	-0.01326643
544.39	0.04456311		1074.4	0.00580922		1604.39	0.01203924		2134.4	0.01423246		2664.4	-0.01312695
544.59	0.04514654		1074.6	0.0060057		1604.59	0.0128753		2134.6	0.01389349		2664.6	-0.01243262
544.79	0.04507107		1074.8	0.00586855		1604.79	0.01262345		2134.8	0.01397618		2664.8	-0.01234566
544.99	0.04527739		1075	0.00612951		1604.99	0.01277906		2135	0.01458823		2665	-0.01155613
545.19	0.04536154		1075.2	0.00622071		1605.19	0.01272621		2135.2	0.01378935		2665.2	-0.01075257
545.39	0.04441469		1075.4	0.00510696		1605.39	0.01268699		2135.4	0.01335867		2665.4	-0.01031878
545.59	0.04432927		1075.6	0.00578088		1605.59	0.01306065		2135.6	0.0128354		2665.6	-0.01039192
545.79	0.04424238		1075.8	0.00573938		1605.79	0.01365032		2135.8	0.01290535		2665.8	-0.0093843
545.99	0.0443831		1076	0.00601381		1605.99	0.01396321		2136	0.01306364		2666	-0.00972803
546.19	0.04420896		1076.2	0.00587112		1606.19	0.01412152		2136.2	0.01214891		2666.2	-0.00902354
546.39	0.04380182		1076.4	0.00609422		1606.39	0.01360842		2136.4	0.01243229		2666.4	-0.00978311
546.59	0.04386408		1076.6	0.00604168		1606.59	0.01307428		2136.6	0.01172528		2666.6	-0.01013498
546.79	0.04371117		1076.8	0.0071749		1606.79	0.01391786		2136.8	0.01173561		2666.8	-0.01029314
546.99	0.04350764		1077	0.007396		1606.99	0.01322169		2137	0.01168268		2667	-0.00994987
547.19	0.04414372		1077.2	0.00815531		1607.19	0.01291416		2137.2	0.01195143		2667.2	-0.01124395
547.39	0.04461949		1077.4	0.00770897		1607.39	0.01252831		2137.4	0.01221531		2667.4	-0.01140975
547.59	0.04634506		1077.6	0.00824359		1607.59	0.01295763		2137.6	0.01289596		2667.6	-0.01166035
547.79	0.04674309		1077.8	0.00834146		1607.79	0.011735		2137.8	0.01225321		2667.8	-0.01168639
547.99	0.04647744		1078	0.00816299		1607.99	0.01171268		2138	0.01358335		2668	-0.01190446
548.19	0.04644		1078.2	0.00845756		1608.19	0.01164348		2138.2	0.01388097		2668.2	-0.01187401
548.39	0.04652979		1078.4	0.00875492		1608.39	0.01165654		2138.4	0.01250836		2668.4	-0.01201327
548.59	0.04697113		1078.6	0.00908096		1608.59	0.01107195		2138.6	0.01354891		2668.6	-0.01214655
548.79	0.04630621		1078.8	0.00792775		1608.79	0.01081334		2138.8	0.01421075		2668.8	-0.01219428
548.99	0.04571865		1079	0.00823427		1608.99	0.01103332		2139	0.0139356		2669	-0.01165915
549.19	0.04545306		1079.2	0.00796214		1609.19	0.01158243		2139.2	0.01493714		2669.2	-0.01254846
549.39	0.04549973		1079.4	0.0075172		1609.39	0.01238968		2139.4	0.01563681		2669.4	-0.01240694
549.59	0.04629038		1079.6	0.00803377		1609.59	0.01278094		2139.6	0.01600084		2669.6	-0.01302633
549.79	0.046128		1079.8	0.00765206		1609.79	0.01280276		2139.8	0.01678465		2669.8	-0.01270564
549.99	0.04653593		1080	0.00791972		1609.99	0.01349413		2140	0.01574198		2670	-0.01322187
550.19	0.04579175		1080.2	0.00825611		1610.19	0.01395156		2140.2	0.01455534		2670.2	-0.01297352
550.39	0.04550553		1080.4	0.00781245		1610.39	0.01341087		2140.4	0.01372292		2670.4	-0.01354899
550.59	0.04608584		1080.6	0.00792454		1610.59	0.01424821		2140.6	0.01305793		2670.6	-0.01310683
550.79	0.04613668		1080.8	0.00774429		1610.79	0.01479071		2140.8	0.01268422		2670.8	-0.01204133
550.99	0.04568983		1081	0.00732214		1610.99	0.01431544		2141	0.01167311		2671	-0.01207128
551.19	0.04654438		1081.2	0.00744412		1611.19	0.01549949		2141.2	0.01181961		2671.2	-0.01212629
551.39	0.04671462		1081.4	0.00711601		1611.39	0.01521594		2141.4	0.01051791		2671.4	-0.01153034
551.59	0.04693291		1081.6	0.00662026		1611.59	0.01510765		2141.6	0.01065942		2671.6	-0.01081455
551.79	0.0468736		1081.8	0.0059242		1611.79	0.01443137		2141.8	0.01021824		2671.8	-0.01079349
551.99	0.04669437		1082	0.00613346		1611.99	0.01497195		2142	0.01116908		2672	-0.01056414
552.19	0.0456373		1082.2	0.00640956		1612.19	0.01543861		2142.2	0.01044202		2672.2	-0.01051531
552.39	0.04562493		1082.4	0.00672798		1612.39	0.01581115		2142.4	0.01088206		2672.4	-0.01132241
552.59	0.04519316		1082.6	0.00613325		1612.59	0.01543442		2142.6	0.01232008		2672.6	-0.01148547
552.79	0.04478754		1082.8	0.00555179		1612.79	0.01534192		2142.8	0.01274041		2672.8	-0.01146514
552.99	0.04435242		1083	0.00660356		1612.99	0.0157839		2143	0.01355083		2673	-0.01120514
553.19	0.04378286		1083.2	0.00680104		1613.19	0.01581259		2143.2	0.01533907		2673.2	-0.01167478
553.39	0.04420365		1083.4	0.00685781		1613.39	0.01531484		2143.4	0.01523319		2673.4	-0.01083981
553.59	0.04398143		1083.6	0.00797903		1613.59	0.01535322		2143.6	0.01571104		2673.6	-0.0111004
553.79	0.04380814		1083.8	0.0080931		1613.79	0.01466702		2143.8	0.01604395		2673.8	-0.01064275
553.99	0.04337716		1084	0.00866488		1613.99	0.01495808		2144	0.01506686		2674	-0.01035398
554.19	0.04290438		1084.2	0.00947034		1614.19	0.0143496		2144.2	0.01498142		2674.2	-0.01065786
554.39	0.04340419		1084.4	0.00926722		1614.39	0.0141033		2144.4	0.01439006		2674.4	-0.01046465
554.59	0.04334273		1084.6	0.00945317		1614.59	0.01386062		2144.6	0.01487384		2674.6	-0.00931482
554.79	0.04424006		1084.8	0.00859546		1614.79	0.01420924		2144.8	0.01411657		2674.8	-0.00917961
554.99	0.04372673		1085	0.00839757		1614.99	0.01448482		2145	0.01386639		2675	-0.0090134
555.19	0.04424281		1085.2	0.00798986		1615.19	0.01531646		2145.2	0.01437972		2675.2	-0.00871037
555.39	0.04439066		1085.4	0.00770798		1615.39	0.01524618		2145.4	0.01394262		2675.4	-0.00912828
555.59	0.0452284		1085.6	0.00674772		1615.59	0.01574488		2145.6	0.01442144		2675.6	-0.00915459
555.79	0.0451082		1085.8	0.0058754		1615.79	0.01604275		2145.8	0.01421939		2675.8	-0.00988377
555.99	0.0453822		1086	0.00560479		1615.99	0.01646909		2146	0.01451549		2676	-0.00968575
556.19	0.04552228		1086.2	0.00471466		1616.19	0.01764411		2146.2	0.01423918		2676.2	-0.01040146
556.39	0.04608113		1086.4	0.00485697		1616.39	0.01770254		2146.4	0.01463671		2676.4	-0.01145587
556.59	0.04661017		1086.6	0.0042211		1616.59	0.01742881		2146.6	0.01470589		2676.6	-0.01137983
556.79	0.04642107		1086.8	0.00508078		1616.79	0.01706626		2146.8	0.0143171		2676.8	-0.01130438
556.99	0.04556515		1087	0.00544694		1616.99	0.01695158		2147	0.01385608		2677	-0.01095711
557.19	0.04577901		1087.2	0.00488912		1617.19	0.01631543		2147.2	0.01302602		2677.2	-0.01138897
557.39	0.04555735		1087.4	0.00594405		1617.39	0.01587546		2147.4	0.01212478		2677.4	-0.01137476
557.59	0.04443211		1087.6	0.00738571		1617.59	0.01588366		2147.6	0.01237839		2677.6	-0.01239823
557.79	0.04396433		1087.8	0.00757523		1617.79	0.01597089		2147.8	0.01225535		2677.8	-0.01278034
557.99	0.04333592		1088	0.0084207		1617.99	0.01609153		2148	0.01140254		2678	-0.01376583
558.19	0.04367047		1088.2	0.00880085		1618.19	0.01568186		2148.2	0.01122447		2678.2	-0.01412409
558.39	0.04366704		1088.4	0.00850119		1618.39	0.01516701		2148.4	0.01098448		2678.4	-0.01415046
558.59	0.04335918		1088.6	0.00858007		1618.59	0.0143351		2148.6	0.01111405		2678.6	-0.01397546
558.79	0.04402656		1088.8	0.0087561		1618.79	0.01401638		2148.8	0.0107216		2678.8	-0.01412601
558.99	0.04343896		1089	0.009048		1618.99	0.01261257		2149	0.01119793		2679	-0.01356829
559.19	0.04351229		1089.2	0.00944874		1619.19	0.01166263		2149.2	0.01151911		2679.2	-0.01349293
559.39	0.04370159		1089.4	0.00931952		1619.39	0.01042771		2149.4	0.01172557		2679.4	-0.013404
559.59	0.04379312		1089.6	0.00868946		1619.59	0.00906578		2149.6	0.01174213		2679.6	-0.01281648
559.79	0.04365878		1089.8	0.00768297		1619.79	0.00766802		2149.8	0.01191195		2679.8	-0.01240508
