# Supplementary material for: Functional development of a V3/glycan-specific broadly neutralizing antibody isolated from a case of HIV superinfection
Source: eLife journal article supplement (doi:10.7554/elife.68110), 2021-07-15
Supplement: fig2-data2 [file A1.xls]

Vers 3.43 Data Simulation
Conc1	5E-07	5E-07	5E-07	5E-07
Start1	200.03	730.02	1260.02	1790.01
Stop1	559.82	1089.82	1619.82	2149.81
Time1	Data1	Sim1	Time2	Data2	Sim2	Time3	Data3	Sim3	Time4	Data4	Sim4
200.03	0.00930086		730.02	0.0038312		1260.02	0.01123505		1790.01	0.000372
200.23	0.00978975		730.22	0.00411309		1260.22	0.01145463		1790.21	0.0005992
200.43	0.00987824		730.42	0.00376082		1260.42	0.01093664		1790.41	0.00073896
200.63	0.01029008		730.62	0.00404608		1260.62	0.01167468		1790.61	0.001485
200.83	0.01108764		730.82	0.00396144		1260.82	0.01134692		1790.81	0.00191823
201.03	0.012482		731.02	0.00426443		1261.02	0.01101208		1791.01	0.00249881
201.23	0.01520587		731.22	0.00490434		1261.22	0.01154725		1791.21	0.00294518
201.43	0.01762447		731.42	0.00537083		1261.42	0.01203186		1791.41	0.00288798
201.63	0.02107272		731.62	0.0061518		1261.62	0.01192645		1791.61	0.00281784
201.83	0.02455427		731.82	0.00717314		1261.82	0.01122055		1791.81	0.00312796
202.03	0.02850148		732.02	0.00766779		1262.02	0.01145212		1792.01	0.00397703
202.23	0.03229532		732.22	0.00881396		1262.22	0.01110303		1792.21	0.00387673
202.43	0.03625641		732.42	0.009063		1262.42	0.01230257		1792.41	0.00424682
202.63	0.04075147		732.62	0.00951		1262.62	0.01115661		1792.61	0.00470824
202.83	0.04472804		732.82	0.00976595		1262.82	0.01128645		1792.81	0.0037124
203.03	0.04771307		733.02	0.00992694		1263.02	0.01163598		1793.01	0.0036219
203.23	0.05108185		733.22	0.00968347		1263.22	0.01157819		1793.21	0.00298475
203.43	0.0540411		733.42	0.00947885		1263.42	0.01083518		1793.41	0.00193127
203.63	0.05716459		733.62	0.00980104		1263.62	0.01171554		1793.61	0.00235484
203.83	0.06118062		733.82	0.00977252		1263.82	0.01187511		1793.81	0.00285871
204.03	0.0644649		734.02	0.00994639		1264.02	0.01289532		1794.01	0.00270424
204.23	0.06805116		734.22	0.00932824		1264.22	0.01227794		1794.21	0.0023782
204.43	0.07052409		734.42	0.00884937		1264.42	0.01219894		1794.41	0.00214343
204.63	0.07387678		734.62	0.0096298		1264.62	0.01339421		1794.61	0.00228504
204.83	0.07702439		734.82	0.00991441		1264.82	0.01284924		1794.81	0.00110588
205.03	0.08016674		735.02	0.01023439		1265.02	0.01347684		1795.01	0.00063464
205.23	0.08372327		735.22	0.01092356		1265.22	0.0147979		1795.21	0.00000792
205.43	0.08703832		735.42	0.01144168		1265.42	0.01446491		1795.41	-0.00097741
205.63	0.0899508		735.62	0.01221415		1265.62	0.01435042		1795.61	-0.00156995
205.83	0.09253376		735.82	0.0126013		1265.82	0.01423829		1795.81	-0.00225825
206.03	0.09628936		736.02	0.01278672		1266.02	0.01500477		1796.01	-0.00274969
206.23	0.09945346		736.22	0.01310837		1266.22	0.01518207		1796.21	-0.00341039
206.43	0.10378027		736.42	0.01374871		1266.42	0.01513488		1796.41	-0.00272886
206.63	0.10627671		736.62	0.0138209		1266.62	0.01387009		1796.61	-0.00296714
206.83	0.10925103		736.82	0.01441161		1266.82	0.01539754		1796.81	-0.00302816
207.03	0.1122453		737.02	0.01476039		1267.02	0.01579432		1797.01	-0.00233229
207.23	0.11539816		737.22	0.01547712		1267.22	0.01651859		1797.21	-0.00169437
207.43	0.11838441		737.42	0.01512143		1267.42	0.01741553		1797.41	-0.00159612
207.63	0.1217669		737.62	0.01493906		1267.62	0.01917804		1797.61	0.00009961
207.83	0.12475692		737.82	0.01501002		1267.82	0.01906887		1797.81	0.00145428
208.03	0.12696269		738.02	0.01539862		1268.02	0.0198416		1798.01	0.00215137
208.23	0.12914892		738.22	0.0149644		1268.22	0.01954059		1798.21	0.00283929
208.43	0.13092497		738.42	0.01578676		1268.42	0.02001813		1798.41	0.00356236
208.63	0.13325502		738.62	0.01600655		1268.62	0.0203574		1798.61	0.00455482
208.83	0.13554048		738.82	0.01577966		1268.82	0.01969992		1798.81	0.00518409
209.03	0.1383932		739.02	0.01620993		1269.02	0.01965932		1799.01	0.00641556
209.23	0.14076302		739.22	0.01703696		1269.22	0.01940924		1799.21	0.00678708
209.43	0.1433056		739.42	0.01686215		1269.42	0.01874381		1799.41	0.0064172
209.63	0.14438221		739.62	0.01716908		1269.62	0.01884343		1799.61	0.00541776
209.83	0.14760959		739.82	0.01710309		1269.82	0.01839478		1799.81	0.00492784
210.03	0.15113516		740.02	0.01694243		1270.02	0.01849653		1800.01	0.0046827
210.23	0.15293811		740.22	0.01683544		1270.22	0.01788516		1800.21	0.00442404
210.43	0.15471191		740.42	0.01728573		1270.42	0.01749802		1800.41	0.00352715
210.63	0.15690908		740.62	0.01654566		1270.62	0.01800678		1800.61	0.00301697
210.83	0.1602738		740.82	0.01658493		1270.82	0.01771153		1800.81	0.00320908
211.03	0.16219656		741.02	0.01678713		1271.02	0.01768818		1801.01	0.00286767
211.23	0.16493271		741.22	0.01654003		1271.22	0.01776927		1801.21	0.00275554
211.43	0.1669124		741.42	0.01586276		1271.42	0.01796684		1801.41	0.00244109
211.63	0.16912627		741.62	0.01592549		1271.62	0.01885581		1801.61	0.00304926
211.83	0.17065622		741.82	0.01693939		1271.82	0.01878394		1801.81	0.0033619
212.03	0.17294361		742.02	0.01687406		1272.02	0.01912201		1802.01	0.00280253
212.23	0.17480791		742.22	0.01658948		1272.22	0.01744154		1802.21	0.00231827
212.43	0.17682027		742.42	0.01814246		1272.42	0.01703074		1802.41	0.00224691
212.63	0.17892472		742.62	0.01759424		1272.62	0.01685571		1802.61	0.0024825
212.83	0.18139046		742.82	0.01855487		1272.82	0.01657731		1802.81	0.00236413
213.03	0.18341952		743.02	0.02005749		1273.02	0.01728003		1803.01	0.0017951
213.23	0.18439475		743.22	0.0210728		1273.22	0.01741296		1803.21	0.00195321
213.43	0.18586089		743.42	0.02203984		1273.42	0.01855889		1803.41	0.00169182
213.63	0.18627306		743.62	0.02284412		1273.62	0.01882314		1803.61	0.00147071
213.83	0.18938018		743.82	0.02284763		1273.82	0.01933524		1803.81	0.00124757
214.03	0.1901352		744.02	0.02326328		1274.02	0.02032918		1804.01	0.00072881
214.23	0.19138955		744.22	0.02370858		1274.22	0.01963264		1804.21	0.0008423
214.43	0.19260581		744.42	0.02280504		1274.42	0.0210046		1804.41	0.00061806
214.63	0.19512709		744.62	0.02278569		1274.62	0.02121225		1804.61	0.00103369
214.83	0.19734737		744.82	0.02337647		1274.82	0.02057882		1804.81	0.00133836
215.03	0.19897486		745.02	0.02344727		1275.02	0.02081831		1805.01	0.0015544
215.23	0.20149142		745.22	0.02328365		1275.22	0.02028809		1805.21	0.00284604
215.43	0.20343499		745.42	0.02395916		1275.42	0.02088992		1805.41	0.00353842
215.63	0.20565452		745.62	0.02429183		1275.62	0.02143386		1805.61	0.00366076
215.83	0.20813234		745.82	0.02465458		1275.82	0.02120657		1805.81	0.00380047
216.03	0.21088992		746.02	0.02361657		1276.02	0.02077771		1806.01	0.00365507
216.23	0.21310017		746.22	0.02377989		1276.22	0.01954233		1806.21	0.00352347
216.43	0.2148734		746.42	0.02384949		1276.42	0.01975716		1806.41	0.0041303
216.63	0.21590513		746.62	0.02281125		1276.62	0.02045035		1806.61	0.00449246
216.83	0.21777154		746.82	0.02307252		1276.82	0.021192		1806.81	0.00450764
217.03	0.21921553		747.02	0.02301427		1277.02	0.02097953		1807.01	0.00441455
217.23	0.22040317		747.22	0.02271332		1277.22	0.02118555		1807.21	0.0054757
217.43	0.22117717		747.42	0.0224951		1277.42	0.02124331		1807.41	0.00511387
217.63	0.22224601		747.62	0.02343115		1277.62	0.02091428		1807.61	0.00595439
217.83	0.22491925		747.82	0.02418319		1277.82	0.02119333		1807.81	0.00537649
218.03	0.22553908		748.02	0.02417279		1278.02	0.02131432		1808.01	0.00507496
218.23	0.22794972		748.22	0.02414812		1278.22	0.02105121		1808.21	0.00572335
218.43	0.22959074		748.42	0.02409775		1278.42	0.02219628		1808.41	0.00529689
218.63	0.23186545		748.62	0.02469604		1278.62	0.02198585		1808.61	0.00479277
218.83	0.2339302		748.82	0.02571242		1278.82	0.02200379		1808.81	0.0045437
219.03	0.23471843		749.02	0.02594729		1279.02	0.02183766		1809.01	0.00415629
219.23	0.23634888		749.22	0.02647736		1279.22	0.02175756		1809.21	0.00407593
219.43	0.23760586		749.42	0.0271887		1279.42	0.02222605		1809.41	0.00290066
219.63	0.23882291		749.62	0.0268323		1279.62	0.02234406		1809.61	0.00305197
219.83	0.2404797		749.82	0.02691875		1279.82	0.02184477		1809.81	0.00372687
220.03	0.24138125		750.02	0.02704612		1280.02	0.02193492		1810.01	0.00383973
220.23	0.24163567		750.22	0.02732		1280.22	0.02091828		1810.21	0.0034734
220.43	0.24139952		750.42	0.02699127		1280.42	0.0203141		1810.41	0.00371925
220.63	0.24148454		750.62	0.02724171		1280.62	0.01970545		1810.61	0.0040505
220.83	0.24253792		750.82	0.02745867		1280.82	0.01923535		1810.81	0.00346163
221.03	0.24300834		751.02	0.02703809		1281.02	0.01759352		1811.01	0.00395354
221.23	0.24361098		751.22	0.02665311		1281.22	0.01775362		1811.21	0.0042013
221.43	0.2442532		751.42	0.02799544		1281.42	0.01722925		1811.41	0.00435388
221.63	0.24567393		751.62	0.02894752		1281.62	0.01808128		1811.61	0.00490426
221.83	0.24737709		751.82	0.0282081		1281.82	0.01746341		1811.81	0.00442403
222.03	0.24858064		752.02	0.02860597		1282.02	0.01766997		1812.01	0.00518588
222.23	0.25024505		752.22	0.0294346		1282.22	0.0191899		1812.21	0.00574429
222.43	0.25176648		752.42	0.03041722		1282.42	0.01992766		1812.41	0.00598272
222.63	0.25286019		752.62	0.03099159		1282.62	0.02127699		1812.61	0.00506231
222.83	0.25448884		752.82	0.03247858		1282.82	0.022106		1812.81	0.00490348
223.03	0.2550767		753.02	0.03257882		1283.02	0.02193918		1813.01	0.00500879
223.23	0.25663558		753.22	0.03353931		1283.22	0.02326272		1813.21	0.00535601
223.43	0.25833153		753.42	0.03430725		1283.42	0.02471633		1813.41	0.00593577
223.63	0.25994812		753.62	0.03484581		1283.62	0.0251766		1813.61	0.00674096
223.83	0.26131116		753.82	0.03505531		1283.82	0.02513861		1813.81	0.00705574
224.03	0.2620219		754.02	0.03543569		1284.02	0.02565419		1814.01	0.00688238
224.23	0.26305611		754.22	0.0355395		1284.22	0.02457222		1814.21	0.00755685
224.43	0.26395239		754.42	0.03620231		1284.42	0.02430258		1814.41	0.00740521
224.63	0.2654371		754.62	0.03633519		1284.62	0.02332844		1814.61	0.00756002
224.83	0.266829		754.82	0.03638873		1284.82	0.0231324		1814.81	0.00730667
225.03	0.26764791		755.02	0.03593138		1285.02	0.02258582		1815.01	0.00840099
225.23	0.26932232		755.22	0.03580197		1285.22	0.02317771		1815.21	0.0071515
225.43	0.27058982		755.42	0.0353692		1285.42	0.02312224		1815.41	0.0073616
225.63	0.27162339		755.62	0.03428147		1285.62	0.02298313		1815.61	0.00650162
225.83	0.27325323		755.82	0.0345113		1285.82	0.02185062		1815.81	0.00621659
226.03	0.27428172		756.02	0.03514508		1286.02	0.02270057		1816.01	0.00554471
226.23	0.27550049		756.22	0.03491533		1286.22	0.02354376		1816.21	0.00429722
226.43	0.27691855		756.42	0.03477686		1286.42	0.02343416		1816.41	0.00332786
226.63	0.27820686		756.62	0.03441668		1286.62	0.02364398		1816.61	0.00143932
226.83	0.27854406		756.82	0.03401729		1286.82	0.02297627		1816.81	0.00126889
227.03	0.27844424		757.02	0.03386453		1287.02	0.02287676		1817.01	0.00103329
227.23	0.27940512		757.22	0.03468958		1287.22	0.024106		1817.21	0.00077454
227.43	0.28089103		757.42	0.03482113		1287.42	0.02431791		1817.41	0.00107213
227.63	0.28116		757.62	0.03543745		1287.62	0.02365368		1817.61	0.0011471
227.83	0.28216744		757.82	0.03584864		1287.82	0.02291061		1817.81	0.00188864
228.03	0.28307751		758.02	0.03776674		1288.02	0.02299725		1818.01	0.00255049
228.23	0.2838624		758.22	0.03812416		1288.22	0.02209589		1818.21	0.00263377
228.43	0.28445229		758.42	0.03917462		1288.42	0.02150946		1818.41	0.00255728
228.63	0.28586964		758.62	0.03995583		1288.62	0.02093056		1818.61	0.00398292
228.83	0.2865739		758.82	0.04145189		1288.82	0.02073737		1818.81	0.00495609
229.03	0.28785176		759.02	0.04225661		1289.02	0.0210575		1819.01	0.00585566
229.23	0.29004335		759.22	0.04199979		1289.22	0.02117138		1819.21	0.0053898
229.43	0.29135197		759.42	0.04178909		1289.42	0.02132193		1819.41	0.00640202
229.63	0.29274475		759.62	0.04212131		1289.62	0.02161916		1819.61	0.00637845
229.83	0.29456552		759.82	0.04210767		1289.82	0.02214442		1819.81	0.00700295
230.03	0.29568752		760.02	0.04217284		1290.02	0.02343701		1820.01	0.00718106
230.23	0.29720315		760.22	0.04153745		1290.22	0.02395241		1820.21	0.00737702
230.43	0.2984602		760.42	0.04061032		1290.42	0.02442032		1820.41	0.00732211
230.63	0.29975682		760.62	0.04011773		1290.62	0.0243909		1820.61	0.0073678
230.83	0.2997111		760.82	0.03964378		1290.82	0.02464736		1820.81	0.00716982
231.03	0.30113907		761.02	0.04035936		1291.02	0.02496828		1821.01	0.00709448
231.23	0.30194307		761.22	0.04088052		1291.22	0.02499057		1821.21	0.00725255
231.43	0.30239636		761.42	0.04075899		1291.42	0.02542513		1821.41	0.00743731
231.63	0.30259474		761.62	0.04100475		1291.62	0.02496261		1821.61	0.00628743
231.83	0.30350404		761.82	0.04128746		1291.82	0.02456228		1821.81	0.00538612
232.03	0.30330507		762.02	0.04164625		1292.02	0.0244106		1822.01	0.00553942
232.23	0.3031196		762.22	0.0412726		1292.22	0.02445982		1822.21	0.00496344
232.43	0.30387804		762.42	0.04191826		1292.42	0.02417329		1822.41	0.00518957
232.63	0.3047885		762.62	0.04183486		1292.62	0.02332483		1822.61	0.00513625
232.83	0.30473424		762.82	0.04199864		1292.82	0.02203259		1822.81	0.00410331
233.03	0.30521724		763.02	0.04212699		1293.02	0.0224842		1823.01	0.00300978
233.23	0.30679063		763.22	0.04110555		1293.22	0.02265617		1823.21	0.00282461
233.43	0.30762283		763.42	0.04175856		1293.42	0.02383039		1823.41	0.0026571
233.63	0.30867313		763.62	0.04263526		1293.62	0.02410774		1823.61	0.00215718
233.83	0.30935376		763.82	0.04358		1293.82	0.02570797		1823.81	0.0020616
234.03	0.31029961		764.02	0.04397605		1294.02	0.02622196		1824.01	0.0016877
234.23	0.31195638		764.22	0.04413806		1294.22	0.02671163		1824.21	0.00169514
234.43	0.31367903		764.42	0.04453699		1294.42	0.02702886		1824.41	0.00187394
234.63	0.31577995		764.62	0.04516614		1294.62	0.02709383		1824.61	0.00138871
234.83	0.31720442		764.82	0.04582343		1294.82	0.0278437		1824.81	0.00078228
235.03	0.31979139		765.02	0.04646577		1295.02	0.02749594		1825.01	0.00064419
235.23	0.32090034		765.22	0.04700661		1295.22	0.026926		1825.21	0.00016739
235.43	0.32120215		765.42	0.04637943		1295.42	0.0268923		1825.41	-0.00036523
235.63	0.32210579		765.62	0.04666907		1295.62	0.02627848		1825.61	-0.00113751
235.83	0.32408762		765.82	0.04692745		1295.82	0.02555994		1825.81	-0.00039007
236.03	0.3254369		766.02	0.04706425		1296.02	0.02504237		1826.01	0.00021222
236.23	0.32700154		766.22	0.0475736		1296.22	0.02462997		1826.21	0.00045159
236.43	0.32798371		766.42	0.04787299		1296.42	0.02329358		1826.41	0.00050672
236.63	0.32871656		766.62	0.04659576		1296.62	0.02253608		1826.61	0.00045271
236.83	0.3281541		766.82	0.04651931		1296.82	0.02157819		1826.81	0.00094074
237.03	0.32899313		767.02	0.04673609		1297.02	0.02217093		1827.01	0.00114373
237.23	0.33026151		767.22	0.04611572		1297.22	0.02285591		1827.21	0.00165745
237.43	0.3308818		767.42	0.04732038		1297.42	0.02401383		1827.41	0.00184418
237.63	0.33105118		767.62	0.04827954		1297.62	0.02424172		1827.61	0.00181632
237.83	0.33096165		767.82	0.04822582		1297.82	0.02539888		1827.81	0.00233962
238.03	0.33132303		768.02	0.04826957		1298.02	0.02519475		1828.01	0.00342341
238.23	0.33175083		768.22	0.04915248		1298.22	0.02534165		1828.21	0.00453512
238.43	0.33178492		768.42	0.0494768		1298.42	0.02554753		1828.41	0.00495991
238.63	0.33137937		768.62	0.04917112		1298.62	0.02629021		1828.61	0.00488201
238.83	0.33111176		768.82	0.04947851		1298.82	0.0273591		1828.81	0.00586271
239.03	0.33177102		769.02	0.05066418		1299.02	0.02665103		1829.01	0.00622021
239.23	0.33159001		769.22	0.05131506		1299.22	0.02656107		1829.21	0.00579931
239.43	0.33141655		769.42	0.05122003		1299.42	0.02604738		1829.41	0.00662456
239.63	0.33315237		769.62	0.05208494		1299.62	0.02552253		1829.61	0.0069107
239.83	0.33465084		769.82	0.05272708		1299.82	0.02603363		1829.81	0.00769769
240.03	0.33540259		770.02	0.05260621		1300.02	0.02621241		1830.01	0.00667354
240.23	0.33572731		770.22	0.05231149		1300.22	0.02649729		1830.21	0.00617032
240.43	0.33610766		770.42	0.05113275		1300.42	0.02652749		1830.41	0.006413
240.63	0.33650775		770.62	0.04990375		1300.62	0.02680716		1830.61	0.00645521
240.83	0.33717524		770.82	0.04999822		1300.82	0.02588021		1830.81	0.00641734
241.03	0.33868217		771.02	0.05067173		1301.02	0.02648029		1831.01	0.00598975
241.23	0.33950597		771.22	0.05034459		1301.22	0.027196		1831.21	0.00491652
241.43	0.34044596		771.42	0.05060904		1301.42	0.02731055		1831.41	0.00418568
241.63	0.34087247		771.62	0.05076709		1301.62	0.02804057		1831.61	0.0025503
241.83	0.34146107		771.82	0.05095931		1301.82	0.02834792		1831.81	0.00279516
242.03	0.34174306		772.02	0.05151		1302.02	0.0278374		1832.01	0.00303782
242.23	0.34186474		772.22	0.05145478		1302.22	0.02795548		1832.21	0.00260782
242.43	0.34194128		772.42	0.0517728		1302.42	0.02844171		1832.41	0.00174749
242.63	0.34198883		772.62	0.05268521		1302.62	0.02885507		1832.61	0.00204542
242.83	0.34240741		772.82	0.0544275		1302.82	0.0295345		1832.81	0.00260823
243.03	0.34418489		773.02	0.05657106		1303.02	0.02945221		1833.01	0.00201491
243.23	0.34559879		773.22	0.05736857		1303.22	0.0292552		1833.21	0.00225469
243.43	0.34662275		773.42	0.05904434		1303.42	0.0287535		1833.41	0.00332182
243.63	0.34857106		773.62	0.05962692		1303.62	0.02840719		1833.61	0.00397568
243.83	0.34915876		773.82	0.05993046		1303.82	0.02915939		1833.81	0.00417824
244.03	0.3500213		774.02	0.05893913		1304.02	0.02827012		1834.01	0.00380526
244.23	0.35092941		774.22	0.0595038		1304.22	0.02756267		1834.21	0.00409793
244.43	0.35145055		774.42	0.05933867		1304.42	0.02699403		1834.41	0.00507238
244.63	0.35300033		774.62	0.06012027		1304.62	0.02657599		1834.61	0.00550573
244.83	0.35435937		774.82	0.05972765		1304.82	0.0256477		1834.81	0.00584238
245.03	0.35570314		775.02	0.06024386		1305.02	0.02531912		1835.01	0.00608388
245.23	0.35704803		775.22	0.05994911		1305.22	0.02544885		1835.21	0.00593232
245.43	0.35824045		775.42	0.06011355		1305.42	0.02545416		1835.41	0.00582359
245.63	0.35947219		775.62	0.06013788		1305.62	0.02578198		1835.61	0.00574696
245.83	0.36042636		775.82	0.05978851		1305.82	0.02501118		1835.81	0.00706458
246.03	0.36067545		776.02	0.05902488		1306.02	0.0247426		1836.01	0.00738858
246.23	0.36107771		776.22	0.05884325		1306.22	0.02541093		1836.21	0.00777167
246.43	0.36118711		776.42	0.05920968		1306.42	0.02574398		1836.41	0.00766315
246.63	0.36053549		776.62	0.06026518		1306.62	0.02652669		1836.61	0.00839164
246.83	0.36141554		776.82	0.06031269		1306.82	0.02699275		1836.81	0.00806686
247.03	0.36298774		777.02	0.06059192		1307.02	0.0273193		1837.01	0.00789913
247.23	0.36343955		777.22	0.05998133		1307.22	0.02705609		1837.21	0.00825986
247.43	0.36361645		777.42	0.06063752		1307.42	0.02735054		1837.41	0.00854957
247.63	0.36451904		777.62	0.06014378		1307.62	0.02689648		1837.61	0.00846353
247.83	0.3641274		777.82	0.06009177		1307.82	0.02689409		1837.81	0.00848922
248.03	0.3648913		778.02	0.06028558		1308.02	0.02544666		1838.01	0.0078575
248.23	0.36546903		778.22	0.06121685		1308.22	0.02546709		1838.21	0.00710008
248.43	0.3657172		778.42	0.06076478		1308.42	0.02547361		1838.41	0.00693393
248.63	0.36730024		778.62	0.06066107		1308.62	0.02494679		1838.61	0.00675792
248.83	0.36710804		778.82	0.06046169		1308.82	0.02458953		1838.81	0.00650212
249.03	0.36800324		779.02	0.0612001		1309.02	0.02462722		1839.01	0.00627383
249.23	0.368819		779.22	0.0616962		1309.22	0.02554877		1839.21	0.00767945
249.43	0.36929353		779.42	0.06221796		1309.42	0.02502949		1839.41	0.00721138
249.63	0.36998062		779.62	0.06239203		1309.62	0.0252062		1839.61	0.00779592
249.83	0.37064959		779.82	0.06182766		1309.82	0.02580249		1839.81	0.00830119
250.03	0.37058276		780.02	0.06169391		1310.02	0.02628258		1840.01	0.00847509
250.23	0.37036144		780.22	0.062484		1310.22	0.02687682		1840.21	0.00849638
250.43	0.37003184		780.42	0.06264848		1310.42	0.02645137		1840.41	0.00821921
250.63	0.36977835		780.62	0.06264147		1310.62	0.02644304		1840.61	0.00776641
250.83	0.37120916		780.82	0.06245453		1310.82	0.0260545		1840.81	0.00672102
251.03	0.37264855		781.02	0.06214144		1311.02	0.02714234		1841.01	0.00598479
251.23	0.37293557		781.22	0.06250384		1311.22	0.0268106		1841.21	0.00582079
251.43	0.37341405		781.42	0.06367318		1311.42	0.02664253		1841.41	0.00480265
251.63	0.37415674		781.62	0.06400619		1311.62	0.02630699		1841.61	0.00476765
251.83	0.37432631		781.82	0.06394016		1311.82	0.02617677		1841.81	0.00447538
252.03	0.37556757		782.02	0.06465764		1312.02	0.02535656		1842.01	0.00375956
252.23	0.37559293		782.22	0.06504352		1312.22	0.02623388		1842.21	0.00358146
252.43	0.37576429		782.42	0.06515105		1312.42	0.02639033		1842.41	0.00424734
252.63	0.37675019		782.62	0.06659438		1312.62	0.02645672		1842.61	0.00459978
252.83	0.37705194		782.82	0.0671442		1312.82	0.02713822		1842.81	0.00461664
253.03	0.37825644		783.02	0.06907		1313.02	0.02746999		1843.01	0.00554849
253.23	0.37908144		783.22	0.07040874		1313.22	0.02789235		1843.21	0.00705137
253.43	0.37962359		783.42	0.07064607		1313.42	0.02807671		1843.41	0.00635718
253.63	0.38017318		783.62	0.07050737		1313.62	0.02861531		1843.61	0.00736052
253.83	0.38078021		783.82	0.06927589		1313.82	0.02939495		1843.81	0.00715878
254.03	0.38098993		784.02	0.06899941		1314.02	0.02898847		1844.01	0.0069999
254.23	0.38155627		784.22	0.06845121		1314.22	0.0283386		1844.21	0.00657846
254.43	0.38275298		784.42	0.06657585		1314.42	0.02739801		1844.41	0.00571666
254.63	0.38381273		784.62	0.06542968		1314.62	0.02768026		1844.61	0.00477744
254.83	0.38524766		784.82	0.06511011		1314.82	0.02798799		1844.81	0.00443043
255.03	0.38686368		785.02	0.06458244		1315.02	0.02774634		1845.01	0.00427775
255.23	0.38597616		785.22	0.06479566		1315.22	0.02617375		1845.21	0.00465527
255.43	0.38652656		785.42	0.06332938		1315.42	0.0257928		1845.41	0.004234
255.63	0.38714239		785.62	0.06271954		1315.62	0.02509367		1845.61	0.00464827
255.83	0.38833484		785.82	0.062165		1315.82	0.02566543		1845.81	0.00350795
256.03	0.38860509		786.02	0.06244672		1316.02	0.02560533		1846.01	0.00418927
256.23	0.38865213		786.22	0.06345084		1316.22	0.02588459		1846.21	0.00444566
256.43	0.38892192		786.42	0.06470435		1316.42	0.02610575		1846.41	0.00563499
256.63	0.38986625		786.62	0.06673947		1316.62	0.02570565		1846.61	0.00674918
256.83	0.38960592		786.82	0.06777363		1316.82	0.0253364		1846.81	0.00579482
257.03	0.3901848		787.02	0.07050567		1317.02	0.02546631		1847.01	0.00726351
257.23	0.39056607		787.22	0.07178382		1317.22	0.0256029		1847.21	0.00696796
257.43	0.39131984		787.42	0.07248773		1317.42	0.02649611		1847.41	0.0064706
257.63	0.39143697		787.62	0.07276594		1317.62	0.02729943		1847.61	0.00666093
257.83	0.39159419		787.82	0.07256365		1317.82	0.02773794		1847.81	0.00589629
258.03	0.39274162		788.02	0.0729123		1318.02	0.02767534		1848.01	0.00521345
258.23	0.39331278		788.22	0.07284375		1318.22	0.0282006		1848.21	0.00493837
258.43	0.39356344		788.42	0.07324221		1318.42	0.02892751		1848.41	0.00499434
258.63	0.39376549		788.62	0.07443513		1318.62	0.02853792		1848.61	0.00519767
258.83	0.39375874		788.82	0.07532094		1318.82	0.02723781		1848.81	0.0052391
259.03	0.39373373		789.02	0.07540304		1319.02	0.02618455		1849.01	0.00581712
259.23	0.39312911		789.22	0.07520555		1319.22	0.02593912		1849.21	0.00659306
259.43	0.39377164		789.42	0.07418918		1319.42	0.026848		1849.41	0.00617848
259.63	0.39409837		789.62	0.07426083		1319.62	0.02709294		1849.61	0.0055705
259.83	0.39469025		789.82	0.07443648		1319.82	0.02812468		1849.81	0.00533694
260.03	0.39510446		790.02	0.07382331		1320.02	0.02756786		1850.01	0.00676419
260.23	0.3953229		790.22	0.07389728		1320.22	0.02669829		1850.21	0.00740925
260.43	0.39629216		790.42	0.07413987		1320.42	0.02567163		1850.41	0.00806644
260.63	0.39801262		790.62	0.07449552		1320.62	0.02574606		1850.61	0.00862384
260.83	0.3985381		790.82	0.07470002		1320.82	0.02604968		1850.81	0.00718337
261.03	0.40022027		791.02	0.0749079		1321.02	0.02664319		1851.01	0.00792072
261.23	0.40131342		791.22	0.07440751		1321.22	0.02669299		1851.21	0.00680272
261.43	0.40206514		791.42	0.07349196		1321.42	0.0272015		1851.41	0.00625981
261.63	0.40243838		791.62	0.07315067		1321.62	0.02752876		1851.61	0.00611566
261.83	0.40306044		791.82	0.07381423		1321.82	0.02647679		1851.81	0.00509684
262.03	0.40502829		792.02	0.0743277		1322.02	0.02672605		1852.01	0.00431503
262.23	0.40511181		792.22	0.0751014		1322.22	0.02658162		1852.21	0.00480183
262.43	0.4061789		792.42	0.07635494		1322.42	0.02604865		1852.41	0.00457899
262.63	0.40665504		792.62	0.07714882		1322.62	0.02451672		1852.61	0.0039616
262.83	0.40681586		792.82	0.07808207		1322.82	0.02437213		1852.81	0.00383774
263.03	0.40596033		793.02	0.07813704		1323.02	0.02502434		1853.01	0.00466562
263.23	0.40556586		793.22	0.07899851		1323.22	0.02589545		1853.21	0.00507932
263.43	0.40552009		793.42	0.07913324		1323.42	0.02694517		1853.41	0.00469
263.63	0.40536834		793.62	0.07889723		1323.62	0.02620556		1853.61	0.00457225
263.83	0.40580517		793.82	0.07940081		1323.82	0.02596929		1853.81	0.00504274
264.03	0.40593288		794.02	0.0797047		1324.02	0.02580997		1854.01	0.0057214
264.23	0.40586038		794.22	0.08012361		1324.22	0.02590849		1854.21	0.00534139
264.43	0.4080556		794.42	0.08035966		1324.42	0.02578599		1854.41	0.00542327
264.63	0.40828896		794.62	0.08012577		1324.62	0.02682826		1854.61	0.00611938
264.83	0.40791904		794.82	0.07928931		1324.82	0.026969		1854.81	0.0057742
265.03	0.40798926		795.02	0.07878487		1325.02	0.0269788		1855.01	0.00604932
265.23	0.40827051		795.22	0.07845829		1325.22	0.02723035		1855.21	0.00587294
265.43	0.40929372		795.42	0.07895169		1325.42	0.0275595		1855.41	0.00538668
265.63	0.41088852		795.62	0.07952632		1325.62	0.02770493		1855.61	0.00517171
265.83	0.41191574		795.82	0.07939189		1325.82	0.02762012		1855.81	0.0045201
266.03	0.41397812		796.02	0.0793959		1326.02	0.02769725		1856.01	0.00468755
266.23	0.41463635		796.22	0.07921801		1326.22	0.02753259		1856.21	0.00455055
266.43	0.41623035		796.42	0.07990302		1326.42	0.02715205		1856.41	0.00451763
266.63	0.41541124		796.62	0.08005319		1326.62	0.02638236		1856.61	0.00478588
266.83	0.41525695		796.82	0.08026996		1326.82	0.02739302		1856.81	0.00639055
267.03	0.41497983		797.02	0.08043114		1327.02	0.02771218		1857.01	0.00715836
267.23	0.41534351		797.22	0.08042028		1327.22	0.02866035		1857.21	0.00750328
267.43	0.41585317		797.42	0.08035106		1327.42	0.02916775		1857.41	0.00743621
267.63	0.41622785		797.62	0.08009352		1327.62	0.0285149		1857.61	0.00793305
267.83	0.41626954		797.82	0.08137869		1327.82	0.02911172		1857.81	0.00855795
268.03	0.41583181		798.02	0.0818475		1328.02	0.02848891		1858.01	0.00793988
268.23	0.41656761		798.22	0.08137479		1328.22	0.02782391		1858.21	0.00823272
268.43	0.4175743		798.42	0.08140651		1328.42	0.02764908		1858.41	0.00804403
268.63	0.41677581		798.62	0.08173633		1328.62	0.02761475		1858.61	0.00747055
268.83	0.41633558		798.82	0.08256852		1328.82	0.02829132		1858.81	0.00710556
269.03	0.41610173		799.02	0.08364892		1329.02	0.02906766		1859.01	0.00627409
269.23	0.41753809		799.22	0.08461057		1329.22	0.02930317		1859.21	0.00535814
269.43	0.41837543		799.42	0.08506571		1329.42	0.02972507		1859.41	0.00450427
269.63	0.41897902		799.62	0.08489785		1329.62	0.02909222		1859.61	0.00396976
269.83	0.41963062		799.82	0.08523913		1329.82	0.02882051		1859.81	0.00356665
270.03	0.4204707		800.02	0.08616237		1330.02	0.0269519		1860.01	0.00318925
270.23	0.42075343		800.22	0.0867936		1330.22	0.02645933		1860.21	0.00294342
270.43	0.42090726		800.42	0.0873449		1330.42	0.02658235		1860.41	0.00401221
270.63	0.42079423		800.62	0.08791853		1330.62	0.02637789		1860.61	0.00528859
270.83	0.42172966		800.82	0.0889755		1330.82	0.02723473		1860.81	0.00540399
271.03	0.42266125		801.02	0.08886802		1331.02	0.02677876		1861.01	0.0057648
271.23	0.42326792		801.22	0.08881834		1331.22	0.0259802		1861.21	0.00559592
271.43	0.42432789		801.42	0.08889591		1331.42	0.02524414		1861.41	0.00663007
271.63	0.42472346		801.62	0.08826915		1331.62	0.02442702		1861.61	0.00771672
271.83	0.42460433		801.82	0.0887516		1331.82	0.02409128		1861.81	0.00794999
272.03	0.4247513		802.02	0.08765566		1332.02	0.0231881		1862.01	0.00736255
272.23	0.42550462		802.22	0.08744775		1332.22	0.02323302		1862.21	0.00773446
272.43	0.42549467		802.42	0.0871056		1332.42	0.02333689		1862.41	0.00655648
272.63	0.42550308		802.62	0.08715202		1332.62	0.0241832		1862.61	0.00696164
272.83	0.42560609		802.82	0.08800538		1332.82	0.02488936		1862.81	0.00731678
273.03	0.42671565		803.02	0.08803121		1333.02	0.0256861		1863.01	0.0060676
273.23	0.42726348		803.22	0.08771343		1333.22	0.02617447		1863.21	0.00568309
273.43	0.42664356		803.42	0.08733198		1333.42	0.02656002		1863.41	0.00557152
273.63	0.42697675		803.62	0.08736243		1333.62	0.02695663		1863.61	0.00500081
273.83	0.42737491		803.82	0.0876632		1333.82	0.02713166		1863.81	0.00378128
274.03	0.42704167		804.02	0.08843664		1334.02	0.02658956		1864.01	0.00402382
274.23	0.42761943		804.22	0.08919744		1334.22	0.02719454		1864.21	0.00455202
274.43	0.42833067		804.42	0.08935212		1334.42	0.02784788		1864.41	0.00448785
274.63	0.42803709		804.62	0.09055964		1334.62	0.02731976		1864.61	0.00467477
274.83	0.428355		804.82	0.09150103		1334.82	0.02756642		1864.81	0.00419656
275.03	0.42880964		805.02	0.09176968		1335.02	0.02713002		1865.01	0.00498071
275.23	0.42923678		805.22	0.09211772		1335.22	0.02658818		1865.21	0.00452476
275.43	0.4299279		805.42	0.09253649		1335.42	0.02635349		1865.41	0.00604644
275.63	0.43033981		805.62	0.0923675		1335.62	0.02614002		1865.61	0.00626945
275.83	0.4314563		805.82	0.09294402		1335.82	0.02604618		1865.81	0.00618563
276.03	0.43189932		806.02	0.09261349		1336.02	0.02593187		1866.01	0.00639332
276.23	0.43250826		806.22	0.09302604		1336.22	0.02562407		1866.21	0.00663632
276.43	0.4330302		806.42	0.09360099		1336.42	0.02571857		1866.41	0.00716329
276.63	0.43387709		806.62	0.09372396		1336.62	0.0264112		1866.61	0.00822869
276.83	0.43461458		806.82	0.09385629		1336.82	0.02667864		1866.81	0.0084212
277.03	0.43461122		807.02	0.09286504		1337.02	0.02714883		1867.01	0.00891809
277.23	0.43375773		807.22	0.09252113		1337.22	0.0279454		1867.21	0.00932603
277.43	0.4339289		807.42	0.09201512		1337.42	0.02887264		1867.41	0.00983766
277.63	0.43394518		807.62	0.09193216		1337.62	0.03037601		1867.61	0.01072762
277.83	0.43433305		807.82	0.09185502		1337.82	0.03044534		1867.81	0.01046344
278.03	0.43440175		808.02	0.09243833		1338.02	0.03054559		1868.01	0.01126125
278.23	0.43539409		808.22	0.09219141		1338.22	0.0312541		1868.21	0.01090871
278.43	0.43579464		808.42	0.09241543		1338.42	0.0322328		1868.41	0.01077453
278.63	0.43558491		808.62	0.09280385		1338.62	0.0320325		1868.61	0.0104665
278.83	0.43754025		808.82	0.09407668		1338.82	0.03238322		1868.81	0.00982645
279.03	0.43798325		809.02	0.09460634		1339.02	0.03188069		1869.01	0.00873889
279.23	0.43902765		809.22	0.09512434		1339.22	0.03086647		1869.21	0.00901855
279.43	0.44034625		809.42	0.0964019		1339.42	0.03038245		1869.41	0.00851409
279.63	0.44128338		809.62	0.0965981		1339.62	0.03056282		1869.61	0.00847929
279.83	0.44152356		809.82	0.09777417		1339.82	0.03096193		1869.81	0.00767959
280.03	0.44122856		810.02	0.09862883		1340.02	0.03024564		1870.01	0.00732846
280.23	0.44114239		810.22	0.09971677		1340.22	0.03010334		1870.21	0.00714117
280.43	0.44150978		810.42	0.10088174		1340.42	0.02974626		1870.41	0.00664116
280.63	0.44084651		810.62	0.10052556		1340.62	0.02922409		1870.61	0.00569175
280.83	0.44057967		810.82	0.10096656		1340.82	0.0295424		1870.81	0.00561065
281.03	0.43986846		811.02	0.1008138		1341.02	0.02912013		1871.01	0.00564577
281.23	0.43936267		811.22	0.10087996		1341.22	0.03046978		1871.21	0.00543628
281.43	0.43967742		811.42	0.10061605		1341.42	0.03052238		1871.41	0.00607216
281.63	0.44024017		811.62	0.10042618		1341.62	0.02964554		1871.61	0.00702884
281.83	0.44139099		811.82	0.0999577		1341.82	0.02802559		1871.81	0.00612905
282.03	0.44159558		812.02	0.09962123		1342.02	0.02762889		1872.01	0.00761644
282.23	0.44200993		812.22	0.09936093		1342.22	0.02708552		1872.21	0.00800808
282.43	0.44235567		812.42	0.09907726		1342.42	0.0270753		1872.41	0.00806529
282.63	0.4434675		812.62	0.09849539		1342.62	0.02592354		1872.61	0.00693917
282.83	0.44417918		812.82	0.09794578		1342.82	0.02572714		1872.81	0.00732756
283.03	0.44445749		813.02	0.09716877		1343.02	0.02553915		1873.01	0.00824101
283.23	0.44494893		813.22	0.09706165		1343.22	0.02622799		1873.21	0.00945168
283.43	0.44570069		813.42	0.09662921		1343.42	0.02642058		1873.41	0.00818554
283.63	0.44613501		813.62	0.09573181		1343.62	0.02704435		1873.61	0.00866908
283.83	0.44621034		813.82	0.09588566		1343.82	0.02698775		1873.81	0.00803808
284.03	0.44694676		814.02	0.09606345		1344.02	0.0267227		1874.01	0.00826391
284.23	0.44675044		814.22	0.09683965		1344.22	0.02741801		1874.21	0.0082838
284.43	0.4469182		814.42	0.09694643		1344.42	0.0280272		1874.41	0.00759877
284.63	0.44693158		814.62	0.09697791		1344.62	0.02791255		1874.61	0.00667995
284.83	0.44736603		814.82	0.09749605		1344.82	0.02772882		1874.81	0.00689813
285.03	0.44758879		815.02	0.09737506		1345.02	0.0274362		1875.01	0.00664794
285.23	0.44817345		815.22	0.09809259		1345.22	0.02796558		1875.21	0.00656629
285.43	0.44920544		815.42	0.09913159		1345.42	0.02617693		1875.41	0.00663762
285.63	0.44973965		815.62	0.10002339		1345.62	0.02544348		1875.61	0.0069615
285.83	0.45019183		815.82	0.10061354		1345.82	0.02480183		1875.81	0.00658484
286.03	0.44999474		816.02	0.10160563		1346.02	0.02500651		1876.01	0.00804026
286.23	0.45008491		816.22	0.10240596		1346.22	0.02487278		1876.21	0.00737802
286.43	0.45112727		816.42	0.10282824		1346.42	0.02530011		1876.41	0.00744462
286.63	0.45115898		816.62	0.1027266		1346.62	0.02482853		1876.61	0.00746145
286.83	0.45131066		816.82	0.10272895		1346.82	0.02543188		1876.81	0.00850802
287.03	0.45185685		817.02	0.10298397		1347.02	0.02631672		1877.01	0.00822366
287.23	0.45279199		817.22	0.10278433		1347.22	0.02669721		1877.21	0.00811056
287.43	0.45387608		817.42	0.10283991		1347.42	0.02608857		1877.41	0.00688293
287.63	0.45471903		817.62	0.10163526		1347.62	0.02648269		1877.61	0.00702907
287.83	0.45528434		817.82	0.10212665		1347.82	0.02575717		1877.81	0.00738887
288.03	0.45545073		818.02	0.10236628		1348.02	0.02578976		1878.01	0.00789925
288.23	0.45483891		818.22	0.10262535		1348.22	0.02622939		1878.21	0.00821742
288.43	0.45487232		818.42	0.10195228		1348.42	0.02684097		1878.41	0.00803815
288.63	0.45470838		818.62	0.10300543		1348.62	0.02625185		1878.61	0.0071031
288.83	0.45450083		818.82	0.10327699		1348.82	0.02535825		1878.81	0.00705284
289.03	0.45437024		819.02	0.10360944		1349.02	0.02632048		1879.01	0.00617636
289.23	0.45471056		819.22	0.10469084		1349.22	0.02714229		1879.21	0.00573282
289.43	0.45439896		819.42	0.10514953		1349.42	0.02640483		1879.41	0.00528724
289.63	0.4545179		819.62	0.10493534		1349.62	0.02699459		1879.61	0.00627425
289.83	0.4549562		819.82	0.10501433		1349.82	0.02686897		1879.81	0.00649574
290.03	0.45500335		820.02	0.10558685		1350.02	0.02770174		1880.01	0.00811873
290.23	0.45572471		820.22	0.1056629		1350.22	0.0279063		1880.21	0.00850281
290.43	0.45650928		820.42	0.10556933		1350.42	0.0287794		1880.41	0.00897156
290.63	0.45653927		820.62	0.10577606		1350.62	0.02848472		1880.61	0.00890038
290.83	0.45809997		820.82	0.10616265		1350.82	0.02852473		1880.81	0.00837262
291.03	0.45879064		821.02	0.10632159		1351.02	0.02927809		1881.01	0.00715813
291.23	0.46020093		821.22	0.10637061		1351.22	0.02921976		1881.21	0.00726667
291.43	0.460602		821.42	0.10584314		1351.42	0.02906204		1881.41	0.0065698
291.63	0.46159737		821.62	0.10533267		1351.62	0.02844273		1881.61	0.00653508
291.83	0.46238727		821.82	0.10679655		1351.82	0.02784701		1881.81	0.00704426
292.03	0.46310512		822.02	0.10732829		1352.02	0.02784523		1882.01	0.00720198
292.23	0.46335171		822.22	0.10802201		1352.22	0.02844136		1882.21	0.00721224
292.43	0.46338387		822.42	0.10992792		1352.42	0.02867229		1882.41	0.00700476
292.63	0.46338882		822.62	0.11156205		1352.62	0.02795231		1882.61	0.00722194
292.83	0.46318526		822.82	0.11156196		1352.82	0.02787165		1882.81	0.00703575
293.03	0.4628749		823.02	0.11216716		1353.02	0.02854568		1883.01	0.00649429
293.23	0.4627823		823.22	0.11194446		1353.22	0.02855223		1883.21	0.00680137
293.43	0.46204596		823.42	0.11183852		1353.42	0.02756656		1883.41	0.0069789
293.63	0.4615595		823.62	0.1111737		1353.62	0.02806873		1883.61	0.00820276
293.83	0.46146503		823.82	0.11135979		1353.82	0.02745572		1883.81	0.00832223
294.03	0.4616946		824.02	0.11060984		1354.02	0.02683325		1884.01	0.0087688
294.23	0.46205297		824.22	0.10986224		1354.22	0.02650857		1884.21	0.00840271
294.43	0.46133245		824.42	0.10990606		1354.42	0.02643755		1884.41	0.00852727
294.63	0.46119089		824.62	0.10961038		1354.62	0.0251884		1884.61	0.00851659
294.83	0.46164816		824.82	0.10931769		1354.82	0.02551266		1884.81	0.00768072
295.03	0.46126708		825.02	0.10964191		1355.02	0.02564217		1885.01	0.00686844
295.23	0.46228709		825.22	0.10994384		1355.22	0.02601814		1885.21	0.00718219
295.43	0.46297513		825.42	0.11040927		1355.42	0.02662228		1885.41	0.00684741
295.63	0.46403187		825.62	0.11119777		1355.62	0.02680852		1885.61	0.0071311
295.83	0.46472737		825.82	0.11181173		1355.82	0.02711272		1885.81	0.0071153
296.03	0.46503824		826.02	0.11205238		1356.02	0.02786225		1886.01	0.00719652
296.23	0.46515375		826.22	0.11270693		1356.22	0.02884537		1886.21	0.00792
296.43	0.46482873		826.42	0.11331363		1356.42	0.02952264		1886.41	0.00809049
296.63	0.46474672		826.62	0.11297388		1356.62	0.02928663		1886.61	0.0082204
296.83	0.46495105		826.82	0.11222546		1356.82	0.02974939		1886.81	0.00827389
297.03	0.46598692		827.02	0.1124523		1357.02	0.02963557		1887.01	0.00836841
297.23	0.46615899		827.22	0.11280031		1357.22	0.02988227		1887.21	0.00814068
297.43	0.46641959		827.42	0.11318977		1357.42	0.02906369		1887.41	0.00836998
297.63	0.46675336		827.62	0.11243665		1357.62	0.02962525		1887.61	0.00847502
297.83	0.46774923		827.82	0.11276999		1357.82	0.02886065		1887.81	0.00834129
298.03	0.46822901		828.02	0.11263641		1358.02	0.02890057		1888.01	0.0082216
298.23	0.46809105		828.22	0.11335858		1358.22	0.02954968		1888.21	0.00786571
298.43	0.46790782		828.42	0.11419352		1358.42	0.02970321		1888.41	0.00788621
298.63	0.46917537		828.62	0.11466315		1358.62	0.02929595		1888.61	0.0070063
298.83	0.46914202		828.82	0.11596321		1358.82	0.02928218		1888.81	0.00582561
299.03	0.46994908		829.02	0.11656194		1359.02	0.02923276		1889.01	0.0053195
299.23	0.47078573		829.22	0.11742975		1359.22	0.02967713		1889.21	0.00427172
299.43	0.470868		829.42	0.11768377		1359.42	0.02947393		1889.41	0.00412352
299.63	0.47049615		829.62	0.11704413		1359.62	0.02893853		1889.61	0.00399266
299.83	0.47064656		829.82	0.11618695		1359.82	0.0290633		1889.81	0.00332508
300.03	0.47063363		830.02	0.11535806		1360.02	0.02924964		1890.01	0.00320841
300.23	0.47129135		830.22	0.11523409		1360.22	0.0291768		1890.21	0.00331398
300.43	0.47099784		830.42	0.11503886		1360.42	0.02859144		1890.41	0.00294625
300.63	0.47181209		830.62	0.11518073		1360.62	0.02743657		1890.61	0.00347656
300.83	0.47332969		830.82	0.1153721		1360.82	0.02757908		1890.81	0.00480786
301.03	0.47407652		831.02	0.11643363		1361.02	0.02685973		1891.01	0.00549002
301.23	0.47430798		831.22	0.11721214		1361.22	0.0254224		1891.21	0.00512385
301.43	0.47505585		831.42	0.11708013		1361.42	0.02485911		1891.41	0.00602796
301.63	0.47580175		831.62	0.11713924		1361.62	0.02538833		1891.61	0.00668315
301.83	0.47612211		831.82	0.11837499		1361.82	0.02638567		1891.81	0.00660869
302.03	0.47606364		832.02	0.11915246		1362.02	0.02740989		1892.01	0.00713951
302.23	0.475081		832.22	0.12010266		1362.22	0.02729079		1892.21	0.00693514
302.43	0.47512953		832.42	0.12108255		1362.42	0.02729248		1892.41	0.00684859
302.63	0.4745462		832.62	0.12151716		1362.62	0.0271653		1892.61	0.00718923
302.83	0.47416852		832.82	0.1211623		1362.82	0.02692667		1892.81	0.00749481
303.03	0.47478641		833.02	0.12052251		1363.02	0.02737814		1893.01	0.00782794
303.23	0.47477577		833.22	0.12106661		1363.22	0.02705292		1893.21	0.0074504
303.43	0.47464817		833.42	0.1214297		1363.42	0.02768015		1893.41	0.00763157
303.63	0.47388303		833.62	0.12110243		1363.62	0.0277273		1893.61	0.00649891
303.83	0.47446781		833.82	0.12070626		1363.82	0.02871044		1893.81	0.00589884
304.03	0.47461284		834.02	0.12071676		1364.02	0.02807251		1894.01	0.00598219
304.23	0.47502723		834.22	0.12153532		1364.22	0.02724859		1894.21	0.00575785
304.43	0.4744256		834.42	0.12090686		1364.42	0.02694102		1894.41	0.00589653
304.63	0.47544308		834.62	0.12034006		1364.62	0.02681069		1894.61	0.0063677
304.83	0.47622085		834.82	0.11995422		1364.82	0.02668051		1894.81	0.00692268
305.03	0.47656867		835.02	0.11984564		1365.02	0.02548138		1895.01	0.00729226
305.23	0.47782051		835.22	0.11930042		1365.22	0.02530882		1895.21	0.00682659
305.43	0.47853267		835.42	0.1187985		1365.42	0.02615628		1895.41	0.00684217
305.63	0.47928664		835.62	0.11885001		1365.62	0.02677356		1895.61	0.00708364
305.83	0.47916599		835.82	0.1194449		1365.82	0.0276278		1895.81	0.00651382
306.03	0.48034098		836.02	0.11981237		1366.02	0.02720051		1896.01	0.0067765
306.23	0.48075138		836.22	0.12059612		1366.22	0.02608315		1896.21	0.0067618
306.43	0.48179777		836.42	0.12107171		1366.42	0.02616655		1896.41	0.00708559
306.63	0.48190002		836.62	0.12225341		1366.62	0.02675495		1896.61	0.00772265
306.83	0.48275982		836.82	0.12239504		1366.82	0.02681081		1896.81	0.00710196
307.03	0.48210148		837.02	0.12335638		1367.02	0.0270838		1897.01	0.00650033
307.23	0.48283582		837.22	0.12504244		1367.22	0.02691787		1897.21	0.00638407
307.43	0.4818708		837.42	0.1262788		1367.42	0.02689406		1897.41	0.00578172
307.63	0.48168856		837.62	0.12590283		1367.62	0.02649415		1897.61	0.00512114
307.83	0.48181567		837.82	0.12608924		1367.82	0.02619863		1897.81	0.00547857
308.03	0.48139188		838.02	0.12581195		1368.02	0.02479553		1898.01	0.00526049
308.23	0.48119033		838.22	0.12521401		1368.22	0.02545006		1898.21	0.00469264
308.43	0.48107124		838.42	0.12454907		1368.42	0.02602448		1898.41	0.00584545
308.63	0.48134011		838.62	0.12419648		1368.62	0.02611931		1898.61	0.0061006
308.83	0.48093798		838.82	0.12359881		1368.82	0.0269497		1898.81	0.00619941
309.03	0.48129908		839.02	0.12262699		1369.02	0.02679841		1899.01	0.00645091
309.23	0.48173235		839.22	0.1216381		1369.22	0.02715696		1899.21	0.00617835
309.43	0.4820421		839.42	0.12130101		1369.42	0.02690329		1899.41	0.00632302
309.63	0.48259668		839.62	0.12228622		1369.62	0.02727795		1899.61	0.00733812
309.83	0.48308656		839.82	0.12266203		1369.82	0.02770055		1899.81	0.00738401
310.03	0.48422254		840.02	0.12308755		1370.02	0.02712022		1900.01	0.00761214
310.23	0.48446461		840.22	0.12386106		1370.22	0.02647456		1900.21	0.00841265
310.43	0.48448534		840.42	0.12415037		1370.42	0.02673278		1900.41	0.00837583
310.63	0.48442445		840.62	0.12607085		1370.62	0.02734543		1900.61	0.0082992
310.83	0.48549518		840.82	0.12671159		1370.82	0.02766874		1900.81	0.00773138
311.03	0.48519411		841.02	0.12714156		1371.02	0.0275718		1901.01	0.00699215
311.23	0.48571754		841.22	0.12855034		1371.22	0.0283487		1901.21	0.00679277
311.43	0.48594732		841.42	0.12835572		1371.42	0.02858817		1901.41	0.00642447
311.63	0.48711132		841.62	0.1287129		1371.62	0.02917506		1901.61	0.00599422
311.83	0.48659181		841.82	0.12899083		1371.82	0.02930197		1901.81	0.00550762
312.03	0.48715764		842.02	0.12820497		1372.02	0.0298484		1902.01	0.00603008
312.23	0.48732746		842.22	0.12776807		1372.22	0.03072542		1902.21	0.00639707
312.43	0.4874477		842.42	0.12740247		1372.42	0.0307146		1902.41	0.00646988
312.63	0.48719927		842.62	0.12684427		1372.62	0.03099528		1902.61	0.00576343
312.83	0.48736074		842.82	0.1263806		1372.82	0.03127386		1902.81	0.00567866
313.03	0.48810749		843.02	0.12570789		1373.02	0.03082306		1903.01	0.00612597
313.23	0.48861636		843.22	0.12591871		1373.22	0.03099868		1903.21	0.00616812
313.43	0.4889706		843.42	0.12641217		1373.42	0.03068292		1903.41	0.00695708
313.63	0.48904673		843.62	0.12658989		1373.62	0.03075013		1903.61	0.00747896
313.83	0.48905872		843.82	0.12635842		1373.82	0.0295481		1903.81	0.00693603
314.03	0.4894896		844.02	0.12586616		1374.02	0.02823165		1904.01	0.00657484
314.23	0.49073322		844.22	0.12610857		1374.22	0.02781933		1904.21	0.00679539
314.43	0.49117254		844.42	0.12608992		1374.42	0.02712085		1904.41	0.00572928
314.63	0.49151475		844.62	0.12738087		1374.62	0.02678817		1904.61	0.0053641
314.83	0.49256322		844.82	0.1273419		1374.82	0.02664774		1904.81	0.00461508
315.03	0.49216784		845.02	0.12804473		1375.02	0.02735137		1905.01	0.00394545
315.23	0.49292251		845.22	0.129563		1375.22	0.02740388		1905.21	0.00441009
315.43	0.49310832		845.42	0.12903849		1375.42	0.02720098		1905.41	0.00546425
315.63	0.49307544		845.62	0.12923972		1375.62	0.02737256		1905.61	0.00618357
315.83	0.49178434		845.82	0.12850289		1375.82	0.02727705		1905.81	0.00642475
316.03	0.49190067		846.02	0.12806199		1376.02	0.02700663		1906.01	0.00720844
316.23	0.49161146		846.22	0.12825908		1376.22	0.02680729		1906.21	0.00616403
316.43	0.49170655		846.42	0.12839678		1376.42	0.02775162		1906.41	0.00623294
316.63	0.49249442		846.62	0.1290164		1376.62	0.02801487		1906.61	0.00698782
316.83	0.4924119		846.82	0.12940619		1376.82	0.02755661		1906.81	0.00721112
317.03	0.49259104		847.02	0.12976302		1377.02	0.02777117		1907.01	0.00782925
317.23	0.49407325		847.22	0.13005832		1377.22	0.02780026		1907.21	0.00860922
317.43	0.49483067		847.42	0.13019284		1377.42	0.02781262		1907.41	0.00872366
317.63	0.49517679		847.62	0.12954858		1377.62	0.02842945		1907.61	0.00898985
317.83	0.49573345		847.82	0.13069514		1377.82	0.02804607		1907.81	0.0082238
318.03	0.49677532		848.02	0.13059868		1378.02	0.02848774		1908.01	0.00831574
318.23	0.49778485		848.22	0.13159469		1378.22	0.02807627		1908.21	0.00826983
318.43	0.49825031		848.42	0.13295958		1378.42	0.02754331		1908.41	0.00733739
318.63	0.49887728		848.62	0.13391007		1378.62	0.02803788		1908.61	0.00697028
318.83	0.49887582		848.82	0.13316209		1378.82	0.02898767		1908.81	0.00669286
319.03	0.49914112		849.02	0.13355857		1379.02	0.03029313		1909.01	0.00609083
319.23	0.49924915		849.22	0.13388034		1379.22	0.02929579		1909.21	0.00586933
319.43	0.49865173		849.42	0.13336263		1379.42	0.02974134		1909.41	0.00562665
319.63	0.49933234		849.62	0.13407928		1379.62	0.02966263		1909.61	0.0043417
319.83	0.49878033		849.82	0.13459387		1379.82	0.02976849		1909.81	0.00286091
320.03	0.49916339		850.02	0.13471363		1380.02	0.02933877		1910.01	0.00255854
320.23	0.49858393		850.22	0.13498216		1380.22	0.02950897		1910.21	0.00333529
320.43	0.4984972		850.42	0.13549656		1380.42	0.02978744		1910.41	0.00402521
320.63	0.49921291		850.62	0.13544069		1380.62	0.02828209		1910.61	0.00372992
320.83	0.49927176		850.82	0.13638363		1380.82	0.02594576		1910.81	0.00391676
321.03	0.49986799		851.02	0.13624821		1381.02	0.02628116		1911.01	0.00527272
321.23	0.50084376		851.22	0.13705547		1381.22	0.02641844		1911.21	0.00585599
321.43	0.5006493		851.42	0.13712592		1381.42	0.02651178		1911.41	0.00595729
321.63	0.5005586		851.62	0.13709443		1381.62	0.0259965		1911.61	0.00716351
321.83	0.50035701		851.82	0.13827393		1381.82	0.02501633		1911.81	0.006846
322.03	0.50043333		852.02	0.13817284		1382.02	0.02533357		1912.01	0.00780756
322.23	0.50071486		852.22	0.13900683		1382.22	0.02486579		1912.21	0.00756845
322.43	0.50001673		852.42	0.13955264		1382.42	0.02428295		1912.41	0.00673577
322.63	0.49952124		852.62	0.13892164		1382.62	0.02466508		1912.61	0.00776772
322.83	0.49832923		852.82	0.13808381		1382.82	0.02530954		1912.81	0.0077485
323.03	0.49942699		853.02	0.13878163		1383.02	0.02556066		1913.01	0.0064128
323.23	0.49955255		853.22	0.13911294		1383.22	0.02442773		1913.21	0.00604538
323.43	0.50018552		853.42	0.13957195		1383.42	0.02502536		1913.41	0.00573978
323.63	0.50033344		853.62	0.13975099		1383.62	0.02463044		1913.61	0.00537865
323.83	0.49987096		853.82	0.13897777		1383.82	0.02508924		1913.81	0.00575291
324.03	0.50091887		854.02	0.13813505		1384.02	0.02564733		1914.01	0.00588036
324.23	0.50093219		854.22	0.13823816		1384.22	0.02684234		1914.21	0.00634243
324.43	0.50260135		854.42	0.13846769		1384.42	0.02747902		1914.41	0.0055939
324.63	0.50348987		854.62	0.13816482		1384.62	0.02661567		1914.61	0.00521123
324.83	0.50440989		854.82	0.13838616		1384.82	0.02640449		1914.81	0.00547576
325.03	0.50477632		855.02	0.13782375		1385.02	0.02784398		1915.01	0.00576832
325.23	0.50560447		855.22	0.13829904		1385.22	0.02736184		1915.21	0.00529994
325.43	0.50579138		855.42	0.13809089		1385.42	0.02675596		1915.41	0.00605754
325.63	0.50543783		855.62	0.13765972		1385.62	0.02628641		1915.61	0.00666596
325.83	0.50483729		855.82	0.13719557		1385.82	0.02602582		1915.81	0.00667395
326.03	0.50514757		856.02	0.13814012		1386.02	0.02696033		1916.01	0.00681898
326.23	0.504571		856.22	0.13924315		1386.22	0.02743792		1916.21	0.00679601
326.43	0.50336283		856.42	0.13928475		1386.42	0.02694989		1916.41	0.00572537
326.63	0.50406946		856.62	0.13998374		1386.62	0.02752751		1916.61	0.00698322
326.83	0.5038888		856.82	0.14032073		1386.82	0.02852294		1916.81	0.00579787
327.03	0.50466106		857.02	0.14094192		1387.02	0.02824434		1917.01	0.00507175
327.23	0.50452472		857.22	0.1415122		1387.22	0.02829787		1917.21	0.0053996
327.43	0.50431468		857.42	0.14233059		1387.42	0.02831683		1917.41	0.00590695
327.63	0.50371949		857.62	0.14234136		1387.62	0.02768398		1917.61	0.00525625
327.83	0.50434596		857.82	0.14214939		1387.82	0.02854051		1917.81	0.00494222
328.03	0.50544494		858.02	0.14237069		1388.02	0.0297542		1918.01	0.00481111
328.23	0.50552249		858.22	0.14350277		1388.22	0.02936102		1918.21	0.00604306
328.43	0.50637041		858.42	0.14378817		1388.42	0.02864834		1918.41	0.00589609
328.63	0.50653117		858.62	0.14385336		1388.62	0.02781317		1918.61	0.00619198
328.83	0.50686278		858.82	0.14335331		1388.82	0.02756375		1918.81	0.0070126
329.03	0.50700448		859.02	0.14344433		1389.02	0.02741946		1919.01	0.00790579
329.23	0.50760076		859.22	0.14370663		1389.22	0.02586909		1919.21	0.00845698
329.43	0.50802592		859.42	0.14390613		1389.42	0.02547314		1919.41	0.00906199
329.63	0.50900768		859.62	0.14216402		1389.62	0.02523264		1919.61	0.00930955
329.83	0.50917117		859.82	0.14167526		1389.82	0.02563252		1919.81	0.00924361
330.03	0.5095856		860.02	0.14296649		1390.02	0.02710848		1920.01	0.00876692
330.23	0.50991223		860.22	0.1423197		1390.22	0.02722542		1920.21	0.00832924
330.43	0.51086453		860.42	0.1418899		1390.42	0.02721552		1920.41	0.00799393
330.63	0.51257802		860.62	0.14251139		1390.62	0.0278886		1920.61	0.00839645
330.83	0.51331988		860.82	0.14258057		1390.82	0.02892581		1920.81	0.00769038
331.03	0.5138498		861.02	0.14275124		1391.02	0.02898711		1921.01	0.00749334
331.23	0.51475193		861.22	0.14270594		1391.22	0.0287215		1921.21	0.0073435
331.43	0.51472148		861.42	0.14340946		1391.42	0.02774614		1921.41	0.00706633
331.63	0.51526857		861.62	0.1426133		1391.62	0.02785506		1921.61	0.00596446
331.83	0.51581477		861.82	0.14254321		1391.82	0.02777264		1921.81	0.00672833
332.03	0.51565196		862.02	0.1431958		1392.02	0.02744119		1922.01	0.00669939
332.23	0.51522694		862.22	0.14435217		1392.22	0.02531874		1922.21	0.00622723
332.43	0.5146487		862.42	0.14478088		1392.42	0.02503955		1922.41	0.00580753
332.63	0.51440632		862.62	0.14523642		1392.62	0.02532209		1922.61	0.00586335
332.83	0.51357624		862.82	0.1452759		1392.82	0.0251561		1922.81	0.00700033
333.03	0.51363531		863.02	0.1462266		1393.02	0.02473777		1923.01	0.00633727
333.23	0.51433822		863.22	0.14620797		1393.22	0.02416694		1923.21	0.00655254
333.43	0.51471116		863.42	0.1464898		1393.42	0.0248436		1923.41	0.00637732
333.63	0.514555		863.62	0.14660092		1393.62	0.02483228		1923.61	0.00689475
333.83	0.51370223		863.82	0.14765583		1393.82	0.02554957		1923.81	0.00697545
334.03	0.51338365		864.02	0.14895038		1394.02	0.02604379		1924.01	0.00706875
334.23	0.51332022		864.22	0.14829423		1394.22	0.02593019		1924.21	0.00699417
334.43	0.51389719		864.42	0.14909775		1394.42	0.02572662		1924.41	0.00801561
334.63	0.51464556		864.62	0.15023257		1394.62	0.02614585		1924.61	0.00704829
334.83	0.51446473		864.82	0.15055364		1394.82	0.0272252		1924.81	0.00704667
335.03	0.51501982		865.02	0.15045961		1395.02	0.02723694		1925.01	0.00645209
335.23	0.51529006		865.22	0.14980311		1395.22	0.02728476		1925.21	0.00684119
335.43	0.51539532		865.42	0.14998833		1395.42	0.02682683		1925.41	0.00705647
335.63	0.51659386		865.62	0.14860656		1395.62	0.0265495		1925.61	0.006714
335.83	0.51608279		865.82	0.14891286		1395.82	0.02631262		1925.81	0.00735839
336.03	0.51594277		866.02	0.14851399		1396.02	0.02572087		1926.01	0.00735296
336.23	0.51617344		866.22	0.14924285		1396.22	0.02460971		1926.21	0.0075409
336.43	0.51608281		866.42	0.14940122		1396.42	0.0246193		1926.41	0.00768676
336.63	0.51639296		866.62	0.149083		1396.62	0.02520044		1926.61	0.00834759
336.83	0.51596985		866.82	0.14867808		1396.82	0.0249279		1926.81	0.00899326
337.03	0.51646734		867.02	0.14865176		1397.02	0.02557843		1927.01	0.00830455
337.23	0.51624132		867.22	0.14945216		1397.22	0.02587563		1927.21	0.00919329
337.43	0.51575284		867.42	0.15022399		1397.42	0.02624448		1927.41	0.00934058
337.63	0.51518031		867.62	0.14989539		1397.62	0.02677003		1927.61	0.00988743
337.83	0.51469249		867.82	0.15021519		1397.82	0.02671067		1927.81	0.00889379
338.03	0.51428992		868.02	0.15071922		1398.02	0.02650936		1928.01	0.00849206
338.23	0.51433903		868.22	0.15062919		1398.22	0.02697259		1928.21	0.00773317
338.43	0.51436659		868.42	0.15230725		1398.42	0.02696425		1928.41	0.00815546
338.63	0.51482892		868.62	0.15346199		1398.62	0.02786571		1928.61	0.00719566
338.83	0.51418237		868.82	0.15356698		1398.82	0.02890003		1928.81	0.00713422
339.03	0.51483951		869.02	0.1538796		1399.02	0.02794486		1929.01	0.00653178
339.23	0.51491095		869.22	0.15394723		1399.22	0.02810884		1929.21	0.00731915
339.43	0.51632213		869.42	0.15370984		1399.42	0.02720345		1929.41	0.00737784
339.63	0.51729646		869.62	0.1541613		1399.62	0.02712511		1929.61	0.00731618
339.83	0.51719167		869.82	0.15429149		1399.82	0.02710158		1929.81	0.00846966
340.03	0.51788256		870.02	0.15435635		1400.02	0.02648894		1930.01	0.00863284
340.23	0.51857497		870.22	0.15501384		1400.22	0.02566472		1930.21	0.00901567
340.43	0.518849		870.42	0.15541501		1400.42	0.02531946		1930.41	0.00968051
340.63	0.51983985		870.62	0.15478738		1400.62	0.02576211		1930.61	0.01083233
340.83	0.52103041		870.82	0.15540389		1400.82	0.02489736		1930.81	0.0111784
341.03	0.52165358		871.02	0.15597791		1401.02	0.02513618		1931.01	0.01149292
341.23	0.52107148		871.22	0.15627621		1401.22	0.02497934		1931.21	0.01175685
341.43	0.52162347		871.42	0.15462243		1401.42	0.02561964		1931.41	0.01129987
341.63	0.5221655		871.62	0.15439586		1401.62	0.02602881		1931.61	0.01042272
341.83	0.52299035		871.82	0.1547467		1401.82	0.02623071		1931.81	0.00989824
342.03	0.52420313		872.02	0.15467801		1402.02	0.02737556		1932.01	0.00942314
342.23	0.52501594		872.22	0.15457263		1402.22	0.02849935		1932.21	0.0095634
342.43	0.52551978		872.42	0.1548311		1402.42	0.02909872		1932.41	0.0094311
342.63	0.52540112		872.62	0.15437596		1402.62	0.02930469		1932.61	0.00850533
342.83	0.52381436		872.82	0.15405759		1402.82	0.03001542		1932.81	0.00831772
343.03	0.52435772		873.02	0.15396165		1403.02	0.03011395		1933.01	0.00809167
343.23	0.52460759		873.22	0.15416118		1403.22	0.0293815		1933.21	0.00801544
343.43	0.52512653		873.42	0.15431743		1403.42	0.02954957		1933.41	0.00838842
343.63	0.52453545		873.62	0.15541284		1403.62	0.02976696		1933.61	0.0083338
343.83	0.52470417		873.82	0.15588703		1403.82	0.02918397		1933.81	0.00869843
344.03	0.5238676		874.02	0.15731954		1404.02	0.02904062		1934.01	0.00841195
344.23	0.52443812		874.22	0.158038		1404.22	0.02825538		1934.21	0.00841823
344.43	0.52484099		874.42	0.15829804		1404.42	0.02822724		1934.41	0.00917195
344.63	0.52511179		874.62	0.15885212		1404.62	0.0278702		1934.61	0.00924729
344.83	0.52561798		874.82	0.15985651		1404.82	0.02726541		1934.81	0.00945221
345.03	0.52490984		875.02	0.15985284		1405.02	0.02760056		1935.01	0.00890716
345.23	0.52456777		875.22	0.15948641		1405.22	0.02770952		1935.21	0.00798166
345.43	0.52572724		875.42	0.15936137		1405.42	0.02845178		1935.41	0.00751942
345.63	0.52632399		875.62	0.15974035		1405.62	0.02776448		1935.61	0.00720238
345.83	0.52701651		875.82	0.15984849		1405.82	0.02786824		1935.81	0.00797346
346.03	0.52731085		876.02	0.16008842		1406.02	0.02832836		1936.01	0.00721136
346.23	0.52726577		876.22	0.15977589		1406.22	0.02857328		1936.21	0.00711994
346.43	0.52693019		876.42	0.15950555		1406.42	0.0287033		1936.41	0.00714893
346.63	0.52627097		876.62	0.15918924		1406.62	0.02842071		1936.61	0.00726848
346.83	0.52668388		876.82	0.15952055		1406.82	0.02829595		1936.81	0.00755323
347.03	0.52798598		877.02	0.15932249		1407.02	0.02825446		1937.01	0.00721598
347.23	0.52898506		877.22	0.16029797		1407.22	0.02734087		1937.21	0.00739595
347.43	0.52917613		877.42	0.16021297		1407.42	0.02866052		1937.41	0.00817711
347.63	0.52894573		877.62	0.160268		1407.62	0.02958142		1937.61	0.00759649
347.83	0.52936375		877.82	0.16091089		1407.82	0.02928798		1937.81	0.00750958
348.03	0.52872707		878.02	0.16105227		1408.02	0.02956323		1938.01	0.00708468
348.23	0.52936667		878.22	0.16062809		1408.22	0.03027282		1938.21	0.00666966
348.43	0.52940967		878.42	0.16144236		1408.42	0.03055656		1938.41	0.00759928
348.63	0.5291781		878.62	0.16168032		1408.62	0.03030905		1938.61	0.00769654
348.83	0.52937567		878.82	0.16162493		1408.82	0.03034944		1938.81	0.00782751
349.03	0.53000895		879.02	0.16191889		1409.02	0.03069753		1939.01	0.00755728
349.23	0.53041251		879.22	0.16239717		1409.22	0.03121483		1939.21	0.00673454
349.43	0.53112583		879.42	0.16274139		1409.42	0.03185698		1939.41	0.00655299
349.63	0.53030423		879.62	0.16333364		1409.62	0.0299826		1939.61	0.00652119
349.83	0.53054163		879.82	0.16356013		1409.82	0.02968437		1939.81	0.00688248
350.03	0.53049737		880.02	0.16395825		1410.02	0.02993916		1940.01	0.00669378
350.23	0.53052646		880.22	0.16378441		1410.22	0.03014796		1940.21	0.00651078
350.43	0.5314463		880.42	0.16348926		1410.42	0.02993314		1940.41	0.0075559
350.63	0.5320662		880.62	0.16367093		1410.62	0.03066084		1940.61	0.00773241
350.83	0.53265529		880.82	0.16341581		1410.82	0.03061397		1940.81	0.00832282
351.03	0.5327599		881.02	0.16300886		1411.02	0.03114719		1941.01	0.00861597
351.23	0.53297924		881.22	0.16357135		1411.22	0.03145215		1941.21	0.00958796
351.43	0.53245077		881.42	0.16269605		1411.42	0.0319505		1941.41	0.00972344
351.63	0.53193289		881.62	0.16274317		1411.62	0.03229254		1941.61	0.00945349
351.83	0.53190879		881.82	0.16280394		1411.82	0.03120606		1941.81	0.00979965
352.03	0.53163949		882.02	0.1630916		1412.02	0.03100162		1942.01	0.01014733
352.23	0.5308844		882.22	0.163844		1412.22	0.03175379		1942.21	0.01019406
352.43	0.53039001		882.42	0.16500295		1412.42	0.03049516		1942.41	0.01087838
352.63	0.52953319		882.62	0.16497113		1412.62	0.02933703		1942.61	0.01045793
352.83	0.52948411		882.82	0.16589509		1412.82	0.02894444		1942.81	0.0098157
353.03	0.53013742		883.02	0.16727194		1413.02	0.02852563		1943.01	0.0095801
353.23	0.52973253		883.22	0.16734961		1413.22	0.02760187		1943.21	0.00910416
353.43	0.53029222		883.42	0.16734818		1413.42	0.02643551		1943.41	0.00875039
353.63	0.53033868		883.62	0.16794151		1413.62	0.02474906		1943.61	0.00861295
353.83	0.53159509		883.82	0.1674907		1413.82	0.02432389		1943.81	0.00835467
354.03	0.53192944		884.02	0.1670545		1414.02	0.02411355		1944.01	0.00773337
354.23	0.53315042		884.22	0.16596975		1414.22	0.02491095		1944.21	0.00754903
354.43	0.53470312		884.42	0.16571337		1414.42	0.02452521		1944.41	0.00789251
354.63	0.53553442		884.62	0.16500301		1414.62	0.02457333		1944.61	0.00814443
354.83	0.5361369		884.82	0.1642974		1414.82	0.02442593		1944.81	0.00758448
355.03	0.5366881		885.02	0.16401638		1415.02	0.02561045		1945.01	0.00786745
355.23	0.53764002		885.22	0.16396827		1415.22	0.02673982		1945.21	0.00861364
355.43	0.53883632		885.42	0.16369387		1415.42	0.02745454		1945.41	0.0080956
355.63	0.53918835		885.62	0.16341893		1415.62	0.02763742		1945.61	0.00850115
355.83	0.54056897		885.82	0.16379904		1415.82	0.02834526		1945.81	0.00851187
356.03	0.53998459		886.02	0.16482346		1416.02	0.02972506		1946.01	0.00869583
356.23	0.53977763		886.22	0.16554448		1416.22	0.03094337		1946.21	0.00879797
356.43	0.53971721		886.42	0.16674951		1416.42	0.03022959		1946.41	0.00841866
356.63	0.5393949		886.62	0.16831074		1416.62	0.02933663		1946.61	0.00850569
356.83	0.53988697		886.82	0.16932572		1416.82	0.02974698		1946.81	0.00877657
357.03	0.54018199		887.02	0.1693322		1417.02	0.02880243		1947.01	0.0092603
357.23	0.5404091		887.22	0.16947331		1417.22	0.02924052		1947.21	0.00989143
357.43	0.54084444		887.42	0.17023072		1417.42	0.02842455		1947.41	0.00944962
357.63	0.54095756		887.62	0.17074829		1417.62	0.02860261		1947.61	0.00906463
357.83	0.54097087		887.82	0.17070405		1417.82	0.02805508		1947.81	0.00914391
358.03	0.5412809		888.02	0.16999652		1418.02	0.02736107		1948.01	0.00857045
358.23	0.54088574		888.22	0.16995032		1418.22	0.02838714		1948.21	0.00852125
358.43	0.54042808		888.42	0.17013577		1418.42	0.02700359		1948.41	0.00895895
358.63	0.54039312		888.62	0.1693515		1418.62	0.02604143		1948.61	0.00858139
358.83	0.54038527		888.82	0.16966574		1418.82	0.02639375		1948.81	0.00847399
359.03	0.53975344		889.02	0.17017569		1419.02	0.02737845		1949.01	0.0097438
359.23	0.53939473		889.22	0.1705809		1419.22	0.02804111		1949.21	0.0090967
359.43	0.53960572		889.42	0.17079814		1419.42	0.02819634		1949.41	0.00877672
359.63	0.53945917		889.62	0.17108299		1419.62	0.02875767		1949.61	0.00913424
359.83	0.53922684		889.82	0.17264065		1419.82	0.02963125		1949.81	0.00823908
360.03	0.5384955		890.02	0.17371158		1420.02	0.02975486		1950.01	0.00826359
360.23	0.53894543		890.22	0.17298087		1420.22	0.02945607		1950.21	0.00829707
360.43	0.53855095		890.42	0.17335111		1420.42	0.02847269		1950.41	0.0071789
360.63	0.53897886		890.62	0.17423773		1420.62	0.02857857		1950.61	0.00766867
360.83	0.53963865		890.82	0.17430972		1420.82	0.02877844		1950.81	0.00783291
361.03	0.5401788		891.02	0.17411344		1421.02	0.02791734		1951.01	0.00798173
361.23	0.54003463		891.22	0.17479461		1421.22	0.0284443		1951.21	0.00852022
361.43	0.53924675		891.42	0.17453609		1421.42	0.02838597		1951.41	0.00839349
361.63	0.53913639		891.62	0.17408983		1421.62	0.02922431		1951.61	0.00844734
361.83	0.53993191		891.82	0.17362235		1421.82	0.02982271		1951.81	0.00948157
362.03	0.53939617		892.02	0.17206628		1422.02	0.03009426		1952.01	0.00963595
362.23	0.53884156		892.22	0.17206329		1422.22	0.03057246		1952.21	0.00969918
362.43	0.53879778		892.42	0.17191921		1422.42	0.02996127		1952.41	0.0101576
362.63	0.53985953		892.62	0.17150403		1422.62	0.02972531		1952.61	0.01009015
362.83	0.54093155		892.82	0.17121774		1422.82	0.02973853		1952.81	0.01066559
363.03	0.54072141		893.02	0.17100498		1423.02	0.03113812		1953.01	0.01069235
363.23	0.54080023		893.22	0.17152129		1423.22	0.03150897		1953.21	0.0106926
363.43	0.54168449		893.42	0.17220105		1423.42	0.03161439		1953.41	0.01159482
363.63	0.54183889		893.62	0.17301548		1423.62	0.03213946		1953.61	0.01180588
363.83	0.54208583		893.82	0.17413587		1423.82	0.03200846		1953.81	0.01083684
364.03	0.54289702		894.02	0.17461389		1424.02	0.03132527		1954.01	0.01105913
364.23	0.54452071		894.22	0.17444588		1424.22	0.03122668		1954.21	0.01102836
364.43	0.54585733		894.42	0.17595279		1424.42	0.03144138		1954.41	0.01039106
364.63	0.54666627		894.62	0.17725126		1424.62	0.03150012		1954.61	0.01047521
364.83	0.54741172		894.82	0.17762723		1424.82	0.03067306		1954.81	0.01026314
365.03	0.54776155		895.02	0.17838182		1425.02	0.03029577		1955.01	0.00941044
365.23	0.54702402		895.22	0.17788085		1425.22	0.03033016		1955.21	0.00864269
365.43	0.54758471		895.42	0.17762183		1425.42	0.03052188		1955.41	0.00821081
365.63	0.54824988		895.62	0.17705578		1425.62	0.02990492		1955.61	0.00777306
365.83	0.54823098		895.82	0.17685863		1425.82	0.03033157		1955.81	0.00688864
366.03	0.54697847		896.02	0.1760164		1426.02	0.02906726		1956.01	0.00583429
366.23	0.54682808		896.22	0.1766212		1426.22	0.02880994		1956.21	0.00502034
366.43	0.54663209		896.42	0.1756474		1426.42	0.02873349		1956.41	0.00546342
366.63	0.54771318		896.62	0.17466392		1426.62	0.02819595		1956.61	0.00525314
366.83	0.54785791		896.82	0.1744578		1426.82	0.02795977		1956.81	0.00596048
367.03	0.54701163		897.02	0.17417701		1427.02	0.02884555		1957.01	0.00706651
367.23	0.54667399		897.22	0.17521765		1427.22	0.02917722		1957.21	0.00773248
367.43	0.54660092		897.42	0.17596995		1427.42	0.02949405		1957.41	0.00822305
367.63	0.54634712		897.62	0.17595926		1427.62	0.02987107		1957.61	0.00877555
367.83	0.54614875		897.82	0.17663293		1427.82	0.03060689		1957.81	0.0090811
368.03	0.5464697		898.02	0.1769166		1428.02	0.03069692		1958.01	0.01010624
368.23	0.54683602		898.22	0.17798272		1428.22	0.03141114		1958.21	0.01033247
368.43	0.54754082		898.42	0.1784176		1428.42	0.03116434		1958.41	0.01083727
368.63	0.54764023		898.62	0.17862066		1428.62	0.03107768		1958.61	0.01100093
368.83	0.54833563		898.82	0.17789131		1428.82	0.03074082		1958.81	0.01092813
369.03	0.54870672		899.02	0.17919997		1429.02	0.03014674		1959.01	0.01056058
369.23	0.54860734		899.22	0.1799666		1429.22	0.02934928		1959.21	0.00963418
369.43	0.54888642		899.42	0.1809241		1429.42	0.02920344		1959.41	0.00874846
369.63	0.54830922		899.62	0.18123707		1429.62	0.02815654		1959.61	0.00717958
369.83	0.54743166		899.82	0.18143499		1429.82	0.02756195		1959.81	0.00585023
370.03	0.54751631		900.02	0.18131308		1430.02	0.02710936		1960.01	0.00599478
370.23	0.54738823		900.22	0.1814062		1430.22	0.02757607		1960.21	0.0056457
370.43	0.54657676		900.42	0.18162127		1430.42	0.02680809		1960.41	0.00605695
370.63	0.54648212		900.62	0.18176087		1430.62	0.02725893		1960.61	0.00505516
370.83	0.54704497		900.82	0.18176999		1430.82	0.02743185		1960.81	0.00590524
371.03	0.54697145		901.02	0.18150594		1431.02	0.02764495		1961.01	0.00651954
371.23	0.54727016		901.22	0.18156118		1431.22	0.02892483		1961.21	0.00685345
371.43	0.54711848		901.42	0.18158556		1431.42	0.02905445		1961.41	0.00798369
371.63	0.54813115		901.62	0.18019666		1431.62	0.02928431		1961.61	0.00892299
371.83	0.54823754		901.82	0.17994109		1431.82	0.03002998		1961.81	0.00979495
372.03	0.5496271		902.02	0.17967801		1432.02	0.03003585		1962.01	0.01009911
372.23	0.55046653		902.22	0.17978025		1432.22	0.03046689		1962.21	0.00980498
372.43	0.55180613		902.42	0.17926805		1432.42	0.03065441		1962.41	0.01105756
372.63	0.55266474		902.62	0.17953578		1432.62	0.03140009		1962.61	0.01117608
372.83	0.55411626		902.82	0.17964476		1432.82	0.0312378		1962.81	0.01107436
373.03	0.55500983		903.02	0.1810482		1433.02	0.03046868		1963.01	0.01011045
373.23	0.55446671		903.22	0.18191309		1433.22	0.03024504		1963.21	0.00891071
373.43	0.55414071		903.42	0.18202869		1433.42	0.03059167		1963.41	0.00801989
373.63	0.55395829		903.62	0.18185118		1433.62	0.03007943		1963.61	0.00652072
373.83	0.55395478		903.82	0.18216881		1433.82	0.03114905		1963.81	0.00613029
374.03	0.55365755		904.02	0.18271033		1434.02	0.03119754		1964.01	0.00528848
374.23	0.55315691		904.22	0.1824881		1434.22	0.03127763		1964.21	0.00444455
374.43	0.55176362		904.42	0.18385488		1434.42	0.03072079		1964.41	0.0042669
374.63	0.55168536		904.62	0.18378367		1434.62	0.03152903		1964.61	0.0033404
374.83	0.55174131		904.82	0.18437992		1434.82	0.03182467		1964.81	0.00388434
375.03	0.55152433		905.02	0.18484591		1435.02	0.03128142		1965.01	0.00456409
375.23	0.55127016		905.22	0.18506045		1435.22	0.03143466		1965.21	0.00545891
375.43	0.55171179		905.42	0.18556945		1435.42	0.03160503		1965.41	0.00592069
375.63	0.55233012		905.62	0.18621896		1435.62	0.03158815		1965.61	0.00566069
375.83	0.55197202		905.82	0.18644253		1435.82	0.03186138		1965.81	0.00565659
376.03	0.55195176		906.02	0.18718045		1436.02	0.0324079		1966.01	0.00545783
376.23	0.55175768		906.22	0.18736648		1436.22	0.03237153		1966.21	0.00588607
376.43	0.55160898		906.42	0.18735479		1436.42	0.0322245		1966.41	0.00729815
376.63	0.55280574		906.62	0.18803122		1436.62	0.03146475		1966.61	0.00848278
376.83	0.55338487		906.82	0.18766896		1436.82	0.03136821		1966.81	0.00924104
377.03	0.55336516		907.02	0.18822488		1437.02	0.03138497		1967.01	0.00918098
377.23	0.55337045		907.22	0.18816671		1437.22	0.03183939		1967.21	0.00969366
377.43	0.55434885		907.42	0.18769074		1437.42	0.0322531		1967.41	0.00989529
377.63	0.55462671		907.62	0.18761491		1437.62	0.03182988		1967.61	0.00991804
377.83	0.55521441		907.82	0.18817817		1437.82	0.03190708		1967.81	0.00993785
378.03	0.55502481		908.02	0.18828376		1438.02	0.03101077		1968.01	0.00956978
378.23	0.55515776		908.22	0.18802483		1438.22	0.03092827		1968.21	0.00973074
378.43	0.55475098		908.42	0.18884416		1438.42	0.03054538		1968.41	0.00943728
378.63	0.55478856		908.62	0.1886429		1438.62	0.03046201		1968.61	0.00886869
378.83	0.55490432		908.82	0.18873206		1438.82	0.02990926		1968.81	0.00877145
379.03	0.55486802		909.02	0.1883927		1439.02	0.02913451		1969.01	0.00869978
379.23	0.55439742		909.22	0.18822315		1439.22	0.02917571		1969.21	0.00865347
379.43	0.55438453		909.42	0.18809288		1439.42	0.02941041		1969.41	0.00788861
379.63	0.55367349		909.62	0.18804235		1439.62	0.02906011		1969.61	0.00721603
379.83	0.55296129		909.82	0.1868154		1439.82	0.02869		1969.81	0.00736831
380.02	0.55296129		910.02	0.1868154		1440.02	0.02869		1970.01	0.00736831
380.22	0.55481568		910.22	0.18771076		1440.22	0.02867185		1970.21	0.00741513
380.42	0.55598283		910.42	0.18910044		1440.42	0.0284927		1970.41	0.00781519
380.62	0.55708278		910.62	0.1901114		1440.62	0.02879887		1970.61	0.00790835
380.82	0.55780207		910.82	0.19133604		1440.82	0.02865622		1970.81	0.00872013
381.02	0.55898492		911.02	0.19246032		1441.02	0.02853777		1971.01	0.00879988
381.22	0.55940062		911.22	0.19340515		1441.22	0.02815796		1971.21	0.00886044
381.42	0.56033274		911.42	0.19417651		1441.42	0.02720993		1971.41	0.00888105
381.62	0.5603671		911.62	0.19508197		1441.62	0.0271627		1971.61	0.00802738
381.82	0.55992494		911.82	0.19496778		1441.82	0.02672929		1971.81	0.0083178
382.02	0.55932596		912.02	0.19400158		1442.02	0.02607914		1972.01	0.00813514
382.22	0.55772142		912.22	0.19334972		1442.22	0.02585302		1972.21	0.00791484
382.42	0.55691459		912.42	0.19271317		1442.42	0.02565637		1972.41	0.00835784
382.62	0.55769207		912.62	0.19224174		1442.62	0.02433053		1972.61	0.00770628
382.82	0.55808271		912.82	0.19147584		1442.82	0.02378085		1972.81	0.00819414
383.02	0.55832309		913.02	0.18966039		1443.02	0.02382234		1973.01	0.00851637
383.22	0.55860566		913.22	0.18836968		1443.22	0.02338398		1973.21	0.0088371
383.42	0.55799396		913.42	0.18738692		1443.42	0.02326019		1973.41	0.0092107
383.62	0.55857929		913.62	0.18691038		1443.62	0.0238774		1973.61	0.00967109
383.82	0.55910957		913.82	0.18730474		1443.82	0.02308293		1973.81	0.00986092
384.02	0.55944179		914.02	0.18818725		1444.02	0.02284391		1974.01	0.01005828
384.22	0.55978291		914.22	0.18923124		1444.22	0.0226431		1974.21	0.00892282
384.42	0.55921421		914.42	0.19031235		1444.42	0.02311837		1974.41	0.00844452
384.62	0.5585312		914.62	0.19028222		1444.62	0.02349626		1974.61	0.00735834
384.82	0.5585623		914.82	0.19080159		1444.82	0.02327666		1974.81	0.00778937
385.02	0.55858356		915.02	0.19146434		1445.02	0.02269173		1975.01	0.0067674
385.22	0.55770798		915.22	0.19236742		1445.22	0.02225864		1975.21	0.00715183
385.42	0.55830262		915.42	0.19287721		1445.42	0.02159377		1975.41	0.0070257
385.62	0.55760058		915.62	0.19373117		1445.62	0.02188046		1975.61	0.00708573
385.82	0.5573809		915.82	0.19302703		1445.82	0.02133748		1975.81	0.00764768
386.02	0.55764318		916.02	0.19208909		1446.02	0.02083865		1976.01	0.0075439
386.22	0.5569492		916.22	0.19216649		1446.22	0.02064739		1976.21	0.00803238
386.42	0.5563569		916.42	0.19160503		1446.42	0.01947766		1976.41	0.00854326
386.62	0.55669957		916.62	0.19128651		1446.62	0.01862122		1976.61	0.00836577
386.82	0.55624091		916.82	0.19079652		1446.82	0.01894181		1976.81	0.00808625
387.02	0.55555196		917.02	0.18982197		1447.02	0.01893331		1977.01	0.00804071
387.22	0.55508564		917.22	0.18996534		1447.22	0.01859904		1977.21	0.00831013
387.42	0.55439651		917.42	0.1892981		1447.42	0.01858256		1977.41	0.00808483
387.62	0.5545241		917.62	0.18906712		1447.62	0.01923859		1977.61	0.00753054
387.82	0.55451531		917.82	0.18950995		1447.82	0.01935411		1977.81	0.00687565
388.02	0.5542112		918.02	0.19020887		1448.02	0.01984837		1978.01	0.0054199
388.22	0.55437248		918.22	0.1908639		1448.22	0.02021973		1978.21	0.0043624
388.42	0.5548625		918.42	0.19095376		1448.42	0.02092534		1978.41	0.00348769
388.62	0.55492475		918.62	0.19059984		1448.62	0.02143253		1978.61	0.00252998
388.82	0.55605281		918.82	0.19105695		1448.82	0.02093648		1978.81	0.00256376
389.02	0.55582554		919.02	0.19195883		1449.02	0.02129613		1979.01	0.00280177
389.22	0.55548023		919.22	0.19239799		1449.22	0.02136141		1979.21	0.00336662
389.42	0.5568144		919.42	0.19343681		1449.42	0.02075778		1979.41	0.00362629
389.62	0.55641435		919.62	0.19393092		1449.62	0.02137824		1979.61	0.00452754
389.82	0.55675224		919.82	0.19252263		1449.82	0.02116765		1979.81	0.00419759
390.02	0.55677926		920.02	0.19109771		1450.02	0.02095097		1980.01	0.00506971
390.22	0.55633278		920.22	0.19074309		1450.22	0.01984061		1980.21	0.00600122
390.42	0.55605859		920.42	0.18973792		1450.42	0.01896594		1980.41	0.00716302
390.62	0.55614908		920.62	0.18903426		1450.62	0.01893888		1980.61	0.00745044
390.82	0.55616429		920.82	0.18849826		1450.82	0.01833428		1980.81	0.00837463
391.02	0.55677174		921.02	0.18715604		1451.02	0.01782128		1981.01	0.0093669
391.22	0.55675937		921.22	0.18676489		1451.22	0.01729859		1981.21	0.009836
391.42	0.55715372		921.42	0.18635779		1451.42	0.01772831		1981.41	0.00969344
391.62	0.55715071		921.62	0.1858996		1451.62	0.01856903		1981.61	0.00939934
391.82	0.55771185		921.82	0.18600094		1451.82	0.01880387		1981.81	0.00890545
392.02	0.55803057		922.02	0.18704145		1452.02	0.01908133		1982.01	0.00762918
392.22	0.55872927		922.22	0.18791034		1452.22	0.01911445		1982.21	0.00723277
392.42	0.55832688		922.42	0.18892868		1452.42	0.01935484		1982.41	0.0058147
392.62	0.55710653		922.62	0.18946645		1452.62	0.01931424		1982.61	0.00431035
392.82	0.55675823		922.82	0.1894106		1452.82	0.01857905		1982.81	0.00336581
393.02	0.55629895		923.02	0.19029992		1453.02	0.01891852		1983.01	0.00325643
393.22	0.55567362		923.22	0.19093205		1453.22	0.01768314		1983.21	0.00228082
393.42	0.55547338		923.42	0.19194452		1453.42	0.01675393		1983.41	0.00253091
393.62	0.55392808		923.62	0.19214809		1453.62	0.01674405		1983.61	0.00279619
393.82	0.55326966		923.82	0.1911119		1453.82	0.01573712		1983.81	0.00263526
394.02	0.5530695		924.02	0.19022063		1454.02	0.0143896		1984.01	0.00287378
394.22	0.55368658		924.22	0.18951597		1454.22	0.01334342		1984.21	0.00355346
394.42	0.55389388		924.42	0.18880063		1454.42	0.01238707		1984.41	0.0044551
394.62	0.55378454		924.62	0.18788008		1454.62	0.0119968		1984.61	0.00453929
394.82	0.55490704		924.82	0.18693085		1454.82	0.01184529		1984.81	0.00531971
395.02	0.55621614		925.02	0.18612573		1455.02	0.01252541		1985.01	0.00527291
395.22	0.55607846		925.22	0.18664944		1455.22	0.01245662		1985.21	0.00624424
395.42	0.55655539		925.42	0.18637437		1455.42	0.01289514		1985.41	0.00633489
395.62	0.55653374		925.62	0.18610944		1455.62	0.01288239		1985.61	0.00662057
395.82	0.55734986		925.82	0.18668499		1455.82	0.01395371		1985.81	0.00633207
396.02	0.55722737		926.02	0.18727892		1456.02	0.01491238		1986.01	0.00615509
396.22	0.55726338		926.22	0.18799385		1456.22	0.0149604		1986.21	0.00611076
396.42	0.55572371		926.42	0.1874735		1456.42	0.01510221		1986.41	0.00615791
396.62	0.55607657		926.62	0.18696847		1456.62	0.0150199		1986.61	0.00677895
396.82	0.55675659		926.82	0.18671609		1456.82	0.01468209		1986.81	0.00700371
397.02	0.55654351		927.02	0.18784912		1457.02	0.01419946		1987.01	0.00872397
397.22	0.55677508		927.22	0.18849258		1457.22	0.01295829		1987.21	0.0089
397.42	0.55626158		927.42	0.18886826		1457.42	0.01211092		1987.41	0.00994108
397.62	0.55629574		927.62	0.18861524		1457.62	0.01189379		1987.61	0.00985755
397.82	0.55582192		927.82	0.18756977		1457.82	0.01110896		1987.81	0.00959151
398.02	0.55665207		928.02	0.18719873		1458.02	0.01052507		1988.01	0.00942453
398.22	0.55709614		928.22	0.18569044		1458.22	0.01069415		1988.21	0.00995165
398.42	0.55674389		928.42	0.18538951		1458.42	0.01024717		1988.41	0.00913402
398.62	0.55712126		928.62	0.18554791		1458.62	0.01051728		1988.61	0.00830204
398.82	0.55776679		928.82	0.18560852		1458.82	0.01121564		1988.81	0.00770441
399.02	0.55719085		929.02	0.18573601		1459.02	0.01200151		1989.01	0.00715153
399.22	0.5568928		929.22	0.18685507		1459.22	0.01253425		1989.21	0.00606696
399.42	0.5565363		929.42	0.18681667		1459.42	0.0139102		1989.41	0.00468422
399.62	0.55748778		929.62	0.18679261		1459.62	0.01541091		1989.61	0.00318918
399.82	0.55854723		929.82	0.18769961		1459.82	0.0167373		1989.81	0.00228358
400.02	0.55730882		930.02	0.18868083		1460.02	0.01741508		1990.01	0.00192738
400.22	0.55722301		930.22	0.18913741		1460.22	0.01764171		1990.21	0.00195622
400.42	0.55572965		930.42	0.18795483		1460.42	0.01755852		1990.41	0.00205094
400.62	0.55546206		930.62	0.18797448		1460.62	0.01759161		1990.61	0.00175408
400.82	0.55422704		930.82	0.18788722		1460.82	0.01675399		1990.81	0.0018847
401.02	0.55336017		931.02	0.18789751		1461.02	0.01585868		1991.01	0.00241103
401.22	0.55350357		931.22	0.18799872		1461.22	0.014992		1991.21	0.00252719
401.42	0.5526089		931.42	0.18676749		1461.42	0.01359511		1991.41	0.00379317
401.62	0.55270983		931.62	0.18682268		1461.62	0.01264056		1991.61	0.00559977
401.82	0.55218359		931.82	0.18725969		1461.82	0.01156475		1991.81	0.00748823
402.02	0.55309069		932.02	0.18686025		1462.02	0.01038652		1992.01	0.00887042
402.22	0.55286843		932.22	0.18590681		1462.22	0.00942942		1992.21	0.01074136
402.42	0.5527629		932.42	0.18636543		1462.42	0.00854219		1992.41	0.01140349
402.62	0.5533642		932.62	0.18659137		1462.62	0.00829731		1992.61	0.01199028
402.82	0.5533489		932.82	0.18621998		1462.82	0.00932031		1992.81	0.01206572
403.02	0.5548683		933.02	0.18585403		1463.02	0.00967535		1993.01	0.01229668
403.22	0.55572857		933.22	0.18700026		1463.22	0.01079385		1993.21	0.01191824
403.42	0.55673462		933.42	0.1871761		1463.42	0.01165318		1993.41	0.01155937
403.62	0.55767701		933.62	0.18765256		1463.62	0.01297196		1993.61	0.00943029
403.82	0.55807612		933.82	0.18902447		1463.82	0.01397506		1993.81	0.00795798
404.02	0.55751888		934.02	0.18927819		1464.02	0.01482899		1994.01	0.00604284
404.22	0.55752412		934.22	0.18942867		1464.22	0.01499389		1994.21	0.00485311
404.42	0.55663907		934.42	0.18871675		1464.42	0.01386762		1994.41	0.00405635
404.62	0.55725869		934.62	0.18832165		1464.62	0.013146		1994.61	0.00287854
404.82	0.55734914		934.82	0.18839915		1464.82	0.01277101		1994.81	0.00254423
405.02	0.55772828		935.02	0.18859125		1465.02	0.01193042		1995.01	0.00221612
405.22	0.55731595		935.22	0.18818077		1465.22	0.01165359		1995.21	0.00271611
405.42	0.55780322		935.42	0.18756883		1465.42	0.00988719		1995.41	0.00341724
405.62	0.55751444		935.62	0.18838252		1465.62	0.00954317		1995.61	0.00514624
405.82	0.55720313		935.82	0.18768649		1465.82	0.00901107		1995.81	0.00586102
406.02	0.55680962		936.02	0.18694362		1466.02	0.00841163		1996.01	0.00737972
406.22	0.55613065		936.22	0.18692052		1466.22	0.00797066		1996.21	0.00931288
406.42	0.55632701		936.42	0.18636345		1466.42	0.00764226		1996.41	0.00955654
406.62	0.55720402		936.62	0.18580817		1466.62	0.00740998		1996.61	0.00977405
406.82	0.55806756		936.82	0.18605364		1466.82	0.0075193		1996.81	0.01043842
407.02	0.55868424		937.02	0.18610992		1467.02	0.00734744		1997.01	0.01105092
407.22	0.55818387		937.22	0.18706231		1467.22	0.00880254		1997.21	0.01095366
407.42	0.55862692		937.42	0.18750686		1467.42	0.00983934		1997.41	0.00892193
407.62	0.55813032		937.62	0.18751626		1467.62	0.01157924		1997.61	0.00722048
407.82	0.5583556		937.82	0.18769962		1467.82	0.0119698		1997.81	0.00605042
408.02	0.5583152		938.02	0.18699339		1468.02	0.01170422		1998.01	0.0051726
408.22	0.55768327		938.22	0.18710659		1468.22	0.0110474		1998.21	0.00457332
408.42	0.55712986		938.42	0.18715376		1468.42	0.00972171		1998.41	0.00486706
408.62	0.55719178		938.62	0.18629021		1468.62	0.00959529		1998.61	0.0040539
408.82	0.55685294		938.82	0.1858868		1468.82	0.00959734		1998.81	0.0037182
409.02	0.556612		939.02	0.18502079		1469.02	0.00795541		1999.01	0.00352429
409.22	0.5561836		939.22	0.18498852		1469.22	0.00694121		1999.21	0.00370842
409.42	0.5556123		939.42	0.18551343		1469.42	0.00490994		1999.41	0.00453983
409.62	0.55484847		939.62	0.18600773		1469.62	0.00534493		1999.61	0.00572297
409.82	0.55520441		939.82	0.18651355		1469.82	0.00480115		1999.81	0.0064257
410.02	0.55449532		940.02	0.18724598		1470.02	0.00468625		2000.01	0.00632735
410.22	0.55604078		940.22	0.18849632		1470.22	0.00423221		2000.21	0.00646838
410.42	0.55674867		940.42	0.18841053		1470.42	0.00353443		2000.41	0.00663145
410.62	0.55782647		940.62	0.18862899		1470.62	0.00336989		2000.61	0.00719058
410.82	0.55889871		940.82	0.18878496		1470.82	0.00426471		2000.81	0.00742214
411.02	0.55903181		941.02	0.18960661		1471.02	0.00491369		2001.01	0.00736053
411.22	0.55982957		941.22	0.19042664		1471.22	0.00552069		2001.21	0.0065188
411.42	0.56076051		941.42	0.189911		1471.42	0.00710053		2001.41	0.00560519
411.62	0.5600329		941.62	0.18929109		1471.62	0.00797229		2001.61	0.00535053
411.82	0.56065103		941.82	0.18873348		1471.82	0.00772853		2001.81	0.00558489
412.02	0.56039521		942.02	0.18810128		1472.02	0.00828973		2002.01	0.00423654
412.22	0.56014795		942.22	0.18848208		1472.22	0.00749217		2002.21	0.00373457
412.42	0.5589285		942.42	0.18856422		1472.42	0.00747581		2002.41	0.00420555
412.62	0.55866891		942.62	0.18695876		1472.62	0.00680616		2002.61	0.0039228
412.82	0.55869811		942.82	0.18677033		1472.82	0.00525725		2002.81	0.00427303
413.02	0.55815668		943.02	0.18584894		1473.02	0.00450237		2003.01	0.00490079
413.22	0.5571727		943.22	0.18634676		1473.22	0.00385822		2003.21	0.00504161
413.42	0.55538976		943.42	0.18651398		1473.42	0.00429515		2003.41	0.00657279
413.62	0.55567001		943.62	0.18702605		1473.62	0.00548362		2003.61	0.00698842
413.82	0.55507785		943.82	0.1879528		1473.82	0.00534878		2003.81	0.00721236
414.02	0.55497719		944.02	0.18843493		1474.02	0.00590044		2004.01	0.00733744
414.22	0.55562786		944.22	0.1885958		1474.22	0.00545564		2004.21	0.00857561
414.42	0.55474775		944.42	0.18859116		1474.42	0.00450299		2004.41	0.00897194
414.62	0.5554815		944.62	0.18943125		1474.62	0.00513602		2004.61	0.008738
414.82	0.55580921		944.82	0.18969416		1474.82	0.00536258		2004.81	0.00828899
415.02	0.55539727		945.02	0.19033883		1475.02	0.00555004		2005.01	0.007487
415.22	0.55567484		945.22	0.19023506		1475.22	0.00507499		2005.21	0.00635422
415.42	0.55597052		945.42	0.18906407		1475.42	0.00573241		2005.41	0.00564151
415.62	0.55553015		945.62	0.18866311		1475.62	0.00452439		2005.61	0.00451342
415.82	0.55636768		945.82	0.18754947		1475.82	0.00368868		2005.81	0.00363403
416.02	0.55635076		946.02	0.1873411		1476.02	0.00426535		2006.01	0.00236961
416.22	0.5570327		946.22	0.18700842		1476.22	0.00399144		2006.21	0.00256447
416.42	0.55605281		946.42	0.18637596		1476.42	0.00407001		2006.41	0.00228469
416.62	0.55691916		946.62	0.1852178		1476.62	0.0035615		2006.61	0.00182575
416.82	0.55688612		946.82	0.18523471		1476.82	0.00331076		2006.81	0.00153784
417.02	0.5563372		947.02	0.18430831		1477.02	0.00366531		2007.01	0.00186416
417.22	0.55575814		947.22	0.18501619		1477.22	0.00310675		2007.21	0.0020715
417.42	0.5548808		947.42	0.18547327		1477.42	0.00422875		2007.41	0.0034929
417.62	0.55522502		947.62	0.18582846		1477.62	0.00413375		2007.61	0.00366721
417.82	0.55521724		947.82	0.18574581		1477.82	0.00337552		2007.81	0.00418978
418.02	0.55538556		948.02	0.1856062		1478.02	0.00345901		2008.01	0.00500153
418.22	0.55461567		948.22	0.18552257		1478.22	0.00271053		2008.21	0.00502985
418.42	0.55523176		948.42	0.18678816		1478.42	0.00264595		2008.41	0.00484952
418.62	0.5551497		948.62	0.18712167		1478.62	0.00380659		2008.61	0.00475541
418.82	0.55531564		948.82	0.18708319		1478.82	0.00418995		2008.81	0.0042241
419.02	0.55424839		949.02	0.18703797		1479.02	0.00402413		2009.01	0.00352052
419.22	0.55388774		949.22	0.18732969		1479.22	0.00320554		2009.21	0.00320669
419.42	0.55348788		949.42	0.18675159		1479.42	0.00270861		2009.41	0.00339893
419.62	0.55312277		949.62	0.1860461		1479.62	0.00176882		2009.61	0.00305736
419.82	0.55310931		949.82	0.18532311		1479.82	0.0020936		2009.81	0.00402262
420.02	0.55274569		950.02	0.18559038		1480.02	0.00299262		2010.01	0.00454283
420.22	0.55323644		950.22	0.18596389		1480.22	0.00276317		2010.21	0.00482325
420.42	0.55302836		950.42	0.18580232		1480.42	0.00260522		2010.41	0.00462781
420.62	0.55399643		950.62	0.18611426		1480.62	0.00258614		2010.61	0.00472111
420.82	0.55342281		950.82	0.18631139		1480.82	0.002038		2010.81	0.00537504
421.02	0.55312876		951.02	0.1867498		1481.02	0.00211669		2011.01	0.00617315
421.22	0.55368534		951.22	0.18703421		1481.22	0.00265204		2011.21	0.00683445
421.42	0.55384903		951.42	0.18759612		1481.42	0.00311243		2011.41	0.00659442
421.62	0.55496937		951.62	0.18703576		1481.62	0.00291938		2011.61	0.00678216
421.82	0.55588235		951.82	0.18709617		1481.82	0.00288408		2011.81	0.00671281
422.02	0.55577115		952.02	0.1871242		1482.02	0.00344379		2012.01	0.00695642
422.22	0.55653881		952.22	0.18787123		1482.22	0.0037836		2012.21	0.00575892
422.42	0.55745701		952.42	0.18833546		1482.42	0.00491912		2012.41	0.00539165
422.62	0.55734272		952.62	0.18754845		1482.62	0.00564118		2012.61	0.0049967
422.82	0.55787135		952.82	0.18783645		1482.82	0.00554134		2012.81	0.00440706
423.02	0.5567058		953.02	0.18741337		1483.02	0.00493063		2013.01	0.00381439
423.22	0.55677241		953.22	0.1865025		1483.22	0.00439101		2013.21	0.00309152
423.42	0.55635028		953.42	0.18619609		1483.42	0.00395818		2013.41	0.00210684
423.62	0.55654208		953.62	0.18542684		1483.62	0.00415742		2013.61	0.00112615
423.82	0.55616422		953.82	0.18465364		1483.82	0.00434022		2013.81	0.00101872
424.02	0.55535482		954.02	0.18541911		1484.02	0.0032705		2014.01	0.0002464
424.22	0.55500257		954.22	0.18528771		1484.22	0.00251265		2014.21	0.00006613
424.42	0.55421188		954.42	0.18526753		1484.42	0.00110573		2014.41	-0.00092022
424.62	0.5543132		954.62	0.18647001		1484.62	0.00025752		2014.61	-0.0002926
424.82	0.55342923		954.82	0.18687211		1484.82	-0.00037577		2014.81	0.00045652
425.02	0.55279043		955.02	0.18763641		1485.02	-0.00024508		2015.01	0.00105864
425.22	0.55349251		955.22	0.18753918		1485.22	-0.00017265		2015.21	0.00198847
425.42	0.55350292		955.42	0.18842879		1485.42	-0.00105115		2015.41	0.00138706
425.62	0.55370522		955.62	0.1884741		1485.62	-0.00108501		2015.61	0.00225817
425.82	0.55364162		955.82	0.18879106		1485.82	-0.0001255		2015.81	0.0023204
426.02	0.55393723		956.02	0.18838609		1486.02	-0.00014684		2016.01	0.00260122
426.22	0.55393217		956.22	0.1887981		1486.22	-0.00036104		2016.21	0.00312588
426.42	0.55405569		956.42	0.18822861		1486.42	0.00014964		2016.41	0.00378772
426.62	0.55430524		956.62	0.18817718		1486.62	-0.00038273		2016.61	0.00358949
426.82	0.5541383		956.82	0.18856042		1486.82	0.00034979		2016.81	0.00368847
427.02	0.55416831		957.02	0.1882388		1487.02	0.00189626		2017.01	0.00345367
427.22	0.5541481		957.22	0.18777725		1487.22	0.00268673		2017.21	0.00333327
427.42	0.55450164		957.42	0.18863518		1487.42	0.00365114		2017.41	0.00290305
427.62	0.55498667		957.62	0.18794266		1487.62	0.00441958		2017.61	0.00328499
427.82	0.55477823		957.82	0.18695127		1487.82	0.00363059		2017.81	0.00260062
428.02	0.5541991		958.02	0.18687373		1488.02	0.00245842		2018.01	0.00235089
428.22	0.55385664		958.22	0.18643965		1488.22	0.00167879		2018.21	0.00160412
428.42	0.55369662		958.42	0.18663626		1488.42	0.00109159		2018.41	0.00160288
428.62	0.5537932		958.62	0.1868317		1488.62	0.00128867		2018.61	0.00297626
428.82	0.5532916		958.82	0.18613089		1488.82	0.0012788		2018.81	0.00326846
429.02	0.55339582		959.02	0.18603795		1489.02	0.00122086		2019.01	0.00367023
429.22	0.55416349		959.22	0.18590042		1489.22	0.00089697		2019.21	0.00321131
429.42	0.55434027		959.42	0.18606218		1489.42	0.00001261		2019.41	0.00226073
429.62	0.55499852		959.62	0.1857954		1489.62	0.00036231		2019.61	0.00258306
429.82	0.55594202		959.82	0.18442353		1489.82	0.00138391		2019.81	0.00228665
430.02	0.55593262		960.02	0.18457456		1490.02	0.00047573		2020.01	0.00232887
430.22	0.55602045		960.22	0.18555607		1490.22	0.00065826		2020.21	0.00273744
430.42	0.55647737		960.42	0.18674468		1490.42	0.00161948		2020.41	0.0022794
430.62	0.55627553		960.62	0.18791082		1490.62	0.00220282		2020.61	0.00268718
430.82	0.55651758		960.82	0.18850003		1490.82	0.00396318		2020.81	0.00283745
431.02	0.55638484		961.02	0.18833823		1491.02	0.00453841		2021.01	0.00362374
431.22	0.55554226		961.22	0.18891389		1491.22	0.0038681		2021.21	0.00362791
431.42	0.5550621		961.42	0.18925457		1491.42	0.00472781		2021.41	0.00285659
431.62	0.5540023		961.62	0.18802634		1491.62	0.00484637		2021.61	0.00318164
431.82	0.55403674		961.82	0.18656506		1491.82	0.00448961		2021.81	0.0025202
432.02	0.55371527		962.02	0.18600889		1492.02	0.00428268		2022.01	0.00313544
432.22	0.55369833		962.22	0.18556496		1492.22	0.00372013		2022.21	0.00289629
432.42	0.55269697		962.42	0.18462128		1492.42	0.00461118		2022.41	0.00400164
432.62	0.55226285		962.62	0.18444346		1492.62	0.00438703		2022.61	0.00446735
432.82	0.55172276		962.82	0.18367335		1492.82	0.00399066		2022.81	0.00417154
433.02	0.5510168		963.02	0.18332611		1493.02	0.0033328		2023.01	0.00417363
433.22	0.55108921		963.22	0.18200906		1493.22	0.00182009		2023.21	0.00410854
433.42	0.55265854		963.42	0.18166108		1493.42	0.00120171		2023.41	0.00367933
433.62	0.55419709		963.62	0.18152584		1493.62	0.00140254		2023.61	0.00377133
433.82	0.55399854		963.82	0.18107232		1493.82	0.00135051		2023.81	0.00322123
434.02	0.55400274		964.02	0.18299541		1494.02	0.00079749		2024.01	0.00269008
434.22	0.55517202		964.22	0.18425632		1494.22	0.00075328		2024.21	0.00242676
434.42	0.55511799		964.42	0.18503417		1494.42	0.00097592		2024.41	0.00289763
434.62	0.55462322		964.62	0.18515574		1494.62	0.0004101		2024.61	0.00277186
434.82	0.55439726		964.82	0.18532603		1494.82	0.00044059		2024.81	0.00185881
435.02	0.55267155		965.02	0.18623226		1495.02	-0.00014653		2025.01	0.00214819
435.22	0.55181791		965.22	0.1877343		1495.22	-0.00017557		2025.21	0.00186029
435.42	0.55199529		965.42	0.18830063		1495.42	0.00095717		2025.41	0.00183358
435.62	0.55177097		965.62	0.18817586		1495.62	0.00028023		2025.61	0.00269042
435.82	0.55241923		965.82	0.18817036		1495.82	0.00036164		2025.81	0.00192932
436.02	0.5525503		966.02	0.18878719		1496.02	0.00019265		2026.01	0.00232847
436.22	0.55166458		966.22	0.18919791		1496.22	0.00002347		2026.21	0.00209005
436.42	0.55085638		966.42	0.18924317		1496.42	0.00003973		2026.41	0.00291511
436.62	0.55143358		966.62	0.19012482		1496.62	-0.00096101		2026.61	0.00310695
436.82	0.55122704		966.82	0.18870692		1496.82	-0.00235147		2026.81	0.00344455
437.02	0.55168108		967.02	0.18769156		1497.02	-0.00315105		2027.01	0.00291287
437.22	0.55365183		967.22	0.18714821		1497.22	-0.00438175		2027.21	0.00287394
437.42	0.55586499		967.42	0.1879653		1497.42	-0.00366852		2027.41	0.00274395
437.62	0.55619824		967.62	0.18776245		1497.62	-0.0028486		2027.61	0.00282506
437.82	0.55636586		967.82	0.18745925		1497.82	-0.00215464		2027.81	0.00260393
438.02	0.55669632		968.02	0.1869565		1498.02	-0.0020969		2028.01	0.0024236
438.22	0.55710227		968.22	0.18631979		1498.22	-0.00170573		2028.21	0.00210443
438.42	0.55730069		968.42	0.18586506		1498.42	-0.00049435		2028.41	0.00244735
438.62	0.55696501		968.62	0.1854342		1498.62	-0.00037772		2028.61	0.00135734
438.82	0.55683716		968.82	0.18580042		1498.82	0.0010887		2028.81	0.00110997
439.02	0.55694346		969.02	0.18692195		1499.02	0.0008636		2029.01	0.00091189
439.22	0.55799557		969.22	0.18604591		1499.22	0.00148325		2029.21	0.00069488
439.42	0.55777407		969.42	0.18539555		1499.42	0.00194694		2029.41	0.00015098
439.62	0.55666244		969.62	0.18484388		1499.62	0.00177532		2029.61	0.00032642
439.82	0.55612141		969.82	0.18353282		1499.82	0.0014234		2029.81	-0.00041384
440.02	0.55571457		970.02	0.18383049		1500.02	-0.0000784		2030.01	-0.00025682
440.22	0.55412447		970.22	0.18402552		1500.22	-0.00139793		2030.21	-0.00028505
440.42	0.55436303		970.42	0.18312104		1500.42	-0.00274154		2030.41	0.00005167
440.62	0.55475499		970.62	0.18340524		1500.62	-0.00376309		2030.61	0.000298
440.82	0.55443857		970.82	0.18263331		1500.82	-0.00437663		2030.81	0.00095257
441.02	0.55404469		971.02	0.18328535		1501.02	-0.00458234		2031.01	0.00087875
441.22	0.55426837		971.22	0.18363155		1501.22	-0.00445951		2031.21	0.00286134
441.42	0.5546154		971.42	0.18379384		1501.42	-0.0032454		2031.41	0.00330679
441.62	0.55431286		971.62	0.18345141		1501.62	-0.00274797		2031.61	0.00331413
441.82	0.55487589		971.82	0.18269926		1501.82	-0.003152		2031.81	0.00388059
442.02	0.55362998		972.02	0.18298642		1502.02	-0.00289136		2032.01	0.00391126
442.22	0.55403655		972.22	0.18404623		1502.22	-0.00159989		2032.21	0.00359176
442.42	0.55459134		972.42	0.18442852		1502.42	-0.00122091		2032.41	0.0035389
442.62	0.55454494		972.62	0.18497295		1502.62	-0.00095013		2032.61	0.00312281
442.82	0.55521676		972.82	0.18591447		1502.82	-0.00072542		2032.81	0.00296487
443.02	0.55592256		973.02	0.18568521		1503.02	-0.00097165		2033.01	0.00209888
443.22	0.55579408		973.22	0.18528007		1503.22	-0.00015209		2033.21	0.00198228
443.42	0.55510226		973.42	0.18468449		1503.42	-0.00092926		2033.41	0.00174527
443.62	0.5551774		973.62	0.18495823		1503.62	-0.00134986		2033.61	0.0022709
443.82	0.55489328		973.82	0.18429914		1503.82	-0.00272176		2033.81	0.00242568
444.02	0.5545175		974.02	0.18500064		1504.02	-0.00343162		2034.01	0.0025005
444.22	0.55397702		974.22	0.18484887		1504.22	-0.00361591		2034.21	0.00294475
444.42	0.5555019		974.42	0.18431556		1504.42	-0.00420671		2034.41	0.00320998
444.62	0.55563029		974.62	0.18512969		1504.62	-0.00459856		2034.61	0.00391635
444.82	0.55501233		974.82	0.18507235		1504.82	-0.00425757		2034.81	0.00481159
445.02	0.5546429		975.02	0.18466767		1505.02	-0.00351218		2035.01	0.00508458
445.22	0.55508188		975.22	0.18328258		1505.22	-0.00352619		2035.21	0.00670736
445.42	0.55593362		975.42	0.18313152		1505.42	-0.0039191		2035.41	0.00647943
445.62	0.55602253		975.62	0.18302507		1505.62	-0.00397258		2035.61	0.00651141
445.82	0.55560883		975.82	0.18173202		1505.82	-0.00298851		2035.81	0.00668228
446.02	0.55564536		976.02	0.18163682		1506.02	-0.00202172		2036.01	0.00610069
446.22	0.55607367		976.22	0.18198668		1506.22	-0.00209186		2036.21	0.00561041
446.42	0.55581711		976.42	0.1819367		1506.42	-0.00282902		2036.41	0.00478273
446.62	0.55515673		976.62	0.18215438		1506.62	-0.00288012		2036.61	0.00326983
446.82	0.55436528		976.82	0.18286656		1506.82	-0.00250498		2036.81	0.00295579
447.02	0.55297777		977.02	0.18284388		1507.02	-0.00322452		2037.01	0.00198646
447.22	0.551518		977.22	0.18233681		1507.22	-0.00320729		2037.21	0.00105597
447.42	0.55121228		977.42	0.18130313		1507.42	-0.00383293		2037.41	-0.00072418
447.62	0.55041659		977.62	0.18190143		1507.62	-0.00362681		2037.61	-0.00135566
447.82	0.5496466		977.82	0.18149654		1507.82	-0.00346906		2037.81	-0.00132864
448.02	0.54876344		978.02	0.18080474		1508.02	-0.00345832		2038.01	-0.00256429
448.22	0.54771928		978.22	0.18075469		1508.22	-0.00469332		2038.21	-0.00212351
448.42	0.54734613		978.42	0.18079789		1508.42	-0.00472057		2038.41	-0.00266731
448.62	0.54671053		978.62	0.18043239		1508.62	-0.00381062		2038.61	-0.00220432
448.82	0.54703751		978.82	0.18016372		1508.82	-0.00330225		2038.81	-0.00220163
449.02	0.54748552		979.02	0.17996177		1509.02	-0.00277839		2039.01	-0.00029838
449.22	0.54874653		979.22	0.17993061		1509.22	-0.00299443		2039.21	0.00224401
449.42	0.54938317		979.42	0.18096975		1509.42	-0.00168041		2039.41	0.0026361
449.62	0.54986111		979.62	0.18087875		1509.62	-0.00042327		2039.61	0.00307509
449.82	0.55079388		979.82	0.1803943		1509.82	0.00053083		2039.81	0.00347822
450.02	0.55212567		980.02	0.18126969		1510.02	0.00095385		2040.01	0.00366048
450.22	0.55316156		980.22	0.18292601		1510.22	0.00146467		2040.21	0.00338008
450.42	0.55284488		980.42	0.18230715		1510.42	0.00127566		2040.41	0.00316655
450.62	0.55210693		980.62	0.18272946		1510.62	0.00142653		2040.61	0.00273088
450.82	0.55192627		980.82	0.18346118		1510.82	0.00151761		2040.81	0.0026486
451.02	0.55180043		981.02	0.18293253		1511.02	0.0005968		2041.01	0.00096269
451.22	0.55113976		981.22	0.18274935		1511.22	0.00142397		2041.21	0.00040068
451.42	0.55148661		981.42	0.18299942		1511.42	0.0014906		2041.41	-0.00027692
451.62	0.55075093		981.62	0.18328787		1511.62	0.0012719		2041.61	-0.00074079
451.82	0.55066649		981.82	0.18305367		1511.82	0.00070116		2041.81	-0.00096627
452.02	0.54971644		982.02	0.18277378		1512.02	-0.00084909		2042.01	-0.00164118
452.22	0.54905646		982.22	0.18296134		1512.22	-0.00215949		2042.21	-0.0010477
452.42	0.54928627		982.42	0.18303385		1512.42	-0.00243115		2042.41	-0.00220616
452.62	0.55079292		982.62	0.18336963		1512.62	-0.00314999		2042.61	-0.00183401
452.82	0.55102003		982.82	0.18408612		1512.82	-0.00432613		2042.81	-0.00229446
453.02	0.55195641		983.02	0.18429211		1513.02	-0.00496085		2043.01	-0.00023507
453.22	0.55310015		983.22	0.1848992		1513.22	-0.0050447		2043.21	0.00093006
453.42	0.55335023		983.42	0.1854225		1513.42	-0.00500299		2043.41	0.00088072
453.62	0.55371402		983.62	0.18507309		1513.62	-0.00492503		2043.61	0.00203193
453.82	0.55391886		983.82	0.18509851		1513.82	-0.00514289		2043.81	0.00204317
454.02	0.55524902		984.02	0.18587281		1514.02	-0.0046297		2044.01	0.00203325
454.22	0.55542706		984.22	0.18596917		1514.22	-0.00462033		2044.21	0.00206415
454.42	0.55453922		984.42	0.18567897		1514.42	-0.00495165		2044.41	0.00266822
454.62	0.55467735		984.62	0.18535541		1514.62	-0.00400286		2044.61	0.0024482
454.82	0.55554882		984.82	0.18516906		1514.82	-0.00333734		2044.81	0.00192257
455.02	0.5555131		985.02	0.18424013		1515.02	-0.00379717		2045.01	0.00197035
455.22	0.55577794		985.22	0.18438038		1515.22	-0.00222274		2045.21	0.00259026
455.42	0.55604404		985.42	0.1838352		1515.42	-0.00190564		2045.41	0.00234887
455.62	0.55551096		985.62	0.18296263		1515.62	-0.00195944		2045.61	0.0018469
455.82	0.55555045		985.82	0.18253985		1515.82	-0.00256247		2045.81	0.00195239
456.02	0.55502293		986.02	0.1819171		1516.02	-0.00322931		2046.01	0.00256977
456.22	0.55470987		986.22	0.18219875		1516.22	-0.00214637		2046.21	0.00221079
456.42	0.5548452		986.42	0.18221787		1516.42	-0.0015794		2046.41	0.00161346
456.62	0.55577336		986.62	0.1831537		1516.62	-0.00183168		2046.61	0.00156101
456.82	0.55536566		986.82	0.18426714		1516.82	-0.00138487		2046.81	0.00100512
457.02	0.5559846		987.02	0.18430049		1517.02	-0.00124099		2047.01	0.00074465
457.22	0.55556188		987.22	0.18434258		1517.22	-0.00142261		2047.21	0.00082332
457.42	0.55499234		987.42	0.18492367		1517.42	-0.00063611		2047.41	0.00066694
457.62	0.55316175		987.62	0.18460967		1517.62	-0.00033446		2047.61	0.00095331
457.82	0.55196533		987.82	0.18540471		1517.82	-0.00046748		2047.81	0.00098469
458.02	0.55264504		988.02	0.18532489		1518.02	-0.00039695		2048.01	0.00061634
458.22	0.55144852		988.22	0.18512487		1518.22	-0.00067621		2048.21	0.00061047
458.42	0.55182831		988.42	0.18467029		1518.42	-0.00113988		2048.41	0.00103212
458.62	0.55174273		988.62	0.18392604		1518.62	-0.00136275		2048.61	0.00087056
458.82	0.55177061		988.82	0.1841757		1518.82	-0.00247642		2048.81	0.00087967
459.02	0.55152488		989.02	0.18300923		1519.02	-0.00377943		2049.01	0.00132013
459.22	0.55160246		989.22	0.18277629		1519.22	-0.00341723		2049.21	0.00250923
459.42	0.55109148		989.42	0.18185151		1519.42	-0.00448242		2049.41	0.00260515
459.62	0.55200169		989.62	0.18095334		1519.62	-0.00599102		2049.61	0.00261924
459.82	0.55286928		989.82	0.18147443		1519.82	-0.00642586		2049.81	0.00314253
460.02	0.55334165		990.02	0.18114689		1520.02	-0.00570584		2050.01	0.00328669
460.22	0.5530245		990.22	0.18128495		1520.22	-0.00473092		2050.21	0.00242999
460.42	0.55315095		990.42	0.18226613		1520.42	-0.00455911		2050.41	0.00244637
460.62	0.55431501		990.62	0.18291353		1520.62	-0.00464701		2050.61	0.0017707
460.82	0.55475067		990.82	0.18322896		1520.82	-0.00360365		2050.81	0.00133822
461.02	0.55493545		991.02	0.18258142		1521.02	-0.00414372		2051.01	0.00116746
461.22	0.55478786		991.22	0.18277346		1521.22	-0.00406781		2051.21	0.00153381
461.42	0.55413098		991.42	0.18315292		1521.42	-0.00233351		2051.41	0.00095288
461.62	0.55332255		991.62	0.18279527		1521.62	-0.00159806		2051.61	0.00055808
461.82	0.55331498		991.82	0.18381662		1521.82	-0.00131434		2051.81	-0.00003054
462.02	0.55391459		992.02	0.18378229		1522.02	-0.00187065		2052.01	-0.00181376
462.22	0.55346838		992.22	0.18457642		1522.22	-0.00229525		2052.21	-0.00281678
462.42	0.5537761		992.42	0.18463646		1522.42	-0.00343305		2052.41	-0.00327118
462.62	0.55316451		992.62	0.1853611		1522.62	-0.00430095		2052.61	-0.00339154
462.82	0.55299789		992.82	0.1850517		1522.82	-0.00488778		2052.81	-0.0036235
463.02	0.55301852		993.02	0.18441154		1523.02	-0.00546574		2053.01	-0.00400038
463.22	0.55288311		993.22	0.18389155		1523.22	-0.00653852		2053.21	-0.00383055
463.42	0.55355175		993.42	0.18324188		1523.42	-0.00738289		2053.41	-0.00382842
463.62	0.55434769		993.62	0.18358862		1523.62	-0.008103		2053.61	-0.0029048
463.82	0.55424278		993.82	0.18397076		1523.82	-0.00713088		2053.81	-0.0022566
464.02	0.55388535		994.02	0.18353445		1524.02	-0.00637656		2054.01	-0.00241583
464.22	0.55348412		994.22	0.18337576		1524.22	-0.00642117		2054.21	-0.00122861
464.42	0.55415004		994.42	0.18353657		1524.42	-0.0058221		2054.41	0.00008682
464.62	0.55549373		994.62	0.18176963		1524.62	-0.00532119		2054.61	0.00072081
464.82	0.55465224		994.82	0.18139697		1524.82	-0.0052901		2054.81	0.00148354
465.02	0.55465354		995.02	0.18122766		1525.02	-0.00515602		2055.01	0.00213826
465.22	0.55378842		995.22	0.18121948		1525.22	-0.00369046		2055.21	0.00138029
465.42	0.55351449		995.42	0.18143585		1525.42	-0.00221721		2055.41	0.00125363
465.62	0.55292519		995.62	0.18100691		1525.62	-0.00134368		2055.61	0.00077435
465.82	0.55241883		995.82	0.18168409		1525.82	-0.00103782		2055.81	0.00003171
466.02	0.55173087		996.02	0.18199753		1526.02	-0.00094327		2056.01	-0.00126665
466.22	0.55128469		996.22	0.18232513		1526.22	-0.00152481		2056.21	-0.00161738
466.42	0.55149673		996.42	0.18250748		1526.42	-0.00221433		2056.41	-0.00174439
466.62	0.55074418		996.62	0.18245631		1526.62	-0.00231538		2056.61	-0.00185233
466.82	0.55019366		996.82	0.18255643		1526.82	-0.0024916		2056.81	-0.00179294
467.02	0.54947493		997.02	0.18289325		1527.02	-0.00346122		2057.01	-0.00156929
467.22	0.54917739		997.22	0.18316773		1527.22	-0.00472581		2057.21	-0.00076967
467.42	0.54947029		997.42	0.18333451		1527.42	-0.00472303		2057.41	0.00016038
467.62	0.5497588		997.62	0.1844528		1527.62	-0.00543298		2057.61	0.00073893
467.82	0.5502707		997.82	0.18413582		1527.82	-0.00590223		2057.81	0.00173598
468.02	0.55106103		998.02	0.18431974		1528.02	-0.00601905		2058.01	0.00189844
468.22	0.55233908		998.22	0.18406437		1528.22	-0.00644683		2058.21	0.00292832
468.42	0.55352352		998.42	0.18367448		1528.42	-0.00570829		2058.41	0.00406026
468.62	0.55336772		998.62	0.18380581		1528.62	-0.00585785		2058.61	0.00383349
468.82	0.55363459		998.82	0.18396564		1528.82	-0.00541529		2058.81	0.00333034
469.02	0.55491916		999.02	0.18449794		1529.02	-0.00399644		2059.01	0.00328862
469.22	0.55494614		999.22	0.18484633		1529.22	-0.00266549		2059.21	0.00240499
469.42	0.55612837		999.42	0.18476373		1529.42	-0.00160531		2059.41	0.00206408
469.62	0.5560357		999.62	0.18508196		1529.62	-0.00083015		2059.61	0.00081128
469.82	0.55603432		999.82	0.18617262		1529.82	-0.00000785		2059.81	0.00035779
470.02	0.55605931		1000.02	0.18592833		1530.02	0.00066745		2060.01	-0.00005525
470.22	0.55557442		1000.22	0.18540608		1530.22	-0.00032065		2060.21	0.00037101
470.42	0.55605391		1000.42	0.18440862		1530.42	-0.00037552		2060.41	-0.0001776
470.62	0.55452252		1000.62	0.18490971		1530.62	0.00024951		2060.61	-0.00046935
470.82	0.55459142		1000.82	0.1850965		1530.82	-0.00012492		2060.81	-0.00009661
471.02	0.55401102		1001.02	0.18411483		1531.02	-0.00130168		2061.01	0.00034418
471.22	0.55398274		1001.22	0.18320498		1531.22	-0.00296125		2061.21	0.00001707
471.42	0.55393149		1001.42	0.18221957		1531.42	-0.00469891		2061.41	-0.00034037
471.62	0.5535105		1001.62	0.18195312		1531.62	-0.00688096		2061.61	-0.00047138
471.82	0.55395197		1001.82	0.18153041		1531.82	-0.00692163		2061.81	0.00032636
472.02	0.55484995		1002.02	0.18175788		1532.02	-0.00708435		2062.01	0.00038407
472.22	0.55522789		1002.22	0.18085055		1532.22	-0.00724809		2062.21	0.00033949
472.42	0.55516235		1002.42	0.17982658		1532.42	-0.00688935		2062.41	0.0009405
472.62	0.55502801		1002.62	0.17953921		1532.62	-0.00721587		2062.61	-0.00006846
472.82	0.55603427		1002.82	0.17945474		1532.82	-0.00593935		2062.81	-0.00045952
473.02	0.55583665		1003.02	0.18059864		1533.02	-0.00604964		2063.01	-0.00038893
473.22	0.55591188		1003.22	0.18061644		1533.22	-0.00613054		2063.21	-0.00070269
473.42	0.55564682		1003.42	0.18097943		1533.42	-0.00593345		2063.41	-0.00127561
473.62	0.55438397		1003.62	0.18216556		1533.62	-0.00615707		2063.61	-0.00070923
473.82	0.55401118		1003.82	0.18124879		1533.82	-0.00577324		2063.81	-0.00030434
474.02	0.55303342		1004.02	0.18064622		1534.02	-0.00560546		2064.01	-0.00042978
474.22	0.55162877		1004.22	0.18091726		1534.22	-0.00647329		2064.21	-0.0007266
474.42	0.55164073		1004.42	0.181423		1534.42	-0.00606943		2064.41	-0.00107639
474.62	0.55088096		1004.62	0.18265741		1534.62	-0.00570306		2064.61	-0.00056016
474.82	0.55178811		1004.82	0.18222703		1534.82	-0.00657623		2064.81	-0.00031397
475.02	0.55094687		1005.02	0.18193162		1535.02	-0.00760334		2065.01	0.00055265
475.22	0.55079107		1005.22	0.18160511		1535.22	-0.00871323		2065.21	0.00025448
475.42	0.55037403		1005.42	0.18165332		1535.42	-0.00890615		2065.41	0.00108593
475.62	0.55082893		1005.62	0.18206794		1535.62	-0.00911038		2065.61	0.00203601
475.82	0.55301319		1005.82	0.18147954		1535.82	-0.00838063		2065.81	0.00354613
476.02	0.55393192		1006.02	0.18090006		1536.02	-0.00864431		2066.01	0.00406884
476.22	0.553953		1006.22	0.17988889		1536.22	-0.00827249		2066.21	0.00297464
476.42	0.55492818		1006.42	0.17929114		1536.42	-0.00814		2066.41	0.0035317
476.62	0.55640739		1006.62	0.18006076		1536.62	-0.00767549		2066.61	0.00210106
476.82	0.55738966		1006.82	0.18107865		1536.82	-0.00797259		2066.81	0.00248662
477.02	0.5570917		1007.02	0.18127682		1537.02	-0.00796388		2067.01	0.00223954
477.22	0.55727502		1007.22	0.18080301		1537.22	-0.0077325		2067.21	0.00113744
477.42	0.55712307		1007.42	0.18069044		1537.42	-0.00756025		2067.41	0.00067565
477.62	0.55679231		1007.62	0.18118494		1537.62	-0.00679522		2067.61	0.00098755
477.82	0.55540775		1007.82	0.18100813		1537.82	-0.0051455		2067.81	-0.00042603
478.02	0.55487875		1008.02	0.18156334		1538.02	-0.00427176		2068.01	-0.0010465
478.22	0.55443449		1008.22	0.18214796		1538.22	-0.00405012		2068.21	-0.00168664
478.42	0.55379667		1008.42	0.18249448		1538.42	-0.00465168		2068.41	-0.00172914
478.62	0.55311003		1008.62	0.18257436		1538.62	-0.00432576		2068.61	-0.00153609
478.82	0.55273524		1008.82	0.18308501		1538.82	-0.00441832		2068.81	-0.0011207
479.02	0.55183196		1009.02	0.18324392		1539.02	-0.00386033		2069.01	-0.00045028
479.22	0.55084347		1009.22	0.18295295		1539.22	-0.00362978		2069.21	0.00086988
479.42	0.5508916		1009.42	0.18324759		1539.42	-0.00337709		2069.41	0.00228313
479.62	0.5517933		1009.62	0.18268251		1539.62	-0.00446446		2069.61	0.003183
479.82	0.55267489		1009.82	0.18279523		1539.82	-0.00444896		2069.81	0.00371065
480.02	0.5517573		1010.02	0.18326633		1540.02	-0.00547467		2070.01	0.00357218
480.22	0.55223346		1010.22	0.18238076		1540.22	-0.00633263		2070.21	0.00284812
480.42	0.55226087		1010.42	0.18217881		1540.42	-0.00719052		2070.41	0.00322704
480.62	0.55313014		1010.62	0.18251508		1540.62	-0.0073208		2070.61	0.00252772
480.82	0.55257668		1010.82	0.18338861		1540.82	-0.0076796		2070.81	0.00271345
481.02	0.55176503		1011.02	0.18307509		1541.02	-0.00701709		2071.01	0.00213411
481.22	0.55175909		1011.22	0.18295487		1541.22	-0.0074153		2071.21	0.00162344
481.42	0.5516452		1011.42	0.18306909		1541.42	-0.00728835		2071.41	0.00225048
481.62	0.5516368		1011.62	0.18411597		1541.62	-0.00651257		2071.61	0.00122756
481.82	0.55091027		1011.82	0.18383321		1541.82	-0.00630166		2071.81	0.00092448
482.02	0.55196969		1012.02	0.18299152		1542.02	-0.00692887		2072.01	0.00030813
482.22	0.55151101		1012.22	0.18304113		1542.22	-0.00750135		2072.21	-0.0001502
482.42	0.55077562		1012.42	0.18260309		1542.42	-0.00799496		2072.41	-0.00020327
482.62	0.55116842		1012.62	0.18293027		1542.62	-0.00779572		2072.61	-0.00077797
482.82	0.5517153		1012.82	0.18282298		1542.82	-0.00840485		2072.81	-0.00077326
483.02	0.55281444		1013.02	0.18268939		1543.02	-0.00906036		2073.01	-0.00081636
483.22	0.55322697		1013.22	0.18213415		1543.22	-0.00969673		2073.21	-0.00006327
483.42	0.55495045		1013.42	0.18131159		1543.42	-0.01024205		2073.41	-0.00020375
483.62	0.55486033		1013.62	0.18133534		1543.62	-0.01122617		2073.61	-0.0005241
483.82	0.55595064		1013.82	0.18204478		1543.82	-0.01081284		2073.81	-0.0003886
484.02	0.55617612		1014.02	0.18085216		1544.02	-0.01099304		2074.01	-0.00087825
484.22	0.55669517		1014.22	0.18029928		1544.22	-0.01067047		2074.21	-0.00047101
484.42	0.55658885		1014.42	0.18102276		1544.42	-0.01053223		2074.41	-0.00123157
484.62	0.55677995		1014.62	0.18105838		1544.62	-0.00963416		2074.61	-0.00082552
484.82	0.5554428		1014.82	0.18176295		1544.82	-0.0085442		2074.81	-0.00167163
485.02	0.554553		1015.02	0.18205384		1545.02	-0.00782217		2075.01	-0.00066355
485.22	0.5538007		1015.22	0.1823266		1545.22	-0.0069907		2075.21	-0.00038439
485.42	0.55321854		1015.42	0.18274585		1545.42	-0.00594025		2075.41	-0.00019471
485.62	0.55275751		1015.62	0.18263737		1545.62	-0.00522742		2075.61	-0.00046093
485.82	0.55142111		1015.82	0.18185145		1545.82	-0.00466731		2075.81	0.00019497
486.02	0.55065414		1016.02	0.1816392		1546.02	-0.00515878		2076.01	0.00018465
486.22	0.54899362		1016.22	0.18174738		1546.22	-0.00567049		2076.21	0.00014338
486.42	0.54826953		1016.42	0.18200106		1546.42	-0.0066824		2076.41	0.00037788
486.62	0.54926627		1016.62	0.18197838		1546.62	-0.00739421		2076.61	-0.00002654
486.82	0.5492111		1016.82	0.18153123		1546.82	-0.00864997		2076.81	0.00019577
487.02	0.54979958		1017.02	0.18141639		1547.02	-0.00949532		2077.01	0.00057666
487.22	0.550072		1017.22	0.18081585		1547.22	-0.00964135		2077.21	0.00071758
487.42	0.55056903		1017.42	0.18115844		1547.42	-0.00978378		2077.41	0.00011365
487.62	0.55160858		1017.62	0.1818318		1547.62	-0.01078694		2077.61	0.00048631
487.82	0.5526914		1017.82	0.18159873		1547.82	-0.01102708		2077.81	0.00114284
488.02	0.55353177		1018.02	0.18132736		1548.02	-0.01138721		2078.01	0.00128274
488.22	0.55404106		1018.22	0.18219211		1548.22	-0.01185548		2078.21	0.00122179
488.42	0.5548577		1018.42	0.18206624		1548.42	-0.01197823		2078.41	0.00030057
488.62	0.55436053		1018.62	0.18126853		1548.62	-0.01175102		2078.61	0.00002341
488.82	0.55402935		1018.82	0.18202205		1548.82	-0.01171884		2078.81	-0.00072319
489.02	0.5531274		1019.02	0.1821973		1549.02	-0.01087439		2079.01	0.00033991
489.22	0.55295931		1019.22	0.18230058		1549.22	-0.01034388		2079.21	0.00017213
489.42	0.55175636		1019.42	0.18252426		1549.42	-0.01070473		2079.41	-0.00062669
489.62	0.55080332		1019.62	0.18256705		1549.62	-0.01132942		2079.61	-0.00089257
489.82	0.5499521		1019.82	0.18130935		1549.82	-0.01167595		2079.81	-0.00133732
490.02	0.5500232		1020.02	0.18172085		1550.02	-0.01236234		2080.01	-0.00163355
490.22	0.5500157		1020.22	0.18181745		1550.22	-0.01227142		2080.21	-0.00196713
490.42	0.55048626		1020.42	0.18224459		1550.42	-0.01166286		2080.41	-0.0017412
490.62	0.55060311		1020.62	0.1809837		1550.62	-0.01130088		2080.61	-0.00149505
490.82	0.54987187		1020.82	0.18064517		1550.82	-0.01109119		2080.81	-0.00083832
491.02	0.54980131		1021.02	0.17940752		1551.02	-0.01067003		2081.01	-0.00005614
491.22	0.55035557		1021.22	0.17852817		1551.22	-0.01078432		2081.21	0.00067328
491.42	0.55105252		1021.42	0.17854841		1551.42	-0.01050475		2081.41	0.00193526
491.62	0.55140458		1021.62	0.17800518		1551.62	-0.01079767		2081.61	0.00256639
491.82	0.55063826		1021.82	0.1780836		1551.82	-0.00979936		2081.81	0.00210635
492.02	0.55155031		1022.02	0.17830852		1552.02	-0.00870706		2082.01	0.00238531
492.22	0.55181212		1022.22	0.17783836		1552.22	-0.00933136		2082.21	0.00171868
492.42	0.55230041		1022.42	0.17735001		1552.42	-0.00907849		2082.41	0.00006074
492.62	0.55188272		1022.62	0.17698962		1552.62	-0.00963167		2082.61	-0.00013807
492.82	0.5521583		1022.82	0.17795801		1552.82	-0.00931889		2082.81	-0.00053115
493.02	0.55164118		1023.02	0.17747215		1553.02	-0.00937503		2083.01	-0.00125919
493.22	0.5507335		1023.22	0.17821269		1553.22	-0.00988157		2083.21	-0.00265091
493.42	0.54981205		1023.42	0.17872085		1553.42	-0.01041841		2083.41	-0.00339064
493.62	0.54996182		1023.62	0.17876335		1553.62	-0.01000777		2083.61	-0.0034833
493.82	0.55001581		1023.82	0.17741683		1553.82	-0.00931747		2083.81	-0.00360114
494.02	0.55129005		1024.02	0.1795962		1554.02	-0.00936022		2084.01	-0.00330324
494.22	0.55101941		1024.22	0.17936485		1554.22	-0.00950483		2084.21	-0.00306866
494.42	0.55035186		1024.42	0.17944584		1554.42	-0.00934949		2084.41	-0.0023534
494.62	0.55015566		1024.62	0.17936889		1554.62	-0.00939473		2084.61	-0.00133874
494.82	0.55112067		1024.82	0.18008166		1554.82	-0.00891357		2084.81	-0.00057585
495.02	0.55193519		1025.02	0.18017533		1555.02	-0.00993316		2085.01	0.0003621
495.22	0.55236193		1025.22	0.18014282		1555.22	-0.01057351		2085.21	0.00145752
495.42	0.55263962		1025.42	0.18086035		1555.42	-0.01043397		2085.41	0.00282473
495.62	0.55204273		1025.62	0.18028142		1555.62	-0.01032856		2085.61	0.00230521
495.82	0.55309507		1025.82	0.18039896		1555.82	-0.0102305		2085.81	0.00167021
496.02	0.5538244		1026.02	0.18077094		1556.02	-0.01094304		2086.01	0.00258376
496.22	0.55383438		1026.22	0.18116489		1556.22	-0.01115245		2086.21	0.00169055
496.42	0.55412205		1026.42	0.18248276		1556.42	-0.01040221		2086.41	0.00051166
496.62	0.55377496		1026.62	0.18257086		1556.62	-0.00967758		2086.61	0.00039977
496.82	0.55318521		1026.82	0.18351056		1556.82	-0.00919157		2086.81	-0.00167563
497.02	0.55188055		1027.02	0.18241237		1557.02	-0.00929888		2087.01	-0.0024796
497.22	0.54993049		1027.22	0.18296317		1557.22	-0.00886447		2087.21	-0.00248251
497.42	0.54915723		1027.42	0.18345729		1557.42	-0.00830712		2087.41	-0.00315635
497.62	0.5482917		1027.62	0.18289177		1557.62	-0.00751399		2087.61	-0.00374832
497.82	0.54738292		1027.82	0.18154165		1557.82	-0.00803425		2087.81	-0.00421622
498.02	0.54734976		1028.02	0.18155082		1558.02	-0.00900625		2088.01	-0.00380357
498.22	0.54672158		1028.22	0.18050652		1558.22	-0.00927563		2088.21	-0.00333223
498.42	0.54724252		1028.42	0.1802374		1558.42	-0.00914759		2088.41	-0.00221885
498.62	0.54807688		1028.62	0.17963213		1558.62	-0.00855806		2088.61	-0.00163778
498.82	0.54986725		1028.82	0.1789034		1558.82	-0.0102338		2088.81	-0.00103841
499.02	0.55063513		1029.02	0.17794305		1559.02	-0.01228425		2089.01	-0.00033133
499.22	0.55095422		1029.22	0.17726369		1559.22	-0.01265428		2089.21	0.00053969
499.42	0.551539		1029.42	0.17699523		1559.42	-0.01214905		2089.41	0.00145627
499.62	0.55271821		1029.62	0.17622321		1559.62	-0.0113413		2089.61	0.00258733
499.82	0.55413753		1029.82	0.177668		1559.82	-0.01120133		2089.81	0.0026857
500.02	0.55435643		1030.02	0.17870807		1560.02	-0.01105106		2090.01	0.00323769
500.22	0.55481386		1030.22	0.17983294		1560.22	-0.01041832		2090.21	0.00211167
500.42	0.55598237		1030.42	0.18113712		1560.42	-0.00994516		2090.41	0.00160571
500.62	0.55512107		1030.62	0.181146		1560.62	-0.00892569		2090.61	0.00094417
500.82	0.55458167		1030.82	0.18270897		1560.82	-0.01005028		2090.81	0.00064416
501.02	0.55408957		1031.02	0.18213702		1561.02	-0.00975225		2091.01	0.00026916
501.22	0.55277131		1031.22	0.18293101		1561.22	-0.00981427		2091.21	-0.00035435
501.42	0.55273651		1031.42	0.18409825		1561.42	-0.00941218		2091.41	-0.00141388
501.62	0.55264339		1031.62	0.1830921		1561.62	-0.01062459		2091.61	-0.0010661
501.82	0.55222254		1031.82	0.1819907		1561.82	-0.01181197		2091.81	-0.00036455
502.02	0.5513148		1032.02	0.18141645		1562.02	-0.0113745		2092.01	0.00026468
502.22	0.55086832		1032.22	0.18126233		1562.22	-0.01109161		2092.21	-0.00008112
502.42	0.55089159		1032.42	0.18002894		1562.42	-0.01016996		2092.41	0.00066824
502.62	0.55047565		1032.62	0.17895478		1562.62	-0.01064278		2092.61	0.00108179
502.82	0.55051935		1032.82	0.17811591		1562.82	-0.01193178		2092.81	0.00064274
503.02	0.55044412		1033.02	0.17777224		1563.02	-0.01193986		2093.01	0.00095727
503.22	0.5501038		1033.22	0.17784757		1563.22	-0.01044		2093.21	0.00181323
503.42	0.54958859		1033.42	0.17749269		1563.42	-0.00933824		2093.41	0.00269347
503.62	0.54952107		1033.62	0.17737446		1563.62	-0.00828468		2093.61	0.00343718
503.82	0.54941706		1033.82	0.17787149		1563.82	-0.00841281		2093.81	0.00287449
504.02	0.54884158		1034.02	0.17799796		1564.02	-0.00842645		2094.01	0.00279798
504.22	0.54864779		1034.22	0.17889999		1564.22	-0.00815564		2094.21	0.00209951
504.42	0.54857664		1034.42	0.17958404		1564.42	-0.00778437		2094.41	0.00248096
504.62	0.54838653		1034.62	0.17957773		1564.62	-0.00861985		2094.61	0.002958
504.82	0.54830015		1034.82	0.18084577		1564.82	-0.0103725		2094.81	0.00288648
505.02	0.54783307		1035.02	0.17993533		1565.02	-0.01012941		2095.01	0.00210682
505.22	0.54762936		1035.22	0.1814859		1565.22	-0.01059956		2095.21	0.00173542
505.42	0.54840408		1035.42	0.18197091		1565.42	-0.01119837		2095.41	0.0017485
505.62	0.54889372		1035.62	0.18117158		1565.62	-0.01184404		2095.61	0.00099278
505.82	0.54876213		1035.82	0.18155871		1565.82	-0.01110891		2095.81	0.00128461
506.02	0.54848545		1036.02	0.18231798		1566.02	-0.010877		2096.01	0.00121192
506.22	0.5495815		1036.22	0.18223764		1566.22	-0.01003097		2096.21	0.00195591
506.42	0.55023471		1036.42	0.18118103		1566.42	-0.0097384		2096.41	0.00356949
506.62	0.5501431		1036.62	0.18045219		1566.62	-0.01053343		2096.61	0.00366244
506.82	0.55129746		1036.82	0.18069538		1566.82	-0.01084246		2096.81	0.00400691
507.02	0.55193911		1037.02	0.18104489		1567.02	-0.01143071		2097.01	0.00458717
507.22	0.55142133		1037.22	0.18101617		1567.22	-0.01106806		2097.21	0.00579661
507.42	0.550668		1037.42	0.18071579		1567.42	-0.01107035		2097.41	0.00537052
507.62	0.55115167		1037.62	0.18007896		1567.62	-0.01012583		2097.61	0.00484206
507.82	0.55153594		1037.82	0.1803456		1567.82	-0.01082501		2097.81	0.00481445
508.02	0.55104943		1038.02	0.18032211		1568.02	-0.01104446		2098.01	0.00440934
508.22	0.55103456		1038.22	0.18005526		1568.22	-0.01093746		2098.21	0.00392281
508.42	0.55082354		1038.42	0.18032397		1568.42	-0.01079257		2098.41	0.00311499
508.62	0.55077919		1038.62	0.1795602		1568.62	-0.01145911		2098.61	0.00319859
508.82	0.5493405		1038.82	0.18004392		1568.82	-0.01101415		2098.81	0.00197793
509.02	0.54881442		1039.02	0.17964715		1569.02	-0.01058768		2099.01	0.00162541
509.22	0.54892828		1039.22	0.18019968		1569.22	-0.01133457		2099.21	0.00051531
509.42	0.548615		1039.42	0.17949537		1569.42	-0.01126575		2099.41	-0.00019795
509.62	0.54894271		1039.62	0.18037509		1569.62	-0.01072289		2099.61	-0.00066991
509.82	0.54824063		1039.82	0.18076048		1569.82	-0.01060619		2099.81	-0.00066785
510.02	0.54898506		1040.02	0.18087618		1570.02	-0.01139132		2100.01	-0.00018453
510.22	0.54943758		1040.22	0.18051196		1570.22	-0.01175924		2100.21	0.00022489
510.42	0.54795909		1040.42	0.18001885		1570.42	-0.01259816		2100.41	0.00073283
510.62	0.54830313		1040.62	0.18024776		1570.62	-0.01319949		2100.61	0.00167559
510.82	0.54973513		1040.82	0.18082178		1570.82	-0.01425019		2100.81	0.00243334
511.02	0.54946246		1041.02	0.18046304		1571.02	-0.01373214		2101.01	0.00265262
511.22	0.54862169		1041.22	0.18047837		1571.22	-0.01302125		2101.21	0.00313376
511.42	0.54915237		1041.42	0.17997069		1571.42	-0.01191643		2101.41	0.00280427
511.62	0.54998361		1041.62	0.17941522		1571.62	-0.01072041		2101.61	0.00340326
511.82	0.55015729		1041.82	0.1799492		1571.82	-0.01069037		2101.81	0.00354268
512.02	0.54983696		1042.02	0.1795603		1572.02	-0.009853		2102.01	0.00290499
512.22	0.54949112		1042.22	0.17975183		1572.22	-0.00904172		2102.21	0.00207527
512.42	0.54888316		1042.42	0.17984252		1572.42	-0.00753701		2102.41	0.00142859
512.62	0.54838135		1042.62	0.17909501		1572.62	-0.00732115		2102.61	0.00212113
512.82	0.54760061		1042.82	0.18064743		1572.82	-0.00700193		2102.81	0.00119631
513.02	0.54791848		1043.02	0.18062437		1573.02	-0.0081216		2103.01	0.00178333
513.22	0.54741167		1043.22	0.18056968		1573.22	-0.00928394		2103.21	0.0009835
513.42	0.54621262		1043.42	0.18005181		1573.42	-0.00905048		2103.41	0.00132549
513.62	0.54635163		1043.62	0.1803555		1573.62	-0.01015998		2103.61	0.00097297
513.82	0.54614174		1043.82	0.17926132		1573.82	-0.01128383		2103.81	-0.0006563
514.02	0.54659005		1044.02	0.17791428		1574.02	-0.01294294		2104.01	-0.00002701
514.22	0.54644998		1044.22	0.17744893		1574.22	-0.01439141		2104.21	-0.00022241
514.42	0.54577243		1044.42	0.17686036		1574.42	-0.01386802		2104.41	0.00041412
514.62	0.54824663		1044.62	0.17613959		1574.62	-0.01403895		2104.61	0.00052898
514.82	0.54926309		1044.82	0.17625005		1574.82	-0.01422828		2104.81	0.00000283
515.02	0.54956078		1045.02	0.17640365		1575.02	-0.0134127		2105.01	-0.00008123
515.22	0.54908587		1045.22	0.17724259		1575.22	-0.01326405		2105.21	-0.00017248
515.42	0.54975162		1045.42	0.17725388		1575.42	-0.01280921		2105.41	0.00003129
515.62	0.54977912		1045.62	0.17660278		1575.62	-0.01148265		2105.61	-0.00024226
515.82	0.54945138		1045.82	0.17709439		1575.82	-0.01132683		2105.81	-0.00139475
516.02	0.54962266		1046.02	0.17783285		1576.02	-0.01094728		2106.01	-0.00261704
516.22	0.54894832		1046.22	0.17846014		1576.22	-0.0110084		2106.21	-0.00297281
516.42	0.54827785		1046.42	0.17869527		1576.42	-0.00964915		2106.41	-0.00317636
516.62	0.54846618		1046.62	0.17932736		1576.62	-0.0101371		2106.61	-0.0034547
516.82	0.54789559		1046.82	0.18046073		1576.82	-0.01060113		2106.81	-0.00362995
517.02	0.54791672		1047.02	0.18088201		1577.02	-0.01086679		2107.01	-0.00248826
517.22	0.54704496		1047.22	0.18127876		1577.22	-0.01119384		2107.21	-0.00264269
517.42	0.54662674		1047.42	0.18055641		1577.42	-0.01108584		2107.41	-0.0018596
517.62	0.54626352		1047.62	0.18042109		1577.62	-0.01216776		2107.61	-0.00209768
517.82	0.54631783		1047.82	0.17919933		1577.82	-0.01235315		2107.81	-0.00153867
518.02	0.54651664		1048.02	0.17852034		1578.02	-0.01278426		2108.01	-0.00024185
518.22	0.54826444		1048.22	0.17915781		1578.22	-0.0124755		2108.21	0.00090485
518.42	0.54964985		1048.42	0.17869589		1578.42	-0.01221557		2108.41	0.00199212
518.62	0.55118589		1048.62	0.17826725		1578.62	-0.01177618		2108.61	0.00234532
518.82	0.5518719		1048.82	0.17848875		1578.82	-0.01152761		2108.81	0.00290794
519.02	0.55292469		1049.02	0.17883381		1579.02	-0.01126224		2109.01	0.00270115
519.22	0.55350421		1049.22	0.1794623		1579.22	-0.01094559		2109.21	0.00386822
519.42	0.55318259		1049.42	0.17929634		1579.42	-0.01033164		2109.41	0.0033207
519.62	0.55340076		1049.62	0.1787155		1579.62	-0.00899832		2109.61	0.00255435
519.82	0.55337978		1049.82	0.17953122		1579.82	-0.0094972		2109.81	0.00192378
520.02	0.55378293		1050.02	0.18094723		1580.02	-0.00915467		2110.01	0.00083953
520.22	0.55202871		1050.22	0.18115951		1580.22	-0.00945724		2110.21	-0.00008156
520.42	0.55130052		1050.42	0.18113332		1580.42	-0.00943385		2110.41	-0.00141974
520.62	0.55120233		1050.62	0.18184638		1580.62	-0.00980584		2110.61	-0.00145025
520.82	0.54953127		1050.82	0.18205224		1580.82	-0.00957759		2110.81	-0.00147664
521.02	0.54815771		1051.02	0.18311021		1581.02	-0.01072613		2111.01	-0.00160261
521.22	0.54691917		1051.22	0.1837221		1581.22	-0.01207543		2111.21	-0.00131821
521.42	0.54556549		1051.42	0.18298368		1581.42	-0.01252081		2111.41	0.00001788
521.62	0.54447491		1051.62	0.18295639		1581.62	-0.01345709		2111.61	0.00071602
521.82	0.5444545		1051.82	0.18271861		1581.82	-0.01308259		2111.81	0.00188622
522.02	0.54386832		1052.02	0.18183673		1582.02	-0.01204188		2112.01	0.00344262
522.22	0.54522075		1052.22	0.18155372		1582.22	-0.01186125		2112.21	0.00455519
522.42	0.54592142		1052.42	0.18093501		1582.42	-0.0117926		2112.41	0.00484938
522.62	0.54627168		1052.62	0.18091315		1582.62	-0.01054496		2112.61	0.00476629
522.82	0.54726562		1052.82	0.18118867		1582.82	-0.01029262		2112.81	0.00481064
523.02	0.54848306		1053.02	0.18104786		1583.02	-0.01026545		2113.01	0.00462137
523.22	0.54948311		1053.22	0.18121968		1583.22	-0.00980462		2113.21	0.00485302
523.42	0.54981669		1053.42	0.18136933		1583.42	-0.0090357		2113.41	0.00276774
523.62	0.55110895		1053.62	0.18189127		1583.62	-0.00954493		2113.61	0.00116957
523.82	0.55100517		1053.82	0.182216		1583.82	-0.01004106		2113.81	0.00039803
524.02	0.55078961		1054.02	0.18328912		1584.02	-0.01014711		2114.01	-0.00098672
524.22	0.5500266		1054.22	0.18333089		1584.22	-0.01056511		2114.21	-0.00253558
524.42	0.55001111		1054.42	0.18338144		1584.42	-0.01158002		2114.41	-0.00366315
524.62	0.54871199		1054.62	0.18322241		1584.62	-0.01115469		2114.61	-0.00402628
524.82	0.54771405		1054.82	0.18274511		1584.82	-0.01199458		2114.81	-0.00496273
525.02	0.54691034		1055.02	0.18380093		1585.02	-0.01399864		2115.01	-0.00453385
525.22	0.54676691		1055.22	0.18388378		1585.22	-0.01448777		2115.21	-0.00313314
525.42	0.54606503		1055.42	0.18309223		1585.42	-0.01415992		2115.41	-0.00160108
525.62	0.54547499		1055.62	0.183395		1585.62	-0.01411481		2115.61	-0.0005965
525.82	0.54546422		1055.82	0.18315234		1585.82	-0.012915		2115.81	0.00108424
526.02	0.54510197		1056.02	0.18266754		1586.02	-0.01260978		2116.01	0.00299229
526.22	0.54644762		1056.22	0.18296548		1586.22	-0.01295543		2116.21	0.00330971
526.42	0.54680832		1056.42	0.18359367		1586.42	-0.01228693		2116.41	0.00401942
526.62	0.54687452		1056.62	0.18383586		1586.62	-0.01140232		2116.61	0.00502334
526.82	0.54758638		1056.82	0.18350985		1586.82	-0.01200511		2116.81	0.00472937
527.02	0.54826579		1057.02	0.18303025		1587.02	-0.01122066		2117.01	0.00497044
527.22	0.54910069		1057.22	0.18323321		1587.22	-0.01129532		2117.21	0.00408733
527.42	0.54867765		1057.42	0.18318044		1587.42	-0.01130626		2117.41	0.00291991
527.62	0.54837688		1057.62	0.18347018		1587.62	-0.01204914		2117.61	0.00156316
527.82	0.54696521		1057.82	0.18283964		1587.82	-0.01159086		2117.81	0.00113065
528.02	0.5460192		1058.02	0.18306712		1588.02	-0.01237199		2118.01	0.00010607
528.22	0.54576362		1058.22	0.18262789		1588.22	-0.01225798		2118.21	-0.0017974
528.42	0.54411289		1058.42	0.18221606		1588.42	-0.0127833		2118.41	-0.00183897
528.62	0.54278028		1058.62	0.18199502		1588.62	-0.01209398		2118.61	-0.00290025
528.82	0.54257923		1058.82	0.181798		1588.82	-0.01283665		2118.81	-0.00350796
529.02	0.54215665		1059.02	0.18115696		1589.02	-0.01416218		2119.01	-0.00256068
529.22	0.54232827		1059.22	0.18070683		1589.22	-0.01378542		2119.21	-0.00255318
529.42	0.54234871		1059.42	0.18053371		1589.42	-0.01413979		2119.41	-0.00181379
529.62	0.54340225		1059.62	0.18085958		1589.62	-0.01441867		2119.61	-0.00197243
529.82	0.54454441		1059.82	0.18053662		1589.82	-0.01431123		2119.81	-0.00117104
530.02	0.54566328		1060.02	0.18009243		1590.02	-0.01500931		2120.01	-0.00161335
530.22	0.54632915		1060.22	0.18041073		1590.22	-0.01433454		2120.21	-0.00234181
530.42	0.54677156		1060.42	0.18077824		1590.42	-0.01424885		2120.41	-0.00240171
530.62	0.54727116		1060.62	0.18103155		1590.62	-0.01403074		2120.61	-0.00193873
530.82	0.54723644		1060.82	0.18027931		1590.82	-0.01381465		2120.81	-0.00246887
531.02	0.54721228		1061.02	0.1806273		1591.02	-0.01236752		2121.01	-0.00200686
531.22	0.54726979		1061.22	0.17974964		1591.22	-0.01281814		2121.21	-0.00237663
531.42	0.54736988		1061.42	0.17976008		1591.42	-0.01285371		2121.41	-0.002336
531.62	0.54708393		1061.62	0.18054428		1591.62	-0.01339468		2121.61	-0.00310074
531.82	0.54559516		1061.82	0.17970403		1591.82	-0.01390363		2121.81	-0.00283689
532.02	0.54527844		1062.02	0.1800393		1592.02	-0.01458429		2122.01	-0.00313839
532.22	0.54615428		1062.22	0.18110113		1592.22	-0.01491504		2122.21	-0.00264741
532.42	0.54558041		1062.42	0.18140525		1592.42	-0.01509858		2122.41	-0.00187714
532.62	0.5453151		1062.62	0.18168111		1592.62	-0.01464357		2122.61	-0.00264159
532.82	0.54606272		1062.82	0.18138441		1592.82	-0.01568791		2122.81	-0.00236383
533.02	0.54666869		1063.02	0.18088055		1593.02	-0.01599693		2123.01	-0.00191202
533.22	0.54809196		1063.22	0.18118808		1593.22	-0.01558583		2123.21	-0.00216189
533.42	0.54955632		1063.42	0.18068617		1593.42	-0.01632313		2123.41	-0.00175821
533.62	0.55056244		1063.62	0.18049605		1593.62	-0.01590441		2123.61	-0.00197891
533.82	0.55063266		1063.82	0.18063084		1593.82	-0.01610739		2123.81	-0.00182063
534.02	0.55073545		1064.02	0.18087224		1594.02	-0.01621589		2124.01	-0.00289948
534.22	0.55132771		1064.22	0.18148052		1594.22	-0.01565116		2124.21	-0.00219937
534.42	0.55129673		1064.42	0.18204333		1594.42	-0.0154243		2124.41	-0.00091551
534.62	0.5508538		1064.62	0.18239246		1594.62	-0.01468903		2124.61	-0.00039895
534.82	0.54999703		1064.82	0.18147977		1594.82	-0.01336131		2124.81	-0.00064451
535.02	0.54932071		1065.02	0.18110038		1595.02	-0.01308813		2125.01	-0.00058708
535.22	0.54916524		1065.22	0.18065323		1595.22	-0.01355717		2125.21	-0.00087126
535.42	0.54877846		1065.42	0.18116263		1595.42	-0.01352099		2125.41	-0.00143419
535.62	0.54752642		1065.62	0.18083762		1595.62	-0.01335601		2125.61	-0.00187635
535.82	0.54647274		1065.82	0.18005913		1595.82	-0.01400544		2125.81	-0.00209984
536.02	0.54630061		1066.02	0.18047145		1596.02	-0.01361977		2126.01	-0.00220944
536.22	0.54592537		1066.22	0.18087728		1596.22	-0.01414021		2126.21	-0.00163501
536.42	0.54519476		1066.42	0.18049934		1596.42	-0.013717		2126.41	-0.00144077
536.62	0.54535048		1066.62	0.18016768		1596.62	-0.01396166		2126.61	-0.00088038
536.82	0.54645896		1066.82	0.17886691		1596.82	-0.01466518		2126.81	-0.00051798
537.02	0.54702346		1067.02	0.17727701		1597.02	-0.01456531		2127.01	-0.00088655
537.22	0.54788708		1067.22	0.17622002		1597.22	-0.01479842		2127.21	-0.00058859
537.42	0.54895655		1067.42	0.17553045		1597.42	-0.01580191		2127.41	-0.0001385
537.62	0.54907993		1067.62	0.17560095		1597.62	-0.01638555		2127.61	-0.00014988
537.82	0.54975231		1067.82	0.17619746		1597.82	-0.01697118		2127.81	0.00030852
538.02	0.54980894		1068.02	0.17553018		1598.02	-0.01662538		2128.01	0.00060184
538.22	0.55122386		1068.22	0.17666235		1598.22	-0.01549346		2128.21	0.00159815
538.42	0.55063857		1068.42	0.1770102		1598.42	-0.01538512		2128.41	0.0021852
538.62	0.55106969		1068.62	0.17688562		1598.62	-0.01524602		2128.61	0.00095809
538.82	0.55070183		1068.82	0.17693829		1598.82	-0.01480498		2128.81	0.00135337
539.02	0.5495219		1069.02	0.17748775		1599.02	-0.01441371		2129.01	0.00120567
539.22	0.54949622		1069.22	0.17821659		1599.22	-0.01453502		2129.21	0.00059533
539.42	0.54821172		1069.42	0.17916774		1599.42	-0.01382632		2129.41	0.00015716
539.62	0.54710889		1069.62	0.17970557		1599.62	-0.01366753		2129.61	-0.00055474
539.82	0.54564249		1069.82	0.1803447		1599.82	-0.01424029		2129.81	-0.00174074
540.02	0.54433075		1070.02	0.18109249		1600.02	-0.01398299		2130.01	-0.00193383
540.22	0.54380917		1070.22	0.18139293		1600.22	-0.01443009		2130.21	-0.00149335
540.42	0.54472359		1070.42	0.18145203		1600.42	-0.01501357		2130.41	-0.00099401
540.62	0.5450597		1070.62	0.18113668		1600.62	-0.01562629		2130.61	-0.00051575
540.82	0.54495541		1070.82	0.18001814		1600.82	-0.01573774		2130.81	-0.00011126
541.02	0.54594475		1071.02	0.17971832		1601.02	-0.01628554		2131.01	-0.00102668
541.22	0.54596486		1071.22	0.1792167		1601.22	-0.01678746		2131.21	-0.00084009
541.42	0.54789806		1071.42	0.17916342		1601.42	-0.01832825		2131.41	-0.00048905
541.62	0.54793039		1071.62	0.17988052		1601.62	-0.01812628		2131.61	-0.00060861
541.82	0.54762662		1071.82	0.18011764		1601.82	-0.01765917		2131.81	-0.00114166
542.02	0.54759473		1072.02	0.17892654		1602.02	-0.01705565		2132.01	-0.00176099
542.22	0.54868789		1072.22	0.18008741		1602.22	-0.01677529		2132.21	-0.00211967
542.42	0.54838495		1072.42	0.17919478		1602.42	-0.01829701		2132.41	-0.00241436
542.62	0.54854633		1072.62	0.17902371		1602.62	-0.0177113		2132.61	-0.00322885
542.82	0.5474593		1072.82	0.17927805		1602.82	-0.01784747		2132.81	-0.00329923
543.02	0.54659551		1073.02	0.17993466		1603.02	-0.01684379		2133.01	-0.00472486
543.22	0.54687775		1073.22	0.1801399		1603.22	-0.01602539		2133.21	-0.00521571
543.42	0.54604989		1073.42	0.18114132		1603.42	-0.01526825		2133.41	-0.00618029
543.62	0.54584828		1073.62	0.18149702		1603.62	-0.01510717		2133.61	-0.00719214
543.82	0.54522703		1073.82	0.18197881		1603.82	-0.0145572		2133.81	-0.00723536
544.02	0.54510097		1074.02	0.18148488		1604.02	-0.01413274		2134.01	-0.00671254
544.22	0.54584115		1074.22	0.18069422		1604.22	-0.01521968		2134.21	-0.00557779
544.42	0.54687202		1074.42	0.18053762		1604.42	-0.0155362		2134.41	-0.00541983
544.62	0.5470341		1074.62	0.18075609		1604.62	-0.01519336		2134.61	-0.00459741
544.82	0.5478997		1074.82	0.17957768		1604.82	-0.01588637		2134.81	-0.00386468
545.02	0.54907016		1075.02	0.17948685		1605.02	-0.01687675		2135.01	-0.00346965
545.22	0.54942335		1075.22	0.18025388		1605.22	-0.01740788		2135.21	-0.0022268
545.42	0.55043733		1075.42	0.18149008		1605.42	-0.01767571		2135.41	-0.00030457
545.62	0.54954864		1075.62	0.18247195		1605.62	-0.01786968		2135.61	-0.0003272
545.82	0.54895343		1075.82	0.18150508		1605.82	-0.01791164		2135.81	-0.00102836
546.02	0.5496309		1076.02	0.18117025		1606.02	-0.01821919		2136.01	-0.00033818
546.22	0.54955179		1076.22	0.18162141		1606.22	-0.01923167		2136.21	0.00026528
546.42	0.54816561		1076.42	0.18136113		1606.42	-0.01936071		2136.41	0.00080235
546.62	0.5473623		1076.62	0.18164466		1606.62	-0.01812784		2136.61	0.00108536
546.82	0.54640382		1076.82	0.18140773		1606.82	-0.01841037		2136.81	0.00021917
547.02	0.54613873		1077.02	0.18142461		1607.02	-0.01672951		2137.01	0.00036128
547.22	0.54510767		1077.22	0.18215021		1607.22	-0.0156442		2137.21	0.00063205
547.42	0.54419225		1077.42	0.18211758		1607.42	-0.01534181		2137.41	0.00005657
547.62	0.54417947		1077.62	0.18200141		1607.62	-0.01476061		2137.61	-0.00033923
547.82	0.54352213		1077.82	0.18107427		1607.82	-0.01434626		2137.81	-0.00041078
548.02	0.54350518		1078.02	0.1796957		1608.02	-0.01509084		2138.01	-0.00158698
548.22	0.54356086		1078.22	0.17902407		1608.22	-0.01644552		2138.21	-0.00265566
548.42	0.54454844		1078.42	0.17899136		1608.42	-0.01635327		2138.41	-0.00306232
548.62	0.54559764		1078.62	0.17852086		1608.62	-0.01563908		2138.61	-0.00274197
548.82	0.54635076		1078.82	0.17828058		1608.82	-0.01668487		2138.81	-0.00216199
549.02	0.54720465		1079.02	0.1795078		1609.02	-0.016988		2139.01	-0.0020828
549.22	0.54761532		1079.22	0.18039362		1609.22	-0.01703884		2139.21	-0.00137299
549.42	0.54823148		1079.42	0.17963309		1609.42	-0.01712753		2139.41	-0.00067012
549.62	0.54805854		1079.62	0.1785317		1609.62	-0.01756263		2139.61	-0.00217153
549.82	0.54784818		1079.82	0.17789786		1609.82	-0.01711894		2139.81	-0.00262999
550.02	0.54814538		1080.02	0.17794235		1610.02	-0.01681158		2140.01	-0.00217269
550.22	0.54739559		1080.22	0.17815615		1610.22	-0.01619282		2140.21	-0.00171041
550.42	0.54599714		1080.42	0.17791159		1610.42	-0.01592715		2140.41	-0.00188612
550.62	0.54655115		1080.62	0.17850977		1610.62	-0.01495846		2140.61	-0.00139602
550.82	0.5460019		1080.82	0.17809837		1610.82	-0.01433523		2140.81	-0.00168248
551.02	0.54612822		1081.02	0.17908074		1611.02	-0.01299699		2141.01	-0.00163188
551.22	0.54587477		1081.22	0.17897443		1611.22	-0.01250166		2141.21	-0.00211006
551.42	0.54571935		1081.42	0.17810548		1611.42	-0.01230807		2141.41	-0.00248314
551.62	0.54535184		1081.62	0.17789815		1611.62	-0.01248731		2141.61	-0.00228296
551.82	0.5454496		1081.82	0.17722946		1611.82	-0.01300064		2141.81	-0.00238081
552.02	0.54466931		1082.02	0.17779046		1612.02	-0.01301611		2142.01	-0.00268104
552.22	0.54567918		1082.22	0.17789645		1612.22	-0.01374942		2142.21	-0.00162199
552.42	0.54676899		1082.42	0.17851121		1612.42	-0.01391791		2142.41	-0.00040088
552.62	0.54756214		1082.62	0.17802256		1612.62	-0.01356305		2142.61	-0.00030383
552.82	0.54781699		1082.82	0.17808879		1612.82	-0.0149326		2142.81	0.00028377
553.02	0.54815616		1083.02	0.17877284		1613.02	-0.01518713		2143.01	0.00045575
553.22	0.54817472		1083.22	0.17777875		1613.22	-0.01568517		2143.21	0.00174036
553.42	0.54817021		1083.42	0.17674827		1613.42	-0.01588614		2143.41	0.00209488
553.62	0.5473815		1083.62	0.17625488		1613.62	-0.01603829		2143.61	0.00160922
553.82	0.54674995		1083.82	0.17647767		1613.82	-0.01559369		2143.81	0.00242878
554.02	0.5466196		1084.02	0.17623013		1614.02	-0.01512708		2144.01	0.00226459
554.22	0.54567997		1084.22	0.1768315		1614.22	-0.01575686		2144.21	0.00285835
554.42	0.54535595		1084.42	0.17652204		1614.42	-0.01586802		2144.41	0.00265466
554.62	0.5460074		1084.62	0.17695862		1614.62	-0.01472343		2144.61	0.0027972
554.82	0.54493469		1084.82	0.17666906		1614.82	-0.01327038		2144.81	0.0014364
555.02	0.54570955		1085.02	0.17672784		1615.02	-0.01346305		2145.01	0.00009019
555.22	0.54525189		1085.22	0.17637219		1615.22	-0.01356289		2145.21	-0.00066439
555.42	0.5449615		1085.42	0.17682199		1615.42	-0.01403623		2145.41	-0.00128575
555.62	0.54553		1085.62	0.17761267		1615.62	-0.01445137		2145.61	-0.00190554
555.82	0.54630635		1085.82	0.17724737		1615.82	-0.01473659		2145.81	-0.0022476
556.02	0.54527626		1086.02	0.17817249		1616.02	-0.01443819		2146.01	-0.00246675
556.22	0.54661056		1086.22	0.17899322		1616.22	-0.0147658		2146.21	-0.00230178
556.42	0.54712731		1086.42	0.17906855		1616.42	-0.01488074		2146.41	-0.00322066
556.62	0.54746205		1086.62	0.17933727		1616.62	-0.01531138		2146.61	-0.00307072
556.82	0.54757305		1086.82	0.18004141		1616.82	-0.01533618		2146.81	-0.0029545
557.02	0.54807662		1087.02	0.18067132		1617.02	-0.01544324		2147.01	-0.00212038
557.22	0.54895223		1087.22	0.18020495		1617.22	-0.01672961		2147.21	-0.00185855
557.42	0.54907111		1087.42	0.17934138		1617.42	-0.0172113		2147.41	-0.00193725
557.62	0.54925292		1087.62	0.17878282		1617.62	-0.01747418		2147.61	-0.00184842
557.82	0.54886522		1087.82	0.17847675		1617.82	-0.01751002		2147.81	-0.00130623
558.02	0.54860784		1088.02	0.17811251		1618.02	-0.01774525		2148.01	-0.00157835
558.22	0.54773701		1088.22	0.17807717		1618.22	-0.01798583		2148.21	-0.00119528
558.42	0.54740962		1088.42	0.17773097		1618.42	-0.0169137		2148.41	-0.00183471
558.62	0.54707223		1088.62	0.17769267		1618.62	-0.01623988		2148.61	-0.00254415
558.82	0.54637788		1088.82	0.1777895		1618.82	-0.01513732		2148.81	-0.00356088
559.02	0.54655163		1089.02	0.17806971		1619.02	-0.01567191		2149.01	-0.00471639
559.22	0.5459618		1089.22	0.17827444		1619.22	-0.01520979		2149.21	-0.00572476
559.42	0.54601282		1089.42	0.17840425		1619.42	-0.01489202		2149.41	-0.00675266
559.62	0.54559263		1089.62	0.17886625		1619.62	-0.01418166		2149.61	-0.00755203
559.82	0.54501909		1089.82	0.17847843		1619.82	-0.01334687		2149.81	-0.0079556
