# Supplementary material for: Functional development of a V3/glycan-specific broadly neutralizing antibody isolated from a case of HIV superinfection
Source: eLife journal article supplement (doi:10.7554/elife.68110), 2021-07-15
Supplement: fig2-data2 [file A1.xls]

Vers 3.43 Data Simulation
Conc1	5E-07	5E-07	5E-07	5E-07	5E-07
Start1	200	729.99	1260	1790	2320
Stop1	559.8	1089.79	1619.8	2149.8	2679.8
Time1	Data1	Sim1	Time2	Data2	Sim2	Time3	Data3	Sim3	Time4	Data4	Sim4	Time5	Data5	Sim5
200	0.02456759		729.99	-0.00041378		1260	0.00829938		1790	0.00151023		2320	-0.00171927
200.2	0.02384564		730.19	0.00022813		1260.2	0.00912367		1790.2	0.00130061		2320.2	-0.00107913
200.4	0.02335262		730.39	0.00074885		1260.4	0.00932829		1790.4	0.00151937		2320.4	-0.00069401
200.6	0.02319495		730.59	0.00096861		1260.6	0.00973426		1790.6	0.00155832		2320.6	0.00066161
200.8	0.02282274		730.79	0.00172056		1260.8	0.01003833		1790.8	0.00109031		2320.8	0.00104993
201	0.02306599		730.99	0.00164188		1261	0.01006787		1791	0.00104916		2321	0.00251369
201.2	0.02316132		731.19	0.00212836		1261.2	0.01056494		1791.2	0.0014734		2321.2	0.00280924
201.4	0.02351073		731.39	0.00234472		1261.4	0.01073883		1791.4	0.00110159		2321.4	0.00340846
201.6	0.02392908		731.59	0.00292596		1261.6	0.01059145		1791.6	0.00046047		2321.6	0.00433315
201.8	0.02554757		731.79	0.00317336		1261.8	0.010419		1791.8	-0.00006145		2321.8	0.00488478
202	0.02653404		731.99	0.00362701		1262	0.01023438		1792	-0.00067905		2322	0.00531795
202.2	0.02817722		732.19	0.0039452		1262.2	0.00959253		1792.2	-0.00148052		2322.2	0.00565092
202.4	0.02856878		732.39	0.00362235		1262.4	0.00952358		1792.4	-0.00180315		2322.4	0.00596581
202.6	0.02948874		732.59	0.00336029		1262.6	0.00931535		1792.6	-0.00149191		2322.6	0.00565739
202.8	0.02937793		732.79	0.00347538		1262.8	0.00883041		1792.8	-0.00070647		2322.8	0.00450495
203	0.03082773		732.99	0.0036652		1263	0.00799771		1793	-0.00048185		2323	0.00530579
203.2	0.03315233		733.19	0.00289512		1263.2	0.00819963		1793.2	-0.00071114		2323.2	0.00521965
203.4	0.03445716		733.39	0.00336121		1263.4	0.00853574		1793.4	0.00045796		2323.4	0.00452528
203.6	0.03515627		733.59	0.00273353		1263.6	0.00832257		1793.6	0.00076675		2323.6	0.00349036
203.8	0.03694813		733.79	0.002731		1263.8	0.00807435		1793.8	0.00130249		2323.8	0.00350576
204	0.03781289		733.99	0.00220238		1264	0.00890516		1794	0.00140539		2324	0.00313768
204.2	0.03835014		734.19	0.00180583		1264.2	0.00939111		1794.2	0.00140885		2324.2	0.00318051
204.4	0.03975356		734.39	0.0013823		1264.4	0.00970991		1794.4	0.0022835		2324.4	0.00316794
204.6	0.0411835		734.59	0.00081772		1264.6	0.01050583		1794.6	0.00300692		2324.6	0.00422046
204.8	0.0421442		734.79	0.00090367		1264.8	0.01127364		1794.8	0.00285391		2324.8	0.00399478
205	0.04333177		734.99	0.00010427		1265	0.01144906		1795	0.00362322		2325	0.00526004
205.2	0.04357234		735.19	-0.00004436		1265.2	0.01248896		1795.2	0.0044083		2325.2	0.00481166
205.4	0.04463089		735.39	-0.0005258		1265.4	0.01264023		1795.4	0.00439837		2325.4	0.00486579
205.6	0.04611476		735.59	0.00020788		1265.6	0.01191637		1795.6	0.00407756		2325.6	0.00547034
205.8	0.04760212		735.79	0.00028348		1265.8	0.0111219		1795.8	0.00400743		2325.8	0.00594109
206	0.04770246		735.99	0.00080762		1266	0.01085781		1796	0.00382206		2326	0.00675336
206.2	0.04822265		736.19	0.00101426		1266.2	0.00962122		1796.2	0.00299988		2326.2	0.00701283
206.4	0.04832291		736.39	0.00042068		1266.4	0.00913668		1796.4	0.00257802		2326.4	0.00569727
206.6	0.04947621		736.59	0.00084303		1266.6	0.00851689		1796.6	0.00222548		2326.6	0.00526277
206.8	0.04986214		736.79	0.00142972		1266.8	0.00806302		1796.8	0.00131002		2326.8	0.00519063
207	0.0511308		736.99	0.00189833		1267	0.00815991		1797	-0.00001346		2327	0.00472589
207.2	0.05182496		737.19	0.00280498		1267.2	0.00847737		1797.2	-0.00050926		2327.2	0.00392384
207.4	0.05180005		737.39	0.00344031		1267.4	0.00790431		1797.4	-0.00089406		2327.4	0.00318148
207.6	0.05269209		737.59	0.0036981		1267.6	0.00745486		1797.6	-0.00092366		2327.6	0.00286066
207.8	0.05301468		737.79	0.0044378		1267.8	0.00757925		1797.8	-0.00024743		2327.8	0.00169217
208	0.05365142		737.99	0.00444951		1268	0.00732428		1798	-0.00000235		2328	0.00110227
208.2	0.05514103		738.19	0.00421024		1268.2	0.00775136		1798.2	0.0009443		2328.2	0.00083361
208.4	0.05562816		738.39	0.00440234		1268.4	0.00825072		1798.4	0.00156325		2328.4	0.0002586
208.6	0.05700254		738.59	0.00459672		1268.6	0.00881343		1798.6	0.00198889		2328.6	0.00013475
208.8	0.05773916		738.79	0.00486665		1268.8	0.00966492		1798.8	0.00231997		2328.8	-0.000278
209	0.05921879		738.99	0.00465246		1269	0.00982101		1799	0.00400144		2329	-0.00062314
209.2	0.05953689		739.19	0.00437324		1269.2	0.01048739		1799.2	0.00459475		2329.2	-0.00092567
209.4	0.06034295		739.39	0.00363129		1269.4	0.01009916		1799.4	0.00530163		2329.4	-0.00013149
209.6	0.0612377		739.59	0.0040002		1269.6	0.00963598		1799.6	0.00533143		2329.6	0.00138496
209.8	0.06151935		739.79	0.00343756		1269.8	0.00990276		1799.8	0.00547604		2329.8	0.00229863
210	0.06197746		739.99	0.0031788		1270	0.0106797		1800	0.00489979		2330	0.00358012
210.2	0.06301526		740.19	0.00317619		1270.2	0.00994994		1800.2	0.00422117		2330.2	0.00474489
210.4	0.06464384		740.39	0.00288972		1270.4	0.01023345		1800.4	0.00361018		2330.4	0.00492582
210.6	0.06530354		740.59	0.00325171		1270.6	0.01043208		1800.6	0.0023352		2330.6	0.00641551
210.8	0.06538887		740.79	0.00342857		1270.8	0.01016688		1800.8	0.0011965		2330.8	0.00683058
211	0.06601187		740.99	0.00371276		1271	0.00961655		1801	0.00038687		2331	0.00661865
211.2	0.06623345		741.19	0.00387498		1271.2	0.00932835		1801.2	-0.00007535		2331.2	0.00677187
211.4	0.06695697		741.39	0.00404775		1271.4	0.00887393		1801.4	0.0005204		2331.4	0.00640866
211.6	0.06727606		741.59	0.0042112		1271.6	0.00837053		1801.6	0.00068206		2331.6	0.00591983
211.8	0.06759692		741.79	0.0042176		1271.8	0.00886425		1801.8	0.00082429		2331.8	0.00528428
212	0.06874471		741.99	0.00466558		1272	0.00873724		1802	0.00074699		2332	0.00548415
212.2	0.06932956		742.19	0.00483371		1272.2	0.00987204		1802.2	0.00175946		2332.2	0.00509016
212.4	0.06982317		742.39	0.00435881		1272.4	0.0106183		1802.4	0.00180365		2332.4	0.00343936
212.6	0.07172102		742.59	0.00452609		1272.6	0.01144643		1802.6	0.00232795		2332.6	0.0028924
212.8	0.07265158		742.79	0.00411139		1272.8	0.01229771		1802.8	0.002958		2332.8	0.00209961
213	0.07340585		742.99	0.00395289		1273	0.01217746		1803	0.00385405		2333	0.00170009
213.2	0.07272422		743.19	0.00272956		1273.2	0.01207243		1803.2	0.0035717		2333.2	0.00244203
213.4	0.07276129		743.39	0.00261412		1273.4	0.01141714		1803.4	0.00441054		2333.4	0.00303192
213.6	0.07317012		743.59	0.00317189		1273.6	0.01152071		1803.6	0.00424973		2333.6	0.00293726
213.8	0.07396758		743.79	0.00281465		1273.8	0.01155995		1803.8	0.00430144		2333.8	0.00369241
214	0.07457429		743.99	0.00301028		1274	0.01157344		1804	0.00423857		2334	0.00487053
214.2	0.07613322		744.19	0.00359579		1274.2	0.01147824		1804.2	0.00478175		2334.2	0.00606929
214.4	0.07751529		744.39	0.00355467		1274.4	0.01092033		1804.4	0.00517821		2334.4	0.00590272
214.6	0.0773656		744.59	0.00430195		1274.6	0.00992441		1804.6	0.00515392		2334.6	0.00641584
214.8	0.07842956		744.79	0.0044643		1274.8	0.00961952		1804.8	0.00483791		2334.8	0.00583893
215	0.07860563		744.99	0.00437905		1275	0.00924953		1805	0.00463189		2335	0.00562443
215.2	0.07942597		745.19	0.00391594		1275.2	0.00934684		1805.2	0.00544385		2335.2	0.0050783
215.4	0.08102536		745.39	0.00416646		1275.4	0.00943809		1805.4	0.0054551		2335.4	0.00457786
215.6	0.08195682		745.59	0.00424801		1275.6	0.00911142		1805.6	0.00542223		2335.6	0.00442087
215.8	0.082944		745.79	0.00505549		1275.8	0.00989566		1805.8	0.00556659		2335.8	0.00370525
216	0.08365634		745.99	0.005331		1276	0.01000418		1806	0.00542517		2336	0.00309153
216.2	0.08476799		746.19	0.00500819		1276.2	0.01070145		1806.2	0.005388		2336.2	0.00328524
216.4	0.08528059		746.39	0.00414686		1276.4	0.0109618		1806.4	0.00492952		2336.4	0.0020833
216.6	0.08579525		746.59	0.0036831		1276.6	0.01150734		1806.6	0.00487876		2336.6	0.00153424
216.8	0.08609385		746.79	0.00365627		1276.8	0.01134959		1806.8	0.00429844		2336.8	0.00151003
217	0.08580574		746.99	0.00398191		1277	0.01061852		1807	0.00364459		2337	0.00218678
217.2	0.08613227		747.19	0.00417256		1277.2	0.01088685		1807.2	0.00311284		2337.2	0.00300403
217.4	0.08563521		747.39	0.00528249		1277.4	0.01013583		1807.4	0.00201735		2337.4	0.00252657
217.6	0.08514082		747.59	0.00560461		1277.6	0.01061383		1807.6	0.00152793		2337.6	0.00248065
217.8	0.08526994		747.79	0.00544291		1277.8	0.01060595		1807.8	0.00137916		2337.8	0.00334499
218	0.0853139		747.99	0.00605207		1278	0.01076299		1808	0.00149909		2338	0.00373254
218.2	0.08607737		748.19	0.00650041		1278.2	0.01047018		1808.2	0.00174603		2338.2	0.00444061
218.4	0.08608449		748.39	0.00646881		1278.4	0.00987818		1808.4	0.0018246		2338.4	0.00445895
218.6	0.08625549		748.59	0.00680312		1278.6	0.01015775		1808.6	0.00166341		2338.6	0.00506472
218.8	0.08678672		748.79	0.00625927		1278.8	0.01045578		1808.8	0.00193567		2338.8	0.00480529
219	0.08683711		748.99	0.0054308		1279	0.00954284		1809	0.0023443		2339	0.00412617
219.2	0.08869892		749.19	0.00441407		1279.2	0.00929644		1809.2	0.00273731		2339.2	0.00349832
219.4	0.09063834		749.39	0.00418545		1279.4	0.00911974		1809.4	0.00224174		2339.4	0.00229398
219.6	0.09178853		749.59	0.00360588		1279.6	0.0092436		1809.6	0.00272393		2339.6	0.0018859
219.8	0.09155821		749.79	0.00402309		1279.8	0.00961142		1809.8	0.00224413		2339.8	0.00127806
220	0.0927344		749.99	0.004002		1280	0.00996212		1810	0.00299872		2340	0.00118742
220.2	0.09388378		750.19	0.00383568		1280.2	0.01028343		1810.2	0.00330234		2340.2	0.0014784
220.4	0.09422259		750.39	0.00280257		1280.4	0.01067666		1810.4	0.00298519		2340.4	0.00065478
220.6	0.09450899		750.59	0.00215861		1280.6	0.01105358		1810.6	0.00265422		2340.6	0.00100056
220.8	0.09491499		750.79	0.00275667		1280.8	0.01095538		1810.8	0.00196129		2340.8	0.00143612
221	0.09591191		750.99	0.00277725		1281	0.01170085		1811	0.00146159		2341	0.00199242
221.2	0.09709754		751.19	0.00336184		1281.2	0.01216766		1811.2	0.00175826		2341.2	0.00216288
221.4	0.09631927		751.39	0.00451921		1281.4	0.01161333		1811.4	0.00105603		2341.4	0.00145887
221.6	0.0960246		751.59	0.00500879		1281.6	0.01186946		1811.6	0.00179654		2341.6	0.00197398
221.8	0.09651348		751.79	0.00466094		1281.8	0.01122313		1811.8	0.00174213		2341.8	0.00241621
222	0.09660754		751.99	0.00492449		1282	0.01096655		1812	0.00243124		2342	0.00299195
222.2	0.09704558		752.19	0.00517679		1282.2	0.01006508		1812.2	0.00306621		2342.2	0.00403016
222.4	0.09717844		752.39	0.00495593		1282.4	0.00989114		1812.4	0.00342952		2342.4	0.00402294
222.6	0.09745418		752.59	0.00439978		1282.6	0.00992374		1812.6	0.00356282		2342.6	0.00387055
222.8	0.09687719		752.79	0.00379226		1282.8	0.00967351		1812.8	0.00395469		2342.8	0.00354344
223	0.09721838		752.99	0.00256867		1283	0.00902904		1813	0.00434738		2343	0.00266435
223.2	0.0985755		753.19	0.0019336		1283.2	0.00903806		1813.2	0.00447733		2343.2	0.00292609
223.4	0.09930514		753.39	0.0024754		1283.4	0.00906844		1813.4	0.00463651		2343.4	0.0025539
223.6	0.09959691		753.59	0.0021064		1283.6	0.00960225		1813.6	0.00483845		2343.6	0.00298866
223.8	0.09955335		753.79	0.00303911		1283.8	0.00972169		1813.8	0.0046792		2343.8	0.00317083
224	0.10028899		753.99	0.00261331		1284	0.01000071		1814	0.00545355		2344	0.00352258
224.2	0.10083607		754.19	0.00191011		1284.2	0.01023575		1814.2	0.00552575		2344.2	0.00379792
224.4	0.10096332		754.39	0.00118017		1284.4	0.01015368		1814.4	0.00540493		2344.4	0.00351582
224.6	0.10177375		754.59	0.00112119		1284.6	0.01052528		1814.6	0.00512506		2344.6	0.00345895
224.8	0.10317677		754.79	0.00168692		1284.8	0.01138481		1814.8	0.004812		2344.8	0.00368373
225	0.10456973		754.99	0.00236082		1285	0.0118893		1815	0.00480184		2345	0.00413006
225.2	0.10503296		755.19	0.00349808		1285.2	0.01194436		1815.2	0.00463233		2345.2	0.0035916
225.4	0.10467462		755.39	0.00412059		1285.4	0.01184725		1815.4	0.00339198		2345.4	0.00378956
225.6	0.10451727		755.59	0.00408865		1285.6	0.01166674		1815.6	0.00295449		2345.6	0.00310342
225.8	0.10566035		755.79	0.00384102		1285.8	0.01202989		1815.8	0.00224288		2345.8	0.00265073
226	0.10596075		755.99	0.00411466		1286	0.01166377		1816	0.00208329		2346	0.00283709
226.2	0.10665372		756.19	0.00414981		1286.2	0.01102647		1816.2	0.00204977		2346.2	0.00301692
226.4	0.10657454		756.39	0.00394068		1286.4	0.01168996		1816.4	0.0008233		2346.4	0.00240099
226.6	0.10656615		756.59	0.00440356		1286.6	0.01155495		1816.6	0.00053763		2346.6	0.00320165
226.8	0.10644934		756.79	0.00537071		1286.8	0.01106288		1816.8	0.00131667		2346.8	0.00351828
227	0.10739375		756.99	0.00507008		1287	0.01034776		1817	0.00183587		2347	0.0032521
227.2	0.10876652		757.19	0.00657532		1287.2	0.01107271		1817.2	0.00236872		2347.2	0.00255919
227.4	0.10867144		757.39	0.00692498		1287.4	0.01071999		1817.4	0.00312485		2347.4	0.00252866
227.6	0.10874441		757.59	0.00661242		1287.6	0.01097086		1817.6	0.00415986		2347.6	0.00240192
227.8	0.10924849		757.79	0.00678901		1287.8	0.01117552		1817.8	0.00477996		2347.8	0.00238287
228	0.10969474		757.99	0.00626731		1288	0.01133587		1818	0.00648459		2348	0.00210279
228.2	0.11088029		758.19	0.00605174		1288.2	0.01168156		1818.2	0.00771948		2348.2	0.00163244
228.4	0.11091011		758.39	0.00562563		1288.4	0.01188839		1818.4	0.00787744		2348.4	0.00102833
228.6	0.11149437		758.59	0.00524104		1288.6	0.01203857		1818.6	0.0081009		2348.6	0.00054889
228.8	0.11243438		758.79	0.00524578		1288.8	0.011502		1818.8	0.00885008		2348.8	0.0000713
229	0.11288377		758.99	0.00485792		1289	0.01162193		1819	0.00864017		2349	-0.00027969
229.2	0.11281521		759.19	0.00498803		1289.2	0.01199066		1819.2	0.0079378		2349.2	-0.00125699
229.4	0.11243922		759.39	0.00478343		1289.4	0.01176629		1819.4	0.00693254		2349.4	-0.00098884
229.6	0.11308944		759.59	0.00516874		1289.6	0.01170086		1819.6	0.00672681		2349.6	-0.00197929
229.8	0.11413841		759.79	0.00496322		1289.8	0.01157507		1819.8	0.00601815		2349.8	-0.00143824
230	0.11459532		759.99	0.00489671		1290	0.01031672		1820	0.00580303		2350	-0.00089915
230.2	0.11466462		760.19	0.00409246		1290.2	0.00999263		1820.2	0.00521783		2350.2	0.00040906
230.4	0.11509609		760.39	0.00493286		1290.4	0.00976364		1820.4	0.00435387		2350.4	0.00109397
230.6	0.11648838		760.59	0.00592795		1290.6	0.00930376		1820.6	0.00509709		2350.6	0.00200139
230.8	0.11784892		760.79	0.00621464		1290.8	0.00975607		1820.8	0.00551682		2350.8	0.00106198
231	0.11883017		760.99	0.00663299		1291	0.01055408		1821	0.00502426		2351	0.00052648
231.2	0.11976997		761.19	0.00765278		1291.2	0.01140317		1821.2	0.00488212		2351.2	-0.0003927
231.4	0.12011064		761.39	0.00678876		1291.4	0.00996625		1821.4	0.00519794		2351.4	0.00042077
231.6	0.12063698		761.59	0.00688801		1291.6	0.01062114		1821.6	0.00515052		2351.6	0.00040357
231.8	0.12172448		761.79	0.00692273		1291.8	0.0110532		1821.8	0.00434376		2351.8	0.00078923
232	0.12244636		761.99	0.00654976		1292	0.01110035		1822	0.00406349		2352	0.00119578
232.2	0.12260826		762.19	0.00626603		1292.2	0.01121018		1822.2	0.00411092		2352.2	0.00061868
232.4	0.12218081		762.39	0.00628783		1292.4	0.01128241		1822.4	0.00418201		2352.4	0.00011201
232.6	0.12329079		762.59	0.00691951		1292.6	0.01054599		1822.6	0.00418399		2352.6	-0.00023856
232.8	0.12392311		762.79	0.00667167		1292.8	0.0112029		1822.8	0.00411279		2352.8	-0.00006167
233	0.12341877		762.99	0.00603217		1293	0.01247833		1823	0.0033908		2353	0.00122891
233.2	0.1231302		763.19	0.00645163		1293.2	0.01308128		1823.2	0.00363777		2353.2	0.00093745
233.4	0.12275073		763.39	0.00616124		1293.4	0.01259569		1823.4	0.00441909		2353.4	0.00127444
233.6	0.12281997		763.59	0.0058111		1293.6	0.01239456		1823.6	0.00455044		2353.6	0.00178311
233.8	0.12193186		763.79	0.00495065		1293.8	0.01230658		1823.8	0.0048452		2353.8	0.00304116
234	0.12190095		763.99	0.00400216		1294	0.01206699		1824	0.00497362		2354	0.00386529
234.2	0.12070601		764.19	0.00350401		1294.2	0.01266597		1824.2	0.00549045		2354.2	0.00467498
234.4	0.12151494		764.39	0.00419564		1294.4	0.0127387		1824.4	0.00610204		2354.4	0.00450554
234.6	0.12181934		764.59	0.00413077		1294.6	0.01265654		1824.6	0.00668865		2354.6	0.00461506
234.8	0.12152359		764.79	0.00397248		1294.8	0.01248481		1824.8	0.00655415		2354.8	0.00387158
235	0.12129644		764.99	0.00440811		1295	0.01307202		1825	0.00670885		2355	0.00322754
235.2	0.12086379		765.19	0.00413656		1295.2	0.01317286		1825.2	0.00681334		2355.2	0.00246374
235.4	0.12107672		765.39	0.00342148		1295.4	0.01198144		1825.4	0.00661259		2355.4	0.00224562
235.6	0.12071131		765.59	0.00377316		1295.6	0.01289483		1825.6	0.00559401		2355.6	0.00218044
235.8	0.12092356		765.79	0.00398205		1295.8	0.01350821		1825.8	0.00446183		2355.8	0.00266898
236	0.12162122		765.99	0.00366137		1296	0.01327544		1826	0.00453082		2356	0.0025991
236.2	0.12209492		766.19	0.00400251		1296.2	0.0132875		1826.2	0.00518698		2356.2	0.00175218
236.4	0.12317579		766.39	0.00485865		1296.4	0.01356544		1826.4	0.00516263		2356.4	0.00200344
236.6	0.12409193		766.59	0.00508035		1296.6	0.01329035		1826.6	0.00498685		2356.6	0.00235525
236.8	0.12462187		766.79	0.00482638		1296.8	0.01412984		1826.8	0.00544545		2356.8	0.00284122
237	0.12601846		766.99	0.00490566		1297	0.01415044		1827	0.00570781		2357	0.00277936
237.2	0.12702646		767.19	0.00624075		1297.2	0.01427945		1827.2	0.00596951		2357.2	0.0011171
237.4	0.1276009		767.39	0.00654399		1297.4	0.01364872		1827.4	0.00624457		2357.4	0.00074272
237.6	0.12818465		767.59	0.00688696		1297.6	0.0137756		1827.6	0.00574129		2357.6	0.00064851
237.8	0.12872145		767.79	0.00698423		1297.8	0.01388661		1827.8	0.00575931		2357.8	0.00067611
238	0.12944612		767.99	0.00672515		1298	0.01378059		1828	0.00607535		2358	0.00101335
238.2	0.12951863		768.19	0.00702198		1298.2	0.01352971		1828.2	0.0069656		2358.2	0.00063296
238.4	0.13046344		768.39	0.00745565		1298.4	0.01236164		1828.4	0.00741158		2358.4	0.00013136
238.6	0.13025477		768.59	0.00777142		1298.6	0.01215078		1828.6	0.00744916		2358.6	-0.00038718
238.8	0.13062807		768.79	0.00787145		1298.8	0.01262632		1828.8	0.00813252		2358.8	-0.00134447
239	0.13122401		768.99	0.00806529		1299	0.01329936		1829	0.00792482		2359	-0.00165724
239.2	0.13099813		769.19	0.00794466		1299.2	0.01272413		1829.2	0.00749472		2359.2	-0.00185957
239.4	0.1315102		769.39	0.00811316		1299.4	0.01177782		1829.4	0.00644032		2359.4	-0.00108362
239.6	0.1313069		769.59	0.00852201		1299.6	0.01228408		1829.6	0.00668356		2359.6	-0.00089998
239.8	0.13142104		769.79	0.00788708		1299.8	0.01231456		1829.8	0.00654332		2359.8	0.00014141
240	0.13211698		769.99	0.00681798		1300	0.011596		1830	0.00676337		2360	0.0004961
240.2	0.13119188		770.19	0.00624895		1300.2	0.01080149		1830.2	0.00715368		2360.2	0.00100589
240.4	0.13163478		770.39	0.0062645		1300.4	0.01138162		1830.4	0.00679805		2360.4	0.00117492
240.6	0.13171109		770.59	0.00546224		1300.6	0.01108142		1830.6	0.00651577		2360.6	0.00165681
240.8	0.13184949		770.79	0.00492499		1300.8	0.01069966		1830.8	0.00623423		2360.8	0.00185081
241	0.13255553		770.99	0.00506173		1301	0.01030597		1831	0.00521912		2361	0.00119609
241.2	0.1327047		771.19	0.00586194		1301.2	0.01044555		1831.2	0.0050169		2361.2	0.00095142
241.4	0.13384562		771.39	0.00515519		1301.4	0.01018487		1831.4	0.00509859		2361.4	0.00117906
241.6	0.13447599		771.59	0.00514083		1301.6	0.01009175		1831.6	0.00455503		2361.6	0.0007322
241.8	0.13519468		771.79	0.00536547		1301.8	0.01043861		1831.8	0.00463234		2361.8	0.00125009
242	0.13622902		771.99	0.00449221		1302	0.01079408		1832	0.00505565		2362	0.001304
242.2	0.13687206		772.19	0.0055721		1302.2	0.0106058		1832.2	0.00528821		2362.2	0.00036008
242.4	0.1376058		772.39	0.00601251		1302.4	0.01113046		1832.4	0.00561024		2362.4	0.00036226
242.6	0.137948		772.59	0.00662611		1302.6	0.01233504		1832.6	0.00535158		2362.6	0.00066004
242.8	0.13809601		772.79	0.0070252		1302.8	0.01279167		1832.8	0.00571333		2362.8	0.00042124
243	0.13815933		772.99	0.00728241		1303	0.01311853		1833	0.0054795		2363	0.00022863
243.2	0.13842927		773.19	0.00747033		1303.2	0.01327929		1833.2	0.00612583		2363.2	-0.00011053
243.4	0.13852841		773.39	0.00856602		1303.4	0.01406955		1833.4	0.00625857		2363.4	-0.00045179
243.6	0.13902831		773.59	0.00844486		1303.6	0.01476706		1833.6	0.00713855		2363.6	-0.00102105
243.8	0.13848658		773.79	0.00786948		1303.8	0.01519677		1833.8	0.00719834		2363.8	-0.00061531
244	0.13755672		773.99	0.00807352		1304	0.01481474		1834	0.00717881		2364	-0.00010127
244.2	0.13653581		774.19	0.00887712		1304.2	0.01469705		1834.2	0.00799927		2364.2	-0.00039583
244.4	0.13677086		774.39	0.00821099		1304.4	0.01591185		1834.4	0.00746163		2364.4	-0.00095189
244.6	0.13528911		774.59	0.00769253		1304.6	0.0157947		1834.6	0.00781829		2364.6	-0.00039448
244.8	0.1342717		774.79	0.00724115		1304.8	0.01543206		1834.8	0.00804182		2364.8	-0.00022314
245	0.13486768		774.99	0.00752243		1305	0.01562472		1835	0.00835935		2365	-0.00005282
245.2	0.13566534		775.19	0.00694505		1305.2	0.01540025		1835.2	0.00842619		2365.2	-0.00006721
245.4	0.13667577		775.39	0.00715819		1305.4	0.01564902		1835.4	0.00811407		2365.4	-0.00014357
245.6	0.13789458		775.59	0.00712925		1305.6	0.01485549		1835.6	0.00811212		2365.6	0.00009719
245.8	0.13892247		775.79	0.00738278		1305.8	0.01560655		1835.8	0.00833902		2365.8	0.00078793
246	0.1400396		775.99	0.00766277		1306	0.01571913		1836	0.00818003		2366	0.00017908
246.2	0.14169483		776.19	0.00877494		1306.2	0.01539963		1836.2	0.008324		2366.2	0.00107079
246.4	0.14223595		776.39	0.00852346		1306.4	0.01557836		1836.4	0.00837055		2366.4	0.00185698
246.6	0.14280584		776.59	0.0083848		1306.6	0.01638797		1836.6	0.0082812		2366.6	0.00218377
246.8	0.14374234		776.79	0.00804957		1306.8	0.01674057		1836.8	0.00812467		2366.8	0.00194492
247	0.14552378		776.99	0.00763069		1307	0.01691372		1837	0.00809696		2367	0.00199269
247.2	0.14699649		777.19	0.0078397		1307.2	0.01663635		1837.2	0.00788043		2367.2	0.00182158
247.4	0.14768453		777.39	0.00769001		1307.4	0.01602397		1837.4	0.00756675		2367.4	0.00162887
247.6	0.14779222		777.59	0.0071834		1307.6	0.01538729		1837.6	0.00825813		2367.6	0.00214047
247.8	0.1469569		777.79	0.00687915		1307.8	0.01423652		1837.8	0.00850348		2367.8	0.00298898
248	0.14714374		777.99	0.0068733		1308	0.01251345		1838	0.00891988		2368	0.00331571
248.2	0.14667545		778.19	0.00728288		1308.2	0.01295152		1838.2	0.00950102		2368.2	0.00235151
248.4	0.14595275		778.39	0.00626085		1308.4	0.01302219		1838.4	0.00913002		2368.4	0.00183063
248.6	0.14501381		778.59	0.00619893		1308.6	0.01226171		1838.6	0.00944549		2368.6	0.00176694
248.8	0.1448182		778.79	0.00552853		1308.8	0.01109202		1838.8	0.00903768		2368.8	0.0007182
249	0.14441284		778.99	0.00493044		1309	0.01011474		1839	0.00905509		2369	0.00046002
249.2	0.14398218		779.19	0.00459972		1309.2	0.00888285		1839.2	0.0080104		2369.2	0.00030998
249.4	0.14326457		779.39	0.00468749		1309.4	0.00868642		1839.4	0.00800734		2369.4	0.00050116
249.6	0.14350783		779.59	0.00382275		1309.6	0.00832132		1839.6	0.00730495		2369.6	0.00079919
249.8	0.14349972		779.79	0.00483327		1309.8	0.00909275		1839.8	0.00720501		2369.8	-0.00004924
250	0.14417313		779.99	0.0056682		1310	0.0093647		1840	0.00687502		2370	-0.00030592
250.2	0.14551248		780.19	0.0058712		1310.2	0.00981111		1840.2	0.00684887		2370.2	0.00054539
250.4	0.14524243		780.39	0.00555111		1310.4	0.01103321		1840.4	0.00650034		2370.4	0.0006048
250.6	0.14616285		780.59	0.00536219		1310.6	0.01209546		1840.6	0.00573874		2370.6	0.00131351
250.8	0.14672461		780.79	0.00578706		1310.8	0.01219908		1840.8	0.00494585		2370.8	0.00157614
251	0.14683807		780.99	0.00565081		1311	0.01221022		1841	0.00521259		2371	0.00219879
251.2	0.14620645		781.19	0.00627666		1311.2	0.01267423		1841.2	0.00527193		2371.2	0.00250733
251.4	0.14612261		781.39	0.00548083		1311.4	0.01317327		1841.4	0.0055328		2371.4	0.00244138
251.6	0.14648182		781.59	0.00588794		1311.6	0.01334299		1841.6	0.00651491		2371.6	0.00240825
251.8	0.14700768		781.79	0.00621534		1311.8	0.01331406		1841.8	0.00745347		2371.8	0.00289617
252	0.1479805		781.99	0.0065056		1312	0.01439176		1842	0.00835753		2372	0.00248299
252.2	0.14868601		782.19	0.00781594		1312.2	0.0154911		1842.2	0.00802374		2372.2	0.00167998
252.4	0.15028132		782.39	0.00771276		1312.4	0.01469056		1842.4	0.00779824		2372.4	0.00118603
252.6	0.15106791		782.59	0.00756158		1312.6	0.01440108		1842.6	0.00760852		2372.6	0.00016763
252.8	0.15126071		782.79	0.00788165		1312.8	0.01373254		1842.8	0.00747572		2372.8	-0.00044478
253	0.15143885		782.99	0.0079411		1313	0.0136857		1843	0.00731713		2373	0.00031568
253.2	0.15243663		783.19	0.00756505		1313.2	0.01364491		1843.2	0.0066708		2373.2	0.00036256
253.4	0.15318518		783.39	0.00702943		1313.4	0.01425607		1843.4	0.00713145		2373.4	-0.00062427
253.6	0.15426649		783.59	0.00742744		1313.6	0.01507044		1843.6	0.00691588		2373.6	-0.00044984
253.8	0.15494242		783.79	0.00809526		1313.8	0.01639024		1843.8	0.00753011		2373.8	-0.00124665
254	0.1553521		783.99	0.00807327		1314	0.01725554		1844	0.00692653		2374	-0.00066271
254.2	0.15576059		784.19	0.00770107		1314.2	0.01829437		1844.2	0.00692078		2374.2	-0.00040448
254.4	0.15510089		784.39	0.00685225		1314.4	0.01893659		1844.4	0.00688385		2374.4	-0.00052618
254.6	0.1546055		784.59	0.00724779		1314.6	0.01890721		1844.6	0.00732772		2374.6	-0.00025846
254.8	0.15462574		784.79	0.00710287		1314.8	0.0184262		1844.8	0.00792515		2374.8	-0.00045761
255	0.15404894		784.99	0.00741861		1315	0.01857515		1845	0.00902075		2375	-0.0000366
255.2	0.15391837		785.19	0.00816048		1315.2	0.01840888		1845.2	0.00908023		2375.2	-0.00081278
255.4	0.15455504		785.39	0.00778257		1315.4	0.01767847		1845.4	0.00914859		2375.4	-0.00160942
255.6	0.15452187		785.59	0.00819278		1315.6	0.01700695		1845.6	0.0099906		2375.6	-0.00099023
255.8	0.15469158		785.79	0.00848596		1315.8	0.01719955		1845.8	0.01135994		2375.8	-0.00037834
256	0.15544924		785.99	0.00744237		1316	0.01694432		1846	0.01120308		2376	-0.00041457
256.2	0.15641307		786.19	0.00783623		1316.2	0.01626046		1846.2	0.01110099		2376.2	-0.00053919
256.4	0.15670896		786.39	0.00720273		1316.4	0.01542769		1846.4	0.01103921		2376.4	-0.00048017
256.6	0.15625953		786.59	0.00743419		1316.6	0.01481232		1846.6	0.01097157		2376.6	-0.00084562
256.8	0.15580113		786.79	0.00734801		1316.8	0.01386544		1846.8	0.01085863		2376.8	0.00003769
257	0.1562458		786.99	0.007062		1317	0.01380238		1847	0.01085554		2377	0.00122866
257.2	0.15685005		787.19	0.00667169		1317.2	0.01260926		1847.2	0.01058856		2377.2	0.00114419
257.4	0.15591881		787.39	0.00627431		1317.4	0.01353864		1847.4	0.01006016		2377.4	0.00082721
257.6	0.15569062		787.59	0.00660267		1317.6	0.01332772		1847.6	0.00960958		2377.6	0.00147137
257.8	0.1551581		787.79	0.00595324		1317.8	0.01399865		1847.8	0.00925398		2377.8	0.00074367
258	0.15569209		787.99	0.00554038		1318	0.01366659		1848	0.00910267		2378	0.00076683
258.2	0.15548938		788.19	0.00552223		1318.2	0.01410459		1848.2	0.00916438		2378.2	-0.00050699
258.4	0.15569165		788.39	0.00625728		1318.4	0.01346255		1848.4	0.00964723		2378.4	-0.0011962
258.6	0.15607		788.59	0.0074741		1318.6	0.01329528		1848.6	0.0099096		2378.6	-0.00105659
258.8	0.15658435		788.79	0.008126		1318.8	0.01266823		1848.8	0.00961799		2378.8	-0.00118142
259	0.15628508		788.99	0.00916825		1319	0.01253099		1849	0.00929367		2379	-0.00120905
259.2	0.15649576		789.19	0.00871045		1319.2	0.01236212		1849.2	0.00916098		2379.2	-0.0022703
259.4	0.15737112		789.39	0.00903926		1319.4	0.01220796		1849.4	0.00907146		2379.4	-0.00191966
259.6	0.15721601		789.59	0.00943867		1319.6	0.01307315		1849.6	0.00948101		2379.6	-0.00152942
259.8	0.15873209		789.79	0.00889538		1319.8	0.0132684		1849.8	0.00947688		2379.8	-0.00139289
260	0.15924166		789.99	0.00886421		1320	0.01333944		1850	0.0088776		2380	-0.00133211
260.2	0.16013598		790.19	0.00887841		1320.2	0.01358081		1850.2	0.00817511		2380.2	-0.00038416
260.4	0.16012796		790.39	0.00862115		1320.4	0.01372079		1850.4	0.00764046		2380.4	0.0000135
260.6	0.16071552		790.59	0.00892901		1320.6	0.01298814		1850.6	0.00770887		2380.6	0.00080587
260.8	0.1602493		790.79	0.00843716		1320.8	0.01302526		1850.8	0.00758189		2380.8	0.00230443
261	0.16086596		790.99	0.00885639		1321	0.01332538		1851	0.00660522		2381	0.0025212
261.2	0.16080516		791.19	0.00882958		1321.2	0.01340305		1851.2	0.00566948		2381.2	0.00295752
261.4	0.15962751		791.39	0.00852034		1321.4	0.01459823		1851.4	0.00550041		2381.4	0.00240773
261.6	0.16043836		791.59	0.00858222		1321.6	0.01390937		1851.6	0.00609272		2381.6	0.00260933
261.8	0.16048993		791.79	0.00829639		1321.8	0.0142813		1851.8	0.00580766		2381.8	0.00243643
262	0.16176607		791.99	0.00831849		1322	0.01412622		1852	0.00607125		2382	0.00223769
262.2	0.16194642		792.19	0.00830313		1322.2	0.01412926		1852.2	0.00564586		2382.2	0.00214036
262.4	0.16281424		792.39	0.00821306		1322.4	0.01352698		1852.4	0.00607846		2382.4	0.00217875
262.6	0.16290155		792.59	0.00800487		1322.6	0.01421743		1852.6	0.00631578		2382.6	0.00189236
262.8	0.16235622		792.79	0.00774969		1322.8	0.01385056		1852.8	0.00616301		2382.8	0.00106941
263	0.16271663		792.99	0.00716347		1323	0.01375382		1853	0.00635368		2383	0.00022254
263.2	0.16294841		793.19	0.00683509		1323.2	0.0137903		1853.2	0.00742556		2383.2	-0.00076395
263.4	0.16387973		793.39	0.00697262		1323.4	0.01403275		1853.4	0.00786306		2383.4	-0.00106376
263.6	0.16380502		793.59	0.00731043		1323.6	0.01429968		1853.6	0.00822057		2383.6	-0.00125375
263.8	0.16522654		793.79	0.00711429		1323.8	0.01383415		1853.8	0.00882206		2383.8	-0.00130225
264	0.16653805		793.99	0.00788012		1324	0.0141485		1854	0.00952878		2384	-0.00062461
264.2	0.16752636		794.19	0.0075217		1324.2	0.01422487		1854.2	0.00991528		2384.2	0.00000936
264.4	0.16734608		794.39	0.00758826		1324.4	0.01432212		1854.4	0.01070618		2384.4	-0.00060335
264.6	0.16780928		794.59	0.00858339		1324.6	0.013834		1854.6	0.01101543		2384.6	-0.00087286
264.8	0.16672147		794.79	0.00829428		1324.8	0.01433848		1854.8	0.01061392		2384.8	-0.00082283
265	0.16665928		794.99	0.00908485		1325	0.0149266		1855	0.00979683		2385	-0.00090239
265.2	0.16649983		795.19	0.0092149		1325.2	0.0151512		1855.2	0.01049185		2385.2	-0.00004602
265.4	0.16637592		795.39	0.00984528		1325.4	0.01517408		1855.4	0.01098065		2385.4	-0.00113379
265.6	0.16639801		795.59	0.01025832		1325.6	0.01476122		1855.6	0.01066979		2385.6	-0.00022493
265.8	0.16658111		795.79	0.00992483		1325.8	0.01472712		1855.8	0.01033308		2385.8	-0.00044414
266	0.1668723		795.99	0.00921532		1326	0.01426095		1856	0.00973975		2386	0.00003609
266.2	0.167154		796.19	0.00869663		1326.2	0.01351549		1856.2	0.00879071		2386.2	0.00036847
266.4	0.16678798		796.39	0.00902832		1326.4	0.0135518		1856.4	0.00829949		2386.4	0.00025768
266.6	0.16660136		796.59	0.00929069		1326.6	0.01343617		1856.6	0.00733371		2386.6	0.00020077
266.8	0.16643905		796.79	0.00895811		1326.8	0.01287731		1856.8	0.00686288		2386.8	0.00063461
267	0.1667819		796.99	0.00872761		1327	0.01312071		1857	0.00746714		2387	0.00010533
267.2	0.16711584		797.19	0.0088262		1327.2	0.01350207		1857.2	0.00710279		2387.2	0.00076029
267.4	0.16782564		797.39	0.0088677		1327.4	0.01400079		1857.4	0.00658292		2387.4	0.0006119
267.6	0.16761392		797.59	0.00993055		1327.6	0.01332717		1857.6	0.00652335		2387.6	0.00050322
267.8	0.16844002		797.79	0.00989697		1327.8	0.01379167		1857.8	0.00711915		2387.8	0.00000804
268	0.16933827		797.99	0.00995		1328	0.01454455		1858	0.0068666		2388	0.00037556
268.2	0.16897355		798.19	0.00978882		1328.2	0.01400584		1858.2	0.0067946		2388.2	-0.00020077
268.4	0.16876589		798.39	0.00981418		1328.4	0.01391492		1858.4	0.00685979		2388.4	-0.00089034
268.6	0.16913439		798.59	0.01063943		1328.6	0.01370567		1858.6	0.00663238		2388.6	-0.000712
268.8	0.16906944		798.79	0.01002347		1328.8	0.01409877		1858.8	0.00604566		2388.8	-0.00065291
269	0.17036062		798.99	0.01005176		1329	0.01433502		1859	0.00668447		2389	-0.0002556
269.2	0.17128366		799.19	0.00988113		1329.2	0.014083		1859.2	0.00620682		2389.2	-0.00056125
269.4	0.1717186		799.39	0.00983984		1329.4	0.01455094		1859.4	0.00666239		2389.4	-0.00116418
269.6	0.17181944		799.59	0.00817426		1329.6	0.0137895		1859.6	0.00617523		2389.6	-0.00076717
269.8	0.17293243		799.79	0.00805732		1329.8	0.01424542		1859.8	0.00621873		2389.8	-0.00182644
270	0.17307216		799.99	0.00781005		1330	0.01388094		1860	0.00609713		2390	-0.00118447
270.2	0.17368733		800.19	0.00792129		1330.2	0.0141589		1860.2	0.00672773		2390.2	-0.00103856
270.4	0.17358514		800.39	0.00882037		1330.4	0.01472849		1860.4	0.00725535		2390.4	-0.00043377
270.6	0.17443364		800.59	0.00850056		1330.6	0.01418059		1860.6	0.00701192		2390.6	-0.0000496
270.8	0.17430697		800.79	0.00789586		1330.8	0.01439117		1860.8	0.00803745		2390.8	0.00023472
271	0.17364065		800.99	0.00740937		1331	0.01406402		1861	0.00843982		2391	-0.00047014
271.2	0.173912		801.19	0.00671317		1331.2	0.01353812		1861.2	0.00745912		2391.2	0.00021453
271.4	0.17341188		801.39	0.00693033		1331.4	0.01270165		1861.4	0.00811731		2391.4	0.0002499
271.6	0.17236875		801.59	0.00678092		1331.6	0.01261267		1861.6	0.00929887		2391.6	0.00031514
271.8	0.17255117		801.79	0.0063361		1331.8	0.01306267		1861.8	0.01077504		2391.8	0.00032532
272	0.17244184		801.99	0.00657306		1332	0.01247167		1862	0.01102881		2392	0.00119564
272.2	0.17142711		802.19	0.00679753		1332.2	0.01182639		1862.2	0.01167015		2392.2	0.00092829
272.4	0.17147586		802.39	0.00735704		1332.4	0.01171037		1862.4	0.01156016		2392.4	0.00020502
272.6	0.1724644		802.59	0.00832313		1332.6	0.0116597		1862.6	0.01121177		2392.6	0.00006196
272.8	0.17352955		802.79	0.00839765		1332.8	0.01305701		1862.8	0.01112822		2392.8	-0.00057243
273	0.17461787		802.99	0.00865327		1333	0.01311201		1863	0.01048496		2393	0.00011635
273.2	0.17477378		803.19	0.00871049		1333.2	0.01409812		1863.2	0.00985854		2393.2	-0.00051225
273.4	0.17578132		803.39	0.00833328		1333.4	0.01402385		1863.4	0.01046988		2393.4	-0.00114818
273.6	0.17605951		803.59	0.0079743		1333.6	0.01368444		1863.6	0.01002515		2393.6	-0.00227271
273.8	0.1767442		803.79	0.00922605		1333.8	0.01486062		1863.8	0.00947889		2393.8	-0.00323767
274	0.17665046		803.99	0.0094273		1334	0.01450846		1864	0.00986765		2394	-0.00373887
274.2	0.17659736		804.19	0.00962272		1334.2	0.01465627		1864.2	0.00944934		2394.2	-0.00407961
274.4	0.17614331		804.39	0.01024228		1334.4	0.01396734		1864.4	0.00838923		2394.4	-0.0043971
274.6	0.17671462		804.59	0.00966311		1334.6	0.01323787		1864.6	0.00699817		2394.6	-0.00426667
274.8	0.17583461		804.79	0.00957729		1334.8	0.01272413		1864.8	0.00682973		2394.8	-0.00454881
275	0.17535506		804.99	0.00933697		1335	0.01280164		1865	0.0061971		2395	-0.00429599
275.2	0.17563898		805.19	0.0084646		1335.2	0.01293242		1865.2	0.00621814		2395.2	-0.00374827
275.4	0.17521025		805.39	0.00847787		1335.4	0.01251577		1865.4	0.00718697		2395.4	-0.00318305
275.6	0.17562441		805.59	0.00854485		1335.6	0.01262103		1865.6	0.00725259		2395.6	-0.00288287
275.8	0.17571384		805.79	0.00888448		1335.8	0.01269454		1865.8	0.00716138		2395.8	-0.00284269
276	0.17611324		805.99	0.00907161		1336	0.0122694		1866	0.00702177		2396	-0.00222745
276.2	0.17600195		806.19	0.00935919		1336.2	0.01225214		1866.2	0.00748869		2396.2	-0.0030202
276.4	0.17689376		806.39	0.00992397		1336.4	0.0123422		1866.4	0.00759197		2396.4	-0.00285385
276.6	0.17717533		806.59	0.01073249		1336.6	0.01256232		1866.6	0.00855433		2396.6	-0.00188054
276.8	0.17735684		806.79	0.01084288		1336.8	0.01387951		1866.8	0.00898376		2396.8	-0.00139475
277	0.17749455		806.99	0.01214846		1337	0.01340412		1867	0.00895591		2397	-0.00029505
277.2	0.17814854		807.19	0.01207992		1337.2	0.01377296		1867.2	0.00969601		2397.2	-0.00089071
277.4	0.17928389		807.39	0.01223813		1337.4	0.01324294		1867.4	0.00970278		2397.4	-0.00129849
277.6	0.1796459		807.59	0.01247442		1337.6	0.01467148		1867.6	0.00938011		2397.6	-0.00200801
277.8	0.17964383		807.79	0.01287443		1337.8	0.01538355		1867.8	0.00875131		2397.8	-0.00175919
278	0.1800814		807.99	0.01245074		1338	0.01544803		1868	0.00834382		2398	-0.00262288
278.2	0.1807911		808.19	0.01160638		1338.2	0.01639484		1868.2	0.0079463		2398.2	-0.00232486
278.4	0.18068965		808.39	0.01158681		1338.4	0.01652299		1868.4	0.00683182		2398.4	-0.00194115
278.6	0.18037269		808.59	0.01121716		1338.6	0.01670147		1868.6	0.00649822		2398.6	-0.00148293
278.8	0.17994797		808.79	0.01098958		1338.8	0.01721922		1868.8	0.00620747		2398.8	-0.00088337
279	0.17985092		808.99	0.01019721		1339	0.01848678		1869	0.00618816		2399	-0.00067202
279.2	0.18027745		809.19	0.00891788		1339.2	0.01906066		1869.2	0.00656594		2399.2	-0.00023841
279.4	0.17991734		809.39	0.00796811		1339.4	0.0192058		1869.4	0.0057781		2399.4	-0.00047437
279.6	0.18000787		809.59	0.00827367		1339.6	0.01973241		1869.6	0.00482489		2399.6	-0.00000913
279.8	0.17928984		809.79	0.0071439		1339.8	0.01985261		1869.8	0.00494661		2399.8	0.00024115
280	0.1795885		809.99	0.00685702		1340	0.01926841		1870	0.00539083		2400	0.00009606
280.2	0.17943457		810.19	0.00706454		1340.2	0.01811863		1870.2	0.00607784		2400.2	-0.00026551
280.4	0.17947776		810.39	0.00720288		1340.4	0.0179361		1870.4	0.00650834		2400.4	-0.00044094
280.6	0.17932471		810.59	0.00756817		1340.6	0.01713496		1870.6	0.00703932		2400.6	-0.00094878
280.8	0.17959143		810.79	0.00762404		1340.8	0.01690444		1870.8	0.00692983		2400.8	-0.00141023
281	0.18010285		810.99	0.00883709		1341	0.01576525		1871	0.00650946		2401	-0.00214955
281.2	0.18090838		811.19	0.00834976		1341.2	0.0153646		1871.2	0.00590958		2401.2	-0.00306849
281.4	0.18162877		811.39	0.00826206		1341.4	0.01553223		1871.4	0.00562733		2401.4	-0.00365003
281.6	0.18167448		811.59	0.00843271		1341.6	0.01601661		1871.6	0.00505457		2401.6	-0.00376501
281.8	0.1813673		811.79	0.00850082		1341.8	0.01532856		1871.8	0.00462738		2401.8	-0.00378145
282	0.182277		811.99	0.00745829		1342	0.01559928		1872	0.0040371		2402	-0.00476897
282.2	0.18238699		812.19	0.00729048		1342.2	0.01533204		1872.2	0.00405608		2402.2	-0.00485098
282.4	0.18180783		812.39	0.00726451		1342.4	0.0144364		1872.4	0.00390901		2402.4	-0.00522925
282.6	0.18175192		812.59	0.00756058		1342.6	0.01410798		1872.6	0.00435025		2402.6	-0.00496738
282.8	0.18175958		812.79	0.00828509		1342.8	0.0147373		1872.8	0.0043982		2402.8	-0.00439544
283	0.18197247		812.99	0.00832616		1343	0.01537779		1873	0.00447626		2403	-0.00384275
283.2	0.18237056		813.19	0.00809467		1343.2	0.01584877		1873.2	0.00477225		2403.2	-0.00343216
283.4	0.18167321		813.39	0.0074134		1343.4	0.01532502		1873.4	0.00532828		2403.4	-0.00340014
283.6	0.18096608		813.59	0.00801573		1343.6	0.01476648		1873.6	0.00597642		2403.6	-0.00234625
283.8	0.18126494		813.79	0.00736828		1343.8	0.01473015		1873.8	0.00728259		2403.8	-0.00227691
284	0.1814892		813.99	0.00769461		1344	0.01495939		1874	0.00870987		2404	-0.00269488
284.2	0.18216413		814.19	0.00788237		1344.2	0.01444541		1874.2	0.01011265		2404.2	-0.00275834
284.4	0.18257568		814.39	0.00830857		1344.4	0.01508356		1874.4	0.01101856		2404.4	-0.00364574
284.6	0.18287735		814.59	0.00837252		1344.6	0.0146817		1874.6	0.01122116		2404.6	-0.00327379
284.8	0.18347812		814.79	0.00821645		1344.8	0.01441986		1874.8	0.01195423		2404.8	-0.00221633
285	0.18371395		814.99	0.0084056		1345	0.01485828		1875	0.01191132		2405	-0.00229131
285.2	0.18420393		815.19	0.00791939		1345.2	0.01567565		1875.2	0.01177869		2405.2	-0.00197762
285.4	0.18493881		815.39	0.00797829		1345.4	0.01584337		1875.4	0.01128065		2405.4	-0.00177501
285.6	0.18504649		815.59	0.00886144		1345.6	0.01575094		1875.6	0.01073899		2405.6	-0.00213819
285.8	0.18630597		815.79	0.00844747		1345.8	0.0157518		1875.8	0.01004842		2405.8	-0.00189523
286	0.18703927		815.99	0.00766546		1346	0.01615005		1876	0.00894485		2406	-0.0019902
286.2	0.1876898		816.19	0.00723894		1346.2	0.01538203		1876.2	0.00841202		2406.2	-0.00243202
286.4	0.18764673		816.39	0.00753519		1346.4	0.01430027		1876.4	0.00752621		2406.4	-0.00238293
286.6	0.18869124		816.59	0.00872092		1346.6	0.01412232		1876.6	0.00624302		2406.6	-0.00138035
286.8	0.18913544		816.79	0.00898032		1346.8	0.01359636		1876.8	0.00565766		2406.8	-0.00066713
287	0.19045875		816.99	0.00809063		1347	0.01305922		1877	0.00480835		2407	0.0000648
287.2	0.19008909		817.19	0.00711686		1347.2	0.01264267		1877.2	0.00441864		2407.2	-0.00032415
287.4	0.18973944		817.39	0.00664738		1347.4	0.01206107		1877.4	0.00489119		2407.4	-0.00028131
287.6	0.18954343		817.59	0.00651412		1347.6	0.01203869		1877.6	0.00470711		2407.6	-0.00027506
287.8	0.19036899		817.79	0.00633832		1347.8	0.0121871		1877.8	0.00534959		2407.8	-0.00185345
288	0.1897087		817.99	0.00626031		1348	0.01225334		1878	0.00629247		2408	-0.00219081
288.2	0.19056856		818.19	0.0065514		1348.2	0.01272733		1878.2	0.00712478		2408.2	-0.00256663
288.4	0.19032821		818.39	0.00640251		1348.4	0.01304507		1878.4	0.00836704		2408.4	-0.00267097
288.6	0.18991563		818.59	0.00649653		1348.6	0.01347972		1878.6	0.00911186		2408.6	-0.00166336
288.8	0.18993775		818.79	0.0064709		1348.8	0.01388226		1878.8	0.01077156		2408.8	-0.00154609
289	0.18962525		818.99	0.00634626		1349	0.01453915		1879	0.01109463		2409	-0.00222052
289.2	0.18983381		819.19	0.00630354		1349.2	0.01514312		1879.2	0.01181081		2409.2	-0.00315803
289.4	0.19032918		819.39	0.00655719		1349.4	0.01434951		1879.4	0.01175184		2409.4	-0.00317739
289.6	0.19007845		819.59	0.00726735		1349.6	0.0141313		1879.6	0.01246149		2409.6	-0.00304314
289.8	0.19046838		819.79	0.00716925		1349.8	0.01416878		1879.8	0.01179475		2409.8	-0.00158308
290	0.19066907		819.99	0.0074076		1350	0.01412265		1880	0.01134458		2410	-0.00185368
290.2	0.19070622		820.19	0.00767069		1350.2	0.0132271		1880.2	0.01112461		2410.2	-0.00173477
290.4	0.19055142		820.39	0.00885264		1350.4	0.01253578		1880.4	0.00982005		2410.4	-0.00128456
290.6	0.19137811		820.59	0.00964329		1350.6	0.01298795		1880.6	0.00924753		2410.6	-0.00101266
290.8	0.19162688		820.79	0.00944499		1350.8	0.01258966		1880.8	0.00906963		2410.8	-0.00127752
291	0.19124584		820.99	0.00942354		1351	0.01246391		1881	0.00820681		2411	-0.00179756
291.2	0.19085427		821.19	0.00927905		1351.2	0.01301684		1881.2	0.00795994		2411.2	-0.00199387
291.4	0.19181216		821.39	0.00967511		1351.4	0.01299019		1881.4	0.00799628		2411.4	-0.00180186
291.6	0.19173417		821.59	0.0090609		1351.6	0.01304467		1881.6	0.00695092		2411.6	-0.0023732
291.8	0.19152592		821.79	0.00937084		1351.8	0.01330594		1881.8	0.0069866		2411.8	-0.00315846
292	0.19190565		821.99	0.00850833		1352	0.01394791		1882	0.00770468		2412	-0.00285902
292.2	0.19175405		822.19	0.00829567		1352.2	0.01422658		1882.2	0.00763147		2412.2	-0.00317001
292.4	0.19107321		822.39	0.00747693		1352.4	0.01397252		1882.4	0.00731253		2412.4	-0.00300231
292.6	0.19100602		822.59	0.00719089		1352.6	0.01432298		1882.6	0.00743128		2412.6	-0.00331338
292.8	0.191266		822.79	0.0063756		1352.8	0.01390664		1882.8	0.00803246		2412.8	-0.00363714
293	0.1918993		822.99	0.00576405		1353	0.0139908		1883	0.00805932		2413	-0.0037617
293.2	0.19159488		823.19	0.00417745		1353.2	0.01420082		1883.2	0.0085253		2413.2	-0.00436351
293.4	0.19184498		823.39	0.0041818		1353.4	0.01434781		1883.4	0.00813526		2413.4	-0.00395954
293.6	0.19161386		823.59	0.00455369		1353.6	0.01459685		1883.6	0.00823893		2413.6	-0.00380417
293.8	0.19198285		823.79	0.00425849		1353.8	0.01463571		1883.8	0.00797342		2413.8	-0.00307144
294	0.19214358		823.99	0.00425944		1354	0.01469789		1884	0.00838332		2414	-0.00323398
294.2	0.19182339		824.19	0.00433702		1354.2	0.01462253		1884.2	0.00833535		2414.2	-0.00321283
294.4	0.1922043		824.39	0.00493579		1354.4	0.01459		1884.4	0.00824955		2414.4	-0.00392786
294.6	0.19202433		824.59	0.00568201		1354.6	0.01429838		1884.6	0.00878061		2414.6	-0.00384209
294.8	0.19221863		824.79	0.00616841		1354.8	0.01435206		1884.8	0.00922903		2414.8	-0.0043853
295	0.19210837		824.99	0.0061594		1355	0.01465394		1885	0.00966255		2415	-0.00389876
295.2	0.19388988		825.19	0.00738231		1355.2	0.01482915		1885.2	0.00996372		2415.2	-0.00354782
295.4	0.19445787		825.39	0.00806547		1355.4	0.01505617		1885.4	0.0099696		2415.4	-0.0034848
295.6	0.19422748		825.59	0.00875916		1355.6	0.01481972		1885.6	0.00978088		2415.6	-0.00428648
295.8	0.19506185		825.79	0.01023338		1355.8	0.01528789		1885.8	0.0104215		2415.8	-0.00384219
296	0.19633935		825.99	0.01047808		1356	0.01493946		1886	0.01034551		2416	-0.00383585
296.2	0.19565906		826.19	0.0112286		1356.2	0.01418818		1886.2	0.00969291		2416.2	-0.00428682
296.4	0.19606394		826.39	0.01074119		1356.4	0.01388507		1886.4	0.0096618		2416.4	-0.00424419
296.6	0.1972621		826.59	0.01091048		1356.6	0.01371889		1886.6	0.01032551		2416.6	-0.00437025
296.8	0.19757158		826.79	0.01123294		1356.8	0.01325274		1886.8	0.01049579		2416.8	-0.00383264
297	0.19807525		826.99	0.01134952		1357	0.01246017		1887	0.01025003		2417	-0.00403773
297.2	0.19775126		827.19	0.01128247		1357.2	0.01260904		1887.2	0.01016601		2417.2	-0.00492166
297.4	0.19755725		827.39	0.01172278		1357.4	0.01234131		1887.4	0.00997191		2417.4	-0.00510972
297.6	0.19753225		827.59	0.01091461		1357.6	0.01125173		1887.6	0.00964358		2417.6	-0.00467601
297.8	0.19745046		827.79	0.01056363		1357.8	0.01123096		1887.8	0.0098215		2417.8	-0.00393886
298	0.19662413		827.99	0.01053503		1358	0.01183534		1888	0.0095045		2418	-0.0038986
298.2	0.197042		828.19	0.01043033		1358.2	0.01221996		1888.2	0.01003184		2418.2	-0.00405255
298.4	0.1963367		828.39	0.00936923		1358.4	0.0119246		1888.4	0.01039861		2418.4	-0.00420985
298.6	0.19550215		828.59	0.00921337		1358.6	0.01236769		1888.6	0.01139646		2418.6	-0.00333958
298.8	0.19563072		828.79	0.00845554		1358.8	0.01312274		1888.8	0.01095537		2418.8	-0.00316266
299	0.19592809		828.99	0.00846997		1359	0.01335276		1889	0.01122139		2419	-0.00253288
299.2	0.19615685		829.19	0.00960793		1359.2	0.01327257		1889.2	0.01126805		2419.2	-0.00287134
299.4	0.19608566		829.39	0.00893611		1359.4	0.01356529		1889.4	0.01147805		2419.4	-0.00268207
299.6	0.19641758		829.59	0.00866941		1359.6	0.01324386		1889.6	0.0107243		2419.6	-0.00254406
299.8	0.19678244		829.79	0.00829431		1359.8	0.01443466		1889.8	0.01051139		2419.8	-0.00209018
300	0.19687635		829.99	0.00875586		1360	0.01440592		1890	0.01070726		2420	-0.00241117
300.2	0.19677869		830.19	0.00942887		1360.2	0.01467022		1890.2	0.01072351		2420.2	-0.00287137
300.4	0.19755652		830.39	0.00929225		1360.4	0.01462549		1890.4	0.01098241		2420.4	-0.00195123
300.6	0.19855402		830.59	0.00943649		1360.6	0.01485108		1890.6	0.01026598		2420.6	-0.00220905
300.8	0.19772852		830.79	0.0097855		1360.8	0.01518406		1890.8	0.009716		2420.8	-0.00215387
301	0.19829625		830.99	0.00968206		1361	0.01409159		1891	0.00905859		2421	-0.0026525
301.2	0.1984164		831.19	0.01029579		1361.2	0.01403304		1891.2	0.00778708		2421.2	-0.00327524
301.4	0.19874469		831.39	0.01026908		1361.4	0.01342549		1891.4	0.00745506		2421.4	-0.00257832
301.6	0.19958212		831.59	0.01075131		1361.6	0.01386889		1891.6	0.00713242		2421.6	-0.00197934
301.8	0.19982937		831.79	0.01106555		1361.8	0.01489221		1891.8	0.00758027		2421.8	-0.00197428
302	0.20015644		831.99	0.01060681		1362	0.015284		1892	0.00782621		2422	-0.0021878
302.2	0.20016512		832.19	0.01016051		1362.2	0.0150805		1892.2	0.00938792		2422.2	-0.00276885
302.4	0.19950238		832.39	0.00917339		1362.4	0.01503714		1892.4	0.01035326		2422.4	-0.00277903
302.6	0.19990106		832.59	0.00979663		1362.6	0.01564997		1892.6	0.01107656		2422.6	-0.00265519
302.8	0.20057974		832.79	0.00899736		1362.8	0.01506533		1892.8	0.01057565		2422.8	-0.00306613
303	0.20052548		832.99	0.00908096		1363	0.01525443		1893	0.01105678		2423	-0.00357621
303.2	0.20096302		833.19	0.00902332		1363.2	0.01503911		1893.2	0.01129514		2423.2	-0.00442938
303.4	0.20152951		833.39	0.00809797		1363.4	0.01512185		1893.4	0.01224203		2423.4	-0.00415043
303.6	0.20162559		833.59	0.00774595		1363.6	0.01542176		1893.6	0.01234163		2423.6	-0.00463345
303.8	0.20197041		833.79	0.00819962		1363.8	0.0155958		1893.8	0.01363593		2423.8	-0.00517019
304	0.20256632		833.99	0.00860081		1364	0.01546043		1894	0.0138413		2424	-0.00520078
304.2	0.2034802		834.19	0.0086292		1364.2	0.01548113		1894.2	0.01390607		2424.2	-0.00499279
304.4	0.20403863		834.39	0.00765727		1364.4	0.01574371		1894.4	0.01348985		2424.4	-0.00504263
304.6	0.20422596		834.59	0.00735798		1364.6	0.01606851		1894.6	0.01310723		2424.6	-0.00589447
304.8	0.20495469		834.79	0.00768903		1364.8	0.01594217		1894.8	0.0126595		2424.8	-0.0054121
305	0.20572817		834.99	0.00811322		1365	0.01491138		1895	0.01138541		2425	-0.0053744
305.2	0.206155		835.19	0.00879321		1365.2	0.01476712		1895.2	0.01098576		2425.2	-0.00510213
305.4	0.20706705		835.39	0.008277		1365.4	0.01460932		1895.4	0.0118325		2425.4	-0.00407362
305.6	0.20723119		835.59	0.00892834		1365.6	0.01418427		1895.6	0.01118174		2425.6	-0.0032631
305.8	0.20737969		835.79	0.00849084		1365.8	0.01395586		1895.8	0.01106201		2425.8	-0.00398802
306	0.20665434		835.99	0.00852083		1366	0.01359408		1896	0.01084878		2426	-0.00354106
306.2	0.20550096		836.19	0.00874342		1366.2	0.01293721		1896.2	0.01142826		2426.2	-0.00333141
306.4	0.20522931		836.39	0.00950561		1366.4	0.0128293		1896.4	0.0112679		2426.4	-0.00299203
306.6	0.20494544		836.59	0.00973505		1366.6	0.01308018		1896.6	0.00993766		2426.6	-0.00303756
306.8	0.20429257		836.79	0.01026584		1366.8	0.01264678		1896.8	0.00915893		2426.8	-0.00325655
307	0.20333183		836.99	0.01014703		1367	0.01286612		1897	0.00876131		2427	-0.00331062
307.2	0.2026405		837.19	0.01063261		1367.2	0.01294909		1897.2	0.00956404		2427.2	-0.00383279
307.4	0.20161099		837.39	0.01051809		1367.4	0.01289271		1897.4	0.00987778		2427.4	-0.00359264
307.6	0.20153604		837.59	0.0101642		1367.6	0.01266979		1897.6	0.00975926		2427.6	-0.0035245
307.8	0.20189426		837.79	0.01121984		1367.8	0.01258137		1897.8	0.00957999		2427.8	-0.00359338
308	0.20190607		837.99	0.01136443		1368	0.01268263		1898	0.0096465		2428	-0.00363772
308.2	0.20272302		838.19	0.01237989		1368.2	0.01312803		1898.2	0.0102594		2428.2	-0.00327812
308.4	0.20241571		838.39	0.01225758		1368.4	0.01398048		1898.4	0.00940307		2428.4	-0.00390132
308.6	0.20310252		838.59	0.01277374		1368.6	0.01407665		1898.6	0.00961033		2428.6	-0.00289193
308.8	0.20396109		838.79	0.01251065		1368.8	0.01384207		1898.8	0.00960054		2428.8	-0.0027788
309	0.20358596		838.99	0.01213727		1369	0.01308277		1899	0.0102238		2429	-0.0025588
309.2	0.20441552		839.19	0.01195096		1369.2	0.01359244		1899.2	0.0112704		2429.2	-0.00239442
309.4	0.20534827		839.39	0.01099162		1369.4	0.0127557		1899.4	0.01067159		2429.4	-0.00249327
309.6	0.20503727		839.59	0.0113036		1369.6	0.01310508		1899.6	0.01008765		2429.6	-0.00322102
309.8	0.20489105		839.79	0.01005339		1369.8	0.01381356		1899.8	0.00968143		2429.8	-0.00397049
310	0.20452298		839.99	0.0095157		1370	0.01386094		1900	0.00970313		2430	-0.00303279
310.2	0.2048423		840.19	0.00917905		1370.2	0.0133416		1900.2	0.00923524		2430.2	-0.0033345
310.4	0.20558247		840.39	0.00913154		1370.4	0.01321031		1900.4	0.00847923		2430.4	-0.00399739
310.6	0.20541381		840.59	0.00871677		1370.6	0.01338709		1900.6	0.0078259		2430.6	-0.00445291
310.8	0.20549458		840.79	0.00903598		1370.8	0.01286664		1900.8	0.0075708		2430.8	-0.00488756
311	0.20593756		840.99	0.00791597		1371	0.01255016		1901	0.00840758		2431	-0.00490092
311.2	0.20597719		841.19	0.00715493		1371.2	0.01310729		1901.2	0.00939025		2431.2	-0.00528045
311.4	0.20636053		841.39	0.0070916		1371.4	0.01298519		1901.4	0.00849544		2431.4	-0.00539677
311.6	0.20658604		841.59	0.00656787		1371.6	0.01318875		1901.6	0.00823896		2431.6	-0.00508226
311.8	0.20726312		841.79	0.00752244		1371.8	0.01343975		1901.8	0.00843521		2431.8	-0.00526379
312	0.20789255		841.99	0.00677934		1372	0.0133968		1902	0.00917839		2432	-0.00487901
312.2	0.20897192		842.19	0.00724637		1372.2	0.01354481		1902.2	0.0088546		2432.2	-0.00428167
312.4	0.208978		842.39	0.00711348		1372.4	0.0135473		1902.4	0.00795181		2432.4	-0.0045095
312.6	0.20960292		842.59	0.00745783		1372.6	0.01298379		1902.6	0.00863348		2432.6	-0.00411296
312.8	0.20930364		842.79	0.00770345		1372.8	0.01245761		1902.8	0.00875554		2432.8	-0.00459639
313	0.20903479		842.99	0.00820447		1373	0.01138697		1903	0.00859886		2433	-0.00488686
313.2	0.20961864		843.19	0.00916101		1373.2	0.01170013		1903.2	0.00795065		2433.2	-0.0046903
313.4	0.20979841		843.39	0.00931247		1373.4	0.01215278		1903.4	0.0068974		2433.4	-0.0046197
313.6	0.20954748		843.59	0.0101485		1373.6	0.01284181		1903.6	0.00718013		2433.6	-0.0042005
313.8	0.21011033		843.79	0.01036229		1373.8	0.01254432		1903.8	0.00674145		2433.8	-0.00302639
314	0.21062453		843.99	0.01084298		1374	0.01281202		1904	0.00750727		2434	-0.00270139
314.2	0.2108345		844.19	0.01067061		1374.2	0.01274721		1904.2	0.0071469		2434.2	-0.00287764
314.4	0.21118267		844.39	0.01075752		1374.4	0.01321926		1904.4	0.00787863		2434.4	-0.00358667
314.6	0.21187947		844.59	0.01128306		1374.6	0.01364955		1904.6	0.00766478		2434.6	-0.0037836
314.8	0.21228027		844.79	0.01168592		1374.8	0.01396323		1904.8	0.0079475		2434.8	-0.00387649
315	0.21229194		844.99	0.01144478		1375	0.01409979		1905	0.00880723		2435	-0.00475207
315.2	0.21260517		845.19	0.01091071		1375.2	0.01538566		1905.2	0.00953711		2435.2	-0.0052323
315.4	0.21324717		845.39	0.01142622		1375.4	0.01534265		1905.4	0.00986476		2435.4	-0.00499956
315.6	0.21324966		845.59	0.01019241		1375.6	0.01581205		1905.6	0.01037036		2435.6	-0.00511201
315.8	0.21416292		845.79	0.00993248		1375.8	0.01578397		1905.8	0.01140396		2435.8	-0.00570391
316	0.21466066		845.99	0.00924663		1376	0.01580309		1906	0.01140439		2436	-0.00625054
316.2	0.21469099		846.19	0.00925856		1376.2	0.01617174		1906.2	0.0108284		2436.2	-0.00628761
316.4	0.21405057		846.39	0.0096579		1376.4	0.01624741		1906.4	0.01088811		2436.4	-0.00609662
316.6	0.21344331		846.59	0.00997888		1376.6	0.0156339		1906.6	0.01117702		2436.6	-0.00586931
316.8	0.2127973		846.79	0.01027045		1376.8	0.01573707		1906.8	0.01008349		2436.8	-0.00537172
317	0.2124935		846.99	0.01022187		1377	0.01465946		1907	0.01064573		2437	-0.00500567
317.2	0.21214522		847.19	0.01034725		1377.2	0.01539371		1907.2	0.01053959		2437.2	-0.00392177
317.4	0.21224977		847.39	0.01061563		1377.4	0.01641248		1907.4	0.01049794		2437.4	-0.00421819
317.6	0.21140692		847.59	0.01059832		1377.6	0.01520555		1907.6	0.01066405		2437.6	-0.00375324
317.8	0.21112476		847.79	0.00987702		1377.8	0.01468006		1907.8	0.0101678		2437.8	-0.00381686
318	0.21082476		847.99	0.0099806		1378	0.0146233		1908	0.01080326		2438	-0.00356719
318.2	0.21066005		848.19	0.01048773		1378.2	0.01466076		1908.2	0.01047457		2438.2	-0.00414483
318.4	0.21106123		848.39	0.01058665		1378.4	0.01452382		1908.4	0.01098307		2438.4	-0.00466194
318.6	0.21186927		848.59	0.01142726		1378.6	0.01541044		1908.6	0.01002795		2438.6	-0.00485957
318.8	0.21173507		848.79	0.01181876		1378.8	0.0160678		1908.8	0.01062152		2438.8	-0.00578972
319	0.21279952		848.99	0.01184815		1379	0.01604117		1909	0.01110426		2439	-0.00670688
319.2	0.21400579		849.19	0.01190403		1379.2	0.01665005		1909.2	0.01212597		2439.2	-0.00657468
319.4	0.21445742		849.39	0.01151006		1379.4	0.0164726		1909.4	0.01173859		2439.4	-0.00632188
319.6	0.2147136		849.59	0.01083898		1379.6	0.01674474		1909.6	0.01115065		2439.6	-0.00767588
319.8	0.21596377		849.79	0.01067757		1379.8	0.01668915		1909.8	0.01148235		2439.8	-0.00817734
320	0.21620301		849.99	0.01112007		1380	0.01681098		1910	0.01104483		2440	-0.00808357
320.2	0.2160857		850.19	0.01147586		1380.2	0.01749291		1910.2	0.01160924		2440.2	-0.00750946
320.4	0.21578657		850.39	0.01185023		1380.4	0.01696112		1910.4	0.01268907		2440.4	-0.00741155
320.6	0.21529617		850.59	0.01171043		1380.6	0.01641462		1910.6	0.01246459		2440.6	-0.00676623
320.8	0.21504831		850.79	0.01173612		1380.8	0.01623041		1910.8	0.01188407		2440.8	-0.00658309
321	0.21442049		850.99	0.01081588		1381	0.0151939		1911	0.01237378		2441	-0.00676434
321.2	0.21358536		851.19	0.01067439		1381.2	0.01450234		1911.2	0.01214938		2441.2	-0.00707878
321.4	0.2129155		851.39	0.01096981		1381.4	0.01457572		1911.4	0.01221275		2441.4	-0.00704152
321.6	0.21225036		851.59	0.01074809		1381.6	0.01313322		1911.6	0.01193189		2441.6	-0.00628339
321.8	0.21172237		851.79	0.01059117		1381.8	0.01223938		1911.8	0.01147452		2441.8	-0.00601945
322	0.21184367		851.99	0.01199329		1382	0.01165628		1912	0.01203055		2442	-0.00604383
322.2	0.21155926		852.19	0.01210227		1382.2	0.01136684		1912.2	0.01167901		2442.2	-0.00659691
322.4	0.21213927		852.39	0.01239056		1382.4	0.0112117		1912.4	0.01234914		2442.4	-0.00688533
322.6	0.21256145		852.59	0.01325008		1382.6	0.01245571		1912.6	0.01171492		2442.6	-0.00702914
322.8	0.21347247		852.79	0.01320383		1382.8	0.0120568		1912.8	0.01159409		2442.8	-0.00826385
323	0.21474289		852.99	0.01210008		1383	0.01184314		1913	0.0119491		2443	-0.0073194
323.2	0.2146869		853.19	0.01195265		1383.2	0.01284907		1913.2	0.01105239		2443.2	-0.00732097
323.4	0.21496844		853.39	0.01119564		1383.4	0.01319876		1913.4	0.01040515		2443.4	-0.0073913
323.6	0.21563605		853.59	0.01146481		1383.6	0.01356086		1913.6	0.01024728		2443.6	-0.0073275
323.8	0.21685009		853.79	0.01176283		1383.8	0.01415029		1913.8	0.01099425		2443.8	-0.00716301
324	0.21661709		853.99	0.01252553		1384	0.01433458		1914	0.01029827		2444	-0.00690489
324.2	0.21724118		854.19	0.01251348		1384.2	0.01503729		1914.2	0.0112465		2444.2	-0.0064271
324.4	0.21804689		854.39	0.01255336		1384.4	0.01544646		1914.4	0.0116147		2444.4	-0.00648474
324.6	0.21829009		854.59	0.0124166		1384.6	0.01506932		1914.6	0.01069035		2444.6	-0.00615781
324.8	0.21832213		854.79	0.01142772		1384.8	0.01510945		1914.8	0.01071419		2444.8	-0.00578835
325	0.21774607		854.99	0.00992502		1385	0.01482792		1915	0.01047229		2445	-0.00582766
325.2	0.21801117		855.19	0.00915813		1385.2	0.01532009		1915.2	0.01094794		2445.2	-0.00600638
325.4	0.21809687		855.39	0.00807737		1385.4	0.01610508		1915.4	0.01101443		2445.4	-0.00623398
325.6	0.2182582		855.59	0.00703539		1385.6	0.01556539		1915.6	0.01049461		2445.6	-0.00643144
325.8	0.21793466		855.79	0.00648162		1385.8	0.01556223		1915.8	0.01080216		2445.8	-0.00708044
326	0.21849067		855.99	0.0068654		1386	0.01546133		1916	0.01073335		2446	-0.00747435
326.2	0.21847649		856.19	0.00694993		1386.2	0.01540737		1916.2	0.01082876		2446.2	-0.0076697
326.4	0.21914512		856.39	0.00794003		1386.4	0.0154031		1916.4	0.01148157		2446.4	-0.00800724
326.6	0.21941278		856.59	0.00758016		1386.6	0.01532699		1916.6	0.01098999		2446.6	-0.00784729
326.8	0.21985185		856.79	0.00724577		1386.8	0.01474378		1916.8	0.0105562		2446.8	-0.00836363
327	0.21983211		856.99	0.00653441		1387	0.01450737		1917	0.0106631		2447	-0.00750202
327.2	0.21976579		857.19	0.00737138		1387.2	0.0145381		1917.2	0.0107087		2447.2	-0.00773788
327.4	0.22021437		857.39	0.00782015		1387.4	0.01340327		1917.4	0.01068921		2447.4	-0.00727764
327.6	0.22070246		857.59	0.00909306		1387.6	0.01392876		1917.6	0.01073966		2447.6	-0.0063642
327.8	0.22112312		857.79	0.00990124		1387.8	0.01378742		1917.8	0.01101342		2447.8	-0.00595261
328	0.22101588		857.99	0.01079433		1388	0.01363341		1918	0.01074358		2448	-0.00568938
328.2	0.22196964		858.19	0.01175542		1388.2	0.01380659		1918.2	0.01123709		2448.2	-0.00525528
328.4	0.22176597		858.39	0.01219877		1388.4	0.01354914		1918.4	0.01095682		2448.4	-0.00512982
328.6	0.22082932		858.59	0.01203324		1388.6	0.01313706		1918.6	0.01034145		2448.6	-0.00479447
328.8	0.21990516		858.79	0.01165943		1388.8	0.01262253		1918.8	0.01030022		2448.8	-0.00421436
329	0.21903883		858.99	0.01134516		1389	0.01227193		1919	0.01045423		2449	-0.00445589
329.2	0.21991086		859.19	0.01088185		1389.2	0.01227338		1919.2	0.01066943		2449.2	-0.00475588
329.4	0.21982697		859.39	0.01010592		1389.4	0.01165988		1919.4	0.00962442		2449.4	-0.00481206
329.6	0.21994606		859.59	0.00981541		1389.6	0.01143465		1919.6	0.00908443		2449.6	-0.0047085
329.8	0.22027345		859.79	0.01013906		1389.8	0.01185732		1919.8	0.00896244		2449.8	-0.00504425
330	0.22080459		859.99	0.01058218		1390	0.01213993		1920	0.00832306		2450	-0.00431968
330.2	0.22152388		860.19	0.01038826		1390.2	0.01275239		1920.2	0.008551		2450.2	-0.00492176
330.4	0.22220907		860.39	0.01029712		1390.4	0.01356465		1920.4	0.00853113		2450.4	-0.00525348
330.6	0.22249206		860.59	0.00953713		1390.6	0.01419221		1920.6	0.00873227		2450.6	-0.00626762
330.8	0.22301227		860.79	0.00946987		1390.8	0.01352709		1920.8	0.0091009		2450.8	-0.00701975
331	0.22336045		860.99	0.00919602		1391	0.01335939		1921	0.01040911		2451	-0.00743814
331.2	0.22405787		861.19	0.00950742		1391.2	0.01407124		1921.2	0.0113825		2451.2	-0.00715596
331.4	0.22344186		861.39	0.00944259		1391.4	0.01453561		1921.4	0.01141097		2451.4	-0.00736447
331.6	0.22279702		861.59	0.01053467		1391.6	0.01592104		1921.6	0.01199144		2451.6	-0.00742653
331.8	0.22238007		861.79	0.01027609		1391.8	0.01600316		1921.8	0.01287065		2451.8	-0.00743286
332	0.22200269		861.99	0.01061455		1392	0.01573842		1922	0.01349243		2452	-0.00761389
332.2	0.22193132		862.19	0.01068594		1392.2	0.01537864		1922.2	0.01328539		2452.2	-0.00733768
332.4	0.2207884		862.39	0.01053037		1392.4	0.01485416		1922.4	0.01307335		2452.4	-0.00652153
332.6	0.21987514		862.59	0.01120493		1392.6	0.01424813		1922.6	0.0134206		2452.6	-0.00643913
332.8	0.21970594		862.79	0.01175173		1392.8	0.01287762		1922.8	0.01250622		2452.8	-0.00677011
333	0.22000409		862.99	0.01146603		1393	0.01210415		1923	0.01277218		2453	-0.00653712
333.2	0.22210361		863.19	0.01144997		1393.2	0.01122603		1923.2	0.01194281		2453.2	-0.00576822
333.4	0.22281315		863.39	0.01130845		1393.4	0.0110698		1923.4	0.01131593		2453.4	-0.00578384
333.6	0.22413799		863.59	0.011614		1393.6	0.0105377		1923.6	0.01190444		2453.6	-0.00544612
333.8	0.22491205		863.79	0.01226522		1393.8	0.01026506		1923.8	0.01195633		2453.8	-0.00473948
334	0.22540293		863.99	0.0124211		1394	0.01019375		1924	0.01227734		2454	-0.00454539
334.2	0.22620619		864.19	0.01203603		1394.2	0.01093594		1924.2	0.01258064		2454.2	-0.00525396
334.4	0.22692576		864.39	0.01300559		1394.4	0.01156514		1924.4	0.01284631		2454.4	-0.00577465
334.6	0.22651136		864.59	0.01309523		1394.6	0.01122657		1924.6	0.01361682		2454.6	-0.00561056
334.8	0.22603824		864.79	0.01322479		1394.8	0.01084243		1924.8	0.01447024		2454.8	-0.0052189
335	0.22592585		864.99	0.01303562		1395	0.01214258		1925	0.01469896		2455	-0.00511527
335.2	0.22564159		865.19	0.01329404		1395.2	0.01342458		1925.2	0.01404589		2455.2	-0.00488648
335.4	0.224664		865.39	0.01294959		1395.4	0.01426792		1925.4	0.01399083		2455.4	-0.00504726
335.6	0.22381402		865.59	0.01289352		1395.6	0.015069		1925.6	0.01391022		2455.6	-0.00487734
335.8	0.2244709		865.79	0.01224358		1395.8	0.01544562		1925.8	0.01364731		2455.8	-0.00425074
336	0.2242846		865.99	0.01172036		1396	0.01613153		1926	0.0124267		2456	-0.00380575
336.2	0.22429606		866.19	0.01123856		1396.2	0.01707825		1926.2	0.01166497		2456.2	-0.00413541
336.4	0.22305232		866.39	0.0110768		1396.4	0.01713596		1926.4	0.01035759		2456.4	-0.00429184
336.6	0.22333729		866.59	0.01128522		1396.6	0.01777062		1926.6	0.00972293		2456.6	-0.0052281
336.8	0.22407122		866.79	0.01015734		1396.8	0.01818964		1926.8	0.00830167		2456.8	-0.0058298
337	0.22471782		866.99	0.00920763		1397	0.01806639		1927	0.00865937		2457	-0.00569116
337.2	0.2257042		867.19	0.00923185		1397.2	0.01788932		1927.2	0.00898901		2457.2	-0.00506518
337.4	0.22545297		867.39	0.00906138		1397.4	0.01786207		1927.4	0.00890941		2457.4	-0.00556816
337.6	0.22567002		867.59	0.0094255		1397.6	0.01771199		1927.6	0.00952238		2457.6	-0.00594491
337.8	0.22580512		867.79	0.01052205		1397.8	0.01764831		1927.8	0.00943307		2457.8	-0.00615755
338	0.22657161		867.99	0.01141433		1398	0.01759907		1928	0.01011754		2458	-0.00715693
338.2	0.22724547		868.19	0.01180132		1398.2	0.01734337		1928.2	0.01084693		2458.2	-0.00767377
338.4	0.2270704		868.39	0.01221974		1398.4	0.01742939		1928.4	0.01120089		2458.4	-0.00747196
338.6	0.22701076		868.59	0.01119381		1398.6	0.01674214		1928.6	0.0120847		2458.6	-0.007251
338.8	0.2267094		868.79	0.0111525		1398.8	0.01700446		1928.8	0.01272428		2458.8	-0.00763137
339	0.22748816		868.99	0.01105291		1399	0.01678382		1929	0.01225874		2459	-0.00842641
339.2	0.22682307		869.19	0.01102524		1399.2	0.01678878		1929.2	0.01200742		2459.2	-0.00850971
339.4	0.22679627		869.39	0.01090683		1399.4	0.01695567		1929.4	0.01261308		2459.4	-0.00754022
339.6	0.22726202		869.59	0.01134286		1399.6	0.0163688		1929.6	0.01219785		2459.6	-0.00653247
339.8	0.22847985		869.79	0.01184828		1399.8	0.01687312		1929.8	0.01156091		2459.8	-0.00605297
340	0.22838596		869.99	0.01120169		1400	0.01711785		1930	0.0112613		2460	-0.00557538
340.2	0.22826361		870.19	0.01077699		1400.2	0.01696349		1930.2	0.01132812		2460.2	-0.00571536
340.4	0.22701203		870.39	0.00993398		1400.4	0.0163718		1930.4	0.01080756		2460.4	-0.00572067
340.6	0.22709412		870.59	0.01006826		1400.6	0.01615929		1930.6	0.0106019		2460.6	-0.00488911
340.8	0.22673207		870.79	0.01007304		1400.8	0.01531489		1930.8	0.01046126		2460.8	-0.0045721
341	0.22626222		870.99	0.01075183		1401	0.015273		1931	0.01061433		2461	-0.00406456
341.2	0.22627063		871.19	0.01095638		1401.2	0.01502716		1931.2	0.010713		2461.2	-0.00360787
341.4	0.22633358		871.39	0.01120271		1401.4	0.01514375		1931.4	0.01065827		2461.4	-0.00365528
341.6	0.22627254		871.59	0.01223486		1401.6	0.01476411		1931.6	0.01055536		2461.6	-0.00405681
341.8	0.22705148		871.79	0.01262659		1401.8	0.01403428		1931.8	0.01048271		2461.8	-0.00480275
342	0.22713983		871.99	0.01240623		1402	0.01377064		1932	0.01163705		2462	-0.00563507
342.2	0.22813976		872.19	0.01194991		1402.2	0.01370291		1932.2	0.01244681		2462.2	-0.00570887
342.4	0.22820304		872.39	0.01131221		1402.4	0.01306733		1932.4	0.01317284		2462.4	-0.00589072
342.6	0.22931349		872.59	0.01112178		1402.6	0.01245845		1932.6	0.01383827		2462.6	-0.00649069
342.8	0.22923128		872.79	0.01120292		1402.8	0.01308309		1932.8	0.01431475		2462.8	-0.00692057
343	0.22959052		872.99	0.01090967		1403	0.0124629		1933	0.01436336		2463	-0.00791554
343.2	0.23030321		873.19	0.01062042		1403.2	0.01217084		1933.2	0.01476997		2463.2	-0.00709055
343.4	0.23107484		873.39	0.01055431		1403.4	0.01213971		1933.4	0.01502606		2463.4	-0.00632777
343.6	0.23177385		873.59	0.01055642		1403.6	0.01216582		1933.6	0.01446408		2463.6	-0.00543334
343.8	0.23236011		873.79	0.01028902		1403.8	0.01247114		1933.8	0.01432649		2463.8	-0.00548648
344	0.23245804		873.99	0.00948231		1404	0.01201933		1934	0.0142969		2464	-0.0045141
344.2	0.23215317		874.19	0.00961462		1404.2	0.01276989		1934.2	0.01408891		2464.2	-0.0047784
344.4	0.2316821		874.39	0.00927084		1404.4	0.01254759		1934.4	0.01381145		2464.4	-0.00469336
344.6	0.23139558		874.59	0.00956027		1404.6	0.01250091		1934.6	0.01296086		2464.6	-0.00378073
344.8	0.23075323		874.79	0.00938754		1404.8	0.01308241		1934.8	0.01294748		2464.8	-0.00446871
345	0.230687		874.99	0.0090339		1405	0.01373646		1935	0.0121344		2465	-0.00517834
345.2	0.23021028		875.19	0.00930791		1405.2	0.01383196		1935.2	0.01194023		2465.2	-0.00541158
345.4	0.23021385		875.39	0.00958345		1405.4	0.01336951		1935.4	0.01171287		2465.4	-0.00642147
345.6	0.22975399		875.59	0.0094783		1405.6	0.01351835		1935.6	0.01070631		2465.6	-0.00814648
345.8	0.23074362		875.79	0.0083922		1405.8	0.01381269		1935.8	0.01165535		2465.8	-0.00949474
346	0.23120378		875.99	0.00861421		1406	0.01405749		1936	0.01367587		2466	-0.00989392
346.2	0.23185329		876.19	0.00875879		1406.2	0.01348419		1936.2	0.01357496		2466.2	-0.0107446
346.4	0.23079845		876.39	0.0085106		1406.4	0.01381257		1936.4	0.01454436		2466.4	-0.01162392
346.6	0.23096899		876.59	0.00870542		1406.6	0.01467704		1936.6	0.01484191		2466.6	-0.01182752
346.8	0.23075561		876.79	0.00902053		1406.8	0.01507105		1936.8	0.01464001		2466.8	-0.01218426
347	0.23105267		876.99	0.00882756		1407	0.01429143		1937	0.01495378		2467	-0.01210653
347.2	0.23222523		877.19	0.00865724		1407.2	0.01387526		1937.2	0.0144046		2467.2	-0.0112577
347.4	0.23183216		877.39	0.00909364		1407.4	0.01433996		1937.4	0.01338725		2467.4	-0.01064639
347.6	0.23302629		877.59	0.00883163		1407.6	0.01431879		1937.6	0.01300995		2467.6	-0.00899761
347.8	0.23412686		877.79	0.00918386		1407.8	0.01392006		1937.8	0.01184361		2467.8	-0.00778679
348	0.2338772		877.99	0.00902156		1408	0.01442171		1938	0.01078902		2468	-0.00548199
348.2	0.23438332		878.19	0.00997871		1408.2	0.01584546		1938.2	0.01005014		2468.2	-0.0045559
348.4	0.23421658		878.39	0.00885197		1408.4	0.0159185		1938.4	0.01029201		2468.4	-0.0038845
348.6	0.2331487		878.59	0.00920772		1408.6	0.0168991		1938.6	0.01002856		2468.6	-0.00374699
348.8	0.23237361		878.79	0.00944402		1408.8	0.01740902		1938.8	0.00999148		2468.8	-0.00389519
349	0.2327496		878.99	0.01013213		1409	0.01762525		1939	0.00961128		2469	-0.00448796
349.2	0.23251749		879.19	0.01102094		1409.2	0.01784514		1939.2	0.01014476		2469.2	-0.00464703
349.4	0.23397297		879.39	0.01076235		1409.4	0.01739243		1939.4	0.01017814		2469.4	-0.00546754
349.6	0.23454789		879.59	0.01007663		1409.6	0.01737548		1939.6	0.01082079		2469.6	-0.00610175
349.8	0.2348088		879.79	0.00970555		1409.8	0.01682634		1939.8	0.01252183		2469.8	-0.00594217
350	0.23425647		879.99	0.01021146		1410	0.01629279		1940	0.01374851		2470	-0.00663236
350.2	0.23362655		880.19	0.0092756		1410.2	0.01657863		1940.2	0.01392019		2470.2	-0.00729962
350.4	0.23254458		880.39	0.00910336		1410.4	0.01698131		1940.4	0.01586251		2470.4	-0.00785065
350.6	0.23157932		880.59	0.00909314		1410.6	0.01583075		1940.6	0.01519198		2470.6	-0.00863071
350.8	0.23155981		880.79	0.00928946		1410.8	0.01550298		1940.8	0.01559005		2470.8	-0.00889772
351	0.23180538		880.99	0.00929298		1411	0.01488295		1941	0.01668936		2471	-0.00961908
351.2	0.23212107		881.19	0.00992256		1411.2	0.01405022		1941.2	0.01525042		2471.2	-0.00979149
351.4	0.23181746		881.39	0.0096108		1411.4	0.01461144		1941.4	0.01512553		2471.4	-0.00948457
351.6	0.23236727		881.59	0.0094341		1411.6	0.01459449		1941.6	0.01522514		2471.6	-0.00849292
351.8	0.23192614		881.79	0.01056481		1411.8	0.01427438		1941.8	0.01421694		2471.8	-0.00780065
352	0.23169336		881.99	0.01130899		1412	0.0145462		1942	0.01411036		2472	-0.00770813
352.2	0.23198765		882.19	0.01202804		1412.2	0.01558811		1942.2	0.01417176		2472.2	-0.00933451
352.4	0.23172663		882.39	0.01204922		1412.4	0.01537506		1942.4	0.01416033		2472.4	-0.01014803
352.6	0.23172422		882.59	0.01229716		1412.6	0.01606578		1942.6	0.01321973		2472.6	-0.01014312
352.8	0.23250132		882.79	0.01237362		1412.8	0.01528885		1942.8	0.01339502		2472.8	-0.01035891
353	0.23360834		882.99	0.01272507		1413	0.01503232		1943	0.01376291		2473	-0.01072313
353.2	0.23402397		883.19	0.0121894		1413.2	0.01427153		1943.2	0.01424413		2473.2	-0.01050442
353.4	0.23540921		883.39	0.01134415		1413.4	0.01383651		1943.4	0.01349676		2473.4	-0.00990088
353.6	0.23580846		883.59	0.01056458		1413.6	0.01315565		1943.6	0.01417693		2473.6	-0.01048592
353.8	0.23563538		883.79	0.01007192		1413.8	0.01239265		1943.8	0.01451234		2473.8	-0.01028624
354	0.23619655		883.99	0.0093307		1414	0.01266952		1944	0.01472274		2474	-0.01024473
354.2	0.23632854		884.19	0.00838062		1414.2	0.01268201		1944.2	0.01493746		2474.2	-0.01034987
354.4	0.23541849		884.39	0.00791222		1414.4	0.01210929		1944.4	0.01534988		2474.4	-0.01130612
354.6	0.23438455		884.59	0.00788267		1414.6	0.01208603		1944.6	0.01463599		2474.6	-0.0111902
354.8	0.23434861		884.79	0.00858096		1414.8	0.01249112		1944.8	0.0157092		2474.8	-0.00976525
355	0.23392993		884.99	0.00872617		1415	0.01239745		1945	0.01550296		2475	-0.00976167
355.2	0.23411725		885.19	0.0084546		1415.2	0.01285971		1945.2	0.01531508		2475.2	-0.0083537
355.4	0.23415127		885.39	0.00808662		1415.4	0.01410207		1945.4	0.01588248		2475.4	-0.00780565
355.6	0.23393322		885.59	0.00826466		1415.6	0.01440571		1945.6	0.01630427		2475.6	-0.00755651
355.8	0.234313		885.79	0.00868779		1415.8	0.01418975		1945.8	0.01576742		2475.8	-0.00737204
356	0.23506688		885.99	0.00899315		1416	0.01424196		1946	0.01503794		2476	-0.00754514
356.2	0.23542148		886.19	0.00841743		1416.2	0.01485825		1946.2	0.01493643		2476.2	-0.00805576
356.4	0.23582693		886.39	0.00846332		1416.4	0.01426123		1946.4	0.01422251		2476.4	-0.00749342
356.6	0.23614946		886.59	0.00767962		1416.6	0.01453155		1946.6	0.01448241		2476.6	-0.00759874
356.8	0.23626005		886.79	0.00756777		1416.8	0.01406303		1946.8	0.01509619		2476.8	-0.00805762
357	0.23643284		886.99	0.00793239		1417	0.01403723		1947	0.0144226		2477	-0.00781584
357.2	0.23739413		887.19	0.00735286		1417.2	0.01393066		1947.2	0.01402143		2477.2	-0.00800671
357.4	0.23775059		887.39	0.00751669		1417.4	0.01382465		1947.4	0.01313669		2477.4	-0.00895244
357.6	0.23758968		887.59	0.00811772		1417.6	0.01335893		1947.6	0.01373382		2477.6	-0.01027277
357.8	0.2378997		887.79	0.0082904		1417.8	0.01354491		1947.8	0.01368989		2477.8	-0.01007484
358	0.23854474		887.99	0.00817654		1418	0.01382649		1948	0.01375536		2478	-0.00996346
358.2	0.23827193		888.19	0.00834535		1418.2	0.01434097		1948.2	0.01366077		2478.2	-0.00999563
358.4	0.23754003		888.39	0.0081113		1418.4	0.01483835		1948.4	0.01420912		2478.4	-0.01044329
358.6	0.23684494		888.59	0.00857913		1418.6	0.01570939		1948.6	0.01429256		2478.6	-0.01007044
358.8	0.23658004		888.79	0.0086061		1418.8	0.01605467		1948.8	0.01483295		2478.8	-0.01001607
359	0.23633514		888.99	0.0076094		1419	0.01677015		1949	0.01497229		2479	-0.01053573
359.2	0.23660449		889.19	0.00780827		1419.2	0.01758847		1949.2	0.01605637		2479.2	-0.00976278
359.4	0.23619858		889.39	0.00773688		1419.4	0.01804494		1949.4	0.01640129		2479.4	-0.00962479
359.6	0.2365295		889.59	0.00728818		1419.6	0.01800592		1949.6	0.01671659		2479.6	-0.00920557
359.8	0.23727753		889.79	0.00780732		1419.8	0.01753026		1949.8	0.01647074		2479.8	-0.00815793
360	0.23675466		889.99	0.00745216		1420	0.01743167		1950	0.01604887		2480	-0.00754691
360.2	0.23682383		890.19	0.00780715		1420.2	0.01690265		1950.2	0.01657499		2480.2	-0.00765321
360.4	0.23619364		890.39	0.00858342		1420.4	0.01657611		1950.4	0.01562888		2480.4	-0.00790159
360.6	0.23652128		890.59	0.00908712		1420.6	0.01650024		1950.6	0.01600707		2480.6	-0.00825367
360.8	0.23673904		890.79	0.00917709		1420.8	0.01624302		1950.8	0.01515308		2480.8	-0.0081763
361	0.23729293		890.99	0.00985806		1421	0.01612282		1951	0.01457649		2481	-0.00901951
361.2	0.23718985		891.19	0.01045317		1421.2	0.0157679		1951.2	0.01501061		2481.2	-0.00913111
361.4	0.23669322		891.39	0.01083657		1421.4	0.01466137		1951.4	0.01474739		2481.4	-0.00947215
361.6	0.23601898		891.59	0.01129727		1421.6	0.01469168		1951.6	0.01498803		2481.6	-0.00991554
361.8	0.23636597		891.79	0.01110177		1421.8	0.01478005		1951.8	0.01547574		2481.8	-0.0098592
362	0.23625764		891.99	0.01129977		1422	0.0139264		1952	0.01576098		2482	-0.01030131
362.2	0.23639968		892.19	0.01102419		1422.2	0.01480832		1952.2	0.0154993		2482.2	-0.01123225
362.4	0.23593471		892.39	0.01078862		1422.4	0.01467417		1952.4	0.01590535		2482.4	-0.01209863
362.6	0.23520817		892.59	0.01126641		1422.6	0.0151918		1952.6	0.01581924		2482.6	-0.01228729
362.8	0.23557502		892.79	0.01110146		1422.8	0.01596562		1952.8	0.01600945		2482.8	-0.01246144
363	0.2355111		892.99	0.01105284		1423	0.01597517		1953	0.01605083		2483	-0.01172884
363.2	0.23617628		893.19	0.01140043		1423.2	0.01643906		1953.2	0.01590809		2483.2	-0.01078331
363.4	0.23657067		893.39	0.01122656		1423.4	0.0169858		1953.4	0.01522656		2483.4	-0.00956653
363.6	0.23735286		893.59	0.01091296		1423.6	0.01702726		1953.6	0.01456351		2483.6	-0.00907899
363.8	0.2383927		893.79	0.0113848		1423.8	0.01812695		1953.8	0.01397825		2483.8	-0.00778699
364	0.2384412		893.99	0.0112246		1424	0.01848869		1954	0.01339376		2484	-0.00713177
364.2	0.23980869		894.19	0.01175989		1424.2	0.01817305		1954.2	0.01338583		2484.2	-0.00717076
364.4	0.24032314		894.39	0.01191833		1424.4	0.0186535		1954.4	0.01249373		2484.4	-0.00711106
364.6	0.24095207		894.59	0.01163991		1424.6	0.01844469		1954.6	0.01265921		2484.6	-0.00732487
364.8	0.24198903		894.79	0.01059876		1424.8	0.01847105		1954.8	0.01217434		2484.8	-0.00755791
365	0.24154697		894.99	0.01072823		1425	0.01844678		1955	0.01226708		2485	-0.00762955
365.2	0.24096167		895.19	0.01054711		1425.2	0.01821372		1955.2	0.01276229		2485.2	-0.00678842
365.4	0.24106921		895.39	0.01017923		1425.4	0.01755039		1955.4	0.01316268		2485.4	-0.00715307
365.6	0.2399451		895.59	0.00939452		1425.6	0.01751265		1955.6	0.01480477		2485.6	-0.00801053
365.8	0.24018138		895.79	0.00951806		1425.8	0.01701186		1955.8	0.0153833		2485.8	-0.00891018
366	0.2394309		895.99	0.00981561		1426	0.01538425		1956	0.01545235		2486	-0.00948379
366.2	0.23889702		896.19	0.00919639		1426.2	0.01604292		1956.2	0.01543716		2486.2	-0.01012399
366.4	0.23775714		896.39	0.00926733		1426.4	0.01595544		1956.4	0.0160463		2486.4	-0.00983026
366.6	0.23724981		896.59	0.00979797		1426.6	0.01616014		1956.6	0.01670025		2486.6	-0.01040733
366.8	0.23786784		896.79	0.00914617		1426.8	0.01628613		1956.8	0.01600921		2486.8	-0.01077853
367	0.2375658		896.99	0.00937176		1427	0.0161825		1957	0.01541981		2487	-0.01035587
367.2	0.23815785		897.19	0.00919712		1427.2	0.01584029		1957.2	0.01494405		2487.2	-0.01001987
367.4	0.23912523		897.39	0.00977135		1427.4	0.0161		1957.4	0.01492714		2487.4	-0.00929926
367.6	0.23949944		897.59	0.00973908		1427.6	0.01589327		1957.6	0.01501682		2487.6	-0.0094436
367.8	0.24048743		897.79	0.01031563		1427.8	0.0161716		1957.8	0.01426353		2487.8	-0.00825093
368	0.24063641		897.99	0.00981884		1428	0.01584986		1958	0.01415137		2488	-0.00781376
368.2	0.24116344		898.19	0.0098392		1428.2	0.01606283		1958.2	0.01404427		2488.2	-0.00770955
368.4	0.24173982		898.39	0.00985159		1428.4	0.01596941		1958.4	0.01355668		2488.4	-0.00755306
368.6	0.24239005		898.59	0.00931438		1428.6	0.01670686		1958.6	0.01338422		2488.6	-0.00729573
368.8	0.24294586		898.79	0.00855075		1428.8	0.01775346		1958.8	0.01342531		2488.8	-0.00745486
369	0.24269119		898.99	0.0091437		1429	0.01807088		1959	0.01351742		2489	-0.00713655
369.2	0.24310896		899.19	0.00898778		1429.2	0.01825011		1959.2	0.01469719		2489.2	-0.00714124
369.4	0.24290897		899.39	0.00912213		1429.4	0.01788399		1959.4	0.01497932		2489.4	-0.00789168
369.6	0.24255901		899.59	0.00849754		1429.6	0.01806027		1959.6	0.01524383		2489.6	-0.00795702
369.8	0.24200561		899.79	0.00909313		1429.8	0.01838922		1959.8	0.01471859		2489.8	-0.00857382
370	0.24120556		899.99	0.00930948		1430	0.01739222		1960	0.01497095		2490	-0.00829397
370.2	0.2407349		900.19	0.00938345		1430.2	0.01795917		1960.2	0.01473888		2490.2	-0.00862942
370.4	0.24054496		900.39	0.00969384		1430.4	0.0177692		1960.4	0.01537231		2490.4	-0.00868361
370.6	0.24124772		900.59	0.01037593		1430.6	0.01751026		1960.6	0.01593372		2490.6	-0.00955463
370.8	0.24179807		900.79	0.01045153		1430.8	0.01710504		1960.8	0.01432948		2490.8	-0.00953048
371	0.24217201		900.99	0.01161257		1431	0.01634378		1961	0.01372063		2491	-0.00958073
371.2	0.24279498		901.19	0.01212324		1431.2	0.01469625		1961.2	0.01340971		2491.2	-0.00951674
371.4	0.24317993		901.39	0.01303088		1431.4	0.01494074		1961.4	0.01281096		2491.4	-0.00927981
371.6	0.24325037		901.59	0.01247857		1431.6	0.01409732		1961.6	0.01192713		2491.6	-0.00991553
371.8	0.24436427		901.79	0.0131261		1431.8	0.01432313		1961.8	0.01227037		2491.8	-0.00928663
372	0.24550652		901.99	0.0127255		1432	0.01490159		1962	0.01273078		2492	-0.0097902
372.2	0.2462805		902.19	0.01307579		1432.2	0.01569247		1962.2	0.01312313		2492.2	-0.00955728
372.4	0.24709867		902.39	0.01277735		1432.4	0.0158627		1962.4	0.01340223		2492.4	-0.00937185
372.6	0.24741604		902.59	0.01253601		1432.6	0.01661795		1962.6	0.013419		2492.6	-0.0087384
372.8	0.24725888		902.79	0.01211081		1432.8	0.01758305		1962.8	0.0139493		2492.8	-0.00974135
373	0.24718592		902.99	0.01240486		1433	0.01809925		1963	0.01421552		2493	-0.01007385
373.2	0.24669745		903.19	0.01134853		1433.2	0.01868689		1963.2	0.01463018		2493.2	-0.01029701
373.4	0.24631517		903.39	0.01091517		1433.4	0.01891191		1963.4	0.01499359		2493.4	-0.01048883
373.6	0.24540318		903.59	0.0097082		1433.6	0.01956734		1963.6	0.014772		2493.6	-0.00977116
373.8	0.24474668		903.79	0.00948595		1433.8	0.01989082		1963.8	0.01557515		2493.8	-0.0099336
374	0.2444854		903.99	0.0093068		1434	0.01980733		1964	0.01606329		2494	-0.00935992
374.2	0.24445944		904.19	0.00979376		1434.2	0.01995429		1964.2	0.01651067		2494.2	-0.00951269
374.4	0.24429514		904.39	0.00944608		1434.4	0.01949002		1964.4	0.01747822		2494.4	-0.00940573
374.6	0.24506978		904.59	0.0097528		1434.6	0.01867878		1964.6	0.01728185		2494.6	-0.0087417
374.8	0.24488493		904.79	0.0099641		1434.8	0.01822692		1964.8	0.01564971		2494.8	-0.00828389
375	0.244788		904.99	0.0112175		1435	0.01757786		1965	0.0149299		2495	-0.00827594
375.2	0.24520467		905.19	0.0113349		1435.2	0.01772774		1965.2	0.01496834		2495.2	-0.00853958
375.4	0.24561836		905.39	0.01154287		1435.4	0.0175242		1965.4	0.01466693		2495.4	-0.00794223
375.6	0.24625016		905.59	0.01107168		1435.6	0.01756962		1965.6	0.01473877		2495.6	-0.00796354
375.8	0.24731267		905.79	0.0116918		1435.8	0.01810487		1965.8	0.01530365		2495.8	-0.00748466
376	0.2470946		905.99	0.01126082		1436	0.01769041		1966	0.01452196		2496	-0.0077694
376.2	0.24757135		906.19	0.01119507		1436.2	0.01754991		1966.2	0.01438848		2496.2	-0.00701268
376.4	0.24762698		906.39	0.01090098		1436.4	0.0172091		1966.4	0.01461626		2496.4	-0.00716334
376.6	0.24797326		906.59	0.01050659		1436.6	0.01763835		1966.6	0.01420613		2496.6	-0.00683361
376.8	0.24757777		906.79	0.00954487		1436.8	0.01811576		1966.8	0.01441302		2496.8	-0.00753472
377	0.24680394		906.99	0.0089867		1437	0.01827867		1967	0.01411841		2497	-0.00759581
377.2	0.24713153		907.19	0.00866089		1437.2	0.01882803		1967.2	0.01425328		2497.2	-0.00756005
377.4	0.2465398		907.39	0.00918097		1437.4	0.01914237		1967.4	0.01392314		2497.4	-0.00802269
377.6	0.24589877		907.59	0.00876555		1437.6	0.0198026		1967.6	0.01292288		2497.6	-0.00790173
377.8	0.24665055		907.79	0.00940464		1437.8	0.01991976		1967.8	0.01362306		2497.8	-0.00908893
378	0.24687077		907.99	0.00965444		1438	0.02002011		1968	0.01375693		2498	-0.00982304
378.2	0.24737416		908.19	0.01037418		1438.2	0.01926965		1968.2	0.01396396		2498.2	-0.01089931
378.4	0.24746542		908.39	0.01033497		1438.4	0.01849064		1968.4	0.01388157		2498.4	-0.01127394
378.6	0.24818904		908.59	0.01105887		1438.6	0.01799859		1968.6	0.01349807		2498.6	-0.01154616
378.8	0.24800711		908.79	0.01180082		1438.8	0.01766475		1968.8	0.01310509		2498.8	-0.01262674
379	0.24791134		908.99	0.0126014		1439	0.0172194		1969	0.01317206		2499	-0.01346531
379.2	0.24806396		909.19	0.01227301		1439.2	0.01671064		1969.2	0.01318203		2499.2	-0.01410358
379.4	0.24781373		909.39	0.01229076		1439.4	0.01560027		1969.4	0.01287792		2499.4	-0.01385276
379.6	0.24753186		909.59	0.01193879		1439.6	0.01544966		1969.6	0.01257552		2499.6	-0.01435651
379.8	0.24782149		909.79	0.01186635		1439.8	0.01444476		1969.8	0.01223868		2499.8	-0.01468637
380	0.24782149		909.99	0.01186635		1440	0.01444476		1970	0.01223868		2500	-0.01468637
380.2	0.24603836		910.19	0.01168259		1440.2	0.01362608		1970.2	0.01341991		2500.2	-0.01334253
380.4	0.24499958		910.39	0.01200732		1440.4	0.01326345		1970.4	0.01448961		2500.4	-0.01236098
380.6	0.24315204		910.59	0.01164224		1440.6	0.01242573		1970.6	0.01530988		2500.6	-0.01140752
380.8	0.24155826		910.79	0.01117072		1440.8	0.01202222		1970.8	0.01664686		2500.8	-0.01016272
381	0.2398765		910.99	0.01155086		1441	0.01141835		1971	0.01712739		2501	-0.00908116
381.2	0.23869066		911.19	0.01223691		1441.2	0.01150388		1971.2	0.01730164		2501.2	-0.00800174
381.4	0.23695018		911.39	0.01277509		1441.4	0.01166656		1971.4	0.01745875		2501.4	-0.00655332
381.6	0.2354933		911.59	0.01245513		1441.6	0.01150439		1971.6	0.01695134		2501.6	-0.006265
381.8	0.23466674		911.79	0.01301123		1441.8	0.01156441		1971.8	0.01644387		2501.8	-0.00602129
382	0.2341337		911.99	0.01302972		1442	0.01140171		1972	0.01541474		2502	-0.00664938
382.2	0.2344725		912.19	0.01299325		1442.2	0.01072327		1972.2	0.01406237		2502.2	-0.00760466
382.4	0.2343306		912.39	0.0131685		1442.4	0.00915149		1972.4	0.01239615		2502.4	-0.00734466
382.6	0.23495004		912.59	0.01401299		1442.6	0.00878949		1972.6	0.01147249		2502.6	-0.00783262
382.8	0.23543469		912.79	0.01313707		1442.8	0.00817486		1972.8	0.01108256		2502.8	-0.00835426
383	0.23620422		912.99	0.01312352		1443	0.00769522		1973	0.01135592		2503	-0.00809212
383.2	0.2368842		913.19	0.01276869		1443.2	0.00718292		1973.2	0.0124465		2503.2	-0.00862313
383.4	0.23663614		913.39	0.01268979		1443.4	0.00836641		1973.4	0.0125706		2503.4	-0.00917947
383.6	0.23668169		913.59	0.0127276		1443.6	0.00855095		1973.6	0.01426981		2503.6	-0.00928366
383.8	0.23633082		913.79	0.01299412		1443.8	0.00794361		1973.8	0.01394851		2503.8	-0.00949619
384	0.23566163		913.99	0.01313137		1444	0.00736363		1974	0.0140206		2504	-0.0091957
384.2	0.23478464		914.19	0.01268782		1444.2	0.00730772		1974.2	0.01593295		2504.2	-0.00970009
384.4	0.23406448		914.39	0.01171912		1444.4	0.00808259		1974.4	0.01673539		2504.4	-0.00964935
384.6	0.23247593		914.59	0.01031838		1444.6	0.00838289		1974.6	0.0173249		2504.6	-0.0089068
384.8	0.23204181		914.79	0.01019651		1444.8	0.00835052		1974.8	0.01759118		2504.8	-0.00911217
385	0.23097188		914.99	0.01126741		1445	0.00847821		1975	0.01653901		2505	-0.00894653
385.2	0.229793		915.19	0.01204394		1445.2	0.00898385		1975.2	0.01585158		2505.2	-0.00927812
385.4	0.22884337		915.39	0.01198728		1445.4	0.0087223		1975.4	0.01506765		2505.4	-0.00965606
385.6	0.22847937		915.59	0.01237135		1445.6	0.00806069		1975.6	0.01394055		2505.6	-0.01079434
385.8	0.22854191		915.79	0.01325742		1445.8	0.0074605		1975.8	0.01336974		2505.8	-0.01131901
386	0.22786546		915.99	0.01338057		1446	0.00572498		1976	0.01207126		2506	-0.01205584
386.2	0.22856105		916.19	0.01362548		1446.2	0.00407431		1976.2	0.01065032		2506.2	-0.01217373
386.4	0.22787354		916.39	0.01370543		1446.4	0.0029942		1976.4	0.00925691		2506.4	-0.01103005
386.6	0.22905751		916.59	0.01417019		1446.6	0.00343119		1976.6	0.00934084		2506.6	-0.01140618
386.8	0.22941164		916.79	0.01337963		1446.8	0.00392755		1976.8	0.00982261		2506.8	-0.01076405
387	0.22984464		916.99	0.01358152		1447	0.00470713		1977	0.0106862		2507	-0.01087544
387.2	0.22915999		917.19	0.01331599		1447.2	0.00517889		1977.2	0.01151754		2507.2	-0.01067607
387.4	0.2290701		917.39	0.01352412		1447.4	0.00591959		1977.4	0.01188076		2507.4	-0.00964576
387.6	0.22862187		917.59	0.01246845		1447.6	0.00634303		1977.6	0.01239633		2507.6	-0.00815784
387.8	0.22701247		917.79	0.01182875		1447.8	0.00621445		1977.8	0.01274756		2507.8	-0.00706718
388	0.22589238		917.99	0.01105271		1448	0.00714396		1978	0.01418863		2508	-0.00573369
388.2	0.2255905		918.19	0.00975722		1448.2	0.00737055		1978.2	0.01548275		2508.2	-0.00471573
388.4	0.22420459		918.39	0.00885923		1448.4	0.00830051		1978.4	0.01566302		2508.4	-0.00382655
388.6	0.22364062		918.59	0.00866914		1448.6	0.00888945		1978.6	0.01587885		2508.6	-0.00251409
388.8	0.22359245		918.79	0.00890371		1448.8	0.00845285		1978.8	0.01551097		2508.8	-0.00307902
389	0.22345517		918.99	0.00970615		1449	0.00844571		1979	0.01523986		2509	-0.00298517
389.2	0.22346725		919.19	0.01005258		1449.2	0.00791493		1979.2	0.01501419		2509.2	-0.00418492
389.4	0.2243284		919.39	0.01059016		1449.4	0.00751453		1979.4	0.01379016		2509.4	-0.00587993
389.6	0.22380692		919.59	0.0118075		1449.6	0.00680356		1979.6	0.01384879		2509.6	-0.00694095
389.8	0.22370484		919.79	0.01224801		1449.8	0.00611731		1979.8	0.01266186		2509.8	-0.00800113
390	0.22363116		919.99	0.01312431		1450	0.00522415		1980	0.01142808		2510	-0.00948733
390.2	0.22432906		920.19	0.01303652		1450.2	0.00433718		1980.2	0.01094753		2510.2	-0.01057662
390.4	0.22441317		920.39	0.01297772		1450.4	0.00364816		1980.4	0.0102759		2510.4	-0.01146672
390.6	0.22594235		920.59	0.01269482		1450.6	0.00420165		1980.6	0.01072819		2510.6	-0.01263512
390.8	0.22490489		920.79	0.01174606		1450.8	0.00489735		1980.8	0.01037829		2510.8	-0.01250046
391	0.22526907		920.99	0.0111288		1451	0.00558174		1981	0.01075732		2511	-0.01277542
391.2	0.22485898		921.19	0.01007514		1451.2	0.00569902		1981.2	0.01096226		2511.2	-0.01170351
391.4	0.22503415		921.39	0.00934858		1451.4	0.00599747		1981.4	0.0111563		2511.4	-0.01064499
391.6	0.22543369		921.59	0.00813329		1451.6	0.00682907		1981.6	0.01145679		2511.6	-0.01016253
391.8	0.22436338		921.79	0.00776796		1451.8	0.00719441		1981.8	0.01220372		2511.8	-0.01067601
392	0.22489991		921.99	0.00737037		1452	0.00772503		1982	0.01278071		2512	-0.01016017
392.2	0.22502829		922.19	0.00725697		1452.2	0.00727292		1982.2	0.01325821		2512.2	-0.01016766
392.4	0.2242513		922.39	0.00763162		1452.4	0.00798767		1982.4	0.01388718		2512.4	-0.01007032
392.6	0.22462407		922.59	0.00725197		1452.6	0.00809958		1982.6	0.01401042		2512.6	-0.00926598
392.8	0.22503269		922.79	0.00765702		1452.8	0.0069797		1982.8	0.01381469		2512.8	-0.00919762
393	0.22475066		922.99	0.00819584		1453	0.00637436		1983	0.01349739		2513	-0.00982165
393.2	0.22400199		923.19	0.00897437		1453.2	0.00570686		1983.2	0.01271178		2513.2	-0.00994145
393.4	0.22403937		923.39	0.01018217		1453.4	0.00563158		1983.4	0.01105072		2513.4	-0.01124223
393.6	0.22356057		923.59	0.01096977		1453.6	0.00474564		1983.6	0.01058163		2513.6	-0.01087915
393.8	0.2237332		923.79	0.01150476		1453.8	0.00440005		1983.8	0.00940349		2513.8	-0.01117758
394	0.22450505		923.99	0.01187962		1454	0.00374019		1984	0.00919238		2514	-0.01251235
394.2	0.22418753		924.19	0.01147913		1454.2	0.00286667		1984.2	0.00928066		2514.2	-0.01282385
394.4	0.22391406		924.39	0.01125012		1454.4	0.0027892		1984.4	0.00914296		2514.4	-0.01303187
394.6	0.22324576		924.59	0.01140414		1454.6	0.00320171		1984.6	0.00999008		2514.6	-0.01244831
394.8	0.22217543		924.79	0.01008048		1454.8	0.00389904		1984.8	0.01005882		2514.8	-0.01165196
395	0.22250943		924.99	0.00949748		1455	0.00431054		1985	0.01048411		2515	-0.01131886
395.2	0.2216051		925.19	0.00920087		1455.2	0.00412694		1985.2	0.01160628		2515.2	-0.01039652
395.4	0.22042902		925.39	0.0083517		1455.4	0.00425811		1985.4	0.01134503		2515.4	-0.01016356
395.6	0.220233		925.59	0.00759502		1455.6	0.00487385		1985.6	0.01136534		2515.6	-0.01045953
395.8	0.21864362		925.79	0.00730213		1455.8	0.00624098		1985.8	0.01167853		2515.8	-0.01069766
396	0.21890165		925.99	0.00829464		1456	0.00669851		1986	0.01160874		2516	-0.00938525
396.2	0.21844027		926.19	0.00841793		1456.2	0.00672107		1986.2	0.01094155		2516.2	-0.00897679
396.4	0.21818427		926.39	0.00834277		1456.4	0.00642739		1986.4	0.01080488		2516.4	-0.00866456
396.6	0.2180886		926.59	0.00852672		1456.6	0.00604749		1986.6	0.01008029		2516.6	-0.00858302
396.8	0.21784441		926.79	0.00955563		1456.8	0.00576937		1986.8	0.01008714		2516.8	-0.00854587
397	0.21781285		926.99	0.01037389		1457	0.0050648		1987	0.00951263		2517	-0.00896359
397.2	0.217947		927.19	0.01086926		1457.2	0.00442022		1987.2	0.00860478		2517.2	-0.00884859
397.4	0.21860596		927.39	0.01103254		1457.4	0.00422272		1987.4	0.00811182		2517.4	-0.01044108
397.6	0.21965058		927.59	0.01091242		1457.6	0.00317306		1987.6	0.00809262		2517.6	-0.01095715
397.8	0.22006287		927.79	0.0111752		1457.8	0.0033572		1987.8	0.00818374		2517.8	-0.01273639
398	0.22071379		927.99	0.01141923		1458	0.00324606		1988	0.00806018		2518	-0.01443782
398.2	0.22139442		928.19	0.01096992		1458.2	0.0031021		1988.2	0.00905138		2518.2	-0.01392967
398.4	0.22209163		928.39	0.01103621		1458.4	0.00301815		1988.4	0.00993342		2518.4	-0.01490744
398.6	0.22250722		928.59	0.01092884		1458.6	0.00397026		1988.6	0.01027902		2518.6	-0.01502481
398.8	0.22186885		928.79	0.00901204		1458.8	0.00471975		1988.8	0.0107983		2518.8	-0.01587212
399	0.22192202		928.99	0.00901489		1459	0.0052732		1989	0.0117096		2519	-0.01546015
399.2	0.22097531		929.19	0.00801854		1459.2	0.00573033		1989.2	0.01281608		2519.2	-0.01558222
399.4	0.22020851		929.39	0.00661705		1459.4	0.00694993		1989.4	0.01228937		2519.4	-0.01527973
399.6	0.22031224		929.59	0.0067917		1459.6	0.00835646		1989.6	0.01246003		2519.6	-0.01504894
399.8	0.2194992		929.79	0.00691198		1459.8	0.00942282		1989.8	0.01237945		2519.8	-0.01424655
400	0.21878629		929.99	0.00742422		1460	0.00951591		1990	0.01178748		2520	-0.01238292
400.2	0.21845897		930.19	0.00699277		1460.2	0.00866031		1990.2	0.01114879		2520.2	-0.01211195
400.4	0.21767013		930.39	0.00750859		1460.4	0.00771994		1990.4	0.01093378		2520.4	-0.01268661
400.6	0.21750921		930.59	0.00781251		1460.6	0.00665329		1990.6	0.01068177		2520.6	-0.01218011
400.8	0.21662134		930.79	0.00852141		1460.8	0.00543593		1990.8	0.00995418		2520.8	-0.01142921
401	0.2165174		930.99	0.00820297		1461	0.00386243		1991	0.00871184		2521	-0.01102826
401.2	0.21680428		931.19	0.00829817		1461.2	0.00290771		1991.2	0.00781664		2521.2	-0.0115036
401.4	0.21710849		931.39	0.0080977		1461.4	0.00216489		1991.4	0.00700485		2521.4	-0.01287762
401.6	0.21761061		931.59	0.00887308		1461.6	0.00070598		1991.6	0.00582868		2521.6	-0.01360699
401.8	0.21687604		931.79	0.00910716		1461.8	0.00048005		1991.8	0.0054449		2521.8	-0.01411544
402	0.21669057		931.99	0.00953556		1462	-0.00004532		1992	0.0051996		2522	-0.01322951
402.2	0.21743786		932.19	0.00967411		1462.2	-0.00059842		1992.2	0.00547806		2522.2	-0.01246411
402.4	0.21806051		932.39	0.00992231		1462.4	-0.00082306		1992.4	0.00540484		2522.4	-0.01382011
402.6	0.21761887		932.59	0.00960567		1462.6	-0.00014272		1992.6	0.00552619		2522.6	-0.01427805
402.8	0.21683853		932.79	0.00917403		1462.8	-0.00004339		1992.8	0.00708032		2522.8	-0.01465912
403	0.21681726		932.99	0.00880817		1463	0.00078405		1993	0.00828478		2523	-0.01350685
403.2	0.21593393		933.19	0.00771929		1463.2	0.00166171		1993.2	0.00915865		2523.2	-0.01362275
403.4	0.2145814		933.39	0.00731834		1463.4	0.00247609		1993.4	0.01043133		2523.4	-0.01301945
403.6	0.21404886		933.59	0.00665275		1463.6	0.00238969		1993.6	0.01139841		2523.6	-0.01299888
403.8	0.21314533		933.79	0.00538331		1463.8	0.00288117		1993.8	0.01191323		2523.8	-0.01258118
404	0.21224971		933.99	0.00487249		1464	0.00310154		1994	0.01229725		2524	-0.0119182
404.2	0.21268347		934.19	0.00506604		1464.2	0.00211736		1994.2	0.01296662		2524.2	-0.01155906
404.4	0.21271534		934.39	0.0045959		1464.4	0.0026255		1994.4	0.01341824		2524.4	-0.01131013
404.6	0.2132881		934.59	0.00438102		1464.6	0.00217853		1994.6	0.01293561		2524.6	-0.0110205
404.8	0.21370059		934.79	0.00496419		1464.8	0.00159148		1994.8	0.01145142		2524.8	-0.01154572
405	0.21534041		934.99	0.00517255		1465	0.00146494		1995	0.01001821		2525	-0.01269475
405.2	0.21621597		935.19	0.00618459		1465.2	0.00084351		1995.2	0.00904366		2525.2	-0.01335314
405.4	0.21640539		935.39	0.00639077		1465.4	0.00086148		1995.4	0.00793162		2525.4	-0.01415495
405.6	0.21640371		935.59	0.00707526		1465.6	0.00026294		1995.6	0.00661627		2525.6	-0.01443515
405.8	0.2168417		935.79	0.00681461		1465.8	0.00026423		1995.8	0.0060803		2525.8	-0.01460217
406	0.21697963		935.99	0.00761867		1466	-0.00021374		1996	0.00572968		2526	-0.01451096
406.2	0.21734063		936.19	0.00799369		1466.2	-0.00097142		1996.2	0.00532661		2526.2	-0.01512535
406.4	0.21789873		936.39	0.00774812		1466.4	-0.00142017		1996.4	0.00526257		2526.4	-0.01528167
406.6	0.2165899		936.59	0.00783783		1466.6	-0.00171931		1996.6	0.00621157		2526.6	-0.01543487
406.8	0.21625072		936.79	0.00725217		1466.8	-0.0015792		1996.8	0.00735794		2526.8	-0.01510865
407	0.21518011		936.99	0.00611282		1467	-0.00116429		1997	0.00834135		2527	-0.01437263
407.2	0.21364574		937.19	0.00533381		1467.2	-0.00041481		1997.2	0.00946624		2527.2	-0.01409344
407.4	0.21255774		937.39	0.00450438		1467.4	0.00056799		1997.4	0.00995455		2527.4	-0.01423023
407.6	0.21242811		937.59	0.00351228		1467.6	0.00068625		1997.6	0.00995571		2527.6	-0.0140055
407.8	0.21176074		937.79	0.0027777		1467.8	0.00112905		1997.8	0.01035486		2527.8	-0.01304504
408	0.21177313		937.99	0.00300039		1468	0.0016675		1998	0.01041242		2528	-0.01192357
408.2	0.21207225		938.19	0.0031779		1468.2	0.0012944		1998.2	0.01118949		2528.2	-0.0120609
408.4	0.21204783		938.39	0.0036552		1468.4	0.00133013		1998.4	0.01034849		2528.4	-0.0123087
408.6	0.21239234		938.59	0.00520758		1468.6	0.00071717		1998.6	0.00926867		2528.6	-0.01267476
408.8	0.21268928		938.79	0.0058407		1468.8	0.0009672		1998.8	0.00760386		2528.8	-0.01269061
409	0.21298428		938.99	0.006777		1469	0.00114632		1999	0.00641349		2529	-0.01335385
409.2	0.21369322		939.19	0.00743896		1469.2	0.00094233		1999.2	0.0060141		2529.2	-0.01296848
409.4	0.21428794		939.39	0.0076827		1469.4	0.00159949		1999.4	0.00562612		2529.4	-0.01306967
409.6	0.21521975		939.59	0.00789531		1469.6	0.00142729		1999.6	0.00548751		2529.6	-0.01413801
409.8	0.21532238		939.79	0.00897123		1469.8	0.00090607		1999.8	0.00629956		2529.8	-0.0143875
410	0.21407697		939.99	0.00918147		1470	0.00034175		2000	0.0076482		2530	-0.01428516
410.2	0.21333589		940.19	0.0091164		1470.2	-0.00020121		2000.2	0.00745474		2530.2	-0.01424647
410.4	0.21301569		940.39	0.00883093		1470.4	-0.00008409		2000.4	0.00791632		2530.4	-0.01364759
410.6	0.21227828		940.59	0.00799169		1470.6	0.00035149		2000.6	0.00931764		2530.6	-0.01376131
410.8	0.21128937		940.79	0.00679782		1470.8	0.00126597		2000.8	0.01023695		2530.8	-0.01337381
411	0.21036829		940.99	0.0063796		1471	0.00212446		2001	0.01092783		2531	-0.01272587
411.2	0.20956722		941.19	0.00591806		1471.2	0.00292351		2001.2	0.01104339		2531.2	-0.01249872
411.4	0.20909518		941.39	0.00493316		1471.4	0.00378671		2001.4	0.0110495		2531.4	-0.01247123
411.6	0.20878864		941.59	0.00417337		1471.6	0.00290597		2001.6	0.01122915		2531.6	-0.01244979
411.8	0.20880894		941.79	0.00357282		1471.8	0.00282666		2001.8	0.01093764		2531.8	-0.01284344
412	0.20911935		941.99	0.003746		1472	0.00286811		2002	0.01022105		2532	-0.01243722
412.2	0.20926628		942.19	0.00369816		1472.2	0.00210617		2002.2	0.00956787		2532.2	-0.01276261
412.4	0.20929921		942.39	0.00472039		1472.4	0.00202777		2002.4	0.00831456		2532.4	-0.01334489
412.6	0.21077224		942.59	0.00521051		1472.6	0.00217605		2002.6	0.00767831		2532.6	-0.01355482
412.8	0.21215448		942.79	0.0049731		1472.8	0.00254263		2002.8	0.00629246		2532.8	-0.01456232
413	0.21341645		942.99	0.00542728		1473	0.00199591		2003	0.00555845		2533	-0.01544621
413.2	0.21449783		943.19	0.00672845		1473.2	0.0015373		2003.2	0.00533073		2533.2	-0.01497026
413.4	0.21461581		943.39	0.00765408		1473.4	0.00092925		2003.4	0.00567367		2533.4	-0.01546865
413.6	0.2153027		943.59	0.00861946		1473.6	0.00037173		2003.6	0.00564277		2533.6	-0.01687543
413.8	0.21368141		943.79	0.00887013		1473.8	-0.00026929		2003.8	0.00575907		2533.8	-0.01703412
414	0.21318346		943.99	0.00807165		1474	-0.00098648		2004	0.0062488		2534	-0.01748321
414.2	0.21259569		944.19	0.00834666		1474.2	-0.00124323		2004.2	0.00630119		2534.2	-0.01683701
414.4	0.2113682		944.39	0.00772555		1474.4	-0.00095745		2004.4	0.00683437		2534.4	-0.01631715
414.6	0.21023779		944.59	0.00681632		1474.6	-0.00046478		2004.6	0.0081373		2534.6	-0.0158184
414.8	0.208758		944.79	0.00702272		1474.8	-0.00093239		2004.8	0.00882532		2534.8	-0.01564765
415	0.20805096		944.99	0.00691079		1475	-0.00086538		2005	0.00943094		2535	-0.01478393
415.2	0.20646385		945.19	0.00613107		1475.2	-0.00051413		2005.2	0.01005883		2535.2	-0.01387697
415.4	0.20653687		945.39	0.00526978		1475.4	-0.00012955		2005.4	0.01063571		2535.4	-0.0138965
415.6	0.20607699		945.59	0.0045595		1475.6	-0.00060859		2005.6	0.00987176		2535.6	-0.01365188
415.8	0.20619242		945.79	0.00417118		1475.8	-0.00001966		2005.8	0.00932991		2535.8	-0.01340404
416	0.20611034		945.99	0.00432565		1476	-0.00008199		2006	0.00877937		2536	-0.01332456
416.2	0.20669308		946.19	0.00423233		1476.2	0.00005676		2006.2	0.00780221		2536.2	-0.01329739
416.4	0.20758587		946.39	0.00462583		1476.4	0.00021792		2006.4	0.00777811		2536.4	-0.01427827
416.6	0.2092547		946.59	0.00503955		1476.6	0.00034157		2006.6	0.00743776		2536.6	-0.01405128
416.8	0.20972156		946.79	0.00546511		1476.8	0.00122614		2006.8	0.00670476		2536.8	-0.01423593
417	0.2092294		946.99	0.00614008		1477	0.00123604		2007	0.00605381		2537	-0.01418521
417.2	0.20940628		947.19	0.00734372		1477.2	0.00130364		2007.2	0.00587312		2537.2	-0.01489281
417.4	0.20978447		947.39	0.00681053		1477.4	0.0007351		2007.4	0.00548756		2537.4	-0.01574973
417.6	0.21013403		947.59	0.00684098		1477.6	0.00151421		2007.6	0.00544712		2537.6	-0.01670976
417.8	0.21002266		947.79	0.00661593		1477.8	0.00137686		2007.8	0.00557716		2537.8	-0.01611718
418	0.2109019		947.99	0.00714512		1478	0.00155817		2008	0.00623528		2538	-0.01572759
418.2	0.2101029		948.19	0.00756368		1478.2	0.00233498		2008.2	0.00734332		2538.2	-0.01520768
418.4	0.20914595		948.39	0.00665138		1478.4	0.00313018		2008.4	0.00738668		2538.4	-0.01577233
418.6	0.20929937		948.59	0.00612333		1478.6	0.0033026		2008.6	0.00861096		2538.6	-0.01553006
418.8	0.20878706		948.79	0.00593413		1478.8	0.0033166		2008.8	0.00919443		2538.8	-0.01539828
419	0.20776299		948.99	0.00452137		1479	0.00381645		2009	0.0096932		2539	-0.01405549
419.2	0.20718034		949.19	0.00360781		1479.2	0.00404984		2009.2	0.01020062		2539.2	-0.01341587
419.4	0.20742824		949.39	0.00336705		1479.4	0.00397245		2009.4	0.00993891		2539.4	-0.01365894
419.6	0.20652886		949.59	0.00283458		1479.6	0.00343963		2009.6	0.0092685		2539.6	-0.01292229
419.8	0.20696024		949.79	0.00250155		1479.8	0.0034618		2009.8	0.00912098		2539.8	-0.01343626
420	0.20677372		949.99	0.00254064		1480	0.00297501		2010	0.0089947		2540	-0.01346141
420.2	0.20706695		950.19	0.00230265		1480.2	0.00289855		2010.2	0.00893226		2540.2	-0.01232853
420.4	0.20801095		950.39	0.00282426		1480.4	0.00288331		2010.4	0.00905687		2540.4	-0.01299447
420.6	0.20796594		950.59	0.00371902		1480.6	0.00290881		2010.6	0.0082703		2540.6	-0.01335549
420.8	0.20752716		950.79	0.00424914		1480.8	0.00296028		2010.8	0.00709394		2540.8	-0.01324886
421	0.20757709		950.99	0.0045708		1481	0.00189611		2011	0.00674507		2541	-0.01432207
421.2	0.2082292		951.19	0.00533836		1481.2	0.00142782		2011.2	0.0059692		2541.2	-0.01574669
421.4	0.20869251		951.39	0.00595509		1481.4	0.00101703		2011.4	0.00608757		2541.4	-0.01607126
421.6	0.2088435		951.59	0.00691566		1481.6	0.00060979		2011.6	0.00659494		2541.6	-0.01621597
421.8	0.20857412		951.79	0.00806419		1481.8	0.00078035		2011.8	0.00617917		2541.8	-0.01486947
422	0.20873969		951.99	0.00866371		1482	0.00205287		2012	0.00681452		2542	-0.01548484
422.2	0.20782876		952.19	0.00876733		1482.2	0.00205398		2012.2	0.00699751		2542.2	-0.01574771
422.4	0.20753183		952.39	0.00820996		1482.4	0.00235058		2012.4	0.00700818		2542.4	-0.01535605
422.6	0.20729484		952.59	0.00754459		1482.6	0.00225359		2012.6	0.00803856		2542.6	-0.01460749
422.8	0.20650807		952.79	0.00712113		1482.8	0.00273157		2012.8	0.0081298		2542.8	-0.01446078
423	0.20561996		952.99	0.00658821		1483	0.0022497		2013	0.00863501		2543	-0.01389858
423.2	0.20542516		953.19	0.00649482		1483.2	0.00239922		2013.2	0.00919393		2543.2	-0.0131948
423.4	0.20507538		953.39	0.00600785		1483.4	0.00243508		2013.4	0.00944896		2543.4	-0.01355547
423.6	0.20487043		953.59	0.0051008		1483.6	0.00189515		2013.6	0.0094445		2543.6	-0.01330719
423.8	0.2056569		953.79	0.00398897		1483.8	0.00165333		2013.8	0.00889767		2543.8	-0.01378319
424	0.2053145		953.99	0.00458683		1484	0.00133922		2014	0.00898068		2544	-0.01418984
424.2	0.20537338		954.19	0.00454977		1484.2	0.00099551		2014.2	0.0089249		2544.2	-0.0144109
424.4	0.20628648		954.39	0.00499246		1484.4	0.00095533		2014.4	0.00817145		2544.4	-0.01536329
424.6	0.20599782		954.59	0.00439554		1484.6	-0.00031896		2014.6	0.00763811		2544.6	-0.01609292
424.8	0.20674132		954.79	0.0038758		1484.8	-0.00117304		2014.8	0.00730627		2544.8	-0.01651481
425	0.20675764		954.99	0.00375801		1485	-0.00117488		2015	0.00742234		2545	-0.01775097
425.2	0.206806		955.19	0.00379767		1485.2	-0.00131518		2015.2	0.00714593		2545.2	-0.0188612
425.4	0.20618299		955.39	0.00413119		1485.4	-0.00173424		2015.4	0.00816109		2545.4	-0.01883934
425.6	0.2050074		955.59	0.00387541		1485.6	-0.00283877		2015.6	0.0084651		2545.6	-0.01860547
425.8	0.20470302		955.79	0.00397914		1485.8	-0.00217099		2015.8	0.00841679		2545.8	-0.0179469
426	0.20506428		955.99	0.0028411		1486	-0.00144756		2016	0.00831862		2546	-0.01799247
426.2	0.20477609		956.19	0.00159112		1486.2	-0.00193129		2016.2	0.0080957		2546.2	-0.01636399
426.4	0.20390413		956.39	0.0009869		1486.4	-0.00066563		2016.4	0.00837582		2546.4	-0.01534418
426.6	0.20364242		956.59	0.00016718		1486.6	-0.00003518		2016.6	0.00906797		2546.6	-0.0149838
426.8	0.20370826		956.79	0.00026976		1486.8	0.00076495		2016.8	0.00911927		2546.8	-0.01467111
427	0.2031591		956.99	0.00018672		1487	0.0007903		2017	0.00931716		2547	-0.01448019
427.2	0.20305		957.19	-0.00002257		1487.2	0.00156481		2017.2	0.00918461		2547.2	-0.01413326
427.4	0.20322099		957.39	0.00008642		1487.4	0.00153257		2017.4	0.00862614		2547.4	-0.0150713
427.6	0.20449063		957.59	0.00049848		1487.6	0.00082581		2017.6	0.00787088		2547.6	-0.01499333
427.8	0.20582628		957.79	0.0014864		1487.8	0.00027619		2017.8	0.00686323		2547.8	-0.01519987
428	0.20581514		957.99	0.00325951		1488	-0.00005631		2018	0.00675477		2548	-0.016076
428.2	0.20687167		958.19	0.00310314		1488.2	-0.00074366		2018.2	0.00599767		2548.2	-0.01598135
428.4	0.20763548		958.39	0.00358022		1488.4	-0.00106213		2018.4	0.00507982		2548.4	-0.01699455
428.6	0.20785627		958.59	0.00338718		1488.6	-0.00205194		2018.6	0.00490217		2548.6	-0.01825123
428.8	0.20784898		958.79	0.00395291		1488.8	-0.0015598		2018.8	0.00451002		2548.8	-0.01855338
429	0.20688523		958.99	0.0046339		1489	-0.00095833		2019	0.00445574		2549	-0.01918738
429.2	0.20733377		959.19	0.00466822		1489.2	-0.00204533		2019.2	0.00487617		2549.2	-0.01917278
429.4	0.2067509		959.39	0.00486365		1489.4	-0.00253986		2019.4	0.00566073		2549.4	-0.01907419
429.6	0.20610561		959.59	0.00361389		1489.6	-0.00289766		2019.6	0.00591052		2549.6	-0.01827748
429.8	0.20593253		959.79	0.00250278		1489.8	-0.0026326		2019.8	0.00572998		2549.8	-0.01708551
430	0.20594062		959.99	0.00200755		1490	-0.00228378		2020	0.00623321		2550	-0.01555404
430.2	0.2053075		960.19	0.00048474		1490.2	-0.00220768		2020.2	0.00684943		2550.2	-0.01425485
430.4	0.20402371		960.39	0.00108888		1490.4	-0.00094672		2020.4	0.00709427		2550.4	-0.01369253
430.6	0.20399379		960.59	0.00034076		1490.6	-0.00053926		2020.6	0.00773261		2550.6	-0.01261177
430.8	0.20402825		960.79	-0.00010405		1490.8	-0.00030754		2020.8	0.00809631		2550.8	-0.0119501
431	0.20409232		960.99	0.00026547		1491	-0.00034294		2021	0.00790168		2551	-0.01204331
431.2	0.20458525		961.19	0.00011684		1491.2	-0.00003094		2021.2	0.00806758		2551.2	-0.01132039
431.4	0.20568106		961.39	0.00167252		1491.4	-0.00039809		2021.4	0.00808359		2551.4	-0.01128984
431.6	0.20658204		961.59	0.00176451		1491.6	-0.00056811		2021.6	0.00826224		2551.6	-0.01097548
431.8	0.20711446		961.79	0.00262588		1491.8	-0.00053895		2021.8	0.00768292		2551.8	-0.01178213
432	0.20652447		961.99	0.0032049		1492	-0.00111057		2022	0.00678155		2552	-0.01290275
432.2	0.20633424		962.19	0.00324677		1492.2	-0.00141267		2022.2	0.00535587		2552.2	-0.01393604
432.4	0.20556472		962.39	0.00413669		1492.4	-0.00147298		2022.4	0.00453031		2552.4	-0.01559963
432.6	0.20564403		962.59	0.00502075		1492.6	-0.0011886		2022.6	0.00368264		2552.6	-0.01615392
432.8	0.2053301		962.79	0.00551603		1492.8	-0.0004087		2022.8	0.00300274		2552.8	-0.01646597
433	0.20510672		962.99	0.00535403		1493	-0.00041172		2023	0.00249008		2553	-0.01693939
433.2	0.20459011		963.19	0.00496395		1493.2	-0.00118993		2023.2	0.00254718		2553.2	-0.01714771
433.4	0.20255606		963.39	0.0045676		1493.4	-0.00104144		2023.4	0.00253645		2553.4	-0.01743917
433.6	0.20110843		963.59	0.00356414		1493.6	-0.00081528		2023.6	0.00303407		2553.6	-0.01695614
433.8	0.20034703		963.79	0.00302534		1493.8	-0.00050335		2023.8	0.00301978		2553.8	-0.01620962
434	0.20017658		963.99	0.00258636		1494	0.00004522		2024	0.00363025		2554	-0.0160716
434.2	0.19979125		964.19	0.00052001		1494.2	0.00047694		2024.2	0.00392995		2554.2	-0.01566464
434.4	0.19949649		964.39	0.00098013		1494.4	0.00073535		2024.4	0.00400713		2554.4	-0.01570164
434.6	0.1998292		964.59	-0.00030192		1494.6	0.00122902		2024.6	0.00487243		2554.6	-0.0150022
434.8	0.20040985		964.79	0.00053698		1494.8	0.00105748		2024.8	0.00546862		2554.8	-0.01460348
435	0.20141914		964.99	0.00134454		1495	0.00128756		2025	0.0059911		2555	-0.01494539
435.2	0.20169033		965.19	0.00108612		1495.2	0.0009401		2025.2	0.00660363		2555.2	-0.01453048
435.4	0.20276206		965.39	0.00188897		1495.4	0.0007913		2025.4	0.00700522		2555.4	-0.01520688
435.6	0.20387306		965.59	0.00167988		1495.6	0.00087734		2025.6	0.00666934		2555.6	-0.01614742
435.8	0.20464902		965.79	0.00240479		1495.8	0.00067947		2025.8	0.00647659		2555.8	-0.01687766
436	0.20418753		965.99	0.00239188		1496	0.00004745		2026	0.00573148		2556	-0.0167319
436.2	0.20487888		966.19	0.00282286		1496.2	-0.00022691		2026.2	0.00443352		2556.2	-0.01777322
436.4	0.20537129		966.39	0.00317989		1496.4	-0.00026107		2026.4	0.00427288		2556.4	-0.01792535
436.6	0.2053534		966.59	0.00249711		1496.6	-0.00034917		2026.6	0.0037321		2556.6	-0.01785543
436.8	0.20440509		966.79	0.00209221		1496.8	-0.00064679		2026.8	0.00447475		2556.8	-0.01796695
437	0.20301322		966.99	0.00182495		1497	-0.00117824		2027	0.00470508		2557	-0.01830271
437.2	0.20158957		967.19	0.00151743		1497.2	-0.00157639		2027.2	0.00497063		2557.2	-0.01807263
437.4	0.20018889		967.39	0.00132901		1497.4	-0.00082013		2027.4	0.00560588		2557.4	-0.01731813
437.6	0.19909432		967.59	0.00069673		1497.6	-0.00070494		2027.6	0.00636896		2557.6	-0.01634496
437.8	0.19904443		967.79	-0.00013648		1497.8	-0.00007596		2027.8	0.00704519		2557.8	-0.01558375
438	0.199095		967.99	-0.00039396		1498	-0.00012009		2028	0.00790934		2558	-0.01553188
438.2	0.19854369		968.19	-0.00009388		1498.2	-0.00028354		2028.2	0.00951842		2558.2	-0.01439127
438.4	0.19807286		968.39	0.00051823		1498.4	0.00020594		2028.4	0.00950078		2558.4	-0.01370145
438.6	0.19788656		968.59	0.00048838		1498.6	0.00084453		2028.6	0.01019653		2558.6	-0.01295768
438.8	0.19811149		968.79	0.0013738		1498.8	0.00084782		2028.8	0.01055734		2558.8	-0.01330974
439	0.19838774		968.99	0.00044566		1499	0.00033299		2029	0.01152313		2559	-0.01457077
439.2	0.19941916		969.19	0.00055815		1499.2	-0.00019921		2029.2	0.01167482		2559.2	-0.01483161
439.4	0.20143007		969.39	0.00073788		1499.4	-0.00053345		2029.4	0.01161204		2559.4	-0.01549683
439.6	0.20305351		969.59	0.00184727		1499.6	-0.0006477		2029.6	0.01036029		2559.6	-0.01561946
439.8	0.2038552		969.79	0.00213895		1499.8	-0.00099996		2029.8	0.01009609		2559.8	-0.0160899
440	0.20488355		969.99	0.00241549		1500	-0.00162986		2030	0.00872467		2560	-0.0165216
440.2	0.20548754		970.19	0.00319545		1500.2	-0.00164544		2030.2	0.00720965		2560.2	-0.01804469
440.4	0.2055558		970.39	0.00324532		1500.4	-0.00189881		2030.4	0.00694706		2560.4	-0.01868694
440.6	0.2051993		970.59	0.0032071		1500.6	-0.00181787		2030.6	0.00661794		2560.6	-0.01939771
440.8	0.20411055		970.79	0.00384151		1500.8	-0.00210351		2030.8	0.00674636		2560.8	-0.01956567
441	0.20320027		970.99	0.00331127		1501	-0.00202188		2031	0.0063585		2561	-0.0198671
441.2	0.20262109		971.19	0.00236013		1501.2	-0.00180576		2031.2	0.00561221		2561.2	-0.01930387
441.4	0.20125154		971.39	0.0014887		1501.4	-0.00148754		2031.4	0.00569337		2561.4	-0.01938436
441.6	0.20000934		971.59	0.00148975		1501.6	-0.00103023		2031.6	0.00588774		2561.6	-0.01914503
441.8	0.20016884		971.79	0.00088013		1501.8	-0.00032267		2031.8	0.00655208		2561.8	-0.01880525
442	0.19897261		971.99	0.00127858		1502	0.00035178		2032	0.0065319		2562	-0.01846621
442.2	0.19804288		972.19	0.00126419		1502.2	0.00112093		2032.2	0.00704896		2562.2	-0.01760866
442.4	0.19834469		972.39	0.0006168		1502.4	0.00196027		2032.4	0.0062852		2562.4	-0.01765333
442.6	0.19817145		972.59	0.00024922		1502.6	0.00209243		2032.6	0.00717823		2562.6	-0.01830592
442.8	0.19880146		972.79	-0.0005313		1502.8	0.00217568		2032.8	0.00761073		2562.8	-0.01844131
443	0.19898567		972.99	-0.00027712		1503	0.0009498		2033	0.00797152		2563	-0.01920215
443.2	0.20059508		973.19	-0.00032286		1503.2	0.00062822		2033.2	0.00781063		2563.2	-0.01870565
443.4	0.20135508		973.39	0.00004007		1503.4	0.00041066		2033.4	0.00621376		2563.4	-0.01791499
443.6	0.2025883		973.59	0.00109851		1503.6	-0.00054481		2033.6	0.00535048		2563.6	-0.01788302
443.8	0.20397502		973.79	0.00125797		1503.8	-0.00168219		2033.8	0.00472325		2563.8	-0.01835355
444	0.20458276		973.99	0.00197811		1504	-0.00186985		2034	0.00421849		2564	-0.01824428
444.2	0.20484506		974.19	0.00282916		1504.2	-0.00240196		2034.2	0.00368514		2564.2	-0.01828586
444.4	0.20555743		974.39	0.00306401		1504.4	-0.00303046		2034.4	0.0040385		2564.4	-0.01797173
444.6	0.20473569		974.59	0.00240684		1504.6	-0.00338307		2034.6	0.00398325		2564.6	-0.01724522
444.8	0.203741		974.79	0.00134567		1504.8	-0.00409699		2034.8	0.00433972		2564.8	-0.01713741
445	0.20306864		974.99	0.00004647		1505	-0.00428313		2035	0.00475741		2565	-0.01686242
445.2	0.20239662		975.19	-0.00142754		1505.2	-0.00393934		2035.2	0.0050281		2565.2	-0.01642372
445.4	0.20094971		975.39	-0.00220325		1505.4	-0.00366332		2035.4	0.00601496		2565.4	-0.01492912
445.6	0.19952408		975.59	-0.00184915		1505.6	-0.00283345		2035.6	0.00711224		2565.6	-0.01404844
445.8	0.19873805		975.79	-0.00289684		1505.8	-0.00237319		2035.8	0.00824293		2565.8	-0.01346498
446	0.19746754		975.99	-0.00357913		1506	-0.00162334		2036	0.00845224		2566	-0.01318064
446.2	0.19773062		976.19	-0.00357101		1506.2	-0.00121361		2036.2	0.00835427		2566.2	-0.01314588
446.4	0.19777696		976.39	-0.00398393		1506.4	-0.00050781		2036.4	0.00792744		2566.4	-0.01338038
446.6	0.19766899		976.59	-0.0037878		1506.6	-0.00033283		2036.6	0.00854031		2566.6	-0.01343518
446.8	0.19819178		976.79	-0.00320811		1506.8	-0.00036705		2036.8	0.00807417		2566.8	-0.01455673
447	0.19803094		976.99	-0.00263555		1507	-0.00060445		2037	0.00797756		2567	-0.01589702
447.2	0.19906693		977.19	-0.00249758		1507.2	-0.0000842		2037.2	0.00717539		2567.2	-0.01551034
447.4	0.19917121		977.39	-0.00091206		1507.4	-0.0003787		2037.4	0.00548045		2567.4	-0.01634605
447.6	0.20060364		977.59	-0.00014539		1507.6	-0.00135172		2037.6	0.00485902		2567.6	-0.01719081
447.8	0.20078341		977.79	0.00048258		1507.8	-0.00140814		2037.8	0.00400176		2567.8	-0.01817825
448	0.20024335		977.99	0.00179895		1508	-0.00045533		2038	0.00410774		2568	-0.0191999
448.2	0.19989865		978.19	0.00215917		1508.2	-0.00070295		2038.2	0.00372522		2568.2	-0.01972637
448.4	0.1992688		978.39	0.00143522		1508.4	-0.0010946		2038.4	0.00433681		2568.4	-0.02007788
448.6	0.19751163		978.59	0.00167117		1508.6	-0.00160186		2038.6	0.00440979		2568.6	-0.0198344
448.8	0.1972895		978.79	0.00133229		1508.8	-0.00157865		2038.8	0.00547173		2568.8	-0.02026538
449	0.19624458		978.99	-0.00009817		1509	-0.00144615		2039	0.00601186		2569	-0.01898209
449.2	0.19555819		979.19	-0.0019305		1509.2	-0.00081864		2039.2	0.00705955		2569.2	-0.01825849
449.4	0.19448261		979.39	-0.002866		1509.4	-0.00034251		2039.4	0.00771409		2569.4	-0.01645828
449.6	0.19380681		979.59	-0.00250388		1509.6	0.00046398		2039.6	0.00810345		2569.6	-0.01696309
449.8	0.19419904		979.79	-0.00336358		1509.8	0.00084065		2039.8	0.00824511		2569.8	-0.01676954
450	0.19438417		979.99	-0.00365447		1510	0.00103654		2040	0.00817669		2570	-0.01638754
450.2	0.1956057		980.19	-0.00306578		1510.2	0.00130659		2040.2	0.00766149		2570.2	-0.01623614
450.4	0.19616891		980.39	-0.00295457		1510.4	0.00198773		2040.4	0.00755252		2570.4	-0.01615361
450.6	0.19734067		980.59	-0.00132062		1510.6	0.00131945		2040.6	0.00727799		2570.6	-0.01604608
450.8	0.1984181		980.79	-0.00089731		1510.8	0.00124725		2040.8	0.00729544		2570.8	-0.01724056
451	0.19860432		980.99	-0.00055577		1511	0.00119982		2041	0.00671526		2571	-0.01698795
451.2	0.19983502		981.19	0.00042292		1511.2	0.00091353		2041.2	0.00572886		2571.2	-0.01700364
451.4	0.1998765		981.39	0.00113307		1511.4	0.00024671		2041.4	0.00496519		2571.4	-0.0178461
451.6	0.20017617		981.59	0.00115085		1511.6	0.00042753		2041.6	0.00418628		2571.6	-0.01828293
451.8	0.19934404		981.79	0.00153298		1511.8	0.00001231		2041.8	0.00404391		2571.8	-0.01962095
452	0.1986906		981.99	0.00115823		1512	0.00056255		2042	0.00423502		2572	-0.02048102
452.2	0.19801658		982.19	0.00048197		1512.2	-0.0002191		2042.2	0.00542429		2572.2	-0.02112179
452.4	0.19681151		982.39	-0.00011373		1512.4	-0.00025077		2042.4	0.00656394		2572.4	-0.0208643
452.6	0.19529455		982.59	-0.00121811		1512.6	-0.00059583		2042.6	0.00735268		2572.6	-0.02091691
452.8	0.19491444		982.79	-0.00283042		1512.8	-0.00023094		2042.8	0.00831385		2572.8	-0.02052531
453	0.19381321		982.99	-0.00455801		1513	0.00092382		2043	0.00876684		2573	-0.01975756
453.2	0.19303016		983.19	-0.00530574		1513.2	0.00150522		2043.2	0.00946115		2573.2	-0.01914214
453.4	0.19249683		983.39	-0.00520482		1513.4	0.00182436		2043.4	0.00922642		2573.4	-0.01793951
453.6	0.19254273		983.59	-0.00488213		1513.6	0.00129438		2043.6	0.00915761		2573.6	-0.01781586
453.8	0.1921934		983.79	-0.00496586		1513.8	0.00107053		2043.8	0.00929626		2573.8	-0.01696655
454	0.19214008		983.99	-0.00492607		1514	0.0008822		2044	0.00923866		2574	-0.01644238
454.2	0.19334557		984.19	-0.00457195		1514.2	0.00069505		2044.2	0.0087617		2574.2	-0.01589605
454.4	0.19387189		984.39	-0.00437195		1514.4	0.00060936		2044.4	0.00829941		2574.4	-0.01578511
454.6	0.19474717		984.59	-0.00324913		1514.6	-0.00056002		2044.6	0.00730588		2574.6	-0.01509967
454.8	0.19599638		984.79	-0.00353032		1514.8	-0.00108003		2044.8	0.00677239		2574.8	-0.01535998
455	0.19702724		984.99	-0.00240757		1515	-0.00145618		2045	0.00569407		2575	-0.01519813
455.2	0.19854807		985.19	-0.00190385		1515.2	-0.00241186		2045.2	0.00465765		2575.2	-0.01602126
455.4	0.19936769		985.39	-0.00128635		1515.4	-0.0023652		2045.4	0.00351585		2575.4	-0.01744441
455.6	0.19951705		985.59	-0.00080925		1515.6	-0.00253513		2045.6	0.0027131		2575.6	-0.01828267
455.8	0.19904998		985.79	-0.00074976		1515.8	-0.00255838		2045.8	0.00270353		2575.8	-0.01916185
456	0.19898589		985.99	-0.00145996		1516	-0.00245267		2046	0.00389514		2576	-0.02063905
456.2	0.19808143		986.19	-0.00107026		1516.2	-0.00256873		2046.2	0.00556702		2576.2	-0.02094802
456.4	0.19739517		986.39	-0.00095331		1516.4	-0.00233077		2046.4	0.00618768		2576.4	-0.02102339
456.6	0.1966346		986.59	-0.00188264		1516.6	-0.00321507		2046.6	0.00685397		2576.6	-0.0208855
456.8	0.19609916		986.79	-0.00181372		1516.8	-0.00155056		2046.8	0.00754224		2576.8	-0.02022268
457	0.19458469		986.99	-0.00223816		1517	-0.00022038		2047	0.00854773		2577	-0.02012379
457.2	0.19355589		987.19	-0.00215601		1517.2	-0.00020962		2047.2	0.00940757		2577.2	-0.01930238
457.4	0.19320705		987.39	-0.00212133		1517.4	-0.00009383		2047.4	0.01019809		2577.4	-0.01854145
457.6	0.19281485		987.59	-0.00255876		1517.6	-0.00070761		2047.6	0.01045479		2577.6	-0.01803388
457.8	0.19237575		987.79	-0.0022965		1517.8	-0.00007786		2047.8	0.01108759		2577.8	-0.01749339
458	0.19325922		987.99	-0.00355437		1518	-0.00035857		2048	0.01038218		2578	-0.01705672
458.2	0.19426261		988.19	-0.00256538		1518.2	-0.00104373		2048.2	0.01000784		2578.2	-0.0168556
458.4	0.19475698		988.39	-0.00182121		1518.4	-0.00101099		2048.4	0.00874276		2578.4	-0.01672674
458.6	0.19528795		988.59	-0.00015214		1518.6	-0.00112814		2048.6	0.00764987		2578.6	-0.01634359
458.8	0.19609272		988.79	0.00063467		1518.8	-0.00085549		2048.8	0.00629892		2578.8	-0.01623318
459	0.19718635		988.99	0.00070359		1519	-0.00069469		2049	0.00556877		2579	-0.01670013
459.2	0.19677213		989.19	0.00098083		1519.2	-0.00172067		2049.2	0.00453763		2579.2	-0.01737763
459.4	0.19714067		989.39	0.00135425		1519.4	-0.00144972		2049.4	0.00413507		2579.4	-0.01755789
459.6	0.19623203		989.59	0.00135788		1519.6	-0.00163253		2049.6	0.00395699		2579.6	-0.01733453
459.8	0.19509424		989.79	0.00080037		1519.8	-0.00150114		2049.8	0.00449845		2579.8	-0.01734232
460	0.19548804		989.99	0.00019403		1520	-0.00251064		2050	0.00536949		2580	-0.01787586
460.2	0.19441724		990.19	-0.00020137		1520.2	-0.00277181		2050.2	0.00626381		2580.2	-0.01716269
460.4	0.1941637		990.39	-0.00106853		1520.4	-0.00273809		2050.4	0.00729632		2580.4	-0.01725153
460.6	0.19347146		990.59	-0.00249033		1520.6	-0.00258048		2050.6	0.00817735		2580.6	-0.01712083
460.8	0.19296357		990.79	-0.00318515		1520.8	-0.00111613		2050.8	0.00927037		2580.8	-0.01768951
461	0.19145398		990.99	-0.00398412		1521	-0.00018651		2051	0.01090579		2581	-0.0174256
461.2	0.19167917		991.19	-0.00417144		1521.2	-0.00002192		2051.2	0.01193613		2581.2	-0.01644533
461.4	0.19172246		991.39	-0.00469092		1521.4	0.00021896		2051.4	0.01250022		2581.4	-0.01578661
461.6	0.19225164		991.59	-0.00527775		1521.6	-0.0001998		2051.6	0.01201854		2581.6	-0.01529451
461.8	0.1930333		991.79	-0.00554774		1521.8	-0.00048572		2051.8	0.01086084		2581.8	-0.01551831
462	0.19394343		991.99	-0.00564952		1522	-0.00101984		2052	0.00926593		2582	-0.01583779
462.2	0.19430049		992.19	-0.00400204		1522.2	-0.00072266		2052.2	0.00882123		2582.2	-0.01626164
462.4	0.1948241		992.39	-0.00332066		1522.4	-0.00061364		2052.4	0.00685764		2582.4	-0.01746444
462.6	0.19572685		992.59	-0.00193605		1522.6	-0.00128564		2052.6	0.00568679		2582.6	-0.01855309
462.8	0.19582744		992.79	-0.00166974		1522.8	-0.00218585		2052.8	0.00426496		2582.8	-0.01887702
463	0.19648669		992.99	-0.00195792		1523	-0.00311689		2053	0.00317572		2583	-0.01973053
463.2	0.1970537		993.19	-0.000699		1523.2	-0.0038791		2053.2	0.00222471		2583.2	-0.02016457
463.4	0.1980594		993.39	-0.00011708		1523.4	-0.00423161		2053.4	0.0017688		2583.4	-0.02002574
463.6	0.19775421		993.59	-0.00032259		1523.6	-0.00416754		2053.6	0.0010631		2583.6	-0.01998218
463.8	0.19727112		993.79	-0.0004019		1523.8	-0.00427363		2053.8	0.00154228		2583.8	-0.01976687
464	0.19688821		993.99	-0.000966		1524	-0.00451373		2054	0.00226775		2584	-0.01986254
464.2	0.19551781		994.19	-0.00256601		1524.2	-0.0045219		2054.2	0.00352843		2584.2	-0.0197672
464.4	0.19427772		994.39	-0.00271496		1524.4	-0.00357775		2054.4	0.00477529		2584.4	-0.01911912
464.6	0.19323666		994.59	-0.00333119		1524.6	-0.00366592		2054.6	0.00577818		2584.6	-0.01871627
464.8	0.19254096		994.79	-0.00437959		1524.8	-0.00299923		2054.8	0.00708973		2584.8	-0.01794972
465	0.19098049		994.99	-0.00471665		1525	-0.00224468		2055	0.00796105		2585	-0.0169863
465.2	0.19117431		995.19	-0.00552109		1525.2	-0.00153574		2055.2	0.00800139		2585.2	-0.01623414
465.4	0.19059956		995.39	-0.00602019		1525.4	-0.00107866		2055.4	0.00807215		2585.4	-0.01580631
465.6	0.19033068		995.59	-0.00653264		1525.6	-0.00073581		2055.6	0.00775747		2585.6	-0.01559832
465.8	0.19064622		995.79	-0.00660434		1525.8	-0.00016985		2055.8	0.00668625		2585.8	-0.01553667
466	0.19030406		995.99	-0.00637942		1526	0.00039721		2056	0.00664456		2586	-0.01564914
466.2	0.19164075		996.19	-0.00557731		1526.2	0.00008491		2056.2	0.00674111		2586.2	-0.01713688
466.4	0.19234404		996.39	-0.00407189		1526.4	-0.00089916		2056.4	0.0047937		2586.4	-0.01912696
466.6	0.19237744		996.59	-0.00246896		1526.6	-0.00148465		2056.6	0.00408704		2586.6	-0.02010361
466.8	0.19228839		996.79	-0.00255816		1526.8	-0.00230277		2056.8	0.00276983		2586.8	-0.02072392
467	0.19237		996.99	-0.00178129		1527	-0.00248933		2057	0.00193916		2587	-0.02106222
467.2	0.19340798		997.19	-0.0010529		1527.2	-0.0031149		2057.2	0.00119826		2587.2	-0.02171403
467.4	0.19274152		997.39	-0.00082317		1527.4	-0.00300228		2057.4	0.00183291		2587.4	-0.02220285
467.6	0.19195736		997.59	-0.00050341		1527.6	-0.00309475		2057.6	0.0016606		2587.6	-0.02270697
467.8	0.19134317		997.79	0.00048733		1527.8	-0.00334344		2057.8	0.00228654		2587.8	-0.02359941
468	0.19093342		997.99	0.00049385		1528	-0.00362878		2058	0.00355197		2588	-0.02339772
468.2	0.18989305		998.19	-0.00019405		1528.2	-0.00388448		2058.2	0.00442168		2588.2	-0.02260914
468.4	0.18973271		998.39	0.00036862		1528.4	-0.00390164		2058.4	0.00510016		2588.4	-0.02177112
468.6	0.18934901		998.59	-0.00028611		1528.6	-0.00490691		2058.6	0.0058954		2588.6	-0.02137155
468.8	0.18976872		998.79	-0.0005189		1528.8	-0.00460093		2058.8	0.00659493		2588.8	-0.02123251
469	0.18967182		998.99	-0.00042239		1529	-0.00377172		2059	0.00638377		2589	-0.02007162
469.2	0.19028665		999.19	-0.00125426		1529.2	-0.0031531		2059.2	0.00644587		2589.2	-0.01957117
469.4	0.19007559		999.39	-0.00101056		1529.4	-0.00293875		2059.4	0.00659017		2589.4	-0.01876547
469.6	0.19069594		999.59	-0.0018997		1529.6	-0.00282634		2059.6	0.00588611		2589.6	-0.01831533
469.8	0.19194217		999.79	-0.0016719		1529.8	-0.00229225		2059.8	0.00532351		2589.8	-0.01804296
470	0.19319387		999.99	-0.00135832		1530	-0.00277346		2060	0.00483248		2590	-0.01824822
470.2	0.19551138		1000.19	-0.00085301		1530.2	-0.00350099		2060.2	0.00450712		2590.2	-0.01942615
470.4	0.1950878		1000.39	-0.00045533		1530.4	-0.00386442		2060.4	0.00353269		2590.4	-0.0196312
470.6	0.19545023		1000.59	-0.00102435		1530.6	-0.0039883		2060.6	0.00327612		2590.6	-0.02001194
470.8	0.19541155		1000.79	-0.0016751		1530.8	-0.00451191		2060.8	0.00296683		2590.8	-0.02072463
471	0.19539053		1000.99	-0.0020233		1531	-0.00449867		2061	0.00309707		2591	-0.02060225
471.2	0.19579383		1001.19	-0.00218411		1531.2	-0.0045934		2061.2	0.00248646		2591.2	-0.02138462
471.4	0.19508718		1001.39	-0.002241		1531.4	-0.00394883		2061.4	0.00286483		2591.4	-0.02154446
471.6	0.19461688		1001.59	-0.00137728		1531.6	-0.0045486		2061.6	0.00242883		2591.6	-0.02150783
471.8	0.1938027		1001.79	-0.00125607		1531.8	-0.00423974		2061.8	0.00255496		2591.8	-0.02168955
472	0.19306628		1001.99	-0.00187001		1532	-0.00475962		2062	0.00345136		2592	-0.02129969
472.2	0.19193003		1002.19	-0.0022168		1532.2	-0.00491346		2062.2	0.00338888		2592.2	-0.02074948
472.4	0.19143837		1002.39	-0.00262804		1532.4	-0.00468891		2062.4	0.00330979		2592.4	-0.02098172
472.6	0.19039242		1002.59	-0.00320969		1532.6	-0.00410331		2062.6	0.00358162		2592.6	-0.02088264
472.8	0.19145598		1002.79	-0.00390126		1532.8	-0.0036818		2062.8	0.00460695		2592.8	-0.02037942
473	0.19116248		1002.99	-0.00430626		1533	-0.00267518		2063	0.00528598		2593	-0.02028628
473.2	0.1911064		1003.19	-0.00471618		1533.2	-0.00286663		2063.2	0.00554773		2593.2	-0.0208434
473.4	0.19116461		1003.39	-0.00415583		1533.4	-0.00295015		2063.4	0.00613997		2593.4	-0.02107542
473.6	0.19115809		1003.59	-0.00494217		1533.6	-0.00224962		2063.6	0.00617465		2593.6	-0.02184004
473.8	0.19183062		1003.79	-0.00425421		1533.8	-0.00197221		2063.8	0.00654323		2593.8	-0.02223783
474	0.19266359		1003.99	-0.00374469		1534	-0.00185038		2064	0.00710829		2594	-0.02228719
474.2	0.19330228		1004.19	-0.00382332		1534.2	-0.00259968		2064.2	0.00684024		2594.2	-0.02289917
474.4	0.19300208		1004.39	-0.00366179		1534.4	-0.00298264		2064.4	0.00687282		2594.4	-0.02295589
474.6	0.19345102		1004.59	-0.00355422		1534.6	-0.00234108		2064.6	0.00685557		2594.6	-0.02298055
474.8	0.19279332		1004.79	-0.00237964		1534.8	-0.00242203		2064.8	0.00625406		2594.8	-0.02307495
475	0.19328231		1004.99	-0.00285394		1535	-0.00271055		2065	0.00500741		2595	-0.02276222
475.2	0.1924508		1005.19	-0.00202031		1535.2	-0.00295936		2065.2	0.00403945		2595.2	-0.02260609
475.4	0.19180962		1005.39	-0.0020149		1535.4	-0.00327882		2065.4	0.00394962		2595.4	-0.02165249
475.6	0.19103283		1005.59	-0.00184343		1535.6	-0.00330488		2065.6	0.0033298		2595.6	-0.02104309
475.8	0.18990598		1005.79	-0.00219906		1535.8	-0.00360062		2065.8	0.00327268		2595.8	-0.02009638
476	0.18940177		1005.99	-0.00182733		1536	-0.00356371		2066	0.00377573		2596	-0.01908566
476.2	0.18836747		1006.19	-0.00237685		1536.2	-0.00321775		2066.2	0.00348878		2596.2	-0.0175026
476.4	0.18797162		1006.39	-0.00379631		1536.4	-0.00196648		2066.4	0.00401479		2596.4	-0.01726366
476.6	0.18827047		1006.59	-0.00511543		1536.6	-0.00161876		2066.6	0.00428463		2596.6	-0.01673172
476.8	0.18882672		1006.79	-0.00599528		1536.8	-0.00147163		2066.8	0.00546245		2596.8	-0.01581356
477	0.1890026		1006.99	-0.00599259		1537	-0.00093715		2067	0.00612663		2597	-0.01562219
477.2	0.19029585		1007.19	-0.00636039		1537.2	-0.00186312		2067.2	0.00665222		2597.2	-0.0153397
477.4	0.19104964		1007.39	-0.00619085		1537.4	-0.0022372		2067.4	0.0082391		2597.4	-0.01573489
477.6	0.19165476		1007.59	-0.00687059		1537.6	-0.00199042		2067.6	0.00891069		2597.6	-0.01660031
477.8	0.19262282		1007.79	-0.00628546		1537.8	-0.00312465		2067.8	0.00918055		2597.8	-0.01657532
478	0.1937854		1007.99	-0.00506045		1538	-0.00339543		2068	0.00938001		2598	-0.01707498
478.2	0.19419693		1008.19	-0.00496677		1538.2	-0.00480684		2068.2	0.00838241		2598.2	-0.01840876
478.4	0.19454761		1008.39	-0.00484063		1538.4	-0.00543482		2068.4	0.00834606		2598.4	-0.01967153
478.6	0.19439032		1008.59	-0.00425765		1538.6	-0.00538618		2068.6	0.00762608		2598.6	-0.0205982
478.8	0.19352617		1008.79	-0.00326923		1538.8	-0.00542138		2068.8	0.00626408		2598.8	-0.0216037
479	0.19299503		1008.99	-0.00348604		1539	-0.00570566		2069	0.0049679		2599	-0.02241883
479.2	0.19225162		1009.19	-0.00276097		1539.2	-0.0052921		2069.2	0.00461236		2599.2	-0.02282857
479.4	0.19166198		1009.39	-0.00248473		1539.4	-0.0051576		2069.4	0.00422681		2599.4	-0.02168389
479.6	0.19155136		1009.59	-0.00228487		1539.6	-0.00451919		2069.6	0.00416913		2599.6	-0.02158938
479.8	0.19072723		1009.79	-0.0021804		1539.8	-0.00376446		2069.8	0.00397767		2599.8	-0.02062475
480	0.19049119		1009.99	-0.00273623		1540	-0.00315595		2070	0.00438218		2600	-0.02027011
480.2	0.18957257		1010.19	-0.00486568		1540.2	-0.00280067		2070.2	0.00379215		2600.2	-0.01988352
480.4	0.18937883		1010.39	-0.00615633		1540.4	-0.00251357		2070.4	0.00389094		2600.4	-0.01975139
480.6	0.18973353		1010.59	-0.00689395		1540.6	-0.00232906		2070.6	0.00337318		2600.6	-0.01923463
480.8	0.19047524		1010.79	-0.00746251		1540.8	-0.00223805		2070.8	0.00359033		2600.8	-0.01791949
481	0.1917037		1010.99	-0.00720362		1541	-0.00274117		2071	0.0035029		2601	-0.01759746
481.2	0.19213803		1011.19	-0.00780361		1541.2	-0.00325824		2071.2	0.00370576		2601.2	-0.01794318
481.4	0.19223684		1011.39	-0.00766238		1541.4	-0.00348449		2071.4	0.00409028		2601.4	-0.01830194
481.6	0.19255034		1011.59	-0.00733326		1541.6	-0.00471179		2071.6	0.00388348		2601.6	-0.01879055
481.8	0.19280037		1011.79	-0.00671623		1541.8	-0.00614514		2071.8	0.00317147		2601.8	-0.0196033
482	0.1935003		1011.99	-0.00625983		1542	-0.00646943		2072	0.00298969		2602	-0.02023239
482.2	0.19301143		1012.19	-0.00664998		1542.2	-0.00703924		2072.2	0.00305752		2602.2	-0.02097883
482.4	0.19261216		1012.39	-0.00608492		1542.4	-0.00722233		2072.4	0.00279714		2602.4	-0.02175967
482.6	0.19171425		1012.59	-0.00521131		1542.6	-0.00705341		2072.6	0.00170839		2602.6	-0.02165139
482.8	0.19093116		1012.79	-0.00435998		1542.8	-0.0067211		2072.8	0.00124284		2602.8	-0.02148404
483	0.19011739		1012.99	-0.0044236		1543	-0.00667487		2073	0.00164974		2603	-0.020752
483.2	0.19002943		1013.19	-0.00473048		1543.2	-0.00598969		2073.2	0.00218636		2603.2	-0.0197532
483.4	0.18983025		1013.39	-0.00403685		1543.4	-0.00647912		2073.4	0.00324669		2603.4	-0.01861198
483.6	0.18973135		1013.59	-0.0038907		1543.6	-0.0060749		2073.6	0.00416607		2603.6	-0.01853176
483.8	0.18869642		1013.79	-0.00425068		1543.8	-0.00608111		2073.8	0.00465909		2603.8	-0.01754883
484	0.18758568		1013.99	-0.00466279		1544	-0.00657871		2074	0.00535953		2604	-0.01721824
484.2	0.18702931		1014.19	-0.00477903		1544.2	-0.00716878		2074.2	0.00563073		2604.2	-0.01665488
484.4	0.18718497		1014.39	-0.00461521		1544.4	-0.00674444		2074.4	0.00644032		2604.4	-0.01654822
484.6	0.18821315		1014.59	-0.00433065		1544.6	-0.00615382		2074.6	0.00734287		2604.6	-0.01705458
484.8	0.18881567		1014.79	-0.00442114		1544.8	-0.00569842		2074.8	0.00773382		2604.8	-0.01709145
485	0.18833664		1014.99	-0.00396391		1545	-0.00534859		2075	0.00776746		2605	-0.0176192
485.2	0.18763018		1015.19	-0.00445449		1545.2	-0.00519371		2075.2	0.00727158		2605.2	-0.01806694
485.4	0.18807315		1015.39	-0.0033132		1545.4	-0.00494204		2075.4	0.00693685		2605.4	-0.01903738
485.6	0.18797418		1015.59	-0.00260919		1545.6	-0.00569979		2075.6	0.0063039		2605.6	-0.0202834
485.8	0.18802618		1015.79	-0.00254504		1545.8	-0.00558051		2075.8	0.00550652		2605.8	-0.02168496
486	0.18825813		1015.99	-0.00184657		1546	-0.00532296		2076	0.00478284		2606	-0.02206267
486.2	0.18850681		1016.19	-0.00145094		1546.2	-0.00542697		2076.2	0.00427531		2606.2	-0.02356897
486.4	0.18818888		1016.39	-0.00109958		1546.4	-0.00581783		2076.4	0.0029886		2606.4	-0.02428363
486.6	0.18793531		1016.59	-0.00112657		1546.6	-0.00611645		2076.6	0.00219637		2606.6	-0.02448899
486.8	0.18845016		1016.79	-0.00194014		1546.8	-0.00621945		2076.8	0.0017777		2606.8	-0.0245401
487	0.18828306		1016.99	-0.0030404		1547	-0.00609967		2077	0.00234482		2607	-0.024153
487.2	0.18838		1017.19	-0.0038213		1547.2	-0.00598681		2077.2	0.00284766		2607.2	-0.02406242
487.4	0.18755659		1017.39	-0.00370696		1547.4	-0.00632114		2077.4	0.00296368		2607.4	-0.02449877
487.6	0.18645705		1017.59	-0.00487724		1547.6	-0.00613983		2077.6	0.00259283		2607.6	-0.02450874
487.8	0.18469349		1017.79	-0.00527873		1547.8	-0.00632379		2077.8	0.00325123		2607.8	-0.02355878
488	0.18390579		1017.99	-0.00497435		1548	-0.00577715		2078	0.00367418		2608	-0.02306878
488.2	0.18467525		1018.19	-0.0054683		1548.2	-0.00572531		2078.2	0.00519866		2608.2	-0.0225364
488.4	0.18515361		1018.39	-0.00558325		1548.4	-0.00486931		2078.4	0.00604651		2608.4	-0.02194005
488.6	0.18575845		1018.59	-0.00533281		1548.6	-0.0050037		2078.6	0.0066729		2608.6	-0.02123761
488.8	0.18580565		1018.79	-0.00499498		1548.8	-0.00494496		2078.8	0.00690519		2608.8	-0.02037272
489	0.18550798		1018.99	-0.00501687		1549	-0.00471627		2079	0.00680343		2609	-0.01896652
489.2	0.1857642		1019.19	-0.00436126		1549.2	-0.00439629		2079.2	0.0061699		2609.2	-0.01833484
489.4	0.18661656		1019.39	-0.00306415		1549.4	-0.00407069		2079.4	0.00564736		2609.4	-0.0185729
489.6	0.18635236		1019.59	-0.00265028		1549.6	-0.0051813		2079.6	0.00462605		2609.6	-0.01883035
489.8	0.18719818		1019.79	-0.00231675		1549.8	-0.00585926		2079.8	0.00390896		2609.8	-0.01890849
490	0.18812703		1019.99	-0.00115928		1550	-0.00627136		2080	0.00315481		2610	-0.01942822
490.2	0.18842132		1020.19	-0.0011324		1550.2	-0.00705404		2080.2	0.00240647		2610.2	-0.01982381
490.4	0.18761828		1020.39	-0.00053406		1550.4	-0.007501		2080.4	0.00221232		2610.4	-0.02002218
490.6	0.18756182		1020.59	-0.00103985		1550.6	-0.00764538		2080.6	0.00210019		2610.6	-0.02075087
490.8	0.18807057		1020.79	-0.00184632		1550.8	-0.0072852		2080.8	0.00224238		2610.8	-0.02092762
491	0.18735913		1020.99	-0.0019564		1551	-0.00682584		2081	0.00308047		2611	-0.02096778
491.2	0.18644471		1021.19	-0.0032551		1551.2	-0.00563039		2081.2	0.00398135		2611.2	-0.0208658
491.4	0.18581971		1021.39	-0.00344519		1551.4	-0.0051408		2081.4	0.0037671		2611.4	-0.02125539
491.6	0.1846551		1021.59	-0.00468095		1551.6	-0.00411878		2081.6	0.00419272		2611.6	-0.01962626
491.8	0.18334402		1021.79	-0.00421321		1551.8	-0.00312117		2081.8	0.00535273		2611.8	-0.01836403
492	0.18409411		1021.99	-0.00507355		1552	-0.00255243		2082	0.0055742		2612	-0.01805569
492.2	0.1839517		1022.19	-0.00584684		1552.2	-0.00286645		2082.2	0.00636455		2612.2	-0.01807386
492.4	0.18420928		1022.39	-0.00510556		1552.4	-0.00222819		2082.4	0.00592033		2612.4	-0.01697523
492.6	0.18452331		1022.59	-0.00510008		1552.6	-0.00211262		2082.6	0.00528168		2612.6	-0.01742979
492.8	0.18555212		1022.79	-0.00603506		1552.8	-0.00215705		2082.8	0.00504947		2612.8	-0.01783635
493	0.18583703		1022.99	-0.00703243		1553	-0.00266098		2083	0.00443842		2613	-0.01836459
493.2	0.18670743		1023.19	-0.00650802		1553.2	-0.00328494		2083.2	0.00411516		2613.2	-0.01980416
493.4	0.18766637		1023.39	-0.00624224		1553.4	-0.00423091		2083.4	0.0026864		2613.4	-0.02044344
493.6	0.18842126		1023.59	-0.00518826		1553.6	-0.00553781		2083.6	0.00185876		2613.6	-0.02125364
493.8	0.18881209		1023.79	-0.00509991		1553.8	-0.0057628		2083.8	0.00112182		2613.8	-0.0227276
494	0.18885544		1023.99	-0.00517799		1554	-0.00613898		2084	0.00010468		2614	-0.02414051
494.2	0.18863015		1024.19	-0.00478755		1554.2	-0.00676259		2084.2	-0.00043092		2614.2	-0.02522426
494.4	0.18748571		1024.39	-0.00507697		1554.4	-0.00618422		2084.4	0.00004569		2614.4	-0.02674412
494.6	0.18678875		1024.59	-0.00517355		1554.6	-0.0059739		2084.6	0.00023405		2614.6	-0.0272735
494.8	0.18557634		1024.79	-0.00421909		1554.8	-0.00515355		2084.8	0.00072541		2614.8	-0.02670177
495	0.18455313		1024.99	-0.004724		1555	-0.004639		2085	0.00187371		2615	-0.02601332
495.2	0.18339429		1025.19	-0.00547992		1555.2	-0.00388566		2085.2	0.00316257		2615.2	-0.0246926
495.4	0.18329264		1025.39	-0.0057512		1555.4	-0.00397483		2085.4	0.00375577		2615.4	-0.02378353
495.6	0.18254921		1025.59	-0.00666489		1555.6	-0.00274323		2085.6	0.00472916		2615.6	-0.02223193
495.8	0.18208385		1025.79	-0.00687825		1555.8	-0.00251175		2085.8	0.0061184		2615.8	-0.02211216
496	0.18270695		1025.99	-0.00772065		1556	-0.00208487		2086	0.00640771		2616	-0.02194283
496.2	0.18246267		1026.19	-0.00758168		1556.2	-0.00201808		2086.2	0.00705123		2616.2	-0.02155506
496.4	0.18309792		1026.39	-0.0070387		1556.4	-0.00060312		2086.4	0.00668513		2616.4	-0.02024805
496.6	0.18430843		1026.59	-0.00767012		1556.6	-0.00133456		2086.6	0.00554882		2616.6	-0.02104107
496.8	0.18640667		1026.79	-0.00813019		1556.8	-0.00215753		2086.8	0.00527768		2616.8	-0.02126896
497	0.18736665		1026.99	-0.00743242		1557	-0.00324797		2087	0.00518314		2617	-0.0220637
497.2	0.18866679		1027.19	-0.00577529		1557.2	-0.00333718		2087.2	0.00474307		2617.2	-0.0225607
497.4	0.1890304		1027.39	-0.00463854		1557.4	-0.00380357		2087.4	0.00362849		2617.4	-0.02237298
497.6	0.18920224		1027.59	-0.00330944		1557.6	-0.00531803		2087.6	0.00346114		2617.6	-0.02246249
497.8	0.19009554		1027.79	-0.00287344		1557.8	-0.00543146		2087.8	0.0025448		2617.8	-0.02299683
498	0.19072204		1027.99	-0.00190676		1558	-0.00641271		2088	0.00211257		2618	-0.0230472
498.2	0.19064426		1028.19	-0.00096393		1558.2	-0.00682481		2088.2	0.00259284		2618.2	-0.02383461
498.4	0.1895805		1028.39	-0.00048486		1558.4	-0.00741916		2088.4	0.00174817		2618.4	-0.0234926
498.6	0.18849731		1028.59	0.00062393		1558.6	-0.00806389		2088.6	0.00190792		2618.6	-0.02229399
498.8	0.18641378		1028.79	0.00117202		1558.8	-0.00780072		2088.8	0.00207721		2618.8	-0.02039786
499	0.18550881		1028.99	-0.00008214		1559	-0.00775627		2089	0.00349428		2619	-0.0200111
499.2	0.18511612		1029.19	-0.00139992		1559.2	-0.00689658		2089.2	0.00324905		2619.2	-0.01907435
499.4	0.18486333		1029.39	-0.00270838		1559.4	-0.00645083		2089.4	0.00411919		2619.4	-0.01897457
499.6	0.18433595		1029.59	-0.00369062		1559.6	-0.00532476		2089.6	0.0049767		2619.6	-0.01872786
499.8	0.18441732		1029.79	-0.00469143		1559.8	-0.00399829		2089.8	0.00539192		2619.8	-0.0177097
500	0.18486232		1029.99	-0.0057608		1560	-0.00317471		2090	0.00498069		2620	-0.01749516
500.2	0.18480782		1030.19	-0.0068007		1560.2	-0.0028259		2090.2	0.0041413		2620.2	-0.01733642
500.4	0.18555012		1030.39	-0.00772315		1560.4	-0.0017328		2090.4	0.00399036		2620.4	-0.01752026
500.6	0.1862516		1030.59	-0.00763784		1560.6	-0.00250203		2090.6	0.00300373		2620.6	-0.01915742
500.8	0.18702192		1030.79	-0.00782399		1560.8	-0.0026675		2090.8	0.00313012		2620.8	-0.02053497
501	0.18582192		1030.99	-0.00728628		1561	-0.00287694		2091	0.0030613		2621	-0.0219931
501.2	0.18609676		1031.19	-0.00679572		1561.2	-0.00347007		2091.2	0.00190274		2621.2	-0.02276251
501.4	0.18588423		1031.39	-0.00666066		1561.4	-0.00443267		2091.4	0.00125471		2621.4	-0.02354211
501.6	0.18608035		1031.59	-0.00591596		1561.6	-0.00580376		2091.6	0.00076834		2621.6	-0.02419743
501.8	0.18678005		1031.79	-0.00544929		1561.8	-0.00614966		2091.8	0.00093367		2621.8	-0.02651465
502	0.18570005		1031.99	-0.00577386		1562	-0.00709782		2092	0.00084335		2622	-0.02700475
502.2	0.18546894		1032.19	-0.00572716		1562.2	-0.00794033		2092.2	0.00058587		2622.2	-0.02790547
502.4	0.18516507		1032.39	-0.00576711		1562.4	-0.00857252		2092.4	0.00038317		2622.4	-0.02703088
502.6	0.18474738		1032.59	-0.00607695		1562.6	-0.00883379		2092.6	0.00150492		2622.6	-0.02653695
502.8	0.18368798		1032.79	-0.00646293		1562.8	-0.00790397		2092.8	0.00189379		2622.8	-0.02612979
503	0.18383942		1032.99	-0.00721219		1563	-0.00739671		2093	0.00289788		2623	-0.02655159
503.2	0.18412488		1033.19	-0.00748786		1563.2	-0.00621172		2093.2	0.00253752		2623.2	-0.0263705
503.4	0.1833047		1033.39	-0.00710435		1563.4	-0.0059991		2093.4	0.00348825		2623.4	-0.02590168
503.6	0.18368104		1033.59	-0.00690259		1563.6	-0.00535641		2093.6	0.00452407		2623.6	-0.02503733
503.8	0.18348041		1033.79	-0.00714167		1563.8	-0.00464731		2093.8	0.00471644		2623.8	-0.02388393
504	0.18326492		1033.99	-0.0075082		1564	-0.00512723		2094	0.00448258		2624	-0.02421252
504.2	0.18339468		1034.19	-0.00777378		1564.2	-0.00498761		2094.2	0.00423133		2624.2	-0.02417795
504.4	0.18321747		1034.39	-0.00739006		1564.4	-0.00495597		2094.4	0.00451191		2624.4	-0.02377525
504.6	0.18334077		1034.59	-0.00734829		1564.6	-0.00647338		2094.6	0.00353693		2624.6	-0.02392546
504.8	0.18289643		1034.79	-0.00728528		1564.8	-0.00738836		2094.8	0.00307875		2624.8	-0.02432731
505	0.18263797		1034.99	-0.00685676		1565	-0.00737765		2095	0.00269712		2625	-0.02402076
505.2	0.18394658		1035.19	-0.00637306		1565.2	-0.00831333		2095.2	0.00183612		2625.2	-0.0242242
505.4	0.18293247		1035.39	-0.00601651		1565.4	-0.0087705		2095.4	0.00172519		2625.4	-0.02406373
505.6	0.18296074		1035.59	-0.00586599		1565.6	-0.00893808		2095.6	0.00100572		2625.6	-0.02445538
505.8	0.18313398		1035.79	-0.00590817		1565.8	-0.00850308		2095.8	0.00055992		2625.8	-0.02418562
506	0.18282205		1035.99	-0.00548623		1566	-0.00832594		2096	-0.00057761		2626	-0.02318355
506.2	0.18364086		1036.19	-0.00512009		1566.2	-0.00822894		2096.2	-0.00108064		2626.2	-0.02321297
506.4	0.18364122		1036.39	-0.00595816		1566.4	-0.00788737		2096.4	-0.00101732		2626.4	-0.02246347
506.6	0.18331216		1036.59	-0.00564483		1566.6	-0.00768626		2096.6	-0.00104676		2626.6	-0.02205528
506.8	0.18313847		1036.79	-0.00556196		1566.8	-0.00672885		2096.8	-0.00021661		2626.8	-0.02169738
507	0.18308279		1036.99	-0.00593102		1567	-0.00629934		2097	0.00000462		2627	-0.02201303
507.2	0.1825105		1037.19	-0.00665952		1567.2	-0.00596102		2097.2	0.0006351		2627.2	-0.02162407
507.4	0.18202775		1037.39	-0.00708165		1567.4	-0.00599705		2097.4	0.00148661		2627.4	-0.02112323
507.6	0.18270178		1037.59	-0.00712447		1567.6	-0.00552061		2097.6	0.00324211		2627.6	-0.02133293
507.8	0.18302119		1037.79	-0.00766227		1567.8	-0.00564829		2097.8	0.00353304		2627.8	-0.02174873
508	0.18345441		1037.99	-0.00728454		1568	-0.00612437		2098	0.00352622		2628	-0.02218201
508.2	0.18417343		1038.19	-0.00712359		1568.2	-0.00617292		2098.2	0.00367324		2628.2	-0.02293359
508.4	0.18458982		1038.39	-0.00731546		1568.4	-0.00703286		2098.4	0.00429771		2628.4	-0.02356727
508.6	0.18555273		1038.59	-0.00688901		1568.6	-0.00880994		2098.6	0.00399392		2628.6	-0.02466014
508.8	0.18549793		1038.79	-0.00541893		1568.8	-0.00878058		2098.8	0.00487227		2628.8	-0.02539288
509	0.18608818		1038.99	-0.00475588		1569	-0.00855035		2099	0.00511337		2629	-0.02570446
509.2	0.18605092		1039.19	-0.0040123		1569.2	-0.00869528		2099.2	0.00499964		2629.2	-0.02643807
509.4	0.18468495		1039.39	-0.0042835		1569.4	-0.00864246		2099.4	0.00423295		2629.4	-0.02627274
509.6	0.18482262		1039.59	-0.00424771		1569.6	-0.00791155		2099.6	0.0028078		2629.6	-0.0271603
509.8	0.18400453		1039.79	-0.0034181		1569.8	-0.00685932		2099.8	0.00240672		2629.8	-0.02697119
510	0.18268895		1039.99	-0.00283516		1570	-0.00670449		2100	0.00249775		2630	-0.02778801
510.2	0.18136296		1040.19	-0.00360744		1570.2	-0.0054769		2100.2	0.00227688		2630.2	-0.02767405
510.4	0.17966183		1040.39	-0.00409014		1570.4	-0.00466929		2100.4	0.00213219		2630.4	-0.02696661
510.6	0.17880959		1040.59	-0.00432342		1570.6	-0.0038973		2100.6	0.00283929		2630.6	-0.02541026
510.8	0.17832517		1040.79	-0.00578136		1570.8	-0.00303497		2100.8	0.00385328		2630.8	-0.02485637
511	0.17740491		1040.99	-0.00755345		1571	-0.00226883		2101	0.00426718		2631	-0.02401038
511.2	0.17736924		1041.19	-0.00890576		1571.2	-0.00296817		2101.2	0.00519104		2631.2	-0.02283126
511.4	0.17853881		1041.39	-0.0094598		1571.4	-0.0028066		2101.4	0.00483603		2631.4	-0.02269741
511.6	0.1794701		1041.59	-0.01013091		1571.6	-0.00301233		2101.6	0.00501356		2631.6	-0.02270529
511.8	0.18073821		1041.79	-0.01028687		1571.8	-0.00388656		2101.8	0.00480328		2631.8	-0.02227399
512	0.18085295		1041.99	-0.00976495		1572	-0.00413974		2102	0.00395788		2632	-0.02252552
512.2	0.18292463		1042.19	-0.00958602		1572.2	-0.00532421		2102.2	0.00394086		2632.2	-0.02333026
512.4	0.18490869		1042.39	-0.00930311		1572.4	-0.00699152		2102.4	0.00387548		2632.4	-0.02353529
512.6	0.18610761		1042.59	-0.00777242		1572.6	-0.00839919		2102.6	0.00330841		2632.6	-0.02434701
512.8	0.18728562		1042.79	-0.00786767		1572.8	-0.00889603		2102.8	0.0034525		2632.8	-0.02512565
513	0.18808085		1042.99	-0.00738015		1573	-0.00890289		2103	0.00280733		2633	-0.02571358
513.2	0.18833337		1043.19	-0.00674435		1573.2	-0.00979909		2103.2	0.00233168		2633.2	-0.02654824
513.4	0.18767919		1043.39	-0.00625851		1573.4	-0.01107298		2103.4	0.00131363		2633.4	-0.02685759
513.6	0.18751998		1043.59	-0.00550205		1573.6	-0.01030333		2103.6	0.00136052		2633.6	-0.02797185
513.8	0.18643409		1043.79	-0.00478164		1573.8	-0.0105463		2103.8	0.00181659		2633.8	-0.02777277
514	0.18587428		1043.99	-0.0047955		1574	-0.01026067		2104	0.00197677		2634	-0.02793498
514.2	0.18415519		1044.19	-0.00501327		1574.2	-0.00942428		2104.2	0.00176856		2634.2	-0.02759718
514.4	0.18307759		1044.39	-0.00486191		1574.4	-0.0088649		2104.4	0.00226165		2634.4	-0.02656185
514.6	0.18200013		1044.59	-0.00609374		1574.6	-0.00841473		2104.6	0.00287031		2634.6	-0.02545312
514.8	0.18121136		1044.79	-0.00697681		1574.8	-0.00787644		2104.8	0.00347642		2634.8	-0.02534872
515	0.18103552		1044.99	-0.00680229		1575	-0.00727335		2105	0.00384589		2635	-0.02425194
515.2	0.18085817		1045.19	-0.00739191		1575.2	-0.0076031		2105.2	0.00376912		2635.2	-0.02395886
515.4	0.18138224		1045.39	-0.00784174		1575.4	-0.00667366		2105.4	0.00344174		2635.4	-0.02362787
515.6	0.18099355		1045.59	-0.00809141		1575.6	-0.00617131		2105.6	0.00338956		2635.6	-0.02358941
515.8	0.18164688		1045.79	-0.00756017		1575.8	-0.00567276		2105.8	0.00308966		2635.8	-0.02338384
516	0.18099163		1045.99	-0.00755727		1576	-0.00503679		2106	0.00268958		2636	-0.02416858
516.2	0.18235143		1046.19	-0.0069618		1576.2	-0.00527432		2106.2	0.00249828		2636.2	-0.02474021
516.4	0.18228815		1046.39	-0.00695048		1576.4	-0.00483623		2106.4	0.00195179		2636.4	-0.02581447
516.6	0.18200309		1046.59	-0.00604976		1576.6	-0.00465113		2106.6	0.00149895		2636.6	-0.02683076
516.8	0.1821957		1046.79	-0.0064461		1576.8	-0.00424881		2106.8	0.00163415		2636.8	-0.02734747
517	0.18211837		1046.99	-0.00600142		1577	-0.00393348		2107	0.00161037		2637	-0.0274489
517.2	0.18116425		1047.19	-0.00534166		1577.2	-0.00527446		2107.2	0.00093832		2637.2	-0.02817615
517.4	0.18060122		1047.39	-0.00451857		1577.4	-0.00528566		2107.4	0.00063792		2637.4	-0.02848422
517.6	0.18067436		1047.59	-0.00441037		1577.6	-0.00472501		2107.6	0.00122641		2637.6	-0.02866589
517.8	0.18103287		1047.79	-0.00450308		1577.8	-0.0051665		2107.8	0.00164897		2637.8	-0.02803102
518	0.18102603		1047.99	-0.00466797		1578	-0.00466577		2108	0.00164605		2638	-0.02739821
518.2	0.17979356		1048.19	-0.00505027		1578.2	-0.00487453		2108.2	0.00244877		2638.2	-0.02631067
518.4	0.17976398		1048.39	-0.00556274		1578.4	-0.00452121		2108.4	0.00303885		2638.4	-0.025232
518.6	0.17943734		1048.59	-0.00665132		1578.6	-0.00437459		2108.6	0.00386544		2638.6	-0.02432253
518.8	0.17978672		1048.79	-0.00692469		1578.8	-0.00456847		2108.8	0.00517739		2638.8	-0.02274927
519	0.18078617		1048.99	-0.00711788		1579	-0.00462709		2109	0.00618245		2639	-0.02163979
519.2	0.18118188		1049.19	-0.00803065		1579.2	-0.0053878		2109.2	0.00702109		2639.2	-0.02135494
519.4	0.18205561		1049.39	-0.00917261		1579.4	-0.00660354		2109.4	0.00709183		2639.4	-0.02065667
519.6	0.18189948		1049.59	-0.00950291		1579.6	-0.00667723		2109.6	0.00620457		2639.6	-0.02052394
519.8	0.18329084		1049.79	-0.01030468		1579.8	-0.00617126		2109.8	0.00585558		2639.8	-0.0206193
520	0.18370391		1049.99	-0.01052266		1580	-0.00601471		2110	0.00536287		2640	-0.02155482
520.2	0.18486577		1050.19	-0.01006622		1580.2	-0.00655775		2110.2	0.00374396		2640.2	-0.02271595
520.4	0.18422823		1050.39	-0.01027951		1580.4	-0.00634919		2110.4	0.00329337		2640.4	-0.02341549
520.6	0.18477097		1050.59	-0.0090377		1580.6	-0.00669924		2110.6	0.00273015		2640.6	-0.02406974
520.8	0.18466721		1050.79	-0.00895734		1580.8	-0.00599577		2110.8	0.00343361		2640.8	-0.025332
521	0.18385645		1050.99	-0.00834014		1581	-0.0060727		2111	0.00284725		2641	-0.0262395
521.2	0.18335712		1051.19	-0.00749677		1581.2	-0.00587852		2111.2	0.00267034		2641.2	-0.02664476
521.4	0.18320334		1051.39	-0.00678159		1581.4	-0.00535325		2111.4	0.00236776		2641.4	-0.02662549
521.6	0.18264633		1051.59	-0.00677255		1581.6	-0.00452104		2111.6	0.00239		2641.6	-0.02580448
521.8	0.18210044		1051.79	-0.00648422		1581.8	-0.00454938		2111.8	0.00342737		2641.8	-0.02482616
522	0.18055855		1051.99	-0.00628632		1582	-0.00411612		2112	0.00344159		2642	-0.02373676
522.2	0.17966453		1052.19	-0.00685599		1582.2	-0.00329185		2112.2	0.00476083		2642.2	-0.02329465
522.4	0.17864366		1052.39	-0.00740421		1582.4	-0.00297167		2112.4	0.00574496		2642.4	-0.02294294
522.6	0.17811715		1052.59	-0.00812281		1582.6	-0.0030978		2112.6	0.00676353		2642.6	-0.02183861
522.8	0.17872862		1052.79	-0.00895694		1582.8	-0.00302856		2112.8	0.00701753		2642.8	-0.02068934
523	0.17932429		1052.99	-0.00978661		1583	-0.00371403		2113	0.0072644		2643	-0.02052925
523.2	0.17996844		1053.19	-0.01012394		1583.2	-0.00512391		2113.2	0.00720722		2643.2	-0.02041627
523.4	0.18063519		1053.39	-0.01148585		1583.4	-0.00627391		2113.4	0.0067366		2643.4	-0.02033514
523.6	0.18192908		1053.59	-0.01120849		1583.6	-0.00575539		2113.6	0.00655211		2643.6	-0.02116605
523.8	0.1831883		1053.79	-0.01129307		1583.8	-0.00623503		2113.8	0.00608484		2643.8	-0.02170889
524	0.18393696		1053.99	-0.01062441		1584	-0.00685647		2114	0.00498143		2644	-0.02249752
524.2	0.18430625		1054.19	-0.00956778		1584.2	-0.00803361		2114.2	0.00380309		2644.2	-0.02337153
524.4	0.18467428		1054.39	-0.00853513		1584.4	-0.00801137		2114.4	0.00426974		2644.4	-0.02401706
524.6	0.18488854		1054.59	-0.00688411		1584.6	-0.00870837		2114.6	0.00306018		2644.6	-0.02526986
524.8	0.18451018		1054.79	-0.00646537		1584.8	-0.00865393		2114.8	0.00310314		2644.8	-0.02647238
525	0.18398976		1054.99	-0.0053958		1585	-0.00909506		2115	0.0025387		2645	-0.02631155
525.2	0.18371856		1055.19	-0.00464979		1585.2	-0.00891027		2115.2	0.00215964		2645.2	-0.02618079
525.4	0.18273594		1055.39	-0.0036821		1585.4	-0.00926664		2115.4	0.00146399		2645.4	-0.02493528
525.6	0.18181018		1055.59	-0.00331115		1585.6	-0.00892611		2115.6	0.00138057		2645.6	-0.0241501
525.8	0.18089585		1055.79	-0.00290346		1585.8	-0.00892736		2115.8	0.00225757		2645.8	-0.02286104
526	0.1797924		1055.99	-0.00329984		1586	-0.0079094		2116	0.00250685		2646	-0.02187987
526.2	0.17969209		1056.19	-0.00392504		1586.2	-0.00709121		2116.2	0.00272101		2646.2	-0.02107416
526.4	0.17879939		1056.39	-0.00529266		1586.4	-0.00715866		2116.4	0.00232258		2646.4	-0.02011952
526.6	0.17975125		1056.59	-0.00545598		1586.6	-0.00709409		2116.6	0.00257215		2646.6	-0.01885264
526.8	0.17905548		1056.79	-0.0068791		1586.8	-0.00609847		2116.8	0.00261193		2646.8	-0.01824267
527	0.17873183		1056.99	-0.00836586		1587	-0.00736047		2117	0.00316983		2647	-0.01822904
527.2	0.17836445		1057.19	-0.00851681		1587.2	-0.00785933		2117.2	0.00244487		2647.2	-0.01880963
527.4	0.17801556		1057.39	-0.00933726		1587.4	-0.00792441		2117.4	0.00286891		2647.4	-0.01937474
527.6	0.17809606		1057.59	-0.00848863		1587.6	-0.00709859		2117.6	0.00284104		2647.6	-0.0200456
527.8	0.17832885		1057.79	-0.007994		1587.8	-0.00751553		2117.8	0.00198485		2647.8	-0.01987605
528	0.1788049		1057.99	-0.00898156		1588	-0.00690783		2118	0.00130232		2648	-0.02099834
528.2	0.17788335		1058.19	-0.00840473		1588.2	-0.00771126		2118.2	0.00097151		2648.2	-0.02197352
528.4	0.1778034		1058.39	-0.00825663		1588.4	-0.00771685		2118.4	0.00126773		2648.4	-0.02312008
528.6	0.17680612		1058.59	-0.00782707		1588.6	-0.00762118		2118.6	0.00017181		2648.6	-0.02370285
528.8	0.17625489		1058.79	-0.00727992		1588.8	-0.00766852		2118.8	-0.00033		2648.8	-0.02480111
529	0.17559636		1058.99	-0.00634196		1589	-0.00734754		2119	-0.00069506		2649	-0.02466987
529.2	0.17471222		1059.19	-0.00574282		1589.2	-0.00747857		2119.2	-0.00064346		2649.2	-0.02484294
529.4	0.17479693		1059.39	-0.00558122		1589.4	-0.00765104		2119.4	-0.00046684		2649.4	-0.02387615
529.6	0.17383983		1059.59	-0.0061936		1589.6	-0.00740309		2119.6	-0.00054503		2649.6	-0.02327692
529.8	0.17394807		1059.79	-0.00645914		1589.8	-0.00683002		2119.8	0.0002601		2649.8	-0.02201681
530	0.1737469		1059.99	-0.0077288		1590	-0.00562066		2120	0.00035367		2650	-0.02107935
530.2	0.17414394		1060.19	-0.00872369		1590.2	-0.00560593		2120.2	-0.00023158		2650.2	-0.02014957
530.4	0.17432604		1060.39	-0.01010084		1590.4	-0.00570813		2120.4	0.00001054		2650.4	-0.01970655
530.6	0.17507633		1060.59	-0.01005413		1590.6	-0.00540307		2120.6	0.00147002		2650.6	-0.01904042
530.8	0.1749463		1060.79	-0.01127664		1590.8	-0.00529205		2120.8	0.00149641		2650.8	-0.01851964
531	0.17654796		1060.99	-0.01161394		1591	-0.0062655		2121	0.00172035		2651	-0.0196336
531.2	0.17756437		1061.19	-0.01124825		1591.2	-0.00631746		2121.2	0.00140731		2651.2	-0.01916035
531.4	0.17918613		1061.39	-0.01115067		1591.4	-0.00591713		2121.4	0.00250053		2651.4	-0.01994599
531.6	0.18022208		1061.59	-0.01075084		1591.6	-0.00578026		2121.6	0.00182693		2651.6	-0.02098756
531.8	0.18105108		1061.79	-0.01063281		1591.8	-0.00718596		2121.8	0.00217001		2651.8	-0.02182126
532	0.1809264		1061.99	-0.01082849		1592	-0.00729449		2122	0.00167156		2652	-0.02353432
532.2	0.18038455		1062.19	-0.00972923		1592.2	-0.00754563		2122.2	0.00152323		2652.2	-0.02456639
532.4	0.18101485		1062.39	-0.00860797		1592.4	-0.00811651		2122.4	0.00144764		2652.4	-0.02578448
532.6	0.18067019		1062.59	-0.00781853		1592.6	-0.00770375		2122.6	0.00100261		2652.6	-0.02650804
532.8	0.18028836		1062.79	-0.00653534		1592.8	-0.00868827		2122.8	0.00029127		2652.8	-0.02756892
533	0.17971454		1062.99	-0.00613754		1593	-0.00853417		2123	0.0005823		2653	-0.02751537
533.2	0.17916822		1063.19	-0.00580596		1593.2	-0.0085178		2123.2	0.00171307		2653.2	-0.02755124
533.4	0.17895012		1063.39	-0.00639893		1593.4	-0.00829675		2123.4	0.0019728		2653.4	-0.02692664
533.6	0.17766708		1063.59	-0.00630212		1593.6	-0.00787516		2123.6	0.00223438		2653.6	-0.02567203
533.8	0.17687921		1063.79	-0.00686478		1593.8	-0.0069219		2123.8	0.00254405		2653.8	-0.0252645
534	0.17554679		1063.99	-0.00814862		1594	-0.00604921		2124	0.00155835		2654	-0.02471594
534.2	0.17547015		1064.19	-0.00878826		1594.2	-0.00655933		2124.2	0.00173245		2654.2	-0.02441396
534.4	0.17507835		1064.39	-0.00914926		1594.4	-0.00622396		2124.4	0.00199952		2654.4	-0.02413379
534.6	0.17528378		1064.59	-0.00969723		1594.6	-0.0064532		2124.6	0.00221289		2654.6	-0.02324359
534.8	0.17628972		1064.79	-0.01053493		1594.8	-0.00706838		2124.8	0.00214545		2654.8	-0.02284751
535	0.17673378		1064.99	-0.01028043		1595	-0.00659511		2125	0.00250064		2655	-0.0235948
535.2	0.17671489		1065.19	-0.01028112		1595.2	-0.00703271		2125.2	0.00251057		2655.2	-0.02314712
535.4	0.17626371		1065.39	-0.01006612		1595.4	-0.00726027		2125.4	0.00243207		2655.4	-0.02458095
535.6	0.17595439		1065.59	-0.00957815		1595.6	-0.00810074		2125.6	0.00191043		2655.6	-0.0248604
535.8	0.17578283		1065.79	-0.00870579		1595.8	-0.00891854		2125.8	0.00195873		2655.8	-0.02512567
536	0.17618859		1065.99	-0.00752245		1596	-0.00852194		2126	0.001207		2656	-0.02606068
536.2	0.17611652		1066.19	-0.00666962		1596.2	-0.00849609		2126.2	0.00106334		2656.2	-0.02628209
536.4	0.17666828		1066.39	-0.00546926		1596.4	-0.00920695		2126.4	0.00134139		2656.4	-0.02679808
536.6	0.17628798		1066.59	-0.00543903		1596.6	-0.00884785		2126.6	0.00135635		2656.6	-0.02702143
536.8	0.17678806		1066.79	-0.00452141		1596.8	-0.00899927		2126.8	0.00144851		2656.8	-0.02680469
537	0.17653214		1066.99	-0.00419976		1597	-0.00774975		2127	0.00270868		2657	-0.02661969
537.2	0.17630848		1067.19	-0.00433409		1597.2	-0.00691731		2127.2	0.00380772		2657.2	-0.02578451
537.4	0.17678754		1067.39	-0.00418302		1597.4	-0.00683446		2127.4	0.00415023		2657.4	-0.02479674
537.6	0.17726353		1067.59	-0.00472241		1597.6	-0.00606219		2127.6	0.00430493		2657.6	-0.02356879
537.8	0.17670226		1067.79	-0.00589131		1597.8	-0.0055967		2127.8	0.00365338		2657.8	-0.02409435
538	0.17745369		1067.99	-0.00658523		1598	-0.00560237		2128	0.00307651		2658	-0.02422926
538.2	0.17773222		1068.19	-0.00764219		1598.2	-0.00575313		2128.2	0.00348961		2658.2	-0.02364387
538.4	0.17847273		1068.39	-0.0083934		1598.4	-0.00603597		2128.4	0.00309565		2658.4	-0.02329382
538.6	0.17963089		1068.59	-0.0091393		1598.6	-0.00653416		2128.6	0.002456		2658.6	-0.02313786
538.8	0.1808997		1068.79	-0.0094093		1598.8	-0.00662575		2128.8	0.00301132		2658.8	-0.02383054
539	0.1816768		1068.99	-0.00912411		1599	-0.00637349		2129	0.00316489		2659	-0.0239284
539.2	0.18128154		1069.19	-0.00967147		1599.2	-0.00814082		2129.2	0.00257879		2659.2	-0.02402589
539.4	0.18152031		1069.39	-0.00932521		1599.4	-0.00819292		2129.4	0.00186063		2659.4	-0.02443418
539.6	0.18166174		1069.59	-0.0087731		1599.6	-0.00904571		2129.6	0.00157976		2659.6	-0.02523756
539.8	0.18128521		1069.79	-0.00830154		1599.8	-0.01055639		2129.8	0.00090564		2659.8	-0.02597966
540	0.1812381		1069.99	-0.00760306		1600	-0.01072146		2130	-0.00004136		2660	-0.0273653
540.2	0.18011935		1070.19	-0.00690432		1600.2	-0.01145021		2130.2	-0.00008152		2660.2	-0.02831466
540.4	0.17987369		1070.39	-0.00664079		1600.4	-0.01120498		2130.4	-0.00027769		2660.4	-0.02938329
540.6	0.17814148		1070.59	-0.00661966		1600.6	-0.0107404		2130.6	0.00043696		2660.6	-0.02947435
540.8	0.17741068		1070.79	-0.00598747		1600.8	-0.00945155		2130.8	0.00167889		2660.8	-0.0294783
541	0.17546284		1070.99	-0.00483986		1601	-0.00790144		2131	0.00334182		2661	-0.02906261
541.2	0.17423782		1071.19	-0.00536544		1601.2	-0.00669999		2131.2	0.00406587		2661.2	-0.02812388
541.4	0.17416887		1071.39	-0.00610914		1601.4	-0.00615663		2131.4	0.00489693		2661.4	-0.02712222
541.6	0.17403178		1071.59	-0.00702772		1601.6	-0.00495848		2131.6	0.00442275		2661.6	-0.02619066
541.8	0.17343546		1071.79	-0.00746821		1601.8	-0.00497529		2131.8	0.00475596		2661.8	-0.02599248
542	0.17338523		1071.99	-0.00850017		1602	-0.004401		2132	0.0051554		2662	-0.0251343
542.2	0.1729533		1072.19	-0.0098412		1602.2	-0.00439468		2132.2	0.00500417		2662.2	-0.0238214
542.4	0.17454222		1072.39	-0.00997619		1602.4	-0.00507141		2132.4	0.00494478		2662.4	-0.02340072
542.6	0.17588158		1072.59	-0.0108055		1602.6	-0.0051243		2132.6	0.00404993		2662.6	-0.02298423
542.8	0.17713052		1072.79	-0.01117275		1602.8	-0.00600249		2132.8	0.00449173		2662.8	-0.02351141
543	0.1783663		1072.99	-0.01133394		1603	-0.00637897		2133	0.0031874		2663	-0.0229782
543.2	0.17840461		1073.19	-0.01116144		1603.2	-0.00817953		2133.2	0.00201879		2663.2	-0.02407831
543.4	0.17999023		1073.39	-0.01036198		1603.4	-0.00818852		2133.4	0.00129655		2663.4	-0.02494749
543.6	0.18059478		1073.59	-0.00961074		1603.6	-0.00954181		2133.6	0.00057356		2663.6	-0.02571806
543.8	0.18068001		1073.79	-0.00953022		1603.8	-0.01063593		2133.8	-0.00089397		2663.8	-0.02689592
544	0.18094449		1073.99	-0.00927737		1604	-0.01036725		2134	-0.00228115		2664	-0.0287984
544.2	0.17989313		1074.19	-0.00869903		1604.2	-0.01085853		2134.2	-0.00200244		2664.2	-0.02868786
544.4	0.17950105		1074.39	-0.00807643		1604.4	-0.01057807		2134.4	-0.00175298		2664.4	-0.02850775
544.6	0.17736863		1074.59	-0.0077095		1604.6	-0.00998578		2134.6	0.00004134		2664.6	-0.02845855
544.8	0.17674332		1074.79	-0.0071997		1604.8	-0.00912669		2134.8	0.00192504		2664.8	-0.02856106
545	0.17503442		1074.99	-0.00743637		1605	-0.00803323		2135	0.00322623		2665	-0.02822984
545.2	0.17445501		1075.19	-0.00896077		1605.2	-0.00738958		2135.2	0.00357402		2665.2	-0.02744154
545.4	0.17412807		1075.39	-0.00910598		1605.4	-0.00692068		2135.4	0.00408296		2665.4	-0.02659339
545.6	0.17408051		1075.59	-0.00916907		1605.6	-0.00620438		2135.6	0.00398931		2665.6	-0.02576701
545.8	0.17340248		1075.79	-0.00981597		1605.8	-0.00615184		2135.8	0.00470529		2665.8	-0.02480359
546	0.17356407		1075.99	-0.01064547		1606	-0.00558666		2136	0.00463606		2666	-0.02434339
546.2	0.17440369		1076.19	-0.01058235		1606.2	-0.00602081		2136.2	0.004449		2666.2	-0.02432934
546.4	0.17560458		1076.39	-0.01090841		1606.4	-0.00638934		2136.4	0.00428739		2666.4	-0.02445458
546.6	0.17591956		1076.59	-0.01115191		1606.6	-0.00622001		2136.6	0.00321927		2666.6	-0.02498616
546.8	0.17589307		1076.79	-0.01089326		1606.8	-0.0067923		2136.8	0.00313796		2666.8	-0.02531855
547	0.17652507		1076.99	-0.01073533		1607	-0.00665602		2137	0.00161554		2667	-0.02468891
547.2	0.17704185		1077.19	-0.00969187		1607.2	-0.0071866		2137.2	0.00098119		2667.2	-0.02581941
547.4	0.17824828		1077.39	-0.00900681		1607.4	-0.00668797		2137.4	0.0004809		2667.4	-0.02569089
547.6	0.17815719		1077.59	-0.00772639		1607.6	-0.00671807		2137.6	-0.0004254		2667.6	-0.02642758
547.8	0.17750099		1077.79	-0.00758045		1607.8	-0.00664434		2137.8	-0.00186587		2667.8	-0.02793119
548	0.17675473		1077.99	-0.0062824		1608	-0.00654553		2138	-0.00219798		2668	-0.0282072
548.2	0.17541323		1078.19	-0.00556442		1608.2	-0.00639156		2138.2	-0.00193328		2668.2	-0.02740178
548.4	0.17425565		1078.39	-0.00492138		1608.4	-0.00626532		2138.4	-0.00144521		2668.4	-0.02749507
548.6	0.17297585		1078.59	-0.00554053		1608.6	-0.00549944		2138.6	-0.00032693		2668.6	-0.02738668
548.8	0.17342229		1078.79	-0.00619144		1608.8	-0.00495565		2138.8	0.00043169		2668.8	-0.02727022
549	0.17321636		1078.99	-0.00644095		1609	-0.0049086		2139	0.00052475		2669	-0.02717545
549.2	0.17314031		1079.19	-0.00681873		1609.2	-0.00484031		2139.2	0.00100699		2669.2	-0.02595933
549.4	0.17310853		1079.39	-0.00657204		1609.4	-0.00484038		2139.4	0.00182406		2669.4	-0.02534498
549.6	0.17452083		1079.59	-0.00777902		1609.6	-0.00430011		2139.6	0.00201042		2669.6	-0.02465191
549.8	0.17446976		1079.79	-0.00912641		1609.8	-0.00449654		2139.8	0.00327974		2669.8	-0.0244591
550	0.17577232		1079.99	-0.0104907		1610	-0.00455333		2140	0.00465077		2670	-0.0248701
550.2	0.17674459		1080.19	-0.0101235		1610.2	-0.00550059		2140.2	0.00506723		2670.2	-0.02555612
550.4	0.17713693		1080.39	-0.01200006		1610.4	-0.00680091		2140.4	0.00471703		2670.4	-0.02557933
550.6	0.17727389		1080.59	-0.01265609		1610.6	-0.00760708		2140.6	0.00407724		2670.6	-0.02557291
550.8	0.17698244		1080.79	-0.01361846		1610.8	-0.00805531		2140.8	0.00340888		2670.8	-0.02508605
551	0.17675227		1080.99	-0.01376891		1611	-0.00868687		2141	0.00257403		2671	-0.02520423
551.2	0.17756898		1081.19	-0.01297019		1611.2	-0.00975871		2141.2	0.00210895		2671.2	-0.02637342
551.4	0.17717465		1081.39	-0.01238319		1611.4	-0.01018622		2141.4	0.00173836		2671.4	-0.02667195
551.6	0.17752278		1081.59	-0.01109403		1611.6	-0.01069372		2141.6	0.00002598		2671.6	-0.0269042
551.8	0.17629735		1081.79	-0.01117451		1611.8	-0.01075328		2141.8	-0.00019333		2671.8	-0.02834558
552	0.17499775		1081.99	-0.01078653		1612	-0.01036045		2142	-0.00014782		2672	-0.02822476
552.2	0.17322204		1082.19	-0.01085071		1612.2	-0.0100082		2142.2	-0.00031097		2672.2	-0.02840179
552.4	0.17191109		1082.39	-0.01059856		1612.4	-0.00988702		2142.4	0.00003295		2672.4	-0.02745926
552.6	0.17175564		1082.59	-0.01035605		1612.6	-0.00944412		2142.6	0.00028003		2672.6	-0.02679091
552.8	0.17179433		1082.79	-0.0098197		1612.8	-0.00943275		2142.8	0.00091437		2672.8	-0.02631758
553	0.17130671		1082.99	-0.00989002		1613	-0.00979672		2143	0.00167462		2673	-0.02560633
553.2	0.17069824		1083.19	-0.01069648		1613.2	-0.00911856		2143.2	0.00220823		2673.2	-0.02471638
553.4	0.17082439		1083.39	-0.01116295		1613.4	-0.00860853		2143.4	0.00214228		2673.4	-0.02401509
553.6	0.17140735		1083.59	-0.01198438		1613.6	-0.00815983		2143.6	0.00247748		2673.6	-0.0239828
553.8	0.17105632		1083.79	-0.01188696		1613.8	-0.00750912		2143.8	0.00293403		2673.8	-0.02433096
554	0.17232376		1083.99	-0.01246525		1614	-0.00715043		2144	0.00303083		2674	-0.02434317
554.2	0.17327303		1084.19	-0.01226913		1614.2	-0.00754588		2144.2	0.00187082		2674.2	-0.02501348
554.4	0.17441261		1084.39	-0.01420641		1614.4	-0.0085706		2144.4	0.00118969		2674.4	-0.02528764
554.6	0.17466575		1084.59	-0.01401863		1614.6	-0.00894453		2144.6	0.00041037		2674.6	-0.02515529
554.8	0.17449379		1084.79	-0.01413		1614.8	-0.0085407		2144.8	-0.00021113		2674.8	-0.02607956
555	0.17438498		1084.99	-0.01333748		1615	-0.00916637		2145	-0.00072128		2675	-0.02723233
555.2	0.17556126		1085.19	-0.01264146		1615.2	-0.01007226		2145.2	-0.00225381		2675.2	-0.02824466
555.4	0.17528145		1085.39	-0.01223525		1615.4	-0.00967799		2145.4	-0.00300714		2675.4	-0.02911993
555.6	0.17505736		1085.59	-0.01154091		1615.6	-0.00941209		2145.6	-0.00334289		2675.6	-0.02941109
555.8	0.17377849		1085.79	-0.01165918		1615.8	-0.0093516		2145.8	-0.00180917		2675.8	-0.03064946
556	0.1732723		1085.99	-0.01111234		1616	-0.00916486		2146	-0.00152616		2676	-0.03031306
556.2	0.17237841		1086.19	-0.01089017		1616.2	-0.00878301		2146.2	-0.00096791		2676.2	-0.02992471
556.4	0.17230375		1086.39	-0.01039957		1616.4	-0.00814934		2146.4	-0.00011574		2676.4	-0.02852854
556.6	0.172204		1086.59	-0.01038714		1616.6	-0.00862008		2146.6	0.00036264		2676.6	-0.02797348
556.8	0.17223754		1086.79	-0.01105312		1616.8	-0.00883785		2146.8	0.00165876		2676.8	-0.02770981
557	0.17215218		1086.99	-0.01135011		1617	-0.00867277		2147	0.00212402		2677	-0.02703656
557.2	0.17164142		1087.19	-0.01122579		1617.2	-0.00871326		2147.2	0.00292051		2677.2	-0.02644856
557.4	0.17150899		1087.39	-0.01176079		1617.4	-0.00846145		2147.4	0.00304826		2677.4	-0.02542408
557.6	0.17145571		1087.59	-0.01242576		1617.6	-0.00841081		2147.6	0.00294786		2677.6	-0.02451184
557.8	0.17235116		1087.79	-0.01157482		1617.8	-0.0073469		2147.8	0.00232377		2677.8	-0.02443749
558	0.17331259		1087.99	-0.01172844		1618	-0.00744686		2148	0.00197281		2678	-0.02412365
558.2	0.17421181		1088.19	-0.01115277		1618.2	-0.00761427		2148.2	0.00110159		2678.2	-0.02441886
558.4	0.17510609		1088.39	-0.01094454		1618.4	-0.00814771		2148.4	0.00061855		2678.4	-0.02431779
558.6	0.17492369		1088.59	-0.01010739		1618.6	-0.00790323		2148.6	-0.00049149		2678.6	-0.02435264
558.8	0.17481802		1088.79	-0.00967705		1618.8	-0.00763067		2148.8	-0.00148843		2678.8	-0.02518039
559	0.17470279		1088.99	-0.00905054		1619	-0.00813822		2149	-0.00280482		2679	-0.0252397
559.2	0.17501309		1089.19	-0.00881173		1619.2	-0.00871239		2149.2	-0.00414741		2679.2	-0.02536501
559.4	0.17461138		1089.39	-0.00835047		1619.4	-0.00854951		2149.4	-0.00417356		2679.4	-0.02553093
559.6	0.17416864		1089.59	-0.00776354		1619.6	-0.00902774		2149.6	-0.00424103		2679.6	-0.02511854
559.8	0.17465996		1089.79	-0.00782287		1619.8	-0.00954335		2149.8	-0.00436428		2679.8	-0.02503893
