# Supplementary material for: Functional development of a V3/glycan-specific broadly neutralizing antibody isolated from a case of HIV superinfection
Source: eLife journal article supplement (doi:10.7554/elife.68110), 2021-07-15
Supplement: fig2-data2 [file A3.xls]

Vers 3.43 Data Simulation
Conc1	1E-06	1E-06	1E-06	1E-06	1E-06	1E-06
Start1	290	879.99	1469.99	2059.98	2649.98	3239.98
Stop1	649.8	1239.79	1829.79	2419.78	3009.78	3599.78
Time1	Data1	Sim1	Time2	Data2	Sim2	Time3	Data3	Sim3	Time4	Data4	Sim4	Time5	Data5	Sim5	Time6	Data6	Sim6
290	0.01624435		879.99	0.00140984		1469.99	-0.0011061		2059.98	-0.00340338		2649.98	0.00293596		3239.98	-0.00545805
290.2	0.01687859		880.19	0.00068018		1470.19	-0.00056175		2060.18	-0.00358642		2650.18	0.00282412		3240.18	-0.00547274
290.4	0.01700493		880.39	0.0004821		1470.39	-0.00078586		2060.38	-0.00333872		2650.38	0.0021743		3240.38	-0.00589936
290.6	0.01801879		880.59	0.00043674		1470.59	-0.0006783		2060.58	-0.00435552		2650.58	0.00160631		3240.58	-0.00642123
290.8	0.01948082		880.79	0.00028883		1470.79	-0.00021276		2060.78	-0.00502964		2650.78	0.00132598		3240.78	-0.0064771
291	0.02043496		880.99	0.00027057		1470.99	-0.00048339		2060.98	-0.00522584		2650.98	0.00135263		3240.98	-0.00768847
291.2	0.02105834		881.19	0.00074786		1471.19	-0.00039546		2061.18	-0.00616879		2651.18	0.00162518		3241.18	-0.00766543
291.4	0.02131793		881.39	0.00147874		1471.39	-0.00052145		2061.38	-0.00668679		2651.38	0.00192571		3241.38	-0.0088309
291.6	0.02111316		881.59	0.00225406		1471.59	-0.00058543		2061.58	-0.00642182		2651.58	0.0023269		3241.58	-0.00906746
291.8	0.02133221		881.79	0.00321294		1471.79	-0.00081326		2061.78	-0.00586269		2651.78	0.00238904		3241.78	-0.00965116
292	0.0217086		881.99	0.0036912		1471.99	-0.0007366		2061.98	-0.00548233		2651.98	0.0029254		3241.98	-0.00973507
292.2	0.02199446		882.19	0.00385233		1472.19	-0.00110059		2062.18	-0.00537331		2652.18	0.00270406		3242.18	-0.00911469
292.4	0.02229567		882.39	0.00439949		1472.39	-0.00084093		2062.38	-0.00478717		2652.38	0.00231559		3242.38	-0.00996274
292.6	0.02263853		882.59	0.00505643		1472.59	0.00042928		2062.58	-0.00401695		2652.58	0.00249909		3242.58	-0.010301
292.8	0.02302994		882.79	0.00550383		1472.79	0.0009242		2062.78	-0.003135		2652.78	0.00235077		3242.78	-0.00992081
293	0.02317534		882.99	0.00437115		1472.99	0.00111484		2062.98	-0.00352107		2652.98	0.00255881		3242.98	-0.01012673
293.2	0.02420483		883.19	0.00311592		1473.19	0.00127674		2063.18	-0.00316978		2653.18	0.00217927		3243.18	-0.0101219
293.4	0.02439146		883.39	0.00206164		1473.39	0.00176846		2063.38	-0.00245233		2653.38	0.00222633		3243.38	-0.00967794
293.6	0.02534542		883.59	0.00065179		1473.59	0.00216983		2063.58	-0.00141649		2653.58	0.00264706		3243.58	-0.00963564
293.8	0.02522111		883.79	-0.00060599		1473.79	0.00254768		2063.78	-0.00076465		2653.78	0.00237766		3243.78	-0.00941227
294	0.02643203		883.99	-0.00097978		1473.99	0.00269889		2063.98	-0.00131914		2653.98	0.00294261		3243.98	-0.00834628
294.2	0.0264294		884.19	-0.00087666		1474.19	0.0037478		2064.18	-0.00136905		2654.18	0.0026041		3244.18	-0.00780797
294.4	0.02726688		884.39	-0.00017024		1474.39	0.00336884		2064.38	-0.00149244		2654.38	0.00200186		3244.38	-0.00822069
294.6	0.02873023		884.59	0.00035047		1474.59	0.00398358		2064.58	-0.00176446		2654.58	0.00258586		3244.58	-0.00847657
294.8	0.02931782		884.79	0.00037923		1474.79	0.00427032		2064.78	-0.00228691		2654.78	0.00311712		3244.78	-0.00819008
295	0.02979082		884.99	0.00138947		1474.99	0.0036926		2064.98	-0.00225067		2654.98	0.00330791		3244.98	-0.00938989
295.2	0.03047961		885.19	0.00257579		1475.19	0.00394003		2065.18	-0.00286086		2655.18	0.00359909		3245.18	-0.0094698
295.4	0.0309912		885.39	0.00371939		1475.39	0.00372252		2065.38	-0.0023741		2655.38	0.00337935		3245.38	-0.01053018
295.6	0.03094707		885.59	0.00420815		1475.59	0.00390224		2065.58	-0.00121703		2655.58	0.0036329		3245.58	-0.01081824
295.8	0.0320651		885.79	0.00473661		1475.79	0.00403564		2065.78	-0.00122371		2655.78	0.00321202		3245.78	-0.01102572
296	0.03246976		885.99	0.00482197		1475.99	0.00355657		2065.98	-0.00113104		2655.98	0.00286585		3245.98	-0.0111486
296.2	0.03258662		886.19	0.0055506		1476.19	0.00327708		2066.18	-0.00108697		2656.18	0.00222959		3246.18	-0.01057782
296.4	0.03335095		886.39	0.00590336		1476.39	0.00422464		2066.38	-0.0005404		2656.38	0.00206636		3246.38	-0.01117138
296.6	0.03321089		886.59	0.0067901		1476.59	0.0052187		2066.58	-0.00003076		2656.58	0.00261528		3246.58	-0.01099884
296.8	0.03409799		886.79	0.00621572		1476.79	0.00524344		2066.78	0.00012087		2656.78	0.00362625		3246.78	-0.01058639
297	0.03410703		886.99	0.00533066		1476.99	0.00524506		2066.98	-0.00006252		2656.98	0.00405257		3246.98	-0.0106613
297.2	0.03485042		887.19	0.00467858		1477.19	0.00537848		2067.18	-0.00075168		2657.18	0.00437713		3247.18	-0.01028215
297.4	0.0347279		887.39	0.00385184		1477.39	0.00563631		2067.38	-0.00076742		2657.38	0.00500261		3247.38	-0.01048697
297.6	0.03454949		887.59	0.0033952		1477.59	0.0064919		2067.58	-0.00092736		2657.58	0.00536697		3247.58	-0.01043054
297.8	0.03513285		887.79	0.00339706		1477.79	0.00652394		2067.78	-0.00169798		2657.78	0.00557403		3247.78	-0.00938557
298	0.03579679		887.99	0.00312857		1477.99	0.00620033		2067.98	-0.0023464		2657.98	0.00557264		3247.98	-0.00959124
298.2	0.03617428		888.19	0.00335345		1478.19	0.0066389		2068.18	-0.0026815		2658.18	0.00543424		3248.18	-0.00966441
298.4	0.03648851		888.39	0.00350918		1478.39	0.00594064		2068.38	-0.00195872		2658.38	0.00538511		3248.38	-0.01011543
298.6	0.03677721		888.59	0.00348137		1478.59	0.00573542		2068.58	-0.00145333		2658.58	0.00630387		3248.58	-0.01031687
298.8	0.03671636		888.79	0.00379575		1478.79	0.00486149		2068.78	-0.0016707		2658.78	0.00575882		3248.78	-0.01010254
299	0.03723219		888.99	0.00375919		1478.99	0.00447352		2068.98	-0.00061948		2658.98	0.0056712		3248.98	-0.00985815
299.2	0.03753137		889.19	0.00368338		1479.19	0.00424348		2069.18	-0.0008472		2659.18	0.0053043		3249.18	-0.00963359
299.4	0.03745413		889.39	0.00345916		1479.39	0.00422891		2069.38	-0.00053572		2659.38	0.00499504		3249.38	-0.01021742
299.6	0.03772638		889.59	0.00334281		1479.59	0.00406174		2069.58	0.00022657		2659.58	0.00508384		3249.58	-0.01060389
299.8	0.03852951		889.79	0.00415575		1479.79	0.0036181		2069.78	0.00057289		2659.78	0.00481464		3249.78	-0.0102217
300	0.03799017		889.99	0.00469693		1479.99	0.00288434		2069.98	0.00152712		2659.98	0.00483373		3249.98	-0.01059886
300.2	0.03859554		890.19	0.00535085		1480.19	0.00329291		2070.18	0.00174635		2660.18	0.00532862		3250.18	-0.00940776
300.4	0.039329		890.39	0.00510899		1480.39	0.00361098		2070.38	0.00147427		2660.38	0.00528784		3250.38	-0.00954357
300.6	0.03996414		890.59	0.00589048		1480.59	0.00350592		2070.58	0.00124672		2660.58	0.00615622		3250.58	-0.00975898
300.8	0.04091699		890.79	0.00558194		1480.79	0.00369371		2070.78	0.00148473		2660.78	0.00564268		3250.78	-0.00921765
301	0.04173576		890.99	0.00557663		1480.99	0.00340749		2070.98	0.00035071		2660.98	0.00552403		3250.98	-0.00876065
301.2	0.04234708		891.19	0.00562831		1481.19	0.0040192		2071.18	-0.00074457		2661.18	0.00547768		3251.18	-0.00931985
301.4	0.04299786		891.39	0.00543249		1481.39	0.00423104		2071.38	-0.0011851		2661.38	0.00544583		3251.38	-0.00992854
301.6	0.04404445		891.59	0.00477332		1481.59	0.0056234		2071.58	-0.00127595		2661.58	0.00482141		3251.58	-0.00985069
301.8	0.04495773		891.79	0.00465232		1481.79	0.00475686		2071.78	-0.00214929		2661.78	0.00486742		3251.78	-0.01026099
302	0.04489654		891.99	0.00437595		1481.99	0.00491501		2071.98	-0.00249024		2661.98	0.00454291		3251.98	-0.01074073
302.2	0.04469912		892.19	0.00496965		1482.19	0.0054559		2072.18	-0.00183457		2662.18	0.00458499		3252.18	-0.01099584
302.4	0.04452348		892.39	0.00516843		1482.39	0.00522864		2072.38	-0.00123907		2662.38	0.00453333		3252.38	-0.01133127
302.6	0.04476651		892.59	0.00569839		1482.59	0.00581075		2072.58	-0.00120992		2662.58	0.00505553		3252.58	-0.01113737
302.8	0.04476671		892.79	0.00589786		1482.79	0.00634335		2072.78	-0.00019067		2662.78	0.00434284		3252.78	-0.01055425
303	0.04520941		892.99	0.00566457		1482.99	0.00682272		2072.98	-0.00075689		2662.98	0.00384697		3252.98	-0.0097551
303.2	0.04477204		893.19	0.00611605		1483.19	0.00715387		2073.18	-0.00160432		2663.18	0.00305679		3253.18	-0.01013694
303.4	0.04470238		893.39	0.00659354		1483.39	0.00809067		2073.38	-0.00084455		2663.38	0.00341202		3253.38	-0.01140376
303.6	0.04450062		893.59	0.0077056		1483.59	0.00826379		2073.58	-0.00020977		2663.58	0.00347944		3253.58	-0.01087762
303.8	0.04458522		893.79	0.00837344		1483.79	0.00806302		2073.78	0.00020987		2663.78	0.00357803		3253.78	-0.01094063
304	0.04441734		893.99	0.00857926		1483.99	0.00837337		2073.98	0.00048671		2663.98	0.00346523		3253.98	-0.01071912
304.2	0.04549988		894.19	0.00833665		1484.19	0.00847914		2074.18	-0.00017137		2664.18	0.00378307		3254.18	-0.01017582
304.4	0.04622254		894.39	0.0084239		1484.39	0.00870392		2074.38	-0.00036327		2664.38	0.00383304		3254.38	-0.0100455
304.6	0.04728598		894.59	0.00804643		1484.59	0.00850768		2074.58	-0.0007932		2664.58	0.00430473		3254.58	-0.00967998
304.8	0.04694264		894.79	0.00780629		1484.79	0.00870074		2074.78	-0.00128897		2664.78	0.00437569		3254.78	-0.00884533
305	0.04729211		894.99	0.00772523		1484.99	0.00807426		2074.98	-0.00230258		2664.98	0.00608031		3254.98	-0.00835741
305.2	0.04673034		895.19	0.00750358		1485.19	0.00800804		2075.18	-0.00222136		2665.18	0.00656387		3255.18	-0.00920302
305.4	0.04673413		895.39	0.00659176		1485.39	0.00770953		2075.38	-0.00282845		2665.38	0.00750053		3255.38	-0.0088678
305.6	0.0473329		895.59	0.00515184		1485.59	0.00766487		2075.58	-0.00283295		2665.58	0.00783191		3255.58	-0.0097407
305.8	0.04699081		895.79	0.00571335		1485.79	0.00636037		2075.78	-0.00326133		2665.78	0.00881484		3255.78	-0.00938845
306	0.04696065		895.99	0.00581558		1485.99	0.00703972		2075.98	-0.00282367		2665.98	0.0098975		3255.98	-0.00899087
306.2	0.04772254		896.19	0.00634375		1486.19	0.00712746		2076.18	-0.00215735		2666.18	0.01048961		3256.18	-0.00935652
306.4	0.04859932		896.39	0.00578662		1486.39	0.00730701		2076.38	-0.00187788		2666.38	0.0102277		3256.38	-0.00890267
306.6	0.04961169		896.59	0.00624543		1486.59	0.00822057		2076.58	-0.00178529		2666.58	0.01033429		3256.58	-0.00849469
306.8	0.05046792		896.79	0.00632966		1486.79	0.00813455		2076.78	-0.00010078		2666.78	0.00996895		3256.78	-0.00875055
307	0.05058156		896.99	0.00614851		1486.99	0.0077333		2076.98	0.00034218		2666.98	0.00892709		3256.98	-0.00803623
307.2	0.0498157		897.19	0.00689075		1487.19	0.00854179		2077.18	0.00062528		2667.18	0.00821015		3257.18	-0.00845703
307.4	0.05005964		897.39	0.00730925		1487.39	0.00897427		2077.38	0.00165988		2667.38	0.00785881		3257.38	-0.00916868
307.6	0.04980972		897.59	0.00740334		1487.59	0.00943072		2077.58	0.00191985		2667.58	0.00688137		3257.58	-0.0090289
307.8	0.05050681		897.79	0.0072481		1487.79	0.00959695		2077.78	0.0028122		2667.78	0.0060152		3257.78	-0.00904068
308	0.05176478		897.99	0.00695775		1487.99	0.00975586		2077.98	0.00366153		2667.98	0.00605507		3257.98	-0.00847248
308.2	0.05238272		898.19	0.00634993		1488.19	0.0089107		2078.18	0.00344171		2668.18	0.00623693		3258.18	-0.00831954
308.4	0.05313102		898.39	0.00560198		1488.39	0.00851967		2078.38	0.00388794		2668.38	0.00682818		3258.38	-0.00786003
308.6	0.05361853		898.59	0.00478467		1488.59	0.00797887		2078.58	0.00340663		2668.58	0.007667		3258.58	-0.00717413
308.8	0.05288388		898.79	0.00463449		1488.79	0.00846986		2078.78	0.0035199		2668.78	0.00905338		3258.78	-0.00713952
309	0.05242128		898.99	0.004932		1488.99	0.00850231		2078.98	0.00319071		2668.98	0.01026039		3258.98	-0.00657936
309.2	0.0524709		899.19	0.00429611		1489.19	0.00800243		2079.18	0.00300377		2669.18	0.01058318		3259.18	-0.00704817
309.4	0.05295731		899.39	0.00315755		1489.39	0.00863224		2079.38	0.00240205		2669.38	0.01025305		3259.38	-0.00745888
309.6	0.05374656		899.59	0.00434276		1489.59	0.00890938		2079.58	0.00237269		2669.58	0.00967041		3259.58	-0.00814406
309.8	0.05364411		899.79	0.00552253		1489.79	0.00912473		2079.78	0.00201351		2669.78	0.0100174		3259.78	-0.0080381
310	0.05390141		899.99	0.00558968		1489.99	0.00990431		2079.98	0.00215154		2669.98	0.01035894		3259.98	-0.00872829
310.2	0.05439633		900.19	0.00651488		1490.19	0.00964734		2080.18	0.00217812		2670.18	0.00975891		3260.18	-0.00871199
310.4	0.05436221		900.39	0.00660563		1490.39	0.01034684		2080.38	0.00201007		2670.38	0.00957066		3260.38	-0.00866432
310.6	0.05451757		900.59	0.00846056		1490.59	0.01078973		2080.58	0.0017345		2670.58	0.00919322		3260.58	-0.00910092
310.8	0.05432835		900.79	0.00899604		1490.79	0.01097533		2080.78	0.0029786		2670.78	0.00808639		3260.78	-0.00865277
311	0.05454489		900.99	0.00896844		1490.99	0.01103067		2080.98	0.00234091		2670.98	0.0068005		3260.98	-0.00772983
311.2	0.05427885		901.19	0.01003098		1491.19	0.01205783		2081.18	0.0019454		2671.18	0.00615569		3261.18	-0.00850394
311.4	0.05421562		901.39	0.00960031		1491.39	0.01192666		2081.38	0.00247795		2671.38	0.00539112		3261.38	-0.00843965
311.6	0.05377782		901.59	0.00964897		1491.59	0.01168216		2081.58	0.0030133		2671.58	0.00416353		3261.58	-0.00862818
311.8	0.05436384		901.79	0.00951187		1491.79	0.01053061		2081.78	0.00343841		2671.78	0.00415667		3261.78	-0.00822004
312	0.05509605		901.99	0.0095221		1491.99	0.00956677		2081.98	0.00348469		2671.98	0.00457442		3261.98	-0.00775473
312.2	0.05506926		902.19	0.00907458		1492.19	0.00762949		2082.18	0.00366274		2672.18	0.00402766		3262.18	-0.00752838
312.4	0.05602869		902.39	0.00756593		1492.39	0.00752069		2082.38	0.00344768		2672.38	0.00479589		3262.38	-0.00769053
312.6	0.0563912		902.59	0.00707574		1492.59	0.00774257		2082.58	0.00412081		2672.58	0.00520525		3262.58	-0.0071636
312.8	0.05640726		902.79	0.00635295		1492.79	0.00749992		2082.78	0.00436497		2672.78	0.00586243		3262.78	-0.00774537
313	0.05628044		902.99	0.00619699		1492.99	0.00708177		2082.98	0.00425325		2672.98	0.00592298		3262.98	-0.00764294
313.2	0.05750623		903.19	0.00567484		1493.19	0.00664585		2083.18	0.00425706		2673.18	0.00535132		3263.18	-0.00792685
313.4	0.05768306		903.39	0.00565991		1493.39	0.00722775		2083.38	0.00436993		2673.38	0.005851		3263.38	-0.00914566
313.6	0.05798129		903.59	0.00665129		1493.59	0.00738413		2083.58	0.00488998		2673.58	0.00679026		3263.58	-0.0094057
313.8	0.05833793		903.79	0.00699727		1493.79	0.00782934		2083.78	0.00515499		2673.78	0.0075813		3263.78	-0.00988716
314	0.05876376		903.99	0.00767		1493.99	0.00797108		2083.98	0.00520622		2673.98	0.00843875		3263.98	-0.01017986
314.2	0.05876776		904.19	0.00890609		1494.19	0.00774343		2084.18	0.00431308		2674.18	0.0090263		3264.18	-0.01031922
314.4	0.0581369		904.39	0.00937976		1494.39	0.00819748		2084.38	0.00387527		2674.38	0.00927257		3264.38	-0.01056305
314.6	0.05815685		904.59	0.01120957		1494.59	0.00845548		2084.58	0.00384859		2674.58	0.00941017		3264.58	-0.01079337
314.8	0.05799174		904.79	0.01145059		1494.79	0.00871387		2084.78	0.00399391		2674.78	0.00967102		3264.78	-0.01017069
315	0.05803211		904.99	0.01136162		1494.99	0.00945117		2084.98	0.00393247		2674.98	0.00971076		3264.98	-0.01086077
315.2	0.05720944		905.19	0.01174883		1495.19	0.01028234		2085.18	0.00493989		2675.18	0.0094149		3265.18	-0.0105245
315.4	0.05691968		905.39	0.01172068		1495.39	0.0099537		2085.38	0.00535908		2675.38	0.00828667		3265.38	-0.00959314
315.6	0.05640722		905.59	0.01186847		1495.59	0.0095434		2085.58	0.00489579		2675.58	0.00847861		3265.58	-0.00985999
315.8	0.05732422		905.79	0.0118426		1495.79	0.00958175		2085.78	0.00287556		2675.78	0.00870502		3265.78	-0.00956506
316	0.05704671		905.99	0.01169873		1495.99	0.00970983		2085.98	0.00325553		2675.98	0.00833916		3265.98	-0.00949779
316.2	0.05777979		906.19	0.01058285		1496.19	0.00906965		2086.18	0.00295943		2676.18	0.00788655		3266.18	-0.00905474
316.4	0.05829074		906.39	0.00921041		1496.39	0.00981446		2086.38	0.00203052		2676.38	0.00817806		3266.38	-0.00963016
316.6	0.05860305		906.59	0.00906013		1496.59	0.01042893		2086.58	0.00211659		2676.58	0.00851795		3266.58	-0.00949161
316.8	0.05928156		906.79	0.0087121		1496.79	0.00979735		2086.78	0.00171352		2676.78	0.00830058		3266.78	-0.00865493
317	0.05972769		906.99	0.00889761		1496.99	0.01022821		2086.98	0.00112748		2676.98	0.00829436		3266.98	-0.00740813
317.2	0.06054567		907.19	0.00852189		1497.19	0.01065067		2087.18	0.00071399		2677.18	0.00791681		3267.18	-0.00715705
317.4	0.06068101		907.39	0.00797702		1497.39	0.01120363		2087.38	0.00081652		2677.38	0.00790623		3267.38	-0.00784348
317.6	0.06165931		907.59	0.00787763		1497.59	0.01204112		2087.58	0.00104518		2677.58	0.00753755		3267.58	-0.00819867
317.8	0.06217687		907.79	0.00834567		1497.79	0.01196624		2087.78	0.00084717		2677.78	0.00701345		3267.78	-0.00845064
318	0.06235832		907.99	0.00846805		1497.99	0.01124271		2087.98	0.00134579		2677.98	0.00694844		3267.98	-0.00888346
318.2	0.06193028		908.19	0.0086155		1498.19	0.01149438		2088.18	0.00157446		2678.18	0.00718644		3268.18	-0.00988635
318.4	0.06156363		908.39	0.00913259		1498.39	0.01214249		2088.38	0.00187734		2678.38	0.00681209		3268.38	-0.00969088
318.6	0.06272386		908.59	0.0099442		1498.59	0.01267405		2088.58	0.00236239		2678.58	0.0070084		3268.58	-0.01002293
318.8	0.06232741		908.79	0.01002429		1498.79	0.01309763		2088.78	0.00296054		2678.78	0.00759438		3268.78	-0.00958306
319	0.06180988		908.99	0.00937891		1498.99	0.01421833		2088.98	0.00416305		2678.98	0.00674681		3268.98	-0.00965496
319.2	0.0620941		909.19	0.00949389		1499.19	0.01406933		2089.18	0.00544819		2679.18	0.00692496		3269.18	-0.00887478
319.4	0.06190499		909.39	0.00925921		1499.39	0.01304914		2089.38	0.00512213		2679.38	0.00711008		3269.38	-0.00960648
319.6	0.0616114		909.59	0.0092318		1499.59	0.01280507		2089.58	0.00411083		2679.58	0.00758133		3269.58	-0.01054346
319.8	0.06282328		909.79	0.00881854		1499.79	0.01214713		2089.78	0.00295397		2679.78	0.00804843		3269.78	-0.01130921
320	0.06208348		909.99	0.00839007		1499.99	0.010761		2089.98	0.00383104		2679.98	0.00811999		3269.98	-0.01095685
320.2	0.06196315		910.19	0.00811167		1500.19	0.01068242		2090.18	0.00312254		2680.18	0.00784812		3270.18	-0.01016451
320.4	0.06186099		910.39	0.00818062		1500.39	0.01047321		2090.38	0.00355187		2680.38	0.00835569		3270.38	-0.01037217
320.6	0.06267824		910.59	0.00889219		1500.59	0.01039922		2090.58	0.00358589		2680.58	0.00868079		3270.58	-0.00947681
320.8	0.06310854		910.79	0.00949572		1500.79	0.01040635		2090.78	0.00424103		2680.78	0.00853915		3270.78	-0.00823435
321	0.06343544		910.99	0.00945708		1500.99	0.01065055		2090.98	0.00404688		2680.98	0.00955633		3270.98	-0.00806456
321.2	0.06278697		911.19	0.00931947		1501.19	0.01139618		2091.18	0.0047111		2681.18	0.00948872		3271.18	-0.00813671
321.4	0.06334076		911.39	0.00965932		1501.39	0.01208112		2091.38	0.00514502		2681.38	0.00951646		3271.38	-0.00831135
321.6	0.06454663		911.59	0.01041489		1501.59	0.01224533		2091.58	0.0052704		2681.58	0.01020766		3271.58	-0.00822369
321.8	0.06475489		911.79	0.0109095		1501.79	0.01220596		2091.78	0.00498311		2681.78	0.01055687		3271.78	-0.00859748
322	0.06518419		911.99	0.01080337		1501.99	0.01230727		2091.98	0.00567876		2681.98	0.01115144		3271.98	-0.00925004
322.2	0.06515594		912.19	0.0111825		1502.19	0.01355974		2092.18	0.0047163		2682.18	0.01245949		3272.18	-0.00939238
322.4	0.06615433		912.39	0.01237558		1502.39	0.01353279		2092.38	0.00431908		2682.38	0.01305202		3272.38	-0.00871574
322.6	0.06703266		912.59	0.01236331		1502.59	0.01343241		2092.58	0.00389774		2682.58	0.01336217		3272.58	-0.00881951
322.8	0.06636947		912.79	0.01184646		1502.79	0.01341925		2092.78	0.00395837		2682.78	0.01315254		3272.78	-0.00893708
323	0.06613473		912.99	0.0111371		1502.99	0.01301582		2092.98	0.00428342		2682.98	0.01166038		3272.98	-0.00885632
323.2	0.06706192		913.19	0.01178021		1503.19	0.01236735		2093.18	0.00412291		2683.18	0.01059569		3273.18	-0.00978102
323.4	0.06662221		913.39	0.01119789		1503.39	0.01181181		2093.38	0.00282493		2683.38	0.00998235		3273.38	-0.00955768
323.6	0.06675515		913.59	0.01022992		1503.59	0.01196833		2093.58	0.00199014		2683.58	0.00887114		3273.58	-0.01046743
323.8	0.06689563		913.79	0.00909251		1503.79	0.01104961		2093.78	0.00066124		2683.78	0.0081409		3273.78	-0.01141576
324	0.06589294		913.99	0.00883292		1503.99	0.01037305		2093.98	0.00077033		2683.98	0.0067481		3273.98	-0.01074465
324.2	0.0653993		914.19	0.00848022		1504.19	0.0106599		2094.18	0.00073431		2684.18	0.00536586		3274.18	-0.01098088
324.4	0.06604942		914.39	0.00821673		1504.39	0.0100896		2094.38	0.00131421		2684.38	0.00564514		3274.38	-0.01022868
324.6	0.06659511		914.59	0.00760488		1504.59	0.01043705		2094.58	0.00163938		2684.58	0.00580432		3274.58	-0.01045678
324.8	0.06657467		914.79	0.00781399		1504.79	0.01061192		2094.78	0.00195766		2684.78	0.00617375		3274.78	-0.01041267
325	0.06733697		914.99	0.00747478		1504.99	0.0109838		2094.98	0.00204934		2684.98	0.00663937		3274.98	-0.00980285
325.2	0.06713764		915.19	0.00904838		1505.19	0.01176185		2095.18	0.00214953		2685.18	0.00644266		3275.18	-0.00940557
325.4	0.0678597		915.39	0.01000042		1505.39	0.01166466		2095.38	0.00212432		2685.38	0.00688415		3275.38	-0.00913193
325.6	0.06870327		915.59	0.01054465		1505.59	0.01159814		2095.58	0.00278316		2685.58	0.00757056		3275.58	-0.00922209
325.8	0.0692207		915.79	0.01140599		1505.79	0.0111201		2095.78	0.00307433		2685.78	0.00861644		3275.78	-0.00991824
326	0.06968031		915.99	0.01170733		1505.99	0.01028829		2095.98	0.00357651		2685.98	0.0094782		3275.98	-0.00980276
326.2	0.06988439		916.19	0.01329112		1506.19	0.01063725		2096.18	0.00338582		2686.18	0.01091678		3276.18	-0.00962542
326.4	0.07027535		916.39	0.01374156		1506.39	0.01022924		2096.38	0.0047846		2686.38	0.0114488		3276.38	-0.00945481
326.6	0.06985647		916.59	0.013639		1506.59	0.0105005		2096.58	0.00438462		2686.58	0.01064601		3276.58	-0.01005457
326.8	0.06985219		916.79	0.01369591		1506.79	0.01053444		2096.78	0.00515827		2686.78	0.01022995		3276.78	-0.01043384
327	0.07008337		916.99	0.01373012		1506.99	0.01043838		2096.98	0.0051297		2686.98	0.00974207		3276.98	-0.01040498
327.2	0.07004532		917.19	0.01339227		1507.19	0.01081735		2097.18	0.00523967		2687.18	0.00997655		3277.18	-0.01069758
327.4	0.07072119		917.39	0.01265562		1507.39	0.01179512		2097.38	0.00537537		2687.38	0.01050345		3277.38	-0.01033325
327.6	0.07152148		917.59	0.01251256		1507.59	0.01243352		2097.58	0.0053584		2687.58	0.00972444		3277.58	-0.01140598
327.8	0.07140539		917.79	0.01222954		1507.79	0.01202149		2097.78	0.00488311		2687.78	0.00942886		3277.78	-0.0116262
328	0.0723949		917.99	0.01200322		1507.99	0.01204113		2097.98	0.00457244		2687.98	0.0089401		3277.98	-0.01162811
328.2	0.07208436		918.19	0.0117421		1508.19	0.01141516		2098.18	0.00385758		2688.18	0.00894849		3278.18	-0.01080097
328.4	0.07229492		918.39	0.0108843		1508.39	0.01205025		2098.38	0.00379647		2688.38	0.00997346		3278.38	-0.01079406
328.6	0.0718587		918.59	0.01019402		1508.59	0.01269462		2098.58	0.00286057		2688.58	0.01034187		3278.58	-0.01226721
328.8	0.07238959		918.79	0.01070548		1508.79	0.01222383		2098.78	0.00182999		2688.78	0.0101882		3278.78	-0.0120503
329	0.07243887		918.99	0.01144796		1508.99	0.01335717		2098.98	0.0017488		2688.98	0.01050057		3278.98	-0.01128093
329.2	0.07240805		919.19	0.01184101		1509.19	0.01337601		2099.18	0.00179492		2689.18	0.01045602		3279.18	-0.0112718
329.4	0.07272309		919.39	0.01145287		1509.39	0.01358171		2099.38	0.00228162		2689.38	0.0104865		3279.38	-0.01138443
329.6	0.07336246		919.59	0.0117228		1509.59	0.01376284		2099.58	0.00246804		2689.58	0.01045816		3279.58	-0.01082285
329.8	0.07325893		919.79	0.01211165		1509.79	0.01359986		2099.78	0.00203201		2689.78	0.01024625		3279.78	-0.01097475
330	0.07307548		919.99	0.01219302		1509.99	0.0145982		2099.98	0.00170862		2689.98	0.0102791		3279.98	-0.01123345
330.2	0.0733125		920.19	0.01257478		1510.19	0.01579418		2100.18	0.00238276		2690.18	0.01018806		3280.18	-0.01119628
330.4	0.07278579		920.39	0.01239777		1510.39	0.01584522		2100.38	0.00266024		2690.38	0.00927455		3280.38	-0.0111028
330.6	0.07208183		920.59	0.01294223		1510.59	0.01559181		2100.58	0.00155237		2690.58	0.00849469		3280.58	-0.01103599
330.8	0.07202856		920.79	0.01327062		1510.79	0.01570939		2100.78	0.00173422		2690.78	0.00843262		3280.78	-0.01061445
331	0.0715377		920.99	0.01329035		1510.99	0.01553369		2100.98	0.00229553		2690.98	0.00895303		3280.98	-0.00991112
331.2	0.07245292		921.19	0.01340914		1511.19	0.01534997		2101.18	0.0027045		2691.18	0.00917218		3281.18	-0.00919212
331.4	0.07358101		921.39	0.01404045		1511.39	0.01536541		2101.38	0.00303742		2691.38	0.00855519		3281.38	-0.00907871
331.6	0.07425338		921.59	0.01450506		1511.59	0.01581013		2101.58	0.00368555		2691.58	0.00810115		3281.58	-0.00862506
331.8	0.07424005		921.79	0.01407288		1511.79	0.01522074		2101.78	0.00369464		2691.78	0.00799327		3281.78	-0.00810429
332	0.07480546		921.99	0.01367738		1511.99	0.01494045		2101.98	0.00352256		2691.98	0.00827665		3281.98	-0.00794476
332.2	0.07459398		922.19	0.01383352		1512.19	0.01449095		2102.18	0.00454242		2692.18	0.00907594		3282.18	-0.00661109
332.4	0.0753956		922.39	0.01305706		1512.39	0.01507329		2102.38	0.00483998		2692.38	0.00967274		3282.38	-0.00773929
332.6	0.07495004		922.59	0.01295567		1512.59	0.0150678		2102.58	0.00481161		2692.58	0.00925652		3282.58	-0.00815952
332.8	0.07550434		922.79	0.01299034		1512.79	0.01545218		2102.78	0.00557489		2692.78	0.00914393		3282.78	-0.00765546
333	0.07538912		922.99	0.01325296		1512.99	0.01564515		2102.98	0.00662756		2692.98	0.00868513		3282.98	-0.0073624
333.2	0.076164		923.19	0.01173758		1513.19	0.01613544		2103.18	0.0071244		2693.18	0.00820594		3283.18	-0.00778312
333.4	0.07627562		923.39	0.01139808		1513.39	0.01643971		2103.38	0.00696817		2693.38	0.007998		3283.38	-0.00742427
333.6	0.07623844		923.59	0.0112741		1513.59	0.0167821		2103.58	0.00664979		2693.58	0.00785036		3283.58	-0.00769815
333.8	0.076893		923.79	0.01168606		1513.79	0.01745009		2103.78	0.00657941		2693.78	0.00760525		3283.78	-0.00897155
334	0.07716772		923.99	0.01202337		1513.99	0.01774897		2103.98	0.0065478		2693.98	0.00717613		3283.98	-0.00948944
334.2	0.07706524		924.19	0.01203094		1514.19	0.01705359		2104.18	0.00664909		2694.18	0.00660044		3284.18	-0.01019141
334.4	0.07624835		924.39	0.0123108		1514.39	0.0165723		2104.38	0.00619502		2694.38	0.0055984		3284.38	-0.0107954
334.6	0.07545072		924.59	0.01333493		1514.59	0.01604545		2104.58	0.00590498		2694.58	0.00611403		3284.58	-0.01214871
334.8	0.07451869		924.79	0.01382709		1514.79	0.01626844		2104.78	0.00537439		2694.78	0.00638013		3284.78	-0.01257215
335	0.07435461		924.99	0.01436846		1514.99	0.0157879		2104.98	0.00554693		2694.98	0.00697904		3284.98	-0.01229984
335.2	0.07550592		925.19	0.01407552		1515.19	0.0158521		2105.18	0.00509243		2695.18	0.00697398		3285.18	-0.01164905
335.4	0.07522004		925.39	0.01465321		1515.39	0.01507521		2105.38	0.00453552		2695.38	0.00718168		3285.38	-0.01207175
335.6	0.07580945		925.59	0.0144343		1515.59	0.01529612		2105.58	0.00475254		2695.58	0.00731396		3285.58	-0.01179807
335.8	0.07602505		925.79	0.01453059		1515.79	0.01423632		2105.78	0.00510882		2695.78	0.00784847		3285.78	-0.01143587
336	0.07689917		925.99	0.01388725		1515.99	0.01413674		2105.98	0.00476744		2695.98	0.00860902		3285.98	-0.01163994
336.2	0.07774763		926.19	0.01439535		1516.19	0.01495423		2106.18	0.00459478		2696.18	0.00899774		3286.18	-0.01177579
336.4	0.07823738		926.39	0.0147017		1516.39	0.01512602		2106.38	0.00362136		2696.38	0.00992392		3286.38	-0.01149661
336.6	0.07763136		926.59	0.01528158		1516.59	0.01565387		2106.58	0.00310571		2696.58	0.00958577		3286.58	-0.0115015
336.8	0.07752207		926.79	0.01570871		1516.79	0.01604198		2106.78	0.00390657		2696.78	0.00983656		3286.78	-0.0111458
337	0.07749582		926.99	0.01561801		1516.99	0.0164056		2106.98	0.00414713		2696.98	0.00942425		3286.98	-0.01038477
337.2	0.0783153		927.19	0.01494223		1517.19	0.01682371		2107.18	0.00478514		2697.18	0.00943997		3287.18	-0.00960092
337.4	0.07846671		927.39	0.01592407		1517.39	0.01698584		2107.38	0.0049895		2697.38	0.0086336		3287.38	-0.00847111
337.6	0.07924748		927.59	0.016056		1517.59	0.01692536		2107.58	0.00527121		2697.58	0.00777828		3287.58	-0.00883216
337.8	0.08000302		927.79	0.01689224		1517.79	0.01676642		2107.78	0.00517963		2697.78	0.00663186		3287.78	-0.00849086
338	0.07971491		927.99	0.01618644		1517.99	0.01537242		2107.98	0.00617586		2697.98	0.00549833		3287.98	-0.00867917
338.2	0.07931586		928.19	0.01645417		1518.19	0.01469105		2108.18	0.00628312		2698.18	0.00450656		3288.18	-0.00918889
338.4	0.07914827		928.39	0.01642622		1518.39	0.01352876		2108.38	0.00689388		2698.38	0.00325797		3288.38	-0.00944898
338.6	0.07916467		928.59	0.0171236		1518.59	0.01271944		2108.58	0.00754702		2698.58	0.00342257		3288.58	-0.01005365
338.8	0.07851706		928.79	0.01708383		1518.79	0.01154806		2108.78	0.00767314		2698.78	0.00302151		3288.78	-0.01013961
339	0.07892999		928.99	0.01739616		1518.99	0.01080003		2108.98	0.00827309		2698.98	0.0035047		3288.98	-0.00947279
339.2	0.07961507		929.19	0.01645019		1519.19	0.01024201		2109.18	0.00907738		2699.18	0.00355569		3289.18	-0.01026163
339.4	0.07913875		929.39	0.01658819		1519.39	0.00966144		2109.38	0.00867309		2699.38	0.00408528		3289.38	-0.01119833
339.6	0.07875287		929.59	0.0155511		1519.59	0.01058274		2109.58	0.00951723		2699.58	0.00471089		3289.58	-0.01134587
339.8	0.07886319		929.79	0.01468312		1519.79	0.01117017		2109.78	0.01038325		2699.78	0.00599628		3289.78	-0.0117973
340	0.07936247		929.99	0.01395822		1519.99	0.01261625		2109.98	0.00920541		2699.98	0.00720569		3289.98	-0.01184841
340.2	0.07905593		930.19	0.01460596		1520.19	0.0135206		2110.18	0.00843941		2700.18	0.00860286		3290.18	-0.01213292
340.4	0.07928972		930.39	0.01492714		1520.39	0.01421441		2110.38	0.00850589		2700.38	0.01049149		3290.38	-0.01166921
340.6	0.07873382		930.59	0.0151394		1520.59	0.01521765		2110.58	0.00871975		2700.58	0.01112888		3290.58	-0.01264615
340.8	0.07883643		930.79	0.01499832		1520.79	0.01633811		2110.78	0.00915559		2700.78	0.01116892		3290.78	-0.01184458
341	0.0792667		930.99	0.01428216		1520.99	0.01739449		2110.98	0.00890087		2700.98	0.01186313		3290.98	-0.01056486
341.2	0.0801113		931.19	0.01483146		1521.19	0.01739787		2111.18	0.00935355		2701.18	0.01218073		3291.18	-0.01036536
341.4	0.08074241		931.39	0.01506763		1521.39	0.01801922		2111.38	0.00852144		2701.38	0.01141007		3291.38	-0.00990515
341.6	0.08172921		931.59	0.01474597		1521.59	0.01813785		2111.58	0.00807836		2701.58	0.01132563		3291.58	-0.01003634
341.8	0.08191344		931.79	0.01442325		1521.79	0.01817572		2111.78	0.00732233		2701.78	0.01075121		3291.78	-0.00992221
342	0.08180505		931.99	0.0142063		1521.99	0.01735303		2111.98	0.00839926		2701.98	0.00985195		3291.98	-0.01001302
342.2	0.08107118		932.19	0.01528894		1522.19	0.01654023		2112.18	0.00789355		2702.18	0.00905668		3292.18	-0.01015636
342.4	0.08183934		932.39	0.01536175		1522.39	0.0157987		2112.38	0.00819744		2702.38	0.00838733		3292.38	-0.00974325
342.6	0.08201616		932.59	0.01608394		1522.59	0.01627284		2112.58	0.00780399		2702.58	0.00828332		3292.58	-0.01052927
342.8	0.08138503		932.79	0.01602818		1522.79	0.01542511		2112.78	0.00699626		2702.78	0.00827769		3292.78	-0.01104155
343	0.08148782		932.99	0.01639012		1522.99	0.01576755		2112.98	0.00709239		2702.98	0.00817348		3292.98	-0.01040885
343.2	0.08183943		933.19	0.016849		1523.19	0.0167073		2113.18	0.00769237		2703.18	0.00810271		3293.18	-0.01114741
343.4	0.08102796		933.39	0.01689218		1523.39	0.01734314		2113.38	0.00737581		2703.38	0.00862373		3293.38	-0.01140122
343.6	0.08100581		933.59	0.01582373		1523.59	0.01775701		2113.58	0.0079898		2703.58	0.00948192		3293.58	-0.01115633
343.8	0.08218662		933.79	0.01589974		1523.79	0.01772141		2113.78	0.00777301		2703.78	0.0100495		3293.78	-0.01172788
344	0.08321094		933.99	0.01720886		1523.99	0.01813852		2113.98	0.00717785		2703.98	0.01052737		3293.98	-0.01177509
344.2	0.08414783		934.19	0.0177204		1524.19	0.01789492		2114.18	0.0065951		2704.18	0.01061182		3294.18	-0.01237657
344.4	0.08506166		934.39	0.0175765		1524.39	0.01802321		2114.38	0.00670446		2704.38	0.01169278		3294.38	-0.01265818
344.6	0.08531074		934.59	0.01735461		1524.59	0.01745699		2114.58	0.00626492		2704.58	0.01175248		3294.58	-0.01238523
344.8	0.0858521		934.79	0.01729863		1524.79	0.01767012		2114.78	0.00562942		2704.78	0.01184607		3294.78	-0.01111849
345	0.08524658		934.99	0.01723235		1524.99	0.01782131		2114.98	0.00545443		2704.98	0.01277397		3294.98	-0.01059452
345.2	0.0851543		935.19	0.01690587		1525.19	0.01866165		2115.18	0.00567242		2705.18	0.01229336		3295.18	-0.01142366
345.4	0.08509413		935.39	0.0161191		1525.39	0.01935973		2115.38	0.00522232		2705.38	0.01138165		3295.38	-0.01092972
345.6	0.08511675		935.59	0.0159923		1525.59	0.01951412		2115.58	0.00483225		2705.58	0.01143273		3295.58	-0.01009478
345.8	0.08503568		935.79	0.01594441		1525.79	0.01908002		2115.78	0.00474664		2705.78	0.01076766		3295.78	-0.00981957
346	0.08440848		935.99	0.01657306		1525.99	0.01857147		2115.98	0.00594735		2705.98	0.01008653		3295.98	-0.00924483
346.2	0.08474222		936.19	0.01611889		1526.19	0.01808917		2116.18	0.00606568		2706.18	0.00906238		3296.18	-0.0086401
346.4	0.08562421		936.39	0.0151448		1526.39	0.01901293		2116.38	0.00704567		2706.38	0.00832098		3296.38	-0.00770462
346.6	0.08569653		936.59	0.01503409		1526.59	0.01970871		2116.58	0.00761025		2706.58	0.00812381		3296.58	-0.00814837
346.8	0.08459056		936.79	0.01479291		1526.79	0.01969326		2116.78	0.00906122		2706.78	0.00811404		3296.78	-0.00839887
347	0.08591196		936.99	0.01515527		1526.99	0.02001214		2116.98	0.01094246		2706.98	0.00840637		3296.98	-0.00809603
347.2	0.08584964		937.19	0.01560399		1527.19	0.01989058		2117.18	0.01157018		2707.18	0.00903489		3297.18	-0.00812463
347.4	0.08628798		937.39	0.01492165		1527.39	0.0186765		2117.38	0.01203602		2707.38	0.00974473		3297.38	-0.00923234
347.6	0.08676485		937.59	0.01517669		1527.59	0.01818391		2117.58	0.01170369		2707.58	0.00998608		3297.58	-0.00955616
347.8	0.0876855		937.79	0.01621677		1527.79	0.01807774		2117.78	0.01086059		2707.78	0.00999523		3297.78	-0.01029956
348	0.08780582		937.99	0.01698973		1527.99	0.01803027		2117.98	0.01085662		2707.98	0.01000411		3297.98	-0.01010827
348.2	0.0882474		938.19	0.0165018		1528.19	0.01752417		2118.18	0.0108171		2708.18	0.01001163		3298.18	-0.00995911
348.4	0.08752775		938.39	0.01606799		1528.39	0.01756034		2118.38	0.01063487		2708.38	0.01093211		3298.38	-0.00965392
348.6	0.08693096		938.59	0.01660838		1528.59	0.01754696		2118.58	0.00939405		2708.58	0.0110658		3298.58	-0.00841498
348.8	0.08632425		938.79	0.01811927		1528.79	0.01835233		2118.78	0.00794687		2708.78	0.01152527		3298.78	-0.00870724
349	0.08588481		938.99	0.01858881		1528.99	0.01900213		2118.98	0.0077829		2708.98	0.01159092		3298.98	-0.00880528
349.2	0.08500971		939.19	0.01835379		1529.19	0.01984969		2119.18	0.00746804		2709.18	0.01162095		3299.18	-0.00932708
349.4	0.08473173		939.39	0.01828772		1529.39	0.01911981		2119.38	0.00588547		2709.38	0.01122216		3299.38	-0.00888585
349.6	0.08466426		939.59	0.01873526		1529.59	0.01908663		2119.58	0.00471755		2709.58	0.0117984		3299.58	-0.00835577
349.8	0.08491676		939.79	0.01852987		1529.79	0.01855824		2119.78	0.00468907		2709.78	0.01083427		3299.78	-0.00888429
350	0.08445572		939.99	0.01823916		1529.99	0.01834866		2119.98	0.00528043		2709.98	0.0098384		3299.98	-0.00889554
350.2	0.08533072		940.19	0.01789899		1530.19	0.0187393		2120.18	0.00575121		2710.18	0.00937123		3300.18	-0.00879891
350.4	0.08531697		940.39	0.01787762		1530.39	0.01940564		2120.38	0.00659776		2710.38	0.00964776		3300.38	-0.00888501
350.6	0.08476203		940.59	0.01781511		1530.59	0.01953833		2120.58	0.00719936		2710.58	0.00863503		3300.58	-0.00944618
350.8	0.08442699		940.79	0.01781412		1530.79	0.01868919		2120.78	0.00803283		2710.78	0.00883592		3300.78	-0.01005521
351	0.08572479		940.99	0.01805368		1530.99	0.01841488		2120.98	0.00717379		2710.98	0.00817486		3300.98	-0.00981062
351.2	0.08543894		941.19	0.01836389		1531.19	0.01766694		2121.18	0.00672766		2711.18	0.00806756		3301.18	-0.01070171
351.4	0.08691028		941.39	0.01820189		1531.39	0.01733545		2121.38	0.0070083		2711.38	0.00759603		3301.38	-0.01169649
351.6	0.08645392		941.59	0.01915581		1531.59	0.01803349		2121.58	0.00641407		2711.58	0.00654925		3301.58	-0.01174315
351.8	0.08705789		941.79	0.01915306		1531.79	0.01870797		2121.78	0.00685338		2711.78	0.0067563		3301.78	-0.01123315
352	0.08725565		941.99	0.01917798		1531.99	0.01846106		2121.98	0.00733027		2711.98	0.00708482		3301.98	-0.01060745
352.2	0.0875116		942.19	0.01887485		1532.19	0.01874974		2122.18	0.00783745		2712.18	0.00802619		3302.18	-0.01116982
352.4	0.08704977		942.39	0.01916152		1532.39	0.01938666		2122.38	0.00814285		2712.38	0.00858598		3302.38	-0.01109432
352.6	0.08804855		942.59	0.01972917		1532.59	0.01974395		2122.58	0.00783228		2712.58	0.00898591		3302.58	-0.01054065
352.8	0.08873218		942.79	0.02015714		1532.79	0.01973838		2122.78	0.00909666		2712.78	0.00971864		3302.78	-0.01179681
353	0.08958782		942.99	0.02038465		1532.99	0.01912831		2122.98	0.01049771		2712.98	0.01015861		3302.98	-0.01185505
353.2	0.08822392		943.19	0.0203525		1533.19	0.01850529		2123.18	0.0104204		2713.18	0.01076392		3303.18	-0.01230841
353.4	0.08837261		943.39	0.02076359		1533.39	0.017844		2123.38	0.01060462		2713.38	0.01063485		3303.38	-0.01264954
353.6	0.08784402		943.59	0.02129539		1533.59	0.01867027		2123.58	0.01098011		2713.58	0.01081166		3303.58	-0.01240589
353.8	0.08819782		943.79	0.02078458		1533.79	0.01734296		2123.78	0.01223142		2713.78	0.01030947		3303.78	-0.01338411
354	0.08869327		943.99	0.02086499		1533.99	0.01640609		2123.98	0.0123569		2713.98	0.01091271		3303.98	-0.0131963
354.2	0.08967294		944.19	0.02037713		1534.19	0.01649297		2124.18	0.01300951		2714.18	0.01086051		3304.18	-0.01290779
354.4	0.08906444		944.39	0.01929138		1534.39	0.0162094		2124.38	0.01359554		2714.38	0.01034799		3304.38	-0.0132225
354.6	0.08877517		944.59	0.01880087		1534.59	0.01679175		2124.58	0.01319387		2714.58	0.00998503		3304.58	-0.01285787
354.8	0.08974369		944.79	0.0185471		1534.79	0.01655459		2124.78	0.0125487		2714.78	0.0109449		3304.78	-0.0125562
355	0.08930015		944.99	0.01857916		1534.99	0.01774992		2124.98	0.01151992		2714.98	0.01083245		3304.98	-0.01287827
355.2	0.0893123		945.19	0.01886128		1535.19	0.01777658		2125.18	0.01156795		2715.18	0.01168951		3305.18	-0.01227136
355.4	0.09029361		945.39	0.01929193		1535.39	0.01867924		2125.38	0.01077991		2715.38	0.01219292		3305.38	-0.01145088
355.6	0.08950231		945.59	0.01991004		1535.59	0.01878561		2125.58	0.01038929		2715.58	0.01254128		3305.58	-0.01101511
355.8	0.09046701		945.79	0.01973836		1535.79	0.01869251		2125.78	0.00999078		2715.78	0.01403675		3305.78	-0.00994098
356	0.09099082		945.99	0.01937166		1535.99	0.01883596		2125.98	0.00837014		2715.98	0.01448558		3305.98	-0.00961
356.2	0.09152879		946.19	0.01959458		1536.19	0.01969938		2126.18	0.00757253		2716.18	0.01453752		3306.18	-0.00947201
356.4	0.09194397		946.39	0.019755		1536.39	0.0207552		2126.38	0.00724564		2716.38	0.0139238		3306.38	-0.00889258
356.6	0.0924061		946.59	0.02005216		1536.59	0.02043989		2126.58	0.00634252		2716.58	0.01402084		3306.58	-0.00849251
356.8	0.09180382		946.79	0.0206792		1536.79	0.01980577		2126.78	0.00713235		2716.78	0.0134392		3306.78	-0.00874097
357	0.09118125		946.99	0.02142907		1536.99	0.01892764		2126.98	0.00731594		2716.98	0.0132172		3306.98	-0.00887201
357.2	0.089462		947.19	0.02189413		1537.19	0.01927071		2127.18	0.00656069		2717.18	0.01216743		3307.18	-0.00890124
357.4	0.08992763		947.39	0.02108827		1537.39	0.01956082		2127.38	0.00685734		2717.38	0.01068969		3307.38	-0.00875082
357.6	0.08948338		947.59	0.01997752		1537.59	0.01946373		2127.58	0.00681314		2717.58	0.00972096		3307.58	-0.00971519
357.8	0.09023283		947.79	0.01839426		1537.79	0.01859419		2127.78	0.00754124		2717.78	0.00938888		3307.78	-0.01068198
358	0.09086922		947.99	0.01709994		1537.99	0.01835208		2127.98	0.00698097		2717.98	0.00909758		3307.98	-0.01152607
358.2	0.09036769		948.19	0.01557766		1538.19	0.01855682		2128.18	0.00807508		2718.18	0.00795304		3308.18	-0.01270635
358.4	0.09005489		948.39	0.01494433		1538.39	0.01877201		2128.38	0.00810742		2718.38	0.00838653		3308.38	-0.01333002
358.6	0.09006189		948.59	0.01506577		1538.59	0.01839511		2128.58	0.00817651		2718.58	0.00871451		3308.58	-0.01373556
358.8	0.08944273		948.79	0.014829		1538.79	0.01815741		2128.78	0.00833575		2718.78	0.00931832		3308.78	-0.01429543
359	0.08831922		948.99	0.01518601		1538.99	0.01820188		2128.98	0.00821145		2718.98	0.00954924		3308.98	-0.0145958
359.2	0.08960011		949.19	0.01553292		1539.19	0.01750061		2129.18	0.00848131		2719.18	0.00979045		3309.18	-0.01350654
359.4	0.09126528		949.39	0.01633462		1539.39	0.01743862		2129.38	0.00810299		2719.38	0.01122843		3309.38	-0.01295635
359.6	0.09175535		949.59	0.01714177		1539.59	0.01677816		2129.58	0.00924092		2719.58	0.01191268		3309.58	-0.0117287
359.8	0.09340483		949.79	0.01766899		1539.79	0.01747491		2129.78	0.00896438		2719.78	0.01268426		3309.78	-0.01105282
360	0.09425978		949.99	0.01855394		1539.99	0.01802539		2129.98	0.00801244		2719.98	0.012128		3309.98	-0.01055822
360.2	0.09424996		950.19	0.01982754		1540.19	0.01848652		2130.18	0.00784617		2720.18	0.01270076		3310.18	-0.01006979
360.4	0.09473943		950.39	0.02143064		1540.39	0.01794639		2130.38	0.00783417		2720.38	0.01309023		3310.38	-0.00941365
360.6	0.09513026		950.59	0.02160176		1540.59	0.0168893		2130.58	0.00846898		2720.58	0.01327732		3310.58	-0.00885304
360.8	0.09490432		950.79	0.02280013		1540.79	0.01700218		2130.78	0.00921211		2720.78	0.01285351		3310.78	-0.00819169
361	0.09437148		950.99	0.02259216		1540.99	0.01698863		2130.98	0.00942604		2720.98	0.01255554		3310.98	-0.00824554
361.2	0.09453847		951.19	0.0228914		1541.19	0.01788927		2131.18	0.00896951		2721.18	0.01188313		3311.18	-0.00817759
361.4	0.09515536		951.39	0.02248121		1541.39	0.01788195		2131.38	0.00936949		2721.38	0.01071058		3311.38	-0.00782145
361.6	0.09513793		951.59	0.02226351		1541.59	0.01830645		2131.58	0.00960887		2721.58	0.01128532		3311.58	-0.00884685
361.8	0.09637067		951.79	0.02216996		1541.79	0.01777035		2131.78	0.00994217		2721.78	0.01066939		3311.78	-0.0091126
362	0.09652071		951.99	0.02252564		1541.99	0.01716174		2131.98	0.00965525		2721.98	0.01091993		3311.98	-0.00959296
362.2	0.09620215		952.19	0.02190065		1542.19	0.01688847		2132.18	0.0101707		2722.18	0.01054639		3312.18	-0.01020419
362.4	0.09653404		952.39	0.02184115		1542.39	0.01764086		2132.38	0.00921722		2722.38	0.01078365		3312.38	-0.01047286
362.6	0.09509649		952.59	0.02209865		1542.59	0.01682382		2132.58	0.00912827		2722.58	0.010909		3312.58	-0.01110499
362.8	0.09469882		952.79	0.02139291		1542.79	0.01691239		2132.78	0.00854476		2722.78	0.01088867		3312.78	-0.0113375
363	0.09546509		952.99	0.02136546		1542.99	0.0166046		2132.98	0.00799782		2722.98	0.01080427		3312.98	-0.01233263
363.2	0.09602148		953.19	0.0208333		1543.19	0.01634876		2133.18	0.00798791		2723.18	0.01118217		3313.18	-0.01206709
363.4	0.09577672		953.39	0.02123327		1543.39	0.01641121		2133.38	0.00800436		2723.38	0.01215439		3313.38	-0.01178977
363.6	0.09460138		953.59	0.02083933		1543.59	0.01728147		2133.58	0.00815032		2723.58	0.01120851		3313.58	-0.0117173
363.8	0.09389558		953.79	0.02076646		1543.79	0.0182465		2133.78	0.00799117		2723.78	0.01050756		3313.78	-0.01272382
364	0.09404349		953.99	0.02120209		1543.99	0.01853482		2133.98	0.00668593		2723.98	0.01018396		3313.98	-0.01205859
364.2	0.09403893		954.19	0.02082082		1544.19	0.01907117		2134.18	0.00622821		2724.18	0.01083484		3314.18	-0.0123268
364.4	0.09439875		954.39	0.02093964		1544.39	0.01916888		2134.38	0.00663147		2724.38	0.01080113		3314.38	-0.01253061
364.6	0.09390918		954.59	0.02038391		1544.59	0.02006586		2134.58	0.00790049		2724.58	0.01065134		3314.58	-0.01167581
364.8	0.09344534		954.79	0.02076891		1544.79	0.02008499		2134.78	0.00779327		2724.78	0.00985827		3314.78	-0.01165771
365	0.09319299		954.99	0.02053862		1544.99	0.02069368		2134.98	0.00881824		2724.98	0.009356		3314.98	-0.011601
365.2	0.09335489		955.19	0.02100298		1545.19	0.02124314		2135.18	0.00969464		2725.18	0.00895557		3315.18	-0.01104537
365.4	0.0940219		955.39	0.02090694		1545.39	0.02110272		2135.38	0.01098627		2725.38	0.00821015		3315.38	-0.01057099
365.6	0.09428505		955.59	0.02057724		1545.59	0.02111132		2135.58	0.01150145		2725.58	0.00886191		3315.58	-0.0093394
365.8	0.09510675		955.79	0.02169743		1545.79	0.02064374		2135.78	0.01197921		2725.78	0.0089959		3315.78	-0.00914907
366	0.09516278		955.99	0.02179573		1545.99	0.02076065		2135.98	0.01190161		2725.98	0.01041012		3315.98	-0.0092584
366.2	0.09510995		956.19	0.021152		1546.19	0.020675		2136.18	0.01213811		2726.18	0.01157589		3316.18	-0.01019585
366.4	0.09541953		956.39	0.02069101		1546.39	0.02084275		2136.38	0.01161809		2726.38	0.01242673		3316.38	-0.00973994
366.6	0.09474038		956.59	0.02094563		1546.59	0.02015423		2136.58	0.01174897		2726.58	0.01352147		3316.58	-0.00983355
366.8	0.09483333		956.79	0.02089757		1546.79	0.02009383		2136.78	0.01105625		2726.78	0.0136924		3316.78	-0.0108815
367	0.09495176		956.99	0.02110424		1546.99	0.01986937		2136.98	0.01035768		2726.98	0.0138525		3316.98	-0.01091903
367.2	0.09483569		957.19	0.0206477		1547.19	0.01964712		2137.18	0.00924639		2727.18	0.0135396		3317.18	-0.01021905
367.4	0.09514126		957.39	0.02113947		1547.39	0.0195639		2137.38	0.00986961		2727.38	0.01308896		3317.38	-0.01019715
367.6	0.09499283		957.59	0.0206538		1547.59	0.02058969		2137.58	0.00867509		2727.58	0.0126788		3317.58	-0.01065944
367.8	0.09529321		957.79	0.02087547		1547.79	0.02018921		2137.78	0.0083601		2727.78	0.01284964		3317.78	-0.01062251
368	0.09610688		957.99	0.02141449		1547.99	0.02068019		2137.98	0.0072998		2727.98	0.01289284		3317.98	-0.01046835
368.2	0.09704514		958.19	0.02126029		1548.19	0.02094305		2138.18	0.00797557		2728.18	0.01276946		3318.18	-0.01076984
368.4	0.0969922		958.39	0.02163861		1548.39	0.02096652		2138.38	0.00847031		2728.38	0.01199409		3318.38	-0.01067863
368.6	0.0973334		958.59	0.02141662		1548.59	0.02081229		2138.58	0.00873082		2728.58	0.01111558		3318.58	-0.01054257
368.8	0.0976736		958.79	0.02107849		1548.79	0.02046701		2138.78	0.00838434		2728.78	0.01023247		3318.78	-0.01125436
369	0.09760015		958.99	0.02193977		1548.99	0.02136058		2138.98	0.00914526		2728.98	0.01034425		3318.98	-0.01142234
369.2	0.09736126		959.19	0.02174982		1549.19	0.0206059		2139.18	0.00888138		2729.18	0.00943231		3319.18	-0.01180865
369.4	0.09807139		959.39	0.02132983		1549.39	0.0200287		2139.38	0.00888392		2729.38	0.00952128		3319.38	-0.01142343
369.6	0.09821769		959.59	0.02124315		1549.59	0.01909218		2139.58	0.00814464		2729.58	0.00996616		3319.58	-0.01078197
369.8	0.09859661		959.79	0.02126022		1549.79	0.01848274		2139.78	0.00816636		2729.78	0.01045046		3319.78	-0.01160099
370	0.09882196		959.99	0.02058692		1549.99	0.01869848		2139.98	0.00814337		2729.98	0.01100397		3319.98	-0.01207483
370.2	0.09848229		960.19	0.02091713		1550.19	0.01943449		2140.18	0.00841949		2730.18	0.01179085		3320.18	-0.01178994
370.4	0.09778785		960.39	0.02061599		1550.39	0.02044979		2140.38	0.00722411		2730.38	0.01197696		3320.38	-0.01085629
370.6	0.09658586		960.59	0.02070324		1550.59	0.02101797		2140.58	0.00646801		2730.58	0.01183755		3320.58	-0.01155714
370.8	0.0963877		960.79	0.02092096		1550.79	0.02115203		2140.78	0.00613741		2730.78	0.0118908		3320.78	-0.01136881
371	0.09652546		960.99	0.02095329		1550.99	0.01983163		2140.98	0.00597844		2730.98	0.01221785		3320.98	-0.0101773
371.2	0.09722312		961.19	0.02028472		1551.19	0.01994444		2141.18	0.00627847		2731.18	0.01220605		3321.18	-0.00970109
371.4	0.09710693		961.39	0.02028251		1551.39	0.01958437		2141.38	0.00777539		2731.38	0.01246584		3321.38	-0.00992968
371.6	0.09691096		961.59	0.02011994		1551.59	0.02012966		2141.58	0.00733553		2731.58	0.01301749		3321.58	-0.00992604
371.8	0.09698698		961.79	0.02057023		1551.79	0.02024445		2141.78	0.00829544		2731.78	0.01267083		3321.78	-0.00890173
372	0.09754894		961.99	0.0207894		1551.99	0.02213054		2141.98	0.00912087		2731.98	0.01236887		3321.98	-0.00935775
372.2	0.09850685		962.19	0.02082173		1552.19	0.02193361		2142.18	0.00976659		2732.18	0.01172023		3322.18	-0.00932416
372.4	0.09739072		962.39	0.020686		1552.39	0.02257034		2142.38	0.01040192		2732.38	0.01151506		3322.38	-0.00958004
372.6	0.09767533		962.59	0.02096206		1552.59	0.02343274		2142.58	0.01076389		2732.58	0.01063638		3322.58	-0.01048305
372.8	0.09861968		962.79	0.0209375		1552.79	0.02378354		2142.78	0.01141696		2732.78	0.01063947		3322.78	-0.0101672
373	0.09919695		962.99	0.02115295		1552.99	0.02453094		2142.98	0.01087912		2732.98	0.01072659		3322.98	-0.01101058
373.2	0.09912225		963.19	0.02164071		1553.19	0.02403794		2143.18	0.01084623		2733.18	0.01067887		3323.18	-0.01134142
373.4	0.10046185		963.39	0.02074437		1553.39	0.02444844		2143.38	0.01122739		2733.38	0.01084378		3323.38	-0.01092203
373.6	0.10139383		963.59	0.02048759		1553.59	0.02448732		2143.58	0.01250418		2733.58	0.01033831		3323.58	-0.01157408
373.8	0.10141815		963.79	0.02076908		1553.79	0.02411403		2143.78	0.01258533		2733.78	0.01104534		3323.78	-0.01248365
374	0.1019801		963.99	0.02151615		1553.99	0.02498796		2143.98	0.01269417		2733.98	0.01100927		3323.98	-0.01271516
374.2	0.10173632		964.19	0.02242528		1554.19	0.02497285		2144.18	0.01222111		2734.18	0.0116361		3324.18	-0.01224746
374.4	0.10189087		964.39	0.02278828		1554.39	0.02507479		2144.38	0.01095019		2734.38	0.01238701		3324.38	-0.0120723
374.6	0.10154968		964.59	0.02324329		1554.59	0.02474098		2144.58	0.01108583		2734.58	0.01226097		3324.58	-0.01277591
374.8	0.10173511		964.79	0.02395973		1554.79	0.02340277		2144.78	0.01123276		2734.78	0.0133486		3324.78	-0.01186555
375	0.10084176		964.99	0.02477497		1554.99	0.02237705		2144.98	0.01131893		2734.98	0.01321236		3324.98	-0.01152584
375.2	0.10074422		965.19	0.02455527		1555.19	0.02223955		2145.18	0.01175065		2735.18	0.01298716		3325.18	-0.01115061
375.4	0.10052996		965.39	0.02453871		1555.39	0.02220191		2145.38	0.01141124		2735.38	0.01291151		3325.38	-0.01097185
375.6	0.10073822		965.59	0.02429136		1555.59	0.02322883		2145.58	0.01092392		2735.58	0.01314073		3325.58	-0.01087459
375.8	0.10061446		965.79	0.0240605		1555.79	0.0227309		2145.78	0.0108179		2735.78	0.01267119		3325.78	-0.01066741
376	0.0999312		965.99	0.02401702		1555.99	0.02193734		2145.98	0.01076296		2735.98	0.01274638		3325.98	-0.01153331
376.2	0.09977576		966.19	0.02461092		1556.19	0.02164327		2146.18	0.01071728		2736.18	0.0118499		3326.18	-0.01092809
376.4	0.09923748		966.39	0.02363378		1556.39	0.02224604		2146.38	0.01114117		2736.38	0.01245672		3326.38	-0.01069498
376.6	0.09936557		966.59	0.02355999		1556.59	0.02269999		2146.58	0.01157202		2736.58	0.01165018		3326.58	-0.01123311
376.8	0.0998607		966.79	0.02274337		1556.79	0.02297333		2146.78	0.01180723		2736.78	0.01255645		3326.78	-0.01108265
377	0.09952312		966.99	0.02256051		1556.99	0.02392717		2146.98	0.0114142		2736.98	0.0121574		3326.98	-0.01133279
377.2	0.09962523		967.19	0.02287712		1557.19	0.02431078		2147.18	0.01189494		2737.18	0.01177818		3327.18	-0.01138165
377.4	0.09980517		967.39	0.02161472		1557.39	0.02426587		2147.38	0.01216698		2737.38	0.01110252		3327.38	-0.0109381
377.6	0.09993984		967.59	0.02249976		1557.59	0.02315637		2147.58	0.01245377		2737.58	0.01039183		3327.58	-0.01159317
377.8	0.10054468		967.79	0.0222856		1557.79	0.02263178		2147.78	0.01230436		2737.78	0.01024926		3327.78	-0.01241516
378	0.10141644		967.99	0.02241328		1557.99	0.02317806		2147.98	0.01291986		2737.98	0.0097171		3327.98	-0.01181962
378.2	0.10099229		968.19	0.02293161		1558.19	0.02362903		2148.18	0.01320624		2738.18	0.01069714		3328.18	-0.01172256
378.4	0.10124928		968.39	0.02373683		1558.39	0.0234749		2148.38	0.01301765		2738.38	0.01075119		3328.38	-0.01181378
378.6	0.10112043		968.59	0.02361987		1558.59	0.02324738		2148.58	0.01349486		2738.58	0.01131287		3328.58	-0.01193534
378.8	0.10075268		968.79	0.02425176		1558.79	0.02292646		2148.78	0.01288934		2738.78	0.01151222		3328.78	-0.01141438
379	0.10066108		968.99	0.02510698		1558.99	0.02254485		2148.98	0.0127114		2738.98	0.01144171		3328.98	-0.01110066
379.2	0.10132977		969.19	0.02460943		1559.19	0.0219746		2149.18	0.01219795		2739.18	0.01298538		3329.18	-0.01074371
379.4	0.10194268		969.39	0.02451413		1559.39	0.02308066		2149.38	0.01153877		2739.38	0.01285369		3329.38	-0.0100245
379.6	0.10209123		969.59	0.02358668		1559.59	0.02320902		2149.58	0.01108697		2739.58	0.01306628		3329.58	-0.01063691
379.8	0.10200702		969.79	0.02317873		1559.79	0.02376662		2149.78	0.01055839		2739.78	0.01303596		3329.78	-0.01024486
380	0.10261832		969.99	0.02300216		1559.99	0.02336495		2149.98	0.01048142		2739.98	0.01346355		3329.98	-0.01095323
380.2	0.10292016		970.19	0.02297248		1560.19	0.02440233		2150.18	0.0101192		2740.18	0.01321436		3330.18	-0.01126836
380.4	0.10231295		970.39	0.02181479		1560.39	0.02462808		2150.38	0.00979147		2740.38	0.0140852		3330.38	-0.01227318
380.6	0.101863		970.59	0.02180034		1560.59	0.02559074		2150.58	0.00917487		2740.58	0.01293546		3330.58	-0.01267668
380.8	0.10181866		970.79	0.02086229		1560.79	0.02630943		2150.78	0.00905829		2740.78	0.0131624		3330.78	-0.01204085
381	0.10171395		970.99	0.02041335		1560.99	0.02623978		2150.98	0.00912888		2740.98	0.01195305		3330.98	-0.01192972
381.2	0.10134478		971.19	0.02023797		1561.19	0.02574482		2151.18	0.00897359		2741.18	0.0117653		3331.18	-0.01150317
381.4	0.10141778		971.39	0.01968252		1561.39	0.02491072		2151.38	0.00901586		2741.38	0.01093068		3331.38	-0.0113909
381.6	0.10196925		971.59	0.01986866		1561.59	0.02420921		2151.58	0.01018776		2741.58	0.01050424		3331.58	-0.01172997
381.8	0.10249318		971.79	0.01890115		1561.79	0.02466084		2151.78	0.01161623		2741.78	0.01016561		3331.78	-0.01177352
382	0.10231039		971.99	0.01938082		1561.99	0.02392529		2151.98	0.01255323		2741.98	0.01075445		3331.98	-0.01116501
382.2	0.10139745		972.19	0.01996835		1562.19	0.02360825		2152.18	0.01283927		2742.18	0.01027968		3332.18	-0.01092607
382.4	0.10137651		972.39	0.02091064		1562.39	0.02273811		2152.38	0.01191324		2742.38	0.01099707		3332.38	-0.01136073
382.6	0.10078576		972.59	0.02187881		1562.59	0.02238779		2152.58	0.0110535		2742.58	0.01167331		3332.58	-0.01115739
382.8	0.10025722		972.79	0.02297252		1562.79	0.02169147		2152.78	0.01060365		2742.78	0.01168359		3332.78	-0.01098875
383	0.10120071		972.99	0.02411016		1562.99	0.02131255		2152.98	0.0104871		2742.98	0.01222271		3332.98	-0.01014955
383.2	0.10125517		973.19	0.02471145		1563.19	0.02152273		2153.18	0.01036482		2743.18	0.01260435		3333.18	-0.00999147
383.4	0.10136908		973.39	0.02510903		1563.39	0.02261843		2153.38	0.01044892		2743.38	0.01154421		3333.38	-0.00947844
383.6	0.10237656		973.59	0.02473986		1563.59	0.02289792		2153.58	0.00961309		2743.58	0.01190174		3333.58	-0.01000985
383.8	0.10291878		973.79	0.02613523		1563.79	0.02384876		2153.78	0.00904516		2743.78	0.01174725		3333.78	-0.01055754
384	0.10330502		973.99	0.02704932		1563.99	0.02346854		2153.98	0.00874735		2743.98	0.01193134		3333.98	-0.01214388
384.2	0.10321373		974.19	0.02689995		1564.19	0.02434504		2154.18	0.0087539		2744.18	0.01173558		3334.18	-0.01251002
384.4	0.10379378		974.39	0.02673305		1564.39	0.02476335		2154.38	0.00865014		2744.38	0.01173408		3334.38	-0.01273058
384.6	0.10399005		974.59	0.02638696		1564.59	0.02521509		2154.58	0.00885612		2744.58	0.01137565		3334.58	-0.01246299
384.8	0.10462785		974.79	0.02639409		1564.79	0.0245662		2154.78	0.01022199		2744.78	0.01151631		3334.78	-0.01219555
385	0.10501683		974.99	0.02632802		1564.99	0.0239519		2154.98	0.01049027		2744.98	0.01194712		3334.98	-0.01279022
385.2	0.10586175		975.19	0.02612073		1565.19	0.02421094		2155.18	0.01112988		2745.18	0.01225064		3335.18	-0.01178193
385.4	0.10618602		975.39	0.02591203		1565.39	0.02423452		2155.38	0.01206765		2745.38	0.0124974		3335.38	-0.01183339
385.6	0.10594947		975.59	0.02541598		1565.59	0.02443603		2155.58	0.01368828		2745.58	0.01297446		3335.58	-0.01022587
385.8	0.1060231		975.79	0.02514721		1565.79	0.02466561		2155.78	0.01416592		2745.78	0.01237348		3335.78	-0.00957741
386	0.1051824		975.99	0.02577101		1565.99	0.024461		2155.98	0.01381778		2745.98	0.01282945		3335.98	-0.00943327
386.2	0.10467472		976.19	0.02586809		1566.19	0.02404586		2156.18	0.01398652		2746.18	0.01258104		3336.18	-0.00981444
386.4	0.10376005		976.39	0.02630673		1566.39	0.02441606		2156.38	0.0135082		2746.38	0.01322211		3336.38	-0.01004988
386.6	0.10339562		976.59	0.02571483		1566.59	0.02405867		2156.58	0.01353481		2746.58	0.0124247		3336.58	-0.00995077
386.8	0.103731		976.79	0.02584373		1566.79	0.02451924		2156.78	0.01403337		2746.78	0.01228405		3336.78	-0.00960263
387	0.10363034		976.99	0.02597124		1566.99	0.02540932		2156.98	0.01411541		2746.98	0.01183382		3336.98	-0.00972443
387.2	0.10267893		977.19	0.02592833		1567.19	0.02550649		2157.18	0.01378375		2747.18	0.01169588		3337.18	-0.01048074
387.4	0.10352605		977.39	0.02573904		1567.39	0.0264182		2157.38	0.01401448		2747.38	0.01156153		3337.38	-0.01066364
387.6	0.10397778		977.59	0.02594392		1567.59	0.02656836		2157.58	0.01268194		2747.58	0.01189215		3337.58	-0.01142432
387.8	0.10322431		977.79	0.02617439		1567.79	0.02641582		2157.78	0.0122866		2747.78	0.0124458		3337.78	-0.01201691
388	0.10336594		977.99	0.0253485		1567.99	0.02620383		2157.98	0.01218602		2747.98	0.01273785		3337.98	-0.01286737
388.2	0.10418755		978.19	0.02529993		1568.19	0.02571836		2158.18	0.01236347		2748.18	0.01289824		3338.18	-0.01238829
388.4	0.10530699		978.39	0.02559819		1568.39	0.02570831		2158.38	0.01144685		2748.38	0.01335665		3338.38	-0.01377604
388.6	0.10556818		978.59	0.02529195		1568.59	0.0257027		2158.58	0.01150115		2748.58	0.01340683		3338.58	-0.01361361
388.8	0.10547696		978.79	0.02545147		1568.79	0.02599875		2158.78	0.01249401		2748.78	0.01362848		3338.78	-0.01442257
389	0.10521071		978.99	0.02542057		1568.99	0.02617922		2158.98	0.01239483		2748.98	0.01410396		3338.98	-0.01376502
389.2	0.10488666		979.19	0.02603905		1569.19	0.02607053		2159.18	0.0128316		2749.18	0.0138407		3339.18	-0.01344788
389.4	0.1041944		979.39	0.02585631		1569.39	0.02562576		2159.38	0.01347834		2749.38	0.01412291		3339.38	-0.01327534
389.6	0.10374611		979.59	0.02575304		1569.59	0.02539212		2159.58	0.01293072		2749.58	0.01425865		3339.58	-0.01189102
389.8	0.10374096		979.79	0.02589525		1569.79	0.02511481		2159.78	0.01261416		2749.78	0.01426119		3339.78	-0.01178264
390	0.1038133		979.99	0.02670444		1569.99	0.02475413		2159.98	0.01262989		2749.98	0.01408213		3339.98	-0.01152192
390.2	0.10474717		980.19	0.0265155		1570.19	0.02390405		2160.18	0.01380186		2750.18	0.01312136		3340.18	-0.01131939
390.4	0.10468418		980.39	0.02619783		1570.39	0.02372777		2160.38	0.01344459		2750.38	0.01299017		3340.38	-0.01154725
390.6	0.10483979		980.59	0.02622329		1570.59	0.02274826		2160.58	0.01288881		2750.58	0.0125011		3340.58	-0.01092018
390.8	0.10490318		980.79	0.02679513		1570.79	0.02261665		2160.78	0.01301045		2750.78	0.01226906		3340.78	-0.01032899
391	0.10582456		980.99	0.02617311		1570.99	0.0225586		2160.98	0.01300896		2750.98	0.0121002		3340.98	-0.01015449
391.2	0.10690398		981.19	0.02623083		1571.19	0.02137596		2161.18	0.01216299		2751.18	0.01246158		3341.18	-0.00993607
391.4	0.10805974		981.39	0.0261288		1571.39	0.02108553		2161.38	0.01164601		2751.38	0.01222363		3341.38	-0.0101183
391.6	0.10788882		981.59	0.02573013		1571.59	0.02056863		2161.58	0.01087494		2751.58	0.01310669		3341.58	-0.00996181
391.8	0.10788384		981.79	0.02565195		1571.79	0.02050117		2161.78	0.01137364		2751.78	0.01336925		3341.78	-0.00969916
392	0.10875104		981.99	0.02501994		1571.99	0.02103358		2161.98	0.01160351		2751.98	0.01268772		3341.98	-0.01032347
392.2	0.11023654		982.19	0.02548383		1572.19	0.02196242		2162.18	0.01144701		2752.18	0.01263729		3342.18	-0.01045019
392.4	0.11066613		982.39	0.02516442		1572.39	0.02264806		2162.38	0.01104059		2752.38	0.01198934		3342.38	-0.01099936
392.6	0.11037291		982.59	0.02520794		1572.59	0.02315589		2162.58	0.01178059		2752.58	0.01143026		3342.58	-0.01098515
392.8	0.10969481		982.79	0.02540005		1572.79	0.02403418		2162.78	0.01217515		2752.78	0.01102118		3342.78	-0.0115909
393	0.11018898		982.99	0.02570757		1572.99	0.02270216		2162.98	0.01159792		2752.98	0.0101788		3342.98	-0.01055523
393.2	0.11002008		983.19	0.02566632		1573.19	0.02272715		2163.18	0.01123327		2753.18	0.01009127		3343.18	-0.01100068
393.4	0.11032462		983.39	0.02452177		1573.39	0.02240783		2163.38	0.01138776		2753.38	0.01029783		3343.38	-0.01047145
393.6	0.10993605		983.59	0.02422887		1573.59	0.02269134		2163.58	0.010939		2753.58	0.01053031		3343.58	-0.00978143
393.8	0.11066743		983.79	0.02386315		1573.79	0.02309537		2163.78	0.0112144		2753.78	0.01032326		3343.78	-0.00956449
394	0.11104887		983.99	0.0239468		1573.99	0.02320712		2163.98	0.01191858		2753.98	0.01009178		3343.98	-0.00936667
394.2	0.11069502		984.19	0.02429153		1574.19	0.02265344		2164.18	0.01234323		2754.18	0.01032338		3344.18	-0.01010177
394.4	0.10994107		984.39	0.02409833		1574.39	0.02273459		2164.38	0.011861		2754.38	0.01091152		3344.38	-0.01018053
394.6	0.10940549		984.59	0.02480766		1574.59	0.0219641		2164.58	0.01213404		2754.58	0.01089829		3344.58	-0.00884206
394.8	0.10967796		984.79	0.02494363		1574.79	0.02211871		2164.78	0.01236664		2754.78	0.01180268		3344.78	-0.00843025
395	0.1104647		984.99	0.02542427		1574.99	0.02152249		2164.98	0.01286754		2754.98	0.01263405		3344.98	-0.0076497
395.2	0.11047193		985.19	0.02538831		1575.19	0.02214403		2165.18	0.01315133		2755.18	0.01394418		3345.18	-0.00785798
395.4	0.10960588		985.39	0.02624777		1575.39	0.02251512		2165.38	0.01319944		2755.38	0.01398237		3345.38	-0.00854707
395.6	0.10952818		985.59	0.02646827		1575.59	0.02249283		2165.58	0.01365903		2755.58	0.01446681		3345.58	-0.00853249
395.8	0.10942635		985.79	0.02695484		1575.79	0.02302312		2165.78	0.01404316		2755.78	0.01361321		3345.78	-0.00853008
396	0.10914611		985.99	0.027094		1575.99	0.02352578		2165.98	0.01449773		2755.98	0.01383717		3345.98	-0.00987165
396.2	0.10924472		986.19	0.02864537		1576.19	0.02377416		2166.18	0.01423836		2756.18	0.01367186		3346.18	-0.01022081
396.4	0.10900471		986.39	0.02886676		1576.39	0.02341338		2166.38	0.01339984		2756.38	0.01317061		3346.38	-0.0104857
396.6	0.10856687		986.59	0.02824372		1576.59	0.02318511		2166.58	0.01381881		2756.58	0.01256104		3346.58	-0.01138464
396.8	0.10953169		986.79	0.02866372		1576.79	0.02381652		2166.78	0.01409349		2756.78	0.01218586		3346.78	-0.01147341
397	0.10962955		986.99	0.02819656		1576.99	0.02321514		2166.98	0.01406236		2756.98	0.01229672		3346.98	-0.01121808
397.2	0.10936323		987.19	0.02754995		1577.19	0.02362763		2167.18	0.01451318		2757.18	0.0119256		3347.18	-0.01135546
397.4	0.10925254		987.39	0.02715949		1577.39	0.02388174		2167.38	0.0143493		2757.38	0.012326		3347.38	-0.01163731
397.6	0.10945244		987.59	0.02680473		1577.59	0.02424695		2167.58	0.01400219		2757.58	0.01231932		3347.58	-0.01143366
397.8	0.10952268		987.79	0.02644061		1577.79	0.02515067		2167.78	0.01389051		2757.78	0.0122154		3347.78	-0.01178241
398	0.1092249		987.99	0.02574343		1577.99	0.02551647		2167.98	0.01444622		2757.98	0.01263886		3347.98	-0.01174329
398.2	0.1087067		988.19	0.02598019		1578.19	0.02566115		2168.18	0.01467676		2758.18	0.01155912		3348.18	-0.01184153
398.4	0.10895158		988.39	0.02536235		1578.39	0.02574932		2168.38	0.0145281		2758.38	0.01124854		3348.38	-0.01047125
398.6	0.10956348		988.59	0.02535397		1578.59	0.02475291		2168.58	0.01449075		2758.58	0.01195854		3348.58	-0.00961306
398.8	0.10962978		988.79	0.0243496		1578.79	0.0251424		2168.78	0.01415758		2758.78	0.01281396		3348.78	-0.00836962
399	0.10991802		988.99	0.02341087		1578.99	0.02484767		2168.98	0.01392568		2758.98	0.01286472		3348.98	-0.00730913
399.2	0.10973953		989.19	0.02275981		1579.19	0.02555453		2169.18	0.01303892		2759.18	0.01394441		3349.18	-0.00750374
399.4	0.10955904		989.39	0.02338808		1579.39	0.02423098		2169.38	0.0122308		2759.38	0.01346657		3349.38	-0.00728475
399.6	0.11036087		989.59	0.02365455		1579.59	0.0231757		2169.58	0.01231331		2759.58	0.01351753		3349.58	-0.00652049
399.8	0.11055625		989.79	0.02414827		1579.79	0.0229971		2169.78	0.01232455		2759.78	0.01311596		3349.78	-0.00653914
400	0.11051962		989.99	0.02469059		1579.99	0.02272114		2169.98	0.01217921		2759.98	0.01371584		3349.98	-0.0074947
400.2	0.11067077		990.19	0.02505703		1580.19	0.0221356		2170.18	0.01154597		2760.18	0.01314579		3350.18	-0.00778205
400.4	0.11136668		990.39	0.02439352		1580.39	0.02206488		2170.38	0.01131572		2760.38	0.01352554		3350.38	-0.00784039
400.6	0.11062557		990.59	0.02412162		1580.59	0.02242229		2170.58	0.0120261		2760.58	0.01387296		3350.58	-0.00853628
400.8	0.11161595		990.79	0.0244444		1580.79	0.02306419		2170.78	0.01149918		2760.78	0.01438993		3350.78	-0.00946604
401	0.1111466		990.99	0.02462497		1580.99	0.02303499		2170.98	0.01105218		2760.98	0.01440984		3350.98	-0.01025015
401.2	0.11194342		991.19	0.02473315		1581.19	0.0236542		2171.18	0.01164338		2761.18	0.01369567		3351.18	-0.01096469
401.4	0.11243359		991.39	0.02574047		1581.39	0.02453518		2171.38	0.01106036		2761.38	0.01410816		3351.38	-0.01186187
401.6	0.1128936		991.59	0.02603672		1581.59	0.02500808		2171.58	0.01143873		2761.58	0.01414796		3351.58	-0.01237524
401.8	0.11294325		991.79	0.02559789		1581.79	0.02640395		2171.78	0.01174713		2761.78	0.01441028		3351.78	-0.01346012
402	0.11322151		991.99	0.02541392		1581.99	0.02573504		2171.98	0.0122674		2761.98	0.0146556		3351.98	-0.01269563
402.2	0.11358651		992.19	0.02609313		1582.19	0.02587639		2172.18	0.01248374		2762.18	0.01397595		3352.18	-0.012883
402.4	0.11345773		992.39	0.0259116		1582.39	0.02636507		2172.38	0.01235401		2762.38	0.01464847		3352.38	-0.01220568
402.6	0.11326417		992.59	0.02538142		1582.59	0.02572399		2172.58	0.01204166		2762.58	0.0147678		3352.58	-0.01237918
402.8	0.1126658		992.79	0.02503567		1582.79	0.02666649		2172.78	0.01213175		2762.78	0.01483394		3352.78	-0.01236172
403	0.11245367		992.99	0.02551352		1582.99	0.02713142		2172.98	0.01197001		2762.98	0.0146485		3352.98	-0.01249864
403.2	0.11236176		993.19	0.02673372		1583.19	0.02718512		2173.18	0.01215557		2763.18	0.01496786		3353.18	-0.01261996
403.4	0.11245234		993.39	0.02758415		1583.39	0.02701683		2173.38	0.01295782		2763.38	0.01444842		3353.38	-0.01106407
403.6	0.11264518		993.59	0.02847626		1583.59	0.02628994		2173.58	0.01371115		2763.58	0.01486425		3353.58	-0.01107648
403.8	0.11148088		993.79	0.02870825		1583.79	0.02670674		2173.78	0.01347309		2763.78	0.01350943		3353.78	-0.01092975
404	0.11126405		993.99	0.02833378		1583.99	0.02632736		2173.98	0.01389894		2763.98	0.01358381		3353.98	-0.0110835
404.2	0.11130596		994.19	0.028078		1584.19	0.02582046		2174.18	0.01400858		2764.18	0.01330051		3354.18	-0.0107514
404.4	0.11121973		994.39	0.02769698		1584.39	0.02583067		2174.38	0.01447258		2764.38	0.01387284		3354.38	-0.0109462
404.6	0.10994536		994.59	0.02749862		1584.59	0.02655516		2174.58	0.01402351		2764.58	0.01331803		3354.58	-0.012012
404.8	0.11072193		994.79	0.02685914		1584.79	0.02665202		2174.78	0.01363927		2764.78	0.01231304		3354.78	-0.01217486
405	0.11139572		994.99	0.02729915		1584.99	0.02673362		2174.98	0.01409008		2764.98	0.01150589		3354.98	-0.01182105
405.2	0.11185552		995.19	0.02690982		1585.19	0.02714941		2175.18	0.01472565		2765.18	0.01147154		3355.18	-0.011375
405.4	0.11280733		995.39	0.02695225		1585.39	0.02689152		2175.38	0.01471984		2765.38	0.01175328		3355.38	-0.01157799
405.6	0.11298234		995.59	0.02699228		1585.59	0.02708931		2175.58	0.01465999		2765.58	0.01221355		3355.58	-0.01135701
405.8	0.11414516		995.79	0.02679641		1585.79	0.0268114		2175.78	0.01393401		2765.78	0.01259419		3355.78	-0.01106653
406	0.11510293		995.99	0.02717721		1585.99	0.02553733		2175.98	0.01360701		2765.98	0.01316438		3355.98	-0.01017588
406.2	0.11596557		996.19	0.02680023		1586.19	0.02592671		2176.18	0.0127136		2766.18	0.01338632		3356.18	-0.01089231
406.4	0.11572518		996.39	0.02696728		1586.39	0.02644018		2176.38	0.01247786		2766.38	0.01310581		3356.38	-0.01054653
406.6	0.11734698		996.59	0.02763061		1586.59	0.02578868		2176.58	0.01230186		2766.58	0.0127918		3356.58	-0.01168352
406.8	0.11824785		996.79	0.02822896		1586.79	0.026759		2176.78	0.01281354		2766.78	0.01253164		3356.78	-0.01184639
407	0.11775041		996.99	0.02807496		1586.99	0.02674645		2176.98	0.01283594		2766.98	0.01186436		3356.98	-0.01171942
407.2	0.11816014		997.19	0.02802113		1587.19	0.0267366		2177.18	0.01274517		2767.18	0.01226964		3357.18	-0.01160367
407.4	0.11724375		997.39	0.02857545		1587.39	0.02748521		2177.38	0.01302149		2767.38	0.01201497		3357.38	-0.01105079
407.6	0.11661173		997.59	0.02848722		1587.59	0.02777406		2177.58	0.0130273		2767.58	0.01139962		3357.58	-0.01233782
407.8	0.11599446		997.79	0.02805675		1587.79	0.02801184		2177.78	0.01323305		2767.78	0.01061617		3357.78	-0.01260193
408	0.11608293		997.99	0.02801954		1587.99	0.02787317		2177.98	0.01356989		2767.98	0.01112171		3357.98	-0.01389423
408.2	0.1151707		998.19	0.0281509		1588.19	0.02793237		2178.18	0.0137482		2768.18	0.01046893		3358.18	-0.01433726
408.4	0.11367243		998.39	0.02780081		1588.39	0.02838789		2178.38	0.01415609		2768.38	0.00984993		3358.38	-0.01493772
408.6	0.11267697		998.59	0.02782095		1588.59	0.02908437		2178.58	0.01460764		2768.58	0.00953019		3358.58	-0.01532275
408.8	0.11254635		998.79	0.02718775		1588.79	0.02848887		2178.78	0.01489755		2768.78	0.00948988		3358.78	-0.01440401
409	0.11223532		998.99	0.02692837		1588.99	0.02800838		2178.98	0.01533017		2768.98	0.00943101		3358.98	-0.01404078
409.2	0.1117297		999.19	0.02730416		1589.19	0.0275207		2179.18	0.01583004		2769.18	0.00999461		3359.18	-0.01366241
409.4	0.11206226		999.39	0.02779872		1589.39	0.02705305		2179.38	0.01585766		2769.38	0.01087359		3359.38	-0.01353899
409.6	0.11192765		999.59	0.02896949		1589.59	0.02706126		2179.58	0.01573116		2769.58	0.01155866		3359.58	-0.01243106
409.8	0.11290599		999.79	0.02984807		1589.79	0.02575496		2179.78	0.01530474		2769.78	0.01255396		3359.78	-0.01201627
410	0.11407292		999.99	0.0299817		1589.99	0.02552344		2179.98	0.01539384		2769.98	0.01379358		3359.98	-0.01266165
410.2	0.11419121		1000.19	0.0303752		1590.19	0.02559298		2180.18	0.0154771		2770.18	0.01411178		3360.18	-0.0126178
410.4	0.11469353		1000.39	0.03177018		1590.39	0.02505282		2180.38	0.01634961		2770.38	0.01434144		3360.38	-0.01260248
410.6	0.11588486		1000.59	0.03165083		1590.59	0.02518235		2180.58	0.01698549		2770.58	0.01413666		3360.58	-0.01333413
410.8	0.11613777		1000.79	0.03034942		1590.79	0.02568676		2180.78	0.01747164		2770.78	0.01420236		3360.78	-0.01281397
411	0.11620753		1000.99	0.02954767		1590.99	0.02580616		2180.98	0.01698082		2770.98	0.01385074		3360.98	-0.01391375
411.2	0.11752461		1001.19	0.02927949		1591.19	0.0265581		2181.18	0.01690969		2771.18	0.01488398		3361.18	-0.01508773
411.4	0.11708919		1001.39	0.02911099		1591.39	0.02775774		2181.38	0.016952		2771.38	0.01433045		3361.38	-0.0153125
411.6	0.11749424		1001.59	0.02800086		1591.59	0.0277187		2181.58	0.01685735		2771.58	0.01419003		3361.58	-0.01592602
411.8	0.11795614		1001.79	0.02795687		1591.79	0.0281031		2181.78	0.0170128		2771.78	0.01420867		3361.78	-0.01605533
412	0.11753808		1001.99	0.02767555		1591.99	0.02902845		2181.98	0.01628975		2771.98	0.01407954		3361.98	-0.01653882
412.2	0.11713772		1002.19	0.02649254		1592.19	0.02959598		2182.18	0.0163088		2772.18	0.01291275		3362.18	-0.01617273
412.4	0.11802783		1002.39	0.02589554		1592.39	0.03012032		2182.38	0.01581965		2772.38	0.01202329		3362.38	-0.01611254
412.6	0.11894928		1002.59	0.0265334		1592.59	0.03019411		2182.58	0.01573871		2772.58	0.01230054		3362.58	-0.01619235
412.8	0.11961635		1002.79	0.0260668		1592.79	0.03033942		2182.78	0.01537857		2772.78	0.01163622		3362.78	-0.01550852
413	0.11955218		1002.99	0.02575622		1592.99	0.03014219		2182.98	0.01533286		2772.98	0.01208269		3362.98	-0.01576334
413.2	0.11875148		1003.19	0.02630108		1593.19	0.02958589		2183.18	0.01527604		2773.18	0.01258684		3363.18	-0.01531004
413.4	0.11908849		1003.39	0.02641556		1593.39	0.0299293		2183.38	0.0143441		2773.38	0.01253209		3363.38	-0.01455334
413.6	0.11887161		1003.59	0.02695223		1593.59	0.03006438		2183.58	0.01443648		2773.58	0.01255717		3363.58	-0.01342077
413.8	0.11838723		1003.79	0.02777879		1593.79	0.0292571		2183.78	0.01386093		2773.78	0.01308692		3363.78	-0.01347834
414	0.11820524		1003.99	0.02815469		1593.99	0.02947271		2183.98	0.01414218		2773.98	0.01410635		3363.98	-0.01354343
414.2	0.11765776		1004.19	0.02868559		1594.19	0.02947388		2184.18	0.01436948		2774.18	0.01470973		3364.18	-0.01245347
414.4	0.11753355		1004.39	0.02830314		1594.39	0.0286415		2184.38	0.01436196		2774.38	0.01512032		3364.38	-0.01256426
414.6	0.11777707		1004.59	0.0274233		1594.59	0.02864924		2184.58	0.01451267		2774.58	0.01520467		3364.58	-0.01229062
414.8	0.11792484		1004.79	0.02665675		1594.79	0.0283021		2184.78	0.014625		2774.78	0.01525691		3364.78	-0.01249795
415	0.11756768		1004.99	0.02708011		1594.99	0.02876293		2184.98	0.01451882		2774.98	0.01519247		3364.98	-0.01329108
415.2	0.11746696		1005.19	0.02767448		1595.19	0.02893071		2185.18	0.01478045		2775.18	0.01556826		3365.18	-0.01389379
415.4	0.1163748		1005.39	0.02754197		1595.39	0.0291214		2185.38	0.01430884		2775.38	0.01510546		3365.38	-0.01354232
415.6	0.11657412		1005.59	0.02764359		1595.59	0.02888759		2185.58	0.01467501		2775.58	0.01481012		3365.58	-0.01312252
415.8	0.11631696		1005.79	0.0284056		1595.79	0.02877129		2185.78	0.01426023		2775.78	0.01483875		3365.78	-0.0130574
416	0.11629895		1005.99	0.02849084		1595.99	0.03005447		2185.98	0.01429215		2775.98	0.01398754		3365.98	-0.01346987
416.2	0.1166595		1006.19	0.02930902		1596.19	0.02950053		2186.18	0.01523516		2776.18	0.013631		3366.18	-0.01407433
416.4	0.11818164		1006.39	0.03053796		1596.39	0.02885497		2186.38	0.0155092		2776.38	0.01237621		3366.38	-0.01411397
416.6	0.11805676		1006.59	0.03133628		1596.59	0.02812662		2186.58	0.01632033		2776.58	0.01333199		3366.58	-0.01436123
416.8	0.11832236		1006.79	0.03076641		1596.79	0.02865161		2186.78	0.01705921		2776.78	0.01371963		3366.78	-0.01395729
417	0.11786616		1006.99	0.03066255		1596.99	0.0282796		2186.98	0.0168019		2776.98	0.01529874		3366.98	-0.01430726
417.2	0.11768776		1007.19	0.03042351		1597.19	0.02763699		2187.18	0.01712004		2777.18	0.0152525		3367.18	-0.01424252
417.4	0.11866292		1007.39	0.03006712		1597.39	0.0272312		2187.38	0.0165965		2777.38	0.01521782		3367.38	-0.01320004
417.6	0.1189054		1007.59	0.02928328		1597.59	0.02644525		2187.58	0.01635402		2777.58	0.01594599		3367.58	-0.01258401
417.8	0.11914188		1007.79	0.02927913		1597.79	0.02579471		2187.78	0.01542485		2777.78	0.017298		3367.78	-0.01216827
418	0.12012436		1007.99	0.02886458		1597.99	0.02604047		2187.98	0.01507845		2777.98	0.01827744		3367.98	-0.01246808
418.2	0.12055063		1008.19	0.02829911		1598.19	0.02563289		2188.18	0.01451462		2778.18	0.01806588		3368.18	-0.01128441
418.4	0.12068003		1008.39	0.02740263		1598.39	0.02516846		2188.38	0.01336423		2778.38	0.01715589		3368.38	-0.01132853
418.6	0.12136802		1008.59	0.02751503		1598.59	0.02523418		2188.58	0.01246779		2778.58	0.01678303		3368.58	-0.01104321
418.8	0.12176528		1008.79	0.02715002		1598.79	0.02585092		2188.78	0.01259185		2778.78	0.01639528		3368.78	-0.01162723
419	0.12197221		1008.99	0.02794614		1598.99	0.02716944		2188.98	0.01238442		2778.98	0.01695589		3368.98	-0.01223653
419.2	0.12290039		1009.19	0.02874603		1599.19	0.02751357		2189.18	0.0122385		2779.18	0.0163324		3369.18	-0.01358004
419.4	0.12265208		1009.39	0.02842141		1599.39	0.02810701		2189.38	0.0120579		2779.38	0.01609932		3369.38	-0.01304631
419.6	0.12289791		1009.59	0.02872919		1599.59	0.02796337		2189.58	0.01231177		2779.58	0.01499252		3369.58	-0.01309859
419.8	0.12177681		1009.79	0.02957019		1599.79	0.02858227		2189.78	0.01215078		2779.78	0.01409737		3369.78	-0.01369763
420	0.12154495		1009.99	0.0297693		1599.99	0.02999215		2189.98	0.01330423		2779.98	0.01358282		3369.98	-0.01392179
420.2	0.12023943		1010.19	0.02966309		1600.19	0.02974739		2190.18	0.01457245		2780.18	0.01370129		3370.18	-0.01385436
420.4	0.12033201		1010.39	0.02916362		1600.39	0.02975603		2190.38	0.01527081		2780.38	0.01200647		3370.38	-0.01342045
420.6	0.11995196		1010.59	0.02789409		1600.59	0.03022766		2190.58	0.01596183		2780.58	0.01299903		3370.58	-0.01344837
420.8	0.12076929		1010.79	0.02757606		1600.79	0.03021461		2190.78	0.01692805		2780.78	0.01317807		3370.78	-0.01306506
421	0.12042008		1010.99	0.02708498		1600.99	0.0292646		2190.98	0.01665605		2780.98	0.01342733		3370.98	-0.01349722
421.2	0.12058865		1011.19	0.02644233		1601.19	0.02843089		2191.18	0.01676857		2781.18	0.01375379		3371.18	-0.01361692
421.4	0.12208138		1011.39	0.02597101		1601.39	0.02801829		2191.38	0.01633711		2781.38	0.01365613		3371.38	-0.0133285
421.6	0.12229817		1011.59	0.02532942		1601.59	0.02742436		2191.58	0.01631971		2781.58	0.01360178		3371.58	-0.01342634
421.8	0.1227514		1011.79	0.02603332		1601.79	0.02783041		2191.78	0.01667675		2781.78	0.01347741		3371.78	-0.01387148
422	0.12247377		1011.99	0.02624789		1601.99	0.02767684		2191.98	0.01653296		2781.98	0.01249826		3371.98	-0.01369891
422.2	0.12206017		1012.19	0.02682961		1602.19	0.02736165		2192.18	0.01656552		2782.18	0.01155827		3372.18	-0.01296276
422.4	0.12322067		1012.39	0.0273857		1602.39	0.02745642		2192.38	0.01684818		2782.38	0.01199907		3372.38	-0.01322396
422.6	0.12349814		1012.59	0.02832591		1602.59	0.0272195		2192.58	0.01634179		2782.58	0.01275447		3372.58	-0.01348935
422.8	0.12463651		1012.79	0.02881011		1602.79	0.02747856		2192.78	0.01781974		2782.78	0.014099		3372.78	-0.01399831
423	0.12447238		1012.99	0.02984129		1602.99	0.02724531		2192.98	0.01805654		2782.98	0.01382699		3372.98	-0.01490693
423.2	0.12484011		1013.19	0.03047714		1603.19	0.0269645		2193.18	0.01779756		2783.18	0.01410571		3373.18	-0.01417196
423.4	0.12328129		1013.39	0.03074675		1603.39	0.02691543		2193.38	0.01719646		2783.38	0.01389908		3373.38	-0.01332816
423.6	0.12265525		1013.59	0.03101766		1603.59	0.02816015		2193.58	0.01751701		2783.58	0.0139495		3373.58	-0.013341
423.8	0.12139988		1013.79	0.03196981		1603.79	0.02893212		2193.78	0.01661479		2783.78	0.01403899		3373.78	-0.01290007
424	0.12081843		1013.99	0.03110741		1603.99	0.02860414		2193.98	0.01650593		2783.98	0.01487657		3373.98	-0.01159952
424.2	0.12028054		1014.19	0.03035304		1604.19	0.02808789		2194.18	0.01671692		2784.18	0.01368879		3374.18	-0.01115087
424.4	0.12021547		1014.39	0.02957051		1604.39	0.02773693		2194.38	0.01595412		2784.38	0.01321089		3374.38	-0.01131724
424.6	0.11994936		1014.59	0.02913984		1604.59	0.02825964		2194.58	0.01622529		2784.58	0.01435663		3374.58	-0.01110622
424.8	0.11961488		1014.79	0.02929992		1604.79	0.02702426		2194.78	0.01601818		2784.78	0.01501154		3374.78	-0.01137119
425	0.11871005		1014.99	0.02860723		1604.99	0.02706378		2194.98	0.01448551		2784.98	0.01579677		3374.98	-0.01121071
425.2	0.11902323		1015.19	0.02943471		1605.19	0.0268989		2195.18	0.01480298		2785.18	0.01601377		3375.18	-0.0109228
425.4	0.11904183		1015.39	0.02959127		1605.39	0.02764227		2195.38	0.01469933		2785.38	0.0155332		3375.38	-0.01103391
425.6	0.11820702		1015.59	0.02925491		1605.59	0.02714356		2195.58	0.01475052		2785.58	0.01563437		3375.58	-0.01090975
425.8	0.11872734		1015.79	0.02993672		1605.79	0.0274295		2195.78	0.01445169		2785.78	0.01451825		3375.78	-0.01084463
426	0.11838015		1015.99	0.03026799		1605.99	0.02723363		2195.98	0.01442573		2785.98	0.01404749		3375.98	-0.01022298
426.2	0.11949012		1016.19	0.03066957		1606.19	0.02812384		2196.18	0.01419046		2786.18	0.01369162		3376.18	-0.0112542
426.4	0.12081278		1016.39	0.0307595		1606.39	0.02796431		2196.38	0.01402435		2786.38	0.01415963		3376.38	-0.01070432
426.6	0.12158491		1016.59	0.03133363		1606.59	0.02823529		2196.58	0.01286114		2786.58	0.01323616		3376.58	-0.01056122
426.8	0.12316676		1016.79	0.03108942		1606.79	0.02876524		2196.78	0.01375395		2786.78	0.01290822		3376.78	-0.01032338
427	0.12323816		1016.99	0.03087845		1606.99	0.02841		2196.98	0.01357127		2786.98	0.01203647		3376.98	-0.0106678
427.2	0.12442898		1017.19	0.03141013		1607.19	0.02911251		2197.18	0.01344238		2787.18	0.01233466		3377.18	-0.0101923
427.4	0.12383629		1017.39	0.03202823		1607.39	0.03012594		2197.38	0.01328472		2787.38	0.01108987		3377.38	-0.01096107
427.6	0.12436808		1017.59	0.03178948		1607.59	0.0311561		2197.58	0.01337502		2787.58	0.01038521		3377.58	-0.01174169
427.8	0.12469313		1017.79	0.03210516		1607.79	0.02994168		2197.78	0.01229519		2787.78	0.01016752		3377.78	-0.01264929
428	0.12460496		1017.99	0.03108668		1607.99	0.02966055		2197.98	0.01334815		2787.98	0.01044092		3377.98	-0.0129456
428.2	0.1240578		1018.19	0.0311934		1608.19	0.02899329		2198.18	0.01378521		2788.18	0.00987585		3378.18	-0.01356282
428.4	0.12329903		1018.39	0.03117809		1608.39	0.0296309		2198.38	0.01378483		2788.38	0.0111307		3378.38	-0.01372654
428.6	0.12268965		1018.59	0.03167516		1608.59	0.02948719		2198.58	0.01533356		2788.58	0.01222041		3378.58	-0.0139279
428.8	0.12213436		1018.79	0.0315964		1608.79	0.02908148		2198.78	0.01469105		2788.78	0.01246546		3378.78	-0.01418025
429	0.12102891		1018.99	0.03124074		1608.99	0.02971598		2198.98	0.01483604		2788.98	0.0122873		3378.98	-0.01394986
429.2	0.12043559		1019.19	0.03185083		1609.19	0.02952254		2199.18	0.01513963		2789.18	0.01232509		3379.18	-0.01348894
429.4	0.11944014		1019.39	0.03108849		1609.39	0.0295888		2199.38	0.01440043		2789.38	0.01274845		3379.38	-0.0135393
429.6	0.11940563		1019.59	0.03093778		1609.59	0.02884245		2199.58	0.01453121		2789.58	0.01277649		3379.58	-0.01326948
429.8	0.11895785		1019.79	0.03073226		1609.79	0.02961076		2199.78	0.01457693		2789.78	0.01257324		3379.78	-0.01237453
430	0.11834778		1019.99	0.0303858		1609.99	0.03004781		2199.98	0.0148203		2789.98	0.01269885		3379.98	-0.012457
430.2	0.11839402		1020.19	0.02989836		1610.19	0.03105021		2200.18	0.01438375		2790.18	0.01263815		3380.18	-0.01309825
430.4	0.11897894		1020.39	0.03016282		1610.39	0.03067565		2200.38	0.01463546		2790.38	0.01287177		3380.38	-0.01255579
430.6	0.11940017		1020.59	0.03036539		1610.59	0.03090955		2200.58	0.01425456		2790.58	0.01276231		3380.58	-0.01295319
430.8	0.12026418		1020.79	0.02990163		1610.79	0.03213264		2200.78	0.01517409		2790.78	0.01360408		3380.78	-0.01270076
431	0.12068487		1020.99	0.03039624		1610.99	0.03164971		2200.98	0.01542295		2790.98	0.01358461		3380.98	-0.01310581
431.2	0.12114589		1021.19	0.03103507		1611.19	0.0324321		2201.18	0.01586725		2791.18	0.01326658		3381.18	-0.01335592
431.4	0.12093711		1021.39	0.03085998		1611.39	0.03244427		2201.38	0.01505		2791.38	0.01293703		3381.38	-0.0138989
431.6	0.12175526		1021.59	0.03039133		1611.59	0.03150536		2201.58	0.01494472		2791.58	0.01278916		3381.58	-0.01419864
431.8	0.12233367		1021.79	0.03106844		1611.79	0.0306224		2201.78	0.01471513		2791.78	0.01390231		3381.78	-0.01410894
432	0.12247615		1021.99	0.03136143		1611.99	0.03054458		2201.98	0.01509144		2791.98	0.01347614		3381.98	-0.01372154
432.2	0.12314994		1022.19	0.03121135		1612.19	0.02960637		2202.18	0.01551103		2792.18	0.01279589		3382.18	-0.0132548
432.4	0.12409361		1022.39	0.03174392		1612.39	0.03028912		2202.38	0.01532046		2792.38	0.01311497		3382.38	-0.01285026
432.6	0.12481695		1022.59	0.03148628		1612.59	0.03047314		2202.58	0.01505335		2792.58	0.01254301		3382.58	-0.01312203
432.8	0.12592288		1022.79	0.03169089		1612.79	0.03112003		2202.78	0.0139569		2792.78	0.0115186		3382.78	-0.01265234
433	0.1262564		1022.99	0.03168305		1612.99	0.03123149		2202.98	0.01381791		2792.98	0.01078054		3382.98	-0.01263699
433.2	0.12649159		1023.19	0.03192288		1613.19	0.03119587		2203.18	0.0138049		2793.18	0.01109582		3383.18	-0.01228825
433.4	0.1264717		1023.39	0.03175618		1613.39	0.03094288		2203.38	0.01357276		2793.38	0.01106997		3383.38	-0.01217294
433.6	0.12719294		1023.59	0.03161235		1613.59	0.03141259		2203.58	0.01377224		2793.58	0.01083453		3383.58	-0.01198573
433.8	0.12728584		1023.79	0.03039061		1613.79	0.03173401		2203.78	0.01428464		2793.78	0.01123712		3383.78	-0.01128407
434	0.12782278		1023.99	0.0299187		1613.99	0.03100392		2203.98	0.01488666		2793.98	0.01171882		3383.98	-0.01216816
434.2	0.12771435		1024.19	0.02972045		1614.19	0.03077213		2204.18	0.01495564		2794.18	0.01217472		3384.18	-0.01343145
434.4	0.1270686		1024.39	0.0300926		1614.39	0.02942085		2204.38	0.01544957		2794.38	0.01245558		3384.38	-0.01376288
434.6	0.1263751		1024.59	0.02993143		1614.59	0.02993248		2204.58	0.01566303		2794.58	0.01327991		3384.58	-0.01380148
434.8	0.12652431		1024.79	0.0302077		1614.79	0.03021183		2204.78	0.01670337		2794.78	0.01382828		3384.78	-0.01286491
435	0.12608463		1024.99	0.0311022		1614.99	0.02858035		2204.98	0.0161971		2794.98	0.01322205		3384.98	-0.01291363
435.2	0.12552666		1025.19	0.03126874		1615.19	0.02785806		2205.18	0.01576638		2795.18	0.01387666		3385.18	-0.01284057
435.4	0.12620761		1025.39	0.03119481		1615.39	0.0264063		2205.38	0.01493464		2795.38	0.01415401		3385.38	-0.01276948
435.6	0.12567956		1025.59	0.03087092		1615.59	0.02528047		2205.58	0.01498355		2795.58	0.01427161		3385.58	-0.01288697
435.8	0.12596762		1025.79	0.03069244		1615.79	0.02553312		2205.78	0.01436165		2795.78	0.01508607		3385.78	-0.01346781
436	0.12533738		1025.99	0.03004587		1615.99	0.02556972		2205.98	0.0152199		2795.98	0.01505662		3385.98	-0.01387829
436.2	0.12548405		1026.19	0.02968998		1616.19	0.02571012		2206.18	0.01590814		2796.18	0.01551403		3386.18	-0.01438838
436.4	0.12602273		1026.39	0.03100126		1616.39	0.02639151		2206.38	0.01502309		2796.38	0.01572774		3386.38	-0.01455456
436.6	0.12623456		1026.59	0.03104829		1616.59	0.02776286		2206.58	0.01472189		2796.58	0.01597654		3386.58	-0.01462564
436.8	0.12639986		1026.79	0.03251637		1616.79	0.0286003		2206.78	0.01507756		2796.78	0.01564949		3386.78	-0.01470918
437	0.12669801		1026.99	0.03330424		1616.99	0.02885964		2206.98	0.01474573		2796.98	0.01539282		3386.98	-0.01501135
437.2	0.1264613		1027.19	0.03304097		1617.19	0.03014816		2207.18	0.01552256		2797.18	0.01511036		3387.18	-0.01449845
437.4	0.1270537		1027.39	0.03323373		1617.39	0.03141939		2207.38	0.01502697		2797.38	0.01493297		3387.38	-0.01415325
437.6	0.12808392		1027.59	0.03341926		1617.59	0.03198541		2207.58	0.01509228		2797.58	0.01459875		3387.58	-0.01381956
437.8	0.12834019		1027.79	0.03327404		1617.79	0.03190859		2207.78	0.01551304		2797.78	0.01469197		3387.78	-0.01336861
438	0.12761232		1027.99	0.03323832		1617.99	0.03227133		2207.98	0.01499651		2797.98	0.01425572		3387.98	-0.01402295
438.2	0.12657395		1028.19	0.03328172		1618.19	0.03280564		2208.18	0.01488581		2798.18	0.0137222		3388.18	-0.01463271
438.4	0.12603035		1028.39	0.03288795		1618.39	0.0324244		2208.38	0.0155028		2798.38	0.01311608		3388.38	-0.01386725
438.6	0.12545935		1028.59	0.03340239		1618.59	0.03310312		2208.58	0.01604201		2798.58	0.01331727		3388.58	-0.01416736
438.8	0.12561909		1028.79	0.03321536		1618.79	0.03234866		2208.78	0.01630839		2798.78	0.01258221		3388.78	-0.01303149
439	0.12530396		1028.99	0.0339627		1618.99	0.03171421		2208.98	0.01660573		2798.98	0.01176689		3388.98	-0.01295791
439.2	0.12535386		1029.19	0.03387844		1619.19	0.03188462		2209.18	0.01700587		2799.18	0.011977		3389.18	-0.0129856
439.4	0.12506848		1029.39	0.03329963		1619.39	0.03219159		2209.38	0.01718508		2799.38	0.01180855		3389.38	-0.01324304
439.6	0.1247065		1029.59	0.03250493		1619.59	0.03222271		2209.58	0.01657896		2799.58	0.01153147		3389.58	-0.01366249
439.8	0.12533869		1029.79	0.03149161		1619.79	0.0326772		2209.78	0.01716167		2799.78	0.01153678		3389.78	-0.01408331
440	0.12514099		1029.99	0.0318406		1619.99	0.03187513		2209.98	0.01817244		2799.98	0.01171493		3389.98	-0.0149058
440.2	0.12588146		1030.19	0.03229376		1620.19	0.03176441		2210.18	0.01792123		2800.18	0.01182339		3390.18	-0.01532846
440.4	0.12677822		1030.39	0.0330371		1620.39	0.03199131		2210.38	0.01809889		2800.38	0.01161138		3390.38	-0.01490985
440.6	0.12641774		1030.59	0.03293328		1620.59	0.03238928		2210.58	0.01820844		2800.58	0.01228271		3390.58	-0.01468712
440.8	0.12666307		1030.79	0.03444776		1620.79	0.03155948		2210.78	0.01782587		2800.78	0.01259805		3390.78	-0.01472578
441	0.12672961		1030.99	0.03460772		1620.99	0.0314715		2210.98	0.01754131		2800.98	0.01269523		3390.98	-0.01527871
441.2	0.12675769		1031.19	0.03472274		1621.19	0.03260446		2211.18	0.01702992		2801.18	0.01300953		3391.18	-0.01559553
441.4	0.12695608		1031.39	0.03568088		1621.39	0.03279268		2211.38	0.0158446		2801.38	0.01363469		3391.38	-0.01633859
441.6	0.12714174		1031.59	0.03559088		1621.59	0.03191552		2211.58	0.01539813		2801.58	0.01377076		3391.58	-0.016637
441.8	0.12665489		1031.79	0.03489846		1621.79	0.03202789		2211.78	0.01589947		2801.78	0.01410708		3391.78	-0.0172658
442	0.12603059		1031.99	0.03463639		1621.99	0.03256927		2211.98	0.01534794		2801.98	0.01403653		3391.98	-0.01827912
442.2	0.12612458		1032.19	0.03418157		1622.19	0.03154013		2212.18	0.01619889		2802.18	0.01477052		3392.18	-0.01885297
442.4	0.12656522		1032.39	0.03344868		1622.39	0.030878		2212.38	0.01706784		2802.38	0.01462001		3392.38	-0.01873114
442.6	0.12647879		1032.59	0.03358516		1622.59	0.03100433		2212.58	0.01763782		2802.58	0.01426751		3392.58	-0.01907105
442.8	0.12698049		1032.79	0.03285829		1622.79	0.03196658		2212.78	0.01830862		2802.78	0.01377855		3392.78	-0.01831381
443	0.12782331		1032.99	0.03398602		1622.99	0.03273104		2212.98	0.01844921		2802.98	0.01326473		3392.98	-0.01902983
443.2	0.12798537		1033.19	0.03426271		1623.19	0.03381568		2213.18	0.0181753		2803.18	0.01288726		3393.18	-0.01822709
443.4	0.1279059		1033.39	0.03362686		1623.39	0.03425842		2213.38	0.01816385		2803.38	0.01280992		3393.38	-0.01821721
443.6	0.12913832		1033.59	0.0334309		1623.59	0.03431216		2213.58	0.01753245		2803.58	0.01302075		3393.58	-0.01802489
443.8	0.12935263		1033.79	0.0327433		1623.79	0.03461515		2213.78	0.01827468		2803.78	0.01344078		3393.78	-0.01771374
444	0.1299142		1033.99	0.033216		1623.99	0.03415773		2213.98	0.01840226		2803.98	0.01349793		3393.98	-0.01707257
444.2	0.12936049		1034.19	0.03347493		1624.19	0.03513356		2214.18	0.0176185		2804.18	0.01382063		3394.18	-0.01606543
444.4	0.12883072		1034.39	0.03348893		1624.39	0.0352365		2214.38	0.0183056		2804.38	0.01386943		3394.38	-0.01560703
444.6	0.12765376		1034.59	0.03335669		1624.59	0.03472545		2214.58	0.01791281		2804.58	0.0144628		3394.58	-0.01558452
444.8	0.12802668		1034.79	0.03378521		1624.79	0.0345689		2214.78	0.01776031		2804.78	0.01467331		3394.78	-0.01587603
445	0.12747974		1034.99	0.0335009		1624.99	0.0349957		2214.98	0.01780804		2804.98	0.01486436		3394.98	-0.01609748
445.2	0.12729896		1035.19	0.03329823		1625.19	0.03565075		2215.18	0.01740397		2805.18	0.0155218		3395.18	-0.01560906
445.4	0.12712747		1035.39	0.03288047		1625.39	0.03484568		2215.38	0.0174706		2805.38	0.01553599		3395.38	-0.01571022
445.6	0.12764701		1035.59	0.03266991		1625.59	0.03462312		2215.58	0.0176439		2805.58	0.01594272		3395.58	-0.01524827
445.8	0.12703041		1035.79	0.03257214		1625.79	0.03481995		2215.78	0.01851915		2805.78	0.01625132		3395.78	-0.01548281
446	0.12725678		1035.99	0.03309508		1625.99	0.03412615		2215.98	0.01797439		2805.98	0.01553353		3395.98	-0.01558506
446.2	0.12765069		1036.19	0.03243787		1626.19	0.03283486		2216.18	0.01853124		2806.18	0.01476128		3396.18	-0.01536961
446.4	0.1282786		1036.39	0.03187269		1626.39	0.03323926		2216.38	0.01921064		2806.38	0.01442435		3396.38	-0.01431142
446.6	0.12926325		1036.59	0.03175439		1626.59	0.03419852		2216.58	0.01883851		2806.58	0.01421104		3396.58	-0.01438616
446.8	0.12938486		1036.79	0.03272774		1626.79	0.0343189		2216.78	0.01883937		2806.78	0.01391504		3396.78	-0.01463634
447	0.13036173		1036.99	0.03297835		1626.99	0.03405678		2216.98	0.01896466		2806.98	0.01325449		3396.98	-0.01462474
447.2	0.13031311		1037.19	0.0334716		1627.19	0.03387589		2217.18	0.01874876		2807.18	0.01292766		3397.18	-0.01440809
447.4	0.1312285		1037.39	0.03305793		1627.39	0.03374402		2217.38	0.01844042		2807.38	0.01358924		3397.38	-0.0146648
447.6	0.13155397		1037.59	0.0329386		1627.59	0.03399045		2217.58	0.01775016		2807.58	0.01360823		3397.58	-0.01495429
447.8	0.13196132		1037.79	0.03204885		1627.79	0.03369465		2217.78	0.01768477		2807.78	0.01276095		3397.78	-0.014287
448	0.13174519		1037.99	0.03210114		1627.99	0.03322253		2217.98	0.01863541		2807.98	0.01248407		3397.98	-0.01434087
448.2	0.13178804		1038.19	0.03241325		1628.19	0.03339548		2218.18	0.01798192		2808.18	0.0127835		3398.18	-0.01464003
448.4	0.13169398		1038.39	0.03222658		1628.39	0.03247322		2218.38	0.01825083		2808.38	0.01199444		3398.38	-0.01531122
448.6	0.13208156		1038.59	0.03228511		1628.59	0.0319407		2218.58	0.01872654		2808.58	0.01162415		3398.58	-0.0152119
448.8	0.13266197		1038.79	0.0323322		1628.79	0.03180167		2218.78	0.01945168		2808.78	0.01187712		3398.78	-0.01505527
449	0.13280801		1038.99	0.03315275		1628.99	0.03184046		2218.98	0.01908872		2808.98	0.01259029		3398.98	-0.01438823
449.2	0.13290194		1039.19	0.0333595		1629.19	0.03145677		2219.18	0.01790109		2809.18	0.01272684		3399.18	-0.01404989
449.4	0.13355638		1039.39	0.03422666		1629.39	0.03091392		2219.38	0.0173338		2809.38	0.01312592		3399.38	-0.01448134
449.6	0.13388209		1039.59	0.03494555		1629.59	0.03165702		2219.58	0.01731478		2809.58	0.0135863		3399.58	-0.01428686
449.8	0.13348282		1039.79	0.03546102		1629.79	0.03157104		2219.78	0.01744302		2809.78	0.01383794		3399.78	-0.01438813
450	0.13335823		1039.99	0.03547348		1629.99	0.031382		2219.98	0.01755128		2809.98	0.01387877		3399.98	-0.01432905
450.2	0.13366743		1040.19	0.03443817		1630.19	0.03122498		2220.18	0.01818518		2810.18	0.01379198		3400.18	-0.01401652
450.4	0.13425457		1040.39	0.03390854		1630.39	0.03217141		2220.38	0.01822364		2810.38	0.01404309		3400.38	-0.01252033
450.6	0.13454821		1040.59	0.03457957		1630.59	0.03255376		2220.58	0.01787989		2810.58	0.01455569		3400.58	-0.01333607
450.8	0.13343631		1040.79	0.03607935		1630.79	0.03180278		2220.78	0.01813528		2810.78	0.01397487		3400.78	-0.01388092
451	0.13348042		1040.99	0.03619707		1630.99	0.03283623		2220.98	0.0187122		2810.98	0.0134584		3400.98	-0.01419806
451.2	0.13341763		1041.19	0.0372168		1631.19	0.03330231		2221.18	0.01796067		2811.18	0.01364788		3401.18	-0.01457776
451.4	0.13346848		1041.39	0.03628315		1631.39	0.03396446		2221.38	0.01810674		2811.38	0.01390419		3401.38	-0.01467435
451.6	0.13340731		1041.59	0.03530034		1631.59	0.03469735		2221.58	0.01827515		2811.58	0.0130553		3401.58	-0.01492025
451.8	0.13381939		1041.79	0.03478198		1631.79	0.03411203		2221.78	0.01839184		2811.78	0.01245207		3401.78	-0.01432677
452	0.13282265		1041.99	0.0346565		1631.99	0.03412597		2221.98	0.01966941		2811.98	0.01265906		3401.98	-0.01456446
452.2	0.13297925		1042.19	0.03551365		1632.19	0.03415946		2222.18	0.01904592		2812.18	0.01289793		3402.18	-0.01374004
452.4	0.13228439		1042.39	0.03595853		1632.39	0.033543		2222.38	0.01905282		2812.38	0.01208601		3402.38	-0.01379773
452.6	0.13206991		1042.59	0.0356713		1632.59	0.03359659		2222.58	0.01919788		2812.58	0.01222895		3402.58	-0.01367495
452.8	0.13259921		1042.79	0.03546196		1632.79	0.03302068		2222.78	0.01885693		2812.78	0.01274951		3402.78	-0.01422803
453	0.13299158		1042.99	0.03571538		1632.99	0.03279374		2222.98	0.01765403		2812.98	0.01294362		3402.98	-0.01370909
453.2	0.13382982		1043.19	0.03563107		1633.19	0.03208042		2223.18	0.01746428		2813.18	0.01301108		3403.18	-0.01404024
453.4	0.13479775		1043.39	0.0354352		1633.39	0.03206857		2223.38	0.01765845		2813.38	0.01337199		3403.38	-0.01454342
453.6	0.13531917		1043.59	0.03525066		1633.59	0.03207077		2223.58	0.01752913		2813.58	0.01324847		3403.58	-0.01465183
453.8	0.13531424		1043.79	0.03437293		1633.79	0.03131709		2223.78	0.01690591		2813.78	0.01383823		3403.78	-0.01457402
454	0.13479555		1043.99	0.03444828		1633.99	0.03168091		2223.98	0.01763775		2813.98	0.01447357		3403.98	-0.01543242
454.2	0.13473273		1044.19	0.03403996		1634.19	0.03142593		2224.18	0.01803117		2814.18	0.01403067		3404.18	-0.01514204
454.4	0.13452203		1044.39	0.03440971		1634.39	0.03198035		2224.38	0.01799		2814.38	0.0142716		3404.38	-0.01430474
454.6	0.13374092		1044.59	0.0349364		1634.59	0.03187024		2224.58	0.01810322		2814.58	0.01517739		3404.58	-0.01563621
454.8	0.1324973		1044.79	0.03487381		1634.79	0.03231672		2224.78	0.01815835		2814.78	0.01435085		3404.78	-0.01559578
455	0.13214159		1044.99	0.03404884		1634.99	0.03352692		2224.98	0.01779866		2814.98	0.01418378		3404.98	-0.01506792
455.2	0.13173369		1045.19	0.03432606		1635.19	0.03374803		2225.18	0.01759667		2815.18	0.01367728		3405.18	-0.01499284
455.4	0.13156667		1045.39	0.03281316		1635.39	0.03425061		2225.38	0.01807598		2815.38	0.01355687		3405.38	-0.01477866
455.6	0.13082012		1045.59	0.033186		1635.59	0.03509654		2225.58	0.01822583		2815.58	0.01310591		3405.58	-0.01397432
455.8	0.1297242		1045.79	0.03380448		1635.79	0.0345303		2225.78	0.01926547		2815.78	0.01229827		3405.78	-0.01403361
456	0.12890204		1045.99	0.03395562		1635.99	0.03460715		2225.98	0.02008615		2815.98	0.01197236		3405.98	-0.01382812
456.2	0.12837641		1046.19	0.03493741		1636.19	0.03479733		2226.18	0.01995214		2816.18	0.01174417		3406.18	-0.01293648
456.4	0.12870415		1046.39	0.03472461		1636.39	0.03468081		2226.38	0.01970093		2816.38	0.0109881		3406.38	-0.01323941
456.6	0.12956135		1046.59	0.03550466		1636.59	0.03396039		2226.58	0.01926085		2816.58	0.01027942		3406.58	-0.01385486
456.8	0.13044393		1046.79	0.03640435		1636.79	0.03412707		2226.78	0.01963766		2816.78	0.01048778		3406.78	-0.01414759
457	0.13162993		1046.99	0.037154		1636.99	0.03381304		2226.98	0.02005002		2816.98	0.01070024		3406.98	-0.01395868
457.2	0.13317046		1047.19	0.03724567		1637.19	0.03302895		2227.18	0.01966135		2817.18	0.01012709		3407.18	-0.01447377
457.4	0.13382189		1047.39	0.03725631		1637.39	0.03317687		2227.38	0.01878268		2817.38	0.01008146		3407.38	-0.01425002
457.6	0.13468552		1047.59	0.03730658		1637.59	0.03324372		2227.58	0.01821785		2817.58	0.01050527		3407.58	-0.01408757
457.8	0.13473046		1047.79	0.03660197		1637.79	0.03300274		2227.78	0.01835059		2817.78	0.01141571		3407.78	-0.0146239
458	0.13526385		1047.99	0.03727804		1637.99	0.03311711		2227.98	0.01849505		2817.98	0.01177625		3407.98	-0.0156451
458.2	0.13639448		1048.19	0.03609013		1638.19	0.03292998		2228.18	0.01783491		2818.18	0.01185261		3408.18	-0.01554338
458.4	0.13782208		1048.39	0.0360394		1638.39	0.03353997		2228.38	0.01684242		2818.38	0.01268768		3408.38	-0.01566904
458.6	0.13825145		1048.59	0.03539236		1638.59	0.03319478		2228.58	0.01693764		2818.58	0.0130685		3408.58	-0.0165945
458.8	0.13813473		1048.79	0.03514908		1638.79	0.03394521		2228.78	0.01639526		2818.78	0.01312083		3408.78	-0.0166683
459	0.13838771		1048.99	0.03519142		1638.99	0.03479337		2228.98	0.01522089		2818.98	0.01368846		3408.98	-0.01668603
459.2	0.1381814		1049.19	0.03572592		1639.19	0.03497859		2229.18	0.01571798		2819.18	0.01466847		3409.18	-0.01714057
459.4	0.1368506		1049.39	0.03502119		1639.39	0.03555793		2229.38	0.01621595		2819.38	0.01565394		3409.38	-0.01692401
459.6	0.13584177		1049.59	0.03556774		1639.59	0.03506229		2229.58	0.01643545		2819.58	0.01556923		3409.58	-0.015794
459.8	0.13518925		1049.79	0.03516147		1639.79	0.03401305		2229.78	0.01741437		2819.78	0.01465579		3409.78	-0.01613156
460	0.13443745		1049.99	0.03540123		1639.99	0.03430755		2229.98	0.01715692		2819.98	0.01506085		3409.98	-0.01594759
460.2	0.13365043		1050.19	0.03593215		1640.19	0.03402986		2230.18	0.01770521		2820.18	0.01468208		3410.18	-0.01590738
460.4	0.13331295		1050.39	0.03684018		1640.39	0.03387821		2230.38	0.01824226		2820.38	0.01465611		3410.38	-0.01607941
460.6	0.13286202		1050.59	0.03859727		1640.59	0.03370251		2230.58	0.01811199		2820.58	0.01465751		3410.58	-0.01647899
460.8	0.13218036		1050.79	0.03859234		1640.79	0.03473751		2230.78	0.01933548		2820.78	0.01617037		3410.78	-0.0169061
461	0.13243468		1050.99	0.03818948		1640.99	0.03418035		2230.98	0.01956823		2820.98	0.0164059		3410.98	-0.01713363
461.2	0.13192971		1051.19	0.03838826		1641.19	0.03408065		2231.18	0.01935566		2821.18	0.0156828		3411.18	-0.01618864
461.4	0.13151856		1051.39	0.03864903		1641.39	0.03434134		2231.38	0.0188719		2821.38	0.01527154		3411.38	-0.0156836
461.6	0.1316784		1051.59	0.03806216		1641.59	0.03452335		2231.58	0.01879954		2821.58	0.01523122		3411.58	-0.01573655
461.8	0.13151942		1051.79	0.03800393		1641.79	0.03474913		2231.78	0.01857692		2821.78	0.0158086		3411.78	-0.0162234
462	0.13201361		1051.99	0.03800114		1641.99	0.0343225		2231.98	0.01798545		2821.98	0.01533764		3411.98	-0.01686486
462.2	0.13191176		1052.19	0.03820975		1642.19	0.03445993		2232.18	0.01825652		2822.18	0.01509675		3412.18	-0.01698794
462.4	0.13282092		1052.39	0.03873082		1642.39	0.0351173		2232.38	0.0179641		2822.38	0.01499446		3412.38	-0.01678852
462.6	0.13325591		1052.59	0.03795675		1642.59	0.03449195		2232.58	0.01897752		2822.58	0.01482873		3412.58	-0.01678281
462.8	0.13345736		1052.79	0.03787318		1642.79	0.03510094		2232.78	0.01826962		2822.78	0.0148006		3412.78	-0.01559416
463	0.13443082		1052.99	0.03752911		1642.99	0.03552184		2232.98	0.01865185		2822.98	0.0153599		3412.98	-0.01508533
463.2	0.13429831		1053.19	0.03731765		1643.19	0.03483984		2233.18	0.01912808		2823.18	0.01516068		3413.18	-0.01481378
463.4	0.1337172		1053.39	0.03671401		1643.39	0.03355176		2233.38	0.01911988		2823.38	0.01458126		3413.38	-0.01381746
463.6	0.13439227		1053.59	0.03567386		1643.59	0.0328186		2233.58	0.01900879		2823.58	0.01434964		3413.58	-0.01250917
463.8	0.13416971		1053.79	0.03560405		1643.79	0.03300859		2233.78	0.01945472		2823.78	0.01449952		3413.78	-0.01321149
464	0.13408547		1053.99	0.03598183		1643.99	0.03351166		2233.98	0.01987554		2823.98	0.01473236		3413.98	-0.01307301
464.2	0.13445775		1054.19	0.03537428		1644.19	0.03256896		2234.18	0.0201213		2824.18	0.01498315		3414.18	-0.01292228
464.4	0.13458663		1054.39	0.03470866		1644.39	0.03276349		2234.38	0.02033513		2824.38	0.01607458		3414.38	-0.01275884
464.6	0.13528956		1054.59	0.03432		1644.59	0.03338676		2234.58	0.01978403		2824.58	0.01599246		3414.58	-0.01291011
464.8	0.13544388		1054.79	0.0338013		1644.79	0.0339299		2234.78	0.02055867		2824.78	0.01699093		3414.78	-0.01321531
465	0.13570228		1054.99	0.03349282		1644.99	0.03363343		2234.98	0.0207875		2824.98	0.01653652		3414.98	-0.01336226
465.2	0.13576962		1055.19	0.03372421		1645.19	0.03371936		2235.18	0.02028193		2825.18	0.01548622		3415.18	-0.01364233
465.4	0.13558914		1055.39	0.03450484		1645.39	0.03354851		2235.38	0.01881378		2825.38	0.01402898		3415.38	-0.01399965
465.6	0.13587412		1055.59	0.03419926		1645.59	0.03400341		2235.58	0.0186522		2825.58	0.01416458		3415.58	-0.01419933
465.8	0.13570512		1055.79	0.03562882		1645.79	0.03368423		2235.78	0.01801264		2825.78	0.01398118		3415.78	-0.01438546
466	0.13519795		1055.99	0.03569128		1645.99	0.03372299		2235.98	0.01835426		2825.98	0.01369165		3415.98	-0.01508414
466.2	0.13528528		1056.19	0.03630212		1646.19	0.03380221		2236.18	0.0194945		2826.18	0.01309681		3416.18	-0.01518585
466.4	0.13653221		1056.39	0.03633633		1646.39	0.03358177		2236.38	0.0186889		2826.38	0.01345508		3416.38	-0.01514577
466.6	0.13672931		1056.59	0.03602623		1646.59	0.03351996		2236.58	0.01898412		2826.58	0.0134313		3416.58	-0.01498118
466.8	0.13687474		1056.79	0.03713225		1646.79	0.03347122		2236.78	0.0195946		2826.78	0.0135001		3416.78	-0.01524551
467	0.13743722		1056.99	0.03740985		1646.99	0.03345083		2236.98	0.01973493		2826.98	0.01383036		3416.98	-0.01596717
467.2	0.1363954		1057.19	0.03743267		1647.19	0.03350867		2237.18	0.01905332		2827.18	0.01392847		3417.18	-0.01627856
467.4	0.13545887		1057.39	0.03791373		1647.39	0.03319146		2237.38	0.01884796		2827.38	0.01436993		3417.38	-0.01662389
467.6	0.13580967		1057.59	0.03737811		1647.59	0.03355069		2237.58	0.01868108		2827.58	0.0150458		3417.58	-0.01642366
467.8	0.13615163		1057.79	0.03770118		1647.79	0.03327987		2237.78	0.0185985		2827.78	0.01679836		3417.78	-0.01676865
468	0.13661952		1057.99	0.03744431		1647.99	0.03276913		2237.98	0.01854122		2827.98	0.01767194		3417.98	-0.01633388
468.2	0.13695748		1058.19	0.03685904		1648.19	0.03226207		2238.18	0.01819733		2828.18	0.01874109		3418.18	-0.01597923
468.4	0.13712917		1058.39	0.03667805		1648.39	0.03265949		2238.38	0.01876621		2828.38	0.01888744		3418.38	-0.01566611
468.6	0.13723368		1058.59	0.03696621		1648.59	0.03336895		2238.58	0.01896081		2828.58	0.01798376		3418.58	-0.01503319
468.8	0.13680968		1058.79	0.03724425		1648.79	0.03347533		2238.78	0.02002169		2828.78	0.01778269		3418.78	-0.01453066
469	0.13669789		1058.99	0.03742533		1648.99	0.03343074		2238.98	0.02064198		2828.98	0.01615902		3418.98	-0.01404277
469.2	0.13631326		1059.19	0.0381818		1649.19	0.03404114		2239.18	0.02031196		2829.18	0.01422706		3419.18	-0.01330192
469.4	0.13567479		1059.39	0.03949038		1649.39	0.03425137		2239.38	0.02054275		2829.38	0.01227998		3419.38	-0.01203448
469.6	0.13516988		1059.59	0.03945168		1649.59	0.03498559		2239.58	0.02142288		2829.58	0.01136664		3419.58	-0.01132359
469.8	0.13447379		1059.79	0.04059927		1649.79	0.03534959		2239.78	0.0221575		2829.78	0.00991181		3419.78	-0.01083883
470	0.13447379		1059.99	0.04059927		1649.99	0.03534959		2239.98	0.0221575		2829.98	0.00991181		3419.98	-0.01083883
470.2	0.13395257		1060.19	0.04011478		1650.19	0.03522022		2240.18	0.02163025		2830.18	0.01017771		3420.18	-0.01117348
470.4	0.13272607		1060.39	0.04005581		1650.39	0.03540108		2240.38	0.02214723		2830.38	0.0111326		3420.38	-0.01158575
470.6	0.13186519		1060.59	0.04002155		1650.59	0.03543505		2240.58	0.02202836		2830.58	0.01101803		3420.58	-0.01222488
470.8	0.1305681		1060.79	0.04018751		1650.79	0.03443825		2240.78	0.02164701		2830.78	0.01134086		3420.78	-0.01262489
471	0.1293598		1060.99	0.03950198		1650.99	0.03429088		2240.98	0.02084692		2830.98	0.01240724		3420.98	-0.01282872
471.2	0.1285464		1061.19	0.03943455		1651.19	0.03471458		2241.18	0.02063528		2831.18	0.01314379		3421.18	-0.01361178
471.4	0.12748854		1061.39	0.03912683		1651.39	0.03466626		2241.38	0.01986009		2831.38	0.01397699		3421.38	-0.01399481
471.6	0.12702818		1061.59	0.03827029		1651.59	0.0342755		2241.58	0.0200682		2831.58	0.01368381		3421.58	-0.01361615
471.8	0.1263751		1061.79	0.03754859		1651.79	0.03464578		2241.78	0.01953413		2831.78	0.01374893		3421.78	-0.01440547
472	0.12580771		1061.99	0.03722866		1651.99	0.03447687		2241.98	0.01941102		2831.98	0.01355907		3421.98	-0.01413893
472.2	0.12515226		1062.19	0.03612252		1652.19	0.03474331		2242.18	0.01975095		2832.18	0.01378645		3422.18	-0.01341
472.4	0.12555785		1062.39	0.03543965		1652.39	0.03447171		2242.38	0.02118426		2832.38	0.01244962		3422.38	-0.01227684
472.6	0.12571683		1062.59	0.03433011		1652.59	0.03424354		2242.58	0.02188405		2832.58	0.01152973		3422.58	-0.01215373
472.8	0.12508483		1062.79	0.03474847		1652.79	0.03403433		2242.78	0.0229524		2832.78	0.01101438		3422.78	-0.01189839
473	0.12448647		1062.99	0.03560728		1652.99	0.03319812		2242.98	0.02214279		2832.98	0.01066657		3422.98	-0.01127151
473.2	0.12461054		1063.19	0.03604733		1653.19	0.03294198		2243.18	0.02230408		2833.18	0.01022019		3423.18	-0.01158899
473.4	0.12517538		1063.39	0.03535313		1653.39	0.03413013		2243.38	0.02179798		2833.38	0.01027805		3423.38	-0.01147179
473.6	0.12434031		1063.59	0.03617291		1653.59	0.03350643		2243.58	0.02059251		2833.58	0.0104738		3423.58	-0.01124758
473.8	0.12395101		1063.79	0.0371437		1653.79	0.03366001		2243.78	0.02111436		2833.78	0.01015865		3423.78	-0.01074173
474	0.124412		1063.99	0.03736089		1653.99	0.03416186		2243.98	0.02051382		2833.98	0.00933263		3423.98	-0.01060301
474.2	0.12429695		1064.19	0.03677813		1654.19	0.03330266		2244.18	0.02073892		2834.18	0.00911487		3424.18	-0.01088816
474.4	0.1231085		1064.39	0.03805619		1654.39	0.03340462		2244.38	0.02109264		2834.38	0.00963173		3424.38	-0.0109067
474.6	0.12251304		1064.59	0.03871544		1654.59	0.03338073		2244.58	0.01956819		2834.58	0.0091665		3424.58	-0.01029724
474.8	0.12139755		1064.79	0.03884652		1654.79	0.03362691		2244.78	0.01905006		2834.78	0.00962437		3424.78	-0.00984895
475	0.12012524		1064.99	0.03825283		1654.99	0.03471499		2244.98	0.01846946		2834.98	0.01036434		3424.98	-0.01000034
475.2	0.1198151		1065.19	0.03815618		1655.19	0.03559778		2245.18	0.01904784		2835.18	0.01018827		3425.18	-0.01045711
475.4	0.118824		1065.39	0.03705412		1655.39	0.03504618		2245.38	0.01876359		2835.38	0.01051638		3425.38	-0.01031183
475.6	0.11879856		1065.59	0.03611706		1655.59	0.03519097		2245.58	0.01979562		2835.58	0.01007136		3425.58	-0.01037436
475.8	0.11838965		1065.79	0.03615077		1655.79	0.03522286		2245.78	0.01981172		2835.78	0.01035201		3425.78	-0.01114859
476	0.11799134		1065.99	0.03539919		1655.99	0.03498805		2245.98	0.01934249		2835.98	0.01006257		3425.98	-0.01043857
476.2	0.11760183		1066.19	0.03385929		1656.19	0.03510519		2246.18	0.02026432		2836.18	0.00981683		3426.18	-0.01152324
476.4	0.11786862		1066.39	0.03437148		1656.39	0.03451771		2246.38	0.02017175		2836.38	0.00853568		3426.38	-0.01172975
476.6	0.11676013		1066.59	0.03366871		1656.59	0.03464098		2246.58	0.02020141		2836.58	0.00863838		3426.58	-0.01232292
476.8	0.1164455		1066.79	0.03327832		1656.79	0.03334879		2246.78	0.02008087		2836.78	0.00892738		3426.78	-0.01192443
477	0.11638847		1066.99	0.03265529		1656.99	0.03240759		2246.98	0.01927173		2836.98	0.00911276		3426.98	-0.01151271
477.2	0.11737486		1067.19	0.03199536		1657.19	0.0328443		2247.18	0.0187527		2837.18	0.00931845		3427.18	-0.01263778
477.4	0.11801605		1067.39	0.03156236		1657.39	0.03242538		2247.38	0.01842864		2837.38	0.00948575		3427.38	-0.01364301
477.6	0.1185271		1067.59	0.03224564		1657.59	0.03199653		2247.58	0.01801391		2837.58	0.00926933		3427.58	-0.01368945
477.8	0.11896038		1067.79	0.0320891		1657.79	0.03291559		2247.78	0.0194336		2837.78	0.00885469		3427.78	-0.01414578
478	0.12002602		1067.99	0.03195484		1657.99	0.03308864		2247.98	0.01994429		2837.98	0.00880864		3427.98	-0.01427667
478.2	0.12009947		1068.19	0.0319544		1658.19	0.03191775		2248.18	0.02029689		2838.18	0.00875626		3428.18	-0.01473068
478.4	0.11961133		1068.39	0.03245057		1658.39	0.0323742		2248.38	0.01974383		2838.38	0.00923926		3428.38	-0.01451181
478.6	0.11995239		1068.59	0.03237231		1658.59	0.03263468		2248.58	0.01947386		2838.58	0.00892433		3428.58	-0.01447635
478.8	0.11952311		1068.79	0.03271139		1658.79	0.03242284		2248.78	0.0197481		2838.78	0.00887772		3428.78	-0.01479114
479	0.11915486		1068.99	0.0327439		1658.99	0.03239559		2248.98	0.01942464		2838.98	0.00882277		3428.98	-0.01429931
479.2	0.11922522		1069.19	0.03296116		1659.19	0.03273437		2249.18	0.01878263		2839.18	0.00940698		3429.18	-0.01389265
479.4	0.11942267		1069.39	0.03323832		1659.39	0.032238		2249.38	0.01784834		2839.38	0.00991398		3429.38	-0.01411021
479.6	0.11909505		1069.59	0.03341274		1659.59	0.03281155		2249.58	0.01816317		2839.58	0.00953475		3429.58	-0.01402959
479.8	0.11875608		1069.79	0.03394037		1659.79	0.03278166		2249.78	0.01833467		2839.78	0.00937114		3429.78	-0.0133134
480	0.11800013		1069.99	0.03436504		1659.99	0.03363902		2249.98	0.01751462		2839.98	0.00872981		3429.98	-0.01332629
480.2	0.11710293		1070.19	0.03473283		1660.19	0.03397014		2250.18	0.01833471		2840.18	0.00782688		3430.18	-0.01444204
480.4	0.11622298		1070.39	0.03566793		1660.39	0.03346464		2250.38	0.01807468		2840.38	0.00768939		3430.38	-0.01427454
480.6	0.11508075		1070.59	0.03435859		1660.59	0.03408142		2250.58	0.01859985		2840.58	0.00769532		3430.58	-0.01440274
480.8	0.11480944		1070.79	0.03354478		1660.79	0.03315102		2250.78	0.01905592		2840.78	0.00793719		3430.78	-0.01460315
481	0.1148424		1070.99	0.03337571		1660.99	0.03391124		2250.98	0.01866245		2840.98	0.00759042		3430.98	-0.01482981
481.2	0.11420194		1071.19	0.03367		1661.19	0.03428995		2251.18	0.01918681		2841.18	0.00808227		3431.18	-0.01482343
481.4	0.11395686		1071.39	0.03326884		1661.39	0.03481156		2251.38	0.02053006		2841.38	0.00702178		3431.38	-0.01412941
481.6	0.11416661		1071.59	0.03351509		1661.59	0.03532494		2251.58	0.02175008		2841.58	0.00697425		3431.58	-0.01320425
481.8	0.1135235		1071.79	0.03320521		1661.79	0.03541368		2251.78	0.02262312		2841.78	0.00764384		3431.78	-0.01297591
482	0.11278097		1071.99	0.03368678		1661.99	0.03514812		2251.98	0.02290505		2841.98	0.00824087		3431.98	-0.01292487
482.2	0.11287769		1072.19	0.03370262		1662.19	0.03468388		2252.18	0.02314575		2842.18	0.00782386		3432.18	-0.01285757
482.4	0.11275155		1072.39	0.03328921		1662.39	0.03493505		2252.38	0.02245518		2842.38	0.00854562		3432.38	-0.01225903
482.6	0.11246019		1072.59	0.0335594		1662.59	0.03462939		2252.58	0.02185259		2842.58	0.00836074		3432.58	-0.01228045
482.8	0.11163568		1072.79	0.03390478		1662.79	0.03413037		2252.78	0.02048563		2842.78	0.00859021		3432.78	-0.01180014
483	0.11083116		1072.99	0.03322586		1662.99	0.03467026		2252.98	0.01951482		2842.98	0.00948352		3432.98	-0.01163436
483.2	0.11014067		1073.19	0.03343663		1663.19	0.03472303		2253.18	0.01857322		2843.18	0.0096268		3433.18	-0.01262475
483.4	0.11010208		1073.39	0.03294932		1663.39	0.03436761		2253.38	0.01848937		2843.38	0.0096751		3433.38	-0.01337422
483.6	0.10938908		1073.59	0.03268005		1663.59	0.03449377		2253.58	0.01841888		2843.58	0.0088426		3433.58	-0.01312998
483.8	0.10958624		1073.79	0.03310086		1663.79	0.03366656		2253.78	0.01788371		2843.78	0.00869702		3433.78	-0.01291589
484	0.10959134		1073.99	0.03335916		1663.99	0.03314772		2253.98	0.01689585		2843.98	0.00789299		3433.98	-0.01323693
484.2	0.10903416		1074.19	0.03306386		1664.19	0.03304155		2254.18	0.01647484		2844.18	0.00781402		3434.18	-0.01393162
484.4	0.10861837		1074.39	0.03309928		1664.39	0.0324214		2254.38	0.01583449		2844.38	0.0088988		3434.38	-0.01472041
484.6	0.10815757		1074.59	0.03261043		1664.59	0.03278137		2254.58	0.01534885		2844.58	0.00917841		3434.58	-0.0150701
484.8	0.10808863		1074.79	0.03223799		1664.79	0.03242177		2254.78	0.01520871		2844.78	0.00900135		3434.78	-0.01551506
485	0.10817964		1074.99	0.03230391		1664.99	0.03293133		2254.98	0.01500583		2844.98	0.00882273		3434.98	-0.01507419
485.2	0.10825762		1075.19	0.03191385		1665.19	0.03322784		2255.18	0.01618507		2845.18	0.00900854		3435.18	-0.01451386
485.4	0.10888826		1075.39	0.03215426		1665.39	0.03293313		2255.38	0.01601917		2845.38	0.0079304		3435.38	-0.01468667
485.6	0.10980906		1075.59	0.03256345		1665.59	0.03275326		2255.58	0.01612181		2845.58	0.00831009		3435.58	-0.01489152
485.8	0.11005102		1075.79	0.03304176		1665.79	0.03375189		2255.78	0.01536295		2845.78	0.00816084		3435.78	-0.01421191
486	0.11033378		1075.99	0.03337187		1665.99	0.03393523		2255.98	0.01591891		2845.98	0.00787302		3435.98	-0.01386955
486.2	0.1116473		1076.19	0.0335646		1666.19	0.03381722		2256.18	0.01612908		2846.18	0.00740969		3436.18	-0.01314713
486.4	0.11166106		1076.39	0.03321955		1666.39	0.03411765		2256.38	0.01572193		2846.38	0.0074882		3436.38	-0.01346925
486.6	0.11134548		1076.59	0.03394531		1666.59	0.03402778		2256.58	0.01548508		2846.58	0.00707583		3436.58	-0.01397299
486.8	0.11088401		1076.79	0.03409065		1666.79	0.03380702		2256.78	0.01449131		2846.78	0.00684545		3436.78	-0.01454977
487	0.11056688		1076.99	0.03451972		1666.99	0.03390235		2256.98	0.01476101		2846.98	0.00669143		3436.98	-0.01523479
487.2	0.1109475		1077.19	0.03471005		1667.19	0.0334269		2257.18	0.01492902		2847.18	0.0056777		3437.18	-0.0156025
487.4	0.11161703		1077.39	0.03385793		1667.39	0.03262487		2257.38	0.01421775		2847.38	0.00598857		3437.38	-0.01591743
487.6	0.1115257		1077.59	0.03345547		1667.59	0.03254934		2257.58	0.01343302		2847.58	0.00500827		3437.58	-0.0157864
487.8	0.1108431		1077.79	0.03311013		1667.79	0.03177918		2257.78	0.01288949		2847.78	0.00483913		3437.78	-0.0156314
488	0.11060086		1077.99	0.03232032		1667.99	0.03224444		2257.98	0.01284339		2847.98	0.00438521		3437.98	-0.0158142
488.2	0.10974665		1078.19	0.03217179		1668.19	0.03247052		2258.18	0.01226342		2848.18	0.00543847		3438.18	-0.01595224
488.4	0.10896282		1078.39	0.03218845		1668.39	0.03278162		2258.38	0.01230084		2848.38	0.0063745		3438.38	-0.01686044
488.6	0.10789628		1078.59	0.03125518		1668.59	0.03339209		2258.58	0.01214706		2848.58	0.00593772		3438.58	-0.01705796
488.8	0.10683965		1078.79	0.03067295		1668.79	0.03430436		2258.78	0.01228124		2848.78	0.00634981		3438.78	-0.01728939
489	0.10573129		1078.99	0.03006048		1668.99	0.0353822		2258.98	0.01290584		2848.98	0.00652935		3438.98	-0.01691133
489.2	0.10530131		1079.19	0.02890653		1669.19	0.03568108		2259.18	0.0131603		2849.18	0.00725824		3439.18	-0.0169898
489.4	0.10474571		1079.39	0.02845662		1669.39	0.03568576		2259.38	0.01231725		2849.38	0.00697166		3439.38	-0.01658605
489.6	0.10482096		1079.59	0.02722227		1669.59	0.03598479		2259.58	0.0129057		2849.58	0.00766456		3439.58	-0.01644959
489.8	0.10431699		1079.79	0.02676657		1669.79	0.03646019		2259.78	0.01368651		2849.78	0.00737734		3439.78	-0.01465379
490	0.10457967		1079.99	0.0259919		1669.99	0.03564921		2259.98	0.01468756		2849.98	0.00761265		3439.98	-0.01424513
490.2	0.10400777		1080.19	0.02621174		1670.19	0.03558707		2260.18	0.01466617		2850.18	0.00819795		3440.18	-0.01415255
490.4	0.1038445		1080.39	0.02717277		1670.39	0.03527728		2260.38	0.01509646		2850.38	0.00799188		3440.38	-0.01414319
490.6	0.10399758		1080.59	0.02764968		1670.59	0.03464538		2260.58	0.01508523		2850.58	0.00829035		3440.58	-0.01438875
490.8	0.10361481		1080.79	0.02738347		1670.79	0.03387691		2260.78	0.0150781		2850.78	0.00788042		3440.78	-0.01511638
491	0.10390804		1080.99	0.02782436		1670.99	0.03338605		2260.98	0.0164989		2850.98	0.00757602		3440.98	-0.01532647
491.2	0.10402712		1081.19	0.02735476		1671.19	0.03206303		2261.18	0.01733249		2851.18	0.00752916		3441.18	-0.01565848
491.4	0.10443787		1081.39	0.02702042		1671.39	0.03130323		2261.38	0.0172936		2851.38	0.00743655		3441.38	-0.0157309
491.6	0.10473137		1081.59	0.02673226		1671.59	0.03054323		2261.58	0.01745606		2851.58	0.00707717		3441.58	-0.01634756
491.8	0.10469308		1081.79	0.02652602		1671.79	0.03023315		2261.78	0.01763939		2851.78	0.00619803		3441.78	-0.01625199
492	0.10509321		1081.99	0.02615744		1671.99	0.02950588		2261.98	0.0178598		2851.98	0.0056195		3441.98	-0.01677868
492.2	0.10584571		1082.19	0.02705162		1672.19	0.02968953		2262.18	0.01726428		2852.18	0.00546352		3442.18	-0.01653768
492.4	0.1057028		1082.39	0.02721025		1672.39	0.02994473		2262.38	0.01736028		2852.38	0.00551813		3442.38	-0.01771766
492.6	0.10635367		1082.59	0.02677447		1672.59	0.03076925		2262.58	0.01700057		2852.58	0.00512986		3442.58	-0.01834547
492.8	0.1070323		1082.79	0.02736021		1672.79	0.03092655		2262.78	0.01733197		2852.78	0.00497118		3442.78	-0.01917398
493	0.10737925		1082.99	0.02665525		1672.99	0.0309131		2262.98	0.01724792		2852.98	0.00521218		3442.98	-0.01870977
493.2	0.10759106		1083.19	0.02644837		1673.19	0.03100513		2263.18	0.01682329		2853.18	0.0058652		3443.18	-0.01831506
493.4	0.10804486		1083.39	0.02627617		1673.39	0.0313576		2263.38	0.01579251		2853.38	0.00516089		3443.38	-0.01768235
493.6	0.10910635		1083.59	0.02607226		1673.59	0.03057879		2263.58	0.0163276		2853.58	0.00650193		3443.58	-0.01770466
493.8	0.10925823		1083.79	0.02591343		1673.79	0.03126028		2263.78	0.01614801		2853.78	0.00625033		3443.78	-0.01630669
494	0.10937245		1083.99	0.02697968		1673.99	0.03167749		2263.98	0.01545631		2853.98	0.00672685		3443.98	-0.01633288
494.2	0.10940899		1084.19	0.02823251		1674.19	0.03200512		2264.18	0.01487443		2854.18	0.00664413		3444.18	-0.01701325
494.4	0.10941692		1084.39	0.02917691		1674.39	0.03192672		2264.38	0.01489893		2854.38	0.00620806		3444.38	-0.01724522
494.6	0.10865169		1084.59	0.02863574		1674.59	0.031988		2264.58	0.01473518		2854.58	0.00620331		3444.58	-0.01659992
494.8	0.10830017		1084.79	0.02901686		1674.79	0.03162796		2264.78	0.01465123		2854.78	0.00563399		3444.78	-0.01636829
495	0.10712089		1084.99	0.02935325		1674.99	0.03118919		2264.98	0.01471626		2854.98	0.00590641		3444.98	-0.01644313
495.2	0.10646984		1085.19	0.02946447		1675.19	0.02983685		2265.18	0.01504222		2855.18	0.0063508		3445.18	-0.01609248
495.4	0.10647778		1085.39	0.02965005		1675.39	0.02996236		2265.38	0.01506741		2855.38	0.00620425		3445.38	-0.01572626
495.6	0.1058905		1085.59	0.02945102		1675.59	0.03016496		2265.58	0.0145099		2855.58	0.00575753		3445.58	-0.01556713
495.8	0.10488843		1085.79	0.02921059		1675.79	0.03086593		2265.78	0.01442238		2855.78	0.00512877		3445.78	-0.01482756
496	0.10444958		1085.99	0.02928573		1675.99	0.0306188		2265.98	0.01424776		2855.98	0.00501285		3445.98	-0.01495755
496.2	0.10546917		1086.19	0.0291351		1676.19	0.03100921		2266.18	0.01346972		2856.18	0.00556137		3446.18	-0.01510446
496.4	0.10555931		1086.39	0.02922168		1676.39	0.03035135		2266.38	0.01325149		2856.38	0.00638492		3446.38	-0.01595894
496.6	0.10555235		1086.59	0.02869323		1676.59	0.03031405		2266.58	0.0139627		2856.58	0.0066421		3446.58	-0.01570261
496.8	0.10591242		1086.79	0.02863108		1676.79	0.02928732		2266.78	0.01326424		2856.78	0.00672159		3446.78	-0.01556879
497	0.10498572		1086.99	0.02819293		1676.99	0.02917684		2266.98	0.01282902		2856.98	0.00764028		3446.98	-0.01503558
497.2	0.10531725		1087.19	0.02848273		1677.19	0.02940099		2267.18	0.01324621		2857.18	0.00760057		3447.18	-0.01555453
497.4	0.10575111		1087.39	0.02839283		1677.39	0.02854673		2267.38	0.0129857		2857.38	0.00838843		3447.38	-0.01608153
497.6	0.10619629		1087.59	0.02837451		1677.59	0.02889667		2267.58	0.01438677		2857.58	0.0093457		3447.58	-0.01626866
497.8	0.10536796		1087.79	0.02836713		1677.79	0.02983773		2267.78	0.01394204		2857.78	0.0088436		3447.78	-0.01605723
498	0.10514465		1087.99	0.02918601		1677.99	0.02954387		2267.98	0.01411755		2857.98	0.00876447		3447.98	-0.01571208
498.2	0.10530528		1088.19	0.02842708		1678.19	0.02911176		2268.18	0.0147382		2858.18	0.00782461		3448.18	-0.01605358
498.4	0.10398228		1088.39	0.02938378		1678.39	0.02884177		2268.38	0.01483973		2858.38	0.0078985		3448.38	-0.01577031
498.6	0.10363573		1088.59	0.02861314		1678.59	0.02860019		2268.58	0.01508004		2858.58	0.00766493		3448.58	-0.01472489
498.8	0.10290891		1088.79	0.02953759		1678.79	0.02826243		2268.78	0.01530792		2858.78	0.00687231		3448.78	-0.01528801
499	0.1022582		1088.99	0.03002785		1678.99	0.0279816		2268.98	0.015165		2858.98	0.00779576		3448.98	-0.01612497
499.2	0.10269953		1089.19	0.02997077		1679.19	0.0278306		2269.18	0.01562209		2859.18	0.00688724		3449.18	-0.01595654
499.4	0.10284886		1089.39	0.030112		1679.39	0.02834337		2269.38	0.0147398		2859.38	0.00619794		3449.38	-0.01570589
499.6	0.10303404		1089.59	0.02951974		1679.59	0.0281872		2269.58	0.01418532		2859.58	0.0060255		3449.58	-0.01596487
499.8	0.10342048		1089.79	0.02866667		1679.79	0.0283188		2269.78	0.01479895		2859.78	0.0058945		3449.78	-0.0165871
500	0.10333146		1089.99	0.02918959		1679.99	0.02817444		2269.98	0.01530118		2859.98	0.00476841		3449.98	-0.01713478
500.2	0.10378635		1090.19	0.0292439		1680.19	0.0276855		2270.18	0.01536279		2860.18	0.00489364		3450.18	-0.01769525
500.4	0.10410236		1090.39	0.02960521		1680.39	0.02720571		2270.38	0.0150304		2860.38	0.00417409		3450.38	-0.01765792
500.6	0.10442791		1090.59	0.02938538		1680.59	0.02673199		2270.58	0.01568505		2860.58	0.00376685		3450.58	-0.01772134
500.8	0.10497916		1090.79	0.02913684		1680.79	0.02631872		2270.78	0.01443822		2860.78	0.00326299		3450.78	-0.01860032
501	0.1041919		1090.99	0.02894497		1680.99	0.02677007		2270.98	0.01450532		2860.98	0.00235714		3450.98	-0.01984946
501.2	0.10443933		1091.19	0.02812156		1681.19	0.02682419		2271.18	0.0148722		2861.18	0.00219709		3451.18	-0.0206673
501.4	0.10354306		1091.39	0.02658873		1681.39	0.02722307		2271.38	0.01511188		2861.38	0.00211401		3451.38	-0.02108577
501.6	0.10305142		1091.59	0.02550843		1681.59	0.02749946		2271.58	0.01541758		2861.58	0.00121309		3451.58	-0.02021419
501.8	0.10136529		1091.79	0.02502044		1681.79	0.02729715		2271.78	0.01461877		2861.78	0.00141324		3451.78	-0.01985037
502	0.10093573		1091.99	0.02401913		1681.99	0.02642613		2271.98	0.0152672		2861.98	0.00167322		3451.98	-0.0186021
502.2	0.10088273		1092.19	0.02376364		1682.19	0.0261099		2272.18	0.01525634		2862.18	0.00145541		3452.18	-0.01829724
502.4	0.10026509		1092.39	0.02370426		1682.39	0.02653298		2272.38	0.01455419		2862.38	0.00114074		3452.38	-0.01724857
502.6	0.10048847		1092.59	0.02268407		1682.59	0.02652585		2272.58	0.01430857		2862.58	0.00095793		3452.58	-0.01654379
502.8	0.10070453		1092.79	0.02294601		1682.79	0.02627905		2272.78	0.01382862		2862.78	0.00133076		3452.78	-0.01695997
503	0.10200713		1092.99	0.02262908		1682.99	0.02588324		2272.98	0.01278537		2862.98	0.00239599		3452.98	-0.01765868
503.2	0.10249185		1093.19	0.02175949		1683.19	0.02608045		2273.18	0.01182811		2863.18	0.00214064		3453.18	-0.01808912
503.4	0.10250968		1093.39	0.02184633		1683.39	0.02575258		2273.38	0.01114088		2863.38	0.00239956		3453.38	-0.01856328
503.6	0.10284192		1093.59	0.02208931		1683.59	0.02570855		2273.58	0.01114052		2863.58	0.00240341		3453.58	-0.0191359
503.8	0.10311687		1093.79	0.02275172		1683.79	0.02633794		2273.78	0.0114678		2863.78	0.00188909		3453.78	-0.01905547
504	0.10306279		1093.99	0.02417069		1683.99	0.02619116		2273.98	0.01154045		2863.98	0.00153755		3453.98	-0.01970797
504.2	0.10389027		1094.19	0.02451942		1684.19	0.02565812		2274.18	0.01168222		2864.18	0.00167233		3454.18	-0.01961007
504.4	0.10418399		1094.39	0.02479		1684.39	0.02438904		2274.38	0.01123189		2864.38	0.00145329		3454.38	-0.01996082
504.6	0.10418018		1094.59	0.02482983		1684.59	0.02391045		2274.58	0.01184367		2864.58	0.00148085		3454.58	-0.02101838
504.8	0.10298333		1094.79	0.02463227		1684.79	0.02403254		2274.78	0.01164152		2864.78	0.00118048		3454.78	-0.02188767
505	0.10291523		1094.99	0.0249801		1684.99	0.02446973		2274.98	0.01109977		2864.98	0.00084946		3454.98	-0.02290035
505.2	0.10240539		1095.19	0.02510281		1685.19	0.02484039		2275.18	0.01143701		2865.18	0.00129619		3455.18	-0.02235626
505.4	0.10163851		1095.39	0.02515432		1685.39	0.02550039		2275.38	0.01148914		2865.38	0.00141265		3455.38	-0.02131486
505.6	0.10166856		1095.59	0.02610009		1685.59	0.02486102		2275.58	0.01157779		2865.58	0.00175781		3455.58	-0.02056556
505.8	0.10138283		1095.79	0.02626394		1685.79	0.02522556		2275.78	0.01202711		2865.78	0.00212841		3455.78	-0.02050625
506	0.10150791		1095.99	0.02676492		1685.99	0.02512729		2275.98	0.01221817		2865.98	0.00246266		3455.98	-0.01976686
506.2	0.10174		1096.19	0.02755248		1686.19	0.02551584		2276.18	0.01230357		2866.18	0.00295159		3456.18	-0.01974792
506.4	0.10162938		1096.39	0.02700969		1686.39	0.02611789		2276.38	0.01267537		2866.38	0.00302888		3456.38	-0.01947805
506.6	0.10115822		1096.59	0.02663571		1686.59	0.02607427		2276.58	0.01234447		2866.58	0.00484073		3456.58	-0.01991216
506.8	0.10143323		1096.79	0.02612987		1686.79	0.02628588		2276.78	0.01254627		2866.78	0.00542823		3456.78	-0.01968219
507	0.10145183		1096.99	0.02603091		1686.99	0.02747201		2276.98	0.0118706		2866.98	0.00520674		3456.98	-0.0195679
507.2	0.10099215		1097.19	0.02597573		1687.19	0.02880517		2277.18	0.012146		2867.18	0.00482986		3457.18	-0.0192456
507.4	0.09997152		1097.39	0.0255751		1687.39	0.02821831		2277.38	0.01188467		2867.38	0.00406955		3457.38	-0.01886669
507.6	0.10070002		1097.59	0.02529475		1687.59	0.0285156		2277.58	0.01179776		2867.58	0.00437463		3457.58	-0.01868458
507.8	0.1014426		1097.79	0.02466346		1687.79	0.02758568		2277.78	0.01303872		2867.78	0.00320619		3457.78	-0.01870102
508	0.10160256		1097.99	0.02368231		1687.99	0.02654703		2277.98	0.01401482		2867.98	0.00369492		3457.98	-0.01856107
508.2	0.10121037		1098.19	0.02267084		1688.19	0.02581898		2278.18	0.01537242		2868.18	0.00328818		3458.18	-0.01864962
508.4	0.10043081		1098.39	0.02318995		1688.39	0.02517871		2278.38	0.01643764		2868.38	0.00399556		3458.38	-0.01951391
508.6	0.10039437		1098.59	0.02315275		1688.59	0.02574271		2278.58	0.01739158		2868.58	0.00410971		3458.58	-0.01978465
508.8	0.10034709		1098.79	0.02345719		1688.79	0.02617097		2278.78	0.01781116		2868.78	0.00369588		3458.78	-0.0186272
509	0.10113503		1098.99	0.02412012		1688.99	0.02568663		2278.98	0.01727544		2868.98	0.00424842		3458.98	-0.01785295
509.2	0.1016335		1099.19	0.02508613		1689.19	0.02578269		2279.18	0.0180292		2869.18	0.00445535		3459.18	-0.01586023
509.4	0.10292274		1099.39	0.02574859		1689.39	0.02555182		2279.38	0.01810177		2869.38	0.0045603		3459.38	-0.01527121
509.6	0.10438561		1099.59	0.02658691		1689.59	0.02501729		2279.58	0.01800887		2869.58	0.00424941		3459.58	-0.01563222
509.8	0.10419066		1099.79	0.02659631		1689.79	0.02591203		2279.78	0.01719871		2869.78	0.00463662		3459.78	-0.01546143
510	0.10347195		1099.99	0.02719834		1689.99	0.02599354		2279.98	0.01675838		2869.98	0.00550047		3459.98	-0.01510815
510.2	0.1034809		1100.19	0.02707544		1690.19	0.02650553		2280.18	0.01686708		2870.18	0.00515017		3460.18	-0.01514509
510.4	0.10265778		1100.39	0.02719701		1690.39	0.02688696		2280.38	0.01644547		2870.38	0.00450534		3460.38	-0.01502536
510.6	0.10182086		1100.59	0.02735759		1690.59	0.02691025		2280.58	0.01491786		2870.58	0.00486445		3460.58	-0.01496945
510.8	0.10173011		1100.79	0.02725944		1690.79	0.02807668		2280.78	0.01415516		2870.78	0.00362132		3460.78	-0.01447787
511	0.10079206		1100.99	0.0271408		1690.99	0.0284347		2280.98	0.01289937		2870.98	0.00396496		3460.98	-0.0153309
511.2	0.09988723		1101.19	0.0270417		1691.19	0.02903532		2281.18	0.01228812		2871.18	0.00545988		3461.18	-0.01624727
511.4	0.09984002		1101.39	0.0258578		1691.39	0.02814963		2281.38	0.01041253		2871.38	0.00501636		3461.38	-0.01697447
511.6	0.10129134		1101.59	0.0260706		1691.59	0.02786183		2281.58	0.01082951		2871.58	0.00565209		3461.58	-0.01813572
511.8	0.10119344		1101.79	0.02525348		1691.79	0.0257588		2281.78	0.01141781		2871.78	0.00483444		3461.78	-0.01946558
512	0.10012152		1101.99	0.02537894		1691.99	0.02541492		2281.98	0.0114727		2871.98	0.0058716		3461.98	-0.02028082
512.2	0.09957091		1102.19	0.02560206		1692.19	0.02531633		2282.18	0.0121883		2872.18	0.0058947		3462.18	-0.02168778
512.4	0.09966603		1102.39	0.02658784		1692.39	0.0251271		2282.38	0.01255532		2872.38	0.00624319		3462.38	-0.02190971
512.6	0.0998093		1102.59	0.02599842		1692.59	0.02533669		2282.58	0.01254752		2872.58	0.00587747		3462.58	-0.02130055
512.8	0.09988642		1102.79	0.02608626		1692.79	0.02481436		2282.78	0.01209557		2872.78	0.00546495		3462.78	-0.01974493
513	0.10045725		1102.99	0.02694789		1692.99	0.02463167		2282.98	0.01105064		2872.98	0.00594565		3462.98	-0.01969246
513.2	0.10119383		1103.19	0.02661608		1693.19	0.0251907		2283.18	0.01139606		2873.18	0.0044992		3463.18	-0.01959561
513.4	0.10185496		1103.39	0.0262906		1693.39	0.02514809		2283.38	0.01109491		2873.38	0.00421083		3463.38	-0.01966502
513.6	0.10194043		1103.59	0.02554031		1693.59	0.02497843		2283.58	0.0109023		2873.58	0.00357684		3463.58	-0.01974605
513.8	0.10142987		1103.79	0.02496015		1693.79	0.0260109		2283.78	0.01088332		2873.78	0.00376284		3463.78	-0.01930949
514	0.10194655		1103.99	0.02436875		1693.99	0.02609859		2283.98	0.01098858		2873.98	0.00234372		3463.98	-0.01961242
514.2	0.10134868		1104.19	0.02422498		1694.19	0.02629327		2284.18	0.01094289		2874.18	0.00172448		3464.18	-0.02030568
514.4	0.10136245		1104.39	0.02406123		1694.39	0.0267618		2284.38	0.01090534		2874.38	0.00075279		3464.38	-0.02039252
514.6	0.10079019		1104.59	0.02377284		1694.59	0.0269954		2284.58	0.01008487		2874.58	0.00091844		3464.58	-0.02089329
514.8	0.10102118		1104.79	0.02290975		1694.79	0.02685174		2284.78	0.00995248		2874.78	0.00111323		3464.78	-0.02055628
515	0.10013971		1104.99	0.02233515		1694.99	0.02657188		2284.98	0.00968441		2874.98	0.00248207		3464.98	-0.02117764
515.2	0.1001945		1105.19	0.02205326		1695.19	0.02739631		2285.18	0.00952336		2875.18	0.00294591		3465.18	-0.02066846
515.4	0.10041734		1105.39	0.02157078		1695.39	0.02648222		2285.38	0.00962102		2875.38	0.0027368		3465.38	-0.02019992
515.6	0.10028073		1105.59	0.02308444		1695.59	0.02557268		2285.58	0.01098121		2875.58	0.00386992		3465.58	-0.02010857
515.8	0.09957791		1105.79	0.02285898		1695.79	0.02575083		2285.78	0.01117086		2875.78	0.00400432		3465.78	-0.01979766
516	0.09969326		1105.99	0.02338644		1695.99	0.02566388		2285.98	0.01168399		2875.98	0.0039569		3465.98	-0.01885946
516.2	0.09994068		1106.19	0.02329339		1696.19	0.02569155		2286.18	0.01234039		2876.18	0.00451842		3466.18	-0.01775452
516.4	0.09924219		1106.39	0.02474738		1696.39	0.02582341		2286.38	0.0117652		2876.38	0.00393828		3466.38	-0.01728981
516.6	0.0988378		1106.59	0.02554528		1696.59	0.02573986		2286.58	0.01164504		2876.58	0.00394701		3466.58	-0.01614982
516.8	0.09847306		1106.79	0.02614496		1696.79	0.02581795		2286.78	0.01188189		2876.78	0.00405995		3466.78	-0.01565968
517	0.09839428		1106.99	0.02702989		1696.99	0.02578519		2286.98	0.01184342		2876.98	0.00325718		3466.98	-0.01646597
517.2	0.09854745		1107.19	0.02601047		1697.19	0.02553629		2287.18	0.01261867		2877.18	0.00262259		3467.18	-0.01643373
517.4	0.09895781		1107.39	0.02664632		1697.39	0.02434313		2287.38	0.01306702		2877.38	0.00352333		3467.38	-0.01600585
517.6	0.09925682		1107.59	0.02745792		1697.59	0.02438835		2287.58	0.01326482		2877.58	0.00330457		3467.58	-0.01688423
517.8	0.09932502		1107.79	0.02702787		1697.79	0.02469492		2287.78	0.01311841		2877.78	0.0035874		3467.78	-0.01769732
518	0.09949481		1107.99	0.02619948		1697.99	0.02433333		2287.98	0.01265129		2877.98	0.00320605		3467.98	-0.01881521
518.2	0.09868083		1108.19	0.02554047		1698.19	0.02367921		2288.18	0.01242097		2878.18	0.00259954		3468.18	-0.01962202
518.4	0.09883331		1108.39	0.02456947		1698.39	0.02410515		2288.38	0.01165232		2878.38	0.00172309		3468.38	-0.01913716
518.6	0.09782851		1108.59	0.02454442		1698.59	0.02280452		2288.58	0.01055615		2878.58	0.00174469		3468.58	-0.01971618
518.8	0.09747209		1108.79	0.02356626		1698.79	0.0227383		2288.78	0.00929367		2878.78	0.00221309		3468.78	-0.01890005
519	0.09660369		1108.99	0.02227054		1698.99	0.0232952		2288.98	0.0089951		2878.98	0.00210125		3468.98	-0.01862443
519.2	0.09650452		1109.19	0.02141606		1699.19	0.02391809		2289.18	0.00856397		2879.18	0.00262996		3469.18	-0.01840177
519.4	0.09707573		1109.39	0.02112651		1699.39	0.02416202		2289.38	0.0082172		2879.38	0.00340173		3469.38	-0.01874505
519.6	0.09756571		1109.59	0.02065163		1699.59	0.02559815		2289.58	0.00808183		2879.58	0.00319969		3469.58	-0.01802471
519.8	0.09762488		1109.79	0.01968603		1699.79	0.02632377		2289.78	0.00812012		2879.78	0.0023626		3469.78	-0.01854122
520	0.09792806		1109.99	0.01913333		1699.99	0.02617541		2289.98	0.00838135		2879.98	0.00204924		3469.98	-0.01862145
520.2	0.09762626		1110.19	0.0194133		1700.19	0.02621737		2290.18	0.00820603		2880.18	0.002216		3470.18	-0.01821527
520.4	0.09767382		1110.39	0.02058941		1700.39	0.02583818		2290.38	0.00838231		2880.38	0.00171522		3470.38	-0.01874508
520.6	0.09840036		1110.59	0.02108811		1700.59	0.02579454		2290.58	0.00939551		2880.58	0.00197426		3470.58	-0.01846135
520.8	0.09809592		1110.79	0.02093264		1700.79	0.02611084		2290.78	0.0107334		2880.78	0.00240747		3470.78	-0.01939479
521	0.09743791		1110.99	0.02140454		1700.99	0.02576951		2290.98	0.01078848		2880.98	0.00165627		3470.98	-0.02044835
521.2	0.09780176		1111.19	0.02170309		1701.19	0.02558262		2291.18	0.01180539		2881.18	0.00247862		3471.18	-0.02015173
521.4	0.09707583		1111.39	0.02378691		1701.39	0.0253704		2291.38	0.01268467		2881.38	0.00297049		3471.38	-0.02065104
521.6	0.09673663		1111.59	0.02511718		1701.59	0.02585866		2291.58	0.01301377		2881.58	0.00236777		3471.58	-0.02151481
521.8	0.09638266		1111.79	0.02442337		1701.79	0.02627645		2291.78	0.01330313		2881.78	0.00289633		3471.78	-0.02237052
522	0.09601233		1111.99	0.02474781		1701.99	0.02716634		2291.98	0.01292118		2881.98	0.00339244		3471.98	-0.02197303
522.2	0.09586845		1112.19	0.02509967		1702.19	0.02723296		2292.18	0.01233128		2882.18	0.00284345		3472.18	-0.0217705
522.4	0.09469034		1112.39	0.02553211		1702.39	0.02771872		2292.38	0.01092847		2882.38	0.00354875		3472.38	-0.02118554
522.6	0.09426114		1112.59	0.02742627		1702.59	0.0275458		2292.58	0.01054975		2882.58	0.00349392		3472.58	-0.02211273
522.8	0.09443641		1112.79	0.02759282		1702.79	0.02880957		2292.78	0.01055464		2882.78	0.00402052		3472.78	-0.02192457
523	0.09492134		1112.99	0.02730806		1702.99	0.02895814		2292.98	0.01063899		2882.98	0.00358124		3472.98	-0.02216488
523.2	0.09463287		1113.19	0.02777345		1703.19	0.02869723		2293.18	0.00973266		2883.18	0.00385331		3473.18	-0.02281979
523.4	0.09499553		1113.39	0.02778824		1703.39	0.02920904		2293.38	0.01005868		2883.38	0.00391961		3473.38	-0.02244999
523.6	0.09539183		1113.59	0.02767998		1703.59	0.02949035		2293.58	0.01014354		2883.58	0.00316065		3473.58	-0.02192753
523.8	0.09497682		1113.79	0.02726442		1703.79	0.02831417		2293.78	0.01105901		2883.78	0.00300198		3473.78	-0.02256665
524	0.0949101		1113.99	0.0265691		1703.99	0.02848923		2293.98	0.00992649		2883.98	0.00395653		3473.98	-0.02220661
524.2	0.09545157		1114.19	0.02621953		1704.19	0.02708836		2294.18	0.00967151		2884.18	0.00369101		3474.18	-0.02151625
524.4	0.09603339		1114.39	0.02582538		1704.39	0.02661398		2294.38	0.00978469		2884.38	0.00397272		3474.38	-0.02157654
524.6	0.09609588		1114.59	0.02480371		1704.59	0.02629092		2294.58	0.00972044		2884.58	0.00416061		3474.58	-0.02195149
524.8	0.09600286		1114.79	0.02371483		1704.79	0.02562169		2294.78	0.01035149		2884.78	0.00484526		3474.78	-0.02245577
525	0.09582206		1114.99	0.02342341		1704.99	0.02475222		2294.98	0.00977877		2884.98	0.00489216		3474.98	-0.02273085
525.2	0.09696455		1115.19	0.02359544		1705.19	0.02455278		2295.18	0.01045215		2885.18	0.00523455		3475.18	-0.02341899
525.4	0.09666066		1115.39	0.02382551		1705.39	0.02467343		2295.38	0.01054306		2885.38	0.00503537		3475.38	-0.02423104
525.6	0.09743742		1115.59	0.02337784		1705.59	0.02507993		2295.58	0.0099904		2885.58	0.00428382		3475.58	-0.02398315
525.8	0.0975025		1115.79	0.02258611		1705.79	0.02559166		2295.78	0.00988859		2885.78	0.00500947		3475.78	-0.02421103
526	0.0984145		1115.99	0.02276053		1705.99	0.02531232		2295.98	0.00991576		2885.98	0.00505193		3475.98	-0.02375075
526.2	0.0984821		1116.19	0.02366604		1706.19	0.02593575		2296.18	0.01004268		2886.18	0.00548471		3476.18	-0.02343295
526.4	0.09758093		1116.39	0.02413828		1706.39	0.02688993		2296.38	0.00994373		2886.38	0.00662864		3476.38	-0.02376322
526.6	0.09807551		1116.59	0.02610233		1706.59	0.02702962		2296.58	0.01053886		2886.58	0.00643931		3476.58	-0.02394028
526.8	0.09733952		1116.79	0.02585924		1706.79	0.02710086		2296.78	0.01058596		2886.78	0.00665991		3476.78	-0.02377861
527	0.09637289		1116.99	0.02553985		1706.99	0.02691681		2296.98	0.01068582		2886.98	0.00644268		3476.98	-0.02343246
527.2	0.09561476		1117.19	0.0260956		1707.19	0.02619209		2297.18	0.01158125		2887.18	0.00602339		3477.18	-0.02259272
527.4	0.09546582		1117.39	0.02555596		1707.39	0.02676333		2297.38	0.01269858		2887.38	0.00610539		3477.38	-0.02218774
527.6	0.09532451		1117.59	0.02519176		1707.59	0.02699832		2297.58	0.01277468		2887.58	0.00529704		3477.58	-0.02132401
527.8	0.09422189		1117.79	0.02457478		1707.79	0.02675078		2297.78	0.0125648		2887.78	0.00553955		3477.78	-0.02094461
528	0.09385135		1117.99	0.02425741		1707.99	0.02704975		2297.98	0.01156754		2887.98	0.00566292		3477.98	-0.02047236
528.2	0.0941401		1118.19	0.02369496		1708.19	0.02692672		2298.18	0.01183906		2888.18	0.00474226		3478.18	-0.01995316
528.4	0.09412		1118.39	0.02277286		1708.39	0.0268665		2298.38	0.01118469		2888.38	0.00493451		3478.38	-0.02036911
528.6	0.09432002		1118.59	0.02263933		1708.59	0.0262056		2298.58	0.0105982		2888.58	0.00454298		3478.58	-0.02086978
528.8	0.09491196		1118.79	0.02262109		1708.79	0.02592068		2298.78	0.01036381		2888.78	0.00459722		3478.78	-0.02101811
529	0.09483063		1118.99	0.02245883		1708.99	0.02528077		2298.98	0.00988279		2888.98	0.00311273		3478.98	-0.02203562
529.2	0.09552076		1119.19	0.02252555		1709.19	0.02508634		2299.18	0.01001828		2889.18	0.0023241		3479.18	-0.02341314
529.4	0.09539473		1119.39	0.02284762		1709.39	0.02441248		2299.38	0.00986758		2889.38	0.00160557		3479.38	-0.02270539
529.6	0.09598248		1119.59	0.02195465		1709.59	0.0246562		2299.58	0.00977994		2889.58	0.00062057		3479.58	-0.02212392
529.8	0.0961754		1119.79	0.02212545		1709.79	0.0237949		2299.78	0.00999574		2889.78	0.00156366		3479.78	-0.02230919
530	0.09658935		1119.99	0.02244308		1709.99	0.02362157		2299.98	0.00998898		2889.98	0.00135305		3479.98	-0.02214575
530.2	0.09607486		1120.19	0.02307836		1710.19	0.02415001		2300.18	0.0100665		2890.18	0.00196057		3480.18	-0.0220824
530.4	0.09548829		1120.39	0.02304294		1710.39	0.0242748		2300.38	0.01057001		2890.38	0.00180949		3480.38	-0.02205176
530.6	0.09475595		1120.59	0.02371477		1710.59	0.02299284		2300.58	0.00991166		2890.58	0.00122145		3480.58	-0.02283809
530.8	0.09435697		1120.79	0.02284032		1710.79	0.0221308		2300.78	0.00920533		2890.78	0.00176711		3480.78	-0.02316859
531	0.0942016		1120.99	0.02286122		1710.99	0.02127574		2300.98	0.00989437		2890.98	0.00225241		3480.98	-0.02314846
531.2	0.0947925		1121.19	0.02303948		1711.19	0.02129506		2301.18	0.01049324		2891.18	0.00211165		3481.18	-0.02260634
531.4	0.09400838		1121.39	0.02295433		1711.39	0.0217737		2301.38	0.01010854		2891.38	0.00266851		3481.38	-0.0222953
531.6	0.09405186		1121.59	0.02384145		1711.59	0.02236237		2301.58	0.00978784		2891.58	0.00251404		3481.58	-0.02214152
531.8	0.09382104		1121.79	0.02444759		1711.79	0.02143322		2301.78	0.00982402		2891.78	0.00284307		3481.78	-0.02208116
532	0.09433963		1121.99	0.02440274		1711.99	0.02183306		2301.98	0.0100731		2891.98	0.00269204		3481.98	-0.02185629
532.2	0.09454491		1122.19	0.02460918		1712.19	0.02209146		2302.18	0.00999565		2892.18	0.00281705		3482.18	-0.02216429
532.4	0.09424762		1122.39	0.02424236		1712.39	0.02261409		2302.38	0.00955624		2892.38	0.00304936		3482.38	-0.02221087
532.6	0.09494491		1122.59	0.02457952		1712.59	0.02343779		2302.58	0.00893663		2892.58	0.00338671		3482.58	-0.02259997
532.8	0.09572531		1122.79	0.02457416		1712.79	0.02392741		2302.78	0.00969414		2892.78	0.00323344		3482.78	-0.02277284
533	0.09579223		1122.99	0.02398048		1712.99	0.02337023		2302.98	0.00981458		2892.98	0.0025952		3482.98	-0.02369483
533.2	0.0972247		1123.19	0.02387067		1713.19	0.02372646		2303.18	0.00983188		2893.18	0.00324266		3483.18	-0.0236394
533.4	0.09712585		1123.39	0.02334313		1713.39	0.02376833		2303.38	0.01023609		2893.38	0.00275489		3483.38	-0.02282367
533.6	0.09736552		1123.59	0.02221464		1713.59	0.02431369		2303.58	0.01031898		2893.58	0.00264101		3483.58	-0.02269937
533.8	0.09792536		1123.79	0.02258221		1713.79	0.02291062		2303.78	0.00944806		2893.78	0.00261899		3483.78	-0.02306083
534	0.09771795		1123.99	0.02160604		1713.99	0.02255046		2303.98	0.00982386		2893.98	0.00215756		3483.98	-0.02383492
534.2	0.09738976		1124.19	0.02110267		1714.19	0.021933		2304.18	0.01041292		2894.18	0.00208959		3484.18	-0.02444851
534.4	0.09680608		1124.39	0.0208184		1714.39	0.02186657		2304.38	0.01023468		2894.38	0.00237901		3484.38	-0.02470092
534.6	0.09622124		1124.59	0.02081825		1714.59	0.02045063		2304.58	0.00877405		2894.58	0.00207311		3484.58	-0.02585634
534.8	0.09586306		1124.79	0.02081849		1714.79	0.020019		2304.78	0.00803893		2894.78	0.00232083		3484.78	-0.02470136
535	0.09449836		1124.99	0.02166302		1714.99	0.01956983		2304.98	0.00875781		2894.98	0.00268654		3484.98	-0.02448627
535.2	0.0942042		1125.19	0.0217874		1715.19	0.02004395		2305.18	0.00872973		2895.18	0.00215935		3485.18	-0.02381025
535.4	0.09282736		1125.39	0.02173049		1715.39	0.01941979		2305.38	0.00924175		2895.38	0.00175787		3485.38	-0.02340076
535.6	0.09229306		1125.59	0.02231859		1715.59	0.01943992		2305.58	0.00921664		2895.58	0.00204105		3485.58	-0.02305663
535.8	0.09218986		1125.79	0.0218887		1715.79	0.01930343		2305.78	0.00971533		2895.78	0.00243105		3485.78	-0.02170885
536	0.09180353		1125.99	0.0216297		1715.99	0.01988441		2305.98	0.01004504		2895.98	0.00237004		3485.98	-0.02052848
536.2	0.09161389		1126.19	0.02126812		1716.19	0.02121376		2306.18	0.01015301		2896.18	0.00324287		3486.18	-0.01983925
536.4	0.09088281		1126.39	0.02106713		1716.39	0.02261113		2306.38	0.00973949		2896.38	0.00324139		3486.38	-0.01916623
536.6	0.09221216		1126.59	0.02118084		1716.59	0.02323827		2306.58	0.00933969		2896.58	0.00342888		3486.58	-0.01852296
536.8	0.09312686		1126.79	0.02173333		1716.79	0.0238059		2306.78	0.00958123		2896.78	0.00290401		3486.78	-0.01819928
537	0.09240032		1126.99	0.02133602		1716.99	0.02407705		2306.98	0.00933153		2896.98	0.00257448		3486.98	-0.01761535
537.2	0.09347579		1127.19	0.02197277		1717.19	0.02487154		2307.18	0.00970454		2897.18	0.00207533		3487.18	-0.01698124
537.4	0.0930643		1127.39	0.02141453		1717.39	0.02492462		2307.38	0.01007936		2897.38	0.00195523		3487.38	-0.01649516
537.6	0.09350061		1127.59	0.02163122		1717.59	0.02493921		2307.58	0.00997622		2897.58	0.00142877		3487.58	-0.01644373
537.8	0.09426353		1127.79	0.02196104		1717.79	0.02414601		2307.78	0.00969954		2897.78	0.00064283		3487.78	-0.01771453
538	0.09317699		1127.99	0.02116928		1717.99	0.02364591		2307.98	0.01022212		2897.98	0.00079167		3487.98	-0.01847792
538.2	0.09375992		1128.19	0.02165648		1718.19	0.02350836		2308.18	0.01024712		2898.18	0.00049463		3488.18	-0.01886109
538.4	0.09309323		1128.39	0.02198185		1718.39	0.02342241		2308.38	0.00996662		2898.38	-0.00011099		3488.38	-0.01934417
538.6	0.09242944		1128.59	0.02265426		1718.59	0.02403386		2308.58	0.01011581		2898.58	-0.00096924		3488.58	-0.01975785
538.8	0.09166199		1128.79	0.02301265		1718.79	0.02356844		2308.78	0.00969136		2898.78	-0.00033556		3488.78	-0.01957967
539	0.0906576		1128.99	0.02274537		1718.99	0.02332409		2308.98	0.01124126		2898.98	0.00013971		3488.98	-0.0205753
539.2	0.09066716		1129.19	0.0217864		1719.19	0.02415665		2309.18	0.01140228		2899.18	0.00009408		3489.18	-0.02088756
539.4	0.09071456		1129.39	0.02141247		1719.39	0.02379046		2309.38	0.01185074		2899.38	0.00146405		3489.38	-0.02161233
539.6	0.09086759		1129.59	0.02128162		1719.59	0.02437114		2309.58	0.01130029		2899.58	0.00199819		3489.58	-0.02159524
539.8	0.09111118		1129.79	0.02095341		1719.79	0.02514861		2309.78	0.01101856		2899.78	0.00264598		3489.78	-0.02156761
540	0.09124584		1129.99	0.02105915		1719.99	0.02464271		2309.98	0.01067279		2899.98	0.00312612		3489.98	-0.02191087
540.2	0.09222293		1130.19	0.02109455		1720.19	0.02551804		2310.18	0.00981925		2900.18	0.00398861		3490.18	-0.02297444
540.4	0.09316368		1130.39	0.02152401		1720.39	0.02526911		2310.38	0.00941584		2900.38	0.00323016		3490.38	-0.02259354
540.6	0.09371422		1130.59	0.02216143		1720.59	0.0250889		2310.58	0.00918582		2900.58	0.00375712		3490.58	-0.02219694
540.8	0.09360238		1130.79	0.02260137		1720.79	0.0252666		2310.78	0.00943281		2900.78	0.00320459		3490.78	-0.02276084
541	0.09258381		1130.99	0.02256373		1720.99	0.02512901		2310.98	0.00943698		2900.98	0.00220715		3490.98	-0.02228463
541.2	0.09275066		1131.19	0.0233189		1721.19	0.02510713		2311.18	0.00969144		2901.18	0.00259148		3491.18	-0.02249612
541.4	0.0932763		1131.39	0.02287928		1721.39	0.02462369		2311.38	0.00862594		2901.38	0.00260434		3491.38	-0.02173091
541.6	0.09283227		1131.59	0.02211248		1721.59	0.02384243		2311.58	0.00819318		2901.58	0.0012961		3491.58	-0.02169568
541.8	0.09158616		1131.79	0.02201683		1721.79	0.02277474		2311.78	0.00826214		2901.78	0.00061675		3491.78	-0.02215141
542	0.09103434		1131.99	0.02104769		1721.99	0.02209116		2311.98	0.00871528		2901.98	0.00033338		3491.98	-0.0214886
542.2	0.09101569		1132.19	0.0205401		1722.19	0.02301879		2312.18	0.00861667		2902.18	0.00029809		3492.18	-0.02131219
542.4	0.08962328		1132.39	0.02011592		1722.39	0.02292201		2312.38	0.00863265		2902.38	-0.0004553		3492.38	-0.02080291
542.6	0.08952611		1132.59	0.02038734		1722.59	0.02344924		2312.58	0.00870128		2902.58	0.00036062		3492.58	-0.02044371
542.8	0.08955086		1132.79	0.02017261		1722.79	0.02242396		2312.78	0.00819994		2902.78	0.00067515		3492.78	-0.01982746
543	0.09008382		1132.99	0.01951733		1722.99	0.02274479		2312.98	0.00912665		2902.98	0.00076375		3492.98	-0.01987408
543.2	0.09084708		1133.19	0.01943761		1723.19	0.02300136		2313.18	0.00831473		2903.18	0.000307		3493.18	-0.01988536
543.4	0.09118753		1133.39	0.01986963		1723.39	0.02190646		2313.38	0.00830041		2903.38	0.00018566		3493.38	-0.01996897
543.6	0.09156618		1133.59	0.02034126		1723.59	0.0219417		2313.58	0.00786828		2903.58	-0.00052286		3493.58	-0.02012964
543.8	0.09206289		1133.79	0.02132504		1723.79	0.02199963		2313.78	0.00712132		2903.78	0.00016491		3493.78	-0.02078354
544	0.09321477		1133.99	0.0221882		1723.99	0.02146182		2313.98	0.0067763		2903.98	0.00031872		3493.98	-0.02082226
544.2	0.09382934		1134.19	0.02295221		1724.19	0.021561		2314.18	0.00758716		2904.18	0.00016018		3494.18	-0.02112314
544.4	0.09442491		1134.39	0.02324863		1724.39	0.02106106		2314.38	0.00815578		2904.38	-0.00012214		3494.38	-0.02036762
544.6	0.09398997		1134.59	0.02437038		1724.59	0.02066529		2314.58	0.00853455		2904.58	0.00108709		3494.58	-0.02054393
544.8	0.09349283		1134.79	0.02513339		1724.79	0.02078455		2314.78	0.00831505		2904.78	0.00056869		3494.78	-0.02046653
545	0.09240899		1134.99	0.02549185		1724.99	0.02088488		2314.98	0.00807968		2904.98	0.00007513		3494.98	-0.0202256
545.2	0.09175963		1135.19	0.02585169		1725.19	0.02070652		2315.18	0.00872364		2905.18	0.00154676		3495.18	-0.02034568
545.4	0.09218648		1135.39	0.02488706		1725.39	0.02053466		2315.38	0.00847048		2905.38	0.00085611		3495.38	-0.02001375
545.6	0.09100475		1135.59	0.02391138		1725.59	0.02045535		2315.58	0.00901217		2905.58	0.00092469		3495.58	-0.02030773
545.8	0.0902097		1135.79	0.02458027		1725.79	0.02029577		2315.78	0.00941384		2905.78	0.00093434		3495.78	-0.01967528
546	0.09109435		1135.99	0.02336416		1725.99	0.02100149		2315.98	0.00975925		2905.98	0.00191671		3495.98	-0.01895298
546.2	0.09066661		1136.19	0.02364455		1726.19	0.02172592		2316.18	0.00869951		2906.18	0.0023629		3496.18	-0.01936096
546.4	0.09093781		1136.39	0.02331815		1726.39	0.02123339		2316.38	0.00873072		2906.38	0.00264465		3496.38	-0.01974603
546.6	0.09200564		1136.59	0.02291703		1726.59	0.02108371		2316.58	0.00788851		2906.58	0.00358226		3496.58	-0.02037079
546.8	0.09328803		1136.79	0.02194025		1726.79	0.0204565		2316.78	0.00754417		2906.78	0.00353108		3496.78	-0.01991615
547	0.09377741		1136.99	0.02099243		1726.99	0.02012183		2316.98	0.00742499		2906.98	0.0037057		3496.98	-0.01990585
547.2	0.09439362		1137.19	0.02107124		1727.19	0.01994374		2317.18	0.0074128		2907.18	0.00333144		3497.18	-0.02084626
547.4	0.09420792		1137.39	0.02131553		1727.39	0.02033698		2317.38	0.00741866		2907.38	0.00365897		3497.38	-0.02083782
547.6	0.09434097		1137.59	0.02184813		1727.59	0.02118736		2317.58	0.00614797		2907.58	0.004588		3497.58	-0.02132219
547.8	0.09441244		1137.79	0.02195361		1727.79	0.02216512		2317.78	0.00585747		2907.78	0.00430918		3497.78	-0.02117323
548	0.09400434		1137.99	0.02132165		1727.99	0.0228884		2317.98	0.00608699		2907.98	0.00443377		3497.98	-0.02106623
548.2	0.09374457		1138.19	0.02163134		1728.19	0.02285158		2318.18	0.0067449		2908.18	0.00434804		3498.18	-0.02077682
548.4	0.09383752		1138.39	0.02116253		1728.39	0.02322542		2318.38	0.00669182		2908.38	0.0046262		3498.38	-0.02095602
548.6	0.09358534		1138.59	0.02148487		1728.59	0.02248411		2318.58	0.00650776		2908.58	0.00476924		3498.58	-0.02052992
548.8	0.09278253		1138.79	0.02144174		1728.79	0.02260992		2318.78	0.00610103		2908.78	0.00340266		3498.78	-0.01981718
549	0.09216246		1138.99	0.02127455		1728.99	0.02222337		2318.98	0.00692696		2908.98	0.00262985		3498.98	-0.0203464
549.2	0.09155197		1139.19	0.02135108		1729.19	0.02175072		2319.18	0.00672903		2909.18	0.00295866		3499.18	-0.02016974
549.4	0.09115282		1139.39	0.0213851		1729.39	0.02212311		2319.38	0.00711325		2909.38	0.00192421		3499.38	-0.02008689
549.6	0.09073058		1139.59	0.02141293		1729.59	0.02220843		2319.58	0.00689139		2909.58	0.00221621		3499.58	-0.02031029
549.8	0.0911154		1139.79	0.02173661		1729.79	0.02195274		2319.78	0.00742405		2909.78	0.00161279		3499.78	-0.01938913
550	0.09095151		1139.99	0.02207574		1729.99	0.02243138		2319.98	0.0081819		2909.98	0.0018384		3499.98	-0.01924944
550.2	0.09134067		1140.19	0.02297439		1730.19	0.02171696		2320.18	0.00812271		2910.18	0.00081773		3500.18	-0.02005847
550.4	0.09145094		1140.39	0.02224608		1730.39	0.0210211		2320.38	0.00846781		2910.38	0.00045381		3500.38	-0.02040959
550.6	0.09218104		1140.59	0.02173356		1730.59	0.02119936		2320.58	0.00769448		2910.58	0.00080041		3500.58	-0.02117314
550.8	0.09190308		1140.79	0.0210585		1730.79	0.0216607		2320.78	0.00806349		2910.78	0.0011189		3500.78	-0.02180589
551	0.09080968		1140.99	0.02102977		1730.99	0.02213466		2320.98	0.00889757		2910.98	0.00019578		3500.98	-0.02234292
551.2	0.09095864		1141.19	0.02154549		1731.19	0.0229716		2321.18	0.00930529		2911.18	0.00036102		3501.18	-0.0241521
551.4	0.08941023		1141.39	0.02158343		1731.39	0.02361682		2321.38	0.00941634		2911.38	0.00019175		3501.38	-0.02428277
551.6	0.08819146		1141.59	0.0222977		1731.59	0.02456087		2321.58	0.00824944		2911.58	0.00090679		3501.58	-0.02421933
551.8	0.08823361		1141.79	0.02205076		1731.79	0.02481495		2321.78	0.00879144		2911.78	0.00035121		3501.78	-0.02502977
552	0.08795879		1141.99	0.02204606		1731.99	0.02484301		2321.98	0.00782529		2911.98	0.0004967		3501.98	-0.0243503
552.2	0.08847156		1142.19	0.02202418		1732.19	0.02465779		2322.18	0.00678264		2912.18	0.00083232		3502.18	-0.0239048
552.4	0.08870422		1142.39	0.02193574		1732.39	0.0246783		2322.38	0.00698458		2912.38	0.00092231		3502.38	-0.02440554
552.6	0.08900425		1142.59	0.02206081		1732.59	0.02344817		2322.58	0.00635197		2912.58	0.00044099		3502.58	-0.02311221
552.8	0.0884499		1142.79	0.02230374		1732.79	0.02333446		2322.78	0.00562972		2912.78	-0.00008842		3502.78	-0.02332443
553	0.08891657		1142.99	0.0214789		1732.99	0.02189239		2322.98	0.0059873		2912.98	0.00005872		3502.98	-0.02369675
553.2	0.08958736		1143.19	0.0211939		1733.19	0.0222036		2323.18	0.00577597		2913.18	-0.0000923		3503.18	-0.02190039
553.4	0.0898828		1143.39	0.02078838		1733.39	0.02213841		2323.38	0.00683212		2913.38	-0.00025146		3503.38	-0.02116245
553.6	0.0903228		1143.59	0.02084854		1733.59	0.02140273		2323.58	0.00652658		2913.58	0.00005968		3503.58	-0.02090659
553.8	0.09030895		1143.79	0.02115942		1733.79	0.02092629		2323.78	0.00701967		2913.78	0.0001109		3503.78	-0.01936402
554	0.09070739		1143.99	0.02100308		1733.99	0.01987051		2323.98	0.00822193		2913.98	-0.00006475		3503.98	-0.02050952
554.2	0.09212734		1144.19	0.02038702		1734.19	0.01906933		2324.18	0.00919173		2914.18	-0.0008831		3504.18	-0.02057098
554.4	0.09198641		1144.39	0.01970615		1734.39	0.01946119		2324.38	0.00936074		2914.38	-0.00038053		3504.38	-0.02142174
554.6	0.09205826		1144.59	0.0191365		1734.59	0.01987775		2324.58	0.01002584		2914.58	0.00089085		3504.58	-0.02294173
554.8	0.0915582		1144.79	0.01845159		1734.79	0.01973077		2324.78	0.01138839		2914.78	0.00139562		3504.78	-0.02352124
555	0.09165266		1144.99	0.01798636		1734.99	0.01953035		2324.98	0.01287412		2914.98	0.0009999		3504.98	-0.02403991
555.2	0.09191411		1145.19	0.01907105		1735.19	0.01961608		2325.18	0.01300353		2915.18	0.00136309		3505.18	-0.02550151
555.4	0.09113924		1145.39	0.0192011		1735.39	0.02004719		2325.38	0.01291357		2915.38	0.0016994		3505.38	-0.02562818
555.6	0.09106891		1145.59	0.02040192		1735.59	0.02056823		2325.58	0.01222635		2915.58	0.00234911		3505.58	-0.02586701
555.8	0.09152373		1145.79	0.01979251		1735.79	0.0202226		2325.78	0.01204896		2915.78	0.00190174		3505.78	-0.02663537
556	0.09089209		1145.99	0.02050176		1735.99	0.02094233		2325.98	0.00988708		2915.98	0.00281057		3505.98	-0.02627542
556.2	0.09034155		1146.19	0.0198807		1736.19	0.02105142		2326.18	0.01023089		2916.18	0.00318729		3506.18	-0.02688093
556.4	0.09019006		1146.39	0.02061358		1736.39	0.02151193		2326.38	0.01005406		2916.38	0.00343323		3506.38	-0.02646168
556.6	0.09026846		1146.59	0.02138792		1736.59	0.02096817		2326.58	0.00905574		2916.58	0.00327248		3506.58	-0.02630895
556.8	0.09075456		1146.79	0.02132143		1736.79	0.02106582		2326.78	0.00821371		2916.78	0.00275031		3506.78	-0.02618345
557	0.0919782		1146.99	0.02120861		1736.99	0.0217849		2326.98	0.0080899		2916.98	0.00253581		3506.98	-0.02448125
557.2	0.09177127		1147.19	0.02255127		1737.19	0.02270057		2327.18	0.00794486		2917.18	0.0025329		3507.18	-0.02264221
557.4	0.09135666		1147.39	0.02340255		1737.39	0.02229346		2327.38	0.00795897		2917.38	0.00275079		3507.38	-0.02215134
557.6	0.09072714		1147.59	0.02383675		1737.59	0.02188516		2327.58	0.00752804		2917.58	0.00160062		3507.58	-0.02222381
557.8	0.0904396		1147.79	0.02376586		1737.79	0.02206511		2327.78	0.00769181		2917.78	0.00035761		3507.78	-0.02146436
558	0.09097388		1147.99	0.02222		1737.99	0.021852		2327.98	0.00781675		2917.98	-0.0005666		3507.98	-0.02160798
558.2	0.09152608		1148.19	0.02247867		1738.19	0.02251435		2328.18	0.0073938		2918.18	-0.00095519		3508.18	-0.01969557
558.4	0.09060417		1148.39	0.02224667		1738.39	0.02233524		2328.38	0.00673611		2918.38	-0.00040971		3508.38	-0.02013013
558.6	0.08955633		1148.59	0.02218259		1738.59	0.02213079		2328.58	0.00753879		2918.58	-0.00090146		3508.58	-0.01973797
558.8	0.08860998		1148.79	0.02107703		1738.79	0.02175315		2328.78	0.00799977		2918.78	-0.001903		3508.78	-0.01922605
559	0.0880249		1148.99	0.02082477		1738.99	0.02123584		2328.98	0.00867129		2918.98	-0.00291955		3508.98	-0.02056957
559.2	0.0873204		1149.19	0.02092824		1739.19	0.02078986		2329.18	0.00893544		2919.18	-0.00353622		3509.18	-0.02130687
559.4	0.08689489		1149.39	0.01959684		1739.39	0.02086058		2329.38	0.00909489		2919.38	-0.00358176		3509.38	-0.02183747
559.6	0.0865396		1149.59	0.01925638		1739.59	0.02025552		2329.58	0.0089307		2919.58	-0.00337385		3509.58	-0.0219035
559.8	0.08612068		1149.79	0.01809947		1739.79	0.01935261		2329.78	0.00838276		2919.78	-0.00292043		3509.78	-0.02209275
560	0.08614667		1149.99	0.01810198		1739.99	0.01931016		2329.98	0.00796547		2919.98	-0.00190745		3509.98	-0.02358814
560.2	0.08552082		1150.19	0.01733461		1740.19	0.0191283		2330.18	0.00747189		2920.18	-0.00170753		3510.18	-0.02418265
560.4	0.08735888		1150.39	0.0174837		1740.39	0.01993712		2330.38	0.00643556		2920.38	-0.00113408		3510.38	-0.02461686
560.6	0.08840552		1150.59	0.0186423		1740.59	0.01949569		2330.58	0.00562793		2920.58	-0.00065196		3510.58	-0.02529747
560.8	0.09002303		1150.79	0.01857544		1740.79	0.01969035		2330.78	0.004917		2920.78	-0.00022457		3510.78	-0.0247696
561	0.09023029		1150.99	0.01957892		1740.99	0.0199153		2330.98	0.00501619		2920.98	0.00043448		3510.98	-0.02477106
561.2	0.09016881		1151.19	0.02055457		1741.19	0.01930248		2331.18	0.00555913		2921.18	0.00006805		3511.18	-0.02395635
561.4	0.09021093		1151.39	0.02149681		1741.39	0.01877369		2331.38	0.00566298		2921.38	0.00064192		3511.38	-0.02406303
561.6	0.09006204		1151.59	0.02138376		1741.59	0.01884683		2331.58	0.00531892		2921.58	-0.00009412		3511.58	-0.02425773
561.8	0.09008329		1151.79	0.02234182		1741.79	0.02011148		2331.78	0.00457156		2921.78	-0.00015282		3511.78	-0.02464583
562	0.09056174		1151.99	0.02125823		1741.99	0.02125038		2331.98	0.00361942		2921.98	0.00033724		3511.98	-0.02416682
562.2	0.0908055		1152.19	0.02266528		1742.19	0.02117633		2332.18	0.00322024		2922.18	0.00023077		3512.18	-0.02409655
562.4	0.08922176		1152.39	0.02224709		1742.39	0.02094954		2332.38	0.00346523		2922.38	-0.00026152		3512.38	-0.0244676
562.6	0.08783004		1152.59	0.02222251		1742.59	0.02141527		2332.58	0.00390026		2922.58	-0.00082018		3512.58	-0.02496552
562.8	0.0873533		1152.79	0.02145885		1742.79	0.02154083		2332.78	0.00461468		2922.78	-0.00067845		3512.78	-0.02612735
563	0.08772363		1152.99	0.02058882		1742.99	0.02185219		2332.98	0.00563953		2922.98	-0.00157395		3512.98	-0.02761276
563.2	0.087718		1153.19	0.02008694		1743.19	0.02268769		2333.18	0.0060103		2923.18	-0.00198524		3513.18	-0.02774736
563.4	0.08692148		1153.39	0.01954799		1743.39	0.02347792		2333.38	0.00612675		2923.38	-0.0019663		3513.38	-0.02781891
563.6	0.08723442		1153.59	0.01905996		1743.59	0.02379008		2333.58	0.00598266		2923.58	-0.0018443		3513.58	-0.02772509
563.8	0.08786146		1153.79	0.01901929		1743.79	0.02347413		2333.78	0.00632769		2923.78	-0.00176807		3513.78	-0.02804813
564	0.08822838		1153.99	0.01839043		1743.99	0.02353901		2333.98	0.00590083		2923.98	-0.00158715		3513.98	-0.0291574
564.2	0.08751626		1154.19	0.01822239		1744.19	0.02429204		2334.18	0.00477194		2924.18	-0.00209254		3514.18	-0.02780163
564.4	0.08964494		1154.39	0.0184829		1744.39	0.02426823		2334.38	0.00552853		2924.38	-0.00168185		3514.38	-0.02696655
564.6	0.08977352		1154.59	0.01819377		1744.59	0.02347197		2334.58	0.00598472		2924.58	-0.00086933		3514.58	-0.02601803
564.8	0.09037701		1154.79	0.01810924		1744.79	0.02293458		2334.78	0.00540991		2924.78	-0.00057606		3514.78	-0.02520335
565	0.08990026		1154.99	0.0185242		1744.99	0.0216094		2334.98	0.00668304		2924.98	-0.0008175		3514.98	-0.02536643
565.2	0.09010937		1155.19	0.0191538		1745.19	0.02064721		2335.18	0.00731116		2925.18	-0.00029689		3515.18	-0.02425545
565.4	0.08970139		1155.39	0.01974459		1745.39	0.0201252		2335.38	0.00748735		2925.38	0.00132282		3515.38	-0.02411817
565.6	0.08923099		1155.59	0.02042004		1745.59	0.01987807		2335.58	0.00703764		2925.58	0.00192693		3515.58	-0.0239244
565.8	0.08914796		1155.79	0.02165347		1745.79	0.01944421		2335.78	0.0065546		2925.78	0.00246298		3515.78	-0.02302059
566	0.08910454		1155.99	0.02125333		1745.99	0.01943771		2335.98	0.00569395		2925.98	0.00301059		3515.98	-0.02153705
566.2	0.08877127		1156.19	0.02170094		1746.19	0.01773261		2336.18	0.00554035		2926.18	0.00297311		3516.18	-0.02176839
566.4	0.08801214		1156.39	0.02082035		1746.39	0.0177601		2336.38	0.00571606		2926.38	0.00313849		3516.38	-0.02145043
566.6	0.08773461		1156.59	0.02104977		1746.59	0.01785559		2336.58	0.00590075		2926.58	0.00401129		3516.58	-0.02200004
566.8	0.08772361		1156.79	0.01996234		1746.79	0.01823933		2336.78	0.00657071		2926.78	0.00404003		3516.78	-0.02216242
567	0.08828774		1156.99	0.01991757		1746.99	0.01835871		2336.98	0.00716296		2926.98	0.00352112		3516.98	-0.02182742
567.2	0.08727736		1157.19	0.01982806		1747.19	0.0179007		2337.18	0.00662545		2927.18	0.00371952		3517.18	-0.02244737
567.4	0.08758908		1157.39	0.02027871		1747.39	0.01802095		2337.38	0.00722143		2927.38	0.00429211		3517.38	-0.02243761
567.6	0.08801975		1157.59	0.01935689		1747.59	0.01819925		2337.58	0.00675935		2927.58	0.00405956		3517.58	-0.02253275
567.8	0.08748455		1157.79	0.01939456		1747.79	0.01771912		2337.78	0.00635192		2927.78	0.00412378		3517.78	-0.02284481
568	0.08761139		1157.99	0.019029		1747.99	0.01885006		2337.98	0.00541973		2927.98	0.00336985		3517.98	-0.02242921
568.2	0.08728747		1158.19	0.01888018		1748.19	0.01925417		2338.18	0.00563875		2928.18	0.00324032		3518.18	-0.02215333
568.4	0.08920364		1158.39	0.01887109		1748.39	0.01954501		2338.38	0.00628543		2928.38	0.00322853		3518.38	-0.02248078
568.6	0.08944716		1158.59	0.01802913		1748.59	0.01975509		2338.58	0.00650731		2928.58	0.00268316		3518.58	-0.02341362
568.8	0.09044819		1158.79	0.01831832		1748.79	0.01959309		2338.78	0.00648014		2928.78	0.00276628		3518.78	-0.02476798
569	0.09052478		1158.99	0.01775698		1748.99	0.01912387		2338.98	0.00849523		2928.98	0.0031314		3518.98	-0.02548952
569.2	0.09127796		1159.19	0.01784423		1749.19	0.01940784		2339.18	0.00791812		2929.18	0.00346497		3519.18	-0.02479146
569.4	0.09098467		1159.39	0.01823505		1749.39	0.01987889		2339.38	0.00742421		2929.38	0.0036329		3519.38	-0.02392047
569.6	0.09043849		1159.59	0.01861906		1749.59	0.01891091		2339.58	0.00762651		2929.58	0.00347691		3519.58	-0.02379123
569.8	0.09071095		1159.79	0.01840414		1749.79	0.01962832		2339.78	0.00745289		2929.78	0.00333258		3519.78	-0.02323898
570	0.0909713		1159.99	0.01786407		1749.99	0.02058441		2339.98	0.00716769		2929.98	0.00319502		3519.98	-0.02406716
570.2	0.09090291		1160.19	0.01724489		1750.19	0.02084106		2340.18	0.00781142		2930.18	0.00283369		3520.18	-0.02458607
570.4	0.09069898		1160.39	0.01796868		1750.39	0.02080822		2340.38	0.00839588		2930.38	0.00304099		3520.38	-0.02392349
570.6	0.0902389		1160.59	0.01838261		1750.59	0.02049654		2340.58	0.00899009		2930.58	0.00364598		3520.58	-0.0242861
570.8	0.09044303		1160.79	0.01837148		1750.79	0.01965121		2340.78	0.00883722		2930.78	0.00417946		3520.78	-0.02443416
571	0.09053079		1160.99	0.01913752		1750.99	0.01862073		2340.98	0.0095502		2930.98	0.00327998		3520.98	-0.02464708
571.2	0.08986716		1161.19	0.01884005		1751.19	0.01754036		2341.18	0.00840241		2931.18	0.00319288		3521.18	-0.02565814
571.4	0.09004352		1161.39	0.0192421		1751.39	0.01744168		2341.38	0.00848763		2931.38	0.00303272		3521.38	-0.02567182
571.6	0.08952124		1161.59	0.01909979		1751.59	0.01683559		2341.58	0.00784557		2931.58	0.00262299		3521.58	-0.02583592
571.8	0.08939052		1161.79	0.01954656		1751.79	0.01629828		2341.78	0.00655183		2931.78	0.00110565		3521.78	-0.02527579
572	0.08902345		1161.99	0.0197257		1751.99	0.01640024		2341.98	0.0064341		2931.98	0.00058407		3521.98	-0.02452069
572.2	0.08785676		1162.19	0.02004165		1752.19	0.01531135		2342.18	0.00718705		2932.18	0.00010687		3522.18	-0.02456623
572.4	0.08847126		1162.39	0.02059375		1752.39	0.01542915		2342.38	0.00660375		2932.38	-0.00075024		3522.38	-0.02362932
572.6	0.08811631		1162.59	0.02083562		1752.59	0.01643158		2342.58	0.00671827		2932.58	-0.0015639		3522.58	-0.02392922
572.8	0.08867818		1162.79	0.01991958		1752.79	0.01671423		2342.78	0.00676366		2932.78	-0.00152512		3522.78	-0.02309731
573	0.08867394		1162.99	0.01967883		1752.99	0.01748805		2342.98	0.00663273		2932.98	-0.0021496		3522.98	-0.02216718
573.2	0.08890455		1163.19	0.02024225		1753.19	0.0183823		2343.18	0.00565378		2933.18	-0.00268856		3523.18	-0.02167543
573.4	0.08817024		1163.39	0.02061154		1753.39	0.01954984		2343.38	0.00613392		2933.38	-0.00282087		3523.38	-0.02104211
573.6	0.08774327		1163.59	0.02076496		1753.59	0.01996725		2343.58	0.00644325		2933.58	-0.00310675		3523.58	-0.02112828
573.8	0.08771322		1163.79	0.02076508		1753.79	0.02154848		2343.78	0.0059893		2933.78	-0.00211123		3523.78	-0.02215416
574	0.08754544		1163.99	0.02135123		1753.99	0.02257378		2343.98	0.00565459		2933.98	-0.00145995		3523.98	-0.02193525
574.2	0.08677958		1164.19	0.02146103		1754.19	0.02260355		2344.18	0.00626635		2934.18	-0.00129961		3524.18	-0.02205377
574.4	0.08729017		1164.39	0.02246742		1754.39	0.02234279		2344.38	0.00634746		2934.38	-0.00048346		3524.38	-0.02217
574.6	0.08761781		1164.59	0.02194777		1754.59	0.02207087		2344.58	0.0064968		2934.58	-0.00022864		3524.58	-0.02258661
574.8	0.08800507		1164.79	0.0210275		1754.79	0.02121048		2344.78	0.00637013		2934.78	0.00065777		3524.78	-0.02270297
575	0.08784037		1164.99	0.02057803		1754.99	0.02106682		2344.98	0.00737124		2934.98	0.00040457		3524.98	-0.02338853
575.2	0.08841982		1165.19	0.02006035		1755.19	0.01988096		2345.18	0.00694213		2935.18	0.00136698		3525.18	-0.02447609
575.4	0.08950662		1165.39	0.01949441		1755.39	0.01972868		2345.38	0.00743931		2935.38	0.00228443		3525.38	-0.02493727
575.6	0.0897518		1165.59	0.01987873		1755.59	0.01925253		2345.58	0.00712376		2935.58	0.00269948		3525.58	-0.02470082
575.8	0.0893171		1165.79	0.0190544		1755.79	0.01862123		2345.78	0.006042		2935.78	0.00243023		3525.78	-0.02443852
576	0.08821227		1165.99	0.01945952		1755.99	0.0182113		2345.98	0.00674865		2935.98	0.00221199		3525.98	-0.0250472
576.2	0.08768718		1166.19	0.01926075		1756.19	0.01816495		2346.18	0.00700729		2936.18	0.00165803		3526.18	-0.02481178
576.4	0.08863238		1166.39	0.01858153		1756.39	0.01832609		2346.38	0.00583543		2936.38	0.00116316		3526.38	-0.02540075
576.6	0.08908057		1166.59	0.01841042		1756.59	0.01805392		2346.58	0.00586043		2936.58	0.00149641		3526.58	-0.02546958
576.8	0.08879412		1166.79	0.01784263		1756.79	0.01800229		2346.78	0.00597074		2936.78	0.00104522		3526.78	-0.02531271
577	0.08842842		1166.99	0.01943528		1756.99	0.01844757		2346.98	0.00589317		2936.98	0.0006297		3526.98	-0.02594764
577.2	0.08837676		1167.19	0.01974072		1757.19	0.01829007		2347.18	0.00617757		2937.18	0.00050461		3527.18	-0.02657723
577.4	0.08806423		1167.39	0.0203905		1757.39	0.01827239		2347.38	0.00556665		2937.38	0.00121602		3527.38	-0.02661257
577.6	0.08827562		1167.59	0.02090156		1757.59	0.01776842		2347.58	0.00557146		2937.58	0.00093111		3527.58	-0.02697232
577.8	0.08814697		1167.79	0.02107186		1757.79	0.01782644		2347.78	0.00509994		2937.78	0.00081676		3527.78	-0.02780076
578	0.08857971		1167.99	0.02218595		1757.99	0.01767732		2347.98	0.00443167		2937.98	0.00022069		3527.98	-0.02745003
578.2	0.08905551		1168.19	0.02254904		1758.19	0.01716954		2348.18	0.00517914		2938.18	-0.00031742		3528.18	-0.02779336
578.4	0.08925274		1168.39	0.02321167		1758.39	0.0177112		2348.38	0.00548216		2938.38	-0.00036555		3528.38	-0.02738031
578.6	0.08895113		1168.59	0.02287472		1758.59	0.01678542		2348.58	0.005575		2938.58	-0.00086752		3528.58	-0.02652727
578.8	0.08868212		1168.79	0.02289346		1758.79	0.01655881		2348.78	0.00632022		2938.78	-0.00020893		3528.78	-0.02674405
579	0.08834749		1168.99	0.02366962		1758.99	0.01634223		2348.98	0.00647572		2938.98	0.00019019		3528.98	-0.02727094
579.2	0.0879886		1169.19	0.02356088		1759.19	0.01602421		2349.18	0.00598072		2939.18	0.00041295		3529.18	-0.02758138
579.4	0.08848676		1169.39	0.02357585		1759.39	0.01666889		2349.38	0.00531523		2939.38	0.00093167		3529.38	-0.02717939
579.6	0.08738147		1169.59	0.02287323		1759.59	0.01681452		2349.58	0.00548485		2939.58	-0.00024944		3529.58	-0.02651233
579.8	0.08688585		1169.79	0.02191069		1759.79	0.01670547		2349.78	0.00623794		2939.78	-0.00001807		3529.78	-0.02628531
580	0.08603927		1169.99	0.02187682		1759.99	0.01650341		2349.98	0.00662872		2939.98	-0.00127763		3529.98	-0.02679746
580.2	0.08603142		1170.19	0.02108103		1760.19	0.01709392		2350.18	0.00644749		2940.18	-0.00076428		3530.18	-0.02700687
580.4	0.08583756		1170.39	0.02103234		1760.39	0.0169749		2350.38	0.00571884		2940.38	-0.00046633		3530.38	-0.02736465
580.6	0.08497875		1170.59	0.02156826		1760.59	0.01718221		2350.58	0.00574024		2940.58	-0.00027925		3530.58	-0.027245
580.8	0.08453037		1170.79	0.02153101		1760.79	0.01788823		2350.78	0.00549051		2940.78	-0.00134659		3530.78	-0.02721608
581	0.08491646		1170.99	0.02179979		1760.99	0.018102		2350.98	0.00477365		2940.98	-0.00052464		3530.98	-0.02720628
581.2	0.08562395		1171.19	0.02157769		1761.19	0.01806977		2351.18	0.00507336		2941.18	-0.00022959		3531.18	-0.02698991
581.4	0.08627098		1171.39	0.02202142		1761.39	0.01810588		2351.38	0.00471193		2941.38	-0.00071332		3531.38	-0.02636342
581.6	0.08699107		1171.59	0.02167019		1761.59	0.01729631		2351.58	0.00574931		2941.58	-0.00164055		3531.58	-0.02553219
581.8	0.08751947		1171.79	0.02144639		1761.79	0.01670926		2351.78	0.00543535		2941.78	-0.00208105		3531.78	-0.02605747
582	0.08827925		1171.99	0.02163177		1761.99	0.01686894		2351.98	0.00615548		2941.98	-0.00245433		3531.98	-0.02622952
582.2	0.08771368		1172.19	0.02154719		1762.19	0.01658051		2352.18	0.00674719		2942.18	-0.00238797		3532.18	-0.02553601
582.4	0.08734977		1172.39	0.02066215		1762.39	0.01566863		2352.38	0.00697209		2942.38	-0.00215822		3532.38	-0.02491803
582.6	0.08765916		1172.59	0.01971843		1762.59	0.01449326		2352.58	0.00729237		2942.58	-0.00254751		3532.58	-0.02478767
582.8	0.08747726		1172.79	0.0188983		1762.79	0.01394652		2352.78	0.00784738		2942.78	-0.00288369		3532.78	-0.02446488
583	0.08693599		1172.99	0.01818579		1762.99	0.01339709		2352.98	0.00703494		2942.98	-0.00306996		3532.98	-0.02398291
583.2	0.08665908		1173.19	0.01743653		1763.19	0.01416836		2353.18	0.00705984		2943.18	-0.00304029		3533.18	-0.02295401
583.4	0.0874652		1173.39	0.01609262		1763.39	0.01448028		2353.38	0.00752445		2943.38	-0.00270023		3533.38	-0.02260924
583.6	0.08658981		1173.59	0.01496814		1763.59	0.01453025		2353.58	0.00767305		2943.58	-0.00314916		3533.58	-0.02316281
583.8	0.08605704		1173.79	0.01485679		1763.79	0.01432048		2353.78	0.00764279		2943.78	-0.00193491		3533.78	-0.02413194
584	0.08537851		1173.99	0.01494651		1763.99	0.01462267		2353.98	0.00679024		2943.98	-0.00242531		3533.98	-0.02548748
584.2	0.0851872		1174.19	0.01526005		1764.19	0.01531077		2354.18	0.00698317		2944.18	-0.0016031		3534.18	-0.02618836
584.4	0.0845453		1174.39	0.01575215		1764.39	0.01578982		2354.38	0.00677196		2944.38	-0.00102507		3534.38	-0.02621057
584.6	0.0849303		1174.59	0.01557569		1764.59	0.01696758		2354.58	0.00642664		2944.58	-0.00177231		3534.58	-0.02694178
584.8	0.08566861		1174.79	0.01634695		1764.79	0.01658009		2354.78	0.0058835		2944.78	-0.00165349		3534.78	-0.02688422
585	0.08592375		1174.99	0.01756746		1764.99	0.01842446		2354.98	0.00673368		2944.98	-0.00115655		3534.98	-0.02766364
585.2	0.08608297		1175.19	0.01856086		1765.19	0.01810017		2355.18	0.00726502		2945.18	-0.00142361		3535.18	-0.02849088
585.4	0.08640413		1175.39	0.01877861		1765.39	0.01749958		2355.38	0.0074462		2945.38	-0.00160159		3535.38	-0.02784341
585.6	0.08671127		1175.59	0.01910653		1765.59	0.01687131		2355.58	0.00782524		2945.58	-0.00118845		3535.58	-0.02805579
585.8	0.08689589		1175.79	0.01883541		1765.79	0.01664094		2355.78	0.00791171		2945.78	-0.0014482		3535.78	-0.02831123
586	0.08615485		1175.99	0.01908839		1765.99	0.01648272		2355.98	0.00826953		2945.98	-0.00130286		3535.98	-0.02763074
586.2	0.08598395		1176.19	0.01864214		1766.19	0.0154389		2356.18	0.00797111		2946.18	-0.0009605		3536.18	-0.02658329
586.4	0.08645977		1176.39	0.0174264		1766.39	0.01499475		2356.38	0.00846558		2946.38	-0.00152502		3536.38	-0.02630028
586.6	0.08633107		1176.59	0.01749713		1766.59	0.01494317		2356.58	0.00891598		2946.58	-0.00204071		3536.58	-0.02542935
586.8	0.08607932		1176.79	0.01695243		1766.79	0.01499732		2356.78	0.00869108		2946.78	-0.00214925		3536.78	-0.02494258
587	0.08529433		1176.99	0.01737908		1766.99	0.01489757		2356.98	0.00828511		2946.98	-0.00204981		3536.98	-0.02436013
587.2	0.08569553		1177.19	0.01716543		1767.19	0.01551719		2357.18	0.00817967		2947.18	-0.00137611		3537.18	-0.02378506
587.4	0.0866978		1177.39	0.01641219		1767.39	0.01488943		2357.38	0.00765652		2947.38	-0.00112608		3537.38	-0.02430876
587.6	0.08608397		1177.59	0.01695082		1767.59	0.01465946		2357.58	0.00683919		2947.58	-0.0013691		3537.58	-0.02475263
587.8	0.08666798		1177.79	0.01675269		1767.79	0.01498485		2357.78	0.00625614		2947.78	-0.00124012		3537.78	-0.02500133
588	0.08688541		1177.99	0.01729753		1767.99	0.01571594		2357.98	0.00600526		2947.98	-0.00165719		3537.98	-0.02436672
588.2	0.08725604		1178.19	0.01693801		1768.19	0.01634368		2358.18	0.005495		2948.18	-0.00148611		3538.18	-0.02462386
588.4	0.08686231		1178.39	0.0175493		1768.39	0.01690141		2358.38	0.00466758		2948.38	-0.00160602		3538.38	-0.02445632
588.6	0.0871114		1178.59	0.01743461		1768.59	0.01748772		2358.58	0.00465047		2948.58	-0.00267625		3538.58	-0.02426711
588.8	0.08675716		1178.79	0.01843711		1768.79	0.01751015		2358.78	0.00486258		2948.78	-0.00293328		3538.78	-0.02343174
589	0.08649035		1178.99	0.01952881		1768.99	0.01817781		2358.98	0.00500927		2948.98	-0.0034871		3538.98	-0.02416329
589.2	0.08540724		1179.19	0.01978441		1769.19	0.01676701		2359.18	0.00482295		2949.18	-0.00350039		3539.18	-0.02312416
589.4	0.08530019		1179.39	0.0200757		1769.39	0.01714415		2359.38	0.00538416		2949.38	-0.00298216		3539.38	-0.02199479
589.6	0.08479795		1179.59	0.02001935		1769.59	0.01738731		2359.58	0.00529442		2949.58	-0.00365154		3539.58	-0.02139417
589.8	0.08365907		1179.79	0.01990931		1769.79	0.01699925		2359.78	0.00566252		2949.78	-0.00339272		3539.78	-0.0204975
590	0.08241821		1179.99	0.02019124		1769.99	0.01635459		2359.98	0.00624198		2949.98	-0.00294919		3539.98	-0.01976443
590.2	0.08290894		1180.19	0.02048871		1770.19	0.01606179		2360.18	0.0065848		2950.18	-0.00263333		3540.18	-0.02044829
590.4	0.08302122		1180.39	0.02125236		1770.39	0.01579648		2360.38	0.00698404		2950.38	-0.00248804		3540.38	-0.02091824
590.6	0.08272967		1180.59	0.02148134		1770.59	0.01534059		2360.58	0.00766028		2950.58	-0.00217894		3540.58	-0.02037786
590.8	0.08306789		1180.79	0.02065346		1770.79	0.015744		2360.78	0.00797523		2950.78	-0.00183537		3540.78	-0.02161565
591	0.08331243		1180.99	0.02032258		1770.99	0.01588436		2360.98	0.00847399		2950.98	-0.00119123		3540.98	-0.0226687
591.2	0.08464607		1181.19	0.0193463		1771.19	0.01674788		2361.18	0.00770564		2951.18	-0.00079203		3541.18	-0.02340452
591.4	0.08493743		1181.39	0.01882721		1771.39	0.01681306		2361.38	0.00773956		2951.38	0.00005424		3541.38	-0.02408854
591.6	0.08581895		1181.59	0.01839678		1771.59	0.01728717		2361.58	0.00723412		2951.58	0.00008149		3541.58	-0.0245388
591.8	0.08602184		1181.79	0.01757755		1771.79	0.01707566		2361.78	0.00657091		2951.78	0.00073582		3541.78	-0.02534151
592	0.08574223		1181.99	0.01737303		1771.99	0.01804671		2361.98	0.00688896		2951.98	0.00115311		3541.98	-0.02573547
592.2	0.08461949		1182.19	0.01628353		1772.19	0.01808014		2362.18	0.00599661		2952.18	0.00092583		3542.18	-0.02628267
592.4	0.08357309		1182.39	0.0169238		1772.39	0.0177608		2362.38	0.00637714		2952.38	0.00074378		3542.38	-0.02575086
592.6	0.08308814		1182.59	0.01562004		1772.59	0.01846212		2362.58	0.00650315		2952.58	0.00071004		3542.58	-0.0252977
592.8	0.08248284		1182.79	0.01615351		1772.79	0.01863431		2362.78	0.00666464		2952.78	0.00040265		3542.78	-0.02548294
593	0.08186659		1182.99	0.01639849		1772.99	0.01868854		2362.98	0.00676114		2952.98	-0.00018651		3542.98	-0.02569246
593.2	0.08046549		1183.19	0.01621333		1773.19	0.01892243		2363.18	0.00710541		2953.18	0.00041284		3543.18	-0.02461211
593.4	0.08072026		1183.39	0.01627519		1773.39	0.019742		2363.38	0.00717562		2953.38	0.00044265		3543.38	-0.02520456
593.6	0.0795081		1183.59	0.01625361		1773.59	0.01911967		2363.58	0.00732954		2953.58	-0.00047008		3543.58	-0.02436586
593.8	0.07945064		1183.79	0.01697528		1773.79	0.01780734		2363.78	0.00813715		2953.78	-0.00040888		3543.78	-0.02450511
594	0.07992276		1183.99	0.01771415		1773.99	0.0175461		2363.98	0.0082051		2953.98	-0.00090309		3543.98	-0.02445308
594.2	0.08043218		1184.19	0.01801838		1774.19	0.01680317		2364.18	0.00814494		2954.18	-0.00170548		3544.18	-0.02491074
594.4	0.08191976		1184.39	0.01760341		1774.39	0.01719137		2364.38	0.00858673		2954.38	-0.00183066		3544.38	-0.02444384
594.6	0.08225552		1184.59	0.01725222		1774.59	0.01793095		2364.58	0.00917942		2954.58	-0.00195534		3544.58	-0.02427341
594.8	0.08370103		1184.79	0.0169339		1774.79	0.01872242		2364.78	0.00904844		2954.78	-0.00186611		3544.78	-0.02535694
595	0.08456176		1184.99	0.01663501		1774.99	0.01890943		2364.98	0.00952395		2954.98	-0.0017843		3544.98	-0.02571907
595.2	0.08488944		1185.19	0.01706412		1775.19	0.0192751		2365.18	0.00938509		2955.18	-0.00241447		3545.18	-0.02483147
595.4	0.08622123		1185.39	0.01747035		1775.39	0.01887509		2365.38	0.00950948		2955.38	-0.00186727		3545.38	-0.02579062
595.6	0.08696533		1185.59	0.01823305		1775.59	0.01849342		2365.58	0.00889705		2955.58	-0.00270843		3545.58	-0.02675372
595.8	0.0857875		1185.79	0.01881983		1775.79	0.01841523		2365.78	0.00923571		2955.78	-0.00288887		3545.78	-0.02780852
596	0.08550632		1185.99	0.01903576		1775.99	0.01847028		2365.98	0.0092039		2955.98	-0.0034142		3545.98	-0.02721868
596.2	0.08473957		1186.19	0.01912606		1776.19	0.01779019		2366.18	0.00825863		2956.18	-0.00369841		3546.18	-0.02752564
596.4	0.08431313		1186.39	0.01918536		1776.39	0.01749545		2366.38	0.00865038		2956.38	-0.00347349		3546.38	-0.02775683
596.6	0.08344299		1186.59	0.01870756		1776.59	0.01766789		2366.58	0.00821162		2956.58	-0.00295936		3546.58	-0.02824183
596.8	0.08351353		1186.79	0.018369		1776.79	0.01757641		2366.78	0.00879755		2956.78	-0.00297591		3546.78	-0.0277906
597	0.08368594		1186.99	0.01785332		1776.99	0.01772752		2366.98	0.0086407		2956.98	-0.00203583		3546.98	-0.02684574
597.2	0.08283726		1187.19	0.01681872		1777.19	0.01695676		2367.18	0.00818987		2957.18	-0.00151296		3547.18	-0.02652787
597.4	0.0827319		1187.39	0.01637891		1777.39	0.01576911		2367.38	0.00851263		2957.38	-0.00140905		3547.38	-0.02605816
597.6	0.08215566		1187.59	0.01636516		1777.59	0.01427223		2367.58	0.00812042		2957.58	-0.0012555		3547.58	-0.02591676
597.8	0.08349636		1187.79	0.01646501		1777.79	0.01370939		2367.78	0.00736893		2957.78	-0.00139434		3547.78	-0.02639055
598	0.08269735		1187.99	0.01691012		1777.99	0.01391265		2367.98	0.00681076		2957.98	-0.00067616		3547.98	-0.02556088
598.2	0.08323001		1188.19	0.01578577		1778.19	0.01379603		2368.18	0.00648579		2958.18	-0.00058926		3548.18	-0.02424486
598.4	0.08389272		1188.39	0.01510641		1778.39	0.01492127		2368.38	0.00667624		2958.38	0.00085654		3548.38	-0.02436992
598.6	0.08438265		1188.59	0.01519028		1778.59	0.01526078		2368.58	0.00669735		2958.58	0.00163489		3548.58	-0.02451268
598.8	0.08459219		1188.79	0.01567618		1778.79	0.01539668		2368.78	0.00681222		2958.78	0.00106969		3548.78	-0.02462071
599	0.08443713		1188.99	0.01596785		1778.99	0.01510992		2368.98	0.00675938		2958.98	0.00118984		3548.98	-0.02467265
599.2	0.08399633		1189.19	0.01650495		1779.19	0.01477938		2369.18	0.00654095		2959.18	0.00038546		3549.18	-0.02520608
599.4	0.08411272		1189.39	0.01702108		1779.39	0.01465387		2369.38	0.00551798		2959.38	0.00053908		3549.38	-0.0257127
599.6	0.08355134		1189.59	0.01747584		1779.59	0.01460329		2369.58	0.00508447		2959.58	0.00029891		3549.58	-0.02524607
599.8	0.08286674		1189.79	0.0176855		1779.79	0.01488711		2369.78	0.00530684		2959.78	-0.00008566		3549.78	-0.02503415
600	0.08242535		1189.99	0.01799146		1779.99	0.0141869		2369.98	0.00525805		2959.98	-0.00007627		3549.98	-0.02461091
600.2	0.08301999		1190.19	0.01757394		1780.19	0.01388343		2370.18	0.00490872		2960.18	0.00040852		3550.18	-0.02526649
600.4	0.08282027		1190.39	0.01743132		1780.39	0.0144991		2370.38	0.00522985		2960.38	0.00115618		3550.38	-0.02512536
600.6	0.08245412		1190.59	0.01703307		1780.59	0.01522898		2370.58	0.00437529		2960.58	0.00136974		3550.58	-0.02505318
600.8	0.08321857		1190.79	0.01593704		1780.79	0.01557232		2370.78	0.00459292		2960.78	0.00187299		3550.78	-0.02383665
601	0.08331974		1190.99	0.01613355		1780.99	0.01577917		2370.98	0.00378123		2960.98	0.00242608		3550.98	-0.02386811
601.2	0.0823964		1191.19	0.01524379		1781.19	0.01537188		2371.18	0.00320313		2961.18	0.00097685		3551.18	-0.02397931
601.4	0.08212153		1191.39	0.01630501		1781.39	0.0145314		2371.38	0.00284394		2961.38	0.00032934		3551.38	-0.02393346
601.6	0.08264664		1191.59	0.01655185		1781.59	0.01460241		2371.58	0.00176245		2961.58	-0.00014282		3551.58	-0.02430451
601.8	0.08267417		1191.79	0.0165453		1781.79	0.01451749		2371.78	0.00188349		2961.78	0.00014028		3551.78	-0.02398313
602	0.08189362		1191.99	0.01621233		1781.99	0.01416321		2371.98	0.0018618		2961.98	0.00062918		3551.98	-0.02346407
602.2	0.0827894		1192.19	0.01520626		1782.19	0.01538431		2372.18	0.00200552		2962.18	-0.00010097		3552.18	-0.02355055
602.4	0.08199021		1192.39	0.01541505		1782.39	0.01564205		2372.38	0.00252817		2962.38	-0.000011		3552.38	-0.02446982
602.6	0.08196392		1192.59	0.01591282		1782.59	0.01518896		2372.58	0.00273006		2962.58	-0.00092945		3552.58	-0.02519422
602.8	0.08118314		1192.79	0.01673021		1782.79	0.0148825		2372.78	0.00309308		2962.78	-0.00192227		3552.78	-0.02576404
603	0.08144404		1192.99	0.0158976		1782.99	0.0139214		2372.98	0.00286705		2962.98	-0.0021789		3552.98	-0.02606339
603.2	0.08075157		1193.19	0.0155716		1783.19	0.01388107		2373.18	0.00336163		2963.18	-0.00239605		3553.18	-0.0256693
603.4	0.08058634		1193.39	0.01643125		1783.39	0.01409791		2373.38	0.00365207		2963.38	-0.00187877		3553.38	-0.02556042
603.6	0.08084441		1193.59	0.0164755		1783.59	0.01422824		2373.58	0.00397733		2963.58	-0.00210466		3553.58	-0.02639561
603.8	0.08029259		1193.79	0.01677609		1783.79	0.01461586		2373.78	0.00467616		2963.78	-0.00265368		3553.78	-0.02724894
604	0.08025846		1193.99	0.01631571		1783.99	0.0145647		2373.98	0.00384448		2963.98	-0.00208508		3553.98	-0.02776644
604.2	0.0814067		1194.19	0.01563434		1784.19	0.01493192		2374.18	0.00356354		2964.18	-0.00127256		3554.18	-0.02693815
604.4	0.08102968		1194.39	0.01666351		1784.39	0.01606746		2374.38	0.00311617		2964.38	-0.00065358		3554.38	-0.02761198
604.6	0.08139831		1194.59	0.01708873		1784.59	0.01670728		2374.58	0.00322467		2964.58	-0.00180964		3554.58	-0.02717352
604.8	0.0824007		1194.79	0.0170473		1784.79	0.01666639		2374.78	0.00317643		2964.78	-0.00166856		3554.78	-0.02602229
605	0.08244732		1194.99	0.01765221		1784.99	0.01664727		2374.98	0.00279668		2964.98	-0.00262167		3554.98	-0.02644327
605.2	0.08196499		1195.19	0.01771092		1785.19	0.01489841		2375.18	0.0028279		2965.18	-0.0035829		3555.18	-0.02609667
605.4	0.08215121		1195.39	0.01816129		1785.39	0.01443029		2375.38	0.00348792		2965.38	-0.00337342		3555.38	-0.02572723
605.6	0.08275584		1195.59	0.01760469		1785.59	0.01404117		2375.58	0.00330388		2965.58	-0.00301988		3555.58	-0.02531004
605.8	0.0822474		1195.79	0.01695192		1785.79	0.01320961		2375.78	0.00390092		2965.78	-0.00241354		3555.78	-0.02558123
606	0.08180059		1195.99	0.01713498		1785.99	0.01275623		2375.98	0.00415295		2965.98	-0.00249583		3555.98	-0.02525268
606.2	0.08171706		1196.19	0.01736814		1786.19	0.01353795		2376.18	0.00439524		2966.18	-0.00195827		3556.18	-0.02506263
606.4	0.08114265		1196.39	0.01754459		1786.39	0.01315846		2376.38	0.0050473		2966.38	-0.00191948		3556.38	-0.02494408
606.6	0.08048147		1196.59	0.01738992		1786.59	0.01305345		2376.58	0.00575907		2966.58	-0.00101915		3556.58	-0.0255894
606.8	0.08081403		1196.79	0.01739067		1786.79	0.01326893		2376.78	0.00666131		2966.78	-0.00019572		3556.78	-0.02565787
607	0.08080556		1196.99	0.01628694		1786.99	0.01374032		2376.98	0.00726152		2966.98	0.00019532		3556.98	-0.02552347
607.2	0.080563		1197.19	0.01618065		1787.19	0.01469856		2377.18	0.00748312		2967.18	0.00033522		3557.18	-0.02601127
607.4	0.08018376		1197.39	0.01628165		1787.39	0.01499274		2377.38	0.00744845		2967.38	0.00008869		3557.38	-0.02661055
607.6	0.08006131		1197.59	0.01429254		1787.59	0.01598942		2377.58	0.0068706		2967.58	-0.00079852		3557.58	-0.02733386
607.8	0.08018195		1197.79	0.01396281		1787.79	0.01742369		2377.78	0.00638054		2967.78	-0.00165169		3557.78	-0.02727988
608	0.08064493		1197.99	0.01371488		1787.99	0.017715		2377.98	0.00567091		2967.98	-0.00175399		3557.98	-0.02764902
608.2	0.08141583		1198.19	0.0140662		1788.19	0.01818361		2378.18	0.00645896		2968.18	-0.00244951		3558.18	-0.02773144
608.4	0.08134837		1198.39	0.01470417		1788.39	0.01941737		2378.38	0.00662366		2968.38	-0.002951		3558.38	-0.02769762
608.6	0.08230137		1198.59	0.01445014		1788.59	0.02070382		2378.58	0.00670466		2968.58	-0.00413129		3558.58	-0.02715381
608.8	0.08241293		1198.79	0.01476483		1788.79	0.02007607		2378.78	0.00587696		2968.78	-0.00462858		3558.78	-0.02679222
609	0.08183346		1198.99	0.01527018		1788.99	0.01938887		2378.98	0.00588836		2968.98	-0.00553465		3558.98	-0.02668366
609.2	0.08177836		1199.19	0.01502185		1789.19	0.01843915		2379.18	0.00618732		2969.18	-0.00557617		3559.18	-0.02614605
609.4	0.08175808		1199.39	0.0149873		1789.39	0.01855467		2379.38	0.00653509		2969.38	-0.00633938		3559.38	-0.02664904
609.6	0.08147554		1199.59	0.01515201		1789.59	0.0175682		2379.58	0.00664114		2969.58	-0.00690453		3559.58	-0.02691736
609.8	0.08062229		1199.79	0.01542418		1789.79	0.01625282		2379.78	0.00681224		2969.78	-0.00605994		3559.78	-0.02682907
610	0.08028696		1199.99	0.01633298		1789.99	0.01565587		2379.98	0.00740763		2969.98	-0.00528019		3559.98	-0.02611669
610.2	0.0807347		1200.19	0.01663568		1790.19	0.01593292		2380.18	0.00712244		2970.18	-0.00444368		3560.18	-0.02610922
610.4	0.07974495		1200.39	0.01617359		1790.39	0.01516163		2380.38	0.00741354		2970.38	-0.00447392		3560.38	-0.02580476
610.6	0.07959182		1200.59	0.01646855		1790.59	0.01521081		2380.58	0.00716339		2970.58	-0.00347245		3560.58	-0.02594048
610.8	0.08083336		1200.79	0.01649264		1790.79	0.01488439		2380.78	0.00764003		2970.78	-0.00311755		3560.78	-0.02519682
611	0.08084726		1200.99	0.01597188		1790.99	0.01540895		2380.98	0.00793002		2970.98	-0.00396112		3560.98	-0.02476274
611.2	0.08065492		1201.19	0.01594602		1791.19	0.01537303		2381.18	0.00748962		2971.18	-0.00409085		3561.18	-0.02505733
611.4	0.07994338		1201.39	0.01567357		1791.39	0.01511252		2381.38	0.00781538		2971.38	-0.00433458		3561.38	-0.02463601
611.6	0.07965283		1201.59	0.01501505		1791.59	0.01546006		2381.58	0.00721924		2971.58	-0.00450616		3561.58	-0.02524958
611.8	0.08006253		1201.79	0.01545192		1791.79	0.01565429		2381.78	0.00716796		2971.78	-0.00450574		3561.78	-0.02507828
612	0.08052765		1201.99	0.01536714		1791.99	0.01461026		2381.98	0.00775889		2971.98	-0.00442962		3561.98	-0.02567579
612.2	0.08032536		1202.19	0.01564089		1792.19	0.01527947		2382.18	0.00816336		2972.18	-0.00502437		3562.18	-0.02605925
612.4	0.08027287		1202.39	0.015203		1792.39	0.01692894		2382.38	0.00745525		2972.38	-0.00509803		3562.38	-0.02558843
612.6	0.08108372		1202.59	0.0148145		1792.59	0.0175802		2382.58	0.0066037		2972.58	-0.00493929		3562.58	-0.02576997
612.8	0.0807999		1202.79	0.01524446		1792.79	0.01726398		2382.78	0.00619828		2972.78	-0.00529759		3562.78	-0.02556184
613	0.08047888		1202.99	0.01436359		1792.99	0.01719618		2382.98	0.00574657		2972.98	-0.00545139		3562.98	-0.02526924
613.2	0.08143807		1203.19	0.01397056		1793.19	0.0173477		2383.18	0.00545619		2973.18	-0.00627371		3563.18	-0.02605524
613.4	0.08139761		1203.39	0.01416014		1793.39	0.01785462		2383.38	0.00542872		2973.38	-0.00660721		3563.38	-0.02765011
613.6	0.08142744		1203.59	0.01429101		1793.59	0.01795386		2383.58	0.0049123		2973.58	-0.00608953		3563.58	-0.02774245
613.8	0.08121266		1203.79	0.01381777		1793.79	0.01751931		2383.78	0.00437534		2973.78	-0.00527291		3563.78	-0.02716401
614	0.08052644		1203.99	0.01425582		1793.99	0.01828524		2383.98	0.00369131		2973.98	-0.00484596		3563.98	-0.02683124
614.2	0.08073094		1204.19	0.01408572		1794.19	0.01843498		2384.18	0.00265213		2974.18	-0.00555981		3564.18	-0.02692592
614.4	0.08020988		1204.39	0.01419215		1794.39	0.01861482		2384.38	0.00217393		2974.38	-0.00593332		3564.38	-0.02750643
614.6	0.08131664		1204.59	0.01526812		1794.59	0.01869801		2384.58	0.00251331		2974.58	-0.00585254		3564.58	-0.02784333
614.8	0.08133215		1204.79	0.01566917		1794.79	0.01763788		2384.78	0.00249357		2974.78	-0.0055604		3564.78	-0.02747246
615	0.08110995		1204.99	0.01609301		1794.99	0.01784517		2384.98	0.00249155		2974.98	-0.00632562		3564.98	-0.02751506
615.2	0.08114327		1205.19	0.01698387		1795.19	0.01705715		2385.18	0.00243902		2975.18	-0.00541004		3565.18	-0.02742697
615.4	0.08050513		1205.39	0.01741678		1795.39	0.01738997		2385.38	0.00295424		2975.38	-0.00528446		3565.38	-0.02704893
615.6	0.08046337		1205.59	0.01810861		1795.59	0.01690447		2385.58	0.00332667		2975.58	-0.00457889		3565.58	-0.0271094
615.8	0.08066589		1205.79	0.0180517		1795.79	0.01596236		2385.78	0.00448975		2975.78	-0.00413051		3565.78	-0.0273216
616	0.08087361		1205.99	0.01842825		1795.99	0.01523062		2385.98	0.00533645		2975.98	-0.00400109		3565.98	-0.02815303
616.2	0.08082283		1206.19	0.01865832		1796.19	0.0160791		2386.18	0.00584027		2976.18	-0.00367491		3566.18	-0.02818239
616.4	0.08137263		1206.39	0.01729365		1796.39	0.01623986		2386.38	0.00449817		2976.38	-0.00290618		3566.38	-0.02805878
616.6	0.08162202		1206.59	0.01667447		1796.59	0.01629571		2386.58	0.00423042		2976.58	-0.00229497		3566.58	-0.02795505
616.8	0.08168743		1206.79	0.01623752		1796.79	0.01615835		2386.78	0.00452906		2976.78	-0.00312121		3566.78	-0.02816
617	0.08235543		1206.99	0.01505316		1796.99	0.01590834		2386.98	0.00396331		2976.98	-0.00393918		3566.98	-0.02871066
617.2	0.08303736		1207.19	0.0151821		1797.19	0.01661996		2387.18	0.00454445		2977.18	-0.00407547		3567.18	-0.02926545
617.4	0.08232666		1207.39	0.01462261		1797.39	0.01670388		2387.38	0.0048501		2977.38	-0.00307777		3567.38	-0.02980529
617.6	0.08157711		1207.59	0.01421355		1797.59	0.01611626		2387.58	0.00476868		2977.58	-0.00278309		3567.58	-0.03011711
617.8	0.08087231		1207.79	0.01346423		1797.79	0.01595356		2387.78	0.00488607		2977.78	-0.00395043		3567.78	-0.02991085
618	0.08009473		1207.99	0.01422246		1797.99	0.01594067		2387.98	0.00417478		2977.98	-0.00486272		3567.98	-0.03005236
618.2	0.07995279		1208.19	0.01422415		1798.19	0.01521275		2388.18	0.00395293		2978.18	-0.00613132		3568.18	-0.03038726
618.4	0.08013941		1208.39	0.01488272		1798.39	0.01465055		2388.38	0.00346363		2978.38	-0.00582114		3568.38	-0.03026027
618.6	0.08075406		1208.59	0.01573504		1798.59	0.01334737		2388.58	0.00355512		2978.58	-0.00641838		3568.58	-0.02953523
618.8	0.08057057		1208.79	0.01661311		1798.79	0.01302172		2388.78	0.00310053		2978.78	-0.00693241		3568.78	-0.02873259
619	0.08090792		1208.99	0.01726749		1798.99	0.01279379		2388.98	0.00329919		2978.98	-0.00671839		3568.98	-0.02827246
619.2	0.08109492		1209.19	0.01775236		1799.19	0.01259936		2389.18	0.00411497		2979.18	-0.00623541		3569.18	-0.02782666
619.4	0.08083737		1209.39	0.01803773		1799.39	0.0127509		2389.38	0.00535722		2979.38	-0.00619326		3569.38	-0.02711491
619.6	0.08196148		1209.59	0.01822353		1799.59	0.01220764		2389.58	0.00612182		2979.58	-0.00542882		3569.58	-0.02697054
619.8	0.0822696		1209.79	0.01766226		1799.79	0.01230196		2389.78	0.00721928		2979.78	-0.00466758		3569.78	-0.02698405
620	0.08314219		1209.99	0.0176058		1799.99	0.0128037		2389.98	0.00735349		2979.98	-0.00386355		3569.98	-0.02715179
620.2	0.08334258		1210.19	0.01692641		1800.19	0.01324075		2390.18	0.00804088		2980.18	-0.00337419		3570.18	-0.02643861
620.4	0.08376488		1210.39	0.01592731		1800.39	0.01349497		2390.38	0.00736688		2980.38	-0.00271318		3570.38	-0.02724104
620.6	0.08319709		1210.59	0.01561626		1800.59	0.0136185		2390.58	0.00805305		2980.58	-0.00337834		3570.58	-0.02769524
620.8	0.08304188		1210.79	0.0143953		1800.79	0.01346576		2390.78	0.00873416		2980.78	-0.00352528		3570.78	-0.02791078
621	0.08309675		1210.99	0.01376986		1800.99	0.01368973		2390.98	0.00866172		2980.98	-0.00216129		3570.98	-0.02879145
621.2	0.08176493		1211.19	0.01397118		1801.19	0.01339703		2391.18	0.00911234		2981.18	-0.00111321		3571.18	-0.0289957
621.4	0.08163433		1211.39	0.01401862		1801.39	0.01348688		2391.38	0.00824992		2981.38	-0.00026424		3571.38	-0.02939901
621.6	0.0811805		1211.59	0.0147893		1801.59	0.01403006		2391.58	0.00807995		2981.58	-0.00012487		3571.58	-0.0303562
621.8	0.08133084		1211.79	0.01448959		1801.79	0.0137556		2391.78	0.0069487		2981.78	-0.00099999		3571.78	-0.03012688
622	0.08068094		1211.99	0.0152947		1801.99	0.01372526		2391.98	0.00666606		2981.98	-0.00044565		3571.98	-0.03034689
622.2	0.08039637		1212.19	0.01487465		1802.19	0.01306195		2392.18	0.00579197		2982.18	-0.00001758		3572.18	-0.03061043
622.4	0.08071115		1212.39	0.01475556		1802.39	0.01288098		2392.38	0.00536018		2982.38	0.00044284		3572.38	-0.03062241
622.6	0.08003682		1212.59	0.01542935		1802.59	0.01297897		2392.58	0.0053969		2982.58	-0.00031624		3572.58	-0.03110636
622.8	0.07914875		1212.79	0.01607494		1802.79	0.01348343		2392.78	0.00455222		2982.78	-0.00073698		3572.78	-0.03130985
623	0.07892096		1212.99	0.0162651		1802.99	0.0135495		2392.98	0.00409727		2982.98	-0.00075145		3572.98	-0.0309613
623.2	0.07932381		1213.19	0.0164191		1803.19	0.01385513		2393.18	0.00443016		2983.18	-0.00141122		3573.18	-0.02941502
623.4	0.07969757		1213.39	0.01637418		1803.39	0.01411081		2393.38	0.00446889		2983.38	-0.00224357		3573.38	-0.02860306
623.6	0.08004653		1213.59	0.0169577		1803.59	0.01516164		2393.58	0.00366014		2983.58	-0.00226581		3573.58	-0.02873049
623.8	0.07965249		1213.79	0.01652049		1803.79	0.01504677		2393.78	0.00361037		2983.78	-0.00247621		3573.78	-0.02744988
624	0.07980926		1213.99	0.0159157		1803.99	0.01551547		2393.98	0.00388564		2983.98	-0.003701		3573.98	-0.02823559
624.2	0.07909339		1214.19	0.01601051		1804.19	0.01572861		2394.18	0.00454276		2984.18	-0.00502064		3574.18	-0.02780249
624.4	0.0793059		1214.39	0.01611211		1804.39	0.01574528		2394.38	0.00401912		2984.38	-0.00522459		3574.38	-0.02852861
624.6	0.0789272		1214.59	0.01582704		1804.59	0.01555601		2394.58	0.00354762		2984.58	-0.00594087		3574.58	-0.02768858
624.8	0.0785011		1214.79	0.01487225		1804.79	0.01565072		2394.78	0.00221793		2984.78	-0.00433898		3574.78	-0.02719289
625	0.07875877		1214.99	0.01527511		1804.99	0.0152506		2394.98	0.00211549		2984.98	-0.00363848		3574.98	-0.02725019
625.2	0.07842002		1215.19	0.01588745		1805.19	0.01532493		2395.18	0.00217232		2985.18	-0.00424786		3575.18	-0.0273099
625.4	0.07937182		1215.39	0.0163107		1805.39	0.0161005		2395.38	0.00159115		2985.38	-0.00375969		3575.38	-0.02713207
625.6	0.07999365		1215.59	0.01678196		1805.59	0.01596467		2395.58	0.00156708		2985.58	-0.00468517		3575.58	-0.02740297
625.8	0.08049978		1215.79	0.01633916		1805.79	0.01566817		2395.78	0.00103283		2985.78	-0.00485302		3575.78	-0.02787458
626	0.0802977		1215.99	0.01715547		1805.99	0.01569416		2395.98	0.00186563		2985.98	-0.00438891		3575.98	-0.0279211
626.2	0.07999075		1216.19	0.01692267		1806.19	0.01533276		2396.18	0.00180583		2986.18	-0.00451537		3576.18	-0.02853229
626.4	0.07913455		1216.39	0.01666775		1806.39	0.0156101		2396.38	0.00225519		2986.38	-0.00441553		3576.38	-0.0277984
626.6	0.07891169		1216.59	0.01708194		1806.59	0.01585951		2396.58	0.00243617		2986.58	-0.00517617		3576.58	-0.02733715
626.8	0.07827927		1216.79	0.01611314		1806.79	0.01558952		2396.78	0.00266974		2986.78	-0.00657527		3576.78	-0.02651545
627	0.07864527		1216.99	0.01595034		1806.99	0.01588408		2396.98	0.0032324		2986.98	-0.00717537		3576.98	-0.02583807
627.2	0.07882429		1217.19	0.01571268		1807.19	0.01543923		2397.18	0.00370715		2987.18	-0.00671658		3577.18	-0.02505485
627.4	0.07829001		1217.39	0.01534005		1807.39	0.01559405		2397.38	0.00405636		2987.38	-0.00699682		3577.38	-0.02583354
627.6	0.07789025		1217.59	0.01550422		1807.59	0.01595755		2397.58	0.00388045		2987.58	-0.00678955		3577.58	-0.02589715
627.8	0.07767327		1217.79	0.01474511		1807.79	0.01548369		2397.78	0.00438659		2987.78	-0.00664642		3577.78	-0.02584815
628	0.07839223		1217.99	0.01461219		1807.99	0.01560466		2397.98	0.00515402		2987.98	-0.00729989		3577.98	-0.02731931
628.2	0.07933576		1218.19	0.01477388		1808.19	0.01536338		2398.18	0.00523689		2988.18	-0.00622212		3578.18	-0.0269941
628.4	0.08099028		1218.39	0.01439318		1808.39	0.01592133		2398.38	0.0046248		2988.38	-0.00504424		3578.38	-0.02763457
628.6	0.08082522		1218.59	0.01385755		1808.59	0.01522914		2398.58	0.004099		2988.58	-0.00423204		3578.58	-0.02819052
628.8	0.08119841		1218.79	0.01384564		1808.79	0.01459222		2398.78	0.00336582		2988.78	-0.00350326		3578.78	-0.02951426
629	0.0817586		1218.99	0.0139691		1808.99	0.01425547		2398.98	0.00470344		2988.98	-0.00375169		3578.98	-0.03056874
629.2	0.08292533		1219.19	0.01432846		1809.19	0.01432053		2399.18	0.00496344		2989.18	-0.00357427		3579.18	-0.03071159
629.4	0.08284988		1219.39	0.01428373		1809.39	0.01443889		2399.38	0.0043736		2989.38	-0.00328434		3579.38	-0.03046296
629.6	0.08300843		1219.59	0.01462495		1809.59	0.01486619		2399.58	0.00499947		2989.58	-0.00368001		3579.58	-0.03132001
629.8	0.08234577		1219.79	0.01476821		1809.79	0.0148612		2399.78	0.00560992		2989.78	-0.00351591		3579.78	-0.03090687
630	0.08216823		1219.99	0.0155087		1809.99	0.01456224		2399.98	0.00641849		2989.98	-0.00398958		3579.98	-0.02976706
630.2	0.08123865		1220.19	0.01459409		1810.19	0.01490445		2400.18	0.00612432		2990.18	-0.00370753		3580.18	-0.03034362
630.4	0.08160606		1220.39	0.01403127		1810.39	0.01559607		2400.38	0.00633111		2990.38	-0.00417128		3580.38	-0.02929981
630.6	0.08143189		1220.59	0.01418018		1810.59	0.01618095		2400.58	0.00675065		2990.58	-0.0049474		3580.58	-0.02930335
630.8	0.08034198		1220.79	0.01337749		1810.79	0.0158399		2400.78	0.00653422		2990.78	-0.00555409		3580.78	-0.0283804
631	0.08022824		1220.99	0.01380266		1810.99	0.01666024		2400.98	0.00712729		2990.98	-0.00522553		3580.98	-0.02780298
631.2	0.07972569		1221.19	0.01386228		1811.19	0.01721248		2401.18	0.00704722		2991.18	-0.0049673		3581.18	-0.02753221
631.4	0.07861085		1221.39	0.01427633		1811.39	0.01765503		2401.38	0.00655126		2991.38	-0.00546018		3581.38	-0.02727844
631.6	0.07858043		1221.59	0.0139994		1811.59	0.01764571		2401.58	0.00539351		2991.58	-0.00499946		3581.58	-0.02733621
631.8	0.07851341		1221.79	0.01375459		1811.79	0.01774283		2401.78	0.00442534		2991.78	-0.00436504		3581.78	-0.02787082
632	0.08011498		1221.99	0.01326252		1811.99	0.01702036		2401.98	0.00347145		2991.98	-0.00440205		3581.98	-0.02843837
632.2	0.0804489		1222.19	0.01365834		1812.19	0.01673836		2402.18	0.00291972		2992.18	-0.00398035		3582.18	-0.02839434
632.4	0.0802918		1222.39	0.01382376		1812.39	0.0163005		2402.38	0.00181273		2992.38	-0.00461981		3582.38	-0.02950604
632.6	0.07900771		1222.59	0.01449902		1812.59	0.01409463		2402.58	0.00116083		2992.58	-0.00465998		3582.58	-0.03049117
632.8	0.07980553		1222.79	0.0147963		1812.79	0.01371334		2402.78	0.00020482		2992.78	-0.0046829		3582.78	-0.03127272
633	0.07928627		1222.99	0.01442699		1812.99	0.01209516		2402.98	0.00108657		2992.98	-0.0054649		3582.98	-0.03066861
633.2	0.07922105		1223.19	0.01385938		1813.19	0.01171935		2403.18	0.00110665		2993.18	-0.00564251		3583.18	-0.0306775
633.4	0.07809487		1223.39	0.01327105		1813.39	0.01202487		2403.38	0.00161681		2993.38	-0.00625705		3583.38	-0.03145361
633.6	0.07821711		1223.59	0.01359471		1813.59	0.01269411		2403.58	0.00291176		2993.58	-0.00715129		3583.58	-0.03185497
633.8	0.07760455		1223.79	0.01369603		1813.79	0.0120184		2403.78	0.00261288		2993.78	-0.00867293		3583.78	-0.03145865
634	0.07786013		1223.99	0.01424636		1813.99	0.01182992		2403.98	0.00281701		2993.98	-0.00845294		3583.98	-0.03139512
634.2	0.0768973		1224.19	0.01443139		1814.19	0.01253026		2404.18	0.00313952		2994.18	-0.00755478		3584.18	-0.03228236
634.4	0.07731264		1224.39	0.01496155		1814.39	0.01287093		2404.38	0.00409068		2994.38	-0.00821073		3584.38	-0.03104483
634.6	0.07649908		1224.59	0.01487711		1814.59	0.01339874		2404.58	0.0046115		2994.58	-0.00844519		3584.58	-0.03075992
634.8	0.07592221		1224.79	0.0145616		1814.79	0.0129169		2404.78	0.00469592		2994.78	-0.0089241		3584.78	-0.03037889
635	0.07623348		1224.99	0.0148526		1814.99	0.0139254		2404.98	0.00594768		2994.98	-0.00915159		3584.98	-0.03059845
635.2	0.07638948		1225.19	0.01463097		1815.19	0.01486935		2405.18	0.00586421		2995.18	-0.00874797		3585.18	-0.03114171
635.4	0.07638182		1225.39	0.01512805		1815.39	0.01456145		2405.38	0.00562697		2995.38	-0.00756538		3585.38	-0.03202824
635.6	0.07636021		1225.59	0.0146245		1815.59	0.01484916		2405.58	0.005604		2995.58	-0.00648132		3585.58	-0.0328435
635.8	0.07641491		1225.79	0.01424722		1815.79	0.01563184		2405.78	0.0048956		2995.78	-0.00704258		3585.78	-0.0328624
636	0.07688788		1225.99	0.01444158		1815.99	0.01545852		2405.98	0.00477689		2995.98	-0.00721197		3585.98	-0.03269547
636.2	0.07647048		1226.19	0.01534478		1816.19	0.01586705		2406.18	0.00394014		2996.18	-0.0076591		3586.18	-0.03136634
636.4	0.07676358		1226.39	0.01600508		1816.39	0.01622067		2406.38	0.0033655		2996.38	-0.00781428		3586.38	-0.03121781
636.6	0.07686436		1226.59	0.01569269		1816.59	0.015517		2406.58	0.00362987		2996.58	-0.00722221		3586.58	-0.03090266
636.8	0.07763491		1226.79	0.0148935		1816.79	0.01556374		2406.78	0.00362871		2996.78	-0.00703813		3586.78	-0.02991209
637	0.07768509		1226.99	0.0145176		1816.99	0.01504659		2406.98	0.00433845		2996.98	-0.00782511		3586.98	-0.02915269
637.2	0.07854204		1227.19	0.01389794		1817.19	0.016605		2407.18	0.00396806		2997.18	-0.00671651		3587.18	-0.02924338
637.4	0.07923275		1227.39	0.01394458		1817.39	0.01727587		2407.38	0.00413411		2997.38	-0.00606819		3587.38	-0.02930806
637.6	0.07902477		1227.59	0.0140333		1817.59	0.01746695		2407.58	0.00430195		2997.58	-0.00567864		3587.58	-0.02978191
637.8	0.0787258		1227.79	0.01371525		1817.79	0.01655702		2407.78	0.00394367		2997.78	-0.00509931		3587.78	-0.02973041
638	0.0787861		1227.99	0.0136469		1817.99	0.01584728		2407.98	0.00387487		2997.98	-0.00353936		3587.98	-0.02901732
638.2	0.0791147		1228.19	0.01357881		1818.19	0.01556304		2408.18	0.00362958		2998.18	-0.00271964		3588.18	-0.02976245
638.4	0.07909553		1228.39	0.01359399		1818.39	0.01497381		2408.38	0.00253838		2998.38	-0.00229308		3588.38	-0.02966831
638.6	0.07830641		1228.59	0.01429998		1818.59	0.01538114		2408.58	0.00257264		2998.58	-0.00243009		3588.58	-0.03089935
638.8	0.07812449		1228.79	0.01489939		1818.79	0.01511349		2408.78	0.00206388		2998.78	-0.00244356		3588.78	-0.03148324
639	0.07767241		1228.99	0.01548277		1818.99	0.01527644		2408.98	0.00233873		2998.98	-0.001835		3588.98	-0.03171564
639.2	0.07797349		1229.19	0.01567605		1819.19	0.01531572		2409.18	0.00226745		2999.18	-0.00138837		3589.18	-0.03247576
639.4	0.07855142		1229.39	0.01656088		1819.39	0.01494055		2409.38	0.00185853		2999.38	-0.00156781		3589.38	-0.03308486
639.6	0.07776509		1229.59	0.01620184		1819.59	0.01553296		2409.58	0.00136179		2999.58	-0.00294172		3589.58	-0.03297318
639.8	0.07787709		1229.79	0.01585265		1819.79	0.01579949		2409.78	0.00079471		2999.78	-0.00360101		3589.78	-0.03232788
640	0.07806552		1229.99	0.01626399		1819.99	0.01531607		2409.98	0.00110932		2999.98	-0.0043338		3589.98	-0.0319348
640.2	0.07813095		1230.19	0.01686225		1820.19	0.01586675		2410.18	0.00114512		3000.18	-0.00486006		3590.18	-0.03084423
640.4	0.07781092		1230.39	0.01674969		1820.39	0.0156254		2410.38	0.00186633		3000.38	-0.00446066		3590.38	-0.03088267
640.6	0.07748582		1230.59	0.01562144		1820.59	0.01557384		2410.58	0.00275731		3000.58	-0.00444602		3590.58	-0.03087451
640.8	0.07810372		1230.79	0.01540126		1820.79	0.01572331		2410.78	0.00340301		3000.78	-0.00473462		3590.78	-0.03062706
641	0.07898241		1230.99	0.01474833		1820.99	0.01612872		2410.98	0.00473122		3000.98	-0.0049904		3590.98	-0.03131688
641.2	0.07942428		1231.19	0.01490858		1821.19	0.01573731		2411.18	0.00526465		3001.18	-0.00467899		3591.18	-0.03079681
641.4	0.07975129		1231.39	0.014718		1821.39	0.0149505		2411.38	0.0048539		3001.38	-0.00430114		3591.38	-0.03103615
641.6	0.07955477		1231.59	0.01463654		1821.59	0.01449941		2411.58	0.00494736		3001.58	-0.00417617		3591.58	-0.03184175
641.8	0.08044301		1231.79	0.01412959		1821.79	0.01390547		2411.78	0.0040164		3001.78	-0.00341824		3591.78	-0.03172498
642	0.07969977		1231.99	0.01389623		1821.99	0.01372397		2411.98	0.00351521		3001.98	-0.00320869		3591.98	-0.03173393
642.2	0.07972402		1232.19	0.01453295		1822.19	0.01312936		2412.18	0.00258247		3002.18	-0.00298144		3592.18	-0.03233243
642.4	0.07832034		1232.39	0.01528337		1822.39	0.01310824		2412.38	0.00225571		3002.38	-0.003464		3592.38	-0.03250666
642.6	0.07749591		1232.59	0.01549257		1822.59	0.01337129		2412.58	0.00252867		3002.58	-0.0039903		3592.58	-0.03255903
642.8	0.07707917		1232.79	0.01484103		1822.79	0.01366512		2412.78	0.00177599		3002.78	-0.00434619		3592.78	-0.03169812
643	0.07667712		1232.99	0.01547127		1822.99	0.0127773		2412.98	0.00213421		3002.98	-0.00465842		3592.98	-0.03201266
643.2	0.07694167		1233.19	0.01600962		1823.19	0.01310664		2413.18	0.00171608		3003.18	-0.00478108		3593.18	-0.0320358
643.4	0.07619475		1233.39	0.01571759		1823.39	0.01243009		2413.38	0.00116889		3003.38	-0.00507441		3593.38	-0.03201275
643.6	0.07531385		1233.59	0.01473046		1823.59	0.01174533		2413.58	0.00009831		3003.58	-0.00513406		3593.58	-0.03146688
643.8	0.07488288		1233.79	0.01452681		1823.79	0.01119387		2413.78	0.00081578		3003.78	-0.0047933		3593.78	-0.0309007
644	0.07411877		1233.99	0.01533912		1823.99	0.01098519		2413.98	0.00061309		3003.98	-0.0050185		3593.98	-0.03028526
644.2	0.07391834		1234.19	0.01447575		1824.19	0.01170298		2414.18	0.00122913		3004.18	-0.00481505		3594.18	-0.02988576
644.4	0.07371823		1234.39	0.01468167		1824.39	0.01171234		2414.38	0.00177018		3004.38	-0.00446119		3594.38	-0.02936605
644.6	0.07430057		1234.59	0.01418579		1824.59	0.01165096		2414.58	0.00265808		3004.58	-0.00490079		3594.58	-0.02879307
644.8	0.07529341		1234.79	0.01443259		1824.79	0.0115742		2414.78	0.00281703		3004.78	-0.00506695		3594.78	-0.02779926
645	0.07634704		1234.99	0.014028		1824.99	0.01171171		2414.98	0.00266248		3004.98	-0.0049585		3594.98	-0.02722181
645.2	0.07716339		1235.19	0.01488037		1825.19	0.01113006		2415.18	0.00197931		3005.18	-0.00473776		3595.18	-0.02606212
645.4	0.07805923		1235.39	0.01444848		1825.39	0.01108889		2415.38	0.00109103		3005.38	-0.00483564		3595.38	-0.02581231
645.6	0.07857633		1235.59	0.0140413		1825.59	0.01101775		2415.58	0.00069434		3005.58	-0.00492011		3595.58	-0.02685061
645.8	0.07834079		1235.79	0.01370609		1825.79	0.01134918		2415.78	-0.00076028		3005.78	-0.00532624		3595.78	-0.0264363
646	0.07736393		1235.99	0.01360891		1825.99	0.01161277		2415.98	0.00013079		3005.98	-0.00585191		3595.98	-0.02658802
646.2	0.07746565		1236.19	0.01396386		1826.19	0.01107471		2416.18	-0.00029837		3006.18	-0.00567541		3596.18	-0.02707927
646.4	0.0775471		1236.39	0.01332708		1826.39	0.01198035		2416.38	0.00120631		3006.38	-0.00620914		3596.38	-0.02697195
646.6	0.07679213		1236.59	0.01298673		1826.59	0.01231632		2416.58	0.00079733		3006.58	-0.00651624		3596.58	-0.02649392
646.8	0.07656751		1236.79	0.01278886		1826.79	0.01258883		2416.78	0.00073724		3006.78	-0.00696163		3596.78	-0.02740195
647	0.07680388		1236.99	0.01410029		1826.99	0.01150958		2416.98	0.00080277		3006.98	-0.00640644		3596.98	-0.02881626
647.2	0.07534598		1237.19	0.01408156		1827.19	0.01174186		2417.18	0.00076996		3007.18	-0.00644222		3597.18	-0.02837217
647.4	0.0748478		1237.39	0.01415691		1827.39	0.01071387		2417.38	0.00062806		3007.38	-0.00648055		3597.38	-0.03010587
647.6	0.07488336		1237.59	0.01381096		1827.59	0.01069283		2417.58	0.00074723		3007.58	-0.00655486		3597.58	-0.0309622
647.8	0.07443896		1237.79	0.01432186		1827.79	0.01101312		2417.78	0.00146078		3007.78	-0.00611932		3597.78	-0.03167999
648	0.07443968		1237.99	0.01450567		1827.99	0.0112219		2417.98	0.00135973		3007.98	-0.00552874		3597.98	-0.03187032
648.2	0.07492202		1238.19	0.01350075		1828.19	0.0113355		2418.18	0.00219869		3008.18	-0.00565457		3598.18	-0.03220946
648.4	0.07497413		1238.39	0.01398607		1828.39	0.01133676		2418.38	0.00244373		3008.38	-0.00516116		3598.38	-0.03191715
648.6	0.07568947		1238.59	0.01312286		1828.59	0.01106999		2418.58	0.00262704		3008.58	-0.00515428		3598.58	-0.03196023
648.8	0.07648727		1238.79	0.01314521		1828.79	0.01160467		2418.78	0.00241968		3008.78	-0.00487227		3598.78	-0.03178794
649	0.07750854		1238.99	0.01224399		1828.99	0.01166378		2418.98	0.00271808		3008.98	-0.00487733		3598.98	-0.0320321
649.2	0.07794082		1239.19	0.01213898		1829.19	0.01147678		2419.18	0.00320348		3009.18	-0.00511279		3599.18	-0.0318819
649.4	0.07814209		1239.39	0.01131942		1829.39	0.01134555		2419.38	0.00323138		3009.38	-0.00578833		3599.38	-0.03207374
649.6	0.0782662		1239.59	0.01088197		1829.59	0.01147625		2419.58	0.00324174		3009.58	-0.00587682		3599.58	-0.03241174
649.8	0.07809238		1239.79	0.01057298		1829.79	0.01219453		2419.78	0.0036278		3009.78	-0.00622603		3599.78	-0.0316198
