# Supplementary material for: Functional development of a V3/glycan-specific broadly neutralizing antibody isolated from a case of HIV superinfection
Source: eLife journal article supplement (doi:10.7554/elife.68110), 2021-07-15
Supplement: fig2-data2 [file A3.xls]

Vers 3.43 Data Simulation
Conc1	5E-07	5E-07	5E-07	5E-07	5E-07	5E-07	5E-07
Start1	290	879.99	1469.99	2059.99	2650	3240	3830
Stop1	649.8	1239.79	1829.8	2419.79	3009.8	3599.8	4189.8
Time1	Data1	Sim1	Time2	Data2	Sim2	Time3	Data3	Sim3	Time4	Data4	Sim4	Time5	Data5	Sim5	Time6	Data6	Sim6	Time7	Data7	Sim7
290	0.00067077		879.99	0.00391892		1469.99	0.00160197		2059.99	0.00059184		2650	-0.00469538		3240	0.00472617		3830	-0.01423246
290.2	0.00140798		880.19	0.00494615		1470.19	0.00219081		2060.19	0.00054863		2650.2	-0.00526574		3240.2	0.00452466		3830.2	-0.01256565
290.4	0.00300375		880.39	0.00545196		1470.39	0.00246736		2060.39	0.00010118		2650.4	-0.00543781		3240.4	0.00441804		3830.4	-0.01114288
290.6	0.00473158		880.59	0.00651305		1470.59	0.00293326		2060.59	0.00039127		2650.6	-0.00578648		3240.6	0.00439446		3830.6	-0.01083527
290.8	0.0073988		880.79	0.0076452		1470.79	0.00275512		2060.79	0.00000235		2650.8	-0.00562047		3240.8	0.00336337		3830.8	-0.00929318
291	0.01001193		880.99	0.00904992		1470.99	0.00324165		2060.99	0.00049156		2651	-0.00506964		3241	0.00370456		3831	-0.00780351
291.2	0.01301093		881.19	0.00950587		1471.19	0.00372545		2061.19	-0.00007837		2651.2	-0.00410967		3241.2	0.0035095		3831.2	-0.00695618
291.4	0.01654652		881.39	0.01086326		1471.39	0.00417315		2061.39	-0.00018362		2651.4	-0.00412463		3241.4	0.00365073		3831.4	-0.00663554
291.6	0.0213072		881.59	0.01181694		1471.59	0.00473092		2061.59	-0.00058434		2651.6	-0.00522826		3241.6	0.00351608		3831.6	-0.00624241
291.8	0.02569604		881.79	0.01309834		1471.79	0.0056831		2061.79	0.00002504		2651.8	-0.00549547		3241.8	0.00443374		3831.8	-0.00564152
292	0.03045823		881.99	0.01492089		1471.99	0.00637656		2061.99	-0.00003656		2652	-0.00511141		3242	0.00488896		3832	-0.00566004
292.2	0.03551954		882.19	0.01629641		1472.19	0.00686839		2062.19	0.00004331		2652.2	-0.0053992		3242.2	0.00598137		3832.2	-0.00630766
292.4	0.04165245		882.39	0.01745678		1472.39	0.00713827		2062.39	-0.00023018		2652.4	-0.00525558		3242.4	0.00692973		3832.4	-0.00579561
292.6	0.04660587		882.59	0.01930756		1472.59	0.00749846		2062.59	-0.0006828		2652.6	-0.00539657		3242.6	0.00621277		3832.6	-0.00584188
292.8	0.05092509		882.79	0.02162109		1472.79	0.00786521		2062.79	0.00010578		2652.8	-0.00496893		3242.8	0.00597859		3832.8	-0.00666297
293	0.05508826		882.99	0.02329406		1472.99	0.00870881		2062.99	0.00051407		2653	-0.00438064		3243	0.00646203		3833	-0.00602337
293.2	0.05972913		883.19	0.02499319		1473.19	0.00961019		2063.19	0.00058989		2653.2	-0.00430045		3243.2	0.00682785		3833.2	-0.00668507
293.4	0.0650043		883.39	0.02632148		1473.39	0.01078962		2063.39	0.00088703		2653.4	-0.00405576		3243.4	0.00707854		3833.4	-0.00645241
293.6	0.06927908		883.59	0.02706422		1473.59	0.012031		2063.59	0.00159375		2653.6	-0.00393631		3243.6	0.00702885		3833.6	-0.00586613
293.8	0.07311527		883.79	0.02800046		1473.79	0.01317649		2063.79	0.00260237		2653.8	-0.00354556		3243.8	0.00884299		3833.8	-0.00678897
294	0.07729026		883.99	0.02971532		1473.99	0.01470235		2063.99	0.00206156		2654	-0.0024337		3244	0.01023058		3834	-0.00709846
294.2	0.08131636		884.19	0.03066243		1474.19	0.01582128		2064.19	0.00241774		2654.2	-0.00217144		3244.2	0.01134521		3834.2	-0.00758514
294.4	0.0860034		884.39	0.03108042		1474.39	0.0167634		2064.39	0.00249346		2654.4	-0.00100693		3244.4	0.01239096		3834.4	-0.00804369
294.6	0.08903232		884.59	0.03210497		1474.59	0.01723407		2064.59	0.00306151		2654.6	-0.00043949		3244.6	0.01211029		3834.6	-0.00902019
294.8	0.09329123		884.79	0.03375221		1474.79	0.01714363		2064.79	0.0034065		2654.8	0.00053078		3244.8	0.01203624		3834.8	-0.00854426
295	0.09684482		884.99	0.03469543		1474.99	0.01829892		2064.99	0.00403728		2655	0.0017269		3245	0.01369278		3835	-0.00829563
295.2	0.10099946		885.19	0.03515683		1475.19	0.01961195		2065.19	0.00301293		2655.2	0.00198034		3245.2	0.01363109		3835.2	-0.00815713
295.4	0.10515766		885.39	0.03721992		1475.39	0.02002796		2065.39	0.00354884		2655.4	0.00096714		3245.4	0.01396277		3835.4	-0.00834416
295.6	0.10946116		885.59	0.03852766		1475.59	0.02131142		2065.59	0.00339972		2655.6	0.00046766		3245.6	0.01329032		3835.6	-0.00768756
295.8	0.1132099		885.79	0.04110963		1475.79	0.02262316		2065.79	0.00469208		2655.8	0.00076527		3245.8	0.01404377		3835.8	-0.00728829
296	0.11727643		885.99	0.0427454		1475.99	0.02322709		2065.99	0.00455354		2656	0.00078881		3246	0.01379856		3836	-0.0079831
296.2	0.12080468		886.19	0.04435288		1476.19	0.02405367		2066.19	0.00419195		2656.2	0.00106077		3246.2	0.01436608		3836.2	-0.00746589
296.4	0.125135		886.39	0.04568352		1476.39	0.02378844		2066.39	0.0047757		2656.4	0.00171075		3246.4	0.01517884		3836.4	-0.00777109
296.6	0.1278119		886.59	0.04698379		1476.59	0.02467098		2066.59	0.00455241		2656.6	0.00228449		3246.6	0.01423197		3836.6	-0.00819145
296.8	0.13016666		886.79	0.04801066		1476.79	0.02464353		2066.79	0.00495543		2656.8	0.00203864		3246.8	0.01455057		3836.8	-0.00808192
297	0.13320815		886.99	0.04862612		1476.99	0.02599827		2066.99	0.00488993		2657	0.00217615		3247	0.01517387		3837	-0.00720461
297.2	0.13659329		887.19	0.04936664		1477.19	0.02629317		2067.19	0.0052428		2657.2	0.00218099		3247.2	0.01506063		3837.2	-0.007447
297.4	0.13995423		887.39	0.05004288		1477.39	0.02677		2067.39	0.00493829		2657.4	0.00226754		3247.4	0.01540765		3837.4	-0.00773972
297.6	0.14283526		887.59	0.05085716		1477.59	0.02749305		2067.59	0.00524408		2657.6	0.00253878		3247.6	0.01539765		3837.6	-0.00668341
297.8	0.14544816		887.79	0.05108704		1477.79	0.0283844		2067.79	0.00651595		2657.8	0.00232478		3247.8	0.01595251		3837.8	-0.007559
298	0.14882642		887.99	0.05228409		1477.99	0.02806803		2067.99	0.00575192		2658	0.00309117		3248	0.01580459		3838	-0.00702652
298.2	0.15130082		888.19	0.05281104		1478.19	0.02795579		2068.19	0.00613125		2658.2	0.00311109		3248.2	0.01581986		3838.2	-0.00607438
298.4	0.15420809		888.39	0.05410608		1478.39	0.0281008		2068.39	0.00589333		2658.4	0.00284253		3248.4	0.01646954		3838.4	-0.00543503
298.6	0.15672269		888.59	0.05595156		1478.59	0.02822036		2068.59	0.00644652		2658.6	0.00206612		3248.6	0.01574147		3838.6	-0.00486762
298.8	0.15965148		888.79	0.05782606		1478.79	0.02844878		2068.79	0.00583511		2658.8	0.0021429		3248.8	0.01661715		3838.8	-0.00441995
299	0.16240117		888.99	0.05900137		1478.99	0.02964425		2068.99	0.00570052		2659	0.00261097		3249	0.01718941		3839	-0.00387578
299.2	0.16508182		889.19	0.06038308		1479.19	0.03114237		2069.19	0.00459069		2659.2	0.00295098		3249.2	0.01657796		3839.2	-0.00330914
299.4	0.16705686		889.39	0.06226335		1479.39	0.03138789		2069.39	0.00489536		2659.4	0.00320434		3249.4	0.01717901		3839.4	-0.00314363
299.6	0.16942942		889.59	0.06362843		1479.59	0.03276109		2069.59	0.00498648		2659.6	0.00358941		3249.6	0.01700792		3839.6	-0.00341599
299.8	0.17198492		889.79	0.0657526		1479.79	0.03379659		2069.79	0.00567073		2659.8	0.004074		3249.8	0.01766103		3839.8	-0.00363091
300	0.17428495		889.99	0.06638089		1479.99	0.03518615		2069.99	0.00578018		2660	0.00585339		3250	0.01810877		3840	-0.00419784
300.2	0.17605909		890.19	0.06726115		1480.19	0.03633371		2070.19	0.00586313		2660.2	0.00700969		3250.2	0.018023		3840.2	-0.00344477
300.4	0.17873144		890.39	0.06784389		1480.39	0.03646812		2070.39	0.00688693		2660.4	0.00663814		3250.4	0.01960827		3840.4	-0.00519878
300.6	0.18038133		890.59	0.06881092		1480.59	0.03820696		2070.59	0.00698168		2660.6	0.00679801		3250.6	0.01877834		3840.6	-0.00536383
300.8	0.1822285		890.79	0.06965729		1480.79	0.03857034		2070.79	0.00787589		2660.8	0.00699463		3250.8	0.02061037		3840.8	-0.0056869
301	0.18417227		890.99	0.07041769		1480.99	0.04047193		2070.99	0.00788603		2661	0.00723172		3251	0.02150362		3841	-0.00589374
301.2	0.18661778		891.19	0.07142207		1481.19	0.04126029		2071.19	0.00753274		2661.2	0.00796089		3251.2	0.0216382		3841.2	-0.00626994
301.4	0.1895208		891.39	0.07215899		1481.39	0.04164902		2071.39	0.00820485		2661.4	0.00770339		3251.4	0.02262486		3841.4	-0.00698271
301.6	0.19122127		891.59	0.07348014		1481.59	0.04242908		2071.59	0.00895022		2661.6	0.00783469		3251.6	0.02283014		3841.6	-0.00733341
301.8	0.19271112		891.79	0.07467143		1481.79	0.04238054		2071.79	0.00885757		2661.8	0.00839471		3251.8	0.02343608		3841.8	-0.00846725
302	0.19452935		891.99	0.07702526		1481.99	0.04248771		2071.99	0.00801253		2662	0.00822523		3252	0.02310634		3842	-0.00771082
302.2	0.19600104		892.19	0.07853342		1482.19	0.04273096		2072.19	0.00804307		2662.2	0.00816873		3252.2	0.02409862		3842.2	-0.00755504
302.4	0.19832683		892.39	0.0802452		1482.39	0.04373375		2072.39	0.00741018		2662.4	0.00808794		3252.4	0.02412755		3842.4	-0.00764613
302.6	0.20001744		892.59	0.08149675		1482.59	0.04477181		2072.59	0.00580928		2662.6	0.00789714		3252.6	0.02374941		3842.6	-0.00785144
302.8	0.2012708		892.79	0.08225278		1482.79	0.04524992		2072.79	0.00378401		2662.8	0.00929327		3252.8	0.02405655		3842.8	-0.00846234
303	0.20287925		892.99	0.08312907		1482.99	0.0461075		2072.99	0.00314357		2663	0.01011557		3253	0.02424796		3843	-0.00807993
303.2	0.20483129		893.19	0.08319502		1483.19	0.04699286		2073.19	0.00162649		2663.2	0.01101539		3253.2	0.02411563		3843.2	-0.00744163
303.4	0.20669589		893.39	0.08457197		1483.39	0.04701403		2073.39	0.00189976		2663.4	0.0111016		3253.4	0.02496387		3843.4	-0.00723103
303.6	0.20852618		893.59	0.08535042		1483.59	0.04753687		2073.59	0.00169595		2663.6	0.01172384		3253.6	0.0248588		3843.6	-0.00748771
303.8	0.2095589		893.79	0.08682456		1483.79	0.04777437		2073.79	0.00208246		2663.8	0.01298996		3253.8	0.02533371		3843.8	-0.00706458
304	0.21143655		893.99	0.08700927		1483.99	0.04837972		2073.99	0.00262997		2664	0.01371007		3254	0.02618772		3844	-0.00760858
304.2	0.21297498		894.19	0.08742865		1484.19	0.0487911		2074.19	0.00246728		2664.2	0.01268029		3254.2	0.02693586		3844.2	-0.008498
304.4	0.21503555		894.39	0.08827135		1484.39	0.04903134		2074.39	0.00241103		2664.4	0.01264709		3254.4	0.02855295		3844.4	-0.01009513
304.6	0.21625122		894.59	0.08904198		1484.59	0.0496418		2074.59	0.00330478		2664.6	0.01358106		3254.6	0.02826449		3844.6	-0.00978419
304.8	0.21733262		894.79	0.08931959		1484.79	0.05060867		2074.79	0.00405267		2664.8	0.01344523		3254.8	0.03005302		3844.8	-0.00996603
305	0.21851737		894.99	0.0903489		1484.99	0.05211262		2074.99	0.0040895		2665	0.01236376		3255	0.03085922		3845	-0.01005204
305.2	0.22072413		895.19	0.09053817		1485.19	0.05307405		2075.19	0.00453953		2665.2	0.01221682		3255.2	0.03113325		3845.2	-0.00982146
305.4	0.22254236		895.39	0.09124737		1485.39	0.05309301		2075.39	0.00556717		2665.4	0.01141946		3255.4	0.03181472		3845.4	-0.01090004
305.6	0.22436036		895.59	0.09290717		1485.59	0.05386532		2075.59	0.00542551		2665.6	0.0120215		3255.6	0.03157678		3845.6	-0.0115513
305.8	0.22589769		895.79	0.09543959		1485.79	0.05380432		2075.79	0.0059888		2665.8	0.01270575		3255.8	0.03222134		3845.8	-0.01073691
306	0.22747229		895.99	0.09698897		1485.99	0.05480109		2075.99	0.00603537		2666	0.01287643		3256	0.03178517		3846	-0.0101484
306.2	0.22868394		896.19	0.09723037		1486.19	0.0552969		2076.19	0.00644503		2666.2	0.01412918		3256.2	0.0323473		3846.2	-0.00970771
306.4	0.23002519		896.39	0.09792634		1486.39	0.05652497		2076.39	0.00553128		2666.4	0.01399039		3256.4	0.0318207		3846.4	-0.00942629
306.6	0.23118367		896.59	0.09945458		1486.59	0.05684123		2076.59	0.00493905		2666.6	0.01384915		3256.6	0.03205622		3846.6	-0.00902479
306.8	0.23225741		896.79	0.10014593		1486.79	0.05767238		2076.79	0.00442036		2666.8	0.01450156		3256.8	0.03229695		3846.8	-0.0080784
307	0.23331884		896.99	0.10079822		1486.99	0.05865275		2076.99	0.00402813		2667	0.01492436		3257	0.03231164		3847	-0.00719357
307.2	0.23528695		897.19	0.10161211		1487.19	0.05996802		2077.19	0.00493495		2667.2	0.0152159		3257.2	0.03221866		3847.2	-0.00687369
307.4	0.23701626		897.39	0.10320993		1487.39	0.06026035		2077.39	0.00487667		2667.4	0.01521876		3257.4	0.0326208		3847.4	-0.00652625
307.6	0.23789342		897.59	0.10438348		1487.59	0.06134967		2077.59	0.0047507		2667.6	0.01545593		3257.6	0.03293489		3847.6	-0.00622875
307.8	0.2396694		897.79	0.10570372		1487.79	0.06212043		2077.79	0.00459745		2667.8	0.01613057		3257.8	0.03341654		3847.8	-0.00617215
308	0.24218853		897.99	0.10598601		1487.99	0.06358334		2077.99	0.00422864		2668	0.01546226		3258	0.03377911		3848	-0.00651077
308.2	0.24409876		898.19	0.10656272		1488.19	0.06450634		2078.19	0.00492967		2668.2	0.01551668		3258.2	0.03413825		3848.2	-0.00720325
308.4	0.2452081		898.39	0.10742343		1488.39	0.06468144		2078.39	0.00611554		2668.4	0.01575565		3258.4	0.0340992		3848.4	-0.00740202
308.6	0.24619984		898.59	0.10764265		1488.59	0.06577113		2078.59	0.0073966		2668.6	0.01568821		3258.6	0.03344021		3848.6	-0.00706563
308.8	0.24711349		898.79	0.10748607		1488.79	0.06623929		2078.79	0.00735276		2668.8	0.01412517		3258.8	0.03402129		3848.8	-0.00667754
309	0.24850702		898.99	0.10850075		1488.99	0.06711277		2078.99	0.00694202		2669	0.01384692		3259	0.03404862		3849	-0.00621769
309.2	0.25003665		899.19	0.10927142		1489.19	0.06785521		2079.19	0.00689022		2669.2	0.01448601		3259.2	0.03450319		3849.2	-0.00517766
309.4	0.25173205		899.39	0.11050298		1489.39	0.06756855		2079.39	0.00656073		2669.4	0.01464661		3259.4	0.03459616		3849.4	-0.00701426
309.6	0.25338064		899.59	0.11146312		1489.59	0.06794588		2079.59	0.00724799		2669.6	0.01489066		3259.6	0.0342319		3849.6	-0.00651658
309.8	0.25512618		899.79	0.11267361		1489.79	0.06765848		2079.79	0.0077911		2669.8	0.01554247		3259.8	0.03507551		3849.8	-0.0064353
310	0.25657771		899.99	0.11341127		1489.99	0.06834009		2079.99	0.00735053		2670	0.01497962		3260	0.03509628		3850	-0.00678362
310.2	0.25795265		900.19	0.11367855		1490.19	0.06799491		2080.19	0.00799157		2670.2	0.01466958		3260.2	0.03547883		3850.2	-0.00640707
310.4	0.25895169		900.39	0.11534882		1490.39	0.06835268		2080.39	0.00771895		2670.4	0.01422612		3260.4	0.03702874		3850.4	-0.00685764
310.6	0.25971689		900.59	0.11614611		1490.59	0.0685249		2080.59	0.00721027		2670.6	0.01418768		3260.6	0.03780425		3850.6	-0.00602922
310.8	0.26114799		900.79	0.11649119		1490.79	0.06918832		2080.79	0.00584383		2670.8	0.01434683		3260.8	0.03825932		3850.8	-0.00658603
311	0.26215466		900.99	0.11676362		1490.99	0.06972825		2080.99	0.00566593		2671	0.01503589		3261	0.03877457		3851	-0.00714447
311.2	0.26266878		901.19	0.11740607		1491.19	0.06976881		2081.19	0.00627113		2671.2	0.01485601		3261.2	0.0392796		3851.2	-0.00679191
311.4	0.26387555		901.39	0.11783331		1491.39	0.0698012		2081.39	0.00479569		2671.4	0.01514013		3261.4	0.03938595		3851.4	-0.00737067
311.6	0.26511585		901.59	0.11936523		1491.59	0.0700362		2081.59	0.00424189		2671.6	0.0158842		3261.6	0.03963256		3851.6	-0.00716548
311.8	0.2671701		901.79	0.11960636		1491.79	0.07065969		2081.79	0.00397686		2671.8	0.01657797		3261.8	0.04048523		3851.8	-0.00684602
312	0.26782216		901.99	0.11993654		1491.99	0.07126538		2081.99	0.0032236		2672	0.01657582		3262	0.04098242		3852	-0.0071528
312.2	0.26852273		902.19	0.11975719		1492.19	0.0716318		2082.19	0.00385605		2672.2	0.0174436		3262.2	0.04141963		3852.2	-0.00752801
312.4	0.26967204		902.39	0.11993802		1492.39	0.07241044		2082.39	0.00346593		2672.4	0.01863721		3262.4	0.0413035		3852.4	-0.00819022
312.6	0.26958825		902.59	0.12046525		1492.59	0.07369901		2082.59	0.00271058		2672.6	0.01950198		3262.6	0.04118395		3852.6	-0.00720433
312.8	0.26940374		902.79	0.12145617		1492.79	0.07396502		2082.79	0.00238516		2672.8	0.01972278		3262.8	0.04257256		3852.8	-0.00674364
313	0.27025731		902.99	0.12335596		1492.99	0.07556461		2082.99	0.00226804		2673	0.02012787		3263	0.04274007		3853	-0.00690343
313.2	0.27070304		903.19	0.12440266		1493.19	0.07594887		2083.19	0.00246604		2673.2	0.02033037		3263.2	0.04327628		3853.2	-0.00723822
313.4	0.27225772		903.39	0.12496937		1493.39	0.0759098		2083.39	0.0034766		2673.4	0.02018274		3263.4	0.04240405		3853.4	-0.00893373
313.6	0.27344055		903.59	0.12572626		1493.59	0.0769213		2083.59	0.00446829		2673.6	0.02014458		3263.6	0.04212879		3853.6	-0.00823606
313.8	0.27534612		903.79	0.12697552		1493.79	0.07771963		2083.79	0.00506879		2673.8	0.02010399		3263.8	0.04294209		3853.8	-0.0095234
314	0.27678286		903.99	0.12880441		1493.99	0.07832847		2083.99	0.00467734		2674	0.01929499		3264	0.04314744		3854	-0.00907733
314.2	0.27840735		904.19	0.13024914		1494.19	0.0778895		2084.19	0.00609239		2674.2	0.01972851		3264.2	0.0439175		3854.2	-0.00930747
314.4	0.27882041		904.39	0.13193101		1494.39	0.07890052		2084.39	0.00582056		2674.4	0.01969712		3264.4	0.04434805		3854.4	-0.00912616
314.6	0.27961462		904.59	0.13197844		1494.59	0.07930723		2084.59	0.00484142		2674.6	0.01908192		3264.6	0.0447148		3854.6	-0.00825631
314.8	0.28041055		904.79	0.13327779		1494.79	0.07927756		2084.79	0.00522267		2674.8	0.01796567		3264.8	0.04511703		3854.8	-0.00878568
315	0.28059108		904.99	0.13346886		1494.99	0.07955211		2084.99	0.00579319		2675	0.01841739		3265	0.04543922		3855	-0.00849535
315.2	0.28132721		905.19	0.13438513		1495.19	0.07938226		2085.19	0.00614459		2675.2	0.0182397		3265.2	0.04536432		3855.2	-0.00788004
315.4	0.28276343		905.39	0.13526044		1495.39	0.08047341		2085.39	0.00582167		2675.4	0.01892154		3265.4	0.04603295		3855.4	-0.00845819
315.6	0.28386937		905.59	0.1365403		1495.59	0.08080576		2085.59	0.00532197		2675.6	0.01977174		3265.6	0.04680203		3855.6	-0.00798051
315.8	0.2850705		905.79	0.13720618		1495.79	0.08233054		2085.79	0.00497201		2675.8	0.0198645		3265.8	0.04767111		3855.8	-0.00801056
316	0.28512731		905.99	0.13742003		1495.99	0.08352914		2085.99	0.00429427		2676	0.01943109		3266	0.04795702		3856	-0.00772522
316.2	0.28681556		906.19	0.13670381		1496.19	0.08490478		2086.19	0.00475325		2676.2	0.02024068		3266.2	0.04861674		3856.2	-0.00727097
316.4	0.28836659		906.39	0.13717951		1496.39	0.08637774		2086.39	0.00429831		2676.4	0.0211421		3266.4	0.04924881		3856.4	-0.00671514
316.6	0.28806802		906.59	0.13805129		1496.59	0.08734254		2086.59	0.00304252		2676.6	0.02115557		3266.6	0.04958629		3856.6	-0.00609057
316.8	0.28927915		906.79	0.13873154		1496.79	0.08755246		2086.79	0.00380685		2676.8	0.02092132		3266.8	0.05025014		3856.8	-0.00659048
317	0.29020907		906.99	0.1392289		1496.99	0.08829166		2086.99	0.00449902		2677	0.02020329		3267	0.05142391		3857	-0.00630459
317.2	0.29116504		907.19	0.13968828		1497.19	0.0880149		2087.19	0.00483411		2677.2	0.02088662		3267.2	0.05194066		3857.2	-0.00683683
317.4	0.29219823		907.39	0.13958987		1497.39	0.08862238		2087.39	0.00579219		2677.4	0.0206901		3267.4	0.0516517		3857.4	-0.00739787
317.6	0.29269291		907.59	0.14017889		1497.59	0.08917257		2087.59	0.0059095		2677.6	0.02107468		3267.6	0.05208321		3857.6	-0.00780555
317.8	0.29367854		907.79	0.14106404		1497.79	0.08969362		2087.79	0.00612183		2677.8	0.0211699		3267.8	0.05196291		3857.8	-0.00874859
318	0.29487451		907.99	0.14220092		1497.99	0.08996063		2087.99	0.00597279		2678	0.02227793		3268	0.05223332		3858	-0.00823562
318.2	0.29508781		908.19	0.14298394		1498.19	0.09015887		2088.19	0.00739583		2678.2	0.02309073		3268.2	0.05228488		3858.2	-0.00867864
318.4	0.29505251		908.39	0.14319421		1498.39	0.0912995		2088.39	0.00656018		2678.4	0.02304645		3268.4	0.05198406		3858.4	-0.00852358
318.6	0.29555848		908.59	0.14363768		1498.59	0.09165636		2088.59	0.00663334		2678.6	0.02299504		3268.6	0.05222131		3858.6	-0.0083508
318.8	0.29620986		908.79	0.14503015		1498.79	0.09109555		2088.79	0.00647987		2678.8	0.02311871		3268.8	0.05191761		3858.8	-0.0096126
319	0.29642633		908.99	0.14489018		1498.99	0.09172958		2088.99	0.00713817		2679	0.02500819		3269	0.05226858		3859	-0.01014591
319.2	0.29727406		909.19	0.14608356		1499.19	0.09159949		2089.19	0.00711943		2679.2	0.02543391		3269.2	0.0531156		3859.2	-0.01034938
319.4	0.29733865		909.39	0.14743684		1499.39	0.09278292		2089.39	0.00788426		2679.4	0.02593775		3269.4	0.05362332		3859.4	-0.0114128
319.6	0.29798132		909.59	0.14875433		1499.59	0.09359047		2089.59	0.00743218		2679.6	0.02583171		3269.6	0.05417358		3859.6	-0.01158841
319.8	0.29914635		909.79	0.14961285		1499.79	0.09483228		2089.79	0.0071056		2679.8	0.02507482		3269.8	0.05430923		3859.8	-0.01129074
320	0.2997533		909.99	0.14985615		1499.99	0.09551688		2089.99	0.00793162		2680	0.02479335		3270	0.05471774		3860	-0.01089641
320.2	0.3014057		910.19	0.15083459		1500.19	0.09547416		2090.19	0.00743082		2680.2	0.02581946		3270.2	0.05557263		3860.2	-0.01092328
320.4	0.30171006		910.39	0.15166939		1500.39	0.09570729		2090.39	0.00696114		2680.4	0.02619095		3270.4	0.05564087		3860.4	-0.01140885
320.6	0.30347122		910.59	0.15325829		1500.59	0.09533907		2090.59	0.00738905		2680.6	0.02646461		3270.6	0.05577928		3860.6	-0.01152182
320.8	0.30472702		910.79	0.15420658		1500.79	0.0954251		2090.79	0.00848058		2680.8	0.02627845		3270.8	0.05675006		3860.8	-0.01056822
321	0.30534562		910.99	0.15455552		1500.99	0.09607555		2090.99	0.00818665		2681	0.02646737		3271	0.05840538		3861	-0.00999241
321.2	0.30580086		911.19	0.1553256		1501.19	0.09719631		2091.19	0.00826748		2681.2	0.02715094		3271.2	0.05865832		3861.2	-0.00974744
321.4	0.30597497		911.39	0.15567242		1501.39	0.09811958		2091.39	0.00866277		2681.4	0.02717887		3271.4	0.05960441		3861.4	-0.00920166
321.6	0.30695626		911.59	0.15584404		1501.59	0.09901041		2091.59	0.00873367		2681.6	0.02807037		3271.6	0.05938836		3861.6	-0.0086166
321.8	0.30796879		911.79	0.15623478		1501.79	0.10013523		2091.79	0.00802376		2681.8	0.02837887		3271.8	0.05995458		3861.8	-0.00809643
322	0.30854239		911.99	0.15734294		1501.99	0.10155486		2091.99	0.00736083		2682	0.0289128		3272	0.06030537		3862	-0.00753408
322.2	0.30910503		912.19	0.1582726		1502.19	0.10154358		2092.19	0.0075657		2682.2	0.02923422		3272.2	0.05953845		3862.2	-0.00698767
322.4	0.31000642		912.39	0.15882819		1502.39	0.10228511		2092.39	0.00654686		2682.4	0.02907583		3272.4	0.05887282		3862.4	-0.00648544
322.6	0.31067284		912.59	0.15989405		1502.59	0.10271322		2092.59	0.00615373		2682.6	0.02892717		3272.6	0.0580578		3862.6	-0.00596039
322.8	0.31145359		912.79	0.1606903		1502.79	0.10264994		2092.79	0.00505059		2682.8	0.02931883		3272.8	0.05823745		3862.8	-0.00626588
323	0.31201729		912.99	0.16126413		1502.99	0.10324419		2092.99	0.00531212		2683	0.02969756		3273	0.05824438		3863	-0.00572072
323.2	0.31322743		913.19	0.16245352		1503.19	0.1031388		2093.19	0.004674		2683.2	0.0295079		3273.2	0.05770216		3863.2	-0.00659419
323.4	0.31365508		913.39	0.16292265		1503.39	0.10395324		2093.39	0.00502384		2683.4	0.02929338		3273.4	0.05684102		3863.4	-0.00634639
323.6	0.31484189		913.59	0.16342585		1503.59	0.10414058		2093.59	0.00421999		2683.6	0.02918414		3273.6	0.05602348		3863.6	-0.00612931
323.8	0.31571047		913.79	0.1637952		1503.79	0.1039673		2093.79	0.00486158		2683.8	0.02937583		3273.8	0.05558163		3863.8	-0.00543627
324	0.31629016		913.99	0.16490784		1503.99	0.1037677		2093.99	0.00582208		2684	0.02949116		3274	0.05566228		3864	-0.00616369
324.2	0.31699486		914.19	0.16515442		1504.19	0.1040767		2094.19	0.00481522		2684.2	0.02957238		3274.2	0.05605326		3864.2	-0.00629183
324.4	0.31750258		914.39	0.16543488		1504.39	0.10431172		2094.39	0.0058482		2684.4	0.0299733		3274.4	0.05541595		3864.4	-0.00660654
324.6	0.32036909		914.59	0.16623047		1504.59	0.10494489		2094.59	0.00689385		2684.6	0.03084958		3274.6	0.05630619		3864.6	-0.00573579
324.8	0.32133725		914.79	0.16580267		1504.79	0.10545111		2094.79	0.00700333		2684.8	0.03094696		3274.8	0.05747497		3864.8	-0.00546878
325	0.32171147		914.99	0.16585342		1504.99	0.10548876		2094.99	0.00824896		2685	0.0315153		3275	0.05824771		3865	-0.00540313
325.2	0.32276881		915.19	0.16681047		1505.19	0.10593845		2095.19	0.00944633		2685.2	0.03176157		3275.2	0.059519		3865.2	-0.00545171
325.4	0.32420265		915.39	0.16719456		1505.39	0.10598515		2095.39	0.009771		2685.4	0.03192937		3275.4	0.06081033		3865.4	-0.00603514
325.6	0.32561133		915.59	0.16700441		1505.59	0.10651327		2095.59	0.00970765		2685.6	0.032388		3275.6	0.06104286		3865.6	-0.00623682
325.8	0.32634013		915.79	0.16745026		1505.79	0.10699778		2095.79	0.00920606		2685.8	0.03301192		3275.8	0.0625533		3865.8	-0.00590868
326	0.32606999		915.99	0.1682539		1505.99	0.10772681		2095.99	0.00965927		2686	0.03357599		3276	0.06246909		3866	-0.00622714
326.2	0.32724511		916.19	0.168755		1506.19	0.10772905		2096.19	0.00995403		2686.2	0.03460849		3276.2	0.06295717		3866.2	-0.00658396
326.4	0.32780319		916.39	0.16936439		1506.39	0.10803049		2096.39	0.00890596		2686.4	0.03503692		3276.4	0.06312852		3866.4	-0.00671618
326.6	0.32780277		916.59	0.17080112		1506.59	0.10841256		2096.59	0.00846722		2686.6	0.03401672		3276.6	0.06341434		3866.6	-0.0070843
326.8	0.32822535		916.79	0.17167784		1506.79	0.10871743		2096.79	0.00794097		2686.8	0.03434793		3276.8	0.06410271		3866.8	-0.00791323
327	0.32887258		916.99	0.17327863		1506.99	0.10890418		2096.99	0.00807426		2687	0.0341421		3277	0.06388077		3867	-0.00821434
327.2	0.32840844		917.19	0.17301633		1507.19	0.10912234		2097.19	0.00815849		2687.2	0.03526501		3277.2	0.06414219		3867.2	-0.008132
327.4	0.32838768		917.39	0.17401603		1507.39	0.10930935		2097.39	0.0084259		2687.4	0.03545966		3277.4	0.06402249		3867.4	-0.00717378
327.6	0.32831998		917.59	0.17552955		1507.59	0.10949428		2097.59	0.00813786		2687.6	0.03411529		3277.6	0.06452718		3867.6	-0.00770939
327.8	0.32801881		917.79	0.17636511		1507.79	0.11098288		2097.79	0.00795576		2687.8	0.03419311		3277.8	0.06480931		3867.8	-0.0073802
328	0.32764638		917.99	0.1770029		1507.99	0.11122577		2097.99	0.00663706		2688	0.03293652		3278	0.06497797		3868	-0.00857001
328.2	0.32791607		918.19	0.17644252		1508.19	0.11176496		2098.19	0.00599176		2688.2	0.03236937		3278.2	0.06580687		3868.2	-0.00802385
328.4	0.32779519		918.39	0.17751022		1508.39	0.11067229		2098.39	0.00687296		2688.4	0.03269837		3278.4	0.06537317		3868.4	-0.00804077
328.6	0.32927854		918.59	0.17690084		1508.59	0.11077326		2098.59	0.00634844		2688.6	0.03356651		3278.6	0.0657437		3868.6	-0.00752887
328.8	0.32884776		918.79	0.1766443		1508.79	0.11030173		2098.79	0.00675821		2688.8	0.03355139		3278.8	0.06555141		3868.8	-0.00738391
329	0.32834141		918.99	0.17718182		1508.99	0.11092724		2098.99	0.00680919		2689	0.03358823		3279	0.06524554		3869	-0.00664005
329.2	0.32918487		919.19	0.17760223		1509.19	0.11140591		2099.19	0.00644768		2689.2	0.03342795		3279.2	0.06561536		3869.2	-0.0065995
329.4	0.32958999		919.39	0.17715639		1509.39	0.11322002		2099.39	0.00641806		2689.4	0.03412292		3279.4	0.06566117		3869.4	-0.00697236
329.6	0.3303352		919.59	0.17687684		1509.59	0.11408907		2099.59	0.00655645		2689.6	0.03451207		3279.6	0.06645241		3869.6	-0.00655658
329.8	0.32993621		919.79	0.17632058		1509.79	0.11534507		2099.79	0.00651996		2689.8	0.03518609		3279.8	0.06710852		3869.8	-0.00608844
330	0.3302466		919.99	0.17707107		1509.99	0.11672292		2099.99	0.00718222		2690	0.03580735		3280	0.06752835		3870	-0.00628871
330.2	0.3322419		920.19	0.17783897		1510.19	0.1172906		2100.19	0.00732578		2690.2	0.03618285		3280.2	0.06801603		3870.2	-0.00613857
330.4	0.33364817		920.39	0.17852356		1510.39	0.11842061		2100.39	0.00780249		2690.4	0.03611692		3280.4	0.06813172		3870.4	-0.00545634
330.6	0.3347743		920.59	0.17936635		1510.59	0.11979754		2100.59	0.00895506		2690.6	0.03555167		3280.6	0.06803361		3870.6	-0.00543928
330.8	0.33593373		920.79	0.18019626		1510.79	0.12011347		2100.79	0.00976923		2690.8	0.03663562		3280.8	0.06802128		3870.8	-0.00555747
331	0.33681525		920.99	0.18103709		1510.99	0.12048526		2100.99	0.01036		2691	0.03721013		3281	0.06900904		3871	-0.00552694
331.2	0.33791149		921.19	0.18091025		1511.19	0.12097012		2101.19	0.01030379		2691.2	0.03791364		3281.2	0.06981719		3871.2	-0.00554571
331.4	0.33887082		921.39	0.18288963		1511.39	0.1211517		2101.39	0.01068836		2691.4	0.03758035		3281.4	0.07007955		3871.4	-0.00635457
331.6	0.33938232		921.59	0.18365079		1511.59	0.12111499		2101.59	0.01054715		2691.6	0.03742349		3281.6	0.07005363		3871.6	-0.00681207
331.8	0.33974947		921.79	0.18391104		1511.79	0.12070341		2101.79	0.01000682		2691.8	0.03828052		3281.8	0.06936997		3871.8	-0.00703801
332	0.34068862		921.99	0.18406491		1511.99	0.11925779		2101.99	0.01009815		2692	0.03782637		3282	0.06936863		3872	-0.00710263
332.2	0.34079698		922.19	0.18394346		1512.19	0.11901206		2102.19	0.01023932		2692.2	0.03884438		3282.2	0.06962908		3872.2	-0.00756905
332.4	0.34017318		922.39	0.1855217		1512.39	0.11771241		2102.39	0.009924		2692.4	0.04014447		3282.4	0.06829293		3872.4	-0.00899126
332.6	0.34151795		922.59	0.18544537		1512.59	0.11861004		2102.59	0.00855303		2692.6	0.04049119		3282.6	0.06821791		3872.6	-0.00887559
332.8	0.34145164		922.79	0.18626143		1512.79	0.11888948		2102.79	0.00893604		2692.8	0.0403864		3282.8	0.06857645		3872.8	-0.00929237
333	0.34221915		922.99	0.18729173		1512.99	0.11977023		2102.99	0.0082885		2693	0.04036993		3283	0.06973984		3873	-0.00931298
333.2	0.34275319		923.19	0.18742924		1513.19	0.11993654		2103.19	0.00798393		2693.2	0.04058476		3283.2	0.07059524		3873.2	-0.00979803
333.4	0.34295622		923.39	0.18812372		1513.39	0.12118013		2103.39	0.00713783		2693.4	0.04063207		3283.4	0.0719108		3873.4	-0.01063498
333.6	0.3428269		923.59	0.18908576		1513.59	0.12131378		2103.59	0.00774405		2693.6	0.04032554		3283.6	0.073338		3873.6	-0.01058141
333.8	0.34274652		923.79	0.18942673		1513.79	0.1226942		2103.79	0.00715547		2693.8	0.0406241		3283.8	0.07459389		3873.8	-0.01028393
334	0.34421197		923.99	0.19014833		1513.99	0.12359944		2103.99	0.00720356		2694	0.04043852		3284	0.07530684		3874	-0.00945038
334.2	0.34498796		924.19	0.19030651		1514.19	0.12429839		2104.19	0.00694164		2694.2	0.03959896		3284.2	0.07623589		3874.2	-0.00898853
334.4	0.34579323		924.39	0.19025941		1514.39	0.12530359		2104.39	0.00722799		2694.4	0.03873701		3284.4	0.07578147		3874.4	-0.00889288
334.6	0.34583848		924.59	0.19077092		1514.59	0.12589071		2104.59	0.00750432		2694.6	0.03843116		3284.6	0.07597936		3874.6	-0.00814572
334.8	0.34588998		924.79	0.19171786		1514.79	0.12635758		2104.79	0.00687787		2694.8	0.03826112		3284.8	0.0769618		3874.8	-0.00802484
335	0.34678985		924.99	0.19164606		1514.99	0.12710352		2104.99	0.00652721		2695	0.03808432		3285	0.078047		3875	-0.00745608
335.2	0.34812919		925.19	0.19213452		1515.19	0.1280824		2105.19	0.00678816		2695.2	0.03787539		3285.2	0.07807838		3875.2	-0.00659874
335.4	0.34777114		925.39	0.19313277		1515.39	0.12815493		2105.39	0.0069015		2695.4	0.0383865		3285.4	0.07861029		3875.4	-0.00598122
335.6	0.34775652		925.59	0.19342694		1515.59	0.12893361		2105.59	0.00678071		2695.6	0.03869947		3285.6	0.07802979		3875.6	-0.00547595
335.8	0.34798734		925.79	0.19359938		1515.79	0.12876513		2105.79	0.00609557		2695.8	0.03954236		3285.8	0.07731686		3875.8	-0.00503943
336	0.34814858		925.99	0.19422849		1515.99	0.12949435		2105.99	0.00631269		2696	0.04031335		3286	0.07658751		3876	-0.00524236
336.2	0.34833427		926.19	0.19493298		1516.19	0.12912005		2106.19	0.00618335		2696.2	0.04094631		3286.2	0.0766344		3876.2	-0.00624312
336.4	0.34871274		926.39	0.19576105		1516.39	0.12961975		2106.39	0.00580715		2696.4	0.04047708		3286.4	0.0757167		3876.4	-0.0063957
336.6	0.35120466		926.59	0.19595144		1516.59	0.13032217		2106.59	0.00494519		2696.6	0.04044599		3286.6	0.07576969		3876.6	-0.0053785
336.8	0.35125389		926.79	0.19650748		1516.79	0.12995022		2106.79	0.00519205		2696.8	0.04153557		3286.8	0.07569812		3876.8	-0.00588624
337	0.35138154		926.99	0.19743273		1516.99	0.13038085		2106.99	0.00451144		2697	0.04238441		3287	0.07659005		3877	-0.00634383
337.2	0.35172783		927.19	0.19727968		1517.19	0.13060158		2107.19	0.00509103		2697.2	0.04234428		3287.2	0.07696858		3877.2	-0.0066763
337.4	0.35332449		927.39	0.19764343		1517.39	0.13068208		2107.39	0.00506139		2697.4	0.0413136		3287.4	0.07741621		3877.4	-0.00679644
337.6	0.3539083		927.59	0.19825223		1517.59	0.13115163		2107.59	0.00610501		2697.6	0.04183275		3287.6	0.07769487		3877.6	-0.00698542
337.8	0.35500178		927.79	0.19782622		1517.79	0.1326666		2107.79	0.00530135		2697.8	0.04145584		3287.8	0.07883245		3877.8	-0.00644601
338	0.35588052		927.99	0.19756867		1517.99	0.13315009		2107.99	0.00614352		2698	0.04129986		3288	0.07911362		3878	-0.00615254
338.2	0.35616133		928.19	0.19714102		1518.19	0.13390756		2108.19	0.00660936		2698.2	0.04157786		3288.2	0.07943207		3878.2	-0.00591384
338.4	0.35763336		928.39	0.19704036		1518.39	0.13440315		2108.39	0.00758062		2698.4	0.04160361		3288.4	0.07865333		3878.4	-0.00686749
338.6	0.3576178		928.59	0.19717741		1518.59	0.13475749		2108.59	0.00908832		2698.6	0.04209314		3288.6	0.07965262		3878.6	-0.00594153
338.8	0.35820226		928.79	0.19766221		1518.79	0.13565135		2108.79	0.00947859		2698.8	0.04273021		3288.8	0.08094938		3878.8	-0.00634019
339	0.35867552		928.99	0.19782614		1518.99	0.13506352		2108.99	0.00975696		2699	0.04311047		3289	0.08173554		3879	-0.00620544
339.2	0.35931911		929.19	0.19813396		1519.19	0.13567826		2109.19	0.00995167		2699.2	0.04426203		3289.2	0.08314315		3879.2	-0.00632239
339.4	0.35896187		929.39	0.19838189		1519.39	0.13591879		2109.39	0.00965335		2699.4	0.04534924		3289.4	0.08426006		3879.4	-0.0066247
339.6	0.35901799		929.59	0.19850303		1519.59	0.13664446		2109.59	0.010094		2699.6	0.04630341		3289.6	0.08435597		3879.6	-0.00657856
339.8	0.35946132		929.79	0.19822946		1519.79	0.13573124		2109.79	0.00993777		2699.8	0.04735855		3289.8	0.08421488		3879.8	-0.00620403
340	0.35953289		929.99	0.19895291		1519.99	0.13552605		2109.99	0.00999361		2700	0.04790264		3290	0.08436814		3880	-0.00680206
340.2	0.3602863		930.19	0.19917012		1520.19	0.13554908		2110.19	0.00997133		2700.2	0.04769079		3290.2	0.08389473		3880.2	-0.00713947
340.4	0.36030353		930.39	0.19978622		1520.39	0.1357537		2110.39	0.00901509		2700.4	0.04832192		3290.4	0.08362959		3880.4	-0.00739365
340.6	0.36136755		930.59	0.20095968		1520.59	0.13514207		2110.59	0.00821783		2700.6	0.04821831		3290.6	0.08323908		3880.6	-0.0079289
340.8	0.36106694		930.79	0.2016663		1520.79	0.1352886		2110.79	0.00779002		2700.8	0.04865501		3290.8	0.08300592		3880.8	-0.0079037
341	0.36135612		930.99	0.20239614		1520.99	0.13570734		2110.99	0.00780836		2701	0.04852051		3291	0.0835836		3881	-0.00789741
341.2	0.36215883		931.19	0.20309986		1521.19	0.13582078		2111.19	0.00811236		2701.2	0.0477503		3291.2	0.0833305		3881.2	-0.00794123
341.4	0.36360237		931.39	0.20399095		1521.39	0.13665198		2111.39	0.00764909		2701.4	0.04717894		3291.4	0.08310882		3881.4	-0.00736343
341.6	0.36368699		931.59	0.20546067		1521.59	0.13773222		2111.59	0.00754088		2701.6	0.04795601		3291.6	0.08207051		3881.6	-0.00684803
341.8	0.36439254		931.79	0.20599348		1521.79	0.13837861		2111.79	0.00740032		2701.8	0.04731552		3291.8	0.08239114		3881.8	-0.00679042
342	0.36470348		931.99	0.20728339		1521.99	0.13772077		2111.99	0.00820749		2702	0.0476859		3292	0.08220108		3882	-0.00633296
342.2	0.36532021		932.19	0.20721552		1522.19	0.13771422		2112.19	0.00823169		2702.2	0.0472857		3292.2	0.08143595		3882.2	-0.006666
342.4	0.36634466		932.39	0.20792685		1522.39	0.13764021		2112.39	0.00814975		2702.4	0.04627297		3292.4	0.08167974		3882.4	-0.00740695
342.6	0.36623762		932.59	0.20923665		1522.59	0.13714629		2112.59	0.0089083		2702.6	0.04648584		3292.6	0.08293899		3882.6	-0.00679001
342.8	0.36739356		932.79	0.20986932		1522.79	0.1380542		2112.79	0.00790767		2702.8	0.04693552		3292.8	0.08421271		3882.8	-0.00621551
343	0.36796648		932.99	0.21031482		1522.99	0.13811063		2112.99	0.00761765		2703	0.04688442		3293	0.08431387		3883	-0.00617108
343.2	0.36974793		933.19	0.21159338		1523.19	0.13881402		2113.19	0.00740453		2703.2	0.04697764		3293.2	0.08534606		3883.2	-0.00542706
343.4	0.37012108		933.39	0.21222314		1523.39	0.13896045		2113.39	0.00783671		2703.4	0.04730743		3293.4	0.08595269		3883.4	-0.00525674
343.6	0.37035629		933.59	0.21251385		1523.59	0.13943273		2113.59	0.00771514		2703.6	0.04682094		3293.6	0.08644244		3883.6	-0.00454729
343.8	0.37111344		933.79	0.21351985		1523.79	0.13937965		2113.79	0.00684245		2703.8	0.0471766		3293.8	0.08720231		3883.8	-0.00425518
344	0.3715678		933.99	0.21424971		1523.99	0.14012973		2113.99	0.00590182		2704	0.04752648		3294	0.08740006		3884	-0.00573001
344.2	0.37244386		934.19	0.21492661		1524.19	0.14099763		2114.19	0.00545496		2704.2	0.04726038		3294.2	0.0881733		3884.2	-0.00648127
344.4	0.37279898		934.39	0.21522951		1524.39	0.14117031		2114.39	0.00493827		2704.4	0.04738223		3294.4	0.08855696		3884.4	-0.00671792
344.6	0.37285625		934.59	0.21537531		1524.59	0.14248146		2114.59	0.00466651		2704.6	0.04763625		3294.6	0.08882435		3884.6	-0.00605248
344.8	0.37334212		934.79	0.21543004		1524.79	0.14394117		2114.79	0.004727		2704.8	0.0494256		3294.8	0.08947065		3884.8	-0.00548255
345	0.37348718		934.99	0.21635448		1524.99	0.14493461		2114.99	0.00484562		2705	0.05027704		3295	0.0896664		3885	-0.00569141
345.2	0.37390799		935.19	0.21701845		1525.19	0.14649685		2115.19	0.00520055		2705.2	0.0499855		3295.2	0.08946179		3885.2	-0.00587909
345.4	0.37417443		935.39	0.21761564		1525.39	0.14789817		2115.39	0.00573728		2705.4	0.05037917		3295.4	0.08897074		3885.4	-0.00528012
345.6	0.37386592		935.59	0.21797248		1525.59	0.14764602		2115.59	0.00576745		2705.6	0.0502634		3295.6	0.08892653		3885.6	-0.00534638
345.8	0.37329758		935.79	0.21854421		1525.79	0.14734538		2115.79	0.00657603		2705.8	0.04984968		3295.8	0.08952463		3885.8	-0.00608894
346	0.37427614		935.99	0.21909056		1525.99	0.14809934		2115.99	0.00676919		2706	0.05010779		3296	0.08984877		3886	-0.00615108
346.2	0.37528653		936.19	0.21886847		1526.19	0.1483801		2116.19	0.0067692		2706.2	0.0495064		3296.2	0.08990268		3886.2	-0.00688579
346.4	0.37509747		936.39	0.21874345		1526.39	0.14839262		2116.39	0.00694955		2706.4	0.0495695		3296.4	0.09061912		3886.4	-0.00660683
346.6	0.37530501		936.59	0.21984909		1526.59	0.14857253		2116.59	0.00761477		2706.6	0.05087893		3296.6	0.09111377		3886.6	-0.00563804
346.8	0.37608989		936.79	0.21964798		1526.79	0.14922459		2116.79	0.00788021		2706.8	0.05114314		3296.8	0.09095803		3886.8	-0.0051522
347	0.37644979		936.99	0.2200476		1526.99	0.14901091		2116.99	0.00867365		2707	0.05094007		3297	0.0903397		3887	-0.0057123
347.2	0.37765285		937.19	0.22060314		1527.19	0.14863008		2117.19	0.00838887		2707.2	0.05128463		3297.2	0.09110415		3887.2	-0.00481963
347.4	0.37776909		937.39	0.2198269		1527.39	0.14892172		2117.39	0.00833621		2707.4	0.05181856		3297.4	0.09117409		3887.4	-0.00499552
347.6	0.37793455		937.59	0.22067331		1527.59	0.14886195		2117.59	0.00753457		2707.6	0.05162168		3297.6	0.09175644		3887.6	-0.0040646
347.8	0.37869019		937.79	0.22070181		1527.79	0.14853349		2117.79	0.00712473		2707.8	0.05229999		3297.8	0.09183529		3887.8	-0.00492643
348	0.37865328		937.99	0.21997535		1527.99	0.14968749		2117.99	0.00669845		2708	0.05243598		3298	0.09141356		3888	-0.00573083
348.2	0.37939958		938.19	0.22058961		1528.19	0.15004715		2118.19	0.0064354		2708.2	0.05337332		3298.2	0.09158503		3888.2	-0.00584728
348.4	0.38006846		938.39	0.22037366		1528.39	0.15061043		2118.39	0.0067814		2708.4	0.05435696		3298.4	0.09151075		3888.4	-0.00553612
348.6	0.3797723		938.59	0.22167385		1528.59	0.15108018		2118.59	0.00617786		2708.6	0.05567232		3298.6	0.09219811		3888.6	-0.00478023
348.8	0.38096779		938.79	0.22274725		1528.79	0.15163344		2118.79	0.0069133		2708.8	0.05556483		3298.8	0.09165136		3888.8	-0.00572427
349	0.38088992		938.99	0.22313302		1528.99	0.1521629		2118.99	0.00780743		2709	0.05559439		3299	0.09159855		3889	-0.0054334
349.2	0.38047022		939.19	0.22341634		1529.19	0.15326125		2119.19	0.00866958		2709.2	0.05498764		3299.2	0.09159874		3889.2	-0.00553112
349.4	0.37963194		939.39	0.22390196		1529.39	0.15348927		2119.39	0.00838882		2709.4	0.05504472		3299.4	0.09162355		3889.4	-0.00550392
349.6	0.37999669		939.59	0.22411071		1529.59	0.15366537		2119.59	0.00887767		2709.6	0.05462113		3299.6	0.09258921		3889.6	-0.00595869
349.8	0.38056402		939.79	0.22453181		1529.79	0.15459852		2119.79	0.00940241		2709.8	0.05483849		3299.8	0.09223862		3889.8	-0.00609639
350	0.38211094		939.99	0.22458647		1529.99	0.15553078		2119.99	0.00912136		2710	0.0539755		3300	0.09276847		3890	-0.00721296
350.2	0.38164465		940.19	0.22481274		1530.19	0.1548236		2120.19	0.00998032		2710.2	0.05310901		3300.2	0.09272907		3890.2	-0.00717982
350.4	0.38060091		940.39	0.22488284		1530.39	0.15536323		2120.39	0.01087459		2710.4	0.0537075		3300.4	0.09296086		3890.4	-0.00695473
350.6	0.38130361		940.59	0.22569083		1530.59	0.15493106		2120.59	0.01099502		2710.6	0.05432432		3300.6	0.09331545		3890.6	-0.00728359
350.8	0.38227553		940.79	0.22528351		1530.79	0.15457885		2120.79	0.0105965		2710.8	0.05517038		3300.8	0.09318973		3890.8	-0.00827479
351	0.38269968		940.99	0.22449684		1530.99	0.15431326		2120.99	0.01020313		2711	0.05550368		3301	0.09335641		3891	-0.00812287
351.2	0.38334921		941.19	0.2246444		1531.19	0.15497577		2121.19	0.00939448		2711.2	0.05665114		3301.2	0.0940507		3891.2	-0.00735974
351.4	0.38412125		941.39	0.22538477		1531.39	0.15533843		2121.39	0.00905122		2711.4	0.05697023		3301.4	0.09387638		3891.4	-0.00805778
351.6	0.38456179		941.59	0.2261231		1531.59	0.15533522		2121.59	0.00870863		2711.6	0.05689645		3301.6	0.09447536		3891.6	-0.00756007
351.8	0.38457475		941.79	0.2264803		1531.79	0.15572447		2121.79	0.0079467		2711.8	0.0573361		3301.8	0.09459772		3891.8	-0.0084594
352	0.38422727		941.99	0.22749797		1531.99	0.15578206		2121.99	0.00745046		2712	0.05704844		3302	0.09481996		3892	-0.00820064
352.2	0.38509927		942.19	0.22896608		1532.19	0.15521478		2122.19	0.00782441		2712.2	0.05814511		3302.2	0.09497446		3892.2	-0.00842732
352.4	0.38613474		942.39	0.22982225		1532.39	0.15498476		2122.39	0.00813297		2712.4	0.0586331		3302.4	0.09583783		3892.4	-0.00801932
352.6	0.38621804		942.59	0.23158523		1532.59	0.15475405		2122.59	0.0082573		2712.6	0.05824463		3302.6	0.09566921		3892.6	-0.00737712
352.8	0.38706298		942.79	0.23172237		1532.79	0.15459679		2122.79	0.00919427		2712.8	0.05830043		3302.8	0.09675673		3892.8	-0.00780218
353	0.38671558		942.99	0.23183941		1532.99	0.15477624		2122.99	0.00944275		2713	0.05803958		3303	0.09812427		3893	-0.00683698
353.2	0.38676941		943.19	0.23233028		1533.19	0.15534398		2123.19	0.00886398		2713.2	0.05804684		3303.2	0.09805361		3893.2	-0.00639447
353.4	0.38736581		943.39	0.23258099		1533.39	0.15463494		2123.39	0.00808796		2713.4	0.05722126		3303.4	0.09737406		3893.4	-0.00554456
353.6	0.38815763		943.59	0.2329113		1533.59	0.1543051		2123.59	0.00871861		2713.6	0.05673352		3303.6	0.09701215		3893.6	-0.00565587
353.8	0.38792902		943.79	0.23273177		1533.79	0.15453204		2123.79	0.00902781		2713.8	0.05698686		3303.8	0.09637153		3893.8	-0.00595264
354	0.3883813		943.99	0.23275703		1533.99	0.15409679		2123.99	0.00960363		2714	0.05557626		3304	0.09641363		3894	-0.00610819
354.2	0.38868402		944.19	0.23373207		1534.19	0.1543743		2124.19	0.00986041		2714.2	0.0559407		3304.2	0.09681936		3894.2	-0.00525334
354.4	0.38916756		944.39	0.23417968		1534.39	0.15416044		2124.39	0.0099657		2714.4	0.05703627		3304.4	0.09704789		3894.4	-0.00532292
354.6	0.3895552		944.59	0.23446871		1534.59	0.15309172		2124.59	0.00974208		2714.6	0.05784806		3304.6	0.09744016		3894.6	-0.00495176
354.8	0.39029406		944.79	0.23386987		1534.79	0.15286607		2124.79	0.00968248		2714.8	0.05882752		3304.8	0.09706058		3894.8	-0.00405409
355	0.39058743		944.99	0.23387224		1534.99	0.15382079		2124.99	0.01037549		2715	0.05979287		3305	0.09803745		3895	-0.00354018
355.2	0.39187974		945.19	0.23471066		1535.19	0.15489273		2125.19	0.01080032		2715.2	0.05995326		3305.2	0.0989189		3895.2	-0.0038467
355.4	0.39310407		945.39	0.23461633		1535.39	0.15539493		2125.39	0.01080824		2715.4	0.05927388		3305.4	0.09993654		3895.4	-0.00438016
355.6	0.3942493		945.59	0.23473554		1535.59	0.15671635		2125.59	0.01095662		2715.6	0.05909855		3305.6	0.10067858		3895.6	-0.00392624
355.8	0.39492003		945.79	0.23639662		1535.79	0.1571671		2125.79	0.01126363		2715.8	0.05951512		3305.8	0.10127235		3895.8	-0.00443411
356	0.39603776		945.99	0.23734418		1535.99	0.15770802		2125.99	0.01246427		2716	0.05912387		3306	0.1013433		3896	-0.00476701
356.2	0.3976855		946.19	0.2376353		1536.19	0.15921045		2126.19	0.01309067		2716.2	0.060113		3306.2	0.1019217		3896.2	-0.00514233
356.4	0.39951372		946.39	0.23800169		1536.39	0.16099969		2126.39	0.01352538		2716.4	0.06006819		3306.4	0.10266157		3896.4	-0.00566563
356.6	0.39985621		946.59	0.2385808		1536.59	0.16184058		2126.59	0.01363633		2716.6	0.05966937		3306.6	0.10303433		3896.6	-0.00619542
356.8	0.399302		946.79	0.23880757		1536.79	0.16293578		2126.79	0.0131986		2716.8	0.05945251		3306.8	0.10511068		3896.8	-0.00712635
357	0.3993437		946.99	0.23974292		1536.99	0.16399536		2126.99	0.01311432		2717	0.05884921		3307	0.10503207		3897	-0.00737322
357.2	0.3995175		947.19	0.24028048		1537.19	0.16427388		2127.19	0.01282885		2717.2	0.0587461		3307.2	0.10445756		3897.2	-0.00797368
357.4	0.39997238		947.39	0.23994206		1537.39	0.1641905		2127.39	0.01206523		2717.4	0.05832856		3307.4	0.10405907		3897.4	-0.00910058
357.6	0.39896609		947.59	0.23944344		1537.59	0.16530826		2127.59	0.01185196		2717.6	0.05835324		3307.6	0.10476699		3897.6	-0.00913439
357.8	0.39842174		947.79	0.23922346		1537.79	0.16614788		2127.79	0.0115209		2717.8	0.05847659		3307.8	0.10529216		3897.8	-0.00881161
358	0.39840589		947.99	0.23901141		1537.99	0.16619665		2127.99	0.01117325		2718	0.05788297		3308	0.10626423		3898	-0.00857202
358.2	0.39901069		948.19	0.23988452		1538.19	0.16746705		2128.19	0.01029837		2718.2	0.0582362		3308.2	0.10627235		3898.2	-0.0083689
358.4	0.39926652		948.39	0.23986532		1538.39	0.1674456		2128.39	0.01027473		2718.4	0.05841563		3308.4	0.10562244		3898.4	-0.00838482
358.6	0.3986148		948.59	0.23970265		1538.59	0.16757916		2128.59	0.00954781		2718.6	0.05932774		3308.6	0.10645112		3898.6	-0.00780198
358.8	0.39909736		948.79	0.23952828		1538.79	0.16688091		2128.79	0.00927538		2718.8	0.05906562		3308.8	0.1060965		3898.8	-0.00735262
359	0.39931926		948.99	0.24000956		1538.99	0.16698218		2128.99	0.008532		2719	0.0603339		3309	0.1078957		3899	-0.00755942
359.2	0.40045078		949.19	0.23996913		1539.19	0.16660108		2129.19	0.00825398		2719.2	0.06002045		3309.2	0.108008		3899.2	-0.00667588
359.4	0.40013494		949.39	0.2404514		1539.39	0.16665962		2129.39	0.00776639		2719.4	0.06012132		3309.4	0.10825218		3899.4	-0.00667855
359.6	0.40111995		949.59	0.2418162		1539.59	0.16739895		2129.59	0.0079761		2719.6	0.06102925		3309.6	0.10778396		3899.6	-0.00620518
359.8	0.40189328		949.79	0.24265012		1539.79	0.16725486		2129.79	0.00920218		2719.8	0.06138536		3309.8	0.10793609		3899.8	-0.00565815
360	0.40289898		949.99	0.24407994		1539.99	0.16742648		2129.99	0.0097254		2720	0.06176729		3310	0.10736266		3900	-0.00570618
360.2	0.40361944		950.19	0.24442337		1540.19	0.16769787		2130.19	0.01077977		2720.2	0.06225463		3310.2	0.10669215		3900.2	-0.00557068
360.4	0.40438815		950.39	0.24529095		1540.39	0.16816143		2130.39	0.01164344		2720.4	0.06193762		3310.4	0.10647689		3900.4	-0.00627425
360.6	0.40464525		950.59	0.24574687		1540.59	0.16747665		2130.59	0.01207925		2720.6	0.06223077		3310.6	0.10644242		3900.6	-0.00721519
360.8	0.40418512		950.79	0.2472103		1540.79	0.16847416		2130.79	0.01252948		2720.8	0.06256323		3310.8	0.10663244		3900.8	-0.00769793
361	0.40480668		950.99	0.24783102		1540.99	0.16806263		2130.99	0.01292719		2721	0.06296466		3311	0.10594937		3901	-0.0082768
361.2	0.40518355		951.19	0.24820307		1541.19	0.16778206		2131.19	0.01322565		2721.2	0.0629907		3311.2	0.10556515		3901.2	-0.00889956
361.4	0.40447283		951.39	0.24766739		1541.39	0.16892233		2131.39	0.01292347		2721.4	0.06395487		3311.4	0.10581729		3901.4	-0.00901891
361.6	0.40375087		951.59	0.24838165		1541.59	0.17022602		2131.59	0.01344756		2721.6	0.06294418		3311.6	0.1059579		3901.6	-0.00850663
361.8	0.40388857		951.79	0.24849492		1541.79	0.17094703		2131.79	0.01409086		2721.8	0.06294949		3311.8	0.10589187		3901.8	-0.00851154
362	0.40371645		951.99	0.24877238		1541.99	0.1712692		2131.99	0.01437013		2722	0.06282664		3312	0.10668345		3902	-0.00869561
362.2	0.4047993		952.19	0.24956856		1542.19	0.17184413		2132.19	0.01422936		2722.2	0.06278147		3312.2	0.10567998		3902.2	-0.00863862
362.4	0.40503134		952.39	0.24935993		1542.39	0.17188696		2132.39	0.01324409		2722.4	0.06271933		3312.4	0.10636831		3902.4	-0.00908375
362.6	0.40497897		952.59	0.24956514		1542.59	0.17223402		2132.59	0.01129921		2722.6	0.06356789		3312.6	0.10762997		3902.6	-0.00927153
362.8	0.40532374		952.79	0.24970854		1542.79	0.17205713		2132.79	0.01079355		2722.8	0.0634385		3312.8	0.10789979		3902.8	-0.00928073
363	0.40565701		952.99	0.2492982		1542.99	0.17310896		2132.99	0.01002634		2723	0.06453317		3313	0.10918227		3903	-0.00882868
363.2	0.40598298		953.19	0.24930979		1543.19	0.17458917		2133.19	0.0095065		2723.2	0.06478308		3313.2	0.10907833		3903.2	-0.00817187
363.4	0.4055018		953.39	0.24969978		1543.39	0.17527032		2133.39	0.00928329		2723.4	0.06532814		3313.4	0.10994582		3903.4	-0.00943945
363.6	0.40697454		953.59	0.2505312		1543.59	0.17623292		2133.59	0.00886045		2723.6	0.06575229		3313.6	0.11043045		3903.6	-0.00925593
363.8	0.40812457		953.79	0.25115317		1543.79	0.17621146		2133.79	0.00968425		2723.8	0.06618341		3313.8	0.11108269		3903.8	-0.00884052
364	0.40864354		953.99	0.25241832		1543.99	0.17624337		2133.99	0.00961988		2724	0.06594501		3314	0.11119291		3904	-0.00948722
364.2	0.40945118		954.19	0.25145437		1544.19	0.17639594		2134.19	0.00969904		2724.2	0.06588366		3314.2	0.11212409		3904.2	-0.00899029
364.4	0.40988409		954.39	0.25109938		1544.39	0.17650699		2134.39	0.00938416		2724.4	0.06492015		3314.4	0.11233739		3904.4	-0.00906288
364.6	0.41007843		954.59	0.25089366		1544.59	0.17695282		2134.59	0.00912232		2724.6	0.06523502		3314.6	0.11268995		3904.6	-0.00910238
364.8	0.40949074		954.79	0.25174257		1544.79	0.17761558		2134.79	0.00956653		2724.8	0.06478298		3314.8	0.11251191		3904.8	-0.00881362
365	0.41025046		954.99	0.25180055		1544.99	0.1775151		2134.99	0.0096569		2725	0.06471202		3315	0.11262064		3905	-0.00849753
365.2	0.40974284		955.19	0.25278423		1545.19	0.17720528		2135.19	0.01064235		2725.2	0.0642128		3315.2	0.11308012		3905.2	-0.0091048
365.4	0.40929414		955.39	0.25380614		1545.39	0.17717616		2135.39	0.01076079		2725.4	0.063739		3315.4	0.11314401		3905.4	-0.00865294
365.6	0.40945756		955.59	0.25403343		1545.59	0.17669988		2135.59	0.01125086		2725.6	0.06243939		3315.6	0.11293526		3905.6	-0.00834515
365.8	0.41014521		955.79	0.25377838		1545.79	0.17667255		2135.79	0.01122116		2725.8	0.06273948		3315.8	0.11294471		3905.8	-0.00735336
366	0.41012548		955.99	0.25416792		1545.99	0.17567706		2135.99	0.0107676		2726	0.06236697		3316	0.11244875		3906	-0.00673408
366.2	0.41082235		956.19	0.25351383		1546.19	0.17569909		2136.19	0.01110231		2726.2	0.06254891		3316.2	0.11169725		3906.2	-0.00679007
366.4	0.41091481		956.39	0.253806		1546.39	0.17565952		2136.39	0.01103348		2726.4	0.06200207		3316.4	0.11203859		3906.4	-0.00669661
366.6	0.40973615		956.59	0.25377085		1546.59	0.17698468		2136.59	0.01083677		2726.6	0.06277309		3316.6	0.11187301		3906.6	-0.00713217
366.8	0.40960762		956.79	0.2542786		1546.79	0.17758718		2136.79	0.01210536		2726.8	0.06324877		3316.8	0.11202808		3906.8	-0.0065676
367	0.40973091		956.99	0.25436509		1546.99	0.17823345		2136.99	0.01241015		2727	0.06446857		3317	0.11247553		3907	-0.00668749
367.2	0.41021981		957.19	0.25524852		1547.19	0.17911527		2137.19	0.0121547		2727.2	0.0651018		3317.2	0.11292233		3907.2	-0.0070458
367.4	0.41075511		957.39	0.25712613		1547.39	0.17937929		2137.39	0.01272272		2727.4	0.0666088		3317.4	0.11391725		3907.4	-0.00730148
367.6	0.4117074		957.59	0.25880346		1547.59	0.17963192		2137.59	0.0130217		2727.6	0.06738157		3317.6	0.11440681		3907.6	-0.00629876
367.8	0.4119637		957.79	0.25919883		1547.79	0.180411		2137.79	0.01393675		2727.8	0.06829925		3317.8	0.11583971		3907.8	-0.00561249
368	0.4111517		957.99	0.25886774		1547.99	0.1804713		2137.99	0.01405685		2728	0.06800174		3318	0.11639995		3908	-0.00502108
368.2	0.41138812		958.19	0.25928517		1548.19	0.18062059		2138.19	0.01347062		2728.2	0.0685631		3318.2	0.11726248		3908.2	-0.00440788
368.4	0.41051494		958.39	0.26035955		1548.39	0.18026806		2138.39	0.01428561		2728.4	0.06884165		3318.4	0.11673074		3908.4	-0.00455701
368.6	0.4108638		958.59	0.26081939		1548.59	0.18018484		2138.59	0.01447128		2728.6	0.06972987		3318.6	0.11748275		3908.6	-0.00451104
368.8	0.41195672		958.79	0.2620727		1548.79	0.17991366		2138.79	0.01563813		2728.8	0.07018466		3318.8	0.11733121		3908.8	-0.00536023
369	0.41264651		958.99	0.26297633		1548.99	0.18026449		2138.99	0.01446593		2729	0.07088988		3319	0.11826195		3909	-0.00577657
369.2	0.41281142		959.19	0.26319758		1549.19	0.17885109		2139.19	0.01391726		2729.2	0.07144504		3319.2	0.11800006		3909.2	-0.00639266
369.4	0.41290653		959.39	0.26352825		1549.39	0.1779997		2139.39	0.01327786		2729.4	0.07128527		3319.4	0.11748835		3909.4	-0.00613948
369.6	0.41326407		959.59	0.26275654		1549.59	0.17816926		2139.59	0.01233973		2729.6	0.07108634		3319.6	0.11712934		3909.6	-0.00624978
369.8	0.41458442		959.79	0.26281585		1549.79	0.17851164		2139.79	0.01110802		2729.8	0.07100405		3319.8	0.11739834		3909.8	-0.0064525
370	0.41492294		959.99	0.26237375		1549.99	0.17825709		2139.99	0.01108439		2730	0.07106883		3320	0.11698536		3910	-0.0058473
370.2	0.41514987		960.19	0.26213597		1550.19	0.17918931		2140.19	0.01133		2730.2	0.07140233		3320.2	0.11722811		3910.2	-0.00680477
370.4	0.41524501		960.39	0.26295925		1550.39	0.1795581		2140.39	0.01057048		2730.4	0.07080788		3320.4	0.11692408		3910.4	-0.00756134
370.6	0.41441133		960.59	0.26154899		1550.59	0.18128349		2140.59	0.01061656		2730.6	0.07152765		3320.6	0.11733326		3910.6	-0.00822283
370.8	0.41573019		960.79	0.26200293		1550.79	0.18211123		2140.79	0.0100031		2730.8	0.07174785		3320.8	0.11800306		3910.8	-0.00810328
371	0.41672064		960.99	0.26220233		1550.99	0.18216229		2140.99	0.0089904		2731	0.07133191		3321	0.11861594		3911	-0.00839361
371.2	0.41765291		961.19	0.26272601		1551.19	0.1832057		2141.19	0.00827171		2731.2	0.07042044		3321.2	0.11886551		3911.2	-0.00824461
371.4	0.41755444		961.39	0.2630015		1551.39	0.18438509		2141.39	0.00808849		2731.4	0.07057421		3321.4	0.11887206		3911.4	-0.00782722
371.6	0.41762338		961.59	0.26318993		1551.59	0.18471945		2141.59	0.00863041		2731.6	0.06978632		3321.6	0.11913995		3911.6	-0.00828801
371.8	0.41792867		961.79	0.26297797		1551.79	0.18614585		2141.79	0.00824941		2731.8	0.06975284		3321.8	0.11910737		3911.8	-0.00847899
372	0.41802668		961.99	0.26267079		1551.99	0.18572402		2141.99	0.00829013		2732	0.06925803		3322	0.1179433		3912	-0.00815367
372.2	0.41912844		962.19	0.26341887		1552.19	0.18584912		2142.19	0.0080059		2732.2	0.06937405		3322.2	0.11807976		3912.2	-0.00857543
372.4	0.41887347		962.39	0.26357856		1552.39	0.185713		2142.39	0.00908654		2732.4	0.07013703		3322.4	0.11784298		3912.4	-0.00842942
372.6	0.41982413		962.59	0.26387647		1552.59	0.18586944		2142.59	0.01001027		2732.6	0.07099653		3322.6	0.11827973		3912.6	-0.0077046
372.8	0.4206219		962.79	0.26425801		1552.79	0.18670136		2142.79	0.01053116		2732.8	0.0709069		3322.8	0.11859147		3912.8	-0.00769953
373	0.4204183		962.99	0.26439094		1552.99	0.18777936		2142.99	0.00977898		2733	0.07119321		3323	0.11908649		3913	-0.00711973
373.2	0.42057711		963.19	0.26419429		1553.19	0.18701963		2143.19	0.00942953		2733.2	0.0707408		3323.2	0.118855		3913.2	-0.00623914
373.4	0.42069315		963.39	0.26467075		1553.39	0.18739324		2143.39	0.01044301		2733.4	0.07018527		3323.4	0.11951644		3913.4	-0.00585012
373.6	0.42189889		963.59	0.2647964		1553.59	0.18804659		2143.59	0.01093595		2733.6	0.07062363		3323.6	0.12081005		3913.6	-0.00524493
373.8	0.42230983		963.79	0.26525146		1553.79	0.18819001		2143.79	0.01132596		2733.8	0.07189784		3323.8	0.12244472		3913.8	-0.00464332
374	0.4224044		963.99	0.26560894		1553.99	0.18863293		2143.99	0.01322059		2734	0.07255959		3324	0.12308248		3914	-0.00424976
374.2	0.42277958		964.19	0.26618691		1554.19	0.18860399		2144.19	0.01272446		2734.2	0.07309578		3324.2	0.12339689		3914.2	-0.00514364
374.4	0.42297622		964.39	0.26604948		1554.39	0.18852802		2144.39	0.01287099		2734.4	0.07373028		3324.4	0.1242131		3914.4	-0.004599
374.6	0.42273792		964.59	0.26588558		1554.59	0.18929385		2144.59	0.01341377		2734.6	0.07448472		3324.6	0.12480631		3914.6	-0.00451341
374.8	0.42344908		964.79	0.26678863		1554.79	0.18912463		2144.79	0.01283843		2734.8	0.07414587		3324.8	0.12530179		3914.8	-0.00444783
375	0.42383265		964.99	0.26674596		1554.99	0.18843344		2144.99	0.01322613		2735	0.07337247		3325	0.12600151		3915	-0.00431537
375.2	0.4238436		965.19	0.26611541		1555.19	0.18886254		2145.19	0.01217643		2735.2	0.07326224		3325.2	0.12558317		3915.2	-0.0040864
375.4	0.423377		965.39	0.26646439		1555.39	0.18821511		2145.39	0.01230823		2735.4	0.07391143		3325.4	0.1251269		3915.4	-0.00396012
375.6	0.4233954		965.59	0.26724806		1555.59	0.18803032		2145.59	0.01242069		2735.6	0.07429285		3325.6	0.12447327		3915.6	-0.00467531
375.8	0.42352068		965.79	0.26635718		1555.79	0.18815545		2145.79	0.01042154		2735.8	0.07475842		3325.8	0.1234279		3915.8	-0.00421751
376	0.42401905		965.99	0.26690256		1555.99	0.18761367		2145.99	0.01009745		2736	0.0746927		3326	0.12329707		3916	-0.00404028
376.2	0.42433463		966.19	0.2669261		1556.19	0.1872309		2146.19	0.00902774		2736.2	0.07515918		3326.2	0.12345033		3916.2	-0.00391037
376.4	0.42385716		966.39	0.26703779		1556.39	0.18759804		2146.39	0.00883423		2736.4	0.07525885		3326.4	0.12315235		3916.4	-0.00272889
376.6	0.42499401		966.59	0.26684175		1556.59	0.18811874		2146.59	0.00915159		2736.6	0.07556997		3326.6	0.12331991		3916.6	-0.00164198
376.8	0.42565953		966.79	0.26685898		1556.79	0.18922478		2146.79	0.00807953		2736.8	0.0752875		3326.8	0.12354343		3916.8	-0.00147578
377	0.42647647		966.99	0.2673598		1556.99	0.18977149		2146.99	0.00772383		2737	0.07579543		3327	0.12371792		3917	-0.00115972
377.2	0.42756553		967.19	0.26789921		1557.19	0.18937235		2147.19	0.00683096		2737.2	0.07517776		3327.2	0.12478331		3917.2	-0.00089685
377.4	0.42810991		967.39	0.26863844		1557.39	0.18990551		2147.39	0.00808743		2737.4	0.07648257		3327.4	0.12602334		3917.4	-0.00008676
377.6	0.42856504		967.59	0.26933021		1557.59	0.18967384		2147.59	0.00853978		2737.6	0.0775966		3327.6	0.12728753		3917.6	-0.00132256
377.8	0.42915357		967.79	0.27022967		1557.79	0.19001372		2147.79	0.00898161		2737.8	0.07872902		3327.8	0.12834858		3917.8	-0.00239424
378	0.42964194		967.99	0.2698992		1557.99	0.19063367		2147.99	0.01020615		2738	0.07888582		3328	0.12936704		3918	-0.00310895
378.2	0.43045312		968.19	0.26985633		1558.19	0.19107918		2148.19	0.00976396		2738.2	0.07875376		3328.2	0.1298336		3918.2	-0.00382555
378.4	0.43035841		968.39	0.26986616		1558.39	0.19166303		2148.39	0.01017699		2738.4	0.07892382		3328.4	0.13089121		3918.4	-0.00398048
378.6	0.43035065		968.59	0.27012386		1558.59	0.19260308		2148.59	0.01059303		2738.6	0.07906588		3328.6	0.1313956		3918.6	-0.00449061
378.8	0.43090734		968.79	0.27038959		1558.79	0.1919215		2148.79	0.01124979		2738.8	0.07834134		3328.8	0.13152603		3918.8	-0.00518485
379	0.43166119		968.99	0.27082641		1558.99	0.19264209		2148.99	0.01099471		2739	0.07816536		3329	0.13107194		3919	-0.00589403
379.2	0.43099457		969.19	0.27200857		1559.19	0.19223137		2149.19	0.011158		2739.2	0.07824173		3329.2	0.12975371		3919.2	-0.00589253
379.4	0.43059057		969.39	0.27332036		1559.39	0.19208115		2149.39	0.01198455		2739.4	0.07864114		3329.4	0.12917755		3919.4	-0.00681551
379.6	0.42981962		969.59	0.27424949		1559.59	0.19310234		2149.59	0.01211881		2739.6	0.07946943		3329.6	0.12866006		3919.6	-0.00696641
379.8	0.4296036		969.79	0.27481313		1559.79	0.19265242		2149.79	0.01180196		2739.8	0.07906437		3329.8	0.12846608		3919.8	-0.00778763
380	0.42955118		969.99	0.27617178		1559.99	0.19432214		2149.99	0.01304241		2740	0.07938771		3330	0.12837638		3920	-0.00826792
380.2	0.42924797		970.19	0.27625943		1560.19	0.19465532		2150.19	0.01264149		2740.2	0.0790651		3330.2	0.12772692		3920.2	-0.00889537
380.4	0.42947736		970.39	0.27718368		1560.39	0.19545183		2150.39	0.01236516		2740.4	0.07847985		3330.4	0.12751203		3920.4	-0.00820927
380.6	0.42976896		970.59	0.27787783		1560.59	0.19676226		2150.59	0.01288192		2740.6	0.07908643		3330.6	0.12694487		3920.6	-0.00788294
380.8	0.42965867		970.79	0.2788832		1560.79	0.19740504		2150.79	0.01239189		2740.8	0.07907787		3330.8	0.12695156		3920.8	-0.00781025
381	0.43034672		970.99	0.2795054		1560.99	0.19740747		2150.99	0.01162394		2741	0.07919953		3331	0.1271881		3921	-0.00731183
381.2	0.4302952		971.19	0.27952952		1561.19	0.19728404		2151.19	0.01047255		2741.2	0.07888127		3331.2	0.12782037		3921.2	-0.00634766
381.4	0.43069766		971.39	0.2800297		1561.39	0.19770136		2151.39	0.01053251		2741.4	0.07977272		3331.4	0.12754788		3921.4	-0.00556439
381.6	0.43156858		971.59	0.27992344		1561.59	0.198192		2151.59	0.01006518		2741.6	0.08011465		3331.6	0.12859255		3921.6	-0.00649071
381.8	0.43185604		971.79	0.27956755		1561.79	0.19840234		2151.79	0.0092697		2741.8	0.07957374		3331.8	0.12993259		3921.8	-0.00565321
382	0.43180116		971.99	0.27797795		1561.99	0.19888371		2151.99	0.00873632		2742	0.07906356		3332	0.13057805		3922	-0.00480407
382.2	0.43253485		972.19	0.2780411		1562.19	0.19883563		2152.19	0.00845764		2742.2	0.07853058		3332.2	0.13113638		3922.2	-0.00434223
382.4	0.43297708		972.39	0.27837737		1562.39	0.19847962		2152.39	0.00796441		2742.4	0.07860745		3332.4	0.13182376		3922.4	-0.00442484
382.6	0.43310635		972.59	0.27791588		1562.59	0.19876241		2152.59	0.00849768		2742.6	0.07904558		3332.6	0.13193498		3922.6	-0.00415213
382.8	0.43413464		972.79	0.27848182		1562.79	0.19833907		2152.79	0.00867858		2742.8	0.07847615		3332.8	0.13197694		3922.8	-0.00507951
383	0.43489487		972.99	0.27882467		1562.99	0.19794571		2152.99	0.00844777		2743	0.07874099		3333	0.13206077		3923	-0.00439191
383.2	0.43433488		973.19	0.27882713		1563.19	0.19676033		2153.19	0.01033043		2743.2	0.07882082		3333.2	0.13234488		3923.2	-0.00380189
383.4	0.43500746		973.39	0.27832809		1563.39	0.19689297		2153.39	0.01092326		2743.4	0.07948514		3333.4	0.13326328		3923.4	-0.00394694
383.6	0.43517278		973.59	0.27846734		1563.59	0.19673477		2153.59	0.0127067		2743.6	0.08057737		3333.6	0.13344253		3923.6	-0.00443101
383.8	0.43492712		973.79	0.27846899		1563.79	0.19643294		2153.79	0.01308122		2743.8	0.08059479		3333.8	0.13385683		3923.8	-0.00550253
384	0.43518242		973.99	0.27892887		1563.99	0.19790385		2153.99	0.01334596		2744	0.08122099		3334	0.13414593		3924	-0.00615259
384.2	0.43532457		974.19	0.27900202		1564.19	0.19723924		2154.19	0.01254676		2744.2	0.08111389		3334.2	0.13347465		3924.2	-0.0064599
384.4	0.43525238		974.39	0.27977982		1564.39	0.19780875		2154.39	0.01214803		2744.4	0.08134639		3334.4	0.13291102		3924.4	-0.00609052
384.6	0.4356373		974.59	0.27964292		1564.59	0.19826193		2154.59	0.01259825		2744.6	0.08156803		3334.6	0.13256012		3924.6	-0.0062443
384.8	0.43531316		974.79	0.2795526		1564.79	0.19859237		2154.79	0.01206797		2744.8	0.08199088		3334.8	0.13319232		3924.8	-0.00722889
385	0.43650198		974.99	0.27981155		1564.99	0.19869058		2154.99	0.01085524		2745	0.08236533		3335	0.13287566		3925	-0.00694686
385.2	0.4366613		975.19	0.27956805		1565.19	0.19926292		2155.19	0.01034883		2745.2	0.08229704		3335.2	0.13303891		3925.2	-0.00611109
385.4	0.43741438		975.39	0.28058648		1565.39	0.19990208		2155.39	0.00949154		2745.4	0.08255388		3335.4	0.13317545		3925.4	-0.00645326
385.6	0.43776608		975.59	0.2802512		1565.59	0.20022148		2155.59	0.00804211		2745.6	0.08328006		3335.6	0.13407757		3925.6	-0.00718767
385.8	0.43735892		975.79	0.28013713		1565.79	0.20042223		2155.79	0.00705858		2745.8	0.08262906		3335.8	0.13361486		3925.8	-0.00719649
386	0.43763714		975.99	0.28137917		1565.99	0.20120858		2155.99	0.0068588		2746	0.08368324		3336	0.13376983		3926	-0.00794812
386.2	0.43787531		976.19	0.28272555		1566.19	0.20183076		2156.19	0.00767711		2746.2	0.08428933		3336.2	0.13395893		3926.2	-0.00779882
386.4	0.43791392		976.39	0.2835538		1566.39	0.20225394		2156.39	0.00749733		2746.4	0.08478021		3336.4	0.13440419		3926.4	-0.00862481
386.6	0.43786835		976.59	0.28353357		1566.59	0.20308114		2156.59	0.00777818		2746.6	0.08468954		3336.6	0.13477239		3926.6	-0.00864144
386.8	0.43872822		976.79	0.28473152		1566.79	0.20376768		2156.79	0.00777605		2746.8	0.08407531		3336.8	0.13565049		3926.8	-0.00849369
387	0.43845464		976.99	0.28463639		1566.99	0.20275551		2156.99	0.0076194		2747	0.08397484		3337	0.13539646		3927	-0.00835266
387.2	0.43783675		977.19	0.28526286		1567.19	0.20257946		2157.19	0.00783135		2747.2	0.0841014		3337.2	0.13548661		3927.2	-0.00813148
387.4	0.43831707		977.39	0.28568772		1567.39	0.20279152		2157.39	0.00814136		2747.4	0.08442527		3337.4	0.13640336		3927.4	-0.0077667
387.6	0.43857644		977.59	0.28593154		1567.59	0.203416		2157.59	0.00827113		2747.6	0.08474735		3337.6	0.13677388		3927.6	-0.00768988
387.8	0.43851273		977.79	0.28568784		1567.79	0.2036373		2157.79	0.00730307		2747.8	0.08537382		3337.8	0.13688142		3927.8	-0.00724957
388	0.4395564		977.99	0.2868477		1567.99	0.20410391		2157.99	0.0080625		2748	0.08485539		3338	0.13696754		3928	-0.00682428
388.2	0.43922375		978.19	0.2869747		1568.19	0.20489837		2158.19	0.00830461		2748.2	0.08401358		3338.2	0.13694027		3928.2	-0.00692739
388.4	0.43970172		978.39	0.28766935		1568.39	0.20585005		2158.39	0.00844496		2748.4	0.08399341		3338.4	0.13752858		3928.4	-0.00701443
388.6	0.44086167		978.59	0.28705158		1568.59	0.20625108		2158.59	0.00887559		2748.6	0.08427249		3338.6	0.13764053		3928.6	-0.00757843
388.8	0.44059015		978.79	0.28732503		1568.79	0.20720085		2158.79	0.00985954		2748.8	0.08399668		3338.8	0.13871338		3928.8	-0.00748898
389	0.4415434		978.99	0.28805128		1568.99	0.20702501		2158.99	0.01052216		2749	0.08355389		3339	0.13888447		3929	-0.00618102
389.2	0.4419644		979.19	0.28773913		1569.19	0.20698009		2159.19	0.01065523		2749.2	0.08453211		3339.2	0.13916315		3929.2	-0.00579124
389.4	0.44220162		979.39	0.28815838		1569.39	0.2066917		2159.39	0.01076234		2749.4	0.08497473		3339.4	0.13979853		3929.4	-0.00584971
389.6	0.44261289		979.59	0.2886213		1569.59	0.20577923		2159.59	0.01101693		2749.6	0.08531048		3339.6	0.14049964		3929.6	-0.00576311
389.8	0.44259717		979.79	0.28903142		1569.79	0.20516294		2159.79	0.01144142		2749.8	0.08482023		3339.8	0.14086582		3929.8	-0.00547098
390	0.44271921		979.99	0.28983871		1569.99	0.20444519		2159.99	0.01209314		2750	0.08523801		3340	0.14121347		3930	-0.00521744
390.2	0.44345916		980.19	0.28923744		1570.19	0.20433238		2160.19	0.01314917		2750.2	0.08529372		3340.2	0.14135913		3930.2	-0.00457645
390.4	0.44412207		980.39	0.28933279		1570.39	0.20418016		2160.39	0.01264357		2750.4	0.08552672		3340.4	0.14188388		3930.4	-0.0056763
390.6	0.44434607		980.59	0.28955075		1570.59	0.2040945		2160.59	0.01218095		2750.6	0.08528159		3340.6	0.14219681		3930.6	-0.00576333
390.8	0.44514595		980.79	0.29069767		1570.79	0.20371833		2160.79	0.01105753		2750.8	0.08540748		3340.8	0.14326232		3930.8	-0.00603537
391	0.44405714		980.99	0.29153457		1570.99	0.20227616		2160.99	0.01027797		2751	0.0853894		3341	0.1426792		3931	-0.00687224
391.2	0.44405026		981.19	0.29205383		1571.19	0.20182181		2161.19	0.00938757		2751.2	0.08545852		3341.2	0.1425355		3931.2	-0.00639332
391.4	0.44460726		981.39	0.29257719		1571.39	0.20242616		2161.39	0.00932797		2751.4	0.08577574		3341.4	0.14296202		3931.4	-0.00670952
391.6	0.44466238		981.59	0.29183849		1571.59	0.20333055		2161.59	0.00901567		2751.6	0.08593196		3341.6	0.14308023		3931.6	-0.00658379
391.8	0.44601575		981.79	0.29197435		1571.79	0.20396327		2161.79	0.0092327		2751.8	0.08610245		3341.8	0.14223633		3931.8	-0.00629337
392	0.44658898		981.99	0.29271065		1571.99	0.20451954		2161.99	0.0103734		2752	0.08634119		3342	0.14197052		3932	-0.00597293
392.2	0.44691198		982.19	0.29266512		1572.19	0.20588811		2162.19	0.01019807		2752.2	0.0864012		3342.2	0.14199457		3932.2	-0.00663537
392.4	0.44787694		982.39	0.29301761		1572.39	0.20623071		2162.39	0.01009457		2752.4	0.08791078		3342.4	0.14213417		3932.4	-0.00611661
392.6	0.44823235		982.59	0.29272114		1572.59	0.20685233		2162.59	0.01106595		2752.6	0.08823442		3342.6	0.14154795		3932.6	-0.0054008
392.8	0.44854782		982.79	0.29274799		1572.79	0.20740407		2162.79	0.01265164		2752.8	0.08776418		3342.8	0.1422842		3932.8	-0.00486254
393	0.44794558		982.99	0.29314586		1572.99	0.20752659		2162.99	0.01303582		2753	0.08892764		3343	0.1426818		3933	-0.00490471
393.2	0.44815771		983.19	0.29277875		1573.19	0.20786351		2163.19	0.01371333		2753.2	0.08924398		3343.2	0.14337626		3933.2	-0.00458974
393.4	0.44740542		983.39	0.29332711		1573.39	0.20756186		2163.39	0.01448286		2753.4	0.088903		3343.4	0.14493463		3933.4	-0.00425277
393.6	0.44738526		983.59	0.29353715		1573.59	0.20719072		2163.59	0.01462956		2753.6	0.08940347		3343.6	0.14559093		3933.6	-0.00380236
393.8	0.44718921		983.79	0.29259973		1573.79	0.20712069		2163.79	0.01415794		2753.8	0.08919886		3343.8	0.14567724		3933.8	-0.00395723
394	0.44670387		983.99	0.29267083		1573.99	0.20836883		2163.99	0.01492159		2754	0.08884015		3344	0.14618869		3934	-0.00433415
394.2	0.44729651		984.19	0.29293425		1574.19	0.2091807		2164.19	0.01489983		2754.2	0.08968538		3344.2	0.14651245		3934.2	-0.0045433
394.4	0.44810648		984.39	0.29365865		1574.39	0.21073002		2164.39	0.01434735		2754.4	0.08885013		3344.4	0.14678744		3934.4	-0.00538543
394.6	0.44757825		984.59	0.29456125		1574.59	0.21097349		2164.59	0.01384997		2754.6	0.0891732		3344.6	0.14761173		3934.6	-0.00586474
394.8	0.44748166		984.79	0.29607329		1574.79	0.21132464		2164.79	0.01416846		2754.8	0.08815894		3344.8	0.14745241		3934.8	-0.00666143
395	0.4463845		984.99	0.29662405		1574.99	0.21152676		2164.99	0.01405665		2755	0.088143		3345	0.14640246		3935	-0.00717691
395.2	0.44610819		985.19	0.29698564		1575.19	0.21257884		2165.19	0.01358045		2755.2	0.08826314		3345.2	0.14638167		3935.2	-0.00741485
395.4	0.44652219		985.39	0.29743048		1575.39	0.21323247		2165.39	0.01314125		2755.4	0.08847571		3345.4	0.14711429		3935.4	-0.00806876
395.6	0.44722923		985.59	0.2966222		1575.59	0.21382413		2165.59	0.01325266		2755.6	0.08840186		3345.6	0.1479631		3935.6	-0.00806675
395.8	0.44847206		985.79	0.29728278		1575.79	0.21443468		2165.79	0.01248076		2755.8	0.08883133		3345.8	0.14699611		3935.8	-0.0077695
396	0.44813558		985.99	0.29791469		1575.99	0.21491156		2165.99	0.01189654		2756	0.08978974		3346	0.14686004		3936	-0.00776023
396.2	0.44946991		986.19	0.29826526		1576.19	0.21585635		2166.19	0.0115085		2756.2	0.09037032		3346.2	0.14653027		3936.2	-0.00847042
396.4	0.44961224		986.39	0.29843935		1576.39	0.21630897		2166.39	0.0111038		2756.4	0.09150162		3346.4	0.14637093		3936.4	-0.00798438
396.6	0.45004291		986.59	0.29778065		1576.59	0.21694544		2166.59	0.01147382		2756.6	0.09145777		3346.6	0.14575089		3936.6	-0.00800426
396.8	0.45081856		986.79	0.2979311		1576.79	0.21702273		2166.79	0.01137341		2756.8	0.09189145		3346.8	0.14497968		3936.8	-0.00932136
397	0.44968451		986.99	0.29818193		1576.99	0.21693526		2166.99	0.01079754		2757	0.09257448		3347	0.14497339		3937	-0.01000338
397.2	0.45000162		987.19	0.29695544		1577.19	0.21622366		2167.19	0.01097213		2757.2	0.09200077		3347.2	0.1450492		3937.2	-0.01010023
397.4	0.45050968		987.39	0.29750165		1577.39	0.21581926		2167.39	0.01041407		2757.4	0.09275435		3347.4	0.14556919		3937.4	-0.01023243
397.6	0.45061481		987.59	0.29727259		1577.59	0.2161559		2167.59	0.00984047		2757.6	0.09337685		3347.6	0.14558953		3937.6	-0.01012802
397.8	0.45055507		987.79	0.29714757		1577.79	0.21670818		2167.79	0.00959154		2757.8	0.09260533		3347.8	0.14537467		3937.8	-0.01057674
398	0.44985219		987.99	0.29730402		1577.99	0.21722033		2167.99	0.01058655		2758	0.09268319		3348	0.14614509		3938	-0.01088495
398.2	0.45007208		988.19	0.29805312		1578.19	0.21742414		2168.19	0.01047868		2758.2	0.09213641		3348.2	0.14582566		3938.2	-0.01010738
398.4	0.4497228		988.39	0.29828386		1578.39	0.21780776		2168.39	0.01115465		2758.4	0.09119819		3348.4	0.14609837		3938.4	-0.01006601
398.6	0.44834882		988.59	0.29891801		1578.59	0.21681603		2168.59	0.01096856		2758.6	0.09242158		3348.6	0.14660578		3938.6	-0.00989149
398.8	0.44828985		988.79	0.29989371		1578.79	0.2170634		2168.79	0.01172279		2758.8	0.09182032		3348.8	0.14667982		3938.8	-0.00956717
399	0.44882052		988.99	0.29991292		1578.99	0.21757715		2168.99	0.01151296		2759	0.09262646		3349	0.14727698		3939	-0.00855133
399.2	0.44828491		989.19	0.29922537		1579.19	0.21707902		2169.19	0.01132018		2759.2	0.09237368		3349.2	0.14828149		3939.2	-0.00808821
399.4	0.44882361		989.39	0.29885294		1579.39	0.21714906		2169.39	0.01196097		2759.4	0.09259327		3349.4	0.14981382		3939.4	-0.00835701
399.6	0.44920936		989.59	0.29879108		1579.59	0.21758202		2169.59	0.0121456		2759.6	0.09306441		3349.6	0.15049878		3939.6	-0.00784869
399.8	0.44952988		989.79	0.29945122		1579.79	0.21819114		2169.79	0.01157684		2759.8	0.0925318		3349.8	0.15053705		3939.8	-0.00702528
400	0.45049343		989.99	0.29949479		1579.99	0.21864134		2169.99	0.01189796		2760	0.09277472		3350	0.15060967		3940	-0.00781946
400.2	0.45225728		990.19	0.29971796		1580.19	0.2193796		2170.19	0.01279613		2760.2	0.09288209		3350.2	0.15000836		3940.2	-0.00762599
400.4	0.45241601		990.39	0.29948316		1580.39	0.21910059		2170.39	0.01260626		2760.4	0.09337407		3350.4	0.14997357		3940.4	-0.00664092
400.6	0.45330166		990.59	0.29988053		1580.59	0.21873073		2170.59	0.01257706		2760.6	0.09337865		3350.6	0.14928978		3940.6	-0.00672125
400.8	0.454094		990.79	0.30039907		1580.79	0.21889071		2170.79	0.01216837		2760.8	0.09343069		3350.8	0.14820415		3940.8	-0.00697442
401	0.45411615		990.99	0.30010315		1580.99	0.21897595		2170.99	0.01248106		2761	0.09376507		3351	0.14842211		3941	-0.00730801
401.2	0.45443373		991.19	0.29992614		1581.19	0.21917995		2171.19	0.01309192		2761.2	0.0930111		3351.2	0.14896117		3941.2	-0.00667804
401.4	0.45523065		991.39	0.30120768		1581.39	0.21949172		2171.39	0.0126827		2761.4	0.09332572		3351.4	0.1495106		3941.4	-0.00617054
401.6	0.45514622		991.59	0.30117859		1581.59	0.2194783		2171.59	0.01204262		2761.6	0.09344886		3351.6	0.14921719		3941.6	-0.00663676
401.8	0.45430029		991.79	0.30159862		1581.79	0.21899341		2171.79	0.01237512		2761.8	0.09266021		3351.8	0.1485975		3941.8	-0.00611709
402	0.45354078		991.99	0.30185676		1581.99	0.21878497		2171.99	0.01259641		2762	0.09300593		3352	0.14978582		3942	-0.00540794
402.2	0.45365532		992.19	0.30278691		1582.19	0.21922353		2172.19	0.01171034		2762.2	0.09233287		3352.2	0.14957688		3942.2	-0.00466065
402.4	0.4535843		992.39	0.30333627		1582.39	0.21921295		2172.39	0.01156368		2762.4	0.09357368		3352.4	0.14966798		3942.4	-0.0039159
402.6	0.45423088		992.59	0.30343118		1582.59	0.21864973		2172.59	0.01035645		2762.6	0.09445045		3352.6	0.15056602		3942.6	-0.00346901
402.8	0.45517422		992.79	0.30332908		1582.79	0.21933404		2172.79	0.01063177		2762.8	0.0942189		3352.8	0.15102762		3942.8	-0.00270784
403	0.45586859		992.99	0.3026162		1582.99	0.22039193		2172.99	0.01037211		2763	0.09540858		3353	0.1518486		3943	-0.00251342
403.2	0.45551046		993.19	0.30258351		1583.19	0.21934618		2173.19	0.0101936		2763.2	0.09459725		3353.2	0.1526038		3943.2	-0.0031941
403.4	0.45609506		993.39	0.30411146		1583.39	0.22034369		2173.39	0.01067454		2763.4	0.09483451		3353.4	0.15328151		3943.4	-0.00366516
403.6	0.45636832		993.59	0.30498049		1583.59	0.22032121		2173.59	0.00978303		2763.6	0.09538516		3353.6	0.15419428		3943.6	-0.00379185
403.8	0.45668942		993.79	0.30618313		1583.79	0.21952054		2173.79	0.00920858		2763.8	0.09563644		3353.8	0.15524037		3943.8	-0.00475735
404	0.45800108		993.99	0.30672139		1583.99	0.21986216		2173.99	0.00952827		2764	0.09644433		3354	0.15501249		3944	-0.0060152
404.2	0.45812406		994.19	0.30754854		1584.19	0.22065563		2174.19	0.00984757		2764.2	0.09634069		3354.2	0.15564443		3944.2	-0.00557861
404.4	0.45773856		994.39	0.30790941		1584.39	0.22072257		2174.39	0.00936385		2764.4	0.09660444		3354.4	0.15523943		3944.4	-0.0059609
404.6	0.45784466		994.59	0.30900947		1584.59	0.22183		2174.59	0.00958064		2764.6	0.09645512		3354.6	0.15510154		3944.6	-0.00657193
404.8	0.45849271		994.79	0.30904376		1584.79	0.22251674		2174.79	0.00989733		2764.8	0.09630042		3354.8	0.15427443		3944.8	-0.00658556
405	0.45836675		994.99	0.3092942		1584.99	0.22330916		2174.99	0.00997282		2765	0.09718878		3355	0.15503299		3945	-0.00666147
405.2	0.45866754		995.19	0.30986968		1585.19	0.22320327		2175.19	0.01035806		2765.2	0.09695114		3355.2	0.1550212		3945.2	-0.00595933
405.4	0.45921662		995.39	0.31045027		1585.39	0.22255953		2175.39	0.01036837		2765.4	0.09759913		3355.4	0.15425547		3945.4	-0.00634568
405.6	0.4587382		995.59	0.30988442		1585.59	0.22293553		2175.59	0.01073427		2765.6	0.09758475		3355.6	0.15353509		3945.6	-0.00666414
405.8	0.45840436		995.79	0.30934566		1585.79	0.222997		2175.79	0.01143112		2765.8	0.09710716		3355.8	0.15330794		3945.8	-0.0054579
406	0.45941928		995.99	0.30933976		1585.99	0.22332233		2175.99	0.01118143		2766	0.09786605		3356	0.15359605		3946	-0.00621439
406.2	0.45921401		996.19	0.30886818		1586.19	0.22409794		2176.19	0.01129059		2766.2	0.09749232		3356.2	0.15349854		3946.2	-0.00654114
406.4	0.46040387		996.39	0.30780585		1586.39	0.22410427		2176.39	0.01189386		2766.4	0.0981311		3356.4	0.15374567		3946.4	-0.00576465
406.6	0.4608773		996.59	0.30707018		1586.59	0.22368651		2176.59	0.01229361		2766.6	0.09826729		3356.6	0.15396358		3946.6	-0.00626489
406.8	0.46128225		996.79	0.30704336		1586.79	0.22465293		2176.79	0.01307122		2766.8	0.09832707		3356.8	0.15409038		3946.8	-0.00605224
407	0.46137845		996.99	0.30685405		1586.99	0.22564437		2176.99	0.01324271		2767	0.09897403		3357	0.15523965		3947	-0.00638438
407.2	0.46169951		997.19	0.30755505		1587.19	0.22442882		2177.19	0.01313304		2767.2	0.09898134		3357.2	0.15632248		3947.2	-0.00681627
407.4	0.46158839		997.39	0.3074525		1587.39	0.22495133		2177.39	0.01284533		2767.4	0.10024005		3357.4	0.15695344		3947.4	-0.00647995
407.6	0.4615187		997.59	0.30746964		1587.59	0.2247192		2177.59	0.01214208		2767.6	0.10137229		3357.6	0.15826647		3947.6	-0.00750957
407.8	0.46215661		997.79	0.30690572		1587.79	0.22392155		2177.79	0.01194494		2767.8	0.10222438		3357.8	0.15909166		3947.8	-0.00816639
408	0.4624476		997.99	0.30600575		1587.99	0.22469804		2177.99	0.01233999		2768	0.10199711		3358	0.15978465		3948	-0.00883064
408.2	0.46176933		998.19	0.30551225		1588.19	0.22532348		2178.19	0.01191846		2768.2	0.10179591		3358.2	0.16015301		3948.2	-0.00886816
408.4	0.46206227		998.39	0.30560271		1588.39	0.22564747		2178.39	0.01142072		2768.4	0.10154058		3358.4	0.15988917		3948.4	-0.00906318
408.6	0.46162892		998.59	0.30545013		1588.59	0.22623632		2178.59	0.01088271		2768.6	0.10076924		3358.6	0.1607679		3948.6	-0.00864388
408.8	0.46217001		998.79	0.30558342		1588.79	0.22520666		2178.79	0.01101194		2768.8	0.10079769		3358.8	0.16107864		3948.8	-0.00752086
409	0.46242167		998.99	0.30660291		1588.99	0.2255131		2178.99	0.01140005		2769	0.10107568		3359	0.16227955		3949	-0.00712604
409.2	0.46346274		999.19	0.3076074		1589.19	0.22519632		2179.19	0.01198355		2769.2	0.10092059		3359.2	0.16144338		3949.2	-0.00623891
409.4	0.46334761		999.39	0.30886378		1589.39	0.22530115		2179.39	0.01197131		2769.4	0.10048443		3359.4	0.16165738		3949.4	-0.00549966
409.6	0.46334725		999.59	0.30893575		1589.59	0.22546357		2179.59	0.01276642		2769.6	0.09966566		3359.6	0.16155054		3949.6	-0.00495369
409.8	0.46465033		999.79	0.3094912		1589.79	0.22552483		2179.79	0.01279029		2769.8	0.09976113		3359.8	0.16155114		3949.8	-0.00496278
410	0.46486004		999.99	0.30973272		1589.99	0.22569916		2179.99	0.01323098		2770	0.09973015		3360	0.1609585		3950	-0.00562718
410.2	0.46466829		1000.19	0.3095081		1590.19	0.22660807		2180.19	0.01421079		2770.2	0.10006122		3360.2	0.16104553		3950.2	-0.00498201
410.4	0.46588897		1000.39	0.31024824		1590.39	0.22672512		2180.39	0.01467397		2770.4	0.10046916		3360.4	0.16027506		3950.4	-0.00423062
410.6	0.46591893		1000.59	0.31108928		1590.59	0.22674264		2180.59	0.01512994		2770.6	0.10009532		3360.6	0.15912761		3950.6	-0.00484905
410.8	0.46638269		1000.79	0.31069916		1590.79	0.22694056		2180.79	0.0154045		2770.8	0.10001621		3360.8	0.15918951		3950.8	-0.00417612
411	0.46678887		1000.99	0.31125939		1590.99	0.22710664		2180.99	0.01526896		2771	0.09988075		3361	0.15952409		3951	-0.00413796
411.2	0.46700198		1001.19	0.31169956		1591.19	0.22717606		2181.19	0.01547118		2771.2	0.10034066		3361.2	0.15967539		3951.2	-0.00505473
411.4	0.46652453		1001.39	0.3111602		1591.39	0.22732854		2181.39	0.01512849		2771.4	0.10045844		3361.4	0.15863171		3951.4	-0.00554929
411.6	0.4659894		1001.59	0.31137361		1591.59	0.22721452		2181.59	0.01443755		2771.6	0.10141627		3361.6	0.15862384		3951.6	-0.0066038
411.8	0.46593045		1001.79	0.31167556		1591.79	0.22694014		2181.79	0.01411651		2771.8	0.10180965		3361.8	0.15881994		3951.8	-0.00748282
412	0.46599741		1001.99	0.3110218		1591.99	0.22750498		2181.99	0.01363161		2772	0.10132749		3362	0.15891803		3952	-0.00810467
412.2	0.46601458		1002.19	0.31188236		1592.19	0.22754632		2182.19	0.01271996		2772.2	0.10105124		3362.2	0.15818982		3952.2	-0.00850847
412.4	0.46636322		1002.39	0.31225808		1592.39	0.22836067		2182.39	0.01258707		2772.4	0.10067555		3362.4	0.15861369		3952.4	-0.00904934
412.6	0.466802		1002.59	0.3129971		1592.59	0.22843464		2182.59	0.01163522		2772.6	0.09962104		3362.6	0.15912541		3952.6	-0.00919696
412.8	0.46756322		1002.79	0.31415557		1592.79	0.22799626		2182.79	0.01201185		2772.8	0.0998129		3362.8	0.15927007		3952.8	-0.00934781
413	0.46762368		1002.99	0.31586605		1592.99	0.22833617		2182.99	0.01130962		2773	0.09953737		3363	0.15966898		3953	-0.0095165
413.2	0.4681117		1003.19	0.31639118		1593.19	0.22852354		2183.19	0.0108848		2773.2	0.09976315		3363.2	0.15943427		3953.2	-0.00888826
413.4	0.4679211		1003.39	0.31746302		1593.39	0.2292297		2183.39	0.01030325		2773.4	0.10004468		3363.4	0.16019279		3953.4	-0.00883848
413.6	0.46804664		1003.59	0.31733995		1593.59	0.22953031		2183.59	0.01109044		2773.6	0.10014007		3363.6	0.15967858		3953.6	-0.00889205
413.8	0.4685523		1003.79	0.31682108		1593.79	0.23065411		2183.79	0.0094131		2773.8	0.10073726		3363.8	0.1604377		3953.8	-0.00907308
414	0.46782167		1003.99	0.31661752		1593.99	0.23106947		2183.99	0.00982104		2774	0.10096168		3364	0.16148708		3954	-0.00928842
414.2	0.46783042		1004.19	0.31730363		1594.19	0.23141163		2184.19	0.01008398		2774.2	0.10179271		3364.2	0.16184044		3954.2	-0.00864003
414.4	0.46820534		1004.39	0.31720125		1594.39	0.23146111		2184.39	0.01059535		2774.4	0.10198087		3364.4	0.16177462		3954.4	-0.00805214
414.6	0.46836483		1004.59	0.31672742		1594.59	0.23061376		2184.59	0.01045694		2774.6	0.10090246		3364.6	0.16259406		3954.6	-0.00762089
414.8	0.4679876		1004.79	0.31578765		1594.79	0.23138387		2184.79	0.01084604		2774.8	0.10176557		3364.8	0.16368008		3954.8	-0.00698899
415	0.46786536		1004.99	0.3164087		1594.99	0.23209166		2184.99	0.01177343		2775	0.10226169		3365	0.16463429		3955	-0.00682481
415.2	0.46739085		1005.19	0.31565917		1595.19	0.23217541		2185.19	0.01249073		2775.2	0.10287586		3365.2	0.16493587		3955.2	-0.00615976
415.4	0.46650562		1005.39	0.31570729		1595.39	0.23215906		2185.39	0.01248989		2775.4	0.10352025		3365.4	0.16501929		3955.4	-0.00574179
415.6	0.46630034		1005.59	0.31632883		1595.59	0.23229023		2185.59	0.01271899		2775.6	0.10446807		3365.6	0.1657343		3955.6	-0.00524857
415.8	0.46757628		1005.79	0.31719348		1595.79	0.23214282		2185.79	0.01289416		2775.8	0.10449181		3365.8	0.16607324		3955.8	-0.00516608
416	0.46846014		1005.99	0.3176059		1595.99	0.23256738		2185.99	0.01347067		2776	0.10414452		3366	0.16661657		3956	-0.00452868
416.2	0.4679352		1006.19	0.31805254		1596.19	0.23256143		2186.19	0.01360444		2776.2	0.10378297		3366.2	0.16713974		3956.2	-0.00491
416.4	0.46776736		1006.39	0.31822255		1596.39	0.2333448		2186.39	0.01364953		2776.4	0.10333866		3366.4	0.16732957		3956.4	-0.00612203
416.6	0.46819234		1006.59	0.31936339		1596.59	0.23291085		2186.59	0.01320817		2776.6	0.10253553		3366.6	0.16713181		3956.6	-0.0067295
416.8	0.46737176		1006.79	0.32028607		1596.79	0.23241515		2186.79	0.01358328		2776.8	0.10213286		3366.8	0.16761429		3956.8	-0.00730868
417	0.46772992		1006.99	0.32055259		1596.99	0.23253112		2186.99	0.01349389		2777	0.10140212		3367	0.16732588		3957	-0.00716049
417.2	0.46848715		1007.19	0.3205132		1597.19	0.23345075		2187.19	0.01336115		2777.2	0.10156828		3367.2	0.16581272		3957.2	-0.00797907
417.4	0.4683216		1007.39	0.32138069		1597.39	0.2336341		2187.39	0.01285285		2777.4	0.1014062		3367.4	0.16615781		3957.4	-0.00842262
417.6	0.46853694		1007.59	0.32167371		1597.59	0.23367878		2187.59	0.01345035		2777.6	0.10068335		3367.6	0.16594892		3957.6	-0.00835195
417.8	0.46877799		1007.79	0.32221096		1597.79	0.23437084		2187.79	0.01319828		2777.8	0.10124223		3367.8	0.16605035		3957.8	-0.00846352
418	0.46921714		1007.99	0.32301681		1597.99	0.23459533		2187.99	0.01400884		2778	0.10184076		3368	0.16619702		3958	-0.00895002
418.2	0.46940823		1008.19	0.32339947		1598.19	0.2347354		2188.19	0.01369221		2778.2	0.1023006		3368.2	0.16555379		3958.2	-0.00862058
418.4	0.47029198		1008.39	0.32295256		1598.39	0.23427893		2188.39	0.01373803		2778.4	0.1027754		3368.4	0.16556353		3958.4	-0.00821259
418.6	0.47010229		1008.59	0.32221696		1598.59	0.2348269		2188.59	0.01249107		2778.6	0.10323177		3368.6	0.16564704		3958.6	-0.00842444
418.8	0.47112394		1008.79	0.32089358		1598.79	0.23629669		2188.79	0.01342716		2778.8	0.10513754		3368.8	0.1658155		3958.8	-0.00853268
419	0.47200474		1008.99	0.3210304		1598.99	0.23556642		2188.99	0.01452512		2779	0.1061657		3369	0.16540854		3959	-0.00776223
419.2	0.47205894		1009.19	0.32099481		1599.19	0.23548359		2189.19	0.0144927		2779.2	0.10731252		3369.2	0.16490971		3959.2	-0.00715448
419.4	0.47211608		1009.39	0.32209119		1599.39	0.23580094		2189.39	0.01469482		2779.4	0.10842017		3369.4	0.16448868		3959.4	-0.00759692
419.6	0.47281697		1009.59	0.32273902		1599.59	0.2351393		2189.59	0.01508663		2779.6	0.1089218		3369.6	0.16504773		3959.6	-0.00827531
419.8	0.47371613		1009.79	0.32317734		1599.79	0.23513674		2189.79	0.01467078		2779.8	0.10903193		3369.8	0.16559038		3959.8	-0.00887291
420	0.47377738		1009.99	0.32308806		1599.99	0.2344829		2189.99	0.0146861		2780	0.10866682		3370	0.16716555		3960	-0.00959191
420.2	0.47337872		1010.19	0.32228004		1600.19	0.23368562		2190.19	0.0147024		2780.2	0.10839805		3370.2	0.16762989		3960.2	-0.01027739
420.4	0.47355228		1010.39	0.32294411		1600.39	0.23341895		2190.39	0.0149791		2780.4	0.10873905		3370.4	0.16801422		3960.4	-0.01126758
420.6	0.47365712		1010.59	0.32302619		1600.59	0.23379363		2190.59	0.01521442		2780.6	0.1085795		3370.6	0.16823752		3960.6	-0.01172376
420.8	0.47455411		1010.79	0.32291176		1600.79	0.23380829		2190.79	0.01581257		2780.8	0.10771436		3370.8	0.16919262		3960.8	-0.01229213
421	0.47503691		1010.99	0.32233002		1600.99	0.23415508		2190.99	0.01584888		2781	0.10798274		3371	0.1688015		3961	-0.01240787
421.2	0.47519252		1011.19	0.32280684		1601.19	0.23443842		2191.19	0.01579453		2781.2	0.10853845		3371.2	0.1691989		3961.2	-0.01272593
421.4	0.47482252		1011.39	0.32264906		1601.39	0.23407886		2191.39	0.01584657		2781.4	0.10823056		3371.4	0.17081141		3961.4	-0.01219282
421.6	0.47460853		1011.59	0.3233128		1601.59	0.23472985		2191.59	0.01571885		2781.6	0.10781572		3371.6	0.17056064		3961.6	-0.01142744
421.8	0.47390743		1011.79	0.32335159		1601.79	0.23530678		2191.79	0.01516203		2781.8	0.10845034		3371.8	0.17035537		3961.8	-0.01071287
422	0.47432303		1011.99	0.32253593		1601.99	0.23647952		2191.99	0.01412473		2782	0.10878239		3372	0.17032073		3962	-0.01018625
422.2	0.47330784		1012.19	0.32232776		1602.19	0.23703192		2192.19	0.01350879		2782.2	0.10874442		3372.2	0.16989554		3962.2	-0.00878826
422.4	0.47320223		1012.39	0.3217226		1602.39	0.23734631		2192.39	0.01318145		2782.4	0.10903843		3372.4	0.16948047		3962.4	-0.00795611
422.6	0.47285484		1012.59	0.32122066		1602.59	0.23925897		2192.59	0.01240869		2782.6	0.11016695		3372.6	0.168974		3962.6	-0.00828943
422.8	0.47349906		1012.79	0.3211206		1602.79	0.23957269		2192.79	0.01276389		2782.8	0.11011546		3372.8	0.16906268		3962.8	-0.00767809
423	0.47294131		1012.99	0.32218972		1602.99	0.23945098		2192.99	0.01255278		2783	0.11087914		3373	0.16822622		3963	-0.00683568
423.2	0.47221626		1013.19	0.32327084		1603.19	0.23955476		2193.19	0.01220031		2783.2	0.1111037		3373.2	0.16868305		3963.2	-0.00726092
423.4	0.4724224		1013.39	0.32484901		1603.39	0.23975461		2193.39	0.01235742		2783.4	0.11196933		3373.4	0.16855854		3963.4	-0.0066729
423.6	0.47275457		1013.59	0.32564194		1603.59	0.23997731		2193.59	0.0122422		2783.6	0.1115484		3373.6	0.17006115		3963.6	-0.00672496
423.8	0.47352608		1013.79	0.32599815		1603.79	0.2396251		2193.79	0.01135684		2783.8	0.11126705		3373.8	0.17070355		3963.8	-0.00621499
424	0.47446009		1013.99	0.32631744		1603.99	0.23872218		2193.99	0.0111176		2784	0.110745		3374	0.17145691		3964	-0.00617142
424.2	0.47454253		1014.19	0.32700838		1604.19	0.23872009		2194.19	0.01131107		2784.2	0.11021168		3374.2	0.17140996		3964.2	-0.00562997
424.4	0.4752817		1014.39	0.32742233		1604.39	0.23984705		2194.39	0.01133058		2784.4	0.11010476		3374.4	0.17185366		3964.4	-0.00580637
424.6	0.4750927		1014.59	0.32764777		1604.59	0.23977487		2194.59	0.01110228		2784.6	0.10943929		3374.6	0.1727267		3964.6	-0.00721444
424.8	0.47604919		1014.79	0.32820695		1604.79	0.23971871		2194.79	0.01070609		2784.8	0.10892364		3374.8	0.17320309		3964.8	-0.00775814
425	0.4756901		1014.99	0.32868685		1604.99	0.23986569		2194.99	0.01071026		2785	0.10981626		3375	0.17370412		3965	-0.0081205
425.2	0.47655457		1015.19	0.32946695		1605.19	0.24024673		2195.19	0.01028321		2785.2	0.10925821		3375.2	0.17452506		3965.2	-0.00810012
425.4	0.47722314		1015.39	0.32915773		1605.39	0.24053122		2195.39	0.00941063		2785.4	0.10895202		3375.4	0.17526435		3965.4	-0.00816802
425.6	0.47670877		1015.59	0.33044479		1605.59	0.24062511		2195.59	0.00958021		2785.6	0.10838644		3375.6	0.17460474		3965.6	-0.00754291
425.8	0.47704419		1015.79	0.32985368		1605.79	0.2419628		2195.79	0.00992265		2785.8	0.10855721		3375.8	0.17474716		3965.8	-0.00809124
426	0.47747916		1015.99	0.329137		1605.99	0.24318852		2195.99	0.01011627		2786	0.10902618		3376	0.17538952		3966	-0.00794294
426.2	0.47707222		1016.19	0.32938177		1606.19	0.24326946		2196.19	0.01018007		2786.2	0.10908629		3376.2	0.17547975		3966.2	-0.00807726
426.4	0.4767306		1016.39	0.32954267		1606.39	0.24395782		2196.39	0.01040757		2786.4	0.10867271		3376.4	0.17504946		3966.4	-0.00951561
426.6	0.47691546		1016.59	0.32953157		1606.59	0.24433479		2196.59	0.01091346		2786.6	0.10868905		3376.6	0.17481741		3966.6	-0.01001744
426.8	0.4768864		1016.79	0.32930891		1606.79	0.24368657		2196.79	0.01148684		2786.8	0.10877955		3376.8	0.17489006		3966.8	-0.00933179
427	0.47667864		1016.99	0.32917882		1606.99	0.24411074		2196.99	0.01210037		2787	0.1097299		3377	0.17506471		3967	-0.00966392
427.2	0.47689918		1017.19	0.32917916		1607.19	0.24355195		2197.19	0.01228491		2787.2	0.11007586		3377.2	0.17520447		3967.2	-0.00963344
427.4	0.47761233		1017.39	0.32977971		1607.39	0.24440159		2197.39	0.01207433		2787.4	0.11144748		3377.4	0.17472439		3967.4	-0.00891185
427.6	0.47822143		1017.59	0.32969361		1607.59	0.24411895		2197.59	0.0119201		2787.6	0.11085539		3377.6	0.17463929		3967.6	-0.00863692
427.8	0.47900028		1017.79	0.32964569		1607.79	0.24345841		2197.79	0.01158163		2787.8	0.11143785		3377.8	0.17401981		3967.8	-0.00842157
428	0.47955586		1017.99	0.32915657		1607.99	0.24340488		2197.99	0.01146586		2788	0.1124226		3378	0.17391531		3968	-0.00894612
428.2	0.48011838		1018.19	0.32904964		1608.19	0.2432788		2198.19	0.01108116		2788.2	0.11331494		3378.2	0.17367622		3968.2	-0.00838366
428.4	0.48050684		1018.39	0.3290776		1608.39	0.24278437		2198.39	0.01108812		2788.4	0.11377147		3378.4	0.17326556		3968.4	-0.00833129
428.6	0.48033337		1018.59	0.32929473		1608.59	0.24253803		2198.59	0.01117919		2788.6	0.11417546		3378.6	0.17399869		3968.6	-0.00895796
428.8	0.48071737		1018.79	0.32943291		1608.79	0.24321583		2198.79	0.01136177		2788.8	0.11445091		3378.8	0.1736089		3968.8	-0.00817143
429	0.48111868		1018.99	0.32954007		1608.99	0.24377053		2198.99	0.01174546		2789	0.11540689		3379	0.17389346		3969	-0.00752857
429.2	0.48207685		1019.19	0.32977969		1609.19	0.2442201		2199.19	0.01156357		2789.2	0.11504315		3379.2	0.1743494		3969.2	-0.0073185
429.4	0.48233389		1019.39	0.33017972		1609.39	0.24501381		2199.39	0.01194254		2789.4	0.11575554		3379.4	0.1746806		3969.4	-0.00716003
429.6	0.48185306		1019.59	0.33170267		1609.59	0.2449842		2199.59	0.01240087		2789.6	0.11570019		3379.6	0.17436303		3969.6	-0.0068982
429.8	0.48172499		1019.79	0.33195347		1609.79	0.24607076		2199.79	0.01235083		2789.8	0.11624788		3379.8	0.17546505		3969.8	-0.00674471
430	0.48118542		1019.99	0.33247271		1609.99	0.24569698		2199.99	0.0122431		2790	0.11672918		3380	0.17623111		3970	-0.00641254
430.2	0.48116515		1020.19	0.33243885		1610.19	0.24595043		2200.19	0.01227107		2790.2	0.11601381		3380.2	0.17630229		3970.2	-0.00593886
430.4	0.48030197		1020.39	0.33318827		1610.39	0.24624004		2200.39	0.01166718		2790.4	0.11538103		3380.4	0.1761378		3970.4	-0.00573072
430.6	0.48014436		1020.59	0.33306234		1610.59	0.24606469		2200.59	0.01276307		2790.6	0.11596649		3380.6	0.1760637		3970.6	-0.0057492
430.8	0.48014751		1020.79	0.33322182		1610.79	0.24629639		2200.79	0.0123325		2790.8	0.11624746		3380.8	0.17591479		3970.8	-0.00590136
431	0.4796485		1020.99	0.33324762		1610.99	0.24713821		2200.99	0.01199146		2791	0.11691894		3381	0.17549185		3971	-0.00626329
431.2	0.47965486		1021.19	0.33395861		1611.19	0.24693142		2201.19	0.01174358		2791.2	0.11714628		3381.2	0.17532272		3971.2	-0.00630294
431.4	0.48002895		1021.39	0.33394197		1611.39	0.24672524		2201.39	0.0109697		2791.4	0.11776017		3381.4	0.17511094		3971.4	-0.00626216
431.6	0.48097449		1021.59	0.33377514		1611.59	0.24673424		2201.59	0.01093697		2791.6	0.118299		3381.6	0.17515804		3971.6	-0.0059274
431.8	0.48083211		1021.79	0.33371209		1611.79	0.24581322		2201.79	0.0106017		2791.8	0.11951449		3381.8	0.17498691		3971.8	-0.00625665
432	0.48115902		1021.99	0.33331309		1611.99	0.24555498		2201.99	0.01024441		2792	0.11925754		3382	0.17546069		3972	-0.0064937
432.2	0.48229576		1022.19	0.33358968		1612.19	0.24517131		2202.19	0.00962052		2792.2	0.11933736		3382.2	0.17519156		3972.2	-0.00624357
432.4	0.48196187		1022.39	0.33371846		1612.39	0.24538944		2202.39	0.01075899		2792.4	0.11860061		3382.4	0.17556498		3972.4	-0.0067408
432.6	0.48310625		1022.59	0.33368536		1612.59	0.24644124		2202.59	0.01184737		2792.6	0.11845863		3382.6	0.1765766		3972.6	-0.00741154
432.8	0.48297267		1022.79	0.33391966		1612.79	0.24561885		2202.79	0.01268204		2792.8	0.11824619		3382.8	0.17673463		3972.8	-0.00725771
433	0.48364785		1022.99	0.33470578		1612.99	0.24586002		2202.99	0.01336528		2793	0.11841974		3383	0.17670855		3973	-0.00789336
433.2	0.48464023		1023.19	0.33578754		1613.19	0.24636595		2203.19	0.01409479		2793.2	0.11837858		3383.2	0.17726122		3973.2	-0.00929274
433.4	0.4847798		1023.39	0.33650448		1613.39	0.24727086		2203.39	0.01473249		2793.4	0.11827006		3383.4	0.17730806		3973.4	-0.00913485
433.6	0.48562362		1023.59	0.33762105		1613.59	0.24709707		2203.59	0.01541047		2793.6	0.11697504		3383.6	0.17806385		3973.6	-0.00911792
433.8	0.48599268		1023.79	0.33784014		1613.79	0.2475299		2203.79	0.01518821		2793.8	0.1167565		3383.8	0.17840642		3973.8	-0.00846321
434	0.48625467		1023.99	0.33832013		1613.99	0.24741751		2203.99	0.01585087		2794	0.11649732		3384	0.1780691		3974	-0.00853726
434.2	0.48718286		1024.19	0.3388737		1614.19	0.24818289		2204.19	0.01539418		2794.2	0.116517		3384.2	0.17881724		3974.2	-0.00753192
434.4	0.48696106		1024.39	0.33977852		1614.39	0.24775728		2204.39	0.01434322		2794.4	0.11722136		3384.4	0.1786697		3974.4	-0.00828813
434.6	0.48723397		1024.59	0.33933084		1614.59	0.24830193		2204.59	0.01479544		2794.6	0.11737649		3384.6	0.17792291		3974.6	-0.00898781
434.8	0.48770591		1024.79	0.33929725		1614.79	0.248759		2204.79	0.01413284		2794.8	0.11713129		3384.8	0.17813427		3974.8	-0.00902982
435	0.48719572		1024.99	0.33901859		1614.99	0.24843014		2204.99	0.01422978		2795	0.11730657		3385	0.1786221		3975	-0.00883288
435.2	0.4873918		1025.19	0.33882521		1615.19	0.24781449		2205.19	0.01392941		2795.2	0.11677671		3385.2	0.179829		3975.2	-0.0089817
435.4	0.4875358		1025.39	0.33756505		1615.39	0.2471154		2205.39	0.01344245		2795.4	0.11716123		3385.4	0.18040357		3975.4	-0.00849188
435.6	0.48714219		1025.59	0.33669197		1615.59	0.24773758		2205.59	0.01302243		2795.6	0.11805287		3385.6	0.18152823		3975.6	-0.00925751
435.8	0.48574519		1025.79	0.33702641		1615.79	0.24762049		2205.79	0.01268689		2795.8	0.11801465		3385.8	0.18240353		3975.8	-0.00958501
436	0.48601529		1025.99	0.33637874		1615.99	0.24876084		2205.99	0.01190593		2796	0.1180002		3386	0.18296684		3976	-0.00986634
436.2	0.48580694		1026.19	0.33627258		1616.19	0.24964229		2206.19	0.01130181		2796.2	0.11867389		3386.2	0.18301834		3976.2	-0.0105749
436.4	0.48523392		1026.39	0.33573352		1616.39	0.25072688		2206.39	0.01224276		2796.4	0.11861011		3386.4	0.18377104		3976.4	-0.01082388
436.6	0.48602385		1026.59	0.33601567		1616.59	0.25058584		2206.59	0.01210183		2796.6	0.11877738		3386.6	0.18388948		3976.6	-0.01087431
436.8	0.48623951		1026.79	0.33534467		1616.79	0.25011826		2206.79	0.0120495		2796.8	0.1193863		3386.8	0.18311632		3976.8	-0.01102902
437	0.48681327		1026.99	0.33570331		1616.99	0.25138162		2206.99	0.01135195		2797	0.11985218		3387	0.18281787		3977	-0.01215248
437.2	0.4866796		1027.19	0.33546809		1617.19	0.25216235		2207.19	0.01100191		2797.2	0.12012854		3387.2	0.18249982		3977.2	-0.01298252
437.4	0.48733377		1027.39	0.3354144		1617.39	0.25326748		2207.39	0.01109037		2797.4	0.11934827		3387.4	0.18199875		3977.4	-0.01250505
437.6	0.48854117		1027.59	0.33587098		1617.59	0.25267043		2207.59	0.01041409		2797.6	0.11910335		3387.6	0.18232474		3977.6	-0.01234993
437.8	0.488744		1027.79	0.3357437		1617.79	0.25235262		2207.79	0.0090509		2797.8	0.12003053		3387.8	0.18157051		3977.8	-0.0111108
438	0.48822283		1027.99	0.33663023		1617.99	0.25230839		2207.99	0.00917654		2798	0.12061668		3388	0.18084806		3978	-0.01054976
438.2	0.4894695		1028.19	0.33786095		1618.19	0.25261299		2208.19	0.00759747		2798.2	0.12062557		3388.2	0.181094		3978.2	-0.00983014
438.4	0.48964667		1028.39	0.3377129		1618.39	0.25212967		2208.39	0.0073659		2798.4	0.12065161		3388.4	0.18107726		3978.4	-0.0099886
438.6	0.49030885		1028.59	0.33851446		1618.59	0.25293181		2208.59	0.0080377		2798.6	0.12020626		3388.6	0.18045393		3978.6	-0.00934334
438.8	0.49049008		1028.79	0.33874551		1618.79	0.25215917		2208.79	0.00834958		2798.8	0.12017303		3388.8	0.18063997		3978.8	-0.00858741
439	0.49061609		1028.99	0.33909081		1618.99	0.2517552		2208.99	0.00987286		2799	0.12056413		3389	0.18111658		3979	-0.00765698
439.2	0.49090533		1029.19	0.33949596		1619.19	0.25259264		2209.19	0.01030134		2799.2	0.12117108		3389.2	0.18217157		3979.2	-0.00715269
439.4	0.48967377		1029.39	0.33927		1619.39	0.2529019		2209.39	0.01165478		2799.4	0.1213116		3389.4	0.18311318		3979.4	-0.00730268
439.6	0.48960488		1029.59	0.33908293		1619.59	0.25443757		2209.59	0.01230826		2799.6	0.12160258		3389.6	0.18351737		3979.6	-0.00780313
439.8	0.48897346		1029.79	0.33972626		1619.79	0.25503156		2209.79	0.01375559		2799.8	0.12151332		3389.8	0.1837614		3979.8	-0.00824362
440	0.4884334		1029.99	0.33969888		1619.99	0.25558648		2209.99	0.01402336		2800	0.12169516		3390	0.18330973		3980	-0.00864444
440.2	0.48835844		1030.19	0.34001086		1620.19	0.25637774		2210.19	0.01457723		2800.2	0.12108479		3390.2	0.18430988		3980.2	-0.00890926
440.4	0.48825066		1030.39	0.3399297		1620.39	0.25717135		2210.39	0.01507628		2800.4	0.12114499		3390.4	0.18480184		3980.4	-0.00863985
440.6	0.48883425		1030.59	0.34043452		1620.59	0.25680106		2210.59	0.01448782		2800.6	0.12149468		3390.6	0.1845641		3980.6	-0.0089542
440.8	0.4892141		1030.79	0.34047046		1620.79	0.25719102		2210.79	0.01497909		2800.8	0.12223654		3390.8	0.18472252		3980.8	-0.00952574
441	0.48913988		1030.99	0.34132707		1620.99	0.25761143		2210.99	0.0141791		2801	0.12267631		3391	0.18539816		3981	-0.01005501
441.2	0.48855454		1031.19	0.34220637		1621.19	0.25754138		2211.19	0.01310129		2801.2	0.12276371		3391.2	0.18502525		3981.2	-0.01032979
441.4	0.48972089		1031.39	0.34262342		1621.39	0.25754734		2211.39	0.0129712		2801.4	0.12223031		3391.4	0.18498854		3981.4	-0.01090424
441.6	0.48946861		1031.59	0.34221305		1621.59	0.25686747		2211.59	0.01232848		2801.6	0.1230806		3391.6	0.18614983		3981.6	-0.01084375
441.8	0.48912621		1031.79	0.34248154		1621.79	0.25705261		2211.79	0.01163116		2801.8	0.12314312		3391.8	0.18655226		3981.8	-0.01035678
442	0.48978325		1031.99	0.34325018		1621.99	0.25777815		2211.99	0.0112585		2802	0.12345641		3392	0.18553114		3982	-0.010316
442.2	0.49070281		1032.19	0.34449659		1622.19	0.25762697		2212.19	0.0099039		2802.2	0.12332063		3392.2	0.18657371		3982.2	-0.00987444
442.4	0.49046233		1032.39	0.34454874		1622.39	0.25720451		2212.39	0.01008841		2802.4	0.12332804		3392.4	0.18665905		3982.4	-0.00941603
442.6	0.49108758		1032.59	0.34546777		1622.59	0.25720004		2212.59	0.00951328		2802.6	0.12381762		3392.6	0.18587984		3982.6	-0.00821561
442.8	0.49185195		1032.79	0.34548717		1622.79	0.25700098		2212.79	0.00908063		2802.8	0.12430188		3392.8	0.18628315		3982.8	-0.00722336
443	0.49235872		1032.99	0.34613122		1622.99	0.25823621		2212.99	0.01024771		2803	0.12450928		3393	0.18653821		3983	-0.00707824
443.2	0.49236693		1033.19	0.34634033		1623.19	0.25852263		2213.19	0.01019137		2803.2	0.12422624		3393.2	0.18625307		3983.2	-0.00719565
443.4	0.49127049		1033.39	0.34593977		1623.39	0.25818498		2213.39	0.01089811		2803.4	0.12431689		3393.4	0.18663607		3983.4	-0.00745171
443.6	0.49262801		1033.59	0.34520747		1623.59	0.25940167		2213.59	0.01156374		2803.6	0.12448667		3393.6	0.1862014		3983.6	-0.00814643
443.8	0.4922485		1033.79	0.34498507		1623.79	0.25863862		2213.79	0.01235808		2803.8	0.12503329		3393.8	0.18641243		3983.8	-0.00885093
444	0.49317333		1033.99	0.34485189		1623.99	0.25805737		2213.99	0.01190916		2804	0.12445372		3394	0.18674398		3984	-0.00746749
444.2	0.49426465		1034.19	0.34459237		1624.19	0.25809909		2214.19	0.01218735		2804.2	0.12382671		3394.2	0.18751368		3984.2	-0.00709037
444.4	0.49486672		1034.39	0.34476104		1624.39	0.25820285		2214.39	0.01193094		2804.4	0.12467962		3394.4	0.18768806		3984.4	-0.00705108
444.6	0.49477267		1034.59	0.34482125		1624.59	0.25776154		2214.59	0.01207544		2804.6	0.125805		3394.6	0.18767297		3984.6	-0.00652511
444.8	0.49459098		1034.79	0.34472791		1624.79	0.25721931		2214.79	0.01225468		2804.8	0.12616547		3394.8	0.18767944		3984.8	-0.00708289
445	0.49510548		1034.99	0.34442645		1624.99	0.25658437		2214.99	0.0118646		2805	0.12687151		3395	0.1880153		3985	-0.00724009
445.2	0.49394576		1035.19	0.34416761		1625.19	0.25581285		2215.19	0.01151605		2805.2	0.1266209		3395.2	0.18833982		3985.2	-0.00774686
445.4	0.49417401		1035.39	0.34314814		1625.39	0.25546826		2215.39	0.01153325		2805.4	0.12698443		3395.4	0.18884938		3985.4	-0.00769977
445.6	0.49386773		1035.59	0.34298634		1625.59	0.25480683		2215.59	0.01089933		2805.6	0.12731155		3395.6	0.1898114		3985.6	-0.00659162
445.8	0.49295468		1035.79	0.34355187		1625.79	0.25446412		2215.79	0.0102743		2805.8	0.1274924		3395.8	0.19009239		3985.8	-0.00705112
446	0.49221539		1035.99	0.34306973		1625.99	0.25436813		2215.99	0.01006353		2806	0.12768951		3396	0.19013677		3986	-0.00737845
446.2	0.49085968		1036.19	0.3439798		1626.19	0.25426268		2216.19	0.00974469		2806.2	0.12745671		3396.2	0.19084857		3986.2	-0.00663997
446.4	0.49104712		1036.39	0.34444203		1626.39	0.25453586		2216.39	0.01026232		2806.4	0.12683284		3396.4	0.19104945		3986.4	-0.00711893
446.6	0.49136866		1036.59	0.34529757		1626.59	0.25515045		2216.59	0.00999672		2806.6	0.12727845		3396.6	0.19120814		3986.6	-0.00766312
446.8	0.4911886		1036.79	0.34602947		1626.79	0.25556222		2216.79	0.01050251		2806.8	0.12685951		3396.8	0.19196331		3986.8	-0.00824702
447	0.49095418		1036.99	0.34649781		1626.99	0.25574498		2216.99	0.01150124		2807	0.1258523		3397	0.19155419		3987	-0.00861155
447.2	0.49045497		1037.19	0.34658357		1627.19	0.25580825		2217.19	0.01249996		2807.2	0.12529581		3397.2	0.19173049		3987.2	-0.00904966
447.4	0.49058961		1037.39	0.34665541		1627.39	0.25644981		2217.39	0.01313021		2807.4	0.12552184		3397.4	0.1924505		3987.4	-0.00974354
447.6	0.49140181		1037.59	0.34713924		1627.59	0.25730294		2217.59	0.01428679		2807.6	0.12482222		3397.6	0.19210887		3987.6	-0.00962306
447.8	0.4920017		1037.79	0.34767177		1627.79	0.25648042		2217.79	0.01427685		2807.8	0.12393245		3397.8	0.19204312		3987.8	-0.00868096
448	0.49305507		1037.99	0.34848206		1627.99	0.25762068		2217.99	0.01402911		2808	0.12294176		3398	0.19176489		3988	-0.00832874
448.2	0.49397697		1038.19	0.34893474		1628.19	0.25838092		2218.19	0.01478111		2808.2	0.1225748		3398.2	0.19135466		3988.2	-0.00890646
448.4	0.4947065		1038.39	0.34908459		1628.39	0.25888477		2218.39	0.01461939		2808.4	0.12379616		3398.4	0.19197455		3988.4	-0.0087827
448.6	0.49468447		1038.59	0.34907464		1628.59	0.25906476		2218.59	0.01475263		2808.6	0.12491903		3398.6	0.19180546		3988.6	-0.00892771
448.8	0.49512372		1038.79	0.34895121		1628.79	0.25845112		2218.79	0.01564458		2808.8	0.12516969		3398.8	0.19209714		3988.8	-0.00876888
449	0.49521771		1038.99	0.34898623		1628.99	0.25956801		2218.99	0.01626181		2809	0.12567136		3399	0.19272123		3989	-0.00824916
449.2	0.49485217		1039.19	0.34806373		1629.19	0.26029369		2219.19	0.01570312		2809.2	0.1264415		3399.2	0.19306438		3989.2	-0.00818167
449.4	0.49595624		1039.39	0.34822271		1629.39	0.26109783		2219.39	0.01509978		2809.4	0.1268016		3399.4	0.19279961		3989.4	-0.00775998
449.6	0.49666898		1039.59	0.34782388		1629.59	0.26142943		2219.59	0.01532272		2809.6	0.12708169		3399.6	0.19307631		3989.6	-0.00733348
449.8	0.49620164		1039.79	0.34736142		1629.79	0.26172458		2219.79	0.01488049		2809.8	0.12788403		3399.8	0.19351804		3989.8	-0.00853052
450	0.49634425		1039.99	0.34719027		1629.99	0.26288982		2219.99	0.01481641		2810	0.12795024		3400	0.19408682		3990	-0.00835527
450.2	0.49674827		1040.19	0.34796703		1630.19	0.26363516		2220.19	0.01480695		2810.2	0.12837957		3400.2	0.19337017		3990.2	-0.00816426
450.4	0.49790464		1040.39	0.34792738		1630.39	0.26349547		2220.39	0.01471566		2810.4	0.12878062		3400.4	0.1941794		3990.4	-0.00882836
450.6	0.49836321		1040.59	0.3481224		1630.59	0.26410492		2220.59	0.01476488		2810.6	0.12937389		3400.6	0.19402593		3990.6	-0.00905764
450.8	0.49933011		1040.79	0.34786564		1630.79	0.26401956		2220.79	0.01538916		2810.8	0.12912107		3400.8	0.19428825		3990.8	-0.00901321
451	0.49981541		1040.99	0.34822418		1630.99	0.26447252		2220.99	0.01528523		2811	0.12898306		3401	0.19413609		3991	-0.00900724
451.2	0.50005247		1041.19	0.34839146		1631.19	0.26468266		2221.19	0.0156676		2811.2	0.12819514		3401.2	0.1943317		3991.2	-0.00950307
451.4	0.50128777		1041.39	0.34896156		1631.39	0.2645017		2221.39	0.01511313		2811.4	0.12870189		3401.4	0.19390894		3991.4	-0.00957703
451.6	0.5007536		1041.59	0.34982057		1631.59	0.26398663		2221.59	0.01499739		2811.6	0.12763616		3401.6	0.19347683		3991.6	-0.00871709
451.8	0.50114144		1041.79	0.34988505		1631.79	0.26393252		2221.79	0.01424439		2811.8	0.12750935		3401.8	0.19333273		3991.8	-0.00846287
452	0.50160325		1041.99	0.34998969		1631.99	0.26385867		2221.99	0.01400508		2812	0.12755772		3402	0.19268969		3992	-0.00928314
452.2	0.50199073		1042.19	0.34972789		1632.19	0.26295879		2222.19	0.01425925		2812.2	0.12804791		3402.2	0.1928129		3992.2	-0.00835691
452.4	0.50218413		1042.39	0.34990877		1632.39	0.26313764		2222.39	0.01351017		2812.4	0.12827187		3402.4	0.19380727		3992.4	-0.00806542
452.6	0.50220482		1042.59	0.34954783		1632.59	0.26294499		2222.59	0.01425288		2812.6	0.12844515		3402.6	0.19354784		3992.6	-0.00786204
452.8	0.50174552		1042.79	0.34920505		1632.79	0.26299199		2222.79	0.01520688		2812.8	0.12796387		3402.8	0.1931231		3992.8	-0.00758835
453	0.50166168		1042.99	0.34907334		1632.99	0.26413569		2222.99	0.01524626		2813	0.128376		3403	0.19332079		3993	-0.00763945
453.2	0.50192574		1043.19	0.34895044		1633.19	0.26436278		2223.19	0.01507753		2813.2	0.12952731		3403.2	0.19349926		3993.2	-0.00758845
453.4	0.50201565		1043.39	0.34977743		1633.39	0.26370507		2223.39	0.01481533		2813.4	0.12920916		3403.4	0.19321427		3993.4	-0.00703974
453.6	0.50122616		1043.59	0.35027961		1633.59	0.26253153		2223.59	0.01525263		2813.6	0.1295117		3403.6	0.19362238		3993.6	-0.0068183
453.8	0.50030182		1043.79	0.35112442		1633.79	0.26221851		2223.79	0.01473238		2813.8	0.12947882		3403.8	0.19359207		3993.8	-0.00704443
454	0.4993809		1043.99	0.35268392		1633.99	0.26287661		2223.99	0.01467402		2814	0.12957032		3404	0.19330408		3994	-0.00792842
454.2	0.49882983		1044.19	0.35344262		1634.19	0.26246013		2224.19	0.01441826		2814.2	0.13043429		3404.2	0.1929802		3994.2	-0.00804161
454.4	0.49981732		1044.39	0.35357669		1634.39	0.26268877		2224.39	0.01422818		2814.4	0.13006763		3404.4	0.19299777		3994.4	-0.00823078
454.6	0.50013518		1044.59	0.35488411		1634.59	0.26277805		2224.59	0.01452273		2814.6	0.13062571		3404.6	0.19343685		3994.6	-0.00936153
454.8	0.50104097		1044.79	0.35513801		1634.79	0.26303386		2224.79	0.01440507		2814.8	0.13141614		3404.8	0.19363473		3994.8	-0.00967495
455	0.50102169		1044.99	0.35560992		1634.99	0.26262126		2224.99	0.01359304		2815	0.13143605		3405	0.19428558		3995	-0.01041608
455.2	0.50232839		1045.19	0.35564233		1635.19	0.26250206		2225.19	0.01336943		2815.2	0.13101449		3405.2	0.19510076		3995.2	-0.01127997
455.4	0.5031491		1045.39	0.35662888		1635.39	0.26239537		2225.39	0.01232721		2815.4	0.13212553		3405.4	0.19467292		3995.4	-0.01207057
455.6	0.50309903		1045.59	0.35670029		1635.59	0.26247552		2225.59	0.01196195		2815.6	0.13169194		3405.6	0.1953034		3995.6	-0.01199591
455.8	0.50375686		1045.79	0.35604609		1635.79	0.26318371		2225.79	0.01169027		2815.8	0.13232963		3405.8	0.19607215		3995.8	-0.0117499
456	0.50446859		1045.99	0.35622153		1635.99	0.26389663		2225.99	0.0117133		2816	0.13168853		3406	0.19562736		3996	-0.01208432
456.2	0.50481222		1046.19	0.35595401		1636.19	0.26458882		2226.19	0.01116841		2816.2	0.13180532		3406.2	0.19598938		3996.2	-0.01131367
456.4	0.50560636		1046.39	0.35569908		1636.39	0.2654615		2226.39	0.01163247		2816.4	0.13142936		3406.4	0.19668902		3996.4	-0.01166014
456.6	0.50607552		1046.59	0.35446348		1636.59	0.26564013		2226.59	0.01236249		2816.6	0.13152355		3406.6	0.19620666		3996.6	-0.0113696
456.8	0.50575527		1046.79	0.35401818		1636.79	0.2662468		2226.79	0.01313346		2816.8	0.13173146		3406.8	0.19668231		3996.8	-0.01132202
457	0.50569831		1046.99	0.35494686		1636.99	0.26717522		2226.99	0.01344215		2817	0.13258992		3407	0.19726234		3997	-0.01094209
457.2	0.50583479		1047.19	0.35546718		1637.19	0.26721304		2227.19	0.01353911		2817.2	0.13339719		3407.2	0.19662647		3997.2	-0.01156384
457.4	0.50468917		1047.39	0.35582577		1637.39	0.26671352		2227.39	0.01352463		2817.4	0.13334497		3407.4	0.19699509		3997.4	-0.01147546
457.6	0.50329734		1047.59	0.3568682		1637.59	0.26676009		2227.59	0.01437854		2817.6	0.13362447		3407.6	0.1976295		3997.6	-0.01135281
457.8	0.50244328		1047.79	0.35742671		1637.79	0.26762914		2227.79	0.01411702		2817.8	0.13414601		3407.8	0.19769352		3997.8	-0.01202912
458	0.50157813		1047.99	0.35833273		1637.99	0.26727627		2227.99	0.01366716		2818	0.13468188		3408	0.19782058		3998	-0.01281287
458.2	0.50144208		1048.19	0.3576716		1638.19	0.26697881		2228.19	0.01402355		2818.2	0.13535764		3408.2	0.19840616		3998.2	-0.01156563
458.4	0.50204408		1048.39	0.3574895		1638.39	0.26702399		2228.39	0.01381179		2818.4	0.13547649		3408.4	0.19791094		3998.4	-0.01181719
458.6	0.50174684		1048.59	0.3578808		1638.59	0.26594947		2228.59	0.01389795		2818.6	0.13738894		3408.6	0.1989304		3998.6	-0.01216357
458.8	0.50252488		1048.79	0.35722035		1638.79	0.26596279		2228.79	0.01383584		2818.8	0.13855046		3408.8	0.19861173		3998.8	-0.01183261
459	0.50198115		1048.99	0.35692704		1638.99	0.26548325		2228.99	0.01306845		2819	0.13862196		3409	0.19857923		3999	-0.01250278
459.2	0.50171003		1049.19	0.35717241		1639.19	0.26612407		2229.19	0.01234755		2819.2	0.13933722		3409.2	0.19815772		3999.2	-0.01226129
459.4	0.50253112		1049.39	0.3574668		1639.39	0.26595096		2229.39	0.01191726		2819.4	0.13988906		3409.4	0.19751043		3999.4	-0.01192262
459.6	0.50302713		1049.59	0.3565734		1639.59	0.26659242		2229.59	0.01260214		2819.6	0.13940506		3409.6	0.1976984		3999.6	-0.01004505
459.8	0.50256039		1049.79	0.35682599		1639.79	0.26750902		2229.79	0.01225816		2819.8	0.13867302		3409.8	0.19782075		3999.8	-0.00884685
460	0.50295549		1049.99	0.35657925		1639.99	0.26784538		2229.99	0.01213095		2820	0.13736959		3410	0.19784639		4000	-0.00876375
460.2	0.50381013		1050.19	0.35653127		1640.19	0.26760207		2230.19	0.01179316		2820.2	0.1376292		3410.2	0.19761894		4000.2	-0.00775404
460.4	0.50468994		1050.39	0.35616994		1640.39	0.26828276		2230.39	0.01273652		2820.4	0.13779922		3410.4	0.19800246		4000.4	-0.0070639
460.6	0.50521351		1050.59	0.35550639		1640.59	0.26838686		2230.59	0.01217607		2820.6	0.13733928		3410.6	0.19812335		4000.6	-0.00706793
460.8	0.50512866		1050.79	0.35619094		1640.79	0.26850401		2230.79	0.01181028		2820.8	0.1375025		3410.8	0.20009085		4000.8	-0.00668195
461	0.5061763		1050.99	0.35687259		1640.99	0.26895467		2230.99	0.01190471		2821	0.13698639		3411	0.19973059		4001	-0.00670043
461.2	0.50651635		1051.19	0.35699202		1641.19	0.26875568		2231.19	0.01207742		2821.2	0.13715633		3411.2	0.19981998		4001.2	-0.00712556
461.4	0.50570118		1051.39	0.35769922		1641.39	0.26934217		2231.39	0.01160105		2821.4	0.13670463		3411.4	0.20165722		4001.4	-0.00731162
461.6	0.50546888		1051.59	0.35840219		1641.59	0.26977925		2231.59	0.0118323		2821.6	0.13603847		3411.6	0.20361557		4001.6	-0.00767078
461.8	0.50523319		1051.79	0.35838919		1641.79	0.27011927		2231.79	0.01221882		2821.8	0.1357902		3411.8	0.2039928		4001.8	-0.00849303
462	0.50548324		1051.99	0.35834588		1641.99	0.26974113		2231.99	0.01215447		2822	0.13480032		3412	0.20466206		4002	-0.00809014
462.2	0.50535583		1052.19	0.35835852		1642.19	0.26964042		2232.19	0.01233071		2822.2	0.13480475		3412.2	0.2051455		4002.2	-0.0080455
462.4	0.50573296		1052.39	0.35901458		1642.39	0.26926204		2232.39	0.01157854		2822.4	0.13574838		3412.4	0.2050085		4002.4	-0.00964093
462.6	0.50551568		1052.59	0.35938102		1642.59	0.26875774		2232.59	0.01153749		2822.6	0.13675637		3412.6	0.20494705		4002.6	-0.01041299
462.8	0.50515768		1052.79	0.3592573		1642.79	0.26888678		2232.79	0.01133168		2822.8	0.13683606		3412.8	0.20397899		4002.8	-0.01050405
463	0.50404637		1052.99	0.35918295		1642.99	0.26957591		2232.99	0.01062289		2823	0.13680243		3413	0.20338855		4003	-0.01112891
463.2	0.50303319		1053.19	0.35927263		1643.19	0.26958936		2233.19	0.01122489		2823.2	0.13702717		3413.2	0.20275215		4003.2	-0.01033407
463.4	0.50357462		1053.39	0.35965295		1643.39	0.26919103		2233.39	0.01211962		2823.4	0.1365485		3413.4	0.2027017		4003.4	-0.01001461
463.6	0.50280053		1053.59	0.35924265		1643.59	0.2695917		2233.59	0.01287857		2823.6	0.13586886		3413.6	0.20259662		4003.6	-0.00934082
463.8	0.50291106		1053.79	0.35978962		1643.79	0.26985405		2233.79	0.01244554		2823.8	0.13531406		3413.8	0.20251074		4003.8	-0.00962371
464	0.50318385		1053.99	0.36038701		1643.99	0.26943656		2233.99	0.01363976		2824	0.13538055		3414	0.20247863		4004	-0.00944147
464.2	0.50334036		1054.19	0.3606751		1644.19	0.2690482		2234.19	0.01331562		2824.2	0.13659784		3414.2	0.20201946		4004.2	-0.00873754
464.4	0.5041332		1054.39	0.36123522		1644.39	0.26939853		2234.39	0.01332244		2824.4	0.13652755		3414.4	0.20257401		4004.4	-0.00856472
464.6	0.50447228		1054.59	0.36150796		1644.59	0.26897708		2234.59	0.01306462		2824.6	0.13699323		3414.6	0.20299577		4004.6	-0.00836056
464.8	0.50484345		1054.79	0.36185999		1644.79	0.26953537		2234.79	0.0135291		2824.8	0.13722157		3414.8	0.2039631		4004.8	-0.00772365
465	0.50552037		1054.99	0.36137278		1644.99	0.2700817		2234.99	0.01434975		2825	0.13684388		3415	0.20353869		4005	-0.00730916
465.2	0.50613086		1055.19	0.36207173		1645.19	0.26995258		2235.19	0.01411294		2825.2	0.13793481		3415.2	0.20387763		4005.2	-0.00841284
465.4	0.50644348		1055.39	0.36281201		1645.39	0.27074711		2235.39	0.01396081		2825.4	0.13725056		3415.4	0.20545497		4005.4	-0.00804544
465.6	0.50647751		1055.59	0.36266758		1645.59	0.27145683		2235.59	0.01435314		2825.6	0.1368202		3415.6	0.20551696		4005.6	-0.00796226
465.8	0.50763094		1055.79	0.36248748		1645.79	0.27252699		2235.79	0.01413281		2825.8	0.13754352		3415.8	0.20528815		4005.8	-0.00776651
466	0.50857562		1055.99	0.36232705		1645.99	0.2722799		2235.99	0.01337483		2826	0.13783368		3416	0.20640205		4006	-0.00763154
466.2	0.50852542		1056.19	0.36264742		1646.19	0.27168179		2236.19	0.01336451		2826.2	0.13833877		3416.2	0.20647779		4006.2	-0.00753721
466.4	0.50903882		1056.39	0.36257612		1646.39	0.27163543		2236.39	0.01318904		2826.4	0.13899908		3416.4	0.20637621		4006.4	-0.00790498
466.6	0.50830135		1056.59	0.36234241		1646.59	0.27231272		2236.59	0.01252226		2826.6	0.13893033		3416.6	0.20604706		4006.6	-0.00713004
466.8	0.5079991		1056.79	0.36196261		1646.79	0.27243776		2236.79	0.01202607		2826.8	0.13950505		3416.8	0.20561974		4006.8	-0.00699379
467	0.50721761		1056.99	0.36175475		1646.99	0.27275118		2236.99	0.01206751		2827	0.14016813		3417	0.20535468		4007	-0.00740246
467.2	0.50699922		1057.19	0.36213058		1647.19	0.27244641		2237.19	0.01333186		2827.2	0.14057026		3417.2	0.20532327		4007.2	-0.00618807
467.4	0.50748849		1057.39	0.36253445		1647.39	0.27245444		2237.39	0.01300519		2827.4	0.140141		3417.4	0.20532098		4007.4	-0.00650615
467.6	0.50745203		1057.59	0.36231362		1647.59	0.27280616		2237.59	0.01285743		2827.6	0.14055558		3417.6	0.20529059		4007.6	-0.00618786
467.8	0.5074263		1057.79	0.36239025		1647.79	0.27360879		2237.79	0.01322688		2827.8	0.13974185		3417.8	0.20466545		4007.8	-0.00636261
468	0.50665241		1057.99	0.36247857		1647.99	0.27390909		2237.99	0.01374394		2828	0.13941653		3418	0.20479281		4008	-0.00631262
468.2	0.50651973		1058.19	0.36155977		1648.19	0.27453905		2238.19	0.01316083		2828.2	0.13936947		3418.2	0.20470333		4008.2	-0.00636537
468.4	0.50699774		1058.39	0.36185743		1648.39	0.27549851		2238.39	0.01350063		2828.4	0.13892826		3418.4	0.20462795		4008.4	-0.00623876
468.6	0.50688191		1058.59	0.36150797		1648.59	0.27587091		2238.59	0.01368958		2828.6	0.13925859		3418.6	0.20471168		4008.6	-0.00605514
468.8	0.50678176		1058.79	0.36135526		1648.79	0.27670628		2238.79	0.01368289		2828.8	0.13902538		3418.8	0.20508711		4008.8	-0.00615185
469	0.50691476		1058.99	0.36131021		1648.99	0.27664963		2238.99	0.01312061		2829	0.13910883		3419	0.20508402		4009	-0.0057568
469.2	0.50741889		1059.19	0.36190017		1649.19	0.27677242		2239.19	0.01279275		2829.2	0.13952421		3419.2	0.20497021		4009.2	-0.00602239
469.4	0.50747824		1059.39	0.36213845		1649.39	0.27746833		2239.39	0.01243134		2829.4	0.13891941		3419.4	0.20561177		4009.4	-0.00523697
469.6	0.50776035		1059.59	0.36182857		1649.59	0.27789385		2239.59	0.01178798		2829.6	0.13940804		3419.6	0.20574367		4009.6	-0.00547971
469.8	0.50853819		1059.79	0.36195806		1649.79	0.27780872		2239.79	0.01115031		2829.8	0.14015999		3419.8	0.20683028		4009.8	-0.00502195
470	0.50853819		1059.99	0.36195806		1650	0.27780872		2239.99	0.01115031		2830	0.14015999		3420	0.20683028		4010	-0.00502195
470.2	0.50933853		1060.19	0.36267458		1650.2	0.27823736		2240.19	0.01137103		2830.2	0.14159681		3420.2	0.20643546		4010.2	-0.00419631
470.4	0.51011468		1060.39	0.36255696		1650.4	0.27802892		2240.39	0.01151544		2830.4	0.1426763		3420.4	0.20603398		4010.4	-0.00328087
470.6	0.51077234		1060.59	0.36303744		1650.6	0.27763503		2240.59	0.01204119		2830.6	0.14387801		3420.6	0.20498451		4010.6	-0.00318187
470.8	0.51084812		1060.79	0.36342398		1650.8	0.27714108		2240.79	0.01274037		2830.8	0.14410468		3420.8	0.20373131		4010.8	-0.00222696
471	0.51085522		1060.99	0.363554		1651	0.27727811		2240.99	0.01329181		2831	0.14529951		3421	0.20259985		4011	-0.0010553
471.2	0.51120567		1061.19	0.36448241		1651.2	0.277272		2241.19	0.01323503		2831.2	0.14604987		3421.2	0.20183185		4011.2	-0.0004305
471.4	0.51157761		1061.39	0.36506076		1651.4	0.27680693		2241.39	0.0125061		2831.4	0.14682804		3421.4	0.2014881		4011.4	0.0002093
471.6	0.51142869		1061.59	0.36577093		1651.6	0.27674771		2241.59	0.01263508		2831.6	0.14752704		3421.6	0.20091344		4011.6	0.00064177
471.8	0.51174288		1061.79	0.36608567		1651.8	0.27650484		2241.79	0.01235779		2831.8	0.14734839		3421.8	0.2009819		4011.8	0.00061321
472	0.51202599		1061.99	0.36631369		1652	0.27633149		2241.99	0.01194135		2832	0.14711928		3422	0.20132852		4012	-0.00032013
472.2	0.51202779		1062.19	0.36582994		1652.2	0.27614522		2242.19	0.01135624		2832.2	0.1469429		3422.2	0.20241081		4012.2	-0.0005427
472.4	0.51179346		1062.39	0.36594424		1652.4	0.27475133		2242.39	0.01112417		2832.4	0.14629297		3422.4	0.20269339		4012.4	-0.00036065
472.6	0.51163617		1062.59	0.36606505		1652.6	0.27442816		2242.59	0.01090162		2832.6	0.14634355		3422.6	0.20385233		4012.6	-0.00087048
472.8	0.51153525		1062.79	0.36672227		1652.8	0.27466949		2242.79	0.01072783		2832.8	0.14678831		3422.8	0.20398573		4012.8	-0.0014054
473	0.51072335		1062.99	0.36667983		1653	0.27511511		2242.99	0.01039194		2833	0.14614348		3423	0.20524052		4013	-0.00050092
473.2	0.5105941		1063.19	0.36624248		1653.2	0.27446857		2243.19	0.01011723		2833.2	0.14572387		3423.2	0.20550537		4013.2	-0.00078777
473.4	0.5102123		1063.39	0.36635898		1653.4	0.27412273		2243.39	0.01010972		2833.4	0.14589826		3423.4	0.20579342		4013.4	-0.00103669
473.6	0.51055515		1063.59	0.36581162		1653.6	0.27497111		2243.59	0.01004146		2833.6	0.14556872		3423.6	0.20561042		4013.6	-0.00078709
473.8	0.51026308		1063.79	0.3657038		1653.8	0.2748912		2243.79	0.00979415		2833.8	0.14651433		3423.8	0.20557952		4013.8	-0.00092368
474	0.51110003		1063.99	0.36567101		1654	0.27529023		2243.99	0.0090225		2834	0.14667606		3424	0.20513445		4014	-0.00111089
474.2	0.51125108		1064.19	0.36520565		1654.2	0.27554207		2244.19	0.00896444		2834.2	0.14684783		3424.2	0.20521852		4014.2	-0.00060926
474.4	0.51140382		1064.39	0.36437091		1654.4	0.2752607		2244.39	0.00950618		2834.4	0.14699092		3424.4	0.2046719		4014.4	-0.00048623
474.6	0.51185523		1064.59	0.36423419		1654.6	0.27478628		2244.59	0.01033053		2834.6	0.14735099		3424.6	0.20427792		4014.6	-0.00045128
474.8	0.51177583		1064.79	0.36369084		1654.8	0.27509977		2244.79	0.01045225		2834.8	0.14753495		3424.8	0.20398726		4014.8	0.00098899
475	0.51187018		1064.99	0.36385444		1655	0.27510861		2244.99	0.00972042		2835	0.14815527		3425	0.20430924		4015	0.00212782
475.2	0.51253411		1065.19	0.3636054		1655.2	0.27464198		2245.19	0.00882447		2835.2	0.14919131		3425.2	0.20417775		4015.2	0.0024014
475.4	0.5128514		1065.39	0.3636013		1655.4	0.27367345		2245.39	0.00831585		2835.4	0.1493575		3425.4	0.20408821		4015.4	0.00244355
475.6	0.51356317		1065.59	0.36333135		1655.6	0.27376117		2245.59	0.0076328		2835.6	0.14921116		3425.6	0.2035443		4015.6	0.00217394
475.8	0.51455321		1065.79	0.3631281		1655.8	0.27386651		2245.79	0.00718936		2835.8	0.14923281		3425.8	0.20478904		4015.8	0.001471
476	0.51488341		1065.99	0.36345832		1656	0.2738146		2245.99	0.00685646		2836	0.14907868		3426	0.20466385		4016	0.00057551
476.2	0.51451749		1066.19	0.36295122		1656.2	0.27389213		2246.19	0.00664284		2836.2	0.14952701		3426.2	0.20470783		4016.2	0.0000701
476.4	0.51414249		1066.39	0.36422238		1656.4	0.27324024		2246.39	0.0064009		2836.4	0.14884132		3426.4	0.20451272		4016.4	-0.00117816
476.6	0.51343323		1066.59	0.3645803		1656.6	0.27312052		2246.59	0.00533859		2836.6	0.14852764		3426.6	0.20471758		4016.6	-0.00158759
476.8	0.51338563		1066.79	0.36561529		1656.8	0.27347474		2246.79	0.00537968		2836.8	0.14772926		3426.8	0.20455513		4016.8	-0.00225907
477	0.5122875		1066.99	0.36538904		1657	0.27322523		2246.99	0.00633168		2837	0.14718036		3427	0.20475567		4017	-0.00202904
477.2	0.51162584		1067.19	0.364576		1657.2	0.27240528		2247.19	0.00738442		2837.2	0.14678559		3427.2	0.20372218		4017.2	-0.00324866
477.4	0.51120733		1067.39	0.36448661		1657.4	0.27315048		2247.39	0.00784462		2837.4	0.14667371		3427.4	0.20329891		4017.4	-0.00290339
477.6	0.51145695		1067.59	0.3638965		1657.6	0.27422567		2247.59	0.00783554		2837.6	0.14563066		3427.6	0.20257943		4017.6	-0.00256802
477.8	0.51152796		1067.79	0.36405155		1657.8	0.27410366		2247.79	0.0083358		2837.8	0.14594971		3427.8	0.20261454		4017.8	-0.00263225
478	0.51149926		1067.99	0.36387623		1658	0.27565508		2247.99	0.00825701		2838	0.14468735		3428	0.20116017		4018	-0.00241856
478.2	0.51161319		1068.19	0.36341203		1658.2	0.2753259		2248.19	0.00983145		2838.2	0.14432935		3428.2	0.20183253		4018.2	-0.00188583
478.4	0.51180402		1068.39	0.36350467		1658.4	0.27550982		2248.39	0.01020531		2838.4	0.14497964		3428.4	0.20163903		4018.4	-0.00142989
478.6	0.51234157		1068.59	0.36322613		1658.6	0.27586229		2248.59	0.00974072		2838.6	0.14552184		3428.6	0.2014962		4018.6	-0.00067319
478.8	0.5119655		1068.79	0.3632989		1658.8	0.27575166		2248.79	0.00899527		2838.8	0.1456035		3428.8	0.20147526		4018.8	0.00068532
479	0.51226489		1068.99	0.36293924		1659	0.27468581		2248.99	0.00864861		2839	0.14488191		3429	0.20160867		4019	0.00126714
479.2	0.51338472		1069.19	0.36250033		1659.2	0.27511206		2249.19	0.00869417		2839.2	0.14529518		3429.2	0.20152229		4019.2	0.00119406
479.4	0.51337448		1069.39	0.36258086		1659.4	0.2749638		2249.39	0.00783066		2839.4	0.14453338		3429.4	0.20131805		4019.4	0.00107202
479.6	0.51385415		1069.59	0.36276827		1659.6	0.27474294		2249.59	0.00734967		2839.6	0.14491645		3429.6	0.20182405		4019.6	0.00101889
479.8	0.51310491		1069.79	0.36324117		1659.8	0.27427627		2249.79	0.00754884		2839.8	0.14567664		3429.8	0.20115802		4019.8	-0.00018102
480	0.51304445		1069.99	0.36464574		1660	0.27379966		2249.99	0.00728282		2840	0.14581133		3430	0.19986446		4020	-0.00108828
480.2	0.51230076		1070.19	0.3653153		1660.2	0.27438545		2250.19	0.00710465		2840.2	0.14618189		3430.2	0.19890072		4020.2	-0.00122639
480.4	0.5113488		1070.39	0.36667366		1660.4	0.273549		2250.39	0.00678085		2840.4	0.14644962		3430.4	0.19871175		4020.4	-0.00115871
480.6	0.51073534		1070.59	0.36719355		1660.6	0.27418197		2250.59	0.00634274		2840.6	0.14670425		3430.6	0.19908503		4020.6	-0.00130394
480.8	0.51107026		1070.79	0.36796157		1660.8	0.27433817		2250.79	0.00735903		2840.8	0.14718999		3430.8	0.19955293		4020.8	-0.00224662
481	0.51018677		1070.99	0.36681646		1661	0.27360283		2250.99	0.00765009		2841	0.14700069		3431	0.19907487		4021	-0.00281207
481.2	0.50948629		1071.19	0.36614873		1661.2	0.27378782		2251.19	0.00814686		2841.2	0.14696932		3431.2	0.19929165		4021.2	-0.0025001
481.4	0.50937479		1071.39	0.36542238		1661.4	0.27434182		2251.39	0.00750708		2841.4	0.14663458		3431.4	0.19956432		4021.4	-0.00131813
481.6	0.50987694		1071.59	0.36460517		1661.6	0.27452337		2251.59	0.00772421		2841.6	0.14580671		3431.6	0.19971358		4021.6	-0.0006672
481.8	0.51005587		1071.79	0.36435407		1661.8	0.27383927		2251.79	0.00799609		2841.8	0.14713245		3431.8	0.20107131		4021.8	-0.00036301
482	0.50932836		1071.99	0.36434735		1662	0.27400757		2251.99	0.00796336		2842	0.14606342		3432	0.20047344		4022	-0.0007384
482.2	0.50911785		1072.19	0.36381337		1662.2	0.27285618		2252.19	0.00794696		2842.2	0.14607319		3432.2	0.20103962		4022.2	-0.0002113
482.4	0.50920678		1072.39	0.36326499		1662.4	0.2731274		2252.39	0.00708265		2842.4	0.14635087		3432.4	0.20052634		4022.4	0.00041304
482.6	0.50982761		1072.59	0.36317099		1662.6	0.27359246		2252.59	0.00572212		2842.6	0.14620574		3432.6	0.20058374		4022.6	0.00111553
482.8	0.51072015		1072.79	0.36248857		1662.8	0.27233143		2252.79	0.00590058		2842.8	0.14483323		3432.8	0.20075101		4022.8	0.00153141
483	0.51150872		1072.99	0.36122321		1663	0.27220131		2252.99	0.00581628		2843	0.14398312		3433	0.20144753		4023	0.00100037
483.2	0.51200098		1073.19	0.36113942		1663.2	0.27221828		2253.19	0.00577603		2843.2	0.14486779		3433.2	0.20173088		4023.2	0.00133778
483.4	0.51153257		1073.39	0.36047394		1663.4	0.27105791		2253.39	0.0049655		2843.4	0.14455211		3433.4	0.2007664		4023.4	0.00137029
483.6	0.51233531		1073.59	0.36066283		1663.6	0.26980886		2253.59	0.00572807		2843.6	0.14484567		3433.6	0.20079727		4023.6	0.00134149
483.8	0.51281118		1073.79	0.36122474		1663.8	0.26930691		2253.79	0.00485547		2843.8	0.14586862		3433.8	0.19996363		4023.8	0.00013081
484	0.51334307		1073.99	0.36212365		1664	0.26998695		2253.99	0.00454455		2844	0.14652421		3434	0.2002427		4024	0.00066859
484.2	0.51259389		1074.19	0.36250425		1664.2	0.27045419		2254.19	0.00437809		2844.2	0.14645331		3434.2	0.19971824		4024.2	0.00061601
484.4	0.51241238		1074.39	0.36232382		1664.4	0.27063835		2254.39	0.0037972		2844.4	0.14706423		3434.4	0.20006827		4024.4	-0.00017877
484.6	0.51324214		1074.59	0.3621974		1664.6	0.27110985		2254.59	0.00384676		2844.6	0.14716577		3434.6	0.20012179		4024.6	-0.00122021
484.8	0.51287717		1074.79	0.36236709		1664.8	0.27078578		2254.79	0.00498416		2844.8	0.14727824		3434.8	0.20026874		4024.8	-0.00145935
485	0.51189609		1074.99	0.36140706		1665	0.27176018		2254.99	0.0048149		2845	0.14706961		3435	0.19979806		4025	-0.00246688
485.2	0.51127768		1075.19	0.36118536		1665.2	0.27168471		2255.19	0.00522016		2845.2	0.14633779		3435.2	0.19980479		4025.2	-0.00219987
485.4	0.510934		1075.39	0.36126897		1665.4	0.27219926		2255.39	0.00483208		2845.4	0.14600919		3435.4	0.1999171		4025.4	-0.00284099
485.6	0.51070513		1075.59	0.36209164		1665.6	0.27260223		2255.59	0.00488416		2845.6	0.14588535		3435.6	0.19992671		4025.6	-0.00347387
485.8	0.51073805		1075.79	0.36265865		1665.8	0.27280215		2255.79	0.00492623		2845.8	0.14681517		3435.8	0.19978252		4025.8	-0.00440362
486	0.51070709		1075.99	0.36302836		1666	0.27289148		2255.99	0.00470188		2846	0.14656775		3436	0.19911702		4026	-0.004207
486.2	0.51130351		1076.19	0.36371692		1666.2	0.27291413		2256.19	0.00494547		2846.2	0.14639968		3436.2	0.20001342		4026.2	-0.00382228
486.4	0.51200557		1076.39	0.36518892		1666.4	0.27332571		2256.39	0.00495016		2846.4	0.14559388		3436.4	0.20005388		4026.4	-0.00336557
486.6	0.51198912		1076.59	0.36632643		1666.6	0.2741581		2256.59	0.00474079		2846.6	0.1456904		3436.6	0.20037493		4026.6	-0.00328294
486.8	0.51246421		1076.79	0.3667186		1666.8	0.27371612		2256.79	0.00503353		2846.8	0.14478083		3436.8	0.2003837		4026.8	-0.00288979
487	0.51245284		1076.99	0.36724158		1667	0.27438136		2256.99	0.0049142		2847	0.14514998		3437	0.20115673		4027	-0.00202568
487.2	0.51325427		1077.19	0.36884487		1667.2	0.27393308		2257.19	0.00448454		2847.2	0.1453565		3437.2	0.20203011		4027.2	-0.00078787
487.4	0.51336908		1077.39	0.36887819		1667.4	0.2739368		2257.39	0.00448479		2847.4	0.14411665		3437.4	0.20269296		4027.4	-0.00041452
487.6	0.5134997		1077.59	0.36905006		1667.6	0.27346068		2257.59	0.00453548		2847.6	0.14401125		3437.6	0.2034073		4027.6	-0.00008939
487.8	0.51362142		1077.79	0.36952396		1667.8	0.27346129		2257.79	0.00359167		2847.8	0.14423332		3437.8	0.20487704		4027.8	-0.00012447
488	0.51311012		1077.99	0.36907114		1668	0.27389726		2257.99	0.0042692		2848	0.14336307		3438	0.20495557		4028	0.00050657
488.2	0.51268952		1078.19	0.36897099		1668.2	0.27346439		2258.19	0.00461282		2848.2	0.14285063		3438.2	0.20484143		4028.2	-0.00036591
488.4	0.5127137		1078.39	0.36862101		1668.4	0.2732938		2258.39	0.00409498		2848.4	0.14364793		3438.4	0.20507136		4028.4	-0.00002715
488.6	0.51301773		1078.59	0.3683662		1668.6	0.27281533		2258.59	0.00420961		2848.6	0.14365377		3438.6	0.20446511		4028.6	-0.00003014
488.8	0.51150028		1078.79	0.367938		1668.8	0.27218951		2258.79	0.00417867		2848.8	0.14413817		3438.8	0.20488842		4028.8	-0.00028849
489	0.51199303		1078.99	0.36592804		1669	0.27283085		2258.99	0.00340204		2849	0.14411429		3439	0.20376191		4029	-0.00103972
489.2	0.51130305		1079.19	0.36522883		1669.2	0.2719804		2259.19	0.0038991		2849.2	0.14457454		3439.2	0.20310352		4029.2	-0.0009167
489.4	0.51132469		1079.39	0.36481191		1669.4	0.27300089		2259.39	0.00382775		2849.4	0.14595485		3439.4	0.20186083		4029.4	-0.00153335
489.6	0.51170941		1079.59	0.36385766		1669.6	0.27276532		2259.59	0.00459544		2849.6	0.14665745		3439.6	0.20116829		4029.6	-0.00126722
489.8	0.51222644		1079.79	0.36252601		1669.8	0.27197106		2259.79	0.00517369		2849.8	0.14758181		3439.8	0.20082658		4029.8	-0.0015883
490	0.51191113		1079.99	0.36208801		1670	0.27106985		2259.99	0.00519431		2850	0.14755778		3440	0.20090238		4030	-0.00089856
490.2	0.51109634		1080.19	0.36283333		1670.2	0.27111971		2260.19	0.00605862		2850.2	0.14692984		3440.2	0.20136115		4030.2	-0.00065018
490.4	0.51062591		1080.39	0.36342148		1670.4	0.27171039		2260.39	0.00570965		2850.4	0.14628816		3440.4	0.20089048		4030.4	-0.0009007
490.6	0.51002938		1080.59	0.36343542		1670.6	0.27244497		2260.59	0.00579335		2850.6	0.14637899		3440.6	0.20122391		4030.6	-0.00073201
490.8	0.51019754		1080.79	0.36366349		1670.8	0.27182429		2260.79	0.00524022		2850.8	0.14634038		3440.8	0.2012438		4030.8	-0.00066046
491	0.51037465		1080.99	0.36387128		1671	0.27196516		2260.99	0.00581437		2851	0.1461318		3441	0.20185786		4031	-0.00179277
491.2	0.50999169		1081.19	0.36466717		1671.2	0.27191139		2261.19	0.0057882		2851.2	0.14623052		3441.2	0.20312008		4031.2	-0.00214391
491.4	0.5091031		1081.39	0.36429412		1671.4	0.27286125		2261.39	0.00565172		2851.4	0.14540387		3441.4	0.20302156		4031.4	-0.00246381
491.6	0.508705		1081.59	0.36407769		1671.6	0.27300592		2261.59	0.00480469		2851.6	0.14495779		3441.6	0.20248551		4031.6	-0.00272416
491.8	0.50881882		1081.79	0.3648777		1671.8	0.27420625		2261.79	0.00436672		2851.8	0.14497775		3441.8	0.20336587		4031.8	-0.00309831
492	0.50903903		1081.99	0.36549453		1672	0.2742534		2261.99	0.00542427		2852	0.1446149		3442	0.20336716		4032	-0.00341176
492.2	0.50847782		1082.19	0.3665942		1672.2	0.27475658		2262.19	0.00473627		2852.2	0.14502723		3442.2	0.20385578		4032.2	-0.00413638
492.4	0.50830045		1082.39	0.36811205		1672.4	0.27535705		2262.39	0.0034756		2852.4	0.14510792		3442.4	0.20433042		4032.4	-0.00452909
492.6	0.50844347		1082.59	0.36815089		1672.6	0.27606837		2262.59	0.00260333		2852.6	0.14528902		3442.6	0.20421058		4032.6	-0.00464978
492.8	0.50754836		1082.79	0.36715949		1672.8	0.27611935		2262.79	0.00270237		2852.8	0.14576625		3442.8	0.20471811		4032.8	-0.00429023
493	0.50812481		1082.99	0.36648928		1673	0.27715592		2262.99	0.00220131		2853	0.14642725		3443	0.20449452		4033	-0.00461419
493.2	0.50836576		1083.19	0.36609813		1673.2	0.27697772		2263.19	0.00241713		2853.2	0.14687407		3443.2	0.20531707		4033.2	-0.0049691
493.4	0.5089125		1083.39	0.36517039		1673.4	0.27689017		2263.39	0.00261507		2853.4	0.14706748		3443.4	0.20493298		4033.4	-0.00484797
493.6	0.50920441		1083.59	0.36476849		1673.6	0.27573043		2263.59	0.00341637		2853.6	0.14582207		3443.6	0.20601494		4033.6	-0.00459482
493.8	0.50882957		1083.79	0.36405316		1673.8	0.27466913		2263.79	0.00346731		2853.8	0.14484399		3443.8	0.20617153		4033.8	-0.0049306
494	0.50850137		1083.99	0.36355592		1674	0.27462648		2263.99	0.00367378		2854	0.14483601		3444	0.2055211		4034	-0.00420721
494.2	0.50850334		1084.19	0.36319901		1674.2	0.27477417		2264.19	0.00439925		2854.2	0.14463285		3444.2	0.20565026		4034.2	-0.00408973
494.4	0.50934556		1084.39	0.36288189		1674.4	0.27448154		2264.39	0.00420259		2854.4	0.14428699		3444.4	0.20524894		4034.4	-0.00367599
494.6	0.50979031		1084.59	0.36215516		1674.6	0.27412585		2264.59	0.00465758		2854.6	0.14436939		3444.6	0.20476103		4034.6	-0.00247195
494.8	0.51006205		1084.79	0.36086943		1674.8	0.27230332		2264.79	0.00548423		2854.8	0.145234		3444.8	0.20404816		4034.8	-0.00252351
495	0.51042904		1084.99	0.359929		1675	0.27189702		2264.99	0.00581107		2855	0.14445464		3445	0.20393084		4035	-0.00317977
495.2	0.50949119		1085.19	0.35926835		1675.2	0.27209261		2265.19	0.00540669		2855.2	0.14471229		3445.2	0.20384902		4035.2	-0.00254533
495.4	0.50948999		1085.39	0.35876037		1675.4	0.27231585		2265.39	0.00466883		2855.4	0.14458364		3445.4	0.20276178		4035.4	-0.00164076
495.6	0.50939209		1085.59	0.35842195		1675.6	0.27210424		2265.59	0.00359438		2855.6	0.14486296		3445.6	0.20155313		4035.6	-0.00047725
495.8	0.51012986		1085.79	0.35899245		1675.8	0.27292011		2265.79	0.00364541		2855.8	0.1450215		3445.8	0.20143609		4035.8	-0.00043172
496	0.5109188		1085.99	0.35999479		1676	0.27299831		2265.99	0.00446456		2856	0.14476177		3446	0.20119831		4036	-0.00074861
496.2	0.51013413		1086.19	0.36072955		1676.2	0.27367009		2266.19	0.00386234		2856.2	0.14469016		3446.2	0.20085402		4036.2	-0.00141156
496.4	0.510031		1086.39	0.36186887		1676.4	0.27367826		2266.39	0.00344931		2856.4	0.14462393		3446.4	0.20061694		4036.4	-0.00185075
496.6	0.50993374		1086.59	0.36177169		1676.6	0.27393992		2266.59	0.00333497		2856.6	0.14488677		3446.6	0.20039503		4036.6	-0.00178136
496.8	0.51027761		1086.79	0.36169964		1676.8	0.27338812		2266.79	0.00348149		2856.8	0.14492274		3446.8	0.20085482		4036.8	-0.00179433
497	0.51204978		1086.99	0.3620186		1677	0.2732195		2266.99	0.00320992		2857	0.1455561		3447	0.20118685		4037	-0.00294103
497.2	0.5130959		1087.19	0.36156185		1677.2	0.27377872		2267.19	0.00352617		2857.2	0.14579512		3447.2	0.20208671		4037.2	-0.00302172
497.4	0.51308229		1087.39	0.36174256		1677.4	0.2735984		2267.39	0.00397146		2857.4	0.14608258		3447.4	0.20247493		4037.4	-0.00305335
497.6	0.51246796		1087.59	0.36218924		1677.6	0.27384307		2267.59	0.00405661		2857.6	0.14532077		3447.6	0.20283835		4037.6	-0.00327306
497.8	0.51213839		1087.79	0.36242257		1677.8	0.27393026		2267.79	0.00427954		2857.8	0.14625428		3447.8	0.20262153		4037.8	-0.00366885
498	0.51222985		1087.99	0.3621837		1678	0.27433355		2267.99	0.0043937		2858	0.14716035		3448	0.20224055		4038	-0.00396867
498.2	0.51259417		1088.19	0.3628842		1678.2	0.27480991		2268.19	0.00424168		2858.2	0.14652632		3448.2	0.20346641		4038.2	-0.00322487
498.4	0.51253657		1088.39	0.36348999		1678.4	0.27445419		2268.39	0.00452147		2858.4	0.14634644		3448.4	0.20291277		4038.4	-0.00200302
498.6	0.51182958		1088.59	0.36301235		1678.6	0.2741333		2268.59	0.00490666		2858.6	0.14588066		3448.6	0.20310493		4038.6	-0.00185306
498.8	0.51103067		1088.79	0.36205316		1678.8	0.27339481		2268.79	0.00527863		2858.8	0.14567242		3448.8	0.2033982		4038.8	-0.00260935
499	0.5109146		1088.99	0.36165115		1679	0.27330305		2268.99	0.00424914		2859	0.14399486		3449	0.20384617		4039	-0.00227085
499.2	0.50949948		1089.19	0.3621683		1679.2	0.27330907		2269.19	0.00445067		2859.2	0.1440516		3449.2	0.20342357		4039.2	-0.00129729
499.4	0.50944843		1089.39	0.36190476		1679.4	0.27266424		2269.39	0.00329934		2859.4	0.14354583		3449.4	0.20213117		4039.4	-0.00037124
499.6	0.50961326		1089.59	0.36147715		1679.6	0.271827		2269.59	0.00200032		2859.6	0.14266252		3449.6	0.20130253		4039.6	-0.0005546
499.8	0.50981437		1089.79	0.36223101		1679.8	0.27160061		2269.79	0.00280443		2859.8	0.14193664		3449.8	0.20065876		4039.8	-0.00188361
500	0.50922474		1089.99	0.36363884		1680	0.27092204		2269.99	0.00306909		2860	0.14095564		3450	0.1991666		4040	-0.00218251
500.2	0.50846353		1090.19	0.36400178		1680.2	0.2708112		2270.19	0.00225548		2860.2	0.14025425		3450.2	0.1990565		4040.2	-0.00250033
500.4	0.50869898		1090.39	0.36441878		1680.4	0.27072216		2270.39	0.00153384		2860.4	0.14066996		3450.4	0.1989576		4040.4	-0.0026571
500.6	0.50847674		1090.59	0.36430166		1680.6	0.27073376		2270.59	0.00082101		2860.6	0.1403342		3450.6	0.19866823		4040.6	-0.00332046
500.8	0.50934927		1090.79	0.36436399		1680.8	0.27043068		2270.79	-0.00026596		2860.8	0.14103029		3450.8	0.1992437		4040.8	-0.00385882
501	0.50963647		1090.99	0.36506495		1681	0.27117978		2270.99	-0.00093868		2861	0.14126803		3451	0.19978093		4041	-0.00426887
501.2	0.50991167		1091.19	0.36566116		1681.2	0.27237305		2271.19	-0.00188082		2861.2	0.14261824		3451.2	0.20088408		4041.2	-0.00516437
501.4	0.50893461		1091.39	0.36640359		1681.4	0.27230109		2271.39	-0.00146387		2861.4	0.14363962		3451.4	0.20103524		4041.4	-0.00575602
501.6	0.50812881		1091.59	0.36695212		1681.6	0.27325585		2271.59	-0.00202443		2861.6	0.14495999		3451.6	0.20131313		4041.6	-0.00610353
501.8	0.50826723		1091.79	0.36691333		1681.8	0.27384955		2271.79	-0.00231811		2861.8	0.14626604		3451.8	0.20231927		4041.8	-0.0075114
502	0.50836986		1091.99	0.36673263		1682	0.27448095		2271.99	-0.00235202		2862	0.14741232		3452	0.20303082		4042	-0.00813176
502.2	0.50893398		1092.19	0.36748006		1682.2	0.27510339		2272.19	-0.00255065		2862.2	0.14835425		3452.2	0.20350813		4042.2	-0.0071926
502.4	0.50865441		1092.39	0.36754314		1682.4	0.27528995		2272.39	-0.00145207		2862.4	0.14829137		3452.4	0.20303536		4042.4	-0.00718714
502.6	0.50862285		1092.59	0.36663385		1682.6	0.27587668		2272.59	-0.00106086		2862.6	0.14850068		3452.6	0.20311652		4042.6	-0.0071493
502.8	0.50886101		1092.79	0.36601264		1682.8	0.27617565		2272.79	-0.00095972		2862.8	0.14846979		3452.8	0.20340986		4042.8	-0.00622903
503	0.50926754		1092.99	0.36576121		1683	0.27511025		2272.99	0.00020125		2863	0.1478164		3453	0.20346008		4043	-0.00551024
503.2	0.50935261		1093.19	0.36597853		1683.2	0.27440686		2273.19	0.00139679		2863.2	0.14734466		3453.2	0.20323747		4043.2	-0.00499811
503.4	0.51003166		1093.39	0.36474717		1683.4	0.27350004		2273.39	0.00142027		2863.4	0.14585677		3453.4	0.20287904		4043.4	-0.00513077
503.6	0.51120877		1093.59	0.36517532		1683.6	0.27324759		2273.59	0.00218825		2863.6	0.14504335		3453.6	0.20376831		4043.6	-0.00490499
503.8	0.51092926		1093.79	0.36618192		1683.8	0.27363639		2273.79	0.0031047		2863.8	0.14421995		3453.8	0.20364296		4043.8	-0.00436839
504	0.51111183		1093.99	0.36678891		1684	0.27322874		2273.99	0.00232649		2864	0.14338324		3454	0.20405774		4044	-0.00410218
504.2	0.5113409		1094.19	0.36678013		1684.2	0.27355126		2274.19	0.0017939		2864.2	0.14286483		3454.2	0.20513139		4044.2	-0.0040672
504.4	0.51154355		1094.39	0.36585238		1684.4	0.27234856		2274.39	0.00125876		2864.4	0.14207862		3454.4	0.20472442		4044.4	-0.0035822
504.6	0.5110516		1094.59	0.36592619		1684.6	0.27224252		2274.59	0.00137983		2864.6	0.13992024		3454.6	0.20551933		4044.6	-0.00366902
504.8	0.51146963		1094.79	0.36680862		1684.8	0.27219652		2274.79	0.00079291		2864.8	0.1399879		3454.8	0.20661795		4044.8	-0.00382269
505	0.51147708		1094.99	0.36791721		1685	0.2723096		2274.99	0.00036483		2865	0.13968783		3455	0.2067121		4045	-0.00361704
505.2	0.51218383		1095.19	0.36868066		1685.2	0.27237089		2275.19	0.00090815		2865.2	0.14045161		3455.2	0.20672893		4045.2	-0.00468763
505.4	0.51128113		1095.39	0.36944238		1685.4	0.27312412		2275.39	0.0011664		2865.4	0.14156498		3455.4	0.20601976		4045.4	-0.00502905
505.6	0.51119883		1095.59	0.36936822		1685.6	0.27359372		2275.59	0.00031166		2865.6	0.14167869		3455.6	0.20554185		4045.6	-0.00476918
505.8	0.51145913		1095.79	0.36869043		1685.8	0.27373321		2275.79	-0.00032558		2865.8	0.14211896		3455.8	0.20497349		4045.8	-0.00620698
506	0.51150657		1095.99	0.36812211		1686	0.27376255		2275.99	-0.00027561		2866	0.14250257		3456	0.2040343		4046	-0.00650165
506.2	0.51119609		1096.19	0.36751966		1686.2	0.27376147		2276.19	-0.00078685		2866.2	0.1430272		3456.2	0.20328854		4046.2	-0.00665404
506.4	0.51034071		1096.39	0.36603422		1686.4	0.27362195		2276.39	0.00004695		2866.4	0.14205784		3456.4	0.20234086		4046.4	-0.00719167
506.6	0.51060992		1096.59	0.36516541		1686.6	0.2736327		2276.59	-0.00029177		2866.6	0.14260777		3456.6	0.20106312		4046.6	-0.00684773
506.8	0.5101912		1096.79	0.36475865		1686.8	0.2730355		2276.79	-0.00009934		2866.8	0.14223697		3456.8	0.20150685		4046.8	-0.00672673
507	0.50951694		1096.99	0.36416805		1687	0.27239139		2276.99	0.00078964		2867	0.14233481		3457	0.20044543		4047	-0.00708406
507.2	0.50980348		1097.19	0.36359522		1687.2	0.27267976		2277.19	0.00107981		2867.2	0.14231869		3457.2	0.20076836		4047.2	-0.00674926
507.4	0.50950521		1097.39	0.36294462		1687.4	0.27293205		2277.39	0.00164572		2867.4	0.14214328		3457.4	0.20102692		4047.4	-0.00684799
507.6	0.5089809		1097.59	0.36336706		1687.6	0.27383427		2277.59	0.0017398		2867.6	0.14239454		3457.6	0.20175082		4047.6	-0.00645866
507.8	0.50816791		1097.79	0.36338056		1687.8	0.27366598		2277.79	0.00143976		2867.8	0.14248154		3457.8	0.20165554		4047.8	-0.00626514
508	0.50812449		1097.99	0.36349495		1688	0.27365452		2277.99	0.00107113		2868	0.14210325		3458	0.2019593		4048	-0.00631381
508.2	0.50763239		1098.19	0.36299548		1688.2	0.27420987		2278.19	0.00177261		2868.2	0.14153204		3458.2	0.20249846		4048.2	-0.005609
508.4	0.50766324		1098.39	0.36272828		1688.4	0.27417867		2278.39	0.00233544		2868.4	0.1407784		3458.4	0.20256853		4048.4	-0.00567804
508.6	0.50805391		1098.59	0.36327695		1688.6	0.27547857		2278.59	0.0030357		2868.6	0.14045534		3458.6	0.20324106		4048.6	-0.00528463
508.8	0.50813029		1098.79	0.36480782		1688.8	0.27602439		2278.79	0.00200706		2868.8	0.14153792		3458.8	0.20322804		4048.8	-0.00524205
509	0.50784081		1098.99	0.3654021		1689	0.27646777		2278.99	0.00218908		2869	0.14202893		3459	0.20257729		4049	-0.00512991
509.2	0.50839013		1099.19	0.36648238		1689.2	0.27627834		2279.19	0.00259246		2869.2	0.14245213		3459.2	0.20253364		4049.2	-0.00540389
509.4	0.50894684		1099.39	0.36714342		1689.4	0.27679854		2279.39	0.00216173		2869.4	0.14352512		3459.4	0.20206997		4049.4	-0.00493036
509.6	0.50914879		1099.59	0.36635209		1689.6	0.27693209		2279.59	0.00185616		2869.6	0.14366748		3459.6	0.20121979		4049.6	-0.00503612
509.8	0.50944847		1099.79	0.36558274		1689.8	0.27692106		2279.79	0.00195502		2869.8	0.14400059		3459.8	0.20071824		4049.8	-0.00515339
510	0.50917574		1099.99	0.3643759		1690	0.27669946		2279.99	0.00222469		2870	0.14405748		3460	0.20140512		4050	-0.00427301
510.2	0.50897028		1100.19	0.36270204		1690.2	0.27596343		2280.19	0.00190261		2870.2	0.14440818		3460.2	0.20113574		4050.2	-0.00434281
510.4	0.509641		1100.39	0.36193501		1690.4	0.27528223		2280.39	0.00150848		2870.4	0.14344112		3460.4	0.20049086		4050.4	-0.00401928
510.6	0.51071026		1100.59	0.3620017		1690.6	0.27471956		2280.59	0.00065894		2870.6	0.14320873		3460.6	0.19991098		4050.6	-0.00349569
510.8	0.5097714		1100.79	0.36166653		1690.8	0.27343612		2280.79	0.00103107		2870.8	0.14302779		3460.8	0.19988224		4050.8	-0.00383001
511	0.50997463		1100.99	0.36125734		1691	0.27376262		2280.99	0.00096595		2871	0.14276945		3461	0.19960485		4051	-0.00286103
511.2	0.50978415		1101.19	0.36180762		1691.2	0.27373095		2281.19	0.0010835		2871.2	0.1425528		3461.2	0.19976039		4051.2	-0.00274141
511.4	0.50949931		1101.39	0.36168938		1691.4	0.27299335		2281.39	0.00101767		2871.4	0.14269845		3461.4	0.2010023		4051.4	-0.00267484
511.6	0.5087144		1101.59	0.36194101		1691.6	0.27394333		2281.59	0.00047043		2871.6	0.14237485		3461.6	0.20054576		4051.6	-0.00262637
511.8	0.50867243		1101.79	0.36270085		1691.8	0.2738222		2281.79	-0.00017372		2871.8	0.14218458		3461.8	0.20023317		4051.8	-0.00309169
512	0.50838645		1101.99	0.3625354		1692	0.27381203		2281.99	-0.00059688		2872	0.14152963		3462	0.20023208		4052	-0.00352259
512.2	0.50857939		1102.19	0.3629982		1692.2	0.27366061		2282.19	-0.00040098		2872.2	0.14042814		3462.2	0.20104177		4052.2	-0.00433168
512.4	0.50938258		1102.39	0.36352868		1692.4	0.27332333		2282.39	0.00005828		2872.4	0.14016863		3462.4	0.20130024		4052.4	-0.00546398
512.6	0.50975569		1102.59	0.36428736		1692.6	0.27367182		2282.59	-0.00096104		2872.6	0.14031993		3462.6	0.20051301		4052.6	-0.00632341
512.8	0.50944089		1102.79	0.36487581		1692.8	0.27428405		2282.79	-0.00194192		2872.8	0.14106995		3462.8	0.20100218		4052.8	-0.00741538
513	0.50901246		1102.99	0.36494264		1693	0.27414753		2282.99	-0.00135584		2873	0.14226555		3463	0.2001165		4053	-0.00823778
513.2	0.50967687		1103.19	0.36590006		1693.2	0.27348623		2283.19	-0.00180846		2873.2	0.1423079		3463.2	0.20040868		4053.2	-0.00877636
513.4	0.50945474		1103.39	0.3658389		1693.4	0.27384196		2283.39	-0.00184784		2873.4	0.1433591		3463.4	0.20060893		4053.4	-0.00856195
513.6	0.50955914		1103.59	0.36594379		1693.6	0.27461889		2283.59	-0.00180106		2873.6	0.14340235		3463.6	0.20087678		4053.6	-0.00822189
513.8	0.50863314		1103.79	0.36579443		1693.8	0.27480105		2283.79	-0.0013121		2873.8	0.1429452		3463.8	0.20076745		4053.8	-0.00692853
514	0.50896853		1103.99	0.3650878		1694	0.27415054		2283.99	-0.00184798		2874	0.14300851		3464	0.2016082		4054	-0.0067081
514.2	0.50967055		1104.19	0.36375682		1694.2	0.27399056		2284.19	-0.00113049		2874.2	0.14322688		3464.2	0.20082342		4054.2	-0.00655883
514.4	0.50996552		1104.39	0.36380428		1694.4	0.27426671		2284.39	-0.00141953		2874.4	0.14302356		3464.4	0.20046329		4054.4	-0.00630216
514.6	0.50944615		1104.59	0.36369711		1694.6	0.2744204		2284.59	-0.00051678		2874.6	0.14303196		3464.6	0.19997283		4054.6	-0.00577699
514.8	0.50813514		1104.79	0.3629559		1694.8	0.27421112		2284.79	0.00018354		2874.8	0.14288676		3464.8	0.20028602		4054.8	-0.0051117
515	0.50765049		1104.99	0.36320734		1695	0.27475573		2284.99	0.00066288		2875	0.14234765		3465	0.20090891		4055	-0.00461853
515.2	0.50684256		1105.19	0.3636059		1695.2	0.27518992		2285.19	0.00103693		2875.2	0.14283367		3465.2	0.20137838		4055.2	-0.00428572
515.4	0.50614045		1105.39	0.36354744		1695.4	0.27449188		2285.39	0.00024386		2875.4	0.14284518		3465.4	0.20233883		4055.4	-0.00433062
515.6	0.50471636		1105.59	0.36292213		1695.6	0.27497653		2285.59	0.00038333		2875.6	0.14146197		3465.6	0.20089442		4055.6	-0.00454936
515.8	0.50457158		1105.79	0.36330982		1695.8	0.27429004		2285.79	-0.0001051		2875.8	0.14124266		3465.8	0.20068692		4055.8	-0.00448189
516	0.50507115		1105.99	0.36272783		1696	0.2732399		2285.99	-0.00061211		2876	0.14050645		3466	0.20037916		4056	-0.00437062
516.2	0.50550214		1106.19	0.36384206		1696.2	0.27270763		2286.19	-0.00069567		2876.2	0.14023698		3466.2	0.20062342		4056.2	-0.00486652
516.4	0.50632727		1106.39	0.36326806		1696.4	0.27268654		2286.39	-0.00036309		2876.4	0.14071725		3466.4	0.19997934		4056.4	-0.00552829
516.6	0.50666205		1106.59	0.36370557		1696.6	0.27323632		2286.59	-0.00181622		2876.6	0.14158661		3466.6	0.19870948		4056.6	-0.00530567
516.8	0.50634827		1106.79	0.36317561		1696.8	0.27301684		2286.79	-0.00236068		2876.8	0.14260627		3466.8	0.19845823		4056.8	-0.00520179
517	0.50688855		1106.99	0.36306819		1697	0.27230133		2286.99	-0.00271454		2877	0.14286015		3467	0.19753843		4057	-0.00520466
517.2	0.50810433		1107.19	0.36315501		1697.2	0.27208247		2287.19	-0.00341304		2877.2	0.14240697		3467.2	0.19809335		4057.2	-0.00474833
517.4	0.50862438		1107.39	0.36247937		1697.4	0.2732771		2287.39	-0.00356983		2877.4	0.14270938		3467.4	0.19861934		4057.4	-0.00431251
517.6	0.51015267		1107.59	0.36215898		1697.6	0.27404395		2287.59	-0.00354647		2877.6	0.1427827		3467.6	0.19931713		4057.6	-0.00338523
517.8	0.5104199		1107.79	0.36091404		1697.8	0.27478511		2287.79	-0.00355093		2877.8	0.14346694		3467.8	0.19913901		4057.8	-0.00328
518	0.51136112		1107.99	0.36030089		1698	0.2745359		2287.99	-0.0040311		2878	0.14427487		3468	0.20058714		4058	-0.00346138
518.2	0.51126898		1108.19	0.35934556		1698.2	0.27536898		2288.19	-0.00315663		2878.2	0.14501861		3468.2	0.20089142		4058.2	-0.00335121
518.4	0.50975143		1108.39	0.35990792		1698.4	0.2755245		2288.39	-0.00305011		2878.4	0.14546006		3468.4	0.2006602		4058.4	-0.00314435
518.6	0.5083627		1108.59	0.35948495		1698.6	0.27546798		2288.59	-0.00259547		2878.6	0.14508615		3468.6	0.20077523		4058.6	-0.00292705
518.8	0.50762636		1108.79	0.35965589		1698.8	0.27500051		2288.79	-0.00265902		2878.8	0.14437554		3468.8	0.20077391		4058.8	-0.00340667
519	0.50710372		1108.99	0.36058144		1699	0.27436365		2288.99	-0.00221359		2879	0.14438071		3469	0.20131747		4059	-0.00364734
519.2	0.50608252		1109.19	0.36154623		1699.2	0.27446799		2289.19	-0.00292077		2879.2	0.14453525		3469.2	0.20170597		4059.2	-0.00336585
519.4	0.50608862		1109.39	0.36172354		1699.4	0.27344614		2289.39	-0.0023384		2879.4	0.14417454		3469.4	0.20271513		4059.4	-0.00415758
519.6	0.5058262		1109.59	0.36153472		1699.6	0.2730918		2289.59	-0.001294		2879.6	0.14387492		3469.6	0.20336953		4059.6	-0.00408375
519.8	0.50644052		1109.79	0.36259573		1699.8	0.27306188		2289.79	-0.00222237		2879.8	0.14408861		3469.8	0.20332504		4059.8	-0.00347278
520	0.50692777		1109.99	0.36315025		1700	0.27236703		2289.99	-0.00179034		2880	0.14348822		3470	0.20289924		4060	-0.00422128
520.2	0.5067266		1110.19	0.36441184		1700.2	0.27305726		2290.19	-0.00185743		2880.2	0.14305713		3470.2	0.20327887		4060.2	-0.00458999
520.4	0.50754183		1110.39	0.36443732		1700.4	0.27404607		2290.39	-0.00161056		2880.4	0.14332975		3470.4	0.2026497		4060.4	-0.00462018
520.6	0.50742395		1110.59	0.36444641		1700.6	0.27461284		2290.59	-0.00205472		2880.6	0.14276443		3470.6	0.20273239		4060.6	-0.00408375
520.8	0.50805132		1110.79	0.36388993		1700.8	0.2745292		2290.79	-0.00106578		2880.8	0.14214374		3470.8	0.20243264		4060.8	-0.00446557
521	0.50970508		1110.99	0.36349884		1701	0.27533891		2290.99	-0.00013946		2881	0.14144674		3471	0.20245369		4061	-0.00450814
521.2	0.50955196		1111.19	0.36344396		1701.2	0.27719716		2291.19	0.00087242		2881.2	0.14099615		3471.2	0.2023239		4061.2	-0.00392967
521.4	0.51002942		1111.39	0.36266342		1701.4	0.27839716		2291.39	0.00143062		2881.4	0.14126928		3471.4	0.20248688		4061.4	-0.00458326
521.6	0.51048067		1111.59	0.36150662		1701.6	0.27903276		2291.59	0.00160265		2881.6	0.14058164		3471.6	0.2029055		4061.6	-0.0036472
521.8	0.5100735		1111.79	0.36082977		1701.8	0.27904233		2291.79	0.00179604		2881.8	0.14073894		3471.8	0.20270047		4061.8	-0.00380308
522	0.50897931		1111.99	0.36074686		1702	0.27906061		2291.99	0.00167548		2882	0.14014644		3472	0.20308297		4062	-0.00392868
522.2	0.50861729		1112.19	0.36025869		1702.2	0.27883009		2292.19	0.00144057		2882.2	0.14042944		3472.2	0.20227496		4062.2	-0.00347991
522.4	0.50776379		1112.39	0.36102641		1702.4	0.27881353		2292.39	0.001098		2882.4	0.14027358		3472.4	0.20152896		4062.4	-0.00360126
522.6	0.50772833		1112.59	0.36061186		1702.6	0.27923631		2292.59	0.000238		2882.6	0.13934534		3472.6	0.20146129		4062.6	-0.00398866
522.8	0.50806552		1112.79	0.36120825		1702.8	0.27840483		2292.79	-0.00019761		2882.8	0.13934696		3472.8	0.20090881		4062.8	-0.00376739
523	0.50864212		1112.99	0.36158601		1703	0.27645089		2292.99	0.00005689		2883	0.13990676		3473	0.2011871		4063	-0.00285384
523.2	0.50904433		1113.19	0.36234371		1703.2	0.2756428		2293.19	-0.00060916		2883.2	0.13992873		3473.2	0.20110872		4063.2	-0.00324456
523.4	0.51040213		1113.39	0.36279592		1703.4	0.27537508		2293.39	-0.00050057		2883.4	0.14031965		3473.4	0.20212761		4063.4	-0.00334493
523.6	0.51091442		1113.59	0.36329543		1703.6	0.27490108		2293.59	-0.001582		2883.6	0.14049536		3473.6	0.20133826		4063.6	-0.0033694
523.8	0.51079724		1113.79	0.36381493		1703.8	0.27493177		2293.79	-0.0027615		2883.8	0.14006863		3473.8	0.20105559		4063.8	-0.00369554
524	0.51046952		1113.99	0.36403638		1704	0.27460894		2293.99	-0.00318892		2884	0.1401065		3474	0.20152203		4064	-0.00437226
524.2	0.51033535		1114.19	0.36494287		1704.2	0.27540269		2294.19	-0.00347239		2884.2	0.14048876		3474.2	0.20164802		4064.2	-0.00374046
524.4	0.50999636		1114.39	0.36441682		1704.4	0.2757938		2294.39	-0.00326854		2884.4	0.14153078		3474.4	0.20149381		4064.4	-0.00450362
524.6	0.50956026		1114.59	0.36362332		1704.6	0.27594048		2294.59	-0.00299732		2884.6	0.14060982		3474.6	0.20151044		4064.6	-0.0046734
524.8	0.50980243		1114.79	0.3638761		1704.8	0.27567602		2294.79	-0.00232964		2884.8	0.14032544		3474.8	0.20117826		4064.8	-0.00441321
525	0.50971173		1114.99	0.36399167		1705	0.27585633		2294.99	-0.00204371		2885	0.14159782		3475	0.20191819		4065	-0.0051584
525.2	0.50890132		1115.19	0.36450356		1705.2	0.2769057		2295.19	-0.00137971		2885.2	0.14168146		3475.2	0.2022145		4065.2	-0.00544377
525.4	0.50894354		1115.39	0.36407805		1705.4	0.27688796		2295.39	-0.00220604		2885.4	0.14230671		3475.4	0.20284215		4065.4	-0.00619808
525.6	0.50848675		1115.59	0.3631912		1705.6	0.27680103		2295.59	-0.00227457		2885.6	0.14184139		3475.6	0.20320582		4065.6	-0.00585173
525.8	0.50780423		1115.79	0.36314051		1705.8	0.27651331		2295.79	-0.00204643		2885.8	0.14240112		3475.8	0.20411821		4065.8	-0.00643318
526	0.50704305		1115.99	0.36253874		1706	0.27672176		2295.99	-0.00184417		2886	0.14246809		3476	0.20461568		4066	-0.00645913
526.2	0.50662244		1116.19	0.36301741		1706.2	0.27653781		2296.19	-0.0023743		2886.2	0.1431213		3476.2	0.20404964		4066.2	-0.00683344
526.4	0.50683701		1116.39	0.36355723		1706.4	0.27696509		2296.39	-0.0027399		2886.4	0.14248459		3476.4	0.2047635		4066.4	-0.00697745
526.6	0.50679831		1116.59	0.36296756		1706.6	0.27609433		2296.59	-0.00268845		2886.6	0.14251169		3476.6	0.20435348		4066.6	-0.00625688
526.8	0.50758141		1116.79	0.36273687		1706.8	0.27448415		2296.79	-0.00228389		2886.8	0.1419907		3476.8	0.20370173		4066.8	-0.00656108
527	0.50809091		1116.99	0.36312083		1707	0.27434759		2296.99	-0.00213536		2887	0.14166326		3477	0.20350694		4067	-0.00567786
527.2	0.50841284		1117.19	0.36236252		1707.2	0.27492976		2297.19	-0.00188514		2887.2	0.14156753		3477.2	0.20323926		4067.2	-0.00659234
527.4	0.50850295		1117.39	0.36192377		1707.4	0.27544428		2297.39	-0.00145786		2887.4	0.14188113		3477.4	0.20260406		4067.4	-0.0061692
527.6	0.50918011		1117.59	0.36139662		1707.6	0.27562041		2297.59	-0.00085317		2887.6	0.14126142		3477.6	0.20163074		4067.6	-0.00573288
527.8	0.5084717		1117.79	0.36102517		1707.8	0.27587147		2297.79	-0.00091036		2887.8	0.14138962		3477.8	0.20170889		4067.8	-0.00536529
528	0.50863628		1117.99	0.36040444		1708	0.27649438		2297.99	-0.00030317		2888	0.14225247		3478	0.2012301		4068	-0.00569007
528.2	0.50802484		1118.19	0.35988084		1708.2	0.27688706		2298.19	0.000603		2888.2	0.14233737		3478.2	0.20024651		4068.2	-0.00557893
528.4	0.50809229		1118.39	0.35931748		1708.4	0.27724316		2298.39	0.00029056		2888.4	0.1421841		3478.4	0.20005144		4068.4	-0.00661441
528.6	0.50828804		1118.59	0.35950707		1708.6	0.27713327		2298.59	0.00067012		2888.6	0.14165361		3478.6	0.20036937		4068.6	-0.00582419
528.8	0.50864733		1118.79	0.36020475		1708.8	0.27673245		2298.79	0.00112246		2888.8	0.14121899		3478.8	0.20098141		4068.8	-0.00607548
529	0.50967297		1118.99	0.36032342		1709	0.27639336		2298.99	0.00126857		2889	0.14278458		3479	0.20212096		4069	-0.00659003
529.2	0.51016826		1119.19	0.36052541		1709.2	0.27589571		2299.19	0.00089842		2889.2	0.14329851		3479.2	0.20293735		4069.2	-0.00697419
529.4	0.51084779		1119.39	0.36054921		1709.4	0.2744709		2299.39	-0.00009133		2889.4	0.14410833		3479.4	0.20309959		4069.4	-0.00626059
529.6	0.51047604		1119.59	0.36023337		1709.6	0.27347547		2299.59	0.00034824		2889.6	0.14452992		3479.6	0.2029918		4069.6	-0.00611595
529.8	0.51058439		1119.79	0.36075783		1709.8	0.27328131		2299.79	0.00083683		2889.8	0.1448941		3479.8	0.20352964		4069.8	-0.00550774
530	0.51048322		1119.99	0.36158825		1710	0.27198311		2299.99	-0.00025893		2890	0.14538993		3480	0.20250112		4070	-0.00451753
530.2	0.51000326		1120.19	0.36246577		1710.2	0.27138104		2300.19	-0.00005572		2890.2	0.14497027		3480.2	0.20207749		4070.2	-0.00495991
530.4	0.51039505		1120.39	0.36245353		1710.4	0.27085346		2300.39	-0.00040677		2890.4	0.14377619		3480.4	0.20263687		4070.4	-0.00473062
530.6	0.51023464		1120.59	0.36242639		1710.6	0.2699341		2300.59	-0.0004694		2890.6	0.14357588		3480.6	0.20180819		4070.6	-0.00523831
530.8	0.51071842		1120.79	0.36230288		1710.8	0.26955152		2300.79	-0.00054922		2890.8	0.14219911		3480.8	0.20154831		4070.8	-0.0050921
531	0.51032171		1120.99	0.36219244		1711	0.27070831		2300.99	-0.000599		2891	0.14205826		3481	0.20133132		4071	-0.00440474
531.2	0.50942644		1121.19	0.36227964		1711.2	0.27015741		2301.19	0.00036273		2891.2	0.14170695		3481.2	0.2007989		4071.2	-0.00476688
531.4	0.50898294		1121.39	0.36250175		1711.4	0.27039096		2301.39	-0.00001209		2891.4	0.14075706		3481.4	0.20000952		4071.4	-0.00409405
531.6	0.50829425		1121.59	0.3625706		1711.6	0.27214396		2301.59	0.00006399		2891.6	0.13946012		3481.6	0.19961017		4071.6	-0.00475782
531.8	0.50754708		1121.79	0.36232852		1711.8	0.27361998		2301.79	-0.00040733		2891.8	0.13982316		3481.8	0.19912096		4071.8	-0.00565605
532	0.50660453		1121.99	0.36153468		1712	0.27476703		2301.99	0.00079185		2892	0.13938395		3482	0.19875621		4072	-0.00678543
532.2	0.50609215		1122.19	0.36120913		1712.2	0.27517241		2302.19	0.00027817		2892.2	0.13884072		3482.2	0.19842544		4072.2	-0.00651867
532.4	0.50691862		1122.39	0.36162506		1712.4	0.27503638		2302.39	0.00004439		2892.4	0.13845004		3482.4	0.1987128		4072.4	-0.00704594
532.6	0.50679241		1122.59	0.36186597		1712.6	0.27559278		2302.59	0.00076237		2892.6	0.13847736		3482.6	0.19870088		4072.6	-0.00701353
532.8	0.50737655		1122.79	0.36161304		1712.8	0.27604734		2302.79	0.00044991		2892.8	0.13856558		3482.8	0.19938544		4072.8	-0.00752051
533	0.50813156		1122.99	0.36089645		1713	0.27517949		2302.99	0.00008694		2893	0.13964507		3483	0.19949816		4073	-0.00770637
533.2	0.50878771		1123.19	0.36060224		1713.2	0.27420913		2303.19	-0.00037558		2893.2	0.14025163		3483.2	0.20009063		4073.2	-0.00837077
533.4	0.50918623		1123.39	0.36087987		1713.4	0.27451395		2303.39	-0.00072314		2893.4	0.14026607		3483.4	0.20017526		4073.4	-0.00770102
533.6	0.50886722		1123.59	0.3605643		1713.6	0.27437089		2303.59	-0.00010329		2893.6	0.14161429		3483.6	0.19994371		4073.6	-0.00783342
533.8	0.51001856		1123.79	0.3604148		1713.8	0.27413378		2303.79	0.00021875		2893.8	0.14191924		3483.8	0.20059559		4073.8	-0.0071532
534	0.50952665		1123.99	0.36038342		1714	0.27331341		2303.99	0.00031672		2894	0.14219219		3484	0.20090339		4074	-0.00654663
534.2	0.50985429		1124.19	0.3596336		1714.2	0.27334908		2304.19	0.00119405		2894.2	0.14204379		3484.2	0.20119521		4074.2	-0.00687769
534.4	0.51027839		1124.39	0.35875602		1714.4	0.27300861		2304.39	0.00010071		2894.4	0.1422037		3484.4	0.20195554		4074.4	-0.00627341
534.6	0.51089052		1124.59	0.35921501		1714.6	0.2720784		2304.59	-0.00006161		2894.6	0.14231158		3484.6	0.20193302		4074.6	-0.0062856
534.8	0.51112903		1124.79	0.3601228		1714.8	0.27206496		2304.79	-0.00036182		2894.8	0.14206832		3484.8	0.20271038		4074.8	-0.00575259
535	0.51064706		1124.99	0.36098878		1715	0.27145388		2304.99	-0.00051703		2895	0.14103399		3485	0.20282693		4075	-0.0067425
535.2	0.5104428		1125.19	0.36205004		1715.2	0.27098732		2305.19	-0.00037257		2895.2	0.13985078		3485.2	0.20316668		4075.2	-0.00700854
535.4	0.51075345		1125.39	0.3624172		1715.4	0.27213842		2305.39	-0.00079948		2895.4	0.13992142		3485.4	0.20296525		4075.4	-0.00782826
535.6	0.51082161		1125.59	0.36223985		1715.6	0.27234606		2305.59	-0.00094399		2895.6	0.14036535		3485.6	0.20340484		4075.6	-0.00867167
535.8	0.51103238		1125.79	0.36241335		1715.8	0.27235538		2305.79	-0.00100536		2895.8	0.14129899		3485.8	0.2034432		4075.8	-0.00896839
536	0.51035844		1125.99	0.36222539		1716	0.27155827		2305.99	-0.00114124		2896	0.14128529		3486	0.2028887		4076	-0.00926225
536.2	0.51104601		1126.19	0.36315786		1716.2	0.27135103		2306.19	-0.00168136		2896.2	0.141125		3486.2	0.20284411		4076.2	-0.00935801
536.4	0.511131		1126.39	0.36271255		1716.4	0.27084347		2306.39	-0.00201167		2896.4	0.1418885		3486.4	0.20232336		4076.4	-0.00983131
536.6	0.51070501		1126.59	0.36257132		1716.6	0.27197915		2306.59	-0.00215309		2896.6	0.14246641		3486.6	0.20245558		4076.6	-0.00945284
536.8	0.51095842		1126.79	0.36192566		1716.8	0.27287949		2306.79	-0.00320618		2896.8	0.14243624		3486.8	0.20257015		4076.8	-0.00988424
537	0.51059826		1126.99	0.36104951		1717	0.27218553		2306.99	-0.00408222		2897	0.14270953		3487	0.20210732		4077	-0.00989614
537.2	0.51031011		1127.19	0.36031271		1717.2	0.27237783		2307.19	-0.00452834		2897.2	0.1429094		3487.2	0.20232991		4077.2	-0.00921428
537.4	0.51014652		1127.39	0.35996163		1717.4	0.27282781		2307.39	-0.00409331		2897.4	0.14334971		3487.4	0.20193385		4077.4	-0.00832375
537.6	0.50937448		1127.59	0.35910697		1717.6	0.27319689		2307.59	-0.00433365		2897.6	0.14395263		3487.6	0.20098795		4077.6	-0.00702235
537.8	0.50860985		1127.79	0.35872839		1717.8	0.27363272		2307.79	-0.00417843		2897.8	0.14332332		3487.8	0.2010765		4077.8	-0.00631726
538	0.50773398		1127.99	0.35817409		1718	0.27420193		2307.99	-0.00350881		2898	0.14396298		3488	0.20008632		4078	-0.00539552
538.2	0.5078419		1128.19	0.35800131		1718.2	0.27461586		2308.19	-0.00376182		2898.2	0.14359434		3488.2	0.19925592		4078.2	-0.00548018
538.4	0.50730914		1128.39	0.35897567		1718.4	0.27501488		2308.39	-0.00342355		2898.4	0.14292861		3488.4	0.1992042		4078.4	-0.0049028
538.6	0.50722097		1128.59	0.36064968		1718.6	0.27463854		2308.59	-0.00356885		2898.6	0.14217308		3488.6	0.19833157		4078.6	-0.00485208
538.8	0.50746729		1128.79	0.36092232		1718.8	0.27491857		2308.79	-0.00363162		2898.8	0.1411975		3488.8	0.19877634		4078.8	-0.00435515
539	0.50746022		1128.99	0.36066278		1719	0.2745301		2308.99	-0.00335346		2899	0.1402506		3489	0.19808018		4079	-0.00512509
539.2	0.5069962		1129.19	0.36013896		1719.2	0.2749838		2309.19	-0.00323646		2899.2	0.14131986		3489.2	0.19832267		4079.2	-0.0056819
539.4	0.50737214		1129.39	0.35954718		1719.4	0.2743032		2309.39	-0.00320888		2899.4	0.14256989		3489.4	0.19828075		4079.4	-0.00645181
539.6	0.50733634		1129.59	0.35859331		1719.6	0.27380072		2309.59	-0.00381253		2899.6	0.14244472		3489.6	0.19911344		4079.6	-0.0058223
539.8	0.50684235		1129.79	0.35914205		1719.8	0.27381252		2309.79	-0.00343203		2899.8	0.1424529		3489.8	0.19869037		4079.8	-0.00603305
540	0.50626502		1129.99	0.35934209		1720	0.27404275		2309.99	-0.00383421		2900	0.14206141		3490	0.19882776		4080	-0.00677999
540.2	0.50674355		1130.19	0.35954749		1720.2	0.27482494		2310.19	-0.00308439		2900.2	0.14172658		3490.2	0.19951491		4080.2	-0.00700041
540.4	0.50686441		1130.39	0.35881686		1720.4	0.27483491		2310.39	-0.00355654		2900.4	0.14236513		3490.4	0.20004673		4080.4	-0.00755662
540.6	0.5072713		1130.59	0.35880937		1720.6	0.27564559		2310.59	-0.00313941		2900.6	0.14191288		3490.6	0.20086057		4080.6	-0.00789871
540.8	0.50800106		1130.79	0.35867055		1720.8	0.27603184		2310.79	-0.0040709		2900.8	0.14140403		3490.8	0.20061592		4080.8	-0.00830128
541	0.50809195		1130.99	0.35888567		1721	0.27495475		2310.99	-0.00376258		2901	0.14038028		3491	0.20128909		4081	-0.00764619
541.2	0.50807875		1131.19	0.35900403		1721.2	0.27444207		2311.19	-0.00307401		2901.2	0.13966465		3491.2	0.20089237		4081.2	-0.00690377
541.4	0.50870854		1131.39	0.3598043		1721.4	0.27494331		2311.39	-0.00303656		2901.4	0.13923509		3491.4	0.20083088		4081.4	-0.00714444
541.6	0.50846101		1131.59	0.36081917		1721.6	0.2752601		2311.59	-0.00444566		2901.6	0.139163		3491.6	0.20019315		4081.6	-0.00716881
541.8	0.50831512		1131.79	0.36186344		1721.8	0.27451532		2311.79	-0.00379943		2901.8	0.13913378		3491.8	0.19949716		4081.8	-0.00763934
542	0.50881164		1131.99	0.36167275		1722	0.27463676		2311.99	-0.00388782		2902	0.13915161		3492	0.19933473		4082	-0.00789972
542.2	0.50888782		1132.19	0.36386513		1722.2	0.27358512		2312.19	-0.00378703		2902.2	0.13825091		3492.2	0.19883159		4082.2	-0.00801365
542.4	0.50881597		1132.39	0.36471602		1722.4	0.27322429		2312.39	-0.00394229		2902.4	0.13805948		3492.4	0.19872908		4082.4	-0.00834908
542.6	0.50937085		1132.59	0.36347581		1722.6	0.27220311		2312.59	-0.00402174		2902.6	0.13803441		3492.6	0.19865508		4082.6	-0.00942396
542.8	0.50927012		1132.79	0.362566		1722.8	0.27222164		2312.79	-0.00408259		2902.8	0.13821935		3492.8	0.19839442		4082.8	-0.00931706
543	0.50850612		1132.99	0.36159547		1723	0.27171963		2312.99	-0.00441601		2903	0.13914685		3493	0.19789251		4083	-0.01039835
543.2	0.50755864		1133.19	0.36086971		1723.2	0.2709924		2313.19	-0.00412179		2903.2	0.14014188		3493.2	0.19772141		4083.2	-0.01017944
543.4	0.50751539		1133.39	0.36016508		1723.4	0.27081759		2313.39	-0.00364553		2903.4	0.14065215		3493.4	0.19766411		4083.4	-0.01013253
543.6	0.50656938		1133.59	0.35951135		1723.6	0.27137739		2313.59	-0.00363476		2903.6	0.14083878		3493.6	0.19871908		4083.6	-0.0097213
543.8	0.50645696		1133.79	0.3596294		1723.8	0.27142807		2313.79	-0.00309635		2903.8	0.14163879		3493.8	0.1982443		4083.8	-0.01035611
544	0.5063023		1133.99	0.35876391		1724	0.27196936		2313.99	-0.00389625		2904	0.14225481		3494	0.19815936		4084	-0.01104144
544.2	0.50730486		1134.19	0.3572156		1724.2	0.27204804		2314.19	-0.00304052		2904.2	0.14244735		3494.2	0.1990359		4084.2	-0.01078795
544.4	0.50739811		1134.39	0.35644733		1724.4	0.27265697		2314.39	-0.00351466		2904.4	0.14282649		3494.4	0.19916461		4084.4	-0.01099848
544.6	0.50781741		1134.59	0.35672249		1724.6	0.27338278		2314.59	-0.00251619		2904.6	0.14269851		3494.6	0.198952		4084.6	-0.0104903
544.8	0.50851328		1134.79	0.35682411		1724.8	0.27345043		2314.79	-0.00215869		2904.8	0.14234528		3494.8	0.19824633		4084.8	-0.00902064
545	0.50843779		1134.99	0.35684496		1725	0.27243362		2314.99	-0.00146529		2905	0.14168765		3495	0.19805349		4085	-0.00870688
545.2	0.50829223		1135.19	0.35676623		1725.2	0.27205968		2315.19	-0.00132472		2905.2	0.14202074		3495.2	0.19796632		4085.2	-0.00753847
545.4	0.50798295		1135.39	0.35768149		1725.4	0.27222754		2315.39	-0.0016413		2905.4	0.142246		3495.4	0.19786965		4085.4	-0.00731205
545.6	0.50806116		1135.59	0.35760108		1725.6	0.27192367		2315.59	-0.00169814		2905.6	0.14233792		3495.6	0.19725752		4085.6	-0.00702697
545.8	0.50785749		1135.79	0.3576012		1725.8	0.27157854		2315.79	-0.00137081		2905.8	0.14246091		3495.8	0.19812819		4085.8	-0.00682429
546	0.50829455		1135.99	0.35814649		1726	0.27113632		2315.99	-0.00134391		2906	0.1420552		3496	0.19905558		4086	-0.00750534
546.2	0.50784206		1136.19	0.35887214		1726.2	0.27076486		2316.19	-0.00159348		2906.2	0.1423396		3496.2	0.19916362		4086.2	-0.00744019
546.4	0.50765893		1136.39	0.35832483		1726.4	0.27074295		2316.39	-0.00215461		2906.4	0.14240689		3496.4	0.19963121		4086.4	-0.00841358
546.6	0.50765611		1136.59	0.35845284		1726.6	0.27058773		2316.59	-0.00208378		2906.6	0.14157263		3496.6	0.2003681		4086.6	-0.00935863
546.8	0.50681161		1136.79	0.35960367		1726.8	0.27088902		2316.79	-0.0025642		2906.8	0.14148155		3496.8	0.20014955		4086.8	-0.00890746
547	0.50620227		1136.99	0.36018287		1727	0.27078855		2316.99	-0.00262084		2907	0.14123949		3497	0.20129918		4087	-0.00893279
547.2	0.50578319		1137.19	0.36035062		1727.2	0.27096266		2317.19	-0.00300539		2907.2	0.14099703		3497.2	0.20217671		4087.2	-0.00881945
547.4	0.5055308		1137.39	0.36005131		1727.4	0.27037592		2317.39	-0.00420328		2907.4	0.14079098		3497.4	0.20325934		4087.4	-0.009494
547.6	0.5052614		1137.59	0.35939089		1727.6	0.26971433		2317.59	-0.0049875		2907.6	0.14081775		3497.6	0.20386845		4087.6	-0.00979263
547.8	0.50527319		1137.79	0.35978328		1727.8	0.27035162		2317.79	-0.00499597		2907.8	0.14067315		3497.8	0.20324522		4087.8	-0.01003279
548	0.50563621		1137.99	0.35903137		1728	0.27097657		2317.99	-0.00588665		2908	0.14094979		3498	0.20367351		4088	-0.0104585
548.2	0.50611048		1138.19	0.35910679		1728.2	0.2725971		2318.19	-0.00561689		2908.2	0.14109074		3498.2	0.20436829		4088.2	-0.01040336
548.4	0.50563496		1138.39	0.36007721		1728.4	0.27371515		2318.39	-0.00595147		2908.4	0.14041756		3498.4	0.20310053		4088.4	-0.01044229
548.6	0.50579564		1138.59	0.36035805		1728.6	0.2740922		2318.59	-0.00533068		2908.6	0.13981012		3498.6	0.20160702		4088.6	-0.00890504
548.8	0.50534754		1138.79	0.35957914		1728.8	0.27398774		2318.79	-0.00531785		2908.8	0.13941		3498.8	0.20020433		4088.8	-0.00843564
549	0.50447151		1138.99	0.35931953		1729	0.27409643		2318.99	-0.00552326		2909	0.13921971		3499	0.19926553		4089	-0.00831367
549.2	0.50444834		1139.19	0.3589595		1729.2	0.2747159		2319.19	-0.00494813		2909.2	0.13896524		3499.2	0.19888739		4089.2	-0.00794921
549.4	0.5043258		1139.39	0.35877904		1729.4	0.27480521		2319.39	-0.00527212		2909.4	0.1386509		3499.4	0.19823833		4089.4	-0.00778456
549.6	0.50424845		1139.59	0.35839767		1729.6	0.27537602		2319.59	-0.0048397		2909.6	0.1389038		3499.6	0.19839594		4089.6	-0.00795105
549.8	0.5042207		1139.79	0.35896644		1729.8	0.27553658		2319.79	-0.0053657		2909.8	0.13933924		3499.8	0.19802592		4089.8	-0.0084899
550	0.50431456		1139.99	0.35919949		1730	0.27519208		2319.99	-0.00528923		2910	0.13971019		3500	0.19784063		4090	-0.00883438
550.2	0.5040323		1140.19	0.35869437		1730.2	0.27550912		2320.19	-0.00546298		2910.2	0.14009844		3500.2	0.19793191		4090.2	-0.0095164
550.4	0.50469505		1140.39	0.35895893		1730.4	0.27429634		2320.39	-0.00492977		2910.4	0.13992277		3500.4	0.19805276		4090.4	-0.01036538
550.6	0.50421602		1140.59	0.35894759		1730.6	0.27367607		2320.59	-0.00460805		2910.6	0.14018745		3500.6	0.19851429		4090.6	-0.01124121
550.8	0.50513239		1140.79	0.35908955		1730.8	0.272675		2320.79	-0.0049696		2910.8	0.14058426		3500.8	0.19855412		4090.8	-0.01078622
551	0.50515849		1140.99	0.35847757		1731	0.27199807		2320.99	-0.00537748		2911	0.14075731		3501	0.19954933		4091	-0.01030824
551.2	0.50486327		1141.19	0.35749031		1731.2	0.27149745		2321.19	-0.00524186		2911.2	0.14140251		3501.2	0.19939874		4091.2	-0.01102421
551.4	0.50485152		1141.39	0.35720483		1731.4	0.2704244		2321.39	-0.00488028		2911.4	0.14206413		3501.4	0.19936356		4091.4	-0.0117193
551.6	0.50444923		1141.59	0.35631402		1731.6	0.27033096		2321.59	-0.00425535		2911.6	0.14265734		3501.6	0.19946718		4091.6	-0.01166068
551.8	0.50434803		1141.79	0.35669793		1731.8	0.27135086		2321.79	-0.00429757		2911.8	0.14307963		3501.8	0.19946431		4091.8	-0.01219534
552	0.50557243		1141.99	0.35629361		1732	0.27240309		2321.99	-0.00469012		2912	0.14428055		3502	0.19957987		4092	-0.01214044
552.2	0.50571126		1142.19	0.35696414		1732.2	0.27275251		2322.19	-0.00476833		2912.2	0.14426056		3502.2	0.19897665		4092.2	-0.01156034
552.4	0.50575708		1142.39	0.35698204		1732.4	0.27269476		2322.39	-0.00442145		2912.4	0.14344661		3502.4	0.19820928		4092.4	-0.01079417
552.6	0.50549832		1142.59	0.35670312		1732.6	0.27327521		2322.59	-0.00368585		2912.6	0.14337669		3502.6	0.19713984		4092.6	-0.009423
552.8	0.50485995		1142.79	0.35700194		1732.8	0.27437879		2322.79	-0.00321886		2912.8	0.14309457		3502.8	0.19690193		4092.8	-0.0094631
553	0.50496899		1142.99	0.35654358		1733	0.27558685		2322.99	-0.00308679		2913	0.14289067		3503	0.19626024		4093	-0.00852527
553.2	0.50469929		1143.19	0.35627652		1733.2	0.27606851		2323.19	-0.00328757		2913.2	0.14239497		3503.2	0.19677939		4093.2	-0.00837134
553.4	0.50477525		1143.39	0.35729316		1733.4	0.27573926		2323.39	-0.00394668		2913.4	0.1414467		3503.4	0.19685853		4093.4	-0.00766101
553.6	0.50410349		1143.59	0.35825404		1733.6	0.276407		2323.59	-0.00383552		2913.6	0.14127999		3503.6	0.19584935		4093.6	-0.00788367
553.8	0.50476432		1143.79	0.35866826		1733.8	0.27589215		2323.79	-0.00492467		2913.8	0.1404797		3503.8	0.19498351		4093.8	-0.00835378
554	0.50504549		1143.99	0.35900391		1734	0.27480262		2323.99	-0.00475753		2914	0.1398042		3504	0.1952873		4094	-0.00837386
554.2	0.50520105		1144.19	0.35890389		1734.2	0.27391245		2324.19	-0.00476408		2914.2	0.13911272		3504.2	0.19552762		4094.2	-0.00960849
554.4	0.50559955		1144.39	0.35873096		1734.4	0.27240946		2324.39	-0.00518431		2914.4	0.13916656		3504.4	0.19606181		4094.4	-0.00890566
554.6	0.50527433		1144.59	0.35891143		1734.6	0.27106855		2324.59	-0.00540729		2914.6	0.13929351		3504.6	0.19642388		4094.6	-0.00863952
554.8	0.5058495		1144.79	0.35865799		1734.8	0.27037727		2324.79	-0.00517767		2914.8	0.1384631		3504.8	0.19663161		4094.8	-0.00869656
555	0.50549347		1144.99	0.35803784		1735	0.2701097		2324.99	-0.00448865		2915	0.13840256		3505	0.1967712		4095	-0.0092893
555.2	0.50534854		1145.19	0.35752282		1735.2	0.26987906		2325.19	-0.00374703		2915.2	0.13928246		3505.2	0.19646661		4095.2	-0.01001472
555.4	0.50521101		1145.39	0.35749183		1735.4	0.26881683		2325.39	-0.00391202		2915.4	0.13984388		3505.4	0.1973823		4095.4	-0.01047426
555.6	0.50537592		1145.59	0.35697739		1735.6	0.26825978		2325.59	-0.00510792		2915.6	0.14068393		3505.6	0.19855401		4095.6	-0.00973384
555.8	0.50517348		1145.79	0.35664509		1735.8	0.26843591		2325.79	-0.0056629		2915.8	0.14150719		3505.8	0.19878044		4095.8	-0.01001577
556	0.50599061		1145.99	0.35650142		1736	0.26797229		2325.99	-0.00494677		2916	0.14205143		3506	0.19960641		4096	-0.00984026
556.2	0.50504121		1146.19	0.35686328		1736.2	0.2676366		2326.19	-0.00493185		2916.2	0.14216658		3506.2	0.19972564		4096.2	-0.00934661
556.4	0.50554991		1146.39	0.35621963		1736.4	0.26774478		2326.39	-0.0038755		2916.4	0.14261559		3506.4	0.19975952		4096.4	-0.00983144
556.6	0.50528936		1146.59	0.35615629		1736.6	0.26826389		2326.59	-0.00321632		2916.6	0.14289644		3506.6	0.19913226		4096.6	-0.00888308
556.8	0.50413456		1146.79	0.35573023		1736.8	0.26882244		2326.79	-0.00296677		2916.8	0.14337958		3506.8	0.1997818		4096.8	-0.00811933
557	0.50392779		1146.99	0.35486862		1737	0.26969132		2326.99	-0.00209371		2917	0.14289879		3507	0.19971332		4097	-0.00776127
557.2	0.50382395		1147.19	0.35603869		1737.2	0.2701876		2327.19	-0.00219217		2917.2	0.14272575		3507.2	0.19983475		4097.2	-0.00762704
557.4	0.50452358		1147.39	0.35688811		1737.4	0.2700715		2327.39	-0.00205721		2917.4	0.14195105		3507.4	0.19943827		4097.4	-0.00756356
557.6	0.50470528		1147.59	0.3572467		1737.6	0.27137026		2327.59	-0.00279869		2917.6	0.14140719		3507.6	0.19881052		4097.6	-0.00754842
557.8	0.50464777		1147.79	0.35707928		1737.8	0.27130318		2327.79	-0.00234765		2917.8	0.14056961		3507.8	0.19874365		4097.8	-0.00834403
558	0.504891		1147.99	0.35663016		1738	0.27155325		2327.99	-0.00242523		2918	0.1402766		3508	0.19859773		4098	-0.00819134
558.2	0.50509256		1148.19	0.35636043		1738.2	0.27124572		2328.19	-0.00298406		2918.2	0.13989513		3508.2	0.19883487		4098.2	-0.00954755
558.4	0.50584709		1148.39	0.35605135		1738.4	0.27154809		2328.39	-0.00313128		2918.4	0.13942309		3508.4	0.19890212		4098.4	-0.00955848
558.6	0.50648183		1148.59	0.35654229		1738.6	0.27199564		2328.59	-0.00228029		2918.6	0.1389982		3508.6	0.19939056		4098.6	-0.00977034
558.8	0.5067326		1148.79	0.3561556		1738.8	0.27278263		2328.79	-0.00204315		2918.8	0.13845645		3508.8	0.19872433		4098.8	-0.0105414
559	0.50754853		1148.99	0.35585282		1739	0.27313573		2328.99	-0.00200719		2919	0.13880474		3509	0.19897511		4099	-0.01045088
559.2	0.50744886		1149.19	0.35570811		1739.2	0.27355168		2329.19	-0.00277411		2919.2	0.14028714		3509.2	0.19862804		4099.2	-0.01063654
559.4	0.5073791		1149.39	0.35634859		1739.4	0.27394779		2329.39	-0.00434109		2919.4	0.14033981		3509.4	0.19961456		4099.4	-0.01055187
559.6	0.50859919		1149.59	0.35583826		1739.6	0.27373794		2329.59	-0.00527249		2919.6	0.14050692		3509.6	0.19921435		4099.6	-0.01087387
559.8	0.50779834		1149.79	0.35536988		1739.8	0.27333689		2329.79	-0.0053005		2919.8	0.14060507		3509.8	0.19892703		4099.8	-0.01091243
560	0.50762784		1149.99	0.3556329		1740	0.2734774		2329.99	-0.0056699		2920	0.14044481		3510	0.19909317		4100	-0.01099658
560.2	0.50830675		1150.19	0.3560155		1740.2	0.27340885		2330.19	-0.00599146		2920.2	0.14069077		3510.2	0.19863087		4100.2	-0.01048167
560.4	0.50856306		1150.39	0.35579176		1740.4	0.27260538		2330.39	-0.00575607		2920.4	0.14108666		3510.4	0.19822604		4100.4	-0.01051724
560.6	0.50828979		1150.59	0.35644134		1740.6	0.27319199		2330.59	-0.00534517		2920.6	0.14040823		3510.6	0.1977859		4100.6	-0.00854558
560.8	0.50634403		1150.79	0.35676978		1740.8	0.2736921		2330.79	-0.00509375		2920.8	0.14026098		3510.8	0.19804608		4100.8	-0.00792492
561	0.5057722		1150.99	0.35751229		1741	0.27416735		2330.99	-0.00474006		2921	0.1389352		3511	0.19764811		4101	-0.00743024
561.2	0.50657467		1151.19	0.3586043		1741.2	0.27329914		2331.19	-0.00542908		2921.2	0.13905132		3511.2	0.19698479		4101.2	-0.0072431
561.4	0.50694771		1151.39	0.35792771		1741.4	0.27250761		2331.39	-0.00513689		2921.4	0.13833288		3511.4	0.19719998		4101.4	-0.00715846
561.6	0.50676328		1151.59	0.35702189		1741.6	0.27203422		2331.59	-0.00543648		2921.6	0.1384299		3511.6	0.19705268		4101.6	-0.00750611
561.8	0.5055996		1151.79	0.35589209		1741.8	0.2710617		2331.79	-0.00455327		2921.8	0.13842714		3511.8	0.19665901		4101.8	-0.00803428
562	0.50601496		1151.99	0.35510873		1742	0.27036471		2331.99	-0.00496935		2922	0.13842983		3512	0.19631128		4102	-0.00830802
562.2	0.5066633		1152.19	0.35517826		1742.2	0.26877872		2332.19	-0.00517426		2922.2	0.13778085		3512.2	0.19685359		4102.2	-0.00923278
562.4	0.50646926		1152.39	0.35512582		1742.4	0.26907002		2332.39	-0.0043258		2922.4	0.13808235		3512.4	0.19718424		4102.4	-0.01014857
562.6	0.50625725		1152.59	0.35568388		1742.6	0.2690816		2332.59	-0.00369501		2922.6	0.13803263		3512.6	0.19689793		4102.6	-0.01002518
562.8	0.50582397		1152.79	0.35494394		1742.8	0.2680132		2332.79	-0.00406237		2922.8	0.13815949		3512.8	0.19625096		4102.8	-0.01022511
563	0.50588949		1152.99	0.3549351		1743	0.26741053		2332.99	-0.00432164		2923	0.13878536		3513	0.19684988		4103	-0.00968201
563.2	0.50579515		1153.19	0.35521366		1743.2	0.26759359		2333.19	-0.00432402		2923.2	0.13902089		3513.2	0.19661036		4103.2	-0.00994218
563.4	0.50605138		1153.39	0.35537718		1743.4	0.26788541		2333.39	-0.00422773		2923.4	0.13909882		3513.4	0.19739222		4103.4	-0.00961198
563.6	0.50627192		1153.59	0.35549037		1743.6	0.26699545		2333.59	-0.00359174		2923.6	0.13942191		3513.6	0.19685116		4103.6	-0.00948713
563.8	0.50505128		1153.79	0.35544051		1743.8	0.26806647		2333.79	-0.00341136		2923.8	0.14020278		3513.8	0.19790616		4103.8	-0.00923752
564	0.50500586		1153.99	0.3556864		1744	0.26898315		2333.99	-0.0037766		2924	0.1397635		3514	0.19825854		4104	-0.00927953
564.2	0.50514678		1154.19	0.35616675		1744.2	0.26931989		2334.19	-0.00385209		2924.2	0.13981044		3514.2	0.1991205		4104.2	-0.00922975
564.4	0.50501978		1154.39	0.35647008		1744.4	0.27059603		2334.39	-0.00426672		2924.4	0.13908104		3514.4	0.19926994		4104.4	-0.00882711
564.6	0.50486767		1154.59	0.35697259		1744.6	0.27262657		2334.59	-0.00474205		2924.6	0.13819236		3514.6	0.19930859		4104.6	-0.00752555
564.8	0.50411075		1154.79	0.35720245		1744.8	0.27306004		2334.79	-0.00604639		2924.8	0.13778694		3514.8	0.19915242		4104.8	-0.00690777
565	0.50477137		1154.99	0.35713656		1745	0.27380038		2334.99	-0.00621294		2925	0.13744169		3515	0.19975473		4105	-0.00749793
565.2	0.50647236		1155.19	0.35689989		1745.2	0.27361184		2335.19	-0.00647075		2925.2	0.13787404		3515.2	0.19991111		4105.2	-0.0083375
565.4	0.50622142		1155.39	0.35612557		1745.4	0.27412753		2335.39	-0.00636505		2925.4	0.1379237		3515.4	0.20112897		4105.4	-0.00806039
565.6	0.50619695		1155.59	0.35564526		1745.6	0.27419982		2335.59	-0.00700134		2925.6	0.13850456		3515.6	0.20166881		4105.6	-0.00910496
565.8	0.50603903		1155.79	0.35560642		1745.8	0.2743297		2335.79	-0.00767458		2925.8	0.13800043		3515.8	0.20190928		4105.8	-0.00920521
566	0.5065929		1155.99	0.35621895		1746	0.27339409		2335.99	-0.00773263		2926	0.13761891		3516	0.2018123		4106	-0.00948967
566.2	0.50753693		1156.19	0.35663786		1746.2	0.27246582		2336.19	-0.00853707		2926.2	0.13685688		3516.2	0.2021665		4106.2	-0.00937818
566.4	0.50804861		1156.39	0.35613709		1746.4	0.27269036		2336.39	-0.00804415		2926.4	0.13688583		3516.4	0.20128204		4106.4	-0.00993763
566.6	0.50732788		1156.59	0.35639584		1746.6	0.27181637		2336.59	-0.00839988		2926.6	0.13659042		3516.6	0.20084784		4106.6	-0.00868126
566.8	0.50766614		1156.79	0.35605451		1746.8	0.27066617		2336.79	-0.0085785		2926.8	0.13702103		3516.8	0.20090071		4106.8	-0.00815908
567	0.50734375		1156.99	0.35700708		1747	0.2697763		2336.99	-0.00758172		2927	0.13690348		3517	0.20017443		4107	-0.00763637
567.2	0.50753434		1157.19	0.35770277		1747.2	0.26886127		2337.19	-0.00637312		2927.2	0.1373336		3517.2	0.19980601		4107.2	-0.00788113
567.4	0.50719134		1157.39	0.35825722		1747.4	0.26814331		2337.39	-0.00519857		2927.4	0.13821157		3517.4	0.19916035		4107.4	-0.00790605
567.6	0.50669521		1157.59	0.35919224		1747.6	0.26685818		2337.59	-0.00469702		2927.6	0.13836173		3517.6	0.19856753		4107.6	-0.008027
567.8	0.50613632		1157.79	0.35862137		1747.8	0.26702441		2337.79	-0.00421751		2927.8	0.13849995		3517.8	0.19882907		4107.8	-0.00863279
568	0.50602254		1157.99	0.35904379		1748	0.26645275		2337.99	-0.00464881		2928	0.13772504		3518	0.19827422		4108	-0.00833319
568.2	0.50647484		1158.19	0.35958724		1748.2	0.2666251		2338.19	-0.00442961		2928.2	0.13761001		3518.2	0.19803155		4108.2	-0.0090416
568.4	0.50613984		1158.39	0.35935915		1748.4	0.26631623		2338.39	-0.00517188		2928.4	0.13701895		3518.4	0.19793011		4108.4	-0.00865329
568.6	0.50485909		1158.59	0.35898984		1748.6	0.26618023		2338.59	-0.00520208		2928.6	0.13682245		3518.6	0.19771297		4108.6	-0.00831055
568.8	0.50481651		1158.79	0.35874517		1748.8	0.26627749		2338.79	-0.00551195		2928.8	0.1366676		3518.8	0.19647421		4108.8	-0.0083876
569	0.50447632		1158.99	0.35805829		1749	0.26785615		2338.99	-0.00615523		2929	0.13778902		3519	0.19764006		4109	-0.0091623
569.2	0.50473656		1159.19	0.35795532		1749.2	0.26769133		2339.19	-0.0060185		2929.2	0.13804537		3519.2	0.19801122		4109.2	-0.00908328
569.4	0.50420809		1159.39	0.35778424		1749.4	0.26814006		2339.39	-0.00623072		2929.4	0.13872611		3519.4	0.1986449		4109.4	-0.00835381
569.6	0.50404705		1159.59	0.35677585		1749.6	0.26839174		2339.59	-0.00656605		2929.6	0.13871699		3519.6	0.19895092		4109.6	-0.0089466
569.8	0.50450578		1159.79	0.35691246		1749.8	0.26820689		2339.79	-0.00673832		2929.8	0.13877316		3519.8	0.19925619		4109.8	-0.00848484
570	0.50463877		1159.99	0.35658754		1750	0.26913844		2339.99	-0.00672418		2930	0.13863444		3520	0.19869183		4110	-0.00783671
570.2	0.50498558		1160.19	0.35584209		1750.2	0.27006483		2340.19	-0.00748806		2930.2	0.13902799		3520.2	0.19849273		4110.2	-0.00777219
570.4	0.50544804		1160.39	0.35448206		1750.4	0.27082291		2340.39	-0.00752152		2930.4	0.14005979		3520.4	0.19786032		4110.4	-0.00760068
570.6	0.50466145		1160.59	0.35425568		1750.6	0.27144006		2340.59	-0.00745698		2930.6	0.14034153		3520.6	0.19759389		4110.6	-0.00764559
570.8	0.50467178		1160.79	0.35396942		1750.8	0.2717094		2340.79	-0.00685684		2930.8	0.14112329		3520.8	0.19655476		4110.8	-0.00730272
571	0.50445982		1160.99	0.35386939		1751	0.27111668		2340.99	-0.00567154		2931	0.14119256		3521	0.1956448		4111	-0.00757027
571.2	0.50453426		1161.19	0.35401172		1751.2	0.27068487		2341.19	-0.00468019		2931.2	0.14132184		3521.2	0.19607524		4111.2	-0.00797133
571.4	0.50436036		1161.39	0.35315262		1751.4	0.27108665		2341.39	-0.00407098		2931.4	0.14059069		3521.4	0.19552376		4111.4	-0.00836563
571.6	0.50363318		1161.59	0.35264951		1751.6	0.27069903		2341.59	-0.00406904		2931.6	0.14089046		3521.6	0.19565644		4111.6	-0.00930242
571.8	0.50362749		1161.79	0.35234361		1751.8	0.27115588		2341.79	-0.00400569		2931.8	0.13973954		3521.8	0.19539839		4111.8	-0.00920542
572	0.50317122		1161.99	0.35273793		1752	0.27139773		2341.99	-0.00429959		2932	0.14019407		3522	0.19513179		4112	-0.00933768
572.2	0.50318954		1162.19	0.35229359		1752.2	0.2705856		2342.19	-0.00492954		2932.2	0.14011464		3522.2	0.19557776		4112.2	-0.01014412
572.4	0.50199466		1162.39	0.35203007		1752.4	0.26987283		2342.39	-0.00564004		2932.4	0.14057086		3522.4	0.19639624		4112.4	-0.00988997
572.6	0.50249477		1162.59	0.35239384		1752.6	0.27035462		2342.59	-0.00528363		2932.6	0.14075552		3522.6	0.19656466		4112.6	-0.01020217
572.8	0.50336117		1162.79	0.35310442		1752.8	0.27085776		2342.79	-0.00601544		2932.8	0.14032084		3522.8	0.19693019		4112.8	-0.01011384
573	0.50329345		1162.99	0.35280447		1753	0.2712899		2342.99	-0.00602776		2933	0.14041135		3523	0.19898553		4113	-0.01005933
573.2	0.50296953		1163.19	0.3532312		1753.2	0.26985146		2343.19	-0.0050826		2933.2	0.13934572		3523.2	0.19959214		4113.2	-0.01118248
573.4	0.50292776		1163.39	0.35473744		1753.4	0.26974387		2343.39	-0.00511313		2933.4	0.13975135		3523.4	0.19980585		4113.4	-0.01160627
573.6	0.50341527		1163.59	0.3549807		1753.6	0.26949673		2343.59	-0.0046243		2933.6	0.13997833		3523.6	0.20093522		4113.6	-0.01196133
573.8	0.50429275		1163.79	0.35602891		1753.8	0.26887408		2343.79	-0.00535967		2933.8	0.14024779		3523.8	0.20061524		4113.8	-0.01199162
574	0.50383163		1163.99	0.3567108		1754	0.26960671		2343.99	-0.00607499		2934	0.14000062		3524	0.19992888		4114	-0.01208186
574.2	0.50456997		1164.19	0.35713756		1754.2	0.26864956		2344.19	-0.00674264		2934.2	0.14081374		3524.2	0.20034991		4114.2	-0.01208204
574.4	0.50505371		1164.39	0.35680686		1754.4	0.26809167		2344.39	-0.00685105		2934.4	0.14187781		3524.4	0.19979241		4114.4	-0.01252437
574.6	0.50507404		1164.59	0.35689645		1754.6	0.26802929		2344.59	-0.00559966		2934.6	0.14201513		3524.6	0.19932639		4114.6	-0.01211475
574.8	0.50498066		1164.79	0.35704217		1754.8	0.26746651		2344.79	-0.00552608		2934.8	0.14222957		3524.8	0.19868069		4114.8	-0.01137179
575	0.50578244		1164.99	0.35734269		1755	0.26686931		2344.99	-0.00503884		2935	0.14087958		3525	0.19864898		4115	-0.01102535
575.2	0.50564356		1165.19	0.35761298		1755.2	0.26701898		2345.19	-0.00438018		2935.2	0.14054612		3525.2	0.19865072		4115.2	-0.00995746
575.4	0.50549484		1165.39	0.35661045		1755.4	0.26781786		2345.39	-0.00445438		2935.4	0.14063416		3525.4	0.19791792		4115.4	-0.01015712
575.6	0.50427463		1165.59	0.35616897		1755.6	0.26806572		2345.59	-0.00449247		2935.6	0.14112255		3525.6	0.19764063		4115.6	-0.0093991
575.8	0.50426327		1165.79	0.35646793		1755.8	0.26758984		2345.79	-0.00550312		2935.8	0.14086528		3525.8	0.19661202		4115.8	-0.00848259
576	0.50390856		1165.99	0.35665809		1756	0.26795986		2345.99	-0.00591377		2936	0.1421147		3526	0.19595675		4116	-0.00867271
576.2	0.50412842		1166.19	0.35630899		1756.2	0.26794738		2346.19	-0.00653786		2936.2	0.14197655		3526.2	0.19630556		4116.2	-0.00921979
576.4	0.5039854		1166.39	0.35644724		1756.4	0.26760205		2346.39	-0.00663006		2936.4	0.14221249		3526.4	0.19628891		4116.4	-0.00854326
576.6	0.50395146		1166.59	0.35625123		1756.6	0.26849797		2346.59	-0.00696676		2936.6	0.14029092		3526.6	0.1958977		4116.6	-0.00920134
576.8	0.50424066		1166.79	0.35606174		1756.8	0.26844437		2346.79	-0.00701403		2936.8	0.13903207		3526.8	0.19589174		4116.8	-0.00992605
577	0.50379481		1166.99	0.35522805		1757	0.26789687		2346.99	-0.00694947		2937	0.13851752		3527	0.19555698		4117	-0.01076946
577.2	0.50341744		1167.19	0.35506358		1757.2	0.26747504		2347.19	-0.00776619		2937.2	0.13743573		3527.2	0.19495397		4117.2	-0.01178046
577.4	0.50382094		1167.39	0.35596176		1757.4	0.26726397		2347.39	-0.00805614		2937.4	0.13726012		3527.4	0.1944255		4117.4	-0.01223406
577.6	0.50455944		1167.59	0.35500764		1757.6	0.2669488		2347.59	-0.00751437		2937.6	0.13691032		3527.6	0.19497589		4117.6	-0.01160404
577.8	0.50487864		1167.79	0.35507679		1757.8	0.26664965		2347.79	-0.00835513		2937.8	0.13667243		3527.8	0.19421484		4117.8	-0.01230641
578	0.50441322		1167.99	0.35487351		1758	0.26653013		2347.99	-0.00855787		2938	0.13581559		3528	0.19445533		4118	-0.0123021
578.2	0.50425334		1168.19	0.3540191		1758.2	0.26583928		2348.19	-0.00860947		2938.2	0.13617563		3528.2	0.19499246		4118.2	-0.0119851
578.4	0.50380538		1168.39	0.35325408		1758.4	0.26580208		2348.39	-0.00749286		2938.4	0.13678389		3528.4	0.19452328		4118.4	-0.01161459
578.6	0.5039231		1168.59	0.35334532		1758.6	0.26601712		2348.59	-0.00662321		2938.6	0.13646744		3528.6	0.19513492		4118.6	-0.01035698
578.8	0.50378908		1168.79	0.3529757		1758.8	0.26584144		2348.79	-0.00716763		2938.8	0.13684454		3528.8	0.19618469		4118.8	-0.00976523
579	0.50318805		1168.99	0.35349659		1759	0.26697365		2348.99	-0.00671597		2939	0.13638936		3529	0.19773944		4119	-0.00903456
579.2	0.5026192		1169.19	0.35340792		1759.2	0.26727059		2349.19	-0.00636466		2939.2	0.13762437		3529.2	0.19801485		4119.2	-0.00772727
579.4	0.50115027		1169.39	0.35388495		1759.4	0.26722584		2349.39	-0.00725283		2939.4	0.13735518		3529.4	0.19846711		4119.4	-0.00817906
579.6	0.49979297		1169.59	0.35436371		1759.6	0.26653649		2349.59	-0.00748383		2939.6	0.13735824		3529.6	0.1984224		4119.6	-0.00732219
579.8	0.49935861		1169.79	0.35508664		1759.8	0.26678532		2349.79	-0.00746226		2939.8	0.13773587		3529.8	0.1977965		4119.8	-0.00794341
580	0.49915204		1169.99	0.35614173		1760	0.26728558		2349.99	-0.0070681		2940	0.13774879		3530	0.19799693		4120	-0.00846052
580.2	0.49903805		1170.19	0.35600876		1760.2	0.26771624		2350.19	-0.0070869		2940.2	0.13770036		3530.2	0.19826445		4120.2	-0.0088055
580.4	0.49866925		1170.39	0.35582967		1760.4	0.26725379		2350.39	-0.00735723		2940.4	0.138579		3530.4	0.19703194		4120.4	-0.0091703
580.6	0.49911042		1170.59	0.35494626		1760.6	0.26755602		2350.59	-0.00750108		2940.6	0.13796598		3530.6	0.1970192		4120.6	-0.01007256
580.8	0.50051937		1170.79	0.35486273		1760.8	0.26713451		2350.79	-0.00731319		2940.8	0.13777378		3530.8	0.19587993		4120.8	-0.01105744
581	0.50092662		1170.99	0.35431695		1761	0.2668937		2350.99	-0.00723833		2941	0.13703438		3531	0.19535952		4121	-0.01137288
581.2	0.50124016		1171.19	0.35421029		1761.2	0.26779011		2351.19	-0.00769651		2941.2	0.136633		3531.2	0.19528656		4121.2	-0.01114818
581.4	0.50125782		1171.39	0.35451667		1761.4	0.26785534		2351.39	-0.00623025		2941.4	0.13680123		3531.4	0.19628644		4121.4	-0.01113466
581.6	0.50256333		1171.59	0.35452717		1761.6	0.26828537		2351.59	-0.00541842		2941.6	0.13698888		3531.6	0.19685339		4121.6	-0.0108698
581.8	0.50277355		1171.79	0.3541072		1761.8	0.26845654		2351.79	-0.00581901		2941.8	0.13653891		3531.8	0.19718459		4121.8	-0.01208802
582	0.50289842		1171.99	0.35312005		1762	0.26854625		2351.99	-0.0052981		2942	0.1355716		3532	0.1967101		4122	-0.01041707
582.2	0.50354761		1172.19	0.35318701		1762.2	0.2684776		2352.19	-0.00447455		2942.2	0.13650008		3532.2	0.19703115		4122.2	-0.00978513
582.4	0.50392449		1172.39	0.35311204		1762.4	0.26858074		2352.39	-0.0042841		2942.4	0.13759419		3532.4	0.19638847		4122.4	-0.00919699
582.6	0.50393434		1172.59	0.3532633		1762.6	0.26914107		2352.59	-0.0044176		2942.6	0.1375664		3532.6	0.19753751		4122.6	-0.00882876
582.8	0.50348365		1172.79	0.3531347		1762.8	0.26918595		2352.79	-0.00506081		2942.8	0.13789863		3532.8	0.19775742		4122.8	-0.00856486
583	0.50360851		1172.99	0.35401156		1763	0.26969921		2352.99	-0.00506075		2943	0.13745673		3533	0.19731758		4123	-0.00813853
583.2	0.50291947		1173.19	0.35452879		1763.2	0.26885613		2353.19	-0.00530567		2943.2	0.13837326		3533.2	0.19667791		4123.2	-0.00740208
583.4	0.50166383		1173.39	0.35479974		1763.4	0.2692748		2353.39	-0.00587386		2943.4	0.13751661		3533.4	0.19708202		4123.4	-0.00726774
583.6	0.50053315		1173.59	0.35498224		1763.6	0.26900922		2353.59	-0.00563663		2943.6	0.13810711		3533.6	0.19686363		4123.6	-0.0068893
583.8	0.50005684		1173.79	0.35514993		1763.8	0.26972392		2353.79	-0.00567366		2943.8	0.13838401		3533.8	0.19722245		4123.8	-0.00734026
584	0.49978154		1173.99	0.35518094		1764	0.2695578		2353.99	-0.00741687		2944	0.13869106		3534	0.19751577		4124	-0.00797899
584.2	0.50008565		1174.19	0.35382449		1764.2	0.26992025		2354.19	-0.00833377		2944.2	0.13969451		3534.2	0.19721081		4124.2	-0.0085304
584.4	0.5000529		1174.39	0.35319916		1764.4	0.26913979		2354.39	-0.00900875		2944.4	0.13993157		3534.4	0.1969341		4124.4	-0.00899189
584.6	0.50060469		1174.59	0.35189741		1764.6	0.26921145		2354.59	-0.00974391		2944.6	0.13921832		3534.6	0.19673744		4124.6	-0.00901491
584.8	0.50176035		1174.79	0.35177107		1764.8	0.27002377		2354.79	-0.00978861		2944.8	0.13903375		3534.8	0.19569019		4124.8	-0.01074493
585	0.50135641		1174.99	0.35077971		1765	0.27067498		2354.99	-0.01069283		2945	0.13939845		3535	0.1966168		4125	-0.0110973
585.2	0.50209117		1175.19	0.35053633		1765.2	0.27139636		2355.19	-0.01121358		2945.2	0.13901014		3535.2	0.19716707		4125.2	-0.01187639
585.4	0.50265918		1175.39	0.35020441		1765.4	0.27122728		2355.39	-0.01071212		2945.4	0.13863324		3535.4	0.19769278		4125.4	-0.01260054
585.6	0.50377674		1175.59	0.35017854		1765.6	0.27078107		2355.59	-0.01088543		2945.6	0.13841614		3535.6	0.19808196		4125.6	-0.01316824
585.8	0.50430509		1175.79	0.34954076		1765.8	0.27090546		2355.79	-0.01093369		2945.8	0.13834722		3535.8	0.19846359		4125.8	-0.01318013
586	0.50491941		1175.99	0.34957522		1766	0.27131559		2355.99	-0.01052464		2946	0.13853698		3536	0.19767565		4126	-0.01167281
586.2	0.50513784		1176.19	0.35066094		1766.2	0.27114853		2356.19	-0.00910486		2946.2	0.13890749		3536.2	0.19748202		4126.2	-0.01188725
586.4	0.50476158		1176.39	0.35090406		1766.4	0.27196305		2356.39	-0.00880461		2946.4	0.1384474		3536.4	0.19636005		4126.4	-0.01180624
586.6	0.50421599		1176.59	0.35178883		1766.6	0.27216608		2356.59	-0.00753823		2946.6	0.13749041		3536.6	0.19653858		4126.6	-0.01109882
586.8	0.50358307		1176.79	0.35216319		1766.8	0.27133747		2356.79	-0.00773038		2946.8	0.13706224		3536.8	0.19540566		4126.8	-0.01029218
587	0.5035381		1176.99	0.35339223		1767	0.2714076		2356.99	-0.00717147		2947	0.13692675		3537	0.19478125		4127	-0.0097271
587.2	0.50237419		1177.19	0.35410243		1767.2	0.2705428		2357.19	-0.00611343		2947.2	0.13742678		3537.2	0.19639891		4127.2	-0.00898928
587.4	0.50112071		1177.39	0.35468697		1767.4	0.27031755		2357.39	-0.00566954		2947.4	0.13639452		3537.4	0.1969691		4127.4	-0.00798759
587.6	0.50028887		1177.59	0.35571909		1767.6	0.26941474		2357.59	-0.00555009		2947.6	0.13606773		3537.6	0.19769549		4127.6	-0.00731468
587.8	0.49974365		1177.79	0.35591803		1767.8	0.26906381		2357.79	-0.00540438		2947.8	0.1360974		3537.8	0.19809023		4127.8	-0.0073438
588	0.50002437		1177.99	0.35594991		1768	0.26903858		2357.99	-0.00605897		2948	0.13605316		3538	0.19840526		4128	-0.00766494
588.2	0.49990458		1178.19	0.35548574		1768.2	0.26843326		2358.19	-0.00574941		2948.2	0.13628923		3538.2	0.19941283		4128.2	-0.00799515
588.4	0.50017658		1178.39	0.35537095		1768.4	0.26790924		2358.39	-0.00583437		2948.4	0.13620077		3538.4	0.19973732		4128.4	-0.00837604
588.6	0.50096713		1178.59	0.35465232		1768.6	0.26777489		2358.59	-0.00584476		2948.6	0.13643269		3538.6	0.19946302		4128.6	-0.00945746
588.8	0.50064442		1178.79	0.35451641		1768.8	0.26722902		2358.79	-0.00567502		2948.8	0.13657214		3538.8	0.19955814		4128.8	-0.01149834
589	0.50044001		1178.99	0.35320066		1769	0.2666353		2358.99	-0.0064712		2949	0.13644525		3539	0.19937599		4129	-0.01200725
589.2	0.50099181		1179.19	0.35292146		1769.2	0.26631058		2359.19	-0.00597887		2949.2	0.13643298		3539.2	0.19893835		4129.2	-0.01313069
589.4	0.50017148		1179.39	0.35254891		1769.4	0.26597949		2359.39	-0.00581366		2949.4	0.1372396		3539.4	0.19975552		4129.4	-0.01327207
589.6	0.49951941		1179.59	0.35192564		1769.6	0.26613205		2359.59	-0.00571403		2949.6	0.13810949		3539.6	0.19972359		4129.6	-0.013145
589.8	0.49899536		1179.79	0.351792		1769.8	0.26664997		2359.79	-0.00523289		2949.8	0.13885877		3539.8	0.19959153		4129.8	-0.01235115
590	0.49877581		1179.99	0.35151818		1770	0.26757052		2359.99	-0.00542466		2950	0.13987796		3540	0.19973314		4130	-0.01248238
590.2	0.49848934		1180.19	0.35163558		1770.2	0.26789242		2360.19	-0.00437902		2950.2	0.13936248		3540.2	0.19919858		4130.2	-0.01235311
590.4	0.49923211		1180.39	0.35109733		1770.4	0.26882042		2360.39	-0.00498815		2950.4	0.13986256		3540.4	0.19895973		4130.4	-0.01238469
590.6	0.49882707		1180.59	0.35154788		1770.6	0.26840107		2360.59	-0.00503825		2950.6	0.1396648		3540.6	0.19835335		4130.6	-0.01263807
590.8	0.49966982		1180.79	0.35170132		1770.8	0.26809254		2360.79	-0.00663514		2950.8	0.14013715		3540.8	0.19778948		4130.8	-0.01205353
591	0.50069325		1180.99	0.35233709		1771	0.26874975		2360.99	-0.0073731		2951	0.14060954		3541	0.19780653		4131	-0.0119421
591.2	0.5018082		1181.19	0.35255407		1771.2	0.26832201		2361.19	-0.00761947		2951.2	0.14089279		3541.2	0.1986765		4131.2	-0.01089428
591.4	0.50200613		1181.39	0.35276901		1771.4	0.26859602		2361.39	-0.0082571		2951.4	0.13989461		3541.4	0.1976368		4131.4	-0.00998293
591.6	0.50297396		1181.59	0.35310186		1771.6	0.26824178		2361.59	-0.00893588		2951.6	0.14014534		3541.6	0.19826697		4131.6	-0.00902385
591.8	0.50307337		1181.79	0.35330104		1771.8	0.26768479		2361.79	-0.00920506		2951.8	0.13994546		3541.8	0.19867609		4131.8	-0.00974712
592	0.50374449		1181.99	0.35309354		1772	0.26770206		2361.99	-0.00956658		2952	0.13928582		3542	0.19943945		4132	-0.01000844
592.2	0.50369296		1182.19	0.35267851		1772.2	0.26796343		2362.19	-0.00993514		2952.2	0.13858514		3542.2	0.20019644		4132.2	-0.01082214
592.4	0.50439477		1182.39	0.35341815		1772.4	0.26674827		2362.39	-0.01030947		2952.4	0.13769627		3542.4	0.20046104		4132.4	-0.01144694
592.6	0.50438208		1182.59	0.35367821		1772.6	0.26614761		2362.59	-0.00945603		2952.6	0.13710249		3542.6	0.20061943		4132.6	-0.0117523
592.8	0.50362538		1182.79	0.35361864		1772.8	0.26547582		2362.79	-0.00932048		2952.8	0.13640793		3542.8	0.20003534		4132.8	-0.01269103
593	0.50360071		1182.99	0.35292689		1773	0.26555464		2362.99	-0.00893483		2953	0.1359861		3543	0.20034528		4133	-0.01252261
593.2	0.50266671		1183.19	0.35288636		1773.2	0.26577233		2363.19	-0.00822829		2953.2	0.13649335		3543.2	0.20070619		4133.2	-0.01317875
593.4	0.50150015		1183.39	0.35195575		1773.4	0.26552718		2363.39	-0.0074615		2953.4	0.13618951		3543.4	0.20204694		4133.4	-0.01236575
593.6	0.50093742		1183.59	0.35189254		1773.6	0.26558079		2363.59	-0.00721719		2953.6	0.13591389		3543.6	0.20155781		4133.6	-0.01148657
593.8	0.5013144		1183.79	0.35235471		1773.8	0.26573613		2363.79	-0.00637218		2953.8	0.13641102		3543.8	0.20204962		4133.8	-0.01086782
594	0.5013753		1183.99	0.35201618		1774	0.26615581		2363.99	-0.0062104		2954	0.13765825		3544	0.20207601		4134	-0.01163054
594.2	0.50139344		1184.19	0.35166729		1774.2	0.26587504		2364.19	-0.00494125		2954.2	0.13722121		3544.2	0.20077606		4134.2	-0.01142172
594.4	0.5020145		1184.39	0.35153233		1774.4	0.26572732		2364.39	-0.00459401		2954.4	0.13849169		3544.4	0.20040892		4134.4	-0.01180951
594.6	0.50154012		1184.59	0.35109199		1774.6	0.26583458		2364.59	-0.00508707		2954.6	0.13797525		3544.6	0.19925429		4134.6	-0.0117552
594.8	0.50202239		1184.79	0.35115917		1774.8	0.26597984		2364.79	-0.00603533		2954.8	0.13924944		3544.8	0.19891206		4134.8	-0.01063403
595	0.50257548		1184.99	0.35156212		1775	0.26593684		2364.99	-0.00645173		2955	0.13943066		3545	0.1979392		4135	-0.0098138
595.2	0.50263157		1185.19	0.35224396		1775.2	0.2652052		2365.19	-0.00711703		2955.2	0.1398106		3545.2	0.19759779		4135.2	-0.00902104
595.4	0.50233732		1185.39	0.35225864		1775.4	0.26480903		2365.39	-0.00776997		2955.4	0.13978256		3545.4	0.19708504		4135.4	-0.00875962
595.6	0.50195069		1185.59	0.35245501		1775.6	0.26474815		2365.59	-0.00833785		2955.6	0.14038541		3545.6	0.19715917		4135.6	-0.00857688
595.8	0.50054501		1185.79	0.35226862		1775.8	0.2658566		2365.79	-0.00893549		2955.8	0.13935071		3545.8	0.19683664		4135.8	-0.00891946
596	0.50032836		1185.99	0.35328147		1776	0.26652382		2365.99	-0.01013764		2956	0.13888241		3546	0.19614794		4136	-0.00980138
596.2	0.50009566		1186.19	0.35345926		1776.2	0.26747055		2366.19	-0.01114188		2956.2	0.1383999		3546.2	0.19610524		4136.2	-0.0102526
596.4	0.49918109		1186.39	0.35350492		1776.4	0.26737155		2366.39	-0.01164244		2956.4	0.13843647		3546.4	0.19631972		4136.4	-0.01145671
596.6	0.49946117		1186.59	0.35255711		1776.6	0.26820603		2366.59	-0.01211747		2956.6	0.1381274		3546.6	0.19625159		4136.6	-0.01204834
596.8	0.49968515		1186.79	0.35224624		1776.8	0.26847758		2366.79	-0.01205981		2956.8	0.13767624		3546.8	0.19626236		4136.8	-0.01242391
597	0.49896186		1186.99	0.35161062		1777	0.26967801		2366.99	-0.01189913		2957	0.13822091		3547	0.19691101		4137	-0.01261232
597.2	0.49887266		1187.19	0.35128388		1777.2	0.27023933		2367.19	-0.01237556		2957.2	0.13805093		3547.2	0.19766975		4137.2	-0.01157362
597.4	0.49922864		1187.39	0.35127998		1777.4	0.27000054		2367.39	-0.01142389		2957.4	0.13822215		3547.4	0.19837397		4137.4	-0.01111045
597.6	0.50040051		1187.59	0.35208285		1777.6	0.27026571		2367.59	-0.01138804		2957.6	0.13755941		3547.6	0.1984731		4137.6	-0.01097974
597.8	0.50090338		1187.79	0.35259594		1777.8	0.26979942		2367.79	-0.01051104		2957.8	0.1383161		3547.8	0.19806717		4137.8	-0.0113203
598	0.49983415		1187.99	0.35240475		1778	0.26935961		2367.99	-0.00930455		2958	0.13952815		3548	0.19775719		4138	-0.0111083
598.2	0.50010359		1188.19	0.35183238		1778.2	0.26878604		2368.19	-0.00893698		2958.2	0.13987539		3548.2	0.19702629		4138.2	-0.01095652
598.4	0.50018914		1188.39	0.35155902		1778.4	0.2685354		2368.39	-0.00820131		2958.4	0.14081259		3548.4	0.1964366		4138.4	-0.01055832
598.6	0.50132299		1188.59	0.35214671		1778.6	0.26776569		2368.59	-0.00792248		2958.6	0.14103454		3548.6	0.19637344		4138.6	-0.01028686
598.8	0.50075296		1188.79	0.35307405		1778.8	0.2667872		2368.79	-0.00748162		2958.8	0.14172039		3548.8	0.19663699		4138.8	-0.01029613
599	0.50055445		1188.99	0.35429054		1779	0.26572587		2368.99	-0.0071573		2959	0.14136728		3549	0.19641111		4139	-0.01020576
599.2	0.50035648		1189.19	0.35434364		1779.2	0.26531738		2369.19	-0.00736579		2959.2	0.14178178		3549.2	0.1968757		4139.2	-0.01051307
599.4	0.50037292		1189.39	0.35445461		1779.4	0.26464451		2369.39	-0.00726718		2959.4	0.14153897		3549.4	0.19698665		4139.4	-0.01034725
599.6	0.49913789		1189.59	0.3546078		1779.6	0.2646092		2369.59	-0.00729992		2959.6	0.1410711		3549.6	0.19646888		4139.6	-0.01060342
599.8	0.49835791		1189.79	0.35474567		1779.8	0.26487731		2369.79	-0.00794939		2959.8	0.14012767		3549.8	0.19584989		4139.8	-0.01184805
600	0.49840105		1189.99	0.35522905		1780	0.26459728		2369.99	-0.00847096		2960	0.14009128		3550	0.19607502		4140	-0.01311054
600.2	0.49806929		1190.19	0.35348908		1780.2	0.26446306		2370.19	-0.00875263		2960.2	0.14050101		3550.2	0.19611289		4140.2	-0.0133618
600.4	0.49758528		1190.39	0.35259014		1780.4	0.26543002		2370.39	-0.00844318		2960.4	0.13979074		3550.4	0.19651601		4140.4	-0.01451171
600.6	0.49870139		1190.59	0.35197921		1780.6	0.26556518		2370.59	-0.008609		2960.6	0.13879844		3550.6	0.19666823		4140.6	-0.01476795
600.8	0.49941176		1190.79	0.3519732		1780.8	0.26610903		2370.79	-0.00759408		2960.8	0.13859762		3550.8	0.19725178		4140.8	-0.01440372
601	0.49928369		1190.99	0.35183113		1781	0.26675093		2370.99	-0.00816131		2961	0.13884456		3551	0.1971253		4141	-0.0148877
601.2	0.49994432		1191.19	0.35158464		1781.2	0.2673105		2371.19	-0.00805839		2961.2	0.13761702		3551.2	0.1975131		4141.2	-0.01490548
601.4	0.50012604		1191.39	0.35147532		1781.4	0.2671208		2371.39	-0.00758128		2961.4	0.13726212		3551.4	0.19772906		4141.4	-0.01504197
601.6	0.49998532		1191.59	0.35124594		1781.6	0.26759629		2371.59	-0.00806022		2961.6	0.13690577		3551.6	0.1972615		4141.6	-0.01442752
601.8	0.49982322		1191.79	0.35149411		1781.8	0.26755159		2371.79	-0.00788653		2961.8	0.1378496		3551.8	0.19691496		4141.8	-0.01389969
602	0.49938463		1191.99	0.3510561		1782	0.2678891		2371.99	-0.00804651		2962	0.13867923		3552	0.19697493		4142	-0.01242759
602.2	0.49999832		1192.19	0.35060691		1782.2	0.26822514		2372.19	-0.00894353		2962.2	0.13901286		3552.2	0.1971474		4142.2	-0.01187644
602.4	0.49990583		1192.39	0.35033558		1782.4	0.26888264		2372.39	-0.00880139		2962.4	0.13888855		3552.4	0.19685231		4142.4	-0.01240801
602.6	0.501206		1192.59	0.351435		1782.6	0.26872227		2372.59	-0.00969294		2962.6	0.13887498		3552.6	0.19712433		4142.6	-0.01270687
602.8	0.50041977		1192.79	0.35159566		1782.8	0.26897831		2372.79	-0.0106775		2962.8	0.1386276		3552.8	0.19685165		4142.8	-0.01230997
603	0.50081531		1192.99	0.35265774		1783	0.26902399		2372.99	-0.01165356		2963	0.13814727		3553	0.19689404		4143	-0.01181979
603.2	0.50175089		1193.19	0.35283116		1783.2	0.26796628		2373.19	-0.01312911		2963.2	0.13821335		3553.2	0.19710411		4143.2	-0.01189273
603.4	0.50247552		1193.39	0.35325037		1783.4	0.26748465		2373.39	-0.01387159		2963.4	0.1376843		3553.4	0.19709194		4143.4	-0.01172945
603.6	0.50229134		1193.59	0.35350239		1783.6	0.26758234		2373.59	-0.01457045		2963.6	0.13716876		3553.6	0.19685489		4143.6	-0.01173211
603.8	0.50203155		1193.79	0.35339145		1783.8	0.26765641		2373.79	-0.01551686		2963.8	0.13719201		3553.8	0.19685453		4143.8	-0.01182858
604	0.50131846		1193.99	0.35288358		1784	0.26757709		2373.99	-0.01577681		2964	0.13691542		3554	0.19766127		4144	-0.01130695
604.2	0.50108797		1194.19	0.3526499		1784.2	0.26681586		2374.19	-0.01558283		2964.2	0.13608293		3554.2	0.19751759		4144.2	-0.01146625
604.4	0.50092991		1194.39	0.35209285		1784.4	0.26788831		2374.39	-0.01434291		2964.4	0.13523741		3554.4	0.19798586		4144.4	-0.01194376
604.6	0.50105266		1194.59	0.35149963		1784.6	0.26765641		2374.59	-0.01395931		2964.6	0.13523043		3554.6	0.19845726		4144.6	-0.01245743
604.8	0.50081905		1194.79	0.35087359		1784.8	0.26727588		2374.79	-0.0128124		2964.8	0.13482479		3554.8	0.19785435		4144.8	-0.01259852
605	0.499916		1194.99	0.35032979		1785	0.26644524		2374.99	-0.01297364		2965	0.13527555		3555	0.19693268		4145	-0.01277832
605.2	0.49972952		1195.19	0.34939261		1785.2	0.26698815		2375.19	-0.01183912		2965.2	0.13468015		3555.2	0.19714461		4145.2	-0.01305386
605.4	0.49887362		1195.39	0.3483953		1785.4	0.26666788		2375.39	-0.01149094		2965.4	0.13482303		3555.4	0.19717704		4145.4	-0.01192332
605.6	0.49822305		1195.59	0.34718308		1785.6	0.26676207		2375.59	-0.01054662		2965.6	0.13672725		3555.6	0.19715932		4145.6	-0.0113957
605.8	0.4981348		1195.79	0.34684599		1785.8	0.26681745		2375.79	-0.00983804		2965.8	0.13699513		3555.8	0.19770959		4145.8	-0.01119362
606	0.49773218		1195.99	0.34643767		1786	0.26729461		2375.99	-0.00982614		2966	0.13790076		3556	0.1973528		4146	-0.0109202
606.2	0.49810353		1196.19	0.34652017		1786.2	0.26819701		2376.19	-0.00931691		2966.2	0.13696593		3556.2	0.19725433		4146.2	-0.01121719
606.4	0.49807051		1196.39	0.34679406		1786.4	0.26868887		2376.39	-0.01001887		2966.4	0.13711099		3556.4	0.19692774		4146.4	-0.01178605
606.6	0.49929994		1196.59	0.34786122		1786.6	0.26827364		2376.59	-0.01110278		2966.6	0.13747056		3556.6	0.19619841		4146.6	-0.01149069
606.8	0.49858836		1196.79	0.34825717		1786.8	0.26837835		2376.79	-0.01204893		2966.8	0.1367352		3556.8	0.19611535		4146.8	-0.01110569
607	0.49945795		1196.99	0.34903143		1787	0.26886217		2376.99	-0.01194504		2967	0.13635656		3557	0.19621872		4147	-0.0120621
607.2	0.50052472		1197.19	0.3493889		1787.2	0.26765115		2377.19	-0.01246361		2967.2	0.13581793		3557.2	0.19623587		4147.2	-0.0121194
607.4	0.50094117		1197.39	0.35013519		1787.4	0.26819069		2377.39	-0.01219604		2967.4	0.13576478		3557.4	0.19653405		4147.4	-0.01170104
607.6	0.50087583		1197.59	0.35009738		1787.6	0.26733714		2377.59	-0.01280672		2967.6	0.13508599		3557.6	0.19601479		4147.6	-0.01143736
607.8	0.50083633		1197.79	0.34980485		1787.8	0.26672312		2377.79	-0.01291871		2967.8	0.13518002		3557.8	0.19547454		4147.8	-0.01091912
608	0.50026357		1197.99	0.3502721		1788	0.266189		2377.99	-0.01269831		2968	0.13395803		3558	0.19551801		4148	-0.01112175
608.2	0.50011477		1198.19	0.35030203		1788.2	0.26534037		2378.19	-0.01114209		2968.2	0.13353196		3558.2	0.19504239		4148.2	-0.01194718
608.4	0.50036948		1198.39	0.3493434		1788.4	0.26520068		2378.39	-0.01066354		2968.4	0.133687		3558.4	0.1945718		4148.4	-0.01202004
608.6	0.50014987		1198.59	0.3495165		1788.6	0.26512227		2378.59	-0.00976497		2968.6	0.13361436		3558.6	0.1945305		4148.6	-0.01250884
608.8	0.4998996		1198.79	0.34929539		1788.8	0.26392478		2378.79	-0.00802499		2968.8	0.13401073		3558.8	0.19315803		4148.8	-0.01226689
609	0.50041601		1198.99	0.34896697		1789	0.26357146		2378.99	-0.00758857		2969	0.13479356		3559	0.19412346		4149	-0.01161622
609.2	0.50063392		1199.19	0.34838663		1789.2	0.26417838		2379.19	-0.00648436		2969.2	0.13558766		3559.2	0.19456627		4149.2	-0.01196513
609.4	0.5000614		1199.39	0.34703213		1789.4	0.26407003		2379.39	-0.00636398		2969.4	0.13576594		3559.4	0.19467789		4149.4	-0.0113008
609.6	0.49985549		1199.59	0.34720909		1789.6	0.26445591		2379.59	-0.00683192		2969.6	0.13685486		3559.6	0.19526229		4149.6	-0.01129765
609.8	0.49942169		1199.79	0.34818972		1789.8	0.26574457		2379.79	-0.00735031		2969.8	0.13725494		3559.8	0.19572458		4149.8	-0.01179993
610	0.49883037		1199.99	0.34873063		1790	0.26644783		2379.99	-0.00792622		2970	0.13830532		3560	0.19582538		4150	-0.01160294
610.2	0.49938874		1200.19	0.3496971		1790.2	0.26723508		2380.19	-0.00833513		2970.2	0.13729103		3560.2	0.19720035		4150.2	-0.01230519
610.4	0.4989852		1200.39	0.34988383		1790.4	0.26777015		2380.39	-0.00972586		2970.4	0.13778729		3560.4	0.19784372		4150.4	-0.01293525
610.6	0.49858407		1200.59	0.34949415		1790.6	0.26853138		2380.59	-0.01060944		2970.6	0.13725604		3560.6	0.19769314		4150.6	-0.01385196
610.8	0.49892272		1200.79	0.3501617		1790.8	0.26901187		2380.79	-0.01132914		2970.8	0.1360704		3560.8	0.19859966		4150.8	-0.01431344
611	0.50012805		1200.99	0.35091593		1791	0.26914554		2380.99	-0.01125584		2971	0.1359319		3561	0.19864012		4151	-0.01492171
611.2	0.50045023		1201.19	0.35104803		1791.2	0.26882044		2381.19	-0.01183467		2971.2	0.13597502		3561.2	0.1993595		4151.2	-0.01503653
611.4	0.5009938		1201.39	0.35075553		1791.4	0.26875476		2381.39	-0.01181815		2971.4	0.13598585		3561.4	0.19935611		4151.4	-0.01503502
611.6	0.50133845		1201.59	0.35043927		1791.6	0.26841807		2381.59	-0.01214255		2971.6	0.13563854		3561.6	0.19889489		4151.6	-0.01501668
611.8	0.50177057		1201.79	0.35115083		1791.8	0.26776006		2381.79	-0.0117773		2971.8	0.13599356		3561.8	0.19902089		4151.8	-0.01476726
612	0.50192228		1201.99	0.35134126		1792	0.26809685		2381.99	-0.01182475		2972	0.13572595		3562	0.1991315		4152	-0.01542716
612.2	0.50151494		1202.19	0.3511823		1792.2	0.26744442		2382.19	-0.01054466		2972.2	0.13564438		3562.2	0.19881008		4152.2	-0.01509789
612.4	0.50159614		1202.39	0.35034624		1792.4	0.26656953		2382.39	-0.00973557		2972.4	0.13581415		3562.4	0.1984152		4152.4	-0.01479768
612.6	0.50098496		1202.59	0.35113088		1792.6	0.26677095		2382.59	-0.00754922		2972.6	0.13611676		3562.6	0.19853702		4152.6	-0.01403799
612.8	0.50070672		1202.79	0.35049672		1792.8	0.26562528		2382.79	-0.00631713		2972.8	0.13667785		3562.8	0.19832162		4152.8	-0.01291036
613	0.50103451		1202.99	0.35040491		1793	0.26585309		2382.99	-0.00693484		2973	0.13653756		3563	0.1979129		4153	-0.01231277
613.2	0.5004571		1203.19	0.34996453		1793.2	0.26519272		2383.19	-0.00710488		2973.2	0.13723075		3563.2	0.1973087		4153.2	-0.01158604
613.4	0.50027952		1203.39	0.34915527		1793.4	0.2649126		2383.39	-0.00806496		2973.4	0.13653225		3563.4	0.19702942		4153.4	-0.01077422
613.6	0.49989858		1203.59	0.34992299		1793.6	0.26439297		2383.59	-0.00871443		2973.6	0.13700321		3563.6	0.19715458		4153.6	-0.01035604
613.8	0.49965507		1203.79	0.35090741		1793.8	0.26528722		2383.79	-0.00881684		2973.8	0.13701776		3563.8	0.19642587		4153.8	-0.009727
614	0.49958506		1203.99	0.35164282		1794	0.26497153		2383.99	-0.00882846		2974	0.13707786		3564	0.19571098		4154	-0.00963584
614.2	0.50045464		1204.19	0.35159013		1794.2	0.26558961		2384.19	-0.00977972		2974.2	0.13652589		3564.2	0.19652004		4154.2	-0.01002245
614.4	0.49985595		1204.39	0.35116117		1794.4	0.2660508		2384.39	-0.01031975		2974.4	0.13588849		3564.4	0.19626014		4154.4	-0.01101275
614.6	0.49962549		1204.59	0.3509564		1794.6	0.26624064		2384.59	-0.01105768		2974.6	0.13567594		3564.6	0.19624391		4154.6	-0.01152279
614.8	0.50058338		1204.79	0.35132219		1794.8	0.2658782		2384.79	-0.01139034		2974.8	0.13519173		3564.8	0.19590209		4154.8	-0.01239499
615	0.50062841		1204.99	0.35159999		1795	0.26657362		2384.99	-0.01172821		2975	0.1355771		3565	0.19603538		4155	-0.01336472
615.2	0.50085728		1205.19	0.35116979		1795.2	0.26696885		2385.19	-0.01159224		2975.2	0.13613678		3565.2	0.19680125		4155.2	-0.01417626
615.4	0.5004854		1205.39	0.35129656		1795.4	0.26698849		2385.39	-0.01220279		2975.4	0.13566008		3565.4	0.19708166		4155.4	-0.01424528
615.6	0.49995773		1205.59	0.35197571		1795.6	0.26710455		2385.59	-0.01213073		2975.6	0.13548307		3565.6	0.19790943		4155.6	-0.01449652
615.8	0.50037099		1205.79	0.35158577		1795.8	0.2672329		2385.79	-0.01306953		2975.8	0.13601271		3565.8	0.19860801		4155.8	-0.01524096
616	0.49979261		1205.99	0.35118945		1796	0.2678814		2385.99	-0.01273752		2976	0.13611326		3566	0.19873229		4156	-0.01497703
616.2	0.49827369		1206.19	0.35028249		1796.2	0.26736598		2386.19	-0.01179372		2976.2	0.13559128		3566.2	0.19870255		4156.2	-0.01529234
616.4	0.49779024		1206.39	0.34994241		1796.4	0.26718166		2386.39	-0.01038441		2976.4	0.13602479		3566.4	0.19878818		4156.4	-0.01618742
616.6	0.49736741		1206.59	0.35072549		1796.6	0.26747699		2386.59	-0.00954672		2976.6	0.13619292		3566.6	0.19807288		4156.6	-0.01562389
616.8	0.49614744		1206.79	0.35043057		1796.8	0.26737732		2386.79	-0.00969264		2976.8	0.1362461		3566.8	0.1971044		4156.8	-0.0145895
617	0.49566094		1206.99	0.35071937		1797	0.26691291		2386.99	-0.00919206		2977	0.13637356		3567	0.19609937		4157	-0.01347443
617.2	0.49556997		1207.19	0.35001814		1797.2	0.26628007		2387.19	-0.00811291		2977.2	0.13693573		3567.2	0.1966719		4157.2	-0.01231153
617.4	0.495941		1207.39	0.34932446		1797.4	0.26554552		2387.39	-0.00820441		2977.4	0.1362839		3567.4	0.19648856		4157.4	-0.01086694
617.6	0.4966116		1207.59	0.34968115		1797.6	0.26537311		2387.59	-0.00783703		2977.6	0.13635653		3567.6	0.1962122		4157.6	-0.00962632
617.8	0.4966293		1207.79	0.35067717		1797.8	0.26594072		2387.79	-0.00877511		2977.8	0.13616738		3567.8	0.19512124		4157.8	-0.00857049
618	0.49659514		1207.99	0.35102324		1798	0.26577022		2387.99	-0.00919145		2978	0.13685124		3568	0.19564779		4158	-0.00797857
618.2	0.4963925		1208.19	0.3500711		1798.2	0.26619302		2388.19	-0.01012892		2978.2	0.13683083		3568.2	0.1961694		4158.2	-0.00773899
618.4	0.49600068		1208.39	0.35072257		1798.4	0.26585176		2388.39	-0.00926996		2978.4	0.13725936		3568.4	0.19601281		4158.4	-0.00869459
618.6	0.49574708		1208.59	0.35081805		1798.6	0.26579128		2388.59	-0.00999866		2978.6	0.13739992		3568.6	0.19600421		4158.6	-0.00901229
618.8	0.49627522		1208.79	0.35093614		1798.8	0.26569277		2388.79	-0.01032846		2978.8	0.13793315		3568.8	0.1955813		4158.8	-0.00978484
619	0.49648088		1208.99	0.35183094		1799	0.26549154		2388.99	-0.0115644		2979	0.13732051		3569	0.19652276		4159	-0.01035233
619.2	0.49609993		1209.19	0.35246893		1799.2	0.26543508		2389.19	-0.01181237		2979.2	0.13722334		3569.2	0.19622431		4159.2	-0.01079091
619.4	0.49541058		1209.39	0.35276648		1799.4	0.26523115		2389.39	-0.01234855		2979.4	0.13744742		3569.4	0.19627889		4159.4	-0.0115856
619.6	0.49595872		1209.59	0.35232896		1799.6	0.26563296		2389.59	-0.01199437		2979.6	0.13755076		3569.6	0.19617228		4159.6	-0.01190581
619.8	0.49622119		1209.79	0.35161054		1799.8	0.26566356		2389.79	-0.01227516		2979.8	0.1384045		3569.8	0.19677197		4159.8	-0.01291069
620	0.49591014		1209.99	0.35057019		1800	0.26546907		2389.99	-0.01145582		2980	0.13858888		3570	0.19643784		4160	-0.01301244
620.2	0.49647674		1210.19	0.35056108		1800.2	0.26558748		2390.19	-0.01157629		2980.2	0.1379301		3570.2	0.19629215		4160.2	-0.01480312
620.4	0.49675432		1210.39	0.35051235		1800.4	0.26612652		2390.39	-0.01153654		2980.4	0.13824472		3570.4	0.19572434		4160.4	-0.01497158
620.6	0.49673796		1210.59	0.34993706		1800.6	0.26662707		2390.59	-0.01185047		2980.6	0.13765265		3570.6	0.19527725		4160.6	-0.01423405
620.8	0.49682879		1210.79	0.34953929		1800.8	0.26671883		2390.79	-0.01164186		2980.8	0.1377994		3570.8	0.19440422		4160.8	-0.0137357
621	0.49751118		1210.99	0.34905468		1801	0.2663267		2390.99	-0.01079143		2981	0.1381008		3571	0.19450734		4161	-0.01439537
621.2	0.49832181		1211.19	0.34786552		1801.2	0.26645562		2391.19	-0.01131966		2981.2	0.13773557		3571.2	0.19472898		4161.2	-0.01375992
621.4	0.49881828		1211.39	0.34759091		1801.4	0.26672228		2391.39	-0.01242772		2981.4	0.13753904		3571.4	0.19469732		4161.4	-0.01303675
621.6	0.49893317		1211.59	0.34756266		1801.6	0.26779004		2391.59	-0.01231255		2981.6	0.13800099		3571.6	0.19365262		4161.6	-0.01235824
621.8	0.49884934		1211.79	0.34853052		1801.8	0.26722463		2391.79	-0.01273884		2981.8	0.13787949		3571.8	0.19282606		4161.8	-0.01154774
622	0.4991192		1211.99	0.34848688		1802	0.26704952		2391.99	-0.0124588		2982	0.13831334		3572	0.19305274		4162	-0.0111726
622.2	0.49843701		1212.19	0.34792604		1802.2	0.2672036		2392.19	-0.01275654		2982.2	0.13869214		3572.2	0.19259376		4162.2	-0.01189973
622.4	0.49838063		1212.39	0.3485185		1802.4	0.26646272		2392.39	-0.01191644		2982.4	0.13884752		3572.4	0.19310076		4162.4	-0.01221884
622.6	0.4985533		1212.59	0.34821047		1802.6	0.26692397		2392.59	-0.01299267		2982.6	0.13785767		3572.6	0.19270861		4162.6	-0.01228553
622.8	0.49976763		1212.79	0.34790599		1802.8	0.26612599		2392.79	-0.01286703		2982.8	0.13793632		3572.8	0.19202186		4162.8	-0.01261485
623	0.49981875		1212.99	0.34869854		1803	0.26582254		2392.99	-0.01295233		2983	0.1370576		3573	0.19177665		4163	-0.01305409
623.2	0.49898075		1213.19	0.34945957		1803.2	0.26578433		2393.19	-0.01227193		2983.2	0.1374569		3573.2	0.19027679		4163.2	-0.01321302
623.4	0.49915472		1213.39	0.34965962		1803.4	0.26485334		2393.39	-0.01154379		2983.4	0.13801691		3573.4	0.19076272		4163.4	-0.01407736
623.6	0.49959762		1213.59	0.34961375		1803.6	0.26498158		2393.59	-0.01126862		2983.6	0.13752974		3573.6	0.1912142		4163.6	-0.01362902
623.8	0.498817		1213.79	0.3498992		1803.8	0.26390192		2393.79	-0.01039093		2983.8	0.13729083		3573.8	0.1920812		4163.8	-0.01376984
624	0.49877926		1213.99	0.34925889		1804	0.26448034		2393.99	-0.01084469		2984	0.13693334		3574	0.19203872		4164	-0.01388053
624.2	0.49904206		1214.19	0.34914701		1804.2	0.26475812		2394.19	-0.01088718		2984.2	0.1361119		3574.2	0.19251301		4164.2	-0.01433853
624.4	0.498663		1214.39	0.34835646		1804.4	0.26512121		2394.39	-0.0112197		2984.4	0.13588049		3574.4	0.19302282		4164.4	-0.01423666
624.6	0.49869472		1214.59	0.34932989		1804.6	0.26519613		2394.59	-0.01132598		2984.6	0.13518979		3574.6	0.19375209		4164.6	-0.01453745
624.8	0.49900766		1214.79	0.34934631		1804.8	0.26490252		2394.79	-0.01130788		2984.8	0.13484525		3574.8	0.19326717		4164.8	-0.01456539
625	0.49862189		1214.99	0.34912314		1805	0.26549385		2394.99	-0.01202587		2985	0.13484401		3575	0.19415429		4165	-0.01457238
625.2	0.49805883		1215.19	0.34875593		1805.2	0.26569442		2395.19	-0.01301939		2985.2	0.1342381		3575.2	0.19476031		4165.2	-0.01388621
625.4	0.49727752		1215.39	0.34891071		1805.4	0.26638124		2395.39	-0.01351604		2985.4	0.13442901		3575.4	0.19435884		4165.4	-0.01382383
625.6	0.49699525		1215.59	0.34962357		1805.6	0.26659702		2395.59	-0.01257401		2985.6	0.13516053		3575.6	0.19367359		4165.6	-0.01359979
625.8	0.49708354		1215.79	0.35015794		1805.8	0.265688		2395.79	-0.01393461		2985.8	0.13587472		3575.8	0.19370808		4165.8	-0.01384229
626	0.49717305		1215.99	0.34991006		1806	0.26544109		2395.99	-0.01349957		2986	0.1362549		3576	0.19435271		4166	-0.01403797
626.2	0.497269		1216.19	0.3489021		1806.2	0.26616215		2396.19	-0.01402675		2986.2	0.13611127		3576.2	0.19493349		4166.2	-0.01435298
626.4	0.49755225		1216.39	0.34898126		1806.4	0.26587514		2396.39	-0.01364534		2986.4	0.13613455		3576.4	0.19523541		4166.4	-0.01417731
626.6	0.49847489		1216.59	0.34823706		1806.6	0.26670883		2396.59	-0.01384828		2986.6	0.13664993		3576.6	0.19370297		4166.6	-0.01450418
626.8	0.49944145		1216.79	0.34785265		1806.8	0.2658224		2396.79	-0.0134673		2986.8	0.13667388		3576.8	0.19388537		4166.8	-0.01505788
627	0.49861493		1216.99	0.34797122		1807	0.26572286		2396.99	-0.01307149		2987	0.13652018		3577	0.19309548		4167	-0.01489654
627.2	0.49830584		1217.19	0.34816113		1807.2	0.26581174		2397.19	-0.01223885		2987.2	0.13596798		3577.2	0.19265606		4167.2	-0.01469301
627.4	0.49850232		1217.39	0.34747878		1807.4	0.26587973		2397.39	-0.01138628		2987.4	0.13612828		3577.4	0.1932346		4167.4	-0.0151116
627.6	0.49828865		1217.59	0.34698734		1807.6	0.26633016		2397.59	-0.01060817		2987.6	0.13579338		3577.6	0.19297039		4167.6	-0.01436019
627.8	0.4982843		1217.79	0.34680798		1807.8	0.26621949		2397.79	-0.00961936		2987.8	0.13557666		3577.8	0.19277424		4167.8	-0.01400009
628	0.49803687		1217.99	0.3458129		1808	0.26602478		2397.99	-0.00990533		2988	0.13513367		3578	0.19251727		4168	-0.01442474
628.2	0.49776182		1218.19	0.34542989		1808.2	0.26573204		2398.19	-0.00911003		2988.2	0.1350206		3578.2	0.192835		4168.2	-0.01499943
628.4	0.49791466		1218.39	0.3457844		1808.4	0.26485204		2398.39	-0.00936962		2988.4	0.13387323		3578.4	0.19296784		4168.4	-0.01445461
628.6	0.49850481		1218.59	0.34614358		1808.6	0.26409171		2398.59	-0.0096754		2988.6	0.13327874		3578.6	0.19324022		4168.6	-0.01392679
628.8	0.49835673		1218.79	0.34515707		1808.8	0.26424431		2398.79	-0.01001555		2988.8	0.1329369		3578.8	0.19377772		4168.8	-0.01296689
629	0.49774105		1218.99	0.34530459		1809	0.26403017		2398.99	-0.01058257		2989	0.13356474		3579	0.19414766		4169	-0.01380723
629.2	0.49736504		1219.19	0.34562718		1809.2	0.26378453		2399.19	-0.01147445		2989.2	0.13299608		3579.2	0.19479527		4169.2	-0.01408422
629.4	0.49772198		1219.39	0.3465926		1809.4	0.26400122		2399.39	-0.01196659		2989.4	0.13319087		3579.4	0.19438947		4169.4	-0.01498931
629.6	0.49839158		1219.59	0.34721222		1809.6	0.2630431		2399.59	-0.01209975		2989.6	0.13402922		3579.6	0.19508096		4169.6	-0.01523464
629.8	0.49903809		1219.79	0.34702861		1809.8	0.26213658		2399.79	-0.01343548		2989.8	0.13407882		3579.8	0.19489078		4169.8	-0.01494546
630	0.49970472		1219.99	0.34749234		1810	0.26187758		2399.99	-0.01285476		2990	0.13362223		3580	0.19507836		4170	-0.01443128
630.2	0.4993671		1220.19	0.34762904		1810.2	0.26286672		2400.19	-0.01404127		2990.2	0.13337495		3580.2	0.19474665		4170.2	-0.01444368
630.4	0.49956102		1220.39	0.34880185		1810.4	0.26255846		2400.39	-0.01410849		2990.4	0.13453131		3580.4	0.19410429		4170.4	-0.01443279
630.6	0.49978365		1220.59	0.34939688		1810.6	0.26300798		2400.59	-0.01449605		2990.6	0.13507497		3580.6	0.19377621		4170.6	-0.01423511
630.8	0.49927514		1220.79	0.34985396		1810.8	0.26355048		2400.79	-0.01408614		2990.8	0.13389978		3580.8	0.1948542		4170.8	-0.01455109
631	0.49832747		1220.99	0.34934606		1811	0.26413675		2400.99	-0.01350177		2991	0.1341341		3581	0.19510838		4171	-0.01438013
631.2	0.49857609		1221.19	0.34979826		1811.2	0.26484944		2401.19	-0.01284555		2991.2	0.13482169		3581.2	0.1958169		4171.2	-0.01443785
631.4	0.49800357		1221.39	0.34932138		1811.4	0.26512617		2401.39	-0.01216623		2991.4	0.13572205		3581.4	0.19591068		4171.4	-0.01439169
631.6	0.49835719		1221.59	0.350022		1811.6	0.2657983		2401.59	-0.01147104		2991.6	0.13618178		3581.6	0.19585736		4171.6	-0.01400033
631.8	0.49804716		1221.79	0.3499752		1811.8	0.26543526		2401.79	-0.01105396		2991.8	0.1361571		3581.8	0.1963371		4171.8	-0.01360455
632	0.49674338		1221.99	0.35006277		1812	0.26502682		2401.99	-0.01099653		2992	0.13626141		3582	0.19629936		4172	-0.01360478
632.2	0.49541486		1222.19	0.34975654		1812.2	0.26568649		2402.19	-0.01065015		2992.2	0.13734052		3582.2	0.1968066		4172.2	-0.01324652
632.4	0.49565706		1222.39	0.34889822		1812.4	0.26507223		2402.39	-0.01090178		2992.4	0.13664205		3582.4	0.19720135		4172.4	-0.01148178
632.6	0.49534624		1222.59	0.34899606		1812.6	0.26514732		2402.59	-0.01091129		2992.6	0.13648377		3582.6	0.19777566		4172.6	-0.01156789
632.8	0.49453694		1222.79	0.34901947		1812.8	0.26565694		2402.79	-0.01080106		2992.8	0.13657527		3582.8	0.19888613		4172.8	-0.01202893
633	0.49519406		1222.99	0.34856134		1813	0.26411536		2402.99	-0.01071584		2993	0.1366903		3583	0.19958961		4173	-0.01263137
633.2	0.49546865		1223.19	0.34763367		1813.2	0.26481277		2403.19	-0.01117161		2993.2	0.13672438		3583.2	0.20009439		4173.2	-0.01212518
633.4	0.49638596		1223.39	0.34731209		1813.4	0.26439027		2403.39	-0.01187357		2993.4	0.13596114		3583.4	0.1999663		4173.4	-0.01288286
633.6	0.49609847		1223.59	0.34697785		1813.6	0.26343298		2403.59	-0.01250259		2993.6	0.13674092		3583.6	0.19919922		4173.6	-0.01223927
633.8	0.49632628		1223.79	0.34713879		1813.8	0.26299747		2403.79	-0.01273021		2993.8	0.13675899		3583.8	0.19767877		4173.8	-0.01223229
634	0.49586189		1223.99	0.34793238		1814	0.2635132		2403.99	-0.01315725		2994	0.13710028		3584	0.19720092		4174	-0.01240874
634.2	0.4954609		1224.19	0.34829042		1814.2	0.26415045		2404.19	-0.0133405		2994.2	0.13745137		3584.2	0.19690672		4174.2	-0.01244244
634.4	0.49629836		1224.39	0.34759985		1814.4	0.26419946		2404.39	-0.01299752		2994.4	0.13714879		3584.4	0.19643791		4174.4	-0.01331685
634.6	0.49556773		1224.59	0.34754352		1814.6	0.26480555		2404.59	-0.01336814		2994.6	0.13706894		3584.6	0.1963884		4174.6	-0.01410569
634.8	0.49514327		1224.79	0.34672942		1814.8	0.26509574		2404.79	-0.01271062		2994.8	0.13667037		3584.8	0.19681355		4174.8	-0.01522956
635	0.4943242		1224.99	0.3462193		1815	0.26410038		2404.99	-0.01255913		2995	0.13639139		3585	0.19700327		4175	-0.01569258
635.2	0.49463518		1225.19	0.34634129		1815.2	0.26430445		2405.19	-0.01178314		2995.2	0.13716159		3585.2	0.1965362		4175.2	-0.0152037
635.4	0.49402719		1225.39	0.34639033		1815.4	0.26523428		2405.39	-0.01112241		2995.4	0.1371413		3585.4	0.19612333		4175.4	-0.01474075
635.6	0.49426041		1225.59	0.34610249		1815.6	0.26673575		2405.59	-0.01070088		2995.6	0.13731075		3585.6	0.1953071		4175.6	-0.01418707
635.8	0.49355085		1225.79	0.34633262		1815.8	0.26666355		2405.79	-0.01053264		2995.8	0.13677117		3585.8	0.19555158		4175.8	-0.01340174
636	0.49289442		1225.99	0.3466034		1816	0.26698545		2405.99	-0.01077188		2996	0.13704114		3586	0.19500821		4176	-0.01329994
636.2	0.49292158		1226.19	0.34594371		1816.2	0.26705415		2406.19	-0.01077471		2996.2	0.1365972		3586.2	0.1950468		4176.2	-0.01337016
636.4	0.49396525		1226.39	0.34626232		1816.4	0.2666606		2406.39	-0.01056739		2996.4	0.13551712		3586.4	0.19474372		4176.4	-0.01259217
636.6	0.49451659		1226.59	0.34760769		1816.6	0.26634552		2406.59	-0.01049379		2996.6	0.13525131		3586.6	0.19560578		4176.6	-0.01306561
636.8	0.49637896		1226.79	0.34817888		1816.8	0.26555317		2406.79	-0.01074357		2996.8	0.13538373		3586.8	0.19648647		4176.8	-0.01283215
637	0.49710472		1226.99	0.34772943		1817	0.26421106		2406.99	-0.01068339		2997	0.13557966		3587	0.19660767		4177	-0.01171362
637.2	0.4971035		1227.19	0.34876741		1817.2	0.26450374		2407.19	-0.01072402		2997.2	0.13550709		3587.2	0.19605006		4177.2	-0.0118548
637.4	0.4978153		1227.39	0.35038885		1817.4	0.26380835		2407.39	-0.01244694		2997.4	0.13536427		3587.4	0.19601851		4177.4	-0.01224286
637.6	0.49811323		1227.59	0.35104235		1817.6	0.26298424		2407.59	-0.01260186		2997.6	0.13628513		3587.6	0.19605426		4177.6	-0.01286874
637.8	0.49908218		1227.79	0.35122342		1817.8	0.262147		2407.79	-0.01283956		2997.8	0.13554737		3587.8	0.19572916		4177.8	-0.01321789
638	0.49967912		1227.99	0.35173325		1818	0.26345664		2407.99	-0.01336437		2998	0.13466		3588	0.19642065		4178	-0.01373049
638.2	0.50010648		1228.19	0.35145077		1818.2	0.26319335		2408.19	-0.01298888		2998.2	0.1343918		3588.2	0.1968928		4178.2	-0.01382425
638.4	0.50094045		1228.39	0.34990007		1818.4	0.26329917		2408.39	-0.01381946		2998.4	0.13326238		3588.4	0.19659518		4178.4	-0.01549461
638.6	0.50001009		1228.59	0.3495266		1818.6	0.2622576		2408.59	-0.0136796		2998.6	0.13389282		3588.6	0.19727978		4178.6	-0.01560959
638.8	0.49925145		1228.79	0.34842747		1818.8	0.26143618		2408.79	-0.01337506		2998.8	0.13275737		3588.8	0.19727103		4178.8	-0.01631813
639	0.49826628		1228.99	0.34770135		1819	0.26065026		2408.99	-0.01338591		2999	0.13214521		3589	0.197463		4179	-0.0165236
639.2	0.4985321		1229.19	0.34644869		1819.2	0.2616491		2409.19	-0.01284589		2999.2	0.13305832		3589.2	0.19723881		4179.2	-0.01581165
639.4	0.4982591		1229.39	0.34525358		1819.4	0.26316366		2409.39	-0.01304907		2999.4	0.13347548		3589.4	0.19724816		4179.4	-0.01641795
639.6	0.49775261		1229.59	0.34417958		1819.6	0.26392604		2409.59	-0.01276228		2999.6	0.1340356		3589.6	0.19680175		4179.6	-0.01633709
639.8	0.4973818		1229.79	0.34407903		1819.8	0.26436364		2409.79	-0.01300196		2999.8	0.13483197		3589.8	0.19728789		4179.8	-0.01687169
640	0.49684575		1229.99	0.34387252		1820	0.26501113		2409.99	-0.01308727		3000	0.1358669		3590	0.19724384		4180	-0.01747593
640.2	0.49712051		1230.19	0.34414997		1820.2	0.26557738		2410.19	-0.01332891		3000.2	0.13531715		3590.2	0.1976138		4180.2	-0.01724048
640.4	0.49690109		1230.39	0.34476203		1820.4	0.26555737		2410.39	-0.01316487		3000.4	0.13579683		3590.4	0.19742806		4180.4	-0.01665633
640.6	0.49769907		1230.59	0.34513177		1820.6	0.2653784		2410.59	-0.01310484		3000.6	0.13585315		3590.6	0.19843001		4180.6	-0.01638472
640.8	0.49889805		1230.79	0.34558337		1820.8	0.26483212		2410.79	-0.01361886		3000.8	0.13645221		3590.8	0.19837407		4180.8	-0.01628112
641	0.49845624		1230.99	0.34630139		1821	0.26456519		2410.99	-0.01419961		3001	0.13718379		3591	0.19811107		4181	-0.01648035
641.2	0.49884296		1231.19	0.34813527		1821.2	0.26434496		2411.19	-0.0144959		3001.2	0.13749296		3591.2	0.19810828		4181.2	-0.01676042
641.4	0.49852647		1231.39	0.34832294		1821.4	0.26427085		2411.39	-0.01562282		3001.4	0.13742268		3591.4	0.19795172		4181.4	-0.01741854
641.6	0.4987317		1231.59	0.34791596		1821.6	0.26364428		2411.59	-0.01565884		3001.6	0.13644918		3591.6	0.19824283		4181.6	-0.01892483
641.8	0.49872377		1231.79	0.34821506		1821.8	0.2635217		2411.79	-0.01573702		3001.8	0.13562447		3591.8	0.19728167		4181.8	-0.01874011
642	0.49899127		1231.99	0.34902466		1822	0.26388572		2411.99	-0.01523629		3002	0.13472431		3592	0.19773568		4182	-0.01879571
642.2	0.49789555		1232.19	0.34958637		1822.2	0.26350511		2412.19	-0.01444851		3002.2	0.13435775		3592.2	0.19725578		4182.2	-0.01870096
642.4	0.49810657		1232.39	0.34943753		1822.4	0.26345783		2412.39	-0.01446745		3002.4	0.13411689		3592.4	0.19709809		4182.4	-0.01942003
642.6	0.49740772		1232.59	0.34955566		1822.6	0.26263486		2412.59	-0.01325328		3002.6	0.13426349		3592.6	0.19704718		4182.6	-0.01876362
642.8	0.49721494		1232.79	0.34834466		1822.8	0.2622291		2412.79	-0.01306092		3002.8	0.1333053		3592.8	0.19652032		4182.8	-0.01851739
643	0.49711244		1232.99	0.34831462		1823	0.26187471		2412.99	-0.01253723		3003	0.13416966		3593	0.19653686		4183	-0.01828065
643.2	0.49684237		1233.19	0.34774177		1823.2	0.26185028		2413.19	-0.01144834		3003.2	0.13434744		3593.2	0.19591189		4183.2	-0.01736179
643.4	0.49637174		1233.39	0.34785403		1823.4	0.26283595		2413.39	-0.01193111		3003.4	0.1345421		3593.4	0.19608115		4183.4	-0.01739111
643.6	0.49599337		1233.59	0.34761146		1823.6	0.26324402		2413.59	-0.01156673		3003.6	0.13449016		3593.6	0.19583279		4183.6	-0.01644296
643.8	0.49626713		1233.79	0.34790722		1823.8	0.26402743		2413.79	-0.01157075		3003.8	0.13465191		3593.8	0.19580184		4183.8	-0.01555587
644	0.49584001		1233.99	0.34878074		1824	0.26496676		2413.99	-0.01150411		3004	0.13409156		3594	0.19621901		4184	-0.01463625
644.2	0.49604254		1234.19	0.34902318		1824.2	0.26530773		2414.19	-0.01262682		3004.2	0.13341089		3594.2	0.19659845		4184.2	-0.01357195
644.4	0.49566101		1234.39	0.34832838		1824.4	0.26449418		2414.39	-0.01263426		3004.4	0.13334886		3594.4	0.19729679		4184.4	-0.01357497
644.6	0.49638902		1234.59	0.34864118		1824.6	0.26447384		2414.59	-0.01382175		3004.6	0.13284297		3594.6	0.19810723		4184.6	-0.01317592
644.8	0.4962717		1234.79	0.34875063		1824.8	0.26479882		2414.79	-0.01464972		3004.8	0.13342538		3594.8	0.19746954		4184.8	-0.01336678
645	0.49595275		1234.99	0.34878832		1825	0.26434994		2414.99	-0.0143212		3005	0.13350484		3595	0.19718735		4185	-0.01353329
645.2	0.49505815		1235.19	0.34892195		1825.2	0.26332747		2415.19	-0.01376492		3005.2	0.1333761		3595.2	0.19693246		4185.2	-0.01328692
645.4	0.49439437		1235.39	0.34825025		1825.4	0.26236099		2415.39	-0.01422472		3005.4	0.13245472		3595.4	0.19671225		4185.4	-0.01502829
645.6	0.49440637		1235.59	0.34820098		1825.6	0.26153337		2415.59	-0.01434193		3005.6	0.13178264		3595.6	0.19629444		4185.6	-0.01482859
645.8	0.4935626		1235.79	0.34857922		1825.8	0.26153154		2415.79	-0.01351781		3005.8	0.13128287		3595.8	0.19610131		4185.8	-0.01508498
646	0.4931098		1235.99	0.34959011		1826	0.26147298		2415.99	-0.0124047		3006	0.13050651		3596	0.19601502		4186	-0.0151276
646.2	0.49231587		1236.19	0.34995043		1826.2	0.26193739		2416.19	-0.01230993		3006.2	0.13098603		3596.2	0.19582356		4186.2	-0.01509356
646.4	0.49364391		1236.39	0.34885072		1826.4	0.2623991		2416.39	-0.01205289		3006.4	0.13201716		3596.4	0.19632959		4186.4	-0.01566544
646.6	0.4944622		1236.59	0.34819537		1826.6	0.26225411		2416.59	-0.01147385		3006.6	0.13188125		3596.6	0.19595975		4186.6	-0.01583923
646.8	0.49528508		1236.79	0.34748554		1826.8	0.26121545		2416.79	-0.01132044		3006.8	0.13186452		3596.8	0.19580228		4186.8	-0.0164042
647	0.49502858		1236.99	0.34815771		1827	0.26079823		2416.99	-0.01153645		3007	0.13304462		3597	0.19585058		4187	-0.01644453
647.2	0.49525744		1237.19	0.34769307		1827.2	0.26087398		2417.19	-0.0120725		3007.2	0.13331916		3597.2	0.19608906		4187.2	-0.01613979
647.4	0.49584362		1237.39	0.34758279		1827.4	0.26175261		2417.39	-0.01359488		3007.4	0.13358884		3597.4	0.19593608		4187.4	-0.01663247
647.6	0.49643894		1237.59	0.34731445		1827.6	0.26304161		2417.59	-0.01365452		3007.6	0.13459436		3597.6	0.19633818		4187.6	-0.01596879
647.8	0.49694765		1237.79	0.34774442		1827.8	0.26356004		2417.79	-0.01388372		3007.8	0.13502598		3597.8	0.1962472		4187.8	-0.01554521
648	0.49695937		1237.99	0.34798386		1828	0.26447941		2417.99	-0.01437027		3008	0.13538014		3598	0.19648286		4188	-0.01552815
648.2	0.49708256		1238.19	0.3477833		1828.2	0.26442988		2418.19	-0.01510476		3008.2	0.13589908		3598.2	0.19656593		4188.2	-0.01512486
648.4	0.49682327		1238.39	0.34763452		1828.4	0.2642919		2418.39	-0.01481435		3008.4	0.13606466		3598.4	0.19669905		4188.4	-0.0153599
648.6	0.49685123		1238.59	0.34821893		1828.6	0.26491836		2418.59	-0.01522603		3008.6	0.13642273		3598.6	0.19583456		4188.6	-0.0148347
648.8	0.49611966		1238.79	0.34819923		1828.8	0.26534917		2418.79	-0.01413362		3008.8	0.13716386		3598.8	0.19480585		4188.8	-0.01465775
649	0.49579		1238.99	0.34871922		1829	0.2647506		2418.99	-0.01336278		3009	0.13766215		3599	0.19458758		4189	-0.01474945
649.2	0.4947882		1239.19	0.34933272		1829.2	0.26448876		2419.19	-0.01336063		3009.2	0.1380777		3599.2	0.19417974		4189.2	-0.01472813
649.4	0.49416468		1239.39	0.34976005		1829.4	0.26432888		2419.39	-0.0133265		3009.4	0.13794252		3599.4	0.19390729		4189.4	-0.01515811
649.6	0.49327294		1239.59	0.35011459		1829.6	0.26438956		2419.59	-0.01274442		3009.6	0.13808732		3599.6	0.19306454		4189.6	-0.01437849
649.8	0.49203382		1239.79	0.35058723		1829.8	0.26472801		2419.79	-0.01213525		3009.8	0.13824422		3599.8	0.19303034		4189.8	-0.01508758
