# Supplementary material for: Functional development of a V3/glycan-specific broadly neutralizing antibody isolated from a case of HIV superinfection
Source: eLife journal article supplement (doi:10.7554/elife.68110), 2021-07-15
Supplement: fig2-data2 [file A3.xls]

Vers 3.43 Data Simulation
Conc1	5E-07	5E-07	5E-07	5E-07	5E-07
Start1	200	729.99	1259.99	1789.98	2320.01
Stop1	559.8	1089.79	1619.78	2149.78	2679.81
Time1	Data1	Sim1	Time2	Data2	Sim2	Time3	Data3	Sim3	Time4	Data4	Sim4	Time5	Data5	Sim5
200	0.00633446		729.99	0.00687855		1259.99	0.00472766		1789.98	0.00839917		2320.01	-0.00362433
200.2	0.0060118		730.19	0.00631702		1260.19	0.0059247		1790.18	0.0076378		2320.21	-0.00431593
200.4	0.0063365		730.39	0.0069206		1260.39	0.00656866		1790.38	0.00726923		2320.41	-0.0041312
200.6	0.00730607		730.59	0.00769085		1260.59	0.00696016		1790.58	0.006406		2320.61	-0.0052321
200.8	0.00853058		730.79	0.00889473		1260.79	0.00714119		1790.78	0.00584718		2320.81	-0.00566373
201	0.01013913		730.99	0.00967327		1260.99	0.00746641		1790.98	0.00533842		2321.01	-0.006144
201.2	0.01215613		731.19	0.01044085		1261.19	0.00728708		1791.18	0.00454226		2321.21	-0.00594256
201.4	0.01506961		731.39	0.0112923		1261.39	0.00741459		1791.38	0.00432666		2321.41	-0.0063221
201.6	0.01742858		731.59	0.01198992		1261.59	0.00722722		1791.58	0.00392805		2321.61	-0.00593366
201.8	0.02112434		731.79	0.01194953		1261.79	0.00706429		1791.78	0.00368166		2321.81	-0.00559129
202	0.02541782		731.99	0.01268266		1261.99	0.00682975		1791.98	0.00360075		2322.01	-0.00473858
202.2	0.02977377		732.19	0.01307783		1262.19	0.00688911		1792.18	0.00427965		2322.21	-0.00444247
202.4	0.03435381		732.39	0.01359923		1262.39	0.00669878		1792.38	0.00379299		2322.41	-0.00479844
202.6	0.03858175		732.59	0.01477106		1262.59	0.00656787		1792.58	0.00315756		2322.61	-0.00393406
202.8	0.04262101		732.79	0.01555912		1262.79	0.0074002		1792.78	0.00324829		2322.81	-0.003892
203	0.04649274		732.99	0.01693625		1262.99	0.00775032		1792.98	0.00325068		2323.01	-0.00460281
203.2	0.05121583		733.19	0.01789627		1263.19	0.00799623		1793.18	0.0029296		2323.21	-0.00432888
203.4	0.0555717		733.39	0.017758		1263.39	0.00847141		1793.38	0.00253579		2323.41	-0.00383506
203.6	0.05990198		733.59	0.01840701		1263.59	0.008143		1793.58	0.00296297		2323.61	-0.00318115
203.8	0.0633674		733.79	0.0187746		1263.79	0.0088969		1793.78	0.00217176		2323.81	-0.00387538
204	0.06684025		733.99	0.01898987		1263.99	0.00918272		1793.98	0.00279473		2324.01	-0.00349095
204.2	0.0711743		734.19	0.02005717		1264.19	0.00999043		1794.18	0.00384907		2324.21	-0.00329942
204.4	0.07580892		734.39	0.02195676		1264.39	0.00971632		1794.38	0.00442626		2324.41	-0.00307122
204.6	0.07985146		734.59	0.02299098		1264.59	0.00976986		1794.58	0.00465594		2324.61	-0.00427149
204.8	0.08361932		734.79	0.02452191		1264.79	0.00954823		1794.78	0.00420823		2324.81	-0.00294696
205	0.08673013		734.99	0.02589063		1264.99	0.00967097		1794.98	0.00422095		2325.01	-0.00295231
205.2	0.08972601		735.19	0.02740184		1265.19	0.00895462		1795.18	0.00497745		2325.21	-0.00270055
205.4	0.09292761		735.39	0.02889113		1265.39	0.00867542		1795.38	0.0055358		2325.41	-0.00317984
205.6	0.09599213		735.59	0.03019746		1265.59	0.00854877		1795.58	0.00577774		2325.61	-0.00317746
205.8	0.09957431		735.79	0.03084381		1265.79	0.00864167		1795.78	0.00624831		2325.81	-0.00329434
206	0.10293399		735.99	0.03227218		1265.99	0.00827261		1795.98	0.00641498		2326.01	-0.00343148
206.2	0.10646342		736.19	0.03230266		1266.19	0.00867969		1796.18	0.00693992		2326.21	-0.00418519
206.4	0.10999837		736.39	0.03286192		1266.39	0.00794682		1796.38	0.00662685		2326.41	-0.00425455
206.6	0.11390301		736.59	0.03397521		1266.59	0.00810963		1796.58	0.00719396		2326.61	-0.0041394
206.8	0.11571437		736.79	0.03456661		1266.79	0.00797103		1796.78	0.00849843		2326.81	-0.00508593
207	0.1189073		736.99	0.0356927		1266.99	0.00782479		1796.98	0.00875196		2327.01	-0.00605827
207.2	0.12158084		737.19	0.03559102		1267.19	0.0077396		1797.18	0.00869783		2327.21	-0.00601843
207.4	0.1236446		737.39	0.03636203		1267.39	0.00770432		1797.38	0.00845759		2327.41	-0.00697124
207.6	0.12583512		737.59	0.03659174		1267.59	0.00751642		1797.58	0.00921045		2327.61	-0.0077525
207.8	0.12832762		737.79	0.03736829		1267.79	0.00841365		1797.78	0.00873513		2327.81	-0.00858785
208	0.13099274		737.99	0.03795276		1267.99	0.00831873		1797.98	0.00901221		2328.01	-0.00779311
208.2	0.13299593		738.19	0.03897721		1268.19	0.00766597		1798.18	0.00934066		2328.21	-0.00784785
208.4	0.13541659		738.39	0.03940672		1268.39	0.00778167		1798.38	0.00925584		2328.41	-0.00764327
208.6	0.13772394		738.59	0.04040898		1268.59	0.00750417		1798.58	0.00919403		2328.61	-0.00732317
208.8	0.13958542		738.79	0.04202894		1268.79	0.0071517		1798.78	0.0078506		2328.81	-0.00600942
209	0.14187088		738.99	0.04373601		1268.99	0.007318		1798.98	0.00863416		2329.01	-0.00596236
209.2	0.14429872		739.19	0.04520397		1269.19	0.00643747		1799.18	0.00910503		2329.21	-0.00545442
209.4	0.14682848		739.39	0.04605784		1269.39	0.00700714		1799.38	0.00884129		2329.41	-0.00510159
209.6	0.14975955		739.59	0.04679559		1269.59	0.00723803		1799.58	0.00873538		2329.61	-0.00469625
209.8	0.15216029		739.79	0.04752058		1269.79	0.00683527		1799.78	0.00862529		2329.81	-0.00385302
210	0.1554098		739.99	0.04854501		1269.99	0.00628611		1799.98	0.00831931		2330.01	-0.00371106
210.2	0.15845317		740.19	0.04921556		1270.19	0.00700902		1800.18	0.00841459		2330.21	-0.00384801
210.4	0.16096336		740.39	0.05075791		1270.39	0.00813675		1800.38	0.0091968		2330.41	-0.00466568
210.6	0.16304481		740.59	0.0516406		1270.59	0.00927704		1800.58	0.00957577		2330.61	-0.00531757
210.8	0.16445767		740.79	0.05340006		1270.79	0.00932189		1800.78	0.00955432		2330.81	-0.00633538
211	0.16760657		740.99	0.05476963		1270.99	0.0100088		1800.98	0.00913429		2331.01	-0.00758466
211.2	0.1699754		741.19	0.05557131		1271.19	0.0096873		1801.18	0.00886068		2331.21	-0.00868828
211.4	0.17164743		741.39	0.05700509		1271.39	0.00986664		1801.38	0.00799753		2331.41	-0.01017685
211.6	0.17350494		741.59	0.05739603		1271.59	0.01027271		1801.58	0.00731736		2331.61	-0.01052635
211.8	0.17485386		741.79	0.0574953		1271.79	0.01048136		1801.78	0.00674261		2331.81	-0.0105307
212	0.17550062		741.99	0.05790885		1271.99	0.01057123		1801.98	0.00639837		2332.01	-0.00995218
212.2	0.17711354		742.19	0.05863698		1272.19	0.00993566		1802.18	0.00726142		2332.21	-0.01056029
212.4	0.1797544		742.39	0.05842178		1272.39	0.00983299		1802.38	0.00798757		2332.41	-0.01051169
212.6	0.18168016		742.59	0.05895029		1272.59	0.00982341		1802.58	0.00836561		2332.61	-0.01003615
212.8	0.18337161		742.79	0.05950125		1272.79	0.00962286		1802.78	0.00853694		2332.81	-0.00942763
213	0.18612083		742.99	0.060149		1272.99	0.00967383		1802.98	0.00937812		2333.01	-0.0094629
213.2	0.18808098		743.19	0.06033024		1273.19	0.00941		1803.18	0.01087856		2333.21	-0.00923065
213.4	0.18972513		743.39	0.0602915		1273.39	0.00937614		1803.38	0.01155765		2333.41	-0.00890347
213.6	0.19198853		743.59	0.06108337		1273.59	0.00820957		1803.58	0.01215014		2333.61	-0.00820529
213.8	0.1937346		743.79	0.0622093		1273.79	0.00819847		1803.78	0.01267338		2333.81	-0.00759786
214	0.19543324		743.99	0.0634258		1273.99	0.00756013		1803.98	0.01376569		2334.01	-0.00759892
214.2	0.19710645		744.19	0.06487571		1274.19	0.00820933		1804.18	0.01518278		2334.21	-0.00719063
214.4	0.19881662		744.39	0.06658422		1274.39	0.00882694		1804.38	0.01595285		2334.41	-0.00719189
214.6	0.20020497		744.59	0.06779384		1274.59	0.00714903		1804.58	0.01639174		2334.61	-0.00632646
214.8	0.20208643		744.79	0.06948211		1274.79	0.00652355		1804.78	0.01671291		2334.81	-0.0066295
215	0.20363874		744.99	0.07058043		1274.99	0.00647124		1804.98	0.01596941		2335.01	-0.00768395
215.2	0.20476175		745.19	0.07229985		1275.19	0.00587555		1805.18	0.01525729		2335.21	-0.00833533
215.4	0.20539588		745.39	0.07304009		1275.39	0.00598244		1805.38	0.01396134		2335.41	-0.00840041
215.6	0.20649861		745.59	0.07388124		1275.59	0.00644169		1805.58	0.01230533		2335.61	-0.00857456
215.8	0.2077992		745.79	0.07347274		1275.79	0.00660316		1805.78	0.01195948		2335.81	-0.00857815
216	0.20960195		745.99	0.07442498		1275.99	0.00678418		1805.98	0.01192742		2336.01	-0.00872408
216.2	0.21197221		746.19	0.07504254		1276.19	0.00609403		1806.18	0.01192348		2336.21	-0.00864728
216.4	0.21403454		746.39	0.07513588		1276.39	0.007145		1806.38	0.01135153		2336.41	-0.00974801
216.6	0.21593245		746.59	0.07654347		1276.59	0.00834105		1806.58	0.01130308		2336.61	-0.01002134
216.8	0.21823759		746.79	0.07783927		1276.79	0.00764756		1806.78	0.01053428		2336.81	-0.01089244
217	0.22066878		746.99	0.07825207		1276.99	0.00819524		1806.98	0.0103947		2337.01	-0.01099525
217.2	0.22229743		747.19	0.07855614		1277.19	0.00783732		1807.18	0.01107604		2337.21	-0.01055203
217.4	0.22348692		747.39	0.07927055		1277.39	0.00827167		1807.38	0.01070565		2337.41	-0.01043509
217.6	0.22575872		747.59	0.07984301		1277.59	0.00811671		1807.58	0.01053582		2337.61	-0.00983628
217.8	0.22674906		747.79	0.08093355		1277.79	0.00877564		1807.78	0.01034213		2337.81	-0.00947328
218	0.22776879		747.99	0.08163224		1277.99	0.00867441		1807.98	0.01110846		2338.01	-0.00992993
218.2	0.2289392		748.19	0.08257856		1278.19	0.00886644		1808.18	0.01122492		2338.21	-0.00988543
218.4	0.23021349		748.39	0.08268938		1278.39	0.00876426		1808.38	0.01113205		2338.41	-0.00933123
218.6	0.23079803		748.59	0.08294441		1278.59	0.00776187		1808.58	0.01209603		2338.61	-0.00840722
218.8	0.23151353		748.79	0.08352483		1278.79	0.00816021		1808.78	0.01194924		2338.81	-0.00899481
219	0.23204479		748.99	0.0840381		1278.99	0.00730164		1808.98	0.01083023		2339.01	-0.00872799
219.2	0.23273482		749.19	0.08443838		1279.19	0.00703094		1809.18	0.01095032		2339.21	-0.00910761
219.4	0.23340466		749.39	0.08432312		1279.39	0.00649545		1809.38	0.01002697		2339.41	-0.00859889
219.6	0.23447096		749.59	0.08475461		1279.59	0.00623524		1809.58	0.01015569		2339.61	-0.00809134
219.8	0.2354061		749.79	0.08479403		1279.79	0.00603428		1809.78	0.01085107		2339.81	-0.00818165
220	0.23721274		749.99	0.0865775		1279.99	0.00534791		1809.98	0.01103584		2340.01	-0.00797095
220.2	0.23815865		750.19	0.08726679		1280.19	0.00576644		1810.18	0.01057883		2340.21	-0.00835194
220.4	0.23940296		750.39	0.08830691		1280.39	0.00631694		1810.38	0.01051741		2340.41	-0.00859759
220.6	0.24083377		750.59	0.0891627		1280.59	0.00547837		1810.58	0.01033897		2340.61	-0.00779765
220.8	0.24207656		750.79	0.08988278		1280.79	0.00479076		1810.78	0.01031073		2340.81	-0.00683392
221	0.24357795		750.99	0.09138514		1280.99	0.00561825		1810.98	0.01075748		2341.01	-0.00627726
221.2	0.24493772		751.19	0.09215565		1281.19	0.0056353		1811.18	0.01099078		2341.21	-0.00632862
221.4	0.24693465		751.39	0.09358107		1281.39	0.00627184		1811.38	0.01033736		2341.41	-0.00696296
221.6	0.24838652		751.59	0.09446308		1281.59	0.00655015		1811.58	0.01040859		2341.61	-0.00755728
221.8	0.24884812		751.79	0.09577995		1281.79	0.0083894		1811.78	0.0109499		2341.81	-0.00800922
222	0.24976022		751.99	0.09610772		1281.99	0.00926098		1811.98	0.01231521		2342.01	-0.008718
222.2	0.25075172		752.19	0.09680711		1282.19	0.00905942		1812.18	0.0124786		2342.21	-0.00857981
222.4	0.25180221		752.39	0.09682894		1282.39	0.01016367		1812.38	0.01308662		2342.41	-0.00783673
222.6	0.25272366		752.59	0.09677501		1282.59	0.00996898		1812.58	0.0135101		2342.61	-0.00819375
222.8	0.25380433		752.79	0.09679403		1282.79	0.0110083		1812.78	0.01362217		2342.81	-0.00921275
223	0.2541942		752.99	0.09634318		1282.99	0.01089968		1812.98	0.01407318		2343.01	-0.00953445
223.2	0.25514869		753.19	0.09614846		1283.19	0.01138639		1813.18	0.01493175		2343.21	-0.0108463
223.4	0.25609899		753.39	0.09634671		1283.39	0.01054468		1813.38	0.0156838		2343.41	-0.01039341
223.6	0.25714483		753.59	0.09697162		1283.59	0.01097705		1813.58	0.01632594		2343.61	-0.01054572
223.8	0.25799705		753.79	0.09773406		1283.79	0.0108823		1813.78	0.01521793		2343.81	-0.01120032
224	0.25915309		753.99	0.09841259		1283.99	0.01039882		1813.98	0.01462957		2344.01	-0.01078375
224.2	0.25946158		754.19	0.09896343		1284.19	0.01085306		1814.18	0.01357568		2344.21	-0.00992689
224.4	0.2605203		754.39	0.10002376		1284.39	0.01009648		1814.38	0.01252134		2344.41	-0.00873122
224.6	0.2614114		754.59	0.10079325		1284.59	0.00927352		1814.58	0.01128519		2344.61	-0.00773214
224.8	0.26177484		754.79	0.10274553		1284.79	0.00914481		1814.78	0.01133489		2344.81	-0.00710195
225	0.26320682		754.99	0.10433958		1284.99	0.00908443		1814.98	0.01081407		2345.01	-0.00708932
225.2	0.26443306		755.19	0.10498622		1285.19	0.008866		1815.18	0.01022263		2345.21	-0.00670989
225.4	0.26504609		755.39	0.10661648		1285.39	0.00836341		1815.38	0.00984584		2345.41	-0.00656993
225.6	0.26497865		755.59	0.1072625		1285.59	0.00855103		1815.58	0.01004756		2345.61	-0.00596431
225.8	0.26567638		755.79	0.10781405		1285.79	0.00875258		1815.78	0.0106293		2345.81	-0.00577041
226	0.26634486		755.99	0.10847972		1285.99	0.00815702		1815.98	0.0117928		2346.01	-0.00585419
226.2	0.26746614		756.19	0.10953576		1286.19	0.00875971		1816.18	0.01147734		2346.21	-0.00545342
226.4	0.26818527		756.39	0.11076216		1286.39	0.00948744		1816.38	0.01140459		2346.41	-0.00514097
226.6	0.26980383		756.59	0.11072452		1286.59	0.00979409		1816.58	0.01273491		2346.61	-0.00556364
226.8	0.27107554		756.79	0.11133975		1286.79	0.01036604		1816.78	0.01395892		2346.81	-0.00570827
227	0.27143859		756.99	0.11076205		1286.99	0.00974815		1816.98	0.01540101		2347.01	-0.00573758
227.2	0.27310574		757.19	0.11199761		1287.19	0.00974382		1817.18	0.01612867		2347.21	-0.00609515
227.4	0.27416264		757.39	0.11261218		1287.39	0.0086518		1817.38	0.01652203		2347.41	-0.00620857
227.6	0.27519578		757.59	0.11347325		1287.59	0.00886159		1817.58	0.01574592		2347.61	-0.00711732
227.8	0.27616345		757.79	0.11483601		1287.79	0.00799892		1817.78	0.01452508		2347.81	-0.0072064
228	0.27695862		757.99	0.11547479		1287.99	0.00863695		1817.98	0.01379602		2348.01	-0.00708992
228.2	0.27780008		758.19	0.1159361		1288.19	0.00840237		1818.18	0.01341565		2348.21	-0.00706307
228.4	0.27955956		758.39	0.11664571		1288.39	0.00812985		1818.38	0.01325949		2348.41	-0.0079209
228.6	0.28063634		758.59	0.11691998		1288.59	0.00793358		1818.58	0.01373442		2348.61	-0.00825147
228.8	0.28168189		758.79	0.11773788		1288.79	0.0082632		1818.78	0.01435998		2348.81	-0.00943655
229	0.28356786		758.99	0.11818035		1288.99	0.00839647		1818.98	0.01412036		2349.01	-0.00967209
229.2	0.28489635		759.19	0.1177525		1289.19	0.00834304		1819.18	0.01368286		2349.21	-0.01064182
229.4	0.28498082		759.39	0.11755754		1289.39	0.00723553		1819.38	0.01357159		2349.41	-0.01151605
229.6	0.28630146		759.59	0.11743018		1289.59	0.00648922		1819.58	0.01367365		2349.61	-0.01222241
229.8	0.2871983		759.79	0.11757132		1289.79	0.00692008		1819.78	0.01528623		2349.81	-0.01271458
230	0.2879784		759.99	0.11860123		1289.99	0.00705409		1819.98	0.01588754		2350.01	-0.01265428
230.2	0.28914599		760.19	0.11991001		1290.19	0.00803497		1820.18	0.01521966		2350.21	-0.01160435
230.4	0.28939823		760.39	0.12083518		1290.39	0.00820859		1820.38	0.01549822		2350.41	-0.01179519
230.6	0.29057528		760.59	0.12064668		1290.59	0.00869038		1820.58	0.01677913		2350.61	-0.01163216
230.8	0.29071899		760.79	0.12229071		1290.79	0.00806165		1820.78	0.01637021		2350.81	-0.01117399
231	0.2900787		760.99	0.12254036		1290.99	0.00832775		1820.98	0.01618435		2351.01	-0.01056649
231.2	0.2904893		761.19	0.12438068		1291.19	0.00819588		1821.18	0.01567055		2351.21	-0.0105614
231.4	0.29096231		761.39	0.12542012		1291.39	0.00736416		1821.38	0.01541043		2351.41	-0.00986582
231.6	0.29197764		761.59	0.12621147		1291.59	0.00800427		1821.58	0.0146221		2351.61	-0.00922487
231.8	0.29253281		761.79	0.12739494		1291.79	0.00776076		1821.78	0.01374246		2351.81	-0.00796688
232	0.29302658		761.99	0.12686718		1291.99	0.00854933		1821.98	0.01345833		2352.01	-0.00811034
232.2	0.29470775		762.19	0.1268153		1292.19	0.00821898		1822.18	0.01436764		2352.21	-0.00811365
232.4	0.29601358		762.39	0.12783973		1292.39	0.00796719		1822.38	0.01424997		2352.41	-0.00861879
232.6	0.29712712		762.59	0.12888811		1292.59	0.00793425		1822.58	0.01394028		2352.61	-0.00874383
232.8	0.29797261		762.79	0.12848436		1292.79	0.00840516		1822.78	0.01314052		2352.81	-0.00854385
233	0.30000822		762.99	0.12822277		1292.99	0.00836659		1822.98	0.0119881		2353.01	-0.00829103
233.2	0.30075794		763.19	0.12796736		1293.19	0.00834732		1823.18	0.01120105		2353.21	-0.00892183
233.4	0.30097104		763.39	0.1289308		1293.39	0.00737661		1823.38	0.01148516		2353.41	-0.0087289
233.6	0.30200826		763.59	0.12955155		1293.59	0.00783292		1823.58	0.01191368		2353.61	-0.00907851
233.8	0.3017973		763.79	0.13004182		1293.79	0.00841227		1823.78	0.01225734		2353.81	-0.0087933
234	0.30316817		763.99	0.1315597		1293.99	0.00874681		1823.98	0.01242457		2354.01	-0.0094137
234.2	0.30349236		764.19	0.13289442		1294.19	0.00988396		1824.18	0.0127267		2354.21	-0.00948799
234.4	0.30389606		764.39	0.13379881		1294.39	0.01009548		1824.38	0.01460727		2354.41	-0.00968467
234.6	0.30513195		764.59	0.13410061		1294.59	0.00990023		1824.58	0.01525883		2354.61	-0.00953594
234.8	0.30589804		764.79	0.13514467		1294.79	0.01041244		1824.78	0.01601641		2354.81	-0.0097837
235	0.30564539		764.99	0.13471018		1294.99	0.01125239		1824.98	0.01636756		2355.01	-0.00994472
235.2	0.3069313		765.19	0.13482437		1295.19	0.01145052		1825.18	0.01662271		2355.21	-0.00938582
235.4	0.30789274		765.39	0.13497749		1295.39	0.01179612		1825.38	0.01676309		2355.41	-0.00856138
235.6	0.30871253		765.59	0.13458792		1295.59	0.01160663		1825.58	0.01599551		2355.61	-0.00841093
235.8	0.30931626		765.79	0.13450808		1295.79	0.01155827		1825.78	0.01664469		2355.81	-0.00840035
236	0.31013764		765.99	0.13444826		1295.99	0.01157264		1825.98	0.01652195		2356.01	-0.0085922
236.2	0.31145463		766.19	0.13472198		1296.19	0.01109485		1826.18	0.0158017		2356.21	-0.00805825
236.4	0.31133929		766.39	0.13564087		1296.39	0.01017473		1826.38	0.01511261		2356.41	-0.00855647
236.6	0.31272613		766.59	0.13645894		1296.59	0.01023719		1826.58	0.01542382		2356.61	-0.00794919
236.8	0.31313911		766.79	0.13574042		1296.79	0.01088472		1826.78	0.01505693		2356.81	-0.00826026
237	0.31493703		766.99	0.13661696		1296.99	0.01055125		1826.98	0.01495376		2357.01	-0.00870031
237.2	0.31471627		767.19	0.13799828		1297.19	0.01006929		1827.18	0.01495657		2357.21	-0.0086743
237.4	0.31430313		767.39	0.13901137		1297.39	0.00958664		1827.38	0.01601076		2357.41	-0.00840108
237.6	0.31494243		767.59	0.13970334		1297.59	0.01036007		1827.58	0.01638282		2357.61	-0.0091823
237.8	0.31443299		767.79	0.14019168		1297.79	0.01065831		1827.78	0.0165877		2357.81	-0.00969821
238	0.31585763		767.99	0.14124238		1297.99	0.01103824		1827.98	0.01689675		2358.01	-0.01060506
238.2	0.31675438		768.19	0.14212674		1298.19	0.01169818		1828.18	0.01790068		2358.21	-0.01069027
238.4	0.31833331		768.39	0.1429665		1298.39	0.01193978		1828.38	0.01944812		2358.41	-0.0109474
238.6	0.31972131		768.59	0.1429123		1298.59	0.01234074		1828.58	0.0191415		2358.61	-0.01082768
238.8	0.320246		768.79	0.1434651		1298.79	0.01315185		1828.78	0.01921481		2358.81	-0.01115783
239	0.31980384		768.99	0.14327192		1298.99	0.01322653		1828.98	0.01811006		2359.01	-0.01101929
239.2	0.32041151		769.19	0.14317879		1299.19	0.01321283		1829.18	0.0177442		2359.21	-0.01066971
239.4	0.32063394		769.39	0.14452532		1299.39	0.01269068		1829.38	0.01722298		2359.41	-0.01136265
239.6	0.32126801		769.59	0.1450978		1299.59	0.01215167		1829.58	0.01713983		2359.61	-0.01112267
239.8	0.32156141		769.79	0.14588181		1299.79	0.011981		1829.78	0.01675859		2359.81	-0.01120305
240	0.32161045		769.99	0.14716631		1299.99	0.01150601		1829.98	0.01521196		2360.01	-0.0109066
240.2	0.32197582		770.19	0.14807265		1300.19	0.0109766		1830.18	0.01398735		2360.21	-0.0110497
240.4	0.32201335		770.39	0.14841425		1300.39	0.01018334		1830.38	0.01469834		2360.41	-0.01112643
240.6	0.32335092		770.59	0.14777227		1300.59	0.01013591		1830.58	0.01551513		2360.61	-0.01120064
240.8	0.32379573		770.79	0.14732021		1300.79	0.00983884		1830.78	0.01543678		2360.81	-0.01116608
241	0.32481433		770.99	0.14710391		1300.99	0.00943108		1830.98	0.01614136		2361.01	-0.01062096
241.2	0.32512991		771.19	0.1474967		1301.19	0.00876726		1831.18	0.01743647		2361.21	-0.01011868
241.4	0.32435267		771.39	0.14728392		1301.39	0.00889008		1831.38	0.01914615		2361.41	-0.01011705
241.6	0.3254249		771.59	0.14658124		1301.59	0.00853203		1831.58	0.01950735		2361.61	-0.01046934
241.8	0.3251759		771.79	0.14613709		1301.79	0.00873619		1831.78	0.01959486		2361.81	-0.01078032
242	0.32709877		771.99	0.14687532		1301.99	0.00848283		1831.98	0.01969452		2362.01	-0.01102319
242.2	0.3282895		772.19	0.14733417		1302.19	0.00872701		1832.18	0.02064519		2362.21	-0.01134969
242.4	0.32953392		772.39	0.14838397		1302.39	0.00880029		1832.38	0.02122754		2362.41	-0.01109144
242.6	0.33028883		772.59	0.14882349		1302.59	0.00861061		1832.58	0.02023404		2362.61	-0.01051368
242.8	0.33080069		772.79	0.14978972		1302.79	0.00924625		1832.78	0.02021568		2362.81	-0.01064232
243	0.3315061		772.99	0.15090451		1302.99	0.00931234		1832.98	0.01982253		2363.01	-0.010955
243.2	0.33162538		773.19	0.15277191		1303.19	0.00921093		1833.18	0.02022919		2363.21	-0.01160623
243.4	0.33182383		773.39	0.15408756		1303.39	0.00975645		1833.38	0.0198535		2363.41	-0.01170975
243.6	0.33201169		773.59	0.1543337		1303.59	0.00948725		1833.58	0.01948535		2363.61	-0.01123094
243.8	0.33204364		773.79	0.1550693		1303.79	0.00961467		1833.78	0.01828431		2363.81	-0.0117861
244	0.33295984		773.99	0.15568046		1303.99	0.01054905		1833.98	0.01745471		2364.01	-0.01175172
244.2	0.33286402		774.19	0.15520654		1304.19	0.01109662		1834.18	0.01690819		2364.21	-0.01151628
244.4	0.33286439		774.39	0.15455306		1304.39	0.01086644		1834.38	0.01679968		2364.41	-0.0113868
244.6	0.33350034		774.59	0.15424476		1304.59	0.01155589		1834.58	0.01671505		2364.61	-0.01115236
244.8	0.33436804		774.79	0.15485236		1304.79	0.0117671		1834.78	0.01674655		2364.81	-0.01029802
245	0.33467159		774.99	0.15533047		1304.99	0.0122217		1834.98	0.01709675		2365.01	-0.01103891
245.2	0.33531301		775.19	0.15577568		1305.19	0.01230701		1835.18	0.01770725		2365.21	-0.01168622
245.4	0.3351958		775.39	0.15554559		1305.39	0.01277865		1835.38	0.01740296		2365.41	-0.01157585
245.6	0.33612377		775.59	0.1557305		1305.59	0.01279726		1835.58	0.01716219		2365.61	-0.01090797
245.8	0.33690985		775.79	0.1563718		1305.79	0.01341719		1835.78	0.01662522		2365.81	-0.01074874
246	0.33825132		775.99	0.15708573		1305.99	0.01319315		1835.98	0.01636416		2366.01	-0.01123774
246.2	0.33977587		776.19	0.15764921		1306.19	0.01244998		1836.18	0.01614141		2366.21	-0.01104443
246.4	0.34144165		776.39	0.15911902		1306.39	0.01227225		1836.38	0.01621391		2366.41	-0.01023043
246.6	0.34155402		776.59	0.16016745		1306.59	0.01293696		1836.58	0.0157695		2366.61	-0.01006994
246.8	0.34184221		776.79	0.16102434		1306.79	0.01289281		1836.78	0.01600322		2366.81	-0.0099761
247	0.34267883		776.99	0.16207137		1306.99	0.01176166		1836.98	0.01634144		2367.01	-0.01041265
247.2	0.34241729		777.19	0.16208491		1307.19	0.01169957		1837.18	0.01641481		2367.21	-0.00998201
247.4	0.34250798		777.39	0.16136514		1307.39	0.01140125		1837.38	0.01644867		2367.41	-0.01039027
247.6	0.34388229		777.59	0.16118213		1307.59	0.01009704		1837.58	0.01654237		2367.61	-0.01035169
247.8	0.34466704		777.79	0.16105187		1307.79	0.01085227		1837.78	0.01649365		2367.81	-0.01049352
248	0.3451507		777.99	0.16120188		1307.99	0.01107875		1837.98	0.01624213		2368.01	-0.01065905
248.2	0.34470587		778.19	0.1609705		1308.19	0.010799		1838.18	0.01537573		2368.21	-0.01105639
248.4	0.34522847		778.39	0.16164245		1308.39	0.01097365		1838.38	0.01510176		2368.41	-0.01158697
248.6	0.34616146		778.59	0.16252784		1308.59	0.01122429		1838.58	0.01522204		2368.61	-0.01131247
248.8	0.34638759		778.79	0.16343934		1308.79	0.01146208		1838.78	0.015808		2368.81	-0.01198876
249	0.34651737		778.99	0.1637321		1308.99	0.01193545		1838.98	0.01543306		2369.01	-0.0131548
249.2	0.34720207		779.19	0.16423063		1309.19	0.01200088		1839.18	0.01600247		2369.21	-0.01284987
249.4	0.34745372		779.39	0.1640255		1309.39	0.01227211		1839.38	0.01678448		2369.41	-0.01208713
249.6	0.34773836		779.59	0.16528316		1309.59	0.01295641		1839.58	0.01762987		2369.61	-0.01170844
249.8	0.34867957		779.79	0.16598571		1309.79	0.01258744		1839.78	0.01726176		2369.81	-0.01149634
250	0.34924981		779.99	0.1669233		1309.99	0.0119873		1839.98	0.01745977		2370.01	-0.01195057
250.2	0.34985491		780.19	0.16788051		1310.19	0.01130064		1840.18	0.01737844		2370.21	-0.01184366
250.4	0.35001569		780.39	0.16851724		1310.39	0.01174728		1840.38	0.01762838		2370.41	-0.01115339
250.6	0.3497402		780.59	0.16908032		1310.59	0.01234743		1840.58	0.01753681		2370.61	-0.01079574
250.8	0.34938625		780.79	0.1692867		1310.79	0.01095057		1840.78	0.01793451		2370.81	-0.01015404
251	0.34978645		780.99	0.16926544		1310.99	0.01036905		1840.98	0.01853341		2371.01	-0.00949464
251.2	0.35020451		781.19	0.16896056		1311.19	0.00999946		1841.18	0.01828422		2371.21	-0.00884752
251.4	0.35094568		781.39	0.16957031		1311.39	0.00970826		1841.38	0.01925583		2371.41	-0.00961575
251.6	0.35252231		781.59	0.16989848		1311.59	0.00909771		1841.58	0.01934802		2371.61	-0.00904462
251.8	0.35313152		781.79	0.17011567		1311.79	0.00966556		1841.78	0.01896843		2371.81	-0.00905054
252	0.35394964		781.99	0.17074723		1311.99	0.00957728		1841.98	0.0184687		2372.01	-0.00907981
252.2	0.35483877		782.19	0.17146482		1312.19	0.00933735		1842.18	0.01788837		2372.21	-0.00915537
252.4	0.35593123		782.39	0.17212717		1312.39	0.00897461		1842.38	0.01870459		2372.41	-0.00921779
252.6	0.35671915		782.59	0.17282935		1312.59	0.00837187		1842.58	0.01901141		2372.61	-0.0095766
252.8	0.35688462		782.79	0.1735536		1312.79	0.00909435		1842.78	0.01959867		2372.81	-0.01012498
253	0.35711186		782.99	0.17426796		1312.99	0.00931456		1842.98	0.01896097		2373.01	-0.01117186
253.2	0.35671879		783.19	0.17455821		1313.19	0.00856571		1843.18	0.02001224		2373.21	-0.01056762
253.4	0.35727938		783.39	0.17559903		1313.39	0.00892496		1843.38	0.02020898		2373.41	-0.01080248
253.6	0.35764805		783.59	0.17726024		1313.59	0.00867889		1843.58	0.01932791		2373.61	-0.01111121
253.8	0.35786035		783.79	0.17751269		1313.79	0.00868448		1843.78	0.01893598		2373.81	-0.01092644
254	0.35778019		783.99	0.17790034		1313.99	0.00850167		1843.98	0.01876867		2374.01	-0.01172523
254.2	0.35794748		784.19	0.17809348		1314.19	0.00894685		1844.18	0.01749033		2374.21	-0.01137587
254.4	0.35870242		784.39	0.17829389		1314.39	0.00940389		1844.38	0.01743456		2374.41	-0.01131782
254.6	0.35877403		784.59	0.17872197		1314.59	0.00938062		1844.58	0.01778685		2374.61	-0.01151578
254.8	0.35808418		784.79	0.17849812		1314.79	0.00900716		1844.78	0.01842298		2374.81	-0.01171882
255	0.35910873		784.99	0.17797216		1314.99	0.00854305		1844.98	0.01866823		2375.01	-0.01225741
255.2	0.35964108		785.19	0.17878065		1315.19	0.00875189		1845.18	0.01919069		2375.21	-0.01307072
255.4	0.36038049		785.39	0.17954138		1315.39	0.00994973		1845.38	0.02003339		2375.41	-0.01314
255.6	0.3610468		785.59	0.17886503		1315.59	0.00980116		1845.58	0.02020263		2375.61	-0.0134363
255.8	0.36144416		785.79	0.1789212		1315.79	0.00936437		1845.78	0.02010734		2375.81	-0.01327136
256	0.36147114		785.99	0.17936936		1315.99	0.00926925		1845.98	0.02098542		2376.01	-0.01386264
256.2	0.36232655		786.19	0.17918726		1316.19	0.00879112		1846.18	0.02114482		2376.21	-0.01444199
256.4	0.36288804		786.39	0.17915577		1316.39	0.00862397		1846.38	0.02127511		2376.41	-0.01481396
256.6	0.36304725		786.59	0.1792337		1316.59	0.00912743		1846.58	0.02083237		2376.61	-0.01447492
256.8	0.36321216		786.79	0.17977175		1316.79	0.01019177		1846.78	0.01998049		2376.81	-0.01376108
257	0.36230158		786.99	0.18079458		1316.99	0.01014237		1846.98	0.01947564		2377.01	-0.01344679
257.2	0.36300334		787.19	0.18135823		1317.19	0.00965567		1847.18	0.01964469		2377.21	-0.01183634
257.4	0.3641035		787.39	0.18357603		1317.39	0.0101217		1847.38	0.01927648		2377.41	-0.01118236
257.6	0.36436768		787.59	0.18408489		1317.59	0.01069693		1847.58	0.01912633		2377.61	-0.01104405
257.8	0.36446152		787.79	0.18422871		1317.79	0.01123244		1847.78	0.01896128		2377.81	-0.01117131
258	0.3648198		787.99	0.18481647		1317.99	0.01133521		1847.98	0.01797948		2378.01	-0.01166959
258.2	0.36574043		788.19	0.18521596		1318.19	0.01115077		1848.18	0.01735816		2378.21	-0.01132745
258.4	0.36638		788.39	0.18534824		1318.39	0.00993653		1848.38	0.01819255		2378.41	-0.01195175
258.6	0.36656425		788.59	0.18578929		1318.59	0.00936403		1848.58	0.01814177		2378.61	-0.01196249
258.8	0.36630643		788.79	0.18577326		1318.79	0.00908225		1848.78	0.01786197		2378.81	-0.0121059
259	0.367577		788.99	0.18593992		1318.99	0.00862277		1848.98	0.01816733		2379.01	-0.01313768
259.2	0.3677941		789.19	0.1867366		1319.19	0.0092342		1849.18	0.01859865		2379.21	-0.01398806
259.4	0.36910033		789.39	0.18678802		1319.39	0.01013132		1849.38	0.01914322		2379.41	-0.01380457
259.6	0.36962529		789.59	0.18595797		1319.59	0.00974034		1849.58	0.01941327		2379.61	-0.01435413
259.8	0.3699878		789.79	0.18715875		1319.79	0.00840558		1849.78	0.01881709		2379.81	-0.01361365
260	0.37088628		789.99	0.18793236		1319.99	0.00893226		1849.98	0.01804427		2380.01	-0.0143578
260.2	0.37176637		790.19	0.18780182		1320.19	0.0091708		1850.18	0.01706289		2380.21	-0.01383185
260.4	0.37243894		790.39	0.18816543		1320.39	0.0098227		1850.38	0.01710445		2380.41	-0.01344148
260.6	0.37383169		790.59	0.18882631		1320.59	0.01113557		1850.58	0.01711209		2380.61	-0.01273053
260.8	0.37470967		790.79	0.18953958		1320.79	0.01254376		1850.78	0.01684745		2380.81	-0.01236849
261	0.37480444		790.99	0.19025553		1320.99	0.01328002		1850.98	0.01779623		2381.01	-0.01203281
261.2	0.3764113		791.19	0.19071669		1321.19	0.01422137		1851.18	0.0176692		2381.21	-0.01170395
261.4	0.37723551		791.39	0.19095266		1321.39	0.01400377		1851.38	0.01824169		2381.41	-0.01162572
261.6	0.37761987		791.59	0.19029235		1321.59	0.01384426		1851.58	0.01797983		2381.61	-0.01232603
261.8	0.37734684		791.79	0.1902088		1321.79	0.01370957		1851.78	0.01760552		2381.81	-0.01336937
262	0.37731057		791.99	0.19027952		1321.99	0.01275909		1851.98	0.01744836		2382.01	-0.01401737
262.2	0.37695047		792.19	0.19005291		1322.19	0.01133091		1852.18	0.01811432		2382.21	-0.01373923
262.4	0.37663927		792.39	0.19067854		1322.39	0.0103156		1852.38	0.01795448		2382.41	-0.01423302
262.6	0.37651018		792.59	0.19178916		1322.59	0.0109116		1852.58	0.01752921		2382.61	-0.01464127
262.8	0.37599901		792.79	0.19186421		1322.79	0.01049126		1852.78	0.01729681		2382.81	-0.01523003
263	0.37605384		792.99	0.19238353		1322.99	0.01074699		1852.98	0.01763897		2383.01	-0.01551397
263.2	0.37606676		793.19	0.19328757		1323.19	0.01162363		1853.18	0.01765836		2383.21	-0.01467445
263.4	0.37616065		793.39	0.19402301		1323.39	0.01202153		1853.38	0.01764711		2383.41	-0.0140161
263.6	0.37621288		793.59	0.19427215		1323.59	0.01149366		1853.58	0.01684833		2383.61	-0.01366123
263.8	0.37661047		793.79	0.19557267		1323.79	0.01158477		1853.78	0.01673827		2383.81	-0.01302288
264	0.37746127		793.99	0.19600541		1323.99	0.01196461		1853.98	0.01692124		2384.01	-0.01388674
264.2	0.37718057		794.19	0.19655275		1324.19	0.01325761		1854.18	0.0177589		2384.21	-0.01333769
264.4	0.37816513		794.39	0.19660993		1324.39	0.01438997		1854.38	0.01763519		2384.41	-0.01331237
264.6	0.37943952		794.59	0.19723179		1324.59	0.01492952		1854.58	0.01791445		2384.61	-0.01246734
264.8	0.37979374		794.79	0.19662704		1324.79	0.01432587		1854.78	0.01800957		2384.81	-0.01202395
265	0.37976419		794.99	0.19644975		1324.99	0.01358393		1854.98	0.01921169		2385.01	-0.0115636
265.2	0.38124025		795.19	0.19632371		1325.19	0.01271986		1855.18	0.01918331		2385.21	-0.01209028
265.4	0.381875		795.39	0.19574428		1325.39	0.01174968		1855.38	0.01883069		2385.41	-0.01201538
265.6	0.38229201		795.59	0.1950939		1325.59	0.01176448		1855.58	0.01797993		2385.61	-0.01256272
265.8	0.38210728		795.79	0.19514962		1325.79	0.01199349		1855.78	0.01823867		2385.81	-0.01274739
266	0.38209196		795.99	0.19548818		1325.99	0.01105967		1855.98	0.01830969		2386.01	-0.0130821
266.2	0.38217975		796.19	0.19571961		1326.19	0.01077222		1856.18	0.01818543		2386.21	-0.01299652
266.4	0.3822892		796.39	0.19637118		1326.39	0.01000762		1856.38	0.01808781		2386.41	-0.01316073
266.6	0.3822334		796.59	0.19781138		1326.59	0.00973668		1856.58	0.01788859		2386.61	-0.01388649
266.8	0.38183783		796.79	0.19837494		1326.79	0.00904877		1856.78	0.01784303		2386.81	-0.01406703
267	0.38201579		796.99	0.19944887		1326.99	0.00917711		1856.98	0.01785653		2387.01	-0.01381338
267.2	0.38243339		797.19	0.2004049		1327.19	0.00859118		1857.18	0.01745913		2387.21	-0.01402731
267.4	0.38324529		797.39	0.20080531		1327.39	0.00826954		1857.38	0.01759655		2387.41	-0.01500339
267.6	0.38398778		797.59	0.20149848		1327.59	0.0087399		1857.58	0.01701849		2387.61	-0.01510659
267.8	0.38436718		797.79	0.20215937		1327.79	0.00995195		1857.78	0.01711025		2387.81	-0.01508876
268	0.38443695		797.99	0.20274624		1327.99	0.00943694		1857.98	0.01745028		2388.01	-0.01491773
268.2	0.38437864		798.19	0.20345991		1328.19	0.01010947		1858.18	0.01690199		2388.21	-0.01388939
268.4	0.38451606		798.39	0.20354763		1328.39	0.00921812		1858.38	0.01701661		2388.41	-0.01334264
268.6	0.38517266		798.59	0.20464595		1328.59	0.00907139		1858.58	0.01756208		2388.61	-0.01314143
268.8	0.38522234		798.79	0.20443302		1328.79	0.00889973		1858.78	0.01700856		2388.81	-0.01268907
269	0.38565084		798.99	0.20522052		1328.99	0.00887254		1858.98	0.01722511		2389.01	-0.01165073
269.2	0.38701331		799.19	0.20523517		1329.19	0.00971475		1859.18	0.01662194		2389.21	-0.01112311
269.4	0.38695973		799.39	0.20474		1329.39	0.01074627		1859.38	0.01542209		2389.41	-0.0101505
269.6	0.38749427		799.59	0.2039681		1329.59	0.01124643		1859.58	0.01473949		2389.61	-0.00984043
269.8	0.38746363		799.79	0.20404371		1329.79	0.01189649		1859.78	0.01502757		2389.81	-0.01003175
270	0.38771794		799.99	0.20455048		1329.99	0.01197412		1859.98	0.01513046		2390.01	-0.01050497
270.2	0.3876789		800.19	0.20518336		1330.19	0.01172782		1860.18	0.01516772		2390.21	-0.01077925
270.4	0.38774585		800.39	0.20664757		1330.39	0.0114873		1860.38	0.01627133		2390.41	-0.0105416
270.6	0.38839185		800.59	0.20847243		1330.59	0.01236165		1860.58	0.01683856		2390.61	-0.01127702
270.8	0.38949855		800.79	0.20798915		1330.79	0.01338673		1860.78	0.0175707		2390.81	-0.01139679
271	0.39070286		800.99	0.20771654		1330.99	0.01401058		1860.98	0.01781202		2391.01	-0.01166304
271.2	0.39171684		801.19	0.2083508		1331.19	0.01393716		1861.18	0.01768325		2391.21	-0.01172698
271.4	0.39296087		801.39	0.2080822		1331.39	0.0149417		1861.38	0.01917011		2391.41	-0.01278301
271.6	0.39358369		801.59	0.20878702		1331.59	0.01472629		1861.58	0.01885099		2391.61	-0.01293926
271.8	0.39442136		801.79	0.20867106		1331.79	0.01500755		1861.78	0.01992763		2391.81	-0.01303295
272	0.39435459		801.99	0.20943124		1331.99	0.01393101		1861.98	0.0208475		2392.01	-0.01337211
272.2	0.39442454		802.19	0.21040429		1332.19	0.0132749		1862.18	0.02039389		2392.21	-0.014085
272.4	0.39486205		802.39	0.21031867		1332.39	0.01242659		1862.38	0.02109018		2392.41	-0.01443062
272.6	0.39517618		802.59	0.21112855		1332.59	0.01246377		1862.58	0.02050075		2392.61	-0.01486046
272.8	0.39512333		802.79	0.21124022		1332.79	0.01140997		1862.78	0.01996974		2392.81	-0.01439345
273	0.39550874		802.99	0.21124271		1332.99	0.01051671		1862.98	0.02012413		2393.01	-0.01419162
273.2	0.39517165		803.19	0.21106047		1333.19	0.01050733		1863.18	0.01923224		2393.21	-0.01419607
273.4	0.39454966		803.39	0.2104135		1333.39	0.00991869		1863.38	0.01765294		2393.41	-0.01468357
273.6	0.39476841		803.59	0.21036487		1333.59	0.00907151		1863.58	0.01728101		2393.61	-0.01490138
273.8	0.39422247		803.79	0.21023693		1333.79	0.00914917		1863.78	0.01839355		2393.81	-0.01453042
274	0.39331182		803.99	0.21094433		1333.99	0.00889536		1863.98	0.01849804		2394.01	-0.01371039
274.2	0.39303044		804.19	0.21122733		1334.19	0.00899301		1864.18	0.01887564		2394.21	-0.01264593
274.4	0.39344349		804.39	0.21168377		1334.39	0.00939799		1864.38	0.0185886		2394.41	-0.01118138
274.6	0.39378798		804.59	0.21084379		1334.59	0.01041446		1864.58	0.01891337		2394.61	-0.01163199
274.8	0.39436651		804.79	0.20954932		1334.79	0.01076681		1864.78	0.01930484		2394.81	-0.01144563
275	0.3954859		804.99	0.20963313		1334.99	0.011048		1864.98	0.0190106		2395.01	-0.01160254
275.2	0.3958123		805.19	0.21043951		1335.19	0.01119796		1865.18	0.0187992		2395.21	-0.0116651
275.4	0.39627059		805.39	0.21126645		1335.39	0.01144806		1865.38	0.01933329		2395.41	-0.01183514
275.6	0.39736345		805.59	0.21214855		1335.59	0.01139159		1865.58	0.01859456		2395.61	-0.0118475
275.8	0.39811232		805.79	0.21290297		1335.79	0.01231969		1865.78	0.01863279		2395.81	-0.0115152
276	0.39737106		805.99	0.21449234		1335.99	0.01210846		1865.98	0.01851682		2396.01	-0.01160087
276.2	0.3981048		806.19	0.21593341		1336.19	0.01157583		1866.18	0.01892191		2396.21	-0.01161718
276.4	0.3984381		806.39	0.21618069		1336.39	0.01129587		1866.38	0.01938426		2396.41	-0.01173338
276.6	0.3981165		806.59	0.21821247		1336.59	0.01133772		1866.58	0.01876378		2396.61	-0.01162319
276.8	0.39793412		806.79	0.21790439		1336.79	0.0114607		1866.78	0.01805675		2396.81	-0.0117446
277	0.39824253		806.99	0.21780399		1336.99	0.01141584		1866.98	0.01788777		2397.01	-0.01160787
277.2	0.39789892		807.19	0.21826476		1337.19	0.01122253		1867.18	0.01721985		2397.21	-0.01167552
277.4	0.39791907		807.39	0.21743085		1337.39	0.01083372		1867.38	0.0166992		2397.41	-0.0122934
277.6	0.39784872		807.59	0.21756268		1337.59	0.01068422		1867.58	0.01707316		2397.61	-0.01273351
277.8	0.3978386		807.79	0.21752092		1337.79	0.01083824		1867.78	0.01666069		2397.81	-0.01256087
278	0.39757484		807.99	0.2183383		1337.99	0.01060536		1867.98	0.01561897		2398.01	-0.01299676
278.2	0.39848127		808.19	0.21894861		1338.19	0.01062882		1868.18	0.01535124		2398.21	-0.01366572
278.4	0.39957928		808.39	0.2190429		1338.39	0.01035255		1868.38	0.01552483		2398.41	-0.01453384
278.6	0.39984252		808.59	0.21883182		1338.59	0.00993265		1868.58	0.01653124		2398.61	-0.01557838
278.8	0.40035252		808.79	0.2190806		1338.79	0.01039619		1868.78	0.01661807		2398.81	-0.01581649
279	0.40098288		808.99	0.2197922		1338.99	0.01100587		1868.98	0.016513		2399.01	-0.01667949
279.2	0.40096699		809.19	0.2200029		1339.19	0.01089364		1869.18	0.01635374		2399.21	-0.01714145
279.4	0.40160395		809.39	0.22134732		1339.39	0.01029694		1869.38	0.01682676		2399.41	-0.01667324
279.6	0.40268761		809.59	0.22145257		1339.59	0.01018508		1869.58	0.01757684		2399.61	-0.01669953
279.8	0.40268169		809.79	0.22217282		1339.79	0.00950651		1869.78	0.01746471		2399.81	-0.01619234
280	0.40312409		809.99	0.22303021		1339.99	0.00912214		1869.98	0.01794634		2400.01	-0.01564897
280.2	0.40414697		810.19	0.22349294		1340.19	0.00876022		1870.18	0.01855114		2400.21	-0.01563207
280.4	0.40382341		810.39	0.22370416		1340.39	0.00928608		1870.38	0.01889823		2400.41	-0.0153555
280.6	0.40417614		810.59	0.22427923		1340.59	0.00864976		1870.58	0.01873741		2400.61	-0.01531932
280.8	0.40373491		810.79	0.22310201		1340.79	0.00935175		1870.78	0.01875026		2400.81	-0.01559327
281	0.40382839		810.99	0.2231703		1340.99	0.00923721		1870.98	0.01879576		2401.01	-0.01547377
281.2	0.40451066		811.19	0.22359869		1341.19	0.0089884		1871.18	0.01866791		2401.21	-0.01577639
281.4	0.40450124		811.39	0.22345668		1341.39	0.00932567		1871.38	0.01888653		2401.41	-0.0158096
281.6	0.40489943		811.59	0.22374906		1341.59	0.00954586		1871.58	0.01846845		2401.61	-0.01508662
281.8	0.40492543		811.79	0.22446994		1341.79	0.00895557		1871.78	0.01822916		2401.81	-0.01475758
282	0.40515872		811.99	0.225296		1341.99	0.00955402		1871.98	0.01870407		2402.01	-0.01426418
282.2	0.40630764		812.19	0.22502597		1342.19	0.01084911		1872.18	0.0195552		2402.21	-0.01401245
282.4	0.4064659		812.39	0.2243915		1342.39	0.01147269		1872.38	0.02113415		2402.41	-0.01337587
282.6	0.40563611		812.59	0.22421351		1342.59	0.01205453		1872.58	0.02144825		2402.61	-0.01239726
282.8	0.40605706		812.79	0.22454804		1342.79	0.01400216		1872.78	0.02209309		2402.81	-0.0123801
283	0.4062361		812.99	0.22482475		1342.99	0.01410524		1872.98	0.02257455		2403.01	-0.01254257
283.2	0.40732514		813.19	0.22453943		1343.19	0.01415391		1873.18	0.02267123		2403.21	-0.01218765
283.4	0.40795313		813.39	0.22524861		1343.39	0.0141146		1873.38	0.02275701		2403.41	-0.01124956
283.6	0.40874535		813.59	0.22467276		1343.59	0.01359833		1873.58	0.02227276		2403.61	-0.01151099
283.8	0.40885496		813.79	0.22452519		1343.79	0.01281142		1873.78	0.02183426		2403.81	-0.01169611
284	0.40963018		813.99	0.22516111		1343.99	0.01243161		1873.98	0.02181971		2404.01	-0.01135956
284.2	0.40984284		814.19	0.22538683		1344.19	0.01220192		1874.18	0.02184231		2404.21	-0.01270555
284.4	0.40977208		814.39	0.22575657		1344.39	0.01203837		1874.38	0.02193636		2404.41	-0.01388044
284.6	0.41050679		814.59	0.22626934		1344.59	0.01113334		1874.58	0.02096963		2404.61	-0.01497341
284.8	0.41005395		814.79	0.22645317		1344.79	0.01201953		1874.78	0.01977245		2404.81	-0.01546204
285	0.41063397		814.99	0.22770909		1344.99	0.01096544		1874.98	0.01965379		2405.01	-0.01557799
285.2	0.41174736		815.19	0.22829841		1345.19	0.01056732		1875.18	0.01947529		2405.21	-0.01571452
285.4	0.41123656		815.39	0.22820546		1345.39	0.01037028		1875.38	0.01915798		2405.41	-0.01595176
285.6	0.41145872		815.59	0.2280191		1345.59	0.01021873		1875.58	0.01805957		2405.61	-0.01526589
285.8	0.41118414		815.79	0.22809035		1345.79	0.01044968		1875.78	0.01848408		2405.81	-0.01516794
286	0.41188491		815.99	0.22771423		1345.99	0.01161045		1875.98	0.01848083		2406.01	-0.01533308
286.2	0.41136691		816.19	0.22804802		1346.19	0.01243439		1876.18	0.01962918		2406.21	-0.01539818
286.4	0.41039326		816.39	0.22891673		1346.39	0.01278589		1876.38	0.01996379		2406.41	-0.01550439
286.6	0.41049052		816.59	0.22931067		1346.59	0.01326245		1876.58	0.02018292		2406.61	-0.01520926
286.8	0.41097223		816.79	0.23087065		1346.79	0.01426341		1876.78	0.02150591		2406.81	-0.01557018
287	0.41049817		816.99	0.23092624		1346.99	0.01394902		1876.98	0.02161954		2407.01	-0.01536319
287.2	0.41061092		817.19	0.23067618		1347.19	0.01322293		1877.18	0.02140598		2407.21	-0.01472239
287.4	0.4104582		817.39	0.23099406		1347.39	0.01254982		1877.38	0.02122958		2407.41	-0.01495672
287.6	0.41094189		817.59	0.23119951		1347.59	0.01136923		1877.58	0.02130885		2407.61	-0.01538762
287.8	0.41089134		817.79	0.23246711		1347.79	0.01043167		1877.78	0.02144937		2407.81	-0.01598169
288	0.41101204		817.99	0.23274873		1347.99	0.00977166		1877.98	0.02125927		2408.01	-0.01615275
288.2	0.41189744		818.19	0.2323557		1348.19	0.01006778		1878.18	0.02174166		2408.21	-0.0177578
288.4	0.41244619		818.39	0.23237857		1348.39	0.01005053		1878.38	0.02172399		2408.41	-0.01783277
288.6	0.41356103		818.59	0.23282362		1348.59	0.01004803		1878.58	0.0218565		2408.61	-0.01784203
288.8	0.41384052		818.79	0.23327863		1348.79	0.01022394		1878.78	0.02123955		2408.81	-0.01807176
289	0.41555621		818.99	0.23383215		1348.99	0.00960704		1878.98	0.02127808		2409.01	-0.01789906
289.2	0.4163897		819.19	0.23269771		1349.19	0.00999314		1879.18	0.02074612		2409.21	-0.0179137
289.4	0.41657097		819.39	0.23224817		1349.39	0.00960604		1879.38	0.02039917		2409.41	-0.01804397
289.6	0.41703063		819.59	0.23221514		1349.59	0.0104153		1879.58	0.02014189		2409.61	-0.01706548
289.8	0.41784182		819.79	0.23197961		1349.79	0.01078576		1879.78	0.02067596		2409.81	-0.01753562
290	0.4180157		819.99	0.23312664		1349.99	0.01136164		1879.98	0.02052203		2410.01	-0.01824902
290.2	0.41725318		820.19	0.23428295		1350.19	0.01187202		1880.18	0.02102715		2410.21	-0.01831272
290.4	0.41835182		820.39	0.23494713		1350.39	0.01173623		1880.38	0.02132908		2410.41	-0.01822274
290.6	0.41900583		820.59	0.23582341		1350.59	0.01201593		1880.58	0.02237528		2410.61	-0.01755845
290.8	0.41941628		820.79	0.2373		1350.79	0.01274507		1880.78	0.02330006		2410.81	-0.01656897
291	0.4201238		820.99	0.23757614		1350.99	0.01259719		1880.98	0.02243916		2411.01	-0.01467242
291.2	0.42102965		821.19	0.23781225		1351.19	0.01261203		1881.18	0.02230722		2411.21	-0.0141189
291.4	0.42184872		821.39	0.23864058		1351.39	0.01268707		1881.38	0.0224341		2411.41	-0.01418722
291.6	0.42277563		821.59	0.23907233		1351.59	0.01258644		1881.58	0.02190207		2411.61	-0.01309145
291.8	0.42209758		821.79	0.23947822		1351.79	0.01269945		1881.78	0.02203381		2411.81	-0.0132148
292	0.42196865		821.99	0.23817992		1351.99	0.01290458		1881.98	0.0216265		2412.01	-0.01294545
292.2	0.42206821		822.19	0.23868394		1352.19	0.01311466		1882.18	0.02219224		2412.21	-0.01301073
292.4	0.42182242		822.39	0.23906841		1352.39	0.01251751		1882.38	0.02216583		2412.41	-0.01278542
292.6	0.42226864		822.59	0.2388979		1352.59	0.01236594		1882.58	0.02198476		2412.61	-0.01207995
292.8	0.42222116		822.79	0.23870623		1352.79	0.01101024		1882.78	0.02144421		2412.81	-0.01256536
293	0.42311158		822.99	0.23900421		1352.99	0.00988999		1882.98	0.02120024		2413.01	-0.0131256
293.2	0.42249152		823.19	0.2390751		1353.19	0.00960797		1883.18	0.02019788		2413.21	-0.01403414
293.4	0.42300531		823.39	0.23983469		1353.39	0.00937383		1883.38	0.01996451		2413.41	-0.01410233
293.6	0.42313909		823.59	0.24048248		1353.59	0.00895686		1883.58	0.02012315		2413.61	-0.0148425
293.8	0.42366887		823.79	0.240527		1353.79	0.00893362		1883.78	0.02050312		2413.81	-0.01573549
294	0.42332994		823.99	0.24103444		1353.99	0.00929335		1883.98	0.02062147		2414.01	-0.01639982
294.2	0.42398264		824.19	0.24175335		1354.19	0.00939525		1884.18	0.02109944		2414.21	-0.01567107
294.4	0.42527646		824.39	0.24301134		1354.39	0.00912681		1884.38	0.02216975		2414.41	-0.01514015
294.6	0.42573307		824.59	0.24385608		1354.59	0.01074319		1884.58	0.02273484		2414.61	-0.01465017
294.8	0.42657356		824.79	0.24463252		1354.79	0.01176091		1884.78	0.02330559		2414.81	-0.01441415
295	0.42819705		824.99	0.24490945		1354.99	0.01177432		1884.98	0.02328395		2415.01	-0.0145296
295.2	0.42822966		825.19	0.24458463		1355.19	0.01231687		1885.18	0.02379774		2415.21	-0.01563142
295.4	0.42786716		825.39	0.24500434		1355.39	0.01238295		1885.38	0.02331881		2415.41	-0.01600797
295.6	0.42710071		825.59	0.24459224		1355.59	0.01412153		1885.58	0.02326124		2415.61	-0.01622879
295.8	0.42607296		825.79	0.24442558		1355.79	0.01459238		1885.78	0.02344532		2415.81	-0.01675224
296	0.42530445		825.99	0.24293108		1355.99	0.01445667		1885.98	0.02326813		2416.01	-0.01669885
296.2	0.42424873		826.19	0.24319999		1356.19	0.01351112		1886.18	0.02372949		2416.21	-0.01667547
296.4	0.4235636		826.39	0.24235186		1356.39	0.01271168		1886.38	0.0234213		2416.41	-0.01733248
296.6	0.42366244		826.59	0.24215604		1356.59	0.01194423		1886.58	0.02321921		2416.61	-0.0170413
296.8	0.42377756		826.79	0.24214395		1356.79	0.00999891		1886.78	0.02346847		2416.81	-0.01794084
297	0.42371363		826.99	0.24209601		1356.99	0.00974957		1886.98	0.02282514		2417.01	-0.01797179
297.2	0.42394635		827.19	0.24141134		1357.19	0.00919448		1887.18	0.02233956		2417.21	-0.0174924
297.4	0.42480942		827.39	0.24137213		1357.39	0.00875045		1887.38	0.02290388		2417.41	-0.01649609
297.6	0.42492833		827.59	0.24127252		1357.59	0.0079404		1887.58	0.02314275		2417.61	-0.016533
297.8	0.42470722		827.79	0.24110506		1357.79	0.00804501		1887.78	0.02309703		2417.81	-0.01550691
298	0.42533899		827.99	0.24125521		1357.99	0.0079519		1887.98	0.02369872		2418.01	-0.01473053
298.2	0.42621075		828.19	0.24287997		1358.19	0.00753694		1888.18	0.02362785		2418.21	-0.01286617
298.4	0.42661725		828.39	0.243597		1358.39	0.00664984		1888.38	0.02407247		2418.41	-0.0124601
298.6	0.42657302		828.59	0.24424195		1358.59	0.00756891		1888.58	0.02473286		2418.61	-0.01238971
298.8	0.42752115		828.79	0.24506041		1358.79	0.00739916		1888.78	0.02494613		2418.81	-0.01268709
299	0.42871153		828.99	0.24577392		1358.99	0.00821903		1888.98	0.0249579		2419.01	-0.01296228
299.2	0.42810294		829.19	0.24696503		1359.19	0.0089792		1889.18	0.02466682		2419.21	-0.01272532
299.4	0.42883542		829.39	0.24811016		1359.39	0.00960912		1889.38	0.02411228		2419.41	-0.01266516
299.6	0.42935038		829.59	0.24802779		1359.59	0.01111863		1889.58	0.0240721		2419.61	-0.01282262
299.8	0.43023904		829.79	0.24835666		1359.79	0.01071646		1889.78	0.02391468		2419.81	-0.01241696
300	0.43057347		829.99	0.24807888		1359.99	0.01056203		1889.98	0.02373251		2420.01	-0.01260416
300.2	0.43055703		830.19	0.24941166		1360.19	0.01093863		1890.18	0.02366952		2420.21	-0.01309052
300.4	0.43067601		830.39	0.24904968		1360.39	0.01225894		1890.38	0.02277199		2420.41	-0.0139214
300.6	0.43120292		830.59	0.24939825		1360.59	0.01221472		1890.58	0.02276725		2420.61	-0.01380506
300.8	0.4309803		830.79	0.24934465		1360.79	0.01118691		1890.78	0.02249533		2420.81	-0.01425292
301	0.43128004		830.99	0.24908479		1360.99	0.01079597		1890.98	0.02261768		2421.01	-0.01470613
301.2	0.43190153		831.19	0.2491817		1361.19	0.0102804		1891.18	0.02221437		2421.21	-0.01520828
301.4	0.43224558		831.39	0.24938999		1361.39	0.01052974		1891.38	0.02203904		2421.41	-0.01540376
301.6	0.43211652		831.59	0.24960109		1361.59	0.01016544		1891.58	0.02213703		2421.61	-0.01474443
301.8	0.4321482		831.79	0.24946999		1361.79	0.00936514		1891.78	0.02180612		2421.81	-0.014104
302	0.4325612		831.99	0.24922376		1361.99	0.00893892		1891.98	0.02189604		2422.01	-0.01403461
302.2	0.43279261		832.19	0.24964289		1362.19	0.00854144		1892.18	0.02131739		2422.21	-0.01320705
302.4	0.43298462		832.39	0.24891931		1362.39	0.00840885		1892.38	0.02200241		2422.41	-0.01337186
302.6	0.43226626		832.59	0.24994877		1362.59	0.00862121		1892.58	0.02152791		2422.61	-0.01437122
302.8	0.43349611		832.79	0.25026973		1362.79	0.0078053		1892.78	0.0218129		2422.81	-0.01441178
303	0.43380146		832.99	0.25031788		1362.99	0.00792544		1892.98	0.02166255		2423.01	-0.0143059
303.2	0.43451392		833.19	0.25182323		1363.19	0.00711226		1893.18	0.02177022		2423.21	-0.01348054
303.4	0.43597495		833.39	0.25226168		1363.39	0.00744319		1893.38	0.021338		2423.41	-0.01443273
303.6	0.436954		833.59	0.25212293		1363.59	0.00751933		1893.58	0.02109209		2423.61	-0.0158114
303.8	0.43806547		833.79	0.25268531		1363.79	0.00731716		1893.78	0.02111925		2423.81	-0.01660072
304	0.43801752		833.99	0.25285862		1363.99	0.00823096		1893.98	0.02108046		2424.01	-0.01726264
304.2	0.43767073		834.19	0.25282243		1364.19	0.00975197		1894.18	0.02185264		2424.21	-0.01815049
304.4	0.43694986		834.39	0.25224978		1364.39	0.00929897		1894.38	0.02135279		2424.41	-0.01883146
304.6	0.43552808		834.59	0.2523219		1364.59	0.00938652		1894.58	0.02147912		2424.61	-0.01886841
304.8	0.43458524		834.79	0.25296272		1364.79	0.00902295		1894.78	0.02136066		2424.81	-0.01930508
305	0.43482815		834.99	0.2526843		1364.99	0.00983474		1894.98	0.02133307		2425.01	-0.0193567
305.2	0.43428941		835.19	0.25274409		1365.19	0.01054236		1895.18	0.02097282		2425.21	-0.01908568
305.4	0.43399811		835.39	0.25307558		1365.39	0.01096386		1895.38	0.02160166		2425.41	-0.01853285
305.6	0.43414812		835.59	0.2533628		1365.59	0.01044704		1895.58	0.0214769		2425.61	-0.01750027
305.8	0.43509379		835.79	0.25304196		1365.79	0.0106087		1895.78	0.02100576		2425.81	-0.01702807
306	0.43518885		835.99	0.25264006		1365.99	0.01016523		1895.98	0.02178721		2426.01	-0.01713239
306.2	0.43601532		836.19	0.25333956		1366.19	0.00995056		1896.18	0.0224954		2426.21	-0.01620394
306.4	0.4365765		836.39	0.25370442		1366.39	0.00981889		1896.38	0.02206192		2426.41	-0.01687879
306.6	0.43683407		836.59	0.25465085		1366.59	0.00864048		1896.58	0.02195599		2426.61	-0.01657653
306.8	0.43791658		836.79	0.25394394		1366.79	0.00818701		1896.78	0.02263161		2426.81	-0.01562563
307	0.43908681		836.99	0.25451965		1366.99	0.00859028		1896.98	0.02252611		2427.01	-0.01468713
307.2	0.43972303		837.19	0.25507433		1367.19	0.00843935		1897.18	0.02255407		2427.21	-0.0142971
307.4	0.43968168		837.39	0.25513293		1367.39	0.00936128		1897.38	0.02149273		2427.41	-0.01547892
307.6	0.4396284		837.59	0.25511025		1367.59	0.00888023		1897.58	0.02113537		2427.61	-0.01617857
307.8	0.4401033		837.79	0.25588386		1367.79	0.00961056		1897.78	0.02171625		2427.81	-0.0161285
308	0.43969693		837.99	0.25602843		1367.99	0.00980424		1897.98	0.02226262		2428.01	-0.01647481
308.2	0.4389145		838.19	0.25620569		1368.19	0.01001305		1898.18	0.02219767		2428.21	-0.01712491
308.4	0.43761183		838.39	0.2568497		1368.39	0.0105344		1898.38	0.02118115		2428.41	-0.01667623
308.6	0.4374037		838.59	0.25762561		1368.59	0.0112262		1898.58	0.02043516		2428.61	-0.01651262
308.8	0.43777853		838.79	0.25767797		1368.79	0.01093226		1898.78	0.02069668		2428.81	-0.01654387
309	0.43782846		838.99	0.25850994		1368.99	0.01174279		1898.98	0.02064439		2429.01	-0.01607318
309.2	0.43807155		839.19	0.25941196		1369.19	0.01116807		1899.18	0.0210448		2429.21	-0.01607945
309.4	0.43788815		839.39	0.26009716		1369.39	0.01063087		1899.38	0.02107395		2429.41	-0.01596118
309.6	0.43819522		839.59	0.2599348		1369.59	0.00987092		1899.58	0.02068155		2429.61	-0.01533666
309.8	0.43896441		839.79	0.25997369		1369.79	0.0096698		1899.78	0.02125694		2429.81	-0.01524368
310	0.43862976		839.99	0.26020023		1369.99	0.00818898		1899.98	0.02227395		2430.01	-0.01573466
310.2	0.43921989		840.19	0.26040192		1370.19	0.00853445		1900.18	0.02154755		2430.21	-0.01531071
310.4	0.43995614		840.39	0.26004193		1370.39	0.00863648		1900.38	0.02085999		2430.41	-0.01527298
310.6	0.44046596		840.59	0.25983923		1370.59	0.00837185		1900.58	0.02167248		2430.61	-0.01437682
310.8	0.44086221		840.79	0.26007478		1370.79	0.0083229		1900.78	0.02154418		2430.81	-0.01379791
311	0.44016638		840.99	0.26014248		1370.99	0.00824258		1900.98	0.02177328		2431.01	-0.0132906
311.2	0.43898969		841.19	0.25973843		1371.19	0.00851554		1901.18	0.02147594		2431.21	-0.01318261
311.4	0.43885137		841.39	0.26060955		1371.39	0.00949595		1901.38	0.02144978		2431.41	-0.0136303
311.6	0.43922307		841.59	0.26049891		1371.59	0.00923984		1901.58	0.02253573		2431.61	-0.01353598
311.8	0.44009576		841.79	0.26115607		1371.79	0.00888006		1901.78	0.02336217		2431.81	-0.01303927
312	0.44108274		841.99	0.26166795		1371.99	0.00780675		1901.98	0.02312931		2432.01	-0.01449724
312.2	0.44187816		842.19	0.26186037		1372.19	0.00835535		1902.18	0.02327792		2432.21	-0.01456765
312.4	0.44282333		842.39	0.26205783		1372.39	0.00909661		1902.38	0.02331048		2432.41	-0.01408264
312.6	0.44368228		842.59	0.26198485		1372.59	0.00804335		1902.58	0.02296582		2432.61	-0.01495415
312.8	0.4447758		842.79	0.26196785		1372.79	0.00804152		1902.78	0.02314486		2432.81	-0.01512944
313	0.44511465		842.99	0.26262118		1372.99	0.00783654		1902.98	0.02273614		2433.01	-0.01504095
313.2	0.44552884		843.19	0.26220541		1373.19	0.0074556		1903.18	0.02285981		2433.21	-0.01596737
313.4	0.4461223		843.39	0.26172512		1373.39	0.00743962		1903.38	0.02250181		2433.41	-0.01557117
313.6	0.44620011		843.59	0.26084141		1373.59	0.00739616		1903.58	0.02215518		2433.61	-0.01605218
313.8	0.44731083		843.79	0.26066051		1373.79	0.00720104		1903.78	0.02193184		2433.81	-0.01730994
314	0.44689118		843.99	0.26053208		1373.99	0.00683176		1903.98	0.02137809		2434.01	-0.0180275
314.2	0.44738618		844.19	0.26017337		1374.19	0.00799283		1904.18	0.02050455		2434.21	-0.01798343
314.4	0.4473656		844.39	0.26040054		1374.39	0.00820528		1904.38	0.02063071		2434.41	-0.0178765
314.6	0.44759398		844.59	0.26097073		1374.59	0.00852186		1904.58	0.02074053		2434.61	-0.01817452
314.8	0.44723694		844.79	0.26101172		1374.79	0.00765857		1904.78	0.02134309		2434.81	-0.01788112
315	0.44587637		844.99	0.26060689		1374.99	0.00702787		1904.98	0.02173877		2435.01	-0.01789238
315.2	0.44496004		845.19	0.26096281		1375.19	0.00771982		1905.18	0.02169655		2435.21	-0.01797068
315.4	0.44494403		845.39	0.26209387		1375.39	0.00752873		1905.38	0.02238074		2435.41	-0.01747526
315.6	0.44550026		845.59	0.26281163		1375.59	0.00745786		1905.58	0.02238424		2435.61	-0.01653543
315.8	0.4459322		845.79	0.26357109		1375.79	0.00695124		1905.78	0.02212483		2435.81	-0.01750353
316	0.44740858		845.99	0.26417849		1375.99	0.00696381		1905.98	0.02217831		2436.01	-0.01771568
316.2	0.44743282		846.19	0.26441405		1376.19	0.00847149		1906.18	0.02228949		2436.21	-0.01737345
316.4	0.44777291		846.39	0.26478823		1376.39	0.00910007		1906.38	0.02227105		2436.41	-0.01712402
316.6	0.44810345		846.59	0.26550285		1376.59	0.00896201		1906.58	0.02127782		2436.61	-0.01721726
316.8	0.44928351		846.79	0.26638365		1376.79	0.00936964		1906.78	0.02178302		2436.81	-0.01639454
317	0.45028209		846.99	0.26591348		1376.99	0.00918778		1906.98	0.02201355		2437.01	-0.0166225
317.2	0.45060616		847.19	0.26696199		1377.19	0.0102709		1907.18	0.02282929		2437.21	-0.0172275
317.4	0.45148395		847.39	0.26674923		1377.39	0.0104687		1907.38	0.02268639		2437.41	-0.01673575
317.6	0.45056551		847.59	0.26753983		1377.59	0.01074746		1907.58	0.02213061		2437.61	-0.01759504
317.8	0.45020374		847.79	0.26763314		1377.79	0.01042171		1907.78	0.02291059		2437.81	-0.0176245
318	0.44985241		847.99	0.26751171		1377.99	0.00993679		1907.98	0.02330465		2438.01	-0.01787673
318.2	0.44938423		848.19	0.26737882		1378.19	0.00986645		1908.18	0.02343886		2438.21	-0.01718494
318.4	0.44920591		848.39	0.26805408		1378.39	0.00860334		1908.38	0.0239691		2438.41	-0.0170819
318.6	0.44970096		848.59	0.2690302		1378.59	0.00739683		1908.58	0.02372002		2438.61	-0.01789497
318.8	0.44866378		848.79	0.26788288		1378.79	0.00621913		1908.78	0.02361711		2438.81	-0.01773107
319	0.44749625		848.99	0.2681182		1378.99	0.00525429		1908.98	0.02318756		2439.01	-0.01749284
319.2	0.44743755		849.19	0.26899336		1379.19	0.0050341		1909.18	0.02266394		2439.21	-0.01738074
319.4	0.44858056		849.39	0.26926542		1379.39	0.00437474		1909.38	0.02214211		2439.41	-0.01644525
319.6	0.4492127		849.59	0.2695181		1379.59	0.00459751		1909.58	0.02116186		2439.61	-0.01701273
319.8	0.44928277		849.79	0.2697296		1379.79	0.00464972		1909.78	0.02088635		2439.81	-0.01723935
320	0.4502484		849.99	0.26989156		1379.99	0.00516239		1909.98	0.02101965		2440.01	-0.01681478
320.2	0.45043826		850.19	0.27043989		1380.19	0.00603505		1910.18	0.02144236		2440.21	-0.0175187
320.4	0.45111118		850.39	0.27064099		1380.39	0.00578894		1910.38	0.02151545		2440.41	-0.01654816
320.6	0.4513462		850.59	0.27162748		1380.59	0.00599961		1910.58	0.02080236		2440.61	-0.01632319
320.8	0.45233275		850.79	0.27179433		1380.79	0.00633405		1910.78	0.02101122		2440.81	-0.01626117
321	0.45352877		850.99	0.27204027		1380.99	0.00663067		1910.98	0.02065519		2441.01	-0.01735238
321.2	0.45263353		851.19	0.27304487		1381.19	0.00747727		1911.18	0.02073706		2441.21	-0.01728482
321.4	0.4519849		851.39	0.27220263		1381.39	0.0076813		1911.38	0.02100613		2441.41	-0.01690655
321.6	0.45071204		851.59	0.27239756		1381.59	0.00744457		1911.58	0.02130229		2441.61	-0.01705032
321.8	0.45017156		851.79	0.27173762		1381.79	0.00717284		1911.78	0.02180742		2441.81	-0.01702988
322	0.45068118		851.99	0.27116594		1381.99	0.00683096		1911.98	0.02151185		2442.01	-0.01786935
322.2	0.45019925		852.19	0.27118315		1382.19	0.0066143		1912.18	0.02169334		2442.21	-0.01729279
322.4	0.45141117		852.39	0.27163023		1382.39	0.00591739		1912.38	0.02231285		2442.41	-0.01790543
322.6	0.45162608		852.59	0.27154177		1382.59	0.00560367		1912.58	0.022282		2442.61	-0.01894252
322.8	0.45138186		852.79	0.27003868		1382.79	0.00495334		1912.78	0.02310642		2442.81	-0.01845662
323	0.45201883		852.99	0.27094059		1382.99	0.00446451		1912.98	0.02384427		2443.01	-0.01789162
323.2	0.45228636		853.19	0.27126544		1383.19	0.00502612		1913.18	0.02397929		2443.21	-0.01809377
323.4	0.4528184		853.39	0.27111959		1383.39	0.00537825		1913.38	0.02349043		2443.41	-0.01839341
323.6	0.45326942		853.59	0.27179514		1383.59	0.00595433		1913.58	0.02340533		2443.61	-0.01910397
323.8	0.45401733		853.79	0.27173484		1383.79	0.00617079		1913.78	0.0234612		2443.81	-0.01958435
324	0.45512101		853.99	0.27191922		1383.99	0.00650275		1913.98	0.02406783		2444.01	-0.02131495
324.2	0.45541657		854.19	0.27266358		1384.19	0.00680311		1914.18	0.02375562		2444.21	-0.02148354
324.4	0.45609047		854.39	0.27406774		1384.39	0.00666326		1914.38	0.02260373		2444.41	-0.02127313
324.6	0.45654272		854.59	0.27484209		1384.59	0.00776022		1914.58	0.02156757		2444.61	-0.02106114
324.8	0.45709664		854.79	0.27480151		1384.79	0.00797063		1914.78	0.02101156		2444.81	-0.02081549
325	0.45640867		854.99	0.27584783		1384.99	0.00852865		1914.98	0.02046392		2445.01	-0.02065877
325.2	0.45545412		855.19	0.27542023		1385.19	0.00871441		1915.18	0.02005731		2445.21	-0.01948824
325.4	0.45473111		855.39	0.27520315		1385.39	0.0091634		1915.38	0.01956136		2445.41	-0.01884534
325.6	0.45433629		855.59	0.27588989		1385.59	0.0090235		1915.58	0.01890329		2445.61	-0.01866611
325.8	0.45414491		855.79	0.2758539		1385.79	0.00869903		1915.78	0.01868247		2445.81	-0.01865242
326	0.45401773		855.99	0.27580458		1385.99	0.00805048		1915.98	0.01921969		2446.01	-0.01748531
326.2	0.45345528		856.19	0.27657866		1386.19	0.00713252		1916.18	0.01985237		2446.21	-0.01635684
326.4	0.45343016		856.39	0.27724626		1386.39	0.00611916		1916.38	0.02118909		2446.41	-0.01611064
326.6	0.45259942		856.59	0.27782341		1386.59	0.00565227		1916.58	0.02097847		2446.61	-0.01545465
326.8	0.45280981		856.79	0.27763406		1386.79	0.00487273		1916.78	0.02065382		2446.81	-0.01461086
327	0.45259731		856.99	0.27758296		1386.99	0.00511905		1916.98	0.02055087		2447.01	-0.01462114
327.2	0.45251538		857.19	0.27723651		1387.19	0.00485632		1917.18	0.02071934		2447.21	-0.0146792
327.4	0.45428409		857.39	0.27720655		1387.39	0.00443933		1917.38	0.02045642		2447.41	-0.01464073
327.6	0.45508864		857.59	0.27694159		1387.59	0.00485127		1917.58	0.02187324		2447.61	-0.01478276
327.8	0.45621461		857.79	0.2773419		1387.79	0.00547102		1917.78	0.02239309		2447.81	-0.01594626
328	0.45693374		857.99	0.27809418		1387.99	0.00607329		1917.98	0.02378753		2448.01	-0.01707258
328.2	0.45707906		858.19	0.27839502		1388.19	0.00638114		1918.18	0.02345611		2448.21	-0.01719498
328.4	0.45774897		858.39	0.27942897		1388.39	0.00651619		1918.38	0.02370904		2448.41	-0.01686722
328.6	0.45849637		858.59	0.27944944		1388.59	0.00823778		1918.58	0.02376041		2448.61	-0.01664547
328.8	0.45923655		858.79	0.27894775		1388.79	0.00815157		1918.78	0.02388805		2448.81	-0.0171289
329	0.45930484		858.99	0.27919607		1388.99	0.00891745		1918.98	0.02368682		2449.01	-0.01672473
329.2	0.4598567		859.19	0.27849424		1389.19	0.00914726		1919.18	0.02266191		2449.21	-0.01731419
329.4	0.45986646		859.39	0.27804504		1389.39	0.00933055		1919.38	0.02254903		2449.41	-0.01729687
329.6	0.46007613		859.59	0.27872562		1389.59	0.00880469		1919.58	0.02321524		2449.61	-0.01812768
329.8	0.45928248		859.79	0.27833417		1389.79	0.00788316		1919.78	0.02342799		2449.81	-0.01827725
330	0.45920843		859.99	0.27852796		1389.99	0.00813888		1919.98	0.02390346		2450.01	-0.01793434
330.2	0.45919214		860.19	0.27860976		1390.19	0.00759711		1920.18	0.02392137		2450.21	-0.01823568
330.4	0.45958803		860.39	0.2783906		1390.39	0.00754434		1920.38	0.02333967		2450.41	-0.01834464
330.6	0.46019825		860.59	0.278249		1390.59	0.00778195		1920.58	0.02233105		2450.61	-0.01836739
330.8	0.46083593		860.79	0.27770109		1390.79	0.00709828		1920.78	0.02175247		2450.81	-0.01891503
331	0.46090652		860.99	0.27763038		1390.99	0.00652579		1920.98	0.02271705		2451.01	-0.01919584
331.2	0.46188691		861.19	0.27733108		1391.19	0.00662407		1921.18	0.02338711		2451.21	-0.0182749
331.4	0.46240282		861.39	0.27832692		1391.39	0.00694294		1921.38	0.02418231		2451.41	-0.01770556
331.6	0.46202151		861.59	0.27804492		1391.59	0.00745323		1921.58	0.02541732		2451.61	-0.0174546
331.8	0.46203504		861.79	0.27919081		1391.79	0.00796204		1921.78	0.02572841		2451.81	-0.01815248
332	0.46143303		861.99	0.28007186		1391.99	0.006919		1921.98	0.0258764		2452.01	-0.01819494
332.2	0.4610915		862.19	0.28064002		1392.19	0.00712672		1922.18	0.02495907		2452.21	-0.01755406
332.4	0.46107526		862.39	0.2810423		1392.39	0.00750716		1922.38	0.02386621		2452.41	-0.01694674
332.6	0.4621879		862.59	0.28159374		1392.59	0.0084738		1922.58	0.02289158		2452.61	-0.0173909
332.8	0.46283145		862.79	0.28135728		1392.79	0.00746791		1922.78	0.02290485		2452.81	-0.01706293
333	0.46288039		862.99	0.28212048		1392.99	0.00699425		1922.98	0.02304237		2453.01	-0.01579579
333.2	0.46238242		863.19	0.28147113		1393.19	0.00641528		1923.18	0.02240147		2453.21	-0.01583305
333.4	0.46206404		863.39	0.28118596		1393.39	0.00653315		1923.38	0.02270944		2453.41	-0.01546927
333.6	0.4622101		863.59	0.28236736		1393.59	0.00650886		1923.58	0.02296766		2453.61	-0.01607648
333.8	0.46222457		863.79	0.28228292		1393.79	0.00602034		1923.78	0.02260826		2453.81	-0.01489045
334	0.46304414		863.99	0.28195304		1393.99	0.00656396		1923.98	0.02304142		2454.01	-0.01523637
334.2	0.46314205		864.19	0.28184743		1394.19	0.0058141		1924.18	0.02277835		2454.21	-0.01501334
334.4	0.46329224		864.39	0.2814643		1394.39	0.00598874		1924.38	0.02236285		2454.41	-0.01566101
334.6	0.46364295		864.59	0.28126294		1394.59	0.00658463		1924.58	0.02348431		2454.61	-0.01576173
334.8	0.46396737		864.79	0.28139982		1394.79	0.00603427		1924.78	0.0230749		2454.81	-0.01593126
335	0.46445731		864.99	0.28137243		1394.99	0.00530132		1924.98	0.02379089		2455.01	-0.01583863
335.2	0.46446001		865.19	0.28047309		1395.19	0.00625326		1925.18	0.02435106		2455.21	-0.0158262
335.4	0.46370704		865.39	0.28179602		1395.39	0.00563381		1925.38	0.02463703		2455.41	-0.01591022
335.6	0.46286098		865.59	0.28226686		1395.59	0.0059623		1925.58	0.02453442		2455.61	-0.01645463
335.8	0.46224689		865.79	0.28399714		1395.79	0.00601123		1925.78	0.02451036		2455.81	-0.01696881
336	0.4617523		865.99	0.28466019		1395.99	0.00514059		1925.98	0.02326606		2456.01	-0.01691945
336.2	0.46210188		866.19	0.28455453		1396.19	0.00620406		1926.18	0.02318873		2456.21	-0.01738654
336.4	0.46250862		866.39	0.2851424		1396.39	0.00534161		1926.38	0.02260279		2456.41	-0.01740397
336.6	0.46369906		866.59	0.28575615		1396.59	0.00548375		1926.58	0.02302171		2456.61	-0.01721059
336.8	0.46367335		866.79	0.28592565		1396.79	0.00477859		1926.78	0.02373412		2456.81	-0.01642965
337	0.46329741		866.99	0.28584583		1396.99	0.00493852		1926.98	0.02369738		2457.01	-0.01516617
337.2	0.46338607		867.19	0.28525593		1397.19	0.00568505		1927.18	0.02316294		2457.21	-0.0150177
337.4	0.46331432		867.39	0.28621763		1397.39	0.00597564		1927.38	0.02346885		2457.41	-0.01440793
337.6	0.46368623		867.59	0.28693912		1397.59	0.00631449		1927.58	0.0229587		2457.61	-0.01459895
337.8	0.46443999		867.79	0.28654507		1397.79	0.00536263		1927.78	0.02284676		2457.81	-0.01356549
338	0.46497819		867.99	0.28633691		1397.99	0.00492851		1927.98	0.02317824		2458.01	-0.01465721
338.2	0.46639567		868.19	0.28612118		1398.19	0.0043053		1928.18	0.02314204		2458.21	-0.01506876
338.4	0.46720738		868.39	0.2862352		1398.39	0.00493265		1928.38	0.02400955		2458.41	-0.01559593
338.6	0.46848582		868.59	0.28596248		1398.59	0.00564001		1928.58	0.02452554		2458.61	-0.01456083
338.8	0.4699661		868.79	0.28610707		1398.79	0.00464591		1928.78	0.024107		2458.81	-0.01547905
339	0.47063726		868.99	0.28563431		1398.99	0.00468513		1928.98	0.02450603		2459.01	-0.01585699
339.2	0.47026836		869.19	0.28612191		1399.19	0.00500949		1929.18	0.02474631		2459.21	-0.01617674
339.4	0.46991405		869.39	0.28681154		1399.39	0.00476915		1929.38	0.02435544		2459.41	-0.01627357
339.6	0.46922338		869.59	0.28690548		1399.59	0.00492692		1929.58	0.02365778		2459.61	-0.01667735
339.8	0.46954127		869.79	0.28751348		1399.79	0.00505951		1929.78	0.02356234		2459.81	-0.01702238
340	0.46941319		869.99	0.28681962		1399.99	0.0052998		1929.98	0.02299481		2460.01	-0.01668518
340.2	0.46977773		870.19	0.28738841		1400.19	0.00541381		1930.18	0.02288755		2460.21	-0.01688592
340.4	0.46988968		870.39	0.28655601		1400.39	0.00529268		1930.38	0.02265552		2460.41	-0.01712009
340.6	0.46921301		870.59	0.28585389		1400.59	0.00652713		1930.58	0.02183654		2460.61	-0.01728581
340.8	0.46917826		870.79	0.28646047		1400.79	0.00703732		1930.78	0.02122759		2460.81	-0.01627245
341	0.46878184		870.99	0.28562071		1400.99	0.0078453		1930.98	0.02129178		2461.01	-0.01617085
341.2	0.46899805		871.19	0.28653687		1401.19	0.00842758		1931.18	0.0206548		2461.21	-0.01639971
341.4	0.46829166		871.39	0.28686273		1401.39	0.00868451		1931.38	0.02120046		2461.41	-0.01730963
341.6	0.46912664		871.59	0.28661696		1401.59	0.00900649		1931.58	0.02139844		2461.61	-0.01926489
341.8	0.46982298		871.79	0.28690067		1401.79	0.00897461		1931.78	0.02186976		2461.81	-0.02003156
342	0.47067483		871.99	0.28721042		1401.99	0.00889831		1931.98	0.02217067		2462.01	-0.02101273
342.2	0.47155706		872.19	0.2875709		1402.19	0.00875255		1932.18	0.02269784		2462.21	-0.02142428
342.4	0.47228961		872.39	0.28817321		1402.39	0.00921164		1932.38	0.02337135		2462.41	-0.02164115
342.6	0.47246197		872.59	0.28761158		1402.59	0.00953556		1932.58	0.02345084		2462.61	-0.02146997
342.8	0.47308204		872.79	0.28808495		1402.79	0.00919849		1932.78	0.02322011		2462.81	-0.02211168
343	0.47327558		872.99	0.28811988		1402.99	0.00908303		1932.98	0.02353553		2463.01	-0.02175631
343.2	0.47300608		873.19	0.28866701		1403.19	0.00818111		1933.18	0.02301672		2463.21	-0.02041497
343.4	0.47274462		873.39	0.28862376		1403.39	0.00793937		1933.38	0.02234546		2463.41	-0.01971973
343.6	0.47359171		873.59	0.28931439		1403.59	0.00707641		1933.58	0.02207508		2463.61	-0.0191331
343.8	0.47370898		873.79	0.28989236		1403.79	0.00587947		1933.78	0.02191205		2463.81	-0.01846242
344	0.47439332		873.99	0.29030984		1403.99	0.00598804		1933.98	0.02171395		2464.01	-0.01732988
344.2	0.4741555		874.19	0.29101668		1404.19	0.00528704		1934.18	0.02159231		2464.21	-0.01703963
344.4	0.47415814		874.39	0.28985938		1404.39	0.00505621		1934.38	0.02157569		2464.41	-0.01702547
344.6	0.47308161		874.59	0.2906383		1404.59	0.00509288		1934.58	0.02136488		2464.61	-0.01595691
344.8	0.47379247		874.79	0.29153103		1404.79	0.00469854		1934.78	0.02165193		2464.81	-0.01492357
345	0.47373175		874.99	0.29154353		1404.99	0.00466051		1934.98	0.02201973		2465.01	-0.01583177
345.2	0.47387687		875.19	0.29266147		1405.19	0.00497579		1935.18	0.02304894		2465.21	-0.01610166
345.4	0.47419371		875.39	0.29263588		1405.39	0.00498219		1935.38	0.02468132		2465.41	-0.01716647
345.6	0.47517286		875.59	0.29259483		1405.59	0.00487811		1935.58	0.02415314		2465.61	-0.01814096
345.8	0.47524881		875.79	0.29237458		1405.79	0.00573807		1935.78	0.02479305		2465.81	-0.01873047
346	0.47525337		875.99	0.29237558		1405.99	0.00573525		1935.98	0.02469925		2466.01	-0.01873367
346.2	0.47561476		876.19	0.29267948		1406.19	0.00582304		1936.18	0.02427858		2466.21	-0.01913767
346.4	0.47641981		876.39	0.29281344		1406.39	0.00743681		1936.38	0.02383436		2466.41	-0.01984704
346.6	0.47660681		876.59	0.29269815		1406.59	0.00821968		1936.58	0.0228607		2466.61	-0.01982307
346.8	0.47681414		876.79	0.29298925		1406.79	0.00799037		1936.78	0.02272164		2466.81	-0.01962487
347	0.47677724		876.99	0.29268146		1406.99	0.00800833		1936.98	0.0226163		2467.01	-0.01931417
347.2	0.47696535		877.19	0.29248196		1407.19	0.0081003		1937.18	0.0220042		2467.21	-0.01825166
347.4	0.47668324		877.39	0.29292588		1407.39	0.00837535		1937.38	0.02135852		2467.41	-0.01870973
347.6	0.47636676		877.59	0.29238317		1407.59	0.00844891		1937.58	0.02145655		2467.61	-0.01865438
347.8	0.4754011		877.79	0.29182552		1407.79	0.00811209		1937.78	0.02071023		2467.81	-0.01859642
348	0.47554596		877.99	0.29225937		1407.99	0.00911011		1937.98	0.02120467		2468.01	-0.01895196
348.2	0.47379501		878.19	0.2915569		1408.19	0.00830099		1938.18	0.02076035		2468.21	-0.01835991
348.4	0.47328768		878.39	0.29120828		1408.39	0.00732593		1938.38	0.02058483		2468.41	-0.0184628
348.6	0.47256903		878.59	0.29190228		1408.59	0.00742842		1938.58	0.02137791		2468.61	-0.01837388
348.8	0.472901		878.79	0.29212091		1408.79	0.00746333		1938.78	0.02174473		2468.81	-0.018399
349	0.47359634		878.99	0.29306475		1408.99	0.00697954		1938.98	0.02232504		2469.01	-0.01870699
349.2	0.47377828		879.19	0.29308506		1409.19	0.0067401		1939.18	0.02346553		2469.21	-0.01836984
349.4	0.47425785		879.39	0.29397857		1409.39	0.00590435		1939.38	0.02292178		2469.41	-0.01787992
349.6	0.47445418		879.59	0.29379847		1409.59	0.00580224		1939.58	0.02164889		2469.61	-0.01842873
349.8	0.47487014		879.79	0.29437666		1409.79	0.00570753		1939.78	0.02251294		2469.81	-0.01819875
350	0.47555734		879.99	0.29579142		1409.99	0.00600182		1939.98	0.02164092		2470.01	-0.01815786
350.2	0.47653851		880.19	0.29663885		1410.19	0.00639803		1940.18	0.020878		2470.21	-0.01810544
350.4	0.4772119		880.39	0.297812		1410.39	0.00712195		1940.38	0.02040773		2470.41	-0.01870364
350.6	0.47766907		880.59	0.29789667		1410.59	0.00664272		1940.58	0.0201042		2470.61	-0.01852932
350.8	0.47725647		880.79	0.29837617		1410.79	0.00645387		1940.78	0.02132931		2470.81	-0.01882914
351	0.47738388		880.99	0.29844193		1410.99	0.00701672		1940.98	0.02143596		2471.01	-0.0184243
351.2	0.47819365		881.19	0.29855992		1411.19	0.0074688		1941.18	0.02284113		2471.21	-0.01826138
351.4	0.47780248		881.39	0.2985162		1411.39	0.00826587		1941.38	0.0233976		2471.41	-0.01816012
351.6	0.47777892		881.59	0.29852816		1411.59	0.00861789		1941.58	0.02460917		2471.61	-0.01790726
351.8	0.47781813		881.79	0.29835585		1411.79	0.0087894		1941.78	0.025432		2471.81	-0.01813761
352	0.47785103		881.99	0.29889844		1411.99	0.00923529		1941.98	0.02611761		2472.01	-0.01902052
352.2	0.47751956		882.19	0.2988466		1412.19	0.00884098		1942.18	0.02596822		2472.21	-0.01877415
352.4	0.47758572		882.39	0.29869545		1412.39	0.00865241		1942.38	0.02685998		2472.41	-0.01906214
352.6	0.477779		882.59	0.29865716		1412.59	0.00903118		1942.58	0.02742204		2472.61	-0.01875184
352.8	0.47822277		882.79	0.29862195		1412.79	0.00919428		1942.78	0.02752986		2472.81	-0.0184825
353	0.4789661		882.99	0.29822477		1412.99	0.00850008		1942.98	0.02813736		2473.01	-0.01909208
353.2	0.47911194		883.19	0.297633		1413.19	0.00796213		1943.18	0.02776258		2473.21	-0.01957894
353.4	0.47982285		883.39	0.29855231		1413.39	0.00741803		1943.38	0.02646602		2473.41	-0.01994093
353.6	0.48025986		883.59	0.29828813		1413.59	0.00680929		1943.58	0.02567911		2473.61	-0.02031987
353.8	0.48123923		883.79	0.29791201		1413.79	0.00669172		1943.78	0.02564151		2473.81	-0.01983397
354	0.48162052		883.99	0.29769261		1413.99	0.00707422		1943.98	0.02418319		2474.01	-0.02099572
354.2	0.48126326		884.19	0.29823924		1414.19	0.00653271		1944.18	0.02331406		2474.21	-0.02128083
354.4	0.48113644		884.39	0.29843858		1414.39	0.00630283		1944.38	0.02260392		2474.41	-0.02169164
354.6	0.48123706		884.59	0.29783195		1414.59	0.00638599		1944.58	0.02262435		2474.61	-0.0213198
354.8	0.48121137		884.79	0.29839301		1414.79	0.00562907		1944.78	0.02287637		2474.81	-0.02208807
355	0.48130253		884.99	0.29782655		1414.99	0.00552713		1944.98	0.022736		2475.01	-0.02181741
355.2	0.48180503		885.19	0.29825682		1415.19	0.00620205		1945.18	0.0234232		2475.21	-0.02112841
355.4	0.4818285		885.39	0.29885716		1415.39	0.00610455		1945.38	0.0235872		2475.41	-0.02086391
355.6	0.48240706		885.59	0.29921723		1415.59	0.00617861		1945.58	0.02394863		2475.61	-0.02046909
355.8	0.48167122		885.79	0.29918538		1415.79	0.00688866		1945.78	0.02385277		2475.81	-0.02019373
356	0.48182739		885.99	0.29937377		1415.99	0.00713384		1945.98	0.02340013		2476.01	-0.01976119
356.2	0.48194365		886.19	0.29929791		1416.19	0.00737192		1946.18	0.02366871		2476.21	-0.0190477
356.4	0.48211387		886.39	0.30003896		1416.39	0.00676965		1946.38	0.02439343		2476.41	-0.01865475
356.6	0.48209799		886.59	0.30085655		1416.59	0.00658949		1946.58	0.02534414		2476.61	-0.01829043
356.8	0.48191967		886.79	0.30108873		1416.79	0.0065976		1946.78	0.02615439		2476.81	-0.01804466
357	0.48223833		886.99	0.30002858		1416.99	0.00620181		1946.98	0.026876		2477.01	-0.01841899
357.2	0.48205968		887.19	0.29979878		1417.19	0.00584302		1947.18	0.02701121		2477.21	-0.01794683
357.4	0.48246288		887.39	0.29967158		1417.39	0.00608631		1947.38	0.0274371		2477.41	-0.01716391
357.6	0.48184255		887.59	0.29973172		1417.59	0.00566375		1947.58	0.02757052		2477.61	-0.01701117
357.8	0.48216954		887.79	0.299626		1417.79	0.00593592		1947.78	0.02795062		2477.81	-0.01675735
358	0.4817394		887.99	0.30021433		1417.99	0.00556353		1947.98	0.02730965		2478.01	-0.01758483
358.2	0.48041717		888.19	0.30127478		1418.19	0.0060303		1948.18	0.02734636		2478.21	-0.01681728
358.4	0.4801017		888.39	0.30097257		1418.39	0.00594077		1948.38	0.02612194		2478.41	-0.016611
358.6	0.48022875		888.59	0.30127765		1418.59	0.0060558		1948.58	0.02593727		2478.61	-0.01664048
358.8	0.47952444		888.79	0.30277041		1418.79	0.00536705		1948.78	0.02515538		2478.81	-0.01682798
359	0.47969852		888.99	0.30342421		1418.99	0.00576016		1948.98	0.02466819		2479.01	-0.01623067
359.2	0.47989937		889.19	0.30439474		1419.19	0.00602907		1949.18	0.02383999		2479.21	-0.01576139
359.4	0.4803725		889.39	0.30460198		1419.39	0.00619175		1949.38	0.02347137		2479.41	-0.01601649
359.6	0.48084254		889.59	0.30426161		1419.59	0.0074703		1949.58	0.02236225		2479.61	-0.01583104
359.8	0.48082529		889.79	0.30519574		1419.79	0.00817158		1949.78	0.02156875		2479.81	-0.01602935
360	0.48148942		889.99	0.30487344		1419.99	0.00830434		1949.98	0.02181292		2480.01	-0.01612954
360.2	0.4817385		890.19	0.30596376		1420.19	0.00830683		1950.18	0.02162148		2480.21	-0.01773405
360.4	0.48179181		890.39	0.30630622		1420.39	0.0077241		1950.38	0.02159613		2480.41	-0.01853928
360.6	0.4813037		890.59	0.30614585		1420.59	0.0078177		1950.58	0.02196163		2480.61	-0.01914288
360.8	0.48157579		890.79	0.30540172		1420.79	0.00817096		1950.78	0.02147707		2480.81	-0.01921515
361	0.48194224		890.99	0.30463994		1420.99	0.00803771		1950.98	0.02213625		2481.01	-0.01980961
361.2	0.48171192		891.19	0.30421804		1421.19	0.00805312		1951.18	0.02257488		2481.21	-0.02011956
361.4	0.4829663		891.39	0.30416092		1421.39	0.0079706		1951.38	0.02330111		2481.41	-0.02002442
361.6	0.48361666		891.59	0.30391858		1421.59	0.00771448		1951.58	0.02291409		2481.61	-0.02031321
361.8	0.48413142		891.79	0.30368744		1421.79	0.00816905		1951.78	0.0231278		2481.81	-0.02019945
362	0.48367454		891.99	0.3038376		1421.99	0.00815428		1951.98	0.02285935		2482.01	-0.02014419
362.2	0.48300199		892.19	0.30344995		1422.19	0.00799897		1952.18	0.02298213		2482.21	-0.01951441
362.4	0.48389383		892.39	0.30318009		1422.39	0.00730444		1952.38	0.02326017		2482.41	-0.01842079
362.6	0.48416361		892.59	0.30371471		1422.59	0.00818858		1952.58	0.02418436		2482.61	-0.01787523
362.8	0.48489597		892.79	0.30438362		1422.79	0.00804938		1952.78	0.02422853		2482.81	-0.01739857
363	0.48612942		892.99	0.3043486		1422.99	0.00745958		1952.98	0.02444484		2483.01	-0.01731381
363.2	0.48675591		893.19	0.30414685		1423.19	0.00732681		1953.18	0.02420202		2483.21	-0.01714106
363.4	0.48742907		893.39	0.30408978		1423.39	0.00826239		1953.38	0.02542107		2483.41	-0.01676303
363.6	0.48757489		893.59	0.30485458		1423.59	0.00827413		1953.58	0.0253127		2483.61	-0.01694826
363.8	0.48848348		893.79	0.30566554		1423.79	0.00758245		1953.78	0.02565996		2483.81	-0.01711322
364	0.4879239		893.99	0.30603185		1423.99	0.007591		1953.98	0.0263718		2484.01	-0.01779522
364.2	0.48739854		894.19	0.30761466		1424.19	0.00750996		1954.18	0.02586482		2484.21	-0.01871311
364.4	0.48709125		894.39	0.30774592		1424.39	0.00746786		1954.38	0.02610622		2484.41	-0.01922748
364.6	0.48735978		894.59	0.30854109		1424.59	0.00788361		1954.58	0.02652859		2484.61	-0.01957624
364.8	0.48805184		894.79	0.30907761		1424.79	0.00807056		1954.78	0.02694505		2484.81	-0.01939623
365	0.4875898		894.99	0.30954706		1424.99	0.00792464		1954.98	0.02703466		2485.01	-0.01933844
365.2	0.48743389		895.19	0.30999419		1425.19	0.00803991		1955.18	0.02549957		2485.21	-0.01913185
365.4	0.4881631		895.39	0.30949567		1425.39	0.00828357		1955.38	0.02593953		2485.41	-0.01874329
365.6	0.48856411		895.59	0.30915669		1425.59	0.00833033		1955.58	0.0256708		2485.61	-0.01912325
365.8	0.48774255		895.79	0.30904972		1425.79	0.00874811		1955.78	0.02486916		2485.81	-0.01907391
366	0.48730443		895.99	0.30879106		1425.99	0.00872522		1955.98	0.02494232		2486.01	-0.01866124
366.2	0.48704123		896.19	0.30830261		1426.19	0.0085897		1956.18	0.02500076		2486.21	-0.01852424
366.4	0.48770644		896.39	0.30824722		1426.39	0.00866445		1956.38	0.02432521		2486.41	-0.01822212
366.6	0.48669948		896.59	0.30727108		1426.59	0.0087777		1956.58	0.02379201		2486.61	-0.01866732
366.8	0.48743593		896.79	0.30784891		1426.79	0.00798162		1956.78	0.02354178		2486.81	-0.01821318
367	0.48751481		896.99	0.30788238		1426.99	0.00768155		1956.98	0.02338518		2487.01	-0.01829915
367.2	0.48724897		897.19	0.30832002		1427.19	0.00788497		1957.18	0.0241315		2487.21	-0.01788105
367.4	0.48755206		897.39	0.30897511		1427.39	0.00748876		1957.38	0.0248405		2487.41	-0.01767012
367.6	0.48733409		897.59	0.30962309		1427.59	0.00693923		1957.58	0.0246173		2487.61	-0.01826773
367.8	0.48793574		897.79	0.30970981		1427.79	0.00704817		1957.78	0.02402591		2487.81	-0.01827459
368	0.48782733		897.99	0.31032755		1427.99	0.00705375		1957.98	0.02443677		2488.01	-0.01807503
368.2	0.4884531		898.19	0.31077706		1428.19	0.00678533		1958.18	0.02461006		2488.21	-0.01796821
368.4	0.4888726		898.39	0.31104667		1428.39	0.00691831		1958.38	0.02494753		2488.41	-0.01859473
368.6	0.49003541		898.59	0.31161069		1428.59	0.00725433		1958.58	0.02482792		2488.61	-0.01818768
368.8	0.49035487		898.79	0.31200687		1428.79	0.00644934		1958.78	0.02500386		2488.81	-0.01853329
369	0.48995543		898.99	0.31147046		1428.99	0.00688978		1958.98	0.02452943		2489.01	-0.01839037
369.2	0.49052471		899.19	0.31165818		1429.19	0.00660315		1959.18	0.02435398		2489.21	-0.01859379
369.4	0.4909885		899.39	0.31121106		1429.39	0.00622131		1959.38	0.02591502		2489.41	-0.0180559
369.6	0.4915113		899.59	0.31095977		1429.59	0.00646654		1959.58	0.02559426		2489.61	-0.01756152
369.8	0.49026197		899.79	0.31081977		1429.79	0.00700908		1959.78	0.02454702		2489.81	-0.01677116
370	0.4904614		899.99	0.31067339		1429.99	0.00675784		1959.98	0.02439101		2490.01	-0.01708653
370.2	0.49024726		900.19	0.31113584		1430.19	0.00679877		1960.18	0.02335198		2490.21	-0.01795816
370.4	0.49063981		900.39	0.31043379		1430.39	0.00693453		1960.38	0.02189224		2490.41	-0.0181638
370.6	0.49017542		900.59	0.31004995		1430.59	0.0068462		1960.58	0.02277236		2490.61	-0.01845943
370.8	0.49150139		900.79	0.31062636		1430.79	0.0069802		1960.78	0.02257641		2490.81	-0.01868212
371	0.49195156		900.99	0.31004935		1430.99	0.00715489		1960.98	0.02240484		2491.01	-0.0190607
371.2	0.49240375		901.19	0.31030381		1431.19	0.00646242		1961.18	0.02311127		2491.21	-0.01899611
371.4	0.49324241		901.39	0.31069256		1431.39	0.00590772		1961.38	0.02264052		2491.41	-0.01930006
371.6	0.49432125		901.59	0.30997423		1431.59	0.00580581		1961.58	0.02179352		2491.61	-0.01919599
371.8	0.49478964		901.79	0.31019324		1431.79	0.00592643		1961.78	0.02198161		2491.81	-0.01904122
372	0.49424665		901.99	0.31065648		1431.99	0.00525624		1961.98	0.02252213		2492.01	-0.01944881
372.2	0.49403649		902.19	0.31215041		1432.19	0.0057277		1962.18	0.02310548		2492.21	-0.02029442
372.4	0.49399297		902.39	0.31284877		1432.39	0.00510251		1962.38	0.02336344		2492.41	-0.02123531
372.6	0.4937329		902.59	0.31294606		1432.59	0.00445215		1962.58	0.02383533		2492.61	-0.02149032
372.8	0.49291474		902.79	0.31321505		1432.79	0.0042484		1962.78	0.02504387		2492.81	-0.0223814
373	0.49189092		902.99	0.31298489		1432.99	0.00447778		1962.98	0.02539912		2493.01	-0.02224037
373.2	0.49130736		903.19	0.3139056		1433.19	0.00465876		1963.18	0.02552285		2493.21	-0.02237995
373.4	0.49020223		903.39	0.3132833		1433.39	0.00501999		1963.38	0.02598348		2493.41	-0.02159752
373.6	0.49008273		903.59	0.31351812		1433.59	0.00544995		1963.58	0.02573702		2493.61	-0.02087192
373.8	0.48942121		903.79	0.31390213		1433.79	0.0059583		1963.78	0.02578905		2493.81	-0.02046825
374	0.48997366		903.99	0.31383782		1433.99	0.00550102		1963.98	0.02562967		2494.01	-0.02081728
374.2	0.48935091		904.19	0.31435461		1434.19	0.00598735		1964.18	0.02524524		2494.21	-0.02134258
374.4	0.48969957		904.39	0.31333242		1434.39	0.00573615		1964.38	0.02547346		2494.41	-0.02072728
374.6	0.49049531		904.59	0.31307687		1434.59	0.00569463		1964.58	0.02713512		2494.61	-0.02088533
374.8	0.49122568		904.79	0.31240808		1434.79	0.00599488		1964.78	0.02665449		2494.81	-0.02119314
375	0.49152933		904.99	0.31267444		1434.99	0.00602035		1964.98	0.02638793		2495.01	-0.02101846
375.2	0.49246371		905.19	0.3130757		1435.19	0.00618187		1965.18	0.02628355		2495.21	-0.02035832
375.4	0.49290853		905.39	0.31290664		1435.39	0.00621102		1965.38	0.0254636		2495.41	-0.0200409
375.6	0.49330364		905.59	0.31256698		1435.59	0.00546842		1965.58	0.02509789		2495.61	-0.01986217
375.8	0.49290634		905.79	0.31402698		1435.79	0.0056019		1965.78	0.02613395		2495.81	-0.0201418
376	0.49276675		905.99	0.31446917		1435.99	0.00550755		1965.98	0.02538741		2496.01	-0.0203344
376.2	0.49388074		906.19	0.31509798		1436.19	0.00596575		1966.18	0.02566253		2496.21	-0.01988831
376.4	0.49405529		906.39	0.3153454		1436.39	0.00523756		1966.38	0.02540353		2496.41	-0.02003236
376.6	0.49420581		906.59	0.31592658		1436.59	0.00551355		1966.58	0.02538758		2496.61	-0.02081756
376.8	0.49520503		906.79	0.31641406		1436.79	0.0062714		1966.78	0.02518386		2496.81	-0.02078375
377	0.4949523		906.99	0.31663192		1436.99	0.00626194		1966.98	0.02493249		2497.01	-0.02034744
377.2	0.49465533		907.19	0.31648754		1437.19	0.00723753		1967.18	0.02452381		2497.21	-0.02027335
377.4	0.49500003		907.39	0.31645972		1437.39	0.00752928		1967.38	0.02439322		2497.41	-0.01966723
377.6	0.49540152		907.59	0.3173459		1437.59	0.00768624		1967.58	0.02411697		2497.61	-0.01886117
377.8	0.49575756		907.79	0.31733277		1437.79	0.00803421		1967.78	0.02394302		2497.81	-0.0191859
378	0.49596322		907.99	0.31737916		1437.99	0.00746932		1967.98	0.02371268		2498.01	-0.0195839
378.2	0.49582241		908.19	0.31729593		1438.19	0.00748606		1968.18	0.02377553		2498.21	-0.02002366
378.4	0.49653759		908.39	0.3167825		1438.39	0.00711461		1968.38	0.02411185		2498.41	-0.02001982
378.6	0.49713786		908.59	0.31677344		1438.59	0.0070764		1968.58	0.0243856		2498.61	-0.02046754
378.8	0.4969396		908.79	0.31677439		1438.79	0.00662946		1968.78	0.02377569		2498.81	-0.02069398
379	0.49675067		908.99	0.31728113		1438.99	0.00591969		1968.98	0.02327659		2499.01	-0.02013834
379.2	0.49675005		909.19	0.31692467		1439.19	0.0050508		1969.18	0.02332497		2499.21	-0.01938109
379.4	0.49635924		909.39	0.31668872		1439.39	0.00370898		1969.38	0.02317244		2499.41	-0.01933521
379.6	0.49616695		909.59	0.31709038		1439.59	0.0023555		1969.58	0.02341024		2499.61	-0.01886107
379.8	0.49621455		909.79	0.31751355		1439.79	0.00183331		1969.78	0.02373749		2499.81	-0.01801885
380	0.49621455		909.99	0.31751355		1439.98	0.00183331		1969.98	0.02373749		2500.01	-0.01801885
380.2	0.49595872		910.19	0.31701613		1440.18	0.00230789		1970.18	0.02300358		2500.21	-0.0172206
380.4	0.49606458		910.39	0.31744989		1440.38	0.00288713		1970.38	0.02173135		2500.41	-0.01697659
380.6	0.49646763		910.59	0.31727861		1440.58	0.00250209		1970.58	0.02080597		2500.61	-0.01629611
380.8	0.49728473		910.79	0.31697915		1440.78	0.00264546		1970.78	0.02057196		2500.81	-0.01634479
381	0.49765487		910.99	0.31728789		1440.98	0.00308335		1970.98	0.01956582		2501.01	-0.0156735
381.2	0.49799616		911.19	0.3176233		1441.18	0.00292059		1971.18	0.01839766		2501.21	-0.01577744
381.4	0.49807999		911.39	0.31810729		1441.38	0.00257206		1971.38	0.01733177		2501.41	-0.01594062
381.6	0.49794265		911.59	0.31805452		1441.58	0.00267206		1971.58	0.01675852		2501.61	-0.01583768
381.8	0.49790103		911.79	0.31810502		1441.78	0.00234633		1971.78	0.01681983		2501.81	-0.01640556
382	0.49721081		911.99	0.31759471		1441.98	0.00256626		1971.98	0.01669781		2502.01	-0.01626053
382.2	0.49705242		912.19	0.31754911		1442.18	0.00153641		1972.18	0.01615528		2502.21	-0.01641156
382.4	0.49783355		912.39	0.31717489		1442.38	0.00094148		1972.38	0.0153052		2502.41	-0.01685716
382.6	0.49789259		912.59	0.31774857		1442.58	0.0008096		1972.58	0.0158023		2502.61	-0.01662362
382.8	0.49871314		912.79	0.31769613		1442.78	0.00256053		1972.78	0.01635106		2502.81	-0.01673727
383	0.49928608		912.99	0.31745497		1442.98	0.00332073		1972.98	0.01606844		2503.01	-0.01666165
383.2	0.49916834		913.19	0.31768614		1443.18	0.00412679		1973.18	0.01724479		2503.21	-0.01648309
383.4	0.49908097		913.39	0.31808975		1443.38	0.00429778		1973.38	0.01773497		2503.41	-0.01566684
383.6	0.49872831		913.59	0.31744209		1443.58	0.00431053		1973.58	0.01856533		2503.61	-0.01536007
383.8	0.49856778		913.79	0.31785943		1443.78	0.00377595		1973.78	0.01942517		2503.81	-0.01637668
384	0.49763864		913.99	0.31852544		1443.98	0.00422202		1973.98	0.01830362		2504.01	-0.01706436
384.2	0.49733529		914.19	0.3191824		1444.18	0.00337201		1974.18	0.01841926		2504.21	-0.01719687
384.4	0.49800508		914.39	0.32012162		1444.38	0.00252739		1974.38	0.01800003		2504.41	-0.01831932
384.6	0.49800976		914.59	0.31985183		1444.58	0.00165947		1974.58	0.01867085		2504.61	-0.01887716
384.8	0.4979412		914.79	0.32053032		1444.78	0.00142563		1974.78	0.01847494		2504.81	-0.01958034
385	0.4970615		914.99	0.32102581		1444.98	0.00045086		1974.98	0.01721156		2505.01	-0.01957465
385.2	0.49676803		915.19	0.32130579		1445.18	0.00004723		1975.18	0.01646484		2505.21	-0.02015538
385.4	0.49648764		915.39	0.32043238		1445.38	0.00033689		1975.38	0.01628002		2505.41	-0.01957928
385.6	0.49664178		915.59	0.31929167		1445.58	0.00080484		1975.58	0.01686914		2505.61	-0.01916713
385.8	0.49669966		915.79	0.31938678		1445.78	0.00048918		1975.78	0.01659459		2505.81	-0.01919256
386	0.49623831		915.99	0.31907487		1445.98	0.00092229		1975.98	0.01606936		2506.01	-0.01818107
386.2	0.49747514		916.19	0.32002159		1446.18	0.00000234		1976.18	0.01535991		2506.21	-0.01781343
386.4	0.49757371		916.39	0.31969062		1446.38	0.00063789		1976.38	0.01597749		2506.41	-0.01835669
386.6	0.49811391		916.59	0.31954784		1446.58	0.00094667		1976.58	0.0166576		2506.61	-0.01768535
386.8	0.49806152		916.79	0.3198841		1446.78	0.00184565		1976.78	0.01640074		2506.81	-0.01790595
387	0.49880462		916.99	0.31989108		1446.98	0.001442		1976.98	0.01554885		2507.01	-0.01815241
387.2	0.49798267		917.19	0.32003763		1447.18	0.00111539		1977.18	0.01667803		2507.21	-0.01827213
387.4	0.49773235		917.39	0.32043276		1447.38	0.00145753		1977.38	0.01744969		2507.41	-0.01909311
387.6	0.49780448		917.59	0.32044686		1447.58	0.00188028		1977.58	0.0172303		2507.61	-0.01972117
387.8	0.49865995		917.79	0.32183154		1447.78	0.00176899		1977.78	0.01757694		2507.81	-0.02002611
388	0.49835732		917.99	0.32260981		1447.98	0.001336		1977.98	0.01699567		2508.01	-0.02060194
388.2	0.49851234		918.19	0.32294916		1448.18	0.00076362		1978.18	0.01693329		2508.21	-0.02107425
388.4	0.49854521		918.39	0.32214814		1448.38	0.00079459		1978.38	0.01718543		2508.41	-0.02147052
388.6	0.49728137		918.59	0.32173658		1448.58	0.00143279		1978.58	0.0167959		2508.61	-0.02137309
388.8	0.49656399		918.79	0.32125299		1448.78	0.00121365		1978.78	0.01645064		2508.81	-0.02085015
389	0.49661143		918.99	0.32053555		1448.98	0.001259		1978.98	0.01607999		2509.01	-0.0207198
389.2	0.49648487		919.19	0.3202447		1449.18	0.00279216		1979.18	0.01561734		2509.21	-0.02017644
389.4	0.49661281		919.39	0.31926282		1449.38	0.00331749		1979.38	0.01545237		2509.41	-0.01947011
389.6	0.49728519		919.59	0.3197072		1449.58	0.00315271		1979.58	0.01565975		2509.61	-0.01932135
389.8	0.49749155		919.79	0.32045644		1449.78	0.0031339		1979.78	0.01483725		2509.81	-0.01913002
390	0.49761221		919.99	0.31994316		1449.98	0.0028912		1979.98	0.01462822		2510.01	-0.01852936
390.2	0.49822257		920.19	0.32058071		1450.18	0.00226607		1980.18	0.01312331		2510.21	-0.01800969
390.4	0.49742604		920.39	0.31950342		1450.38	0.0019898		1980.38	0.0130802		2510.41	-0.0176968
390.6	0.49766063		920.59	0.31924454		1450.58	0.00156839		1980.58	0.01249896		2510.61	-0.01775427
390.8	0.49718033		920.79	0.3193181		1450.78	0.00144728		1980.78	0.01199226		2510.81	-0.01804967
391	0.49796709		920.99	0.31900511		1450.98	0.00145663		1980.98	0.01175642		2511.01	-0.01772722
391.2	0.49874137		921.19	0.31946624		1451.18	0.00118885		1981.18	0.01226012		2511.21	-0.01796123
391.4	0.49959724		921.39	0.31976156		1451.38	0.00142778		1981.38	0.01173587		2511.41	-0.01867363
391.6	0.50039878		921.59	0.31989946		1451.58	0.00082696		1981.58	0.01124697		2511.61	-0.0190023
391.8	0.50090772		921.79	0.320523		1451.78	0.00000907		1981.78	0.01187405		2511.81	-0.01801645
392	0.50052855		921.99	0.32026504		1451.98	-0.00035868		1981.98	0.01095874		2512.01	-0.01794476
392.2	0.50092744		922.19	0.32035603		1452.18	0.00091983		1982.18	0.01068557		2512.21	-0.01735775
392.4	0.50110431		922.39	0.31953507		1452.38	0.00167572		1982.38	0.01119139		2512.41	-0.017151
392.6	0.50062456		922.59	0.31971046		1452.58	0.00232021		1982.58	0.01083945		2512.61	-0.01693421
392.8	0.50110289		922.79	0.32017588		1452.78	0.00274287		1982.78	0.0108923		2512.81	-0.01700344
393	0.50132963		922.99	0.3206652		1452.98	0.00380191		1982.98	0.01053383		2513.01	-0.01742806
393.2	0.50119434		923.19	0.32066584		1453.18	0.00483611		1983.18	0.00974591		2513.21	-0.01739403
393.4	0.50081818		923.39	0.32081391		1453.38	0.00490871		1983.38	0.00964999		2513.41	-0.01766395
393.6	0.50067505		923.59	0.32064297		1453.58	0.00450223		1983.58	0.00998136		2513.61	-0.01757523
393.8	0.50041743		923.79	0.32079639		1453.78	0.00408217		1983.78	0.00962543		2513.81	-0.01742891
394	0.50021681		923.99	0.32039389		1453.98	0.00339605		1983.98	0.00998469		2514.01	-0.0170286
394.2	0.49976162		924.19	0.32141232		1454.18	0.00332825		1984.18	0.00922578		2514.21	-0.01699615
394.4	0.49902205		924.39	0.32128267		1454.38	0.00308401		1984.38	0.00970558		2514.41	-0.01721339
394.6	0.49835876		924.59	0.32161548		1454.58	0.003172		1984.58	0.01002717		2514.61	-0.01745352
394.8	0.49832637		924.79	0.32115465		1454.78	0.00301619		1984.78	0.01074276		2514.81	-0.01733771
395	0.49844041		924.99	0.32158569		1454.98	0.00318173		1984.98	0.01155344		2515.01	-0.01766883
395.2	0.49779191		925.19	0.32129916		1455.18	0.00228108		1985.18	0.01096061		2515.21	-0.01741729
395.4	0.49664911		925.39	0.32099319		1455.38	0.00298744		1985.38	0.01052506		2515.41	-0.01822053
395.6	0.49685868		925.59	0.3211144		1455.58	0.00202724		1985.58	0.01067442		2515.61	-0.0187622
395.8	0.49751048		925.79	0.32058097		1455.78	0.00183075		1985.78	0.0107535		2515.81	-0.01858985
396	0.49732379		925.99	0.31998885		1455.98	0.00197671		1985.98	0.00958687		2516.01	-0.01929991
396.2	0.49834727		926.19	0.31991829		1456.18	0.00292337		1986.18	0.00997273		2516.21	-0.0193879
396.4	0.49800039		926.39	0.31978547		1456.38	0.0027209		1986.38	0.00972801		2516.41	-0.01932869
396.6	0.49736879		926.59	0.31975227		1456.58	0.00312442		1986.58	0.01009332		2516.61	-0.01866437
396.8	0.49811652		926.79	0.31925136		1456.78	0.00318564		1986.78	0.00981981		2516.81	-0.01878759
397	0.49845057		926.99	0.31910402		1456.98	0.0043117		1986.98	0.00951214		2517.01	-0.01907595
397.2	0.49853836		927.19	0.31912257		1457.18	0.00443667		1987.18	0.00864137		2517.21	-0.01999514
397.4	0.4979338		927.39	0.31913981		1457.38	0.00426465		1987.38	0.00875404		2517.41	-0.02027148
397.6	0.49921473		927.59	0.31865679		1457.58	0.00367134		1987.58	0.00879382		2517.61	-0.02005164
397.8	0.50003117		927.79	0.31944621		1457.78	0.00279371		1987.78	0.0095923		2517.81	-0.01988271
398	0.49960104		927.99	0.31897665		1457.98	0.0029083		1987.98	0.0106772		2518.01	-0.01958239
398.2	0.49973041		928.19	0.31978632		1458.18	0.00234584		1988.18	0.01008437		2518.21	-0.01962035
398.4	0.49961581		928.39	0.3191063		1458.38	0.00218325		1988.38	0.01008043		2518.41	-0.01927832
398.6	0.49904299		928.59	0.31913375		1458.58	0.00240987		1988.58	0.00981808		2518.61	-0.01917289
398.8	0.49910928		928.79	0.31919109		1458.78	0.00250087		1988.78	0.00978127		2518.81	-0.01962449
399	0.49840805		928.99	0.31941457		1458.98	0.00264174		1988.98	0.00901746		2519.01	-0.01948406
399.2	0.49771787		929.19	0.31885102		1459.18	0.00234786		1989.18	0.00859977		2519.21	-0.01928584
399.4	0.49800768		929.39	0.31876924		1459.38	0.00321075		1989.38	0.00850252		2519.41	-0.0197865
399.6	0.49852037		929.59	0.31905865		1459.58	0.00266205		1989.58	0.00848419		2519.61	-0.01932744
399.8	0.49833954		929.79	0.31900046		1459.78	0.00201384		1989.78	0.00826993		2519.81	-0.01945031
400	0.49755413		929.99	0.31890933		1459.98	0.00251347		1989.98	0.008104		2520.01	-0.01844371
400.2	0.49835572		930.19	0.31878434		1460.18	0.00276087		1990.18	0.00882689		2520.21	-0.01743662
400.4	0.49671083		930.39	0.31924669		1460.38	0.00236222		1990.38	0.00946678		2520.41	-0.01684303
400.6	0.49671036		930.59	0.31865203		1460.58	0.00255395		1990.58	0.01103599		2520.61	-0.01633983
400.8	0.49773809		930.79	0.31851706		1460.78	0.00287486		1990.78	0.01134813		2520.81	-0.01736401
401	0.49746993		930.99	0.31891163		1460.98	0.00406658		1990.98	0.0108982		2521.01	-0.01830137
401.2	0.49721312		931.19	0.31938623		1461.18	0.00378185		1991.18	0.01104559		2521.21	-0.01942294
401.4	0.49688962		931.39	0.3182409		1461.38	0.00430077		1991.38	0.01143578		2521.41	-0.01969979
401.6	0.49759568		931.59	0.31809926		1461.58	0.0039829		1991.58	0.01157818		2521.61	-0.02036286
401.8	0.49722062		931.79	0.31814179		1461.78	0.0040812		1991.78	0.01239525		2521.81	-0.02043732
402	0.49633388		931.99	0.318125		1461.98	0.00430836		1991.98	0.01273774		2522.01	-0.02094975
402.2	0.49706746		932.19	0.31823648		1462.18	0.00417888		1992.18	0.01198551		2522.21	-0.02165616
402.4	0.49760811		932.39	0.3178208		1462.38	0.00389777		1992.38	0.01087127		2522.41	-0.02225986
402.6	0.49780739		932.59	0.31934453		1462.58	0.00325398		1992.58	0.00999495		2522.61	-0.02312227
402.8	0.49945651		932.79	0.31952983		1462.78	0.0036131		1992.78	0.00989922		2522.81	-0.0231444
403	0.49948943		932.99	0.31946631		1462.98	0.00315818		1992.98	0.00951372		2523.01	-0.02296384
403.2	0.50010343		933.19	0.31907916		1463.18	0.00311871		1993.18	0.00897563		2523.21	-0.02241552
403.4	0.49991832		933.39	0.31895088		1463.38	0.00284275		1993.38	0.00766157		2523.41	-0.0217325
403.6	0.50022957		933.59	0.3191269		1463.58	0.0022236		1993.58	0.00762039		2523.61	-0.02087873
403.8	0.5008425		933.79	0.31907759		1463.78	0.001334		1993.78	0.00767097		2523.81	-0.02063492
404	0.50173112		933.99	0.31885536		1463.98	0.00138278		1993.98	0.0078085		2524.01	-0.01918174
404.2	0.50167418		934.19	0.31889668		1464.18	0.00059797		1994.18	0.00819709		2524.21	-0.01889476
404.4	0.5013501		934.39	0.31849329		1464.38	0.0007372		1994.38	0.00821029		2524.41	-0.01826382
404.6	0.50209183		934.59	0.31787133		1464.58	0.00040116		1994.58	0.0088524		2524.61	-0.01762314
404.8	0.50150303		934.79	0.31777267		1464.78	0.00013679		1994.78	0.00905569		2524.81	-0.01761149
405	0.50029437		934.99	0.31750872		1464.98	0.00016064		1994.98	0.0092902		2525.01	-0.01740808
405.2	0.49996917		935.19	0.31849317		1465.18	0.00012248		1995.18	0.00987336		2525.21	-0.01789607
405.4	0.49928334		935.39	0.31824234		1465.38	0.00029968		1995.38	0.01065402		2525.41	-0.01913144
405.6	0.49948266		935.59	0.31912278		1465.58	0.00039492		1995.58	0.01073065		2525.61	-0.01946161
405.8	0.49923714		935.79	0.31919609		1465.78	0.00101376		1995.78	0.01119304		2525.81	-0.01951395
406	0.49944955		935.99	0.3194549		1465.98	0.0010576		1995.98	0.01162374		2526.01	-0.0198789
406.2	0.49926272		936.19	0.31993355		1466.18	0.00073626		1996.18	0.01109923		2526.21	-0.02000731
406.4	0.4992842		936.39	0.32081226		1466.38	0.00064757		1996.38	0.01026557		2526.41	-0.02008653
406.6	0.49988186		936.59	0.3220237		1466.58	0.00117761		1996.58	0.01047308		2526.61	-0.02066139
406.8	0.50057619		936.79	0.32203872		1466.78	0.00208387		1996.78	0.01017674		2526.81	-0.02073131
407	0.49992842		936.99	0.3223199		1466.98	0.00197499		1996.98	0.00941425		2527.01	-0.02046205
407.2	0.4999417		937.19	0.32218193		1467.18	0.00264998		1997.18	0.0084519		2527.21	-0.02040544
407.4	0.4998848		937.39	0.32206699		1467.38	0.00300008		1997.38	0.00866526		2527.41	-0.02062317
407.6	0.49996941		937.59	0.32271131		1467.58	0.0042438		1997.58	0.00866869		2527.61	-0.02077917
407.8	0.49959373		937.79	0.32308333		1467.78	0.00527167		1997.78	0.0076894		2527.81	-0.02100069
408	0.49935446		937.99	0.32323629		1467.98	0.00569677		1997.98	0.00793303		2528.01	-0.02053639
408.2	0.49930585		938.19	0.32271142		1468.18	0.0061463		1998.18	0.00809864		2528.21	-0.02048011
408.4	0.49866974		938.39	0.32236851		1468.38	0.0067925		1998.38	0.00753453		2528.41	-0.02051465
408.6	0.497588		938.59	0.32252249		1468.58	0.00723119		1998.58	0.00781935		2528.61	-0.02043527
408.8	0.4964109		938.79	0.3223373		1468.78	0.00741063		1998.78	0.0084416		2528.81	-0.02107839
409	0.49596145		938.99	0.3225347		1468.98	0.00714641		1998.98	0.00885043		2529.01	-0.0213272
409.2	0.49571423		939.19	0.32245838		1469.18	0.00617379		1999.18	0.00836953		2529.21	-0.02181249
409.4	0.49624799		939.39	0.3215666		1469.38	0.00540364		1999.38	0.00847637		2529.41	-0.021731
409.6	0.49643768		939.59	0.32081698		1469.58	0.00546966		1999.58	0.00781774		2529.61	-0.02123524
409.8	0.49692843		939.79	0.3200978		1469.78	0.00492114		1999.78	0.00764379		2529.81	-0.02099171
410	0.49728436		939.99	0.32003104		1469.98	0.00427417		1999.98	0.00716384		2530.01	-0.02088247
410.2	0.4970864		940.19	0.3204403		1470.18	0.0030355		2000.18	0.006449		2530.21	-0.02060677
410.4	0.49738446		940.39	0.32013185		1470.38	0.00334412		2000.38	0.00638935		2530.41	-0.02033001
410.6	0.49738293		940.59	0.32027575		1470.58	0.00297044		2000.58	0.00626346		2530.61	-0.02053919
410.8	0.49798118		940.79	0.32053642		1470.78	0.00196867		2000.78	0.00588639		2530.81	-0.01983125
411	0.49862822		940.99	0.32063546		1470.98	0.00237368		2000.98	0.00600825		2531.01	-0.01923284
411.2	0.49832375		941.19	0.32057151		1471.18	0.00267095		2001.18	0.00636937		2531.21	-0.01951884
411.4	0.49915572		941.39	0.32059008		1471.38	0.00323509		2001.38	0.00674171		2531.41	-0.02002641
411.6	0.49877248		941.59	0.32090842		1471.58	0.00402162		2001.58	0.00686399		2531.61	-0.0197972
411.8	0.49933644		941.79	0.32140669		1471.78	0.00416968		2001.78	0.00781564		2531.81	-0.01952753
412	0.49945018		941.99	0.32112632		1471.98	0.00422696		2001.98	0.00855678		2532.01	-0.01941328
412.2	0.4998567		942.19	0.32118081		1472.18	0.00539373		2002.18	0.0087252		2532.21	-0.02010589
412.4	0.49937452		942.39	0.32088582		1472.38	0.00682829		2002.38	0.00869217		2532.41	-0.02091086
412.6	0.49922167		942.59	0.32097101		1472.58	0.00742932		2002.58	0.00921487		2532.61	-0.02111738
412.8	0.49964501		942.79	0.32023296		1472.78	0.00707827		2002.78	0.01001085		2532.81	-0.02178297
413	0.49944279		942.99	0.32022131		1472.98	0.00612516		2002.98	0.0104686		2533.01	-0.02230385
413.2	0.49938457		943.19	0.31944413		1473.18	0.00487788		2003.18	0.01034177		2533.21	-0.02278387
413.4	0.49954515		943.39	0.31933743		1473.38	0.00459104		2003.38	0.01023856		2533.41	-0.02257129
413.6	0.49912513		943.59	0.31959018		1473.58	0.00414993		2003.58	0.00915961		2533.61	-0.02322619
413.8	0.49973336		943.79	0.31968778		1473.78	0.0034592		2003.78	0.00825111		2533.81	-0.02366017
414	0.49927794		943.99	0.32026961		1473.98	0.00314087		2003.98	0.00761455		2534.01	-0.02347194
414.2	0.4992767		944.19	0.32056779		1474.18	0.00257407		2004.18	0.00771507		2534.21	-0.02342802
414.4	0.49885185		944.39	0.32083393		1474.38	0.00287656		2004.38	0.00746231		2534.41	-0.02297962
414.6	0.49789522		944.59	0.32090976		1474.58	0.00254		2004.58	0.00713534		2534.61	-0.02274102
414.8	0.49830119		944.79	0.32117518		1474.78	0.0022217		2004.78	0.00643532		2534.81	-0.02201689
415	0.49777301		944.99	0.32112704		1474.98	0.00360354		2004.98	0.00675802		2535.01	-0.02151274
415.2	0.49658065		945.19	0.32073746		1475.18	0.00354653		2005.18	0.00647475		2535.21	-0.02140319
415.4	0.49702909		945.39	0.32077581		1475.38	0.00320955		2005.38	0.00649617		2535.41	-0.02013776
415.6	0.49655242		945.59	0.32120926		1475.58	0.0038287		2005.58	0.00628364		2535.61	-0.01918461
415.8	0.49670621		945.79	0.32125693		1475.78	0.0045904		2005.78	0.00604991		2535.81	-0.01841186
416	0.49681203		945.99	0.32017219		1475.98	0.00500295		2005.98	0.0050492		2536.01	-0.01790962
416.2	0.49736121		946.19	0.32082442		1476.18	0.00667205		2006.18	0.00529445		2536.21	-0.01868641
416.4	0.49727339		946.39	0.32005152		1476.38	0.0073882		2006.38	0.00560705		2536.41	-0.0182615
416.6	0.49759354		946.59	0.32124225		1476.58	0.00638047		2006.58	0.00489209		2536.61	-0.01757783
416.8	0.4983287		946.79	0.3211709		1476.78	0.00649097		2006.78	0.00565694		2536.81	-0.01783527
417	0.4979221		946.99	0.32149475		1476.98	0.00565494		2006.98	0.005766		2537.01	-0.01802662
417.2	0.49818769		947.19	0.3208807		1477.18	0.0054087		2007.18	0.00571812		2537.21	-0.01862616
417.4	0.49841263		947.39	0.32088355		1477.38	0.00542163		2007.38	0.00470885		2537.41	-0.01770535
417.6	0.49895838		947.59	0.32145622		1477.58	0.00528659		2007.58	0.00344568		2537.61	-0.01792131
417.8	0.49935301		947.79	0.32161222		1477.78	0.00488498		2007.78	0.00354071		2537.81	-0.0185941
418	0.49927013		947.99	0.3224134		1477.98	0.00469384		2007.98	0.00402359		2538.01	-0.01922766
418.2	0.49975199		948.19	0.32225225		1478.18	0.00411923		2008.18	0.00441816		2538.21	-0.02040786
418.4	0.49955717		948.39	0.3216574		1478.38	0.00394718		2008.38	0.0038471		2538.41	-0.02040922
418.6	0.49880322		948.59	0.32199956		1478.58	0.0041659		2008.58	0.00367824		2538.61	-0.02118734
418.8	0.49839026		948.79	0.32192524		1478.78	0.00405651		2008.78	0.00389975		2538.81	-0.02115529
419	0.49824644		948.99	0.32143586		1478.98	0.00334871		2008.98	0.00527277		2539.01	-0.02162628
419.2	0.49805815		949.19	0.32076463		1479.18	0.00291699		2009.18	0.00501211		2539.21	-0.0220184
419.4	0.49788071		949.39	0.32054566		1479.38	0.00185838		2009.38	0.00578767		2539.41	-0.02169962
419.6	0.49744681		949.59	0.31940557		1479.58	0.00281474		2009.58	0.0056873		2539.61	-0.02198985
419.8	0.49722299		949.79	0.31855561		1479.78	0.00291421		2009.78	0.00571226		2539.81	-0.0220121
420	0.49685747		949.99	0.31870315		1479.98	0.00281642		2009.98	0.0066873		2540.01	-0.02249724
420.2	0.49625522		950.19	0.31924233		1480.18	0.00309887		2010.18	0.00710504		2540.21	-0.02234593
420.4	0.49553037		950.39	0.31877295		1480.38	0.00255456		2010.38	0.00754057		2540.41	-0.02196303
420.6	0.49597821		950.59	0.31997242		1480.58	0.00258995		2010.58	0.00683084		2540.61	-0.02124299
420.8	0.4955236		950.79	0.31896537		1480.78	0.00312573		2010.78	0.00811085		2540.81	-0.02000799
421	0.4953068		950.99	0.31854515		1480.98	0.00275067		2010.98	0.0070137		2541.01	-0.01980756
421.2	0.49610549		951.19	0.31839285		1481.18	0.0025837		2011.18	0.00629054		2541.21	-0.01930202
421.4	0.49593601		951.39	0.31859278		1481.38	0.0025433		2011.38	0.00530667		2541.41	-0.01749308
421.6	0.49529311		951.59	0.31992158		1481.58	0.0019234		2011.58	0.00459922		2541.61	-0.01724509
421.8	0.49585155		951.79	0.3199271		1481.78	0.00078739		2011.78	0.00365725		2541.81	-0.01721909
422	0.49596877		951.99	0.32064645		1481.98	0.00071532		2011.98	0.00380554		2542.01	-0.017005
422.2	0.49612236		952.19	0.32019829		1482.18	0.00094262		2012.18	0.00333553		2542.21	-0.01691741
422.4	0.49557908		952.39	0.32031007		1482.38	0.00172015		2012.38	0.00232475		2542.41	-0.01649571
422.6	0.49558081		952.59	0.321346		1482.58	0.00253194		2012.58	0.00303063		2542.61	-0.01624547
422.8	0.49613469		952.79	0.32125649		1482.78	0.00160339		2012.78	0.0029975		2542.81	-0.01560964
423	0.4965998		952.99	0.32147439		1482.98	0.0014249		2012.98	0.00245163		2543.01	-0.01621665
423.2	0.49625896		953.19	0.32132762		1483.18	0.00235095		2013.18	0.00142828		2543.21	-0.01662697
423.4	0.49597136		953.39	0.32190706		1483.38	0.00253969		2013.38	0.00119868		2543.41	-0.01731066
423.6	0.49636865		953.59	0.32141278		1483.58	0.00362431		2013.58	0.00088603		2543.61	-0.01732981
423.8	0.49604851		953.79	0.32249174		1483.78	0.00370935		2013.78	0.00117851		2543.81	-0.01869727
424	0.49551035		953.99	0.32295433		1483.98	0.00386354		2013.98	0.00230173		2544.01	-0.01963617
424.2	0.49489042		954.19	0.32267476		1484.18	0.00327385		2014.18	0.00165623		2544.21	-0.01990982
424.4	0.4947089		954.39	0.32262413		1484.38	0.00433341		2014.38	0.0019512		2544.41	-0.02082886
424.6	0.49489381		954.59	0.32272456		1484.58	0.00474859		2014.58	0.00198636		2544.61	-0.0202463
424.8	0.49473909		954.79	0.32239511		1484.78	0.00461484		2014.78	0.00205125		2544.81	-0.02029927
425	0.49554148		954.99	0.3227559		1484.98	0.00490741		2014.98	0.00144286		2545.01	-0.02210038
425.2	0.49604334		955.19	0.32253287		1485.18	0.00485939		2015.18	0.00234648		2545.21	-0.02198532
425.4	0.49575555		955.39	0.32185851		1485.38	0.00509119		2015.38	0.00286729		2545.41	-0.02229507
425.6	0.49572414		955.59	0.32220481		1485.58	0.00325694		2015.58	0.0036713		2545.61	-0.02202573
425.8	0.49646998		955.79	0.32146432		1485.78	0.00275864		2015.78	0.00362133		2545.81	-0.02188933
426	0.49606836		955.99	0.32096694		1485.98	0.0026482		2015.98	0.00461476		2546.01	-0.02142023
426.2	0.49644991		956.19	0.32020782		1486.18	0.00276135		2016.18	0.0043528		2546.21	-0.02156757
426.4	0.49656492		956.39	0.32009383		1486.38	0.00290376		2016.38	0.00454307		2546.41	-0.02068771
426.6	0.49739753		956.59	0.32050486		1486.58	0.0028607		2016.58	0.00560776		2546.61	-0.02023689
426.8	0.49832454		956.79	0.32024097		1486.78	0.00149446		2016.78	0.00541705		2546.81	-0.01965339
427	0.49856324		956.99	0.31992362		1486.98	0.0012846		2016.98	0.00542547		2547.01	-0.01945803
427.2	0.49892498		957.19	0.31983283		1487.18	0.00170734		2017.18	0.00511365		2547.21	-0.01935127
427.4	0.50038578		957.39	0.32000452		1487.38	0.00190272		2017.38	0.00519597		2547.41	-0.01933595
427.6	0.50091492		957.59	0.31965726		1487.58	0.00147611		2017.58	0.00581922		2547.61	-0.01953058
427.8	0.5005767		957.79	0.3203076		1487.78	0.00166417		2017.78	0.00594162		2547.81	-0.0202541
428	0.50003708		957.99	0.32040214		1487.98	0.00121969		2017.98	0.00612444		2548.01	-0.01982589
428.2	0.49891658		958.19	0.32009928		1488.18	0.00106665		2018.18	0.0053553		2548.21	-0.01894636
428.4	0.49916944		958.39	0.32096311		1488.38	0.00207162		2018.38	0.00513531		2548.41	-0.01862975
428.6	0.49835933		958.59	0.32175121		1488.58	0.00242249		2018.58	0.00465158		2548.61	-0.01876159
428.8	0.49748284		958.79	0.32247495		1488.78	0.00358769		2018.78	0.00441129		2548.81	-0.01908663
429	0.49727572		958.99	0.32335458		1488.98	0.00413543		2018.98	0.0055198		2549.01	-0.0198913
429.2	0.49706477		959.19	0.3230726		1489.18	0.00357249		2019.18	0.00554515		2549.21	-0.0194136
429.4	0.49618203		959.39	0.32349398		1489.38	0.00398326		2019.38	0.00481711		2549.41	-0.0189921
429.6	0.49492265		959.59	0.324097		1489.58	0.00340987		2019.58	0.00481256		2549.61	-0.01877488
429.8	0.4943342		959.79	0.32401412		1489.78	0.00328299		2019.78	0.00377648		2549.81	-0.0188891
430	0.49390757		959.99	0.32308246		1489.98	0.00329739		2019.98	0.00279759		2550.01	-0.0190111
430.2	0.49367206		960.19	0.32233636		1490.18	0.00348941		2020.18	0.00284099		2550.21	-0.01936608
430.4	0.49388217		960.39	0.32156621		1490.38	0.00390362		2020.38	0.00318523		2550.41	-0.01938454
430.6	0.49349752		960.59	0.32135143		1490.58	0.00354915		2020.58	0.00316652		2550.61	-0.01993842
430.8	0.49297189		960.79	0.32087266		1490.78	0.00276157		2020.78	0.00276408		2550.81	-0.01999674
431	0.49296977		960.99	0.31998194		1490.98	0.00302144		2020.98	0.00249345		2551.01	-0.02043088
431.2	0.49338292		961.19	0.31934061		1491.18	0.00346089		2021.18	0.00248216		2551.21	-0.0208054
431.4	0.49423072		961.39	0.31929899		1491.38	0.00356954		2021.38	0.003161		2551.41	-0.02080979
431.6	0.49432612		961.59	0.31975694		1491.58	0.00288581		2021.58	0.00331653		2551.61	-0.02121072
431.8	0.49461833		961.79	0.31994083		1491.78	0.00294755		2021.78	0.00390216		2551.81	-0.02108226
432	0.49493403		961.99	0.32003041		1491.98	0.00233985		2021.98	0.00454915		2552.01	-0.02055449
432.2	0.49541591		962.19	0.32009863		1492.18	0.00247916		2022.18	0.00463067		2552.21	-0.01979822
432.4	0.49689706		962.39	0.32158495		1492.38	0.00269563		2022.38	0.00462041		2552.41	-0.01978917
432.6	0.49713628		962.59	0.32288461		1492.58	0.00333877		2022.58	0.0055083		2552.61	-0.01972798
432.8	0.49813183		962.79	0.32347629		1492.78	0.00380925		2022.78	0.00584812		2552.81	-0.01973954
433	0.49897934		962.99	0.32472194		1492.98	0.0038599		2022.98	0.00594361		2553.01	-0.02017439
433.2	0.5004459		963.19	0.3252488		1493.18	0.00397819		2023.18	0.00479876		2553.21	-0.02000221
433.4	0.5008868		963.39	0.32540837		1493.38	0.00496337		2023.38	0.00414036		2553.41	-0.01957769
433.6	0.50078559		963.59	0.3249403		1493.58	0.00389854		2023.58	0.00449186		2553.61	-0.01957085
433.8	0.50079713		963.79	0.32435893		1493.78	0.00355756		2023.78	0.00390717		2553.81	-0.01886787
434	0.50062631		963.99	0.32368452		1493.98	0.00365996		2023.98	0.00311278		2554.01	-0.01825814
434.2	0.50077192		964.19	0.32358801		1494.18	0.00358636		2024.18	0.00306943		2554.21	-0.01834189
434.4	0.50051517		964.39	0.32338325		1494.38	0.00359556		2024.38	0.00252167		2554.41	-0.01885207
434.6	0.49883623		964.59	0.32345933		1494.58	0.00287682		2024.58	0.00217867		2554.61	-0.01888499
434.8	0.49720328		964.79	0.32308187		1494.78	0.00349997		2024.78	0.0015238		2554.81	-0.01951904
435	0.49724951		964.99	0.32184571		1494.98	0.00343633		2024.98	0.00147719		2555.01	-0.01956683
435.2	0.49695464		965.19	0.3218161		1495.18	0.00298267		2025.18	0.00122379		2555.21	-0.01939692
435.4	0.49655053		965.39	0.32173691		1495.38	0.00297911		2025.38	0.00105922		2555.41	-0.01937118
435.6	0.49642849		965.59	0.3211925		1495.58	0.00196486		2025.58	0.00147614		2555.61	-0.01937208
435.8	0.49606732		965.79	0.32009356		1495.78	0.00276033		2025.78	0.00182785		2555.81	-0.0198343
436	0.49578838		965.99	0.31940159		1495.98	0.00289131		2025.98	0.00197178		2556.01	-0.02001241
436.2	0.49544904		966.19	0.32010484		1496.18	0.00322802		2026.18	0.00134638		2556.21	-0.02032856
436.4	0.49526693		966.39	0.32094245		1496.38	0.00338594		2026.38	0.00192249		2556.41	-0.02071719
436.6	0.49507954		966.59	0.32139585		1496.58	0.0034656		2026.58	0.00263377		2556.61	-0.02133431
436.8	0.49539157		966.79	0.32089105		1496.78	0.00263743		2026.78	0.0026024		2556.81	-0.02198861
437	0.49510825		966.99	0.3214576		1496.98	0.00216099		2026.98	0.0028342		2557.01	-0.02199877
437.2	0.49610398		967.19	0.32163993		1497.18	0.0011372		2027.18	0.00359365		2557.21	-0.0216508
437.4	0.49599186		967.39	0.32166939		1497.38	0.00031449		2027.38	0.00399969		2557.41	-0.02084048
437.6	0.49487562		967.59	0.32191443		1497.58	-0.00062663		2027.58	0.00470443		2557.61	-0.02017353
437.8	0.49469497		967.79	0.32247594		1497.78	-0.00015375		2027.78	0.00448243		2557.81	-0.02003502
438	0.49528501		967.99	0.32274894		1497.98	-0.00113954		2027.98	0.00442998		2558.01	-0.02022588
438.2	0.49555409		968.19	0.32314735		1498.18	-0.00194167		2028.18	0.00405639		2558.21	-0.01996093
438.4	0.49541785		968.39	0.32211922		1498.38	-0.00217853		2028.38	0.00405132		2558.41	-0.01970582
438.6	0.4957436		968.59	0.32193538		1498.58	-0.0025935		2028.58	0.00353456		2558.61	-0.02004328
438.8	0.49596794		968.79	0.32197685		1498.78	-0.00106867		2028.78	0.00257628		2558.81	-0.02007941
439	0.49684955		968.99	0.32146819		1498.98	-0.0007807		2028.98	0.00274999		2559.01	-0.02013595
439.2	0.49601971		969.19	0.32156703		1499.18	-0.00044198		2029.18	0.00172015		2559.21	-0.01968637
439.4	0.49581889		969.39	0.32058862		1499.38	0.00061275		2029.38	0.00080054		2559.41	-0.02027703
439.6	0.49603848		969.59	0.32086836		1499.58	0.00101921		2029.58	0.0005878		2559.61	-0.02045215
439.8	0.49604799		969.79	0.32028767		1499.78	0.00202782		2029.78	0.00025951		2559.81	-0.02115263
440	0.49630085		969.99	0.32053479		1499.98	0.0023276		2029.98	0.00022773		2560.01	-0.02157604
440.2	0.49624603		970.19	0.32110154		1500.18	0.00275479		2030.18	-0.0003518		2560.21	-0.02201386
440.4	0.49645219		970.39	0.32100711		1500.38	0.00223335		2030.38	0.00054921		2560.41	-0.02301306
440.6	0.49671121		970.59	0.32153421		1500.58	0.00208858		2030.58	0.00058454		2560.61	-0.02349807
440.8	0.49692233		970.79	0.32124761		1500.78	0.00151534		2030.78	0.00050616		2560.81	-0.02281839
441	0.49694609		970.99	0.3209854		1500.98	0.00161819		2030.98	0.00089536		2561.01	-0.02267303
441.2	0.49690128		971.19	0.32060598		1501.18	0.00124272		2031.18	0.0017645		2561.21	-0.02279143
441.4	0.4961611		971.39	0.32047543		1501.38	0.00196704		2031.38	0.00091554		2561.41	-0.02266835
441.6	0.49561426		971.59	0.32048513		1501.58	0.0022835		2031.58	0.00050941		2561.61	-0.02312424
441.8	0.49518932		971.79	0.32090538		1501.78	0.00280398		2031.78	0.00031536		2561.81	-0.02281416
442	0.49563769		971.99	0.31994301		1501.98	0.00174477		2031.98	0.00027496		2562.01	-0.02224931
442.2	0.49520038		972.19	0.32049898		1502.18	0.00190827		2032.18	-0.00046533		2562.21	-0.02102541
442.4	0.49611441		972.39	0.31957922		1502.38	0.00237793		2032.38	0.00006703		2562.41	-0.02157062
442.6	0.49615854		972.59	0.32018765		1502.58	0.00287793		2032.58	-0.00008904		2562.61	-0.02221632
442.8	0.49622097		972.79	0.32080396		1502.78	0.00351158		2032.78	0.00044332		2562.81	-0.02172173
443	0.49576145		972.99	0.32082625		1502.98	0.00301943		2032.98	0.00072799		2563.01	-0.02146272
443.2	0.49516214		973.19	0.32142429		1503.18	0.00274491		2033.18	0.00024667		2563.21	-0.02114458
443.4	0.49536169		973.39	0.32139602		1503.38	0.00244235		2033.38	0.0001392		2563.41	-0.02165369
443.6	0.49569747		973.59	0.32258001		1503.58	0.00163132		2033.58	0.00048966		2563.61	-0.02120024
443.8	0.49615502		973.79	0.32275218		1503.78	0.00114845		2033.78	0.00125183		2563.81	-0.0208857
444	0.49614037		973.99	0.32274273		1503.98	0.00149688		2033.98	0.00049687		2564.01	-0.0209509
444.2	0.49613		974.19	0.3228162		1504.18	0.00110154		2034.18	-0.00020421		2564.21	-0.02107857
444.4	0.49588487		974.39	0.32228562		1504.38	-0.00010563		2034.38	0.00079231		2564.41	-0.02168458
444.6	0.49538963		974.59	0.32186703		1504.58	-0.00002312		2034.58	0.00102086		2564.61	-0.02078564
444.8	0.49476367		974.79	0.32066445		1504.78	-0.00100347		2034.78	0.00148313		2564.81	-0.02001693
445	0.49399058		974.99	0.31959034		1504.98	-0.00026242		2034.98	0.00181639		2565.01	-0.0198726
445.2	0.49287289		975.19	0.3183508		1505.18	-0.00019444		2035.18	0.00122991		2565.21	-0.01958739
445.4	0.49269044		975.39	0.31842407		1505.38	0.00016069		2035.38	0.00025792		2565.41	-0.0189117
445.6	0.49207567		975.59	0.31859519		1505.58	0.00061778		2035.58	0.00014888		2565.61	-0.01931155
445.8	0.49153049		975.79	0.31795895		1505.78	0.00154658		2035.78	-0.00029868		2565.81	-0.01850222
446	0.49125441		975.99	0.31764424		1505.98	0.00164502		2035.98	-0.00028884		2566.01	-0.01910014
446.2	0.49118465		976.19	0.31831889		1506.18	0.00273591		2036.18	-0.00074585		2566.21	-0.019649
446.4	0.49145786		976.39	0.31775686		1506.38	0.00345099		2036.38	-0.00007384		2566.41	-0.02094792
446.6	0.49118164		976.59	0.31828428		1506.58	0.00253873		2036.58	0.00006501		2566.61	-0.02166498
446.8	0.49163187		976.79	0.3180496		1506.78	0.0020889		2036.78	0.00011631		2566.81	-0.0220883
447	0.49158617		976.99	0.31847118		1506.98	0.00256421		2036.98	0.00014513		2567.01	-0.0225086
447.2	0.49267606		977.19	0.31888886		1507.18	0.00195934		2037.18	0.00083537		2567.21	-0.02300856
447.4	0.49335475		977.39	0.31945602		1507.38	0.00186452		2037.38	0.00071138		2567.41	-0.02357636
447.6	0.49412557		977.59	0.31950899		1507.58	0.00163389		2037.58	0.00199465		2567.61	-0.0238166
447.8	0.49501787		977.79	0.31996586		1507.78	0.00108461		2037.78	0.00223197		2567.81	-0.02400206
448	0.49440653		977.99	0.31958908		1507.98	0.00110337		2037.98	0.00194943		2568.01	-0.02405679
448.2	0.49478204		978.19	0.32046814		1508.18	-0.00007897		2038.18	0.00235833		2568.21	-0.02400748
448.4	0.49474234		978.39	0.3194998		1508.38	-0.0000863		2038.38	0.00327475		2568.41	-0.02407645
448.6	0.49454128		978.59	0.31929512		1508.58	0.00075557		2038.58	0.00351538		2568.61	-0.02308825
448.8	0.49484055		978.79	0.31879712		1508.78	0.00045173		2038.78	0.00383815		2568.81	-0.0221499
449	0.49466109		978.99	0.31815817		1508.98	0.00120741		2038.98	0.00367897		2569.01	-0.02105338
449.2	0.49489908		979.19	0.31752668		1509.18	0.00072492		2039.18	0.00369988		2569.21	-0.02028482
449.4	0.49497983		979.39	0.3178334		1509.38	0.00146897		2039.38	0.00344448		2569.41	-0.02004587
449.6	0.4942839		979.59	0.31746035		1509.58	0.00203793		2039.58	0.00280131		2569.61	-0.019963
449.8	0.49424449		979.79	0.31663119		1509.78	0.00320093		2039.78	0.00234243		2569.81	-0.01925285
450	0.49373661		979.99	0.31714145		1509.98	0.00342608		2039.98	0.0024292		2570.01	-0.01968851
450.2	0.49375175		980.19	0.31814392		1510.18	0.004277		2040.18	0.00243685		2570.21	-0.02011225
450.4	0.49371714		980.39	0.31843747		1510.38	0.00404726		2040.38	0.0022611		2570.41	-0.02079609
450.6	0.49405653		980.59	0.31909721		1510.58	0.00340741		2040.58	0.00191187		2570.61	-0.02119431
450.8	0.49421618		980.79	0.31932399		1510.78	0.00434554		2040.78	0.00159178		2570.81	-0.02243452
451	0.49484617		980.99	0.320033		1510.98	0.00427761		2040.98	0.00182233		2571.01	-0.02319599
451.2	0.49546237		981.19	0.31983979		1511.18	0.00370776		2041.18	0.00127276		2571.21	-0.02314929
451.4	0.49527753		981.39	0.31988042		1511.38	0.00362479		2041.38	0.00128924		2571.41	-0.0233248
451.6	0.49490812		981.59	0.32006257		1511.58	0.00295107		2041.58	0.0021344		2571.61	-0.02372355
451.8	0.49481613		981.79	0.32132801		1511.78	0.00181618		2041.78	0.00134569		2571.81	-0.02428833
452	0.49425751		981.99	0.32209368		1511.98	0.00165973		2041.98	0.00153779		2572.01	-0.02409235
452.2	0.49431243		982.19	0.3226767		1512.18	0.00113565		2042.18	0.00171012		2572.21	-0.02387241
452.4	0.49384021		982.39	0.32171585		1512.38	0.00118451		2042.38	0.0021132		2572.41	-0.02239412
452.6	0.49408346		982.59	0.32163041		1512.58	0.00085708		2042.58	0.00276176		2572.61	-0.0213155
452.8	0.49351048		982.79	0.32129323		1512.78	0.00092294		2042.78	0.00248042		2572.81	-0.0199192
453	0.49280334		982.99	0.32117484		1512.98	0.00126686		2042.98	0.00264386		2573.01	-0.01882972
453.2	0.49276818		983.19	0.32082221		1513.18	0.00057349		2043.18	0.00221571		2573.21	-0.01840981
453.4	0.49223052		983.39	0.32125272		1513.38	0.00157864		2043.38	0.00200761		2573.41	-0.01875033
453.6	0.49205565		983.59	0.32098079		1513.58	0.00126099		2043.58	0.00151143		2573.61	-0.01779339
453.8	0.49232307		983.79	0.32121602		1513.78	0.00183045		2043.78	0.00141784		2573.81	-0.01804961
454	0.49268333		983.99	0.32184351		1513.98	0.00187558		2043.98	0.00120166		2574.01	-0.0187353
454.2	0.49259266		984.19	0.32233138		1514.18	0.00284191		2044.18	0.00090996		2574.21	-0.01948448
454.4	0.49310057		984.39	0.32189842		1514.38	0.00223318		2044.38	0.0002294		2574.41	-0.02061782
454.6	0.49305035		984.59	0.32242424		1514.58	0.00249132		2044.58	0.00021639		2574.61	-0.02131091
454.8	0.49309298		984.79	0.32228653		1514.78	0.00222008		2044.78	-0.00059654		2574.81	-0.02247903
455	0.49373536		984.99	0.32146827		1514.98	0.00269509		2044.98	-0.00170759		2575.01	-0.02256935
455.2	0.49377754		985.19	0.32092305		1515.18	0.00272602		2045.18	-0.00241803		2575.21	-0.02320238
455.4	0.49478101		985.39	0.32097402		1515.38	0.00223817		2045.38	-0.00184844		2575.41	-0.02341467
455.6	0.4943349		985.59	0.3215866		1515.58	0.00180826		2045.58	-0.00154962		2575.61	-0.02416602
455.8	0.49486074		985.79	0.32146162		1515.78	0.00053068		2045.78	-0.00181637		2575.81	-0.02397304
456	0.49501813		985.99	0.32163743		1515.98	-0.00006337		2045.98	-0.00136507		2576.01	-0.02384366
456.2	0.4940723		986.19	0.32065047		1516.18	-0.00075741		2046.18	-0.00124233		2576.21	-0.02270714
456.4	0.49404239		986.39	0.31980132		1516.38	-0.00104028		2046.38	-0.00138654		2576.41	-0.0218191
456.6	0.49377745		986.59	0.31984959		1516.58	-0.00104551		2046.58	-0.00061894		2576.61	-0.02160979
456.8	0.49243958		986.79	0.32035171		1516.78	0.00003851		2046.78	-0.00026888		2576.81	-0.02037439
457	0.49252939		986.99	0.32090567		1516.98	-0.00020088		2046.98	0.00052412		2577.01	-0.01995042
457.2	0.49241291		987.19	0.32091617		1517.18	-0.00040219		2047.18	-0.0001285		2577.21	-0.01965006
457.4	0.49279188		987.39	0.32183024		1517.38	0.00061959		2047.38	-0.00034058		2577.41	-0.02021723
457.6	0.49294845		987.59	0.32156736		1517.58	0.00023692		2047.58	-0.0011444		2577.61	-0.01969114
457.8	0.49323918		987.79	0.32199797		1517.78	-0.00001644		2047.78	-0.00121709		2577.81	-0.02021649
458	0.49359307		987.99	0.32179092		1517.98	0.0003771		2047.98	-0.00089162		2578.01	-0.02011696
458.2	0.49302979		988.19	0.32212952		1518.18	0.00043458		2048.18	-0.00063181		2578.21	-0.02008142
458.4	0.4940099		988.39	0.32268649		1518.38	0.0006665		2048.38	-0.00078595		2578.41	-0.02002804
458.6	0.49389168		988.59	0.32359037		1518.58	0.00098383		2048.58	-0.00062013		2578.61	-0.02010305
458.8	0.49407854		988.79	0.32295555		1518.78	0.00110466		2048.78	-0.00145589		2578.81	-0.01986703
459	0.49470259		988.99	0.32256672		1518.98	0.00175305		2048.98	-0.00140001		2579.01	-0.01992499
459.2	0.49528135		989.19	0.32259354		1519.18	0.0009899		2049.18	-0.00049702		2579.21	-0.0201584
459.4	0.49547117		989.39	0.32265714		1519.38	0.00116242		2049.38	0.00040264		2579.41	-0.0191659
459.6	0.4942559		989.59	0.32259429		1519.58	0.00038523		2049.58	0.00062933		2579.61	-0.01907894
459.8	0.49483905		989.79	0.32284808		1519.78	0.00022051		2049.78	0.00114275		2579.81	-0.01969735
460	0.49401727		989.99	0.32272391		1519.98	-0.00073582		2049.98	0.00134736		2580.01	-0.02052595
460.2	0.49369183		990.19	0.32173826		1520.18	-0.00042787		2050.18	0.00151411		2580.21	-0.02057223
460.4	0.49342035		990.39	0.32133235		1520.38	-0.00044167		2050.38	0.00159149		2580.41	-0.0209867
460.6	0.49309235		990.59	0.32181812		1520.58	-0.00016198		2050.58	0.00253667		2580.61	-0.02078443
460.8	0.49233772		990.79	0.32186672		1520.78	0.00101667		2050.78	0.00197241		2580.81	-0.02095128
461	0.49220833		990.99	0.32131408		1520.98	0.00105446		2050.98	0.00166188		2581.01	-0.02137932
461.2	0.49239514		991.19	0.32040544		1521.18	0.00151601		2051.18	0.00049099		2581.21	-0.02105088
461.4	0.49285249		991.39	0.32002775		1521.38	0.001438		2051.38	0.00032786		2581.41	-0.02180508
461.6	0.49244948		991.59	0.31946249		1521.58	0.00076033		2051.58	0.00000285		2581.61	-0.02120179
461.8	0.4921846		991.79	0.31920424		1521.78	0.00081708		2051.78	-0.00069391		2581.81	-0.0211514
462	0.49159924		991.99	0.31871064		1521.98	0.00144486		2051.98	-0.00107232		2582.01	-0.02087272
462.2	0.49092232		992.19	0.31848957		1522.18	0.00157642		2052.18	-0.00121151		2582.21	-0.02038305
462.4	0.49112882		992.39	0.31907201		1522.38	0.00156828		2052.38	-0.00186432		2582.41	-0.02015064
462.6	0.4910088		992.59	0.3188652		1522.58	0.00062311		2052.58	-0.00178496		2582.61	-0.02002796
462.8	0.49170028		992.79	0.31856052		1522.78	0.0001437		2052.78	-0.00147053		2582.81	-0.01912328
463	0.4920714		992.99	0.31865783		1522.98	0.00071327		2052.98	-0.00133108		2583.01	-0.01900789
463.2	0.49206555		993.19	0.31971969		1523.18	0.0001944		2053.18	-0.00110206		2583.21	-0.01817637
463.4	0.49178528		993.39	0.32057556		1523.38	0.00037123		2053.38	-0.00047176		2583.41	-0.01818216
463.6	0.49180545		993.59	0.3212765		1523.58	0.00016937		2053.58	-0.00057965		2583.61	-0.01950539
463.8	0.49279134		993.79	0.32235001		1523.78	0.00014741		2053.78	-0.00082197		2583.81	-0.02013282
464	0.49191761		993.99	0.32248706		1523.98	-0.00059046		2053.98	-0.00147685		2584.01	-0.02016981
464.2	0.49261521		994.19	0.32276521		1524.18	0.00008414		2054.18	-0.00187545		2584.21	-0.02102363
464.4	0.49263857		994.39	0.32292281		1524.38	-0.00054733		2054.38	-0.00221477		2584.41	-0.02160696
464.6	0.49287878		994.59	0.32293419		1524.58	0.00025667		2054.58	-0.00224522		2584.61	-0.02201943
464.8	0.49244201		994.79	0.32236333		1524.78	0.00023584		2054.78	-0.00269801		2584.81	-0.02219462
465	0.49205191		994.99	0.32278384		1524.98	0.00041455		2054.98	-0.00246737		2585.01	-0.02232663
465.2	0.49185828		995.19	0.32248693		1525.18	0.00023027		2055.18	-0.00256968		2585.21	-0.02216421
465.4	0.49130438		995.39	0.32214859		1525.38	-0.00017715		2055.38	-0.00241121		2585.41	-0.02308618
465.6	0.49074397		995.59	0.32309371		1525.58	-0.00006701		2055.58	-0.0023544		2585.61	-0.02390804
465.8	0.49087194		995.79	0.322563		1525.78	0.00089705		2055.78	-0.00223524		2585.81	-0.02426488
466	0.49044647		995.99	0.32164333		1525.98	0.00063563		2055.98	-0.00203313		2586.01	-0.02442427
466.2	0.49044719		996.19	0.32156368		1526.18	0.00029726		2056.18	-0.00178121		2586.21	-0.02434388
466.4	0.49144475		996.39	0.32149237		1526.38	0.00100351		2056.38	-0.00134327		2586.41	-0.02488643
466.6	0.49156323		996.59	0.32168345		1526.58	0.00116121		2056.58	-0.00105258		2586.61	-0.02473963
466.8	0.49225525		996.79	0.3217203		1526.78	0.00206784		2056.78	-0.00093465		2586.81	-0.02493603
467	0.49219223		996.99	0.32187501		1526.98	0.00316787		2056.98	-0.00131729		2587.01	-0.02521371
467.2	0.49275206		997.19	0.32228819		1527.18	0.00262909		2057.18	-0.0008557		2587.21	-0.02467884
467.4	0.49300108		997.39	0.32190825		1527.38	0.00238199		2057.38	-0.00045035		2587.41	-0.02457084
467.6	0.4924156		997.59	0.3219669		1527.58	0.00225566		2057.58	-0.00070927		2587.61	-0.02404127
467.8	0.49320825		997.79	0.32233184		1527.78	0.00174146		2057.78	-0.00138989		2587.81	-0.02290387
468	0.49249174		997.99	0.3221286		1527.98	0.00195774		2057.98	-0.00135249		2588.01	-0.02283895
468.2	0.49312495		998.19	0.32169902		1528.18	0.00138997		2058.18	-0.00178514		2588.21	-0.02315779
468.4	0.49300758		998.39	0.32143573		1528.38	0.00117082		2058.38	-0.00225383		2588.41	-0.02322903
468.6	0.49266015		998.59	0.32012823		1528.58	0.00143522		2058.58	-0.00237508		2588.61	-0.02317598
468.8	0.49207755		998.79	0.32020115		1528.78	0.00031664		2058.78	-0.00298106		2588.81	-0.02271131
469	0.49141232		998.99	0.32026126		1528.98	0.00017731		2058.98	-0.00317669		2589.01	-0.02361685
469.2	0.49125221		999.19	0.32043151		1529.18	-0.0004139		2059.18	-0.00259976		2589.21	-0.0235602
469.4	0.49204891		999.39	0.32023431		1529.38	-0.00074009		2059.38	-0.00245367		2589.41	-0.02405439
469.6	0.4929934		999.59	0.32066155		1529.58	-0.0002047		2059.58	-0.00267318		2589.61	-0.02448495
469.8	0.49404679		999.79	0.31975571		1529.78	0.00024766		2059.78	-0.00223869		2589.81	-0.02434041
470	0.49507533		999.99	0.31920183		1529.98	-0.00008862		2059.98	-0.00271181		2590.01	-0.02487217
470.2	0.49537514		1000.19	0.3191666		1530.18	0.00026243		2060.18	-0.00259108		2590.21	-0.02511426
470.4	0.49572562		1000.39	0.31899417		1530.38	0.00037886		2060.38	-0.00222522		2590.41	-0.02581579
470.6	0.4953681		1000.59	0.31990669		1530.58	0.0003886		2060.58	-0.00218972		2590.61	-0.02542788
470.8	0.49630925		1000.79	0.31910692		1530.78	0.00078119		2060.78	-0.00169416		2590.81	-0.02477997
471	0.49636968		1000.99	0.31888809		1530.98	0.00038184		2060.98	-0.00063665		2591.01	-0.02335254
471.2	0.49663153		1001.19	0.31879639		1531.18	-0.00004079		2061.18	-0.00006236		2591.21	-0.02207921
471.4	0.49508258		1001.39	0.31883098		1531.38	-0.00059621		2061.38	-0.00007001		2591.41	-0.02152831
471.6	0.49376968		1001.59	0.31905384		1531.58	-0.00041744		2061.58	-0.00015627		2591.61	-0.02128283
471.8	0.4940029		1001.79	0.31951969		1531.78	-0.00019016		2061.78	-0.00020489		2591.81	-0.02164565
472	0.49262801		1001.99	0.31926278		1531.98	-0.00001673		2061.98	0.00021522		2592.01	-0.0221697
472.2	0.4918957		1002.19	0.31924641		1532.18	-0.00045808		2062.18	0.00026198		2592.21	-0.02270465
472.4	0.49093079		1002.39	0.31934789		1532.38	0.00032672		2062.38	-0.00010804		2592.41	-0.02378634
472.6	0.49096708		1002.59	0.3186461		1532.58	0.00033445		2062.58	0.00031521		2592.61	-0.02349342
472.8	0.49034912		1002.79	0.31942847		1532.78	0.00020907		2062.78	-0.00082061		2592.81	-0.02246546
473	0.49033654		1002.99	0.31938465		1532.98	0.001181		2062.98	-0.00118753		2593.01	-0.02242239
473.2	0.48989395		1003.19	0.32010727		1533.18	0.00192749		2063.18	-0.00098006		2593.21	-0.0219274
473.4	0.49062885		1003.39	0.31999335		1533.38	0.00194825		2063.38	-0.00209839		2593.41	-0.02222369
473.6	0.49140731		1003.59	0.31983619		1533.58	0.00209909		2063.58	-0.00233718		2593.61	-0.02219081
473.8	0.49280487		1003.79	0.31936769		1533.78	0.00284839		2063.78	-0.00219185		2593.81	-0.02247891
474	0.49348558		1003.99	0.31916054		1533.98	0.00283468		2063.98	-0.00187686		2594.01	-0.02282192
474.2	0.49241594		1004.19	0.31852617		1534.18	0.00260117		2064.18	-0.00183429		2594.21	-0.02317972
474.4	0.49228173		1004.39	0.31889347		1534.38	0.00252392		2064.38	-0.00163888		2594.41	-0.02320174
474.6	0.49269207		1004.59	0.31928219		1534.58	0.00274968		2064.58	-0.00027055		2594.61	-0.02264162
474.8	0.49269057		1004.79	0.31967708		1534.78	0.00198556		2064.78	-0.00027368		2594.81	-0.02197779
475	0.49257229		1004.99	0.32022153		1534.98	0.00078816		2064.98	-0.00000905		2595.01	-0.02189305
475.2	0.4924571		1005.19	0.32121716		1535.18	0.00070772		2065.18	-0.00063219		2595.21	-0.02249205
475.4	0.49151201		1005.39	0.32114069		1535.38	0.00044759		2065.38	-0.00117495		2595.41	-0.02295475
475.6	0.49114254		1005.59	0.32170971		1535.58	-0.00010062		2065.58	-0.00163208		2595.61	-0.02364165
475.8	0.49089626		1005.79	0.32238523		1535.78	-0.00071373		2065.78	-0.0012291		2595.81	-0.02324012
476	0.49069703		1005.99	0.32216383		1535.98	-0.00169117		2065.98	-0.00136458		2596.01	-0.0235898
476.2	0.49065225		1006.19	0.3220982		1536.18	-0.00161134		2066.18	-0.00182182		2596.21	-0.0237534
476.4	0.49121527		1006.39	0.32205875		1536.38	-0.00111345		2066.38	-0.00295917		2596.41	-0.02354732
476.6	0.49151404		1006.59	0.32153209		1536.58	-0.00043098		2066.58	-0.00354519		2596.61	-0.0224518
476.8	0.49088766		1006.79	0.32219718		1536.78	-0.00000029		2066.78	-0.00503854		2596.81	-0.02206015
477	0.49060749		1006.99	0.32172361		1536.98	0.00150573		2066.98	-0.00417659		2597.01	-0.02211279
477.2	0.49068856		1007.19	0.32158408		1537.18	0.00161937		2067.18	-0.00409937		2597.21	-0.02179354
477.4	0.49210596		1007.39	0.32135469		1537.38	0.00230461		2067.38	-0.00400877		2597.41	-0.02151973
477.6	0.492924		1007.59	0.32063957		1537.58	0.00266232		2067.58	-0.00325865		2597.61	-0.02164954
477.8	0.49375802		1007.79	0.32032008		1537.78	0.00341278		2067.78	-0.00293724		2597.81	-0.02253915
478	0.49323949		1007.99	0.3206415		1537.98	0.00308319		2067.98	-0.00180784		2598.01	-0.02359794
478.2	0.49303172		1008.19	0.32007695		1538.18	0.00295839		2068.18	-0.00161532		2598.21	-0.02374719
478.4	0.49356254		1008.39	0.32040384		1538.38	0.00286011		2068.38	-0.00042278		2598.41	-0.02366777
478.6	0.49310687		1008.59	0.32060018		1538.58	0.00188054		2068.58	0.00030715		2598.61	-0.02369383
478.8	0.49246864		1008.79	0.32155076		1538.78	0.00109854		2068.78	0.00052314		2598.81	-0.02311564
479	0.49205971		1008.99	0.32177737		1538.98	0.00148391		2068.98	0.00115017		2599.01	-0.02308857
479.2	0.49193509		1009.19	0.32181783		1539.18	0.00134306		2069.18	0.00155838		2599.21	-0.02294567
479.4	0.49149127		1009.39	0.32160972		1539.38	-0.00048319		2069.38	0.00134105		2599.41	-0.02301672
479.6	0.49074824		1009.59	0.32102076		1539.58	-0.00157729		2069.58	0.00061002		2599.61	-0.02329936
479.8	0.49117849		1009.79	0.32112024		1539.78	-0.00237842		2069.78	0.00003481		2599.81	-0.02260861
480	0.49198337		1009.99	0.32076673		1539.98	-0.00287218		2069.98	-0.00139399		2600.01	-0.02259418
480.2	0.49208998		1010.19	0.32027637		1540.18	-0.00335306		2070.18	-0.00209765		2600.21	-0.02305541
480.4	0.49221539		1010.39	0.32022823		1540.38	-0.00298337		2070.38	-0.00369964		2600.41	-0.02374587
480.6	0.49146979		1010.59	0.32076049		1540.58	-0.00300836		2070.58	-0.00504304		2600.61	-0.02469456
480.8	0.49198918		1010.79	0.32088431		1540.78	-0.00254268		2070.78	-0.00567268		2600.81	-0.02398062
481	0.4919011		1010.99	0.32011865		1540.98	-0.00163707		2070.98	-0.00480802		2601.01	-0.0240074
481.2	0.49288848		1011.19	0.31996384		1541.18	-0.00149192		2071.18	-0.00574239		2601.21	-0.02355069
481.4	0.49310255		1011.39	0.32014637		1541.38	-0.00072924		2071.38	-0.00568397		2601.41	-0.02513708
481.6	0.49295239		1011.59	0.3203917		1541.58	-0.00098248		2071.58	-0.00583359		2601.61	-0.0256008
481.8	0.49324099		1011.79	0.32096645		1541.78	-0.00099925		2071.78	-0.00522539		2601.81	-0.02630293
482	0.49235458		1011.99	0.32131587		1541.98	-0.00061132		2071.98	-0.00449872		2602.01	-0.02639816
482.2	0.49219904		1012.19	0.32064515		1542.18	-0.0005322		2072.18	-0.00360384		2602.21	-0.02527757
482.4	0.49171364		1012.39	0.32025969		1542.38	-0.00058676		2072.38	-0.0025125		2602.41	-0.02416237
482.6	0.49060996		1012.59	0.31948422		1542.58	0.00001721		2072.58	-0.00256309		2602.61	-0.02294214
482.8	0.49019657		1012.79	0.31945302		1542.78	0.00137346		2072.78	-0.0012193		2602.81	-0.02279921
483	0.49086223		1012.99	0.31928581		1542.98	0.00226034		2072.98	-0.00154448		2603.01	-0.02279279
483.2	0.49072668		1013.19	0.31825176		1543.18	0.00116575		2073.18	-0.00127253		2603.21	-0.02201193
483.4	0.49067929		1013.39	0.31820411		1543.38	0.00001682		2073.38	-0.00212132		2603.41	-0.02187047
483.6	0.49059019		1013.59	0.31794742		1543.58	0.00025227		2073.58	-0.00256634		2603.61	-0.02199921
483.8	0.49171608		1013.79	0.31834013		1543.78	0.00044501		2073.78	-0.00291286		2603.81	-0.0219791
484	0.49175219		1013.99	0.31765548		1543.98	0.00051415		2073.98	-0.0037946		2604.01	-0.02096036
484.2	0.49208847		1014.19	0.3178928		1544.18	0.00018658		2074.18	-0.0051448		2604.21	-0.02170745
484.4	0.49193461		1014.39	0.31760591		1544.38	0.00116111		2074.38	-0.00621013		2604.41	-0.02174507
484.6	0.49224898		1014.59	0.31768427		1544.58	0.00059721		2074.58	-0.00642589		2604.61	-0.0217454
484.8	0.49263274		1014.79	0.31741583		1544.78	0.00071072		2074.78	-0.00661908		2604.81	-0.02148766
485	0.49268335		1014.99	0.31795433		1544.98	0.00036523		2074.98	-0.00672952		2605.01	-0.02286202
485.2	0.49272601		1015.19	0.31847812		1545.18	-0.00002003		2075.18	-0.00749098		2605.21	-0.02304182
485.4	0.49274599		1015.39	0.31942477		1545.38	-0.00072279		2075.38	-0.00743419		2605.41	-0.02412622
485.6	0.4934686		1015.59	0.31867806		1545.58	-0.00103568		2075.58	-0.00766859		2605.61	-0.02483911
485.8	0.49410195		1015.79	0.31953647		1545.78	-0.00175078		2075.78	-0.00675034		2605.81	-0.0256863
486	0.49400134		1015.99	0.31952849		1545.98	-0.00183356		2075.98	-0.00612315		2606.01	-0.02558884
486.2	0.49411266		1016.19	0.31862899		1546.18	-0.00229044		2076.18	-0.00551142		2606.21	-0.02536242
486.4	0.49406978		1016.39	0.31884308		1546.38	-0.00251072		2076.38	-0.00500638		2606.41	-0.02571935
486.6	0.49365909		1016.59	0.31895036		1546.58	-0.00150719		2076.58	-0.00461095		2606.61	-0.02579338
486.8	0.49425493		1016.79	0.32015249		1546.78	-0.00161191		2076.78	-0.00301427		2606.81	-0.02597845
487	0.49406837		1016.99	0.32123486		1546.98	-0.00193169		2076.98	-0.00260372		2607.01	-0.0245604
487.2	0.49239632		1017.19	0.32100684		1547.18	-0.00225342		2077.18	-0.00197602		2607.21	-0.02418948
487.4	0.49180783		1017.39	0.32197575		1547.38	-0.00226247		2077.38	-0.0018413		2607.41	-0.02411643
487.6	0.49140768		1017.59	0.32211539		1547.58	-0.00107915		2077.58	-0.00146112		2607.61	-0.02358193
487.8	0.49107556		1017.79	0.32181502		1547.78	-0.00003624		2077.78	-0.00165474		2607.81	-0.0228172
488	0.49068386		1017.99	0.32185621		1547.98	0.00007705		2077.98	-0.00249529		2608.01	-0.02181333
488.2	0.49123224		1018.19	0.32171869		1548.18	0.00031911		2078.18	-0.00268063		2608.21	-0.02159934
488.4	0.49078652		1018.39	0.32149072		1548.38	0.0008462		2078.38	-0.00271876		2608.41	-0.02163608
488.6	0.49145234		1018.59	0.32194071		1548.58	0.00085032		2078.58	-0.0035501		2608.61	-0.02211156
488.8	0.49049909		1018.79	0.32214848		1548.78	0.00074145		2078.78	-0.00407585		2608.81	-0.02276232
489	0.49070651		1018.99	0.32183481		1548.98	0.00044005		2078.98	-0.00464301		2609.01	-0.02261968
489.2	0.49033171		1019.19	0.32135884		1549.18	-0.00021083		2079.18	-0.00428635		2609.21	-0.02210022
489.4	0.49040664		1019.39	0.31948737		1549.38	-0.00063383		2079.38	-0.00489038		2609.41	-0.02255938
489.6	0.49073016		1019.59	0.31875979		1549.58	-0.00054673		2079.58	-0.00478824		2609.61	-0.02342178
489.8	0.49146334		1019.79	0.31917274		1549.78	-0.00100723		2079.78	-0.00380598		2609.81	-0.02300988
490	0.49157898		1019.99	0.31833119		1549.98	-0.0009747		2079.98	-0.00397824		2610.01	-0.02247193
490.2	0.49132717		1020.19	0.31773153		1550.18	-0.00142446		2080.18	-0.00337083		2610.21	-0.0228214
490.4	0.49109581		1020.39	0.3177609		1550.38	-0.00171691		2080.38	-0.00325946		2610.41	-0.02248379
490.6	0.49093524		1020.59	0.31705189		1550.58	-0.00207729		2080.58	-0.00360442		2610.61	-0.02133601
490.8	0.49113182		1020.79	0.31769604		1550.78	-0.00270697		2080.78	-0.00371929		2610.81	-0.01999491
491	0.4900694		1020.99	0.31822048		1550.98	-0.00246833		2080.98	-0.00417626		2611.01	-0.01982693
491.2	0.49020356		1021.19	0.31819563		1551.18	-0.00279714		2081.18	-0.00540286		2611.21	-0.01991736
491.4	0.4908484		1021.39	0.31826082		1551.38	-0.00197034		2081.38	-0.0060117		2611.41	-0.02000989
491.6	0.49202061		1021.59	0.31901511		1551.58	-0.00104701		2081.58	-0.00648526		2611.61	-0.02010805
491.8	0.49214303		1021.79	0.31872886		1551.78	-0.00105336		2081.78	-0.00668191		2611.81	-0.02104457
492	0.49322025		1021.99	0.31946961		1551.98	-0.00034897		2081.98	-0.00729393		2612.01	-0.02156954
492.2	0.49421956		1022.19	0.31970581		1552.18	0.00016124		2082.18	-0.00737726		2612.21	-0.0217078
492.4	0.49455528		1022.39	0.32076333		1552.38	0.00100933		2082.38	-0.00807867		2612.41	-0.0233043
492.6	0.49533581		1022.59	0.32123568		1552.58	0.00077119		2082.58	-0.00816165		2612.61	-0.02450278
492.8	0.49398257		1022.79	0.32116134		1552.78	0.00022405		2082.78	-0.00694394		2612.81	-0.02468151
493	0.49383352		1022.99	0.32100258		1552.98	-0.00047109		2082.98	-0.0064472		2613.01	-0.024951
493.2	0.49296647		1023.19	0.32052024		1553.18	-0.00081755		2083.18	-0.00624852		2613.21	-0.02514523
493.4	0.49203496		1023.39	0.32022938		1553.38	-0.00099834		2083.38	-0.00632461		2613.41	-0.02566266
493.6	0.4917743		1023.59	0.320677		1553.58	-0.0005502		2083.58	-0.00519889		2613.61	-0.02594804
493.8	0.49214652		1023.79	0.31981147		1553.78	-0.00028997		2083.78	-0.00425908		2613.81	-0.02501467
494	0.49131112		1023.99	0.32010766		1553.98	0.00005764		2083.98	-0.00459435		2614.01	-0.02517899
494.2	0.4902806		1024.19	0.31968859		1554.18	-0.00009896		2084.18	-0.00435175		2614.21	-0.02443201
494.4	0.48984703		1024.39	0.31980578		1554.38	-0.00026486		2084.38	-0.00432815		2614.41	-0.02383088
494.6	0.4899926		1024.59	0.31957272		1554.58	-0.00058149		2084.58	-0.00427337		2614.61	-0.02384596
494.8	0.48985061		1024.79	0.32033166		1554.78	-0.00072054		2084.78	-0.00385163		2614.81	-0.02273299
495	0.49057615		1024.99	0.31982388		1554.98	-0.00061047		2084.98	-0.00390828		2615.01	-0.02197156
495.2	0.49093832		1025.19	0.31937591		1555.18	-0.00044288		2085.18	-0.00414122		2615.21	-0.02120338
495.4	0.49179462		1025.39	0.31848089		1555.38	-0.00025664		2085.38	-0.0038407		2615.41	-0.02191043
495.6	0.49230345		1025.59	0.31908046		1555.58	-0.00012249		2085.58	-0.00355337		2615.61	-0.02189252
495.8	0.49217511		1025.79	0.31840643		1555.78	-0.00055966		2085.78	-0.0034905		2615.81	-0.02196561
496	0.49350169		1025.99	0.31867744		1555.98	-0.00084176		2085.98	-0.00378652		2616.01	-0.02154545
496.2	0.49456515		1026.19	0.31779538		1556.18	-0.0018179		2086.18	-0.00455705		2616.21	-0.02126841
496.4	0.49492354		1026.39	0.31829931		1556.38	-0.00130903		2086.38	-0.00528707		2616.41	-0.02191693
496.6	0.49475961		1026.59	0.31812877		1556.58	-0.00250125		2086.58	-0.00509591		2616.61	-0.02193342
496.8	0.49445875		1026.79	0.31774333		1556.78	-0.00292172		2086.78	-0.00534588		2616.81	-0.0218518
497	0.49367561		1026.99	0.31764091		1556.98	-0.00369952		2086.98	-0.00576997		2617.01	-0.02225542
497.2	0.49270587		1027.19	0.31768358		1557.18	-0.00400329		2087.18	-0.00717851		2617.21	-0.02204213
497.4	0.49193407		1027.39	0.31824953		1557.38	-0.00424209		2087.38	-0.006844		2617.41	-0.02158557
497.6	0.4911008		1027.59	0.31861149		1557.58	-0.00353304		2087.58	-0.00744356		2617.61	-0.02084202
497.8	0.49097468		1027.79	0.31933618		1557.78	-0.00280437		2087.78	-0.00772624		2617.81	-0.02049997
498	0.48984042		1027.99	0.31991144		1557.98	-0.00262842		2087.98	-0.007841		2618.01	-0.02103262
498.2	0.48943723		1028.19	0.31979335		1558.18	-0.00167525		2088.18	-0.00782365		2618.21	-0.02020533
498.4	0.48936909		1028.39	0.32026041		1558.38	-0.00077972		2088.38	-0.00675406		2618.41	-0.0211957
498.6	0.48969884		1028.59	0.31963058		1558.58	-0.0006314		2088.58	-0.00651504		2618.61	-0.02133423
498.8	0.49058171		1028.79	0.31944302		1558.78	-0.00014821		2088.78	-0.0058308		2618.81	-0.0200516
499	0.49130472		1028.99	0.31961812		1558.98	0.00079573		2088.98	-0.00657625		2619.01	-0.02039375
499.2	0.4916196		1029.19	0.32024653		1559.18	0.00095375		2089.18	-0.0054634		2619.21	-0.02040102
499.4	0.49236619		1029.39	0.32055936		1559.38	0.0006121		2089.38	-0.00584322		2619.41	-0.02108202
499.6	0.49315365		1029.59	0.3210811		1559.58	0.00049707		2089.58	-0.00570022		2619.61	-0.02041832
499.8	0.49362276		1029.79	0.32116661		1559.78	0.00004615		2089.78	-0.0058897		2619.81	-0.01947202
500	0.49374255		1029.99	0.32145972		1559.98	-0.00011673		2089.98	-0.00625431		2620.01	-0.01938298
500.2	0.49347261		1030.19	0.32094135		1560.18	-0.00060989		2090.18	-0.00710181		2620.21	-0.01875892
500.4	0.49307727		1030.39	0.32129924		1560.38	0.00022518		2090.38	-0.00725791		2620.41	-0.01918901
500.6	0.49217378		1030.59	0.32097066		1560.58	-0.00071469		2090.58	-0.0067123		2620.61	-0.02021661
500.8	0.49172026		1030.79	0.3211636		1560.78	-0.00011559		2090.78	-0.00716594		2620.81	-0.02014902
501	0.48994345		1030.99	0.3218635		1560.98	-0.00124406		2090.98	-0.00657846		2621.01	-0.01961145
501.2	0.48931147		1031.19	0.32149639		1561.18	-0.00159352		2091.18	-0.00702		2621.21	-0.01928703
501.4	0.48882769		1031.39	0.32130641		1561.38	-0.00213048		2091.38	-0.00697353		2621.41	-0.01963326
501.6	0.48867053		1031.59	0.32098075		1561.58	-0.00171742		2091.58	-0.00786643		2621.61	-0.02006216
501.8	0.4891234		1031.79	0.32063428		1561.78	-0.00200407		2091.78	-0.00707854		2621.81	-0.02149827
502	0.48900586		1031.99	0.31962462		1561.98	-0.00186712		2091.98	-0.00679731		2622.01	-0.0219122
502.2	0.48993727		1032.19	0.31931578		1562.18	-0.00089759		2092.18	-0.00689797		2622.21	-0.02272335
502.4	0.49052145		1032.39	0.3188901		1562.38	-0.00098747		2092.38	-0.00683395		2622.41	-0.02331332
502.6	0.49100169		1032.59	0.31810009		1562.58	-0.00153006		2092.58	-0.00696187		2622.61	-0.02325391
502.8	0.49208554		1032.79	0.31743894		1562.78	0.00001518		2092.78	-0.00729027		2622.81	-0.02287108
503	0.49254357		1032.99	0.31784034		1562.98	0.00045581		2092.98	-0.00774735		2623.01	-0.02312066
503.2	0.49323862		1033.19	0.31762921		1563.18	0.00090507		2093.18	-0.00696294		2623.21	-0.02246358
503.4	0.4933978		1033.39	0.31743518		1563.38	0.00118081		2093.38	-0.00765643		2623.41	-0.02257255
503.6	0.49367359		1033.59	0.31779687		1563.58	0.00086022		2093.58	-0.00750322		2623.61	-0.0218465
503.8	0.49237997		1033.79	0.31817243		1563.78	0.00153727		2093.78	-0.00813145		2623.81	-0.02202272
504	0.49231754		1033.99	0.31798826		1563.98	0.00159986		2093.98	-0.00818675		2624.01	-0.0228987
504.2	0.49160404		1034.19	0.31717668		1564.18	0.00119489		2094.18	-0.00765912		2624.21	-0.0231723
504.4	0.49087663		1034.39	0.31721835		1564.38	0.00195571		2094.38	-0.00681505		2624.41	-0.02375255
504.6	0.48931951		1034.59	0.31762765		1564.58	0.00217511		2094.58	-0.00577864		2624.61	-0.02416857
504.8	0.48912904		1034.79	0.31809812		1564.78	0.00214155		2094.78	-0.00542973		2624.81	-0.02413577
505	0.4885698		1034.99	0.31896419		1564.98	0.00096814		2094.98	-0.00438859		2625.01	-0.02457719
505.2	0.48907608		1035.19	0.31823228		1565.18	0.00051387		2095.18	-0.00504484		2625.21	-0.02538606
505.4	0.48946661		1035.39	0.31814521		1565.38	-0.00055574		2095.38	-0.00535284		2625.41	-0.02570275
505.6	0.49010104		1035.59	0.31849737		1565.58	-0.00070161		2095.58	-0.00537172		2625.61	-0.02587281
505.8	0.49100873		1035.79	0.3194123		1565.78	-0.00112151		2095.78	-0.00458613		2625.81	-0.02623627
506	0.49032299		1035.99	0.3192323		1565.98	-0.00089814		2095.98	-0.00451058		2626.01	-0.02599657
506.2	0.49075713		1036.19	0.31958765		1566.18	-0.00145305		2096.18	-0.00470268		2626.21	-0.02654744
506.4	0.49060839		1036.39	0.31963973		1566.38	-0.00073531		2096.38	-0.00540905		2626.41	-0.02586824
506.6	0.48997961		1036.59	0.31871353		1566.58	-0.00033654		2096.58	-0.00546199		2626.61	-0.02567506
506.8	0.49083475		1036.79	0.31892393		1566.78	0.00063039		2096.78	-0.00572291		2626.81	-0.02528506
507	0.4903225		1036.99	0.31909742		1566.98	0.00070546		2096.98	-0.00608895		2627.01	-0.02513536
507.2	0.49033142		1037.19	0.31958379		1567.18	0.00041838		2097.18	-0.00661219		2627.21	-0.02502241
507.4	0.4901342		1037.39	0.31966425		1567.38	0.00039939		2097.38	-0.00736282		2627.41	-0.02403268
507.6	0.49064403		1037.59	0.32079521		1567.58	0.0001826		2097.58	-0.00798724		2627.61	-0.02307193
507.8	0.49055532		1037.79	0.32078544		1567.78	0.00044925		2097.78	-0.00841631		2627.81	-0.02249202
508	0.49209747		1037.99	0.32067156		1567.98	-0.00016203		2097.98	-0.00686168		2628.01	-0.02219622
508.2	0.49154209		1038.19	0.32064433		1568.18	-0.00095759		2098.18	-0.00609492		2628.21	-0.02153225
508.4	0.49154227		1038.39	0.32074239		1568.38	-0.00087436		2098.38	-0.00543742		2628.41	-0.02060824
508.6	0.49161434		1038.59	0.32042272		1568.58	-0.00124605		2098.58	-0.00569573		2628.61	-0.02050199
508.8	0.49221914		1038.79	0.32041285		1568.78	-0.00178941		2098.78	-0.00538338		2628.81	-0.02055829
509	0.49218404		1038.99	0.32116081		1568.98	-0.00146433		2098.98	-0.00501135		2629.01	-0.02007737
509.2	0.49266846		1039.19	0.32049168		1569.18	-0.00274382		2099.18	-0.00609242		2629.21	-0.02095536
509.4	0.49214873		1039.39	0.32042721		1569.38	-0.00288931		2099.38	-0.00591469		2629.41	-0.02122072
509.6	0.49107465		1039.59	0.32074383		1569.58	-0.00249988		2099.58	-0.00592674		2629.61	-0.02175719
509.8	0.49079685		1039.79	0.32088174		1569.78	-0.00203571		2099.78	-0.00615335		2629.81	-0.02307071
510	0.48895611		1039.99	0.3201673		1569.98	-0.00202776		2099.98	-0.00622654		2630.01	-0.02394965
510.2	0.48889987		1040.19	0.32004725		1570.18	-0.00148702		2100.18	-0.00711216		2630.21	-0.02588485
510.4	0.48841556		1040.39	0.320502		1570.38	-0.00021441		2100.38	-0.00757885		2630.41	-0.02666718
510.6	0.48739213		1040.59	0.31991541		1570.58	-0.00047679		2100.58	-0.00769845		2630.61	-0.02773302
510.8	0.48798757		1040.79	0.32041427		1570.78	0.00000496		2100.78	-0.00800774		2630.81	-0.02863249
511	0.48762763		1040.99	0.32049667		1570.98	0.00095909		2100.98	-0.00873018		2631.01	-0.02849855
511.2	0.48802736		1041.19	0.32107716		1571.18	0.00101697		2101.18	-0.00833993		2631.21	-0.02825932
511.4	0.4884211		1041.39	0.32090228		1571.38	0.00139495		2101.38	-0.00883663		2631.41	-0.02719736
511.6	0.48897853		1041.59	0.32198569		1571.58	0.00069474		2101.58	-0.00829563		2631.61	-0.02644095
511.8	0.48916761		1041.79	0.32196022		1571.78	0.00071923		2101.78	-0.00761141		2631.81	-0.02554596
512	0.49012456		1041.99	0.32211774		1571.98	0.00060207		2101.98	-0.00600943		2632.01	-0.02522477
512.2	0.48929382		1042.19	0.32258785		1572.18	0.00011054		2102.18	-0.00544422		2632.21	-0.02430828
512.4	0.48958303		1042.39	0.32294072		1572.38	0.00050438		2102.38	-0.00471063		2632.41	-0.02322523
512.6	0.4894595		1042.59	0.3228811		1572.58	0.00026689		2102.58	-0.00425557		2632.61	-0.02276802
512.8	0.48933664		1042.79	0.32288799		1572.78	0.00030592		2102.78	-0.00352678		2632.81	-0.02233173
513	0.48875151		1042.99	0.32308992		1572.98	-0.00029219		2102.98	-0.00319448		2633.01	-0.02147528
513.2	0.48792826		1043.19	0.32227485		1573.18	-0.00141672		2103.18	-0.00401382		2633.21	-0.02146177
513.4	0.4871859		1043.39	0.32184066		1573.38	-0.00174077		2103.38	-0.00399485		2633.41	-0.0208852
513.6	0.48723764		1043.59	0.32128445		1573.58	-0.00176488		2103.58	-0.00433437		2633.61	-0.0211693
513.8	0.48747009		1043.79	0.32104573		1573.78	-0.00215051		2103.78	-0.00482208		2633.81	-0.02153434
514	0.4876446		1043.99	0.32021286		1573.98	-0.00258287		2103.98	-0.00495241		2634.01	-0.02182183
514.2	0.48822949		1044.19	0.32017306		1574.18	-0.00227293		2104.18	-0.00511736		2634.21	-0.02295646
514.4	0.4892005		1044.39	0.31991788		1574.38	-0.00218704		2104.38	-0.00519135		2634.41	-0.02368444
514.6	0.49017799		1044.59	0.31927221		1574.58	-0.00177493		2104.58	-0.00591847		2634.61	-0.02416597
514.8	0.49101406		1044.79	0.31915794		1574.78	-0.00059442		2104.78	-0.00682283		2634.81	-0.02478241
515	0.49161288		1044.99	0.31809963		1574.98	-0.00068936		2104.98	-0.00752713		2635.01	-0.02534528
515.2	0.49174729		1045.19	0.31760437		1575.18	-0.00039597		2105.18	-0.00776487		2635.21	-0.0261973
515.4	0.49306905		1045.39	0.3171632		1575.38	-0.00062977		2105.38	-0.00807939		2635.41	-0.02642517
515.6	0.49274104		1045.59	0.31667837		1575.58	-0.00064863		2105.58	-0.00773272		2635.61	-0.02632742
515.8	0.49309644		1045.79	0.31718391		1575.78	-0.00038729		2105.78	-0.00817883		2635.81	-0.02577358
516	0.49293117		1045.99	0.31723806		1575.98	-0.00025412		2105.98	-0.00793521		2636.01	-0.02608756
516.2	0.49239848		1046.19	0.31833193		1576.18	-0.00032955		2106.18	-0.00738026		2636.21	-0.02603396
516.4	0.4923232		1046.39	0.31776745		1576.38	-0.00081512		2106.38	-0.00677377		2636.41	-0.02594819
516.6	0.49174058		1046.59	0.31782371		1576.58	-0.00139465		2106.58	-0.00687325		2636.61	-0.02591452
516.8	0.49103777		1046.79	0.31828375		1576.78	-0.00149226		2106.78	-0.00643875		2636.81	-0.02520215
517	0.48942034		1046.99	0.31857361		1576.98	-0.00265879		2106.98	-0.00623773		2637.01	-0.02391677
517.2	0.48912759		1047.19	0.31853535		1577.18	-0.00280398		2107.18	-0.0067803		2637.21	-0.02363387
517.4	0.48954885		1047.39	0.31903066		1577.38	-0.00286557		2107.38	-0.0060328		2637.41	-0.02387608
517.6	0.48917872		1047.59	0.31978806		1577.58	-0.00253533		2107.58	-0.0054762		2637.61	-0.02347907
517.8	0.48862699		1047.79	0.32109784		1577.78	-0.00338853		2107.78	-0.00466186		2637.81	-0.02346835
518	0.48929458		1047.99	0.32146278		1577.98	-0.00283531		2107.98	-0.00434492		2638.01	-0.02402738
518.2	0.48840816		1048.19	0.32202092		1578.18	-0.00258937		2108.18	-0.0039814		2638.21	-0.02415195
518.4	0.48817865		1048.39	0.32205241		1578.38	-0.002495		2108.38	-0.00438059		2638.41	-0.02423582
518.6	0.48801284		1048.59	0.32124091		1578.58	-0.00208094		2108.58	-0.00531599		2638.61	-0.02392054
518.8	0.48768493		1048.79	0.3207163		1578.78	-0.00245882		2108.78	-0.00539143		2638.81	-0.02394126
519	0.48810353		1048.99	0.31948167		1578.98	-0.00306332		2108.98	-0.00530001		2639.01	-0.02485142
519.2	0.4879766		1049.19	0.31958733		1579.18	-0.00286681		2109.18	-0.00595381		2639.21	-0.02490509
519.4	0.48845731		1049.39	0.31852378		1579.38	-0.00320473		2109.38	-0.00664255		2639.41	-0.02451062
519.6	0.48731245		1049.59	0.31811784		1579.58	-0.00303438		2109.58	-0.00701877		2639.61	-0.02411885
519.8	0.48791493		1049.79	0.31858528		1579.78	-0.00398608		2109.78	-0.00796351		2639.81	-0.02406952
520	0.48822714		1049.99	0.31785536		1579.98	-0.0037286		2109.98	-0.00760127		2640.01	-0.02401117
520.2	0.48789953		1050.19	0.31769889		1580.18	-0.00350319		2110.18	-0.00698036		2640.21	-0.0240646
520.4	0.48757079		1050.39	0.31734225		1580.38	-0.003902		2110.38	-0.00700151		2640.41	-0.02394412
520.6	0.48778192		1050.59	0.31826649		1580.58	-0.00370832		2110.58	-0.00798241		2640.61	-0.02291837
520.8	0.48683962		1050.79	0.31830791		1580.78	-0.00320646		2110.78	-0.00761489		2640.81	-0.02258449
521	0.48664977		1050.99	0.3179983		1580.98	-0.0030622		2110.98	-0.00791804		2641.01	-0.02182565
521.2	0.48737253		1051.19	0.31837446		1581.18	-0.00183309		2111.18	-0.00803567		2641.21	-0.02270568
521.4	0.48740563		1051.39	0.31950712		1581.38	-0.00042223		2111.38	-0.00791654		2641.41	-0.0232575
521.6	0.48681281		1051.59	0.31955724		1581.58	-0.00021243		2111.58	-0.00775682		2641.61	-0.02323095
521.8	0.48703069		1051.79	0.31953936		1581.78	0.00039036		2111.78	-0.00747985		2641.81	-0.02416271
522	0.48747275		1051.99	0.3190314		1581.98	0.00086797		2111.98	-0.00756156		2642.01	-0.02386199
522.2	0.48750477		1052.19	0.31808344		1582.18	0.00056051		2112.18	-0.00730468		2642.21	-0.02416306
522.4	0.4885572		1052.39	0.31767576		1582.38	0.0006882		2112.38	-0.00658296		2642.41	-0.0242012
522.6	0.4890698		1052.59	0.31689388		1582.58	0.00050982		2112.58	-0.00643999		2642.61	-0.024492
522.8	0.4894881		1052.79	0.31734448		1582.78	-0.0010164		2112.78	-0.00655956		2642.81	-0.02574802
523	0.48983831		1052.99	0.31675201		1582.98	-0.00153002		2112.98	-0.00706276		2643.01	-0.02683738
523.2	0.49045962		1053.19	0.31714606		1583.18	-0.00201056		2113.18	-0.00757534		2643.21	-0.02654786
523.4	0.49047815		1053.39	0.31645574		1583.38	-0.00246788		2113.38	-0.00761123		2643.41	-0.02629868
523.6	0.4909407		1053.59	0.31675544		1583.58	-0.00284592		2113.58	-0.00678319		2643.61	-0.02630397
523.8	0.49184004		1053.79	0.3172588		1583.78	-0.00387218		2113.78	-0.00665618		2643.81	-0.0258754
524	0.49191616		1053.99	0.31759424		1583.98	-0.0032004		2113.98	-0.00587798		2644.01	-0.02470731
524.2	0.49080096		1054.19	0.31804053		1584.18	-0.00319367		2114.18	-0.0058679		2644.21	-0.02404803
524.4	0.49103331		1054.39	0.31956946		1584.38	-0.00342424		2114.38	-0.00584596		2644.41	-0.02372903
524.6	0.4911305		1054.59	0.31935137		1584.58	-0.00352145		2114.58	-0.00659024		2644.61	-0.02282742
524.8	0.49041322		1054.79	0.31916631		1584.78	-0.00309349		2114.78	-0.00659262		2644.81	-0.02289067
525	0.49046366		1054.99	0.32006488		1584.98	-0.00232346		2114.98	-0.00690729		2645.01	-0.02262454
525.2	0.4908194		1055.19	0.3204441		1585.18	-0.00135355		2115.18	-0.00773881		2645.21	-0.0234261
525.4	0.49062833		1055.39	0.32034391		1585.38	-0.00069532		2115.38	-0.00892865		2645.41	-0.02397912
525.6	0.49027577		1055.59	0.31973334		1585.58	-0.00049845		2115.58	-0.00897228		2645.61	-0.02395551
525.8	0.4907822		1055.79	0.31962769		1585.78	-0.00049717		2115.78	-0.00869942		2645.81	-0.02419184
526	0.49055397		1055.99	0.31965047		1585.98	-0.00067586		2115.98	-0.00833806		2646.01	-0.02426736
526.2	0.49091641		1056.19	0.3191497		1586.18	-0.00051762		2116.18	-0.00839851		2646.21	-0.02530417
526.4	0.49029851		1056.39	0.31957219		1586.38	-0.00050023		2116.38	-0.00818018		2646.41	-0.02553349
526.6	0.48944998		1056.59	0.31907935		1586.58	-0.00081596		2116.58	-0.00884915		2646.61	-0.02629288
526.8	0.48880305		1056.79	0.31864432		1586.78	-0.00094194		2116.78	-0.00900634		2646.81	-0.0277329
527	0.48892808		1056.99	0.31777234		1586.98	-0.0010833		2116.98	-0.00893999		2647.01	-0.02775947
527.2	0.48807304		1057.19	0.31781807		1587.18	-0.00044995		2117.18	-0.00891838		2647.21	-0.02693324
527.4	0.48715021		1057.39	0.31699611		1587.38	-0.00037143		2117.38	-0.00912815		2647.41	-0.02688638
527.6	0.48635145		1057.59	0.31650906		1587.58	-0.00039948		2117.58	-0.00800969		2647.61	-0.02743378
527.8	0.48579275		1057.79	0.31645189		1587.78	-0.00063531		2117.78	-0.00722833		2647.81	-0.02715894
528	0.48478887		1057.99	0.31656293		1587.98	-0.00002433		2117.98	-0.00719487		2648.01	-0.02696671
528.2	0.48393335		1058.19	0.31652188		1588.18	-0.00071885		2118.18	-0.00672975		2648.21	-0.02720787
528.4	0.48445338		1058.39	0.31777157		1588.38	-0.00093183		2118.38	-0.00584298		2648.41	-0.02725533
528.6	0.4840893		1058.59	0.3170872		1588.58	-0.0016027		2118.58	-0.00600392		2648.61	-0.02693029
528.8	0.4849621		1058.79	0.31763911		1588.78	-0.00109631		2118.78	-0.00576616		2648.81	-0.02649446
529	0.48557846		1058.99	0.31841319		1588.98	-0.00114405		2118.98	-0.00600623		2649.01	-0.02706575
529.2	0.48723566		1059.19	0.31841128		1589.18	-0.00134752		2119.18	-0.00706286		2649.21	-0.02702874
529.4	0.48756498		1059.39	0.31824717		1589.38	-0.00143605		2119.38	-0.0079306		2649.41	-0.02697577
529.6	0.48816937		1059.59	0.31829276		1589.58	-0.00154934		2119.58	-0.00723354		2649.61	-0.02646981
529.8	0.48923362		1059.79	0.31898751		1589.78	-0.00145977		2119.78	-0.00754773		2649.81	-0.02657761
530	0.49038362		1059.99	0.31845086		1589.98	-0.00133191		2119.98	-0.00842029		2650.01	-0.02607355
530.2	0.4917841		1060.19	0.31856543		1590.18	-0.00137598		2120.18	-0.00898232		2650.21	-0.02627036
530.4	0.49219802		1060.39	0.31864367		1590.38	-0.00160249		2120.38	-0.00935642		2650.41	-0.02561817
530.6	0.49308193		1060.59	0.31836433		1590.58	-0.00164776		2120.58	-0.00933799		2650.61	-0.02529154
530.8	0.49292014		1060.79	0.31804086		1590.78	-0.00178152		2120.78	-0.010261		2650.81	-0.0250793
531	0.49357073		1060.99	0.31740538		1590.98	-0.0027522		2120.98	-0.01032752		2651.01	-0.02476381
531.2	0.49307548		1061.19	0.31782774		1591.18	-0.00206253		2121.18	-0.01060462		2651.21	-0.02452789
531.4	0.49220621		1061.39	0.31779059		1591.38	-0.00262675		2121.38	-0.00972364		2651.41	-0.0251018
531.6	0.49106658		1061.59	0.31761869		1591.58	-0.00332568		2121.58	-0.00841188		2651.61	-0.02524
531.8	0.49060169		1061.79	0.31875746		1591.78	-0.00268223		2121.78	-0.00757653		2651.81	-0.02555759
532	0.48934702		1061.99	0.31937787		1591.98	-0.00352355		2121.98	-0.00726347		2652.01	-0.02549784
532.2	0.48856006		1062.19	0.31948123		1592.18	-0.0037155		2122.18	-0.00719515		2652.21	-0.02594277
532.4	0.48811494		1062.39	0.32050696		1592.38	-0.00358231		2122.38	-0.00685825		2652.41	-0.02593535
532.6	0.48766994		1062.59	0.31985546		1592.58	-0.00382904		2122.58	-0.00659479		2652.61	-0.02627137
532.8	0.48746893		1062.79	0.31987984		1592.78	-0.00317381		2122.78	-0.0068336		2652.81	-0.02646245
533	0.48806346		1062.99	0.31962969		1592.98	-0.00408351		2122.98	-0.00702195		2653.01	-0.02749548
533.2	0.48811278		1063.19	0.31969971		1593.18	-0.003637		2123.18	-0.00703212		2653.21	-0.02640013
533.4	0.48738656		1063.39	0.31898807		1593.38	-0.00303487		2123.38	-0.00704185		2653.41	-0.02599813
533.6	0.48834068		1063.59	0.31810611		1593.58	-0.00226202		2123.58	-0.0067057		2653.61	-0.02672991
533.8	0.4893202		1063.79	0.31808304		1593.78	-0.00109641		2123.78	-0.00721077		2653.81	-0.02702296
534	0.49015979		1063.99	0.31736141		1593.98	-0.00076146		2123.98	-0.00742478		2654.01	-0.02634839
534.2	0.49003633		1064.19	0.31704042		1594.18	-0.00079133		2124.18	-0.00784611		2654.21	-0.02580099
534.4	0.49016578		1064.39	0.31620136		1594.38	-0.0009589		2124.38	-0.00754993		2654.41	-0.02523541
534.6	0.49025043		1064.59	0.31546848		1594.58	-0.00093512		2124.58	-0.00735025		2654.61	-0.02502419
534.8	0.48993372		1064.79	0.31464262		1594.78	-0.00118277		2124.78	-0.00848594		2654.81	-0.02488603
535	0.49050382		1064.99	0.31413356		1594.98	-0.00079455		2124.98	-0.00694738		2655.01	-0.02554866
535.2	0.4902256		1065.19	0.31526961		1595.18	-0.00019999		2125.18	-0.0067709		2655.21	-0.02521643
535.4	0.48939636		1065.39	0.31619672		1595.38	0.00014999		2125.38	-0.00591205		2655.41	-0.02455106
535.6	0.48919725		1065.59	0.3162315		1595.58	0.00070259		2125.58	-0.00571732		2655.61	-0.02460785
535.8	0.48864732		1065.79	0.31720993		1595.78	0.00088311		2125.78	-0.00574459		2655.81	-0.02594008
536	0.48766351		1065.99	0.31736399		1595.98	-0.00004783		2125.98	-0.00667299		2656.01	-0.02646639
536.2	0.48689437		1066.19	0.31886029		1596.18	0.00043324		2126.18	-0.00768751		2656.21	-0.02710872
536.4	0.48659385		1066.39	0.31948432		1596.38	-0.00048089		2126.38	-0.00708588		2656.41	-0.02728505
536.6	0.48660665		1066.59	0.31922275		1596.58	-0.00149294		2126.58	-0.00712272		2656.61	-0.02749469
536.8	0.48658305		1066.79	0.31986952		1596.78	-0.0018896		2126.78	-0.00722548		2656.81	-0.02766575
537	0.48736658		1066.99	0.31995026		1596.98	-0.00334762		2126.98	-0.00795471		2657.01	-0.02797865
537.2	0.48626009		1067.19	0.32016396		1597.18	-0.00314325		2127.18	-0.00793214		2657.21	-0.0277804
537.4	0.48574162		1067.39	0.32015559		1597.38	-0.00410358		2127.38	-0.00757721		2657.41	-0.02801236
537.6	0.48664433		1067.59	0.31953751		1597.58	-0.00414131		2127.58	-0.00732436		2657.61	-0.02880174
537.8	0.48692954		1067.79	0.32034877		1597.78	-0.00498096		2127.78	-0.00759912		2657.81	-0.02861326
538	0.4868872		1067.99	0.32064242		1597.98	-0.00528424		2127.98	-0.00761375		2658.01	-0.02796789
538.2	0.4859349		1068.19	0.320107		1598.18	-0.00531519		2128.18	-0.00820393		2658.21	-0.02722386
538.4	0.48669594		1068.39	0.31991406		1598.38	-0.00528278		2128.38	-0.0076481		2658.41	-0.02744331
538.6	0.48736877		1068.59	0.31963523		1598.58	-0.00523894		2128.58	-0.00732486		2658.61	-0.02660716
538.8	0.48754554		1068.79	0.31933426		1598.78	-0.00575714		2128.78	-0.00771966		2658.81	-0.02596765
539	0.48833659		1068.99	0.32004208		1598.98	-0.00530644		2128.98	-0.00732419		2659.01	-0.02648035
539.2	0.4886594		1069.19	0.32134672		1599.18	-0.00494543		2129.18	-0.00842587		2659.21	-0.0253464
539.4	0.48877147		1069.39	0.3217415		1599.38	-0.00361769		2129.38	-0.00904699		2659.41	-0.02527855
539.6	0.48836462		1069.59	0.32152279		1599.58	-0.00305042		2129.58	-0.00903986		2659.61	-0.02610371
539.8	0.48780873		1069.79	0.32196858		1599.78	-0.00328366		2129.78	-0.0097083		2659.81	-0.0270391
540	0.48729396		1069.99	0.3213212		1599.98	-0.0031694		2129.98	-0.00980901		2660.01	-0.0273598
540.2	0.4867526		1070.19	0.32094374		1600.18	-0.00294796		2130.18	-0.00972375		2660.21	-0.02717013
540.4	0.48675033		1070.39	0.3190927		1600.38	-0.00335331		2130.38	-0.00891737		2660.41	-0.02643302
540.6	0.48709759		1070.59	0.31843435		1600.58	-0.00328865		2130.58	-0.00888646		2660.61	-0.02631152
540.8	0.48777422		1070.79	0.31760437		1600.78	-0.00233419		2130.78	-0.00913234		2660.81	-0.02729151
541	0.48749242		1070.99	0.31619059		1600.98	-0.00280485		2130.98	-0.0096676		2661.01	-0.02789735
541.2	0.48769013		1071.19	0.31554475		1601.18	-0.00236136		2131.18	-0.0082389		2661.21	-0.02788793
541.4	0.48824143		1071.39	0.31484054		1601.38	-0.00293321		2131.38	-0.00699535		2661.41	-0.02807842
541.6	0.48902091		1071.59	0.31317683		1601.58	-0.00238811		2131.58	-0.00683847		2661.61	-0.02782174
541.8	0.48828409		1071.79	0.31254483		1601.78	-0.00267917		2131.78	-0.00692304		2661.81	-0.02851954
542	0.48743197		1071.99	0.31262169		1601.98	-0.00193887		2131.98	-0.00590492		2662.01	-0.02775953
542.2	0.48715639		1072.19	0.31240744		1602.18	-0.00217049		2132.18	-0.00617093		2662.21	-0.02729763
542.4	0.48807645		1072.39	0.31329876		1602.38	-0.00236816		2132.38	-0.0058266		2662.41	-0.0273395
542.6	0.48816686		1072.59	0.31371225		1602.58	-0.00251343		2132.58	-0.00495886		2662.61	-0.02661872
542.8	0.48865586		1072.79	0.31452574		1602.78	-0.00239706		2132.78	-0.00587841		2662.81	-0.02696018
543	0.48896861		1072.99	0.31617599		1602.98	-0.00185385		2132.98	-0.00636435		2663.01	-0.0276685
543.2	0.48874472		1073.19	0.31739007		1603.18	-0.00128423		2133.18	-0.00628962		2663.21	-0.02706418
543.4	0.48876778		1073.39	0.31845676		1603.38	-0.00043938		2133.38	-0.00660102		2663.41	-0.02759208
543.6	0.48858607		1073.59	0.31895092		1603.58	-0.00100296		2133.58	-0.0066961		2663.61	-0.0276753
543.8	0.48881539		1073.79	0.31929694		1603.78	-0.00139907		2133.78	-0.00723633		2663.81	-0.02786272
544	0.48822169		1073.99	0.31901216		1603.98	-0.00193863		2133.98	-0.0073309		2664.01	-0.027962
544.2	0.48826816		1074.19	0.3195405		1604.18	-0.00220907		2134.18	-0.00771556		2664.21	-0.02743094
544.4	0.48798253		1074.39	0.31949719		1604.38	-0.00214347		2134.38	-0.00822378		2664.41	-0.02725675
544.6	0.48825082		1074.59	0.31979597		1604.58	-0.00095064		2134.58	-0.00848362		2664.61	-0.02780522
544.8	0.48885968		1074.79	0.31872089		1604.78	-0.00064075		2134.78	-0.00878928		2664.81	-0.02890786
545	0.48809318		1074.99	0.31843816		1604.98	-0.00141164		2134.98	-0.00896587		2665.01	-0.02755643
545.2	0.4887191		1075.19	0.317874		1605.18	-0.00116479		2135.18	-0.00911565		2665.21	-0.02700983
545.4	0.48910986		1075.39	0.3171968		1605.38	-0.00089274		2135.38	-0.00950947		2665.41	-0.02781522
545.6	0.48794007		1075.59	0.3165947		1605.58	-0.00085415		2135.58	-0.00961374		2665.61	-0.02709978
545.8	0.48686943		1075.79	0.31613339		1605.78	-0.00138963		2135.78	-0.00983454		2665.81	-0.02803287
546	0.48709188		1075.99	0.31686649		1605.98	-0.00147315		2135.98	-0.00886214		2666.01	-0.02744393
546.2	0.48671178		1076.19	0.31639486		1606.18	-0.00154236		2136.18	-0.0085461		2666.21	-0.02850291
546.4	0.4867776		1076.39	0.31674463		1606.38	-0.00092328		2136.38	-0.00721526		2666.41	-0.02886726
546.6	0.48699632		1076.59	0.31635609		1606.58	-0.0012124		2136.58	-0.00627296		2666.61	-0.02788964
546.8	0.48661627		1076.79	0.31723012		1606.78	-0.00162821		2136.78	-0.00601595		2666.81	-0.0284041
547	0.48568523		1076.99	0.31740677		1606.98	-0.00227289		2136.98	-0.00546725		2667.01	-0.02866022
547.2	0.48610728		1077.19	0.31771527		1607.18	-0.00242541		2137.18	-0.00504583		2667.21	-0.02815029
547.4	0.48639664		1077.39	0.31738247		1607.38	-0.0031416		2137.38	-0.00562863		2667.41	-0.02877214
547.6	0.48642428		1077.59	0.31737722		1607.58	-0.00419051		2137.58	-0.00568622		2667.61	-0.02969523
547.8	0.48635411		1077.79	0.31706716		1607.78	-0.00468457		2137.78	-0.00536201		2667.81	-0.02958538
548	0.4853109		1077.99	0.31720794		1607.98	-0.00502288		2137.98	-0.0053995		2668.01	-0.03032166
548.2	0.48593074		1078.19	0.31755347		1608.18	-0.00493287		2138.18	-0.00593523		2668.21	-0.03031177
548.4	0.48564304		1078.39	0.31782968		1608.38	-0.00445786		2138.38	-0.00593592		2668.41	-0.03021864
548.6	0.48664679		1078.59	0.31789027		1608.58	-0.00412038		2138.58	-0.00573339		2668.61	-0.02969978
548.8	0.48656181		1078.79	0.31728044		1608.78	-0.00423487		2138.78	-0.00629918		2668.81	-0.02952764
549	0.48640394		1078.99	0.3174709		1608.98	-0.00463465		2138.98	-0.00697556		2669.01	-0.02811933
549.2	0.48731639		1079.19	0.31711043		1609.18	-0.00381466		2139.18	-0.0079747		2669.21	-0.02896525
549.4	0.48759807		1079.39	0.31745477		1609.38	-0.00355534		2139.38	-0.00892287		2669.41	-0.02945319
549.6	0.48700498		1079.59	0.31717249		1609.58	-0.00383409		2139.58	-0.00950722		2669.61	-0.02940563
549.8	0.48731317		1079.79	0.3168933		1609.78	-0.00345103		2139.78	-0.01032812		2669.81	-0.02986802
550	0.48752822		1079.99	0.3169522		1609.98	-0.00379798		2139.98	-0.0095894		2670.01	-0.02988561
550.2	0.48741669		1080.19	0.31604366		1610.18	-0.00404034		2140.18	-0.01007257		2670.21	-0.02938085
550.4	0.48778405		1080.39	0.31595329		1610.38	-0.00477913		2140.38	-0.00970787		2670.41	-0.02893471
550.6	0.48725557		1080.59	0.31579433		1610.58	-0.00550355		2140.58	-0.01040998		2670.61	-0.02805264
550.8	0.4864451		1080.79	0.31545927		1610.78	-0.00620518		2140.78	-0.01085679		2670.81	-0.02811295
551	0.48648874		1080.99	0.3141824		1610.98	-0.00658414		2140.98	-0.01056262		2671.01	-0.02727733
551.2	0.48642257		1081.19	0.31383291		1611.18	-0.00644754		2141.18	-0.01045155		2671.21	-0.02802425
551.4	0.4858749		1081.39	0.31342857		1611.38	-0.00697445		2141.38	-0.00971045		2671.41	-0.02878793
551.6	0.48506688		1081.59	0.31408363		1611.58	-0.00647699		2141.58	-0.00950182		2671.61	-0.02893907
551.8	0.48494513		1081.79	0.31426913		1611.78	-0.00672485		2141.78	-0.00908227		2671.81	-0.02854376
552	0.48487528		1081.99	0.31544649		1611.98	-0.00561399		2141.98	-0.00887226		2672.01	-0.02943019
552.2	0.48547325		1082.19	0.31590936		1612.18	-0.005377		2142.18	-0.00916518		2672.21	-0.02904391
552.4	0.48577635		1082.39	0.31639119		1612.38	-0.00460255		2142.38	-0.00889003		2672.41	-0.02866136
552.6	0.48693409		1082.59	0.3159885		1612.58	-0.00408399		2142.58	-0.01004197		2672.61	-0.02915257
552.8	0.48687438		1082.79	0.31616641		1612.78	-0.00366416		2142.78	-0.01047745		2672.81	-0.02932962
553	0.48701913		1082.99	0.31604357		1612.98	-0.00379428		2142.98	-0.01111067		2673.01	-0.02970178
553.2	0.48764564		1083.19	0.31648613		1613.18	-0.00320905		2143.18	-0.01160864		2673.21	-0.02980552
553.4	0.48814879		1083.39	0.31699084		1613.38	-0.00298452		2143.38	-0.01159638		2673.41	-0.02886841
553.6	0.48874563		1083.59	0.3166808		1613.58	-0.00216202		2143.58	-0.01129436		2673.61	-0.02801156
553.8	0.48920656		1083.79	0.31612843		1613.78	-0.0019218		2143.78	-0.01072964		2673.81	-0.02700591
554	0.48954371		1083.99	0.31592759		1613.98	-0.00213786		2143.98	-0.0098371		2674.01	-0.02620927
554.2	0.49027243		1084.19	0.3151003		1614.18	-0.00248943		2144.18	-0.0100208		2674.21	-0.02577368
554.4	0.49000746		1084.39	0.31503521		1614.38	-0.00296832		2144.38	-0.00947571		2674.41	-0.02598883
554.6	0.48934562		1084.59	0.31436124		1614.58	-0.00397763		2144.58	-0.00908073		2674.61	-0.02539531
554.8	0.48913624		1084.79	0.3140177		1614.78	-0.00486218		2144.78	-0.00851745		2674.81	-0.0250862
555	0.48873927		1084.99	0.31382431		1614.98	-0.00495045		2144.98	-0.00752609		2675.01	-0.02465032
555.2	0.48837732		1085.19	0.31472494		1615.18	-0.00446011		2145.18	-0.00729371		2675.21	-0.02523866
555.4	0.48784533		1085.39	0.31565863		1615.38	-0.00430078		2145.38	-0.00687708		2675.41	-0.02482931
555.6	0.48739898		1085.59	0.31609548		1615.58	-0.00452505		2145.58	-0.00762954		2675.61	-0.02528705
555.8	0.48750559		1085.79	0.31620017		1615.78	-0.00499585		2145.78	-0.00779844		2675.81	-0.02611446
556	0.48696186		1085.99	0.31679961		1615.98	-0.00416243		2145.98	-0.00745437		2676.01	-0.02609124
556.2	0.48738066		1086.19	0.31685189		1616.18	-0.00488861		2146.18	-0.00751019		2676.21	-0.02623751
556.4	0.4874097		1086.39	0.31676936		1616.38	-0.00512449		2146.38	-0.00794058		2676.41	-0.02669045
556.6	0.48786635		1086.59	0.31658832		1616.58	-0.0049336		2146.58	-0.00878792		2676.61	-0.02787509
556.8	0.48741064		1086.79	0.31719162		1616.78	-0.0048838		2146.78	-0.00835288		2676.81	-0.02845105
557	0.48748475		1086.99	0.31677617		1616.98	-0.00479284		2146.98	-0.00816184		2677.01	-0.0286732
557.2	0.48782972		1087.19	0.31630421		1617.18	-0.00488868		2147.18	-0.00747555		2677.21	-0.02801563
557.4	0.48833715		1087.39	0.31625074		1617.38	-0.00419437		2147.38	-0.00685202		2677.41	-0.02706088
557.6	0.48830802		1087.59	0.31564536		1617.58	-0.00392346		2147.58	-0.00689584		2677.61	-0.02700338
557.8	0.48791487		1087.79	0.31588223		1617.78	-0.00443675		2147.78	-0.00726214		2677.81	-0.02705286
558	0.4876702		1087.99	0.3165933		1617.98	-0.0046131		2147.98	-0.0077262		2678.01	-0.02703499
558.2	0.48743911		1088.19	0.31667323		1618.18	-0.00543074		2148.18	-0.00818394		2678.21	-0.02737506
558.4	0.48677484		1088.39	0.31699529		1618.38	-0.00589366		2148.38	-0.00859587		2678.41	-0.0275825
558.6	0.4865055		1088.59	0.31690756		1618.58	-0.00660507		2148.58	-0.00851456		2678.61	-0.02782325
558.8	0.48678824		1088.79	0.31714268		1618.78	-0.00613406		2148.78	-0.00902297		2678.81	-0.02790166
559	0.48681776		1088.99	0.3173066		1618.98	-0.00547103		2148.98	-0.00927776		2679.01	-0.0276184
559.2	0.48695474		1089.19	0.31764068		1619.18	-0.00509455		2149.18	-0.00936214		2679.21	-0.0279391
559.4	0.48672177		1089.39	0.31730829		1619.38	-0.00499607		2149.38	-0.00940829		2679.41	-0.0283937
559.6	0.48692541		1089.59	0.31668284		1619.58	-0.00531927		2149.58	-0.00937978		2679.61	-0.0288493
559.8	0.48679567		1089.79	0.31646101		1619.78	-0.00501803		2149.78	-0.00873325		2679.81	-0.02896698
