# Supplementary material for: Functional development of a V3/glycan-specific broadly neutralizing antibody isolated from a case of HIV superinfection
Source: eLife journal article supplement (doi:10.7554/elife.68110), 2021-07-15
Supplement: fig2-data2 [file A5.xls]

Vers 3.43 Data Simulation
Conc1	2E-06	2E-06	2E-06	2E-06	2E-06	2E-06	2E-06
Start1	290	880	1470	2060	2649.99	3239.99	3829.98
Stop1	649.8	1239.79	1829.8	2419.8	3009.79	3599.78	4189.78
Time1	Data1	Sim1	Time2	Data2	Sim2	Time3	Data3	Sim3	Time4	Data4	Sim4	Time5	Data5	Sim5	Time6	Data6	Sim6	Time7	Data7	Sim7
290	0.00789995		880	0.00408398		1470	0.00433782		2060	0.00775419		2649.99	-0.00528316		3239.99	0.00169164		3829.98	-0.00811247
290.2	0.00807289		880.2	0.00463175		1470.2	0.00416209		2060.2	0.00790315		2650.19	-0.00607545		3240.19	0.00175946		3830.18	-0.0086667
290.4	0.00890907		880.4	0.0051433		1470.4	0.00426553		2060.4	0.00820767		2650.39	-0.00634475		3240.39	0.002244		3830.38	-0.00894051
290.6	0.00984084		880.6	0.00528252		1470.6	0.00394567		2060.6	0.00862281		2650.59	-0.00687214		3240.59	0.00249182		3830.58	-0.00870993
290.8	0.01104986		880.8	0.00588916		1470.8	0.00365906		2060.8	0.00858008		2650.79	-0.00755453		3240.79	0.00277873		3830.78	-0.00827399
291	0.01266115		881	0.00625319		1471	0.00368999		2061	0.00887391		2650.99	-0.00758067		3240.99	0.00259147		3830.98	-0.00823082
291.2	0.01517832		881.2	0.00685757		1471.2	0.00444295		2061.2	0.00883174		2651.19	-0.00752685		3241.19	0.0025578		3831.18	-0.00773302
291.4	0.01818518		881.4	0.00708857		1471.4	0.00486757		2061.4	0.00887852		2651.39	-0.00710771		3241.39	0.00268798		3831.38	-0.00797734
291.6	0.02094027		881.6	0.00772191		1471.6	0.00469357		2061.6	0.00820984		2651.59	-0.00716626		3241.59	0.0022082		3831.58	-0.00826086
291.8	0.02414776		881.8	0.00783007		1471.8	0.00520623		2061.8	0.00846037		2651.79	-0.00756707		3241.79	0.00187901		3831.78	-0.00871962
292	0.02756936		882	0.00804391		1472	0.00524046		2062	0.00900086		2651.99	-0.00716394		3241.99	0.00210352		3831.98	-0.00950591
292.2	0.03151311		882.2	0.0080211		1472.2	0.00574041		2062.2	0.009877		2652.19	-0.00732993		3242.19	0.00198345		3832.18	-0.00933292
292.4	0.03562941		882.4	0.00803582		1472.4	0.00586575		2062.4	0.01054886		2652.39	-0.00707146		3242.39	0.00245189		3832.38	-0.00955783
292.6	0.03941713		882.6	0.00836739		1472.6	0.00695935		2062.6	0.0107706		2652.59	-0.00769663		3242.59	0.00168887		3832.58	-0.00981365
292.8	0.04349617		882.8	0.00894475		1472.8	0.00860226		2062.8	0.01085986		2652.79	-0.00741354		3242.79	0.0015133		3832.78	-0.0100897
293	0.04712791		883	0.00991201		1473	0.00952692		2063	0.01111521		2652.99	-0.00821947		3242.99	0.0019608		3832.98	-0.01008466
293.2	0.05018832		883.2	0.01052285		1473.2	0.01048479		2063.2	0.01236481		2653.19	-0.00931889		3243.19	0.00240494		3833.18	-0.00965682
293.4	0.05436679		883.4	0.01115894		1473.4	0.01019694		2063.4	0.01330086		2653.39	-0.01058262		3243.39	0.00303141		3833.38	-0.01031261
293.6	0.0585874		883.6	0.01195891		1473.6	0.0096083		2063.6	0.01525653		2653.59	-0.01036759		3243.59	0.00267446		3833.58	-0.01071808
293.8	0.06243139		883.8	0.01361746		1473.8	0.01001981		2063.8	0.01635038		2653.79	-0.01035825		3243.79	0.00229251		3833.78	-0.01091318
294	0.06606901		884	0.01430194		1474	0.00988539		2064	0.01717124		2653.99	-0.0107893		3243.99	0.00269315		3833.98	-0.01130935
294.2	0.06828824		884.2	0.01522552		1474.2	0.01028543		2064.2	0.01826552		2654.19	-0.01027438		3244.19	0.00363899		3834.18	-0.01166797
294.4	0.07224547		884.4	0.01532847		1474.4	0.01024164		2064.4	0.01882867		2654.39	-0.01020805		3244.39	0.00404452		3834.38	-0.010569
294.6	0.07520006		884.6	0.01599397		1474.6	0.01056947		2064.6	0.01887173		2654.59	-0.00977148		3244.59	0.00336792		3834.58	-0.00971225
294.8	0.0779882		884.8	0.01644855		1474.8	0.01120292		2064.8	0.0187327		2654.79	-0.00862374		3244.79	0.00330865		3834.78	-0.00920798
295	0.08087825		885	0.01664735		1475	0.01193382		2065	0.01928842		2654.99	-0.00784914		3244.99	0.00307399		3834.98	-0.00986645
295.2	0.08426442		885.2	0.01697284		1475.2	0.01267315		2065.2	0.01808489		2655.19	-0.00761146		3245.19	0.00275622		3835.18	-0.00929876
295.4	0.08740183		885.4	0.01645333		1475.4	0.01293014		2065.4	0.01802061		2655.39	-0.00700569		3245.39	0.0036459		3835.38	-0.00901529
295.6	0.08967045		885.6	0.01641261		1475.6	0.01368754		2065.6	0.01811149		2655.59	-0.00746442		3245.59	0.0037588		3835.58	-0.00916889
295.8	0.09239509		885.8	0.01647734		1475.8	0.01456835		2065.8	0.01833956		2655.79	-0.00743626		3245.79	0.00430578		3835.78	-0.00886032
296	0.09525286		886	0.01629468		1476	0.01407989		2066	0.01858827		2655.99	-0.00678583		3245.99	0.00517493		3835.98	-0.00816568
296.2	0.09828014		886.2	0.01668739		1476.2	0.01405798		2066.2	0.01816172		2656.19	-0.00677983		3246.19	0.00585877		3836.18	-0.00744852
296.4	0.10134272		886.4	0.01687035		1476.4	0.01397149		2066.4	0.01739183		2656.39	-0.006345		3246.39	0.00622333		3836.38	-0.00764554
296.6	0.10338653		886.6	0.01749103		1476.6	0.01541757		2066.6	0.01737761		2656.59	-0.0062608		3246.59	0.00593769		3836.58	-0.00697774
296.8	0.10634686		886.8	0.01853663		1476.8	0.01607555		2066.8	0.01746269		2656.79	-0.00675479		3246.79	0.00728435		3836.78	-0.00722308
297	0.10831534		887	0.01926261		1477	0.01623106		2067	0.01922081		2656.99	-0.00830019		3246.99	0.00723551		3836.98	-0.00704776
297.2	0.11076486		887.2	0.01971793		1477.2	0.01515577		2067.2	0.02015206		2657.19	-0.00796994		3247.19	0.00812971		3837.18	-0.00730092
297.4	0.11370919		887.4	0.01985482		1477.4	0.01473776		2067.4	0.02054748		2657.39	-0.00814961		3247.39	0.00756513		3837.38	-0.00701255
297.6	0.11638853		887.6	0.02083022		1477.6	0.01395485		2067.6	0.02122074		2657.59	-0.00774127		3247.59	0.00640225		3837.58	-0.00763135
297.8	0.11890852		887.8	0.02152296		1477.8	0.01362713		2067.8	0.02127335		2657.79	-0.00811828		3247.79	0.00612164		3837.78	-0.00752104
298	0.12104248		888	0.02153564		1478	0.01386769		2068	0.02162553		2657.99	-0.00829342		3247.99	0.00596594		3837.98	-0.00671248
298.2	0.12234987		888.2	0.02146908		1478.2	0.01328737		2068.2	0.02143676		2658.19	-0.00837826		3248.19	0.00596908		3838.18	-0.00633639
298.4	0.12499596		888.4	0.02138454		1478.4	0.01331558		2068.4	0.02108519		2658.39	-0.00867641		3248.39	0.00442881		3838.38	-0.0057329
298.6	0.1269147		888.6	0.02245772		1478.6	0.01445441		2068.6	0.02061846		2658.59	-0.00798523		3248.59	0.00372754		3838.58	-0.00672993
298.8	0.12859461		888.8	0.02219568		1478.8	0.01505607		2068.8	0.02062606		2658.79	-0.00862072		3248.79	0.00416091		3838.78	-0.00682388
299	0.1304419		889	0.02290496		1479	0.01571701		2069	0.02028505		2658.99	-0.01024215		3248.99	0.00348483		3838.98	-0.00658853
299.2	0.13206586		889.2	0.02249913		1479.2	0.01654012		2069.2	0.02015621		2659.19	-0.00979477		3249.19	0.00368591		3839.18	-0.00587193
299.4	0.13422872		889.4	0.0229621		1479.4	0.01783043		2069.4	0.02073521		2659.39	-0.00937448		3249.39	0.00483217		3839.38	-0.00573561
299.6	0.13599318		889.6	0.02411057		1479.6	0.01875843		2069.6	0.02110778		2659.59	-0.00926694		3249.59	0.00453646		3839.58	-0.0056334
299.8	0.13850129		889.8	0.02525955		1479.8	0.01897005		2069.8	0.02131296		2659.79	-0.00878304		3249.79	0.00472782		3839.78	-0.00462879
300	0.14061401		890	0.02551433		1480	0.01830857		2070	0.02194525		2659.99	-0.00817726		3249.99	0.00535156		3839.98	-0.00473058
300.2	0.14253354		890.2	0.02683247		1480.2	0.01896778		2070.2	0.02243343		2660.19	-0.00847669		3250.19	0.00574552		3840.18	-0.0050153
300.4	0.1442712		890.4	0.02739985		1480.4	0.01943983		2070.4	0.02276676		2660.39	-0.00845934		3250.39	0.0050479		3840.38	-0.0058652
300.6	0.14531059		890.6	0.0281393		1480.6	0.02045018		2070.6	0.02284032		2660.59	-0.00833346		3250.59	0.00528051		3840.58	-0.00631875
300.8	0.1474501		890.8	0.02824403		1480.8	0.02073847		2070.8	0.02350871		2660.79	-0.00968164		3250.79	0.00582171		3840.78	-0.00728418
301	0.14863323		891	0.02841833		1481	0.02101777		2071	0.02494771		2660.99	-0.01010448		3250.99	0.00549737		3840.98	-0.00833603
301.2	0.15028		891.2	0.02795073		1481.2	0.02099652		2071.2	0.0252281		2661.19	-0.00896302		3251.19	0.0057717		3841.18	-0.00987423
301.4	0.15287423		891.4	0.02756774		1481.4	0.02070145		2071.4	0.02536468		2661.39	-0.0093732		3251.39	0.00506157		3841.38	-0.01095575
301.6	0.15435091		891.6	0.02716991		1481.6	0.02074041		2071.6	0.02556142		2661.59	-0.00900534		3251.59	0.00481242		3841.58	-0.01216027
301.8	0.15628256		891.8	0.02669854		1481.8	0.0199246		2071.8	0.02589842		2661.79	-0.00892167		3251.79	0.0049324		3841.78	-0.01203474
302	0.15748212		892	0.02733661		1482	0.02033553		2072	0.025702		2661.99	-0.00852276		3251.99	0.00446814		3841.98	-0.01171937
302.2	0.15923514		892.2	0.02773119		1482.2	0.02053329		2072.2	0.02541107		2662.19	-0.00819035		3252.19	0.00409209		3842.18	-0.01238712
302.4	0.16114878		892.4	0.02831829		1482.4	0.02144559		2072.4	0.02585136		2662.39	-0.00769576		3252.39	0.00454262		3842.38	-0.01240482
302.6	0.16266561		892.6	0.02816872		1482.6	0.02125664		2072.6	0.02524569		2662.59	-0.00760622		3252.59	0.00479588		3842.58	-0.01252683
302.8	0.16359003		892.8	0.02765276		1482.8	0.02178895		2072.8	0.02534933		2662.79	-0.00824334		3252.79	0.00499562		3842.78	-0.01191992
303	0.16518816		893	0.0278432		1483	0.02142439		2073	0.02521652		2662.99	-0.00793401		3252.99	0.00499077		3842.98	-0.01107574
303.2	0.16655859		893.2	0.02727387		1483.2	0.02103599		2073.2	0.02555234		2663.19	-0.00665811		3253.19	0.00558304		3843.18	-0.01068417
303.4	0.16867613		893.4	0.02868474		1483.4	0.02101553		2073.4	0.02530464		2663.39	-0.00638313		3253.39	0.00565528		3843.38	-0.01012288
303.6	0.16998442		893.6	0.02945323		1483.6	0.02142737		2073.6	0.02590147		2663.59	-0.00608628		3253.59	0.00612557		3843.58	-0.00820012
303.8	0.17073773		893.8	0.0293441		1483.8	0.02208126		2073.8	0.02561615		2663.79	-0.00664765		3253.79	0.00596414		3843.78	-0.00767062
304	0.1710004		894	0.02921716		1484	0.02217929		2074	0.02514366		2663.99	-0.00689635		3253.99	0.00545699		3843.98	-0.00748142
304.2	0.17182524		894.2	0.03012845		1484.2	0.02288906		2074.2	0.02486312		2664.19	-0.00823488		3254.19	0.00433857		3844.18	-0.00701849
304.4	0.17186591		894.4	0.02989996		1484.4	0.02284749		2074.4	0.02504374		2664.39	-0.00906013		3254.39	0.00302037		3844.38	-0.00680236
304.6	0.17294753		894.6	0.02965057		1484.6	0.0229266		2074.6	0.02567429		2664.59	-0.01044551		3254.59	0.00299886		3844.58	-0.00692724
304.8	0.1738868		894.8	0.02925092		1484.8	0.02280047		2074.8	0.02754721		2664.79	-0.01201395		3254.79	0.00362965		3844.78	-0.00741367
305	0.17397709		895	0.02956499		1485	0.02279478		2075	0.02840435		2664.99	-0.01113454		3254.99	0.003496		3844.98	-0.00860714
305.2	0.17484491		895.2	0.02939155		1485.2	0.0227547		2075.2	0.02937469		2665.19	-0.01148949		3255.19	0.00391504		3845.18	-0.00845633
305.4	0.17688865		895.4	0.02927707		1485.4	0.02282801		2075.4	0.03010618		2665.39	-0.01158792		3255.39	0.00297335		3845.38	-0.00833023
305.6	0.17787507		895.6	0.0289721		1485.6	0.02321063		2075.6	0.03081957		2665.59	-0.01095731		3255.59	0.00292785		3845.58	-0.00787431
305.8	0.17988851		895.8	0.02895883		1485.8	0.02261236		2075.8	0.03153771		2665.79	-0.01094144		3255.79	0.00254178		3845.78	-0.00683975
306	0.18134485		896	0.02998949		1486	0.02345114		2076	0.03173289		2665.99	-0.0102652		3255.99	0.00303953		3845.98	-0.00676597
306.2	0.18306328		896.2	0.03005071		1486.2	0.02399224		2076.2	0.03213511		2666.19	-0.00900493		3256.19	0.00365314		3846.18	-0.00774296
306.4	0.18436401		896.4	0.02977563		1486.4	0.02360643		2076.4	0.03235783		2666.39	-0.00836171		3256.39	0.00373045		3846.38	-0.00700762
306.6	0.18483736		896.6	0.02896027		1486.6	0.02384257		2076.6	0.03204174		2666.59	-0.00798138		3256.59	0.00266529		3846.58	-0.00760075
306.8	0.1856738		896.8	0.02976656		1486.8	0.02394695		2076.8	0.03243045		2666.79	-0.00725463		3256.79	0.00297538		3846.78	-0.00818671
307	0.18719734		897	0.03020397		1487	0.02289718		2077	0.03221327		2666.99	-0.0063297		3256.99	0.00356432		3846.98	-0.0078277
307.2	0.18782787		897.2	0.03050715		1487.2	0.02313823		2077.2	0.03276259		2667.19	-0.00608579		3257.19	0.00368253		3847.18	-0.00823751
307.4	0.18926028		897.4	0.03162373		1487.4	0.02307151		2077.4	0.0324136		2667.39	-0.0057662		3257.39	0.00372297		3847.38	-0.00777124
307.6	0.19053596		897.6	0.0322869		1487.6	0.0233825		2077.6	0.0322576		2667.59	-0.0059847		3257.59	0.00423218		3847.58	-0.00763936
307.8	0.19173583		897.8	0.03163769		1487.8	0.02300998		2077.8	0.03137565		2667.79	-0.006077		3257.79	0.00379069		3847.78	-0.00758998
308	0.19298644		898	0.03255814		1488	0.02288604		2078	0.0315198		2667.99	-0.00634526		3257.99	0.00375606		3847.98	-0.00729913
308.2	0.19448598		898.2	0.03362328		1488.2	0.02287121		2078.2	0.03226343		2668.19	-0.00779549		3258.19	0.00375808		3848.18	-0.00708813
308.4	0.19506528		898.4	0.03392517		1488.4	0.02271809		2078.4	0.03350371		2668.39	-0.00857336		3258.39	0.00381927		3848.38	-0.00646804
308.6	0.19663388		898.6	0.03447242		1488.6	0.02266576		2078.6	0.03430835		2668.59	-0.00929219		3258.59	0.00391455		3848.58	-0.00737746
308.8	0.19754014		898.8	0.03446417		1488.8	0.02313846		2078.8	0.03537857		2668.79	-0.00899739		3258.79	0.004929		3848.78	-0.00751731
309	0.19933284		899	0.03510146		1489	0.02281328		2079	0.03636323		2668.99	-0.00868308		3258.99	0.00495819		3848.98	-0.00781523
309.2	0.20100468		899.2	0.03568137		1489.2	0.02327478		2079.2	0.03765744		2669.19	-0.01039297		3259.19	0.00506909		3849.18	-0.00598344
309.4	0.20315642		899.4	0.03517029		1489.4	0.02414606		2079.4	0.03821651		2669.39	-0.0098324		3259.39	0.00483946		3849.38	-0.00577916
309.6	0.20456355		899.6	0.03487769		1489.6	0.02497301		2079.6	0.03896808		2669.59	-0.00996977		3259.59	0.00565363		3849.58	-0.00480491
309.8	0.20541245		899.8	0.03543809		1489.8	0.0254164		2079.8	0.03950299		2669.79	-0.00975891		3259.79	0.00561697		3849.78	-0.0050134
310	0.20684917		900	0.0366239		1490	0.02677899		2080	0.03879687		2669.99	-0.00882863		3259.99	0.00588674		3849.98	-0.00614733
310.2	0.20784934		900.2	0.03735239		1490.2	0.02791146		2080.2	0.03892631		2670.19	-0.00882296		3260.19	0.00579947		3850.18	-0.00718283
310.4	0.20810355		900.4	0.0375196		1490.4	0.02915827		2080.4	0.03807319		2670.39	-0.00897921		3260.39	0.00507796		3850.38	-0.00741012
310.6	0.20817637		900.6	0.03770766		1490.6	0.02994624		2080.6	0.03803311		2670.59	-0.00867429		3260.59	0.00478541		3850.58	-0.00889485
310.8	0.20879034		900.8	0.03918696		1490.8	0.03003683		2080.8	0.03737603		2670.79	-0.00814457		3260.79	0.00540122		3850.78	-0.00926804
311	0.20965773		901	0.03930704		1491	0.03009622		2081	0.03651195		2670.99	-0.00814253		3260.99	0.00551387		3850.98	-0.00878058
311.2	0.20987482		901.2	0.03959788		1491.2	0.03044363		2081.2	0.03662223		2671.19	-0.0079762		3261.19	0.00536151		3851.18	-0.00870446
311.4	0.21066734		901.4	0.04038195		1491.4	0.03003772		2081.4	0.03591796		2671.39	-0.00770693		3261.39	0.00512637		3851.38	-0.00789353
311.6	0.21135642		901.6	0.04012627		1491.6	0.02920478		2081.6	0.03640666		2671.59	-0.0078948		3261.59	0.00567606		3851.58	-0.00816755
311.8	0.21207558		901.8	0.04013905		1491.8	0.02865259		2081.8	0.03664758		2671.79	-0.0074239		3261.79	0.00542721		3851.78	-0.00706331
312	0.21292084		902	0.04029552		1492	0.02895655		2082	0.03745965		2671.99	-0.00899007		3261.99	0.00480866		3851.98	-0.00699725
312.2	0.21372791		902.2	0.04077933		1492.2	0.02851336		2082.2	0.03843056		2672.19	-0.00975979		3262.19	0.00514142		3852.18	-0.00620888
312.4	0.21429477		902.4	0.04092398		1492.4	0.02851517		2082.4	0.03926408		2672.39	-0.0100681		3262.39	0.00465665		3852.38	-0.00560505
312.6	0.21583637		902.6	0.04034219		1492.6	0.02815457		2082.6	0.03996198		2672.59	-0.00974436		3262.59	0.00411489		3852.58	-0.00700139
312.8	0.21708674		902.8	0.03973818		1492.8	0.02736661		2082.8	0.04113609		2672.79	-0.01044263		3262.79	0.00536356		3852.78	-0.00715652
313	0.21801819		903	0.0384888		1493	0.02776817		2083	0.04263425		2672.99	-0.01022604		3262.99	0.00394503		3852.98	-0.00733001
313.2	0.21888588		903.2	0.0384921		1493.2	0.02758654		2083.2	0.04339688		2673.19	-0.01116178		3263.19	0.00387336		3853.18	-0.00651187
313.4	0.22025222		903.4	0.0390459		1493.4	0.0283157		2083.4	0.04357209		2673.39	-0.01028323		3263.39	0.0038198		3853.38	-0.00689923
313.6	0.2211377		903.6	0.03966713		1493.6	0.02800117		2083.6	0.04383996		2673.59	-0.00950678		3263.59	0.00407837		3853.58	-0.00728671
313.8	0.22207094		903.8	0.04037567		1493.8	0.02787654		2083.8	0.04313945		2673.79	-0.00904794		3263.79	0.00359313		3853.78	-0.00803573
314	0.22388429		904	0.04091814		1494	0.02806771		2084	0.04144608		2673.99	-0.00816571		3263.99	0.00307617		3853.98	-0.00779833
314.2	0.22501451		904.2	0.0414818		1494.2	0.02823154		2084.2	0.04144904		2674.19	-0.0085066		3264.19	0.003642		3854.18	-0.00830673
314.4	0.22568095		904.4	0.04210893		1494.4	0.02908519		2084.4	0.04001991		2674.39	-0.00701929		3264.39	0.00405864		3854.38	-0.00807031
314.6	0.22662653		904.6	0.04307344		1494.6	0.02943725		2084.6	0.03937004		2674.59	-0.00578824		3264.59	0.00442319		3854.58	-0.00834829
314.8	0.22695083		904.8	0.04409029		1494.8	0.02948529		2084.8	0.03853388		2674.79	-0.00535546		3264.79	0.00490957		3854.78	-0.00848462
315	0.22714855		905	0.04472948		1495	0.02931476		2085	0.03804899		2674.99	-0.00572393		3264.99	0.0051879		3854.98	-0.00803105
315.2	0.22749555		905.2	0.04522695		1495.2	0.02985993		2085.2	0.03822403		2675.19	-0.0051475		3265.19	0.00576544		3855.18	-0.00879708
315.4	0.22854601		905.4	0.04613151		1495.4	0.03085318		2085.4	0.03917568		2675.39	-0.00549543		3265.39	0.00595677		3855.38	-0.00877015
315.6	0.22983689		905.6	0.04586198		1495.6	0.03041996		2085.6	0.03975434		2675.59	-0.00669731		3265.59	0.00634762		3855.58	-0.00707126
315.8	0.23070658		905.8	0.04610003		1495.8	0.03119123		2085.8	0.04016181		2675.79	-0.00687256		3265.79	0.00644387		3855.78	-0.00668974
316	0.23138207		906	0.04682062		1496	0.03123567		2086	0.04088576		2675.99	-0.00891036		3265.99	0.00632389		3855.98	-0.00671349
316.2	0.23136567		906.2	0.04741002		1496.2	0.03228425		2086.2	0.0415223		2676.19	-0.00933747		3266.19	0.00733268		3856.18	-0.00661172
316.4	0.2320724		906.4	0.04678485		1496.4	0.03297604		2086.4	0.0419688		2676.39	-0.01005057		3266.39	0.00675886		3856.38	-0.00778087
316.6	0.23354117		906.6	0.04608281		1496.6	0.03302182		2086.6	0.04258035		2676.59	-0.01071168		3266.59	0.00644611		3856.58	-0.00956867
316.8	0.23407887		906.8	0.04494984		1496.8	0.03339409		2086.8	0.04368914		2676.79	-0.01216683		3266.79	0.00677851		3856.78	-0.00883593
317	0.23524921		907	0.04397668		1497	0.03416754		2087	0.04490918		2676.99	-0.01132631		3266.99	0.00547244		3856.98	-0.00894684
317.2	0.23712484		907.2	0.04553723		1497.2	0.03372636		2087.2	0.045196		2677.19	-0.01191328		3267.19	0.00553057		3857.18	-0.00853284
317.4	0.23831343		907.4	0.04573972		1497.4	0.03424524		2087.4	0.04527015		2677.39	-0.01149495		3267.39	0.00504059		3857.38	-0.0082071
317.6	0.23886199		907.6	0.04539245		1497.6	0.03310595		2087.6	0.04597212		2677.59	-0.01077165		3267.59	0.00414386		3857.58	-0.0081717
317.8	0.23865539		907.8	0.04504143		1497.8	0.03316937		2087.8	0.04559395		2677.79	-0.00992711		3267.79	0.00362314		3857.78	-0.00708258
318	0.23953633		908	0.04546303		1498	0.03223625		2088	0.04497391		2677.99	-0.00930276		3267.99	0.00329901		3857.98	-0.00705583
318.2	0.24068535		908.2	0.04606427		1498.2	0.0319501		2088.2	0.04559801		2678.19	-0.00936732		3268.19	0.00450678		3858.18	-0.00714047
318.4	0.24100094		908.4	0.0467761		1498.4	0.0324508		2088.4	0.04537028		2678.39	-0.00810367		3268.39	0.00490431		3858.38	-0.00693887
318.6	0.24104546		908.6	0.04710664		1498.6	0.03311986		2088.6	0.04546884		2678.59	-0.00768481		3268.59	0.00503454		3858.58	-0.00812488
318.8	0.24139406		908.8	0.04813926		1498.8	0.03263965		2088.8	0.04493786		2678.79	-0.0074911		3268.79	0.00479783		3858.78	-0.00859145
319	0.24193594		909	0.04957589		1499	0.03359426		2089	0.04425473		2678.99	-0.00793798		3268.99	0.00491542		3858.98	-0.00899328
319.2	0.24361364		909.2	0.05050005		1499.2	0.0345495		2089.2	0.04484354		2679.19	-0.00697433		3269.19	0.00557582		3859.18	-0.00884835
319.4	0.24393986		909.4	0.05201752		1499.4	0.03585458		2089.4	0.04577567		2679.39	-0.0070655		3269.39	0.00515337		3859.38	-0.00757253
319.6	0.24446747		909.6	0.05251963		1499.6	0.03527087		2089.6	0.0456595		2679.59	-0.00727532		3269.59	0.00509718		3859.58	-0.00588919
319.8	0.24428895		909.8	0.05414158		1499.8	0.03575707		2089.8	0.04539982		2679.79	-0.00662792		3269.79	0.00432963		3859.78	-0.00689005
320	0.24539865		910	0.05546969		1500	0.03656997		2090	0.04581133		2679.99	-0.00706882		3269.99	0.00384408		3859.98	-0.00642899
320.2	0.24653355		910.2	0.05506743		1500.2	0.03736638		2090.2	0.04631384		2680.19	-0.00742012		3270.19	0.00404723		3860.18	-0.00677209
320.4	0.24808531		910.4	0.05544853		1500.4	0.0361571		2090.4	0.04652543		2680.39	-0.00691523		3270.39	0.00284893		3860.38	-0.00636441
320.6	0.24984139		910.6	0.05549287		1500.6	0.03653487		2090.6	0.04749595		2680.59	-0.00731324		3270.59	0.00292051		3860.58	-0.00616898
320.8	0.25126811		910.8	0.05489906		1500.8	0.03553139		2090.8	0.04752552		2680.79	-0.00758383		3270.79	0.00285191		3860.78	-0.00539823
321	0.25278433		911	0.0547597		1501	0.03502912		2091	0.04914203		2680.99	-0.00690156		3270.99	0.00227577		3860.98	-0.00618814
321.2	0.25281427		911.2	0.05458419		1501.2	0.03460471		2091.2	0.0497568		2681.19	-0.00766421		3271.19	0.00184796		3861.18	-0.00585437
321.4	0.25294364		911.4	0.05380026		1501.4	0.03463876		2091.4	0.05153749		2681.39	-0.0076618		3271.39	0.0020034		3861.38	-0.00537153
321.6	0.25296726		911.6	0.05370168		1501.6	0.03442203		2091.6	0.05278126		2681.59	-0.00761507		3271.59	0.0024629		3861.58	-0.00493238
321.8	0.25318167		911.8	0.05306009		1501.8	0.03337632		2091.8	0.05259948		2681.79	-0.00835628		3271.79	0.00344346		3861.78	-0.00447954
322	0.2537298		912	0.05285616		1502	0.03299658		2092	0.05230884		2681.99	-0.00973151		3271.99	0.0035822		3861.98	-0.00500445
322.2	0.253885		912.2	0.05260551		1502.2	0.03339397		2092.2	0.05208707		2682.19	-0.00959505		3272.19	0.00445731		3862.18	-0.00400058
322.4	0.25299581		912.4	0.05310514		1502.4	0.03386571		2092.4	0.05141291		2682.39	-0.00934163		3272.39	0.00434947		3862.38	-0.00472842
322.6	0.25365771		912.6	0.0537015		1502.6	0.03405519		2092.6	0.05147474		2682.59	-0.00871635		3272.59	0.00416422		3862.58	-0.00524583
322.8	0.2543595		912.8	0.05397005		1502.8	0.03353069		2092.8	0.05003035		2682.79	-0.00903958		3272.79	0.00516467		3862.78	-0.00594626
323	0.25447209		913	0.05488399		1503	0.03420921		2093	0.04982206		2682.99	-0.00902397		3272.99	0.0055983		3862.98	-0.00631475
323.2	0.2549213		913.2	0.05588992		1503.2	0.03479801		2093.2	0.04987645		2683.19	-0.00813036		3273.19	0.00582072		3863.18	-0.00652714
323.4	0.25382135		913.4	0.05623344		1503.4	0.03630914		2093.4	0.04956402		2683.39	-0.00851714		3273.39	0.00493162		3863.38	-0.00662836
323.6	0.25461714		913.6	0.05615927		1503.6	0.03654386		2093.6	0.04940381		2683.59	-0.008384		3273.59	0.00520536		3863.58	-0.00666813
323.8	0.25497714		913.8	0.05689094		1503.8	0.0374899		2093.8	0.04907259		2683.79	-0.00844926		3273.79	0.00388678		3863.78	-0.00723529
324	0.2560988		914	0.05634242		1504	0.03783598		2094	0.04899083		2683.99	-0.00849328		3273.99	0.00461833		3863.98	-0.00738946
324.2	0.25747951		914.2	0.05621604		1504.2	0.03780623		2094.2	0.04888898		2684.19	-0.00857366		3274.19	0.00475538		3864.18	-0.0079182
324.4	0.25928589		914.4	0.05561631		1504.4	0.03801352		2094.4	0.04880695		2684.39	-0.00719892		3274.39	0.00470055		3864.38	-0.00770728
324.6	0.26076344		914.6	0.05468052		1504.6	0.03807699		2094.6	0.04913442		2684.59	-0.0074262		3274.59	0.0056468		3864.58	-0.00827614
324.8	0.26146672		914.8	0.05365144		1504.8	0.03751666		2094.8	0.04944433		2684.79	-0.00781179		3274.79	0.0058971		3864.78	-0.00818094
325	0.26168462		915	0.05317431		1505	0.03839083		2095	0.05149134		2684.99	-0.00737459		3274.99	0.00585837		3864.98	-0.00838772
325.2	0.2609649		915.2	0.05301169		1505.2	0.03928988		2095.2	0.05214457		2685.19	-0.00722256		3275.19	0.00555859		3865.18	-0.00771901
325.4	0.26215012		915.4	0.05327606		1505.4	0.03986636		2095.4	0.05376034		2685.39	-0.00638256		3275.39	0.00649801		3865.38	-0.00751254
325.6	0.26318258		915.6	0.05342897		1505.6	0.03956425		2095.6	0.05454212		2685.59	-0.00679205		3275.59	0.00690126		3865.58	-0.00747345
325.8	0.26328235		915.8	0.0534381		1505.8	0.03951999		2095.8	0.05540137		2685.79	-0.00676642		3275.79	0.00692212		3865.78	-0.00693781
326	0.26330545		916	0.05360715		1506	0.04021084		2096	0.05609601		2685.99	-0.00602129		3275.99	0.00699584		3865.98	-0.00660911
326.2	0.26334559		916.2	0.05444899		1506.2	0.03937275		2096.2	0.05642252		2686.19	-0.00478138		3276.19	0.00678995		3866.18	-0.00628064
326.4	0.26398368		916.4	0.05510304		1506.4	0.03891104		2096.4	0.05655786		2686.39	-0.00499027		3276.39	0.00654644		3866.38	-0.00657709
326.6	0.26508938		916.6	0.05543689		1506.6	0.0376276		2096.6	0.05696239		2686.59	-0.005139		3276.59	0.00644099		3866.58	-0.00626748
326.8	0.26525611		916.8	0.05569171		1506.8	0.03699846		2096.8	0.05637263		2686.79	-0.00536255		3276.79	0.00735251		3866.78	-0.00591473
327	0.26519099		917	0.05631584		1507	0.03668791		2097	0.05566528		2686.99	-0.00568266		3276.99	0.00709837		3866.98	-0.00549091
327.2	0.26559896		917.2	0.05733838		1507.2	0.03701547		2097.2	0.05476618		2687.19	-0.00647746		3277.19	0.00688424		3867.18	-0.00610351
327.4	0.26531683		917.4	0.05738052		1507.4	0.03674443		2097.4	0.05481704		2687.39	-0.00740334		3277.39	0.00634253		3867.38	-0.00566206
327.6	0.26620946		917.6	0.05802512		1507.6	0.03612084		2097.6	0.05522241		2687.59	-0.00793678		3277.59	0.00626378		3867.58	-0.00525367
327.8	0.26629456		917.8	0.05829547		1507.8	0.03628674		2097.8	0.05504685		2687.79	-0.00878359		3277.79	0.00508107		3867.78	-0.00574539
328	0.26657577		918	0.05810172		1508	0.03606148		2098	0.05468129		2687.99	-0.00903637		3277.99	0.00542205		3867.98	-0.00601415
328.2	0.26789167		918.2	0.05750016		1508.2	0.03666762		2098.2	0.05480787		2688.19	-0.00926807		3278.19	0.00526511		3868.18	-0.00530335
328.4	0.26879873		918.4	0.05688735		1508.4	0.03647984		2098.4	0.05554616		2688.39	-0.00863397		3278.39	0.00481909		3868.38	-0.00459817
328.6	0.26903472		918.6	0.0572959		1508.6	0.03700253		2098.6	0.05561932		2688.59	-0.00931077		3278.59	0.00441821		3868.58	-0.00452188
328.8	0.26907736		918.8	0.05703059		1508.8	0.03793305		2098.8	0.05660109		2688.79	-0.00958718		3278.79	0.00370366		3868.78	-0.00537465
329	0.26984278		919	0.0573575		1509	0.03878383		2099	0.05716187		2688.99	-0.00909688		3278.99	0.00275264		3868.98	-0.00665496
329.2	0.27058241		919.2	0.05714178		1509.2	0.03995703		2099.2	0.05731968		2689.19	-0.00856494		3279.19	0.00262385		3869.18	-0.00695577
329.4	0.27244415		919.4	0.05686826		1509.4	0.0401511		2099.4	0.05847204		2689.39	-0.00833527		3279.39	0.00218015		3869.38	-0.00771273
329.6	0.27400606		919.6	0.05729595		1509.6	0.04107343		2099.6	0.05887078		2689.59	-0.00761787		3279.59	0.00186801		3869.58	-0.00830023
329.8	0.27452728		919.8	0.05769579		1509.8	0.04203707		2099.8	0.06016473		2689.79	-0.00645167		3279.79	0.00214731		3869.78	-0.0078877
330	0.27591399		920	0.05840092		1510	0.04286742		2100	0.05989247		2689.99	-0.00551888		3279.99	0.00186784		3869.98	-0.00826059
330.2	0.27602445		920.2	0.05918993		1510.2	0.04269293		2100.2	0.05979212		2690.19	-0.00504993		3280.19	0.00175641		3870.18	-0.00825141
330.4	0.27808214		920.4	0.05925047		1510.4	0.04275736		2100.4	0.05951724		2690.39	-0.00546438		3280.39	0.00182576		3870.38	-0.00802692
330.6	0.27873173		920.6	0.06017822		1510.6	0.04213422		2100.6	0.05920467		2690.59	-0.00563821		3280.59	0.00278056		3870.58	-0.00829386
330.8	0.27947203		920.8	0.06007521		1510.8	0.04184695		2100.8	0.05840966		2690.79	-0.00482933		3280.79	0.00351778		3870.78	-0.00771066
331	0.27935518		921	0.06001633		1511	0.04117877		2101	0.05760892		2690.99	-0.00507742		3280.99	0.00414196		3870.98	-0.00778916
331.2	0.2802218		921.2	0.06058444		1511.2	0.04042977		2101.2	0.0577495		2691.19	-0.00421618		3281.19	0.00387956		3871.18	-0.00830211
331.4	0.28007975		921.4	0.06124767		1511.4	0.03995905		2101.4	0.05869122		2691.39	-0.00419296		3281.39	0.00449699		3871.38	-0.00801782
331.6	0.28037176		921.6	0.06157722		1511.6	0.04041596		2101.6	0.05914668		2691.59	-0.0044819		3281.59	0.00561112		3871.58	-0.00807027
331.8	0.28014425		921.8	0.06166882		1511.8	0.04072683		2101.8	0.05917929		2691.79	-0.00453581		3281.79	0.00643359		3871.78	-0.00836325
332	0.27999706		922	0.06148914		1512	0.04028991		2102	0.05943061		2691.99	-0.00517768		3281.99	0.00718039		3871.98	-0.00714468
332.2	0.28108749		922.2	0.0604992		1512.2	0.0404811		2102.2	0.06031511		2692.19	-0.0051222		3282.19	0.0074513		3872.18	-0.00568655
332.4	0.28177524		922.4	0.06048486		1512.4	0.0407093		2102.4	0.06074656		2692.39	-0.00551793		3282.39	0.0069636		3872.38	-0.00493793
332.6	0.28249624		922.6	0.06011686		1512.6	0.04190809		2102.6	0.06092035		2692.59	-0.00596787		3282.59	0.00700957		3872.58	-0.00554375
332.8	0.28269614		922.8	0.05981969		1512.8	0.04191703		2102.8	0.06246917		2692.79	-0.00620652		3282.79	0.00661015		3872.78	-0.00584233
333	0.28330056		923	0.06043568		1513	0.04213118		2103	0.06280009		2692.99	-0.00686928		3282.99	0.00614455		3872.98	-0.00580395
333.2	0.28424985		923.2	0.06068795		1513.2	0.04267767		2103.2	0.06218225		2693.19	-0.00691763		3283.19	0.00525341		3873.18	-0.00550321
333.4	0.28552699		923.4	0.06097786		1513.4	0.04327073		2103.4	0.06223		2693.39	-0.00655561		3283.39	0.00342732		3873.38	-0.00553138
333.6	0.28720069		923.6	0.06207733		1513.6	0.04404454		2103.6	0.06169842		2693.59	-0.00593425		3283.59	0.00377047		3873.58	-0.00535228
333.8	0.28721764		923.8	0.06352579		1513.8	0.04479993		2103.8	0.06211326		2693.79	-0.00512346		3283.79	0.00329549		3873.78	-0.00554973
334	0.28853239		924	0.06408668		1514	0.04524122		2104	0.06104296		2693.99	-0.00506167		3283.99	0.00307102		3873.98	-0.00567561
334.2	0.2882137		924.2	0.06475453		1514.2	0.04447188		2104.2	0.06077379		2694.19	-0.00493652		3284.19	0.00312339		3874.18	-0.00553286
334.4	0.28989099		924.4	0.06545163		1514.4	0.04416141		2104.4	0.06082675		2694.39	-0.00530135		3284.39	0.00289309		3874.38	-0.0063415
334.6	0.2894816		924.6	0.06659617		1514.6	0.04351685		2104.6	0.06048107		2694.59	-0.00530051		3284.59	0.00312975		3874.58	-0.00679943
334.8	0.28981356		924.8	0.06617246		1514.8	0.04307516		2104.8	0.06021575		2694.79	-0.00479425		3284.79	0.00239346		3874.78	-0.00680645
335	0.29068297		925	0.06737291		1515	0.04231911		2105	0.06103047		2694.99	-0.00570579		3284.99	0.00320005		3874.98	-0.00704531
335.2	0.29106602		925.2	0.06775526		1515.2	0.04251686		2105.2	0.06077703		2695.19	-0.00610929		3285.19	0.00296771		3875.18	-0.00729529
335.4	0.29096357		925.4	0.0685685		1515.4	0.04281759		2105.4	0.06143991		2695.39	-0.00662905		3285.39	0.00414947		3875.38	-0.00756659
335.6	0.29111552		925.6	0.06889791		1515.6	0.04256229		2105.6	0.06141563		2695.59	-0.00653236		3285.59	0.00409825		3875.58	-0.00745572
335.8	0.29105274		925.8	0.06860218		1515.8	0.04254553		2105.8	0.06122389		2695.79	-0.00658386		3285.79	0.0038732		3875.78	-0.006639
336	0.29010242		926	0.0681736		1516	0.04210551		2106	0.06175269		2695.99	-0.00675412		3285.99	0.00424765		3875.98	-0.0056954
336.2	0.29061747		926.2	0.06754602		1516.2	0.04280745		2106.2	0.06221087		2696.19	-0.0067876		3286.19	0.0039118		3876.18	-0.00524193
336.4	0.29060972		926.4	0.06763708		1516.4	0.04311666		2106.4	0.06237217		2696.39	-0.0068729		3286.39	0.00441455		3876.38	-0.00495249
336.6	0.29121808		926.6	0.06772486		1516.6	0.04317024		2106.6	0.06346673		2696.59	-0.00644407		3286.59	0.00464174		3876.58	-0.00450216
336.8	0.29122561		926.8	0.06816116		1516.8	0.04273175		2106.8	0.06456653		2696.79	-0.00622455		3286.79	0.00438018		3876.78	-0.00341574
337	0.29233642		927	0.0679218		1517	0.04343928		2107	0.0642804		2696.99	-0.00679206		3286.99	0.00374269		3876.98	-0.00358759
337.2	0.29328623		927.2	0.06777278		1517.2	0.04388337		2107.2	0.06420866		2697.19	-0.00627928		3287.19	0.00308349		3877.18	-0.00372127
337.4	0.29400476		927.4	0.06764813		1517.4	0.04519814		2107.4	0.06456252		2697.39	-0.00606178		3287.39	0.0030692		3877.38	-0.00396637
337.6	0.29504371		927.6	0.06731037		1517.6	0.04527262		2107.6	0.06432972		2697.59	-0.00554002		3287.59	0.00378833		3877.58	-0.0044588
337.8	0.29493038		927.8	0.06774623		1517.8	0.0460916		2107.8	0.0646146		2697.79	-0.00508218		3287.79	0.0033946		3877.78	-0.00513014
338	0.29607542		928	0.066996		1518	0.04585582		2108	0.06446627		2697.99	-0.0053709		3287.99	0.00375786		3877.98	-0.00436826
338.2	0.29582685		928.2	0.06719321		1518.2	0.04572206		2108.2	0.06392709		2698.19	-0.00504316		3288.19	0.00299524		3878.18	-0.00476894
338.4	0.29698409		928.4	0.06772128		1518.4	0.0451417		2108.4	0.064552		2698.39	-0.00527265		3288.39	0.00211171		3878.38	-0.00543265
338.6	0.29716078		928.6	0.06879105		1518.6	0.04420174		2108.6	0.06416958		2698.59	-0.00542324		3288.59	0.00186175		3878.58	-0.00532537
338.8	0.2975687		928.8	0.06883983		1518.8	0.04469298		2108.8	0.0645487		2698.79	-0.00571802		3288.79	0.00289839		3878.78	-0.00484752
339	0.2974521		929	0.07001692		1519	0.04426755		2109	0.06527769		2698.99	-0.00668991		3288.99	0.00358483		3878.98	-0.00464516
339.2	0.29703153		929.2	0.06984237		1519.2	0.04455925		2109.2	0.06510795		2699.19	-0.00647521		3289.19	0.00251148		3879.18	-0.00444616
339.4	0.29734966		929.4	0.07073623		1519.4	0.0444139		2109.4	0.06557678		2699.39	-0.00609716		3289.39	0.00203612		3879.38	-0.00489444
339.6	0.29740138		929.6	0.07118269		1519.6	0.04405979		2109.6	0.06619538		2699.59	-0.00501731		3289.59	0.00188736		3879.58	-0.00455238
339.8	0.29697042		929.8	0.07144126		1519.8	0.0449713		2109.8	0.06637094		2699.79	-0.00506361		3289.79	0.00246838		3879.78	-0.00414952
340	0.29655059		930	0.07268609		1520	0.04550918		2110	0.06712359		2699.99	-0.00408771		3289.99	0.00318057		3879.98	-0.00440734
340.2	0.2976125		930.2	0.07246465		1520.2	0.04509678		2110.2	0.06704305		2700.19	-0.00457392		3290.19	0.00262828		3880.18	-0.00434832
340.4	0.29846386		930.4	0.07189073		1520.4	0.04467753		2110.4	0.06745871		2700.39	-0.00374604		3290.39	0.00286324		3880.38	-0.00411961
340.6	0.29982584		930.6	0.07136542		1520.6	0.04423338		2110.6	0.06810356		2700.59	-0.00343407		3290.59	0.00167614		3880.58	-0.0037517
340.8	0.30045487		930.8	0.07095153		1520.8	0.04490812		2110.8	0.06825444		2700.79	-0.00320077		3290.79	0.00171977		3880.78	-0.00343097
341	0.30214674		931	0.07031001		1521	0.04577487		2111	0.06759417		2700.99	-0.00364386		3290.99	0.0011933		3880.98	-0.00521488
341.2	0.30280461		931.2	0.07019414		1521.2	0.04545004		2111.2	0.06733472		2701.19	-0.00352792		3291.19	0.00105554		3881.18	-0.00556853
341.4	0.30406629		931.4	0.06971769		1521.4	0.0459456		2111.4	0.06660262		2701.39	-0.00358974		3291.39	0.00105693		3881.38	-0.00579913
341.6	0.30554882		931.6	0.06876724		1521.6	0.04580369		2111.6	0.06639551		2701.59	-0.00293744		3291.59	0.00091817		3881.58	-0.00523397
341.8	0.30629615		931.8	0.07001176		1521.8	0.0464636		2111.8	0.06616816		2701.79	-0.00363853		3291.79	-0.00032438		3881.78	-0.00527701
342	0.30688974		932	0.07007913		1522	0.04561499		2112	0.06556142		2701.99	-0.00362741		3291.99	-0.00028222		3881.98	-0.00449475
342.2	0.30696986		932.2	0.07100425		1522.2	0.04502135		2112.2	0.06478593		2702.19	-0.00289416		3292.19	-0.00062633		3882.18	-0.00557557
342.4	0.30698799		932.4	0.07217715		1522.4	0.04442503		2112.4	0.06502355		2702.39	-0.00298109		3292.39	-0.00020463		3882.38	-0.00609952
342.6	0.30653826		932.6	0.07410442		1522.6	0.04482703		2112.6	0.06476196		2702.59	-0.00323262		3292.59	0.00120738		3882.58	-0.00596782
342.8	0.30701699		932.8	0.0747882		1522.8	0.04528366		2112.8	0.06464561		2702.79	-0.00316716		3292.79	0.00209329		3882.78	-0.00592575
343	0.30689581		933	0.0756335		1523	0.04534132		2113	0.06455249		2702.99	-0.00393176		3292.99	0.00255602		3882.98	-0.00642856
343.2	0.30685838		933.2	0.07670683		1523.2	0.04551278		2113.2	0.06438389		2703.19	-0.00394145		3293.19	0.00307108		3883.18	-0.00615519
343.4	0.30683925		933.4	0.07731053		1523.4	0.04642076		2113.4	0.06477505		2703.39	-0.00433674		3293.39	0.00369396		3883.38	-0.00606326
343.6	0.30687314		933.6	0.0778508		1523.6	0.04639043		2113.6	0.06560451		2703.59	-0.00437187		3293.59	0.00477552		3883.58	-0.00649422
343.8	0.30644848		933.8	0.07891612		1523.8	0.04727306		2113.8	0.06637494		2703.79	-0.00595014		3293.79	0.00443433		3883.78	-0.00657553
344	0.30621993		934	0.07856787		1524	0.04704287		2114	0.0676233		2703.99	-0.00561799		3293.99	0.00460014		3883.98	-0.00677009
344.2	0.30662631		934.2	0.07801307		1524.2	0.04679297		2114.2	0.06836719		2704.19	-0.00649095		3294.19	0.00480756		3884.18	-0.00718276
344.4	0.30690423		934.4	0.07729225		1524.4	0.04855814		2114.4	0.0697763		2704.39	-0.00643099		3294.39	0.00385681		3884.38	-0.00734491
344.6	0.30711207		934.6	0.07782671		1524.6	0.04881715		2114.6	0.07074551		2704.59	-0.00623497		3294.59	0.0030834		3884.58	-0.00719423
344.8	0.30690831		934.8	0.07770378		1524.8	0.04953214		2114.8	0.07101743		2704.79	-0.00656747		3294.79	0.00366434		3884.78	-0.00638221
345	0.30759656		935	0.07658953		1525	0.04896253		2115	0.07067588		2704.99	-0.00661412		3294.99	0.00286906		3884.98	-0.00616939
345.2	0.30776033		935.2	0.07592349		1525.2	0.04884473		2115.2	0.07192806		2705.19	-0.00653532		3295.19	0.00256039		3885.18	-0.00516494
345.4	0.3080723		935.4	0.07584224		1525.4	0.04893827		2115.4	0.07208553		2705.39	-0.00688676		3295.39	0.00223002		3885.38	-0.00518221
345.6	0.30862618		935.6	0.07619695		1525.6	0.04929739		2115.6	0.07289604		2705.59	-0.00642886		3295.59	0.00286106		3885.58	-0.00489531
345.8	0.3089323		935.8	0.07717839		1525.8	0.0499753		2115.8	0.07290038		2705.79	-0.00659973		3295.79	0.00263717		3885.78	-0.00576145
346	0.30870788		936	0.07680596		1526	0.0500323		2116	0.07246968		2705.99	-0.00535263		3295.99	0.00266729		3885.98	-0.00562879
346.2	0.3088764		936.2	0.07750754		1526.2	0.05086462		2116.2	0.07277681		2706.19	-0.00427034		3296.19	0.00256004		3886.18	-0.00649796
346.4	0.30933769		936.4	0.07831464		1526.4	0.05177511		2116.4	0.0726304		2706.39	-0.0041286		3296.39	0.00192725		3886.38	-0.00663617
346.6	0.30988928		936.6	0.08006208		1526.6	0.05166467		2116.6	0.07166036		2706.59	-0.00385111		3296.59	0.00140416		3886.58	-0.00595842
346.8	0.31078196		936.8	0.08037591		1526.8	0.05123427		2116.8	0.07148074		2706.79	-0.00380591		3296.79	0.00092081		3886.78	-0.00542141
347	0.31032853		937	0.0810541		1527	0.05127516		2117	0.07120111		2706.99	-0.00415592		3296.99	0.00144257		3886.98	-0.00517647
347.2	0.31001968		937.2	0.0815908		1527.2	0.05121174		2117.2	0.07104518		2707.19	-0.00394308		3297.19	0.00148135		3887.18	-0.0044016
347.4	0.31030247		937.4	0.080772		1527.4	0.05115982		2117.4	0.07078132		2707.39	-0.004669		3297.39	0.00072273		3887.38	-0.00487821
347.6	0.31068476		937.6	0.08164685		1527.6	0.0499128		2117.6	0.07092523		2707.59	-0.00461453		3297.59	0.00051569		3887.58	-0.00591354
347.8	0.3118428		937.8	0.08204702		1527.8	0.04966325		2117.8	0.07162608		2707.79	-0.00502555		3297.79	0.0007339		3887.78	-0.00576583
348	0.31222888		938	0.08086136		1528	0.04994614		2118	0.07173372		2707.99	-0.00466723		3297.99	0.00107295		3887.98	-0.00598754
348.2	0.31310314		938.2	0.08063632		1528.2	0.05023971		2118.2	0.07145918		2708.19	-0.00511829		3298.19	0.00148079		3888.18	-0.00625769
348.4	0.31342839		938.4	0.08023342		1528.4	0.05074708		2118.4	0.07142124		2708.39	-0.00468763		3298.39	0.00118654		3888.38	-0.00579721
348.6	0.31371743		938.6	0.0798585		1528.6	0.04965794		2118.6	0.07148432		2708.59	-0.0044679		3298.59	0.00181744		3888.58	-0.0052503
348.8	0.31364272		938.8	0.07878662		1528.8	0.04968716		2118.8	0.07114564		2708.79	-0.00464639		3298.79	0.00272924		3888.78	-0.00468155
349	0.31388886		939	0.07816275		1529	0.04893122		2119	0.07136585		2708.99	-0.00410651		3298.99	0.00307148		3888.98	-0.00432176
349.2	0.31530324		939.2	0.07829666		1529.2	0.04913705		2119.2	0.07201987		2709.19	-0.00457239		3299.19	0.00407613		3889.18	-0.00551111
349.4	0.31588731		939.4	0.07901058		1529.4	0.04885512		2119.4	0.07141979		2709.39	-0.00509042		3299.39	0.00403218		3889.38	-0.00635073
349.6	0.31703969		939.6	0.07891662		1529.6	0.04999594		2119.6	0.07189461		2709.59	-0.00447961		3299.59	0.00466751		3889.58	-0.00664524
349.8	0.31838468		939.8	0.07891447		1529.8	0.05053873		2119.8	0.0713866		2709.79	-0.00511818		3299.79	0.00434421		3889.78	-0.00680137
350	0.31948177		940	0.07927192		1530	0.05085411		2120	0.07190905		2709.99	-0.0050839		3299.99	0.00379689		3889.98	-0.00604242
350.2	0.32030025		940.2	0.0798751		1530.2	0.05259566		2120.2	0.07239519		2710.19	-0.00527484		3300.19	0.00359821		3890.18	-0.00593503
350.4	0.32067069		940.4	0.08125244		1530.4	0.05258186		2120.4	0.07268191		2710.39	-0.00578224		3300.39	0.00380457		3890.38	-0.00588927
350.6	0.32077946		940.6	0.0821465		1530.6	0.05186923		2120.6	0.07336261		2710.59	-0.00561749		3300.59	0.00414432		3890.58	-0.00579001
350.8	0.32022		940.8	0.08265702		1530.8	0.05268118		2120.8	0.07398748		2710.79	-0.00551393		3300.79	0.00458513		3890.78	-0.00485208
351	0.31909871		941	0.08245815		1531	0.05256974		2121	0.07415444		2710.99	-0.00594133		3300.99	0.00456433		3890.98	-0.00545928
351.2	0.31862185		941.2	0.08213329		1531.2	0.05283565		2121.2	0.07504784		2711.19	-0.00601675		3301.19	0.00459253		3891.18	-0.00514359
351.4	0.31843967		941.4	0.08144641		1531.4	0.05310338		2121.4	0.07396353		2711.39	-0.00641936		3301.39	0.00454094		3891.38	-0.0057634
351.6	0.3198185		941.6	0.08266223		1531.6	0.05237514		2121.6	0.07469027		2711.59	-0.00568596		3301.59	0.0053311		3891.58	-0.00646344
351.8	0.32011191		941.8	0.08285025		1531.8	0.05236812		2121.8	0.07506702		2711.79	-0.00629258		3301.79	0.005609		3891.78	-0.00657401
352	0.32004949		942	0.08202127		1532	0.05288913		2122	0.07494554		2711.99	-0.00620862		3301.99	0.00594922		3891.98	-0.00673244
352.2	0.32023388		942.2	0.08192625		1532.2	0.05298451		2122.2	0.07505633		2712.19	-0.00670759		3302.19	0.00698827		3892.18	-0.00597331
352.4	0.32012664		942.4	0.08217031		1532.4	0.05325999		2122.4	0.07510588		2712.39	-0.00635548		3302.39	0.00737901		3892.38	-0.00646727
352.6	0.3206568		942.6	0.08204254		1532.6	0.05215626		2122.6	0.07504024		2712.59	-0.0071112		3302.59	0.0070109		3892.58	-0.00673112
352.8	0.32110643		942.8	0.08256985		1532.8	0.05307363		2122.8	0.0750941		2712.79	-0.00645238		3302.79	0.00747757		3892.78	-0.00674698
353	0.3226382		943	0.08341687		1533	0.0526605		2123	0.07580713		2712.99	-0.00591419		3302.99	0.00734933		3892.98	-0.00671082
353.2	0.32317111		943.2	0.08488737		1533.2	0.05200803		2123.2	0.07577142		2713.19	-0.00668522		3303.19	0.00725275		3893.18	-0.00754112
353.4	0.32360981		943.4	0.08549609		1533.4	0.05154756		2123.4	0.07579546		2713.39	-0.00591771		3303.39	0.00622627		3893.38	-0.00763014
353.6	0.32454959		943.6	0.08592602		1533.6	0.05184933		2123.6	0.07560623		2713.59	-0.0057539		3303.59	0.00583876		3893.58	-0.00794866
353.8	0.32605776		943.8	0.08604888		1533.8	0.05214235		2123.8	0.07579863		2713.79	-0.00566942		3303.79	0.00513628		3893.78	-0.0068573
354	0.3269776		944	0.08618352		1534	0.05229001		2124	0.07667114		2713.99	-0.0046391		3303.99	0.00443081		3893.98	-0.00676778
354.2	0.32673675		944.2	0.08629214		1534.2	0.05308069		2124.2	0.07654342		2714.19	-0.00466577		3304.19	0.00405995		3894.18	-0.00712053
354.4	0.32670411		944.4	0.08741522		1534.4	0.05271346		2124.4	0.07695894		2714.39	-0.00432574		3304.39	0.00458574		3894.38	-0.00706066
354.6	0.32707605		944.6	0.08703797		1534.6	0.05325674		2124.6	0.0770843		2714.59	-0.00427949		3304.59	0.00455846		3894.58	-0.00615424
354.8	0.32709723		944.8	0.08676738		1534.8	0.05422288		2124.8	0.07683214		2714.79	-0.00440517		3304.79	0.0040524		3894.78	-0.00494428
355	0.3267236		945	0.08616893		1535	0.05449268		2125	0.07689358		2714.99	-0.00453186		3304.99	0.00345677		3894.98	-0.00463184
355.2	0.32684451		945.2	0.08607645		1535.2	0.05516558		2125.2	0.07692062		2715.19	-0.00423744		3305.19	0.00342862		3895.18	-0.0031747
355.4	0.32677441		945.4	0.08640927		1535.4	0.05559618		2125.4	0.07682726		2715.39	-0.00428562		3305.39	0.00338488		3895.38	-0.00323943
355.6	0.32772027		945.6	0.08646032		1535.6	0.05549693		2125.6	0.07858557		2715.59	-0.00402911		3305.59	0.00397715		3895.58	-0.00298585
355.8	0.32750905		945.8	0.08586257		1535.8	0.055656		2125.8	0.07943897		2715.79	-0.00420305		3305.79	0.00399634		3895.78	-0.00273238
356	0.32851706		946	0.08523113		1536	0.0561505		2126	0.07920257		2715.99	-0.00446647		3305.99	0.00426282		3895.98	-0.00268768
356.2	0.32898789		946.2	0.0849456		1536.2	0.05728119		2126.2	0.08032846		2716.19	-0.00528953		3306.19	0.0037188		3896.18	-0.00328652
356.4	0.32967258		946.4	0.08539165		1536.4	0.05767507		2126.4	0.08064202		2716.39	-0.00465057		3306.39	0.00321383		3896.38	-0.00425683
356.6	0.33127265		946.6	0.08531222		1536.6	0.05783036		2126.6	0.08126224		2716.59	-0.00441186		3306.59	0.00274985		3896.58	-0.00424396
356.8	0.33169603		946.8	0.08587178		1536.8	0.05875761		2126.8	0.08249327		2716.79	-0.00362585		3306.79	0.00285084		3896.78	-0.00484794
357	0.33258324		947	0.08679988		1537	0.05801117		2127	0.08215152		2716.99	-0.00434842		3306.99	0.00345745		3896.98	-0.00507616
357.2	0.33231196		947.2	0.08740768		1537.2	0.05682595		2127.2	0.08245713		2717.19	-0.0045052		3307.19	0.00350877		3897.18	-0.00568078
357.4	0.33310402		947.4	0.08737107		1537.4	0.05649817		2127.4	0.08227917		2717.39	-0.00328065		3307.39	0.00283574		3897.38	-0.0059175
357.6	0.33357361		947.6	0.08664401		1537.6	0.0565806		2127.6	0.08213233		2717.59	-0.00372411		3307.59	0.00242631		3897.58	-0.0054738
357.8	0.3343644		947.8	0.08572962		1537.8	0.05646066		2127.8	0.08224403		2717.79	-0.00363313		3307.79	0.00238884		3897.78	-0.00487109
358	0.33470875		948	0.08594069		1538	0.05510573		2128	0.08239564		2717.99	-0.00324623		3307.99	0.00250931		3897.98	-0.00516895
358.2	0.33492143		948.2	0.08609539		1538.2	0.05523059		2128.2	0.08173189		2718.19	-0.00405572		3308.19	0.00243103		3898.18	-0.00462899
358.4	0.33474796		948.4	0.08658385		1538.4	0.05553383		2128.4	0.08058843		2718.39	-0.00380418		3308.39	0.00328418		3898.38	-0.00393862
358.6	0.33518124		948.6	0.08669208		1538.6	0.05506574		2128.6	0.07973751		2718.59	-0.00449529		3308.59	0.00409902		3898.58	-0.00316579
358.8	0.33519215		948.8	0.08670415		1538.8	0.0552677		2128.8	0.07895441		2718.79	-0.00473956		3308.79	0.00306256		3898.78	-0.00271697
359	0.33489542		949	0.08778532		1539	0.05563447		2129	0.07805239		2718.99	-0.00491944		3308.99	0.0027794		3898.98	-0.00276094
359.2	0.33429111		949.2	0.08779182		1539.2	0.05511075		2129.2	0.07812455		2719.19	-0.00492664		3309.19	0.00243686		3899.18	-0.0034957
359.4	0.33421618		949.4	0.08816449		1539.4	0.05511918		2129.4	0.07827581		2719.39	-0.0046756		3309.39	0.00248408		3899.38	-0.00373134
359.6	0.33413492		949.6	0.08727115		1539.6	0.05483008		2129.6	0.07903375		2719.59	-0.00455303		3309.59	0.00276064		3899.58	-0.00380631
359.8	0.33429809		949.8	0.08766882		1539.8	0.05446848		2129.8	0.07989285		2719.79	-0.00431265		3309.79	0.00258805		3899.78	-0.00424549
360	0.33433798		950	0.08791798		1540	0.0546989		2130	0.08043432		2719.99	-0.00384944		3309.99	0.00151546		3899.98	-0.00480397
360.2	0.33431576		950.2	0.08815007		1540.2	0.05585279		2130.2	0.0820903		2720.19	-0.00335393		3310.19	0.00083572		3900.18	-0.00556974
360.4	0.33388391		950.4	0.08874734		1540.4	0.05567739		2130.4	0.08224308		2720.39	-0.00227919		3310.39	0.00097395		3900.38	-0.00535789
360.6	0.33417128		950.6	0.08912048		1540.6	0.05666383		2130.6	0.0825492		2720.59	-0.00253784		3310.59	0.00093524		3900.58	-0.00556343
360.8	0.33466713		950.8	0.08953277		1540.8	0.05708695		2130.8	0.08269409		2720.79	-0.00236138		3310.79	0.00162568		3900.78	-0.00590621
361	0.3353787		951	0.09023662		1541	0.05785682		2131	0.08292097		2720.99	-0.0030612		3310.99	0.00180325		3900.98	-0.00599878
361.2	0.33617005		951.2	0.08977411		1541.2	0.05781353		2131.2	0.08384328		2721.19	-0.00224129		3311.19	0.00183036		3901.18	-0.00642122
361.4	0.33704424		951.4	0.08995521		1541.4	0.05769259		2131.4	0.08358658		2721.39	-0.00242148		3311.39	0.00214909		3901.38	-0.00651638
361.6	0.33718371		951.6	0.08968447		1541.6	0.05851374		2131.6	0.08381647		2721.59	-0.00306695		3311.59	0.00222988		3901.58	-0.00567028
361.8	0.33733546		951.8	0.09026148		1541.8	0.05827872		2131.8	0.08368044		2721.79	-0.003264		3311.79	0.00358032		3901.78	-0.00549713
362	0.33760356		952	0.09073777		1542	0.05840315		2132	0.08375179		2721.99	-0.00297356		3311.99	0.00393325		3901.98	-0.00518992
362.2	0.33806185		952.2	0.09115936		1542.2	0.05876893		2132.2	0.08368662		2722.19	-0.00434268		3312.19	0.00412448		3902.18	-0.00485847
362.4	0.33790067		952.4	0.0918189		1542.4	0.05907139		2132.4	0.08319583		2722.39	-0.00486807		3312.39	0.00476133		3902.38	-0.00448443
362.6	0.33802762		952.6	0.09247224		1542.6	0.05926234		2132.6	0.08357902		2722.59	-0.00620038		3312.59	0.00536596		3902.58	-0.004449
362.8	0.33830016		952.8	0.09263017		1542.8	0.05946093		2132.8	0.08315832		2722.79	-0.00745133		3312.79	0.0053334		3902.78	-0.00450296
363	0.33882341		953	0.09354814		1543	0.05930719		2133	0.08317412		2722.99	-0.00795828		3312.99	0.00554344		3902.98	-0.00567805
363.2	0.33877045		953.2	0.09340021		1543.2	0.0587221		2133.2	0.08419595		2723.19	-0.00817663		3313.19	0.00487737		3903.18	-0.00621806
363.4	0.33897502		953.4	0.0936257		1543.4	0.0577711		2133.4	0.08439104		2723.39	-0.0085895		3313.39	0.00547482		3903.38	-0.00605692
363.6	0.33902536		953.6	0.0929904		1543.6	0.05690693		2133.6	0.08552068		2723.59	-0.00892672		3313.59	0.00528637		3903.58	-0.00624521
363.8	0.34012184		953.8	0.09313583		1543.8	0.05666794		2133.8	0.08647029		2723.79	-0.00913399		3313.79	0.00527782		3903.78	-0.00604154
364	0.33879828		954	0.09306732		1544	0.05636144		2134	0.08665374		2723.99	-0.00757121		3313.99	0.00440503		3903.98	-0.00569058
364.2	0.33887806		954.2	0.09250428		1544.2	0.05695784		2134.2	0.08690792		2724.19	-0.00745283		3314.19	0.00412225		3904.18	-0.00507392
364.4	0.33951849		954.4	0.09286126		1544.4	0.05711737		2134.4	0.08641146		2724.39	-0.00704196		3314.39	0.00465657		3904.38	-0.00503763
364.6	0.34056303		954.6	0.09297375		1544.6	0.05847636		2134.6	0.08664063		2724.59	-0.00622822		3314.59	0.00383704		3904.58	-0.00531825
364.8	0.34159019		954.8	0.09272335		1544.8	0.05848386		2134.8	0.08687313		2724.79	-0.00504661		3314.79	0.00394127		3904.78	-0.00462807
365	0.34184775		955	0.0931586		1545	0.0583914		2135	0.08746595		2724.99	-0.00520126		3314.99	0.00356416		3904.98	-0.00523349
365.2	0.34278048		955.2	0.09334123		1545.2	0.05825373		2135.2	0.08726581		2725.19	-0.00412589		3315.19	0.00397147		3905.18	-0.00566374
365.4	0.34327899		955.4	0.09448041		1545.4	0.05928945		2135.4	0.08697625		2725.39	-0.0050759		3315.39	0.00406997		3905.38	-0.00583334
365.6	0.34225462		955.6	0.0952633		1545.6	0.06030152		2135.6	0.08744178		2725.59	-0.00473914		3315.59	0.0044865		3905.58	-0.00530069
365.8	0.34225808		955.8	0.09650529		1545.8	0.06048539		2135.8	0.08771897		2725.79	-0.00420756		3315.79	0.00590859		3905.78	-0.00582276
366	0.34236673		956	0.09675287		1546	0.05994609		2136	0.08837125		2725.99	-0.0034392		3315.99	0.00549647		3905.98	-0.00553769
366.2	0.342559		956.2	0.09686985		1546.2	0.05989452		2136.2	0.08889052		2726.19	-0.00420517		3316.19	0.00491348		3906.18	-0.00578794
366.4	0.34301964		956.4	0.09691795		1546.4	0.06032566		2136.4	0.08880858		2726.39	-0.00415756		3316.39	0.00540547		3906.38	-0.0052713
366.6	0.34273732		956.6	0.09668312		1546.6	0.06039296		2136.6	0.08895896		2726.59	-0.00427766		3316.59	0.00589933		3906.58	-0.00499478
366.8	0.34263305		956.8	0.09621825		1546.8	0.06024148		2136.8	0.08874848		2726.79	-0.00483377		3316.79	0.00586092		3906.78	-0.00503446
367	0.34328891		957	0.09583204		1547	0.06055689		2137	0.0884988		2726.99	-0.00465915		3316.99	0.00515978		3906.98	-0.00529884
367.2	0.343928		957.2	0.09528803		1547.2	0.05958258		2137.2	0.08836318		2727.19	-0.004789		3317.19	0.00461646		3907.18	-0.0053258
367.4	0.34464225		957.4	0.09501265		1547.4	0.0594296		2137.4	0.08793487		2727.39	-0.00519536		3317.39	0.00463616		3907.38	-0.00511599
367.6	0.34580513		957.6	0.0941056		1547.6	0.05978335		2137.6	0.08834433		2727.59	-0.00507439		3317.59	0.00384321		3907.58	-0.00491839
367.8	0.34621506		957.8	0.09468212		1547.8	0.06014664		2137.8	0.08904403		2727.79	-0.00482921		3317.79	0.00338872		3907.78	-0.00498738
368	0.34540652		958	0.09485157		1548	0.06029033		2138	0.08853758		2727.99	-0.00389817		3317.99	0.00285233		3907.98	-0.00385463
368.2	0.34720597		958.2	0.09418641		1548.2	0.06036214		2138.2	0.08884921		2728.19	-0.00473316		3318.19	0.00240543		3908.18	-0.00291582
368.4	0.34773384		958.4	0.09497188		1548.4	0.06031121		2138.4	0.0886016		2728.39	-0.00410785		3318.39	0.00256969		3908.38	-0.00280591
368.6	0.34743348		958.6	0.09518999		1548.6	0.06033169		2138.6	0.08942816		2728.59	-0.00314815		3318.59	0.00158342		3908.58	-0.00188002
368.8	0.34845253		958.8	0.09648639		1548.8	0.05957638		2138.8	0.08922647		2728.79	-0.00298655		3318.79	0.00164152		3908.78	-0.00084997
369	0.34931493		959	0.0975328		1549	0.06015798		2139	0.090101		2728.99	-0.00367456		3318.99	0.00149825		3908.98	-0.00169354
369.2	0.34940038		959.2	0.09888178		1549.2	0.06072279		2139.2	0.09047748		2729.19	-0.00319992		3319.19	0.00163001		3909.18	-0.00227344
369.4	0.34984053		959.4	0.10050491		1549.4	0.06124234		2139.4	0.09088273		2729.39	-0.00458243		3319.39	0.00122335		3909.38	-0.00263831
369.6	0.3497406		959.6	0.10157737		1549.6	0.06023059		2139.6	0.091574		2729.59	-0.00427565		3319.59	0.00236052		3909.58	-0.00335972
369.8	0.35018105		959.8	0.10291397		1549.8	0.06052494		2139.8	0.09215663		2729.79	-0.0042135		3319.79	0.00262187		3909.78	-0.0038803
370	0.35032396		960	0.10263412		1550	0.06004463		2140	0.0920844		2729.99	-0.00473899		3319.99	0.00170246		3909.98	-0.00351643
370.2	0.35053323		960.2	0.10277014		1550.2	0.06147264		2140.2	0.09259196		2730.19	-0.00512899		3320.19	0.00194814		3910.18	-0.00339335
370.4	0.35023957		960.4	0.10326639		1550.4	0.0618932		2140.4	0.09213432		2730.39	-0.00586574		3320.39	0.00267152		3910.38	-0.00333679
370.6	0.34987195		960.6	0.10274824		1550.6	0.0616749		2140.6	0.09162515		2730.59	-0.00637013		3320.59	0.00308115		3910.58	-0.00286684
370.8	0.34999025		960.8	0.10196561		1550.8	0.06195434		2140.8	0.0911025		2730.79	-0.00715259		3320.79	0.00308959		3910.78	-0.00328992
371	0.35028823		961	0.10117662		1551	0.0624358		2141	0.0904166		2730.99	-0.00744817		3320.99	0.00294097		3910.98	-0.0032878
371.2	0.3507766		961.2	0.10063027		1551.2	0.06245773		2141.2	0.09001572		2731.19	-0.00793777		3321.19	0.0026695		3911.18	-0.00362737
371.4	0.35137189		961.4	0.10048809		1551.4	0.06371121		2141.4	0.09020031		2731.39	-0.008592		3321.39	0.00310453		3911.38	-0.00366517
371.6	0.35183429		961.6	0.10021599		1551.6	0.06401519		2141.6	0.08984616		2731.59	-0.00863873		3321.59	0.00324799		3911.58	-0.00393464
371.8	0.35213708		961.8	0.10083796		1551.8	0.0638372		2141.8	0.09013174		2731.79	-0.00855491		3321.79	0.00419065		3911.78	-0.00433944
372	0.35283183		962	0.10057725		1552	0.06402891		2142	0.09010285		2731.99	-0.00912427		3321.99	0.00421376		3911.98	-0.00330386
372.2	0.35420076		962.2	0.1005226		1552.2	0.06380501		2142.2	0.09052301		2732.19	-0.00854513		3322.19	0.00343799		3912.18	-0.00270332
372.4	0.35434883		962.4	0.10146715		1552.4	0.06360804		2142.4	0.0909346		2732.39	-0.00806519		3322.39	0.00369779		3912.38	-0.00295066
372.6	0.35502447		962.6	0.10151331		1552.6	0.06326416		2142.6	0.09134304		2732.59	-0.00812572		3322.59	0.00278253		3912.58	-0.00209725
372.8	0.35586269		962.8	0.10228415		1552.8	0.06357177		2142.8	0.09115942		2732.79	-0.0071623		3322.79	0.0021466		3912.78	-0.00116501
373	0.35541475		963	0.10283875		1553	0.06388535		2143	0.09186792		2732.99	-0.00678099		3322.99	0.00157621		3912.98	-0.00180829
373.2	0.35584005		963.2	0.10312073		1553.2	0.06323759		2143.2	0.09221593		2733.19	-0.00554319		3323.19	0.00135287		3913.18	-0.00212325
373.4	0.35594366		963.4	0.10442287		1553.4	0.06255673		2143.4	0.09269765		2733.39	-0.00607502		3323.39	0.00068581		3913.38	-0.00240795
373.6	0.35638708		963.6	0.10421036		1553.6	0.06214087		2143.6	0.09299241		2733.59	-0.00566615		3323.59	0.00193811		3913.58	-0.00184284
373.8	0.35590194		963.8	0.10498866		1553.8	0.06225956		2143.8	0.09316039		2733.79	-0.00495226		3323.79	0.00102849		3913.78	-0.00112538
374	0.35471621		964	0.10448723		1554	0.06221804		2144	0.09258982		2733.99	-0.00414194		3323.99	0.00048226		3913.98	-0.00053439
374.2	0.35403469		964.2	0.10391815		1554.2	0.06286535		2144.2	0.09338525		2734.19	-0.00416013		3324.19	0.00114684		3914.18	-0.00041882
374.4	0.35345684		964.4	0.10364969		1554.4	0.06149301		2144.4	0.0926186		2734.39	-0.00458983		3324.39	0.00093985		3914.38	-0.00118573
374.6	0.3533682		964.6	0.10348279		1554.6	0.06174802		2144.6	0.09225296		2734.59	-0.00436937		3324.59	0.00014316		3914.58	-0.00143167
374.8	0.35322103		964.8	0.10269454		1554.8	0.06202129		2144.8	0.09178563		2734.79	-0.00393531		3324.79	-0.00067522		3914.78	-0.00223738
375	0.35248265		965	0.10236233		1555	0.06203682		2145	0.09220449		2734.99	-0.00386995		3324.99	-0.00026703		3914.98	-0.00268053
375.2	0.35306586		965.2	0.10198513		1555.2	0.06160402		2145.2	0.09120144		2735.19	-0.00405975		3325.19	-0.000069		3915.18	-0.0034213
375.4	0.35363619		965.4	0.10248548		1555.4	0.06114834		2145.4	0.09161476		2735.39	-0.00357079		3325.39	0.00006132		3915.38	-0.0041868
375.6	0.35439325		965.6	0.10244224		1555.6	0.06037623		2145.6	0.09190708		2735.59	-0.00272667		3325.59	0.00042688		3915.58	-0.0051156
375.8	0.35506884		965.8	0.10240283		1555.8	0.0601656		2145.8	0.09281408		2735.79	-0.00295876		3325.79	0.00076307		3915.78	-0.00512994
376	0.35586837		966	0.10258308		1556	0.05989079		2146	0.09353196		2735.99	-0.00379182		3325.99	0.00013978		3915.98	-0.00552474
376.2	0.35703214		966.2	0.10254867		1556.2	0.05948989		2146.2	0.09386235		2736.19	-0.00390557		3326.19	0.00012123		3916.18	-0.00546312
376.4	0.35762799		966.4	0.10298405		1556.4	0.05977415		2146.4	0.09365483		2736.39	-0.00533165		3326.39	0.00118495		3916.38	-0.00568848
376.6	0.35800405		966.6	0.10263347		1556.6	0.06001742		2146.6	0.09353429		2736.59	-0.00522759		3326.59	0.00124083		3916.58	-0.00466634
376.8	0.35889797		966.8	0.10249635		1556.8	0.06053111		2146.8	0.09398427		2736.79	-0.00381594		3326.79	0.00168708		3916.78	-0.00532665
377	0.35990812		967	0.10307805		1557	0.06081544		2147	0.09410973		2736.99	-0.00318158		3326.99	0.00215157		3916.98	-0.00583188
377.2	0.3608651		967.2	0.10348195		1557.2	0.06083526		2147.2	0.09447237		2737.19	-0.00279709		3327.19	0.00342706		3917.18	-0.00596731
377.4	0.36090529		967.4	0.10436479		1557.4	0.06095132		2147.4	0.09536467		2737.39	-0.00337862		3327.39	0.00403808		3917.38	-0.00479762
377.6	0.3613572		967.6	0.1040878		1557.6	0.06093238		2147.6	0.09601627		2737.59	-0.00324497		3327.59	0.00477008		3917.58	-0.00353289
377.8	0.36023411		967.8	0.10485493		1557.8	0.06122262		2147.8	0.09585454		2737.79	-0.00340739		3327.79	0.00484413		3917.78	-0.00275581
378	0.35964872		968	0.10514999		1558	0.06284291		2148	0.09647967		2737.99	-0.00375517		3327.99	0.00541797		3917.98	-0.00237274
378.2	0.35984688		968.2	0.10535697		1558.2	0.06334842		2148.2	0.09716303		2738.19	-0.00475227		3328.19	0.00530151		3918.18	-0.00251765
378.4	0.36038937		968.4	0.10604673		1558.4	0.0636821		2148.4	0.09694842		2738.39	-0.0050048		3328.39	0.00538818		3918.38	-0.00278746
378.6	0.36034469		968.6	0.10654603		1558.6	0.06551119		2148.6	0.09664148		2738.59	-0.00519226		3328.59	0.00528671		3918.58	-0.00281248
378.8	0.35982688		968.8	0.1068091		1558.8	0.06570734		2148.8	0.09719095		2738.79	-0.00541428		3328.79	0.00505423		3918.78	-0.0024116
379	0.35958183		969	0.1061542		1559	0.0662833		2149	0.09743289		2738.99	-0.00565182		3328.99	0.0049289		3918.98	-0.00211639
379.2	0.36023558		969.2	0.10551631		1559.2	0.0659504		2149.2	0.09668862		2739.19	-0.00528028		3329.19	0.00400731		3919.18	-0.00212903
379.4	0.36066382		969.4	0.10544649		1559.4	0.06596902		2149.4	0.09737978		2739.39	-0.00499207		3329.39	0.00371813		3919.38	-0.00165104
379.6	0.3606755		969.6	0.10531065		1559.6	0.06585219		2149.6	0.09838673		2739.59	-0.00525347		3329.59	0.00350165		3919.58	-0.00198625
379.8	0.36120916		969.8	0.10555966		1559.8	0.06590117		2149.8	0.0982746		2739.79	-0.00586676		3329.79	0.00296013		3919.78	-0.00179414
380	0.36209048		970	0.10536896		1560	0.06478358		2150	0.09829044		2739.99	-0.00675725		3329.99	0.00311178		3919.98	-0.00230012
380.2	0.36328465		970.2	0.10477746		1560.2	0.06521779		2150.2	0.09770786		2740.19	-0.00693983		3330.19	0.0028978		3920.18	-0.00175531
380.4	0.36373244		970.4	0.10507012		1560.4	0.06615133		2150.4	0.09709478		2740.39	-0.00611845		3330.39	0.00269471		3920.38	-0.00128431
380.6	0.36410013		970.6	0.10465204		1560.6	0.06600369		2150.6	0.09724539		2740.59	-0.0052395		3330.59	0.00200516		3920.58	-0.0016137
380.8	0.3646264		970.8	0.1053208		1560.8	0.0661082		2150.8	0.0974073		2740.79	-0.00434632		3330.79	0.00196374		3920.78	-0.00288711
381	0.36532602		971	0.10720588		1561	0.0665041		2151	0.0972402		2740.99	-0.0035539		3330.99	0.00209632		3920.98	-0.00273733
381.2	0.36497852		971.2	0.1082554		1561.2	0.066433		2151.2	0.09785397		2741.19	-0.0035975		3331.19	0.0031226		3921.18	-0.00333775
381.4	0.36543937		971.4	0.10887735		1561.4	0.06616132		2151.4	0.09787813		2741.39	-0.00393197		3331.39	0.00296406		3921.38	-0.00293401
381.6	0.36466255		971.6	0.1095693		1561.6	0.06582239		2151.6	0.09789881		2741.59	-0.00419536		3331.59	0.0030764		3921.58	-0.00267044
381.8	0.36410546		971.8	0.11063662		1561.8	0.06660426		2151.8	0.0972031		2741.79	-0.00336056		3331.79	0.0035571		3921.78	-0.00271623
382	0.36444213		972	0.11150297		1562	0.06679169		2152	0.09763447		2741.99	-0.0031604		3331.99	0.00343302		3921.98	-0.00373219
382.2	0.36508118		972.2	0.11112439		1562.2	0.06657769		2152.2	0.09765121		2742.19	-0.00380692		3332.19	0.00339094		3922.18	-0.00387592
382.4	0.36478685		972.4	0.11055972		1562.4	0.06678983		2152.4	0.09742119		2742.39	-0.00347408		3332.39	0.00367675		3922.38	-0.00410066
382.6	0.36460601		972.6	0.11060305		1562.6	0.06735223		2152.6	0.09712955		2742.59	-0.00268955		3332.59	0.00290681		3922.58	-0.00405872
382.8	0.36342128		972.8	0.11061313		1562.8	0.06739718		2152.8	0.09713325		2742.79	-0.00243461		3332.79	0.00181486		3922.78	-0.00434183
383	0.36476485		973	0.10968585		1563	0.06652666		2153	0.09637127		2742.99	-0.00247041		3332.99	0.00221241		3922.98	-0.00438709
383.2	0.36521179		973.2	0.1098034		1563.2	0.06628126		2153.2	0.09707532		2743.19	-0.00240212		3333.19	0.00202419		3923.18	-0.00466501
383.4	0.36555029		973.4	0.10971304		1563.4	0.06638624		2153.4	0.09752237		2743.39	-0.00274705		3333.39	0.00180558		3923.38	-0.00431006
383.6	0.36649875		973.6	0.11011972		1563.6	0.06586806		2153.6	0.0980526		2743.59	-0.0022624		3333.59	0.0021544		3923.58	-0.00460315
383.8	0.36726931		973.8	0.11019568		1563.8	0.06534072		2153.8	0.09770036		2743.79	-0.00254061		3333.79	0.00281586		3923.78	-0.00476948
384	0.36739085		974	0.10964888		1564	0.06520035		2154	0.09888662		2743.99	-0.00289494		3333.99	0.00300348		3923.98	-0.00386608
384.2	0.36695684		974.2	0.10998516		1564.2	0.06641361		2154.2	0.09798841		2744.19	-0.002487		3334.19	0.00246762		3924.18	-0.00384046
384.4	0.36666761		974.4	0.11098551		1564.4	0.06737811		2154.4	0.09803761		2744.39	-0.00223744		3334.39	0.00166706		3924.38	-0.00307576
384.6	0.36600934		974.6	0.11206032		1564.6	0.06755901		2154.6	0.09801386		2744.59	-0.00343032		3334.59	0.00168137		3924.58	-0.00411977
384.8	0.36621473		974.8	0.11365344		1564.8	0.06768232		2154.8	0.09783117		2744.79	-0.00333565		3334.79	0.00196917		3924.78	-0.00452876
385	0.36624871		975	0.11410687		1565	0.06791967		2155	0.0976995		2744.99	-0.00397891		3334.99	0.00245116		3924.98	-0.0044994
385.2	0.36548247		975.2	0.11381996		1565.2	0.06831904		2155.2	0.09829679		2745.19	-0.00441414		3335.19	0.00274747		3925.18	-0.00407039
385.4	0.36599768		975.4	0.11376285		1565.4	0.06860211		2155.4	0.09840539		2745.39	-0.00469064		3335.39	0.00304002		3925.38	-0.00369597
385.6	0.36539806		975.6	0.11357946		1565.6	0.0688606		2155.6	0.09905901		2745.59	-0.0048792		3335.59	0.00287713		3925.58	-0.0028812
385.8	0.3658298		975.8	0.11350564		1565.8	0.06915953		2155.8	0.09919036		2745.79	-0.00473247		3335.79	0.00288969		3925.78	-0.00285609
386	0.36609734		976	0.11317206		1566	0.06873842		2156	0.10025972		2745.99	-0.00500236		3335.99	0.00250154		3925.98	-0.00307067
386.2	0.36646995		976.2	0.11269846		1566.2	0.06924089		2156.2	0.10045558		2746.19	-0.00538752		3336.19	0.00227396		3926.18	-0.00241293
386.4	0.3662874		976.4	0.11207909		1566.4	0.06936309		2156.4	0.10073502		2746.39	-0.00470761		3336.39	0.00134668		3926.38	-0.0021329
386.6	0.36701739		976.6	0.11282247		1566.6	0.06892326		2156.6	0.10116652		2746.59	-0.00492988		3336.59	0.00159796		3926.58	-0.00284851
386.8	0.3677799		976.8	0.11246803		1566.8	0.0684524		2156.8	0.1008313		2746.79	-0.00526957		3336.79	0.00194431		3926.78	-0.00261194
387	0.36937867		977	0.11279942		1567	0.06674933		2157	0.10136986		2746.99	-0.00571497		3336.99	0.00240247		3926.98	-0.00241612
387.2	0.36980374		977.2	0.11353519		1567.2	0.06712262		2157.2	0.10206841		2747.19	-0.00549938		3337.19	0.00199282		3927.18	-0.00195007
387.4	0.37097557		977.4	0.11344239		1567.4	0.06619372		2157.4	0.10190017		2747.39	-0.00604033		3337.39	0.00188854		3927.38	-0.00181877
387.6	0.37300015		977.6	0.11387041		1567.6	0.06612119		2157.6	0.10200639		2747.59	-0.00592935		3337.59	0.00309906		3927.58	-0.00226054
387.8	0.37320995		977.8	0.11369203		1567.8	0.06619621		2157.8	0.10149929		2747.79	-0.00661204		3337.79	0.00273883		3927.78	-0.00309436
388	0.37334105		978	0.11362412		1568	0.0661206		2158	0.10163828		2747.99	-0.00683603		3337.99	0.00291739		3927.98	-0.00242196
388.2	0.37365284		978.2	0.11409126		1568.2	0.06662666		2158.2	0.10021987		2748.19	-0.00654582		3338.19	0.0032239		3928.18	-0.00268542
388.4	0.37458064		978.4	0.11432374		1568.4	0.06684168		2158.4	0.10040787		2748.39	-0.00685223		3338.39	0.00249969		3928.38	-0.00218393
388.6	0.37386163		978.6	0.11503646		1568.6	0.06666651		2158.6	0.09987808		2748.59	-0.00740947		3338.59	0.00271319		3928.58	-0.0029735
388.8	0.37372627		978.8	0.11569536		1568.8	0.06654898		2158.8	0.09976589		2748.79	-0.00707771		3338.79	0.00298464		3928.78	-0.00256517
389	0.37322297		979	0.11501632		1569	0.0664553		2159	0.099986		2748.99	-0.00764893		3338.99	0.00392218		3928.98	-0.0025257
389.2	0.37281899		979.2	0.11542178		1569.2	0.06713275		2159.2	0.10064467		2749.19	-0.00711722		3339.19	0.00394355		3929.18	-0.00192392
389.4	0.37249597		979.4	0.11582148		1569.4	0.06750884		2159.4	0.10051429		2749.39	-0.00649769		3339.39	0.00429719		3929.38	-0.00280653
389.6	0.37130979		979.6	0.11576921		1569.6	0.06653419		2159.6	0.10068963		2749.59	-0.00655951		3339.59	0.00384311		3929.58	-0.00222752
389.8	0.37068583		979.8	0.1165907		1569.8	0.0665808		2159.8	0.10089862		2749.79	-0.00640813		3339.79	0.00406641		3929.78	-0.00203985
390	0.37082315		980	0.11745366		1570	0.06638502		2160	0.10164513		2749.99	-0.00483765		3339.99	0.00393434		3929.98	-0.00186672
390.2	0.37050107		980.2	0.11831452		1570.2	0.0671012		2160.2	0.10129218		2750.19	-0.00511916		3340.19	0.00421767		3930.18	-0.00091316
390.4	0.37047666		980.4	0.11802313		1570.4	0.06737255		2160.4	0.10236963		2750.39	-0.00482981		3340.39	0.00407619		3930.38	-0.00012193
390.6	0.37147948		980.6	0.11790639		1570.6	0.06588719		2160.6	0.10299525		2750.59	-0.00540344		3340.59	0.00412734		3930.58	-0.00031689
390.8	0.37242374		980.8	0.11737236		1570.8	0.06597522		2160.8	0.10373695		2750.79	-0.00458875		3340.79	0.00319422		3930.78	-0.0002202
391	0.37236253		981	0.11771547		1571	0.06519354		2161	0.10492287		2750.99	-0.00463343		3340.99	0.00142199		3930.98	-0.00027897
391.2	0.37406882		981.2	0.11694271		1571.2	0.06615047		2161.2	0.1053117		2751.19	-0.00530923		3341.19	0.00085535		3931.18	-0.00068364
391.4	0.37501353		981.4	0.11575654		1571.4	0.06701752		2161.4	0.10593946		2751.39	-0.00581678		3341.39	0.00056734		3931.38	-0.00065999
391.6	0.37656611		981.6	0.11538481		1571.6	0.06786825		2161.6	0.10615179		2751.59	-0.00535265		3341.59	0.00001808		3931.58	-0.00092739
391.8	0.37701066		981.8	0.11550681		1571.8	0.06800606		2161.8	0.10604814		2751.79	-0.00563834		3341.79	-0.00067577		3931.78	-0.0014822
392	0.37713222		982	0.11493386		1572	0.06837116		2162	0.10687598		2751.99	-0.00613924		3341.99	0.00001895		3931.98	-0.00198582
392.2	0.37897293		982.2	0.11387923		1572.2	0.07004666		2162.2	0.10727463		2752.19	-0.00558198		3342.19	0.00020544		3932.18	-0.0023613
392.4	0.37879151		982.4	0.11412967		1572.4	0.07051227		2162.4	0.10743721		2752.39	-0.00544402		3342.39	-0.00011851		3932.38	-0.00310168
392.6	0.37721277		982.6	0.1141353		1572.6	0.07061397		2162.6	0.10742708		2752.59	-0.00550758		3342.59	0.00054123		3932.58	-0.00385516
392.8	0.37712144		982.8	0.11396884		1572.8	0.07153658		2162.8	0.10746877		2752.79	-0.00504097		3342.79	0.0014415		3932.78	-0.00427193
393	0.37630647		983	0.11358852		1573	0.07156067		2163	0.10718987		2752.99	-0.00522859		3342.99	0.00271094		3932.98	-0.00481343
393.2	0.37504746		983.2	0.11464132		1573.2	0.07209786		2163.2	0.10695783		2753.19	-0.00496152		3343.19	0.00240631		3933.18	-0.00510375
393.4	0.37511845		983.4	0.11572609		1573.4	0.0716895		2163.4	0.10623663		2753.39	-0.00450199		3343.39	0.00252958		3933.38	-0.00517971
393.6	0.37442386		983.6	0.11681991		1573.6	0.07183172		2163.6	0.10564861		2753.59	-0.00500698		3343.59	0.00299435		3933.58	-0.00407729
393.8	0.37460988		983.8	0.11878448		1573.8	0.07197974		2163.8	0.10541503		2753.79	-0.00540946		3343.79	0.0036145		3933.78	-0.00328656
394	0.3752434		984	0.11935348		1574	0.07191316		2164	0.10562327		2753.99	-0.00568956		3343.99	0.00322538		3933.98	-0.00310782
394.2	0.37510066		984.2	0.12040397		1574.2	0.07239956		2164.2	0.10527305		2754.19	-0.00638082		3344.19	0.00365136		3934.18	-0.0020387
394.4	0.37611805		984.4	0.11965269		1574.4	0.07215609		2164.4	0.10602602		2754.39	-0.00632724		3344.39	0.00227414		3934.38	-0.00195471
394.6	0.37765235		984.6	0.11991148		1574.6	0.07098503		2164.6	0.10572991		2754.59	-0.00722633		3344.59	0.00190715		3934.58	-0.00222071
394.8	0.37763096		984.8	0.12070866		1574.8	0.07110251		2164.8	0.10628075		2754.79	-0.00700244		3344.79	0.00176596		3934.78	-0.00265426
395	0.37769732		985	0.12089037		1575	0.07188447		2165	0.10583964		2754.99	-0.00771661		3344.99	0.00128742		3934.98	-0.00246742
395.2	0.37867344		985.2	0.12093549		1575.2	0.07276152		2165.2	0.10599642		2755.19	-0.00809946		3345.19	0.00204511		3935.18	-0.0022102
395.4	0.37874809		985.4	0.12174132		1575.4	0.0730701		2165.4	0.10668842		2755.39	-0.00730814		3345.39	0.0019022		3935.38	-0.00067021
395.6	0.37961186		985.6	0.12258032		1575.6	0.07260147		2165.6	0.10775638		2755.59	-0.00642592		3345.59	0.00106948		3935.58	-0.00165164
395.8	0.38076408		985.8	0.12349503		1575.8	0.07299307		2165.8	0.10808206		2755.79	-0.00623718		3345.79	0.00153497		3935.78	-0.00196896
396	0.38098629		986	0.12301169		1576	0.07409452		2166	0.10892303		2755.99	-0.00528523		3345.99	0.00139144		3935.98	-0.00263157
396.2	0.38237189		986.2	0.12269092		1576.2	0.07465627		2166.2	0.10921428		2756.19	-0.00481849		3346.19	0.00171449		3936.18	-0.00280367
396.4	0.38184665		986.4	0.12332986		1576.4	0.07408771		2166.4	0.10955098		2756.39	-0.00392075		3346.39	0.00188708		3936.38	-0.00285561
396.6	0.38191848		986.6	0.12306251		1576.6	0.0742305		2166.6	0.1091257		2756.59	-0.00346703		3346.59	0.00210791		3936.58	-0.00325727
396.8	0.3820287		986.8	0.12293315		1576.8	0.07491785		2166.8	0.10873424		2756.79	-0.00319146		3346.79	0.00287126		3936.78	-0.00326124
397	0.38120317		987	0.12299942		1577	0.07519117		2167	0.10838309		2756.99	-0.00270855		3346.99	0.00298034		3936.98	-0.00273585
397.2	0.38146703		987.2	0.12305954		1577.2	0.07555054		2167.2	0.10871124		2757.19	-0.00267315		3347.19	0.00224006		3937.18	-0.00233701
397.4	0.38207756		987.4	0.12257606		1577.4	0.07548343		2167.4	0.10882185		2757.39	-0.00326972		3347.39	0.0020933		3937.38	-0.00198384
397.6	0.38137046		987.6	0.12177568		1577.6	0.07568789		2167.6	0.10939193		2757.59	-0.00387214		3347.59	0.00215228		3937.58	-0.0023964
397.8	0.38159303		987.8	0.1207346		1577.8	0.07543666		2167.8	0.11012081		2757.79	-0.00440439		3347.79	0.00253688		3937.78	-0.00263223
398	0.38186089		988	0.11987747		1578	0.07538688		2168	0.11042203		2757.99	-0.00468374		3347.99	0.00203817		3937.98	-0.00336668
398.2	0.3821285		988.2	0.11953469		1578.2	0.07532355		2168.2	0.11020684		2758.19	-0.00432871		3348.19	0.00189169		3938.18	-0.00313371
398.4	0.38256089		988.4	0.11863144		1578.4	0.0745225		2168.4	0.1098646		2758.39	-0.00510921		3348.39	0.0007513		3938.38	-0.00396638
398.6	0.38320002		988.6	0.11905353		1578.6	0.07338169		2168.6	0.10946098		2758.59	-0.00621901		3348.59	0.00207229		3938.58	-0.00439713
398.8	0.38280563		988.8	0.11927094		1578.8	0.07343643		2168.8	0.10983748		2758.79	-0.00577882		3348.79	0.00188284		3938.78	-0.00359706
399	0.38280603		989	0.1190141		1579	0.0739108		2169	0.11004415		2758.99	-0.00584931		3348.99	0.00203886		3938.98	-0.00324608
399.2	0.38341297		989.2	0.11944266		1579.2	0.0724409		2169.2	0.11029698		2759.19	-0.00563239		3349.19	0.00155195		3939.18	-0.00238419
399.4	0.38401021		989.4	0.12009322		1579.4	0.07247003		2169.4	0.11043695		2759.39	-0.00526611		3349.39	0.00107806		3939.38	-0.00180478
399.6	0.38452411		989.6	0.12131801		1579.6	0.07221183		2169.6	0.11133475		2759.59	-0.00501506		3349.59	0.00055725		3939.58	-0.00362577
399.8	0.3844841		989.8	0.12259804		1579.8	0.07264457		2169.8	0.11028585		2759.79	-0.00526278		3349.79	0.00113347		3939.78	-0.00338701
400	0.38431053		990	0.12329109		1580	0.07338822		2170	0.10966629		2759.99	-0.00455485		3349.99	0.00139329		3939.98	-0.00371855
400.2	0.38478595		990.2	0.12478921		1580.2	0.07306516		2170.2	0.10955087		2760.19	-0.00550639		3350.19	0.00190881		3940.18	-0.00357133
400.4	0.38475766		990.4	0.12616512		1580.4	0.07320603		2170.4	0.10975704		2760.39	-0.005137		3350.39	0.00223975		3940.38	-0.0030018
400.6	0.38448487		990.6	0.12745041		1580.6	0.07358393		2170.6	0.10943424		2760.59	-0.00448443		3350.59	0.00255692		3940.58	-0.00309728
400.8	0.38348548		990.8	0.12858801		1580.8	0.07404893		2170.8	0.10929975		2760.79	-0.00423546		3350.79	0.00286537		3940.78	-0.00266637
401	0.38295823		991	0.12913148		1581	0.07409848		2171	0.11010495		2760.99	-0.00399928		3350.99	0.0028147		3940.98	-0.00323598
401.2	0.38278721		991.2	0.12933702		1581.2	0.07429249		2171.2	0.11083824		2761.19	-0.00493974		3351.19	0.00256782		3941.18	-0.00369885
401.4	0.38226228		991.4	0.12969523		1581.4	0.07361023		2171.4	0.11197898		2761.39	-0.00521396		3351.39	0.00262357		3941.38	-0.00418911
401.6	0.38215585		991.6	0.12930799		1581.6	0.07322061		2171.6	0.11294988		2761.59	-0.00533512		3351.59	0.00305176		3941.58	-0.00441618
401.8	0.38286969		991.8	0.1289456		1581.8	0.0743761		2171.8	0.11318169		2761.79	-0.00557357		3351.79	0.00301865		3941.78	-0.00457305
402	0.38342767		992	0.12892336		1582	0.07389925		2172	0.11358033		2761.99	-0.00537046		3351.99	0.00293129		3941.98	-0.00419696
402.2	0.38352863		992.2	0.12803734		1582.2	0.07380132		2172.2	0.11355112		2762.19	-0.00537839		3352.19	0.00333081		3942.18	-0.00402547
402.4	0.38483073		992.4	0.1270275		1582.4	0.07234093		2172.4	0.11361771		2762.39	-0.00566077		3352.39	0.00301556		3942.38	-0.004239
402.6	0.3857479		992.6	0.12676571		1582.6	0.07225486		2172.6	0.11423254		2762.59	-0.00521573		3352.59	0.0031743		3942.58	-0.0042341
402.8	0.3870852		992.8	0.12619415		1582.8	0.07210246		2172.8	0.11377979		2762.79	-0.00395196		3352.79	0.00220807		3942.78	-0.00281187
403	0.38721235		993	0.12545706		1583	0.07191768		2173	0.11389922		2762.99	-0.00418314		3352.99	0.00174557		3942.98	-0.00328933
403.2	0.38826386		993.2	0.12516336		1583.2	0.07131758		2173.2	0.11318981		2763.19	-0.00419616		3353.19	0.00179618		3943.18	-0.00319766
403.4	0.3888674		993.4	0.12508046		1583.4	0.07241211		2173.4	0.11298131		2763.39	-0.00443074		3353.39	0.00173435		3943.38	-0.00321239
403.6	0.38830294		993.6	0.12523474		1583.6	0.07239292		2173.6	0.11279051		2763.59	-0.00359635		3353.59	0.00202978		3943.58	-0.00382707
403.8	0.38855534		993.8	0.12514685		1583.8	0.07263807		2173.8	0.11171834		2763.79	-0.00380737		3353.79	0.00281088		3943.78	-0.00279039
404	0.38910867		994	0.12505621		1584	0.0735263		2174	0.11202793		2763.99	-0.0034192		3353.99	0.00272114		3943.98	-0.0028555
404.2	0.3894155		994.2	0.12696824		1584.2	0.07325896		2174.2	0.1121819		2764.19	-0.00363622		3354.19	0.00306429		3944.18	-0.00233403
404.4	0.38934351		994.4	0.12714031		1584.4	0.07427632		2174.4	0.1120947		2764.39	-0.00275527		3354.39	0.00329597		3944.38	-0.00313579
404.6	0.38883623		994.6	0.12839324		1584.6	0.0747109		2174.6	0.11304468		2764.59	-0.00155243		3354.59	0.00283229		3944.58	-0.00378042
404.8	0.38809238		994.8	0.12876701		1584.8	0.07538715		2174.8	0.11294996		2764.79	-0.00202134		3354.79	0.00259461		3944.78	-0.00406576
405	0.38861627		995	0.12907447		1585	0.07550198		2175	0.11376492		2764.99	-0.00271062		3354.99	0.00253609		3944.98	-0.00457677
405.2	0.38944167		995.2	0.12960347		1585.2	0.07659494		2175.2	0.11482824		2765.19	-0.00366164		3355.19	0.00192645		3945.18	-0.00425958
405.4	0.3894264		995.4	0.12917871		1585.4	0.07726439		2175.4	0.11561787		2765.39	-0.00402034		3355.39	0.00245987		3945.38	-0.00444367
405.6	0.38970673		995.6	0.12832672		1585.6	0.07828445		2175.6	0.11528983		2765.59	-0.00472928		3355.59	0.00180347		3945.58	-0.00457686
405.8	0.38990303		995.8	0.12748354		1585.8	0.07988399		2175.8	0.11493635		2765.79	-0.00449968		3355.79	0.00111185		3945.78	-0.00414688
406	0.39018644		996	0.1266127		1586	0.07956952		2176	0.11499112		2765.99	-0.00396742		3355.99	0.00153181		3945.98	-0.00366551
406.2	0.39081289		996.2	0.12581161		1586.2	0.07965167		2176.2	0.11487676		2766.19	-0.0046633		3356.19	0.00140124		3946.18	-0.00423048
406.4	0.39167457		996.4	0.12542933		1586.4	0.07975764		2176.4	0.11496868		2766.39	-0.00488632		3356.39	0.00025523		3946.38	-0.00465047
406.6	0.39202439		996.6	0.12563933		1586.6	0.08062238		2176.6	0.11515193		2766.59	-0.00485003		3356.59	-0.00097993		3946.58	-0.00474102
406.8	0.39276048		996.8	0.12483114		1586.8	0.08055463		2176.8	0.11502774		2766.79	-0.00492447		3356.79	-0.00169463		3946.78	-0.00374233
407	0.39218991		997	0.12417558		1587	0.08099847		2177	0.11585627		2766.99	-0.0052513		3356.99	-0.00179022		3946.98	-0.00364602
407.2	0.39303635		997.2	0.12421915		1587.2	0.08111079		2177.2	0.11618774		2767.19	-0.00511968		3357.19	-0.00144505		3947.18	-0.0026049
407.4	0.39276783		997.4	0.12477967		1587.4	0.08083993		2177.4	0.11603592		2767.39	-0.00506597		3357.39	-0.00153645		3947.38	-0.0024563
407.6	0.39254907		997.6	0.12574359		1587.6	0.08008017		2177.6	0.11511183		2767.59	-0.00484882		3357.59	-0.0012673		3947.58	-0.00167479
407.8	0.39344755		997.8	0.12620114		1587.8	0.0795361		2177.8	0.11515669		2767.79	-0.0054882		3357.79	-0.00069646		3947.78	-0.00118125
408	0.39291027		998	0.12737208		1588	0.07996249		2178	0.1157897		2767.99	-0.00495788		3357.99	-0.00002336		3947.98	-0.00163078
408.2	0.3926315		998.2	0.1290401		1588.2	0.07908405		2178.2	0.11508131		2768.19	-0.00364685		3358.19	0.00093652		3948.18	-0.00178508
408.4	0.39260347		998.4	0.12933394		1588.4	0.07800213		2178.4	0.11494709		2768.39	-0.00325431		3358.39	0.00158115		3948.38	-0.00330489
408.6	0.3922235		998.6	0.13049702		1588.6	0.07755816		2178.6	0.11542897		2768.59	-0.00298415		3358.59	0.00191575		3948.58	-0.00295853
408.8	0.39264584		998.8	0.13099438		1588.8	0.07693556		2178.8	0.11469826		2768.79	-0.00339317		3358.79	0.00253855		3948.78	-0.00256119
409	0.39340791		999	0.1323833		1589	0.07624836		2179	0.11523235		2768.99	-0.00438666		3358.99	0.00340703		3948.98	-0.00248732
409.2	0.39403629		999.2	0.13259725		1589.2	0.07659908		2179.2	0.11520232		2769.19	-0.00485739		3359.19	0.00345001		3949.18	-0.00228447
409.4	0.39397526		999.4	0.1327118		1589.4	0.07657933		2179.4	0.11562408		2769.39	-0.00490522		3359.39	0.00384154		3949.38	-0.00270674
409.6	0.39328089		999.6	0.13380888		1589.6	0.07578835		2179.6	0.11597513		2769.59	-0.00477557		3359.59	0.00254545		3949.58	-0.00302672
409.8	0.39378911		999.8	0.13388405		1589.8	0.07515673		2179.8	0.11560133		2769.79	-0.00435788		3359.79	0.00242678		3949.78	-0.00289143
410	0.39468391		1000	0.13478506		1590	0.07489455		2180	0.11566807		2769.99	-0.00475924		3359.99	0.00161838		3949.98	-0.00337498
410.2	0.39536664		1000.2	0.13533479		1590.2	0.07499673		2180.2	0.11615873		2770.19	-0.00577152		3360.19	0.00098559		3950.18	-0.00373183
410.4	0.39554499		1000.4	0.13486719		1590.4	0.07590756		2180.4	0.11624289		2770.39	-0.00613128		3360.39	0.00023717		3950.38	-0.00383739
410.6	0.39554515		1000.6	0.13390222		1590.6	0.07601084		2180.6	0.11617563		2770.59	-0.00572574		3360.59	-0.00069993		3950.58	-0.00267291
410.8	0.39578014		1000.8	0.13326158		1590.8	0.07653715		2180.8	0.11629147		2770.79	-0.00554161		3360.79	-0.00125376		3950.78	-0.00237821
411	0.39629258		1001	0.13263693		1591	0.07688452		2181	0.11628939		2770.99	-0.00530394		3360.99	-0.0011585		3950.98	-0.00235787
411.2	0.39677728		1001.2	0.13222645		1591.2	0.07678145		2181.2	0.11615758		2771.19	-0.00508987		3361.19	-0.0018579		3951.18	-0.001432
411.4	0.39717092		1001.4	0.13233619		1591.4	0.076585		2181.4	0.11604495		2771.39	-0.00486383		3361.39	-0.00130708		3951.38	-0.00136244
411.6	0.39724164		1001.6	0.1323358		1591.6	0.07615358		2181.6	0.11551245		2771.59	-0.00451302		3361.59	-0.00149218		3951.58	-0.00068115
411.8	0.39676191		1001.8	0.13215163		1591.8	0.07633645		2181.8	0.11563701		2771.79	-0.00401815		3361.79	-0.00079858		3951.78	-0.0009693
412	0.39581719		1002	0.13155312		1592	0.0770427		2182	0.11609875		2771.99	-0.00379362		3361.99	-0.00012113		3951.98	-0.00134502
412.2	0.39490454		1002.2	0.13152012		1592.2	0.07599831		2182.2	0.11501983		2772.19	-0.00310856		3362.19	0.00025715		3952.18	-0.00159016
412.4	0.3945696		1002.4	0.1310243		1592.4	0.07653248		2182.4	0.11461654		2772.39	-0.00369115		3362.39	0.00078987		3952.38	-0.00154925
412.6	0.39386414		1002.6	0.13109223		1592.6	0.07628993		2182.6	0.11434253		2772.59	-0.00316009		3362.59	0.0011998		3952.58	-0.00150511
412.8	0.39377194		1002.8	0.13157071		1592.8	0.07602302		2182.8	0.11493707		2772.79	-0.00316674		3362.79	0.00255571		3952.78	-0.00182906
413	0.39374415		1003	0.13214728		1593	0.07688455		2183	0.11608581		2772.99	-0.00318021		3362.99	0.00369622		3952.98	-0.00168188
413.2	0.39402477		1003.2	0.13208004		1593.2	0.07699201		2183.2	0.11675144		2773.19	-0.00268042		3363.19	0.00328097		3953.18	-0.00216261
413.4	0.39376076		1003.4	0.1323769		1593.4	0.07738664		2183.4	0.11832006		2773.39	-0.00325052		3363.39	0.00389635		3953.38	-0.00291233
413.6	0.39355129		1003.6	0.13313088		1593.6	0.07692267		2183.6	0.11836503		2773.59	-0.00322481		3363.59	0.00335984		3953.58	-0.0033709
413.8	0.39471258		1003.8	0.1330868		1593.8	0.07700225		2183.8	0.11932146		2773.79	-0.00340945		3363.79	0.00295492		3953.78	-0.00252812
414	0.39540976		1004	0.13384003		1594	0.07772629		2184	0.12043017		2773.99	-0.00434645		3363.99	0.0030917		3953.98	-0.00245688
414.2	0.39632693		1004.2	0.13318506		1594.2	0.07742732		2184.2	0.12138426		2774.19	-0.0048582		3364.19	0.00438599		3954.18	-0.00247069
414.4	0.39654541		1004.4	0.13227336		1594.4	0.07768267		2184.4	0.12176304		2774.39	-0.00521821		3364.39	0.00409266		3954.38	-0.00227568
414.6	0.39762674		1004.6	0.13213688		1594.6	0.07740527		2184.6	0.12229112		2774.59	-0.00574674		3364.59	0.00344926		3954.58	-0.00160468
414.8	0.39915661		1004.8	0.13174956		1594.8	0.07765599		2184.8	0.12194205		2774.79	-0.00657872		3364.79	0.00302368		3954.78	-0.00236976
415	0.40007943		1005	0.13216357		1595	0.07755989		2185	0.12260804		2774.99	-0.00586119		3364.99	0.00305389		3954.98	-0.00228144
415.2	0.40089094		1005.2	0.13226346		1595.2	0.07757403		2185.2	0.12290947		2775.19	-0.00514459		3365.19	0.00222462		3955.18	-0.00187531
415.4	0.40168245		1005.4	0.13276248		1595.4	0.07818192		2185.4	0.12433108		2775.39	-0.00514485		3365.39	0.00246097		3955.38	-0.0023443
415.6	0.40072328		1005.6	0.1325785		1595.6	0.0786102		2185.6	0.1234971		2775.59	-0.00497911		3365.59	0.00177453		3955.58	-0.0032065
415.8	0.39967339		1005.8	0.13263721		1595.8	0.07940238		2185.8	0.12307459		2775.79	-0.00510988		3365.79	0.00173148		3955.78	-0.00371435
416	0.39877853		1006	0.13217044		1596	0.07989396		2186	0.12361951		2775.99	-0.00529775		3365.99	0.00147973		3955.98	-0.00327301
416.2	0.39808071		1006.2	0.13299186		1596.2	0.07945546		2186.2	0.12269047		2776.19	-0.00464844		3366.19	0.00082524		3956.18	-0.00247832
416.4	0.398308		1006.4	0.13256523		1596.4	0.07962891		2186.4	0.12246677		2776.39	-0.0041475		3366.39	0.00099324		3956.38	-0.00191259
416.6	0.39801135		1006.6	0.133474		1596.6	0.07763749		2186.6	0.12169227		2776.59	-0.00380653		3366.59	0.00195592		3956.58	-0.00214128
416.8	0.39802683		1006.8	0.134915		1596.8	0.07819562		2186.8	0.12165676		2776.79	-0.00362729		3366.79	0.00189268		3956.78	-0.00197147
417	0.39762122		1007	0.13582828		1597	0.0787389		2187	0.12113654		2776.99	-0.00309183		3366.99	0.00194982		3956.98	-0.00213302
417.2	0.39779511		1007.2	0.13613159		1597.2	0.07832327		2187.2	0.12090278		2777.19	-0.00425863		3367.19	0.00182106		3957.18	-0.00251925
417.4	0.39850409		1007.4	0.13670816		1597.4	0.07854291		2187.4	0.12035117		2777.39	-0.00565081		3367.39	0.00175805		3957.38	-0.00212051
417.6	0.39855052		1007.6	0.1370244		1597.6	0.07831362		2187.6	0.1201976		2777.59	-0.00485878		3367.59	0.00066675		3957.58	-0.00106784
417.8	0.39934528		1007.8	0.13740093		1597.8	0.07881355		2187.8	0.12084991		2777.79	-0.00535517		3367.79	0.00107527		3957.78	-0.0004608
418	0.3998891		1008	0.13742446		1598	0.07898293		2188	0.12065954		2777.99	-0.00643827		3367.99	0.00205369		3957.98	-0.00105138
418.2	0.40091364		1008.2	0.13654739		1598.2	0.07900983		2188.2	0.12094214		2778.19	-0.00641907		3368.19	0.00214537		3958.18	-0.00083052
418.4	0.40095181		1008.4	0.13613839		1598.4	0.0790677		2188.4	0.12066129		2778.39	-0.00672526		3368.39	0.00135961		3958.38	-0.00068607
418.6	0.40250622		1008.6	0.13648214		1598.6	0.07945166		2188.6	0.1206388		2778.59	-0.00697592		3368.59	0.00073709		3958.58	-0.00048701
418.8	0.40238921		1008.8	0.13630491		1598.8	0.08035744		2188.8	0.1203084		2778.79	-0.00585826		3368.79	0.00070811		3958.78	-0.00076248
419	0.40347246		1009	0.13644874		1599	0.08062386		2189	0.12110552		2778.99	-0.00370659		3368.99	0.00075481		3958.98	-0.00080704
419.2	0.40357541		1009.2	0.13615079		1599.2	0.08201936		2189.2	0.12135342		2779.19	-0.00331445		3369.19	0.00029614		3959.18	-0.00088885
419.4	0.40298404		1009.4	0.13614927		1599.4	0.08318387		2189.4	0.12124932		2779.39	-0.00294307		3369.39	0.00078687		3959.38	-0.00117078
419.6	0.40294418		1009.6	0.13536992		1599.6	0.08355229		2189.6	0.12000761		2779.59	-0.00202179		3369.59	0.00091548		3959.58	-0.00130428
419.8	0.40217933		1009.8	0.13483831		1599.8	0.0832528		2189.8	0.12041839		2779.79	-0.00245812		3369.79	0.00108416		3959.78	-0.00146836
420	0.40197134		1010	0.13489291		1600	0.082825		2190	0.12084265		2779.99	-0.00262709		3369.99	0.00180696		3959.98	-0.00058938
420.2	0.40172028		1010.2	0.13592997		1600.2	0.08229558		2190.2	0.12101198		2780.19	-0.00249159		3370.19	0.00156176		3960.18	0.0000255
420.4	0.40254094		1010.4	0.13605295		1600.4	0.08066211		2190.4	0.12186473		2780.39	-0.00242018		3370.39	0.00256523		3960.38	-0.00009923
420.6	0.40284146		1010.6	0.13701904		1600.6	0.07963805		2190.6	0.12241147		2780.59	-0.00240606		3370.59	0.00272859		3960.58	-0.00003273
420.8	0.402705		1010.8	0.13823647		1600.8	0.07969857		2190.8	0.12261888		2780.79	-0.00222662		3370.79	0.00200561		3960.78	-0.00033867
421	0.40267917		1011	0.13825902		1601	0.07946264		2191	0.12310208		2780.99	-0.00244199		3370.99	0.00238662		3960.98	-0.00031141
421.2	0.40307471		1011.2	0.13822945		1601.2	0.07921816		2191.2	0.12405358		2781.19	-0.00421606		3371.19	0.00241425		3961.18	-0.00018761
421.4	0.40377032		1011.4	0.13838068		1601.4	0.07896443		2191.4	0.12431272		2781.39	-0.0046136		3371.39	0.00219626		3961.38	0.00014514
421.6	0.40341506		1011.6	0.13831676		1601.6	0.07976595		2191.6	0.12488982		2781.59	-0.00454861		3371.59	0.00256123		3961.58	0.00034496
421.8	0.40494352		1011.8	0.13920512		1601.8	0.07943044		2191.8	0.12573352		2781.79	-0.00536813		3371.79	0.00283175		3961.78	-0.00018532
422	0.40500504		1012	0.138967		1602	0.07928909		2192	0.12608524		2781.99	-0.00570498		3371.99	0.00283538		3961.98	0.00035777
422.2	0.40556206		1012.2	0.13797105		1602.2	0.07951226		2192.2	0.12613423		2782.19	-0.00583608		3372.19	0.00231198		3962.18	0.00038179
422.4	0.40581787		1012.4	0.13819465		1602.4	0.07930733		2192.4	0.12629881		2782.39	-0.00506937		3372.39	0.0013446		3962.38	0.0001744
422.6	0.40722757		1012.6	0.13837882		1602.6	0.07942755		2192.6	0.12631103		2782.59	-0.0048977		3372.59	0.00014012		3962.58	0.00057056
422.8	0.40697803		1012.8	0.13889186		1602.8	0.08011386		2192.8	0.12585254		2782.79	-0.0042701		3372.79	0.00024434		3962.78	0.00021882
423	0.40783171		1013	0.13894288		1603	0.07966883		2193	0.1250378		2782.99	-0.00352245		3372.99	0.00051404		3962.98	0.00041813
423.2	0.40768671		1013.2	0.14001945		1603.2	0.08120577		2193.2	0.12477419		2783.19	-0.00343515		3373.19	0.00046225		3963.18	0.0006224
423.4	0.40823808		1013.4	0.14063754		1603.4	0.08106189		2193.4	0.12336247		2783.39	-0.00299883		3373.39	0.00098355		3963.38	0.00067676
423.6	0.40873272		1013.6	0.14074504		1603.6	0.08113649		2193.6	0.12281177		2783.59	-0.00233065		3373.59	0.00116257		3963.58	-0.00020852
423.8	0.40764015		1013.8	0.1410958		1603.8	0.08064065		2193.8	0.12266205		2783.79	-0.00223616		3373.79	0.00112818		3963.78	-0.00097418
424	0.40806014		1014	0.14313133		1604	0.08056517		2194	0.12241439		2783.99	-0.00226124		3373.99	0.00185499		3963.98	-0.00074171
424.2	0.40818019		1014.2	0.14435958		1604.2	0.08010887		2194.2	0.12204079		2784.19	-0.00221847		3374.19	0.00202264		3964.18	-0.00147581
424.4	0.40899185		1014.4	0.14484965		1604.4	0.0792644		2194.4	0.12232573		2784.39	-0.00207994		3374.39	0.00245307		3964.38	-0.00165081
424.6	0.40860724		1014.6	0.14559643		1604.6	0.07996052		2194.6	0.12164274		2784.59	-0.00198564		3374.59	0.00152351		3964.58	-0.00160302
424.8	0.4082426		1014.8	0.14578494		1604.8	0.08038338		2194.8	0.12095975		2784.79	-0.0026549		3374.79	0.00159778		3964.78	-0.00146776
425	0.40804772		1015	0.14552298		1605	0.08060768		2195	0.12108257		2784.99	-0.00336388		3374.99	0.00214861		3964.98	-0.00139203
425.2	0.40715938		1015.2	0.14535554		1605.2	0.08163018		2195.2	0.1221613		2785.19	-0.00414005		3375.19	0.00249663		3965.18	-0.00199229
425.4	0.40730942		1015.4	0.14492725		1605.4	0.08120221		2195.4	0.12228975		2785.39	-0.00435442		3375.39	0.00269165		3965.38	-0.00189954
425.6	0.40692106		1015.6	0.14450165		1605.6	0.08178254		2195.6	0.12299855		2785.59	-0.00531511		3375.59	0.00215846		3965.58	-0.00133433
425.8	0.40785553		1015.8	0.14478509		1605.8	0.08072563		2195.8	0.12342065		2785.79	-0.0057573		3375.79	0.00098333		3965.78	-0.00141096
426	0.40801556		1016	0.14391797		1606	0.08172749		2196	0.12340478		2785.99	-0.00587908		3375.99	0.00108306		3965.98	-0.00158785
426.2	0.40869975		1016.2	0.14259145		1606.2	0.0827152		2196.2	0.12402927		2786.19	-0.00716935		3376.19	0.00028164		3966.18	-0.00216157
426.4	0.40905364		1016.4	0.14246107		1606.4	0.08351964		2196.4	0.12467961		2786.39	-0.00682507		3376.39	-0.00050646		3966.38	-0.00169824
426.6	0.41023058		1016.6	0.1415673		1606.6	0.08330405		2196.6	0.12516323		2786.59	-0.00755419		3376.59	-0.00022773		3966.58	-0.00188767
426.8	0.41040596		1016.8	0.14136724		1606.8	0.08392962		2196.8	0.12615316		2786.79	-0.00688807		3376.79	0.00007487		3966.78	-0.00236129
427	0.4110157		1017	0.14065991		1607	0.08387225		2197	0.12674791		2786.99	-0.00580063		3376.99	0.00003113		3966.98	-0.00196686
427.2	0.41145075		1017.2	0.1407609		1607.2	0.08455611		2197.2	0.12650863		2787.19	-0.00504658		3377.19	0.0001562		3967.18	-0.00186037
427.4	0.41179541		1017.4	0.14143759		1607.4	0.08474988		2197.4	0.12581793		2787.39	-0.00439267		3377.39	0.00028441		3967.38	-0.00192457
427.6	0.41123697		1017.6	0.14192039		1607.6	0.08470438		2197.6	0.12623758		2787.59	-0.00336051		3377.59	0.00132953		3967.58	-0.00251616
427.8	0.41075403		1017.8	0.14185021		1607.8	0.0844848		2197.8	0.1267582		2787.79	-0.0032671		3377.79	0.00189746		3967.78	-0.00179704
428	0.41109069		1018	0.14352691		1608	0.08517208		2198	0.12753516		2787.99	-0.0041624		3377.99	0.00238317		3967.98	-0.00190726
428.2	0.41057351		1018.2	0.1442739		1608.2	0.08484259		2198.2	0.12715398		2788.19	-0.0038884		3378.19	0.00290712		3968.18	-0.00171813
428.4	0.41048694		1018.4	0.14499977		1608.4	0.08539602		2198.4	0.12721956		2788.39	-0.00443054		3378.39	0.00233103		3968.38	-0.00085511
428.6	0.41013016		1018.6	0.14540487		1608.6	0.08650155		2198.6	0.1270086		2788.59	-0.00452317		3378.59	0.00291866		3968.58	-0.00054459
428.8	0.40978209		1018.8	0.14572622		1608.8	0.08635092		2198.8	0.12744356		2788.79	-0.00446851		3378.79	0.00393085		3968.78	-0.00038803
429	0.40897258		1019	0.14583559		1609	0.08624558		2199	0.12809878		2788.99	-0.00440889		3378.99	0.00404014		3968.98	-0.00018704
429.2	0.40791512		1019.2	0.14587855		1609.2	0.08668518		2199.2	0.12852995		2789.19	-0.00449647		3379.19	0.00398502		3969.18	-0.00022547
429.4	0.40786		1019.4	0.14637295		1609.4	0.08608736		2199.4	0.12850501		2789.39	-0.00467871		3379.39	0.00362147		3969.38	0.00056944
429.6	0.40822913		1019.6	0.14687984		1609.6	0.0869212		2199.6	0.12977054		2789.59	-0.00511379		3379.59	0.00303328		3969.58	0.00038426
429.8	0.40921895		1019.8	0.14761448		1609.8	0.08641506		2199.8	0.13036236		2789.79	-0.00522103		3379.79	0.00311504		3969.78	-0.00050243
430	0.40975961		1020	0.14688739		1610	0.08691132		2200	0.13105344		2789.99	-0.0047848		3379.99	0.00350737		3969.98	-0.00020804
430.2	0.40955577		1020.2	0.14583173		1610.2	0.08703919		2200.2	0.13163075		2790.19	-0.00500314		3380.19	0.00355453		3970.18	-0.00048039
430.4	0.41023986		1020.4	0.1456507		1610.4	0.08693098		2200.4	0.13153716		2790.39	-0.00447263		3380.39	0.00279667		3970.38	-0.00036201
430.6	0.41207246		1020.6	0.14475211		1610.6	0.08594186		2200.6	0.13196047		2790.59	-0.00480035		3380.59	0.00281762		3970.58	-0.00104524
430.8	0.41263743		1020.8	0.14481422		1610.8	0.08595993		2200.8	0.13157346		2790.79	-0.00426602		3380.79	0.00215353		3970.78	-0.00079648
431	0.4127897		1021	0.14483937		1611	0.08549948		2201	0.13040242		2790.99	-0.00400551		3380.99	0.00220962		3970.98	-0.00046302
431.2	0.41284907		1021.2	0.14470063		1611.2	0.08439386		2201.2	0.12913849		2791.19	-0.0044576		3381.19	0.00206511		3971.18	-0.00080493
431.4	0.41304534		1021.4	0.14554085		1611.4	0.0848394		2201.4	0.12897216		2791.39	-0.00422232		3381.39	0.00250203		3971.38	-0.00080898
431.6	0.41257758		1021.6	0.14574907		1611.6	0.08487305		2201.6	0.12891079		2791.59	-0.00393175		3381.59	0.00323539		3971.58	-0.00145278
431.8	0.41238857		1021.8	0.14580761		1611.8	0.08541052		2201.8	0.12948064		2791.79	-0.00453216		3381.79	0.00259609		3971.78	-0.00186842
432	0.41292842		1022	0.14664053		1612	0.08600025		2202	0.12919666		2791.99	-0.00527169		3381.99	0.00173782		3971.98	-0.00198674
432.2	0.41250157		1022.2	0.14750423		1612.2	0.08592566		2202.2	0.12875552		2792.19	-0.00538568		3382.19	0.00230227		3972.18	-0.00223196
432.4	0.41256721		1022.4	0.14724724		1612.4	0.08618193		2202.4	0.12861898		2792.39	-0.0062977		3382.39	0.00227587		3972.38	-0.00232822
432.6	0.4123099		1022.6	0.14762046		1612.6	0.08658361		2202.6	0.1286751		2792.59	-0.00590275		3382.59	0.00223147		3972.58	-0.00263331
432.8	0.41195466		1022.8	0.14784727		1612.8	0.08660464		2202.8	0.12876815		2792.79	-0.00554123		3382.79	0.00199121		3972.78	-0.00282922
433	0.41174081		1023	0.14771431		1613	0.08652676		2203	0.12828342		2792.99	-0.00562959		3382.99	0.00149722		3972.98	-0.00284853
433.2	0.41122648		1023.2	0.14775105		1613.2	0.08652214		2203.2	0.12842404		2793.19	-0.00479553		3383.19	0.00115557		3973.18	-0.00326736
433.4	0.41160455		1023.4	0.14766689		1613.4	0.08724199		2203.4	0.12890314		2793.39	-0.00472017		3383.39	0.00074463		3973.38	-0.00297082
433.6	0.41202421		1023.6	0.14795831		1613.6	0.08741313		2203.6	0.1297859		2793.59	-0.00450545		3383.59	0.00103018		3973.58	-0.0035735
433.8	0.41250701		1023.8	0.14787721		1613.8	0.08652937		2203.8	0.12955865		2793.79	-0.00425434		3383.79	0.00164712		3973.78	-0.00382903
434	0.41267153		1024	0.14770414		1614	0.08642274		2204	0.12958937		2793.99	-0.0034369		3383.99	0.00113674		3973.98	-0.00351871
434.2	0.41269715		1024.2	0.14798466		1614.2	0.08669216		2204.2	0.13002039		2794.19	-0.00249059		3384.19	0.00091021		3974.18	-0.00427125
434.4	0.41384966		1024.4	0.14797065		1614.4	0.08684677		2204.4	0.13082712		2794.39	-0.00250622		3384.39	-0.00007647		3974.38	-0.00392436
434.6	0.41515627		1024.6	0.14757576		1614.6	0.0868783		2204.6	0.13100843		2794.59	-0.00318088		3384.59	0.00011658		3974.58	-0.00367016
434.8	0.41474779		1024.8	0.14810013		1614.8	0.08683471		2204.8	0.1306048		2794.79	-0.00400917		3384.79	0.00030035		3974.78	-0.00344053
435	0.41466396		1025	0.14770279		1615	0.08598472		2205	0.13076245		2794.99	-0.00373573		3384.99	0.00118856		3974.98	-0.00370526
435.2	0.4141828		1025.2	0.14759706		1615.2	0.08550969		2205.2	0.13123604		2795.19	-0.00373402		3385.19	0.00130477		3975.18	-0.0043056
435.4	0.41437813		1025.4	0.148372		1615.4	0.08619776		2205.4	0.13221541		2795.39	-0.00332533		3385.39	0.00193419		3975.38	-0.00421865
435.6	0.41432496		1025.6	0.1491572		1615.6	0.08616598		2205.6	0.13297068		2795.59	-0.00296808		3385.59	0.0015016		3975.58	-0.00392916
435.8	0.41285124		1025.8	0.14973098		1615.8	0.08604398		2205.8	0.13371141		2795.79	-0.00355197		3385.79	0.00145285		3975.78	-0.00312663
436	0.41363574		1026	0.14973239		1616	0.08566128		2206	0.13297087		2795.99	-0.00337143		3385.99	0.00132053		3975.98	-0.00225585
436.2	0.41290359		1026.2	0.15064166		1616.2	0.08519317		2206.2	0.1337234		2796.19	-0.00348052		3386.19	0.00177416		3976.18	-0.00230618
436.4	0.41346335		1026.4	0.1502195		1616.4	0.08532589		2206.4	0.1324688		2796.39	-0.00402615		3386.39	0.00168418		3976.38	-0.0016031
436.6	0.41350058		1026.6	0.15101074		1616.6	0.0856783		2206.6	0.13314423		2796.59	-0.00336485		3386.59	0.00099832		3976.58	-0.00147222
436.8	0.41366808		1026.8	0.15107148		1616.8	0.0855632		2206.8	0.13333928		2796.79	-0.00353617		3386.79	0.00149574		3976.78	-0.00040175
437	0.41399262		1027	0.1512802		1617	0.08435827		2207	0.13216547		2796.99	-0.0039211		3386.99	0.00196566		3976.98	-0.00054015
437.2	0.41440284		1027.2	0.15091613		1617.2	0.0850802		2207.2	0.13259901		2797.19	-0.00359187		3387.19	0.00223106		3977.18	-0.00107469
437.4	0.41496908		1027.4	0.15121767		1617.4	0.08599878		2207.4	0.13173493		2797.39	-0.00363428		3387.39	0.00309844		3977.38	-0.00138812
437.6	0.41566667		1027.6	0.15293065		1617.6	0.08618		2207.6	0.1313278		2797.59	-0.00346149		3387.59	0.00390488		3977.58	-0.00218579
437.8	0.41613996		1027.8	0.15302745		1617.8	0.08586272		2207.8	0.13087028		2797.79	-0.00330281		3387.79	0.00399436		3977.78	-0.00259782
438	0.41606167		1028	0.15277652		1618	0.08653324		2208	0.13173721		2797.99	-0.00268376		3387.99	0.00395887		3977.98	-0.00258494
438.2	0.41608659		1028.2	0.15301433		1618.2	0.08704693		2208.2	0.13264727		2798.19	-0.00199445		3388.19	0.00430043		3978.18	-0.00343615
438.4	0.41644449		1028.4	0.15313708		1618.4	0.08812347		2208.4	0.13259376		2798.39	-0.0021764		3388.39	0.00350323		3978.38	-0.00395299
438.6	0.41656632		1028.6	0.15406397		1618.6	0.08877363		2208.6	0.13243391		2798.59	-0.00310222		3388.59	0.00436811		3978.58	-0.00475589
438.8	0.41602447		1028.8	0.15404918		1618.8	0.08899407		2208.8	0.13285737		2798.79	-0.00306192		3388.79	0.00502985		3978.78	-0.00471419
439	0.41565233		1029	0.15364628		1619	0.08853455		2209	0.1334872		2798.99	-0.00224109		3388.99	0.00488732		3978.98	-0.00516287
439.2	0.41511678		1029.2	0.15380849		1619.2	0.08884001		2209.2	0.13350944		2799.19	-0.00127978		3389.19	0.00479397		3979.18	-0.00528692
439.4	0.41574636		1029.4	0.15408419		1619.4	0.0887115		2209.4	0.13334565		2799.39	-0.00110406		3389.39	0.00443437		3979.38	-0.00461208
439.6	0.41477907		1029.6	0.15445901		1619.6	0.08837084		2209.6	0.13344885		2799.59	-0.00024222		3389.59	0.00406164		3979.58	-0.00425318
439.8	0.41450437		1029.8	0.15413557		1619.8	0.08799081		2209.8	0.13339433		2799.79	-0.00079871		3389.79	0.00459969		3979.78	-0.00384012
440	0.41617775		1030	0.15325755		1620	0.08785439		2210	0.13329185		2799.99	-0.00170316		3389.99	0.0036992		3979.98	-0.00346761
440.2	0.41559256		1030.2	0.15442596		1620.2	0.08769832		2210.2	0.13455413		2800.19	-0.0030507		3390.19	0.00322983		3980.18	-0.00248743
440.4	0.41634911		1030.4	0.15376801		1620.4	0.08753694		2210.4	0.13439016		2800.39	-0.00416963		3390.39	0.00301529		3980.38	-0.00171584
440.6	0.41670193		1030.6	0.15368601		1620.6	0.08668143		2210.6	0.13643634		2800.59	-0.00495661		3390.59	0.00295643		3980.58	-0.00078972
440.8	0.41761793		1030.8	0.15329827		1620.8	0.08559593		2210.8	0.13675574		2800.79	-0.00629225		3390.79	0.00305795		3980.78	-0.00032631
441	0.41822871		1031	0.1532929		1621	0.08546071		2211	0.13698604		2800.99	-0.0067192		3390.99	0.00304306		3980.98	-0.00088035
441.2	0.41885647		1031.2	0.15305727		1621.2	0.08695924		2211.2	0.13803981		2801.19	-0.00708244		3391.19	0.00243149		3981.18	-0.0013634
441.4	0.41914801		1031.4	0.15356603		1621.4	0.08650907		2211.4	0.13847693		2801.39	-0.0070983		3391.39	0.00205823		3981.38	-0.00064485
441.6	0.41934755		1031.6	0.15354986		1621.6	0.08611313		2211.6	0.13902193		2801.59	-0.00745603		3391.59	0.00160807		3981.58	-0.00059885
441.8	0.4191385		1031.8	0.15307595		1621.8	0.08617078		2211.8	0.13946211		2801.79	-0.00724322		3391.79	0.00100025		3981.78	-0.00000098
442	0.41896468		1032	0.15255609		1622	0.08679738		2212	0.1405008		2801.99	-0.00703965		3391.99	0.00065946		3981.98	-0.00015199
442.2	0.41966739		1032.2	0.15358611		1622.2	0.08731193		2212.2	0.14079816		2802.19	-0.00603831		3392.19	0.00012195		3982.18	-0.00042608
442.4	0.42069875		1032.4	0.15451036		1622.4	0.08795796		2212.4	0.1404867		2802.39	-0.00531355		3392.39	-0.00048971		3982.38	-0.00058464
442.6	0.42049905		1032.6	0.15499561		1622.6	0.08925345		2212.6	0.13997721		2802.59	-0.00478547		3392.59	0.00001115		3982.58	-0.00117594
442.8	0.42040047		1032.8	0.15446317		1622.8	0.08934038		2212.8	0.1394776		2802.79	-0.00395761		3392.79	-0.00014234		3982.78	-0.00108608
443	0.4213529		1033	0.15529466		1623	0.08979602		2213	0.13875999		2802.99	-0.00347559		3392.99	-0.00055977		3982.98	-0.00162234
443.2	0.42157205		1033.2	0.15502673		1623.2	0.08993213		2213.2	0.1378048		2803.19	-0.00267236		3393.19	-0.00029159		3983.18	-0.00200126
443.4	0.42206113		1033.4	0.15566922		1623.4	0.08959348		2213.4	0.13739032		2803.39	-0.00235235		3393.39	-0.00009084		3983.38	-0.00247209
443.6	0.42138146		1033.6	0.15617249		1623.6	0.08958108		2213.6	0.13754306		2803.59	-0.00189466		3393.59	0.00115832		3983.58	-0.00319853
443.8	0.42174366		1033.8	0.15690747		1623.8	0.08929818		2213.8	0.13631738		2803.79	-0.00285372		3393.79	0.00237635		3983.78	-0.0032639
444	0.42180893		1034	0.15681644		1624	0.08949654		2214	0.1358162		2803.99	-0.00380256		3393.99	0.0030212		3983.98	-0.00310334
444.2	0.420703		1034.2	0.15759586		1624.2	0.0887775		2214.2	0.13580676		2804.19	-0.00383623		3394.19	0.00362362		3984.18	-0.00322058
444.4	0.42106322		1034.4	0.15652832		1624.4	0.08855073		2214.4	0.13519488		2804.39	-0.00343089		3394.39	0.00357095		3984.38	-0.00278343
444.6	0.42104805		1034.6	0.15643755		1624.6	0.08851676		2214.6	0.13539618		2804.59	-0.00403949		3394.59	0.00387614		3984.58	-0.00311235
444.8	0.42097642		1034.8	0.15620796		1624.8	0.08885516		2214.8	0.13565105		2804.79	-0.00435515		3394.79	0.00382445		3984.78	-0.0033735
445	0.42054861		1035	0.15560324		1625	0.09011448		2215	0.1357892		2804.99	-0.00474449		3394.99	0.00336451		3984.98	-0.00298508
445.2	0.41998954		1035.2	0.15500362		1625.2	0.0905036		2215.2	0.13620575		2805.19	-0.00472294		3395.19	0.00295609		3985.18	-0.00374584
445.4	0.419785		1035.4	0.15437153		1625.4	0.08987859		2215.4	0.13736318		2805.39	-0.00415853		3395.39	0.00232855		3985.38	-0.00279432
445.6	0.41911812		1035.6	0.15386662		1625.6	0.09049848		2215.6	0.13814655		2805.59	-0.00377517		3395.59	0.00219108		3985.58	-0.0030363
445.8	0.4195336		1035.8	0.1534456		1625.8	0.0908836		2215.8	0.13877032		2805.79	-0.0034414		3395.79	0.00197295		3985.78	-0.00316336
446	0.41953359		1036	0.1520224		1626	0.09045422		2216	0.13935659		2805.99	-0.00343254		3395.99	0.00153713		3985.98	-0.00262003
446.2	0.42027794		1036.2	0.15190354		1626.2	0.09016414		2216.2	0.14006822		2806.19	-0.00288159		3396.19	0.00133717		3986.18	-0.00175778
446.4	0.42074225		1036.4	0.15203079		1626.4	0.09075786		2216.4	0.14068335		2806.39	-0.00283843		3396.39	0.00078847		3986.38	-0.00241934
446.6	0.42063669		1036.6	0.15174346		1626.6	0.09173403		2216.6	0.14117136		2806.59	-0.00238724		3396.59	0.00038763		3986.58	-0.00304443
446.8	0.42179875		1036.8	0.1521687		1626.8	0.09185909		2216.8	0.14203938		2806.79	-0.00247692		3396.79	0.00037305		3986.78	-0.00277093
447	0.42279776		1037	0.15297605		1627	0.09227741		2217	0.14228387		2806.99	-0.00220525		3396.99	0.00065639		3986.98	-0.00229461
447.2	0.42276524		1037.2	0.15284566		1627.2	0.09148192		2217.2	0.14170378		2807.19	-0.00254556		3397.19	0.00058917		3987.18	-0.00294196
447.4	0.42252814		1037.4	0.15388324		1627.4	0.09099777		2217.4	0.14115601		2807.39	-0.00277508		3397.39	0.00164615		3987.38	-0.00233229
447.6	0.42159826		1037.6	0.15495148		1627.6	0.09033101		2217.6	0.13965883		2807.59	-0.00342116		3397.59	0.00259391		3987.58	-0.00224302
447.8	0.42186413		1037.8	0.1546801		1627.8	0.08951847		2217.8	0.13840359		2807.79	-0.00388162		3397.79	0.00289948		3987.78	-0.00148096
448	0.42164639		1038	0.15444055		1628	0.08949623		2218	0.13777576		2807.99	-0.00420454		3397.99	0.00289479		3987.98	-0.00185613
448.2	0.42154131		1038.2	0.15481501		1628.2	0.08924919		2218.2	0.13758657		2808.19	-0.00384239		3398.19	0.0020986		3988.18	-0.00137523
448.4	0.42252558		1038.4	0.15456727		1628.4	0.08879552		2218.4	0.13767505		2808.39	-0.0038653		3398.39	0.00167948		3988.38	-0.00036219
448.6	0.4225212		1038.6	0.15456252		1628.6	0.0892568		2218.6	0.13747934		2808.59	-0.00565303		3398.59	0.00129752		3988.58	-0.00056451
448.8	0.42370283		1038.8	0.1543172		1628.8	0.08902833		2218.8	0.137706		2808.79	-0.00636744		3398.79	0.00118627		3988.78	0.00002123
449	0.42420738		1039	0.15444843		1629	0.08973898		2219	0.13807078		2808.99	-0.00635311		3398.99	0.00031122		3988.98	-0.00017226
449.2	0.42384644		1039.2	0.15518982		1629.2	0.08969062		2219.2	0.13827969		2809.19	-0.00630856		3399.19	0.00026015		3989.18	-0.00043826
449.4	0.42346568		1039.4	0.15523093		1629.4	0.09057227		2219.4	0.13885251		2809.39	-0.00615978		3399.39	-0.00042897		3989.38	0.00038841
449.6	0.42397119		1039.6	0.15579969		1629.6	0.09103368		2219.6	0.13871322		2809.59	-0.0060608		3399.59	-0.00045197		3989.58	0.00025034
449.8	0.42529056		1039.8	0.15580807		1629.8	0.09071077		2219.8	0.13803851		2809.79	-0.00581397		3399.79	-0.00042175		3989.78	0.00058537
450	0.42572245		1040	0.15639351		1630	0.09091695		2220	0.13854931		2809.99	-0.00595263		3399.99	-0.00072589		3989.98	0.00109738
450.2	0.42597171		1040.2	0.15709305		1630.2	0.09115826		2220.2	0.13945841		2810.19	-0.00578946		3400.19	-0.00034611		3990.18	0.00050551
450.4	0.42615147		1040.4	0.15817876		1630.4	0.09205931		2220.4	0.14060506		2810.39	-0.00510031		3400.39	0.00010852		3990.38	-0.0002266
450.6	0.4264622		1040.6	0.15919625		1630.6	0.0926716		2220.6	0.1411457		2810.59	-0.00383831		3400.59	0.00067798		3990.58	0.00020031
450.8	0.42692805		1040.8	0.16036277		1630.8	0.09287383		2220.8	0.14112428		2810.79	-0.00387064		3400.79	0.00113216		3990.78	0.00115539
451	0.42634244		1041	0.161371		1631	0.09291764		2221	0.14093405		2810.99	-0.00307329		3400.99	0.00155794		3990.98	0.00189399
451.2	0.4264577		1041.2	0.16130305		1631.2	0.09185274		2221.2	0.14014834		2811.19	-0.00353262		3401.19	0.00192248		3991.18	0.00117185
451.4	0.42579203		1041.4	0.16180396		1631.4	0.09176268		2221.4	0.14015023		2811.39	-0.00393434		3401.39	0.00188012		3991.38	0.00100428
451.6	0.42550469		1041.6	0.16174623		1631.6	0.09099082		2221.6	0.13997407		2811.59	-0.00399673		3401.59	0.00202132		3991.58	0.00013847
451.8	0.42541813		1041.8	0.16066986		1631.8	0.09047811		2221.8	0.13943759		2811.79	-0.00373531		3401.79	0.00237719		3991.78	-0.00049779
452	0.42479264		1042	0.1619253		1632	0.09088475		2222	0.14002542		2811.99	-0.00386699		3401.99	0.00277164		3991.98	-0.00114053
452.2	0.42478351		1042.2	0.16185899		1632.2	0.0905607		2222.2	0.14083604		2812.19	-0.00395685		3402.19	0.00233352		3992.18	-0.00096566
452.4	0.4248068		1042.4	0.16123506		1632.4	0.09025116		2222.4	0.14169621		2812.39	-0.00458281		3402.39	0.00153402		3992.38	-0.00092824
452.6	0.42480515		1042.6	0.1616908		1632.6	0.09070333		2222.6	0.14195258		2812.59	-0.00513002		3402.59	0.00061575		3992.58	-0.00121105
452.8	0.42442679		1042.8	0.16134653		1632.8	0.09003114		2222.8	0.14209671		2812.79	-0.00462776		3402.79	0.00045696		3992.78	-0.00170823
453	0.42375527		1043	0.16135566		1633	0.09051776		2223	0.14254329		2812.99	-0.00446515		3402.99	-0.00026606		3992.98	-0.00284394
453.2	0.42368616		1043.2	0.16118076		1633.2	0.09128537		2223.2	0.14296337		2813.19	-0.0053675		3403.19	0.00006031		3993.18	-0.00256323
453.4	0.42403997		1043.4	0.16037328		1633.4	0.09241674		2223.4	0.14290034		2813.39	-0.00486345		3403.39	-0.00005295		3993.38	-0.00246187
453.6	0.42614657		1043.6	0.16075934		1633.6	0.09219504		2223.6	0.14252473		2813.59	-0.00519003		3403.59	-0.00008307		3993.58	-0.00318088
453.8	0.42671382		1043.8	0.16081603		1633.8	0.09197124		2223.8	0.14205309		2813.79	-0.00544834		3403.79	0.00055334		3993.78	-0.00314668
454	0.42698498		1044	0.16073413		1634	0.09228623		2224	0.14234516		2813.99	-0.00499403		3403.99	0.00067186		3993.98	-0.0036609
454.2	0.42736279		1044.2	0.1613406		1634.2	0.09235932		2224.2	0.14292082		2814.19	-0.00513897		3404.19	0.0007656		3994.18	-0.00359027
454.4	0.42736238		1044.4	0.16238996		1634.4	0.09241556		2224.4	0.14409122		2814.39	-0.00421618		3404.39	0.00051554		3994.38	-0.00289589
454.6	0.42757749		1044.6	0.16278917		1634.6	0.09200616		2224.6	0.14412925		2814.59	-0.00441529		3404.59	0.00087351		3994.58	-0.00183268
454.8	0.42784476		1044.8	0.16304507		1634.8	0.09183215		2224.8	0.1438502		2814.79	-0.00506113		3404.79	0.00078042		3994.78	-0.00155563
455	0.42751404		1045	0.1633895		1635	0.09203882		2225	0.14326206		2814.99	-0.00468567		3404.99	0.00155162		3994.98	-0.00151294
455.2	0.42768818		1045.2	0.16310355		1635.2	0.09133308		2225.2	0.14322089		2815.19	-0.00534315		3405.19	0.00217815		3995.18	-0.00260164
455.4	0.42787965		1045.4	0.16314905		1635.4	0.09223347		2225.4	0.14346049		2815.39	-0.00615051		3405.39	0.00190533		3995.38	-0.00284049
455.6	0.42687479		1045.6	0.16300359		1635.6	0.09251101		2225.6	0.14324868		2815.59	-0.0061736		3405.59	0.0030297		3995.58	-0.00289597
455.8	0.42613839		1045.8	0.163595		1635.8	0.09268293		2225.8	0.14353498		2815.79	-0.00576381		3405.79	0.00355119		3995.78	-0.00240929
456	0.42567257		1046	0.16382374		1636	0.09255985		2226	0.1452494		2815.99	-0.0060586		3405.99	0.00303417		3995.98	-0.0020017
456.2	0.42553159		1046.2	0.16280546		1636.2	0.09224378		2226.2	0.14530174		2816.19	-0.00647767		3406.19	0.00253785		3996.18	-0.00247837
456.4	0.42537785		1046.4	0.16231636		1636.4	0.09272991		2226.4	0.14602292		2816.39	-0.00588888		3406.39	0.00179868		3996.38	-0.00223462
456.6	0.42585935		1046.6	0.16239617		1636.6	0.09298646		2226.6	0.14659508		2816.59	-0.00522073		3406.59	0.00177776		3996.58	-0.00274996
456.8	0.42564099		1046.8	0.16126622		1636.8	0.09363167		2226.8	0.14728341		2816.79	-0.00512696		3406.79	0.00127341		3996.78	-0.0021333
457	0.42711872		1047	0.161147		1637	0.09433269		2227	0.14890217		2816.99	-0.00523314		3406.99	0.00153379		3996.98	-0.00298586
457.2	0.42822967		1047.2	0.15963418		1637.2	0.09428699		2227.2	0.14969194		2817.19	-0.00524111		3407.19	0.00135669		3997.18	-0.00246254
457.4	0.42854478		1047.4	0.15932637		1637.4	0.09367647		2227.4	0.14889901		2817.39	-0.00449337		3407.39	0.00060631		3997.38	-0.00277167
457.6	0.42952602		1047.6	0.15984407		1637.6	0.09280545		2227.6	0.14853375		2817.59	-0.0040463		3407.59	0.00011253		3997.58	-0.00341598
457.8	0.42948407		1047.8	0.15970579		1637.8	0.09381438		2227.8	0.14869149		2817.79	-0.0026124		3407.79	-0.00033341		3997.78	-0.00342435
458	0.43094147		1048	0.16031963		1638	0.09404174		2228	0.14832114		2817.99	-0.00197011		3407.99	-0.00142857		3997.98	-0.00363605
458.2	0.43119856		1048.2	0.16244647		1638.2	0.0931331		2228.2	0.14887967		2818.19	-0.00238058		3408.19	-0.00112192		3998.18	-0.00362158
458.4	0.4313262		1048.4	0.16287281		1638.4	0.0924641		2228.4	0.14865258		2818.39	-0.00234432		3408.39	-0.00093414		3998.38	-0.00267247
458.6	0.43172172		1048.6	0.16345737		1638.6	0.09210439		2228.6	0.14707833		2818.59	-0.00322704		3408.59	-0.00014933		3998.58	-0.00240284
458.8	0.43092015		1048.8	0.16427279		1638.8	0.09345257		2228.8	0.14689058		2818.79	-0.00271205		3408.79	0.00019753		3998.78	-0.00277355
459	0.42986175		1049	0.16443451		1639	0.09430814		2229	0.14618097		2818.99	-0.00234353		3408.99	0.00131249		3998.98	-0.00205435
459.2	0.42946276		1049.2	0.16481355		1639.2	0.09543609		2229.2	0.14637055		2819.19	-0.00239845		3409.19	0.00091954		3999.18	-0.00205915
459.4	0.42960853		1049.4	0.16506555		1639.4	0.09617083		2229.4	0.14616287		2819.39	-0.00268936		3409.39	0.00134667		3999.38	-0.00128889
459.6	0.42859029		1049.6	0.16504862		1639.6	0.09611359		2229.6	0.14594272		2819.59	-0.00300286		3409.59	0.00168462		3999.58	-0.00079136
459.8	0.42859208		1049.8	0.1650495		1639.8	0.09541943		2229.8	0.14620257		2819.79	-0.00357073		3409.79	0.00189165		3999.78	-0.00003471
460	0.42847367		1050	0.16438451		1640	0.09497609		2230	0.14613935		2819.99	-0.00399296		3409.99	0.00091038		3999.98	0.00005781
460.2	0.42886113		1050.2	0.1641385		1640.2	0.0959557		2230.2	0.14569295		2820.19	-0.00431884		3410.19	0.00052746		4000.18	0.00003193
460.4	0.429277		1050.4	0.16442299		1640.4	0.0962683		2230.4	0.14508209		2820.39	-0.00411469		3410.39	-0.00030464		4000.38	0.00057458
460.6	0.43015872		1050.6	0.16361775		1640.6	0.09744871		2230.6	0.1451839		2820.59	-0.00408325		3410.59	-0.00063664		4000.58	0.00075872
460.8	0.4300226		1050.8	0.16300717		1640.8	0.09792868		2230.8	0.14506617		2820.79	-0.00396781		3410.79	-0.00034521		4000.78	0.00161605
461	0.43072725		1051	0.16309331		1641	0.0971289		2231	0.14584408		2820.99	-0.00386787		3410.99	0.00006117		4000.98	0.00087494
461.2	0.43036984		1051.2	0.16222833		1641.2	0.09643014		2231.2	0.14582858		2821.19	-0.0038697		3411.19	-0.00105066		4001.18	0.00096495
461.4	0.43017282		1051.4	0.16306342		1641.4	0.09635211		2231.4	0.14541811		2821.39	-0.00253993		3411.39	-0.00115972		4001.38	0.0001178
461.6	0.43093697		1051.6	0.16283728		1641.6	0.09643277		2231.6	0.14576783		2821.59	-0.0017119		3411.59	-0.0009023		4001.58	-0.00036235
461.8	0.43152789		1051.8	0.16225662		1641.8	0.09681171		2231.8	0.14612951		2821.79	-0.00130039		3411.79	-0.00099629		4001.78	-0.00126542
462	0.4321817		1052	0.16333166		1642	0.09546475		2232	0.14562335		2821.99	-0.00231009		3411.99	-0.00083747		4001.98	-0.00111625
462.2	0.43188186		1052.2	0.16416804		1642.2	0.09481403		2232.2	0.14644175		2822.19	-0.00277047		3412.19	0.00025526		4002.18	-0.00156448
462.4	0.43165074		1052.4	0.1638498		1642.4	0.09512788		2232.4	0.14717587		2822.39	-0.00270957		3412.39	-0.00043828		4002.38	-0.00110281
462.6	0.43105704		1052.6	0.16412045		1642.6	0.09560966		2232.6	0.14707899		2822.59	-0.00304671		3412.59	0.00059093		4002.58	-0.00110988
462.8	0.4297463		1052.8	0.16490058		1642.8	0.09520422		2232.8	0.14828063		2822.79	-0.00318618		3412.79	0.00099941		4002.78	-0.00113528
463	0.42901062		1053	0.16539144		1643	0.09505435		2233	0.14840977		2822.99	-0.00400112		3412.99	0.00131462		4002.98	-0.0010798
463.2	0.42958585		1053.2	0.16575537		1643.2	0.09467086		2233.2	0.14872103		2823.19	-0.00451279		3413.19	0.0013091		4003.18	-0.00066407
463.4	0.43015862		1053.4	0.16649193		1643.4	0.09389428		2233.4	0.14830874		2823.39	-0.00512374		3413.39	0.00192476		4003.38	0.00008875
463.6	0.43012767		1053.6	0.16665723		1643.6	0.09336365		2233.6	0.14833514		2823.59	-0.00509136		3413.59	0.00173555		4003.58	0.00013548
463.8	0.43074964		1053.8	0.16778218		1643.8	0.09381546		2233.8	0.14821009		2823.79	-0.00539946		3413.79	0.00171976		4003.78	0.00003572
464	0.43095467		1054	0.16793141		1644	0.09357931		2234	0.14846454		2823.99	-0.00484636		3413.99	0.0006869		4003.98	0.00025715
464.2	0.43223738		1054.2	0.16742107		1644.2	0.09387596		2234.2	0.14869852		2824.19	-0.00523681		3414.19	0.00090885		4004.18	-0.00011245
464.4	0.43365035		1054.4	0.16750385		1644.4	0.09445778		2234.4	0.14814912		2824.39	-0.00565483		3414.39	0.00065667		4004.38	0.00067454
464.6	0.43429537		1054.6	0.16622915		1644.6	0.09608884		2234.6	0.14833426		2824.59	-0.00562963		3414.59	0.00171611		4004.58	0.00045418
464.8	0.43515513		1054.8	0.16627835		1644.8	0.09692595		2234.8	0.14859223		2824.79	-0.0056236		3414.79	0.00241873		4004.78	0.000307
465	0.43625249		1055	0.16638882		1645	0.09704559		2235	0.14904982		2824.99	-0.00578931		3414.99	0.00253643		4004.98	-0.000056
465.2	0.43642316		1055.2	0.16638251		1645.2	0.09721652		2235.2	0.14839327		2825.19	-0.00459293		3415.19	0.00134779		4005.18	-0.00058279
465.4	0.43759923		1055.4	0.16567899		1645.4	0.09793415		2235.4	0.14798915		2825.39	-0.0032339		3415.39	0.00221073		4005.38	-0.00127616
465.6	0.4379607		1055.6	0.16529478		1645.6	0.09824198		2235.6	0.14897476		2825.59	-0.00324257		3415.59	0.00157213		4005.58	-0.00096903
465.8	0.43818368		1055.8	0.1651663		1645.8	0.09847673		2235.8	0.14908527		2825.79	-0.00323135		3415.79	0.00099609		4005.78	-0.00115377
466	0.4380152		1056	0.16523809		1646	0.09910608		2236	0.14920315		2825.99	-0.00315377		3415.99	0.00087742		4005.98	-0.00112011
466.2	0.43806907		1056.2	0.16469891		1646.2	0.09945065		2236.2	0.14978927		2826.19	-0.00260616		3416.19	0.00034835		4006.18	-0.00136864
466.4	0.43777167		1056.4	0.16501187		1646.4	0.09883607		2236.4	0.15048883		2826.39	-0.00207164		3416.39	0.00038027		4006.38	-0.00044681
466.6	0.438312		1056.6	0.16555085		1646.6	0.09861057		2236.6	0.14998318		2826.59	-0.00211561		3416.59	0.00108919		4006.58	-0.00056732
466.8	0.43772222		1056.8	0.16648586		1646.8	0.09768509		2236.8	0.15006373		2826.79	-0.00211132		3416.79	0.00037371		4006.78	-0.00127181
467	0.43708913		1057	0.16705508		1647	0.09791927		2237	0.15044247		2826.99	-0.00204269		3416.99	0.00017404		4006.98	-0.00121181
467.2	0.43740317		1057.2	0.16717558		1647.2	0.09788353		2237.2	0.15040697		2827.19	-0.00157113		3417.19	0.00020834		4007.18	-0.00026862
467.4	0.43704583		1057.4	0.16760514		1647.4	0.09768363		2237.4	0.15018324		2827.39	-0.00197686		3417.39	0.00081603		4007.38	-0.00054667
467.6	0.43671984		1057.6	0.16843078		1647.6	0.09751066		2237.6	0.15092003		2827.59	-0.00170041		3417.59	0.00079058		4007.58	-0.0009984
467.8	0.436469		1057.8	0.16897266		1647.8	0.09780714		2237.8	0.15125393		2827.79	-0.0024446		3417.79	0.00089043		4007.78	-0.00137893
468	0.43615567		1058	0.16874437		1648	0.09719907		2238	0.15218986		2827.99	-0.00250373		3417.99	0.00085333		4007.98	-0.00127809
468.2	0.43664941		1058.2	0.16857685		1648.2	0.09768973		2238.2	0.15292705		2828.19	-0.00334677		3418.19	0.00092716		4008.18	-0.00145042
468.4	0.43672854		1058.4	0.16901189		1648.4	0.09840523		2238.4	0.15307032		2828.39	-0.00368304		3418.39	0.00055884		4008.38	-0.00084298
468.6	0.43639643		1058.6	0.16873179		1648.6	0.09867169		2238.6	0.15337762		2828.59	-0.00355842		3418.59	0.00104288		4008.58	-0.00111881
468.8	0.43654566		1058.8	0.16904827		1648.8	0.09904827		2238.8	0.15387916		2828.79	-0.00350342		3418.79	0.00033414		4008.78	-0.00059986
469	0.43651919		1059	0.16917636		1649	0.09863829		2239	0.15415691		2828.99	-0.00309748		3418.99	-0.00018754		4008.98	0.00003646
469.2	0.43618247		1059.2	0.16928026		1649.2	0.09885912		2239.2	0.15454524		2829.19	-0.00246769		3419.19	-0.0013116		4009.18	0.00054913
469.4	0.43628966		1059.4	0.16874654		1649.4	0.09942083		2239.4	0.15558559		2829.39	-0.00236315		3419.39	-0.00125528		4009.38	0.00111121
469.6	0.43574079		1059.6	0.16882087		1649.6	0.09926544		2239.6	0.15657887		2829.59	-0.00213002		3419.59	-0.00263097		4009.58	0.00210334
469.8	0.43597386		1059.8	0.16823426		1649.8	0.09965908		2239.8	0.15637794		2829.79	-0.00177988		3419.79	-0.00296084		4009.78	0.00262418
470	0.43597386		1059.99	0.16823426		1650	0.09965908		2240	0.15637794		2829.99	-0.00177988		3419.98	-0.00296084		4009.98	0.00262418
470.2	0.43502518		1060.19	0.16846352		1650.2	0.09912969		2240.2	0.15443138		2830.19	-0.00177877		3420.18	-0.00401728		4010.18	0.0034352
470.4	0.43531083		1060.39	0.16820398		1650.4	0.09828183		2240.4	0.15313609		2830.39	-0.00178033		3420.38	-0.00387896		4010.38	0.00414608
470.6	0.43482146		1060.59	0.16743064		1650.6	0.09703514		2240.6	0.15166996		2830.59	-0.0017767		3420.58	-0.00459044		4010.58	0.00383446
470.8	0.433736		1060.79	0.16692126		1650.8	0.09598214		2240.8	0.1508145		2830.79	-0.00092108		3420.78	-0.00456507		4010.78	0.00388753
471	0.43299131		1060.99	0.1666277		1651	0.09564257		2241	0.1492109		2830.99	-0.00046776		3420.98	-0.00471465		4010.98	0.00434295
471.2	0.43248013		1061.19	0.1663667		1651.2	0.09433205		2241.2	0.14770673		2831.19	-0.00072492		3421.18	-0.00448292		4011.18	0.00466856
471.4	0.43175964		1061.39	0.16579259		1651.4	0.09344392		2241.4	0.14639902		2831.39	-0.00076695		3421.38	-0.00511273		4011.38	0.00522817
471.6	0.43140949		1061.59	0.16586705		1651.6	0.09265851		2241.6	0.1454747		2831.59	0.00001762		3421.58	-0.00514241		4011.58	0.00602131
471.8	0.43125193		1061.79	0.16618932		1651.8	0.0917627		2241.8	0.1450901		2831.79	0.00008299		3421.78	-0.00505981		4011.78	0.00647574
472	0.43107641		1061.99	0.16580603		1652	0.09052709		2242	0.1449384		2831.99	0.00016306		3421.98	-0.00508757		4011.98	0.00734586
472.2	0.43080023		1062.19	0.1654388		1652.2	0.08962755		2242.2	0.14445655		2832.19	0.00041754		3422.18	-0.00481609		4012.18	0.0076784
472.4	0.43092571		1062.39	0.16424435		1652.4	0.08921213		2242.4	0.14316351		2832.39	0.00062901		3422.38	-0.00425894		4012.38	0.008067
472.6	0.43110656		1062.59	0.16451168		1652.6	0.08924612		2242.6	0.14190058		2832.59	0.00132		3422.58	-0.00346567		4012.58	0.00795709
472.8	0.43112404		1062.79	0.16459527		1652.8	0.08997528		2242.8	0.14125815		2832.79	0.00129025		3422.78	-0.0034747		4012.78	0.00764089
473	0.4311237		1062.99	0.16518181		1653	0.09042468		2243	0.14088544		2832.99	0.0013384		3422.98	-0.00380881		4012.98	0.00821345
473.2	0.43185986		1063.19	0.16527983		1653.2	0.09016819		2243.2	0.14181633		2833.19	0.00170452		3423.18	-0.00395515		4013.18	0.00877331
473.4	0.43088804		1063.39	0.16527391		1653.4	0.08922884		2243.4	0.14160949		2833.39	0.00085747		3423.38	-0.00425615		4013.38	0.00837643
473.6	0.43104153		1063.59	0.16573801		1653.6	0.08848708		2243.6	0.14105266		2833.59	0.00119331		3423.58	-0.00402808		4013.58	0.00818965
473.8	0.43104239		1063.79	0.16587536		1653.8	0.08898003		2243.8	0.14085246		2833.79	0.00055624		3423.78	-0.00409693		4013.78	0.00838637
474	0.42988394		1063.99	0.16640515		1654	0.0892951		2244	0.13976752		2833.99	0.00047135		3423.98	-0.0037604		4013.98	0.00833259
474.2	0.42933809		1064.19	0.16602553		1654.2	0.08890935		2244.2	0.13953914		2834.19	0.00113525		3424.18	-0.00354113		4014.18	0.00881024
474.4	0.42894411		1064.39	0.16553472		1654.4	0.08797184		2244.4	0.13971845		2834.39	0.00119347		3424.38	-0.00234077		4014.38	0.00852038
474.6	0.42696011		1064.59	0.16466937		1654.6	0.08745274		2244.6	0.13942291		2834.59	0.00121818		3424.58	-0.00254274		4014.58	0.00787991
474.8	0.42546813		1064.79	0.16440849		1654.8	0.08795141		2244.8	0.1389025		2834.79	0.00178542		3424.78	-0.00174144		4014.78	0.00761591
475	0.42487751		1064.99	0.1644947		1655	0.08822396		2245	0.13844163		2834.99	0.00091803		3424.98	-0.00113479		4014.98	0.00755027
475.2	0.42415234		1065.19	0.16531462		1655.2	0.08697005		2245.2	0.13794907		2835.19	-0.00010253		3425.18	-0.00086948		4015.18	0.00736713
475.4	0.42380261		1065.39	0.16527121		1655.4	0.08641236		2245.4	0.13817009		2835.39	0.00028873		3425.38	-0.00191767		4015.38	0.00765523
475.6	0.42378016		1065.59	0.1657411		1655.6	0.08591902		2245.6	0.13846467		2835.59	0.00061938		3425.58	-0.00172806		4015.58	0.00806351
475.8	0.42390995		1065.79	0.16540019		1655.8	0.08494911		2245.8	0.13939616		2835.79	-0.0002462		3425.78	-0.00148606		4015.78	0.00853281
476	0.42351969		1065.99	0.16367884		1656	0.08426742		2246	0.13976406		2835.99	-0.00020429		3425.98	-0.00206481		4015.98	0.00854665
476.2	0.42391346		1066.19	0.16250223		1656.2	0.0839693		2246.2	0.13912017		2836.19	-0.0003337		3426.18	-0.00232744		4016.18	0.00868787
476.4	0.42444796		1066.39	0.16104718		1656.4	0.08382578		2246.4	0.13897859		2836.39	-0.00122836		3426.38	-0.00209127		4016.38	0.00796455
476.6	0.42424238		1066.59	0.16099413		1656.6	0.08484193		2246.6	0.13983296		2836.59	-0.00146577		3426.58	-0.00158194		4016.58	0.00770136
476.8	0.42445412		1066.79	0.16017186		1656.8	0.08610887		2246.8	0.13878361		2836.79	-0.0016983		3426.78	-0.00136262		4016.78	0.00785641
477	0.42504939		1066.99	0.16003844		1657	0.08600683		2247	0.13929019		2836.99	-0.00155331		3426.98	-0.00142993		4016.98	0.00682494
477.2	0.42541774		1067.19	0.16064138		1657.2	0.08587504		2247.2	0.13872369		2837.19	-0.00140647		3427.18	-0.00129646		4017.18	0.00621428
477.4	0.42472892		1067.39	0.16089012		1657.4	0.08548803		2247.4	0.13865211		2837.39	-0.00124735		3427.38	-0.00181781		4017.38	0.0058089
477.6	0.42480848		1067.59	0.16108167		1657.6	0.08529536		2247.6	0.13769768		2837.59	-0.00115228		3427.58	-0.00242967		4017.58	0.00552586
477.8	0.42324099		1067.79	0.16112171		1657.8	0.08527808		2247.8	0.13759885		2837.79	-0.00124217		3427.78	-0.00368004		4017.78	0.00462249
478	0.42209627		1067.99	0.16043078		1658	0.0852203		2248	0.13723961		2837.99	-0.001324		3427.98	-0.00455604		4017.98	0.00452384
478.2	0.42089203		1068.19	0.16076286		1658.2	0.08494324		2248.2	0.13696131		2838.19	-0.00076256		3428.18	-0.00470959		4018.18	0.00537914
478.4	0.41940633		1068.39	0.16119498		1658.4	0.08455134		2248.4	0.13593112		2838.39	-0.00099319		3428.38	-0.004687		4018.38	0.0057121
478.6	0.41877567		1068.59	0.16096346		1658.6	0.08474133		2248.6	0.13512931		2838.59	-0.00024889		3428.58	-0.00481671		4018.58	0.00531193
478.8	0.41792526		1068.79	0.16140346		1658.8	0.08509148		2248.8	0.13484137		2838.79	0.00042256		3428.78	-0.00459028		4018.78	0.00413526
479	0.41712462		1068.99	0.16253484		1659	0.08468911		2249	0.13517259		2838.99	-0.00087821		3428.98	-0.00432661		4018.98	0.00375512
479.2	0.41635856		1069.19	0.16279105		1659.2	0.08364792		2249.2	0.13516192		2839.19	-0.00038335		3429.18	-0.0046232		4019.18	0.00419724
479.4	0.41592753		1069.39	0.16246364		1659.4	0.08373546		2249.4	0.13564863		2839.39	0.00037189		3429.38	-0.00448085		4019.38	0.00455081
479.6	0.414911		1069.59	0.16194907		1659.6	0.0832389		2249.6	0.13584751		2839.59	0.00031194		3429.58	-0.00492277		4019.58	0.00539083
479.8	0.41470426		1069.79	0.16135952		1659.8	0.08331694		2249.8	0.13687635		2839.79	0.00107425		3429.78	-0.00476898		4019.78	0.00510475
480	0.41517695		1069.99	0.16026289		1660	0.08396405		2250	0.13703003		2839.99	0.00124619		3429.98	-0.00412264		4019.98	0.00510705
480.2	0.41514581		1070.19	0.1599068		1660.2	0.08413901		2250.2	0.1373501		2840.19	0.00053637		3430.18	-0.00376514		4020.18	0.00519902
480.4	0.41488109		1070.39	0.15917273		1660.4	0.08449708		2250.4	0.1376426		2840.39	-0.00048717		3430.38	-0.00295331		4020.38	0.00429184
480.6	0.41489172		1070.59	0.15949116		1660.6	0.08532573		2250.6	0.13738788		2840.59	-0.00035257		3430.58	-0.00179821		4020.58	0.00498931
480.8	0.41569561		1070.79	0.15911602		1660.8	0.0866594		2250.8	0.13622176		2840.79	-0.00025101		3430.78	-0.00183854		4020.78	0.00456961
481	0.41550479		1070.99	0.15906541		1661	0.08649206		2251	0.13651664		2840.99	0.00010492		3430.98	-0.00294569		4020.98	0.00384036
481.2	0.41492247		1071.19	0.1598945		1661.2	0.08674407		2251.2	0.13594686		2841.19	0.0006001		3431.18	-0.0033045		4021.18	0.00401867
481.4	0.41412285		1071.39	0.15996609		1661.4	0.08710756		2251.4	0.13646219		2841.39	0.00126386		3431.38	-0.00425367		4021.38	0.00377729
481.6	0.41359287		1071.59	0.1602918		1661.6	0.08658416		2251.6	0.1356497		2841.59	0.00077224		3431.58	-0.00487653		4021.58	0.00435787
481.8	0.41307686		1071.79	0.1602179		1661.8	0.08586946		2251.8	0.13497185		2841.79	0.00044845		3431.78	-0.00543452		4021.78	0.00484177
482	0.41293455		1071.99	0.16016062		1662	0.08597618		2252	0.13429368		2841.99	-0.00117821		3431.98	-0.00625121		4021.98	0.00521794
482.2	0.41285098		1072.19	0.16090251		1662.2	0.08609608		2252.2	0.13404888		2842.19	-0.00115473		3432.18	-0.00661204		4022.18	0.00573058
482.4	0.41238804		1072.39	0.16039191		1662.4	0.08578547		2252.4	0.13358099		2842.39	-0.00120347		3432.38	-0.00692988		4022.38	0.00487736
482.6	0.41227724		1072.59	0.15964737		1662.6	0.08575668		2252.6	0.13367341		2842.59	-0.00147292		3432.58	-0.0069939		4022.58	0.00440822
482.8	0.41167826		1072.79	0.15978616		1662.8	0.08570019		2252.8	0.13461409		2842.79	-0.00252662		3432.78	-0.0068557		4022.78	0.0042763
483	0.41149515		1072.99	0.15956954		1663	0.08430336		2253	0.13460882		2842.99	-0.00442639		3432.98	-0.00686481		4022.98	0.00471407
483.2	0.41070691		1073.19	0.15847803		1663.2	0.08309338		2253.2	0.13507146		2843.19	-0.00408784		3433.18	-0.00654265		4023.18	0.00585024
483.4	0.41027134		1073.39	0.15901608		1663.4	0.08265788		2253.4	0.13455018		2843.39	-0.00457774		3433.38	-0.00654897		4023.38	0.00571079
483.6	0.40972951		1073.59	0.1585208		1663.6	0.08175827		2253.6	0.13540109		2843.59	-0.00507992		3433.58	-0.00653688		4023.58	0.00572638
483.8	0.41007062		1073.79	0.15856993		1663.8	0.08164154		2253.8	0.13558236		2843.79	-0.00493012		3433.78	-0.00569885		4023.78	0.00492689
484	0.41018859		1073.99	0.15804069		1664	0.08096389		2254	0.13579681		2843.99	-0.0056158		3433.98	-0.00444361		4023.98	0.00607193
484.2	0.4099643		1074.19	0.15842063		1664.2	0.08009144		2254.2	0.13613371		2844.19	-0.00588177		3434.18	-0.00472022		4024.18	0.00570972
484.4	0.41069088		1074.39	0.15883673		1664.4	0.07963848		2254.4	0.13581381		2844.39	-0.00621659		3434.38	-0.00379645		4024.38	0.00601684
484.6	0.41047868		1074.59	0.15882963		1664.6	0.08022055		2254.6	0.13501481		2844.59	-0.00629098		3434.58	-0.0037073		4024.58	0.00665081
484.8	0.40946001		1074.79	0.1583801		1664.8	0.0812961		2254.8	0.13484413		2844.79	-0.0053163		3434.78	-0.00381629		4024.78	0.00644573
485	0.40838932		1074.99	0.15902104		1665	0.08079403		2255	0.13480976		2844.99	-0.00489414		3434.98	-0.0038081		4024.98	0.00669233
485.2	0.40825193		1075.19	0.16008564		1665.2	0.08140416		2255.2	0.13503414		2845.19	-0.00430177		3435.18	-0.00339155		4025.18	0.00702383
485.4	0.40794821		1075.39	0.16079737		1665.4	0.08117289		2255.4	0.13575237		2845.39	-0.00399003		3435.38	-0.00417477		4025.38	0.00674201
485.6	0.40693112		1075.59	0.16101074		1665.6	0.08106597		2255.6	0.13559502		2845.59	-0.00421319		3435.58	-0.00414239		4025.58	0.00752286
485.8	0.40692464		1075.79	0.16096674		1665.8	0.08100922		2255.8	0.13464677		2845.79	-0.00395271		3435.78	-0.00455119		4025.78	0.00697298
486	0.40612409		1075.99	0.16064528		1666	0.08241634		2256	0.13433954		2845.99	-0.00436333		3435.98	-0.00518283		4025.98	0.0061474
486.2	0.40520924		1076.19	0.16093679		1666.2	0.0828611		2256.2	0.13428111		2846.19	-0.00346982		3436.18	-0.00509666		4026.18	0.00497034
486.4	0.40423927		1076.39	0.15945928		1666.4	0.08361356		2256.4	0.13466866		2846.39	-0.00357092		3436.38	-0.0053708		4026.38	0.00519636
486.6	0.40420279		1076.59	0.15938029		1666.6	0.08358434		2256.6	0.13483567		2846.59	-0.00369853		3436.58	-0.00461681		4026.58	0.00599754
486.8	0.40425814		1076.79	0.15889457		1666.8	0.08457459		2256.8	0.135011		2846.79	-0.00356211		3436.78	-0.00419661		4026.78	0.00569382
487	0.4041151		1076.99	0.1580721		1667	0.08433078		2257	0.13450726		2846.99	-0.00383362		3436.98	-0.00482799		4026.98	0.00539487
487.2	0.40391949		1077.19	0.15713971		1667.2	0.08399867		2257.2	0.1346041		2847.19	-0.00381887		3437.18	-0.00459721		4027.18	0.00510219
487.4	0.40379657		1077.39	0.15696227		1667.4	0.08392226		2257.4	0.13439417		2847.39	-0.00336937		3437.38	-0.00528359		4027.38	0.00436745
487.6	0.40309355		1077.59	0.15675322		1667.6	0.08363924		2257.6	0.13539147		2847.59	-0.00337159		3437.58	-0.00481946		4027.58	0.00352362
487.8	0.40368088		1077.79	0.15674298		1667.8	0.08260319		2257.8	0.13434944		2847.79	-0.00337291		3437.78	-0.00581355		4027.78	0.00334837
488	0.40439231		1077.99	0.15651724		1668	0.08202405		2258	0.13481488		2847.99	-0.00270206		3437.98	-0.00606429		4027.98	0.00389981
488.2	0.40448784		1078.19	0.15664192		1668.2	0.08155501		2258.2	0.13493446		2848.19	-0.0025881		3438.18	-0.0064016		4028.18	0.00333219
488.4	0.40411853		1078.39	0.15652394		1668.4	0.08165858		2258.4	0.13482713		2848.39	-0.00287943		3438.38	-0.00631638		4028.38	0.00286148
488.6	0.40393224		1078.59	0.15639914		1668.6	0.0816714		2258.6	0.13436449		2848.59	-0.00295817		3438.58	-0.00695887		4028.58	0.00248679
488.8	0.40434896		1078.79	0.15622094		1668.8	0.08042421		2258.8	0.13485673		2848.79	-0.00224042		3438.78	-0.00666886		4028.78	0.0023484
489	0.40510526		1078.99	0.1569248		1669	0.08039649		2259	0.13534937		2848.99	-0.00364589		3438.98	-0.00740261		4028.98	0.00188854
489.2	0.40507724		1079.19	0.15733501		1669.2	0.08086502		2259.2	0.13585465		2849.19	-0.00300409		3439.18	-0.00780441		4029.18	0.00201371
489.4	0.40397909		1079.39	0.15793291		1669.4	0.08052227		2259.4	0.13620421		2849.39	-0.00303639		3439.38	-0.00923215		4029.38	0.00073763
489.6	0.4033654		1079.59	0.15779418		1669.6	0.08071007		2259.6	0.13537717		2849.59	-0.0029368		3439.58	-0.00873267		4029.58	0.00074381
489.8	0.40443609		1079.79	0.15835421		1669.8	0.08028849		2259.8	0.1355306		2849.79	-0.00232734		3439.78	-0.00883115		4029.78	0.00045359
490	0.40319122		1079.99	0.15848231		1670	0.08093072		2260	0.13506846		2849.99	-0.00241969		3439.98	-0.00859526		4029.98	0.00121275
490.2	0.40298093		1080.19	0.15869924		1670.2	0.08019163		2260.2	0.13528014		2850.19	-0.00194018		3440.18	-0.00899797		4030.18	0.00157583
490.4	0.40308407		1080.39	0.1574009		1670.4	0.08035362		2260.4	0.13497644		2850.39	-0.00174551		3440.38	-0.00813598		4030.38	0.00305534
490.6	0.40276147		1080.59	0.15726994		1670.6	0.08050775		2260.6	0.13406995		2850.59	-0.00172926		3440.58	-0.00726957		4030.58	0.00325496
490.8	0.40256434		1080.79	0.15587246		1670.8	0.08135252		2260.8	0.13294163		2850.79	-0.00244177		3440.78	-0.00724234		4030.78	0.00296747
491	0.40218914		1080.99	0.15536015		1671	0.08077592		2261	0.13214763		2850.99	-0.00234367		3440.98	-0.00690536		4030.98	0.00364334
491.2	0.40129459		1081.19	0.15464114		1671.2	0.0801201		2261.2	0.13276101		2851.19	-0.00239345		3441.18	-0.00565051		4031.18	0.00345267
491.4	0.40011502		1081.39	0.15494005		1671.4	0.08043264		2261.4	0.13303781		2851.39	-0.00249617		3441.38	-0.00553344		4031.38	0.0032427
491.6	0.39915146		1081.59	0.15538137		1671.6	0.08021578		2261.6	0.13316977		2851.59	-0.00300447		3441.58	-0.004102		4031.58	0.00366394
491.8	0.39926115		1081.79	0.15438438		1671.8	0.07988768		2261.8	0.13250797		2851.79	-0.00296729		3441.78	-0.00451959		4031.78	0.00391356
492	0.39859303		1081.99	0.15426319		1672	0.08059732		2262	0.13340658		2851.99	-0.00198497		3441.98	-0.00475534		4031.98	0.00418468
492.2	0.39796569		1082.19	0.15412757		1672.2	0.08103286		2262.2	0.13372858		2852.19	-0.00245328		3442.18	-0.00459278		4032.18	0.00453336
492.4	0.39848894		1082.39	0.15440361		1672.4	0.08158989		2262.4	0.13355665		2852.39	-0.002152		3442.38	-0.00543477		4032.38	0.00463743
492.6	0.39863288		1082.59	0.15437582		1672.6	0.08175251		2262.6	0.13323914		2852.59	-0.00264848		3442.58	-0.00629072		4032.58	0.00444946
492.8	0.39929777		1082.79	0.15398411		1672.8	0.08207987		2262.8	0.13310383		2852.79	-0.00213759		3442.78	-0.00691045		4032.78	0.00482435
493	0.39914567		1082.99	0.15472322		1673	0.08292006		2263	0.13375649		2852.99	-0.00186647		3442.98	-0.00799474		4032.98	0.00366199
493.2	0.39857557		1083.19	0.15496417		1673.2	0.08320759		2263.2	0.1334331		2853.19	-0.00094958		3443.18	-0.00857384		4033.18	0.00403445
493.4	0.39878978		1083.39	0.15603515		1673.4	0.08327818		2263.4	0.13266941		2853.39	-0.00146718		3443.38	-0.00973739		4033.38	0.00348394
493.6	0.39982944		1083.59	0.15660168		1673.6	0.08236608		2263.6	0.13217789		2853.59	-0.00044607		3443.58	-0.00931769		4033.58	0.00442363
493.8	0.40026521		1083.79	0.15683856		1673.8	0.08245655		2263.8	0.13259535		2853.79	-0.00024203		3443.78	-0.0106143		4033.78	0.00416368
494	0.39983203		1083.99	0.15709928		1674	0.08226391		2264	0.13274944		2853.99	-0.00027337		3443.98	-0.011278		4033.98	0.00517248
494.2	0.40041515		1084.19	0.15654208		1674.2	0.08115693		2264.2	0.13337905		2854.19	-0.00002106		3444.18	-0.01079818		4034.18	0.00516339
494.4	0.40001592		1084.39	0.15578665		1674.4	0.08016236		2264.4	0.13335035		2854.39	-0.00093983		3444.38	-0.01003626		4034.38	0.00432493
494.6	0.40009335		1084.59	0.15515192		1674.6	0.07937333		2264.6	0.13300567		2854.59	-0.00175425		3444.58	-0.0101144		4034.58	0.00362273
494.8	0.39961192		1084.79	0.15443898		1674.8	0.07844352		2264.8	0.13318051		2854.79	-0.00221914		3444.78	-0.00967354		4034.78	0.00405111
495	0.39845052		1084.99	0.15407393		1675	0.07882448		2265	0.13437108		2854.99	-0.00218177		3444.98	-0.00780143		4034.98	0.00362164
495.2	0.39738323		1085.19	0.15390562		1675.2	0.07878572		2265.2	0.13482225		2855.19	-0.00303126		3445.18	-0.00714417		4035.18	0.00226585
495.4	0.39701365		1085.39	0.15380731		1675.4	0.07848686		2265.4	0.13437938		2855.39	-0.00363443		3445.38	-0.00688386		4035.38	0.00281758
495.6	0.39633781		1085.59	0.15358358		1675.6	0.07832716		2265.6	0.13495467		2855.59	-0.00297874		3445.58	-0.00518955		4035.58	0.00356698
495.8	0.39597329		1085.79	0.15269422		1675.8	0.07860953		2265.8	0.1342813		2855.79	-0.00329021		3445.78	-0.005595		4035.78	0.00279492
496	0.39562335		1085.99	0.15319539		1676	0.07988853		2266	0.13480846		2855.99	-0.00338412		3445.98	-0.00586686		4035.98	0.00317645
496.2	0.39583363		1086.19	0.15278924		1676.2	0.07992686		2266.2	0.13366083		2856.19	-0.00384006		3446.18	-0.00554352		4036.18	0.00310506
496.4	0.39605168		1086.39	0.15326061		1676.4	0.0801484		2266.4	0.13225492		2856.39	-0.00315499		3446.38	-0.00596519		4036.38	0.00268097
496.6	0.39589925		1086.59	0.15229615		1676.6	0.08034283		2266.6	0.13187625		2856.59	-0.00286884		3446.58	-0.00574412		4036.58	0.00257213
496.8	0.39652259		1086.79	0.15242123		1676.8	0.08095896		2266.8	0.13134935		2856.79	-0.00221559		3446.78	-0.006468		4036.78	0.00359007
497	0.39516236		1086.99	0.15280905		1677	0.08162182		2267	0.13116305		2856.99	-0.00236714		3446.98	-0.00583507		4036.98	0.00367819
497.2	0.39451583		1087.19	0.15346957		1677.2	0.08229686		2267.2	0.1298217		2857.19	-0.00218326		3447.18	-0.00543693		4037.18	0.00459351
497.4	0.39502616		1087.39	0.15421753		1677.4	0.0823648		2267.4	0.12877914		2857.39	-0.00149499		3447.38	-0.00602104		4037.38	0.00450146
497.6	0.39649433		1087.59	0.15437882		1677.6	0.0823194		2267.6	0.12926736		2857.59	-0.00032431		3447.58	-0.00613269		4037.58	0.00459416
497.8	0.39600185		1087.79	0.15411295		1677.8	0.08318218		2267.8	0.12960503		2857.79	-0.00145069		3447.78	-0.00666017		4037.78	0.00384656
498	0.39593968		1087.99	0.15437042		1678	0.08242743		2268	0.12953946		2857.99	-0.00141775		3447.98	-0.00633142		4037.98	0.00437803
498.2	0.3958688		1088.19	0.15419331		1678.2	0.08204053		2268.2	0.13011059		2858.19	-0.00204212		3448.18	-0.00625579		4038.18	0.00332712
498.4	0.39596341		1088.39	0.15422642		1678.4	0.0815374		2268.4	0.13051369		2858.39	-0.00299976		3448.38	-0.00753028		4038.38	0.00297678
498.6	0.3958945		1088.59	0.15390279		1678.6	0.08164534		2268.6	0.13038146		2858.59	-0.0033688		3448.58	-0.00794332		4038.58	0.00331529
498.8	0.39515106		1088.79	0.15395004		1678.8	0.08141697		2268.8	0.1311539		2858.79	-0.00459958		3448.78	-0.00805738		4038.78	0.00347686
499	0.39488203		1088.99	0.15410892		1679	0.08150042		2269	0.13122252		2858.99	-0.00527628		3448.98	-0.00802605		4038.98	0.00229733
499.2	0.39552402		1089.19	0.15443336		1679.2	0.0809318		2269.2	0.13015131		2859.19	-0.00577389		3449.18	-0.00891158		4039.18	0.00181403
499.4	0.39579911		1089.39	0.15427208		1679.4	0.07962375		2269.4	0.13070958		2859.39	-0.00570812		3449.38	-0.00934633		4039.38	0.00304744
499.6	0.39551074		1089.59	0.15391123		1679.6	0.07940667		2269.6	0.13154564		2859.59	-0.0053991		3449.58	-0.01007372		4039.58	0.00241504
499.8	0.3950886		1089.79	0.15379993		1679.8	0.07883121		2269.8	0.13099679		2859.79	-0.00613422		3449.78	-0.01081647		4039.78	0.00229814
500	0.39438564		1089.99	0.15386318		1680	0.07824733		2270	0.13123434		2859.99	-0.00675249		3449.98	-0.01098875		4039.98	0.00179132
500.2	0.39336996		1090.19	0.1533256		1680.2	0.07746862		2270.2	0.13090686		2860.19	-0.00630354		3450.18	-0.01108613		4040.18	0.0015552
500.4	0.39255333		1090.39	0.15287342		1680.4	0.07759538		2270.4	0.13158401		2860.39	-0.00586695		3450.38	-0.01093047		4040.38	0.00217824
500.6	0.39184418		1090.59	0.15172302		1680.6	0.0771958		2270.6	0.13234973		2860.59	-0.00488639		3450.58	-0.01046946		4040.58	0.00251225
500.8	0.39106555		1090.79	0.15198099		1680.8	0.07762971		2270.8	0.13232377		2860.79	-0.00415417		3450.78	-0.01036216		4040.78	0.00326144
501	0.38936774		1090.99	0.15168431		1681	0.07772246		2271	0.13277209		2860.99	-0.00332354		3450.98	-0.00904534		4040.98	0.00271856
501.2	0.38927523		1091.19	0.15121823		1681.2	0.07744048		2271.2	0.13318843		2861.19	-0.00154637		3451.18	-0.00788156		4041.18	0.00199886
501.4	0.38992985		1091.39	0.15043163		1681.4	0.07723898		2271.4	0.132937		2861.39	-0.00102473		3451.38	-0.00799308		4041.38	0.00144664
501.6	0.38954933		1091.59	0.15089007		1681.6	0.07778039		2271.6	0.13332022		2861.59	-0.00068354		3451.58	-0.0073422		4041.58	0.00137054
501.8	0.38836242		1091.79	0.15095183		1681.8	0.07836052		2271.8	0.13305187		2861.79	-0.00129064		3451.78	-0.00670328		4041.78	0.00080395
502	0.38852266		1091.99	0.15075096		1682	0.07817823		2272	0.13263043		2861.99	-0.00055648		3451.98	-0.00604248		4041.98	0.00135757
502.2	0.38769874		1092.19	0.15169186		1682.2	0.07829442		2272.2	0.13359698		2862.19	-0.00063654		3452.18	-0.00584981		4042.18	0.00090005
502.4	0.38754578		1092.39	0.15093389		1682.4	0.07835941		2272.4	0.13302492		2862.39	-0.00106988		3452.38	-0.0052548		4042.38	0.00094635
502.6	0.38741032		1092.59	0.15135071		1682.6	0.07813543		2272.6	0.13269062		2862.59	-0.00128468		3452.58	-0.00518754		4042.58	0.00107855
502.8	0.38766286		1092.79	0.15141798		1682.8	0.07783792		2272.8	0.13199315		2862.79	-0.00179085		3452.78	-0.00524495		4042.78	0.00078288
503	0.38853928		1092.99	0.15159161		1683	0.07757593		2273	0.13140048		2862.99	-0.00128088		3452.98	-0.0052799		4042.98	0.00138862
503.2	0.38927289		1093.19	0.15146742		1683.2	0.07793588		2273.2	0.13088645		2863.19	-0.00172597		3453.18	-0.00478331		4043.18	0.00243878
503.4	0.3898133		1093.39	0.15199797		1683.4	0.07745626		2273.4	0.13128703		2863.39	-0.00192021		3453.38	-0.00520612		4043.38	0.00358709
503.6	0.39006932		1093.59	0.15276724		1683.6	0.0777642		2273.6	0.1307515		2863.59	-0.00219263		3453.58	-0.00553773		4043.58	0.00354508
503.8	0.38965147		1093.79	0.15333622		1683.8	0.0777902		2273.8	0.13069426		2863.79	-0.00364956		3453.78	-0.00526916		4043.78	0.00430865
504	0.38963833		1093.99	0.15327502		1684	0.07778717		2274	0.13064611		2863.99	-0.00475044		3453.98	-0.00582511		4043.98	0.00431787
504.2	0.38970675		1094.19	0.15279995		1684.2	0.07817326		2274.2	0.13112543		2864.19	-0.00413424		3454.18	-0.00655911		4044.18	0.00576139
504.4	0.3898434		1094.39	0.15310544		1684.4	0.07881961		2274.4	0.13147917		2864.39	-0.00424805		3454.38	-0.00700771		4044.38	0.00621672
504.6	0.39052083		1094.59	0.15323309		1684.6	0.07894524		2274.6	0.13149497		2864.59	-0.00336337		3454.58	-0.00805246		4044.58	0.00592801
504.8	0.39039329		1094.79	0.15372605		1684.8	0.07966044		2274.8	0.13118722		2864.79	-0.00312144		3454.78	-0.00893446		4044.78	0.00606041
505	0.39014251		1094.99	0.15344692		1685	0.07900387		2275	0.13170404		2864.99	-0.00375299		3454.98	-0.00931746		4044.98	0.00560063
505.2	0.39070195		1095.19	0.15395344		1685.2	0.07832422		2275.2	0.13219875		2865.19	-0.00343653		3455.18	-0.00895427		4045.18	0.00543204
505.4	0.39042956		1095.39	0.15418936		1685.4	0.07790043		2275.4	0.13194147		2865.39	-0.00405622		3455.38	-0.00956347		4045.38	0.00501842
505.6	0.38942983		1095.59	0.15405952		1685.6	0.07873677		2275.6	0.13183279		2865.59	-0.00433668		3455.58	-0.00983159		4045.58	0.00496692
505.8	0.3891621		1095.79	0.15417553		1685.8	0.0790339		2275.8	0.13142188		2865.79	-0.00455944		3455.78	-0.00951396		4045.78	0.00377528
506	0.38826869		1095.99	0.15314597		1686	0.07805638		2276	0.13039614		2865.99	-0.00399518		3455.98	-0.00902768		4045.98	0.00359976
506.2	0.38685111		1096.19	0.15273606		1686.2	0.07691097		2276.2	0.13019227		2866.19	-0.00372625		3456.18	-0.00901719		4046.18	0.00221366
506.4	0.3870027		1096.39	0.15139735		1686.4	0.07656493		2276.4	0.12972457		2866.39	-0.00428546		3456.38	-0.00888588		4046.38	0.00168796
506.6	0.3871607		1096.59	0.15161374		1686.6	0.07546818		2276.6	0.12920344		2866.59	-0.00357648		3456.58	-0.00911387		4046.58	0.00213633
506.8	0.38646224		1096.79	0.15019649		1686.8	0.07562932		2276.8	0.12840605		2866.79	-0.00404336		3456.78	-0.00836919		4046.78	0.0025914
507	0.3870398		1096.99	0.150393		1687	0.07540453		2277	0.12799189		2866.99	-0.00428918		3456.98	-0.00790479		4046.98	0.00353643
507.2	0.38673337		1097.19	0.15003315		1687.2	0.0756366		2277.2	0.12708604		2867.19	-0.00450954		3457.18	-0.00710771		4047.18	0.00354079
507.4	0.38712692		1097.39	0.14990682		1687.4	0.07591891		2277.4	0.12712804		2867.39	-0.00433511		3457.38	-0.00767285		4047.38	0.00343214
507.6	0.38721406		1097.59	0.15003333		1687.6	0.07620661		2277.6	0.12729341		2867.59	-0.00423184		3457.58	-0.00795454		4047.58	0.0034443
507.8	0.38633199		1097.79	0.14920675		1687.8	0.07598977		2277.8	0.12784986		2867.79	-0.00431658		3457.78	-0.00905154		4047.78	0.00405845
508	0.38698474		1097.99	0.14846555		1688	0.07594938		2278	0.12808201		2867.99	-0.00372126		3457.98	-0.0095273		4047.98	0.00484649
508.2	0.38661991		1098.19	0.14788561		1688.2	0.07641018		2278.2	0.12785213		2868.19	-0.00359691		3458.18	-0.00976575		4048.18	0.00510489
508.4	0.38709324		1098.39	0.14861772		1688.4	0.07724272		2278.4	0.12887093		2868.39	-0.00266598		3458.38	-0.01014535		4048.38	0.00471107
508.6	0.38776177		1098.59	0.14909279		1688.6	0.07727425		2278.6	0.12916914		2868.59	-0.0024369		3458.58	-0.01092184		4048.58	0.00429718
508.8	0.38771303		1098.79	0.14988457		1688.8	0.07640269		2278.8	0.12988201		2868.79	-0.00221584		3458.78	-0.01018547		4048.78	0.00418966
509	0.38785068		1098.99	0.14990847		1689	0.07602376		2279	0.13114796		2868.99	-0.00237868		3458.98	-0.01045028		4048.98	0.00440527
509.2	0.3879684		1099.19	0.15016446		1689.2	0.07610204		2279.2	0.13193876		2869.19	-0.00232955		3459.18	-0.01050679		4049.18	0.00359632
509.4	0.38772637		1099.39	0.14989087		1689.4	0.07699155		2279.4	0.13271259		2869.39	-0.00355721		3459.38	-0.00944414		4049.38	0.00273724
509.6	0.38745826		1099.59	0.1500075		1689.6	0.07783994		2279.6	0.13261202		2869.59	-0.00384931		3459.58	-0.00900079		4049.58	0.00218416
509.8	0.38688549		1099.79	0.1506618		1689.8	0.07718945		2279.8	0.13247188		2869.79	-0.00375897		3459.78	-0.00873785		4049.78	0.00108703
510	0.38599686		1099.99	0.14976456		1690	0.07602415		2280	0.13283107		2869.99	-0.00389819		3459.98	-0.00835603		4049.98	0.00097882
510.2	0.38536485		1100.19	0.14984225		1690.2	0.0761288		2280.2	0.13403153		2870.19	-0.00342805		3460.18	-0.00813102		4050.18	0.00083021
510.4	0.38516882		1100.39	0.15037507		1690.4	0.07564053		2280.4	0.1341122		2870.39	-0.00457336		3460.38	-0.00795048		4050.38	0.00115912
510.6	0.38481042		1100.59	0.14993011		1690.6	0.07525556		2280.6	0.1334068		2870.59	-0.00465904		3460.58	-0.0074872		4050.58	0.00144634
510.8	0.38363856		1100.79	0.14955856		1690.8	0.0759651		2280.8	0.13263684		2870.79	-0.0050237		3460.78	-0.00789377		4050.78	0.00206279
511	0.38386909		1100.99	0.14987207		1691	0.07585621		2281	0.13251113		2870.99	-0.00569562		3460.98	-0.0084769		4050.98	0.00237197
511.2	0.38303846		1101.19	0.14892209		1691.2	0.07603592		2281.2	0.1319563		2871.19	-0.00471884		3461.18	-0.00864759		4051.18	0.00167638
511.4	0.38312485		1101.39	0.14917524		1691.4	0.07700879		2281.4	0.13247289		2871.39	-0.0048217		3461.38	-0.00950583		4051.38	0.00151092
511.6	0.38218665		1101.59	0.14940854		1691.6	0.07725737		2281.6	0.13234103		2871.59	-0.00460816		3461.58	-0.00963652		4051.58	0.00194343
511.8	0.38171135		1101.79	0.1493037		1691.8	0.07636597		2281.8	0.13132159		2871.79	-0.00466893		3461.78	-0.0097386		4051.78	0.00213255
512	0.38196452		1101.99	0.14962254		1692	0.07625967		2282	0.13034235		2871.99	-0.0050374		3461.98	-0.00949757		4051.98	0.00203084
512.2	0.38206984		1102.19	0.15022946		1692.2	0.07618178		2282.2	0.12974186		2872.19	-0.00573164		3462.18	-0.00911891		4052.18	0.00163935
512.4	0.38262039		1102.39	0.15117738		1692.4	0.07546068		2282.4	0.13050757		2872.39	-0.0054362		3462.38	-0.00984311		4052.38	0.00133951
512.6	0.38188123		1102.59	0.15129573		1692.6	0.07495715		2282.6	0.13025439		2872.59	-0.00567669		3462.58	-0.00983505		4052.58	0.00083478
512.8	0.38205327		1102.79	0.15109719		1692.8	0.07473675		2282.8	0.13068497		2872.79	-0.00591579		3462.78	-0.00939383		4052.78	0.00101728
513	0.38208855		1102.99	0.15175727		1693	0.07575882		2283	0.13032519		2872.99	-0.0061509		3462.98	-0.00995163		4052.98	0.00114558
513.2	0.38219345		1103.19	0.15192512		1693.2	0.07562331		2283.2	0.12924936		2873.19	-0.00649365		3463.18	-0.01009604		4053.18	0.00097298
513.4	0.38185009		1103.39	0.1522753		1693.4	0.07585445		2283.4	0.12908428		2873.39	-0.00675141		3463.38	-0.00849611		4053.38	0.00120832
513.6	0.38111234		1103.59	0.15252263		1693.6	0.07549774		2283.6	0.12895625		2873.59	-0.00633018		3463.58	-0.00863149		4053.58	0.00127022
513.8	0.38019239		1103.79	0.15206635		1693.8	0.07470915		2283.8	0.12886296		2873.79	-0.00549006		3463.78	-0.00886693		4053.78	0.0009861
514	0.38095287		1103.99	0.15145659		1694	0.07477105		2284	0.12919853		2873.99	-0.00527064		3463.98	-0.00881485		4053.98	0.00067752
514.2	0.38145678		1104.19	0.15133887		1694.2	0.07516589		2284.2	0.12891935		2874.19	-0.00433981		3464.18	-0.00901647		4054.18	0.00145885
514.4	0.38128946		1104.39	0.15129096		1694.4	0.07461833		2284.4	0.12824711		2874.39	-0.00390485		3464.38	-0.00966014		4054.38	0.00159789
514.6	0.38079834		1104.59	0.14960499		1694.6	0.07543622		2284.6	0.12810136		2874.59	-0.00330698		3464.58	-0.00956375		4054.58	0.00096792
514.8	0.38043575		1104.79	0.14997392		1694.8	0.07499829		2284.8	0.1287252		2874.79	-0.00280767		3464.78	-0.00991455		4054.78	0.00144697
515	0.38089997		1104.99	0.14941258		1695	0.07515609		2285	0.12919737		2874.99	-0.00233602		3464.98	-0.00970367		4054.98	0.00102346
515.2	0.38103627		1105.19	0.14895165		1695.2	0.07445167		2285.2	0.12946226		2875.19	-0.00150785		3465.18	-0.01032965		4055.18	0.00045589
515.4	0.38192253		1105.39	0.14853633		1695.4	0.07422111		2285.4	0.13036665		2875.39	-0.00191291		3465.38	-0.01058343		4055.38	0.00050206
515.6	0.38185962		1105.59	0.14833223		1695.6	0.07388112		2285.6	0.13007701		2875.59	-0.00211796		3465.58	-0.01025102		4055.58	0.00100643
515.8	0.38273275		1105.79	0.14853983		1695.8	0.0726822		2285.8	0.12998529		2875.79	-0.00232469		3465.78	-0.00978993		4055.78	0.00049991
516	0.38315254		1105.99	0.14827613		1696	0.07261331		2286	0.12984305		2875.99	-0.00220723		3465.98	-0.00967861		4055.98	0.00043023
516.2	0.3824949		1106.19	0.14846658		1696.2	0.07248764		2286.2	0.13052435		2876.19	-0.00289764		3466.18	-0.00983098		4056.18	0.00012212
516.4	0.38155366		1106.39	0.14802955		1696.4	0.07209608		2286.4	0.13146156		2876.39	-0.00276691		3466.38	-0.01027877		4056.38	0.00064632
516.6	0.38060524		1106.59	0.14798637		1696.6	0.07257404		2286.6	0.13130573		2876.59	-0.00251965		3466.58	-0.00989253		4056.58	0.00074533
516.8	0.3805292		1106.79	0.14872708		1696.8	0.07244801		2286.8	0.13162243		2876.79	-0.0033607		3466.78	-0.01041187		4056.78	0.00125982
517	0.3793683		1106.99	0.14975143		1697	0.07252648		2287	0.13061524		2876.99	-0.00338032		3466.98	-0.01109358		4056.98	0.00163373
517.2	0.37853972		1107.19	0.15059989		1697.2	0.07271503		2287.2	0.1290764		2877.19	-0.00409461		3467.18	-0.01149897		4057.18	0.00266913
517.4	0.37783381		1107.39	0.15103145		1697.4	0.07280974		2287.4	0.12965335		2877.39	-0.00437314		3467.38	-0.01054679		4057.38	0.00296035
517.6	0.37749851		1107.59	0.15183967		1697.6	0.07230842		2287.6	0.12985365		2877.59	-0.00471546		3467.58	-0.01049568		4057.58	0.00299219
517.8	0.37776526		1107.79	0.15239299		1697.8	0.07230728		2287.8	0.12859467		2877.79	-0.0041473		3467.78	-0.01079388		4057.78	0.00276482
518	0.37843113		1107.99	0.15217673		1698	0.07290965		2288	0.12855396		2877.99	-0.00394572		3467.98	-0.01104417		4057.98	0.00277162
518.2	0.37784984		1108.19	0.15194219		1698.2	0.07339057		2288.2	0.12777852		2878.19	-0.00321207		3468.18	-0.01108747		4058.18	0.00371883
518.4	0.37741927		1108.39	0.15240222		1698.4	0.07285952		2288.4	0.127849		2878.39	-0.00310438		3468.38	-0.01109736		4058.38	0.0038592
518.6	0.37742069		1108.59	0.15190336		1698.6	0.0723067		2288.6	0.12728856		2878.59	-0.00415821		3468.58	-0.01023231		4058.58	0.00276185
518.8	0.37822474		1108.79	0.15299173		1698.8	0.07159907		2288.8	0.12760675		2878.79	-0.00407126		3468.78	-0.01019858		4058.78	0.00263952
519	0.37994322		1108.99	0.15203855		1699	0.0716474		2289	0.12762323		2878.99	-0.00368407		3468.98	-0.01023858		4058.98	0.00175576
519.2	0.38035973		1109.19	0.15153369		1699.2	0.07130421		2289.2	0.12808901		2879.19	-0.00372587		3469.18	-0.01080379		4059.18	0.00143244
519.4	0.38162389		1109.39	0.15099487		1699.4	0.0718667		2289.4	0.12795346		2879.39	-0.00421301		3469.38	-0.01046929		4059.38	0.00087775
519.6	0.38214365		1109.59	0.15132781		1699.6	0.07215209		2289.6	0.12791261		2879.59	-0.00456829		3469.58	-0.01016632		4059.58	0.00063389
519.8	0.38301991		1109.79	0.15071663		1699.8	0.07176401		2289.8	0.12886028		2879.79	-0.00463413		3469.78	-0.00972168		4059.78	0.00003712
520	0.38286095		1109.99	0.14992649		1700	0.07236315		2290	0.12912582		2879.99	-0.0046385		3469.98	-0.0099794		4059.98	-0.0002623
520.2	0.38219961		1110.19	0.14932683		1700.2	0.07236045		2290.2	0.12966264		2880.19	-0.00510177		3470.18	-0.01053209		4060.18	-0.00021693
520.4	0.3816448		1110.39	0.14893699		1700.4	0.07255417		2290.4	0.12974568		2880.39	-0.00521156		3470.38	-0.01111794		4060.38	-0.00027312
520.6	0.38083568		1110.59	0.14964929		1700.6	0.07232408		2290.6	0.12969765		2880.59	-0.00577783		3470.58	-0.01142941		4060.58	-0.00117899
520.8	0.38048071		1110.79	0.1500524		1700.8	0.07248672		2290.8	0.12972011		2880.79	-0.00657633		3470.78	-0.0115457		4060.78	-0.00051766
521	0.38016668		1110.99	0.15003848		1701	0.07371733		2291	0.12916603		2880.99	-0.00717246		3470.98	-0.01093665		4060.98	0.00027961
521.2	0.37980936		1111.19	0.15045129		1701.2	0.07404198		2291.2	0.12881963		2881.19	-0.0066261		3471.18	-0.01043884		4061.18	0.00150648
521.4	0.37980634		1111.39	0.15048543		1701.4	0.07437203		2291.4	0.12858395		2881.39	-0.00638767		3471.38	-0.00964427		4061.38	0.00230568
521.6	0.37924858		1111.59	0.15073123		1701.6	0.07480741		2291.6	0.12839047		2881.59	-0.0064725		3471.58	-0.00915573		4061.58	0.00313871
521.8	0.37973515		1111.79	0.15057705		1701.8	0.07562201		2291.8	0.12764529		2881.79	-0.00553694		3471.78	-0.00981473		4061.78	0.00366955
522	0.37946713		1111.99	0.15040098		1702	0.0761991		2292	0.12759438		2881.99	-0.00479614		3471.98	-0.00942457		4061.98	0.00458062
522.2	0.37935548		1112.19	0.15061533		1702.2	0.07583936		2292.2	0.12651529		2882.19	-0.00473589		3472.18	-0.00950725		4062.18	0.0052928
522.4	0.37926793		1112.39	0.15100862		1702.4	0.07525855		2292.4	0.12640885		2882.39	-0.00502042		3472.38	-0.00944958		4062.38	0.00569157
522.6	0.37968201		1112.59	0.15033629		1702.6	0.07518202		2292.6	0.12685921		2882.59	-0.00512298		3472.58	-0.00963465		4062.58	0.00489042
522.8	0.38009031		1112.79	0.15075755		1702.8	0.07522603		2292.8	0.12704305		2882.79	-0.00468196		3472.78	-0.01031927		4062.78	0.00472626
523	0.38120978		1112.99	0.15125157		1703	0.07563358		2293	0.12737861		2882.99	-0.00386261		3472.98	-0.0110731		4062.98	0.00465925
523.2	0.38094502		1113.19	0.15120396		1703.2	0.0752111		2293.2	0.12732748		2883.19	-0.00397056		3473.18	-0.01022369		4063.18	0.00423943
523.4	0.38219921		1113.39	0.15076682		1703.4	0.07502353		2293.4	0.12762397		2883.39	-0.00467951		3473.38	-0.00949918		4063.38	0.00356913
523.6	0.38183346		1113.59	0.15090915		1703.6	0.07462161		2293.6	0.12848959		2883.59	-0.00552804		3473.58	-0.00972268		4063.58	0.00310429
523.8	0.38144899		1113.79	0.15062683		1703.8	0.07455515		2293.8	0.12848746		2883.79	-0.00541687		3473.78	-0.00902415		4063.78	0.00162479
524	0.38086772		1113.99	0.15020345		1704	0.0739711		2294	0.12864239		2883.99	-0.00517692		3473.98	-0.00920551		4063.98	0.00146838
524.2	0.37938254		1114.19	0.1503131		1704.2	0.07336447		2294.2	0.12931067		2884.19	-0.00598793		3474.18	-0.00955602		4064.18	0.00075711
524.4	0.37794629		1114.39	0.15145226		1704.4	0.07394441		2294.4	0.12930599		2884.39	-0.00595039		3474.38	-0.00976367		4064.38	-0.00043585
524.6	0.37728893		1114.59	0.15078724		1704.6	0.07389053		2294.6	0.13001471		2884.59	-0.00689256		3474.58	-0.00955588		4064.58	-0.00079643
524.8	0.37725359		1114.79	0.15058146		1704.8	0.07483585		2294.8	0.13029085		2884.79	-0.00737711		3474.78	-0.00854582		4064.78	-0.00114595
525	0.37688452		1114.99	0.15014428		1705	0.07488596		2295	0.12962275		2884.99	-0.00701389		3474.98	-0.00821158		4064.98	-0.00063029
525.2	0.37596726		1115.19	0.14985125		1705.2	0.07433048		2295.2	0.1285161		2885.19	-0.0060702		3475.18	-0.00812758		4065.18	-0.0001746
525.4	0.37556299		1115.39	0.14944551		1705.4	0.0753463		2295.4	0.12795961		2885.39	-0.00653771		3475.38	-0.00806147		4065.38	-0.00002653
525.6	0.37495476		1115.59	0.14912356		1705.6	0.07534509		2295.6	0.12788179		2885.59	-0.00670825		3475.58	-0.00869166		4065.58	0.0003601
525.8	0.37509487		1115.79	0.14874812		1705.8	0.07563307		2295.8	0.12697773		2885.79	-0.00612872		3475.78	-0.00926722		4065.78	0.00047263
526	0.37458905		1115.99	0.14749057		1706	0.0746344		2296	0.12637441		2885.99	-0.00564706		3475.98	-0.00877965		4065.98	0.00125292
526.2	0.37334541		1116.19	0.14620413		1706.2	0.07489953		2296.2	0.12626326		2886.19	-0.00535183		3476.18	-0.01017816		4066.18	0.00133407
526.4	0.37297043		1116.39	0.14582796		1706.4	0.07471905		2296.4	0.12669421		2886.39	-0.00572894		3476.38	-0.01059089		4066.38	0.00207291
526.6	0.37297824		1116.59	0.14439617		1706.6	0.07400203		2296.6	0.12706084		2886.59	-0.00513693		3476.58	-0.01098446		4066.58	0.00275212
526.8	0.37288254		1116.79	0.1448637		1706.8	0.07347759		2296.8	0.12698387		2886.79	-0.00466661		3476.78	-0.01121263		4066.78	0.00323312
527	0.37302677		1116.99	0.14455652		1707	0.07396761		2297	0.12716612		2886.99	-0.00417814		3476.98	-0.00992837		4066.98	0.00324466
527.2	0.37271609		1117.19	0.14441228		1707.2	0.07316919		2297.2	0.12735233		2887.19	-0.00500798		3477.18	-0.00902244		4067.18	0.00236525
527.4	0.37250406		1117.39	0.14408681		1707.4	0.07332857		2297.4	0.12727504		2887.39	-0.0058564		3477.38	-0.00930376		4067.38	0.00191073
527.6	0.3718951		1117.59	0.14467193		1707.6	0.07347765		2297.6	0.12766518		2887.59	-0.00572201		3477.58	-0.00941274		4067.58	0.00249608
527.8	0.37137684		1117.79	0.14512845		1707.8	0.07286246		2297.8	0.12785245		2887.79	-0.00504946		3477.78	-0.00863344		4067.78	0.00219873
528	0.37152909		1117.99	0.14490466		1708	0.07332746		2298	0.12881727		2887.99	-0.00529911		3477.98	-0.00953813		4067.98	0.00237267
528.2	0.37113853		1118.19	0.14536507		1708.2	0.07410801		2298.2	0.12885336		2888.19	-0.00567143		3478.18	-0.00937214		4068.18	0.00172446
528.4	0.37164368		1118.39	0.14520009		1708.4	0.07456395		2298.4	0.12877262		2888.39	-0.00552217		3478.38	-0.0090363		4068.38	0.0016472
528.6	0.37135351		1118.59	0.14468765		1708.6	0.07422123		2298.6	0.12920017		2888.59	-0.00633148		3478.58	-0.00925678		4068.58	0.00092433
528.8	0.37235244		1118.79	0.14521703		1708.8	0.07405474		2298.8	0.12934467		2888.79	-0.00636874		3478.78	-0.00866601		4068.78	0.00066391
529	0.37283319		1118.99	0.14491486		1709	0.07440105		2299	0.12883534		2888.99	-0.00665512		3478.98	-0.00884004		4068.98	0.00153535
529.2	0.37301711		1119.19	0.14504996		1709.2	0.07414072		2299.2	0.12858821		2889.19	-0.00685141		3479.18	-0.0089657		4069.18	0.00194676
529.4	0.3734685		1119.39	0.14488587		1709.4	0.07390708		2299.4	0.12866088		2889.39	-0.00723904		3479.38	-0.00920743		4069.38	0.00208004
529.6	0.37343005		1119.59	0.14556979		1709.6	0.07329266		2299.6	0.12823657		2889.59	-0.00768876		3479.58	-0.0099182		4069.58	0.00241894
529.8	0.37374649		1119.79	0.14598183		1709.8	0.07328549		2299.8	0.12734789		2889.79	-0.00721606		3479.78	-0.00967907		4069.78	0.00324742
530	0.37322371		1119.99	0.14533532		1710	0.07287386		2300	0.12763703		2889.99	-0.00648462		3479.98	-0.01049162		4069.98	0.00307951
530.2	0.37203183		1120.19	0.14572041		1710.2	0.07429514		2300.2	0.1277067		2890.19	-0.00597627		3480.18	-0.01135287		4070.18	0.00332893
530.4	0.3719295		1120.39	0.14634492		1710.4	0.07397924		2300.4	0.12700971		2890.39	-0.00660888		3480.38	-0.01068919		4070.38	0.00366307
530.6	0.3715073		1120.59	0.14645004		1710.6	0.07411959		2300.6	0.1272424		2890.59	-0.0058296		3480.58	-0.01072868		4070.58	0.00368701
530.8	0.37126107		1120.79	0.14770881		1710.8	0.07405851		2300.8	0.12770619		2890.79	-0.00643269		3480.78	-0.01091461		4070.78	0.00278798
531	0.3716686		1120.99	0.1476553		1711	0.07445038		2301	0.12764529		2890.99	-0.00686644		3480.98	-0.01126347		4070.98	0.00223295
531.2	0.37230175		1121.19	0.14830474		1711.2	0.07413438		2301.2	0.12728665		2891.19	-0.00741576		3481.18	-0.01259343		4071.18	0.00172931
531.4	0.37210681		1121.39	0.14809575		1711.4	0.07373656		2301.4	0.12664691		2891.39	-0.00750206		3481.38	-0.01262939		4071.38	0.00187542
531.6	0.372545		1121.59	0.14812323		1711.6	0.07406581		2301.6	0.12631921		2891.59	-0.0074876		3481.58	-0.01191443		4071.58	0.00198105
531.8	0.37236574		1121.79	0.14785908		1711.8	0.07410284		2301.8	0.12604578		2891.79	-0.00800392		3481.78	-0.01191238		4071.78	0.00149095
532	0.37302675		1121.99	0.14753026		1712	0.07485103		2302	0.12628702		2891.99	-0.00785454		3481.98	-0.0120735		4071.98	0.00079944
532.2	0.37284815		1122.19	0.14707556		1712.2	0.07457758		2302.2	0.12608236		2892.19	-0.00748581		3482.18	-0.01107423		4072.18	0.00107367
532.4	0.37214814		1122.39	0.14660958		1712.4	0.07447279		2302.4	0.12718912		2892.39	-0.007527		3482.38	-0.01026969		4072.38	0.00099752
532.6	0.37175982		1122.59	0.14659894		1712.6	0.0741106		2302.6	0.12759085		2892.59	-0.00732503		3482.58	-0.01001773		4072.58	0.00065921
532.8	0.37200549		1122.79	0.14644308		1712.8	0.07359006		2302.8	0.128055		2892.79	-0.00794764		3482.78	-0.00945308		4072.78	0.0008635
533	0.37088838		1122.99	0.14593616		1713	0.07330364		2303	0.12838206		2892.99	-0.00849864		3482.98	-0.00917523		4072.98	0.00099036
533.2	0.37030832		1123.19	0.14690433		1713.2	0.07175321		2303.2	0.12773762		2893.19	-0.00839841		3483.18	-0.00854528		4073.18	0.00131271
533.4	0.36960345		1123.39	0.14707986		1713.4	0.07041548		2303.4	0.12775909		2893.39	-0.00848708		3483.38	-0.00846255		4073.38	0.00103123
533.6	0.36782844		1123.59	0.14762253		1713.6	0.06991624		2303.6	0.12776263		2893.59	-0.00872481		3483.58	-0.00883727		4073.58	0.00102451
533.8	0.36727294		1123.79	0.14797628		1713.8	0.06973961		2303.8	0.12766305		2893.79	-0.00805845		3483.78	-0.0088052		4073.78	0.00150133
534	0.36681287		1123.99	0.14715949		1714	0.06967786		2304	0.12864974		2893.99	-0.00775594		3483.98	-0.01068822		4073.98	0.00060069
534.2	0.36637244		1124.19	0.14756814		1714.2	0.06987106		2304.2	0.12806152		2894.19	-0.00758623		3484.18	-0.01090916		4074.18	0.00166658
534.4	0.3668914		1124.39	0.14780839		1714.4	0.06941709		2304.4	0.12832013		2894.39	-0.00820068		3484.38	-0.011289		4074.38	0.00114481
534.6	0.36702806		1124.59	0.14808908		1714.6	0.06954387		2304.6	0.12920538		2894.59	-0.00731804		3484.58	-0.0121166		4074.58	0.00176283
534.8	0.36725046		1124.79	0.1476		1714.8	0.06815451		2304.8	0.12941268		2894.79	-0.00712391		3484.78	-0.01312693		4074.78	0.00128283
535	0.36862066		1124.99	0.14643155		1715	0.06848771		2305	0.1295419		2894.99	-0.00632487		3484.98	-0.01472678		4074.98	0.00170115
535.2	0.36910737		1125.19	0.14557457		1715.2	0.06855337		2305.2	0.12841284		2895.19	-0.00612193		3485.18	-0.01459854		4075.18	0.00155297
535.4	0.36885947		1125.39	0.14560919		1715.4	0.06801913		2305.4	0.12861099		2895.39	-0.00568583		3485.38	-0.01459377		4075.38	0.00086242
535.6	0.36999501		1125.59	0.14531151		1715.6	0.06898596		2305.6	0.12826529		2895.59	-0.00537401		3485.58	-0.01342796		4075.58	0.00083082
535.8	0.37007872		1125.79	0.14564877		1715.8	0.07008142		2305.8	0.12867235		2895.79	-0.00505365		3485.78	-0.01351575		4075.78	0.00091515
536	0.37076257		1125.99	0.14543809		1716	0.07060374		2306	0.12918497		2895.99	-0.00415747		3485.98	-0.01409499		4075.98	0.00085148
536.2	0.37072005		1126.19	0.14595494		1716.2	0.07123683		2306.2	0.12898986		2896.19	-0.00402561		3486.18	-0.01279959		4076.18	0.00127766
536.4	0.3702446		1126.39	0.14647023		1716.4	0.07166301		2306.4	0.12907495		2896.39	-0.00391938		3486.38	-0.01180592		4076.38	0.00135712
536.6	0.37000589		1126.59	0.14706106		1716.6	0.0721539		2306.6	0.12809887		2896.59	-0.00475616		3486.58	-0.01147339		4076.58	0.00067899
536.8	0.36944827		1126.79	0.14795869		1716.8	0.07219069		2306.8	0.12673909		2896.79	-0.00550234		3486.78	-0.01093009		4076.78	-0.00014096
537	0.36879477		1126.99	0.14854889		1717	0.07324245		2307	0.12667542		2896.99	-0.00643942		3486.98	-0.00977582		4076.98	0.00004519
537.2	0.36823119		1127.19	0.1494385		1717.2	0.07296702		2307.2	0.12539658		2897.19	-0.00706562		3487.18	-0.00909545		4077.18	0.00023399
537.4	0.36772209		1127.39	0.14938806		1717.4	0.07251699		2307.4	0.12520109		2897.39	-0.00805948		3487.38	-0.00942508		4077.38	0.00040398
537.6	0.36665538		1127.59	0.14968993		1717.6	0.07254302		2307.6	0.12480646		2897.59	-0.0088649		3487.58	-0.00950236		4077.58	0.00015665
537.8	0.3670501		1127.79	0.14948377		1717.8	0.07276255		2307.8	0.12486007		2897.79	-0.00883205		3487.78	-0.00973816		4077.78	0.00069306
538	0.36753358		1127.99	0.14969038		1718	0.07260486		2308	0.1244579		2897.99	-0.00908633		3487.98	-0.01068657		4077.98	0.00108772
538.2	0.36680014		1128.19	0.1499959		1718.2	0.07217625		2308.2	0.12463189		2898.19	-0.00914184		3488.18	-0.01103978		4078.18	0.00200668
538.4	0.36696909		1128.39	0.14962529		1718.4	0.07178276		2308.4	0.12456067		2898.39	-0.00889916		3488.38	-0.01161029		4078.38	0.0014069
538.6	0.36656252		1128.59	0.14921336		1718.6	0.07173079		2308.6	0.12448083		2898.59	-0.00794893		3488.58	-0.01206865		4078.58	0.00143758
538.8	0.36661748		1128.79	0.14872124		1718.8	0.07051912		2308.8	0.12427596		2898.79	-0.00744515		3488.78	-0.01179907		4078.78	0.00081007
539	0.36712964		1128.99	0.1479401		1719	0.07067279		2309	0.12404173		2898.99	-0.00631939		3488.98	-0.01273546		4078.98	0.00050992
539.2	0.36741651		1129.19	0.14724648		1719.2	0.07080034		2309.2	0.12374721		2899.19	-0.0064371		3489.18	-0.01192399		4079.18	-0.00007419
539.4	0.36736422		1129.39	0.14786801		1719.4	0.07062188		2309.4	0.12346467		2899.39	-0.00507773		3489.38	-0.01215467		4079.38	0.00009672
539.6	0.3688228		1129.59	0.14784296		1719.6	0.07204101		2309.6	0.123013		2899.59	-0.00512082		3489.58	-0.01157708		4079.58	0.00140084
539.8	0.3690849		1129.79	0.14747099		1719.8	0.07161848		2309.8	0.122894		2899.79	-0.00567256		3489.78	-0.01229166		4079.78	0.00113835
540	0.36968741		1129.99	0.14738673		1720	0.07155768		2310	0.12257895		2899.99	-0.00512742		3489.98	-0.01334828		4079.98	0.00139622
540.2	0.36993841		1130.19	0.14795366		1720.2	0.07105572		2310.2	0.12216804		2900.19	-0.00571623		3490.18	-0.01252951		4080.18	0.00170284
540.4	0.36993419		1130.39	0.1479583		1720.4	0.07161964		2310.4	0.12168016		2900.39	-0.00579537		3490.38	-0.01252879		4080.38	0.00159585
540.6	0.36991112		1130.59	0.14797766		1720.6	0.0721946		2310.6	0.12070718		2900.59	-0.00710234		3490.58	-0.01250507		4080.58	0.00137933
540.8	0.36917326		1130.79	0.14818889		1720.8	0.07355063		2310.8	0.12100727		2900.79	-0.00747006		3490.78	-0.01150002		4080.78	0.00162901
541	0.36827617		1130.99	0.14793552		1721	0.07456861		2311	0.12173058		2900.99	-0.0080674		3490.98	-0.0104444		4080.98	0.0029778
541.2	0.36665409		1131.19	0.14718023		1721.2	0.07389061		2311.2	0.12194442		2901.19	-0.00788461		3491.18	-0.01002355		4081.18	0.00317809
541.4	0.36683546		1131.39	0.14686027		1721.4	0.07341994		2311.4	0.12201787		2901.39	-0.00751911		3491.38	-0.00945344		4081.38	0.00333934
541.6	0.36621127		1131.59	0.14618285		1721.6	0.07363111		2311.6	0.12264516		2901.59	-0.00742895		3491.58	-0.0093118		4081.58	0.00396025
541.8	0.36557801		1131.79	0.14610071		1721.8	0.07331511		2311.8	0.12360028		2901.79	-0.00743976		3491.78	-0.00945031		4081.78	0.00408157
542	0.36520241		1131.99	0.14637442		1722	0.0732453		2312	0.12401671		2901.99	-0.00673737		3491.98	-0.009948		4081.98	0.00408016
542.2	0.3651721		1132.19	0.14582874		1722.2	0.07194327		2312.2	0.12570924		2902.19	-0.0063438		3492.18	-0.01066461		4082.18	0.00303257
542.4	0.36515934		1132.39	0.14567668		1722.4	0.07141593		2312.4	0.12593018		2902.39	-0.00616962		3492.38	-0.01009826		4082.38	0.00212735
542.6	0.36536268		1132.59	0.14556251		1722.6	0.07052495		2312.6	0.12684489		2902.59	-0.00557331		3492.58	-0.01013869		4082.58	0.00184223
542.8	0.36526267		1132.79	0.14600228		1722.8	0.07021678		2312.8	0.12688225		2902.79	-0.00545529		3492.78	-0.00960005		4082.78	0.0016904
543	0.36525092		1132.99	0.14556974		1723	0.06959032		2313	0.12721055		2902.99	-0.00473767		3492.98	-0.01109304		4082.98	0.00070648
543.2	0.36633154		1133.19	0.14537956		1723.2	0.07030469		2313.2	0.12683975		2903.19	-0.00489187		3493.18	-0.01097928		4083.18	0.00171394
543.4	0.36645209		1133.39	0.14580983		1723.4	0.0707304		2313.4	0.12629459		2903.39	-0.00518783		3493.38	-0.01112178		4083.38	0.00205336
543.6	0.3668047		1133.59	0.14457539		1723.6	0.07029183		2313.6	0.12649504		2903.59	-0.00552873		3493.58	-0.01072544		4083.58	0.00216033
543.8	0.36721811		1133.79	0.14450278		1723.8	0.06919334		2313.8	0.12567455		2903.79	-0.0065192		3493.78	-0.01181206		4083.78	0.00127564
544	0.36730812		1133.99	0.14483638		1724	0.06957703		2314	0.12574602		2903.99	-0.00609846		3493.98	-0.01225093		4083.98	0.00156022
544.2	0.36715805		1134.19	0.14448251		1724.2	0.06946177		2314.2	0.12568429		2904.19	-0.00668556		3494.18	-0.01280102		4084.18	0.00172123
544.4	0.3667838		1134.39	0.14432621		1724.4	0.07006194		2314.4	0.12548953		2904.39	-0.00687754		3494.38	-0.01345263		4084.38	0.00165262
544.6	0.36644787		1134.59	0.14328535		1724.6	0.07063836		2314.6	0.12472196		2904.59	-0.00767153		3494.58	-0.01345034		4084.58	0.00143181
544.8	0.36456282		1134.79	0.14346326		1724.8	0.07117165		2314.8	0.1250509		2904.79	-0.00763091		3494.78	-0.01243266		4084.78	0.00079711
545	0.36326667		1134.99	0.1431965		1725	0.07069094		2315	0.12421627		2904.99	-0.00751744		3494.98	-0.01233224		4084.98	0.00171349
545.2	0.36201963		1135.19	0.14302677		1725.2	0.07041483		2315.2	0.12438328		2905.19	-0.00720732		3495.18	-0.01192633		4085.18	0.00172685
545.4	0.36239147		1135.39	0.1424063		1725.4	0.06996047		2315.4	0.12365876		2905.39	-0.00708459		3495.38	-0.01205803		4085.38	0.00133253
545.6	0.36201375		1135.59	0.14225644		1725.6	0.07033038		2315.6	0.12441555		2905.59	-0.00777443		3495.58	-0.01230878		4085.58	0.00208458
545.8	0.36119296		1135.79	0.14240986		1725.8	0.0702063		2315.8	0.12465473		2905.79	-0.00769203		3495.78	-0.01165187		4085.78	0.00088318
546	0.36166325		1135.99	0.14184251		1726	0.07042103		2316	0.1246432		2905.99	-0.00737606		3495.98	-0.0119145		4085.98	0.00191666
546.2	0.36225178		1136.19	0.14142642		1726.2	0.06943175		2316.2	0.12469012		2906.19	-0.00741222		3496.18	-0.01191552		4086.18	0.00100717
546.4	0.36237893		1136.39	0.1412818		1726.4	0.06946547		2316.4	0.12388355		2906.39	-0.00776065		3496.38	-0.01133475		4086.38	0.00166202
546.6	0.36339893		1136.59	0.14096603		1726.6	0.06954746		2316.6	0.12433793		2906.59	-0.0077228		3496.58	-0.01169131		4086.58	0.00246394
546.8	0.36417884		1136.79	0.14059377		1726.8	0.07007876		2316.8	0.12462415		2906.79	-0.00782813		3496.78	-0.01117866		4086.78	0.00275832
547	0.36443298		1136.99	0.14084161		1727	0.0700002		2317	0.12496927		2906.99	-0.00692221		3496.98	-0.01155116		4086.98	0.00311169
547.2	0.36504571		1137.19	0.1408174		1727.2	0.07062744		2317.2	0.12439138		2907.19	-0.00647216		3497.18	-0.0110459		4087.18	0.00398866
547.4	0.36543764		1137.39	0.14070609		1727.4	0.0708329		2317.4	0.12499657		2907.39	-0.00685742		3497.38	-0.01077777		4087.38	0.00363033
547.6	0.36604891		1137.59	0.13979998		1727.6	0.07067572		2317.6	0.12535963		2907.59	-0.00607256		3497.58	-0.01103141		4087.58	0.0044037
547.8	0.36631664		1137.79	0.14060626		1727.8	0.0710179		2317.8	0.12476957		2907.79	-0.00632768		3497.78	-0.0118399		4087.78	0.00499623
548	0.36576264		1137.99	0.14062203		1728	0.07094384		2318	0.12587961		2907.99	-0.00487766		3497.98	-0.01212542		4087.98	0.00510337
548.2	0.3654359		1138.19	0.14087132		1728.2	0.0706488		2318.2	0.12570614		2908.19	-0.00500016		3498.18	-0.01267332		4088.18	0.00478462
548.4	0.36566466		1138.39	0.14141075		1728.4	0.07086369		2318.4	0.12534349		2908.39	-0.00605316		3498.38	-0.01289764		4088.38	0.00422273
548.6	0.36499247		1138.59	0.14090976		1728.6	0.07148431		2318.6	0.12483803		2908.59	-0.00642324		3498.58	-0.0127964		4088.58	0.00325298
548.8	0.36371988		1138.79	0.14238441		1728.8	0.07112164		2318.8	0.12459602		2908.79	-0.00631302		3498.78	-0.01248906		4088.78	0.00235492
549	0.36362301		1138.99	0.14261387		1729	0.07140651		2319	0.12435367		2908.99	-0.0073718		3498.98	-0.01278971		4088.98	0.002456
549.2	0.36317665		1139.19	0.14239139		1729.2	0.07094168		2319.2	0.12396433		2909.19	-0.00737352		3499.18	-0.011769		4089.18	0.0017031
549.4	0.36360413		1139.39	0.1416705		1729.4	0.07080858		2319.4	0.12424745		2909.39	-0.00774786		3499.38	-0.01189152		4089.38	0.00062801
549.6	0.36344782		1139.59	0.14154378		1729.6	0.07060596		2319.6	0.12322015		2909.59	-0.00797111		3499.58	-0.01103949		4089.58	0.00090495
549.8	0.36294274		1139.79	0.14190858		1729.8	0.07041952		2319.8	0.12298816		2909.79	-0.00773998		3499.78	-0.00961238		4089.78	0.00022404
550	0.36279312		1139.99	0.14237244		1730	0.07021121		2320	0.1218311		2909.99	-0.00772635		3499.98	-0.01031437		4089.98	0.00012706
550.2	0.36281762		1140.19	0.14164656		1730.2	0.06948156		2320.2	0.12184323		2910.19	-0.0077237		3500.18	-0.01061895		4090.18	-0.00097183
550.4	0.36289657		1140.39	0.14128093		1730.4	0.06972725		2320.4	0.12249364		2910.39	-0.00758826		3500.38	-0.0102133		4090.38	-0.00011148
550.6	0.36291193		1140.59	0.14143059		1730.6	0.07020331		2320.6	0.12388704		2910.59	-0.00778093		3500.58	-0.00956151		4090.58	-0.00049773
550.8	0.36254117		1140.79	0.14205143		1730.8	0.06955096		2320.8	0.1242935		2910.79	-0.00694905		3500.78	-0.0096635		4090.78	-0.00109598
551	0.36215616		1140.99	0.14293576		1731	0.06973708		2321	0.12396442		2910.99	-0.00554106		3500.98	-0.01018258		4090.98	-0.001486
551.2	0.36202928		1141.19	0.14287113		1731.2	0.0693946		2321.2	0.12466616		2911.19	-0.00496484		3501.18	-0.00996228		4091.18	-0.00158142
551.4	0.36234399		1141.39	0.1435199		1731.4	0.0689412		2321.4	0.12490758		2911.39	-0.00382104		3501.38	-0.00970926		4091.38	-0.0015926
551.6	0.3614076		1141.59	0.14391183		1731.6	0.06892287		2321.6	0.12506477		2911.59	-0.00345707		3501.58	-0.00987737		4091.58	-0.00098367
551.8	0.36002817		1141.79	0.14381568		1731.8	0.06830751		2321.8	0.1248643		2911.79	-0.00308078		3501.78	-0.009967		4091.78	-0.00095946
552	0.35956737		1141.99	0.14377329		1732	0.06844177		2322	0.12613488		2911.99	-0.00307257		3501.98	-0.00996349		4091.98	-0.00015658
552.2	0.35952303		1142.19	0.14416859		1732.2	0.06898898		2322.2	0.12617727		2912.19	-0.00447423		3502.18	-0.00989716		4092.18	-0.00039771
552.4	0.35989525		1142.39	0.1442938		1732.4	0.06958306		2322.4	0.12623298		2912.39	-0.00594633		3502.38	-0.01086667		4092.38	-0.00095065
552.6	0.35978284		1142.59	0.1442412		1732.6	0.06972826		2322.6	0.12618147		2912.59	-0.00578448		3502.58	-0.01105355		4092.58	-0.00049813
552.8	0.35989397		1142.79	0.14489383		1732.8	0.06917702		2322.8	0.12663441		2912.79	-0.00696325		3502.78	-0.01092748		4092.78	-0.0002224
553	0.36006078		1142.99	0.14485056		1733	0.0695533		2323	0.12705381		2912.99	-0.00821581		3502.98	-0.01131831		4092.98	0.00067844
553.2	0.36053783		1143.19	0.14425436		1733.2	0.06970225		2323.2	0.12665262		2913.19	-0.008479		3503.18	-0.01119142		4093.18	0.00087863
553.4	0.36106913		1143.39	0.14453187		1733.4	0.06977584		2323.4	0.12635459		2913.39	-0.00939269		3503.38	-0.01155347		4093.38	0.00157827
553.6	0.36071965		1143.59	0.14444514		1733.6	0.06958715		2323.6	0.12540381		2913.59	-0.00985231		3503.58	-0.01136697		4093.58	0.00191983
553.8	0.36092412		1143.79	0.14480071		1733.8	0.07035885		2323.8	0.12634754		2913.79	-0.01045521		3503.78	-0.01223136		4093.78	0.00236481
554	0.36182135		1143.99	0.14439242		1734	0.07096596		2324	0.12592514		2913.99	-0.01045525		3503.98	-0.01434494		4093.98	0.00204035
554.2	0.36263872		1144.19	0.14311825		1734.2	0.07104225		2324.2	0.12626331		2914.19	-0.01015955		3504.18	-0.01557516		4094.18	0.00255008
554.4	0.36258152		1144.39	0.14213676		1734.4	0.071823		2324.4	0.1265737		2914.39	-0.00908719		3504.38	-0.01502371		4094.38	0.00292555
554.6	0.36308435		1144.59	0.14192056		1734.6	0.07158803		2324.6	0.12600411		2914.59	-0.00908993		3504.58	-0.01542872		4094.58	0.00227317
554.8	0.36248562		1144.79	0.14192918		1734.8	0.07080347		2324.8	0.12507804		2914.79	-0.00809054		3504.78	-0.01638107		4094.78	0.00170935
555	0.36291076		1144.99	0.14130911		1735	0.07112144		2325	0.12456927		2914.99	-0.0074248		3504.98	-0.01737237		4094.98	0.00116108
555.2	0.36206348		1145.19	0.14061784		1735.2	0.07021911		2325.2	0.1244398		2915.19	-0.00657503		3505.18	-0.01727308		4095.18	0.00104762
555.4	0.36121424		1145.39	0.14032512		1735.4	0.06977838		2325.4	0.12325318		2915.39	-0.00505546		3505.38	-0.01702521		4095.38	0.00009282
555.6	0.35958167		1145.59	0.13966859		1735.6	0.06974668		2325.6	0.12274041		2915.59	-0.00569767		3505.58	-0.01640891		4095.58	-0.00012009
555.8	0.35904578		1145.79	0.13943945		1735.8	0.06904943		2325.8	0.12132972		2915.79	-0.00551659		3505.78	-0.015607		4095.78	-0.00072487
556	0.35839466		1145.99	0.14005402		1736	0.06904568		2326	0.12132881		2915.99	-0.00583429		3505.98	-0.01512586		4095.98	-0.00048585
556.2	0.35784571		1146.19	0.14012129		1736.2	0.06812255		2326.2	0.12094151		2916.19	-0.00584738		3506.18	-0.01464569		4096.18	-0.00172164
556.4	0.35780682		1146.39	0.14037021		1736.4	0.06767999		2326.4	0.12089776		2916.39	-0.00635508		3506.38	-0.01421682		4096.38	-0.00229387
556.6	0.3572214		1146.59	0.14123365		1736.6	0.06758128		2326.6	0.12104297		2916.59	-0.00610827		3506.58	-0.01278932		4096.58	-0.00118649
556.8	0.35730593		1146.79	0.14169116		1736.8	0.06715149		2326.8	0.12177824		2916.79	-0.0069279		3506.78	-0.01214544		4096.78	-0.00107194
557	0.35705811		1146.99	0.14277357		1737	0.06713512		2327	0.12197609		2916.99	-0.00663533		3506.98	-0.01123188		4096.98	-0.00108096
557.2	0.35717889		1147.19	0.14319878		1737.2	0.06680676		2327.2	0.12193395		2917.19	-0.0070566		3507.18	-0.01081859		4097.18	-0.00009609
557.4	0.35695358		1147.39	0.14421657		1737.4	0.06599557		2327.4	0.12210889		2917.39	-0.00729174		3507.38	-0.01015328		4097.38	0.0007676
557.6	0.35692509		1147.59	0.14481422		1737.6	0.06575391		2327.6	0.12335246		2917.59	-0.00794057		3507.58	-0.01026707		4097.58	0.00120748
557.8	0.35784889		1147.79	0.14542054		1737.8	0.06575838		2327.8	0.12396539		2917.79	-0.00847868		3507.78	-0.01010796		4097.78	0.00236971
558	0.35869057		1147.99	0.14533887		1738	0.06559322		2328	0.12437306		2917.99	-0.00775231		3507.98	-0.01012359		4097.98	0.00238062
558.2	0.35910904		1148.19	0.14477997		1738.2	0.06495176		2328.2	0.1243288		2918.19	-0.00711249		3508.18	-0.01019837		4098.18	0.00311917
558.4	0.35911683		1148.39	0.14462465		1738.4	0.06455257		2328.4	0.12419578		2918.39	-0.00646643		3508.38	-0.00917697		4098.38	0.00423063
558.6	0.35980856		1148.59	0.14558771		1738.6	0.06508361		2328.6	0.12402645		2918.59	-0.0068051		3508.58	-0.01028529		4098.58	0.00496399
558.8	0.35946293		1148.79	0.14540143		1738.8	0.06527212		2328.8	0.12401966		2918.79	-0.00669168		3508.78	-0.01128506		4098.78	0.0050602
559	0.35955138		1148.99	0.14458781		1739	0.06589288		2329	0.12383913		2918.99	-0.00608259		3508.98	-0.01245847		4098.98	0.005864
559.2	0.3588696		1149.19	0.14467897		1739.2	0.06592418		2329.2	0.1233636		2919.19	-0.00599502		3509.18	-0.01277597		4099.18	0.00589215
559.4	0.35849883		1149.39	0.14514169		1739.4	0.06668533		2329.4	0.1226718		2919.39	-0.00578994		3509.38	-0.01222427		4099.38	0.0049528
559.6	0.35790911		1149.59	0.14522057		1739.6	0.06728856		2329.6	0.12239182		2919.59	-0.0066771		3509.58	-0.01132892		4099.58	0.00464659
559.8	0.35791796		1149.79	0.1448021		1739.8	0.06774823		2329.8	0.1215648		2919.79	-0.00660359		3509.78	-0.0119611		4099.78	0.00393336
560	0.3571468		1149.99	0.14416372		1740	0.06874821		2330	0.12166258		2919.99	-0.0064555		3509.98	-0.01221915		4099.98	0.00336089
560.2	0.35734932		1150.19	0.14315843		1740.2	0.06929589		2330.2	0.12120363		2920.19	-0.00644679		3510.18	-0.01202939		4100.18	0.00258092
560.4	0.3577557		1150.39	0.14278315		1740.4	0.07046084		2330.4	0.12145055		2920.39	-0.0070919		3510.38	-0.01203731		4100.38	0.00152422
560.6	0.35724831		1150.59	0.14246368		1740.6	0.07044805		2330.6	0.1211491		2920.59	-0.00713175		3510.58	-0.01186752		4100.58	0.00189263
560.8	0.35734605		1150.79	0.14219511		1740.8	0.07029435		2330.8	0.12107043		2920.79	-0.0068503		3510.78	-0.01201002		4100.78	0.00083694
561	0.35672807		1150.99	0.14233185		1741	0.06971763		2331	0.12107446		2920.99	-0.00637894		3510.98	-0.01130855		4100.98	0.00012749
561.2	0.35636189		1151.19	0.14278441		1741.2	0.06966812		2331.2	0.120768		2921.19	-0.00720999		3511.18	-0.01200865		4101.18	0.00016587
561.4	0.35538954		1151.39	0.14310026		1741.4	0.06947747		2331.4	0.12065717		2921.39	-0.00743488		3511.38	-0.01179084		4101.38	-0.00067395
561.6	0.35523264		1151.59	0.14434115		1741.6	0.06916595		2331.6	0.12140486		2921.59	-0.00804578		3511.58	-0.01177295		4101.58	-0.00046252
561.8	0.35535592		1151.79	0.1442939		1741.8	0.06869359		2331.8	0.12143891		2921.79	-0.00801782		3511.78	-0.01238375		4101.78	-0.00043164
562	0.35530783		1151.99	0.14395171		1742	0.06874745		2332	0.12226884		2921.99	-0.00716326		3511.98	-0.01305867		4101.98	-0.0000234
562.2	0.35534466		1152.19	0.14365116		1742.2	0.06808325		2332.2	0.12148354		2922.19	-0.00690572		3512.18	-0.01358318		4102.18	0.00124324
562.4	0.35519211		1152.39	0.14379012		1742.4	0.06815149		2332.4	0.121128		2922.39	-0.00685094		3512.38	-0.01273354		4102.38	0.00215117
562.6	0.35562566		1152.59	0.1444525		1742.6	0.06847559		2332.6	0.12087819		2922.59	-0.00678079		3512.58	-0.01369425		4102.58	0.00257957
562.8	0.35453857		1152.79	0.14430734		1742.8	0.06746534		2332.8	0.11997374		2922.79	-0.00697212		3512.78	-0.01358275		4102.78	0.00317284
563	0.35482581		1152.99	0.14395947		1743	0.06796701		2333	0.11985917		2922.99	-0.00630248		3512.98	-0.01428701		4102.98	0.00336222
563.2	0.35510089		1153.19	0.14397811		1743.2	0.06778714		2333.2	0.11987741		2923.19	-0.00636136		3513.18	-0.01418451		4103.18	0.00260403
563.4	0.35496861		1153.39	0.14321877		1743.4	0.06837873		2333.4	0.11961741		2923.39	-0.00621331		3513.38	-0.0134178		4103.38	0.00167668
563.6	0.3544364		1153.59	0.14220932		1743.6	0.06830532		2333.6	0.12004007		2923.59	-0.00707575		3513.58	-0.01317304		4103.58	0.00100204
563.8	0.35496388		1153.79	0.14075885		1743.8	0.0682466		2333.8	0.12019044		2923.79	-0.00738416		3513.78	-0.01276508		4103.78	0.0006852
564	0.35492436		1153.99	0.14007621		1744	0.06834989		2334	0.12012221		2923.99	-0.00841036		3513.98	-0.01157135		4103.98	0.00034285
564.2	0.35522771		1154.19	0.13943702		1744.2	0.06791945		2334.2	0.12054099		2924.19	-0.00904705		3514.18	-0.01162762		4104.18	-0.00015979
564.4	0.35513714		1154.39	0.13877491		1744.4	0.06805457		2334.4	0.12078194		2924.39	-0.00963173		3514.38	-0.0119063		4104.38	-0.0004017
564.6	0.35540994		1154.59	0.13843146		1744.6	0.06783164		2334.6	0.12043362		2924.59	-0.01001988		3514.58	-0.01225353		4104.58	-0.00030619
564.8	0.35531311		1154.79	0.1385508		1744.8	0.06785833		2334.8	0.12035119		2924.79	-0.00952812		3514.78	-0.01191567		4104.78	-0.00132763
565	0.35500546		1154.99	0.13852357		1745	0.06715759		2335	0.11994917		2924.99	-0.0092695		3514.98	-0.01092004		4104.98	-0.00196407
565.2	0.35470026		1155.19	0.13908721		1745.2	0.06744185		2335.2	0.11999856		2925.19	-0.00949255		3515.18	-0.01138842		4105.18	-0.00085834
565.4	0.3553597		1155.39	0.1390774		1745.4	0.06800151		2335.4	0.12054752		2925.39	-0.0092531		3515.38	-0.01170118		4105.38	-0.00008512
565.6	0.35647124		1155.59	0.13983918		1745.6	0.06760701		2335.6	0.12049666		2925.59	-0.00894453		3515.58	-0.01264707		4105.58	0.00098828
565.8	0.35654468		1155.79	0.13945219		1745.8	0.068092		2335.8	0.120995		2925.79	-0.00862935		3515.78	-0.01242787		4105.78	0.00112544
566	0.35701891		1155.99	0.13907398		1746	0.06834482		2336	0.12125984		2925.99	-0.00787206		3515.98	-0.01177303		4105.98	0.0014414
566.2	0.35746131		1156.19	0.13917628		1746.2	0.06781466		2336.2	0.12059064		2926.19	-0.00777896		3516.18	-0.01254828		4106.18	0.00173156
566.4	0.35768548		1156.39	0.13939703		1746.4	0.06792519		2336.4	0.12017333		2926.39	-0.00673991		3516.38	-0.01176138		4106.38	0.00202322
566.6	0.35804147		1156.59	0.14051719		1746.6	0.06793772		2336.6	0.11988394		2926.59	-0.00538827		3516.58	-0.01196384		4106.58	0.00211648
566.8	0.35729788		1156.79	0.14073319		1746.8	0.0680544		2336.8	0.11950354		2926.79	-0.00492137		3516.78	-0.0121895		4106.78	0.00199804
567	0.35814846		1156.99	0.14069159		1747	0.06833206		2337	0.11972256		2926.99	-0.00275365		3516.98	-0.01329335		4106.98	0.00098693
567.2	0.35820559		1157.19	0.14094096		1747.2	0.06720891		2337.2	0.11902813		2927.19	-0.00248876		3517.18	-0.01333648		4107.18	0.00085266
567.4	0.35734695		1157.39	0.14103973		1747.4	0.06689534		2337.4	0.11863309		2927.39	-0.00265566		3517.38	-0.01340395		4107.38	0.00043293
567.6	0.35696918		1157.59	0.14075903		1747.6	0.0659974		2337.6	0.11850604		2927.59	-0.00405824		3517.58	-0.01252199		4107.58	0.00024676
567.8	0.35682379		1157.79	0.14091639		1747.8	0.06555901		2337.8	0.11887385		2927.79	-0.00420947		3517.78	-0.01131883		4107.78	0.00110686
568	0.35544709		1157.99	0.14106547		1748	0.0650857		2338	0.11878149		2927.99	-0.00507929		3517.98	-0.01137692		4107.98	0.00056334
568.2	0.35481303		1158.19	0.14166108		1748.2	0.06478785		2338.2	0.11898577		2928.19	-0.00533241		3518.18	-0.01193882		4108.18	0.00077507
568.4	0.35378131		1158.39	0.14144633		1748.4	0.06515084		2338.4	0.11882652		2928.39	-0.00593045		3518.38	-0.01331909		4108.38	0.00162226
568.6	0.35296753		1158.59	0.14158908		1748.6	0.06453344		2338.6	0.11925401		2928.59	-0.00655634		3518.58	-0.01357234		4108.58	0.00133331
568.8	0.35206635		1158.79	0.14168247		1748.8	0.06403095		2338.8	0.1194667		2928.79	-0.00588965		3518.78	-0.01357889		4108.78	0.00147826
569	0.35245424		1158.99	0.14099018		1749	0.0636454		2339	0.12021064		2928.99	-0.00609103		3518.98	-0.0134396		4108.98	0.00197074
569.2	0.35334169		1159.19	0.14087554		1749.2	0.0651025		2339.2	0.12091018		2929.19	-0.00645887		3519.18	-0.01430058		4109.18	0.00354519
569.4	0.35421782		1159.39	0.14064473		1749.4	0.06637266		2339.4	0.12093955		2929.39	-0.00621339		3519.38	-0.01500191		4109.38	0.00343031
569.6	0.35373537		1159.59	0.14120015		1749.6	0.06665448		2339.6	0.12114727		2929.59	-0.00609198		3519.58	-0.01441253		4109.58	0.00329087
569.8	0.35288598		1159.79	0.1414724		1749.8	0.06745292		2339.8	0.12208496		2929.79	-0.00518789		3519.78	-0.01355285		4109.78	0.0034093
570	0.3533341		1159.99	0.14137939		1750	0.0674866		2340	0.1224532		2929.99	-0.0052134		3519.98	-0.01461987		4109.98	0.00298857
570.2	0.35381415		1160.19	0.14198442		1750.2	0.06761183		2340.2	0.1234862		2930.19	-0.00443129		3520.18	-0.01528474		4110.18	0.00322523
570.4	0.35432579		1160.39	0.14217406		1750.4	0.06785283		2340.4	0.12345652		2930.39	-0.00359452		3520.38	-0.01425215		4110.38	0.00354995
570.6	0.35450326		1160.59	0.14363368		1750.6	0.06823747		2340.6	0.12361011		2930.59	-0.00295063		3520.58	-0.01472746		4110.58	0.00347057
570.8	0.35398614		1160.79	0.14380724		1750.8	0.06720448		2340.8	0.12332191		2930.79	-0.00252666		3520.78	-0.01568675		4110.78	0.002987
571	0.35442267		1160.99	0.14409402		1751	0.06640053		2341	0.1232067		2930.99	-0.00290592		3520.98	-0.01576927		4110.98	0.00230577
571.2	0.35420385		1161.19	0.14390039		1751.2	0.06531152		2341.2	0.12366731		2931.19	-0.00311308		3521.18	-0.01539483		4111.18	0.00249081
571.4	0.35329788		1161.39	0.14350378		1751.4	0.06457698		2341.4	0.12329858		2931.39	-0.00403623		3521.38	-0.01442213		4111.38	0.00230946
571.6	0.35373199		1161.59	0.14275698		1751.6	0.06378003		2341.6	0.12356077		2931.59	-0.00467805		3521.58	-0.01352727		4111.58	0.00224419
571.8	0.35363301		1161.79	0.14287236		1751.8	0.06367761		2341.8	0.12352836		2931.79	-0.00506789		3521.78	-0.01298973		4111.78	0.00175045
572	0.35434121		1161.99	0.14221266		1752	0.06290238		2342	0.12332823		2931.99	-0.00629188		3521.98	-0.01335306		4111.98	0.00087341
572.2	0.35359881		1162.19	0.14134785		1752.2	0.06368782		2342.2	0.12299197		2932.19	-0.00695106		3522.18	-0.012736		4112.18	0.00092405
572.4	0.35254447		1162.39	0.14092735		1752.4	0.06404884		2342.4	0.12214811		2932.39	-0.00775989		3522.38	-0.01354847		4112.38	0.00057079
572.6	0.35316841		1162.59	0.14094783		1752.6	0.06360635		2342.6	0.12231995		2932.59	-0.00844966		3522.58	-0.01250949		4112.58	0.00004542
572.8	0.35343918		1162.79	0.13971485		1752.8	0.06389368		2342.8	0.12177292		2932.79	-0.00780152		3522.78	-0.01192149		4112.78	0.00036585
573	0.35321242		1162.99	0.13838063		1753	0.06441268		2343	0.12185293		2932.99	-0.0083368		3522.98	-0.0122707		4112.98	0.00047558
573.2	0.35254111		1163.19	0.13804573		1753.2	0.06574384		2343.2	0.12108953		2933.19	-0.00797244		3523.18	-0.01260085		4113.18	0.0009836
573.4	0.35149743		1163.39	0.13843402		1753.4	0.06533162		2343.4	0.11982268		2933.39	-0.00711667		3523.38	-0.01299271		4113.38	0.00151896
573.6	0.35085161		1163.59	0.13856392		1753.6	0.06551333		2343.6	0.12065323		2933.59	-0.00733062		3523.58	-0.01266051		4113.58	0.00179231
573.8	0.35015027		1163.79	0.1389845		1753.8	0.06542811		2343.8	0.12036337		2933.79	-0.00675852		3523.78	-0.01284893		4113.78	0.00201408
574	0.35053431		1163.99	0.13958989		1754	0.0647906		2344	0.12094208		2933.99	-0.00689061		3523.98	-0.013114		4113.98	0.00152165
574.2	0.35057101		1164.19	0.14047272		1754.2	0.06453143		2344.2	0.12069122		2934.19	-0.00569029		3524.18	-0.01280609		4114.18	0.00220519
574.4	0.34976277		1164.39	0.14054776		1754.4	0.06452282		2344.4	0.12027389		2934.39	-0.00600676		3524.38	-0.01225916		4114.38	0.00277717
574.6	0.34914417		1164.59	0.14155505		1754.6	0.064475		2344.6	0.12105284		2934.59	-0.00601288		3524.58	-0.01312077		4114.58	0.00263293
574.8	0.34859958		1164.79	0.14154605		1754.8	0.06350294		2344.8	0.12141817		2934.79	-0.00612744		3524.78	-0.01304417		4114.78	0.00152414
575	0.34899141		1164.99	0.14106251		1755	0.06366769		2345	0.12203853		2934.99	-0.00664888		3524.98	-0.01218512		4114.98	0.00085633
575.2	0.34874638		1165.19	0.14042056		1755.2	0.06369381		2345.2	0.12170003		2935.19	-0.00637677		3525.18	-0.01218078		4115.18	0.00033785
575.4	0.34898912		1165.39	0.14025479		1755.4	0.06366616		2345.4	0.12112007		2935.39	-0.00740686		3525.38	-0.01170144		4115.38	-0.00063345
575.6	0.35016697		1165.59	0.14054848		1755.6	0.06408564		2345.6	0.1220194		2935.59	-0.00776463		3525.58	-0.01123132		4115.58	-0.00108612
575.8	0.35021105		1165.79	0.14067358		1755.8	0.06459666		2345.8	0.12186584		2935.79	-0.00828853		3525.78	-0.01071819		4115.78	-0.00214928
576	0.35134767		1165.99	0.14068351		1756	0.06449867		2346	0.12179402		2935.99	-0.00830133		3525.98	-0.01074628		4115.98	-0.00247863
576.2	0.35010576		1166.19	0.14033544		1756.2	0.06588908		2346.2	0.12118966		2936.19	-0.00879041		3526.18	-0.00978918		4116.18	-0.00318376
576.4	0.35086214		1166.39	0.14055818		1756.4	0.06567562		2346.4	0.12055253		2936.39	-0.00915156		3526.38	-0.01067579		4116.38	-0.00378054
576.6	0.35173169		1166.59	0.14012481		1756.6	0.06578403		2346.6	0.12066791		2936.59	-0.00899201		3526.58	-0.0104383		4116.58	-0.00352785
576.8	0.35150169		1166.79	0.13962404		1756.8	0.06598503		2346.8	0.11992169		2936.79	-0.00892505		3526.78	-0.01088078		4116.78	-0.00361083
577	0.35134133		1166.99	0.13910857		1757	0.06680325		2347	0.11964791		2936.99	-0.00949356		3526.98	-0.0118611		4116.98	-0.00368261
577.2	0.35136332		1167.19	0.1391216		1757.2	0.06638564		2347.2	0.1189665		2937.19	-0.00947134		3527.18	-0.01228461		4117.18	-0.00350121
577.4	0.35153319		1167.39	0.13995109		1757.4	0.06536184		2347.4	0.11858498		2937.39	-0.00931086		3527.38	-0.01341827		4117.38	-0.00290743
577.6	0.35226347		1167.59	0.13970081		1757.6	0.06565581		2347.6	0.11938186		2937.59	-0.00970487		3527.58	-0.01332666		4117.58	-0.00273639
577.8	0.35238504		1167.79	0.14020866		1757.8	0.06472897		2347.8	0.11963537		2937.79	-0.0090079		3527.78	-0.01349956		4117.78	-0.00222608
578	0.35249812		1167.99	0.13990145		1758	0.06397406		2348	0.11966091		2937.99	-0.00801925		3527.98	-0.01434021		4117.98	-0.00116598
578.2	0.35200586		1168.19	0.13984086		1758.2	0.06440858		2348.2	0.1194043		2938.19	-0.00793854		3528.18	-0.0149549		4118.18	-0.00025327
578.4	0.35172738		1168.39	0.13951109		1758.4	0.06481604		2348.4	0.12003825		2938.39	-0.00803007		3528.38	-0.01562901		4118.38	0.00005786
578.6	0.35140563		1168.59	0.13961035		1758.6	0.06468451		2348.6	0.12012477		2938.59	-0.00710206		3528.58	-0.0164984		4118.58	0.00068741
578.8	0.35129962		1168.79	0.13875539		1758.8	0.0648822		2348.8	0.11989604		2938.79	-0.00691205		3528.78	-0.0159876		4118.78	0.00043551
579	0.35022629		1168.99	0.13849015		1759	0.06548568		2349	0.11976272		2938.99	-0.00669112		3528.98	-0.01618294		4118.98	0.00060033
579.2	0.35005216		1169.19	0.13889385		1759.2	0.06581582		2349.2	0.11914217		2939.19	-0.00687923		3529.18	-0.01623555		4119.18	0.00129473
579.4	0.35010315		1169.39	0.13883396		1759.4	0.0656045		2349.4	0.12029841		2939.39	-0.00652093		3529.38	-0.01583904		4119.38	0.00191108
579.6	0.34985453		1169.59	0.13902644		1759.6	0.06571646		2349.6	0.12134128		2939.59	-0.0061611		3529.58	-0.01495008		4119.58	0.00293065
579.8	0.348915		1169.79	0.13860972		1759.8	0.0656085		2349.8	0.12154607		2939.79	-0.00561815		3529.78	-0.01426937		4119.78	0.00285559
580	0.34864765		1169.99	0.13865348		1760	0.06635403		2350	0.12184694		2939.99	-0.00587034		3529.98	-0.01408083		4119.98	0.00260016
580.2	0.34777253		1170.19	0.13845575		1760.2	0.06683515		2350.2	0.12141944		2940.19	-0.00614549		3530.18	-0.01297082		4120.18	0.00196251
580.4	0.34851935		1170.39	0.1381529		1760.4	0.06703242		2350.4	0.12126684		2940.39	-0.00628007		3530.38	-0.01273234		4120.38	0.00059407
580.6	0.34804711		1170.59	0.13844413		1760.6	0.06743229		2350.6	0.12098497		2940.59	-0.00645555		3530.58	-0.01143234		4120.58	0.0011414
580.8	0.347825		1170.79	0.13841623		1760.8	0.06704732		2350.8	0.12052564		2940.79	-0.00650477		3530.78	-0.01028823		4120.78	0.00019594
581	0.34752595		1170.99	0.13790847		1761	0.06706238		2351	0.11998833		2940.99	-0.00674805		3530.98	-0.01052152		4120.98	-0.00092899
581.2	0.34742719		1171.19	0.13784445		1761.2	0.0655457		2351.2	0.11956136		2941.19	-0.00675514		3531.18	-0.0101292		4121.18	-0.00118747
581.4	0.34777023		1171.39	0.13846133		1761.4	0.0649505		2351.4	0.11943744		2941.39	-0.00648437		3531.38	-0.01002564		4121.38	-0.0011921
581.6	0.3480463		1171.59	0.13853949		1761.6	0.06444849		2351.6	0.12007189		2941.59	-0.00608719		3531.58	-0.009788		4121.58	-0.00135226
581.8	0.34798519		1171.79	0.13852371		1761.8	0.06413961		2351.8	0.12001954		2941.79	-0.00525457		3531.78	-0.0100259		4121.78	-0.00139531
582	0.34751417		1171.99	0.13797348		1762	0.06356315		2352	0.11972244		2941.99	-0.0048223		3531.98	-0.01119934		4121.98	-0.00111438
582.2	0.3473201		1172.19	0.13804015		1762.2	0.06396631		2352.2	0.1197485		2942.19	-0.00539812		3532.18	-0.01152172		4122.18	-0.0014325
582.4	0.34657282		1172.39	0.13747472		1762.4	0.06383029		2352.4	0.1193863		2942.39	-0.00594576		3532.38	-0.01198264		4122.38	-0.00201681
582.6	0.3461509		1172.59	0.13755681		1762.6	0.06321381		2352.6	0.11871638		2942.59	-0.00567308		3532.58	-0.01198293		4122.58	-0.00225136
582.8	0.34593541		1172.79	0.13857726		1762.8	0.06383364		2352.8	0.11882105		2942.79	-0.00570748		3532.78	-0.01217605		4122.78	-0.0025058
583	0.34520478		1172.99	0.13929651		1763	0.0639217		2353	0.11906195		2942.99	-0.00635308		3532.98	-0.01295453		4122.98	-0.00249266
583.2	0.34600871		1173.19	0.13955767		1763.2	0.06407982		2353.2	0.11936309		2943.19	-0.00609122		3533.18	-0.01297709		4123.18	-0.00200177
583.4	0.34565069		1173.39	0.13893788		1763.4	0.06465973		2353.4	0.1200533		2943.39	-0.00608599		3533.38	-0.01267689		4123.38	-0.00186611
583.6	0.34541668		1173.59	0.13924535		1763.6	0.06494107		2353.6	0.12024388		2943.59	-0.00688511		3533.58	-0.0127697		4123.58	-0.00187164
583.8	0.34526441		1173.79	0.13884327		1763.8	0.06535037		2353.8	0.12085152		2943.79	-0.00717724		3533.78	-0.01328488		4123.78	-0.00192825
584	0.34519013		1173.99	0.13907254		1764	0.06627326		2354	0.12135869		2943.99	-0.00781177		3533.98	-0.01392243		4123.98	-0.00257633
584.2	0.34652047		1174.19	0.13919399		1764.2	0.06578466		2354.2	0.12130639		2944.19	-0.00786156		3534.18	-0.01329045		4124.18	-0.00232427
584.4	0.34646904		1174.39	0.13934615		1764.4	0.06629582		2354.4	0.12112425		2944.39	-0.00884558		3534.38	-0.01363515		4124.38	-0.00255546
584.6	0.34643006		1174.59	0.13951236		1764.6	0.0661998		2354.6	0.12113345		2944.59	-0.00907049		3534.58	-0.0134787		4124.58	-0.00231102
584.8	0.34645216		1174.79	0.13907711		1764.8	0.06520407		2354.8	0.12038958		2944.79	-0.00881513		3534.78	-0.01289482		4124.78	-0.00243199
585	0.3465833		1174.99	0.13859474		1765	0.06432397		2355	0.11984357		2944.99	-0.00869566		3534.98	-0.01349661		4124.98	-0.00247165
585.2	0.34635855		1175.19	0.13775852		1765.2	0.06348857		2355.2	0.11945394		2945.19	-0.00839926		3535.18	-0.01254714		4125.18	-0.00156838
585.4	0.34693368		1175.39	0.13850387		1765.4	0.06357448		2355.4	0.11965359		2945.39	-0.00821284		3535.38	-0.01202629		4125.38	-0.00122576
585.6	0.34655205		1175.59	0.13922771		1765.6	0.06362795		2355.6	0.11981865		2945.59	-0.00760028		3535.58	-0.0115632		4125.58	-0.00087722
585.8	0.34717745		1175.79	0.13811466		1765.8	0.06391369		2355.8	0.11896786		2945.79	-0.00836118		3535.78	-0.01020323		4125.78	-0.00086616
586	0.34739121		1175.99	0.13756615		1766	0.06341192		2356	0.11952212		2945.99	-0.00892939		3535.98	-0.0107615		4125.98	-0.00015764
586.2	0.34738959		1176.19	0.13664695		1766.2	0.06376137		2356.2	0.11913396		2946.19	-0.00951039		3536.18	-0.00977729		4126.18	-0.00022267
586.4	0.34704483		1176.39	0.13689387		1766.4	0.06370217		2356.4	0.11877992		2946.39	-0.00941769		3536.38	-0.01003593		4126.38	-0.00010892
586.6	0.34715897		1176.59	0.13747762		1766.6	0.06382482		2356.6	0.11897381		2946.59	-0.00870051		3536.58	-0.01001623		4126.58	-0.00010476
586.8	0.34714635		1176.79	0.13755563		1766.8	0.06494021		2356.8	0.11950168		2946.79	-0.00873845		3536.78	-0.01037639		4126.78	-0.00047072
587	0.34667575		1176.99	0.13772415		1767	0.06505382		2357	0.11924461		2946.99	-0.00853003		3536.98	-0.01020858		4126.98	-0.00170245
587.2	0.34615372		1177.19	0.13737865		1767.2	0.06531612		2357.2	0.11958354		2947.19	-0.00762395		3537.18	-0.01012076		4127.18	-0.001541
587.4	0.34554911		1177.39	0.13745908		1767.4	0.06503936		2357.4	0.12036461		2947.39	-0.00794868		3537.38	-0.01043238		4127.38	-0.00167589
587.6	0.34520293		1177.59	0.13677038		1767.6	0.06492587		2357.6	0.12068637		2947.59	-0.00803016		3537.58	-0.01142846		4127.58	-0.00189711
587.8	0.3445847		1177.79	0.13636001		1767.8	0.0660655		2357.8	0.12192616		2947.79	-0.00768497		3537.78	-0.01125668		4127.78	-0.00234651
588	0.34455823		1177.99	0.13669016		1768	0.06647027		2358	0.12158866		2947.99	-0.00830019		3537.98	-0.01166191		4127.98	-0.00279785
588.2	0.34557632		1178.19	0.13662113		1768.2	0.06683162		2358.2	0.12161238		2948.19	-0.00745906		3538.18	-0.0120907		4128.18	-0.00297411
588.4	0.3452607		1178.39	0.13617017		1768.4	0.06731618		2358.4	0.12161822		2948.39	-0.00767288		3538.38	-0.01329984		4128.38	-0.00394236
588.6	0.34614147		1178.59	0.13552336		1768.6	0.06637247		2358.6	0.12129766		2948.59	-0.00715188		3538.58	-0.01426539		4128.58	-0.00367387
588.8	0.34564315		1178.79	0.13504065		1768.8	0.06508722		2358.8	0.12050976		2948.79	-0.00630319		3538.78	-0.01422093		4128.78	-0.00307822
589	0.34651816		1178.99	0.13493757		1769	0.0645346		2359	0.11966468		2948.99	-0.0057093		3538.98	-0.01436829		4128.98	-0.00278098
589.2	0.34691886		1179.19	0.13466053		1769.2	0.0644876		2359.2	0.11940223		2949.19	-0.00504135		3539.18	-0.0144487		4129.18	-0.00279728
589.4	0.34791539		1179.39	0.13595687		1769.4	0.06455738		2359.4	0.11909421		2949.39	-0.00525628		3539.38	-0.01384277		4129.38	-0.00268095
589.6	0.34777953		1179.59	0.13622195		1769.6	0.06390705		2359.6	0.119109		2949.59	-0.00520833		3539.58	-0.01382712		4129.58	-0.00180731
589.8	0.3483896		1179.79	0.13456269		1769.8	0.06292161		2359.8	0.11821561		2949.79	-0.00646522		3539.78	-0.0142176		4129.78	-0.00190222
590	0.3486737		1179.99	0.13495965		1770	0.06246069		2360	0.11820798		2949.99	-0.00612838		3539.98	-0.01501637		4129.98	-0.00084627
590.2	0.34888506		1180.19	0.13506142		1770.2	0.0621136		2360.2	0.11773561		2950.19	-0.00697278		3540.18	-0.01459913		4130.18	-0.0009344
590.4	0.34916812		1180.39	0.13606778		1770.4	0.06185598		2360.4	0.11779907		2950.39	-0.00684331		3540.38	-0.01545328		4130.38	-0.00128722
590.6	0.34901792		1180.59	0.13581308		1770.6	0.06138572		2360.6	0.11760534		2950.59	-0.00736622		3540.58	-0.01506878		4130.58	-0.00210181
590.8	0.34835517		1180.79	0.13588988		1770.8	0.06139768		2360.8	0.11790036		2950.79	-0.00710927		3540.78	-0.01514289		4130.78	-0.0028497
591	0.34735698		1180.99	0.13705301		1771	0.06060301		2361	0.11762303		2950.99	-0.00664251		3540.98	-0.01513636		4130.98	-0.00366328
591.2	0.34602643		1181.19	0.13652502		1771.2	0.05990198		2361.2	0.11836865		2951.19	-0.0077045		3541.18	-0.01507197		4131.18	-0.00244797
591.4	0.34476027		1181.39	0.13599917		1771.4	0.05971948		2361.4	0.11850964		2951.39	-0.00788985		3541.38	-0.01468389		4131.38	-0.00216296
591.6	0.34323364		1181.59	0.13499164		1771.6	0.06064325		2361.6	0.11769519		2951.59	-0.00788282		3541.58	-0.01374377		4131.58	-0.00201765
591.8	0.34254066		1181.79	0.134922		1771.8	0.06152401		2361.8	0.11757942		2951.79	-0.00890256		3541.78	-0.01290743		4131.78	-0.00184181
592	0.34263809		1181.99	0.13451865		1772	0.06149896		2362	0.11711926		2951.99	-0.00832998		3541.98	-0.01282289		4131.98	-0.0017494
592.2	0.34310913		1182.19	0.13452222		1772.2	0.06159362		2362.2	0.11742603		2952.19	-0.00818524		3542.18	-0.01316843		4132.18	-0.00175919
592.4	0.34278574		1182.39	0.13476692		1772.4	0.06043255		2362.4	0.11774367		2952.39	-0.00803827		3542.38	-0.01380164		4132.38	-0.00203289
592.6	0.34335525		1182.59	0.13481273		1772.6	0.05998082		2362.6	0.11694584		2952.59	-0.00829646		3542.58	-0.01371274		4132.58	-0.00113956
592.8	0.34325329		1182.79	0.13553195		1772.8	0.06079595		2362.8	0.11702763		2952.79	-0.00743449		3542.78	-0.01327252		4132.78	-0.00091209
593	0.34377075		1182.99	0.1357748		1773	0.06094511		2363	0.11685712		2952.99	-0.00680936		3542.98	-0.01330555		4132.98	-0.00068482
593.2	0.34311591		1183.19	0.13653595		1773.2	0.06116634		2363.2	0.11680696		2953.19	-0.00626882		3543.18	-0.01309685		4133.18	-0.00179277
593.4	0.34327477		1183.39	0.13718076		1773.4	0.06074537		2363.4	0.11739684		2953.39	-0.00698835		3543.38	-0.0131391		4133.38	-0.00130469
593.6	0.34295379		1183.59	0.13600206		1773.6	0.05999778		2363.6	0.11760558		2953.59	-0.00751186		3543.58	-0.01377962		4133.58	-0.00074582
593.8	0.34388143		1183.79	0.13628379		1773.8	0.06011885		2363.8	0.1168394		2953.79	-0.00812369		3543.78	-0.01414355		4133.78	-0.00115651
594	0.34448439		1183.99	0.13748691		1774	0.06046898		2364	0.11792202		2953.99	-0.00882197		3543.98	-0.01336295		4133.98	-0.00067968
594.2	0.34558925		1184.19	0.13740163		1774.2	0.06082991		2364.2	0.11850839		2954.19	-0.00916592		3544.18	-0.01430809		4134.18	-0.00142868
594.4	0.34572764		1184.39	0.13726069		1774.4	0.06055342		2364.4	0.11889466		2954.39	-0.00799146		3544.38	-0.0153968		4134.38	-0.00182942
594.6	0.34599896		1184.59	0.13688897		1774.6	0.06079699		2364.6	0.11897575		2954.59	-0.00763496		3544.58	-0.01516541		4134.58	-0.00206542
594.8	0.34602581		1184.79	0.13725583		1774.8	0.06065057		2364.8	0.1183956		2954.79	-0.00754131		3544.78	-0.01569848		4134.78	-0.00227174
595	0.34570336		1184.99	0.13711382		1775	0.060317		2365	0.117709		2954.99	-0.00844058		3544.98	-0.01563871		4134.98	-0.00269503
595.2	0.34479556		1185.19	0.13589584		1775.2	0.06080822		2365.2	0.1177509		2955.19	-0.00852819		3545.18	-0.01508027		4135.18	-0.00129594
595.4	0.34484916		1185.39	0.13510934		1775.4	0.06056155		2365.4	0.11725367		2955.39	-0.00883876		3545.38	-0.01417983		4135.38	-0.00140237
595.6	0.34419661		1185.59	0.13511584		1775.6	0.06075386		2365.6	0.11626908		2955.59	-0.00904372		3545.58	-0.01397743		4135.58	-0.00134411
595.8	0.34423668		1185.79	0.13418622		1775.8	0.0611671		2365.8	0.11605834		2955.79	-0.00946009		3545.78	-0.01424588		4135.78	0.00007236
596	0.34356435		1185.99	0.13439099		1776	0.06102471		2366	0.11487073		2955.99	-0.00915831		3545.98	-0.01427248		4135.98	0.00019572
596.2	0.34333704		1186.19	0.13473563		1776.2	0.06037349		2366.2	0.11448531		2956.19	-0.00938009		3546.18	-0.0151334		4136.18	0.00006985
596.4	0.34303404		1186.39	0.13446417		1776.4	0.06020309		2366.4	0.11457257		2956.39	-0.00835199		3546.38	-0.01487796		4136.38	-0.00004076
596.6	0.34352769		1186.59	0.13413794		1776.6	0.06169413		2366.6	0.11416756		2956.59	-0.00821813		3546.58	-0.01434007		4136.58	-0.0003346
596.8	0.34259269		1186.79	0.1348151		1776.8	0.06272261		2366.8	0.11416905		2956.79	-0.00764193		3546.78	-0.01431719		4136.78	0.00022882
597	0.34166797		1186.99	0.13511283		1777	0.06194646		2367	0.11494499		2956.99	-0.00858756		3546.98	-0.01384914		4136.98	0.00022222
597.2	0.34115024		1187.19	0.13601765		1777.2	0.06187549		2367.2	0.11534434		2957.19	-0.00943741		3547.18	-0.01325616		4137.18	0.00059221
597.4	0.34157387		1187.39	0.13587849		1777.4	0.0610962		2367.4	0.11685754		2957.39	-0.00920425		3547.38	-0.01364235		4137.38	0.00182823
597.6	0.3409305		1187.59	0.13609148		1777.6	0.06146609		2367.6	0.11720897		2957.59	-0.00928613		3547.58	-0.01407765		4137.58	0.00167795
597.8	0.34074921		1187.79	0.13748801		1777.8	0.0619092		2367.8	0.11829775		2957.79	-0.00883739		3547.78	-0.01417836		4137.78	0.00199252
598	0.34063736		1187.99	0.13823992		1778	0.06239099		2368	0.11943515		2957.99	-0.00854042		3547.98	-0.01347274		4137.98	0.00196994
598.2	0.34076338		1188.19	0.13834612		1778.2	0.06206919		2368.2	0.11957883		2958.19	-0.0077891		3548.18	-0.0143827		4138.18	0.0012443
598.4	0.34004814		1188.39	0.13790883		1778.4	0.06224298		2368.4	0.11983783		2958.39	-0.00706645		3548.38	-0.0144738		4138.38	0.00095792
598.6	0.34009504		1188.59	0.13848015		1778.6	0.06211012		2368.6	0.11938785		2958.59	-0.00670588		3548.58	-0.014128		4138.58	0.00029439
598.8	0.34013707		1188.79	0.13888352		1778.8	0.06144851		2368.8	0.11861582		2958.79	-0.00729733		3548.78	-0.01438013		4138.78	-0.00021724
599	0.33989508		1188.99	0.13923621		1779	0.06154574		2369	0.11925433		2958.99	-0.00719906		3548.98	-0.01458697		4138.98	-0.00035305
599.2	0.34059386		1189.19	0.13898194		1779.2	0.06179799		2369.2	0.11893185		2959.19	-0.00650929		3549.18	-0.01464162		4139.18	-0.00040894
599.4	0.34157155		1189.39	0.13837988		1779.4	0.06165668		2369.4	0.11847849		2959.39	-0.00684254		3549.38	-0.0143369		4139.38	-0.00046862
599.6	0.34086971		1189.59	0.1381282		1779.6	0.06194076		2369.6	0.11759453		2959.59	-0.0070894		3549.58	-0.01535927		4139.58	0.00057636
599.8	0.34079297		1189.79	0.13769093		1779.8	0.06156039		2369.8	0.11620104		2959.79	-0.00728689		3549.78	-0.01527884		4139.78	0.00136804
600	0.34035565		1189.99	0.13786641		1780	0.06107704		2370	0.11525231		2959.99	-0.00674462		3549.98	-0.01519212		4139.98	0.00099668
600.2	0.34125091		1190.19	0.13727685		1780.2	0.06094381		2370.2	0.11566696		2960.19	-0.00629479		3550.18	-0.01613681		4140.18	0.00101715
600.4	0.34142004		1190.39	0.13625678		1780.4	0.0621601		2370.4	0.11552265		2960.39	-0.0060787		3550.38	-0.01624648		4140.38	0.00099058
600.6	0.34172065		1190.59	0.13708104		1780.6	0.06230389		2370.6	0.11538514		2960.59	-0.00569382		3550.58	-0.01655346		4140.58	0.00122073
600.8	0.34192634		1190.79	0.13734363		1780.8	0.06213776		2370.8	0.11579226		2960.79	-0.00623794		3550.78	-0.01724685		4140.78	0.0031309
601	0.34259494		1190.99	0.13691838		1781	0.06143652		2371	0.11626063		2960.99	-0.00672851		3550.98	-0.0170296		4140.98	0.00348764
601.2	0.34360229		1191.19	0.13669299		1781.2	0.06099339		2371.2	0.1168044		2961.19	-0.0061802		3551.18	-0.01705045		4141.18	0.0042988
601.4	0.34334908		1191.39	0.13656892		1781.4	0.06014755		2371.4	0.11760509		2961.39	-0.00533727		3551.38	-0.01752		4141.38	0.00396566
601.6	0.34312543		1191.59	0.13631195		1781.6	0.06119107		2371.6	0.11789636		2961.59	-0.00605066		3551.58	-0.01831035		4141.58	0.00310407
601.8	0.34366781		1191.79	0.1365905		1781.8	0.0612976		2371.8	0.11743877		2961.79	-0.00641561		3551.78	-0.01784681		4141.78	0.00376279
602	0.34483905		1191.99	0.13638209		1782	0.06204113		2372	0.11667582		2961.99	-0.00717691		3551.98	-0.01706335		4141.98	0.00314844
602.2	0.34532049		1192.19	0.13610272		1782.2	0.06091511		2372.2	0.11653893		2962.19	-0.00841904		3552.18	-0.01756394		4142.18	0.00209452
602.4	0.34500351		1192.39	0.13566607		1782.4	0.06148802		2372.4	0.11617164		2962.39	-0.0084208		3552.38	-0.01817083		4142.38	0.00105884
602.6	0.34435548		1192.59	0.13699475		1782.6	0.06105034		2372.6	0.11574558		2962.59	-0.00807979		3552.58	-0.01799583		4142.58	-0.0000554
602.8	0.34440626		1192.79	0.1374312		1782.8	0.06177571		2372.8	0.11551129		2962.79	-0.00951007		3552.78	-0.01759293		4142.78	-0.00044608
603	0.34424052		1192.99	0.13757364		1783	0.06188923		2373	0.11501921		2962.99	-0.00925267		3552.98	-0.01678616		4142.98	-0.00079433
603.2	0.34446327		1193.19	0.13731087		1783.2	0.06178295		2373.2	0.11437624		2963.19	-0.00979992		3553.18	-0.01538528		4143.18	-0.00177412
603.4	0.34425407		1193.39	0.13743345		1783.4	0.06195366		2373.4	0.11417703		2963.39	-0.01134045		3553.38	-0.01436335		4143.38	-0.00135272
603.6	0.34264109		1193.59	0.13800638		1783.6	0.06215226		2373.6	0.11419629		2963.59	-0.01049829		3553.58	-0.01401386		4143.58	-0.00151766
603.8	0.34134437		1193.79	0.13776324		1783.8	0.06273547		2373.8	0.11419241		2963.79	-0.01016758		3553.78	-0.01352683		4143.78	-0.00258313
604	0.34026629		1193.99	0.13786511		1784	0.0631708		2374	0.11530046		2963.99	-0.00943699		3553.98	-0.01367486		4143.98	-0.00279891
604.2	0.33954335		1194.19	0.13714118		1784.2	0.06373884		2374.2	0.11587859		2964.19	-0.00909519		3554.18	-0.01393158		4144.18	-0.00227917
604.4	0.33845388		1194.39	0.13709888		1784.4	0.06442851		2374.4	0.11712834		2964.39	-0.00835392		3554.38	-0.0142837		4144.38	-0.00179198
604.6	0.3383833		1194.59	0.13731196		1784.6	0.06292334		2374.6	0.11753887		2964.59	-0.00789993		3554.58	-0.01357544		4144.58	-0.00140461
604.8	0.33840432		1194.79	0.13544279		1784.8	0.06286256		2374.8	0.1179228		2964.79	-0.0076829		3554.78	-0.01373175		4144.78	-0.00125753
605	0.33865938		1194.99	0.13468074		1785	0.06156552		2375	0.11838967		2964.99	-0.00723465		3554.98	-0.01270589		4144.98	-0.00143369
605.2	0.33889901		1195.19	0.13453017		1785.2	0.06049932		2375.2	0.11942085		2965.19	-0.00763949		3555.18	-0.01298369		4145.18	-0.00092334
605.4	0.33947816		1195.39	0.13441047		1785.4	0.06052774		2375.4	0.11971082		2965.39	-0.00747861		3555.38	-0.01327529		4145.38	-0.00077116
605.6	0.34045333		1195.59	0.13493732		1785.6	0.06094699		2375.6	0.11983899		2965.59	-0.00734594		3555.58	-0.01349037		4145.58	-0.00046824
605.8	0.34244592		1195.79	0.13484505		1785.8	0.06055287		2375.8	0.11907682		2965.79	-0.00712409		3555.78	-0.01292126		4145.78	-0.00026554
606	0.34250805		1195.99	0.13494435		1786	0.06019864		2376	0.11926144		2965.99	-0.00782446		3555.98	-0.01338667		4145.98	-0.00082818
606.2	0.34274179		1196.19	0.1348621		1786.2	0.06011971		2376.2	0.11936528		2966.19	-0.00832048		3556.18	-0.01381879		4146.18	-0.0017968
606.4	0.34175727		1196.39	0.13482143		1786.4	0.06144528		2376.4	0.1195949		2966.39	-0.00796181		3556.38	-0.01466108		4146.38	-0.00259606
606.6	0.34154475		1196.59	0.13400299		1786.6	0.06115808		2376.6	0.11967746		2966.59	-0.00782852		3556.58	-0.01440887		4146.58	-0.00275865
606.8	0.34228823		1196.79	0.13359163		1786.8	0.06164937		2376.8	0.11903545		2966.79	-0.00962901		3556.78	-0.01449969		4146.78	-0.0020821
607	0.34276624		1196.99	0.13288681		1787	0.0609092		2377	0.11825514		2966.99	-0.00930651		3556.98	-0.01441941		4146.98	-0.00175028
607.2	0.3432495		1197.19	0.13364491		1787.2	0.06116772		2377.2	0.11805576		2967.19	-0.0098715		3557.18	-0.01534359		4147.18	-0.00135912
607.4	0.34321851		1197.39	0.13358091		1787.4	0.06156408		2377.4	0.11823347		2967.39	-0.00987821		3557.38	-0.0159565		4147.38	-0.00024562
607.6	0.34220977		1197.59	0.1339186		1787.6	0.06284001		2377.6	0.11878216		2967.59	-0.00777573		3557.58	-0.01587117		4147.58	-0.0001808
607.8	0.34155019		1197.79	0.13341092		1787.8	0.06250466		2377.8	0.11843848		2967.79	-0.00807849		3557.78	-0.01620712		4147.78	-0.00034919
608	0.3416007		1197.99	0.13340466		1788	0.0619548		2378	0.1192323		2967.99	-0.00787859		3557.98	-0.01627231		4147.98	0.00054922
608.2	0.34154813		1198.19	0.1331434		1788.2	0.06193483		2378.2	0.11820008		2968.19	-0.00771776		3558.18	-0.01603873		4148.18	0.00099863
608.4	0.34192496		1198.39	0.13384581		1788.4	0.06147963		2378.4	0.11864097		2968.39	-0.00792346		3558.38	-0.01609173		4148.38	0.000733
608.6	0.3426529		1198.59	0.13323083		1788.6	0.06042754		2378.6	0.11753844		2968.59	-0.00779001		3558.58	-0.01547832		4148.58	0.00089428
608.8	0.34235526		1198.79	0.13346569		1788.8	0.05950005		2378.8	0.11773094		2968.79	-0.00700384		3558.78	-0.01631331		4148.78	0.00195969
609	0.34268758		1198.99	0.13446167		1789	0.05852221		2379	0.11762072		2968.99	-0.00673972		3558.98	-0.01567128		4148.98	0.00204334
609.2	0.34300715		1199.19	0.1346096		1789.2	0.05770589		2379.2	0.11669449		2969.19	-0.00661188		3559.18	-0.01586913		4149.18	0.00261427
609.4	0.34321965		1199.39	0.13470951		1789.4	0.05803687		2379.4	0.11696078		2969.39	-0.00577233		3559.38	-0.01523651		4149.38	0.00266275
609.6	0.34192399		1199.59	0.13490069		1789.6	0.05866369		2379.6	0.11630341		2969.59	-0.00543419		3559.58	-0.01620741		4149.58	0.00217593
609.8	0.34213208		1199.79	0.13480965		1789.8	0.05969719		2379.8	0.11595002		2969.79	-0.00543875		3559.78	-0.01639598		4149.78	0.002046
610	0.34057618		1199.99	0.13523507		1790	0.06003125		2380	0.11548263		2969.99	-0.00610981		3559.98	-0.01697891		4149.98	0.00150523
610.2	0.33959534		1200.19	0.13419539		1790.2	0.06065737		2380.2	0.11574255		2970.19	-0.00658552		3560.18	-0.01651976		4150.18	0.00037887
610.4	0.33780506		1200.39	0.13401297		1790.4	0.06185603		2380.4	0.11652908		2970.39	-0.00691315		3560.38	-0.01637445		4150.38	0.00006512
610.6	0.33765873		1200.59	0.133278		1790.6	0.06197578		2380.6	0.11642293		2970.59	-0.00717979		3560.58	-0.01636563		4150.58	-0.00065287
610.8	0.33770706		1200.79	0.13324377		1790.8	0.06310721		2380.8	0.11563915		2970.79	-0.00827002		3560.78	-0.01668475		4150.78	-0.00070045
611	0.33725183		1200.99	0.13256748		1791	0.06268149		2381	0.11567047		2970.99	-0.00915257		3560.98	-0.01696298		4150.98	-0.00128825
611.2	0.33665674		1201.19	0.13282395		1791.2	0.06306981		2381.2	0.11578996		2971.19	-0.00894592		3561.18	-0.01768572		4151.18	-0.00178913
611.4	0.33614749		1201.39	0.13278244		1791.4	0.06338005		2381.4	0.11610251		2971.39	-0.00885935		3561.38	-0.01788978		4151.38	-0.00201064
611.6	0.33542324		1201.59	0.13327614		1791.6	0.06412937		2381.6	0.11649013		2971.59	-0.00835599		3561.58	-0.01754058		4151.58	-0.00284228
611.8	0.33582694		1201.79	0.13304445		1791.8	0.0635822		2381.8	0.1167997		2971.79	-0.00758855		3561.78	-0.01783797		4151.78	-0.00318455
612	0.33642923		1201.99	0.13419546		1792	0.0639683		2382	0.11727025		2971.99	-0.0078828		3561.98	-0.0177929		4151.98	-0.00348564
612.2	0.33723235		1202.19	0.13453482		1792.2	0.06364648		2382.2	0.11661625		2972.19	-0.00777512		3562.18	-0.01742309		4152.18	-0.00359889
612.4	0.33821151		1202.39	0.13492883		1792.4	0.06252505		2382.4	0.11722967		2972.39	-0.00783728		3562.38	-0.01669292		4152.38	-0.00229707
612.6	0.338741		1202.59	0.13473376		1792.6	0.061607		2382.6	0.11690886		2972.59	-0.00762736		3562.58	-0.01666676		4152.58	-0.00163265
612.8	0.33906102		1202.79	0.13557021		1792.8	0.06072101		2382.8	0.11743033		2972.79	-0.00752015		3562.78	-0.01652625		4152.78	-0.00068698
613	0.33954885		1202.99	0.13471445		1793	0.06080111		2383	0.11687488		2972.99	-0.00720821		3562.98	-0.01660922		4152.98	-0.00146598
613.2	0.3400802		1203.19	0.13426026		1793.2	0.06025937		2383.2	0.11648939		2973.19	-0.0074221		3563.18	-0.01639505		4153.18	-0.00113238
613.4	0.33977654		1203.39	0.13419711		1793.4	0.06081664		2383.4	0.11669687		2973.39	-0.00846891		3563.38	-0.01679485		4153.38	-0.00156638
613.6	0.33927255		1203.59	0.13415328		1793.6	0.06064338		2383.6	0.11712613		2973.59	-0.00775758		3563.58	-0.01731148		4153.58	-0.00101773
613.8	0.33947033		1203.79	0.13498379		1793.8	0.06034761		2383.8	0.11762328		2973.79	-0.00750601		3563.78	-0.01634332		4153.78	-0.00029647
614	0.33863765		1203.99	0.13461191		1794	0.05892178		2384	0.11718988		2973.99	-0.00756653		3563.98	-0.0160232		4153.98	-0.00020621
614.2	0.3373374		1204.19	0.13415688		1794.2	0.0588806		2384.2	0.11766713		2974.19	-0.00788284		3564.18	-0.01513365		4154.18	-0.00010081
614.4	0.33682389		1204.39	0.13440186		1794.4	0.05987666		2384.4	0.11780188		2974.39	-0.00735916		3564.38	-0.01451911		4154.38	-0.00035361
614.6	0.33728557		1204.59	0.13419116		1794.6	0.05954933		2384.6	0.11710067		2974.59	-0.0072535		3564.58	-0.01490949		4154.58	-0.00114326
614.8	0.33683283		1204.79	0.13295568		1794.8	0.05976088		2384.8	0.11654386		2974.79	-0.00754982		3564.78	-0.01475274		4154.78	-0.00135476
615	0.33626149		1204.99	0.1324801		1795	0.0590701		2385	0.11750082		2974.99	-0.00776688		3564.98	-0.01601071		4154.98	-0.00176181
615.2	0.33567158		1205.19	0.13195955		1795.2	0.05975544		2385.2	0.11824656		2975.19	-0.00709678		3565.18	-0.01699031		4155.18	-0.00140138
615.4	0.33586411		1205.39	0.13197102		1795.4	0.06005359		2385.4	0.11767939		2975.39	-0.00707978		3565.38	-0.01742732		4155.38	-0.00098187
615.6	0.33622705		1205.59	0.13301524		1795.6	0.0599449		2385.6	0.1181014		2975.59	-0.00671996		3565.58	-0.01746897		4155.58	-0.00099493
615.8	0.33652881		1205.79	0.13267528		1795.8	0.06019912		2385.8	0.11776595		2975.79	-0.0070149		3565.78	-0.01732566		4155.78	-0.00034902
616	0.33696448		1205.99	0.13297258		1796	0.06007925		2386	0.11818725		2975.99	-0.00728951		3565.98	-0.01703479		4155.98	-0.00052884
616.2	0.33760023		1206.19	0.13290272		1796.2	0.05962173		2386.2	0.1183224		2976.19	-0.00723222		3566.18	-0.01609802		4156.18	0.00017976
616.4	0.33712096		1206.39	0.13289832		1796.4	0.05977299		2386.4	0.11806965		2976.39	-0.00776774		3566.38	-0.01522749		4156.38	0.00030749
616.6	0.33685347		1206.59	0.13254615		1796.6	0.06007713		2386.6	0.1183496		2976.59	-0.00794798		3566.58	-0.01599488		4156.58	-0.00053021
616.8	0.33691079		1206.79	0.13305301		1796.8	0.05956909		2386.8	0.11884393		2976.79	-0.00825932		3566.78	-0.01609453		4156.78	-0.00053226
617	0.33734333		1206.99	0.13290626		1797	0.05948933		2387	0.11838193		2976.99	-0.00889583		3566.98	-0.01666333		4156.98	-0.00141709
617.2	0.33779471		1207.19	0.13362666		1797.2	0.05968169		2387.2	0.11858562		2977.19	-0.009403		3567.18	-0.01592672		4157.18	-0.00231283
617.4	0.33800264		1207.39	0.13354964		1797.4	0.05954398		2387.4	0.11885077		2977.39	-0.01030539		3567.38	-0.01638902		4157.38	-0.00242206
617.6	0.33822551		1207.59	0.13289459		1797.6	0.05954416		2387.6	0.11913442		2977.59	-0.00941767		3567.58	-0.01577039		4157.58	-0.00263598
617.8	0.33840031		1207.79	0.13235374		1797.8	0.05971903		2387.8	0.11790344		2977.79	-0.00916944		3567.78	-0.01545834		4157.78	-0.00248142
618	0.33811764		1207.99	0.13217923		1798	0.05964606		2388	0.11741631		2977.99	-0.00895713		3567.98	-0.0164476		4157.98	-0.00249602
618.2	0.33875772		1208.19	0.13278089		1798.2	0.06085146		2388.2	0.11737161		2978.19	-0.00868659		3568.18	-0.01530214		4158.18	-0.0027212
618.4	0.33904668		1208.39	0.1330703		1798.4	0.06115596		2388.4	0.11725409		2978.39	-0.00803375		3568.38	-0.01519164		4158.38	-0.00309209
618.6	0.33887062		1208.59	0.13255543		1798.6	0.06117206		2388.6	0.11672888		2978.59	-0.00740067		3568.58	-0.01541764		4158.58	-0.00251365
618.8	0.33891637		1208.79	0.13106698		1798.8	0.06128366		2388.8	0.1159272		2978.79	-0.00744732		3568.78	-0.01570044		4158.78	-0.00233666
619	0.33929476		1208.99	0.13077039		1799	0.06162074		2389	0.11621364		2978.99	-0.00728545		3568.98	-0.01649942		4158.98	-0.00208342
619.2	0.33961739		1209.19	0.12974996		1799.2	0.06197757		2389.2	0.11497562		2979.19	-0.0080467		3569.18	-0.01579723		4159.18	-0.00154882
619.4	0.33942152		1209.39	0.12966805		1799.4	0.06168477		2389.4	0.11387976		2979.39	-0.00804313		3569.38	-0.01565378		4159.38	-0.00147431
619.6	0.33910361		1209.59	0.12979185		1799.6	0.06169621		2389.6	0.11444709		2979.59	-0.00817062		3569.58	-0.01583461		4159.58	-0.00124425
619.8	0.33933336		1209.79	0.129209		1799.8	0.06149597		2389.8	0.11442649		2979.79	-0.00849384		3569.78	-0.01523525		4159.78	-0.00058383
620	0.33929665		1209.99	0.12959428		1800	0.06161084		2390	0.1145951		2979.99	-0.00745958		3569.98	-0.01452778		4159.98	-0.00085059
620.2	0.33823977		1210.19	0.12976093		1800.2	0.06189373		2390.2	0.11440736		2980.19	-0.00814451		3570.18	-0.01459819		4160.18	-0.0003949
620.4	0.33659214		1210.39	0.12984059		1800.4	0.061739		2390.4	0.11425009		2980.39	-0.00901554		3570.38	-0.01500872		4160.38	-0.000534
620.6	0.3364634		1210.59	0.13056116		1800.6	0.061022		2390.6	0.11501297		2980.59	-0.00932554		3570.58	-0.01544782		4160.58	-0.00097755
620.8	0.33615864		1210.79	0.13170191		1800.8	0.05992401		2390.8	0.11531755		2980.79	-0.00952215		3570.78	-0.01489705		4160.78	-0.00056379
621	0.33618133		1210.99	0.13237389		1801	0.06081608		2391	0.11532173		2980.99	-0.01027358		3570.98	-0.01513478		4160.98	-0.00110331
621.2	0.33576054		1211.19	0.13239018		1801.2	0.06141173		2391.2	0.11572638		2981.19	-0.01035468		3571.18	-0.01548002		4161.18	-0.00078126
621.4	0.33550649		1211.39	0.13214308		1801.4	0.06176434		2391.4	0.11618852		2981.39	-0.01109164		3571.38	-0.01555006		4161.38	-0.00083614
621.6	0.33501067		1211.59	0.13183418		1801.6	0.06103553		2391.6	0.11694214		2981.59	-0.01083038		3571.58	-0.01621943		4161.58	-0.00048731
621.8	0.33502191		1211.79	0.13228339		1801.8	0.06083605		2391.8	0.11722415		2981.79	-0.01077254		3571.78	-0.01661242		4161.78	0.00007183
622	0.33429451		1211.99	0.13325253		1802	0.06075343		2392	0.11844181		2981.99	-0.01131505		3571.98	-0.01678348		4161.98	-0.00046908
622.2	0.33425685		1212.19	0.13362135		1802.2	0.06039646		2392.2	0.11901465		2982.19	-0.01095935		3572.18	-0.01636567		4162.18	-0.00049045
622.4	0.3335947		1212.39	0.13392624		1802.4	0.05969712		2392.4	0.11861003		2982.39	-0.01125577		3572.38	-0.01719299		4162.38	0.00047008
622.6	0.33376616		1212.59	0.13366224		1802.6	0.05983745		2392.6	0.11841351		2982.59	-0.01104928		3572.58	-0.01729601		4162.58	0.00089382
622.8	0.33439994		1212.79	0.13408775		1802.8	0.05953289		2392.8	0.11785958		2982.79	-0.01134306		3572.78	-0.01677531		4162.78	0.00073924
623	0.33512278		1212.99	0.13425989		1803	0.05987455		2393	0.11846135		2982.99	-0.01102997		3572.98	-0.01670068		4162.98	0.00071088
623.2	0.3350418		1213.19	0.13358473		1803.2	0.05977446		2393.2	0.11797622		2983.19	-0.01166353		3573.18	-0.01720196		4163.18	0.00051534
623.4	0.33516944		1213.39	0.13384869		1803.4	0.05947758		2393.4	0.11821457		2983.39	-0.01169645		3573.38	-0.01753195		4163.38	0.00069337
623.6	0.33547205		1213.59	0.13354085		1803.6	0.05935275		2393.6	0.11834298		2983.59	-0.01138998		3573.58	-0.01740205		4163.58	0.00136929
623.8	0.33625806		1213.79	0.13440126		1803.8	0.0591356		2393.8	0.11808531		2983.79	-0.01173973		3573.78	-0.01691156		4163.78	0.00117452
624	0.33573731		1213.99	0.1343644		1804	0.05965816		2394	0.11784079		2983.99	-0.01147568		3573.98	-0.01686108		4163.98	0.00044517
624.2	0.33584763		1214.19	0.13413388		1804.2	0.05919842		2394.2	0.11777948		2984.19	-0.0115618		3574.18	-0.01721987		4164.18	0.00105927
624.4	0.33565437		1214.39	0.13478973		1804.4	0.05820533		2394.4	0.11760838		2984.39	-0.01103042		3574.38	-0.01744642		4164.38	0.00088447
624.6	0.33548083		1214.59	0.13491925		1804.6	0.05778888		2394.6	0.11788852		2984.59	-0.01093984		3574.58	-0.017533		4164.58	0.0015042
624.8	0.33477587		1214.79	0.13486774		1804.8	0.05744438		2394.8	0.11703143		2984.79	-0.01084686		3574.78	-0.01748617		4164.78	0.00181041
625	0.33452251		1214.99	0.13496133		1805	0.05906275		2395	0.11679065		2984.99	-0.01109635		3574.98	-0.01775981		4164.98	0.00105957
625.2	0.33355239		1215.19	0.13457052		1805.2	0.05869979		2395.2	0.11574018		2985.19	-0.01032567		3575.18	-0.01768608		4165.18	0.00242748
625.4	0.33380109		1215.39	0.13395726		1805.4	0.05826489		2395.4	0.11617684		2985.39	-0.01051178		3575.38	-0.01837		4165.38	0.00183705
625.6	0.33296923		1215.59	0.13343116		1805.6	0.05750879		2395.6	0.11688882		2985.59	-0.01140873		3575.58	-0.0187721		4165.58	0.00199929
625.8	0.33237646		1215.79	0.13334521		1805.8	0.05800091		2395.8	0.11624454		2985.79	-0.01131304		3575.78	-0.01885754		4165.78	0.00132621
626	0.33119722		1215.99	0.13286446		1806	0.05845284		2396	0.11638535		2985.99	-0.01049892		3575.98	-0.01891853		4165.98	0.00050152
626.2	0.33095847		1216.19	0.13326826		1806.2	0.05841092		2396.2	0.11569814		2986.19	-0.00997903		3576.18	-0.01897441		4166.18	0.00098478
626.4	0.33156122		1216.39	0.13367132		1806.4	0.05907979		2396.4	0.1150522		2986.39	-0.01064369		3576.38	-0.01905425		4166.38	0.00132604
626.6	0.33144021		1216.59	0.13346219		1806.6	0.05970586		2396.6	0.11512894		2986.59	-0.01022558		3576.58	-0.01854075		4166.58	0.00010458
626.8	0.33119519		1216.79	0.13399069		1806.8	0.05911076		2396.8	0.11540793		2986.79	-0.01013941		3576.78	-0.0170727		4166.78	0.00021392
627	0.33172416		1216.99	0.13314454		1807	0.05976365		2397	0.11547491		2986.99	-0.00991785		3576.98	-0.01657472		4166.98	0.00047545
627.2	0.3311763		1217.19	0.13322974		1807.2	0.05923741		2397.2	0.11559872		2987.19	-0.00973377		3577.18	-0.01589565		4167.18	0.00062257
627.4	0.33106824		1217.39	0.13391849		1807.4	0.05900754		2397.4	0.11549483		2987.39	-0.00966285		3577.38	-0.01476914		4167.38	0.00108129
627.6	0.33043328		1217.59	0.13370683		1807.6	0.05915995		2397.6	0.11601786		2987.59	-0.00867074		3577.58	-0.01425238		4167.58	0.00084101
627.8	0.33083699		1217.79	0.13405537		1807.8	0.05889271		2397.8	0.11521427		2987.79	-0.00839896		3577.78	-0.01388638		4167.78	-0.0000171
628	0.33125852		1217.99	0.13369326		1808	0.05770664		2398	0.11489963		2987.99	-0.0077041		3577.98	-0.01317632		4167.98	0.00025054
628.2	0.33195626		1218.19	0.1339371		1808.2	0.05692053		2398.2	0.11458629		2988.19	-0.00743617		3578.18	-0.01274647		4168.18	0.00107077
628.4	0.33184536		1218.39	0.13452039		1808.4	0.05634248		2398.4	0.11474952		2988.39	-0.00689695		3578.38	-0.01316557		4168.38	0.00100336
628.6	0.33200126		1218.59	0.13452911		1808.6	0.05610631		2398.6	0.11509235		2988.59	-0.00741321		3578.58	-0.01366397		4168.58	0.00070067
628.8	0.3322171		1218.79	0.13478561		1808.8	0.05643973		2398.8	0.11413468		2988.79	-0.00747409		3578.78	-0.01385691		4168.78	0.00009817
629	0.33297053		1218.99	0.13483439		1809	0.05702082		2399	0.11525259		2988.99	-0.00754424		3578.98	-0.01404317		4168.98	-0.00036164
629.2	0.33227086		1219.19	0.13433889		1809.2	0.05570761		2399.2	0.11548401		2989.19	-0.00749685		3579.18	-0.01509115		4169.18	0.00025685
629.4	0.33296761		1219.39	0.13283284		1809.4	0.05587346		2399.4	0.11592216		2989.39	-0.0083843		3579.38	-0.01570337		4169.38	-0.00107372
629.6	0.33221018		1219.59	0.13246596		1809.6	0.05582348		2399.6	0.11558007		2989.59	-0.00899322		3579.58	-0.01575235		4169.58	-0.00153862
629.8	0.33262132		1219.79	0.131723		1809.8	0.05612179		2399.8	0.11491475		2989.79	-0.00836393		3579.78	-0.01716915		4169.78	-0.00165497
630	0.33257643		1219.99	0.13156349		1810	0.05650957		2400	0.11465666		2989.99	-0.00839306		3579.98	-0.01767245		4169.98	-0.00126283
630.2	0.33329341		1220.19	0.13166682		1810.2	0.05630139		2400.2	0.11405969		2990.19	-0.0092107		3580.18	-0.0179838		4170.18	-0.00082717
630.4	0.33365287		1220.39	0.13108264		1810.4	0.05671969		2400.4	0.11477072		2990.39	-0.00995344		3580.38	-0.01892038		4170.38	-0.00178803
630.6	0.33366457		1220.59	0.13124979		1810.6	0.05732676		2400.6	0.11512815		2990.59	-0.01027741		3580.58	-0.01866953		4170.58	-0.00188823
630.8	0.33372988		1220.79	0.1302066		1810.8	0.0576603		2400.8	0.11535365		2990.79	-0.01028269		3580.78	-0.0182093		4170.78	-0.00071544
631	0.33388868		1220.99	0.12927548		1811	0.05851322		2401	0.11556137		2990.99	-0.01026807		3580.98	-0.01812409		4170.98	-0.00042442
631.2	0.33322701		1221.19	0.12919759		1811.2	0.05741963		2401.2	0.11579957		2991.19	-0.01042449		3581.18	-0.017708		4171.18	0.00038053
631.4	0.33279451		1221.39	0.12884931		1811.4	0.05743796		2401.4	0.11529237		2991.39	-0.01063483		3581.38	-0.01822286		4171.38	0.00038001
631.6	0.33260411		1221.59	0.12843573		1811.6	0.05751205		2401.6	0.1156618		2991.59	-0.01006492		3581.58	-0.01855053		4171.58	-0.00093969
631.8	0.33264504		1221.79	0.12822436		1811.8	0.05713354		2401.8	0.11412957		2991.79	-0.00966553		3581.78	-0.01810177		4171.78	-0.00018957
632	0.33321334		1221.99	0.12858227		1812	0.0565064		2402	0.11418784		2991.99	-0.00945888		3581.98	-0.01684251		4171.98	0.00036496
632.2	0.3329475		1222.19	0.12936014		1812.2	0.05679302		2402.2	0.11359536		2992.19	-0.00936909		3582.18	-0.01729978		4172.18	-0.00086487
632.4	0.33301288		1222.39	0.12950546		1812.4	0.05623841		2402.4	0.11425455		2992.39	-0.00875918		3582.38	-0.01813231		4172.38	-0.00157098
632.6	0.33264328		1222.59	0.13019147		1812.6	0.05585551		2402.6	0.11463717		2992.59	-0.00891736		3582.58	-0.01827665		4172.58	-0.0027705
632.8	0.33169889		1222.79	0.13057247		1812.8	0.05636103		2402.8	0.11404719		2992.79	-0.00884564		3582.78	-0.01831412		4172.78	-0.00268211
633	0.33150843		1222.99	0.13091381		1813	0.05583391		2403	0.11520586		2992.99	-0.00770537		3582.98	-0.01867046		4172.98	-0.0034334
633.2	0.33076476		1223.19	0.13164306		1813.2	0.05565029		2403.2	0.11519567		2993.19	-0.00800497		3583.18	-0.01940535		4173.18	-0.00389831
633.4	0.3314967		1223.39	0.13113772		1813.4	0.05651737		2403.4	0.1143834		2993.39	-0.00815142		3583.38	-0.01894502		4173.38	-0.00470293
633.6	0.33156282		1223.59	0.13198964		1813.6	0.05739049		2403.6	0.11455064		2993.59	-0.00825627		3583.58	-0.01892324		4173.58	-0.00452018
633.8	0.33145282		1223.79	0.132654		1813.8	0.0575868		2403.8	0.11486183		2993.79	-0.00944501		3583.78	-0.0189281		4173.78	-0.00514824
634	0.33149291		1223.99	0.13411814		1814	0.05812523		2404	0.11544558		2993.99	-0.01017778		3583.98	-0.01946447		4173.98	-0.00459541
634.2	0.33223165		1224.19	0.13402292		1814.2	0.05893001		2404.2	0.11527812		2994.19	-0.01082084		3584.18	-0.01987206		4174.18	-0.00508246
634.4	0.33231557		1224.39	0.13434676		1814.4	0.05922468		2404.4	0.11518452		2994.39	-0.01171083		3584.38	-0.02006051		4174.38	-0.00496254
634.6	0.33266361		1224.59	0.13483462		1814.6	0.05994296		2404.6	0.11501923		2994.59	-0.01251867		3584.58	-0.01971614		4174.58	-0.00432403
634.8	0.33186694		1224.79	0.13369032		1814.8	0.05903186		2404.8	0.11499513		2994.79	-0.01299922		3584.78	-0.02012304		4174.78	-0.00354987
635	0.33148746		1224.99	0.13426149		1815	0.05844356		2405	0.11433752		2994.99	-0.01318508		3584.98	-0.01999834		4174.98	-0.00278027
635.2	0.33147474		1225.19	0.13484131		1815.2	0.05740177		2405.2	0.11398045		2995.19	-0.01347345		3585.18	-0.01972636		4175.18	-0.00191187
635.4	0.33184611		1225.39	0.1346012		1815.4	0.05750286		2405.4	0.11438112		2995.39	-0.01314514		3585.38	-0.02074142		4175.38	-0.00188608
635.6	0.3317669		1225.59	0.13471313		1815.6	0.05695331		2405.6	0.11420236		2995.59	-0.013155		3585.58	-0.020323		4175.58	-0.00246965
635.8	0.33121519		1225.79	0.13377104		1815.8	0.05637953		2405.8	0.1129173		2995.79	-0.01282109		3585.78	-0.01909617		4175.78	-0.00141902
636	0.33133137		1225.99	0.13303369		1816	0.05546224		2406	0.11328369		2995.99	-0.01252949		3585.98	-0.01868692		4175.98	-0.00200717
636.2	0.33148997		1226.19	0.13262707		1816.2	0.05457303		2406.2	0.11274086		2996.19	-0.01171238		3586.18	-0.01905163		4176.18	-0.00202318
636.4	0.33114122		1226.39	0.13198764		1816.4	0.05385525		2406.4	0.1137023		2996.39	-0.01030683		3586.38	-0.01882587		4176.38	-0.00140659
636.6	0.33076343		1226.59	0.13246065		1816.6	0.05370346		2406.6	0.11391007		2996.59	-0.00931457		3586.58	-0.01769644		4176.58	-0.00125372
636.8	0.33028196		1226.79	0.13205551		1816.8	0.05409942		2406.8	0.11408785		2996.79	-0.0081078		3586.78	-0.01827147		4176.78	-0.00026407
637	0.33149496		1226.99	0.13269872		1817	0.0537786		2407	0.11531607		2996.99	-0.00697764		3586.98	-0.01790702		4176.98	-0.00003838
637.2	0.33164685		1227.19	0.13279128		1817.2	0.05447532		2407.2	0.11574211		2997.19	-0.00728256		3587.18	-0.01698924		4177.18	-0.0004959
637.4	0.33222563		1227.39	0.13204833		1817.4	0.05580335		2407.4	0.11632219		2997.39	-0.00712557		3587.38	-0.01678109		4177.38	-0.00082635
637.6	0.33183168		1227.59	0.13238218		1817.6	0.05611051		2407.6	0.11709535		2997.59	-0.00774607		3587.58	-0.01639053		4177.58	-0.00041787
637.8	0.33200045		1227.79	0.13209229		1817.8	0.05606273		2407.8	0.11667549		2997.79	-0.00906503		3587.78	-0.01653915		4177.78	-0.00029621
638	0.3316671		1227.99	0.13204347		1818	0.05725065		2408	0.11672346		2997.99	-0.00919765		3587.98	-0.01687909		4177.98	0.0006724
638.2	0.33153625		1228.19	0.13133579		1818.2	0.05666427		2408.2	0.11601974		2998.19	-0.00989563		3588.18	-0.01618735		4178.18	0.0013015
638.4	0.33129127		1228.39	0.13141143		1818.4	0.0566272		2408.4	0.11554662		2998.39	-0.01072857		3588.38	-0.01606916		4178.38	0.00094499
638.6	0.33072911		1228.59	0.13240883		1818.6	0.05689055		2408.6	0.11584771		2998.59	-0.0112541		3588.58	-0.01525364		4178.58	0.00083353
638.8	0.33022229		1228.79	0.13327313		1818.8	0.05579034		2408.8	0.11552969		2998.79	-0.01161285		3588.78	-0.01574652		4178.78	0.00116934
639	0.33011059		1228.99	0.13374572		1819	0.05628037		2409	0.11472315		2998.99	-0.01183938		3588.98	-0.01607061		4178.98	0.00125586
639.2	0.329903		1229.19	0.13406761		1819.2	0.05618345		2409.2	0.11469717		2999.19	-0.01277068		3589.18	-0.01601995		4179.18	0.00120243
639.4	0.32938549		1229.39	0.13394595		1819.4	0.05564217		2409.4	0.11457754		2999.39	-0.01358149		3589.38	-0.01595539		4179.38	0.00109538
639.6	0.32918321		1229.59	0.13417233		1819.6	0.05451964		2409.6	0.11409692		2999.59	-0.01421		3589.58	-0.01535307		4179.58	-0.00006572
639.8	0.32904931		1229.79	0.13349406		1819.8	0.05478131		2409.8	0.11402492		2999.79	-0.01385075		3589.78	-0.01612052		4179.78	-0.00065572
640	0.328893		1229.99	0.13283733		1820	0.05425139		2410	0.11470303		2999.99	-0.01344548		3589.98	-0.01766132		4179.98	-0.00097292
640.2	0.32918264		1230.19	0.13282585		1820.2	0.0536946		2410.2	0.11395747		3000.19	-0.01324948		3590.18	-0.01837873		4180.18	-0.00026678
640.4	0.32792907		1230.39	0.13315993		1820.4	0.05396531		2410.4	0.11437333		3000.39	-0.01285926		3590.38	-0.0187594		4180.38	-0.00083195
640.6	0.32779549		1230.59	0.13330401		1820.6	0.0540567		2410.6	0.11489854		3000.59	-0.01304919		3590.58	-0.0194116		4180.58	-0.00080471
640.8	0.32707285		1230.79	0.13332897		1820.8	0.05473247		2410.8	0.11434457		3000.79	-0.01288802		3590.78	-0.02034084		4180.78	-0.00092116
641	0.32747582		1230.99	0.13352374		1821	0.05583511		2411	0.11394733		3000.99	-0.01206148		3590.98	-0.02000458		4180.98	-0.00182866
641.2	0.32688073		1231.19	0.13309401		1821.2	0.05711529		2411.2	0.11357765		3001.19	-0.01189342		3591.18	-0.02039416		4181.18	-0.00305503
641.4	0.3267483		1231.39	0.13268331		1821.4	0.05745503		2411.4	0.11363014		3001.39	-0.01319465		3591.38	-0.02035709		4181.38	-0.0033769
641.6	0.32607798		1231.59	0.1322281		1821.6	0.05710568		2411.6	0.11276157		3001.59	-0.01348624		3591.58	-0.0198945		4181.58	-0.00309301
641.8	0.32599806		1231.79	0.1314444		1821.8	0.05750934		2411.8	0.11202412		3001.79	-0.01375341		3591.78	-0.01895055		4181.78	-0.00358034
642	0.32505094		1231.99	0.13125759		1822	0.05831407		2412	0.11159293		3001.99	-0.01271937		3591.98	-0.01896143		4181.98	-0.00372843
642.2	0.3254807		1232.19	0.13097538		1822.2	0.05843695		2412.2	0.11172075		3002.19	-0.01266166		3592.18	-0.01829613		4182.18	-0.00368562
642.4	0.32552641		1232.39	0.13109584		1822.4	0.05959747		2412.4	0.11221477		3002.39	-0.01204388		3592.38	-0.01795307		4182.38	-0.0041418
642.6	0.32567252		1232.59	0.132145		1822.6	0.06000216		2412.6	0.11215314		3002.59	-0.01116254		3592.58	-0.01676842		4182.58	-0.00366857
642.8	0.32559647		1232.79	0.13165853		1822.8	0.05947013		2412.8	0.11226842		3002.79	-0.01081914		3592.78	-0.01700216		4182.78	-0.00389016
643	0.32589561		1232.99	0.13094007		1823	0.06081883		2413	0.1121606		3002.99	-0.01056479		3592.98	-0.01604884		4182.98	-0.00276901
643.2	0.32558951		1233.19	0.13144944		1823.2	0.06010722		2413.2	0.1121968		3003.19	-0.00988762		3593.18	-0.0158971		4183.18	-0.00188197
643.4	0.3266659		1233.39	0.13185495		1823.4	0.05996719		2413.4	0.11252871		3003.39	-0.00993994		3593.38	-0.01518513		4183.38	-0.00194757
643.6	0.32731086		1233.59	0.13162512		1823.6	0.05920635		2413.6	0.11298213		3003.59	-0.0088904		3593.58	-0.01569447		4183.58	-0.00269274
643.8	0.3271452		1233.79	0.13079977		1823.8	0.05863003		2413.8	0.11336977		3003.79	-0.00860821		3593.78	-0.01749905		4183.78	-0.00181176
644	0.32722376		1233.99	0.13032577		1824	0.05809119		2414	0.11383928		3003.99	-0.00829978		3593.98	-0.01798829		4183.98	-0.00089563
644.2	0.32675497		1234.19	0.12984851		1824.2	0.05773179		2414.2	0.11303919		3004.19	-0.00865982		3594.18	-0.01827741		4184.18	-0.00066885
644.4	0.32627061		1234.39	0.13002158		1824.4	0.05746585		2414.4	0.11320617		3004.39	-0.00786334		3594.38	-0.01924067		4184.38	-0.00019514
644.6	0.32630654		1234.59	0.12995576		1824.6	0.05689763		2414.6	0.11383274		3004.59	-0.00859591		3594.58	-0.01980573		4184.58	0.00011533
644.8	0.32637601		1234.79	0.12990701		1824.8	0.05688672		2414.8	0.11358767		3004.79	-0.00882585		3594.78	-0.01973919		4184.78	-0.00004639
645	0.32682648		1234.99	0.12965307		1825	0.05631442		2415	0.11383344		3004.99	-0.00873852		3594.98	-0.01977777		4184.98	-0.00060905
645.2	0.32702943		1235.19	0.12905341		1825.2	0.05590009		2415.2	0.11440234		3005.19	-0.009417		3595.18	-0.01952985		4185.18	-0.00141607
645.4	0.32634679		1235.39	0.12929974		1825.4	0.05441241		2415.4	0.11426523		3005.39	-0.01014079		3595.38	-0.01946856		4185.38	-0.00156835
645.6	0.32635456		1235.59	0.12965906		1825.6	0.05416029		2415.6	0.11381626		3005.59	-0.00981163		3595.58	-0.01982305		4185.58	-0.00203461
645.8	0.32640525		1235.79	0.13046097		1825.8	0.05383789		2415.8	0.11354577		3005.79	-0.0094715		3595.78	-0.01967155		4185.78	-0.00221944
646	0.32603028		1235.99	0.13063247		1826	0.05393239		2416	0.1130711		3005.99	-0.00874082		3595.98	-0.0205359		4185.98	-0.00124201
646.2	0.32590911		1236.19	0.13095711		1826.2	0.05397165		2416.2	0.11339824		3006.19	-0.00857132		3596.18	-0.01987218		4186.18	-0.00138933
646.4	0.32592653		1236.39	0.13064553		1826.4	0.05428595		2416.4	0.11344718		3006.39	-0.00835166		3596.38	-0.01925069		4186.38	-0.00144018
646.6	0.32603344		1236.59	0.13043941		1826.6	0.05489158		2416.6	0.11237504		3006.59	-0.00769148		3596.58	-0.0196697		4186.58	-0.00177058
646.8	0.3260919		1236.79	0.13003567		1826.8	0.05455214		2416.8	0.11272293		3006.79	-0.00768522		3596.78	-0.01977205		4186.78	-0.00159711
647	0.32664264		1236.99	0.12948979		1827	0.05505109		2417	0.11332857		3006.99	-0.0082951		3596.98	-0.01921242		4186.98	-0.00041306
647.2	0.32678621		1237.19	0.12939229		1827.2	0.05388998		2417.2	0.11262622		3007.19	-0.00848841		3597.18	-0.01971329		4187.18	-0.00072588
647.4	0.32766941		1237.39	0.12958787		1827.4	0.05437867		2417.4	0.11256897		3007.39	-0.00870412		3597.38	-0.01901411		4187.38	-0.00085754
647.6	0.32785444		1237.59	0.12901679		1827.6	0.05408222		2417.6	0.11285046		3007.59	-0.0082873		3597.58	-0.01891916		4187.58	-0.0016267
647.8	0.32880548		1237.79	0.12876444		1827.8	0.05487667		2417.8	0.11273317		3007.79	-0.00873612		3597.78	-0.01888331		4187.78	-0.00139844
648	0.3293125		1237.99	0.12876571		1828	0.05587305		2418	0.11230261		3007.99	-0.00885923		3597.98	-0.01833246		4187.98	-0.00209687
648.2	0.32895674		1238.19	0.12840863		1828.2	0.05606859		2418.2	0.11174063		3008.19	-0.00968181		3598.18	-0.0184829		4188.18	-0.00275148
648.4	0.32931453		1238.39	0.12891634		1828.4	0.05602138		2418.4	0.11180824		3008.39	-0.01014054		3598.38	-0.01871852		4188.38	-0.00259502
648.6	0.32905907		1238.59	0.12905558		1828.6	0.05611614		2418.6	0.11237934		3008.59	-0.01174934		3598.58	-0.01828794		4188.58	-0.00319946
648.8	0.3286347		1238.79	0.12893794		1828.8	0.05614374		2418.8	0.11239263		3008.79	-0.01243052		3598.78	-0.0181947		4188.78	-0.00369225
649	0.32775605		1238.99	0.12929331		1829	0.05582816		2419	0.11233416		3008.99	-0.01290271		3598.98	-0.01819564		4188.98	-0.00417914
649.2	0.3268123		1239.19	0.12946468		1829.2	0.05608425		2419.2	0.11230834		3009.19	-0.01322747		3599.18	-0.01812462		4189.18	-0.00473263
649.4	0.32511272		1239.39	0.13072929		1829.4	0.05531808		2419.4	0.11193919		3009.39	-0.0140079		3599.38	-0.01855018		4189.38	-0.0045936
649.6	0.32417048		1239.59	0.13133037		1829.6	0.05478701		2419.6	0.11163305		3009.59	-0.01456883		3599.58	-0.01833813		4189.58	-0.00441358
649.8	0.3226262		1239.79	0.13187451		1829.8	0.05409218		2419.8	0.11140413		3009.79	-0.01476849		3599.78	-0.01856349		4189.78	-0.00381667
