# Supplementary material for: Functional development of a V3/glycan-specific broadly neutralizing antibody isolated from a case of HIV superinfection
Source: eLife journal article supplement (doi:10.7554/elife.68110), 2021-07-15
Supplement: fig2-data2 [file A5.xls]

Vers 3.43 Data Simulation
Conc1	5E-07	5E-07	5E-07	5E-07	5E-07	5E-07
Start1	290	879.99	1470.01	2060	2650	3240
Stop1	649.8	1239.79	1829.81	2419.8	3009.8	3599.79
Time1	Data1	Sim1	Time2	Data2	Sim2	Time3	Data3	Sim3	Time4	Data4	Sim4	Time5	Data5	Sim5	Time6	Data6	Sim6
290	-0.00214365		879.99	0.00479373		1470.01	-0.00199495		2060	0.01426579		2650	-0.00254303		3240	-0.00162961
290.2	-0.00184796		880.19	0.00456881		1470.21	-0.00256504		2060.2	0.01427658		2650.2	-0.00244056		3240.2	-0.00129464
290.4	-0.00145696		880.39	0.00484327		1470.41	-0.00292098		2060.4	0.01412137		2650.4	-0.00211529		3240.4	-0.00127812
290.6	-0.00093012		880.59	0.00540083		1470.61	-0.00258622		2060.6	0.0148925		2650.6	-0.00223544		3240.6	-0.00102002
290.8	-0.00030297		880.79	0.00531762		1470.81	-0.0017273		2060.8	0.01574811		2650.8	-0.00190423		3240.8	-0.00121678
291	0.00098155		880.99	0.00517244		1471.01	-0.00121733		2061	0.01582342		2651	-0.00199382		3241	-0.0008976
291.2	0.00160077		881.19	0.00555527		1471.21	-0.00048983		2061.2	0.01669974		2651.2	-0.00138362		3241.2	-0.00040741
291.4	0.00251619		881.39	0.00646937		1471.41	-0.00038214		2061.4	0.01705396		2651.4	-0.00083341		3241.4	0.00018361
291.6	0.00414127		881.59	0.00707019		1471.61	0.00074739		2061.6	0.01795445		2651.6	-0.00102395		3241.6	0.00081983
291.8	0.0050953		881.79	0.00790576		1471.81	0.0009733		2061.8	0.01817139		2651.8	-0.00147984		3241.8	0.00072341
292	0.00736625		881.99	0.00846066		1472.01	0.00167225		2062	0.01809885		2652	-0.00117419		3242	0.00035418
292.2	0.00933824		882.19	0.00911489		1472.21	0.00233777		2062.2	0.01752541		2652.2	-0.00200002		3242.2	-0.00032837
292.4	0.01055639		882.39	0.00915774		1472.41	0.00260505		2062.4	0.01639974		2652.4	-0.00214303		3242.4	-0.00035738
292.6	0.0126481		882.59	0.00912676		1472.61	0.00234231		2062.6	0.01542378		2652.6	-0.00264499		3242.6	-0.0005009
292.8	0.01434986		882.79	0.00963197		1472.81	0.00169496		2062.8	0.01523863		2652.8	-0.00264438		3242.8	-0.00054943
293	0.01646599		882.99	0.00972491		1473.01	0.00037427		2063	0.01456452		2653	-0.00209384		3243	0.0001451
293.2	0.01821281		883.19	0.0099592		1473.21	-0.00068966		2063.2	0.01543139		2653.2	-0.00265926		3243.2	0.00032744
293.4	0.02061642		883.39	0.00939574		1473.41	-0.00130476		2063.4	0.01607073		2653.4	-0.00251998		3243.4	0.00063312
293.6	0.02237257		883.59	0.00898926		1473.61	-0.00320105		2063.6	0.01686849		2653.6	-0.00239862		3243.6	0.00185748
293.8	0.02364693		883.79	0.00917938		1473.81	-0.00329077		2063.8	0.01755662		2653.8	-0.00213739		3243.8	0.00059843
294	0.02492695		883.99	0.00933186		1474.01	-0.00313486		2064	0.01772792		2654	-0.00255217		3244	0.00037811
294.2	0.02708788		884.19	0.00927412		1474.21	-0.00381959		2064.2	0.0177358		2654.2	-0.00191824		3244.2	0.00025671
294.4	0.02883663		884.39	0.0092523		1474.41	-0.00358313		2064.4	0.01856167		2654.4	-0.00169801		3244.4	0.00030912
294.6	0.02991492		884.59	0.00972301		1474.61	-0.00354281		2064.6	0.02006158		2654.6	-0.00229156		3244.6	0.00057735
294.8	0.03152539		884.79	0.00919816		1474.81	-0.00312532		2064.8	0.02128764		2654.8	-0.001894		3244.8	0.0002022
295	0.03336457		884.99	0.0092881		1475.01	-0.00331061		2065	0.02186697		2655	-0.00200189		3245	0.00086953
295.2	0.03452727		885.19	0.01007653		1475.21	-0.00382136		2065.2	0.02378194		2655.2	-0.00054436		3245.2	0.00134489
295.4	0.0365157		885.39	0.01112851		1475.41	-0.00380471		2065.4	0.02345461		2655.4	-0.00054683		3245.4	0.00112489
295.6	0.03882392		885.59	0.01157105		1475.61	-0.00345345		2065.6	0.02401896		2655.6	-0.00061581		3245.6	0.00052332
295.8	0.04079801		885.79	0.01233925		1475.81	-0.0034125		2065.8	0.02365755		2655.8	-0.0008915		3245.8	-0.00069962
296	0.0434191		885.99	0.01315586		1476.01	-0.00247254		2066	0.02347297		2656	-0.00138196		3246	-0.00105819
296.2	0.04510137		886.19	0.0131697		1476.21	-0.00166426		2066.2	0.0221975		2656.2	-0.00255794		3246.2	-0.00120487
296.4	0.04697129		886.39	0.01238472		1476.41	-0.00028046		2066.4	0.02256432		2656.4	-0.00211615		3246.4	-0.00093273
296.6	0.04824694		886.59	0.01278462		1476.61	-0.00080945		2066.6	0.02258562		2656.6	-0.00212856		3246.6	-0.00048685
296.8	0.04997992		886.79	0.01342629		1476.81	-0.00006069		2066.8	0.02248889		2656.8	-0.00113245		3246.8	-0.00012676
297	0.05200432		886.99	0.01334263		1477.01	-0.00079441		2067	0.02217371		2657	-0.00069449		3247	0.00005459
297.2	0.05385879		887.19	0.01250773		1477.21	-0.00066193		2067.2	0.02205013		2657.2	-0.00069156		3247.2	0.00030805
297.4	0.0549348		887.39	0.0118223		1477.41	-0.0001812		2067.4	0.02162073		2657.4	-0.00058964		3247.4	0.00055563
297.6	0.05624859		887.59	0.01193939		1477.61	0.00048298		2067.6	0.02098545		2657.6	-0.0000245		3247.6	-0.00006719
297.8	0.05746118		887.79	0.01126657		1477.81	0.00233968		2067.8	0.02063415		2657.8	-0.00064893		3247.8	-0.00105941
298	0.05908875		887.99	0.01220849		1478.01	0.00320261		2068	0.02059631		2658	-0.00116152		3248	-0.00071971
298.2	0.060479		888.19	0.01214251		1478.21	0.00208464		2068.2	0.02065297		2658.2	-0.00104053		3248.2	-0.00156918
298.4	0.06093897		888.39	0.01198879		1478.41	0.00181137		2068.4	0.02110472		2658.4	-0.00176781		3248.4	-0.00175405
298.6	0.06172462		888.59	0.01274355		1478.61	0.00141733		2068.6	0.02136341		2658.6	-0.00214701		3248.6	-0.0014075
298.8	0.06247169		888.79	0.0126859		1478.81	0.0009872		2068.8	0.02228992		2658.8	-0.0025093		3248.8	-0.00205093
299	0.06395012		888.99	0.01240986		1479.01	0.00023433		2069	0.02246762		2659	-0.00289189		3249	-0.00166574
299.2	0.06490522		889.19	0.01239987		1479.21	-0.00118085		2069.2	0.02280681		2659.2	-0.00270974		3249.2	-0.0016896
299.4	0.06649632		889.39	0.0130523		1479.41	-0.00112713		2069.4	0.02283002		2659.4	-0.00299058		3249.4	-0.00215918
299.6	0.06883945		889.59	0.01330492		1479.61	-0.00159204		2069.6	0.02365615		2659.6	-0.00303068		3249.6	-0.00214739
299.8	0.07004901		889.79	0.01442428		1479.81	-0.00141119		2069.8	0.02415843		2659.8	-0.00370731		3249.8	-0.00245904
300	0.07083745		889.99	0.01515466		1480.01	-0.00100896		2070	0.02422068		2660	-0.00392124		3250	-0.00264848
300.2	0.07271373		890.19	0.01494929		1480.21	-0.0004287		2070.2	0.02360312		2660.2	-0.00346836		3250.2	-0.00300775
300.4	0.07371116		890.39	0.01524627		1480.41	-0.00024849		2070.4	0.02488785		2660.4	-0.00257131		3250.4	-0.00313984
300.6	0.07412614		890.59	0.01609351		1480.61	-0.00088037		2070.6	0.02461987		2660.6	-0.0023115		3250.6	-0.00249425
300.8	0.07548121		890.79	0.01593152		1480.81	-0.000677		2070.8	0.02412578		2660.8	-0.00179883		3250.8	-0.00284024
301	0.07736702		890.99	0.01671532		1481.01	-0.00145458		2071	0.02416587		2661	-0.00131109		3251	-0.00280732
301.2	0.07915357		891.19	0.01683695		1481.21	-0.00138433		2071.2	0.02450201		2661.2	-0.00177762		3251.2	-0.00229819
301.4	0.0794266		891.39	0.01706231		1481.41	-0.00165173		2071.4	0.02468301		2661.4	-0.00235655		3251.4	-0.00253658
301.6	0.08136379		891.59	0.01754847		1481.61	-0.00157823		2071.6	0.0245431		2661.6	-0.00234308		3251.6	-0.00210109
301.8	0.0825485		891.79	0.01806388		1481.81	-0.00122956		2071.8	0.02492492		2661.8	-0.00268328		3251.8	-0.00106576
302	0.08436607		891.99	0.01930115		1482.01	-0.0016484		2072	0.02481096		2662	-0.00228862		3252	-0.00154216
302.2	0.08550986		892.19	0.01933568		1482.21	-0.00263377		2072.2	0.02537777		2662.2	-0.00194503		3252.2	-0.00207162
302.4	0.08666029		892.39	0.01958996		1482.41	-0.00276303		2072.4	0.02539684		2662.4	-0.00167666		3252.4	-0.00195012
302.6	0.08892514		892.59	0.0201572		1482.61	-0.00203281		2072.6	0.02554675		2662.6	-0.00195493		3252.6	-0.00074528
302.8	0.08988249		892.79	0.02030743		1482.81	-0.00154896		2072.8	0.0261383		2662.8	-0.00277583		3252.8	-0.00022631
303	0.09207588		892.99	0.01990796		1483.01	-0.00144126		2073	0.02692022		2663	-0.00242153		3253	0.00056529
303.2	0.09325169		893.19	0.0196729		1483.21	-0.00099191		2073.2	0.02718487		2663.2	-0.00180309		3253.2	0.00126966
303.4	0.09465585		893.39	0.0208341		1483.41	0.00079375		2073.4	0.02741423		2663.4	-0.00129312		3253.4	0.00135336
303.6	0.09614541		893.59	0.02138811		1483.61	0.00154632		2073.6	0.02731086		2663.6	-0.00061077		3253.6	0.00192199
303.8	0.09621992		893.79	0.02248974		1483.81	0.00189222		2073.8	0.02659819		2663.8	0.00021045		3253.8	0.00150908
304	0.09714268		893.99	0.02210256		1484.01	0.00345312		2074	0.02638162		2664	0.00109159		3254	0.00128455
304.2	0.09829515		894.19	0.02281533		1484.21	0.00363656		2074.2	0.02610675		2664.2	0.00130976		3254.2	0.00072638
304.4	0.09904156		894.39	0.02225041		1484.41	0.00345375		2074.4	0.02639431		2664.4	0.00158745		3254.4	0.0003884
304.6	0.09962419		894.59	0.02245367		1484.61	0.00367671		2074.6	0.02589055		2664.6	0.00164842		3254.6	0.00048085
304.8	0.09993454		894.79	0.02267863		1484.81	0.00353352		2074.8	0.02521247		2664.8	0.00127168		3254.8	-0.00009836
305	0.1004181		894.99	0.02345867		1485.01	0.00291064		2075	0.02608338		2665	0.00141242		3255	0.000423
305.2	0.10052714		895.19	0.02364758		1485.21	0.00280076		2075.2	0.02673091		2665.2	0.00087137		3255.2	0.00002243
305.4	0.1000778		895.39	0.02299528		1485.41	0.00228179		2075.4	0.02646793		2665.4	0.00105301		3255.4	-0.00021302
305.6	0.10123286		895.59	0.02275613		1485.61	0.00212463		2075.6	0.02669149		2665.6	0.0007573		3255.6	0.00029802
305.8	0.10235532		895.79	0.02274945		1485.81	0.00216359		2075.8	0.02710806		2665.8	0.00119439		3255.8	-0.00043663
306	0.10384616		895.99	0.02234516		1486.01	0.00121009		2076	0.0277089		2666	0.00157467		3256	-0.00064772
306.2	0.10519268		896.19	0.02213788		1486.21	0.00076041		2076.2	0.02879924		2666.2	0.00107007		3256.2	0.00023191
306.4	0.10700885		896.39	0.02196887		1486.41	0.00089186		2076.4	0.02856735		2666.4	0.00033897		3256.4	0.00019376
306.6	0.10796674		896.59	0.02203281		1486.61	0.00120853		2076.6	0.02926232		2666.6	-0.00063932		3256.6	0.00083285
306.8	0.10856012		896.79	0.02168778		1486.81	0.00131222		2076.8	0.02933271		2666.8	-0.00109046		3256.8	0.00168039
307	0.10989056		896.99	0.0219987		1487.01	0.00051138		2077	0.03014962		2667	-0.00079272		3257	0.00195153
307.2	0.11120065		897.19	0.02214771		1487.21	0.00142025		2077.2	0.02990222		2667.2	-0.00058062		3257.2	0.00189301
307.4	0.11276561		897.39	0.02336189		1487.41	0.00143262		2077.4	0.03008121		2667.4	-0.001067		3257.4	0.00244978
307.6	0.11388417		897.59	0.02407846		1487.61	0.00154857		2077.6	0.03029609		2667.6	-0.00056339		3257.6	0.00255064
307.8	0.11500207		897.79	0.02489152		1487.81	0.00190202		2077.8	0.02951181		2667.8	-0.00095813		3257.8	0.00196624
308	0.11613134		897.99	0.02497327		1488.01	0.00312217		2078	0.02942329		2668	-0.00062183		3258	0.00097467
308.2	0.11683382		898.19	0.02529366		1488.21	0.00248107		2078.2	0.02914512		2668.2	-0.00021332		3258.2	-0.00021006
308.4	0.11798006		898.39	0.02531364		1488.41	0.00281065		2078.4	0.0293712		2668.4	0.00037344		3258.4	-0.00042046
308.6	0.11825125		898.59	0.02601187		1488.61	0.00349673		2078.6	0.02883737		2668.6	0.00118849		3258.6	-0.00127794
308.8	0.11887311		898.79	0.02655829		1488.81	0.00354507		2078.8	0.02886817		2668.8	0.00122865		3258.8	-0.00260962
309	0.1197267		898.99	0.02631691		1489.01	0.00306024		2079	0.02969957		2669	0.00177704		3259	-0.00328612
309.2	0.12050402		899.19	0.02682		1489.21	0.0028044		2079.2	0.02996028		2669.2	0.00215759		3259.2	-0.00495786
309.4	0.12145925		899.39	0.02615861		1489.41	0.00237835		2079.4	0.02985001		2669.4	0.00276991		3259.4	-0.00490579
309.6	0.1230759		899.59	0.025738		1489.61	0.00310535		2079.6	0.02954039		2669.6	0.00209573		3259.6	-0.00488192
309.8	0.12525057		899.79	0.02527462		1489.81	0.00261675		2079.8	0.03043141		2669.8	0.00216214		3259.8	-0.00533953
310	0.12680162		899.99	0.02580938		1490.01	0.00227742		2080	0.03033373		2670	0.00147161		3260	-0.00421126
310.2	0.12885478		900.19	0.0260714		1490.21	0.00225889		2080.2	0.03050905		2670.2	0.00093354		3260.2	-0.00408399
310.4	0.12978492		900.39	0.02552686		1490.41	0.00172822		2080.4	0.0307569		2670.4	0.00125811		3260.4	-0.00448804
310.6	0.13000644		900.59	0.02541889		1490.61	0.00130052		2080.6	0.03121626		2670.6	0.00060988		3260.6	-0.00312677
310.8	0.13028442		900.79	0.02517322		1490.81	0.00182369		2080.8	0.03177568		2670.8	-0.00039036		3260.8	-0.00163371
311	0.13156128		900.99	0.02577093		1491.01	0.001914		2081	0.03226193		2671	-0.00003732		3261	-0.00118664
311.2	0.13313731		901.19	0.02547428		1491.21	0.00229534		2081.2	0.03265295		2671.2	-0.00025999		3261.2	-0.0005045
311.4	0.13425106		901.39	0.02602538		1491.41	0.00226591		2081.4	0.03334236		2671.4	-0.00151382		3261.4	0.00049176
311.6	0.13408463		901.59	0.02637487		1491.61	0.00285126		2081.6	0.03322042		2671.6	-0.00157719		3261.6	0.00055524
311.8	0.13398297		901.79	0.02682744		1491.81	0.00278031		2081.8	0.03305896		2671.8	-0.00173152		3261.8	0.00109218
312	0.13313139		901.99	0.02754353		1492.01	0.00263479		2082	0.03270455		2672	-0.00085586		3262	0.00167309
312.2	0.13359994		902.19	0.02819488		1492.21	0.00224844		2082.2	0.03294685		2672.2	-0.00090024		3262.2	0.00172477
312.4	0.13408163		902.39	0.02942734		1492.41	0.00272284		2082.4	0.03246772		2672.4	-0.00040167		3262.4	0.00161561
312.6	0.13477824		902.59	0.02885999		1492.61	0.00243872		2082.6	0.0317016		2672.6	-0.00025956		3262.6	0.00103595
312.8	0.13583459		902.79	0.02887811		1492.81	0.00177222		2082.8	0.03144706		2672.8	-0.00028986		3262.8	0.0002366
313	0.13667303		902.99	0.02891475		1493.01	0.00032548		2083	0.03131746		2673	0.00074662		3263	0.00009113
313.2	0.13709725		903.19	0.02982484		1493.21	-0.00039493		2083.2	0.03164677		2673.2	0.00148066		3263.2	0.000003
313.4	0.1386343		903.39	0.02928594		1493.41	-0.00005806		2083.4	0.03141012		2673.4	0.00126278		3263.4	0.00012147
313.6	0.14068155		903.59	0.02967946		1493.61	0.00088327		2083.6	0.0308917		2673.6	0.00074662		3263.6	-0.00034355
313.8	0.14238793		903.79	0.03003429		1493.81	0.00045317		2083.8	0.03159372		2673.8	0.00095334		3263.8	-0.00021745
314	0.14375782		903.99	0.03018349		1494.01	0.00112121		2084	0.03146389		2674	0.000965		3264	0.00093225
314.2	0.14455747		904.19	0.03001792		1494.21	0.00098566		2084.2	0.03282973		2674.2	0.00197298		3264.2	0.00037014
314.4	0.14510511		904.39	0.03016154		1494.41	0.00135881		2084.4	0.03337484		2674.4	0.00209815		3264.4	0.00121081
314.6	0.14560079		904.59	0.02981809		1494.61	0.00168344		2084.6	0.03358757		2674.6	0.00159164		3264.6	0.00203367
314.8	0.14610091		904.79	0.03006186		1494.81	0.00247803		2084.8	0.03361297		2674.8	0.00166221		3264.8	0.00247313
315	0.14753138		904.99	0.03086266		1495.01	0.00245348		2085	0.0336708		2675	0.00260823		3265	0.00273909
315.2	0.14849596		905.19	0.0310812		1495.21	0.00245211		2085.2	0.03496315		2675.2	0.0020522		3265.2	0.00291319
315.4	0.14889411		905.39	0.03129882		1495.41	0.00302975		2085.4	0.03655916		2675.4	0.00126962		3265.4	0.002253
315.6	0.14848271		905.59	0.03147639		1495.61	0.00313512		2085.6	0.03710302		2675.6	0.00119637		3265.6	0.00185977
315.8	0.14890855		905.79	0.03222565		1495.81	0.00319993		2085.8	0.03763753		2675.8	0.00035649		3265.8	0.00107761
316	0.14947127		905.99	0.03285467		1496.01	0.00397235		2086	0.03736255		2676	0.00045316		3266	0.00102314
316.2	0.15127333		906.19	0.03319227		1496.21	0.003714		2086.2	0.03772599		2676.2	0.00057321		3266.2	-0.00089179
316.4	0.15143118		906.39	0.03301275		1496.41	0.00333431		2086.4	0.03725828		2676.4	0.00095986		3266.4	-0.00087099
316.6	0.15286937		906.59	0.0329548		1496.61	0.00302108		2086.6	0.03723079		2676.6	0.001069		3266.6	-0.00068656
316.8	0.15326283		906.79	0.03351769		1496.81	0.00271622		2086.8	0.03723316		2676.8	0.00114649		3266.8	-0.0016547
317	0.15368775		906.99	0.03403891		1497.01	0.00127186		2087	0.03714621		2677	0.00192298		3267	-0.00156535
317.2	0.15449262		907.19	0.03435558		1497.21	0.00171749		2087.2	0.03727241		2677.2	0.00206452		3267.2	-0.00110677
317.4	0.15412374		907.39	0.03519079		1497.41	0.00209533		2087.4	0.03658172		2677.4	0.0011254		3267.4	-0.00106276
317.6	0.1547834		907.59	0.03636616		1497.61	0.0020965		2087.6	0.03609991		2677.6	0.00089276		3267.6	-0.00123395
317.8	0.15469605		907.79	0.0360729		1497.81	0.00161262		2087.8	0.03618984		2677.8	0.00056815		3267.8	-0.0009915
318	0.15585909		907.99	0.03609703		1498.01	0.00153214		2088	0.03583108		2678	0.00086336		3268	-0.00030187
318.2	0.15561449		908.19	0.03676078		1498.21	0.00037055		2088.2	0.03515286		2678.2	0.00142844		3268.2	-0.00037085
318.4	0.15641052		908.39	0.03683305		1498.41	-0.00032007		2088.4	0.03479534		2678.4	0.00146133		3268.4	0.00045122
318.6	0.15737044		908.59	0.03733494		1498.61	-0.00103309		2088.6	0.03393874		2678.6	0.00206614		3268.6	0.00034767
318.8	0.15775791		908.79	0.03885599		1498.81	-0.0014043		2088.8	0.03312979		2678.8	0.0023625		3268.8	0.00129167
319	0.1583769		908.99	0.03903037		1499.01	-0.00099005		2089	0.03395817		2679	0.00197326		3269	0.00157685
319.2	0.1588508		909.19	0.03949032		1499.21	-0.00155389		2089.2	0.0344802		2679.2	0.00183006		3269.2	0.00172438
319.4	0.16005529		909.39	0.03930554		1499.41	-0.00111341		2089.4	0.03494582		2679.4	0.00187646		3269.4	0.00165925
319.6	0.15975255		909.59	0.03971969		1499.61	-0.00108642		2089.6	0.03456783		2679.6	0.00123952		3269.6	0.00156005
319.8	0.16055298		909.79	0.0398398		1499.81	-0.00033958		2089.8	0.03522339		2679.8	0.00111872		3269.8	0.00144684
320	0.1612741		909.99	0.04008083		1500.01	0.00049221		2090	0.03503234		2680	0.00197465		3270	0.00109622
320.2	0.16217045		910.19	0.04027604		1500.21	-0.00056009		2090.2	0.03576093		2680.2	0.00181592		3270.2	0.00033892
320.4	0.16297446		910.39	0.04069457		1500.41	0.00022107		2090.4	0.03550689		2680.4	0.0015478		3270.4	0.00153927
320.6	0.16390327		910.59	0.04086642		1500.61	0.00160672		2090.6	0.03604444		2680.6	0.00157297		3270.6	0.00121811
320.8	0.16400038		910.79	0.04118606		1500.81	0.00239475		2090.8	0.03689545		2680.8	0.00153409		3270.8	0.00094213
321	0.16395668		910.99	0.04156297		1501.01	0.00270329		2091	0.03666516		2681	0.00226133		3271	0.00142565
321.2	0.16414559		911.19	0.04211902		1501.21	0.00385781		2091.2	0.03768445		2681.2	0.00226119		3271.2	0.00152116
321.4	0.16441889		911.39	0.0425223		1501.41	0.00365626		2091.4	0.03779803		2681.4	0.00121702		3271.4	0.00064766
321.6	0.16661606		911.59	0.04205516		1501.61	0.0035671		2091.6	0.03836632		2681.6	0.00140283		3271.6	-0.00084331
321.8	0.16706939		911.79	0.04176978		1501.81	0.00320796		2091.8	0.03860677		2681.8	0.00171019		3271.8	-0.00066021
322	0.16762999		911.99	0.04201005		1502.01	0.00360062		2092	0.03912346		2682	0.00230563		3272	-0.00089119
322.2	0.16801912		912.19	0.04149104		1502.21	0.00295756		2092.2	0.03806322		2682.2	0.0025878		3272.2	-0.00058088
322.4	0.1697066		912.39	0.04098902		1502.41	0.0028198		2092.4	0.03847284		2682.4	0.00226157		3272.4	-0.00116031
322.6	0.17068516		912.59	0.04090647		1502.61	0.00310233		2092.6	0.03740138		2682.6	0.00254623		3272.6	-0.00107288
322.8	0.17187636		912.79	0.04104504		1502.81	0.00294523		2092.8	0.03745604		2682.8	0.00220701		3272.8	0.00006748
323	0.17268819		912.99	0.04011713		1503.01	0.002801		2093	0.03746301		2683	0.00212109		3273	0.00062701
323.2	0.17358742		913.19	0.04041339		1503.21	0.00110455		2093.2	0.03698989		2683.2	0.00281701		3273.2	0.00013756
323.4	0.17532452		913.39	0.04060482		1503.41	0.00098015		2093.4	0.03696655		2683.4	0.00222908		3273.4	0.0006404
323.6	0.17554879		913.59	0.0405651		1503.61	0.00077545		2093.6	0.03678045		2683.6	0.00132728		3273.6	0.00053401
323.8	0.17779809		913.79	0.04049965		1503.81	0.00105886		2093.8	0.03649604		2683.8	0.00217558		3273.8	0.00049317
324	0.17881636		913.99	0.04068092		1504.01	0.00060861		2094	0.03604334		2684	0.00203595		3274	0.00004224
324.2	0.18021532		914.19	0.04104215		1504.21	0.00015087		2094.2	0.03651218		2684.2	0.00177198		3274.2	0.00080745
324.4	0.18156269		914.39	0.04185015		1504.41	0.000941		2094.4	0.03682291		2684.4	0.00154457		3274.4	0.00156404
324.6	0.18208983		914.59	0.04237061		1504.61	0.00102561		2094.6	0.03765548		2684.6	0.00096755		3274.6	0.00262674
324.8	0.18204508		914.79	0.04334226		1504.81	0.00065797		2094.8	0.03850052		2684.8	0.00171876		3274.8	0.00408105
325	0.1823717		914.99	0.04354005		1505.01	0.00045766		2095	0.03896602		2685	0.00185334		3275	0.00443823
325.2	0.18320429		915.19	0.04423107		1505.21	0.00011191		2095.2	0.03988948		2685.2	0.00217909		3275.2	0.00485055
325.4	0.18457085		915.39	0.0450246		1505.41	-0.00004714		2095.4	0.04054554		2685.4	0.00230595		3275.4	0.00521051
325.6	0.18492814		915.59	0.04580274		1505.61	0.00089707		2095.6	0.04126603		2685.6	0.00310881		3275.6	0.00551751
325.8	0.18455874		915.79	0.04603086		1505.81	0.00142275		2095.8	0.04137546		2685.8	0.00313513		3275.8	0.00655829
326	0.18478666		915.99	0.04631509		1506.01	0.00193915		2096	0.04193116		2686	0.00284362		3276	0.00709489
326.2	0.18545993		916.19	0.04568996		1506.21	0.00209077		2096.2	0.04021429		2686.2	0.0020787		3276.2	0.00755125
326.4	0.18561886		916.39	0.04543065		1506.41	0.00197549		2096.4	0.04079291		2686.4	0.00187807		3276.4	0.0062671
326.6	0.18625624		916.59	0.04522449		1506.61	0.00200048		2096.6	0.04035916		2686.6	0.0024373		3276.6	0.00571484
326.8	0.18633428		916.79	0.04559114		1506.81	0.00153874		2096.8	0.04018417		2686.8	0.00225133		3276.8	0.00510402
327	0.18625759		916.99	0.04447534		1507.01	0.00117557		2097	0.03991933		2687	0.00289612		3277	0.00376294
327.2	0.18703045		917.19	0.04533486		1507.21	0.00096484		2097.2	0.03890088		2687.2	0.00330446		3277.2	0.0023868
327.4	0.18829524		917.39	0.04526766		1507.41	0.00124134		2097.4	0.03831379		2687.4	0.00296328		3277.4	0.00210244
327.6	0.18925392		917.59	0.04408588		1507.61	0.00184281		2097.6	0.03787213		2687.6	0.00342415		3277.6	0.00065195
327.8	0.18999556		917.79	0.04451375		1507.81	0.00272312		2097.8	0.03650852		2687.8	0.00470104		3277.8	0.00008173
328	0.1897044		917.99	0.04491365		1508.01	0.00183725		2098	0.03705252		2688	0.00430865		3278	-0.0009141
328.2	0.19068626		918.19	0.04578014		1508.21	0.00144537		2098.2	0.03706031		2688.2	0.00445317		3278.2	-0.00048807
328.4	0.19094896		918.39	0.04664062		1508.41	0.00083521		2098.4	0.03783787		2688.4	0.00418645		3278.4	-0.00107953
328.6	0.19085146		918.59	0.04686536		1508.61	0.00046464		2098.6	0.03778995		2688.6	0.00427151		3278.6	-0.00074844
328.8	0.19103551		918.79	0.04710089		1508.81	0.00043829		2098.8	0.03875607		2688.8	0.00462933		3278.8	-0.00136795
329	0.19184937		918.99	0.04706289		1509.01	0.00057629		2099	0.03920126		2689	0.00473747		3279	-0.00169841
329.2	0.19217947		919.19	0.04754896		1509.21	0.00087625		2099.2	0.03939113		2689.2	0.00448088		3279.2	-0.00027943
329.4	0.19322506		919.39	0.04840536		1509.41	0.00167877		2099.4	0.0399392		2689.4	0.00415893		3279.4	0.00032756
329.6	0.19371165		919.59	0.04821616		1509.61	0.00154898		2099.6	0.04085292		2689.6	0.00351728		3279.6	0.00064235
329.8	0.19449288		919.79	0.04748058		1509.81	0.0011128		2099.8	0.04136691		2689.8	0.00282295		3279.8	0.00060087
330	0.19579968		919.99	0.04753778		1510.01	0.00094318		2100	0.04226797		2690	0.00272944		3280	0.00127605
330.2	0.19662641		920.19	0.0468012		1510.21	0.00105895		2100.2	0.04149999		2690.2	0.00212794		3280.2	0.00077212
330.4	0.19681178		920.39	0.04634272		1510.41	0.00019496		2100.4	0.04204765		2690.4	0.00214648		3280.4	0.00020902
330.6	0.19764424		920.59	0.04680569		1510.61	0.00039728		2100.6	0.04165533		2690.6	0.00228914		3280.6	0.00024898
330.8	0.19782283		920.79	0.04615477		1510.81	0.00024413		2100.8	0.04173159		2690.8	0.00252236		3280.8	0.00007244
331	0.19825945		920.99	0.04573587		1511.01	0.0004805		2101	0.04179118		2691	0.00257198		3281	0.00084199
331.2	0.19936744		921.19	0.04570885		1511.21	0.00084064		2101.2	0.0409218		2691.2	0.00172832		3281.2	0.00144622
331.4	0.19969134		921.39	0.0451046		1511.41	0.00109142		2101.4	0.04042686		2691.4	0.00182215		3281.4	0.00065471
331.6	0.20044597		921.59	0.04480574		1511.61	0.00138522		2101.6	0.04031599		2691.6	0.00233535		3281.6	0.00061201
331.8	0.1999548		921.79	0.04512468		1511.81	0.00126844		2101.8	0.03986933		2691.8	0.00329557		3281.8	0.00107607
332	0.19963381		921.99	0.04534979		1512.01	0.00049182		2102	0.03995103		2692	0.00304732		3282	0.00043137
332.2	0.20069936		922.19	0.04621277		1512.21	0.00188929		2102.2	0.04005014		2692.2	0.00335405		3282.2	0.00103555
332.4	0.20082648		922.39	0.04697698		1512.41	0.00224696		2102.4	0.04091098		2692.4	0.00329853		3282.4	0.00094017
332.6	0.20047633		922.59	0.04736438		1512.61	0.00347749		2102.6	0.04079793		2692.6	0.00361928		3282.6	0.00191394
332.8	0.20058087		922.79	0.04759119		1512.81	0.00356891		2102.8	0.04167286		2692.8	0.00384842		3282.8	0.00224274
333	0.20105843		922.99	0.04834595		1513.01	0.00454861		2103	0.04135203		2693	0.00418538		3283	0.00311181
333.2	0.20192263		923.19	0.04872799		1513.21	0.00563578		2103.2	0.04209276		2693.2	0.00382878		3283.2	0.00397125
333.4	0.20253746		923.39	0.04981203		1513.41	0.00591926		2103.4	0.04270845		2693.4	0.00423333		3283.4	0.00338509
333.6	0.20401558		923.59	0.04958976		1513.61	0.00543607		2103.6	0.04409241		2693.6	0.00394863		3283.6	0.00308698
333.8	0.20531238		923.79	0.0494329		1513.81	0.0061238		2103.8	0.04423537		2693.8	0.0038666		3283.8	0.00265317
334	0.20694659		923.99	0.05003077		1514.01	0.00610629		2104	0.0446188		2694	0.0042431		3284	0.00247681
334.2	0.20780553		924.19	0.05024798		1514.21	0.00598372		2104.2	0.04448796		2694.2	0.00411637		3284.2	0.00207008
334.4	0.2080631		924.39	0.05072897		1514.41	0.00685862		2104.4	0.04500364		2694.4	0.00349062		3284.4	0.00214325
334.6	0.20960415		924.59	0.05090318		1514.61	0.00761921		2104.6	0.04512431		2694.6	0.00348786		3284.6	0.00224315
334.8	0.21045059		924.79	0.05034812		1514.81	0.00711497		2104.8	0.04545955		2694.8	0.00243994		3284.8	0.00193964
335	0.21097889		924.99	0.05085194		1515.01	0.00767048		2105	0.04526156		2695	0.00107847		3285	0.00248802
335.2	0.21179474		925.19	0.05107455		1515.21	0.0073055		2105.2	0.04428193		2695.2	0.00095585		3285.2	0.00198301
335.4	0.21154206		925.39	0.05121342		1515.41	0.00717664		2105.4	0.04430279		2695.4	0.00141115		3285.4	-0.00003098
335.6	0.21177871		925.59	0.05042734		1515.61	0.00656447		2105.6	0.04400174		2695.6	0.00201042		3285.6	0.00069284
335.8	0.21155742		925.79	0.05016435		1515.81	0.00605655		2105.8	0.04393895		2695.8	0.00210862		3285.8	0.00013051
336	0.21130033		925.99	0.05124205		1516.01	0.00588096		2106	0.04307814		2696	0.00192896		3286	0.00027359
336.2	0.21130822		926.19	0.05124003		1516.21	0.00581815		2106.2	0.04375962		2696.2	0.00280593		3286.2	0.00142602
336.4	0.21043357		926.39	0.05153839		1516.41	0.00515872		2106.4	0.04386676		2696.4	0.00229863		3286.4	0.00243219
336.6	0.20961001		926.59	0.05192528		1516.61	0.0057981		2106.6	0.04337626		2696.6	0.00232553		3286.6	0.00282713
336.8	0.20978686		926.79	0.05204603		1516.81	0.00549902		2106.8	0.04363099		2696.8	0.00260895		3286.8	0.00206381
337	0.21078049		926.99	0.0526805		1517.01	0.00522023		2107	0.04279004		2697	0.00260458		3287	0.00205882
337.2	0.21117196		927.19	0.05187333		1517.21	0.00392259		2107.2	0.04267822		2697.2	0.00259669		3287.2	0.00227897
337.4	0.21107647		927.39	0.05234086		1517.41	0.00368577		2107.4	0.04247089		2697.4	0.00259876		3287.4	0.00204924
337.6	0.21205788		927.59	0.05196083		1517.61	0.00324439		2107.6	0.04254634		2697.6	0.002303		3287.6	0.00127486
337.8	0.21270353		927.79	0.05201373		1517.81	0.0029704		2107.8	0.04221333		2697.8	0.00293969		3287.8	0.00097035
338	0.21455528		927.99	0.0526004		1518.01	0.00262313		2108	0.04299516		2698	0.00341101		3288	0.00018113
338.2	0.21541413		928.19	0.0521743		1518.21	0.00302801		2108.2	0.04278303		2698.2	0.00402114		3288.2	-0.00042958
338.4	0.21620416		928.39	0.05197845		1518.41	0.00311621		2108.4	0.04303446		2698.4	0.00342843		3288.4	-0.00027338
338.6	0.21772479		928.59	0.0516035		1518.61	0.00199256		2108.6	0.04288859		2698.6	0.00363876		3288.6	-0.00009907
338.8	0.21831846		928.79	0.05290185		1518.81	0.00166402		2108.8	0.04336724		2698.8	0.00357627		3288.8	-0.00087038
339	0.2190688		928.99	0.05381923		1519.01	0.00182768		2109	0.04279354		2699	0.00414251		3289	-0.00053925
339.2	0.21965921		929.19	0.05358979		1519.21	0.00190675		2109.2	0.04279644		2699.2	0.00571228		3289.2	-0.00075605
339.4	0.21999928		929.39	0.05417236		1519.41	0.00232746		2109.4	0.04315107		2699.4	0.00547849		3289.4	-0.00138178
339.6	0.22082412		929.59	0.05425314		1519.61	0.00260363		2109.6	0.04302797		2699.6	0.00524996		3289.6	-0.00035009
339.8	0.22179685		929.79	0.05493482		1519.81	0.00314443		2109.8	0.04367945		2699.8	0.00467424		3289.8	-0.00001197
340	0.22204561		929.99	0.05665697		1520.01	0.00348274		2110	0.04449616		2700	0.0045841		3290	0.00080605
340.2	0.22244314		930.19	0.05703794		1520.21	0.00372165		2110.2	0.04551176		2700.2	0.00454299		3290.2	0.00114466
340.4	0.22277931		930.39	0.05782552		1520.41	0.004645		2110.4	0.04564264		2700.4	0.00336081		3290.4	0.00125591
340.6	0.22310098		930.59	0.05860045		1520.61	0.00563269		2110.6	0.04553231		2700.6	0.00359829		3290.6	0.000627
340.8	0.22383195		930.79	0.05943423		1520.81	0.00564437		2110.8	0.04625033		2700.8	0.00393382		3290.8	0.00053119
341	0.22404046		930.99	0.05956882		1521.01	0.00440981		2111	0.04567909		2701	0.00354887		3291	0.00136744
341.2	0.22396282		931.19	0.05985764		1521.21	0.00466363		2111.2	0.04610821		2701.2	0.00348458		3291.2	0.00118011
341.4	0.22369177		931.39	0.06007856		1521.41	0.00517878		2111.4	0.04653968		2701.4	0.003512		3291.4	0.0001542
341.6	0.22417596		931.59	0.05932048		1521.61	0.00508177		2111.6	0.046985		2701.6	0.00393725		3291.6	-0.00005226
341.8	0.22534232		931.79	0.05813719		1521.81	0.00462855		2111.8	0.04775516		2701.8	0.00434643		3291.8	-0.00050351
342	0.2253531		931.99	0.05761455		1522.01	0.00305348		2112	0.04882873		2702	0.00401024		3292	-0.00112356
342.2	0.2252113		932.19	0.05730212		1522.21	0.00279519		2112.2	0.04809934		2702.2	0.00500059		3292.2	-0.00169188
342.4	0.22440017		932.39	0.05770704		1522.41	0.00171857		2112.4	0.04816641		2702.4	0.00513798		3292.4	-0.00039206
342.6	0.2239301		932.59	0.05817606		1522.61	0.00059418		2112.6	0.04852258		2702.6	0.0055081		3292.6	-0.00021916
342.8	0.22360824		932.79	0.05936409		1522.81	0.00116622		2112.8	0.04896006		2702.8	0.00574159		3292.8	-0.00003103
343	0.22397367		932.99	0.05947567		1523.01	0.00089334		2113	0.04793473		2703	0.00620066		3293	0.00053988
343.2	0.22447005		933.19	0.05929811		1523.21	0.00095707		2113.2	0.04819529		2703.2	0.00678138		3293.2	0.00103978
343.4	0.22490831		933.39	0.06117872		1523.41	0.00113509		2113.4	0.04753124		2703.4	0.00547821		3293.4	0.00165469
343.6	0.2256341		933.59	0.06178067		1523.61	0.00136393		2113.6	0.04819823		2703.6	0.00509703		3293.6	0.00301476
343.8	0.22607721		933.79	0.06237905		1523.81	0.00094918		2113.8	0.04850333		2703.8	0.00535362		3293.8	0.00390413
344	0.22639666		933.99	0.0631771		1524.01	0.00060357		2114	0.04826446		2704	0.00480705		3294	0.00404358
344.2	0.22704015		934.19	0.06303145		1524.21	0.00024684		2114.2	0.04757053		2704.2	0.00487246		3294.2	0.0046397
344.4	0.22760631		934.39	0.0632741		1524.41	0.00020467		2114.4	0.04679012		2704.4	0.00550684		3294.4	0.0053631
344.6	0.22892059		934.59	0.06323201		1524.61	0.00056946		2114.6	0.04603757		2704.6	0.0064084		3294.6	0.0059408
344.8	0.23051242		934.79	0.06338799		1524.81	0.00038729		2114.8	0.0460843		2704.8	0.00678471		3294.8	0.0062821
345	0.23068108		934.99	0.06307732		1525.01	0.00071514		2115	0.04559367		2705	0.00662679		3295	0.00591585
345.2	0.23214372		935.19	0.06277606		1525.21	0.00191664		2115.2	0.04583074		2705.2	0.00686538		3295.2	0.00476503
345.4	0.2327338		935.39	0.0610676		1525.41	0.00225086		2115.4	0.04522365		2705.4	0.0069448		3295.4	0.00408823
345.6	0.23268177		935.59	0.0597592		1525.61	0.00265455		2115.6	0.04582855		2705.6	0.00699954		3295.6	0.00393811
345.8	0.23365044		935.79	0.05889034		1525.81	0.0027914		2115.8	0.04581802		2705.8	0.00661144		3295.8	0.00283512
346	0.23358452		935.99	0.0587307		1526.01	0.00285847		2116	0.04512225		2706	0.00630514		3296	0.00264827
346.2	0.23421861		936.19	0.05918641		1526.21	0.00436644		2116.2	0.04434936		2706.2	0.00714029		3296.2	0.00190748
346.4	0.23413293		936.39	0.05991083		1526.41	0.00472366		2116.4	0.04420387		2706.4	0.00631133		3296.4	0.00209342
346.6	0.23415483		936.59	0.05992638		1526.61	0.00481438		2116.6	0.04495513		2706.6	0.00600078		3296.6	0.00087351
346.8	0.23437455		936.79	0.05995923		1526.81	0.00547947		2116.8	0.04553744		2706.8	0.00556963		3296.8	0.00126481
347	0.23500357		936.99	0.06091476		1527.01	0.00506931		2117	0.04515087		2707	0.00460243		3297	0.00116918
347.2	0.23460925		937.19	0.06150072		1527.21	0.00532712		2117.2	0.04603791		2707.2	0.00370215		3297.2	0.00132883
347.4	0.23496869		937.39	0.06281014		1527.41	0.004653		2117.4	0.04620352		2707.4	0.00304721		3297.4	0.00129575
347.6	0.23512956		937.59	0.06321107		1527.61	0.00450155		2117.6	0.04756619		2707.6	0.00327026		3297.6	0.00170897
347.8	0.23541246		937.79	0.06255832		1527.81	0.00397007		2117.8	0.04782174		2707.8	0.00309528		3297.8	0.00108315
348	0.23551061		937.99	0.0627674		1528.01	0.00376329		2118	0.04746056		2708	0.00249662		3298	0.00134786
348.2	0.23578958		938.19	0.06337238		1528.21	0.00284197		2118.2	0.0473095		2708.2	0.00252891		3298.2	0.00190481
348.4	0.23596647		938.39	0.06377411		1528.41	0.00247961		2118.4	0.04722134		2708.4	0.00336435		3298.4	0.00262357
348.6	0.23656658		938.59	0.06280497		1528.61	0.0027685		2118.6	0.04774339		2708.6	0.00281081		3298.6	0.0027496
348.8	0.23667488		938.79	0.06279096		1528.81	0.0020762		2118.8	0.04770325		2708.8	0.00262206		3298.8	0.00221131
349	0.23622048		938.99	0.06304226		1529.01	0.00224629		2119	0.0474596		2709	0.00274579		3299	0.00176296
349.2	0.23774271		939.19	0.06252389		1529.21	0.00197732		2119.2	0.04756752		2709.2	0.00317788		3299.2	0.00148071
349.4	0.23738746		939.39	0.06206617		1529.41	0.00255289		2119.4	0.04710982		2709.4	0.00346384		3299.4	0.00133289
349.6	0.23784114		939.59	0.06274712		1529.61	0.00299138		2119.6	0.04749623		2709.6	0.0038787		3299.6	0.00137903
349.8	0.23997631		939.79	0.06263026		1529.81	0.00389718		2119.8	0.04712842		2709.8	0.00427413		3299.8	0.00133294
350	0.24074057		939.99	0.06226629		1530.01	0.00430242		2120	0.04697813		2710	0.00537429		3300	0.00146173
350.2	0.24158042		940.19	0.06304136		1530.21	0.00457548		2120.2	0.04664586		2710.2	0.00606685		3300.2	0.00130009
350.4	0.24224336		940.39	0.06439001		1530.41	0.00461002		2120.4	0.04669696		2710.4	0.0055417		3300.4	0.00067252
350.6	0.24275513		940.59	0.06492629		1530.61	0.00451068		2120.6	0.04771304		2710.6	0.00697413		3300.6	0.00066625
350.8	0.24319685		940.79	0.06600994		1530.81	0.00488512		2120.8	0.04850397		2710.8	0.00636336		3300.8	0.00108672
351	0.24363192		940.99	0.06684045		1531.01	0.0053426		2121	0.04854631		2711	0.00652067		3301	0.00010645
351.2	0.24369097		941.19	0.06733154		1531.21	0.00592763		2121.2	0.04919564		2711.2	0.00724008		3301.2	0.00029452
351.4	0.24442364		941.39	0.06808266		1531.41	0.00582806		2121.4	0.04863393		2711.4	0.00776399		3301.4	0.00060114
351.6	0.24452964		941.59	0.06833553		1531.61	0.006971		2121.6	0.04897939		2711.6	0.00846892		3301.6	0.00075475
351.8	0.24413652		941.79	0.0681535		1531.81	0.0067889		2121.8	0.04807797		2711.8	0.00763367		3301.8	0.00052307
352	0.24425801		941.99	0.06885623		1532.01	0.00659713		2122	0.04688657		2712	0.00685357		3302	0.00137159
352.2	0.24452444		942.19	0.06861945		1532.21	0.00593662		2122.2	0.04751784		2712.2	0.00604352		3302.2	0.00165457
352.4	0.24448978		942.39	0.06738153		1532.41	0.00576308		2122.4	0.04721401		2712.4	0.00558524		3302.4	0.00154907
352.6	0.24465699		942.59	0.06694255		1532.61	0.00494584		2122.6	0.04765275		2712.6	0.00435757		3302.6	0.00144384
352.8	0.24501508		942.79	0.06626512		1532.81	0.0036751		2122.8	0.04687591		2712.8	0.00414307		3302.8	0.0014467
353	0.24552284		942.99	0.0659085		1533.01	0.00369164		2123	0.04749387		2713	0.00370269		3303	0.00154223
353.2	0.24665116		943.19	0.0649664		1533.21	0.003437		2123.2	0.04807468		2713.2	0.00395702		3303.2	0.00140627
353.4	0.24648263		943.39	0.06609076		1533.41	0.00332196		2123.4	0.04858676		2713.4	0.00405375		3303.4	0.00154771
353.6	0.24767063		943.59	0.06633678		1533.61	0.00311063		2123.6	0.04886094		2713.6	0.00438679		3303.6	0.00118616
353.8	0.24822455		943.79	0.06549946		1533.81	0.00308387		2123.8	0.0487824		2713.8	0.00440115		3303.8	0.00038265
354	0.2479543		943.99	0.06517769		1534.01	0.00249025		2124	0.04895451		2714	0.00493106		3304	-0.00062016
354.2	0.24812333		944.19	0.0667361		1534.21	0.0017813		2124.2	0.04877072		2714.2	0.00384923		3304.2	-0.00168512
354.4	0.24884998		944.39	0.06721117		1534.41	0.00126446		2124.4	0.04888477		2714.4	0.00345688		3304.4	-0.00271869
354.6	0.24943786		944.59	0.06705475		1534.61	0.00143277		2124.6	0.04978592		2714.6	0.0038649		3304.6	-0.00211385
354.8	0.24895011		944.79	0.06722933		1534.81	0.00169938		2124.8	0.05033406		2714.8	0.00360667		3304.8	-0.00256247
355	0.24930531		944.99	0.06756571		1535.01	0.00161237		2125	0.05011321		2715	0.00384638		3305	-0.00204351
355.2	0.24974041		945.19	0.06877438		1535.21	0.00167233		2125.2	0.05021247		2715.2	0.00362736		3305.2	-0.00071836
355.4	0.25031983		945.39	0.06922233		1535.41	0.00252779		2125.4	0.04928831		2715.4	0.00411935		3305.4	0.00019133
355.6	0.25101549		945.59	0.06924624		1535.61	0.00278616		2125.6	0.04976936		2715.6	0.0041833		3305.6	0.00066358
355.8	0.25171271		945.79	0.06923174		1535.81	0.00316045		2125.8	0.04859973		2715.8	0.00430056		3305.8	0.00091959
356	0.25308889		945.99	0.06940636		1536.01	0.00280896		2126	0.04910664		2716	0.00443739		3306	0.00115717
356.2	0.25392343		946.19	0.06956993		1536.21	0.00268365		2126.2	0.0503731		2716.2	0.00469782		3306.2	0.00102572
356.4	0.25395382		946.39	0.06963743		1536.41	0.00277794		2126.4	0.04968836		2716.4	0.0047603		3306.4	0.00174741
356.6	0.25475988		946.59	0.07028163		1536.61	0.00296818		2126.6	0.04997711		2716.6	0.00478761		3306.6	0.00202282
356.8	0.25542698		946.79	0.06982671		1536.81	0.00291338		2126.8	0.0488296		2716.8	0.00480176		3306.8	0.00257939
357	0.25578352		946.99	0.07015291		1537.01	0.00340008		2127	0.05001155		2717	0.00592019		3307	0.00260606
357.2	0.2561914		947.19	0.0702398		1537.21	0.00341229		2127.2	0.04994797		2717.2	0.00675262		3307.2	0.00198497
357.4	0.25642192		947.39	0.07130347		1537.41	0.00412617		2127.4	0.04994731		2717.4	0.00648277		3307.4	0.0014876
357.6	0.25701		947.59	0.07105731		1537.61	0.00469424		2127.6	0.0497173		2717.6	0.00708732		3307.6	0.00146356
357.8	0.25820876		947.79	0.07138177		1537.81	0.0046727		2127.8	0.04894301		2717.8	0.00756635		3307.8	0.00094392
358	0.25806893		947.99	0.07121369		1538.01	0.00420473		2128	0.04900634		2718	0.00713266		3308	0.00020651
358.2	0.258701		948.19	0.07184634		1538.21	0.0036122		2128.2	0.04872454		2718.2	0.00584417		3308.2	-0.00022633
358.4	0.25924602		948.39	0.07054359		1538.41	0.00318127		2128.4	0.04920762		2718.4	0.00437802		3308.4	0.0001459
358.6	0.25959153		948.59	0.07091228		1538.61	0.003123		2128.6	0.05077782		2718.6	0.00377293		3308.6	0.00077619
358.8	0.25919241		948.79	0.07128607		1538.81	0.00301975		2128.8	0.05114669		2718.8	0.00367138		3308.8	0.00069743
359	0.26002287		948.99	0.07206849		1539.01	0.00266672		2129	0.05148015		2719	0.00363632		3309	0.00073055
359.2	0.25976024		949.19	0.07168106		1539.21	0.00269116		2129.2	0.0521277		2719.2	0.00313831		3309.2	0.00083873
359.4	0.26014033		949.39	0.07133354		1539.41	0.00300916		2129.4	0.05185893		2719.4	0.00381903		3309.4	0.00158454
359.6	0.2601693		949.59	0.07147208		1539.61	0.0029705		2129.6	0.05205942		2719.6	0.00414662		3309.6	0.00132115
359.8	0.26064495		949.79	0.07168605		1539.81	0.00351441		2129.8	0.05115921		2719.8	0.00484539		3309.8	0.0010893
360	0.26055534		949.99	0.07275949		1540.01	0.00363599		2130	0.05139833		2720	0.0047282		3310	0.00080325
360.2	0.26020998		950.19	0.07325712		1540.21	0.00398147		2130.2	0.05132177		2720.2	0.0055094		3310.2	0.00046081
360.4	0.260029		950.39	0.07326814		1540.41	0.00416541		2130.4	0.05056675		2720.4	0.00621756		3310.4	0.00116568
360.6	0.26032345		950.59	0.07304154		1540.61	0.00427882		2130.6	0.05085964		2720.6	0.00616873		3310.6	0.00068095
360.8	0.25979366		950.79	0.07438002		1540.81	0.0044826		2130.8	0.05038171		2720.8	0.00652167		3310.8	-0.00002189
361	0.26043483		950.99	0.07533714		1541.01	0.00496712		2131	0.05198902		2721	0.00737595		3311	0.00039665
361.2	0.26046155		951.19	0.07611613		1541.21	0.00427853		2131.2	0.05154401		2721.2	0.00787989		3311.2	0.00022159
361.4	0.2610991		951.39	0.07672913		1541.41	0.00405376		2131.4	0.05132385		2721.4	0.00825514		3311.4	0.00049306
361.6	0.26221342		951.59	0.07748483		1541.61	0.00327836		2131.6	0.05142389		2721.6	0.00926375		3311.6	0.00126073
361.8	0.26308331		951.79	0.07755091		1541.81	0.00315049		2131.8	0.05109133		2721.8	0.00848078		3311.8	0.00140812
362	0.26230078		951.99	0.07761245		1542.01	0.00349064		2132	0.05232196		2722	0.00731709		3312	0.00208651
362.2	0.26210425		952.19	0.07826511		1542.21	0.0035292		2132.2	0.05307299		2722.2	0.00626604		3312.2	0.00255971
362.4	0.26248776		952.39	0.07816294		1542.41	0.00402872		2132.4	0.05379659		2722.4	0.00591587		3312.4	0.00358278
362.6	0.26311502		952.59	0.07799739		1542.61	0.0041472		2132.6	0.05421934		2722.6	0.00582768		3312.6	0.00408215
362.8	0.26309485		952.79	0.07787198		1542.81	0.00438913		2132.8	0.05467261		2722.8	0.00582132		3312.8	0.00430696
363	0.26329775		952.99	0.07749195		1543.01	0.00490315		2133	0.0545285		2723	0.00564225		3313	0.0039538
363.2	0.26285179		953.19	0.0768718		1543.21	0.0053954		2133.2	0.05414396		2723.2	0.00526429		3313.2	0.00490448
363.4	0.26347588		953.39	0.07687213		1543.41	0.00566924		2133.4	0.0531452		2723.4	0.0060606		3313.4	0.0054013
363.6	0.26335106		953.59	0.07661357		1543.61	0.0056997		2133.6	0.05224949		2723.6	0.00604934		3313.6	0.00456235
363.8	0.26446014		953.79	0.07650134		1543.81	0.00666906		2133.8	0.05203378		2723.8	0.00623487		3313.8	0.00419715
364	0.26505457		953.99	0.07622683		1544.01	0.00655826		2134	0.05241045		2724	0.00657006		3314	0.00350513
364.2	0.26676771		954.19	0.07531232		1544.21	0.00570111		2134.2	0.05270073		2724.2	0.00693248		3314.2	0.00254701
364.4	0.26647517		954.39	0.07504343		1544.41	0.00586014		2134.4	0.05289512		2724.4	0.00636416		3314.4	0.0025917
364.6	0.26704247		954.59	0.07530386		1544.61	0.00585294		2134.6	0.0535023		2724.6	0.00513381		3314.6	0.00217514
364.8	0.26791438		954.79	0.07676593		1544.81	0.00563185		2134.8	0.0529906		2724.8	0.00489612		3314.8	0.00184734
365	0.26906025		954.99	0.07697554		1545.01	0.00558726		2135	0.05354347		2725	0.00512881		3315	0.00243382
365.2	0.26883614		955.19	0.07674649		1545.21	0.00490269		2135.2	0.05359472		2725.2	0.00670795		3315.2	0.00188701
365.4	0.26933724		955.39	0.07721015		1545.41	0.00540968		2135.4	0.05409501		2725.4	0.00640771		3315.4	0.00119019
365.6	0.26948407		955.59	0.07739894		1545.61	0.00567658		2135.6	0.05381112		2725.6	0.00622526		3315.6	0.00122047
365.8	0.26918126		955.79	0.07795496		1545.81	0.00656776		2135.8	0.05417518		2725.8	0.00599903		3315.8	0.00104048
366	0.26898377		955.99	0.0792689		1546.01	0.00650676		2136	0.05421299		2726	0.00641028		3316	0.00159164
366.2	0.26904975		956.19	0.08030301		1546.21	0.00639488		2136.2	0.05401735		2726.2	0.00607817		3316.2	0.00083607
366.4	0.27028314		956.39	0.08028861		1546.41	0.00622433		2136.4	0.05347297		2726.4	0.00613982		3316.4	0.00057775
366.6	0.27016264		956.59	0.08034364		1546.61	0.00603044		2136.6	0.053816		2726.6	0.00622679		3316.6	-0.00022877
366.8	0.27029233		956.79	0.08144738		1546.81	0.00619922		2136.8	0.05371722		2726.8	0.00648052		3316.8	-0.00067376
367	0.26962125		956.99	0.08171462		1547.01	0.00649753		2137	0.05215684		2727	0.00651012		3317	-0.00051342
367.2	0.26991588		957.19	0.08218286		1547.21	0.00611196		2137.2	0.05173079		2727.2	0.00687692		3317.2	-0.00060283
367.4	0.26994066		957.39	0.08172353		1547.41	0.0059507		2137.4	0.05176566		2727.4	0.00637593		3317.4	-0.0011023
367.6	0.27043164		957.59	0.08148049		1547.61	0.00510919		2137.6	0.05237788		2727.6	0.00635915		3317.6	-0.00169037
367.8	0.27118647		957.79	0.08101468		1547.81	0.00537495		2137.8	0.05286607		2727.8	0.00676227		3317.8	-0.00120773
368	0.27239429		957.99	0.08038871		1548.01	0.00496339		2138	0.05319981		2728	0.00657744		3318	-0.00126481
368.2	0.27401438		958.19	0.07971504		1548.21	0.00500624		2138.2	0.05264671		2728.2	0.00619687		3318.2	-0.00182365
368.4	0.27388766		958.39	0.07961416		1548.41	0.00520345		2138.4	0.05299105		2728.4	0.00462286		3318.4	-0.00137847
368.6	0.27536683		958.59	0.08051462		1548.61	0.00507967		2138.6	0.05239961		2728.6	0.0049268		3318.6	-0.00042158
368.8	0.27631653		958.79	0.08056943		1548.81	0.00535831		2138.8	0.05229396		2728.8	0.00542228		3318.8	0.0005888
369	0.27703216		958.99	0.08049516		1549.01	0.00633843		2139	0.0524865		2729	0.00628895		3319	0.00075128
369.2	0.27728867		959.19	0.07983485		1549.21	0.00654941		2139.2	0.0525127		2729.2	0.00732866		3319.2	0.00108619
369.4	0.27767418		959.39	0.0804492		1549.41	0.00646639		2139.4	0.05225447		2729.4	0.00680367		3319.4	0.00121729
369.6	0.27801156		959.59	0.08064832		1549.61	0.00660446		2139.6	0.05101429		2729.6	0.00735149		3319.6	0.00188509
369.8	0.27867194		959.79	0.08134048		1549.81	0.00697196		2139.8	0.0514653		2729.8	0.00737393		3319.8	0.00245387
370	0.2785092		959.99	0.08193419		1550.01	0.00662454		2140	0.05139092		2730	0.00790087		3320	0.00255619
370.2	0.27824819		960.19	0.08292385		1550.21	0.0069329		2140.2	0.05154653		2730.2	0.00733745		3320.2	0.00208106
370.4	0.27826627		960.39	0.08328866		1550.41	0.00699905		2140.4	0.0518994		2730.4	0.0083466		3320.4	0.00177148
370.6	0.27681786		960.59	0.08387519		1550.61	0.00717234		2140.6	0.05249337		2730.6	0.01014805		3320.6	0.00208357
370.8	0.27681513		960.79	0.08408392		1550.81	0.00704072		2140.8	0.05225734		2730.8	0.00954546		3320.8	0.00235816
371	0.27572402		960.99	0.08391486		1551.01	0.00728174		2141	0.05205228		2731	0.00908497		3321	0.00255819
371.2	0.27570244		961.19	0.08355243		1551.21	0.00802155		2141.2	0.05227454		2731.2	0.00894793		3321.2	0.00221074
371.4	0.27549486		961.39	0.08331595		1551.41	0.00745315		2141.4	0.05275054		2731.4	0.00824796		3321.4	0.00288621
371.6	0.27571467		961.59	0.083129		1551.61	0.00675956		2141.6	0.053152		2731.6	0.00796186		3321.6	0.00310374
371.8	0.27567294		961.79	0.08216568		1551.81	0.00673613		2141.8	0.05302475		2731.8	0.00810727		3321.8	0.00345792
372	0.27684733		961.99	0.08180232		1552.01	0.00629956		2142	0.05257374		2732	0.00750932		3322	0.00342101
372.2	0.27779363		962.19	0.08147656		1552.21	0.00598521		2142.2	0.05313247		2732.2	0.00740449		3322.2	0.00204199
372.4	0.27860256		962.39	0.08189669		1552.41	0.0057978		2142.4	0.05379948		2732.4	0.00647851		3322.4	0.00152733
372.6	0.28013192		962.59	0.08256734		1552.61	0.00627511		2142.6	0.05380051		2732.6	0.00675068		3322.6	0.00237893
372.8	0.28119611		962.79	0.08168825		1552.81	0.00635394		2142.8	0.05440737		2732.8	0.00647693		3322.8	0.00166604
373	0.28216131		962.99	0.08264049		1553.01	0.00577737		2143	0.05450922		2733	0.00622949		3323	0.00127251
373.2	0.28275821		963.19	0.08315672		1553.21	0.00630912		2143.2	0.05476383		2733.2	0.00616924		3323.2	0.00101025
373.4	0.28241197		963.39	0.08390502		1553.41	0.006129		2143.4	0.05520743		2733.4	0.00636293		3323.4	0.00133324
373.6	0.28238767		963.59	0.08470788		1553.61	0.00599253		2143.6	0.05485078		2733.6	0.0060917		3323.6	0.000956
373.8	0.28233381		963.79	0.08507393		1553.81	0.0059449		2143.8	0.0549476		2733.8	0.00585308		3323.8	-0.00000633
374	0.28203477		963.99	0.08510843		1554.01	0.0055938		2144	0.05535421		2734	0.00671838		3324	-0.00099745
374.2	0.28208755		964.19	0.08611846		1554.21	0.0051456		2144.2	0.05626687		2734.2	0.00665699		3324.2	-0.00074691
374.4	0.2816634		964.39	0.08684264		1554.41	0.00439122		2144.4	0.05729073		2734.4	0.00781349		3324.4	-0.00170367
374.6	0.28055509		964.59	0.08698441		1554.61	0.00486931		2144.6	0.05687177		2734.6	0.00812612		3324.6	-0.00129502
374.8	0.28088279		964.79	0.08755542		1554.81	0.00480886		2144.8	0.05675199		2734.8	0.00741812		3324.8	-0.00166013
375	0.28047418		964.99	0.08766183		1555.01	0.0059396		2145	0.05627738		2735	0.0071936		3325	-0.00057532
375.2	0.28097645		965.19	0.08799973		1555.21	0.00613185		2145.2	0.05613902		2735.2	0.00688249		3325.2	-0.00044743
375.4	0.28099368		965.39	0.08789988		1555.41	0.0053453		2145.4	0.05661253		2735.4	0.00660951		3325.4	-0.0001325
375.6	0.28126499		965.59	0.08759076		1555.61	0.00551857		2145.6	0.05624028		2735.6	0.00717325		3325.6	0.00008876
375.8	0.2816161		965.79	0.08728441		1555.81	0.00563465		2145.8	0.05573921		2735.8	0.00762136		3325.8	0.00041781
376	0.28235308		965.99	0.08775552		1556.01	0.00559659		2146	0.05452422		2736	0.00709529		3326	0.00000342
376.2	0.28310728		966.19	0.08812866		1556.21	0.00572068		2146.2	0.05535465		2736.2	0.00699596		3326.2	-0.00045638
376.4	0.2847296		966.39	0.08860716		1556.41	0.00532961		2146.4	0.05474145		2736.4	0.00681917		3326.4	-0.00013878
376.6	0.2854925		966.59	0.08938368		1556.61	0.00600449		2146.6	0.05412273		2736.6	0.00729374		3326.6	0.00099313
376.8	0.28541488		966.79	0.09000948		1556.81	0.00581424		2146.8	0.05404316		2736.8	0.00781633		3326.8	0.00004647
377	0.28610281		966.99	0.09094461		1557.01	0.00565767		2147	0.05424724		2737	0.00824307		3327	0.00052696
377.2	0.28612885		967.19	0.09093387		1557.21	0.00662065		2147.2	0.0543741		2737.2	0.00826153		3327.2	0.00061479
377.4	0.28578155		967.39	0.09035902		1557.41	0.00615657		2147.4	0.05388345		2737.4	0.00843698		3327.4	0.00068271
377.6	0.28615714		967.59	0.09114577		1557.61	0.00573263		2147.6	0.05349134		2737.6	0.00813046		3327.6	0.00062388
377.8	0.28725926		967.79	0.09138528		1557.81	0.00589795		2147.8	0.05411494		2737.8	0.00852047		3327.8	0.00052693
378	0.28772882		967.99	0.09149221		1558.01	0.00560029		2148	0.05465331		2738	0.00852808		3328	0.00194088
378.2	0.28767932		968.19	0.09179884		1558.21	0.00568119		2148.2	0.05533896		2738.2	0.00813673		3328.2	0.00193296
378.4	0.28801855		968.39	0.0917943		1558.41	0.00608157		2148.4	0.05479538		2738.4	0.00758782		3328.4	0.00177803
378.6	0.28890983		968.59	0.09156366		1558.61	0.00716783		2148.6	0.05519818		2738.6	0.00732418		3328.6	0.00221392
378.8	0.28924876		968.79	0.09169366		1558.81	0.00654324		2148.8	0.05583089		2738.8	0.00712804		3328.8	0.0025168
379	0.29001782		968.99	0.09056143		1559.01	0.00719786		2149	0.05548651		2739	0.00625301		3329	0.00308134
379.2	0.29039655		969.19	0.09018869		1559.21	0.0069224		2149.2	0.05643084		2739.2	0.00574119		3329.2	0.00251256
379.4	0.29077776		969.39	0.08934614		1559.41	0.00763403		2149.4	0.05681255		2739.4	0.0054282		3329.4	0.00301719
379.6	0.29207295		969.59	0.08959049		1559.61	0.00679885		2149.6	0.05591519		2739.6	0.0053243		3329.6	0.00344389
379.8	0.29231001		969.79	0.0895583		1559.81	0.00738107		2149.8	0.0559367		2739.8	0.00461693		3329.8	0.00244764
380	0.29257816		969.99	0.08954409		1560.01	0.0072986		2150	0.05502698		2740	0.00469508		3330	0.00156983
380.2	0.29272227		970.19	0.08874381		1560.21	0.0066586		2150.2	0.0556234		2740.2	0.00542674		3330.2	0.00154968
380.4	0.29275006		970.39	0.08929738		1560.41	0.0062895		2150.4	0.05571168		2740.4	0.00664269		3330.4	0.0008996
380.6	0.2925548		970.59	0.08962828		1560.61	0.00679488		2150.6	0.05624955		2740.6	0.00752657		3330.6	0.00059164
380.8	0.29275352		970.79	0.08985175		1560.81	0.00572118		2150.8	0.0574936		2740.8	0.00765206		3330.8	-0.00009475
381	0.29210744		970.99	0.0897453		1561.01	0.00502714		2151	0.05812339		2741	0.00891587		3331	-0.00007255
381.2	0.29181009		971.19	0.09107048		1561.21	0.00551326		2151.2	0.05832706		2741.2	0.00962059		3331.2	0.0000041
381.4	0.29171424		971.39	0.09196868		1561.41	0.00537478		2151.4	0.05874086		2741.4	0.01086575		3331.4	-0.00028342
381.6	0.29168396		971.59	0.09409176		1561.61	0.00506258		2151.6	0.05914184		2741.6	0.01102291		3331.6	-0.00040947
381.8	0.29208575		971.79	0.09428911		1561.81	0.00482798		2151.8	0.05969121		2741.8	0.01191772		3331.8	-0.00009652
382	0.29222044		971.99	0.09458199		1562.01	0.00486563		2152	0.05920306		2742	0.01232947		3332	0.00017781
382.2	0.29222882		972.19	0.09482717		1562.21	0.00513419		2152.2	0.05971912		2742.2	0.01308729		3332.2	0.00002019
382.4	0.29338583		972.39	0.09562443		1562.41	0.00511237		2152.4	0.05963037		2742.4	0.0133183		3332.4	-0.0003021
382.6	0.29292851		972.59	0.09538074		1562.61	0.00523223		2152.6	0.06037717		2742.6	0.01308948		3332.6	0.00012083
382.8	0.29282611		972.79	0.09516293		1562.81	0.00413714		2152.8	0.05960754		2742.8	0.01273011		3332.8	0.0005054
383	0.29355092		972.99	0.0946097		1563.01	0.00417085		2153	0.06004753		2743	0.01196075		3333	0.00098368
383.2	0.2936915		973.19	0.09481649		1563.21	0.00342449		2153.2	0.05997706		2743.2	0.01159098		3333.2	0.00197036
383.4	0.29381116		973.39	0.09470626		1563.41	0.00341447		2153.4	0.06034812		2743.4	0.01122045		3333.4	0.00243476
383.6	0.29463424		973.59	0.09518699		1563.61	0.00293312		2153.6	0.06013926		2743.6	0.01038523		3333.6	0.00284802
383.8	0.29490021		973.79	0.09467097		1563.81	0.00402571		2153.8	0.05977752		2743.8	0.01006886		3333.8	0.00247514
384	0.29555949		973.99	0.0940581		1564.01	0.00363827		2154	0.05920003		2744	0.01010991		3334	0.00304341
384.2	0.29592964		974.19	0.09383353		1564.21	0.00357244		2154.2	0.05999605		2744.2	0.00971041		3334.2	0.00303574
384.4	0.29663062		974.39	0.09475649		1564.41	0.00357909		2154.4	0.06006332		2744.4	0.0087577		3334.4	0.00250145
384.6	0.29728187		974.59	0.09429633		1564.61	0.00337148		2154.6	0.06002523		2744.6	0.00757765		3334.6	0.00223389
384.8	0.29741421		974.79	0.09452518		1564.81	0.00258485		2154.8	0.06056288		2744.8	0.00666016		3334.8	0.00226784
385	0.29770238		974.99	0.09509018		1565.01	0.00291015		2155	0.05965322		2745	0.00738436		3335	0.0022153
385.2	0.29873106		975.19	0.09626585		1565.21	0.00381958		2155.2	0.05988951		2745.2	0.00743585		3335.2	0.00131357
385.4	0.29915274		975.39	0.09595243		1565.41	0.00405302		2155.4	0.05915885		2745.4	0.00725		3335.4	0.00017827
385.6	0.29954514		975.59	0.09643541		1565.61	0.00446493		2155.6	0.05899732		2745.6	0.00732713		3335.6	-0.00065134
385.8	0.30037968		975.79	0.09559306		1565.81	0.00570077		2155.8	0.05910874		2745.8	0.00894315		3335.8	-0.00008027
386	0.30031946		975.99	0.09582032		1566.01	0.00758156		2156	0.05907638		2746	0.00934842		3336	-0.00093443
386.2	0.3003475		976.19	0.09684214		1566.21	0.00792517		2156.2	0.05924836		2746.2	0.0097385		3336.2	-0.00115199
386.4	0.30049835		976.39	0.0963157		1566.41	0.00798532		2156.4	0.05949114		2746.4	0.00999135		3336.4	-0.00174947
386.6	0.29995036		976.59	0.09546148		1566.61	0.00820467		2156.6	0.06025477		2746.6	0.01039567		3336.6	-0.00084661
386.8	0.30009554		976.79	0.09604496		1566.81	0.00741252		2156.8	0.06038189		2746.8	0.01098125		3336.8	-0.00021732
387	0.30034448		976.99	0.09628611		1567.01	0.00750908		2157	0.06103259		2747	0.01149425		3337	0.00072281
387.2	0.3000667		977.19	0.0966684		1567.21	0.00688525		2157.2	0.06058379		2747.2	0.01160009		3337.2	0.00197042
387.4	0.29999581		977.39	0.09647439		1567.41	0.00718752		2157.4	0.0611778		2747.4	0.01115637		3337.4	0.002922
387.6	0.30138116		977.59	0.09744463		1567.61	0.00687329		2157.6	0.06061312		2747.6	0.01081996		3337.6	0.00319891
387.8	0.30198901		977.79	0.09721552		1567.81	0.00596065		2157.8	0.06001659		2747.8	0.01056138		3337.8	0.00347462
388	0.3025406		977.99	0.09786294		1568.01	0.00595473		2158	0.05970186		2748	0.01045933		3338	0.00413083
388.2	0.30273366		978.19	0.09876453		1568.21	0.0063667		2158.2	0.05918122		2748.2	0.00989529		3338.2	0.00316256
388.4	0.30314784		978.39	0.09973093		1568.41	0.00642397		2158.4	0.05879358		2748.4	0.00908337		3338.4	0.00350121
388.6	0.30279474		978.59	0.10004353		1568.61	0.00594184		2158.6	0.05836596		2748.6	0.00798604		3338.6	0.00372205
388.8	0.30262316		978.79	0.10084974		1568.81	0.00596427		2158.8	0.05826406		2748.8	0.00713496		3338.8	0.00321903
389	0.30293418		978.99	0.10120045		1569.01	0.00714818		2159	0.05774511		2749	0.00763064		3339	0.0024563
389.2	0.30350396		979.19	0.10072973		1569.21	0.00741131		2159.2	0.05765739		2749.2	0.0074821		3339.2	0.00062346
389.4	0.30286734		979.39	0.10029882		1569.41	0.00749476		2159.4	0.05724935		2749.4	0.00740801		3339.4	-0.00010579
389.6	0.30277596		979.59	0.10081073		1569.61	0.00835668		2159.6	0.057779		2749.6	0.00766052		3339.6	-0.00037592
389.8	0.30276139		979.79	0.10024593		1569.81	0.00965805		2159.8	0.05734272		2749.8	0.00764773		3339.8	-0.00074062
390	0.3022671		979.99	0.1010868		1570.01	0.01006968		2160	0.05741503		2750	0.00748762		3340	-0.00139059
390.2	0.30246753		980.19	0.10192539		1570.21	0.00933505		2160.2	0.05750232		2750.2	0.00714654		3340.2	-0.00174348
390.4	0.30272992		980.39	0.10118557		1570.41	0.00945873		2160.4	0.05790592		2750.4	0.00703202		3340.4	-0.0027601
390.6	0.30302258		980.59	0.10076153		1570.61	0.00971482		2160.6	0.05849454		2750.6	0.0075554		3340.6	-0.00275496
390.8	0.30309093		980.79	0.10126459		1570.81	0.00861808		2160.8	0.05827198		2750.8	0.00749971		3340.8	-0.00230405
391	0.30383124		980.99	0.10179422		1571.01	0.00831195		2161	0.05796721		2751	0.00726652		3341	-0.00230946
391.2	0.30381638		981.19	0.10175356		1571.21	0.00815003		2161.2	0.05797081		2751.2	0.00730291		3341.2	-0.00175431
391.4	0.30454532		981.39	0.10191153		1571.41	0.00746721		2161.4	0.05795884		2751.4	0.00745093		3341.4	-0.00154312
391.6	0.30591421		981.59	0.10278836		1571.61	0.00645052		2161.6	0.05741558		2751.6	0.00761683		3341.6	-0.002558
391.8	0.30650382		981.79	0.1026226		1571.81	0.00612098		2161.8	0.05768303		2751.8	0.00798222		3341.8	-0.00119531
392	0.3065736		981.99	0.10326004		1572.01	0.00623686		2162	0.05720589		2752	0.0082716		3342	-0.00081777
392.2	0.30635316		982.19	0.10342097		1572.21	0.00656922		2162.2	0.05730044		2752.2	0.00838719		3342.2	-0.00029681
392.4	0.30676503		982.39	0.10367261		1572.41	0.00700902		2162.4	0.0581628		2752.4	0.00839897		3342.4	-0.00029966
392.6	0.3066328		982.59	0.1029603		1572.61	0.00723689		2162.6	0.05809084		2752.6	0.00830195		3342.6	-0.00080221
392.8	0.30704503		982.79	0.10237331		1572.81	0.00698372		2162.8	0.05893733		2752.8	0.00893104		3342.8	-0.00214841
393	0.30692821		982.99	0.10194208		1573.01	0.00676452		2163	0.05938879		2753	0.00950058		3343	-0.00185663
393.2	0.30774152		983.19	0.10129504		1573.21	0.00570681		2163.2	0.0594832		2753.2	0.00873742		3343.2	-0.00191654
393.4	0.30761359		983.39	0.10187257		1573.41	0.00558393		2163.4	0.06042558		2753.4	0.00811047		3343.4	-0.00180801
393.6	0.30806382		983.59	0.10169067		1573.61	0.00567113		2163.6	0.06027574		2753.6	0.00729363		3343.6	-0.00205398
393.8	0.30830348		983.79	0.10184969		1573.81	0.00560939		2163.8	0.05971742		2753.8	0.00752192		3343.8	-0.00203331
394	0.3087053		983.99	0.10308894		1574.01	0.00546687		2164	0.05983273		2754	0.00741142		3344	-0.00202477
394.2	0.3087637		984.19	0.10337517		1574.21	0.0051922		2164.2	0.05979325		2754.2	0.00652291		3344.2	-0.00157069
394.4	0.30908973		984.39	0.10269271		1574.41	0.00507023		2164.4	0.05964469		2754.4	0.00662334		3344.4	-0.00185407
394.6	0.30928844		984.59	0.10257741		1574.61	0.00423413		2164.6	0.05944291		2754.6	0.00715912		3344.6	-0.0011348
394.8	0.3093323		984.79	0.10377082		1574.81	0.00360764		2164.8	0.05937933		2754.8	0.00644153		3344.8	-0.00082501
395	0.30982042		984.99	0.10485141		1575.01	0.00411239		2165	0.05861171		2755	0.00647536		3345	-0.00068121
395.2	0.30998303		985.19	0.10515237		1575.21	0.00318556		2165.2	0.058581		2755.2	0.00685072		3345.2	0.00012929
395.4	0.31080277		985.39	0.10532295		1575.41	0.00169014		2165.4	0.05922225		2755.4	0.00656187		3345.4	0.00005812
395.6	0.31176631		985.59	0.10580955		1575.61	0.00150525		2165.6	0.05842313		2755.6	0.0064724		3345.6	-0.00008274
395.8	0.31203045		985.79	0.10546024		1575.81	0.00197441		2165.8	0.05848767		2755.8	0.00714694		3345.8	0.00115838
396	0.31142731		985.99	0.10581048		1576.01	0.00271272		2166	0.05780982		2756	0.0065804		3346	0.00147297
396.2	0.31095293		986.19	0.10590221		1576.21	0.00416177		2166.2	0.05782922		2756.2	0.00752761		3346.2	0.00155423
396.4	0.3107729		986.39	0.10516789		1576.41	0.00535774		2166.4	0.05765354		2756.4	0.0085042		3346.4	0.00087043
396.6	0.31091721		986.59	0.10482825		1576.61	0.00545082		2166.6	0.05755161		2756.6	0.00894601		3346.6	0.00103017
396.8	0.3113992		986.79	0.10487203		1576.81	0.00553549		2166.8	0.05761182		2756.8	0.00944982		3346.8	0.00053543
397	0.3116674		986.99	0.1057762		1577.01	0.00601866		2167	0.05859771		2757	0.00883588		3347	0.00082141
397.2	0.31219064		987.19	0.10571418		1577.21	0.00667374		2167.2	0.0587976		2757.2	0.00855311		3347.2	-0.00016516
397.4	0.3120519		987.39	0.10633108		1577.41	0.00730756		2167.4	0.05896826		2757.4	0.00898952		3347.4	-0.00057971
397.6	0.31186296		987.59	0.10574646		1577.61	0.00786411		2167.6	0.05879298		2757.6	0.00897129		3347.6	-0.00057802
397.8	0.31223676		987.79	0.10612134		1577.81	0.00836871		2167.8	0.05936924		2757.8	0.00990886		3347.8	0.00036048
398	0.31214723		987.99	0.10601663		1578.01	0.00855717		2168	0.05975767		2758	0.0096637		3348	0.0005686
398.2	0.31218979		988.19	0.10593353		1578.21	0.00809262		2168.2	0.0594566		2758.2	0.00931724		3348.2	0.00124085
398.4	0.31268118		988.39	0.10582767		1578.41	0.00806873		2168.4	0.05898161		2758.4	0.00967851		3348.4	0.00042027
398.6	0.31312176		988.59	0.10592248		1578.61	0.00775007		2168.6	0.05831718		2758.6	0.01009645		3348.6	0.00015746
398.8	0.31299066		988.79	0.10576849		1578.81	0.00762023		2168.8	0.05819974		2758.8	0.00993452		3348.8	-0.00016294
399	0.31351513		988.99	0.1054747		1579.01	0.00641998		2169	0.05747258		2759	0.00980137		3349	0.00004977
399.2	0.31398704		989.19	0.10498595		1579.21	0.00534282		2169.2	0.05771778		2759.2	0.00895029		3349.2	0.00023836
399.4	0.31436358		989.39	0.1041011		1579.41	0.00473352		2169.4	0.05761675		2759.4	0.00867713		3349.4	-0.00078225
399.6	0.31510841		989.59	0.1041717		1579.61	0.0055039		2169.6	0.05716502		2759.6	0.00822176		3349.6	-0.00097931
399.8	0.31587881		989.79	0.10329008		1579.81	0.00563971		2169.8	0.05730262		2759.8	0.00787386		3349.8	0.00003783
400	0.31553405		989.99	0.10333357		1580.01	0.00627906		2170	0.05741091		2760	0.00765526		3350	0.00010214
400.2	0.31564264		990.19	0.10359015		1580.21	0.00669879		2170.2	0.0574273		2760.2	0.0082068		3350.2	-0.00126195
400.4	0.316069		990.39	0.10350652		1580.41	0.00718993		2170.4	0.05698968		2760.4	0.00859455		3350.4	-0.00079567
400.6	0.31731854		990.59	0.10453705		1580.61	0.00738486		2170.6	0.05725621		2760.6	0.00872659		3350.6	-0.00096475
400.8	0.31774887		990.79	0.10481643		1580.81	0.00870533		2170.8	0.05818285		2760.8	0.00931321		3350.8	-0.00058033
401	0.31861426		990.99	0.10580703		1581.01	0.00895817		2171	0.05972156		2761	0.00895581		3351	-0.00023418
401.2	0.31908396		991.19	0.10584821		1581.21	0.00878718		2171.2	0.05881985		2761.2	0.00905786		3351.2	0.00021831
401.4	0.31957881		991.39	0.10608296		1581.41	0.00868367		2171.4	0.05971461		2761.4	0.00872694		3351.4	0.00121631
401.6	0.32048561		991.59	0.1051905		1581.61	0.008553		2171.6	0.06084153		2761.6	0.00909272		3351.6	0.00228749
401.8	0.32108117		991.79	0.10513278		1581.81	0.0081814		2171.8	0.06143249		2761.8	0.00934578		3351.8	0.00367588
402	0.32113228		991.99	0.10592836		1582.01	0.00749634		2172	0.06164151		2762	0.00940669		3352	0.00386516
402.2	0.32113239		992.19	0.10672064		1582.21	0.00686944		2172.2	0.06143427		2762.2	0.00928444		3352.2	0.00337577
402.4	0.32111964		992.39	0.10666891		1582.41	0.00604066		2172.4	0.06112456		2762.4	0.01022371		3352.4	0.00289848
402.6	0.32081445		992.59	0.10658622		1582.61	0.00568556		2172.6	0.06012809		2762.6	0.01087411		3352.6	0.00293935
402.8	0.3208684		992.79	0.10695797		1582.81	0.00518469		2172.8	0.05978269		2762.8	0.00994262		3352.8	0.00228991
403	0.32045312		992.99	0.10726906		1583.01	0.00514431		2173	0.06010689		2763	0.00947585		3353	0.00210222
403.2	0.31986068		993.19	0.10760875		1583.21	0.00545172		2173.2	0.06055665		2763.2	0.00891871		3353.2	0.00184876
403.4	0.31901464		993.39	0.10841795		1583.41	0.00572453		2173.4	0.06114957		2763.4	0.00837591		3353.4	0.00112038
403.6	0.31925334		993.59	0.10872283		1583.61	0.00581701		2173.6	0.06195177		2763.6	0.00777303		3353.6	0.00104963
403.8	0.32035873		993.79	0.10929614		1583.81	0.00533285		2173.8	0.06221451		2763.8	0.00775569		3353.8	0.00052427
404	0.31928386		993.99	0.10944734		1584.01	0.00615386		2174	0.06221194		2764	0.00813467		3354	-0.00135928
404.2	0.31864902		994.19	0.11056173		1584.21	0.00685139		2174.2	0.06213759		2764.2	0.0081117		3354.2	-0.00253613
404.4	0.31902849		994.39	0.11091464		1584.41	0.00699895		2174.4	0.06242284		2764.4	0.00815816		3354.4	-0.00143419
404.6	0.31991284		994.59	0.11153766		1584.61	0.00746028		2174.6	0.06287796		2764.6	0.00866967		3354.6	-0.00145429
404.8	0.31977206		994.79	0.11115648		1584.81	0.00880641		2174.8	0.06317553		2764.8	0.00884354		3354.8	-0.00144742
405	0.32044073		994.99	0.11059796		1585.01	0.00846155		2175	0.06286074		2765	0.00874303		3355	-0.00193206
405.2	0.32097428		995.19	0.10964608		1585.21	0.00819752		2175.2	0.06191431		2765.2	0.00884584		3355.2	-0.00124687
405.4	0.3212969		995.39	0.10935265		1585.41	0.00857913		2175.4	0.06268778		2765.4	0.00846434		3355.4	-0.0011775
405.6	0.32221829		995.59	0.10833254		1585.61	0.0085504		2175.6	0.06253997		2765.6	0.00953709		3355.6	-0.00140313
405.8	0.32357496		995.79	0.10831998		1585.81	0.00885909		2175.8	0.0616526		2765.8	0.00951019		3355.8	-0.00090705
406	0.32363175		995.99	0.10878211		1586.01	0.00778478		2176	0.06172878		2766	0.01032685		3356	-0.00173099
406.2	0.32354142		996.19	0.10798682		1586.21	0.00715713		2176.2	0.06098559		2766.2	0.01080463		3356.2	-0.00159558
406.4	0.32381435		996.39	0.1077468		1586.41	0.00677849		2176.4	0.06045232		2766.4	0.01206431		3356.4	-0.00106716
406.6	0.32423036		996.59	0.10821956		1586.61	0.00692111		2176.6	0.05973669		2766.6	0.01245399		3356.6	-0.00067782
406.8	0.32458032		996.79	0.10899191		1586.81	0.0072622		2176.8	0.06011008		2766.8	0.01275232		3356.8	-0.00063957
407	0.3241885		996.99	0.10887971		1587.01	0.00803208		2177	0.06045103		2767	0.01317056		3357	0.00010487
407.2	0.32386097		997.19	0.10940287		1587.21	0.00763643		2177.2	0.06086083		2767.2	0.01287477		3357.2	-0.00006603
407.4	0.32399814		997.39	0.10991304		1587.41	0.00754144		2177.4	0.06126121		2767.4	0.01271596		3357.4	-0.00048876
407.6	0.32422937		997.59	0.10991416		1587.61	0.00684565		2177.6	0.06122299		2767.6	0.0128149		3357.6	-0.00074229
407.8	0.3250792		997.79	0.11088505		1587.81	0.00674452		2177.8	0.06129721		2767.8	0.01275766		3357.8	-0.00120894
408	0.32404962		997.99	0.11097933		1588.01	0.00688729		2178	0.0610609		2768	0.01286399		3358	-0.00120935
408.2	0.32364882		998.19	0.112433		1588.21	0.00668455		2178.2	0.06099723		2768.2	0.01223826		3358.2	0.00007096
408.4	0.32377157		998.39	0.11270954		1588.41	0.00591978		2178.4	0.06137662		2768.4	0.01142954		3358.4	0.00122953
408.6	0.32379259		998.59	0.11451113		1588.61	0.00616832		2178.6	0.06069562		2768.6	0.01095176		3358.6	0.00150833
408.8	0.3228794		998.79	0.11477222		1588.81	0.00727846		2178.8	0.06081119		2768.8	0.01048135		3358.8	0.00195771
409	0.32271057		998.99	0.11561813		1589.01	0.00728472		2179	0.06016585		2769	0.01006875		3359	0.00179032
409.2	0.32257925		999.19	0.11603154		1589.21	0.00677518		2179.2	0.06028474		2769.2	0.00941983		3359.2	0.00237129
409.4	0.32284311		999.39	0.11646439		1589.41	0.0063826		2179.4	0.06103479		2769.4	0.00922927		3359.4	0.00262979
409.6	0.32355159		999.59	0.11581382		1589.61	0.00642046		2179.6	0.06005576		2769.6	0.00940994		3359.6	0.00295425
409.8	0.32407068		999.79	0.11611328		1589.81	0.00598103		2179.8	0.06033627		2769.8	0.00920839		3359.8	0.00344189
410	0.32325716		999.99	0.11612482		1590.01	0.00495009		2180	0.06064109		2770	0.00938304		3360	0.0024597
410.2	0.32281338		1000.19	0.11572521		1590.21	0.00428286		2180.2	0.06132147		2770.2	0.00956093		3360.2	0.0029693
410.4	0.32357259		1000.39	0.1165101		1590.41	0.00430157		2180.4	0.0614811		2770.4	0.00954243		3360.4	0.00193301
410.6	0.32421972		1000.59	0.1163939		1590.61	0.00420303		2180.6	0.0613209		2770.6	0.00902162		3360.6	0.00102637
410.8	0.32471009		1000.79	0.11681938		1590.81	0.00464677		2180.8	0.06229643		2770.8	0.00938298		3360.8	0.00048769
411	0.32571561		1000.99	0.11587339		1591.01	0.00459196		2181	0.06201441		2771	0.00948167		3361	0.00051826
411.2	0.32635566		1001.19	0.1155773		1591.21	0.00385481		2181.2	0.06249728		2771.2	0.00973925		3361.2	-0.00012133
411.4	0.32728		1001.39	0.11470767		1591.41	0.00423415		2181.4	0.06225361		2771.4	0.00980919		3361.4	-0.00126419
411.6	0.32828646		1001.59	0.11450951		1591.61	0.00485818		2181.6	0.06146981		2771.6	0.0093027		3361.6	-0.00172115
411.8	0.32936843		1001.79	0.11485528		1591.81	0.00496397		2181.8	0.06088609		2771.8	0.00921461		3361.8	-0.00196161
412	0.33012437		1001.99	0.11470447		1592.01	0.00580397		2182	0.0600937		2772	0.00844725		3362	-0.00226879
412.2	0.33006664		1002.19	0.11467926		1592.21	0.00647389		2182.2	0.05912836		2772.2	0.00735915		3362.2	-0.00192034
412.4	0.33042831		1002.39	0.11458374		1592.41	0.00686008		2182.4	0.05932134		2772.4	0.00700487		3362.4	-0.00187346
412.6	0.33057187		1002.59	0.11627133		1592.61	0.00777302		2182.6	0.05871167		2772.6	0.00695682		3362.6	-0.00182094
412.8	0.3307982		1002.79	0.11624772		1592.81	0.00889124		2182.8	0.05829312		2772.8	0.00718958		3362.8	-0.00167538
413	0.33197413		1002.99	0.11617972		1593.01	0.00916752		2183	0.05722511		2773	0.00664867		3363	-0.00174541
413.2	0.33202624		1003.19	0.11497793		1593.21	0.00848557		2183.2	0.05698512		2773.2	0.0070822		3363.2	-0.00182837
413.4	0.33256984		1003.39	0.11494267		1593.41	0.00909946		2183.4	0.05696005		2773.4	0.00797495		3363.4	-0.00122866
413.6	0.33296711		1003.59	0.11453961		1593.61	0.00954132		2183.6	0.05536278		2773.6	0.00824233		3363.6	-0.00156542
413.8	0.33257613		1003.79	0.11541339		1593.81	0.00890522		2183.8	0.05681896		2773.8	0.00884934		3363.8	-0.00179818
414	0.33131734		1003.99	0.11580317		1594.01	0.00873633		2184	0.0568306		2774	0.00919789		3364	-0.00222431
414.2	0.33061874		1004.19	0.11562745		1594.21	0.00806197		2184.2	0.05814036		2774.2	0.0089728		3364.2	-0.00165931
414.4	0.3306192		1004.39	0.11577043		1594.41	0.00871111		2184.4	0.05813511		2774.4	0.00879656		3364.4	-0.00185618
414.6	0.32936761		1004.59	0.11591162		1594.61	0.00796183		2184.6	0.05893368		2774.6	0.0092047		3364.6	-0.00098657
414.8	0.32945384		1004.79	0.11630039		1594.81	0.00702401		2184.8	0.06014715		2774.8	0.00998819		3364.8	-0.00064693
415	0.32996039		1004.99	0.11645959		1595.01	0.00655337		2185	0.06067794		2775	0.01031839		3365	-0.00094144
415.2	0.32945462		1005.19	0.11619263		1595.21	0.005876		2185.2	0.06168883		2775.2	0.01066538		3365.2	-0.00103371
415.4	0.32905779		1005.39	0.11631713		1595.41	0.00592792		2185.4	0.06147726		2775.4	0.01056845		3365.4	-0.00144811
415.6	0.32945455		1005.59	0.11731331		1595.61	0.00561127		2185.6	0.06213274		2775.6	0.01009708		3365.6	-0.0010519
415.8	0.32873677		1005.79	0.11800108		1595.81	0.00475606		2185.8	0.06235199		2775.8	0.01018846		3365.8	-0.00124966
416	0.32920249		1005.99	0.11834962		1596.01	0.0047925		2186	0.06169465		2776	0.00892852		3366	-0.00148263
416.2	0.32881676		1006.19	0.11844309		1596.21	0.00461693		2186.2	0.06109021		2776.2	0.00829352		3366.2	-0.00166292
416.4	0.32929993		1006.39	0.11838043		1596.41	0.00507316		2186.4	0.0613403		2776.4	0.00809641		3366.4	-0.00246189
416.6	0.33005966		1006.59	0.11907751		1596.61	0.00463196		2186.6	0.06055832		2776.6	0.00770794		3366.6	-0.00276657
416.8	0.33156239		1006.79	0.11893101		1596.81	0.00502741		2186.8	0.06001904		2776.8	0.00726793		3366.8	-0.00316575
417	0.33249544		1006.99	0.11847677		1597.01	0.00466077		2187	0.05921323		2777	0.00746009		3367	-0.00369052
417.2	0.3327834		1007.19	0.11784937		1597.21	0.00507472		2187.2	0.05984165		2777.2	0.00857003		3367.2	-0.00481199
417.4	0.33461367		1007.39	0.11822686		1597.41	0.00573061		2187.4	0.06099735		2777.4	0.00989941		3367.4	-0.00420891
417.6	0.3356429		1007.59	0.11752589		1597.61	0.00517324		2187.6	0.06054654		2777.6	0.0105546		3367.6	-0.00421384
417.8	0.33594718		1007.79	0.11811525		1597.81	0.00457572		2187.8	0.06170559		2777.8	0.01012868		3367.8	-0.00331088
418	0.33555271		1007.99	0.11801104		1598.01	0.00450954		2188	0.06126548		2778	0.01045075		3368	-0.00327029
418.2	0.3368107		1008.19	0.1171075		1598.21	0.00506821		2188.2	0.06120749		2778.2	0.00976794		3368.2	-0.00271189
418.4	0.33701841		1008.39	0.11781626		1598.41	0.00559473		2188.4	0.06082348		2778.4	0.01034164		3368.4	-0.00254096
418.6	0.33699187		1008.59	0.11841813		1598.61	0.00470896		2188.6	0.06172		2778.6	0.01053052		3368.6	-0.00254488
418.8	0.33764392		1008.79	0.11834965		1598.81	0.0045619		2188.8	0.06166143		2778.8	0.01013685		3368.8	-0.00295137
419	0.33726248		1008.99	0.11859962		1599.01	0.00520086		2189	0.06221008		2779	0.01043584		3369	-0.00270646
419.2	0.33690171		1009.19	0.1180073		1599.21	0.00568591		2189.2	0.06192923		2779.2	0.01119171		3369.2	-0.00127966
419.4	0.33691848		1009.39	0.11814757		1599.41	0.00588352		2189.4	0.06130276		2779.4	0.01115883		3369.4	-0.00105297
419.6	0.33658848		1009.59	0.1183968		1599.61	0.00577102		2189.6	0.06138217		2779.6	0.0109031		3369.6	-0.00133122
419.8	0.33612047		1009.79	0.11843395		1599.81	0.00658795		2189.8	0.060477		2779.8	0.01039632		3369.8	-0.00181783
420	0.33652268		1009.99	0.11866505		1600.01	0.00743734		2190	0.05974417		2780	0.00997412		3370	-0.00192698
420.2	0.3358214		1010.19	0.1191641		1600.21	0.00823712		2190.2	0.05959015		2780.2	0.0094219		3370.2	-0.00242207
420.4	0.33583228		1010.39	0.12001629		1600.41	0.00824041		2190.4	0.05973388		2780.4	0.00906857		3370.4	-0.0026239
420.6	0.33533447		1010.59	0.12003299		1600.61	0.00690659		2190.6	0.05935855		2780.6	0.00912974		3370.6	-0.00294402
420.8	0.33500164		1010.79	0.11994044		1600.81	0.00691121		2190.8	0.05918636		2780.8	0.00898641		3370.8	-0.00332651
421	0.33616464		1010.99	0.1195337		1601.01	0.00667131		2191	0.05957444		2781	0.00957713		3371	-0.00361726
421.2	0.33661578		1011.19	0.11908999		1601.21	0.00715132		2191.2	0.06009941		2781.2	0.00925974		3371.2	-0.00388169
421.4	0.33659425		1011.39	0.11972942		1601.41	0.00624034		2191.4	0.05987216		2781.4	0.01022378		3371.4	-0.0031375
421.6	0.33600075		1011.59	0.11984316		1601.61	0.00594397		2191.6	0.05876237		2781.6	0.0104821		3371.6	-0.00286754
421.8	0.33636889		1011.79	0.12070526		1601.81	0.0059522		2191.8	0.05891104		2781.8	0.01019755		3371.8	-0.00222247
422	0.33652006		1011.99	0.12106391		1602.01	0.00631597		2192	0.05955224		2782	0.0109257		3372	-0.00215559
422.2	0.33790238		1012.19	0.12151554		1602.21	0.00633835		2192.2	0.06000285		2782.2	0.01048777		3372.2	-0.00162835
422.4	0.3380628		1012.39	0.12214757		1602.41	0.00529385		2192.4	0.06079448		2782.4	0.01148016		3372.4	-0.00180668
422.6	0.33768761		1012.59	0.12170509		1602.61	0.00486746		2192.6	0.06138228		2782.6	0.01132851		3372.6	-0.00210406
422.8	0.33772935		1012.79	0.12150719		1602.81	0.0044451		2192.8	0.06174427		2782.8	0.01151546		3372.8	-0.00167111
423	0.33828798		1012.99	0.12127598		1603.01	0.00535195		2193	0.06221597		2783	0.01219059		3373	-0.00091035
423.2	0.33865648		1013.19	0.12093256		1603.21	0.00566353		2193.2	0.06233673		2783.2	0.01248954		3373.2	-0.00053322
423.4	0.33942763		1013.39	0.12069671		1603.41	0.00483404		2193.4	0.06296807		2783.4	0.01254179		3373.4	-0.00074259
423.6	0.33975402		1013.59	0.12146473		1603.61	0.00530048		2193.6	0.06249668		2783.6	0.0128989		3373.6	-0.00096603
423.8	0.34044505		1013.79	0.12231624		1603.81	0.00544954		2193.8	0.06257787		2783.8	0.01295637		3373.8	-0.00015316
424	0.34080253		1013.99	0.12391164		1604.01	0.00534624		2194	0.06205828		2784	0.0130243		3374	0.00071547
424.2	0.34045402		1014.19	0.12527109		1604.21	0.00499847		2194.2	0.06120996		2784.2	0.01130833		3374.2	0.00035246
424.4	0.34049145		1014.39	0.12567259		1604.41	0.00497194		2194.4	0.06113263		2784.4	0.00996464		3374.4	-0.00002778
424.6	0.34025281		1014.59	0.12538447		1604.61	0.00475305		2194.6	0.06073002		2784.6	0.00910361		3374.6	-0.00061302
424.8	0.34078172		1014.79	0.1259447		1604.81	0.00557915		2194.8	0.0598834		2784.8	0.00833581		3374.8	-0.00119837
425	0.34142402		1014.99	0.12594604		1605.01	0.00600012		2195	0.05955237		2785	0.00772123		3375	-0.00158558
425.2	0.34057182		1015.19	0.12625404		1605.21	0.00675719		2195.2	0.0588342		2785.2	0.0063584		3375.2	-0.00168007
425.4	0.34082921		1015.39	0.12641801		1605.41	0.00658509		2195.4	0.05915679		2785.4	0.00713324		3375.4	-0.00245602
425.6	0.34144404		1015.59	0.12680439		1605.61	0.00727779		2195.6	0.05962271		2785.6	0.00645222		3375.6	-0.00323346
425.8	0.34137733		1015.79	0.1269288		1605.81	0.00740128		2195.8	0.06118092		2785.8	0.00625599		3375.8	-0.00393478
426	0.34065856		1015.99	0.1264638		1606.01	0.00707334		2196	0.06170781		2786	0.00675752		3376	-0.00371399
426.2	0.33950653		1016.19	0.12662591		1606.21	0.006053		2196.2	0.06197944		2786.2	0.00633417		3376.2	-0.00438074
426.4	0.33901209		1016.39	0.125899		1606.41	0.00579453		2196.4	0.06184991		2786.4	0.00791216		3376.4	-0.00548264
426.6	0.33842068		1016.59	0.12568457		1606.61	0.00580044		2196.6	0.06207545		2786.6	0.00832813		3376.6	-0.00632145
426.8	0.33874731		1016.79	0.12603712		1606.81	0.0054994		2196.8	0.06237456		2786.8	0.00890406		3376.8	-0.00640221
427	0.33901243		1016.99	0.12576355		1607.01	0.00557338		2197	0.06179356		2787	0.00933397		3377	-0.00587178
427.2	0.33924823		1017.19	0.12548231		1607.21	0.00440501		2197.2	0.06268723		2787.2	0.01011341		3377.2	-0.00583891
427.4	0.34006583		1017.39	0.12560912		1607.41	0.00365805		2197.4	0.06288145		2787.4	0.01029691		3377.4	-0.00584263
427.6	0.33989548		1017.59	0.12610407		1607.61	0.00448199		2197.6	0.06149355		2787.6	0.01038415		3377.6	-0.00418484
427.8	0.34041526		1017.79	0.12660181		1607.81	0.00454112		2197.8	0.06147859		2787.8	0.01088713		3377.8	-0.00310754
428	0.34003162		1017.99	0.12752368		1608.01	0.00511496		2198	0.06039744		2788	0.01035197		3378	-0.00315878
428.2	0.3402906		1018.19	0.12721604		1608.21	0.00532802		2198.2	0.06091559		2788.2	0.00967148		3378.2	-0.00310904
428.4	0.34053943		1018.39	0.12752574		1608.41	0.00606127		2198.4	0.06174916		2788.4	0.00971415		3378.4	-0.00246061
428.6	0.34086366		1018.59	0.12759248		1608.61	0.00628293		2198.6	0.06172056		2788.6	0.01008693		3378.6	-0.00196769
428.8	0.34204078		1018.79	0.12759051		1608.81	0.00740722		2198.8	0.06105602		2788.8	0.01055878		3378.8	-0.00219305
429	0.34264348		1018.99	0.12769332		1609.01	0.00723176		2199	0.06154797		2789	0.01002337		3379	-0.00143532
429.2	0.34322793		1019.19	0.1275059		1609.21	0.00751885		2199.2	0.06214016		2789.2	0.00915779		3379.2	-0.00189708
429.4	0.3438573		1019.39	0.12732192		1609.41	0.00683276		2199.4	0.06320448		2789.4	0.01079872		3379.4	-0.00211815
429.6	0.34394921		1019.59	0.12661007		1609.61	0.00656133		2199.6	0.0633148		2789.6	0.01086627		3379.6	-0.00223544
429.8	0.3436372		1019.79	0.12557867		1609.81	0.00665098		2199.8	0.06389326		2789.8	0.01178719		3379.8	-0.0024173
430	0.34398707		1019.99	0.12531827		1610.01	0.00663782		2200	0.06293269		2790	0.01174445		3380	-0.00187151
430.2	0.3440709		1020.19	0.12524299		1610.21	0.0067026		2200.2	0.06231155		2790.2	0.01121632		3380.2	-0.00277333
430.4	0.34530609		1020.39	0.12559483		1610.41	0.00718765		2200.4	0.06236518		2790.4	0.01244298		3380.4	-0.00383639
430.6	0.34614851		1020.59	0.12591566		1610.61	0.00690646		2200.6	0.06255452		2790.6	0.01263351		3380.6	-0.00430447
430.8	0.34705248		1020.79	0.1260991		1610.81	0.00723026		2200.8	0.06285445		2790.8	0.01234963		3380.8	-0.00380234
431	0.3471588		1020.99	0.12630462		1611.01	0.00686984		2201	0.06368849		2791	0.01143689		3381	-0.00380668
431.2	0.34777915		1021.19	0.12702505		1611.21	0.0064804		2201.2	0.06519213		2791.2	0.0114818		3381.2	-0.00350895
431.4	0.34818914		1021.39	0.12754097		1611.41	0.00666841		2201.4	0.06511057		2791.4	0.01002922		3381.4	-0.00329319
431.6	0.34705965		1021.59	0.1282512		1611.61	0.00660406		2201.6	0.06515885		2791.6	0.0101613		3381.6	-0.00196167
431.8	0.34743073		1021.79	0.12901527		1611.81	0.00675786		2201.8	0.06496478		2791.8	0.01047728		3381.8	-0.00295304
432	0.34632389		1021.99	0.12929818		1612.01	0.00691853		2202	0.06531451		2792	0.00974974		3382	-0.00333859
432.2	0.34623542		1022.19	0.12954864		1612.21	0.00677582		2202.2	0.06620121		2792.2	0.00894939		3382.2	-0.00257852
432.4	0.34610133		1022.39	0.12998538		1612.41	0.00660536		2202.4	0.06529287		2792.4	0.00955006		3382.4	-0.00235814
432.6	0.3459728		1022.59	0.12990482		1612.61	0.00630953		2202.6	0.06459057		2792.6	0.00910829		3382.6	-0.00210002
432.8	0.34576668		1022.79	0.1300388		1612.81	0.00615847		2202.8	0.06403204		2792.8	0.00805193		3382.8	-0.00211656
433	0.34553028		1022.99	0.12915614		1613.01	0.00455537		2203	0.06426483		2793	0.00751487		3383	-0.00191094
433.2	0.34641656		1023.19	0.12850777		1613.21	0.00403085		2203.2	0.06376909		2793.2	0.00757506		3383.2	-0.00265705
433.4	0.34654798		1023.39	0.12818336		1613.41	0.00391155		2203.4	0.06310913		2793.4	0.00845173		3383.4	-0.00292974
433.6	0.34722945		1023.59	0.12712119		1613.61	0.00399115		2203.6	0.06200358		2793.6	0.00809215		3383.6	-0.00341091
433.8	0.34762565		1023.79	0.12711204		1613.81	0.00523947		2203.8	0.06250326		2793.8	0.00848745		3383.8	-0.00378449
434	0.3488836		1023.99	0.12774325		1614.01	0.00574066		2204	0.06139739		2794	0.00782866		3384	-0.00287214
434.2	0.34906781		1024.19	0.12762131		1614.21	0.00620586		2204.2	0.06073532		2794.2	0.00830964		3384.2	-0.00289011
434.4	0.35043285		1024.39	0.12860061		1614.41	0.00608854		2204.4	0.06120296		2794.4	0.00955645		3384.4	-0.00321649
434.6	0.35187775		1024.59	0.12894538		1614.61	0.00626818		2204.6	0.06094367		2794.6	0.01067427		3384.6	-0.00269296
434.8	0.35295735		1024.79	0.129297		1614.81	0.00646149		2204.8	0.06121711		2794.8	0.00978297		3384.8	-0.00222496
435	0.35335923		1024.99	0.13026762		1615.01	0.00647659		2205	0.06221517		2795	0.01041725		3385	-0.00283018
435.2	0.35421407		1025.19	0.13086625		1615.21	0.00694119		2205.2	0.0640253		2795.2	0.01165895		3385.2	-0.0020657
435.4	0.35455801		1025.39	0.13140374		1615.41	0.00630938		2205.4	0.0642239		2795.4	0.01159797		3385.4	-0.00156412
435.6	0.35462455		1025.59	0.13192395		1615.61	0.00581052		2205.6	0.06489309		2795.6	0.01284806		3385.6	-0.00113251
435.8	0.35528498		1025.79	0.13228721		1615.81	0.00616254		2205.8	0.06525994		2795.8	0.01275001		3385.8	-0.00119229
436	0.35563932		1025.99	0.1321168		1616.01	0.00590426		2206	0.06600258		2796	0.01213283		3386	-0.00065566
436.2	0.35629472		1026.19	0.13229146		1616.21	0.00545781		2206.2	0.06535249		2796.2	0.01158853		3386.2	-0.00012045
436.4	0.35679904		1026.39	0.13246261		1616.41	0.00562179		2206.4	0.06514518		2796.4	0.01229241		3386.4	0.00020119
436.6	0.35623328		1026.59	0.13297004		1616.61	0.00499448		2206.6	0.06551408		2796.6	0.01131283		3386.6	0.00016591
436.8	0.35623175		1026.79	0.13260946		1616.81	0.00480415		2206.8	0.06595045		2796.8	0.01067841		3386.8	-0.00011185
437	0.35638047		1026.99	0.13216646		1617.01	0.00409506		2207	0.06636206		2797	0.01103114		3387	-0.0007769
437.2	0.35583994		1027.19	0.13300353		1617.21	0.00441921		2207.2	0.06632113		2797.2	0.01114114		3387.2	-0.00124097
437.4	0.35465149		1027.39	0.13268467		1617.41	0.00496609		2207.4	0.06666178		2797.4	0.01046396		3387.4	-0.00160481
437.6	0.35398654		1027.59	0.13276098		1617.61	0.00510684		2207.6	0.06680862		2797.6	0.01043117		3387.6	-0.00148709
437.8	0.35399834		1027.79	0.13338058		1617.81	0.00572794		2207.8	0.06728313		2797.8	0.01054423		3387.8	-0.00207747
438	0.35486786		1027.99	0.13410204		1618.01	0.00532687		2208	0.06629633		2798	0.00975898		3388	-0.00097321
438.2	0.35449955		1028.19	0.13382504		1618.21	0.00589188		2208.2	0.06526797		2798.2	0.01022848		3388.2	-0.00103937
438.4	0.35479941		1028.39	0.13466827		1618.41	0.00596966		2208.4	0.06473279		2798.4	0.01031204		3388.4	-0.00137465
438.6	0.35491511		1028.59	0.13417279		1618.61	0.00655412		2208.6	0.06473766		2798.6	0.01001942		3388.6	-0.00179368
438.8	0.35555477		1028.79	0.13411354		1618.81	0.00705304		2208.8	0.06489242		2798.8	0.01008736		3388.8	-0.00163964
439	0.35560197		1028.99	0.13360845		1619.01	0.00810876		2209	0.06623776		2799	0.01065948		3389	-0.00233524
439.2	0.35553589		1029.19	0.13308108		1619.21	0.0078857		2209.2	0.06663816		2799.2	0.01087043		3389.2	-0.00160957
439.4	0.35583323		1029.39	0.1334894		1619.41	0.00662734		2209.4	0.06597323		2799.4	0.01064932		3389.4	-0.00206601
439.6	0.35615483		1029.59	0.13283088		1619.61	0.00679029		2209.6	0.06643669		2799.6	0.01054411		3389.6	-0.00265351
439.8	0.35624837		1029.79	0.13255876		1619.81	0.00740983		2209.8	0.06614437		2799.8	0.00980658		3389.8	-0.00300504
440	0.35667198		1029.99	0.13270524		1620.01	0.00792052		2210	0.0657005		2800	0.01029163		3390	-0.00349006
440.2	0.35552368		1030.19	0.13304659		1620.21	0.00810882		2210.2	0.0656066		2800.2	0.01049399		3390.2	-0.00348942
440.4	0.35527373		1030.39	0.13394279		1620.41	0.00783624		2210.4	0.06580257		2800.4	0.01075173		3390.4	-0.00348778
440.6	0.35522773		1030.59	0.13438135		1620.61	0.00709322		2210.6	0.06552309		2800.6	0.01009386		3390.6	-0.00359224
440.8	0.35516584		1030.79	0.1344947		1620.81	0.00639542		2210.8	0.0659502		2800.8	0.00946328		3390.8	-0.00338999
441	0.35437952		1030.99	0.13434145		1621.01	0.00622761		2211	0.06688494		2801	0.00945404		3391	-0.00312222
441.2	0.35437927		1031.19	0.13430997		1621.21	0.00623324		2211.2	0.06711323		2801.2	0.00968208		3391.2	-0.00277603
441.4	0.35459038		1031.39	0.13394556		1621.41	0.00490041		2211.4	0.06765656		2801.4	0.00916453		3391.4	-0.00267101
441.6	0.35492532		1031.59	0.13418328		1621.61	0.00411394		2211.6	0.06774606		2801.6	0.00927355		3391.6	-0.00138343
441.8	0.35561849		1031.79	0.13454924		1621.81	0.00359589		2211.8	0.06735673		2801.8	0.00975285		3391.8	-0.00037319
442	0.35667593		1031.99	0.13470159		1622.01	0.00320194		2212	0.067106		2802	0.01018077		3392	0.00034163
442.2	0.35696865		1032.19	0.13370481		1622.21	0.00443843		2212.2	0.0660729		2802.2	0.01066159		3392.2	0.00051002
442.4	0.35786813		1032.39	0.13376408		1622.41	0.00406139		2212.4	0.06601437		2802.4	0.01101831		3392.4	0.00092656
442.6	0.35842681		1032.59	0.13318971		1622.61	0.00426397		2212.6	0.06585468		2802.6	0.01178919		3392.6	0.00088896
442.8	0.35884173		1032.79	0.13326754		1622.81	0.00449503		2212.8	0.06561112		2802.8	0.01161446		3392.8	0.00134559
443	0.35821821		1032.99	0.1331012		1623.01	0.00437179		2213	0.06565476		2803	0.01110479		3393	0.00074535
443.2	0.35827024		1033.19	0.13399207		1623.21	0.00372591		2213.2	0.06554936		2803.2	0.01091419		3393.2	0.0008735
443.4	0.35885873		1033.39	0.13516445		1623.41	0.00385931		2213.4	0.06562366		2803.4	0.01027691		3393.4	0.00027694
443.6	0.35878005		1033.59	0.13529847		1623.61	0.00542708		2213.6	0.0655239		2803.6	0.01009896		3393.6	-0.00043308
443.8	0.35866923		1033.79	0.1357875		1623.81	0.00527239		2213.8	0.06543521		2803.8	0.00975833		3393.8	-0.00045396
444	0.35866678		1033.99	0.13616716		1624.01	0.00518908		2214	0.06530253		2804	0.00934309		3394	-0.00084375
444.2	0.35782857		1034.19	0.13609913		1624.21	0.00534138		2214.2	0.06498078		2804.2	0.00885067		3394.2	-0.00077537
444.4	0.35799642		1034.39	0.13676816		1624.41	0.00508934		2214.4	0.06499809		2804.4	0.00804041		3394.4	-0.00230935
444.6	0.35747588		1034.59	0.13699186		1624.61	0.00533395		2214.6	0.06541702		2804.6	0.00680472		3394.6	-0.00262098
444.8	0.35664259		1034.79	0.13730535		1624.81	0.00467784		2214.8	0.06528378		2804.8	0.00681993		3394.8	-0.00294774
445	0.3569931		1034.99	0.13665642		1625.01	0.00548566		2215	0.06501266		2805	0.0071691		3395	-0.00324663
445.2	0.35685914		1035.19	0.13712437		1625.21	0.00503219		2215.2	0.06484728		2805.2	0.00772991		3395.2	-0.00394595
445.4	0.35698185		1035.39	0.13692366		1625.41	0.00407318		2215.4	0.06482291		2805.4	0.00776769		3395.4	-0.00372892
445.6	0.35668043		1035.59	0.13673023		1625.61	0.0040601		2215.6	0.0646282		2805.6	0.00849541		3395.6	-0.00295147
445.8	0.35731605		1035.79	0.13587148		1625.81	0.00435491		2215.8	0.0639607		2805.8	0.00923965		3395.8	-0.00326982
446	0.35846139		1035.99	0.13586003		1626.01	0.00488742		2216	0.06318871		2806	0.01008206		3396	-0.00376557
446.2	0.3585211		1036.19	0.13503072		1626.21	0.0056936		2216.2	0.06277759		2806.2	0.01061974		3396.2	-0.00415372
446.4	0.35884642		1036.39	0.13553244		1626.41	0.00437506		2216.4	0.06322729		2806.4	0.01131368		3396.4	-0.00341535
446.6	0.35759772		1036.59	0.13563018		1626.61	0.00434714		2216.6	0.06271444		2806.6	0.01143517		3396.6	-0.00359042
446.8	0.35722231		1036.79	0.13619184		1626.81	0.00434186		2216.8	0.06254841		2806.8	0.01145686		3396.8	-0.00310759
447	0.35710571		1036.99	0.13727443		1627.01	0.00406559		2217	0.06332589		2807	0.01213371		3397	-0.00271327
447.2	0.35786532		1037.19	0.13880646		1627.21	0.00399866		2217.2	0.06401396		2807.2	0.01192652		3397.2	-0.00228157
447.4	0.35777882		1037.39	0.13883146		1627.41	0.00446111		2217.4	0.06400945		2807.4	0.01219132		3397.4	-0.0020204
447.6	0.35748572		1037.59	0.13931927		1627.61	0.00477962		2217.6	0.06416121		2807.6	0.0126966		3397.6	-0.00176662
447.8	0.35767866		1037.79	0.13856975		1627.81	0.0038087		2217.8	0.06459788		2807.8	0.01276799		3397.8	-0.00104176
448	0.3575283		1037.99	0.13842654		1628.01	0.00463492		2218	0.06477834		2808	0.01202504		3398	-0.00146122
448.2	0.35645537		1038.19	0.13917665		1628.21	0.00526054		2218.2	0.0653678		2808.2	0.01226772		3398.2	-0.00192621
448.4	0.35668194		1038.39	0.13962003		1628.41	0.005498		2218.4	0.06662281		2808.4	0.01211233		3398.4	-0.00243073
448.6	0.35718558		1038.59	0.14015569		1628.61	0.00576884		2218.6	0.06650455		2808.6	0.01238306		3398.6	-0.0012798
448.8	0.35796224		1038.79	0.14109699		1628.81	0.00649881		2218.8	0.06577629		2808.8	0.01322951		3398.8	-0.00103759
449	0.35931449		1038.99	0.14131681		1629.01	0.00749929		2219	0.06576324		2809	0.01310704		3399	-0.00108477
449.2	0.35948838		1039.19	0.14185572		1629.21	0.00717032		2219.2	0.06532387		2809.2	0.01300846		3399.2	-0.00124569
449.4	0.36071042		1039.39	0.14185567		1629.41	0.00804663		2219.4	0.06498135		2809.4	0.01228972		3399.4	-0.00073269
449.6	0.36112736		1039.59	0.1420642		1629.61	0.00886408		2219.6	0.06493075		2809.6	0.01215457		3399.6	-0.00035322
449.8	0.36281243		1039.79	0.14190569		1629.81	0.00957878		2219.8	0.06397138		2809.8	0.01070477		3399.8	-0.00026757
450	0.36359174		1039.99	0.14236566		1630.01	0.00986267		2220	0.06335353		2810	0.01051857		3400	-0.0005621
450.2	0.36397634		1040.19	0.1432214		1630.21	0.00957718		2220.2	0.06309133		2810.2	0.01039541		3400.2	-0.00154933
450.4	0.36377889		1040.39	0.14242481		1630.41	0.00871746		2220.4	0.06278341		2810.4	0.01007872		3400.4	-0.00144864
450.6	0.3639618		1040.59	0.14278343		1630.61	0.00900223		2220.6	0.06125022		2810.6	0.01019112		3400.6	-0.00198782
450.8	0.36410395		1040.79	0.14334027		1630.81	0.00797628		2220.8	0.0608919		2810.8	0.01022952		3400.8	-0.00204717
451	0.36405082		1040.99	0.14341462		1631.01	0.00756102		2221	0.06127559		2811	0.00972379		3401	-0.00204498
451.2	0.36418504		1041.19	0.14356639		1631.21	0.00712537		2221.2	0.06181823		2811.2	0.00930593		3401.2	-0.0024873
451.4	0.36371355		1041.39	0.14215216		1631.41	0.00737433		2221.4	0.06165528		2811.4	0.00914209		3401.4	-0.00281287
451.6	0.3645868		1041.59	0.1417662		1631.61	0.00658697		2221.6	0.06265579		2811.6	0.00929666		3401.6	-0.00309374
451.8	0.36453782		1041.79	0.1406033		1631.81	0.0055993		2221.8	0.06301443		2811.8	0.00966729		3401.8	-0.00376423
452	0.36471469		1041.99	0.14029786		1632.01	0.00618739		2222	0.06451456		2812	0.00988262		3402	-0.00405632
452.2	0.36442459		1042.19	0.14043526		1632.21	0.00588725		2222.2	0.06533208		2812.2	0.01081046		3402.2	-0.00425478
452.4	0.36503448		1042.39	0.14011988		1632.41	0.00555867		2222.4	0.06693111		2812.4	0.01151989		3402.4	-0.004123
452.6	0.36532033		1042.59	0.14067503		1632.61	0.00448831		2222.6	0.06689143		2812.6	0.01210158		3402.6	-0.00405918
452.8	0.36488813		1042.79	0.14118435		1632.81	0.00461859		2222.8	0.0673531		2812.8	0.01271272		3402.8	-0.00415227
453	0.36449283		1042.99	0.14064909		1633.01	0.00474916		2223	0.06700617		2813	0.01239397		3403	-0.00421178
453.2	0.36448439		1043.19	0.14078666		1633.21	0.00448769		2223.2	0.06651622		2813.2	0.0119766		3403.2	-0.00353714
453.4	0.36352637		1043.39	0.14137427		1633.41	0.00590016		2223.4	0.06741219		2813.4	0.01185061		3403.4	-0.00335596
453.6	0.36376471		1043.59	0.14132318		1633.61	0.00671885		2223.6	0.06736221		2813.6	0.01149436		3403.6	-0.00277327
453.8	0.36394656		1043.79	0.14187804		1633.81	0.0064759		2223.8	0.06689384		2813.8	0.01098415		3403.8	-0.00252944
454	0.36398625		1043.99	0.14178127		1634.01	0.00697127		2224	0.06669391		2814	0.01153343		3404	-0.00259983
454.2	0.36434067		1044.19	0.14306413		1634.21	0.00681751		2224.2	0.06578319		2814.2	0.01134307		3404.2	-0.00145964
454.4	0.36419337		1044.39	0.14294119		1634.41	0.00657904		2224.4	0.06564284		2814.4	0.01118937		3404.4	-0.00063065
454.6	0.36512011		1044.59	0.14410501		1634.61	0.00669722		2224.6	0.06525195		2814.6	0.01117315		3404.6	0.00012664
454.8	0.36452203		1044.79	0.14461689		1634.81	0.00617141		2224.8	0.06607524		2814.8	0.01030088		3404.8	0.00087361
455	0.36524128		1044.99	0.14520586		1635.01	0.00711367		2225	0.0661255		2815	0.01019664		3405	0.0011009
455.2	0.36586138		1045.19	0.14510886		1635.21	0.0065919		2225.2	0.06621616		2815.2	0.00937956		3405.2	0.00093633
455.4	0.36675765		1045.39	0.14510787		1635.41	0.00718384		2225.4	0.06610166		2815.4	0.00913838		3405.4	-0.00030037
455.6	0.3679267		1045.59	0.14538321		1635.61	0.00668072		2225.6	0.06680167		2815.6	0.00939634		3405.6	-0.00060938
455.8	0.36793794		1045.79	0.14602945		1635.81	0.0064207		2225.8	0.06647125		2815.8	0.00959319		3405.8	-0.00033069
456	0.3679602		1045.99	0.1466698		1636.01	0.0066436		2226	0.06732346		2816	0.00992045		3406	0.00019233
456.2	0.36712637		1046.19	0.14744475		1636.21	0.00611408		2226.2	0.06708729		2816.2	0.00940035		3406.2	-0.00036082
456.4	0.36728049		1046.39	0.1477243		1636.41	0.00610623		2226.4	0.06779674		2816.4	0.00878862		3406.4	-0.00107014
456.6	0.36707139		1046.59	0.14767389		1636.61	0.00546973		2226.6	0.06712097		2816.6	0.00919354		3406.6	-0.00156007
456.8	0.36695231		1046.79	0.14752832		1636.81	0.0058419		2226.8	0.06694508		2816.8	0.00944133		3406.8	-0.00182271
457	0.36715152		1046.99	0.14756025		1637.01	0.00624172		2227	0.06564296		2817	0.00938196		3407	-0.00141238
457.2	0.36710421		1047.19	0.14821799		1637.21	0.00630102		2227.2	0.06560498		2817.2	0.00906436		3407.2	-0.00148572
457.4	0.36654618		1047.39	0.14790074		1637.41	0.00644214		2227.4	0.06536761		2817.4	0.00995254		3407.4	-0.00237605
457.6	0.3674431		1047.59	0.14773801		1637.61	0.00698782		2227.6	0.06515566		2817.6	0.0100808		3407.6	-0.00170647
457.8	0.36754808		1047.79	0.14798364		1637.81	0.00666212		2227.8	0.06461556		2817.8	0.01074087		3407.8	-0.00093787
458	0.36756024		1047.99	0.1480653		1638.01	0.00683836		2228	0.06439504		2818	0.01185311		3408	0.00018399
458.2	0.36732643		1048.19	0.14884556		1638.21	0.0065795		2228.2	0.0638896		2818.2	0.01191397		3408.2	0.00089883
458.4	0.36727139		1048.39	0.14903472		1638.41	0.00639661		2228.4	0.06386172		2818.4	0.01209103		3408.4	0.00113029
458.6	0.36752069		1048.59	0.14874951		1638.61	0.00686824		2228.6	0.06429916		2818.6	0.01208609		3408.6	0.00118271
458.8	0.36702187		1048.79	0.14806125		1638.81	0.00731193		2228.8	0.06498971		2818.8	0.01108677		3408.8	0.00132789
459	0.36814737		1048.99	0.14810872		1639.01	0.00775481		2229	0.06467297		2819	0.01162858		3409	0.0004173
459.2	0.36821092		1049.19	0.14863214		1639.21	0.00808459		2229.2	0.06497004		2819.2	0.01094365		3409.2	-0.00046876
459.4	0.36824924		1049.39	0.14894781		1639.41	0.00913752		2229.4	0.06599835		2819.4	0.01110066		3409.4	-0.00151897
459.6	0.36828871		1049.59	0.14874428		1639.61	0.00870667		2229.6	0.06586223		2819.6	0.0108196		3409.6	-0.00054151
459.8	0.36802138		1049.79	0.14909906		1639.81	0.00781302		2229.8	0.06597784		2819.8	0.01085696		3409.8	-0.00035158
460	0.36812551		1049.99	0.14851191		1640.01	0.00726556		2230	0.06617979		2820	0.0110175		3410	-0.00078285
460.2	0.36725072		1050.19	0.14825287		1640.21	0.0074326		2230.2	0.06583093		2820.2	0.01099105		3410.2	-0.00178135
460.4	0.36761909		1050.39	0.14773847		1640.41	0.00701212		2230.4	0.06569883		2820.4	0.01046128		3410.4	-0.00203289
460.6	0.36702184		1050.59	0.14748175		1640.61	0.00610373		2230.6	0.06579665		2820.6	0.01086433		3410.6	-0.00198726
460.8	0.36686822		1050.79	0.14762299		1640.81	0.00592559		2230.8	0.0660667		2820.8	0.01116056		3410.8	-0.00210053
461	0.3673431		1050.99	0.14761043		1641.01	0.00602831		2231	0.06514147		2821	0.01116112		3411	-0.00153081
461.2	0.36754354		1051.19	0.14772592		1641.21	0.00633079		2231.2	0.06497762		2821.2	0.01106211		3411.2	-0.00241928
461.4	0.36804399		1051.39	0.14778356		1641.41	0.00590013		2231.4	0.06493716		2821.4	0.01175524		3411.4	-0.0021555
461.6	0.36897942		1051.59	0.14810625		1641.61	0.006269		2231.6	0.06529313		2821.6	0.01228872		3411.6	-0.001237
461.8	0.36870926		1051.79	0.14849033		1641.81	0.00635279		2231.8	0.06437118		2821.8	0.01309801		3411.8	-0.00072387
462	0.36843312		1051.99	0.14938562		1642.01	0.00641088		2232	0.06475042		2822	0.01311109		3412	-0.00128738
462.2	0.36869793		1052.19	0.14911012		1642.21	0.00670555		2232.2	0.06488403		2822.2	0.01277755		3412.2	-0.00190826
462.4	0.36931247		1052.39	0.14846678		1642.41	0.00649769		2232.4	0.06538923		2822.4	0.01303		3412.4	-0.00119104
462.6	0.37021704		1052.59	0.14875181		1642.61	0.00715647		2232.6	0.06601428		2822.6	0.01218715		3412.6	-0.00221349
462.8	0.37097552		1052.79	0.14867191		1642.81	0.00790022		2232.8	0.06673087		2822.8	0.01195585		3412.8	-0.00295541
463	0.37282134		1052.99	0.14914332		1643.01	0.00876189		2233	0.06652479		2823	0.01308344		3413	-0.00389437
463.2	0.37328504		1053.19	0.15016267		1643.21	0.0092047		2233.2	0.06651827		2823.2	0.01311726		3413.2	-0.00337479
463.4	0.37384953		1053.39	0.14998313		1643.41	0.00935247		2233.4	0.06606215		2823.4	0.01338966		3413.4	-0.00342571
463.6	0.37417735		1053.59	0.14985226		1643.61	0.00871314		2233.6	0.06581921		2823.6	0.01279136		3413.6	-0.00292113
463.8	0.37432147		1053.79	0.14984355		1643.81	0.0084182		2233.8	0.06539135		2823.8	0.01322293		3413.8	-0.00333646
464	0.37488093		1053.99	0.1504002		1644.01	0.00853751		2234	0.06506501		2824	0.01283618		3414	-0.00325369
464.2	0.37438959		1054.19	0.15116146		1644.21	0.0086254		2234.2	0.06463484		2824.2	0.01303925		3414.2	-0.00351918
464.4	0.37480652		1054.39	0.15152283		1644.41	0.00813213		2234.4	0.06516864		2824.4	0.01236252		3414.4	-0.00345139
464.6	0.37356138		1054.59	0.15141718		1644.61	0.00797279		2234.6	0.06607355		2824.6	0.01241077		3414.6	-0.00340273
464.8	0.3741689		1054.79	0.15153118		1644.81	0.00852296		2234.8	0.06548873		2824.8	0.01337485		3414.8	-0.0038174
465	0.37436184		1054.99	0.15186509		1645.01	0.00871906		2235	0.06471763		2825	0.01270973		3415	-0.00422302
465.2	0.3743316		1055.19	0.15208114		1645.21	0.00932808		2235.2	0.0654931		2825.2	0.01255854		3415.2	-0.00396482
465.4	0.3740897		1055.39	0.15252133		1645.41	0.00922702		2235.4	0.06619236		2825.4	0.01282879		3415.4	-0.00296884
465.6	0.37469838		1055.59	0.15283709		1645.61	0.00916509		2235.6	0.06672508		2825.6	0.01264046		3415.6	-0.00298005
465.8	0.37326854		1055.79	0.15363214		1645.81	0.0091455		2235.8	0.06641607		2825.8	0.01250072		3415.8	-0.00189244
466	0.37278056		1055.99	0.15321602		1646.01	0.00914253		2236	0.06702744		2826	0.01269978		3416	-0.00133137
466.2	0.37249343		1056.19	0.15226328		1646.21	0.00944247		2236.2	0.0670559		2826.2	0.01289796		3416.2	-0.00048518
466.4	0.37225095		1056.39	0.15206858		1646.41	0.00900971		2236.4	0.06737018		2826.4	0.01197295		3416.4	0.00025681
466.6	0.37318596		1056.59	0.15228508		1646.61	0.01011509		2236.6	0.06756766		2826.6	0.01149907		3416.6	0.00018808
466.8	0.37324443		1056.79	0.15201464		1646.81	0.01042922		2236.8	0.06739963		2826.8	0.01215051		3416.8	0.00073436
467	0.37330561		1056.99	0.1514442		1647.01	0.01030654		2237	0.06726268		2827	0.01239834		3417	0.00200874
467.2	0.37322985		1057.19	0.15132212		1647.21	0.01050341		2237.2	0.06644071		2827.2	0.01242883		3417.2	0.00320368
467.4	0.37337854		1057.39	0.15109314		1647.41	0.01016848		2237.4	0.06617576		2827.4	0.01207711		3417.4	0.0029623
467.6	0.37378376		1057.59	0.15050438		1647.61	0.01092485		2237.6	0.06567892		2827.6	0.01121024		3417.6	0.00306156
467.8	0.37471421		1057.79	0.15145473		1647.81	0.01097318		2237.8	0.06521429		2827.8	0.01147796		3417.8	0.00246743
468	0.37570622		1057.99	0.15273787		1648.01	0.01082896		2238	0.0653177		2828	0.01113204		3418	0.00186593
468.2	0.37619169		1058.19	0.15312988		1648.21	0.01060381		2238.2	0.06507342		2828.2	0.01122659		3418.2	0.00069362
468.4	0.37660674		1058.39	0.15354392		1648.41	0.0100929		2238.4	0.06515222		2828.4	0.01104585		3418.4	-0.000064
468.6	0.3767684		1058.59	0.15351791		1648.61	0.00987112		2238.6	0.06458888		2828.6	0.01091308		3418.6	-0.00085368
468.8	0.37777266		1058.79	0.15408444		1648.81	0.0097914		2238.8	0.06363982		2828.8	0.01106001		3418.8	-0.00199252
469	0.37792676		1058.99	0.154332		1649.01	0.00926698		2239	0.0635995		2829	0.00982366		3419	-0.00275357
469.2	0.37881146		1059.19	0.15430987		1649.21	0.00913774		2239.2	0.06364756		2829.2	0.00958828		3419.2	-0.00252819
469.4	0.37919348		1059.39	0.15501414		1649.41	0.00849356		2239.4	0.06295542		2829.4	0.00925093		3419.4	-0.00281282
469.6	0.37974071		1059.59	0.15530624		1649.61	0.00792981		2239.6	0.06242864		2829.6	0.00856886		3419.6	-0.00311127
469.8	0.37927158		1059.79	0.15518985		1649.81	0.0075023		2239.8	0.06115395		2829.8	0.00873384		3419.8	-0.00236776
470	0.37927158		1059.99	0.15518985		1650.01	0.0075023		2240	0.06115395		2830	0.00873384		3419.99	-0.00236776
470.2	0.38133449		1060.19	0.15538462		1650.21	0.00795619		2240.2	0.06055365		2830.2	0.00919098		3420.19	-0.00296836
470.4	0.38274169		1060.39	0.15582877		1650.41	0.00775316		2240.4	0.06032043		2830.4	0.01029022		3420.39	-0.00297173
470.6	0.38477138		1060.59	0.1560783		1650.61	0.00788206		2240.6	0.05988665		2830.6	0.01074343		3420.59	-0.00338786
470.8	0.38598788		1060.79	0.15547275		1650.81	0.00746131		2240.8	0.05929371		2830.8	0.01136623		3420.79	-0.00326564
471	0.38704259		1060.99	0.1555957		1651.01	0.00734618		2241	0.05843651		2831	0.01181885		3420.99	-0.00412996
471.2	0.38773044		1061.19	0.15516507		1651.21	0.00769717		2241.2	0.05820782		2831.2	0.01236001		3421.19	-0.00397701
471.4	0.3884487		1061.39	0.15499254		1651.41	0.00756989		2241.4	0.05776429		2831.4	0.01285621		3421.39	-0.00436957
471.6	0.38876978		1061.59	0.15530437		1651.61	0.00734818		2241.6	0.05726262		2831.6	0.01313863		3421.59	-0.00430408
471.8	0.3891627		1061.79	0.15507625		1651.81	0.00685902		2241.8	0.05739689		2831.8	0.01383849		3421.79	-0.00494787
472	0.38855118		1061.99	0.15454556		1652.01	0.00682603		2242	0.05683003		2832	0.01409601		3421.99	-0.0047821
472.2	0.38831407		1062.19	0.15463431		1652.21	0.00664261		2242.2	0.05687542		2832.2	0.01404313		3422.19	-0.00452465
472.4	0.38768601		1062.39	0.15385301		1652.41	0.00782886		2242.4	0.05630271		2832.4	0.01349503		3422.39	-0.00421335
472.6	0.38681644		1062.59	0.15307962		1652.61	0.00819149		2242.6	0.05503142		2832.6	0.01342393		3422.59	-0.00389791
472.8	0.38627841		1062.79	0.15299161		1652.81	0.00755123		2242.8	0.05451952		2832.8	0.01326448		3422.79	-0.00355863
473	0.3849055		1062.99	0.152542		1653.01	0.00717766		2243	0.05348869		2833	0.01268739		3422.99	-0.00345079
473.2	0.38508911		1063.19	0.1531173		1653.21	0.00712549		2243.2	0.05345988		2833.2	0.01282354		3423.19	-0.0038047
473.4	0.38575698		1063.39	0.15333464		1653.41	0.00690023		2243.4	0.05340088		2833.4	0.01232898		3423.39	-0.00340716
473.6	0.38540066		1063.59	0.15390411		1653.61	0.00714436		2243.6	0.05400685		2833.6	0.01237335		3423.59	-0.00366207
473.8	0.38628572		1063.79	0.15400805		1653.81	0.00726769		2243.8	0.05345836		2833.8	0.01227098		3423.79	-0.00407947
474	0.38706787		1063.99	0.15378635		1654.01	0.0078818		2244	0.05255384		2834	0.01147661		3423.99	-0.00360465
474.2	0.38741299		1064.19	0.15450865		1654.21	0.00855607		2244.2	0.05229428		2834.2	0.01130829		3424.19	-0.00308407
474.4	0.38659024		1064.39	0.15454893		1654.41	0.00797952		2244.4	0.05265416		2834.4	0.0114905		3424.39	-0.00327437
474.6	0.38710208		1064.59	0.15419558		1654.61	0.00824763		2244.6	0.05218726		2834.6	0.01119151		3424.59	-0.00319036
474.8	0.38674997		1064.79	0.15334413		1654.81	0.00808894		2244.8	0.05286999		2834.8	0.01078803		3424.79	-0.00317092
475	0.38659529		1064.99	0.15336461		1655.01	0.00808258		2245	0.05248072		2835	0.01103129		3424.99	-0.00361065
475.2	0.38626654		1065.19	0.15307718		1655.21	0.00819362		2245.2	0.05265756		2835.2	0.01099849		3425.19	-0.00321211
475.4	0.38611372		1065.39	0.15369707		1655.41	0.00824292		2245.4	0.05201999		2835.4	0.01100583		3425.39	-0.00396925
475.6	0.38590415		1065.59	0.15411202		1655.61	0.00847727		2245.6	0.05155923		2835.6	0.01196285		3425.59	-0.00365875
475.8	0.38568882		1065.79	0.15322995		1655.81	0.00798968		2245.8	0.05135919		2835.8	0.01253662		3425.79	-0.00396683
476	0.3848555		1065.99	0.15247519		1656.01	0.00841699		2246	0.05058995		2836	0.01277302		3425.99	-0.00343985
476.2	0.38510997		1066.19	0.1522969		1656.21	0.00811792		2246.2	0.0503505		2836.2	0.01256053		3426.19	-0.00286724
476.4	0.38485621		1066.39	0.15187078		1656.41	0.00780598		2246.4	0.04902146		2836.4	0.01320398		3426.39	-0.00253693
476.6	0.3852866		1066.59	0.15199946		1656.61	0.00804597		2246.6	0.04870703		2836.6	0.01282373		3426.59	-0.00243152
476.8	0.38545398		1066.79	0.15190345		1656.81	0.00646092		2246.8	0.04833358		2836.8	0.01250711		3426.79	-0.00296394
477	0.38436371		1066.99	0.15192133		1657.01	0.0069668		2247	0.04828376		2837	0.01224909		3426.99	-0.00253633
477.2	0.38444816		1067.19	0.15265196		1657.21	0.00712387		2247.2	0.04816131		2837.2	0.01213497		3427.19	-0.00264464
477.4	0.38449345		1067.39	0.15225247		1657.41	0.00709644		2247.4	0.04878219		2837.4	0.0114016		3427.39	-0.0024387
477.6	0.38443231		1067.59	0.1526493		1657.61	0.007772		2247.6	0.04808887		2837.6	0.01139856		3427.59	-0.00265564
477.8	0.38481606		1067.79	0.15258039		1657.81	0.00763278		2247.8	0.04809455		2837.8	0.01036488		3427.79	-0.00251262
478	0.3848137		1067.99	0.15308919		1658.01	0.008609		2248	0.04772334		2838	0.00978887		3427.99	-0.00272224
478.2	0.3837378		1068.19	0.15372323		1658.21	0.00957071		2248.2	0.04854829		2838.2	0.00973786		3428.19	-0.00345585
478.4	0.3833937		1068.39	0.1541592		1658.41	0.0090354		2248.4	0.04904859		2838.4	0.00983756		3428.39	-0.00436006
478.6	0.38377528		1068.59	0.15382662		1658.61	0.00918614		2248.6	0.0494718		2838.6	0.00947833		3428.59	-0.00401706
478.8	0.38434114		1068.79	0.15387854		1658.81	0.00841529		2248.8	0.05020343		2838.8	0.00897079		3428.79	-0.00423142
479	0.38461452		1068.99	0.15453213		1659.01	0.007647		2249	0.04931349		2839	0.00948902		3428.99	-0.00505162
479.2	0.38453594		1069.19	0.1552837		1659.21	0.00761912		2249.2	0.04908824		2839.2	0.00920555		3429.19	-0.00561102
479.4	0.38399191		1069.39	0.15498674		1659.41	0.00776772		2249.4	0.04827475		2839.4	0.01001		3429.39	-0.00561873
479.6	0.38438684		1069.59	0.15398877		1659.61	0.00748002		2249.6	0.04773863		2839.6	0.01100978		3429.59	-0.00523818
479.8	0.38478885		1069.79	0.15293989		1659.81	0.00594954		2249.8	0.04752064		2839.8	0.01197803		3429.79	-0.00475027
480	0.38442037		1069.99	0.15232077		1660.01	0.00551241		2250	0.04728616		2840	0.01250788		3429.99	-0.00586602
480.2	0.3852012		1070.19	0.15166876		1660.21	0.0047597		2250.2	0.04632026		2840.2	0.01243777		3430.19	-0.00625776
480.4	0.38544076		1070.39	0.1516035		1660.41	0.00400605		2250.4	0.04535179		2840.4	0.0127678		3430.39	-0.00675039
480.6	0.38495534		1070.59	0.15173444		1660.61	0.00375692		2250.6	0.04547577		2840.6	0.0121007		3430.59	-0.00658536
480.8	0.38418205		1070.79	0.15168034		1660.81	0.00300214		2250.8	0.04523504		2840.8	0.01152049		3430.79	-0.00624776
481	0.38333806		1070.99	0.15170204		1661.01	0.0040841		2251	0.04551915		2841	0.01099442		3430.99	-0.00587257
481.2	0.38450272		1071.19	0.15153163		1661.21	0.00483867		2251.2	0.04504562		2841.2	0.0106387		3431.19	-0.00623754
481.4	0.38479792		1071.39	0.15147575		1661.41	0.00531631		2251.4	0.04569892		2841.4	0.01015968		3431.39	-0.0064467
481.6	0.38538815		1071.59	0.15202507		1661.61	0.00616749		2251.6	0.04487902		2841.6	0.00969684		3431.59	-0.00579101
481.8	0.38516067		1071.79	0.15128897		1661.81	0.0065763		2251.8	0.04514717		2841.8	0.00906625		3431.79	-0.00695835
482	0.38497564		1071.99	0.15138772		1662.01	0.00702056		2252	0.04412463		2842	0.0096558		3431.99	-0.00716938
482.2	0.38461693		1072.19	0.15193215		1662.21	0.00762839		2252.2	0.04402718		2842.2	0.00968463		3432.19	-0.00682983
482.4	0.38484547		1072.39	0.15241179		1662.41	0.00723468		2252.4	0.04409393		2842.4	0.00987172		3432.39	-0.0058415
482.6	0.38467035		1072.59	0.15193764		1662.61	0.00763249		2252.6	0.04454551		2842.6	0.0093779		3432.59	-0.00565904
482.8	0.3848298		1072.79	0.1525175		1662.81	0.00704068		2252.8	0.04476256		2842.8	0.00962408		3432.79	-0.00526756
483	0.38449107		1072.99	0.1529943		1663.01	0.00704371		2253	0.04439061		2843	0.00969724		3432.99	-0.00583223
483.2	0.38395417		1073.19	0.15237917		1663.21	0.00720752		2253.2	0.04468117		2843.2	0.00981729		3433.19	-0.00500907
483.4	0.38443081		1073.39	0.15155762		1663.41	0.0070871		2253.4	0.04510784		2843.4	0.01095877		3433.39	-0.00495844
483.6	0.38480226		1073.59	0.1511029		1663.61	0.00720402		2253.6	0.04525668		2843.6	0.01189459		3433.59	-0.00524992
483.8	0.38492946		1073.79	0.15150875		1663.81	0.00629817		2253.8	0.04534579		2843.8	0.012838		3433.79	-0.00542597
484	0.38517505		1073.99	0.15082894		1664.01	0.00643603		2254	0.04491444		2844	0.01211807		3433.99	-0.00665548
484.2	0.38550181		1074.19	0.14961616		1664.21	0.00580697		2254.2	0.04417567		2844.2	0.01156694		3434.19	-0.00632961
484.4	0.38531402		1074.39	0.1500296		1664.41	0.00579		2254.4	0.04407648		2844.4	0.01073549		3434.39	-0.0054215
484.6	0.38540066		1074.59	0.14998493		1664.61	0.00581066		2254.6	0.04347537		2844.6	0.00992739		3434.59	-0.00539081
484.8	0.38578409		1074.79	0.14987695		1664.81	0.0063204		2254.8	0.04341755		2844.8	0.00873405		3434.79	-0.00467417
485	0.38594645		1074.99	0.149869		1665.01	0.00710193		2255	0.04291835		2845	0.00864827		3434.99	-0.00558816
485.2	0.38577759		1075.19	0.14962534		1665.21	0.00713035		2255.2	0.04266152		2845.2	0.0085309		3435.19	-0.00615425
485.4	0.3859947		1075.39	0.14924184		1665.41	0.00717895		2255.4	0.0427196		2845.4	0.00857567		3435.39	-0.00655458
485.6	0.38620868		1075.59	0.14884558		1665.61	0.00737865		2255.6	0.04267164		2845.6	0.008729		3435.59	-0.00630943
485.8	0.38556703		1075.79	0.1477626		1665.81	0.00735361		2255.8	0.04234925		2845.8	0.00894559		3435.79	-0.00759351
486	0.38598558		1075.99	0.14777389		1666.01	0.00719985		2256	0.04177529		2846	0.00951501		3435.99	-0.00753182
486.2	0.38644897		1076.19	0.147435		1666.21	0.00688646		2256.2	0.04274284		2846.2	0.00984897		3436.19	-0.0076268
486.4	0.38560533		1076.39	0.14762725		1666.41	0.00617406		2256.4	0.04254854		2846.4	0.01049703		3436.39	-0.00770387
486.6	0.38454452		1076.59	0.14790954		1666.61	0.0059344		2256.6	0.04281947		2846.6	0.01070237		3436.59	-0.00816723
486.8	0.38414795		1076.79	0.14940377		1666.81	0.00551242		2256.8	0.04336455		2846.8	0.01126239		3436.79	-0.00879924
487	0.38385568		1076.99	0.14994182		1667.01	0.00489484		2257	0.04357794		2847	0.01125969		3436.99	-0.00911775
487.2	0.38381768		1077.19	0.15061274		1667.21	0.00493605		2257.2	0.04351595		2847.2	0.01160468		3437.19	-0.00940655
487.4	0.38378491		1077.39	0.15056446		1667.41	0.00466777		2257.4	0.04406987		2847.4	0.01232717		3437.39	-0.00991202
487.6	0.38332071		1077.59	0.1508468		1667.61	0.00556576		2257.6	0.04309978		2847.6	0.01195582		3437.59	-0.01004694
487.8	0.38396363		1077.79	0.15044745		1667.81	0.00557264		2257.8	0.04245374		2847.8	0.01194232		3437.79	-0.00925159
488	0.38502049		1077.99	0.15016677		1668.01	0.0057557		2258	0.0415672		2848	0.01138271		3437.99	-0.00940669
488.2	0.38488576		1078.19	0.15064149		1668.21	0.00564437		2258.2	0.04121299		2848.2	0.01084847		3438.19	-0.00903699
488.4	0.38510456		1078.39	0.15141665		1668.41	0.00607775		2258.4	0.04058397		2848.4	0.01023556		3438.39	-0.00887209
488.6	0.38475102		1078.59	0.15144998		1668.61	0.00635152		2258.6	0.03976717		2848.6	0.01060426		3438.59	-0.0084893
488.8	0.38452476		1078.79	0.15158879		1668.81	0.00673361		2258.8	0.03942439		2848.8	0.01039864		3438.79	-0.00802883
489	0.38425007		1078.99	0.15161544		1669.01	0.00721749		2259	0.03912936		2849	0.01055565		3438.99	-0.00863757
489.2	0.38397926		1079.19	0.15170252		1669.21	0.00731074		2259.2	0.03886631		2849.2	0.01039754		3439.19	-0.00846153
489.4	0.38367316		1079.39	0.15176504		1669.41	0.00769687		2259.4	0.03933194		2849.4	0.00969516		3439.39	-0.00903967
489.6	0.38349162		1079.59	0.15152584		1669.61	0.00787504		2259.6	0.03976315		2849.6	0.00994558		3439.59	-0.00956374
489.8	0.38336549		1079.79	0.15131081		1669.81	0.00713187		2259.8	0.04053144		2849.8	0.01021552		3439.79	-0.01003187
490	0.38384881		1079.99	0.15112145		1670.01	0.00640794		2260	0.04070654		2850	0.01049943		3439.99	-0.01058681
490.2	0.38361955		1080.19	0.15206717		1670.21	0.00566721		2260.2	0.04118208		2850.2	0.01105766		3440.19	-0.01011697
490.4	0.38296476		1080.39	0.15314433		1670.41	0.00496959		2260.4	0.04070187		2850.4	0.01159873		3440.39	-0.01033805
490.6	0.382728		1080.59	0.15463175		1670.61	0.00430625		2260.6	0.04054515		2850.6	0.01121916		3440.59	-0.01042276
490.8	0.3833446		1080.79	0.15518023		1670.81	0.00371094		2260.8	0.04064111		2850.8	0.01051351		3440.79	-0.010924
491	0.38304014		1080.99	0.15430264		1671.01	0.0023675		2261	0.04108293		2851	0.00944692		3440.99	-0.01043259
491.2	0.38300345		1081.19	0.15373108		1671.21	0.00246419		2261.2	0.04029371		2851.2	0.00873232		3441.19	-0.01046966
491.4	0.3827422		1081.39	0.15277587		1671.41	0.00208177		2261.4	0.04086443		2851.4	0.00816854		3441.39	-0.0103207
491.6	0.38355582		1081.59	0.15274856		1671.61	0.00281116		2261.6	0.04052794		2851.6	0.0074888		3441.59	-0.01012919
491.8	0.38410375		1081.79	0.15236592		1671.81	0.00257823		2261.8	0.04031505		2851.8	0.00734436		3441.79	-0.00906655
492	0.3845497		1081.99	0.15363382		1672.01	0.00266962		2262	0.04000162		2852	0.00663229		3441.99	-0.00969257
492.2	0.38428205		1082.19	0.1528419		1672.21	0.00345183		2262.2	0.0400671		2852.2	0.00571939		3442.19	-0.00950991
492.4	0.38321568		1082.39	0.15200879		1672.41	0.00380478		2262.4	0.04063027		2852.4	0.005335		3442.39	-0.00978665
492.6	0.38261083		1082.59	0.1523008		1672.61	0.00443785		2262.6	0.04137119		2852.6	0.0058258		3442.59	-0.00947653
492.8	0.38249037		1082.79	0.1519676		1672.81	0.00388003		2262.8	0.04098639		2852.8	0.00498083		3442.79	-0.00997376
493	0.38190911		1082.99	0.15124573		1673.01	0.00339482		2263	0.04074995		2853	0.00458676		3442.99	-0.00961481
493.2	0.38189008		1083.19	0.15128693		1673.21	0.00328811		2263.2	0.04022259		2853.2	0.00461719		3443.19	-0.00956931
493.4	0.38141454		1083.39	0.15097756		1673.41	0.0026631		2263.4	0.04003389		2853.4	0.00534422		3443.39	-0.00979612
493.6	0.38220303		1083.59	0.15111639		1673.61	0.00299699		2263.6	0.03988668		2853.6	0.00607327		3443.59	-0.00984165
493.8	0.38184894		1083.79	0.15071239		1673.81	0.00234806		2263.8	0.0405099		2853.8	0.00640035		3443.79	-0.00963352
494	0.38186644		1083.99	0.15059515		1674.01	0.0025248		2264	0.03947023		2854	0.00703994		3443.99	-0.00892805
494.2	0.38169111		1084.19	0.15016168		1674.21	0.00328585		2264.2	0.03950271		2854.2	0.00892378		3444.19	-0.00909635
494.4	0.3824019		1084.39	0.14959632		1674.41	0.002324		2264.4	0.0384609		2854.4	0.00977915		3444.39	-0.00951826
494.6	0.38263848		1084.59	0.14892447		1674.61	0.00217897		2264.6	0.03771845		2854.6	0.00902136		3444.59	-0.00973871
494.8	0.38269398		1084.79	0.14842956		1674.81	0.00211102		2264.8	0.03735867		2854.8	0.0093872		3444.79	-0.00964218
495	0.38166111		1084.99	0.14823079		1675.01	0.00286354		2265	0.03767588		2855	0.00973037		3444.99	-0.00905089
495.2	0.38150891		1085.19	0.14802424		1675.21	0.00369835		2265.2	0.03709732		2855.2	0.01044523		3445.19	-0.00850263
495.4	0.38146678		1085.39	0.14825121		1675.41	0.00400103		2265.4	0.03745867		2855.4	0.01009992		3445.39	-0.00872598
495.6	0.3816119		1085.59	0.14790606		1675.61	0.00479198		2265.6	0.0376717		2855.6	0.01023069		3445.59	-0.00818848
495.8	0.38129635		1085.79	0.14796789		1675.81	0.00521343		2265.8	0.03781049		2855.8	0.00960864		3445.79	-0.00787532
496	0.38124894		1085.99	0.14827482		1676.01	0.00613162		2266	0.0376506		2856	0.00942484		3445.99	-0.00877265
496.2	0.3812438		1086.19	0.14786486		1676.21	0.00688901		2266.2	0.03734355		2856.2	0.00924406		3446.19	-0.00908749
496.4	0.38033303		1086.39	0.14787607		1676.41	0.00700772		2266.4	0.03786645		2856.4	0.00927134		3446.39	-0.00910297
496.6	0.38069868		1086.59	0.14879761		1676.61	0.00648413		2266.6	0.03760037		2856.6	0.00960451		3446.59	-0.0087885
496.8	0.38033612		1086.79	0.14807756		1676.81	0.00514781		2266.8	0.03670507		2856.8	0.00906721		3446.79	-0.0080203
497	0.38037358		1086.99	0.14766652		1677.01	0.00500544		2267	0.03606141		2857	0.00915453		3446.99	-0.00736408
497.2	0.38061931		1087.19	0.14869108		1677.21	0.00422619		2267.2	0.03526374		2857.2	0.00939846		3447.19	-0.00733254
497.4	0.38033914		1087.39	0.14985081		1677.41	0.00329897		2267.4	0.03533477		2857.4	0.00970955		3447.39	-0.00646358
497.6	0.38063826		1087.59	0.14960077		1677.61	0.00323845		2267.6	0.03529994		2857.6	0.00903016		3447.59	-0.00642503
497.8	0.38025504		1087.79	0.1485654		1677.81	0.00235381		2267.8	0.03613762		2857.8	0.00939146		3447.79	-0.00683631
498	0.38031404		1087.99	0.14853687		1678.01	0.00147789		2268	0.03549862		2858	0.01049854		3447.99	-0.00664582
498.2	0.38068327		1088.19	0.14826199		1678.21	0.00171789		2268.2	0.03581959		2858.2	0.01097479		3448.19	-0.00797679
498.4	0.38191553		1088.39	0.14883397		1678.41	0.00018478		2268.4	0.03544904		2858.4	0.01022544		3448.39	-0.00872906
498.6	0.38178763		1088.59	0.14914507		1678.61	0.00069081		2268.6	0.03556823		2858.6	0.00981133		3448.59	-0.00881437
498.8	0.38106165		1088.79	0.14961161		1678.81	0.00088119		2268.8	0.03592621		2858.8	0.01020225		3448.79	-0.00879876
499	0.38144599		1088.99	0.14943295		1679.01	0.00106838		2269	0.03605504		2859	0.01045988		3448.99	-0.00930063
499.2	0.38195849		1089.19	0.1495105		1679.21	0.00126348		2269.2	0.03702354		2859.2	0.01047473		3449.19	-0.00981154
499.4	0.38244661		1089.39	0.14894003		1679.41	0.00155801		2269.4	0.03763309		2859.4	0.00972679		3449.39	-0.01029817
499.6	0.38225661		1089.59	0.14902974		1679.61	0.00159779		2269.6	0.03780334		2859.6	0.00840401		3449.59	-0.0105817
499.8	0.38228924		1089.79	0.14923609		1679.81	0.00167361		2269.8	0.03825842		2859.8	0.00700115		3449.79	-0.01071113
500	0.38265177		1089.99	0.14924513		1680.01	0.00229658		2270	0.0372857		2860	0.00679836		3449.99	-0.01144048
500.2	0.38278646		1090.19	0.14937076		1680.21	0.00227435		2270.2	0.03647997		2860.2	0.00598006		3450.19	-0.01157022
500.4	0.38248081		1090.39	0.14855237		1680.41	0.00249873		2270.4	0.03668161		2860.4	0.00561791		3450.39	-0.01126554
500.6	0.38209041		1090.59	0.14925036		1680.61	0.00201001		2270.6	0.03627313		2860.6	0.00537802		3450.59	-0.01063753
500.8	0.3809006		1090.79	0.14805313		1680.81	0.00149823		2270.8	0.0360809		2860.8	0.00490966		3450.79	-0.01040466
501	0.38108408		1090.99	0.14750618		1681.01	0.0015654		2271	0.03611917		2861	0.00482625		3450.99	-0.01048518
501.2	0.3807303		1091.19	0.14788706		1681.21	0.00050486		2271.2	0.03559239		2861.2	0.00509834		3451.19	-0.01007876
501.4	0.38081752		1091.39	0.14745822		1681.41	-0.00018575		2271.4	0.03507829		2861.4	0.00536441		3451.39	-0.00928893
501.6	0.38124577		1091.59	0.14649736		1681.61	-0.00043052		2271.6	0.03444853		2861.6	0.00484904		3451.59	-0.0088345
501.8	0.38091461		1091.79	0.14704407		1681.81	-0.00115341		2271.8	0.03508168		2861.8	0.00565663		3451.79	-0.00890881
502	0.38112643		1091.99	0.14711708		1682.01	-0.00165461		2272	0.03400284		2862	0.00592168		3451.99	-0.00896948
502.2	0.38115968		1092.19	0.14691835		1682.21	-0.00086359		2272.2	0.03471314		2862.2	0.00570132		3452.19	-0.00991845
502.4	0.38154478		1092.39	0.14694262		1682.41	-0.00119349		2272.4	0.03484246		2862.4	0.00659087		3452.39	-0.01024697
502.6	0.38112276		1092.59	0.14641565		1682.61	-0.00068641		2272.6	0.03468862		2862.6	0.00665876		3452.59	-0.01000923
502.8	0.3806239		1092.79	0.14637566		1682.81	-0.00032239		2272.8	0.0339272		2862.8	0.00764167		3452.79	-0.01084104
503	0.38149206		1092.99	0.14667749		1683.01	-0.00009962		2273	0.03283126		2863	0.00805955		3452.99	-0.01157783
503.2	0.3810791		1093.19	0.1470251		1683.21	0.0001425		2273.2	0.03369629		2863.2	0.00792853		3453.19	-0.01149824
503.4	0.38181458		1093.39	0.14714745		1683.41	0.00058536		2273.4	0.03281917		2863.4	0.00681859		3453.39	-0.01163682
503.6	0.38150969		1093.59	0.14852583		1683.61	0.00082117		2273.6	0.03316499		2863.6	0.00509415		3453.59	-0.01226625
503.8	0.38106248		1093.79	0.14819242		1683.81	0.00126378		2273.8	0.03306397		2863.8	0.00455337		3453.79	-0.01244624
504	0.38102692		1093.99	0.14807725		1684.01	0.00104537		2274	0.03266602		2864	0.00440579		3453.99	-0.01331046
504.2	0.38081662		1094.19	0.14773815		1684.21	0.00089663		2274.2	0.03273027		2864.2	0.00402568		3454.19	-0.01299927
504.4	0.38061941		1094.39	0.1470217		1684.41	0.00139877		2274.4	0.03293688		2864.4	0.00361375		3454.39	-0.01246468
504.6	0.37933283		1094.59	0.14688602		1684.61	0.00129993		2274.6	0.03239587		2864.6	0.00368102		3454.59	-0.01148658
504.8	0.37949757		1094.79	0.14645403		1684.81	0.00072498		2274.8	0.03322219		2864.8	0.00272182		3454.79	-0.0112572
505	0.37982406		1094.99	0.14629651		1685.01	0.00088827		2275	0.03280448		2865	0.00270134		3454.99	-0.01079763
505.2	0.37978705		1095.19	0.14675995		1685.21	0.00016529		2275.2	0.03226999		2865.2	0.00221089		3455.19	-0.00994711
505.4	0.38024543		1095.39	0.14697819		1685.41	-0.00051607		2275.4	0.03269932		2865.4	0.00156466		3455.39	-0.00937864
505.6	0.38022448		1095.59	0.14733686		1685.61	-0.00028852		2275.6	0.0335819		2865.6	0.00146655		3455.59	-0.00860591
505.8	0.38019471		1095.79	0.14745345		1685.81	-0.00066872		2275.8	0.03379119		2865.8	0.00175077		3455.79	-0.00832656
506	0.38006895		1095.99	0.14682695		1686.01	-0.00043414		2276	0.03379187		2866	0.00164485		3455.99	-0.00857343
506.2	0.37981321		1096.19	0.14698024		1686.21	0.00008858		2276.2	0.03470275		2866.2	0.00294579		3456.19	-0.00917085
506.4	0.38081022		1096.39	0.14727702		1686.41	-0.00036196		2276.4	0.03460468		2866.4	0.00314115		3456.39	-0.00860794
506.6	0.38167377		1096.59	0.14734056		1686.61	0.00008349		2276.6	0.03446959		2866.6	0.00350992		3456.59	-0.0094382
506.8	0.38233572		1096.79	0.14788844		1686.81	0.00091596		2276.8	0.03403519		2866.8	0.00472116		3456.79	-0.00972888
507	0.38284314		1096.99	0.14836346		1687.01	-0.00021178		2277	0.0345434		2867	0.00590202		3456.99	-0.00955759
507.2	0.38223685		1097.19	0.1484373		1687.21	-0.00001536		2277.2	0.0355805		2867.2	0.00623944		3457.19	-0.01045194
507.4	0.38263336		1097.39	0.14969404		1687.41	0.0008165		2277.4	0.0358495		2867.4	0.00640599		3457.39	-0.01058014
507.6	0.38198788		1097.59	0.15042705		1687.61	0.00112173		2277.6	0.03706017		2867.6	0.00622199		3457.59	-0.01143289
507.8	0.38125541		1097.79	0.14924411		1687.81	0.00116975		2277.8	0.03719564		2867.8	0.00635066		3457.79	-0.01213115
508	0.3810204		1097.99	0.14920268		1688.01	0.00083111		2278	0.0369424		2868	0.00691941		3457.99	-0.01249895
508.2	0.38062254		1098.19	0.14918665		1688.21	0.00125207		2278.2	0.03720951		2868.2	0.00664299		3458.19	-0.01251975
508.4	0.38074157		1098.39	0.1501335		1688.41	0.00172		2278.4	0.03671575		2868.4	0.00602217		3458.39	-0.0115408
508.6	0.38033556		1098.59	0.15031696		1688.61	0.00133481		2278.6	0.03628946		2868.6	0.00606792		3458.59	-0.01037493
508.8	0.38088693		1098.79	0.15023145		1688.81	0.000816		2278.8	0.03655688		2868.8	0.00418749		3458.79	-0.00996549
509	0.38058303		1098.99	0.15049602		1689.01	0.00099173		2279	0.03559141		2869	0.00464925		3458.99	-0.01029102
509.2	0.38006694		1099.19	0.15000328		1689.21	0.00022517		2279.2	0.03496791		2869.2	0.00512479		3459.19	-0.01019661
509.4	0.37975763		1099.39	0.14993671		1689.41	-0.00000999		2279.4	0.03414832		2869.4	0.00534109		3459.39	-0.01000034
509.6	0.37966592		1099.59	0.14920225		1689.61	0.00008054		2279.6	0.03383957		2869.6	0.0053571		3459.59	-0.00969471
509.8	0.37994079		1099.79	0.1483379		1689.81	-0.00040089		2279.8	0.03269196		2869.8	0.00497423		3459.79	-0.00896745
510	0.38062311		1099.99	0.14774818		1690.01	-0.00027224		2280	0.03276921		2870	0.00599556		3459.99	-0.00942992
510.2	0.38108653		1100.19	0.14741719		1690.21	-0.00014588		2280.2	0.03211207		2870.2	0.00609208		3460.19	-0.01038966
510.4	0.38160082		1100.39	0.14662122		1690.41	-0.0007348		2280.4	0.03136394		2870.4	0.00564118		3460.39	-0.01048479
510.6	0.38263144		1100.59	0.1467126		1690.61	0.00020388		2280.6	0.03162144		2870.6	0.00630928		3460.59	-0.01170616
510.8	0.38228857		1100.79	0.14675371		1690.81	0.00019372		2280.8	0.03147685		2870.8	0.00612283		3460.79	-0.01152828
511	0.38209553		1100.99	0.14686468		1691.01	0.00007509		2281	0.03109967		2871	0.0066965		3460.99	-0.01173847
511.2	0.38180203		1101.19	0.14637819		1691.21	0.00063755		2281.2	0.0308109		2871.2	0.00551947		3461.19	-0.01278175
511.4	0.38201079		1101.39	0.14760475		1691.41	0.00052828		2281.4	0.03068479		2871.4	0.00522548		3461.39	-0.01320813
511.6	0.38194643		1101.59	0.14748677		1691.61	0.00071137		2281.6	0.031225		2871.6	0.0046592		3461.59	-0.01437946
511.8	0.38078632		1101.79	0.14756602		1691.81	0.0012019		2281.8	0.03091259		2871.8	0.00498782		3461.79	-0.01566965
512	0.38095672		1101.99	0.14832812		1692.01	0.00117444		2282	0.03046679		2872	0.00462643		3461.99	-0.01553153
512.2	0.38110559		1102.19	0.14942407		1692.21	0.00072718		2282.2	0.0309529		2872.2	0.00331587		3462.19	-0.01493428
512.4	0.38145079		1102.39	0.15005742		1692.41	-0.00011156		2282.4	0.0305398		2872.4	0.00293285		3462.39	-0.01425374
512.6	0.38083513		1102.59	0.14987984		1692.61	-0.00101302		2282.6	0.03044969		2872.6	0.00294694		3462.59	-0.0135076
512.8	0.37997594		1102.79	0.14951949		1692.81	-0.00191668		2282.8	0.03017466		2872.8	0.00328579		3462.79	-0.01314605
513	0.3795325		1102.99	0.1497384		1693.01	-0.00267098		2283	0.02999376		2873	0.0044234		3462.99	-0.013158
513.2	0.37891749		1103.19	0.14837281		1693.21	-0.00347652		2283.2	0.02965983		2873.2	0.00558317		3463.19	-0.01233077
513.4	0.37848753		1103.39	0.14877155		1693.41	-0.00371984		2283.4	0.02966269		2873.4	0.00532136		3463.39	-0.01196746
513.6	0.37928988		1103.59	0.14764548		1693.61	-0.00415074		2283.6	0.03057767		2873.6	0.0059347		3463.59	-0.01191472
513.8	0.37896788		1103.79	0.14659263		1693.81	-0.00397557		2283.8	0.03009505		2873.8	0.00606555		3463.79	-0.01179728
514	0.37922087		1103.99	0.14595341		1694.01	-0.00358694		2284	0.03098827		2874	0.0062496		3463.99	-0.01191763
514.2	0.37786142		1104.19	0.14561106		1694.21	-0.00356191		2284.2	0.02990552		2874.2	0.00574575		3464.19	-0.01131248
514.4	0.37770194		1104.39	0.14584701		1694.41	-0.00300287		2284.4	0.03033264		2874.4	0.00564948		3464.39	-0.01168179
514.6	0.37836705		1104.59	0.14672841		1694.61	-0.00118684		2284.6	0.0310307		2874.6	0.00564275		3464.59	-0.01100043
514.8	0.37858315		1104.79	0.14614218		1694.81	-0.00060922		2284.8	0.03085472		2874.8	0.00480209		3464.79	-0.0103596
515	0.37907985		1104.99	0.14548832		1695.01	0.00023621		2285	0.02960762		2875	0.00484484		3464.99	-0.00992842
515.2	0.37850031		1105.19	0.146214		1695.21	0.00045803		2285.2	0.02963877		2875.2	0.00447259		3465.19	-0.01022973
515.4	0.37847956		1105.39	0.14708849		1695.41	0.00086832		2285.4	0.03012402		2875.4	0.00452254		3465.39	-0.01097797
515.6	0.37853047		1105.59	0.14716181		1695.61	0.00159263		2285.6	0.03135311		2875.6	0.00425967		3465.59	-0.01174091
515.8	0.37775743		1105.79	0.14711692		1695.81	0.00233356		2285.8	0.03124603		2875.8	0.00412216		3465.79	-0.01209967
516	0.37795267		1105.99	0.14634544		1696.01	0.00183417		2286	0.03089972		2876	0.00335236		3465.99	-0.01085954
516.2	0.37842924		1106.19	0.14599135		1696.21	0.00140066		2286.2	0.03054564		2876.2	0.00328806		3466.19	-0.0109318
516.4	0.37883585		1106.39	0.14591218		1696.41	0.00085414		2286.4	0.02976452		2876.4	0.00387897		3466.39	-0.01153015
516.6	0.37944535		1106.59	0.14587601		1696.61	0.00068605		2286.6	0.02877754		2876.6	0.00453483		3466.59	-0.01196188
516.8	0.37941075		1106.79	0.14512133		1696.81	0.00048524		2286.8	0.02820182		2876.8	0.0047803		3466.79	-0.01219918
517	0.37977265		1106.99	0.14453728		1697.01	-0.00025765		2287	0.02879065		2877	0.00344206		3466.99	-0.01244149
517.2	0.37992041		1107.19	0.14439547		1697.21	-0.00013288		2287.2	0.02886438		2877.2	0.00456187		3467.19	-0.01231197
517.4	0.38010699		1107.39	0.14522763		1697.41	-0.00053634		2287.4	0.02891073		2877.4	0.00438786		3467.39	-0.01337689
517.6	0.38070025		1107.59	0.14460749		1697.61	-0.0006368		2287.6	0.02884682		2877.6	0.00466903		3467.59	-0.01421952
517.8	0.3808045		1107.79	0.14483073		1697.81	-0.00044803		2287.8	0.028642		2877.8	0.00343012		3467.79	-0.01458912
518	0.38101826		1107.99	0.14521408		1698.01	-0.00046784		2288	0.02874909		2878	0.0038602		3467.99	-0.01360649
518.2	0.38086315		1108.19	0.14558848		1698.21	-0.00065881		2288.2	0.02811516		2878.2	0.00492089		3468.19	-0.01361892
518.4	0.3805228		1108.39	0.14619729		1698.41	-0.00017897		2288.4	0.02923927		2878.4	0.00525459		3468.39	-0.01444134
518.6	0.38037698		1108.59	0.14526459		1698.61	0.00043498		2288.6	0.02928679		2878.6	0.00523531		3468.59	-0.01371039
518.8	0.38008752		1108.79	0.14453408		1698.81	-0.00025712		2288.8	0.02944599		2878.8	0.00486235		3468.79	-0.01370875
519	0.37947355		1108.99	0.14465463		1699.01	-0.00102323		2289	0.02834696		2879	0.00479306		3468.99	-0.01354969
519.2	0.37932268		1109.19	0.14562037		1699.21	-0.00121838		2289.2	0.02917825		2879.2	0.00448665		3469.19	-0.01330835
519.4	0.37941751		1109.39	0.14539943		1699.41	-0.00203651		2289.4	0.02963946		2879.4	0.00349238		3469.39	-0.01327114
519.6	0.3791416		1109.59	0.14453377		1699.61	-0.00270073		2289.6	0.03030226		2879.6	0.00278143		3469.59	-0.01319212
519.8	0.37821443		1109.79	0.14335357		1699.81	-0.00288625		2289.8	0.02980806		2879.8	0.00263833		3469.79	-0.01283405
520	0.37789749		1109.99	0.14306039		1700.01	-0.00342683		2290	0.02942201		2880	0.00237611		3469.99	-0.01197878
520.2	0.37873073		1110.19	0.14252125		1700.21	-0.00217086		2290.2	0.02961789		2880.2	0.00243275		3470.19	-0.01204841
520.4	0.37957339		1110.39	0.14307524		1700.41	-0.00220996		2290.4	0.02931114		2880.4	0.00155689		3470.39	-0.01282884
520.6	0.37996011		1110.59	0.14243814		1700.61	-0.00164239		2290.6	0.02977425		2880.6	0.0010318		3470.59	-0.014075
520.8	0.37914696		1110.79	0.14229712		1700.81	-0.00110902		2290.8	0.02999606		2880.8	0.00042703		3470.79	-0.01336731
521	0.37988121		1110.99	0.14170697		1701.01	-0.00146254		2291	0.03091757		2881	-0.0002016		3470.99	-0.0137376
521.2	0.37886324		1111.19	0.1421978		1701.21	-0.00095492		2291.2	0.03097401		2881.2	0.00124472		3471.19	-0.01453577
521.4	0.3795753		1111.39	0.14259569		1701.41	-0.00138236		2291.4	0.03110156		2881.4	0.00063251		3471.39	-0.01544764
521.6	0.37987111		1111.59	0.14300319		1701.61	-0.00047598		2291.6	0.03059277		2881.6	0.00062434		3471.59	-0.01538191
521.8	0.38064697		1111.79	0.14325955		1701.81	0.00011589		2291.8	0.03087036		2881.8	0.00118766		3471.79	-0.01548316
522	0.38008474		1111.99	0.14310452		1702.01	0.00042242		2292	0.03029166		2882	0.00227207		3471.99	-0.01541369
522.2	0.38012536		1112.19	0.14336141		1702.21	0.00068529		2292.2	0.03056956		2882.2	0.00271201		3472.19	-0.0162955
522.4	0.3793353		1112.39	0.14351301		1702.41	0.0007016		2292.4	0.0302849		2882.4	0.00256882		3472.39	-0.01642662
522.6	0.37835645		1112.59	0.14316975		1702.61	0.00068324		2292.6	0.02934347		2882.6	0.00228939		3472.59	-0.01613964
522.8	0.37806067		1112.79	0.14380249		1702.81	-0.00044039		2292.8	0.02885392		2882.8	0.00223071		3472.79	-0.01525169
523	0.37817005		1112.99	0.14433922		1703.01	-0.00140695		2293	0.02721448		2883	0.00203807		3472.99	-0.01581458
523.2	0.37772693		1113.19	0.14544954		1703.21	-0.00210101		2293.2	0.0274463		2883.2	0.00165336		3473.19	-0.01541472
523.4	0.37679245		1113.39	0.14526656		1703.41	-0.00333707		2293.4	0.02774627		2883.4	0.0004553		3473.39	-0.01473285
523.6	0.37626111		1113.59	0.14532607		1703.61	-0.0035718		2293.6	0.02794428		2883.6	0.00069185		3473.59	-0.01470923
523.8	0.37623818		1113.79	0.14594103		1703.81	-0.00371721		2293.8	0.02725015		2883.8	0.00041822		3473.79	-0.01450651
524	0.37622386		1113.99	0.14603082		1704.01	-0.00292343		2294	0.02760804		2884	0.0001379		3473.99	-0.01337986
524.2	0.37642139		1114.19	0.1451751		1704.21	-0.00254522		2294.2	0.0277355		2884.2	-0.00012448		3474.19	-0.01268276
524.4	0.37715374		1114.39	0.14533217		1704.41	-0.00377937		2294.4	0.02747811		2884.4	0.00061923		3474.39	-0.01361463
524.6	0.37641005		1114.59	0.14417671		1704.61	-0.00359324		2294.6	0.02810189		2884.6	0.00175516		3474.59	-0.01377022
524.8	0.37624695		1114.79	0.14424654		1704.81	-0.00388386		2294.8	0.02707213		2884.8	0.00303442		3474.79	-0.01370406
525	0.37709183		1114.99	0.1436494		1705.01	-0.00355861		2295	0.0280291		2885	0.00427933		3474.99	-0.01429852
525.2	0.37625898		1115.19	0.14464324		1705.21	-0.00291275		2295.2	0.02824553		2885.2	0.00569282		3475.19	-0.01422303
525.4	0.37739149		1115.39	0.14585453		1705.41	-0.00311729		2295.4	0.02852711		2885.4	0.00549322		3475.39	-0.01399603
525.6	0.37745871		1115.59	0.14590861		1705.61	-0.00197489		2295.6	0.02843758		2885.6	0.0058079		3475.59	-0.01401558
525.8	0.37796766		1115.79	0.1450199		1705.81	-0.00147278		2295.8	0.02831214		2885.8	0.00601214		3475.79	-0.01446279
526	0.37782765		1115.99	0.1448455		1706.01	-0.00174567		2296	0.02767241		2886	0.00597281		3475.99	-0.01422511
526.2	0.37850321		1116.19	0.14459411		1706.21	-0.00126541		2296.2	0.02741199		2886.2	0.00586628		3476.19	-0.01475804
526.4	0.37874994		1116.39	0.14394765		1706.41	-0.00116774		2296.4	0.02657219		2886.4	0.00575543		3476.39	-0.01480206
526.6	0.37835147		1116.59	0.14419095		1706.61	-0.00129671		2296.6	0.02644901		2886.6	0.00509438		3476.59	-0.01478743
526.8	0.37939782		1116.79	0.14380378		1706.81	-0.00188729		2296.8	0.0265231		2886.8	0.0035077		3476.79	-0.01483377
527	0.37906702		1116.99	0.14375181		1707.01	-0.00222196		2297	0.0264096		2887	0.00314787		3476.99	-0.015119
527.2	0.37862238		1117.19	0.14417854		1707.21	-0.00260697		2297.2	0.02684901		2887.2	0.00181019		3477.19	-0.01475805
527.4	0.37843102		1117.39	0.144425		1707.41	-0.00268395		2297.4	0.02726418		2887.4	0.0007265		3477.39	-0.01422569
527.6	0.37800421		1117.59	0.14546621		1707.61	-0.00218972		2297.6	0.02642147		2887.6	-0.00011498		3477.59	-0.01430168
527.8	0.37867909		1117.79	0.14512978		1707.81	-0.00233306		2297.8	0.02584147		2887.8	-0.00055051		3477.79	-0.01407821
528	0.37862524		1117.99	0.14470244		1708.01	-0.00220931		2298	0.02605781		2888	-0.00010023		3477.99	-0.01333727
528.2	0.378872		1118.19	0.14434979		1708.21	-0.00384741		2298.2	0.02591474		2888.2	0.00026153		3478.19	-0.01354793
528.4	0.3786562		1118.39	0.14420602		1708.41	-0.00379262		2298.4	0.02601282		2888.4	0.00051329		3478.39	-0.01394131
528.6	0.37756552		1118.59	0.14426703		1708.61	-0.00339498		2298.6	0.02653037		2888.6	0.00017618		3478.59	-0.0140127
528.8	0.37730515		1118.79	0.14514793		1708.81	-0.00278994		2298.8	0.02590252		2888.8	0.00060793		3478.79	-0.01378985
529	0.3774246		1118.99	0.14625906		1709.01	-0.00191098		2299	0.02656052		2889	0.00120829		3478.99	-0.01354339
529.2	0.37737077		1119.19	0.14740666		1709.21	-0.00270782		2299.2	0.02657033		2889.2	0.0021968		3479.19	-0.01382274
529.4	0.37705943		1119.39	0.14820659		1709.41	-0.00311017		2299.4	0.02574304		2889.4	0.00233053		3479.39	-0.01440425
529.6	0.37768451		1119.59	0.14652557		1709.61	-0.00265659		2299.6	0.02591127		2889.6	0.00280762		3479.59	-0.01522711
529.8	0.37759083		1119.79	0.14648968		1709.81	-0.00237445		2299.8	0.02549622		2889.8	0.00357736		3479.79	-0.01536381
530	0.37746704		1119.99	0.14650171		1710.01	-0.00272798		2300	0.02507362		2890	0.00409181		3479.99	-0.0157369
530.2	0.37816545		1120.19	0.14563075		1710.21	-0.0029406		2300.2	0.02460126		2890.2	0.00400892		3480.19	-0.01685569
530.4	0.37812595		1120.39	0.14544208		1710.41	-0.00330056		2300.4	0.02529289		2890.4	0.00419606		3480.39	-0.01723565
530.6	0.37804047		1120.59	0.14594807		1710.61	-0.00398827		2300.6	0.02552176		2890.6	0.00342117		3480.59	-0.0174476
530.8	0.37802646		1120.79	0.14486352		1710.81	-0.00464383		2300.8	0.02490697		2890.8	0.00258588		3480.79	-0.01692037
531	0.37769884		1120.99	0.14484456		1711.01	-0.0047329		2301	0.02476017		2891	0.0024384		3480.99	-0.01667329
531.2	0.37787452		1121.19	0.14462276		1711.21	-0.00501572		2301.2	0.02502174		2891.2	0.00208615		3481.19	-0.01636579
531.4	0.37787635		1121.39	0.14412576		1711.41	-0.00490035		2301.4	0.02481997		2891.4	0.002008		3481.39	-0.01582297
531.6	0.37751072		1121.59	0.14406765		1711.61	-0.00470912		2301.6	0.02424934		2891.6	0.00169563		3481.59	-0.0155004
531.8	0.37821358		1121.79	0.14329441		1711.81	-0.00553865		2301.8	0.0243399		2891.8	0.00247437		3481.79	-0.01510726
532	0.37862977		1121.99	0.14321512		1712.01	-0.0059329		2302	0.02368235		2892	0.00196921		3481.99	-0.01510822
532.2	0.3788693		1122.19	0.1428053		1712.21	-0.00627391		2302.2	0.02362515		2892.2	0.0006728		3482.19	-0.01542653
532.4	0.37836527		1122.39	0.14228426		1712.41	-0.00503298		2302.4	0.02389431		2892.4	-0.00013038		3482.39	-0.01480523
532.6	0.37848724		1122.59	0.14266397		1712.61	-0.00519793		2302.6	0.02473407		2892.6	-0.00012449		3482.59	-0.01373299
532.8	0.3785387		1122.79	0.14303213		1712.81	-0.00468304		2302.8	0.02461827		2892.8	0.00049858		3482.79	-0.01353331
533	0.37942303		1122.99	0.14388881		1713.01	-0.00402515		2303	0.02440102		2893	0.00083472		3482.99	-0.01403853
533.2	0.38032015		1123.19	0.14325998		1713.21	-0.00479148		2303.2	0.02457085		2893.2	0.00134242		3483.19	-0.01397087
533.4	0.37959089		1123.39	0.14327532		1713.41	-0.00336864		2303.4	0.02430969		2893.4	0.00132291		3483.39	-0.01394329
533.6	0.38001192		1123.59	0.14264844		1713.61	-0.00295136		2303.6	0.02555682		2893.6	0.00122115		3483.59	-0.01435274
533.8	0.38001741		1123.79	0.14419103		1713.81	-0.00240734		2303.8	0.0250411		2893.8	0.00191746		3483.79	-0.01419112
534	0.3794306		1123.99	0.14375447		1714.01	-0.00236753		2304	0.02440469		2894	0.00220831		3483.99	-0.01481484
534.2	0.3793091		1124.19	0.14424316		1714.21	-0.0024396		2304.2	0.02447953		2894.2	0.00219096		3484.19	-0.01581283
534.4	0.37856873		1124.39	0.14475929		1714.41	-0.00261282		2304.4	0.02410104		2894.4	0.00246496		3484.39	-0.01579102
534.6	0.37776445		1124.59	0.14529584		1714.61	-0.00289116		2304.6	0.02404374		2894.6	0.00252705		3484.59	-0.01644473
534.8	0.37771951		1124.79	0.14430132		1714.81	-0.00297003		2304.8	0.02289194		2894.8	0.00158368		3484.79	-0.01697658
535	0.37813578		1124.99	0.14416514		1715.01	-0.00286429		2305	0.02356268		2895	0.00175821		3484.99	-0.01726546
535.2	0.37789962		1125.19	0.14403973		1715.21	-0.00348403		2305.2	0.02311186		2895.2	0.00277552		3485.19	-0.0169298
535.4	0.37715724		1125.39	0.14459427		1715.41	-0.00369091		2305.4	0.02142513		2895.4	0.00335927		3485.39	-0.01688604
535.6	0.37664148		1125.59	0.14564655		1715.61	-0.00451907		2305.6	0.02074591		2895.6	0.00393068		3485.59	-0.01682642
535.8	0.37760341		1125.79	0.1457518		1715.81	-0.00506736		2305.8	0.01975419		2895.8	0.00413883		3485.79	-0.01750378
536	0.37773112		1125.99	0.14594341		1716.01	-0.00475016		2306	0.01848885		2896	0.00461324		3485.99	-0.01820006
536.2	0.37793278		1126.19	0.14566075		1716.21	-0.00412933		2306.2	0.0184205		2896.2	0.00522877		3486.19	-0.01786688
536.4	0.37757316		1126.39	0.1453287		1716.41	-0.00420449		2306.4	0.01895914		2896.4	0.00549117		3486.39	-0.01703071
536.6	0.37832803		1126.59	0.14505732		1716.61	-0.00487143		2306.6	0.01972576		2896.6	0.00565876		3486.59	-0.01628927
536.8	0.37715432		1126.79	0.14566901		1716.81	-0.00452751		2306.8	0.01967394		2896.8	0.00589382		3486.79	-0.01624938
537	0.37805669		1126.99	0.1455736		1717.01	-0.0048503		2307	0.01972661		2897	0.0055689		3486.99	-0.01505136
537.2	0.37775668		1127.19	0.14443014		1717.21	-0.00496067		2307.2	0.02045705		2897.2	0.00584339		3487.19	-0.01357921
537.4	0.37719497		1127.39	0.14517002		1717.41	-0.00392084		2307.4	0.02135435		2897.4	0.00621545		3487.39	-0.01383797
537.6	0.37735643		1127.59	0.14515847		1717.61	-0.00377334		2307.6	0.02172056		2897.6	0.00630854		3487.59	-0.01410853
537.8	0.37697254		1127.79	0.14513912		1717.81	-0.00305645		2307.8	0.02193319		2897.8	0.00629241		3487.79	-0.01375319
538	0.37608616		1127.99	0.14516191		1718.01	-0.00272802		2308	0.02243054		2898	0.00558408		3487.99	-0.01398891
538.2	0.37602226		1128.19	0.14553811		1718.21	-0.00247492		2308.2	0.02253483		2898.2	0.00435812		3488.19	-0.01450971
538.4	0.3756318		1128.39	0.14550995		1718.41	-0.00190837		2308.4	0.02255754		2898.4	0.00400118		3488.39	-0.01439774
538.6	0.37562028		1128.59	0.14570106		1718.61	-0.00158733		2308.6	0.02365256		2898.6	0.00332023		3488.59	-0.01555262
538.8	0.3758116		1128.79	0.14478308		1718.81	-0.00216171		2308.8	0.02304092		2898.8	0.0018661		3488.79	-0.01569705
539	0.37577612		1128.99	0.14485121		1719.01	-0.00222722		2309	0.02379158		2899	0.00241546		3488.99	-0.01588887
539.2	0.37593538		1129.19	0.1451755		1719.21	-0.00322668		2309.2	0.02366787		2899.2	0.00248002		3489.19	-0.01626183
539.4	0.37643024		1129.39	0.14581696		1719.41	-0.0028425		2309.4	0.02297008		2899.4	0.00270487		3489.39	-0.01551847
539.6	0.3772243		1129.59	0.14631669		1719.61	-0.00354015		2309.6	0.02267433		2899.6	0.0029014		3489.59	-0.01608239
539.8	0.37796474		1129.79	0.1463408		1719.81	-0.00351124		2309.8	0.0227657		2899.8	0.00301081		3489.79	-0.01641576
540	0.37821008		1129.99	0.1457653		1720.01	-0.00371744		2310	0.0221913		2900	0.00347504		3489.99	-0.01714587
540.2	0.37898503		1130.19	0.14521224		1720.21	-0.00416639		2310.2	0.02222253		2900.2	0.00327939		3490.19	-0.0167774
540.4	0.37867404		1130.39	0.14516629		1720.41	-0.00573207		2310.4	0.02220677		2900.4	0.0029875		3490.39	-0.01651753
540.6	0.37915887		1130.59	0.14484618		1720.61	-0.00637249		2310.6	0.02264599		2900.6	0.00335103		3490.59	-0.0170396
540.8	0.37730579		1130.79	0.14530965		1720.81	-0.00800149		2310.8	0.02272977		2900.8	0.00387295		3490.79	-0.01644492
541	0.37816658		1130.99	0.14484177		1721.01	-0.00816955		2311	0.0233452		2901	0.00406108		3490.99	-0.01577063
541.2	0.37664566		1131.19	0.14446301		1721.21	-0.0072155		2311.2	0.02355269		2901.2	0.00426581		3491.19	-0.01669258
541.4	0.37535943		1131.39	0.14475216		1721.41	-0.00722312		2311.4	0.02443709		2901.4	0.00447233		3491.39	-0.01733087
541.6	0.37466213		1131.59	0.14420286		1721.61	-0.00697216		2311.6	0.02447759		2901.6	0.00416118		3491.59	-0.01763304
541.8	0.37424242		1131.79	0.14353559		1721.81	-0.00614165		2311.8	0.02439474		2901.8	0.0039542		3491.79	-0.01719838
542	0.37397308		1131.99	0.14337432		1722.01	-0.00560074		2312	0.02406776		2902	0.00368031		3491.99	-0.01771911
542.2	0.37360209		1132.19	0.14293741		1722.21	-0.00475744		2312.2	0.02386361		2902.2	0.00319261		3492.19	-0.01793997
542.4	0.37316182		1132.39	0.1431955		1722.41	-0.00387057		2312.4	0.02393106		2902.4	0.00230997		3492.39	-0.01762874
542.6	0.37351483		1132.59	0.14329106		1722.61	-0.00386696		2312.6	0.0237678		2902.6	0.00143484		3492.59	-0.01769627
542.8	0.37348497		1132.79	0.14215877		1722.81	-0.00477181		2312.8	0.02340237		2902.8	0.00113264		3492.79	-0.01833135
543	0.37462831		1132.99	0.14269435		1723.01	-0.00382333		2313	0.0239092		2903	0.00087184		3492.99	-0.01828452
543.2	0.37621125		1133.19	0.14268759		1723.21	-0.00406851		2313.2	0.0229269		2903.2	0.00088991		3493.19	-0.01709373
543.4	0.37778925		1133.39	0.14286008		1723.41	-0.00297627		2313.4	0.02148954		2903.4	0.0001754		3493.39	-0.0155808
543.6	0.37809889		1133.59	0.14346867		1723.61	-0.00332845		2313.6	0.01989724		2903.6	-0.00038423		3493.59	-0.01620718
543.8	0.37931364		1133.79	0.14336688		1723.81	-0.00284817		2313.8	0.01925725		2903.8	-0.00091718		3493.79	-0.01564082
544	0.38060942		1133.99	0.14295218		1724.01	-0.0022786		2314	0.01762437		2904	-0.00072842		3493.99	-0.01602944
544.2	0.38133361		1134.19	0.14319945		1724.21	-0.00270715		2314.2	0.01784794		2904.2	-0.00083904		3494.19	-0.01513191
544.4	0.38141435		1134.39	0.14393425		1724.41	-0.00304741		2314.4	0.01792493		2904.4	-0.00040818		3494.39	-0.01533892
544.6	0.38107918		1134.59	0.14419861		1724.61	-0.002956		2314.6	0.01874583		2904.6	-0.00042207		3494.59	-0.01537006
544.8	0.37959443		1134.79	0.14464444		1724.81	-0.00431453		2314.8	0.01873408		2904.8	0.00015182		3494.79	-0.01426477
545	0.37909542		1134.99	0.14451672		1725.01	-0.00304332		2315	0.01959316		2905	-0.0006997		3494.99	-0.01422945
545.2	0.37800718		1135.19	0.1438891		1725.21	-0.00324939		2315.2	0.01933508		2905.2	-0.0007057		3495.19	-0.01470761
545.4	0.3766753		1135.39	0.1442509		1725.41	-0.0036302		2315.4	0.02047017		2905.4	-0.00057132		3495.39	-0.01477696
545.6	0.37633906		1135.59	0.1433961		1725.61	-0.00376346		2315.6	0.0195146		2905.6	-0.00049058		3495.59	-0.01541896
545.8	0.37574334		1135.79	0.14272407		1725.81	-0.00398064		2315.8	0.01903206		2905.8	0.00043041		3495.79	-0.01507085
546	0.37481912		1135.99	0.14251945		1726.01	-0.0042347		2316	0.0197011		2906	0.0005667		3495.99	-0.01523948
546.2	0.37413037		1136.19	0.14349398		1726.21	-0.00463813		2316.2	0.01981957		2906.2	-0.00045342		3496.19	-0.01506106
546.4	0.37397783		1136.39	0.14424712		1726.41	-0.00534093		2316.4	0.01966304		2906.4	-0.00094432		3496.39	-0.01504643
546.6	0.37437813		1136.59	0.1444741		1726.61	-0.00601821		2316.6	0.02035038		2906.6	-0.00032439		3496.59	-0.01543792
546.8	0.37422552		1136.79	0.14385604		1726.81	-0.00649789		2316.8	0.02070754		2906.8	0.00007266		3496.79	-0.0158982
547	0.37535879		1136.99	0.14409022		1727.01	-0.00513493		2317	0.02139465		2907	0.00005692		3496.99	-0.01527116
547.2	0.3757758		1137.19	0.14353917		1727.21	-0.00571629		2317.2	0.02061642		2907.2	0.00003137		3497.19	-0.01463285
547.4	0.37615604		1137.39	0.14380241		1727.41	-0.00539691		2317.4	0.01994596		2907.4	-0.00031678		3497.39	-0.01464967
547.6	0.37637448		1137.59	0.14318611		1727.61	-0.00552623		2317.6	0.01956184		2907.6	0.00044659		3497.59	-0.01511917
547.8	0.37694788		1137.79	0.14248882		1727.81	-0.0048229		2317.8	0.01966765		2907.8	0.00116225		3497.79	-0.01533
548	0.3772613		1137.99	0.14152796		1728.01	-0.004397		2318	0.02061462		2908	0.00174065		3497.99	-0.0159619
548.2	0.37769252		1138.19	0.14110028		1728.21	-0.00431255		2318.2	0.02109734		2908.2	0.00181815		3498.19	-0.01599571
548.4	0.37783826		1138.39	0.14188906		1728.41	-0.00397076		2318.4	0.0217871		2908.4	0.00291747		3498.39	-0.01688042
548.6	0.37744742		1138.59	0.14234534		1728.61	-0.00345372		2318.6	0.02227732		2908.6	0.00287204		3498.59	-0.01700227
548.8	0.37760185		1138.79	0.14284928		1728.81	-0.00306013		2318.8	0.02210895		2908.8	0.0026258		3498.79	-0.01655164
549	0.37791043		1138.99	0.14204019		1729.01	-0.002699		2319	0.02189861		2909	0.00204373		3498.99	-0.01743633
549.2	0.37830019		1139.19	0.14229161		1729.21	-0.0027898		2319.2	0.02185872		2909.2	0.00269359		3499.19	-0.01755254
549.4	0.37680697		1139.39	0.14328349		1729.41	-0.00298508		2319.4	0.02182835		2909.4	0.0028941		3499.39	-0.01781128
549.6	0.37630307		1139.59	0.1430715		1729.61	-0.0029967		2319.6	0.02023492		2909.6	0.00334844		3499.59	-0.01776309
549.8	0.37523042		1139.79	0.14359661		1729.81	-0.00322734		2319.8	0.02048272		2909.8	0.00361759		3499.79	-0.01755201
550	0.37470948		1139.99	0.14400173		1730.01	-0.00274615		2320	0.0204391		2910	0.00339107		3499.99	-0.0175151
550.2	0.37402298		1140.19	0.14488484		1730.21	-0.00291788		2320.2	0.02043057		2910.2	0.00318874		3500.19	-0.01779456
550.4	0.3742081		1140.39	0.14511727		1730.41	-0.00297955		2320.4	0.02079802		2910.4	0.00342144		3500.39	-0.01841869
550.6	0.37405186		1140.59	0.14468062		1730.61	-0.00245445		2320.6	0.0215652		2910.6	0.00298536		3500.59	-0.01907575
550.8	0.3748448		1140.79	0.14465282		1730.81	-0.00179204		2320.8	0.02222895		2910.8	0.00279874		3500.79	-0.01934149
551	0.37474933		1140.99	0.14466538		1731.01	-0.00113396		2321	0.02284097		2911	0.00342232		3500.99	-0.01928259
551.2	0.3745569		1141.19	0.14411148		1731.21	-0.00201897		2321.2	0.02277464		2911.2	0.00377521		3501.19	-0.01896051
551.4	0.37466496		1141.39	0.14368416		1731.41	-0.00214742		2321.4	0.02250342		2911.4	0.0036739		3501.39	-0.01942168
551.6	0.37490944		1141.59	0.14258744		1731.61	-0.00272027		2321.6	0.02313909		2911.6	0.00424082		3501.59	-0.02024898
551.8	0.37458643		1141.79	0.14285116		1731.81	-0.00245996		2321.8	0.02286592		2911.8	0.00408992		3501.79	-0.02076749
552	0.37473277		1141.99	0.14294071		1732.01	-0.00254392		2322	0.02405388		2912	0.00465706		3501.99	-0.02053048
552.2	0.37491869		1142.19	0.14329749		1732.21	-0.00326955		2322.2	0.0236174		2912.2	0.00514782		3502.19	-0.02024759
552.4	0.37591035		1142.39	0.1446162		1732.41	-0.0035911		2322.4	0.02397852		2912.4	0.00569632		3502.39	-0.02045953
552.6	0.37679232		1142.59	0.14510125		1732.61	-0.00384259		2322.6	0.02362453		2912.6	0.00421926		3502.59	-0.02079582
552.8	0.37796553		1142.79	0.14527823		1732.81	-0.00424878		2322.8	0.02267351		2912.8	0.00336681		3502.79	-0.02003758
553	0.37813832		1142.99	0.1444185		1733.01	-0.00556439		2323	0.02174239		2913	0.00290085		3502.99	-0.0201874
553.2	0.37839539		1143.19	0.14476438		1733.21	-0.00564243		2323.2	0.02168427		2913.2	0.00194955		3503.19	-0.01999412
553.4	0.3775891		1143.39	0.14490128		1733.41	-0.00677622		2323.4	0.02050398		2913.4	0.00129133		3503.39	-0.01886327
553.6	0.37716628		1143.59	0.14499983		1733.61	-0.00650625		2323.6	0.01960615		2913.6	0.00018363		3503.59	-0.01892749
553.8	0.37670627		1143.79	0.14470757		1733.81	-0.00709475		2323.8	0.01960792		2913.8	-0.00049717		3503.79	-0.01916586
554	0.37669335		1143.99	0.14471658		1734.01	-0.00670897		2324	0.01901431		2914	-0.00111867		3503.99	-0.01930107
554.2	0.37649512		1144.19	0.14420639		1734.21	-0.00653988		2324.2	0.01842607		2914.2	-0.00224988		3504.19	-0.0197862
554.4	0.37704702		1144.39	0.14405897		1734.41	-0.00629164		2324.4	0.01720721		2914.4	-0.00373852		3504.39	-0.02023503
554.6	0.37722853		1144.59	0.14431692		1734.61	-0.00578115		2324.6	0.01709408		2914.6	-0.0040681		3504.59	-0.01994851
554.8	0.37774755		1144.79	0.14513536		1734.81	-0.0048579		2324.8	0.01750465		2914.8	-0.00308293		3504.79	-0.019798
555	0.37669566		1144.99	0.14438088		1735.01	-0.00391692		2325	0.01753053		2915	-0.00306441		3504.99	-0.01986104
555.2	0.37691306		1145.19	0.1447244		1735.21	-0.00386479		2325.2	0.01738267		2915.2	-0.00277373		3505.19	-0.01961848
555.4	0.37653113		1145.39	0.14587142		1735.41	-0.00408084		2325.4	0.01762569		2915.4	-0.00263382		3505.39	-0.01957799
555.6	0.37571368		1145.59	0.14546997		1735.61	-0.00398511		2325.6	0.0176796		2915.6	-0.00134242		3505.59	-0.01966035
555.8	0.37588248		1145.79	0.14582333		1735.81	-0.00318302		2325.8	0.01745028		2915.8	-0.0007011		3505.79	-0.01879627
556	0.37622857		1145.99	0.14636536		1736.01	-0.0035481		2326	0.01808223		2916	-0.00003592		3505.99	-0.0188003
556.2	0.37659013		1146.19	0.14568531		1736.21	-0.00375837		2326.2	0.01829317		2916.2	0.0005516		3506.19	-0.01917899
556.4	0.37703031		1146.39	0.14579309		1736.41	-0.00323331		2326.4	0.01820224		2916.4	0.00031173		3506.39	-0.01933945
556.6	0.37735339		1146.59	0.14488596		1736.61	-0.00359918		2326.6	0.01852607		2916.6	-0.00049148		3506.59	-0.01997227
556.8	0.37696422		1146.79	0.1438795		1736.81	-0.00358014		2326.8	0.01827716		2916.8	-0.00026555		3506.79	-0.0194445
557	0.37678532		1146.99	0.14280622		1737.01	-0.00405222		2327	0.01814047		2917	-0.00034395		3506.99	-0.01936257
557.2	0.37586365		1147.19	0.14266601		1737.21	-0.00421397		2327.2	0.01888085		2917.2	-0.00042172		3507.19	-0.01934006
557.4	0.37531974		1147.39	0.14289288		1737.41	-0.00509103		2327.4	0.01868687		2917.4	-0.00003535		3507.39	-0.01871742
557.6	0.37567621		1147.59	0.14248509		1737.61	-0.00487707		2327.6	0.01881806		2917.6	0.00036308		3507.59	-0.01956977
557.8	0.37540437		1147.79	0.14234399		1737.81	-0.00564959		2327.8	0.0189861		2917.8	0.00027153		3507.79	-0.01950683
558	0.37565498		1147.99	0.1423152		1738.01	-0.00594987		2328	0.01884464		2918	-0.00107214		3507.99	-0.01938689
558.2	0.37575891		1148.19	0.14191571		1738.21	-0.00621398		2328.2	0.01874303		2918.2	-0.00184261		3508.19	-0.0197263
558.4	0.37508931		1148.39	0.14247295		1738.41	-0.00583164		2328.4	0.01850146		2918.4	-0.0018492		3508.39	-0.01966022
558.6	0.37473943		1148.59	0.14342609		1738.61	-0.00539356		2328.6	0.01886696		2918.6	-0.00075107		3508.59	-0.01914199
558.8	0.37481546		1148.79	0.14378461		1738.81	-0.00555112		2328.8	0.02016867		2918.8	-0.00051994		3508.79	-0.01958329
559	0.37468846		1148.99	0.14327078		1739.01	-0.00517713		2329	0.02049292		2919	-0.00088515		3508.99	-0.0194559
559.2	0.3752156		1149.19	0.14381843		1739.21	-0.00584086		2329.2	0.02003632		2919.2	-0.00076843		3509.19	-0.0191658
559.4	0.3752335		1149.39	0.14351505		1739.41	-0.00574872		2329.4	0.01924821		2919.4	-0.00076306		3509.39	-0.01910615
559.6	0.37551011		1149.59	0.14225686		1739.61	-0.0057562		2329.6	0.01857929		2919.6	-0.0006885		3509.59	-0.01910745
559.8	0.37619868		1149.79	0.14272184		1739.81	-0.00518604		2329.8	0.01835853		2919.8	-0.00101085		3509.79	-0.0196167
560	0.37650704		1149.99	0.14214794		1740.01	-0.00532879		2330	0.0189864		2920	-0.00096698		3509.99	-0.02011456
560.2	0.37639306		1150.19	0.14077961		1740.21	-0.00454338		2330.2	0.01880126		2920.2	-0.00109123		3510.19	-0.02014987
560.4	0.37608812		1150.39	0.14027288		1740.41	-0.0038463		2330.4	0.01865935		2920.4	-0.0016779		3510.39	-0.02030381
560.6	0.3759555		1150.59	0.13981261		1740.61	-0.0038585		2330.6	0.01843788		2920.6	-0.00144843		3510.59	-0.02039611
560.8	0.374676		1150.79	0.13952013		1740.81	-0.00416116		2330.8	0.01828075		2920.8	-0.00113506		3510.79	-0.02004738
561	0.37494417		1150.99	0.13912828		1741.01	-0.00485143		2331	0.01827119		2921	-0.00148586		3510.99	-0.02017206
561.2	0.37448657		1151.19	0.13890942		1741.21	-0.00508303		2331.2	0.01860267		2921.2	-0.00202027		3511.19	-0.02002086
561.4	0.37547648		1151.39	0.13970764		1741.41	-0.00541151		2331.4	0.0176228		2921.4	-0.00259614		3511.39	-0.01965773
561.6	0.37618827		1151.59	0.13934084		1741.61	-0.00551614		2331.6	0.01738183		2921.6	-0.00228395		3511.59	-0.01925858
561.8	0.37592577		1151.79	0.14014898		1741.81	-0.00650359		2331.8	0.01732476		2921.8	-0.00318795		3511.79	-0.01896124
562	0.3766002		1151.99	0.14071049		1742.01	-0.00698091		2332	0.01735545		2922	-0.00387647		3511.99	-0.01956709
562.2	0.37526147		1152.19	0.14110297		1742.21	-0.00726074		2332.2	0.01774618		2922.2	-0.00354167		3512.19	-0.02039161
562.4	0.37479229		1152.39	0.14189654		1742.41	-0.00724029		2332.4	0.01777389		2922.4	-0.00271494		3512.39	-0.02045865
562.6	0.37551522		1152.59	0.14243793		1742.61	-0.00787905		2332.6	0.01777824		2922.6	-0.00168543		3512.59	-0.01988854
562.8	0.37657099		1152.79	0.14261837		1742.81	-0.00827373		2332.8	0.01803613		2922.8	-0.00137264		3512.79	-0.0200462
563	0.37758219		1152.99	0.14218513		1743.01	-0.00852365		2333	0.01719703		2923	-0.00073835		3512.99	-0.02003816
563.2	0.3774237		1153.19	0.14200744		1743.21	-0.00876214		2333.2	0.01606778		2923.2	-0.00063738		3513.19	-0.02053363
563.4	0.37733008		1153.39	0.1424363		1743.41	-0.00829295		2333.4	0.01545564		2923.4	-0.00008388		3513.39	-0.02050271
563.6	0.37850299		1153.59	0.14205436		1743.61	-0.00829846		2333.6	0.01632953		2923.6	0.00039293		3513.59	-0.02117138
563.8	0.37832305		1153.79	0.14185124		1743.81	-0.00744139		2333.8	0.01700215		2923.8	0.00070976		3513.79	-0.02169872
564	0.37914594		1153.99	0.14107228		1744.01	-0.00719201		2334	0.017108		2924	0.00117341		3513.99	-0.02171424
564.2	0.37882958		1154.19	0.1414829		1744.21	-0.0064646		2334.2	0.01656365		2924.2	0.00069805		3514.19	-0.02185715
564.4	0.37874028		1154.39	0.14160516		1744.41	-0.0064308		2334.4	0.01761387		2924.4	0.00148175		3514.39	-0.02261616
564.6	0.37822074		1154.59	0.14181381		1744.61	-0.00644596		2334.6	0.01704378		2924.6	0.00149861		3514.59	-0.02206169
564.8	0.3770021		1154.79	0.14128965		1744.81	-0.0063325		2334.8	0.01763983		2924.8	0.00072641		3514.79	-0.02212053
565	0.37682111		1154.99	0.14091673		1745.01	-0.00596118		2335	0.0177775		2925	-0.00068984		3514.99	-0.0220531
565.2	0.37665552		1155.19	0.1409075		1745.21	-0.00544236		2335.2	0.01733083		2925.2	-0.00142447		3515.19	-0.02146388
565.4	0.3764177		1155.39	0.14131327		1745.41	-0.00524199		2335.4	0.01706996		2925.4	-0.00123593		3515.39	-0.02124762
565.6	0.3762741		1155.59	0.14130181		1745.61	-0.00494579		2335.6	0.01816087		2925.6	-0.0012877		3515.59	-0.02142994
565.8	0.37599056		1155.79	0.14216922		1745.81	-0.00515484		2335.8	0.0183772		2925.8	-0.00228311		3515.79	-0.02259792
566	0.37559897		1155.99	0.14261125		1746.01	-0.00518682		2336	0.01858401		2926	-0.00264556		3515.99	-0.02249266
566.2	0.37493737		1156.19	0.14216052		1746.21	-0.0053729		2336.2	0.01902228		2926.2	-0.00375368		3516.19	-0.02243472
566.4	0.37501433		1156.39	0.14277006		1746.41	-0.00504832		2336.4	0.0191593		2926.4	-0.00368655		3516.39	-0.02136473
566.6	0.37500112		1156.59	0.1434188		1746.61	-0.0049042		2336.6	0.0183427		2926.6	-0.00264314		3516.59	-0.02089185
566.8	0.37459422		1156.79	0.14378583		1746.81	-0.00389916		2336.8	0.0181436		2926.8	-0.00315241		3516.79	-0.02049838
567	0.37399585		1156.99	0.14311169		1747.01	-0.00434501		2337	0.01836703		2927	-0.00267107		3516.99	-0.01978959
567.2	0.3732952		1157.19	0.14302925		1747.21	-0.00374955		2337.2	0.01876905		2927.2	-0.00226693		3517.19	-0.01994456
567.4	0.37396149		1157.39	0.14371678		1747.41	-0.00395444		2337.4	0.019562		2927.4	-0.00218451		3517.39	-0.01949737
567.6	0.37447811		1157.59	0.14267969		1747.61	-0.00407503		2337.6	0.01986038		2927.6	-0.00158152		3517.59	-0.01994788
567.8	0.37358668		1157.79	0.14229514		1747.81	-0.0041629		2337.8	0.01936369		2927.8	-0.00163018		3517.79	-0.01884474
568	0.3741142		1157.99	0.14212248		1748.01	-0.00341309		2338	0.0193537		2928	-0.00132538		3517.99	-0.01853252
568.2	0.37400994		1158.19	0.14222694		1748.21	-0.00378884		2338.2	0.01881602		2928.2	-0.00140853		3518.19	-0.01762986
568.4	0.37438783		1158.39	0.14168177		1748.41	-0.00409065		2338.4	0.01916913		2928.4	-0.00060402		3518.39	-0.01735067
568.6	0.37456866		1158.59	0.14151521		1748.61	-0.00367493		2338.6	0.01856886		2928.6	-0.00101633		3518.59	-0.01675584
568.8	0.37434004		1158.79	0.141184		1748.81	-0.00382803		2338.8	0.01855994		2928.8	-0.00116881		3518.79	-0.01660891
569	0.37457937		1158.99	0.14121231		1749.01	-0.00371793		2339	0.01726172		2929	-0.00098931		3518.99	-0.01633938
569.2	0.37520328		1159.19	0.14097252		1749.21	-0.0039294		2339.2	0.01641435		2929.2	-0.00054222		3519.19	-0.01656953
569.4	0.37580102		1159.39	0.14140793		1749.41	-0.00412104		2339.4	0.01638698		2929.4	-0.0000624		3519.39	-0.01697612
569.6	0.37623771		1159.59	0.14158578		1749.61	-0.00403718		2339.6	0.01606129		2929.6	-0.00047504		3519.59	-0.01768841
569.8	0.37655156		1159.79	0.14169722		1749.81	-0.00446768		2339.8	0.01498043		2929.8	-0.00028599		3519.79	-0.01840401
570	0.37675986		1159.99	0.14153766		1750.01	-0.00493092		2340	0.0142331		2930	-0.00043229		3519.99	-0.01831887
570.2	0.37648043		1160.19	0.1412071		1750.21	-0.00541284		2340.2	0.0144761		2930.2	-0.00076289		3520.19	-0.01843736
570.4	0.37568345		1160.39	0.14209725		1750.41	-0.00551435		2340.4	0.0139491		2930.4	-0.00005179		3520.39	-0.01859064
570.6	0.37529561		1160.59	0.14196967		1750.61	-0.00565819		2340.6	0.01360651		2930.6	0.00090811		3520.59	-0.01907485
570.8	0.37445093		1160.79	0.14142055		1750.81	-0.00507905		2340.8	0.01408684		2930.8	0.00060717		3520.79	-0.01863247
571	0.37337309		1160.99	0.14070437		1751.01	-0.00599361		2341	0.01463664		2931	0.0010759		3520.99	-0.01862041
571.2	0.37290171		1161.19	0.14074126		1751.21	-0.00573063		2341.2	0.01475918		2931.2	0.00087169		3521.19	-0.01915329
571.4	0.37318916		1161.39	0.13992298		1751.41	-0.00610401		2341.4	0.01478495		2931.4	0.00042557		3521.39	-0.01908568
571.6	0.37298826		1161.59	0.13826773		1751.61	-0.00626555		2341.6	0.01504072		2931.6	0.00045131		3521.59	-0.01907032
571.8	0.37266866		1161.79	0.13795867		1751.81	-0.00625074		2341.8	0.01526575		2931.8	-0.00035587		3521.79	-0.01766282
572	0.37336138		1161.99	0.13837428		1752.01	-0.00574038		2342	0.01566865		2932	-0.0000231		3521.99	-0.01729448
572.2	0.37347005		1162.19	0.13801781		1752.21	-0.00632077		2342.2	0.01544955		2932.2	-0.00009387		3522.19	-0.01693961
572.4	0.37345782		1162.39	0.13718618		1752.41	-0.00601898		2342.4	0.01580445		2932.4	-0.00066656		3522.39	-0.01739196
572.6	0.37344269		1162.59	0.13745739		1752.61	-0.00581015		2342.6	0.0158807		2932.6	-0.00088571		3522.59	-0.0176307
572.8	0.37316257		1162.79	0.13750122		1752.81	-0.00575016		2342.8	0.0159588		2932.8	-0.00097448		3522.79	-0.01764391
573	0.37345578		1162.99	0.13788994		1753.01	-0.00584531		2343	0.0151829		2933	-0.00107822		3522.99	-0.01767486
573.2	0.37443919		1163.19	0.13779958		1753.21	-0.00559647		2343.2	0.01522678		2933.2	-0.00082413		3523.19	-0.01883866
573.4	0.37573979		1163.39	0.13861535		1753.41	-0.00531655		2343.4	0.01525609		2933.4	-0.00051074		3523.39	-0.01950636
573.6	0.37564126		1163.59	0.13878118		1753.61	-0.00504874		2343.6	0.01503708		2933.6	-0.00060967		3523.59	-0.01969183
573.8	0.37608587		1163.79	0.13996786		1753.81	-0.00439268		2343.8	0.01517135		2933.8	-0.0004768		3523.79	-0.01969136
574	0.37660086		1163.99	0.14070997		1754.01	-0.00461403		2344	0.01487353		2934	-0.00043711		3523.99	-0.02012391
574.2	0.37595954		1164.19	0.14123755		1754.21	-0.00527395		2344.2	0.01522222		2934.2	-0.00057814		3524.19	-0.02048454
574.4	0.3759027		1164.39	0.14196997		1754.41	-0.00489023		2344.4	0.01456106		2934.4	-0.00042229		3524.39	-0.02074584
574.6	0.37617014		1164.59	0.14217361		1754.61	-0.00500159		2344.6	0.01479653		2934.6	-0.00010631		3524.59	-0.02048264
574.8	0.37550117		1164.79	0.14191479		1754.81	-0.00462054		2344.8	0.01480415		2934.8	-0.00081623		3524.79	-0.02070429
575	0.37499681		1164.99	0.14178048		1755.01	-0.00446667		2345	0.01447848		2935	-0.00107913		3524.99	-0.02018748
575.2	0.37535111		1165.19	0.14224863		1755.21	-0.00474814		2345.2	0.01468288		2935.2	-0.00154511		3525.19	-0.02016869
575.4	0.37496759		1165.39	0.14120568		1755.41	-0.00585199		2345.4	0.01466204		2935.4	-0.00172794		3525.39	-0.02008254
575.6	0.37432223		1165.59	0.14171389		1755.61	-0.00614101		2345.6	0.0150449		2935.6	-0.00208012		3525.59	-0.01962361
575.8	0.37366673		1165.79	0.14150771		1755.81	-0.00602475		2345.8	0.01410961		2935.8	-0.00166769		3525.79	-0.01905459
576	0.37366275		1165.99	0.14210884		1756.01	-0.00618812		2346	0.01380789		2936	-0.00194947		3525.99	-0.01945865
576.2	0.37304894		1166.19	0.14117712		1756.21	-0.00592142		2346.2	0.01329184		2936.2	-0.0025165		3526.19	-0.01989312
576.4	0.37244484		1166.39	0.14101452		1756.41	-0.0061427		2346.4	0.01316037		2936.4	-0.00366292		3526.39	-0.02046919
576.6	0.37238308		1166.59	0.14165746		1756.61	-0.00635034		2346.6	0.01403059		2936.6	-0.00303252		3526.59	-0.02059505
576.8	0.37228998		1166.79	0.14089324		1756.81	-0.00708669		2346.8	0.01393994		2936.8	-0.00372232		3526.79	-0.02147064
577	0.3730958		1166.99	0.14165385		1757.01	-0.00818487		2347	0.01364924		2937	-0.00361261		3526.99	-0.02119639
577.2	0.37388223		1167.19	0.14075699		1757.21	-0.00746301		2347.2	0.01407123		2937.2	-0.00332926		3527.19	-0.02154409
577.4	0.37417213		1167.39	0.14109741		1757.41	-0.00777849		2347.4	0.01445835		2937.4	-0.00354415		3527.39	-0.02122617
577.6	0.37401551		1167.59	0.14172353		1757.61	-0.00799134		2347.6	0.01403478		2937.6	-0.0038747		3527.59	-0.02105536
577.8	0.37489867		1167.79	0.14270399		1757.81	-0.00753513		2347.8	0.0134046		2937.8	-0.00383535		3527.79	-0.02081333
578	0.37441382		1167.99	0.14237418		1758.01	-0.00769464		2348	0.01302164		2938	-0.00359606		3527.99	-0.02078876
578.2	0.37441963		1168.19	0.14207647		1758.21	-0.00722276		2348.2	0.0133716		2938.2	-0.00394427		3528.19	-0.02092081
578.4	0.3756909		1168.39	0.14241652		1758.41	-0.0065892		2348.4	0.0130977		2938.4	-0.00336729		3528.39	-0.01916418
578.6	0.3766291		1168.59	0.14245075		1758.61	-0.00658867		2348.6	0.01373523		2938.6	-0.003933		3528.59	-0.01817289
578.8	0.37696189		1168.79	0.14117925		1758.81	-0.00651678		2348.8	0.01394682		2938.8	-0.00357492		3528.79	-0.01750393
579	0.37755326		1168.99	0.1412529		1759.01	-0.00684146		2349	0.0143799		2939	-0.00244935		3528.99	-0.01685389
579.2	0.37764463		1169.19	0.14169011		1759.21	-0.0075168		2349.2	0.01535335		2939.2	-0.00250449		3529.19	-0.01713132
579.4	0.3764114		1169.39	0.14025409		1759.41	-0.00831167		2349.4	0.01539934		2939.4	-0.00157499		3529.39	-0.01790037
579.6	0.37674077		1169.59	0.14056367		1759.61	-0.00777466		2349.6	0.01645601		2939.6	-0.00079816		3529.59	-0.01832474
579.8	0.37678766		1169.79	0.13978519		1759.81	-0.00715862		2349.8	0.01657748		2939.8	-0.00054631		3529.79	-0.01876897
580	0.37671286		1169.99	0.13991636		1760.01	-0.00739795		2350	0.01680982		2940	-0.00134031		3529.99	-0.01920201
580.2	0.37662984		1170.19	0.14029171		1760.21	-0.0062688		2350.2	0.01766256		2940.2	-0.00103867		3530.19	-0.02030536
580.4	0.37657662		1170.39	0.13955706		1760.41	-0.00584001		2350.4	0.01767204		2940.4	-0.00141711		3530.39	-0.02167863
580.6	0.37595992		1170.59	0.13878896		1760.61	-0.00588852		2350.6	0.01827604		2940.6	-0.00141103		3530.59	-0.02150566
580.8	0.37477328		1170.79	0.13842772		1760.81	-0.00674525		2350.8	0.01740251		2940.8	-0.00202557		3530.79	-0.02157731
581	0.37453614		1170.99	0.13984509		1761.01	-0.00676838		2351	0.01729141		2941	-0.00179176		3530.99	-0.0208981
581.2	0.37395816		1171.19	0.13950546		1761.21	-0.00616154		2351.2	0.01712408		2941.2	-0.00215173		3531.19	-0.0205602
581.4	0.37351386		1171.39	0.1406708		1761.41	-0.0065644		2351.4	0.01654211		2941.4	-0.00268964		3531.39	-0.02073636
581.6	0.37331589		1171.59	0.14119438		1761.61	-0.00682721		2351.6	0.0150981		2941.6	-0.00310662		3531.59	-0.02000461
581.8	0.3731515		1171.79	0.14127743		1761.81	-0.00577014		2351.8	0.01469555		2941.8	-0.00339873		3531.79	-0.01947402
582	0.37257731		1171.99	0.14098397		1762.01	-0.00577879		2352	0.01411064		2942	-0.00412634		3531.99	-0.01930982
582.2	0.37329985		1172.19	0.14120341		1762.21	-0.00631969		2352.2	0.01450624		2942.2	-0.00384496		3532.19	-0.01862012
582.4	0.37390463		1172.39	0.14213319		1762.41	-0.00648396		2352.4	0.01419436		2942.4	-0.00361035		3532.39	-0.01649907
582.6	0.3751389		1172.59	0.142257		1762.61	-0.00648271		2352.6	0.01421391		2942.6	-0.00347767		3532.59	-0.01746397
582.8	0.37537265		1172.79	0.14205255		1762.81	-0.00816212		2352.8	0.0138627		2942.8	-0.00261254		3532.79	-0.0178959
583	0.37517868		1172.99	0.14211304		1763.01	-0.00862752		2353	0.01435635		2943	-0.00302242		3532.99	-0.01936565
583.2	0.37536991		1173.19	0.14200463		1763.21	-0.00847733		2353.2	0.01511089		2943.2	-0.00329012		3533.19	-0.02065072
583.4	0.3753558		1173.39	0.14097306		1763.41	-0.00884585		2353.4	0.01540866		2943.4	-0.00260907		3533.39	-0.0216511
583.6	0.37692493		1173.59	0.14178846		1763.61	-0.00802474		2353.6	0.01599206		2943.6	-0.0025605		3533.59	-0.02219466
583.8	0.37746961		1173.79	0.14115722		1763.81	-0.00759628		2353.8	0.01584959		2943.8	-0.00267725		3533.79	-0.02266986
584	0.37701864		1173.99	0.14012677		1764.01	-0.00743788		2354	0.01530538		2944	-0.00285553		3533.99	-0.02421962
584.2	0.37700744		1174.19	0.13957645		1764.21	-0.00621918		2354.2	0.01481543		2944.2	-0.00202114		3534.19	-0.02526461
584.4	0.37725987		1174.39	0.13806758		1764.41	-0.0055885		2354.4	0.01399432		2944.4	-0.00160419		3534.39	-0.02574105
584.6	0.37663029		1174.59	0.13820565		1764.61	-0.00556251		2354.6	0.01478437		2944.6	-0.00137306		3534.59	-0.02492172
584.8	0.37664192		1174.79	0.13887786		1764.81	-0.00561644		2354.8	0.01459268		2944.8	-0.00097979		3534.79	-0.02484305
585	0.37668572		1174.99	0.13937423		1765.01	-0.00499471		2355	0.01494887		2945	-0.00050576		3534.99	-0.02482564
585.2	0.37496929		1175.19	0.13857662		1765.21	-0.00488066		2355.2	0.0156823		2945.2	-0.00066611		3535.19	-0.02427644
585.4	0.3745052		1175.39	0.13824091		1765.41	-0.0048172		2355.4	0.01593525		2945.4	-0.00019967		3535.39	-0.02406554
585.6	0.3747858		1175.59	0.13811463		1765.61	-0.0047604		2355.6	0.01584628		2945.6	-0.00047636		3535.59	-0.02362734
585.8	0.37467394		1175.79	0.13752852		1765.81	-0.00437144		2355.8	0.01628433		2945.8	-0.00078112		3535.79	-0.0236822
586	0.37443943		1175.99	0.13798362		1766.01	-0.00532165		2356	0.01628894		2946	-0.00178133		3535.99	-0.0231813
586.2	0.37355138		1176.19	0.13838609		1766.21	-0.00571107		2356.2	0.01644659		2946.2	-0.00080789		3536.19	-0.02256951
586.4	0.37457416		1176.39	0.13867944		1766.41	-0.00534758		2356.4	0.01588215		2946.4	-0.00159896		3536.39	-0.02259903
586.6	0.37526933		1176.59	0.13842898		1766.61	-0.00624597		2356.6	0.01599107		2946.6	-0.00171716		3536.59	-0.02340565
586.8	0.3747796		1176.79	0.13913311		1766.81	-0.00758337		2356.8	0.0163855		2946.8	-0.00241846		3536.79	-0.02320096
587	0.37533497		1176.99	0.13893268		1767.01	-0.00705157		2357	0.01666523		2947	-0.00289382		3536.99	-0.0231143
587.2	0.37661176		1177.19	0.13972262		1767.21	-0.0067686		2357.2	0.01652107		2947.2	-0.00238444		3537.19	-0.02306248
587.4	0.37685938		1177.39	0.13989021		1767.41	-0.0070257		2357.4	0.01540543		2947.4	-0.00209949		3537.39	-0.02308145
587.6	0.37817466		1177.59	0.14049428		1767.61	-0.00733907		2357.6	0.01481882		2947.6	-0.00183316		3537.59	-0.02284187
587.8	0.37798939		1177.79	0.14010704		1767.81	-0.00752938		2357.8	0.0139497		2947.8	-0.0012379		3537.79	-0.02316765
588	0.37746673		1177.99	0.13894712		1768.01	-0.00782409		2358	0.01356703		2948	-0.00086174		3537.99	-0.02357675
588.2	0.37772541		1178.19	0.13866866		1768.21	-0.00800285		2358.2	0.01329957		2948.2	-0.00041761		3538.19	-0.02318782
588.4	0.37797744		1178.39	0.13903827		1768.41	-0.00834884		2358.4	0.01375991		2948.4	-0.00041233		3538.39	-0.02285164
588.6	0.377396		1178.59	0.13911662		1768.61	-0.00893165		2358.6	0.01402504		2948.6	-0.00043413		3538.59	-0.02248633
588.8	0.37655791		1178.79	0.1393502		1768.81	-0.00902453		2358.8	0.0133526		2948.8	-0.0004925		3538.79	-0.02273413
589	0.37525871		1178.99	0.1398303		1769.01	-0.00881872		2359	0.0130439		2949	-0.00146353		3538.99	-0.02297445
589.2	0.37366802		1179.19	0.13974038		1769.21	-0.00835464		2359.2	0.01369468		2949.2	-0.00128591		3539.19	-0.02237795
589.4	0.37414997		1179.39	0.14025695		1769.41	-0.00839885		2359.4	0.01329828		2949.4	-0.00162811		3539.39	-0.02228283
589.6	0.37415477		1179.59	0.14028215		1769.61	-0.00826457		2359.6	0.01333441		2949.6	-0.00278949		3539.59	-0.02227426
589.8	0.37287829		1179.79	0.13980679		1769.81	-0.00797744		2359.8	0.01371893		2949.8	-0.00352129		3539.79	-0.02174592
590	0.37250355		1179.99	0.14055905		1770.01	-0.00737036		2360	0.01404205		2950	-0.00414902		3539.99	-0.02195876
590.2	0.37181186		1180.19	0.14138952		1770.21	-0.00704867		2360.2	0.01308165		2950.2	-0.00399638		3540.19	-0.0225188
590.4	0.37235602		1180.39	0.1412223		1770.41	-0.00763291		2360.4	0.01417749		2950.4	-0.00472671		3540.39	-0.02250909
590.6	0.37156918		1180.59	0.1417225		1770.61	-0.00853157		2360.6	0.01448101		2950.6	-0.00450756		3540.59	-0.02259859
590.8	0.37163643		1180.79	0.14281075		1770.81	-0.00811823		2360.8	0.01503946		2950.8	-0.00500769		3540.79	-0.02292507
591	0.37168435		1180.99	0.14318631		1771.01	-0.00749678		2361	0.01512173		2951	-0.00564756		3540.99	-0.02299034
591.2	0.37182426		1181.19	0.14301645		1771.21	-0.00688758		2361.2	0.01523248		2951.2	-0.00586716		3541.19	-0.02361925
591.4	0.37244619		1181.39	0.14274546		1771.41	-0.00707474		2361.4	0.01527857		2951.4	-0.00641071		3541.39	-0.02440513
591.6	0.37281629		1181.59	0.14253386		1771.61	-0.0075526		2361.6	0.01603596		2951.6	-0.00584756		3541.59	-0.02413549
591.8	0.37309483		1181.79	0.14179251		1771.81	-0.00735426		2361.8	0.01564629		2951.8	-0.00553288		3541.79	-0.02413595
592	0.37328833		1181.99	0.14117812		1772.01	-0.00821336		2362	0.01571687		2952	-0.00556734		3541.99	-0.02365323
592.2	0.37369284		1182.19	0.14092519		1772.21	-0.00885202		2362.2	0.01527822		2952.2	-0.00560582		3542.19	-0.02253334
592.4	0.3740467		1182.39	0.14119894		1772.41	-0.00894839		2362.4	0.01454655		2952.4	-0.00434545		3542.39	-0.02264092
592.6	0.37463891		1182.59	0.14116406		1772.61	-0.00929086		2362.6	0.01404507		2952.6	-0.00319172		3542.59	-0.02331923
592.8	0.37535757		1182.79	0.14093139		1772.81	-0.00859933		2362.8	0.01264465		2952.8	-0.00287686		3542.79	-0.02365779
593	0.37529451		1182.99	0.14055607		1773.01	-0.00846018		2363	0.01258951		2953	-0.00203		3542.99	-0.02306942
593.2	0.37551289		1183.19	0.13995478		1773.21	-0.00769203		2363.2	0.01251126		2953.2	-0.00027477		3543.19	-0.02221391
593.4	0.37601838		1183.39	0.13911494		1773.41	-0.00807874		2363.4	0.01242072		2953.4	-0.00041569		3543.39	-0.02243337
593.6	0.37605129		1183.59	0.13826973		1773.61	-0.00660633		2363.6	0.01315992		2953.6	0.00023356		3543.59	-0.02171118
593.8	0.37606778		1183.79	0.1381904		1773.81	-0.00591159		2363.8	0.01275979		2953.8	-0.00000908		3543.79	-0.0215411
594	0.37595388		1183.99	0.13886723		1774.01	-0.00543468		2364	0.01276056		2954	-0.0002434		3543.99	-0.02190725
594.2	0.37489339		1184.19	0.13982547		1774.21	-0.00559792		2364.2	0.01265849		2954.2	-0.00057404		3544.19	-0.02199012
594.4	0.37428992		1184.39	0.13926428		1774.41	-0.00702279		2364.4	0.01357828		2954.4	-0.00043811		3544.39	-0.02100357
594.6	0.37339943		1184.59	0.1392864		1774.61	-0.00685676		2364.6	0.01332365		2954.6	-0.00077886		3544.59	-0.02122153
594.8	0.37351609		1184.79	0.13894324		1774.81	-0.00698443		2364.8	0.01341927		2954.8	-0.0020307		3544.79	-0.02171661
595	0.37354973		1184.99	0.13851724		1775.01	-0.00698153		2365	0.01371664		2955	-0.00269191		3544.99	-0.02276672
595.2	0.37374891		1185.19	0.13802013		1775.21	-0.00740176		2365.2	0.01435459		2955.2	-0.00357138		3545.19	-0.02311413
595.4	0.37340426		1185.39	0.13790945		1775.41	-0.00821101		2365.4	0.01456587		2955.4	-0.00371211		3545.39	-0.02377039
595.6	0.37323764		1185.59	0.13826239		1775.61	-0.00842998		2365.6	0.014518		2955.6	-0.00389468		3545.59	-0.0230571
595.8	0.37424913		1185.79	0.13862338		1775.81	-0.0083083		2365.8	0.01384833		2955.8	-0.00500697		3545.79	-0.02323122
596	0.37388433		1185.99	0.13960704		1776.01	-0.00899101		2366	0.01377279		2956	-0.00514671		3545.99	-0.02317717
596.2	0.37355136		1186.19	0.13919189		1776.21	-0.00890899		2366.2	0.01353004		2956.2	-0.005363		3546.19	-0.02297843
596.4	0.37343542		1186.39	0.14002027		1776.41	-0.00870459		2366.4	0.013229		2956.4	-0.0046143		3546.39	-0.02380198
596.6	0.37407246		1186.59	0.13933704		1776.61	-0.00964143		2366.6	0.01298899		2956.6	-0.00460382		3546.59	-0.02412889
596.8	0.37357294		1186.79	0.1382145		1776.81	-0.00889098		2366.8	0.01214426		2956.8	-0.00466276		3546.79	-0.02379976
597	0.37259035		1186.99	0.13785279		1777.01	-0.00854718		2367	0.01264061		2957	-0.00428947		3546.99	-0.02321842
597.2	0.3732954		1187.19	0.13806917		1777.21	-0.00760006		2367.2	0.01259029		2957.2	-0.00523924		3547.19	-0.02306429
597.4	0.37401978		1187.39	0.1376748		1777.41	-0.00771791		2367.4	0.01354261		2957.4	-0.00536107		3547.39	-0.02275306
597.6	0.37374751		1187.59	0.13762		1777.61	-0.00633546		2367.6	0.01321139		2957.6	-0.00541022		3547.59	-0.02179916
597.8	0.37326969		1187.79	0.13838411		1777.81	-0.00639212		2367.8	0.0120508		2957.8	-0.00583188		3547.79	-0.02151951
598	0.37210486		1187.99	0.139094		1778.01	-0.0066536		2368	0.01250401		2958	-0.00522679		3547.99	-0.02075606
598.2	0.37117779		1188.19	0.13982012		1778.21	-0.00687534		2368.2	0.01317296		2958.2	-0.00425431		3548.19	-0.02050788
598.4	0.37090785		1188.39	0.13890488		1778.41	-0.00789318		2368.4	0.01250625		2958.4	-0.00445462		3548.39	-0.01970617
598.6	0.37084209		1188.59	0.1381847		1778.61	-0.0074593		2368.6	0.01256259		2958.6	-0.00486734		3548.59	-0.02095651
598.8	0.37191438		1188.79	0.13840599		1778.81	-0.00803556		2368.8	0.0121602		2958.8	-0.00530578		3548.79	-0.02157296
599	0.37218053		1188.99	0.13842545		1779.01	-0.00849118		2369	0.01217766		2959	-0.00479545		3548.99	-0.02205951
599.2	0.37200265		1189.19	0.1392554		1779.21	-0.00861996		2369.2	0.01297518		2959.2	-0.00591554		3549.19	-0.02190847
599.4	0.37082078		1189.39	0.13945286		1779.41	-0.0091364		2369.4	0.01329402		2959.4	-0.00497935		3549.39	-0.02298653
599.6	0.37101906		1189.59	0.13979451		1779.61	-0.00920189		2369.6	0.01280546		2959.6	-0.00576675		3549.59	-0.02369874
599.8	0.37085496		1189.79	0.14022334		1779.81	-0.01007904		2369.8	0.01187674		2959.8	-0.00594753		3549.79	-0.02403085
600	0.37026582		1189.99	0.14017898		1780.01	-0.01009695		2370	0.01182607		2960	-0.00525948		3549.99	-0.02430436
600.2	0.37034066		1190.19	0.13934393		1780.21	-0.00986017		2370.2	0.01232298		2960.2	-0.00536364		3550.19	-0.02503949
600.4	0.37030575		1190.39	0.13959343		1780.41	-0.00999018		2370.4	0.01289298		2960.4	-0.0044479		3550.39	-0.0255028
600.6	0.36993911		1190.59	0.13848768		1780.61	-0.00969071		2370.6	0.0130567		2960.6	-0.00408855		3550.59	-0.02536047
600.8	0.3687053		1190.79	0.13866955		1780.81	-0.0091588		2370.8	0.01209112		2960.8	-0.00393878		3550.79	-0.02467637
601	0.36938196		1190.99	0.13867685		1781.01	-0.00842487		2371	0.01281347		2961	-0.00350712		3550.99	-0.02520279
601.2	0.36952456		1191.19	0.13882298		1781.21	-0.00833416		2371.2	0.01293759		2961.2	-0.00417806		3551.19	-0.02544397
601.4	0.37003676		1191.39	0.13844395		1781.41	-0.00843183		2371.4	0.01337339		2961.4	-0.0029		3551.39	-0.02471522
601.6	0.37017838		1191.59	0.13859343		1781.61	-0.00841748		2371.6	0.01249856		2961.6	-0.00220742		3551.59	-0.02464107
601.8	0.3701405		1191.79	0.1392405		1781.81	-0.00941907		2371.8	0.01203768		2961.8	-0.00258697		3551.79	-0.0245117
602	0.37023033		1191.99	0.13934112		1782.01	-0.00956625		2372	0.01293628		2962	-0.00205492		3551.99	-0.02393374
602.2	0.37055381		1192.19	0.13949382		1782.21	-0.00935986		2372.2	0.01341116		2962.2	-0.00184775		3552.19	-0.02381887
602.4	0.37151907		1192.39	0.13885054		1782.41	-0.00958669		2372.4	0.01290596		2962.4	-0.00297359		3552.39	-0.02405541
602.6	0.37177571		1192.59	0.13882045		1782.61	-0.00919523		2372.6	0.01305042		2962.6	-0.00344581		3552.59	-0.0250577
602.8	0.37299619		1192.79	0.13873729		1782.81	-0.00970242		2372.8	0.01198194		2962.8	-0.00409157		3552.79	-0.02544749
603	0.37338396		1192.99	0.13826717		1783.01	-0.01017029		2373	0.01200394		2963	-0.00377283		3552.99	-0.0258354
603.2	0.37336026		1193.19	0.13774945		1783.21	-0.00969979		2373.2	0.01293824		2963.2	-0.00457939		3553.19	-0.02626459
603.4	0.37234699		1193.39	0.1374495		1783.41	-0.00939803		2373.4	0.01220753		2963.4	-0.00406487		3553.39	-0.02702796
603.6	0.37290518		1193.59	0.13718683		1783.61	-0.00900648		2373.6	0.01097169		2963.6	-0.00475415		3553.59	-0.02617572
603.8	0.37356107		1193.79	0.13733365		1783.81	-0.00924547		2373.8	0.01050316		2963.8	-0.00441526		3553.79	-0.02583262
604	0.37348969		1193.99	0.13734094		1784.01	-0.00777227		2374	0.01150881		2964	-0.00349274		3553.99	-0.02622088
604.2	0.37337785		1194.19	0.13751771		1784.21	-0.00723753		2374.2	0.01204177		2964.2	-0.00332507		3554.19	-0.02600318
604.4	0.37219956		1194.39	0.13815332		1784.41	-0.00649051		2374.4	0.01193434		2964.4	-0.00253177		3554.39	-0.02538455
604.6	0.37282011		1194.59	0.13911745		1784.61	-0.00541047		2374.6	0.01203089		2964.6	-0.00259621		3554.59	-0.02436779
604.8	0.3731684		1194.79	0.13949953		1784.81	-0.00544714		2374.8	0.01108685		2964.8	-0.00314433		3554.79	-0.0249351
605	0.37433316		1194.99	0.13931775		1785.01	-0.00509413		2375	0.01212254		2965	-0.0028852		3554.99	-0.0250659
605.2	0.37454418		1195.19	0.14007895		1785.21	-0.00555285		2375.2	0.01212162		2965.2	-0.00395931		3555.19	-0.02428219
605.4	0.37612518		1195.39	0.14050317		1785.41	-0.00589281		2375.4	0.01197634		2965.4	-0.00380869		3555.39	-0.02326552
605.6	0.37705455		1195.59	0.14109724		1785.61	-0.00570517		2375.6	0.01251641		2965.6	-0.00471865		3555.59	-0.02260864
605.8	0.37740433		1195.79	0.14071027		1785.81	-0.00590393		2375.8	0.01284816		2965.8	-0.00567157		3555.79	-0.02217597
606	0.37855662		1195.99	0.14043927		1786.01	-0.00673529		2376	0.01354343		2966	-0.00486292		3555.99	-0.02165235
606.2	0.37880636		1196.19	0.14067223		1786.21	-0.00736746		2376.2	0.01366567		2966.2	-0.00434827		3556.19	-0.02233403
606.4	0.37977652		1196.39	0.14053647		1786.41	-0.00816497		2376.4	0.01397241		2966.4	-0.00464048		3556.39	-0.02365544
606.6	0.37898035		1196.59	0.14015735		1786.61	-0.00894998		2376.6	0.01367505		2966.6	-0.00490682		3556.59	-0.0237231
606.8	0.37887589		1196.79	0.13908891		1786.81	-0.01053798		2376.8	0.01421241		2966.8	-0.00496274		3556.79	-0.02417716
607	0.37807179		1196.99	0.13962568		1787.01	-0.01101194		2377	0.01462729		2967	-0.00494351		3556.99	-0.02394758
607.2	0.37696788		1197.19	0.13957471		1787.21	-0.0109531		2377.2	0.01555645		2967.2	-0.00570452		3557.19	-0.02411494
607.4	0.37547316		1197.39	0.1399347		1787.41	-0.01131635		2377.4	0.01585823		2967.4	-0.00529567		3557.39	-0.0244367
607.6	0.37476394		1197.59	0.13966783		1787.61	-0.01172068		2377.6	0.01650626		2967.6	-0.00527395		3557.59	-0.02373654
607.8	0.37371366		1197.79	0.13958315		1787.81	-0.01237212		2377.8	0.01675387		2967.8	-0.00439852		3557.79	-0.02422563
608	0.37237409		1197.99	0.14000336		1788.01	-0.01164477		2378	0.01716122		2968	-0.0029536		3557.99	-0.02423416
608.2	0.37100296		1198.19	0.13956438		1788.21	-0.01189386		2378.2	0.01656056		2968.2	-0.00276509		3558.19	-0.02406761
608.4	0.37043987		1198.39	0.14024741		1788.41	-0.01153477		2378.4	0.01694023		2968.4	-0.00262386		3558.39	-0.02446373
608.6	0.37098496		1198.59	0.14088327		1788.61	-0.01076654		2378.6	0.01709575		2968.6	-0.00327071		3558.59	-0.02495081
608.8	0.37085826		1198.79	0.14064917		1788.81	-0.01043867		2378.8	0.01607484		2968.8	-0.00285588		3558.79	-0.02491912
609	0.3704889		1198.99	0.14133599		1789.01	-0.01005374		2379	0.01594766		2969	-0.00285135		3558.99	-0.02421149
609.2	0.37049361		1199.19	0.1421186		1789.21	-0.00971253		2379.2	0.01575075		2969.2	-0.0026888		3559.19	-0.02415988
609.4	0.37110704		1199.39	0.14182761		1789.41	-0.00867091		2379.4	0.01508335		2969.4	-0.00309624		3559.39	-0.02424864
609.6	0.37091626		1199.59	0.14246707		1789.61	-0.00807236		2379.6	0.01507464		2969.6	-0.00379324		3559.59	-0.02469765
609.8	0.37178716		1199.79	0.14201157		1789.81	-0.00853477		2379.8	0.01483858		2969.8	-0.00405527		3559.79	-0.0255687
610	0.37192727		1199.99	0.14181526		1790.01	-0.00949398		2380	0.01472231		2970	-0.00280274		3559.99	-0.0260056
610.2	0.37198316		1200.19	0.14184454		1790.21	-0.00912869		2380.2	0.01443601		2970.2	-0.00233153		3560.19	-0.02706779
610.4	0.3719199		1200.39	0.14101293		1790.41	-0.00946147		2380.4	0.01477018		2970.4	-0.00268678		3560.39	-0.02754702
610.6	0.37105319		1200.59	0.14076014		1790.61	-0.00982238		2380.6	0.01448201		2970.6	-0.00281178		3560.59	-0.02694864
610.8	0.37102333		1200.79	0.13998382		1790.81	-0.01025907		2380.8	0.01469988		2970.8	-0.00384689		3560.79	-0.0274011
611	0.37117672		1200.99	0.14069536		1791.01	-0.00989568		2381	0.01391742		2971	-0.00453366		3560.99	-0.02684273
611.2	0.37143806		1201.19	0.14003853		1791.21	-0.01033572		2381.2	0.0143978		2971.2	-0.00406827		3561.19	-0.02636606
611.4	0.37050048		1201.39	0.13892984		1791.41	-0.01144103		2381.4	0.01482948		2971.4	-0.00440819		3561.39	-0.02622211
611.6	0.37040118		1201.59	0.13798273		1791.61	-0.01055072		2381.6	0.01457078		2971.6	-0.0036435		3561.59	-0.02543092
611.8	0.36984302		1201.79	0.13772689		1791.81	-0.01060146		2381.8	0.01324366		2971.8	-0.00366416		3561.79	-0.02515341
612	0.37020667		1201.99	0.13748993		1792.01	-0.01111208		2382	0.01326546		2972	-0.00298085		3561.99	-0.02490375
612.2	0.37016589		1202.19	0.13708812		1792.21	-0.01105137		2382.2	0.01300486		2972.2	-0.00337673		3562.19	-0.02485585
612.4	0.37070566		1202.39	0.13811991		1792.41	-0.01181113		2382.4	0.01407169		2972.4	-0.00285195		3562.39	-0.02500216
612.6	0.37048596		1202.59	0.13855574		1792.61	-0.01196914		2382.6	0.01353857		2972.6	-0.00289505		3562.59	-0.02469926
612.8	0.37108047		1202.79	0.13846464		1792.81	-0.01230281		2382.8	0.0133812		2972.8	-0.00249007		3562.79	-0.02375262
613	0.37043324		1202.99	0.13863496		1793.01	-0.01242469		2383	0.01320656		2973	-0.00255462		3562.99	-0.02373573
613.2	0.37075327		1203.19	0.13865458		1793.21	-0.01230992		2383.2	0.01274623		2973.2	-0.00228811		3563.19	-0.02458261
613.4	0.37134259		1203.39	0.13837025		1793.41	-0.0121185		2383.4	0.01222824		2973.4	-0.00357959		3563.39	-0.02486307
613.6	0.37090167		1203.59	0.13861812		1793.61	-0.01251976		2383.6	0.01295956		2973.6	-0.00387731		3563.59	-0.02566974
613.8	0.37159595		1203.79	0.13738196		1793.81	-0.01210273		2383.8	0.01325661		2973.8	-0.00361954		3563.79	-0.02623969
614	0.37114786		1203.99	0.13704993		1794.01	-0.01212226		2384	0.01328984		2974	-0.00291878		3563.99	-0.0266409
614.2	0.37207531		1204.19	0.13667764		1794.21	-0.0117976		2384.2	0.01356152		2974.2	-0.00331288		3564.19	-0.02662412
614.4	0.37201477		1204.39	0.13615944		1794.41	-0.01142962		2384.4	0.01352374		2974.4	-0.00359097		3564.39	-0.02574425
614.6	0.37271514		1204.59	0.13714249		1794.61	-0.01052839		2384.6	0.01284425		2974.6	-0.00358949		3564.59	-0.02502275
614.8	0.37252205		1204.79	0.13740569		1794.81	-0.00984012		2384.8	0.01225186		2974.8	-0.00422915		3564.79	-0.02541774
615	0.37301988		1204.99	0.13775637		1795.01	-0.00922948		2385	0.01246464		2975	-0.00386849		3564.99	-0.02470743
615.2	0.37313206		1205.19	0.13760331		1795.21	-0.00958453		2385.2	0.0124803		2975.2	-0.00316633		3565.19	-0.02493683
615.4	0.37254118		1205.39	0.13769243		1795.41	-0.00911346		2385.4	0.01277018		2975.4	-0.00350776		3565.39	-0.02484058
615.6	0.37287714		1205.59	0.13854788		1795.61	-0.00826569		2385.6	0.01173919		2975.6	-0.00225957		3565.59	-0.02481057
615.8	0.37197657		1205.79	0.13981841		1795.81	-0.00867414		2385.8	0.01182195		2975.8	-0.0024592		3565.79	-0.02571927
616	0.37242774		1205.99	0.14007946		1796.01	-0.00904829		2386	0.01277859		2976	-0.00191973		3565.99	-0.02529704
616.2	0.37249984		1206.19	0.14059361		1796.21	-0.00808975		2386.2	0.01297279		2976.2	-0.00160801		3566.19	-0.02527853
616.4	0.37233409		1206.39	0.14164448		1796.41	-0.0100147		2386.4	0.01417155		2976.4	-0.00126936		3566.39	-0.02517524
616.6	0.3725344		1206.59	0.14184391		1796.61	-0.01020879		2386.6	0.01397863		2976.6	-0.0017911		3566.59	-0.0243111
616.8	0.37297794		1206.79	0.14125773		1796.81	-0.01043799		2386.8	0.01441593		2976.8	-0.00208189		3566.79	-0.02312051
617	0.37220948		1206.99	0.14115316		1797.01	-0.01035276		2387	0.01440358		2977	-0.00177815		3566.99	-0.02346984
617.2	0.37255097		1207.19	0.14064805		1797.21	-0.01066365		2387.2	0.01499303		2977.2	-0.00250396		3567.19	-0.02440528
617.4	0.37220849		1207.39	0.13993302		1797.41	-0.01123145		2387.4	0.01516993		2977.4	-0.00296309		3567.39	-0.02337997
617.6	0.37200949		1207.59	0.13949677		1797.61	-0.01130347		2387.6	0.01530449		2977.6	-0.00378248		3567.59	-0.02445206
617.8	0.37132173		1207.79	0.13907542		1797.81	-0.01144352		2387.8	0.01506924		2977.8	-0.00446802		3567.79	-0.02433828
618	0.37156591		1207.99	0.13914721		1798.01	-0.01183406		2388	0.01476717		2978	-0.00449031		3567.99	-0.02414063
618.2	0.3716825		1208.19	0.13932497		1798.21	-0.01168571		2388.2	0.01406189		2978.2	-0.00500463		3568.19	-0.02333718
618.4	0.37140722		1208.39	0.13947281		1798.41	-0.01122847		2388.4	0.01303652		2978.4	-0.0049778		3568.39	-0.02327243
618.6	0.37166267		1208.59	0.13974224		1798.61	-0.01036447		2388.6	0.01251974		2978.6	-0.00474354		3568.59	-0.02421675
618.8	0.37194754		1208.79	0.13930022		1798.81	-0.00991603		2388.8	0.01123905		2978.8	-0.00446807		3568.79	-0.02524237
619	0.37291026		1208.99	0.13889071		1799.01	-0.00972787		2389	0.01024252		2979	-0.00374733		3568.99	-0.02541452
619.2	0.3735443		1209.19	0.13922598		1799.21	-0.01020917		2389.2	0.00909549		2979.2	-0.00307559		3569.19	-0.02576156
619.4	0.37363221		1209.39	0.13940949		1799.41	-0.00898556		2389.4	0.00886694		2979.4	-0.00299908		3569.39	-0.02565714
619.6	0.3732138		1209.59	0.14024485		1799.61	-0.00905296		2389.6	0.00866203		2979.6	-0.00152639		3569.59	-0.0257434
619.8	0.37280332		1209.79	0.13907596		1799.81	-0.00824997		2389.8	0.00786558		2979.8	-0.00062116		3569.79	-0.02565182
620	0.37341756		1209.99	0.13862938		1800.01	-0.00814113		2390	0.00778646		2980	-0.00050078		3569.99	-0.02470468
620.2	0.37410051		1210.19	0.1390059		1800.21	-0.00760041		2390.2	0.00757042		2980.2	0.00015265		3570.19	-0.02494778
620.4	0.37404228		1210.39	0.13904063		1800.41	-0.00779043		2390.4	0.00845272		2980.4	0.00002461		3570.39	-0.02567055
620.6	0.37436972		1210.59	0.13818768		1800.61	-0.00754262		2390.6	0.00839672		2980.6	-0.00000132		3570.59	-0.02504874
620.8	0.37416023		1210.79	0.13741372		1800.81	-0.00705347		2390.8	0.00898959		2980.8	-0.00073544		3570.79	-0.02532066
621	0.37396136		1210.99	0.1364514		1801.01	-0.00684368		2391	0.00972805		2981	-0.00130037		3570.99	-0.02580123
621.2	0.37375604		1211.19	0.13573743		1801.21	-0.00751164		2391.2	0.01011923		2981.2	-0.00253082		3571.19	-0.025973
621.4	0.37266963		1211.39	0.13545681		1801.41	-0.00755443		2391.4	0.01043869		2981.4	-0.00277481		3571.39	-0.02535347
621.6	0.37291356		1211.59	0.13487867		1801.61	-0.00744567		2391.6	0.01054906		2981.6	-0.00368039		3571.59	-0.02665454
621.8	0.37224414		1211.79	0.13504408		1801.81	-0.00776564		2391.8	0.01142273		2981.8	-0.0033081		3571.79	-0.02624
622	0.37268327		1211.99	0.13592848		1802.01	-0.00791927		2392	0.01101759		2982	-0.00310341		3571.99	-0.02607439
622.2	0.37156523		1212.19	0.13643408		1802.21	-0.00846003		2392.2	0.01130763		2982.2	-0.00348497		3572.19	-0.0265138
622.4	0.37203132		1212.39	0.13685267		1802.41	-0.00959722		2392.4	0.01077561		2982.4	-0.00324202		3572.39	-0.02697417
622.6	0.37177972		1212.59	0.13722607		1802.61	-0.00970685		2392.6	0.0109854		2982.6	-0.00358135		3572.59	-0.02677061
622.8	0.37127683		1212.79	0.13750204		1802.81	-0.00935399		2392.8	0.01054488		2982.8	-0.00297219		3572.79	-0.02589512
623	0.37102932		1212.99	0.13804218		1803.01	-0.0096427		2393	0.01026408		2983	-0.00295929		3572.99	-0.02523878
623.2	0.37104166		1213.19	0.13860645		1803.21	-0.01034208		2393.2	0.01107687		2983.2	-0.00259739		3573.19	-0.02480175
623.4	0.37028126		1213.39	0.13922497		1803.41	-0.01000482		2393.4	0.01073606		2983.4	-0.00312041		3573.39	-0.02363196
623.6	0.36995198		1213.59	0.13936348		1803.61	-0.01053913		2393.6	0.01022761		2983.6	-0.00238709		3573.59	-0.02261226
623.8	0.36936926		1213.79	0.13873943		1803.81	-0.01049165		2393.8	0.00871862		2983.8	-0.00262547		3573.79	-0.02249919
624	0.36940298		1213.99	0.13987941		1804.01	-0.01057831		2394	0.00861023		2984	-0.00292338		3573.99	-0.0224362
624.2	0.36949887		1214.19	0.13982619		1804.21	-0.01002317		2394.2	0.00833633		2984.2	-0.00361925		3574.19	-0.02237154
624.4	0.36931057		1214.39	0.13941953		1804.41	-0.01063647		2394.4	0.0085764		2984.4	-0.00387102		3574.39	-0.0225491
624.6	0.36918861		1214.59	0.13992641		1804.61	-0.01064541		2394.6	0.00860471		2984.6	-0.00410939		3574.59	-0.02254848
624.8	0.36929586		1214.79	0.13984486		1804.81	-0.01050909		2394.8	0.00819498		2984.8	-0.00447729		3574.79	-0.02278397
625	0.3691637		1214.99	0.13939935		1805.01	-0.01038568		2395	0.00858925		2985	-0.00517165		3574.99	-0.02335567
625.2	0.36926197		1215.19	0.1390611		1805.21	-0.01124541		2395.2	0.00786705		2985.2	-0.00524413		3575.19	-0.02393289
625.4	0.36986847		1215.39	0.13896463		1805.41	-0.01064626		2395.4	0.00822357		2985.4	-0.00479367		3575.39	-0.02488522
625.6	0.37042063		1215.59	0.13828746		1805.61	-0.01080367		2395.6	0.00704953		2985.6	-0.00453974		3575.59	-0.02527204
625.8	0.37103525		1215.79	0.13798583		1805.81	-0.01122604		2395.8	0.00672552		2985.8	-0.00467551		3575.79	-0.02487131
626	0.37078539		1215.99	0.13729005		1806.01	-0.01145897		2396	0.00565637		2986	-0.00477965		3575.99	-0.02509897
626.2	0.37082259		1216.19	0.13712242		1806.21	-0.01208065		2396.2	0.00584386		2986.2	-0.00462527		3576.19	-0.0262881
626.4	0.37154982		1216.39	0.13695572		1806.41	-0.01166097		2396.4	0.00566		2986.4	-0.00490641		3576.39	-0.02609951
626.6	0.37111309		1216.59	0.13647757		1806.61	-0.00993473		2396.6	0.00668602		2986.6	-0.0047639		3576.59	-0.02555228
626.8	0.37110947		1216.79	0.13606199		1806.81	-0.00953204		2396.8	0.00637732		2986.8	-0.00428184		3576.79	-0.02569845
627	0.37131085		1216.99	0.13566119		1807.01	-0.00986095		2397	0.00681216		2987	-0.00415395		3576.99	-0.02614144
627.2	0.37197107		1217.19	0.13569008		1807.21	-0.00985574		2397.2	0.00800126		2987.2	-0.00415973		3577.19	-0.02607908
627.4	0.37204629		1217.39	0.13575175		1807.41	-0.00958796		2397.4	0.0086043		2987.4	-0.00538007		3577.39	-0.02547232
627.6	0.37261854		1217.59	0.13597841		1807.61	-0.00920111		2397.6	0.00932239		2987.6	-0.00515913		3577.59	-0.02515273
627.8	0.37226045		1217.79	0.13613393		1807.81	-0.00898193		2397.8	0.00990337		2987.8	-0.00502005		3577.79	-0.02414663
628	0.37259963		1217.99	0.13615559		1808.01	-0.00901469		2398	0.01050421		2988	-0.0046081		3577.99	-0.02313852
628.2	0.37275659		1218.19	0.13627558		1808.21	-0.00895566		2398.2	0.01113811		2988.2	-0.00465971		3578.19	-0.02280702
628.4	0.37196295		1218.39	0.13720808		1808.41	-0.00896355		2398.4	0.01192414		2988.4	-0.00428452		3578.39	-0.02311791
628.6	0.37221155		1218.59	0.13800242		1808.61	-0.00752537		2398.6	0.01261012		2988.6	-0.00408861		3578.59	-0.02385105
628.8	0.37267471		1218.79	0.13754594		1808.81	-0.00788436		2398.8	0.01227751		2988.8	-0.00415917		3578.79	-0.02432474
629	0.37225094		1218.99	0.13729169		1809.01	-0.00736985		2399	0.0116176		2989	-0.00485957		3578.99	-0.0252538
629.2	0.37269542		1219.19	0.13733212		1809.21	-0.0084292		2399.2	0.010956		2989.2	-0.00453858		3579.19	-0.02520402
629.4	0.37283609		1219.39	0.13763008		1809.41	-0.0079961		2399.4	0.01051743		2989.4	-0.00403535		3579.39	-0.02514799
629.6	0.37208851		1219.59	0.13711194		1809.61	-0.00906775		2399.6	0.0090486		2989.6	-0.00384741		3579.59	-0.02455707
629.8	0.37174781		1219.79	0.13674361		1809.81	-0.00919223		2399.8	0.00797072		2989.8	-0.00423718		3579.79	-0.02453326
630	0.37164645		1219.99	0.13626198		1810.01	-0.00969625		2400	0.00753183		2990	-0.00342135		3579.99	-0.02406048
630.2	0.37092934		1220.19	0.13689101		1810.21	-0.00996104		2400.2	0.00692685		2990.2	-0.00281695		3580.19	-0.02482694
630.4	0.37032194		1220.39	0.13740794		1810.41	-0.01012783		2400.4	0.00633282		2990.4	-0.00261337		3580.39	-0.02487958
630.6	0.37029813		1220.59	0.13779956		1810.61	-0.01011835		2400.6	0.00657101		2990.6	-0.00306457		3580.59	-0.02454428
630.8	0.37048389		1220.79	0.13853009		1810.81	-0.01134363		2400.8	0.00674767		2990.8	-0.00298253		3580.79	-0.02494756
631	0.37045179		1220.99	0.13887061		1811.01	-0.01221029		2401	0.00755895		2991	-0.00313666		3580.99	-0.02505952
631.2	0.37057881		1221.19	0.13995811		1811.21	-0.01235056		2401.2	0.0067957		2991.2	-0.00403755		3581.19	-0.02478054
631.4	0.37024498		1221.39	0.14030574		1811.41	-0.01243394		2401.4	0.0076103		2991.4	-0.00459361		3581.39	-0.02546174
631.6	0.37019416		1221.59	0.14102517		1811.61	-0.01207866		2401.6	0.0070011		2991.6	-0.0042078		3581.59	-0.02484566
631.8	0.37010906		1221.79	0.14071962		1811.81	-0.01161088		2401.8	0.0077436		2991.8	-0.00391215		3581.79	-0.02479653
632	0.36995723		1221.99	0.14036136		1812.01	-0.01198625		2402	0.00762054		2992	-0.00415594		3581.99	-0.02499435
632.2	0.37019304		1222.19	0.14005358		1812.21	-0.01087706		2402.2	0.00729459		2992.2	-0.00479372		3582.19	-0.02532921
632.4	0.36982856		1222.39	0.13903325		1812.41	-0.01077742		2402.4	0.00755811		2992.4	-0.00550323		3582.39	-0.02599156
632.6	0.3709133		1222.59	0.13876189		1812.61	-0.01031754		2402.6	0.00757132		2992.6	-0.00529401		3582.59	-0.02591471
632.8	0.3708866		1222.79	0.13798807		1812.81	-0.01085941		2402.8	0.0071066		2992.8	-0.00591646		3582.79	-0.02646593
633	0.37079801		1222.99	0.1372346		1813.01	-0.01050976		2403	0.0070698		2993	-0.00591852		3582.99	-0.02643359
633.2	0.37039992		1223.19	0.13702375		1813.21	-0.01047752		2403.2	0.00764001		2993.2	-0.00606957		3583.19	-0.02631287
633.4	0.36992267		1223.39	0.13626877		1813.41	-0.01046152		2403.4	0.00777349		2993.4	-0.00585318		3583.39	-0.0264797
633.6	0.36918162		1223.59	0.13564978		1813.61	-0.0106248		2403.6	0.00768669		2993.6	-0.00642189		3583.59	-0.02667426
633.8	0.36880217		1223.79	0.13482668		1813.81	-0.01096529		2403.8	0.00778263		2993.8	-0.00596893		3583.79	-0.02684771
634	0.36943759		1223.99	0.13423372		1814.01	-0.0117336		2404	0.00837446		2994	-0.00574479		3583.99	-0.02655639
634.2	0.36869528		1224.19	0.13484098		1814.21	-0.01227548		2404.2	0.00867127		2994.2	-0.00523504		3584.19	-0.02694275
634.4	0.36960325		1224.39	0.13503753		1814.41	-0.0127117		2404.4	0.00979393		2994.4	-0.00553912		3584.39	-0.02622618
634.6	0.37002958		1224.59	0.13586925		1814.61	-0.01261148		2404.6	0.01097358		2994.6	-0.00592404		3584.59	-0.02612554
634.8	0.3707434		1224.79	0.13708759		1814.81	-0.01317027		2404.8	0.01164963		2994.8	-0.00504485		3584.79	-0.02656453
635	0.3703656		1224.99	0.13717449		1815.01	-0.01307518		2405	0.01200463		2995	-0.00488218		3584.99	-0.02655226
635.2	0.36991129		1225.19	0.13724733		1815.21	-0.01225927		2405.2	0.01229773		2995.2	-0.00412352		3585.19	-0.02647452
635.4	0.36966586		1225.39	0.13687391		1815.41	-0.01204417		2405.4	0.01320367		2995.4	-0.00404438		3585.39	-0.0273706
635.6	0.3702966		1225.59	0.13725609		1815.61	-0.01166492		2405.6	0.01288654		2995.6	-0.00387622		3585.59	-0.02737891
635.8	0.37056866		1225.79	0.1377155		1815.81	-0.01168675		2405.8	0.01280654		2995.8	-0.00388947		3585.79	-0.02745048
636	0.37059908		1225.99	0.13748737		1816.01	-0.01202318		2406	0.01190355		2996	-0.00424882		3585.99	-0.02696911
636.2	0.37089765		1226.19	0.13788694		1816.21	-0.01097158		2406.2	0.01078005		2996.2	-0.00466236		3586.19	-0.02686306
636.4	0.37171728		1226.39	0.13761084		1816.41	-0.01102378		2406.4	0.01032745		2996.4	-0.00502622		3586.39	-0.0263466
636.6	0.37204722		1226.59	0.13882767		1816.61	-0.0106016		2406.6	0.00920806		2996.6	-0.00468902		3586.59	-0.02595366
636.8	0.37230107		1226.79	0.13770447		1816.81	-0.01063016		2406.8	0.00867775		2996.8	-0.00557738		3586.79	-0.02568471
637	0.37222372		1226.99	0.13796422		1817.01	-0.01033687		2407	0.00837822		2997	-0.00535303		3586.99	-0.02482589
637.2	0.37194346		1227.19	0.13783378		1817.21	-0.009769		2407.2	0.0075583		2997.2	-0.0059432		3587.19	-0.02533874
637.4	0.37126779		1227.39	0.13769993		1817.41	-0.00969136		2407.4	0.00746266		2997.4	-0.0056575		3587.39	-0.02607923
637.6	0.37152684		1227.59	0.13782884		1817.61	-0.00936		2407.6	0.00710019		2997.6	-0.00586441		3587.59	-0.02646447
637.8	0.371293		1227.79	0.13712726		1817.81	-0.00952982		2407.8	0.00684948		2997.8	-0.00524603		3587.79	-0.02716349
638	0.37154742		1227.99	0.13732644		1818.01	-0.0097098		2408	0.00719505		2998	-0.00631252		3587.99	-0.02692916
638.2	0.37188976		1228.19	0.13726415		1818.21	-0.01020895		2408.2	0.00746927		2998.2	-0.00614004		3588.19	-0.02631323
638.4	0.37206161		1228.39	0.13649878		1818.41	-0.01002084		2408.4	0.00814503		2998.4	-0.00636608		3588.39	-0.02607686
638.6	0.37187799		1228.59	0.13726134		1818.61	-0.00931039		2408.6	0.00862275		2998.6	-0.00594275		3588.59	-0.02642504
638.8	0.37173633		1228.79	0.13657022		1818.81	-0.00954306		2408.8	0.00907389		2998.8	-0.00546887		3588.79	-0.02673878
639	0.37086699		1228.99	0.13640603		1819.01	-0.00969209		2409	0.00989884		2999	-0.00462456		3588.99	-0.02707603
639.2	0.36984332		1229.19	0.13588492		1819.21	-0.00946103		2409.2	0.00994191		2999.2	-0.00477443		3589.19	-0.0279751
639.4	0.36983475		1229.39	0.13546195		1819.41	-0.00968996		2409.4	0.00935299		2999.4	-0.00585525		3589.39	-0.02861412
639.6	0.36982647		1229.59	0.13604365		1819.61	-0.0100012		2409.6	0.00878236		2999.6	-0.00558437		3589.59	-0.02911824
639.8	0.36956899		1229.79	0.13675435		1819.81	-0.01017361		2409.8	0.00858776		2999.8	-0.00570816		3589.79	-0.02851875
640	0.36891351		1229.99	0.13725249		1820.01	-0.00924368		2410	0.00821775		3000	-0.0055324		3589.99	-0.0292242
640.2	0.36945509		1230.19	0.13778562		1820.21	-0.0087009		2410.2	0.0077533		3000.2	-0.00597674		3590.19	-0.02883342
640.4	0.37003438		1230.39	0.13686772		1820.41	-0.00841541		2410.4	0.00765601		3000.4	-0.00578612		3590.39	-0.02877142
640.6	0.36940205		1230.59	0.13737358		1820.61	-0.00868552		2410.6	0.00608925		3000.6	-0.00533598		3590.59	-0.02819051
640.8	0.36986657		1230.79	0.13699411		1820.81	-0.00905284		2410.8	0.00605143		3000.8	-0.00579317		3590.79	-0.02741205
641	0.36970181		1230.99	0.13759174		1821.01	-0.00900363		2411	0.00614875		3001	-0.0050286		3590.99	-0.02697124
641.2	0.36957664		1231.19	0.13769779		1821.21	-0.00851981		2411.2	0.00680595		3001.2	-0.0050284		3591.19	-0.02747078
641.4	0.36905181		1231.39	0.13766507		1821.41	-0.00805493		2411.4	0.00702069		3001.4	-0.00574495		3591.39	-0.02753892
641.6	0.37009024		1231.59	0.137661		1821.61	-0.00803452		2411.6	0.00605651		3001.6	-0.00601673		3591.59	-0.02768389
641.8	0.37032207		1231.79	0.13740335		1821.81	-0.00759222		2411.8	0.00585378		3001.8	-0.00713402		3591.79	-0.02710458
642	0.37098344		1231.99	0.13714198		1822.01	-0.00780831		2412	0.00574226		3002	-0.00836126		3591.99	-0.02581534
642.2	0.37201146		1232.19	0.13662837		1822.21	-0.00788708		2412.2	0.00581165		3002.2	-0.00842254		3592.19	-0.02515682
642.4	0.37222982		1232.39	0.13652621		1822.41	-0.0078478		2412.4	0.00585529		3002.4	-0.00833537		3592.39	-0.02455221
642.6	0.37231315		1232.59	0.13677868		1822.61	-0.00830002		2412.6	0.0057183		3002.6	-0.00773441		3592.59	-0.02438314
642.8	0.37209416		1232.79	0.13573918		1822.81	-0.00989355		2412.8	0.00480911		3002.8	-0.00757768		3592.79	-0.02488412
643	0.37197382		1232.99	0.13597524		1823.01	-0.00981486		2413	0.00523663		3003	-0.00642726		3592.99	-0.02499578
643.2	0.37158586		1233.19	0.1354998		1823.21	-0.00984085		2413.2	0.0055548		3003.2	-0.00681303		3593.19	-0.02551612
643.4	0.37227448		1233.39	0.13577826		1823.41	-0.01065585		2413.4	0.00552544		3003.4	-0.0059729		3593.39	-0.02592284
643.6	0.37261		1233.59	0.13698098		1823.61	-0.01138263		2413.6	0.00598514		3003.6	-0.00525322		3593.59	-0.0262186
643.8	0.3724725		1233.79	0.1379644		1823.81	-0.01138903		2413.8	0.00738486		3003.8	-0.00529332		3593.79	-0.0269277
644	0.37249522		1233.99	0.13821976		1824.01	-0.01139976		2414	0.00811658		3004	-0.00405378		3593.99	-0.02727591
644.2	0.37313091		1234.19	0.13761146		1824.21	-0.01227937		2414.2	0.00855512		3004.2	-0.00443034		3594.19	-0.02660432
644.4	0.37227914		1234.39	0.13689234		1824.41	-0.01266506		2414.4	0.00786223		3004.4	-0.00455438		3594.39	-0.02688175
644.6	0.37179968		1234.59	0.13743721		1824.61	-0.01341743		2414.6	0.00755354		3004.6	-0.0037313		3594.59	-0.02640051
644.8	0.37195555		1234.79	0.13806569		1824.81	-0.01424291		2414.8	0.00877284		3004.8	-0.00433331		3594.79	-0.02661346
645	0.37168489		1234.99	0.13829454		1825.01	-0.01502155		2415	0.00945286		3005	-0.00450643		3594.99	-0.02674463
645.2	0.37152833		1235.19	0.13813023		1825.21	-0.01537332		2415.2	0.00939539		3005.2	-0.00495814		3595.19	-0.02641472
645.4	0.37134754		1235.39	0.13794619		1825.41	-0.0159511		2415.4	0.00891137		3005.4	-0.00614362		3595.39	-0.0262501
645.6	0.3717994		1235.59	0.13841523		1825.61	-0.01565686		2415.6	0.00795732		3005.6	-0.00616552		3595.59	-0.02617475
645.8	0.37208711		1235.79	0.13831868		1825.81	-0.01531175		2415.8	0.00792208		3005.8	-0.00710575		3595.79	-0.02578151
646	0.3719411		1235.99	0.13780253		1826.01	-0.0149477		2416	0.00736771		3006	-0.0069028		3595.99	-0.02516527
646.2	0.37214457		1236.19	0.13710629		1826.21	-0.0147739		2416.2	0.00838318		3006.2	-0.00722334		3596.19	-0.02594271
646.4	0.37175421		1236.39	0.13673905		1826.41	-0.01500245		2416.4	0.00789146		3006.4	-0.0064525		3596.39	-0.02561578
646.6	0.3716345		1236.59	0.1355609		1826.61	-0.01535004		2416.6	0.00777111		3006.6	-0.00604873		3596.59	-0.02642851
646.8	0.37249676		1236.79	0.13486748		1826.81	-0.01447812		2416.8	0.00721447		3006.8	-0.0063031		3596.79	-0.02683903
647	0.37334143		1236.99	0.13636501		1827.01	-0.01326567		2417	0.00826102		3007	-0.00601101		3596.99	-0.027231
647.2	0.37370971		1237.19	0.13638026		1827.21	-0.01268954		2417.2	0.00833891		3007.2	-0.00665506		3597.19	-0.02760221
647.4	0.37391589		1237.39	0.13689464		1827.41	-0.01199028		2417.4	0.00824602		3007.4	-0.0072266		3597.39	-0.02787333
647.6	0.37476691		1237.59	0.1368559		1827.61	-0.01105578		2417.6	0.00834804		3007.6	-0.00803486		3597.59	-0.02813865
647.8	0.37493065		1237.79	0.13662421		1827.81	-0.0103513		2417.8	0.00873576		3007.8	-0.00861435		3597.79	-0.02872828
648	0.37558155		1237.99	0.13624961		1828.01	-0.00967157		2418	0.00865364		3008	-0.00861625		3597.99	-0.02843433
648.2	0.37539239		1238.19	0.13599942		1828.21	-0.00904761		2418.2	0.00769981		3008.2	-0.0094651		3598.19	-0.02886185
648.4	0.37527367		1238.39	0.13600536		1828.41	-0.00840437		2418.4	0.00685567		3008.4	-0.00921623		3598.39	-0.02924377
648.6	0.37547694		1238.59	0.13642128		1828.61	-0.00799527		2418.6	0.00703477		3008.6	-0.00813964		3598.59	-0.0293643
648.8	0.37542316		1238.79	0.13692046		1828.81	-0.00800204		2418.8	0.00671716		3008.8	-0.00806867		3598.79	-0.029298
649	0.37525925		1238.99	0.1368412		1829.01	-0.00788522		2419	0.00579534		3009	-0.00703426		3598.99	-0.02906356
649.2	0.37506915		1239.19	0.1367714		1829.21	-0.00741456		2419.2	0.00517868		3009.2	-0.00598555		3599.19	-0.02834798
649.4	0.37486348		1239.39	0.13728537		1829.41	-0.00711863		2419.4	0.00488882		3009.4	-0.00522338		3599.39	-0.02840068
649.6	0.37499096		1239.59	0.13746505		1829.61	-0.00614898		2419.6	0.00414531		3009.6	-0.00378307		3599.59	-0.02835277
649.8	0.37462051		1239.79	0.13725917		1829.81	-0.00601994		2419.8	0.00404197		3009.8	-0.00252649		3599.79	-0.02817915
