# Supplementary material for: Functional development of a V3/glycan-specific broadly neutralizing antibody isolated from a case of HIV superinfection
Source: eLife journal article supplement (doi:10.7554/elife.68110), 2021-07-15
Supplement: fig2-data2 [file A5.xls]

Vers 3.43 Data Simulation
Conc1	2E-06	2E-06	2E-06	2E-06	2E-06
Start1	290.01	880.01	1470	2060	2650
Stop1	649.81	1239.81	1829.8	2419.8	3009.8
Time1	Data1	Sim1	Time2	Data2	Sim2	Time3	Data3	Sim3	Time4	Data4	Sim4	Time5	Data5	Sim5
290.01	-0.00663302		880.01	0.00077528		1470	0.00160169		2060	-0.00731687		2650	0.01166595
290.21	-0.00562986		880.21	0.001565		1470.2	0.00174794		2060.2	-0.00466099		2650.2	0.01360292
290.41	-0.00434475		880.41	0.00302269		1470.4	0.00277864		2060.4	-0.00316339		2650.4	0.0152793
290.61	-0.00326499		880.61	0.00421006		1470.6	0.00441145		2060.6	-0.00183393		2650.6	0.01700895
290.81	-0.0019438		880.81	0.00494456		1470.8	0.0055266		2060.8	0.00010463		2650.8	0.01902595
291.01	-0.0005917		881.01	0.00627079		1471	0.0066904		2061	0.00221602		2651	0.02096544
291.21	0.00144355		881.21	0.00749859		1471.2	0.00816179		2061.2	0.00404777		2651.2	0.02346139
291.41	0.00348445		881.41	0.00852316		1471.4	0.00954008		2061.4	0.00615986		2651.4	0.02604765
291.61	0.00505065		881.61	0.00933998		1471.6	0.01143057		2061.6	0.00759619		2651.6	0.02852382
291.81	0.00698555		881.81	0.01018442		1471.8	0.01319262		2061.8	0.00913686		2651.8	0.03044877
292.01	0.00828588		882.01	0.01096851		1472	0.01483534		2062	0.00986449		2652	0.03274238
292.21	0.0097366		882.21	0.01123495		1472.2	0.01632525		2062.2	0.01003937		2652.2	0.03434699
292.41	0.01020363		882.41	0.01146415		1472.4	0.01663893		2062.4	0.01033127		2652.4	0.03639958
292.61	0.01137001		882.61	0.01123025		1472.6	0.01713386		2062.6	0.01042268		2652.6	0.03786903
292.81	0.01190448		882.81	0.01157355		1472.8	0.01778954		2062.8	0.01024116		2652.8	0.03972729
293.01	0.01271183		883.01	0.01229666		1473	0.01735737		2063	0.01031534		2653	0.04109812
293.21	0.01383219		883.21	0.01281304		1473.2	0.01721607		2063.2	0.011561		2653.2	0.04294222
293.41	0.01383159		883.41	0.01366812		1473.4	0.01690687		2063.4	0.01227669		2653.4	0.04458767
293.61	0.01450512		883.61	0.01448556		1473.6	0.01719692		2063.6	0.01304481		2653.6	0.04597064
293.81	0.0150789		883.81	0.01455619		1473.8	0.01709693		2063.8	0.01383825		2653.8	0.04705109
294.01	0.0136158		884.01	0.01550699		1474	0.01595073		2064	0.01461079		2654	0.04757992
294.21	0.01351395		884.21	0.01555107		1474.2	0.01527269		2064.2	0.01543972		2654.2	0.04775188
294.41	0.01337646		884.41	0.0159132		1474.4	0.01591884		2064.4	0.01507046		2654.4	0.04776159
294.61	0.01277046		884.61	0.01555548		1474.6	0.01550899		2064.6	0.01527003		2654.6	0.0482704
294.81	0.01253908		884.81	0.01518439		1474.8	0.01474597		2064.8	0.01653393		2654.8	0.04923797
295.01	0.0125624		885.01	0.01556492		1475	0.01446648		2065	0.01693539		2655	0.04979458
295.21	0.01281889		885.21	0.01509735		1475.2	0.01453099		2065.2	0.01756964		2655.2	0.05047129
295.41	0.01290353		885.41	0.01503727		1475.4	0.01426662		2065.4	0.0178699		2655.4	0.05057287
295.61	0.0125366		885.61	0.01521562		1475.6	0.01519387		2065.6	0.01814718		2655.6	0.05089688
295.81	0.01265778		885.81	0.0154234		1475.8	0.01540366		2065.8	0.01872213		2655.8	0.050497
296.01	0.01229453		886.01	0.01524379		1476	0.01561854		2066	0.01847582		2656	0.05048316
296.21	0.01213221		886.21	0.01518364		1476.2	0.01620684		2066.2	0.01794679		2656.2	0.05009841
296.41	0.0118271		886.41	0.01556302		1476.4	0.0154846		2066.4	0.01812588		2656.4	0.04946445
296.61	0.01216341		886.61	0.01507311		1476.6	0.01604939		2066.6	0.01810382		2656.6	0.04906013
296.81	0.01205812		886.81	0.01576264		1476.8	0.01606564		2066.8	0.01896376		2656.8	0.0486977
297.01	0.01211313		887.01	0.0162321		1477	0.01544674		2067	0.01971024		2657	0.04772862
297.21	0.01321835		887.21	0.01572668		1477.2	0.01590338		2067.2	0.02067716		2657.2	0.04703293
297.41	0.01358795		887.41	0.01629887		1477.4	0.01671258		2067.4	0.020705		2657.4	0.04707975
297.61	0.01411614		887.61	0.01715025		1477.6	0.01705365		2067.6	0.02058275		2657.6	0.04721301
297.81	0.01350651		887.81	0.01742643		1477.8	0.01693066		2067.8	0.02031638		2657.8	0.04733342
298.01	0.01220012		888.01	0.01654025		1478	0.01594857		2068	0.01989417		2658	0.04676299
298.21	0.01236496		888.21	0.01532883		1478.2	0.01653603		2068.2	0.01912503		2658.2	0.045912
298.41	0.01298114		888.41	0.01465144		1478.4	0.01707		2068.4	0.01852372		2658.4	0.04660573
298.61	0.01287866		888.61	0.01436289		1478.6	0.01618229		2068.6	0.01792628		2658.6	0.04745034
298.81	0.01377556		888.81	0.01377692		1478.8	0.01721921		2068.8	0.01777486		2658.8	0.04823717
299.01	0.01386929		889.01	0.01349355		1479	0.01726438		2069	0.01707619		2659	0.04914596
299.21	0.01320126		889.21	0.01235772		1479.2	0.01692542		2069.2	0.01719025		2659.2	0.04990627
299.41	0.01383708		889.41	0.01259823		1479.4	0.01672886		2069.4	0.01608547		2659.4	0.05100808
299.61	0.01401416		889.61	0.01306311		1479.6	0.01726366		2069.6	0.01619199		2659.6	0.05176386
299.81	0.01349707		889.81	0.01274832		1479.8	0.01741269		2069.8	0.01542703		2659.8	0.05145739
300.01	0.01289874		890.01	0.01225277		1480	0.01737494		2070	0.01521687		2660	0.05213942
300.21	0.01209256		890.21	0.01140668		1480.2	0.01770698		2070.2	0.01498273		2660.2	0.05271916
300.41	0.01246013		890.41	0.01079073		1480.4	0.01668658		2070.4	0.01526899		2660.4	0.05337698
300.61	0.01270122		890.61	0.01022494		1480.6	0.01736592		2070.6	0.01567156		2660.6	0.05384375
300.81	0.01253516		890.81	0.01072307		1480.8	0.01715663		2070.8	0.01635139		2660.8	0.05456633
301.01	0.01286457		891.01	0.00987572		1481	0.01651535		2071	0.01718069		2661	0.0546661
301.21	0.01310066		891.21	0.01018109		1481.2	0.01656573		2071.2	0.01752388		2661.2	0.05564293
301.41	0.01177445		891.41	0.01115042		1481.4	0.01656478		2071.4	0.01754939		2661.4	0.05570889
301.61	0.01084738		891.61	0.01213231		1481.6	0.01642763		2071.6	0.01713038		2661.6	0.05534081
301.81	0.01014729		891.81	0.01213839		1481.8	0.01552696		2071.8	0.01700803		2661.8	0.05456372
302.01	0.0098723		892.01	0.01165582		1482	0.01530585		2072	0.01693616		2662	0.05363359
302.21	0.00958823		892.21	0.0118246		1482.2	0.01593308		2072.2	0.01663303		2662.2	0.05337413
302.41	0.00990449		892.41	0.01186301		1482.4	0.01623171		2072.4	0.01726694		2662.4	0.05243458
302.61	0.00888711		892.61	0.01252598		1482.6	0.01602383		2072.6	0.01690487		2662.6	0.05248111
302.81	0.00914417		892.81	0.01201629		1482.8	0.01659941		2072.8	0.01710489		2662.8	0.05283689
303.01	0.00824673		893.01	0.01192377		1483	0.01578693		2073	0.01733767		2663	0.05269512
303.21	0.00851078		893.21	0.01090772		1483.2	0.01565888		2073.2	0.01737755		2663.2	0.05244077
303.41	0.00916419		893.41	0.01167107		1483.4	0.01545824		2073.4	0.01656419		2663.4	0.05289054
303.61	0.00854198		893.61	0.01142871		1483.6	0.01538997		2073.6	0.01654706		2663.6	0.05310199
303.81	0.00762782		893.81	0.01068632		1483.8	0.01486583		2073.8	0.01528925		2663.8	0.05278194
304.01	0.00725813		894.01	0.01153714		1484	0.0139073		2074	0.01533268		2664	0.0537434
304.21	0.00753418		894.21	0.01057362		1484.2	0.01378906		2074.2	0.01472122		2664.2	0.05383748
304.41	0.00807378		894.41	0.01102963		1484.4	0.01302124		2074.4	0.01473198		2664.4	0.05372945
304.61	0.00814132		894.61	0.01074427		1484.6	0.01311548		2074.6	0.01441335		2664.6	0.0540156
304.81	0.00760406		894.81	0.01123946		1484.8	0.01206172		2074.8	0.01454331		2664.8	0.05467478
305.01	0.00821419		895.01	0.01112023		1485	0.01138576		2075	0.01510366		2665	0.05548431
305.21	0.0085018		895.21	0.0123732		1485.2	0.01210702		2075.2	0.01489722		2665.2	0.05600336
305.41	0.008314		895.41	0.01263833		1485.4	0.01271425		2075.4	0.01536724		2665.4	0.05674509
305.61	0.00841947		895.61	0.01241644		1485.6	0.01264363		2075.6	0.01585875		2665.6	0.05661425
305.81	0.00858738		895.81	0.0117209		1485.8	0.01251592		2075.8	0.01620094		2665.8	0.05640627
306.01	0.00926559		896.01	0.01105918		1486	0.01378287		2076	0.01682571		2666	0.05800616
306.21	0.00873689		896.21	0.01105322		1486.2	0.01409292		2076.2	0.01640849		2666.2	0.05880197
306.41	0.00943489		896.41	0.01089651		1486.4	0.01428193		2076.4	0.01672752		2666.4	0.05848164
306.61	0.0086117		896.61	0.01020253		1486.6	0.01452704		2076.6	0.01611013		2666.6	0.05915965
306.81	0.00884214		896.81	0.00937419		1486.8	0.01433723		2076.8	0.01624789		2666.8	0.05972425
307.01	0.00817523		897.01	0.00917673		1487	0.01429785		2077	0.01640153		2667	0.05928044
307.21	0.00818537		897.21	0.00811424		1487.2	0.01448197		2077.2	0.01663458		2667.2	0.05913153
307.41	0.00751788		897.41	0.00849442		1487.4	0.01454651		2077.4	0.01668457		2667.4	0.05900405
307.61	0.00682042		897.61	0.00870141		1487.6	0.01473757		2077.6	0.01642992		2667.6	0.05934445
307.81	0.00648878		897.81	0.00923487		1487.8	0.01430023		2077.8	0.0162186		2667.8	0.05830746
308.01	0.00655061		898.01	0.01032534		1488	0.0135557		2078	0.01585451		2668	0.05830125
308.21	0.00664261		898.21	0.00993603		1488.2	0.01323525		2078.2	0.01590391		2668.2	0.05739529
308.41	0.00663443		898.41	0.01038789		1488.4	0.01335737		2078.4	0.01588136		2668.4	0.05669335
308.61	0.0060094		898.61	0.01035712		1488.6	0.01381429		2078.6	0.01493842		2668.6	0.05706688
308.81	0.00597604		898.81	0.01067222		1488.8	0.0136025		2078.8	0.01574004		2668.8	0.05680102
309.01	0.00664779		899.01	0.01018951		1489	0.01459784		2079	0.01634048		2669	0.05725414
309.21	0.00651968		899.21	0.01036037		1489.2	0.01548308		2079.2	0.01641022		2669.2	0.05772712
309.41	0.00612783		899.41	0.00999293		1489.4	0.0148718		2079.4	0.0163193		2669.4	0.0586849
309.61	0.00592934		899.61	0.01014178		1489.6	0.01481845		2079.6	0.0168769		2669.6	0.05779196
309.81	0.00527727		899.81	0.01101804		1489.8	0.01469953		2079.8	0.01617988		2669.8	0.05830218
310.01	0.00547686		900.01	0.01087802		1490	0.01461606		2080	0.01556304		2670	0.05928648
310.21	0.00534442		900.21	0.01122049		1490.2	0.01378041		2080.2	0.0152947		2670.2	0.0597131
310.41	0.00589668		900.41	0.01090076		1490.4	0.01398818		2080.4	0.01461601		2670.4	0.06008842
310.61	0.00517973		900.61	0.01053409		1490.6	0.01455935		2080.6	0.01469119		2670.6	0.06082463
310.81	0.00561948		900.81	0.01064274		1490.8	0.01470877		2080.8	0.01423031		2670.8	0.06170246
311.01	0.00561875		901.01	0.01075919		1491	0.0146887		2081	0.01502123		2671	0.06147582
311.21	0.00619157		901.21	0.01042437		1491.2	0.01570938		2081.2	0.01549402		2671.2	0.06193423
311.41	0.00643746		901.41	0.01046634		1491.4	0.01619937		2081.4	0.01630158		2671.4	0.06318373
311.61	0.00631281		901.61	0.01055535		1491.6	0.01626253		2081.6	0.01639619		2671.6	0.06381889
311.81	0.00619359		901.81	0.00993979		1491.8	0.01602304		2081.8	0.0166563		2671.8	0.063793
312.01	0.00671366		902.01	0.00967776		1492	0.01555318		2082	0.01615592		2672	0.06395748
312.21	0.00742537		902.21	0.01002713		1492.2	0.01622916		2082.2	0.01724662		2672.2	0.06357857
312.41	0.00788975		902.41	0.00942253		1492.4	0.01719985		2082.4	0.0174506		2672.4	0.06343542
312.61	0.00808184		902.61	0.00870412		1492.6	0.01759198		2082.6	0.01783419		2672.6	0.06310391
312.81	0.00894961		902.81	0.00809141		1492.8	0.01735081		2082.8	0.01901179		2672.8	0.06288699
313.01	0.00917218		903.01	0.00806651		1493	0.01652281		2083	0.01871215		2673	0.06253958
313.21	0.00783856		903.21	0.00816269		1493.2	0.01641185		2083.2	0.01875014		2673.2	0.06232394
313.41	0.00747634		903.41	0.00828735		1493.4	0.01580048		2083.4	0.01894291		2673.4	0.06157196
313.61	0.0071974		903.61	0.00829558		1493.6	0.01522434		2083.6	0.01912467		2673.6	0.06062573
313.81	0.00669502		903.81	0.00821366		1493.8	0.01406348		2083.8	0.01849797		2673.8	0.06110208
314.01	0.00661897		904.01	0.00796674		1494	0.01328262		2084	0.01751176		2674	0.06104896
314.21	0.00606589		904.21	0.00742048		1494.2	0.01363888		2084.2	0.01786774		2674.2	0.06091842
314.41	0.00617939		904.41	0.00755153		1494.4	0.01406939		2084.4	0.01664346		2674.4	0.06081101
314.61	0.0055609		904.61	0.00773682		1494.6	0.0141538		2084.6	0.01647273		2674.6	0.0608887
314.81	0.0056031		904.81	0.00770569		1494.8	0.01403894		2084.8	0.0145308		2674.8	0.06100214
315.01	0.00441303		905.01	0.00732705		1495	0.01405655		2085	0.01483381		2675	0.06032596
315.21	0.00390946		905.21	0.00654596		1495.2	0.01413872		2085.2	0.01379677		2675.2	0.06106901
315.41	0.00341569		905.41	0.005274		1495.4	0.01411292		2085.4	0.01358619		2675.4	0.06097823
315.61	0.00247784		905.61	0.00591922		1495.6	0.01392254		2085.6	0.01291106		2675.6	0.0605192
315.81	0.00240277		905.81	0.00662335		1495.8	0.01415035		2085.8	0.0132268		2675.8	0.0610259
316.01	0.00260775		906.01	0.00705677		1496	0.01379494		2086	0.01296406		2676	0.05987628
316.21	0.00356558		906.21	0.00766858		1496.2	0.01456122		2086.2	0.01326498		2676.2	0.05987926
316.41	0.00335587		906.41	0.00708692		1496.4	0.0149132		2086.4	0.01317111		2676.4	0.05946656
316.61	0.00371142		906.61	0.00640411		1496.6	0.01441801		2086.6	0.01366934		2676.6	0.05888002
316.81	0.00325944		906.81	0.00720483		1496.8	0.01359317		2086.8	0.01399812		2676.8	0.05890275
317.01	0.00340943		907.01	0.00720161		1497	0.01307716		2087	0.01470024		2677	0.05866456
317.21	0.00219791		907.21	0.00675165		1497.2	0.01361077		2087.2	0.01526507		2677.2	0.05879124
317.41	0.00219445		907.41	0.00652979		1497.4	0.01297757		2087.4	0.01568808		2677.4	0.05976056
317.61	0.00175637		907.61	0.00665597		1497.6	0.01265262		2087.6	0.01610595		2677.6	0.06049612
317.81	0.00223047		907.81	0.00667093		1497.8	0.01271495		2087.8	0.01693606		2677.8	0.06154318
318.01	0.00166458		908.01	0.00670815		1498	0.01260348		2088	0.01761319		2678	0.06116522
318.21	0.00159243		908.21	0.00576702		1498.2	0.01382802		2088.2	0.01818446		2678.2	0.06123824
318.41	0.00225925		908.41	0.00612712		1498.4	0.0137864		2088.4	0.01768111		2678.4	0.06242673
318.61	0.00224143		908.61	0.00551864		1498.6	0.01398551		2088.6	0.01747176		2678.6	0.06345252
318.81	0.00291209		908.81	0.00513667		1498.8	0.01386543		2088.8	0.01695595		2678.8	0.06381666
319.01	0.00271009		909.01	0.00436788		1499	0.0142304		2089	0.01718748		2679	0.06351872
319.21	0.00314668		909.21	0.00420307		1499.2	0.01351726		2089.2	0.0167882		2679.2	0.06449883
319.41	0.00291442		909.41	0.00440022		1499.4	0.01355367		2089.4	0.01658243		2679.4	0.06407888
319.61	0.00260038		909.61	0.00637112		1499.6	0.01353205		2089.6	0.01665564		2679.6	0.06415943
319.81	0.00337902		909.81	0.00640144		1499.8	0.01299837		2089.8	0.01656027		2679.8	0.06412984
320.01	0.00385484		910.01	0.00612651		1500	0.01229427		2090	0.01559497		2680	0.06330026
320.21	0.00454726		910.21	0.00615172		1500.2	0.01206706		2090.2	0.01540884		2680.2	0.06361813
320.41	0.00485987		910.41	0.00561391		1500.4	0.01139727		2090.4	0.01464007		2680.4	0.0634255
320.61	0.00481808		910.61	0.00550934		1500.6	0.01070068		2090.6	0.01442671		2680.6	0.06341575
320.81	0.00416673		910.81	0.00588135		1500.8	0.01049042		2090.8	0.01376704		2680.8	0.06351994
321.01	0.00448085		911.01	0.00513768		1501	0.01047079		2091	0.01401458		2681	0.06374542
321.21	0.0034398		911.21	0.0049739		1501.2	0.01030392		2091.2	0.01320039		2681.2	0.06379779
321.41	0.0031678		911.41	0.00464131		1501.4	0.0097554		2091.4	0.01382091		2681.4	0.0634864
321.61	0.0026546		911.61	0.00530135		1501.6	0.01004577		2091.6	0.01417655		2681.6	0.06263715
321.81	0.00321739		911.81	0.00447311		1501.8	0.01020014		2091.8	0.01485586		2681.8	0.06271652
322.01	0.00212298		912.01	0.00458358		1502	0.01043175		2092	0.01494558		2682	0.06187164
322.21	0.001932		912.21	0.00402223		1502.2	0.01079642		2092.2	0.0143408		2682.2	0.06148014
322.41	0.0025654		912.41	0.00397646		1502.4	0.01084293		2092.4	0.01513308		2682.4	0.06229677
322.61	0.00161717		912.61	0.00388793		1502.6	0.01093559		2092.6	0.01658491		2682.6	0.06257736
322.81	0.00180491		912.81	0.00460008		1502.8	0.01119238		2092.8	0.01636915		2682.8	0.06222235
323.01	0.00033239		913.01	0.00524577		1503	0.01160185		2093	0.01637308		2683	0.06261554
323.21	-0.0003323		913.21	0.00601886		1503.2	0.01151792		2093.2	0.01738797		2683.2	0.06315968
323.41	-0.00033244		913.41	0.0060333		1503.4	0.01210351		2093.4	0.01755956		2683.4	0.06265528
323.61	-0.00003088		913.61	0.0074629		1503.6	0.01235382		2093.6	0.01781281		2683.6	0.06312772
323.81	0.00062314		913.81	0.00652748		1503.8	0.01151836		2093.8	0.01725446		2683.8	0.06327887
324.01	0.00102451		914.01	0.00702814		1504	0.01176233		2094	0.01663471		2684	0.06378359
324.21	0.0011356		914.21	0.00670117		1504.2	0.01230573		2094.2	0.01590019		2684.2	0.06416856
324.41	0.00120492		914.41	0.00677187		1504.4	0.01324815		2094.4	0.01484272		2684.4	0.06453376
324.61	0.00103778		914.61	0.00634363		1504.6	0.01422151		2094.6	0.01483161		2684.6	0.06479133
324.81	0.00160517		914.81	0.00581645		1504.8	0.01407843		2094.8	0.01354032		2684.8	0.0649681
325.01	0.00206689		915.01	0.00518991		1505	0.01368852		2095	0.01331079		2685	0.06504302
325.21	0.00206667		915.21	0.00504382		1505.2	0.01315891		2095.2	0.01251251		2685.2	0.06457505
325.41	0.0019553		915.41	0.00490285		1505.4	0.0126494		2095.4	0.01230527		2685.4	0.06421659
325.61	0.00136693		915.61	0.00525669		1505.6	0.01257592		2095.6	0.01116039		2685.6	0.06354581
325.81	0.00182676		915.81	0.00465268		1505.8	0.0121906		2095.8	0.01154262		2685.8	0.06392933
326.01	0.00229272		916.01	0.00437866		1506	0.01171449		2096	0.01118891		2686	0.06321154
326.21	0.00187936		916.21	0.00411637		1506.2	0.01129621		2096.2	0.01165858		2686.2	0.06352765
326.41	0.00253869		916.41	0.00364188		1506.4	0.01093653		2096.4	0.01253873		2686.4	0.06406332
326.61	0.00119564		916.61	0.00353943		1506.6	0.01021147		2096.6	0.01296616		2686.6	0.06390293
326.81	0.00157905		916.81	0.00341515		1506.8	0.01118352		2096.8	0.01227938		2686.8	0.06490415
327.01	0.00030545		917.01	0.00334736		1507	0.01079652		2097	0.01257391		2687	0.06497501
327.21	0.00032842		917.21	0.00316074		1507.2	0.01103178		2097.2	0.0131694		2687.2	0.06511083
327.41	0.00118184		917.41	0.00364762		1507.4	0.01112378		2097.4	0.01285226		2687.4	0.06493785
327.61	0.00112578		917.61	0.00416501		1507.6	0.01081784		2097.6	0.01326308		2687.6	0.0659473
327.81	0.00050346		917.81	0.0030731		1507.8	0.01062465		2097.8	0.01387976		2687.8	0.06610499
328.01	-0.00018125		918.01	0.00251502		1508	0.01065215		2098	0.0132823		2688	0.06639682
328.21	-0.00075081		918.21	0.00268248		1508.2	0.01156586		2098.2	0.01442533		2688.2	0.06635059
328.41	-0.00081779		918.41	0.00386563		1508.4	0.01158289		2098.4	0.01420947		2688.4	0.06635753
328.61	-0.00108509		918.61	0.00339516		1508.6	0.0119696		2098.6	0.01404498		2688.6	0.06708007
328.81	-0.00073554		918.81	0.00361633		1508.8	0.01197317		2098.8	0.01323161		2688.8	0.06787329
329.01	-0.00074755		919.01	0.0040231		1509	0.01168365		2099	0.01347207		2689	0.06830269
329.21	-0.00106422		919.21	0.00430053		1509.2	0.01141821		2099.2	0.01306278		2689.2	0.06836517
329.41	-0.00138606		919.41	0.00489958		1509.4	0.01182814		2099.4	0.01306516		2689.4	0.06827354
329.61	-0.00137256		919.61	0.00502681		1509.6	0.01170393		2099.6	0.01265896		2689.6	0.0678738
329.81	-0.00050792		919.81	0.00504414		1509.8	0.01226364		2099.8	0.01323643		2689.8	0.06782906
330.01	-0.00013705		920.01	0.00534505		1510	0.01209294		2100	0.01347878		2690	0.06622096
330.21	-0.00079919		920.21	0.00615924		1510.2	0.01260541		2100.2	0.01369853		2690.2	0.06571479
330.41	-0.00045169		920.41	0.00540637		1510.4	0.01273245		2100.4	0.01373151		2690.4	0.06518036
330.61	-0.00104021		920.61	0.00553872		1510.6	0.01290501		2100.6	0.01359679		2690.6	0.06453294
330.81	-0.00084265		920.81	0.00465758		1510.8	0.014258		2100.8	0.01270767		2690.8	0.06494167
331.01	-0.00033146		921.01	0.00494588		1511	0.01406106		2101	0.01269495		2691	0.06347687
331.21	0.00006612		921.21	0.00453187		1511.2	0.01433344		2101.2	0.01272205		2691.2	0.06389903
331.41	0.00057257		921.41	0.00435917		1511.4	0.01490768		2101.4	0.01290345		2691.4	0.06347456
331.61	-0.00024669		921.61	0.00341267		1511.6	0.01491836		2101.6	0.01360997		2691.6	0.06306459
331.81	-0.00075292		921.81	0.00271169		1511.8	0.0143084		2101.8	0.01319633		2691.8	0.06248358
332.01	-0.00096693		922.01	0.00166627		1512	0.01439998		2102	0.01252425		2692	0.06162488
332.21	-0.00042067		922.21	0.00307395		1512.2	0.0146663		2102.2	0.01288784		2692.2	0.06182801
332.41	-0.00091548		922.41	0.0040124		1512.4	0.01405153		2102.4	0.01167778		2692.4	0.06198968
332.61	-0.0009096		922.61	0.00351979		1512.6	0.01407612		2102.6	0.01182757		2692.6	0.06302852
332.81	-0.00022726		922.81	0.00305317		1512.8	0.01374836		2102.8	0.01142242		2692.8	0.06409399
333.01	-0.00071343		923.01	0.0033391		1513	0.01297498		2103	0.01171774		2693	0.06397968
333.21	-0.00128912		923.21	0.00378916		1513.2	0.0127444		2103.2	0.01180158		2693.2	0.06428731
333.41	-0.00108741		923.41	0.00442234		1513.4	0.01253492		2103.4	0.01218552		2693.4	0.0646759
333.61	-0.00086999		923.61	0.00433809		1513.6	0.01201202		2103.6	0.01199763		2693.6	0.06478015
333.81	-0.00085426		923.81	0.0051704		1513.8	0.01238845		2103.8	0.01360063		2693.8	0.06505282
334.01	-0.00136166		924.01	0.00637023		1514	0.01229694		2104	0.0139584		2694	0.06542745
334.21	-0.00169504		924.21	0.00673062		1514.2	0.0124968		2104.2	0.0145359		2694.2	0.06567741
334.41	-0.00192877		924.41	0.00673646		1514.4	0.01164791		2104.4	0.01435676		2694.4	0.06643904
334.61	-0.00123885		924.61	0.00695601		1514.6	0.01063395		2104.6	0.01407153		2694.6	0.06663705
334.81	-0.00081909		924.81	0.00650785		1514.8	0.01079264		2104.8	0.01388577		2694.8	0.06673438
335.01	-0.0006263		925.01	0.006609		1515	0.01131087		2105	0.01443636		2695	0.0664463
335.21	-0.00163519		925.21	0.00651968		1515.2	0.01174752		2105.2	0.01384969		2695.2	0.06688809
335.41	-0.00156112		925.41	0.00620047		1515.4	0.01239214		2105.4	0.01343825		2695.4	0.06691653
335.61	-0.00188835		925.61	0.00579979		1515.6	0.01165709		2105.6	0.01330946		2695.6	0.06659386
335.81	-0.00160116		925.81	0.00541184		1515.8	0.01115325		2105.8	0.01248477		2695.8	0.06669762
336.01	-0.00211225		926.01	0.00487507		1516	0.01234273		2106	0.01235934		2696	0.06643404
336.21	-0.00229285		926.21	0.0052713		1516.2	0.01169626		2106.2	0.01191661		2696.2	0.06656369
336.41	-0.00294991		926.41	0.00423337		1516.4	0.01146949		2106.4	0.01235907		2696.4	0.06635951
336.61	-0.00294413		926.61	0.00326132		1516.6	0.01156795		2106.6	0.01220953		2696.6	0.06644312
336.81	-0.00330384		926.81	0.00265239		1516.8	0.01097233		2106.8	0.01220705		2696.8	0.06654551
337.01	-0.00314352		927.01	0.00300663		1517	0.01099269		2107	0.0126502		2697	0.06621469
337.21	-0.00270922		927.21	0.00293207		1517.2	0.01095177		2107.2	0.01280311		2697.2	0.06640641
337.41	-0.00288161		927.41	0.00221553		1517.4	0.01117927		2107.4	0.01334376		2697.4	0.06618119
337.61	-0.00297806		927.61	0.00183241		1517.6	0.01180364		2107.6	0.01370746		2697.6	0.06623289
337.81	-0.00329422		927.81	0.00230643		1517.8	0.01253387		2107.8	0.01424187		2697.8	0.06675786
338.01	-0.003943		928.01	0.00260413		1518	0.01308879		2108	0.01356327		2698	0.06639078
338.21	-0.00418139		928.21	0.00245648		1518.2	0.01226466		2108.2	0.01349703		2698.2	0.06580732
338.41	-0.00420383		928.41	0.00300678		1518.4	0.01217198		2108.4	0.01213083		2698.4	0.0660291
338.61	-0.00360372		928.61	0.00243069		1518.6	0.01237544		2108.6	0.01229821		2698.6	0.06561731
338.81	-0.00433293		928.81	0.0031638		1518.8	0.01250296		2108.8	0.01181146		2698.8	0.06529952
339.01	-0.00467948		929.01	0.00312586		1519	0.01333705		2109	0.01104211		2699	0.06598294
339.21	-0.00451181		929.21	0.00329401		1519.2	0.01356174		2109.2	0.00991834		2699.2	0.06682207
339.41	-0.00385905		929.41	0.00197653		1519.4	0.01412809		2109.4	0.01003519		2699.4	0.06666158
339.61	-0.00419812		929.61	0.00109849		1519.6	0.01388372		2109.6	0.0101033		2699.6	0.06663695
339.81	-0.00438264		929.81	0.00098857		1519.8	0.01348788		2109.8	0.00986831		2699.8	0.0670049
340.01	-0.00450833		930.01	0.00037951		1520	0.0134837		2110	0.01005213		2700	0.06700732
340.21	-0.00478988		930.21	0.00031827		1520.2	0.01304968		2110.2	0.00970728		2700.2	0.06710433
340.41	-0.00357901		930.41	-0.00002332		1520.4	0.01210852		2110.4	0.01003245		2700.4	0.06693235
340.61	-0.00313194		930.61	0.00071131		1520.6	0.01166558		2110.6	0.01000888		2700.6	0.06697827
340.81	-0.00241346		930.81	0.00142471		1520.8	0.00988786		2110.8	0.01130305		2700.8	0.0682195
341.01	-0.00200214		931.01	0.00129434		1521	0.00939293		2111	0.01172574		2701	0.06841368
341.21	-0.0020084		931.21	0.00083705		1521.2	0.00936634		2111.2	0.01237208		2701.2	0.06840764
341.41	-0.00236862		931.41	0.00104727		1521.4	0.00885934		2111.4	0.01323013		2701.4	0.06874822
341.61	-0.00246585		931.61	0.00152371		1521.6	0.0091675		2111.6	0.01399544		2701.6	0.06963646
341.81	-0.00278304		931.81	0.00253236		1521.8	0.00960096		2111.8	0.0140167		2701.8	0.06982984
342.01	-0.00343845		932.01	0.00289105		1522	0.00982722		2112	0.01441392		2702	0.06932348
342.21	-0.0025357		932.21	0.00330909		1522.2	0.00929593		2112.2	0.01531389		2702.2	0.06915982
342.41	-0.00250142		932.41	0.00355839		1522.4	0.00997086		2112.4	0.01527917		2702.4	0.06942713
342.61	-0.00261528		932.61	0.00361506		1522.6	0.00991647		2112.6	0.01614294		2702.6	0.06862942
342.81	-0.00298126		932.81	0.00463975		1522.8	0.00993258		2112.8	0.01509324		2702.8	0.06873452
343.01	-0.00379072		933.01	0.00375771		1523	0.01126482		2113	0.01474997		2703	0.0686382
343.21	-0.00398339		933.21	0.0024636		1523.2	0.01212124		2113.2	0.01399337		2703.2	0.06856194
343.41	-0.00406445		933.41	0.00111016		1523.4	0.01285126		2113.4	0.01417952		2703.4	0.06723286
343.61	-0.00483102		933.61	0.00109707		1523.6	0.01312583		2113.6	0.01360146		2703.6	0.06703662
343.81	-0.0048883		933.81	0.0007601		1523.8	0.01310383		2113.8	0.01297393		2703.8	0.06642645
344.01	-0.00482998		934.01	0.00020679		1524	0.01392506		2114	0.01181794		2704	0.06591452
344.21	-0.00472662		934.21	0.00068483		1524.2	0.01449193		2114.2	0.01136866		2704.2	0.06591566
344.41	-0.00413444		934.41	0.00058408		1524.4	0.01348789		2114.4	0.01119009		2704.4	0.06584831
344.61	-0.00487357		934.61	0.00126648		1524.6	0.01329297		2114.6	0.01119259		2704.6	0.0664735
344.81	-0.00589396		934.81	0.00151893		1524.8	0.01257043		2114.8	0.01246027		2704.8	0.06717416
345.01	-0.00599288		935.01	0.00121824		1525	0.0123747		2115	0.01216245		2705	0.06686104
345.21	-0.00608235		935.21	0.00110332		1525.2	0.01200909		2115.2	0.01273348		2705.2	0.06741457
345.41	-0.00655531		935.41	0.00160568		1525.4	0.01110986		2115.4	0.01329377		2705.4	0.06772454
345.61	-0.00701512		935.61	0.00203542		1525.6	0.01108582		2115.6	0.01366026		2705.6	0.06845775
345.81	-0.0074175		935.81	0.00253936		1525.8	0.01107593		2115.8	0.0144299		2705.8	0.06836064
346.01	-0.00734066		936.01	0.0025452		1526	0.01033616		2116	0.01477411		2706	0.06837867
346.21	-0.00697339		936.21	0.00253599		1526.2	0.00994177		2116.2	0.01506053		2706.2	0.06918571
346.41	-0.00697362		936.41	0.00342156		1526.4	0.00991499		2116.4	0.01478511		2706.4	0.06930524
346.61	-0.00686123		936.61	0.00352729		1526.6	0.0095252		2116.6	0.01490198		2706.6	0.0691522
346.81	-0.0064754		936.81	0.00332726		1526.8	0.00967368		2116.8	0.01402969		2706.8	0.06964133
347.01	-0.00601818		937.01	0.002847		1527	0.01004971		2117	0.01447501		2707	0.06900938
347.21	-0.00552917		937.21	0.00275005		1527.2	0.00992714		2117.2	0.01442736		2707.2	0.06838222
347.41	-0.00479903		937.41	0.0026028		1527.4	0.01002345		2117.4	0.01419899		2707.4	0.06712337
347.61	-0.00475723		937.61	0.00231946		1527.6	0.01029822		2117.6	0.01343723		2707.6	0.0661174
347.81	-0.00440532		937.81	0.00127668		1527.8	0.01037993		2117.8	0.01299471		2707.8	0.06530952
348.01	-0.00437976		938.01	0.00095973		1528	0.01115117		2118	0.01282059		2708	0.06487275
348.21	-0.0038316		938.21	0.00090756		1528.2	0.01132246		2118.2	0.0127525		2708.2	0.0649583
348.41	-0.00455291		938.41	0.00105143		1528.4	0.0116622		2118.4	0.01207135		2708.4	0.06524416
348.61	-0.00356043		938.61	0.00213629		1528.6	0.01177613		2118.6	0.01246959		2708.6	0.06498088
348.81	-0.00323442		938.81	0.00161365		1528.8	0.01254451		2118.8	0.01312007		2708.8	0.06449002
349.01	-0.00267898		939.01	0.00157569		1529	0.01247426		2119	0.01256117		2709	0.06493532
349.21	-0.00266116		939.21	0.00135013		1529.2	0.0125577		2119.2	0.01277795		2709.2	0.06467801
349.41	-0.00319719		939.41	0.00150035		1529.4	0.01280165		2119.4	0.01244175		2709.4	0.06432867
349.61	-0.00323291		939.61	0.00127735		1529.6	0.0127791		2119.6	0.0122364		2709.6	0.06484531
349.81	-0.00392901		939.81	0.00105767		1529.8	0.01296926		2119.8	0.01267399		2709.8	0.06460705
350.01	-0.00423116		940.01	0.00103229		1530	0.01248673		2120	0.01115789		2710	0.06496386
350.21	-0.00420329		940.21	0.00094335		1530.2	0.01259967		2120.2	0.0096619		2710.2	0.0654233
350.41	-0.0037324		940.41	0.00131972		1530.4	0.01240305		2120.4	0.00971029		2710.4	0.06539446
350.61	-0.00384923		940.61	0.00054614		1530.6	0.01192857		2120.6	0.00914408		2710.6	0.06626985
350.81	-0.00382615		940.81	0.00149229		1530.8	0.01168544		2120.8	0.00917705		2710.8	0.06657393
351.01	-0.00427467		941.01	0.00215109		1531	0.01165066		2121	0.00855831		2711	0.06617269
351.21	-0.00513697		941.21	0.00334386		1531.2	0.01197458		2121.2	0.00823942		2711.2	0.06671808
351.41	-0.00552724		941.41	0.00391546		1531.4	0.01272301		2121.4	0.00802625		2711.4	0.06722643
351.61	-0.00571726		941.61	0.00430104		1531.6	0.01284242		2121.6	0.00863072		2711.6	0.06698092
351.81	-0.00597973		941.81	0.00471773		1531.8	0.01330157		2121.8	0.00913288		2711.8	0.0669582
352.01	-0.00626301		942.01	0.00450313		1532	0.0138544		2122	0.00993459		2712	0.0671039
352.21	-0.00712973		942.21	0.00596119		1532.2	0.01419659		2122.2	0.01007886		2712.2	0.06802789
352.41	-0.00722748		942.41	0.00648041		1532.4	0.01429005		2122.4	0.01077871		2712.4	0.06830623
352.61	-0.00599635		942.61	0.00620207		1532.6	0.01406236		2122.6	0.01212184		2712.6	0.06793265
352.81	-0.00607389		942.81	0.00541108		1532.8	0.01414831		2122.8	0.01294675		2712.8	0.06815636
353.01	-0.00672625		943.01	0.00567166		1533	0.01359745		2123	0.01374184		2713	0.06837542
353.21	-0.0069671		943.21	0.00545394		1533.2	0.01388559		2123.2	0.01382273		2713.2	0.0671846
353.41	-0.0079745		943.41	0.00492629		1533.4	0.01345965		2123.4	0.01398078		2713.4	0.06659905
353.61	-0.00833229		943.61	0.00366066		1533.6	0.01290897		2123.6	0.01435799		2713.6	0.06641699
353.81	-0.00853704		943.81	0.0027132		1533.8	0.01249993		2123.8	0.01462781		2713.8	0.06625953
354.01	-0.00846794		944.01	0.00206817		1534	0.01245595		2124	0.01367627		2714	0.06643338
354.21	-0.00801727		944.21	0.00164729		1534.2	0.01280407		2124.2	0.01339958		2714.2	0.06593403
354.41	-0.00780262		944.41	0.00146079		1534.4	0.01279739		2124.4	0.01452599		2714.4	0.06666692
354.61	-0.00796829		944.61	0.00168045		1534.6	0.01309353		2124.6	0.01370184		2714.6	0.06659681
354.81	-0.00790585		944.81	0.0021693		1534.8	0.01364173		2124.8	0.01294807		2714.8	0.06713022
355.01	-0.00758566		945.01	0.00221077		1535	0.01417284		2125	0.01211307		2715	0.06735941
355.21	-0.00761885		945.21	0.00251814		1535.2	0.01452359		2125.2	0.0128656		2715.2	0.06753726
355.41	-0.00719865		945.41	0.00252197		1535.4	0.01458013		2125.4	0.01285776		2715.4	0.06715946
355.61	-0.00627718		945.61	0.00222628		1535.6	0.0133235		2125.6	0.01292746		2715.6	0.06680283
355.81	-0.00612374		945.81	0.00226325		1535.8	0.01316454		2125.8	0.01179403		2715.8	0.06724139
356.01	-0.00699308		946.01	0.00201763		1536	0.01345683		2126	0.01166117		2716	0.06834084
356.21	-0.00746001		946.21	0.00216245		1536.2	0.01311947		2126.2	0.01148781		2716.2	0.06874391
356.41	-0.0067918		946.41	0.00216661		1536.4	0.01239197		2126.4	0.01084502		2716.4	0.06824687
356.61	-0.00736324		946.61	0.00204229		1536.6	0.01202084		2126.6	0.01115098		2716.6	0.06777766
356.81	-0.00724611		946.81	0.00148919		1536.8	0.01135838		2126.8	0.01008414		2716.8	0.06815802
357.01	-0.00694244		947.01	0.00228102		1537	0.01120499		2127	0.0101204		2717	0.06798072
357.21	-0.00670325		947.21	0.00222286		1537.2	0.01063923		2127.2	0.00895468		2717.2	0.06800249
357.41	-0.00732692		947.41	0.00224341		1537.4	0.01022639		2127.4	0.00950079		2717.4	0.06839585
357.61	-0.00670101		947.61	0.00202898		1537.6	0.00983901		2127.6	0.01033631		2717.6	0.06893181
357.81	-0.00640714		947.81	0.00172109		1537.8	0.01034377		2127.8	0.01052696		2717.8	0.06932591
358.01	-0.00567675		948.01	0.00147378		1538	0.01075304		2128	0.01047413		2718	0.06930799
358.21	-0.00596739		948.21	0.00168797		1538.2	0.01127657		2128.2	0.01057922		2718.2	0.06935809
358.41	-0.00671771		948.41	0.00214544		1538.4	0.01083347		2128.4	0.01129354		2718.4	0.06989233
358.61	-0.0067524		948.61	0.00227573		1538.6	0.01085687		2128.6	0.01054694		2718.6	0.06867399
358.81	-0.00701088		948.81	0.00167565		1538.8	0.01112828		2128.8	0.01022409		2718.8	0.06892717
359.01	-0.00753699		949.01	0.00139133		1539	0.01162575		2129	0.0107836		2719	0.0687582
359.21	-0.00762918		949.21	0.00134853		1539.2	0.01136653		2129.2	0.0108703		2719.2	0.06822286
359.41	-0.00787893		949.41	0.00140572		1539.4	0.01108916		2129.4	0.00996956		2719.4	0.06783625
359.61	-0.00821648		949.61	0.0016886		1539.6	0.00996575		2129.6	0.00982255		2719.6	0.06824601
359.81	-0.00919516		949.81	0.00193647		1539.8	0.01074026		2129.8	0.0093929		2719.8	0.0685086
360.01	-0.01001255		950.01	0.00174675		1540	0.01093621		2130	0.00949319		2720	0.0686919
360.21	-0.00959665		950.21	0.00134238		1540.2	0.01115344		2130.2	0.01022813		2720.2	0.06750459
360.41	-0.00979549		950.41	0.00248846		1540.4	0.01104413		2130.4	0.01010635		2720.4	0.0675924
360.61	-0.00990236		950.61	0.001848		1540.6	0.01070141		2130.6	0.01147573		2720.6	0.06715392
360.81	-0.00903363		950.81	0.00118393		1540.8	0.01058689		2130.8	0.01152863		2720.8	0.06703269
361.01	-0.00875862		951.01	0.00163042		1541	0.01125354		2131	0.0125805		2721	0.06676086
361.21	-0.00923296		951.21	0.00151169		1541.2	0.01111109		2131.2	0.01244299		2721.2	0.06739148
361.41	-0.00975253		951.41	0.00150463		1541.4	0.012369		2131.4	0.01361553		2721.4	0.06778241
361.61	-0.00910165		951.61	0.00125831		1541.6	0.01332827		2131.6	0.01388143		2721.6	0.06803399
361.81	-0.00851848		951.81	0.00049454		1541.8	0.01354825		2131.8	0.01372019		2721.8	0.06879308
362.01	-0.00765807		952.01	0.00010533		1542	0.01321649		2132	0.01390536		2722	0.06827724
362.21	-0.00818031		952.21	0.00134124		1542.2	0.01383777		2132.2	0.01421991		2722.2	0.06815354
362.41	-0.00815778		952.41	0.00161318		1542.4	0.01373292		2132.4	0.01480796		2722.4	0.06751101
362.61	-0.00774838		952.61	0.00128275		1542.6	0.01403236		2132.6	0.01420696		2722.6	0.06663004
362.81	-0.00855724		952.81	0.0013236		1542.8	0.01454199		2132.8	0.01348236		2722.8	0.0671805
363.01	-0.00818047		953.01	0.00162879		1543	0.0142808		2133	0.01313169		2723	0.06744038
363.21	-0.00772533		953.21	0.00185251		1543.2	0.01335498		2133.2	0.0127064		2723.2	0.06711932
363.41	-0.00867585		953.41	0.00192793		1543.4	0.01386636		2133.4	0.01233627		2723.4	0.06767153
363.61	-0.00886621		953.61	0.0023174		1543.6	0.01303702		2133.6	0.01199504		2723.6	0.06841807
363.81	-0.00934488		953.81	0.00217853		1543.8	0.0132742		2133.8	0.01241369		2723.8	0.06907464
364.01	-0.00930462		954.01	0.00170337		1544	0.01251401		2134	0.01263352		2724	0.0689058
364.21	-0.00922259		954.21	0.0020918		1544.2	0.01283016		2134.2	0.0130462		2724.2	0.06946222
364.41	-0.009455		954.41	0.00301727		1544.4	0.01237734		2134.4	0.01280903		2724.4	0.06962458
364.61	-0.01037281		954.61	0.00248835		1544.6	0.01182132		2134.6	0.0128028		2724.6	0.06890177
364.81	-0.01085537		954.81	0.00255516		1544.8	0.01294015		2134.8	0.01243263		2724.8	0.06873774
365.01	-0.01160282		955.01	0.0025485		1545	0.01342598		2135	0.01205994		2725	0.06849199
365.21	-0.01157508		955.21	0.00287756		1545.2	0.01400924		2135.2	0.0116997		2725.2	0.06937552
365.41	-0.01187549		955.41	0.00244307		1545.4	0.01417498		2135.4	0.01189441		2725.4	0.0692584
365.61	-0.01114741		955.61	0.00156881		1545.6	0.01421014		2135.6	0.01139389		2725.6	0.06901974
365.81	-0.01065269		955.81	0.00068239		1545.8	0.0134856		2135.8	0.01072376		2725.8	0.06907556
366.01	-0.0101596		956.01	0.00096389		1546	0.0135737		2136	0.01045188		2726	0.06860741
366.21	-0.00984677		956.21	0.00096134		1546.2	0.01375556		2136.2	0.01050004		2726.2	0.06835847
366.41	-0.00959932		956.41	0.0002922		1546.4	0.01349109		2136.4	0.01000511		2726.4	0.06800067
366.61	-0.00921713		956.61	0.00061869		1546.6	0.0136559		2136.6	0.00958876		2726.6	0.06776313
366.81	-0.0093479		956.81	0.00007665		1546.8	0.01420576		2136.8	0.00916588		2726.8	0.06802762
367.01	-0.00890365		957.01	-0.00005344		1547	0.01416037		2137	0.00923707		2727	0.0685403
367.21	-0.00887895		957.21	-0.00048014		1547.2	0.01459727		2137.2	0.0089256		2727.2	0.06844681
367.41	-0.00955339		957.41	-0.00078714		1547.4	0.01475833		2137.4	0.00805498		2727.4	0.06904142
367.61	-0.00929868		957.61	-0.00065823		1547.6	0.01346046		2137.6	0.00759088		2727.6	0.06816348
367.81	-0.00919407		957.81	-0.00057508		1547.8	0.01351911		2137.8	0.00824454		2727.8	0.06817473
368.01	-0.00922367		958.01	-0.00169738		1548	0.01302369		2138	0.00808572		2728	0.06771774
368.21	-0.00869562		958.21	-0.00112606		1548.2	0.0128261		2138.2	0.00781718		2728.2	0.06740515
368.41	-0.00899133		958.41	-0.00088267		1548.4	0.01252232		2138.4	0.00837475		2728.4	0.06687482
368.61	-0.0096839		958.61	-0.00122711		1548.6	0.01231983		2138.6	0.00849345		2728.6	0.06703771
368.81	-0.00920936		958.81	-0.00099283		1548.8	0.01267675		2138.8	0.00850454		2728.8	0.06686155
369.01	-0.01000133		959.01	-0.00190065		1549	0.01242585		2139	0.00846993		2729	0.06660868
369.21	-0.00977836		959.21	-0.00143345		1549.2	0.01209694		2139.2	0.00829461		2729.2	0.06776767
369.41	-0.00965792		959.41	-0.00186948		1549.4	0.0110504		2139.4	0.00858538		2729.4	0.06716832
369.61	-0.0098328		959.61	-0.00139592		1549.6	0.01134402		2139.6	0.00881705		2729.6	0.06740688
369.81	-0.00963052		959.81	-0.00079312		1549.8	0.01137529		2139.8	0.00865801		2729.8	0.06764096
370.01	-0.00957651		960.01	0.00060554		1550	0.0117019		2140	0.00965408		2730	0.06788225
370.21	-0.00958206		960.21	0.00037653		1550.2	0.01245647		2140.2	0.0096723		2730.2	0.06701224
370.41	-0.00963626		960.41	0.00172988		1550.4	0.01341077		2140.4	0.00945591		2730.4	0.06722007
370.61	-0.00958232		960.61	0.0023751		1550.6	0.01459742		2140.6	0.00995203		2730.6	0.06767343
370.81	-0.00912426		960.81	0.00225076		1550.8	0.01548182		2140.8	0.01050136		2730.8	0.06804768
371.01	-0.00956055		961.01	0.00320775		1551	0.01564611		2141	0.01042242		2731	0.06795037
371.21	-0.00974498		961.21	0.00258631		1551.2	0.01632603		2141.2	0.00985405		2731.2	0.06802793
371.41	-0.00980533		961.41	0.00136993		1551.4	0.01639546		2141.4	0.00922347		2731.4	0.06815061
371.61	-0.00925245		961.61	0.00132856		1551.6	0.01589094		2141.6	0.00943718		2731.6	0.06766425
371.81	-0.00952272		961.81	0.00091984		1551.8	0.01584183		2141.8	0.00964706		2731.8	0.0686509
372.01	-0.00997697		962.01	0.0000423		1552	0.01565051		2142	0.00948614		2732	0.06880803
372.21	-0.01013277		962.21	0.00049798		1552.2	0.01477452		2142.2	0.00953166		2732.2	0.06847601
372.41	-0.01088695		962.41	-0.00038557		1552.4	0.01501856		2142.4	0.00963321		2732.4	0.06940698
372.61	-0.01092584		962.61	-0.00115932		1552.6	0.01437085		2142.6	0.00919621		2732.6	0.06996211
372.81	-0.01124496		962.81	-0.00148302		1552.8	0.01309462		2142.8	0.00869227		2732.8	0.07056792
373.01	-0.01215215		963.01	-0.00173483		1553	0.01232231		2143	0.00873363		2733	0.07075832
373.21	-0.01206483		963.21	-0.00131783		1553.2	0.01170802		2143.2	0.00926689		2733.2	0.07164554
373.41	-0.01181677		963.41	-0.00132028		1553.4	0.01103177		2143.4	0.01041681		2733.4	0.07069935
373.61	-0.01250126		963.61	-0.00040256		1553.6	0.01138592		2143.6	0.01071971		2733.6	0.07104255
373.81	-0.01171541		963.81	-0.00050678		1553.8	0.01116765		2143.8	0.01110844		2733.8	0.07091805
374.01	-0.01145699		964.01	0.00037927		1554	0.01125586		2144	0.01119934		2734	0.07122748
374.21	-0.01138157		964.21	0.00060221		1554.2	0.01152616		2144.2	0.01072562		2734.2	0.07074729
374.41	-0.01073574		964.41	0.00152916		1554.4	0.01184395		2144.4	0.01117616		2734.4	0.07147096
374.61	-0.01065451		964.61	0.0012206		1554.6	0.01207086		2144.6	0.01158626		2734.6	0.07163549
374.81	-0.01051464		964.81	0.00148643		1554.8	0.01223246		2144.8	0.01190912		2734.8	0.07137347
375.01	-0.01140588		965.01	0.00103988		1555	0.01232012		2145	0.01128827		2735	0.07087219
375.21	-0.01097137		965.21	0.00010095		1555.2	0.01275642		2145.2	0.01095696		2735.2	0.07054691
375.41	-0.0106861		965.41	-0.00026197		1555.4	0.01234925		2145.4	0.01078114		2735.4	0.07028645
375.61	-0.01076779		965.61	0.00014082		1555.6	0.01207495		2145.6	0.01072872		2735.6	0.07031884
375.81	-0.01116433		965.81	0.00014042		1555.8	0.01243429		2145.8	0.01107645		2735.8	0.07082814
376.01	-0.01116316		966.01	-0.00001706		1556	0.01247395		2146	0.01045384		2736	0.07061845
376.21	-0.01135093		966.21	-0.00005708		1556.2	0.01184322		2146.2	0.01035761		2736.2	0.07075348
376.41	-0.01124205		966.41	-0.00088979		1556.4	0.01276742		2146.4	0.00985608		2736.4	0.07194156
376.61	-0.01171152		966.61	-0.0010923		1556.6	0.01263964		2146.6	0.01014688		2736.6	0.07251337
376.81	-0.01228379		966.81	-0.00064819		1556.8	0.01281453		2146.8	0.01032577		2736.8	0.07320937
377.01	-0.01299321		967.01	-0.00044328		1557	0.01271272		2147	0.01048104		2737	0.07301136
377.21	-0.01341184		967.21	-0.00085638		1557.2	0.01296064		2147.2	0.01098872		2737.2	0.07324067
377.41	-0.01316845		967.41	0.00050314		1557.4	0.01293486		2147.4	0.01103017		2737.4	0.07276863
377.61	-0.01348661		967.61	0.00065256		1557.6	0.01408859		2147.6	0.01056954		2737.6	0.07300643
377.81	-0.01303415		967.81	0.00032126		1557.8	0.01412159		2147.8	0.01027995		2737.8	0.07266742
378.01	-0.0126529		968.01	0.00064533		1558	0.01456671		2148	0.00964348		2738	0.07245057
378.21	-0.01277033		968.21	0.00036197		1558.2	0.01476437		2148.2	0.00913167		2738.2	0.07123139
378.41	-0.01240172		968.41	-0.00017548		1558.4	0.01446855		2148.4	0.00860587		2738.4	0.07105194
378.61	-0.01273654		968.61	-0.00001589		1558.6	0.01425038		2148.6	0.00850806		2738.6	0.07066122
378.81	-0.01253636		968.81	0.00043458		1558.8	0.01485766		2148.8	0.00807607		2738.8	0.06990704
379.01	-0.0122384		969.01	0.00094388		1559	0.0144654		2149	0.00750081		2739	0.06912571
379.21	-0.01139003		969.21	0.00140358		1559.2	0.01361979		2149.2	0.00736657		2739.2	0.06831474
379.41	-0.01099707		969.41	0.00186682		1559.4	0.01384705		2149.4	0.00777838		2739.4	0.06853855
379.61	-0.01118754		969.61	0.0018556		1559.6	0.01368791		2149.6	0.00780362		2739.6	0.06863471
379.81	-0.0107103		969.81	0.00233129		1559.8	0.01346482		2149.8	0.00783018		2739.8	0.06860727
380.01	-0.01068158		970.01	0.00243529		1560	0.01340884		2150	0.00783187		2740	0.06891728
380.21	-0.01073457		970.21	0.00206228		1560.2	0.01372636		2150.2	0.00794661		2740.2	0.06956805
380.41	-0.00989001		970.41	0.00079923		1560.4	0.01373545		2150.4	0.00868519		2740.4	0.0704932
380.61	-0.01043409		970.61	0.00103242		1560.6	0.01367528		2150.6	0.00956316		2740.6	0.07090456
380.81	-0.01069302		970.81	0.00130124		1560.8	0.01339601		2150.8	0.0102262		2740.8	0.07136206
381.01	-0.01070514		971.01	0.00118474		1561	0.01257768		2151	0.01020215		2741	0.07203575
381.21	-0.01044753		971.21	0.00065887		1561.2	0.01241912		2151.2	0.01096285		2741.2	0.07186926
381.41	-0.01045858		971.41	0.00079659		1561.4	0.01169811		2151.4	0.01116916		2741.4	0.0718636
381.61	-0.01030773		971.61	-0.00041846		1561.6	0.01150519		2151.6	0.01177805		2741.6	0.07178121
381.81	-0.00978458		971.81	-0.00092115		1561.8	0.01103939		2151.8	0.01156541		2741.8	0.07152311
382.01	-0.00941957		972.01	-0.000873		1562	0.01051192		2152	0.01201312		2742	0.07197991
382.21	-0.00952702		972.21	-0.00116646		1562.2	0.00973392		2152.2	0.01220266		2742.2	0.07152158
382.41	-0.00994428		972.41	-0.00070207		1562.4	0.00938773		2152.4	0.01178756		2742.4	0.07121352
382.61	-0.01009649		972.61	-0.00035213		1562.6	0.00939645		2152.6	0.01158734		2742.6	0.07123563
382.81	-0.01046827		972.81	-0.00127873		1562.8	0.00949014		2152.8	0.01097617		2742.8	0.0707309
383.01	-0.01036964		973.01	-0.0004523		1563	0.00855617		2153	0.01024372		2743	0.0705582
383.21	-0.01026492		973.21	-0.00013169		1563.2	0.00805026		2153.2	0.01006277		2743.2	0.07028201
383.41	-0.01065405		973.41	0.00027063		1563.4	0.00963177		2153.4	0.01050132		2743.4	0.0702096
383.61	-0.01102797		973.61	-0.00072757		1563.6	0.01046103		2153.6	0.01019195		2743.6	0.07050632
383.81	-0.01098858		973.81	-0.00164844		1563.8	0.01033205		2153.8	0.01006224		2743.8	0.07025071
384.01	-0.0109861		974.01	-0.00308399		1564	0.01131625		2154	0.01025892		2744	0.07022504
384.21	-0.00995959		974.21	-0.00365023		1564.2	0.0122286		2154.2	0.0106391		2744.2	0.07059882
384.41	-0.00945668		974.41	-0.00411579		1564.4	0.01298836		2154.4	0.01195519		2744.4	0.07122146
384.61	-0.00972419		974.61	-0.00444191		1564.6	0.01434471		2154.6	0.0127684		2744.6	0.07159291
384.81	-0.00917323		974.81	-0.00442587		1564.8	0.01485324		2154.8	0.01308178		2744.8	0.07224127
385.01	-0.0089684		975.01	-0.00429293		1565	0.01493264		2155	0.01264497		2745	0.07215046
385.21	-0.00934945		975.21	-0.00445873		1565.2	0.0154042		2155.2	0.01288151		2745.2	0.07112429
385.41	-0.0102293		975.41	-0.00398235		1565.4	0.01501389		2155.4	0.0132354		2745.4	0.07052404
385.61	-0.00973932		975.61	-0.00321496		1565.6	0.01506327		2155.6	0.01360059		2745.6	0.07048446
385.81	-0.00916524		975.81	-0.00252717		1565.8	0.01531766		2155.8	0.01331871		2745.8	0.06997116
386.01	-0.0092009		976.01	-0.00234092		1566	0.01509783		2156	0.01322245		2746	0.06996311
386.21	-0.00950402		976.21	-0.00243066		1566.2	0.01566515		2156.2	0.01263812		2746.2	0.06979373
386.41	-0.01070525		976.41	-0.00176056		1566.4	0.01515482		2156.4	0.01149953		2746.4	0.06897979
386.61	-0.01107577		976.61	-0.00191255		1566.6	0.01454058		2156.6	0.01115552		2746.6	0.0689668
386.81	-0.01190158		976.81	-0.0014743		1566.8	0.01400227		2156.8	0.01074679		2746.8	0.06896494
387.01	-0.01282928		977.01	0.00002675		1567	0.01317392		2157	0.00993774		2747	0.06975047
387.21	-0.01402927		977.21	0.0007614		1567.2	0.01222163		2157.2	0.01080029		2747.2	0.0698312
387.41	-0.01496282		977.41	0.00114524		1567.4	0.01247839		2157.4	0.0108173		2747.4	0.07044765
387.61	-0.01609107		977.61	0.00016563		1567.6	0.01218885		2157.6	0.01067014		2747.6	0.07086983
387.81	-0.015916		977.81	0.00027037		1567.8	0.01146664		2157.8	0.01024297		2747.8	0.07097458
388.01	-0.01601221		978.01	0.00033367		1568	0.01152613		2158	0.01029809		2748	0.07157034
388.21	-0.01645981		978.21	0.00000282		1568.2	0.01141127		2158.2	0.01145925		2748.2	0.07193853
388.41	-0.01747463		978.41	-0.00071777		1568.4	0.01155983		2158.4	0.01193144		2748.4	0.07215005
388.61	-0.01729616		978.61	-0.00053843		1568.6	0.01183948		2158.6	0.01200981		2748.6	0.07200938
388.81	-0.01741948		978.81	0.00024962		1568.8	0.01115046		2158.8	0.01100286		2748.8	0.07205376
389.01	-0.01764694		979.01	0.00076143		1569	0.01202361		2159	0.01038002		2749	0.07155648
389.21	-0.01848886		979.21	0.00087145		1569.2	0.01170726		2159.2	0.01049792		2749.2	0.0712107
389.41	-0.01847448		979.41	0.00103759		1569.4	0.01146995		2159.4	0.01114512		2749.4	0.07101299
389.61	-0.01640166		979.61	0.00091779		1569.6	0.01132329		2159.6	0.01108032		2749.6	0.07106553
389.81	-0.01503428		979.81	0.00052796		1569.8	0.01238318		2159.8	0.01101102		2749.8	0.07100428
390.01	-0.01477552		980.01	-0.00081062		1570	0.01287735		2160	0.01089598		2750	0.07082211
390.21	-0.01427487		980.21	-0.00118982		1570.2	0.01341772		2160.2	0.01107826		2750.2	0.07054239
390.41	-0.01459783		980.41	-0.00058139		1570.4	0.01272907		2160.4	0.01024508		2750.4	0.06934576
390.61	-0.01377356		980.61	-0.00024262		1570.6	0.01301036		2160.6	0.00974717		2750.6	0.06977896
390.81	-0.01413344		980.81	-0.00061006		1570.8	0.01326823		2160.8	0.0100797		2750.8	0.06980751
391.01	-0.01432041		981.01	-0.00074895		1571	0.01299855		2161	0.01054563		2751	0.07044697
391.21	-0.01489811		981.21	-0.00077964		1571.2	0.01297146		2161.2	0.01123796		2751.2	0.06986872
391.41	-0.01528998		981.41	-0.00125865		1571.4	0.0134133		2161.4	0.01098126		2751.4	0.07078599
391.61	-0.01564883		981.61	-0.00217327		1571.6	0.01391633		2161.6	0.01060543		2751.6	0.07069806
391.81	-0.01479602		981.81	-0.00205061		1571.8	0.01370415		2161.8	0.01057042		2751.8	0.0706069
392.01	-0.0155848		982.01	-0.00267234		1572	0.01289827		2162	0.01029278		2752	0.07019152
392.21	-0.01607985		982.21	-0.00256134		1572.2	0.01357763		2162.2	0.01074644		2752.2	0.06946581
392.41	-0.01593246		982.41	-0.0022716		1572.4	0.01360962		2162.4	0.01039471		2752.4	0.0694171
392.61	-0.01469549		982.61	-0.00134852		1572.6	0.01358402		2162.6	0.00960956		2752.6	0.06979294
392.81	-0.01474919		982.81	-0.00074812		1572.8	0.01357631		2162.8	0.00840417		2752.8	0.07047222
393.01	-0.01427933		983.01	-0.00031721		1573	0.01447015		2163	0.00784055		2753	0.07124516
393.21	-0.01483869		983.21	-0.00097752		1573.2	0.01340993		2163.2	0.00877728		2753.2	0.07111878
393.41	-0.01421811		983.41	-0.00114575		1573.4	0.01345867		2163.4	0.00863873		2753.4	0.07105477
393.61	-0.01279134		983.61	-0.0016413		1573.6	0.01308848		2163.6	0.00884474		2753.6	0.07095991
393.81	-0.01259577		983.81	-0.00182819		1573.8	0.01294414		2163.8	0.00953948		2753.8	0.07109741
394.01	-0.01308442		984.01	-0.00259028		1574	0.01264299		2164	0.00892994		2754	0.07010058
394.21	-0.01289944		984.21	-0.00224727		1574.2	0.01339225		2164.2	0.00888788		2754.2	0.07030628
394.41	-0.01373934		984.41	-0.00148106		1574.4	0.01298241		2164.4	0.00856632		2754.4	0.07077392
394.61	-0.01396481		984.61	-0.00184918		1574.6	0.0128988		2164.6	0.00898721		2754.6	0.07134751
394.81	-0.01486585		984.81	-0.00206875		1574.8	0.01290895		2164.8	0.00939383		2754.8	0.0713886
395.01	-0.01573527		985.01	-0.00186465		1575	0.01235362		2165	0.01026422		2755	0.07249586
395.21	-0.01653079		985.21	-0.00199947		1575.2	0.01269301		2165.2	0.01111151		2755.2	0.07240506
395.41	-0.01722879		985.41	-0.00213309		1575.4	0.01335963		2165.4	0.01189253		2755.4	0.073237
395.61	-0.01709855		985.61	-0.00184374		1575.6	0.0137137		2165.6	0.01265722		2755.6	0.07277907
395.81	-0.01719201		985.81	-0.00108515		1575.8	0.01406671		2165.8	0.01383237		2755.8	0.07211532
396.01	-0.01725131		986.01	-0.00065104		1576	0.01433811		2166	0.0138833		2756	0.0721248
396.21	-0.01717474		986.21	0.00023666		1576.2	0.01391521		2166.2	0.01446536		2756.2	0.07136399
396.41	-0.01664926		986.41	-0.00027887		1576.4	0.01376439		2166.4	0.01419435		2756.4	0.07171085
396.61	-0.01606074		986.61	0.00011855		1576.6	0.01378091		2166.6	0.01420357		2756.6	0.07252903
396.81	-0.01590788		986.81	0.00012436		1576.8	0.01417667		2166.8	0.01333711		2756.8	0.07339784
397.01	-0.01593808		987.01	-0.00013878		1577	0.01427129		2167	0.01361524		2757	0.07310179
397.21	-0.01592555		987.21	-0.00125984		1577.2	0.0149883		2167.2	0.01427435		2757.2	0.07268766
397.41	-0.01565022		987.41	-0.00163132		1577.4	0.01479685		2167.4	0.01323697		2757.4	0.07245471
397.61	-0.01540726		987.61	-0.00235503		1577.6	0.01478759		2167.6	0.01331522		2757.6	0.07307375
397.81	-0.01595464		987.81	-0.0022055		1577.8	0.01515197		2167.8	0.01225631		2757.8	0.07315259
398.01	-0.01635833		988.01	-0.00299375		1578	0.01529035		2168	0.01115628		2758	0.07276922
398.21	-0.01631123		988.21	-0.0031693		1578.2	0.01572145		2168.2	0.01133956		2758.2	0.07326328
398.41	-0.01680276		988.41	-0.00298172		1578.4	0.01522308		2168.4	0.01071837		2758.4	0.07279873
398.61	-0.01641694		988.61	-0.00364171		1578.6	0.01563581		2168.6	0.00998618		2758.6	0.07283418
398.81	-0.01599009		988.81	-0.00362216		1578.8	0.01574414		2168.8	0.00974944		2758.8	0.07252454
399.01	-0.01551148		989.01	-0.00399621		1579	0.0153537		2169	0.01024046		2759	0.07206361
399.21	-0.01507859		989.21	-0.00375053		1579.2	0.01513062		2169.2	0.00997107		2759.2	0.07218474
399.41	-0.01443312		989.41	-0.00377198		1579.4	0.01554952		2169.4	0.009796		2759.4	0.0718972
399.61	-0.01340741		989.61	-0.00290797		1579.6	0.01521548		2169.6	0.0101995		2759.6	0.07126317
399.81	-0.01324461		989.81	-0.00161558		1579.8	0.01523825		2169.8	0.00981812		2759.8	0.07067232
400.01	-0.01223426		990.01	-0.00074063		1580	0.01453459		2170	0.00858864		2760	0.07045772
400.21	-0.01227194		990.21	-0.00037496		1580.2	0.01374981		2170.2	0.0086134		2760.2	0.06998343
400.41	-0.0122601		990.41	-0.00018602		1580.4	0.01477721		2170.4	0.00893945		2760.4	0.07022188
400.61	-0.0117533		990.61	0.00070546		1580.6	0.01500689		2170.6	0.00864303		2760.6	0.07010422
400.81	-0.01140167		990.81	0.00093439		1580.8	0.0145989		2170.8	0.0085886		2760.8	0.07066275
401.01	-0.01165753		991.01	0.00007662		1581	0.01476925		2171	0.00880795		2761	0.07005264
401.21	-0.01103345		991.21	-0.0006659		1581.2	0.0151837		2171.2	0.0087943		2761.2	0.0700444
401.41	-0.01200601		991.41	-0.00072956		1581.4	0.01366201		2171.4	0.00832063		2761.4	0.06948625
401.61	-0.01253592		991.61	-0.00084089		1581.6	0.01314461		2171.6	0.00840119		2761.6	0.06955241
401.81	-0.01299431		991.81	-0.00069711		1581.8	0.01331943		2171.8	0.00830662		2761.8	0.06927485
402.01	-0.01293434		992.01	-0.00144748		1582	0.01322177		2172	0.00869266		2762	0.06863297
402.21	-0.01306616		992.21	-0.00147086		1582.2	0.01315611		2172.2	0.00832829		2762.2	0.06865015
402.41	-0.01454723		992.41	-0.0015814		1582.4	0.0128743		2172.4	0.00842086		2762.4	0.06800698
402.61	-0.01528077		992.61	-0.00228754		1582.6	0.01326074		2172.6	0.00869668		2762.6	0.06786207
402.81	-0.01545622		992.81	-0.00220625		1582.8	0.0124261		2172.8	0.00906684		2762.8	0.06720223
403.01	-0.0150862		993.01	-0.00221319		1583	0.01301734		2173	0.00906053		2763	0.06753386
403.21	-0.01542533		993.21	-0.00180552		1583.2	0.01263174		2173.2	0.00933206		2763.2	0.06827619
403.41	-0.0155712		993.41	-0.0017054		1583.4	0.01290665		2173.4	0.00944074		2763.4	0.06746921
403.61	-0.01570327		993.61	-0.00095696		1583.6	0.01350784		2173.6	0.00926295		2763.6	0.06768028
403.81	-0.01667028		993.81	-0.00124684		1583.8	0.01430442		2173.8	0.00841429		2763.8	0.06792273
404.01	-0.01701978		994.01	-0.00149625		1584	0.01451873		2174	0.00867734		2764	0.06812458
404.21	-0.01781239		994.21	-0.00164874		1584.2	0.01504126		2174.2	0.00986199		2764.2	0.06870326
404.41	-0.01755143		994.41	-0.00242989		1584.4	0.01518311		2174.4	0.00984925		2764.4	0.06923079
404.61	-0.01689685		994.61	-0.00285277		1584.6	0.01482361		2174.6	0.00965496		2764.6	0.0701631
404.81	-0.01627418		994.81	-0.00326951		1584.8	0.01468282		2174.8	0.01018445		2764.8	0.07125416
405.01	-0.01603712		995.01	-0.00419564		1585	0.01533765		2175	0.00995308		2765	0.07177071
405.21	-0.01570369		995.21	-0.00477397		1585.2	0.0155346		2175.2	0.0095943		2765.2	0.07220223
405.41	-0.01674308		995.41	-0.00444393		1585.4	0.01454181		2175.4	0.0091854		2765.4	0.07173726
405.61	-0.0156378		995.61	-0.00384696		1585.6	0.0144369		2175.6	0.00887955		2765.6	0.07289201
405.81	-0.01549156		995.81	-0.00384679		1585.8	0.0150547		2175.8	0.00829082		2765.8	0.07308409
406.01	-0.01456984		996.01	-0.00354311		1586	0.01439009		2176	0.00839157		2766	0.07273538
406.21	-0.01516014		996.21	-0.00286533		1586.2	0.01408515		2176.2	0.00856621		2766.2	0.07273897
406.41	-0.01666822		996.41	-0.0025554		1586.4	0.01311566		2176.4	0.00867948		2766.4	0.07308036
406.61	-0.01612523		996.61	-0.00291559		1586.6	0.01339413		2176.6	0.0083972		2766.6	0.07240986
406.81	-0.01561964		996.81	-0.00272991		1586.8	0.01273645		2176.8	0.00831382		2766.8	0.07199191
407.01	-0.01530612		997.01	-0.0025432		1587	0.01332012		2177	0.00755731		2767	0.07146179
407.21	-0.01566501		997.21	-0.00247119		1587.2	0.01229459		2177.2	0.00729328		2767.2	0.07136414
407.41	-0.01537864		997.41	-0.00319198		1587.4	0.01211287		2177.4	0.00717359		2767.4	0.07175252
407.61	-0.01501567		997.61	-0.00361877		1587.6	0.01247439		2177.6	0.00756002		2767.6	0.07164634
407.81	-0.01521818		997.81	-0.00416759		1587.8	0.01163417		2177.8	0.00763086		2767.8	0.07150451
408.01	-0.0151149		998.01	-0.00339099		1588	0.01089923		2178	0.0076813		2768	0.07149664
408.21	-0.01493701		998.21	-0.00321967		1588.2	0.01080414		2178.2	0.00716576		2768.2	0.07173344
408.41	-0.01410619		998.41	-0.0040656		1588.4	0.01111061		2178.4	0.007148		2768.4	0.07229067
408.61	-0.0143515		998.61	-0.00362715		1588.6	0.01198604		2178.6	0.00685675		2768.6	0.07274635
408.81	-0.01457859		998.81	-0.00321892		1588.8	0.01234624		2178.8	0.00715845		2768.8	0.07285032
409.01	-0.01572745		999.01	-0.0037115		1589	0.01255997		2179	0.00762851		2769	0.07290538
409.21	-0.01675715		999.21	-0.00357047		1589.2	0.01394688		2179.2	0.00713354		2769.2	0.07269477
409.41	-0.01745786		999.41	-0.00222251		1589.4	0.01452484		2179.4	0.00726112		2769.4	0.07221559
409.61	-0.01728696		999.61	-0.00195811		1589.6	0.0154131		2179.6	0.00802507		2769.6	0.07259847
409.81	-0.01841059		999.81	-0.00146972		1589.8	0.01600044		2179.8	0.00841218		2769.8	0.07214568
410.01	-0.01823384		1000.01	-0.00103264		1590	0.01603739		2180	0.00938042		2770	0.0721532
410.21	-0.01973517		1000.21	-0.00102958		1590.2	0.01673366		2180.2	0.01026191		2770.2	0.07174219
410.41	-0.02074108		1000.41	-0.00172177		1590.4	0.01636729		2180.4	0.00984073		2770.4	0.07225838
410.61	-0.02074834		1000.61	-0.0022884		1590.6	0.0173324		2180.6	0.00986868		2770.6	0.07105576
410.81	-0.02060086		1000.81	-0.00250459		1590.8	0.01747721		2180.8	0.0094647		2770.8	0.07084718
411.01	-0.02082087		1001.01	-0.0023101		1591	0.01748954		2181	0.00911003		2771	0.07061664
411.21	-0.01990257		1001.21	-0.00295758		1591.2	0.01745229		2181.2	0.00924293		2771.2	0.07188624
411.41	-0.01927028		1001.41	-0.00362042		1591.4	0.01751767		2181.4	0.00995107		2771.4	0.07198114
411.61	-0.01840661		1001.61	-0.00405481		1591.6	0.01722625		2181.6	0.00960106		2771.6	0.07149933
411.81	-0.01830282		1001.81	-0.00377802		1591.8	0.01649552		2181.8	0.00875124		2771.8	0.07192957
412.01	-0.017869		1002.01	-0.00394465		1592	0.01594139		2182	0.00893593		2772	0.07179288
412.21	-0.01642664		1002.21	-0.00452365		1592.2	0.01578317		2182.2	0.00921317		2772.2	0.0725794
412.41	-0.01631163		1002.41	-0.00560351		1592.4	0.01520971		2182.4	0.00937673		2772.4	0.07327092
412.61	-0.01668926		1002.61	-0.0054027		1592.6	0.01429171		2182.6	0.00998445		2772.6	0.07365075
412.81	-0.01703834		1002.81	-0.00553369		1592.8	0.01386567		2182.8	0.01065798		2772.8	0.07330616
413.01	-0.01748257		1003.01	-0.00613083		1593	0.01489128		2183	0.01167241		2773	0.07299483
413.21	-0.01791106		1003.21	-0.0053827		1593.2	0.01576133		2183.2	0.01176357		2773.2	0.07313449
413.41	-0.01762671		1003.41	-0.00536569		1593.4	0.01498462		2183.4	0.01211727		2773.4	0.07295236
413.61	-0.01818967		1003.61	-0.00526972		1593.6	0.01442273		2183.6	0.01250707		2773.6	0.07193403
413.81	-0.0180438		1003.81	-0.0049463		1593.8	0.01434905		2183.8	0.01280161		2773.8	0.07121883
414.01	-0.01666441		1004.01	-0.0057409		1594	0.01455752		2184	0.01285707		2774	0.0708597
414.21	-0.01745043		1004.21	-0.00631356		1594.2	0.01458174		2184.2	0.01267409		2774.2	0.07049499
414.41	-0.01828971		1004.41	-0.00644078		1594.4	0.01502223		2184.4	0.01168023		2774.4	0.07082519
414.61	-0.01777942		1004.61	-0.00598468		1594.6	0.01475995		2184.6	0.01147706		2774.6	0.06989228
414.81	-0.01772238		1004.81	-0.00578183		1594.8	0.01483417		2184.8	0.01135443		2774.8	0.0696335
415.01	-0.01842406		1005.01	-0.0049112		1595	0.01466692		2185	0.01164531		2775	0.06954876
415.21	-0.01761847		1005.21	-0.0053688		1595.2	0.01536225		2185.2	0.01100749		2775.2	0.06959814
415.41	-0.01718362		1005.41	-0.0051372		1595.4	0.01585086		2185.4	0.01126686		2775.4	0.07005011
415.61	-0.01698276		1005.61	-0.00508351		1595.6	0.0161418		2185.6	0.01069435		2775.6	0.07135477
415.81	-0.01775216		1005.81	-0.00454683		1595.8	0.01600094		2185.8	0.01117716		2775.8	0.07252881
416.01	-0.01698669		1006.01	-0.00448867		1596	0.01560369		2186	0.01206757		2776	0.07276678
416.21	-0.0165487		1006.21	-0.00454944		1596.2	0.01579025		2186.2	0.01221937		2776.2	0.07475414
416.41	-0.01724611		1006.41	-0.00443091		1596.4	0.01590575		2186.4	0.01242462		2776.4	0.07467708
416.61	-0.01690203		1006.61	-0.003649		1596.6	0.01552324		2186.6	0.01290223		2776.6	0.07472934
416.81	-0.01788019		1006.81	-0.00364794		1596.8	0.01553427		2186.8	0.01234266		2776.8	0.07452223
417.01	-0.01731307		1007.01	-0.00367394		1597	0.01550188		2187	0.01233		2777	0.07462957
417.21	-0.01757969		1007.21	-0.00318314		1597.2	0.01467757		2187.2	0.01256056		2777.2	0.07376939
417.41	-0.01756239		1007.41	-0.00395876		1597.4	0.01380807		2187.4	0.01181226		2777.4	0.07259979
417.61	-0.01843591		1007.61	-0.00351754		1597.6	0.01459884		2187.6	0.01155517		2777.6	0.07184331
417.81	-0.01787503		1007.81	-0.00441462		1597.8	0.0144341		2187.8	0.01148414		2777.8	0.07193655
418.01	-0.01777407		1008.01	-0.00533366		1598	0.01368469		2188	0.01052586		2778	0.07198879
418.21	-0.01920489		1008.21	-0.00539144		1598.2	0.0134003		2188.2	0.00973565		2778.2	0.0722479
418.41	-0.01901099		1008.41	-0.00467703		1598.4	0.01302795		2188.4	0.00908619		2778.4	0.07218347
418.61	-0.01836846		1008.61	-0.00502953		1598.6	0.01233379		2188.6	0.00928561		2778.6	0.07222893
418.81	-0.01878044		1008.81	-0.00543865		1598.8	0.01265108		2188.8	0.00913928		2778.8	0.07265038
419.01	-0.01888433		1009.01	-0.00493717		1599	0.01251027		2189	0.00871951		2779	0.0728349
419.21	-0.01829032		1009.21	-0.00579174		1599.2	0.01277543		2189.2	0.00725356		2779.2	0.07303378
419.41	-0.01810356		1009.41	-0.00538347		1599.4	0.01306376		2189.4	0.00705546		2779.4	0.0745086
419.61	-0.01855224		1009.61	-0.00520424		1599.6	0.01322254		2189.6	0.00734177		2779.6	0.0753831
419.81	-0.01947132		1009.81	-0.00506774		1599.8	0.01366941		2189.8	0.00718904		2779.8	0.07530556
420.01	-0.01827685		1010.01	-0.00501526		1600	0.01365228		2190	0.00726872		2780	0.07520082
420.21	-0.01782166		1010.21	-0.0050357		1600.2	0.01468421		2190.2	0.00682991		2780.2	0.07608547
420.41	-0.01728331		1010.41	-0.00445935		1600.4	0.0150284		2190.4	0.0063148		2780.4	0.07583254
420.61	-0.01735755		1010.61	-0.00375477		1600.6	0.01478629		2190.6	0.00627555		2780.6	0.07583356
420.81	-0.01755753		1010.81	-0.00378635		1600.8	0.01487095		2190.8	0.00680025		2780.8	0.07583192
421.01	-0.0169311		1011.01	-0.00303558		1601	0.01482027		2191	0.00703052		2781	0.07552714
421.21	-0.01745066		1011.21	-0.00289591		1601.2	0.0156756		2191.2	0.00810185		2781.2	0.07438171
421.41	-0.01825751		1011.41	-0.00313227		1601.4	0.01705773		2191.4	0.00758173		2781.4	0.07309409
421.61	-0.01928779		1011.61	-0.00236823		1601.6	0.01820928		2191.6	0.00846546		2781.6	0.07313301
421.81	-0.01966367		1011.81	-0.00306582		1601.8	0.01742842		2191.8	0.00839476		2781.8	0.07162399
422.01	-0.02027281		1012.01	-0.0030854		1602	0.01779764		2192	0.00838862		2782	0.07125266
422.21	-0.02067371		1012.21	-0.00297023		1602.2	0.01721698		2192.2	0.00837772		2782.2	0.07103555
422.41	-0.02075957		1012.41	-0.00242631		1602.4	0.01683124		2192.4	0.00870705		2782.4	0.07065564
422.61	-0.02202703		1012.61	-0.00321406		1602.6	0.01657353		2192.6	0.00986245		2782.6	0.07106692
422.81	-0.02216634		1012.81	-0.0035041		1602.8	0.01636969		2192.8	0.00991809		2782.8	0.07058151
423.01	-0.02229612		1013.01	-0.00379629		1603	0.01613719		2193	0.01008227		2783	0.07014065
423.21	-0.02310695		1013.21	-0.00397066		1603.2	0.01645124		2193.2	0.0097636		2783.2	0.06974214
423.41	-0.02316819		1013.41	-0.00371826		1603.4	0.01607815		2193.4	0.0104108		2783.4	0.07012958
423.61	-0.02281831		1013.61	-0.00340386		1603.6	0.01553661		2193.6	0.01158925		2783.6	0.07095251
423.81	-0.02263743		1013.81	-0.00314149		1603.8	0.01575144		2193.8	0.01108115		2783.8	0.07104606
424.01	-0.02130281		1014.01	-0.00316291		1604	0.01545705		2194	0.01152579		2784	0.07146612
424.21	-0.02079548		1014.21	-0.00245528		1604.2	0.01597556		2194.2	0.01088617		2784.2	0.07241509
424.41	-0.01945718		1014.41	-0.00131651		1604.4	0.0151483		2194.4	0.01132557		2784.4	0.07340934
424.61	-0.01929345		1014.61	-0.00112687		1604.6	0.01539013		2194.6	0.01091435		2784.6	0.07385192
424.81	-0.01822767		1014.81	-0.00178286		1604.8	0.01557223		2194.8	0.0101333		2784.8	0.07401004
425.01	-0.01846551		1015.01	-0.00184804		1605	0.01530953		2195	0.00911073		2785	0.07333175
425.21	-0.01822072		1015.21	-0.00230669		1605.2	0.01643004		2195.2	0.00928232		2785.2	0.07301695
425.41	-0.01791485		1015.41	-0.00308777		1605.4	0.01666595		2195.4	0.00865306		2785.4	0.07273827
425.61	-0.01802816		1015.61	-0.00332304		1605.6	0.01595573		2195.6	0.00813867		2785.6	0.0737055
425.81	-0.01806916		1015.81	-0.00439555		1605.8	0.01564095		2195.8	0.00772303		2785.8	0.07361137
426.01	-0.01747259		1016.01	-0.0052709		1606	0.01561925		2196	0.00778955		2786	0.07330944
426.21	-0.01759932		1016.21	-0.0055412		1606.2	0.0147141		2196.2	0.00785037		2786.2	0.072755
426.41	-0.0176722		1016.41	-0.00533205		1606.4	0.01496642		2196.4	0.00840113		2786.4	0.07360509
426.61	-0.01782443		1016.61	-0.00561919		1606.6	0.01496874		2196.6	0.00902173		2786.6	0.07404535
426.81	-0.01824494		1016.81	-0.00580045		1606.8	0.01435658		2196.8	0.0090788		2786.8	0.07344761
427.01	-0.01911097		1017.01	-0.006127		1607	0.01391688		2197	0.0097324		2787	0.0733496
427.21	-0.02016281		1017.21	-0.00503623		1607.2	0.01430039		2197.2	0.00972008		2787.2	0.07363576
427.41	-0.01981278		1017.41	-0.00406744		1607.4	0.0133941		2197.4	0.01037979		2787.4	0.07439166
427.61	-0.02040508		1017.61	-0.00320245		1607.6	0.01361325		2197.6	0.01087331		2787.6	0.0738098
427.81	-0.02116947		1017.81	-0.00275978		1607.8	0.01499554		2197.8	0.0110555		2787.8	0.07355989
428.01	-0.0214944		1018.01	-0.00242311		1608	0.01558372		2198	0.01120856		2788	0.07372318
428.21	-0.02049527		1018.21	-0.00160088		1608.2	0.01634195		2198.2	0.01036459		2788.2	0.07393933
428.41	-0.02040071		1018.41	-0.00166504		1608.4	0.01668237		2198.4	0.01019767		2788.4	0.07390141
428.61	-0.02113858		1018.61	-0.0022226		1608.6	0.01723536		2198.6	0.0093127		2788.6	0.07290633
428.81	-0.02082574		1018.81	-0.00244229		1608.8	0.01731972		2198.8	0.00924106		2788.8	0.07201855
429.01	-0.0214334		1019.01	-0.00242764		1609	0.0165209		2199	0.00993191		2789	0.07127408
429.21	-0.02037692		1019.21	-0.00289672		1609.2	0.01691403		2199.2	0.00978657		2789.2	0.07130472
429.41	-0.02037603		1019.41	-0.00355926		1609.4	0.01714418		2199.4	0.00870352		2789.4	0.07055327
429.61	-0.01997885		1019.61	-0.00440302		1609.6	0.01725792		2199.6	0.00907001		2789.6	0.07059144
429.81	-0.01938348		1019.81	-0.00583765		1609.8	0.01723997		2199.8	0.00886336		2789.8	0.07026698
430.01	-0.01861175		1020.01	-0.00623426		1610	0.01749996		2200	0.0092855		2790	0.06866584
430.21	-0.01853653		1020.21	-0.00579244		1610.2	0.01716477		2200.2	0.00961202		2790.2	0.06940269
430.41	-0.01822062		1020.41	-0.00575126		1610.4	0.01683578		2200.4	0.00999057		2790.4	0.06967662
430.61	-0.01773548		1020.61	-0.00547817		1610.6	0.01656814		2200.6	0.00941863		2790.6	0.06998926
430.81	-0.01815489		1020.81	-0.00569468		1610.8	0.01611189		2200.8	0.00915667		2790.8	0.06969186
431.01	-0.0177863		1021.01	-0.00576098		1611	0.01657253		2201	0.01008067		2791	0.07021454
431.21	-0.01765188		1021.21	-0.00466632		1611.2	0.01733323		2201.2	0.00942834		2791.2	0.07133403
431.41	-0.01802765		1021.41	-0.00421145		1611.4	0.01711254		2201.4	0.00945184		2791.4	0.0725118
431.61	-0.01887488		1021.61	-0.0039969		1611.6	0.01757822		2201.6	0.00945418		2791.6	0.0720668
431.81	-0.01908607		1021.81	-0.00311178		1611.8	0.01793188		2201.8	0.00958886		2791.8	0.07351796
432.01	-0.01863467		1022.01	-0.00258346		1612	0.01796879		2202	0.00897533		2792	0.07459114
432.21	-0.01850457		1022.21	-0.00173144		1612.2	0.01868991		2202.2	0.00880896		2792.2	0.07484237
432.41	-0.01925404		1022.41	-0.00099564		1612.4	0.01829032		2202.4	0.00886809		2792.4	0.07557928
432.61	-0.01956145		1022.61	-0.00045782		1612.6	0.01795806		2202.6	0.00881057		2792.6	0.07535228
432.81	-0.01982842		1022.81	-0.00069089		1612.8	0.01894107		2202.8	0.0082577		2792.8	0.07553654
433.01	-0.02048798		1023.01	-0.001178		1613	0.01948426		2203	0.00754879		2793	0.0752932
433.21	-0.02104742		1023.21	-0.0022875		1613.2	0.01988547		2203.2	0.00692277		2793.2	0.07427092
433.41	-0.02191874		1023.41	-0.00220846		1613.4	0.02013762		2203.4	0.00730784		2793.4	0.07304354
433.61	-0.02150815		1023.61	-0.00270334		1613.6	0.01951068		2203.6	0.00770389		2793.6	0.07311133
433.81	-0.02230885		1023.81	-0.00384042		1613.8	0.01938921		2203.8	0.00677005		2793.8	0.0719435
434.01	-0.02250131		1024.01	-0.0048312		1614	0.02021434		2204	0.00716057		2794	0.07069813
434.21	-0.02186236		1024.21	-0.00508312		1614.2	0.01986416		2204.2	0.00608719		2794.2	0.07052209
434.41	-0.02225344		1024.41	-0.00588675		1614.4	0.01957879		2204.4	0.00550251		2794.4	0.07001888
434.61	-0.02173318		1024.61	-0.00632058		1614.6	0.0201613		2204.6	0.0051834		2794.6	0.07056052
434.81	-0.0216599		1024.81	-0.00679611		1614.8	0.02023296		2204.8	0.00593309		2794.8	0.0697327
435.01	-0.02146071		1025.01	-0.00780074		1615	0.01973727		2205	0.00645329		2795	0.06940491
435.21	-0.02151354		1025.21	-0.00761244		1615.2	0.01898475		2205.2	0.00562096		2795.2	0.07000687
435.41	-0.02167818		1025.41	-0.00795729		1615.4	0.01857953		2205.4	0.00566641		2795.4	0.07065934
435.61	-0.0220777		1025.61	-0.00754607		1615.6	0.01784224		2205.6	0.00643978		2795.6	0.07026011
435.81	-0.02274191		1025.81	-0.00729528		1615.8	0.01791867		2205.8	0.00699337		2795.8	0.07067419
436.01	-0.02262945		1026.01	-0.00713321		1616	0.01756415		2206	0.00708324		2796	0.07097847
436.21	-0.02321053		1026.21	-0.00687292		1616.2	0.01700211		2206.2	0.00733045		2796.2	0.07143235
436.41	-0.02346083		1026.41	-0.00627834		1616.4	0.01625464		2206.4	0.00696433		2796.4	0.07292189
436.61	-0.02336129		1026.61	-0.00617369		1616.6	0.01680833		2206.6	0.0078601		2796.6	0.07326371
436.81	-0.02304785		1026.81	-0.00569126		1616.8	0.01777836		2206.8	0.00754149		2796.8	0.07366766
437.01	-0.02359052		1027.01	-0.00539121		1617	0.01765003		2207	0.00757104		2797	0.07362565
437.21	-0.02335808		1027.21	-0.00553643		1617.2	0.0168715		2207.2	0.00828886		2797.2	0.07304572
437.41	-0.0232139		1027.41	-0.00538479		1617.4	0.01606516		2207.4	0.00880481		2797.4	0.07296028
437.61	-0.022496		1027.61	-0.00595882		1617.6	0.01553772		2207.6	0.00773257		2797.6	0.07257598
437.81	-0.02188615		1027.81	-0.00710988		1617.8	0.01610928		2207.8	0.00812216		2797.8	0.07224012
438.01	-0.0213362		1028.01	-0.00740438		1618	0.01629712		2208	0.00794146		2798	0.07234077
438.21	-0.02036591		1028.21	-0.00711482		1618.2	0.01509299		2208.2	0.00800826		2798.2	0.072517
438.41	-0.02082882		1028.41	-0.00778143		1618.4	0.01479262		2208.4	0.00799069		2798.4	0.07247178
438.61	-0.0199292		1028.61	-0.00817223		1618.6	0.01558758		2208.6	0.00805574		2798.6	0.07281469
438.81	-0.01979981		1028.81	-0.00848718		1618.8	0.01609422		2208.8	0.00826965		2798.8	0.07216018
439.01	-0.01959575		1029.01	-0.00854253		1619	0.01678778		2209	0.00771168		2799	0.07184794
439.21	-0.01925793		1029.21	-0.00753214		1619.2	0.01730418		2209.2	0.00823547		2799.2	0.07213558
439.41	-0.01936651		1029.41	-0.00746208		1619.4	0.01757223		2209.4	0.00846727		2799.4	0.07191787
439.61	-0.02038667		1029.61	-0.00635327		1619.6	0.017529		2209.6	0.00882202		2799.6	0.07194825
439.81	-0.02151621		1029.81	-0.00574946		1619.8	0.0179949		2209.8	0.00880632		2799.8	0.0717154
440.01	-0.02172986		1030.01	-0.00432273		1620	0.0179283		2210	0.00883276		2800	0.07198572
440.21	-0.02264704		1030.21	-0.0035706		1620.2	0.01782796		2210.2	0.00890114		2800.2	0.07273987
440.41	-0.02243909		1030.41	-0.00270156		1620.4	0.01823519		2210.4	0.0091447		2800.4	0.07354581
440.61	-0.02223205		1030.61	-0.00227959		1620.6	0.01891367		2210.6	0.01012824		2800.6	0.07365479
440.81	-0.02188514		1030.81	-0.00249992		1620.8	0.01843578		2210.8	0.00906407		2800.8	0.0735494
441.01	-0.02262908		1031.01	-0.00279331		1621	0.01784162		2211	0.00911121		2801	0.0737355
441.21	-0.02251619		1031.21	-0.00331412		1621.2	0.01729249		2211.2	0.00951072		2801.2	0.07347146
441.41	-0.02286049		1031.41	-0.00460892		1621.4	0.01613617		2211.4	0.00944542		2801.4	0.07274917
441.61	-0.02198437		1031.61	-0.00464136		1621.6	0.01610431		2211.6	0.00948827		2801.6	0.07133368
441.81	-0.02192671		1031.81	-0.00516244		1621.8	0.01612093		2211.8	0.00966006		2801.8	0.070937
442.01	-0.02223085		1032.01	-0.00587109		1622	0.0157307		2212	0.00920634		2802	0.07010602
442.21	-0.02198351		1032.21	-0.00677745		1622.2	0.01510549		2212.2	0.00874505		2802.2	0.06957702
442.41	-0.02318268		1032.41	-0.00722984		1622.4	0.01590663		2212.4	0.00785508		2802.4	0.06896694
442.61	-0.02371425		1032.61	-0.00770214		1622.6	0.01576507		2212.6	0.00780681		2802.6	0.06983345
442.81	-0.02478067		1032.81	-0.00771714		1622.8	0.01576129		2212.8	0.008105		2802.8	0.06989032
443.01	-0.02500843		1033.01	-0.00707839		1623	0.01558669		2213	0.00758702		2803	0.07033094
443.21	-0.02543626		1033.21	-0.00706345		1623.2	0.0152093		2213.2	0.00711845		2803.2	0.07077779
443.41	-0.02618351		1033.41	-0.00684551		1623.4	0.01521615		2213.4	0.00696171		2803.4	0.07165641
443.61	-0.027038		1033.61	-0.00625431		1623.6	0.01596416		2213.6	0.00669814		2803.6	0.07225788
443.81	-0.02759847		1033.81	-0.00640984		1623.8	0.01615418		2213.8	0.00726018		2803.8	0.07251258
444.01	-0.02665227		1034.01	-0.00582413		1624	0.01708311		2214	0.0079653		2804	0.07282858
444.21	-0.02565925		1034.21	-0.00604216		1624.2	0.01749695		2214.2	0.00825307		2804.2	0.07378818
444.41	-0.02453126		1034.41	-0.00663225		1624.4	0.01820848		2214.4	0.00843449		2804.4	0.07464496
444.61	-0.02426487		1034.61	-0.00641631		1624.6	0.01887985		2214.6	0.00823121		2804.6	0.07535109
444.81	-0.0231746		1034.81	-0.00673341		1624.8	0.01850462		2214.8	0.00840434		2804.8	0.07559055
445.01	-0.02293235		1035.01	-0.00543106		1625	0.0192324		2215	0.0090592		2805	0.07560813
445.21	-0.02245748		1035.21	-0.00515524		1625.2	0.01878385		2215.2	0.00896275		2805.2	0.07514511
445.41	-0.02168758		1035.41	-0.00508395		1625.4	0.01864192		2215.4	0.00889546		2805.4	0.07437555
445.61	-0.02093986		1035.61	-0.00471822		1625.6	0.0189885		2215.6	0.00958509		2805.6	0.07352427
445.81	-0.02125806		1035.81	-0.00495788		1625.8	0.01898437		2215.8	0.00889538		2805.8	0.07369932
446.01	-0.02053754		1036.01	-0.00542747		1626	0.01865483		2216	0.0093217		2806	0.073527
446.21	-0.02072806		1036.21	-0.00493518		1626.2	0.01787956		2216.2	0.00906943		2806.2	0.07332776
446.41	-0.02128833		1036.41	-0.00525934		1626.4	0.01792583		2216.4	0.00900387		2806.4	0.07283757
446.61	-0.02159245		1036.61	-0.00523144		1626.6	0.01652947		2216.6	0.00920541		2806.6	0.07409494
446.81	-0.02178212		1036.81	-0.00579838		1626.8	0.01702674		2216.8	0.00904983		2806.8	0.07401236
447.01	-0.02182528		1037.01	-0.00561936		1627	0.01697028		2217	0.00847155		2807	0.07397501
447.21	-0.02243515		1037.21	-0.00634672		1627.2	0.01744236		2217.2	0.00844253		2807.2	0.07390016
447.41	-0.02308784		1037.41	-0.00716086		1627.4	0.01798075		2217.4	0.00998495		2807.4	0.07405236
447.61	-0.02355506		1037.61	-0.00751145		1627.6	0.01861813		2217.6	0.01023855		2807.6	0.07359751
447.81	-0.02319435		1037.81	-0.00875128		1627.8	0.01897666		2217.8	0.01092671		2807.8	0.073764
448.01	-0.0224131		1038.01	-0.00879898		1628	0.01948512		2218	0.01121089		2808	0.07328396
448.21	-0.02300933		1038.21	-0.00905725		1628.2	0.01974728		2218.2	0.01079241		2808.2	0.07395733
448.41	-0.02347394		1038.41	-0.00925428		1628.4	0.01950051		2218.4	0.00980624		2808.4	0.07404123
448.61	-0.02407707		1038.61	-0.00873857		1628.6	0.01965466		2218.6	0.00903429		2808.6	0.07331166
448.81	-0.0241127		1038.81	-0.00818495		1628.8	0.01839301		2218.8	0.00973339		2808.8	0.07247792
449.01	-0.02393799		1039.01	-0.0074107		1629	0.01801092		2219	0.00917154		2809	0.07261296
449.21	-0.02364787		1039.21	-0.00804504		1629.2	0.01640781		2219.2	0.00832103		2809.2	0.07327832
449.41	-0.02327867		1039.41	-0.00786634		1629.4	0.01660423		2219.4	0.0087232		2809.4	0.07350166
449.61	-0.02334418		1039.61	-0.0083488		1629.6	0.01592896		2219.6	0.00812999		2809.6	0.07363318
449.81	-0.02290949		1039.81	-0.00754724		1629.8	0.01586265		2219.8	0.00737777		2809.8	0.07416924
450.01	-0.02178082		1040.01	-0.00678502		1630	0.01532888		2220	0.00736421		2810	0.07423999
450.21	-0.02174018		1040.21	-0.00529273		1630.2	0.01580011		2220.2	0.00712179		2810.2	0.07395842
450.41	-0.02142157		1040.41	-0.0051979		1630.4	0.01627241		2220.4	0.00666457		2810.4	0.07436659
450.61	-0.02105402		1040.61	-0.00359101		1630.6	0.01673115		2220.6	0.0064581		2810.6	0.07577094
450.81	-0.02073827		1040.81	-0.00293834		1630.8	0.01786784		2220.8	0.00661286		2810.8	0.07570882
451.01	-0.02089745		1041.01	-0.00285243		1631	0.01776185		2221	0.00708574		2811	0.07627814
451.21	-0.02192267		1041.21	-0.00337563		1631.2	0.01880654		2221.2	0.00760647		2811.2	0.07720856
451.41	-0.0227347		1041.41	-0.00335335		1631.4	0.0191952		2221.4	0.00881479		2811.4	0.0772238
451.61	-0.02279135		1041.61	-0.00325328		1631.6	0.01998736		2221.6	0.00873196		2811.6	0.07704536
451.81	-0.02314005		1041.81	-0.0040124		1631.8	0.02020546		2221.8	0.00923049		2811.8	0.07703907
452.01	-0.02398828		1042.01	-0.00361227		1632	0.01975624		2222	0.0091005		2812	0.0765972
452.21	-0.02506374		1042.21	-0.00459498		1632.2	0.01950836		2222.2	0.00837485		2812.2	0.07695558
452.41	-0.02488888		1042.41	-0.00497676		1632.4	0.01886646		2222.4	0.00825398		2812.4	0.07660516
452.61	-0.02486782		1042.61	-0.00560232		1632.6	0.01869891		2222.6	0.00875792		2812.6	0.07538969
452.81	-0.02463869		1042.81	-0.00593346		1632.8	0.01768349		2222.8	0.00967525		2812.8	0.07522876
453.01	-0.02410994		1043.01	-0.00690703		1633	0.01738312		2223	0.00903291		2813	0.07589981
453.21	-0.02404508		1043.21	-0.00681175		1633.2	0.01659002		2223.2	0.00871639		2813.2	0.07609893
453.41	-0.02412903		1043.41	-0.00685636		1633.4	0.01660384		2223.4	0.00827029		2813.4	0.07511311
453.61	-0.02372412		1043.61	-0.00671234		1633.6	0.01597238		2223.6	0.00776505		2813.6	0.07464586
453.81	-0.0235938		1043.81	-0.00596701		1633.8	0.0170067		2223.8	0.00690467		2813.8	0.0747749
454.01	-0.02296087		1044.01	-0.00472032		1634	0.01723646		2224	0.00681487		2814	0.07387483
454.21	-0.02317981		1044.21	-0.00391129		1634.2	0.01774892		2224.2	0.00605106		2814.2	0.07333503
454.41	-0.02278373		1044.41	-0.00314996		1634.4	0.01709463		2224.4	0.00624845		2814.4	0.07455175
454.61	-0.02223444		1044.61	-0.00205928		1634.6	0.01715294		2224.6	0.00587398		2814.6	0.07521068
454.81	-0.02258144		1044.81	-0.00197107		1634.8	0.0166517		2224.8	0.00641521		2814.8	0.07515062
455.01	-0.02241253		1045.01	-0.002121		1635	0.01597049		2225	0.00681718		2815	0.07558568
455.21	-0.02259771		1045.21	-0.00173921		1635.2	0.0167518		2225.2	0.00665674		2815.2	0.07633593
455.41	-0.02281618		1045.41	-0.00161856		1635.4	0.01673285		2225.4	0.00703286		2815.4	0.07680862
455.61	-0.02256452		1045.61	-0.00146288		1635.6	0.01656973		2225.6	0.00723681		2815.6	0.07702784
455.81	-0.02260342		1045.81	-0.00135028		1635.8	0.01588514		2225.8	0.00694461		2815.8	0.07736209
456.01	-0.02277567		1046.01	-0.00225325		1636	0.01615302		2226	0.0067023		2816	0.07753757
456.21	-0.02223858		1046.21	-0.00323403		1636.2	0.01577075		2226.2	0.00714416		2816.2	0.07773986
456.41	-0.02191435		1046.41	-0.0031281		1636.4	0.01564969		2226.4	0.00785843		2816.4	0.07835861
456.61	-0.02229533		1046.61	-0.00362748		1636.6	0.01558913		2226.6	0.00838508		2816.6	0.07744471
456.81	-0.02227349		1046.81	-0.00337676		1636.8	0.01538816		2226.8	0.00863189		2816.8	0.07737718
457.01	-0.02204476		1047.01	-0.0032689		1637	0.01585844		2227	0.00838266		2817	0.07702671
457.21	-0.02228253		1047.21	-0.00288475		1637.2	0.01607573		2227.2	0.00864586		2817.2	0.07691553
457.41	-0.02210974		1047.41	-0.00371823		1637.4	0.01684959		2227.4	0.0085678		2817.4	0.07638654
457.61	-0.02181079		1047.61	-0.00377367		1637.6	0.01749194		2227.6	0.00959645		2817.6	0.07580705
457.81	-0.02255639		1047.81	-0.00370325		1637.8	0.01924616		2227.8	0.00954106		2817.8	0.07473504
458.01	-0.02256244		1048.01	-0.00356185		1638	0.0189271		2228	0.0109436		2818	0.07414243
458.21	-0.02266592		1048.21	-0.00447801		1638.2	0.01951923		2228.2	0.01120989		2818.2	0.07433872
458.41	-0.0220887		1048.41	-0.00493582		1638.4	0.01939008		2228.4	0.01161632		2818.4	0.07475454
458.61	-0.02234407		1048.61	-0.00550719		1638.6	0.01991207		2228.6	0.01149832		2818.6	0.07457417
458.81	-0.02261989		1048.81	-0.00657905		1638.8	0.02000403		2228.8	0.01131168		2818.8	0.07483585
459.01	-0.02244292		1049.01	-0.00667785		1639	0.02029649		2229	0.0112891		2819	0.07534421
459.21	-0.02294209		1049.21	-0.00712547		1639.2	0.02135886		2229.2	0.01125136		2819.2	0.07531404
459.41	-0.02306261		1049.41	-0.00679245		1639.4	0.02064781		2229.4	0.0109585		2819.4	0.07553849
459.61	-0.02331381		1049.61	-0.00675562		1639.6	0.02078737		2229.6	0.01056195		2819.6	0.07465303
459.81	-0.02242512		1049.81	-0.00734259		1639.8	0.02124604		2229.8	0.00971197		2819.8	0.07446147
460.01	-0.02286477		1050.01	-0.00818386		1640	0.02165438		2230	0.01033042		2820	0.07491649
460.21	-0.02309425		1050.21	-0.00787937		1640.2	0.02096821		2230.2	0.01031123		2820.2	0.07464798
460.41	-0.02342593		1050.41	-0.00737192		1640.4	0.0203711		2230.4	0.01039937		2820.4	0.07507121
460.61	-0.02334968		1050.61	-0.00621786		1640.6	0.01991094		2230.6	0.01020991		2820.6	0.07411167
460.81	-0.02314898		1050.81	-0.00584921		1640.8	0.01969722		2230.8	0.00974184		2820.8	0.07443706
461.01	-0.02287555		1051.01	-0.00586913		1641	0.02007462		2231	0.00966543		2821	0.0747886
461.21	-0.02276988		1051.21	-0.0061898		1641.2	0.02014583		2231.2	0.01015837		2821.2	0.07575486
461.41	-0.02225867		1051.41	-0.00634069		1641.4	0.01985372		2231.4	0.01031076		2821.4	0.07531037
461.61	-0.02256643		1051.61	-0.00599128		1641.6	0.01972682		2231.6	0.01148675		2821.6	0.07469708
461.81	-0.02274929		1051.81	-0.00578645		1641.8	0.02011208		2231.8	0.01134328		2821.8	0.07466405
462.01	-0.02178875		1052.01	-0.00621585		1642	0.020027		2232	0.01149176		2822	0.07486541
462.21	-0.02166342		1052.21	-0.00691499		1642.2	0.02067819		2232.2	0.01113535		2822.2	0.07440133
462.41	-0.02187267		1052.41	-0.00723127		1642.4	0.02052539		2232.4	0.01065285		2822.4	0.073882
462.61	-0.02257157		1052.61	-0.00708422		1642.6	0.02021935		2232.6	0.01056946		2822.6	0.07341255
462.81	-0.02286006		1052.81	-0.00744463		1642.8	0.02010761		2232.8	0.01042253		2822.8	0.07383123
463.01	-0.02345149		1053.01	-0.00640364		1643	0.02061988		2233	0.01076725		2823	0.07329467
463.21	-0.02427126		1053.21	-0.00672738		1643.2	0.02054129		2233.2	0.01116794		2823.2	0.07277948
463.41	-0.02442392		1053.41	-0.0073513		1643.4	0.01965258		2233.4	0.01075841		2823.4	0.0730598
463.61	-0.02483364		1053.61	-0.00850623		1643.6	0.01995094		2233.6	0.0105726		2823.6	0.07248524
463.81	-0.02452819		1053.81	-0.00755128		1643.8	0.01933861		2233.8	0.01073457		2823.8	0.0719216
464.01	-0.02556784		1054.01	-0.00799965		1644	0.0180018		2234	0.01101326		2824	0.07219989
464.21	-0.0256754		1054.21	-0.00772037		1644.2	0.01697022		2234.2	0.01093607		2824.2	0.07180191
464.41	-0.02540939		1054.41	-0.00667369		1644.4	0.01647494		2234.4	0.01108568		2824.4	0.0716959
464.61	-0.02515842		1054.61	-0.00625128		1644.6	0.01608997		2234.6	0.01066546		2824.6	0.07111855
464.81	-0.02521589		1054.81	-0.00694257		1644.8	0.01632741		2234.8	0.01013465		2824.8	0.07140491
465.01	-0.024116		1055.01	-0.00688009		1645	0.01579201		2235	0.00972255		2825	0.0714316
465.21	-0.02435197		1055.21	-0.00615884		1645.2	0.01633473		2235.2	0.00959534		2825.2	0.07155172
465.41	-0.02404933		1055.41	-0.00526312		1645.4	0.01569827		2235.4	0.00951596		2825.4	0.07112421
465.61	-0.02375929		1055.61	-0.00460259		1645.6	0.01628713		2235.6	0.00883246		2825.6	0.07179174
465.81	-0.02332345		1055.81	-0.00461904		1645.8	0.01632268		2235.8	0.00807417		2825.8	0.07198224
466.01	-0.02309094		1056.01	-0.00451679		1646	0.01645434		2236	0.00844831		2826	0.07201712
466.21	-0.024055		1056.21	-0.0047234		1646.2	0.0171687		2236.2	0.00866474		2826.2	0.0723705
466.41	-0.02411127		1056.41	-0.00418378		1646.4	0.01749053		2236.4	0.00769403		2826.4	0.07194515
466.61	-0.0239902		1056.61	-0.0036035		1646.6	0.01664195		2236.6	0.0068942		2826.6	0.07203123
466.81	-0.02405972		1056.81	-0.00381448		1646.8	0.01695652		2236.8	0.00672171		2826.8	0.0727336
467.01	-0.02446371		1057.01	-0.004121		1647	0.01721273		2237	0.00630001		2827	0.07266496
467.21	-0.02461677		1057.21	-0.00534954		1647.2	0.0168697		2237.2	0.00641004		2827.2	0.07334398
467.41	-0.02466374		1057.41	-0.00569968		1647.4	0.0164244		2237.4	0.00600862		2827.4	0.07354042
467.61	-0.0244431		1057.61	-0.00595551		1647.6	0.01650985		2237.6	0.00557658		2827.6	0.07288575
467.81	-0.02395575		1057.81	-0.00547181		1647.8	0.0163061		2237.8	0.00590202		2827.8	0.07262414
468.01	-0.02339657		1058.01	-0.00665569		1648	0.01595062		2238	0.00619007		2828	0.07285151
468.21	-0.02261919		1058.21	-0.00640386		1648.2	0.0164606		2238.2	0.00655112		2828.2	0.07246325
468.41	-0.02183518		1058.41	-0.0059244		1648.4	0.01718714		2238.4	0.0068204		2828.4	0.07181783
468.61	-0.0211733		1058.61	-0.006146		1648.6	0.01729652		2238.6	0.00684419		2828.6	0.07141715
468.81	-0.02074967		1058.81	-0.0059127		1648.8	0.01774654		2238.8	0.00665477		2828.8	0.07128128
469.01	-0.02014157		1059.01	-0.00535053		1649	0.01758475		2239	0.00656125		2829	0.07093796
469.21	-0.02048802		1059.21	-0.0046728		1649.2	0.01856999		2239.2	0.00684492		2829.2	0.07097819
469.41	-0.01983548		1059.41	-0.00433303		1649.4	0.01846545		2239.4	0.00707168		2829.4	0.07106056
469.61	-0.01964866		1059.61	-0.00407914		1649.6	0.01904639		2239.6	0.00672286		2829.6	0.07124952
469.81	-0.02011482		1059.81	-0.0039399		1649.8	0.01912121		2239.8	0.00738114		2829.8	0.07113126
470.01	-0.02011482		1060.01	-0.0039399		1650	0.01912121		2240	0.00738114		2830	0.07113126
470.21	-0.02186676		1060.21	-0.00484753		1650.2	0.0175129		2240.2	0.00609608		2830.2	0.06890469
470.41	-0.02430852		1060.41	-0.00541475		1650.4	0.01637184		2240.4	0.00472864		2830.4	0.06571626
470.61	-0.02639312		1060.61	-0.00717656		1650.6	0.01512431		2240.6	0.00310274		2830.6	0.06264522
470.81	-0.02862708		1060.81	-0.00913154		1650.8	0.01305478		2240.8	0.0008816		2830.8	0.05927209
471.01	-0.03017431		1061.01	-0.01132098		1651	0.01162846		2241	-0.00051045		2831	0.05587496
471.21	-0.03185976		1061.21	-0.0127686		1651.2	0.01015541		2241.2	-0.00154472		2831.2	0.0525451
471.41	-0.03360385		1061.41	-0.01381987		1651.4	0.00878755		2241.4	-0.00316305		2831.4	0.04917342
471.61	-0.03395511		1061.61	-0.01561009		1651.6	0.00732061		2241.6	-0.00474211		2831.6	0.04552548
471.81	-0.03451773		1061.81	-0.01730328		1651.8	0.00619108		2241.8	-0.00618503		2831.8	0.04216139
472.01	-0.03450265		1062.01	-0.01888152		1652	0.00608082		2242	-0.00717638		2832	0.0400933
472.21	-0.03489135		1062.21	-0.02026203		1652.2	0.00629213		2242.2	-0.00826894		2832.2	0.03783273
472.41	-0.03569526		1062.41	-0.02095727		1652.4	0.00675661		2242.4	-0.00817306		2832.4	0.03609461
472.61	-0.03593108		1062.61	-0.0206742		1652.6	0.00713286		2242.6	-0.00820733		2832.6	0.03474257
472.81	-0.03500823		1062.81	-0.02065404		1652.8	0.00846813		2242.8	-0.00936361		2832.8	0.03374173
473.01	-0.03455445		1063.01	-0.02020566		1653	0.00904779		2243	-0.00948882		2833	0.03280182
473.21	-0.03427326		1063.21	-0.01899692		1653.2	0.00893367		2243.2	-0.00984729		2833.2	0.03153226
473.41	-0.03400328		1063.41	-0.01818729		1653.4	0.01010525		2243.4	-0.01017974		2833.4	0.03124809
473.61	-0.03376894		1063.61	-0.01730519		1653.6	0.01193331		2243.6	-0.01107935		2833.6	0.03064363
473.81	-0.03287204		1063.81	-0.01593644		1653.8	0.01305088		2243.8	-0.01183918		2833.8	0.02985591
474.01	-0.03238048		1064.01	-0.01515882		1654	0.01370368		2244	-0.01193863		2834	0.02922741
474.21	-0.03247183		1064.21	-0.01402402		1654.2	0.01427114		2244.2	-0.01222389		2834.2	0.02820402
474.41	-0.03228098		1064.41	-0.01286195		1654.4	0.01555085		2244.4	-0.01285944		2834.4	0.02731901
474.61	-0.032154		1064.61	-0.01293976		1654.6	0.01609381		2244.6	-0.01329348		2834.6	0.02654592
474.81	-0.03212274		1064.81	-0.01243608		1654.8	0.01732359		2244.8	-0.01399954		2834.8	0.02586489
475.01	-0.03096637		1065.01	-0.01184795		1655	0.0185176		2245	-0.01417914		2835	0.02553763
475.21	-0.02995931		1065.21	-0.01082173		1655.2	0.01908767		2245.2	-0.01434445		2835.2	0.02456006
475.41	-0.02878351		1065.41	-0.01106648		1655.4	0.0193972		2245.4	-0.01561618		2835.4	0.02277724
475.61	-0.0273267		1065.61	-0.01156806		1655.6	0.01982245		2245.6	-0.0156523		2835.6	0.02217616
475.81	-0.02742644		1065.81	-0.01164191		1655.8	0.02045396		2245.8	-0.01567708		2835.8	0.02186673
476.01	-0.02744992		1066.01	-0.01179714		1656	0.02132226		2246	-0.01550238		2836	0.02172263
476.21	-0.02780085		1066.21	-0.01232998		1656.2	0.02124554		2246.2	-0.01503606		2836.2	0.02070814
476.41	-0.02753964		1066.41	-0.012654		1656.4	0.02107445		2246.4	-0.01404697		2836.4	0.01980173
476.61	-0.02699722		1066.61	-0.01215749		1656.6	0.02133427		2246.6	-0.01380898		2836.6	0.01940865
476.81	-0.02687366		1066.81	-0.01251231		1656.8	0.02092931		2246.8	-0.0143862		2836.8	0.01954246
477.01	-0.02702415		1067.01	-0.01256741		1657	0.02016157		2247	-0.01349431		2837	0.02001185
477.21	-0.02701396		1067.21	-0.01300194		1657.2	0.02106067		2247.2	-0.01302396		2837.2	0.01986517
477.41	-0.02674151		1067.41	-0.01293572		1657.4	0.02113473		2247.4	-0.0121663		2837.4	0.01978809
477.61	-0.02698488		1067.61	-0.0125154		1657.6	0.02045784		2247.6	-0.01213563		2837.6	0.01991481
477.81	-0.02658012		1067.81	-0.01234545		1657.8	0.01917352		2247.8	-0.01114801		2837.8	0.0197705
478.01	-0.02613674		1068.01	-0.01182164		1658	0.01913743		2248	-0.01005562		2838	0.01956994
478.21	-0.02610054		1068.21	-0.0112436		1658.2	0.0187256		2248.2	-0.0096862		2838.2	0.01884331
478.41	-0.02521121		1068.41	-0.01081888		1658.4	0.01925038		2248.4	-0.00954967		2838.4	0.01971936
478.61	-0.02517708		1068.61	-0.01080246		1658.6	0.01990672		2248.6	-0.00964092		2838.6	0.01891348
478.81	-0.02469808		1068.81	-0.01021281		1658.8	0.01999258		2248.8	-0.01049138		2838.8	0.01870337
479.01	-0.02423315		1069.01	-0.00996395		1659	0.01972824		2249	-0.01077414		2839	0.01833074
479.21	-0.02398259		1069.21	-0.00966086		1659.2	0.02000075		2249.2	-0.01048419		2839.2	0.01704973
479.41	-0.02357757		1069.41	-0.00909555		1659.4	0.02029812		2249.4	-0.01086428		2839.4	0.01592216
479.61	-0.02328402		1069.61	-0.0075985		1659.6	0.02108607		2249.6	-0.01047953		2839.6	0.01614829
479.81	-0.02344744		1069.81	-0.00709611		1659.8	0.02119852		2249.8	-0.01089164		2839.8	0.01546697
480.01	-0.02303792		1070.01	-0.00640255		1660	0.02115831		2250	-0.01101825		2840	0.01489887
480.21	-0.02212501		1070.21	-0.00648048		1660.2	0.02099464		2250.2	-0.01102586		2840.2	0.01447638
480.41	-0.02179839		1070.41	-0.00579959		1660.4	0.02118209		2250.4	-0.01126584		2840.4	0.01412164
480.61	-0.02204415		1070.61	-0.00566851		1660.6	0.02147241		2250.6	-0.01224376		2840.6	0.01385907
480.81	-0.02240511		1070.81	-0.00503345		1660.8	0.02078351		2250.8	-0.01240598		2840.8	0.0138627
481.01	-0.02321367		1071.01	-0.00482096		1661	0.02071924		2251	-0.01261336		2841	0.0133901
481.21	-0.02255772		1071.21	-0.00419637		1661.2	0.02095611		2251.2	-0.01266906		2841.2	0.01297993
481.41	-0.02176777		1071.41	-0.00468487		1661.4	0.02063926		2251.4	-0.01245738		2841.4	0.01339643
481.61	-0.02127347		1071.61	-0.00447445		1661.6	0.02006102		2251.6	-0.01234247		2841.6	0.01317803
481.81	-0.01991086		1071.81	-0.00486468		1661.8	0.01968431		2251.8	-0.01180598		2841.8	0.01302152
482.01	-0.0197161		1072.01	-0.00510644		1662	0.02055292		2252	-0.01063236		2842	0.01295841
482.21	-0.01956384		1072.21	-0.00556907		1662.2	0.02043018		2252.2	-0.01075982		2842.2	0.01312516
482.41	-0.01958739		1072.41	-0.0054877		1662.4	0.02080893		2252.4	-0.00980476		2842.4	0.01298134
482.61	-0.02005947		1072.61	-0.00601842		1662.6	0.02116137		2252.6	-0.00981779		2842.6	0.01236076
482.81	-0.02034203		1072.81	-0.00562544		1662.8	0.02113239		2252.8	-0.00966282		2842.8	0.01247229
483.01	-0.02129274		1073.01	-0.00534055		1663	0.02234861		2253	-0.00921304		2843	0.01194367
483.21	-0.02120978		1073.21	-0.00455974		1663.2	0.02347419		2253.2	-0.00887784		2843.2	0.01105127
483.41	-0.02162515		1073.41	-0.00458394		1663.4	0.02471321		2253.4	-0.00851608		2843.4	0.01148404
483.61	-0.02273358		1073.61	-0.00429042		1663.6	0.02571464		2253.6	-0.00850924		2843.6	0.01103067
483.81	-0.02331511		1073.81	-0.00407669		1663.8	0.02582869		2253.8	-0.0095245		2843.8	0.01065994
484.01	-0.02290117		1074.01	-0.00418987		1664	0.0259814		2254	-0.0092187		2844	0.01093401
484.21	-0.0225822		1074.21	-0.00456489		1664.2	0.02565778		2254.2	-0.00858283		2844.2	0.01065376
484.41	-0.02338827		1074.41	-0.0046054		1664.4	0.02597922		2254.4	-0.00948904		2844.4	0.01105538
484.61	-0.02379538		1074.61	-0.00444332		1664.6	0.0255192		2254.6	-0.0103972		2844.6	0.01093368
484.81	-0.023322		1074.81	-0.00419749		1664.8	0.02531857		2254.8	-0.01032991		2844.8	0.01093638
485.01	-0.02383302		1075.01	-0.00413759		1665	0.02515079		2255	-0.01022971		2845	0.01115276
485.21	-0.02315849		1075.21	-0.00415452		1665.2	0.02457087		2255.2	-0.00980308		2845.2	0.01197955
485.41	-0.02228348		1075.41	-0.00476927		1665.4	0.02412544		2255.4	-0.00890347		2845.4	0.0117526
485.61	-0.02201239		1075.61	-0.00472684		1665.6	0.0226646		2255.6	-0.00899513		2845.6	0.01125018
485.81	-0.02121145		1075.81	-0.00544398		1665.8	0.02190372		2255.8	-0.00896176		2845.8	0.01145192
486.01	-0.02187303		1076.01	-0.00608365		1666	0.02113486		2256	-0.00778564		2846	0.01166137
486.21	-0.02197628		1076.21	-0.00610449		1666.2	0.0203393		2256.2	-0.0073481		2846.2	0.01153976
486.41	-0.0219712		1076.41	-0.00571953		1666.4	0.02018864		2256.4	-0.00645844		2846.4	0.01181549
486.61	-0.02128179		1076.61	-0.00593244		1666.6	0.02056621		2256.6	-0.00651741		2846.6	0.01200529
486.81	-0.02136433		1076.81	-0.00488975		1666.8	0.02058513		2256.8	-0.00612087		2846.8	0.01092636
487.01	-0.0219669		1077.01	-0.00420201		1667	0.02122145		2257	-0.00521489		2847	0.01028094
487.21	-0.02179803		1077.21	-0.00437705		1667.2	0.02172719		2257.2	-0.00456443		2847.2	0.00967886
487.41	-0.02239336		1077.41	-0.00482181		1667.4	0.02247337		2257.4	-0.00422191		2847.4	0.00975937
487.61	-0.02273802		1077.61	-0.00440879		1667.6	0.0225208		2257.6	-0.00489019		2847.6	0.00924428
487.81	-0.02177703		1077.81	-0.00426492		1667.8	0.02223883		2257.8	-0.00558805		2847.8	0.00866488
488.01	-0.02070687		1078.01	-0.0043958		1668	0.02170895		2258	-0.00484061		2848	0.00895479
488.21	-0.02060629		1078.21	-0.00439919		1668.2	0.02205247		2258.2	-0.00504152		2848.2	0.00845345
488.41	-0.02001379		1078.41	-0.00444003		1668.4	0.02260887		2258.4	-0.00604959		2848.4	0.00862608
488.61	-0.01923911		1078.61	-0.00373675		1668.6	0.02296267		2258.6	-0.00676832		2848.6	0.00833373
488.81	-0.0185099		1078.81	-0.00414041		1668.8	0.02348397		2258.8	-0.00694783		2848.8	0.00819109
489.01	-0.01840688		1079.01	-0.00344455		1669	0.02302223		2259	-0.00724741		2849	0.00856469
489.21	-0.01869363		1079.21	-0.00325797		1669.2	0.02292293		2259.2	-0.00694531		2849.2	0.00760929
489.41	-0.0181891		1079.41	-0.00370756		1669.4	0.02316874		2259.4	-0.00647267		2849.4	0.00722475
489.61	-0.01771057		1079.61	-0.00423422		1669.6	0.02293765		2259.6	-0.00624238		2849.6	0.00763069
489.81	-0.01767133		1079.81	-0.00482221		1669.8	0.02327434		2259.8	-0.00606507		2849.8	0.00793626
490.01	-0.01828586		1080.01	-0.00444018		1670	0.02342576		2260	-0.00550677		2850	0.00842118
490.21	-0.01888159		1080.21	-0.00451529		1670.2	0.02435758		2260.2	-0.00570586		2850.2	0.00890775
490.41	-0.01893037		1080.41	-0.00463023		1670.4	0.02488997		2260.4	-0.00559378		2850.4	0.00948661
490.61	-0.01941503		1080.61	-0.00449591		1670.6	0.02531367		2260.6	-0.00498872		2850.6	0.0089637
490.81	-0.01950375		1080.81	-0.00348503		1670.8	0.02560672		2260.8	-0.00421381		2850.8	0.00949734
491.01	-0.019177		1081.01	-0.00433011		1671	0.02590099		2261	-0.00309728		2851	0.00986123
491.21	-0.01917214		1081.21	-0.00459062		1671.2	0.02522483		2261.2	-0.0029341		2851.2	0.0097635
491.41	-0.01901429		1081.41	-0.00488742		1671.4	0.02564991		2261.4	-0.00288132		2851.4	0.00978443
491.61	-0.01877889		1081.61	-0.00544487		1671.6	0.02424106		2261.6	-0.00269213		2851.6	0.00976295
491.81	-0.01803271		1081.81	-0.00544397		1671.8	0.02398834		2261.8	-0.00202424		2851.8	0.00841728
492.01	-0.01765894		1082.01	-0.00529744		1672	0.02309785		2262	-0.00181099		2852	0.00870514
492.21	-0.0181473		1082.21	-0.00559021		1672.2	0.02256727		2262.2	-0.00223731		2852.2	0.00798816
492.41	-0.01829017		1082.41	-0.00545397		1672.4	0.0222165		2262.4	-0.00264116		2852.4	0.00731601
492.61	-0.01857915		1082.61	-0.0052788		1672.6	0.02242612		2262.6	-0.00333268		2852.6	0.00683359
492.81	-0.01883259		1082.81	-0.00517999		1672.8	0.02216882		2262.8	-0.00335903		2852.8	0.00637355
493.01	-0.01873176		1083.01	-0.00453972		1673	0.02142562		2263	-0.00346511		2853	0.00550476
493.21	-0.01907888		1083.21	-0.00400826		1673.2	0.0217108		2263.2	-0.00350355		2853.2	0.00430404
493.41	-0.01907904		1083.41	-0.00384919		1673.4	0.02200751		2263.4	-0.00349583		2853.4	0.0048104
493.61	-0.01884155		1083.61	-0.00404015		1673.6	0.02173057		2263.6	-0.00353009		2853.6	0.00434133
493.81	-0.01922542		1083.81	-0.00386229		1673.8	0.02115181		2263.8	-0.00450194		2853.8	0.00420951
494.01	-0.02042946		1084.01	-0.00315038		1674	0.0208836		2264	-0.00486128		2854	0.00406227
494.21	-0.02157253		1084.21	-0.00435867		1674.2	0.02070713		2264.2	-0.00550058		2854.2	0.0043947
494.41	-0.02161703		1084.41	-0.00452634		1674.4	0.0206585		2264.4	-0.00545922		2854.4	0.00516399
494.61	-0.0219401		1084.61	-0.00466779		1674.6	0.02044569		2264.6	-0.00574306		2854.6	0.00513262
494.81	-0.02179846		1084.81	-0.00468804		1674.8	0.02016453		2264.8	-0.00582065		2854.8	0.00582441
495.01	-0.02245391		1085.01	-0.00514266		1675	0.0201209		2265	-0.00593853		2855	0.00549609
495.21	-0.02320935		1085.21	-0.00476939		1675.2	0.0199802		2265.2	-0.00552389		2855.2	0.0054707
495.41	-0.02310521		1085.41	-0.00526046		1675.4	0.02055926		2265.4	-0.00534323		2855.4	0.00482642
495.61	-0.02358708		1085.61	-0.00536571		1675.6	0.02060532		2265.6	-0.00522723		2855.6	0.00536769
495.81	-0.02422719		1085.81	-0.00544129		1675.8	0.02163974		2265.8	-0.00484673		2855.8	0.00481442
496.01	-0.0248806		1086.01	-0.00522279		1676	0.02198559		2266	-0.00488579		2856	0.00491633
496.21	-0.02577849		1086.21	-0.00538748		1676.2	0.02219363		2266.2	-0.00464743		2856.2	0.00481539
496.41	-0.02607093		1086.41	-0.00478483		1676.4	0.02399249		2266.4	-0.00442126		2856.4	0.00485051
496.61	-0.0258297		1086.61	-0.00507393		1676.6	0.02421266		2266.6	-0.00438919		2856.6	0.00515149
496.81	-0.02541107		1086.81	-0.00447229		1676.8	0.02507411		2266.8	-0.00518903		2856.8	0.0058443
497.01	-0.02426207		1087.01	-0.00457363		1677	0.02503583		2267	-0.00569428		2857	0.00591464
497.21	-0.02367158		1087.21	-0.00429568		1677.2	0.02559549		2267.2	-0.00523751		2857.2	0.00605736
497.41	-0.02348032		1087.41	-0.00396224		1677.4	0.02575146		2267.4	-0.00461918		2857.4	0.00643738
497.61	-0.02255396		1087.61	-0.00459656		1677.6	0.02510593		2267.6	-0.00454454		2857.6	0.00651846
497.81	-0.0222703		1087.81	-0.00450533		1677.8	0.0249441		2267.8	-0.00447897		2857.8	0.00605706
498.01	-0.02221565		1088.01	-0.004232		1678	0.02495688		2268	-0.00468415		2858	0.00589876
498.21	-0.0221134		1088.21	-0.00493868		1678.2	0.02459462		2268.2	-0.00462239		2858.2	0.00555445
498.41	-0.02196393		1088.41	-0.0040556		1678.4	0.02452671		2268.4	-0.00510831		2858.4	0.00608015
498.61	-0.02096148		1088.61	-0.00427588		1678.6	0.02324122		2268.6	-0.00559524		2858.6	0.00473465
498.81	-0.02126091		1088.81	-0.00367525		1678.8	0.02349255		2268.8	-0.00519897		2858.8	0.00496091
499.01	-0.02134629		1089.01	-0.0029505		1679	0.02338426		2269	-0.00552979		2859	0.00479441
499.21	-0.02050961		1089.21	-0.00302879		1679.2	0.02337102		2269.2	-0.00518502		2859.2	0.0048992
499.41	-0.02006424		1089.41	-0.00323599		1679.4	0.02362589		2269.4	-0.00550625		2859.4	0.00405299
499.61	-0.01945377		1089.61	-0.00385257		1679.6	0.02381515		2269.6	-0.00588879		2859.6	0.00374124
499.81	-0.01916039		1089.81	-0.00431048		1679.8	0.02307575		2269.8	-0.0054288		2859.8	0.0027926
500.01	-0.01924894		1090.01	-0.00421824		1680	0.02303642		2270	-0.00498133		2860	0.00272642
500.21	-0.01908629		1090.21	-0.00482461		1680.2	0.02238184		2270.2	-0.0045165		2860.2	0.00328199
500.41	-0.01924958		1090.41	-0.00503779		1680.4	0.02298849		2270.4	-0.00366713		2860.4	0.00329816
500.61	-0.01870791		1090.61	-0.00560835		1680.6	0.02257527		2270.6	-0.00358075		2860.6	0.0031231
500.81	-0.01785191		1090.81	-0.00620203		1680.8	0.02308252		2270.8	-0.00338592		2860.8	0.00326668
501.01	-0.01743485		1091.01	-0.00661311		1681	0.02295266		2271	-0.00269368		2861	0.00385891
501.21	-0.01717649		1091.21	-0.00646815		1681.2	0.02307851		2271.2	-0.00193681		2861.2	0.00417163
501.41	-0.01662608		1091.41	-0.00601211		1681.4	0.02334315		2271.4	-0.00240509		2861.4	0.00414749
501.61	-0.01685793		1091.61	-0.00552781		1681.6	0.02364947		2271.6	-0.00237489		2861.6	0.00413128
501.81	-0.01687067		1091.81	-0.00504408		1681.8	0.02334928		2271.8	-0.00262204		2861.8	0.00332946
502.01	-0.01691965		1092.01	-0.00513381		1682	0.02358881		2272	-0.00268399		2862	0.00392962
502.21	-0.01802566		1092.21	-0.00515477		1682.2	0.02372245		2272.2	-0.00262313		2862.2	0.00434436
502.41	-0.01856898		1092.41	-0.0047031		1682.4	0.02331123		2272.4	-0.00324673		2862.4	0.0046194
502.61	-0.01823816		1092.61	-0.00517636		1682.6	0.02345977		2272.6	-0.00324872		2862.6	0.00432478
502.81	-0.01936998		1092.81	-0.00479731		1682.8	0.02401566		2272.8	-0.00268696		2862.8	0.0047335
503.01	-0.01941401		1093.01	-0.00520131		1683	0.02408712		2273	-0.00271934		2863	0.00427502
503.21	-0.01906697		1093.21	-0.00628071		1683.2	0.02435626		2273.2	-0.00255208		2863.2	0.00482863
503.41	-0.01977478		1093.41	-0.00679834		1683.4	0.02417765		2273.4	-0.0024804		2863.4	0.00392492
503.61	-0.0200841		1093.61	-0.00725774		1683.6	0.02359533		2273.6	-0.00299886		2863.6	0.00446653
503.81	-0.02046273		1093.81	-0.00700242		1683.8	0.02314834		2273.8	-0.0024262		2863.8	0.00482389
504.01	-0.02043291		1094.01	-0.00666065		1684	0.0239928		2274	-0.00179277		2864	0.00479612
504.21	-0.02074021		1094.21	-0.00598779		1684.2	0.02479691		2274.2	-0.00131981		2864.2	0.00497547
504.41	-0.02157678		1094.41	-0.00560753		1684.4	0.0247851		2274.4	-0.00035308		2864.4	0.00498074
504.61	-0.02159737		1094.61	-0.00523582		1684.6	0.02401888		2274.6	-0.00095933		2864.6	0.00534775
504.81	-0.0224258		1094.81	-0.0054706		1684.8	0.02370243		2274.8	-0.00178395		2864.8	0.00565525
505.01	-0.02228159		1095.01	-0.00448724		1685	0.02377455		2275	-0.00171905		2865	0.00581157
505.21	-0.02153237		1095.21	-0.00444975		1685.2	0.02357142		2275.2	-0.00256331		2865.2	0.00502942
505.41	-0.02055948		1095.41	-0.00401552		1685.4	0.02375166		2275.4	-0.00287001		2865.4	0.00475197
505.61	-0.02065052		1095.61	-0.00371816		1685.6	0.02409981		2275.6	-0.00305094		2865.6	0.00432666
505.81	-0.02002504		1095.81	-0.00466746		1685.8	0.0238094		2275.8	-0.00402623		2865.8	0.00418823
506.01	-0.01966315		1096.01	-0.00552225		1686	0.02410597		2276	-0.00408025		2866	0.00419492
506.21	-0.01958667		1096.21	-0.00522845		1686.2	0.02394649		2276.2	-0.00458368		2866.2	0.00384709
506.41	-0.02002569		1096.41	-0.00506214		1686.4	0.0235587		2276.4	-0.00436709		2866.4	0.00252718
506.61	-0.01976302		1096.61	-0.00590737		1686.6	0.02412736		2276.6	-0.00423969		2866.6	0.00153298
506.81	-0.02019605		1096.81	-0.00704453		1686.8	0.02429787		2276.8	-0.0038193		2866.8	-0.00009455
507.01	-0.01937655		1097.01	-0.00703814		1687	0.02469296		2277	-0.00354555		2867	-0.00120144
507.21	-0.01931726		1097.21	-0.0071137		1687.2	0.02428229		2277.2	-0.00346013		2867.2	-0.00108339
507.41	-0.01996831		1097.41	-0.00687232		1687.4	0.02402115		2277.4	-0.00321283		2867.4	-0.00191425
507.61	-0.0201894		1097.61	-0.00573536		1687.6	0.02418705		2277.6	-0.00273382		2867.6	-0.00204099
507.81	-0.01969851		1097.81	-0.00535477		1687.8	0.02459322		2277.8	-0.001928		2867.8	-0.00212846
508.01	-0.02021652		1098.01	-0.00522863		1688	0.02464228		2278	-0.00214696		2868	-0.00178565
508.21	-0.02108372		1098.21	-0.00516138		1688.2	0.02414198		2278.2	-0.00181422		2868.2	-0.00137346
508.41	-0.02154868		1098.41	-0.00499101		1688.4	0.02238438		2278.4	-0.00187925		2868.4	-0.00095937
508.61	-0.02191911		1098.61	-0.00525134		1688.6	0.02108805		2278.6	-0.00236211		2868.6	-0.00025808
508.81	-0.02206786		1098.81	-0.00457745		1688.8	0.02129079		2278.8	-0.00253148		2868.8	-0.0002535
509.01	-0.02126582		1099.01	-0.00397238		1689	0.02120555		2279	-0.00208332		2869	0.00004626
509.21	-0.02079658		1099.21	-0.00401954		1689.2	0.0200465		2279.2	-0.00276399		2869.2	0.00011415
509.41	-0.02019637		1099.41	-0.00378858		1689.4	0.0197975		2279.4	-0.00278018		2869.4	0.00022961
509.61	-0.01982535		1099.61	-0.00364637		1689.6	0.01930249		2279.6	-0.00283611		2869.6	0.00008274
509.81	-0.02025248		1099.81	-0.0042378		1689.8	0.01868968		2279.8	-0.00309108		2869.8	0.000409
510.01	-0.02068018		1100.01	-0.00421449		1690	0.01841248		2280	-0.00278842		2870	0.00077154
510.21	-0.02075336		1100.21	-0.00351617		1690.2	0.01913676		2280.2	-0.00258999		2870.2	0.00104484
510.41	-0.02206866		1100.41	-0.00365585		1690.4	0.02000583		2280.4	-0.00191434		2870.4	0.00079659
510.61	-0.02236618		1100.61	-0.00481025		1690.6	0.02082552		2280.6	-0.00210599		2870.6	0.00060247
510.81	-0.02229298		1100.81	-0.00464169		1690.8	0.02228457		2280.8	-0.00130627		2870.8	0.0002088
511.01	-0.0219418		1101.01	-0.00445175		1691	0.02213976		2281	-0.00075537		2871	0.00030113
511.21	-0.02236277		1101.21	-0.00469935		1691.2	0.02268446		2281.2	-0.00045505		2871.2	-0.00000761
511.41	-0.02262479		1101.41	-0.00596118		1691.4	0.02323183		2281.4	0.00020226		2871.4	-0.00033381
511.61	-0.02207188		1101.61	-0.00624518		1691.6	0.02448958		2281.6	0.00056886		2871.6	-0.00013149
511.81	-0.0209376		1101.81	-0.00757655		1691.8	0.02529032		2281.8	0.00026289		2871.8	0.00002377
512.01	-0.02027706		1102.01	-0.00862651		1692	0.02541674		2282	0.00007486		2872	0.00045268
512.21	-0.02003922		1102.21	-0.00866707		1692.2	0.02552934		2282.2	0.00068827		2872.2	0.0009897
512.41	-0.01957339		1102.41	-0.00813157		1692.4	0.0248894		2282.4	0.00000066		2872.4	0.00093816
512.61	-0.01935705		1102.61	-0.00839672		1692.6	0.02444291		2282.6	0.00016319		2872.6	0.0015018
512.81	-0.01938457		1102.81	-0.00770711		1692.8	0.02438203		2282.8	-0.00089869		2872.8	0.00107622
513.01	-0.01892185		1103.01	-0.00794101		1693	0.02375769		2283	-0.00125388		2873	0.00045976
513.21	-0.01859612		1103.21	-0.00807286		1693.2	0.02331984		2283.2	-0.00265335		2873.2	-0.00044914
513.41	-0.01820229		1103.41	-0.00716438		1693.4	0.02338667		2283.4	-0.00293357		2873.4	-0.00109533
513.61	-0.0173271		1103.61	-0.00645996		1693.6	0.0228137		2283.6	-0.00342529		2873.6	-0.000579
513.81	-0.01764462		1103.81	-0.00615184		1693.8	0.02240292		2283.8	-0.0042488		2873.8	-0.00014471
514.01	-0.01761373		1104.01	-0.00511457		1694	0.02297398		2284	-0.00460804		2874	0.00020865
514.21	-0.01790906		1104.21	-0.00363071		1694.2	0.0232542		2284.2	-0.00431395		2874.2	0.0005488
514.41	-0.01901308		1104.41	-0.00418211		1694.4	0.02372402		2284.4	-0.0047185		2874.4	0.00136102
514.61	-0.01940369		1104.61	-0.00416769		1694.6	0.02372914		2284.6	-0.00476843		2874.6	0.00139632
514.81	-0.01944773		1104.81	-0.00351364		1694.8	0.02376419		2284.8	-0.00376104		2874.8	0.00102904
515.01	-0.02013468		1105.01	-0.00454095		1695	0.02324442		2285	-0.00349293		2875	0.00128268
515.21	-0.02050306		1105.21	-0.00438013		1695.2	0.02359324		2285.2	-0.00310922		2875.2	0.00083645
515.41	-0.0210618		1105.41	-0.00570883		1695.4	0.02387876		2285.4	-0.00237443		2875.4	0.00128672
515.61	-0.0208216		1105.61	-0.0052791		1695.6	0.02450155		2285.6	-0.0020855		2875.6	0.00179587
515.81	-0.02073035		1105.81	-0.00557313		1695.8	0.02446516		2285.8	-0.00136409		2875.8	0.00167454
516.01	-0.02122754		1106.01	-0.00601245		1696	0.02429792		2286	-0.0005761		2876	0.00268048
516.21	-0.02252351		1106.21	-0.00594404		1696.2	0.0237609		2286.2	-0.00052364		2876.2	0.00209457
516.41	-0.02277132		1106.41	-0.00648515		1696.4	0.02392961		2286.4	-0.00109203		2876.4	0.00109603
516.61	-0.02336931		1106.61	-0.00669337		1696.6	0.0236629		2286.6	-0.00081483		2876.6	0.00076655
516.81	-0.02337243		1106.81	-0.00685611		1696.8	0.02352844		2286.8	-0.00174442		2876.8	0.0005182
517.01	-0.02268435		1107.01	-0.00703132		1697	0.02396441		2287	-0.00164357		2877	0.00050186
517.21	-0.02205739		1107.21	-0.00639767		1697.2	0.02398379		2287.2	-0.00242548		2877.2	0.0004536
517.41	-0.02210468		1107.41	-0.00517331		1697.4	0.02338422		2287.4	-0.00222099		2877.4	0.00005032
517.61	-0.02132526		1107.61	-0.00518689		1697.6	0.02234484		2287.6	-0.00224129		2877.6	0.00031848
517.81	-0.02209893		1107.81	-0.0055147		1697.8	0.02181846		2287.8	-0.00248217		2877.8	-0.00055133
518.01	-0.02180908		1108.01	-0.0057816		1698	0.02152621		2288	-0.00254142		2878	-0.00129531
518.21	-0.02252774		1108.21	-0.00540468		1698.2	0.0217397		2288.2	-0.00282246		2878.2	-0.00140741
518.41	-0.02214912		1108.41	-0.00595735		1698.4	0.02115027		2288.4	-0.00291081		2878.4	-0.00130812
518.61	-0.02199504		1108.61	-0.00565088		1698.6	0.02093147		2288.6	-0.00250682		2878.6	-0.00164056
518.81	-0.02175062		1108.81	-0.00517216		1698.8	0.02067113		2288.8	-0.00224859		2878.8	-0.00213929
519.01	-0.02194287		1109.01	-0.00488944		1699	0.02191012		2289	-0.00235403		2879	-0.00202592
519.21	-0.02226352		1109.21	-0.0040581		1699.2	0.02183244		2289.2	-0.00308947		2879.2	-0.00243236
519.41	-0.02248112		1109.41	-0.00347308		1699.4	0.02268913		2289.4	-0.00225607		2879.4	-0.00204088
519.61	-0.02242516		1109.61	-0.00277878		1699.6	0.02338841		2289.6	-0.00233418		2879.6	-0.00248397
519.81	-0.02228618		1109.81	-0.00364578		1699.8	0.02413796		2289.8	-0.00167138		2879.8	-0.0028394
520.01	-0.02212296		1110.01	-0.00372783		1700	0.02500791		2290	-0.00161572		2880	-0.0027797
520.21	-0.02220347		1110.21	-0.00328917		1700.2	0.0251877		2290.2	-0.0022475		2880.2	-0.00341189
520.41	-0.02177058		1110.41	-0.00278549		1700.4	0.0261845		2290.4	-0.00235896		2880.4	-0.00263763
520.61	-0.02172356		1110.61	-0.00254019		1700.6	0.0255623		2290.6	-0.00189339		2880.6	-0.00174659
520.81	-0.02138997		1110.81	-0.00258641		1700.8	0.02532017		2290.8	-0.00184552		2880.8	-0.00067664
521.01	-0.02080561		1111.01	-0.00257515		1701	0.02549012		2291	-0.0013123		2881	-0.00024147
521.21	-0.02094468		1111.21	-0.00232375		1701.2	0.02541601		2291.2	-0.00107501		2881.2	0.0000381
521.41	-0.02187011		1111.41	-0.00290248		1701.4	0.02481148		2291.4	-0.00145302		2881.4	0.00001737
521.61	-0.02152455		1111.61	-0.00427722		1701.6	0.0240278		2291.6	-0.00133093		2881.6	-0.00037163
521.81	-0.02124456		1111.81	-0.00571133		1701.8	0.02338805		2291.8	-0.00226169		2881.8	-0.0009442
522.01	-0.02014397		1112.01	-0.00682788		1702	0.0226603		2292	-0.00259812		2882	-0.00081981
522.21	-0.02036883		1112.21	-0.00721283		1702.2	0.02298518		2292.2	-0.00237745		2882.2	-0.0008698
522.41	-0.01973781		1112.41	-0.00764898		1702.4	0.02120575		2292.4	-0.0020339		2882.4	-0.00133163
522.61	-0.02005117		1112.61	-0.00741828		1702.6	0.0220707		2292.6	-0.00202394		2882.6	-0.00187329
522.81	-0.0199308		1112.81	-0.00699345		1702.8	0.02262485		2292.8	-0.00241761		2882.8	-0.00235969
523.01	-0.01977411		1113.01	-0.00747264		1703	0.02305467		2293	-0.00300199		2883	-0.00274257
523.21	-0.01954754		1113.21	-0.00720752		1703.2	0.02184166		2293.2	-0.00358063		2883.2	-0.00344292
523.41	-0.01889851		1113.41	-0.00728996		1703.4	0.02240636		2293.4	-0.00291133		2883.4	-0.00368597
523.61	-0.0184986		1113.61	-0.00737699		1703.6	0.02286786		2293.6	-0.00297014		2883.6	-0.00479886
523.81	-0.017721		1113.81	-0.00772227		1703.8	0.02264167		2293.8	-0.00282978		2883.8	-0.0045756
524.01	-0.01767752		1114.01	-0.00672876		1704	0.02267324		2294	-0.00325349		2884	-0.00463063
524.21	-0.01701368		1114.21	-0.00610333		1704.2	0.02184036		2294.2	-0.00309303		2884.2	-0.00406864
524.41	-0.01667164		1114.41	-0.00582796		1704.4	0.02206215		2294.4	-0.00259787		2884.4	-0.00333483
524.61	-0.01692508		1114.61	-0.00618579		1704.6	0.02154028		2294.6	-0.00177548		2884.6	-0.00283705
524.81	-0.01634319		1114.81	-0.00508098		1704.8	0.02173226		2294.8	-0.00133372		2884.8	-0.00311551
525.01	-0.01627852		1115.01	-0.00419687		1705	0.02206925		2295	-0.00120061		2885	-0.00242418
525.21	-0.01706637		1115.21	-0.00395364		1705.2	0.02255741		2295.2	-0.000806		2885.2	-0.00159161
525.41	-0.01722442		1115.41	-0.00461389		1705.4	0.02185292		2295.4	-0.00115931		2885.4	-0.00135667
525.61	-0.01780657		1115.61	-0.00481645		1705.6	0.02239615		2295.6	-0.00027777		2885.6	-0.0016599
525.81	-0.01803636		1115.81	-0.00526393		1705.8	0.02272704		2295.8	0.00018257		2885.8	-0.00153945
526.01	-0.01905511		1116.01	-0.00565672		1706	0.02336514		2296	0.00116174		2886	-0.00233269
526.21	-0.01968104		1116.21	-0.00591517		1706.2	0.0242144		2296.2	0.00212776		2886.2	-0.00325747
526.41	-0.0213001		1116.41	-0.00561232		1706.4	0.02392742		2296.4	0.00302287		2886.4	-0.00469407
526.61	-0.02251478		1116.61	-0.00600784		1706.6	0.02505744		2296.6	0.00364853		2886.6	-0.00459682
526.81	-0.02338694		1116.81	-0.00568155		1706.8	0.02546847		2296.8	0.00306796		2886.8	-0.0040978
527.01	-0.02336769		1117.01	-0.00639944		1707	0.02488737		2297	0.0031713		2887	-0.00437699
527.21	-0.02330206		1117.21	-0.00563648		1707.2	0.02436216		2297.2	0.00280857		2887.2	-0.0042472
527.41	-0.02252261		1117.41	-0.0059919		1707.4	0.02471416		2297.4	0.00289647		2887.4	-0.00445984
527.61	-0.02172708		1117.61	-0.00565667		1707.6	0.02490349		2297.6	0.00268212		2887.6	-0.00479006
527.81	-0.02145963		1117.81	-0.00562051		1707.8	0.02478167		2297.8	0.00198302		2887.8	-0.0041057
528.01	-0.02123831		1118.01	-0.00566903		1708	0.02436475		2298	0.00199117		2888	-0.00322529
528.21	-0.02049939		1118.21	-0.00581396		1708.2	0.02376575		2298.2	0.00245371		2888.2	-0.00244086
528.41	-0.0203014		1118.41	-0.00549893		1708.4	0.0240346		2298.4	0.00181011		2888.4	-0.00214991
528.61	-0.01981069		1118.61	-0.00519608		1708.6	0.02329465		2298.6	0.00132069		2888.6	-0.00147709
528.81	-0.01940049		1118.81	-0.00504761		1708.8	0.02245125		2298.8	0.00084004		2888.8	-0.00186691
529.01	-0.02017458		1119.01	-0.00547819		1709	0.02206725		2299	0.00050497		2889	-0.00015561
529.21	-0.02027673		1119.21	-0.00544204		1709.2	0.02175679		2299.2	0.00073068		2889.2	0.00006713
529.41	-0.01968188		1119.41	-0.00587066		1709.4	0.02134786		2299.4	-0.00018869		2889.4	-0.0004978
529.61	-0.01940131		1119.61	-0.00637814		1709.6	0.02184679		2299.6	-0.00003179		2889.6	-0.00105042
529.81	-0.01962149		1119.81	-0.00685961		1709.8	0.02143145		2299.8	-0.00079808		2889.8	-0.0022452
530.01	-0.01992868		1120.01	-0.00771153		1710	0.02123738		2300	-0.00156395		2890	-0.00299892
530.21	-0.02001417		1120.21	-0.00814117		1710.2	0.02155957		2300.2	-0.00123458		2890.2	-0.00323727
530.41	-0.02044234		1120.41	-0.00849788		1710.4	0.02139555		2300.4	-0.00237052		2890.4	-0.00334899
530.61	-0.02008796		1120.61	-0.0087701		1710.6	0.02154585		2300.6	-0.0033333		2890.6	-0.00231459
530.81	-0.0198731		1120.81	-0.00800694		1710.8	0.02195415		2300.8	-0.00321356		2890.8	-0.00160889
531.01	-0.0198181		1121.01	-0.00809318		1711	0.02120554		2301	-0.00283272		2891	-0.00207094
531.21	-0.01909445		1121.21	-0.0071283		1711.2	0.02134013		2301.2	-0.00262189		2891.2	-0.00203451
531.41	-0.0185568		1121.41	-0.00717838		1711.4	0.02174319		2301.4	-0.00239997		2891.4	-0.00290093
531.61	-0.01813328		1121.61	-0.00611425		1711.6	0.0223819		2301.6	-0.00258779		2891.6	-0.00365532
531.81	-0.01901378		1121.81	-0.00515347		1711.8	0.02240304		2301.8	-0.00269266		2891.8	-0.00388455
532.01	-0.01943457		1122.01	-0.00510714		1712	0.02263882		2302	-0.00216032		2892	-0.00376503
532.21	-0.02000701		1122.21	-0.00543755		1712.2	0.02246309		2302.2	-0.00161041		2892.2	-0.00413299
532.41	-0.02020943		1122.41	-0.00493937		1712.4	0.02208275		2302.4	-0.00182128		2892.4	-0.00464679
532.61	-0.02095639		1122.61	-0.00508592		1712.6	0.02177683		2302.6	-0.00084046		2892.6	-0.00492485
532.81	-0.02197846		1122.81	-0.00577413		1712.8	0.0219583		2302.8	-0.00078346		2892.8	-0.00588607
533.01	-0.0224387		1123.01	-0.00494856		1713	0.02246694		2303	0.00044304		2893	-0.00479974
533.21	-0.02168177		1123.21	-0.00478275		1713.2	0.02236921		2303.2	0.00074442		2893.2	-0.00570415
533.41	-0.02145053		1123.41	-0.00557437		1713.4	0.02214232		2303.4	0.00054457		2893.4	-0.00647591
533.61	-0.02117221		1123.61	-0.00656084		1713.6	0.02214293		2303.6	0.00101391		2893.6	-0.0063642
533.81	-0.02183592		1123.81	-0.00662656		1713.8	0.02226705		2303.8	0.00136059		2893.8	-0.00639641
534.01	-0.02163002		1124.01	-0.00764491		1714	0.02321789		2304	0.00076397		2894	-0.00597125
534.21	-0.02177223		1124.21	-0.00809851		1714.2	0.0236208		2304.2	0.0007938		2894.2	-0.00579669
534.41	-0.02077456		1124.41	-0.00769882		1714.4	0.0236889		2304.4	-0.00062275		2894.4	-0.00554293
534.61	-0.02041799		1124.61	-0.00691703		1714.6	0.02367068		2304.6	-0.00036992		2894.6	-0.00568808
534.81	-0.0205744		1124.81	-0.00643685		1714.8	0.0236496		2304.8	0.00061333		2894.8	-0.00527528
535.01	-0.0208006		1125.01	-0.00570355		1715	0.02332899		2305	-0.0001285		2895	-0.00593156
535.21	-0.01964921		1125.21	-0.00560584		1715.2	0.02338429		2305.2	-0.00077184		2895.2	-0.00618745
535.41	-0.01989642		1125.41	-0.00566811		1715.4	0.02292967		2305.4	-0.00271537		2895.4	-0.00686108
535.61	-0.01951766		1125.61	-0.00561125		1715.6	0.02245115		2305.6	-0.00342915		2895.6	-0.00758288
535.81	-0.01991711		1125.81	-0.00606702		1715.8	0.02208474		2305.8	-0.00304378		2895.8	-0.00805533
536.01	-0.01991008		1126.01	-0.00718005		1716	0.02176668		2306	-0.00307627		2896	-0.00709128
536.21	-0.0194395		1126.21	-0.00776402		1716.2	0.02140439		2306.2	-0.00321803		2896.2	-0.00728987
536.41	-0.01972338		1126.41	-0.00689805		1716.4	0.02134509		2306.4	-0.00370904		2896.4	-0.00767827
536.61	-0.02123418		1126.61	-0.00713191		1716.6	0.02124937		2306.6	-0.00316218		2896.6	-0.00780107
536.81	-0.02166453		1126.81	-0.00717571		1716.8	0.02113951		2306.8	-0.0039509		2896.8	-0.00732107
537.01	-0.02127221		1127.01	-0.00732655		1717	0.02064689		2307	-0.00357965		2897	-0.00613019
537.21	-0.02126008		1127.21	-0.0076046		1717.2	0.02000977		2307.2	-0.00392036		2897.2	-0.00635322
537.41	-0.02202421		1127.41	-0.00847689		1717.4	0.02005344		2307.4	-0.00327571		2897.4	-0.00555218
537.61	-0.02147235		1127.61	-0.00939155		1717.6	0.02076101		2307.6	-0.00285421		2897.6	-0.00469521
537.81	-0.02139255		1127.81	-0.00889014		1717.8	0.02090591		2307.8	-0.00211413		2897.8	-0.00398161
538.01	-0.02181183		1128.01	-0.00878281		1718	0.02187656		2308	-0.00221082		2898	-0.00410825
538.21	-0.02101958		1128.21	-0.00757217		1718.2	0.02149645		2308.2	-0.00191285		2898.2	-0.00451597
538.41	-0.01980791		1128.41	-0.00631701		1718.4	0.02245499		2308.4	-0.00099347		2898.4	-0.00438207
538.61	-0.02020932		1128.61	-0.00582539		1718.6	0.02295136		2308.6	-0.00103238		2898.6	-0.00393607
538.81	-0.01963882		1128.81	-0.00567021		1718.8	0.0232162		2308.8	-0.0012499		2898.8	-0.00418226
539.01	-0.01946891		1129.01	-0.00616719		1719	0.0235081		2309	-0.00178355		2899	-0.00379728
539.21	-0.01958006		1129.21	-0.00659724		1719.2	0.02397809		2309.2	-0.00189907		2899.2	-0.0040485
539.41	-0.01933224		1129.41	-0.00647157		1719.4	0.02457778		2309.4	-0.00177565		2899.4	-0.00356297
539.61	-0.01971927		1129.61	-0.007189		1719.6	0.02438466		2309.6	-0.00094381		2899.6	-0.00406964
539.81	-0.01938528		1129.81	-0.00709324		1719.8	0.02477914		2309.8	-0.00010877		2899.8	-0.00421745
540.01	-0.01921885		1130.01	-0.00723527		1720	0.02513119		2310	-0.00101113		2900	-0.00371186
540.21	-0.01874076		1130.21	-0.00688809		1720.2	0.02539884		2310.2	-0.00141553		2900.2	-0.00455887
540.41	-0.01913189		1130.41	-0.00653313		1720.4	0.02486533		2310.4	-0.00209564		2900.4	-0.00504167
540.61	-0.02001434		1130.61	-0.00666193		1720.6	0.02496009		2310.6	-0.00267432		2900.6	-0.00549997
540.81	-0.02052135		1130.81	-0.00712403		1720.8	0.02457803		2310.8	-0.00337304		2900.8	-0.00543831
541.01	-0.02013259		1131.01	-0.00739279		1721	0.0242222		2311	-0.00379029		2901	-0.0059329
541.21	-0.0208947		1131.21	-0.00736188		1721.2	0.02423536		2311.2	-0.00342095		2901.2	-0.00655357
541.41	-0.0206774		1131.41	-0.00840905		1721.4	0.02401922		2311.4	-0.00312662		2901.4	-0.00596057
541.61	-0.02061049		1131.61	-0.00859884		1721.6	0.0239537		2311.6	-0.00259025		2901.6	-0.00661468
541.81	-0.02021622		1131.81	-0.00820091		1721.8	0.02422861		2311.8	-0.0018226		2901.8	-0.00679848
542.01	-0.02066562		1132.01	-0.00792561		1722	0.02403829		2312	-0.00153854		2902	-0.00793021
542.21	-0.02032806		1132.21	-0.00773509		1722.2	0.02309389		2312.2	-0.00216253		2902.2	-0.00798565
542.41	-0.02142132		1132.41	-0.00784894		1722.4	0.02379413		2312.4	-0.00089304		2902.4	-0.00726303
542.61	-0.02289545		1132.61	-0.00768524		1722.6	0.02288673		2312.6	-0.00192667		2902.6	-0.00742054
542.81	-0.0228214		1132.81	-0.00767118		1722.8	0.02236389		2312.8	-0.00223261		2902.8	-0.00761577
543.01	-0.02347263		1133.01	-0.00770598		1723	0.02214754		2313	-0.00200715		2903	-0.00697595
543.21	-0.02353514		1133.21	-0.00772087		1723.2	0.02302337		2313.2	-0.00128794		2903.2	-0.00726046
543.41	-0.02338148		1133.41	-0.0080869		1723.4	0.02240006		2313.4	-0.0008419		2903.4	-0.00618097
543.61	-0.02412151		1133.61	-0.0086872		1723.6	0.02212451		2313.6	-0.00155176		2903.6	-0.00594115
543.81	-0.02312361		1133.81	-0.0089114		1723.8	0.02249415		2313.8	-0.00197616		2903.8	-0.00541906
544.01	-0.02353037		1134.01	-0.0089122		1724	0.02269759		2314	-0.00238366		2904	-0.00463185
544.21	-0.02324956		1134.21	-0.00857708		1724.2	0.02181439		2314.2	-0.00236796		2904.2	-0.00449613
544.41	-0.02317603		1134.41	-0.008325		1724.4	0.02230639		2314.4	-0.00249742		2904.4	-0.00438159
544.61	-0.02325744		1134.61	-0.00758736		1724.6	0.02266552		2314.6	-0.00228852		2904.6	-0.00337392
544.81	-0.02337082		1134.81	-0.00759165		1724.8	0.0224418		2314.8	-0.00232402		2904.8	-0.00354868
545.01	-0.02198781		1135.01	-0.00718024		1725	0.02316455		2315	-0.00221348		2905	-0.00375627
545.21	-0.02163756		1135.21	-0.0071196		1725.2	0.02321771		2315.2	-0.00226215		2905.2	-0.00337206
545.41	-0.02131803		1135.41	-0.00694569		1725.4	0.02334386		2315.4	-0.00202129		2905.4	-0.00334285
545.61	-0.02211383		1135.61	-0.00761009		1725.6	0.02457526		2315.6	-0.00164936		2905.6	-0.00401922
545.81	-0.02138885		1135.81	-0.00740148		1725.8	0.02486173		2315.8	-0.00193219		2905.8	-0.00405074
546.01	-0.02163114		1136.01	-0.00697071		1726	0.02408124		2316	-0.00208166		2906	-0.0043608
546.21	-0.02192275		1136.21	-0.00705344		1726.2	0.02452144		2316.2	-0.00201024		2906.2	-0.00441718
546.41	-0.02258317		1136.41	-0.00652882		1726.4	0.02513287		2316.4	-0.00125485		2906.4	-0.00476179
546.61	-0.02192498		1136.61	-0.00636571		1726.6	0.02468751		2316.6	-0.00147727		2906.6	-0.0052064
546.81	-0.02100515		1136.81	-0.006788		1726.8	0.02489401		2316.8	-0.00168842		2906.8	-0.00540373
547.01	-0.02117591		1137.01	-0.00644913		1727	0.02511694		2317	-0.001217		2907	-0.00654008
547.21	-0.02062949		1137.21	-0.00722767		1727.2	0.0259592		2317.2	-0.00095666		2907.2	-0.00622741
547.41	-0.02107357		1137.41	-0.00799233		1727.4	0.02558257		2317.4	-0.00100408		2907.4	-0.00616173
547.61	-0.0215161		1137.61	-0.00857534		1727.6	0.02578576		2317.6	-0.00178049		2907.6	-0.00744359
547.81	-0.02127678		1137.81	-0.00837887		1727.8	0.02530933		2317.8	-0.00177621		2907.8	-0.00810848
548.01	-0.02189602		1138.01	-0.00846741		1728	0.02417128		2318	-0.0011473		2908	-0.00788381
548.21	-0.02159023		1138.21	-0.00787468		1728.2	0.02275647		2318.2	-0.00212666		2908.2	-0.00816868
548.41	-0.02168162		1138.41	-0.00763426		1728.4	0.02309919		2318.4	-0.00253104		2908.4	-0.00731083
548.61	-0.02121397		1138.61	-0.00720315		1728.6	0.02260101		2318.6	-0.00267732		2908.6	-0.0079481
548.81	-0.02137353		1138.81	-0.00733906		1728.8	0.0219269		2318.8	-0.00352977		2908.8	-0.00913421
549.01	-0.02089425		1139.01	-0.00719998		1729	0.0216907		2319	-0.00373807		2909	-0.00879667
549.21	-0.02142868		1139.21	-0.00748851		1729.2	0.02120626		2319.2	-0.00439262		2909.2	-0.0091613
549.41	-0.02189707		1139.41	-0.00747835		1729.4	0.02110198		2319.4	-0.00424088		2909.4	-0.00907475
549.61	-0.02208804		1139.61	-0.00865603		1729.6	0.02088472		2319.6	-0.00379024		2909.6	-0.00861591
549.81	-0.02172212		1139.81	-0.00826427		1729.8	0.02062325		2319.8	-0.00377516		2909.8	-0.00858758
550.01	-0.02122244		1140.01	-0.00899316		1730	0.02021875		2320	-0.00219995		2910	-0.00862173
550.21	-0.02060173		1140.21	-0.00972146		1730.2	0.02082131		2320.2	-0.00134239		2910.2	-0.0087895
550.41	-0.02052718		1140.41	-0.00978352		1730.4	0.0208545		2320.4	-0.00117052		2910.4	-0.00840258
550.61	-0.01987405		1140.61	-0.01018618		1730.6	0.02117787		2320.6	-0.00034882		2910.6	-0.00851491
550.81	-0.02007134		1140.81	-0.01011079		1730.8	0.02164061		2320.8	-0.00000224		2910.8	-0.00886366
551.01	-0.02053594		1141.01	-0.00964796		1731	0.02254792		2321	0.00045275		2911	-0.00920556
551.21	-0.01968296		1141.21	-0.00971584		1731.2	0.02359236		2321.2	0.00070608		2911.2	-0.0086233
551.41	-0.02012208		1141.41	-0.00906603		1731.4	0.0237846		2321.4	0.0002834		2911.4	-0.00926478
551.61	-0.0201175		1141.61	-0.00839401		1731.6	0.0233126		2321.6	-0.0001006		2911.6	-0.00915811
551.81	-0.01951134		1141.81	-0.0072564		1731.8	0.02355064		2321.8	-0.00021061		2911.8	-0.00810877
552.01	-0.01962399		1142.01	-0.00730893		1732	0.02331593		2322	-0.00029891		2912	-0.00801726
552.21	-0.01993074		1142.21	-0.00691471		1732.2	0.02379923		2322.2	-0.00140519		2912.2	-0.00801325
552.41	-0.01996324		1142.41	-0.00666441		1732.4	0.02427584		2322.4	-0.00124988		2912.4	-0.00816851
552.61	-0.01980116		1142.61	-0.00685065		1732.6	0.02514859		2322.6	-0.0011018		2912.6	-0.00872521
552.81	-0.01993019		1142.81	-0.00723541		1732.8	0.02547008		2322.8	-0.00130984		2912.8	-0.0079054
553.01	-0.01991929		1143.01	-0.00745728		1733	0.026039		2323	-0.00138994		2913	-0.00711078
553.21	-0.01995858		1143.21	-0.00832584		1733.2	0.02615538		2323.2	-0.00143016		2913.2	-0.00676403
553.41	-0.02014605		1143.41	-0.00825674		1733.4	0.02618884		2323.4	-0.00123509		2913.4	-0.00567349
553.61	-0.02013281		1143.61	-0.00857231		1733.6	0.02616974		2323.6	-0.00040167		2913.6	-0.00531708
553.81	-0.01991187		1143.81	-0.00807698		1733.8	0.02608092		2323.8	0.00014293		2913.8	-0.00563189
554.01	-0.0196753		1144.01	-0.00843318		1734	0.02578376		2324	0.00154272		2914	-0.00605925
554.21	-0.02002473		1144.21	-0.00883976		1734.2	0.02607001		2324.2	0.00160705		2914.2	-0.00660222
554.41	-0.02057755		1144.41	-0.00904906		1734.4	0.02598346		2324.4	0.00188781		2914.4	-0.00686126
554.61	-0.02049689		1144.61	-0.00893928		1734.6	0.02651896		2324.6	0.00261894		2914.6	-0.00735313
554.81	-0.02054854		1144.81	-0.00889579		1734.8	0.02615545		2324.8	0.00305674		2914.8	-0.00785153
555.01	-0.02059257		1145.01	-0.00972632		1735	0.02607909		2325	0.00237621		2915	-0.00762428
555.21	-0.02009712		1145.21	-0.00908302		1735.2	0.02513563		2325.2	0.00169469		2915.2	-0.00811478
555.41	-0.0207007		1145.41	-0.00831986		1735.4	0.0244584		2325.4	0.00067064		2915.4	-0.00934249
555.61	-0.02119867		1145.61	-0.00812573		1735.6	0.02382769		2325.6	0.00131085		2915.6	-0.00936262
555.81	-0.02132772		1145.81	-0.00812896		1735.8	0.02419716		2325.8	0.00089757		2915.8	-0.01039835
556.01	-0.02172055		1146.01	-0.00841634		1736	0.02373041		2326	0.00070987		2916	-0.01102021
556.21	-0.02230813		1146.21	-0.00816845		1736.2	0.023926		2326.2	0.00000915		2916.2	-0.01136646
556.41	-0.0221964		1146.41	-0.00822216		1736.4	0.02376657		2326.4	-0.00080249		2916.4	-0.01027605
556.61	-0.02225893		1146.61	-0.00866934		1736.6	0.02425282		2326.6	-0.00062126		2916.6	-0.00953809
556.81	-0.02271666		1146.81	-0.00908161		1736.8	0.02415505		2326.8	-0.00132586		2916.8	-0.00899573
557.01	-0.0233882		1147.01	-0.00901346		1737	0.02336257		2327	-0.00172281		2917	-0.00820286
557.21	-0.02352412		1147.21	-0.00896108		1737.2	0.02266852		2327.2	-0.00211582		2917.2	-0.00689746
557.41	-0.02332243		1147.41	-0.00825811		1737.4	0.02286392		2327.4	-0.00270187		2917.4	-0.0056118
557.61	-0.02329232		1147.61	-0.00866491		1737.6	0.02245049		2327.6	-0.00241054		2917.6	-0.00549205
557.81	-0.02354781		1147.81	-0.00887952		1737.8	0.02203701		2327.8	-0.0018057		2917.8	-0.00600208
558.01	-0.02339358		1148.01	-0.00891007		1738	0.02202553		2328	-0.00105726		2918	-0.00542989
558.21	-0.02293124		1148.21	-0.00920004		1738.2	0.02141731		2328.2	-0.00105851		2918.2	-0.00464561
558.41	-0.02133059		1148.41	-0.00943108		1738.4	0.02111003		2328.4	-0.00055662		2918.4	-0.00475382
558.61	-0.02045296		1148.61	-0.00943987		1738.6	0.02093699		2328.6	-0.00010155		2918.6	-0.00439488
558.81	-0.01933548		1148.81	-0.01034273		1738.8	0.02036948		2328.8	-0.00002107		2918.8	-0.0045766
559.01	-0.01839037		1149.01	-0.01031328		1739	0.01947388		2329	-0.00041066		2919	-0.00468746
559.21	-0.01766439		1149.21	-0.00902177		1739.2	0.01926688		2329.2	-0.00028754		2919.2	-0.00538608
559.41	-0.01789233		1149.41	-0.00831116		1739.4	0.01999657		2329.4	-0.00059553		2919.4	-0.00565705
559.61	-0.01791092		1149.61	-0.00747438		1739.6	0.02013489		2329.6	-0.00056839		2919.6	-0.00477756
559.81	-0.01797708		1149.81	-0.00628542		1739.8	0.02063913		2329.8	-0.00098581		2919.8	-0.0045589
560.01	-0.01838374		1150.01	-0.0053003		1740	0.02072353		2330	-0.00079662		2920	-0.00407876
560.21	-0.01835405		1150.21	-0.00418077		1740.2	0.02143873		2330.2	-0.00121972		2920.2	-0.00399739
560.41	-0.01820668		1150.41	-0.00471062		1740.4	0.02115045		2330.4	-0.00127071		2920.4	-0.00322545
560.61	-0.01791301		1150.61	-0.00494557		1740.6	0.02136808		2330.6	-0.0006933		2920.6	-0.00336001
560.81	-0.01806007		1150.81	-0.00541706		1740.8	0.0209446		2330.8	-0.0016591		2920.8	-0.0029093
561.01	-0.0179859		1151.01	-0.00544968		1741	0.02049907		2331	-0.00109029		2921	-0.00292225
561.21	-0.01820578		1151.21	-0.00674559		1741.2	0.02090717		2331.2	-0.00116162		2921.2	-0.00299213
561.41	-0.0180327		1151.41	-0.0080508		1741.4	0.02173447		2331.4	-0.00125742		2921.4	-0.0035533
561.61	-0.018611		1151.61	-0.00896228		1741.6	0.0220618		2331.6	-0.00170284		2921.6	-0.00414889
561.81	-0.01934341		1151.81	-0.00912543		1741.8	0.02181011		2331.8	-0.00135051		2921.8	-0.00491699
562.01	-0.01918504		1152.01	-0.00959675		1742	0.02182325		2332	-0.00136545		2922	-0.0044163
562.21	-0.02010461		1152.21	-0.01046785		1742.2	0.02194294		2332.2	-0.00151745		2922.2	-0.00568084
562.41	-0.02017821		1152.41	-0.01102908		1742.4	0.02285364		2332.4	-0.00122135		2922.4	-0.0068704
562.61	-0.02120408		1152.61	-0.01154908		1742.6	0.02354495		2332.6	-0.00142474		2922.6	-0.00720085
562.81	-0.0216614		1152.81	-0.01228489		1742.8	0.02386484		2332.8	-0.00189327		2922.8	-0.00782193
563.01	-0.02268279		1153.01	-0.01143543		1743	0.02355217		2333	-0.00138977		2923	-0.0077013
563.21	-0.02333327		1153.21	-0.01160168		1743.2	0.02456211		2333.2	-0.00129156		2923.2	-0.00724199
563.41	-0.02374104		1153.41	-0.0109436		1743.4	0.02478051		2333.4	-0.00111154		2923.4	-0.00597115
563.61	-0.02421167		1153.61	-0.01029117		1743.6	0.02413582		2333.6	-0.00103083		2923.6	-0.00600466
563.81	-0.02482476		1153.81	-0.00911361		1743.8	0.02394646		2333.8	-0.00164677		2923.8	-0.00667761
564.01	-0.02500897		1154.01	-0.0086412		1744	0.02341021		2334	-0.00127832		2924	-0.00721357
564.21	-0.02448614		1154.21	-0.00863723		1744.2	0.02279025		2334.2	-0.00127291		2924.2	-0.00680893
564.41	-0.02419608		1154.41	-0.00947981		1744.4	0.02185224		2334.4	-0.00155259		2924.4	-0.00651795
564.61	-0.02334234		1154.61	-0.00912623		1744.6	0.02080633		2334.6	-0.00158496		2924.6	-0.00622874
564.81	-0.02278474		1154.81	-0.00888491		1744.8	0.01996433		2334.8	-0.00247901		2924.8	-0.00652115
565.01	-0.02234462		1155.01	-0.00891316		1745	0.0205644		2335	-0.00164045		2925	-0.00653134
565.21	-0.02226277		1155.21	-0.01011447		1745.2	0.0205906		2335.2	-0.00220059		2925.2	-0.00709937
565.41	-0.02125453		1155.41	-0.00990143		1745.4	0.02003205		2335.4	-0.00222825		2925.4	-0.00723979
565.61	-0.02123126		1155.61	-0.00943346		1745.6	0.02012156		2335.6	-0.00232072		2925.6	-0.00664468
565.81	-0.02189635		1155.81	-0.0092565		1745.8	0.01975111		2335.8	-0.00208681		2925.8	-0.00731949
566.01	-0.02125969		1156.01	-0.00927952		1746	0.02041104		2336	-0.00238799		2926	-0.00709863
566.21	-0.02148646		1156.21	-0.009412		1746.2	0.02142275		2336.2	-0.00280391		2926.2	-0.00811304
566.41	-0.02078065		1156.41	-0.01016218		1746.4	0.02182466		2336.4	-0.00315494		2926.4	-0.00814339
566.61	-0.02042737		1156.61	-0.0105211		1746.6	0.02224216		2336.6	-0.00298999		2926.6	-0.00861456
566.81	-0.02002486		1156.81	-0.01050503		1746.8	0.02269476		2336.8	-0.00264122		2926.8	-0.00823744
567.01	-0.0197885		1157.01	-0.01010225		1747	0.02307433		2337	-0.00159994		2927	-0.00813468
567.21	-0.0198076		1157.21	-0.01007064		1747.2	0.02335361		2337.2	-0.00144314		2927.2	-0.00834095
567.41	-0.01993275		1157.41	-0.00956475		1747.4	0.02347109		2337.4	-0.00036449		2927.4	-0.00821202
567.61	-0.01995269		1157.61	-0.00904802		1747.6	0.02267814		2337.6	-0.00128236		2927.6	-0.00956318
567.81	-0.0210036		1157.81	-0.00972863		1747.8	0.02260694		2337.8	-0.00183996		2927.8	-0.00962342
568.01	-0.02023561		1158.01	-0.00976697		1748	0.0225229		2338	-0.00142638		2928	-0.00893956
568.21	-0.02118966		1158.21	-0.01054449		1748.2	0.02296149		2338.2	-0.00156706		2928.2	-0.00775476
568.41	-0.02215782		1158.41	-0.01123149		1748.4	0.02324865		2338.4	-0.00093107		2928.4	-0.00785279
568.61	-0.02289564		1158.61	-0.01085323		1748.6	0.02332805		2338.6	-0.00101196		2928.6	-0.00841364
568.81	-0.0232046		1158.81	-0.01046146		1748.8	0.023774		2338.8	-0.00184846		2928.8	-0.0078557
569.01	-0.02327905		1159.01	-0.01073867		1749	0.02405221		2339	-0.00117406		2929	-0.00676369
569.21	-0.02339469		1159.21	-0.01096453		1749.2	0.02403552		2339.2	-0.00062084		2929.2	-0.00673636
569.41	-0.0230602		1159.41	-0.01076612		1749.4	0.02398739		2339.4	-0.00035348		2929.4	-0.0060575
569.61	-0.02262445		1159.61	-0.01048442		1749.6	0.02398248		2339.6	-0.00076454		2929.6	-0.00586572
569.81	-0.02222668		1159.81	-0.0103327		1749.8	0.02366086		2339.8	-0.00097473		2929.8	-0.00575263
570.01	-0.02214085		1160.01	-0.01067929		1750	0.02331683		2340	-0.00092193		2930	-0.00587528
570.21	-0.02080061		1160.21	-0.01085851		1750.2	0.02298134		2340.2	-0.00076148		2930.2	-0.00649913
570.41	-0.01985162		1160.41	-0.01161141		1750.4	0.02227362		2340.4	-0.00074525		2930.4	-0.00656006
570.61	-0.01919469		1160.61	-0.01099714		1750.6	0.02285989		2340.6	-0.0012216		2930.6	-0.00744288
570.81	-0.01861441		1160.81	-0.01092567		1750.8	0.0226553		2340.8	-0.00134634		2930.8	-0.00748894
571.01	-0.01812357		1161.01	-0.01070595		1751	0.02303561		2341	-0.00124146		2931	-0.00770086
571.21	-0.01845689		1161.21	-0.01042749		1751.2	0.02281749		2341.2	-0.00165418		2931.2	-0.00800959
571.41	-0.01810133		1161.41	-0.01048627		1751.4	0.02353877		2341.4	-0.00183655		2931.4	-0.0079991
571.61	-0.01783121		1161.61	-0.01069667		1751.6	0.02317		2341.6	-0.0025991		2931.6	-0.00847455
571.81	-0.01835004		1161.81	-0.01154581		1751.8	0.02336817		2341.8	-0.00283667		2931.8	-0.00831988
572.01	-0.01808669		1162.01	-0.01111767		1752	0.02341999		2342	-0.00310047		2932	-0.00928849
572.21	-0.01930637		1162.21	-0.01192681		1752.2	0.02431258		2342.2	-0.00326022		2932.2	-0.00978725
572.41	-0.01963599		1162.41	-0.01121765		1752.4	0.02405441		2342.4	-0.00322935		2932.4	-0.01058318
572.61	-0.02024107		1162.61	-0.00976894		1752.6	0.02401643		2342.6	-0.0044943		2932.6	-0.0114582
572.81	-0.02084195		1162.81	-0.00919024		1752.8	0.02349599		2342.8	-0.00487788		2932.8	-0.01083959
573.01	-0.02149869		1163.01	-0.00891497		1753	0.02380935		2343	-0.0038103		2933	-0.01113368
573.21	-0.02140126		1163.21	-0.00895115		1753.2	0.02424757		2343.2	-0.00292086		2933.2	-0.01189675
573.41	-0.02141007		1163.41	-0.00921468		1753.4	0.02395985		2343.4	-0.00341523		2933.4	-0.01206014
573.61	-0.02146196		1163.61	-0.00995056		1753.6	0.02282116		2343.6	-0.00253578		2933.6	-0.01218708
573.81	-0.02186074		1163.81	-0.00950772		1753.8	0.02230502		2343.8	-0.00180187		2933.8	-0.01131815
574.01	-0.02212336		1164.01	-0.00899622		1754	0.02138155		2344	-0.00144952		2934	-0.01159866
574.21	-0.02084304		1164.21	-0.00896134		1754.2	0.02136236		2344.2	-0.00086733		2934.2	-0.01077617
574.41	-0.02113413		1164.41	-0.00970674		1754.4	0.02110852		2344.4	-0.00111872		2934.4	-0.01022225
574.61	-0.02100464		1164.61	-0.00912675		1754.6	0.02040182		2344.6	-0.00057197		2934.6	-0.00968989
574.81	-0.02126449		1164.81	-0.00927804		1754.8	0.01968056		2344.8	-0.00051572		2934.8	-0.00847722
575.01	-0.02094765		1165.01	-0.00937241		1755	0.02059268		2345	-0.00037908		2935	-0.00741128
575.21	-0.02115443		1165.21	-0.00951474		1755.2	0.02132289		2345.2	-0.0014383		2935.2	-0.00731207
575.41	-0.02084465		1165.41	-0.00966898		1755.4	0.02233196		2345.4	-0.00144894		2935.4	-0.00660415
575.61	-0.0207882		1165.61	-0.01079176		1755.6	0.02113886		2345.6	-0.00113415		2935.6	-0.00696841
575.81	-0.02038274		1165.81	-0.01053827		1755.8	0.02130239		2345.8	-0.00176874		2935.8	-0.00689192
576.01	-0.019766		1166.01	-0.01138456		1756	0.02080053		2346	-0.00304801		2936	-0.00724522
576.21	-0.01922603		1166.21	-0.01133877		1756.2	0.02067251		2346.2	-0.0033249		2936.2	-0.00696695
576.41	-0.01917112		1166.41	-0.00984204		1756.4	0.01942758		2346.4	-0.00262602		2936.4	-0.00734856
576.61	-0.01948836		1166.61	-0.0092931		1756.6	0.01969369		2346.6	-0.00275096		2936.6	-0.00770369
576.81	-0.01943959		1166.81	-0.00878134		1756.8	0.01960946		2346.8	-0.00265113		2936.8	-0.00708393
577.01	-0.01877533		1167.01	-0.00947085		1757	0.0204495		2347	-0.00151029		2937	-0.00808285
577.21	-0.01806543		1167.21	-0.01011393		1757.2	0.02056517		2347.2	-0.00081345		2937.2	-0.00856891
577.41	-0.01773534		1167.41	-0.00946512		1757.4	0.02090009		2347.4	-0.00033238		2937.4	-0.00896032
577.61	-0.01800465		1167.61	-0.01072484		1757.6	0.02053802		2347.6	0.00115807		2937.6	-0.008834
577.81	-0.01764207		1167.81	-0.00976888		1757.8	0.02030106		2347.8	0.00126947		2937.8	-0.00861382
578.01	-0.01736219		1168.01	-0.0098585		1758	0.020213		2348	0.00204286		2938	-0.00980114
578.21	-0.0173414		1168.21	-0.01025415		1758.2	0.02020914		2348.2	0.00250881		2938.2	-0.0103285
578.41	-0.01826765		1168.41	-0.01006529		1758.4	0.0200721		2348.4	0.00278932		2938.4	-0.01023076
578.61	-0.01957817		1168.61	-0.00988511		1758.6	0.01995099		2348.6	0.00355396		2938.6	-0.0101766
578.81	-0.02073246		1168.81	-0.00994905		1758.8	0.02099147		2348.8	0.00350784		2938.8	-0.00968115
579.01	-0.02146661		1169.01	-0.00966262		1759	0.02184918		2349	0.00323093		2939	-0.00922777
579.21	-0.02235517		1169.21	-0.00935177		1759.2	0.02186505		2349.2	0.00321848		2939.2	-0.00928311
579.41	-0.02278404		1169.41	-0.00972741		1759.4	0.02169896		2349.4	0.00367098		2939.4	-0.00915592
579.61	-0.02342625		1169.61	-0.00991324		1759.6	0.02083169		2349.6	0.00367194		2939.6	-0.00987527
579.81	-0.02353316		1169.81	-0.00985691		1759.8	0.02056854		2349.8	0.0017719		2939.8	-0.00911765
580.01	-0.02393825		1170.01	-0.01002858		1760	0.01905371		2350	0.00102299		2940	-0.0090934
580.21	-0.02420565		1170.21	-0.0093722		1760.2	0.01821182		2350.2	0.00142468		2940.2	-0.00844389
580.41	-0.02445409		1170.41	-0.00893055		1760.4	0.0179852		2350.4	0.00143792		2940.4	-0.00847925
580.61	-0.02423873		1170.61	-0.00846607		1760.6	0.01875067		2350.6	0.00080389		2940.6	-0.00779324
580.81	-0.02431042		1170.81	-0.00829183		1760.8	0.01898169		2350.8	-0.00020423		2940.8	-0.00805629
581.01	-0.0237451		1171.01	-0.00917267		1761	0.01903448		2351	0.00015327		2941	-0.00860205
581.21	-0.02361537		1171.21	-0.00889196		1761.2	0.01899746		2351.2	0.00040979		2941.2	-0.00885861
581.41	-0.02273537		1171.41	-0.00943385		1761.4	0.02002379		2351.4	-0.0001365		2941.4	-0.00932564
581.61	-0.02268662		1171.61	-0.01134962		1761.6	0.0197494		2351.6	0.00005902		2941.6	-0.00944068
581.81	-0.0211765		1171.81	-0.01143789		1761.8	0.02028974		2351.8	-0.00008262		2941.8	-0.0098358
582.01	-0.02143644		1172.01	-0.01266752		1762	0.0212495		2352	0.00066869		2942	-0.01020077
582.21	-0.02103763		1172.21	-0.01284935		1762.2	0.02088117		2352.2	0.00079727		2942.2	-0.01035853
582.41	-0.02213665		1172.41	-0.01283008		1762.4	0.02183651		2352.4	0.00131307		2942.4	-0.00984787
582.61	-0.02218478		1172.61	-0.01263729		1762.6	0.02321122		2352.6	0.00211148		2942.6	-0.00975987
582.81	-0.0225648		1172.81	-0.01227009		1762.8	0.02326601		2352.8	0.00193436		2942.8	-0.00914916
583.01	-0.02239735		1173.01	-0.01259777		1763	0.02276852		2353	0.00162648		2943	-0.00956125
583.21	-0.02180259		1173.21	-0.01277361		1763.2	0.02329822		2353.2	0.00236437		2943.2	-0.00947306
583.41	-0.02192191		1173.41	-0.0131002		1763.4	0.02336103		2353.4	0.00226838		2943.4	-0.00925872
583.61	-0.02226882		1173.61	-0.01348098		1763.6	0.02271619		2353.6	0.00197486		2943.6	-0.00891775
583.81	-0.02244016		1173.81	-0.01380746		1763.8	0.02242295		2353.8	0.0012052		2943.8	-0.008655
584.01	-0.02227195		1174.01	-0.0134277		1764	0.02282411		2354	0.00200695		2944	-0.00880985
584.21	-0.02175006		1174.21	-0.01375673		1764.2	0.02324086		2354.2	0.00148934		2944.2	-0.00827111
584.41	-0.02120898		1174.41	-0.01350305		1764.4	0.02359245		2354.4	0.0015491		2944.4	-0.00882624
584.61	-0.02044834		1174.61	-0.01234663		1764.6	0.02292433		2354.6	0.00070917		2944.6	-0.00872924
584.81	-0.02027781		1174.81	-0.01129328		1764.8	0.02234272		2354.8	-0.00048417		2944.8	-0.0089201
585.01	-0.01996991		1175.01	-0.01123362		1765	0.02160375		2355	-0.00033332		2945	-0.00894709
585.21	-0.02051899		1175.21	-0.01126525		1765.2	0.02147366		2355.2	-0.00049596		2945.2	-0.00917156
585.41	-0.01972448		1175.41	-0.01169693		1765.4	0.02196598		2355.4	-0.00070702		2945.4	-0.0096892
585.61	-0.01996205		1175.61	-0.01162747		1765.6	0.02113279		2355.6	-0.00015402		2945.6	-0.00995752
585.81	-0.01965684		1175.81	-0.01119844		1765.8	0.02077929		2355.8	-0.00014208		2945.8	-0.00914145
586.01	-0.02086346		1176.01	-0.012001		1766	0.02011722		2356	-0.00040994		2946	-0.0084633
586.21	-0.02070676		1176.21	-0.01175497		1766.2	0.01925485		2356.2	-0.00087475		2946.2	-0.00860785
586.41	-0.02166658		1176.41	-0.0113746		1766.4	0.01969886		2356.4	-0.00110432		2946.4	-0.00860563
586.61	-0.02203038		1176.61	-0.01057546		1766.6	0.02028907		2356.6	-0.0007972		2946.6	-0.00801401
586.81	-0.0229332		1176.81	-0.01048887		1766.8	0.01882281		2356.8	-0.00138435		2946.8	-0.00809048
587.01	-0.02323371		1177.01	-0.00991608		1767	0.01928971		2357	-0.00053747		2947	-0.00828795
587.21	-0.02378883		1177.21	-0.00895446		1767.2	0.02003209		2357.2	-0.00048307		2947.2	-0.00760951
587.41	-0.02446193		1177.41	-0.00947276		1767.4	0.01979049		2357.4	-0.00059159		2947.4	-0.00712717
587.61	-0.02410811		1177.61	-0.01032077		1767.6	0.02036044		2357.6	-0.00022578		2947.6	-0.00755355
587.81	-0.02366242		1177.81	-0.01007494		1767.8	0.0212115		2357.8	-0.00001872		2947.8	-0.00888338
588.01	-0.02365108		1178.01	-0.01031696		1768	0.02200014		2358	-0.00034719		2948	-0.00890054
588.21	-0.02369324		1178.21	-0.00949538		1768.2	0.02248177		2358.2	-0.00061585		2948.2	-0.00870795
588.41	-0.02369759		1178.41	-0.00908396		1768.4	0.02225562		2358.4	-0.00061086		2948.4	-0.009427
588.61	-0.02378268		1178.61	-0.00839949		1768.6	0.02231078		2358.6	-0.0014215		2948.6	-0.009433
588.81	-0.02356385		1178.81	-0.00779411		1768.8	0.02258163		2358.8	-0.00163407		2948.8	-0.0092857
589.01	-0.02411085		1179.01	-0.00805142		1769	0.02226986		2359	-0.00187984		2949	-0.01001505
589.21	-0.02380045		1179.21	-0.00791101		1769.2	0.02265108		2359.2	-0.00171455		2949.2	-0.00936347
589.41	-0.02286198		1179.41	-0.00863127		1769.4	0.02245565		2359.4	-0.00158487		2949.4	-0.01016375
589.61	-0.02279151		1179.61	-0.00895544		1769.6	0.02147199		2359.6	-0.00202948		2949.6	-0.0096238
589.81	-0.02223329		1179.81	-0.00967406		1769.8	0.02101341		2359.8	-0.00219246		2949.8	-0.00906096
590.01	-0.02242993		1180.01	-0.01078395		1770	0.02029499		2360	-0.00206239		2950	-0.00852131
590.21	-0.02273355		1180.21	-0.01104427		1770.2	0.01989926		2360.2	-0.00171728		2950.2	-0.00867311
590.41	-0.02195949		1180.41	-0.01025434		1770.4	0.01910965		2360.4	-0.00126321		2950.4	-0.0085138
590.61	-0.02235159		1180.61	-0.01068754		1770.6	0.01920315		2360.6	-0.00087309		2950.6	-0.0080331
590.81	-0.02194787		1180.81	-0.0117389		1770.8	0.01782505		2360.8	-0.00058641		2950.8	-0.00757468
591.01	-0.02203911		1181.01	-0.01203212		1771	0.0178539		2361	0.00007597		2951	-0.00765949
591.21	-0.02145911		1181.21	-0.01203579		1771.2	0.01741653		2361.2	0.00034269		2951.2	-0.00813038
591.41	-0.02195505		1181.41	-0.01340964		1771.4	0.01772625		2361.4	0.00042802		2951.4	-0.00825294
591.61	-0.02186545		1181.61	-0.01337468		1771.6	0.01721503		2361.6	0.0007744		2951.6	-0.0095141
591.81	-0.02164538		1181.81	-0.01328267		1771.8	0.01719221		2361.8	0.00115912		2951.8	-0.01008513
592.01	-0.02277268		1182.01	-0.01306362		1772	0.0183846		2362	0.00074115		2952	-0.01042537
592.21	-0.02265142		1182.21	-0.01170244		1772.2	0.01881899		2362.2	0.00098341		2952.2	-0.0105264
592.41	-0.02251646		1182.41	-0.01159252		1772.4	0.01871112		2362.4	0.00033027		2952.4	-0.01157568
592.61	-0.02237209		1182.61	-0.01138531		1772.6	0.0194934		2362.6	-0.00021344		2952.6	-0.01176871
592.81	-0.02154939		1182.81	-0.01100965		1772.8	0.01922933		2362.8	-0.00030621		2952.8	-0.01096941
593.01	-0.02141073		1183.01	-0.01074247		1773	0.01990157		2363	-0.00050938		2953	-0.01181756
593.21	-0.02159087		1183.21	-0.01081113		1773.2	0.02117798		2363.2	-0.00057481		2953.2	-0.01077638
593.41	-0.02141613		1183.41	-0.01007269		1773.4	0.02131255		2363.4	-0.00022445		2953.4	-0.01129719
593.61	-0.02153859		1183.61	-0.01003582		1773.6	0.02163743		2363.6	-0.00037308		2953.6	-0.01044223
593.81	-0.0222712		1183.81	-0.01041515		1773.8	0.02215646		2363.8	-0.00021007		2953.8	-0.0101648
594.01	-0.02299942		1184.01	-0.01055029		1774	0.02217863		2364	0.00018896		2954	-0.00946627
594.21	-0.0229416		1184.21	-0.01088883		1774.2	0.02279698		2364.2	-0.00061792		2954.2	-0.0089743
594.41	-0.0223352		1184.41	-0.01133493		1774.4	0.02311734		2364.4	-0.0009685		2954.4	-0.00806306
594.61	-0.02279478		1184.61	-0.01238228		1774.6	0.0233251		2364.6	-0.00149711		2954.6	-0.00782641
594.81	-0.02260407		1184.81	-0.01247834		1774.8	0.02269731		2364.8	-0.00120649		2954.8	-0.00704885
595.01	-0.02314666		1185.01	-0.01203223		1775	0.02332477		2365	-0.00119358		2955	-0.00748906
595.21	-0.02430176		1185.21	-0.01186342		1775.2	0.0237311		2365.2	-0.00102656		2955.2	-0.00805668
595.41	-0.02538687		1185.41	-0.01227862		1775.4	0.02423203		2365.4	-0.00087653		2955.4	-0.00762036
595.61	-0.02468246		1185.61	-0.01228127		1775.6	0.0236012		2365.6	-0.00041202		2955.6	-0.00872672
595.81	-0.02385006		1185.81	-0.01268973		1775.8	0.02351335		2365.8	-0.00055868		2955.8	-0.00828906
596.01	-0.02367881		1186.01	-0.01228922		1776	0.02398519		2366	-0.00082531		2956	-0.00949383
596.21	-0.02289867		1186.21	-0.0120753		1776.2	0.02340972		2366.2	-0.00097029		2956.2	-0.00969978
596.41	-0.02183356		1186.41	-0.01284384		1776.4	0.02350341		2366.4	-0.00137399		2956.4	-0.01089952
596.61	-0.02051283		1186.61	-0.01362357		1776.6	0.02338402		2366.6	-0.00178296		2956.6	-0.01093482
596.81	-0.02023543		1186.81	-0.01314528		1776.8	0.02292291		2366.8	-0.00130768		2956.8	-0.01050759
597.01	-0.02094455		1187.01	-0.01273853		1777	0.02362209		2367	-0.0010818		2957	-0.01156586
597.21	-0.02131758		1187.21	-0.01189585		1777.2	0.02306805		2367.2	-0.00087323		2957.2	-0.01055398
597.41	-0.02095916		1187.41	-0.01164484		1777.4	0.02232189		2367.4	-0.00052237		2957.4	-0.01106705
597.61	-0.02170746		1187.61	-0.01178263		1777.6	0.02104803		2367.6	-0.00017689		2957.6	-0.0113915
597.81	-0.02247172		1187.81	-0.01183892		1777.8	0.02090847		2367.8	-0.00067879		2957.8	-0.01137696
598.01	-0.02272354		1188.01	-0.01133384		1778	0.02003862		2368	-0.00084853		2958	-0.01192926
598.21	-0.02237369		1188.21	-0.01119817		1778.2	0.01965457		2368.2	-0.00232155		2958.2	-0.01202836
598.41	-0.02286556		1188.41	-0.01132259		1778.4	0.01949658		2368.4	-0.00173894		2958.4	-0.01262912
598.61	-0.02374256		1188.61	-0.01101712		1778.6	0.01970145		2368.6	-0.0010428		2958.6	-0.01313026
598.81	-0.02419708		1188.81	-0.01065686		1778.8	0.01985065		2368.8	-0.00069654		2958.8	-0.01204744
599.01	-0.02384403		1189.01	-0.01061951		1779	0.02092219		2369	-0.00046045		2959	-0.01200689
599.21	-0.02405256		1189.21	-0.01107373		1779.2	0.02139159		2369.2	-0.00017958		2959.2	-0.01215833
599.41	-0.02396393		1189.41	-0.01069209		1779.4	0.02129072		2369.4	-0.00090927		2959.4	-0.01257523
599.61	-0.02308318		1189.61	-0.01072463		1779.6	0.02082653		2369.6	-0.00071		2959.6	-0.01297111
599.81	-0.02388231		1189.81	-0.01088008		1779.8	0.02053131		2369.8	-0.00148624		2959.8	-0.01208686
600.01	-0.02333664		1190.01	-0.01194107		1780	0.02112848		2370	-0.00147391		2960	-0.01279638
600.21	-0.02349787		1190.21	-0.01283844		1780.2	0.02113968		2370.2	-0.00121757		2960.2	-0.01277114
600.41	-0.02217409		1190.41	-0.01343689		1780.4	0.02168853		2370.4	-0.00137122		2960.4	-0.0123434
600.61	-0.022604		1190.61	-0.01317763		1780.6	0.02158415		2370.6	-0.00137513		2960.6	-0.01115202
600.81	-0.02346779		1190.81	-0.01270981		1780.8	0.02157257		2370.8	-0.00032704		2960.8	-0.01078635
601.01	-0.02363849		1191.01	-0.01304511		1781	0.0212667		2371	-0.00023187		2961	-0.00993312
601.21	-0.02324022		1191.21	-0.01228706		1781.2	0.02016945		2371.2	-0.00053351		2961.2	-0.00921052
601.41	-0.02328579		1191.41	-0.01250457		1781.4	0.01946749		2371.4	-0.0009063		2961.4	-0.00968884
601.61	-0.02326746		1191.61	-0.01193441		1781.6	0.01835722		2371.6	-0.00055378		2961.6	-0.01034446
601.81	-0.02391132		1191.81	-0.01253321		1781.8	0.01783731		2371.8	-0.00095713		2961.8	-0.01027837
602.01	-0.02405735		1192.01	-0.01245074		1782	0.01653163		2372	-0.0012935		2962	-0.01090423
602.21	-0.02383991		1192.21	-0.01242565		1782.2	0.01593647		2372.2	-0.00067756		2962.2	-0.01012718
602.41	-0.02393925		1192.41	-0.01259954		1782.4	0.01593162		2372.4	-0.00059555		2962.4	-0.00991139
602.61	-0.02326158		1192.61	-0.01214406		1782.6	0.01609989		2372.6	-0.00008161		2962.6	-0.00943328
602.81	-0.0225305		1192.81	-0.01200123		1782.8	0.01600228		2372.8	-0.00040668		2962.8	-0.0083421
603.01	-0.02173699		1193.01	-0.01177695		1783	0.01635936		2373	-0.00050622		2963	-0.00920417
603.21	-0.02180002		1193.21	-0.0114944		1783.2	0.01563093		2373.2	-0.00173236		2963.2	-0.00875856
603.41	-0.02256414		1193.41	-0.01137975		1783.4	0.01514502		2373.4	-0.00318365		2963.4	-0.00905642
603.61	-0.0224077		1193.61	-0.01133629		1783.6	0.0147708		2373.6	-0.00292119		2963.6	-0.00845697
603.81	-0.02345469		1193.81	-0.0112111		1783.8	0.01507624		2373.8	-0.00334114		2963.8	-0.00789292
604.01	-0.02279431		1194.01	-0.01122624		1784	0.01573276		2374	-0.00368502		2964	-0.00888255
604.21	-0.02276237		1194.21	-0.01082506		1784.2	0.01667898		2374.2	-0.00382304		2964.2	-0.00857084
604.41	-0.02282686		1194.41	-0.0108176		1784.4	0.01783259		2374.4	-0.00382838		2964.4	-0.00743147
604.61	-0.02374456		1194.61	-0.01030867		1784.6	0.01866897		2374.6	-0.0031318		2964.6	-0.00748571
604.81	-0.02391517		1194.81	-0.01049839		1784.8	0.01930314		2374.8	-0.00246515		2964.8	-0.0079851
605.01	-0.02400144		1195.01	-0.01064951		1785	0.01965694		2375	-0.00280413		2965	-0.00780776
605.21	-0.02429118		1195.21	-0.01059384		1785.2	0.02058556		2375.2	-0.00303138		2965.2	-0.00930242
605.41	-0.02446714		1195.41	-0.01114225		1785.4	0.02106133		2375.4	-0.00254625		2965.4	-0.01067891
605.61	-0.02455903		1195.61	-0.01170268		1785.6	0.02126657		2375.6	-0.00162717		2965.6	-0.0115378
605.81	-0.02518663		1195.81	-0.01274701		1785.8	0.02117654		2375.8	-0.00174173		2965.8	-0.01182941
606.01	-0.02439736		1196.01	-0.01252126		1786	0.02195424		2376	-0.0021726		2966	-0.01226014
606.21	-0.02397755		1196.21	-0.01304733		1786.2	0.0228268		2376.2	-0.00029999		2966.2	-0.01209467
606.41	-0.02313972		1196.41	-0.01331783		1786.4	0.02337104		2376.4	-0.00088442		2966.4	-0.01173992
606.61	-0.02206393		1196.61	-0.01414549		1786.6	0.02378071		2376.6	0.00052899		2966.6	-0.01160873
606.81	-0.02228047		1196.81	-0.01503682		1786.8	0.02314362		2376.8	0.00062026		2966.8	-0.01189335
607.01	-0.02162631		1197.01	-0.01472793		1787	0.02249404		2377	0.00032126		2967	-0.01204594
607.21	-0.02115617		1197.21	-0.01459258		1787.2	0.02160386		2377.2	-0.00026686		2967.2	-0.01108836
607.41	-0.02091506		1197.41	-0.01568618		1787.4	0.02203262		2377.4	0.00020243		2967.4	-0.01150681
607.61	-0.02125768		1197.61	-0.01546906		1787.6	0.02217019		2377.6	-0.00002811		2967.6	-0.01068043
607.81	-0.02130447		1197.81	-0.01436587		1787.8	0.02197804		2377.8	-0.00007833		2967.8	-0.01045618
608.01	-0.02185754		1198.01	-0.01474843		1788	0.02141818		2378	-0.00053895		2968	-0.01056967
608.21	-0.02190493		1198.21	-0.01440671		1788.2	0.02120145		2378.2	-0.00046046		2968.2	-0.00845218
608.41	-0.02310083		1198.41	-0.01396242		1788.4	0.02118056		2378.4	0.00054564		2968.4	-0.00793628
608.61	-0.02410413		1198.61	-0.01338981		1788.6	0.02168178		2378.6	0.00055804		2968.6	-0.00780875
608.81	-0.02430193		1198.81	-0.01379949		1788.8	0.0213036		2378.8	0.00051851		2968.8	-0.00772735
609.01	-0.02425531		1199.01	-0.01374867		1789	0.021805		2379	-0.00001748		2969	-0.0075666
609.21	-0.02489471		1199.21	-0.01404924		1789.2	0.02147187		2379.2	-0.00072643		2969.2	-0.00821385
609.41	-0.02504521		1199.41	-0.01364388		1789.4	0.0206167		2379.4	-0.00052262		2969.4	-0.00796668
609.61	-0.02556669		1199.61	-0.01347312		1789.6	0.02044873		2379.6	-0.00046093		2969.6	-0.00821455
609.81	-0.02511045		1199.81	-0.01370382		1789.8	0.02008784		2379.8	-0.0008926		2969.8	-0.00849206
610.01	-0.02395726		1200.01	-0.01353925		1790	0.01981788		2380	-0.00112449		2970	-0.00875713
610.21	-0.02314302		1200.21	-0.01420073		1790.2	0.01917001		2380.2	-0.00028008		2970.2	-0.00858923
610.41	-0.02234223		1200.41	-0.01383437		1790.4	0.01838104		2380.4	-0.0012301		2970.4	-0.00869461
610.61	-0.02188614		1200.61	-0.01456387		1790.6	0.0179964		2380.6	-0.0017904		2970.6	-0.00952355
610.81	-0.02172511		1200.81	-0.01407267		1790.8	0.017214		2380.8	-0.00185284		2970.8	-0.0103572
611.01	-0.02115711		1201.01	-0.01351256		1791	0.01822883		2381	-0.00159086		2971	-0.01081788
611.21	-0.02085351		1201.21	-0.01398565		1791.2	0.01883563		2381.2	-0.00144265		2971.2	-0.01094219
611.41	-0.0208822		1201.41	-0.01514386		1791.4	0.01896608		2381.4	-0.00208182		2971.4	-0.01117969
611.61	-0.02194768		1201.61	-0.01514306		1791.6	0.01896548		2381.6	-0.00288383		2971.6	-0.01030829
611.81	-0.02168077		1201.81	-0.01479656		1791.8	0.01900969		2381.8	-0.00284728		2971.8	-0.01017635
612.01	-0.02230576		1202.01	-0.01529333		1792	0.01959713		2382	-0.00223633		2972	-0.00950974
612.21	-0.02248725		1202.21	-0.01430829		1792.2	0.02087749		2382.2	-0.00234129		2972.2	-0.00844914
612.41	-0.02351362		1202.41	-0.01431558		1792.4	0.02163195		2382.4	-0.00258818		2972.4	-0.00893378
612.61	-0.02449751		1202.61	-0.0139756		1792.6	0.02192248		2382.6	-0.00306058		2972.6	-0.00829704
612.81	-0.0246547		1202.81	-0.01419585		1792.8	0.0219117		2382.8	-0.00290631		2972.8	-0.00849171
613.01	-0.02554949		1203.01	-0.01408152		1793	0.02154748		2383	-0.00278682		2973	-0.00847011
613.21	-0.02618205		1203.21	-0.01402508		1793.2	0.02092385		2383.2	-0.00236413		2973.2	-0.00853453
613.41	-0.02614247		1203.41	-0.01317606		1793.4	0.02051023		2383.4	-0.00088422		2973.4	-0.00925816
613.61	-0.02589824		1203.61	-0.01268384		1793.6	0.02064634		2383.6	-0.00081907		2973.6	-0.00958086
613.81	-0.025392		1203.81	-0.01354238		1793.8	0.01949087		2383.8	-0.00065818		2973.8	-0.00929425
614.01	-0.02576947		1204.01	-0.01380382		1794	0.01922246		2384	-0.00096585		2974	-0.00954577
614.21	-0.02591262		1204.21	-0.0132862		1794.2	0.0189971		2384.2	0.00007352		2974.2	-0.00985993
614.41	-0.02594018		1204.41	-0.01267558		1794.4	0.01901514		2384.4	-0.00015371		2974.4	-0.01108151
614.61	-0.02597696		1204.61	-0.01252204		1794.6	0.01902583		2384.6	0.00021874		2974.6	-0.01132952
614.81	-0.02542758		1204.81	-0.01240209		1794.8	0.019932		2384.8	0.00059799		2974.8	-0.01223631
615.01	-0.02478361		1205.01	-0.01248446		1795	0.02071846		2385	0.00060319		2975	-0.01273498
615.21	-0.02450491		1205.21	-0.01268454		1795.2	0.0204302		2385.2	-0.00025727		2975.2	-0.01219262
615.41	-0.02472908		1205.41	-0.01280813		1795.4	0.02022629		2385.4	-0.00037586		2975.4	-0.01272614
615.61	-0.02445691		1205.61	-0.01283868		1795.6	0.02120746		2385.6	-0.00040178		2975.6	-0.01166846
615.81	-0.02327354		1205.81	-0.01273785		1795.8	0.02160046		2385.8	-0.00047502		2975.8	-0.0113222
616.01	-0.02360958		1206.01	-0.01351578		1796	0.02118781		2386	-0.00095425		2976	-0.01108202
616.21	-0.02381054		1206.21	-0.01355796		1796.2	0.02060668		2386.2	-0.00212696		2976.2	-0.01110868
616.41	-0.02437077		1206.41	-0.01365224		1796.4	0.01922932		2386.4	-0.00298623		2976.4	-0.01151324
616.61	-0.02443149		1206.61	-0.01306247		1796.6	0.01893469		2386.6	-0.00253732		2976.6	-0.0111606
616.81	-0.02499236		1206.81	-0.01387396		1796.8	0.01915224		2386.8	-0.00171836		2976.8	-0.01137871
617.01	-0.02508719		1207.01	-0.01381083		1797	0.01910166		2387	-0.00100028		2977	-0.01096444
617.21	-0.02502453		1207.21	-0.01363814		1797.2	0.01911843		2387.2	-0.00026368		2977.2	-0.01146254
617.41	-0.02492449		1207.41	-0.012931		1797.4	0.0189205		2387.4	-0.00051196		2977.4	-0.01228857
617.61	-0.0252854		1207.61	-0.01359261		1797.6	0.01915898		2387.6	-0.0005811		2977.6	-0.01228723
617.81	-0.02601986		1207.81	-0.0138399		1797.8	0.01868224		2387.8	-0.00097742		2977.8	-0.01182005
618.01	-0.02620892		1208.01	-0.01285288		1798	0.01918023		2388	-0.00138031		2978	-0.01148091
618.21	-0.02559833		1208.21	-0.01237057		1798.2	0.01867872		2388.2	-0.00125483		2978.2	-0.01149342
618.41	-0.02510158		1208.41	-0.01210008		1798.4	0.01898341		2388.4	-0.001961		2978.4	-0.01249738
618.61	-0.02525834		1208.61	-0.01255618		1798.6	0.01918451		2388.6	-0.001541		2978.6	-0.01238132
618.81	-0.02493873		1208.81	-0.0123062		1798.8	0.01928312		2388.8	-0.00166599		2978.8	-0.01232596
619.01	-0.0250311		1209.01	-0.01142676		1799	0.01817767		2389	-0.00187984		2979	-0.01213885
619.21	-0.02574029		1209.21	-0.01109708		1799.2	0.017673		2389.2	-0.0020491		2979.2	-0.01200416
619.41	-0.02590251		1209.41	-0.01128773		1799.4	0.0175347		2389.4	-0.00232456		2979.4	-0.01141524
619.61	-0.02503421		1209.61	-0.01190958		1799.6	0.0169966		2389.6	-0.00269166		2979.6	-0.01022531
619.81	-0.02476359		1209.81	-0.01274871		1799.8	0.0163532		2389.8	-0.00295787		2979.8	-0.01061721
620.01	-0.02514709		1210.01	-0.01355054		1800	0.01622265		2390	-0.00284743		2980	-0.01064089
620.21	-0.02440086		1210.21	-0.01346628		1800.2	0.01661331		2390.2	-0.00251582		2980.2	-0.01058204
620.41	-0.02385224		1210.41	-0.01375344		1800.4	0.01781465		2390.4	-0.00265825		2980.4	-0.0097192
620.61	-0.02327617		1210.61	-0.01387346		1800.6	0.01912224		2390.6	-0.00148843		2980.6	-0.00965351
620.81	-0.02350645		1210.81	-0.01461331		1800.8	0.01950436		2390.8	-0.00112146		2980.8	-0.01012209
621.01	-0.0231808		1211.01	-0.01459268		1801	0.02015114		2391	-0.0010924		2981	-0.0107502
621.21	-0.02270134		1211.21	-0.01521824		1801.2	0.02035978		2391.2	-0.00132485		2981.2	-0.01184353
621.41	-0.0225641		1211.41	-0.01499473		1801.4	0.02044482		2391.4	-0.00124531		2981.4	-0.01239307
621.61	-0.02218406		1211.61	-0.01464731		1801.6	0.02074036		2391.6	-0.00154413		2981.6	-0.01249703
621.81	-0.02202784		1211.81	-0.01453509		1801.8	0.02081965		2391.8	-0.00249624		2981.8	-0.01137699
622.01	-0.02158925		1212.01	-0.01392096		1802	0.02093325		2392	-0.00200212		2982	-0.01210206
622.21	-0.02173745		1212.21	-0.01351559		1802.2	0.02106656		2392.2	-0.00218848		2982.2	-0.0129035
622.41	-0.02176813		1212.41	-0.01324603		1802.4	0.0207493		2392.4	-0.00240396		2982.4	-0.01217336
622.61	-0.02260362		1212.61	-0.01292144		1802.6	0.02080803		2392.6	-0.00170792		2982.6	-0.01168857
622.81	-0.02286376		1212.81	-0.01123593		1802.8	0.01978436		2392.8	-0.00205534		2982.8	-0.01171783
623.01	-0.02314179		1213.01	-0.01078836		1803	0.01901715		2393	-0.00210719		2983	-0.0116254
623.21	-0.02323621		1213.21	-0.01076832		1803.2	0.01861141		2393.2	-0.00231159		2983.2	-0.01121235
623.41	-0.02299591		1213.41	-0.01045115		1803.4	0.01835565		2393.4	-0.00230919		2983.4	-0.01073352
623.61	-0.02256477		1213.61	-0.01048983		1803.6	0.01878083		2393.6	-0.00204593		2983.6	-0.01066184
623.81	-0.02251777		1213.81	-0.01062101		1803.8	0.01876696		2393.8	-0.00164904		2983.8	-0.01047893
624.01	-0.02285602		1214.01	-0.01013032		1804	0.01874028		2394	-0.00049869		2984	-0.00970461
624.21	-0.0224041		1214.21	-0.01043458		1804.2	0.01907679		2394.2	-0.00003746		2984.2	-0.00915001
624.41	-0.02233385		1214.41	-0.0106507		1804.4	0.0198207		2394.4	-0.00051799		2984.4	-0.00867981
624.61	-0.02289262		1214.61	-0.01081768		1804.6	0.01949198		2394.6	0.00098229		2984.6	-0.00890705
624.81	-0.0234638		1214.81	-0.01076468		1804.8	0.01980587		2394.8	0.00062817		2984.8	-0.00987284
625.01	-0.02317445		1215.01	-0.0112805		1805	0.02022929		2395	0.00030572		2985	-0.01015067
625.21	-0.0227609		1215.21	-0.01116081		1805.2	0.01909939		2395.2	0.00071877		2985.2	-0.01024242
625.41	-0.02351825		1215.41	-0.01049		1805.4	0.01839251		2395.4	0.00047447		2985.4	-0.01088662
625.61	-0.0232518		1215.61	-0.01033816		1805.6	0.01909679		2395.6	-0.00055067		2985.6	-0.01005907
625.81	-0.02344398		1215.81	-0.0109667		1805.8	0.01866503		2395.8	-0.00087769		2985.8	-0.00985192
626.01	-0.02357081		1216.01	-0.01027844		1806	0.01884112		2396	-0.00134621		2986	-0.01039248
626.21	-0.02355523		1216.21	-0.01039266		1806.2	0.01938584		2396.2	-0.00224815		2986.2	-0.01028272
626.41	-0.02361569		1216.41	-0.01008574		1806.4	0.01923106		2396.4	-0.00257913		2986.4	-0.00954324
626.61	-0.02409826		1216.61	-0.01016006		1806.6	0.02008489		2396.6	-0.00257009		2986.6	-0.00998268
626.81	-0.02426892		1216.81	-0.01084653		1806.8	0.01967713		2396.8	-0.00286478		2986.8	-0.00965758
627.01	-0.02371766		1217.01	-0.01168923		1807	0.02001786		2397	-0.00269695		2987	-0.00843009
627.21	-0.02357576		1217.21	-0.0122803		1807.2	0.01997266		2397.2	-0.00279932		2987.2	-0.00888492
627.41	-0.02375802		1217.41	-0.01253667		1807.4	0.01960142		2397.4	-0.0025857		2987.4	-0.00900136
627.61	-0.02356815		1217.61	-0.01271551		1807.6	0.01995438		2397.6	-0.0022854		2987.6	-0.0086261
627.81	-0.02374743		1217.81	-0.01292396		1807.8	0.01930669		2397.8	-0.00161059		2987.8	-0.0082887
628.01	-0.02463382		1218.01	-0.01308153		1808	0.01885595		2398	-0.00152908		2988	-0.00836453
628.21	-0.0245082		1218.21	-0.01372995		1808.2	0.01935529		2398.2	-0.0005003		2988.2	-0.00849258
628.41	-0.02570689		1218.41	-0.01475684		1808.4	0.01982526		2398.4	-0.00087412		2988.4	-0.008324
628.61	-0.02653261		1218.61	-0.01540293		1808.6	0.01928963		2398.6	0.00061142		2988.6	-0.00864886
628.81	-0.02675202		1218.81	-0.01559435		1808.8	0.01969557		2398.8	-0.00033571		2988.8	-0.00905709
629.01	-0.02623549		1219.01	-0.01595234		1809	0.01842152		2399	0.00039022		2989	-0.0088095
629.21	-0.02657247		1219.21	-0.01557495		1809.2	0.01795989		2399.2	0.00078255		2989.2	-0.00943885
629.41	-0.02703908		1219.41	-0.01605046		1809.4	0.01828641		2399.4	-0.00011358		2989.4	-0.00924766
629.61	-0.02621728		1219.61	-0.01634816		1809.6	0.01830258		2399.6	-0.00081659		2989.6	-0.00886252
629.81	-0.02607682		1219.81	-0.01648196		1809.8	0.01845798		2399.8	-0.0012319		2989.8	-0.00908096
630.01	-0.02576548		1220.01	-0.01656237		1810	0.01845438		2400	-0.00167594		2990	-0.00949327
630.21	-0.02588063		1220.21	-0.01616318		1810.2	0.01827296		2400.2	-0.00244219		2990.2	-0.01037161
630.41	-0.02622241		1220.41	-0.01536893		1810.4	0.01819975		2400.4	-0.00317526		2990.4	-0.00982641
630.61	-0.0268758		1220.61	-0.01542561		1810.6	0.0180374		2400.6	-0.00386518		2990.6	-0.00925439
630.81	-0.0272838		1220.81	-0.01551202		1810.8	0.01796049		2400.8	-0.0048833		2990.8	-0.00950846
631.01	-0.02626816		1221.01	-0.01473468		1811	0.01767978		2401	-0.00481873		2991	-0.00931068
631.21	-0.02731822		1221.21	-0.01424929		1811.2	0.01757641		2401.2	-0.00493946		2991.2	-0.00955247
631.41	-0.02741657		1221.41	-0.0143821		1811.4	0.01741282		2401.4	-0.00565638		2991.4	-0.00945372
631.61	-0.02794644		1221.61	-0.0134245		1811.6	0.01836365		2401.6	-0.00560184		2991.6	-0.00965961
631.81	-0.0285806		1221.81	-0.01389067		1811.8	0.01821778		2401.8	-0.00521554		2991.8	-0.009427
632.01	-0.02818533		1222.01	-0.01381985		1812	0.01806257		2402	-0.00468868		2992	-0.0097066
632.21	-0.02799877		1222.21	-0.0141891		1812.2	0.01808707		2402.2	-0.00351215		2992.2	-0.00987215
632.41	-0.0284484		1222.41	-0.01438817		1812.4	0.01731629		2402.4	-0.00355411		2992.4	-0.00969948
632.61	-0.02749816		1222.61	-0.01489739		1812.6	0.01727852		2402.6	-0.0024959		2992.6	-0.00973447
632.81	-0.02770787		1222.81	-0.01496819		1812.8	0.01811711		2402.8	-0.00131848		2992.8	-0.00958221
633.01	-0.0277172		1223.01	-0.01456021		1813	0.01799584		2403	-0.00029128		2993	-0.01044753
633.21	-0.02757576		1223.21	-0.01485368		1813.2	0.01800096		2403.2	-0.0005688		2993.2	-0.01163014
633.41	-0.02754161		1223.41	-0.01484232		1813.4	0.01790369		2403.4	-0.00026602		2993.4	-0.01159189
633.61	-0.02684362		1223.61	-0.01487263		1813.6	0.01810587		2403.6	0.00003781		2993.6	-0.01179328
633.81	-0.02645065		1223.81	-0.01509141		1813.8	0.0192853		2403.8	0.00029201		2993.8	-0.0117878
634.01	-0.02593792		1224.01	-0.01461769		1814	0.01877522		2404	-0.00076364		2994	-0.01274591
634.21	-0.02619865		1224.21	-0.01464419		1814.2	0.01841318		2404.2	-0.0012111		2994.2	-0.01366298
634.41	-0.02674688		1224.41	-0.01373029		1814.4	0.01856467		2404.4	-0.00161357		2994.4	-0.01354182
634.61	-0.02739456		1224.61	-0.01393897		1814.6	0.01801144		2404.6	-0.0019066		2994.6	-0.01409097
634.81	-0.02756157		1224.81	-0.01436239		1814.8	0.01854489		2404.8	-0.00214092		2994.8	-0.01484627
635.01	-0.02760824		1225.01	-0.01398577		1815	0.01808227		2405	-0.00163875		2995	-0.01345731
635.21	-0.02858814		1225.21	-0.01421586		1815.2	0.01809664		2405.2	-0.00241072		2995.2	-0.01244982
635.41	-0.02830843		1225.41	-0.01507524		1815.4	0.01748256		2405.4	-0.00287422		2995.4	-0.0122202
635.61	-0.02815197		1225.61	-0.01481513		1815.6	0.01772448		2405.6	-0.00246154		2995.6	-0.01185822
635.81	-0.02714119		1225.81	-0.01556202		1815.8	0.01717657		2405.8	-0.00188508		2995.8	-0.01133949
636.01	-0.02620959		1226.01	-0.0158266		1816	0.01738003		2406	-0.00211759		2996	-0.01076883
636.21	-0.02596871		1226.21	-0.01597233		1816.2	0.01775998		2406.2	-0.00239703		2996.2	-0.0101718
636.41	-0.02552326		1226.41	-0.01596418		1816.4	0.01753737		2406.4	-0.00223146		2996.4	-0.00941711
636.61	-0.02503644		1226.61	-0.01695664		1816.6	0.01772523		2406.6	-0.00208218		2996.6	-0.00883287
636.81	-0.02522227		1226.81	-0.01653049		1816.8	0.01760417		2406.8	-0.00145035		2996.8	-0.00923158
637.01	-0.02450376		1227.01	-0.01655985		1817	0.01747547		2407	-0.00172789		2997	-0.00972881
637.21	-0.02363267		1227.21	-0.01724518		1817.2	0.01740137		2407.2	-0.00121833		2997.2	-0.01020789
637.41	-0.02282051		1227.41	-0.01768956		1817.4	0.01867628		2407.4	-0.00041292		2997.4	-0.00995141
637.61	-0.0221434		1227.61	-0.01842251		1817.6	0.0188004		2407.6	-0.00040796		2997.6	-0.01055629
637.81	-0.02187283		1227.81	-0.01839572		1817.8	0.01921416		2407.8	-0.00137818		2997.8	-0.01159953
638.01	-0.02181833		1228.01	-0.01706752		1818	0.01889878		2408	-0.00207636		2998	-0.012592
638.21	-0.0223804		1228.21	-0.01719637		1818.2	0.01827494		2408.2	-0.00206069		2998.2	-0.0131105
638.41	-0.0233076		1228.41	-0.01632081		1818.4	0.01787275		2408.4	-0.00231178		2998.4	-0.01384575
638.61	-0.0236611		1228.61	-0.01662468		1818.6	0.0182814		2408.6	-0.00276064		2998.6	-0.01415852
638.81	-0.02443304		1228.81	-0.01657622		1818.8	0.01825439		2408.8	-0.00271214		2998.8	-0.01420307
639.01	-0.02537481		1229.01	-0.01633482		1819	0.01800906		2409	-0.00338251		2999	-0.0147156
639.21	-0.02522772		1229.21	-0.01629314		1819.2	0.01840679		2409.2	-0.00371401		2999.2	-0.01459785
639.41	-0.02498983		1229.41	-0.01655927		1819.4	0.01875653		2409.4	-0.00394074		2999.4	-0.01475547
639.61	-0.02447442		1229.61	-0.01609772		1819.6	0.01952249		2409.6	-0.00380141		2999.6	-0.01479476
639.81	-0.02403535		1229.81	-0.01641836		1819.8	0.02025179		2409.8	-0.00350463		2999.8	-0.01458791
640.01	-0.02430926		1230.01	-0.01695477		1820	0.02092104		2410	-0.00351744		3000	-0.01434975
640.21	-0.02354927		1230.21	-0.0168686		1820.2	0.01991754		2410.2	-0.00380389		3000.2	-0.01373211
640.41	-0.02344805		1230.41	-0.01725835		1820.4	0.01908643		2410.4	-0.00367559		3000.4	-0.01336131
640.61	-0.02299666		1230.61	-0.01795381		1820.6	0.01919127		2410.6	-0.00314949		3000.6	-0.01320875
640.81	-0.02251733		1230.81	-0.01777819		1820.8	0.02026587		2410.8	-0.00238172		3000.8	-0.01391738
641.01	-0.02184376		1231.01	-0.01832096		1821	0.02067549		2411	-0.00207682		3001	-0.01342456
641.21	-0.02170473		1231.21	-0.01891084		1821.2	0.02119984		2411.2	-0.00154593		3001.2	-0.01351215
641.41	-0.02175616		1231.41	-0.01894617		1821.4	0.02123923		2411.4	-0.0015329		3001.4	-0.01273203
641.61	-0.02271078		1231.61	-0.01848988		1821.6	0.02018763		2411.6	-0.0015612		3001.6	-0.01254155
641.81	-0.02257154		1231.81	-0.01835592		1821.8	0.02010741		2411.8	-0.00185945		3001.8	-0.01220418
642.01	-0.02288055		1232.01	-0.01788248		1822	0.019574		2412	-0.00151771		3002	-0.01225641
642.21	-0.02353556		1232.21	-0.01797098		1822.2	0.01897809		2412.2	-0.0010778		3002.2	-0.01178939
642.41	-0.02367607		1232.41	-0.01729974		1822.4	0.01915335		2412.4	-0.00040588		3002.4	-0.01199777
642.61	-0.02474109		1232.61	-0.01730828		1822.6	0.02012256		2412.6	-0.00041589		3002.6	-0.01191963
642.81	-0.02512878		1232.81	-0.01671719		1822.8	0.02017453		2412.8	0.00059834		3002.8	-0.01259639
643.01	-0.02633677		1233.01	-0.01647319		1823	0.01996307		2413	0.0006749		3003	-0.01349417
643.21	-0.02552562		1233.21	-0.01615796		1823.2	0.01954447		2413.2	0.00101176		3003.2	-0.0128361
643.41	-0.0256943		1233.41	-0.01524885		1823.4	0.019245		2413.4	0.00107268		3003.4	-0.01305159
643.61	-0.02589294		1233.61	-0.01473939		1823.6	0.01856259		2413.6	0.00154615		3003.6	-0.01336545
643.81	-0.02520748		1233.81	-0.01500396		1823.8	0.01844032		2413.8	0.00137522		3003.8	-0.01338868
644.01	-0.02560463		1234.01	-0.01455718		1824	0.01692657		2414	0.00150412		3004	-0.01409466
644.21	-0.02509881		1234.21	-0.01465787		1824.2	0.01589727		2414.2	0.0006128		3004.2	-0.0139745
644.41	-0.02532992		1234.41	-0.01440396		1824.4	0.01650489		2414.4	0.00079063		3004.4	-0.01460262
644.61	-0.02495092		1234.61	-0.01411723		1824.6	0.0163222		2414.6	0.00043677		3004.6	-0.01491496
644.81	-0.02475812		1234.81	-0.01327421		1824.8	0.01667602		2414.8	-0.00068974		3004.8	-0.0149349
645.01	-0.02446757		1235.01	-0.01339732		1825	0.01648354		2415	-0.00057196		3005	-0.0142401
645.21	-0.02465541		1235.21	-0.01373651		1825.2	0.01685437		2415.2	-0.00010526		3005.2	-0.01442423
645.41	-0.0240747		1235.41	-0.0138967		1825.4	0.01732906		2415.4	-0.0003868		3005.4	-0.0137611
645.61	-0.02369761		1235.61	-0.01364529		1825.6	0.01805075		2415.6	-0.00048568		3005.6	-0.01319378
645.81	-0.02264391		1235.81	-0.01393942		1825.8	0.01865863		2415.8	-0.00096127		3005.8	-0.0134158
646.01	-0.02213392		1236.01	-0.01454919		1826	0.01899324		2416	-0.00119269		3006	-0.01289272
646.21	-0.02210852		1236.21	-0.01458894		1826.2	0.01914824		2416.2	-0.00051703		3006.2	-0.01185613
646.41	-0.02192287		1236.41	-0.01507939		1826.4	0.01964655		2416.4	-0.00013481		3006.4	-0.01195457
646.61	-0.02277516		1236.61	-0.01591257		1826.6	0.02009008		2416.6	-0.00016131		3006.6	-0.01164254
646.81	-0.02317149		1236.81	-0.01542647		1826.8	0.02073105		2416.8	-0.00056537		3006.8	-0.01172161
647.01	-0.02430585		1237.01	-0.01589881		1827	0.02065449		2417	-0.00106855		3007	-0.01196162
647.21	-0.02400647		1237.21	-0.01621288		1827.2	0.02093334		2417.2	-0.00106287		3007.2	-0.01182754
647.41	-0.02483431		1237.41	-0.01614999		1827.4	0.01996415		2417.4	-0.00123436		3007.4	-0.01233914
647.61	-0.02463132		1237.61	-0.0168542		1827.6	0.01922061		2417.6	-0.00164208		3007.6	-0.012652
647.81	-0.02449216		1237.81	-0.01667083		1827.8	0.01917291		2417.8	-0.00218647		3007.8	-0.01258091
648.01	-0.02498171		1238.01	-0.01640308		1828	0.01857252		2418	-0.00222542		3008	-0.01299252
648.21	-0.02484704		1238.21	-0.01666505		1828.2	0.01879062		2418.2	-0.00311659		3008.2	-0.01283346
648.41	-0.02505367		1238.41	-0.01623257		1828.4	0.01872161		2418.4	-0.00346098		3008.4	-0.01302551
648.61	-0.02497359		1238.61	-0.01593541		1828.6	0.01857199		2418.6	-0.00432339		3008.6	-0.01271551
648.81	-0.02484771		1238.81	-0.01552998		1828.8	0.01925594		2418.8	-0.00453487		3008.8	-0.0124138
649.01	-0.02485585		1239.01	-0.01552793		1829	0.01965284		2419	-0.00397711		3009	-0.01244146
649.21	-0.02474002		1239.21	-0.01550337		1829.2	0.02011523		2419.2	-0.00449217		3009.2	-0.01236409
649.41	-0.02433692		1239.41	-0.01526162		1829.4	0.02089515		2419.4	-0.00502839		3009.4	-0.01186629
649.61	-0.02429584		1239.61	-0.01480841		1829.6	0.02120236		2419.6	-0.0054087		3009.6	-0.01120706
649.81	-0.02404913		1239.81	-0.01551778		1829.8	0.0211684		2419.8	-0.00576755		3009.8	-0.01130124
