# Supplementary material for: Functional development of a V3/glycan-specific broadly neutralizing antibody isolated from a case of HIV superinfection
Source: eLife journal article supplement (doi:10.7554/elife.68110), 2021-07-15
Supplement: fig2-data2 [file A7.xls]

Vers 3.43 Data Simulation
Conc1	2E-06	2E-06	2E-06	2E-06	2E-06	2E-06	2E-06	2E-06
Start1	200	729.99	1259.99	1789.98	2319.98	2849.98	3379.98	3909.98
Stop1	559.79	1089.79	1619.79	2149.78	2679.78	3209.78	3739.78	4269.78
Time1	Data1	Sim1	Time2	Data2	Sim2	Time3	Data3	Sim3	Time4	Data4	Sim4	Time5	Data5	Sim5	Time6	Data6	Sim6	Time7	Data7	Sim7	Time8	Data8	Sim8
200	0.01363024		729.99	0.0036904		1259.99	0.00023221		1789.98	-0.00178618		2319.98	0.00886694		2849.98	0.01716994		3379.98	0.01930117		3909.98	0.00857734
200.2	0.01352509		730.19	0.00439801		1260.19	0.00105961		1790.18	-0.00095084		2320.18	0.00975787		2850.18	0.01738742		3380.18	0.01954796		3910.18	0.00856807
200.4	0.0132979		730.39	0.00462981		1260.39	0.00135792		1790.38	-0.00080541		2320.38	0.0110837		2850.38	0.01821326		3380.38	0.01980651		3910.38	0.00730865
200.6	0.01327101		730.59	0.0054149		1260.59	0.00103616		1790.58	0.00004607		2320.58	0.01237493		2850.58	0.0188069		3380.58	0.01991299		3910.58	0.00632524
200.8	0.0138333		730.79	0.00573575		1260.79	0.00115245		1790.78	0.00100356		2320.78	0.01278119		2850.78	0.01972884		3380.78	0.0192434		3910.78	0.00502706
201	0.01390958		730.99	0.00651986		1260.99	0.00145381		1790.98	0.00179779		2320.98	0.01380529		2850.98	0.02056743		3380.98	0.01922811		3910.98	0.00365191
201.2	0.01359376		731.19	0.00690216		1261.19	0.00097904		1791.18	0.00276924		2321.18	0.01376334		2851.18	0.02190662		3381.18	0.0188287		3911.18	0.00221818
201.4	0.014149		731.39	0.00787945		1261.39	0.00094571		1791.38	0.00309529		2321.38	0.01433803		2851.38	0.02328523		3381.38	0.01863817		3911.38	0.00139561
201.6	0.01544704		731.59	0.008071		1261.59	0.0013989		1791.58	0.00337233		2321.58	0.01441824		2851.58	0.02518886		3381.58	0.01799057		3911.58	0.00094786
201.8	0.01581464		731.79	0.0084749		1261.79	0.00061444		1791.78	0.00358002		2321.78	0.01495129		2851.78	0.02710756		3381.78	0.01757558		3911.78	0.00033817
202	0.01592154		731.99	0.00886079		1261.99	0.0006725		1791.98	0.00351798		2321.98	0.0149496		2851.98	0.02958494		3381.98	0.01731227		3911.98	0.00079831
202.2	0.01630884		732.19	0.00811061		1262.19	0.00053554		1792.18	0.00335245		2322.18	0.014324		2852.18	0.03153138		3382.18	0.01761401		3912.18	0.00095197
202.4	0.01689361		732.39	0.00791341		1262.39	0.00005061		1792.38	0.0033495		2322.38	0.01373536		2852.38	0.0328207		3382.38	0.01683435		3912.38	0.00143618
202.6	0.01828322		732.59	0.00680721		1262.59	0.00052627		1792.58	0.00297644		2322.58	0.01415366		2852.58	0.0349732		3382.58	0.01619374		3912.58	0.00166161
202.8	0.01879598		732.79	0.00793561		1262.79	0.00116949		1792.78	0.00312313		2322.78	0.01367714		2852.78	0.03606994		3382.78	0.01625922		3912.78	0.00193964
203	0.01955012		732.99	0.00691613		1262.99	0.00150623		1792.98	0.00405287		2322.98	0.01316963		2852.98	0.03788764		3382.98	0.01592053		3912.98	0.00279916
203.2	0.02018554		733.19	0.00653704		1263.19	0.00202883		1793.18	0.00388491		2323.18	0.01259748		2853.18	0.03994017		3383.18	0.01540731		3913.18	0.00309853
203.4	0.01985866		733.39	0.00620793		1263.39	0.00240329		1793.38	0.00454735		2323.38	0.012098		2853.38	0.04202105		3383.38	0.01530178		3913.38	0.0047481
203.6	0.01952822		733.59	0.00651776		1263.59	0.00282706		1793.58	0.00430225		2323.58	0.01134235		2853.58	0.04458887		3383.58	0.01698502		3913.58	0.00514825
203.8	0.02058884		733.79	0.00713533		1263.79	0.00309455		1793.78	0.00407588		2323.78	0.01043617		2853.78	0.0464779		3383.78	0.01814112		3913.78	0.00529833
204	0.0207161		733.99	0.00770894		1263.99	0.00364966		1793.98	0.00405897		2323.98	0.01058057		2853.98	0.04825882		3383.98	0.01879934		3913.98	0.00508163
204.2	0.02121826		734.19	0.00867058		1264.19	0.00400391		1794.18	0.00423962		2324.18	0.01141609		2854.18	0.04991001		3384.18	0.02050091		3914.18	0.00469893
204.4	0.02218336		734.39	0.00862912		1264.39	0.00371026		1794.38	0.00370232		2324.38	0.01203377		2854.38	0.0518081		3384.38	0.02155889		3914.38	0.00362576
204.6	0.02258481		734.59	0.00979226		1264.59	0.00346087		1794.58	0.00298761		2324.58	0.01240033		2854.58	0.05292948		3384.58	0.02255783		3914.58	0.0028941
204.8	0.02372545		734.79	0.01083622		1264.79	0.00366573		1794.78	0.002637		2324.78	0.01243425		2854.78	0.05452985		3384.78	0.02334132		3914.78	0.00222562
205	0.02352558		734.99	0.01194506		1264.99	0.00317577		1794.98	0.00187001		2324.98	0.01346415		2854.98	0.05579491		3384.98	0.02480412		3914.98	0.00121579
205.2	0.02418003		735.19	0.01246446		1265.19	0.00249383		1795.18	0.00134211		2325.18	0.01333504		2855.18	0.0574642		3385.18	0.02424994		3915.18	0.00053055
205.4	0.02540971		735.39	0.01316057		1265.39	0.00226572		1795.38	0.00072067		2325.38	0.0143152		2855.38	0.05880908		3385.38	0.02398338		3915.38	-0.00010946
205.6	0.02567622		735.59	0.01343932		1265.59	0.00167785		1795.58	0.00007533		2325.58	0.0154672		2855.58	0.06080924		3385.58	0.02396094		3915.58	-0.00088789
205.8	0.02530951		735.79	0.01347074		1265.79	0.00052825		1795.78	-0.0006011		2325.78	0.01596096		2855.78	0.06185157		3385.78	0.02373765		3915.78	-0.00151065
206	0.02590988		735.99	0.01314556		1265.99	0.00063585		1795.98	-0.00049325		2325.98	0.01530471		2855.98	0.06384879		3385.98	0.0242226		3915.98	-0.00139751
206.2	0.0269668		736.19	0.0119992		1266.19	0.00019056		1796.18	0.00003723		2326.18	0.01515715		2856.18	0.06405401		3386.18	0.02352895		3916.18	-0.0005509
206.4	0.02755387		736.39	0.01156573		1266.39	0.00057623		1796.38	0.00014825		2326.38	0.01431619		2856.38	0.06576293		3386.38	0.02260299		3916.38	-0.00049729
206.6	0.02792654		736.59	0.0105419		1266.59	0.00093405		1796.58	0.00057042		2326.58	0.01452241		2856.58	0.06722335		3386.58	0.02202965		3916.58	-0.00055901
206.8	0.02817552		736.79	0.01127669		1266.79	0.00063441		1796.78	0.00077521		2326.78	0.01351889		2856.78	0.06900402		3386.78	0.02227609		3916.78	-0.00054702
207	0.02886315		736.99	0.00895059		1266.99	0.00125462		1796.98	0.00125588		2326.98	0.01300266		2856.98	0.07065031		3386.98	0.02214987		3916.98	0.00042216
207.2	0.02987793		737.19	0.00866342		1267.19	0.00258121		1797.18	0.00075533		2327.18	0.01220724		2857.18	0.0714557		3387.18	0.02182949		3917.18	0.00080832
207.4	0.02961052		737.39	0.00817816		1267.39	0.00340512		1797.38	0.00149095		2327.38	0.01232549		2857.38	0.07307676		3387.38	0.02154646		3917.38	0.00193195
207.6	0.02951053		737.59	0.00826583		1267.59	0.00472065		1797.58	0.00121169		2327.58	0.01206268		2857.58	0.07425225		3387.58	0.02027817		3917.58	0.00176252
207.8	0.03031187		737.79	0.00823383		1267.79	0.00466163		1797.78	0.00176137		2327.78	0.01109409		2857.78	0.07482806		3387.78	0.01896973		3917.78	0.00147368
208	0.03002956		737.99	0.00845875		1267.99	0.00528126		1797.98	0.00217264		2327.98	0.01127668		2857.98	0.07585194		3387.98	0.01873022		3917.98	0.00154122
208.2	0.0305427		738.19	0.00829854		1268.19	0.00513598		1798.18	0.0027488		2328.18	0.01158355		2858.18	0.07692268		3388.18	0.01858894		3918.18	0.00177684
208.4	0.0305882		738.39	0.0085401		1268.39	0.00550696		1798.38	0.0023623		2328.38	0.01188441		2858.38	0.07816946		3388.38	0.01890144		3918.38	0.0018519
208.6	0.03030631		738.59	0.00901828		1268.59	0.00568609		1798.58	0.0017451		2328.58	0.01232026		2858.58	0.07938675		3388.58	0.01904688		3918.58	0.00222052
208.8	0.03067608		738.79	0.0088951		1268.79	0.00488647		1798.78	0.00177605		2328.78	0.01256284		2858.78	0.08045621		3388.78	0.01898164		3918.78	0.00221956
209	0.03112155		738.99	0.0084027		1268.99	0.00465181		1798.98	0.00164144		2328.98	0.01334645		2858.98	0.0814725		3388.98	0.01854123		3918.98	0.00131753
209.2	0.03129543		739.19	0.00814269		1269.19	0.00386894		1799.18	0.0010708		2329.18	0.01360861		2859.18	0.08261212		3389.18	0.01704623		3919.18	0.00048282
209.4	0.03088906		739.39	0.00795722		1269.39	0.00323301		1799.38	0.00131095		2329.38	0.01483155		2859.38	0.08326983		3389.38	0.01719467		3919.38	0.00051661
209.6	0.03161265		739.59	0.00820918		1269.59	0.00221875		1799.58	0.00087638		2329.58	0.01567936		2859.58	0.08473349		3389.58	0.01739111		3919.58	0.00071448
209.8	0.03277471		739.79	0.00735005		1269.79	0.00190492		1799.78	0.00099406		2329.78	0.01459608		2859.78	0.08539431		3389.78	0.01706279		3919.78	0.00049167
210	0.03342679		739.99	0.00743157		1269.99	0.00189872		1799.98	0.00176278		2329.98	0.01441821		2859.98	0.08750236		3389.98	0.01741893		3919.98	0.00077232
210.2	0.03330162		740.19	0.00689477		1270.19	0.00205389		1800.18	0.00241821		2330.18	0.01392212		2860.18	0.08839865		3390.18	0.01772381		3920.18	0.00255638
210.4	0.03330438		740.39	0.00655864		1270.39	0.00226375		1800.38	0.00227993		2330.38	0.01224501		2860.38	0.08999559		3390.38	0.01882243		3920.38	0.00179755
210.6	0.03394911		740.59	0.00700682		1270.59	0.00261194		1800.58	0.00233941		2330.58	0.01157391		2860.58	0.09064647		3390.58	0.01987385		3920.58	0.00158164
210.8	0.03413185		740.79	0.00692125		1270.79	0.00317277		1800.78	0.00269545		2330.78	0.01116139		2860.78	0.09188766		3390.78	0.02170808		3920.78	0.0018079
211	0.03371206		740.99	0.00619845		1270.99	0.0043005		1800.98	0.00266087		2330.98	0.01082311		2860.98	0.09259548		3390.98	0.02226249		3920.98	0.00293654
211.2	0.03402539		741.19	0.0071089		1271.19	0.00387564		1801.18	0.00225807		2331.18	0.01113272		2861.18	0.09318754		3391.18	0.02208927		3921.18	0.00230008
211.4	0.03320797		741.39	0.00739408		1271.39	0.00432241		1801.38	0.00304587		2331.38	0.01142992		2861.38	0.09450437		3391.38	0.02295309		3921.38	0.00257874
211.6	0.0327455		741.59	0.00813677		1271.59	0.00460413		1801.58	0.00299054		2331.58	0.01087509		2861.58	0.09486021		3391.58	0.02239525		3921.58	0.001398
211.8	0.03307413		741.79	0.00979551		1271.79	0.00398916		1801.78	0.00288347		2331.78	0.01099617		2861.78	0.09614629		3391.78	0.02296861		3921.78	0.00127122
212	0.03283091		741.99	0.01023328		1271.99	0.00395486		1801.98	0.00404344		2331.98	0.01194395		2861.98	0.09775989		3391.98	0.02346411		3921.98	0.00140004
212.2	0.03336766		742.19	0.0105994		1272.19	0.00476088		1802.18	0.00406717		2332.18	0.01227945		2862.18	0.09910251		3392.18	0.02368982		3922.18	0.00137939
212.4	0.03313618		742.39	0.01114792		1272.39	0.00479518		1802.38	0.00425957		2332.38	0.01319738		2862.38	0.10021135		3392.38	0.0241518		3922.38	0.00098914
212.6	0.03344473		742.59	0.01065576		1272.59	0.00557237		1802.58	0.00374295		2332.58	0.01337205		2862.58	0.10156421		3392.58	0.02486137		3922.58	0.0009757
212.8	0.03377487		742.79	0.01048353		1272.79	0.00535549		1802.78	0.00330228		2332.78	0.01397433		2862.78	0.10269393		3392.78	0.02480338		3922.78	0.00016988
213	0.03474245		742.99	0.0106396		1272.99	0.00578763		1802.98	0.00345422		2332.98	0.01480262		2862.98	0.10347931		3392.98	0.02442156		3922.98	-0.00018038
213.2	0.03466415		743.19	0.01081888		1273.19	0.00503332		1803.18	0.00317826		2333.18	0.0146222		2863.18	0.10419208		3393.18	0.02378136		3923.18	0.00008133
213.4	0.03502377		743.39	0.01056276		1273.39	0.00561033		1803.38	0.00339502		2333.38	0.01509491		2863.38	0.10429266		3393.38	0.02317461		3923.38	-0.00007164
213.6	0.03722434		743.59	0.00990248		1273.59	0.0049709		1803.58	0.00283937		2333.58	0.01438725		2863.58	0.10555532		3393.58	0.02249873		3923.58	-0.00058214
213.8	0.03747873		743.79	0.00939445		1273.79	0.00551736		1803.78	0.00332546		2333.78	0.01340094		2863.78	0.10588454		3393.78	0.02225617		3923.78	-0.00151273
214	0.03783786		743.99	0.00873484		1273.99	0.00559199		1803.98	0.00330532		2333.98	0.01286666		2863.98	0.10673236		3393.98	0.02129072		3923.98	-0.00100614
214.2	0.03864374		744.19	0.00812958		1274.19	0.00548456		1804.18	0.00312611		2334.18	0.01167778		2864.18	0.10782539		3394.18	0.02109784		3924.18	-0.00076273
214.4	0.03926782		744.39	0.008147		1274.39	0.00569619		1804.38	0.00252056		2334.38	0.01036684		2864.38	0.1086317		3394.38	0.02080302		3924.38	-0.00138684
214.6	0.03898932		744.59	0.00775747		1274.59	0.00650318		1804.58	0.00217317		2334.58	0.00985473		2864.58	0.10924599		3394.58	0.02089818		3924.58	-0.0013743
214.8	0.03838377		744.79	0.00758884		1274.79	0.00660641		1804.78	0.00198615		2334.78	0.00918621		2864.78	0.1091999		3394.78	0.02089135		3924.78	-0.00154782
215	0.03883124		744.99	0.00737398		1274.99	0.00610676		1804.98	0.00099899		2334.98	0.00843654		2864.98	0.10982058		3394.98	0.02083683		3924.98	-0.00127015
215.2	0.0388542		745.19	0.00747222		1275.19	0.00587137		1805.18	0.00078912		2335.18	0.00870857		2865.18	0.11061122		3395.18	0.02053249		3925.18	-0.00212851
215.4	0.03865377		745.39	0.00739995		1275.39	0.00646446		1805.38	0.00087172		2335.38	0.00892158		2865.38	0.11075225		3395.38	0.02065953		3925.38	-0.00286694
215.6	0.03832993		745.59	0.00785365		1275.59	0.0058056		1805.58	0.00047151		2335.58	0.00928605		2865.58	0.11197049		3395.58	0.01998339		3925.58	-0.00304933
215.8	0.03865255		745.79	0.00850649		1275.79	0.00551987		1805.78	0.00012105		2335.78	0.00963339		2865.78	0.11294451		3395.78	0.02030569		3925.78	-0.00241509
216	0.03875073		745.99	0.00809596		1275.99	0.00504974		1805.98	0.0011814		2335.98	0.0088779		2865.98	0.11453432		3395.98	0.02092777		3925.98	-0.00300523
216.2	0.03840725		746.19	0.00806874		1276.19	0.00475514		1806.18	0.0003455		2336.18	0.00959379		2866.18	0.11527782		3396.18	0.02099814		3926.18	-0.0031937
216.4	0.03784275		746.39	0.00783405		1276.39	0.00438946		1806.38	0.00125352		2336.38	0.00982643		2866.38	0.11616924		3396.38	0.02150633		3926.38	-0.0041102
216.6	0.03720616		746.59	0.00807771		1276.59	0.00428619		1806.58	0.00139752		2336.58	0.00976659		2866.58	0.11695273		3396.58	0.02228251		3926.58	-0.00485868
216.8	0.03811269		746.79	0.00786832		1276.79	0.00406339		1806.78	0.00170513		2336.78	0.01021779		2866.78	0.11812218		3396.78	0.02229846		3926.78	-0.00499609
217	0.03880699		746.99	0.00780706		1276.99	0.00366956		1806.98	0.00222968		2336.98	0.01009147		2866.98	0.11847578		3396.98	0.02260636		3926.98	-0.00514195
217.2	0.03903123		747.19	0.00810222		1277.19	0.00413008		1807.18	0.00234152		2337.18	0.01032356		2867.18	0.11909196		3397.18	0.0225602		3927.18	-0.00492678
217.4	0.03971447		747.39	0.0077744		1277.39	0.00451894		1807.38	0.00197507		2337.38	0.01146807		2867.38	0.11923469		3397.38	0.02232609		3927.38	-0.00580282
217.6	0.04097042		747.59	0.00734416		1277.59	0.00491329		1807.58	0.00209354		2337.58	0.01155554		2867.58	0.11968274		3397.58	0.02300537		3927.58	-0.00540754
217.8	0.04071584		747.79	0.00779643		1277.79	0.00620573		1807.78	0.00266862		2337.78	0.01169326		2867.78	0.12014219		3397.78	0.02249992		3927.78	-0.00559312
218	0.04133572		747.99	0.00779813		1277.99	0.00600111		1807.98	0.002606		2337.98	0.01256622		2867.98	0.12129279		3397.98	0.02209153		3927.98	-0.00445465
218.2	0.04170706		748.19	0.00825391		1278.19	0.00613358		1808.18	0.00291627		2338.18	0.01283432		2868.18	0.12214907		3398.18	0.02210435		3928.18	-0.00418816
218.4	0.04193505		748.39	0.00897585		1278.39	0.00632959		1808.38	0.00320704		2338.38	0.01287673		2868.38	0.12298829		3398.38	0.0223956		3928.38	-0.00304839
218.6	0.04168525		748.59	0.00892953		1278.59	0.00683521		1808.58	0.00408339		2338.58	0.0122641		2868.58	0.12301396		3398.58	0.02206448		3928.58	-0.00247958
218.8	0.04188092		748.79	0.01039392		1278.79	0.00678006		1808.78	0.00398528		2338.78	0.0126456		2868.78	0.12404698		3398.78	0.0221204		3928.78	-0.00211181
219	0.04198759		748.99	0.00955123		1278.99	0.00689879		1808.98	0.00380293		2338.98	0.01314928		2868.98	0.12523493		3398.98	0.02245164		3928.98	-0.00101398
219.2	0.04117468		749.19	0.00968431		1279.19	0.00768297		1809.18	0.00470121		2339.18	0.01368213		2869.18	0.12667087		3399.18	0.02241401		3929.18	-0.00094066
219.4	0.04123807		749.39	0.00973357		1279.39	0.00642013		1809.38	0.00429628		2339.38	0.01474045		2869.38	0.12721984		3399.38	0.02327646		3929.38	-0.00017156
219.6	0.04081244		749.59	0.009767		1279.59	0.00583729		1809.58	0.00380948		2339.58	0.01416966		2869.58	0.12837026		3399.58	0.02327836		3929.58	0.00036436
219.8	0.04183744		749.79	0.01040786		1279.79	0.0054093		1809.78	0.00365161		2339.78	0.01404208		2869.78	0.12915044		3399.78	0.02380355		3929.78	0.00044697
220	0.04224445		749.99	0.01105232		1279.99	0.00491063		1809.98	0.00351282		2339.98	0.01501906		2869.98	0.12974708		3399.98	0.02422497		3929.98	0.00017226
220.2	0.04157687		750.19	0.01133216		1280.19	0.00431326		1810.18	0.00323699		2340.18	0.0164157		2870.18	0.1300926		3400.18	0.02371503		3930.18	-0.00023692
220.4	0.0416191		750.39	0.01076012		1280.39	0.00450767		1810.38	0.00289527		2340.38	0.01595786		2870.38	0.13031575		3400.38	0.02388851		3930.38	-0.00143324
220.6	0.04198167		750.59	0.01153573		1280.59	0.00418341		1810.58	0.00255563		2340.58	0.01593988		2870.58	0.13067759		3400.58	0.02463369		3930.58	-0.0028696
220.8	0.04355003		750.79	0.01187564		1280.79	0.00493622		1810.78	0.00153133		2340.78	0.01528987		2870.78	0.13117522		3400.78	0.02595001		3930.78	-0.00309184
221	0.04364181		750.99	0.01222505		1280.99	0.00518688		1810.98	0.00113719		2340.98	0.01492726		2870.98	0.13147101		3400.98	0.02564005		3930.98	-0.00356436
221.2	0.04426774		751.19	0.01227241		1281.19	0.00626046		1811.18	0.00016798		2341.18	0.01470506		2871.18	0.13126754		3401.18	0.02530797		3931.18	-0.00443396
221.4	0.04417646		751.39	0.01217821		1281.39	0.00638777		1811.38	-0.00058972		2341.38	0.01402376		2871.38	0.13087256		3401.38	0.02518649		3931.38	-0.00479657
221.6	0.04448863		751.59	0.01139664		1281.59	0.00733414		1811.58	-0.00116173		2341.58	0.01337884		2871.58	0.13174562		3401.58	0.02595097		3931.58	-0.00451305
221.8	0.04515842		751.79	0.01175893		1281.79	0.00724266		1811.78	-0.00064047		2341.78	0.01344562		2871.78	0.13280303		3401.78	0.02560007		3931.78	-0.00412081
222	0.04533231		751.99	0.01166435		1281.99	0.00653945		1811.98	-0.00122779		2341.98	0.01323631		2871.98	0.13307357		3401.98	0.02650952		3931.98	-0.00377694
222.2	0.04520655		752.19	0.01069434		1282.19	0.00639214		1812.18	-0.00117232		2342.18	0.01264459		2872.18	0.13299358		3402.18	0.02584384		3932.18	-0.00388592
222.4	0.04539802		752.39	0.01076719		1282.39	0.00664399		1812.38	-0.00077636		2342.38	0.01230096		2872.38	0.13441356		3402.38	0.02614107		3932.38	-0.00330644
222.6	0.04514935		752.59	0.01009236		1282.59	0.00623113		1812.58	0.0002821		2342.58	0.01137451		2872.58	0.13472639		3402.58	0.0254317		3932.58	-0.00338608
222.8	0.04503359		752.79	0.01037587		1282.79	0.00517436		1812.78	-0.00058507		2342.78	0.01136063		2872.78	0.13678989		3402.78	0.02578483		3932.78	-0.0032414
223	0.04556608		752.99	0.00915526		1282.99	0.00469894		1812.98	-0.001342		2342.98	0.0115024		2872.98	0.13775918		3402.98	0.02585386		3932.98	-0.00301664
223.2	0.04545648		753.19	0.00865721		1283.19	0.00399817		1813.18	-0.00094226		2343.18	0.01160642		2873.18	0.13910782		3403.18	0.02640259		3933.18	-0.00348066
223.4	0.04557143		753.39	0.00848818		1283.39	0.00305371		1813.38	-0.00174424		2343.38	0.01113743		2873.38	0.14007021		3403.38	0.02697297		3933.38	-0.00343462
223.6	0.04567875		753.59	0.00814169		1283.59	0.00295512		1813.58	-0.00155186		2343.58	0.01127082		2873.58	0.14036338		3403.58	0.0266638		3933.58	-0.00330778
223.8	0.04660267		753.79	0.00839283		1283.79	0.00304162		1813.78	-0.00133243		2343.78	0.01214217		2873.78	0.14163547		3403.78	0.02767969		3933.78	-0.00289765
224	0.04668258		753.99	0.00754836		1283.99	0.00297857		1813.98	-0.00136164		2343.98	0.01336723		2873.98	0.14219284		3403.98	0.02728877		3933.98	-0.00308994
224.2	0.04605604		754.19	0.00700894		1284.19	0.00278009		1814.18	-0.00068366		2344.18	0.01356107		2874.18	0.14302771		3404.18	0.02697729		3934.18	-0.00394385
224.4	0.0461737		754.39	0.00673746		1284.39	0.00304514		1814.38	-0.0008951		2344.38	0.01346659		2874.38	0.142854		3404.38	0.02637226		3934.38	-0.00482156
224.6	0.04614112		754.59	0.00769656		1284.59	0.00329204		1814.58	0.00037439		2344.58	0.01258385		2874.58	0.14306571		3404.58	0.02669296		3934.58	-0.00631772
224.8	0.0458943		754.79	0.00835946		1284.79	0.00410415		1814.78	0.00128344		2344.78	0.01263391		2874.78	0.14239572		3404.78	0.02673886		3934.78	-0.00494573
225	0.0457227		754.99	0.00820679		1284.99	0.004188		1814.98	0.0014843		2344.98	0.01283056		2874.98	0.14209165		3404.98	0.025568		3934.98	-0.005441
225.2	0.04579088		755.19	0.00850563		1285.19	0.00510258		1815.18	0.0021169		2345.18	0.0126241		2875.18	0.14166812		3405.18	0.02538506		3935.18	-0.00457882
225.4	0.04475242		755.39	0.0095681		1285.39	0.0050884		1815.38	0.00376184		2345.38	0.01304549		2875.38	0.14211952		3405.38	0.02446262		3935.38	-0.00365777
225.6	0.04523827		755.59	0.00975199		1285.59	0.00570162		1815.58	0.00434142		2345.58	0.01328484		2875.58	0.14314449		3405.58	0.02475315		3935.58	-0.00321421
225.8	0.04586008		755.79	0.01111606		1285.79	0.0061548		1815.78	0.00559076		2345.78	0.01326036		2875.78	0.14323511		3405.78	0.02402547		3935.78	-0.0033117
226	0.04526007		755.99	0.01170071		1285.99	0.00619742		1815.98	0.005843		2345.98	0.01195474		2875.98	0.14432375		3405.98	0.02374806		3935.98	-0.00271731
226.2	0.04568261		756.19	0.01223189		1286.19	0.00651879		1816.18	0.00619175		2346.18	0.011113		2876.18	0.1449904		3406.18	0.02221067		3936.18	-0.00223041
226.4	0.04649548		756.39	0.01287787		1286.39	0.00713487		1816.38	0.00613196		2346.38	0.01050997		2876.38	0.14598434		3406.38	0.02170567		3936.38	-0.00209157
226.6	0.04755946		756.59	0.01346351		1286.59	0.00645012		1816.58	0.00553348		2346.58	0.00939817		2876.58	0.14645082		3406.58	0.02104311		3936.58	-0.00266034
226.8	0.04800496		756.79	0.0145374		1286.79	0.00618628		1816.78	0.00439201		2346.78	0.00874982		2876.78	0.147678		3406.78	0.02177614		3936.78	-0.00254325
227	0.04849122		756.99	0.01504729		1286.99	0.00589698		1816.98	0.00480556		2346.98	0.00895411		2876.98	0.14824797		3406.98	0.02192517		3936.98	-0.00314772
227.2	0.04833562		757.19	0.01538436		1287.19	0.00593514		1817.18	0.00454633		2347.18	0.00894397		2877.18	0.14888764		3407.18	0.02265401		3937.18	-0.00359889
227.4	0.04950644		757.39	0.01568146		1287.39	0.00589253		1817.38	0.00415415		2347.38	0.00839274		2877.38	0.14960842		3407.38	0.0240823		3937.38	-0.0032756
227.6	0.04962669		757.59	0.01485952		1287.59	0.00485587		1817.58	0.00350262		2347.58	0.00934719		2877.58	0.14977727		3407.58	0.02448516		3937.58	-0.00256134
227.8	0.05031193		757.79	0.01455082		1287.79	0.00482277		1817.78	0.00293036		2347.78	0.00986972		2877.78	0.15093227		3407.78	0.02576038		3937.78	-0.00341097
228	0.0503021		757.99	0.01371769		1287.99	0.0042108		1817.98	0.00296343		2347.98	0.01091448		2877.98	0.15069625		3407.98	0.02562758		3937.98	-0.00437746
228.2	0.05015012		758.19	0.01361042		1288.19	0.00365303		1818.18	0.00180767		2348.18	0.01112894		2878.18	0.14967532		3408.18	0.02603542		3938.18	-0.00489946
228.4	0.04966567		758.39	0.01332978		1288.39	0.00273034		1818.38	0.00231987		2348.38	0.0113189		2878.38	0.14910926		3408.38	0.02606547		3938.38	-0.00508049
228.6	0.04842784		758.59	0.01267966		1288.59	0.00194819		1818.58	0.00263174		2348.58	0.01144171		2878.58	0.14879882		3408.58	0.02768075		3938.58	-0.00600415
228.8	0.04794034		758.79	0.0128115		1288.79	0.0021794		1818.78	0.00304022		2348.78	0.01280747		2878.78	0.14855147		3408.78	0.02877568		3938.78	-0.0053217
229	0.04735926		758.99	0.01239067		1288.99	0.00277021		1818.98	0.00223008		2348.98	0.01368812		2878.98	0.14904555		3408.98	0.02902448		3938.98	-0.00660082
229.2	0.04672601		759.19	0.01231332		1289.19	0.00398308		1819.18	0.00357604		2349.18	0.01407285		2879.18	0.1499575		3409.18	0.02875879		3939.18	-0.00626839
229.4	0.04663453		759.39	0.01182968		1289.39	0.00292258		1819.38	0.00347429		2349.38	0.0143647		2879.38	0.15104213		3409.38	0.02772375		3939.38	-0.00640401
229.6	0.04643304		759.59	0.01172928		1289.59	0.00321951		1819.58	0.00264112		2349.58	0.01410357		2879.58	0.15194719		3409.58	0.02775327		3939.58	-0.00599448
229.8	0.04665586		759.79	0.01144554		1289.79	0.00395099		1819.78	0.00324782		2349.78	0.01385763		2879.78	0.15302231		3409.78	0.02792481		3939.78	-0.00596835
230	0.0462541		759.99	0.01219497		1289.99	0.00367247		1819.98	0.0034665		2349.98	0.0128244		2879.98	0.15400939		3409.98	0.02794464		3939.98	-0.00573047
230.2	0.04650987		760.19	0.01248869		1290.19	0.00453608		1820.18	0.00247697		2350.18	0.01177139		2880.18	0.15413557		3410.18	0.02676642		3940.18	-0.00695831
230.4	0.04759339		760.39	0.01266894		1290.39	0.00482715		1820.38	0.00200714		2350.38	0.01153327		2880.38	0.15448574		3410.38	0.02622773		3940.38	-0.00687519
230.6	0.04833396		760.59	0.01367778		1290.59	0.00517565		1820.58	0.00238037		2350.58	0.01018032		2880.58	0.15553704		3410.58	0.02627644		3940.58	-0.00698553
230.8	0.04841032		760.79	0.01508795		1290.79	0.00544372		1820.78	0.00289016		2350.78	0.00950601		2880.78	0.15623796		3410.78	0.02613351		3940.78	-0.00671714
231	0.04822149		760.99	0.01575102		1290.99	0.00689232		1820.98	0.00308322		2350.98	0.00942756		2880.98	0.15710748		3410.98	0.02530034		3940.98	-0.00723885
231.2	0.04862654		761.19	0.01518251		1291.19	0.00664893		1821.18	0.00219427		2351.18	0.0089605		2881.18	0.15746497		3411.18	0.02552277		3941.18	-0.00690175
231.4	0.04864887		761.39	0.0156788		1291.39	0.00591548		1821.38	0.00174959		2351.38	0.00862125		2881.38	0.1582195		3411.38	0.02654863		3941.38	-0.00627059
231.6	0.04821604		761.59	0.01553417		1291.59	0.00546832		1821.58	0.00141672		2351.58	0.00871893		2881.58	0.15888234		3411.58	0.02629275		3941.58	-0.00670374
231.8	0.04867335		761.79	0.01484542		1291.79	0.00586659		1821.78	0.00175589		2351.78	0.00877561		2881.78	0.15945925		3411.78	0.02668004		3941.78	-0.00654667
232	0.04804809		761.99	0.01395245		1291.99	0.00532684		1821.98	0.00147582		2351.98	0.00843625		2881.98	0.15954182		3411.98	0.02710635		3941.98	-0.00564643
232.2	0.04812217		762.19	0.01202069		1292.19	0.00401842		1822.18	0.00093791		2352.18	0.00819794		2882.18	0.15963052		3412.18	0.02760902		3942.18	-0.00492627
232.4	0.04731405		762.39	0.01153397		1292.39	0.00248158		1822.38	0.00223634		2352.38	0.00781435		2882.38	0.16043864		3412.38	0.02763095		3942.38	-0.00421209
232.6	0.04640688		762.59	0.01010886		1292.59	0.00228913		1822.58	0.00232737		2352.58	0.0088578		2882.58	0.16116662		3412.58	0.02832165		3942.58	-0.00484895
232.8	0.04599004		762.79	0.01027717		1292.79	0.00294583		1822.78	0.00179012		2352.78	0.00862642		2882.78	0.16237425		3412.78	0.02827087		3942.78	-0.00370873
233	0.04654781		762.99	0.00943692		1292.99	0.00286255		1822.98	0.00160431		2352.98	0.0095848		2882.98	0.16308651		3412.98	0.02819364		3942.98	-0.00288798
233.2	0.04775344		763.19	0.00936873		1293.19	0.00138585		1823.18	0.00249612		2353.18	0.00931136		2883.18	0.16288277		3413.18	0.0278153		3943.18	-0.00261978
233.4	0.04744657		763.39	0.00890326		1293.39	0.00033634		1823.38	0.00150327		2353.38	0.00917646		2883.38	0.16309456		3413.38	0.02864055		3943.38	-0.00166962
233.6	0.04716872		763.59	0.00917629		1293.59	0.00093563		1823.58	0.00203081		2353.58	0.00896317		2883.58	0.16331372		3413.58	0.02970714		3943.58	-0.0021562
233.8	0.04744613		763.79	0.00979096		1293.79	0.00126763		1823.78	0.00177221		2353.78	0.00917862		2883.78	0.16301652		3413.78	0.03019984		3943.78	-0.00294921
234	0.0480182		763.99	0.01137106		1293.99	0.00062017		1823.98	0.00124665		2353.98	0.00873346		2883.98	0.16293582		3413.98	0.02987362		3943.98	-0.00359248
234.2	0.04929838		764.19	0.01220879		1294.19	0.00060736		1824.18	0.00000255		2354.18	0.00866943		2884.18	0.16320207		3414.18	0.02848854		3944.18	-0.00445675
234.4	0.05058698		764.39	0.01340658		1294.39	0.00115693		1824.38	0.00064773		2354.38	0.00903557		2884.38	0.16323826		3414.38	0.02874561		3944.38	-0.00421408
234.6	0.05121143		764.59	0.01456482		1294.59	0.00188693		1824.58	0.00050187		2354.58	0.00914891		2884.58	0.16438974		3414.58	0.02890553		3944.58	-0.00565367
234.8	0.05193004		764.79	0.01554584		1294.79	0.00250502		1824.78	-0.00016719		2354.78	0.01042522		2884.78	0.16399938		3414.78	0.02763763		3944.78	-0.00638717
235	0.05210081		764.99	0.01494353		1294.99	0.00295683		1824.98	-0.00059397		2354.98	0.01114827		2884.98	0.16390371		3414.98	0.02708939		3944.98	-0.00663857
235.2	0.05260429		765.19	0.0146687		1295.19	0.00247578		1825.18	0.00014911		2355.18	0.01099931		2885.18	0.16489673		3415.18	0.0273872		3945.18	-0.00737191
235.4	0.05206116		765.39	0.01486167		1295.39	0.00382187		1825.38	0.00003908		2355.38	0.01087614		2885.38	0.1649569		3415.38	0.02775219		3945.38	-0.00789679
235.6	0.05245942		765.59	0.01375652		1295.59	0.00505238		1825.58	0.00080276		2355.58	0.01139469		2885.58	0.16591159		3415.58	0.02711831		3945.58	-0.00878978
235.8	0.05197943		765.79	0.01178232		1295.79	0.00513105		1825.78	0.00137919		2355.78	0.01152835		2885.78	0.16634874		3415.78	0.02751207		3945.78	-0.00863351
236	0.05207553		765.99	0.01101218		1295.99	0.00479774		1825.98	0.00117661		2355.98	0.01085797		2885.98	0.16683207		3415.98	0.02822408		3945.98	-0.00838135
236.2	0.05152212		766.19	0.01024288		1296.19	0.00363601		1826.18	0.00172858		2356.18	0.01077292		2886.18	0.16737958		3416.18	0.0274583		3946.18	-0.00764638
236.4	0.05093703		766.39	0.01020846		1296.39	0.00384808		1826.38	0.00252459		2356.38	0.01021059		2886.38	0.16864069		3416.38	0.02694455		3946.38	-0.00715763
236.6	0.05052273		766.59	0.00949556		1296.59	0.00502763		1826.58	0.00293431		2356.58	0.0105794		2886.58	0.16951199		3416.58	0.0266278		3946.58	-0.00717247
236.8	0.05038557		766.79	0.01040987		1296.79	0.00517898		1826.78	0.00231916		2356.78	0.00928238		2886.78	0.1707189		3416.78	0.02647488		3946.78	-0.00630353
237	0.05072692		766.99	0.01087823		1296.99	0.005168		1826.98	0.00288627		2356.98	0.01042935		2886.98	0.17121213		3416.98	0.02684665		3946.98	-0.00626131
237.2	0.04981617		767.19	0.01125336		1297.19	0.00478285		1827.18	0.00320089		2357.18	0.00962317		2887.18	0.171387		3417.18	0.02642568		3947.18	-0.00625292
237.4	0.04831783		767.39	0.01134062		1297.39	0.00511995		1827.38	0.00266865		2357.38	0.00898221		2887.38	0.17234195		3417.38	0.02782268		3947.38	-0.00562642
237.6	0.04844569		767.59	0.01177821		1297.59	0.00516075		1827.58	0.00200868		2357.58	0.00869695		2887.58	0.17279788		3417.58	0.02773904		3947.58	-0.00565397
237.8	0.0487748		767.79	0.01217663		1297.79	0.00501469		1827.78	0.00122149		2357.78	0.00851742		2887.78	0.17337566		3417.78	0.02717349		3947.78	-0.00520608
238	0.04965339		767.99	0.01285472		1297.99	0.00497273		1827.98	0.0010942		2357.98	0.00772954		2887.98	0.1737387		3417.98	0.02744165		3947.98	-0.00383457
238.2	0.04969852		768.19	0.01280182		1298.19	0.00509137		1828.18	0.00130146		2358.18	0.00862		2888.18	0.17372957		3418.18	0.02758263		3948.18	-0.00303483
238.4	0.04954895		768.39	0.01293889		1298.39	0.00492412		1828.38	0.00194245		2358.38	0.00926906		2888.38	0.17423334		3418.38	0.02890331		3948.38	-0.00236024
238.6	0.05051343		768.59	0.01265839		1298.59	0.00472741		1828.58	0.00061043		2358.58	0.00946478		2888.58	0.17473542		3418.58	0.02885785		3948.58	-0.0029281
238.8	0.05077038		768.79	0.01162202		1298.79	0.00407662		1828.78	0.00083449		2358.78	0.0101091		2888.78	0.17470377		3418.78	0.02964378		3948.78	-0.00353327
239	0.05034905		768.99	0.01105682		1298.99	0.0033874		1828.98	0.00132194		2358.98	0.01005829		2888.98	0.17483251		3418.98	0.0307864		3948.98	-0.00348219
239.2	0.04971855		769.19	0.01100133		1299.19	0.00516795		1829.18	0.00175507		2359.18	0.00980537		2889.18	0.17522906		3419.18	0.03188174		3949.18	-0.00389219
239.4	0.05002288		769.39	0.01057372		1299.39	0.00595703		1829.38	0.00124292		2359.38	0.00932121		2889.38	0.17511141		3419.38	0.03303308		3949.38	-0.00416474
239.6	0.05057497		769.59	0.01029597		1299.59	0.00523958		1829.58	0.0015099		2359.58	0.01043683		2889.58	0.17676719		3419.58	0.03282349		3949.58	-0.00452527
239.8	0.0505686		769.79	0.0104692		1299.79	0.00465775		1829.78	0.0006905		2359.78	0.00982702		2889.78	0.17736217		3419.78	0.03324942		3949.78	-0.00503646
240	0.05180985		769.99	0.01036147		1299.99	0.00486569		1829.98	0.00027647		2359.98	0.00940096		2889.98	0.17869594		3419.98	0.03277999		3949.98	-0.00478043
240.2	0.05140188		770.19	0.01025128		1300.19	0.00402627		1830.18	0.00070822		2360.18	0.00967043		2890.18	0.1802003		3420.18	0.03165262		3950.18	-0.00500666
240.4	0.05178286		770.39	0.0096257		1300.39	0.00474699		1830.38	0.00112047		2360.38	0.00906875		2890.38	0.1806577		3420.38	0.03091806		3950.38	-0.00606095
240.6	0.05245944		770.59	0.01026402		1300.59	0.00503792		1830.58	0.00141801		2360.58	0.00941632		2890.58	0.18047157		3420.58	0.03006345		3950.58	-0.006291
240.8	0.05226069		770.79	0.0104214		1300.79	0.00484375		1830.78	0.00172779		2360.78	0.00929923		2890.78	0.18182692		3420.78	0.0298473		3950.78	-0.00653159
241	0.05194216		770.99	0.01110676		1300.99	0.00537226		1830.98	0.00265345		2360.98	0.00999088		2890.98	0.18231025		3420.98	0.02904038		3950.98	-0.00660255
241.2	0.0522182		771.19	0.01126629		1301.19	0.00538705		1831.18	0.00230499		2361.18	0.00973985		2891.18	0.18308528		3421.18	0.02830944		3951.18	-0.00655524
241.4	0.05291307		771.39	0.01162929		1301.39	0.00536123		1831.38	0.00252768		2361.38	0.00890757		2891.38	0.18330817		3421.38	0.02886364		3951.38	-0.00687945
241.6	0.05301422		771.59	0.01191005		1301.59	0.00496988		1831.58	0.00247292		2361.58	0.00945875		2891.58	0.18366017		3421.58	0.02832442		3951.58	-0.00655835
241.8	0.05329681		771.79	0.01170621		1301.79	0.00462986		1831.78	0.00275578		2361.78	0.00958482		2891.78	0.18416353		3421.78	0.02832332		3951.78	-0.00649192
242	0.0536941		771.99	0.01142867		1301.99	0.00454127		1831.98	0.00236171		2361.98	0.00889375		2891.98	0.18381782		3421.98	0.02870838		3951.98	-0.00624839
242.2	0.05447867		772.19	0.01124295		1302.19	0.00396584		1832.18	0.0031252		2362.18	0.00935146		2892.18	0.18369665		3422.18	0.02945414		3952.18	-0.00681964
242.4	0.055147		772.39	0.01062132		1302.39	0.00346956		1832.38	0.00226681		2362.38	0.00877331		2892.38	0.18419557		3422.38	0.03023897		3952.38	-0.00710287
242.6	0.05584922		772.59	0.01027493		1302.59	0.00370126		1832.58	0.00189439		2362.58	0.00847897		2892.58	0.18460527		3422.58	0.03091091		3952.58	-0.00734064
242.8	0.05594756		772.79	0.01026822		1302.79	0.00333108		1832.78	0.00143532		2362.78	0.00853999		2892.78	0.1850709		3422.78	0.03203549		3952.78	-0.00755935
243	0.05689673		772.99	0.01142499		1302.99	0.00271242		1832.98	0.00086303		2362.98	0.00859163		2892.98	0.18502403		3422.98	0.03216946		3952.98	-0.00705489
243.2	0.05770607		773.19	0.01170885		1303.19	0.00416223		1833.18	0.00006466		2363.18	0.00817893		2893.18	0.18527978		3423.18	0.03198939		3953.18	-0.00768079
243.4	0.05877063		773.39	0.01277628		1303.39	0.00387716		1833.38	-0.0003503		2363.38	0.00728366		2893.38	0.18584076		3423.38	0.03209307		3953.38	-0.00782731
243.6	0.05859854		773.59	0.01355186		1303.59	0.00322542		1833.58	-0.00088018		2363.58	0.00762882		2893.58	0.18624764		3423.58	0.03126459		3953.58	-0.00852588
243.8	0.05903681		773.79	0.01463294		1303.79	0.00339176		1833.78	-0.00145704		2363.78	0.00758008		2893.78	0.18597106		3423.78	0.03096561		3953.78	-0.00869737
244	0.05901682		773.99	0.01443575		1303.99	0.002812		1833.98	-0.00116324		2363.98	0.00724881		2893.98	0.18619432		3423.98	0.03046101		3953.98	-0.00848217
244.2	0.05810775		774.19	0.014626		1304.19	0.00198123		1834.18	-0.00120396		2364.18	0.00696953		2894.18	0.18612678		3424.18	0.02954133		3954.18	-0.00854987
244.4	0.05801379		774.39	0.01434362		1304.39	0.00286902		1834.38	-0.00042976		2364.38	0.00628947		2894.38	0.18538624		3424.38	0.0288017		3954.38	-0.00845553
244.6	0.05719493		774.59	0.01393443		1304.59	0.00275938		1834.58	0.00007875		2364.58	0.00653656		2894.58	0.18537256		3424.58	0.02886263		3954.58	-0.00751606
244.8	0.0566257		774.79	0.01289238		1304.79	0.00318365		1834.78	0.00001787		2364.78	0.00603857		2894.78	0.18713789		3424.78	0.02841769		3954.78	-0.00744706
245	0.0564388		774.99	0.0134493		1304.99	0.00378634		1834.98	0.00077241		2364.98	0.00635548		2894.98	0.18729634		3424.98	0.02774049		3954.98	-0.00695079
245.2	0.05578616		775.19	0.01277307		1305.19	0.00450412		1835.18	0.00084484		2365.18	0.00679106		2895.18	0.18781603		3425.18	0.02730288		3955.18	-0.00703509
245.4	0.05460639		775.39	0.01333144		1305.39	0.00393452		1835.38	0.00163569		2365.38	0.00683143		2895.38	0.18803125		3425.38	0.02805344		3955.38	-0.00637807
245.6	0.05358976		775.59	0.01296438		1305.59	0.00386041		1835.58	0.00174808		2365.58	0.00833388		2895.58	0.18873083		3425.58	0.02767024		3955.58	-0.00656231
245.8	0.05355494		775.79	0.01254926		1305.79	0.00486482		1835.78	0.00252299		2365.78	0.0082055		2895.78	0.18901304		3425.78	0.02816237		3955.78	-0.00756851
246	0.05366731		775.99	0.01134365		1305.99	0.00536334		1835.98	0.00317893		2365.98	0.00789071		2895.98	0.18977032		3425.98	0.02763254		3955.98	-0.00733555
246.2	0.05431912		776.19	0.01145368		1306.19	0.00541587		1836.18	0.00391521		2366.18	0.00810073		2896.18	0.19014761		3426.18	0.02814602		3956.18	-0.00732041
246.4	0.05375469		776.39	0.00995623		1306.39	0.00563766		1836.38	0.00369586		2366.38	0.00816896		2896.38	0.19100134		3426.38	0.02855378		3956.38	-0.00659258
246.6	0.05423141		776.59	0.00997089		1306.59	0.00538012		1836.58	0.00420115		2366.58	0.00823602		2896.58	0.19173708		3426.58	0.02945653		3956.58	-0.00692744
246.8	0.05462779		776.79	0.00989584		1306.79	0.00497611		1836.78	0.00387035		2366.78	0.00882855		2896.78	0.19218273		3426.78	0.02900285		3956.78	-0.00831222
247	0.05580944		776.99	0.01068276		1306.99	0.00425753		1836.98	0.00397155		2366.98	0.0096024		2896.98	0.19188696		3426.98	0.02838576		3956.98	-0.008549
247.2	0.05512929		777.19	0.01102621		1307.19	0.00534459		1837.18	0.00366249		2367.18	0.00965235		2897.18	0.19134451		3427.18	0.02852024		3957.18	-0.00869419
247.4	0.05483246		777.39	0.01222758		1307.39	0.00513616		1837.38	0.00414188		2367.38	0.00928888		2897.38	0.19073417		3427.38	0.02969292		3957.38	-0.00824351
247.6	0.05506913		777.59	0.01270131		1307.59	0.00507921		1837.58	0.00383204		2367.58	0.00957631		2897.58	0.18990908		3427.58	0.02998115		3957.58	-0.00892759
247.8	0.05605504		777.79	0.01309143		1307.79	0.00491355		1837.78	0.00404961		2367.78	0.00928705		2897.78	0.18942626		3427.78	0.03119706		3957.78	-0.00811361
248	0.05583309		777.99	0.01342125		1307.99	0.00481698		1837.98	0.00403093		2367.98	0.00834849		2897.98	0.18929607		3427.98	0.03173181		3957.98	-0.00774595
248.2	0.05612425		778.19	0.01374676		1308.19	0.00499481		1838.18	0.00443845		2368.18	0.0076168		2898.18	0.18992474		3428.18	0.03203329		3958.18	-0.00753514
248.4	0.05671315		778.39	0.0127432		1308.39	0.00442468		1838.38	0.00451555		2368.38	0.00688773		2898.38	0.18945502		3428.38	0.03250011		3958.38	-0.00765569
248.6	0.05593505		778.59	0.01178582		1308.59	0.00366545		1838.58	0.00355105		2368.58	0.00645714		2898.58	0.19054526		3428.58	0.0333675		3958.58	-0.00780345
248.8	0.05688453		778.79	0.01147072		1308.79	0.00350277		1838.78	0.00413273		2368.78	0.00578169		2898.78	0.19134701		3428.78	0.03351516		3958.78	-0.00773311
249	0.05623351		778.99	0.01216215		1308.99	0.00359882		1838.98	0.00502225		2368.98	0.00552315		2898.98	0.1914488		3428.98	0.03375817		3958.98	-0.00658408
249.2	0.05593058		779.19	0.01153952		1309.19	0.00352137		1839.18	0.0053425		2369.18	0.00518618		2899.18	0.19220676		3429.18	0.03368619		3959.18	-0.00676967
249.4	0.05583396		779.39	0.01272432		1309.39	0.00308959		1839.38	0.00522304		2369.38	0.00525079		2899.38	0.19292851		3429.38	0.03508507		3959.38	-0.00590055
249.6	0.05601271		779.59	0.01308227		1309.59	0.00384932		1839.58	0.0059483		2369.58	0.00527458		2899.58	0.19383586		3429.58	0.03400153		3959.58	-0.00680781
249.8	0.05550659		779.79	0.01320917		1309.79	0.00430865		1839.78	0.00628135		2369.78	0.00539673		2899.78	0.19460153		3429.78	0.035012		3959.78	-0.00686362
250	0.05525051		779.99	0.01310895		1309.99	0.00459899		1839.98	0.00666063		2369.98	0.00567219		2899.98	0.19536213		3429.98	0.03457027		3959.98	-0.00719158
250.2	0.05570739		780.19	0.01276787		1310.19	0.0043831		1840.18	0.00679693		2370.18	0.005292		2900.18	0.19511088		3430.18	0.03534904		3960.18	-0.00759408
250.4	0.05565478		780.39	0.01282258		1310.39	0.00402178		1840.38	0.00629844		2370.38	0.00609569		2900.38	0.19579177		3430.38	0.03527004		3960.38	-0.0078984
250.6	0.05615232		780.59	0.01347047		1310.59	0.00376162		1840.58	0.00558393		2370.58	0.00704111		2900.58	0.1966255		3430.58	0.03437879		3960.58	-0.00893759
250.8	0.05705131		780.79	0.01393853		1310.79	0.00449388		1840.78	0.00442293		2370.78	0.00795284		2900.78	0.19691437		3430.78	0.03303491		3960.78	-0.00976239
251	0.05800483		780.99	0.01529006		1310.99	0.00454093		1840.98	0.00376118		2370.98	0.00841112		2900.98	0.19710335		3430.98	0.03326855		3960.98	-0.00922334
251.2	0.05749496		781.19	0.01584693		1311.19	0.00535895		1841.18	0.00313716		2371.18	0.0081678		2901.18	0.19737857		3431.18	0.03366138		3961.18	-0.00955952
251.4	0.05808075		781.39	0.01648096		1311.39	0.00594885		1841.38	0.00345921		2371.38	0.0075108		2901.38	0.19805107		3431.38	0.03372667		3961.38	-0.00894644
251.6	0.05892869		781.59	0.01671307		1311.59	0.00679335		1841.58	0.00283784		2371.58	0.00760418		2901.58	0.1984263		3431.58	0.03316656		3961.58	-0.00913087
251.8	0.0596387		781.79	0.01698689		1311.79	0.00711693		1841.78	0.00377777		2371.78	0.00732926		2901.78	0.19921627		3431.78	0.03313871		3961.78	-0.00836597
252	0.06011397		781.99	0.01705838		1311.99	0.00728129		1841.98	0.00293897		2371.98	0.00758554		2901.98	0.20087964		3431.98	0.03220209		3961.98	-0.0084932
252.2	0.06014019		782.19	0.0167152		1312.19	0.00676662		1842.18	0.00324935		2372.18	0.00774983		2902.18	0.20235353		3432.18	0.0318797		3962.18	-0.00866789
252.4	0.06017451		782.39	0.01557958		1312.39	0.00577449		1842.38	0.00264038		2372.38	0.00747478		2902.38	0.20299868		3432.38	0.0316683		3962.38	-0.00874323
252.6	0.05933918		782.59	0.01548069		1312.59	0.0061046		1842.58	0.00298365		2372.58	0.00783577		2902.58	0.20442501		3432.58	0.03193234		3962.58	-0.00952153
252.8	0.05989854		782.79	0.01522389		1312.79	0.00585288		1842.78	0.00326366		2372.78	0.00768921		2902.78	0.20499797		3432.78	0.03177333		3962.78	-0.00864747
253	0.05908212		782.99	0.01509918		1312.99	0.00537717		1842.98	0.00235602		2372.98	0.00787178		2902.98	0.20572425		3432.98	0.0315889		3962.98	-0.00710441
253.2	0.05955076		783.19	0.01460989		1313.19	0.00473191		1843.18	0.00181975		2373.18	0.00790224		2903.18	0.20585319		3433.18	0.03127056		3963.18	-0.00737223
253.4	0.0583142		783.39	0.0147645		1313.39	0.00448274		1843.38	0.00178576		2373.38	0.00755155		2903.38	0.20629775		3433.38	0.03203242		3963.38	-0.00726345
253.6	0.05789914		783.59	0.01398875		1313.59	0.00435496		1843.58	0.00169408		2373.58	0.00742037		2903.58	0.20624649		3433.58	0.03126719		3963.58	-0.00715936
253.8	0.05722064		783.79	0.01349857		1313.79	0.00430878		1843.78	0.00148302		2373.78	0.00768841		2903.78	0.20511847		3433.78	0.03242326		3963.78	-0.00694
254	0.05730517		783.99	0.01271321		1313.99	0.00399819		1843.98	0.00278898		2373.98	0.00794228		2903.98	0.20406124		3433.98	0.03264318		3963.98	-0.00788022
254.2	0.05707628		784.19	0.01213331		1314.19	0.00316175		1844.18	0.00262887		2374.18	0.00848645		2904.18	0.20251648		3434.18	0.03282839		3964.18	-0.00720431
254.4	0.05708893		784.39	0.01260452		1314.39	0.00301115		1844.38	0.00131043		2374.38	0.00858989		2904.38	0.20222507		3434.38	0.03213529		3964.38	-0.00792217
254.6	0.05759177		784.59	0.01300827		1314.59	0.00405896		1844.58	0.00168846		2374.58	0.00890091		2904.58	0.2017992		3434.58	0.03192494		3964.58	-0.00808132
254.8	0.05734419		784.79	0.0129042		1314.79	0.00509904		1844.78	0.00158112		2374.78	0.00863294		2904.78	0.20130782		3434.78	0.03214111		3964.78	-0.00821816
255	0.05695885		784.99	0.01281563		1314.99	0.00416189		1844.98	0.00109186		2374.98	0.00840919		2904.98	0.20187965		3434.98	0.03231035		3964.98	-0.00778863
255.2	0.05664215		785.19	0.01269672		1315.19	0.00437008		1845.18	0.00146051		2375.18	0.00748635		2905.18	0.20115287		3435.18	0.03133087		3965.18	-0.00759325
255.4	0.05708605		785.39	0.01265105		1315.39	0.00475407		1845.38	0.00224904		2375.38	0.00686306		2905.38	0.20169062		3435.38	0.03103085		3965.38	-0.00720323
255.6	0.05750953		785.59	0.0127012		1315.59	0.00438571		1845.58	0.00236745		2375.58	0.00740687		2905.58	0.20288517		3435.58	0.0309454		3965.58	-0.00721308
255.8	0.05738678		785.79	0.01215849		1315.79	0.00409629		1845.78	0.00357112		2375.78	0.00750978		2905.78	0.20369839		3435.78	0.03086285		3965.78	-0.00690995
256	0.05772124		785.99	0.01123366		1315.99	0.00382409		1845.98	0.00366297		2375.98	0.0077542		2905.98	0.20518594		3435.98	0.03153727		3965.98	-0.00707372
256.2	0.05751549		786.19	0.01110031		1316.19	0.0046354		1846.18	0.00453017		2376.18	0.00783363		2906.18	0.20554521		3436.18	0.03174794		3966.18	-0.00718699
256.4	0.05805319		786.39	0.01096034		1316.39	0.00511676		1846.38	0.00430349		2376.38	0.00711915		2906.38	0.20629611		3436.38	0.03255219		3966.38	-0.00708837
256.6	0.05856259		786.59	0.01066004		1316.59	0.0056634		1846.58	0.00419726		2376.58	0.00710007		2906.58	0.20694453		3436.58	0.03321939		3966.58	-0.00770449
256.8	0.05928864		786.79	0.01032974		1316.79	0.0059871		1846.78	0.00313631		2376.78	0.00681763		2906.78	0.2075562		3436.78	0.03302545		3966.78	-0.00704663
257	0.0586877		786.99	0.00962886		1316.99	0.00637599		1846.98	0.00274456		2376.98	0.00675936		2906.98	0.2081159		3436.98	0.03228974		3966.98	-0.00604928
257.2	0.05817635		787.19	0.00952056		1317.19	0.0076629		1847.18	0.0023491		2377.18	0.006322		2907.18	0.20838426		3437.18	0.03314483		3967.18	-0.00672867
257.4	0.05744409		787.39	0.00964395		1317.39	0.00766202		1847.38	0.0025827		2377.38	0.00633464		2907.38	0.20891391		3437.38	0.03415132		3967.38	-0.00660472
257.6	0.05737892		787.59	0.00926237		1317.59	0.00775071		1847.58	0.00172671		2377.58	0.00627531		2907.58	0.20902152		3437.58	0.03448886		3967.58	-0.00611567
257.8	0.05649041		787.79	0.01076741		1317.79	0.00876621		1847.78	0.00170478		2377.78	0.00642434		2907.78	0.20840174		3437.78	0.03522858		3967.78	-0.00650362
258	0.05632721		787.99	0.01184076		1317.99	0.00898483		1847.98	0.00146982		2377.98	0.00727037		2907.98	0.20770029		3437.98	0.03562018		3967.98	-0.00636685
258.2	0.05689897		788.19	0.01275975		1318.19	0.00893077		1848.18	0.00057471		2378.18	0.00721827		2908.18	0.2075176		3438.18	0.03526865		3968.18	-0.00566221
258.4	0.05721028		788.39	0.01336108		1318.39	0.00917726		1848.38	-0.00037436		2378.38	0.0076177		2908.38	0.2081087		3438.38	0.03527179		3968.38	-0.00599898
258.6	0.05796728		788.59	0.01386212		1318.59	0.00988333		1848.58	-0.00031051		2378.58	0.00855824		2908.58	0.20823123		3438.58	0.03545698		3968.58	-0.00587521
258.8	0.05780337		788.79	0.01426138		1318.79	0.00914968		1848.78	-0.00085207		2378.78	0.0088461		2908.78	0.20858022		3438.78	0.03537859		3968.78	-0.00614707
259	0.05883707		788.99	0.01441135		1318.99	0.00812716		1848.98	-0.00127442		2378.98	0.00922898		2908.98	0.20881403		3438.98	0.0359439		3968.98	-0.00559414
259.2	0.0592656		789.19	0.01563092		1319.19	0.00756912		1849.18	-0.00014857		2379.18	0.00946029		2909.18	0.20784577		3439.18	0.03589603		3969.18	-0.00561752
259.4	0.05953964		789.39	0.01628249		1319.39	0.00698945		1849.38	0.000369		2379.38	0.01012796		2909.38	0.20923478		3439.38	0.03553898		3969.38	-0.00537392
259.6	0.05966617		789.59	0.01556301		1319.59	0.00556602		1849.58	0.00051769		2379.58	0.01119069		2909.58	0.21055696		3439.58	0.03626623		3969.58	-0.00509467
259.8	0.06002345		789.79	0.01538722		1319.79	0.00489774		1849.78	0.001616		2379.78	0.01178275		2909.78	0.21060381		3439.78	0.03620998		3969.78	-0.00560492
260	0.06013883		789.99	0.01422232		1319.99	0.0043154		1849.98	0.00234629		2379.98	0.01120096		2909.98	0.21115806		3439.98	0.03696565		3969.98	-0.00571302
260.2	0.05950716		790.19	0.01389585		1320.19	0.00447041		1850.18	0.00261969		2380.18	0.01073106		2910.18	0.21175929		3440.18	0.03674498		3970.18	-0.00536629
260.4	0.06009369		790.39	0.01313477		1320.39	0.00419761		1850.38	0.00297218		2380.38	0.00976342		2910.38	0.2121482		3440.38	0.03755052		3970.38	-0.00522081
260.6	0.060262		790.59	0.01166747		1320.59	0.00523153		1850.58	0.00290975		2380.58	0.01011468		2910.58	0.21253845		3440.58	0.03719833		3970.58	-0.00494735
260.8	0.05999184		790.79	0.0110598		1320.79	0.00619811		1850.78	0.0032408		2380.78	0.01004482		2910.78	0.21298164		3440.78	0.03666908		3970.78	-0.00504729
261	0.05946456		790.99	0.0102467		1320.99	0.00685983		1850.98	0.00394882		2380.98	0.00997953		2910.98	0.2133575		3440.98	0.0366899		3970.98	-0.00503224
261.2	0.05878927		791.19	0.01048895		1321.19	0.00682623		1851.18	0.00365062		2381.18	0.00977322		2911.18	0.21373199		3441.18	0.03753415		3971.18	-0.00584891
261.4	0.05864652		791.39	0.01058619		1321.39	0.00680715		1851.38	0.0038275		2381.38	0.00975484		2911.38	0.21404559		3441.38	0.03723187		3971.38	-0.00580071
261.6	0.05800134		791.59	0.01050263		1321.59	0.00673771		1851.58	0.00378731		2381.58	0.00950233		2911.58	0.21375038		3441.58	0.03738634		3971.58	-0.00624692
261.8	0.0585857		791.79	0.01120257		1321.79	0.00677412		1851.78	0.00329762		2381.78	0.01001786		2911.78	0.2133683		3441.78	0.03684135		3971.78	-0.00697791
262	0.05980926		791.99	0.01126086		1321.99	0.00658518		1851.98	0.00285121		2381.98	0.00972211		2911.98	0.2124055		3441.98	0.03595315		3971.98	-0.00768663
262.2	0.06173223		792.19	0.01069891		1322.19	0.00611939		1852.18	0.00219993		2382.18	0.00977561		2912.18	0.21316886		3442.18	0.03592315		3972.18	-0.00830202
262.4	0.06253817		792.39	0.01021275		1322.39	0.00699293		1852.38	0.00202342		2382.38	0.00999785		2912.38	0.21355238		3442.38	0.03571729		3972.38	-0.00914531
262.6	0.06327316		792.59	0.01116311		1322.59	0.00798319		1852.58	0.00102353		2382.58	0.00979472		2912.58	0.21339093		3442.58	0.03606448		3972.58	-0.00917081
262.8	0.06299242		792.79	0.01239043		1322.79	0.00780214		1852.78	0.00192595		2382.78	0.01023637		2912.78	0.21311788		3442.78	0.03641191		3972.78	-0.00900733
263	0.06335989		792.99	0.01296702		1322.99	0.00786836		1852.98	0.00194496		2382.98	0.0102161		2912.98	0.21313791		3442.98	0.03592494		3972.98	-0.00857539
263.2	0.06277944		793.19	0.01371456		1323.19	0.00707996		1853.18	0.00289772		2383.18	0.00966755		2913.18	0.21301907		3443.18	0.03562176		3973.18	-0.00812485
263.4	0.06299232		793.39	0.01465398		1323.39	0.0071908		1853.38	0.00298654		2383.38	0.01021484		2913.38	0.21403712		3443.38	0.03551079		3973.38	-0.00773109
263.6	0.06338689		793.59	0.01518064		1323.59	0.00685748		1853.58	0.00197007		2383.58	0.00975237		2913.58	0.21475132		3443.58	0.03608004		3973.58	-0.00751084
263.8	0.06272426		793.79	0.01616309		1323.79	0.00596282		1853.78	0.00182003		2383.78	0.01020554		2913.78	0.21488647		3443.78	0.03585814		3973.78	-0.00613865
264	0.06189004		793.99	0.01544315		1323.99	0.00559011		1853.98	0.00216784		2383.98	0.00957052		2913.98	0.21645267		3443.98	0.03619499		3973.98	-0.00476765
264.2	0.06096295		794.19	0.01629585		1324.19	0.00604391		1854.18	0.00188949		2384.18	0.00867054		2914.18	0.21718879		3444.18	0.0359549		3974.18	-0.003827
264.4	0.06156988		794.39	0.01703351		1324.39	0.00587835		1854.38	0.00141576		2384.38	0.00861393		2914.38	0.21735123		3444.38	0.03595616		3974.38	-0.00361508
264.6	0.06089778		794.59	0.01717116		1324.59	0.00601099		1854.58	0.00134372		2384.58	0.00869937		2914.58	0.21778677		3444.58	0.03560942		3974.58	-0.00368181
264.8	0.06060044		794.79	0.01742036		1324.79	0.00568141		1854.78	0.00228774		2384.78	0.0077085		2914.78	0.21785406		3444.78	0.03591419		3974.78	-0.00332153
265	0.06044369		794.99	0.01783932		1324.99	0.00497132		1854.98	0.00272306		2384.98	0.0073672		2914.98	0.21864359		3444.98	0.03543402		3974.98	-0.00268749
265.2	0.05974678		795.19	0.01821029		1325.19	0.00481474		1855.18	0.00249421		2385.18	0.00764706		2915.18	0.21865945		3445.18	0.03528216		3975.18	-0.0026497
265.4	0.05934605		795.39	0.01752673		1325.39	0.00425903		1855.38	0.00331769		2385.38	0.00721151		2915.38	0.21854274		3445.38	0.03581653		3975.38	-0.00223763
265.6	0.05966783		795.59	0.01670713		1325.59	0.00322962		1855.58	0.00294501		2385.58	0.00801818		2915.58	0.21796103		3445.58	0.03546914		3975.58	-0.00302237
265.8	0.06031774		795.79	0.01675645		1325.79	0.00345192		1855.78	0.00265585		2385.78	0.00783304		2915.78	0.21799071		3445.78	0.03465725		3975.78	-0.00344443
266	0.06116552		795.99	0.01659984		1325.99	0.00442321		1855.98	0.00215763		2385.98	0.00704205		2915.98	0.2179065		3445.98	0.03471116		3975.98	-0.00534589
266.2	0.06133667		796.19	0.01576389		1326.19	0.00503094		1856.18	0.00174501		2386.18	0.00764691		2916.18	0.21911129		3446.18	0.03548154		3976.18	-0.00568559
266.4	0.06122674		796.39	0.01524978		1326.39	0.00614299		1856.38	0.00202405		2386.38	0.00742176		2916.38	0.21936935		3446.38	0.03565108		3976.38	-0.00627367
266.6	0.06094803		796.59	0.01613631		1326.59	0.00660694		1856.58	0.00155589		2386.58	0.00819333		2916.58	0.21958074		3446.58	0.03648047		3976.58	-0.00648865
266.8	0.06059303		796.79	0.01580323		1326.79	0.006232		1856.78	0.00342329		2386.78	0.0086568		2916.78	0.2200867		3446.78	0.03698932		3976.78	-0.00696282
267	0.06115978		796.99	0.0156149		1326.99	0.00614633		1856.98	0.00336973		2386.98	0.00857294		2916.98	0.2207591		3446.98	0.03726251		3976.98	-0.0075554
267.2	0.06136027		797.19	0.0152824		1327.19	0.00651037		1857.18	0.00356956		2387.18	0.00858937		2917.18	0.22161953		3447.18	0.03861141		3977.18	-0.00813142
267.4	0.06280298		797.39	0.0156766		1327.39	0.0063345		1857.38	0.00288455		2387.38	0.00915512		2917.38	0.22239379		3447.38	0.03859245		3977.38	-0.00884093
267.6	0.06319033		797.59	0.01568126		1327.59	0.00652306		1857.58	0.0013485		2387.58	0.00896178		2917.58	0.22357636		3447.58	0.0387576		3977.58	-0.00907519
267.8	0.06258342		797.79	0.01510648		1327.79	0.00668945		1857.78	0.00226921		2387.78	0.01014908		2917.78	0.22389241		3447.78	0.03912125		3977.78	-0.00941341
268	0.06288101		797.99	0.01504399		1327.99	0.00727449		1857.98	0.003453		2387.98	0.00953389		2917.98	0.22476701		3447.98	0.03929741		3977.98	-0.01030344
268.2	0.06286318		798.19	0.01551866		1328.19	0.00767915		1858.18	0.00348427		2388.18	0.00906212		2918.18	0.22508059		3448.18	0.03927079		3978.18	-0.01192959
268.4	0.06302824		798.39	0.01541592		1328.39	0.00749118		1858.38	0.00346734		2388.38	0.00901995		2918.38	0.22529153		3448.38	0.03843078		3978.38	-0.01205735
268.6	0.06230087		798.59	0.01441579		1328.59	0.00754912		1858.58	0.00415566		2388.58	0.00809612		2918.58	0.22488576		3448.58	0.0382386		3978.58	-0.01223463
268.8	0.06189396		798.79	0.01376164		1328.79	0.00792226		1858.78	0.00463408		2388.78	0.00823553		2918.78	0.22502917		3448.78	0.03734735		3978.78	-0.01219571
269	0.06198145		798.99	0.01408602		1328.99	0.00795586		1858.98	0.00446195		2388.98	0.00767903		2918.98	0.22528954		3448.98	0.03609775		3978.98	-0.01197967
269.2	0.06185866		799.19	0.01331044		1329.19	0.00837188		1859.18	0.00384096		2389.18	0.00797934		2919.18	0.22446903		3449.18	0.03594757		3979.18	-0.012185
269.4	0.06258552		799.39	0.0129294		1329.39	0.00746712		1859.38	0.00500377		2389.38	0.00799085		2919.38	0.22434477		3449.38	0.03505396		3979.38	-0.01138536
269.6	0.06350814		799.59	0.01291739		1329.59	0.0080366		1859.58	0.00437853		2389.58	0.00910632		2919.58	0.22395665		3449.58	0.03371522		3979.58	-0.01151549
269.8	0.06320746		799.79	0.01320477		1329.79	0.00781929		1859.78	0.00487892		2389.78	0.008844		2919.78	0.22494635		3449.78	0.03388761		3979.78	-0.01167627
270	0.06303437		799.99	0.01307348		1329.99	0.00791192		1859.98	0.00491209		2389.98	0.00933185		2919.98	0.22589635		3449.98	0.03431396		3979.98	-0.0121926
270.2	0.06244377		800.19	0.01243574		1330.19	0.00795141		1860.18	0.00561335		2390.18	0.00955604		2920.18	0.2267281		3450.18	0.03425657		3980.18	-0.0104691
270.4	0.06236541		800.39	0.01276981		1330.39	0.00756275		1860.38	0.00516958		2390.38	0.01025208		2920.38	0.22726724		3450.38	0.03419382		3980.38	-0.00957112
270.6	0.06244058		800.59	0.01288213		1330.59	0.00686644		1860.58	0.00470835		2390.58	0.0104025		2920.58	0.22773118		3450.58	0.03401885		3980.58	-0.0086569
270.8	0.06280373		800.79	0.01368395		1330.79	0.00628362		1860.78	0.00524066		2390.78	0.01096347		2920.78	0.22916285		3450.78	0.03488408		3980.78	-0.00775238
271	0.06300366		800.99	0.01377689		1330.99	0.00576659		1860.98	0.00431189		2390.98	0.0099603		2920.98	0.22998489		3450.98	0.03458633		3980.98	-0.0083236
271.2	0.06372754		801.19	0.0133377		1331.19	0.00552208		1861.18	0.00329939		2391.18	0.00995051		2921.18	0.23061715		3451.18	0.03466688		3981.18	-0.00804183
271.4	0.06366241		801.39	0.013788		1331.39	0.00493624		1861.38	0.00277753		2391.38	0.0100858		2921.38	0.23024595		3451.38	0.03509046		3981.38	-0.00733971
271.6	0.06389324		801.59	0.01411653		1331.59	0.00593986		1861.58	0.00253652		2391.58	0.00960037		2921.58	0.23016992		3451.58	0.03632804		3981.58	-0.00706298
271.8	0.06374627		801.79	0.01402119		1331.79	0.00661603		1861.78	0.0031529		2391.78	0.00911717		2921.78	0.22976219		3451.78	0.03708193		3981.78	-0.00747354
272	0.06426551		801.99	0.01409824		1331.99	0.0064716		1861.98	0.00338954		2391.98	0.0091802		2921.98	0.22930336		3451.98	0.03760501		3981.98	-0.00771887
272.2	0.06426797		802.19	0.01382434		1332.19	0.00632107		1862.18	0.002346		2392.18	0.00898811		2922.18	0.22939693		3452.18	0.03813613		3982.18	-0.00846195
272.4	0.06438116		802.39	0.01333702		1332.39	0.00659926		1862.38	0.00223072		2392.38	0.008425		2922.38	0.22877991		3452.38	0.03827809		3982.38	-0.0080717
272.6	0.06406876		802.59	0.01335312		1332.59	0.00609851		1862.58	0.00224819		2392.58	0.00862785		2922.58	0.22792351		3452.58	0.03946882		3982.58	-0.00844529
272.8	0.06378218		802.79	0.01359399		1332.79	0.00685146		1862.78	0.00204585		2392.78	0.00885958		2922.78	0.22792383		3452.78	0.03921232		3982.78	-0.00788577
273	0.06505171		802.99	0.01430119		1332.99	0.00659514		1862.98	0.00183698		2392.98	0.00819753		2922.98	0.22760989		3452.98	0.0394856		3982.98	-0.00707535
273.2	0.06533153		803.19	0.01389301		1333.19	0.00625997		1863.18	0.0014794		2393.18	0.00961466		2923.18	0.22815695		3453.18	0.04041103		3983.18	-0.00698334
273.4	0.06589214		803.39	0.01406228		1333.39	0.00550554		1863.38	0.00224835		2393.38	0.01029063		2923.38	0.22831036		3453.38	0.04038718		3983.38	-0.00648405
273.6	0.06560445		803.59	0.01410592		1333.59	0.00556855		1863.58	0.00213942		2393.58	0.01040249		2923.58	0.22865877		3453.58	0.04096913		3983.58	-0.00674521
273.8	0.06444498		803.79	0.01439534		1333.79	0.0050394		1863.78	0.00254321		2393.78	0.01023043		2923.78	0.2293609		3453.78	0.04218103		3983.78	-0.00680196
274	0.06398669		803.99	0.01466573		1333.99	0.00562096		1863.98	0.00227421		2393.98	0.01018168		2923.98	0.23050935		3453.98	0.04258189		3983.98	-0.00625873
274.2	0.0640102		804.19	0.01450127		1334.19	0.00558395		1864.18	0.00183661		2394.18	0.01004811		2924.18	0.23135537		3454.18	0.04275328		3984.18	-0.00554304
274.4	0.06371955		804.39	0.01448854		1334.39	0.00539767		1864.38	0.00145359		2394.38	0.01124491		2924.38	0.23196962		3454.38	0.04153355		3984.38	-0.00510041
274.6	0.06479558		804.59	0.014102		1334.59	0.00535224		1864.58	0.00109592		2394.58	0.01101321		2924.58	0.23312888		3454.58	0.04044996		3984.58	-0.00528518
274.8	0.0650492		804.79	0.01382384		1334.79	0.00580302		1864.78	0.00109881		2394.78	0.01094175		2924.78	0.23416122		3454.78	0.04006663		3984.78	-0.00615235
275	0.06397464		804.99	0.01304547		1334.99	0.00585625		1864.98	0.0003887		2394.98	0.01026984		2924.98	0.23456737		3454.98	0.03925911		3984.98	-0.00734211
275.2	0.06444168		805.19	0.01222436		1335.19	0.00572454		1865.18	-0.0002127		2395.18	0.01067677		2925.18	0.23450575		3455.18	0.04027345		3985.18	-0.00662737
275.4	0.06411749		805.39	0.01264645		1335.39	0.00613246		1865.38	0.00004127		2395.38	0.00914913		2925.38	0.23419922		3455.38	0.04018915		3985.38	-0.00700682
275.6	0.06542379		805.59	0.0113813		1335.59	0.0064382		1865.58	0.00030812		2395.58	0.00814227		2925.58	0.23475998		3455.58	0.0407045		3985.58	-0.00704678
275.8	0.06542605		805.79	0.01099288		1335.79	0.00632653		1865.78	0.00096794		2395.78	0.00702803		2925.78	0.23506272		3455.78	0.04107094		3985.78	-0.00754254
276	0.06549505		805.99	0.01053023		1335.99	0.00540685		1865.98	0.00132845		2395.98	0.00665877		2925.98	0.23528593		3455.98	0.04074119		3985.98	-0.00793717
276.2	0.06504388		806.19	0.01061023		1336.19	0.00523354		1866.18	0.00148276		2396.18	0.00546494		2926.18	0.23488706		3456.18	0.04100783		3986.18	-0.00833076
276.4	0.06580245		806.39	0.01069241		1336.39	0.00502597		1866.38	0.0030479		2396.38	0.00491497		2926.38	0.23489657		3456.38	0.04080631		3986.38	-0.00841481
276.6	0.06591999		806.59	0.01145476		1336.59	0.00407166		1866.58	0.00346649		2396.58	0.00474873		2926.58	0.2347552		3456.58	0.04070026		3986.58	-0.00845815
276.8	0.06659261		806.79	0.01176893		1336.79	0.00442707		1866.78	0.0038373		2396.78	0.0042656		2926.78	0.23505315		3456.78	0.03995621		3986.78	-0.00735702
277	0.06710009		806.99	0.01268138		1336.99	0.00305354		1866.98	0.0045352		2396.98	0.00400375		2926.98	0.23534057		3456.98	0.03967188		3986.98	-0.00826654
277.2	0.0669519		807.19	0.01254093		1337.19	0.00300081		1867.18	0.00461159		2397.18	0.00445783		2927.18	0.23565688		3457.18	0.03923236		3987.18	-0.00842
277.4	0.06688496		807.39	0.01326611		1337.39	0.00325039		1867.38	0.0053111		2397.38	0.00348799		2927.38	0.23516738		3457.38	0.03875853		3987.38	-0.0085377
277.6	0.06680612		807.59	0.01367329		1337.59	0.00296946		1867.58	0.00548788		2397.58	0.00309858		2927.58	0.23531329		3457.58	0.03756566		3987.58	-0.00889322
277.8	0.06701297		807.79	0.01431608		1337.79	0.00351733		1867.78	0.00606478		2397.78	0.00291903		2927.78	0.2357239		3457.78	0.03773025		3987.78	-0.00939293
278	0.06747539		807.99	0.01412921		1337.99	0.00399853		1867.98	0.00674634		2397.98	0.00396187		2927.98	0.23662436		3457.98	0.03763621		3987.98	-0.00908183
278.2	0.06785997		808.19	0.0137927		1338.19	0.00453489		1868.18	0.00797362		2398.18	0.00491083		2928.18	0.23640583		3458.18	0.03719379		3988.18	-0.00857407
278.4	0.06770127		808.39	0.01258045		1338.39	0.00533028		1868.38	0.00835027		2398.38	0.00569481		2928.38	0.23648231		3458.38	0.03604215		3988.38	-0.00916395
278.6	0.06834188		808.59	0.01278911		1338.59	0.00558114		1868.58	0.0082012		2398.58	0.00682035		2928.58	0.23714875		3458.58	0.03556703		3988.58	-0.01037828
278.8	0.06817999		808.79	0.01224708		1338.79	0.00654892		1868.78	0.00808906		2398.78	0.00770653		2928.78	0.23631425		3458.78	0.03598302		3988.78	-0.01073879
279	0.06724818		808.99	0.01176592		1338.99	0.00661667		1868.98	0.00761873		2398.98	0.00862821		2928.98	0.23641106		3458.98	0.03688345		3988.98	-0.01016908
279.2	0.06725359		809.19	0.01123274		1339.19	0.00736144		1869.18	0.00697045		2399.18	0.0084297		2929.18	0.23579598		3459.18	0.03836047		3989.18	-0.00933471
279.4	0.06718493		809.39	0.01120008		1339.39	0.00824218		1869.38	0.00650695		2399.38	0.00818779		2929.38	0.23575776		3459.38	0.03882814		3989.38	-0.00993966
279.6	0.06697421		809.59	0.00990148		1339.59	0.00832872		1869.58	0.00685186		2399.58	0.00939582		2929.58	0.23678103		3459.58	0.04031489		3989.58	-0.00965767
279.8	0.06620284		809.79	0.00981534		1339.79	0.007892		1869.78	0.00682618		2399.78	0.00968499		2929.78	0.23596505		3459.78	0.04020951		3989.78	-0.01018484
280	0.06542021		809.99	0.00885792		1339.99	0.0072601		1869.98	0.00572244		2399.98	0.01033252		2929.98	0.23615265		3459.98	0.04031285		3989.98	-0.01070617
280.2	0.06489897		810.19	0.00887565		1340.19	0.00731543		1870.18	0.00621523		2400.18	0.01137714		2930.18	0.23594021		3460.18	0.04078903		3990.18	-0.01090746
280.4	0.06473368		810.39	0.00956346		1340.39	0.0072993		1870.38	0.006492		2400.38	0.01239263		2930.38	0.2364308		3460.38	0.04076599		3990.38	-0.01235367
280.6	0.0642656		810.59	0.0091774		1340.59	0.00670769		1870.58	0.00630551		2400.58	0.01206834		2930.58	0.23664359		3460.58	0.04043773		3990.58	-0.01196098
280.8	0.06394163		810.79	0.00922447		1340.79	0.00653819		1870.78	0.00662129		2400.78	0.01179767		2930.78	0.23741897		3460.78	0.04047303		3990.78	-0.0120735
281	0.06318661		810.99	0.00991462		1340.99	0.00601596		1870.98	0.00647946		2400.98	0.01141422		2930.98	0.23829317		3460.98	0.0403401		3990.98	-0.01151392
281.2	0.06287692		811.19	0.01061421		1341.19	0.0063904		1871.18	0.00557966		2401.18	0.01130416		2931.18	0.23888354		3461.18	0.04022181		3991.18	-0.01131997
281.4	0.06221717		811.39	0.01174001		1341.39	0.00647675		1871.38	0.00544158		2401.38	0.0107938		2931.38	0.23991511		3461.38	0.03977725		3991.38	-0.01124958
281.6	0.06236411		811.59	0.01198151		1341.59	0.0063953		1871.58	0.00523827		2401.58	0.01036366		2931.58	0.24056841		3461.58	0.03925619		3991.58	-0.01067159
281.8	0.06247813		811.79	0.01259958		1341.79	0.00667542		1871.78	0.00572638		2401.78	0.00968756		2931.78	0.24148412		3461.78	0.04006027		3991.78	-0.01003923
282	0.06266698		811.99	0.01249721		1341.99	0.00605748		1871.98	0.00538562		2401.98	0.00960729		2931.98	0.24236056		3461.98	0.0401748		3991.98	-0.00996571
282.2	0.06260143		812.19	0.01190837		1342.19	0.00656088		1872.18	0.00509013		2402.18	0.00876318		2932.18	0.24233574		3462.18	0.03977084		3992.18	-0.0100276
282.4	0.06334735		812.39	0.01202617		1342.39	0.00633819		1872.38	0.00433483		2402.38	0.00860526		2932.38	0.24250857		3462.38	0.03892462		3992.38	-0.01020068
282.6	0.06428878		812.59	0.01354669		1342.59	0.00634933		1872.58	0.00483434		2402.58	0.00919328		2932.58	0.24276083		3462.58	0.03810261		3992.58	-0.01059137
282.8	0.06551112		812.79	0.01266104		1342.79	0.00739988		1872.78	0.0044834		2402.78	0.00811778		2932.78	0.24157821		3462.78	0.03833335		3992.78	-0.00964745
283	0.06546937		812.99	0.01352959		1342.99	0.00652801		1872.98	0.00394931		2402.98	0.00772275		2932.98	0.24174771		3462.98	0.03955175		3992.98	-0.00948186
283.2	0.06543238		813.19	0.01469738		1343.19	0.00707591		1873.18	0.00434938		2403.18	0.00731578		2933.18	0.24165699		3463.18	0.04043049		3993.18	-0.00991232
283.4	0.0664065		813.39	0.014582		1343.39	0.00639154		1873.38	0.00367622		2403.38	0.00788106		2933.38	0.24151203		3463.38	0.04082533		3993.38	-0.01104351
283.6	0.06630126		813.59	0.01415807		1343.59	0.00614822		1873.58	0.00418677		2403.58	0.00883019		2933.58	0.24158668		3463.58	0.04088945		3993.58	-0.01135691
283.8	0.06728809		813.79	0.01360943		1343.79	0.00521076		1873.78	0.00420151		2403.78	0.00907082		2933.78	0.2413844		3463.78	0.04065698		3993.78	-0.01211712
284	0.06766704		813.99	0.0132795		1343.99	0.00478247		1873.98	0.00451516		2403.98	0.00971233		2933.98	0.24152794		3463.98	0.04187151		3993.98	-0.01235666
284.2	0.06786008		814.19	0.01310923		1344.19	0.00464546		1874.18	0.00605054		2404.18	0.01032382		2934.18	0.24185554		3464.18	0.04230084		3994.18	-0.01205064
284.4	0.0683146		814.39	0.0129647		1344.39	0.00456882		1874.38	0.00638154		2404.38	0.00972678		2934.38	0.24174802		3464.38	0.04297616		3994.38	-0.01261621
284.6	0.06907495		814.59	0.01207772		1344.59	0.00355501		1874.58	0.00718364		2404.58	0.00940227		2934.58	0.24255605		3464.58	0.04298671		3994.58	-0.01211378
284.8	0.06885513		814.79	0.01253174		1344.79	0.00330839		1874.78	0.00747713		2404.78	0.00999254		2934.78	0.24315817		3464.78	0.04369353		3994.78	-0.01249727
285	0.0684442		814.99	0.01366098		1344.99	0.00301092		1874.98	0.00624927		2404.98	0.01030151		2934.98	0.24257547		3464.98	0.04366642		3994.98	-0.0106006
285.2	0.06853088		815.19	0.01367994		1345.19	0.00331347		1875.18	0.00550596		2405.18	0.01040388		2935.18	0.24273938		3465.18	0.04379594		3995.18	-0.01028343
285.4	0.06857412		815.39	0.01373184		1345.39	0.0033525		1875.38	0.00531177		2405.38	0.01041796		2935.38	0.2438822		3465.38	0.0432219		3995.38	-0.00984337
285.6	0.06811409		815.59	0.01353723		1345.59	0.00462785		1875.58	0.00435117		2405.58	0.00923786		2935.58	0.24390869		3465.58	0.04285077		3995.58	-0.0093505
285.8	0.06780517		815.79	0.01346814		1345.79	0.00527828		1875.78	0.0031728		2405.78	0.0092721		2935.78	0.24467518		3465.78	0.04298436		3995.78	-0.00877533
286	0.06819364		815.99	0.0135194		1345.99	0.00571124		1875.98	0.00268554		2405.98	0.00906986		2935.98	0.24499883		3465.98	0.04261837		3995.98	-0.00869338
286.2	0.06759731		816.19	0.01263402		1346.19	0.00646207		1876.18	0.00236604		2406.18	0.0088255		2936.18	0.24477147		3466.18	0.04160506		3996.18	-0.0067315
286.4	0.06734069		816.39	0.01265971		1346.39	0.00651104		1876.38	0.00167339		2406.38	0.0086319		2936.38	0.24501132		3466.38	0.0402037		3996.38	-0.0056629
286.6	0.06705001		816.59	0.012482		1346.59	0.00700714		1876.58	0.00227316		2406.58	0.00834765		2936.58	0.24525154		3466.58	0.03969918		3996.58	-0.00603068
286.8	0.06721457		816.79	0.01236011		1346.79	0.0074726		1876.78	0.00224631		2406.78	0.0079192		2936.78	0.24450738		3466.78	0.0395869		3996.78	-0.00481228
287	0.0666197		816.99	0.01343913		1346.99	0.00698764		1876.98	0.00200477		2406.98	0.00787453		2936.98	0.2452147		3466.98	0.0391728		3996.98	-0.00558972
287.2	0.0662236		817.19	0.01300346		1347.19	0.0069121		1877.18	0.0012491		2407.18	0.00798728		2937.18	0.24496522		3467.18	0.03896643		3997.18	-0.00576153
287.4	0.06599108		817.39	0.01298833		1347.39	0.00604438		1877.38	0.00042029		2407.38	0.00788151		2937.38	0.24548136		3467.38	0.03907798		3997.38	-0.00559485
287.6	0.06606308		817.59	0.0127373		1347.59	0.00552749		1877.58	0.00046127		2407.58	0.00771381		2937.58	0.24615137		3467.58	0.03924341		3997.58	-0.00665169
287.8	0.06686607		817.79	0.01261327		1347.79	0.00424611		1877.78	0.00116228		2407.78	0.0083314		2937.78	0.24703979		3467.78	0.03943875		3997.78	-0.006646
288	0.06741051		817.99	0.01248613		1347.99	0.00328214		1877.98	0.00126366		2407.98	0.00888003		2937.98	0.24712399		3467.98	0.03965753		3997.98	-0.00687484
288.2	0.06811332		818.19	0.01183542		1348.19	0.00209519		1878.18	0.00284073		2408.18	0.00867765		2938.18	0.24773831		3468.18	0.04016326		3998.18	-0.00764163
288.4	0.06862309		818.39	0.01162617		1348.39	0.00185821		1878.38	0.00346742		2408.38	0.00844595		2938.38	0.24766946		3468.38	0.0402229		3998.38	-0.0091785
288.6	0.06905932		818.59	0.01212354		1348.59	0.00111048		1878.58	0.00391611		2408.58	0.00942646		2938.58	0.24852593		3468.58	0.04098576		3998.58	-0.01055204
288.8	0.06820538		818.79	0.01278648		1348.79	0.00139709		1878.78	0.00458999		2408.78	0.00990759		2938.78	0.2477122		3468.78	0.04163761		3998.78	-0.01091117
289	0.06856187		818.99	0.01352585		1348.99	0.00141601		1878.98	0.00492453		2408.98	0.01033389		2938.98	0.24726007		3468.98	0.04229991		3998.98	-0.01104998
289.2	0.06905561		819.19	0.0135199		1349.19	0.00246708		1879.18	0.00526555		2409.18	0.01094235		2939.18	0.24838254		3469.18	0.04292184		3999.18	-0.01142027
289.4	0.0685932		819.39	0.01373985		1349.39	0.00312938		1879.38	0.00526808		2409.38	0.01097271		2939.38	0.24849097		3469.38	0.04313297		3999.38	-0.01231243
289.6	0.06844328		819.59	0.01420081		1349.59	0.00493348		1879.58	0.00481035		2409.58	0.01028021		2939.58	0.24846815		3469.58	0.04350982		3999.58	-0.01245269
289.8	0.06877449		819.79	0.01432309		1349.79	0.00580489		1879.78	0.00470834		2409.78	0.01112937		2939.78	0.24945171		3469.78	0.04504438		3999.78	-0.01182863
290	0.06872924		819.99	0.01400943		1349.99	0.00626461		1879.98	0.00454743		2409.98	0.01064573		2939.98	0.24977458		3469.98	0.04566132		3999.98	-0.01122143
290.2	0.06796271		820.19	0.01284717		1350.19	0.00695121		1880.18	0.00405094		2410.18	0.01072699		2940.18	0.25038325		3470.18	0.04530097		4000.18	-0.00988817
290.4	0.06749494		820.39	0.01297587		1350.39	0.00820191		1880.38	0.00403141		2410.38	0.01025676		2940.38	0.25033456		3470.38	0.04511864		4000.38	-0.0094947
290.6	0.06814416		820.59	0.01342471		1350.59	0.0084029		1880.58	0.00443784		2410.58	0.00963348		2940.58	0.25009199		3470.58	0.04532516		4000.58	-0.00931809
290.8	0.06874214		820.79	0.01395811		1350.79	0.0085797		1880.78	0.00473242		2410.78	0.00905869		2940.78	0.2498783		3470.78	0.04520816		4000.78	-0.0079272
291	0.06870949		820.99	0.01462819		1350.99	0.00841518		1880.98	0.0042272		2410.98	0.00804273		2940.98	0.25023212		3470.98	0.04536588		4000.98	-0.00801648
291.2	0.06849989		821.19	0.01460444		1351.19	0.00794227		1881.18	0.00298213		2411.18	0.00852085		2941.18	0.24983315		3471.18	0.04640526		4001.18	-0.00743946
291.4	0.06839182		821.39	0.01468602		1351.39	0.00714057		1881.38	0.00331109		2411.38	0.00735227		2941.38	0.25010091		3471.38	0.04641213		4001.38	-0.00761548
291.6	0.06879228		821.59	0.01436556		1351.59	0.00585298		1881.58	0.00348666		2411.58	0.00716902		2941.58	0.25017581		3471.58	0.04629432		4001.58	-0.00767385
291.8	0.06893736		821.79	0.01445994		1351.79	0.00462851		1881.78	0.0042711		2411.78	0.00778539		2941.78	0.25052482		3471.78	0.04624643		4001.78	-0.00715177
292	0.06961001		821.99	0.01419601		1351.99	0.00417311		1881.98	0.00559329		2411.98	0.00793998		2941.98	0.25063916		3471.98	0.04546076		4001.98	-0.00764764
292.2	0.06976277		822.19	0.0149629		1352.19	0.00343539		1882.18	0.00647847		2412.18	0.00766256		2942.18	0.2501887		3472.18	0.04656126		4002.18	-0.00830698
292.4	0.06998056		822.39	0.0150097		1352.39	0.00393632		1882.38	0.00643456		2412.38	0.0078803		2942.38	0.25058752		3472.38	0.04622017		4002.38	-0.00890956
292.6	0.06999676		822.59	0.01535742		1352.59	0.00388579		1882.58	0.00628932		2412.58	0.00780076		2942.58	0.25144661		3472.58	0.0463422		4002.58	-0.00954384
292.8	0.0687998		822.79	0.01527962		1352.79	0.0036612		1882.78	0.00743848		2412.78	0.00762219		2942.78	0.25188955		3472.78	0.04643747		4002.78	-0.00957931
293	0.06908382		822.99	0.01530957		1352.99	0.00331996		1882.98	0.00701319		2412.98	0.00787859		2942.98	0.25227508		3472.98	0.04597177		4002.98	-0.00998227
293.2	0.06871181		823.19	0.01500045		1353.19	0.00327735		1883.18	0.00674503		2413.18	0.0078451		2943.18	0.25281787		3473.18	0.04493366		4003.18	-0.01009993
293.4	0.06830362		823.39	0.01445224		1353.39	0.00299524		1883.38	0.00623889		2413.38	0.00715326		2943.38	0.2529568		3473.38	0.04540764		4003.38	-0.01119097
293.6	0.06814444		823.59	0.01427718		1353.59	0.00386273		1883.58	0.00601205		2413.58	0.00636059		2943.58	0.25403851		3473.58	0.04537494		4003.58	-0.01185738
293.8	0.06749166		823.79	0.01412655		1353.79	0.00460485		1883.78	0.00557934		2413.78	0.00688185		2943.78	0.25450507		3473.78	0.04546843		4003.78	-0.01186297
294	0.06695307		823.99	0.01300236		1353.99	0.00584238		1883.98	0.00547331		2413.98	0.0067393		2943.98	0.25436124		3473.98	0.04496759		4003.98	-0.01160146
294.2	0.06691198		824.19	0.01306863		1354.19	0.00609391		1884.18	0.00550084		2414.18	0.00550865		2944.18	0.2541713		3474.18	0.04407009		4004.18	-0.01076181
294.4	0.06715305		824.39	0.01341621		1354.39	0.00682097		1884.38	0.00572395		2414.38	0.00520284		2944.38	0.25386185		3474.38	0.04304591		4004.38	-0.01066129
294.6	0.06746167		824.59	0.01383605		1354.59	0.00720031		1884.58	0.00565503		2414.58	0.00524552		2944.58	0.25434274		3474.58	0.04295706		4004.58	-0.01070391
294.8	0.06696506		824.79	0.01411646		1354.79	0.00689885		1884.78	0.00591297		2414.78	0.0049434		2944.78	0.25449627		3474.78	0.04241643		4004.78	-0.00967939
295	0.06571646		824.99	0.0138429		1354.99	0.00701697		1884.98	0.00568701		2414.98	0.00543974		2944.98	0.25425729		3474.98	0.04210483		4004.98	-0.00912015
295.2	0.06480001		825.19	0.01291104		1355.19	0.00677149		1885.18	0.00598455		2415.18	0.00587055		2945.18	0.25417175		3475.18	0.04267556		4005.18	-0.00848181
295.4	0.06509702		825.39	0.01249366		1355.39	0.00545692		1885.38	0.0065677		2415.38	0.00621377		2945.38	0.25359183		3475.38	0.04202013		4005.38	-0.00819644
295.6	0.06491365		825.59	0.01296932		1355.59	0.00461623		1885.58	0.00625187		2415.58	0.00744913		2945.58	0.25397943		3475.58	0.04138933		4005.58	-0.00741542
295.8	0.06571557		825.79	0.01225044		1355.79	0.00401719		1885.78	0.00614649		2415.78	0.0089061		2945.78	0.25421483		3475.78	0.04173743		4005.78	-0.00782806
296	0.06669941		825.99	0.01207482		1355.99	0.00403921		1885.98	0.00736993		2415.98	0.01002079		2945.98	0.25430583		3475.98	0.04175005		4005.98	-0.00762384
296.2	0.06779752		826.19	0.01245911		1356.19	0.00309229		1886.18	0.0064818		2416.18	0.00993518		2946.18	0.25404422		3476.18	0.04234608		4006.18	-0.0077248
296.4	0.06877336		826.39	0.01191974		1356.39	0.0028034		1886.38	0.00670583		2416.38	0.01035306		2946.38	0.25451027		3476.38	0.0418987		4006.38	-0.00784059
296.6	0.06929454		826.59	0.01179824		1356.59	0.00270642		1886.58	0.00676691		2416.58	0.00989303		2946.58	0.25462747		3476.58	0.04170989		4006.58	-0.00805534
296.8	0.07024442		826.79	0.01177691		1356.79	0.00205706		1886.78	0.00621634		2416.78	0.00995432		2946.78	0.25541621		3476.78	0.04285775		4006.78	-0.00716328
297	0.07120782		826.99	0.01239354		1356.99	0.00200702		1886.98	0.00588007		2416.98	0.00927656		2946.98	0.2556453		3476.98	0.04287991		4006.98	-0.00800861
297.2	0.07254165		827.19	0.01243868		1357.19	0.00172816		1887.18	0.00610605		2417.18	0.00889289		2947.18	0.25642773		3477.18	0.04404575		4007.18	-0.00863772
297.4	0.07286192		827.39	0.01234283		1357.39	0.0024524		1887.38	0.00588096		2417.38	0.00766525		2947.38	0.25660614		3477.38	0.04549502		4007.38	-0.00960825
297.6	0.07324626		827.59	0.01300151		1357.59	0.00356085		1887.58	0.00603957		2417.58	0.00741732		2947.58	0.25660918		3477.58	0.04545087		4007.58	-0.01017963
297.8	0.07359061		827.79	0.0128464		1357.79	0.00408523		1887.78	0.0058578		2417.78	0.0068478		2947.78	0.25686457		3477.78	0.04614371		4007.78	-0.01051871
298	0.0738526		827.99	0.01271605		1357.99	0.00506374		1887.98	0.00578167		2417.98	0.00559797		2947.98	0.25712304		3477.98	0.04694789		4007.98	-0.01070358
298.2	0.07386297		828.19	0.01370673		1358.19	0.00533647		1888.18	0.00573333		2418.18	0.00382889		2948.18	0.25765617		3478.18	0.04723542		4008.18	-0.01052028
298.4	0.07371795		828.39	0.01424827		1358.39	0.00629453		1888.38	0.00641346		2418.38	0.00429345		2948.38	0.2580434		3478.38	0.04626032		4008.38	-0.01106664
298.6	0.07210866		828.59	0.01529038		1358.59	0.00594088		1888.58	0.00584545		2418.58	0.00353278		2948.58	0.2584459		3478.58	0.04768272		4008.58	-0.01120747
298.8	0.07009637		828.79	0.01584004		1358.79	0.00536678		1888.78	0.00563771		2418.78	0.00309489		2948.78	0.25839016		3478.78	0.04790138		4008.78	-0.01009128
299	0.06869245		828.99	0.01528049		1358.99	0.00578335		1888.98	0.00607643		2418.98	0.0038239		2948.98	0.25908018		3478.98	0.04862314		4008.98	-0.0103193
299.2	0.06814658		829.19	0.01600265		1359.19	0.00547359		1889.18	0.00631673		2419.18	0.00358868		2949.18	0.25927474		3479.18	0.04859874		4009.18	-0.01065117
299.4	0.06813809		829.39	0.01689329		1359.39	0.00504192		1889.38	0.00538045		2419.38	0.00447566		2949.38	0.25913486		3479.38	0.04774012		4009.38	-0.01084577
299.6	0.06853794		829.59	0.01698122		1359.59	0.00527219		1889.58	0.00466278		2419.58	0.00584782		2949.58	0.26023504		3479.58	0.04765927		4009.58	-0.01056412
299.8	0.06913976		829.79	0.0165742		1359.79	0.00493014		1889.78	0.00516589		2419.78	0.00717574		2949.78	0.26020259		3479.78	0.04822197		4009.78	-0.01028915
300	0.06934041		829.99	0.01637261		1359.99	0.00497408		1889.98	0.00597269		2419.98	0.00794805		2949.98	0.26022961		3479.98	0.04753964		4009.98	-0.01069275
300.2	0.06922061		830.19	0.016411		1360.19	0.0043116		1890.18	0.00537047		2420.18	0.00793269		2950.18	0.26005713		3480.18	0.04774891		4010.18	-0.01116206
300.4	0.06952898		830.39	0.01629599		1360.39	0.00426992		1890.38	0.00537448		2420.38	0.00905966		2950.38	0.26061211		3480.38	0.04750046		4010.38	-0.01113933
300.6	0.07072338		830.59	0.01587426		1360.59	0.00505692		1890.58	0.0054615		2420.58	0.00935051		2950.58	0.26123334		3480.58	0.04790663		4010.58	-0.01109577
300.8	0.07244331		830.79	0.01570698		1360.79	0.00437715		1890.78	0.00519889		2420.78	0.00937391		2950.78	0.26228359		3480.78	0.04848005		4010.78	-0.01043885
301	0.07218814		830.99	0.01503627		1360.99	0.00394085		1890.98	0.0057568		2420.98	0.00905889		2950.98	0.26272077		3480.98	0.04815318		4010.98	-0.01175134
301.2	0.07328592		831.19	0.0139734		1361.19	0.00421419		1891.18	0.00615901		2421.18	0.01018456		2951.18	0.26296119		3481.18	0.0481365		4011.18	-0.01217483
301.4	0.07312654		831.39	0.01357722		1361.39	0.00492856		1891.38	0.00585819		2421.38	0.01005919		2951.38	0.26331714		3481.38	0.04869826		4011.38	-0.01165656
301.6	0.07320101		831.59	0.01371502		1361.59	0.00512212		1891.58	0.00661384		2421.58	0.00985473		2951.58	0.2640035		3481.58	0.04925658		4011.58	-0.01100685
301.8	0.07307042		831.79	0.0129824		1361.79	0.00533629		1891.78	0.00701222		2421.78	0.0093012		2951.78	0.26516079		3481.78	0.04947161		4011.78	-0.01068791
302	0.07265066		831.99	0.01325986		1361.99	0.00587554		1891.98	0.00695368		2421.98	0.00834443		2951.98	0.26574187		3481.98	0.05008633		4011.98	-0.01056682
302.2	0.07257884		832.19	0.01335554		1362.19	0.00579221		1892.18	0.00725025		2422.18	0.00842066		2952.18	0.26545502		3482.18	0.0492749		4012.18	-0.01039561
302.4	0.07258706		832.39	0.01384605		1362.39	0.00596248		1892.38	0.00745881		2422.38	0.00838927		2952.38	0.26496923		3482.38	0.04946129		4012.38	-0.0108401
302.6	0.07183908		832.59	0.01411762		1362.59	0.00649017		1892.58	0.00644775		2422.58	0.00794646		2952.58	0.26541481		3482.58	0.05014191		4012.58	-0.01072612
302.8	0.07109706		832.79	0.01447318		1362.79	0.00764399		1892.78	0.00619229		2422.78	0.00809836		2952.78	0.2651003		3482.78	0.04938494		4012.78	-0.01011601
303	0.07065743		832.99	0.01478399		1362.99	0.00741562		1892.98	0.00619114		2422.98	0.00825837		2952.98	0.26484908		3482.98	0.04873954		4012.98	-0.01086376
303.2	0.0710569		833.19	0.01464629		1363.19	0.00743038		1893.18	0.00609134		2423.18	0.00815871		2953.18	0.26464699		3483.18	0.04779868		4013.18	-0.01041991
303.4	0.0716696		833.39	0.0147608		1363.39	0.00842117		1893.38	0.00520836		2423.38	0.0086522		2953.38	0.26435845		3483.38	0.04817888		4013.38	-0.01072952
303.6	0.07292928		833.59	0.01454729		1363.59	0.00852672		1893.58	0.00500695		2423.58	0.00950292		2953.58	0.26428457		3483.58	0.04802327		4013.58	-0.01124118
303.8	0.07270179		833.79	0.01491897		1363.79	0.00766274		1893.78	0.00471228		2423.78	0.00905528		2953.78	0.26388115		3483.78	0.04780123		4013.78	-0.01170849
304	0.07222903		833.99	0.01503523		1363.99	0.00738053		1893.98	0.00473631		2423.98	0.00858758		2953.98	0.26363997		3483.98	0.04771834		4013.98	-0.01285584
304.2	0.07183143		834.19	0.01583308		1364.19	0.00663126		1894.18	0.00397431		2424.18	0.00830115		2954.18	0.26333739		3484.18	0.04757979		4014.18	-0.01291694
304.4	0.07245817		834.39	0.01618777		1364.39	0.00708585		1894.38	0.00419138		2424.38	0.00843311		2954.38	0.26367073		3484.38	0.04693934		4014.38	-0.01294591
304.6	0.07272643		834.59	0.01667403		1364.59	0.00699982		1894.58	0.00433514		2424.58	0.0079069		2954.58	0.26318773		3484.58	0.04783991		4014.58	-0.01346171
304.8	0.07279245		834.79	0.01628704		1364.79	0.00587465		1894.78	0.0046547		2424.78	0.00783215		2954.78	0.26310407		3484.78	0.04748789		4014.78	-0.01292855
305	0.07164738		834.99	0.01582167		1364.99	0.00593427		1894.98	0.00494286		2424.98	0.00807579		2954.98	0.26288748		3484.98	0.04726449		4014.98	-0.0132157
305.2	0.07171127		835.19	0.01555864		1365.19	0.00623928		1895.18	0.00592715		2425.18	0.00831185		2955.18	0.26395035		3485.18	0.04730577		4015.18	-0.01297953
305.4	0.07157594		835.39	0.0158651		1365.39	0.00634354		1895.38	0.00610908		2425.38	0.00816981		2955.38	0.26411306		3485.38	0.0483503		4015.38	-0.01185971
305.6	0.07118356		835.59	0.01509318		1365.59	0.00662996		1895.58	0.00746828		2425.58	0.00688542		2955.58	0.26431702		3485.58	0.04809039		4015.58	-0.01187208
305.8	0.07071539		835.79	0.01524906		1365.79	0.00636347		1895.78	0.00721086		2425.78	0.00755642		2955.78	0.26457034		3485.78	0.04887441		4015.78	-0.01188798
306	0.07079642		835.99	0.01503852		1365.99	0.00605891		1895.98	0.00654404		2425.98	0.0069324		2955.98	0.26421686		3485.98	0.04957602		4015.98	-0.0120087
306.2	0.0709218		836.19	0.01502434		1366.19	0.0057301		1896.18	0.0067902		2426.18	0.00745599		2956.18	0.26456479		3486.18	0.04954134		4016.18	-0.01219988
306.4	0.07134941		836.39	0.01556056		1366.39	0.00641456		1896.38	0.00676512		2426.38	0.0068152		2956.38	0.26433283		3486.38	0.04961801		4016.38	-0.01166981
306.6	0.07116818		836.59	0.01560266		1366.59	0.00593359		1896.58	0.00662917		2426.58	0.00634535		2956.58	0.26471142		3486.58	0.04934261		4016.58	-0.01161336
306.8	0.07107066		836.79	0.01538471		1366.79	0.00522514		1896.78	0.00660295		2426.78	0.00593		2956.78	0.26397316		3486.78	0.04947382		4016.78	-0.01121801
307	0.07108733		836.99	0.01512674		1366.99	0.0043725		1896.98	0.00662713		2426.98	0.00573443		2956.98	0.26388656		3486.98	0.04990139		4016.98	-0.01211993
307.2	0.07163113		837.19	0.01474697		1367.19	0.00483844		1897.18	0.00669562		2427.18	0.00518934		2957.18	0.26425399		3487.18	0.05017743		4017.18	-0.01204184
307.4	0.07161223		837.39	0.01520929		1367.39	0.00427102		1897.38	0.00599235		2427.38	0.00507107		2957.38	0.26416805		3487.38	0.05042733		4017.38	-0.01226504
307.6	0.07214225		837.59	0.01504396		1367.59	0.00250249		1897.58	0.0060561		2427.58	0.00444996		2957.58	0.26379443		3487.58	0.05026677		4017.58	-0.01255335
307.8	0.07190182		837.79	0.01589201		1367.79	0.00187514		1897.78	0.00645967		2427.78	0.00403719		2957.78	0.26326821		3487.78	0.05014643		4017.78	-0.01265012
308	0.07199861		837.99	0.01642712		1367.99	0.00152931		1897.98	0.00603381		2427.98	0.00366769		2957.98	0.26294662		3487.98	0.04970987		4017.98	-0.01259508
308.2	0.07159641		838.19	0.01649906		1368.19	0.00076911		1898.18	0.00509879		2428.18	0.00406721		2958.18	0.26335119		3488.18	0.04905672		4018.18	-0.01191927
308.4	0.0715535		838.39	0.01595468		1368.39	0.00126505		1898.38	0.00527363		2428.38	0.00434581		2958.38	0.26413467		3488.38	0.04887557		4018.38	-0.01133611
308.6	0.07031367		838.59	0.01557083		1368.59	0.00124371		1898.58	0.00572152		2428.58	0.00478716		2958.58	0.26397393		3488.58	0.04906499		4018.58	-0.01119042
308.8	0.07044656		838.79	0.01494291		1368.79	0.00190935		1898.78	0.00580432		2428.78	0.00585459		2958.78	0.26469177		3488.78	0.04865428		4018.78	-0.01125163
309	0.07006054		838.99	0.01471465		1368.99	0.00272319		1898.98	0.00650459		2428.98	0.00638124		2958.98	0.26493298		3488.98	0.04815342		4018.98	-0.01194679
309.2	0.06960618		839.19	0.01296359		1369.19	0.00383712		1899.18	0.00659226		2429.18	0.00751754		2959.18	0.26597266		3489.18	0.04791762		4019.18	-0.01290107
309.4	0.06989335		839.39	0.01245011		1369.39	0.00469818		1899.38	0.0061806		2429.38	0.00832068		2959.38	0.26578382		3489.38	0.04766405		4019.38	-0.01282852
309.6	0.06999765		839.59	0.01084526		1369.59	0.00609072		1899.58	0.00530641		2429.58	0.00742453		2959.58	0.26684682		3489.58	0.04836092		4019.58	-0.01346591
309.8	0.07019269		839.79	0.01082664		1369.79	0.00655928		1899.78	0.00436316		2429.78	0.00794561		2959.78	0.26789667		3489.78	0.04945586		4019.78	-0.0132912
310	0.07100797		839.99	0.01048392		1369.99	0.00667619		1899.98	0.00353245		2429.98	0.00774147		2959.98	0.26834163		3489.98	0.04946878		4019.98	-0.0139271
310.2	0.07167579		840.19	0.01046805		1370.19	0.00664114		1900.18	0.00332478		2430.18	0.00726383		2960.18	0.26913324		3490.18	0.05023678		4020.18	-0.01470339
310.4	0.07261864		840.39	0.0115139		1370.39	0.00571925		1900.38	0.0028737		2430.38	0.00681983		2960.38	0.26870628		3490.38	0.04995073		4020.38	-0.01413798
310.6	0.07296623		840.59	0.01113842		1370.59	0.00478063		1900.58	0.00308705		2430.58	0.00702149		2960.58	0.26944656		3490.58	0.05070132		4020.58	-0.01439936
310.8	0.07339147		840.79	0.01047251		1370.79	0.00495853		1900.78	0.00314343		2430.78	0.00758198		2960.78	0.26897869		3490.78	0.05047698		4020.78	-0.0146074
311	0.07328649		840.99	0.01072248		1370.99	0.0046909		1900.98	0.00293917		2430.98	0.00742011		2960.98	0.26902802		3490.98	0.05122328		4020.98	-0.01465024
311.2	0.07356668		841.19	0.01064611		1371.19	0.00346744		1901.18	0.00302283		2431.18	0.00733749		2961.18	0.26963061		3491.18	0.05125944		4021.18	-0.01373955
311.4	0.07403387		841.39	0.01072134		1371.39	0.00291517		1901.38	0.00393739		2431.38	0.00753332		2961.38	0.27045739		3491.38	0.05084881		4021.38	-0.01281632
311.6	0.07478129		841.59	0.01004209		1371.59	0.00222522		1901.58	0.00448944		2431.58	0.00681364		2961.58	0.27005679		3491.58	0.05039158		4021.58	-0.01202922
311.8	0.07550687		841.79	0.01118715		1371.79	0.00220984		1901.78	0.00544115		2431.78	0.00580782		2961.78	0.27083247		3491.78	0.05026173		4021.78	-0.01112347
312	0.07590783		841.99	0.01121297		1371.99	0.00188382		1901.98	0.00572876		2431.98	0.00566051		2961.98	0.27132928		3491.98	0.04956259		4021.98	-0.00964102
312.2	0.07522233		842.19	0.01088681		1372.19	0.00157082		1902.18	0.00637166		2432.18	0.00616972		2962.18	0.27254324		3492.18	0.04893807		4022.18	-0.00868813
312.4	0.07534549		842.39	0.01060082		1372.39	0.00244313		1902.38	0.00723371		2432.38	0.00493965		2962.38	0.27365989		3492.38	0.04844097		4022.38	-0.00786201
312.6	0.07474425		842.59	0.01099301		1372.59	0.00282747		1902.58	0.00801652		2432.58	0.00469082		2962.58	0.27341373		3492.58	0.04892496		4022.58	-0.00872944
312.8	0.07503929		842.79	0.01115202		1372.79	0.00365955		1902.78	0.00923527		2432.78	0.00537905		2962.78	0.27434807		3492.78	0.04868269		4022.78	-0.00898863
313	0.07456802		842.99	0.01108733		1372.99	0.00406585		1902.98	0.0105982		2432.98	0.00610712		2962.98	0.27448298		3492.98	0.04761748		4022.98	-0.00945263
313.2	0.0743862		843.19	0.0109648		1373.19	0.00440591		1903.18	0.01039446		2433.18	0.00619694		2963.18	0.27525698		3493.18	0.04702822		4023.18	-0.0098967
313.4	0.07432859		843.39	0.01242309		1373.39	0.00449616		1903.38	0.01071308		2433.38	0.00603412		2963.38	0.27547778		3493.38	0.04732417		4023.38	-0.00943064
313.6	0.07455742		843.59	0.01307037		1373.59	0.00535055		1903.58	0.01022106		2433.58	0.00530513		2963.58	0.27539227		3493.58	0.04900831		4023.58	-0.00997291
313.8	0.07428501		843.79	0.01463392		1373.79	0.00499516		1903.78	0.01030697		2433.78	0.00534738		2963.78	0.27514914		3493.78	0.04965139		4023.78	-0.01060758
314	0.07488332		843.99	0.01562746		1373.99	0.00425268		1903.98	0.01042689		2433.98	0.00610026		2963.98	0.27357403		3493.98	0.05049475		4023.98	-0.0115975
314.2	0.07507917		844.19	0.01638262		1374.19	0.00410523		1904.18	0.01062989		2434.18	0.0055753		2964.18	0.27316866		3494.18	0.05117915		4024.18	-0.01175803
314.4	0.07463609		844.39	0.01757135		1374.39	0.00348643		1904.38	0.00970105		2434.38	0.0061748		2964.38	0.27291103		3494.38	0.05089393		4024.38	-0.01184315
314.6	0.07428496		844.59	0.01680996		1374.59	0.00343858		1904.58	0.00912571		2434.58	0.00697819		2964.58	0.27190601		3494.58	0.05129776		4024.58	-0.01257899
314.8	0.07372414		844.79	0.01677467		1374.79	0.00343772		1904.78	0.0087431		2434.78	0.00704204		2964.78	0.27145383		3494.78	0.05156233		4024.78	-0.01301435
315	0.07334054		844.99	0.01763425		1374.99	0.00317177		1904.98	0.00781211		2434.98	0.00650916		2964.98	0.27162353		3494.98	0.05235847		4024.98	-0.01213532
315.2	0.07358413		845.19	0.01744014		1375.19	0.00261383		1905.18	0.00706664		2435.18	0.00635419		2965.18	0.27264786		3495.18	0.0527781		4025.18	-0.01173935
315.4	0.07371852		845.39	0.01768327		1375.39	0.00337109		1905.38	0.00754889		2435.38	0.00543995		2965.38	0.27254329		3495.38	0.05319646		4025.38	-0.01136972
315.6	0.07432489		845.59	0.01658644		1375.59	0.00316577		1905.58	0.00562431		2435.58	0.0046331		2965.58	0.27213732		3495.58	0.05346752		4025.58	-0.01043114
315.8	0.07408293		845.79	0.01714407		1375.79	0.00407644		1905.78	0.00559274		2435.78	0.00387474		2965.78	0.27231259		3495.78	0.05428664		4025.78	-0.01006934
316	0.07353153		845.99	0.01630216		1375.99	0.00449852		1905.98	0.00517089		2435.98	0.00427984		2965.98	0.27229774		3495.98	0.05397012		4025.98	-0.00969256
316.2	0.07352081		846.19	0.0161399		1376.19	0.00528012		1906.18	0.00391222		2436.18	0.00419978		2966.18	0.27393263		3496.18	0.05391237		4026.18	-0.00941889
316.4	0.07413953		846.39	0.0156153		1376.39	0.00606164		1906.38	0.00321543		2436.38	0.00308259		2966.38	0.27402437		3496.38	0.05383681		4026.38	-0.00854785
316.6	0.07326651		846.59	0.01521671		1376.59	0.00667858		1906.58	0.0033637		2436.58	0.00372578		2966.58	0.27420499		3496.58	0.05456266		4026.58	-0.00822854
316.8	0.0724357		846.79	0.01537873		1376.79	0.00667742		1906.78	0.00388576		2436.78	0.00418976		2966.78	0.27549633		3496.78	0.05389707		4026.78	-0.00744099
317	0.07232753		846.99	0.01557762		1376.99	0.00703857		1906.98	0.00441273		2436.98	0.00468883		2966.98	0.27577158		3496.98	0.0532845		4026.98	-0.00780137
317.2	0.07227421		847.19	0.0159285		1377.19	0.00614514		1907.18	0.0050647		2437.18	0.004878		2967.18	0.2761516		3497.18	0.0527626		4027.18	-0.0066747
317.4	0.07176418		847.39	0.01626133		1377.39	0.00622872		1907.38	0.005219		2437.38	0.00543917		2967.38	0.27594288		3497.38	0.05369136		4027.38	-0.00596176
317.6	0.07215187		847.59	0.01595637		1377.59	0.00555515		1907.58	0.00630395		2437.58	0.00569093		2967.58	0.27546175		3497.58	0.05325788		4027.58	-0.0063186
317.8	0.07242789		847.79	0.01576279		1377.79	0.00519137		1907.78	0.00707674		2437.78	0.00603564		2967.78	0.27551056		3497.78	0.05270593		4027.78	-0.00734354
318	0.07367361		847.99	0.0153053		1377.99	0.00440553		1907.98	0.00807507		2437.98	0.0063726		2967.98	0.27533908		3497.98	0.05211342		4027.98	-0.00788078
318.2	0.07328786		848.19	0.0154624		1378.19	0.00421639		1908.18	0.00757403		2438.18	0.00604654		2968.18	0.27576934		3498.18	0.05175272		4028.18	-0.00833823
318.4	0.07399608		848.39	0.01509597		1378.39	0.00335821		1908.38	0.00759557		2438.38	0.0063495		2968.38	0.2757506		3498.38	0.05163569		4028.38	-0.00884231
318.6	0.07463231		848.59	0.01485488		1378.59	0.00249798		1908.58	0.00826413		2438.58	0.00689003		2968.58	0.27578023		3498.58	0.05195427		4028.58	-0.00958538
318.8	0.07509441		848.79	0.0141334		1378.79	0.00213991		1908.78	0.008658		2438.78	0.00659406		2968.78	0.27590316		3498.78	0.05207321		4028.78	-0.00988657
319	0.0752808		848.99	0.01469567		1378.99	0.00119995		1908.98	0.008237		2438.98	0.00574989		2968.98	0.27562016		3498.98	0.05305441		4028.98	-0.00982856
319.2	0.07580282		849.19	0.01407218		1379.19	-0.0000239		1909.18	0.00846051		2439.18	0.00497184		2969.18	0.27614454		3499.18	0.05302883		4029.18	-0.00987592
319.4	0.0757535		849.39	0.01352325		1379.39	0.00016122		1909.38	0.00797507		2439.38	0.00412155		2969.38	0.2751558		3499.38	0.05240463		4029.38	-0.01092998
319.6	0.07528665		849.59	0.01236051		1379.59	0.00040216		1909.58	0.00659384		2439.58	0.00429112		2969.58	0.27467505		3499.58	0.05166109		4029.58	-0.01122569
319.8	0.07385406		849.79	0.01240282		1379.79	0.00133918		1909.78	0.00793562		2439.78	0.00481747		2969.78	0.27485819		3499.78	0.0519521		4029.78	-0.01170891
320	0.07435702		849.99	0.01298591		1379.99	0.00115721		1909.98	0.00776603		2439.98	0.00471274		2969.98	0.27484932		3499.98	0.05156139		4029.98	-0.01221091
320.2	0.0745735		850.19	0.01312645		1380.19	0.00178261		1910.18	0.00766744		2440.18	0.00477303		2970.18	0.27538336		3500.18	0.05129768		4030.18	-0.01298098
320.4	0.07354223		850.39	0.01283585		1380.39	0.00226622		1910.38	0.007303		2440.38	0.00440633		2970.38	0.2753296		3500.38	0.05141176		4030.38	-0.01247454
320.6	0.07261111		850.59	0.01286394		1380.59	0.00290887		1910.58	0.00700417		2440.58	0.00530949		2970.58	0.27615966		3500.58	0.05188383		4030.58	-0.01318633
320.8	0.07203837		850.79	0.01329637		1380.79	0.00306696		1910.78	0.00760193		2440.78	0.00626322		2970.78	0.27617753		3500.78	0.05135551		4030.78	-0.01397366
321	0.07230511		850.99	0.01244671		1380.99	0.00383253		1910.98	0.00885201		2440.98	0.00682047		2970.98	0.27573087		3500.98	0.05156438		4030.98	-0.01404364
321.2	0.07232274		851.19	0.01263365		1381.19	0.00313191		1911.18	0.00833388		2441.18	0.00770129		2971.18	0.27565626		3501.18	0.05096975		4031.18	-0.01320352
321.4	0.07219408		851.39	0.0123641		1381.39	0.00340722		1911.38	0.00828135		2441.38	0.00799537		2971.38	0.27565999		3501.38	0.05146974		4031.38	-0.01390279
321.6	0.07322439		851.59	0.01233726		1381.59	0.00370034		1911.58	0.00909965		2441.58	0.0091696		2971.58	0.27552756		3501.58	0.05139876		4031.58	-0.01436274
321.8	0.07473822		851.79	0.01228974		1381.79	0.00428063		1911.78	0.00870722		2441.78	0.00961229		2971.78	0.2761517		3501.78	0.05168466		4031.78	-0.01507084
322	0.0763181		851.99	0.01298727		1381.99	0.00435801		1911.98	0.00899289		2441.98	0.00946239		2971.98	0.27715957		3501.98	0.05218647		4031.98	-0.01524206
322.2	0.07653164		852.19	0.01396738		1382.19	0.00389224		1912.18	0.00879258		2442.18	0.01037227		2972.18	0.27788806		3502.18	0.05247872		4032.18	-0.01536181
322.4	0.07785372		852.39	0.01476263		1382.39	0.00441945		1912.38	0.00947956		2442.38	0.0109591		2972.38	0.2785292		3502.38	0.05343716		4032.38	-0.01441276
322.6	0.0778213		852.59	0.01555344		1382.59	0.00457217		1912.58	0.008454		2442.58	0.01147843		2972.58	0.27893113		3502.58	0.05438702		4032.58	-0.01367753
322.8	0.07838706		852.79	0.01599681		1382.79	0.00514715		1912.78	0.00821085		2442.78	0.01044048		2972.78	0.2785237		3502.78	0.05524398		4032.78	-0.0127298
323	0.07836249		852.99	0.01676741		1382.99	0.00448239		1912.98	0.00809585		2442.98	0.00943997		2972.98	0.27896228		3502.98	0.05567856		4032.98	-0.01202743
323.2	0.07851933		853.19	0.01619109		1383.19	0.00484481		1913.18	0.00775398		2443.18	0.00848854		2973.18	0.27948071		3503.18	0.05404663		4033.18	-0.01157504
323.4	0.07859369		853.39	0.01602928		1383.39	0.00519774		1913.38	0.0059611		2443.38	0.00839921		2973.38	0.27946254		3503.38	0.05384532		4033.38	-0.01138473
323.6	0.07879076		853.59	0.01660775		1383.59	0.00394964		1913.58	0.00560671		2443.58	0.00820279		2973.58	0.27970695		3503.58	0.05408962		4033.58	-0.01096954
323.8	0.07831777		853.79	0.0172915		1383.79	0.0043427		1913.78	0.00616968		2443.78	0.00746378		2973.78	0.2803749		3503.78	0.05415808		4033.78	-0.01026893
324	0.07923832		853.99	0.01731787		1383.99	0.00426643		1913.98	0.00481942		2443.98	0.00678662		2973.98	0.28013329		3503.98	0.05387705		4033.98	-0.0100623
324.2	0.07825339		854.19	0.0166517		1384.19	0.00352437		1914.18	0.00413302		2444.18	0.00643948		2974.18	0.28080023		3504.18	0.05376553		4034.18	-0.0097114
324.4	0.07753061		854.39	0.01605331		1384.39	0.0036008		1914.38	0.00402562		2444.38	0.00619169		2974.38	0.28112277		3504.38	0.05447449		4034.38	-0.00885512
324.6	0.07737781		854.59	0.01578268		1384.59	0.00366339		1914.58	0.00474246		2444.58	0.00622417		2974.58	0.28130157		3504.58	0.05462722		4034.58	-0.00905971
324.8	0.07627745		854.79	0.01492594		1384.79	0.00375249		1914.78	0.00550112		2444.78	0.00569308		2974.78	0.28071921		3504.78	0.05502038		4034.78	-0.00874793
325	0.07548667		854.99	0.01387966		1384.99	0.00337419		1914.98	0.00643226		2444.98	0.0041957		2974.98	0.28068871		3504.98	0.05547959		4034.98	-0.00840166
325.2	0.07419899		855.19	0.01319924		1385.19	0.00317223		1915.18	0.00640658		2445.18	0.00433969		2975.18	0.28096426		3505.18	0.05504748		4035.18	-0.00793275
325.4	0.07361393		855.39	0.01215311		1385.39	0.00321085		1915.38	0.00687005		2445.38	0.00384069		2975.38	0.28138964		3505.38	0.05477047		4035.38	-0.00811605
325.6	0.07371993		855.59	0.0115847		1385.59	0.00328528		1915.58	0.00749232		2445.58	0.00413157		2975.58	0.2814255		3505.58	0.05511989		4035.58	-0.00894141
325.8	0.0742215		855.79	0.01146269		1385.79	0.00272454		1915.78	0.00824452		2445.78	0.00490128		2975.78	0.28200091		3505.78	0.0545192		4035.78	-0.01009937
326	0.07349937		855.99	0.01186534		1385.99	0.00257423		1915.98	0.00859293		2445.98	0.00490501		2975.98	0.28353076		3505.98	0.0547591		4035.98	-0.01068676
326.2	0.07228625		856.19	0.01134016		1386.19	0.00249916		1916.18	0.00940379		2446.18	0.00492401		2976.18	0.28407541		3506.18	0.05437405		4036.18	-0.01079029
326.4	0.07246544		856.39	0.01169567		1386.39	0.0034953		1916.38	0.0088042		2446.38	0.00539895		2976.38	0.28371013		3506.38	0.05471937		4036.38	-0.01113519
326.6	0.07330834		856.59	0.01083899		1386.59	0.00347458		1916.58	0.00865533		2446.58	0.00505442		2976.58	0.28388501		3506.58	0.05514976		4036.58	-0.01072547
326.8	0.07421497		856.79	0.01119384		1386.79	0.0037524		1916.78	0.00894947		2446.78	0.00464163		2976.78	0.28357896		3506.78	0.05465939		4036.78	-0.01128929
327	0.07473267		856.99	0.01076612		1386.99	0.00399368		1916.98	0.0087452		2446.98	0.00478931		2976.98	0.28319369		3506.98	0.05455415		4036.98	-0.01114836
327.2	0.07554185		857.19	0.01037748		1387.19	0.00399001		1917.18	0.00815959		2447.18	0.00459887		2977.18	0.28312633		3507.18	0.0544008		4037.18	-0.0104082
327.4	0.07708187		857.39	0.01075807		1387.39	0.00389892		1917.38	0.00751448		2447.38	0.00502416		2977.38	0.28250471		3507.38	0.054787		4037.38	-0.01063991
327.6	0.078589		857.59	0.01146891		1387.59	0.00387133		1917.58	0.00768052		2447.58	0.00486546		2977.58	0.28282399		3507.58	0.05533764		4037.58	-0.01098479
327.8	0.07844663		857.79	0.01125427		1387.79	0.00545901		1917.78	0.00810062		2447.78	0.00533534		2977.78	0.28295696		3507.78	0.05476433		4037.78	-0.01062756
328	0.07925691		857.99	0.01154353		1387.99	0.00597717		1917.98	0.00803682		2447.98	0.0059193		2977.98	0.28292506		3507.98	0.05450146		4037.98	-0.0098027
328.2	0.07885925		858.19	0.01200559		1388.19	0.00499659		1918.18	0.00883689		2448.18	0.00528391		2978.18	0.28279957		3508.18	0.0545931		4038.18	-0.00950318
328.4	0.07893605		858.39	0.01182109		1388.39	0.00554223		1918.38	0.00929479		2448.38	0.00530881		2978.38	0.28277999		3508.38	0.05461139		4038.38	-0.00915931
328.6	0.07880648		858.59	0.01245063		1388.59	0.00608119		1918.58	0.00986209		2448.58	0.00447303		2978.58	0.28330942		3508.58	0.05407089		4038.58	-0.00907699
328.8	0.0778507		858.79	0.01280047		1388.79	0.00573788		1918.78	0.00991284		2448.78	0.00412893		2978.78	0.28326953		3508.78	0.05381247		4038.78	-0.00877309
329	0.07664863		858.99	0.01357867		1388.99	0.00542305		1918.98	0.01034559		2448.98	0.00417794		2978.98	0.28267501		3508.98	0.05338265		4038.98	-0.0084134
329.2	0.07653669		859.19	0.01320094		1389.19	0.0052757		1919.18	0.00999519		2449.18	0.00461705		2979.18	0.28284264		3509.18	0.05296672		4039.18	-0.00886925
329.4	0.07607089		859.39	0.01376546		1389.39	0.00495803		1919.38	0.00962338		2449.38	0.00458142		2979.38	0.28371396		3509.38	0.05242669		4039.38	-0.00944091
329.6	0.07608911		859.59	0.01442143		1389.59	0.00477924		1919.58	0.01052792		2449.58	0.00524086		2979.58	0.28364688		3509.58	0.05316071		4039.58	-0.01022743
329.8	0.07561658		859.79	0.0155946		1389.79	0.00460364		1919.78	0.01055164		2449.78	0.00624486		2979.78	0.28505577		3509.78	0.05335449		4039.78	-0.01028641
330	0.07462476		859.99	0.01534868		1389.99	0.00499312		1919.98	0.00977692		2449.98	0.00553834		2979.98	0.28583593		3509.98	0.05287911		4039.98	-0.01056911
330.2	0.07420397		860.19	0.01568905		1390.19	0.00525026		1920.18	0.00983524		2450.18	0.00530219		2980.18	0.2857045		3510.18	0.0527334		4040.18	-0.01124067
330.4	0.07532057		860.39	0.01600574		1390.39	0.00511632		1920.38	0.00883215		2450.38	0.00617775		2980.38	0.28574659		3510.38	0.05266057		4040.38	-0.01197224
330.6	0.07622139		860.59	0.01576852		1390.59	0.0052823		1920.58	0.00859954		2450.58	0.00624996		2980.58	0.28590243		3510.58	0.05249961		4040.58	-0.01208149
330.8	0.07602484		860.79	0.01628309		1390.79	0.00523684		1920.78	0.008218		2450.78	0.00722521		2980.78	0.28601598		3510.78	0.05268538		4040.78	-0.01265529
331	0.07701447		860.99	0.01555094		1390.99	0.00559714		1920.98	0.00833448		2450.98	0.00807275		2980.98	0.28585895		3510.98	0.05318552		4040.98	-0.01294847
331.2	0.07810636		861.19	0.01480648		1391.19	0.00517149		1921.18	0.00813384		2451.18	0.0075235		2981.18	0.28540948		3511.18	0.05351833		4041.18	-0.01320412
331.4	0.07823995		861.39	0.01434535		1391.39	0.00554887		1921.38	0.00798403		2451.38	0.0085681		2981.38	0.28488316		3511.38	0.05422495		4041.38	-0.01376881
331.6	0.07855334		861.59	0.01468868		1391.59	0.00555191		1921.58	0.0081252		2451.58	0.00927606		2981.58	0.28526518		3511.58	0.05434307		4041.58	-0.01399531
331.8	0.07758485		861.79	0.01461138		1391.79	0.0056114		1921.78	0.00908357		2451.78	0.009744		2981.78	0.2850326		3511.78	0.05396928		4041.78	-0.01369022
332	0.07780432		861.99	0.0143749		1391.99	0.00478761		1921.98	0.00947425		2451.98	0.00980441		2981.98	0.28465719		3511.98	0.05425726		4041.98	-0.01316267
332.2	0.07738754		862.19	0.01410951		1392.19	0.00451548		1922.18	0.00980598		2452.18	0.00939238		2982.18	0.28499563		3512.18	0.05458898		4042.18	-0.01347717
332.4	0.07627783		862.39	0.01411365		1392.39	0.00429109		1922.38	0.0100498		2452.38	0.0088575		2982.38	0.28642358		3512.38	0.05461972		4042.38	-0.01307467
332.6	0.07537973		862.59	0.01445026		1392.59	0.00385672		1922.58	0.01062918		2452.58	0.00820293		2982.58	0.28661769		3512.58	0.05494581		4042.58	-0.01314941
332.8	0.07475195		862.79	0.01478171		1392.79	0.00389827		1922.78	0.01092623		2452.78	0.00825824		2982.78	0.28704733		3512.78	0.05526875		4042.78	-0.01239007
333	0.07416363		862.99	0.01489523		1392.99	0.00368611		1922.98	0.01122562		2452.98	0.0077008		2982.98	0.28678681		3512.98	0.05576351		4042.98	-0.01172168
333.2	0.07500194		863.19	0.01441859		1393.19	0.00287295		1923.18	0.0112627		2453.18	0.00669547		2983.18	0.28772044		3513.18	0.05630336		4043.18	-0.0123021
333.4	0.07417973		863.39	0.01585343		1393.39	0.0035899		1923.38	0.01113581		2453.38	0.00669469		2983.38	0.28925108		3513.38	0.05659725		4043.38	-0.01213049
333.6	0.07427854		863.59	0.01671562		1393.59	0.00371256		1923.58	0.01161645		2453.58	0.00668005		2983.58	0.29012454		3513.58	0.05756113		4043.58	-0.0115376
333.8	0.0733983		863.79	0.01713505		1393.79	0.00465164		1923.78	0.01095578		2453.78	0.00678466		2983.78	0.29171718		3513.78	0.05775586		4043.78	-0.01227004
334	0.07349445		863.99	0.01722237		1393.99	0.00582532		1923.98	0.01000342		2453.98	0.00696633		2983.98	0.29156169		3513.98	0.05710848		4043.98	-0.01244117
334.2	0.07438878		864.19	0.0178211		1394.19	0.00659853		1924.18	0.00937957		2454.18	0.00708647		2984.18	0.29186697		3514.18	0.05763102		4044.18	-0.01230886
334.4	0.07524674		864.39	0.01711043		1394.39	0.00692112		1924.38	0.00898832		2454.38	0.00753509		2984.38	0.29234917		3514.38	0.05662316		4044.38	-0.01261366
334.6	0.07519775		864.59	0.01651704		1394.59	0.00757688		1924.58	0.00783892		2454.58	0.00807487		2984.58	0.29282702		3514.58	0.0560696		4044.58	-0.01414137
334.8	0.07544988		864.79	0.01683984		1394.79	0.00745497		1924.78	0.00759988		2454.78	0.008118		2984.78	0.29283557		3514.78	0.05670401		4044.78	-0.01446821
335	0.07571882		864.99	0.01578315		1394.99	0.00799255		1924.98	0.00695548		2454.98	0.0081059		2984.98	0.29233768		3514.98	0.05662892		4044.98	-0.01462331
335.2	0.07520886		865.19	0.01491851		1395.19	0.00835769		1925.18	0.006629		2455.18	0.00828406		2985.18	0.29088198		3515.18	0.05624865		4045.18	-0.01420031
335.4	0.07522962		865.39	0.01414828		1395.39	0.00871827		1925.38	0.0074057		2455.38	0.0088821		2985.38	0.29026941		3515.38	0.05646016		4045.38	-0.014078
335.6	0.07578108		865.59	0.01447809		1395.59	0.00931195		1925.58	0.00807723		2455.58	0.00843995		2985.58	0.29046934		3515.58	0.05620243		4045.58	-0.01504653
335.8	0.07591365		865.79	0.01376563		1395.79	0.00849444		1925.78	0.00837747		2455.78	0.00878944		2985.78	0.28960756		3515.78	0.05588243		4045.78	-0.0141425
336	0.0756654		865.99	0.01346534		1395.99	0.00790821		1925.98	0.0091814		2455.98	0.00845109		2985.98	0.28991312		3515.98	0.05566264		4045.98	-0.01412114
336.2	0.07482829		866.19	0.01315599		1396.19	0.0071703		1926.18	0.00918		2456.18	0.00740588		2986.18	0.28986671		3516.18	0.05566363		4046.18	-0.01462548
336.4	0.07454196		866.39	0.01298248		1396.39	0.00554592		1926.38	0.00889242		2456.38	0.00674266		2986.38	0.28946206		3516.38	0.05576866		4046.38	-0.01412247
336.6	0.07439622		866.59	0.01256593		1396.59	0.00417518		1926.58	0.00934548		2456.58	0.00635839		2986.58	0.28821151		3516.58	0.05603594		4046.58	-0.01352602
336.8	0.07504205		866.79	0.01285544		1396.79	0.00371914		1926.78	0.00992493		2456.78	0.00641947		2986.78	0.28846889		3516.78	0.0564102		4046.78	-0.01264765
337	0.07533982		866.99	0.01314917		1396.99	0.00268592		1926.98	0.00999255		2456.98	0.00555739		2986.98	0.28802407		3516.98	0.05662634		4046.98	-0.01153389
337.2	0.0750007		867.19	0.01401477		1397.19	0.0023731		1927.18	0.00929106		2457.18	0.0055414		2987.18	0.28871963		3517.18	0.05580141		4047.18	-0.01157368
337.4	0.07466921		867.39	0.01532473		1397.39	0.00277802		1927.38	0.00891748		2457.38	0.00545524		2987.38	0.29077835		3517.38	0.05579779		4047.38	-0.01154182
337.6	0.07522721		867.59	0.01596716		1397.59	0.00248656		1927.58	0.00862096		2457.58	0.00521398		2987.58	0.2919454		3517.58	0.05679575		4047.58	-0.01125063
337.8	0.07606067		867.79	0.01639476		1397.79	0.00258715		1927.78	0.00804059		2457.78	0.00445687		2987.78	0.29187241		3517.78	0.05681976		4047.78	-0.01177115
338	0.07712403		867.99	0.01724317		1397.99	0.00275152		1927.98	0.00676189		2457.98	0.0044583		2987.98	0.29264023		3517.98	0.05738123		4047.98	-0.0116252
338.2	0.07779277		868.19	0.01746669		1398.19	0.00206913		1928.18	0.00537114		2458.18	0.00446035		2988.18	0.29302664		3518.18	0.05738718		4048.18	-0.01169661
338.4	0.07781423		868.39	0.01726911		1398.39	0.00185394		1928.38	0.00445476		2458.38	0.00452405		2988.38	0.29414833		3518.38	0.05723804		4048.38	-0.01247856
338.6	0.07745593		868.59	0.01752534		1398.59	0.00217858		1928.58	0.00337955		2458.58	0.00472705		2988.58	0.29504394		3518.58	0.05783916		4048.58	-0.0132525
338.8	0.07810091		868.79	0.01856486		1398.79	0.00312011		1928.78	0.00445394		2458.78	0.00491915		2988.78	0.29447722		3518.78	0.05814163		4048.78	-0.01257573
339	0.07789581		868.99	0.01693326		1398.99	0.00432143		1928.98	0.00466599		2458.98	0.00517332		2988.98	0.29441693		3518.98	0.05817619		4048.98	-0.0123639
339.2	0.0778101		869.19	0.01660181		1399.19	0.00460336		1929.18	0.00526598		2459.18	0.00533106		2989.18	0.29339244		3519.18	0.05825701		4049.18	-0.0125214
339.4	0.07920945		869.39	0.01705638		1399.39	0.00585806		1929.38	0.00646801		2459.38	0.00543738		2989.38	0.29372477		3519.38	0.05912052		4049.38	-0.01242379
339.6	0.07923984		869.59	0.01707424		1399.59	0.00631111		1929.58	0.00658902		2459.58	0.00628157		2989.58	0.29468318		3519.58	0.05861701		4049.58	-0.0122728
339.8	0.07957516		869.79	0.01644888		1399.79	0.00626932		1929.78	0.00735402		2459.78	0.00667192		2989.78	0.29352496		3519.78	0.05847258		4049.78	-0.01187807
340	0.07960247		869.99	0.01689158		1399.99	0.00579233		1929.98	0.00900714		2459.98	0.00632308		2989.98	0.29361773		3519.98	0.05770422		4049.98	-0.01184317
340.2	0.07946213		870.19	0.01598504		1400.19	0.0046917		1930.18	0.00955527		2460.18	0.0062629		2990.18	0.29276462		3520.18	0.05752323		4050.18	-0.01159738
340.4	0.07938599		870.39	0.01573412		1400.39	0.00430434		1930.38	0.01033512		2460.38	0.00733928		2990.38	0.29174922		3520.38	0.05758017		4050.38	-0.01067338
340.6	0.07886368		870.59	0.01478979		1400.59	0.00393818		1930.58	0.01178792		2460.58	0.00715695		2990.58	0.29113309		3520.58	0.05686486		4050.58	-0.00976543
340.8	0.07854868		870.79	0.01501867		1400.79	0.00469675		1930.78	0.01151156		2460.78	0.00692477		2990.78	0.29177832		3520.78	0.05623741		4050.78	-0.00877244
341	0.07777058		870.99	0.01488846		1400.99	0.00438775		1930.98	0.01154737		2460.98	0.00656346		2990.98	0.29205096		3520.98	0.05612996		4050.98	-0.00742519
341.2	0.07729555		871.19	0.01523036		1401.19	0.00487483		1931.18	0.01085153		2461.18	0.00676884		2991.18	0.29224399		3521.18	0.05525166		4051.18	-0.0071899
341.4	0.07791604		871.39	0.01545556		1401.39	0.00521266		1931.38	0.01116		2461.38	0.00591944		2991.38	0.29336379		3521.38	0.05566861		4051.38	-0.00733777
341.6	0.07800303		871.59	0.01619108		1401.59	0.00567677		1931.58	0.01094206		2461.58	0.00554954		2991.58	0.2943221		3521.58	0.05650019		4051.58	-0.00747509
341.8	0.0789819		871.79	0.01566758		1401.79	0.00487356		1931.78	0.01012411		2461.78	0.00526863		2991.78	0.2949184		3521.78	0.05647832		4051.78	-0.0078723
342	0.07971922		871.99	0.01570321		1401.99	0.00507375		1931.98	0.00882268		2461.98	0.00578915		2991.98	0.29637241		3521.98	0.05684869		4051.98	-0.00854977
342.2	0.07992301		872.19	0.01549367		1402.19	0.00499809		1932.18	0.00848632		2462.18	0.00557352		2992.18	0.29646777		3522.18	0.05622319		4052.18	-0.00861693
342.4	0.08013641		872.39	0.01527984		1402.39	0.00575194		1932.38	0.00777354		2462.38	0.00513021		2992.38	0.29713927		3522.38	0.05671908		4052.38	-0.00971249
342.6	0.08081185		872.59	0.01477214		1402.59	0.0062235		1932.58	0.00807393		2462.58	0.00588164		2992.58	0.29737423		3522.58	0.0566953		4052.58	-0.01085061
342.8	0.08161863		872.79	0.01454666		1402.79	0.00748919		1932.78	0.00886259		2462.78	0.00530502		2992.78	0.29783888		3522.78	0.05724458		4052.78	-0.01189915
343	0.08150794		872.99	0.01421892		1402.99	0.00702795		1932.98	0.00812812		2462.98	0.00462021		2992.98	0.2982116		3522.98	0.05758129		4052.98	-0.01244681
343.2	0.08209159		873.19	0.01477618		1403.19	0.00664476		1933.18	0.00877093		2463.18	0.00483782		2993.18	0.29904328		3523.18	0.05725493		4053.18	-0.01227796
343.4	0.08331908		873.39	0.01493337		1403.39	0.00714436		1933.38	0.00915527		2463.38	0.00538254		2993.38	0.30020154		3523.38	0.05762748		4053.38	-0.01167486
343.6	0.08254184		873.59	0.01480776		1403.59	0.00729242		1933.58	0.00945829		2463.58	0.00483128		2993.58	0.30047556		3523.58	0.05752373		4053.58	-0.01203641
343.8	0.08247472		873.79	0.01506266		1403.79	0.0068403		1933.78	0.01023927		2463.78	0.00451761		2993.78	0.29989399		3523.78	0.0575586		4053.78	-0.01240813
344	0.08241523		873.99	0.01549716		1403.99	0.00554354		1933.98	0.01047295		2463.98	0.00469026		2993.98	0.29943187		3523.98	0.05678571		4053.98	-0.01233902
344.2	0.08121441		874.19	0.01510535		1404.19	0.00509676		1934.18	0.01028336		2464.18	0.00461264		2994.18	0.29949249		3524.18	0.05699053		4054.18	-0.01186094
344.4	0.08045498		874.39	0.01434698		1404.39	0.00500389		1934.38	0.00918198		2464.38	0.00470266		2994.38	0.29869455		3524.38	0.05722602		4054.38	-0.01181468
344.6	0.08007207		874.59	0.01380084		1404.59	0.00526479		1934.58	0.00933929		2464.58	0.00417282		2994.58	0.29850646		3524.58	0.05614666		4054.58	-0.01113644
344.8	0.07962661		874.79	0.01438434		1404.79	0.00488858		1934.78	0.0088948		2464.78	0.00387027		2994.78	0.29909313		3524.78	0.05652437		4054.78	-0.01096546
345	0.07934498		874.99	0.01478385		1404.99	0.00393225		1934.98	0.00853569		2464.98	0.00430919		2994.98	0.29872031		3524.98	0.05731558		4054.98	-0.01053434
345.2	0.07961321		875.19	0.01522343		1405.19	0.00427889		1935.18	0.00819691		2465.18	0.00430532		2995.18	0.29814501		3525.18	0.057125		4055.18	-0.01124977
345.4	0.07946015		875.39	0.01583268		1405.39	0.00422531		1935.38	0.00857757		2465.38	0.00462278		2995.38	0.29860598		3525.38	0.05803709		4055.38	-0.01142998
345.6	0.07864425		875.59	0.01591692		1405.59	0.00400256		1935.58	0.00750876		2465.58	0.00519795		2995.58	0.2993023		3525.58	0.05922392		4055.58	-0.01124693
345.8	0.07897357		875.79	0.01537801		1405.79	0.00326048		1935.78	0.00696775		2465.78	0.00520408		2995.78	0.29942164		3525.78	0.05867706		4055.78	-0.01122147
346	0.07887086		875.99	0.01475581		1405.99	0.0039524		1935.98	0.00646526		2465.98	0.00566947		2995.98	0.29988231		3525.98	0.05844273		4055.98	-0.01141558
346.2	0.07917847		876.19	0.01402837		1406.19	0.00370334		1936.18	0.00624956		2466.18	0.0061219		2996.18	0.29983838		3526.18	0.05853948		4056.18	-0.01203636
346.4	0.07920394		876.39	0.0138972		1406.39	0.00367461		1936.38	0.00616799		2466.38	0.00713727		2996.38	0.30045728		3526.38	0.05904595		4056.38	-0.0121822
346.6	0.07950294		876.59	0.01432516		1406.59	0.00387695		1936.58	0.00667397		2466.58	0.00758081		2996.58	0.30126894		3526.58	0.05902482		4056.58	-0.01251712
346.8	0.07876869		876.79	0.01478527		1406.79	0.00458677		1936.78	0.00677703		2466.78	0.00761078		2996.78	0.30261654		3526.78	0.05994195		4056.78	-0.01290446
347	0.07860713		876.99	0.014948		1406.99	0.00407734		1936.98	0.0073608		2466.98	0.00797615		2996.98	0.30237004		3526.98	0.05960976		4056.98	-0.01272586
347.2	0.07880307		877.19	0.01511319		1407.19	0.0037828		1937.18	0.00770361		2467.18	0.00799446		2997.18	0.30325666		3527.18	0.05979395		4057.18	-0.01277194
347.4	0.0790094		877.39	0.01550842		1407.39	0.00388999		1937.38	0.00810844		2467.38	0.00773821		2997.38	0.30326119		3527.38	0.06092863		4057.38	-0.01265425
347.6	0.07828115		877.59	0.01632515		1407.59	0.00398701		1937.58	0.0086649		2467.58	0.00764268		2997.58	0.30346281		3527.58	0.06029866		4057.58	-0.01292602
347.8	0.07860822		877.79	0.01630301		1407.79	0.00421045		1937.78	0.00905989		2467.78	0.00820782		2997.78	0.30318313		3527.78	0.05950133		4057.78	-0.01341871
348	0.07877884		877.99	0.01627889		1407.99	0.00425129		1937.98	0.00912659		2467.98	0.00787284		2997.98	0.30325156		3527.98	0.05926597		4057.98	-0.01381225
348.2	0.07799618		878.19	0.01592219		1408.19	0.00494654		1938.18	0.00989156		2468.18	0.00746989		2998.18	0.30336437		3528.18	0.0586166		4058.18	-0.01347405
348.4	0.07813758		878.39	0.0159159		1408.39	0.00504748		1938.38	0.00967448		2468.38	0.00691318		2998.38	0.30281792		3528.38	0.05866671		4058.38	-0.01414467
348.6	0.07887976		878.59	0.01592185		1408.59	0.00512718		1938.58	0.01075363		2468.58	0.00671467		2998.58	0.30218147		3528.58	0.0581116		4058.58	-0.0140939
348.8	0.0795679		878.79	0.01632577		1408.79	0.00467748		1938.78	0.01123834		2468.78	0.00643906		2998.78	0.30234581		3528.78	0.05903383		4058.78	-0.01416729
349	0.07941438		878.99	0.01663405		1408.99	0.00430166		1938.98	0.01002657		2468.98	0.00634052		2998.98	0.30267765		3528.98	0.05903263		4058.98	-0.01433389
349.2	0.07893728		879.19	0.01719125		1409.19	0.00432393		1939.18	0.0098896		2469.18	0.00587449		2999.18	0.30250936		3529.18	0.05889382		4059.18	-0.01480048
349.4	0.07823734		879.39	0.01736813		1409.39	0.00404609		1939.38	0.00982058		2469.38	0.00516276		2999.38	0.30213192		3529.38	0.05978645		4059.38	-0.01366426
349.6	0.07782165		879.59	0.01647126		1409.59	0.00486193		1939.58	0.00914007		2469.58	0.0040955		2999.58	0.30241228		3529.58	0.05890917		4059.58	-0.01415589
349.8	0.07774923		879.79	0.01636699		1409.79	0.00393196		1939.78	0.00907826		2469.78	0.00386144		2999.78	0.30268099		3529.78	0.05867162		4059.78	-0.01440628
350	0.07796751		879.99	0.01517467		1409.99	0.00314603		1939.98	0.00884669		2469.98	0.00475919		2999.98	0.30228175		3529.98	0.05932158		4059.98	-0.01417347
350.2	0.07766993		880.19	0.01595498		1410.19	0.00277202		1940.18	0.00833767		2470.18	0.00474346		3000.18	0.30107388		3530.18	0.06058643		4060.18	-0.0140837
350.4	0.07684749		880.39	0.01582787		1410.39	0.00324624		1940.38	0.00837129		2470.38	0.00594643		3000.38	0.30057321		3530.38	0.06118666		4060.38	-0.0130256
350.6	0.07649913		880.59	0.0156272		1410.59	0.00383482		1940.58	0.00812318		2470.58	0.00590948		3000.58	0.30083541		3530.58	0.06247021		4060.58	-0.01235254
350.8	0.07657531		880.79	0.01493784		1410.79	0.00358415		1940.78	0.00879578		2470.78	0.00617243		3000.78	0.30152457		3530.78	0.06345943		4060.78	-0.01290533
351	0.07699766		880.99	0.01466974		1410.99	0.00330444		1940.98	0.00964532		2470.98	0.00585814		3000.98	0.30137281		3530.98	0.06329948		4060.98	-0.01286159
351.2	0.07731146		881.19	0.01467904		1411.19	0.00297069		1941.18	0.00926905		2471.18	0.00572073		3001.18	0.30259495		3531.18	0.06366841		4061.18	-0.01266345
351.4	0.07765934		881.39	0.0139757		1411.39	0.00340392		1941.38	0.0106082		2471.38	0.00522986		3001.38	0.30387601		3531.38	0.0633786		4061.38	-0.01228132
351.6	0.07755565		881.59	0.01367154		1411.59	0.00375778		1941.58	0.01138241		2471.58	0.0052759		3001.58	0.30435075		3531.58	0.06336737		4061.58	-0.01322478
351.8	0.078535		881.79	0.01304522		1411.79	0.00444589		1941.78	0.01213267		2471.78	0.00570892		3001.78	0.30393032		3531.78	0.06318824		4061.78	-0.0137946
352	0.07869545		881.99	0.01322857		1411.99	0.003537		1941.98	0.01109609		2471.98	0.00619496		3001.98	0.30522338		3531.98	0.06283771		4061.98	-0.01363742
352.2	0.07926201		882.19	0.01284621		1412.19	0.00375816		1942.18	0.01120011		2472.18	0.00685115		3002.18	0.30527304		3532.18	0.06242357		4062.18	-0.01333065
352.4	0.07972824		882.39	0.01343308		1412.39	0.00358386		1942.38	0.01058386		2472.38	0.00706895		3002.38	0.3059061		3532.38	0.06178043		4062.38	-0.01338625
352.6	0.08013945		882.59	0.01360099		1412.59	0.00355435		1942.58	0.01065939		2472.58	0.00749513		3002.58	0.30629901		3532.58	0.06089354		4062.58	-0.01302649
352.8	0.07986401		882.79	0.01427787		1412.79	0.00368054		1942.78	0.01009198		2472.78	0.00769107		3002.78	0.30749034		3532.78	0.06063227		4062.78	-0.01292161
353	0.0787223		882.99	0.01547159		1412.99	0.00466142		1942.98	0.00894734		2472.98	0.00779448		3002.98	0.3079955		3532.98	0.0594551		4062.98	-0.01347678
353.2	0.07900208		883.19	0.01586906		1413.19	0.00511161		1943.18	0.00945659		2473.18	0.00805505		3003.18	0.30819765		3533.18	0.05920199		4063.18	-0.01387989
353.4	0.07922814		883.39	0.01609677		1413.39	0.0048177		1943.38	0.00858034		2473.38	0.00760778		3003.38	0.30812885		3533.38	0.05931953		4063.38	-0.01491238
353.6	0.07905527		883.59	0.01600101		1413.59	0.00532768		1943.58	0.00811304		2473.58	0.00788404		3003.58	0.30788402		3533.58	0.05831602		4063.58	-0.01605856
353.8	0.07876307		883.79	0.01669049		1413.79	0.0046606		1943.78	0.00780539		2473.78	0.00841729		3003.78	0.30713344		3533.78	0.05880636		4063.78	-0.01508655
354	0.07888863		883.99	0.01629449		1413.99	0.00458971		1943.98	0.0067112		2473.98	0.0085864		3003.98	0.30673161		3533.98	0.059567		4063.98	-0.01397256
354.2	0.07852122		884.19	0.01659596		1414.19	0.00567316		1944.18	0.00649748		2474.18	0.00880686		3004.18	0.30561824		3534.18	0.0603987		4064.18	-0.01321054
354.4	0.07908135		884.39	0.01500134		1414.39	0.00690546		1944.38	0.00650692		2474.38	0.00976737		3004.38	0.30544086		3534.38	0.06056514		4064.38	-0.01226293
354.6	0.08013012		884.59	0.01450992		1414.59	0.00664805		1944.58	0.00721424		2474.58	0.00823219		3004.58	0.30628673		3534.58	0.06196079		4064.58	-0.01166738
354.8	0.08065783		884.79	0.0141538		1414.79	0.00665563		1944.78	0.0084521		2474.78	0.00728458		3004.78	0.30617951		3534.78	0.06200313		4064.78	-0.01250046
355	0.08080222		884.99	0.01465655		1414.99	0.00702695		1944.98	0.00811549		2474.98	0.0070077		3004.98	0.30619105		3534.98	0.06154001		4064.98	-0.01236423
355.2	0.08033217		885.19	0.01439899		1415.19	0.00683533		1945.18	0.00830906		2475.18	0.00612298		3005.18	0.30619445		3535.18	0.06124219		4065.18	-0.01270723
355.4	0.08035288		885.39	0.01481822		1415.39	0.00631742		1945.38	0.00842048		2475.38	0.00499064		3005.38	0.3067354		3535.38	0.06136254		4065.38	-0.01333926
355.6	0.08050772		885.59	0.01518752		1415.59	0.00609904		1945.58	0.0091838		2475.58	0.00451163		3005.58	0.3058641		3535.58	0.06269348		4065.58	-0.01399562
355.8	0.08131775		885.79	0.0152198		1415.79	0.00544477		1945.78	0.00837082		2475.78	0.00394579		3005.78	0.30584586		3535.78	0.06220672		4065.78	-0.01363627
356	0.0804669		885.99	0.01580295		1415.99	0.00412827		1945.98	0.00751751		2475.98	0.0039189		3005.98	0.30676439		3535.98	0.06222769		4065.98	-0.01345289
356.2	0.08051118		886.19	0.01549416		1416.19	0.00409261		1946.18	0.00752414		2476.18	0.00329711		3006.18	0.30671545		3536.18	0.06234891		4066.18	-0.01238082
356.4	0.07971032		886.39	0.01565899		1416.39	0.00386424		1946.38	0.00734684		2476.38	0.00241579		3006.38	0.30703358		3536.38	0.06177265		4066.38	-0.01204024
356.6	0.07891449		886.59	0.01615582		1416.59	0.00390407		1946.58	0.00714439		2476.58	0.00232619		3006.58	0.30693845		3536.58	0.06148442		4066.58	-0.01204728
356.8	0.07841759		886.79	0.01663118		1416.79	0.00323624		1946.78	0.00732713		2476.78	0.0025257		3006.78	0.30743098		3536.78	0.06117647		4066.78	-0.01177853
357	0.07797267		886.99	0.01708352		1416.99	0.00404439		1946.98	0.00776471		2476.98	0.00283964		3006.98	0.30700926		3536.98	0.06092555		4066.98	-0.01181388
357.2	0.07826363		887.19	0.01691442		1417.19	0.00289149		1947.18	0.0083961		2477.18	0.00342387		3007.18	0.30817534		3537.18	0.06108559		4067.18	-0.01261696
357.4	0.07882218		887.39	0.01714014		1417.39	0.00288067		1947.38	0.00731343		2477.38	0.0036933		3007.38	0.30851351		3537.38	0.06131063		4067.38	-0.01333277
357.6	0.07945208		887.59	0.01621714		1417.59	0.002557		1947.58	0.0074304		2477.58	0.00454988		3007.58	0.30767534		3537.58	0.06137429		4067.58	-0.01288011
357.8	0.08043573		887.79	0.01639146		1417.79	0.0031803		1947.78	0.00789215		2477.78	0.00479197		3007.78	0.30857132		3537.78	0.06190879		4067.78	-0.01308297
358	0.0807008		887.99	0.01495209		1417.99	0.00344528		1947.98	0.00798092		2477.98	0.00475047		3007.98	0.30837684		3537.98	0.06300228		4067.98	-0.01293298
358.2	0.08016042		888.19	0.01462864		1418.19	0.00435071		1948.18	0.00909042		2478.18	0.00567997		3008.18	0.30802264		3538.18	0.06310748		4068.18	-0.01315121
358.4	0.08054382		888.39	0.01402492		1418.39	0.00514369		1948.38	0.00904843		2478.38	0.00600489		3008.38	0.30861685		3538.38	0.06255542		4068.38	-0.01295888
358.6	0.08121708		888.59	0.01386366		1418.59	0.00440674		1948.58	0.01019083		2478.58	0.0064456		3008.58	0.30858799		3538.58	0.06288126		4068.58	-0.01358977
358.8	0.08054577		888.79	0.01414198		1418.79	0.00480394		1948.78	0.01072291		2478.78	0.00657737		3008.78	0.30792018		3538.78	0.06162022		4068.78	-0.01520575
359	0.07990939		888.99	0.01458764		1418.99	0.00442457		1948.98	0.01064916		2478.98	0.00713103		3008.98	0.3075827		3538.98	0.06183704		4068.98	-0.01619658
359.2	0.07897945		889.19	0.01400256		1419.19	0.00413311		1949.18	0.01103677		2479.18	0.0059745		3009.18	0.30646423		3539.18	0.06208958		4069.18	-0.01668295
359.4	0.07908095		889.39	0.0140821		1419.39	0.00409129		1949.38	0.01090557		2479.38	0.00556324		3009.38	0.3061276		3539.38	0.06327451		4069.38	-0.01752027
359.6	0.07905021		889.59	0.01387811		1419.59	0.004117		1949.58	0.01110151		2479.58	0.00489465		3009.58	0.30554613		3539.58	0.06407086		4069.58	-0.01673382
359.8	0.0793906		889.79	0.01378915		1419.79	0.00401384		1949.78	0.01082867		2479.78	0.00422367		3009.78	0.30575027		3539.78	0.06337571		4069.78	-0.01613403
360	0.07888598		889.99	0.01425834		1419.99	0.00370585		1949.98	0.01058968		2479.98	0.00482539		3009.98	0.30572398		3539.98	0.06370158		4069.98	-0.01651559
360.2	0.07981544		890.19	0.01415309		1420.19	0.0049195		1950.18	0.01012344		2480.18	0.00406724		3010.18	0.30676823		3540.18	0.06394136		4070.18	-0.01626758
360.4	0.08109303		890.39	0.01395247		1420.39	0.00520701		1950.38	0.00981419		2480.38	0.00334342		3010.38	0.30725621		3540.38	0.06331285		4070.38	-0.01571163
360.6	0.08135261		890.59	0.01418375		1420.59	0.00556619		1950.58	0.00983801		2480.58	0.00423269		3010.58	0.30830804		3540.58	0.0626959		4070.58	-0.01607946
360.8	0.08141886		890.79	0.01463061		1420.79	0.00552668		1950.78	0.00943517		2480.78	0.00450343		3010.78	0.30866564		3540.78	0.062874		4070.78	-0.01551746
361	0.08178604		890.99	0.01490493		1420.99	0.00646472		1950.98	0.00883373		2480.98	0.00495433		3010.98	0.30946419		3540.98	0.06346585		4070.98	-0.01581979
361.2	0.08306537		891.19	0.0152323		1421.19	0.0065018		1951.18	0.00832007		2481.18	0.00606052		3011.18	0.31040706		3541.18	0.06391096		4071.18	-0.01643177
361.4	0.08405649		891.39	0.01545376		1421.39	0.00700362		1951.38	0.00817564		2481.38	0.00704388		3011.38	0.31078723		3541.38	0.06377335		4071.38	-0.01641349
361.6	0.08441931		891.59	0.01496383		1421.59	0.00669807		1951.58	0.00836381		2481.58	0.00749202		3011.58	0.31082927		3541.58	0.06366523		4071.58	-0.01566301
361.8	0.08449448		891.79	0.01539045		1421.79	0.00778156		1951.78	0.00973997		2481.78	0.007946		3011.78	0.31192134		3541.78	0.062677		4071.78	-0.01532275
362	0.08390832		891.99	0.01487334		1421.99	0.00832258		1951.98	0.01016669		2481.98	0.00784839		3011.98	0.31165452		3541.98	0.0626774		4071.98	-0.01477085
362.2	0.08286677		892.19	0.01513958		1422.19	0.00879348		1952.18	0.01023733		2482.18	0.00855732		3012.18	0.31158946		3542.18	0.06155609		4072.18	-0.01477043
362.4	0.08247868		892.39	0.01473703		1422.39	0.00908082		1952.38	0.0107297		2482.38	0.00891425		3012.38	0.31165695		3542.38	0.06055022		4072.38	-0.01447781
362.6	0.08169535		892.59	0.01406359		1422.59	0.00871562		1952.58	0.01186784		2482.58	0.00948334		3012.58	0.31107457		3542.58	0.06037213		4072.58	-0.01440409
362.8	0.08080976		892.79	0.01325675		1422.79	0.00802387		1952.78	0.01229226		2482.78	0.00890948		3012.78	0.31043175		3542.78	0.05983661		4072.78	-0.01521761
363	0.07991586		892.99	0.01277846		1422.99	0.00715239		1952.98	0.01289484		2482.98	0.00850765		3012.98	0.30958631		3542.98	0.06029701		4072.98	-0.01391211
363.2	0.07931743		893.19	0.01264473		1423.19	0.00641732		1953.18	0.01277401		2483.18	0.00777822		3013.18	0.30857129		3543.18	0.05916363		4073.18	-0.01326886
363.4	0.07927425		893.39	0.01319802		1423.39	0.00635067		1953.38	0.01278672		2483.38	0.00771025		3013.38	0.30822426		3543.38	0.0590889		4073.38	-0.01304586
363.6	0.07870177		893.59	0.01363599		1423.59	0.00569764		1953.58	0.01247332		2483.58	0.00733464		3013.58	0.30850858		3543.58	0.05951448		4073.58	-0.01171378
363.8	0.07829413		893.79	0.01448331		1423.79	0.00589655		1953.78	0.01241847		2483.78	0.00655251		3013.78	0.30840141		3543.78	0.05931619		4073.78	-0.0122739
364	0.07860624		893.99	0.01505157		1423.99	0.00564978		1953.98	0.01132979		2483.98	0.00622417		3013.98	0.30932658		3543.98	0.0598584		4073.98	-0.01239395
364.2	0.07948161		894.19	0.01573932		1424.19	0.0061243		1954.18	0.01088444		2484.18	0.00495943		3014.18	0.31092145		3544.18	0.0604522		4074.18	-0.01115654
364.4	0.07958479		894.39	0.01537783		1424.39	0.00556019		1954.38	0.00918294		2484.38	0.0048303		3014.38	0.31104932		3544.38	0.05981536		4074.38	-0.01028911
364.6	0.0793231		894.59	0.01624583		1424.59	0.00473477		1954.58	0.00832055		2484.58	0.00504576		3014.58	0.31121118		3544.58	0.05976864		4074.58	-0.01074915
364.8	0.07895557		894.79	0.01681722		1424.79	0.00388032		1954.78	0.00624104		2484.78	0.00460146		3014.78	0.31144888		3544.78	0.06091811		4074.78	-0.01031721
365	0.08040534		894.99	0.0177491		1424.99	0.00409838		1954.98	0.00556492		2484.98	0.00475207		3014.98	0.31215571		3544.98	0.0612139		4074.98	-0.00996818
365.2	0.0808853		895.19	0.01752387		1425.19	0.00483663		1955.18	0.00550634		2485.18	0.00425293		3015.18	0.31207554		3545.18	0.06123727		4075.18	-0.0100005
365.4	0.08058194		895.39	0.01749357		1425.39	0.00513312		1955.38	0.00621181		2485.38	0.00425607		3015.38	0.31225345		3545.38	0.06137959		4075.38	-0.01058184
365.6	0.08151534		895.59	0.01628225		1425.59	0.00524314		1955.58	0.00624909		2485.58	0.00428068		3015.58	0.31242104		3545.58	0.0616377		4075.58	-0.01112956
365.8	0.08170878		895.79	0.01564735		1425.79	0.00596482		1955.78	0.00751202		2485.78	0.00402386		3015.78	0.31224662		3545.78	0.06175876		4075.78	-0.01193015
366	0.08144017		895.99	0.01596583		1425.99	0.0073716		1955.98	0.00749417		2485.98	0.00290115		3015.98	0.3115877		3545.98	0.0627997		4075.98	-0.01271386
366.2	0.08163084		896.19	0.01561129		1426.19	0.0077218		1956.18	0.00717845		2486.18	0.00368449		3016.18	0.31108667		3546.18	0.06250887		4076.18	-0.01296451
366.4	0.08097345		896.39	0.01485711		1426.39	0.00705802		1956.38	0.00783358		2486.38	0.00420622		3016.38	0.31172175		3546.38	0.06298917		4076.38	-0.01320396
366.6	0.08045239		896.59	0.01412452		1426.59	0.00646538		1956.58	0.00836327		2486.58	0.00444514		3016.58	0.31200012		3546.58	0.06343564		4076.58	-0.01344713
366.8	0.08102806		896.79	0.01399896		1426.79	0.0053534		1956.78	0.00875903		2486.78	0.00412733		3016.78	0.31226032		3546.78	0.06306023		4076.78	-0.01471011
367	0.08060593		896.99	0.01421359		1426.99	0.00538042		1956.98	0.00925937		2486.98	0.00406073		3016.98	0.31191634		3546.98	0.06290851		4076.98	-0.01471931
367.2	0.07994392		897.19	0.01445378		1427.19	0.00506366		1957.18	0.01002574		2487.18	0.00364355		3017.18	0.31195867		3547.18	0.06264498		4077.18	-0.01503411
367.4	0.08002789		897.39	0.01433367		1427.39	0.00550387		1957.38	0.01094484		2487.38	0.0038813		3017.38	0.31308929		3547.38	0.06303776		4077.38	-0.0149748
367.6	0.0800262		897.59	0.01510747		1427.59	0.00494524		1957.58	0.01120637		2487.58	0.00365569		3017.58	0.31341865		3547.58	0.06364976		4077.58	-0.01431037
367.8	0.08021861		897.79	0.01553169		1427.79	0.00534525		1957.78	0.01065001		2487.78	0.00341308		3017.78	0.31369252		3547.78	0.06297633		4077.78	-0.01402373
368	0.08074638		897.99	0.0159357		1427.99	0.00492648		1957.98	0.01043781		2487.98	0.0037474		3017.98	0.31444994		3547.98	0.0626832		4077.98	-0.01356122
368.2	0.08052005		898.19	0.01682857		1428.19	0.00458841		1958.18	0.00998842		2488.18	0.00408916		3018.18	0.31405959		3548.18	0.06247933		4078.18	-0.01285398
368.4	0.08065565		898.39	0.01650748		1428.39	0.00368969		1958.38	0.00811256		2488.38	0.00458986		3018.38	0.31398369		3548.38	0.06161993		4078.38	-0.0132721
368.6	0.0816445		898.59	0.01668966		1428.59	0.00285206		1958.58	0.00741971		2488.58	0.00486038		3018.58	0.31418355		3548.58	0.0615533		4078.58	-0.01289997
368.8	0.08221141		898.79	0.01585415		1428.79	0.00266743		1958.78	0.00644238		2488.78	0.00560479		3018.78	0.31495136		3548.78	0.06251553		4078.78	-0.01260596
369	0.08310656		898.99	0.01524082		1428.99	0.00411722		1958.98	0.00645082		2488.98	0.00585364		3018.98	0.3141148		3548.98	0.06245127		4078.98	-0.01245737
369.2	0.08302962		899.19	0.01371426		1429.19	0.00438384		1959.18	0.00626656		2489.18	0.00559729		3019.18	0.31345858		3549.18	0.06282386		4079.18	-0.01264125
369.4	0.08278472		899.39	0.0141476		1429.39	0.00423187		1959.38	0.0063223		2489.38	0.00681688		3019.38	0.31315917		3549.38	0.06371432		4079.38	-0.01295204
369.6	0.08341231		899.59	0.01352743		1429.59	0.00402941		1959.58	0.00646679		2489.58	0.00633832		3019.58	0.31291714		3549.58	0.06431095		4079.58	-0.01360373
369.8	0.0830348		899.79	0.01339112		1429.79	0.00391172		1959.78	0.00645477		2489.78	0.00588512		3019.78	0.31257547		3549.78	0.06478654		4079.78	-0.01352279
370	0.08308932		899.99	0.01441697		1429.99	0.00386313		1959.98	0.00655761		2489.98	0.00554016		3019.98	0.31228989		3549.98	0.06494991		4079.98	-0.01336476
370.2	0.08361533		900.19	0.01396697		1430.19	0.00329766		1960.18	0.00651595		2490.18	0.0059735		3020.18	0.31267317		3550.18	0.06551047		4080.18	-0.01413978
370.4	0.08281419		900.39	0.01362007		1430.39	0.00226017		1960.38	0.00795542		2490.38	0.00577744		3020.38	0.31301297		3550.38	0.06580365		4080.38	-0.01456583
370.6	0.08246431		900.59	0.0136369		1430.59	0.00219046		1960.58	0.00902222		2490.58	0.00536874		3020.58	0.31331414		3550.58	0.06577775		4080.58	-0.01538888
370.8	0.08241808		900.79	0.01368759		1430.79	0.00136773		1960.78	0.01014561		2490.78	0.00424704		3020.78	0.31362016		3550.78	0.06524859		4080.78	-0.01545389
371	0.08230839		900.99	0.01428741		1430.99	0.00197104		1960.98	0.01070246		2490.98	0.00370554		3020.98	0.31415315		3550.98	0.06622835		4080.98	-0.01516751
371.2	0.08180746		901.19	0.01458984		1431.19	0.00120955		1961.18	0.01160238		2491.18	0.00302522		3021.18	0.31513973		3551.18	0.06571502		4081.18	-0.01436905
371.4	0.08264165		901.39	0.01520769		1431.39	0.00299651		1961.38	0.01192414		2491.38	0.00395841		3021.38	0.31562734		3551.38	0.06502136		4081.38	-0.01519718
371.6	0.08318491		901.59	0.01629453		1431.59	0.00296875		1961.58	0.01130322		2491.58	0.00343698		3021.58	0.31505887		3551.58	0.06443011		4081.58	-0.01511527
371.8	0.08264295		901.79	0.01692546		1431.79	0.00381246		1961.78	0.01125286		2491.78	0.00409805		3021.78	0.31539105		3551.78	0.06357126		4081.78	-0.01580147
372	0.08191225		901.99	0.01758722		1431.99	0.00441519		1961.98	0.01105581		2491.98	0.00434958		3021.98	0.31538824		3551.98	0.06326903		4081.98	-0.01610455
372.2	0.08146674		902.19	0.01719498		1432.19	0.00474695		1962.18	0.01117642		2492.18	0.00457666		3022.18	0.31582195		3552.18	0.06241924		4082.18	-0.01598272
372.4	0.08234183		902.39	0.01613707		1432.39	0.00558861		1962.38	0.01040741		2492.38	0.00497304		3022.38	0.31561506		3552.38	0.06215348		4082.38	-0.0173589
372.6	0.08327706		902.59	0.01502846		1432.59	0.00614223		1962.58	0.01065042		2492.58	0.00506334		3022.58	0.31581219		3552.58	0.06249397		4082.58	-0.01707896
372.8	0.08383927		902.79	0.01424576		1432.79	0.00592086		1962.78	0.01080563		2492.78	0.0052221		3022.78	0.31550618		3552.78	0.06204664		4082.78	-0.01633976
373	0.0845052		902.99	0.01341409		1432.99	0.00680433		1962.98	0.01142358		2492.98	0.00508323		3022.98	0.31434157		3552.98	0.06176615		4082.98	-0.01608924
373.2	0.08432994		903.19	0.01358141		1433.19	0.00671061		1963.18	0.01183217		2493.18	0.00511275		3023.18	0.31446806		3553.18	0.06206705		4083.18	-0.01536565
373.4	0.08446109		903.39	0.0132942		1433.39	0.00629174		1963.38	0.01138978		2493.38	0.00570109		3023.38	0.31496802		3553.38	0.0625995		4083.38	-0.01548536
373.6	0.0846935		903.59	0.01184714		1433.59	0.005885		1963.58	0.01155377		2493.58	0.00499768		3023.58	0.31520104		3553.58	0.06214586		4083.58	-0.01547959
373.8	0.08451994		903.79	0.01139934		1433.79	0.00604008		1963.78	0.0117499		2493.78	0.00445555		3023.78	0.31477632		3553.78	0.06227288		4083.78	-0.01525242
374	0.08475071		903.99	0.01169428		1433.99	0.00651237		1963.98	0.01304919		2493.98	0.00384352		3023.98	0.31446379		3553.98	0.06312067		4083.98	-0.0145355
374.2	0.08517797		904.19	0.01117979		1434.19	0.00651383		1964.18	0.01364647		2494.18	0.00370979		3024.18	0.31466138		3554.18	0.06351078		4084.18	-0.01464882
374.4	0.08516762		904.39	0.01208224		1434.39	0.00530335		1964.38	0.0141821		2494.38	0.00386298		3024.38	0.31516406		3554.38	0.06270091		4084.38	-0.01423379
374.6	0.08480506		904.59	0.0125687		1434.59	0.00488063		1964.58	0.01364196		2494.58	0.00334656		3024.58	0.31617101		3554.58	0.0634086		4084.58	-0.01417438
374.8	0.0845195		904.79	0.01361726		1434.79	0.00459483		1964.78	0.01325796		2494.78	0.00336416		3024.78	0.31714617		3554.78	0.06367777		4084.78	-0.01328913
375	0.0843971		904.99	0.01465637		1434.99	0.00533395		1964.98	0.01267234		2494.98	0.00411519		3024.98	0.31768302		3554.98	0.06536016		4084.98	-0.01265462
375.2	0.08400936		905.19	0.01603589		1435.19	0.00494035		1965.18	0.01250976		2495.18	0.0042456		3025.18	0.31807257		3555.18	0.06542523		4085.18	-0.01227067
375.4	0.08461939		905.39	0.01736806		1435.39	0.00624647		1965.38	0.01199752		2495.38	0.00425643		3025.38	0.31838146		3555.38	0.06608802		4085.38	-0.0127981
375.6	0.08445698		905.59	0.0176053		1435.59	0.00486133		1965.58	0.01167794		2495.58	0.00376156		3025.58	0.31928652		3555.58	0.06609626		4085.58	-0.01277369
375.8	0.08362212		905.79	0.01842064		1435.79	0.00530765		1965.78	0.0125878		2495.78	0.00398853		3025.78	0.31977741		3555.78	0.06652571		4085.78	-0.01294715
376	0.08328003		905.99	0.01872613		1435.99	0.00587222		1965.98	0.01181431		2495.98	0.00270712		3025.98	0.31923027		3555.98	0.06658222		4085.98	-0.01300707
376.2	0.08390137		906.19	0.01875509		1436.19	0.00561617		1966.18	0.01186871		2496.18	0.00330766		3026.18	0.31982774		3556.18	0.06622338		4086.18	-0.01318526
376.4	0.08502873		906.39	0.01843125		1436.39	0.00623892		1966.38	0.01148394		2496.38	0.00336762		3026.38	0.31943194		3556.38	0.0672605		4086.38	-0.01354625
376.6	0.08556107		906.59	0.017958		1436.59	0.00526677		1966.58	0.01146593		2496.58	0.00343464		3026.58	0.3195343		3556.58	0.06751085		4086.58	-0.01360681
376.8	0.08579171		906.79	0.01765089		1436.79	0.00473584		1966.78	0.01184572		2496.78	0.00369157		3026.78	0.31896265		3556.78	0.06665263		4086.78	-0.01328711
377	0.08585027		906.99	0.01675456		1436.99	0.00511472		1966.98	0.0123307		2496.98	0.00426845		3026.98	0.31813421		3556.98	0.06740334		4086.98	-0.01344943
377.2	0.0851463		907.19	0.01545961		1437.19	0.00471617		1967.18	0.01232851		2497.18	0.00480637		3027.18	0.31801661		3557.18	0.06751172		4087.18	-0.01310791
377.4	0.08545762		907.39	0.01452197		1437.39	0.00519261		1967.38	0.01147568		2497.38	0.00508329		3027.38	0.31820612		3557.38	0.06751042		4087.38	-0.01358284
377.6	0.08488396		907.59	0.01314679		1437.59	0.00567752		1967.58	0.01200677		2497.58	0.00477046		3027.58	0.31774267		3557.58	0.06651802		4087.58	-0.01377689
377.8	0.08479237		907.79	0.01311667		1437.79	0.0063488		1967.78	0.01190119		2497.78	0.00420248		3027.78	0.3170981		3557.78	0.06640538		4087.78	-0.01461678
378	0.08466861		907.99	0.01314642		1437.99	0.00640546		1967.98	0.01195893		2497.98	0.00426609		3027.98	0.31741876		3557.98	0.06568104		4087.98	-0.01483186
378.2	0.084627		908.19	0.01299603		1438.19	0.00594619		1968.18	0.01155176		2498.18	0.00451414		3028.18	0.31780972		3558.18	0.06414166		4088.18	-0.01548732
378.4	0.08423508		908.39	0.01368148		1438.39	0.00553579		1968.38	0.01090077		2498.38	0.00451067		3028.38	0.31821083		3558.38	0.06293707		4088.38	-0.01599861
378.6	0.08326744		908.59	0.0135661		1438.59	0.00552066		1968.58	0.01065597		2498.58	0.00432664		3028.58	0.31868834		3558.58	0.06276745		4088.58	-0.01598787
378.8	0.08257744		908.79	0.01377287		1438.79	0.00556798		1968.78	0.01071562		2498.78	0.0044984		3028.78	0.31857954		3558.78	0.06188485		4088.78	-0.01565908
379	0.08207932		908.99	0.01386914		1438.99	0.00517989		1968.98	0.01064387		2498.98	0.00402638		3028.98	0.31851345		3558.98	0.06210069		4088.98	-0.01544126
379.2	0.08209122		909.19	0.01483638		1439.19	0.00435533		1969.18	0.01052438		2499.18	0.00290522		3029.18	0.31879186		3559.18	0.06129498		4089.18	-0.01550434
379.4	0.08182006		909.39	0.01465307		1439.39	0.00394622		1969.38	0.0104814		2499.38	0.00213053		3029.38	0.31896401		3559.38	0.06050373		4089.38	-0.01558138
379.6	0.08124813		909.59	0.01464967		1439.59	0.00293637		1969.58	0.0107138		2499.58	0.00154685		3029.58	0.31906121		3559.58	0.05953459		4089.58	-0.01560538
379.8	0.08098826		909.79	0.01545429		1439.79	0.00271161		1969.78	0.01075155		2499.78	0.00099259		3029.78	0.31867234		3559.78	0.05924436		4089.78	-0.01514959
379.99	0.08098826		909.99	0.01545429		1439.99	0.00271161		1969.98	0.01075155		2499.98	0.00099259		3029.98	0.31867234		3559.98	0.05924436		4089.98	-0.01514959
380.19	0.08125721		910.19	0.01474367		1440.19	0.00260834		1970.18	0.0117302		2500.18	-0.00013473		3030.18	0.31960462		3560.18	0.05848332		4090.18	-0.01590512
380.39	0.08103693		910.39	0.01427893		1440.39	0.00240075		1970.38	0.01245135		2500.38	-0.00108615		3030.38	0.31966972		3560.38	0.0577783		4090.38	-0.01685921
380.59	0.08126443		910.59	0.01410536		1440.59	0.00253596		1970.58	0.01232907		2500.58	-0.00175121		3030.58	0.3195462		3560.58	0.05720389		4090.58	-0.01727032
380.79	0.08097352		910.79	0.01385606		1440.79	0.00255721		1970.78	0.01208357		2500.78	-0.00257207		3030.78	0.31876446		3560.78	0.05572037		4090.78	-0.01731763
380.99	0.0798579		910.99	0.0136611		1440.99	0.0014681		1970.98	0.01246304		2500.98	-0.00385643		3030.98	0.31880945		3560.98	0.05460661		4090.98	-0.01754239
381.19	0.07904377		911.19	0.0128723		1441.19	0.00181286		1971.18	0.01292667		2501.18	-0.00506737		3031.18	0.3178322		3561.18	0.05385005		4091.18	-0.01851502
381.39	0.07820155		911.39	0.01269878		1441.39	0.00214272		1971.38	0.01336878		2501.38	-0.00659317		3031.38	0.31720223		3561.38	0.05309949		4091.38	-0.01867386
381.59	0.07728264		911.59	0.0123838		1441.59	0.00286132		1971.58	0.0131108		2501.58	-0.00736704		3031.58	0.31643006		3561.58	0.05296144		4091.58	-0.01850875
381.79	0.07628121		911.79	0.01154926		1441.79	0.00326912		1971.78	0.01273479		2501.78	-0.00735279		3031.78	0.31626337		3561.78	0.05230409		4091.78	-0.01860892
381.99	0.07482043		911.99	0.0107133		1441.99	0.00400888		1971.98	0.01264587		2501.98	-0.00758894		3031.98	0.31484715		3561.98	0.05259327		4091.98	-0.01877121
382.19	0.07375566		912.19	0.01055175		1442.19	0.00451406		1972.18	0.0125415		2502.18	-0.00766401		3032.18	0.31352076		3562.18	0.0530893		4092.18	-0.01840738
382.39	0.07287855		912.39	0.01096444		1442.39	0.00381873		1972.38	0.01129591		2502.38	-0.00785321		3032.38	0.31347278		3562.38	0.05251335		4092.38	-0.01756135
382.59	0.07185695		912.59	0.01172112		1442.59	0.00354014		1972.58	0.01159898		2502.58	-0.00859415		3032.58	0.31220739		3562.58	0.05210866		4092.58	-0.01695403
382.79	0.07101165		912.79	0.01253404		1442.79	0.00476898		1972.78	0.01124091		2502.78	-0.00899231		3032.78	0.31255646		3562.78	0.05207627		4092.78	-0.0171404
382.99	0.07011622		912.99	0.01385331		1442.99	0.0053252		1972.98	0.01103508		2502.98	-0.008203		3032.98	0.31112082		3562.98	0.05126529		4092.98	-0.01735149
383.19	0.06952168		913.19	0.0132405		1443.19	0.00570855		1973.18	0.01059763		2503.18	-0.00806542		3033.18	0.311062		3563.18	0.0509291		4093.18	-0.01706178
383.39	0.06851066		913.39	0.01293531		1443.39	0.00572868		1973.38	0.01047528		2503.38	-0.00884628		3033.38	0.31066443		3563.38	0.05094287		4093.38	-0.01781384
383.59	0.06751466		913.59	0.01140647		1443.59	0.00627459		1973.58	0.01061522		2503.58	-0.00884345		3033.58	0.31062425		3563.58	0.05094044		4093.58	-0.01783725
383.79	0.06680407		913.79	0.01025112		1443.79	0.00578067		1973.78	0.01096724		2503.78	-0.00953664		3033.78	0.31103291		3563.78	0.05097086		4093.78	-0.01771758
383.99	0.06597997		913.99	0.00899176		1443.99	0.0060857		1973.98	0.01131722		2503.98	-0.00959753		3033.98	0.30958785		3563.98	0.05072932		4093.98	-0.01784286
384.19	0.0655199		914.19	0.00806141		1444.19	0.00629409		1974.18	0.01162883		2504.18	-0.00903789		3034.18	0.30951662		3564.18	0.05156432		4094.18	-0.01733515
384.39	0.06442778		914.39	0.0078104		1444.39	0.00686894		1974.38	0.01099944		2504.38	-0.00868461		3034.38	0.30875259		3564.38	0.05196858		4094.38	-0.01756245
384.59	0.06347571		914.59	0.00797411		1444.59	0.00699562		1974.58	0.00990819		2504.58	-0.00925076		3034.58	0.30767758		3564.58	0.05186412		4094.58	-0.01724134
384.79	0.0622018		914.79	0.00754778		1444.79	0.00604394		1974.78	0.00944447		2504.78	-0.00941325		3034.78	0.30725239		3564.78	0.05113051		4094.78	-0.01742679
384.99	0.0612086		914.99	0.00736833		1444.99	0.00556629		1974.98	0.00974735		2504.98	-0.00966314		3034.98	0.30760871		3564.98	0.05096798		4094.98	-0.01717735
385.19	0.06000942		915.19	0.00693165		1445.19	0.00645802		1975.18	0.00935493		2505.18	-0.01059944		3035.18	0.30692016		3565.18	0.05182242		4095.18	-0.0172052
385.39	0.05904708		915.39	0.00764989		1445.39	0.0060467		1975.38	0.00943891		2505.38	-0.0107836		3035.38	0.30677821		3565.38	0.05229319		4095.38	-0.01670805
385.59	0.05880298		915.59	0.00784707		1445.59	0.00589317		1975.58	0.00847341		2505.58	-0.01039785		3035.58	0.3062644		3565.58	0.05249602		4095.58	-0.01732641
385.79	0.05765734		915.79	0.00713797		1445.79	0.00502022		1975.78	0.00900443		2505.78	-0.0101215		3035.78	0.30575939		3565.78	0.05224736		4095.78	-0.01782347
385.99	0.05723632		915.99	0.00769193		1445.99	0.00525137		1975.98	0.00921806		2505.98	-0.01042898		3035.98	0.30438828		3565.98	0.05306969		4095.98	-0.01783206
386.19	0.05693987		916.19	0.00767425		1446.19	0.00447229		1976.18	0.00942135		2506.18	-0.01082373		3036.18	0.3038772		3566.18	0.05349736		4096.18	-0.01703676
386.39	0.05697191		916.39	0.00819774		1446.39	0.00302154		1976.38	0.01041759		2506.38	-0.00975702		3036.38	0.30362822		3566.38	0.05353224		4096.38	-0.01734964
386.59	0.0568205		916.59	0.00912465		1446.59	0.00262206		1976.58	0.01105878		2506.58	-0.00852598		3036.58	0.30315302		3566.58	0.05467903		4096.58	-0.01647019
386.79	0.05593975		916.79	0.00937655		1446.79	0.0018266		1976.78	0.01229966		2506.78	-0.00692904		3036.78	0.30326122		3566.78	0.05447883		4096.78	-0.01717338
386.99	0.05583844		916.99	0.00902832		1446.99	0.00115794		1976.98	0.01265241		2506.98	-0.00633852		3036.98	0.30262177		3566.98	0.05358051		4096.98	-0.01780958
387.19	0.05611993		917.19	0.00902618		1447.19	0.00059976		1977.18	0.0125399		2507.18	-0.0062669		3037.18	0.30276625		3567.18	0.05355607		4097.18	-0.01749917
387.39	0.05545988		917.39	0.008162		1447.39	0.00008233		1977.38	0.01233659		2507.38	-0.00782336		3037.38	0.30251223		3567.38	0.05343377		4097.38	-0.01900756
387.59	0.05530918		917.59	0.00718344		1447.59	-0.00003748		1977.58	0.01292525		2507.58	-0.00798858		3037.58	0.30311717		3567.58	0.05348308		4097.58	-0.01899174
387.79	0.05585188		917.79	0.00633743		1447.79	-0.00118138		1977.78	0.01261129		2507.78	-0.00825218		3037.78	0.30332545		3567.78	0.05261741		4097.78	-0.0189836
387.99	0.05509727		917.99	0.00613742		1447.99	-0.00105372		1977.98	0.01248053		2507.98	-0.00780378		3037.98	0.30251081		3567.98	0.05173941		4097.98	-0.01873783
388.19	0.05534846		918.19	0.00674541		1448.19	-0.00073772		1978.18	0.01223093		2508.18	-0.00752649		3038.18	0.30340564		3568.18	0.0515238		4098.18	-0.01876675
388.39	0.05416393		918.39	0.0072852		1448.39	-0.00053682		1978.38	0.01196316		2508.38	-0.00798236		3038.38	0.30400098		3568.38	0.05119889		4098.38	-0.01999474
388.59	0.05294501		918.59	0.00773187		1448.59	-0.00067078		1978.58	0.01069481		2508.58	-0.00845939		3038.58	0.30395936		3568.58	0.05057989		4098.58	-0.01994486
388.79	0.05271041		918.79	0.00780488		1448.79	0.00011444		1978.78	0.00946801		2508.78	-0.00846334		3038.78	0.30488267		3568.78	0.05020244		4098.78	-0.01996464
388.99	0.05145717		918.99	0.00838582		1448.99	0.00042064		1978.98	0.00966921		2508.98	-0.00883067		3038.98	0.30440382		3568.98	0.05003002		4098.98	-0.01919564
389.19	0.05031527		919.19	0.00851153		1449.19	-0.00026543		1979.18	0.00878599		2509.18	-0.00961056		3039.18	0.30393838		3569.18	0.05079747		4099.18	-0.01952839
389.39	0.05031596		919.39	0.00938855		1449.39	-0.00021224		1979.38	0.00852919		2509.38	-0.00911594		3039.38	0.30272028		3569.38	0.05042995		4099.38	-0.02095722
389.59	0.05007985		919.59	0.00889948		1449.59	0.00022372		1979.58	0.00797956		2509.58	-0.00953116		3039.58	0.30209736		3569.58	0.0504644		4099.58	-0.02116556
389.79	0.04900271		919.79	0.00761859		1449.79	0.00054622		1979.78	0.00955957		2509.78	-0.00974503		3039.78	0.30120025		3569.78	0.05090936		4099.78	-0.02082847
389.99	0.04909024		919.99	0.00758738		1449.99	0.00165775		1979.98	0.009221		2509.98	-0.00970532		3039.98	0.30029593		3569.98	0.05183573		4099.98	-0.02025551
390.19	0.04868019		920.19	0.00717486		1450.19	0.00183381		1980.18	0.01038332		2510.18	-0.00948165		3040.18	0.29961577		3570.18	0.05245204		4100.18	-0.02041498
390.39	0.04848831		920.39	0.00755382		1450.39	0.00219391		1980.38	0.01045637		2510.38	-0.00883271		3040.38	0.29976383		3570.38	0.05295138		4100.38	-0.02123331
390.59	0.04775114		920.59	0.00753286		1450.59	0.00261301		1980.58	0.00951237		2510.58	-0.00833337		3040.58	0.29992609		3570.58	0.05297128		4100.58	-0.0210577
390.79	0.04677102		920.79	0.0074174		1450.79	0.00224142		1980.78	0.01011835		2510.78	-0.00794865		3040.78	0.29937247		3570.78	0.05256186		4100.78	-0.02199729
390.99	0.0469067		920.99	0.00710759		1450.99	0.00319367		1980.98	0.00925777		2510.98	-0.00834369		3040.98	0.29888893		3570.98	0.05197197		4100.98	-0.02238258
391.19	0.04678808		921.19	0.00790507		1451.19	0.00397977		1981.18	0.00874797		2511.18	-0.00882515		3041.18	0.29829833		3571.18	0.05209483		4101.18	-0.02187846
391.39	0.0472139		921.39	0.00735016		1451.39	0.00336068		1981.38	0.0085763		2511.38	-0.00927802		3041.38	0.29885804		3571.38	0.05118054		4101.38	-0.02202201
391.59	0.04698473		921.59	0.00749115		1451.59	0.00276495		1981.58	0.00817095		2511.58	-0.00837023		3041.58	0.2993646		3571.58	0.05033153		4101.58	-0.02103856
391.79	0.0470258		921.79	0.00776905		1451.79	0.0017469		1981.78	0.00688071		2511.78	-0.00796184		3041.78	0.29963479		3571.78	0.04900912		4101.78	-0.02051534
391.99	0.04656203		921.99	0.00865061		1451.99	0.00190896		1981.98	0.00666688		2511.98	-0.00786675		3041.98	0.30032378		3571.98	0.04914635		4101.98	-0.02016919
392.19	0.04672279		922.19	0.00915734		1452.19	0.00265241		1982.18	0.00640987		2512.18	-0.00783129		3042.18	0.30056315		3572.18	0.04886911		4102.18	-0.01934718
392.39	0.04558433		922.39	0.00932485		1452.39	0.00252171		1982.38	0.00585322		2512.38	-0.00731363		3042.38	0.30076936		3572.38	0.04943659		4102.38	-0.01873592
392.59	0.04481422		922.59	0.0095652		1452.59	0.00281178		1982.58	0.00494956		2512.58	-0.00769636		3042.58	0.30075849		3572.58	0.04893495		4102.58	-0.01753018
392.79	0.04486613		922.79	0.00962198		1452.79	0.00262813		1982.78	0.00467252		2512.78	-0.00743389		3042.78	0.30019371		3572.78	0.04886955		4102.78	-0.01789331
392.99	0.04430872		922.99	0.00940292		1452.99	0.00147381		1982.98	0.00527058		2512.98	-0.00707394		3042.98	0.29853428		3572.98	0.04879403		4102.98	-0.01740884
393.19	0.0449629		923.19	0.00863783		1453.19	0.00138664		1983.18	0.00480577		2513.18	-0.00711271		3043.18	0.29842082		3573.18	0.0496804		4103.18	-0.01752285
393.39	0.04457517		923.39	0.00768539		1453.39	0.00178624		1983.38	0.00555623		2513.38	-0.00680381		3043.38	0.29752102		3573.38	0.04932357		4103.38	-0.01771399
393.59	0.04542031		923.59	0.00665175		1453.59	0.00142974		1983.58	0.00680397		2513.58	-0.00653358		3043.58	0.29781191		3573.58	0.05010543		4103.58	-0.01671366
393.79	0.04546531		923.79	0.00579996		1453.79	0.00213803		1983.78	0.00821381		2513.78	-0.00635318		3043.78	0.29689489		3573.78	0.05040371		4103.78	-0.01674689
393.99	0.04537563		923.99	0.00509896		1453.99	0.0023923		1983.98	0.00806159		2513.98	-0.00599635		3043.98	0.29708648		3573.98	0.05078952		4103.98	-0.01598817
394.19	0.04471462		924.19	0.00489229		1454.19	0.00311929		1984.18	0.00833952		2514.18	-0.00551437		3044.18	0.29659315		3574.18	0.05079182		4104.18	-0.01611761
394.39	0.04489507		924.39	0.00533192		1454.39	0.00391462		1984.38	0.00805266		2514.38	-0.00578657		3044.38	0.2960267		3574.38	0.0509327		4104.38	-0.01663272
394.59	0.04443163		924.59	0.00616616		1454.59	0.00329038		1984.58	0.0094833		2514.58	-0.00597828		3044.58	0.29540914		3574.58	0.05092215		4104.58	-0.01652554
394.79	0.0441404		924.79	0.00599183		1454.79	0.00293855		1984.78	0.01030516		2514.78	-0.00625708		3044.78	0.29498358		3574.78	0.05118871		4104.78	-0.01665473
394.99	0.04502903		924.99	0.00573424		1454.99	0.00334795		1984.98	0.00986122		2514.98	-0.00685637		3044.98	0.29446513		3574.98	0.05072362		4104.98	-0.01789391
395.19	0.04487084		925.19	0.00580222		1455.19	0.003092		1985.18	0.00945005		2515.18	-0.00748475		3045.18	0.29335178		3575.18	0.05080046		4105.18	-0.01796717
395.39	0.04454189		925.39	0.00575539		1455.39	0.00141465		1985.38	0.01030316		2515.38	-0.00845417		3045.38	0.29320348		3575.38	0.05087804		4105.38	-0.01802129
395.59	0.04403328		925.59	0.00543851		1455.59	0.00083128		1985.58	0.00915683		2515.58	-0.00894409		3045.58	0.29303296		3575.58	0.05115331		4105.58	-0.01870372
395.79	0.0434761		925.79	0.00562844		1455.79	0.00009845		1985.78	0.0091576		2515.78	-0.00904782		3045.78	0.29387426		3575.78	0.05134757		4105.78	-0.01926193
395.99	0.04275454		925.99	0.00662226		1455.99	-0.00020315		1985.98	0.00943322		2515.98	-0.01019365		3045.98	0.29364474		3575.98	0.05201353		4105.98	-0.01951917
396.19	0.04221231		926.19	0.00774001		1456.19	-0.0004005		1986.18	0.00935339		2516.18	-0.01025843		3046.18	0.29271914		3576.18	0.05152782		4106.18	-0.01995113
396.39	0.0414943		926.39	0.00802065		1456.39	-0.00024473		1986.38	0.00876984		2516.38	-0.01069581		3046.38	0.29349057		3576.38	0.05157014		4106.38	-0.02101687
396.59	0.0415742		926.59	0.00788019		1456.59	-0.00053713		1986.58	0.00842557		2516.58	-0.01152081		3046.58	0.29307141		3576.58	0.05178276		4106.58	-0.02173911
396.79	0.04101915		926.79	0.0072761		1456.79	-0.00078381		1986.78	0.008151		2516.78	-0.01149045		3046.78	0.29261679		3576.78	0.05239992		4106.78	-0.02206683
396.99	0.04020732		926.99	0.00702566		1456.99	-0.00024163		1986.98	0.00831826		2516.98	-0.0123482		3046.98	0.29349821		3576.98	0.05324723		4106.98	-0.02151317
397.19	0.03996802		927.19	0.00591126		1457.19	-0.00021265		1987.18	0.00800084		2517.18	-0.01177772		3047.18	0.29445716		3577.18	0.05318251		4107.18	-0.02115524
397.39	0.04015601		927.39	0.00530626		1457.39	-0.00113704		1987.38	0.00887702		2517.38	-0.0112866		3047.38	0.29443881		3577.38	0.05301631		4107.38	-0.02104064
397.59	0.04117025		927.59	0.00486901		1457.59	-0.00140506		1987.58	0.00945122		2517.58	-0.011124		3047.58	0.29601594		3577.58	0.0536453		4107.58	-0.0210705
397.79	0.04013517		927.79	0.00377172		1457.79	-0.00086823		1987.78	0.00955923		2517.78	-0.01101274		3047.78	0.29596609		3577.78	0.0527339		4107.78	-0.0209405
397.99	0.03987368		927.99	0.00357795		1457.99	-0.00111555		1987.98	0.00926653		2517.98	-0.01059928		3047.98	0.29626871		3577.98	0.0526001		4107.98	-0.02030612
398.19	0.03951843		928.19	0.00476326		1458.19	-0.00020295		1988.18	0.00842443		2518.18	-0.01020499		3048.18	0.29523395		3578.18	0.05220144		4108.18	-0.0203446
398.39	0.04064396		928.39	0.00536912		1458.39	-0.00006113		1988.38	0.00915078		2518.38	-0.00994026		3048.38	0.29546995		3578.38	0.05145532		4108.38	-0.02024779
398.59	0.04025509		928.59	0.00523277		1458.59	-0.00083734		1988.58	0.00892404		2518.58	-0.00998679		3048.58	0.29591436		3578.58	0.05149976		4108.58	-0.02041781
398.79	0.03993986		928.79	0.00500168		1458.79	0.00023512		1988.78	0.00796664		2518.78	-0.00969137		3048.78	0.29532687		3578.78	0.05057643		4108.78	-0.02041976
398.99	0.03970977		928.99	0.00545557		1458.99	0.00106223		1988.98	0.00708376		2518.98	-0.00981491		3048.98	0.29466971		3578.98	0.05013897		4108.98	-0.02096243
399.19	0.03902502		929.19	0.00560662		1459.19	0.00177987		1989.18	0.00785279		2519.18	-0.0102563		3049.18	0.29406645		3579.18	0.04990856		4109.18	-0.02049396
399.39	0.03858266		929.39	0.00571943		1459.39	0.00198725		1989.38	0.00834352		2519.38	-0.01051732		3049.38	0.29371857		3579.38	0.05026483		4109.38	-0.01972585
399.59	0.03842471		929.59	0.00626271		1459.59	0.00259039		1989.58	0.00814234		2519.58	-0.00949095		3049.58	0.29340668		3579.58	0.04949146		4109.58	-0.01998061
399.79	0.03831752		929.79	0.00680132		1459.79	0.00237917		1989.78	0.00816056		2519.78	-0.0092649		3049.78	0.2941152		3579.78	0.04919735		4109.78	-0.01991837
399.99	0.03856246		929.99	0.00824606		1459.99	0.00255685		1989.98	0.0076008		2519.98	-0.01029425		3049.98	0.2929288		3579.98	0.04899929		4109.98	-0.01980891
400.19	0.03872827		930.19	0.00791493		1460.19	0.00254539		1990.18	0.00723416		2520.18	-0.01091013		3050.18	0.29324198		3580.18	0.04921997		4110.18	-0.01997945
400.39	0.03801607		930.39	0.00683668		1460.39	0.00335829		1990.38	0.00704934		2520.38	-0.01149214		3050.38	0.29317463		3580.38	0.04959389		4110.38	-0.01944633
400.59	0.03887348		930.59	0.00668682		1460.59	0.0028381		1990.58	0.00732228		2520.58	-0.01153081		3050.58	0.29263589		3580.58	0.05017156		4110.58	-0.01881933
400.79	0.03768976		930.79	0.00553706		1460.79	0.00234644		1990.78	0.00771013		2520.78	-0.01238926		3050.78	0.29296117		3580.78	0.04952622		4110.78	-0.01781264
400.99	0.03862757		930.99	0.00489497		1460.99	0.00200187		1990.98	0.00750701		2520.98	-0.01247849		3050.98	0.29345988		3580.98	0.04941009		4110.98	-0.01747488
401.19	0.03970784		931.19	0.0037927		1461.19	0.00138985		1991.18	0.00776894		2521.18	-0.011317		3051.18	0.29251627		3581.18	0.04932381		4111.18	-0.01744409
401.39	0.04073635		931.39	0.00322146		1461.39	0.0011277		1991.38	0.00853549		2521.38	-0.01179135		3051.38	0.29159669		3581.38	0.05042864		4111.38	-0.01724962
401.59	0.04081278		931.59	0.00195522		1461.59	0.00029365		1991.58	0.00884992		2521.58	-0.0119877		3051.58	0.29275659		3581.58	0.04990432		4111.58	-0.01653606
401.79	0.04093785		931.79	0.00111322		1461.79	-0.00040564		1991.78	0.0089449		2521.78	-0.01194604		3051.78	0.29219226		3581.78	0.04943187		4111.78	-0.01617764
401.99	0.0416385		931.99	0.00115564		1461.99	-0.00041857		1991.98	0.00930963		2521.98	-0.01221406		3051.98	0.29173606		3581.98	0.04966188		4111.98	-0.01609586
402.19	0.04133186		932.19	0.00041004		1462.19	-0.00123231		1992.18	0.00959768		2522.18	-0.01236817		3052.18	0.29116375		3582.18	0.04907119		4112.18	-0.01573633
402.39	0.04158901		932.39	-0.00050974		1462.39	-0.00180498		1992.38	0.00968867		2522.38	-0.01190847		3052.38	0.29128152		3582.38	0.04797999		4112.38	-0.01582673
402.59	0.0408126		932.59	-0.00030925		1462.59	-0.00143224		1992.58	0.00861554		2522.58	-0.01189887		3052.58	0.29052738		3582.58	0.04823446		4112.58	-0.01642293
402.79	0.04025184		932.79	0.00042391		1462.79	-0.00096783		1992.78	0.00832734		2522.78	-0.01180882		3052.78	0.28975862		3582.78	0.04686894		4112.78	-0.01633612
402.99	0.04027252		932.99	0.00081427		1462.99	-0.0012629		1992.98	0.00806765		2522.98	-0.01201334		3052.98	0.28985127		3582.98	0.04727842		4112.98	-0.01671325
403.19	0.03987514		933.19	0.00133926		1463.19	-0.00068839		1993.18	0.00834779		2523.18	-0.01222907		3053.18	0.28955539		3583.18	0.04720684		4113.18	-0.01723467
403.39	0.03935264		933.39	0.0021934		1463.39	-0.00031021		1993.38	0.00762082		2523.38	-0.01226735		3053.38	0.28896662		3583.38	0.04710591		4113.38	-0.01691656
403.59	0.03884462		933.59	0.00309304		1463.59	0.00009852		1993.58	0.00706589		2523.58	-0.01176333		3053.58	0.28855085		3583.58	0.04752648		4113.58	-0.01774129
403.79	0.03996206		933.79	0.00324846		1463.79	-0.00017682		1993.78	0.00592717		2523.78	-0.01213089		3053.78	0.28856743		3583.78	0.04820007		4113.78	-0.01838117
403.99	0.03944503		933.99	0.00384901		1463.99	0.00003894		1993.98	0.005049		2523.98	-0.01235349		3053.98	0.28862124		3583.98	0.04867555		4113.98	-0.0188987
404.19	0.03828401		934.19	0.00347201		1464.19	0.00014137		1994.18	0.00494816		2524.18	-0.01237722		3054.18	0.28885226		3584.18	0.0490771		4114.18	-0.0194955
404.39	0.03790275		934.39	0.00336636		1464.39	0.00055077		1994.38	0.00356424		2524.38	-0.01244741		3054.38	0.28871762		3584.38	0.04923682		4114.38	-0.01938503
404.59	0.03877877		934.59	0.00373055		1464.59	0.00001247		1994.58	0.00311189		2524.58	-0.01328097		3054.58	0.28910669		3584.58	0.04922076		4114.58	-0.02014409
404.79	0.0384887		934.79	0.0035504		1464.79	0.00007232		1994.78	0.00300282		2524.78	-0.0125455		3054.78	0.28948444		3584.78	0.04896549		4114.78	-0.01962569
404.99	0.0391381		934.99	0.00392939		1464.99	0.00060762		1994.98	0.00308289		2524.98	-0.01135306		3054.98	0.28962745		3584.98	0.04998434		4114.98	-0.01949199
405.19	0.03933844		935.19	0.00469143		1465.19	0.00090209		1995.18	0.0041574		2525.18	-0.01053662		3055.18	0.29014856		3585.18	0.05052362		4115.18	-0.01994715
405.39	0.03978519		935.39	0.0039876		1465.39	0.00072146		1995.38	0.00471023		2525.38	-0.0105198		3055.38	0.29124119		3585.38	0.05046188		4115.38	-0.01960373
405.59	0.03922183		935.59	0.00370101		1465.59	0.00007566		1995.58	0.00541033		2525.58	-0.01061973		3055.58	0.29232716		3585.58	0.05053015		4115.58	-0.01997429
405.79	0.03880436		935.79	0.00298637		1465.79	0.00045069		1995.78	0.00599853		2525.78	-0.01085138		3055.78	0.29216215		3585.78	0.05002366		4115.78	-0.0208556
405.99	0.03721452		935.99	0.00359155		1465.99	0.00113301		1995.98	0.00694016		2525.98	-0.01171424		3055.98	0.29154319		3585.98	0.049552		4115.98	-0.02120384
406.19	0.0358946		936.19	0.00347542		1466.19	0.00050853		1996.18	0.00743338		2526.18	-0.01207064		3056.18	0.29177096		3586.18	0.04860882		4116.18	-0.02109774
406.39	0.03472664		936.39	0.0034291		1466.39	-0.00001445		1996.38	0.00709383		2526.38	-0.01195668		3056.38	0.29145563		3586.38	0.04767335		4116.38	-0.02115397
406.59	0.03324149		936.59	0.00329939		1466.59	-0.00013204		1996.58	0.00755068		2526.58	-0.01156016		3056.58	0.29076101		3586.58	0.04756834		4116.58	-0.02148108
406.79	0.03249475		936.79	0.00375888		1466.79	-0.0008184		1996.78	0.00790258		2526.78	-0.0110323		3056.78	0.2907765		3586.78	0.04746358		4116.78	-0.02171591
406.99	0.03119688		936.99	0.00414394		1466.99	-0.00121869		1996.98	0.00802009		2526.98	-0.01165715		3056.98	0.29083523		3586.98	0.04775428		4116.98	-0.0211538
407.19	0.03089521		937.19	0.00473157		1467.19	-0.0007691		1997.18	0.00833187		2527.18	-0.01211397		3057.18	0.29018483		3587.18	0.04701547		4117.18	-0.0217782
407.39	0.0304786		937.39	0.00503838		1467.39	-0.00006229		1997.38	0.00874597		2527.38	-0.01293398		3057.38	0.28968488		3587.38	0.04724393		4117.38	-0.02093696
407.59	0.02989807		937.59	0.00461834		1467.59	0.0001252		1997.58	0.00881973		2527.58	-0.01267808		3057.58	0.28921557		3587.58	0.04811085		4117.58	-0.02114942
407.79	0.0302435		937.79	0.00412353		1467.79	0.00016912		1997.78	0.00850197		2527.78	-0.01273333		3057.78	0.28920907		3587.78	0.04783444		4117.78	-0.02014139
407.99	0.02934115		937.99	0.00339095		1467.99	-0.00005784		1997.98	0.00808983		2527.98	-0.01249679		3057.98	0.29003271		3587.98	0.04835274		4117.98	-0.01989168
408.19	0.02984444		938.19	0.00299019		1468.19	-0.00027857		1998.18	0.00754323		2528.18	-0.01283996		3058.18	0.28984128		3588.18	0.0485913		4118.18	-0.01919899
408.39	0.03112674		938.39	0.00287952		1468.39	-0.00033903		1998.38	0.00718054		2528.38	-0.01267648		3058.38	0.28956963		3588.38	0.04819379		4118.38	-0.01883664
408.59	0.03215258		938.59	0.00301078		1468.59	-0.00056258		1998.58	0.00757194		2528.58	-0.01248184		3058.58	0.28918502		3588.58	0.04814095		4118.58	-0.01871317
408.79	0.03338223		938.79	0.00255098		1468.79	-0.00034646		1998.78	0.00803529		2528.78	-0.0112034		3058.78	0.28874013		3588.78	0.04827099		4118.78	-0.01684475
408.99	0.03460414		938.99	0.00261673		1468.99	0.00074354		1998.98	0.00883562		2528.98	-0.01127443		3058.98	0.28871544		3588.98	0.04935557		4118.98	-0.01699509
409.19	0.03619836		939.19	0.00254166		1469.19	0.00093409		1999.18	0.00867749		2529.18	-0.01120952		3059.18	0.28837231		3589.18	0.04958976		4119.18	-0.01785386
409.39	0.03706209		939.39	0.00121228		1469.39	0.00133059		1999.38	0.00826382		2529.38	-0.01196038		3059.38	0.28790116		3589.38	0.04983368		4119.38	-0.01858569
409.59	0.03685409		939.59	0.00168114		1469.59	0.00070912		1999.58	0.00728311		2529.58	-0.01311943		3059.58	0.28693411		3589.58	0.04990375		4119.58	-0.0191195
409.79	0.03662241		939.79	0.00113961		1469.79	0.00068818		1999.78	0.00690754		2529.78	-0.01335373		3059.78	0.2868028		3589.78	0.04913454		4119.78	-0.01913096
409.99	0.03491694		939.99	0.00159715		1469.99	-0.00010036		1999.98	0.00666607		2529.98	-0.01394631		3059.98	0.2862962		3589.98	0.04880508		4119.98	-0.01945838
410.19	0.03499792		940.19	0.00088151		1470.19	-0.00037997		2000.18	0.00639188		2530.18	-0.01369767		3060.18	0.28600041		3590.18	0.04912853		4120.18	-0.0197201
410.39	0.03411469		940.39	0.00042872		1470.39	-0.00103075		2000.38	0.00585409		2530.38	-0.0138158		3060.38	0.28482522		3590.38	0.04913874		4120.38	-0.02044252
410.59	0.03324626		940.59	0.00033091		1470.59	-0.00114037		2000.58	0.00500748		2530.58	-0.01347317		3060.58	0.28471489		3590.58	0.04975121		4120.58	-0.02145447
410.79	0.0332384		940.79	0.00136508		1470.79	-0.00167544		2000.78	0.00346533		2530.78	-0.01311591		3060.78	0.28492267		3590.78	0.05087348		4120.78	-0.02218945
410.99	0.03236413		940.99	0.0019357		1470.99	-0.00154325		2000.98	0.0030714		2530.98	-0.01377305		3060.98	0.28507666		3590.98	0.05052633		4120.98	-0.02270596
411.19	0.03154929		941.19	0.0025082		1471.19	-0.00054049		2001.18	0.0030215		2531.18	-0.01433851		3061.18	0.2842315		3591.18	0.05019392		4121.18	-0.02328543
411.39	0.03069154		941.39	0.00318652		1471.39	-0.00037256		2001.38	0.00285557		2531.38	-0.01387274		3061.38	0.28426497		3591.38	0.0495901		4121.38	-0.02252942
411.59	0.02949365		941.59	0.0035658		1471.59	-0.00114327		2001.58	0.0024256		2531.58	-0.01309345		3061.58	0.28339938		3591.58	0.04854816		4121.58	-0.02283555
411.79	0.02941202		941.79	0.00365955		1471.79	-0.00072187		2001.78	0.00327123		2531.78	-0.01273125		3061.78	0.283195		3591.78	0.04754126		4121.78	-0.02255051
411.99	0.02847239		941.99	0.00427299		1471.99	-0.00150547		2001.98	0.00395193		2531.98	-0.01287442		3061.98	0.28317228		3591.98	0.04768998		4121.98	-0.02305468
412.19	0.02836578		942.19	0.00467332		1472.19	-0.00174384		2002.18	0.00417155		2532.18	-0.01220999		3062.18	0.28245744		3592.18	0.04688053		4122.18	-0.02166166
412.39	0.02881056		942.39	0.00540773		1472.39	-0.00137621		2002.38	0.00526017		2532.38	-0.01253134		3062.38	0.28201319		3592.38	0.0458749		4122.38	-0.02052903
412.59	0.02901744		942.59	0.00518881		1472.59	-0.00083882		2002.58	0.00545072		2532.58	-0.01287761		3062.58	0.28216834		3592.58	0.04644625		4122.58	-0.02006327
412.79	0.02872731		942.79	0.00492536		1472.79	-0.00077		2002.78	0.00618456		2532.78	-0.01338536		3062.78	0.28178989		3592.78	0.04644612		4122.78	-0.01830118
412.99	0.02833037		942.99	0.00514679		1472.99	-0.00001784		2002.98	0.00784752		2532.98	-0.01402825		3062.98	0.28259933		3592.98	0.04670082		4122.98	-0.01811176
413.19	0.02793182		943.19	0.00401142		1473.19	-0.00052632		2003.18	0.00817637		2533.18	-0.01341259		3063.18	0.28234979		3593.18	0.04685039		4123.18	-0.0178677
413.39	0.02756389		943.39	0.00376407		1473.39	-0.00043111		2003.38	0.00853745		2533.38	-0.01474364		3063.38	0.28272832		3593.38	0.04596141		4123.38	-0.0183713
413.59	0.02775958		943.59	0.00403001		1473.59	-0.00082821		2003.58	0.00841815		2533.58	-0.01470678		3063.58	0.28365467		3593.58	0.04629407		4123.58	-0.01810537
413.79	0.02718448		943.79	0.0031949		1473.79	0.00036793		2003.78	0.00838672		2533.78	-0.01423609		3063.78	0.28433035		3593.78	0.04641072		4123.78	-0.01799794
413.99	0.02728081		943.99	0.00271892		1473.99	0.00039075		2003.98	0.00861143		2533.98	-0.01478359		3063.98	0.28416493		3593.98	0.0469573		4123.98	-0.01838948
414.19	0.02859345		944.19	0.00238399		1474.19	0.00125958		2004.18	0.00861132		2534.18	-0.01522298		3064.18	0.28396975		3594.18	0.04740584		4124.18	-0.01846068
414.39	0.02936329		944.39	0.00221018		1474.39	0.00080465		2004.38	0.00812466		2534.38	-0.01571869		3064.38	0.28422045		3594.38	0.04702796		4124.38	-0.01969949
414.59	0.0296447		944.59	0.0020421		1474.59	0.00052146		2004.58	0.00685969		2534.58	-0.01549466		3064.58	0.28498624		3594.58	0.04778652		4124.58	-0.02000766
414.79	0.02935199		944.79	0.00190685		1474.79	0.00042627		2004.78	0.00622575		2534.78	-0.01537178		3064.78	0.28566777		3594.78	0.04847787		4124.78	-0.02035859
414.99	0.02951023		944.99	0.00227417		1474.99	0.00095047		2004.98	0.00610962		2534.98	-0.01537213		3064.98	0.28649793		3594.98	0.04829217		4124.98	-0.02004312
415.19	0.02839848		945.19	0.00211594		1475.19	0.00023227		2005.18	0.00527815		2535.18	-0.01529936		3065.18	0.28619418		3595.18	0.04743264		4125.18	-0.01893368
415.39	0.02791853		945.39	0.00214599		1475.39	-0.00017904		2005.38	0.00501743		2535.38	-0.01460995		3065.38	0.28654228		3595.38	0.04734002		4125.38	-0.01914883
415.59	0.02690671		945.59	0.00187707		1475.59	-0.00027329		2005.58	0.00574722		2535.58	-0.01408574		3065.58	0.28563742		3595.58	0.04734301		4125.58	-0.01977145
415.79	0.02683021		945.79	0.00159003		1475.79	-0.00074504		2005.78	0.00659448		2535.78	-0.01402019		3065.78	0.28589925		3595.78	0.04708863		4125.78	-0.02011504
415.99	0.02667242		945.99	0.00135948		1475.99	-0.00186177		2005.98	0.00607086		2535.98	-0.01488682		3065.98	0.28495979		3595.98	0.048029		4125.98	-0.01929606
416.19	0.02691639		946.19	0.00121611		1476.19	-0.0023259		2006.18	0.00594472		2536.18	-0.01468068		3066.18	0.28492641		3596.18	0.04774601		4126.18	-0.01844284
416.39	0.02764934		946.39	0.00190789		1476.39	-0.00222821		2006.38	0.00577202		2536.38	-0.01520789		3066.38	0.28495624		3596.38	0.0480163		4126.38	-0.01862461
416.59	0.02686853		946.59	0.00095432		1476.59	-0.00295048		2006.58	0.00553342		2536.58	-0.01463946		3066.58	0.2845749		3596.58	0.04743411		4126.58	-0.01910993
416.79	0.02654658		946.79	0.00064173		1476.79	-0.0039752		2006.78	0.0062328		2536.78	-0.01600331		3066.78	0.28317043		3596.78	0.04685424		4126.78	-0.01818902
416.99	0.02701827		946.99	0.00107769		1476.99	-0.00424646		2006.98	0.00674685		2536.98	-0.01614555		3066.98	0.28229448		3596.98	0.04723774		4126.98	-0.0178416
417.19	0.02694773		947.19	0.0011335		1477.19	-0.00332161		2007.18	0.00666786		2537.18	-0.01626164		3067.18	0.28104545		3597.18	0.04700709		4127.18	-0.01803782
417.39	0.02765429		947.39	0.00212698		1477.39	-0.00285074		2007.38	0.00681971		2537.38	-0.01750365		3067.38	0.28038512		3597.38	0.04689835		4127.38	-0.01887558
417.59	0.02825173		947.59	0.00216656		1477.59	-0.00318113		2007.58	0.00612474		2537.58	-0.01750005		3067.58	0.28054535		3597.58	0.04696763		4127.58	-0.01825174
417.79	0.02802622		947.79	0.00243235		1477.79	-0.00293828		2007.78	0.00547599		2537.78	-0.01769906		3067.78	0.28015379		3597.78	0.04696167		4127.78	-0.01769506
417.99	0.02858866		947.99	0.00334787		1477.99	-0.00379359		2007.98	0.00537226		2537.98	-0.018071		3067.98	0.2799418		3597.98	0.04648166		4127.98	-0.01787619
418.19	0.02897008		948.19	0.0040867		1478.19	-0.00432932		2008.18	0.00366594		2538.18	-0.01848732		3068.18	0.27961843		3598.18	0.04544747		4128.18	-0.0186829
418.39	0.02831508		948.39	0.00425682		1478.39	-0.00399009		2008.38	0.0029724		2538.38	-0.01857372		3068.38	0.2797699		3598.38	0.04578202		4128.38	-0.01904386
418.59	0.02720643		948.59	0.00462487		1478.59	-0.00417914		2008.58	0.00348042		2538.58	-0.01741262		3068.58	0.28054813		3598.58	0.0467194		4128.58	-0.01941253
418.79	0.02616655		948.79	0.00419014		1478.79	-0.00331995		2008.78	0.00351424		2538.78	-0.01718418		3068.78	0.28087571		3598.78	0.0471202		4128.78	-0.01856566
418.99	0.02610083		948.99	0.00453233		1478.99	-0.00354841		2008.98	0.00337103		2538.98	-0.01561864		3068.98	0.28187874		3598.98	0.04795586		4128.98	-0.0179711
419.19	0.02500749		949.19	0.00357703		1479.19	-0.00408792		2009.18	0.0028762		2539.18	-0.01512086		3069.18	0.2816041		3599.18	0.04770012		4129.18	-0.01742498
419.39	0.02510568		949.39	0.00264249		1479.39	-0.00354768		2009.38	0.00304721		2539.38	-0.01402119		3069.38	0.2827562		3599.38	0.04759162		4129.38	-0.0187387
419.59	0.02528777		949.59	0.00199419		1479.59	-0.00350305		2009.58	0.00360415		2539.58	-0.01303388		3069.58	0.28280061		3599.58	0.04732383		4129.58	-0.01884836
419.79	0.0258735		949.79	0.00212916		1479.79	-0.00331789		2009.78	0.00317615		2539.78	-0.01371782		3069.78	0.28309994		3599.78	0.047826		4129.78	-0.0189054
419.99	0.02640288		949.99	0.00079609		1479.99	-0.00322722		2009.98	0.00330161		2539.98	-0.01386584		3069.98	0.28267001		3599.98	0.04862458		4129.98	-0.01797421
420.19	0.02603112		950.19	0.00105813		1480.19	-0.00400257		2010.18	0.00410723		2540.18	-0.01334783		3070.18	0.28324024		3600.18	0.0482262		4130.18	-0.01871634
420.39	0.02569535		950.39	0.00111911		1480.39	-0.00372997		2010.38	0.00435243		2540.38	-0.01354209		3070.38	0.28313537		3600.38	0.04727156		4130.38	-0.01887771
420.59	0.02566406		950.59	0.00038968		1480.59	-0.00264122		2010.58	0.00523638		2540.58	-0.0141311		3070.58	0.28283289		3600.58	0.04657137		4130.58	-0.01922456
420.79	0.02599246		950.79	0.0009498		1480.79	-0.00238827		2010.78	0.00622028		2540.78	-0.01553654		3070.78	0.28298195		3600.78	0.04631906		4130.78	-0.01835138
420.99	0.02679732		950.99	0.00175778		1480.99	-0.00151965		2010.98	0.00731513		2540.98	-0.01576084		3070.98	0.2831683		3600.98	0.04585228		4130.98	-0.01832329
421.19	0.02639087		951.19	0.00149845		1481.19	-0.00099441		2011.18	0.00818644		2541.18	-0.01596037		3071.18	0.2831225		3601.18	0.0453415		4131.18	-0.01862619
421.39	0.02620434		951.39	0.0018221		1481.39	-0.00075589		2011.38	0.00778866		2541.38	-0.01708101		3071.38	0.28349366		3601.38	0.04589563		4131.38	-0.01880768
421.59	0.02629809		951.59	0.00237367		1481.59	-0.00106573		2011.58	0.0068588		2541.58	-0.01708925		3071.58	0.28435569		3601.58	0.0449457		4131.58	-0.01871581
421.79	0.02620412		951.79	0.00261007		1481.79	-0.00120022		2011.78	0.00637569		2541.78	-0.01761713		3071.78	0.28491235		3601.78	0.04560234		4131.78	-0.01906345
421.99	0.0264602		951.99	0.00272774		1481.99	-0.00129304		2011.98	0.00602199		2541.98	-0.01758791		3071.98	0.28446085		3601.98	0.04523213		4131.98	-0.01985533
422.19	0.02672533		952.19	0.00244483		1482.19	-0.00109369		2012.18	0.00531645		2542.18	-0.01796744		3072.18	0.28272013		3602.18	0.04458419		4132.18	-0.02190255
422.39	0.02549197		952.39	0.00228872		1482.39	-0.00154729		2012.38	0.00649177		2542.38	-0.01680719		3072.38	0.2824026		3602.38	0.04440573		4132.38	-0.02187321
422.59	0.02557823		952.59	0.00186849		1482.59	-0.00169245		2012.58	0.00697847		2542.58	-0.01619224		3072.58	0.28141034		3602.58	0.04480751		4132.58	-0.02230114
422.79	0.02590278		952.79	0.00105625		1482.79	-0.00146998		2012.78	0.00670974		2542.78	-0.01562853		3072.78	0.28075604		3602.78	0.0448925		4132.78	-0.02156287
422.99	0.0261303		952.99	0.00102564		1482.99	-0.00253191		2012.98	0.00631016		2542.98	-0.0145294		3072.98	0.281123		3602.98	0.04591974		4132.98	-0.02125824
423.19	0.02722358		953.19	0.0002292		1483.19	-0.00268263		2013.18	0.0064745		2543.18	-0.01392362		3073.18	0.28028311		3603.18	0.04560627		4133.18	-0.02102091
423.39	0.0274051		953.39	-0.00021156		1483.39	-0.00266632		2013.38	0.00696699		2543.38	-0.0128202		3073.38	0.27997621		3603.38	0.04577056		4133.38	-0.02210947
423.59	0.02640185		953.59	0.00001226		1483.59	-0.00254754		2013.58	0.00605344		2543.58	-0.01305065		3073.58	0.27883346		3603.58	0.04718638		4133.58	-0.02167872
423.79	0.02552137		953.79	0.00032568		1483.79	-0.00236477		2013.78	0.00581575		2543.78	-0.01417503		3073.78	0.278474		3603.78	0.04851341		4133.78	-0.02170546
423.99	0.02487809		953.99	0.00015688		1483.99	-0.00361932		2013.98	0.00638172		2543.98	-0.0137028		3073.98	0.27803215		3603.98	0.04821756		4133.98	-0.02068641
424.19	0.02346302		954.19	0.00134009		1484.19	-0.00419283		2014.18	0.00636144		2544.18	-0.01422578		3074.18	0.27786298		3604.18	0.04864943		4134.18	-0.02079493
424.39	0.02327458		954.39	0.00184366		1484.39	-0.00316169		2014.38	0.00589009		2544.38	-0.01358395		3074.38	0.27824789		3604.38	0.04917983		4134.38	-0.0204748
424.59	0.02272591		954.59	0.00308079		1484.59	-0.00293548		2014.58	0.00556899		2544.58	-0.013883		3074.58	0.278869		3604.58	0.0502086		4134.58	-0.02039594
424.79	0.02171298		954.79	0.00395761		1484.79	-0.00384946		2014.78	0.00583873		2544.78	-0.0141172		3074.78	0.27930794		3604.78	0.04958998		4134.78	-0.01948788
424.99	0.02223557		954.99	0.00450126		1484.99	-0.00405668		2014.98	0.00610587		2544.98	-0.01357308		3074.98	0.27950336		3604.98	0.04979824		4134.98	-0.02013374
425.19	0.02163542		955.19	0.00465852		1485.19	-0.00408363		2015.18	0.00537905		2545.18	-0.01335441		3075.18	0.27972092		3605.18	0.0492408		4135.18	-0.01918423
425.39	0.02122208		955.39	0.00493313		1485.39	-0.00485089		2015.38	0.0045823		2545.38	-0.01410611		3075.38	0.28028542		3605.38	0.04928181		4135.38	-0.01877064
425.59	0.02121472		955.59	0.00554713		1485.59	-0.00554552		2015.58	0.0041814		2545.58	-0.01395997		3075.58	0.28046588		3605.58	0.04874763		4135.58	-0.01827316
425.79	0.02093408		955.79	0.00429272		1485.79	-0.00628978		2015.78	0.00313695		2545.78	-0.01493383		3075.78	0.28006903		3605.78	0.04840054		4135.78	-0.01829594
425.99	0.02066372		955.99	0.00420568		1485.99	-0.00632847		2015.98	0.00300872		2545.98	-0.01445473		3075.98	0.27879755		3605.98	0.04700603		4135.98	-0.01835547
426.19	0.02074365		956.19	0.00415077		1486.19	-0.00665539		2016.18	0.00223035		2546.18	-0.01501857		3076.18	0.27879185		3606.18	0.0451472		4136.18	-0.01870902
426.39	0.02004329		956.39	0.00417509		1486.39	-0.00647861		2016.38	0.00242895		2546.38	-0.01535914		3076.38	0.27959072		3606.38	0.04444327		4136.38	-0.01736236
426.59	0.02057581		956.59	0.00440518		1486.59	-0.00518256		2016.58	0.0025339		2546.58	-0.01647367		3076.58	0.2788817		3606.58	0.04408859		4136.58	-0.01743002
426.79	0.02113522		956.79	0.00411506		1486.79	-0.00498148		2016.78	0.00270415		2546.78	-0.0164903		3076.78	0.27874613		3606.78	0.04418161		4136.78	-0.01760453
426.99	0.02163387		956.99	0.00355471		1486.99	-0.00414941		2016.98	0.00199288		2546.98	-0.01625846		3076.98	0.2786919		3606.98	0.04422596		4136.98	-0.01697913
427.19	0.02293235		957.19	0.00279676		1487.19	-0.00394648		2017.18	0.00306244		2547.18	-0.01704056		3077.18	0.27750857		3607.18	0.04451565		4137.18	-0.01730189
427.39	0.02308863		957.39	0.00204964		1487.39	-0.00394367		2017.38	0.00260804		2547.38	-0.01859444		3077.38	0.27703162		3607.38	0.04455371		4137.38	-0.01815758
427.59	0.0224598		957.59	0.00121635		1487.59	-0.00406115		2017.58	0.00252991		2547.58	-0.01980093		3077.58	0.27728704		3607.58	0.04601148		4137.58	-0.01852248
427.79	0.0224946		957.79	0.00042173		1487.79	-0.00380713		2017.78	0.0029231		2547.78	-0.02048812		3077.78	0.27764368		3607.78	0.04613729		4137.78	-0.01894452
427.99	0.02283187		957.99	-0.00061868		1487.99	-0.0042024		2017.98	0.00340181		2547.98	-0.02015249		3077.98	0.27734876		3607.98	0.0464538		4137.98	-0.0184632
428.19	0.02281949		958.19	-0.0002946		1488.19	-0.00374229		2018.18	0.00263155		2548.18	-0.01921586		3078.18	0.27715179		3608.18	0.04741302		4138.18	-0.01949223
428.39	0.02359305		958.39	0.00015838		1488.39	-0.0036293		2018.38	0.00230498		2548.38	-0.01859928		3078.38	0.27756581		3608.38	0.04834086		4138.38	-0.02050215
428.59	0.02292354		958.59	0.00058139		1488.59	-0.0036312		2018.58	0.00305984		2548.58	-0.01861105		3078.58	0.27760037		3608.58	0.04847152		4138.58	-0.02080381
428.79	0.02368376		958.79	0.00017485		1488.79	-0.00368871		2018.78	0.00283864		2548.78	-0.01781747		3078.78	0.27743774		3608.78	0.04812398		4138.78	-0.02124133
428.99	0.02306741		958.99	0.00005144		1488.99	-0.00375819		2018.98	0.0032954		2548.98	-0.01669539		3078.98	0.27757613		3608.98	0.04826495		4138.98	-0.02122018
429.19	0.0220821		959.19	-0.00059882		1489.19	-0.00370538		2019.18	0.00375853		2549.18	-0.0167231		3079.18	0.27742742		3609.18	0.04753279		4139.18	-0.02059767
429.39	0.02074945		959.39	-0.00086538		1489.39	-0.00537296		2019.38	0.00416077		2549.38	-0.01595099		3079.38	0.27675238		3609.38	0.04786234		4139.38	-0.02028556
429.59	0.02026282		959.59	-0.0002566		1489.59	-0.00568426		2019.58	0.00374296		2549.58	-0.01571856		3079.58	0.27539752		3609.58	0.0475839		4139.58	-0.01966809
429.79	0.01988111		959.79	-0.00030678		1489.79	-0.00590375		2019.78	0.00300214		2549.78	-0.01580983		3079.78	0.27562871		3609.78	0.04651472		4139.78	-0.01998617
429.99	0.01972603		959.99	0.0002116		1489.99	-0.00488777		2019.98	0.00321988		2549.98	-0.01467824		3079.98	0.27599953		3609.98	0.0463518		4139.98	-0.0196506
430.19	0.01974811		960.19	0.00062523		1490.19	-0.00411441		2020.18	0.00282465		2550.18	-0.01403747		3080.18	0.27681218		3610.18	0.04530494		4140.18	-0.01898637
430.39	0.01898079		960.39	0.00098281		1490.39	-0.00251005		2020.38	0.00376377		2550.38	-0.0140663		3080.38	0.27641158		3610.38	0.04433658		4140.38	-0.01884934
430.59	0.01990619		960.59	0.00157258		1490.59	-0.00242673		2020.58	0.00375513		2550.58	-0.01433936		3080.58	0.27640972		3610.58	0.04451957		4140.58	-0.01880559
430.79	0.01995322		960.79	0.00136399		1490.79	-0.00252852		2020.78	0.0029743		2550.78	-0.01385734		3080.78	0.27656081		3610.78	0.04482357		4140.78	-0.01804844
430.99	0.02002759		960.99	0.00090692		1490.99	-0.00224938		2020.98	0.00292352		2550.98	-0.01333275		3080.98	0.27673914		3610.98	0.04505797		4140.98	-0.01761442
431.19	0.02039014		961.19	0.00043992		1491.19	-0.00255648		2021.18	0.00329795		2551.18	-0.01455182		3081.18	0.27695728		3611.18	0.04583591		4141.18	-0.01783788
431.39	0.0200694		961.39	-0.00025681		1491.39	-0.00245492		2021.38	0.00341567		2551.38	-0.01412928		3081.38	0.27725445		3611.38	0.0458421		4141.38	-0.01785399
431.59	0.01952625		961.59	-0.00047361		1491.59	-0.00283124		2021.58	0.00443276		2551.58	-0.01357604		3081.58	0.27679008		3611.58	0.04629726		4141.58	-0.01836802
431.79	0.01980815		961.79	-0.00160484		1491.79	-0.00286487		2021.78	0.00384036		2551.78	-0.0132869		3081.78	0.27713259		3611.78	0.04608748		4141.78	-0.01829971
431.99	0.01992431		961.99	-0.00159693		1491.99	-0.0025587		2021.98	0.00384915		2551.98	-0.01342381		3081.98	0.27619829		3611.98	0.04721179		4141.98	-0.01808682
432.19	0.02014177		962.19	-0.0003724		1492.19	-0.00233195		2022.18	0.00286343		2552.18	-0.01398702		3082.18	0.27692043		3612.18	0.0478913		4142.18	-0.0191209
432.39	0.01987527		962.39	-0.00029356		1492.39	-0.00319602		2022.38	0.00335519		2552.38	-0.01598613		3082.38	0.27667416		3612.38	0.04837877		4142.38	-0.01968356
432.59	0.01974636		962.59	0.00034697		1492.59	-0.00338385		2022.58	0.00335453		2552.58	-0.01638768		3082.58	0.27659085		3612.58	0.04826057		4142.58	-0.01908775
432.79	0.01969516		962.79	-0.00077619		1492.79	-0.00378444		2022.78	0.00242641		2552.78	-0.01686738		3082.78	0.2759429		3612.78	0.04837661		4142.78	-0.01993687
432.99	0.01839836		962.99	-0.00099646		1492.99	-0.00398315		2022.98	0.00297437		2552.98	-0.01715794		3082.98	0.27570636		3612.98	0.04875768		4142.98	-0.02012627
433.19	0.0190381		963.19	-0.00126999		1493.19	-0.00415647		2023.18	0.00335983		2553.18	-0.01774186		3083.18	0.27476832		3613.18	0.04896316		4143.18	-0.01956156
433.39	0.01899086		963.39	-0.00077578		1493.39	-0.005086		2023.38	0.00312813		2553.38	-0.01760836		3083.38	0.27425238		3613.38	0.0485265		4143.38	-0.0186951
433.59	0.01959019		963.59	-0.00025006		1493.59	-0.0057709		2023.58	0.00259247		2553.58	-0.01839467		3083.58	0.27346265		3613.58	0.04773718		4143.58	-0.01888163
433.79	0.01945145		963.79	-0.0000689		1493.79	-0.00534504		2023.78	0.00265607		2553.78	-0.01917047		3083.78	0.27465115		3613.78	0.04686884		4143.78	-0.01961862
433.99	0.01976836		963.99	-0.00045185		1493.99	-0.00440317		2023.98	0.00265111		2553.98	-0.01820506		3083.98	0.27442649		3613.98	0.04676233		4143.98	-0.02004789
434.19	0.01959311		964.19	-0.00045353		1494.19	-0.00423454		2024.18	0.00332609		2554.18	-0.01805742		3084.18	0.27416513		3614.18	0.04588194		4144.18	-0.01986333
434.39	0.0195261		964.39	0.00002336		1494.39	-0.00484074		2024.38	0.00327134		2554.38	-0.01837168		3084.38	0.27447027		3614.38	0.04574454		4144.38	-0.02035363
434.59	0.01989156		964.59	0.0010075		1494.59	-0.00594843		2024.58	0.00385055		2554.58	-0.01859623		3084.58	0.27515866		3614.58	0.04665135		4144.58	-0.02077199
434.79	0.01858455		964.79	0.00114432		1494.79	-0.00603022		2024.78	0.0040735		2554.78	-0.01769101		3084.78	0.27535966		3614.78	0.04608901		4144.78	-0.02071169
434.99	0.01848758		964.99	0.0011791		1494.99	-0.00566127		2024.98	0.00514211		2554.98	-0.01756429		3084.98	0.27507357		3614.98	0.04540667		4144.98	-0.0213995
435.19	0.01805702		965.19	0.00114398		1495.19	-0.00602762		2025.18	0.00557221		2555.18	-0.0175213		3085.18	0.27513119		3615.18	0.04494841		4145.18	-0.02199864
435.39	0.01814346		965.39	0.00150337		1495.39	-0.00574449		2025.38	0.00621076		2555.38	-0.01732523		3085.38	0.27394111		3615.38	0.04509311		4145.38	-0.02188185
435.59	0.01831608		965.59	0.00155087		1495.59	-0.00673935		2025.58	0.00630558		2555.58	-0.01741562		3085.58	0.27348604		3615.58	0.04448614		4145.58	-0.02208793
435.79	0.01871594		965.79	0.00204785		1495.79	-0.00682296		2025.78	0.00554836		2555.78	-0.01795082		3085.78	0.27419178		3615.78	0.04485977		4145.78	-0.02201349
435.99	0.01838349		965.99	0.00269562		1495.99	-0.0067747		2025.98	0.00547034		2555.98	-0.01806364		3085.98	0.27364554		3615.98	0.04475584		4145.98	-0.02173907
436.19	0.01847613		966.19	0.00348779		1496.19	-0.00706751		2026.18	0.00550705		2556.18	-0.01862527		3086.18	0.27489695		3616.18	0.04565588		4146.18	-0.02236112
436.39	0.01851886		966.39	0.00302679		1496.39	-0.00743346		2026.38	0.00548088		2556.38	-0.01828846		3086.38	0.27437188		3616.38	0.04546406		4146.38	-0.02225012
436.59	0.01886226		966.59	0.0027792		1496.59	-0.00731816		2026.58	0.00435544		2556.58	-0.01760051		3086.58	0.27505704		3616.58	0.04593911		4146.58	-0.02223132
436.79	0.01894456		966.79	0.0019329		1496.79	-0.00732852		2026.78	0.00386886		2556.78	-0.01706349		3086.78	0.27431863		3616.78	0.04666031		4146.78	-0.02200548
436.99	0.01895899		966.99	0.00234781		1496.99	-0.00669993		2026.98	0.00343075		2556.98	-0.0171015		3086.98	0.27538009		3616.98	0.04705057		4146.98	-0.02102743
437.19	0.01927348		967.19	0.00225258		1497.19	-0.00596421		2027.18	0.00294594		2557.18	-0.01669867		3087.18	0.27619508		3617.18	0.0471405		4147.18	-0.02061353
437.39	0.01862127		967.39	0.0016695		1497.39	-0.00667813		2027.38	0.00264377		2557.38	-0.01614052		3087.38	0.27702154		3617.38	0.0462142		4147.38	-0.02051744
437.59	0.01894035		967.59	0.00092087		1497.59	-0.00691934		2027.58	0.00194691		2557.58	-0.01688365		3087.58	0.27703342		3617.58	0.0464577		4147.58	-0.02062454
437.79	0.01917766		967.79	0.00015442		1497.79	-0.0060028		2027.78	0.00217547		2557.78	-0.01678091		3087.78	0.27810577		3617.78	0.04662055		4147.78	-0.02193924
437.99	0.01894515		967.99	-0.00047677		1497.99	-0.00517068		2027.98	0.00180855		2557.98	-0.01617164		3087.98	0.27762824		3617.98	0.04692934		4147.98	-0.02243083
438.19	0.01898116		968.19	-0.00077559		1498.19	-0.00593273		2028.18	0.00220699		2558.18	-0.01629874		3088.18	0.27772112		3618.18	0.04692414		4148.18	-0.02190015
438.39	0.01872837		968.39	-0.000686		1498.39	-0.00597486		2028.38	0.00168415		2558.38	-0.01638561		3088.38	0.27815096		3618.38	0.04709148		4148.38	-0.02260286
438.59	0.01874601		968.59	-0.0011978		1498.59	-0.00551269		2028.58	0.00300651		2558.58	-0.01749642		3088.58	0.27742344		3618.58	0.04728156		4148.58	-0.02266455
438.79	0.01824921		968.79	-0.00190412		1498.79	-0.00481889		2028.78	0.00338764		2558.78	-0.01762918		3088.78	0.27696172		3618.78	0.04622355		4148.78	-0.02212993
438.99	0.01874		968.99	-0.00178847		1498.99	-0.00475399		2028.98	0.00393608		2558.98	-0.01815176		3088.98	0.27591751		3618.98	0.04564581		4148.98	-0.02244716
439.19	0.01877475		969.19	-0.00172949		1499.19	-0.00392987		2029.18	0.00388511		2559.18	-0.01836235		3089.18	0.27494828		3619.18	0.04592483		4149.18	-0.0220223
439.39	0.01896813		969.39	-0.00147717		1499.39	-0.00308813		2029.38	0.00322128		2559.38	-0.01781943		3089.38	0.27399111		3619.38	0.04517197		4149.38	-0.02126275
439.59	0.01883613		969.59	-0.0010658		1499.59	-0.0035362		2029.58	0.00378435		2559.58	-0.01780326		3089.58	0.27329853		3619.58	0.04394544		4149.58	-0.02051291
439.79	0.01951834		969.79	-0.00029335		1499.79	-0.00250357		2029.78	0.00394075		2559.78	-0.01770918		3089.78	0.27176318		3619.78	0.04335304		4149.78	-0.01938604
439.99	0.01929613		969.99	-0.00085306		1499.99	-0.00295619		2029.98	0.0048118		2559.98	-0.01720768		3089.98	0.26999249		3619.98	0.04339177		4149.98	-0.01888942
440.19	0.01980456		970.19	-0.00060795		1500.19	-0.0024801		2030.18	0.00453722		2560.18	-0.01772103		3090.18	0.26969409		3620.18	0.04412053		4150.18	-0.01841332
440.39	0.01942849		970.39	-0.0015993		1500.39	-0.00247048		2030.38	0.00409358		2560.38	-0.01673977		3090.38	0.2679645		3620.38	0.04387703		4150.38	-0.01735537
440.59	0.01963669		970.59	-0.00121139		1500.59	-0.00252462		2030.58	0.00397037		2560.58	-0.01617911		3090.58	0.26725289		3620.58	0.04382619		4150.58	-0.01813116
440.79	0.0192777		970.79	-0.00116797		1500.79	-0.00281493		2030.78	0.00437456		2560.78	-0.0160546		3090.78	0.26654582		3620.78	0.04432196		4150.78	-0.0173867
440.99	0.01864996		970.99	-0.00154247		1500.99	-0.00276193		2030.98	0.00370528		2560.98	-0.01511991		3090.98	0.26776836		3620.98	0.04385642		4150.98	-0.01799483
441.19	0.01870581		971.19	-0.00119658		1501.19	-0.00343337		2031.18	0.00299741		2561.18	-0.01461485		3091.18	0.26799255		3621.18	0.04391618		4151.18	-0.01913041
441.39	0.01829374		971.39	-0.00151673		1501.39	-0.00388318		2031.38	0.0031517		2561.38	-0.01508082		3091.38	0.26787489		3621.38	0.04336754		4151.38	-0.02005579
441.59	0.01859573		971.59	-0.00170968		1501.59	-0.00458927		2031.58	0.00326422		2561.58	-0.01597527		3091.58	0.26790561		3621.58	0.0444264		4151.58	-0.020666
441.79	0.01863892		971.79	-0.00211841		1501.79	-0.00482649		2031.78	0.00360926		2561.78	-0.01647557		3091.78	0.26880783		3621.78	0.04457936		4151.78	-0.02154589
441.99	0.01803961		971.99	-0.00162219		1501.99	-0.00547587		2031.98	0.00233349		2561.98	-0.01584468		3091.98	0.26899905		3621.98	0.04492933		4151.98	-0.02152796
442.19	0.01906751		972.19	-0.00155131		1502.19	-0.0073119		2032.18	0.00236749		2562.18	-0.0158922		3092.18	0.27051198		3622.18	0.04584334		4152.18	-0.02104347
442.39	0.01867692		972.39	-0.00224879		1502.39	-0.00674034		2032.38	0.00211279		2562.38	-0.0164853		3092.38	0.27163348		3622.38	0.04679283		4152.38	-0.02220466
442.59	0.01878954		972.59	-0.00184796		1502.59	-0.00797596		2032.58	0.00258112		2562.58	-0.01740905		3092.58	0.27205719		3622.58	0.04807597		4152.58	-0.02255984
442.79	0.01803308		972.79	-0.00195193		1502.79	-0.00772687		2032.78	0.00272344		2562.78	-0.01718164		3092.78	0.27284018		3622.78	0.04825902		4152.78	-0.02254711
442.99	0.01780982		972.99	-0.00079796		1502.99	-0.00748862		2032.98	0.00286487		2562.98	-0.0173371		3092.98	0.27328484		3622.98	0.04884002		4152.98	-0.02228001
443.19	0.01748199		973.19	-0.00074253		1503.19	-0.00602273		2033.18	0.00286539		2563.18	-0.01710257		3093.18	0.27421044		3623.18	0.04935197		4153.18	-0.02190751
443.39	0.0172937		973.39	-0.00075201		1503.39	-0.00627		2033.38	0.0025811		2563.38	-0.01713862		3093.38	0.27475648		3623.38	0.04845116		4153.38	-0.02133056
443.59	0.01726902		973.59	-0.00039268		1503.59	-0.00649246		2033.58	0.00394612		2563.58	-0.01770979		3093.58	0.27482607		3623.58	0.04759018		4153.58	-0.02024521
443.79	0.01736263		973.79	-0.00029795		1503.79	-0.00594906		2033.78	0.0048874		2563.78	-0.0181764		3093.78	0.27447524		3623.78	0.047518		4153.78	-0.01877161
443.99	0.01643666		973.99	0.00045829		1503.99	-0.00637629		2033.98	0.00491135		2563.98	-0.01865953		3093.98	0.27422224		3623.98	0.04726971		4153.98	-0.01792528
444.19	0.01607147		974.19	0.0004468		1504.19	-0.00508512		2034.18	0.0040593		2564.18	-0.01886505		3094.18	0.27331367		3624.18	0.04712502		4154.18	-0.01706661
444.39	0.01573952		974.39	0.00072583		1504.39	-0.00469348		2034.38	0.00422295		2564.38	-0.01735922		3094.38	0.27249563		3624.38	0.0466699		4154.38	-0.01708643
444.59	0.01576342		974.59	0.00097849		1504.59	-0.00446212		2034.58	0.00499739		2564.58	-0.01714663		3094.58	0.27219266		3624.58	0.04624648		4154.58	-0.01786386
444.79	0.01470613		974.79	0.00080512		1504.79	-0.0046904		2034.78	0.00489578		2564.78	-0.01756631		3094.78	0.27268318		3624.78	0.04567717		4154.78	-0.01728579
444.99	0.01427427		974.99	0.00156369		1504.99	-0.00462707		2034.98	0.00363564		2564.98	-0.01749453		3094.98	0.27195454		3624.98	0.04396677		4154.98	-0.01748273
445.19	0.01395915		975.19	0.00207295		1505.19	-0.00446722		2035.18	0.00347175		2565.18	-0.01821843		3095.18	0.2710892		3625.18	0.04339653		4155.18	-0.01756371
445.39	0.01339737		975.39	0.00181484		1505.39	-0.00391104		2035.38	0.00347722		2565.38	-0.01808781		3095.38	0.27048825		3625.38	0.04312266		4155.38	-0.01768153
445.59	0.01292325		975.59	0.00183462		1505.59	-0.00473997		2035.58	0.00274535		2565.58	-0.01816953		3095.58	0.26928507		3625.58	0.04290537		4155.58	-0.01703957
445.79	0.01238251		975.79	0.00237672		1505.79	-0.00457521		2035.78	0.00145626		2565.78	-0.01740534		3095.78	0.26949981		3625.78	0.04333356		4155.78	-0.01721493
445.99	0.01250821		975.99	0.00222615		1505.99	-0.00494336		2035.98	0.00054038		2565.98	-0.01544403		3095.98	0.26962663		3625.98	0.04345193		4155.98	-0.01819314
446.19	0.01290116		976.19	0.00121498		1506.19	-0.0060618		2036.18	0.00065662		2566.18	-0.01546522		3096.18	0.27069655		3626.18	0.0441204		4156.18	-0.01898286
446.39	0.01260405		976.39	0.00067881		1506.39	-0.00550207		2036.38	0.00070592		2566.38	-0.01503633		3096.38	0.27020233		3626.38	0.04401367		4156.38	-0.02103154
446.59	0.01369467		976.59	0.0006542		1506.59	-0.00543958		2036.58	0.00078682		2566.58	-0.01478254		3096.58	0.26992866		3626.58	0.0450546		4156.58	-0.02101209
446.79	0.01335799		976.79	-0.00004511		1506.79	-0.00465145		2036.78	0.00118333		2566.78	-0.01415353		3096.78	0.27013329		3626.78	0.04492084		4156.78	-0.02099537
446.99	0.01318891		976.99	0.00025676		1506.99	-0.00455732		2036.98	0.0010162		2566.98	-0.01415775		3096.98	0.26981072		3626.98	0.04503591		4156.98	-0.0210418
447.19	0.01331407		977.19	-0.00104012		1507.19	-0.00421902		2037.18	0.00033997		2567.18	-0.0141493		3097.18	0.27009433		3627.18	0.04541359		4157.18	-0.02067608
447.39	0.01356572		977.39	-0.00064202		1507.39	-0.00450943		2037.38	0.00111418		2567.38	-0.0147971		3097.38	0.27059934		3627.38	0.04491309		4157.38	-0.02004508
447.59	0.01316176		977.59	-0.00113186		1507.59	-0.00478298		2037.58	0.00212172		2567.58	-0.01538703		3097.58	0.27120068		3627.58	0.04479498		4157.58	-0.01896438
447.79	0.01323212		977.79	-0.00136523		1507.79	-0.00463103		2037.78	0.00252439		2567.78	-0.01615745		3097.78	0.2705593		3627.78	0.04546789		4157.78	-0.01800292
447.99	0.01384562		977.99	-0.00154493		1507.99	-0.004342		2037.98	0.00123841		2567.98	-0.01618543		3097.98	0.27039564		3627.98	0.0456529		4157.98	-0.01822358
448.19	0.01384094		978.19	-0.00262757		1508.19	-0.00431915		2038.18	0.00094337		2568.18	-0.01647162		3098.18	0.27020582		3628.18	0.04691457		4158.18	-0.01894809
448.39	0.01348175		978.39	-0.00269119		1508.39	-0.00552626		2038.38	0.00137501		2568.38	-0.01649393		3098.38	0.27024001		3628.38	0.04687622		4158.38	-0.01925836
448.59	0.01304884		978.59	-0.002576		1508.59	-0.00618539		2038.58	0.00172301		2568.58	-0.0174453		3098.58	0.27031433		3628.58	0.04734945		4158.58	-0.01921427
448.79	0.01278542		978.79	-0.00247796		1508.79	-0.00666479		2038.78	0.0013095		2568.78	-0.01749216		3098.78	0.27060594		3628.78	0.04727295		4158.78	-0.01975626
448.99	0.01235654		978.99	-0.0021237		1508.99	-0.00712589		2038.98	0.00111472		2568.98	-0.0174115		3098.98	0.26984815		3628.98	0.04708615		4158.98	-0.01940192
449.19	0.01223611		979.19	-0.0018934		1509.19	-0.00758068		2039.18	0.00118415		2569.18	-0.01748598		3099.18	0.26995364		3629.18	0.04742348		4159.18	-0.0190144
449.39	0.01217998		979.39	-0.00154935		1509.39	-0.00788261		2039.38	0.00141011		2569.38	-0.01726456		3099.38	0.26999921		3629.38	0.04840178		4159.38	-0.01938719
449.59	0.01205437		979.59	-0.00151902		1509.59	-0.00872083		2039.58	0.00125065		2569.58	-0.01817238		3099.58	0.26991607		3629.58	0.04829245		4159.58	-0.01945664
449.79	0.01154419		979.79	-0.00143961		1509.79	-0.00900107		2039.78	0.00242176		2569.78	-0.01749469		3099.78	0.27082891		3629.78	0.04887914		4159.78	-0.02092283
449.99	0.01242881		979.99	-0.00218314		1509.99	-0.01010634		2039.98	0.00313451		2569.98	-0.01628608		3099.98	0.27109628		3629.98	0.04810753		4159.98	-0.02191542
450.19	0.01240718		980.19	-0.00240513		1510.19	-0.01087908		2040.18	0.0031382		2570.18	-0.01638799		3100.18	0.27123105		3630.18	0.04766572		4160.18	-0.0215635
450.39	0.01308187		980.39	-0.00218774		1510.39	-0.01021041		2040.38	0.00346268		2570.38	-0.0158488		3100.38	0.27044371		3630.38	0.04713688		4160.38	-0.02161467
450.59	0.01345156		980.59	-0.00193749		1510.59	-0.00989904		2040.58	0.00284883		2570.58	-0.01664442		3100.58	0.27015161		3630.58	0.0470174		4160.58	-0.02069349
450.79	0.01277704		980.79	-0.00172127		1510.79	-0.0102458		2040.78	0.00306407		2570.78	-0.01721571		3100.78	0.2702133		3630.78	0.0459099		4160.78	-0.02042078
450.99	0.01256952		980.99	-0.00193543		1510.99	-0.01058648		2040.98	0.00213222		2570.98	-0.01760515		3100.98	0.26950076		3630.98	0.04560822		4160.98	-0.01980383
451.19	0.01309662		981.19	-0.00193999		1511.19	-0.0098763		2041.18	0.00164215		2571.18	-0.01818355		3101.18	0.26993639		3631.18	0.04576611		4161.18	-0.01885849
451.39	0.01353462		981.39	-0.00139845		1511.39	-0.00915594		2041.38	0.00234384		2571.38	-0.0188112		3101.38	0.26969989		3631.38	0.04530458		4161.38	-0.01844321
451.59	0.01421274		981.59	-0.00267356		1511.59	-0.00885597		2041.58	0.00172911		2571.58	-0.01900178		3101.58	0.26899387		3631.58	0.04538278		4161.58	-0.01775202
451.79	0.01460459		981.79	-0.00262566		1511.79	-0.00766579		2041.78	0.00086709		2571.78	-0.01861108		3101.78	0.26843365		3631.78	0.04494715		4161.78	-0.01812689
451.99	0.01462008		981.99	-0.0031561		1511.99	-0.00679594		2041.98	-0.00001047		2571.98	-0.01846878		3101.98	0.26905308		3631.98	0.04549311		4161.98	-0.01907202
452.19	0.01392084		982.19	-0.00318724		1512.19	-0.0064882		2042.18	0.00038203		2572.18	-0.01856708		3102.18	0.26958353		3632.18	0.04502022		4162.18	-0.01949182
452.39	0.01261429		982.39	-0.00272268		1512.39	-0.00662845		2042.38	0.00035999		2572.38	-0.01766885		3102.38	0.26973169		3632.38	0.04501877		4162.38	-0.01964343
452.59	0.01276295		982.59	-0.00227855		1512.59	-0.00572316		2042.58	0.00046044		2572.58	-0.01694701		3102.58	0.27111261		3632.58	0.04556616		4162.58	-0.01941685
452.79	0.01236048		982.79	-0.00191556		1512.79	-0.00541522		2042.78	-0.00048589		2572.78	-0.01603922		3102.78	0.2708374		3632.78	0.04564318		4162.78	-0.02031546
452.99	0.0120669		982.99	-0.00171185		1512.99	-0.00561355		2042.98	-0.00025595		2572.98	-0.01614455		3102.98	0.27070071		3632.98	0.04571141		4162.98	-0.01971717
453.19	0.01185038		983.19	-0.00162632		1513.19	-0.00455836		2043.18	0.00041841		2573.18	-0.01633782		3103.18	0.2713778		3633.18	0.04618872		4163.18	-0.02055538
453.39	0.01178423		983.39	-0.00169567		1513.39	-0.00467896		2043.38	0.00138783		2573.38	-0.01628423		3103.38	0.27211003		3633.38	0.04725538		4163.38	-0.02135033
453.59	0.01085831		983.59	-0.00185323		1513.59	-0.00580085		2043.58	0.00187221		2573.58	-0.01669365		3103.58	0.27225097		3633.58	0.04747796		4163.58	-0.02172022
453.79	0.01039173		983.79	-0.00214565		1513.79	-0.00621412		2043.78	0.00280659		2573.78	-0.01582841		3103.78	0.27207903		3633.78	0.04729931		4163.78	-0.02317384
453.99	0.01072322		983.99	-0.00254106		1513.99	-0.00700998		2043.98	0.00242495		2573.98	-0.01486013		3103.98	0.27118413		3633.98	0.04656072		4163.98	-0.02281806
454.19	0.00988554		984.19	-0.00305931		1514.19	-0.00740914		2044.18	0.00245965		2574.18	-0.01614168		3104.18	0.27170552		3634.18	0.04659958		4164.18	-0.02228296
454.39	0.01007577		984.39	-0.00255445		1514.39	-0.00798184		2044.38	0.00202702		2574.38	-0.01621456		3104.38	0.27138146		3634.38	0.04673957		4164.38	-0.02291667
454.59	0.01001117		984.59	-0.00234279		1514.59	-0.01003746		2044.58	0.00173011		2574.58	-0.01784505		3104.58	0.27095315		3634.58	0.04683524		4164.58	-0.02253
454.79	0.01000294		984.79	-0.00312817		1514.79	-0.01038348		2044.78	0.00234109		2574.78	-0.01834419		3104.78	0.27090835		3634.78	0.04710516		4164.78	-0.02200802
454.99	0.01033827		984.99	-0.00280711		1514.99	-0.01081457		2044.98	0.00231254		2574.98	-0.01764409		3104.98	0.27011866		3634.98	0.04747317		4164.98	-0.02152187
455.19	0.01048156		985.19	-0.00268775		1515.19	-0.01026834		2045.18	0.00193429		2575.18	-0.01824103		3105.18	0.26925444		3635.18	0.04696773		4165.18	-0.02122691
455.39	0.0103803		985.39	-0.00338216		1515.39	-0.01065341		2045.38	0.00228571		2575.38	-0.01767129		3105.38	0.26772058		3635.38	0.04598009		4165.38	-0.020332
455.59	0.01081684		985.59	-0.00409408		1515.59	-0.01074724		2045.58	0.00172012		2575.58	-0.01758729		3105.58	0.26768934		3635.58	0.04605623		4165.58	-0.01952346
455.79	0.01073432		985.79	-0.00389085		1515.79	-0.01113651		2045.78	0.00164929		2575.78	-0.01693504		3105.78	0.26790777		3635.78	0.04504558		4165.78	-0.01976452
455.99	0.01054183		985.99	-0.00460917		1515.99	-0.01081427		2045.98	0.00108466		2575.98	-0.01690063		3105.98	0.26764606		3635.98	0.0448766		4165.98	-0.01946373
456.19	0.01112112		986.19	-0.00505063		1516.19	-0.01075244		2046.18	0.00076306		2576.18	-0.01650702		3106.18	0.26768053		3636.18	0.04360165		4166.18	-0.01854958
456.39	0.01145932		986.39	-0.0054086		1516.39	-0.01128402		2046.38	-0.00027448		2576.38	-0.01622203		3106.38	0.26732399		3636.38	0.04369162		4166.38	-0.01870842
456.59	0.01233425		986.59	-0.00530326		1516.59	-0.01079544		2046.58	-0.00077749		2576.58	-0.01666128		3106.58	0.2671737		3636.58	0.04331054		4166.58	-0.01905822
456.79	0.01259221		986.79	-0.00458255		1516.79	-0.010243		2046.78	-0.00041622		2576.78	-0.01629548		3106.78	0.26611429		3636.78	0.04364918		4166.78	-0.01926679
456.99	0.01279215		986.99	-0.00479259		1516.99	-0.00982612		2046.98	0.00105491		2576.98	-0.01611159		3106.98	0.26562803		3636.98	0.0440601		4166.98	-0.01956747
457.19	0.01279786		987.19	-0.00542323		1517.19	-0.00887475		2047.18	0.00239925		2577.18	-0.01591032		3107.18	0.26605527		3637.18	0.04440974		4167.18	-0.02075134
457.39	0.01304636		987.39	-0.00512718		1517.39	-0.00949145		2047.38	0.00195178		2577.38	-0.01592593		3107.38	0.26582166		3637.38	0.04551361		4167.38	-0.0210793
457.59	0.01253848		987.59	-0.00532199		1517.59	-0.01003746		2047.58	0.00189044		2577.58	-0.01671915		3107.58	0.26576625		3637.58	0.0463017		4167.58	-0.0214386
457.79	0.01261908		987.79	-0.00567761		1517.79	-0.00956564		2047.78	0.00226281		2577.78	-0.0171768		3107.78	0.26644364		3637.78	0.04629834		4167.78	-0.02266329
457.99	0.01199476		987.99	-0.00579378		1517.99	-0.00925094		2047.98	0.00227467		2577.98	-0.01732332		3107.98	0.26691656		3637.98	0.04609307		4167.98	-0.02267137
458.19	0.01097591		988.19	-0.00508503		1518.19	-0.00884948		2048.18	0.00284786		2578.18	-0.0181134		3108.18	0.26846356		3638.18	0.04696938		4168.18	-0.02287271
458.39	0.01133659		988.39	-0.00463216		1518.39	-0.00882394		2048.38	0.00270516		2578.38	-0.01851427		3108.38	0.26815309		3638.38	0.04682062		4168.38	-0.02273593
458.59	0.01110274		988.59	-0.00540491		1518.59	-0.00939923		2048.58	0.00303969		2578.58	-0.0193841		3108.58	0.26854484		3638.58	0.04682821		4168.58	-0.02202682
458.79	0.01069119		988.79	-0.00504147		1518.79	-0.00823282		2048.78	0.00355202		2578.78	-0.01943817		3108.78	0.26846972		3638.78	0.04722709		4168.78	-0.02149838
458.99	0.01005947		988.99	-0.00433645		1518.99	-0.00805553		2048.98	0.00336679		2578.98	-0.01932823		3108.98	0.26814397		3638.98	0.04726564		4168.98	-0.02096432
459.19	0.00862917		989.19	-0.00459248		1519.19	-0.00803832		2049.18	0.00276135		2579.18	-0.0197899		3109.18	0.26802087		3639.18	0.0466698		4169.18	-0.02013358
459.39	0.00813342		989.39	-0.00496065		1519.39	-0.00842756		2049.38	0.00238974		2579.38	-0.01896677		3109.38	0.2672984		3639.38	0.04695874		4169.38	-0.01927341
459.59	0.00858081		989.59	-0.0042157		1519.59	-0.00871787		2049.58	0.00074123		2579.58	-0.01920001		3109.58	0.26721435		3639.58	0.04672428		4169.58	-0.01865126
459.79	0.00881479		989.79	-0.0041217		1519.79	-0.00905258		2049.78	0.00128148		2579.78	-0.01936106		3109.78	0.26695063		3639.78	0.04604726		4169.78	-0.01862831
459.99	0.00914546		989.99	-0.00318167		1519.99	-0.00811082		2049.98	0.00098699		2579.98	-0.02058148		3109.98	0.26669118		3639.98	0.04511053		4169.98	-0.01766056
460.19	0.00938305		990.19	-0.00282406		1520.19	-0.0088066		2050.18	0.00126865		2580.18	-0.02081269		3110.18	0.26668856		3640.18	0.0444709		4170.18	-0.01675682
460.39	0.00922768		990.39	-0.00210389		1520.39	-0.00902221		2050.38	0.00096037		2580.38	-0.02135147		3110.38	0.26534804		3640.38	0.04466114		4170.38	-0.01701572
460.59	0.00840453		990.59	-0.00174999		1520.59	-0.008488		2050.58	0.00075314		2580.58	-0.02165465		3110.58	0.26486679		3640.58	0.04496803		4170.58	-0.01682478
460.79	0.00804392		990.79	-0.00226862		1520.79	-0.00836377		2050.78	0.00175743		2580.78	-0.02076208		3110.78	0.26458191		3640.78	0.04538172		4170.78	-0.01665223
460.99	0.0075705		990.99	-0.00277131		1520.99	-0.00920894		2050.98	0.00119685		2580.98	-0.02144313		3110.98	0.26406948		3640.98	0.04462179		4170.98	-0.01792264
461.19	0.00799913		991.19	-0.00320283		1521.19	-0.00895461		2051.18	0.0007555		2581.18	-0.02131476		3111.18	0.26335921		3641.18	0.04380787		4171.18	-0.01798
461.39	0.00805316		991.39	-0.0026546		1521.39	-0.00939155		2051.38	-0.00060787		2581.38	-0.02221106		3111.38	0.26359121		3641.38	0.0439699		4171.38	-0.01812304
461.59	0.00792113		991.59	-0.00177962		1521.59	-0.00913058		2051.58	0.00057475		2581.58	-0.02277623		3111.58	0.26412213		3641.58	0.04340584		4171.58	-0.01897911
461.79	0.00735669		991.79	-0.0022991		1521.79	-0.00831019		2051.78	0.00054784		2581.78	-0.02245932		3111.78	0.26408104		3641.78	0.04193984		4171.78	-0.01926057
461.99	0.00720122		991.99	-0.00243363		1521.99	-0.0075158		2051.98	0.00134702		2581.98	-0.02145611		3111.98	0.2646746		3641.98	0.04076997		4171.98	-0.01889407
462.19	0.00789376		992.19	-0.00241772		1522.19	-0.00711451		2052.18	0.00138643		2582.18	-0.02147349		3112.18	0.26561503		3642.18	0.04024687		4172.18	-0.01911093
462.39	0.00867737		992.39	-0.00322368		1522.39	-0.00692504		2052.38	0.00160278		2582.38	-0.02077044		3112.38	0.26610046		3642.38	0.03930196		4172.38	-0.01932869
462.59	0.00928862		992.59	-0.00359178		1522.59	-0.00728479		2052.58	0.00109155		2582.58	-0.01956202		3112.58	0.2668288		3642.58	0.04009798		4172.58	-0.01994553
462.79	0.00988347		992.79	-0.00306882		1522.79	-0.00722546		2052.78	0.00138121		2582.78	-0.01886063		3112.78	0.26625381		3642.78	0.04116742		4172.78	-0.02023445
462.99	0.01089966		992.99	-0.00387576		1522.99	-0.00742224		2052.98	0.00085557		2582.98	-0.01825779		3112.98	0.26616369		3642.98	0.0413344		4172.98	-0.021007
463.19	0.01089914		993.19	-0.00369403		1523.19	-0.00793269		2053.18	0.00100613		2583.18	-0.01666715		3113.18	0.2661276		3643.18	0.04152607		4173.18	-0.0205887
463.39	0.01149911		993.39	-0.00359182		1523.39	-0.00808609		2053.38	0.00084918		2583.38	-0.01564489		3113.38	0.26608282		3643.38	0.04223428		4173.38	-0.02016339
463.59	0.01203222		993.59	-0.00243286		1523.59	-0.00872659		2053.58	0.00083864		2583.58	-0.01606128		3113.58	0.26621453		3643.58	0.04258175		4173.58	-0.02032029
463.79	0.01161555		993.79	-0.00215759		1523.79	-0.00885069		2053.78	0.0020606		2583.78	-0.01632612		3113.78	0.26673676		3643.78	0.04305828		4173.78	-0.02015308
463.99	0.01126959		993.99	-0.00153986		1523.99	-0.00915367		2053.98	0.00180537		2583.98	-0.0170013		3113.98	0.26752676		3643.98	0.04353778		4173.98	-0.01910384
464.19	0.00974032		994.19	-0.00127359		1524.19	-0.00975165		2054.18	0.00183015		2584.18	-0.01704866		3114.18	0.26774321		3644.18	0.04459598		4174.18	-0.01917731
464.39	0.00936845		994.39	-0.00126074		1524.39	-0.01074733		2054.38	0.00169094		2584.38	-0.01798873		3114.38	0.26719205		3644.38	0.04490927		4174.38	-0.01993979
464.59	0.00891107		994.59	-0.00225509		1524.59	-0.01107981		2054.58	0.0017457		2584.58	-0.01883979		3114.58	0.26740763		3644.58	0.04482227		4174.58	-0.0206812
464.79	0.00891064		994.79	-0.00255313		1524.79	-0.01153757		2054.78	0.00282878		2584.78	-0.01865063		3114.78	0.26637358		3644.78	0.04481772		4174.78	-0.0210424
464.99	0.00888435		994.99	-0.00212754		1524.99	-0.01259355		2054.98	0.00294042		2584.98	-0.01981819		3114.98	0.2647221		3644.98	0.04477302		4174.98	-0.02099301
465.19	0.00930219		995.19	-0.00185084		1525.19	-0.01170176		2055.18	0.00355152		2585.18	-0.02009063		3115.18	0.26373659		3645.18	0.04498881		4175.18	-0.02005348
465.39	0.00879669		995.39	-0.00155212		1525.39	-0.01122971		2055.38	0.00364253		2585.38	-0.0205468		3115.38	0.26337784		3645.38	0.04562384		4175.38	-0.02076898
465.59	0.00816489		995.59	-0.00179556		1525.59	-0.01004236		2055.58	0.0045634		2585.58	-0.02022757		3115.58	0.26247916		3645.58	0.04549927		4175.58	-0.02102065
465.79	0.00835249		995.79	-0.00328005		1525.79	-0.0101434		2055.78	0.00401249		2585.78	-0.02021872		3115.78	0.2618005		3645.78	0.04558787		4175.78	-0.02087474
465.99	0.00797259		995.99	-0.0034373		1525.99	-0.00977764		2055.98	0.0040439		2585.98	-0.02063801		3115.98	0.26244189		3645.98	0.04508435		4175.98	-0.02103791
466.19	0.00823359		996.19	-0.00373346		1526.19	-0.00930719		2056.18	0.00311162		2586.18	-0.02087767		3116.18	0.26255471		3646.18	0.04457498		4176.18	-0.02155856
466.39	0.00792067		996.39	-0.00372084		1526.39	-0.00888454		2056.38	0.00214109		2586.38	-0.02024269		3116.38	0.26239173		3646.38	0.04468665		4176.38	-0.02176544
466.59	0.0091963		996.59	-0.0036941		1526.59	-0.00995356		2056.58	0.00103566		2586.58	-0.019966		3116.58	0.26264237		3646.58	0.04602163		4176.58	-0.02194955
466.79	0.0103283		996.79	-0.00375744		1526.79	-0.00933364		2056.78	0.00008895		2586.78	-0.0202619		3116.78	0.26179551		3646.78	0.04560212		4176.78	-0.02237985
466.99	0.01067491		996.99	-0.00445164		1526.99	-0.00918766		2056.98	-0.00059905		2586.98	-0.01997704		3116.98	0.26173191		3646.98	0.04482491		4176.98	-0.02194033
467.19	0.01002801		997.19	-0.0037838		1527.19	-0.00893543		2057.18	-0.00079376		2587.18	-0.01956579		3117.18	0.26182387		3647.18	0.04485999		4177.18	-0.02000385
467.39	0.01066557		997.39	-0.00384037		1527.39	-0.00819401		2057.38	-0.00125127		2587.38	-0.020044		3117.38	0.26187733		3647.38	0.04477085		4177.38	-0.01957317
467.59	0.01037485		997.59	-0.00404293		1527.59	-0.00859456		2057.58	-0.00161964		2587.58	-0.02044115		3117.58	0.26195184		3647.58	0.04453213		4177.58	-0.01933254
467.79	0.01051472		997.79	-0.00471629		1527.79	-0.00856462		2057.78	-0.00165456		2587.78	-0.02058223		3117.78	0.26260598		3647.78	0.04420534		4177.78	-0.01911841
467.99	0.0111859		997.99	-0.00514108		1527.99	-0.00810956		2057.98	-0.00172233		2587.98	-0.02114942		3117.98	0.26310284		3647.98	0.04439146		4177.98	-0.01892975
468.19	0.01135649		998.19	-0.00470115		1528.19	-0.00848491		2058.18	-0.00104574		2588.18	-0.02170108		3118.18	0.26325842		3648.18	0.04448894		4178.18	-0.01930258
468.39	0.01193999		998.39	-0.00511904		1528.39	-0.00904283		2058.38	-0.00013947		2588.38	-0.02268619		3118.38	0.26345993		3648.38	0.04439422		4178.38	-0.01901132
468.59	0.01259678		998.59	-0.00520254		1528.59	-0.00860916		2058.58	0.00017484		2588.58	-0.02217288		3118.58	0.26303878		3648.58	0.04362936		4178.58	-0.01775793
468.79	0.01276003		998.79	-0.00442677		1528.79	-0.00897349		2058.78	0.00085112		2588.78	-0.02129678		3118.78	0.26231055		3648.78	0.04350763		4178.78	-0.01726327
468.99	0.01255548		998.99	-0.00398632		1528.99	-0.00866804		2058.98	0.00184394		2588.98	-0.02072366		3118.98	0.26238788		3648.98	0.0438346		4178.98	-0.0167046
469.19	0.01226381		999.19	-0.00404402		1529.19	-0.00723197		2059.18	0.00189375		2589.18	-0.01952086		3119.18	0.2626393		3649.18	0.04335904		4179.18	-0.01716348
469.39	0.01206839		999.39	-0.00484407		1529.39	-0.0067061		2059.38	0.00117789		2589.38	-0.01872507		3119.38	0.26242443		3649.38	0.0429542		4179.38	-0.01772666
469.59	0.01164216		999.59	-0.00484553		1529.59	-0.00676258		2059.58	0.00185365		2589.58	-0.01858905		3119.58	0.26249505		3649.58	0.04265353		4179.58	-0.01734074
469.79	0.01198973		999.79	-0.0045705		1529.79	-0.00719797		2059.78	0.00139648		2589.78	-0.01836414		3119.78	0.26269804		3649.78	0.04241556		4179.78	-0.01664329
469.99	0.0110078		999.99	-0.00420623		1529.99	-0.00692154		2059.98	0.00054739		2589.98	-0.01837243		3119.98	0.26435441		3649.98	0.04175068		4179.98	-0.01631307
470.19	0.01173175		1000.19	-0.00349775		1530.19	-0.00736718		2060.18	0.00074924		2590.18	-0.01847611		3120.18	0.26492669		3650.18	0.04141648		4180.18	-0.01671216
470.39	0.01089875		1000.39	-0.00250188		1530.39	-0.00862177		2060.38	0.00035993		2590.38	-0.01789284		3120.38	0.2655324		3650.38	0.04199212		4180.38	-0.01756064
470.59	0.01140831		1000.59	-0.00313281		1530.59	-0.00887284		2060.58	0.0002058		2590.58	-0.01694672		3120.58	0.26628643		3650.58	0.04223159		4180.58	-0.01796153
470.79	0.01092		1000.79	-0.00248056		1530.79	-0.00891275		2060.78	0.00054476		2590.78	-0.01665053		3120.78	0.2655249		3650.78	0.04127522		4180.78	-0.01833675
470.99	0.01027989		1000.99	-0.00322397		1530.99	-0.00919329		2060.98	0.00103093		2590.98	-0.01664162		3120.98	0.26531349		3650.98	0.04086698		4180.98	-0.01860532
471.19	0.00982061		1001.19	-0.00313501		1531.19	-0.00935676		2061.18	0.00108219		2591.18	-0.01735393		3121.18	0.26487998		3651.18	0.04070741		4181.18	-0.01848039
471.39	0.0093613		1001.39	-0.00362994		1531.39	-0.01025109		2061.38	0.00154039		2591.38	-0.01794466		3121.38	0.26475513		3651.38	0.04095422		4181.38	-0.01913277
471.59	0.00899526		1001.59	-0.00442835		1531.59	-0.01097905		2061.58	0.00198386		2591.58	-0.0175512		3121.58	0.26457448		3651.58	0.0402689		4181.58	-0.01965702
471.79	0.00911094		1001.79	-0.00478872		1531.79	-0.01134668		2061.78	0.00230284		2591.78	-0.01822263		3121.78	0.26371103		3651.78	0.04057827		4181.78	-0.02050011
471.99	0.00940741		1001.99	-0.00474132		1531.99	-0.01173606		2061.98	0.00211498		2591.98	-0.01907264		3121.98	0.26317585		3651.98	0.04075758		4181.98	-0.02104207
472.19	0.00876766		1002.19	-0.00423957		1532.19	-0.01265286		2062.18	0.00317327		2592.18	-0.02009037		3122.18	0.26272354		3652.18	0.04155534		4182.18	-0.02101169
472.39	0.00758714		1002.39	-0.00312889		1532.39	-0.01270702		2062.38	0.00335775		2592.38	-0.02031262		3122.38	0.26251063		3652.38	0.04131774		4182.38	-0.02103615
472.59	0.00776339		1002.59	-0.0025368		1532.59	-0.01281839		2062.58	0.00367038		2592.58	-0.01954033		3122.58	0.26173608		3652.58	0.04080881		4182.58	-0.02078983
472.79	0.0073998		1002.79	-0.00184797		1532.79	-0.01227617		2062.78	0.00396071		2592.78	-0.02017208		3122.78	0.26087541		3652.78	0.0419558		4182.78	-0.02143719
472.99	0.00769854		1002.99	-0.00119167		1532.99	-0.01069572		2062.98	0.00465184		2592.98	-0.02020086		3122.98	0.26013309		3652.98	0.04275112		4182.98	-0.02228905
473.19	0.00726431		1003.19	-0.00183005		1533.19	-0.0101093		2063.18	0.0040387		2593.18	-0.01973781		3123.18	0.26028889		3653.18	0.04203529		4183.18	-0.0220502
473.39	0.00784445		1003.39	-0.0020192		1533.39	-0.00958163		2063.38	0.00371284		2593.38	-0.02025921		3123.38	0.26024159		3653.38	0.04226283		4183.38	-0.02082843
473.59	0.00834713		1003.59	-0.00113812		1533.59	-0.00938331		2063.58	0.00356701		2593.58	-0.01968103		3123.58	0.25984922		3653.58	0.0424908		4183.58	-0.02033727
473.79	0.00938291		1003.79	-0.00138371		1533.79	-0.00965148		2063.78	0.00300454		2593.78	-0.01998583		3123.78	0.26015947		3653.78	0.04294623		4183.78	-0.02010403
473.99	0.00943205		1003.99	-0.00099387		1533.99	-0.00929515		2063.98	0.00321009		2593.98	-0.02010681		3123.98	0.26152606		3653.98	0.0434059		4183.98	-0.02058407
474.19	0.00991154		1004.19	-0.00038652		1534.19	-0.00998404		2064.18	0.0033102		2594.18	-0.02025569		3124.18	0.26120768		3654.18	0.043886		4184.18	-0.02117757
474.39	0.00996413		1004.39	-0.00120796		1534.39	-0.01011661		2064.38	0.00270762		2594.38	-0.01972735		3124.38	0.26027093		3654.38	0.04408341		4184.38	-0.02127188
474.59	0.01021528		1004.59	-0.00201703		1534.59	-0.00876484		2064.58	0.00197326		2594.58	-0.01949902		3124.58	0.2601135		3654.58	0.04434779		4184.58	-0.02070463
474.79	0.009648		1004.79	-0.00095336		1534.79	-0.00888343		2064.78	0.00212641		2594.78	-0.0197263		3124.78	0.26055544		3654.78	0.04430714		4184.78	-0.02089713
474.99	0.0101809		1004.99	-0.00125706		1534.99	-0.0081197		2064.98	0.00101805		2594.98	-0.01986352		3124.98	0.26093803		3654.98	0.04303996		4184.98	-0.02106222
475.19	0.00931098		1005.19	-0.00123445		1535.19	-0.008697		2065.18	0.00076685		2595.18	-0.0201123		3125.18	0.26128886		3655.18	0.04242386		4185.18	-0.02059175
475.39	0.00856223		1005.39	-0.00166151		1535.39	-0.008954		2065.38	0.00043495		2595.38	-0.01995688		3125.38	0.26174778		3655.38	0.04234625		4185.38	-0.02066431
475.59	0.00833824		1005.59	-0.00225561		1535.59	-0.00840774		2065.58	0.00018399		2595.58	-0.01929671		3125.58	0.26191471		3655.58	0.04103105		4185.58	-0.02063283
475.79	0.00729483		1005.79	-0.00225842		1535.79	-0.00925144		2065.78	0.00034985		2595.78	-0.0194066		3125.78	0.26250679		3655.78	0.04115348		4185.78	-0.0203115
475.99	0.00769976		1005.99	-0.0020426		1535.99	-0.00949649		2065.98	0.00029197		2595.98	-0.01967533		3125.98	0.26255382		3655.98	0.04170074		4185.98	-0.02073389
476.19	0.00666735		1006.19	-0.00188736		1536.19	-0.00961653		2066.18	0.00053359		2596.18	-0.02001559		3126.18	0.26254236		3656.18	0.0426055		4186.18	-0.02043443
476.39	0.00523509		1006.39	-0.00222016		1536.39	-0.01036616		2066.38	-0.00031593		2596.38	-0.02033077		3126.38	0.26299121		3656.38	0.04265791		4186.38	-0.01979778
476.59	0.00613659		1006.59	-0.00241372		1536.59	-0.01002762		2066.58	0.00014232		2596.58	-0.02116558		3126.58	0.26341117		3656.58	0.04349581		4186.58	-0.0190436
476.79	0.00653208		1006.79	-0.00239377		1536.79	-0.01011563		2066.78	-0.00038726		2596.78	-0.0224412		3126.78	0.26351126		3656.78	0.04482139		4186.78	-0.01837539
476.99	0.00692731		1006.99	-0.00256036		1536.99	-0.00991823		2066.98	-0.00074454		2596.98	-0.02116226		3126.98	0.26305599		3656.98	0.0443882		4186.98	-0.01840918
477.19	0.00700559		1007.19	-0.00348197		1537.19	-0.01054169		2067.18	-0.00051192		2597.18	-0.02101555		3127.18	0.26362324		3657.18	0.04408776		4187.18	-0.01777299
477.39	0.00848728		1007.39	-0.0032019		1537.39	-0.00986103		2067.38	-0.00117384		2597.38	-0.02195837		3127.38	0.26302718		3657.38	0.04374737		4187.38	-0.01839236
477.59	0.00906512		1007.59	-0.00323219		1537.59	-0.00999104		2067.58	-0.00107468		2597.58	-0.02229472		3127.58	0.2617603		3657.58	0.0439586		4187.58	-0.0184661
477.79	0.01005397		1007.79	-0.00414496		1537.79	-0.01089794		2067.78	-0.00048277		2597.78	-0.02256255		3127.78	0.26122839		3657.78	0.04433056		4187.78	-0.01837512
477.99	0.0109948		1007.99	-0.00454228		1537.99	-0.01078802		2067.98	-0.00076769		2597.98	-0.02212828		3127.98	0.26139443		3657.98	0.04466546		4187.98	-0.0184924
478.19	0.0116983		1008.19	-0.00490726		1538.19	-0.01084621		2068.18	-0.0011227		2598.18	-0.02239981		3128.18	0.25984524		3658.18	0.04496203		4188.18	-0.01863447
478.39	0.01173356		1008.39	-0.00648954		1538.39	-0.01052899		2068.38	-0.00179368		2598.38	-0.02206683		3128.38	0.25854602		3658.38	0.04435158		4188.38	-0.01932194
478.59	0.01089719		1008.59	-0.00593395		1538.59	-0.00978482		2068.58	-0.00176465		2598.58	-0.02119297		3128.58	0.25808874		3658.58	0.04513779		4188.58	-0.01984787
478.79	0.01052051		1008.79	-0.00490555		1538.79	-0.01015602		2068.78	-0.00184929		2598.78	-0.02107722		3128.78	0.25815286		3658.78	0.0445879		4188.78	-0.0205868
478.99	0.00945389		1008.99	-0.00408848		1538.99	-0.00936537		2068.98	-0.00122976		2598.98	-0.01982912		3128.98	0.25743481		3658.98	0.04282791		4188.98	-0.02107015
479.19	0.00807874		1009.19	-0.00393729		1539.19	-0.00937161		2069.18	-0.00054845		2599.18	-0.01989239		3129.18	0.2569993		3659.18	0.04249378		4189.18	-0.02241254
479.39	0.00719038		1009.39	-0.00415608		1539.39	-0.00904723		2069.38	-0.00012517		2599.38	-0.01942687		3129.38	0.25669612		3659.38	0.04226898		4189.38	-0.0231186
479.59	0.00645107		1009.59	-0.00409476		1539.59	-0.00869947		2069.58	-0.00005673		2599.58	-0.01827208		3129.58	0.25717748		3659.58	0.04141157		4189.58	-0.02363967
479.79	0.00633954		1009.79	-0.00362363		1539.79	-0.00909215		2069.78	0.00092966		2599.78	-0.01738183		3129.78	0.2573351		3659.78	0.04199435		4189.78	-0.02385896
479.99	0.00616811		1009.99	-0.00351473		1539.99	-0.00865172		2069.98	0.00054505		2599.98	-0.01791927		3129.98	0.25686425		3659.98	0.04232338		4189.98	-0.02480107
480.19	0.00482291		1010.19	-0.00348803		1540.19	-0.00837701		2070.18	-0.00034687		2600.18	-0.01745764		3130.18	0.25730652		3660.18	0.04226039		4190.18	-0.02480906
480.39	0.00440226		1010.39	-0.00365711		1540.39	-0.00884263		2070.38	-0.00067095		2600.38	-0.01816501		3130.38	0.25797974		3660.38	0.04142055		4190.38	-0.02373247
480.59	0.0052353		1010.59	-0.00279282		1540.59	-0.00824353		2070.58	-0.00047085		2600.58	-0.0184507		3130.58	0.25895774		3660.58	0.04169112		4190.58	-0.02414075
480.79	0.00608578		1010.79	-0.00262116		1540.79	-0.00818955		2070.78	-0.00124241		2600.78	-0.01841704		3130.78	0.26022196		3660.78	0.04119876		4190.78	-0.02395748
480.99	0.00715913		1010.99	-0.0015839		1540.99	-0.00752523		2070.98	-0.00155352		2600.98	-0.01837512		3130.98	0.26043844		3660.98	0.04009047		4190.98	-0.02457398
481.19	0.00766688		1011.19	-0.00216386		1541.19	-0.00740804		2071.18	-0.00150432		2601.18	-0.01953245		3131.18	0.26133239		3661.18	0.03978683		4191.18	-0.02442203
481.39	0.00833982		1011.39	-0.00216117		1541.39	-0.00705152		2071.38	-0.00159872		2601.38	-0.0190482		3131.38	0.26165218		3661.38	0.03902448		4191.38	-0.0231849
481.59	0.00853904		1011.59	-0.00331675		1541.59	-0.00788107		2071.58	-0.00079897		2601.58	-0.01846872		3131.58	0.26172973		3661.58	0.03886247		4191.58	-0.02087
481.79	0.00990431		1011.79	-0.0046016		1541.79	-0.0082867		2071.78	-0.00016119		2601.78	-0.01803533		3131.78	0.26202167		3661.78	0.0396851		4191.78	-0.02021534
481.99	0.01013882		1011.99	-0.00542068		1541.99	-0.00808548		2071.98	-0.00065012		2601.98	-0.01813496		3131.98	0.26246156		3661.98	0.04015218		4191.98	-0.02037861
482.19	0.009673		1012.19	-0.00604999		1542.19	-0.00749733		2072.18	-0.00053247		2602.18	-0.01855512		3132.18	0.26290043		3662.18	0.03984309		4192.18	-0.02098248
482.39	0.00905094		1012.39	-0.00659204		1542.39	-0.00824577		2072.38	-0.00098546		2602.38	-0.01739228		3132.38	0.26237546		3662.38	0.04024001		4192.38	-0.02156267
482.59	0.00880917		1012.59	-0.00615609		1542.59	-0.00807468		2072.58	-0.00005532		2602.58	-0.01783589		3132.58	0.26275994		3662.58	0.04063505		4192.58	-0.02094712
482.79	0.00828749		1012.79	-0.00563126		1542.79	-0.00797501		2072.78	0.0010453		2602.78	-0.01824159		3132.78	0.26321021		3662.78	0.04118045		4192.78	-0.02030125
482.99	0.00775775		1012.99	-0.00532298		1542.99	-0.00818051		2072.98	0.00212053		2602.98	-0.01807638		3132.98	0.26388177		3662.98	0.0411497		4192.98	-0.02082409
483.19	0.00829904		1013.19	-0.00613404		1543.19	-0.00912106		2073.18	0.00210586		2603.18	-0.01855281		3133.18	0.26444577		3663.18	0.04248383		4193.18	-0.02190436
483.39	0.00810902		1013.39	-0.00647847		1543.39	-0.00914256		2073.38	0.00234444		2603.38	-0.01832772		3133.38	0.26542009		3663.38	0.04339544		4193.38	-0.02184158
483.59	0.00732752		1013.59	-0.00615596		1543.59	-0.00890396		2073.58	0.00173734		2603.58	-0.01851227		3133.58	0.26590199		3663.58	0.04361192		4193.58	-0.02193798
483.79	0.00759422		1013.79	-0.005353		1543.79	-0.00947613		2073.78	0.00178298		2603.78	-0.01896998		3133.78	0.26544002		3663.78	0.04435953		4193.78	-0.02159096
483.99	0.00756361		1013.99	-0.00494691		1543.99	-0.00950607		2073.98	0.00079343		2603.98	-0.01950425		3133.98	0.26494284		3663.98	0.04469162		4193.98	-0.02242158
484.19	0.00763952		1014.19	-0.00436672		1544.19	-0.00950706		2074.18	0.00096662		2604.18	-0.01916004		3134.18	0.26508806		3664.18	0.04482357		4194.18	-0.02268802
484.39	0.00733779		1014.39	-0.00492819		1544.39	-0.00949229		2074.38	0.00071404		2604.38	-0.02135247		3134.38	0.26513914		3664.38	0.04444436		4194.38	-0.02269514
484.59	0.00753547		1014.59	-0.00403543		1544.59	-0.00894757		2074.58	0.00045279		2604.58	-0.02121625		3134.58	0.26452112		3664.58	0.04403936		4194.58	-0.02357928
484.79	0.00798138		1014.79	-0.00356561		1544.79	-0.00870718		2074.78	0.00022467		2604.78	-0.02069552		3134.78	0.26419516		3664.78	0.04310927		4194.78	-0.02294364
484.99	0.00669454		1014.99	-0.00327096		1544.99	-0.00947976		2074.98	0.00037006		2604.98	-0.02120811		3134.98	0.26299894		3664.98	0.04238405		4194.98	-0.02269334
485.19	0.00520649		1015.19	-0.00503711		1545.19	-0.00983309		2075.18	-0.00007276		2605.18	-0.02001089		3135.18	0.26212689		3665.18	0.04171521		4195.18	-0.0222671
485.39	0.00433062		1015.39	-0.00490084		1545.39	-0.01012205		2075.38	-0.00011104		2605.38	-0.0186555		3135.38	0.26125092		3665.38	0.04175952		4195.38	-0.02168958
485.59	0.0036284		1015.59	-0.00548138		1545.59	-0.01021373		2075.58	-0.00052723		2605.58	-0.01905583		3135.58	0.26016894		3665.58	0.04155099		4195.58	-0.0206215
485.79	0.00438177		1015.79	-0.0057336		1545.79	-0.00974073		2075.78	-0.00026443		2605.78	-0.0195302		3135.78	0.25907869		3665.78	0.04221066		4195.78	-0.02123265
485.99	0.00404262		1015.99	-0.0056843		1545.99	-0.00998309		2075.98	-0.00138081		2605.98	-0.01964301		3135.98	0.25773585		3665.98	0.04103744		4195.98	-0.02146333
486.19	0.00388476		1016.19	-0.00579179		1546.19	-0.01025719		2076.18	-0.00126772		2606.18	-0.01988141		3136.18	0.25713003		3666.18	0.04010219		4196.18	-0.02174477
486.39	0.00401905		1016.39	-0.00567713		1546.39	-0.01092472		2076.38	-0.00150001		2606.38	-0.01912563		3136.38	0.2557454		3666.38	0.04022126		4196.38	-0.02104068
486.59	0.00368777		1016.59	-0.00502104		1546.59	-0.01066224		2076.58	-0.00067726		2606.58	-0.02030733		3136.58	0.25642832		3666.58	0.04036353		4196.58	-0.02014059
486.79	0.00380973		1016.79	-0.00528918		1546.79	-0.01177365		2076.78	-0.0002307		2606.78	-0.02000781		3136.78	0.2564224		3666.78	0.04087559		4196.78	-0.01970582
486.99	0.00353121		1016.99	-0.00595167		1546.99	-0.01220393		2076.98	-0.0005097		2606.98	-0.02060719		3136.98	0.25698588		3666.98	0.04045858		4196.98	-0.02069202
487.19	0.00273884		1017.19	-0.00585966		1547.19	-0.01198247		2077.18	-0.00087804		2607.18	-0.02122641		3137.18	0.25683279		3667.18	0.04090831		4197.18	-0.02106457
487.39	0.00326837		1017.39	-0.00434048		1547.39	-0.01208483		2077.38	-0.00012612		2607.38	-0.0223078		3137.38	0.25687223		3667.38	0.04081264		4197.38	-0.02042038
487.59	0.00421573		1017.59	-0.00393655		1547.59	-0.01220818		2077.58	-0.00043715		2607.58	-0.02313133		3137.58	0.25647451		3667.58	0.04025038		4197.58	-0.02038948
487.79	0.00485165		1017.79	-0.00326798		1547.79	-0.01310649		2077.78	-0.00012987		2607.78	-0.02332696		3137.78	0.25638234		3667.78	0.04036854		4197.78	-0.02043426
487.99	0.00499172		1017.99	-0.00279509		1547.99	-0.01263009		2077.98	0.00012445		2607.98	-0.02380512		3137.98	0.25708089		3667.98	0.04119607		4197.98	-0.0213093
488.19	0.0048371		1018.19	-0.00281747		1548.19	-0.01261883		2078.18	0.00075231		2608.18	-0.02410677		3138.18	0.25807385		3668.18	0.04097733		4198.18	-0.02138896
488.39	0.00443032		1018.39	-0.0036658		1548.39	-0.0123753		2078.38	0.00108104		2608.38	-0.02459657		3138.38	0.25848838		3668.38	0.0412826		4198.38	-0.0209023
488.59	0.00498043		1018.59	-0.00367765		1548.59	-0.01251128		2078.58	0.00237656		2608.58	-0.02421129		3138.58	0.25809863		3668.58	0.04121792		4198.58	-0.02138315
488.79	0.00452961		1018.79	-0.00383761		1548.79	-0.01244965		2078.78	0.00276895		2608.78	-0.02403652		3138.78	0.25869326		3668.78	0.04077611		4198.78	-0.02112351
488.99	0.00328885		1018.99	-0.00494107		1548.99	-0.01246443		2078.98	0.00260153		2608.98	-0.02496107		3138.98	0.25858796		3668.98	0.0408182		4198.98	-0.02168775
489.19	0.0031322		1019.19	-0.00639395		1549.19	-0.01205331		2079.18	0.00245801		2609.18	-0.02358227		3139.18	0.25873163		3669.18	0.04082354		4199.18	-0.0219575
489.39	0.00277667		1019.39	-0.00649006		1549.39	-0.0119681		2079.38	0.00287785		2609.38	-0.0238509		3139.38	0.2591791		3669.38	0.04190718		4199.38	-0.02133579
489.59	0.00396429		1019.59	-0.00699895		1549.59	-0.01202664		2079.58	0.00250875		2609.58	-0.02368154		3139.58	0.25946508		3669.58	0.04156325		4199.58	-0.02036433
489.79	0.00483314		1019.79	-0.00694562		1549.79	-0.0112561		2079.78	0.00241384		2609.78	-0.02364532		3139.78	0.25909014		3669.78	0.04201501		4199.78	-0.02151217
489.99	0.00412484		1019.99	-0.00746549		1549.99	-0.01164985		2079.98	0.00181257		2609.98	-0.023831		3139.98	0.25910483		3669.98	0.04199809		4199.98	-0.02177834
490.19	0.00393685		1020.19	-0.00799009		1550.19	-0.01168035		2080.18	0.0019303		2610.18	-0.02396472		3140.18	0.25904658		3670.18	0.04239474		4200.18	-0.02261695
490.39	0.00382617		1020.39	-0.00794681		1550.39	-0.01127288		2080.38	0.00173254		2610.38	-0.02289148		3140.38	0.25948939		3670.38	0.04252543		4200.38	-0.02293736
490.59	0.0039123		1020.59	-0.00778288		1550.59	-0.01103163		2080.58	0.00196425		2610.58	-0.02294212		3140.58	0.26003797		3670.58	0.04282855		4200.58	-0.02360408
490.79	0.00481614		1020.79	-0.00879552		1550.79	-0.01150197		2080.78	0.00203842		2610.78	-0.02290194		3140.78	0.25981831		3670.78	0.04235647		4200.78	-0.0240633
490.99	0.00552861		1020.99	-0.00856138		1550.99	-0.01052428		2080.98	0.00154809		2610.98	-0.02321361		3140.98	0.25875815		3670.98	0.0417405		4200.98	-0.02458779
491.19	0.0062742		1021.19	-0.00738458		1551.19	-0.01044999		2081.18	0.00111254		2611.18	-0.0238934		3141.18	0.25833344		3671.18	0.04166178		4201.18	-0.02502736
491.39	0.00838296		1021.39	-0.00663807		1551.39	-0.01104422		2081.38	0.00096386		2611.38	-0.02372845		3141.38	0.25791745		3671.38	0.04096018		4201.38	-0.02554463
491.59	0.00910657		1021.59	-0.00690385		1551.59	-0.01145094		2081.58	0.00003676		2611.58	-0.02304665		3141.58	0.25825378		3671.58	0.04034587		4201.58	-0.02525391
491.79	0.00865616		1021.79	-0.00591391		1551.79	-0.01203903		2081.78	-0.00005795		2611.78	-0.02350198		3141.78	0.25898811		3671.78	0.04063191		4201.78	-0.02447691
491.99	0.00869158		1021.99	-0.00541288		1551.99	-0.01131592		2081.98	-0.00037597		2611.98	-0.02319102		3141.98	0.25945368		3671.98	0.04122713		4201.98	-0.02398163
492.19	0.00885837		1022.19	-0.00590971		1552.19	-0.01165285		2082.18	-0.00008971		2612.18	-0.02255029		3142.18	0.25929066		3672.18	0.040359		4202.18	-0.02341237
492.39	0.00895371		1022.39	-0.00591804		1552.39	-0.01099568		2082.38	0.00045732		2612.38	-0.02169628		3142.38	0.25886261		3672.38	0.03988237		4202.38	-0.02345976
492.59	0.00926751		1022.59	-0.00623028		1552.59	-0.01113847		2082.58	0.00057519		2612.58	-0.02191296		3142.58	0.25820391		3672.58	0.03896783		4202.58	-0.02320114
492.79	0.00877725		1022.79	-0.00528173		1552.79	-0.01135007		2082.78	0.00032642		2612.78	-0.02163667		3142.78	0.25772165		3672.78	0.03877728		4202.78	-0.02300952
492.99	0.00837167		1022.99	-0.00606186		1552.99	-0.01176713		2082.98	0.00010229		2612.98	-0.02154921		3142.98	0.25700248		3672.98	0.03896531		4202.98	-0.02360306
493.19	0.00831414		1023.19	-0.00627182		1553.19	-0.01258732		2083.18	0.00073811		2613.18	-0.02062341		3143.18	0.25690798		3673.18	0.03857695		4203.18	-0.02307999
493.39	0.00749736		1023.39	-0.006444		1553.39	-0.01255489		2083.38	0.00003417		2613.38	-0.02125937		3143.38	0.25659267		3673.38	0.03879292		4203.38	-0.02329211
493.59	0.00810919		1023.59	-0.00651035		1553.59	-0.01238494		2083.58	-0.00026652		2613.58	-0.02036075		3143.58	0.25604181		3673.58	0.03885109		4203.58	-0.02399001
493.79	0.00710296		1023.79	-0.00619179		1553.79	-0.01197678		2083.78	-0.00013251		2613.78	-0.02085724		3143.78	0.25600306		3673.78	0.03933262		4203.78	-0.02517763
493.99	0.00653155		1023.99	-0.00694672		1553.99	-0.01213703		2083.98	-0.00006064		2613.98	-0.02084124		3143.98	0.25557157		3673.98	0.03997864		4203.98	-0.02556348
494.19	0.00552934		1024.19	-0.00701596		1554.19	-0.01264667		2084.18	0.00039019		2614.18	-0.02162282		3144.18	0.25486367		3674.18	0.04144291		4204.18	-0.02631863
494.39	0.00567595		1024.39	-0.0067699		1554.39	-0.0129119		2084.38	0.00021797		2614.38	-0.02107955		3144.38	0.25555434		3674.38	0.04173116		4204.38	-0.0259414
494.59	0.0064245		1024.59	-0.00636503		1554.59	-0.01400143		2084.58	-0.00029159		2614.58	-0.02201658		3144.58	0.25515256		3674.58	0.04231858		4204.58	-0.02622459
494.79	0.00685383		1024.79	-0.00614281		1554.79	-0.01377672		2084.78	0.00021766		2614.78	-0.02305177		3144.78	0.25442764		3674.78	0.04254474		4204.78	-0.02566825
494.99	0.00718096		1024.99	-0.00561458		1554.99	-0.01353705		2084.98	-0.00069746		2614.98	-0.0232811		3144.98	0.25358398		3674.98	0.04285598		4204.98	-0.0255436
495.19	0.00693454		1025.19	-0.00511196		1555.19	-0.01347545		2085.18	-0.00141127		2615.18	-0.0237408		3145.18	0.25372045		3675.18	0.04319718		4205.18	-0.0254988
495.39	0.00687133		1025.39	-0.0047462		1555.39	-0.0134017		2085.38	-0.00140148		2615.38	-0.02309492		3145.38	0.25386445		3675.38	0.04228565		4205.38	-0.0249572
495.59	0.00683948		1025.59	-0.00395941		1555.59	-0.01354734		2085.58	-0.00177748		2615.58	-0.02276181		3145.58	0.25493377		3675.58	0.04190708		4205.58	-0.02305761
495.79	0.00659379		1025.79	-0.00381295		1555.79	-0.01266675		2085.78	-0.00204199		2615.78	-0.02265927		3145.78	0.25521724		3675.78	0.04108935		4205.78	-0.0221798
495.99	0.00655962		1025.99	-0.00403849		1555.99	-0.01137488		2085.98	-0.00209817		2615.98	-0.02140746		3145.98	0.25456563		3675.98	0.04029907		4205.98	-0.02218549
496.19	0.00615937		1026.19	-0.0047987		1556.19	-0.01052467		2086.18	-0.00258567		2616.18	-0.02131363		3146.18	0.25511926		3676.18	0.03907861		4206.18	-0.02277655
496.39	0.00619058		1026.39	-0.00462345		1556.39	-0.00955541		2086.38	-0.00251636		2616.38	-0.02097838		3146.38	0.25547822		3676.38	0.03883597		4206.38	-0.0223764
496.59	0.00580986		1026.59	-0.00535892		1556.59	-0.01006405		2086.58	-0.00333645		2616.58	-0.02082189		3146.58	0.25629667		3676.58	0.03950661		4206.58	-0.02176831
496.79	0.00506763		1026.79	-0.00525063		1556.79	-0.00987982		2086.78	-0.00357		2616.78	-0.02054391		3146.78	0.25623564		3676.78	0.03954966		4206.78	-0.02279064
496.99	0.00477358		1026.99	-0.00592352		1556.99	-0.00928348		2086.98	-0.00388293		2616.98	-0.01959914		3146.98	0.25647673		3676.98	0.03928723		4206.98	-0.02293408
497.19	0.00420689		1027.19	-0.00582542		1557.19	-0.00916833		2087.18	-0.00406639		2617.18	-0.01941165		3147.18	0.25699048		3677.18	0.03936791		4207.18	-0.02288661
497.39	0.00302116		1027.39	-0.00667211		1557.39	-0.00811093		2087.38	-0.00450734		2617.38	-0.01831925		3147.38	0.25706432		3677.38	0.04067012		4207.38	-0.02379433
497.59	0.00237869		1027.59	-0.00673649		1557.59	-0.00790257		2087.58	-0.00407972		2617.58	-0.01761809		3147.58	0.25706937		3677.58	0.04165413		4207.58	-0.0231796
497.79	0.00133535		1027.79	-0.00615044		1557.79	-0.00811961		2087.78	-0.00434297		2617.78	-0.01761195		3147.78	0.25747319		3677.78	0.042069		4207.78	-0.02267581
497.99	0.00100972		1027.99	-0.00623774		1557.99	-0.00898496		2087.98	-0.0042159		2617.98	-0.01754093		3147.98	0.25669966		3677.98	0.04341063		4207.98	-0.02282195
498.19	0.00011713		1028.19	-0.00559765		1558.19	-0.00963073		2088.18	-0.00370985		2618.18	-0.01811614		3148.18	0.2581058		3678.18	0.04463608		4208.18	-0.02276718
498.39	0.0005648		1028.39	-0.00509818		1558.39	-0.01092731		2088.38	-0.00380262		2618.38	-0.01778911		3148.38	0.25855087		3678.38	0.04427097		4208.38	-0.02187016
498.59	0.00075031		1028.59	-0.00520246		1558.59	-0.01191517		2088.58	-0.00385566		2618.58	-0.01889071		3148.58	0.25813863		3678.58	0.0458386		4208.58	-0.02319973
498.79	0.00059717		1028.79	-0.00544764		1558.79	-0.011722		2088.78	-0.00353402		2618.78	-0.02022413		3148.78	0.25805178		3678.78	0.04616028		4208.78	-0.02334402
498.99	0.00085746		1028.99	-0.00553839		1558.99	-0.01248428		2088.98	-0.00331747		2618.98	-0.02077584		3148.98	0.2580206		3678.98	0.04620803		4208.98	-0.02288504
499.19	0.00144597		1029.19	-0.00592806		1559.19	-0.01264792		2089.18	-0.0029919		2619.18	-0.02107468		3149.18	0.25919034		3679.18	0.0447129		4209.18	-0.02266352
499.39	0.00172109		1029.39	-0.00537078		1559.39	-0.01282674		2089.38	-0.00233794		2619.38	-0.02127434		3149.38	0.25912719		3679.38	0.04416576		4209.38	-0.02310625
499.59	0.00248269		1029.59	-0.0044509		1559.59	-0.01370274		2089.58	-0.00306564		2619.58	-0.02186353		3149.58	0.25884537		3679.58	0.04360183		4209.58	-0.02349893
499.79	0.00334327		1029.79	-0.00530925		1559.79	-0.01337592		2089.78	-0.00271278		2619.78	-0.02277013		3149.78	0.25828725		3679.78	0.04251385		4209.78	-0.02435407
499.99	0.00434303		1029.99	-0.00561032		1559.99	-0.0133664		2089.98	-0.0025422		2619.98	-0.02362783		3149.98	0.2571603		3679.98	0.04263504		4209.98	-0.02392011
500.19	0.00473999		1030.19	-0.00562147		1560.19	-0.01317196		2090.18	-0.00354394		2620.18	-0.02492465		3150.18	0.25783635		3680.18	0.04255336		4210.18	-0.02360282
500.39	0.00543679		1030.39	-0.00541854		1560.39	-0.01340525		2090.38	-0.00291442		2620.38	-0.02482509		3150.38	0.25720628		3680.38	0.04265599		4210.38	-0.02283634
500.59	0.00547914		1030.59	-0.00572966		1560.59	-0.01325802		2090.58	-0.00380631		2620.58	-0.02411168		3150.58	0.2571542		3680.58	0.04295932		4210.58	-0.02305623
500.79	0.00581204		1030.79	-0.00498422		1560.79	-0.01282298		2090.78	-0.003552		2620.78	-0.02326392		3150.78	0.25721262		3680.78	0.04192948		4210.78	-0.02344532
500.99	0.00539458		1030.99	-0.00479105		1560.99	-0.01224715		2090.98	-0.00391783		2620.98	-0.0227298		3150.98	0.25701858		3680.98	0.04231934		4210.98	-0.02296664
501.19	0.00481827		1031.19	-0.00440712		1561.19	-0.01223611		2091.18	-0.00450798		2621.18	-0.02223641		3151.18	0.25626236		3681.18	0.04204927		4211.18	-0.02301872
501.39	0.0038448		1031.39	-0.00560862		1561.39	-0.01148778		2091.38	-0.00504546		2621.38	-0.02136518		3151.38	0.25622317		3681.38	0.04188294		4211.38	-0.02228426
501.59	0.0034165		1031.59	-0.00520428		1561.59	-0.01161858		2091.58	-0.00472838		2621.58	-0.02192814		3151.58	0.25574831		3681.58	0.04112506		4211.58	-0.02225279
501.79	0.00398561		1031.79	-0.00424723		1561.79	-0.01210467		2091.78	-0.00445173		2621.78	-0.02049217		3151.78	0.25608707		3681.78	0.04059203		4211.78	-0.02286763
501.99	0.00415184		1031.99	-0.00450005		1561.99	-0.01267975		2091.98	-0.00389335		2621.98	-0.02056259		3151.98	0.25538937		3681.98	0.04097715		4211.98	-0.02314082
502.19	0.00472985		1032.19	-0.00445721		1562.19	-0.01218382		2092.18	-0.00308459		2622.18	-0.01990372		3152.18	0.25551712		3682.18	0.04114813		4212.18	-0.02340429
502.39	0.00542901		1032.39	-0.00470807		1562.39	-0.0126553		2092.38	-0.00298006		2622.38	-0.01976383		3152.38	0.25487777		3682.38	0.04081021		4212.38	-0.0236195
502.59	0.00528762		1032.59	-0.00531489		1562.59	-0.0123455		2092.58	-0.00282268		2622.58	-0.020273		3152.58	0.25521527		3682.58	0.04170731		4212.58	-0.02464833
502.79	0.00518421		1032.79	-0.00577251		1562.79	-0.01207696		2092.78	-0.00199101		2622.78	-0.02080218		3152.78	0.25556163		3682.78	0.04042444		4212.78	-0.0235856
502.99	0.00573947		1032.99	-0.00610973		1562.99	-0.01194821		2092.98	-0.00085147		2622.98	-0.02097151		3152.98	0.25600486		3682.98	0.04078611		4212.98	-0.02370196
503.19	0.00609693		1033.19	-0.00607688		1563.19	-0.01158299		2093.18	-0.00043723		2623.18	-0.02185763		3153.18	0.25645696		3683.18	0.04064571		4213.18	-0.02489614
503.39	0.00567192		1033.39	-0.00577265		1563.39	-0.01132077		2093.38	-0.00100552		2623.38	-0.02270267		3153.38	0.25561743		3683.38	0.04121125		4213.38	-0.02568238
503.59	0.00529946		1033.59	-0.0060254		1563.59	-0.01215455		2093.58	-0.00156376		2623.58	-0.02365616		3153.58	0.2558046		3683.58	0.04124492		4213.58	-0.02622471
503.79	0.00519651		1033.79	-0.00667921		1563.79	-0.01211352		2093.78	-0.00095263		2623.78	-0.02496097		3153.78	0.25517444		3683.78	0.04133326		4213.78	-0.02573775
503.99	0.00487261		1033.99	-0.00629513		1563.99	-0.01236673		2093.98	-0.00095678		2623.98	-0.02503853		3153.98	0.25470882		3683.98	0.04141368		4213.98	-0.02540237
504.19	0.0044675		1034.19	-0.00606205		1564.19	-0.01214955		2094.18	-0.00114805		2624.18	-0.02582824		3154.18	0.2553586		3684.18	0.0419372		4214.18	-0.02531364
504.39	0.00417942		1034.39	-0.00597058		1564.39	-0.01215143		2094.38	-0.00081943		2624.38	-0.02567586		3154.38	0.25487315		3684.38	0.04278303		4214.38	-0.02503255
504.59	0.00379728		1034.59	-0.0058681		1564.59	-0.0118705		2094.58	-0.0015132		2624.58	-0.0255019		3154.58	0.25445412		3684.58	0.04240439		4214.58	-0.02484289
504.79	0.00413951		1034.79	-0.00587492		1564.79	-0.01206989		2094.78	-0.00196461		2624.78	-0.02598506		3154.78	0.2536611		3684.78	0.04211867		4214.78	-0.02424917
504.99	0.0029093		1034.99	-0.00610498		1564.99	-0.0124629		2094.98	-0.00256525		2624.98	-0.0268211		3154.98	0.25262037		3684.98	0.04233516		4214.98	-0.02341942
505.19	0.00281344		1035.19	-0.00631638		1565.19	-0.012825		2095.18	-0.00312818		2625.18	-0.02656723		3155.18	0.25223227		3685.18	0.04211446		4215.18	-0.02284908
505.39	0.00212248		1035.39	-0.00656957		1565.39	-0.01250964		2095.38	-0.00384726		2625.38	-0.0271548		3155.38	0.25249307		3685.38	0.04316303		4215.38	-0.02331578
505.59	0.00206906		1035.59	-0.00561249		1565.59	-0.0130714		2095.58	-0.00319005		2625.58	-0.02745149		3155.58	0.25176513		3685.58	0.04415145		4215.58	-0.02467565
505.79	0.00218453		1035.79	-0.00617404		1565.79	-0.01365856		2095.78	-0.00295053		2625.78	-0.02640899		3155.78	0.25084759		3685.78	0.04471671		4215.78	-0.02417491
505.99	0.00219785		1035.99	-0.00647908		1565.99	-0.01398467		2095.98	-0.00275927		2625.98	-0.02638162		3155.98	0.25076476		3685.98	0.04498437		4215.98	-0.02425603
506.19	0.00256681		1036.19	-0.00607683		1566.19	-0.01359517		2096.18	-0.00211571		2626.18	-0.02494322		3156.18	0.25150574		3686.18	0.04539922		4216.18	-0.02426186
506.39	0.00271159		1036.39	-0.00619085		1566.39	-0.01323001		2096.38	-0.0018719		2626.38	-0.02475746		3156.38	0.25259328		3686.38	0.04501881		4216.38	-0.02473181
506.59	0.00276615		1036.59	-0.00693814		1566.59	-0.01272852		2096.58	-0.0013135		2626.58	-0.02503704		3156.58	0.25362448		3686.58	0.04529782		4216.58	-0.02428113
506.79	0.00313039		1036.79	-0.00757843		1566.79	-0.01297833		2096.78	-0.00131472		2626.78	-0.02473675		3156.78	0.25340199		3686.78	0.04479743		4216.78	-0.02406339
506.99	0.00331034		1036.99	-0.00803177		1566.99	-0.01216482		2096.98	-0.00082783		2626.98	-0.02436264		3156.98	0.25402501		3686.98	0.04541006		4216.98	-0.02479125
507.19	0.00360158		1037.19	-0.00809812		1567.19	-0.01239524		2097.18	-0.00028791		2627.18	-0.02454317		3157.18	0.25472104		3687.18	0.04445003		4217.18	-0.02467362
507.39	0.0031687		1037.39	-0.00857242		1567.39	-0.01181422		2097.38	-0.00075513		2627.38	-0.02435226		3157.38	0.255412		3687.38	0.04389492		4217.38	-0.02481236
507.59	0.00332351		1037.59	-0.00837205		1567.59	-0.01187952		2097.58	-0.00103196		2627.58	-0.02447967		3157.58	0.25662228		3687.58	0.04376163		4217.58	-0.025057
507.79	0.00335422		1037.79	-0.00867022		1567.79	-0.01215594		2097.78	-0.00086679		2627.78	-0.024086		3157.78	0.25715476		3687.78	0.04269083		4217.78	-0.0255416
507.99	0.00374578		1037.99	-0.00823795		1567.99	-0.01237446		2097.98	-0.00104145		2627.98	-0.02379534		3157.98	0.25809482		3687.98	0.04196541		4217.98	-0.0259877
508.19	0.0048652		1038.19	-0.00823995		1568.19	-0.0123479		2098.18	-0.00214359		2628.18	-0.02396584		3158.18	0.25802253		3688.18	0.04178476		4218.18	-0.02564787
508.39	0.00501503		1038.39	-0.00779641		1568.39	-0.0126668		2098.38	-0.00259744		2628.38	-0.02309664		3158.38	0.25729303		3688.38	0.04144406		4218.38	-0.02599
508.59	0.00482311		1038.59	-0.0083221		1568.59	-0.01285464		2098.58	-0.00297443		2628.58	-0.02302044		3158.58	0.25606727		3688.58	0.04040438		4218.58	-0.02626731
508.79	0.00515834		1038.79	-0.00851816		1568.79	-0.01299495		2098.78	-0.00345089		2628.78	-0.02330558		3158.78	0.2551868		3688.78	0.04081518		4218.78	-0.02626382
508.99	0.00403959		1038.99	-0.00829576		1568.99	-0.01255335		2098.98	-0.00317179		2628.98	-0.02288064		3158.98	0.2552941		3688.98	0.04105578		4218.98	-0.02635485
509.19	0.00377102		1039.19	-0.0082096		1569.19	-0.01241753		2099.18	-0.0038415		2629.18	-0.02270466		3159.18	0.25438559		3689.18	0.0419521		4219.18	-0.02724719
509.39	0.00244776		1039.39	-0.00799137		1569.39	-0.01221297		2099.38	-0.00403664		2629.38	-0.02283041		3159.38	0.25401437		3689.38	0.04270806		4219.38	-0.02866302
509.59	0.00227444		1039.59	-0.00810257		1569.59	-0.01237481		2099.58	-0.00341885		2629.58	-0.02272957		3159.58	0.25355069		3689.58	0.04308553		4219.58	-0.02911525
509.79	0.00137478		1039.79	-0.0095648		1569.79	-0.01257072		2099.78	-0.00278732		2629.78	-0.02279895		3159.78	0.25265566		3689.78	0.04320786		4219.78	-0.02924945
509.99	0.00118972		1039.99	-0.00829413		1569.99	-0.01199935		2099.98	-0.00294235		2629.98	-0.02229339		3159.98	0.25399735		3689.98	0.04283932		4219.98	-0.03045869
510.19	0.00099137		1040.19	-0.00833672		1570.19	-0.01118721		2100.18	-0.00204452		2630.18	-0.0226261		3160.18	0.25397843		3690.18	0.04312433		4220.18	-0.03089377
510.39	0.00073967		1040.39	-0.00879532		1570.39	-0.01036764		2100.38	-0.00136619		2630.38	-0.02388867		3160.38	0.25420261		3690.38	0.04335354		4220.38	-0.03144691
510.59	0.00121724		1040.59	-0.00934446		1570.59	-0.01012258		2100.58	-0.00092133		2630.58	-0.0245879		3160.58	0.25410668		3690.58	0.04337476		4220.58	-0.03132302
510.79	0.00077424		1040.79	-0.00991898		1570.79	-0.01111328		2100.78	0.00001591		2630.78	-0.02454276		3160.78	0.25296932		3690.78	0.04248976		4220.78	-0.03113655
510.99	0.0004345		1040.99	-0.01070113		1570.99	-0.00986295		2100.98	0.00138586		2630.98	-0.02477606		3160.98	0.2537075		3690.98	0.04209277		4220.98	-0.03045482
511.19	0.00065347		1041.19	-0.01051678		1571.19	-0.01006776		2101.18	0.00233627		2631.18	-0.02515764		3161.18	0.25392325		3691.18	0.04056596		4221.18	-0.02907528
511.39	0.00046867		1041.39	-0.01060364		1571.39	-0.00912806		2101.38	0.00246665		2631.38	-0.02596648		3161.38	0.25388765		3691.38	0.03994873		4221.38	-0.02858957
511.59	0.00129892		1041.59	-0.01027995		1571.59	-0.00938176		2101.58	0.00237915		2631.58	-0.02626607		3161.58	0.25376215		3691.58	0.03902471		4221.58	-0.02795642
511.79	0.00124143		1041.79	-0.01043792		1571.79	-0.00971288		2101.78	0.0024809		2631.78	-0.02568998		3161.78	0.25342811		3691.78	0.03843677		4221.78	-0.02753028
511.99	0.00209408		1041.99	-0.00955318		1571.99	-0.00995122		2101.98	0.00188884		2631.98	-0.02615026		3161.98	0.25360587		3691.98	0.03754566		4221.98	-0.02652458
512.19	0.00221196		1042.19	-0.00945292		1572.19	-0.0098083		2102.18	0.00115774		2632.18	-0.02562895		3162.18	0.25315567		3692.18	0.03721631		4222.18	-0.02574023
512.39	0.001793		1042.39	-0.00961267		1572.39	-0.00948492		2102.38	0.00168137		2632.38	-0.02522468		3162.38	0.2532423		3692.38	0.03767749		4222.38	-0.02521062
512.59	0.00145345		1042.59	-0.00993207		1572.59	-0.01073673		2102.58	0.0007347		2632.58	-0.02510372		3162.58	0.25323512		3692.58	0.03752341		4222.58	-0.02515344
512.79	0.00133422		1042.79	-0.00894717		1572.79	-0.01106348		2102.78	0.00089248		2632.78	-0.02442514		3162.78	0.25325464		3692.78	0.03801302		4222.78	-0.02448798
512.99	0.00113586		1042.99	-0.00835513		1572.99	-0.01043492		2102.98	0.00077797		2632.98	-0.0239189		3162.98	0.25285618		3692.98	0.03847976		4222.98	-0.0247054
513.19	0.00086243		1043.19	-0.00714304		1573.19	-0.01195285		2103.18	-0.0006719		2633.18	-0.02346064		3163.18	0.25254273		3693.18	0.03909193		4223.18	-0.02475831
513.39	0.00003819		1043.39	-0.00697102		1573.39	-0.01172658		2103.38	-0.0004494		2633.38	-0.02253884		3163.38	0.25302067		3693.38	0.03901218		4223.38	-0.02427556
513.59	0.00091305		1043.59	-0.00683359		1573.59	-0.01182513		2103.58	-0.00107971		2633.58	-0.02200364		3163.58	0.25305633		3693.58	0.0402747		4223.58	-0.02372736
513.79	0.00050873		1043.79	-0.00617133		1573.79	-0.01230236		2103.78	-0.0025819		2633.78	-0.02182522		3163.78	0.25314012		3693.78	0.04046475		4223.78	-0.0238009
513.99	0.00053793		1043.99	-0.00511086		1573.99	-0.01239567		2103.98	-0.00330277		2633.98	-0.02093293		3163.98	0.25430478		3693.98	0.0408111		4223.98	-0.02483896
514.19	-0.00063639		1044.19	-0.00537248		1574.19	-0.01295543		2104.18	-0.00326113		2634.18	-0.02159381		3164.18	0.25466126		3694.18	0.0410835		4224.18	-0.02480014
514.39	-0.00126224		1044.39	-0.00496686		1574.39	-0.01327763		2104.38	-0.00398836		2634.38	-0.02165533		3164.38	0.25520412		3694.38	0.04214078		4224.38	-0.02537554
514.59	-0.00094738		1044.59	-0.00533207		1574.59	-0.0135919		2104.58	-0.00434218		2634.58	-0.02123726		3164.58	0.25491149		3694.58	0.04176114		4224.58	-0.02533803
514.79	-0.00254922		1044.79	-0.00571064		1574.79	-0.01350322		2104.78	-0.00459419		2634.78	-0.02116184		3164.78	0.25455834		3694.78	0.04098525		4224.78	-0.02418012
514.99	-0.00301797		1044.99	-0.00572592		1574.99	-0.01300334		2104.98	-0.00454776		2634.98	-0.02075415		3164.98	0.25515522		3694.98	0.0406303		4224.98	-0.02380572
515.19	-0.00311586		1045.19	-0.00514622		1575.19	-0.01302998		2105.18	-0.00416798		2635.18	-0.02058042		3165.18	0.25503549		3695.18	0.03941372		4225.18	-0.02291181
515.39	-0.00305646		1045.39	-0.00621164		1575.39	-0.01244045		2105.38	-0.00362377		2635.38	-0.02123094		3165.38	0.25451208		3695.38	0.03896943		4225.38	-0.02303056
515.59	-0.00280322		1045.59	-0.00597196		1575.59	-0.01270628		2105.58	-0.00322775		2635.58	-0.02004003		3165.58	0.25406373		3695.58	0.03814434		4225.58	-0.02247297
515.79	-0.00260694		1045.79	-0.00669801		1575.79	-0.01206848		2105.78	-0.00405622		2635.78	-0.01994684		3165.78	0.25351908		3695.78	0.03776483		4225.78	-0.02260758
515.99	-0.00261366		1045.99	-0.00727888		1575.99	-0.01224283		2105.98	-0.00345873		2635.98	-0.02111366		3165.98	0.25379953		3695.98	0.03663785		4225.98	-0.02225315
516.19	-0.00234414		1046.19	-0.00756238		1576.19	-0.01170541		2106.18	-0.00260101		2636.18	-0.02195403		3166.18	0.253229		3696.18	0.03680259		4226.18	-0.02249135
516.39	-0.00243448		1046.39	-0.00833373		1576.39	-0.01180147		2106.38	-0.00179078		2636.38	-0.02232499		3166.38	0.25279151		3696.38	0.03597577		4226.38	-0.0232902
516.59	-0.00257457		1046.59	-0.00898181		1576.59	-0.0130012		2106.58	-0.00146723		2636.58	-0.02263576		3166.58	0.25148001		3696.58	0.0357122		4226.58	-0.02442015
516.79	-0.00250446		1046.79	-0.00868566		1576.79	-0.01289704		2106.78	-0.00045938		2636.78	-0.0222866		3166.78	0.25062697		3696.78	0.03607526		4226.78	-0.02511693
516.99	-0.00113425		1046.99	-0.00857079		1576.99	-0.01289871		2106.98	-0.0010395		2636.98	-0.02225285		3166.98	0.2494514		3696.98	0.03676198		4226.98	-0.02564086
517.19	-0.00047692		1047.19	-0.00894326		1577.19	-0.01430349		2107.18	-0.00149974		2637.18	-0.02228002		3167.18	0.2496858		3697.18	0.03695369		4227.18	-0.02543854
517.39	-0.00039008		1047.39	-0.00945205		1577.39	-0.01348954		2107.38	-0.00143869		2637.38	-0.02222961		3167.38	0.24954398		3697.38	0.03744004		4227.38	-0.02548268
517.59	0.00053563		1047.59	-0.00949114		1577.59	-0.01416138		2107.58	-0.00250512		2637.58	-0.02334504		3167.58	0.2492583		3697.58	0.03825706		4227.58	-0.02516039
517.79	0.0007009		1047.79	-0.00882285		1577.79	-0.01485209		2107.78	-0.00293754		2637.78	-0.0243595		3167.78	0.2496946		3697.78	0.03805926		4227.78	-0.02601215
517.99	0.00043401		1047.99	-0.00904457		1577.99	-0.01485442		2107.98	-0.0022644		2637.98	-0.02531283		3167.98	0.25018328		3697.98	0.038482		4227.98	-0.02638377
518.19	0.00018088		1048.19	-0.00918013		1578.19	-0.01412979		2108.18	-0.00298576		2638.18	-0.02715708		3168.18	0.25091475		3698.18	0.03804182		4228.18	-0.02604989
518.39	0.00090843		1048.39	-0.00784519		1578.39	-0.01378924		2108.38	-0.00361967		2638.38	-0.02719952		3168.38	0.25103822		3698.38	0.03821745		4228.38	-0.02593755
518.59	0.00148136		1048.59	-0.00731103		1578.59	-0.01336774		2108.58	-0.0036291		2638.58	-0.02752533		3168.58	0.25186924		3698.58	0.03811408		4228.58	-0.024797
518.79	0.00076172		1048.79	-0.00677334		1578.79	-0.01315219		2108.78	-0.00373826		2638.78	-0.02772227		3168.78	0.25279721		3698.78	0.03766474		4228.78	-0.02410467
518.99	0.00091445		1048.99	-0.00603121		1578.99	-0.0127512		2108.98	-0.00419243		2638.98	-0.02695137		3168.98	0.253419		3698.98	0.03775024		4228.98	-0.02413193
519.19	0.00083643		1049.19	-0.00631503		1579.19	-0.01199338		2109.18	-0.00406067		2639.18	-0.02729765		3169.18	0.25421096		3699.18	0.03778836		4229.18	-0.02288158
519.39	0.00046776		1049.39	-0.00757994		1579.39	-0.01214405		2109.38	-0.00365547		2639.38	-0.02710984		3169.38	0.25351749		3699.38	0.03787806		4229.38	-0.02356204
519.59	0.00032743		1049.59	-0.00713011		1579.59	-0.0131234		2109.58	-0.00357151		2639.58	-0.02553416		3169.58	0.2533737		3699.58	0.03704208		4229.58	-0.02350854
519.79	0.00000441		1049.79	-0.00798087		1579.79	-0.01294582		2109.78	-0.00334531		2639.78	-0.02597079		3169.78	0.25321923		3699.78	0.03713536		4229.78	-0.02379933
519.99	-0.000043		1049.99	-0.00830083		1579.99	-0.01313875		2109.98	-0.00183846		2639.98	-0.02645504		3169.98	0.25253418		3699.98	0.0375809		4229.98	-0.0233089
520.19	0.00029485		1050.19	-0.0089182		1580.19	-0.01302421		2110.18	-0.00135613		2640.18	-0.02579284		3170.18	0.25210518		3700.18	0.03769409		4230.18	-0.02366878
520.39	-0.00062018		1050.39	-0.01041104		1580.39	-0.01343698		2110.38	-0.00136168		2640.38	-0.02462506		3170.38	0.25105857		3700.38	0.03718937		4230.38	-0.02408398
520.59	0.00000993		1050.59	-0.01172107		1580.59	-0.01369008		2110.58	-0.00184868		2640.58	-0.02341024		3170.58	0.25029606		3700.58	0.03851624		4230.58	-0.02465299
520.79	0.00058986		1050.79	-0.01253689		1580.79	-0.01413156		2110.78	-0.001741		2640.78	-0.02161817		3170.78	0.25030125		3700.78	0.03943209		4230.78	-0.02488652
520.99	0.00158469		1050.99	-0.01267761		1580.99	-0.01406689		2110.98	-0.00206866		2640.98	-0.02190411		3170.98	0.24991999		3700.98	0.04037498		4230.98	-0.02419729
521.19	0.00102934		1051.19	-0.01346421		1581.19	-0.01444821		2111.18	-0.00140623		2641.18	-0.0216405		3171.18	0.25020308		3701.18	0.04013576		4231.18	-0.02506537
521.39	0.00040175		1051.39	-0.01361905		1581.39	-0.01402616		2111.38	-0.00144888		2641.38	-0.02160944		3171.38	0.24972781		3701.38	0.04069928		4231.38	-0.0250529
521.59	0.00057753		1051.59	-0.01409536		1581.59	-0.015056		2111.58	-0.00175973		2641.58	-0.02294212		3171.58	0.24924825		3701.58	0.0400145		4231.58	-0.02573795
521.79	0.00085582		1051.79	-0.01381664		1581.79	-0.01490238		2111.78	-0.00185972		2641.78	-0.02324674		3171.78	0.2503662		3701.78	0.04010907		4231.78	-0.02616627
521.99	0.00061899		1051.99	-0.01331273		1581.99	-0.01398163		2111.98	-0.00239153		2641.98	-0.02344835		3171.98	0.25011167		3701.98	0.039858		4231.98	-0.02622303
522.19	0.00095851		1052.19	-0.01221217		1582.19	-0.01304333		2112.18	-0.00262528		2642.18	-0.02435222		3172.18	0.25217929		3702.18	0.03989134		4232.18	-0.02569423
522.39	0.00117219		1052.39	-0.01006287		1582.39	-0.01363469		2112.38	-0.00263467		2642.38	-0.02458647		3172.38	0.25287178		3702.38	0.03959879		4232.38	-0.02560418
522.59	0.00113748		1052.59	-0.01018272		1582.59	-0.01318417		2112.58	-0.00225425		2642.58	-0.0248602		3172.58	0.25461226		3702.58	0.03982489		4232.58	-0.02515351
522.79	0.00046993		1052.79	-0.01047267		1582.79	-0.01279225		2112.78	-0.00254566		2642.78	-0.02449915		3172.78	0.2552641		3702.78	0.03996421		4232.78	-0.02508397
522.99	-0.00031657		1052.99	-0.0102826		1582.99	-0.01237284		2112.98	-0.00339483		2642.98	-0.02434923		3172.98	0.25592936		3702.98	0.04033058		4232.98	-0.02473253
523.19	-0.0006007		1053.19	-0.0107553		1583.19	-0.01294777		2113.18	-0.0035032		2643.18	-0.02497673		3173.18	0.25685354		3703.18	0.04041058		4233.18	-0.02418555
523.39	-0.00141005		1053.39	-0.01059565		1583.39	-0.01382973		2113.38	-0.00312123		2643.38	-0.02429423		3173.38	0.25580302		3703.38	0.03939871		4233.38	-0.0248903
523.59	-0.00176525		1053.59	-0.00988863		1583.59	-0.01392374		2113.58	-0.00342401		2643.58	-0.024614		3173.58	0.25600147		3703.58	0.03950329		4233.58	-0.02524254
523.79	-0.00195099		1053.79	-0.00962587		1583.79	-0.01376026		2113.78	-0.00362567		2643.78	-0.02552764		3173.78	0.25503863		3703.78	0.03985491		4233.78	-0.02442143
523.99	-0.0016657		1053.99	-0.00965328		1583.99	-0.01360723		2113.98	-0.00348941		2643.98	-0.02546724		3173.98	0.25456133		3703.98	0.04011175		4233.98	-0.0244604
524.19	-0.00129887		1054.19	-0.01010721		1584.19	-0.01379638		2114.18	-0.00374689		2644.18	-0.02503925		3174.18	0.25417317		3704.18	0.03930953		4234.18	-0.02483189
524.39	-0.00201401		1054.39	-0.01044577		1584.39	-0.0141388		2114.38	-0.00379403		2644.38	-0.02506537		3174.38	0.25262232		3704.38	0.0391088		4234.38	-0.02486276
524.59	-0.00144653		1054.59	-0.01098193		1584.59	-0.01423088		2114.58	-0.00306206		2644.58	-0.02454147		3174.58	0.25212961		3704.58	0.03912371		4234.58	-0.02517263
524.79	-0.00235584		1054.79	-0.01126229		1584.79	-0.01360587		2114.78	-0.00215365		2644.78	-0.02522107		3174.78	0.2511817		3704.78	0.0392618		4234.78	-0.02530411
524.99	-0.00280409		1054.99	-0.01110615		1584.99	-0.01372707		2114.98	-0.00248098		2644.98	-0.02657462		3174.98	0.25001324		3704.98	0.03896727		4234.98	-0.02598731
525.19	-0.00352913		1055.19	-0.01137812		1585.19	-0.01371815		2115.18	-0.00188434		2645.18	-0.02592932		3175.18	0.24901922		3705.18	0.03891927		4235.18	-0.02640758
525.39	-0.00402421		1055.39	-0.01053181		1585.39	-0.01387772		2115.38	-0.00193084		2645.38	-0.02603954		3175.38	0.24859907		3705.38	0.03884611		4235.38	-0.02647259
525.59	-0.0032862		1055.59	-0.00963087		1585.59	-0.01398493		2115.58	-0.00219439		2645.58	-0.02607426		3175.58	0.24811111		3705.58	0.03835834		4235.58	-0.02710945
525.79	-0.00348148		1055.79	-0.00922495		1585.79	-0.01263744		2115.78	-0.00192329		2645.78	-0.02573001		3175.78	0.24889683		3705.78	0.03867431		4235.78	-0.02621529
525.99	-0.00352202		1055.99	-0.00826935		1585.99	-0.01129188		2115.98	-0.00143278		2645.98	-0.02481304		3175.98	0.2494951		3705.98	0.03786682		4235.98	-0.02573411
526.19	-0.0031119		1056.19	-0.00799217		1586.19	-0.01105227		2116.18	-0.00063529		2646.18	-0.02480797		3176.18	0.25117443		3706.18	0.03891364		4236.18	-0.02476551
526.39	-0.00288804		1056.39	-0.00799057		1586.39	-0.01152828		2116.38	-0.00049057		2646.38	-0.0248642		3176.38	0.25094656		3706.38	0.03809534		4236.38	-0.02494864
526.59	-0.00262949		1056.59	-0.00834064		1586.59	-0.01124152		2116.58	-0.00060631		2646.58	-0.02401528		3176.58	0.25137225		3706.58	0.03790924		4236.58	-0.02422349
526.79	-0.00205574		1056.79	-0.00884116		1586.79	-0.01143515		2116.78	-0.00187034		2646.78	-0.02305847		3176.78	0.25157153		3706.78	0.03865322		4236.78	-0.02387564
526.99	-0.00161557		1056.99	-0.00850746		1586.99	-0.01241619		2116.98	-0.00344902		2646.98	-0.02226243		3176.98	0.25220614		3706.98	0.03851262		4236.98	-0.02363985
527.19	-0.00161378		1057.19	-0.00840435		1587.19	-0.01300355		2117.18	-0.00478392		2647.18	-0.02202365		3177.18	0.25267471		3707.18	0.03821423		4237.18	-0.02352258
527.39	-0.001011		1057.39	-0.0075766		1587.39	-0.01302449		2117.38	-0.00483948		2647.38	-0.02282207		3177.38	0.25269322		3707.38	0.03831653		4237.38	-0.02346717
527.59	-0.00114874		1057.59	-0.00866154		1587.59	-0.01354426		2117.58	-0.00622759		2647.58	-0.02338574		3177.58	0.25255577		3707.58	0.03969419		4237.58	-0.02460607
527.79	-0.00067177		1057.79	-0.00885003		1587.79	-0.01426147		2117.78	-0.00672782		2647.78	-0.02324103		3177.78	0.25264834		3707.78	0.0397371		4237.78	-0.0238864
527.99	-0.0002196		1057.99	-0.00992962		1587.99	-0.01518627		2117.98	-0.00586786		2647.98	-0.02310671		3177.98	0.25360123		3707.98	0.04037669		4237.98	-0.02448039
528.19	-0.00017604		1058.19	-0.01076291		1588.19	-0.01569459		2118.18	-0.00616442		2648.18	-0.02342819		3178.18	0.25285651		3708.18	0.04041452		4238.18	-0.02502774
528.39	-0.00101377		1058.39	-0.01134762		1588.39	-0.01621832		2118.38	-0.00576603		2648.38	-0.02388052		3178.38	0.25275019		3708.38	0.0402424		4238.38	-0.02486799
528.59	-0.00052977		1058.59	-0.01168862		1588.59	-0.01666876		2118.58	-0.00500883		2648.58	-0.02427377		3178.58	0.25292514		3708.58	0.03945102		4238.58	-0.02519777
528.79	-0.00110145		1058.79	-0.01265159		1588.79	-0.01634359		2118.78	-0.00456365		2648.78	-0.02578309		3178.78	0.25262248		3708.78	0.03965685		4238.78	-0.02563034
528.99	-0.0006647		1058.99	-0.01282704		1588.99	-0.01701012		2118.98	-0.00415231		2648.98	-0.02571943		3178.98	0.25277206		3708.98	0.03932034		4238.98	-0.02565695
529.19	-0.00098285		1059.19	-0.01270537		1589.19	-0.0168337		2119.18	-0.00201221		2649.18	-0.02535351		3179.18	0.25303426		3709.18	0.0396316		4239.18	-0.02573596
529.39	-0.00132636		1059.39	-0.01187579		1589.39	-0.01622906		2119.38	-0.00042802		2649.38	-0.02633439		3179.38	0.25335026		3709.38	0.03822222		4239.38	-0.02589237
529.59	-0.00065465		1059.59	-0.01284042		1589.59	-0.01528413		2119.58	-0.00016092		2649.58	-0.0263143		3179.58	0.25272917		3709.58	0.03711316		4239.58	-0.02524544
529.79	-0.0012462		1059.79	-0.01307163		1589.79	-0.01416989		2119.78	0.00053412		2649.78	-0.02663384		3179.78	0.25281992		3709.78	0.03666087		4239.78	-0.02552308
529.99	-0.00232316		1059.99	-0.01225814		1589.99	-0.01339589		2119.98	0.00080392		2649.98	-0.02653851		3179.98	0.25283809		3709.98	0.03592831		4239.98	-0.02546097
530.19	-0.0024056		1060.19	-0.01216002		1590.19	-0.01393518		2120.18	0.00022384		2650.18	-0.02645698		3180.18	0.25186237		3710.18	0.03635144		4240.18	-0.02643806
530.39	-0.00243635		1060.39	-0.01101216		1590.39	-0.01456506		2120.38	0.00005768		2650.38	-0.02697619		3180.38	0.25093774		3710.38	0.03581324		4240.38	-0.0266841
530.59	-0.0025454		1060.59	-0.01058554		1590.59	-0.01467992		2120.58	-0.00092734		2650.58	-0.02635486		3180.58	0.25005522		3710.58	0.03523376		4240.58	-0.02623884
530.79	-0.00167621		1060.79	-0.01009847		1590.79	-0.01518564		2120.78	-0.00182492		2650.78	-0.02580318		3180.78	0.24913286		3710.78	0.03575155		4240.78	-0.02594991
530.99	-0.00210407		1060.99	-0.00961206		1590.99	-0.015686		2120.98	-0.00254304		2650.98	-0.02565788		3180.98	0.24862105		3710.98	0.03561109		4240.98	-0.02596124
531.19	-0.00221789		1061.19	-0.00968566		1591.19	-0.0152944		2121.18	-0.00306811		2651.18	-0.02605053		3181.18	0.24827815		3711.18	0.03620247		4241.18	-0.02596121
531.39	-0.00174326		1061.39	-0.00882065		1591.39	-0.01537423		2121.38	-0.00345948		2651.38	-0.02633704		3181.38	0.24838668		3711.38	0.03683457		4241.38	-0.02643161
531.59	-0.00250408		1061.59	-0.00990716		1591.59	-0.01624009		2121.58	-0.00439539		2651.58	-0.02553415		3181.58	0.24749864		3711.58	0.03784802		4241.58	-0.02697688
531.79	-0.00202998		1061.79	-0.00943184		1591.79	-0.016595		2121.78	-0.00446527		2651.78	-0.0252246		3181.78	0.24777078		3711.78	0.03796117		4241.78	-0.02649644
531.99	-0.00207984		1061.99	-0.00973683		1591.99	-0.01727059		2121.98	-0.00409712		2651.98	-0.02506501		3181.98	0.24696646		3711.98	0.03853146		4241.98	-0.02689555
532.19	-0.00212636		1062.19	-0.00977527		1592.19	-0.01638013		2122.18	-0.00422473		2652.18	-0.02507462		3182.18	0.24674987		3712.18	0.0381355		4242.18	-0.0262785
532.39	-0.00160072		1062.39	-0.01047004		1592.39	-0.01723193		2122.38	-0.00404429		2652.38	-0.02453371		3182.38	0.24749996		3712.38	0.03837203		4242.38	-0.02624464
532.59	-0.00125428		1062.59	-0.01089434		1592.59	-0.01812513		2122.58	-0.00266815		2652.58	-0.0242579		3182.58	0.24835909		3712.58	0.03893255		4242.58	-0.02599141
532.79	-0.00101325		1062.79	-0.01103653		1592.79	-0.01716496		2122.78	-0.00247407		2652.78	-0.02441921		3182.78	0.24887989		3712.78	0.03906043		4242.78	-0.02624109
532.99	-0.00106441		1062.99	-0.01055461		1592.99	-0.0166874		2122.98	-0.00213656		2652.98	-0.0243472		3182.98	0.24950457		3712.98	0.03940791		4242.98	-0.02577329
533.19	-0.00050457		1063.19	-0.01043532		1593.19	-0.0161347		2123.18	-0.00080534		2653.18	-0.02470689		3183.18	0.24947934		3713.18	0.03966576		4243.18	-0.02681313
533.39	-0.00060223		1063.39	-0.01089508		1593.39	-0.01526612		2123.38	-0.00127639		2653.38	-0.02541362		3183.38	0.25027206		3713.38	0.03870249		4243.38	-0.02674906
533.59	-0.00011476		1063.59	-0.01220022		1593.59	-0.01461868		2123.58	-0.00178044		2653.58	-0.02542562		3183.58	0.25041463		3713.58	0.03870168		4243.58	-0.02709936
533.79	-0.00057221		1063.79	-0.01163633		1593.79	-0.0148801		2123.78	-0.00176326		2653.78	-0.02547102		3183.78	0.25090705		3713.78	0.03862707		4243.78	-0.02818596
533.99	-0.00230274		1063.99	-0.01175326		1593.99	-0.01425665		2123.98	-0.00221775		2653.98	-0.02637217		3183.98	0.25064143		3713.98	0.03841546		4243.98	-0.02774115
534.19	-0.00304903		1064.19	-0.01168233		1594.19	-0.01446123		2124.18	-0.00254366		2654.18	-0.02704366		3184.18	0.25030519		3714.18	0.03863348		4244.18	-0.02797825
534.39	-0.00412974		1064.39	-0.01130732		1594.39	-0.01419684		2124.38	-0.00265007		2654.38	-0.02723573		3184.38	0.250266		3714.38	0.03867651		4244.38	-0.02685486
534.59	-0.0046933		1064.59	-0.01135214		1594.59	-0.01372172		2124.58	-0.00286936		2654.58	-0.02663566		3184.58	0.24969059		3714.58	0.0387799		4244.58	-0.02667894
534.79	-0.00458589		1064.79	-0.01085481		1594.79	-0.0138837		2124.78	-0.00270018		2654.78	-0.02660295		3184.78	0.24851126		3714.78	0.03932182		4244.78	-0.0269824
534.99	-0.00515837		1064.99	-0.01140966		1594.99	-0.01370009		2124.98	-0.00300004		2654.98	-0.0264783		3184.98	0.24862748		3714.98	0.03938713		4244.98	-0.02656302
535.19	-0.00470392		1065.19	-0.01058891		1595.19	-0.01405987		2125.18	-0.00349124		2655.18	-0.02645339		3185.18	0.24838695		3715.18	0.03928675		4245.18	-0.02697989
535.39	-0.0044056		1065.39	-0.00982919		1595.39	-0.01445092		2125.38	-0.00332562		2655.38	-0.02595638		3185.38	0.24896397		3715.38	0.03912155		4245.38	-0.02677343
535.59	-0.00382486		1065.59	-0.01049098		1595.59	-0.01481805		2125.58	-0.0032178		2655.58	-0.02545086		3185.58	0.2482252		3715.58	0.03931347		4245.58	-0.02612723
535.79	-0.00323275		1065.79	-0.01057016		1595.79	-0.01540191		2125.78	-0.00201238		2655.78	-0.02547861		3185.78	0.2473767		3715.78	0.03808567		4245.78	-0.02585138
535.99	-0.00261984		1065.99	-0.01125693		1595.99	-0.01552199		2125.98	-0.0008068		2655.98	-0.02500874		3185.98	0.24652941		3715.98	0.03798132		4245.98	-0.02559333
536.19	-0.00141714		1066.19	-0.01230187		1596.19	-0.01502571		2126.18	-0.00015116		2656.18	-0.02489485		3186.18	0.24708335		3716.18	0.03801568		4246.18	-0.02522642
536.39	-0.0011935		1066.39	-0.01388463		1596.39	-0.01612427		2126.38	0.00013899		2656.38	-0.02377676		3186.38	0.24690969		3716.38	0.03877723		4246.38	-0.02579497
536.59	-0.00082176		1066.59	-0.01324001		1596.59	-0.01578668		2126.58	0.00055807		2656.58	-0.02338691		3186.58	0.24782287		3716.58	0.03835957		4246.58	-0.02445783
536.79	-0.00023333		1066.79	-0.01245485		1596.79	-0.01526691		2126.78	-0.00064397		2656.78	-0.02341635		3186.78	0.24717261		3716.78	0.03765354		4246.78	-0.02422811
536.99	0.00056702		1066.99	-0.01248933		1596.99	-0.01563884		2126.98	-0.00035668		2656.98	-0.02363821		3186.98	0.24690053		3716.98	0.0379786		4246.98	-0.0233765
537.19	0.00127675		1067.19	-0.01288008		1597.19	-0.01547144		2127.18	-0.00133615		2657.18	-0.02350046		3187.18	0.24716626		3717.18	0.03791091		4247.18	-0.0246352
537.39	0.00070114		1067.39	-0.01332205		1597.39	-0.01549282		2127.38	-0.00204158		2657.38	-0.02367633		3187.38	0.24784563		3717.38	0.03697054		4247.38	-0.02530921
537.59	0.00120729		1067.59	-0.01299103		1597.59	-0.01552593		2127.58	-0.00149157		2657.58	-0.02335892		3187.58	0.24750816		3717.58	0.03661571		4247.58	-0.02660827
537.79	0.00079587		1067.79	-0.01221995		1597.79	-0.01652792		2127.78	-0.0022066		2657.78	-0.02270909		3187.78	0.24798603		3717.78	0.03616968		4247.78	-0.02677974
537.99	-0.00037861		1067.99	-0.01236676		1597.99	-0.01560834		2127.98	-0.00336622		2657.98	-0.02241812		3187.98	0.248286		3717.98	0.03631056		4247.98	-0.02684976
538.19	-0.00173844		1068.19	-0.01131812		1598.19	-0.01589295		2128.18	-0.00394891		2658.18	-0.02312117		3188.18	0.24831578		3718.18	0.03568999		4248.18	-0.02782577
538.39	-0.00206034		1068.39	-0.01131904		1598.39	-0.01657781		2128.38	-0.00379555		2658.38	-0.02296359		3188.38	0.24769975		3718.38	0.03579573		4248.38	-0.02847407
538.59	-0.00258128		1068.59	-0.01041057		1598.59	-0.01642969		2128.58	-0.00328829		2658.58	-0.02348383		3188.58	0.24707901		3718.58	0.03617614		4248.58	-0.02894716
538.79	-0.0021132		1068.79	-0.00997466		1598.79	-0.01670046		2128.78	-0.00344807		2658.78	-0.02379421		3188.78	0.24698128		3718.78	0.03562202		4248.78	-0.02938714
538.99	-0.00137097		1068.99	-0.00943223		1598.99	-0.01684798		2128.98	-0.00414362		2658.98	-0.0240435		3188.98	0.2476958		3718.98	0.03488872		4248.98	-0.02864592
539.19	-0.00128744		1069.19	-0.00874443		1599.19	-0.01779089		2129.18	-0.00407857		2659.18	-0.02461656		3189.18	0.2481903		3719.18	0.03480038		4249.18	-0.02855801
539.39	-0.00045228		1069.39	-0.00903146		1599.39	-0.01701815		2129.38	-0.00420162		2659.38	-0.02485458		3189.38	0.24851237		3719.38	0.03493457		4249.38	-0.02806618
539.59	-0.00051896		1069.59	-0.00958283		1599.59	-0.01746085		2129.58	-0.00434328		2659.58	-0.02521771		3189.58	0.24751897		3719.58	0.03535143		4249.58	-0.0276496
539.79	-0.00023067		1069.79	-0.00991411		1599.79	-0.01759859		2129.78	-0.00371396		2659.78	-0.02556263		3189.78	0.24692824		3719.78	0.03526516		4249.78	-0.02780106
539.99	0.00031186		1069.99	-0.01064115		1599.99	-0.01683783		2129.98	-0.00336952		2659.98	-0.02523862		3189.98	0.24721486		3719.98	0.03628069		4249.98	-0.02831146
540.19	0.00045423		1070.19	-0.01128248		1600.19	-0.01634043		2130.18	-0.00382439		2660.18	-0.02604798		3190.18	0.24740737		3720.18	0.03688708		4250.18	-0.02809922
540.39	0.00031416		1070.39	-0.01146923		1600.39	-0.01652343		2130.38	-0.00461258		2660.38	-0.02603587		3190.38	0.24733292		3720.38	0.03702953		4250.38	-0.02738508
540.59	0.00029706		1070.59	-0.01134096		1600.59	-0.01670451		2130.58	-0.00446155		2660.58	-0.02670185		3190.58	0.24837826		3720.58	0.03675229		4250.58	-0.0259011
540.79	0.00042303		1070.79	-0.01132231		1600.79	-0.01674179		2130.78	-0.00475436		2660.78	-0.02705142		3190.78	0.24753497		3720.78	0.03667271		4250.78	-0.02528989
540.99	-0.0000174		1070.99	-0.01159232		1600.99	-0.01628607		2130.98	-0.004138		2660.98	-0.02720149		3190.98	0.24775817		3720.98	0.03755866		4250.98	-0.02433543
541.19	-0.00130423		1071.19	-0.01181129		1601.19	-0.01616892		2131.18	-0.00480274		2661.18	-0.02629295		3191.18	0.24771587		3721.18	0.03690359		4251.18	-0.02469052
541.39	-0.00147051		1071.39	-0.01148534		1601.39	-0.01569889		2131.38	-0.003884		2661.38	-0.02595976		3191.38	0.24740689		3721.38	0.03639523		4251.38	-0.02502853
541.59	-0.00179469		1071.59	-0.01107738		1601.59	-0.015476		2131.58	-0.00320255		2661.58	-0.02588101		3191.58	0.24777661		3721.58	0.03677657		4251.58	-0.02470752
541.79	-0.00222942		1071.79	-0.01116098		1601.79	-0.01514282		2131.78	-0.0043668		2661.78	-0.02583992		3191.78	0.24783592		3721.78	0.03686656		4251.78	-0.0240553
541.99	-0.00379675		1071.99	-0.01191593		1601.99	-0.01396303		2131.98	-0.00437574		2661.98	-0.02585615		3191.98	0.24679415		3721.98	0.03557424		4251.98	-0.02430584
542.19	-0.00392394		1072.19	-0.01164485		1602.19	-0.01424303		2132.18	-0.00417018		2662.18	-0.02702941		3192.18	0.24543323		3722.18	0.03474764		4252.18	-0.02481804
542.39	-0.00370373		1072.39	-0.01211945		1602.39	-0.01431954		2132.38	-0.00389734		2662.38	-0.02655094		3192.38	0.24435923		3722.38	0.03510307		4252.38	-0.02483974
542.59	-0.00405151		1072.59	-0.01186035		1602.59	-0.01370131		2132.58	-0.00386718		2662.58	-0.02600242		3192.58	0.24421881		3722.58	0.03500667		4252.58	-0.02472818
542.79	-0.0034195		1072.79	-0.01213074		1602.79	-0.01353262		2132.78	-0.00433159		2662.78	-0.02667218		3192.78	0.24470263		3722.78	0.03452648		4252.78	-0.02566704
542.99	-0.00372726		1072.99	-0.01243237		1602.99	-0.01351273		2132.98	-0.00518743		2662.98	-0.02700921		3192.98	0.24454382		3722.98	0.03424514		4252.98	-0.02608701
543.19	-0.00440636		1073.19	-0.01285467		1603.19	-0.01301308		2133.18	-0.00510521		2663.18	-0.02724781		3193.18	0.24498809		3723.18	0.03522207		4253.18	-0.02663407
543.39	-0.00403135		1073.39	-0.01317057		1603.39	-0.0119793		2133.38	-0.00500933		2663.38	-0.02726959		3193.38	0.24384334		3723.38	0.03666263		4253.38	-0.02785214
543.59	-0.00360342		1073.59	-0.0138235		1603.59	-0.01269149		2133.58	-0.00516978		2663.58	-0.02665762		3193.58	0.2434851		3723.58	0.03763196		4253.58	-0.02847705
543.79	-0.0029642		1073.79	-0.01358132		1603.79	-0.01228681		2133.78	-0.00459146		2663.78	-0.02655508		3193.78	0.24358137		3723.78	0.03749062		4253.78	-0.02935755
543.99	-0.00311779		1073.99	-0.01294369		1603.99	-0.01232874		2133.98	-0.00375782		2663.98	-0.02658447		3193.98	0.24470504		3723.98	0.03823008		4253.98	-0.0305284
544.19	-0.00350434		1074.19	-0.01326276		1604.19	-0.01234937		2134.18	-0.00393967		2664.18	-0.02724572		3194.18	0.24557751		3724.18	0.03806207		4254.18	-0.03038982
544.39	-0.00303608		1074.39	-0.01266719		1604.39	-0.01380895		2134.38	-0.00335487		2664.38	-0.0268443		3194.38	0.24617374		3724.38	0.03784696		4254.38	-0.03042064
544.59	-0.00326235		1074.59	-0.01258045		1604.59	-0.01407625		2134.58	-0.00249568		2664.58	-0.02658295		3194.58	0.24695057		3724.58	0.0371658		4254.58	-0.02951575
544.79	-0.00306135		1074.79	-0.01179165		1604.79	-0.01449915		2134.78	-0.00178761		2664.78	-0.02668626		3194.78	0.24631689		3724.78	0.03658224		4254.78	-0.02890649
544.99	-0.00385807		1074.99	-0.01118687		1604.99	-0.01517849		2134.98	-0.00162746		2664.98	-0.0270018		3194.98	0.24682472		3724.98	0.03659505		4254.98	-0.02847944
545.19	-0.00335388		1075.19	-0.01102425		1605.19	-0.01614619		2135.18	-0.00143739		2665.18	-0.02687362		3195.18	0.24666377		3725.18	0.03446727		4255.18	-0.02821215
545.39	-0.00326561		1075.39	-0.01058598		1605.39	-0.01520293		2135.38	-0.00121449		2665.38	-0.02788652		3195.38	0.24697675		3725.38	0.03422516		4255.38	-0.02765588
545.59	-0.00336605		1075.59	-0.01017669		1605.59	-0.01577597		2135.58	-0.00084158		2665.58	-0.02774616		3195.58	0.24691252		3725.58	0.03434951		4255.58	-0.02709543
545.79	-0.00251854		1075.79	-0.01019533		1605.79	-0.01604879		2135.78	-0.0016045		2665.78	-0.0273492		3195.78	0.24570237		3725.78	0.03299522		4255.78	-0.02645626
545.99	-0.00210615		1075.99	-0.01069201		1605.99	-0.01652316		2135.98	-0.00173721		2665.98	-0.02726375		3195.98	0.24501978		3725.98	0.03167202		4255.98	-0.02593507
546.19	-0.00203723		1076.19	-0.01096724		1606.19	-0.01704175		2136.18	-0.00205522		2666.18	-0.02742063		3196.18	0.24452875		3726.18	0.03247863		4256.18	-0.02615346
546.39	-0.00278728		1076.39	-0.01143627		1606.39	-0.01735139		2136.38	-0.00195066		2666.38	-0.02666216		3196.38	0.24408815		3726.38	0.03220621		4256.38	-0.02594364
546.59	-0.00301028		1076.59	-0.01157814		1606.59	-0.01737196		2136.58	-0.00173556		2666.58	-0.02635506		3196.58	0.24416568		3726.58	0.03272714		4256.58	-0.02641896
546.79	-0.0038275		1076.79	-0.01201526		1606.79	-0.01662923		2136.78	-0.00253531		2666.78	-0.02754541		3196.78	0.24498403		3726.78	0.03310413		4256.78	-0.02639702
546.99	-0.00424348		1076.99	-0.0129629		1606.99	-0.0168835		2136.98	-0.0033698		2666.98	-0.02722895		3196.98	0.24440406		3726.98	0.03368778		4256.98	-0.02630191
547.19	-0.00421481		1077.19	-0.0131383		1607.19	-0.01683203		2137.18	-0.00385499		2667.18	-0.02683959		3197.18	0.24442527		3727.18	0.03551822		4257.18	-0.02648451
547.39	-0.00389146		1077.39	-0.01335697		1607.39	-0.01756315		2137.38	-0.0038719		2667.38	-0.02702885		3197.38	0.24397302		3727.38	0.03647022		4257.38	-0.0260834
547.59	-0.00358508		1077.59	-0.01295497		1607.59	-0.01742229		2137.58	-0.00493328		2667.58	-0.02646634		3197.58	0.24457341		3727.58	0.03687522		4257.58	-0.02638138
547.79	-0.00445351		1077.79	-0.0127835		1607.79	-0.01728304		2137.78	-0.00495381		2667.78	-0.02653221		3197.78	0.24549927		3727.78	0.03724956		4257.78	-0.02637444
547.99	-0.00515278		1077.99	-0.01216614		1607.99	-0.01811368		2137.98	-0.00517369		2667.98	-0.02665913		3197.98	0.2466049		3727.98	0.03881944		4257.98	-0.02657902
548.19	-0.00428612		1078.19	-0.01222214		1608.19	-0.01825466		2138.18	-0.00631873		2668.18	-0.02766202		3198.18	0.24751096		3728.18	0.03852871		4258.18	-0.02633098
548.39	-0.00381264		1078.39	-0.01163042		1608.39	-0.01916212		2138.38	-0.00608333		2668.38	-0.02743755		3198.38	0.24850687		3728.38	0.03835001		4258.38	-0.02621552
548.59	-0.00381453		1078.59	-0.01173606		1608.59	-0.01871872		2138.58	-0.00660403		2668.58	-0.02789133		3198.58	0.24827793		3728.58	0.03802008		4258.58	-0.02577459
548.79	-0.00321891		1078.79	-0.01065245		1608.79	-0.01894592		2138.78	-0.00563441		2668.78	-0.02892834		3198.78	0.24724238		3728.78	0.03803692		4258.78	-0.02591853
548.99	-0.00312012		1078.99	-0.01067957		1608.99	-0.01842867		2138.98	-0.0059177		2668.98	-0.02869938		3198.98	0.24779639		3728.98	0.03740769		4258.98	-0.0254046
549.19	-0.00242594		1079.19	-0.01041282		1609.19	-0.01840041		2139.18	-0.00488514		2669.18	-0.02851419		3199.18	0.24760829		3729.18	0.03693143		4259.18	-0.02497819
549.39	-0.00245293		1079.39	-0.01055849		1609.39	-0.01757516		2139.38	-0.00512208		2669.38	-0.0280986		3199.38	0.24688614		3729.38	0.03719188		4259.38	-0.02429725
549.59	-0.00158009		1079.59	-0.00989775		1609.59	-0.01819541		2139.58	-0.00447924		2669.58	-0.02828162		3199.58	0.24560089		3729.58	0.03713338		4259.58	-0.02386842
549.79	-0.00136575		1079.79	-0.0103097		1609.79	-0.01777338		2139.78	-0.00442334		2669.78	-0.02916738		3199.78	0.24507355		3729.78	0.03563015		4259.78	-0.02329747
549.99	-0.00222654		1079.99	-0.0107368		1609.99	-0.01768379		2139.98	-0.00369296		2669.98	-0.02957146		3199.98	0.24425862		3729.98	0.03542027		4259.98	-0.02407361
550.19	-0.00306925		1080.19	-0.01078536		1610.19	-0.01706918		2140.18	-0.00258989		2670.18	-0.02907174		3200.18	0.24263656		3730.18	0.03502533		4260.18	-0.02445858
550.39	-0.00337609		1080.39	-0.0113782		1610.39	-0.01637481		2140.38	-0.00275019		2670.38	-0.02783001		3200.38	0.24192175		3730.38	0.03313601		4260.38	-0.0245383
550.59	-0.00344812		1080.59	-0.01175793		1610.59	-0.01650874		2140.58	-0.00293418		2670.58	-0.02742464		3200.58	0.24116162		3730.58	0.03285435		4260.58	-0.02496082
550.79	-0.00433462		1080.79	-0.01270402		1610.79	-0.01618004		2140.78	-0.00387196		2670.78	-0.02736467		3200.78	0.24111988		3730.78	0.03252737		4260.78	-0.02591469
550.99	-0.00423158		1080.99	-0.0127313		1610.99	-0.01616172		2140.98	-0.00367448		2670.98	-0.02614595		3200.98	0.24021835		3730.98	0.03231231		4260.98	-0.02702933
551.19	-0.00484688		1081.19	-0.01276932		1611.19	-0.01545342		2141.18	-0.00381321		2671.18	-0.02610966		3201.18	0.24050495		3731.18	0.03239146		4261.18	-0.02787257
551.39	-0.00495016		1081.39	-0.01232704		1611.39	-0.01519802		2141.38	-0.00287132		2671.38	-0.0266054		3201.38	0.24140956		3731.38	0.03288561		4261.38	-0.02791004
551.59	-0.00446211		1081.59	-0.01171551		1611.59	-0.01414421		2141.58	-0.0040227		2671.58	-0.02635973		3201.58	0.24189258		3731.58	0.03302119		4261.58	-0.02908156
551.79	-0.00427808		1081.79	-0.01161794		1611.79	-0.0143556		2141.78	-0.00447428		2671.78	-0.02707674		3201.78	0.24259433		3731.78	0.03289016		4261.78	-0.02912924
551.99	-0.00353041		1081.99	-0.0114817		1611.99	-0.01429231		2141.98	-0.00478515		2671.98	-0.02820308		3201.98	0.24358679		3731.98	0.03367748		4261.98	-0.02967239
552.19	-0.00263467		1082.19	-0.01158859		1612.19	-0.01442475		2142.18	-0.00516247		2672.18	-0.02782237		3202.18	0.24457588		3732.18	0.03282356		4262.18	-0.03016991
552.39	-0.00306007		1082.39	-0.0121202		1612.39	-0.0149121		2142.38	-0.00456454		2672.38	-0.02730192		3202.38	0.24527955		3732.38	0.0331055		4262.38	-0.03026737
552.59	-0.00218622		1082.59	-0.01181485		1612.59	-0.01444859		2142.58	-0.004427		2672.58	-0.02761014		3202.58	0.24398517		3732.58	0.03362943		4262.58	-0.02951911
552.79	-0.00168008		1082.79	-0.01090499		1612.79	-0.01437025		2142.78	-0.00372472		2672.78	-0.02812408		3202.78	0.2442915		3732.78	0.03400151		4262.78	-0.02934685
552.99	-0.00220159		1082.99	-0.01178651		1612.99	-0.01496481		2142.98	-0.00455858		2672.98	-0.02778001		3202.98	0.24502192		3732.98	0.0336452		4262.98	-0.02836333
553.19	-0.00286441		1083.19	-0.01143511		1613.19	-0.0157788		2143.18	-0.00422061		2673.18	-0.0281128		3203.18	0.24498698		3733.18	0.03456973		4263.18	-0.02782252
553.39	-0.00312183		1083.39	-0.01126864		1613.39	-0.01607864		2143.38	-0.00432194		2673.38	-0.02911134		3203.38	0.24463555		3733.38	0.03476475		4263.38	-0.02730599
553.59	-0.00371499		1083.59	-0.01029484		1613.59	-0.0167597		2143.58	-0.00427764		2673.58	-0.0294901		3203.58	0.24436843		3733.58	0.03511921		4263.58	-0.02805391
553.79	-0.0038447		1083.79	-0.01040755		1613.79	-0.01653877		2143.78	-0.00409521		2673.78	-0.02972547		3203.78	0.24387232		3733.78	0.03472495		4263.78	-0.02800637
553.99	-0.00443296		1083.99	-0.01016615		1613.99	-0.01657763		2143.98	-0.00411622		2673.98	-0.02820835		3203.98	0.24244641		3733.98	0.03533005		4263.98	-0.02852748
554.19	-0.00411709		1084.19	-0.01017088		1614.19	-0.01629774		2144.18	-0.00440648		2674.18	-0.02727745		3204.18	0.24203592		3734.18	0.03541576		4264.18	-0.02811276
554.39	-0.00518326		1084.39	-0.01082288		1614.39	-0.01590173		2144.38	-0.00545131		2674.38	-0.02617746		3204.38	0.24163588		3734.38	0.03498394		4264.38	-0.02815473
554.59	-0.00516033		1084.59	-0.01069471		1614.59	-0.01679741		2144.58	-0.00531606		2674.58	-0.02492871		3204.58	0.24128003		3734.58	0.03585486		4264.58	-0.02890012
554.79	-0.00557837		1084.79	-0.0108113		1614.79	-0.01645122		2144.78	-0.00575551		2674.78	-0.02403676		3204.78	0.24130429		3734.78	0.03616185		4264.78	-0.02993647
554.99	-0.00496695		1084.99	-0.01029514		1614.99	-0.01554041		2144.98	-0.00449037		2674.98	-0.02394411		3204.98	0.24134235		3734.98	0.03618774		4264.98	-0.02928646
555.19	-0.00443674		1085.19	-0.01087414		1615.19	-0.01565075		2145.18	-0.00513681		2675.18	-0.024151		3205.18	0.2423101		3735.18	0.03656502		4265.18	-0.02919983
555.39	-0.00384788		1085.39	-0.01084654		1615.39	-0.01534666		2145.38	-0.00543943		2675.38	-0.02443167		3205.38	0.24319129		3735.38	0.03687819		4265.38	-0.02932324
555.59	-0.0031165		1085.59	-0.01145892		1615.59	-0.01494806		2145.58	-0.00635635		2675.58	-0.02466692		3205.58	0.24323238		3735.58	0.03598155		4265.58	-0.02993701
555.79	-0.00304441		1085.79	-0.01221164		1615.79	-0.015713		2145.78	-0.00664291		2675.78	-0.02503336		3205.78	0.24371335		3735.78	0.0354923		4265.78	-0.03021
555.99	-0.00279841		1085.99	-0.01286877		1615.99	-0.01617835		2145.98	-0.00655244		2675.98	-0.02615408		3205.98	0.24427399		3735.98	0.03455695		4265.98	-0.02977103
556.19	-0.00287692		1086.19	-0.01323093		1616.19	-0.01722995		2146.18	-0.00600123		2676.18	-0.0261283		3206.18	0.24448346		3736.18	0.03334218		4266.18	-0.02875298
556.39	-0.00270154		1086.39	-0.0135139		1616.39	-0.01798902		2146.38	-0.00573557		2676.38	-0.02749111		3206.38	0.24423186		3736.38	0.03292329		4266.38	-0.02790104
556.59	-0.00221314		1086.59	-0.01420263		1616.59	-0.01778845		2146.58	-0.00520805		2676.58	-0.02858703		3206.58	0.24368894		3736.58	0.03248014		4266.58	-0.02690976
556.79	-0.00309179		1086.79	-0.01492996		1616.79	-0.01889383		2146.78	-0.00514758		2676.78	-0.02989248		3206.78	0.24437685		3736.78	0.03202365		4266.78	-0.02660932
556.99	-0.00399837		1086.99	-0.01462516		1616.99	-0.02031994		2146.98	-0.00536025		2676.98	-0.03048668		3206.98	0.24428373		3736.98	0.03130557		4266.98	-0.02646471
557.19	-0.00448301		1087.19	-0.01407703		1617.19	-0.02080796		2147.18	-0.00423829		2677.18	-0.03153237		3207.18	0.24447044		3737.18	0.0318374		4267.18	-0.02657728
557.39	-0.00309054		1087.39	-0.01389244		1617.39	-0.02030925		2147.38	-0.00464576		2677.38	-0.03189909		3207.38	0.24505102		3737.38	0.0312519		4267.38	-0.02754795
557.59	-0.00273568		1087.59	-0.01410062		1617.59	-0.02041184		2147.58	-0.00521735		2677.58	-0.0308889		3207.58	0.24504927		3737.58	0.03226606		4267.58	-0.02870005
557.79	-0.00203328		1087.79	-0.01388468		1617.79	-0.02026482		2147.78	-0.00553077		2677.78	-0.03077378		3207.78	0.24460092		3737.78	0.03288895		4267.78	-0.02799586
557.99	-0.00215348		1087.99	-0.01390063		1617.99	-0.02022382		2147.98	-0.00589206		2677.98	-0.02966509		3207.98	0.2444478		3737.98	0.03403694		4267.98	-0.02842344
558.19	-0.00191397		1088.19	-0.01362845		1618.19	-0.02015096		2148.18	-0.00588842		2678.18	-0.02978555		3208.18	0.24444152		3738.18	0.03467114		4268.18	-0.02851508
558.39	-0.00219186		1088.39	-0.01340146		1618.39	-0.01987275		2148.38	-0.00584078		2678.38	-0.02922812		3208.38	0.24364738		3738.38	0.03499591		4268.38	-0.02894206
558.59	-0.00178884		1088.59	-0.01328181		1618.59	-0.01982105		2148.58	-0.00524739		2678.58	-0.02905905		3208.58	0.24343832		3738.58	0.03548743		4268.58	-0.02969446
558.79	-0.00192789		1088.79	-0.01347572		1618.79	-0.01921409		2148.78	-0.00496453		2678.78	-0.02939683		3208.78	0.24304005		3738.78	0.03562435		4268.78	-0.03004626
558.99	-0.00172054		1088.99	-0.01367841		1618.99	-0.01842024		2148.98	-0.00401975		2678.98	-0.02967743		3208.98	0.24282447		3738.98	0.03605909		4268.98	-0.03023816
559.19	-0.00222685		1089.19	-0.01440789		1619.19	-0.01812076		2149.18	-0.00401357		2679.18	-0.0295608		3209.18	0.24264446		3739.18	0.03633328		4269.18	-0.03095232
559.39	-0.00334324		1089.39	-0.0146898		1619.39	-0.01683532		2149.38	-0.00319835		2679.38	-0.03037953		3209.38	0.24206535		3739.38	0.03599911		4269.38	-0.03158064
559.59	-0.00411722		1089.59	-0.0150261		1619.59	-0.01651498		2149.58	-0.00221227		2679.58	-0.03099608		3209.58	0.24121748		3739.58	0.03567073		4269.58	-0.03192254
559.79	-0.00509555		1089.79	-0.01501247		1619.79	-0.01620821		2149.78	-0.00144826		2679.78	-0.0318829		3209.78	0.24069694		3739.78	0.03503983		4269.78	-0.03170323
