# Supplementary material for: Functional development of a V3/glycan-specific broadly neutralizing antibody isolated from a case of HIV superinfection
Source: eLife journal article supplement (doi:10.7554/elife.68110), 2021-07-15
Supplement: fig2-data2 [file A7.xls]

Vers 3.43 Data Simulation
Conc1	1E-06	1E-06	1E-06	1E-06	1E-06	1E-06	1E-06
Start1	200	730.02	1260.01	1790.04	2320.04	2850.04	3380.04
Stop1	559.79	1089.82	1619.81	2149.84	2679.84	3209.84	3739.84
Time1	Data1	Sim1	Time2	Data2	Sim2	Time3	Data3	Sim3	Time4	Data4	Sim4	Time5	Data5	Sim5	Time6	Data6	Sim6	Time7	Data7	Sim7
200	0.00872165		730.02	0.00277177		1260.01	0.00275284		1790.04	0.0089992		2320.04	-0.00734007		2850.04	-0.00354896		3380.04	-0.00562946
200.2	0.00901581		730.22	0.00364649		1260.21	0.00344393		1790.24	0.00878311		2320.24	-0.00740708		2850.24	-0.00348156		3380.24	-0.00581456
200.4	0.01022361		730.42	0.00383953		1260.41	0.00352205		1790.44	0.00895193		2320.44	-0.00776667		2850.44	-0.0037494		3380.44	-0.00637357
200.6	0.01075241		730.62	0.00460372		1260.61	0.00442839		1790.64	0.0089732		2320.64	-0.00800071		2850.64	-0.0044112		3380.64	-0.0070684
200.8	0.01200591		730.82	0.00556558		1260.81	0.00495894		1790.84	0.00921515		2320.84	-0.00870078		2850.84	-0.0046684		3380.84	-0.00705903
201	0.01232424		731.02	0.00620946		1261.01	0.00543839		1791.04	0.00881342		2321.04	-0.00902967		2851.04	-0.00472378		3381.04	-0.00700517
201.2	0.01301867		731.22	0.0062066		1261.21	0.00619112		1791.24	0.00830693		2321.24	-0.00964185		2851.24	-0.00517327		3381.24	-0.00737349
201.4	0.01384841		731.42	0.00591116		1261.41	0.00628886		1791.44	0.00848932		2321.44	-0.00976687		2851.44	-0.00519415		3381.44	-0.00741552
201.6	0.01491139		731.62	0.00566523		1261.61	0.00626906		1791.64	0.00882578		2321.64	-0.00968327		2851.64	-0.00502507		3381.64	-0.0071615
201.8	0.01524479		731.82	0.00509543		1261.81	0.00683336		1791.84	0.00909215		2321.84	-0.00965956		2851.84	-0.00530081		3381.84	-0.00767103
202	0.01566619		732.02	0.00512604		1262.01	0.00727732		1792.04	0.0089773		2322.04	-0.00998598		2852.04	-0.00570983		3382.04	-0.00718974
202.2	0.01624891		732.22	0.00436569		1262.21	0.00771308		1792.24	0.00901997		2322.24	-0.01045233		2852.24	-0.00544806		3382.24	-0.00717211
202.4	0.01649719		732.42	0.00485122		1262.41	0.00798536		1792.44	0.00891217		2322.44	-0.00971332		2852.44	-0.00417754		3382.44	-0.00717201
202.6	0.01693716		732.62	0.00513566		1262.61	0.00866332		1792.64	0.00931339		2322.64	-0.01013844		2852.64	-0.0043547		3382.64	-0.00693926
202.8	0.01853885		732.82	0.00584751		1262.81	0.00865888		1792.84	0.00950255		2322.84	-0.00963478		2852.84	-0.00475943		3382.84	-0.00622988
203	0.01864983		733.02	0.00568513		1263.01	0.00818098		1793.04	0.00910638		2323.04	-0.00930062		2853.04	-0.00462854		3383.04	-0.00620292
203.2	0.01970346		733.22	0.00648168		1263.21	0.00919789		1793.24	0.00861773		2323.24	-0.00965329		2853.24	-0.00528676		3383.24	-0.00596745
203.4	0.02007339		733.42	0.00664458		1263.41	0.00915152		1793.44	0.00901892		2323.44	-0.01012897		2853.44	-0.0055777		3383.44	-0.00667938
203.6	0.02070475		733.62	0.006529		1263.61	0.0089922		1793.64	0.00936567		2323.64	-0.009012		2853.64	-0.00531539		3383.64	-0.00626346
203.8	0.02091382		733.82	0.0061187		1263.81	0.00885142		1793.84	0.0093969		2323.84	-0.00851131		2853.84	-0.00465658		3383.84	-0.00610085
204	0.02179193		734.02	0.00507475		1264.01	0.00896018		1794.04	0.00931469		2324.04	-0.00824416		2854.04	-0.00363798		3384.04	-0.00646557
204.2	0.02230665		734.22	0.00589867		1264.21	0.00921682		1794.24	0.00807662		2324.24	-0.00740872		2854.24	-0.00392627		3384.24	-0.00671751
204.4	0.02375135		734.42	0.00548638		1264.41	0.00889095		1794.44	0.00790721		2324.44	-0.00729247		2854.44	-0.00410095		3384.44	-0.00699287
204.6	0.02397402		734.62	0.00665682		1264.61	0.00908575		1794.64	0.00815396		2324.64	-0.00724535		2854.64	-0.0047163		3384.64	-0.00674486
204.8	0.02478508		734.82	0.00720956		1264.81	0.00864372		1794.84	0.00779256		2324.84	-0.00794061		2854.84	-0.00384034		3384.84	-0.00622867
205	0.02424448		735.02	0.00759259		1265.01	0.00857479		1795.04	0.00721137		2325.04	-0.0083218		2855.04	-0.00334396		3385.04	-0.00615617
205.2	0.02526457		735.22	0.00668073		1265.21	0.00828853		1795.24	0.00673158		2325.24	-0.00854694		2855.24	-0.00278753		3385.24	-0.00688301
205.4	0.02678783		735.42	0.00649416		1265.41	0.00776667		1795.44	0.00664818		2325.44	-0.00827051		2855.44	-0.00216948		3385.44	-0.00690938
205.6	0.02680855		735.62	0.0065518		1265.61	0.00781545		1795.64	0.00645556		2325.64	-0.00841192		2855.64	-0.00150828		3385.64	-0.0067039
205.8	0.02728604		735.82	0.00670285		1265.81	0.0082883		1795.84	0.00705448		2325.84	-0.00862956		2855.84	-0.00088558		3385.84	-0.00671257
206	0.02810125		736.02	0.00696339		1266.01	0.00874796		1796.04	0.00648445		2326.04	-0.00888309		2856.04	-0.00079402		3386.04	-0.00536533
206.2	0.02882376		736.22	0.00649417		1266.21	0.00903514		1796.24	0.00634937		2326.24	-0.00880104		2856.24	-0.00035221		3386.24	-0.00571074
206.4	0.02929904		736.42	0.00780163		1266.41	0.009032		1796.44	0.0064636		2326.44	-0.00868771		2856.44	-0.00001796		3386.44	-0.00585608
206.6	0.03085831		736.62	0.00731018		1266.61	0.00944087		1796.64	0.00645657		2326.64	-0.0094084		2856.64	-0.00139231		3386.64	-0.00549688
206.8	0.0318509		736.82	0.00784486		1266.81	0.01063625		1796.84	0.00590776		2326.84	-0.00958721		2856.84	-0.00166338		3386.84	-0.00601283
207	0.03175784		737.02	0.00730212		1267.01	0.01048651		1797.04	0.0056805		2327.04	-0.01045423		2857.04	-0.00229921		3387.04	-0.00615939
207.2	0.03290082		737.22	0.00759372		1267.21	0.01104504		1797.24	0.00630354		2327.24	-0.01140907		2857.24	-0.00298034		3387.24	-0.00714622
207.4	0.03262609		737.42	0.00671324		1267.41	0.00975921		1797.44	0.00830358		2327.44	-0.01135889		2857.44	-0.00295299		3387.44	-0.00787259
207.6	0.03297374		737.62	0.00597345		1267.61	0.010043		1797.64	0.00887482		2327.64	-0.01120068		2857.64	-0.00227021		3387.64	-0.00827672
207.8	0.03354682		737.82	0.0050322		1267.81	0.010153		1797.84	0.0079383		2327.84	-0.01185356		2857.84	-0.00204057		3387.84	-0.00792644
208	0.0351174		738.02	0.00450781		1268.01	0.00999942		1798.04	0.00744538		2328.04	-0.01112745		2858.04	-0.00183518		3388.04	-0.00842817
208.2	0.03582178		738.22	0.0045824		1268.21	0.00963396		1798.24	0.00677063		2328.24	-0.01118992		2858.24	-0.00182338		3388.24	-0.00864645
208.4	0.03621367		738.42	0.00487841		1268.41	0.0088548		1798.44	0.00761472		2328.44	-0.01105776		2858.44	-0.00191948		3388.44	-0.00863527
208.6	0.03705085		738.62	0.00527709		1268.61	0.00891052		1798.64	0.00787013		2328.64	-0.01173916		2858.64	-0.00206563		3388.64	-0.00961446
208.8	0.03768734		738.82	0.0051087		1268.81	0.00937918		1798.84	0.00803668		2328.84	-0.01161931		2858.84	-0.00114299		3388.84	-0.01034816
209	0.03843306		739.02	0.0053752		1269.01	0.00955323		1799.04	0.00768329		2329.04	-0.01090516		2859.04	-0.00111306		3389.04	-0.01064864
209.2	0.03966669		739.22	0.00543138		1269.21	0.00903901		1799.24	0.00746108		2329.24	-0.00981935		2859.24	-0.00062471		3389.24	-0.01109268
209.4	0.04078178		739.42	0.00548002		1269.41	0.00832152		1799.44	0.00773704		2329.44	-0.00899954		2859.44	-0.0006915		3389.44	-0.01069603
209.6	0.04123828		739.62	0.0049265		1269.61	0.0078803		1799.64	0.00821679		2329.64	-0.00798139		2859.64	-0.00084415		3389.64	-0.01029227
209.8	0.04298154		739.82	0.00467734		1269.81	0.00771965		1799.84	0.00882637		2329.84	-0.0071643		2859.84	-0.00088688		3389.84	-0.00949041
210	0.04399883		740.02	0.00448552		1270.01	0.00770761		1800.04	0.00783672		2330.04	-0.00728976		2860.04	-0.00148239		3390.04	-0.00862999
210.2	0.0452175		740.22	0.00442568		1270.21	0.007329		1800.24	0.00758549		2330.24	-0.00618699		2860.24	-0.00161526		3390.24	-0.00936302
210.4	0.04599324		740.42	0.00476057		1270.41	0.00690433		1800.44	0.0071512		2330.44	-0.00631696		2860.44	-0.00155296		3390.44	-0.00871342
210.6	0.04691201		740.62	0.00374645		1270.61	0.00769502		1800.64	0.0072021		2330.64	-0.00611675		2860.64	-0.00108965		3390.64	-0.008012
210.8	0.04604538		740.82	0.00391579		1270.81	0.00809665		1800.84	0.00713874		2330.84	-0.00608022		2860.84	-0.00059661		3390.84	-0.00793226
211	0.04591498		741.02	0.00414933		1271.01	0.0073503		1801.04	0.00782955		2331.04	-0.00669342		2861.04	-0.00131551		3391.04	-0.00762611
211.2	0.04562071		741.22	0.00401666		1271.21	0.00721168		1801.24	0.00814414		2331.24	-0.00652681		2861.24	-0.00085782		3391.24	-0.00770874
211.4	0.04501222		741.42	0.00371073		1271.41	0.00731322		1801.44	0.00894449		2331.44	-0.00611332		2861.44	-0.00127979		3391.44	-0.00765448
211.6	0.04466822		741.62	0.00364388		1271.61	0.0074656		1801.64	0.00804454		2331.64	-0.00613614		2861.64	-0.00115732		3391.64	-0.00774577
211.8	0.04474896		741.82	0.00345588		1271.81	0.00658918		1801.84	0.00746709		2331.84	-0.00633365		2861.84	-0.00094453		3391.84	-0.00682298
212	0.04469979		742.02	0.00332416		1272.01	0.00596015		1802.04	0.00716358		2332.04	-0.00537195		2862.04	-0.00039056		3392.04	-0.00691412
212.2	0.04452424		742.22	0.00372934		1272.21	0.00579004		1802.24	0.00702124		2332.24	-0.00557981		2862.24	0.00028701		3392.24	-0.00691924
212.4	0.04473957		742.42	0.00374619		1272.41	0.00592705		1802.44	0.00735299		2332.44	-0.00582757		2862.44	0.00048818		3392.44	-0.00769136
212.6	0.04547836		742.62	0.00317155		1272.61	0.00656922		1802.64	0.00766159		2332.64	-0.0064915		2862.64	0.00054168		3392.64	-0.00803927
212.8	0.04524628		742.82	0.00324584		1272.81	0.0068747		1802.84	0.00796131		2332.84	-0.00659872		2862.84	0.00062789		3392.84	-0.00801857
213	0.04578667		743.02	0.00377967		1273.01	0.00694266		1803.04	0.0071349		2333.04	-0.00639839		2863.04	0.0004719		3393.04	-0.00820476
213.2	0.04605935		743.22	0.00396546		1273.21	0.00645191		1803.24	0.00755366		2333.24	-0.00680458		2863.24	0.00021961		3393.24	-0.00853953
213.4	0.04640452		743.42	0.00355799		1273.41	0.00579489		1803.44	0.00744602		2333.44	-0.00706096		2863.44	-0.00034959		3393.44	-0.00932175
213.6	0.04758146		743.62	0.00351362		1273.61	0.00565612		1803.64	0.00720604		2333.64	-0.00698517		2863.64	-0.00071591		3393.64	-0.00989281
213.8	0.04812593		743.82	0.00370055		1273.81	0.00537671		1803.84	0.00697352		2333.84	-0.00791076		2863.84	0.00026821		3393.84	-0.00955011
214	0.04848057		744.02	0.00407223		1274.01	0.00490859		1804.04	0.00694069		2334.04	-0.00861488		2864.04	0.00003675		3394.04	-0.00940046
214.2	0.0492815		744.22	0.00430289		1274.21	0.0051619		1804.24	0.0061945		2334.24	-0.00795328		2864.24	0.00023138		3394.24	-0.01015299
214.4	0.04933159		744.42	0.00471051		1274.41	0.00537395		1804.44	0.00628126		2334.44	-0.00834174		2864.44	0.00023737		3394.44	-0.01005887
214.6	0.0500468		744.62	0.00485642		1274.61	0.00541956		1804.64	0.00617463		2334.64	-0.00845312		2864.64	0.00091848		3394.64	-0.00989757
214.8	0.04905721		744.82	0.00529478		1274.81	0.00520943		1804.84	0.00725004		2334.84	-0.00800802		2864.84	0.00119508		3394.84	-0.01029065
215	0.04936674		745.02	0.00587222		1275.01	0.00572014		1805.04	0.00897512		2335.04	-0.00737181		2865.04	0.00073773		3395.04	-0.01001586
215.2	0.04878402		745.22	0.00527974		1275.21	0.00686021		1805.24	0.00966567		2335.24	-0.00646561		2865.24	0.00113945		3395.24	-0.00971079
215.4	0.04889608		745.42	0.0057639		1275.41	0.00741486		1805.44	0.01038598		2335.44	-0.00590468		2865.44	0.00056787		3395.44	-0.00943767
215.6	0.04890592		745.62	0.00568414		1275.61	0.00678756		1805.64	0.01072268		2335.64	-0.00521008		2865.64	0.00128694		3395.64	-0.00924504
215.8	0.0489656		745.82	0.00585267		1275.81	0.00697458		1805.84	0.01113762		2335.84	-0.00518037		2865.84	0.00149364		3395.84	-0.00843949
216	0.04872975		746.02	0.0059362		1276.01	0.00757535		1806.04	0.01138822		2336.04	-0.00450428		2866.04	0.00106085		3396.04	-0.00852847
216.2	0.04852461		746.22	0.00625331		1276.21	0.00758608		1806.24	0.0122155		2336.24	-0.00526874		2866.24	0.00047488		3396.24	-0.00825343
216.4	0.04844461		746.42	0.00636454		1276.41	0.00782136		1806.44	0.01250593		2336.44	-0.00493449		2866.44	-0.00021192		3396.44	-0.00852854
216.6	0.04914327		746.62	0.00648298		1276.61	0.00826481		1806.64	0.0127876		2336.64	-0.00484123		2866.64	-0.00144829		3396.64	-0.00829422
216.8	0.0493059		746.82	0.00724826		1276.81	0.00851807		1806.84	0.0120356		2336.84	-0.00523267		2866.84	-0.00159508		3396.84	-0.00909166
217	0.04967353		747.02	0.008267		1277.01	0.00949823		1807.04	0.01241307		2337.04	-0.00550345		2867.04	-0.00138329		3397.04	-0.00979602
217.2	0.04984261		747.22	0.00910618		1277.21	0.00941962		1807.24	0.0123951		2337.24	-0.00579547		2867.24	-0.00264041		3397.24	-0.01072169
217.4	0.04960994		747.42	0.01056074		1277.41	0.00954842		1807.44	0.01098255		2337.44	-0.00525486		2867.44	-0.0029234		3397.44	-0.01135148
217.6	0.05030395		747.62	0.01092511		1277.61	0.00927642		1807.64	0.01070612		2337.64	-0.004346		2867.64	-0.00248293		3397.64	-0.01205789
217.8	0.05016255		747.82	0.01077238		1277.81	0.00868673		1807.84	0.01015528		2337.84	-0.00483525		2867.84	-0.00234163		3397.84	-0.01223282
218	0.05127415		748.02	0.01087741		1278.01	0.00888813		1808.04	0.00974448		2338.04	-0.00472876		2868.04	-0.00311614		3398.04	-0.01216315
218.2	0.05250049		748.22	0.01056074		1278.21	0.00935246		1808.24	0.00845646		2338.24	-0.00491742		2868.24	-0.00323734		3398.24	-0.01245854
218.4	0.05334937		748.42	0.0105646		1278.41	0.00906082		1808.44	0.0092415		2338.44	-0.00455921		2868.44	-0.00267103		3398.44	-0.01287689
218.6	0.05416282		748.62	0.00979304		1278.61	0.00871256		1808.64	0.00791446		2338.64	-0.00527814		2868.64	-0.00170253		3398.64	-0.01130845
218.8	0.05399319		748.82	0.00948761		1278.81	0.00959038		1808.84	0.009021		2338.84	-0.00573095		2868.84	-0.00016091		3398.84	-0.01046282
219	0.05504202		749.02	0.00886397		1279.01	0.01077106		1809.04	0.00918903		2339.04	-0.00563936		2869.04	0.00054193		3399.04	-0.0089626
219.2	0.05563403		749.22	0.00725106		1279.21	0.0111237		1809.24	0.00891846		2339.24	-0.00557979		2869.24	0.00060374		3399.24	-0.00797658
219.4	0.05595446		749.42	0.00605687		1279.41	0.01060804		1809.44	0.00894069		2339.44	-0.00656822		2869.44	0.00079952		3399.44	-0.00648336
219.6	0.05695746		749.62	0.00523507		1279.61	0.01064035		1809.64	0.00925103		2339.64	-0.00736003		2869.64	0.0008054		3399.64	-0.00550968
219.8	0.05675119		749.82	0.00547828		1279.81	0.01063342		1809.84	0.00941513		2339.84	-0.00840929		2869.84	0.00086524		3399.84	-0.00462824
220	0.05624907		750.02	0.00543937		1280.01	0.01117065		1810.04	0.00977146		2340.04	-0.00870705		2870.04	0.00037074		3400.04	-0.00398082
220.2	0.05662867		750.22	0.00549151		1280.21	0.01072006		1810.24	0.00942745		2340.24	-0.00931874		2870.24	0.00045441		3400.24	-0.00375019
220.4	0.05737952		750.42	0.00610334		1280.41	0.01008694		1810.44	0.00937925		2340.44	-0.00872824		2870.44	0.0001082		3400.44	-0.00397281
220.6	0.05765243		750.62	0.00631019		1280.61	0.01014624		1810.64	0.00955076		2340.64	-0.00918347		2870.64	0.00038321		3400.64	-0.00432513
220.8	0.05759258		750.82	0.00674538		1280.81	0.0096931		1810.84	0.00905586		2340.84	-0.00940725		2870.84	0.00077483		3400.84	-0.00500044
221	0.05761654		751.02	0.00741858		1281.01	0.01034405		1811.04	0.00921894		2341.04	-0.00909854		2871.04	0.00040311		3401.04	-0.00574123
221.2	0.05743304		751.22	0.00791931		1281.21	0.00964934		1811.24	0.00844098		2341.24	-0.00773081		2871.24	-0.00008075		3401.24	-0.00668672
221.4	0.05700023		751.42	0.00809773		1281.41	0.00974043		1811.44	0.00761748		2341.44	-0.00680937		2871.44	0.00062557		3401.44	-0.00696464
221.6	0.05758118		751.62	0.00738267		1281.61	0.00845607		1811.64	0.00775704		2341.64	-0.00578802		2871.64	0.00072481		3401.64	-0.00811581
221.8	0.05776246		751.82	0.00703848		1281.81	0.00859277		1811.84	0.00710146		2341.84	-0.00549748		2871.84	0.00045266		3401.84	-0.00899375
222	0.05841564		752.02	0.00748839		1282.01	0.00876304		1812.04	0.00664371		2342.04	-0.00520869		2872.04	0.00058704		3402.04	-0.00876781
222.2	0.05838773		752.22	0.00800512		1282.21	0.00927035		1812.24	0.00611988		2342.24	-0.00527722		2872.24	0.00047686		3402.24	-0.00860257
222.4	0.05867395		752.42	0.00849127		1282.41	0.00934216		1812.44	0.00639705		2342.44	-0.00498489		2872.44	0.00204049		3402.44	-0.0091672
222.6	0.0584787		752.62	0.00869635		1282.61	0.00938314		1812.64	0.00541551		2342.64	-0.00515111		2872.64	0.00237667		3402.64	-0.00851515
222.8	0.05880719		752.82	0.0090774		1282.81	0.00981177		1812.84	0.00633949		2342.84	-0.00494128		2872.84	0.00291867		3402.84	-0.00838966
223	0.05970801		753.02	0.00850773		1283.01	0.00993156		1813.04	0.00688368		2343.04	-0.00492837		2873.04	0.00270891		3403.04	-0.00801321
223.2	0.06085551		753.22	0.00757078		1283.21	0.01025332		1813.24	0.00721932		2343.24	-0.00525329		2873.24	0.00259551		3403.24	-0.00766129
223.4	0.06187348		753.42	0.00778015		1283.41	0.01098358		1813.44	0.0076728		2343.44	-0.00558904		2873.44	0.0021617		3403.44	-0.00804553
223.6	0.0631671		753.62	0.00847127		1283.61	0.01147747		1813.64	0.00717029		2343.64	-0.00526819		2873.64	0.00233322		3403.64	-0.00826192
223.8	0.06227073		753.82	0.00921058		1283.81	0.01170085		1813.84	0.007232		2343.84	-0.00476543		2873.84	0.00299089		3403.84	-0.00833238
224	0.06247309		754.02	0.00830122		1284.01	0.0122205		1814.04	0.00715765		2344.04	-0.00537521		2874.04	0.00308595		3404.04	-0.00903279
224.2	0.06265392		754.22	0.00790446		1284.21	0.0118882		1814.24	0.00689294		2344.24	-0.00603696		2874.24	0.00272397		3404.24	-0.01002851
224.4	0.06300245		754.42	0.00803385		1284.41	0.01131129		1814.44	0.00703335		2344.44	-0.00529465		2874.44	0.00237735		3404.44	-0.0110109
224.6	0.06293481		754.62	0.00768245		1284.61	0.0112706		1814.64	0.00706838		2344.64	-0.00535816		2874.64	0.00263388		3404.64	-0.01109776
224.8	0.06428779		754.82	0.00689692		1284.81	0.01086822		1814.84	0.00610755		2344.84	-0.00525868		2874.84	0.00209117		3404.84	-0.01098056
225	0.06444029		755.02	0.00668614		1285.01	0.01157512		1815.04	0.00659054		2345.04	-0.00531314		2875.04	0.00245012		3405.04	-0.01131639
225.2	0.06440296		755.22	0.00614157		1285.21	0.01108177		1815.24	0.00635545		2345.24	-0.00506632		2875.24	0.00349146		3405.24	-0.01101903
225.4	0.06544958		755.42	0.00585194		1285.41	0.01086738		1815.44	0.00600822		2345.44	-0.00541457		2875.44	0.00282475		3405.44	-0.01127034
225.6	0.06605254		755.62	0.00586319		1285.61	0.01005822		1815.64	0.00625388		2345.64	-0.00478822		2875.64	0.00197096		3405.64	-0.01140623
225.8	0.06659107		755.82	0.00667498		1285.81	0.01071633		1815.84	0.00712447		2345.84	-0.00479906		2875.84	0.00184522		3405.84	-0.01152058
226	0.0666148		756.02	0.00844533		1286.01	0.01037924		1816.04	0.00772592		2346.04	-0.00455417		2876.04	0.00251435		3406.04	-0.01087637
226.2	0.06588213		756.22	0.0093786		1286.21	0.01047732		1816.24	0.00762672		2346.24	-0.00451573		2876.24	0.00311069		3406.24	-0.01071667
226.4	0.06621708		756.42	0.00978617		1286.41	0.00924933		1816.44	0.00787366		2346.44	-0.00437714		2876.44	0.0038292		3406.44	-0.0109963
226.6	0.06594137		756.62	0.01017378		1286.61	0.00893525		1816.64	0.008004		2346.64	-0.00408486		2876.64	0.00363098		3406.64	-0.01095789
226.8	0.06663636		756.82	0.01024637		1286.81	0.0091271		1816.84	0.00861185		2346.84	-0.00436794		2876.84	0.00381167		3406.84	-0.01031006
227	0.06654926		757.02	0.01061855		1287.01	0.00937959		1817.04	0.00897874		2347.04	-0.0056153		2877.04	0.00315321		3407.04	-0.0111664
227.2	0.0669988		757.22	0.01043367		1287.21	0.00965291		1817.24	0.00851801		2347.24	-0.00632229		2877.24	0.00311266		3407.24	-0.01194493
227.4	0.06679809		757.42	0.0107955		1287.41	0.009696		1817.44	0.00894779		2347.44	-0.00576629		2877.44	0.00294809		3407.44	-0.0123726
227.6	0.06664466		757.62	0.01097989		1287.61	0.0097354		1817.64	0.00876632		2347.64	-0.00566964		2877.64	0.0037091		3407.64	-0.01279768
227.8	0.06557584		757.82	0.01099599		1287.81	0.01003256		1817.84	0.00920874		2347.84	-0.00637947		2877.84	0.00416016		3407.84	-0.01345476
228	0.06560715		758.02	0.00993033		1288.01	0.00999362		1818.04	0.00916123		2348.04	-0.00710464		2878.04	0.00463293		3408.04	-0.01431952
228.2	0.06624258		758.22	0.00953229		1288.21	0.01111593		1818.24	0.00940094		2348.24	-0.00651716		2878.24	0.00412568		3408.24	-0.01498616
228.4	0.06764289		758.42	0.0094797		1288.41	0.01217925		1818.44	0.00916663		2348.44	-0.00591286		2878.44	0.0048449		3408.44	-0.01497965
228.6	0.06754933		758.62	0.00896183		1288.61	0.0123928		1818.64	0.00835225		2348.64	-0.00719231		2878.64	0.00466		3408.64	-0.0137593
228.8	0.06819759		758.82	0.0082615		1288.81	0.01394979		1818.84	0.00800862		2348.84	-0.00742951		2878.84	0.00443054		3408.84	-0.0138547
229	0.06889749		759.02	0.00786633		1289.01	0.01518791		1819.04	0.00771173		2349.04	-0.00774611		2879.04	0.00431444		3409.04	-0.01359993
229.2	0.07004579		759.22	0.00718052		1289.21	0.01482169		1819.24	0.00633866		2349.24	-0.0075941		2879.24	0.00398502		3409.24	-0.01314994
229.4	0.07159218		759.42	0.00715018		1289.41	0.01491103		1819.44	0.00665448		2349.44	-0.00755392		2879.44	0.00253212		3409.44	-0.01351707
229.6	0.07164582		759.62	0.00736372		1289.61	0.01435215		1819.64	0.00699945		2349.64	-0.00708445		2879.64	0.00221463		3409.64	-0.0134641
229.8	0.07209492		759.82	0.00720726		1289.81	0.01471073		1819.84	0.00697538		2349.84	-0.0068728		2879.84	0.00222264		3409.84	-0.01376221
230	0.07208852		760.02	0.0077781		1290.01	0.01530371		1820.04	0.00620384		2350.04	-0.00699395		2880.04	0.0023322		3410.04	-0.01383531
230.2	0.07171789		760.22	0.00734192		1290.21	0.0147945		1820.24	0.00461313		2350.24	-0.006773		2880.24	0.00195094		3410.24	-0.01318411
230.4	0.07274741		760.42	0.00726834		1290.41	0.013782		1820.44	0.00465329		2350.44	-0.00646303		2880.44	0.00123025		3410.44	-0.01229904
230.6	0.07272617		760.62	0.00752224		1290.61	0.01376941		1820.64	0.00442474		2350.64	-0.00635814		2880.64	0.0008573		3410.64	-0.0117191
230.8	0.07221187		760.82	0.00845717		1290.81	0.01359094		1820.84	0.00433661		2350.84	-0.00634024		2880.84	0.00036468		3410.84	-0.01165996
231	0.07160061		761.02	0.00933604		1291.01	0.01287021		1821.04	0.00448253		2351.04	-0.00666148		2881.04	-0.00030455		3411.04	-0.01215895
231.2	0.07136441		761.22	0.00939387		1291.21	0.0124691		1821.24	0.0046738		2351.24	-0.00646738		2881.24	0.00081675		3411.24	-0.01195642
231.4	0.07112324		761.42	0.00990685		1291.41	0.01229912		1821.44	0.00602663		2351.44	-0.00563079		2881.44	0.0016204		3411.44	-0.01183224
231.6	0.07144794		761.62	0.00944269		1291.61	0.01234574		1821.64	0.00695818		2351.64	-0.00564634		2881.64	0.00128001		3411.64	-0.01259647
231.8	0.07166147		761.82	0.00903372		1291.81	0.01189277		1821.84	0.00686135		2351.84	-0.00514028		2881.84	0.00259732		3411.84	-0.0121588
232	0.07261009		762.02	0.00924737		1292.01	0.01212883		1822.04	0.00724193		2352.04	-0.00454968		2882.04	0.00333242		3412.04	-0.012191
232.2	0.07345375		762.22	0.0095561		1292.21	0.01316614		1822.24	0.00786967		2352.24	-0.00397451		2882.24	0.00239638		3412.24	-0.01269973
232.4	0.07297441		762.42	0.00945848		1292.41	0.01374077		1822.44	0.00803977		2352.44	-0.00394137		2882.44	0.00296164		3412.44	-0.01253932
232.6	0.07273138		762.62	0.00923544		1292.61	0.0132902		1822.64	0.0090278		2352.64	-0.00476927		2882.64	0.00214055		3412.64	-0.01256825
232.8	0.07322056		762.82	0.00912051		1292.81	0.01342134		1822.84	0.0093561		2352.84	-0.00442174		2882.84	0.00196941		3412.84	-0.01313444
233	0.07417048		763.02	0.00900435		1293.01	0.01240071		1823.04	0.00880282		2353.04	-0.00444192		2883.04	0.00271363		3413.04	-0.01348032
233.2	0.07430949		763.22	0.0087634		1293.21	0.01197488		1823.24	0.00876152		2353.24	-0.00401315		2883.24	0.00240018		3413.24	-0.01371216
233.4	0.07459222		763.42	0.00901256		1293.41	0.01211331		1823.44	0.00951055		2353.44	-0.00442216		2883.44	0.00155448		3413.44	-0.01410888
233.6	0.0739196		763.62	0.00917847		1293.61	0.01200644		1823.64	0.00958318		2353.64	-0.00478698		2883.64	0.00095753		3413.64	-0.01476118
233.8	0.07387032		763.82	0.00865137		1293.81	0.01298823		1823.84	0.00864951		2353.84	-0.00454361		2883.84	0.00019676		3413.84	-0.01500379
234	0.07437355		764.02	0.00922912		1294.01	0.01343418		1824.04	0.00865037		2354.04	-0.00603513		2884.04	-0.00017035		3414.04	-0.01427872
234.2	0.07453868		764.22	0.0089904		1294.21	0.01279194		1824.24	0.00811675		2354.24	-0.00511432		2884.24	0.00058245		3414.24	-0.01349776
234.4	0.07431555		764.42	0.00934285		1294.41	0.0131626		1824.44	0.00860915		2354.44	-0.00567436		2884.44	0.00048304		3414.44	-0.01324575
234.6	0.07457993		764.62	0.00943717		1294.61	0.01384246		1824.64	0.00834101		2354.64	-0.00561445		2884.64	0.00020523		3414.64	-0.01252839
234.8	0.07405216		764.82	0.01013669		1294.81	0.01459758		1824.84	0.00860696		2354.84	-0.00521073		2884.84	0.00061203		3414.84	-0.01328605
235	0.07382707		765.02	0.01045567		1295.01	0.01458767		1825.04	0.008596		2355.04	-0.00552993		2885.04	0.00106395		3415.04	-0.01301607
235.2	0.07387947		765.22	0.01062645		1295.21	0.01469243		1825.24	0.00852662		2355.24	-0.00517112		2885.24	0.00179951		3415.24	-0.01306463
235.4	0.07394454		765.42	0.01041461		1295.41	0.01466877		1825.44	0.00814361		2355.44	-0.00522466		2885.44	0.00246353		3415.44	-0.01192633
235.6	0.0741688		765.62	0.00945842		1295.61	0.01492196		1825.64	0.00785643		2355.64	-0.0049942		2885.64	0.00286929		3415.64	-0.01182134
235.8	0.0745697		765.82	0.0097955		1295.81	0.01508178		1825.84	0.00694687		2355.84	-0.00491297		2885.84	0.00396786		3415.84	-0.01107889
236	0.07509574		766.02	0.01017121		1296.01	0.0158601		1826.04	0.00673405		2356.04	-0.0040688		2886.04	0.0035		3416.04	-0.01158345
236.2	0.07481523		766.22	0.01044226		1296.21	0.0160265		1826.24	0.00664873		2356.24	-0.00357644		2886.24	0.00299242		3416.24	-0.01254713
236.4	0.07500382		766.42	0.00980434		1296.41	0.01695511		1826.44	0.00689086		2356.44	-0.00396105		2886.44	0.00337403		3416.44	-0.01274179
236.6	0.07588395		766.62	0.01005682		1296.61	0.01667375		1826.64	0.0074335		2356.64	-0.00393111		2886.64	0.00301886		3416.64	-0.01294079
236.8	0.07646188		766.82	0.01000203		1296.81	0.01587071		1826.84	0.00655816		2356.84	-0.00310741		2886.84	0.00333579		3416.84	-0.01358623
237	0.07675402		767.02	0.01063911		1297.01	0.01563698		1827.04	0.0069611		2357.04	-0.00254914		2887.04	0.00381853		3417.04	-0.01381357
237.2	0.07709276		767.22	0.01086087		1297.21	0.01619885		1827.24	0.00656225		2357.24	-0.00265685		2887.24	0.00290392		3417.24	-0.01366975
237.4	0.07771795		767.42	0.01124102		1297.41	0.01621505		1827.44	0.00658425		2357.44	-0.00316646		2887.44	0.00256988		3417.44	-0.01337209
237.6	0.07820889		767.62	0.01114851		1297.61	0.01565093		1827.64	0.00658362		2357.64	-0.00291731		2887.64	0.00211666		3417.64	-0.01359427
237.8	0.07890542		767.82	0.0106855		1297.81	0.01491047		1827.84	0.00698467		2357.84	-0.00304382		2887.84	0.0020412		3417.84	-0.01442517
238	0.07976195		768.02	0.01070437		1298.01	0.01403466		1828.04	0.00760278		2358.04	-0.0044465		2888.04	0.0020842		3418.04	-0.01423627
238.2	0.07976799		768.22	0.01086094		1298.21	0.01366825		1828.24	0.00776344		2358.24	-0.00376225		2888.24	0.00219789		3418.24	-0.0148192
238.4	0.07973905		768.42	0.01049984		1298.41	0.01277716		1828.44	0.00811249		2358.44	-0.00431007		2888.44	0.00194947		3418.44	-0.01502768
238.6	0.08107465		768.62	0.01010488		1298.61	0.01263546		1828.64	0.0087794		2358.64	-0.00396024		2888.64	0.00206628		3418.64	-0.0149165
238.8	0.08078441		768.82	0.01063846		1298.81	0.01222635		1828.84	0.0090154		2358.84	-0.00417035		2888.84	0.00261473		3418.84	-0.01555314
239	0.08124419		769.02	0.01101938		1299.01	0.01124504		1829.04	0.008953		2359.04	-0.0038404		2889.04	0.00216599		3419.04	-0.01511585
239.2	0.08147024		769.22	0.01121355		1299.21	0.01052586		1829.24	0.00896864		2359.24	-0.00392885		2889.24	0.00324214		3419.24	-0.01521457
239.4	0.08130246		769.42	0.0110647		1299.41	0.01043813		1829.44	0.00810148		2359.44	-0.00430029		2889.44	0.00361124		3419.44	-0.01474505
239.6	0.08119738		769.62	0.0104075		1299.61	0.0107917		1829.64	0.00853523		2359.64	-0.00431544		2889.64	0.00344635		3419.64	-0.01570676
239.8	0.08146404		769.82	0.00984332		1299.81	0.01144152		1829.84	0.00846856		2359.84	-0.00422766		2889.84	0.00282562		3419.84	-0.01614057
240	0.081721		770.02	0.00939385		1300.01	0.01127964		1830.04	0.00818802		2360.04	-0.0031987		2890.04	0.00269405		3420.04	-0.01677547
240.2	0.08149685		770.22	0.00991302		1300.21	0.01192001		1830.24	0.00833464		2360.24	-0.00360178		2890.24	0.00206454		3420.24	-0.01709117
240.4	0.08154691		770.42	0.00938922		1300.41	0.01330727		1830.44	0.00785039		2360.44	-0.00416249		2890.44	0.00210655		3420.44	-0.0172627
240.6	0.08125422		770.62	0.00958792		1300.61	0.01365459		1830.64	0.00837996		2360.64	-0.00289288		2890.64	0.00204605		3420.64	-0.01663114
240.8	0.0804189		770.82	0.00906309		1300.81	0.01373969		1830.84	0.00821121		2360.84	-0.00322448		2890.84	0.00212623		3420.84	-0.01631898
241	0.0794031		771.02	0.00924865		1301.01	0.01452149		1831.04	0.00816		2361.04	-0.00336753		2891.04	0.00175291		3421.04	-0.01545147
241.2	0.07907772		771.22	0.00892073		1301.21	0.01514928		1831.24	0.00732837		2361.24	-0.0034596		2891.24	0.00084764		3421.24	-0.01527955
241.4	0.07910356		771.42	0.00885461		1301.41	0.01522015		1831.44	0.00739591		2361.44	-0.00252684		2891.44	0.00102051		3421.44	-0.01457302
241.6	0.07917294		771.62	0.00807647		1301.61	0.0146667		1831.64	0.00793659		2361.64	-0.0022335		2891.64	-0.00019262		3421.64	-0.01499386
241.8	0.07912233		771.82	0.00810947		1301.81	0.01424618		1831.84	0.00825508		2361.84	-0.00177419		2891.84	-0.00025427		3421.84	-0.01563734
242	0.0789612		772.02	0.00820295		1302.01	0.01331029		1832.04	0.00836463		2362.04	-0.0023063		2892.04	0.00005406		3422.04	-0.01505986
242.2	0.07931607		772.22	0.00779535		1302.21	0.01297496		1832.24	0.0084296		2362.24	-0.00215005		2892.24	0.00019146		3422.24	-0.01460188
242.4	0.07980136		772.42	0.00705303		1302.41	0.01306737		1832.44	0.00821376		2362.44	-0.00217853		2892.44	0.00144373		3422.44	-0.01377692
242.6	0.08066182		772.62	0.00797887		1302.61	0.01467567		1832.64	0.00817418		2362.64	-0.00189777		2892.64	0.00147501		3422.64	-0.01332923
242.8	0.08092791		772.82	0.00874938		1302.81	0.01431117		1832.84	0.00779181		2362.84	-0.00168093		2892.84	0.00099463		3422.84	-0.01348616
243	0.08125186		773.02	0.00984265		1303.01	0.0143661		1833.04	0.00792666		2363.04	-0.00181053		2893.04	0.00090648		3423.04	-0.01351479
243.2	0.08104316		773.22	0.01041265		1303.21	0.01467092		1833.24	0.0078642		2363.24	-0.00233129		2893.24	0.00212955		3423.24	-0.01334865
243.4	0.08082167		773.42	0.01053144		1303.41	0.01524875		1833.44	0.00762221		2363.44	-0.00254924		2893.44	0.001733		3423.44	-0.0133301
243.6	0.08183076		773.62	0.01102526		1303.61	0.0147301		1833.64	0.00862068		2363.64	-0.00297294		2893.64	0.00198178		3423.64	-0.01353928
243.8	0.08309918		773.82	0.01098057		1303.81	0.01574089		1833.84	0.00850703		2363.84	-0.00268268		2893.84	0.00219504		3423.84	-0.01419372
244	0.0842088		774.02	0.01165754		1304.01	0.01511506		1834.04	0.00880659		2364.04	-0.0034365		2894.04	0.00270939		3424.04	-0.01438649
244.2	0.08429072		774.22	0.01221727		1304.21	0.01597755		1834.24	0.00852065		2364.24	-0.00340062		2894.24	0.00303319		3424.24	-0.01397524
244.4	0.08438469		774.42	0.01152765		1304.41	0.01606905		1834.44	0.00868122		2364.44	-0.00412096		2894.44	0.00374399		3424.44	-0.01442235
244.6	0.08480885		774.62	0.011803		1304.61	0.0163768		1834.64	0.01003432		2364.64	-0.0035729		2894.64	0.0042216		3424.64	-0.01355828
244.8	0.0851061		774.82	0.01123509		1304.81	0.0166513		1834.84	0.01030829		2364.84	-0.00424717		2894.84	0.0049913		3424.84	-0.01388728
245	0.08518389		775.02	0.0109464		1305.01	0.01664067		1835.04	0.00965975		2365.04	-0.00412496		2895.04	0.00466134		3425.04	-0.01465636
245.2	0.08566041		775.22	0.01050757		1305.21	0.0160728		1835.24	0.01011692		2365.24	-0.00359567		2895.24	0.00462042		3425.24	-0.01521521
245.4	0.08579891		775.42	0.01000136		1305.41	0.01531728		1835.44	0.01104748		2365.44	-0.00334242		2895.44	0.00494919		3425.44	-0.01500178
245.6	0.08590079		775.62	0.0096906		1305.61	0.01491085		1835.64	0.01164917		2365.64	-0.00293235		2895.64	0.00422282		3425.64	-0.01466929
245.8	0.08577222		775.82	0.00941653		1305.81	0.01412691		1835.84	0.0107197		2365.84	-0.00282002		2895.84	0.00467668		3425.84	-0.0146661
246	0.08585296		776.02	0.00905567		1306.01	0.01394856		1836.04	0.01096977		2366.04	-0.00351112		2896.04	0.00464428		3426.04	-0.01468134
246.2	0.0862433		776.22	0.00921231		1306.21	0.01435592		1836.24	0.00987778		2366.24	-0.00296379		2896.24	0.00421487		3426.24	-0.01424631
246.4	0.08580324		776.42	0.01001814		1306.41	0.01516003		1836.44	0.00916836		2366.44	-0.00264072		2896.44	0.00458878		3426.44	-0.01450283
246.6	0.08587328		776.62	0.01039112		1306.61	0.01548349		1836.64	0.00909247		2366.64	-0.0023967		2896.64	0.003636		3426.64	-0.0147434
246.8	0.08536038		776.82	0.00975684		1306.81	0.0148056		1836.84	0.00937082		2366.84	-0.00258566		2896.84	0.00306139		3426.84	-0.01540677
247	0.08466674		777.02	0.01032523		1307.01	0.01528613		1837.04	0.00934252		2367.04	-0.00278699		2897.04	0.0033705		3427.04	-0.0151068
247.2	0.08483048		777.22	0.00963536		1307.21	0.01540969		1837.24	0.00835073		2367.24	-0.00355678		2897.24	0.00292623		3427.24	-0.01474242
247.4	0.08469338		777.42	0.00959023		1307.41	0.01538539		1837.44	0.00779719		2367.44	-0.00395607		2897.44	0.00253447		3427.44	-0.01487068
247.6	0.08618837		777.62	0.01017407		1307.61	0.01501665		1837.64	0.00748766		2367.64	-0.00310274		2897.64	0.00234304		3427.64	-0.01484981
247.8	0.08755955		777.82	0.00984854		1307.81	0.0159201		1837.84	0.00648403		2367.84	-0.00286057		2897.84	0.0029475		3427.84	-0.01530399
248	0.08752399		778.02	0.00989189		1308.01	0.01457504		1838.04	0.00600233		2368.04	-0.00201416		2898.04	0.00342188		3428.04	-0.01525309
248.2	0.08828292		778.22	0.00910295		1308.21	0.01496645		1838.24	0.00402168		2368.24	-0.00150608		2898.24	0.00330992		3428.24	-0.01412952
248.4	0.08907597		778.42	0.00907905		1308.41	0.0148571		1838.44	0.00347986		2368.44	-0.00128838		2898.44	0.00394218		3428.44	-0.01439012
248.6	0.08997937		778.62	0.010032		1308.61	0.01474364		1838.64	0.00327962		2368.64	-0.00136965		2898.64	0.00428199		3428.64	-0.01439429
248.8	0.09026032		778.82	0.00976389		1308.81	0.01425178		1838.84	0.00293068		2368.84	-0.00109464		2898.84	0.00527648		3428.84	-0.01473172
249	0.08972563		779.02	0.00950801		1309.01	0.01314643		1839.04	0.00271883		2369.04	-0.00133491		2899.04	0.00499183		3429.04	-0.01506303
249.2	0.08973718		779.22	0.0092604		1309.21	0.01349684		1839.24	0.00369862		2369.24	-0.00102834		2899.24	0.00560526		3429.24	-0.01496157
249.4	0.08949061		779.42	0.00965915		1309.41	0.01381072		1839.44	0.00448574		2369.44	-0.00009419		2899.44	0.00573972		3429.44	-0.01393115
249.6	0.08985583		779.62	0.01031506		1309.61	0.01398668		1839.64	0.00448504		2369.64	0.00078508		2899.64	0.00596789		3429.64	-0.014126
249.8	0.08874437		779.82	0.011008		1309.81	0.01396994		1839.84	0.0047138		2369.84	-0.00014005		2899.84	0.00542018		3429.84	-0.01422587
250	0.08953847		780.02	0.01146517		1310.01	0.01453269		1840.04	0.00570185		2370.04	-0.00030038		2900.04	0.00545475		3430.04	-0.01410061
250.2	0.08951981		780.22	0.01192604		1310.21	0.01394641		1840.24	0.00633125		2370.24	-0.00062426		2900.24	0.00494435		3430.24	-0.01423393
250.4	0.08905716		780.42	0.01229805		1310.41	0.01447952		1840.44	0.00711421		2370.44	-0.0020145		2900.44	0.00508164		3430.44	-0.01461807
250.6	0.08905837		780.62	0.01165994		1310.61	0.01531075		1840.64	0.00845754		2370.64	-0.00269684		2900.64	0.00524253		3430.64	-0.0148471
250.8	0.08883445		780.82	0.01157568		1310.81	0.01595846		1840.84	0.00878161		2370.84	-0.003511		2900.84	0.00604795		3430.84	-0.01517725
251	0.08850085		781.02	0.01170027		1311.01	0.01658412		1841.04	0.00900703		2371.04	-0.00401385		2901.04	0.00620153		3431.04	-0.01470352
251.2	0.08912555		781.22	0.01058547		1311.21	0.01689192		1841.24	0.00912325		2371.24	-0.00501858		2901.24	0.0056401		3431.24	-0.0142063
251.4	0.08954432		781.42	0.01132142		1311.41	0.01674154		1841.44	0.00946823		2371.44	-0.00461991		2901.44	0.00601623		3431.44	-0.01413003
251.6	0.09079078		781.62	0.01167637		1311.61	0.01683754		1841.64	0.00926333		2371.64	-0.00474888		2901.64	0.00604314		3431.64	-0.01378048
251.8	0.09142783		781.82	0.01139706		1311.81	0.01726076		1841.84	0.00907765		2371.84	-0.00507736		2901.84	0.00642772		3431.84	-0.01352587
252	0.09144573		782.02	0.01132456		1312.01	0.01759578		1842.04	0.00808556		2372.04	-0.00456664		2902.04	0.00596685		3432.04	-0.01348043
252.2	0.09298161		782.22	0.01091134		1312.21	0.01809718		1842.24	0.00682091		2372.24	-0.00421639		2902.24	0.00550426		3432.24	-0.01352758
252.4	0.09235294		782.42	0.01116797		1312.41	0.01815732		1842.44	0.00733611		2372.44	-0.00382777		2902.44	0.00594449		3432.44	-0.01400461
252.6	0.09237455		782.62	0.01067059		1312.61	0.01834059		1842.64	0.00740593		2372.64	-0.00452055		2902.64	0.00651082		3432.64	-0.01447975
252.8	0.0926063		782.82	0.00952692		1312.81	0.017381		1842.84	0.00805525		2372.84	-0.00302102		2902.84	0.00679719		3432.84	-0.01437617
253	0.09215057		783.02	0.00866599		1313.01	0.01739442		1843.04	0.00823815		2373.04	-0.00222933		2903.04	0.00631764		3433.04	-0.01504871
253.2	0.09238062		783.22	0.00906501		1313.21	0.01826825		1843.24	0.00805871		2373.24	-0.00114799		2903.24	0.005862		3433.24	-0.01526769
253.4	0.09256393		783.42	0.00957446		1313.41	0.0174012		1843.44	0.00862061		2373.44	0.00031248		2903.44	0.00429996		3433.44	-0.01527119
253.6	0.0929099		783.62	0.00934995		1313.61	0.01646551		1843.64	0.00840566		2373.64	0.00085569		2903.64	0.00352993		3433.64	-0.01497068
253.8	0.09197149		783.82	0.00999624		1313.81	0.01592997		1843.84	0.00827144		2373.84	0.00044334		2903.84	0.00275789		3433.84	-0.01517275
254	0.09311714		784.02	0.00969332		1314.01	0.01624794		1844.04	0.00840503		2374.04	0.00145314		2904.04	0.00279274		3434.04	-0.01451351
254.2	0.09250582		784.22	0.00975181		1314.21	0.0157223		1844.24	0.00895141		2374.24	0.00155991		2904.24	0.00261265		3434.24	-0.01493859
254.4	0.09206472		784.42	0.00983327		1314.41	0.01616785		1844.44	0.00839029		2374.44	0.00182523		2904.44	0.00355954		3434.44	-0.01498692
254.6	0.09206727		784.62	0.00981859		1314.61	0.01648225		1844.64	0.00856534		2374.64	0.00285687		2904.64	0.00396078		3434.64	-0.01552285
254.8	0.09162258		784.82	0.0101316		1314.81	0.01683233		1844.84	0.0078443		2374.84	0.00282958		2904.84	0.00454296		3434.84	-0.01557694
255	0.09199347		785.02	0.00982575		1315.01	0.01637656		1845.04	0.00864534		2375.04	0.00348369		2905.04	0.00448922		3435.04	-0.01550453
255.2	0.09252046		785.22	0.01016171		1315.21	0.01686817		1845.24	0.00848757		2375.24	0.0033934		2905.24	0.00462139		3435.24	-0.01524594
255.4	0.09226674		785.42	0.01134557		1315.41	0.01702773		1845.44	0.00802422		2375.44	0.00336439		2905.44	0.00497989		3435.44	-0.01486799
255.6	0.0920495		785.62	0.01082824		1315.61	0.01773349		1845.64	0.00840078		2375.64	0.002665		2905.64	0.00511814		3435.64	-0.0144388
255.8	0.09125534		785.82	0.01132582		1315.81	0.0190177		1845.84	0.00871119		2375.84	0.00327169		2905.84	0.00493188		3435.84	-0.01443367
256	0.09122895		786.02	0.01143326		1316.01	0.01871051		1846.04	0.00893585		2376.04	0.00322101		2906.04	0.00534473		3436.04	-0.01401526
256.2	0.0914918		786.22	0.01083344		1316.21	0.0186896		1846.24	0.00926124		2376.24	0.00353527		2906.24	0.00562323		3436.24	-0.01453344
256.4	0.09171678		786.42	0.01051312		1316.41	0.01880735		1846.44	0.00917187		2376.44	0.00255351		2906.44	0.00561201		3436.44	-0.01405749
256.6	0.0918224		786.62	0.0102143		1316.61	0.01822877		1846.64	0.00935018		2376.64	0.00225569		2906.64	0.00558856		3436.64	-0.01378427
256.8	0.09201858		786.82	0.00930225		1316.81	0.01769931		1846.84	0.01000827		2376.84	0.00311373		2906.84	0.00466956		3436.84	-0.01355279
257	0.09240627		787.02	0.00882325		1317.01	0.01830467		1847.04	0.00964817		2377.04	0.00274807		2907.04	0.00426858		3437.04	-0.01296953
257.2	0.09286313		787.22	0.00936453		1317.21	0.01804544		1847.24	0.00950758		2377.24	0.00281196		2907.24	0.0029201		3437.24	-0.01255664
257.4	0.09388567		787.42	0.00910133		1317.41	0.01667984		1847.44	0.01007223		2377.44	0.00203324		2907.44	0.00204361		3437.44	-0.01248606
257.6	0.09559339		787.62	0.00964641		1317.61	0.01653441		1847.64	0.01033072		2377.64	0.00126942		2907.64	0.00239915		3437.64	-0.01244511
257.8	0.09598982		787.82	0.01064088		1317.81	0.01624439		1847.84	0.01028403		2377.84	0.00028171		2907.84	0.00224347		3437.84	-0.01297291
258	0.09631333		788.02	0.01030196		1318.01	0.01681161		1848.04	0.01152318		2378.04	0.00030763		2908.04	0.00262413		3438.04	-0.01201834
258.2	0.09691061		788.22	0.01020557		1318.21	0.01642195		1848.24	0.01122386		2378.24	0.00000784		2908.24	0.00242104		3438.24	-0.01263837
258.4	0.09770219		788.42	0.01038793		1318.41	0.0163223		1848.44	0.0102973		2378.44	0.00062017		2908.44	0.00223759		3438.44	-0.01366365
258.6	0.09797231		788.62	0.01072871		1318.61	0.01643134		1848.64	0.0100297		2378.64	0.00072327		2908.64	0.00173066		3438.64	-0.01347145
258.8	0.09806794		788.82	0.01118349		1318.81	0.01721822		1848.84	0.00934177		2378.84	0.00031747		2908.84	0.00264967		3438.84	-0.01346345
259	0.09845617		789.02	0.01172794		1319.01	0.01692338		1849.04	0.00892214		2379.04	0.00018045		2909.04	0.0023446		3439.04	-0.01373049
259.2	0.0979238		789.22	0.01259529		1319.21	0.01819517		1849.24	0.00741051		2379.24	-0.00094205		2909.24	0.00220719		3439.24	-0.01371375
259.4	0.09681007		789.42	0.01293817		1319.41	0.01863422		1849.44	0.00713381		2379.44	-0.00080834		2909.44	0.0029353		3439.44	-0.01367118
259.6	0.09655745		789.62	0.01307565		1319.61	0.01829487		1849.64	0.00673036		2379.64	-0.00100291		2909.64	0.00343906		3439.64	-0.01404983
259.8	0.095925		789.82	0.01388662		1319.81	0.01891532		1849.84	0.00684698		2379.84	-0.00063367		2909.84	0.00320085		3439.84	-0.01402605
260	0.09665883		790.02	0.01366384		1320.01	0.01750267		1850.04	0.00681188		2380.04	-0.00037304		2910.04	0.00429255		3440.04	-0.01417121
260.2	0.09758488		790.22	0.01285871		1320.21	0.01827997		1850.24	0.00611659		2380.24	-0.00037052		2910.24	0.00483528		3440.24	-0.01516619
260.4	0.09782241		790.42	0.012461		1320.41	0.0180898		1850.44	0.00486289		2380.44	0.00006375		2910.44	0.0052506		3440.44	-0.01477309
260.6	0.09737531		790.62	0.01166692		1320.61	0.0181885		1850.64	0.00471854		2380.64	0.00076465		2910.64	0.0057456		3440.64	-0.01493783
260.8	0.09701498		790.82	0.01044587		1320.81	0.01890315		1850.84	0.00433666		2380.84	0.00109359		2910.84	0.00600048		3440.84	-0.01537333
261	0.09727866		791.02	0.01010147		1321.01	0.01848499		1851.04	0.00417318		2381.04	0.00054635		2911.04	0.00648942		3441.04	-0.01528438
261.2	0.09637214		791.22	0.01055999		1321.21	0.01812054		1851.24	0.00359261		2381.24	0.00035474		2911.24	0.00697004		3441.24	-0.01652823
261.4	0.09731632		791.42	0.01032168		1321.41	0.01779383		1851.44	0.0037064		2381.44	-0.00041073		2911.44	0.00740401		3441.44	-0.01682081
261.6	0.09760406		791.62	0.01093623		1321.61	0.01813599		1851.64	0.0038851		2381.64	-0.00062975		2911.64	0.00812203		3441.64	-0.0168934
261.8	0.09704411		791.82	0.01037155		1321.81	0.01750567		1851.84	0.00405693		2381.84	-0.00058651		2911.84	0.00822709		3441.84	-0.01632903
262	0.09654371		792.02	0.00978295		1322.01	0.01797777		1852.04	0.00559664		2382.04	-0.00034117		2912.04	0.00857945		3442.04	-0.01625581
262.2	0.09749203		792.22	0.01013719		1322.21	0.01770444		1852.24	0.00582346		2382.24	0.00022484		2912.24	0.00808593		3442.24	-0.01622634
262.4	0.09658742		792.42	0.01003276		1322.41	0.01797377		1852.44	0.00642873		2382.44	0.00075196		2912.44	0.00772388		3442.44	-0.01624653
262.6	0.09605984		792.62	0.01079188		1322.61	0.01783761		1852.64	0.00614093		2382.64	0.00106996		2912.64	0.00724437		3442.64	-0.01524334
262.8	0.09652318		792.82	0.01179449		1322.81	0.0181107		1852.84	0.00658941		2382.84	0.0008095		2912.84	0.00713668		3442.84	-0.01555525
263	0.09656554		793.02	0.01302748		1323.01	0.01848977		1853.04	0.00721922		2383.04	0.00076134		2913.04	0.00576814		3443.04	-0.01522443
263.2	0.0960653		793.22	0.01431974		1323.21	0.01962937		1853.24	0.00773234		2383.24	-0.00003853		2913.24	0.00566348		3443.24	-0.01491558
263.4	0.09680782		793.42	0.01544266		1323.41	0.01955587		1853.44	0.00900817		2383.44	0.00000158		2913.44	0.00596146		3443.44	-0.01503076
263.6	0.09720653		793.62	0.01559068		1323.61	0.01947771		1853.64	0.00930611		2383.64	0.00004969		2913.64	0.00526822		3443.64	-0.01475554
263.8	0.09750915		793.82	0.01588409		1323.81	0.02045802		1853.84	0.01029138		2383.84	0.00001713		2913.84	0.00446145		3443.84	-0.01442474
264	0.09902436		794.02	0.01585682		1324.01	0.02047384		1854.04	0.0106623		2384.04	0.00057563		2914.04	0.00496916		3444.04	-0.01443796
264.2	0.09977999		794.22	0.01427331		1324.21	0.02148382		1854.24	0.01047372		2384.24	0.00002675		2914.24	0.0047953		3444.24	-0.01341664
264.4	0.09975056		794.42	0.01458614		1324.41	0.0208574		1854.44	0.01013772		2384.44	-0.00032896		2914.44	0.00465043		3444.44	-0.01264258
264.6	0.10094426		794.62	0.01422507		1324.61	0.02089107		1854.64	0.01024716		2384.64	-0.00063925		2914.64	0.00386157		3444.64	-0.01259054
264.8	0.1010429		794.82	0.0132284		1324.81	0.02100645		1854.84	0.01039932		2384.84	-0.00138146		2914.84	0.00389481		3444.84	-0.01272719
265	0.10167089		795.02	0.01324421		1325.01	0.02039912		1855.04	0.01010439		2385.04	-0.0013807		2915.04	0.0042906		3445.04	-0.01244065
265.2	0.10201801		795.22	0.01341107		1325.21	0.0201735		1855.24	0.00935803		2385.24	-0.00199855		2915.24	0.00466832		3445.24	-0.01213662
265.4	0.10265016		795.42	0.01253907		1325.41	0.01967039		1855.44	0.00875353		2385.44	-0.00183165		2915.44	0.00462035		3445.44	-0.01111273
265.6	0.10299863		795.62	0.01263267		1325.61	0.01932287		1855.64	0.00882497		2385.64	-0.00118166		2915.64	0.0048134		3445.64	-0.01087772
265.8	0.10377806		795.82	0.01279304		1325.81	0.01797976		1855.84	0.00869203		2385.84	-0.00159009		2915.84	0.00509388		3445.84	-0.01048416
266	0.10346717		796.02	0.01237248		1326.01	0.01750165		1856.04	0.00852795		2386.04	-0.00186882		2916.04	0.00598416		3446.04	-0.01075085
266.2	0.10341396		796.22	0.01205101		1326.21	0.01672427		1856.24	0.0077106		2386.24	-0.00147799		2916.24	0.0054978		3446.24	-0.01084797
266.4	0.10245171		796.42	0.01196468		1326.41	0.01676915		1856.44	0.00749587		2386.44	-0.00084608		2916.44	0.00576547		3446.44	-0.01151857
266.6	0.10237002		796.62	0.01226847		1326.61	0.01592597		1856.64	0.00719997		2386.64	-0.00007358		2916.64	0.00546167		3446.64	-0.0121109
266.8	0.10224082		796.82	0.01259029		1326.81	0.01688839		1856.84	0.00871617		2386.84	0.00020116		2916.84	0.0055213		3446.84	-0.01288549
267	0.10152508		797.02	0.01322634		1327.01	0.01767021		1857.04	0.00909293		2387.04	0.00100518		2917.04	0.00582679		3447.04	-0.01334346
267.2	0.10134757		797.22	0.01318118		1327.21	0.01778762		1857.24	0.00983594		2387.24	0.00035418		2917.24	0.00570825		3447.24	-0.01415784
267.4	0.10124813		797.42	0.01236409		1327.41	0.01750884		1857.44	0.01019753		2387.44	0.00071954		2917.44	0.0054684		3447.44	-0.01464821
267.6	0.10040474		797.62	0.01114718		1327.61	0.01785922		1857.64	0.01045555		2387.64	0.00134647		2917.64	0.00581109		3447.64	-0.01553296
267.8	0.10104962		797.82	0.0107176		1327.81	0.01908789		1857.84	0.01076316		2387.84	0.00115651		2917.84	0.00604531		3447.84	-0.01615465
268	0.10137863		798.02	0.00962309		1328.01	0.02015418		1858.04	0.01156224		2388.04	0.00083084		2918.04	0.00658228		3448.04	-0.01678144
268.2	0.10154478		798.22	0.00932661		1328.21	0.01974879		1858.24	0.01139162		2388.24	0.00109575		2918.24	0.00666433		3448.24	-0.01733993
268.4	0.10175198		798.42	0.01025594		1328.41	0.01969238		1858.44	0.0116205		2388.44	0.00096233		2918.44	0.00625489		3448.44	-0.0177554
268.6	0.10254726		798.62	0.00962759		1328.61	0.02046247		1858.64	0.01171895		2388.64	0.00194194		2918.64	0.00504396		3448.64	-0.01846288
268.8	0.10266936		798.82	0.00952536		1328.81	0.02079612		1858.84	0.01123076		2388.84	0.00187799		2918.84	0.00538214		3448.84	-0.01886904
269	0.10331806		799.02	0.0108218		1329.01	0.02049058		1859.04	0.01052623		2389.04	0.00244996		2919.04	0.00541935		3449.04	-0.01848432
269.2	0.10334595		799.22	0.01132217		1329.21	0.02075603		1859.24	0.00986972		2389.24	0.00164274		2919.24	0.00512062		3449.24	-0.01781682
269.4	0.10374236		799.42	0.01116891		1329.41	0.02101977		1859.44	0.00914579		2389.44	0.00197611		2919.44	0.00445585		3449.44	-0.01763336
269.6	0.10423033		799.62	0.01182279		1329.61	0.02160349		1859.64	0.00880074		2389.64	0.00206471		2919.64	0.00474537		3449.64	-0.01728202
269.8	0.10437125		799.82	0.0121926		1329.81	0.02144317		1859.84	0.00729505		2389.84	0.00045784		2919.84	0.00505512		3449.84	-0.01722767
270	0.10315687		800.02	0.01251223		1330.01	0.02170931		1860.04	0.00616578		2390.04	-0.00005711		2920.04	0.0057534		3450.04	-0.01746502
270.2	0.10334667		800.22	0.01310367		1330.21	0.02165632		1860.24	0.00617981		2390.24	0.00078059		2920.24	0.00561585		3450.24	-0.01666983
270.4	0.1038798		800.42	0.01385282		1330.41	0.0215441		1860.44	0.00634175		2390.44	0.00087316		2920.44	0.00522467		3450.44	-0.0165747
270.6	0.10330357		800.62	0.01369516		1330.61	0.02187979		1860.64	0.00608377		2390.64	0.00033113		2920.64	0.00487265		3450.64	-0.01636
270.8	0.10325646		800.82	0.01390328		1330.81	0.02268319		1860.84	0.00571731		2390.84	0.00089658		2920.84	0.0055651		3450.84	-0.01647079
271	0.10375597		801.02	0.01383971		1331.01	0.02190584		1861.04	0.00515981		2391.04	0.00045337		2921.04	0.0048905		3451.04	-0.0161971
271.2	0.10406731		801.22	0.01316741		1331.21	0.02067339		1861.24	0.00535269		2391.24	-0.00032532		2921.24	0.00458403		3451.24	-0.01620305
271.4	0.10389035		801.42	0.01309034		1331.41	0.02026866		1861.44	0.00503566		2391.44	-0.0010183		2921.44	0.00428403		3451.44	-0.01596291
271.6	0.10446702		801.62	0.01322926		1331.61	0.0198869		1861.64	0.00503926		2391.64	-0.00066032		2921.64	0.00606849		3451.64	-0.01685953
271.8	0.10559077		801.82	0.01337289		1331.81	0.01952382		1861.84	0.00442725		2391.84	-0.00106176		2921.84	0.0058718		3451.84	-0.01692447
272	0.10546436		802.02	0.01357747		1332.01	0.01867661		1862.04	0.00410287		2392.04	-0.00128961		2922.04	0.00615241		3452.04	-0.01736211
272.2	0.10542188		802.22	0.01429459		1332.21	0.01784439		1862.24	0.00402101		2392.24	0.00036056		2922.24	0.00609049		3452.24	-0.01774228
272.4	0.10634255		802.42	0.01439284		1332.41	0.01784133		1862.44	0.00414073		2392.44	-0.00039638		2922.44	0.0061612		3452.44	-0.017813
272.6	0.1065612		802.62	0.01411739		1332.61	0.01729458		1862.64	0.0046028		2392.64	0.00041975		2922.64	0.0059972		3452.64	-0.01830811
272.8	0.10735586		802.82	0.01391487		1332.81	0.01637695		1862.84	0.00432081		2392.84	-0.00017021		2922.84	0.00649241		3452.84	-0.01830186
273	0.10779515		803.02	0.01387037		1333.01	0.01612715		1863.04	0.00459197		2393.04	0.000179		2923.04	0.00596384		3453.04	-0.01819211
273.2	0.10732512		803.22	0.01339909		1333.21	0.01666813		1863.24	0.00494287		2393.24	0.00071619		2923.24	0.00532386		3453.24	-0.01842036
273.4	0.10732174		803.42	0.01299354		1333.41	0.01803361		1863.44	0.00547067		2393.44	0.00115781		2923.44	0.00546557		3453.44	-0.01830235
273.6	0.10735513		803.62	0.01259191		1333.61	0.01850144		1863.64	0.00590828		2393.64	0.00153185		2923.64	0.00597371		3453.64	-0.01773534
273.8	0.10682695		803.82	0.01236616		1333.81	0.01893905		1863.84	0.00615475		2393.84	0.00133889		2923.84	0.00625131		3453.84	-0.01865686
274	0.10743354		804.02	0.01269473		1334.01	0.01958919		1864.04	0.00678702		2394.04	0.0016726		2924.04	0.00628775		3454.04	-0.01756848
274.2	0.10821152		804.22	0.01240681		1334.21	0.01980388		1864.24	0.00819906		2394.24	0.00243007		2924.24	0.00712985		3454.24	-0.01731469
274.4	0.10838868		804.42	0.01191986		1334.41	0.02029308		1864.44	0.00797951		2394.44	0.0015571		2924.44	0.0065327		3454.44	-0.01773273
274.6	0.10774673		804.62	0.01102418		1334.61	0.02070131		1864.64	0.00765504		2394.64	0.00053446		2924.64	0.00723389		3454.64	-0.01735215
274.8	0.1075797		804.82	0.0106661		1334.81	0.02102227		1864.84	0.00796478		2394.84	0.00028065		2924.84	0.00747751		3454.84	-0.01709469
275	0.10783725		805.02	0.01112952		1335.01	0.02105921		1865.04	0.00872301		2395.04	-0.00149891		2925.04	0.00741309		3455.04	-0.01682798
275.2	0.10745182		805.22	0.01138907		1335.21	0.02124788		1865.24	0.00872101		2395.24	-0.00192851		2925.24	0.0075182		3455.24	-0.01658635
275.4	0.1068391		805.42	0.01156866		1335.41	0.02172621		1865.44	0.00919377		2395.44	-0.00307961		2925.44	0.00712976		3455.44	-0.01578504
275.6	0.10626709		805.62	0.01151512		1335.61	0.02145525		1865.64	0.00914443		2395.64	-0.00285296		2925.64	0.00782763		3455.64	-0.01641388
275.8	0.10675067		805.82	0.01122892		1335.81	0.02117502		1865.84	0.00902531		2395.84	-0.00372678		2925.84	0.00693232		3455.84	-0.01615764
276	0.10649692		806.02	0.01140841		1336.01	0.0211672		1866.04	0.0088652		2396.04	-0.00480781		2926.04	0.00745358		3456.04	-0.01551488
276.2	0.10663968		806.22	0.01235962		1336.21	0.02193112		1866.24	0.00922103		2396.24	-0.00406304		2926.24	0.00810721		3456.24	-0.01501542
276.4	0.10749535		806.42	0.01260117		1336.41	0.02139789		1866.44	0.00831733		2396.44	-0.00487153		2926.44	0.00773242		3456.44	-0.01474137
276.6	0.10746211		806.62	0.01266425		1336.61	0.02075519		1866.64	0.00824386		2396.64	-0.00403144		2926.64	0.00668877		3456.64	-0.01501699
276.8	0.10783344		806.82	0.01264605		1336.81	0.02054637		1866.84	0.00718818		2396.84	-0.0040258		2926.84	0.00605933		3456.84	-0.01534007
277	0.10751755		807.02	0.0125485		1337.01	0.02060845		1867.04	0.0073617		2397.04	-0.00213594		2927.04	0.00579972		3457.04	-0.01526283
277.2	0.10735943		807.22	0.01264558		1337.21	0.02085232		1867.24	0.00651424		2397.24	-0.00027987		2927.24	0.0055421		3457.24	-0.01536312
277.4	0.10741565		807.42	0.01261425		1337.41	0.02128023		1867.44	0.0065133		2397.44	0.00043866		2927.44	0.00599642		3457.44	-0.01557461
277.6	0.108329		807.62	0.01228359		1337.61	0.02112101		1867.64	0.00588619		2397.64	0.00120507		2927.64	0.00503622		3457.64	-0.01634057
277.8	0.10829474		807.82	0.01150305		1337.81	0.021431		1867.84	0.00588731		2397.84	0.00236671		2927.84	0.00497299		3457.84	-0.0173142
278	0.10976088		808.02	0.01241978		1338.01	0.02190365		1868.04	0.00568686		2398.04	0.00322222		2928.04	0.00461383		3458.04	-0.01643653
278.2	0.1092057		808.22	0.01282354		1338.21	0.02167642		1868.24	0.00615717		2398.24	0.00374174		2928.24	0.0059226		3458.24	-0.01676541
278.4	0.10958407		808.42	0.01301564		1338.41	0.02109209		1868.44	0.0059973		2398.44	0.0032183		2928.44	0.00558866		3458.44	-0.01689482
278.6	0.10931318		808.62	0.01331984		1338.61	0.02089375		1868.64	0.00660435		2398.64	0.00242359		2928.64	0.00607409		3458.64	-0.01739546
278.8	0.10899509		808.82	0.01344461		1338.81	0.02074364		1868.84	0.00675841		2398.84	0.00233062		2928.84	0.00598129		3458.84	-0.01814019
279	0.10925986		809.02	0.01361829		1339.01	0.0209561		1869.04	0.00728326		2399.04	0.00236528		2929.04	0.00673471		3459.04	-0.01853965
279.2	0.10873726		809.22	0.01255614		1339.21	0.02066186		1869.24	0.00730648		2399.24	0.00229944		2929.24	0.00636742		3459.24	-0.01863083
279.4	0.10850051		809.42	0.01216814		1339.41	0.0202837		1869.44	0.00822158		2399.44	0.00231894		2929.44	0.00708024		3459.44	-0.01923934
279.6	0.10868247		809.62	0.01191713		1339.61	0.0193423		1869.64	0.0085515		2399.64	0.0027093		2929.64	0.00742086		3459.64	-0.01990567
279.8	0.10919583		809.82	0.01219297		1339.81	0.01923816		1869.84	0.00826358		2399.84	0.00173566		2929.84	0.00782119		3459.84	-0.01902861
280	0.10973052		810.02	0.01255877		1340.01	0.01966539		1870.04	0.00809976		2400.04	0.00109534		2930.04	0.00768087		3460.04	-0.01871546
280.2	0.11008831		810.22	0.01261903		1340.21	0.02041899		1870.24	0.00829076		2400.24	0.00142862		2930.24	0.00769638		3460.24	-0.01901701
280.4	0.11072723		810.42	0.01194635		1340.41	0.02071911		1870.44	0.00782466		2400.44	0.00127139		2930.44	0.00685767		3460.44	-0.01910282
280.6	0.11025831		810.62	0.01212655		1340.61	0.02050705		1870.64	0.00798423		2400.64	0.00094032		2930.64	0.00653207		3460.64	-0.0195323
280.8	0.11081276		810.82	0.01246825		1340.81	0.02038294		1870.84	0.00745196		2400.84	0.00122106		2930.84	0.00638134		3460.84	-0.01848816
281	0.11070358		811.02	0.01262965		1341.01	0.02032644		1871.04	0.00802951		2401.04	0.00231359		2931.04	0.00689195		3461.04	-0.01814379
281.2	0.11101479		811.22	0.01313665		1341.21	0.01973301		1871.24	0.0067266		2401.24	0.00167848		2931.24	0.00739167		3461.24	-0.01795891
281.4	0.11081241		811.42	0.01311895		1341.41	0.02022335		1871.44	0.00689108		2401.44	0.00173337		2931.44	0.00821202		3461.44	-0.0182889
281.6	0.11196194		811.62	0.01332125		1341.61	0.02053459		1871.64	0.00653349		2401.64	0.00196339		2931.64	0.00737947		3461.64	-0.01793652
281.8	0.11187303		811.82	0.01360282		1341.81	0.02075946		1871.84	0.00718559		2401.84	0.00195439		2931.84	0.00806157		3461.84	-0.0179976
282	0.1124777		812.02	0.01387672		1342.01	0.0211818		1872.04	0.00676879		2402.04	0.00104704		2932.04	0.00822315		3462.04	-0.01775147
282.2	0.11190441		812.22	0.01388821		1342.21	0.02113499		1872.24	0.0074172		2402.24	0.00137976		2932.24	0.00846359		3462.24	-0.01805733
282.4	0.11260954		812.42	0.01387249		1342.41	0.02056465		1872.44	0.00799495		2402.44	0.0007771		2932.44	0.00868013		3462.44	-0.0184764
282.6	0.11225913		812.62	0.01415395		1342.61	0.02078794		1872.64	0.00845615		2402.64	0.00084546		2932.64	0.00895886		3462.64	-0.01931737
282.8	0.11265639		812.82	0.01332214		1342.81	0.02004446		1872.84	0.0081493		2402.84	0.0010988		2932.84	0.00872725		3462.84	-0.01922114
283	0.11311052		813.02	0.01306549		1343.01	0.02067309		1873.04	0.00867548		2403.04	0.001435		2933.04	0.00888526		3463.04	-0.01895761
283.2	0.11284118		813.22	0.01265423		1343.21	0.02075357		1873.24	0.00877436		2403.24	0.00145919		2933.24	0.00843867		3463.24	-0.01824218
283.4	0.11285572		813.42	0.01268451		1343.41	0.02060648		1873.44	0.00893717		2403.44	0.00237713		2933.44	0.00801932		3463.44	-0.01882932
283.6	0.11216664		813.62	0.01244121		1343.61	0.02004361		1873.64	0.00852624		2403.64	0.00176865		2933.64	0.00754878		3463.64	-0.01780435
283.8	0.11151287		813.82	0.0127871		1343.81	0.02081786		1873.84	0.00802777		2403.84	0.00101338		2933.84	0.00734492		3463.84	-0.01704377
284	0.11199433		814.02	0.01241523		1344.01	0.02077002		1874.04	0.00793703		2404.04	0.00174396		2934.04	0.00607427		3464.04	-0.01698776
284.2	0.1118325		814.22	0.01232172		1344.21	0.02071368		1874.24	0.00736065		2404.24	0.00176008		2934.24	0.00582432		3464.24	-0.0168694
284.4	0.11172899		814.42	0.0130087		1344.41	0.02082841		1874.44	0.00669452		2404.44	0.00222834		2934.44	0.00650199		3464.44	-0.01548846
284.6	0.11129523		814.62	0.01425317		1344.61	0.02001586		1874.64	0.00630381		2404.64	0.00165149		2934.64	0.00553047		3464.64	-0.01522339
284.8	0.11226294		814.82	0.01514401		1344.81	0.01981716		1874.84	0.0056945		2404.84	0.00171653		2934.84	0.00559984		3464.84	-0.0145137
285	0.11231051		815.02	0.01552264		1345.01	0.01936638		1875.04	0.00586237		2405.04	0.00172124		2935.04	0.00673771		3465.04	-0.01488552
285.2	0.11239263		815.22	0.01605881		1345.21	0.01891291		1875.24	0.00524973		2405.24	0.00111614		2935.24	0.00797266		3465.24	-0.01507141
285.4	0.11255678		815.42	0.01638507		1345.41	0.01936932		1875.44	0.00508051		2405.44	0.00139972		2935.44	0.0084892		3465.44	-0.01572723
285.6	0.11368806		815.62	0.01790429		1345.61	0.0197425		1875.64	0.00512494		2405.64	0.00095786		2935.64	0.00906782		3465.64	-0.01575203
285.8	0.11377052		815.82	0.01742649		1345.81	0.0205279		1875.84	0.0047083		2405.84	0.000277		2935.84	0.00936341		3465.84	-0.01723215
286	0.11389907		816.02	0.01671785		1346.01	0.02092043		1876.04	0.00381787		2406.04	0.00059259		2936.04	0.00900323		3466.04	-0.01763701
286.2	0.11430098		816.22	0.01798912		1346.21	0.02112469		1876.24	0.00388732		2406.24	0.00119283		2936.24	0.00904333		3466.24	-0.01786045
286.4	0.11497615		816.42	0.01866569		1346.41	0.02127424		1876.44	0.00451092		2406.44	0.00094702		2936.44	0.00931136		3466.44	-0.0178315
286.6	0.11517086		816.62	0.01882636		1346.61	0.0214858		1876.64	0.00481337		2406.64	0.00025651		2936.64	0.00867334		3466.64	-0.01841859
286.8	0.11521433		816.82	0.01886886		1346.81	0.02188652		1876.84	0.00445389		2406.84	0.00030286		2936.84	0.00806039		3466.84	-0.01856961
287	0.11563787		817.02	0.0184969		1347.01	0.02317815		1877.04	0.00438772		2407.04	0.00070783		2937.04	0.00718417		3467.04	-0.01850435
287.2	0.11568401		817.22	0.01750391		1347.21	0.02307155		1877.24	0.00473568		2407.24	0.00128673		2937.24	0.00661177		3467.24	-0.0177986
287.4	0.11562839		817.42	0.01672609		1347.41	0.02285282		1877.44	0.00420949		2407.44	0.00181002		2937.44	0.00653275		3467.44	-0.01736297
287.6	0.11443118		817.62	0.01667039		1347.61	0.02308946		1877.64	0.00373556		2407.64	0.00199603		2937.64	0.00639216		3467.64	-0.01641284
287.8	0.11396727		817.82	0.01555614		1347.81	0.02324095		1877.84	0.00327722		2407.84	0.00267008		2937.84	0.00582358		3467.84	-0.01628253
288	0.11451921		818.02	0.01440045		1348.01	0.02313227		1878.04	0.00312336		2408.04	0.00322318		2938.04	0.0046587		3468.04	-0.01611908
288.2	0.11443516		818.22	0.01385487		1348.21	0.02322335		1878.24	0.00305497		2408.24	0.003178		2938.24	0.0044726		3468.24	-0.01556035
288.4	0.11538701		818.42	0.01315029		1348.41	0.02398163		1878.44	0.00263223		2408.44	0.00336417		2938.44	0.0043536		3468.44	-0.01557844
288.6	0.11647562		818.62	0.01227767		1348.61	0.02352096		1878.64	0.0034446		2408.64	0.0032157		2938.64	0.00275379		3468.64	-0.01613866
288.8	0.11674653		818.82	0.01151467		1348.81	0.02364259		1878.84	0.00421643		2408.84	0.00314287		2938.84	0.00325335		3468.84	-0.01672194
289	0.11721516		819.02	0.01134801		1349.01	0.02338115		1879.04	0.00513442		2409.04	0.00287194		2939.04	0.00375823		3469.04	-0.01720073
289.2	0.11740999		819.22	0.0119375		1349.21	0.02317088		1879.24	0.00519461		2409.24	0.00252765		2939.24	0.00367783		3469.24	-0.01745527
289.4	0.11771779		819.42	0.01249039		1349.41	0.02299278		1879.44	0.00548469		2409.44	0.00226682		2939.44	0.00445759		3469.44	-0.01756922
289.6	0.11777742		819.62	0.01307126		1349.61	0.02287127		1879.64	0.00552597		2409.64	0.00159056		2939.64	0.0049303		3469.64	-0.01753723
289.8	0.11757053		819.82	0.01251197		1349.81	0.02259356		1879.84	0.00561775		2409.84	0.00048884		2939.84	0.00462088		3469.84	-0.01846809
290	0.11799305		820.02	0.01297714		1350.01	0.02289763		1880.04	0.00547365		2410.04	0.00050485		2940.04	0.00543596		3470.04	-0.0185336
290.2	0.11814804		820.22	0.01406754		1350.21	0.02247472		1880.24	0.00646867		2410.24	0.00083811		2940.24	0.00656719		3470.24	-0.01809598
290.4	0.11760921		820.42	0.01482848		1350.41	0.0220172		1880.44	0.00727235		2410.44	0.0007945		2940.44	0.0070866		3470.44	-0.01840345
290.6	0.11745888		820.62	0.01477772		1350.61	0.02171705		1880.64	0.0063493		2410.64	0.00026105		2940.64	0.00806171		3470.64	-0.01911292
290.8	0.11794408		820.82	0.01554872		1350.81	0.02162349		1880.84	0.00516778		2410.84	0.00128886		2940.84	0.00858896		3470.84	-0.01920268
291	0.11908443		821.02	0.01458625		1351.01	0.02131436		1881.04	0.00487037		2411.04	0.00196553		2941.04	0.00904904		3471.04	-0.01911906
291.2	0.11883954		821.22	0.01468317		1351.21	0.02139301		1881.24	0.00525665		2411.24	0.00320852		2941.24	0.00908426		3471.24	-0.01827511
291.4	0.11895362		821.42	0.0152572		1351.41	0.02124406		1881.44	0.00507429		2411.44	0.00354178		2941.44	0.00978616		3471.44	-0.01774811
291.6	0.11828836		821.62	0.01562042		1351.61	0.0218019		1881.64	0.00423197		2411.64	0.0039198		2941.64	0.00958904		3471.64	-0.01849619
291.8	0.1184827		821.82	0.0145996		1351.81	0.02174439		1881.84	0.00442885		2411.84	0.00346834		2941.84	0.00948188		3471.84	-0.01843433
292	0.11927128		822.02	0.0143806		1352.01	0.02192518		1882.04	0.00431284		2412.04	0.0032426		2942.04	0.00906839		3472.04	-0.01853801
292.2	0.11943132		822.22	0.01444189		1352.21	0.0216164		1882.24	0.00401577		2412.24	0.00367314		2942.24	0.00873632		3472.24	-0.01830836
292.4	0.1204684		822.42	0.01404751		1352.41	0.02143536		1882.44	0.00418382		2412.44	0.00337422		2942.44	0.00782414		3472.44	-0.01844462
292.6	0.121232		822.62	0.01413522		1352.61	0.02108038		1882.64	0.00508306		2412.64	0.00313058		2942.64	0.00716823		3472.64	-0.0187725
292.8	0.12038566		822.82	0.01448553		1352.81	0.02060561		1882.84	0.00561771		2412.84	0.00289679		2942.84	0.00694738		3472.84	-0.01920009
293	0.12026392		823.02	0.01381331		1353.01	0.02007567		1883.04	0.00557811		2413.04	0.00236564		2943.04	0.00582928		3473.04	-0.01950418
293.2	0.11939468		823.22	0.01366942		1353.21	0.0197906		1883.24	0.00572704		2413.24	0.00256074		2943.24	0.00467894		3473.24	-0.01941376
293.4	0.11925981		823.42	0.01361209		1353.41	0.01893992		1883.44	0.00578206		2413.44	0.00242524		2943.44	0.00477103		3473.44	-0.01999269
293.6	0.11852372		823.62	0.0137292		1353.61	0.0186344		1883.64	0.00554726		2413.64	0.00193843		2943.64	0.0041659		3473.64	-0.02003451
293.8	0.11828904		823.82	0.01365516		1353.81	0.01904133		1883.84	0.00635446		2413.84	0.00180863		2943.84	0.00402482		3473.84	-0.02009076
294	0.11812661		824.02	0.01366543		1354.01	0.01978856		1884.04	0.00576561		2414.04	0.00271917		2944.04	0.00426518		3474.04	-0.0197549
294.2	0.11710384		824.22	0.01392747		1354.21	0.01946374		1884.24	0.00551565		2414.24	0.00226434		2944.24	0.00474657		3474.24	-0.01887193
294.4	0.11687064		824.42	0.01431553		1354.41	0.01979689		1884.44	0.00485278		2414.44	0.00169622		2944.44	0.00500882		3474.44	-0.0192894
294.6	0.11688699		824.62	0.01402353		1354.61	0.02017881		1884.64	0.00395013		2414.64	0.00181316		2944.64	0.00570448		3474.64	-0.01878713
294.8	0.11763692		824.82	0.01448682		1354.81	0.02078423		1884.84	0.00410096		2414.84	0.00177395		2944.84	0.00575705		3474.84	-0.01817284
295	0.1175515		825.02	0.01363744		1355.01	0.02166753		1885.04	0.00429992		2415.04	0.0016969		2945.04	0.00673287		3475.04	-0.01772309
295.2	0.11684778		825.22	0.01417971		1355.21	0.02358496		1885.24	0.00469693		2415.24	0.00231136		2945.24	0.0072863		3475.24	-0.01696448
295.4	0.11788545		825.42	0.0144917		1355.41	0.02414697		1885.44	0.00467184		2415.44	0.00201361		2945.44	0.00860793		3475.44	-0.01694309
295.6	0.11785702		825.62	0.01436106		1355.61	0.0253685		1885.64	0.00480838		2415.64	0.001808		2945.64	0.00886481		3475.64	-0.01630508
295.8	0.11760862		825.82	0.01381208		1355.81	0.02650671		1885.84	0.00536192		2415.84	0.00151751		2945.84	0.00968713		3475.84	-0.01591588
296	0.11775334		826.02	0.01440844		1356.01	0.02736831		1886.04	0.0055244		2416.04	0.00140107		2946.04	0.01002376		3476.04	-0.0163141
296.2	0.11762155		826.22	0.01495557		1356.21	0.02764148		1886.24	0.00617639		2416.24	0.00142424		2946.24	0.01032121		3476.24	-0.0161539
296.4	0.11798591		826.42	0.01498463		1356.41	0.02742023		1886.44	0.00655577		2416.44	0.00085293		2946.44	0.01010852		3476.44	-0.01576524
296.6	0.1186529		826.62	0.0148463		1356.61	0.02721524		1886.64	0.0068723		2416.64	0.00112019		2946.64	0.00999152		3476.64	-0.01655161
296.8	0.11789749		826.82	0.01419362		1356.81	0.02641722		1886.84	0.00710846		2416.84	0.0014845		2946.84	0.01055105		3476.84	-0.01641612
297	0.11726112		827.02	0.0129964		1357.01	0.0264362		1887.04	0.00747498		2417.04	0.00262297		2947.04	0.01020924		3477.04	-0.01707375
297.2	0.11744849		827.22	0.01357757		1357.21	0.02576768		1887.24	0.007268		2417.24	0.0035572		2947.24	0.00981686		3477.24	-0.01744068
297.4	0.11790823		827.42	0.0127402		1357.41	0.0244935		1887.44	0.00666375		2417.44	0.00359962		2947.44	0.01008472		3477.44	-0.01810405
297.6	0.11778791		827.62	0.01329128		1357.61	0.02473522		1887.64	0.00638052		2417.64	0.00340271		2947.64	0.0101583		3477.64	-0.01864981
297.8	0.11858071		827.82	0.01333685		1357.81	0.02462344		1887.84	0.00664985		2417.84	0.00320693		2947.84	0.00997251		3477.84	-0.01880398
298	0.11940335		828.02	0.01395759		1358.01	0.02447702		1888.04	0.00523356		2418.04	0.00331092		2948.04	0.01004453		3478.04	-0.01888954
298.2	0.11997877		828.22	0.01376018		1358.21	0.02419126		1888.24	0.00531861		2418.24	0.00264533		2948.24	0.01042514		3478.24	-0.0182076
298.4	0.12114713		828.42	0.01363805		1358.41	0.02417284		1888.44	0.00541338		2418.44	0.00384441		2948.44	0.0106546		3478.44	-0.01824237
298.6	0.12178641		828.62	0.01377717		1358.61	0.02336513		1888.64	0.00486374		2418.64	0.00415327		2948.64	0.01100399		3478.64	-0.01756209
298.8	0.12267798		828.82	0.01366991		1358.81	0.02369746		1888.84	0.00509811		2418.84	0.00454374		2948.84	0.01015799		3478.84	-0.01728984
299	0.1231611		829.02	0.01299641		1359.01	0.02422732		1889.04	0.00483232		2419.04	0.00550594		2949.04	0.00994937		3479.04	-0.01777835
299.2	0.12420219		829.22	0.01343628		1359.21	0.02504819		1889.24	0.00447945		2419.24	0.0067295		2949.24	0.01028722		3479.24	-0.01803501
299.4	0.125387		829.42	0.01329267		1359.41	0.02476992		1889.44	0.00444959		2419.44	0.00668749		2949.44	0.01084989		3479.44	-0.01767377
299.6	0.1251215		829.62	0.0130706		1359.61	0.02483308		1889.64	0.00521216		2419.64	0.00671195		2949.64	0.00999903		3479.64	-0.01769234
299.8	0.12469415		829.82	0.0137262		1359.81	0.02505382		1889.84	0.00434557		2419.84	0.00687641		2949.84	0.01052167		3479.84	-0.01816999
300	0.12458515		830.02	0.01422133		1360.01	0.02519628		1890.04	0.00419849		2420.04	0.00676803		2950.04	0.01037032		3480.04	-0.01816678
300.2	0.12398145		830.22	0.0146111		1360.21	0.02519396		1890.24	0.00442083		2420.24	0.00710573		2950.24	0.01020016		3480.24	-0.01768713
300.4	0.12385046		830.42	0.01505934		1360.41	0.02441096		1890.44	0.00476692		2420.44	0.00694677		2950.44	0.00971963		3480.44	-0.01732478
300.6	0.12421596		830.62	0.0153642		1360.61	0.02471585		1890.64	0.00498033		2420.64	0.00698783		2950.64	0.00958625		3480.64	-0.01782164
300.8	0.1241846		830.82	0.01596074		1360.81	0.02498442		1890.84	0.00490787		2420.84	0.006462		2950.84	0.01057079		3480.84	-0.01811
301	0.12362217		831.02	0.01604428		1361.01	0.02479026		1891.04	0.00468912		2421.04	0.00650032		2951.04	0.00987349		3481.04	-0.0184853
301.2	0.12316787		831.22	0.01676989		1361.21	0.02435157		1891.24	0.00397909		2421.24	0.00597538		2951.24	0.00880937		3481.24	-0.01858418
301.4	0.12275076		831.42	0.01682857		1361.41	0.02460051		1891.44	0.00396565		2421.44	0.00485404		2951.44	0.0089027		3481.44	-0.01952493
301.6	0.12230269		831.62	0.01867184		1361.61	0.02471003		1891.64	0.00444171		2421.64	0.00398539		2951.64	0.00845476		3481.64	-0.0203572
301.8	0.12191747		831.82	0.01883052		1361.81	0.02418852		1891.84	0.00412417		2421.84	0.00385578		2951.84	0.00828808		3481.84	-0.01962646
302	0.12212747		832.02	0.01867149		1362.01	0.02370144		1892.04	0.00375877		2422.04	0.00380175		2952.04	0.00898801		3482.04	-0.01899879
302.2	0.12192511		832.22	0.01825695		1362.21	0.02361244		1892.24	0.00476054		2422.24	0.00337179		2952.24	0.00947878		3482.24	-0.01771478
302.4	0.1223295		832.42	0.01760969		1362.41	0.02290083		1892.44	0.00460699		2422.44	0.00323331		2952.44	0.00961252		3482.44	-0.01757469
302.6	0.12113432		832.62	0.01783767		1362.61	0.02188218		1892.64	0.00558102		2422.64	0.00310084		2952.64	0.00897146		3482.64	-0.01706471
302.8	0.12088609		832.82	0.01683239		1362.81	0.02195673		1892.84	0.0059725		2422.84	0.00337412		2952.84	0.00854818		3482.84	-0.01644065
303	0.12108628		833.02	0.01600187		1363.01	0.02209323		1893.04	0.00563878		2423.04	0.00334766		2953.04	0.00914885		3483.04	-0.01614211
303.2	0.12137809		833.22	0.01539371		1363.21	0.02193836		1893.24	0.00532248		2423.24	0.00390521		2953.24	0.00945974		3483.24	-0.01535215
303.4	0.12160443		833.42	0.01401929		1363.41	0.02186489		1893.44	0.00544242		2423.44	0.0039734		2953.44	0.0093766		3483.44	-0.01404095
303.6	0.12133733		833.62	0.01347794		1363.61	0.02236458		1893.64	0.00547953		2423.64	0.00468475		2953.64	0.00905081		3483.64	-0.01382086
303.8	0.12103981		833.82	0.01284668		1363.81	0.02219137		1893.84	0.00474536		2423.84	0.00520751		2953.84	0.00935234		3483.84	-0.01395732
304	0.12155096		834.02	0.01195502		1364.01	0.02283762		1894.04	0.00517969		2424.04	0.0061794		2954.04	0.00853349		3484.04	-0.01393138
304.2	0.12255906		834.22	0.01266269		1364.21	0.02349095		1894.24	0.00619616		2424.24	0.0062589		2954.24	0.00790483		3484.24	-0.01424365
304.4	0.12340138		834.42	0.01296445		1364.41	0.02386097		1894.44	0.0070799		2424.44	0.00638626		2954.44	0.00805828		3484.44	-0.01481172
304.6	0.12460177		834.62	0.01323374		1364.61	0.0248365		1894.64	0.00682967		2424.64	0.00642212		2954.64	0.00873061		3484.64	-0.01549103
304.8	0.12581067		834.82	0.01370615		1364.81	0.024874		1894.84	0.00686023		2424.84	0.00582467		2954.84	0.00886408		3484.84	-0.01618118
305	0.12581237		835.02	0.0144226		1365.01	0.02529088		1895.04	0.00643983		2425.04	0.00636741		2955.04	0.00898801		3485.04	-0.01700907
305.2	0.12576343		835.22	0.01555461		1365.21	0.02581238		1895.24	0.00644286		2425.24	0.00730794		2955.24	0.00913096		3485.24	-0.01787307
305.4	0.12658524		835.42	0.01597249		1365.41	0.02551508		1895.44	0.00742963		2425.44	0.0075374		2955.44	0.00984935		3485.44	-0.01952568
305.6	0.12611545		835.62	0.01651018		1365.61	0.02486805		1895.64	0.00786531		2425.64	0.00771583		2955.64	0.01007563		3485.64	-0.01962597
305.8	0.12667154		835.82	0.01677262		1365.81	0.02441167		1895.84	0.00720835		2425.84	0.00817611		2955.84	0.01057989		3485.84	-0.01963322
306	0.12690761		836.02	0.01751123		1366.01	0.02427564		1896.04	0.00727944		2426.04	0.00824352		2956.04	0.01118437		3486.04	-0.01931474
306.2	0.12631446		836.22	0.01771731		1366.21	0.02418928		1896.24	0.00693914		2426.24	0.00792184		2956.24	0.01105883		3486.24	-0.0193532
306.4	0.12603053		836.42	0.01721492		1366.41	0.02443497		1896.44	0.00658722		2426.44	0.00695077		2956.44	0.01070765		3486.44	-0.01946676
306.6	0.12515524		836.62	0.01814586		1366.61	0.02477878		1896.64	0.00682849		2426.64	0.00734009		2956.64	0.0101667		3486.64	-0.01861413
306.8	0.12544467		836.82	0.01828218		1366.81	0.02536667		1896.84	0.00584932		2426.84	0.00726071		2956.84	0.01045699		3486.84	-0.01690467
307	0.12488936		837.02	0.01817827		1367.01	0.0261436		1897.04	0.00537485		2427.04	0.0068309		2957.04	0.00999583		3487.04	-0.01595104
307.2	0.12472889		837.22	0.01849635		1367.21	0.02618882		1897.24	0.0049825		2427.24	0.0072063		2957.24	0.00916707		3487.24	-0.01484514
307.4	0.12437271		837.42	0.01767383		1367.41	0.02666957		1897.44	0.00423961		2427.44	0.00654762		2957.44	0.00912465		3487.44	-0.01417063
307.6	0.1227011		837.62	0.01754498		1367.61	0.02689935		1897.64	0.00470585		2427.64	0.00621105		2957.64	0.00903837		3487.64	-0.01470938
307.8	0.12201298		837.82	0.01712684		1367.81	0.02575761		1897.84	0.0053819		2427.84	0.0066191		2957.84	0.0081805		3487.84	-0.01499459
308	0.12269798		838.02	0.01737122		1368.01	0.02588097		1898.04	0.00555176		2428.04	0.00638945		2958.04	0.00677442		3488.04	-0.01390518
308.2	0.12217097		838.22	0.01821906		1368.21	0.02581873		1898.24	0.0062515		2428.24	0.00612433		2958.24	0.00736052		3488.24	-0.01424659
308.4	0.12193865		838.42	0.01870828		1368.41	0.02556956		1898.44	0.0062965		2428.44	0.00590082		2958.44	0.00847248		3488.44	-0.01427722
308.6	0.12216645		838.62	0.01850543		1368.61	0.02538106		1898.64	0.00609277		2428.64	0.00544703		2958.64	0.00888732		3488.64	-0.01537994
308.8	0.12278851		838.82	0.01883535		1368.81	0.02552531		1898.84	0.00635668		2428.84	0.00529579		2958.84	0.0087783		3488.84	-0.01661034
309	0.12278117		839.02	0.01956198		1369.01	0.02575494		1899.04	0.00617797		2429.04	0.00580155		2959.04	0.00895928		3489.04	-0.01836203
309.2	0.12375403		839.22	0.01933754		1369.21	0.02539231		1899.24	0.00622894		2429.24	0.0064556		2959.24	0.00915842		3489.24	-0.01932617
309.4	0.12454993		839.42	0.01985289		1369.41	0.0239172		1899.44	0.00752639		2429.44	0.00703612		2959.44	0.00895646		3489.44	-0.0207788
309.6	0.1244674		839.62	0.02005231		1369.61	0.02454378		1899.64	0.00639856		2429.64	0.00707632		2959.64	0.00897517		3489.64	-0.02117005
309.8	0.1260414		839.82	0.01982472		1369.81	0.02467342		1899.84	0.00576805		2429.84	0.0070168		2959.84	0.00854586		3489.84	-0.02179787
310	0.12639436		840.02	0.01910203		1370.01	0.02512321		1900.04	0.00551799		2430.04	0.00710329		2960.04	0.00945651		3490.04	-0.02219096
310.2	0.1266995		840.22	0.01789255		1370.21	0.02561765		1900.24	0.00526622		2430.24	0.00752171		2960.24	0.00931408		3490.24	-0.02339807
310.4	0.12847075		840.42	0.01742802		1370.41	0.02756931		1900.44	0.00637655		2430.44	0.00735755		2960.44	0.00951998		3490.44	-0.02316728
310.6	0.12952802		840.62	0.01760885		1370.61	0.02766391		1900.64	0.0065167		2430.64	0.00817273		2960.64	0.00942277		3490.64	-0.02221757
310.8	0.13015852		840.82	0.01631253		1370.81	0.02822877		1900.84	0.00711089		2430.84	0.00784001		2960.84	0.01049244		3490.84	-0.0215643
311	0.12939131		841.02	0.01608048		1371.01	0.02816643		1901.04	0.00716952		2431.04	0.00745652		2961.04	0.0111189		3491.04	-0.02101001
311.2	0.13001619		841.22	0.01595744		1371.21	0.02865262		1901.24	0.00733695		2431.24	0.00763945		2961.24	0.01127619		3491.24	-0.01960522
311.4	0.12985415		841.42	0.01530684		1371.41	0.02918624		1901.44	0.00713242		2431.44	0.00722279		2961.44	0.01157299		3491.44	-0.01936075
311.6	0.12955551		841.62	0.01557807		1371.61	0.02847217		1901.64	0.00782077		2431.64	0.00754781		2961.64	0.01105215		3491.64	-0.01839734
311.8	0.12947546		841.82	0.01566391		1371.81	0.02822649		1901.84	0.00655016		2431.84	0.00788133		2961.84	0.0108231		3491.84	-0.01714076
312	0.12885437		842.02	0.01531116		1372.01	0.02847455		1902.04	0.00526343		2432.04	0.00716946		2962.04	0.01084108		3492.04	-0.01587939
312.2	0.12805186		842.22	0.01542884		1372.21	0.0277142		1902.24	0.00491023		2432.24	0.00741326		2962.24	0.01218689		3492.24	-0.0159206
312.4	0.127698		842.42	0.01533649		1372.41	0.02758553		1902.44	0.00443755		2432.44	0.00621838		2962.44	0.01128159		3492.44	-0.01620793
312.6	0.12726502		842.62	0.01478391		1372.61	0.02779889		1902.64	0.00482909		2432.64	0.00579585		2962.64	0.01049569		3492.64	-0.01699011
312.8	0.12697664		842.82	0.01571566		1372.81	0.02792311		1902.84	0.00433811		2432.84	0.00543223		2962.84	0.00972812		3492.84	-0.01716283
313	0.12618595		843.02	0.01589095		1373.01	0.02795324		1903.04	0.00379417		2433.04	0.00560761		2963.04	0.00907931		3493.04	-0.01720354
313.2	0.12660063		843.22	0.01677204		1373.21	0.02654864		1903.24	0.00389331		2433.24	0.00533548		2963.24	0.0095428		3493.24	-0.01778767
313.4	0.12705605		843.42	0.01712639		1373.41	0.02595652		1903.44	0.00428854		2433.44	0.00577206		2963.44	0.00863852		3493.44	-0.01858462
313.6	0.1278203		843.62	0.0161958		1373.61	0.0261544		1903.64	0.00443636		2433.64	0.00633787		2963.64	0.00833342		3493.64	-0.01867914
313.8	0.12832977		843.82	0.01563917		1373.81	0.02591956		1903.84	0.00509047		2433.84	0.00656706		2963.84	0.00811373		3493.84	-0.01908222
314	0.12835325		844.02	0.01543666		1374.01	0.02619746		1904.04	0.00529475		2434.04	0.0075954		2964.04	0.00876489		3494.04	-0.02045965
314.2	0.12853037		844.22	0.01591572		1374.21	0.02575893		1904.24	0.00613404		2434.24	0.00840824		2964.24	0.00825051		3494.24	-0.02084517
314.4	0.13014102		844.42	0.01609618		1374.41	0.02619683		1904.44	0.0073989		2434.44	0.00862072		2964.44	0.00838601		3494.44	-0.02108626
314.6	0.12963747		844.62	0.01508245		1374.61	0.02591325		1904.64	0.00735062		2434.64	0.00876687		2964.64	0.00848223		3494.64	-0.02115678
314.8	0.1294762		844.82	0.01466414		1374.81	0.02631909		1904.84	0.00828424		2434.84	0.00853143		2964.84	0.00959459		3494.84	-0.02185541
315	0.12920985		845.02	0.01548351		1375.01	0.02589951		1905.04	0.00784577		2435.04	0.00847202		2965.04	0.00996335		3495.04	-0.02166229
315.2	0.13029278		845.22	0.01600483		1375.21	0.02652682		1905.24	0.00769099		2435.24	0.00865		2965.24	0.01073929		3495.24	-0.02076174
315.4	0.12963763		845.42	0.01638997		1375.41	0.02666069		1905.44	0.00751723		2435.44	0.00826421		2965.44	0.01100212		3495.44	-0.02107493
315.6	0.12928159		845.62	0.01706246		1375.61	0.02596302		1905.64	0.00723924		2435.64	0.00863176		2965.64	0.01113305		3495.64	-0.02017499
315.8	0.12874865		845.82	0.01683714		1375.81	0.02618389		1905.84	0.00550261		2435.84	0.00836806		2965.84	0.01227957		3495.84	-0.02020503
316	0.12770191		846.02	0.01583788		1376.01	0.02641567		1906.04	0.00602484		2436.04	0.00795311		2966.04	0.01294759		3496.04	-0.02043511
316.2	0.12735348		846.22	0.01590514		1376.21	0.02625716		1906.24	0.00701161		2436.24	0.00734382		2966.24	0.01280568		3496.24	-0.0207034
316.4	0.12668073		846.42	0.01542711		1376.41	0.02723108		1906.44	0.00769809		2436.44	0.00687294		2966.44	0.01121283		3496.44	-0.02127509
316.6	0.12639263		846.62	0.01516221		1376.61	0.02693583		1906.64	0.00829843		2436.64	0.00717058		2966.64	0.01119036		3496.64	-0.02017583
316.8	0.12698005		846.82	0.01521292		1376.81	0.02676007		1906.84	0.00822992		2436.84	0.00698088		2966.84	0.01112882		3496.84	-0.01967866
317	0.12734244		847.02	0.01515158		1377.01	0.02686738		1907.04	0.00849664		2437.04	0.00745931		2967.04	0.01042662		3497.04	-0.01979722
317.2	0.1282006		847.22	0.01537378		1377.21	0.02621538		1907.24	0.00880137		2437.24	0.007428		2967.24	0.00988608		3497.24	-0.02027473
317.4	0.12835302		847.42	0.01467241		1377.41	0.02578763		1907.44	0.00933447		2437.44	0.00806825		2967.44	0.00936997		3497.44	-0.02017966
317.6	0.12854892		847.62	0.01394025		1377.61	0.0253544		1907.64	0.0085177		2437.64	0.00827732		2967.64	0.00884132		3497.64	-0.01980281
317.8	0.1279882		847.82	0.01427011		1377.81	0.02579171		1907.84	0.0073796		2437.84	0.00858074		2967.84	0.00898959		3497.84	-0.01914145
318	0.12861409		848.02	0.01405152		1378.01	0.02536757		1908.04	0.00666479		2438.04	0.00889059		2968.04	0.00859535		3498.04	-0.01947746
318.2	0.12795243		848.22	0.01373935		1378.21	0.02426029		1908.24	0.00649851		2438.24	0.00935541		2968.24	0.00917236		3498.24	-0.01876321
318.4	0.12826385		848.42	0.01349621		1378.41	0.02398755		1908.44	0.0064813		2438.44	0.00900557		2968.44	0.00903614		3498.44	-0.01851975
318.6	0.12751518		848.62	0.01214262		1378.61	0.02330331		1908.64	0.00568203		2438.64	0.00884062		2968.64	0.00935431		3498.64	-0.0183156
318.8	0.12752661		848.82	0.0125732		1378.81	0.02319526		1908.84	0.00552813		2438.84	0.00936258		2968.84	0.00981968		3498.84	-0.01788041
319	0.12765581		849.02	0.01302844		1379.01	0.02275211		1909.04	0.00457856		2439.04	0.00903135		2969.04	0.01062484		3499.04	-0.01720372
319.2	0.12792818		849.22	0.01342727		1379.21	0.02299708		1909.24	0.00418899		2439.24	0.00882651		2969.24	0.01109255		3499.24	-0.01616952
319.4	0.12786883		849.42	0.01335734		1379.41	0.02327596		1909.44	0.00328933		2439.44	0.00845951		2969.44	0.01112335		3499.44	-0.0166998
319.6	0.12818613		849.62	0.01373988		1379.61	0.02300004		1909.64	0.00284392		2439.64	0.00851037		2969.64	0.01203588		3499.64	-0.01696888
319.8	0.12862584		849.82	0.01325256		1379.81	0.02403556		1909.84	0.00222		2439.84	0.00810234		2969.84	0.01234676		3499.84	-0.01814875
320	0.12788208		850.02	0.01260975		1380.01	0.02584222		1910.04	0.00295308		2440.04	0.00719133		2970.04	0.01330082		3500.04	-0.01798665
320.2	0.12887998		850.22	0.01331072		1380.21	0.02600419		1910.24	0.00355494		2440.24	0.00710584		2970.24	0.01336359		3500.24	-0.01853862
320.4	0.12906819		850.42	0.01289607		1380.41	0.02669904		1910.44	0.0038161		2440.44	0.00730644		2970.44	0.01307803		3500.44	-0.01939312
320.6	0.12965342		850.62	0.01273754		1380.61	0.02667019		1910.64	0.00382823		2440.64	0.00705134		2970.64	0.01396968		3500.64	-0.01945498
320.8	0.13090958		850.82	0.01381567		1380.81	0.02841135		1910.84	0.00465408		2440.84	0.00642202		2970.84	0.01430402		3500.84	-0.01984774
321	0.13019461		851.02	0.01433064		1381.01	0.02948667		1911.04	0.00439847		2441.04	0.00742474		2971.04	0.01436468		3501.04	-0.02032265
321.2	0.13069442		851.22	0.014367		1381.21	0.0294687		1911.24	0.00448279		2441.24	0.00776362		2971.24	0.01409187		3501.24	-0.02067868
321.4	0.13026755		851.42	0.01443127		1381.41	0.02937991		1911.44	0.00439619		2441.44	0.00765286		2971.44	0.01393021		3501.44	-0.02141112
321.6	0.13041153		851.62	0.0149051		1381.61	0.02985824		1911.64	0.00443885		2441.64	0.00802373		2971.64	0.01386695		3501.64	-0.0207765
321.8	0.13003081		851.82	0.01603933		1381.81	0.0297281		1911.84	0.00457762		2441.84	0.00906786		2971.84	0.01421271		3501.84	-0.02081142
322	0.12971126		852.02	0.01622594		1382.01	0.02922917		1912.04	0.00471656		2442.04	0.00866369		2972.04	0.0143274		3502.04	-0.02099484
322.2	0.12868922		852.22	0.01647304		1382.21	0.02811942		1912.24	0.00478304		2442.24	0.00823449		2972.24	0.01471949		3502.24	-0.021024
322.4	0.12914543		852.42	0.01744741		1382.41	0.02791976		1912.44	0.00511744		2442.44	0.0073211		2972.44	0.01398713		3502.44	-0.02048163
322.6	0.12859443		852.62	0.01707432		1382.61	0.02762707		1912.64	0.00440414		2442.64	0.00761624		2972.64	0.01318126		3502.64	-0.01995829
322.8	0.12797959		852.82	0.01724711		1382.81	0.02771653		1912.84	0.0051671		2442.84	0.00735551		2972.84	0.01361639		3502.84	-0.01953071
323	0.12837563		853.02	0.01757555		1383.01	0.02782984		1913.04	0.00478474		2443.04	0.00678413		2973.04	0.01377957		3503.04	-0.01972117
323.2	0.12905248		853.22	0.01767617		1383.21	0.02761233		1913.24	0.00449619		2443.24	0.00603715		2973.24	0.0134556		3503.24	-0.01961535
323.4	0.12952108		853.42	0.0172413		1383.41	0.02770235		1913.44	0.00434646		2443.44	0.00602781		2973.44	0.01388102		3503.44	-0.02005128
323.6	0.12976813		853.62	0.01674338		1383.61	0.02721699		1913.64	0.0042571		2443.64	0.00563778		2973.64	0.01512913		3503.64	-0.02031193
323.8	0.13107898		853.82	0.01688577		1383.81	0.02721328		1913.84	0.00377238		2443.84	0.00495578		2973.84	0.01482079		3503.84	-0.02007604
324	0.13162568		854.02	0.0166682		1384.01	0.02648965		1914.04	0.00399446		2444.04	0.00445938		2974.04	0.01571478		3504.04	-0.02013364
324.2	0.13250681		854.22	0.01651247		1384.21	0.02617853		1914.24	0.00526689		2444.24	0.00405345		2974.24	0.01569487		3504.24	-0.02100004
324.4	0.13172707		854.42	0.01596271		1384.41	0.02667022		1914.44	0.00536102		2444.44	0.00376418		2974.44	0.01575101		3504.44	-0.02114525
324.6	0.13237459		854.62	0.01578692		1384.61	0.02685075		1914.64	0.00503842		2444.64	0.00360602		2974.64	0.01514569		3504.64	-0.02071258
324.8	0.13319244		854.82	0.0166604		1384.81	0.02752103		1914.84	0.00609906		2444.84	0.00377585		2974.84	0.01477467		3504.84	-0.02025809
325	0.13373493		855.02	0.01660279		1385.01	0.02739231		1915.04	0.00520689		2445.04	0.00445547		2975.04	0.01392432		3505.04	-0.02026467
325.2	0.13474172		855.22	0.0166242		1385.21	0.0273822		1915.24	0.00536575		2445.24	0.00483015		2975.24	0.01310609		3505.24	-0.02085459
325.4	0.13448894		855.42	0.01623122		1385.41	0.027177		1915.44	0.00545419		2445.44	0.004666		2975.44	0.0126339		3505.44	-0.02042957
325.6	0.13451752		855.62	0.01653573		1385.61	0.02654031		1915.64	0.00594009		2445.64	0.00488844		2975.64	0.01316874		3505.64	-0.02027673
325.8	0.13388205		855.82	0.01618804		1385.81	0.02698661		1915.84	0.00525651		2445.84	0.00442468		2975.84	0.01302791		3505.84	-0.02093734
326	0.13323413		856.02	0.01614463		1386.01	0.02728533		1916.04	0.00536474		2446.04	0.00335934		2976.04	0.01277057		3506.04	-0.02076976
326.2	0.13290387		856.22	0.01614801		1386.21	0.0271247		1916.24	0.00552033		2446.24	0.00283215		2976.24	0.01244684		3506.24	-0.02064426
326.4	0.13252675		856.42	0.01661406		1386.41	0.02811844		1916.44	0.00568218		2446.44	0.00306331		2976.44	0.01164726		3506.44	-0.02017894
326.6	0.13133564		856.62	0.01678981		1386.61	0.02801365		1916.64	0.00573684		2446.64	0.00358442		2976.64	0.01201371		3506.64	-0.02029681
326.8	0.13060114		856.82	0.01724953		1386.81	0.02819992		1916.84	0.00574719		2446.84	0.00340826		2976.84	0.01257169		3506.84	-0.02122077
327	0.1311292		857.02	0.01741414		1387.01	0.02879902		1917.04	0.00531258		2447.04	0.00434181		2977.04	0.01232459		3507.04	-0.02126704
327.2	0.13113098		857.22	0.01681995		1387.21	0.02848001		1917.24	0.00522802		2447.24	0.0048375		2977.24	0.01230397		3507.24	-0.02124672
327.4	0.13104233		857.42	0.01659174		1387.41	0.02861954		1917.44	0.00564209		2447.44	0.00559499		2977.44	0.01236922		3507.44	-0.02087735
327.6	0.13155169		857.62	0.0171037		1387.61	0.0285657		1917.64	0.00525719		2447.64	0.00574993		2977.64	0.01287613		3507.64	-0.02097285
327.8	0.132074		857.82	0.01783176		1387.81	0.02924236		1917.84	0.00574427		2447.84	0.00636454		2977.84	0.01273637		3507.84	-0.02125326
328	0.13296699		858.02	0.01730525		1388.01	0.0293542		1918.04	0.00626011		2448.04	0.00755191		2978.04	0.01220919		3508.04	-0.02157598
328.2	0.13294143		858.22	0.01676314		1388.21	0.02927606		1918.24	0.00661934		2448.24	0.00768123		2978.24	0.01236603		3508.24	-0.02181656
328.4	0.13313152		858.42	0.0173795		1388.41	0.02909534		1918.44	0.00562429		2448.44	0.00845074		2978.44	0.01187892		3508.44	-0.02163305
328.6	0.13434928		858.62	0.01738318		1388.61	0.02871587		1918.64	0.00543443		2448.64	0.00954878		2978.64	0.01098197		3508.64	-0.02049765
328.8	0.13559403		858.82	0.01745225		1388.81	0.02843511		1918.84	0.00517933		2448.84	0.01065698		2978.84	0.01217244		3508.84	-0.02047871
329	0.13602963		859.02	0.01681326		1389.01	0.02815658		1919.04	0.0037217		2449.04	0.01071244		2979.04	0.01236281		3509.04	-0.02044395
329.2	0.13633028		859.22	0.01603769		1389.21	0.0283727		1919.24	0.00374218		2449.24	0.01080033		2979.24	0.01289263		3509.24	-0.02027447
329.4	0.13620637		859.42	0.01508816		1389.41	0.02705372		1919.44	0.00382565		2449.44	0.01052935		2979.44	0.01307472		3509.44	-0.02049635
329.6	0.13587975		859.62	0.01509542		1389.61	0.02700876		1919.64	0.00459979		2449.64	0.01068297		2979.64	0.01333187		3509.64	-0.02102951
329.8	0.13601896		859.82	0.01477777		1389.81	0.02719443		1919.84	0.0043688		2449.84	0.00986728		2979.84	0.0138007		3509.84	-0.02119498
330	0.13548291		860.02	0.01566849		1390.01	0.02703474		1920.04	0.00432252		2450.04	0.00981483		2980.04	0.01313154		3510.04	-0.02133221
330.2	0.13445849		860.22	0.01597179		1390.21	0.02735962		1920.24	0.00420523		2450.24	0.00965995		2980.24	0.01349743		3510.24	-0.02100009
330.4	0.13372471		860.42	0.01645582		1390.41	0.02763		1920.44	0.00370932		2450.44	0.00953641		2980.44	0.01324077		3510.44	-0.0213274
330.6	0.1332522		860.62	0.01730986		1390.61	0.02715136		1920.64	0.00307263		2450.64	0.00933537		2980.64	0.01376523		3510.64	-0.02147211
330.8	0.13300507		860.82	0.01728889		1390.81	0.02798032		1920.84	0.00276571		2450.84	0.00839633		2980.84	0.01272443		3510.84	-0.02117657
331	0.13268553		861.02	0.01664893		1391.01	0.02854009		1921.04	0.0026441		2451.04	0.00850879		2981.04	0.01272745		3511.04	-0.02110352
331.2	0.13185828		861.22	0.01656062		1391.21	0.02843852		1921.24	0.00360203		2451.24	0.00818817		2981.24	0.01300121		3511.24	-0.02040788
331.4	0.13252273		861.42	0.01806673		1391.41	0.02853402		1921.44	0.00334024		2451.44	0.00735428		2981.44	0.01318217		3511.44	-0.02038313
331.6	0.13308168		861.62	0.01901249		1391.61	0.02919822		1921.64	0.00299472		2451.64	0.00685566		2981.64	0.01326692		3511.64	-0.02087614
331.8	0.13351232		861.82	0.01873055		1391.81	0.02922965		1921.84	0.00302911		2451.84	0.0062404		2981.84	0.01393616		3511.84	-0.02116806
332	0.13447968		862.02	0.01812535		1392.01	0.02873994		1922.04	0.00314184		2452.04	0.00673276		2982.04	0.01358312		3512.04	-0.02128046
332.2	0.13501679		862.22	0.01761835		1392.21	0.02810875		1922.24	0.00268699		2452.24	0.00639215		2982.24	0.01367738		3512.24	-0.02132873
332.4	0.13560815		862.42	0.01772564		1392.41	0.02841294		1922.44	0.00205336		2452.44	0.00748881		2982.44	0.01294844		3512.44	-0.02074959
332.6	0.1356836		862.62	0.0170487		1392.61	0.0280637		1922.64	0.00262644		2452.64	0.0080734		2982.64	0.01318667		3512.64	-0.02064432
332.8	0.13623886		862.82	0.01708614		1392.81	0.02829242		1922.84	0.00241374		2452.84	0.00700897		2982.84	0.01391208		3512.84	-0.0215802
333	0.13647866		863.02	0.01667133		1393.01	0.02794552		1923.04	0.00235272		2453.04	0.00579874		2983.04	0.01392116		3513.04	-0.02145665
333.2	0.13670683		863.22	0.01640773		1393.21	0.02767468		1923.24	0.00330001		2453.24	0.00553876		2983.24	0.01349669		3513.24	-0.02110972
333.4	0.1365517		863.42	0.01676732		1393.41	0.02678292		1923.44	0.0037839		2453.44	0.0052112		2983.44	0.01305235		3513.44	-0.02158111
333.6	0.13684496		863.62	0.01690067		1393.61	0.02723703		1923.64	0.00386791		2453.64	0.00506348		2983.64	0.01293929		3513.64	-0.02160415
333.8	0.13613745		863.82	0.01652452		1393.81	0.02751374		1923.84	0.00415038		2453.84	0.00399273		2983.84	0.01275676		3513.84	-0.0224493
334	0.13444633		864.02	0.01702476		1394.01	0.02838867		1924.04	0.00432682		2454.04	0.00475989		2984.04	0.01246158		3514.04	-0.02186969
334.2	0.13340318		864.22	0.01600095		1394.21	0.02807599		1924.24	0.0041434		2454.24	0.00479602		2984.24	0.01307524		3514.24	-0.02170789
334.4	0.13301498		864.42	0.015948		1394.41	0.02879099		1924.44	0.00326111		2454.44	0.00552613		2984.44	0.01230926		3514.44	-0.02177493
334.6	0.13277723		864.62	0.01631899		1394.61	0.02963529		1924.64	0.00234249		2454.64	0.00574038		2984.64	0.01209554		3514.64	-0.020817
334.8	0.13235401		864.82	0.0159571		1394.81	0.03052298		1924.84	0.00312057		2454.84	0.00608623		2984.84	0.01211683		3514.84	-0.02033065
335	0.13206009		865.02	0.01624771		1395.01	0.03048171		1925.04	0.0030978		2455.04	0.00689777		2985.04	0.01241364		3515.04	-0.02039358
335.2	0.13201908		865.22	0.01666135		1395.21	0.03117854		1925.24	0.00408018		2455.24	0.00737473		2985.24	0.01324427		3515.24	-0.02003365
335.4	0.13312301		865.42	0.01794022		1395.41	0.03166542		1925.44	0.00354327		2455.44	0.00816549		2985.44	0.01271367		3515.44	-0.02046325
335.6	0.13266327		865.62	0.01846979		1395.61	0.03280127		1925.64	0.0039128		2455.64	0.0081159		2985.64	0.01230045		3515.64	-0.02069846
335.8	0.13281317		865.82	0.01793452		1395.81	0.03309488		1925.84	0.00383275		2455.84	0.00929371		2985.84	0.01242232		3515.84	-0.01994653
336	0.13294005		866.02	0.01753189		1396.01	0.03296676		1926.04	0.00395743		2456.04	0.01072485		2986.04	0.01244196		3516.04	-0.01989249
336.2	0.13304891		866.22	0.01821183		1396.21	0.03390377		1926.24	0.00351398		2456.24	0.01081908		2986.24	0.01216834		3516.24	-0.01955598
336.4	0.13360437		866.42	0.01855454		1396.41	0.03403994		1926.44	0.00432364		2456.44	0.01134477		2986.44	0.01185269		3516.44	-0.01921246
336.6	0.13415963		866.62	0.01932		1396.61	0.0343013		1926.64	0.0055126		2456.64	0.01093955		2986.64	0.01244441		3516.64	-0.01958779
336.8	0.13458152		866.82	0.01945411		1396.81	0.03483475		1926.84	0.00551896		2456.84	0.00994351		2986.84	0.01268385		3516.84	-0.01933445
337	0.1355058		867.02	0.01950978		1397.01	0.03434473		1927.04	0.00561968		2457.04	0.00998734		2987.04	0.01297969		3517.04	-0.01865799
337.2	0.13600158		867.22	0.01927694		1397.21	0.034072		1927.24	0.00572864		2457.24	0.00944673		2987.24	0.01282333		3517.24	-0.01802118
337.4	0.13641876		867.42	0.01954748		1397.41	0.0334114		1927.44	0.00574159		2457.44	0.00850219		2987.44	0.01315128		3517.44	-0.01902148
337.6	0.1362163		867.62	0.0189462		1397.61	0.03256601		1927.64	0.00531637		2457.64	0.0085947		2987.64	0.01379442		3517.64	-0.02001942
337.8	0.13550666		867.82	0.01847226		1397.81	0.03192783		1927.84	0.005624		2457.84	0.00802182		2987.84	0.0143253		3517.84	-0.02006062
338	0.1358468		868.02	0.01795774		1398.01	0.0311067		1928.04	0.00555005		2458.04	0.00848895		2988.04	0.01566217		3518.04	-0.02006149
338.2	0.13635083		868.22	0.01715888		1398.21	0.03014673		1928.24	0.00505466		2458.24	0.00841433		2988.24	0.01534869		3518.24	-0.02096824
338.4	0.13680269		868.42	0.01743283		1398.41	0.03065258		1928.44	0.0048808		2458.44	0.00886507		2988.44	0.01511449		3518.44	-0.02133147
338.6	0.13715004		868.62	0.01732011		1398.61	0.03017169		1928.64	0.00482288		2458.64	0.00894204		2988.64	0.01509868		3518.64	-0.02195395
338.8	0.13788541		868.82	0.01721941		1398.81	0.02923067		1928.84	0.00574326		2458.84	0.00941411		2988.84	0.01440087		3518.84	-0.0230094
339	0.13812734		869.02	0.01727929		1399.01	0.02880786		1929.04	0.00584028		2459.04	0.00971385		2989.04	0.01417865		3519.04	-0.02395118
339.2	0.13829385		869.22	0.01712343		1399.21	0.02880452		1929.24	0.00635855		2459.24	0.00955559		2989.24	0.0136345		3519.24	-0.02349067
339.4	0.13800244		869.42	0.017157		1399.41	0.02843413		1929.44	0.00599239		2459.44	0.01044324		2989.44	0.01192241		3519.44	-0.0235819
339.6	0.13731006		869.62	0.01694978		1399.61	0.02844779		1929.64	0.00497183		2459.64	0.00994635		2989.64	0.01138609		3519.64	-0.02369905
339.8	0.13744221		869.82	0.01662008		1399.81	0.02838234		1929.84	0.00465482		2459.84	0.01071565		2989.84	0.01098614		3519.84	-0.02390584
340	0.13733379		870.02	0.0167042		1400.01	0.02880939		1930.04	0.00402626		2460.04	0.01077127		2990.04	0.01154684		3520.04	-0.02373461
340.2	0.13721693		870.22	0.01787787		1400.21	0.02942999		1930.24	0.00352906		2460.24	0.01111897		2990.24	0.01084117		3520.24	-0.02286171
340.4	0.1385017		870.42	0.01758936		1400.41	0.02979549		1930.44	0.00385863		2460.44	0.01146848		2990.44	0.01003852		3520.44	-0.02267699
340.6	0.1393276		870.62	0.01750383		1400.61	0.03085538		1930.64	0.0039968		2460.64	0.01095886		2990.64	0.00996131		3520.64	-0.02187451
340.8	0.13960193		870.82	0.01747298		1400.81	0.03145443		1930.84	0.00414248		2460.84	0.01035029		2990.84	0.00999933		3520.84	-0.0208803
341	0.13993211		871.02	0.01751676		1401.01	0.03158973		1931.04	0.00395433		2461.04	0.01000166		2991.04	0.01070104		3521.04	-0.02060729
341.2	0.13987327		871.22	0.01645409		1401.21	0.03066433		1931.24	0.00390958		2461.24	0.00911315		2991.24	0.01172555		3521.24	-0.02035648
341.4	0.13992364		871.42	0.01692198		1401.41	0.03014616		1931.44	0.0034924		2461.44	0.00902887		2991.44	0.01227571		3521.44	-0.01993538
341.6	0.13962415		871.62	0.01707177		1401.61	0.02991932		1931.64	0.00405734		2461.64	0.00893421		2991.64	0.01365297		3521.64	-0.02010587
341.8	0.13979682		871.82	0.01656816		1401.81	0.03014343		1931.84	0.00466665		2461.84	0.00868853		2991.84	0.01497317		3521.84	-0.01924128
342	0.13994199		872.02	0.01674051		1402.01	0.03051232		1932.04	0.00513561		2462.04	0.00846748		2992.04	0.01588811		3522.04	-0.02008279
342.2	0.14051836		872.22	0.01744181		1402.21	0.0310059		1932.24	0.00542305		2462.24	0.00835352		2992.24	0.01564082		3522.24	-0.02013684
342.4	0.14076707		872.42	0.01785558		1402.41	0.03108703		1932.44	0.00583809		2462.44	0.0076733		2992.44	0.01560769		3522.44	-0.02007941
342.6	0.14123295		872.62	0.01765963		1402.61	0.03072045		1932.64	0.00574996		2462.64	0.0078597		2992.64	0.01530183		3522.64	-0.02060062
342.8	0.14119794		872.82	0.01790137		1402.81	0.03077756		1932.84	0.00596603		2462.84	0.00805254		2992.84	0.0148735		3522.84	-0.01962146
343	0.14086582		873.02	0.01804675		1403.01	0.03099879		1933.04	0.00608953		2463.04	0.00914715		2993.04	0.01536139		3523.04	-0.01966345
343.2	0.14102245		873.22	0.01818849		1403.21	0.03064034		1933.24	0.00606531		2463.24	0.00958059		2993.24	0.01490159		3523.24	-0.01912606
343.4	0.14102077		873.42	0.01851211		1403.41	0.03082167		1933.44	0.0052721		2463.44	0.01020617		2993.44	0.01432077		3523.44	-0.02037939
343.6	0.14084255		873.62	0.0189308		1403.61	0.03056197		1933.64	0.00493088		2463.64	0.01046453		2993.64	0.01492494		3523.64	-0.0204576
343.8	0.14126581		873.82	0.01962736		1403.81	0.03057847		1933.84	0.00417425		2463.84	0.0107799		2993.84	0.01498858		3523.84	-0.02139897
344	0.1410362		874.02	0.01992903		1404.01	0.03111649		1934.04	0.00320305		2464.04	0.01073213		2994.04	0.01556752		3524.04	-0.02032675
344.2	0.14178553		874.22	0.01991477		1404.21	0.03060299		1934.24	0.00302169		2464.24	0.01090312		2994.24	0.01460723		3524.24	-0.02013106
344.4	0.14234098		874.42	0.01965733		1404.41	0.03127625		1934.44	0.0031472		2464.44	0.01029819		2994.44	0.01423158		3524.44	-0.020011
344.6	0.1416421		874.62	0.01956919		1404.61	0.03163075		1934.64	0.00338495		2464.64	0.00994142		2994.64	0.01462721		3524.64	-0.01917701
344.8	0.14212734		874.82	0.01952123		1404.81	0.03101093		1934.84	0.00377571		2464.84	0.00973529		2994.84	0.0147616		3524.84	-0.01907819
345	0.14143159		875.02	0.0189828		1405.01	0.03032782		1935.04	0.00392145		2465.04	0.00978824		2995.04	0.01514477		3525.04	-0.01974348
345.2	0.14206231		875.22	0.01819307		1405.21	0.03026954		1935.24	0.00439647		2465.24	0.00905954		2995.24	0.01505201		3525.24	-0.01983118
345.4	0.14235709		875.42	0.01862548		1405.41	0.03060895		1935.44	0.0042089		2465.44	0.00938405		2995.44	0.01480883		3525.44	-0.0202267
345.6	0.14215659		875.62	0.01794813		1405.61	0.03056575		1935.64	0.00505028		2465.64	0.00889406		2995.64	0.01540039		3525.64	-0.02130111
345.8	0.14222129		875.82	0.01796419		1405.81	0.03117701		1935.84	0.00453322		2465.84	0.00861361		2995.84	0.01530557		3525.84	-0.02138821
346	0.14250618		876.02	0.01847818		1406.01	0.03167192		1936.04	0.00468032		2466.04	0.00842998		2996.04	0.01488756		3526.04	-0.02258331
346.2	0.14279522		876.22	0.01835603		1406.21	0.03154599		1936.24	0.00471359		2466.24	0.00826677		2996.24	0.01450041		3526.24	-0.02260703
346.4	0.14286078		876.42	0.0185291		1406.41	0.03108733		1936.44	0.00423855		2466.44	0.00795238		2996.44	0.01367109		3526.44	-0.02245457
346.6	0.14332856		876.62	0.01867757		1406.61	0.03066162		1936.64	0.00424725		2466.64	0.00831331		2996.64	0.0137834		3526.64	-0.02248332
346.8	0.14231199		876.82	0.01858514		1406.81	0.03030005		1936.84	0.00359828		2466.84	0.00881398		2996.84	0.01356332		3526.84	-0.02242377
347	0.14226154		877.02	0.0188382		1407.01	0.0294167		1937.04	0.00317271		2467.04	0.0097906		2997.04	0.01402799		3527.04	-0.02317013
347.2	0.1426051		877.22	0.01921814		1407.21	0.02848674		1937.24	0.00272507		2467.24	0.00949325		2997.24	0.01398684		3527.24	-0.02312829
347.4	0.14134446		877.42	0.01977197		1407.41	0.02817186		1937.44	0.00150481		2467.44	0.00903298		2997.44	0.01356811		3527.44	-0.0238874
347.6	0.14001465		877.62	0.01964795		1407.61	0.02795384		1937.64	0.00133341		2467.64	0.00918287		2997.64	0.01385159		3527.64	-0.02340808
347.8	0.14022822		877.82	0.0200176		1407.81	0.02796712		1937.84	0.00052518		2467.84	0.00832662		2997.84	0.01386618		3527.84	-0.02301348
348	0.1399652		878.02	0.02011319		1408.01	0.02804673		1938.04	0.00032214		2468.04	0.00735712		2998.04	0.01353921		3528.04	-0.02225069
348.2	0.14039708		878.22	0.01953243		1408.21	0.0270983		1938.24	0.00047666		2468.24	0.00760769		2998.24	0.01260199		3528.24	-0.02145909
348.4	0.13991718		878.42	0.01977248		1408.41	0.0281242		1938.44	-0.0000562		2468.44	0.00760123		2998.44	0.01286972		3528.44	-0.02066173
348.6	0.1396409		878.62	0.01919089		1408.61	0.0281051		1938.64	0.00057129		2468.64	0.00753579		2998.64	0.01304093		3528.64	-0.02057559
348.8	0.14109972		878.82	0.0183293		1408.81	0.02816074		1938.84	0.00099168		2468.84	0.00735845		2998.84	0.01240681		3528.84	-0.02022345
349	0.14073312		879.02	0.01805153		1409.01	0.0287834		1939.04	0.00161188		2469.04	0.00757883		2999.04	0.01203415		3529.04	-0.02035763
349.2	0.14100698		879.22	0.01712042		1409.21	0.02995782		1939.24	0.00213846		2469.24	0.0074361		2999.24	0.01169662		3529.24	-0.01997744
349.4	0.14154799		879.42	0.01668814		1409.41	0.0299998		1939.44	0.00202422		2469.44	0.00747403		2999.44	0.01262703		3529.44	-0.01984056
349.6	0.14130363		879.62	0.0159007		1409.61	0.03026638		1939.64	0.00222671		2469.64	0.00665471		2999.64	0.01350756		3529.64	-0.01950266
349.8	0.14166685		879.82	0.01582046		1409.81	0.03071708		1939.84	0.00294941		2469.84	0.00632389		2999.84	0.01434786		3529.84	-0.02012561
350	0.14210405		880.02	0.01529041		1410.01	0.03087191		1940.04	0.00381963		2470.04	0.00683763		3000.04	0.01539775		3530.04	-0.02012847
350.2	0.14207599		880.22	0.01524169		1410.21	0.03052057		1940.24	0.00380758		2470.24	0.00635327		3000.24	0.01627851		3530.24	-0.02051711
350.4	0.14237933		880.42	0.01509367		1410.41	0.03057433		1940.44	0.0038351		2470.44	0.00618497		3000.44	0.01682517		3530.44	-0.0207276
350.6	0.1419839		880.62	0.01457927		1410.61	0.03011842		1940.64	0.00485368		2470.64	0.00698358		3000.64	0.01817016		3530.64	-0.02191569
350.8	0.14081814		880.82	0.01395025		1410.81	0.02976365		1940.84	0.00499187		2470.84	0.00769931		3000.84	0.01899493		3530.84	-0.02289007
351	0.14057918		881.02	0.01452025		1411.01	0.03023367		1941.04	0.00503099		2471.04	0.00833455		3001.04	0.01914312		3531.04	-0.0225855
351.2	0.14017284		881.22	0.01534554		1411.21	0.03005329		1941.24	0.00505486		2471.24	0.00846492		3001.24	0.01887733		3531.24	-0.02312383
351.4	0.13884821		881.42	0.0163		1411.41	0.02995806		1941.44	0.00478111		2471.44	0.00834299		3001.44	0.01800948		3531.44	-0.02404648
351.6	0.13918165		881.62	0.01733695		1411.61	0.02962868		1941.64	0.00507944		2471.64	0.00811436		3001.64	0.01817188		3531.64	-0.02356412
351.8	0.13990073		881.82	0.01838349		1411.81	0.0292299		1941.84	0.00494613		2471.84	0.00749185		3001.84	0.01781996		3531.84	-0.02392809
352	0.14045107		882.02	0.01836878		1412.01	0.02943967		1942.04	0.00401985		2472.04	0.00775994		3002.04	0.01736241		3532.04	-0.02409237
352.2	0.14121069		882.22	0.01862198		1412.21	0.02972549		1942.24	0.00416544		2472.24	0.00794339		3002.24	0.01675387		3532.24	-0.02386239
352.4	0.14164035		882.42	0.0190795		1412.41	0.03085685		1942.44	0.00280861		2472.44	0.00834708		3002.44	0.01718125		3532.44	-0.0232586
352.6	0.1418522		882.62	0.01905113		1412.61	0.03001682		1942.64	0.00247486		2472.64	0.00898085		3002.64	0.01694878		3532.64	-0.02283293
352.8	0.14209795		882.82	0.01885641		1412.81	0.03004779		1942.84	0.00177215		2472.84	0.00933527		3002.84	0.01637702		3532.84	-0.02239545
353	0.14198219		883.02	0.0196868		1413.01	0.03067242		1943.04	0.00137805		2473.04	0.00982592		3003.04	0.01575967		3533.04	-0.02194215
353.2	0.14150829		883.22	0.01952463		1413.21	0.03069921		1943.24	0.00152731		2473.24	0.01049721		3003.24	0.0161545		3533.24	-0.0213332
353.4	0.14131022		883.42	0.02057227		1413.41	0.03077128		1943.44	0.00053482		2473.44	0.00978221		3003.44	0.01690575		3533.44	-0.02095079
353.6	0.14141948		883.62	0.02003963		1413.61	0.03136891		1943.64	-0.00009126		2473.64	0.01011799		3003.64	0.01697659		3533.64	-0.02098339
353.8	0.14212193		883.82	0.02011654		1413.81	0.03123684		1943.84	-0.00028727		2473.84	0.01026061		3003.84	0.01723354		3533.84	-0.0200016
354	0.14259473		884.02	0.02045283		1414.01	0.03148407		1944.04	-0.00015619		2474.04	0.01095861		3004.04	0.01733467		3534.04	-0.02005255
354.2	0.14268639		884.22	0.01993429		1414.21	0.03170957		1944.24	-0.00009397		2474.24	0.0106545		3004.24	0.01753145		3534.24	-0.02041957
354.4	0.14280665		884.42	0.01948022		1414.41	0.03275452		1944.44	0.00068588		2474.44	0.01123724		3004.44	0.01757741		3534.44	-0.02091926
354.6	0.14268819		884.62	0.01932148		1414.61	0.03246563		1944.64	0.00197332		2474.64	0.01207731		3004.64	0.01753425		3534.64	-0.02074297
354.8	0.14222751		884.82	0.01959264		1414.81	0.03178413		1944.84	0.0014384		2474.84	0.01155897		3004.84	0.01802119		3534.84	-0.02041028
355	0.14251556		885.02	0.01959219		1415.01	0.0318583		1945.04	0.0024646		2475.04	0.01125597		3005.04	0.01757931		3535.04	-0.02026892
355.2	0.14255847		885.22	0.01995969		1415.21	0.03137961		1945.24	0.00327826		2475.24	0.01087193		3005.24	0.01746343		3535.24	-0.02080812
355.4	0.14329505		885.42	0.02038964		1415.41	0.03112153		1945.44	0.00375827		2475.44	0.00990495		3005.44	0.01791364		3535.44	-0.02100358
355.6	0.14354805		885.62	0.02019089		1415.61	0.03041443		1945.64	0.00325708		2475.64	0.00927141		3005.64	0.01830799		3535.64	-0.02109461
355.8	0.14451295		885.82	0.01939893		1415.81	0.03082446		1945.84	0.00337858		2475.84	0.00920184		3005.84	0.01824295		3535.84	-0.0215083
356	0.14477691		886.02	0.0188239		1416.01	0.03091539		1946.04	0.00297139		2476.04	0.00857772		3006.04	0.01822082		3536.04	-0.02145973
356.2	0.14547505		886.22	0.01919818		1416.21	0.03021291		1946.24	0.00352792		2476.24	0.00834769		3006.24	0.01799723		3536.24	-0.02169304
356.4	0.14531035		886.42	0.01857906		1416.41	0.02954205		1946.44	0.00289854		2476.44	0.00827037		3006.44	0.01865371		3536.44	-0.0213678
356.6	0.14509969		886.62	0.0179392		1416.61	0.02789064		1946.64	0.00289998		2476.64	0.00814432		3006.64	0.01857955		3536.64	-0.02187945
356.8	0.14421088		886.82	0.01799519		1416.81	0.02792535		1946.84	0.00363261		2476.84	0.00772094		3006.84	0.01767436		3536.84	-0.02253453
357	0.14340569		887.02	0.01841732		1417.01	0.02820312		1947.04	0.00368354		2477.04	0.00847659		3007.04	0.01737835		3537.04	-0.02266863
357.2	0.143391		887.22	0.0182688		1417.21	0.02761145		1947.24	0.00439282		2477.24	0.00824069		3007.24	0.01735967		3537.24	-0.02172882
357.4	0.14412725		887.42	0.01885366		1417.41	0.02787023		1947.44	0.00384217		2477.44	0.00771781		3007.44	0.01701551		3537.44	-0.02239906
357.6	0.14544862		887.62	0.01842623		1417.61	0.02798169		1947.64	0.00363055		2477.64	0.0082305		3007.64	0.0167746		3537.64	-0.02247958
357.8	0.14554296		887.82	0.01873293		1417.81	0.02803628		1947.84	0.00420664		2477.84	0.00799011		3007.84	0.01667813		3537.84	-0.02128484
358	0.14501829		888.02	0.01921167		1418.01	0.02864494		1948.04	0.00567539		2478.04	0.008182		3008.04	0.01615102		3538.04	-0.02233679
358.2	0.14443965		888.22	0.01825056		1418.21	0.02965679		1948.24	0.00567946		2478.24	0.00766154		3008.24	0.01672		3538.24	-0.02141263
358.4	0.14357003		888.42	0.01877747		1418.41	0.03103392		1948.44	0.00608422		2478.44	0.00786192		3008.44	0.01662821		3538.44	-0.02164141
358.6	0.14334814		888.62	0.01921002		1418.61	0.03026708		1948.64	0.00626354		2478.64	0.00835161		3008.64	0.01630562		3538.64	-0.02113564
358.8	0.14253643		888.82	0.01940535		1418.81	0.03048372		1948.84	0.00648349		2478.84	0.00863823		3008.84	0.01676878		3538.84	-0.02159731
359	0.14237965		889.02	0.0184857		1419.01	0.0310013		1949.04	0.00741064		2479.04	0.00878919		3009.04	0.01653476		3539.04	-0.02173681
359.2	0.14229121		889.22	0.01811206		1419.21	0.03087676		1949.24	0.00771918		2479.24	0.00849531		3009.24	0.01726794		3539.24	-0.02178032
359.4	0.14231212		889.42	0.01852592		1419.41	0.03055643		1949.44	0.00738492		2479.44	0.00828229		3009.44	0.01802461		3539.44	-0.02206371
359.6	0.14163436		889.62	0.01849611		1419.61	0.03004354		1949.64	0.0061305		2479.64	0.00828019		3009.64	0.01726995		3539.64	-0.02227877
359.8	0.1419982		889.82	0.01768075		1419.81	0.02980817		1949.84	0.00680929		2479.84	0.00847692		3009.84	0.01694377		3539.84	-0.02224156
360	0.14158565		890.02	0.01763673		1420.01	0.02952665		1950.04	0.00751073		2480.04	0.00848598		3010.04	0.01670945		3540.04	-0.02257223
360.2	0.14166503		890.22	0.01843555		1420.21	0.02906484		1950.24	0.00747852		2480.24	0.00888529		3010.24	0.01648334		3540.24	-0.02330272
360.4	0.14211229		890.42	0.01781992		1420.41	0.02932561		1950.44	0.00742609		2480.44	0.00867354		3010.44	0.01683255		3540.44	-0.0234248
360.6	0.14272624		890.62	0.01701335		1420.61	0.02863248		1950.64	0.0077428		2480.64	0.00900287		3010.64	0.016861		3540.64	-0.0242158
360.8	0.14292146		890.82	0.01730569		1420.81	0.02900468		1950.84	0.00873149		2480.84	0.00950961		3010.84	0.01673467		3540.84	-0.02342924
361	0.14448852		891.02	0.01665394		1421.01	0.02881784		1951.04	0.00758014		2481.04	0.0100281		3011.04	0.01724126		3541.04	-0.02339959
361.2	0.14605156		891.22	0.01650933		1421.21	0.02904241		1951.24	0.00688381		2481.24	0.00972223		3011.24	0.01748735		3541.24	-0.02237818
361.4	0.14671434		891.42	0.01591927		1421.41	0.02870934		1951.44	0.00620114		2481.44	0.01049071		3011.44	0.01766078		3541.44	-0.02295557
361.6	0.1470444		891.62	0.01609977		1421.61	0.0283897		1951.64	0.00599918		2481.64	0.01096882		3011.64	0.01827563		3541.64	-0.02209442
361.8	0.14698741		891.82	0.01551551		1421.81	0.02872221		1951.84	0.00547163		2481.84	0.01081683		3011.84	0.01850653		3541.84	-0.02149309
362	0.14615478		892.02	0.0156013		1422.01	0.02868468		1952.04	0.00533803		2482.04	0.010902		3012.04	0.01887699		3542.04	-0.02157538
362.2	0.14573318		892.22	0.01605097		1422.21	0.0295959		1952.24	0.00413539		2482.24	0.01049397		3012.24	0.01949356		3542.24	-0.02070081
362.4	0.14518679		892.42	0.01706278		1422.41	0.0298225		1952.44	0.00370495		2482.44	0.01050549		3012.44	0.01858936		3542.44	-0.02079602
362.6	0.14570973		892.62	0.01809033		1422.61	0.02950204		1952.64	0.00373887		2482.64	0.01108545		3012.64	0.01791282		3542.64	-0.02075437
362.8	0.14529325		892.82	0.01754143		1422.81	0.02964965		1952.84	0.00419628		2482.84	0.01056299		3012.84	0.01810106		3542.84	-0.02023752
363	0.14489137		893.02	0.01794915		1423.01	0.02927522		1953.04	0.00403448		2483.04	0.00962788		3013.04	0.01774955		3543.04	-0.02049765
363.2	0.14517448		893.22	0.01856205		1423.21	0.0289572		1953.24	0.00452881		2483.24	0.00860888		3013.24	0.01859968		3543.24	-0.02105533
363.4	0.14531603		893.42	0.01976935		1423.41	0.02950556		1953.44	0.00431494		2483.44	0.00766646		3013.44	0.01840311		3543.44	-0.02069177
363.6	0.14572427		893.62	0.01928508		1423.61	0.03011705		1953.64	0.00444714		2483.64	0.00682551		3013.64	0.0171742		3543.64	-0.02074121
363.8	0.14583056		893.82	0.01852586		1423.81	0.03077885		1953.84	0.00548473		2483.84	0.00650313		3013.84	0.01665922		3543.84	-0.02087358
364	0.14490773		894.02	0.02010733		1424.01	0.03152052		1954.04	0.0057041		2484.04	0.00592682		3014.04	0.01679964		3544.04	-0.02113989
364.2	0.14527794		894.22	0.02081128		1424.21	0.03187207		1954.24	0.00563132		2484.24	0.00519774		3014.24	0.01659693		3544.24	-0.02186218
364.4	0.14652767		894.42	0.02009924		1424.41	0.03231428		1954.44	0.00610501		2484.44	0.00506203		3014.44	0.01734394		3544.44	-0.02177872
364.6	0.1457788		894.62	0.01959275		1424.61	0.03220979		1954.64	0.00594099		2484.64	0.00565943		3014.64	0.01777677		3544.64	-0.02150838
364.8	0.14576654		894.82	0.01972584		1424.81	0.03278689		1954.84	0.00622959		2484.84	0.00633766		3014.84	0.01760511		3544.84	-0.02095525
365	0.14647567		895.02	0.02004588		1425.01	0.03326731		1955.04	0.00545388		2485.04	0.00664678		3015.04	0.01831019		3545.04	-0.02153377
365.2	0.14563579		895.22	0.01996234		1425.21	0.03308841		1955.24	0.00520033		2485.24	0.00701285		3015.24	0.01803823		3545.24	-0.02128022
365.4	0.1456861		895.42	0.01989783		1425.41	0.0332101		1955.44	0.00542696		2485.44	0.00823055		3015.44	0.01819166		3545.44	-0.02212568
365.6	0.14593418		895.62	0.02021055		1425.61	0.03262808		1955.64	0.00528109		2485.64	0.00833883		3015.64	0.01867498		3545.64	-0.02176834
365.8	0.14600697		895.82	0.02055327		1425.81	0.03290124		1955.84	0.00490476		2485.84	0.00911371		3015.84	0.01873378		3545.84	-0.02223275
366	0.14538826		896.02	0.02125661		1426.01	0.03266646		1956.04	0.00525941		2486.04	0.0100116		3016.04	0.01931898		3546.04	-0.02195063
366.2	0.14507322		896.22	0.02205187		1426.21	0.03312181		1956.24	0.00521443		2486.24	0.01021263		3016.24	0.01860371		3546.24	-0.02170824
366.4	0.14524389		896.42	0.02266396		1426.41	0.03285981		1956.44	0.00564593		2486.44	0.01119325		3016.44	0.01832693		3546.44	-0.02206034
366.6	0.14548697		896.62	0.02279269		1426.61	0.03380186		1956.64	0.00597249		2486.64	0.01226365		3016.64	0.01824228		3546.64	-0.02240755
366.8	0.14623488		896.82	0.02253116		1426.81	0.03444636		1956.84	0.00613639		2486.84	0.01180998		3016.84	0.01824493		3546.84	-0.02271955
367	0.14669022		897.02	0.02280004		1427.01	0.03372958		1957.04	0.00542916		2487.04	0.01215916		3017.04	0.01807777		3547.04	-0.02327133
367.2	0.14778205		897.22	0.02250908		1427.21	0.03332387		1957.24	0.00579507		2487.24	0.01201221		3017.24	0.01903758		3547.24	-0.02266097
367.4	0.14848171		897.42	0.02205616		1427.41	0.03289532		1957.44	0.00625318		2487.44	0.01150043		3017.44	0.01894103		3547.44	-0.02185667
367.6	0.14880445		897.62	0.02126757		1427.61	0.03322697		1957.64	0.00590953		2487.64	0.01172344		3017.64	0.01806742		3547.64	-0.02213714
367.8	0.14814872		897.82	0.02118772		1427.81	0.03266906		1957.84	0.00567816		2487.84	0.01130281		3017.84	0.01763693		3547.84	-0.02156485
368	0.14843184		898.02	0.02250933		1428.01	0.03219355		1958.04	0.00557294		2488.04	0.01111528		3018.04	0.01822346		3548.04	-0.02175358
368.2	0.14960344		898.22	0.02089759		1428.21	0.03108343		1958.24	0.00563857		2488.24	0.01139681		3018.24	0.01839986		3548.24	-0.02233573
368.4	0.14888396		898.42	0.01983194		1428.41	0.03125954		1958.44	0.0047692		2488.44	0.01174296		3018.44	0.01911416		3548.44	-0.02215591
368.6	0.1480696		898.62	0.01974867		1428.61	0.03110064		1958.64	0.00427356		2488.64	0.0121961		3018.64	0.01856525		3548.64	-0.02158521
368.8	0.14846562		898.82	0.01992094		1428.81	0.03132991		1958.84	0.00409693		2488.84	0.01175852		3018.84	0.01812422		3548.84	-0.02219866
369	0.14785163		899.02	0.02010013		1429.01	0.03084734		1959.04	0.00396973		2489.04	0.01157636		3019.04	0.01845075		3549.04	-0.02208481
369.2	0.14736135		899.22	0.0196338		1429.21	0.03015108		1959.24	0.0030924		2489.24	0.01166117		3019.24	0.01676754		3549.24	-0.02195979
369.4	0.14727678		899.42	0.01998925		1429.41	0.02996883		1959.44	0.00263543		2489.44	0.01215654		3019.44	0.01591729		3549.44	-0.02188113
369.6	0.146701		899.62	0.01935879		1429.61	0.02888619		1959.64	0.0021708		2489.64	0.01235736		3019.64	0.01607877		3549.64	-0.02155994
369.8	0.14654032		899.82	0.01966435		1429.81	0.02926674		1959.84	0.00178184		2489.84	0.01315972		3019.84	0.01592043		3549.84	-0.02213528
370	0.14588314		900.02	0.01989129		1430.01	0.02929427		1960.04	0.00168416		2490.04	0.01308412		3020.04	0.01527059		3550.04	-0.02150192
370.2	0.14585009		900.22	0.02059819		1430.21	0.02900123		1960.24	0.00180299		2490.24	0.01311792		3020.24	0.01492949		3550.24	-0.02222708
370.4	0.14560625		900.42	0.02129569		1430.41	0.02876084		1960.44	0.00125376		2490.44	0.01348718		3020.44	0.01500805		3550.44	-0.02203468
370.6	0.14564466		900.62	0.0211197		1430.61	0.02984487		1960.64	0.00107924		2490.64	0.0128882		3020.64	0.01514003		3550.64	-0.02128758
370.8	0.14657713		900.82	0.02222599		1430.81	0.02960819		1960.84	0.00175915		2490.84	0.01224278		3020.84	0.01616111		3550.84	-0.02088106
371	0.14660297		901.02	0.02209738		1431.01	0.02886203		1961.04	0.00168255		2491.04	0.01233609		3021.04	0.01652848		3551.04	-0.01993229
371.2	0.14684814		901.22	0.02297428		1431.21	0.0296481		1961.24	0.00204396		2491.24	0.01210761		3021.24	0.01727771		3551.24	-0.01955102
371.4	0.14652925		901.42	0.02239727		1431.41	0.02982218		1961.44	0.00217817		2491.44	0.01146331		3021.44	0.01739738		3551.44	-0.01964337
371.6	0.14675573		901.62	0.02353843		1431.61	0.03165995		1961.64	0.00173114		2491.64	0.01133798		3021.64	0.01750594		3551.64	-0.0200362
371.8	0.1478668		901.82	0.02323922		1431.81	0.03183152		1961.84	0.00225082		2491.84	0.01041927		3021.84	0.01779868		3551.84	-0.01999865
372	0.14868096		902.02	0.02322561		1432.01	0.03184077		1962.04	0.00151486		2492.04	0.01075371		3022.04	0.01861108		3552.04	-0.02090837
372.2	0.14863498		902.22	0.02236232		1432.21	0.03160561		1962.24	0.00109935		2492.24	0.01028318		3022.24	0.01910495		3552.24	-0.02072054
372.4	0.14876213		902.42	0.02210022		1432.41	0.03334115		1962.44	0.00151801		2492.44	0.01018103		3022.44	0.01977408		3552.44	-0.01993899
372.6	0.14934123		902.62	0.02151349		1432.61	0.03331232		1962.64	0.0020836		2492.64	0.00966834		3022.64	0.01986844		3552.64	-0.01941235
372.8	0.15014263		902.82	0.02131531		1432.81	0.03372015		1962.84	0.00261148		2492.84	0.00945081		3022.84	0.02047609		3552.84	-0.0196013
373	0.15004395		903.02	0.02067063		1433.01	0.03364017		1963.04	0.00300855		2493.04	0.01030765		3023.04	0.02031624		3553.04	-0.01949689
373.2	0.1504905		903.22	0.02036761		1433.21	0.0329386		1963.24	0.00362442		2493.24	0.01008462		3023.24	0.01993054		3553.24	-0.01964616
373.4	0.15049342		903.42	0.02017411		1433.41	0.03262847		1963.44	0.00290141		2493.44	0.01106652		3023.44	0.01998889		3553.44	-0.01986121
373.6	0.15080279		903.62	0.01938011		1433.61	0.03311115		1963.64	0.00288576		2493.64	0.01107449		3023.64	0.02002483		3553.64	-0.02032216
373.8	0.15119347		903.82	0.02022287		1433.81	0.03337517		1963.84	0.00207824		2493.84	0.01084844		3023.84	0.01863584		3553.84	-0.02098784
374	0.15111496		904.02	0.02064786		1434.01	0.03258244		1964.04	0.0026862		2494.04	0.01070803		3024.04	0.01824181		3554.04	-0.02151791
374.2	0.15051647		904.22	0.02112079		1434.21	0.03195141		1964.24	0.00167434		2494.24	0.01044458		3024.24	0.01815809		3554.24	-0.02214765
374.4	0.15028417		904.42	0.02103548		1434.41	0.03219626		1964.44	0.00158603		2494.44	0.01000477		3024.44	0.01797817		3554.44	-0.02126108
374.6	0.1505364		904.62	0.02143009		1434.61	0.03287094		1964.64	0.0022253		2494.64	0.00982297		3024.64	0.01759006		3554.64	-0.02145892
374.8	0.15084509		904.82	0.0219438		1434.81	0.03293662		1964.84	0.00259381		2494.84	0.01021498		3024.84	0.01709299		3554.84	-0.0220082
375	0.1505846		905.02	0.02112327		1435.01	0.03301971		1965.04	0.00239388		2495.04	0.010201		3025.04	0.01592454		3555.04	-0.02211277
375.2	0.15043411		905.22	0.02163337		1435.21	0.03256124		1965.24	0.00232736		2495.24	0.01008307		3025.24	0.01585327		3555.24	-0.02269944
375.4	0.15025681		905.42	0.02107703		1435.41	0.03153864		1965.44	0.0026467		2495.44	0.00947393		3025.44	0.01634441		3555.44	-0.02259018
375.6	0.1509362		905.62	0.02251545		1435.61	0.03113756		1965.64	0.00218169		2495.64	0.00958729		3025.64	0.0168653		3555.64	-0.02233197
375.8	0.15135528		905.82	0.0218558		1435.81	0.0298537		1965.84	0.00162213		2495.84	0.00977559		3025.84	0.0166461		3555.84	-0.02267477
376	0.1511134		906.02	0.02159672		1436.01	0.02861194		1966.04	0.00167671		2496.04	0.01012526		3026.04	0.01671487		3556.04	-0.02232192
376.2	0.15093477		906.22	0.02176294		1436.21	0.02908153		1966.24	0.00281889		2496.24	0.01007308		3026.24	0.017464		3556.24	-0.02202978
376.4	0.15147506		906.42	0.02127975		1436.41	0.02996135		1966.44	0.00387499		2496.44	0.01039664		3026.44	0.01827004		3556.44	-0.02123577
376.6	0.15137109		906.62	0.02093456		1436.61	0.03020601		1966.64	0.00403695		2496.64	0.01056206		3026.64	0.01890785		3556.64	-0.02051161
376.8	0.15202969		906.82	0.02153321		1436.81	0.03078702		1966.84	0.00438262		2496.84	0.01098883		3026.84	0.01998869		3556.84	-0.02113395
377	0.152445		907.02	0.02040988		1437.01	0.0302977		1967.04	0.00413783		2497.04	0.01223566		3027.04	0.02023024		3557.04	-0.02086346
377.2	0.15316686		907.22	0.01975721		1437.21	0.02935846		1967.24	0.00493329		2497.24	0.01278973		3027.24	0.02032092		3557.24	-0.02106547
377.4	0.15313538		907.42	0.01979928		1437.41	0.03023908		1967.44	0.00374057		2497.44	0.01341518		3027.44	0.02066455		3557.44	-0.02119556
377.6	0.15314953		907.62	0.01971559		1437.61	0.03140034		1967.64	0.00380701		2497.64	0.01253222		3027.64	0.02046605		3557.64	-0.02173115
377.8	0.15325971		907.82	0.02020854		1437.81	0.0313232		1967.84	0.00378132		2497.84	0.01235788		3027.84	0.01995576		3557.84	-0.02260485
378	0.15323297		908.02	0.01970741		1438.01	0.03107154		1968.04	0.00434691		2498.04	0.01229587		3028.04	0.0201469		3558.04	-0.02312839
378.2	0.15296426		908.22	0.01960034		1438.21	0.03171494		1968.24	0.00357225		2498.24	0.01184428		3028.24	0.01985238		3558.24	-0.02312395
378.4	0.1535552		908.42	0.01943576		1438.41	0.03226642		1968.44	0.0041232		2498.44	0.01191329		3028.44	0.01991108		3558.44	-0.02312926
378.6	0.15358175		908.62	0.01945046		1438.61	0.03270684		1968.64	0.00408548		2498.64	0.01218198		3028.64	0.01934693		3558.64	-0.02332888
378.8	0.15375043		908.82	0.01924169		1438.81	0.03294238		1968.84	0.00395896		2498.84	0.01218598		3028.84	0.01954089		3558.84	-0.02305316
379	0.15359561		909.02	0.01885001		1439.01	0.03261356		1969.04	0.0034337		2499.04	0.0119869		3029.04	0.01993601		3559.04	-0.02266538
379.2	0.15347677		909.22	0.01916968		1439.21	0.03236766		1969.24	0.00245101		2499.24	0.01191567		3029.24	0.02095796		3559.24	-0.02232507
379.4	0.15317212		909.42	0.01911099		1439.41	0.03211575		1969.44	0.00163054		2499.44	0.01182492		3029.44	0.02187631		3559.44	-0.02171737
379.6	0.15312264		909.62	0.01973179		1439.61	0.03230804		1969.64	0.00050633		2499.64	0.01219919		3029.64	0.02207559		3559.64	-0.02119099
379.8	0.15258075		909.82	0.01936871		1439.81	0.03250404		1969.84	-0.00021262		2499.84	0.01229909		3029.84	0.02212554		3559.84	-0.02128646
379.99	0.15258075		910.02	0.01936871		1440.01	0.03250404		1970.04	-0.00021262		2500.04	0.01229909		3030.04	0.02212554		3560.04	-0.02128646
380.19	0.15275061		910.22	0.01962902		1440.21	0.03213649		1970.24	-0.00160009		2500.24	0.01337069		3030.24	0.02310432		3560.24	-0.02073284
380.39	0.15301598		910.42	0.0193779		1440.41	0.03158883		1970.44	-0.00225835		2500.44	0.01398596		3030.44	0.02384167		3560.44	-0.01963442
380.59	0.15296563		910.62	0.01935181		1440.61	0.03125323		1970.64	-0.0032997		2500.64	0.01542779		3030.64	0.02440258		3560.64	-0.01906186
380.79	0.15313541		910.82	0.01948444		1440.81	0.03119874		1970.84	-0.00427172		2500.84	0.01648779		3030.84	0.02548393		3560.84	-0.01812712
380.99	0.15264047		911.02	0.0187865		1441.01	0.03102764		1971.04	-0.00578439		2501.04	0.01698471		3031.04	0.02607023		3561.04	-0.0166873
381.19	0.15264584		911.22	0.01812087		1441.21	0.03110036		1971.24	-0.00676259		2501.24	0.01726788		3031.24	0.02638005		3561.24	-0.01716297
381.39	0.15246717		911.42	0.018289		1441.41	0.03135152		1971.44	-0.00723193		2501.44	0.01778974		3031.44	0.02639586		3561.44	-0.01633204
381.59	0.15179084		911.62	0.01774826		1441.61	0.03100272		1971.64	-0.00777205		2501.64	0.01792637		3031.64	0.02528205		3561.64	-0.01608033
381.79	0.15182312		911.82	0.01717086		1441.81	0.03133916		1971.84	-0.0076301		2501.84	0.01787058		3031.84	0.02498124		3561.84	-0.01556981
381.99	0.15161021		912.02	0.016826		1442.01	0.03158997		1972.04	-0.00773997		2502.04	0.01817792		3032.04	0.02438506		3562.04	-0.01530225
382.19	0.15223516		912.22	0.01638106		1442.21	0.03231795		1972.24	-0.00680999		2502.24	0.01873329		3032.24	0.02341695		3562.24	-0.01564603
382.39	0.15205394		912.42	0.01623075		1442.41	0.03261426		1972.44	-0.00668177		2502.44	0.01879895		3032.44	0.02289269		3562.44	-0.01499606
382.59	0.15206558		912.62	0.0159675		1442.61	0.03224287		1972.64	-0.00653599		2502.64	0.01964619		3032.64	0.0213509		3562.64	-0.01502706
382.79	0.15177858		912.82	0.01641238		1442.81	0.03188276		1972.84	-0.00681347		2502.84	0.01858978		3032.84	0.02059163		3562.84	-0.01512846
382.99	0.15095198		913.02	0.01609566		1443.01	0.03155729		1973.04	-0.00621307		2503.04	0.01762424		3033.04	0.01958271		3563.04	-0.01535986
383.19	0.15013081		913.22	0.01680489		1443.21	0.03173377		1973.24	-0.00480542		2503.24	0.01864752		3033.24	0.02033268		3563.24	-0.01485241
383.39	0.14973356		913.42	0.01671022		1443.41	0.03091559		1973.44	-0.00414139		2503.44	0.01900764		3033.44	0.02191395		3563.44	-0.01490437
383.59	0.15026776		913.62	0.01766274		1443.61	0.03181278		1973.64	-0.00430039		2503.64	0.01910208		3033.64	0.02200232		3563.64	-0.01434703
383.79	0.15022516		913.82	0.01750642		1443.81	0.03187091		1973.84	-0.0049598		2503.84	0.01871632		3033.84	0.02296447		3563.84	-0.01429427
383.99	0.15095421		914.02	0.01711844		1444.01	0.03133158		1974.04	-0.00596161		2504.04	0.01919351		3034.04	0.02305326		3564.04	-0.01469523
384.19	0.14975058		914.22	0.01773899		1444.21	0.03124015		1974.24	-0.00584825		2504.24	0.018769		3034.24	0.02317557		3564.24	-0.01535783
384.39	0.14907298		914.42	0.01829088		1444.41	0.0315777		1974.44	-0.00631874		2504.44	0.01837686		3034.44	0.02290742		3564.44	-0.01520415
384.59	0.14855271		914.62	0.01924645		1444.61	0.03194897		1974.64	-0.00696607		2504.64	0.01914377		3034.64	0.02403159		3564.64	-0.01578994
384.79	0.1483139		914.82	0.01906344		1444.81	0.03160887		1974.84	-0.00747941		2504.84	0.0185748		3034.84	0.02485888		3564.84	-0.01589515
384.99	0.14743359		915.02	0.01902583		1445.01	0.03201549		1975.04	-0.00855664		2505.04	0.0174068		3035.04	0.02494722		3565.04	-0.01601648
385.19	0.14661683		915.22	0.01925136		1445.21	0.03251202		1975.24	-0.00846328		2505.24	0.01657731		3035.24	0.02553276		3565.24	-0.01707553
385.39	0.14627733		915.42	0.02013543		1445.41	0.03223978		1975.44	-0.00814779		2505.44	0.0163163		3035.44	0.0256287		3565.44	-0.01616523
385.59	0.14604733		915.62	0.01995171		1445.61	0.03114303		1975.64	-0.00742258		2505.64	0.01542381		3035.64	0.02455947		3565.64	-0.01565577
385.79	0.14595831		915.82	0.01992838		1445.81	0.03183398		1975.84	-0.00640805		2505.84	0.01502534		3035.84	0.02578091		3565.84	-0.01550372
385.99	0.14566802		916.02	0.01959393		1446.01	0.03147918		1976.04	-0.00638723		2506.04	0.01607056		3036.04	0.02536989		3566.04	-0.01579307
386.19	0.14663219		916.22	0.01907927		1446.21	0.03115393		1976.24	-0.00528203		2506.24	0.01643619		3036.24	0.02452276		3566.24	-0.01613191
386.39	0.14625109		916.42	0.01868437		1446.41	0.03030098		1976.44	-0.00576862		2506.44	0.01644021		3036.44	0.02343541		3566.44	-0.01579751
386.59	0.14493925		916.62	0.01805505		1446.61	0.02934091		1976.64	-0.0059174		2506.64	0.01711959		3036.64	0.02283818		3566.64	-0.01523711
386.79	0.14379955		916.82	0.01718629		1446.81	0.02923285		1976.84	-0.00564395		2506.84	0.01614713		3036.84	0.02295608		3566.84	-0.01468613
386.99	0.1436833		917.02	0.01702681		1447.01	0.02887908		1977.04	-0.00485244		2507.04	0.01603633		3037.04	0.02312852		3567.04	-0.01392371
387.19	0.14380855		917.22	0.01563554		1447.21	0.0284175		1977.24	-0.00526901		2507.24	0.01749492		3037.24	0.02344113		3567.24	-0.01365978
387.39	0.14418389		917.42	0.01474384		1447.41	0.02846056		1977.44	-0.00627547		2507.44	0.01767212		3037.44	0.02416885		3567.44	-0.01354291
387.59	0.1449686		917.62	0.01463807		1447.61	0.0278756		1977.64	-0.00710381		2507.64	0.01766594		3037.64	0.02456988		3567.64	-0.01391315
387.79	0.14449334		917.82	0.01466295		1447.81	0.02801793		1977.84	-0.00755929		2507.84	0.01776996		3037.84	0.02378117		3567.84	-0.0144526
387.99	0.14460569		918.02	0.01563277		1448.01	0.02803678		1978.04	-0.00810453		2508.04	0.01737187		3038.04	0.02309637		3568.04	-0.01563302
388.19	0.14407061		918.22	0.01562772		1448.21	0.02801238		1978.24	-0.00821081		2508.24	0.01620563		3038.24	0.02263403		3568.24	-0.01681559
388.39	0.14477617		918.42	0.01629574		1448.41	0.02860182		1978.44	-0.00910979		2508.44	0.01653544		3038.44	0.02251427		3568.44	-0.01743941
388.59	0.1452683		918.62	0.01643103		1448.61	0.02895801		1978.64	-0.00870809		2508.64	0.0159477		3038.64	0.0236364		3568.64	-0.01754747
388.79	0.14502188		918.82	0.01616127		1448.81	0.02906139		1978.84	-0.00806219		2508.84	0.01475663		3038.84	0.02379074		3568.84	-0.01789508
388.99	0.145		919.02	0.01631699		1449.01	0.02985584		1979.04	-0.00773033		2509.04	0.01405038		3039.04	0.02413545		3569.04	-0.01824621
389.19	0.14472841		919.22	0.01599448		1449.21	0.03028684		1979.24	-0.00688275		2509.24	0.01329979		3039.24	0.02425849		3569.24	-0.01818086
389.39	0.1458316		919.42	0.0166276		1449.41	0.03049524		1979.44	-0.00611794		2509.44	0.01254082		3039.44	0.02443164		3569.44	-0.01667775
389.59	0.1455649		919.62	0.01669993		1449.61	0.03093193		1979.64	-0.0052657		2509.64	0.01202995		3039.64	0.0237634		3569.64	-0.016771
389.79	0.14518424		919.82	0.01587693		1449.81	0.03185333		1979.84	-0.00427446		2509.84	0.01256102		3039.84	0.02502553		3569.84	-0.01733201
389.99	0.14500224		920.02	0.01573251		1450.01	0.03165441		1980.04	-0.00400778		2510.04	0.01375445		3040.04	0.0241975		3570.04	-0.0172987
390.19	0.14492614		920.22	0.01584796		1450.21	0.03169135		1980.24	-0.00409421		2510.24	0.01404568		3040.24	0.02348891		3570.24	-0.01766816
390.39	0.14385528		920.42	0.01627105		1450.41	0.03182489		1980.44	-0.00424063		2510.44	0.01474218		3040.44	0.02277751		3570.44	-0.01718673
390.59	0.14339736		920.62	0.01604759		1450.61	0.03239089		1980.64	-0.00390422		2510.64	0.01460538		3040.64	0.0231325		3570.64	-0.0169116
390.79	0.14305391		920.82	0.01592954		1450.81	0.03253843		1980.84	-0.00440988		2510.84	0.01447224		3040.84	0.02347617		3570.84	-0.01681505
390.99	0.14214772		921.02	0.01592693		1451.01	0.03230856		1981.04	-0.00475813		2511.04	0.01501763		3041.04	0.02330074		3571.04	-0.01674945
391.19	0.14164893		921.22	0.01563272		1451.21	0.03241932		1981.24	-0.00570001		2511.24	0.0159547		3041.24	0.02224752		3571.24	-0.01722468
391.39	0.14141645		921.42	0.01631068		1451.41	0.0327448		1981.44	-0.006277		2511.44	0.01645548		3041.44	0.02306731		3571.44	-0.0169555
391.59	0.14103687		921.62	0.01647322		1451.61	0.03167808		1981.64	-0.00655847		2511.64	0.01711333		3041.64	0.02283908		3571.64	-0.01753554
391.79	0.14079508		921.82	0.01619312		1451.81	0.03283631		1981.84	-0.00694547		2511.84	0.01785668		3041.84	0.02197205		3571.84	-0.01786659
391.99	0.14079403		922.02	0.01614115		1452.01	0.03222554		1982.04	-0.00754022		2512.04	0.01752529		3042.04	0.02229454		3572.04	-0.01887305
392.19	0.14070999		922.22	0.0153985		1452.21	0.03176375		1982.24	-0.00816451		2512.24	0.01761758		3042.24	0.02246888		3572.24	-0.01939193
392.39	0.14039964		922.42	0.01529253		1452.41	0.03130976		1982.44	-0.00819004		2512.44	0.01759953		3042.44	0.02214547		3572.44	-0.01991565
392.59	0.13990523		922.62	0.01503398		1452.61	0.03156726		1982.64	-0.0075404		2512.64	0.01736824		3042.64	0.02205001		3572.64	-0.01990351
392.79	0.13975937		922.82	0.01433544		1452.81	0.03078386		1982.84	-0.00704824		2512.84	0.01816846		3042.84	0.02181645		3572.84	-0.02068623
392.99	0.13979248		923.02	0.01334675		1453.01	0.03046388		1983.04	-0.00698113		2513.04	0.0181903		3043.04	0.02226518		3573.04	-0.02081558
393.19	0.14027607		923.22	0.01283267		1453.21	0.03049622		1983.24	-0.00673702		2513.24	0.01737755		3043.24	0.02182404		3573.24	-0.02074134
393.39	0.14087648		923.42	0.0128698		1453.41	0.03031283		1983.44	-0.00676313		2513.44	0.01647102		3043.44	0.02261323		3573.44	-0.01999114
393.59	0.14045384		923.62	0.01218767		1453.61	0.03111174		1983.64	-0.00689535		2513.64	0.01674605		3043.64	0.02278872		3573.64	-0.0205249
393.79	0.14103223		923.82	0.01239351		1453.81	0.03064509		1983.84	-0.00642924		2513.84	0.01709179		3043.84	0.02309686		3573.84	-0.02035752
393.99	0.14076808		924.02	0.01372058		1454.01	0.03001298		1984.04	-0.00627975		2514.04	0.01686396		3044.04	0.02317035		3574.04	-0.02067603
394.19	0.14083473		924.22	0.01439902		1454.21	0.03046286		1984.24	-0.00676556		2514.24	0.01578199		3044.24	0.02332794		3574.24	-0.0211281
394.39	0.1403606		924.42	0.01422226		1454.41	0.03124358		1984.44	-0.00623634		2514.44	0.01540279		3044.44	0.02394233		3574.44	-0.02084825
394.59	0.13993123		924.62	0.01476798		1454.61	0.03232714		1984.64	-0.00661436		2514.64	0.01491298		3044.64	0.02490831		3574.64	-0.02067127
394.79	0.13858142		924.82	0.01487416		1454.81	0.03178955		1984.84	-0.0067526		2514.84	0.0148178		3044.84	0.02525459		3574.84	-0.02021699
394.99	0.13804048		925.02	0.01522309		1455.01	0.03208133		1985.04	-0.006314		2515.04	0.01482869		3045.04	0.02458161		3575.04	-0.02047327
395.19	0.13827711		925.22	0.01572294		1455.21	0.03243173		1985.24	-0.00640849		2515.24	0.01439556		3045.24	0.02465403		3575.24	-0.01990453
395.39	0.137875		925.42	0.01547021		1455.41	0.03184962		1985.44	-0.00597638		2515.44	0.01381553		3045.44	0.02597867		3575.44	-0.01934338
395.59	0.13694286		925.62	0.01536442		1455.61	0.03146179		1985.64	-0.00574623		2515.64	0.01402371		3045.64	0.02618815		3575.64	-0.01896854
395.79	0.13730426		925.82	0.01525843		1455.81	0.0320276		1985.84	-0.00654061		2515.84	0.01418966		3045.84	0.02593807		3575.84	-0.01856657
395.99	0.13752047		926.02	0.01573959		1456.01	0.0308605		1986.04	-0.00668965		2516.04	0.01458228		3046.04	0.02545335		3576.04	-0.01804897
396.19	0.13817878		926.22	0.01668199		1456.21	0.02969922		1986.24	-0.00708335		2516.24	0.01521028		3046.24	0.02528792		3576.24	-0.01777021
396.39	0.13804232		926.42	0.01685728		1456.41	0.02984613		1986.44	-0.00665819		2516.44	0.01566717		3046.44	0.02425561		3576.44	-0.01841633
396.59	0.13838798		926.62	0.01772183		1456.61	0.03035484		1986.64	-0.0072616		2516.64	0.01606645		3046.64	0.02369016		3576.64	-0.01782786
396.79	0.13903201		926.82	0.01738601		1456.81	0.02974813		1986.84	-0.00784093		2516.84	0.01717556		3046.84	0.02321801		3576.84	-0.0175762
396.99	0.13854213		927.02	0.01762967		1457.01	0.02866342		1987.04	-0.00726885		2517.04	0.01727157		3047.04	0.02310056		3577.04	-0.017667
397.19	0.13931181		927.22	0.01789637		1457.21	0.0282693		1987.24	-0.00735733		2517.24	0.01774652		3047.24	0.02175775		3577.24	-0.0174243
397.39	0.13920604		927.42	0.01822551		1457.41	0.02787453		1987.44	-0.00732318		2517.44	0.01723551		3047.44	0.02141382		3577.44	-0.01687301
397.59	0.13955125		927.62	0.01863459		1457.61	0.02795601		1987.64	-0.00794378		2517.64	0.01771312		3047.64	0.02194128		3577.64	-0.01695232
397.79	0.13923646		927.82	0.01915257		1457.81	0.02722947		1987.84	-0.00643486		2517.84	0.01804604		3047.84	0.02206259		3577.84	-0.0186298
397.99	0.13889214		928.02	0.0194987		1458.01	0.02686867		1988.04	-0.00637337		2518.04	0.01716235		3048.04	0.02255883		3578.04	-0.01961737
398.19	0.13833925		928.22	0.01842394		1458.21	0.02865737		1988.24	-0.00670859		2518.24	0.01666105		3048.24	0.0225898		3578.24	-0.02038591
398.39	0.13747423		928.42	0.01704677		1458.41	0.02922641		1988.44	-0.00652246		2518.44	0.01682719		3048.44	0.02323619		3578.44	-0.0207829
398.59	0.13709951		928.62	0.01671394		1458.61	0.0297184		1988.64	-0.00638897		2518.64	0.01637721		3048.64	0.02366165		3578.64	-0.02156634
398.79	0.13649103		928.82	0.0160378		1458.81	0.02996379		1988.84	-0.00640386		2518.84	0.01624335		3048.84	0.02314654		3578.84	-0.02226004
398.99	0.13654031		929.02	0.01549099		1459.01	0.03064046		1989.04	-0.00630245		2519.04	0.01465371		3049.04	0.02226995		3579.04	-0.02262939
399.19	0.13670953		929.22	0.01481548		1459.21	0.03119083		1989.24	-0.00596998		2519.24	0.01342846		3049.24	0.02211386		3579.24	-0.0220652
399.39	0.13675763		929.42	0.0140046		1459.41	0.03102698		1989.44	-0.00582468		2519.44	0.01301005		3049.44	0.02193729		3579.44	-0.02181641
399.59	0.13702654		929.62	0.01359425		1459.61	0.03136332		1989.64	-0.00575297		2519.64	0.01298725		3049.64	0.02119926		3579.64	-0.02097722
399.79	0.13796019		929.82	0.01402979		1459.81	0.03155724		1989.84	-0.00598627		2519.84	0.01299527		3049.84	0.020158		3579.84	-0.02044329
399.99	0.13832111		930.02	0.01386995		1460.01	0.03161419		1990.04	-0.00650571		2520.04	0.01266843		3050.04	0.02002809		3580.04	-0.01957197
400.19	0.13870602		930.22	0.01481007		1460.21	0.03150153		1990.24	-0.00627317		2520.24	0.01227894		3050.24	0.01984807		3580.24	-0.01925751
400.39	0.13795955		930.42	0.01476022		1460.41	0.03229184		1990.44	-0.00727177		2520.44	0.01313101		3050.44	0.01959162		3580.44	-0.0196188
400.59	0.13744406		930.62	0.01561426		1460.61	0.031343		1990.64	-0.00817494		2520.64	0.01228593		3050.64	0.02018891		3580.64	-0.0182831
400.79	0.13769928		930.82	0.01588831		1460.81	0.02942302		1990.84	-0.00758701		2520.84	0.01328616		3050.84	0.02033482		3580.84	-0.01778936
400.99	0.13696432		931.02	0.01697335		1461.01	0.0280039		1991.04	-0.00668535		2521.04	0.01337301		3051.04	0.02016329		3581.04	-0.01761844
401.19	0.13650342		931.22	0.01762924		1461.21	0.02787722		1991.24	-0.00668317		2521.24	0.01348032		3051.24	0.02058721		3581.24	-0.01665051
401.39	0.13628466		931.42	0.01764138		1461.41	0.02691813		1991.44	-0.00623783		2521.44	0.01343122		3051.44	0.02068788		3581.44	-0.01627811
401.59	0.13620652		931.62	0.01800662		1461.61	0.02720655		1991.64	-0.00689547		2521.64	0.01380258		3051.64	0.02179053		3581.64	-0.01637881
401.79	0.13573544		931.82	0.01859822		1461.81	0.02659966		1991.84	-0.00583906		2521.84	0.01353032		3051.84	0.02220511		3581.84	-0.01730537
401.99	0.1358909		932.02	0.01877238		1462.01	0.02701999		1992.04	-0.0067578		2522.04	0.01295975		3052.04	0.02245877		3582.04	-0.01664815
402.19	0.13518299		932.22	0.01831067		1462.21	0.02822013		1992.24	-0.0064962		2522.24	0.01341128		3052.24	0.0227182		3582.24	-0.0168082
402.39	0.13489667		932.42	0.0179479		1462.41	0.02757415		1992.44	-0.00629237		2522.44	0.01295741		3052.44	0.02353565		3582.44	-0.01724045
402.59	0.13458797		932.62	0.01820066		1462.61	0.02762591		1992.64	-0.00625765		2522.64	0.01291458		3052.64	0.02414396		3582.64	-0.01762319
402.79	0.13371263		932.82	0.0182148		1462.81	0.02781665		1992.84	-0.00634497		2522.84	0.0129898		3052.84	0.02354559		3582.84	-0.01710105
402.99	0.13349502		933.02	0.01681408		1463.01	0.02807438		1993.04	-0.00670951		2523.04	0.01246942		3053.04	0.02313184		3583.04	-0.01728001
403.19	0.13372018		933.22	0.0165711		1463.21	0.02859618		1993.24	-0.00636275		2523.24	0.01297588		3053.24	0.02243495		3583.24	-0.01742333
403.39	0.13256843		933.42	0.01630038		1463.41	0.02868629		1993.44	-0.00700114		2523.44	0.0127898		3053.44	0.02246414		3583.44	-0.01781892
403.59	0.13247324		933.62	0.01634049		1463.61	0.02930297		1993.64	-0.00758846		2523.64	0.01316697		3053.64	0.02173302		3583.64	-0.01784188
403.79	0.13249358		933.82	0.01629132		1463.81	0.03011355		1993.84	-0.00820482		2523.84	0.0130501		3053.84	0.02177267		3583.84	-0.01798842
403.99	0.13246904		934.02	0.01572405		1464.01	0.03062833		1994.04	-0.0101144		2524.04	0.0128844		3054.04	0.02108716		3584.04	-0.01790661
404.19	0.13276203		934.22	0.01573657		1464.21	0.02990303		1994.24	-0.01053006		2524.24	0.01314676		3054.24	0.02088567		3584.24	-0.01733257
404.39	0.13208586		934.42	0.0159276		1464.41	0.02966404		1994.44	-0.0114664		2524.44	0.01390879		3054.44	0.02116895		3584.44	-0.01748663
404.59	0.13168624		934.62	0.01586268		1464.61	0.02910167		1994.64	-0.01151386		2524.64	0.01277084		3054.64	0.02117236		3584.64	-0.01644483
404.79	0.13265107		934.82	0.01592945		1464.81	0.02848244		1994.84	-0.01119905		2524.84	0.01301733		3054.84	0.02061437		3584.84	-0.01575349
404.99	0.13284547		935.02	0.01472211		1465.01	0.02950512		1995.04	-0.01063314		2525.04	0.0131004		3055.04	0.02005688		3585.04	-0.01575554
405.19	0.132639		935.22	0.0146372		1465.21	0.0293997		1995.24	-0.01124744		2525.24	0.01331146		3055.24	0.02014276		3585.24	-0.01560142
405.39	0.13393371		935.42	0.01330946		1465.41	0.0286977		1995.44	-0.01102911		2525.44	0.0135155		3055.44	0.02001004		3585.44	-0.01495454
405.59	0.13406485		935.62	0.01297997		1465.61	0.02830965		1995.64	-0.01083756		2525.64	0.01293412		3055.64	0.02064924		3585.64	-0.01491166
405.79	0.13388076		935.82	0.01385568		1465.81	0.02749927		1995.84	-0.00969444		2525.84	0.0120784		3055.84	0.02149958		3585.84	-0.0159564
405.99	0.1339075		936.02	0.01332512		1466.01	0.02776221		1996.04	-0.00893305		2526.04	0.01221249		3056.04	0.02144727		3586.04	-0.01551521
406.19	0.13334025		936.22	0.01285013		1466.21	0.02729042		1996.24	-0.00823911		2526.24	0.01222756		3056.24	0.02132697		3586.24	-0.01691083
406.39	0.13294861		936.42	0.0127673		1466.41	0.02646912		1996.44	-0.00739747		2526.44	0.01151029		3056.44	0.02116743		3586.44	-0.01714506
406.59	0.13256903		936.62	0.01310651		1466.61	0.02688428		1996.64	-0.00790751		2526.64	0.01174734		3056.64	0.02037891		3586.64	-0.01696443
406.79	0.13139041		936.82	0.0129991		1466.81	0.02734921		1996.84	-0.00756418		2526.84	0.01218953		3056.84	0.02023908		3586.84	-0.01756846
406.99	0.13136507		937.02	0.01263849		1467.01	0.02760838		1997.04	-0.00744582		2527.04	0.01234666		3057.04	0.01973401		3587.04	-0.01868408
407.19	0.13150996		937.22	0.01394495		1467.21	0.02789256		1997.24	-0.00739287		2527.24	0.01237842		3057.24	0.01941021		3587.24	-0.01931942
407.39	0.13122213		937.42	0.01435391		1467.41	0.02822153		1997.44	-0.00843293		2527.44	0.01202488		3057.44	0.01928803		3587.44	-0.02010248
407.59	0.1317939		937.62	0.01452644		1467.61	0.02857305		1997.64	-0.00839292		2527.64	0.01253753		3057.64	0.0186433		3587.64	-0.01995614
407.79	0.13185199		937.82	0.01434053		1467.81	0.02887721		1997.84	-0.00901669		2527.84	0.01255889		3057.84	0.01891063		3587.84	-0.0197389
407.99	0.13190951		938.02	0.01489956		1468.01	0.02883283		1998.04	-0.00975391		2528.04	0.01240305		3058.04	0.01797102		3588.04	-0.02077506
408.19	0.13213424		938.22	0.01493055		1468.21	0.02829904		1998.24	-0.00947251		2528.24	0.01224577		3058.24	0.01825373		3588.24	-0.01990485
408.39	0.13088263		938.42	0.01545195		1468.41	0.02884545		1998.44	-0.00885043		2528.44	0.01271988		3058.44	0.01810037		3588.44	-0.01979343
408.59	0.1311269		938.62	0.01511922		1468.61	0.02841816		1998.64	-0.00837124		2528.64	0.01282328		3058.64	0.01828166		3588.64	-0.01943918
408.79	0.13102178		938.82	0.01532825		1468.81	0.02853686		1998.84	-0.00811418		2528.84	0.01303242		3058.84	0.01886745		3588.84	-0.01943105
408.99	0.1319022		939.02	0.01480705		1469.01	0.02886484		1999.04	-0.00761069		2529.04	0.01261509		3059.04	0.01917592		3589.04	-0.01967228
409.19	0.13095288		939.22	0.01433441		1469.21	0.02808378		1999.24	-0.0090302		2529.24	0.01265637		3059.24	0.02082577		3589.24	-0.01958137
409.39	0.13148494		939.42	0.01355272		1469.41	0.02749234		1999.44	-0.00855086		2529.44	0.01293464		3059.44	0.02182828		3589.44	-0.01911409
409.59	0.1306449		939.62	0.01423371		1469.61	0.02760697		1999.64	-0.00831519		2529.64	0.01343537		3059.64	0.0223909		3589.64	-0.01882115
409.79	0.13058026		939.82	0.01482379		1469.81	0.02744348		1999.84	-0.0078473		2529.84	0.01422911		3059.84	0.02285679		3589.84	-0.01966696
409.99	0.1305933		940.02	0.01432019		1470.01	0.02733693		2000.04	-0.00739618		2530.04	0.01435587		3060.04	0.02268846		3590.04	-0.01950136
410.19	0.12994081		940.22	0.01392673		1470.21	0.02764052		2000.24	-0.00779963		2530.24	0.01399495		3060.24	0.02205621		3590.24	-0.01988995
410.39	0.13045943		940.42	0.01504016		1470.41	0.02758633		2000.44	-0.00879972		2530.44	0.01436649		3060.44	0.02166555		3590.44	-0.01935905
410.59	0.13130813		940.62	0.01479714		1470.61	0.02760693		2000.64	-0.0097314		2530.64	0.01430331		3060.64	0.02232595		3590.64	-0.01957967
410.79	0.13082743		940.82	0.01480135		1470.81	0.02781761		2000.84	-0.00939346		2530.84	0.01491062		3060.84	0.02294778		3590.84	-0.0201819
410.99	0.13242454		941.02	0.01472678		1471.01	0.02760068		2001.04	-0.00958423		2531.04	0.0149798		3061.04	0.02218164		3591.04	-0.02008807
411.19	0.13288737		941.22	0.01510455		1471.21	0.02754071		2001.24	-0.01047042		2531.24	0.01494254		3061.24	0.02215448		3591.24	-0.02021955
411.39	0.13370209		941.42	0.0153207		1471.41	0.02771647		2001.44	-0.01049117		2531.44	0.01376628		3061.44	0.0222873		3591.44	-0.02079177
411.59	0.13415593		941.62	0.01515761		1471.61	0.0282237		2001.64	-0.01011345		2531.64	0.01368635		3061.64	0.02233321		3591.64	-0.02058732
411.79	0.13463863		941.82	0.01477411		1471.81	0.02774204		2001.84	-0.01016036		2531.84	0.01334346		3061.84	0.02228855		3591.84	-0.0212859
411.99	0.1343167		942.02	0.015369		1472.01	0.02818592		2002.04	-0.00994715		2532.04	0.01309504		3062.04	0.02112257		3592.04	-0.02170797
412.19	0.13382692		942.22	0.01502945		1472.21	0.02795224		2002.24	-0.01002921		2532.24	0.01279291		3062.24	0.0209721		3592.24	-0.02110509
412.39	0.13289073		942.42	0.01559206		1472.41	0.02871807		2002.44	-0.00936586		2532.44	0.01310814		3062.44	0.02047705		3592.44	-0.02058526
412.59	0.13244789		942.62	0.01648024		1472.61	0.02841772		2002.64	-0.00882724		2532.64	0.01237223		3062.64	0.01968909		3592.64	-0.02071387
412.79	0.1323533		942.82	0.01587447		1472.81	0.02891642		2002.84	-0.00885024		2532.84	0.01216751		3062.84	0.02002551		3592.84	-0.02064434
412.99	0.13273756		943.02	0.01590819		1473.01	0.02925716		2003.04	-0.00878093		2533.04	0.01136536		3063.04	0.02052253		3593.04	-0.02005504
413.19	0.13092383		943.22	0.01568491		1473.21	0.02912637		2003.24	-0.0088248		2533.24	0.0111407		3063.24	0.02048708		3593.24	-0.0196976
413.39	0.13053456		943.42	0.01618615		1473.41	0.02866886		2003.44	-0.00760621		2533.44	0.01159121		3063.44	0.02000038		3593.44	-0.01978037
413.59	0.1296361		943.62	0.01702705		1473.61	0.02809673		2003.64	-0.00686575		2533.64	0.01200968		3063.64	0.01913067		3593.64	-0.01991172
413.79	0.12890316		943.82	0.01669075		1473.81	0.02780005		2003.84	-0.00652915		2533.84	0.01150379		3063.84	0.01887916		3593.84	-0.02057729
413.99	0.12882871		944.02	0.01662385		1474.01	0.02736835		2004.04	-0.00670991		2534.04	0.01034135		3064.04	0.01822164		3594.04	-0.0200971
414.19	0.12899554		944.22	0.01635967		1474.21	0.02691758		2004.24	-0.00738968		2534.24	0.01101982		3064.24	0.01874513		3594.24	-0.01989774
414.39	0.12931796		944.42	0.01646617		1474.41	0.02622119		2004.44	-0.00847835		2534.44	0.01146983		3064.44	0.01963504		3594.44	-0.02048884
414.59	0.12994402		944.62	0.01595151		1474.61	0.02591818		2004.64	-0.00824761		2534.64	0.01108214		3064.64	0.02069646		3594.64	-0.02042662
414.79	0.12995972		944.82	0.0156224		1474.81	0.02535829		2004.84	-0.00844057		2534.84	0.01223492		3064.84	0.01997398		3594.84	-0.02095053
414.99	0.1307998		945.02	0.0158133		1475.01	0.02550461		2005.04	-0.0085446		2535.04	0.01237389		3065.04	0.0204468		3595.04	-0.02094677
415.19	0.13048552		945.22	0.015182		1475.21	0.0256984		2005.24	-0.00955664		2535.24	0.01203223		3065.24	0.02044817		3595.24	-0.02167844
415.39	0.13064703		945.42	0.01503029		1475.41	0.02578275		2005.44	-0.00942367		2535.44	0.01171264		3065.44	0.02101017		3595.44	-0.02161072
415.59	0.13062881		945.62	0.01452442		1475.61	0.025655		2005.64	-0.00952866		2535.64	0.01303786		3065.64	0.02071961		3595.64	-0.02174497
415.79	0.13085644		945.82	0.01352612		1475.81	0.02533208		2005.84	-0.00975638		2535.84	0.01368773		3065.84	0.02051565		3595.84	-0.02169953
415.99	0.13055191		946.02	0.0136097		1476.01	0.02633936		2006.04	-0.01074102		2536.04	0.01461131		3066.04	0.02014122		3596.04	-0.02151222
416.19	0.13079027		946.22	0.01368026		1476.21	0.02608129		2006.24	-0.0117363		2536.24	0.01460619		3066.24	0.02015437		3596.24	-0.0221081
416.39	0.13116529		946.42	0.01279802		1476.41	0.02641024		2006.44	-0.01127268		2536.44	0.01543515		3066.44	0.02001016		3596.44	-0.02094676
416.59	0.13087285		946.62	0.01272492		1476.61	0.02619284		2006.64	-0.011047		2536.64	0.01555009		3066.64	0.01987806		3596.64	-0.02166164
416.79	0.13144917		946.82	0.01103613		1476.81	0.02661708		2006.84	-0.01047254		2536.84	0.01590647		3066.84	0.02023112		3596.84	-0.02136986
416.99	0.13067497		947.02	0.01136549		1477.01	0.02604747		2007.04	-0.01057058		2537.04	0.01600653		3067.04	0.01978468		3597.04	-0.02047118
417.19	0.12992033		947.22	0.01127421		1477.21	0.02515603		2007.24	-0.01015465		2537.24	0.0157719		3067.24	0.01827926		3597.24	-0.02043003
417.39	0.13009486		947.42	0.01042149		1477.41	0.02470009		2007.44	-0.01081965		2537.44	0.01610536		3067.44	0.0180809		3597.44	-0.02052075
417.59	0.13038891		947.62	0.01132989		1477.61	0.02363513		2007.64	-0.01127765		2537.64	0.01526228		3067.64	0.01720191		3597.64	-0.02015089
417.79	0.12989426		947.82	0.01104534		1477.81	0.0238846		2007.84	-0.01206831		2537.84	0.01522594		3067.84	0.01679871		3597.84	-0.01980604
417.99	0.13078463		948.02	0.01140426		1478.01	0.02286393		2008.04	-0.01164859		2538.04	0.01564787		3068.04	0.01600897		3598.04	-0.02013741
418.19	0.12994517		948.22	0.01222345		1478.21	0.0231718		2008.24	-0.01126168		2538.24	0.01557431		3068.24	0.0169406		3598.24	-0.02064629
418.39	0.12992608		948.42	0.01293858		1478.41	0.02292204		2008.44	-0.01187583		2538.44	0.01414123		3068.44	0.01681221		3598.44	-0.02082199
418.59	0.13069921		948.62	0.0140028		1478.61	0.0238474		2008.64	-0.01110494		2538.64	0.01294954		3068.64	0.0164934		3598.64	-0.01988752
418.79	0.13003476		948.82	0.01432792		1478.81	0.02408622		2008.84	-0.01062923		2538.84	0.01217639		3068.84	0.01585749		3598.84	-0.02055036
418.99	0.12962407		949.02	0.01516217		1479.01	0.02566996		2009.04	-0.01037103		2539.04	0.01018518		3069.04	0.01605391		3599.04	-0.0203726
419.19	0.12939012		949.22	0.01458823		1479.21	0.02547129		2009.24	-0.01024283		2539.24	0.00956037		3069.24	0.01534181		3599.24	-0.02072609
419.39	0.13024948		949.42	0.01472452		1479.41	0.02515207		2009.44	-0.00979795		2539.44	0.00943966		3069.44	0.01636993		3599.44	-0.02015191
419.59	0.13021019		949.62	0.01488768		1479.61	0.02525659		2009.64	-0.00897838		2539.64	0.00890713		3069.64	0.01622954		3599.64	-0.02050921
419.79	0.13075951		949.82	0.01481296		1479.81	0.02630207		2009.84	-0.00923105		2539.84	0.00790535		3069.84	0.01714858		3599.84	-0.02000625
419.99	0.1301664		950.02	0.01541132		1480.01	0.02663295		2010.04	-0.00973691		2540.04	0.00797065		3070.04	0.01762666		3600.04	-0.02060263
420.19	0.13081049		950.22	0.01603192		1480.21	0.02607302		2010.24	-0.00948913		2540.24	0.008004		3070.24	0.01788979		3600.24	-0.02082752
420.39	0.1307437		950.42	0.01565824		1480.41	0.02541251		2010.44	-0.00844004		2540.44	0.00775454		3070.44	0.01819086		3600.44	-0.02055574
420.59	0.12999059		950.62	0.01596171		1480.61	0.02588844		2010.64	-0.00847724		2540.64	0.00737548		3070.64	0.01769229		3600.64	-0.02059919
420.79	0.12907367		950.82	0.01522257		1480.81	0.02603398		2010.84	-0.0080293		2540.84	0.00763446		3070.84	0.017806		3600.84	-0.02048268
420.99	0.12835322		951.02	0.01514778		1481.01	0.02503564		2011.04	-0.00929021		2541.04	0.0084317		3071.04	0.01820573		3601.04	-0.01999401
421.19	0.12820053		951.22	0.01473888		1481.21	0.02477577		2011.24	-0.00913963		2541.24	0.00828193		3071.24	0.01863332		3601.24	-0.01970117
421.39	0.12761757		951.42	0.01360641		1481.41	0.02492932		2011.44	-0.00994495		2541.44	0.00844338		3071.44	0.01955786		3601.44	-0.01936501
421.59	0.12697371		951.62	0.01426358		1481.61	0.02474044		2011.64	-0.0103769		2541.64	0.00948193		3071.64	0.01935116		3601.64	-0.01963013
421.79	0.12570863		951.82	0.01437487		1481.81	0.02497279		2011.84	-0.00963209		2541.84	0.01027505		3071.84	0.018965		3601.84	-0.01991527
421.99	0.12506703		952.02	0.01394601		1482.01	0.02524111		2012.04	-0.00836283		2542.04	0.01037145		3072.04	0.01878733		3602.04	-0.02045141
422.19	0.12484299		952.22	0.01415152		1482.21	0.02602798		2012.24	-0.00891487		2542.24	0.00919267		3072.24	0.01965608		3602.24	-0.02112638
422.39	0.12566001		952.42	0.01383386		1482.41	0.02602612		2012.44	-0.00860945		2542.44	0.00881446		3072.44	0.0196293		3602.44	-0.0213093
422.59	0.12607047		952.62	0.01368948		1482.61	0.02707379		2012.64	-0.00775432		2542.64	0.00869174		3072.64	0.01899475		3602.64	-0.02131561
422.79	0.12603433		952.82	0.01270447		1482.81	0.02729466		2012.84	-0.00778392		2542.84	0.00892366		3072.84	0.01854996		3602.84	-0.02119777
422.99	0.12693992		953.02	0.01179421		1483.01	0.02756705		2013.04	-0.00780033		2543.04	0.00873797		3073.04	0.0177452		3603.04	-0.02087547
423.19	0.12754483		953.22	0.01147243		1483.21	0.02797866		2013.24	-0.00797343		2543.24	0.01005661		3073.24	0.01711754		3603.24	-0.02161248
423.39	0.12784734		953.42	0.01180295		1483.41	0.02833719		2013.44	-0.00819552		2543.44	0.01040138		3073.44	0.01781311		3603.44	-0.02158667
423.59	0.12798674		953.62	0.01189791		1483.61	0.02863641		2013.64	-0.0077295		2543.64	0.00976809		3073.64	0.01717956		3603.64	-0.02220674
423.79	0.12871536		953.82	0.01219992		1483.81	0.02904641		2013.84	-0.0092545		2543.84	0.01023559		3073.84	0.01686136		3603.84	-0.02235138
423.99	0.12948127		954.02	0.01203772		1484.01	0.02849434		2014.04	-0.00977868		2544.04	0.0100459		3074.04	0.01639572		3604.04	-0.02225029
424.19	0.13058601		954.22	0.01261183		1484.21	0.02833161		2014.24	-0.00973262		2544.24	0.00990515		3074.24	0.01541514		3604.24	-0.02177321
424.39	0.13043112		954.42	0.01268001		1484.41	0.027938		2014.44	-0.01032109		2544.44	0.00944555		3074.44	0.01508888		3604.44	-0.02211736
424.59	0.13020101		954.62	0.01287095		1484.61	0.02803819		2014.64	-0.01052572		2544.64	0.00866696		3074.64	0.01537225		3604.64	-0.0216912
424.79	0.13003466		954.82	0.01338821		1484.81	0.02720029		2014.84	-0.01026591		2544.84	0.00890829		3074.84	0.01601334		3604.84	-0.02192754
424.99	0.13025411		955.02	0.01345767		1485.01	0.02653771		2015.04	-0.01081316		2545.04	0.00871958		3075.04	0.01636899		3605.04	-0.02106099
425.19	0.12953937		955.22	0.01367905		1485.21	0.02588325		2015.24	-0.0108163		2545.24	0.00841204		3075.24	0.01667433		3605.24	-0.020299
425.39	0.12912162		955.42	0.01439256		1485.41	0.0252658		2015.44	-0.0106284		2545.44	0.0088573		3075.44	0.01661919		3605.44	-0.02002085
425.59	0.12896133		955.62	0.01541341		1485.61	0.02407634		2015.64	-0.01004686		2545.64	0.0095447		3075.64	0.01656454		3605.64	-0.01948465
425.79	0.12816809		955.82	0.01494982		1485.81	0.02410658		2015.84	-0.00873533		2545.84	0.00851995		3075.84	0.01693536		3605.84	-0.01965045
425.99	0.12715569		956.02	0.01442676		1486.01	0.02373394		2016.04	-0.00872763		2546.04	0.00853272		3076.04	0.01754998		3606.04	-0.02095367
426.19	0.12769824		956.22	0.01473621		1486.21	0.02301057		2016.24	-0.00852411		2546.24	0.00813812		3076.24	0.01859282		3606.24	-0.02173436
426.39	0.12738767		956.42	0.01411212		1486.41	0.02232684		2016.44	-0.00764053		2546.44	0.00919234		3076.44	0.01942554		3606.44	-0.02149014
426.59	0.12745649		956.62	0.01430942		1486.61	0.02193736		2016.64	-0.00750401		2546.64	0.00937903		3076.64	0.01898652		3606.64	-0.02084968
426.79	0.12659749		956.82	0.01366252		1486.81	0.02176413		2016.84	-0.0079303		2546.84	0.01026639		3076.84	0.01898614		3606.84	-0.02033612
426.99	0.12643082		957.02	0.01356913		1487.01	0.02183708		2017.04	-0.00814371		2547.04	0.01030728		3077.04	0.01828077		3607.04	-0.02026178
427.19	0.12568782		957.22	0.0138172		1487.21	0.02285427		2017.24	-0.00888273		2547.24	0.01104984		3077.24	0.01814524		3607.24	-0.02084342
427.39	0.12563904		957.42	0.01324399		1487.41	0.02340195		2017.44	-0.00888967		2547.44	0.01104019		3077.44	0.01797272		3607.44	-0.02036377
427.59	0.12566514		957.62	0.01294854		1487.61	0.02312935		2017.64	-0.00944092		2547.64	0.01108804		3077.64	0.01741268		3607.64	-0.02042434
427.79	0.12570771		957.82	0.01288912		1487.81	0.02384186		2017.84	-0.00982144		2547.84	0.01094165		3077.84	0.01784992		3607.84	-0.0203724
427.99	0.12692629		958.02	0.0125482		1488.01	0.0242422		2018.04	-0.01035114		2548.04	0.01048321		3078.04	0.01863671		3608.04	-0.02049378
428.19	0.12691848		958.22	0.01247082		1488.21	0.02516525		2018.24	-0.01104224		2548.24	0.01137563		3078.24	0.01809184		3608.24	-0.02080047
428.39	0.12743879		958.42	0.01247356		1488.41	0.02558854		2018.44	-0.01196543		2548.44	0.01076433		3078.44	0.01805961		3608.44	-0.02097828
428.59	0.12764062		958.62	0.01240435		1488.61	0.02630016		2018.64	-0.01214657		2548.64	0.00995983		3078.64	0.01805002		3608.64	-0.0205354
428.79	0.12751694		958.82	0.012705		1488.81	0.02699933		2018.84	-0.01255024		2548.84	0.01021782		3078.84	0.01650966		3608.84	-0.02072167
428.99	0.12714558		959.02	0.01222088		1489.01	0.02762956		2019.04	-0.01320531		2549.04	0.0103016		3079.04	0.01631624		3609.04	-0.02107958
429.19	0.12713093		959.22	0.01311042		1489.21	0.02744407		2019.24	-0.0133571		2549.24	0.00991445		3079.24	0.01633804		3609.24	-0.02107251
429.39	0.12727854		959.42	0.01353276		1489.41	0.02734761		2019.44	-0.01288622		2549.44	0.00964164		3079.44	0.01636096		3609.44	-0.0220221
429.59	0.12742448		959.62	0.01274617		1489.61	0.02800617		2019.64	-0.01227825		2549.64	0.00982474		3079.64	0.0169217		3609.64	-0.02209225
429.79	0.12672261		959.82	0.01235457		1489.81	0.02915671		2019.84	-0.01165408		2549.84	0.00909579		3079.84	0.01679688		3609.84	-0.02300476
429.99	0.12606246		960.02	0.0131775		1490.01	0.02797668		2020.04	-0.01118756		2550.04	0.00884745		3080.04	0.01699815		3610.04	-0.0234973
430.19	0.12710693		960.22	0.01338348		1490.21	0.02787212		2020.24	-0.0099933		2550.24	0.00874238		3080.24	0.0174047		3610.24	-0.02320262
430.39	0.12659918		960.42	0.01321667		1490.41	0.02640136		2020.44	-0.01022632		2550.44	0.00945496		3080.44	0.01811736		3610.44	-0.02283444
430.59	0.12629292		960.62	0.01371592		1490.61	0.02601212		2020.64	-0.01006928		2550.64	0.00998439		3080.64	0.01717361		3610.64	-0.02247056
430.79	0.12527471		960.82	0.01324575		1490.81	0.0254875		2020.84	-0.01077035		2550.84	0.01056484		3080.84	0.01709969		3610.84	-0.02294325
430.99	0.1253449		961.02	0.01268198		1491.01	0.02458003		2021.04	-0.01107319		2551.04	0.01022081		3081.04	0.01654847		3611.04	-0.02261671
431.19	0.12540995		961.22	0.01295762		1491.21	0.02420921		2021.24	-0.01045621		2551.24	0.01088984		3081.24	0.01625208		3611.24	-0.02266829
431.39	0.12575986		961.42	0.0132041		1491.41	0.02391796		2021.44	-0.00999924		2551.44	0.01063123		3081.44	0.01629262		3611.44	-0.02245704
431.59	0.12586333		961.62	0.01390242		1491.61	0.02272952		2021.64	-0.00948351		2551.64	0.01118099		3081.64	0.0172492		3611.64	-0.02325708
431.79	0.12700534		961.82	0.01385682		1491.81	0.02345419		2021.84	-0.00993618		2551.84	0.01103647		3081.84	0.0174993		3611.84	-0.0236618
431.99	0.12753376		962.02	0.01283621		1492.01	0.02356006		2022.04	-0.01060967		2552.04	0.01171334		3082.04	0.01751612		3612.04	-0.02336756
432.19	0.12753221		962.22	0.01246091		1492.21	0.02372602		2022.24	-0.01091576		2552.24	0.01190182		3082.24	0.01665125		3612.24	-0.02229651
432.39	0.12801542		962.42	0.01231405		1492.41	0.02364309		2022.44	-0.01169295		2552.44	0.01148709		3082.44	0.01707878		3612.44	-0.02205556
432.59	0.12760177		962.62	0.01186244		1492.61	0.02365672		2022.64	-0.01190499		2552.64	0.0109819		3082.64	0.01708119		3612.64	-0.02204673
432.79	0.12752592		962.82	0.01184501		1492.81	0.02409583		2022.84	-0.0112891		2552.84	0.01033478		3082.84	0.01599549		3612.84	-0.0229197
432.99	0.12752712		963.02	0.01117104		1493.01	0.02437408		2023.04	-0.01142786		2553.04	0.00994351		3083.04	0.0173441		3613.04	-0.02298003
433.19	0.12736919		963.22	0.01133878		1493.21	0.02457289		2023.24	-0.01150666		2553.24	0.0088986		3083.24	0.01713363		3613.24	-0.02298165
433.39	0.12736985		963.42	0.0106172		1493.41	0.02542642		2023.44	-0.0108794		2553.44	0.00905344		3083.44	0.01719115		3613.44	-0.02341326
433.59	0.12743296		963.62	0.01031315		1493.61	0.02599778		2023.64	-0.01016682		2553.64	0.00920842		3083.64	0.01681872		3613.64	-0.02332266
433.79	0.1276078		963.82	0.01004968		1493.81	0.02550686		2023.84	-0.00907312		2553.84	0.00915937		3083.84	0.01578507		3613.84	-0.02321135
433.99	0.12812903		964.02	0.01073002		1494.01	0.02495384		2024.04	-0.00962185		2554.04	0.00937077		3084.04	0.01530074		3614.04	-0.0236875
434.19	0.12753365		964.22	0.01038329		1494.21	0.02468815		2024.24	-0.00960937		2554.24	0.00939617		3084.24	0.01537066		3614.24	-0.02307452
434.39	0.12660116		964.42	0.009807		1494.41	0.02374002		2024.44	-0.01046429		2554.44	0.00947283		3084.44	0.01423941		3614.44	-0.02390368
434.59	0.1268699		964.62	0.00934689		1494.61	0.02392061		2024.64	-0.01015107		2554.64	0.00980664		3084.64	0.01351938		3614.64	-0.02493668
434.79	0.12716744		964.82	0.00911606		1494.81	0.02281538		2024.84	-0.01035533		2554.84	0.00989947		3084.84	0.01396808		3614.84	-0.02633613
434.99	0.12754988		965.02	0.00837903		1495.01	0.02231464		2025.04	-0.01028224		2555.04	0.00942053		3085.04	0.01340494		3615.04	-0.02616049
435.19	0.12769935		965.22	0.00962544		1495.21	0.02228487		2025.24	-0.01010086		2555.24	0.00957552		3085.24	0.01304901		3615.24	-0.02576063
435.39	0.12716901		965.42	0.01005896		1495.41	0.02272437		2025.44	-0.01027724		2555.44	0.00908978		3085.44	0.01307302		3615.44	-0.02533482
435.59	0.12675969		965.62	0.01064386		1495.61	0.02263889		2025.64	-0.01061692		2555.64	0.00941918		3085.64	0.01226216		3615.64	-0.02509775
435.79	0.12714569		965.82	0.01044522		1495.81	0.02352938		2025.84	-0.01170973		2555.84	0.00974651		3085.84	0.0119599		3615.84	-0.02442665
435.99	0.12707156		966.02	0.01037444		1496.01	0.02301805		2026.04	-0.01131685		2556.04	0.01066519		3086.04	0.01203348		3616.04	-0.02390509
436.19	0.12526418		966.22	0.01139644		1496.21	0.02282557		2026.24	-0.01175033		2556.24	0.01069165		3086.24	0.01297649		3616.24	-0.02308105
436.39	0.12488214		966.42	0.01185585		1496.41	0.02309526		2026.44	-0.01272466		2556.44	0.01104998		3086.44	0.01405197		3616.44	-0.02278183
436.59	0.12400247		966.62	0.01211192		1496.61	0.02308088		2026.64	-0.01250278		2556.64	0.01027088		3086.64	0.01457269		3616.64	-0.02220476
436.79	0.12431309		966.82	0.01207042		1496.81	0.02338739		2026.84	-0.01158356		2556.84	0.00990466		3086.84	0.01532273		3616.84	-0.02243445
436.99	0.12390311		967.02	0.01157866		1497.01	0.02367304		2027.04	-0.01258392		2557.04	0.00973098		3087.04	0.01716741		3617.04	-0.02178951
437.19	0.12359818		967.22	0.01176949		1497.21	0.02330633		2027.24	-0.0125308		2557.24	0.00946975		3087.24	0.0173641		3617.24	-0.02154304
437.39	0.12317361		967.42	0.01207246		1497.41	0.02338088		2027.44	-0.01149686		2557.44	0.01026208		3087.44	0.01804326		3617.44	-0.0219299
437.59	0.1222428		967.62	0.01247532		1497.61	0.02351979		2027.64	-0.01124061		2557.64	0.01042031		3087.64	0.0183531		3617.64	-0.02263513
437.79	0.12171651		967.82	0.01179938		1497.81	0.02279258		2027.84	-0.01071214		2557.84	0.01057275		3087.84	0.01865874		3617.84	-0.02276326
437.99	0.121243		968.02	0.01200131		1498.01	0.02272112		2028.04	-0.01044166		2558.04	0.01020842		3088.04	0.01861502		3618.04	-0.02367864
438.19	0.11986975		968.22	0.01197341		1498.21	0.02243426		2028.24	-0.00916038		2558.24	0.00942915		3088.24	0.01877704		3618.24	-0.02365758
438.39	0.12034151		968.42	0.01154601		1498.41	0.02217095		2028.44	-0.00886784		2558.44	0.00948488		3088.44	0.01763061		3618.44	-0.02489109
438.59	0.12108837		968.62	0.01140818		1498.61	0.02196069		2028.64	-0.00761562		2558.64	0.01019114		3088.64	0.01821526		3618.64	-0.02554702
438.79	0.12126717		968.82	0.011414		1498.81	0.02154194		2028.84	-0.0074006		2558.84	0.00989682		3088.84	0.018175		3618.84	-0.02564385
438.99	0.12178313		969.02	0.01166918		1499.01	0.02179363		2029.04	-0.00741553		2559.04	0.00926297		3089.04	0.01713076		3619.04	-0.02479583
439.19	0.12068433		969.22	0.01272691		1499.21	0.02141679		2029.24	-0.00771542		2559.24	0.0097043		3089.24	0.01669845		3619.24	-0.0248879
439.39	0.12072736		969.42	0.01309082		1499.41	0.02236309		2029.44	-0.00729819		2559.44	0.00994922		3089.44	0.01599134		3619.44	-0.02497234
439.59	0.12132566		969.62	0.01259531		1499.61	0.02240552		2029.64	-0.00788253		2559.64	0.00982096		3089.64	0.01507748		3619.64	-0.02542367
439.79	0.12243326		969.82	0.01204865		1499.81	0.02304472		2029.84	-0.00876938		2559.84	0.0105106		3089.84	0.01474767		3619.84	-0.02566718
439.99	0.12270265		970.02	0.01227774		1500.01	0.02380072		2030.04	-0.00911699		2560.04	0.01044051		3090.04	0.01481524		3620.04	-0.02593549
440.19	0.12192544		970.22	0.01240428		1500.21	0.02451785		2030.24	-0.00966157		2560.24	0.00974468		3090.24	0.01533372		3620.24	-0.02534454
440.39	0.1227615		970.42	0.01268651		1500.41	0.02429093		2030.44	-0.01068762		2560.44	0.00946562		3090.44	0.01538714		3620.44	-0.02561017
440.59	0.12301886		970.62	0.0126872		1500.61	0.02406012		2030.64	-0.01143926		2560.64	0.00841076		3090.64	0.0158111		3620.64	-0.02580867
440.79	0.12413548		970.82	0.01213415		1500.81	0.02455101		2030.84	-0.01155613		2560.84	0.00780387		3090.84	0.01666632		3620.84	-0.02606406
440.99	0.12462402		971.02	0.01129526		1501.01	0.02476921		2031.04	-0.01211978		2561.04	0.00778962		3091.04	0.01653627		3621.04	-0.02587603
441.19	0.12415536		971.22	0.0114291		1501.21	0.02448491		2031.24	-0.01184689		2561.24	0.00780056		3091.24	0.01644651		3621.24	-0.02623099
441.39	0.12308253		971.42	0.01084611		1501.41	0.02515496		2031.44	-0.01099428		2561.44	0.00846454		3091.44	0.01694273		3621.44	-0.02685048
441.59	0.12250996		971.62	0.01066346		1501.61	0.02572648		2031.64	-0.01146918		2561.64	0.00815485		3091.64	0.01681855		3621.64	-0.02720044
441.79	0.12228599		971.82	0.00982864		1501.81	0.0256263		2031.84	-0.01108941		2561.84	0.00766634		3091.84	0.0171681		3621.84	-0.02744689
441.99	0.12195287		972.02	0.01014866		1502.01	0.02657686		2032.04	-0.00971754		2562.04	0.00774227		3092.04	0.01680298		3622.04	-0.02697809
442.19	0.12163675		972.22	0.01092607		1502.21	0.02655688		2032.24	-0.00938571		2562.24	0.00802277		3092.24	0.01626279		3622.24	-0.02648964
442.39	0.12153251		972.42	0.01028133		1502.41	0.02646543		2032.44	-0.00957211		2562.44	0.00845514		3092.44	0.01599659		3622.44	-0.02641665
442.59	0.12125345		972.62	0.01053381		1502.61	0.02602992		2032.64	-0.00947192		2562.64	0.00859383		3092.64	0.01657796		3622.64	-0.02584492
442.79	0.12132922		972.82	0.01125264		1502.81	0.02589588		2032.84	-0.00983527		2562.84	0.00827716		3092.84	0.01641595		3622.84	-0.02457707
442.99	0.12109008		973.02	0.01165339		1503.01	0.02552256		2033.04	-0.00986964		2563.04	0.00826045		3093.04	0.01654704		3623.04	-0.02387251
443.19	0.12014443		973.22	0.01188426		1503.21	0.02571359		2033.24	-0.009298		2563.24	0.00798279		3093.24	0.01651327		3623.24	-0.02394493
443.39	0.12163647		973.42	0.01210114		1503.41	0.02651435		2033.44	-0.00885275		2563.44	0.00800976		3093.44	0.01700454		3623.44	-0.02294835
443.59	0.12157548		973.62	0.01187961		1503.61	0.02545256		2033.64	-0.00954733		2563.64	0.00680231		3093.64	0.016659		3623.64	-0.02261018
443.79	0.12229554		973.82	0.01200829		1503.81	0.02512424		2033.84	-0.01025024		2563.84	0.00745283		3093.84	0.01677454		3623.84	-0.02259897
443.99	0.12249432		974.02	0.01181281		1504.01	0.02491292		2034.04	-0.0099969		2564.04	0.00705083		3094.04	0.01710696		3624.04	-0.02315581
444.19	0.1224684		974.22	0.01200811		1504.21	0.0237709		2034.24	-0.01010832		2564.24	0.00616736		3094.24	0.01709802		3624.24	-0.0233258
444.39	0.12205825		974.42	0.01223863		1504.41	0.02278237		2034.44	-0.01083179		2564.44	0.00557569		3094.44	0.0179809		3624.44	-0.02392519
444.59	0.12236647		974.62	0.01126927		1504.61	0.0230026		2034.64	-0.01184758		2564.64	0.00593881		3094.64	0.01842926		3624.64	-0.02436704
444.79	0.12246609		974.82	0.0109009		1504.81	0.0229538		2034.84	-0.01181992		2564.84	0.00705436		3094.84	0.01845301		3624.84	-0.02417378
444.99	0.12182825		975.02	0.01114583		1505.01	0.02222322		2035.04	-0.01151482		2565.04	0.00793346		3095.04	0.01782821		3625.04	-0.02439465
445.19	0.12039328		975.22	0.01055435		1505.21	0.02203439		2035.24	-0.01162253		2565.24	0.00852038		3095.24	0.01813336		3625.24	-0.02475055
445.39	0.11980874		975.42	0.00973083		1505.41	0.02229374		2035.44	-0.01190425		2565.44	0.00895022		3095.44	0.01779371		3625.44	-0.02533016
445.59	0.12011071		975.62	0.01006053		1505.61	0.02284541		2035.64	-0.01276739		2565.64	0.00927		3095.64	0.01699372		3625.64	-0.02586915
445.79	0.12021031		975.82	0.01001009		1505.81	0.02379453		2035.84	-0.01204627		2565.84	0.00985226		3095.84	0.01663932		3625.84	-0.02639128
445.99	0.12038077		976.02	0.01067951		1506.01	0.02451757		2036.04	-0.01177215		2566.04	0.01132386		3096.04	0.01567765		3626.04	-0.02620656
446.19	0.12022034		976.22	0.01067231		1506.21	0.02421189		2036.24	-0.01184433		2566.24	0.01183823		3096.24	0.01502321		3626.24	-0.026616
446.39	0.12026233		976.42	0.01067247		1506.41	0.02448501		2036.44	-0.01246469		2566.44	0.01185555		3096.44	0.01526207		3626.44	-0.02629941
446.59	0.12054518		976.62	0.01108335		1506.61	0.02435773		2036.64	-0.01273355		2566.64	0.01207358		3096.64	0.01467787		3626.64	-0.02554276
446.79	0.12097904		976.82	0.01146631		1506.81	0.02529257		2036.84	-0.01197273		2566.84	0.01212946		3096.84	0.0148098		3626.84	-0.02567496
446.99	0.12069197		977.02	0.01126787		1507.01	0.02526144		2037.04	-0.01152687		2567.04	0.01185543		3097.04	0.01481885		3627.04	-0.02540499
447.19	0.12064088		977.22	0.01167517		1507.21	0.02626075		2037.24	-0.01154182		2567.24	0.01172943		3097.24	0.01469643		3627.24	-0.02498301
447.39	0.12123634		977.42	0.01198578		1507.41	0.02529692		2037.44	-0.01226973		2567.44	0.01109136		3097.44	0.0150471		3627.44	-0.02463308
447.59	0.12079469		977.62	0.01144656		1507.61	0.02418526		2037.64	-0.01265324		2567.64	0.01057178		3097.64	0.01540187		3627.64	-0.02474639
447.79	0.12180034		977.82	0.010686		1507.81	0.02393408		2037.84	-0.0125491		2567.84	0.01066408		3097.84	0.015285		3627.84	-0.0248462
447.99	0.12154335		978.02	0.01019639		1508.01	0.02408837		2038.04	-0.01265276		2568.04	0.01033009		3098.04	0.01448956		3628.04	-0.02452841
448.19	0.12210766		978.22	0.01045374		1508.21	0.02355019		2038.24	-0.01287642		2568.24	0.00939346		3098.24	0.01493134		3628.24	-0.02435152
448.39	0.12156037		978.42	0.01007869		1508.41	0.02290404		2038.44	-0.01305007		2568.44	0.00953456		3098.44	0.01578557		3628.44	-0.02378268
448.59	0.12064149		978.62	0.0101662		1508.61	0.02262091		2038.64	-0.01405043		2568.64	0.00995262		3098.64	0.01485848		3628.64	-0.02400872
448.79	0.11957722		978.82	0.01067974		1508.81	0.02188737		2038.84	-0.01380345		2568.84	0.01013664		3098.84	0.01474663		3628.84	-0.02328928
448.99	0.11857463		979.02	0.01110867		1509.01	0.02104004		2039.04	-0.01325393		2569.04	0.00868899		3099.04	0.01497727		3629.04	-0.02398574
449.19	0.11818874		979.22	0.01049619		1509.21	0.02121477		2039.24	-0.01412667		2569.24	0.00787089		3099.24	0.0150816		3629.24	-0.02397442
449.39	0.11753039		979.42	0.01068802		1509.41	0.02095623		2039.44	-0.01440465		2569.44	0.00759539		3099.44	0.01449518		3629.44	-0.02455242
449.59	0.11773211		979.62	0.01140598		1509.61	0.02104757		2039.64	-0.0143701		2569.64	0.00780393		3099.64	0.01362753		3629.64	-0.02442552
449.79	0.11730564		979.82	0.01159132		1509.81	0.02108846		2039.84	-0.01354496		2569.84	0.00785706		3099.84	0.01269417		3629.84	-0.02487673
449.99	0.11754841		980.02	0.01204985		1510.01	0.02023046		2040.04	-0.01340425		2570.04	0.0076897		3100.04	0.01185044		3630.04	-0.02465965
450.19	0.11655631		980.22	0.01135714		1510.21	0.02033794		2040.24	-0.01288398		2570.24	0.00717356		3100.24	0.01175236		3630.24	-0.02505573
450.39	0.11664876		980.42	0.01130873		1510.41	0.02044747		2040.44	-0.01228504		2570.44	0.00739184		3100.44	0.01174727		3630.44	-0.0247774
450.59	0.11613978		980.62	0.01129609		1510.61	0.02058414		2040.64	-0.01186063		2570.64	0.00807655		3100.64	0.01177899		3630.64	-0.02481142
450.79	0.1153401		980.82	0.01219747		1510.81	0.0208987		2040.84	-0.01218389		2570.84	0.00815246		3100.84	0.01268386		3630.84	-0.02535957
450.99	0.11472311		981.02	0.01224858		1511.01	0.02130032		2041.04	-0.01235146		2571.04	0.0080851		3101.04	0.01342784		3631.04	-0.02539055
451.19	0.1141616		981.22	0.01244969		1511.21	0.02209842		2041.24	-0.01247212		2571.24	0.00791387		3101.24	0.01398357		3631.24	-0.02606031
451.39	0.11406225		981.42	0.01200137		1511.41	0.02167332		2041.44	-0.01217139		2571.44	0.00766852		3101.44	0.01463626		3631.44	-0.02645678
451.59	0.11432765		981.62	0.01153059		1511.61	0.02283797		2041.64	-0.01218985		2571.64	0.00853508		3101.64	0.01598968		3631.64	-0.02616905
451.79	0.11517391		981.82	0.01099611		1511.81	0.02448552		2041.84	-0.01213253		2571.84	0.0086051		3101.84	0.0160519		3631.84	-0.02598171
451.99	0.11541003		982.02	0.01086579		1512.01	0.02526634		2042.04	-0.01256311		2572.04	0.00875943		3102.04	0.01695497		3632.04	-0.02560559
452.19	0.11603715		982.22	0.01134701		1512.21	0.02563731		2042.24	-0.01267957		2572.24	0.0079796		3102.24	0.01804236		3632.24	-0.02600484
452.39	0.11580996		982.42	0.0111418		1512.41	0.02571802		2042.44	-0.01284553		2572.44	0.00776284		3102.44	0.01811025		3632.44	-0.02573829
452.59	0.11564941		982.62	0.01072702		1512.61	0.0252981		2042.64	-0.01361411		2572.64	0.00725052		3102.64	0.017688		3632.64	-0.02670164
452.79	0.11628502		982.82	0.01013594		1512.81	0.02580737		2042.84	-0.01409575		2572.84	0.00689267		3102.84	0.01828874		3632.84	-0.02697529
452.99	0.11685226		983.02	0.01014465		1513.01	0.02508791		2043.04	-0.01401991		2573.04	0.00596426		3103.04	0.01789198		3633.04	-0.02756704
453.19	0.11770206		983.22	0.00933175		1513.21	0.02473792		2043.24	-0.01417066		2573.24	0.00610075		3103.24	0.0172569		3633.24	-0.02708013
453.39	0.11868975		983.42	0.0090678		1513.41	0.02436829		2043.44	-0.01413854		2573.44	0.00665341		3103.44	0.01649305		3633.44	-0.02741932
453.59	0.11939709		983.62	0.00904467		1513.61	0.02389961		2043.64	-0.01393194		2573.64	0.00704524		3103.64	0.01538724		3633.64	-0.02739103
453.79	0.12066306		983.82	0.0090943		1513.81	0.02287841		2043.84	-0.01365898		2573.84	0.00746354		3103.84	0.01447973		3633.84	-0.02799948
453.99	0.12216962		984.02	0.00986175		1514.01	0.02195434		2044.04	-0.01359016		2574.04	0.00746045		3104.04	0.01394148		3634.04	-0.0278407
454.19	0.12182879		984.22	0.00989147		1514.21	0.02170189		2044.24	-0.01352401		2574.24	0.0085975		3104.24	0.01428553		3634.24	-0.02792329
454.39	0.12127054		984.42	0.00956979		1514.41	0.02082904		2044.44	-0.01308122		2574.44	0.00932524		3104.44	0.01363114		3634.44	-0.02736386
454.59	0.12015412		984.62	0.01011839		1514.61	0.02032205		2044.64	-0.01344013		2574.64	0.01010988		3104.64	0.01333377		3634.64	-0.02773735
454.79	0.11953438		984.82	0.01035533		1514.81	0.02010372		2044.84	-0.0135116		2574.84	0.01003266		3104.84	0.01355821		3634.84	-0.02803673
454.99	0.11877765		985.02	0.01029024		1515.01	0.02049824		2045.04	-0.01217143		2575.04	0.01081094		3105.04	0.01354989		3635.04	-0.02793167
455.19	0.11900092		985.22	0.01077082		1515.21	0.020407		2045.24	-0.01216465		2575.24	0.01134016		3105.24	0.01344451		3635.24	-0.02769136
455.39	0.11873004		985.42	0.01048957		1515.41	0.02075368		2045.44	-0.012121		2575.44	0.01130004		3105.44	0.01418375		3635.44	-0.02717023
455.59	0.11865823		985.62	0.00994408		1515.61	0.02202492		2045.64	-0.01212029		2575.64	0.01081653		3105.64	0.01459156		3635.64	-0.02674891
455.79	0.11830971		985.82	0.00933396		1515.81	0.02273883		2045.84	-0.012513		2575.84	0.00992687		3105.84	0.01601812		3635.84	-0.02685175
455.99	0.11758716		986.02	0.00925123		1516.01	0.02247401		2046.04	-0.0125158		2576.04	0.00908518		3106.04	0.0160764		3636.04	-0.02714146
456.19	0.11713139		986.22	0.00930007		1516.21	0.02277415		2046.24	-0.01214022		2576.24	0.00827455		3106.24	0.01569254		3636.24	-0.02669502
456.39	0.11657499		986.42	0.00871071		1516.41	0.02278079		2046.44	-0.01208262		2576.44	0.00808097		3106.44	0.01511134		3636.44	-0.02657643
456.59	0.11623116		986.62	0.0078075		1516.61	0.02250487		2046.64	-0.01317363		2576.64	0.00813248		3106.64	0.0146643		3636.64	-0.02701723
456.79	0.11597644		986.82	0.00718428		1516.81	0.02255275		2046.84	-0.01370544		2576.84	0.00721288		3106.84	0.01482629		3636.84	-0.02596963
456.99	0.11646827		987.02	0.00668183		1517.01	0.02146433		2047.04	-0.01301692		2577.04	0.0071555		3107.04	0.01451622		3637.04	-0.02632051
457.19	0.11695503		987.22	0.00588261		1517.21	0.02087056		2047.24	-0.01301415		2577.24	0.0068632		3107.24	0.01426087		3637.24	-0.02592191
457.39	0.11723971		987.42	0.00613851		1517.41	0.02095706		2047.44	-0.01414903		2577.44	0.00609636		3107.44	0.01456184		3637.44	-0.02577027
457.59	0.11743665		987.62	0.00650065		1517.61	0.02070842		2047.64	-0.0142694		2577.64	0.00622203		3107.64	0.01466526		3637.64	-0.02541747
457.79	0.11782035		987.82	0.0061665		1517.81	0.02074367		2047.84	-0.01512757		2577.84	0.00600903		3107.84	0.01469311		3637.84	-0.02534704
457.99	0.11794439		988.02	0.0062887		1518.01	0.02106436		2048.04	-0.01549563		2578.04	0.00620802		3108.04	0.01502907		3638.04	-0.0255962
458.19	0.11673637		988.22	0.00541523		1518.21	0.02088755		2048.24	-0.01522697		2578.24	0.00650998		3108.24	0.01496319		3638.24	-0.02529289
458.39	0.1158174		988.42	0.0044548		1518.41	0.02102963		2048.44	-0.01526285		2578.44	0.0065081		3108.44	0.01461229		3638.44	-0.02521419
458.59	0.11594331		988.62	0.00507583		1518.61	0.02147349		2048.64	-0.01529244		2578.64	0.00748625		3108.64	0.01490102		3638.64	-0.02548319
458.79	0.1170773		988.82	0.00524672		1518.81	0.02152347		2048.84	-0.01479692		2578.84	0.00725733		3108.84	0.01435843		3638.84	-0.02546192
458.99	0.11650954		989.02	0.0061094		1519.01	0.02169674		2049.04	-0.01404478		2579.04	0.00774323		3109.04	0.01399345		3639.04	-0.02587979
459.19	0.11698601		989.22	0.00591041		1519.21	0.02212936		2049.24	-0.01407643		2579.24	0.00763272		3109.24	0.01406102		3639.24	-0.02528647
459.39	0.11625577		989.42	0.00569023		1519.41	0.02229324		2049.44	-0.0127015		2579.44	0.00739876		3109.44	0.01424803		3639.44	-0.02526451
459.59	0.11526439		989.62	0.00545739		1519.61	0.02308758		2049.64	-0.01255511		2579.64	0.00773959		3109.64	0.0149273		3639.64	-0.02605016
459.79	0.11448186		989.82	0.00595171		1519.81	0.02361046		2049.84	-0.01307689		2579.84	0.00843145		3109.84	0.0153207		3639.84	-0.02698786
459.99	0.11468136		990.02	0.00648989		1520.01	0.02350788		2050.04	-0.0122905		2580.04	0.00860225		3110.04	0.01432234		3640.04	-0.02777735
460.19	0.11414063		990.22	0.00692908		1520.21	0.0237167		2050.24	-0.01270143		2580.24	0.00885884		3110.24	0.01461966		3640.24	-0.02769474
460.39	0.11342281		990.42	0.00680274		1520.41	0.02335265		2050.44	-0.01297362		2580.44	0.00876008		3110.44	0.01449689		3640.44	-0.02774064
460.59	0.11307903		990.62	0.00631136		1520.61	0.02250813		2050.64	-0.01316439		2580.64	0.00904151		3110.64	0.01437794		3640.64	-0.02749852
460.79	0.11307946		990.82	0.00673473		1520.81	0.02125754		2050.84	-0.01298833		2580.84	0.00783129		3110.84	0.01451399		3640.84	-0.0271711
460.99	0.11335011		991.02	0.00743393		1521.01	0.02091076		2051.04	-0.01316872		2581.04	0.00797712		3111.04	0.01329726		3641.04	-0.02783166
461.19	0.11365809		991.22	0.00768062		1521.21	0.02105187		2051.24	-0.01379606		2581.24	0.00713724		3111.24	0.01334836		3641.24	-0.02591109
461.39	0.11447642		991.42	0.00843894		1521.41	0.02161214		2051.44	-0.01394991		2581.44	0.00643371		3111.44	0.01344674		3641.44	-0.02495003
461.59	0.11502039		991.62	0.00816962		1521.61	0.02158264		2051.64	-0.01335079		2581.64	0.00604336		3111.64	0.01375503		3641.64	-0.02385758
461.79	0.11514276		991.82	0.00800826		1521.81	0.02181995		2051.84	-0.01337419		2581.84	0.00606249		3111.84	0.01431795		3641.84	-0.02363724
461.99	0.11592384		992.02	0.00837044		1522.01	0.0216834		2052.04	-0.01271074		2582.04	0.00559273		3112.04	0.01483909		3642.04	-0.02450897
462.19	0.1166424		992.22	0.00892556		1522.21	0.02201606		2052.24	-0.01253151		2582.24	0.00520152		3112.24	0.01508636		3642.24	-0.02453641
462.39	0.11737438		992.42	0.00856195		1522.41	0.02128258		2052.44	-0.01340524		2582.44	0.00511956		3112.44	0.01514549		3642.44	-0.02512704
462.59	0.11831683		992.62	0.00901451		1522.61	0.02115691		2052.64	-0.01297447		2582.64	0.0053342		3112.64	0.01484904		3642.64	-0.02575129
462.79	0.11943405		992.82	0.00887355		1522.81	0.02133602		2052.84	-0.01250092		2582.84	0.00506994		3112.84	0.01337674		3642.84	-0.02644064
462.99	0.11867429		993.02	0.00920268		1523.01	0.02174073		2053.04	-0.01282881		2583.04	0.0054714		3113.04	0.01331967		3643.04	-0.02691336
463.19	0.11829003		993.22	0.00857152		1523.21	0.02229401		2053.24	-0.01287746		2583.24	0.00565617		3113.24	0.01287703		3643.24	-0.02637973
463.39	0.11794653		993.42	0.00892756		1523.41	0.02255855		2053.44	-0.01283739		2583.44	0.00639408		3113.44	0.01302578		3643.44	-0.02734773
463.59	0.11797466		993.62	0.00930617		1523.61	0.02399398		2053.64	-0.0141742		2583.64	0.00736585		3113.64	0.01358905		3643.64	-0.02911431
463.79	0.1180987		993.82	0.00923007		1523.81	0.02421376		2053.84	-0.01482486		2583.84	0.00798122		3113.84	0.01344768		3643.84	-0.02977484
463.99	0.11801165		994.02	0.00882725		1524.01	0.02418799		2054.04	-0.01505707		2584.04	0.00757858		3114.04	0.0143501		3644.04	-0.03024207
464.19	0.11722771		994.22	0.00828321		1524.21	0.02400222		2054.24	-0.01581771		2584.24	0.00760239		3114.24	0.01487175		3644.24	-0.03004352
464.39	0.11739834		994.42	0.00835494		1524.41	0.02352777		2054.44	-0.01590548		2584.44	0.00776871		3114.44	0.01454204		3644.44	-0.02960255
464.59	0.11764708		994.62	0.00801832		1524.61	0.02323679		2054.64	-0.01574656		2584.64	0.00773159		3114.64	0.01443975		3644.64	-0.0295361
464.79	0.11831344		994.82	0.00793763		1524.81	0.02289049		2054.84	-0.01588345		2584.84	0.00700433		3114.84	0.01501049		3644.84	-0.02923564
464.99	0.11750277		995.02	0.00780187		1525.01	0.02338453		2055.04	-0.01628929		2585.04	0.00711517		3115.04	0.01521107		3645.04	-0.02873535
465.19	0.1178942		995.22	0.00804783		1525.21	0.02330834		2055.24	-0.01591018		2585.24	0.006138		3115.24	0.01554856		3645.24	-0.02738035
465.39	0.11842611		995.42	0.00767438		1525.41	0.02288967		2055.44	-0.01523419		2585.44	0.00537149		3115.44	0.0162301		3645.44	-0.02700208
465.59	0.11817135		995.62	0.00697041		1525.61	0.0231244		2055.64	-0.014737		2585.64	0.00510815		3115.64	0.01689957		3645.64	-0.02581479
465.79	0.117766		995.82	0.007372		1525.81	0.02360526		2055.84	-0.01398326		2585.84	0.00511381		3115.84	0.0172158		3645.84	-0.02628736
465.99	0.11718273		996.02	0.00737562		1526.01	0.02294104		2056.04	-0.0131037		2586.04	0.0048862		3116.04	0.01698464		3646.04	-0.02629346
466.19	0.1178299		996.22	0.00716561		1526.21	0.02229095		2056.24	-0.01308806		2586.24	0.00457859		3116.24	0.01681186		3646.24	-0.02654068
466.39	0.11702381		996.42	0.00630796		1526.41	0.02103344		2056.44	-0.01219722		2586.44	0.0042721		3116.44	0.01619877		3646.44	-0.02703657
466.59	0.11714933		996.62	0.00676453		1526.61	0.02111126		2056.64	-0.0116821		2586.64	0.00436811		3116.64	0.01506585		3646.64	-0.02760745
466.79	0.1170451		996.82	0.00616855		1526.81	0.02120949		2056.84	-0.01145379		2586.84	0.00427469		3116.84	0.01383494		3646.84	-0.02797343
466.99	0.1159916		997.02	0.00638852		1527.01	0.02082316		2057.04	-0.01195906		2587.04	0.00509326		3117.04	0.01347805		3647.04	-0.02838976
467.19	0.11574054		997.22	0.00585939		1527.21	0.02033768		2057.24	-0.01203396		2587.24	0.00532904		3117.24	0.01312824		3647.24	-0.02827897
467.39	0.11591096		997.42	0.00633337		1527.41	0.02074943		2057.44	-0.01310335		2587.44	0.00625092		3117.44	0.01289167		3647.44	-0.02859807
467.59	0.1165588		997.62	0.00706107		1527.61	0.02145856		2057.64	-0.01385535		2587.64	0.00671252		3117.64	0.01314963		3647.64	-0.02894973
467.79	0.11608175		997.82	0.00700229		1527.81	0.02120917		2057.84	-0.01399284		2587.84	0.00726332		3117.84	0.01425263		3647.84	-0.0292007
467.99	0.11545886		998.02	0.00739827		1528.01	0.0204893		2058.04	-0.0139962		2588.04	0.00669338		3118.04	0.0147069		3648.04	-0.02929622
468.19	0.11633385		998.22	0.00822555		1528.21	0.02062477		2058.24	-0.01391255		2588.24	0.00642169		3118.24	0.01443902		3648.24	-0.02928865
468.39	0.11694842		998.42	0.00843335		1528.41	0.02063834		2058.44	-0.01398479		2588.44	0.00632929		3118.44	0.01481649		3648.44	-0.02893812
468.59	0.11720081		998.62	0.00849774		1528.61	0.02079831		2058.64	-0.013586		2588.64	0.00592235		3118.64	0.01531383		3648.64	-0.02889064
468.79	0.11775178		998.82	0.00902746		1528.81	0.02103568		2058.84	-0.01440341		2588.84	0.00609139		3118.84	0.01612937		3648.84	-0.02881409
468.99	0.11665844		999.02	0.00991273		1529.01	0.02116596		2059.04	-0.0150022		2589.04	0.0056242		3119.04	0.01591807		3649.04	-0.02899138
469.19	0.11716943		999.22	0.00987929		1529.21	0.02124306		2059.24	-0.0140962		2589.24	0.00496339		3119.24	0.0151622		3649.24	-0.02876341
469.39	0.11753045		999.42	0.0094729		1529.41	0.02143435		2059.44	-0.01390218		2589.44	0.00472643		3119.44	0.0150832		3649.44	-0.02824047
469.59	0.11705749		999.62	0.00897079		1529.61	0.02195765		2059.64	-0.0127453		2589.64	0.00511366		3119.64	0.01464656		3649.64	-0.02741048
469.79	0.11687974		999.82	0.00923027		1529.81	0.02108113		2059.84	-0.01231164		2589.84	0.00446648		3119.84	0.01407104		3649.84	-0.02751171
469.99	0.11678762		1000.02	0.00951188		1530.01	0.02014383		2060.04	-0.01156321		2590.04	0.00379585		3120.04	0.01423231		3650.04	-0.02738692
470.19	0.11701874		1000.22	0.00912783		1530.21	0.01945332		2060.24	-0.01155808		2590.24	0.00386934		3120.24	0.01456368		3650.24	-0.02760185
470.39	0.11567338		1000.42	0.00938597		1530.41	0.01897724		2060.44	-0.01032612		2590.44	0.00416751		3120.44	0.014504		3650.44	-0.02757178
470.59	0.11560513		1000.62	0.00927115		1530.61	0.01851384		2060.64	-0.01054949		2590.64	0.00410493		3120.64	0.01371998		3650.64	-0.02707712
470.79	0.11542526		1000.82	0.00858999		1530.81	0.01861278		2060.84	-0.01074224		2590.84	0.00420052		3120.84	0.01319114		3650.84	-0.02688368
470.99	0.11523266		1001.02	0.00809105		1531.01	0.01826309		2061.04	-0.01220132		2591.04	0.00503982		3121.04	0.01260051		3651.04	-0.02596642
471.19	0.11473234		1001.22	0.00758555		1531.21	0.01809751		2061.24	-0.01327642		2591.24	0.0051175		3121.24	0.01130464		3651.24	-0.02512244
471.39	0.11454623		1001.42	0.00793911		1531.41	0.01884932		2061.44	-0.0143665		2591.44	0.00551168		3121.44	0.010776		3651.44	-0.02564786
471.59	0.11524369		1001.62	0.00770014		1531.61	0.01866264		2061.64	-0.0139025		2591.64	0.00560257		3121.64	0.01120557		3651.64	-0.02624292
471.79	0.114347		1001.82	0.00727391		1531.81	0.01836538		2061.84	-0.01350967		2591.84	0.00590327		3121.84	0.01230312		3651.84	-0.02760337
471.99	0.11448289		1002.02	0.00749092		1532.01	0.01812033		2062.04	-0.0143405		2592.04	0.00558533		3122.04	0.01202018		3652.04	-0.02793593
472.19	0.11551922		1002.22	0.00722337		1532.21	0.01935058		2062.24	-0.01452648		2592.24	0.00581309		3122.24	0.01214587		3652.24	-0.02738263
472.39	0.11570197		1002.42	0.00586335		1532.41	0.01976371		2062.44	-0.01539892		2592.44	0.00600494		3122.44	0.01190782		3652.44	-0.02732498
472.59	0.11590561		1002.62	0.0058097		1532.61	0.02061744		2062.64	-0.01545208		2592.64	0.00660356		3122.64	0.01170492		3652.64	-0.02793669
472.79	0.11594477		1002.82	0.00511381		1532.81	0.02018665		2062.84	-0.01580318		2592.84	0.0064441		3122.84	0.01195413		3652.84	-0.02853052
472.99	0.11620393		1003.02	0.00524673		1533.01	0.02008536		2063.04	-0.0155155		2593.04	0.00623869		3123.04	0.01150586		3653.04	-0.02923196
473.19	0.11644926		1003.22	0.00413419		1533.21	0.01922911		2063.24	-0.01454468		2593.24	0.00576377		3123.24	0.01078169		3653.24	-0.0296181
473.39	0.11620743		1003.42	0.00353964		1533.41	0.01944047		2063.44	-0.01498216		2593.44	0.00507994		3123.44	0.01097549		3653.44	-0.02965045
473.59	0.1163083		1003.62	0.00347997		1533.61	0.01949111		2063.64	-0.01420092		2593.64	0.0042453		3123.64	0.01062702		3653.64	-0.02920552
473.79	0.11531141		1003.82	0.00453329		1533.81	0.01907172		2063.84	-0.01355554		2593.84	0.00330984		3123.84	0.01056044		3653.84	-0.02945469
473.99	0.11518524		1004.02	0.00584108		1534.01	0.01902984		2064.04	-0.01187965		2594.04	0.00345319		3124.04	0.0114826		3654.04	-0.02966091
474.19	0.11481862		1004.22	0.00729633		1534.21	0.01891153		2064.24	-0.01199579		2594.24	0.00418416		3124.24	0.01184051		3654.24	-0.02950899
474.39	0.11376425		1004.42	0.00839039		1534.41	0.01928178		2064.44	-0.01141328		2594.44	0.00369889		3124.44	0.01212636		3654.44	-0.0291749
474.59	0.11340073		1004.62	0.0091169		1534.61	0.01982852		2064.64	-0.01166069		2594.64	0.00276831		3124.64	0.01194355		3654.64	-0.02861306
474.79	0.11300645		1004.82	0.00909409		1534.81	0.02012898		2064.84	-0.01132269		2594.84	0.00270221		3124.84	0.01189313		3654.84	-0.02808698
474.99	0.11280005		1005.02	0.00889236		1535.01	0.02057702		2065.04	-0.01177622		2595.04	0.00292269		3125.04	0.01161314		3655.04	-0.02718284
475.19	0.11247729		1005.22	0.00941151		1535.21	0.02123375		2065.24	-0.01146157		2595.24	0.00342861		3125.24	0.01092997		3655.24	-0.02663742
475.39	0.11249183		1005.42	0.00988578		1535.41	0.02113929		2065.44	-0.0109549		2595.44	0.00373046		3125.44	0.01218418		3655.44	-0.02693286
475.59	0.11253241		1005.62	0.00939187		1535.61	0.02081714		2065.64	-0.01084175		2595.64	0.00348545		3125.64	0.01311506		3655.64	-0.02667608
475.79	0.11189062		1005.82	0.00974323		1535.81	0.02061189		2065.84	-0.01131708		2595.84	0.00371519		3125.84	0.01470162		3655.84	-0.02681189
475.99	0.11274413		1006.02	0.00974844		1536.01	0.02013102		2066.04	-0.01244934		2596.04	0.00435351		3126.04	0.01471135		3656.04	-0.02602225
476.19	0.11309091		1006.22	0.00910852		1536.21	0.02076864		2066.24	-0.01240527		2596.24	0.0045262		3126.24	0.01455564		3656.24	-0.02532766
476.39	0.11307567		1006.42	0.00779186		1536.41	0.02062777		2066.44	-0.0129259		2596.44	0.00462377		3126.44	0.01437301		3656.44	-0.02575828
476.59	0.1132179		1006.62	0.00744082		1536.61	0.01953296		2066.64	-0.01252401		2596.64	0.00458951		3126.64	0.0157581		3656.64	-0.02652835
476.79	0.11412326		1006.82	0.00716677		1536.81	0.01846077		2066.84	-0.01349296		2596.84	0.00391767		3126.84	0.01569699		3656.84	-0.02632647
476.99	0.11471454		1007.02	0.00699434		1537.01	0.01861291		2067.04	-0.0146263		2597.04	0.0034978		3127.04	0.01512042		3657.04	-0.02650872
477.19	0.11424272		1007.22	0.00567394		1537.21	0.01871123		2067.24	-0.01504766		2597.24	0.00308408		3127.24	0.01511656		3657.24	-0.02686361
477.39	0.11386912		1007.42	0.00547785		1537.41	0.01947403		2067.44	-0.01500621		2597.44	0.00241263		3127.44	0.0145023		3657.44	-0.02680694
477.59	0.11438484		1007.62	0.00584612		1537.61	0.01931353		2067.64	-0.01457202		2597.64	0.00234585		3127.64	0.01335867		3657.64	-0.02642451
477.79	0.11374634		1007.82	0.00619355		1537.81	0.01963681		2067.84	-0.0140942		2597.84	0.0026477		3127.84	0.01306583		3657.84	-0.0269826
477.99	0.11485594		1008.02	0.00618656		1538.01	0.01967282		2068.04	-0.01450585		2598.04	0.00249471		3128.04	0.01291946		3658.04	-0.02736928
478.19	0.11466461		1008.22	0.00615808		1538.21	0.0200412		2068.24	-0.01510032		2598.24	0.00250263		3128.24	0.01246199		3658.24	-0.02692298
478.39	0.11412533		1008.42	0.0059281		1538.41	0.02073456		2068.44	-0.01509217		2598.44	0.00219739		3128.44	0.01193801		3658.44	-0.02671421
478.59	0.11381683		1008.62	0.00613352		1538.61	0.02180256		2068.64	-0.01415164		2598.64	0.00135682		3128.64	0.01176804		3658.64	-0.02664292
478.79	0.11362491		1008.82	0.00597069		1538.81	0.02204445		2068.84	-0.01404759		2598.84	0.00185636		3128.84	0.01151595		3658.84	-0.02650847
478.99	0.1141348		1009.02	0.00591055		1539.01	0.02312304		2069.04	-0.01414584		2599.04	0.00242492		3129.04	0.01132894		3659.04	-0.02623472
479.19	0.11309225		1009.22	0.00650875		1539.21	0.02363295		2069.24	-0.01415954		2599.24	0.00229584		3129.24	0.0118055		3659.24	-0.02644375
479.39	0.11250277		1009.42	0.00680664		1539.41	0.02384151		2069.44	-0.01355235		2599.44	0.00277743		3129.44	0.01213867		3659.44	-0.02705188
479.59	0.11255803		1009.62	0.00710018		1539.61	0.02450125		2069.64	-0.01321568		2599.64	0.00295751		3129.64	0.01204613		3659.64	-0.02742587
479.79	0.11186795		1009.82	0.00734885		1539.81	0.02432895		2069.84	-0.01258869		2599.84	0.0034665		3129.84	0.01238554		3659.84	-0.02862192
479.99	0.11197028		1010.02	0.00741842		1540.01	0.02420966		2070.04	-0.0126819		2600.04	0.00394216		3130.04	0.01191849		3660.04	-0.02957239
480.19	0.11137428		1010.22	0.00789441		1540.21	0.02424268		2070.24	-0.01229224		2600.24	0.0035438		3130.24	0.01268417		3660.24	-0.03039729
480.39	0.11137578		1010.42	0.00759888		1540.41	0.02315524		2070.44	-0.01181222		2600.44	0.00387688		3130.44	0.01286061		3660.44	-0.03085238
480.59	0.11213777		1010.62	0.00776981		1540.61	0.02197338		2070.64	-0.01141897		2600.64	0.00318989		3130.64	0.01322055		3660.64	-0.03146563
480.79	0.11329656		1010.82	0.00798806		1540.81	0.021894		2070.84	-0.01211331		2600.84	0.00302034		3130.84	0.01227588		3660.84	-0.031269
480.99	0.11328966		1011.02	0.00747505		1541.01	0.02186138		2071.04	-0.01260907		2601.04	0.00353774		3131.04	0.0116728		3661.04	-0.03140977
481.19	0.11400318		1011.22	0.00686626		1541.21	0.02236621		2071.24	-0.01196764		2601.24	0.00375503		3131.24	0.01195341		3661.24	-0.03122458
481.39	0.11451882		1011.42	0.00683472		1541.41	0.02167692		2071.44	-0.01142969		2601.44	0.00365255		3131.44	0.01160186		3661.44	-0.03035273
481.59	0.11450127		1011.62	0.00690176		1541.61	0.02089307		2071.64	-0.01293694		2601.64	0.00381351		3131.64	0.01137724		3661.64	-0.03008668
481.79	0.1150528		1011.82	0.0066382		1541.81	0.01985205		2071.84	-0.01342862		2601.84	0.00349025		3131.84	0.01148205		3661.84	-0.02895235
481.99	0.11493208		1012.02	0.00578711		1542.01	0.0186914		2072.04	-0.01437883		2602.04	0.00332252		3132.04	0.01162959		3662.04	-0.02888471
482.19	0.11494141		1012.22	0.0060196		1542.21	0.01863286		2072.24	-0.01493558		2602.24	0.00387868		3132.24	0.01153033		3662.24	-0.02764777
482.39	0.11450376		1012.42	0.00666816		1542.41	0.01862445		2072.44	-0.01538736		2602.44	0.00288753		3132.44	0.01125448		3662.44	-0.02731934
482.59	0.11431678		1012.62	0.00664641		1542.61	0.01855888		2072.64	-0.01672607		2602.64	0.00242523		3132.64	0.01134361		3662.64	-0.02658972
482.79	0.11436867		1012.82	0.00647616		1542.81	0.01813136		2072.84	-0.01756199		2602.84	0.00229623		3132.84	0.01114496		3662.84	-0.02678116
482.99	0.11501009		1013.02	0.00644574		1543.01	0.01877314		2073.04	-0.01741376		2603.04	0.00253708		3133.04	0.01122778		3663.04	-0.02684498
483.19	0.11409604		1013.22	0.00642823		1543.21	0.01924909		2073.24	-0.0175186		2603.24	0.00240706		3133.24	0.01074738		3663.24	-0.02710682
483.39	0.11421814		1013.42	0.00656513		1543.41	0.01969625		2073.44	-0.01666491		2603.44	0.00300872		3133.44	0.0098447		3663.44	-0.02769288
483.59	0.11470469		1013.62	0.00691959		1543.61	0.0196378		2073.64	-0.01608228		2603.64	0.00281632		3133.64	0.00927581		3663.64	-0.02836606
483.79	0.11428547		1013.82	0.00628892		1543.81	0.01881192		2073.84	-0.0156405		2603.84	0.00261942		3133.84	0.00952169		3663.84	-0.02920008
483.99	0.1136586		1014.02	0.00657458		1544.01	0.01872251		2074.04	-0.01582225		2604.04	0.00270621		3134.04	0.00954093		3664.04	-0.02923526
484.19	0.11362139		1014.22	0.00709727		1544.21	0.01887488		2074.24	-0.01437368		2604.24	0.00247956		3134.24	0.00957406		3664.24	-0.02908443
484.39	0.11400821		1014.42	0.00686477		1544.41	0.018295		2074.44	-0.01304873		2604.44	0.00285098		3134.44	0.0084182		3664.44	-0.02898143
484.59	0.11344484		1014.62	0.00688753		1544.61	0.01812916		2074.64	-0.01268915		2604.64	0.00196105		3134.64	0.00842553		3664.64	-0.02945699
484.79	0.11329988		1014.82	0.00651474		1544.81	0.01840974		2074.84	-0.01222091		2604.84	0.00284811		3134.84	0.007861		3664.84	-0.02929048
484.99	0.11247924		1015.02	0.00574362		1545.01	0.01920661		2075.04	-0.01201119		2605.04	0.00317283		3135.04	0.00790612		3665.04	-0.02913792
485.19	0.11225463		1015.22	0.00574993		1545.21	0.01984376		2075.24	-0.01131036		2605.24	0.0037056		3135.24	0.00905779		3665.24	-0.02973206
485.39	0.11205103		1015.42	0.00602301		1545.41	0.01930092		2075.44	-0.0115058		2605.44	0.00437503		3135.44	0.0100661		3665.44	-0.03025582
485.59	0.11088109		1015.62	0.00554501		1545.61	0.01876547		2075.64	-0.01202184		2605.64	0.00435835		3135.64	0.01104718		3665.64	-0.03038234
485.79	0.11087292		1015.82	0.0052175		1545.81	0.01857713		2075.84	-0.01141157		2605.84	0.00498522		3135.84	0.01218606		3665.84	-0.02959472
485.99	0.11003058		1016.02	0.00508735		1546.01	0.01888717		2076.04	-0.01173613		2606.04	0.00509875		3136.04	0.01274894		3666.04	-0.0300703
486.19	0.11041689		1016.22	0.00605659		1546.21	0.01942771		2076.24	-0.01214784		2606.24	0.00458377		3136.24	0.01286559		3666.24	-0.02957227
486.39	0.11037313		1016.42	0.00610899		1546.41	0.01915498		2076.44	-0.01274414		2606.44	0.00326024		3136.44	0.01380475		3666.44	-0.02937067
486.59	0.11111633		1016.62	0.00591661		1546.61	0.01959225		2076.64	-0.01331737		2606.64	0.00267665		3136.64	0.01418127		3666.64	-0.0295077
486.79	0.11082981		1016.82	0.00589112		1546.81	0.01903055		2076.84	-0.01274194		2606.84	0.00178552		3136.84	0.01427217		3666.84	-0.03012718
486.99	0.11074439		1017.02	0.00580287		1547.01	0.01894333		2077.04	-0.0134302		2607.04	0.00206761		3137.04	0.01476509		3667.04	-0.0297285
487.19	0.11034945		1017.22	0.00565732		1547.21	0.01891635		2077.24	-0.01422036		2607.24	0.00165438		3137.24	0.01460066		3667.24	-0.03027293
487.39	0.11002833		1017.42	0.00633494		1547.41	0.01935809		2077.44	-0.0139442		2607.44	0.00115179		3137.44	0.01529119		3667.44	-0.03043748
487.59	0.11026132		1017.62	0.00638521		1547.61	0.01947485		2077.64	-0.01381831		2607.64	0.00035945		3137.64	0.01475307		3667.64	-0.03102698
487.79	0.10895552		1017.82	0.00638279		1547.81	0.02014085		2077.84	-0.01423564		2607.84	0.00058888		3137.84	0.01515069		3667.84	-0.03135058
487.99	0.10840187		1018.02	0.00597604		1548.01	0.02038272		2078.04	-0.01498531		2608.04	0.00031711		3138.04	0.01480184		3668.04	-0.03141743
488.19	0.1087314		1018.22	0.00619593		1548.21	0.02025097		2078.24	-0.01415962		2608.24	0.000379		3138.24	0.0145601		3668.24	-0.03181864
488.39	0.10890305		1018.42	0.00621259		1548.41	0.02045885		2078.44	-0.01449063		2608.44	0.00039638		3138.44	0.0138736		3668.44	-0.03200388
488.59	0.10779857		1018.62	0.00595927		1548.61	0.02070852		2078.64	-0.01515136		2608.64	-0.00012377		3138.64	0.01327881		3668.64	-0.0319689
488.79	0.10853375		1018.82	0.00546534		1548.81	0.02152294		2078.84	-0.01493152		2608.84	0.00168041		3138.84	0.01316238		3668.84	-0.03224966
488.99	0.10808937		1019.02	0.0049377		1549.01	0.02264158		2079.04	-0.01488956		2609.04	0.00163223		3139.04	0.01381774		3669.04	-0.03343477
489.19	0.10887721		1019.22	0.00480298		1549.21	0.02243909		2079.24	-0.01471149		2609.24	0.0024755		3139.24	0.0136804		3669.24	-0.03425222
489.39	0.11021048		1019.42	0.00374561		1549.41	0.02216995		2079.44	-0.01446844		2609.44	0.00222911		3139.44	0.0134294		3669.44	-0.0340805
489.59	0.11049238		1019.62	0.00376705		1549.61	0.02131973		2079.64	-0.01433642		2609.64	0.00169373		3139.64	0.01251184		3669.64	-0.0337959
489.79	0.11148289		1019.82	0.00457196		1549.81	0.02083844		2079.84	-0.01406397		2609.84	0.00106697		3139.84	0.01198546		3669.84	-0.03346388
489.99	0.11260321		1020.02	0.0046758		1550.01	0.02062916		2080.04	-0.01430763		2610.04	0.00063963		3140.04	0.0119124		3670.04	-0.03349579
490.19	0.11395889		1020.22	0.00448623		1550.21	0.02063289		2080.24	-0.01500073		2610.24	-0.00016313		3140.24	0.01153323		3670.24	-0.03254936
490.39	0.11479117		1020.42	0.00437926		1550.41	0.01935921		2080.44	-0.01485467		2610.44	0.00005273		3140.44	0.01169932		3670.44	-0.03230735
490.59	0.1148182		1020.62	0.00423269		1550.61	0.01946726		2080.64	-0.01453414		2610.64	-0.00021593		3140.64	0.01169499		3670.64	-0.03226316
490.79	0.11395268		1020.82	0.00422198		1550.81	0.01791385		2080.84	-0.01558815		2610.84	-0.00124408		3140.84	0.01103061		3670.84	-0.03147744
490.99	0.11338758		1021.02	0.00474409		1551.01	0.01769959		2081.04	-0.01608988		2611.04	-0.00076267		3141.04	0.01121744		3671.04	-0.03103843
491.19	0.11292279		1021.22	0.00527293		1551.21	0.01713137		2081.24	-0.01594732		2611.24	-0.00116486		3141.24	0.01121089		3671.24	-0.031601
491.39	0.1122944		1021.42	0.00614428		1551.41	0.01720854		2081.44	-0.0154758		2611.44	-0.00050201		3141.44	0.0113856		3671.44	-0.03097794
491.59	0.11143742		1021.62	0.00595235		1551.61	0.0169005		2081.64	-0.01658896		2611.64	-0.00018049		3141.64	0.0112626		3671.64	-0.03089854
491.79	0.11145839		1021.82	0.00565558		1551.81	0.01655625		2081.84	-0.01658165		2611.84	0.00087701		3141.84	0.01179789		3671.84	-0.03047792
491.99	0.1118046		1022.02	0.00521254		1552.01	0.01665716		2082.04	-0.01654559		2612.04	0.00124331		3142.04	0.01179475		3672.04	-0.02960552
492.19	0.11189775		1022.22	0.0055585		1552.21	0.01679305		2082.24	-0.01555599		2612.24	0.00182806		3142.24	0.01246241		3672.24	-0.02942112
492.39	0.11176065		1022.42	0.00573428		1552.41	0.01787413		2082.44	-0.01534752		2612.44	0.00266729		3142.44	0.01321216		3672.44	-0.0288697
492.59	0.11139613		1022.62	0.00558722		1552.61	0.01842534		2082.64	-0.0150058		2612.64	0.00357712		3142.64	0.01283523		3672.64	-0.02860344
492.79	0.1112697		1022.82	0.00552301		1552.81	0.01930273		2082.84	-0.01477573		2612.84	0.00575516		3142.84	0.01365171		3672.84	-0.02906547
492.99	0.11066133		1023.02	0.00530272		1553.01	0.01928896		2083.04	-0.01499116		2613.04	0.00604824		3143.04	0.01350087		3673.04	-0.02943684
493.19	0.11119143		1023.22	0.00444308		1553.21	0.0187031		2083.24	-0.01458799		2613.24	0.00683075		3143.24	0.01344834		3673.24	-0.0288579
493.39	0.1115054		1023.42	0.00439464		1553.41	0.01874463		2083.44	-0.01439174		2613.44	0.00625133		3143.44	0.01322905		3673.44	-0.02882174
493.59	0.11170052		1023.62	0.00446569		1553.61	0.0177147		2083.64	-0.01479159		2613.64	0.0054168		3143.64	0.01288276		3673.64	-0.02873407
493.79	0.11152768		1023.82	0.0042919		1553.81	0.01783824		2083.84	-0.01470025		2613.84	0.00507306		3143.84	0.0128881		3673.84	-0.02866257
493.99	0.11185465		1024.02	0.00417516		1554.01	0.01830891		2084.04	-0.01481205		2614.04	0.0054946		3144.04	0.01352966		3674.04	-0.02784126
494.19	0.11133095		1024.22	0.00334631		1554.21	0.01878261		2084.24	-0.015168		2614.24	0.00509357		3144.24	0.01315286		3674.24	-0.0272052
494.39	0.11060613		1024.42	0.00416639		1554.41	0.01834665		2084.44	-0.01465664		2614.44	0.00509814		3144.44	0.01334049		3674.44	-0.02798889
494.59	0.10947886		1024.62	0.00377675		1554.61	0.01886685		2084.64	-0.01447246		2614.64	0.00428213		3144.64	0.01379549		3674.64	-0.02807326
494.79	0.10771991		1024.82	0.00397513		1554.81	0.01736234		2084.84	-0.0150958		2614.84	0.00298544		3144.84	0.01278865		3674.84	-0.02859136
494.99	0.1068419		1025.02	0.00476613		1555.01	0.01726095		2085.04	-0.01390616		2615.04	0.00318544		3145.04	0.01336764		3675.04	-0.02938768
495.19	0.10638358		1025.22	0.0042784		1555.21	0.01726825		2085.24	-0.01321994		2615.24	0.00244086		3145.24	0.01312204		3675.24	-0.02955853
495.39	0.10576478		1025.42	0.00427181		1555.41	0.01772753		2085.44	-0.01384327		2615.44	0.00309833		3145.44	0.01277479		3675.44	-0.02895639
495.59	0.1055049		1025.62	0.00315092		1555.61	0.01762388		2085.64	-0.01342485		2615.64	0.00226749		3145.64	0.0131184		3675.64	-0.02874217
495.79	0.10673353		1025.82	0.00296997		1555.81	0.01783121		2085.84	-0.01250458		2615.84	0.00164406		3145.84	0.01264267		3675.84	-0.0292649
495.99	0.10650061		1026.02	0.00298782		1556.01	0.01876721		2086.04	-0.0123856		2616.04	0.00103544		3146.04	0.01246652		3676.04	-0.02917325
496.19	0.10656212		1026.22	0.00259327		1556.21	0.01795889		2086.24	-0.0118579		2616.24	0.00106864		3146.24	0.01318635		3676.24	-0.02940716
496.39	0.10626067		1026.42	0.0034336		1556.41	0.0178763		2086.44	-0.01202648		2616.44	0.00121972		3146.44	0.01315752		3676.44	-0.02907259
496.59	0.10673188		1026.62	0.00414286		1556.61	0.01767737		2086.64	-0.01264325		2616.64	0.0010736		3146.64	0.01203912		3676.64	-0.02932395
496.79	0.10614031		1026.82	0.0040909		1556.81	0.01707518		2086.84	-0.01270251		2616.84	0.00185418		3146.84	0.01205723		3676.84	-0.02899412
496.99	0.10680379		1027.02	0.00382046		1557.01	0.01727474		2087.04	-0.01231429		2617.04	0.00133975		3147.04	0.01138183		3677.04	-0.02890472
497.19	0.10671876		1027.22	0.00359795		1557.21	0.01705224		2087.24	-0.01265054		2617.24	0.00074696		3147.24	0.01137148		3677.24	-0.02904505
497.39	0.1067942		1027.42	0.0042625		1557.41	0.01794905		2087.44	-0.01331563		2617.44	0.00070433		3147.44	0.01065139		3677.44	-0.02852997
497.59	0.10784359		1027.62	0.00423708		1557.61	0.01777893		2087.64	-0.01442367		2617.64	0.00090668		3147.64	0.00996483		3677.64	-0.02763878
497.79	0.10778164		1027.82	0.00482941		1557.81	0.01775622		2087.84	-0.01420636		2617.84	0.00148624		3147.84	0.00948304		3677.84	-0.02766071
497.99	0.10826595		1028.02	0.00468925		1558.01	0.01853524		2088.04	-0.0150037		2618.04	0.00244274		3148.04	0.01069034		3678.04	-0.02755928
498.19	0.10790663		1028.22	0.00442166		1558.21	0.01925819		2088.24	-0.0158606		2618.24	0.00216848		3148.24	0.0106482		3678.24	-0.02807356
498.39	0.10830457		1028.42	0.00552228		1558.41	0.01908921		2088.44	-0.01601145		2618.44	0.00241093		3148.44	0.01081994		3678.44	-0.02888706
498.59	0.10873912		1028.62	0.00585067		1558.61	0.01905627		2088.64	-0.01607457		2618.64	0.00256796		3148.64	0.01080851		3678.64	-0.02945093
498.79	0.1080507		1028.82	0.00624958		1558.81	0.01934848		2088.84	-0.01627131		2618.84	0.0019198		3148.84	0.01094359		3678.84	-0.03002691
498.99	0.10872562		1029.02	0.00666458		1559.01	0.01994726		2089.04	-0.01531337		2619.04	0.00229225		3149.04	0.0113953		3679.04	-0.03007399
499.19	0.10879022		1029.22	0.00551419		1559.21	0.02050858		2089.24	-0.01552025		2619.24	0.00203042		3149.24	0.01170717		3679.24	-0.03032869
499.39	0.1083264		1029.42	0.00574578		1559.41	0.02004406		2089.44	-0.01586236		2619.44	0.00227828		3149.44	0.01117241		3679.44	-0.03074453
499.59	0.10878338		1029.62	0.00480085		1559.61	0.01927755		2089.64	-0.01558816		2619.64	0.0015498		3149.64	0.01162728		3679.64	-0.0311867
499.79	0.10896087		1029.82	0.00556349		1559.81	0.01942059		2089.84	-0.01596345		2619.84	0.00123427		3149.84	0.01152276		3679.84	-0.03137627
499.99	0.10796486		1030.02	0.00558717		1560.01	0.01923505		2090.04	-0.01578657		2620.04	0.0015723		3150.04	0.01146615		3680.04	-0.03065239
500.19	0.10728038		1030.22	0.00613079		1560.21	0.01822402		2090.24	-0.01515614		2620.24	0.00205878		3150.24	0.01178394		3680.24	-0.02987544
500.39	0.10685581		1030.42	0.00717458		1560.41	0.01834118		2090.44	-0.01544332		2620.44	0.00237154		3150.44	0.01063687		3680.44	-0.02996068
500.59	0.10674609		1030.62	0.00673614		1560.61	0.01786284		2090.64	-0.01515174		2620.64	0.00199064		3150.64	0.00968885		3680.64	-0.02954784
500.79	0.10627245		1030.82	0.00674775		1560.81	0.01777456		2090.84	-0.01434067		2620.84	0.00265447		3150.84	0.01028393		3680.84	-0.02910366
500.99	0.10608731		1031.02	0.0064221		1561.01	0.01825163		2091.04	-0.01455494		2621.04	0.0029187		3151.04	0.01013825		3681.04	-0.02842978
501.19	0.10485969		1031.22	0.0055684		1561.21	0.01866915		2091.24	-0.0154557		2621.24	0.00345414		3151.24	0.00992539		3681.24	-0.02774039
501.39	0.10391559		1031.42	0.00535994		1561.41	0.01881886		2091.44	-0.01526498		2621.44	0.00425511		3151.44	0.01005276		3681.44	-0.02637214
501.59	0.1036338		1031.62	0.00482241		1561.61	0.01901297		2091.64	-0.01482395		2621.64	0.0045332		3151.64	0.00987437		3681.64	-0.02595488
501.79	0.10340254		1031.82	0.00430414		1561.81	0.01887441		2091.84	-0.0152405		2621.84	0.00359671		3151.84	0.00996682		3681.84	-0.02635697
501.99	0.10351796		1032.02	0.00388783		1562.01	0.01950147		2092.04	-0.01634131		2622.04	0.00366935		3152.04	0.01056031		3682.04	-0.02614149
502.19	0.1032913		1032.22	0.00453528		1562.21	0.01919291		2092.24	-0.01669653		2622.24	0.00242073		3152.24	0.01054912		3682.24	-0.02581866
502.39	0.10342747		1032.42	0.00454628		1562.41	0.01866417		2092.44	-0.0168085		2622.44	0.00304315		3152.44	0.01052204		3682.44	-0.025514
502.59	0.10313434		1032.62	0.00469832		1562.61	0.01793617		2092.64	-0.016863		2622.64	0.00346133		3152.64	0.01072697		3682.64	-0.02621193
502.79	0.10201547		1032.82	0.00446404		1562.81	0.01840787		2092.84	-0.01594245		2622.84	0.00368309		3152.84	0.01055214		3682.84	-0.02596775
502.99	0.10157822		1033.02	0.00398267		1563.01	0.01819357		2093.04	-0.01557034		2623.04	0.00365744		3153.04	0.01018227		3683.04	-0.02630725
503.19	0.1012445		1033.22	0.00391998		1563.21	0.01746513		2093.24	-0.01476643		2623.24	0.00314825		3153.24	0.00994774		3683.24	-0.02665049
503.39	0.10132067		1033.42	0.00480067		1563.41	0.01681261		2093.44	-0.01468514		2623.44	0.0027754		3153.44	0.00933771		3683.44	-0.02693341
503.59	0.10257113		1033.62	0.00421795		1563.61	0.01703477		2093.64	-0.01477969		2623.64	0.00255564		3153.64	0.01012012		3683.64	-0.02812122
503.79	0.10319871		1033.82	0.00513611		1563.81	0.01641489		2093.84	-0.01387441		2623.84	0.0025416		3153.84	0.00929565		3683.84	-0.02929045
503.99	0.10345517		1034.02	0.00575166		1564.01	0.01564304		2094.04	-0.01345147		2624.04	0.00245147		3154.04	0.00893414		3684.04	-0.02963175
504.19	0.1042714		1034.22	0.0060498		1564.21	0.01568609		2094.24	-0.01242404		2624.24	0.00248158		3154.24	0.00829369		3684.24	-0.02987062
504.39	0.10588708		1034.42	0.00612672		1564.41	0.01581745		2094.44	-0.01279679		2624.44	0.00231686		3154.44	0.00824124		3684.44	-0.03088291
504.59	0.10655775		1034.62	0.00519151		1564.61	0.01491647		2094.64	-0.01283566		2624.64	0.00146486		3154.64	0.00896221		3684.64	-0.03057585
504.79	0.10696219		1034.82	0.00598603		1564.81	0.01497942		2094.84	-0.01298756		2624.84	0.00140607		3154.84	0.01038129		3684.84	-0.0308406
504.99	0.10681985		1035.02	0.00483646		1565.01	0.01593856		2095.04	-0.0130654		2625.04	0.00107594		3155.04	0.0102218		3685.04	-0.03011779
505.19	0.10710844		1035.22	0.00416178		1565.21	0.01693109		2095.24	-0.01322151		2625.24	0.00054969		3155.24	0.01063018		3685.24	-0.02992472
505.39	0.10685714		1035.42	0.00407732		1565.41	0.01661708		2095.44	-0.01318725		2625.44	-0.00035787		3155.44	0.01045508		3685.44	-0.03066878
505.59	0.10712959		1035.62	0.00362405		1565.61	0.01809521		2095.64	-0.0129942		2625.64	-0.0007406		3155.64	0.0099682		3685.64	-0.0307731
505.79	0.10774067		1035.82	0.00358608		1565.81	0.0176925		2095.84	-0.01456411		2625.84	-0.00141095		3155.84	0.00974867		3685.84	-0.03103389
505.99	0.10744543		1036.02	0.00345179		1566.01	0.01746369		2096.04	-0.01494698		2626.04	-0.00066967		3156.04	0.01043843		3686.04	-0.03072185
506.19	0.10759758		1036.22	0.00263256		1566.21	0.01730959		2096.24	-0.01539223		2626.24	-0.00039314		3156.24	0.01073076		3686.24	-0.03079834
506.39	0.10643408		1036.42	0.00157378		1566.41	0.01747431		2096.44	-0.01576339		2626.44	0.00020407		3156.44	0.01093271		3686.44	-0.03049457
506.59	0.10639886		1036.62	0.00158229		1566.61	0.01803974		2096.64	-0.01565297		2626.64	0.00034792		3156.64	0.01120381		3686.64	-0.03052807
506.79	0.10645649		1036.82	0.00133497		1566.81	0.01936608		2096.84	-0.01506509		2626.84	0.00014718		3156.84	0.01043392		3686.84	-0.02966322
506.99	0.10598607		1037.02	0.00055451		1567.01	0.01973955		2097.04	-0.01537381		2627.04	-0.00003648		3157.04	0.01090827		3687.04	-0.02942094
507.19	0.10646344		1037.22	0.00081879		1567.21	0.01993796		2097.24	-0.01496996		2627.24	0.0004971		3157.24	0.01111165		3687.24	-0.029831
507.39	0.10704621		1037.42	0.00046938		1567.41	0.02038267		2097.44	-0.0154542		2627.44	0.00077277		3157.44	0.01149854		3687.44	-0.03038582
507.59	0.10724722		1037.62	0.0000628		1567.61	0.0204072		2097.64	-0.01545753		2627.64	0.00098029		3157.64	0.01056857		3687.64	-0.03153374
507.79	0.10780954		1037.82	0.0014812		1567.81	0.01964761		2097.84	-0.01526552		2627.84	0.00120823		3157.84	0.0100726		3687.84	-0.03146455
507.99	0.10810572		1038.02	0.00166058		1568.01	0.01967374		2098.04	-0.0150011		2628.04	0.00158276		3158.04	0.01045692		3688.04	-0.03122006
508.19	0.10795455		1038.22	0.00159732		1568.21	0.0197935		2098.24	-0.01524742		2628.24	0.00192205		3158.24	0.01114526		3688.24	-0.0304802
508.39	0.10808999		1038.42	0.00166975		1568.41	0.01905457		2098.44	-0.01576074		2628.44	0.00239912		3158.44	0.01187031		3688.44	-0.03020506
508.59	0.10786701		1038.62	0.001737		1568.61	0.01833939		2098.64	-0.01585973		2628.64	0.00248406		3158.64	0.01196977		3688.64	-0.02990845
508.79	0.10778407		1038.82	0.00252945		1568.81	0.01877245		2098.84	-0.01641207		2628.84	0.00195772		3158.84	0.01205222		3688.84	-0.03071588
508.99	0.10785083		1039.02	0.00151222		1569.01	0.01855921		2099.04	-0.01667365		2629.04	0.00180053		3159.04	0.01115991		3689.04	-0.03088072
509.19	0.10834219		1039.22	0.00191553		1569.21	0.01698673		2099.24	-0.01699297		2629.24	0.00192504		3159.24	0.01098908		3689.24	-0.03133616
509.39	0.10764357		1039.42	0.00172863		1569.41	0.01625241		2099.44	-0.01657055		2629.44	0.0016026		3159.44	0.01000733		3689.44	-0.03273287
509.59	0.10750483		1039.62	0.00174881		1569.61	0.0160216		2099.64	-0.0168386		2629.64	0.00128268		3159.64	0.00920042		3689.64	-0.03200826
509.79	0.1077759		1039.82	0.00145915		1569.81	0.015037		2099.84	-0.0166401		2629.84	0.00098483		3159.84	0.0101055		3689.84	-0.0321762
509.99	0.10769475		1040.02	0.00094229		1570.01	0.01430767		2100.04	-0.017153		2630.04	0.00071014		3160.04	0.01033806		3690.04	-0.03185331
510.19	0.10779442		1040.22	0.00053298		1570.21	0.01378004		2100.24	-0.01810387		2630.24	-0.00010303		3160.24	0.01041916		3690.24	-0.03250663
510.39	0.10740305		1040.42	0.00100218		1570.41	0.01441435		2100.44	-0.01816088		2630.44	-0.00034065		3160.44	0.01035044		3690.44	-0.03255339
510.59	0.10856188		1040.62	0.00165643		1570.61	0.01512748		2100.64	-0.01784324		2630.64	-0.0002844		3160.64	0.01012921		3690.64	-0.03243179
510.79	0.10798011		1040.82	0.00185633		1570.81	0.01546601		2100.84	-0.0175243		2630.84	0.00021036		3160.84	0.00986611		3690.84	-0.03277549
510.99	0.10768117		1041.02	0.00167393		1571.01	0.01635693		2101.04	-0.01785338		2631.04	0.00085548		3161.04	0.01074843		3691.04	-0.03259868
511.19	0.10770663		1041.22	0.00234582		1571.21	0.0168724		2101.24	-0.01779202		2631.24	0.00121684		3161.24	0.01080701		3691.24	-0.03319797
511.39	0.10735184		1041.42	0.00228831		1571.41	0.01672753		2101.44	-0.01860829		2631.44	0.00155463		3161.44	0.01022556		3691.44	-0.03298834
511.59	0.1076834		1041.62	0.00292627		1571.61	0.01719966		2101.64	-0.0192613		2631.64	0.00185725		3161.64	0.00994543		3691.64	-0.03342347
511.79	0.10809525		1041.82	0.00376433		1571.81	0.01747829		2101.84	-0.01987692		2631.84	0.00224226		3161.84	0.0107958		3691.84	-0.03285416
511.99	0.10809128		1042.02	0.0024301		1572.01	0.017686		2102.04	-0.02058239		2632.04	0.0031177		3162.04	0.01106531		3692.04	-0.03213423
512.19	0.10755288		1042.22	0.00251678		1572.21	0.01768901		2102.24	-0.02088353		2632.24	0.00330195		3162.24	0.011634		3692.24	-0.03070927
512.39	0.10769569		1042.42	0.00205224		1572.41	0.01759719		2102.44	-0.02021164		2632.44	0.00309958		3162.44	0.01030053		3692.44	-0.03067254
512.59	0.10751724		1042.62	0.00165437		1572.61	0.01733622		2102.64	-0.02048855		2632.64	0.00257812		3162.64	0.01057435		3692.64	-0.0316024
512.79	0.10729648		1042.82	0.00116037		1572.81	0.01664242		2102.84	-0.02134958		2632.84	0.00232816		3162.84	0.00976748		3692.84	-0.03293196
512.99	0.10734682		1043.02	0.00084622		1573.01	0.01648593		2103.04	-0.02071038		2633.04	0.00147178		3163.04	0.00940148		3693.04	-0.03252899
513.19	0.10670638		1043.22	0.00102101		1573.21	0.01656825		2103.24	-0.02037949		2633.24	0.00067777		3163.24	0.01030097		3693.24	-0.03183798
513.39	0.10588626		1043.42	0.00047597		1573.41	0.01618014		2103.44	-0.01974069		2633.44	-0.0005089		3163.44	0.00971288		3693.44	-0.03165481
513.59	0.10656283		1043.62	-0.0000061		1573.61	0.01562232		2103.64	-0.02024158		2633.64	-0.00123944		3163.64	0.00986909		3693.64	-0.03128096
513.79	0.10661974		1043.82	0.00003441		1573.81	0.01532417		2103.84	-0.0201492		2633.84	-0.00151983		3163.84	0.01073952		3693.84	-0.03108607
513.99	0.10592309		1044.02	0.00062069		1574.01	0.01518021		2104.04	-0.02096708		2634.04	-0.00213977		3164.04	0.01074559		3694.04	-0.03103987
514.19	0.10549954		1044.22	0.00186468		1574.21	0.01570747		2104.24	-0.02039387		2634.24	-0.00218378		3164.24	0.01081277		3694.24	-0.03170384
514.39	0.10602162		1044.42	0.00223804		1574.41	0.01682981		2104.44	-0.01936103		2634.44	-0.00188561		3164.44	0.01063287		3694.44	-0.03158249
514.59	0.10532885		1044.62	0.00271876		1574.61	0.01624413		2104.64	-0.01866679		2634.64	-0.00225796		3164.64	0.0105332		3694.64	-0.03171136
514.79	0.1047186		1044.82	0.00296914		1574.81	0.01585352		2104.84	-0.01873271		2634.84	-0.00171761		3164.84	0.01037919		3694.84	-0.03203158
514.99	0.10512077		1045.02	0.00344566		1575.01	0.01599917		2105.04	-0.01899153		2635.04	-0.00144477		3165.04	0.01021812		3695.04	-0.03225398
515.19	0.10381548		1045.22	0.00392028		1575.21	0.01527724		2105.24	-0.01825759		2635.24	-0.00025678		3165.24	0.01014922		3695.24	-0.03225108
515.39	0.10381732		1045.42	0.00370958		1575.41	0.01487433		2105.44	-0.01846215		2635.44	0.00013801		3165.44	0.00911421		3695.44	-0.03217366
515.59	0.10410419		1045.62	0.00400095		1575.61	0.01487356		2105.64	-0.0176844		2635.64	0.00019739		3165.64	0.00844556		3695.64	-0.03260661
515.79	0.10414774		1045.82	0.0038575		1575.81	0.01457695		2105.84	-0.01788019		2635.84	0.00040278		3165.84	0.00750368		3695.84	-0.03242336
515.99	0.10495847		1046.02	0.00312509		1576.01	0.01414762		2106.04	-0.01737579		2636.04	0.00118423		3166.04	0.0072223		3696.04	-0.0322884
516.19	0.10401529		1046.22	0.00376528		1576.21	0.01316878		2106.24	-0.01704855		2636.24	0.00080806		3166.24	0.00642127		3696.24	-0.03257265
516.39	0.10379683		1046.42	0.00353521		1576.41	0.01255533		2106.44	-0.01731656		2636.44	0.00038934		3166.44	0.00627538		3696.44	-0.03340642
516.59	0.10368914		1046.62	0.00291546		1576.61	0.01211835		2106.64	-0.01778007		2636.64	0.00065095		3166.64	0.00667908		3696.64	-0.03375577
516.79	0.10399265		1046.82	0.00318641		1576.81	0.01200324		2106.84	-0.01776646		2636.84	0.00071173		3166.84	0.00619875		3696.84	-0.03435165
516.99	0.10426505		1047.02	0.00295904		1577.01	0.01299123		2107.04	-0.01759471		2637.04	-0.00041132		3167.04	0.00669646		3697.04	-0.03360024
517.19	0.10423739		1047.22	0.0023385		1577.21	0.01284248		2107.24	-0.01763973		2637.24	-0.00083901		3167.24	0.00745539		3697.24	-0.03324221
517.39	0.10503911		1047.42	0.00130284		1577.41	0.0116767		2107.44	-0.01746525		2637.44	-0.0014735		3167.44	0.00728048		3697.44	-0.03307484
517.59	0.10614928		1047.62	0.00063892		1577.61	0.0119786		2107.64	-0.01846338		2637.64	-0.0013105		3167.64	0.00820372		3697.64	-0.03345028
517.79	0.1064446		1047.82	0.00034313		1577.81	0.01244139		2107.84	-0.01840237		2637.84	-0.00139684		3167.84	0.00900733		3697.84	-0.03251265
517.99	0.10609562		1048.02	0.00024799		1578.01	0.01283108		2108.04	-0.01904273		2638.04	-0.0014336		3168.04	0.00979878		3698.04	-0.03262324
518.19	0.1061446		1048.22	-0.00011944		1578.21	0.01305741		2108.24	-0.01956567		2638.24	-0.00115843		3168.24	0.01006763		3698.24	-0.03274491
518.39	0.10574993		1048.42	-0.00092891		1578.41	0.01310725		2108.44	-0.02005634		2638.44	-0.0011481		3168.44	0.01022482		3698.44	-0.03277487
518.59	0.1043251		1048.62	-0.00044127		1578.61	0.01250734		2108.64	-0.019569		2638.64	-0.0013214		3168.64	0.01003235		3698.64	-0.03187333
518.79	0.10370765		1048.82	-0.00038788		1578.81	0.01274562		2108.84	-0.0195116		2638.84	-0.000107		3168.84	0.01088902		3698.84	-0.03132979
518.99	0.10379514		1049.02	-0.00001947		1579.01	0.01331911		2109.04	-0.01889089		2639.04	0.0007668		3169.04	0.01152788		3699.04	-0.03047658
519.19	0.10251342		1049.22	0.00041748		1579.21	0.01395633		2109.24	-0.01788572		2639.24	0.0011439		3169.24	0.01174015		3699.24	-0.03046662
519.39	0.10274303		1049.42	0.00035661		1579.41	0.01446578		2109.44	-0.0176861		2639.44	-0.00022596		3169.44	0.01133715		3699.44	-0.03062862
519.59	0.10246721		1049.62	0.00051495		1579.61	0.01527827		2109.64	-0.01659345		2639.64	-0.00025238		3169.64	0.01109249		3699.64	-0.03102405
519.79	0.10182519		1049.82	0.00116816		1579.81	0.0154377		2109.84	-0.01669789		2639.84	0.00007991		3169.84	0.0115257		3699.84	-0.03105288
519.99	0.10188031		1050.02	0.00167671		1580.01	0.01606692		2110.04	-0.01658881		2640.04	-0.00017667		3170.04	0.01212311		3700.04	-0.03050647
520.19	0.10084415		1050.22	0.00285647		1580.21	0.016704		2110.24	-0.01703642		2640.24	-0.00106095		3170.24	0.01189107		3700.24	-0.03031725
520.39	0.10100619		1050.42	0.00385552		1580.41	0.01668926		2110.44	-0.01681294		2640.44	-0.00157595		3170.44	0.01231037		3700.44	-0.02982674
520.59	0.10154353		1050.62	0.0045546		1580.61	0.01702324		2110.64	-0.01614642		2640.64	-0.00207334		3170.64	0.01167042		3700.64	-0.02927411
520.79	0.10207811		1050.82	0.00559937		1580.81	0.01741109		2110.84	-0.01620377		2640.84	-0.0026625		3170.84	0.01045107		3700.84	-0.0295683
520.99	0.10266971		1051.02	0.00504823		1581.01	0.01728997		2111.04	-0.0164218		2641.04	-0.00340118		3171.04	0.00974492		3701.04	-0.02939115
521.19	0.10363742		1051.22	0.00516817		1581.21	0.01752812		2111.24	-0.01648674		2641.24	-0.00351725		3171.24	0.00856033		3701.24	-0.02987875
521.39	0.10449862		1051.42	0.00479659		1581.41	0.0168665		2111.44	-0.01691991		2641.44	-0.00316135		3171.44	0.00785106		3701.44	-0.02976571
521.59	0.10496253		1051.62	0.00389144		1581.61	0.01599415		2111.64	-0.01816127		2641.64	-0.0031853		3171.64	0.00704653		3701.64	-0.03024394
521.79	0.10540981		1051.82	0.0036992		1581.81	0.0159884		2111.84	-0.0189015		2641.84	-0.00271237		3171.84	0.00612497		3701.84	-0.02967665
521.99	0.10547944		1052.02	0.00273427		1582.01	0.01538424		2112.04	-0.02030957		2642.04	-0.00295054		3172.04	0.00527218		3702.04	-0.0302785
522.19	0.10511956		1052.22	0.00194714		1582.21	0.01515609		2112.24	-0.02071586		2642.24	-0.00320429		3172.24	0.00469892		3702.24	-0.0294726
522.39	0.10529498		1052.42	0.00242343		1582.41	0.01444273		2112.44	-0.0209717		2642.44	-0.00280081		3172.44	0.00426612		3702.44	-0.02925423
522.59	0.10545788		1052.62	0.00244092		1582.61	0.01383191		2112.64	-0.02051146		2642.64	-0.00254284		3172.64	0.00441334		3702.64	-0.02846526
522.79	0.10527144		1052.82	0.00099947		1582.81	0.01347623		2112.84	-0.02154658		2642.84	-0.0017421		3172.84	0.00512033		3702.84	-0.02777506
522.99	0.10536917		1053.02	-0.00028513		1583.01	0.01438362		2113.04	-0.0210343		2643.04	-0.00206796		3173.04	0.00515269		3703.04	-0.02844084
523.19	0.10460384		1053.22	-0.00006785		1583.21	0.01506452		2113.24	-0.02085869		2643.24	-0.00268795		3173.24	0.00529674		3703.24	-0.03012425
523.39	0.10490653		1053.42	-0.00077161		1583.41	0.01489578		2113.44	-0.02089183		2643.44	-0.00315273		3173.44	0.00620023		3703.44	-0.03003142
523.59	0.1047505		1053.62	-0.00006835		1583.61	0.01462008		2113.64	-0.02036345		2643.64	-0.00289195		3173.64	0.00655774		3703.64	-0.03051412
523.79	0.10460135		1053.82	-0.00049148		1583.81	0.01512273		2113.84	-0.02054725		2643.84	-0.00236235		3173.84	0.00785995		3703.84	-0.03035941
523.99	0.10542125		1054.02	-0.00062357		1584.01	0.01590335		2114.04	-0.01998864		2644.04	-0.00284291		3174.04	0.00792728		3704.04	-0.03067285
524.19	0.10517727		1054.22	0.00039397		1584.21	0.01600846		2114.24	-0.01957246		2644.24	-0.0025822		3174.24	0.00783035		3704.24	-0.03145181
524.39	0.10564463		1054.42	0.00154463		1584.41	0.01558272		2114.44	-0.01925175		2644.44	-0.00249616		3174.44	0.00796529		3704.44	-0.03183436
524.59	0.10575086		1054.62	0.00121974		1584.61	0.01501251		2114.64	-0.01957464		2644.64	-0.00251165		3174.64	0.00784726		3704.64	-0.03224248
524.79	0.10520699		1054.82	0.00049875		1584.81	0.01508697		2114.84	-0.01952462		2644.84	-0.00246732		3174.84	0.00721002		3704.84	-0.0334684
524.99	0.10458661		1055.02	-0.00010653		1585.01	0.01473109		2115.04	-0.018949		2645.04	-0.00300645		3175.04	0.00806035		3705.04	-0.0343369
525.19	0.10454856		1055.22	0.00056122		1585.21	0.01507577		2115.24	-0.01809247		2645.24	-0.00234162		3175.24	0.00721016		3705.24	-0.03485855
525.39	0.10452912		1055.42	-0.00003843		1585.41	0.01466802		2115.44	-0.01794379		2645.44	-0.00251229		3175.44	0.00744103		3705.44	-0.03528607
525.59	0.10417475		1055.62	-0.00057022		1585.61	0.01452479		2115.64	-0.01735245		2645.64	-0.00311342		3175.64	0.00687589		3705.64	-0.03504561
525.79	0.10411219		1055.82	-0.00008373		1585.81	0.01553119		2115.84	-0.01690164		2645.84	-0.00236414		3175.84	0.00655347		3705.84	-0.03426747
525.99	0.10410968		1056.02	0.00042948		1586.01	0.01543856		2116.04	-0.01633446		2646.04	-0.003378		3176.04	0.0068194		3706.04	-0.03419428
526.19	0.10328604		1056.22	0.00074363		1586.21	0.01456745		2116.24	-0.0155849		2646.24	-0.00405957		3176.24	0.00748538		3706.24	-0.03328833
526.39	0.10367652		1056.42	0.00172414		1586.41	0.01419163		2116.44	-0.01572275		2646.44	-0.00360413		3176.44	0.00857145		3706.44	-0.03390645
526.59	0.10239898		1056.62	0.0004742		1586.61	0.01497568		2116.64	-0.0152644		2646.64	-0.00365487		3176.64	0.00877909		3706.64	-0.03326193
526.79	0.10143347		1056.82	-0.00027035		1586.81	0.01594761		2116.84	-0.01540656		2646.84	-0.00368112		3176.84	0.0089531		3706.84	-0.03324634
526.99	0.10167537		1057.02	0.00045108		1587.01	0.01681632		2117.04	-0.01506637		2647.04	-0.00379238		3177.04	0.00938918		3707.04	-0.03404264
527.19	0.10113806		1057.22	0.00173817		1587.21	0.01675212		2117.24	-0.01540294		2647.24	-0.00355741		3177.24	0.00979855		3707.24	-0.03354259
527.39	0.10159662		1057.42	0.00225087		1587.41	0.01646083		2117.44	-0.01547758		2647.44	-0.00258439		3177.44	0.01041098		3707.44	-0.03230152
527.59	0.10175289		1057.62	0.00214174		1587.61	0.0165089		2117.64	-0.01552425		2647.64	-0.00285392		3177.64	0.01049049		3707.64	-0.0321838
527.79	0.10194248		1057.82	0.00108497		1587.81	0.01728848		2117.84	-0.01597151		2647.84	-0.00236333		3177.84	0.01064462		3707.84	-0.03202037
527.99	0.10254963		1058.02	0.0010463		1588.01	0.01702712		2118.04	-0.0158614		2648.04	-0.00166314		3178.04	0.0097275		3708.04	-0.0327967
528.19	0.10280082		1058.22	0.00068949		1588.21	0.01661328		2118.24	-0.01680493		2648.24	-0.00115634		3178.24	0.00919764		3708.24	-0.03338601
528.39	0.10285978		1058.42	0.00089593		1588.41	0.01590908		2118.44	-0.01790825		2648.44	-0.00150632		3178.44	0.00872663		3708.44	-0.03350635
528.59	0.10235437		1058.62	-0.00069114		1588.61	0.01584168		2118.64	-0.0185874		2648.64	-0.00175788		3178.64	0.00888455		3708.64	-0.03367281
528.79	0.10201932		1058.82	-0.00075117		1588.81	0.01593934		2118.84	-0.01861134		2648.84	-0.0017092		3178.84	0.00911915		3708.84	-0.03481182
528.99	0.10191036		1059.02	-0.00048557		1589.01	0.01556221		2119.04	-0.01903839		2649.04	-0.00207579		3179.04	0.00918699		3709.04	-0.03588012
529.19	0.10206563		1059.22	-0.00064971		1589.21	0.0155674		2119.24	-0.01951185		2649.24	-0.00139399		3179.24	0.00853825		3709.24	-0.03609107
529.39	0.10223075		1059.42	-0.00096857		1589.41	0.01571359		2119.44	-0.02062756		2649.44	-0.00238253		3179.44	0.00872		3709.44	-0.03555361
529.59	0.10129464		1059.62	-0.0011127		1589.61	0.01578255		2119.64	-0.02060984		2649.64	-0.00280835		3179.64	0.00814329		3709.64	-0.03502198
529.79	0.10089192		1059.82	-0.00009944		1589.81	0.0158503		2119.84	-0.02020243		2649.84	-0.00345489		3179.84	0.00762164		3709.84	-0.03435224
529.99	0.10088003		1060.02	-0.00002812		1590.01	0.015191		2120.04	-0.01992597		2650.04	-0.00438867		3180.04	0.00819679		3710.04	-0.03401864
530.19	0.10006543		1060.22	-0.00077403		1590.21	0.01432637		2120.24	-0.01992695		2650.24	-0.00474736		3180.24	0.00936498		3710.24	-0.03389997
530.39	0.09925515		1060.42	-0.00026391		1590.41	0.01518271		2120.44	-0.02038873		2650.44	-0.00408588		3180.44	0.00940363		3710.44	-0.03402656
530.59	0.09865795		1060.62	-0.00105395		1590.61	0.01533844		2120.64	-0.01998532		2650.64	-0.00427467		3180.64	0.00898824		3710.64	-0.03366476
530.79	0.09901545		1060.82	-0.00034794		1590.81	0.01520327		2120.84	-0.01958623		2650.84	-0.00393793		3180.84	0.00998232		3710.84	-0.03326327
530.99	0.09940451		1061.02	-0.0001441		1591.01	0.01483785		2121.04	-0.01887862		2651.04	-0.0037155		3181.04	0.01079456		3711.04	-0.03223902
531.19	0.09899768		1061.22	-0.00050655		1591.21	0.01451125		2121.24	-0.01803949		2651.24	-0.00323096		3181.24	0.01179869		3711.24	-0.03127464
531.39	0.09904266		1061.42	-0.00093996		1591.41	0.01462439		2121.44	-0.01741453		2651.44	-0.00240879		3181.44	0.01198709		3711.44	-0.03076099
531.59	0.09940958		1061.62	-0.00217398		1591.61	0.01429835		2121.64	-0.01699603		2651.64	-0.00267436		3181.64	0.01152985		3711.64	-0.03033937
531.79	0.09939714		1061.82	-0.00182398		1591.81	0.01459213		2121.84	-0.01651497		2651.84	-0.00284018		3181.84	0.01069397		3711.84	-0.03082448
531.99	0.10027428		1062.02	-0.00233071		1592.01	0.01500521		2122.04	-0.01571393		2652.04	-0.00210584		3182.04	0.0106832		3712.04	-0.0309881
532.19	0.10054044		1062.22	-0.00237902		1592.21	0.01552034		2122.24	-0.01560385		2652.24	-0.00223013		3182.24	0.01080694		3712.24	-0.03148236
532.39	0.10066468		1062.42	-0.00190047		1592.41	0.01590213		2122.44	-0.01519468		2652.44	-0.00229735		3182.44	0.0099032		3712.44	-0.03112515
532.59	0.10135045		1062.62	-0.002184		1592.61	0.01655859		2122.64	-0.01525964		2652.64	-0.00180485		3182.64	0.00986266		3712.64	-0.03209459
532.79	0.10175175		1062.82	-0.00137192		1592.81	0.01651011		2122.84	-0.01594617		2652.84	-0.00110845		3182.84	0.00971811		3712.84	-0.03321565
532.99	0.10184546		1063.02	-0.00127863		1593.01	0.01703844		2123.04	-0.01708873		2653.04	-0.0013477		3183.04	0.00848727		3713.04	-0.0336007
533.19	0.10167031		1063.22	-0.00165582		1593.21	0.01693972		2123.24	-0.01769325		2653.24	-0.0017899		3183.24	0.00746812		3713.24	-0.03289541
533.39	0.1013738		1063.42	-0.00119606		1593.41	0.01652493		2123.44	-0.01842049		2653.44	-0.00234581		3183.44	0.00661121		3713.44	-0.03247855
533.59	0.10140598		1063.62	-0.00114852		1593.61	0.01636632		2123.64	-0.01850437		2653.64	-0.00272849		3183.64	0.00559904		3713.64	-0.03305204
533.79	0.10216049		1063.82	-0.00005128		1593.81	0.01618591		2123.84	-0.01877197		2653.84	-0.0024351		3183.84	0.00624797		3713.84	-0.03335189
533.99	0.10283529		1064.02	-0.00079573		1594.01	0.01506718		2124.04	-0.01931578		2654.04	-0.00223235		3184.04	0.00686343		3714.04	-0.03384648
534.19	0.10221338		1064.22	-0.00093247		1594.21	0.01461935		2124.24	-0.0199492		2654.24	-0.00239462		3184.24	0.00680861		3714.24	-0.03491436
534.39	0.10242746		1064.42	-0.00076747		1594.41	0.014368		2124.44	-0.01918399		2654.44	-0.00249371		3184.44	0.00626732		3714.44	-0.03507294
534.59	0.10305706		1064.62	-0.00092451		1594.61	0.01330011		2124.64	-0.01918333		2654.64	-0.00297368		3184.64	0.00734517		3714.64	-0.03483447
534.79	0.10286558		1064.82	-0.00108102		1594.81	0.01317028		2124.84	-0.0193933		2654.84	-0.00303335		3184.84	0.00851663		3714.84	-0.0346038
534.99	0.10238035		1065.02	-0.00110441		1595.01	0.01261292		2125.04	-0.01928761		2655.04	-0.00297921		3185.04	0.00816148		3715.04	-0.0345302
535.19	0.101918		1065.22	-0.00136478		1595.21	0.01237908		2125.24	-0.01976971		2655.24	-0.00346176		3185.24	0.00841088		3715.24	-0.03434893
535.39	0.10126494		1065.42	-0.00154176		1595.41	0.01242895		2125.44	-0.01952327		2655.44	-0.00290375		3185.44	0.00799		3715.44	-0.03437188
535.59	0.10075084		1065.62	-0.0011255		1595.61	0.01240524		2125.64	-0.0195891		2655.64	-0.00347173		3185.64	0.00830991		3715.64	-0.03426683
535.79	0.10039808		1065.82	0.00027388		1595.81	0.01318075		2125.84	-0.01893982		2655.84	-0.00559263		3185.84	0.00874723		3715.84	-0.03444436
535.99	0.10048603		1066.02	-0.00015333		1596.01	0.0133634		2126.04	-0.0185478		2656.04	-0.00512867		3186.04	0.00969276		3716.04	-0.03446003
536.19	0.09996431		1066.22	-0.00005128		1596.21	0.01392009		2126.24	-0.0189737		2656.24	-0.0049191		3186.24	0.00817073		3716.24	-0.03502646
536.39	0.0992504		1066.42	0.00028416		1596.41	0.01470755		2126.44	-0.0185		2656.44	-0.00477855		3186.44	0.0071382		3716.44	-0.0349909
536.59	0.09931322		1066.62	0.00077519		1596.61	0.01536499		2126.64	-0.0195698		2656.64	-0.004251		3186.64	0.00750683		3716.64	-0.03510386
536.79	0.09855065		1066.82	0.00064814		1596.81	0.01583194		2126.84	-0.01938533		2656.84	-0.00381365		3186.84	0.00676895		3716.84	-0.03495148
536.99	0.09832629		1067.02	0.0013867		1597.01	0.01596525		2127.04	-0.02076477		2657.04	-0.00403548		3187.04	0.0058513		3717.04	-0.03488493
537.19	0.09783843		1067.22	0.00089493		1597.21	0.01615088		2127.24	-0.02038158		2657.24	-0.00424463		3187.24	0.00531501		3717.24	-0.03500485
537.39	0.09742246		1067.42	0.00101495		1597.41	0.01609322		2127.44	-0.02021095		2657.44	-0.00322149		3187.44	0.00500695		3717.44	-0.03517186
537.59	0.09803437		1067.62	0.00015577		1597.61	0.01624453		2127.64	-0.01980541		2657.64	-0.002792		3187.64	0.00587798		3717.64	-0.03526487
537.79	0.09824409		1067.82	-0.00041627		1597.81	0.01593942		2127.84	-0.01991421		2657.84	-0.00175715		3187.84	0.00664035		3717.84	-0.0354615
537.99	0.0979966		1068.02	-0.00134693		1598.01	0.01480691		2128.04	-0.01833526		2658.04	-0.00190605		3188.04	0.00628138		3718.04	-0.03495922
538.19	0.09816278		1068.22	-0.00160048		1598.21	0.01487359		2128.24	-0.01812106		2658.24	-0.00255152		3188.24	0.00572279		3718.24	-0.03496953
538.39	0.09847565		1068.42	-0.00171048		1598.41	0.01452446		2128.44	-0.01703911		2658.44	-0.00306693		3188.44	0.00616059		3718.44	-0.03448291
538.59	0.09859975		1068.62	-0.00176937		1598.61	0.01434975		2128.64	-0.01789292		2658.64	-0.00310828		3188.64	0.0072116		3718.64	-0.03392199
538.79	0.09809243		1068.82	-0.0019291		1598.81	0.0140277		2128.84	-0.01809153		2658.84	-0.00317177		3188.84	0.00760303		3718.84	-0.03423732
538.99	0.09742244		1069.02	-0.00154122		1599.01	0.01324658		2129.04	-0.01799148		2659.04	-0.00374502		3189.04	0.00721882		3719.04	-0.0338007
539.19	0.09695769		1069.22	-0.00207508		1599.21	0.01307471		2129.24	-0.0183354		2659.24	-0.00312913		3189.24	0.00724704		3719.24	-0.03382129
539.39	0.09698656		1069.42	-0.00149117		1599.41	0.01261785		2129.44	-0.01790387		2659.44	-0.00257179		3189.44	0.00724852		3719.44	-0.03384239
539.59	0.09657203		1069.62	-0.00105313		1599.61	0.01202486		2129.64	-0.01861489		2659.64	-0.00333061		3189.64	0.0074472		3719.64	-0.03357959
539.79	0.09683677		1069.82	0.00041227		1599.81	0.01186639		2129.84	-0.0179366		2659.84	-0.00404495		3189.84	0.0071058		3719.84	-0.03320769
539.99	0.09725726		1070.02	-0.00031146		1600.01	0.01192024		2130.04	-0.01816488		2660.04	-0.00344762		3190.04	0.00705169		3720.04	-0.03331527
540.19	0.09708222		1070.22	-0.00030971		1600.21	0.01193972		2130.24	-0.01880964		2660.24	-0.00253562		3190.24	0.00569228		3720.24	-0.03379511
540.39	0.09615015		1070.42	-0.00014207		1600.41	0.01247311		2130.44	-0.01886936		2660.44	-0.00177265		3190.44	0.0055364		3720.44	-0.0329007
540.59	0.09664335		1070.62	0.00019259		1600.61	0.01208804		2130.64	-0.0196495		2660.64	-0.00239991		3190.64	0.00564978		3720.64	-0.03332342
540.79	0.09598659		1070.82	-0.00042656		1600.81	0.0117186		2130.84	-0.01911848		2660.84	-0.00202966		3190.84	0.00473563		3720.84	-0.0339311
540.99	0.09681176		1071.02	-0.00060765		1601.01	0.0120771		2131.04	-0.01937925		2661.04	-0.00211011		3191.04	0.00434874		3721.04	-0.03333
541.19	0.09677567		1071.22	-0.0015037		1601.21	0.01252465		2131.24	-0.01817175		2661.24	-0.00213156		3191.24	0.00458051		3721.24	-0.03345983
541.39	0.0962799		1071.42	-0.00222007		1601.41	0.01260249		2131.44	-0.01704232		2661.44	-0.00199052		3191.44	0.00466713		3721.44	-0.03339075
541.59	0.09663869		1071.62	-0.00313537		1601.61	0.01259277		2131.64	-0.01690435		2661.64	-0.00177706		3191.64	0.00606229		3721.64	-0.03377353
541.79	0.09628342		1071.82	-0.00275436		1601.81	0.01240492		2131.84	-0.01699593		2661.84	-0.00186849		3191.84	0.00600955		3721.84	-0.03359098
541.99	0.09671877		1072.02	-0.00233185		1602.01	0.01184408		2132.04	-0.01590544		2662.04	-0.00298451		3192.04	0.00603818		3722.04	-0.03342188
542.19	0.09747765		1072.22	-0.00190954		1602.21	0.01236255		2132.24	-0.01707248		2662.24	-0.00330953		3192.24	0.00581595		3722.24	-0.03369903
542.39	0.09753431		1072.42	-0.00173175		1602.41	0.01269552		2132.44	-0.01760193		2662.44	-0.00392938		3192.44	0.00641492		3722.44	-0.03361105
542.59	0.09805834		1072.62	-0.00149228		1602.61	0.01299325		2132.64	-0.01830738		2662.64	-0.00423557		3192.64	0.00736637		3722.64	-0.03347578
542.79	0.09799987		1072.82	-0.00133127		1602.81	0.01227083		2132.84	-0.0190376		2662.84	-0.00477539		3192.84	0.00725656		3722.84	-0.03383846
542.99	0.09796282		1073.02	-0.00049109		1603.01	0.01222133		2133.04	-0.01936108		2663.04	-0.00536427		3193.04	0.00763849		3723.04	-0.03319056
543.19	0.09855635		1073.22	-0.00031051		1603.21	0.01233136		2133.24	-0.02001039		2663.24	-0.00486477		3193.24	0.00779124		3723.24	-0.03358688
543.39	0.10017996		1073.42	0.00065765		1603.41	0.01260979		2133.44	-0.01956243		2663.44	-0.00536235		3193.44	0.00805776		3723.44	-0.03331204
543.59	0.10118494		1073.62	0.00012339		1603.61	0.01216695		2133.64	-0.02050775		2663.64	-0.00583245		3193.64	0.00836678		3723.64	-0.03316239
543.79	0.10179997		1073.82	0.00070298		1603.81	0.01185276		2133.84	-0.01963558		2663.84	-0.0064343		3193.84	0.00803428		3723.84	-0.03293132
543.99	0.10250067		1074.02	-0.00060643		1604.01	0.01182286		2134.04	-0.02056134		2664.04	-0.00646123		3194.04	0.00859359		3724.04	-0.03325858
544.19	0.10236258		1074.22	-0.00141995		1604.21	0.01168221		2134.24	-0.02084366		2664.24	-0.00554522		3194.24	0.00842569		3724.24	-0.03411311
544.39	0.10207439		1074.42	-0.00116725		1604.41	0.01180305		2134.44	-0.02120431		2664.44	-0.00578725		3194.44	0.00808833		3724.44	-0.03298841
544.59	0.10273079		1074.62	-0.0021825		1604.61	0.0110929		2134.64	-0.02072941		2664.64	-0.00698839		3194.64	0.00938853		3724.64	-0.03381266
544.79	0.10230007		1074.82	-0.0033136		1604.81	0.01165745		2134.84	-0.01963338		2664.84	-0.00671108		3194.84	0.00886893		3724.84	-0.03367546
544.99	0.10306477		1075.02	-0.0030489		1605.01	0.01217609		2135.04	-0.01956855		2665.04	-0.00634175		3195.04	0.00903328		3725.04	-0.03301537
545.19	0.102055		1075.22	-0.00300344		1605.21	0.01182795		2135.24	-0.01874575		2665.24	-0.00603107		3195.24	0.00872134		3725.24	-0.03419699
545.39	0.10176308		1075.42	-0.00247637		1605.41	0.01215033		2135.44	-0.01836121		2665.44	-0.00575559		3195.44	0.00757936		3725.44	-0.03438837
545.59	0.1007841		1075.62	-0.00217736		1605.61	0.01252239		2135.64	-0.01915575		2665.64	-0.00444221		3195.64	0.00830538		3725.64	-0.03474284
545.79	0.09967785		1075.82	-0.00133237		1605.81	0.0125582		2135.84	-0.0186248		2665.84	-0.00424435		3195.84	0.00761357		3725.84	-0.03421784
545.99	0.10017055		1076.02	-0.00151461		1606.01	0.01321498		2136.04	-0.01888042		2666.04	-0.00388812		3196.04	0.00707522		3726.04	-0.03404148
546.19	0.10012869		1076.22	-0.0013067		1606.21	0.01408094		2136.24	-0.01917513		2666.24	-0.00296959		3196.24	0.00700039		3726.24	-0.03377394
546.39	0.09952964		1076.42	-0.00090291		1606.41	0.01382136		2136.44	-0.01905108		2666.44	-0.00379418		3196.44	0.00702207		3726.44	-0.03291771
546.59	0.10010222		1076.62	-0.00082746		1606.61	0.01409157		2136.64	-0.01883789		2666.64	-0.00298436		3196.64	0.0073906		3726.64	-0.03251809
546.79	0.09989219		1076.82	-0.00049244		1606.81	0.01328009		2136.84	-0.01986464		2666.84	-0.00292241		3196.84	0.00642941		3726.84	-0.03267356
546.99	0.09975561		1077.02	-0.00045274		1607.01	0.01364083		2137.04	-0.02002807		2667.04	-0.00295773		3197.04	0.00674518		3727.04	-0.03296329
547.19	0.0997612		1077.22	-0.00115809		1607.21	0.0131067		2137.24	-0.02056581		2667.24	-0.00262547		3197.24	0.00648419		3727.24	-0.03347122
547.39	0.10010866		1077.42	-0.0018104		1607.41	0.01282683		2137.44	-0.01989174		2667.44	-0.00311107		3197.44	0.00654122		3727.44	-0.03321693
547.59	0.09982598		1077.62	-0.00261256		1607.61	0.01210487		2137.64	-0.02032396		2667.64	-0.00376168		3197.64	0.0060763		3727.64	-0.03332712
547.79	0.09870056		1077.82	-0.00295376		1607.81	0.0120078		2137.84	-0.02010961		2667.84	-0.00424923		3197.84	0.00597749		3727.84	-0.03344925
547.99	0.09790202		1078.02	-0.00426268		1608.01	0.01126942		2138.04	-0.02055786		2668.04	-0.00380004		3198.04	0.00651109		3728.04	-0.03384366
548.19	0.09716395		1078.22	-0.0043067		1608.21	0.01072887		2138.24	-0.02019623		2668.24	-0.00372043		3198.24	0.00654858		3728.24	-0.03387769
548.39	0.09663868		1078.42	-0.00404143		1608.41	0.00944328		2138.44	-0.02040825		2668.44	-0.00457174		3198.44	0.00625626		3728.44	-0.03280545
548.59	0.09592235		1078.62	-0.00501621		1608.61	0.00912044		2138.64	-0.02002703		2668.64	-0.00485875		3198.64	0.00622672		3728.64	-0.03369763
548.79	0.09573569		1078.82	-0.0041972		1608.81	0.00964093		2138.84	-0.0199672		2668.84	-0.00542782		3198.84	0.00553956		3728.84	-0.03395713
548.99	0.09589204		1079.02	-0.00346425		1609.01	0.00850865		2139.04	-0.02005631		2669.04	-0.00474634		3199.04	0.00561312		3729.04	-0.0335386
549.19	0.09490242		1079.22	-0.00353265		1609.21	0.00873161		2139.24	-0.01933013		2669.24	-0.00494993		3199.24	0.00433913		3729.24	-0.03419209
549.39	0.09540491		1079.42	-0.00323721		1609.41	0.00911377		2139.44	-0.01931189		2669.44	-0.00497611		3199.44	0.00444601		3729.44	-0.03451221
549.59	0.09535558		1079.62	-0.00373006		1609.61	0.00986568		2139.64	-0.01984839		2669.64	-0.00433388		3199.64	0.00540625		3729.64	-0.03462632
549.79	0.09561185		1079.82	-0.00347697		1609.81	0.01034692		2139.84	-0.01888968		2669.84	-0.0040567		3199.84	0.00527492		3729.84	-0.03450764
549.99	0.09691251		1080.02	-0.00406297		1610.01	0.01065402		2140.04	-0.01914114		2670.04	-0.00433394		3200.04	0.00590851		3730.04	-0.03441369
550.19	0.09759087		1080.22	-0.00355509		1610.21	0.01105837		2140.24	-0.01828968		2670.24	-0.00361857		3200.24	0.00661298		3730.24	-0.03438287
550.39	0.09811948		1080.42	-0.00337887		1610.41	0.01137667		2140.44	-0.01800945		2670.44	-0.00348452		3200.44	0.00640714		3730.44	-0.03389822
550.59	0.09898841		1080.62	-0.00402351		1610.61	0.01170638		2140.64	-0.01836958		2670.64	-0.00373831		3200.64	0.00676712		3730.64	-0.03400582
550.79	0.09936365		1080.82	-0.00407566		1610.81	0.01220859		2140.84	-0.01928197		2670.84	-0.0037695		3200.84	0.00664153		3730.84	-0.03498748
550.99	0.09953742		1081.02	-0.0047273		1611.01	0.01275514		2141.04	-0.01945429		2671.04	-0.0040636		3201.04	0.0075125		3731.04	-0.03559158
551.19	0.09908971		1081.22	-0.00496646		1611.21	0.01245009		2141.24	-0.01972118		2671.24	-0.0036353		3201.24	0.00805576		3731.24	-0.0356045
551.39	0.0994667		1081.42	-0.00489119		1611.41	0.01282534		2141.44	-0.01960319		2671.44	-0.00413464		3201.44	0.00838003		3731.44	-0.03566437
551.59	0.09889942		1081.62	-0.00456195		1611.61	0.01312056		2141.64	-0.02018251		2671.64	-0.00396358		3201.64	0.00783221		3731.64	-0.03545412
551.79	0.09788421		1081.82	-0.00421955		1611.81	0.01217226		2141.84	-0.01999723		2671.84	-0.0037956		3201.84	0.00861136		3731.84	-0.03587211
551.99	0.0976242		1082.02	-0.00387985		1612.01	0.0117106		2142.04	-0.02021547		2672.04	-0.00341418		3202.04	0.00850908		3732.04	-0.03552641
552.19	0.09698626		1082.22	-0.00322583		1612.21	0.01106537		2142.24	-0.01989285		2672.24	-0.0033588		3202.24	0.00886291		3732.24	-0.0353472
552.39	0.09694675		1082.42	-0.00293725		1612.41	0.01084495		2142.44	-0.02019747		2672.44	-0.00353243		3202.44	0.00853337		3732.44	-0.03524837
552.59	0.09709902		1082.62	-0.00263514		1612.61	0.01184397		2142.64	-0.02027853		2672.64	-0.00319683		3202.64	0.00869206		3732.64	-0.03603564
552.79	0.09722459		1082.82	-0.00200486		1612.81	0.01156944		2142.84	-0.0204094		2672.84	-0.00362688		3202.84	0.00795191		3732.84	-0.03551968
552.99	0.09714044		1083.02	-0.00247986		1613.01	0.01098884		2143.04	-0.02039053		2673.04	-0.0035932		3203.04	0.00713984		3733.04	-0.03480854
553.19	0.09695725		1083.22	-0.00313412		1613.21	0.01086887		2143.24	-0.02046238		2673.24	-0.00389022		3203.24	0.00591437		3733.24	-0.03452196
553.39	0.09662572		1083.42	-0.00296575		1613.41	0.01008262		2143.44	-0.02099172		2673.44	-0.00403087		3203.44	0.00619092		3733.44	-0.03361182
553.59	0.09650463		1083.62	-0.00289631		1613.61	0.00998872		2143.64	-0.02043841		2673.64	-0.00412499		3203.64	0.00547963		3733.64	-0.03295154
553.79	0.09624596		1083.82	-0.00324171		1613.81	0.00985349		2143.84	-0.01946834		2673.84	-0.00377936		3203.84	0.00527221		3733.84	-0.03295095
553.99	0.09667427		1084.02	-0.00432788		1614.01	0.00979573		2144.04	-0.01906214		2674.04	-0.00465928		3204.04	0.00464679		3734.04	-0.03349289
554.19	0.0973416		1084.22	-0.00420056		1614.21	0.01056747		2144.24	-0.01982142		2674.24	-0.00463867		3204.24	0.00365119		3734.24	-0.03347666
554.39	0.09744262		1084.42	-0.00452631		1614.41	0.01092717		2144.44	-0.01925921		2674.44	-0.00498252		3204.44	0.00288643		3734.44	-0.03306816
554.59	0.09734354		1084.62	-0.00519315		1614.61	0.0103779		2144.64	-0.02022651		2674.64	-0.00574592		3204.64	0.00332193		3734.64	-0.03411435
554.79	0.09735965		1084.82	-0.0043559		1614.81	0.01094576		2144.84	-0.02084728		2674.84	-0.00525623		3204.84	0.00271788		3734.84	-0.03482118
554.99	0.0976399		1085.02	-0.00486249		1615.01	0.01021978		2145.04	-0.02112531		2675.04	-0.00515641		3205.04	0.00267682		3735.04	-0.03447627
555.19	0.09791717		1085.22	-0.0045919		1615.21	0.01078655		2145.24	-0.02057931		2675.24	-0.00427228		3205.24	0.00217562		3735.24	-0.03518653
555.39	0.09802458		1085.42	-0.00478115		1615.41	0.01133438		2145.44	-0.02051689		2675.44	-0.00435818		3205.44	0.00210315		3735.44	-0.03554732
555.59	0.09730952		1085.62	-0.00485025		1615.61	0.01178484		2145.64	-0.02011287		2675.64	-0.00487317		3205.64	0.00177281		3735.64	-0.03536985
555.79	0.09762196		1085.82	-0.00406714		1615.81	0.01114597		2145.84	-0.02052596		2675.84	-0.00486783		3205.84	0.00276191		3735.84	-0.03597216
555.99	0.097671		1086.02	-0.00410161		1616.01	0.01153066		2146.04	-0.02042188		2676.04	-0.00500393		3206.04	0.00296412		3736.04	-0.03623378
556.19	0.09736324		1086.22	-0.00382449		1616.21	0.01101408		2146.24	-0.01969581		2676.24	-0.00465731		3206.24	0.00388832		3736.24	-0.03662139
556.39	0.09736707		1086.42	-0.00378289		1616.41	0.01196472		2146.44	-0.01993054		2676.44	-0.00473731		3206.44	0.00420284		3736.44	-0.03753166
556.59	0.09783656		1086.62	-0.00433066		1616.61	0.01169182		2146.64	-0.02002043		2676.64	-0.00488061		3206.64	0.00509073		3736.64	-0.03768039
556.79	0.09689084		1086.82	-0.00473704		1616.81	0.01036299		2146.84	-0.01964859		2676.84	-0.00449		3206.84	0.00476183		3736.84	-0.03729271
556.99	0.09702551		1087.02	-0.00471305		1617.01	0.01007179		2147.04	-0.01861431		2677.04	-0.00456569		3207.04	0.00528816		3737.04	-0.03703049
557.19	0.0970134		1087.22	-0.00474704		1617.21	0.0093694		2147.24	-0.01890917		2677.24	-0.00434761		3207.24	0.00539622		3737.24	-0.03679895
557.39	0.09620853		1087.42	-0.00407698		1617.41	0.00979823		2147.44	-0.0187724		2677.44	-0.00464393		3207.44	0.00592279		3737.44	-0.03662449
557.59	0.096659		1087.62	-0.00436739		1617.61	0.00982189		2147.64	-0.0181123		2677.64	-0.00476262		3207.64	0.00563452		3737.64	-0.03735166
557.79	0.09667575		1087.82	-0.00448578		1617.81	0.0100795		2147.84	-0.01918007		2677.84	-0.00462475		3207.84	0.00623263		3737.84	-0.03776441
557.99	0.09662577		1088.02	-0.00434043		1618.01	0.01036876		2148.04	-0.01995981		2678.04	-0.00541977		3208.04	0.00629235		3738.04	-0.03827985
558.19	0.09677919		1088.22	-0.00361935		1618.21	0.01046572		2148.24	-0.02132446		2678.24	-0.00530886		3208.24	0.00649291		3738.24	-0.03801812
558.39	0.09662248		1088.42	-0.00336594		1618.41	0.01042117		2148.44	-0.02095201		2678.44	-0.00471846		3208.44	0.00699443		3738.44	-0.03810626
558.59	0.0966637		1088.62	-0.00312176		1618.61	0.01037634		2148.64	-0.02188621		2678.64	-0.0045038		3208.64	0.0071568		3738.64	-0.03835203
558.79	0.09687028		1088.82	-0.00270201		1618.81	0.01094644		2148.84	-0.02183814		2678.84	-0.00411195		3208.84	0.00658448		3738.84	-0.03732207
558.99	0.0975342		1089.02	-0.00321049		1619.01	0.01139774		2149.04	-0.02140478		2679.04	-0.00341821		3209.04	0.00651708		3739.04	-0.03673855
559.19	0.09742466		1089.22	-0.00325342		1619.21	0.01250732		2149.24	-0.02085612		2679.24	-0.002982		3209.24	0.00599136		3739.24	-0.03700384
559.39	0.09715345		1089.42	-0.00382388		1619.41	0.01275076		2149.44	-0.02102436		2679.44	-0.00296707		3209.44	0.00584589		3739.44	-0.0363088
559.59	0.09730785		1089.62	-0.00379164		1619.61	0.01270617		2149.64	-0.02082323		2679.64	-0.00322158		3209.64	0.00552804		3739.64	-0.03576759
559.79	0.09760777		1089.82	-0.00355903		1619.81	0.01232661		2149.84	-0.02101021		2679.84	-0.00274909		3209.84	0.00585567		3739.84	-0.03550121
