# Supplementary material for: Functional development of a V3/glycan-specific broadly neutralizing antibody isolated from a case of HIV superinfection
Source: eLife journal article supplement (doi:10.7554/elife.68110), 2021-07-15
Supplement: fig2-data2 [file A9.xls]

Vers 3.43 Data Simulation
Conc1	5E-07	5E-07	5E-07	5E-07	5E-07	5E-07	5E-07
Start1	199.99	729.99	1259.98	1789.98	2319.97	2849.97	3380
Stop1	559.79	1089.79	1619.78	2149.78	2679.77	3209.77	3739.8
Time1	Data1	Sim1	Time2	Data2	Sim2	Time3	Data3	Sim3	Time4	Data4	Sim4	Time5	Data5	Sim5	Time6	Data6	Sim6	Time7	Data7	Sim7
199.99	0.01260159		729.99	-0.00844975		1259.98	0.01179633		1789.98	0.01158318		2319.97	-0.00211424		2849.97	0.00383035		3380	0.00689132
200.19	0.01359571		730.19	-0.00837735		1260.18	0.01129538		1790.18	0.01063726		2320.17	-0.00092076		2850.17	0.00397465		3380.2	0.00687597
200.39	0.01518554		730.39	-0.00839569		1260.38	0.01106687		1790.38	0.01048527		2320.37	-0.00026183		2850.37	0.00506185		3380.4	0.00702093
200.59	0.01769656		730.59	-0.00880542		1260.58	0.01090456		1790.58	0.0105453		2320.57	0.00102636		2850.57	0.00466416		3380.6	0.00737554
200.79	0.02050525		730.79	-0.00849687		1260.78	0.01083433		1790.78	0.01005745		2320.77	0.00119666		2850.77	0.00508014		3380.8	0.00749543
200.99	0.02347702		730.99	-0.00869101		1260.98	0.01036959		1790.98	0.00935321		2320.97	0.00193234		2850.97	0.00475711		3381	0.00798808
201.19	0.02666431		731.19	-0.00883516		1261.18	0.01083683		1791.18	0.00899388		2321.17	0.0023018		2851.17	0.00456713		3381.2	0.00844262
201.39	0.03011413		731.39	-0.00861447		1261.38	0.01103453		1791.38	0.00902359		2321.37	0.00267945		2851.37	0.0046707		3381.4	0.00900251
201.59	0.03406743		731.59	-0.00900352		1261.58	0.01032222		1791.58	0.0090869		2321.57	0.00329116		2851.57	0.00586401		3381.6	0.00918022
201.79	0.03733381		731.79	-0.0092209		1261.78	0.01040575		1791.78	0.00919195		2321.77	0.00363785		2851.77	0.00627975		3381.8	0.00904695
201.99	0.04091877		731.99	-0.00912785		1261.98	0.01061337		1791.98	0.00934452		2321.97	0.00390644		2851.97	0.00718208		3382	0.00852491
202.19	0.04441341		732.19	-0.00987817		1262.18	0.01082541		1792.18	0.01006982		2322.17	0.00367532		2852.17	0.0079754		3382.2	0.00794537
202.39	0.0473767		732.39	-0.0091206		1262.38	0.01173454		1792.38	0.010566		2322.37	0.00372119		2852.37	0.00870277		3382.4	0.00757403
202.59	0.04977081		732.59	-0.00911806		1262.58	0.01221899		1792.58	0.01008239		2322.57	0.00354227		2852.57	0.00872254		3382.6	0.00729775
202.79	0.05105236		732.79	-0.00953943		1262.78	0.01225118		1792.78	0.00945913		2322.77	0.0044839		2852.77	0.0081698		3382.8	0.00628546
202.99	0.05298527		732.99	-0.00946573		1262.98	0.01248242		1792.98	0.00857119		2322.97	0.00513494		2852.97	0.00802671		3383	0.00572249
203.19	0.05459256		733.19	-0.01004605		1263.18	0.01260841		1793.18	0.00869188		2323.17	0.00548802		2853.17	0.00822335		3383.2	0.00565172
203.39	0.05555048		733.39	-0.00952061		1263.38	0.01320988		1793.38	0.0077542		2323.37	0.0053924		2853.37	0.00866173		3383.4	0.00523038
203.59	0.05700575		733.59	-0.00978989		1263.58	0.0136685		1793.58	0.00719419		2323.57	0.00551238		2853.57	0.00928937		3383.6	0.00544664
203.79	0.05878489		733.79	-0.00920328		1263.78	0.01339219		1793.78	0.00654067		2323.77	0.00556111		2853.77	0.00981978		3383.8	0.00587483
203.99	0.0609514		733.99	-0.00910361		1263.98	0.01384937		1793.98	0.00563407		2323.97	0.00608001		2853.97	0.01040591		3384	0.0060357
204.19	0.06292641		734.19	-0.00905886		1264.18	0.01372044		1794.18	0.00510272		2324.17	0.00712505		2854.17	0.01039418		3384.2	0.00530418
204.39	0.0659554		734.39	-0.00922553		1264.38	0.01387091		1794.38	0.00534902		2324.37	0.00727072		2854.37	0.01133021		3384.4	0.00534316
204.59	0.06956603		734.59	-0.00880171		1264.58	0.0146693		1794.58	0.00491689		2324.57	0.00807794		2854.57	0.01128871		3384.6	0.00617657
204.79	0.07190355		734.79	-0.00793488		1264.78	0.01508676		1794.78	0.00418908		2324.77	0.00736882		2854.77	0.01219253		3384.8	0.00613708
204.99	0.07530093		734.99	-0.00724399		1264.98	0.01487831		1794.98	0.00393737		2324.97	0.00785449		2854.97	0.01290142		3385	0.00731467
205.19	0.07854269		735.19	-0.00622037		1265.18	0.01544272		1795.18	0.00364811		2325.17	0.00805836		2855.17	0.01408704		3385.2	0.00818847
205.39	0.08154079		735.39	-0.00589634		1265.38	0.01499383		1795.38	0.0035409		2325.37	0.00887753		2855.37	0.01595907		3385.4	0.00864833
205.59	0.08442907		735.59	-0.00583649		1265.58	0.01498193		1795.58	0.0034889		2325.57	0.00909071		2855.57	0.01828997		3385.6	0.00847773
205.79	0.08631823		735.79	-0.00560353		1265.78	0.01611885		1795.78	0.00379615		2325.77	0.00942335		2855.77	0.01903189		3385.8	0.00795212
205.99	0.08868687		735.99	-0.0051425		1265.98	0.01598303		1795.98	0.0040318		2325.97	0.0104838		2855.97	0.02005013		3386	0.00694439
206.19	0.08989398		736.19	-0.00614289		1266.18	0.01667804		1796.18	0.00478975		2326.17	0.01051699		2856.17	0.02154449		3386.2	0.0060638
206.39	0.09142315		736.39	-0.00556239		1266.38	0.01710633		1796.38	0.00486499		2326.37	0.01111935		2856.37	0.02213662		3386.4	0.00574829
206.59	0.09245957		736.59	-0.00564019		1266.58	0.01768177		1796.58	0.00393522		2326.57	0.01169632		2856.57	0.02246142		3386.6	0.00484991
206.79	0.09415025		736.79	-0.00555902		1266.78	0.01756888		1796.78	0.00300815		2326.77	0.01270444		2856.77	0.0227607		3386.8	0.00392872
206.99	0.09533329		736.99	-0.00645475		1266.98	0.01782212		1796.98	0.00302315		2326.97	0.01359445		2856.97	0.02227446		3387	0.00346637
207.19	0.09647116		737.19	-0.00743225		1267.18	0.01837862		1797.18	0.00314676		2327.17	0.01445707		2857.17	0.02305967		3387.2	0.00286253
207.39	0.0983194		737.39	-0.00857927		1267.38	0.01891087		1797.38	0.00265187		2327.37	0.01504683		2857.37	0.02252659		3387.4	0.00279017
207.59	0.10041313		737.59	-0.00846332		1267.58	0.01963265		1797.58	0.00340462		2327.57	0.01603705		2857.57	0.02230569		3387.6	0.00357417
207.79	0.10350237		737.79	-0.00806793		1267.78	0.01951141		1797.78	0.00331485		2327.77	0.01673683		2857.77	0.0217299		3387.8	0.00311915
207.99	0.10529163		737.99	-0.00812289		1267.98	0.01933472		1797.98	0.00445677		2327.97	0.01785971		2857.97	0.0214562		3388	0.00265429
208.19	0.10843628		738.19	-0.00742937		1268.18	0.01929301		1798.18	0.00545238		2328.17	0.01839517		2858.17	0.02108427		3388.2	0.00234011
208.39	0.11091381		738.39	-0.00682845		1268.38	0.01938987		1798.38	0.006376		2328.37	0.01867057		2858.37	0.02198332		3388.4	0.0022165
208.59	0.11370696		738.59	-0.0064408		1268.58	0.01989		1798.58	0.00677989		2328.57	0.01844347		2858.57	0.0226229		3388.6	0.00300052
208.79	0.1152406		738.79	-0.00584754		1268.78	0.02049272		1798.78	0.00683488		2328.77	0.01809572		2858.77	0.02200845		3388.8	0.00277947
208.99	0.11791765		738.99	-0.00497304		1268.98	0.01993158		1798.98	0.00714507		2328.97	0.0181649		2858.97	0.02278514		3389	0.00375124
209.19	0.11996196		739.19	-0.00457027		1269.18	0.0205965		1799.18	0.00692905		2329.17	0.01852614		2859.17	0.02287746		3389.2	0.00395828
209.39	0.12111907		739.39	-0.00438442		1269.38	0.02142543		1799.38	0.00730105		2329.37	0.01867933		2859.37	0.0240573		3389.4	0.0040442
209.59	0.12245515		739.59	-0.00346303		1269.58	0.02209081		1799.58	0.00755597		2329.57	0.0186284		2859.57	0.02462722		3389.6	0.00416839
209.79	0.12321518		739.79	-0.003404		1269.78	0.0223171		1799.78	0.00781258		2329.77	0.01923786		2859.77	0.0250408		3389.8	0.00302058
209.99	0.12413008		739.99	-0.00299144		1269.98	0.02231231		1799.98	0.00770526		2329.97	0.01944429		2859.97	0.02519782		3390	0.00267377
210.19	0.12462483		740.19	-0.00350168		1270.18	0.02338522		1800.18	0.00723392		2330.17	0.0185589		2860.17	0.02639978		3390.2	0.00238267
210.39	0.12622248		740.39	-0.0032092		1270.38	0.02351616		1800.38	0.00667046		2330.37	0.01927377		2860.37	0.02667768		3390.4	0.0022243
210.59	0.12619005		740.59	-0.00293269		1270.58	0.02357896		1800.58	0.00575337		2330.57	0.01985397		2860.57	0.02727214		3390.6	0.00145379
210.79	0.12714947		740.79	-0.00335956		1270.78	0.02355628		1800.78	0.00573149		2330.77	0.02080976		2860.77	0.02838493		3390.8	0.00126265
210.99	0.12798159		740.99	-0.00354898		1270.98	0.02382407		1800.98	0.00617609		2330.97	0.02188169		2860.97	0.02806207		3391	0.00082319
211.19	0.12872456		741.19	-0.00319555		1271.18	0.02487614		1801.18	0.00601326		2331.17	0.02189134		2861.17	0.02869066		3391.2	0.00127072
211.39	0.13147201		741.39	-0.00403845		1271.38	0.02494219		1801.38	0.00576517		2331.37	0.02336395		2861.37	0.02815196		3391.4	0.00135017
211.59	0.13411431		741.59	-0.00257343		1271.58	0.02393176		1801.58	0.00638662		2331.57	0.02422272		2861.57	0.02787706		3391.6	0.00169431
211.79	0.13677174		741.79	-0.00369672		1271.78	0.02282447		1801.78	0.00642265		2331.77	0.02415309		2861.77	0.0274362		3391.8	0.00184706
211.99	0.13839331		741.99	-0.00429288		1271.98	0.02205986		1801.98	0.00673384		2331.97	0.0247596		2861.97	0.02747488		3392	0.00138622
212.19	0.14022418		742.19	-0.00407408		1272.18	0.0219858		1802.18	0.00666207		2332.17	0.02488177		2862.17	0.02781308		3392.2	0.00141512
212.39	0.14144372		742.39	-0.00411578		1272.38	0.02189733		1802.38	0.00664323		2332.37	0.024964		2862.37	0.0280415		3392.4	0.00091629
212.59	0.14298465		742.59	-0.00469082		1272.58	0.02346335		1802.58	0.00577414		2332.57	0.02451995		2862.57	0.02749053		3392.6	0.00163333
212.79	0.14441143		742.79	-0.00414608		1272.78	0.02440359		1802.78	0.0055641		2332.77	0.02500978		2862.77	0.02700976		3392.8	0.00162279
212.99	0.14629264		742.99	-0.00409939		1272.98	0.02389105		1802.98	0.00628709		2332.97	0.02518043		2862.97	0.02784993		3393	0.00138099
213.19	0.14785858		743.19	-0.00426922		1273.18	0.02468567		1803.18	0.00588896		2333.17	0.02579452		2863.17	0.02818154		3393.2	0.00143468
213.39	0.14851247		743.39	-0.00456544		1273.38	0.025156		1803.38	0.00619645		2333.37	0.02635992		2863.37	0.02892514		3393.4	0.00172164
213.59	0.15049179		743.59	-0.00401992		1273.58	0.02586446		1803.58	0.005742		2333.57	0.02731335		2863.57	0.02895208		3393.6	0.0016153
213.79	0.15110214		743.79	-0.00357941		1273.78	0.02647003		1803.78	0.00571225		2333.77	0.02768005		2863.77	0.02870901		3393.8	0.00023692
213.99	0.15245736		743.99	-0.00303109		1273.98	0.02747364		1803.98	0.00564232		2333.97	0.02784317		2863.97	0.02852854		3394	0.00033185
214.19	0.15286858		744.19	-0.00242351		1274.18	0.0284207		1804.18	0.00489302		2334.17	0.02810515		2864.17	0.02878877		3394.2	-0.00132187
214.39	0.1539283		744.39	-0.00174657		1274.38	0.02850985		1804.38	0.00538159		2334.37	0.029707		2864.37	0.02950678		3394.4	-0.0023247
214.59	0.15420348		744.59	-0.00151831		1274.58	0.02870158		1804.58	0.00558059		2334.57	0.0302943		2864.57	0.03016994		3394.6	-0.00215818
214.79	0.15610345		744.79	-0.00144918		1274.78	0.02941106		1804.78	0.00652311		2334.77	0.03033318		2864.77	0.03094492		3394.8	-0.00153783
214.99	0.15829453		744.99	-0.00065944		1274.98	0.03021424		1804.98	0.00664965		2334.97	0.03119735		2864.97	0.03082991		3395	-0.00036367
215.19	0.15950529		745.19	-0.00088368		1275.18	0.03057322		1805.18	0.00651278		2335.17	0.03103811		2865.17	0.03104896		3395.2	0.00059316
215.39	0.16126838		745.39	-0.00249713		1275.38	0.03018961		1805.38	0.00622924		2335.37	0.03155321		2865.37	0.0308523		3395.4	0.00064035
215.59	0.16339082		745.59	-0.0024671		1275.58	0.02975358		1805.58	0.00604358		2335.57	0.03125525		2865.57	0.03073447		3395.6	0.00173423
215.79	0.16517728		745.79	-0.00374864		1275.78	0.03036408		1805.78	0.00554157		2335.77	0.03157799		2865.77	0.03146246		3395.8	0.00228356
215.99	0.16660699		745.99	-0.00375821		1275.98	0.03104414		1805.98	0.00532946		2335.97	0.03182989		2865.97	0.03224528		3396	0.00216496
216.19	0.16755613		746.19	-0.00306371		1276.18	0.03151274		1806.18	0.00470599		2336.17	0.03238648		2866.17	0.03301774		3396.2	0.00340733
216.39	0.16897804		746.39	-0.00307019		1276.38	0.03212064		1806.38	0.00390383		2336.37	0.03256416		2866.37	0.0333661		3396.4	0.00430966
216.59	0.17049157		746.59	-0.0033695		1276.58	0.03305292		1806.58	0.00277603		2336.57	0.0324762		2866.57	0.03369313		3396.6	0.00521066
216.79	0.1716954		746.79	-0.00297547		1276.78	0.03310644		1806.78	0.00349056		2336.77	0.03302457		2866.77	0.0350173		3396.8	0.00528704
216.99	0.1728016		746.99	-0.00317014		1276.98	0.03272161		1806.98	0.00313911		2336.97	0.03277853		2866.97	0.03563403		3397	0.00523988
217.19	0.17365215		747.19	-0.00386448		1277.18	0.03287247		1807.18	0.00290268		2337.17	0.03386026		2867.17	0.03640625		3397.2	0.00683883
217.39	0.17338945		747.39	-0.00346858		1277.38	0.03288595		1807.38	0.00313298		2337.37	0.03425006		2867.37	0.03686261		3397.4	0.00719018
217.59	0.17393035		747.59	-0.00255711		1277.58	0.03330071		1807.58	0.0024729		2337.57	0.03449284		2867.57	0.03726571		3397.6	0.00725246
217.79	0.17370115		747.79	-0.00225894		1277.78	0.0327863		1807.78	0.00271118		2337.77	0.03458059		2867.77	0.0367935		3397.8	0.00614634
217.99	0.17438798		747.99	-0.00241015		1277.98	0.03332701		1807.98	0.00247574		2337.97	0.03471896		2867.97	0.03749884		3398	0.00594297
218.19	0.17447547		748.19	-0.00198743		1278.18	0.03335095		1808.18	0.00272473		2338.17	0.03528617		2868.17	0.03715556		3398.2	0.0049138
218.39	0.17561395		748.39	-0.0015732		1278.38	0.03316163		1808.38	0.0036082		2338.37	0.03600353		2868.37	0.03752739		3398.4	0.00499663
218.59	0.17670394		748.59	-0.00134676		1278.58	0.03243859		1808.58	0.00472101		2338.57	0.03575058		2868.57	0.0365373		3398.6	0.00497755
218.79	0.1782082		748.79	-0.0003141		1278.78	0.03139421		1808.78	0.006111		2338.77	0.03570064		2868.77	0.03621		3398.8	0.00401964
218.99	0.17929832		748.99	0.00006391		1278.98	0.03097362		1808.98	0.00660898		2338.97	0.03592897		2868.97	0.03600946		3399	0.00335581
219.19	0.1795149		749.19	0.0000698		1279.18	0.02998159		1809.18	0.00693247		2339.17	0.03476323		2869.17	0.03564982		3399.2	0.00219285
219.39	0.18037731		749.39	-0.00066822		1279.38	0.03027336		1809.38	0.0070803		2339.37	0.03477768		2869.37	0.03451084		3399.4	0.00168126
219.59	0.18227691		749.59	0.00015276		1279.58	0.03081212		1809.58	0.00665454		2339.57	0.03533107		2869.57	0.03400639		3399.6	0.00170606
219.79	0.18409922		749.79	0.00058439		1279.78	0.03056591		1809.78	0.00638134		2339.77	0.03608937		2869.77	0.03365318		3399.8	0.00099443
219.99	0.1855495		749.99	0.0012162		1279.98	0.03080537		1809.98	0.00608206		2339.97	0.03657212		2869.97	0.03320485		3400	0.0012455
220.19	0.18726804		750.19	0.00150354		1280.18	0.02972864		1810.18	0.00510937		2340.17	0.03785753		2870.17	0.03337251		3400.2	0.00192867
220.39	0.18798911		750.39	0.00212028		1280.38	0.03060653		1810.38	0.00468931		2340.37	0.03859666		2870.37	0.03302077		3400.4	0.0019637
220.59	0.1891391		750.59	0.00231992		1280.58	0.03137584		1810.58	0.00385232		2340.57	0.03865287		2870.57	0.03298051		3400.6	0.00275652
220.79	0.18947291		750.79	0.00252455		1280.78	0.03234751		1810.78	0.00327041		2340.77	0.0395028		2870.77	0.03417546		3400.8	0.00230443
220.99	0.19084174		750.99	0.00215554		1280.98	0.03212737		1810.98	0.00248478		2340.97	0.03959158		2870.97	0.03478395		3401	0.00281039
221.19	0.19152794		751.19	0.00140246		1281.18	0.03286433		1811.18	0.00205181		2341.17	0.0409461		2871.17	0.03608962		3401.2	0.0031055
221.39	0.19093072		751.39	0.00138109		1281.38	0.03318373		1811.38	0.00120279		2341.37	0.04117698		2871.37	0.03737783		3401.4	0.00290955
221.59	0.19181408		751.59	0.00103533		1281.58	0.03446384		1811.58	0.00092628		2341.57	0.04164377		2871.57	0.03938206		3401.6	0.00301618
221.79	0.19276329		751.79	-0.00006289		1281.78	0.03496547		1811.78	0.00086547		2341.77	0.04256975		2871.77	0.03962278		3401.8	0.0025261
221.99	0.19290381		751.99	-0.00079918		1281.98	0.03563644		1811.98	0.00093671		2341.97	0.04259517		2871.97	0.04122426		3402	0.00287728
222.19	0.19299548		752.19	-0.00055249		1282.18	0.03631062		1812.18	0.00164332		2342.17	0.04276906		2872.17	0.04145601		3402.2	0.00233258
222.39	0.19333528		752.39	-0.00054906		1282.38	0.03510131		1812.38	0.00256215		2342.37	0.04240118		2872.37	0.0416927		3402.4	0.00111419
222.59	0.19418538		752.59	-0.00024304		1282.58	0.03444079		1812.58	0.00360497		2342.57	0.04207381		2872.57	0.04147281		3402.6	-0.00002933
222.79	0.19473903		752.79	0.00044977		1282.78	0.03402007		1812.78	0.00386596		2342.77	0.04219826		2872.77	0.04154193		3402.8	-0.00101777
222.99	0.19494315		752.99	-0.00010618		1282.98	0.03384379		1812.98	0.00435801		2342.97	0.04197871		2872.97	0.04028791		3403	-0.00144456
223.19	0.19606452		753.19	-0.00037724		1283.18	0.03416575		1813.18	0.00494222		2343.17	0.04208878		2873.17	0.03926729		3403.2	-0.00188394
223.39	0.19730918		753.39	-0.00053945		1283.38	0.03502185		1813.38	0.00559283		2343.37	0.04212869		2873.37	0.03730055		3403.4	-0.00156763
223.59	0.1988616		753.59	-0.00024183		1283.58	0.03571893		1813.58	0.00602716		2343.57	0.04256786		2873.57	0.03617159		3403.6	-0.0009617
223.79	0.20067904		753.79	0.00035622		1283.78	0.03523		1813.78	0.00672091		2343.77	0.04263446		2873.77	0.03478946		3403.8	-0.00008253
223.99	0.20130679		753.99	0.00042658		1283.98	0.0349986		1813.98	0.00658894		2343.97	0.04297262		2873.97	0.03435307		3404	0.00057796
224.19	0.20221268		754.19	0.00095811		1284.18	0.03521641		1814.18	0.00659858		2344.17	0.043935		2874.17	0.03403623		3404.2	0.00185683
224.39	0.2024254		754.39	0.0006878		1284.38	0.03653262		1814.38	0.0061567		2344.37	0.04418664		2874.37	0.03388953		3404.4	0.0026887
224.59	0.20364362		754.59	0.00047048		1284.58	0.03632533		1814.58	0.00530251		2344.57	0.04420808		2874.57	0.03446251		3404.6	0.00311666
224.79	0.20478994		754.79	0.00086912		1284.78	0.03653498		1814.78	0.00495923		2344.77	0.04503249		2874.77	0.03577654		3404.8	0.00225991
224.99	0.20638958		754.99	0.00144102		1284.98	0.03706802		1814.98	0.00474886		2344.97	0.04583389		2874.97	0.03672516		3405	0.00264948
225.19	0.20697696		755.19	0.00144408		1285.18	0.03806134		1815.18	0.00408615		2345.17	0.04677592		2875.17	0.03813008		3405.2	0.00301522
225.39	0.20759941		755.39	0.0018539		1285.38	0.03807345		1815.38	0.00449677		2345.37	0.04678884		2875.37	0.03988924		3405.4	0.00405758
225.59	0.20893588		755.59	0.00196878		1285.58	0.038215		1815.58	0.00451088		2345.57	0.04739315		2875.57	0.04124624		3405.6	0.00465829
225.79	0.20972902		755.79	0.00221616		1285.78	0.03821709		1815.78	0.00497837		2345.77	0.04763108		2875.77	0.04213728		3405.8	0.00412625
225.99	0.2102015		755.99	0.00285842		1285.98	0.03800905		1815.98	0.00509181		2345.97	0.04710947		2875.97	0.04286167		3406	0.00394081
226.19	0.21116687		756.19	0.00304909		1286.18	0.03820235		1816.18	0.00550381		2346.17	0.04740937		2876.17	0.04252009		3406.2	0.00255895
226.39	0.21203574		756.39	0.00332466		1286.38	0.03697859		1816.38	0.0064448		2346.37	0.04801372		2876.37	0.04236986		3406.4	0.00075094
226.59	0.2134034		756.59	0.00369946		1286.58	0.03789108		1816.58	0.00667601		2346.57	0.04910912		2876.57	0.0430315		3406.6	0.00010568
226.79	0.21375277		756.79	0.00436429		1286.78	0.03836723		1816.78	0.00753256		2346.77	0.05035322		2876.77	0.04187497		3406.8	-0.00070387
226.99	0.21475514		756.99	0.00337328		1286.98	0.03830185		1816.98	0.00846693		2346.97	0.05089511		2876.97	0.04068365		3407	-0.0006471
227.19	0.21649142		757.19	0.00268709		1287.18	0.03848415		1817.18	0.00903326		2347.17	0.05120432		2877.17	0.04056938		3407.2	-0.00129156
227.39	0.21691123		757.39	0.00278742		1287.38	0.03865351		1817.38	0.00915737		2347.37	0.05111317		2877.37	0.03999989		3407.4	-0.00124623
227.59	0.21818341		757.59	0.0025509		1287.58	0.03860728		1817.58	0.00812686		2347.57	0.05189668		2877.57	0.04035695		3407.6	-0.00090533
227.79	0.21939908		757.79	0.00263985		1287.78	0.03785793		1817.78	0.00711451		2347.77	0.05151305		2877.77	0.0397439		3407.8	-0.00073531
227.99	0.22008499		757.99	0.00252884		1287.98	0.0387258		1817.98	0.00553342		2347.97	0.05239494		2877.97	0.04021504		3408	-0.00070364
228.19	0.22146204		758.19	0.00253846		1288.18	0.04009613		1818.18	0.0050885		2348.17	0.05296404		2878.17	0.0407214		3408.2	0.0003147
228.39	0.22132167		758.39	0.00186666		1288.38	0.03950858		1818.38	0.00330534		2348.37	0.05334835		2878.37	0.04051011		3408.4	0.0003607
228.59	0.22188658		758.59	0.00257114		1288.58	0.0400483		1818.58	0.00279475		2348.57	0.05373683		2878.57	0.04069409		3408.6	0.00102463
228.79	0.22311322		758.79	0.00306943		1288.78	0.04014387		1818.78	0.00215958		2348.77	0.05453191		2878.77	0.04147723		3408.8	0.00183373
228.99	0.22266097		758.99	0.00322263		1288.98	0.04052365		1818.98	0.00146166		2348.97	0.0550539		2878.97	0.04165073		3409	0.00296856
229.19	0.22331936		759.19	0.00325883		1289.18	0.04001519		1819.18	0.00084467		2349.17	0.05500435		2879.17	0.04236377		3409.2	0.00401879
229.39	0.22428873		759.39	0.00351655		1289.38	0.04010743		1819.38	0.00063683		2349.37	0.05443435		2879.37	0.04312023		3409.4	0.00448481
229.59	0.22492998		759.59	0.00408668		1289.58	0.04021613		1819.58	0.00061563		2349.57	0.05484974		2879.57	0.04358266		3409.6	0.00511263
229.79	0.22567295		759.79	0.00461168		1289.78	0.04037301		1819.78	0.0008981		2349.77	0.05470384		2879.77	0.0446574		3409.8	0.00495216
229.99	0.22671469		759.99	0.00466592		1289.98	0.03911883		1819.98	0.00065796		2349.97	0.05530143		2879.97	0.04387163		3410	0.00438186
230.19	0.22696238		760.19	0.00431229		1290.18	0.03839294		1820.18	0.00213971		2350.17	0.05540304		2880.17	0.04423577		3410.2	0.00338137
230.39	0.22741349		760.39	0.00413753		1290.38	0.03833719		1820.38	0.00304524		2350.37	0.05574076		2880.37	0.04487588		3410.4	0.00265511
230.59	0.22770727		760.59	0.00407902		1290.58	0.038571		1820.58	0.00367613		2350.57	0.05665644		2880.57	0.04532841		3410.6	0.00300109
230.79	0.22801896		760.79	0.00390992		1290.78	0.0386274		1820.78	0.00504448		2350.77	0.0566725		2880.77	0.04513444		3410.8	0.00262304
230.99	0.22955051		760.99	0.00284254		1290.98	0.03834738		1820.98	0.00512292		2350.97	0.05634275		2880.97	0.04508408		3411	0.00216664
231.19	0.2298777		761.19	0.00264333		1291.18	0.03868989		1821.18	0.00547936		2351.17	0.05595885		2881.17	0.04551521		3411.2	0.00091939
231.39	0.23039522		761.39	0.00327728		1291.38	0.03924825		1821.38	0.00577312		2351.37	0.05666829		2881.37	0.04613037		3411.4	0.00127133
231.59	0.23201372		761.59	0.00308764		1291.58	0.03899556		1821.58	0.00550706		2351.57	0.05646987		2881.57	0.04641005		3411.6	0.0006979
231.79	0.23367987		761.79	0.00384069		1291.78	0.040493		1821.78	0.00602298		2351.77	0.05680136		2881.77	0.04630191		3411.8	0.0005185
231.99	0.23501952		761.99	0.00379156		1291.98	0.04163497		1821.98	0.00608612		2351.97	0.05810948		2881.97	0.04719122		3412	0.00117265
232.19	0.23558697		762.19	0.00484163		1292.18	0.04228994		1822.18	0.00639766		2352.17	0.05692632		2882.17	0.04696505		3412.2	0.0011627
232.39	0.23556944		762.39	0.00537477		1292.38	0.04253959		1822.38	0.00603446		2352.37	0.05696305		2882.37	0.04645603		3412.4	0.00115934
232.59	0.23675737		762.59	0.00576821		1292.58	0.04401556		1822.58	0.00641316		2352.57	0.05771001		2882.57	0.04763219		3412.6	0.00121712
232.79	0.23772955		762.79	0.00608239		1292.78	0.04345701		1822.78	0.00621287		2352.77	0.0584386		2882.77	0.04835644		3412.8	0.00135083
232.99	0.23792286		762.99	0.00648508		1292.98	0.04425329		1822.98	0.00576492		2352.97	0.05860153		2882.97	0.04914697		3413	0.00112858
233.19	0.23892755		763.19	0.00640604		1293.18	0.04403524		1823.18	0.00549441		2353.17	0.05906992		2883.17	0.05015444		3413.2	0.00152789
233.39	0.23892069		763.39	0.00582981		1293.38	0.04511462		1823.38	0.00523219		2353.37	0.05897948		2883.37	0.05088925		3413.4	0.00198187
233.59	0.23971047		763.59	0.00572365		1293.58	0.04549074		1823.58	0.0052117		2353.57	0.06011268		2883.57	0.05119926		3413.6	0.00218055
233.79	0.24037741		763.79	0.00586504		1293.78	0.04566858		1823.78	0.00386089		2353.77	0.06086838		2883.77	0.05169336		3413.8	0.00208023
233.99	0.24034055		763.99	0.00533367		1293.98	0.04511625		1823.98	0.00391543		2353.97	0.06127277		2883.97	0.05153239		3414	0.00127726
234.19	0.24048376		764.19	0.00481121		1294.18	0.04565392		1824.18	0.00407511		2354.17	0.06095674		2884.17	0.05128095		3414.2	0.00134587
234.39	0.24047466		764.39	0.00448453		1294.38	0.04617374		1824.38	0.00332114		2354.37	0.06177215		2884.37	0.05155504		3414.4	0.00117234
234.59	0.24080571		764.59	0.00431295		1294.58	0.0458346		1824.58	0.0031583		2354.57	0.06271065		2884.57	0.05094634		3414.6	0.00105702
234.79	0.24058765		764.79	0.00407815		1294.78	0.04541734		1824.78	0.00303203		2354.77	0.0633947		2884.77	0.05069536		3414.8	0.00073309
234.99	0.24002132		764.99	0.00401559		1294.98	0.04473724		1824.98	0.00296601		2354.97	0.06372171		2884.97	0.04963213		3415	0.00067369
235.19	0.23921799		765.19	0.00415247		1295.18	0.04442446		1825.18	0.00378008		2355.17	0.06399828		2885.17	0.04912051		3415.2	0.00014899
235.39	0.23974199		765.39	0.00494866		1295.38	0.04449575		1825.38	0.00444198		2355.37	0.06482976		2885.37	0.0486727		3415.4	-0.00016827
235.59	0.24041056		765.59	0.00539389		1295.58	0.04370603		1825.58	0.00478213		2355.57	0.0649863		2885.57	0.0483178		3415.6	-0.00068771
235.79	0.24121679		765.79	0.00650753		1295.78	0.0440176		1825.78	0.00521617		2355.77	0.06537908		2885.77	0.04846812		3415.8	-0.00105884
235.99	0.24194074		765.99	0.00756061		1295.98	0.043675		1825.98	0.00459458		2355.97	0.06533866		2885.97	0.04827457		3416	-0.00095578
236.19	0.24241969		766.19	0.00858621		1296.18	0.04397641		1826.18	0.00505553		2356.17	0.06432123		2886.17	0.04882851		3416.2	-0.00176489
236.39	0.24342583		766.39	0.00913366		1296.38	0.04400677		1826.38	0.00494704		2356.37	0.06518425		2886.37	0.04994607		3416.4	-0.0024057
236.59	0.24462103		766.59	0.00880211		1296.58	0.04459515		1826.58	0.00483758		2356.57	0.06585622		2886.57	0.05162751		3416.6	-0.00230733
236.79	0.24664748		766.79	0.00893909		1296.78	0.04425497		1826.78	0.00473478		2356.77	0.06542893		2886.77	0.053191		3416.8	-0.00131699
236.99	0.24693375		766.99	0.00834843		1296.98	0.04535694		1826.98	0.00482856		2356.97	0.0646304		2886.97	0.05516169		3417	-0.0015642
237.19	0.24714353		767.19	0.00830994		1297.18	0.04568434		1827.18	0.00549981		2357.17	0.06434708		2887.17	0.05641648		3417.2	-0.00079657
237.39	0.24785274		767.39	0.00860367		1297.38	0.04739385		1827.38	0.00491073		2357.37	0.0643426		2887.37	0.05722946		3417.4	-0.00057496
237.59	0.24990483		767.59	0.00911089		1297.58	0.04814906		1827.58	0.00366086		2357.57	0.06503431		2887.57	0.05839586		3417.6	-0.00074147
237.79	0.25107434		767.79	0.00941123		1297.78	0.04892204		1827.78	0.00372811		2357.77	0.06489675		2887.77	0.05942516		3417.8	0.00007951
237.99	0.25148779		767.99	0.00869384		1297.98	0.04896223		1827.98	0.00330218		2357.97	0.06471447		2887.97	0.06026603		3418	0.00021786
238.19	0.25317461		768.19	0.0083262		1298.18	0.04975411		1828.18	0.00305152		2358.17	0.06537951		2888.17	0.06009809		3418.2	0.00064078
238.39	0.25368512		768.39	0.00767342		1298.38	0.0494618		1828.38	0.00325651		2358.37	0.06628991		2888.37	0.06038136		3418.4	0.00054504
238.59	0.25430861		768.59	0.00790403		1298.58	0.04912068		1828.58	0.00261145		2358.57	0.06722827		2888.57	0.05963593		3418.6	0.00059904
238.79	0.25376273		768.79	0.00816184		1298.78	0.04880128		1828.78	0.00262093		2358.77	0.068967		2888.77	0.0592293		3418.8	0.00054213
238.99	0.25463625		768.99	0.0076546		1298.98	0.04830946		1828.98	0.00356636		2358.97	0.06902092		2888.97	0.05832017		3419	0.0010883
239.19	0.25503013		769.19	0.00751835		1299.18	0.04891221		1829.18	0.00422466		2359.17	0.06951456		2889.17	0.05770666		3419.2	0.00043104
239.39	0.25644054		769.39	0.00794616		1299.38	0.0491614		1829.38	0.00410826		2359.37	0.07063451		2889.37	0.05708591		3419.4	0.00047197
239.59	0.25711454		769.59	0.00779092		1299.58	0.04880406		1829.58	0.00454718		2359.57	0.07176785		2889.57	0.05726085		3419.6	0.00116648
239.79	0.25755723		769.79	0.00824956		1299.78	0.04895177		1829.78	0.00428941		2359.77	0.07179541		2889.77	0.05752165		3419.8	0.00100335
239.99	0.25767053		769.99	0.00752634		1299.98	0.04939978		1829.98	0.00363748		2359.97	0.07209802		2889.97	0.0578258		3420	0.0009916
240.19	0.25810676		770.19	0.00703541		1300.18	0.04995683		1830.18	0.00385002		2360.17	0.0721832		2890.17	0.05851809		3420.2	0.00081692
240.39	0.25842687		770.39	0.00673577		1300.38	0.05098873		1830.38	0.00396879		2360.37	0.07246919		2890.37	0.05817472		3420.4	0.00099348
240.59	0.2592896		770.59	0.00670265		1300.58	0.05138673		1830.58	0.00393159		2360.57	0.07232323		2890.57	0.05922317		3420.6	0.00111114
240.79	0.25984579		770.79	0.0068451		1300.78	0.05180148		1830.78	0.00421632		2360.77	0.07213113		2890.77	0.059522		3420.8	0.0011287
240.99	0.25906135		770.99	0.00680931		1300.98	0.05232645		1830.98	0.00458626		2360.97	0.07160613		2890.97	0.06066172		3421	0.00103146
241.19	0.25963745		771.19	0.00726112		1301.18	0.05257779		1831.18	0.00470797		2361.17	0.07191006		2891.17	0.06154775		3421.2	0.00104601
241.39	0.26037168		771.39	0.00757953		1301.38	0.05277245		1831.38	0.00392845		2361.37	0.07219039		2891.37	0.06201318		3421.4	0.00172726
241.59	0.26042688		771.59	0.00805838		1301.58	0.05288908		1831.58	0.00372823		2361.57	0.07230826		2891.57	0.06299207		3421.6	0.00190256
241.79	0.26025629		771.79	0.00852477		1301.78	0.05324998		1831.78	0.00414448		2361.77	0.07231993		2891.77	0.06300319		3421.8	0.00243824
241.99	0.26094589		771.99	0.00915904		1301.98	0.05279227		1831.98	0.00345052		2361.97	0.07264163		2891.97	0.0629697		3422	0.00163696
242.19	0.26212114		772.19	0.00878292		1302.18	0.05225175		1832.18	0.00479674		2362.17	0.07372946		2892.17	0.06236012		3422.2	0.00122985
242.39	0.26259404		772.39	0.0090906		1302.38	0.05094693		1832.38	0.00554365		2362.37	0.07484458		2892.37	0.06234154		3422.4	0.00025723
242.59	0.26298101		772.59	0.00998749		1302.58	0.04985473		1832.58	0.00548008		2362.57	0.0758999		2892.57	0.06232436		3422.6	0.00007647
242.79	0.26347687		772.79	0.00964026		1302.78	0.04901319		1832.78	0.00670546		2362.77	0.07731505		2892.77	0.06235674		3422.8	-0.00058993
242.99	0.26515905		772.99	0.01041011		1302.98	0.04746156		1832.98	0.00751521		2362.97	0.07738277		2892.97	0.06239152		3423	-0.00017505
243.19	0.26639589		773.19	0.01027593		1303.18	0.04707682		1833.18	0.00839658		2363.17	0.07840827		2893.17	0.06308433		3423.2	-0.00132332
243.39	0.26813078		773.39	0.01071774		1303.38	0.04626306		1833.38	0.00783667		2363.37	0.07889873		2893.37	0.063024		3423.4	-0.00237756
243.59	0.26819054		773.59	0.01116134		1303.58	0.04592723		1833.58	0.00814862		2363.57	0.07892284		2893.57	0.06345611		3423.6	-0.00264318
243.79	0.26925927		773.79	0.01102065		1303.78	0.04507972		1833.78	0.00735141		2363.77	0.07873938		2893.77	0.06409436		3423.8	-0.00359336
243.99	0.27023714		773.99	0.01093166		1303.98	0.04509963		1833.98	0.00718065		2363.97	0.07859674		2893.97	0.06373485		3424	-0.00296769
244.19	0.27073303		774.19	0.01140989		1304.18	0.04588823		1834.18	0.00674496		2364.17	0.0792611		2894.17	0.06378348		3424.2	-0.00232506
244.39	0.27130098		774.39	0.01092508		1304.38	0.04791529		1834.38	0.00729038		2364.37	0.07881721		2894.37	0.0631464		3424.4	-0.00191348
244.59	0.27193565		774.59	0.01163671		1304.58	0.04824744		1834.58	0.00665838		2364.57	0.07849296		2894.57	0.06490725		3424.6	-0.00165806
244.79	0.27206328		774.79	0.01042274		1304.78	0.04922935		1834.78	0.00581352		2364.77	0.07773609		2894.77	0.06475229		3424.8	-0.00046355
244.99	0.27249558		774.99	0.00967831		1304.98	0.04990959		1834.98	0.00467451		2364.97	0.07750035		2894.97	0.06628386		3425	0.00083484
245.19	0.27249339		775.19	0.00970895		1305.18	0.0502345		1835.18	0.00389561		2365.17	0.07745611		2895.17	0.06693494		3425.2	0.00161902
245.39	0.27293013		775.39	0.01052796		1305.38	0.05151772		1835.38	0.00333613		2365.37	0.07724794		2895.37	0.06670649		3425.4	0.0026682
245.59	0.27281825		775.59	0.01047421		1305.58	0.05228326		1835.58	0.00291444		2365.57	0.07670165		2895.57	0.06766878		3425.6	0.00250666
245.79	0.27371148		775.79	0.01069446		1305.78	0.05292308		1835.78	0.0016734		2365.77	0.07708019		2895.77	0.06802662		3425.8	0.00288707
245.99	0.27431426		775.99	0.01088524		1305.98	0.05238053		1835.98	0.00168204		2365.97	0.07712402		2895.97	0.06842353		3426	0.00269164
246.19	0.27384892		776.19	0.01006099		1306.18	0.05196028		1836.18	0.00220225		2366.17	0.07770328		2896.17	0.06901349		3426.2	0.00298267
246.39	0.27389304		776.39	0.00989123		1306.38	0.05128863		1836.38	0.00211991		2366.37	0.07765937		2896.37	0.06859082		3426.4	0.00201026
246.59	0.27336167		776.59	0.00978687		1306.58	0.05118748		1836.58	0.00261596		2366.57	0.07813516		2896.57	0.0677983		3426.6	0.00199511
246.79	0.273976		776.79	0.00989163		1306.78	0.05160055		1836.78	0.00297897		2366.77	0.07811121		2896.77	0.06707739		3426.8	0.00091877
246.99	0.2751034		776.99	0.01143812		1306.98	0.05137776		1836.98	0.00333141		2366.97	0.07804215		2896.97	0.06697858		3427	-0.00058479
247.19	0.27614428		777.19	0.01103183		1307.18	0.05155649		1837.18	0.00363173		2367.17	0.07835434		2897.17	0.06750368		3427.2	-0.00254837
247.39	0.27713538		777.39	0.01143275		1307.38	0.05104661		1837.38	0.00255841		2367.37	0.0787822		2897.37	0.06599204		3427.4	-0.00275001
247.59	0.27802131		777.59	0.0122431		1307.58	0.05138072		1837.58	0.0024629		2367.57	0.07902126		2897.57	0.06548685		3427.6	-0.00353275
247.79	0.27976715		777.79	0.0125893		1307.78	0.05185579		1837.78	0.00174025		2367.77	0.07926896		2897.77	0.06579254		3427.8	-0.0028053
247.99	0.28008423		777.99	0.01341422		1307.98	0.05268875		1837.98	0.00155128		2367.97	0.07947373		2897.97	0.06574904		3428	-0.00179525
248.19	0.27965696		778.19	0.01296959		1308.18	0.05409087		1838.18	-0.00001922		2368.17	0.08023579		2898.17	0.06640981		3428.2	-0.00159736
248.39	0.27950217		778.39	0.01222348		1308.38	0.05555976		1838.38	-0.0003822		2368.37	0.0800851		2898.37	0.06657414		3428.4	-0.00119296
248.59	0.27900205		778.59	0.01262343		1308.58	0.055289		1838.58	-0.00139545		2368.57	0.08116584		2898.57	0.06862859		3428.6	-0.00097062
248.79	0.27883583		778.79	0.01228851		1308.78	0.05573103		1838.78	-0.00154965		2368.77	0.08184629		2898.77	0.06919914		3428.8	-0.00029992
248.99	0.2786052		778.99	0.01206711		1308.98	0.05551712		1838.98	-0.00162407		2368.97	0.08270758		2898.97	0.0713295		3429	0.00060132
249.19	0.27837449		779.19	0.01283809		1309.18	0.05607709		1839.18	-0.00114209		2369.17	0.08316368		2899.17	0.07157757		3429.2	0.00183773
249.39	0.27870103		779.39	0.01338839		1309.38	0.05737439		1839.38	-0.00012715		2369.37	0.08334887		2899.37	0.07273402		3429.4	0.00243313
249.59	0.27893284		779.59	0.01311296		1309.58	0.0569278		1839.58	-0.00010504		2369.57	0.08384247		2899.57	0.07472369		3429.6	0.00339735
249.79	0.27892908		779.79	0.01364606		1309.78	0.05694241		1839.78	0.00016308		2369.77	0.08471796		2899.77	0.07552696		3429.8	0.00414431
249.99	0.27879092		779.99	0.013829		1309.98	0.05590428		1839.98	0.00187544		2369.97	0.08446714		2899.97	0.07628545		3430	0.00423763
250.19	0.27815956		780.19	0.01288731		1310.18	0.05440323		1840.18	0.0027799		2370.17	0.08466667		2900.17	0.0757898		3430.2	0.00376679
250.39	0.27805003		780.39	0.01237792		1310.38	0.05368961		1840.38	0.00436697		2370.37	0.08412057		2900.37	0.07462015		3430.4	0.00286206
250.59	0.27830269		780.59	0.01301706		1310.58	0.05320282		1840.58	0.0058189		2370.57	0.08492045		2900.57	0.07394013		3430.6	0.00266405
250.79	0.27915848		780.79	0.01324182		1310.78	0.05311362		1840.78	0.00655655		2370.77	0.08501808		2900.77	0.07299015		3430.8	0.00195737
250.99	0.27997346		780.99	0.01293495		1310.98	0.0520762		1840.98	0.00739219		2370.97	0.08600804		2900.97	0.07235615		3431	0.00078157
251.19	0.28188235		781.19	0.01265064		1311.18	0.05192674		1841.18	0.0072442		2371.17	0.08649607		2901.17	0.07131138		3431.2	0.00053271
251.39	0.28326986		781.39	0.01252559		1311.38	0.05197899		1841.38	0.00676362		2371.37	0.08720496		2901.37	0.07010506		3431.4	0.00036161
251.59	0.28444919		781.59	0.01339688		1311.58	0.0523992		1841.58	0.00567318		2371.57	0.08724338		2901.57	0.07020985		3431.6	-0.00180389
251.79	0.28495468		781.79	0.01336616		1311.78	0.05202639		1841.78	0.00386718		2371.77	0.08736805		2901.77	0.07049582		3431.8	-0.00106471
251.99	0.28515863		781.99	0.01336751		1311.98	0.05240439		1841.98	0.00203282		2371.97	0.08838459		2901.97	0.06999435		3432	-0.00224118
252.19	0.28576361		782.19	0.01276801		1312.18	0.05313395		1842.18	-0.00058793		2372.17	0.08885598		2902.17	0.0709532		3432.2	-0.00201937
252.39	0.28596034		782.39	0.01215094		1312.38	0.05449605		1842.38	-0.0010799		2372.37	0.08921425		2902.37	0.07148017		3432.4	-0.00223414
252.59	0.2866531		782.59	0.01286309		1312.58	0.0562167		1842.58	-0.00193879		2372.57	0.08982258		2902.57	0.07357219		3432.6	-0.00145737
252.79	0.28672644		782.79	0.01310163		1312.78	0.05789598		1842.78	-0.00253757		2372.77	0.08998714		2902.77	0.07477469		3432.8	-0.00087873
252.99	0.28715691		782.99	0.01327612		1312.98	0.05864094		1842.98	-0.00307781		2372.97	0.08983579		2902.97	0.0761048		3433	0.00004638
253.19	0.28888626		783.19	0.01425524		1313.18	0.06039416		1843.18	-0.00281269		2373.17	0.09058161		2903.17	0.07688779		3433.2	0.00122628
253.39	0.2898355		783.39	0.01509779		1313.38	0.06150763		1843.38	-0.00230489		2373.37	0.09072537		2903.37	0.07870132		3433.4	0.00143254
253.59	0.29103984		783.59	0.01532436		1313.58	0.06170434		1843.58	-0.00196939		2373.57	0.09138276		2903.57	0.07991775		3433.6	0.0019278
253.79	0.29236897		783.79	0.01519582		1313.78	0.06151536		1843.78	-0.00068296		2373.77	0.0912045		2903.77	0.08034705		3433.8	0.00148534
253.99	0.29236862		783.99	0.01524447		1313.98	0.06011216		1843.98	0.00116355		2373.97	0.09098048		2903.97	0.08051066		3434	0.00114613
254.19	0.29217086		784.19	0.01493612		1314.18	0.05902195		1844.18	0.00247469		2374.17	0.09088675		2904.17	0.0799075		3434.2	0.00040763
254.39	0.29289918		784.39	0.0152273		1314.38	0.05890792		1844.38	0.00405899		2374.37	0.09032366		2904.37	0.08013172		3434.4	-0.00012031
254.59	0.29331958		784.59	0.01577436		1314.58	0.05827378		1844.58	0.00495751		2374.57	0.09097032		2904.57	0.0794682		3434.6	-0.00014837
254.79	0.29379568		784.79	0.0149291		1314.78	0.0580769		1844.78	0.00519242		2374.77	0.09180603		2904.77	0.07870881		3434.8	-0.00056394
254.99	0.29474603		784.99	0.01449622		1314.98	0.05730877		1844.98	0.00585514		2374.97	0.09238165		2904.97	0.07815458		3435	-0.00200629
255.19	0.29531538		785.19	0.01544363		1315.18	0.05797779		1845.18	0.00594126		2375.17	0.09281421		2905.17	0.07816804		3435.2	-0.00229331
255.39	0.29564926		785.39	0.0153316		1315.38	0.05772191		1845.38	0.00567224		2375.37	0.09396876		2905.37	0.07796006		3435.4	-0.00256837
255.59	0.29564346		785.59	0.01577804		1315.58	0.05809161		1845.58	0.00525569		2375.57	0.09452266		2905.57	0.07745823		3435.6	-0.00320157
255.79	0.29511156		785.79	0.0155332		1315.78	0.05800517		1845.78	0.00443817		2375.77	0.09514249		2905.77	0.07715618		3435.8	-0.00284357
255.99	0.29566521		785.99	0.01535742		1315.98	0.05954146		1845.98	0.00337388		2375.97	0.09582474		2905.97	0.07675552		3436	-0.00324898
256.19	0.29567621		786.19	0.01523404		1316.18	0.05982052		1846.18	0.00307378		2376.17	0.09606865		2906.17	0.07711364		3436.2	-0.00186255
256.39	0.29517799		786.39	0.01545752		1316.38	0.06136979		1846.38	0.00235076		2376.37	0.09697127		2906.37	0.07730913		3436.4	-0.00209248
256.59	0.29569536		786.59	0.01631526		1316.58	0.06291856		1846.58	0.00161436		2376.57	0.09738219		2906.57	0.07813562		3436.6	-0.00082999
256.79	0.2957167		786.79	0.01662102		1316.78	0.06398724		1846.78	0.00046704		2376.77	0.09682728		2906.77	0.07821947		3436.8	-0.001373
256.99	0.29572265		786.99	0.01749508		1316.98	0.0642248		1846.98	-0.00022302		2376.97	0.09621491		2906.97	0.07891629		3437	-0.00089291
257.19	0.29614158		787.19	0.01706712		1317.18	0.06529249		1847.18	-0.00024677		2377.17	0.09629326		2907.17	0.07959852		3437.2	-0.00017735
257.39	0.29530359		787.39	0.01774904		1317.38	0.0660413		1847.38	-0.00027655		2377.37	0.09589833		2907.37	0.08026781		3437.4	0.000203
257.59	0.29468651		787.59	0.0171686		1317.58	0.06645671		1847.58	-0.00047565		2377.57	0.09593535		2907.57	0.08124784		3437.6	0.00124417
257.79	0.29490568		787.79	0.01658931		1317.78	0.06579735		1847.78	-0.0008324		2377.77	0.09526913		2907.77	0.08186965		3437.8	0.00068645
257.99	0.29361091		787.99	0.01613643		1317.98	0.0654168		1847.98	-0.00048069		2377.97	0.09544993		2907.97	0.08239707		3438	0.00088452
258.19	0.29385355		788.19	0.01595174		1318.18	0.06556462		1848.18	-0.00000612		2378.17	0.09484063		2908.17	0.08324577		3438.2	-0.0001735
258.39	0.29400039		788.39	0.01569974		1318.38	0.06492647		1848.38	-0.00011273		2378.37	0.0951683		2908.37	0.08307016		3438.4	-0.00064411
258.59	0.29436176		788.59	0.01571539		1318.58	0.06480888		1848.58	0.0001043		2378.57	0.09631198		2908.57	0.08347781		3438.6	-0.00078462
258.79	0.29529035		788.79	0.01593558		1318.78	0.06403467		1848.78	0.00040404		2378.77	0.09655444		2908.77	0.0834499		3438.8	-0.00216357
258.99	0.29611071		788.99	0.01650329		1318.98	0.0638489		1848.98	0.00170532		2378.97	0.09729074		2908.97	0.0834054		3439	-0.00289928
259.19	0.29663994		789.19	0.01699376		1319.18	0.06496097		1849.18	0.00231356		2379.17	0.09747204		2909.17	0.08428975		3439.2	-0.00304777
259.39	0.29779391		789.39	0.01689292		1319.38	0.06514036		1849.38	0.00306678		2379.37	0.09829448		2909.37	0.08335191		3439.4	-0.00413701
259.59	0.29800946		789.59	0.01727481		1319.58	0.06584126		1849.58	0.00415486		2379.57	0.09897969		2909.57	0.08243013		3439.6	-0.00424733
259.79	0.2988192		789.79	0.01671353		1319.78	0.06583295		1849.78	0.00444992		2379.77	0.10000885		2909.77	0.08161251		3439.8	-0.00447296
259.99	0.29920118		789.99	0.01718562		1319.98	0.06605284		1849.98	0.0045517		2379.97	0.1004287		2909.97	0.08156899		3440	-0.00385356
260.19	0.2992202		790.19	0.01820287		1320.18	0.06617996		1850.18	0.00509292		2380.17	0.10095055		2910.17	0.08126322		3440.2	-0.00361603
260.39	0.30010186		790.39	0.01899329		1320.38	0.06749951		1850.38	0.00468348		2380.37	0.10115653		2910.37	0.08130445		3440.4	-0.00475146
260.59	0.30141349		790.59	0.01908994		1320.58	0.06865416		1850.58	0.00494081		2380.57	0.10077374		2910.57	0.08107458		3440.6	-0.00385441
260.79	0.30156957		790.79	0.0191901		1320.78	0.06957737		1850.78	0.00441446		2380.77	0.09959534		2910.77	0.08141824		3440.8	-0.00411868
260.99	0.3024744		790.99	0.01970862		1320.98	0.06992094		1850.98	0.00468982		2380.97	0.09979021		2910.97	0.08239874		3441	-0.00334527
261.19	0.30361109		791.19	0.01929485		1321.18	0.07079034		1851.18	0.00491131		2381.17	0.09899476		2911.17	0.08353605		3441.2	-0.0016425
261.39	0.30353513		791.39	0.02042715		1321.38	0.07098345		1851.38	0.00463001		2381.37	0.09865693		2911.37	0.08489649		3441.4	-0.00040346
261.59	0.30416971		791.59	0.02009904		1321.58	0.0709722		1851.58	0.00431793		2381.57	0.09908087		2911.57	0.08589262		3441.6	0.00040652
261.79	0.30459373		791.79	0.02029757		1321.78	0.0701685		1851.78	0.00409282		2381.77	0.09928199		2911.77	0.08699636		3441.8	0.00024058
261.99	0.30459898		791.99	0.02005478		1321.98	0.06962408		1851.98	0.00443582		2381.97	0.09930278		2911.97	0.08805785		3442	0.00028986
262.19	0.30511024		792.19	0.01911424		1322.18	0.06909922		1852.18	0.00549033		2382.17	0.09913703		2912.17	0.08880538		3442.2	0.00010572
262.39	0.30566752		792.39	0.01878246		1322.38	0.06786324		1852.38	0.0059063		2382.37	0.09931581		2912.37	0.08867922		3442.4	-0.00007622
262.59	0.30642351		792.59	0.0187828		1322.58	0.06794378		1852.58	0.00728914		2382.57	0.09926106		2912.57	0.08875452		3442.6	0.00009741
262.79	0.30674322		792.79	0.0188291		1322.78	0.06688619		1852.78	0.00810702		2382.77	0.09947161		2912.77	0.08750597		3442.8	-0.00076744
262.99	0.30780977		792.99	0.01921981		1322.98	0.06712891		1852.98	0.00876699		2382.97	0.10074657		2912.97	0.08745967		3443	-0.0004452
263.19	0.30844714		793.19	0.01953955		1323.18	0.06776899		1853.18	0.00900595		2383.17	0.10107588		2913.17	0.08743118		3443.2	-0.00127568
263.39	0.30862565		793.39	0.01867126		1323.38	0.06745659		1853.38	0.00925325		2383.37	0.10210148		2913.37	0.08570036		3443.4	-0.00156054
263.59	0.30857037		793.59	0.01866215		1323.58	0.06817461		1853.58	0.0093583		2383.57	0.10324851		2913.57	0.08421227		3443.6	-0.00073583
263.79	0.30902906		793.79	0.01814787		1323.78	0.06791476		1853.78	0.00863547		2383.77	0.10407092		2913.77	0.084612		3443.8	-0.0009656
263.99	0.3086204		793.99	0.01887049		1323.98	0.06810292		1853.98	0.00763018		2383.97	0.1051325		2913.97	0.08476929		3444	-0.00131227
264.19	0.30844159		794.19	0.01937998		1324.18	0.06846284		1854.18	0.00669221		2384.17	0.1053411		2914.17	0.08369996		3444.2	-0.00264803
264.39	0.30882857		794.39	0.02018892		1324.38	0.06981523		1854.38	0.00536666		2384.37	0.10584601		2914.37	0.08347806		3444.4	-0.00265472
264.59	0.31032248		794.59	0.02023464		1324.58	0.07122301		1854.58	0.00416113		2384.57	0.10627822		2914.57	0.08411633		3444.6	-0.00211417
264.79	0.3117067		794.79	0.02015403		1324.78	0.07205963		1854.78	0.00308113		2384.77	0.10626961		2914.77	0.08480118		3444.8	-0.00250291
264.99	0.31354221		794.99	0.02079584		1324.98	0.072658		1854.98	0.00248179		2384.97	0.10626519		2914.97	0.08576865		3445	-0.0024751
265.19	0.31464131		795.19	0.02261845		1325.18	0.07305754		1855.18	0.0018103		2385.17	0.10571572		2915.17	0.08657738		3445.2	-0.00214252
265.39	0.31417202		795.39	0.02380168		1325.38	0.07348812		1855.38	0.00201385		2385.37	0.10612862		2915.37	0.08814876		3445.4	-0.00237084
265.59	0.31502486		795.59	0.02396256		1325.58	0.07346418		1855.58	0.00220973		2385.57	0.10664287		2915.57	0.08928154		3445.6	-0.00327914
265.79	0.31432674		795.79	0.02364544		1325.78	0.07286595		1855.78	0.00201346		2385.77	0.10661963		2915.77	0.09117714		3445.8	-0.00391494
265.99	0.31381873		795.99	0.02350651		1325.98	0.07247347		1855.98	0.00182725		2385.97	0.10550082		2915.97	0.09211677		3446	-0.00477027
266.19	0.31353349		796.19	0.02306686		1326.18	0.07199285		1856.18	0.00368863		2386.17	0.10520117		2916.17	0.09265083		3446.2	-0.00469856
266.39	0.31359671		796.39	0.02316869		1326.38	0.07167935		1856.38	0.0050793		2386.37	0.10474164		2916.37	0.09188058		3446.4	-0.00523577
266.59	0.31287757		796.59	0.02305584		1326.58	0.07205745		1856.58	0.00664711		2386.57	0.10544467		2916.57	0.09069019		3446.6	-0.00496497
266.79	0.31370456		796.79	0.02329052		1326.78	0.07126329		1856.78	0.00762153		2386.77	0.10531046		2916.77	0.09033125		3446.8	-0.00562594
266.99	0.31375555		796.99	0.02410471		1326.98	0.07177445		1856.98	0.00869687		2386.97	0.10503677		2916.97	0.09081069		3447	-0.00437429
267.19	0.3131435		797.19	0.02363073		1327.18	0.072443		1857.18	0.00954101		2387.17	0.10488137		2917.17	0.09068153		3447.2	-0.00457292
267.39	0.31171751		797.39	0.02313425		1327.38	0.0714959		1857.38	0.00915962		2387.37	0.10472943		2917.37	0.08934532		3447.4	-0.00388269
267.59	0.3116179		797.59	0.02342592		1327.58	0.07174582		1857.58	0.00919915		2387.57	0.10536931		2917.57	0.08874809		3447.6	-0.00332863
267.79	0.31127826		797.79	0.02382509		1327.78	0.07132841		1857.78	0.00924281		2387.77	0.10602492		2917.77	0.08961412		3447.8	-0.00294653
267.99	0.31050413		797.99	0.02427637		1327.98	0.07130092		1857.98	0.0082931		2387.97	0.10661569		2917.97	0.08897519		3448	-0.00297765
268.19	0.31103935		798.19	0.02461473		1328.18	0.07191358		1858.18	0.00739149		2388.17	0.10664742		2918.17	0.08843261		3448.2	-0.00344467
268.39	0.31161426		798.39	0.0247613		1328.38	0.07234297		1858.38	0.00669783		2388.37	0.10749933		2918.37	0.08839132		3448.4	-0.00306113
268.59	0.31334355		798.59	0.02452916		1328.58	0.07319687		1858.58	0.00561939		2388.57	0.10815197		2918.57	0.08945807		3448.6	-0.00314005
268.79	0.31406944		798.79	0.02371529		1328.78	0.07368159		1858.78	0.00482519		2388.77	0.10896683		2918.77	0.08969678		3448.8	-0.00308019
268.99	0.31539167		798.99	0.02421289		1328.98	0.0747289		1858.98	0.00418531		2388.97	0.10952665		2918.97	0.09068528		3449	-0.00274575
269.19	0.31735646		799.19	0.02546543		1329.18	0.07510618		1859.18	0.00417855		2389.17	0.11026615		2919.17	0.09183143		3449.2	-0.00329323
269.39	0.31781445		799.39	0.02488753		1329.38	0.07544029		1859.38	0.00400907		2389.37	0.1105158		2919.37	0.09359162		3449.4	-0.00355193
269.59	0.31962034		799.59	0.0251381		1329.58	0.07470777		1859.58	0.00270626		2389.57	0.11127223		2919.57	0.09477679		3449.6	-0.00370269
269.79	0.319935		799.79	0.02517785		1329.78	0.07469834		1859.78	0.00229068		2389.77	0.11209099		2919.77	0.09642239		3449.8	-0.00383161
269.99	0.3203108		799.99	0.02546379		1329.98	0.07490421		1859.98	0.00245417		2389.97	0.11175165		2919.97	0.09681457		3450	-0.0042371
270.19	0.32146648		800.19	0.02423595		1330.18	0.07509642		1860.18	0.00426484		2390.17	0.11214277		2920.17	0.09787515		3450.2	-0.00377627
270.39	0.32212469		800.39	0.02308857		1330.38	0.07547572		1860.38	0.00476414		2390.37	0.11214463		2920.37	0.09791515		3450.4	-0.00398654
270.59	0.32291783		800.59	0.02259379		1330.58	0.07599855		1860.58	0.00573094		2390.57	0.11258165		2920.57	0.09814259		3450.6	-0.00463396
270.79	0.32407028		800.79	0.02306131		1330.78	0.07662601		1860.78	0.00732604		2390.77	0.1118501		2920.77	0.09880798		3450.8	-0.00439512
270.99	0.32315864		800.99	0.02355734		1330.98	0.07708825		1860.98	0.00780409		2390.97	0.11220908		2920.97	0.09862305		3451	-0.00294236
271.19	0.32344896		801.19	0.02381935		1331.18	0.07693143		1861.18	0.00876911		2391.17	0.11278476		2921.17	0.09823972		3451.2	-0.00228546
271.39	0.32339156		801.39	0.02450492		1331.38	0.075835		1861.38	0.0085087		2391.37	0.11255384		2921.37	0.09758213		3451.4	-0.00207203
271.59	0.32412356		801.59	0.02461207		1331.58	0.07646002		1861.58	0.00947544		2391.57	0.11294364		2921.57	0.0973718		3451.6	-0.00232768
271.79	0.32384357		801.79	0.02477552		1331.78	0.07700364		1861.78	0.01045831		2391.77	0.1126487		2921.77	0.09701113		3451.8	-0.00225873
271.99	0.32273895		801.99	0.0255635		1331.98	0.07724287		1861.98	0.00974515		2391.97	0.11216573		2921.97	0.09543946		3452	-0.00256721
272.19	0.32283016		802.19	0.02612002		1332.18	0.07785891		1862.18	0.01034398		2392.17	0.11259874		2922.17	0.09451068		3452.2	-0.00324398
272.39	0.32249998		802.39	0.02638291		1332.38	0.07732579		1862.38	0.00947182		2392.37	0.11214957		2922.37	0.09408821		3452.4	-0.00326622
272.59	0.32171161		802.59	0.02688984		1332.58	0.07832274		1862.58	0.00866245		2392.57	0.11150364		2922.57	0.09430113		3452.6	-0.002839
272.79	0.32127443		802.79	0.02689827		1332.78	0.07863115		1862.78	0.00759439		2392.77	0.11159273		2922.77	0.09448208		3452.8	-0.00307049
272.99	0.32167852		802.99	0.02790782		1332.98	0.0787336		1862.98	0.00636613		2392.97	0.11080004		2922.97	0.09545528		3453	-0.00328202
273.19	0.32203785		803.19	0.02893826		1333.18	0.07877511		1863.18	0.00576658		2393.17	0.11087717		2923.17	0.09578277		3453.2	-0.00395106
273.39	0.32156517		803.39	0.02927666		1333.38	0.07786961		1863.38	0.00404964		2393.37	0.11071882		2923.37	0.09748628		3453.4	-0.00426844
273.59	0.32206549		803.59	0.02906475		1333.58	0.07752794		1863.58	0.00255775		2393.57	0.11136361		2923.57	0.09871554		3453.6	-0.00457994
273.79	0.32209871		803.79	0.02919783		1333.78	0.07758681		1863.78	0.00283293		2393.77	0.11165233		2923.77	0.09958762		3453.8	-0.00544622
273.99	0.32274202		803.99	0.0281203		1333.98	0.07697896		1863.98	0.00227094		2393.97	0.11197483		2923.97	0.10013057		3454	-0.00564726
274.19	0.32358294		804.19	0.02759571		1334.18	0.07648213		1864.18	0.00263969		2394.17	0.111948		2924.17	0.10151409		3454.2	-0.00571586
274.39	0.32470806		804.39	0.02682523		1334.38	0.07531732		1864.38	0.00261981		2394.37	0.11143606		2924.37	0.10198053		3454.4	-0.00639711
274.59	0.32580188		804.59	0.0262152		1334.58	0.07422714		1864.58	0.00284809		2394.57	0.1124917		2924.57	0.10179364		3454.6	-0.0064551
274.79	0.32661879		804.79	0.0266855		1334.78	0.07356039		1864.78	0.00330987		2394.77	0.11262617		2924.77	0.10211765		3454.8	-0.00599773
274.99	0.32770581		804.99	0.0264897		1334.98	0.07334711		1864.98	0.00363021		2394.97	0.11302917		2924.97	0.10160447		3455	-0.00524929
275.19	0.32888531		805.19	0.02657937		1335.18	0.07323064		1865.18	0.00520452		2395.17	0.11405702		2925.17	0.10151508		3455.2	-0.00517468
275.39	0.32970203		805.39	0.02699951		1335.38	0.07363565		1865.38	0.00555934		2395.37	0.11420274		2925.37	0.10133776		3455.4	-0.00576961
275.59	0.33028312		805.59	0.0268222		1335.58	0.07448191		1865.58	0.00642758		2395.57	0.11554359		2925.57	0.10030174		3455.6	-0.00649839
275.79	0.3303199		805.79	0.026925		1335.78	0.07565428		1865.78	0.00736835		2395.77	0.1162134		2925.77	0.09981006		3455.8	-0.00636163
275.99	0.32995712		805.99	0.02800049		1335.98	0.07689189		1865.98	0.00719178		2395.97	0.11634288		2925.97	0.09900149		3456	-0.00629737
276.19	0.33085158		806.19	0.02847213		1336.18	0.07754062		1866.18	0.00790923		2396.17	0.11632874		2926.17	0.09922758		3456.2	-0.00702466
276.39	0.33139754		806.39	0.02795199		1336.38	0.07827695		1866.38	0.00702649		2396.37	0.11534047		2926.37	0.09955263		3456.4	-0.0067222
276.59	0.33028836		806.59	0.02771672		1336.58	0.07913266		1866.58	0.00690275		2396.57	0.11521202		2926.57	0.09988094		3456.6	-0.00638357
276.79	0.33069648		806.79	0.0282744		1336.78	0.0801807		1866.78	0.00665475		2396.77	0.11548593		2926.77	0.1012048		3456.8	-0.00713102
276.99	0.32975912		806.99	0.02892361		1336.98	0.08176098		1866.98	0.00547678		2396.97	0.11582094		2926.97	0.10244965		3457	-0.00703562
277.19	0.32914655		807.19	0.02947723		1337.18	0.08335921		1867.18	0.00490039		2397.17	0.11642319		2927.17	0.10293053		3457.2	-0.00796756
277.39	0.32866235		807.39	0.02997757		1337.38	0.08365643		1867.38	0.003536		2397.37	0.11630247		2927.37	0.1039631		3457.4	-0.00772077
277.59	0.32889987		807.59	0.0293849		1337.58	0.08464953		1867.58	0.00293251		2397.57	0.11673245		2927.57	0.10417693		3457.6	-0.00718366
277.79	0.32861356		807.79	0.02985698		1337.78	0.08456058		1867.78	0.00291566		2397.77	0.11722063		2927.77	0.10479562		3457.8	-0.00721812
277.99	0.32863972		807.99	0.02875401		1337.98	0.08480193		1867.98	0.00196693		2397.97	0.11788052		2927.97	0.10600773		3458	-0.0062173
278.19	0.32929992		808.19	0.02869569		1338.18	0.08359857		1868.18	0.00235462		2398.17	0.11703156		2928.17	0.10724018		3458.2	-0.00631
278.39	0.32956795		808.39	0.02834984		1338.38	0.08183177		1868.38	0.00243898		2398.37	0.11751091		2928.37	0.10719089		3458.4	-0.00540494
278.59	0.32966186		808.59	0.02868627		1338.58	0.080669		1868.58	0.00228733		2398.57	0.11882861		2928.57	0.10660869		3458.6	-0.00518681
278.79	0.32943918		808.79	0.02941091		1338.78	0.08137367		1868.78	0.00282303		2398.77	0.11893553		2928.77	0.10713489		3458.8	-0.00462022
278.99	0.33011099		808.99	0.02945422		1338.98	0.0811451		1868.98	0.00400516		2398.97	0.11993977		2928.97	0.10647659		3459	-0.00382699
279.19	0.33041354		809.19	0.03020007		1339.18	0.08026623		1869.18	0.00493539		2399.17	0.12159809		2929.17	0.1051616		3459.2	-0.00401911
279.39	0.33145453		809.39	0.03139779		1339.38	0.07933548		1869.38	0.00499248		2399.37	0.12251817		2929.37	0.10485094		3459.4	-0.00415394
279.59	0.332654		809.59	0.03079656		1339.58	0.07902212		1869.58	0.00546051		2399.57	0.12370035		2929.57	0.10420159		3459.6	-0.00451294
279.79	0.33332691		809.79	0.03106143		1339.78	0.07942668		1869.78	0.00581103		2399.77	0.12324588		2929.77	0.10410376		3459.8	-0.00402691
279.99	0.33418928		809.99	0.03040745		1339.98	0.07968601		1869.98	0.00525727		2399.97	0.12284429		2929.97	0.10358625		3460	-0.00454437
280.19	0.33562032		810.19	0.03012834		1340.18	0.07879756		1870.18	0.00542708		2400.17	0.12259725		2930.17	0.1045072		3460.2	-0.0054479
280.39	0.33597027		810.39	0.02935591		1340.38	0.07866972		1870.38	0.00498089		2400.37	0.12271014		2930.37	0.1050904		3460.4	-0.00505766
280.59	0.33591618		810.59	0.02952977		1340.58	0.07875292		1870.58	0.00433402		2400.57	0.12260018		2930.57	0.10543449		3460.6	-0.00507265
280.79	0.33640703		810.79	0.03006669		1340.78	0.08026489		1870.78	0.00393619		2400.77	0.12254071		2930.77	0.10678001		3460.8	-0.00566615
280.99	0.33597286		810.99	0.03033752		1340.98	0.08145325		1870.98	0.00235645		2400.97	0.12319734		2930.97	0.1069794		3461	-0.00582372
281.19	0.33571084		811.19	0.03014523		1341.18	0.08241132		1871.18	0.00144318		2401.17	0.12191303		2931.17	0.10671924		3461.2	-0.00586568
281.39	0.33541755		811.39	0.02961695		1341.38	0.08218822		1871.38	0.00041349		2401.37	0.1219115		2931.37	0.10732215		3461.4	-0.00592904
281.59	0.33517275		811.59	0.02911792		1341.58	0.08332982		1871.58	0.00024319		2401.57	0.12218314		2931.57	0.10786847		3461.6	-0.00650208
281.79	0.33546254		811.79	0.02803909		1341.78	0.0833419		1871.78	-0.00002984		2401.77	0.12260258		2931.77	0.10868055		3461.8	-0.00707114
281.99	0.33525213		811.99	0.02851995		1341.98	0.08344105		1871.98	0.00043671		2401.97	0.12298294		2931.97	0.10911008		3462	-0.00690065
282.19	0.33545655		812.19	0.02943353		1342.18	0.08319553		1872.18	0.00122445		2402.17	0.12252662		2932.17	0.10943329		3462.2	-0.00778313
282.39	0.33503235		812.39	0.0300046		1342.38	0.08305345		1872.38	0.00171594		2402.37	0.12318841		2932.37	0.1085335		3462.4	-0.00690286
282.59	0.33503392		812.59	0.03025628		1342.58	0.08357921		1872.58	0.00119583		2402.57	0.12300318		2932.57	0.10836253		3462.6	-0.00643904
282.79	0.33530112		812.79	0.03095701		1342.78	0.08357739		1872.78	0.00160866		2402.77	0.1227261		2932.77	0.10800165		3462.8	-0.00569754
282.99	0.33690143		812.99	0.0311738		1342.98	0.08251034		1872.98	0.00277336		2402.97	0.12284729		2932.97	0.10644593		3463	-0.00563149
283.19	0.33851066		813.19	0.03188768		1343.18	0.08248708		1873.18	0.00261086		2403.17	0.12355572		2933.17	0.10591797		3463.2	-0.00620384
283.39	0.33917199		813.39	0.03272318		1343.38	0.08164066		1873.38	0.002956		2403.37	0.12377585		2933.37	0.10627854		3463.4	-0.00614528
283.59	0.34073996		813.59	0.03222643		1343.58	0.08236991		1873.58	0.00348544		2403.57	0.1243592		2933.57	0.10652127		3463.6	-0.00626255
283.79	0.34141083		813.79	0.0326974		1343.78	0.08278541		1873.78	0.00305754		2403.77	0.12492294		2933.77	0.106447		3463.8	-0.0059704
283.99	0.34182028		813.99	0.03292482		1343.98	0.08269326		1873.98	0.00283392		2403.97	0.12577665		2933.97	0.10705363		3464	-0.00606942
284.19	0.34213487		814.19	0.03310044		1344.18	0.0824565		1874.18	0.00314869		2404.17	0.12583796		2934.17	0.10881855		3464.2	-0.00519412
284.39	0.34241775		814.39	0.03358847		1344.38	0.08340183		1874.38	0.00286503		2404.37	0.12639967		2934.37	0.10878195		3464.4	-0.00409176
284.59	0.34327604		814.59	0.03439017		1344.58	0.08434992		1874.58	0.00285792		2404.57	0.12621072		2934.57	0.10914148		3464.6	-0.00319147
284.79	0.34376235		814.79	0.03481392		1344.78	0.08579317		1874.78	0.00305911		2404.77	0.12638365		2934.77	0.10995091		3464.8	-0.00327543
284.99	0.34348921		814.99	0.03454251		1344.98	0.08636886		1874.98	0.00231359		2404.97	0.12646218		2934.97	0.10993981		3465	-0.00314389
285.19	0.34273189		815.19	0.03416293		1345.18	0.0874497		1875.18	0.00185803		2405.17	0.12656235		2935.17	0.11147769		3465.2	-0.00246163
285.39	0.34226526		815.39	0.03446941		1345.38	0.08793623		1875.38	0.00239253		2405.37	0.12660616		2935.37	0.1125724		3465.4	-0.00300898
285.59	0.34198088		815.59	0.03490901		1345.58	0.089831		1875.58	0.00181312		2405.57	0.12717994		2935.57	0.11328608		3465.6	-0.00248448
285.79	0.34174965		815.79	0.03448553		1345.78	0.09019944		1875.78	0.00136957		2405.77	0.12804255		2935.77	0.11389302		3465.8	-0.00255669
285.99	0.34096092		815.99	0.03588802		1345.98	0.09089815		1875.98	0.00182382		2405.97	0.12773553		2935.97	0.11454565		3466	-0.00276382
286.19	0.34069544		816.19	0.03596159		1346.18	0.09152384		1876.18	0.00190473		2406.17	0.12720714		2936.17	0.1149573		3466.2	-0.00303519
286.39	0.34039218		816.39	0.03582278		1346.38	0.09132137		1876.38	0.00204123		2406.37	0.12824154		2936.37	0.11454551		3466.4	-0.00231831
286.59	0.34114133		816.59	0.03604076		1346.58	0.09100317		1876.58	0.00186584		2406.57	0.12825554		2936.57	0.11463897		3466.6	-0.00248542
286.79	0.34255679		816.79	0.03551757		1346.78	0.08980031		1876.78	0.00287988		2406.77	0.12882898		2936.77	0.11386658		3466.8	-0.00359621
286.99	0.34381578		816.99	0.03462996		1346.98	0.08960654		1876.98	0.00416504		2406.97	0.129735		2936.97	0.11379841		3467	-0.00442387
287.19	0.345392		817.19	0.03456087		1347.18	0.08955543		1877.18	0.00494567		2407.17	0.13053916		2937.17	0.11415027		3467.2	-0.00482163
287.39	0.34544931		817.39	0.034667		1347.38	0.08849651		1877.38	0.00481875		2407.37	0.13170479		2937.37	0.11362138		3467.4	-0.00387747
287.59	0.34639208		817.59	0.03463248		1347.58	0.08831421		1877.58	0.00528204		2407.57	0.13258442		2937.57	0.11299841		3467.6	-0.00370504
287.79	0.3459739		817.79	0.03512287		1347.78	0.08853606		1877.78	0.00520298		2407.77	0.13247932		2937.77	0.11240428		3467.8	-0.002729
287.99	0.3461616		817.99	0.03519125		1347.98	0.08844273		1877.98	0.00567494		2407.97	0.13239864		2937.97	0.11182442		3468	-0.00152481
288.19	0.34629179		818.19	0.03466431		1348.18	0.08915347		1878.18	0.00581063		2408.17	0.13278105		2938.17	0.11090074		3468.2	-0.00025602
288.39	0.34739727		818.39	0.03460568		1348.38	0.09001122		1878.38	0.00578367		2408.37	0.13295306		2938.37	0.11068445		3468.4	0.00032533
288.59	0.34650611		818.59	0.03425464		1348.58	0.0908397		1878.58	0.00647277		2408.57	0.13268076		2938.57	0.11115422		3468.6	0.00116269
288.79	0.34509785		818.79	0.03372633		1348.78	0.09178818		1878.78	0.00609406		2408.77	0.13275526		2938.77	0.11155663		3468.8	0.00188591
288.99	0.34418259		818.99	0.03291195		1348.98	0.0921591		1878.98	0.0060912		2408.97	0.13309881		2938.97	0.11293104		3469	0.00310476
289.19	0.3434823		819.19	0.03319192		1349.18	0.09309846		1879.18	0.00636617		2409.17	0.13406815		2939.17	0.11432433		3469.2	0.00355061
289.39	0.34331692		819.39	0.03323177		1349.38	0.09359433		1879.38	0.00577755		2409.37	0.13304287		2939.37	0.11495589		3469.4	0.0034557
289.59	0.34329933		819.59	0.03302055		1349.58	0.09404919		1879.58	0.00441203		2409.57	0.13331254		2939.57	0.11595621		3469.6	0.00316567
289.79	0.34322716		819.79	0.03297442		1349.78	0.09353121		1879.78	0.00393386		2409.77	0.13286183		2939.77	0.1171734		3469.8	0.00267621
289.99	0.34334369		819.99	0.03396749		1349.98	0.09240576		1879.98	0.00393622		2409.97	0.13246839		2939.97	0.1186191		3470	0.00232297
290.19	0.34317359		820.19	0.0340892		1350.18	0.09117371		1880.18	0.00376428		2410.17	0.13330406		2940.17	0.11956988		3470.2	0.00117189
290.39	0.34399805		820.39	0.03367406		1350.38	0.09060899		1880.38	0.00395705		2410.37	0.13374225		2940.37	0.11999344		3470.4	0.00107184
290.59	0.3457776		820.59	0.03333241		1350.58	0.09020489		1880.58	0.00424607		2410.57	0.13279646		2940.57	0.12082137		3470.6	0.00082055
290.79	0.34678235		820.79	0.03265434		1350.78	0.0902545		1880.78	0.00545713		2410.77	0.13379338		2940.77	0.1203581		3470.8	0.00006948
290.99	0.34771698		820.99	0.03222869		1350.98	0.09042901		1880.98	0.00589501		2410.97	0.13330095		2940.97	0.12053151		3471	-0.00079785
291.19	0.34909012		821.19	0.03227322		1351.18	0.08969724		1881.18	0.00642572		2411.17	0.13372889		2941.17	0.12017824		3471.2	-0.00048267
291.39	0.34911146		821.39	0.03263557		1351.38	0.08997229		1881.38	0.00573607		2411.37	0.13403158		2941.37	0.11932133		3471.4	-0.00066069
291.59	0.34950083		821.59	0.0338989		1351.58	0.09001835		1881.58	0.00698162		2411.57	0.13312756		2941.57	0.11776434		3471.6	-0.00075488
291.79	0.35038222		821.79	0.03466811		1351.78	0.09137714		1881.78	0.00708415		2411.77	0.13261646		2941.77	0.11758703		3471.8	0.00021842
291.99	0.35144247		821.99	0.03469425		1351.98	0.0914204		1881.98	0.00694236		2411.97	0.1330166		2941.97	0.11664202		3472	0.00034183
292.19	0.35150866		822.19	0.03489493		1352.18	0.09338088		1882.18	0.00643787		2412.17	0.13265718		2942.17	0.11649846		3472.2	0.00071983
292.39	0.35151355		822.39	0.03444374		1352.38	0.09436895		1882.38	0.00658883		2412.37	0.13210121		2942.37	0.11683992		3472.4	0.00058662
292.59	0.34995306		822.59	0.03481655		1352.58	0.09573698		1882.58	0.0069263		2412.57	0.13257421		2942.57	0.11655721		3472.6	0.0005196
292.79	0.34919034		822.79	0.03510413		1352.78	0.09620869		1882.78	0.00623529		2412.77	0.13386997		2942.77	0.11740353		3472.8	0.00020724
292.99	0.34915059		822.99	0.03496424		1352.98	0.09651576		1882.98	0.00657014		2412.97	0.13400624		2942.97	0.1185158		3473	-0.00075977
293.19	0.34976892		823.19	0.03624048		1353.18	0.09628258		1883.18	0.00637643		2413.17	0.13439884		2943.17	0.11886071		3473.2	-0.00192502
293.39	0.34955047		823.39	0.03695595		1353.38	0.09664748		1883.38	0.00558634		2413.37	0.13406399		2943.37	0.11955228		3473.4	-0.00319748
293.59	0.34957752		823.59	0.03764365		1353.58	0.09692278		1883.58	0.00496854		2413.57	0.13452084		2943.57	0.12085923		3473.6	-0.00438619
293.79	0.34886816		823.79	0.03814109		1353.78	0.09639738		1883.78	0.00409506		2413.77	0.13501983		2943.77	0.12158869		3473.8	-0.00545771
293.99	0.34851187		823.99	0.03854259		1353.98	0.09549085		1883.98	0.00344122		2413.97	0.13528215		2943.97	0.12192097		3474	-0.0068677
294.19	0.34847992		824.19	0.03915366		1354.18	0.09469076		1884.18	0.00333179		2414.17	0.1353359		2944.17	0.12204919		3474.2	-0.00777691
294.39	0.34900229		824.39	0.03852706		1354.38	0.09549144		1884.38	0.00406506		2414.37	0.1351372		2944.37	0.12168387		3474.4	-0.00698797
294.59	0.35016177		824.59	0.03897151		1354.58	0.09556105		1884.58	0.00415299		2414.57	0.1354493		2944.57	0.12179822		3474.6	-0.00792792
294.79	0.35139211		824.79	0.03829087		1354.78	0.09564712		1884.78	0.00486015		2414.77	0.13596101		2944.77	0.12036421		3474.8	-0.00834307
294.99	0.35249392		824.99	0.03817822		1354.98	0.09572747		1884.98	0.00474617		2414.97	0.13629226		2944.97	0.12022946		3475	-0.00904456
295.19	0.35329272		825.19	0.03822905		1355.18	0.09603808		1885.18	0.00558548		2415.17	0.13707937		2945.17	0.12015404		3475.2	-0.00812955
295.39	0.35434754		825.39	0.03841154		1355.38	0.09621525		1885.38	0.00614189		2415.37	0.13630358		2945.37	0.1193844		3475.4	-0.00840727
295.59	0.3559307		825.59	0.03898975		1355.58	0.09645919		1885.58	0.0067553		2415.57	0.13639996		2945.57	0.11823713		3475.6	-0.00721659
295.79	0.35705833		825.79	0.03881802		1355.78	0.09733273		1885.78	0.00589301		2415.77	0.13634998		2945.77	0.11862216		3475.8	-0.00637164
295.99	0.3576521		825.99	0.03850259		1355.98	0.09797535		1885.98	0.00554493		2415.97	0.13627053		2945.97	0.11837323		3476	-0.00586769
296.19	0.35706783		826.19	0.0392718		1356.18	0.09962475		1886.18	0.00504579		2416.17	0.13624457		2946.17	0.11811875		3476.2	-0.00422064
296.39	0.35694409		826.39	0.0390912		1356.38	0.10005933		1886.38	0.00543454		2416.37	0.13617495		2946.37	0.11755452		3476.4	-0.00394315
296.59	0.35679289		826.59	0.03939262		1356.58	0.10053324		1886.58	0.00520968		2416.57	0.13661029		2946.57	0.11817008		3476.6	-0.00338855
296.79	0.35646065		826.79	0.03933726		1356.78	0.10028546		1886.78	0.00528785		2416.77	0.13707498		2946.77	0.1190477		3476.8	-0.00293887
296.99	0.35612773		826.99	0.04043664		1356.98	0.10031918		1886.98	0.00611465		2416.97	0.13632374		2946.97	0.11906589		3477	-0.00278805
297.19	0.35616967		827.19	0.04085047		1357.18	0.10005917		1887.18	0.00637977		2417.17	0.13613517		2947.17	0.11961049		3477.2	-0.00219941
297.39	0.35499344		827.39	0.04067672		1357.38	0.1012979		1887.38	0.00588704		2417.37	0.13521874		2947.37	0.12045567		3477.4	-0.00214317
297.59	0.35514995		827.59	0.03941728		1357.58	0.09983515		1887.58	0.00637369		2417.57	0.13576677		2947.57	0.12234147		3477.6	-0.00202908
297.79	0.35487066		827.79	0.03882063		1357.78	0.09859784		1887.78	0.00653004		2417.77	0.13563301		2947.77	0.12306442		3477.8	-0.00243936
297.99	0.35499521		827.99	0.0383743		1357.98	0.0969684		1887.98	0.0061761		2417.97	0.13623206		2947.97	0.12413222		3478	-0.00250568
298.19	0.35504074		828.19	0.03839973		1358.18	0.09623278		1888.18	0.0073729		2418.17	0.1368855		2948.17	0.12451132		3478.2	-0.00207552
298.39	0.35597944		828.39	0.03734507		1358.38	0.09588079		1888.38	0.00798983		2418.37	0.13739082		2948.37	0.1245387		3478.4	-0.00222847
298.59	0.35747234		828.59	0.03731085		1358.58	0.09473564		1888.58	0.00855215		2418.57	0.13828784		2948.57	0.12509522		3478.6	-0.003363
298.79	0.3582759		828.79	0.03626308		1358.78	0.09450778		1888.78	0.00848581		2418.77	0.13861081		2948.77	0.12469851		3478.8	-0.00318325
298.99	0.35859838		828.99	0.03579933		1358.98	0.09494262		1888.98	0.00809212		2418.97	0.14031519		2948.97	0.12492923		3479	-0.00343898
299.19	0.35960939		829.19	0.03567612		1359.18	0.09491811		1889.18	0.00833551		2419.17	0.14019878		2949.17	0.12580069		3479.2	-0.00420387
299.39	0.36080421		829.39	0.03565036		1359.38	0.09489539		1889.38	0.00819139		2419.37	0.1402006		2949.37	0.12549547		3479.4	-0.00564531
299.59	0.36106575		829.59	0.03634199		1359.58	0.096539		1889.58	0.00709014		2419.57	0.14087523		2949.57	0.12470019		3479.6	-0.00594576
299.79	0.36127358		829.79	0.03658741		1359.78	0.09641597		1889.78	0.0060817		2419.77	0.14088784		2949.77	0.12499402		3479.8	-0.00615102
299.99	0.36127443		829.99	0.03684758		1359.98	0.09706088		1889.98	0.00549959		2419.97	0.14103129		2949.97	0.12469003		3480	-0.00590378
300.19	0.36118866		830.19	0.03808463		1360.18	0.09819498		1890.18	0.00588752		2420.17	0.14151704		2950.17	0.12350738		3480.2	-0.0055752
300.39	0.36100905		830.39	0.03833629		1360.38	0.09946568		1890.38	0.00605174		2420.37	0.14157375		2950.37	0.12354669		3480.4	-0.00611061
300.59	0.35952657		830.59	0.03991039		1360.58	0.10055398		1890.58	0.00580941		2420.57	0.14165095		2950.57	0.12377658		3480.6	-0.00667819
300.79	0.35882174		830.79	0.0408137		1360.78	0.10158706		1890.78	0.00642995		2420.77	0.14166494		2950.77	0.12457805		3480.8	-0.00794244
300.99	0.35885446		830.99	0.04177636		1360.98	0.10139174		1890.98	0.00562147		2420.97	0.14083592		2950.97	0.12583773		3481	-0.00866459
301.19	0.35858525		831.19	0.04212515		1361.18	0.10145096		1891.18	0.00446899		2421.17	0.1408106		2951.17	0.1273896		3481.2	-0.00968841
301.39	0.35814297		831.39	0.04300594		1361.38	0.1019029		1891.38	0.00507443		2421.37	0.14139677		2951.37	0.12870218		3481.4	-0.01034104
301.59	0.35882981		831.59	0.0422368		1361.58	0.10100502		1891.58	0.00578534		2421.57	0.14235122		2951.57	0.12975313		3481.6	-0.01166071
301.79	0.35938471		831.79	0.0423974		1361.78	0.10117366		1891.78	0.00587055		2421.77	0.14310925		2951.77	0.12985059		3481.8	-0.0116929
301.99	0.36021641		831.99	0.04272175		1361.98	0.10098658		1891.98	0.00621848		2421.97	0.14398348		2951.97	0.130963		3482	-0.01242212
302.19	0.36094928		832.19	0.0418502		1362.18	0.10204406		1892.18	0.00777918		2422.17	0.14440078		2952.17	0.13078547		3482.2	-0.01261453
302.39	0.36225157		832.39	0.04132817		1362.38	0.10187984		1892.38	0.00754536		2422.37	0.14510568		2952.37	0.13116063		3482.4	-0.01246353
302.59	0.36340378		832.59	0.04102613		1362.58	0.10230672		1892.58	0.00714533		2422.57	0.14639465		2952.57	0.13143395		3482.6	-0.01167574
302.79	0.36362943		832.79	0.04036013		1362.78	0.10276707		1892.78	0.00741099		2422.77	0.14664436		2952.77	0.13037846		3482.8	-0.01088495
302.99	0.36477329		832.99	0.04075214		1362.98	0.10306146		1892.98	0.00790355		2422.97	0.14747298		2952.97	0.1305439		3483	-0.00989783
303.19	0.3658588		833.19	0.04076264		1363.18	0.10357081		1893.18	0.00809725		2423.17	0.14734584		2953.17	0.12969296		3483.2	-0.00952583
303.39	0.36651316		833.39	0.04011811		1363.38	0.10393681		1893.38	0.00771888		2423.37	0.14705951		2953.37	0.12803773		3483.4	-0.00832007
303.59	0.36635068		833.59	0.03989263		1363.58	0.10359646		1893.58	0.0068509		2423.57	0.14735584		2953.57	0.12697887		3483.6	-0.00719623
303.79	0.36753325		833.79	0.03984831		1363.78	0.10285754		1893.78	0.00678619		2423.77	0.14789366		2953.77	0.12682086		3483.8	-0.00566048
303.99	0.36792658		833.99	0.03912892		1363.98	0.10304947		1893.98	0.00672827		2423.97	0.14767131		2953.97	0.12590167		3484	-0.00438362
304.19	0.36780117		834.19	0.03955589		1364.18	0.10426393		1894.18	0.00776177		2424.17	0.14714472		2954.17	0.12496507		3484.2	-0.0043568
304.39	0.36635431		834.39	0.03980234		1364.38	0.10520269		1894.38	0.00693815		2424.37	0.14709216		2954.37	0.12589223		3484.4	-0.00390163
304.59	0.36529236		834.59	0.04124498		1364.58	0.10481479		1894.58	0.00560919		2424.57	0.14669992		2954.57	0.1260734		3484.6	-0.00398733
304.79	0.36586701		834.79	0.04079206		1364.78	0.10439493		1894.78	0.00499766		2424.77	0.14618479		2954.77	0.12728829		3484.8	-0.00470451
304.99	0.36592099		834.99	0.04156727		1364.98	0.10277044		1894.98	0.00386996		2424.97	0.14651374		2954.97	0.12779928		3485	-0.00465593
305.19	0.3645059		835.19	0.04254146		1365.18	0.10349296		1895.18	0.00413468		2425.17	0.1471874		2955.17	0.12809426		3485.2	-0.00489237
305.39	0.36387247		835.39	0.04261034		1365.38	0.1036071		1895.38	0.00455604		2425.37	0.14694625		2955.37	0.12889672		3485.4	-0.00487154
305.59	0.36440492		835.59	0.04205414		1365.58	0.10361873		1895.58	0.00377955		2425.57	0.14741809		2955.57	0.12923574		3485.6	-0.00549938
305.79	0.3639805		835.79	0.04242839		1365.78	0.10301847		1895.78	0.00409152		2425.77	0.14836603		2955.77	0.13088158		3485.8	-0.00502291
305.99	0.36387862		835.99	0.04242541		1365.98	0.10333327		1895.98	0.0045127		2425.97	0.14827302		2955.97	0.13253584		3486	-0.00522374
306.19	0.36373617		836.19	0.0417066		1366.18	0.10382081		1896.18	0.00577172		2426.17	0.14862791		2956.17	0.13215822		3486.2	-0.0048801
306.39	0.36430222		836.39	0.04152098		1366.38	0.1025127		1896.38	0.00630693		2426.37	0.1492848		2956.37	0.13301971		3486.4	-0.00397997
306.59	0.36520974		836.59	0.04237733		1366.58	0.10209814		1896.58	0.00638604		2426.57	0.149387		2956.57	0.13288634		3486.6	-0.00293963
306.79	0.36576481		836.79	0.04256678		1366.78	0.10189471		1896.78	0.00739522		2426.77	0.14971332		2956.77	0.13262619		3486.8	-0.00278068
306.99	0.36689938		836.99	0.04283293		1366.98	0.10131466		1896.98	0.00769092		2426.97	0.15031053		2956.97	0.13270723		3487	-0.00245465
307.19	0.36721567		837.19	0.04258038		1367.18	0.10141178		1897.18	0.00779142		2427.17	0.15018488		2957.17	0.13114803		3487.2	-0.00288654
307.39	0.36809995		837.39	0.04253435		1367.38	0.101494		1897.38	0.00805918		2427.37	0.14939764		2957.37	0.13138856		3487.4	-0.00331919
307.59	0.36879781		837.59	0.04306533		1367.58	0.10150185		1897.58	0.0081156		2427.57	0.14957056		2957.57	0.13092443		3487.6	-0.00409005
307.79	0.3705316		837.79	0.04357171		1367.78	0.10119338		1897.78	0.00804863		2427.77	0.14949141		2957.77	0.13003094		3487.8	-0.0039062
307.99	0.37077152		837.99	0.04276717		1367.98	0.10117388		1897.98	0.00769036		2427.97	0.14853774		2957.97	0.12903624		3488	-0.00405419
308.19	0.37040755		838.19	0.04318252		1368.18	0.10185847		1898.18	0.00708399		2428.17	0.14803413		2958.17	0.1284889		3488.2	-0.0051669
308.39	0.37048335		838.39	0.04384329		1368.38	0.10200593		1898.38	0.00583609		2428.37	0.14774673		2958.37	0.1288395		3488.4	-0.00527956
308.59	0.37109166		838.59	0.04447918		1368.58	0.10236587		1898.58	0.00510202		2428.57	0.14796156		2958.57	0.12874813		3488.6	-0.00663535
308.79	0.37185568		838.79	0.04455599		1368.78	0.10333053		1898.78	0.00526244		2428.77	0.14733757		2958.77	0.12835993		3488.8	-0.00801297
308.99	0.37102257		838.99	0.04466584		1368.98	0.1035495		1898.98	0.00555907		2428.97	0.14774029		2958.97	0.12844922		3489	-0.00961866
309.19	0.37057633		839.19	0.04540529		1369.18	0.10497867		1899.18	0.00551814		2429.17	0.14743821		2959.17	0.128267		3489.2	-0.00982198
309.39	0.37059865		839.39	0.04586667		1369.38	0.1049836		1899.38	0.00488663		2429.37	0.14779067		2959.37	0.12886551		3489.4	-0.01100554
309.59	0.37085901		839.59	0.04639794		1369.58	0.10449899		1899.58	0.00509286		2429.57	0.1487614		2959.57	0.12921211		3489.6	-0.01116502
309.79	0.36994816		839.79	0.04651001		1369.78	0.10339159		1899.78	0.00596532		2429.77	0.14826269		2959.77	0.13069576		3489.8	-0.01087101
309.99	0.37026178		839.99	0.04584981		1369.98	0.10298309		1899.98	0.00639161		2429.97	0.14878995		2959.97	0.1318753		3490	-0.01109988
310.19	0.36948502		840.19	0.04599894		1370.18	0.1029287		1900.18	0.00781254		2430.17	0.14872102		2960.17	0.13339278		3490.2	-0.01149161
310.39	0.36958249		840.39	0.04628742		1370.38	0.10152386		1900.38	0.00811199		2430.37	0.14905512		2960.37	0.13542568		3490.4	-0.01052106
310.59	0.3693716		840.59	0.04741881		1370.58	0.10165837		1900.58	0.00795788		2430.57	0.14915547		2960.57	0.13602808		3490.6	-0.00856444
310.79	0.3694832		840.79	0.04691489		1370.78	0.10228152		1900.78	0.00866793		2430.77	0.15030025		2960.77	0.13657187		3490.8	-0.00779478
310.99	0.36903926		840.99	0.04703762		1370.98	0.10178604		1900.98	0.00921916		2430.97	0.15017974		2960.97	0.13700051		3491	-0.00710377
311.19	0.36983756		841.19	0.0475546		1371.18	0.1025379		1901.18	0.00941861		2431.17	0.15027986		2961.17	0.13619908		3491.2	-0.0063889
311.39	0.37115067		841.39	0.04715071		1371.38	0.10353393		1901.38	0.00899974		2431.37	0.15119993		2961.37	0.13651789		3491.4	-0.00553656
311.59	0.37192305		841.59	0.04748196		1371.58	0.10346394		1901.58	0.00825067		2431.57	0.15133974		2961.57	0.13587793		3491.6	-0.00435713
311.79	0.37207859		841.79	0.04720802		1371.78	0.10293618		1901.78	0.00643951		2431.77	0.15176402		2961.77	0.13495716		3491.8	-0.00304833
311.99	0.37184084		841.99	0.04736962		1371.98	0.10283502		1901.98	0.00494018		2431.97	0.15221293		2961.97	0.134594		3492	-0.00253452
312.19	0.37321083		842.19	0.0475331		1372.18	0.1035372		1902.18	0.00378516		2432.17	0.15249667		2962.17	0.13451387		3492.2	-0.00280085
312.39	0.37396625		842.39	0.04822938		1372.38	0.10400502		1902.38	0.00368338		2432.37	0.15273277		2962.37	0.13422264		3492.4	-0.00332866
312.59	0.37450391		842.59	0.04933039		1372.58	0.10538545		1902.58	0.00375233		2432.57	0.1534462		2962.57	0.13395179		3492.6	-0.00340387
312.79	0.37488868		842.79	0.04988175		1372.78	0.10622768		1902.78	0.00413199		2432.77	0.15321985		2962.77	0.1330925		3492.8	-0.00462279
312.99	0.37562072		842.99	0.04960375		1372.98	0.10666252		1902.98	0.00414704		2432.97	0.15286691		2962.97	0.13354015		3493	-0.00654126
313.19	0.37676191		843.19	0.05075213		1373.18	0.10721913		1903.18	0.00391463		2433.17	0.15286022		2963.17	0.13319688		3493.2	-0.00670253
313.39	0.37725655		843.39	0.05117909		1373.38	0.10711089		1903.38	0.00454733		2433.37	0.15295922		2963.37	0.134044		3493.4	-0.00829358
313.59	0.37746717		843.59	0.05069714		1373.58	0.10707336		1903.58	0.00518914		2433.57	0.15394435		2963.57	0.13515313		3493.6	-0.00868591
313.79	0.37644387		843.79	0.04999044		1373.78	0.10784318		1903.78	0.00537642		2433.77	0.15376519		2963.77	0.13716204		3493.8	-0.01034627
313.99	0.37645934		843.99	0.04917772		1373.98	0.10826507		1903.98	0.00574099		2433.97	0.15469591		2963.97	0.13882375		3494	-0.01118783
314.19	0.3758971		844.19	0.0488883		1374.18	0.10869308		1904.18	0.00683771		2434.17	0.15395131		2964.17	0.1401148		3494.2	-0.01214719
314.39	0.37556289		844.39	0.04850753		1374.38	0.10840862		1904.38	0.00769313		2434.37	0.15504287		2964.37	0.14046597		3494.4	-0.0123069
314.59	0.37547306		844.59	0.04724739		1374.58	0.10870604		1904.58	0.00811592		2434.57	0.15483549		2964.57	0.14052134		3494.6	-0.01155508
314.79	0.37571925		844.79	0.04665311		1374.78	0.10841267		1904.78	0.00854773		2434.77	0.15560444		2964.77	0.14099396		3494.8	-0.01146659
314.99	0.37629229		844.99	0.04639504		1374.98	0.1077345		1904.98	0.00867346		2434.97	0.15546996		2964.97	0.14083773		3495	-0.01161934
315.19	0.37733328		845.19	0.04609045		1375.18	0.10811923		1905.18	0.00871039		2435.17	0.15661031		2965.17	0.14046157		3495.2	-0.01089352
315.39	0.37718679		845.39	0.04543409		1375.38	0.10884277		1905.38	0.00814237		2435.37	0.15652748		2965.37	0.14013129		3495.4	-0.0104485
315.59	0.37675724		845.59	0.0458544		1375.58	0.10851667		1905.58	0.00714849		2435.57	0.15608322		2965.57	0.13954102		3495.6	-0.00881824
315.79	0.37695096		845.79	0.04571965		1375.78	0.10783341		1905.78	0.00661896		2435.77	0.15659808		2965.77	0.13914678		3495.8	-0.00777288
315.99	0.37694241		845.99	0.04639329		1375.98	0.10717888		1905.98	0.00633166		2435.97	0.15643926		2965.97	0.13917909		3496	-0.00733085
316.19	0.37786286		846.19	0.04588003		1376.18	0.10778227		1906.18	0.00623482		2436.17	0.15644788		2966.17	0.13938251		3496.2	-0.00633258
316.39	0.37716788		846.39	0.04662171		1376.38	0.10820971		1906.38	0.0062189		2436.37	0.15646889		2966.37	0.13888175		3496.4	-0.00674141
316.59	0.37739113		846.59	0.04754818		1376.58	0.10977537		1906.58	0.00596048		2436.57	0.15695419		2966.57	0.139141		3496.6	-0.00665487
316.79	0.37763752		846.79	0.04759699		1376.78	0.11082881		1906.78	0.00604481		2436.77	0.15729692		2966.77	0.13947184		3496.8	-0.0075842
316.99	0.37794366		846.99	0.04740637		1376.98	0.11134415		1906.98	0.00576407		2436.97	0.1568911		2966.97	0.14039268		3497	-0.00792601
317.19	0.37767025		847.19	0.04795243		1377.18	0.11281241		1907.18	0.00551659		2437.17	0.15730704		2967.17	0.14095249		3497.2	-0.00763121
317.39	0.37756999		847.39	0.04775057		1377.38	0.11366943		1907.38	0.00611077		2437.37	0.15772146		2967.37	0.14148656		3497.4	-0.00805192
317.59	0.37748313		847.59	0.04771896		1377.58	0.11460348		1907.58	0.00586035		2437.57	0.15790888		2967.57	0.14248128		3497.6	-0.00874256
317.79	0.37785442		847.79	0.0474892		1377.78	0.11462007		1907.78	0.00533751		2437.77	0.15720313		2967.77	0.14337436		3497.8	-0.00985399
317.99	0.3790535		847.99	0.04807994		1377.98	0.11415738		1907.98	0.00542416		2437.97	0.15738914		2967.97	0.1437312		3498	-0.00996036
318.19	0.37892238		848.19	0.04759259		1378.18	0.11363231		1908.18	0.00570672		2438.17	0.15722128		2968.17	0.14368979		3498.2	-0.01109914
318.39	0.37841309		848.39	0.04720861		1378.38	0.11278405		1908.38	0.00631222		2438.37	0.15724211		2968.37	0.14338525		3498.4	-0.01103675
318.59	0.37905965		848.59	0.04693653		1378.58	0.11051495		1908.58	0.00661443		2438.57	0.15644342		2968.57	0.14331582		3498.6	-0.01049189
318.79	0.37995984		848.79	0.04726704		1378.78	0.11043246		1908.78	0.00748308		2438.77	0.15635242		2968.77	0.14331883		3498.8	-0.01003425
318.99	0.38078395		848.99	0.04718877		1378.98	0.11002293		1908.98	0.00777674		2438.97	0.15629837		2968.97	0.14294608		3499	-0.00941572
319.19	0.38001596		849.19	0.04773298		1379.18	0.10991478		1909.18	0.00768627		2439.17	0.1570728		2969.17	0.14236552		3499.2	-0.00848526
319.39	0.37967568		849.39	0.04824935		1379.38	0.10994196		1909.38	0.00846356		2439.37	0.156794		2969.37	0.14143915		3499.4	-0.00751729
319.59	0.37992832		849.59	0.04926202		1379.58	0.10967205		1909.58	0.00830825		2439.57	0.15780946		2969.57	0.14101985		3499.6	-0.00584554
319.79	0.38028514		849.79	0.04933748		1379.78	0.10935026		1909.78	0.00854233		2439.77	0.15732559		2969.77	0.14078411		3499.8	-0.00464563
319.99	0.38014859		849.99	0.04937742		1379.98	0.10965649		1909.98	0.00848169		2439.97	0.1569712		2969.97	0.14034835		3500	-0.00420563
320.19	0.38109188		850.19	0.04887504		1380.18	0.11064341		1910.18	0.00794355		2440.17	0.15660039		2970.17	0.13981686		3500.2	-0.00442885
320.39	0.38115628		850.39	0.04922134		1380.38	0.11202338		1910.38	0.00831075		2440.37	0.15662495		2970.37	0.13925346		3500.4	-0.0048664
320.59	0.38099356		850.59	0.04963229		1380.58	0.1131241		1910.58	0.00818411		2440.57	0.15746707		2970.57	0.14019209		3500.6	-0.00497723
320.79	0.38119644		850.79	0.05025199		1380.78	0.11349953		1910.78	0.00709294		2440.77	0.15796027		2970.77	0.14076		3500.8	-0.00574417
320.99	0.38049259		850.99	0.04980473		1380.98	0.11351966		1910.98	0.00692489		2440.97	0.1578561		2970.97	0.14176079		3501	-0.00671635
321.19	0.38033038		851.19	0.05109621		1381.18	0.11527226		1911.18	0.00543481		2441.17	0.15816398		2971.17	0.14270582		3501.2	-0.00768596
321.39	0.38058771		851.39	0.05194544		1381.38	0.11558301		1911.38	0.00518502		2441.37	0.15833223		2971.37	0.14217763		3501.4	-0.0085012
321.59	0.38064938		851.59	0.05339311		1381.58	0.11596254		1911.58	0.00424726		2441.57	0.15818696		2971.57	0.14296842		3501.6	-0.00964575
321.79	0.38073131		851.79	0.05391953		1381.78	0.11555891		1911.78	0.0035273		2441.77	0.15901559		2971.77	0.14322997		3501.8	-0.01019795
321.99	0.38124386		851.99	0.05489691		1381.98	0.11511368		1911.98	0.002758		2441.97	0.15945461		2971.97	0.14398102		3502	-0.01020134
322.19	0.38136451		852.19	0.05393538		1382.18	0.1146929		1912.18	0.00249805		2442.17	0.15972286		2972.17	0.14444747		3502.2	-0.01040812
322.39	0.38195524		852.39	0.0529863		1382.38	0.11376394		1912.38	0.00366754		2442.37	0.15998255		2972.37	0.14470982		3502.4	-0.00944891
322.59	0.38275329		852.59	0.05260076		1382.58	0.11248956		1912.58	0.00395736		2442.57	0.16067311		2972.57	0.14484145		3502.6	-0.00904686
322.79	0.38404759		852.79	0.05189907		1382.78	0.11292583		1912.78	0.0047568		2442.77	0.16045268		2972.77	0.14540085		3502.8	-0.0087803
322.99	0.38424254		852.99	0.05219295		1382.98	0.11183524		1912.98	0.00499609		2442.97	0.16210995		2972.97	0.1456042		3503	-0.00793642
323.19	0.38419275		853.19	0.05227853		1383.18	0.11151446		1913.18	0.00602268		2443.17	0.1625787		2973.17	0.14563773		3503.2	-0.00784057
323.39	0.38554815		853.39	0.05244333		1383.38	0.1114541		1913.38	0.00673086		2443.37	0.16270756		2973.37	0.1458719		3503.4	-0.00672075
323.59	0.38724402		853.59	0.05248239		1383.58	0.11173972		1913.58	0.00715525		2443.57	0.16237993		2973.57	0.14559228		3503.6	-0.00516474
323.79	0.38689047		853.79	0.05174034		1383.78	0.11189602		1913.78	0.00691975		2443.77	0.16149438		2973.77	0.14555651		3503.8	-0.00396452
323.99	0.38786313		853.99	0.05119441		1383.98	0.11237271		1913.98	0.00770334		2443.97	0.16170444		2973.97	0.14615754		3504	-0.00384663
324.19	0.38830239		854.19	0.05103372		1384.18	0.11279438		1914.18	0.00711248		2444.17	0.16154905		2974.17	0.14526743		3504.2	-0.00478579
324.39	0.38827306		854.39	0.05121737		1384.38	0.11405541		1914.38	0.00734082		2444.37	0.16175386		2974.37	0.14570071		3504.4	-0.00520776
324.59	0.38775048		854.59	0.05173121		1384.58	0.11473727		1914.58	0.00669682		2444.57	0.16195431		2974.57	0.14590005		3504.6	-0.00685939
324.79	0.38785278		854.79	0.05233375		1384.78	0.11446252		1914.78	0.00592938		2444.77	0.16275496		2974.77	0.14623957		3504.8	-0.00816588
324.99	0.38637632		854.99	0.0518877		1384.98	0.11515749		1914.98	0.00662959		2444.97	0.16254346		2974.97	0.14571164		3505	-0.00840811
325.19	0.38647186		855.19	0.05337507		1385.18	0.11672527		1915.18	0.00480402		2445.17	0.16215139		2975.17	0.14576419		3505.2	-0.0089441
325.39	0.38671394		855.39	0.05371207		1385.38	0.11728405		1915.38	0.00426979		2445.37	0.16212248		2975.37	0.14532367		3505.4	-0.00934019
325.59	0.38653767		855.59	0.0541326		1385.58	0.11709146		1915.58	0.00356038		2445.57	0.16256234		2975.57	0.14631254		3505.6	-0.01014175
325.79	0.38680615		855.79	0.05387581		1385.78	0.11749191		1915.78	0.00302199		2445.77	0.16337499		2975.77	0.14738199		3505.8	-0.01024321
325.99	0.38731579		855.99	0.05392924		1385.98	0.11848214		1915.98	0.00257473		2445.97	0.16405602		2975.97	0.1481428		3506	-0.01013082
326.19	0.38726669		856.19	0.0532154		1386.18	0.11875055		1916.18	0.00282917		2446.17	0.16463429		2976.17	0.14853669		3506.2	-0.01027056
326.39	0.3872663		856.39	0.05159413		1386.38	0.11788494		1916.38	0.00394642		2446.37	0.16547502		2976.37	0.1484545		3506.4	-0.00970761
326.59	0.38747789		856.59	0.05163587		1386.58	0.11751598		1916.58	0.00428908		2446.57	0.16582166		2976.57	0.14871132		3506.6	-0.00958201
326.79	0.38811401		856.79	0.0507732		1386.78	0.11720636		1916.78	0.00457975		2446.77	0.1652642		2976.77	0.1492182		3506.8	-0.00958345
326.99	0.38870787		856.99	0.05122828		1386.98	0.11767485		1916.98	0.00485113		2446.97	0.16554223		2976.97	0.14973612		3507	-0.00919481
327.19	0.3894713		857.19	0.05096135		1387.18	0.11771639		1917.18	0.0051474		2447.17	0.16554631		2977.17	0.15036764		3507.2	-0.00927609
327.39	0.39041675		857.39	0.05099412		1387.38	0.1175463		1917.38	0.00536392		2447.37	0.16574033		2977.37	0.14989818		3507.4	-0.00781759
327.59	0.39089619		857.59	0.05124854		1387.58	0.11789282		1917.58	0.00648902		2447.57	0.16558891		2977.57	0.14972496		3507.6	-0.00698207
327.79	0.38988851		857.79	0.05113661		1387.78	0.11803909		1917.78	0.00571457		2447.77	0.16584473		2977.77	0.14925313		3507.8	-0.00673767
327.99	0.39195703		857.99	0.05247683		1387.98	0.11774783		1917.98	0.00584491		2447.97	0.16599706		2977.97	0.14941258		3508	-0.00715987
328.19	0.39193417		858.19	0.05346556		1388.18	0.11819802		1918.18	0.00469819		2448.17	0.16506806		2978.17	0.14809626		3508.2	-0.00780527
328.39	0.3921501		858.39	0.05373659		1388.38	0.11920958		1918.38	0.00492535		2448.37	0.16507537		2978.37	0.14799383		3508.4	-0.00833133
328.59	0.39205059		858.59	0.05406528		1388.58	0.11956644		1918.58	0.00401556		2448.57	0.16482869		2978.57	0.14811941		3508.6	-0.00895357
328.79	0.39234162		858.79	0.05489513		1388.78	0.12029586		1918.78	0.00416111		2448.77	0.16514052		2978.77	0.14836881		3508.8	-0.00904064
328.99	0.39271992		858.99	0.05452926		1388.98	0.12053176		1918.98	0.00393375		2448.97	0.16493388		2978.97	0.14837827		3509	-0.00873689
329.19	0.39394806		859.19	0.0555287		1389.18	0.1209251		1919.18	0.00313353		2449.17	0.16442244		2979.17	0.1500232		3509.2	-0.00827287
329.39	0.39397597		859.39	0.05572965		1389.38	0.12074159		1919.38	0.00316821		2449.37	0.16555256		2979.37	0.15112571		3509.4	-0.00794081
329.59	0.39354696		859.59	0.05596987		1389.58	0.11998137		1919.58	0.00418158		2449.57	0.16658719		2979.57	0.15225974		3509.6	-0.0086212
329.79	0.39323713		859.79	0.05610628		1389.78	0.12086297		1919.78	0.00439799		2449.77	0.16689143		2979.77	0.15318566		3509.8	-0.00883539
329.99	0.39337287		859.99	0.05665321		1389.98	0.12076283		1919.98	0.00460517		2449.97	0.16694999		2979.97	0.15355611		3510	-0.0083551
330.19	0.3929459		860.19	0.05626312		1390.18	0.11980062		1920.18	0.00482017		2450.17	0.16768941		2980.17	0.15391869		3510.2	-0.00855788
330.39	0.39350074		860.39	0.05565163		1390.38	0.11896919		1920.38	0.00601165		2450.37	0.16804167		2980.37	0.15454682		3510.4	-0.00846681
330.59	0.39369219		860.59	0.0559332		1390.58	0.11948005		1920.58	0.00605959		2450.57	0.16835749		2980.57	0.15496765		3510.6	-0.00801457
330.79	0.39429823		860.79	0.05546097		1390.78	0.11989205		1920.78	0.0061784		2450.77	0.16799882		2980.77	0.15540152		3510.8	-0.00777684
330.99	0.3945023		860.99	0.05604938		1390.98	0.11962269		1920.98	0.00668929		2450.97	0.16795434		2980.97	0.15583169		3511	-0.00789179
331.19	0.39430938		861.19	0.05662278		1391.18	0.11934061		1921.18	0.00666178		2451.17	0.16800432		2981.17	0.15613079		3511.2	-0.00756006
331.39	0.39515306		861.39	0.05751635		1391.38	0.11912332		1921.38	0.00779637		2451.37	0.16762162		2981.37	0.15521018		3511.4	-0.00770792
331.59	0.39520356		861.59	0.0579454		1391.58	0.11905801		1921.58	0.00822717		2451.57	0.16685303		2981.57	0.15557369		3511.6	-0.0076531
331.79	0.39581102		861.79	0.05848967		1391.78	0.11920541		1921.78	0.00743267		2451.77	0.16566244		2981.77	0.15522365		3511.8	-0.00804261
331.99	0.39623944		861.99	0.05972072		1391.98	0.12020471		1921.98	0.00648717		2451.97	0.16528848		2981.97	0.15505876		3512	-0.00864047
332.19	0.39552983		862.19	0.05962859		1392.18	0.12192024		1922.18	0.00549472		2452.17	0.16468418		2982.17	0.15423957		3512.2	-0.00860763
332.39	0.39529972		862.39	0.05888872		1392.38	0.12350745		1922.38	0.00471605		2452.37	0.16465271		2982.37	0.1547653		3512.4	-0.00971047
332.59	0.39503375		862.59	0.05828712		1392.58	0.1249615		1922.58	0.00336244		2452.57	0.16446371		2982.57	0.15504422		3512.6	-0.01039893
332.79	0.39457393		862.79	0.0584175		1392.78	0.1254291		1922.78	0.00378336		2452.77	0.16484518		2982.77	0.155266		3512.8	-0.00990173
332.99	0.39530719		862.99	0.05768426		1392.98	0.1252469		1922.98	0.00318693		2452.97	0.16550079		2982.97	0.15602823		3513	-0.00986864
333.19	0.39521034		863.19	0.05767092		1393.18	0.12575248		1923.18	0.00214221		2453.17	0.16570155		2983.17	0.15631272		3513.2	-0.00919289
333.39	0.39456152		863.39	0.05674752		1393.38	0.1249918		1923.38	0.00170907		2453.37	0.16707082		2983.37	0.15648641		3513.4	-0.01076894
333.59	0.39414108		863.59	0.05569445		1393.58	0.1238747		1923.58	0.00244134		2453.57	0.16757036		2983.57	0.15660173		3513.6	-0.01179339
333.79	0.39437244		863.79	0.05578954		1393.78	0.12347354		1923.78	0.00187732		2453.77	0.16765307		2983.77	0.15674636		3513.8	-0.01232383
333.99	0.39521544		863.99	0.05572333		1393.98	0.12233526		1923.98	0.00182658		2453.97	0.16830812		2983.97	0.15769155		3514	-0.01124818
334.19	0.39573981		864.19	0.05464747		1394.18	0.12099754		1924.18	0.00206687		2454.17	0.16962164		2984.17	0.15762152		3514.2	-0.01078861
334.39	0.39719167		864.39	0.05423177		1394.38	0.120183		1924.38	0.0026688		2454.37	0.16995724		2984.37	0.15805691		3514.4	-0.01018396
334.59	0.39784167		864.59	0.05445207		1394.58	0.12005438		1924.58	0.00224716		2454.57	0.17047785		2984.57	0.15806984		3514.6	-0.00944493
334.79	0.39833588		864.79	0.05481881		1394.78	0.11881764		1924.78	0.00338081		2454.77	0.17093611		2984.77	0.15846175		3514.8	-0.00832226
334.99	0.39886303		864.99	0.05444082		1394.98	0.1179101		1924.98	0.00349307		2454.97	0.17072004		2984.97	0.1580164		3515	-0.00828988
335.19	0.39953656		865.19	0.05506144		1395.18	0.11767927		1925.18	0.00401114		2455.17	0.17138497		2985.17	0.15780157		3515.2	-0.00721437
335.39	0.40096748		865.39	0.05509909		1395.38	0.11747736		1925.38	0.00513708		2455.37	0.17177937		2985.37	0.15754756		3515.4	-0.00671694
335.59	0.40023259		865.59	0.05502274		1395.58	0.11789141		1925.58	0.00608921		2455.57	0.17243439		2985.57	0.15788094		3515.6	-0.00597753
335.79	0.40074743		865.79	0.05562386		1395.78	0.11903787		1925.78	0.00638622		2455.77	0.17214563		2985.77	0.15734085		3515.8	-0.00613514
335.99	0.4002573		865.99	0.05609862		1395.98	0.11960584		1925.98	0.006108		2455.97	0.17231907		2985.97	0.15666609		3516	-0.00596586
336.19	0.3994436		866.19	0.05571542		1396.18	0.12055445		1926.18	0.00596227		2456.17	0.1718755		2986.17	0.1564445		3516.2	-0.00534151
336.39	0.39871162		866.39	0.05555929		1396.38	0.12160935		1926.38	0.00527748		2456.37	0.17140831		2986.37	0.15624369		3516.4	-0.00561708
336.59	0.39858194		866.59	0.05603294		1396.58	0.12135751		1926.58	0.00518177		2456.57	0.17162075		2986.57	0.15666869		3516.6	-0.00602516
336.79	0.39803646		866.79	0.05710663		1396.78	0.12258979		1926.78	0.00502313		2456.77	0.17140777		2986.77	0.15677033		3516.8	-0.00645944
336.99	0.39777447		866.99	0.05715911		1396.98	0.123455		1926.98	0.00432655		2456.97	0.17150325		2986.97	0.15652085		3517	-0.00765882
337.19	0.39677821		867.19	0.05747526		1397.18	0.1240523		1927.18	0.00387386		2457.17	0.17181828		2987.17	0.1567876		3517.2	-0.00787011
337.39	0.39590232		867.39	0.05705661		1397.38	0.12387131		1927.38	0.00377575		2457.37	0.17176738		2987.37	0.15703135		3517.4	-0.00988828
337.59	0.39502918		867.59	0.05747567		1397.58	0.12362446		1927.58	0.00498665		2457.57	0.17120038		2987.57	0.15777285		3517.6	-0.01027814
337.79	0.39433699		867.79	0.05865627		1397.78	0.12439612		1927.78	0.00373963		2457.77	0.17050936		2987.77	0.15880931		3517.8	-0.01127711
337.99	0.39473359		867.99	0.05882465		1397.98	0.12383815		1927.98	0.00421474		2457.97	0.17044021		2987.97	0.15939252		3518	-0.0102527
338.19	0.39466916		868.19	0.05873053		1398.18	0.12303037		1928.18	0.00393261		2458.17	0.17089748		2988.17	0.15887301		3518.2	-0.01038599
338.39	0.39488657		868.39	0.05922268		1398.38	0.12328868		1928.38	0.00373695		2458.37	0.17105726		2988.37	0.15970496		3518.4	-0.0101443
338.59	0.3951076		868.59	0.05956282		1398.58	0.12229271		1928.58	0.00380109		2458.57	0.17113519		2988.57	0.15934422		3518.6	-0.00998537
338.79	0.39592017		868.79	0.05893325		1398.78	0.12180221		1928.78	0.0040406		2458.77	0.1716566		2988.77	0.1587296		3518.8	-0.00865829
338.99	0.39701195		868.99	0.05771706		1398.98	0.12239026		1928.98	0.00513585		2458.97	0.1716251		2988.97	0.15817691		3519	-0.00832406
339.19	0.39834359		869.19	0.05812373		1399.18	0.12169778		1929.18	0.00593345		2459.17	0.17253765		2989.17	0.15843733		3519.2	-0.00749674
339.39	0.39960213		869.39	0.05782998		1399.38	0.12178971		1929.38	0.0066324		2459.37	0.17310168		2989.37	0.15836275		3519.4	-0.00683223
339.59	0.40060396		869.59	0.05747086		1399.58	0.12178534		1929.58	0.00719655		2459.57	0.17367817		2989.57	0.15829962		3519.6	-0.00643209
339.79	0.40157768		869.79	0.0572797		1399.78	0.1222681		1929.78	0.00772895		2459.77	0.17358509		2989.77	0.1585041		3519.8	-0.00638631
339.99	0.40198474		869.99	0.05705965		1399.98	0.12243513		1929.98	0.00754572		2459.97	0.17368039		2989.97	0.15840633		3520	-0.00623216
340.19	0.40306159		870.19	0.05693385		1400.18	0.1237282		1930.18	0.00726749		2460.17	0.17363167		2990.17	0.15790717		3520.2	-0.00620023
340.39	0.40362256		870.39	0.05627716		1400.38	0.12447462		1930.38	0.00730339		2460.37	0.17317951		2990.37	0.15824081		3520.4	-0.0062437
340.59	0.40366025		870.59	0.05700149		1400.58	0.12454032		1930.58	0.00760408		2460.57	0.1730273		2990.57	0.15971779		3520.6	-0.00750842
340.79	0.40256351		870.79	0.05730565		1400.78	0.12646954		1930.78	0.00624289		2460.77	0.17291667		2990.77	0.15994979		3520.8	-0.00875304
340.99	0.40206641		870.99	0.05763097		1400.98	0.12627028		1930.98	0.00592064		2460.97	0.17315847		2990.97	0.15977755		3521	-0.00916854
341.19	0.40169759		871.19	0.05801345		1401.18	0.12709287		1931.18	0.00538681		2461.17	0.17335881		2991.17	0.16102762		3521.2	-0.00879568
341.39	0.40143006		871.39	0.05884593		1401.38	0.12724056		1931.38	0.00365841		2461.37	0.17325012		2991.37	0.16165182		3521.4	-0.01034359
341.59	0.40088181		871.59	0.05988646		1401.58	0.12720299		1931.58	0.00372425		2461.57	0.17326649		2991.57	0.16194936		3521.6	-0.0108851
341.79	0.40059893		871.79	0.06066973		1401.78	0.12719059		1931.78	0.00260133		2461.77	0.17370058		2991.77	0.16219131		3521.8	-0.01114597
341.99	0.40098293		871.99	0.06094754		1401.98	0.12621202		1931.98	0.00321682		2461.97	0.17444618		2991.97	0.16209036		3522	-0.01089428
342.19	0.40069658		872.19	0.06041587		1402.18	0.12564366		1932.18	0.00299395		2462.17	0.17532226		2992.17	0.16209957		3522.2	-0.01007488
342.39	0.40130147		872.39	0.06070149		1402.38	0.12446686		1932.38	0.00275506		2462.37	0.1755935		2992.37	0.16284041		3522.4	-0.00963255
342.59	0.40205094		872.59	0.05987165		1402.58	0.12353476		1932.58	0.00375499		2462.57	0.17593517		2992.57	0.16163347		3522.6	-0.00923877
342.79	0.40326883		872.79	0.0592704		1402.78	0.12382366		1932.78	0.00411718		2462.77	0.17696661		2992.77	0.16115082		3522.8	-0.00783686
342.99	0.40387514		872.99	0.05977943		1402.98	0.12305025		1932.98	0.00528724		2462.97	0.1776892		2992.97	0.1608532		3523	-0.00718853
343.19	0.40509222		873.19	0.05966748		1403.18	0.12293899		1933.18	0.00485571		2463.17	0.17797852		2993.17	0.16090076		3523.2	-0.00715494
343.39	0.40548978		873.39	0.05929279		1403.38	0.12344997		1933.38	0.00504073		2463.37	0.17836164		2993.37	0.16053174		3523.4	-0.00664534
343.59	0.40558422		873.59	0.05890368		1403.58	0.12406349		1933.58	0.00550701		2463.57	0.17842573		2993.57	0.16030339		3523.6	-0.00603451
343.79	0.4049387		873.79	0.05913194		1403.78	0.1251023		1933.78	0.00609614		2463.77	0.17846655		2993.77	0.15977881		3523.8	-0.00629998
343.99	0.40640201		873.99	0.05949071		1403.98	0.12558108		1933.98	0.00585064		2463.97	0.17719478		2993.97	0.15939578		3524	-0.0062544
344.19	0.40686237		874.19	0.05990358		1404.18	0.12697487		1934.18	0.0058187		2464.17	0.17658267		2994.17	0.15910747		3524.2	-0.00575772
344.39	0.40620031		874.39	0.06008556		1404.38	0.12823871		1934.38	0.00652299		2464.37	0.17684164		2994.37	0.1601267		3524.4	-0.0056681
344.59	0.40577127		874.59	0.06041668		1404.58	0.12952813		1934.58	0.00566663		2464.57	0.17731545		2994.57	0.16070057		3524.6	-0.00657414
344.79	0.40608143		874.79	0.06189168		1404.78	0.13097777		1934.78	0.00473111		2464.77	0.17804991		2994.77	0.16121357		3524.8	-0.00686518
344.99	0.40592125		874.99	0.06224557		1404.98	0.1322919		1934.98	0.00445638		2464.97	0.17755087		2994.97	0.16152894		3525	-0.0062726
345.19	0.40582573		875.19	0.06255318		1405.18	0.13396391		1935.18	0.00314403		2465.17	0.17829431		2995.17	0.16233872		3525.2	-0.00581565
345.39	0.40552265		875.39	0.06376359		1405.38	0.13391448		1935.38	0.00246209		2465.37	0.17887416		2995.37	0.16182616		3525.4	-0.00773242
345.59	0.40533782		875.59	0.06366354		1405.58	0.13285066		1935.58	0.00296714		2465.57	0.178948		2995.57	0.16188344		3525.6	-0.00776852
345.79	0.4053316		875.79	0.06329066		1405.78	0.13242374		1935.78	0.00305548		2465.77	0.17937951		2995.77	0.16251533		3525.8	-0.00833486
345.99	0.40552813		875.99	0.06299026		1405.98	0.13178641		1935.98	0.00319594		2465.97	0.17991957		2995.97	0.16318604		3526	-0.00874044
346.19	0.40674858		876.19	0.06250981		1406.18	0.1310854		1936.18	0.00420917		2466.17	0.18075359		2996.17	0.16352294		3526.2	-0.00823244
346.39	0.40755277		876.39	0.06241709		1406.38	0.12943933		1936.38	0.00484875		2466.37	0.18107029		2996.37	0.16398651		3526.4	-0.0090738
346.59	0.40784096		876.59	0.06086524		1406.58	0.12942072		1936.58	0.00580793		2466.57	0.18144457		2996.57	0.16405875		3526.6	-0.00918246
346.79	0.40790482		876.79	0.06082908		1406.78	0.12911787		1936.78	0.00597082		2466.77	0.18133722		2996.77	0.16396944		3526.8	-0.00893177
346.99	0.40823406		876.99	0.06094494		1406.98	0.12854748		1936.98	0.00536307		2466.97	0.18113084		2996.97	0.16307909		3527	-0.00885208
347.19	0.40905651		877.19	0.06034608		1407.18	0.1289066		1937.18	0.00588643		2467.17	0.18080681		2997.17	0.16297339		3527.2	-0.00919972
347.39	0.40887573		877.39	0.06033303		1407.38	0.128818		1937.38	0.00619866		2467.37	0.18031675		2997.37	0.16266994		3527.4	-0.00901342
347.59	0.40886476		877.59	0.0605993		1407.58	0.12853774		1937.58	0.00710213		2467.57	0.18032072		2997.57	0.16206167		3527.6	-0.00788624
347.79	0.40956466		877.79	0.06164803		1407.78	0.12814656		1937.78	0.00647529		2467.77	0.17997098		2997.77	0.16235224		3527.8	-0.00644466
347.99	0.41124019		877.99	0.06269929		1407.98	0.12877352		1937.98	0.00672681		2467.97	0.17877739		2997.97	0.16258403		3528	-0.00577767
348.19	0.41066625		878.19	0.06380833		1408.18	0.13043546		1938.18	0.00711329		2468.17	0.1793307		2998.17	0.16290679		3528.2	-0.00478207
348.39	0.41099777		878.39	0.06409291		1408.38	0.13230982		1938.38	0.00728947		2468.37	0.18047667		2998.37	0.1634678		3528.4	-0.00524307
348.59	0.41114284		878.59	0.063953		1408.58	0.13402747		1938.58	0.00634709		2468.57	0.17989696		2998.57	0.16381251		3528.6	-0.00577206
348.79	0.41177452		878.79	0.06594748		1408.78	0.13462381		1938.78	0.00634467		2468.77	0.17960789		2998.77	0.16446517		3528.8	-0.00473587
348.99	0.41054899		878.99	0.06489908		1408.98	0.13616668		1938.98	0.00515655		2468.97	0.17902711		2998.97	0.16510118		3529	-0.00472267
349.19	0.40966816		879.19	0.0654272		1409.18	0.13663963		1939.18	0.00434963		2469.17	0.17974295		2999.17	0.16434224		3529.2	-0.0046013
349.39	0.40899816		879.39	0.06641852		1409.38	0.13495303		1939.38	0.00428808		2469.37	0.18027554		2999.37	0.16465604		3529.4	-0.00538357
349.59	0.40886092		879.59	0.06574398		1409.58	0.13420367		1939.58	0.00390053		2469.57	0.1805417		2999.57	0.16571992		3529.6	-0.0056592
349.79	0.40845176		879.79	0.06515925		1409.78	0.13416921		1939.78	0.00381699		2469.77	0.18125587		2999.77	0.16595052		3529.8	-0.00660642
349.99	0.40946957		879.99	0.06493037		1409.98	0.13301987		1939.98	0.003811		2469.97	0.18118535		2999.97	0.16655625		3530	-0.00723193
350.19	0.409423		880.19	0.0637278		1410.18	0.13184532		1940.18	0.00453352		2470.17	0.18138573		3000.17	0.16699002		3530.2	-0.00774908
350.39	0.40889972		880.39	0.06296027		1410.38	0.13095285		1940.38	0.00502819		2470.37	0.18142802		3000.37	0.16728946		3530.4	-0.00806089
350.59	0.40922974		880.59	0.06266169		1410.58	0.13081298		1940.58	0.00497892		2470.57	0.18191487		3000.57	0.1671251		3530.6	-0.00771592
350.79	0.40964667		880.79	0.06198037		1410.78	0.13062745		1940.78	0.00602908		2470.77	0.18203679		3000.77	0.16612953		3530.8	-0.00741007
350.99	0.41030511		880.99	0.06219624		1410.98	0.12982489		1940.98	0.00624146		2470.97	0.18285464		3000.97	0.1650377		3531	-0.0067835
351.19	0.41109697		881.19	0.06198385		1411.18	0.12940833		1941.18	0.00771813		2471.17	0.1835104		3001.17	0.16497307		3531.2	-0.00686092
351.39	0.41087727		881.39	0.06182017		1411.38	0.1293914		1941.38	0.00798759		2471.37	0.18365918		3001.37	0.16496095		3531.4	-0.00667393
351.59	0.41162285		881.59	0.06207106		1411.58	0.12908694		1941.58	0.00866258		2471.57	0.18380568		3001.57	0.16476637		3531.6	-0.00549124
351.79	0.41300761		881.79	0.06305394		1411.78	0.12927025		1941.78	0.00841336		2471.77	0.18340504		3001.77	0.16479339		3531.8	-0.00464705
351.99	0.41373289		881.99	0.06426036		1411.98	0.13048727		1941.98	0.00926542		2471.97	0.182217		3001.97	0.16405275		3532	-0.00572286
352.19	0.41414003		882.19	0.06457395		1412.18	0.13147967		1942.18	0.00921004		2472.17	0.18182742		3002.17	0.16395421		3532.2	-0.00608577
352.39	0.4147712		882.39	0.06444508		1412.38	0.13271308		1942.38	0.00844377		2472.37	0.18145673		3002.37	0.16330275		3532.4	-0.00618808
352.59	0.41538941		882.59	0.0648521		1412.58	0.13393688		1942.58	0.00732013		2472.57	0.18056834		3002.57	0.16360384		3532.6	-0.00705524
352.79	0.41587963		882.79	0.06515439		1412.78	0.13415884		1942.78	0.0069662		2472.77	0.1802983		3002.77	0.16385383		3532.8	-0.00606489
352.99	0.41526393		882.99	0.06503782		1412.98	0.13610775		1942.98	0.00546443		2472.97	0.18059605		3002.97	0.16471047		3533	-0.00729232
353.19	0.41451755		883.19	0.06655781		1413.18	0.13660454		1943.18	0.00512858		2473.17	0.18061828		3003.17	0.16453528		3533.2	-0.00776657
353.39	0.41472006		883.39	0.06762844		1413.38	0.13660174		1943.38	0.00547591		2473.37	0.18081729		3003.37	0.1659417		3533.4	-0.00804867
353.59	0.41467551		883.59	0.06713226		1413.58	0.13720392		1943.58	0.00509693		2473.57	0.18035645		3003.57	0.1672377		3533.6	-0.00866142
353.79	0.41445042		883.79	0.06737657		1413.78	0.13701183		1943.78	0.00490792		2473.77	0.18060967		3003.77	0.16855516		3533.8	-0.00853582
353.99	0.41502497		883.99	0.06699982		1413.98	0.13613329		1943.98	0.00442349		2473.97	0.18072695		3003.97	0.17003383		3534	-0.00899161
354.19	0.41483374		884.19	0.06708512		1414.18	0.13624139		1944.18	0.0046382		2474.17	0.18109488		3004.17	0.17143629		3534.2	-0.00855585
354.39	0.4149956		884.39	0.06780145		1414.38	0.13568636		1944.38	0.00496885		2474.37	0.18158489		3004.37	0.17203326		3534.4	-0.00854451
354.59	0.41606214		884.59	0.06794523		1414.58	0.13506786		1944.58	0.00459304		2474.57	0.18242117		3004.57	0.17224075		3534.6	-0.00849869
354.79	0.41651882		884.79	0.06647821		1414.78	0.13564054		1944.78	0.0052997		2474.77	0.18320785		3004.77	0.17205668		3534.8	-0.00862703
354.99	0.41652603		884.99	0.06668219		1414.98	0.13551291		1944.98	0.0057706		2474.97	0.183894		3004.97	0.1719886		3535	-0.00788285
355.19	0.41709609		885.19	0.06570916		1415.18	0.13505234		1945.18	0.00628762		2475.17	0.18410892		3005.17	0.17196354		3535.2	-0.00786079
355.39	0.41661718		885.39	0.06466544		1415.38	0.13589882		1945.38	0.00622138		2475.37	0.18403851		3005.37	0.17195311		3535.4	-0.00803212
355.59	0.41770528		885.59	0.06427918		1415.58	0.13546822		1945.58	0.00664687		2475.57	0.18367402		3005.57	0.17126232		3535.6	-0.00754439
355.79	0.4177717		885.79	0.06448546		1415.78	0.13618994		1945.78	0.00582259		2475.77	0.18387997		3005.77	0.17044361		3535.8	-0.00757563
355.99	0.41794553		885.99	0.06376505		1415.98	0.13680911		1945.98	0.00477906		2475.97	0.18395639		3005.97	0.16969283		3536	-0.00750047
356.19	0.41759314		886.19	0.06346484		1416.18	0.13810889		1946.18	0.00323106		2476.17	0.18400844		3006.17	0.16892012		3536.2	-0.00685539
356.39	0.41704989		886.39	0.06389198		1416.38	0.13913952		1946.38	0.00143307		2476.37	0.18340956		3006.37	0.16806997		3536.4	-0.00706
356.59	0.41648673		886.59	0.06496318		1416.58	0.13985767		1946.58	0.00059244		2476.57	0.18326394		3006.57	0.16782224		3536.6	-0.0084312
356.79	0.4158091		886.79	0.06487167		1416.78	0.14108048		1946.78	0.00064193		2476.77	0.18309921		3006.77	0.16717059		3536.8	-0.00890679
356.99	0.41445354		886.99	0.06611669		1416.98	0.14265033		1946.98	-0.00011356		2476.97	0.1832743		3006.97	0.16713266		3537	-0.00993684
357.19	0.41260119		887.19	0.06686228		1417.18	0.14298978		1947.18	-0.00013088		2477.17	0.18262		3007.17	0.16640526		3537.2	-0.01025999
357.39	0.41295616		887.39	0.06685332		1417.38	0.14331996		1947.38	0.00034061		2477.37	0.18175954		3007.37	0.16690529		3537.4	-0.00967743
357.59	0.41311062		887.59	0.06639343		1417.58	0.1432594		1947.58	0.00064326		2477.57	0.18208035		3007.57	0.16786986		3537.6	-0.0097792
357.79	0.41239705		887.79	0.06601321		1417.78	0.14253146		1947.78	0.0006693		2477.77	0.18227375		3007.77	0.16914308		3537.8	-0.01060957
357.99	0.41269715		887.99	0.06622553		1417.98	0.14178254		1947.98	0.0005511		2477.97	0.18218724		3007.97	0.17024286		3538	-0.01147003
358.19	0.41298809		888.19	0.06665493		1418.18	0.14138858		1948.18	0.00149182		2478.17	0.18189371		3008.17	0.17060012		3538.2	-0.01175603
358.39	0.41359445		888.39	0.06656348		1418.38	0.14075925		1948.38	0.00241324		2478.37	0.18221745		3008.37	0.170964		3538.4	-0.01242338
358.59	0.41522009		888.59	0.0665238		1418.58	0.14039716		1948.58	0.00382631		2478.57	0.18317818		3008.57	0.17106384		3538.6	-0.01251737
358.79	0.41605721		888.79	0.06575974		1418.78	0.14048955		1948.78	0.00572113		2478.77	0.18391756		3008.77	0.17160663		3538.8	-0.01213102
358.99	0.41652331		888.99	0.06628805		1418.98	0.1398875		1948.98	0.00706415		2478.97	0.18419911		3008.97	0.17225096		3539	-0.01169177
359.19	0.41792396		889.19	0.06567045		1419.18	0.13911334		1949.18	0.00839401		2479.17	0.1848905		3009.17	0.17287976		3539.2	-0.01130259
359.39	0.41802478		889.39	0.06634555		1419.38	0.13877707		1949.38	0.00860767		2479.37	0.18551417		3009.37	0.17343667		3539.4	-0.01106836
359.59	0.42017771		889.59	0.0672904		1419.58	0.13849252		1949.58	0.00870093		2479.57	0.18594078		3009.57	0.17361706		3539.6	-0.01074872
359.79	0.42087564		889.79	0.06806652		1419.78	0.1391213		1949.78	0.00776601		2479.77	0.18670646		3009.77	0.17314476		3539.8	-0.00988475
359.99	0.42178122		889.99	0.06932304		1419.98	0.13897691		1949.98	0.00767463		2479.97	0.18752722		3009.97	0.17322974		3540	-0.0084348
360.19	0.4210847		890.19	0.0716119		1420.18	0.13956105		1950.18	0.00775931		2480.17	0.18669602		3010.17	0.17251315		3540.2	-0.00822214
360.39	0.42099713		890.39	0.07265697		1420.38	0.14069635		1950.38	0.00794042		2480.37	0.18649967		3010.37	0.17238225		3540.4	-0.00876273
360.59	0.41988283		890.59	0.07335425		1420.58	0.14146318		1950.58	0.00767162		2480.57	0.18669482		3010.57	0.17146262		3540.6	-0.00867672
360.79	0.41892037		890.79	0.07252763		1420.78	0.14265981		1950.78	0.0058725		2480.77	0.18708169		3010.77	0.17036902		3540.8	-0.00890201
360.99	0.41851909		890.99	0.07282879		1420.98	0.14277844		1950.98	0.00529783		2480.97	0.18738297		3010.97	0.16964975		3541	-0.007857
361.19	0.41797		891.19	0.07256401		1421.18	0.14319173		1951.18	0.0039797		2481.17	0.18707221		3011.17	0.16888821		3541.2	-0.00763433
361.39	0.41832153		891.39	0.07195893		1421.38	0.14276001		1951.38	0.00347936		2481.37	0.18694382		3011.37	0.16860814		3541.4	-0.00737469
361.59	0.4174774		891.59	0.07166122		1421.58	0.14248111		1951.58	0.00232267		2481.57	0.18746363		3011.57	0.16952336		3541.6	-0.00853811
361.79	0.41635957		891.79	0.0713917		1421.78	0.14188342		1951.78	0.00189799		2481.77	0.18669335		3011.77	0.16961908		3541.8	-0.00961148
361.99	0.41713833		891.99	0.07214096		1421.98	0.14136093		1951.98	0.00215803		2481.97	0.18610944		3011.97	0.16979859		3542	-0.00988362
362.19	0.41775501		892.19	0.07164608		1422.18	0.14157907		1952.18	0.0034548		2482.17	0.18688948		3012.17	0.16952916		3542.2	-0.00999166
362.39	0.41910778		892.39	0.07164719		1422.38	0.14083292		1952.38	0.0037378		2482.37	0.18796891		3012.37	0.17009158		3542.4	-0.01035145
362.59	0.42011214		892.59	0.07110391		1422.58	0.13958979		1952.58	0.00460009		2482.57	0.18816344		3012.57	0.17033185		3542.6	-0.01027279
362.79	0.42096515		892.79	0.07141998		1422.78	0.14025976		1952.78	0.00558492		2482.77	0.18864291		3012.77	0.17122296		3542.8	-0.01012552
362.99	0.42172737		892.99	0.07138349		1422.98	0.14054866		1952.98	0.00647978		2482.97	0.18933606		3012.97	0.17131427		3543	-0.0103908
363.19	0.42292382		893.19	0.07139055		1423.18	0.1398158		1953.18	0.00636897		2483.17	0.19026006		3013.17	0.17232394		3543.2	-0.0101118
363.39	0.42376031		893.39	0.07158171		1423.38	0.13960436		1953.38	0.00633088		2483.37	0.18988191		3013.37	0.17222284		3543.4	-0.0099491
363.59	0.42459117		893.59	0.07012053		1423.58	0.14036068		1953.58	0.00610011		2483.57	0.19029737		3013.57	0.17219932		3543.6	-0.00953427
363.79	0.42352823		893.79	0.07037356		1423.78	0.14079978		1953.78	0.00706133		2483.77	0.19079445		3013.77	0.17196794		3543.8	-0.00875587
363.99	0.42289228		893.99	0.07112443		1423.98	0.1415703		1953.98	0.00801211		2483.97	0.19090725		3013.97	0.1726355		3544	-0.00804803
364.19	0.42178902		894.19	0.07095507		1424.18	0.14366517		1954.18	0.00861395		2484.17	0.19019736		3014.17	0.17227845		3544.2	-0.00870689
364.39	0.42036769		894.39	0.0706623		1424.38	0.14568662		1954.38	0.00764986		2484.37	0.19013427		3014.37	0.17286077		3544.4	-0.0081514
364.59	0.41891049		894.59	0.07001719		1424.58	0.14567914		1954.58	0.00646953		2484.57	0.1897018		3014.57	0.17187208		3544.6	-0.0073506
364.79	0.41755304		894.79	0.06982875		1424.78	0.14617157		1954.78	0.004987		2484.77	0.19031054		3014.77	0.17180092		3544.8	-0.00735057
364.99	0.41798329		894.99	0.06978193		1424.98	0.14711696		1954.98	0.00498322		2484.97	0.18977143		3014.97	0.17224854		3545	-0.00658773
365.19	0.41674067		895.19	0.06967593		1425.18	0.14721574		1955.18	0.00367127		2485.17	0.18939186		3015.17	0.172591		3545.2	-0.00722177
365.39	0.41660254		895.39	0.06959522		1425.38	0.14652258		1955.38	0.00287758		2485.37	0.18859979		3015.37	0.17344328		3545.4	-0.00767743
365.59	0.41704953		895.59	0.06961548		1425.58	0.14710103		1955.58	0.003445		2485.57	0.18822632		3015.57	0.1741972		3545.6	-0.0088394
365.79	0.41755756		895.79	0.07031379		1425.78	0.14661237		1955.78	0.00423814		2485.77	0.18750391		3015.77	0.17452683		3545.8	-0.00883412
365.99	0.41895413		895.99	0.07112952		1425.98	0.1458857		1955.98	0.00432707		2485.97	0.18794805		3015.97	0.17534689		3546	-0.00919181
366.19	0.42006245		896.19	0.07122726		1426.18	0.14623236		1956.18	0.00464712		2486.17	0.1890628		3016.17	0.17546126		3546.2	-0.00981328
366.39	0.42133157		896.39	0.07169321		1426.38	0.14604143		1956.38	0.00481795		2486.37	0.18893511		3016.37	0.17553793		3546.4	-0.00997294
366.59	0.42260726		896.59	0.07195996		1426.58	0.14617152		1956.58	0.00515887		2486.57	0.18831056		3016.57	0.175794		3546.6	-0.00968284
366.79	0.42392314		896.79	0.07286832		1426.78	0.14632463		1956.78	0.00575716		2486.77	0.18870242		3016.77	0.17571846		3546.8	-0.00963242
366.99	0.42534162		896.99	0.07254609		1426.98	0.14522065		1956.98	0.00601568		2486.97	0.18881421		3016.97	0.17556723		3547	-0.00993236
367.19	0.42684069		897.19	0.07215617		1427.18	0.14462636		1957.18	0.0058715		2487.17	0.19000499		3017.17	0.17644113		3547.2	-0.01020259
367.39	0.42723563		897.39	0.07114666		1427.38	0.14472265		1957.38	0.0063734		2487.37	0.18955089		3017.37	0.17553505		3547.4	-0.00993879
367.59	0.42747836		897.59	0.0707318		1427.58	0.14520529		1957.58	0.00647103		2487.57	0.19029839		3017.57	0.17565228		3547.6	-0.00977604
367.79	0.42768431		897.79	0.07156745		1427.78	0.1457704		1957.78	0.0073408		2487.77	0.19005273		3017.77	0.17575408		3547.8	-0.01017383
367.99	0.42801253		897.99	0.07169365		1427.98	0.14606342		1957.98	0.00685823		2487.97	0.18987592		3017.97	0.17491644		3548	-0.0100469
368.19	0.42745623		898.19	0.07172739		1428.18	0.14704637		1958.18	0.00654887		2488.17	0.19017204		3018.17	0.17378939		3548.2	-0.00957344
368.39	0.4267168		898.39	0.07237568		1428.38	0.14681351		1958.38	0.00620131		2488.37	0.18984924		3018.37	0.17401896		3548.4	-0.00865199
368.59	0.42621974		898.59	0.07173315		1428.58	0.14698996		1958.58	0.00622672		2488.57	0.19023634		3018.57	0.17407096		3548.6	-0.00875291
368.79	0.42551695		898.79	0.07212275		1428.78	0.14727903		1958.78	0.00493069		2488.77	0.19079069		3018.77	0.17438796		3548.8	-0.00918923
368.99	0.42514832		898.99	0.07147587		1428.98	0.14766464		1958.98	0.00441034		2488.97	0.19028596		3018.97	0.17476574		3549	-0.00894891
369.19	0.4237455		899.19	0.07145952		1429.18	0.14809616		1959.18	0.00397997		2489.17	0.19124818		3019.17	0.17549429		3549.2	-0.00857481
369.39	0.42379318		899.39	0.07107943		1429.38	0.14778391		1959.38	0.0039695		2489.37	0.19136641		3019.37	0.17611591		3549.4	-0.00849536
369.59	0.42314941		899.59	0.07052954		1429.58	0.14773265		1959.58	0.00423608		2489.57	0.19210537		3019.57	0.17632654		3549.6	-0.00893923
369.79	0.42213851		899.79	0.07102324		1429.78	0.14680076		1959.78	0.00417214		2489.77	0.19167389		3019.77	0.1769673		3549.8	-0.00924812
369.99	0.42280835		899.99	0.07079387		1429.98	0.14701235		1959.98	0.00451691		2489.97	0.19233063		3019.97	0.17728437		3550	-0.00947754
370.19	0.42359671		900.19	0.07063638		1430.18	0.14715992		1960.18	0.00555725		2490.17	0.19169874		3020.17	0.17748093		3550.2	-0.01004212
370.39	0.42439772		900.39	0.0706548		1430.38	0.14695944		1960.38	0.00645733		2490.37	0.19237842		3020.37	0.17750701		3550.4	-0.0096356
370.59	0.4261286		900.59	0.07092539		1430.58	0.14654887		1960.58	0.00678598		2490.57	0.19221909		3020.57	0.17748592		3550.6	-0.01029922
370.79	0.42701246		900.79	0.07090607		1430.78	0.14566422		1960.78	0.0073504		2490.77	0.19293297		3020.77	0.17753983		3550.8	-0.0102713
370.99	0.42846865		900.99	0.07125252		1430.98	0.14529054		1960.98	0.0082855		2490.97	0.19416615		3020.97	0.17808675		3551	-0.01055612
371.19	0.42945337		901.19	0.07018845		1431.18	0.14537645		1961.18	0.00925585		2491.17	0.19498782		3021.17	0.17812522		3551.2	-0.01036996
371.39	0.43011035		901.39	0.06967195		1431.38	0.14566519		1961.38	0.0093261		2491.37	0.19447885		3021.37	0.1769708		3551.4	-0.00987378
371.59	0.43158158		901.59	0.06944722		1431.58	0.14600257		1961.58	0.01020539		2491.57	0.1944624		3021.57	0.17725753		3551.6	-0.00962548
371.79	0.4319714		901.79	0.06977064		1431.78	0.14626011		1961.78	0.01069233		2491.77	0.19410549		3021.77	0.17753723		3551.8	-0.00944106
371.99	0.43195213		901.99	0.06988641		1431.98	0.14686959		1961.98	0.01021074		2491.97	0.19442201		3021.97	0.17697713		3552	-0.00891701
372.19	0.4308076		902.19	0.07035321		1432.18	0.14713596		1962.18	0.01073181		2492.17	0.19395393		3022.17	0.1768633		3552.2	-0.00766462
372.39	0.43010327		902.39	0.07088696		1432.38	0.14798023		1962.38	0.01032816		2492.37	0.19317246		3022.37	0.17723586		3552.4	-0.00703
372.59	0.42903775		902.59	0.07072291		1432.58	0.1491839		1962.58	0.00860404		2492.57	0.19335088		3022.57	0.17778378		3552.6	-0.00714159
372.79	0.42745678		902.79	0.07145057		1432.78	0.14967274		1962.78	0.00693852		2492.77	0.19281805		3022.77	0.17828757		3552.8	-0.0070197
372.99	0.42595685		902.99	0.07108425		1432.98	0.15093787		1962.98	0.00551123		2492.97	0.19227608		3022.97	0.17802336		3553	-0.00735084
373.19	0.4249383		903.19	0.0712427		1433.18	0.15111498		1963.18	0.00412356		2493.17	0.19252906		3023.17	0.17758485		3553.2	-0.006738
373.39	0.42443389		903.39	0.07056968		1433.38	0.15042164		1963.38	0.0030542		2493.37	0.19246251		3023.37	0.17825561		3553.4	-0.0071668
373.59	0.4224851		903.59	0.07091475		1433.58	0.15093061		1963.58	0.00200378		2493.57	0.19171333		3023.57	0.17842102		3553.6	-0.00765252
373.79	0.42211294		903.79	0.07165468		1433.78	0.15080062		1963.78	0.00166853		2493.77	0.19156291		3023.77	0.17812136		3553.8	-0.00787658
373.99	0.42261907		903.99	0.07153996		1433.98	0.15082264		1963.98	0.00180274		2493.97	0.19289972		3023.97	0.17826212		3554	-0.00785748
374.19	0.42334057		904.19	0.07136287		1434.18	0.14981081		1964.18	0.00228938		2494.17	0.19376638		3024.17	0.17819973		3554.2	-0.00872618
374.39	0.42394411		904.39	0.07197921		1434.38	0.1490998		1964.38	0.00235032		2494.37	0.19585358		3024.37	0.17792617		3554.4	-0.00874864
374.59	0.42522456		904.59	0.07275966		1434.58	0.14912291		1964.58	0.00266955		2494.57	0.19599503		3024.57	0.17736015		3554.6	-0.00970102
374.79	0.42533126		904.79	0.07347445		1434.78	0.14829318		1964.78	0.00244898		2494.77	0.19766049		3024.77	0.17763471		3554.8	-0.00928678
374.99	0.42700171		904.99	0.07346665		1434.98	0.14876788		1964.98	0.00400615		2494.97	0.19843408		3024.97	0.17772947		3555	-0.00821574
375.19	0.42790031		905.19	0.07329929		1435.18	0.14913416		1965.18	0.00581984		2495.17	0.19810587		3025.17	0.17797254		3555.2	-0.00779067
375.39	0.42896337		905.39	0.07385666		1435.38	0.14926972		1965.38	0.00644018		2495.37	0.1988127		3025.37	0.17803175		3555.4	-0.00776789
375.59	0.43025188		905.59	0.07402671		1435.58	0.14946721		1965.58	0.00812184		2495.57	0.19877335		3025.57	0.17885499		3555.6	-0.00768352
375.79	0.43094164		905.79	0.07417125		1435.78	0.15060257		1965.78	0.00862822		2495.77	0.19936683		3025.77	0.18000994		3555.8	-0.00738929
375.99	0.43075491		905.99	0.07375514		1435.98	0.1509625		1965.98	0.00920141		2495.97	0.19914954		3025.97	0.18011403		3556	-0.00664222
376.19	0.4303249		906.19	0.07441758		1436.18	0.1515031		1966.18	0.00969647		2496.17	0.19859462		3026.17	0.18031108		3556.2	-0.00571067
376.39	0.43036724		906.39	0.07458285		1436.38	0.15225299		1966.38	0.00991107		2496.37	0.1976759		3026.37	0.1817139		3556.4	-0.0057914
376.59	0.43043955		906.59	0.07382834		1436.58	0.15327365		1966.58	0.00907678		2496.57	0.19657898		3026.57	0.18288225		3556.6	-0.00704692
376.79	0.43037567		906.79	0.07487108		1436.78	0.15363564		1966.78	0.00926429		2496.77	0.19516206		3026.77	0.18349676		3556.8	-0.00781935
376.99	0.43033829		906.99	0.07422015		1436.98	0.15440431		1966.98	0.00738774		2496.97	0.19439193		3026.97	0.18305895		3557	-0.00858125
377.19	0.43009487		907.19	0.07399423		1437.18	0.15407937		1967.18	0.00639355		2497.17	0.19385387		3027.17	0.18384261		3557.2	-0.00876929
377.39	0.42925344		907.39	0.07473843		1437.38	0.15529164		1967.38	0.00545736		2497.37	0.1933018		3027.37	0.184625		3557.4	-0.00938278
377.59	0.4278862		907.59	0.07485551		1437.58	0.15570172		1967.58	0.00492364		2497.57	0.19309696		3027.57	0.18486191		3557.6	-0.01009417
377.79	0.42769203		907.79	0.07497229		1437.78	0.15464341		1967.78	0.00471801		2497.77	0.19403791		3027.77	0.184813		3557.8	-0.01146979
377.99	0.42729589		907.99	0.07484903		1437.98	0.15376083		1967.98	0.00506113		2497.97	0.19490586		3027.97	0.18491663		3558	-0.01294614
378.19	0.42752557		908.19	0.07539187		1438.18	0.15283252		1968.18	0.00488609		2498.17	0.19550799		3028.17	0.18472163		3558.2	-0.01414857
378.39	0.42745005		908.39	0.07678103		1438.38	0.15235907		1968.38	0.00485459		2498.37	0.19607501		3028.37	0.1845002		3558.4	-0.01479307
378.59	0.42788848		908.59	0.07768078		1438.58	0.15245266		1968.58	0.00478452		2498.57	0.19634078		3028.57	0.18401294		3558.6	-0.01576311
378.79	0.42811347		908.79	0.07863776		1438.78	0.15219969		1968.78	0.00444896		2498.77	0.19725348		3028.77	0.18414263		3558.8	-0.01562526
378.99	0.42920772		908.99	0.07916584		1438.98	0.15259186		1968.98	0.0054861		2498.97	0.19776738		3028.97	0.18394987		3559	-0.01506533
379.19	0.42989895		909.19	0.08040878		1439.18	0.15238963		1969.18	0.00572686		2499.17	0.19827677		3029.17	0.18397114		3559.2	-0.01530548
379.39	0.43078474		909.39	0.08089682		1439.38	0.15218156		1969.38	0.00560314		2499.37	0.19954364		3029.37	0.18337962		3559.4	-0.01513804
379.59	0.43178025		909.59	0.08124944		1439.58	0.15276863		1969.58	0.00608969		2499.57	0.20010039		3029.57	0.18323749		3559.6	-0.01464051
379.79	0.43224007		909.79	0.08173394		1439.78	0.15336724		1969.78	0.0059627		2499.77	0.2008491		3029.77	0.18345929		3559.8	-0.01373176
379.99	0.43224007		909.99	0.08173394		1439.98	0.15336724		1969.98	0.0059627		2499.97	0.2008491		3029.97	0.18345929		3560	-0.01373176
380.19	0.43115247		910.19	0.08274739		1440.18	0.1528381		1970.18	0.00605543		2500.17	0.20162271		3030.17	0.18318416		3560.2	-0.01315376
380.39	0.43022352		910.39	0.08410647		1440.38	0.15216728		1970.38	0.00647809		2500.37	0.20145261		3030.37	0.18282541		3560.4	-0.01290361
380.59	0.42922294		910.59	0.08619195		1440.58	0.15178245		1970.58	0.00629354		2500.57	0.20227627		3030.57	0.18259106		3560.6	-0.01307192
380.79	0.42850059		910.79	0.08724834		1440.78	0.15119368		1970.78	0.00617012		2500.77	0.20269473		3030.77	0.18297075		3560.8	-0.01350911
380.99	0.42738227		910.99	0.08882617		1440.98	0.14970157		1970.98	0.00649468		2500.97	0.20314763		3030.97	0.18311505		3561	-0.0134862
381.19	0.42606326		911.19	0.08980652		1441.18	0.14903717		1971.18	0.00577469		2501.17	0.20372696		3031.17	0.18307218		3561.2	-0.0131368
381.39	0.4253548		911.39	0.0905849		1441.38	0.14839057		1971.38	0.00562482		2501.37	0.20310278		3031.37	0.18343527		3561.4	-0.01321201
381.59	0.42494673		911.59	0.09177765		1441.58	0.14862082		1971.58	0.00574754		2501.57	0.20341901		3031.57	0.18381388		3561.6	-0.01407999
381.79	0.42434793		911.79	0.09326194		1441.78	0.14853408		1971.78	0.00554315		2501.77	0.20411108		3031.77	0.18397953		3561.8	-0.01527041
381.99	0.42490054		911.99	0.09266697		1441.98	0.14949405		1971.98	0.00527733		2501.97	0.20426895		3031.97	0.18420807		3562	-0.01592038
382.19	0.42514836		912.19	0.09207153		1442.18	0.14997456		1972.18	0.00452234		2502.17	0.20417848		3032.17	0.18533021		3562.2	-0.01693839
382.39	0.4251354		912.39	0.09266708		1442.38	0.15027176		1972.38	0.00307432		2502.37	0.20417601		3032.37	0.18615667		3562.4	-0.01609923
382.59	0.42516959		912.59	0.09242688		1442.58	0.15082488		1972.58	0.0021723		2502.57	0.20482247		3032.57	0.18669757		3562.6	-0.01587885
382.79	0.42579642		912.79	0.09266107		1442.78	0.15123188		1972.78	0.00208915		2502.77	0.2055101		3032.77	0.18691786		3562.8	-0.01568813
382.99	0.42596385		912.99	0.09320309		1442.98	0.15236078		1972.98	0.00257704		2502.97	0.20604118		3032.97	0.18783802		3563	-0.01570334
383.19	0.42671805		913.19	0.09317737		1443.18	0.15302837		1973.18	0.003493		2503.17	0.20632562		3033.17	0.18677557		3563.2	-0.01586391
383.39	0.42603665		913.39	0.09318455		1443.38	0.15406199		1973.38	0.00418946		2503.37	0.20582915		3033.37	0.18730523		3563.4	-0.01482623
383.59	0.42552596		913.59	0.09204825		1443.58	0.15361156		1973.58	0.00514581		2503.57	0.20632934		3033.57	0.18695821		3563.6	-0.01412811
383.79	0.42580887		913.79	0.09176821		1443.78	0.1540033		1973.78	0.0057146		2503.77	0.20667258		3033.77	0.18714535		3563.8	-0.0132512
383.99	0.42658264		913.99	0.09100324		1443.98	0.15340592		1973.98	0.00602827		2503.97	0.20699497		3033.97	0.18771858		3564	-0.01261869
384.19	0.42727581		914.19	0.09067964		1444.18	0.15432238		1974.18	0.00645659		2504.17	0.20674656		3034.17	0.18725354		3564.2	-0.01247231
384.39	0.4275524		914.39	0.09118848		1444.38	0.15464226		1974.38	0.00621609		2504.37	0.20634895		3034.37	0.18774779		3564.4	-0.01227633
384.59	0.4274697		914.59	0.09148102		1444.58	0.15452326		1974.58	0.00621809		2504.57	0.20671435		3034.57	0.18789074		3564.6	-0.01149141
384.79	0.42733064		914.79	0.08985211		1444.78	0.15325882		1974.78	0.00615573		2504.77	0.20625379		3034.77	0.18836967		3564.8	-0.01158753
384.99	0.42680302		914.99	0.09043275		1444.98	0.15149603		1974.98	0.00664772		2504.97	0.20642386		3034.97	0.18868688		3565	-0.01060822
385.19	0.42637293		915.19	0.09078467		1445.18	0.15124995		1975.18	0.00621114		2505.17	0.20587924		3035.17	0.18851515		3565.2	-0.0102834
385.39	0.42645351		915.39	0.09113045		1445.38	0.15041028		1975.38	0.00619726		2505.37	0.20559274		3035.37	0.18822825		3565.4	-0.01089378
385.59	0.4266074		915.59	0.09191452		1445.58	0.15078365		1975.58	0.00547449		2505.57	0.20675887		3035.57	0.18868155		3565.6	-0.01113748
385.79	0.42673013		915.79	0.09134279		1445.78	0.15036941		1975.78	0.00483528		2505.77	0.20735644		3035.77	0.18911303		3565.8	-0.0113173
385.99	0.42720154		915.99	0.09097859		1445.98	0.15082994		1975.98	0.00435591		2505.97	0.20711118		3035.97	0.18947325		3566	-0.01077899
386.19	0.42655956		916.19	0.09109834		1446.18	0.15040161		1976.18	0.00336197		2506.17	0.20795394		3036.17	0.19028863		3566.2	-0.01065332
386.39	0.426146		916.39	0.09215741		1446.38	0.15046099		1976.38	0.0022384		2506.37	0.20723151		3036.37	0.18992772		3566.4	-0.01056327
386.59	0.42673102		916.59	0.09178518		1446.58	0.15011644		1976.58	0.00229584		2506.57	0.20688161		3036.57	0.18954613		3566.6	-0.01123222
386.79	0.42769869		916.79	0.09223901		1446.78	0.15059986		1976.78	0.00125284		2506.77	0.20710752		3036.77	0.18978545		3566.8	-0.01219156
386.99	0.42810036		916.99	0.09267075		1446.98	0.15077134		1976.98	0.00079562		2506.97	0.2069946		3036.97	0.19072156		3567	-0.01402069
387.19	0.42759517		917.19	0.09306885		1447.18	0.14986244		1977.18	0.0016258		2507.17	0.20677754		3037.17	0.18973993		3567.2	-0.01483223
387.39	0.42683623		917.39	0.09282801		1447.38	0.15113387		1977.38	0.00225699		2507.37	0.20710633		3037.37	0.19031567		3567.4	-0.01486794
387.59	0.42669085		917.59	0.09165346		1447.58	0.1511382		1977.58	0.00184177		2507.57	0.20748067		3037.57	0.19039664		3567.6	-0.01556897
387.79	0.42688435		917.79	0.09168486		1447.78	0.15127549		1977.78	0.00234359		2507.77	0.20659529		3037.77	0.18988213		3567.8	-0.01502905
387.99	0.42748954		917.99	0.09135655		1447.98	0.15143087		1977.98	0.00217013		2507.97	0.20563911		3037.97	0.1902051		3568	-0.01491388
388.19	0.42757685		918.19	0.09178355		1448.18	0.15106278		1978.18	0.00290287		2508.17	0.20529424		3038.17	0.19048756		3568.2	-0.01434914
388.39	0.42773865		918.39	0.09257523		1448.38	0.15160964		1978.38	0.00340891		2508.37	0.20487854		3038.37	0.1905737		3568.4	-0.01426383
388.59	0.42733747		918.59	0.09205198		1448.58	0.15033148		1978.58	0.00546169		2508.57	0.20365614		3038.57	0.1903197		3568.6	-0.01424611
388.79	0.42768818		918.79	0.09105077		1448.78	0.14980408		1978.78	0.00593572		2508.77	0.20395264		3038.77	0.18957816		3568.8	-0.01410549
388.99	0.42795923		918.99	0.09244909		1448.98	0.149573		1978.98	0.00741699		2508.97	0.20363142		3038.97	0.18951542		3569	-0.01292276
389.19	0.42824897		919.19	0.09265492		1449.18	0.1495304		1979.18	0.00773452		2509.17	0.2029208		3039.17	0.18926024		3569.2	-0.01243326
389.39	0.4287303		919.39	0.0919712		1449.38	0.14905894		1979.38	0.00765656		2509.37	0.20297005		3039.37	0.18981122		3569.4	-0.01177012
389.59	0.42930877		919.59	0.09186339		1449.58	0.15025731		1979.58	0.00805425		2509.57	0.20231595		3039.57	0.19087645		3569.6	-0.01126925
389.79	0.42966419		919.79	0.0913623		1449.78	0.15093649		1979.78	0.00964726		2509.77	0.20230105		3039.77	0.19088886		3569.8	-0.01103133
389.99	0.42960788		919.99	0.09230614		1449.98	0.15184937		1979.98	0.00976365		2509.97	0.20260215		3039.97	0.19069222		3570	-0.01087938
390.19	0.42938844		920.19	0.09197728		1450.18	0.15229949		1980.18	0.00874545		2510.17	0.20276175		3040.17	0.19048693		3570.2	-0.01131758
390.39	0.43043113		920.39	0.0925934		1450.38	0.15292562		1980.38	0.00663759		2510.37	0.20130823		3040.37	0.1907991		3570.4	-0.01217752
390.59	0.43148726		920.59	0.09248597		1450.58	0.15264629		1980.58	0.00556797		2510.57	0.20215498		3040.57	0.19075349		3570.6	-0.01220432
390.79	0.43154923		920.79	0.09297101		1450.78	0.15266133		1980.78	0.00459583		2510.77	0.20339956		3040.77	0.19066069		3570.8	-0.01286115
390.99	0.43084867		920.99	0.09333069		1450.98	0.15246035		1980.98	0.00448478		2510.97	0.20359126		3040.97	0.19051869		3571	-0.01391179
391.19	0.42975381		921.19	0.09354768		1451.18	0.15246374		1981.18	0.00490294		2511.17	0.20420822		3041.17	0.18961152		3571.2	-0.01302629
391.39	0.42916131		921.39	0.09334438		1451.38	0.15261621		1981.38	0.00433886		2511.37	0.20537251		3041.37	0.18994421		3571.4	-0.01312105
391.59	0.42900433		921.59	0.09260072		1451.58	0.15267997		1981.58	0.00410084		2511.57	0.20571754		3041.57	0.19025392		3571.6	-0.01256779
391.79	0.42913085		921.79	0.09335482		1451.78	0.15199168		1981.78	0.00573126		2511.77	0.20610456		3041.77	0.19015134		3571.8	-0.01137942
391.99	0.42934173		921.99	0.09343293		1451.98	0.15116614		1981.98	0.00731378		2511.97	0.20573146		3041.97	0.19065146		3572	-0.01189313
392.19	0.42980828		922.19	0.093664		1452.18	0.15030889		1982.18	0.0095411		2512.17	0.20606627		3042.17	0.19034399		3572.2	-0.01157888
392.39	0.43017577		922.39	0.09484523		1452.38	0.1506495		1982.38	0.01049675		2512.37	0.20594764		3042.37	0.19001512		3572.4	-0.01125397
392.59	0.42947273		922.59	0.09411502		1452.58	0.14872869		1982.58	0.0120518		2512.57	0.20599206		3042.57	0.1905497		3572.6	-0.01119079
392.79	0.43009947		922.79	0.09418334		1452.78	0.1490129		1982.78	0.01238987		2512.77	0.20629853		3042.77	0.18964468		3572.8	-0.01073781
392.99	0.43026433		922.99	0.09437802		1452.98	0.1493195		1982.98	0.01285745		2512.97	0.20520965		3042.97	0.19039497		3573	-0.01061024
393.19	0.43028414		923.19	0.0938018		1453.18	0.14989804		1983.18	0.01346129		2513.17	0.20429991		3043.17	0.19050705		3573.2	-0.01052738
393.39	0.43036671		923.39	0.09303243		1453.38	0.14989722		1983.38	0.01380044		2513.37	0.20325245		3043.37	0.19115208		3573.4	-0.01077693
393.59	0.43080053		923.59	0.09249665		1453.58	0.15028408		1983.58	0.01418182		2513.57	0.20271692		3043.57	0.19108524		3573.6	-0.01055981
393.79	0.43121575		923.79	0.09274773		1453.78	0.15057439		1983.78	0.01354437		2513.77	0.2028057		3043.77	0.19057532		3573.8	-0.01050389
393.99	0.43068706		923.99	0.09350479		1453.98	0.15153863		1983.98	0.01189213		2513.97	0.20218929		3043.97	0.18961471		3574	-0.01132099
394.19	0.43035657		924.19	0.09359551		1454.18	0.15196105		1984.18	0.01017159		2514.17	0.20167592		3044.17	0.18950151		3574.2	-0.01130054
394.39	0.43138839		924.39	0.09382454		1454.38	0.15223541		1984.38	0.00781846		2514.37	0.20188526		3044.37	0.18919919		3574.4	-0.01200634
394.59	0.43128784		924.59	0.09383541		1454.58	0.15150421		1984.58	0.00699453		2514.57	0.2023685		3044.57	0.18739122		3574.6	-0.01241103
394.79	0.43091384		924.79	0.09354328		1454.78	0.1515694		1984.78	0.00650613		2514.77	0.20264082		3044.77	0.18666651		3574.8	-0.01316779
394.99	0.43022319		924.99	0.0934716		1454.98	0.15174725		1984.98	0.00613094		2514.97	0.20273635		3044.97	0.18615348		3575	-0.0134523
395.19	0.43013286		925.19	0.09284135		1455.18	0.15131295		1985.18	0.00533413		2515.17	0.20324423		3045.17	0.18579537		3575.2	-0.01387907
395.39	0.42930178		925.39	0.09260321		1455.38	0.15129033		1985.38	0.00578567		2515.37	0.20347173		3045.37	0.18591738		3575.4	-0.0143341
395.59	0.42848865		925.59	0.09245102		1455.58	0.15215713		1985.58	0.00714943		2515.57	0.20329966		3045.57	0.18614503		3575.6	-0.01311729
395.79	0.42719699		925.79	0.09242213		1455.78	0.15105774		1985.78	0.00871519		2515.77	0.2033439		3045.77	0.18644079		3575.8	-0.01341454
395.99	0.42672074		925.99	0.09227447		1455.98	0.15052974		1985.98	0.01039133		2515.97	0.20333703		3045.97	0.18625712		3576	-0.01359488
396.19	0.4259719		926.19	0.09236003		1456.18	0.15096581		1986.18	0.01192759		2516.17	0.20395251		3046.17	0.1862843		3576.2	-0.01270341
396.39	0.42588737		926.39	0.09290383		1456.38	0.15069948		1986.38	0.01200246		2516.37	0.20386917		3046.37	0.18717306		3576.4	-0.013577
396.59	0.42573796		926.59	0.09140952		1456.58	0.15043855		1986.58	0.0136013		2516.57	0.20353163		3046.57	0.18734947		3576.6	-0.0140305
396.79	0.42610954		926.79	0.0907872		1456.78	0.15123883		1986.78	0.01424156		2516.77	0.20377865		3046.77	0.18687092		3576.8	-0.01363391
396.99	0.42597241		926.99	0.09052114		1456.98	0.15224855		1986.98	0.0153074		2516.97	0.2037878		3046.97	0.18703665		3577	-0.01382587
397.19	0.42628292		927.19	0.09051056		1457.18	0.15252166		1987.18	0.01635038		2517.17	0.20379353		3047.17	0.18721661		3577.2	-0.01352578
397.39	0.42661094		927.39	0.09010965		1457.38	0.1518726		1987.38	0.01549882		2517.37	0.20400629		3047.37	0.18840492		3577.4	-0.01409871
397.59	0.42759187		927.59	0.09012219		1457.58	0.15197151		1987.58	0.01494332		2517.57	0.20459475		3047.57	0.1890319		3577.6	-0.01413354
397.79	0.42727851		927.79	0.09041171		1457.78	0.15255818		1987.78	0.0140095		2517.77	0.20422274		3047.77	0.18948932		3577.8	-0.01456931
397.99	0.42705326		927.99	0.09079488		1457.98	0.15295512		1987.98	0.01355328		2517.97	0.2044565		3047.97	0.19021145		3578	-0.01448327
398.19	0.42766854		928.19	0.09062817		1458.18	0.15221066		1988.18	0.01208283		2518.17	0.20412152		3048.17	0.19048846		3578.2	-0.0139686
398.39	0.42777706		928.39	0.09041869		1458.38	0.15131154		1988.38	0.01075305		2518.37	0.20369147		3048.37	0.19020494		3578.4	-0.01439765
398.59	0.42770822		928.59	0.0899276		1458.58	0.15084781		1988.58	0.0093665		2518.57	0.2037837		3048.57	0.18999139		3578.6	-0.01458201
398.79	0.4280629		928.79	0.09032984		1458.78	0.15056353		1988.78	0.00847001		2518.77	0.20409988		3048.77	0.19086523		3578.8	-0.01433471
398.99	0.42743257		928.99	0.09079113		1458.98	0.150012		1988.98	0.00748247		2518.97	0.2036696		3048.97	0.1906222		3579	-0.01434345
399.19	0.42613698		929.19	0.09097539		1459.18	0.14976623		1989.18	0.00623968		2519.17	0.20302281		3049.17	0.18993052		3579.2	-0.0149204
399.39	0.42446		929.39	0.0921908		1459.38	0.14965832		1989.38	0.00710909		2519.37	0.20231199		3049.37	0.18989117		3579.4	-0.01392959
399.59	0.42456507		929.59	0.09272045		1459.58	0.14940672		1989.58	0.00760402		2519.57	0.20217775		3049.57	0.1889514		3579.6	-0.01290812
399.79	0.42469799		929.79	0.09332278		1459.78	0.14980677		1989.78	0.00863033		2519.77	0.2022432		3049.77	0.18849367		3579.8	-0.01279166
399.99	0.42496987		929.99	0.0945637		1459.98	0.14961308		1989.98	0.00935589		2519.97	0.20210542		3049.97	0.18713555		3580	-0.01267232
400.19	0.4247096		930.19	0.094718		1460.18	0.14966776		1990.18	0.0102654		2520.17	0.20126143		3050.17	0.18609963		3580.2	-0.01322456
400.39	0.42503053		930.39	0.09459756		1460.38	0.1492595		1990.38	0.01164534		2520.37	0.2005265		3050.37	0.18531943		3580.4	-0.01454545
400.59	0.42574207		930.59	0.09400776		1460.58	0.14972802		1990.58	0.01270885		2520.57	0.20019342		3050.57	0.18359922		3580.6	-0.01438857
400.79	0.42635816		930.79	0.09511971		1460.78	0.14965572		1990.78	0.0136655		2520.77	0.20002823		3050.77	0.18284847		3580.8	-0.01438459
400.99	0.42687161		930.99	0.0959498		1460.98	0.15087583		1990.98	0.01404521		2520.97	0.19986115		3050.97	0.18286211		3581	-0.01525435
401.19	0.42765306		931.19	0.09618827		1461.18	0.15098849		1991.18	0.01368564		2521.17	0.19976803		3051.17	0.18314794		3581.2	-0.01510254
401.39	0.42752226		931.39	0.09572662		1461.38	0.15106592		1991.38	0.01277867		2521.37	0.20043253		3051.37	0.18338363		3581.4	-0.01614912
401.59	0.42792218		931.59	0.09482817		1461.58	0.15139326		1991.58	0.01346768		2521.57	0.20016734		3051.57	0.18437678		3581.6	-0.01567964
401.79	0.42784463		931.79	0.09393949		1461.78	0.15110786		1991.78	0.01286377		2521.77	0.19977391		3051.77	0.18478425		3581.8	-0.01466464
401.99	0.42745579		931.99	0.09389996		1461.98	0.15087538		1991.98	0.01230141		2521.97	0.20104167		3051.97	0.18501036		3582	-0.01350498
402.19	0.42719988		932.19	0.09259762		1462.18	0.15085983		1992.18	0.01145725		2522.17	0.20048212		3052.17	0.18440382		3582.2	-0.01293324
402.39	0.42623009		932.39	0.09154798		1462.38	0.1502651		1992.38	0.00948454		2522.37	0.20036718		3052.37	0.18528503		3582.4	-0.01311097
402.59	0.42711328		932.59	0.09182102		1462.58	0.1504397		1992.58	0.00777245		2522.57	0.20144477		3052.57	0.18570594		3582.6	-0.0128373
402.79	0.42790257		932.79	0.09186406		1462.78	0.15002114		1992.78	0.00682636		2522.77	0.20126338		3052.77	0.1869444		3582.8	-0.01241595
402.99	0.42706507		932.99	0.09080274		1462.98	0.14917269		1992.98	0.00577958		2522.97	0.2017494		3052.97	0.1876975		3583	-0.01223367
403.19	0.4268419		933.19	0.09037802		1463.18	0.1490483		1993.18	0.00567939		2523.17	0.20217861		3053.17	0.18811396		3583.2	-0.01206198
403.39	0.42728172		933.39	0.09026819		1463.38	0.14921273		1993.38	0.00685331		2523.37	0.20198553		3053.37	0.18866091		3583.4	-0.01147217
403.59	0.42843683		933.59	0.09052526		1463.58	0.14954886		1993.58	0.00754576		2523.57	0.20224829		3053.57	0.18780338		3583.6	-0.01113614
403.79	0.42854462		933.79	0.09062346		1463.78	0.15018308		1993.78	0.00814515		2523.77	0.20239411		3053.77	0.18812969		3583.8	-0.01100045
403.99	0.42816307		933.99	0.09150851		1463.98	0.15005365		1993.98	0.00786642		2523.97	0.2023273		3053.97	0.18765637		3584	-0.01219084
404.19	0.42769019		934.19	0.09097463		1464.18	0.15024364		1994.18	0.00932568		2524.17	0.20191875		3054.17	0.18756613		3584.2	-0.0136309
404.39	0.42793791		934.39	0.09063115		1464.38	0.14994038		1994.38	0.01092036		2524.37	0.20202797		3054.37	0.18710038		3584.4	-0.0151452
404.59	0.42872296		934.59	0.09090508		1464.58	0.15061943		1994.58	0.0109084		2524.57	0.20252399		3054.57	0.18637047		3584.6	-0.01646076
404.79	0.42893203		934.79	0.09208979		1464.78	0.15031411		1994.78	0.01217638		2524.77	0.20275393		3054.77	0.18632963		3584.8	-0.01627563
404.99	0.42913888		934.99	0.09324592		1464.98	0.15046588		1994.98	0.01297058		2524.97	0.20344404		3054.97	0.18605674		3585	-0.01709265
405.19	0.42900856		935.19	0.09343875		1465.18	0.14956296		1995.18	0.01395385		2525.17	0.20413408		3055.17	0.18534694		3585.2	-0.01774483
405.39	0.42923258		935.39	0.09357418		1465.38	0.14987229		1995.38	0.0144307		2525.37	0.20393144		3055.37	0.1848438		3585.4	-0.01849651
405.59	0.42835892		935.59	0.09329488		1465.58	0.15056719		1995.58	0.01555623		2525.57	0.20375976		3055.57	0.18462759		3585.6	-0.01824188
405.79	0.42776869		935.79	0.09450741		1465.78	0.1501825		1995.78	0.0147416		2525.77	0.20474041		3055.77	0.18379941		3585.8	-0.01743309
405.99	0.42703159		935.99	0.09446066		1465.98	0.1504031		1995.98	0.01456104		2525.97	0.20474438		3055.97	0.18317215		3586	-0.01694265
406.19	0.42686833		936.19	0.09377893		1466.18	0.1508238		1996.18	0.01385344		2526.17	0.20393714		3056.17	0.18279716		3586.2	-0.01696542
406.39	0.42708589		936.39	0.09399155		1466.38	0.15020159		1996.38	0.01184459		2526.37	0.20277483		3056.37	0.18327921		3586.4	-0.0174985
406.59	0.42777938		936.59	0.09417786		1466.58	0.15097671		1996.58	0.01134033		2526.57	0.20324761		3056.57	0.18381353		3586.6	-0.01700959
406.79	0.42738678		936.79	0.09337834		1466.78	0.15039182		1996.78	0.01133818		2526.77	0.20193205		3056.77	0.18524559		3586.8	-0.01763337
406.99	0.42703062		936.99	0.09276292		1466.98	0.14947996		1996.98	0.01168801		2526.97	0.20165633		3056.97	0.1860818		3587	-0.01725693
407.19	0.42717203		937.19	0.09307309		1467.18	0.14992907		1997.18	0.0123936		2527.17	0.20059525		3057.17	0.18631734		3587.2	-0.01640734
407.39	0.42672639		937.39	0.0932877		1467.38	0.1507555		1997.38	0.01306676		2527.37	0.2000816		3057.37	0.18696601		3587.4	-0.01643044
407.59	0.42694985		937.59	0.09360354		1467.58	0.15075356		1997.58	0.01315258		2527.57	0.19993264		3057.57	0.18682168		3587.6	-0.01607905
407.79	0.42628832		937.79	0.09331771		1467.78	0.1508903		1997.78	0.01275677		2527.77	0.20021422		3057.77	0.18724277		3587.8	-0.01567057
407.99	0.42676752		937.99	0.09344517		1467.98	0.15114307		1997.98	0.01225423		2527.97	0.20008239		3057.97	0.18792375		3588	-0.01594577
408.19	0.42695786		938.19	0.09246776		1468.18	0.1501088		1998.18	0.01272535		2528.17	0.2002899		3058.17	0.18731865		3588.2	-0.01605417
408.39	0.42670691		938.39	0.09259205		1468.38	0.15044738		1998.38	0.01291871		2528.37	0.20079157		3058.37	0.18791921		3588.4	-0.01541404
408.59	0.42678005		938.59	0.0925262		1468.58	0.15015232		1998.58	0.01324042		2528.57	0.2004651		3058.57	0.18780142		3588.6	-0.01509137
408.79	0.42702417		938.79	0.09331472		1468.78	0.14919963		1998.78	0.01436031		2528.77	0.2005578		3058.77	0.18799384		3588.8	-0.01446303
408.99	0.42715786		938.99	0.09367957		1468.98	0.14915119		1998.98	0.01528106		2528.97	0.20105597		3058.97	0.18799181		3589	-0.01512059
409.19	0.42714235		939.19	0.09332519		1469.18	0.14941215		1999.18	0.01541783		2529.17	0.20096405		3059.17	0.18816477		3589.2	-0.01523351
409.39	0.42760613		939.39	0.09358696		1469.38	0.14996314		1999.38	0.01513451		2529.37	0.20026143		3059.37	0.18811316		3589.4	-0.01567459
409.59	0.42603535		939.59	0.09352095		1469.58	0.14958873		1999.58	0.01455869		2529.57	0.20073886		3059.57	0.18831746		3589.6	-0.01507499
409.79	0.42609463		939.79	0.09411686		1469.78	0.14844586		1999.78	0.01311066		2529.77	0.20085028		3059.77	0.18844284		3589.8	-0.0139841
409.99	0.42602005		939.99	0.0933391		1469.98	0.14800612		1999.98	0.01203428		2529.97	0.20016362		3059.97	0.18842637		3590	-0.01318924
410.19	0.42685988		940.19	0.093539		1470.18	0.14884519		2000.18	0.01114209		2530.17	0.20005286		3060.17	0.18831835		3590.2	-0.01345436
410.39	0.42716806		940.39	0.09349291		1470.38	0.14865337		2000.38	0.00970996		2530.37	0.19938859		3060.37	0.18891548		3590.4	-0.0141765
410.59	0.42785956		940.59	0.09342382		1470.58	0.14872238		2000.58	0.00962545		2530.57	0.199158		3060.57	0.18946713		3590.6	-0.01437598
410.79	0.42745076		940.79	0.09271877		1470.78	0.14799758		2000.78	0.00991903		2530.77	0.19810813		3060.77	0.19003147		3590.8	-0.01492367
410.99	0.42784783		940.99	0.09262861		1470.98	0.14796222		2000.98	0.0098157		2530.97	0.19826305		3060.97	0.1906766		3591	-0.01474921
411.19	0.42791661		941.19	0.09335092		1471.18	0.14783626		2001.18	0.00936844		2531.17	0.19889391		3061.17	0.19031299		3591.2	-0.01527289
411.39	0.42770822		941.39	0.09320949		1471.38	0.14740159		2001.38	0.0092983		2531.37	0.19969166		3061.37	0.19005641		3591.4	-0.01613968
411.59	0.42725361		941.59	0.09245487		1471.58	0.1474002		2001.58	0.00960489		2531.57	0.19940556		3061.57	0.18901169		3591.6	-0.01652141
411.79	0.42727699		941.79	0.09257533		1471.78	0.14744474		2001.78	0.00938142		2531.77	0.2000028		3061.77	0.18878269		3591.8	-0.01646784
411.99	0.42845191		941.99	0.09243498		1471.98	0.14655236		2001.98	0.00973646		2531.97	0.20110745		3061.97	0.18849156		3592	-0.01674549
412.19	0.42862304		942.19	0.09309068		1472.18	0.1467791		2002.18	0.01050332		2532.17	0.20222947		3062.17	0.18762126		3592.2	-0.01707727
412.39	0.42771182		942.39	0.0933285		1472.38	0.1473361		2002.38	0.01145642		2532.37	0.20301618		3062.37	0.18798925		3592.4	-0.01715103
412.59	0.42777972		942.59	0.09276834		1472.58	0.1467688		2002.58	0.01159021		2532.57	0.20291466		3062.57	0.18660635		3592.6	-0.01878484
412.79	0.42764032		942.79	0.09268252		1472.78	0.1469955		2002.78	0.01149346		2532.77	0.20353978		3062.77	0.18672239		3592.8	-0.0194226
412.99	0.42770474		942.99	0.09201423		1472.98	0.14693297		2002.98	0.01119848		2532.97	0.20382274		3062.97	0.18648861		3593	-0.01964275
413.19	0.42762733		943.19	0.09210775		1473.18	0.14691157		2003.18	0.01077762		2533.17	0.20244461		3063.17	0.18698602		3593.2	-0.01993946
413.39	0.42710328		943.39	0.0914119		1473.38	0.14686935		2003.38	0.01102918		2533.37	0.20173095		3063.37	0.18758503		3593.4	-0.01958647
413.59	0.42658937		943.59	0.09147555		1473.58	0.14669484		2003.58	0.01044321		2533.57	0.20172059		3063.57	0.18747966		3593.6	-0.01877669
413.79	0.42669329		943.79	0.09157321		1473.78	0.14669542		2003.78	0.00988001		2533.77	0.20172534		3063.77	0.18783885		3593.8	-0.01767307
413.99	0.42638234		943.99	0.09137526		1473.98	0.14715874		2003.98	0.00938674		2533.97	0.20076742		3063.97	0.18863786		3594	-0.01650282
414.19	0.42694827		944.19	0.09136919		1474.18	0.14848976		2004.18	0.00914747		2534.17	0.20021064		3064.17	0.18880683		3594.2	-0.01654231
414.39	0.42590968		944.39	0.09035663		1474.38	0.14830174		2004.38	0.00758158		2534.37	0.19907837		3064.37	0.18981178		3594.4	-0.01566043
414.59	0.42696241		944.59	0.09044329		1474.58	0.14838636		2004.58	0.00718239		2534.57	0.19813854		3064.57	0.19041591		3594.6	-0.01409565
414.79	0.42680749		944.79	0.09077414		1474.78	0.14916275		2004.78	0.00664249		2534.77	0.19750408		3064.77	0.19054942		3594.8	-0.01345668
414.99	0.42713553		944.99	0.0914844		1474.98	0.14920954		2004.98	0.00616053		2534.97	0.19730666		3064.97	0.19076423		3595	-0.01281216
415.19	0.42661241		945.19	0.0915321		1475.18	0.14963547		2005.18	0.00584494		2535.17	0.19727588		3065.17	0.18987742		3595.2	-0.01240778
415.39	0.42627191		945.39	0.090932		1475.38	0.14934444		2005.38	0.006345		2535.37	0.19724233		3065.37	0.19010107		3595.4	-0.01211568
415.59	0.42666299		945.59	0.09148361		1475.58	0.15053077		2005.58	0.00688767		2535.57	0.19743068		3065.57	0.19034443		3595.6	-0.01203427
415.79	0.42703593		945.79	0.09290877		1475.78	0.14990583		2005.78	0.00677154		2535.77	0.19962772		3065.77	0.19053716		3595.8	-0.01241161
415.99	0.42758564		945.99	0.09364792		1475.98	0.14968393		2005.98	0.00692836		2535.97	0.20086528		3065.97	0.18978442		3596	-0.01301862
416.19	0.42696888		946.19	0.09438224		1476.18	0.15088235		2006.18	0.007156		2536.17	0.20169411		3066.17	0.18920926		3596.2	-0.01356384
416.39	0.42712515		946.39	0.09400351		1476.38	0.15071491		2006.38	0.00660121		2536.37	0.20213984		3066.37	0.18843756		3596.4	-0.01554106
416.59	0.42751967		946.59	0.09342103		1476.58	0.15083762		2006.58	0.00626288		2536.57	0.20211554		3066.57	0.18742738		3596.6	-0.01653369
416.79	0.42782498		946.79	0.09336341		1476.78	0.15074072		2006.78	0.00637746		2536.77	0.202903		3066.77	0.18739516		3596.8	-0.01678132
416.99	0.42830669		946.99	0.09255868		1476.98	0.15012136		2006.98	0.00625401		2536.97	0.2029996		3066.97	0.18647448		3597	-0.01783097
417.19	0.42821614		947.19	0.09253566		1477.18	0.14984199		2007.18	0.00620582		2537.17	0.20300101		3067.17	0.18613366		3597.2	-0.01902469
417.39	0.42813649		947.39	0.09231002		1477.38	0.15016457		2007.38	0.00671666		2537.37	0.20298581		3067.37	0.1859346		3597.4	-0.0192461
417.59	0.42845227		947.59	0.09197961		1477.58	0.15044263		2007.58	0.0063591		2537.57	0.20434259		3067.57	0.18597913		3597.6	-0.01979184
417.79	0.42830399		947.79	0.0913632		1477.78	0.15003805		2007.78	0.00746708		2537.77	0.20361916		3067.77	0.18701564		3597.8	-0.01879008
417.99	0.42821472		947.99	0.09042785		1477.98	0.14987996		2007.98	0.00752841		2537.97	0.20296117		3067.97	0.18705823		3598	-0.01866504
418.19	0.42790997		948.19	0.09053991		1478.18	0.14986314		2008.18	0.00728447		2538.17	0.20222656		3068.17	0.1865119		3598.2	-0.01906994
418.39	0.42863169		948.39	0.09038692		1478.38	0.15026612		2008.38	0.00632892		2538.37	0.20020143		3068.37	0.18662711		3598.4	-0.01868649
418.59	0.42965126		948.59	0.09061658		1478.58	0.15024663		2008.58	0.0074369		2538.57	0.20006633		3068.57	0.18610553		3598.6	-0.01837407
418.79	0.42948955		948.79	0.09017092		1478.78	0.14992434		2008.78	0.00729031		2538.77	0.19946845		3068.77	0.18667729		3598.8	-0.01860214
418.99	0.42961559		948.99	0.08957981		1478.98	0.1499844		2008.98	0.00691418		2538.97	0.19872789		3068.97	0.18657406		3599	-0.01745101
419.19	0.42909698		949.19	0.08963081		1479.18	0.14974288		2009.18	0.00722037		2539.17	0.1985519		3069.17	0.18726651		3599.2	-0.0168183
419.39	0.42902961		949.39	0.08972497		1479.38	0.14823031		2009.38	0.00703878		2539.37	0.19856612		3069.37	0.18825287		3599.4	-0.01650301
419.59	0.42937864		949.59	0.09015754		1479.58	0.14776774		2009.58	0.00704104		2539.57	0.19928164		3069.57	0.18886173		3599.6	-0.01661775
419.79	0.42876528		949.79	0.09075364		1479.78	0.1474332		2009.78	0.00720175		2539.77	0.19950119		3069.77	0.18890906		3599.8	-0.01610623
419.99	0.42872378		949.99	0.09103817		1479.98	0.1479066		2009.98	0.00783299		2539.97	0.19867478		3069.97	0.18872727		3600	-0.01560195
420.19	0.42846251		950.19	0.09028058		1480.18	0.14757855		2010.18	0.00694451		2540.17	0.19869136		3070.17	0.18848937		3600.2	-0.01567699
420.39	0.42922073		950.39	0.09049211		1480.38	0.14791394		2010.38	0.00636788		2540.37	0.19899555		3070.37	0.18886298		3600.4	-0.01593088
420.59	0.42962033		950.59	0.09075045		1480.58	0.14795758		2010.58	0.00654549		2540.57	0.19946041		3070.57	0.18863475		3600.6	-0.01445225
420.79	0.42913215		950.79	0.09088814		1480.78	0.14781452		2010.78	0.00535894		2540.77	0.20009227		3070.77	0.18791404		3600.8	-0.01403089
420.99	0.42954597		950.99	0.09100315		1480.98	0.14681707		2010.98	0.00482698		2540.97	0.19970522		3070.97	0.18819782		3601	-0.01446104
421.19	0.4292148		951.19	0.09194007		1481.18	0.14633544		2011.18	0.0038341		2541.17	0.20000763		3071.17	0.18882041		3601.2	-0.01393153
421.39	0.4283061		951.39	0.09247496		1481.38	0.14738756		2011.38	0.0037854		2541.37	0.20022667		3071.37	0.18907883		3601.4	-0.01429686
421.59	0.42872668		951.59	0.09183913		1481.58	0.14813434		2011.58	0.00364589		2541.57	0.20044622		3071.57	0.18811753		3601.6	-0.01390897
421.79	0.42841654		951.79	0.09133802		1481.78	0.14749401		2011.78	0.00499414		2541.77	0.19913827		3071.77	0.18777782		3601.8	-0.01344566
421.99	0.42853837		951.99	0.09191557		1481.98	0.14846427		2011.98	0.00492782		2541.97	0.19855206		3071.97	0.18682525		3602	-0.01498342
422.19	0.42729739		952.19	0.09283		1482.18	0.14988687		2012.18	0.00439206		2542.17	0.19730823		3072.17	0.18614321		3602.2	-0.01567476
422.39	0.42700819		952.39	0.09282613		1482.38	0.1507358		2012.38	0.0041772		2542.37	0.19674725		3072.37	0.18621649		3602.4	-0.01646466
422.59	0.42667647		952.59	0.09229475		1482.58	0.15039703		2012.58	0.00403221		2542.57	0.19739944		3072.57	0.18682287		3602.6	-0.01679516
422.79	0.42603762		952.79	0.09205268		1482.78	0.15065944		2012.78	0.00322433		2542.77	0.19649625		3072.77	0.18746788		3602.8	-0.01621411
422.99	0.42663814		952.99	0.09287225		1482.98	0.15132081		2012.98	0.00285477		2542.97	0.19625185		3072.97	0.18740796		3603	-0.01590228
423.19	0.42639342		953.19	0.09255359		1483.18	0.1504681		2013.18	0.00348517		2543.17	0.19714492		3073.17	0.18804795		3603.2	-0.01618048
423.39	0.42695208		953.39	0.09199864		1483.38	0.14999068		2013.38	0.00337908		2543.37	0.19722319		3073.37	0.1884728		3603.4	-0.01665747
423.59	0.42812518		953.59	0.09156098		1483.58	0.15060717		2013.58	0.00396021		2543.57	0.19769887		3073.57	0.18865498		3603.6	-0.01690441
423.79	0.42873303		953.79	0.09149609		1483.78	0.15134347		2013.78	0.00439129		2543.77	0.19759513		3073.77	0.18849024		3603.8	-0.01683816
423.99	0.42912261		953.99	0.09073143		1483.98	0.15204532		2013.98	0.0043104		2543.97	0.19795259		3073.97	0.18810975		3604	-0.01709838
424.19	0.42946804		954.19	0.08971899		1484.18	0.15220196		2014.18	0.00367671		2544.17	0.19895821		3074.17	0.18823288		3604.2	-0.01686729
424.39	0.43027568		954.39	0.0898116		1484.38	0.15262398		2014.38	0.00392006		2544.37	0.1993219		3074.37	0.18878791		3604.4	-0.0169357
424.59	0.43053072		954.59	0.08855899		1484.58	0.15193139		2014.58	0.00299632		2544.57	0.19965213		3074.57	0.18838256		3604.6	-0.01643565
424.79	0.42955766		954.79	0.08828607		1484.78	0.15209124		2014.78	0.00277923		2544.77	0.19948337		3074.77	0.18877657		3604.8	-0.01648968
424.99	0.4305562		954.99	0.08931193		1484.98	0.15090386		2014.98	0.00317732		2544.97	0.19897477		3074.97	0.18988942		3605	-0.01633205
425.19	0.43029682		955.19	0.08983537		1485.18	0.14992083		2015.18	0.00305389		2545.17	0.19895814		3075.17	0.18952072		3605.2	-0.01589723
425.39	0.42960709		955.39	0.08953916		1485.38	0.14979119		2015.38	0.002952		2545.37	0.19950588		3075.37	0.18889975		3605.4	-0.01650244
425.59	0.4291361		955.59	0.08916591		1485.58	0.14898688		2015.58	0.00364388		2545.57	0.19897304		3075.57	0.18764602		3605.6	-0.01614154
425.79	0.42768459		955.79	0.08993271		1485.78	0.14887422		2015.78	0.00465196		2545.77	0.19795249		3075.77	0.18741648		3605.8	-0.01611007
425.99	0.4271904		955.99	0.09083966		1485.98	0.14977178		2015.98	0.00372862		2545.97	0.19693834		3075.97	0.18633077		3606	-0.01668484
426.19	0.42532816		956.19	0.09113645		1486.18	0.14921216		2016.18	0.00250912		2546.17	0.19669845		3076.17	0.18634064		3606.2	-0.01703348
426.39	0.42426348		956.39	0.09068001		1486.38	0.1480226		2016.38	0.0021171		2546.37	0.19599653		3076.37	0.18666791		3606.4	-0.01771971
426.59	0.42368846		956.59	0.09125446		1486.58	0.14716112		2016.58	0.00138705		2546.57	0.19609982		3076.57	0.18734699		3606.6	-0.0176297
426.79	0.42289722		956.79	0.09171074		1486.78	0.14739313		2016.78	0.00141449		2546.77	0.19566682		3076.77	0.18721402		3606.8	-0.01870159
426.99	0.42295017		956.99	0.09235418		1486.98	0.14670045		2016.98	0.00165569		2546.97	0.19639851		3076.97	0.18708595		3607	-0.01977184
427.19	0.42264349		957.19	0.09173778		1487.18	0.14624829		2017.18	0.0012147		2547.17	0.19603059		3077.17	0.18683472		3607.2	-0.02003294
427.39	0.42219984		957.39	0.09177129		1487.38	0.14637771		2017.38	0.0004339		2547.37	0.19622663		3077.37	0.1870105		3607.4	-0.02009304
427.59	0.4220381		957.59	0.09121832		1487.58	0.14653228		2017.58	0.00033127		2547.57	0.19635043		3077.57	0.18671164		3607.6	-0.02013659
427.79	0.42183675		957.79	0.09064064		1487.78	0.14682273		2017.78	0.00089852		2547.77	0.19680715		3077.77	0.18624604		3607.8	-0.02090601
427.99	0.42172988		957.99	0.08931451		1487.98	0.14727931		2017.98	0.00136679		2547.97	0.19696935		3077.97	0.18532749		3608	-0.02080247
428.19	0.42158357		958.19	0.08909432		1488.18	0.14807739		2018.18	0.00150393		2548.17	0.1974406		3078.17	0.18505022		3608.2	-0.02114964
428.39	0.42231652		958.39	0.08797446		1488.38	0.14824283		2018.38	0.00180105		2548.37	0.19767168		3078.37	0.18505046		3608.4	-0.02166196
428.59	0.42274707		958.59	0.08729974		1488.58	0.14874034		2018.58	0.00175123		2548.57	0.19810408		3078.57	0.18568967		3608.6	-0.02082145
428.79	0.4232218		958.79	0.08795334		1488.78	0.14898668		2018.78	0.00295751		2548.77	0.19777994		3078.77	0.18666755		3608.8	-0.02030655
428.99	0.42413705		958.99	0.08906074		1488.98	0.14786695		2018.98	0.0032607		2548.97	0.19753164		3078.97	0.18676197		3609	-0.02027794
429.19	0.42403188		959.19	0.08882946		1489.18	0.14745662		2019.18	0.00273967		2549.17	0.197737		3079.17	0.18721179		3609.2	-0.02061208
429.39	0.42478088		959.39	0.08843175		1489.38	0.14790199		2019.38	0.00234282		2549.37	0.1976147		3079.37	0.18740642		3609.4	-0.02052999
429.59	0.42504897		959.59	0.08876719		1489.58	0.14877782		2019.58	0.00283504		2549.57	0.19696157		3079.57	0.18691644		3609.6	-0.02005537
429.79	0.42583281		959.79	0.08910151		1489.78	0.15030954		2019.78	0.00252587		2549.77	0.19593014		3079.77	0.18684205		3609.8	-0.01976669
429.99	0.42658789		959.99	0.08897803		1489.98	0.15062448		2019.98	0.0019226		2549.97	0.19598746		3079.97	0.18577557		3610	-0.02026073
430.19	0.42708251		960.19	0.08893759		1490.18	0.15092737		2020.18	0.00130521		2550.17	0.19627691		3080.17	0.18622261		3610.2	-0.02093237
430.39	0.42739516		960.39	0.08844932		1490.38	0.15140779		2020.38	0.00160716		2550.37	0.19627131		3080.37	0.18640648		3610.4	-0.02160411
430.59	0.42748619		960.59	0.08969632		1490.58	0.15124752		2020.58	0.00168722		2550.57	0.19686594		3080.57	0.18663449		3610.6	-0.02128031
430.79	0.42753156		960.79	0.08948038		1490.78	0.15189765		2020.78	0.00083362		2550.77	0.19679927		3080.77	0.18653253		3610.8	-0.02210631
430.99	0.42781693		960.99	0.0900845		1490.98	0.15172219		2020.98	0.00045844		2550.97	0.19624498		3080.97	0.18565375		3611	-0.02164775
431.19	0.42833216		961.19	0.09021415		1491.18	0.1514929		2021.18	-0.00048425		2551.17	0.19594364		3081.17	0.18577522		3611.2	-0.02086134
431.39	0.42785538		961.39	0.091248		1491.38	0.15095188		2021.38	-0.00037561		2551.37	0.19655879		3081.37	0.18530744		3611.4	-0.02032521
431.59	0.42773701		961.59	0.09127234		1491.58	0.15016603		2021.58	0.00067433		2551.57	0.19659433		3081.57	0.18519583		3611.6	-0.0207423
431.79	0.42733712		961.79	0.09120154		1491.78	0.15084081		2021.78	0.00120837		2551.77	0.19636783		3081.77	0.18468231		3611.8	-0.02117266
431.99	0.42683246		961.99	0.09176823		1491.98	0.15057322		2021.98	0.00179641		2551.97	0.19608926		3081.97	0.18376388		3612	-0.02067457
432.19	0.42578894		962.19	0.09257124		1492.18	0.15128116		2022.18	0.00184557		2552.17	0.1961665		3082.17	0.1838985		3612.2	-0.02061102
432.39	0.42572805		962.39	0.09188738		1492.38	0.15060001		2022.38	0.00235169		2552.37	0.19706336		3082.37	0.18406826		3612.4	-0.01942608
432.59	0.42602038		962.59	0.09255121		1492.58	0.15060215		2022.58	0.00164262		2552.57	0.19712464		3082.57	0.18406622		3612.6	-0.01875373
432.79	0.425213		962.79	0.09243081		1492.78	0.1501383		2022.78	0.0018102		2552.77	0.19635781		3082.77	0.18386691		3612.8	-0.0187209
432.99	0.42477751		962.99	0.09345583		1492.98	0.14990624		2022.98	0.00219496		2552.97	0.19611312		3082.97	0.18382681		3613	-0.01936155
433.19	0.4247681		963.19	0.09307797		1493.18	0.14979878		2023.18	0.00151454		2553.17	0.19578595		3083.17	0.18509004		3613.2	-0.01919526
433.39	0.42524857		963.39	0.09334681		1493.38	0.14995481		2023.38	0.00230018		2553.37	0.19518644		3083.37	0.1855973		3613.4	-0.0191186
433.59	0.42493744		963.59	0.0931431		1493.58	0.15060754		2023.58	0.00220627		2553.57	0.19613024		3083.57	0.18582299		3613.6	-0.01922157
433.79	0.42504153		963.79	0.09268235		1493.78	0.15066478		2023.78	0.00255896		2553.77	0.19611485		3083.77	0.18582792		3613.8	-0.01978946
433.99	0.42504706		963.99	0.09176697		1493.98	0.15005165		2023.98	0.0019817		2553.97	0.19660935		3083.97	0.18520023		3614	-0.02006981
434.19	0.42584547		964.19	0.09119136		1494.18	0.14968366		2024.18	0.00108615		2554.17	0.19620863		3084.17	0.18594487		3614.2	-0.02049557
434.39	0.42531938		964.39	0.09087894		1494.38	0.14918018		2024.38	0.0015398		2554.37	0.19643046		3084.37	0.18624658		3614.4	-0.02107294
434.59	0.42515384		964.59	0.09121987		1494.58	0.1486074		2024.58	0.00006487		2554.57	0.19619105		3084.57	0.18658958		3614.6	-0.02061009
434.79	0.4259219		964.79	0.09122728		1494.78	0.14869718		2024.78	-0.00054696		2554.77	0.19584748		3084.77	0.18676609		3614.8	-0.0214698
434.99	0.42699877		964.99	0.09174973		1494.98	0.1478622		2024.98	-0.0008061		2554.97	0.19549412		3084.97	0.186851		3615	-0.02160836
435.19	0.4271194		965.19	0.09212729		1495.18	0.14768187		2025.18	-0.00061244		2555.17	0.19601081		3085.17	0.18767739		3615.2	-0.02160717
435.39	0.42694987		965.39	0.09294712		1495.38	0.1469348		2025.38	-0.00072083		2555.37	0.19584308		3085.37	0.18774518		3615.4	-0.02159748
435.59	0.42665969		965.59	0.09242427		1495.58	0.14714453		2025.58	-0.00042691		2555.57	0.19581549		3085.57	0.18871098		3615.6	-0.02139819
435.79	0.42676692		965.79	0.09294973		1495.78	0.14713236		2025.78	-0.00081674		2555.77	0.19492102		3085.77	0.18861674		3615.8	-0.02172878
435.99	0.42548602		965.99	0.09366962		1495.98	0.14700424		2025.98	-0.00083691		2555.97	0.19459039		3085.97	0.18827106		3616	-0.02196607
436.19	0.42590579		966.19	0.09382055		1496.18	0.14749088		2026.18	-0.00118459		2556.17	0.19449119		3086.17	0.18858711		3616.2	-0.02173017
436.39	0.42637602		966.39	0.09292683		1496.38	0.14781434		2026.38	-0.00101283		2556.37	0.19537492		3086.37	0.18800684		3616.4	-0.02107855
436.59	0.42624231		966.59	0.09340143		1496.58	0.14799647		2026.58	-0.00075877		2556.57	0.19460759		3086.57	0.18744129		3616.6	-0.02140723
436.79	0.4255534		966.79	0.09248628		1496.78	0.14776681		2026.78	-0.00022083		2556.77	0.19414198		3086.77	0.18740413		3616.8	-0.02128171
436.99	0.42565801		966.99	0.09257051		1496.98	0.14822932		2026.98	0.00013343		2556.97	0.19440871		3086.97	0.18746451		3617	-0.02106199
437.19	0.42595552		967.19	0.09135163		1497.18	0.14843395		2027.18	-0.00029812		2557.17	0.19436907		3087.17	0.18741108		3617.2	-0.02020044
437.39	0.4262859		967.39	0.09061243		1497.38	0.1487234		2027.38	0.00030906		2557.37	0.19491205		3087.37	0.18717685		3617.4	-0.0204021
437.59	0.42626564		967.59	0.08970636		1497.58	0.14842923		2027.58	-0.00042597		2557.57	0.19614559		3087.57	0.1866213		3617.6	-0.01936658
437.79	0.42607365		967.79	0.0899747		1497.78	0.14817234		2027.78	-0.00023381		2557.77	0.19643512		3087.77	0.18631228		3617.8	-0.01976069
437.99	0.42621421		967.99	0.08909821		1497.98	0.14750032		2027.98	-0.00102303		2557.97	0.1968939		3087.97	0.18591998		3618	-0.01982798
438.19	0.42669945		968.19	0.08924554		1498.18	0.14715745		2028.18	-0.0010052		2558.17	0.19725044		3088.17	0.18562936		3618.2	-0.01968092
438.39	0.42706945		968.39	0.08919431		1498.38	0.14762942		2028.38	-0.00090844		2558.37	0.19817609		3088.37	0.18538147		3618.4	-0.02047858
438.59	0.42715313		968.59	0.08869343		1498.58	0.14786747		2028.58	-0.0016279		2558.57	0.19770791		3088.57	0.18549775		3618.6	-0.02072399
438.79	0.42700769		968.79	0.08864296		1498.78	0.14806417		2028.78	-0.00082979		2558.77	0.19746569		3088.77	0.1854263		3618.8	-0.02162055
438.99	0.42677304		968.99	0.0891206		1498.98	0.14840375		2028.98	-0.00046483		2558.97	0.19726256		3088.97	0.18552377		3619	-0.02180615
439.19	0.42712956		969.19	0.08931613		1499.18	0.14903925		2029.18	-0.0001237		2559.17	0.19744251		3089.17	0.18617814		3619.2	-0.02271366
439.39	0.42736892		969.39	0.08962945		1499.38	0.148806		2029.38	-0.00019138		2559.37	0.19723916		3089.37	0.18543731		3619.4	-0.02309489
439.59	0.4269234		969.59	0.09015141		1499.58	0.14912975		2029.58	-0.00041485		2559.57	0.19676505		3089.57	0.18550189		3619.6	-0.02368508
439.79	0.42664823		969.79	0.0902346		1499.78	0.14852125		2029.78	0.00058993		2559.77	0.19602916		3089.77	0.1850991		3619.8	-0.02503879
439.99	0.42531869		969.99	0.09033533		1499.98	0.14841143		2029.98	0.00072694		2559.97	0.19503175		3089.97	0.18510571		3620	-0.02496576
440.19	0.42614287		970.19	0.09007899		1500.18	0.1483837		2030.18	0.00123995		2560.17	0.19472096		3090.17	0.18501281		3620.2	-0.02508727
440.39	0.4254077		970.39	0.08923316		1500.38	0.14814915		2030.38	0.0011144		2560.37	0.19437151		3090.37	0.18456368		3620.4	-0.02564567
440.59	0.42462118		970.59	0.08861378		1500.58	0.14781126		2030.58	0.00137098		2560.57	0.19312203		3090.57	0.18415919		3620.6	-0.02565605
440.79	0.42468504		970.79	0.08796559		1500.78	0.14773716		2030.78	0.00184599		2560.77	0.19385238		3090.77	0.18413105		3620.8	-0.02513353
440.99	0.42518863		970.99	0.08793939		1500.98	0.14793618		2030.98	0.00217818		2560.97	0.19306064		3090.97	0.18401604		3621	-0.02421519
441.19	0.42512343		971.19	0.0878817		1501.18	0.14726657		2031.18	0.00224601		2561.17	0.1931734		3091.17	0.18318896		3621.2	-0.02231795
441.39	0.42479548		971.39	0.08743435		1501.38	0.14689215		2031.38	0.00143409		2561.37	0.19363006		3091.37	0.18368802		3621.4	-0.02194094
441.59	0.42496475		971.59	0.08783215		1501.58	0.14683567		2031.58	0.00039591		2561.57	0.1947666		3091.57	0.1849261		3621.6	-0.02090347
441.79	0.42561384		971.79	0.08788689		1501.78	0.14662897		2031.78	0.00040666		2561.77	0.19514437		3091.77	0.18505383		3621.8	-0.02216465
441.99	0.4254653		971.99	0.08742025		1501.98	0.14640633		2031.98	0.00010943		2561.97	0.19507314		3091.97	0.18515686		3622	-0.0211377
442.19	0.4255642		972.19	0.08702449		1502.18	0.14653269		2032.18	-0.00025829		2562.17	0.19545674		3092.17	0.18524232		3622.2	-0.01991926
442.39	0.42544369		972.39	0.08721598		1502.38	0.1471264		2032.38	-0.00068871		2562.37	0.19538701		3092.37	0.18541433		3622.4	-0.02057659
442.59	0.42442535		972.59	0.0873708		1502.58	0.14774735		2032.58	-0.00083649		2562.57	0.19436685		3092.57	0.18631382		3622.6	-0.02067931
442.79	0.42342125		972.79	0.08818718		1502.78	0.14881752		2032.78	-0.0009194		2562.77	0.19420096		3092.77	0.18694694		3622.8	-0.02107625
442.99	0.42358399		972.99	0.08871164		1502.98	0.14924612		2032.98	-0.00074434		2562.97	0.1940726		3092.97	0.18641034		3623	-0.02091055
443.19	0.42356403		973.19	0.08812805		1503.18	0.14908167		2033.18	-0.00114568		2563.17	0.1951356		3093.17	0.18712686		3623.2	-0.02151052
443.39	0.42206201		973.39	0.08818394		1503.38	0.14970363		2033.38	-0.00177377		2563.37	0.19488898		3093.37	0.18640266		3623.4	-0.02175452
443.59	0.42193519		973.59	0.08814378		1503.58	0.15019444		2033.58	-0.00176605		2563.57	0.19495995		3093.57	0.1864687		3623.6	-0.02178759
443.79	0.4218292		973.79	0.08740347		1503.78	0.14991914		2033.78	-0.00086274		2563.77	0.19444338		3093.77	0.18616076		3623.8	-0.02232042
443.99	0.42166298		973.99	0.08744066		1503.98	0.15003088		2033.98	-0.00068522		2563.97	0.19444214		3093.97	0.185693		3624	-0.02245551
444.19	0.42134271		974.19	0.08766608		1504.18	0.15001663		2034.18	-0.00012345		2564.17	0.19506309		3094.17	0.18538279		3624.2	-0.02291357
444.39	0.42071492		974.39	0.08750257		1504.38	0.14956854		2034.38	-0.00016111		2564.37	0.1949263		3094.37	0.18480567		3624.4	-0.02366147
444.59	0.42020851		974.59	0.08726013		1504.58	0.14874739		2034.58	0.00020744		2564.57	0.19473054		3094.57	0.18403548		3624.6	-0.0233138
444.79	0.42021418		974.79	0.08739416		1504.78	0.1481434		2034.78	0.0004504		2564.77	0.19547516		3094.77	0.18543841		3624.8	-0.0224237
444.99	0.41954526		974.99	0.08747452		1504.98	0.1474988		2034.98	0.00017732		2564.97	0.19485129		3094.97	0.18515542		3625	-0.02167551
445.19	0.41889633		975.19	0.08751301		1505.18	0.14699743		2035.18	-0.00073445		2565.17	0.19570521		3095.17	0.18452012		3625.2	-0.02066674
445.39	0.41941277		975.39	0.08704598		1505.38	0.1477823		2035.38	-0.00159365		2565.37	0.19651759		3095.37	0.1849199		3625.4	-0.02095189
445.59	0.42080906		975.59	0.08748414		1505.58	0.14768007		2035.58	-0.0016226		2565.57	0.19688068		3095.57	0.18563241		3625.6	-0.02076819
445.79	0.42150421		975.79	0.08737442		1505.78	0.14756479		2035.78	-0.00209363		2565.77	0.19630383		3095.77	0.1851838		3625.8	-0.02106812
445.99	0.42172635		975.99	0.08809613		1505.98	0.14772545		2035.98	-0.00297176		2565.97	0.19638063		3095.97	0.18502816		3626	-0.01948547
446.19	0.42276872		976.19	0.08772903		1506.18	0.14760639		2036.18	-0.00322567		2566.17	0.19647823		3096.17	0.18587217		3626.2	-0.01902856
446.39	0.42327751		976.39	0.08894168		1506.38	0.14770781		2036.38	-0.00362184		2566.37	0.196137		3096.37	0.18574215		3626.4	-0.02000123
446.59	0.42319172		976.59	0.0889651		1506.58	0.14782186		2036.58	-0.00371847		2566.57	0.19570806		3096.57	0.18642608		3626.6	-0.02022768
446.79	0.42305222		976.79	0.08907974		1506.78	0.14806369		2036.78	-0.0041046		2566.77	0.19539332		3096.77	0.18626354		3626.8	-0.01971918
446.99	0.42420248		976.99	0.08809755		1506.98	0.14764984		2036.98	-0.00290845		2566.97	0.19580686		3096.97	0.1860712		3627	-0.01945243
447.19	0.424425		977.19	0.08855925		1507.18	0.14806792		2037.18	-0.00228379		2567.17	0.19629686		3097.17	0.18662891		3627.2	-0.02056455
447.39	0.42479304		977.39	0.08809426		1507.38	0.14930085		2037.38	-0.00267884		2567.37	0.19479716		3097.37	0.1860736		3627.4	-0.02147997
447.59	0.42554689		977.59	0.08704675		1507.58	0.14942049		2037.58	-0.00147621		2567.57	0.19470277		3097.57	0.18530939		3627.6	-0.02173295
447.79	0.42569316		977.79	0.08675404		1507.78	0.14862237		2037.78	-0.00073653		2567.77	0.19333025		3097.77	0.18462026		3627.8	-0.02211406
447.99	0.42559331		977.99	0.0873599		1507.98	0.14896		2037.98	-0.00028195		2567.97	0.19354977		3097.97	0.18456685		3628	-0.02195336
448.19	0.42481348		978.19	0.08782077		1508.18	0.14789549		2038.18	-0.0001602		2568.17	0.19341258		3098.17	0.1838112		3628.2	-0.0212532
448.39	0.42488266		978.39	0.08713887		1508.38	0.14755754		2038.38	-0.00004947		2568.37	0.19290861		3098.37	0.18351347		3628.4	-0.02220332
448.59	0.42433647		978.59	0.08724729		1508.58	0.14708796		2038.58	-0.00013922		2568.57	0.19332332		3098.57	0.18374833		3628.6	-0.02098029
448.79	0.42375291		978.79	0.08724745		1508.78	0.14718026		2038.78	0.00018045		2568.77	0.19428156		3098.77	0.18434819		3628.8	-0.02067937
448.99	0.42272604		978.99	0.0876737		1508.98	0.14806115		2038.98	0.00031888		2568.97	0.19455765		3098.97	0.1831843		3629	-0.02041024
449.19	0.42246028		979.19	0.08789624		1509.18	0.14952162		2039.18	-0.00034705		2569.17	0.19472345		3099.17	0.18243204		3629.2	-0.02051775
449.39	0.42277093		979.39	0.08832439		1509.38	0.15047801		2039.38	-0.00096058		2569.37	0.19477137		3099.37	0.18145853		3629.4	-0.02071773
449.59	0.42298667		979.59	0.08858948		1509.58	0.150704		2039.58	-0.00150972		2569.57	0.19449426		3099.57	0.18179287		3629.6	-0.02101392
449.79	0.4232799		979.79	0.0886819		1509.78	0.15111673		2039.78	-0.00208271		2569.77	0.19473133		3099.77	0.18162792		3629.8	-0.0214315
449.99	0.42237064		979.99	0.08896749		1509.98	0.1509193		2039.98	-0.00276987		2569.97	0.19519981		3099.97	0.18146929		3630	-0.02204947
450.19	0.42195762		980.19	0.08879922		1510.18	0.15090709		2040.18	-0.00292999		2570.17	0.19492972		3100.17	0.18138282		3630.2	-0.02269972
450.39	0.42098238		980.39	0.08851716		1510.38	0.15007094		2040.38	-0.00337042		2570.37	0.19414001		3100.37	0.18057217		3630.4	-0.02288745
450.59	0.42011156		980.59	0.08798755		1510.58	0.15039712		2040.58	-0.00304963		2570.57	0.19303677		3100.57	0.18138959		3630.6	-0.02313819
450.79	0.42004775		980.79	0.08800909		1510.78	0.15074101		2040.78	-0.00243845		2570.77	0.19284153		3100.77	0.18104578		3630.8	-0.02327623
450.99	0.4205381		980.99	0.08736765		1510.98	0.15020388		2040.98	-0.00225241		2570.97	0.19237069		3100.97	0.18114824		3631	-0.02331398
451.19	0.41945069		981.19	0.08719942		1511.18	0.15061626		2041.18	-0.00289775		2571.17	0.19204372		3101.17	0.18101007		3631.2	-0.02458375
451.39	0.41975094		981.39	0.08668531		1511.38	0.15051885		2041.38	-0.00266175		2571.37	0.19140381		3101.37	0.18096503		3631.4	-0.02506717
451.59	0.41868116		981.59	0.08635066		1511.58	0.15029065		2041.58	-0.00161966		2571.57	0.19129107		3101.57	0.18171819		3631.6	-0.0252338
451.79	0.41977222		981.79	0.08693165		1511.78	0.14995259		2041.78	-0.00201651		2571.77	0.19064217		3101.77	0.18204526		3631.8	-0.02528021
451.99	0.419904		981.99	0.08763898		1511.98	0.14996396		2041.98	-0.00249579		2571.97	0.19090665		3101.97	0.18261415		3632	-0.02481693
452.19	0.41978097		982.19	0.08732036		1512.18	0.14924325		2042.18	-0.00218407		2572.17	0.19085214		3102.17	0.18179006		3632.2	-0.02408229
452.39	0.41990572		982.39	0.08669254		1512.38	0.14847628		2042.38	-0.00248978		2572.37	0.19044242		3102.37	0.18204956		3632.4	-0.02401974
452.59	0.4191089		982.59	0.08695347		1512.58	0.14877717		2042.58	-0.00264124		2572.57	0.19104838		3102.57	0.18176071		3632.6	-0.02319194
452.79	0.41833899		982.79	0.08670366		1512.78	0.14850477		2042.78	-0.00283689		2572.77	0.19154921		3102.77	0.18164849		3632.8	-0.02351789
452.99	0.41762785		982.99	0.08648053		1512.98	0.14850483		2042.98	-0.00317024		2572.97	0.19053541		3102.97	0.18223615		3633	-0.02264962
453.19	0.41788934		983.19	0.0870116		1513.18	0.14818902		2043.18	-0.00388648		2573.17	0.18997496		3103.17	0.18205648		3633.2	-0.0226499
453.39	0.41728276		983.39	0.08737381		1513.38	0.14771022		2043.38	-0.00452403		2573.37	0.18941548		3103.37	0.18186993		3633.4	-0.0226087
453.59	0.41732969		983.59	0.08760146		1513.58	0.14719577		2043.58	-0.00478704		2573.57	0.18977553		3103.57	0.18272496		3633.6	-0.02311113
453.79	0.41711633		983.79	0.08791646		1513.78	0.14630483		2043.78	-0.00404014		2573.77	0.19006844		3103.77	0.18274375		3633.8	-0.02372103
453.99	0.41659007		983.99	0.08817927		1513.98	0.14603224		2043.98	-0.00403032		2573.97	0.19014349		3103.97	0.18271397		3634	-0.02378391
454.19	0.417115		984.19	0.0877176		1514.18	0.14608699		2044.18	-0.00362063		2574.17	0.18963429		3104.17	0.18275231		3634.2	-0.02351549
454.39	0.4165087		984.39	0.08799363		1514.38	0.14594642		2044.38	-0.00350871		2574.37	0.18896237		3104.37	0.1830232		3634.4	-0.02321263
454.59	0.41717937		984.59	0.08891526		1514.58	0.14721614		2044.58	-0.00363604		2574.57	0.1886104		3104.57	0.1833879		3634.6	-0.02333219
454.79	0.41780966		984.79	0.08935827		1514.78	0.14740533		2044.78	-0.00313842		2574.77	0.18963451		3104.77	0.1830908		3634.8	-0.02369507
454.99	0.41858989		984.99	0.08942421		1514.98	0.14772558		2044.98	-0.00288624		2574.97	0.18939234		3104.97	0.1830623		3635	-0.02303398
455.19	0.41822052		985.19	0.08938142		1515.18	0.14876976		2045.18	-0.00239516		2575.17	0.19083393		3105.17	0.18352106		3635.2	-0.0238061
455.39	0.41895985		985.39	0.0901409		1515.38	0.14949738		2045.38	-0.00123855		2575.37	0.19089018		3105.37	0.18410507		3635.4	-0.02348544
455.59	0.41921433		985.59	0.09037697		1515.58	0.14967545		2045.58	-0.00093157		2575.57	0.19117305		3105.57	0.18458855		3635.6	-0.02290222
455.79	0.42039164		985.79	0.09015414		1515.78	0.14939286		2045.78	-0.00218301		2575.77	0.19174896		3105.77	0.18472316		3635.8	-0.02280492
455.99	0.42056368		985.99	0.09045249		1515.98	0.14945872		2045.98	-0.00183323		2575.97	0.19171768		3105.97	0.18464146		3636	-0.02222879
456.19	0.42083033		986.19	0.08988536		1516.18	0.14910382		2046.18	-0.00170348		2576.17	0.19249849		3106.17	0.18305613		3636.2	-0.02252082
456.39	0.42070063		986.39	0.0886465		1516.38	0.14852552		2046.38	-0.00214682		2576.37	0.19224983		3106.37	0.18280484		3636.4	-0.02286251
456.59	0.41932887		986.59	0.08767379		1516.58	0.14801776		2046.58	-0.0021198		2576.57	0.19350498		3106.57	0.18266011		3636.6	-0.02323098
456.79	0.41909854		986.79	0.0861684		1516.78	0.14663909		2046.78	-0.00272918		2576.77	0.19369011		3106.77	0.18286561		3636.8	-0.02332708
456.99	0.41955987		986.99	0.08540281		1516.98	0.14628756		2046.98	-0.00298526		2576.97	0.19326301		3106.97	0.18309666		3637	-0.0220933
457.19	0.41964867		987.19	0.08516706		1517.18	0.14506665		2047.18	-0.00351205		2577.17	0.19343131		3107.17	0.18307417		3637.2	-0.02238289
457.39	0.41848887		987.39	0.085133		1517.38	0.14457136		2047.38	-0.00387507		2577.37	0.19357911		3107.37	0.18273016		3637.4	-0.02276238
457.59	0.41859748		987.59	0.08504602		1517.58	0.14385425		2047.58	-0.0038842		2577.57	0.1942239		3107.57	0.18361044		3637.6	-0.02256508
457.79	0.41887655		987.79	0.08439038		1517.78	0.14361156		2047.78	-0.00344221		2577.77	0.19416127		3107.77	0.18377748		3637.8	-0.02235211
457.99	0.41854238		987.99	0.08360244		1517.98	0.14383607		2047.98	-0.00382405		2577.97	0.19389745		3107.97	0.1839011		3638	-0.02214033
458.19	0.4181544		988.19	0.08317286		1518.18	0.14470222		2048.18	-0.00405156		2578.17	0.19307059		3108.17	0.18364477		3638.2	-0.02211884
458.39	0.4180243		988.39	0.0834918		1518.38	0.14510604		2048.38	-0.00452965		2578.37	0.1922598		3108.37	0.18299808		3638.4	-0.0218237
458.59	0.41819663		988.59	0.08405298		1518.58	0.14554824		2048.58	-0.00396372		2578.57	0.19197472		3108.57	0.1827958		3638.6	-0.0221603
458.79	0.41809884		988.79	0.084314		1518.78	0.14673787		2048.78	-0.00305556		2578.77	0.19153831		3108.77	0.18284485		3638.8	-0.02208977
458.99	0.41767242		988.99	0.08492095		1518.98	0.1474235		2048.98	-0.00256198		2578.97	0.19148534		3108.97	0.18200147		3639	-0.02135147
459.19	0.41743556		989.19	0.08498964		1519.18	0.14759416		2049.18	-0.00296901		2579.17	0.19138187		3109.17	0.18196589		3639.2	-0.02093121
459.39	0.41783736		989.39	0.08585648		1519.38	0.14791732		2049.38	-0.00234882		2579.37	0.1904147		3109.37	0.18185708		3639.4	-0.02050775
459.59	0.41798666		989.59	0.08605184		1519.58	0.1477968		2049.58	-0.00190245		2579.57	0.19105472		3109.57	0.18180685		3639.6	-0.020347
459.79	0.41840549		989.79	0.08571991		1519.78	0.14826225		2049.78	-0.00176939		2579.77	0.19131112		3109.77	0.181548		3639.8	-0.02021221
459.99	0.41803676		989.99	0.08664024		1519.98	0.14808805		2049.98	-0.00140295		2579.97	0.1907276		3109.97	0.18055148		3640	-0.02069908
460.19	0.41776413		990.19	0.0858997		1520.18	0.14833469		2050.18	-0.00118743		2580.17	0.19018227		3110.17	0.17993004		3640.2	-0.0216441
460.39	0.41752435		990.39	0.08463979		1520.38	0.14827844		2050.38	-0.00131112		2580.37	0.18986656		3110.37	0.18015431		3640.4	-0.02256071
460.59	0.41674742		990.59	0.08409507		1520.58	0.14816024		2050.58	-0.00261465		2580.57	0.19031586		3110.57	0.18042613		3640.6	-0.02265051
460.79	0.41781123		990.79	0.08394514		1520.78	0.1489953		2050.78	-0.0033304		2580.77	0.18998407		3110.77	0.18013976		3640.8	-0.02267597
460.99	0.41854545		990.99	0.08482821		1520.98	0.1487511		2050.98	-0.00408757		2580.97	0.19071218		3110.97	0.18054082		3641	-0.02254775
461.19	0.41826646		991.19	0.08538607		1521.18	0.14785122		2051.18	-0.0044488		2581.17	0.19094819		3111.17	0.18098571		3641.2	-0.02374719
461.39	0.41877269		991.39	0.08483283		1521.38	0.14820621		2051.38	-0.00490289		2581.37	0.19093037		3111.37	0.18129683		3641.4	-0.0239788
461.59	0.4191569		991.59	0.08341143		1521.58	0.14821968		2051.58	-0.00580978		2581.57	0.19123651		3111.57	0.18236245		3641.6	-0.02489296
461.79	0.4204103		991.79	0.08341253		1521.78	0.14805139		2051.78	-0.00641931		2581.77	0.19102551		3111.77	0.18183138		3641.8	-0.02569281
461.99	0.41966403		991.99	0.08392598		1521.98	0.14772646		2051.98	-0.0065928		2581.97	0.19123219		3111.97	0.1820893		3642	-0.02568881
462.19	0.42024823		992.19	0.08430369		1522.18	0.14807326		2052.18	-0.0062548		2582.17	0.19107931		3112.17	0.18162005		3642.2	-0.02597068
462.39	0.42041834		992.39	0.084518		1522.38	0.14805995		2052.38	-0.00599975		2582.37	0.19039624		3112.37	0.18168047		3642.4	-0.02686172
462.59	0.42095971		992.59	0.08580453		1522.58	0.14830969		2052.58	-0.00507838		2582.57	0.19055819		3112.57	0.18221649		3642.6	-0.0269967
462.79	0.42124963		992.79	0.08627243		1522.78	0.14915146		2052.78	-0.00485427		2582.77	0.19069548		3112.77	0.18243427		3642.8	-0.02694111
462.99	0.42107743		992.99	0.08680797		1522.98	0.14887964		2052.98	-0.0043757		2582.97	0.190631		3112.97	0.18265124		3643	-0.0266072
463.19	0.4213951		993.19	0.08600493		1523.18	0.14949318		2053.18	-0.00460736		2583.17	0.19129262		3113.17	0.18260037		3643.2	-0.02647135
463.39	0.42162588		993.39	0.08652176		1523.38	0.15035785		2053.38	-0.00400999		2583.37	0.19156664		3113.37	0.18308057		3643.4	-0.02566852
463.59	0.42127954		993.59	0.08613407		1523.58	0.1511284		2053.58	-0.00369178		2583.57	0.19159559		3113.57	0.18366587		3643.6	-0.0246093
463.79	0.42201104		993.79	0.08649981		1523.78	0.15132332		2053.78	-0.00324134		2583.77	0.19128279		3113.77	0.18353562		3643.8	-0.0238193
463.99	0.42144551		993.99	0.08720427		1523.98	0.1515176		2053.98	-0.00272696		2583.97	0.1911024		3113.97	0.1833597		3644	-0.02398414
464.19	0.42175246		994.19	0.08679608		1524.18	0.15174638		2054.18	-0.00179045		2584.17	0.19034588		3114.17	0.18356977		3644.2	-0.02397856
464.39	0.42190109		994.39	0.08630481		1524.38	0.15175824		2054.38	-0.00246865		2584.37	0.19120976		3114.37	0.18316179		3644.4	-0.0241412
464.59	0.42087445		994.59	0.08621771		1524.58	0.15204884		2054.58	-0.00276428		2584.57	0.19137184		3114.57	0.18282575		3644.6	-0.02335363
464.79	0.42114704		994.79	0.08652658		1524.78	0.15158829		2054.78	-0.00262907		2584.77	0.19160378		3114.77	0.18264943		3644.8	-0.0238953
464.99	0.42151504		994.99	0.08625322		1524.98	0.1509933		2054.98	-0.00258751		2584.97	0.19180917		3114.97	0.18374712		3645	-0.02444152
465.19	0.42164761		995.19	0.08598817		1525.18	0.15072659		2055.18	-0.00258807		2585.17	0.19189729		3115.17	0.18378448		3645.2	-0.02470621
465.39	0.422187		995.39	0.08535929		1525.38	0.15005064		2055.38	-0.00312316		2585.37	0.19152198		3115.37	0.18358629		3645.4	-0.02447261
465.59	0.42182411		995.59	0.08604062		1525.58	0.14951036		2055.58	-0.00343253		2585.57	0.19167279		3115.57	0.18300536		3645.6	-0.02519879
465.79	0.42257651		995.79	0.08727734		1525.78	0.14885207		2055.78	-0.00316051		2585.77	0.19206932		3115.77	0.18243678		3645.8	-0.02442205
465.99	0.4211752		995.99	0.08758533		1525.98	0.14771698		2055.98	-0.00340951		2585.97	0.19187216		3115.97	0.18311361		3646	-0.02531863
466.19	0.42154666		996.19	0.08734727		1526.18	0.14731444		2056.18	-0.00364146		2586.17	0.19114668		3116.17	0.18263775		3646.2	-0.02604046
466.39	0.42165569		996.39	0.08768231		1526.38	0.14690153		2056.38	-0.00397307		2586.37	0.1908299		3116.37	0.18311234		3646.4	-0.02672594
466.59	0.42195217		996.59	0.08779652		1526.58	0.14643333		2056.58	-0.00443855		2586.57	0.19143935		3116.57	0.18340747		3646.6	-0.02647952
466.79	0.4211586		996.79	0.08655954		1526.78	0.1462879		2056.78	-0.00466901		2586.77	0.1920919		3116.77	0.18345981		3646.8	-0.02640441
466.99	0.42017979		996.99	0.08599587		1526.98	0.14610233		2056.98	-0.0051556		2586.97	0.19196541		3116.97	0.1835885		3647	-0.02590145
467.19	0.42009359		997.19	0.08543232		1527.18	0.14691637		2057.18	-0.00627611		2587.17	0.19255875		3117.17	0.18251433		3647.2	-0.0260115
467.39	0.42000095		997.39	0.0850887		1527.38	0.14606058		2057.38	-0.00656154		2587.37	0.19234349		3117.37	0.18341148		3647.4	-0.02486967
467.59	0.41963263		997.59	0.0843819		1527.58	0.14640081		2057.58	-0.00681989		2587.57	0.19233653		3117.57	0.18351409		3647.6	-0.02540501
467.79	0.41999209		997.79	0.08391505		1527.78	0.14566532		2057.78	-0.00555208		2587.77	0.19196225		3117.77	0.18245321		3647.8	-0.02500909
467.99	0.41919231		997.99	0.08366374		1527.98	0.14516178		2057.98	-0.00488927		2587.97	0.19216839		3117.97	0.18256953		3648	-0.0250778
468.19	0.41850938		998.19	0.08304314		1528.18	0.14504879		2058.18	-0.00465209		2588.17	0.19116213		3118.17	0.18289003		3648.2	-0.02535529
468.39	0.41845132		998.39	0.08220288		1528.38	0.14534408		2058.38	-0.00453135		2588.37	0.19196901		3118.37	0.18230226		3648.4	-0.02530638
468.59	0.41790963		998.59	0.08145575		1528.58	0.14481535		2058.58	-0.00392633		2588.57	0.19197453		3118.57	0.18260127		3648.6	-0.02495424
468.79	0.41896356		998.79	0.08130933		1528.78	0.14453481		2058.78	-0.00363525		2588.77	0.19199297		3118.77	0.18321004		3648.8	-0.0246845
468.99	0.41921742		998.99	0.08093879		1528.98	0.14476146		2058.98	-0.00271792		2588.97	0.19186376		3118.97	0.18408065		3649	-0.02446913
469.19	0.41885396		999.19	0.0814877		1529.18	0.14433963		2059.18	-0.00268696		2589.17	0.19211543		3119.17	0.18296947		3649.2	-0.02374472
469.39	0.41842727		999.39	0.08195315		1529.38	0.14453106		2059.38	-0.00269938		2589.37	0.19186777		3119.37	0.18239639		3649.4	-0.02319358
469.59	0.41879789		999.59	0.08253942		1529.58	0.14491308		2059.58	-0.00370366		2589.57	0.19175338		3119.57	0.18194876		3649.6	-0.02407534
469.79	0.41890484		999.79	0.0826095		1529.78	0.1455305		2059.78	-0.00326312		2589.77	0.19104477		3119.77	0.18205409		3649.8	-0.0247466
469.99	0.41803823		999.99	0.08304898		1529.98	0.14570758		2059.98	-0.00323732		2589.97	0.18970778		3119.97	0.18219738		3650	-0.02569469
470.19	0.41896919		1000.19	0.08328315		1530.18	0.14582248		2060.18	-0.0035357		2590.17	0.18892855		3120.17	0.18129461		3650.2	-0.02465678
470.39	0.41919346		1000.39	0.08399576		1530.38	0.1462919		2060.38	-0.00370517		2590.37	0.18837123		3120.37	0.18114592		3650.4	-0.02449078
470.59	0.41891858		1000.59	0.08447238		1530.58	0.14628327		2060.58	-0.00304196		2590.57	0.18823666		3120.57	0.18071465		3650.6	-0.02389375
470.79	0.41922387		1000.79	0.08484372		1530.78	0.14709731		2060.78	-0.00306199		2590.77	0.18812395		3120.77	0.18026374		3650.8	-0.02359451
470.99	0.4186971		1000.99	0.08572818		1530.98	0.14772681		2060.98	-0.00401726		2590.97	0.1881725		3120.97	0.17987357		3651	-0.02374103
471.19	0.41973829		1001.19	0.0855863		1531.18	0.14824657		2061.18	-0.00467474		2591.17	0.18811551		3121.17	0.17911573		3651.2	-0.02427674
471.39	0.41974651		1001.39	0.08507708		1531.38	0.14787044		2061.38	-0.00474505		2591.37	0.18883212		3121.37	0.17989543		3651.4	-0.02436722
471.59	0.4207634		1001.59	0.08592589		1531.58	0.14828112		2061.58	-0.00503419		2591.57	0.18820701		3121.57	0.17984636		3651.6	-0.02457977
471.79	0.42147201		1001.79	0.08645987		1531.78	0.14682384		2061.78	-0.00427912		2591.77	0.18814122		3121.77	0.18005097		3651.8	-0.02379287
471.99	0.42156873		1001.99	0.08656003		1531.98	0.1464378		2061.98	-0.00374116		2591.97	0.1882871		3121.97	0.18092032		3652	-0.02389215
472.19	0.42204175		1002.19	0.08664426		1532.18	0.14600542		2062.18	-0.00345398		2592.17	0.18847751		3122.17	0.18082119		3652.2	-0.02403753
472.39	0.42230701		1002.39	0.08666679		1532.38	0.14495827		2062.38	-0.00304099		2592.37	0.18937609		3122.37	0.1809471		3652.4	-0.02421265
472.59	0.42205004		1002.59	0.08647551		1532.58	0.14429709		2062.58	-0.002707		2592.57	0.19006353		3122.57	0.18149886		3652.6	-0.02441986
472.79	0.42177662		1002.79	0.08722918		1532.78	0.14406164		2062.78	-0.00303837		2592.77	0.19032027		3122.77	0.18179272		3652.8	-0.02452013
472.99	0.42137604		1002.99	0.08660616		1532.98	0.14376864		2062.98	-0.00296327		2592.97	0.19041033		3122.97	0.18220482		3653	-0.02612534
473.19	0.42072279		1003.19	0.08650406		1533.18	0.14328029		2063.18	-0.00344754		2593.17	0.19107234		3123.17	0.18159678		3653.2	-0.02578984
473.39	0.42017324		1003.39	0.08619736		1533.38	0.14402225		2063.38	-0.0042422		2593.37	0.19110049		3123.37	0.18202161		3653.4	-0.02608894
473.59	0.41977315		1003.59	0.08587759		1533.58	0.14400974		2063.58	-0.00484869		2593.57	0.18997291		3123.57	0.18210683		3653.6	-0.02713144
473.79	0.41891928		1003.79	0.08574128		1533.78	0.14432256		2063.78	-0.00414551		2593.77	0.18873432		3123.77	0.18272972		3653.8	-0.02754598
473.99	0.41849545		1003.99	0.08517409		1533.98	0.14537664		2063.98	-0.00483225		2593.97	0.18839672		3123.97	0.18263022		3654	-0.02698372
474.19	0.41855661		1004.19	0.08535778		1534.18	0.14563273		2064.18	-0.00532899		2594.17	0.18727882		3124.17	0.18137323		3654.2	-0.02680997
474.39	0.41878025		1004.39	0.08576328		1534.38	0.14637715		2064.38	-0.00562776		2594.37	0.18710539		3124.37	0.18172898		3654.4	-0.02679217
474.59	0.41841058		1004.59	0.08612946		1534.58	0.14691445		2064.58	-0.00553364		2594.57	0.18671657		3124.57	0.18139222		3654.6	-0.02697495
474.79	0.41855608		1004.79	0.08634837		1534.78	0.14775988		2064.78	-0.0067555		2594.77	0.18655418		3124.77	0.18093972		3654.8	-0.02633129
474.99	0.41788095		1004.99	0.08528101		1534.98	0.14829851		2064.98	-0.00694507		2594.97	0.18674629		3124.97	0.18107662		3655	-0.02599532
475.19	0.4187997		1005.19	0.08454707		1535.18	0.14802654		2065.18	-0.00690721		2595.17	0.18582572		3125.17	0.18136768		3655.2	-0.02588055
475.39	0.41949554		1005.39	0.08408798		1535.38	0.14777305		2065.38	-0.00711848		2595.37	0.18560326		3125.37	0.18195151		3655.4	-0.02549345
475.59	0.42051413		1005.59	0.08443948		1535.58	0.14711206		2065.58	-0.00735498		2595.57	0.1853098		3125.57	0.18225694		3655.6	-0.02499467
475.79	0.42104713		1005.79	0.08395241		1535.78	0.1474297		2065.78	-0.00668906		2595.77	0.18525588		3125.77	0.18261049		3655.8	-0.02515346
475.99	0.42052355		1005.99	0.08350731		1535.98	0.14737232		2065.98	-0.0061826		2595.97	0.18522603		3125.97	0.1824727		3656	-0.02524453
476.19	0.42053757		1006.19	0.08375691		1536.18	0.14709659		2066.18	-0.00665401		2596.17	0.18621734		3126.17	0.18261422		3656.2	-0.02565948
476.39	0.42063621		1006.39	0.08380524		1536.38	0.14711061		2066.38	-0.00600151		2596.37	0.18677357		3126.37	0.18246609		3656.4	-0.02643845
476.59	0.42087216		1006.59	0.08388113		1536.58	0.14727955		2066.58	-0.00609402		2596.57	0.18808068		3126.57	0.18249619		3656.6	-0.02679414
476.79	0.42094652		1006.79	0.08365652		1536.78	0.14688429		2066.78	-0.00754872		2596.77	0.18926625		3126.77	0.18225861		3656.8	-0.02661626
476.99	0.42076932		1006.99	0.08253298		1536.98	0.14590674		2066.98	-0.00744878		2596.97	0.1899214		3126.97	0.18170144		3657	-0.02632235
477.19	0.42033597		1007.19	0.08303999		1537.18	0.14612302		2067.18	-0.00812018		2597.17	0.19055998		3127.17	0.18078228		3657.2	-0.02501221
477.39	0.41941382		1007.39	0.08321484		1537.38	0.14572563		2067.38	-0.00842184		2597.37	0.19151862		3127.37	0.18091903		3657.4	-0.02538006
477.59	0.41921641		1007.59	0.08396159		1537.58	0.14498604		2067.58	-0.00903949		2597.57	0.19085974		3127.57	0.18049454		3657.6	-0.02550899
477.79	0.4196237		1007.79	0.08416047		1537.78	0.14446472		2067.78	-0.01021978		2597.77	0.19130501		3127.77	0.18033006		3657.8	-0.02473056
477.99	0.41974743		1007.99	0.0836297		1537.98	0.14441205		2067.98	-0.01055477		2597.97	0.19145154		3127.97	0.17921762		3658	-0.02541824
478.19	0.4194548		1008.19	0.08380072		1538.18	0.14356321		2068.18	-0.01062329		2598.17	0.19033744		3128.17	0.17839338		3658.2	-0.02545074
478.39	0.41933031		1008.39	0.08414552		1538.38	0.14254412		2068.38	-0.0110947		2598.37	0.1899846		3128.37	0.17887588		3658.4	-0.02504033
478.59	0.41864655		1008.59	0.08444629		1538.58	0.14226521		2068.58	-0.01065289		2598.57	0.1888795		3128.57	0.17867913		3658.6	-0.02465129
478.79	0.41885716		1008.79	0.08392342		1538.78	0.14134265		2068.78	-0.00954068		2598.77	0.18875298		3128.77	0.17947467		3658.8	-0.02337804
478.99	0.41825832		1008.99	0.0827549		1538.98	0.14152265		2068.98	-0.00892504		2598.97	0.18750426		3128.97	0.17965634		3659	-0.02355362
479.19	0.4189236		1009.19	0.08298068		1539.18	0.14137289		2069.18	-0.00786883		2599.17	0.18658738		3129.17	0.18015066		3659.2	-0.02391256
479.39	0.41870631		1009.39	0.08319941		1539.38	0.14143401		2069.38	-0.00712163		2599.37	0.18629687		3129.37	0.18009026		3659.4	-0.02406313
479.59	0.41759629		1009.59	0.08423869		1539.58	0.1418068		2069.58	-0.00655953		2599.57	0.18594976		3129.57	0.1810685		3659.6	-0.02406909
479.79	0.41770029		1009.79	0.08441157		1539.78	0.14289421		2069.78	-0.00606522		2599.77	0.18534316		3129.77	0.1813611		3659.8	-0.0238631
479.99	0.41686169		1009.99	0.08487496		1539.98	0.14313353		2069.98	-0.00528555		2599.97	0.18529012		3129.97	0.1813265		3660	-0.02403628
480.19	0.41739192		1010.19	0.08525643		1540.18	0.14421628		2070.18	-0.00477364		2600.17	0.18606854		3130.17	0.1815414		3660.2	-0.02488224
480.39	0.41720318		1010.39	0.08495246		1540.38	0.14520436		2070.38	-0.00438229		2600.37	0.18586764		3130.37	0.1800264		3660.4	-0.02497521
480.59	0.41705878		1010.59	0.08504801		1540.58	0.14615629		2070.58	-0.00536098		2600.57	0.18714733		3130.57	0.17896263		3660.6	-0.02476208
480.79	0.41701575		1010.79	0.08506164		1540.78	0.14700944		2070.78	-0.00596432		2600.77	0.18775851		3130.77	0.17814157		3660.8	-0.02399866
480.99	0.41692945		1010.99	0.08496306		1540.98	0.14782218		2070.98	-0.00555215		2600.97	0.18681521		3130.97	0.17765511		3661	-0.02328009
481.19	0.41717549		1011.19	0.0850803		1541.18	0.14837169		2071.18	-0.0055409		2601.17	0.18726129		3131.17	0.17704897		3661.2	-0.02394611
481.39	0.41704942		1011.39	0.08560205		1541.38	0.14788383		2071.38	-0.00526775		2601.37	0.1881254		3131.37	0.17683542		3661.4	-0.02444115
481.59	0.41752883		1011.59	0.08514236		1541.58	0.1482695		2071.58	-0.00635672		2601.57	0.18802192		3131.57	0.17596734		3661.6	-0.02419209
481.79	0.41737686		1011.79	0.0844802		1541.78	0.14815271		2071.78	-0.00745763		2601.77	0.18894683		3131.77	0.17614605		3661.8	-0.02433341
481.99	0.41763222		1011.99	0.08463643		1541.98	0.14797101		2071.98	-0.00762621		2601.97	0.18854611		3131.97	0.17660897		3662	-0.02513656
482.19	0.41799736		1012.19	0.08483361		1542.18	0.14856555		2072.18	-0.00840766		2602.17	0.18824088		3132.17	0.17673668		3662.2	-0.02516418
482.39	0.41777718		1012.39	0.08557229		1542.38	0.1487736		2072.38	-0.00873055		2602.37	0.18902818		3132.37	0.17711484		3662.4	-0.0261485
482.59	0.41819172		1012.59	0.08493211		1542.58	0.1489043		2072.58	-0.00844678		2602.57	0.18912318		3132.57	0.17700923		3662.6	-0.02647054
482.79	0.41829968		1012.79	0.08454905		1542.78	0.14814195		2072.78	-0.00770065		2602.77	0.18891975		3132.77	0.17823293		3662.8	-0.02663258
482.99	0.4178109		1012.99	0.08525691		1542.98	0.14773644		2072.98	-0.00831902		2602.97	0.18749426		3132.97	0.17887449		3663	-0.02746264
483.19	0.41752783		1013.19	0.0861365		1543.18	0.1471507		2073.18	-0.00749845		2603.17	0.18669497		3133.17	0.18012476		3663.2	-0.0279464
483.39	0.4170801		1013.39	0.08685217		1543.38	0.14725156		2073.38	-0.00748273		2603.37	0.18649337		3133.37	0.18064242		3663.4	-0.02739297
483.59	0.41736359		1013.59	0.08744019		1543.58	0.14737912		2073.58	-0.00750857		2603.57	0.18679387		3133.57	0.18183253		3663.6	-0.02721739
483.79	0.41834686		1013.79	0.08765715		1543.78	0.14801086		2073.78	-0.00729962		2603.77	0.18649233		3133.77	0.18212812		3663.8	-0.0271908
483.99	0.41905488		1013.99	0.08781951		1543.98	0.14797916		2073.98	-0.00744721		2603.97	0.18662544		3133.97	0.18225019		3664	-0.02756145
484.19	0.4193118		1014.19	0.08790042		1544.18	0.14846909		2074.18	-0.00748566		2604.17	0.18762984		3134.17	0.18225306		3664.2	-0.0279857
484.39	0.41889281		1014.39	0.08745322		1544.38	0.14794592		2074.38	-0.0071996		2604.37	0.18732845		3134.37	0.18070242		3664.4	-0.02850673
484.59	0.41985314		1014.59	0.08764284		1544.58	0.14837662		2074.58	-0.00681199		2604.57	0.18791629		3134.57	0.18098928		3664.6	-0.02833353
484.79	0.42059158		1014.79	0.08765558		1544.78	0.14800484		2074.78	-0.00606754		2604.77	0.18849437		3134.77	0.18117161		3664.8	-0.02759528
484.99	0.42069983		1014.99	0.08691885		1544.98	0.14710991		2074.98	-0.00517852		2604.97	0.18862162		3134.97	0.18109506		3665	-0.02772619
485.19	0.42123844		1015.19	0.08675724		1545.18	0.14574354		2075.18	-0.00590718		2605.17	0.18928942		3135.17	0.18083187		3665.2	-0.02802323
485.39	0.42109616		1015.39	0.08677162		1545.38	0.14451301		2075.38	-0.00646211		2605.37	0.18982787		3135.37	0.18089133		3665.4	-0.02772149
485.59	0.42044481		1015.59	0.08626263		1545.58	0.14414657		2075.58	-0.00723423		2605.57	0.19058974		3135.57	0.18087326		3665.6	-0.02742126
485.79	0.42019553		1015.79	0.08686884		1545.78	0.14354835		2075.78	-0.00776939		2605.77	0.1903091		3135.77	0.18224133		3665.8	-0.02684449
485.99	0.42056054		1015.99	0.0873105		1545.98	0.14348767		2075.98	-0.00810424		2605.97	0.18988038		3135.97	0.18272283		3666	-0.02608013
486.19	0.41972689		1016.19	0.08693427		1546.18	0.14376962		2076.18	-0.00874899		2606.17	0.19033102		3136.17	0.18191914		3666.2	-0.0263973
486.39	0.41877665		1016.39	0.08571643		1546.38	0.14308733		2076.38	-0.00925559		2606.37	0.18995434		3136.37	0.18237013		3666.4	-0.0264223
486.59	0.41826916		1016.59	0.08567749		1546.58	0.14227787		2076.58	-0.00965032		2606.57	0.18849296		3136.57	0.18259086		3666.6	-0.02599052
486.79	0.41778301		1016.79	0.08591729		1546.78	0.14130542		2076.78	-0.00976415		2606.77	0.18741813		3136.77	0.18359592		3666.8	-0.02543796
486.99	0.41738718		1016.99	0.08523911		1546.98	0.14177253		2076.98	-0.01137401		2606.97	0.18612634		3136.97	0.18434303		3667	-0.02595657
487.19	0.41667625		1017.19	0.08535039		1547.18	0.14309232		2077.18	-0.01123342		2607.17	0.1855126		3137.17	0.18464725		3667.2	-0.02491555
487.39	0.41644328		1017.39	0.08557682		1547.38	0.14420589		2077.38	-0.01156823		2607.37	0.18599121		3137.37	0.18456059		3667.4	-0.02478225
487.59	0.41701709		1017.59	0.08483141		1547.58	0.14468296		2077.58	-0.01135329		2607.57	0.18621494		3137.57	0.18416933		3667.6	-0.02457277
487.79	0.41743186		1017.79	0.08437372		1547.78	0.14492529		2077.78	-0.01072449		2607.77	0.18521087		3137.77	0.18365769		3667.8	-0.02486451
487.99	0.41725246		1017.99	0.08384102		1547.98	0.14466324		2077.98	-0.0096305		2607.97	0.18481033		3137.97	0.18314855		3668	-0.02525263
488.19	0.41660163		1018.19	0.0841057		1548.18	0.14545869		2078.18	-0.00866809		2608.17	0.18430644		3138.17	0.18256713		3668.2	-0.02574748
488.39	0.41622907		1018.39	0.08373108		1548.38	0.14559359		2078.38	-0.00788022		2608.37	0.18367019		3138.37	0.18151023		3668.4	-0.02682885
488.59	0.41670704		1018.59	0.08494615		1548.58	0.14646726		2078.58	-0.00756061		2608.57	0.18392335		3138.57	0.18161578		3668.6	-0.02605571
488.79	0.41715648		1018.79	0.08501268		1548.78	0.1464843		2078.78	-0.00831074		2608.77	0.18433981		3138.77	0.1805621		3668.8	-0.02631871
488.99	0.41763061		1018.99	0.08519361		1548.98	0.14626078		2078.98	-0.00850651		2608.97	0.18495155		3138.97	0.18029763		3669	-0.02641533
489.19	0.41816928		1019.19	0.08527687		1549.18	0.14666009		2079.18	-0.00926421		2609.17	0.18470884		3139.17	0.18038516		3669.2	-0.02648942
489.39	0.41733446		1019.39	0.08561782		1549.38	0.14644036		2079.38	-0.00886027		2609.37	0.18536937		3139.37	0.18003441		3669.4	-0.02682542
489.59	0.41719101		1019.59	0.08617231		1549.58	0.14687031		2079.58	-0.0082918		2609.57	0.18581317		3139.57	0.18009929		3669.6	-0.02646484
489.79	0.41780941		1019.79	0.08630056		1549.78	0.14704228		2079.78	-0.00806231		2609.77	0.18580639		3139.77	0.18029746		3669.8	-0.02658939
489.99	0.41726625		1019.99	0.08638385		1549.98	0.14700204		2079.98	-0.00832507		2609.97	0.18613424		3139.97	0.17971726		3670	-0.02652587
490.19	0.4170551		1020.19	0.08564825		1550.18	0.14633946		2080.18	-0.00847031		2610.17	0.18744802		3140.17	0.17914231		3670.2	-0.02667847
490.39	0.41728822		1020.39	0.08539375		1550.38	0.14634177		2080.38	-0.00926264		2610.37	0.18721035		3140.37	0.17989554		3670.4	-0.02653455
490.59	0.41675436		1020.59	0.08659876		1550.58	0.14679893		2080.58	-0.00854838		2610.57	0.18707618		3140.57	0.17921224		3670.6	-0.02659376
490.79	0.41727618		1020.79	0.0859408		1550.78	0.14676401		2080.78	-0.00833984		2610.77	0.18705007		3140.77	0.17917329		3670.8	-0.02667257
490.99	0.41733372		1020.99	0.08558922		1550.98	0.14737639		2080.98	-0.00915591		2610.97	0.18752796		3140.97	0.17983813		3671	-0.02705547
491.19	0.4173423		1021.19	0.08531405		1551.18	0.14725002		2081.18	-0.00898374		2611.17	0.18702306		3141.17	0.18004767		3671.2	-0.0262727
491.39	0.4181163		1021.39	0.08388942		1551.38	0.14631906		2081.38	-0.00918212		2611.37	0.18681348		3141.37	0.17991597		3671.4	-0.02653919
491.59	0.41960693		1021.59	0.08295006		1551.58	0.14541318		2081.58	-0.00850914		2611.57	0.1868429		3141.57	0.17941938		3671.6	-0.02633267
491.79	0.41972567		1021.79	0.08270785		1551.78	0.14459127		2081.78	-0.00766874		2611.77	0.18610903		3141.77	0.17991732		3671.8	-0.02685798
491.99	0.41902885		1021.99	0.08190008		1551.98	0.14444507		2081.98	-0.00750269		2611.97	0.18557594		3141.97	0.18009781		3672	-0.02685452
492.19	0.41886281		1022.19	0.081129		1552.18	0.14460618		2082.18	-0.00749534		2612.17	0.18483973		3142.17	0.17997042		3672.2	-0.0271387
492.39	0.41900224		1022.39	0.08020139		1552.38	0.14421499		2082.38	-0.00768732		2612.37	0.18434216		3142.37	0.18027875		3672.4	-0.02773566
492.59	0.41923347		1022.59	0.08053569		1552.58	0.14396698		2082.58	-0.00806262		2612.57	0.18495482		3142.57	0.18018293		3672.6	-0.02745241
492.79	0.41986358		1022.79	0.07967799		1552.78	0.14479073		2082.78	-0.00846499		2612.77	0.18476799		3142.77	0.18012807		3672.8	-0.02732747
492.99	0.41936959		1022.99	0.07939386		1552.98	0.14396062		2082.98	-0.00824832		2612.97	0.18550891		3142.97	0.1806411		3673	-0.02711259
493.19	0.41851538		1023.19	0.07800811		1553.18	0.14466464		2083.18	-0.00804496		2613.17	0.18531619		3143.17	0.18112302		3673.2	-0.02751145
493.39	0.41786049		1023.39	0.07787256		1553.38	0.14432799		2083.38	-0.00803503		2613.37	0.18580297		3143.37	0.18102369		3673.4	-0.02748852
493.59	0.41652618		1023.59	0.07784226		1553.58	0.14441655		2083.58	-0.00759148		2613.57	0.18618703		3143.57	0.1813016		3673.6	-0.02780355
493.79	0.41551122		1023.79	0.07835854		1553.78	0.14467395		2083.78	-0.00692105		2613.77	0.18661869		3143.77	0.18066132		3673.8	-0.02863312
493.99	0.41547313		1023.99	0.07920563		1553.98	0.14517016		2083.98	-0.00712967		2613.97	0.18667363		3143.97	0.1810332		3674	-0.02884845
494.19	0.41579513		1024.19	0.0791946		1554.18	0.14573166		2084.18	-0.00740812		2614.17	0.18796001		3144.17	0.18033178		3674.2	-0.02857371
494.39	0.41549426		1024.39	0.08052685		1554.38	0.14705959		2084.38	-0.00701861		2614.37	0.18785588		3144.37	0.17988225		3674.4	-0.02868002
494.59	0.41508585		1024.59	0.08108412		1554.58	0.14721888		2084.58	-0.00620852		2614.57	0.18703831		3144.57	0.17910896		3674.6	-0.02893993
494.79	0.41522158		1024.79	0.08139474		1554.78	0.14725451		2084.78	-0.00653514		2614.77	0.18727802		3144.77	0.1790082		3674.8	-0.02868617
494.99	0.41462734		1024.99	0.08258056		1554.98	0.14717079		2084.98	-0.00744489		2614.97	0.1869256		3144.97	0.17884378		3675	-0.02794706
495.19	0.41528745		1025.19	0.08283762		1555.18	0.14674989		2085.18	-0.00709815		2615.17	0.18617372		3145.17	0.17801763		3675.2	-0.02777269
495.39	0.4165207		1025.39	0.0835226		1555.38	0.14652017		2085.38	-0.00737499		2615.37	0.18597057		3145.37	0.1775491		3675.4	-0.0275316
495.59	0.41636886		1025.59	0.08357687		1555.58	0.14628897		2085.58	-0.00727152		2615.57	0.18683558		3145.57	0.17681458		3675.6	-0.02828079
495.79	0.41582431		1025.79	0.08326858		1555.78	0.1458814		2085.78	-0.00741706		2615.77	0.18639337		3145.77	0.17605122		3675.8	-0.02895421
495.99	0.41577288		1025.99	0.08253281		1555.98	0.14492406		2085.98	-0.00724709		2615.97	0.18528925		3145.97	0.17514302		3676	-0.02829575
496.19	0.41622982		1026.19	0.08250691		1556.18	0.14470733		2086.18	-0.00643899		2616.17	0.18463627		3146.17	0.17457254		3676.2	-0.02833971
496.39	0.41610753		1026.39	0.08285883		1556.38	0.14383412		2086.38	-0.00635356		2616.37	0.18401616		3146.37	0.17427248		3676.4	-0.028008
496.59	0.41686302		1026.59	0.08312808		1556.58	0.14306954		2086.58	-0.00551544		2616.57	0.18369422		3146.57	0.17383887		3676.6	-0.02785853
496.79	0.4169895		1026.79	0.08284985		1556.78	0.14289433		2086.78	-0.00547064		2616.77	0.18345899		3146.77	0.17438142		3676.8	-0.02798744
496.99	0.41675101		1026.99	0.08217738		1556.98	0.1415148		2086.98	-0.00510697		2616.97	0.18374094		3146.97	0.17490454		3677	-0.02808616
497.19	0.41700702		1027.19	0.08144985		1557.18	0.14135439		2087.18	-0.00564478		2617.17	0.18338691		3147.17	0.17502971		3677.2	-0.02800316
497.39	0.41713591		1027.39	0.08184371		1557.38	0.14096838		2087.38	-0.005935		2617.37	0.18328421		3147.37	0.17543644		3677.4	-0.02840845
497.59	0.41644243		1027.59	0.08136883		1557.58	0.14088134		2087.58	-0.00607379		2617.57	0.18328027		3147.57	0.17604275		3677.6	-0.02868335
497.79	0.41718895		1027.79	0.08168025		1557.78	0.14092629		2087.78	-0.00673514		2617.77	0.18294188		3147.77	0.17602119		3677.8	-0.02925157
497.99	0.41882762		1027.99	0.08177917		1557.98	0.14146363		2087.98	-0.00718401		2617.97	0.18241149		3147.97	0.17696344		3678	-0.02936215
498.19	0.41873615		1028.19	0.08138859		1558.18	0.14196129		2088.18	-0.00758306		2618.17	0.18338267		3148.17	0.17693867		3678.2	-0.02844251
498.39	0.41814079		1028.39	0.0819349		1558.38	0.14297683		2088.38	-0.00719383		2618.37	0.18322439		3148.37	0.17798199		3678.4	-0.02797467
498.59	0.4183117		1028.59	0.0816268		1558.58	0.14282931		2088.58	-0.00783318		2618.57	0.18304136		3148.57	0.17849105		3678.6	-0.02783058
498.79	0.41794185		1028.79	0.08179428		1558.78	0.14318555		2088.78	-0.00900768		2618.77	0.18381138		3148.77	0.17841103		3678.8	-0.0267957
498.99	0.41805552		1028.99	0.08134173		1558.98	0.14371395		2088.98	-0.0095766		2618.97	0.18390233		3148.97	0.17911082		3679	-0.02637807
499.19	0.41822532		1029.19	0.0810674		1559.18	0.14387248		2089.18	-0.00943144		2619.17	0.18441384		3149.17	0.17890786		3679.2	-0.02690132
499.39	0.4181602		1029.39	0.08061438		1559.38	0.14459591		2089.38	-0.00969001		2619.37	0.18423248		3149.37	0.17919739		3679.4	-0.02713188
499.59	0.41798368		1029.59	0.0804929		1559.58	0.14506169		2089.58	-0.00893783		2619.57	0.18489313		3149.57	0.17926854		3679.6	-0.0283539
499.79	0.41776338		1029.79	0.08106525		1559.78	0.14553561		2089.78	-0.00939008		2619.77	0.18320453		3149.77	0.17867926		3679.8	-0.02829931
499.99	0.418498		1029.99	0.08171181		1559.98	0.14569111		2089.98	-0.0085868		2619.97	0.18302632		3149.97	0.17834282		3680	-0.02773156
500.19	0.41836514		1030.19	0.08197713		1560.18	0.14644086		2090.18	-0.00788462		2620.17	0.18289675		3150.17	0.17790644		3680.2	-0.02779127
500.39	0.41796605		1030.39	0.0822516		1560.38	0.14597235		2090.38	-0.00736101		2620.37	0.1821847		3150.37	0.17730718		3680.4	-0.0283825
500.59	0.41879201		1030.59	0.08222612		1560.58	0.14520787		2090.58	-0.00712316		2620.57	0.18232457		3150.57	0.17729989		3680.6	-0.02885235
500.79	0.41843623		1030.79	0.08178886		1560.78	0.14525929		2090.78	-0.0074801		2620.77	0.18268832		3150.77	0.1777682		3680.8	-0.02889574
500.99	0.418358		1030.99	0.08097998		1560.98	0.14417284		2090.98	-0.00757682		2620.97	0.18244967		3150.97	0.17770662		3681	-0.02840657
501.19	0.41799946		1031.19	0.08089		1561.18	0.14339255		2091.18	-0.00804941		2621.17	0.18218146		3151.17	0.1767625		3681.2	-0.02881201
501.39	0.41751878		1031.39	0.08060446		1561.38	0.14350909		2091.38	-0.00753732		2621.37	0.18209495		3151.37	0.17731381		3681.4	-0.02938887
501.59	0.41784127		1031.59	0.08000638		1561.58	0.14318795		2091.58	-0.00728183		2621.57	0.18195141		3151.57	0.17763884		3681.6	-0.02894123
501.79	0.41747662		1031.79	0.08087228		1561.78	0.14304412		2091.78	-0.00733091		2621.77	0.18185489		3151.77	0.17738834		3681.8	-0.02926037
501.99	0.41682432		1031.99	0.08110347		1561.98	0.14330841		2091.98	-0.00650375		2621.97	0.18231424		3151.97	0.17764601		3682	-0.02887316
502.19	0.4165448		1032.19	0.08060854		1562.18	0.14285191		2092.18	-0.0067019		2622.17	0.18350733		3152.17	0.1777874		3682.2	-0.02793846
502.39	0.41650188		1032.39	0.0803833		1562.38	0.14283893		2092.38	-0.006654		2622.37	0.18392182		3152.37	0.17846533		3682.4	-0.02701536
502.59	0.4163108		1032.59	0.07967196		1562.58	0.14249684		2092.58	-0.00714216		2622.57	0.18437357		3152.57	0.17905508		3682.6	-0.02755143
502.79	0.41531004		1032.79	0.07914788		1562.78	0.1430162		2092.78	-0.00806379		2622.77	0.18522213		3152.77	0.17876531		3682.8	-0.0267724
502.99	0.41533316		1032.99	0.07889881		1562.98	0.14331583		2092.98	-0.00773298		2622.97	0.18466286		3152.97	0.17881755		3683	-0.02699831
503.19	0.41513119		1033.19	0.07972144		1563.18	0.14325637		2093.18	-0.00703438		2623.17	0.18447011		3153.17	0.17834195		3683.2	-0.02663732
503.39	0.41565712		1033.39	0.08087626		1563.38	0.14332796		2093.38	-0.00610991		2623.37	0.18402338		3153.37	0.17833533		3683.4	-0.02649039
503.59	0.41504775		1033.59	0.08160801		1563.58	0.14405776		2093.58	-0.00601223		2623.57	0.18372853		3153.57	0.17834087		3683.6	-0.02678256
503.79	0.4146957		1033.79	0.08153556		1563.78	0.14455529		2093.78	-0.00640243		2623.77	0.18375268		3153.77	0.17744921		3683.8	-0.02661531
503.99	0.4157102		1033.99	0.08112619		1563.98	0.14459695		2093.98	-0.00671553		2623.97	0.18397173		3153.97	0.1772069		3684	-0.02627779
504.19	0.41488721		1034.19	0.08086948		1564.18	0.1446644		2094.18	-0.00724621		2624.17	0.18328823		3154.17	0.1768468		3684.2	-0.02620039
504.39	0.41529552		1034.39	0.08111816		1564.38	0.14485544		2094.38	-0.0076246		2624.37	0.18285379		3154.37	0.17695779		3684.4	-0.02653296
504.59	0.41529182		1034.59	0.08091552		1564.58	0.14387263		2094.58	-0.0077402		2624.57	0.18327543		3154.57	0.17662067		3684.6	-0.02585828
504.79	0.41558452		1034.79	0.08077547		1564.78	0.14412913		2094.78	-0.00811262		2624.77	0.18306661		3154.77	0.17693499		3684.8	-0.02586016
504.99	0.41527235		1034.99	0.08095303		1564.98	0.14323469		2094.98	-0.00840349		2624.97	0.18249067		3154.97	0.17671243		3685	-0.02637328
505.19	0.41595101		1035.19	0.08199356		1565.18	0.14391114		2095.18	-0.0085058		2625.17	0.18204972		3155.17	0.1762043		3685.2	-0.02709242
505.39	0.41612869		1035.39	0.08151027		1565.38	0.14411654		2095.38	-0.00918872		2625.37	0.1816605		3155.37	0.17662423		3685.4	-0.02741699
505.59	0.41647346		1035.59	0.08177645		1565.58	0.14354783		2095.58	-0.00973883		2625.57	0.18188628		3155.57	0.17599186		3685.6	-0.02752349
505.79	0.41515304		1035.79	0.08187267		1565.78	0.14327251		2095.78	-0.00978942		2625.77	0.1826195		3155.77	0.17620747		3685.8	-0.02807537
505.99	0.41511921		1035.99	0.08147063		1565.98	0.14398424		2095.98	-0.01038052		2625.97	0.1824976		3155.97	0.17608987		3686	-0.0281728
506.19	0.41571621		1036.19	0.08079224		1566.18	0.14403475		2096.18	-0.01096786		2626.17	0.18258674		3156.17	0.17633936		3686.2	-0.02848453
506.39	0.41527859		1036.39	0.07999207		1566.38	0.14468019		2096.38	-0.01104407		2626.37	0.18289927		3156.37	0.17644875		3686.4	-0.02791733
506.59	0.41487409		1036.59	0.07965384		1566.58	0.1453021		2096.58	-0.01157732		2626.57	0.18262509		3156.57	0.17675066		3686.6	-0.0285381
506.79	0.41410368		1036.79	0.07932202		1566.78	0.14535648		2096.78	-0.01169464		2626.77	0.18210699		3156.77	0.17524799		3686.8	-0.02856449
506.99	0.41484532		1036.99	0.07965193		1566.98	0.14479189		2096.98	-0.01100195		2626.97	0.18085629		3156.97	0.17551637		3687	-0.02824787
507.19	0.413856		1037.19	0.08051176		1567.18	0.14426757		2097.18	-0.01002766		2627.17	0.18154817		3157.17	0.17576055		3687.2	-0.02788
507.39	0.41397876		1037.39	0.0807642		1567.38	0.14476051		2097.38	-0.00945725		2627.37	0.18166077		3157.37	0.17540495		3687.4	-0.02800844
507.59	0.41344661		1037.59	0.08005664		1567.58	0.14514942		2097.58	-0.00950063		2627.57	0.1820509		3157.57	0.17505846		3687.6	-0.02838674
507.79	0.41396633		1037.79	0.07983723		1567.78	0.14499809		2097.78	-0.00943625		2627.77	0.1820752		3157.77	0.17581055		3687.8	-0.02907117
507.99	0.41426167		1037.99	0.0800252		1567.98	0.144992		2097.98	-0.00999324		2627.97	0.18035356		3157.97	0.17663429		3688	-0.02939312
508.19	0.41390023		1038.19	0.08123065		1568.18	0.14506213		2098.18	-0.00958888		2628.17	0.18076166		3158.17	0.17724199		3688.2	-0.02940995
508.39	0.41469669		1038.39	0.08198153		1568.38	0.14398973		2098.38	-0.00830014		2628.37	0.18035762		3158.37	0.17754452		3688.4	-0.02902536
508.59	0.4150819		1038.59	0.08207036		1568.58	0.14269576		2098.58	-0.00770866		2628.57	0.18073673		3158.57	0.17767563		3688.6	-0.02880333
508.79	0.41555694		1038.79	0.08328902		1568.78	0.1424612		2098.78	-0.00772697		2628.77	0.18090461		3158.77	0.17846011		3688.8	-0.02913592
508.99	0.41625566		1038.99	0.08365986		1568.98	0.14190007		2098.98	-0.00798374		2628.97	0.18062556		3158.97	0.17904689		3689	-0.0281268
509.19	0.41676803		1039.19	0.0838385		1569.18	0.14190303		2099.18	-0.00898975		2629.17	0.18124571		3159.17	0.17841999		3689.2	-0.02779576
509.39	0.41574609		1039.39	0.08345718		1569.38	0.14145104		2099.38	-0.00927626		2629.37	0.18161633		3159.37	0.17774541		3689.4	-0.02789492
509.59	0.41574796		1039.59	0.08443353		1569.58	0.14166435		2099.58	-0.00916547		2629.57	0.18212332		3159.57	0.1775317		3689.6	-0.02750478
509.79	0.41547062		1039.79	0.08409326		1569.78	0.14158765		2099.78	-0.00931186		2629.77	0.18209627		3159.77	0.17793702		3689.8	-0.02772054
509.99	0.4158249		1039.99	0.08420096		1569.98	0.14311155		2099.98	-0.01011939		2629.97	0.18184455		3159.97	0.17701085		3690	-0.02723853
510.19	0.41580303		1040.19	0.08384795		1570.18	0.14389026		2100.18	-0.01018593		2630.17	0.18246158		3160.17	0.17671045		3690.2	-0.02762556
510.39	0.41604839		1040.39	0.08389275		1570.38	0.14380396		2100.38	-0.01018496		2630.37	0.18247729		3160.37	0.17644278		3690.4	-0.02596929
510.59	0.4159423		1040.59	0.08419821		1570.58	0.14448603		2100.58	-0.01041123		2630.57	0.18160928		3160.57	0.1762644		3690.6	-0.02641852
510.79	0.41555658		1040.79	0.08410098		1570.78	0.14474181		2100.78	-0.0094452		2630.77	0.181237		3160.77	0.17555105		3690.8	-0.02587691
510.99	0.41540384		1040.99	0.08440268		1570.98	0.14478611		2100.98	-0.00912434		2630.97	0.18074303		3160.97	0.1756648		3691	-0.02536741
511.19	0.4148316		1041.19	0.08418929		1571.18	0.14472565		2101.18	-0.00876432		2631.17	0.18091442		3161.17	0.17547047		3691.2	-0.02561136
511.39	0.41613103		1041.39	0.08280111		1571.38	0.14493529		2101.38	-0.00869476		2631.37	0.18081518		3161.37	0.17523095		3691.4	-0.02596459
511.59	0.41486549		1041.59	0.0825426		1571.58	0.14381617		2101.58	-0.00837762		2631.57	0.17939461		3161.57	0.17555804		3691.6	-0.02698806
511.79	0.41451551		1041.79	0.08198147		1571.78	0.14390356		2101.78	-0.00872959		2631.77	0.17784847		3161.77	0.17603554		3691.8	-0.02769539
511.99	0.41476619		1041.99	0.08215042		1571.98	0.14301877		2101.98	-0.00855049		2631.97	0.17641207		3161.97	0.17661587		3692	-0.02740916
512.19	0.41458916		1042.19	0.08235062		1572.18	0.14239456		2102.18	-0.00823866		2632.17	0.17691777		3162.17	0.17672097		3692.2	-0.02670314
512.39	0.41529002		1042.39	0.08176628		1572.38	0.14058237		2102.38	-0.00784348		2632.37	0.17611822		3162.37	0.17651569		3692.4	-0.02714951
512.59	0.41517875		1042.59	0.08071261		1572.58	0.14008782		2102.58	-0.00846256		2632.57	0.17692567		3162.57	0.17649059		3692.6	-0.02723836
512.79	0.41528739		1042.79	0.08025029		1572.78	0.14009953		2102.78	-0.00896503		2632.77	0.17691411		3162.77	0.17681337		3692.8	-0.0270747
512.99	0.41625403		1042.99	0.07976347		1572.98	0.14032801		2102.98	-0.00948978		2632.97	0.177139		3162.97	0.17737297		3693	-0.02713367
513.19	0.41595686		1043.19	0.08011991		1573.18	0.14095067		2103.18	-0.01082385		2633.17	0.17750281		3163.17	0.17704896		3693.2	-0.0278212
513.39	0.41549412		1043.39	0.08047346		1573.38	0.14169253		2103.38	-0.0105314		2633.37	0.17765444		3163.37	0.1766229		3693.4	-0.02866915
513.59	0.41574365		1043.59	0.08052484		1573.58	0.14190243		2103.58	-0.01116721		2633.57	0.17778997		3163.57	0.17710977		3693.6	-0.02799249
513.79	0.4153638		1043.79	0.07965521		1573.78	0.14207692		2103.78	-0.01193344		2633.77	0.17817078		3163.77	0.17726555		3693.8	-0.02841522
513.99	0.41498557		1043.99	0.07935985		1573.98	0.14317883		2103.98	-0.01250161		2633.97	0.17880823		3163.97	0.1770906		3694	-0.02886698
514.19	0.41512213		1044.19	0.07938235		1574.18	0.14266431		2104.18	-0.01282461		2634.17	0.17907804		3164.17	0.1770768		3694.2	-0.02829969
514.39	0.41534759		1044.39	0.07864186		1574.38	0.14266135		2104.38	-0.0129753		2634.37	0.17938635		3164.37	0.17658064		3694.4	-0.02755743
514.59	0.41475301		1044.59	0.07796929		1574.58	0.14328325		2104.58	-0.01236463		2634.57	0.17924974		3164.57	0.17628078		3694.6	-0.02838825
514.79	0.41414615		1044.79	0.07785891		1574.78	0.14341425		2104.78	-0.01192143		2634.77	0.17983588		3164.77	0.17614963		3694.8	-0.02864206
514.99	0.41369702		1044.99	0.0785797		1574.98	0.14217702		2104.98	-0.01212537		2634.97	0.17858782		3164.97	0.17574127		3695	-0.02856762
515.19	0.41432466		1045.19	0.07781022		1575.18	0.14178752		2105.18	-0.01112864		2635.17	0.17906586		3165.17	0.17600563		3695.2	-0.02904473
515.39	0.41507628		1045.39	0.0776452		1575.38	0.14161747		2105.38	-0.01090681		2635.37	0.17872756		3165.37	0.17623836		3695.4	-0.0281148
515.59	0.41458179		1045.59	0.07811984		1575.58	0.14049505		2105.58	-0.01073722		2635.57	0.17783519		3165.57	0.17653919		3695.6	-0.02803221
515.79	0.41592531		1045.79	0.07791818		1575.78	0.14090333		2105.78	-0.01152884		2635.77	0.17751361		3165.77	0.17679378		3695.8	-0.02766844
515.99	0.41657354		1045.99	0.07813063		1575.98	0.13965187		2105.98	-0.0116426		2635.97	0.17726752		3165.97	0.17788364		3696	-0.02779033
516.19	0.41706636		1046.19	0.07805187		1576.18	0.14060638		2106.18	-0.01139199		2636.17	0.17738895		3166.17	0.17848437		3696.2	-0.0280137
516.39	0.41723766		1046.39	0.07778141		1576.38	0.14054636		2106.38	-0.0114334		2636.37	0.17705846		3166.37	0.17912126		3696.4	-0.02776587
516.59	0.41667292		1046.59	0.07768495		1576.58	0.14093313		2106.58	-0.01133536		2636.57	0.17772357		3166.57	0.17913901		3696.6	-0.02793786
516.79	0.41718094		1046.79	0.07818354		1576.78	0.14196236		2106.78	-0.01157499		2636.77	0.17790878		3166.77	0.18076272		3696.8	-0.02851254
516.99	0.41734785		1046.99	0.07970637		1576.98	0.14268085		2106.98	-0.01124561		2636.97	0.17828346		3166.97	0.18122764		3697	-0.02892972
517.19	0.416329		1047.19	0.08033918		1577.18	0.1432484		2107.18	-0.01190991		2637.17	0.17833273		3167.17	0.18158381		3697.2	-0.02904845
517.39	0.41568751		1047.39	0.08075742		1577.38	0.14250915		2107.38	-0.01195149		2637.37	0.17861601		3167.37	0.1812587		3697.4	-0.02867767
517.59	0.41457173		1047.59	0.0808592		1577.58	0.14124916		2107.58	-0.01320092		2637.57	0.17920438		3167.57	0.18139654		3697.6	-0.0277836
517.79	0.4142318		1047.79	0.08081319		1577.78	0.14079828		2107.78	-0.01361804		2637.77	0.17995568		3167.77	0.18133343		3697.8	-0.02822931
517.99	0.41342875		1047.99	0.08154519		1577.98	0.14026992		2107.98	-0.01367631		2637.97	0.1799407		3167.97	0.1808764		3698	-0.02902949
518.19	0.41254212		1048.19	0.08219548		1578.18	0.13962551		2108.18	-0.01373283		2638.17	0.17986185		3168.17	0.17925423		3698.2	-0.02876429
518.39	0.41170663		1048.39	0.08156221		1578.38	0.13976027		2108.38	-0.01411057		2638.37	0.18010568		3168.37	0.17809687		3698.4	-0.03029994
518.59	0.41106147		1048.59	0.08182813		1578.58	0.13903307		2108.58	-0.0136224		2638.57	0.18120886		3168.57	0.17800545		3698.6	-0.03074748
518.79	0.41120004		1048.79	0.08162218		1578.78	0.13823131		2108.78	-0.01318274		2638.77	0.18186324		3168.77	0.17711531		3698.8	-0.03107463
518.99	0.41160072		1048.99	0.08203428		1578.98	0.13678106		2108.98	-0.01265281		2638.97	0.18134562		3168.97	0.1763198		3699	-0.03033554
519.19	0.41133889		1049.19	0.08160023		1579.18	0.1366419		2109.18	-0.01102836		2639.17	0.18287664		3169.17	0.17572916		3699.2	-0.03075212
519.39	0.41236397		1049.39	0.08198218		1579.38	0.13663444		2109.38	-0.01098219		2639.37	0.18229734		3169.37	0.17503123		3699.4	-0.03004195
519.59	0.41263578		1049.59	0.08196581		1579.58	0.13660348		2109.58	-0.01084935		2639.57	0.18235347		3169.57	0.17436525		3699.6	-0.03049947
519.79	0.413028		1049.79	0.08124315		1579.78	0.13805352		2109.78	-0.01083589		2639.77	0.18212637		3169.77	0.17397304		3699.8	-0.03052464
519.99	0.41329867		1049.99	0.08062133		1579.98	0.13880878		2109.98	-0.0101448		2639.97	0.18185959		3169.97	0.17369745		3700	-0.0301366
520.19	0.4131079		1050.19	0.07955436		1580.18	0.13950142		2110.18	-0.00886177		2640.17	0.18092104		3170.17	0.17411942		3700.2	-0.0291827
520.39	0.41208		1050.39	0.07872874		1580.38	0.14029794		2110.38	-0.00851331		2640.37	0.18062197		3170.37	0.1740971		3700.4	-0.02878145
520.59	0.41232392		1050.59	0.07884014		1580.58	0.14107674		2110.58	-0.00853151		2640.57	0.18094085		3170.57	0.17415466		3700.6	-0.02890069
520.79	0.41310543		1050.79	0.0789031		1580.78	0.14184912		2110.78	-0.00940581		2640.77	0.18044723		3170.77	0.17494535		3700.8	-0.02877725
520.99	0.41309628		1050.99	0.07881015		1580.98	0.14181447		2110.98	-0.00985199		2640.97	0.18004707		3170.97	0.17477272		3701	-0.02843552
521.19	0.4122839		1051.19	0.07804328		1581.18	0.14211156		2111.18	-0.01076512		2641.17	0.1793477		3171.17	0.1751695		3701.2	-0.02789043
521.39	0.41273686		1051.39	0.07804724		1581.38	0.14189506		2111.38	-0.01119181		2641.37	0.17915539		3171.37	0.17521538		3701.4	-0.02692132
521.59	0.41188109		1051.59	0.07843832		1581.58	0.14222785		2111.58	-0.01196547		2641.57	0.17865288		3171.57	0.17568466		3701.6	-0.02630487
521.79	0.41156988		1051.79	0.07868709		1581.78	0.14277464		2111.78	-0.0122428		2641.77	0.17744704		3171.77	0.17626057		3701.8	-0.02669256
521.99	0.41072598		1051.99	0.07914767		1581.98	0.14307577		2111.98	-0.01245187		2641.97	0.17692622		3171.97	0.17626289		3702	-0.02755058
522.19	0.41009092		1052.19	0.07898541		1582.18	0.14366054		2112.18	-0.01250866		2642.17	0.17617716		3172.17	0.17618074		3702.2	-0.02730732
522.39	0.41086122		1052.39	0.07811015		1582.38	0.14350493		2112.38	-0.01215053		2642.37	0.17685501		3172.37	0.17743461		3702.4	-0.02746706
522.59	0.41139921		1052.59	0.07760486		1582.58	0.14284113		2112.58	-0.01165201		2642.57	0.17733343		3172.57	0.17814137		3702.6	-0.02726154
522.79	0.41114929		1052.79	0.07722712		1582.78	0.14278082		2112.78	-0.01122199		2642.77	0.17692556		3172.77	0.17791808		3702.8	-0.02737143
522.99	0.41067855		1052.99	0.07858459		1582.98	0.14271296		2112.98	-0.01165887		2642.97	0.17708561		3172.97	0.17779342		3703	-0.02674724
523.19	0.41027388		1053.19	0.07942664		1583.18	0.14207132		2113.18	-0.01082781		2643.17	0.17736432		3173.17	0.17750281		3703.2	-0.02726277
523.39	0.41108562		1053.39	0.07903193		1583.38	0.14273448		2113.38	-0.01117776		2643.37	0.17692229		3173.37	0.17752816		3703.4	-0.02716598
523.59	0.41135113		1053.59	0.0788773		1583.58	0.14342545		2113.58	-0.01059218		2643.57	0.17719218		3173.57	0.17712695		3703.6	-0.02732739
523.79	0.41240888		1053.79	0.07868387		1583.78	0.14358882		2113.78	-0.01051413		2643.77	0.17692797		3173.77	0.17741871		3703.8	-0.02726258
523.99	0.41299461		1053.99	0.0783919		1583.98	0.14350731		2113.98	-0.01023227		2643.97	0.17767483		3173.97	0.17709408		3704	-0.02641811
524.19	0.41316561		1054.19	0.07760361		1584.18	0.14336751		2114.18	-0.01091175		2644.17	0.17808055		3174.17	0.17793182		3704.2	-0.02611832
524.39	0.41369708		1054.39	0.07849028		1584.38	0.14342917		2114.38	-0.01103524		2644.37	0.17815048		3174.37	0.17788087		3704.4	-0.02548638
524.59	0.41437658		1054.59	0.07948941		1584.58	0.14342836		2114.58	-0.01087461		2644.57	0.17871804		3174.57	0.17759516		3704.6	-0.02472291
524.79	0.41495301		1054.79	0.07985572		1584.78	0.14245766		2114.78	-0.01153827		2644.77	0.17870409		3174.77	0.17728987		3704.8	-0.02417709
524.99	0.41469469		1054.99	0.07914013		1584.98	0.14252413		2114.98	-0.01148932		2644.97	0.17875035		3174.97	0.17697868		3705	-0.02378707
525.19	0.41446573		1055.19	0.07958695		1585.18	0.14310291		2115.18	-0.01164622		2645.17	0.17793265		3175.17	0.17747669		3705.2	-0.02355209
525.39	0.41406411		1055.39	0.08022983		1585.38	0.14372874		2115.38	-0.01101868		2645.37	0.17792837		3175.37	0.17675368		3705.4	-0.02324252
525.59	0.41330853		1055.59	0.08056002		1585.58	0.14399954		2115.58	-0.01100379		2645.57	0.17715924		3175.57	0.1758664		3705.6	-0.02286357
525.79	0.41362885		1055.79	0.08052062		1585.78	0.14398642		2115.78	-0.01092634		2645.77	0.17724544		3175.77	0.17562016		3705.8	-0.02372438
525.99	0.41371061		1055.99	0.08070055		1585.98	0.14418853		2115.98	-0.01064973		2645.97	0.17681675		3175.97	0.17446885		3706	-0.02381919
526.19	0.41363004		1056.19	0.08131286		1586.18	0.14424805		2116.18	-0.01016388		2646.17	0.17600863		3176.17	0.17452692		3706.2	-0.02451068
526.39	0.41402327		1056.39	0.08182651		1586.38	0.14380386		2116.38	-0.01036984		2646.37	0.1761069		3176.37	0.17427212		3706.4	-0.02505158
526.59	0.41323181		1056.59	0.08231458		1586.58	0.14356681		2116.58	-0.01139702		2646.57	0.17600612		3176.57	0.17352771		3706.6	-0.02547103
526.79	0.41186862		1056.79	0.08236255		1586.78	0.14369286		2116.78	-0.01073666		2646.77	0.17619611		3176.77	0.17320487		3706.8	-0.02638988
526.99	0.41183663		1056.99	0.08233		1586.98	0.14329916		2116.98	-0.01104548		2646.97	0.17653951		3176.97	0.17235703		3707	-0.02705441
527.19	0.41192779		1057.19	0.08188881		1587.18	0.1424338		2117.18	-0.01053111		2647.17	0.17602316		3177.17	0.17318955		3707.2	-0.02866027
527.39	0.41237938		1057.39	0.08114807		1587.38	0.14285103		2117.38	-0.01111344		2647.37	0.17573403		3177.37	0.17300465		3707.4	-0.02959554
527.59	0.41279138		1057.59	0.08089956		1587.58	0.14284732		2117.58	-0.0107684		2647.57	0.17566662		3177.57	0.17188522		3707.6	-0.02986999
527.79	0.41368423		1057.79	0.08001525		1587.78	0.14189373		2117.78	-0.01163767		2647.77	0.1757392		3177.77	0.17168695		3707.8	-0.02900623
527.99	0.41315565		1057.99	0.07953563		1587.98	0.14165643		2117.98	-0.01145298		2647.97	0.17607113		3177.97	0.17092796		3708	-0.02849423
528.19	0.4126938		1058.19	0.07963403		1588.18	0.14188244		2118.18	-0.01131946		2648.17	0.17517062		3178.17	0.17104381		3708.2	-0.02889399
528.39	0.4131296		1058.39	0.08009429		1588.38	0.14009051		2118.38	-0.01048805		2648.37	0.17411104		3178.37	0.17165646		3708.4	-0.02890949
528.59	0.41364477		1058.59	0.07967647		1588.58	0.14046348		2118.58	-0.01024121		2648.57	0.17425472		3178.57	0.17151093		3708.6	-0.02903861
528.79	0.41371093		1058.79	0.08032837		1588.78	0.14029979		2118.78	-0.01071588		2648.77	0.17382595		3178.77	0.17140635		3708.8	-0.0289244
528.99	0.41357301		1058.99	0.08032342		1588.98	0.14156301		2118.98	-0.01063666		2648.97	0.17384062		3178.97	0.17185372		3709	-0.02927075
529.19	0.41322867		1059.19	0.08156689		1589.18	0.14169314		2119.18	-0.01083827		2649.17	0.17378591		3179.17	0.17228856		3709.2	-0.02917521
529.39	0.4133673		1059.39	0.08225386		1589.38	0.14183391		2119.38	-0.01066355		2649.37	0.17367466		3179.37	0.1714244		3709.4	-0.02878619
529.59	0.41455076		1059.59	0.08223306		1589.58	0.14160901		2119.58	-0.01108374		2649.57	0.17315546		3179.57	0.17207003		3709.6	-0.02885233
529.79	0.41441367		1059.79	0.08287139		1589.78	0.14172494		2119.78	-0.01149944		2649.77	0.17361933		3179.77	0.17268134		3709.8	-0.02915508
529.99	0.41370215		1059.99	0.08290738		1589.98	0.14136961		2119.98	-0.01142998		2649.97	0.17262037		3179.97	0.1725741		3710	-0.02872429
530.19	0.41375292		1060.19	0.0838606		1590.18	0.14164163		2120.18	-0.01230286		2650.17	0.17262455		3180.17	0.17264388		3710.2	-0.02911452
530.39	0.41442875		1060.39	0.0838169		1590.38	0.14244712		2120.38	-0.01285029		2650.37	0.17382593		3180.37	0.17310724		3710.4	-0.02799999
530.59	0.41412584		1060.59	0.08325809		1590.58	0.14193981		2120.58	-0.01277638		2650.57	0.17449026		3180.57	0.17362851		3710.6	-0.02887968
530.79	0.41374678		1060.79	0.08275143		1590.78	0.14182808		2120.78	-0.01185204		2650.77	0.17491001		3180.77	0.17459703		3710.8	-0.02894596
530.99	0.41410128		1060.99	0.08267307		1590.98	0.14194637		2120.98	-0.01224934		2650.97	0.17535623		3180.97	0.17476226		3711	-0.0292827
531.19	0.41470657		1061.19	0.08341104		1591.18	0.14195624		2121.18	-0.01193135		2651.17	0.17455835		3181.17	0.1757969		3711.2	-0.02964473
531.39	0.4148783		1061.39	0.08262624		1591.38	0.14221512		2121.38	-0.01189326		2651.37	0.17508923		3181.37	0.17555128		3711.4	-0.02955595
531.59	0.41488423		1061.59	0.08182272		1591.58	0.14195193		2121.58	-0.01120931		2651.57	0.17583821		3181.57	0.17553555		3711.6	-0.02971364
531.79	0.41497716		1061.79	0.08011036		1591.78	0.14074379		2121.78	-0.01152625		2651.77	0.17603909		3181.77	0.17550325		3711.8	-0.02985589
531.99	0.41407356		1061.99	0.08020885		1591.98	0.14096263		2121.98	-0.01031039		2651.97	0.17597365		3181.97	0.17623892		3712	-0.03070519
532.19	0.41424721		1062.19	0.07951422		1592.18	0.14144223		2122.18	-0.00994147		2652.17	0.17592522		3182.17	0.17592442		3712.2	-0.0308234
532.39	0.41503895		1062.39	0.07951414		1592.38	0.14083974		2122.38	-0.00914728		2652.37	0.17533784		3182.37	0.17641365		3712.4	-0.03102963
532.59	0.41502104		1062.59	0.07895304		1592.58	0.14149895		2122.58	-0.00848811		2652.57	0.17533391		3182.57	0.176284		3712.6	-0.03191832
532.79	0.41377878		1062.79	0.07949462		1592.78	0.14155298		2122.78	-0.00836795		2652.77	0.17579835		3182.77	0.17673102		3712.8	-0.03212683
532.99	0.41393388		1062.99	0.0794706		1592.98	0.14126343		2122.98	-0.00855371		2652.97	0.17609367		3182.97	0.1773418		3713	-0.03230124
533.19	0.41372932		1063.19	0.0798311		1593.18	0.14075265		2123.18	-0.00886929		2653.17	0.17616821		3183.17	0.17683399		3713.2	-0.0317385
533.39	0.41391814		1063.39	0.07960919		1593.38	0.14049693		2123.38	-0.00932708		2653.37	0.17638187		3183.37	0.1767023		3713.4	-0.03157543
533.59	0.41401396		1063.59	0.07828965		1593.58	0.14046479		2123.58	-0.00959886		2653.57	0.17661476		3183.57	0.17676456		3713.6	-0.03110104
533.79	0.41323194		1063.79	0.07742694		1593.78	0.14070285		2123.78	-0.00972818		2653.77	0.17683173		3183.77	0.17589789		3713.8	-0.03061468
533.99	0.41293863		1063.99	0.07682885		1593.98	0.14043236		2123.98	-0.0111042		2653.97	0.17568473		3183.97	0.17476313		3714	-0.03058868
534.19	0.41333284		1064.19	0.07793203		1594.18	0.14082794		2124.18	-0.01155224		2654.17	0.17615341		3184.17	0.17428361		3714.2	-0.03042192
534.39	0.41369442		1064.39	0.07700792		1594.38	0.14008847		2124.38	-0.01171957		2654.37	0.17660159		3184.37	0.1748941		3714.4	-0.03001275
534.59	0.41282632		1064.59	0.07739729		1594.58	0.13944487		2124.58	-0.01198283		2654.57	0.17623762		3184.57	0.17468096		3714.6	-0.02981587
534.79	0.41186599		1064.79	0.07795655		1594.78	0.13920046		2124.78	-0.01169193		2654.77	0.17610008		3184.77	0.17486727		3714.8	-0.02974123
534.99	0.41199336		1064.99	0.0777985		1594.98	0.13956149		2124.98	-0.01226103		2654.97	0.17583975		3184.97	0.1741529		3715	-0.0296804
535.19	0.41209413		1065.19	0.0786701		1595.18	0.13942759		2125.18	-0.01214238		2655.17	0.17554122		3185.17	0.17416567		3715.2	-0.02852189
535.39	0.4116595		1065.39	0.07849723		1595.38	0.1398565		2125.38	-0.01182735		2655.37	0.17563384		3185.37	0.17513521		3715.4	-0.02818947
535.59	0.41111467		1065.59	0.07822261		1595.58	0.13959881		2125.58	-0.01196495		2655.57	0.17544641		3185.57	0.17551071		3715.6	-0.02848906
535.79	0.41002403		1065.79	0.07716704		1595.78	0.13919096		2125.78	-0.01214995		2655.77	0.17504401		3185.77	0.17551519		3715.8	-0.02764626
535.99	0.4097378		1065.99	0.07805339		1595.98	0.14006714		2125.98	-0.01100366		2655.97	0.17556546		3185.97	0.17663237		3716	-0.02824956
536.19	0.41046438		1066.19	0.07756655		1596.18	0.13997768		2126.18	-0.01064282		2656.17	0.17425681		3186.17	0.17593913		3716.2	-0.02797603
536.39	0.41032641		1066.39	0.07854661		1596.38	0.13916287		2126.38	-0.00963151		2656.37	0.17316581		3186.37	0.17645302		3716.4	-0.02917492
536.59	0.41087053		1066.59	0.0786767		1596.58	0.13866048		2126.58	-0.00921081		2656.57	0.17396159		3186.57	0.17655763		3716.6	-0.03064151
536.79	0.41115472		1066.79	0.0791392		1596.78	0.13895317		2126.78	-0.00975203		2656.77	0.17391418		3186.77	0.17648273		3716.8	-0.03093304
536.99	0.41192688		1066.99	0.07925852		1596.98	0.13889082		2126.98	-0.01018225		2656.97	0.17358873		3186.97	0.17674929		3717	-0.03092326
537.19	0.41160755		1067.19	0.07925808		1597.18	0.139691		2127.18	-0.01089445		2657.17	0.17370484		3187.17	0.17669551		3717.2	-0.03062713
537.39	0.41164003		1067.39	0.07997573		1597.38	0.14027772		2127.38	-0.01100809		2657.37	0.17390649		3187.37	0.17681232		3717.4	-0.03087675
537.59	0.41282556		1067.59	0.07954845		1597.58	0.14095991		2127.58	-0.01080516		2657.57	0.17410749		3187.57	0.17630088		3717.6	-0.03121323
537.79	0.41323049		1067.79	0.07937244		1597.78	0.14197481		2127.78	-0.0109478		2657.77	0.17347186		3187.77	0.17594161		3717.8	-0.03207456
537.99	0.41275985		1067.99	0.07930584		1597.98	0.14199392		2127.98	-0.01239086		2657.97	0.17346297		3187.97	0.17616734		3718	-0.0334513
538.19	0.4135406		1068.19	0.07948851		1598.18	0.14197881		2128.18	-0.01249196		2658.17	0.17367532		3188.17	0.17645164		3718.2	-0.03332685
538.39	0.41315685		1068.39	0.07819541		1598.38	0.14158391		2128.38	-0.01361376		2658.37	0.17344199		3188.37	0.17654957		3718.4	-0.03363142
538.59	0.41202496		1068.59	0.07814886		1598.58	0.14211343		2128.58	-0.01328391		2658.57	0.17391327		3188.57	0.1763626		3718.6	-0.0335131
538.79	0.41134449		1068.79	0.07741093		1598.78	0.14185007		2128.78	-0.01329707		2658.77	0.1736437		3188.77	0.17673568		3718.8	-0.03345627
538.99	0.41168679		1068.99	0.07680408		1598.98	0.1417822		2128.98	-0.01379113		2658.97	0.17434886		3188.97	0.17611526		3719	-0.03297451
539.19	0.41078235		1069.19	0.07700559		1599.18	0.14152756		2129.18	-0.01301268		2659.17	0.17405741		3189.17	0.17630005		3719.2	-0.0319687
539.39	0.40975974		1069.39	0.07651591		1599.38	0.14198319		2129.38	-0.01263885		2659.37	0.17390379		3189.37	0.17711471		3719.4	-0.03211496
539.59	0.40989846		1069.59	0.07577545		1599.58	0.14119605		2129.58	-0.0128834		2659.57	0.17407188		3189.57	0.17663106		3719.6	-0.03208182
539.79	0.40980158		1069.79	0.07636546		1599.78	0.14073755		2129.78	-0.01319837		2659.77	0.1743842		3189.77	0.17706933		3719.8	-0.03169395
539.99	0.41074517		1069.99	0.07696299		1599.98	0.14028077		2129.98	-0.011951		2659.97	0.17436664		3189.97	0.17689681		3720	-0.0325924
540.19	0.41137947		1070.19	0.07648527		1600.18	0.13979115		2130.18	-0.0111957		2660.17	0.17239716		3190.17	0.17554095		3720.2	-0.03243595
540.39	0.41165786		1070.39	0.07671056		1600.38	0.13945337		2130.38	-0.01079543		2660.37	0.17240408		3190.37	0.17508912		3720.4	-0.03221851
540.59	0.41233619		1070.59	0.07715129		1600.58	0.13976794		2130.58	-0.0103355		2660.57	0.17315355		3190.57	0.17383174		3720.6	-0.03199915
540.79	0.41272804		1070.79	0.07665258		1600.78	0.1393388		2130.78	-0.01053745		2660.77	0.1717842		3190.77	0.17360467		3720.8	-0.03204578
540.99	0.41191903		1070.99	0.07643768		1600.98	0.13895132		2130.98	-0.01087617		2660.97	0.17169316		3190.97	0.17337509		3721	-0.0312703
541.19	0.41128744		1071.19	0.07745021		1601.18	0.13910304		2131.18	-0.0113176		2661.17	0.17141328		3191.17	0.17359944		3721.2	-0.03028616
541.39	0.41167829		1071.39	0.07797198		1601.38	0.13912976		2131.38	-0.01133885		2661.37	0.17236878		3191.37	0.17280179		3721.4	-0.03030478
541.59	0.41208165		1071.59	0.07742167		1601.58	0.13812774		2131.58	-0.01222107		2661.57	0.17281196		3191.57	0.17237351		3721.6	-0.03062907
541.79	0.41196283		1071.79	0.07705206		1601.78	0.13726866		2131.78	-0.01421282		2661.77	0.17297475		3191.77	0.17251848		3721.8	-0.03083134
541.99	0.41207931		1071.99	0.07755728		1601.98	0.13656022		2131.98	-0.0153164		2661.97	0.17313603		3191.97	0.17358178		3722	-0.03175186
542.19	0.41198048		1072.19	0.07778031		1602.18	0.13726856		2132.18	-0.01606059		2662.17	0.17308112		3192.17	0.17343959		3722.2	-0.03162889
542.39	0.41166278		1072.39	0.07877479		1602.38	0.13762602		2132.38	-0.0161089		2662.37	0.17310949		3192.37	0.17410477		3722.4	-0.03128852
542.59	0.41082388		1072.59	0.07926963		1602.58	0.13777818		2132.58	-0.01552321		2662.57	0.1728334		3192.57	0.17415425		3722.6	-0.0307516
542.79	0.41085274		1072.79	0.07892769		1602.78	0.13788442		2132.78	-0.01579966		2662.77	0.1733392		3192.77	0.17483084		3722.8	-0.03033606
542.99	0.41065974		1072.99	0.07842317		1602.98	0.13799927		2132.98	-0.01559423		2662.97	0.17350454		3192.97	0.17380189		3723	-0.03134468
543.19	0.41004387		1073.19	0.07857005		1603.18	0.13758308		2133.18	-0.01499166		2663.17	0.17338455		3193.17	0.173418		3723.2	-0.03027519
543.39	0.40996391		1073.39	0.07880098		1603.38	0.13900156		2133.38	-0.01425993		2663.37	0.1734382		3193.37	0.17368216		3723.4	-0.03121412
543.59	0.41162042		1073.59	0.07874429		1603.58	0.13843572		2133.58	-0.01390452		2663.57	0.17314969		3193.57	0.17356127		3723.6	-0.03174544
543.79	0.41107244		1073.79	0.0788891		1603.78	0.13949133		2133.78	-0.01280743		2663.77	0.17314075		3193.77	0.17403375		3723.8	-0.03259998
543.99	0.41094716		1073.99	0.07780265		1603.98	0.13944934		2133.98	-0.01124953		2663.97	0.17198808		3193.97	0.17319186		3724	-0.03342875
544.19	0.41103285		1074.19	0.07641233		1604.18	0.14040091		2134.18	-0.01035641		2664.17	0.17182244		3194.17	0.17262768		3724.2	-0.03418688
544.39	0.41073664		1074.39	0.07621118		1604.38	0.14036103		2134.38	-0.00963189		2664.37	0.17207705		3194.37	0.17239627		3724.4	-0.03360163
544.59	0.41027698		1074.59	0.07535101		1604.58	0.14109925		2134.58	-0.00887896		2664.57	0.17178047		3194.57	0.17130105		3724.6	-0.03454695
544.79	0.41037683		1074.79	0.07470302		1604.78	0.14148898		2134.78	-0.00951532		2664.77	0.17132653		3194.77	0.17113602		3724.8	-0.03552222
544.99	0.41005047		1074.99	0.0742506		1604.98	0.14152378		2134.98	-0.00983007		2664.97	0.1717027		3194.97	0.17177375		3725	-0.03546749
545.19	0.41064928		1075.19	0.0740371		1605.18	0.14171067		2135.18	-0.009911		2665.17	0.17205189		3195.17	0.17249311		3725.2	-0.03485362
545.39	0.4111869		1075.39	0.07351123		1605.38	0.14088796		2135.38	-0.01080588		2665.37	0.17237341		3195.37	0.17189776		3725.4	-0.03522917
545.59	0.41120028		1075.59	0.07437989		1605.58	0.13962292		2135.58	-0.01190906		2665.57	0.1725122		3195.57	0.17215084		3725.6	-0.03480019
545.79	0.4122955		1075.79	0.07484625		1605.78	0.13919233		2135.78	-0.01257958		2665.77	0.17322716		3195.77	0.17199615		3725.8	-0.03393528
545.99	0.41278338		1075.99	0.07557019		1605.98	0.13965387		2135.98	-0.0124187		2665.97	0.17227396		3195.97	0.1729311		3726	-0.03426979
546.19	0.41250383		1076.19	0.076077		1606.18	0.14007925		2136.18	-0.01263142		2666.17	0.17249921		3196.17	0.17275889		3726.2	-0.03242176
546.39	0.41344537		1076.39	0.07747288		1606.38	0.13977012		2136.38	-0.01278806		2666.37	0.17259989		3196.37	0.17297962		3726.4	-0.03142163
546.59	0.41297743		1076.59	0.07724821		1606.58	0.1396127		2136.58	-0.01308085		2666.57	0.17308549		3196.57	0.17303574		3726.6	-0.03078459
546.79	0.41329852		1076.79	0.07701086		1606.78	0.1400082		2136.78	-0.01265469		2666.77	0.17384097		3196.77	0.17284691		3726.8	-0.03052133
546.99	0.412529		1076.99	0.07720264		1606.98	0.1398234		2136.98	-0.01249427		2666.97	0.17369996		3196.97	0.17134648		3727	-0.03023599
547.19	0.41234764		1077.19	0.07754314		1607.18	0.1385406		2137.18	-0.01175023		2667.17	0.17369073		3197.17	0.1711174		3727.2	-0.02951684
547.39	0.41266303		1077.39	0.07759128		1607.38	0.13904381		2137.38	-0.01081803		2667.37	0.17376405		3197.37	0.17107961		3727.4	-0.02997653
547.59	0.41257877		1077.59	0.07779718		1607.58	0.13778217		2137.58	-0.01146947		2667.57	0.17353205		3197.57	0.17073294		3727.6	-0.02967214
547.79	0.41015837		1077.79	0.07827673		1607.78	0.13818258		2137.78	-0.01021625		2667.77	0.17291189		3197.77	0.16954905		3727.8	-0.03017641
547.99	0.40906642		1077.99	0.07810229		1607.98	0.13797448		2137.98	-0.0114541		2667.97	0.17227963		3197.97	0.169273		3728	-0.03010497
548.19	0.40861151		1078.19	0.07848311		1608.18	0.1386176		2138.18	-0.01188839		2668.17	0.17320147		3198.17	0.16992799		3728.2	-0.03002854
548.39	0.40724172		1078.39	0.0788786		1608.38	0.13907371		2138.38	-0.01203479		2668.37	0.17224569		3198.37	0.16990451		3728.4	-0.02975698
548.59	0.40676947		1078.59	0.07791051		1608.58	0.14066573		2138.58	-0.0127672		2668.57	0.17248056		3198.57	0.17034391		3728.6	-0.03055273
548.79	0.40713588		1078.79	0.07816423		1608.78	0.14102223		2138.78	-0.01350614		2668.77	0.17239491		3198.77	0.17183372		3728.8	-0.03157899
548.99	0.40787251		1078.99	0.07752872		1608.98	0.1404184		2138.98	-0.01348179		2668.97	0.17196164		3198.97	0.17333619		3729	-0.03114577
549.19	0.40782176		1079.19	0.07740566		1609.18	0.14137913		2139.18	-0.0136279		2669.17	0.17173831		3199.17	0.17346794		3729.2	-0.03111744
549.39	0.40798473		1079.39	0.07780854		1609.38	0.14044865		2139.38	-0.0137984		2669.37	0.17118596		3199.37	0.17322994		3729.4	-0.03145649
549.59	0.40773356		1079.59	0.07777217		1609.58	0.14017054		2139.58	-0.01491413		2669.57	0.17065115		3199.57	0.17394339		3729.6	-0.03091542
549.79	0.40817362		1079.79	0.07742812		1609.78	0.14005962		2139.78	-0.0149477		2669.77	0.17004819		3199.77	0.17410612		3729.8	-0.03075326
549.99	0.40798425		1079.99	0.07726827		1609.98	0.13972215		2139.98	-0.01402297		2669.97	0.16927807		3199.97	0.17475494		3730	-0.03137865
550.19	0.40802931		1080.19	0.07700225		1610.18	0.13955912		2140.18	-0.01371888		2670.17	0.16965707		3200.17	0.1744143		3730.2	-0.03119504
550.39	0.40811024		1080.39	0.07672585		1610.38	0.14012224		2140.38	-0.01390804		2670.37	0.16951316		3200.37	0.17422102		3730.4	-0.03205667
550.59	0.40802311		1080.59	0.07657864		1610.58	0.13943626		2140.58	-0.01305963		2670.57	0.16992777		3200.57	0.17388496		3730.6	-0.03243073
550.79	0.40836895		1080.79	0.07666582		1610.78	0.1399022		2140.78	-0.01226341		2670.77	0.16862646		3200.77	0.17272988		3730.8	-0.03289149
550.99	0.40863236		1080.99	0.0767282		1610.98	0.13976013		2140.98	-0.01249504		2670.97	0.1684706		3200.97	0.17180683		3731	-0.03288189
551.19	0.40885192		1081.19	0.07682273		1611.18	0.13902691		2141.18	-0.01195466		2671.17	0.16796482		3201.17	0.1723171		3731.2	-0.03353002
551.39	0.40963885		1081.39	0.07711646		1611.38	0.1396007		2141.38	-0.01107896		2671.37	0.16871422		3201.37	0.17165936		3731.4	-0.03412892
551.59	0.40899499		1081.59	0.07763667		1611.58	0.13942502		2141.58	-0.01151479		2671.57	0.16882221		3201.57	0.17153806		3731.6	-0.03424243
551.79	0.40862861		1081.79	0.07804391		1611.78	0.13897437		2141.78	-0.01110344		2671.77	0.1688264		3201.77	0.17135333		3731.8	-0.0352851
551.99	0.4092096		1081.99	0.07809279		1611.98	0.13886002		2141.98	-0.01283246		2671.97	0.16942795		3201.97	0.17258995		3732	-0.03567549
552.19	0.40967555		1082.19	0.07798762		1612.18	0.13871869		2142.18	-0.01244111		2672.17	0.17034475		3202.17	0.17309636		3732.2	-0.0351817
552.39	0.40985535		1082.39	0.07747226		1612.38	0.13882714		2142.38	-0.01231547		2672.37	0.17051036		3202.37	0.17327114		3732.4	-0.0352772
552.59	0.4110995		1082.59	0.07706597		1612.58	0.13922021		2142.58	-0.01198574		2672.57	0.17110548		3202.57	0.17422893		3732.6	-0.03538291
552.79	0.4114579		1082.79	0.07759064		1612.78	0.13867166		2142.78	-0.01184816		2672.77	0.17068967		3202.77	0.17473627		3732.8	-0.03466082
552.99	0.41160294		1082.99	0.07761729		1612.98	0.1386396		2142.98	-0.01150532		2672.97	0.17072993		3202.97	0.17441251		3733	-0.03377921
553.19	0.41046823		1083.19	0.07764877		1613.18	0.13919876		2143.18	-0.01233081		2673.17	0.17060026		3203.17	0.17354424		3733.2	-0.03316508
553.39	0.41040664		1083.39	0.07765583		1613.38	0.13885772		2143.38	-0.0122647		2673.37	0.16960021		3203.37	0.17357735		3733.4	-0.03236927
553.59	0.40951471		1083.59	0.07696758		1613.58	0.13865563		2143.58	-0.01254064		2673.57	0.16846678		3203.57	0.1742405		3733.6	-0.03188286
553.79	0.40887878		1083.79	0.0764945		1613.78	0.13734339		2143.78	-0.01182388		2673.77	0.16849491		3203.77	0.1733016		3733.8	-0.03104756
553.99	0.40787052		1083.99	0.07615095		1613.98	0.13675416		2143.98	-0.0111413		2673.97	0.16845812		3203.97	0.17293476		3734	-0.03091698
554.19	0.40750841		1084.19	0.07563852		1614.18	0.13713148		2144.18	-0.01120568		2674.17	0.16794953		3204.17	0.17218275		3734.2	-0.03096734
554.39	0.40704986		1084.39	0.07550819		1614.38	0.13746814		2144.38	-0.01184154		2674.37	0.16751926		3204.37	0.17130897		3734.4	-0.03036633
554.59	0.40700511		1084.59	0.07595241		1614.58	0.1368895		2144.58	-0.01172507		2674.57	0.16738607		3204.57	0.1702976		3734.6	-0.03024112
554.79	0.4072085		1084.79	0.07537656		1614.78	0.13749615		2144.78	-0.0121115		2674.77	0.16615321		3204.77	0.17040983		3734.8	-0.03012291
554.99	0.40681786		1084.99	0.07594318		1614.98	0.13638759		2144.98	-0.0121797		2674.97	0.16734288		3204.97	0.17052828		3735	-0.03003368
555.19	0.40639521		1085.19	0.07583157		1615.18	0.13649708		2145.18	-0.01238828		2675.17	0.16719718		3205.17	0.17161198		3735.2	-0.03006554
555.39	0.40678792		1085.39	0.07615528		1615.38	0.1364864		2145.38	-0.01203126		2675.37	0.1673066		3205.37	0.17124999		3735.4	-0.03076347
555.59	0.40647375		1085.59	0.07668709		1615.58	0.13576146		2145.58	-0.01196513		2675.57	0.1674997		3205.57	0.17145103		3735.6	-0.03110967
555.79	0.40640428		1085.79	0.07667118		1615.78	0.13666141		2145.78	-0.01282318		2675.77	0.16763514		3205.77	0.17228208		3735.8	-0.03141736
555.99	0.40664433		1085.99	0.07565508		1615.98	0.13758828		2145.98	-0.01362085		2675.97	0.16784271		3205.97	0.17289499		3736	-0.03142333
556.19	0.40606805		1086.19	0.07518714		1616.18	0.13884017		2146.18	-0.01374764		2676.17	0.16855259		3206.17	0.17343485		3736.2	-0.03103077
556.39	0.40661201		1086.39	0.07528612		1616.38	0.13909763		2146.38	-0.01398998		2676.37	0.16927579		3206.37	0.17303614		3736.4	-0.03152155
556.59	0.407148		1086.59	0.07575554		1616.58	0.13955216		2146.58	-0.01347907		2676.57	0.16969905		3206.57	0.1729732		3736.6	-0.03209956
556.79	0.40606176		1086.79	0.07656535		1616.78	0.1409351		2146.78	-0.01387085		2676.77	0.17053504		3206.77	0.17332354		3736.8	-0.03199394
556.99	0.40569722		1086.99	0.07663693		1616.98	0.14177169		2146.98	-0.01447888		2676.97	0.17037159		3206.97	0.17324135		3737	-0.03235255
557.19	0.40562595		1087.19	0.07669745		1617.18	0.14207156		2147.18	-0.01568618		2677.17	0.17011953		3207.17	0.17260192		3737.2	-0.03300748
557.39	0.40627404		1087.39	0.07658277		1617.38	0.14202389		2147.38	-0.01517124		2677.37	0.16976944		3207.37	0.17246092		3737.4	-0.03393886
557.59	0.40608306		1087.59	0.07573434		1617.58	0.14098805		2147.58	-0.01576434		2677.57	0.16996963		3207.57	0.17192693		3737.6	-0.03474907
557.79	0.40685015		1087.79	0.07519597		1617.78	0.13959288		2147.78	-0.01644711		2677.77	0.1700634		3207.77	0.1713494		3737.8	-0.03414961
557.99	0.40755439		1087.99	0.07508816		1617.98	0.1398069		2147.98	-0.01667532		2677.97	0.16972154		3207.97	0.17123449		3738	-0.03443507
558.19	0.40859009		1088.19	0.07485634		1618.18	0.13973536		2148.18	-0.01687727		2678.17	0.16928628		3208.17	0.17065482		3738.2	-0.03446059
558.39	0.40888976		1088.39	0.07462107		1618.38	0.13945991		2148.38	-0.01772597		2678.37	0.16909443		3208.37	0.17023157		3738.4	-0.03420841
558.59	0.4092058		1088.59	0.07476565		1618.58	0.13903898		2148.58	-0.01766409		2678.57	0.16879242		3208.57	0.17015599		3738.6	-0.03433025
558.79	0.40950319		1088.79	0.07449091		1618.78	0.13879859		2148.78	-0.0179306		2678.77	0.16861461		3208.77	0.17055688		3738.8	-0.03441892
558.99	0.40908659		1088.99	0.07522189		1618.98	0.13881043		2148.98	-0.01808178		2678.97	0.1686941		3208.97	0.17014513		3739	-0.03428291
559.19	0.40900417		1089.19	0.07503661		1619.18	0.1403355		2149.18	-0.01833254		2679.17	0.16769		3209.17	0.1702928		3739.2	-0.03431111
559.39	0.4085064		1089.39	0.07548716		1619.38	0.14098572		2149.38	-0.01773929		2679.37	0.16739927		3209.37	0.1698605		3739.4	-0.03496542
559.59	0.40804581		1089.59	0.07545536		1619.58	0.14239887		2149.58	-0.01753156		2679.57	0.16758007		3209.57	0.1698812		3739.6	-0.03471377
559.79	0.40721791		1089.79	0.07518688		1619.78	0.14449081		2149.78	-0.01840964		2679.77	0.1677195		3209.77	0.17046563		3739.8	-0.03447779
