# Supplementary material for: Functional development of a V3/glycan-specific broadly neutralizing antibody isolated from a case of HIV superinfection
Source: eLife journal article supplement (doi:10.7554/elife.68110), 2021-07-15
Supplement: fig2-data2 [file A9.xls]

Vers 3.43 Data Simulation
Conc1	5E-07	5E-07	5E-07	5E-07	2E-06	2E-06	2E-06	2E-06
Start1	199.99	729.99	1259.98	1789.99	2319.98	2850.01	3380	3910
Stop1	559.79	1089.79	1619.78	2149.79	2679.78	3209.81	3739.8	4269.8
Time1	Data1	Sim1	Time2	Data2	Sim2	Time3	Data3	Sim3	Time4	Data4	Sim4	Time5	Data5	Sim5	Time6	Data6	Sim6	Time7	Data7	Sim7	Time8	Data8	Sim8
199.99	0.01310411		729.99	0.00259718		1259.98	0.00629735		1789.99	0.00282456		2319.98	0.02110178		2850.01	0.00117225		3380	0.01243349		3910	-0.00348487
200.19	0.0133204		730.19	0.0017974		1260.18	0.00624849		1790.19	0.00141297		2320.18	0.02088259		2850.21	0.00244242		3380.2	0.01338195		3910.2	-0.00340696
200.39	0.01340326		730.39	0.00171785		1260.38	0.00596921		1790.39	-0.00026945		2320.38	0.02045459		2850.41	0.00335399		3380.4	0.01433871		3910.4	-0.00306021
200.59	0.01297085		730.59	0.00191126		1260.58	0.00639072		1790.59	-0.00122441		2320.58	0.02076579		2850.61	0.00382034		3380.6	0.01424352		3910.6	-0.00296449
200.79	0.01360671		730.79	0.00250729		1260.78	0.00629868		1790.79	-0.00216415		2320.78	0.0212759		2850.81	0.00507485		3380.8	0.01476638		3910.8	-0.00328161
200.99	0.01494722		730.99	0.00210861		1260.98	0.00666845		1790.99	-0.00312076		2320.98	0.02137882		2851.01	0.0060324		3381	0.01519531		3911	-0.00378526
201.19	0.0170451		731.19	0.002308		1261.18	0.00585255		1791.19	-0.00469387		2321.18	0.02208176		2851.21	0.00717742		3381.2	0.01534328		3911.2	-0.00392064
201.39	0.01809391		731.39	0.00193535		1261.38	0.00586437		1791.39	-0.0054986		2321.38	0.0230196		2851.41	0.00851017		3381.4	0.01548536		3911.4	-0.00389834
201.59	0.02029882		731.59	0.00124679		1261.58	0.00509647		1791.59	-0.00604017		2321.58	0.02426241		2851.61	0.00944529		3381.6	0.01581349		3911.6	-0.00370975
201.79	0.0224541		731.79	0.00102206		1261.78	0.00495051		1791.79	-0.00618394		2321.78	0.02516935		2851.81	0.0097366		3381.8	0.01611393		3911.8	-0.00369559
201.99	0.02448792		731.99	0.00118729		1261.98	0.0050278		1791.99	-0.00600784		2321.98	0.02732611		2852.01	0.00943685		3382	0.01675773		3912	-0.00348551
202.19	0.02712431		732.19	0.00127789		1262.18	0.00537489		1792.19	-0.00578804		2322.18	0.02899734		2852.21	0.00913294		3382.2	0.01717131		3912.2	-0.00335321
202.39	0.03017109		732.39	0.00145337		1262.38	0.00546659		1792.39	-0.00568632		2322.38	0.03057237		2852.41	0.00866118		3382.4	0.01721802		3912.4	-0.00455554
202.59	0.03361499		732.59	0.00163413		1262.58	0.00599729		1792.59	-0.00567502		2322.58	0.03181663		2852.61	0.00790695		3382.6	0.01824068		3912.6	-0.00464989
202.79	0.03661262		732.79	0.00287748		1262.78	0.0061235		1792.79	-0.0054816		2322.78	0.03193471		2852.81	0.00750915		3382.8	0.01792553		3912.8	-0.00523309
202.99	0.04066391		732.99	0.0030944		1262.98	0.00576833		1792.99	-0.00537613		2322.98	0.03310889		2853.01	0.00786015		3383	0.01869122		3913	-0.00557251
203.19	0.04394409		733.19	0.00340241		1263.18	0.00639233		1793.19	-0.00578861		2323.18	0.03404962		2853.21	0.00801426		3383.2	0.01893689		3913.2	-0.0058232
203.39	0.04763899		733.39	0.00334119		1263.38	0.00820416		1793.39	-0.00543513		2323.38	0.03508189		2853.41	0.00739436		3383.4	0.01890402		3913.4	-0.00628946
203.59	0.05025571		733.59	0.00382984		1263.58	0.00844278		1793.59	-0.00500554		2323.58	0.03530933		2853.61	0.00721945		3383.6	0.01868539		3913.6	-0.00571668
203.79	0.05373885		733.79	0.00459267		1263.78	0.00960879		1793.79	-0.00508461		2323.78	0.03538286		2853.81	0.0061754		3383.8	0.01947412		3913.8	-0.00469352
203.99	0.05706042		733.99	0.00497552		1263.98	0.01046382		1793.99	-0.00557093		2323.98	0.03618673		2854.01	0.00644007		3384	0.01935917		3914	-0.00411588
204.19	0.06126996		734.19	0.00449127		1264.18	0.01126811		1794.19	-0.00555909		2324.18	0.03701918		2854.21	0.00642046		3384.2	0.01984549		3914.2	-0.00404433
204.39	0.06446912		734.39	0.00442067		1264.38	0.01241717		1794.39	-0.00542112		2324.38	0.03689374		2854.41	0.00581036		3384.4	0.01897843		3914.4	-0.0033281
204.59	0.06718512		734.59	0.00550809		1264.58	0.01336095		1794.59	-0.00529752		2324.58	0.03767832		2854.61	0.00584781		3384.6	0.01765505		3914.6	-0.00350007
204.79	0.07065573		734.79	0.00607069		1264.78	0.01335366		1794.79	-0.00576922		2324.78	0.03772751		2854.81	0.00600771		3384.8	0.01752848		3914.8	-0.00367707
204.99	0.07363787		734.99	0.00527421		1264.98	0.01475746		1794.99	-0.00636165		2324.98	0.03709896		2855.01	0.0060542		3385	0.01641751		3915	-0.00425059
205.19	0.07714196		735.19	0.00562225		1265.18	0.01464483		1795.19	-0.00713964		2325.18	0.03738723		2855.21	0.00644839		3385.2	0.01531839		3915.2	-0.00419468
205.39	0.07958376		735.39	0.0046184		1265.38	0.01607161		1795.39	-0.00672634		2325.38	0.03771699		2855.41	0.00711452		3385.4	0.014859		3915.4	-0.00440319
205.59	0.08219498		735.59	0.00292503		1265.58	0.0159843		1795.59	-0.00758248		2325.58	0.03849387		2855.61	0.0068503		3385.6	0.01530982		3915.6	-0.00460806
205.79	0.08365911		735.79	0.00320228		1265.78	0.01700872		1795.79	-0.00753824		2325.78	0.03894815		2855.81	0.00698292		3385.8	0.01562478		3915.8	-0.0045075
205.99	0.08598061		735.99	0.00402555		1265.98	0.01741946		1795.99	-0.00719051		2325.98	0.04040166		2856.01	0.00729864		3386	0.0157748		3916	-0.0045271
206.19	0.08863019		736.19	0.00443958		1266.18	0.01747585		1796.19	-0.00742941		2326.18	0.04043577		2856.21	0.00842627		3386.2	0.01596316		3916.2	-0.00520455
206.39	0.09134281		736.39	0.00446566		1266.38	0.01693433		1796.39	-0.00730142		2326.38	0.04086847		2856.41	0.00910522		3386.4	0.01603818		3916.4	-0.00644694
206.59	0.09337401		736.59	0.00541228		1266.58	0.01623812		1796.59	-0.00676785		2326.58	0.04191949		2856.61	0.00972313		3386.6	0.01628216		3916.6	-0.00638546
206.79	0.09628612		736.79	0.00629794		1266.78	0.01485198		1796.79	-0.00698481		2326.78	0.04215938		2856.81	0.01007787		3386.8	0.0154264		3916.8	-0.00568206
206.99	0.09870245		736.99	0.00655333		1266.98	0.01499774		1796.99	-0.00693461		2326.98	0.04248213		2857.01	0.01068401		3387	0.01517321		3917	-0.00557743
207.19	0.09991696		737.19	0.00680719		1267.18	0.01565047		1797.19	-0.00655774		2327.18	0.04307698		2857.21	0.01030807		3387.2	0.01507544		3917.2	-0.00615035
207.39	0.10192653		737.39	0.00723549		1267.38	0.01587001		1797.39	-0.00554541		2327.38	0.04300362		2857.41	0.00999648		3387.4	0.01521223		3917.4	-0.00620216
207.59	0.10340714		737.59	0.00766991		1267.58	0.01503404		1797.59	-0.00523992		2327.58	0.04272778		2857.61	0.01049421		3387.6	0.0153333		3917.6	-0.00518474
207.79	0.10611459		737.79	0.00851432		1267.78	0.01511848		1797.79	-0.00626734		2327.78	0.04327014		2857.81	0.01013243		3387.8	0.01553481		3917.8	-0.00472109
207.99	0.10830214		737.99	0.00915106		1267.98	0.01526649		1797.99	-0.00620456		2327.98	0.0440129		2858.01	0.01003812		3388	0.01428538		3918	-0.00371906
208.19	0.11108633		738.19	0.00928687		1268.18	0.01505881		1798.19	-0.00631553		2328.18	0.04467697		2858.21	0.00984117		3388.2	0.01427043		3918.2	-0.00275819
208.39	0.11395094		738.39	0.0099287		1268.38	0.0154397		1798.39	-0.00624994		2328.38	0.04433283		2858.41	0.00999783		3388.4	0.01331423		3918.4	-0.0020672
208.59	0.11653216		738.59	0.01133089		1268.58	0.01551331		1798.59	-0.0070255		2328.58	0.04490289		2858.61	0.01082085		3388.6	0.01390028		3918.6	-0.00220125
208.79	0.11881086		738.79	0.01218674		1268.78	0.01665313		1798.79	-0.00726582		2328.78	0.04502191		2858.81	0.01015091		3388.8	0.01470149		3918.8	-0.00221735
208.99	0.1217745		738.99	0.011697		1268.98	0.01833149		1798.99	-0.0066406		2328.98	0.04475616		2859.01	0.01066987		3389	0.01478087		3919	-0.00256834
209.19	0.12524674		739.19	0.01170605		1269.18	0.01949189		1799.19	-0.00653267		2329.18	0.04516612		2859.21	0.01111542		3389.2	0.01504735		3919.2	-0.00249983
209.39	0.12750008		739.39	0.01073419		1269.38	0.02047661		1799.39	-0.00708184		2329.38	0.04527816		2859.41	0.01117436		3389.4	0.01508991		3919.4	-0.00213159
209.59	0.12861592		739.59	0.00988704		1269.58	0.02124205		1799.59	-0.00769508		2329.58	0.04569398		2859.61	0.01080038		3389.6	0.01630766		3919.6	-0.00194816
209.79	0.13110239		739.79	0.01054309		1269.78	0.02209082		1799.79	-0.00753442		2329.78	0.04665081		2859.81	0.01158739		3389.8	0.01617501		3919.8	-0.00141544
209.99	0.13339505		739.99	0.01081973		1269.98	0.02302153		1799.99	-0.00712989		2329.98	0.04763047		2860.01	0.01140424		3390	0.0164394		3920	-0.00164801
210.19	0.13579587		740.19	0.011389		1270.18	0.02331893		1800.19	-0.00764042		2330.18	0.04735209		2860.21	0.01156859		3390.2	0.01713795		3920.2	-0.00209596
210.39	0.13794241		740.39	0.01193719		1270.38	0.02385534		1800.39	-0.00717316		2330.38	0.04696149		2860.41	0.01097009		3390.4	0.01698703		3920.4	-0.00211751
210.59	0.13953462		740.59	0.01381288		1270.58	0.02407171		1800.59	-0.0061979		2330.58	0.04695293		2860.61	0.01034359		3390.6	0.01717178		3920.6	-0.00187536
210.79	0.14122303		740.79	0.01359606		1270.78	0.02352264		1800.79	-0.00596005		2330.78	0.04720187		2860.81	0.00964351		3390.8	0.0169267		3920.8	-0.00203973
210.99	0.14155633		740.99	0.01357289		1270.98	0.02406326		1800.99	-0.00634281		2330.98	0.04663561		2861.01	0.00817291		3391	0.0171554		3921	-0.00291148
211.19	0.14264076		741.19	0.01379757		1271.18	0.02446389		1801.19	-0.00551975		2331.18	0.04679244		2861.21	0.0073542		3391.2	0.01782738		3921.2	-0.00350931
211.39	0.14354101		741.39	0.01434494		1271.38	0.02495115		1801.39	-0.00557829		2331.38	0.0468315		2861.41	0.00695989		3391.4	0.01714642		3921.4	-0.00277316
211.59	0.1450211		741.59	0.0145379		1271.58	0.02491183		1801.59	-0.00547187		2331.58	0.04658492		2861.61	0.00693418		3391.6	0.01692084		3921.6	-0.00268398
211.79	0.14663893		741.79	0.01498634		1271.78	0.0245496		1801.79	-0.00623275		2331.78	0.04690553		2861.81	0.00686922		3391.8	0.01580216		3921.8	-0.00375212
211.99	0.1490894		741.99	0.01492949		1271.98	0.02459743		1801.99	-0.0064923		2331.98	0.04733649		2862.01	0.00724083		3392	0.0158297		3922	-0.00385954
212.19	0.15215751		742.19	0.01515555		1272.18	0.0245018		1802.19	-0.00655594		2332.18	0.04848879		2862.21	0.00759461		3392.2	0.01630306		3922.2	-0.00371333
212.39	0.15513646		742.39	0.01588455		1272.38	0.02445075		1802.39	-0.00619997		2332.38	0.04874984		2862.41	0.00749713		3392.4	0.01619502		3922.4	-0.0039523
212.59	0.15699792		742.59	0.01595008		1272.58	0.02416784		1802.59	-0.00645374		2332.58	0.04889623		2862.61	0.0083027		3392.6	0.01753263		3922.6	-0.00418453
212.79	0.15888849		742.79	0.01669039		1272.78	0.02414015		1802.79	-0.006598		2332.78	0.04878822		2862.81	0.00824464		3392.8	0.01692238		3922.8	-0.00410239
212.99	0.16161352		742.99	0.01622111		1272.98	0.02469407		1802.99	-0.00600219		2332.98	0.04798773		2863.01	0.00885136		3393	0.01650422		3923	-0.00451092
213.19	0.16441616		743.19	0.01565127		1273.18	0.02482866		1803.19	-0.00637772		2333.18	0.04821579		2863.21	0.00962069		3393.2	0.01570112		3923.2	-0.00462371
213.39	0.16624545		743.39	0.01487187		1273.38	0.02464512		1803.39	-0.00740858		2333.38	0.04859487		2863.41	0.00998135		3393.4	0.01572049		3923.4	-0.00440138
213.59	0.16853373		743.59	0.01452375		1273.58	0.02472254		1803.59	-0.00747576		2333.58	0.04897879		2863.61	0.01067611		3393.6	0.01661555		3923.6	-0.00503048
213.79	0.1713788		743.79	0.01510153		1273.78	0.02465898		1803.79	-0.00824127		2333.78	0.04911269		2863.81	0.0115548		3393.8	0.01625526		3923.8	-0.00482421
213.99	0.1731842		743.99	0.01613075		1273.98	0.02492717		1803.99	-0.00790228		2333.98	0.04856092		2864.01	0.01181291		3394	0.01662167		3924	-0.00480666
214.19	0.17541816		744.19	0.017721		1274.18	0.02528484		1804.19	-0.00802458		2334.18	0.04786675		2864.21	0.0126904		3394.2	0.01659242		3924.2	-0.00500254
214.39	0.17651131		744.39	0.01896235		1274.38	0.02553211		1804.39	-0.00829983		2334.38	0.04755951		2864.41	0.01228894		3394.4	0.01701553		3924.4	-0.00445507
214.59	0.17723479		744.59	0.02008968		1274.58	0.02482577		1804.59	-0.00879672		2334.58	0.04838231		2864.61	0.01204592		3394.6	0.01738635		3924.6	-0.004846
214.79	0.17816597		744.79	0.01988371		1274.78	0.02376764		1804.79	-0.00942825		2334.78	0.04868033		2864.81	0.01210692		3394.8	0.01626289		3924.8	-0.00555136
214.99	0.17952234		744.99	0.02034846		1274.98	0.0239752		1804.99	-0.0103059		2334.98	0.04844609		2865.01	0.01189428		3395	0.01622416		3925	-0.00517661
215.19	0.18065012		745.19	0.02070613		1275.18	0.02497083		1805.19	-0.01000859		2335.18	0.04926255		2865.21	0.01248065		3395.2	0.01642236		3925.2	-0.00498951
215.39	0.18122728		745.39	0.02127933		1275.38	0.02575206		1805.39	-0.01029828		2335.38	0.05111407		2865.41	0.01223752		3395.4	0.01539451		3925.4	-0.00450019
215.59	0.18231318		745.59	0.0218089		1275.58	0.02606662		1805.59	-0.01106143		2335.58	0.05179299		2865.61	0.01313826		3395.6	0.01603006		3925.6	-0.0053531
215.79	0.18337795		745.79	0.02201759		1275.78	0.02605588		1805.79	-0.01120542		2335.78	0.05235567		2865.81	0.01240905		3395.8	0.01607666		3925.8	-0.00559081
215.99	0.18504084		745.99	0.02180843		1275.98	0.02678327		1805.99	-0.01132757		2335.98	0.05294594		2866.01	0.01151783		3396	0.01619118		3926	-0.00580167
216.19	0.18618569		746.19	0.02240818		1276.18	0.02778368		1806.19	-0.01091691		2336.18	0.05407909		2866.21	0.01011861		3396.2	0.01654166		3926.2	-0.0045813
216.39	0.18702439		746.39	0.02241914		1276.38	0.02831759		1806.39	-0.010258		2336.38	0.05396621		2866.41	0.01017342		3396.4	0.01667383		3926.4	-0.00405699
216.59	0.18781183		746.59	0.02246945		1276.58	0.02912944		1806.59	-0.01034036		2336.58	0.05320112		2866.61	0.00993858		3396.6	0.01700821		3926.6	-0.004107
216.79	0.18896818		746.79	0.02239399		1276.78	0.03023349		1806.79	-0.01002813		2336.78	0.0518105		2866.81	0.01020447		3396.8	0.01681872		3926.8	-0.00401007
216.99	0.19027405		746.99	0.02259839		1276.98	0.03093197		1806.99	-0.00982397		2336.98	0.05205605		2867.01	0.00990713		3397	0.01760665		3927	-0.00347228
217.19	0.19141279		747.19	0.02203431		1277.18	0.0313081		1807.19	-0.01020222		2337.18	0.05267491		2867.21	0.01057622		3397.2	0.01778785		3927.2	-0.00372167
217.39	0.19191808		747.39	0.02315329		1277.38	0.03220423		1807.39	-0.00986		2337.38	0.05231845		2867.41	0.0102699		3397.4	0.0184113		3927.4	-0.00394748
217.59	0.19385815		747.59	0.02380346		1277.58	0.0328327		1807.59	-0.00946915		2337.58	0.05163947		2867.61	0.01055787		3397.6	0.01807555		3927.6	-0.00428844
217.79	0.1951572		747.79	0.02485073		1277.78	0.03319641		1807.79	-0.00979375		2337.78	0.05143347		2867.81	0.01063722		3397.8	0.01710142		3927.8	-0.00336539
217.99	0.19657427		747.99	0.02500291		1277.98	0.03403444		1807.99	-0.00907495		2337.98	0.05159287		2868.01	0.01017311		3398	0.01643727		3928	-0.00348594
218.19	0.19806089		748.19	0.02563459		1278.18	0.03443752		1808.19	-0.00895304		2338.18	0.05161097		2868.21	0.01001308		3398.2	0.01562828		3928.2	-0.00369358
218.39	0.19941181		748.39	0.02565921		1278.38	0.03382808		1808.39	-0.00877308		2338.38	0.05082231		2868.41	0.00932817		3398.4	0.0161147		3928.4	-0.0030409
218.59	0.20194805		748.59	0.0253843		1278.58	0.03341495		1808.59	-0.00796514		2338.58	0.05073674		2868.61	0.01012623		3398.6	0.01580482		3928.6	-0.00357984
218.79	0.20315556		748.79	0.02520436		1278.78	0.03317849		1808.79	-0.00730229		2338.78	0.05062735		2868.81	0.01064821		3398.8	0.01467886		3928.8	-0.00446547
218.99	0.20429004		748.99	0.02569565		1278.98	0.0334218		1808.99	-0.00711584		2338.98	0.05171633		2869.01	0.01195457		3399	0.01487093		3929	-0.00493971
219.19	0.20479912		749.19	0.02575618		1279.18	0.03417334		1809.19	-0.00735092		2339.18	0.05211098		2869.21	0.01261847		3399.2	0.01473666		3929.2	-0.00512217
219.39	0.20598062		749.39	0.02616684		1279.38	0.03420509		1809.39	-0.0078739		2339.38	0.05314394		2869.41	0.01303237		3399.4	0.01432168		3929.4	-0.00502521
219.59	0.2074406		749.59	0.02688991		1279.58	0.03373366		1809.59	-0.00801382		2339.58	0.05247367		2869.61	0.01316332		3399.6	0.01514936		3929.6	-0.00606465
219.79	0.20915205		749.79	0.02669586		1279.78	0.0336282		1809.79	-0.00765002		2339.78	0.05200364		2869.81	0.01302228		3399.8	0.01542764		3929.8	-0.00554605
219.99	0.21075879		749.99	0.02713032		1279.98	0.03377954		1809.99	-0.00792597		2339.98	0.05194414		2870.01	0.01328932		3400	0.01514067		3930	-0.00583017
220.19	0.21195994		750.19	0.02759211		1280.18	0.03407087		1810.19	-0.0080199		2340.18	0.05168308		2870.21	0.0127171		3400.2	0.01642915		3930.2	-0.0052897
220.39	0.21281611		750.39	0.02795583		1280.38	0.03434905		1810.39	-0.00812609		2340.38	0.05077889		2870.41	0.01274267		3400.4	0.01733607		3930.4	-0.00560232
220.59	0.21273702		750.59	0.02920104		1280.58	0.034516		1810.59	-0.00878624		2340.58	0.0498062		2870.61	0.01210846		3400.6	0.01733837		3930.6	-0.00671517
220.79	0.21346455		750.79	0.02974762		1280.78	0.03466546		1810.79	-0.00879356		2340.78	0.04907943		2870.81	0.0122358		3400.8	0.01782901		3930.8	-0.00659422
220.99	0.21476965		750.99	0.03088751		1280.98	0.03553716		1810.99	-0.00907639		2340.98	0.04979447		2871.01	0.01096742		3401	0.01806129		3931	-0.00593857
221.19	0.21600597		751.19	0.03070256		1281.18	0.03704356		1811.19	-0.00851524		2341.18	0.04958412		2871.21	0.01099989		3401.2	0.018265		3931.2	-0.00750072
221.39	0.21721115		751.39	0.03146042		1281.38	0.03798847		1811.39	-0.00808808		2341.38	0.04942962		2871.41	0.01004846		3401.4	0.01860397		3931.4	-0.00715331
221.59	0.21948273		751.59	0.03055098		1281.58	0.03856187		1811.59	-0.00851616		2341.58	0.04922504		2871.61	0.0095665		3401.6	0.01772784		3931.6	-0.00712671
221.79	0.22082723		751.79	0.02989041		1281.78	0.03971174		1811.79	-0.00873045		2341.78	0.04966924		2871.81	0.00862039		3401.8	0.01669087		3931.8	-0.00656728
221.99	0.2220827		751.99	0.02847659		1281.98	0.0406905		1811.99	-0.00791289		2341.98	0.04983829		2872.01	0.00742697		3402	0.01653946		3932	-0.00690498
222.19	0.22327285		752.19	0.02833334		1282.18	0.04101072		1812.19	-0.00748026		2342.18	0.04984664		2872.21	0.00755523		3402.2	0.01659369		3932.2	-0.00647364
222.39	0.22439652		752.39	0.0274447		1282.38	0.04136109		1812.39	-0.00655784		2342.38	0.05102803		2872.41	0.00751549		3402.4	0.01644429		3932.4	-0.00607517
222.59	0.22607232		752.59	0.02755506		1282.58	0.04211573		1812.59	-0.00619836		2342.58	0.05235319		2872.61	0.00813658		3402.6	0.01564709		3932.6	-0.00579825
222.79	0.2261066		752.79	0.02772097		1282.78	0.04210931		1812.79	-0.00626389		2342.78	0.05395898		2872.81	0.00860246		3402.8	0.01500285		3932.8	-0.00613286
222.99	0.22751243		752.99	0.02816749		1282.98	0.04211503		1812.99	-0.0063759		2342.98	0.05530021		2873.01	0.00974263		3403	0.01521882		3933	-0.0062994
223.19	0.22835031		753.19	0.02784843		1283.18	0.04235077		1813.19	-0.00681279		2343.18	0.0553527		2873.21	0.00975578		3403.2	0.01396829		3933.2	-0.00636371
223.39	0.22925221		753.39	0.02781261		1283.38	0.04191786		1813.39	-0.00717011		2343.38	0.05698491		2873.41	0.009956		3403.4	0.01386932		3933.4	-0.00599367
223.59	0.23029815		753.59	0.02832586		1283.58	0.04094861		1813.59	-0.00782632		2343.58	0.05707529		2873.61	0.0100082		3403.6	0.01407713		3933.6	-0.00644691
223.79	0.2312302		753.79	0.02917564		1283.78	0.04092003		1813.79	-0.00841114		2343.78	0.05737652		2873.81	0.01051774		3403.8	0.01421		3933.8	-0.00578679
223.99	0.23205966		753.99	0.0304808		1283.98	0.04086905		1813.99	-0.00930504		2343.98	0.05720579		2874.01	0.01043896		3404	0.01421582		3934	-0.00578343
224.19	0.23235792		754.19	0.03054714		1284.18	0.04127306		1814.19	-0.01005128		2344.18	0.05682045		2874.21	0.0105056		3404.2	0.01436607		3934.2	-0.0063487
224.39	0.2318086		754.39	0.03171764		1284.38	0.04151628		1814.39	-0.0099958		2344.38	0.05620437		2874.41	0.01142088		3404.4	0.01486518		3934.4	-0.00620437
224.59	0.23228359		754.59	0.03227695		1284.58	0.0415463		1814.59	-0.00969721		2344.58	0.05526043		2874.61	0.01228601		3404.6	0.01492192		3934.6	-0.00668201
224.79	0.23373203		754.79	0.03316412		1284.78	0.04228644		1814.79	-0.00945549		2344.78	0.05467883		2874.81	0.01301799		3404.8	0.01558024		3934.8	-0.00589772
224.99	0.23459877		754.99	0.03300667		1284.98	0.04374204		1814.99	-0.00922912		2344.98	0.05388455		2875.01	0.01256641		3405	0.01650093		3935	-0.00534237
225.19	0.23494664		755.19	0.03273836		1285.18	0.04416588		1815.19	-0.00974173		2345.18	0.05338285		2875.21	0.01232912		3405.2	0.0171813		3935.2	-0.00568966
225.39	0.23604879		755.39	0.03238434		1285.38	0.04467739		1815.39	-0.0105447		2345.38	0.05241402		2875.41	0.01196332		3405.4	0.0176865		3935.4	-0.00430377
225.59	0.23712392		755.59	0.03214273		1285.58	0.04540472		1815.59	-0.01034744		2345.58	0.05169298		2875.61	0.01188809		3405.6	0.01757529		3935.6	-0.00444502
225.79	0.23729324		755.79	0.03184428		1285.78	0.04639605		1815.79	-0.00988128		2345.78	0.05199908		2875.81	0.01255446		3405.8	0.01800346		3935.8	-0.00309495
225.99	0.23801948		755.99	0.03132031		1285.98	0.04624376		1815.99	-0.00964722		2345.98	0.05217738		2876.01	0.01211272		3406	0.0193285		3936	-0.00270305
226.19	0.23894943		756.19	0.0316771		1286.18	0.04664707		1816.19	-0.00950983		2346.18	0.05295763		2876.21	0.01243416		3406.2	0.01921982		3936.2	-0.00241592
226.39	0.23970464		756.39	0.03186683		1286.38	0.04647585		1816.39	-0.00923522		2346.38	0.05355858		2876.41	0.01238283		3406.4	0.01856264		3936.4	-0.0020494
226.59	0.24103756		756.59	0.03154366		1286.58	0.0465016		1816.59	-0.00893534		2346.58	0.05334864		2876.61	0.01107324		3406.6	0.01850753		3936.6	-0.0018194
226.79	0.24246944		756.79	0.03120965		1286.78	0.04670148		1816.79	-0.00872276		2346.78	0.05429731		2876.81	0.0101648		3406.8	0.01890895		3936.8	-0.00329611
226.99	0.24423083		756.99	0.03185757		1286.98	0.0466391		1816.99	-0.00813259		2346.98	0.05545037		2877.01	0.00898862		3407	0.01882161		3937	-0.00404265
227.19	0.24499833		757.19	0.0316156		1287.18	0.04717568		1817.19	-0.00938963		2347.18	0.05614061		2877.21	0.00808607		3407.2	0.01753064		3937.2	-0.00384903
227.39	0.2463073		757.39	0.03209248		1287.38	0.04753197		1817.39	-0.01000097		2347.38	0.0574442		2877.41	0.00826378		3407.4	0.01778975		3937.4	-0.003228
227.59	0.24815512		757.59	0.03317973		1287.58	0.04733158		1817.59	-0.01047194		2347.58	0.05761753		2877.61	0.00856936		3407.6	0.01745126		3937.6	-0.00366868
227.79	0.24936554		757.79	0.03408118		1287.78	0.04755442		1817.79	-0.00992112		2347.78	0.05805495		2877.81	0.0085057		3407.8	0.01726046		3937.8	-0.00379319
227.99	0.25118257		757.99	0.03438041		1287.98	0.04786056		1817.99	-0.01052531		2347.98	0.05849108		2878.01	0.00989582		3408	0.01686755		3938	-0.00392478
228.19	0.25293894		758.19	0.03438146		1288.18	0.04815226		1818.19	-0.00965947		2348.18	0.05847094		2878.21	0.01100731		3408.2	0.01707157		3938.2	-0.00424809
228.39	0.25396169		758.39	0.03546623		1288.38	0.04855781		1818.39	-0.00949066		2348.38	0.05728392		2878.41	0.01247553		3408.4	0.0170964		3938.4	-0.00463559
228.59	0.25531327		758.59	0.03666832		1288.58	0.04858983		1818.59	-0.00966459		2348.58	0.0570341		2878.61	0.0127042		3408.6	0.0172696		3938.6	-0.00517747
228.79	0.25691192		758.79	0.0373954		1288.78	0.04963506		1818.79	-0.00970245		2348.78	0.05761403		2878.81	0.01274112		3408.8	0.01746566		3938.8	-0.00523576
228.99	0.25734083		758.99	0.03712549		1288.98	0.05019209		1818.99	-0.01016041		2348.98	0.05721835		2879.01	0.01246073		3409	0.01737705		3939	-0.00545233
229.19	0.25843691		759.19	0.03730865		1289.18	0.05055057		1819.19	-0.01041373		2349.18	0.05677173		2879.21	0.01207596		3409.2	0.01717392		3939.2	-0.00547346
229.39	0.25972127		759.39	0.03791639		1289.38	0.05135605		1819.39	-0.01014192		2349.38	0.05665349		2879.41	0.01297427		3409.4	0.01743873		3939.4	-0.00492596
229.59	0.26016327		759.59	0.0385724		1289.58	0.05163837		1819.59	-0.00939602		2349.58	0.0567918		2879.61	0.01312577		3409.6	0.01730929		3939.6	-0.00545368
229.79	0.26048928		759.79	0.03873258		1289.78	0.05204538		1819.79	-0.00899468		2349.78	0.0560332		2879.81	0.01296738		3409.8	0.01698874		3939.8	-0.00467623
229.99	0.26094657		759.99	0.03865626		1289.98	0.05257546		1819.99	-0.00884799		2349.98	0.05542636		2880.01	0.0127516		3410	0.01737779		3940	-0.00478229
230.19	0.261418		760.19	0.03916271		1290.18	0.05338551		1820.19	-0.00800564		2350.18	0.05481112		2880.21	0.01333589		3410.2	0.01693993		3940.2	-0.00519091
230.39	0.2615796		760.39	0.03948179		1290.38	0.05363516		1820.39	-0.00765228		2350.38	0.05386196		2880.41	0.01274824		3410.4	0.01679893		3940.4	-0.00632548
230.59	0.26197196		760.59	0.03901289		1290.58	0.05455522		1820.59	-0.00655435		2350.58	0.05503734		2880.61	0.01219974		3410.6	0.01663285		3940.6	-0.00769448
230.79	0.26304911		760.79	0.03934966		1290.78	0.05512398		1820.79	-0.00639931		2350.78	0.05595506		2880.81	0.01203456		3410.8	0.01688675		3940.8	-0.00843119
230.99	0.26336839		760.99	0.03989007		1290.98	0.05444723		1820.99	-0.0072012		2350.98	0.05585998		2881.01	0.0121123		3411	0.01668543		3941	-0.00809194
231.19	0.26348187		761.19	0.0405398		1291.18	0.05462157		1821.19	-0.00819445		2351.18	0.05619859		2881.21	0.01259086		3411.2	0.01670584		3941.2	-0.00728804
231.39	0.26426147		761.39	0.04088844		1291.38	0.05390918		1821.39	-0.0077058		2351.38	0.05715536		2881.41	0.01293303		3411.4	0.01697483		3941.4	-0.00701221
231.59	0.26527158		761.59	0.0412469		1291.58	0.05382604		1821.59	-0.00727239		2351.58	0.05782975		2881.61	0.01272521		3411.6	0.0166851		3941.6	-0.00739464
231.79	0.26596992		761.79	0.0409297		1291.78	0.05321142		1821.79	-0.00771673		2351.78	0.05798827		2881.81	0.0124714		3411.8	0.01745623		3941.8	-0.0076935
231.99	0.26686152		761.99	0.04102904		1291.98	0.05220816		1821.99	-0.00820811		2351.98	0.05875721		2882.01	0.01383874		3412	0.01821803		3942	-0.00725648
232.19	0.26789019		762.19	0.04188794		1292.18	0.05210274		1822.19	-0.00871593		2352.18	0.05840712		2882.21	0.01395012		3412.2	0.0186904		3942.2	-0.0076177
232.39	0.2683843		762.39	0.04173935		1292.38	0.05086715		1822.39	-0.01056732		2352.38	0.05769425		2882.41	0.01461733		3412.4	0.01943079		3942.4	-0.00742433
232.59	0.26806989		762.59	0.04185833		1292.58	0.05029246		1822.59	-0.01129146		2352.58	0.05883918		2882.61	0.01354536		3412.6	0.02070217		3942.6	-0.00689532
232.79	0.26927038		762.79	0.04102083		1292.78	0.05057275		1822.79	-0.01147591		2352.78	0.05881995		2882.81	0.0137035		3412.8	0.02136119		3942.8	-0.00646159
232.99	0.26995339		762.99	0.04152395		1292.98	0.05032983		1822.99	-0.0115887		2352.98	0.05905539		2883.01	0.01373944		3413	0.02158933		3943	-0.00619301
233.19	0.27024412		763.19	0.04164334		1293.18	0.05050325		1823.19	-0.01130962		2353.18	0.05983568		2883.21	0.01324943		3413.2	0.02192239		3943.2	-0.00556762
233.39	0.27034479		763.39	0.04245671		1293.38	0.05181051		1823.39	-0.01107242		2353.38	0.05972776		2883.41	0.01323365		3413.4	0.02233486		3943.4	-0.00517859
233.59	0.27093968		763.59	0.04220391		1293.58	0.05167773		1823.59	-0.01090538		2353.58	0.05887371		2883.61	0.01267696		3413.6	0.0225213		3943.6	-0.0042289
233.79	0.27122094		763.79	0.04275238		1293.78	0.05237802		1823.79	-0.01022428		2353.78	0.05803503		2883.81	0.0126489		3413.8	0.02234875		3943.8	-0.00385077
233.99	0.27124319		763.99	0.04304664		1293.98	0.05366959		1823.99	-0.00944608		2353.98	0.05734564		2884.01	0.01314746		3414	0.02267756		3944	-0.00349146
234.19	0.27237967		764.19	0.04347267		1294.18	0.0546651		1824.19	-0.00856952		2354.18	0.05711903		2884.21	0.01319501		3414.2	0.02174039		3944.2	-0.00400255
234.39	0.27268047		764.39	0.04325243		1294.38	0.05556031		1824.39	-0.00869621		2354.38	0.05716509		2884.41	0.01267083		3414.4	0.02012054		3944.4	-0.00480746
234.59	0.27318382		764.59	0.04365378		1294.58	0.05716169		1824.59	-0.00755553		2354.58	0.05809549		2884.61	0.01314381		3414.6	0.01865146		3944.6	-0.00480802
234.79	0.27405221		764.79	0.04450641		1294.78	0.0570974		1824.79	-0.00805338		2354.78	0.05725615		2884.81	0.01199587		3414.8	0.01813734		3944.8	-0.00402746
234.99	0.27419865		764.99	0.04448169		1294.98	0.0577451		1824.99	-0.00820762		2354.98	0.05718755		2885.01	0.01256006		3415	0.01751448		3945	-0.00402054
235.19	0.274203		765.19	0.04496747		1295.18	0.05823166		1825.19	-0.00795267		2355.18	0.05832145		2885.21	0.01234595		3415.2	0.01690351		3945.2	-0.00401684
235.39	0.27525525		765.39	0.04410628		1295.38	0.05890199		1825.39	-0.00888547		2355.38	0.05818165		2885.41	0.01229007		3415.4	0.01564867		3945.4	-0.00458409
235.59	0.2765688		765.59	0.04486728		1295.58	0.05958805		1825.59	-0.00961372		2355.58	0.05790928		2885.61	0.01310202		3415.6	0.01423615		3945.6	-0.00544899
235.79	0.27746012		765.79	0.04516072		1295.78	0.05963011		1825.79	-0.01019417		2355.78	0.05776852		2885.81	0.01303475		3415.8	0.01444334		3945.8	-0.00581533
235.99	0.27838749		765.99	0.04605704		1295.98	0.05958404		1825.99	-0.00995356		2355.98	0.05836716		2886.01	0.01452625		3416	0.01414667		3946	-0.00590743
236.19	0.28015545		766.19	0.04670334		1296.18	0.05957735		1826.19	-0.01050333		2356.18	0.05736469		2886.21	0.01437145		3416.2	0.01487651		3946.2	-0.00657498
236.39	0.28086651		766.39	0.04614883		1296.38	0.058719		1826.39	-0.01095408		2356.38	0.05765489		2886.41	0.01485163		3416.4	0.01605149		3946.4	-0.0067718
236.59	0.28160851		766.59	0.04579671		1296.58	0.05861299		1826.59	-0.01041611		2356.58	0.05887087		2886.61	0.01492911		3416.6	0.01621048		3946.6	-0.00686086
236.79	0.28348753		766.79	0.04663943		1296.78	0.05869825		1826.79	-0.00994551		2356.78	0.05817093		2886.81	0.01564605		3416.8	0.01722008		3946.8	-0.00675453
236.99	0.28433826		766.99	0.04697054		1296.98	0.05846978		1826.99	-0.00854979		2356.98	0.05857442		2887.01	0.01546891		3417	0.01815981		3947	-0.00710397
237.19	0.28410304		767.19	0.04743995		1297.18	0.05933963		1827.19	-0.00825627		2357.18	0.05830609		2887.21	0.0147371		3417.2	0.01909025		3947.2	-0.00702074
237.39	0.28454281		767.39	0.04772417		1297.38	0.05989235		1827.39	-0.0078541		2357.38	0.05830629		2887.41	0.01448376		3417.4	0.0204189		3947.4	-0.00724908
237.59	0.28482255		767.59	0.04869232		1297.58	0.05971193		1827.59	-0.00746594		2357.58	0.05885471		2887.61	0.01454285		3417.6	0.0216123		3947.6	-0.00641372
237.79	0.28527774		767.79	0.04918196		1297.78	0.06052719		1827.79	-0.00693979		2357.78	0.05883267		2887.81	0.01404591		3417.8	0.02178952		3947.8	-0.00659581
237.99	0.2863799		767.99	0.04899539		1297.98	0.06089157		1827.99	-0.00648756		2357.98	0.05804491		2888.01	0.0136627		3418	0.02190534		3948	-0.00555436
238.19	0.28778839		768.19	0.04888288		1298.18	0.06060091		1828.19	-0.00614106		2358.18	0.05883082		2888.21	0.01387455		3418.2	0.02166458		3948.2	-0.00481337
238.39	0.28845065		768.39	0.04839316		1298.38	0.06112391		1828.39	-0.0063219		2358.38	0.05932619		2888.41	0.0135775		3418.4	0.0211251		3948.4	-0.0040905
238.59	0.28841158		768.59	0.04877247		1298.58	0.06206598		1828.59	-0.00602269		2358.58	0.06008274		2888.61	0.01379815		3418.6	0.02122648		3948.6	-0.00375016
238.79	0.28874325		768.79	0.04851054		1298.78	0.06127731		1828.79	-0.00654825		2358.78	0.06085028		2888.81	0.01382832		3418.8	0.02149691		3948.8	-0.00360851
238.99	0.2890005		768.99	0.0472816		1298.98	0.06184111		1828.99	-0.00673092		2358.98	0.06176732		2889.01	0.0146902		3419	0.02087226		3949	-0.00361828
239.19	0.28893886		769.19	0.04749085		1299.18	0.06113205		1829.19	-0.00788946		2359.18	0.06241267		2889.21	0.01499258		3419.2	0.01985063		3949.2	-0.00350353
239.39	0.29004215		769.39	0.04757942		1299.38	0.06155481		1829.39	-0.00855025		2359.38	0.06240175		2889.41	0.01536443		3419.4	0.01885094		3949.4	-0.00381077
239.59	0.29126904		769.59	0.04835995		1299.58	0.06203741		1829.59	-0.00869771		2359.58	0.0630251		2889.61	0.01546878		3419.6	0.01840777		3949.6	-0.00397704
239.79	0.29161841		769.79	0.0490341		1299.78	0.06271707		1829.79	-0.00879004		2359.78	0.06317727		2889.81	0.01542543		3419.8	0.01853122		3949.8	-0.0042981
239.99	0.29253868		769.99	0.04962576		1299.98	0.06278736		1829.99	-0.00859857		2359.98	0.06388835		2890.01	0.0167235		3420	0.01823584		3950	-0.00410899
240.19	0.29439743		770.19	0.05057002		1300.18	0.062319		1830.19	-0.00900474		2360.18	0.06405534		2890.21	0.01583822		3420.2	0.01832585		3950.2	-0.00412623
240.39	0.29483234		770.39	0.05101512		1300.38	0.06222895		1830.39	-0.00922517		2360.38	0.06498516		2890.41	0.01632855		3420.4	0.01809737		3950.4	-0.00426434
240.59	0.29610197		770.59	0.05081505		1300.58	0.06200844		1830.59	-0.00918868		2360.58	0.06485058		2890.61	0.01580229		3420.6	0.01773623		3950.6	-0.00433809
240.79	0.29703499		770.79	0.05193548		1300.78	0.06293562		1830.79	-0.00978443		2360.78	0.06302372		2890.81	0.01536719		3420.8	0.01770402		3950.8	-0.00461236
240.99	0.29746773		770.99	0.05199647		1300.98	0.06363105		1830.99	-0.00875502		2360.98	0.06208889		2891.01	0.01504904		3421	0.01734641		3951	-0.0048841
241.19	0.29761083		771.19	0.05302413		1301.18	0.06486015		1831.19	-0.008249		2361.18	0.06138537		2891.21	0.01440138		3421.2	0.01735166		3951.2	-0.00517167
241.39	0.2984983		771.39	0.05316475		1301.38	0.06561343		1831.39	-0.007696		2361.38	0.0615511		2891.41	0.01425031		3421.4	0.0172937		3951.4	-0.0057292
241.59	0.29955981		771.59	0.05319707		1301.58	0.06667603		1831.59	-0.00745769		2361.58	0.06026849		2891.61	0.0141942		3421.6	0.01681973		3951.6	-0.00522487
241.79	0.3007373		771.79	0.05237729		1301.78	0.06719779		1831.79	-0.00704026		2361.78	0.05844079		2891.81	0.01292234		3421.8	0.01660095		3951.8	-0.00530525
241.99	0.30171832		771.99	0.05191602		1301.98	0.06770314		1831.99	-0.00615848		2361.98	0.05847038		2892.01	0.01309905		3422	0.01645352		3952	-0.00490824
242.19	0.30230979		772.19	0.05214337		1302.18	0.06830413		1832.19	-0.00549472		2362.18	0.0588819		2892.21	0.01352061		3422.2	0.01647602		3952.2	-0.00481179
242.39	0.30189115		772.39	0.05152192		1302.38	0.06922296		1832.39	-0.00561758		2362.38	0.05835703		2892.41	0.0132958		3422.4	0.01583508		3952.4	-0.00480384
242.59	0.30209415		772.59	0.05131726		1302.58	0.06999552		1832.59	-0.0061854		2362.58	0.05885892		2892.61	0.0140806		3422.6	0.01587478		3952.6	-0.00546878
242.79	0.3026479		772.79	0.05137384		1302.78	0.0694184		1832.79	-0.00531754		2362.78	0.0589005		2892.81	0.0137213		3422.8	0.01634318		3952.8	-0.00549565
242.99	0.30263944		772.99	0.05131269		1302.98	0.06941521		1832.99	-0.00574077		2362.98	0.05920101		2893.01	0.01423163		3423	0.01656989		3953	-0.00452456
243.19	0.30349438		773.19	0.05182709		1303.18	0.06917092		1833.19	-0.00624575		2363.18	0.05934613		2893.21	0.01545809		3423.2	0.01686522		3953.2	-0.00451083
243.39	0.30401748		773.39	0.05234439		1303.38	0.0696183		1833.39	-0.00629042		2363.38	0.05983868		2893.41	0.01596439		3423.4	0.01800467		3953.4	-0.00411772
243.59	0.30483853		773.59	0.05307689		1303.58	0.06929683		1833.59	-0.00627195		2363.58	0.06041233		2893.61	0.01617394		3423.6	0.01862488		3953.6	-0.0040544
243.79	0.30536892		773.79	0.05420178		1303.78	0.06886709		1833.79	-0.00662159		2363.78	0.0608864		2893.81	0.01680605		3423.8	0.01901174		3953.8	-0.00378545
243.99	0.30618746		773.99	0.0548614		1303.98	0.06894747		1833.99	-0.00671739		2363.98	0.06213273		2894.01	0.01678173		3424	0.01946361		3954	-0.00309203
244.19	0.30707476		774.19	0.05660873		1304.18	0.06867341		1834.19	-0.00756347		2364.18	0.06323367		2894.21	0.01590805		3424.2	0.02001309		3954.2	-0.00308472
244.39	0.30752419		774.39	0.05655984		1304.38	0.06878384		1834.39	-0.00774344		2364.38	0.06377098		2894.41	0.01597927		3424.4	0.02094811		3954.4	-0.00367336
244.59	0.30793529		774.59	0.05645198		1304.58	0.06907302		1834.59	-0.00833719		2364.58	0.06324444		2894.61	0.01537666		3424.6	0.02106171		3954.6	-0.0043445
244.79	0.30783847		774.79	0.05638691		1304.78	0.06934175		1834.79	-0.00878683		2364.78	0.06259706		2894.81	0.01653908		3424.8	0.02074117		3954.8	-0.00412492
244.99	0.3090703		774.99	0.0566112		1304.98	0.06950517		1834.99	-0.0083861		2364.98	0.06249539		2895.01	0.01678491		3425	0.0204602		3955	-0.00435047
245.19	0.31011577		775.19	0.05656994		1305.18	0.0690836		1835.19	-0.00821045		2365.18	0.06322686		2895.21	0.01652307		3425.2	0.02046703		3955.2	-0.00472925
245.39	0.31160569		775.39	0.05620863		1305.38	0.07007402		1835.39	-0.0085636		2365.38	0.06390204		2895.41	0.01621268		3425.4	0.02059952		3955.4	-0.00523876
245.59	0.31225769		775.59	0.0555897		1305.58	0.07056902		1835.59	-0.00937958		2365.58	0.06363427		2895.61	0.01602201		3425.6	0.01982661		3955.6	-0.00523878
245.79	0.31221663		775.79	0.05564397		1305.78	0.07176211		1835.79	-0.00962623		2365.78	0.06305143		2895.81	0.01493628		3425.8	0.01960617		3955.8	-0.0054395
245.99	0.312251		775.99	0.05581462		1305.98	0.07270157		1835.99	-0.0091165		2365.98	0.06286423		2896.01	0.01534548		3426	0.01889785		3956	-0.00501487
246.19	0.31273854		776.19	0.05597246		1306.18	0.07283949		1836.19	-0.00950254		2366.18	0.06164847		2896.21	0.01534462		3426.2	0.01823364		3956.2	-0.0054171
246.39	0.31277919		776.39	0.05520886		1306.38	0.07308998		1836.39	-0.0101199		2366.38	0.06106526		2896.41	0.01481395		3426.4	0.01724135		3956.4	-0.0059165
246.59	0.31324224		776.59	0.05501689		1306.58	0.07364694		1836.59	-0.01066063		2366.58	0.06149749		2896.61	0.01492674		3426.6	0.01702775		3956.6	-0.00606923
246.79	0.31404057		776.79	0.05560778		1306.78	0.07428683		1836.79	-0.00968956		2366.78	0.06054983		2896.81	0.01454375		3426.8	0.01772637		3956.8	-0.00535032
246.99	0.3147165		776.99	0.05561224		1306.98	0.07450858		1836.99	-0.01072499		2366.98	0.0607693		2897.01	0.01513442		3427	0.01807622		3957	-0.00449366
247.19	0.31603927		777.19	0.05630871		1307.18	0.0746432		1837.19	-0.01029627		2367.18	0.06000731		2897.21	0.01576392		3427.2	0.0177393		3957.2	-0.00452117
247.39	0.3169339		777.39	0.05691132		1307.38	0.07401466		1837.39	-0.01005964		2367.38	0.0602793		2897.41	0.0150813		3427.4	0.01818786		3957.4	-0.00413456
247.59	0.31778107		777.59	0.05733664		1307.58	0.07414854		1837.59	-0.00965617		2367.58	0.06021145		2897.61	0.01458139		3427.6	0.01815243		3957.6	-0.00437537
247.79	0.31779765		777.79	0.05795752		1307.78	0.07508598		1837.79	-0.01004173		2367.78	0.06140018		2897.81	0.01440229		3427.8	0.01791399		3957.8	-0.00410571
247.99	0.31763421		777.99	0.05832963		1307.98	0.07539201		1837.99	-0.00950255		2367.98	0.06249622		2898.01	0.01402566		3428	0.01810831		3958	-0.00440388
248.19	0.31791263		778.19	0.05938576		1308.18	0.0755391		1838.19	-0.00947045		2368.18	0.06374874		2898.21	0.01426479		3428.2	0.01789924		3958.2	-0.00508613
248.39	0.31846544		778.39	0.05966492		1308.38	0.07569123		1838.39	-0.00895944		2368.38	0.06370419		2898.41	0.0149332		3428.4	0.01822664		3958.4	-0.00508281
248.59	0.31849928		778.59	0.05986689		1308.58	0.07554874		1838.59	-0.01000355		2368.58	0.06357968		2898.61	0.01535652		3428.6	0.01831503		3958.6	-0.00442652
248.79	0.31925531		778.79	0.06066464		1308.78	0.07478324		1838.79	-0.01017286		2368.78	0.06420041		2898.81	0.01598228		3428.8	0.01799808		3958.8	-0.00473392
248.99	0.32086505		778.99	0.06121848		1308.98	0.07497437		1838.99	-0.01054024		2368.98	0.06479373		2899.01	0.01541758		3429	0.01763823		3959	-0.00481605
249.19	0.3214155		779.19	0.06120528		1309.18	0.07498037		1839.19	-0.01040645		2369.18	0.06557611		2899.21	0.01588668		3429.2	0.01820004		3959.2	-0.00533394
249.39	0.32115241		779.39	0.06106358		1309.38	0.07582781		1839.39	-0.01051856		2369.38	0.06566727		2899.41	0.01589059		3429.4	0.01860394		3959.4	-0.00558728
249.59	0.32052337		779.59	0.05966134		1309.58	0.07652237		1839.59	-0.01086908		2369.58	0.06454229		2899.61	0.01546956		3429.6	0.01710779		3959.6	-0.00578423
249.79	0.31987167		779.79	0.06033428		1309.78	0.07670606		1839.79	-0.01015986		2369.78	0.06380728		2899.81	0.01612393		3429.8	0.01644879		3959.8	-0.00510838
249.99	0.31990361		779.99	0.06054206		1309.98	0.07687932		1839.99	-0.00911012		2369.98	0.06429795		2900.01	0.01630455		3430	0.01600417		3960	-0.00540714
250.19	0.31993395		780.19	0.06000714		1310.18	0.076787		1840.19	-0.0094662		2370.18	0.06472736		2900.21	0.01664102		3430.2	0.01642697		3960.2	-0.00537229
250.39	0.31997297		780.39	0.05872534		1310.38	0.07705274		1840.39	-0.00947998		2370.38	0.0644773		2900.41	0.0169081		3430.4	0.01568161		3960.4	-0.0041038
250.59	0.31991173		780.59	0.05880551		1310.58	0.07742378		1840.59	-0.01010684		2370.58	0.06435838		2900.61	0.01637362		3430.6	0.01695651		3960.6	-0.00370464
250.79	0.32183279		780.79	0.05884112		1310.78	0.0775153		1840.79	-0.00955691		2370.78	0.06333318		2900.81	0.01593008		3430.8	0.01735115		3960.8	-0.00279128
250.99	0.32224932		780.99	0.05861395		1310.98	0.07735889		1840.99	-0.01007987		2370.98	0.06217933		2901.01	0.01531693		3431	0.01712357		3961	-0.0033732
251.19	0.32286374		781.19	0.05932313		1311.18	0.07709967		1841.19	-0.00974001		2371.18	0.06174461		2901.21	0.01490185		3431.2	0.0165958		3961.2	-0.00328479
251.39	0.32418204		781.39	0.05996971		1311.38	0.07696842		1841.39	-0.00990133		2371.38	0.06202379		2901.41	0.01371986		3431.4	0.0169036		3961.4	-0.00355075
251.59	0.32413662		781.59	0.05903663		1311.58	0.07736999		1841.59	-0.01044291		2371.58	0.06202861		2901.61	0.01350283		3431.6	0.01656644		3961.6	-0.00353629
251.79	0.32449163		781.79	0.05979212		1311.78	0.07706877		1841.79	-0.01039466		2371.78	0.062173		2901.81	0.01311467		3431.8	0.01631508		3961.8	-0.00359368
251.99	0.32559786		781.99	0.06090867		1311.98	0.07632792		1841.99	-0.01042039		2371.98	0.06183331		2902.01	0.01299293		3432	0.01714423		3962	-0.00414033
252.19	0.32638844		782.19	0.06175485		1312.18	0.07624011		1842.19	-0.01106307		2372.18	0.06192911		2902.21	0.01359338		3432.2	0.01703109		3962.2	-0.00335072
252.39	0.32741661		782.39	0.06199562		1312.38	0.07646646		1842.39	-0.01109378		2372.38	0.06171999		2902.41	0.01391926		3432.4	0.01807864		3962.4	-0.0030717
252.59	0.32849024		782.59	0.06257028		1312.58	0.07559406		1842.59	-0.01142954		2372.58	0.06141865		2902.61	0.01402362		3432.6	0.01872472		3962.6	-0.00336593
252.79	0.32854165		782.79	0.06365178		1312.78	0.07571607		1842.79	-0.01126844		2372.78	0.0615847		2902.81	0.01431542		3432.8	0.01904587		3962.8	-0.00419768
252.99	0.32863726		782.99	0.06366244		1312.98	0.0762115		1842.99	-0.01101796		2372.98	0.06200619		2903.01	0.01467864		3433	0.01925546		3963	-0.00480226
253.19	0.32948272		783.19	0.06376286		1313.18	0.07632728		1843.19	-0.01060957		2373.18	0.06188384		2903.21	0.01569052		3433.2	0.01971321		3963.2	-0.00589251
253.39	0.32902314		783.39	0.06445552		1313.38	0.07651918		1843.39	-0.01017146		2373.38	0.06217842		2903.41	0.0155216		3433.4	0.01921213		3963.4	-0.00641949
253.59	0.32891334		783.59	0.06432185		1313.58	0.07794844		1843.59	-0.00935312		2373.58	0.06194435		2903.61	0.01596014		3433.6	0.01797446		3963.6	-0.00628175
253.79	0.32860603		783.79	0.06568222		1313.78	0.07856654		1843.79	-0.00841231		2373.78	0.06345369		2903.81	0.01728685		3433.8	0.01861937		3963.8	-0.00618416
253.99	0.32879529		783.99	0.0657948		1313.98	0.0804144		1843.99	-0.00904235		2373.98	0.06447179		2904.01	0.01765392		3434	0.01876957		3964	-0.00636707
254.19	0.32910812		784.19	0.06540622		1314.18	0.08086341		1844.19	-0.0095329		2374.18	0.064199		2904.21	0.01842006		3434.2	0.01902091		3964.2	-0.00515414
254.39	0.33013793		784.39	0.06540765		1314.38	0.0818279		1844.39	-0.01049251		2374.38	0.0634669		2904.41	0.01832234		3434.4	0.0185379		3964.4	-0.0054458
254.59	0.33123681		784.59	0.06630578		1314.58	0.08219503		1844.59	-0.01032784		2374.58	0.06397631		2904.61	0.01817516		3434.6	0.01892816		3964.6	-0.00635426
254.79	0.33193214		784.79	0.06674365		1314.78	0.08308771		1844.79	-0.00946638		2374.78	0.06329912		2904.81	0.01782901		3434.8	0.01851633		3964.8	-0.00653074
254.99	0.33196873		784.99	0.06691935		1314.98	0.08342612		1844.99	-0.00924859		2374.98	0.0624887		2905.01	0.01794503		3435	0.01877711		3965	-0.0078937
255.19	0.3327042		785.19	0.0674148		1315.18	0.08348784		1845.19	-0.00898128		2375.18	0.06276921		2905.21	0.01722125		3435.2	0.0181737		3965.2	-0.00739047
255.39	0.33370117		785.39	0.06708037		1315.38	0.08389412		1845.39	-0.00902325		2375.38	0.06307495		2905.41	0.01630265		3435.4	0.01713624		3965.4	-0.00789852
255.59	0.333935		785.59	0.06621903		1315.58	0.08418502		1845.59	-0.01010545		2375.58	0.06243084		2905.61	0.01579492		3435.6	0.01689935		3965.6	-0.00726608
255.79	0.33412977		785.79	0.06681404		1315.78	0.08457851		1845.79	-0.01039828		2375.78	0.06136808		2905.81	0.01551101		3435.8	0.01702537		3965.8	-0.00716356
255.99	0.33457236		785.99	0.06716209		1315.98	0.08471951		1845.99	-0.01030866		2375.98	0.06138458		2906.01	0.01567083		3436	0.01729862		3966	-0.00724777
256.19	0.33479979		786.19	0.06613845		1316.18	0.0845764		1846.19	-0.00997334		2376.18	0.06168797		2906.21	0.01535926		3436.2	0.01766595		3966.2	-0.00725756
256.39	0.3348528		786.39	0.06611965		1316.38	0.0842866		1846.39	-0.00970731		2376.38	0.06209829		2906.41	0.01540766		3436.4	0.01831747		3966.4	-0.00776803
256.59	0.33465815		786.59	0.06706472		1316.58	0.08379718		1846.59	-0.00993811		2376.58	0.06170951		2906.61	0.01586616		3436.6	0.01878408		3966.6	-0.00834462
256.79	0.33403055		786.79	0.06699333		1316.78	0.08441789		1846.79	-0.01109714		2376.78	0.06188711		2906.81	0.0155296		3436.8	0.01963908		3966.8	-0.00830534
256.99	0.33436712		786.99	0.0668409		1316.98	0.0845314		1846.99	-0.0106506		2376.98	0.06237338		2907.01	0.01499312		3437	0.01939373		3967	-0.00851856
257.19	0.33503909		787.19	0.06649655		1317.18	0.08525122		1847.19	-0.01109859		2377.18	0.06161862		2907.21	0.01542252		3437.2	0.01912822		3967.2	-0.0084275
257.39	0.33480768		787.39	0.06691235		1317.38	0.08581462		1847.39	-0.01107557		2377.38	0.06194824		2907.41	0.01519631		3437.4	0.01829099		3967.4	-0.00852691
257.59	0.33453025		787.59	0.0671215		1317.58	0.08726381		1847.59	-0.01138658		2377.58	0.06238181		2907.61	0.01532715		3437.6	0.01858241		3967.6	-0.00783795
257.79	0.3351415		787.79	0.0676019		1317.78	0.08811138		1847.79	-0.01182619		2377.78	0.06380681		2907.81	0.01557317		3437.8	0.01906425		3967.8	-0.00743899
257.99	0.33590977		787.99	0.06835724		1317.98	0.08903924		1847.99	-0.01209634		2377.98	0.06348567		2908.01	0.01593971		3438	0.01890634		3968	-0.007194
258.19	0.33760209		788.19	0.06865331		1318.18	0.08910366		1848.19	-0.01211485		2378.18	0.06390927		2908.21	0.01646013		3438.2	0.01899342		3968.2	-0.00688741
258.39	0.33803634		788.39	0.06863576		1318.38	0.0898506		1848.39	-0.01231179		2378.38	0.06392022		2908.41	0.01622505		3438.4	0.01949476		3968.4	-0.00693838
258.59	0.33865352		788.59	0.06921091		1318.58	0.08984622		1848.59	-0.01097399		2378.58	0.06398573		2908.61	0.01741421		3438.6	0.01963512		3968.6	-0.00662334
258.79	0.33844168		788.79	0.06934019		1318.78	0.09048383		1848.79	-0.01110985		2378.78	0.06400052		2908.81	0.01685249		3438.8	0.02016651		3968.8	-0.0068537
258.99	0.33973872		788.99	0.06958624		1318.98	0.08990328		1848.99	-0.0099603		2378.98	0.06414576		2909.01	0.0178072		3439	0.01987355		3969	-0.00690224
259.19	0.34096729		789.19	0.06976708		1319.18	0.09083708		1849.19	-0.00926061		2379.18	0.06405662		2909.21	0.01693772		3439.2	0.01902077		3969.2	-0.00641238
259.39	0.34164076		789.39	0.06941187		1319.38	0.09122021		1849.39	-0.00907726		2379.38	0.06393038		2909.41	0.01763977		3439.4	0.01884626		3969.4	-0.00614132
259.59	0.34266493		789.59	0.06980248		1319.58	0.09164076		1849.59	-0.00926645		2379.58	0.06318689		2909.61	0.01808418		3439.6	0.019858		3969.6	-0.00600407
259.79	0.34277823		789.79	0.06930673		1319.78	0.09095526		1849.79	-0.00883376		2379.78	0.06269662		2909.81	0.01876119		3439.8	0.02046143		3969.8	-0.00676216
259.99	0.3439184		789.99	0.06961363		1319.98	0.09062745		1849.99	-0.00810487		2379.98	0.0629665		2910.01	0.01821747		3440	0.02084556		3970	-0.00674133
260.19	0.34424542		790.19	0.07025346		1320.18	0.09000953		1850.19	-0.00799281		2380.18	0.0639002		2910.21	0.01790804		3440.2	0.02165561		3970.2	-0.00681348
260.39	0.3448104		790.39	0.07115402		1320.38	0.08961072		1850.39	-0.00924907		2380.38	0.06469717		2910.41	0.01762523		3440.4	0.0219953		3970.4	-0.00681836
260.59	0.34466929		790.59	0.07200871		1320.58	0.08922545		1850.59	-0.01024496		2380.58	0.06484532		2910.61	0.01740766		3440.6	0.02243681		3970.6	-0.00749392
260.79	0.34473252		790.79	0.07245916		1320.78	0.08864886		1850.79	-0.01095239		2380.78	0.06544074		2910.81	0.01641531		3440.8	0.02233805		3970.8	-0.00673027
260.99	0.34478829		790.99	0.07201411		1320.98	0.0887102		1850.99	-0.01120951		2380.98	0.06578325		2911.01	0.01624569		3441	0.02141		3971	-0.00679084
261.19	0.34572193		791.19	0.07194095		1321.18	0.08838553		1851.19	-0.01262775		2381.18	0.06571758		2911.21	0.01658839		3441.2	0.0203039		3971.2	-0.00690595
261.39	0.3467658		791.39	0.07265082		1321.38	0.08898083		1851.39	-0.01334584		2381.38	0.06605482		2911.41	0.01566736		3441.4	0.01997735		3971.4	-0.0070271
261.59	0.34678365		791.59	0.07378302		1321.58	0.08857318		1851.59	-0.013408		2381.58	0.06672076		2911.61	0.01529525		3441.6	0.01979495		3971.6	-0.00697175
261.79	0.34707166		791.79	0.07330199		1321.78	0.08872898		1851.79	-0.01275417		2381.78	0.06702733		2911.81	0.01460771		3441.8	0.01939326		3971.8	-0.00618874
261.99	0.34705746		791.99	0.07345685		1321.98	0.08851811		1851.99	-0.0132862		2381.98	0.06621131		2912.01	0.01451675		3442	0.01850769		3972	-0.00701915
262.19	0.34782741		792.19	0.07317911		1322.18	0.08793674		1852.19	-0.01345066		2382.18	0.06589446		2912.21	0.01448977		3442.2	0.01859779		3972.2	-0.00696121
262.39	0.34763897		792.39	0.07311306		1322.38	0.08820941		1852.39	-0.01323153		2382.38	0.06413724		2912.41	0.01408518		3442.4	0.01854392		3972.4	-0.00723623
262.59	0.34791876		792.59	0.07377779		1322.58	0.08808803		1852.59	-0.01167436		2382.58	0.0633186		2912.61	0.01456339		3442.6	0.01852721		3972.6	-0.00769937
262.79	0.34846115		792.79	0.07356124		1322.78	0.08849979		1852.79	-0.01084567		2382.78	0.06304323		2912.81	0.01396436		3442.8	0.01847943		3972.8	-0.00661984
262.99	0.34913433		792.99	0.07385705		1322.98	0.08866736		1852.99	-0.00968614		2382.98	0.0620862		2913.01	0.01455677		3443	0.01870364		3973	-0.00703456
263.19	0.34906856		793.19	0.07326643		1323.18	0.08972768		1853.19	-0.00914922		2383.18	0.06106214		2913.21	0.01436808		3443.2	0.01882078		3973.2	-0.00671604
263.39	0.3494769		793.39	0.07303472		1323.38	0.09015536		1853.39	-0.00926404		2383.38	0.05964571		2913.41	0.01619718		3443.4	0.01864431		3973.4	-0.00699905
263.59	0.35038877		793.59	0.07324771		1323.58	0.09000574		1853.59	-0.00909067		2383.58	0.05920134		2913.61	0.01621197		3443.6	0.02028991		3973.6	-0.00727684
263.79	0.35059423		793.79	0.07356263		1323.78	0.08957505		1853.79	-0.00866757		2383.78	0.05881317		2913.81	0.01670525		3443.8	0.02100994		3973.8	-0.00808874
263.99	0.35168943		793.99	0.07412234		1323.98	0.09086292		1853.99	-0.00880402		2383.98	0.05918603		2914.01	0.01653624		3444	0.0211151		3974	-0.00805305
264.19	0.35214865		794.19	0.07473371		1324.18	0.09133354		1854.19	-0.00948469		2384.18	0.06009512		2914.21	0.01668704		3444.2	0.02167127		3974.2	-0.00830314
264.39	0.35253635		794.39	0.07542428		1324.38	0.09161419		1854.39	-0.01101418		2384.38	0.05980706		2914.41	0.01633212		3444.4	0.02216395		3974.4	-0.00852733
264.59	0.35188587		794.59	0.07587206		1324.58	0.0917961		1854.59	-0.01190426		2384.58	0.060243		2914.61	0.01607637		3444.6	0.0211575		3974.6	-0.00796386
264.79	0.35202755		794.79	0.07611526		1324.78	0.09283144		1854.79	-0.01234296		2384.78	0.06087779		2914.81	0.01588488		3444.8	0.02080723		3974.8	-0.00792019
264.99	0.35226524		794.99	0.07616112		1324.98	0.09342288		1854.99	-0.0124045		2384.98	0.06142596		2915.01	0.01575763		3445	0.02082543		3975	-0.00847831
265.19	0.35343729		795.19	0.0769195		1325.18	0.09363223		1855.19	-0.01324226		2385.18	0.06220082		2915.21	0.01570712		3445.2	0.02057628		3975.2	-0.00755924
265.39	0.35438446		795.39	0.07750864		1325.38	0.09422774		1855.39	-0.01315135		2385.38	0.06291422		2915.41	0.01547069		3445.4	0.02053084		3975.4	-0.00705706
265.59	0.35429952		795.59	0.07763576		1325.58	0.09306579		1855.59	-0.01241667		2385.58	0.06386201		2915.61	0.0153303		3445.6	0.01984638		3975.6	-0.00727589
265.79	0.35392326		795.79	0.07721478		1325.78	0.09318019		1855.79	-0.01236517		2385.78	0.06401691		2915.81	0.01412954		3445.8	0.01964667		3975.8	-0.0072003
265.99	0.35455742		795.99	0.07755673		1325.98	0.09256043		1855.99	-0.01293444		2385.98	0.06471441		2916.01	0.01391206		3446	0.01993064		3976	-0.00711736
266.19	0.355405		796.19	0.07788862		1326.18	0.09246254		1856.19	-0.01244551		2386.18	0.06465305		2916.21	0.01435999		3446.2	0.02002168		3976.2	-0.00710785
266.39	0.35576359		796.39	0.07770359		1326.38	0.09277587		1856.39	-0.01213401		2386.38	0.06449782		2916.41	0.01412676		3446.4	0.02016427		3976.4	-0.00695269
266.59	0.35580998		796.59	0.07765583		1326.58	0.09222321		1856.59	-0.01065703		2386.58	0.06564001		2916.61	0.01357057		3446.6	0.01987121		3976.6	-0.00600782
266.79	0.35644648		796.79	0.07739945		1326.78	0.09152823		1856.79	-0.01036372		2386.78	0.06506823		2916.81	0.01293347		3446.8	0.02000598		3976.8	-0.00567425
266.99	0.35657884		796.99	0.07723151		1326.98	0.09165987		1856.99	-0.01005476		2386.98	0.06541588		2917.01	0.01284294		3447	0.01996782		3977	-0.0060008
267.19	0.35738942		797.19	0.07772266		1327.18	0.09170046		1857.19	-0.00895421		2387.18	0.06559903		2917.21	0.01375907		3447.2	0.02008119		3977.2	-0.00585638
267.39	0.35818105		797.39	0.07736373		1327.38	0.09171287		1857.39	-0.00869808		2387.38	0.06539534		2917.41	0.01430184		3447.4	0.01972758		3977.4	-0.00621156
267.59	0.35876564		797.59	0.07762933		1327.58	0.09186665		1857.59	-0.00822249		2387.58	0.06577897		2917.61	0.01485666		3447.6	0.02105847		3977.6	-0.00604978
267.79	0.35889291		797.79	0.07769653		1327.78	0.09294299		1857.79	-0.00757615		2387.78	0.06541535		2917.81	0.01548938		3447.8	0.02072973		3977.8	-0.00636868
267.99	0.35934989		797.99	0.07752186		1327.98	0.09468858		1857.99	-0.00803092		2387.98	0.06561059		2918.01	0.01618427		3448	0.01971891		3978	-0.00583364
268.19	0.35923041		798.19	0.07786837		1328.18	0.09514932		1858.19	-0.00817836		2388.18	0.06533926		2918.21	0.01656959		3448.2	0.01952531		3978.2	-0.00569609
268.39	0.35985838		798.39	0.07870413		1328.38	0.09650939		1858.39	-0.00861813		2388.38	0.0644773		2918.41	0.01682047		3448.4	0.01993967		3978.4	-0.00572118
268.59	0.3600441		798.59	0.07864281		1328.58	0.09723487		1858.59	-0.00856823		2388.58	0.06432217		2918.61	0.01684691		3448.6	0.01850832		3978.6	-0.00599907
268.79	0.36069024		798.79	0.0792037		1328.78	0.09786667		1858.79	-0.0078724		2388.78	0.06396183		2918.81	0.01682293		3448.8	0.01879539		3978.8	-0.00628459
268.99	0.36092525		798.99	0.08079172		1328.98	0.0976216		1858.99	-0.0076913		2388.98	0.06407264		2919.01	0.01661407		3449	0.01923932		3979	-0.00577703
269.19	0.36117838		799.19	0.08023039		1329.18	0.09793186		1859.19	-0.00849791		2389.18	0.06437016		2919.21	0.01662389		3449.2	0.01849266		3979.2	-0.00507643
269.39	0.36141501		799.39	0.08030242		1329.38	0.09788786		1859.39	-0.00819502		2389.38	0.06430516		2919.41	0.01607915		3449.4	0.01864721		3979.4	-0.00496158
269.59	0.3612087		799.59	0.0815172		1329.58	0.09786506		1859.59	-0.00857329		2389.58	0.06386612		2919.61	0.01602039		3449.6	0.01929006		3979.6	-0.00512413
269.79	0.36054025		799.79	0.08238648		1329.78	0.09786129		1859.79	-0.00928819		2389.78	0.06392696		2919.81	0.01531795		3449.8	0.0186354		3979.8	-0.00479924
269.99	0.36140604		799.99	0.08279491		1329.98	0.09790702		1859.99	-0.01050316		2389.98	0.06402504		2920.01	0.01513433		3450	0.01963012		3980	-0.00494323
270.19	0.36166383		800.19	0.08341583		1330.18	0.09851202		1860.19	-0.01082048		2390.18	0.0637384		2920.21	0.0157252		3450.2	0.01891736		3980.2	-0.00590943
270.39	0.36217253		800.39	0.08331804		1330.38	0.09813754		1860.39	-0.01040576		2390.38	0.06421645		2920.41	0.01523133		3450.4	0.01945933		3980.4	-0.00668923
270.59	0.36257182		800.59	0.08361461		1330.58	0.09724282		1860.59	-0.01028606		2390.58	0.06488336		2920.61	0.0141306		3450.6	0.0191412		3980.6	-0.00728816
270.79	0.36308573		800.79	0.08428945		1330.78	0.09746691		1860.79	-0.01020694		2390.78	0.06523979		2920.81	0.01418842		3450.8	0.01969983		3980.8	-0.00827938
270.99	0.3632299		800.99	0.08440078		1330.98	0.09837857		1860.99	-0.01001701		2390.98	0.06613169		2921.01	0.01506886		3451	0.01991553		3981	-0.00793291
271.19	0.3635078		801.19	0.08514596		1331.18	0.09863087		1861.19	-0.01012228		2391.18	0.06635272		2921.21	0.01567735		3451.2	0.02065985		3981.2	-0.00844206
271.39	0.36328344		801.39	0.08432203		1331.38	0.09869527		1861.39	-0.01021072		2391.38	0.06688568		2921.41	0.01572347		3451.4	0.01984143		3981.4	-0.00799696
271.59	0.36310238		801.59	0.08505749		1331.58	0.09912068		1861.59	-0.01052698		2391.58	0.06751212		2921.61	0.0169734		3451.6	0.01998787		3981.6	-0.00811253
271.79	0.36324928		801.79	0.08467362		1331.78	0.09939207		1861.79	-0.01024423		2391.78	0.06810372		2921.81	0.01744886		3451.8	0.01993246		3981.8	-0.00870891
271.99	0.36404564		801.99	0.08519019		1331.98	0.10020397		1861.99	-0.01058306		2391.98	0.06899506		2922.01	0.01811843		3452	0.01990487		3982	-0.00905885
272.19	0.36530739		802.19	0.08535023		1332.18	0.09998651		1862.19	-0.01107353		2392.18	0.06895952		2922.21	0.01874803		3452.2	0.02019695		3982.2	-0.00930501
272.39	0.36658899		802.39	0.08538624		1332.38	0.10006727		1862.39	-0.01201707		2392.38	0.06887017		2922.41	0.018902		3452.4	0.02005822		3982.4	-0.00984323
272.59	0.36753304		802.59	0.08440314		1332.58	0.0996157		1862.59	-0.01250464		2392.58	0.0689863		2922.61	0.01848424		3452.6	0.01900927		3982.6	-0.01028417
272.79	0.36801592		802.79	0.08442474		1332.78	0.09972913		1862.79	-0.01294748		2392.78	0.06925181		2922.81	0.01806119		3452.8	0.01942455		3982.8	-0.00913453
272.99	0.36817439		802.99	0.08435257		1332.98	0.09981616		1862.99	-0.01278325		2392.98	0.06930445		2923.01	0.01811275		3453	0.01934472		3983	-0.00856394
273.19	0.36846137		803.19	0.08293311		1333.18	0.10003087		1863.19	-0.01214491		2393.18	0.06850797		2923.21	0.01778957		3453.2	0.01864292		3983.2	-0.00714394
273.39	0.36921526		803.39	0.08333935		1333.38	0.10016535		1863.39	-0.01160489		2393.38	0.06720417		2923.41	0.0178952		3453.4	0.01910864		3983.4	-0.0057827
273.59	0.36960593		803.59	0.08375452		1333.58	0.10001791		1863.59	-0.01193887		2393.58	0.06612219		2923.61	0.01729579		3453.6	0.01889293		3983.6	-0.0055089
273.79	0.37000531		803.79	0.08370175		1333.78	0.10053479		1863.79	-0.01196718		2393.78	0.06581462		2923.81	0.01676216		3453.8	0.01834765		3983.8	-0.00560747
273.99	0.37061216		803.99	0.08363549		1333.98	0.10105498		1863.99	-0.01227795		2393.98	0.0657531		2924.01	0.01628731		3454	0.01845606		3984	-0.0061183
274.19	0.37048469		804.19	0.08333226		1334.18	0.10141241		1864.19	-0.01133209		2394.18	0.06480573		2924.21	0.0161031		3454.2	0.01815853		3984.2	-0.00551049
274.39	0.37065404		804.39	0.08338156		1334.38	0.10047615		1864.39	-0.01123862		2394.38	0.0642751		2924.41	0.01531243		3454.4	0.01850336		3984.4	-0.00609966
274.59	0.37035112		804.59	0.08389934		1334.58	0.10005329		1864.59	-0.010664		2394.58	0.06427241		2924.61	0.01431013		3454.6	0.01806668		3984.6	-0.00544024
274.79	0.370179		804.79	0.08406249		1334.78	0.10016272		1864.79	-0.00975173		2394.78	0.06433655		2924.81	0.0144036		3454.8	0.01885305		3984.8	-0.00450698
274.99	0.3696675		804.99	0.08354587		1334.98	0.10045815		1864.99	-0.00914294		2394.98	0.06387322		2925.01	0.01398081		3455	0.01931601		3985	-0.00353137
275.19	0.36912872		805.19	0.08357801		1335.18	0.10018535		1865.19	-0.00941091		2395.18	0.06450066		2925.21	0.0135603		3455.2	0.01927045		3985.2	-0.00386852
275.39	0.36872657		805.39	0.08368163		1335.38	0.10030027		1865.39	-0.00914826		2395.38	0.06495396		2925.41	0.01371077		3455.4	0.01887841		3985.4	-0.00395181
275.59	0.36793692		805.59	0.08420561		1335.58	0.10075085		1865.59	-0.00902598		2395.58	0.06546304		2925.61	0.01365078		3455.6	0.01891314		3985.6	-0.00493181
275.79	0.36847301		805.79	0.08437938		1335.78	0.10098513		1865.79	-0.00892723		2395.78	0.0658368		2925.81	0.01416919		3455.8	0.0200517		3985.8	-0.00586098
275.99	0.36929155		805.99	0.08470103		1335.98	0.10204751		1865.99	-0.00966675		2395.98	0.06575982		2926.01	0.01423126		3456	0.02015809		3986	-0.00645312
276.19	0.37052298		806.19	0.08505924		1336.18	0.10245078		1866.19	-0.01065059		2396.18	0.0655442		2926.21	0.01510615		3456.2	0.02007066		3986.2	-0.00740314
276.39	0.37149611		806.39	0.08586915		1336.38	0.10261418		1866.39	-0.01089109		2396.38	0.06545443		2926.41	0.0155496		3456.4	0.01993187		3986.4	-0.00824253
276.59	0.37289534		806.59	0.08568688		1336.58	0.10244197		1866.59	-0.01137229		2396.58	0.06570395		2926.61	0.0161042		3456.6	0.01988047		3986.6	-0.00863841
276.79	0.37342035		806.79	0.08671936		1336.78	0.10268073		1866.79	-0.01157698		2396.78	0.06615717		2926.81	0.01684468		3456.8	0.02021993		3986.8	-0.00815766
276.99	0.37435178		806.99	0.0865451		1336.98	0.10199114		1866.99	-0.01161111		2396.98	0.06648781		2927.01	0.01772698		3457	0.0197233		3987	-0.00805002
277.19	0.37544581		807.19	0.08662988		1337.18	0.10213207		1867.19	-0.01183127		2397.18	0.06678016		2927.21	0.01889318		3457.2	0.02001781		3987.2	-0.00832755
277.39	0.37650644		807.39	0.08727967		1337.38	0.10273138		1867.39	-0.01209467		2397.38	0.06662496		2927.41	0.0189497		3457.4	0.02021053		3987.4	-0.00882569
277.59	0.37712829		807.59	0.08813746		1337.58	0.10260624		1867.59	-0.01217811		2397.58	0.06733377		2927.61	0.01861629		3457.6	0.01982101		3987.6	-0.00980208
277.79	0.3780228		807.79	0.08974831		1337.78	0.1030354		1867.79	-0.01210908		2397.78	0.06760145		2927.81	0.0188955		3457.8	0.01923556		3987.8	-0.00967327
277.99	0.37853909		807.99	0.09010535		1337.98	0.10313137		1867.99	-0.01157455		2397.98	0.0675998		2928.01	0.01875267		3458	0.01887565		3988	-0.0089892
278.19	0.37872191		808.19	0.09031934		1338.18	0.10314281		1868.19	-0.01139581		2398.18	0.0669043		2928.21	0.01858829		3458.2	0.01872569		3988.2	-0.00831216
278.39	0.37898091		808.39	0.09120109		1338.38	0.10349478		1868.39	-0.01083159		2398.38	0.0675554		2928.41	0.01837058		3458.4	0.01842512		3988.4	-0.00798599
278.59	0.37940355		808.59	0.09122094		1338.58	0.10399746		1868.59	-0.00950462		2398.58	0.06805154		2928.61	0.01811427		3458.6	0.01792698		3988.6	-0.00716982
278.79	0.37944151		808.79	0.09115932		1338.78	0.10442602		1868.79	-0.00926785		2398.78	0.06903851		2928.81	0.01776387		3458.8	0.01860617		3988.8	-0.00669093
278.99	0.37836693		808.99	0.09092574		1338.98	0.10547917		1868.99	-0.00929193		2398.98	0.06897656		2929.01	0.01711398		3459	0.01785687		3989	-0.00698219
279.19	0.37810983		809.19	0.09063942		1339.18	0.10510689		1869.19	-0.00885759		2399.18	0.0689063		2929.21	0.017887		3459.2	0.01818382		3989.2	-0.00726881
279.39	0.37716442		809.39	0.09061768		1339.38	0.10644652		1869.39	-0.00840001		2399.38	0.06813526		2929.41	0.01759643		3459.4	0.01872245		3989.4	-0.00691347
279.59	0.37577859		809.59	0.09074792		1339.58	0.10628669		1869.59	-0.00784599		2399.58	0.06789929		2929.61	0.01721335		3459.6	0.01922639		3989.6	-0.0075783
279.79	0.37534575		809.79	0.09036643		1339.78	0.10671057		1869.79	-0.0076994		2399.78	0.06757326		2929.81	0.0177238		3459.8	0.02051134		3989.8	-0.00841569
279.99	0.37607261		809.99	0.08952222		1339.98	0.10707971		1869.99	-0.0084868		2399.98	0.06672973		2930.01	0.01726813		3460	0.02011698		3990	-0.00909852
280.19	0.37673832		810.19	0.08919989		1340.18	0.10722256		1870.19	-0.00883338		2400.18	0.06584744		2930.21	0.01698918		3460.2	0.02011967		3990.2	-0.00989815
280.39	0.37727742		810.39	0.08938541		1340.38	0.10623716		1870.39	-0.00948678		2400.38	0.06572001		2930.41	0.01645395		3460.4	0.01983522		3990.4	-0.0098959
280.59	0.37808447		810.59	0.08911024		1340.58	0.10523736		1870.59	-0.01037738		2400.58	0.06583775		2930.61	0.01646049		3460.6	0.02023688		3990.6	-0.00991809
280.79	0.37888501		810.79	0.08870043		1340.78	0.10497241		1870.79	-0.0111577		2400.78	0.0664685		2930.81	0.01573454		3460.8	0.02024343		3990.8	-0.01002725
280.99	0.37884901		810.99	0.08846465		1340.98	0.10464387		1870.99	-0.01161444		2400.98	0.06734078		2931.01	0.01651576		3461	0.02079606		3991	-0.00986832
281.19	0.3794389		811.19	0.08834911		1341.18	0.10559292		1871.19	-0.01235243		2401.18	0.06787643		2931.21	0.01670001		3461.2	0.02136971		3991.2	-0.01084219
281.39	0.37956114		811.39	0.08837162		1341.38	0.10586934		1871.39	-0.01249526		2401.38	0.06765684		2931.41	0.01552104		3461.4	0.0207738		3991.4	-0.01020279
281.59	0.3791907		811.59	0.08865212		1341.58	0.10609011		1871.59	-0.01255319		2401.58	0.06845134		2931.61	0.01576158		3461.6	0.02024883		3991.6	-0.01033074
281.79	0.38018451		811.79	0.08931488		1341.78	0.10669695		1871.79	-0.01294915		2401.78	0.0688584		2931.81	0.01570354		3461.8	0.01996375		3991.8	-0.00933065
281.99	0.38158794		811.99	0.08951992		1341.98	0.10705652		1871.99	-0.01235779		2401.98	0.06899806		2932.01	0.01557935		3462	0.02007438		3992	-0.00887744
282.19	0.38242838		812.19	0.08969177		1342.18	0.10825475		1872.19	-0.01287825		2402.18	0.06894252		2932.21	0.01618656		3462.2	0.01959969		3992.2	-0.00850956
282.39	0.38298193		812.39	0.09019435		1342.38	0.10913879		1872.39	-0.01197967		2402.38	0.06918165		2932.41	0.01675555		3462.4	0.01976724		3992.4	-0.00896196
282.59	0.38370134		812.59	0.09017819		1342.58	0.10912272		1872.59	-0.01183858		2402.58	0.06868918		2932.61	0.01677869		3462.6	0.01941636		3992.6	-0.00907752
282.79	0.38413881		812.79	0.09124008		1342.78	0.1097592		1872.79	-0.01249068		2402.78	0.06854974		2932.81	0.01684415		3462.8	0.01910897		3992.8	-0.00852818
282.99	0.38412406		812.99	0.0911035		1342.98	0.11050408		1872.99	-0.01177088		2402.98	0.0674332		2933.01	0.01672682		3463	0.01912789		3993	-0.00877523
283.19	0.38530554		813.19	0.09087791		1343.18	0.11019299		1873.19	-0.01088983		2403.18	0.06724286		2933.21	0.01781989		3463.2	0.01990394		3993.2	-0.0077425
283.39	0.38483382		813.39	0.09115736		1343.38	0.1109224		1873.39	-0.01069864		2403.38	0.06716676		2933.41	0.01724548		3463.4	0.01978404		3993.4	-0.00784387
283.59	0.38589576		813.59	0.09197843		1343.58	0.1107349		1873.59	-0.01018943		2403.58	0.06675852		2933.61	0.0169955		3463.6	0.01991991		3993.6	-0.00892212
283.79	0.38735438		813.79	0.09198445		1343.78	0.11192615		1873.79	-0.01016936		2403.78	0.06648861		2933.81	0.01731823		3463.8	0.01975624		3993.8	-0.00931245
283.99	0.38829876		813.99	0.09216551		1343.98	0.11251824		1873.99	-0.01101207		2403.98	0.06562763		2934.01	0.01681083		3464	0.0189616		3994	-0.00872456
284.19	0.38835602		814.19	0.09230731		1344.18	0.11294707		1874.19	-0.01067632		2404.18	0.06497518		2934.21	0.01553991		3464.2	0.01891413		3994.2	-0.00897914
284.39	0.38874855		814.39	0.09282188		1344.38	0.11291889		1874.39	-0.01102014		2404.38	0.06460303		2934.41	0.01599367		3464.4	0.0183281		3994.4	-0.0081676
284.59	0.38876249		814.59	0.09354994		1344.58	0.11372549		1874.59	-0.01047084		2404.58	0.06531421		2934.61	0.0161405		3464.6	0.01864064		3994.6	-0.00728841
284.79	0.3880397		814.79	0.09369156		1344.78	0.11382872		1874.79	-0.01095341		2404.78	0.06636768		2934.81	0.01574694		3464.8	0.01902887		3994.8	-0.00678898
284.99	0.38688938		814.99	0.09476717		1344.98	0.11400443		1874.99	-0.01085155		2404.98	0.0672127		2935.01	0.01674821		3465	0.01962068		3995	-0.00630203
285.19	0.38670257		815.19	0.09399898		1345.18	0.11406464		1875.19	-0.0112264		2405.18	0.0680796		2935.21	0.01693507		3465.2	0.01937821		3995.2	-0.00658178
285.39	0.3862003		815.39	0.09410291		1345.38	0.11317201		1875.39	-0.01158643		2405.38	0.06764239		2935.41	0.01663237		3465.4	0.01949373		3995.4	-0.00589303
285.59	0.38566389		815.59	0.09378875		1345.58	0.11319951		1875.59	-0.01105711		2405.58	0.06835862		2935.61	0.01579649		3465.6	0.01922128		3995.6	-0.00659766
285.79	0.38635683		815.79	0.09352932		1345.78	0.112325		1875.79	-0.01093332		2405.78	0.06764368		2935.81	0.01496717		3465.8	0.01907432		3995.8	-0.00664298
285.99	0.38579806		815.99	0.09327819		1345.98	0.11211771		1875.99	-0.01076373		2405.98	0.06696051		2936.01	0.01519231		3466	0.0191407		3996	-0.00662889
286.19	0.38520953		816.19	0.09312506		1346.18	0.11324927		1876.19	-0.01155219		2406.18	0.06672786		2936.21	0.01576499		3466.2	0.01871243		3996.2	-0.00735587
286.39	0.38522744		816.39	0.09343607		1346.38	0.11351436		1876.39	-0.01149365		2406.38	0.06729266		2936.41	0.01551343		3466.4	0.01864354		3996.4	-0.00854395
286.59	0.3855774		816.59	0.09298249		1346.58	0.11381327		1876.59	-0.01153686		2406.58	0.06678119		2936.61	0.01568545		3466.6	0.01869208		3996.6	-0.00776555
286.79	0.38520634		816.79	0.09366532		1346.78	0.11456447		1876.79	-0.01145318		2406.78	0.06662247		2936.81	0.01559875		3466.8	0.01894225		3996.8	-0.00740915
286.99	0.38577665		816.99	0.09288554		1346.98	0.11506891		1876.99	-0.01088789		2406.98	0.06727609		2937.01	0.01598911		3467	0.01976423		3997	-0.00795013
287.19	0.38664247		817.19	0.09220397		1347.18	0.11494891		1877.19	-0.010977		2407.18	0.06814621		2937.21	0.01743123		3467.2	0.01988995		3997.2	-0.00774517
287.39	0.38809892		817.39	0.0925854		1347.38	0.11556975		1877.39	-0.01027339		2407.38	0.06890114		2937.41	0.01765088		3467.4	0.0191823		3997.4	-0.00920618
287.59	0.38941637		817.59	0.09246149		1347.58	0.11539466		1877.59	-0.01080753		2407.58	0.06841353		2937.61	0.01754246		3467.6	0.01973148		3997.6	-0.00973186
287.79	0.39008309		817.79	0.09268025		1347.78	0.1158715		1877.79	-0.01154101		2407.78	0.06879971		2937.81	0.01827783		3467.8	0.01926625		3997.8	-0.00992588
287.99	0.39034578		817.99	0.09254691		1347.98	0.1158825		1877.99	-0.01202003		2407.98	0.06899244		2938.01	0.01939593		3468	0.01936872		3998	-0.00966131
288.19	0.39172196		818.19	0.09286363		1348.18	0.11481073		1878.19	-0.01235854		2408.18	0.06926304		2938.21	0.01936605		3468.2	0.01952221		3998.2	-0.00973559
288.39	0.39207693		818.39	0.09367511		1348.38	0.11530999		1878.39	-0.01257425		2408.38	0.0695655		2938.41	0.02032521		3468.4	0.01955293		3998.4	-0.00855871
288.59	0.39263016		818.59	0.09502831		1348.58	0.1146744		1878.59	-0.01266798		2408.58	0.07043938		2938.61	0.02031403		3468.6	0.01974946		3998.6	-0.00770459
288.79	0.3929721		818.79	0.09635812		1348.78	0.11353632		1878.79	-0.01320926		2408.78	0.07025994		2938.81	0.02069334		3468.8	0.02016573		3998.8	-0.00752264
288.99	0.39347411		818.99	0.09672664		1348.98	0.11306911		1878.99	-0.01395634		2408.98	0.07017837		2939.01	0.02077086		3469	0.02021098		3999	-0.00681702
289.19	0.39428389		819.19	0.0961715		1349.18	0.11240175		1879.19	-0.01474087		2409.18	0.07017956		2939.21	0.02049059		3469.2	0.01988716		3999.2	-0.0066464
289.39	0.39432477		819.39	0.09670892		1349.38	0.11253557		1879.39	-0.01494499		2409.38	0.06905408		2939.41	0.01938868		3469.4	0.01948893		3999.4	-0.00590737
289.59	0.39415767		819.59	0.09581512		1349.58	0.11314935		1879.59	-0.01389034		2409.58	0.06850561		2939.61	0.01860245		3469.6	0.0182986		3999.6	-0.00686028
289.79	0.39346479		819.79	0.09634561		1349.78	0.1135413		1879.79	-0.01448941		2409.78	0.06730291		2939.81	0.01910636		3469.8	0.01815188		3999.8	-0.00588331
289.99	0.39378445		819.99	0.09683385		1349.98	0.11480067		1879.99	-0.01414731		2409.98	0.06722932		2940.01	0.01944632		3470	0.01730122		4000	-0.00515781
290.19	0.39455465		820.19	0.09733674		1350.18	0.11545058		1880.19	-0.0133314		2410.18	0.06672346		2940.21	0.01873409		3470.2	0.0172197		4000.2	-0.00567222
290.39	0.39479321		820.39	0.09766816		1350.38	0.11639487		1880.39	-0.01242822		2410.38	0.06684014		2940.41	0.01858346		3470.4	0.01751455		4000.4	-0.00548919
290.59	0.39347638		820.59	0.09827417		1350.58	0.11738456		1880.59	-0.01174119		2410.58	0.06659756		2940.61	0.01884656		3470.6	0.01783139		4000.6	-0.00473401
290.79	0.39302282		820.79	0.09842054		1350.78	0.11828315		1880.79	-0.01143466		2410.78	0.06650351		2940.81	0.01845527		3470.8	0.01834919		4000.8	-0.00447428
290.99	0.39384623		820.99	0.09883447		1350.98	0.1187815		1880.99	-0.01212917		2410.98	0.06732152		2941.01	0.01827341		3471	0.01917959		4001	-0.00513753
291.19	0.39429104		821.19	0.09839044		1351.18	0.11907806		1881.19	-0.01220201		2411.18	0.06805876		2941.21	0.01802302		3471.2	0.01906609		4001.2	-0.00594584
291.39	0.39546588		821.39	0.09840451		1351.38	0.11958716		1881.39	-0.01158741		2411.38	0.06828443		2941.41	0.01735708		3471.4	0.01872378		4001.4	-0.00667229
291.59	0.39528464		821.59	0.09859436		1351.58	0.11948943		1881.59	-0.01188188		2411.58	0.06800975		2941.61	0.01742151		3471.6	0.01947604		4001.6	-0.00664728
291.79	0.39541581		821.79	0.09905221		1351.78	0.11967636		1881.79	-0.01231733		2411.78	0.06863302		2941.81	0.01850246		3471.8	0.01939676		4001.8	-0.00656681
291.99	0.39595564		821.99	0.09855296		1351.98	0.11973374		1881.99	-0.01190023		2411.98	0.06897679		2942.01	0.01840217		3472	0.02048927		4002	-0.00642032
292.19	0.39617294		822.19	0.09929399		1352.18	0.1192124		1882.19	-0.01238837		2412.18	0.06927186		2942.21	0.01745127		3472.2	0.02044722		4002.2	-0.00594388
292.39	0.39565311		822.39	0.09903865		1352.38	0.11906032		1882.39	-0.01227783		2412.38	0.06894022		2942.41	0.01725026		3472.4	0.02003723		4002.4	-0.00610383
292.59	0.39600261		822.59	0.09910255		1352.58	0.11789218		1882.59	-0.01278529		2412.58	0.06922512		2942.61	0.01657186		3472.6	0.01912429		4002.6	-0.00634826
292.79	0.39567392		822.79	0.0989209		1352.78	0.11794877		1882.79	-0.01287576		2412.78	0.06967113		2942.81	0.01587886		3472.8	0.01978005		4002.8	-0.00607096
292.99	0.39601767		822.99	0.09784747		1352.98	0.11748528		1882.99	-0.01355061		2412.98	0.06985555		2943.01	0.01539834		3473	0.01935993		4003	-0.00611673
293.19	0.39695068		823.19	0.09749197		1353.18	0.11750448		1883.19	-0.01295142		2413.18	0.06979345		2943.21	0.01507359		3473.2	0.01868587		4003.2	-0.006244
293.39	0.3976147		823.39	0.09708255		1353.38	0.11783528		1883.39	-0.01245526		2413.38	0.06967914		2943.41	0.01469632		3473.4	0.01824085		4003.4	-0.00574712
293.59	0.39768245		823.59	0.09608078		1353.58	0.11805071		1883.59	-0.0113507		2413.58	0.0697023		2943.61	0.01504472		3473.6	0.018068		4003.6	-0.00648741
293.79	0.39794459		823.79	0.09628468		1353.78	0.11774187		1883.79	-0.01053183		2413.78	0.06982217		2943.81	0.0153791		3473.8	0.01806928		4003.8	-0.00568786
293.99	0.39879973		823.99	0.09668378		1353.98	0.11737817		1883.99	-0.0096387		2413.98	0.06947277		2944.01	0.01563846		3474	0.01747936		4004	-0.00543539
294.19	0.39852387		824.19	0.09763591		1354.18	0.11660277		1884.19	-0.00872123		2414.18	0.06936589		2944.21	0.0161664		3474.2	0.01815466		4004.2	-0.00577582
294.39	0.39799295		824.39	0.09820553		1354.38	0.11757993		1884.39	-0.00846521		2414.38	0.06927037		2944.41	0.01676809		3474.4	0.01855221		4004.4	-0.00560452
294.59	0.39811839		824.59	0.09994156		1354.58	0.11757836		1884.59	-0.00954831		2414.58	0.06851843		2944.61	0.01714163		3474.6	0.01944116		4004.6	-0.00605414
294.79	0.3981618		824.79	0.10031858		1354.78	0.11742255		1884.79	-0.00984943		2414.78	0.06840958		2944.81	0.01686967		3474.8	0.02061119		4004.8	-0.00634971
294.99	0.39866592		824.99	0.10069142		1354.98	0.11741323		1884.99	-0.01035639		2414.98	0.06910967		2945.01	0.01750163		3475	0.02068173		4005	-0.00731541
295.19	0.39875231		825.19	0.10046381		1355.18	0.11821011		1885.19	-0.01016768		2415.18	0.06854898		2945.21	0.01803329		3475.2	0.0205129		4005.2	-0.0072613
295.39	0.39883363		825.39	0.1014163		1355.38	0.11922799		1885.39	-0.01048185		2415.38	0.06808601		2945.41	0.01914427		3475.4	0.02060128		4005.4	-0.00728543
295.59	0.39844726		825.59	0.10157957		1355.58	0.11947213		1885.59	-0.01038962		2415.58	0.06771346		2945.61	0.01919185		3475.6	0.02185041		4005.6	-0.00718572
295.79	0.39833483		825.79	0.1008262		1355.78	0.12016624		1885.79	-0.01100826		2415.78	0.0681426		2945.81	0.01946122		3475.8	0.02129432		4005.8	-0.00657788
295.99	0.39874197		825.99	0.10115353		1355.98	0.12111574		1885.99	-0.0106449		2415.98	0.06848022		2946.01	0.01935603		3476	0.02093733		4006	-0.00680323
296.19	0.39946656		826.19	0.10165499		1356.18	0.12185526		1886.19	-0.01182694		2416.18	0.06924614		2946.21	0.01964572		3476.2	0.02000421		4006.2	-0.00677572
296.39	0.39916265		826.39	0.10144739		1356.38	0.12143799		1886.39	-0.01269912		2416.38	0.06907253		2946.41	0.01914874		3476.4	0.01869811		4006.4	-0.00768285
296.59	0.39912514		826.59	0.10178131		1356.58	0.12185603		1886.59	-0.01292173		2416.58	0.07029439		2946.61	0.01828394		3476.6	0.01806114		4006.6	-0.00697142
296.79	0.39962358		826.79	0.10153873		1356.78	0.12189547		1886.79	-0.0133633		2416.78	0.07081713		2946.81	0.01796349		3476.8	0.01889729		4006.8	-0.00721158
296.99	0.39984103		826.99	0.10143899		1356.98	0.12208218		1886.99	-0.01336247		2416.98	0.07205046		2947.01	0.01766323		3477	0.01900337		4007	-0.00789473
297.19	0.4004513		827.19	0.10144649		1357.18	0.12205078		1887.19	-0.01330241		2417.18	0.07296525		2947.21	0.01759147		3477.2	0.01991021		4007.2	-0.00778435
297.39	0.40063507		827.39	0.10124299		1357.38	0.12251402		1887.39	-0.01296667		2417.38	0.07350886		2947.41	0.01804087		3477.4	0.01995005		4007.4	-0.00719953
297.59	0.39989342		827.59	0.10139965		1357.58	0.12316342		1887.59	-0.01260867		2417.58	0.07412689		2947.61	0.01839824		3477.6	0.01987743		4007.6	-0.00702895
297.79	0.40043215		827.79	0.10224555		1357.78	0.12187723		1887.79	-0.01268195		2417.78	0.07358349		2947.81	0.01822246		3477.8	0.02034805		4007.8	-0.00599383
297.99	0.40062751		827.99	0.10314532		1357.98	0.12190587		1887.99	-0.01294599		2417.98	0.07290994		2948.01	0.01873596		3478	0.02086592		4008	-0.00541957
298.19	0.40151052		828.19	0.10378053		1358.18	0.12195378		1888.19	-0.01265335		2418.18	0.07289885		2948.21	0.01828769		3478.2	0.02136654		4008.2	-0.00516099
298.39	0.40214903		828.39	0.10362866		1358.38	0.12271978		1888.39	-0.01337341		2418.38	0.0719312		2948.41	0.01867424		3478.4	0.02103322		4008.4	-0.00477033
298.59	0.40285278		828.59	0.10462468		1358.58	0.12198528		1888.59	-0.01387118		2418.58	0.07162855		2948.61	0.01896475		3478.6	0.02213015		4008.6	-0.00604102
298.79	0.40249267		828.79	0.10415211		1358.78	0.12249593		1888.79	-0.01368962		2418.78	0.07127708		2948.81	0.01860568		3478.8	0.02273423		4008.8	-0.00570652
298.99	0.40287456		828.99	0.10430725		1358.98	0.12310345		1888.99	-0.01336887		2418.98	0.07093219		2949.01	0.01884336		3479	0.02219076		4009	-0.00590484
299.19	0.4029729		829.19	0.10529166		1359.18	0.12413572		1889.19	-0.0134705		2419.18	0.06993335		2949.21	0.01779419		3479.2	0.02188527		4009.2	-0.00642737
299.39	0.40322121		829.39	0.10474069		1359.38	0.1239017		1889.39	-0.01394587		2419.38	0.06933926		2949.41	0.01712611		3479.4	0.02139277		4009.4	-0.00673569
299.59	0.40401262		829.59	0.10375301		1359.58	0.12405735		1889.59	-0.01353893		2419.58	0.06839087		2949.61	0.01668385		3479.6	0.02143546		4009.6	-0.00644564
299.79	0.40518672		829.79	0.10428153		1359.78	0.12466954		1889.79	-0.01353202		2419.78	0.0689295		2949.81	0.01655943		3479.8	0.01934218		4009.8	-0.0063758
299.99	0.40600813		829.99	0.10550144		1359.98	0.12436101		1889.99	-0.01333996		2419.98	0.06906718		2950.01	0.01663451		3480	0.01851295		4010	-0.00653979
300.19	0.40698157		830.19	0.10546496		1360.18	0.1245583		1890.19	-0.01326668		2420.18	0.06914876		2950.21	0.01587087		3480.2	0.0174335		4010.2	-0.00703627
300.39	0.40646466		830.39	0.10584706		1360.38	0.12358513		1890.39	-0.01296351		2420.38	0.0688919		2950.41	0.01511247		3480.4	0.01652549		4010.4	-0.00695005
300.59	0.40683211		830.59	0.10553139		1360.58	0.12314003		1890.59	-0.01265112		2420.58	0.06914318		2950.61	0.01522182		3480.6	0.01689807		4010.6	-0.00595173
300.79	0.40711318		830.79	0.10550186		1360.78	0.12253036		1890.79	-0.01239053		2420.78	0.06925829		2950.81	0.01506977		3480.8	0.01770037		4010.8	-0.00730445
300.99	0.4060893		830.99	0.10543305		1360.98	0.12243715		1890.99	-0.01182824		2420.98	0.07029898		2951.01	0.01558786		3481	0.01899583		4011	-0.00733226
301.19	0.40613416		831.19	0.10568199		1361.18	0.12272187		1891.19	-0.01201534		2421.18	0.07050013		2951.21	0.01665981		3481.2	0.01972152		4011.2	-0.00714078
301.39	0.40592241		831.39	0.10507663		1361.38	0.12368621		1891.39	-0.01227695		2421.38	0.0699779		2951.41	0.01691074		3481.4	0.01916911		4011.4	-0.00647409
301.59	0.4059593		831.59	0.10557647		1361.58	0.12438106		1891.59	-0.01267847		2421.58	0.07041696		2951.61	0.01685774		3481.6	0.01985183		4011.6	-0.00665686
301.79	0.40607107		831.79	0.10437368		1361.78	0.12421349		1891.79	-0.01234205		2421.78	0.07059464		2951.81	0.01716424		3481.8	0.02107152		4011.8	-0.00661384
301.99	0.40652311		831.99	0.10415429		1361.98	0.12527344		1891.99	-0.01276849		2421.98	0.07093777		2952.01	0.01736543		3482	0.02188036		4012	-0.00709041
302.19	0.40712715		832.19	0.10479239		1362.18	0.1260453		1892.19	-0.01273467		2422.18	0.07268551		2952.21	0.01769278		3482.2	0.02127806		4012.2	-0.00584069
302.39	0.40743186		832.39	0.10446626		1362.38	0.12686714		1892.39	-0.01364302		2422.38	0.07331406		2952.41	0.01858715		3482.4	0.02132799		4012.4	-0.00632765
302.59	0.40741178		832.59	0.10453398		1362.58	0.12747879		1892.59	-0.0134841		2422.58	0.07330248		2952.61	0.01891014		3482.6	0.02248701		4012.6	-0.00679096
302.79	0.40709753		832.79	0.10428276		1362.78	0.12889826		1892.79	-0.01419099		2422.78	0.07279723		2952.81	0.01854753		3482.8	0.02201224		4012.8	-0.00681981
302.99	0.40646745		832.99	0.10516528		1362.98	0.12940087		1892.99	-0.01375352		2422.98	0.07326955		2953.01	0.01868779		3483	0.02132384		4013	-0.007514
303.19	0.40696077		833.19	0.10494749		1363.18	0.12988287		1893.19	-0.01474744		2423.18	0.0725637		2953.21	0.01817563		3483.2	0.02024892		4013.2	-0.0084119
303.39	0.40708206		833.39	0.1043371		1363.38	0.1286014		1893.39	-0.01561791		2423.38	0.07177705		2953.41	0.01802483		3483.4	0.02032067		4013.4	-0.00768486
303.59	0.40813709		833.59	0.10461835		1363.58	0.12897593		1893.59	-0.01564144		2423.58	0.07130636		2953.61	0.01773126		3483.6	0.02034435		4013.6	-0.00876417
303.79	0.40857284		833.79	0.10560077		1363.78	0.12868694		1893.79	-0.01605158		2423.78	0.07136342		2953.81	0.01704139		3483.8	0.01951541		4013.8	-0.00867395
303.99	0.40944918		833.99	0.10546662		1363.98	0.12838388		1893.99	-0.01594084		2423.98	0.0711703		2954.01	0.01760159		3484	0.01917102		4014	-0.00817807
304.19	0.41018354		834.19	0.10513214		1364.18	0.12819075		1894.19	-0.01513062		2424.18	0.07035701		2954.21	0.01751565		3484.2	0.01937796		4014.2	-0.00790914
304.39	0.41066928		834.39	0.10554881		1364.38	0.12685496		1894.39	-0.01455895		2424.38	0.07016842		2954.41	0.01718887		3484.4	0.01925909		4014.4	-0.00738418
304.59	0.41149359		834.59	0.10557271		1364.58	0.12585925		1894.59	-0.01426941		2424.58	0.06952725		2954.61	0.01793415		3484.6	0.01942807		4014.6	-0.00727956
304.79	0.41143847		834.79	0.10549591		1364.78	0.12584546		1894.79	-0.0139251		2424.78	0.06966663		2954.81	0.01772917		3484.8	0.01975611		4014.8	-0.00781496
304.99	0.41150708		834.99	0.10511475		1364.98	0.12619217		1894.99	-0.0142275		2424.98	0.07006692		2955.01	0.01833956		3485	0.02128975		4015	-0.00723307
305.19	0.41185409		835.19	0.10463292		1365.18	0.12679998		1895.19	-0.01413367		2425.18	0.07007458		2955.21	0.01870081		3485.2	0.02057515		4015.2	-0.00722258
305.39	0.41235416		835.39	0.10434536		1365.38	0.12639595		1895.39	-0.01367432		2425.38	0.06935042		2955.41	0.01823778		3485.4	0.02013293		4015.4	-0.0084762
305.59	0.41291305		835.59	0.10486227		1365.58	0.12703087		1895.59	-0.01307046		2425.58	0.07001546		2955.61	0.01850283		3485.6	0.02093009		4015.6	-0.00886171
305.79	0.41361576		835.79	0.10432712		1365.78	0.12598142		1895.79	-0.01282288		2425.78	0.0704439		2955.81	0.01888519		3485.8	0.02065144		4015.8	-0.00897114
305.99	0.41438538		835.99	0.10465905		1365.98	0.12635767		1895.99	-0.01381963		2425.98	0.07080891		2956.01	0.01903782		3486	0.02098991		4016	-0.00868089
306.19	0.41551295		836.19	0.10478675		1366.18	0.12662017		1896.19	-0.01416059		2426.18	0.07175952		2956.21	0.01951145		3486.2	0.01989646		4016.2	-0.00764611
306.39	0.41591916		836.39	0.10473942		1366.38	0.12683391		1896.39	-0.01505219		2426.38	0.07169413		2956.41	0.01901141		3486.4	0.01965742		4016.4	-0.00844046
306.59	0.4160204		836.59	0.10526979		1366.58	0.12733758		1896.59	-0.01485599		2426.58	0.07121064		2956.61	0.01907969		3486.6	0.01960728		4016.6	-0.00854567
306.79	0.41540862		836.79	0.10615177		1366.78	0.12721656		1896.79	-0.01505571		2426.78	0.07166406		2956.81	0.01876816		3486.8	0.0189448		4016.8	-0.00904693
306.99	0.4149842		836.99	0.10686882		1366.98	0.12804717		1896.99	-0.01511682		2426.98	0.07230007		2957.01	0.01833733		3487	0.01850119		4017	-0.0091693
307.19	0.41488469		837.19	0.10720163		1367.18	0.12813942		1897.19	-0.01522844		2427.18	0.07177468		2957.21	0.01763085		3487.2	0.01761187		4017.2	-0.00849316
307.39	0.41450949		837.39	0.10813259		1367.38	0.12795123		1897.39	-0.01553531		2427.38	0.07244901		2957.41	0.01701147		3487.4	0.01800965		4017.4	-0.00755266
307.59	0.41474431		837.59	0.10836881		1367.58	0.1285182		1897.59	-0.01537344		2427.58	0.07205735		2957.61	0.01668062		3487.6	0.01830283		4017.6	-0.00817925
307.79	0.41464543		837.79	0.10867027		1367.78	0.1294737		1897.79	-0.01559695		2427.78	0.07160475		2957.81	0.01622949		3487.8	0.01848404		4017.8	-0.0068855
307.99	0.41558007		837.99	0.10935381		1367.98	0.13010145		1897.99	-0.01538636		2427.98	0.07271327		2958.01	0.0162727		3488	0.01911111		4018	-0.00653533
308.19	0.41569928		838.19	0.10956136		1368.18	0.13009694		1898.19	-0.01470446		2428.18	0.07309435		2958.21	0.01560978		3488.2	0.0196345		4018.2	-0.0059901
308.39	0.41563774		838.39	0.1106734		1368.38	0.1308105		1898.39	-0.01430275		2428.38	0.07364798		2958.41	0.0154421		3488.4	0.01926976		4018.4	-0.00550088
308.59	0.41532251		838.59	0.11097303		1368.58	0.13130471		1898.59	-0.01518336		2428.58	0.07357508		2958.61	0.0157285		3488.6	0.0198007		4018.6	-0.00525288
308.79	0.41503052		838.79	0.11055247		1368.78	0.13192675		1898.79	-0.0150006		2428.78	0.07348084		2958.81	0.01580265		3488.8	0.02095859		4018.8	-0.00536653
308.99	0.41487814		838.99	0.11011701		1368.98	0.13252743		1898.99	-0.01548017		2428.98	0.07313152		2959.01	0.01655144		3489	0.02166517		4019	-0.00537415
309.19	0.41559608		839.19	0.11025715		1369.18	0.1325809		1899.19	-0.01458313		2429.18	0.07216008		2959.21	0.01751213		3489.2	0.02086689		4019.2	-0.00624634
309.39	0.41673749		839.39	0.11115109		1369.38	0.13294125		1899.39	-0.01406417		2429.38	0.07119206		2959.41	0.0179982		3489.4	0.02088884		4019.4	-0.00714173
309.59	0.4168119		839.59	0.11168275		1369.58	0.13322234		1899.59	-0.01436316		2429.58	0.07081825		2959.61	0.01961272		3489.6	0.02099239		4019.6	-0.00661552
309.79	0.41663675		839.79	0.11184425		1369.78	0.1333941		1899.79	-0.01524287		2429.78	0.06973827		2959.81	0.02088668		3489.8	0.02078155		4019.8	-0.00670639
309.99	0.41698766		839.99	0.11180987		1369.98	0.13336804		1899.99	-0.01490438		2429.98	0.06890373		2960.01	0.02156252		3490	0.02075567		4020	-0.00661299
310.19	0.41853792		840.19	0.11261892		1370.18	0.1327713		1900.19	-0.01518878		2430.18	0.06898408		2960.21	0.02227142		3490.2	0.01949669		4020.2	-0.00749148
310.39	0.41850444		840.39	0.11324531		1370.38	0.13253866		1900.39	-0.01443666		2430.38	0.06920223		2960.41	0.02248181		3490.4	0.01897517		4020.4	-0.00795089
310.59	0.41787121		840.59	0.11312503		1370.58	0.13265206		1900.59	-0.01395146		2430.58	0.06917296		2960.61	0.02278146		3490.6	0.01922766		4020.6	-0.00853782
310.79	0.41746326		840.79	0.11342196		1370.78	0.13241219		1900.79	-0.0132549		2430.78	0.06961836		2960.81	0.02242369		3490.8	0.01806347		4020.8	-0.00882718
310.99	0.41756297		840.99	0.11299122		1370.98	0.13356119		1900.99	-0.01316094		2430.98	0.07002945		2961.01	0.0226769		3491	0.0172903		4021	-0.00868506
311.19	0.41739492		841.19	0.11328619		1371.18	0.13260593		1901.19	-0.01294992		2431.18	0.07002272		2961.21	0.02301102		3491.2	0.01697981		4021.2	-0.00836057
311.39	0.41766569		841.39	0.11325494		1371.38	0.13289476		1901.39	-0.01285159		2431.38	0.07063327		2961.41	0.02294031		3491.4	0.01714286		4021.4	-0.00844601
311.59	0.41829276		841.59	0.11332694		1371.58	0.13298613		1901.59	-0.01255912		2431.58	0.07034158		2961.61	0.02230237		3491.6	0.01718219		4021.6	-0.00848287
311.79	0.41838339		841.79	0.1135588		1371.78	0.13308803		1901.79	-0.01294101		2431.78	0.07043782		2961.81	0.0214624		3491.8	0.0170089		4021.8	-0.00802213
311.99	0.4195096		841.99	0.11383619		1371.98	0.13284001		1901.99	-0.01340214		2431.98	0.07231349		2962.01	0.02115728		3492	0.0175658		4022	-0.00793959
312.19	0.41921471		842.19	0.1134609		1372.18	0.13293418		1902.19	-0.01353279		2432.18	0.07237454		2962.21	0.02102988		3492.2	0.01793765		4022.2	-0.00666898
312.39	0.41851021		842.39	0.11400236		1372.38	0.13325023		1902.39	-0.01349357		2432.38	0.07180983		2962.41	0.02096409		3492.4	0.01813614		4022.4	-0.00657871
312.59	0.41771236		842.59	0.1135583		1372.58	0.13316519		1902.59	-0.01404661		2432.58	0.07222439		2962.61	0.02004654		3492.6	0.01883401		4022.6	-0.00605121
312.79	0.41791399		842.79	0.112629		1372.78	0.13338226		1902.79	-0.01346161		2432.78	0.07221205		2962.81	0.02025988		3492.8	0.01898435		4022.8	-0.00630089
312.99	0.41795355		842.99	0.11217691		1372.98	0.13453265		1902.99	-0.01388142		2432.98	0.07237277		2963.01	0.02040283		3493	0.01877586		4023	-0.00638931
313.19	0.41893201		843.19	0.11359839		1373.18	0.13502168		1903.19	-0.01304781		2433.18	0.07161461		2963.21	0.01965182		3493.2	0.01884643		4023.2	-0.00716877
313.39	0.41846635		843.39	0.11325331		1373.38	0.13654309		1903.39	-0.01325068		2433.38	0.07133102		2963.41	0.01935687		3493.4	0.01928585		4023.4	-0.00690339
313.59	0.41784187		843.59	0.11400626		1373.58	0.13699473		1903.59	-0.01323932		2433.58	0.07076002		2963.61	0.01969834		3493.6	0.0191599		4023.6	-0.00698516
313.79	0.41794148		843.79	0.11420103		1373.78	0.13779718		1903.79	-0.01240699		2433.78	0.07037635		2963.81	0.01956629		3493.8	0.01919166		4023.8	-0.00691961
313.99	0.4191332		843.99	0.11477888		1373.98	0.13738108		1903.99	-0.01150632		2433.98	0.07045099		2964.01	0.01968961		3494	0.01871873		4024	-0.00794178
314.19	0.41937395		844.19	0.11472718		1374.18	0.13782778		1904.19	-0.01218111		2434.18	0.07084262		2964.21	0.01964603		3494.2	0.01881861		4024.2	-0.0091297
314.39	0.41910005		844.39	0.11430578		1374.38	0.13790769		1904.39	-0.01174617		2434.38	0.07050304		2964.41	0.01893576		3494.4	0.01870044		4024.4	-0.00938055
314.59	0.41883048		844.59	0.11406897		1374.58	0.13799245		1904.59	-0.01131092		2434.58	0.07058489		2964.61	0.01873892		3494.6	0.01857145		4024.6	-0.01005754
314.79	0.4198168		844.79	0.11402315		1374.78	0.13805427		1904.79	-0.01191806		2434.78	0.07038462		2964.81	0.01862633		3494.8	0.0180008		4024.8	-0.01040893
314.99	0.41941326		844.99	0.11439461		1374.98	0.13770693		1904.99	-0.01251377		2434.98	0.07034592		2965.01	0.0196317		3495	0.01832876		4025	-0.01079077
315.19	0.42001954		845.19	0.1146779		1375.18	0.13723315		1905.19	-0.0127236		2435.18	0.07010087		2965.21	0.01984116		3495.2	0.0191626		4025.2	-0.01085125
315.39	0.42090344		845.39	0.11455281		1375.38	0.13674901		1905.39	-0.01260296		2435.38	0.07076645		2965.41	0.01999465		3495.4	0.01884958		4025.4	-0.00980316
315.59	0.42219679		845.59	0.11544464		1375.58	0.1361627		1905.59	-0.01322706		2435.58	0.07068192		2965.61	0.02002363		3495.6	0.01854853		4025.6	-0.00980389
315.79	0.42268909		845.79	0.11513427		1375.78	0.13567034		1905.79	-0.01386908		2435.78	0.07063255		2965.81	0.02082334		3495.8	0.019236		4025.8	-0.01000821
315.99	0.42394915		845.99	0.11555171		1375.98	0.13534739		1905.99	-0.0134853		2435.98	0.07149448		2966.01	0.0206657		3496	0.02000847		4026	-0.00897532
316.19	0.42390855		846.19	0.11549371		1376.18	0.13509734		1906.19	-0.01349028		2436.18	0.07106641		2966.21	0.02043471		3496.2	0.01992747		4026.2	-0.00787728
316.39	0.42427491		846.39	0.11538313		1376.38	0.13490454		1906.39	-0.01240496		2436.38	0.07120608		2966.41	0.02137447		3496.4	0.01981744		4026.4	-0.00796503
316.59	0.42498594		846.59	0.11514996		1376.58	0.13508517		1906.59	-0.01227243		2436.58	0.07194264		2966.61	0.02109869		3496.6	0.01977125		4026.6	-0.00750521
316.79	0.42530662		846.79	0.11579275		1376.78	0.13589493		1906.79	-0.01181319		2436.78	0.0722112		2966.81	0.02086707		3496.8	0.01953399		4026.8	-0.00862007
316.99	0.42553192		846.99	0.11567515		1376.98	0.13701882		1906.99	-0.01209254		2436.98	0.07212334		2967.01	0.02061093		3497	0.0197239		4027	-0.00836629
317.19	0.42559525		847.19	0.11654159		1377.18	0.13731762		1907.19	-0.01163404		2437.18	0.07191251		2967.21	0.01969661		3497.2	0.02000477		4027.2	-0.00847614
317.39	0.42547522		847.39	0.11649648		1377.38	0.13853035		1907.39	-0.01152707		2437.38	0.07145837		2967.41	0.01982476		3497.4	0.02011752		4027.4	-0.00822724
317.59	0.42630572		847.59	0.11774647		1377.58	0.13846163		1907.59	-0.01091038		2437.58	0.0714867		2967.61	0.01973099		3497.6	0.01902239		4027.6	-0.00833644
317.79	0.42589238		847.79	0.11811301		1377.78	0.13906276		1907.79	-0.01096827		2437.78	0.07199912		2967.81	0.0197747		3497.8	0.01853909		4027.8	-0.00820546
317.99	0.42595948		847.99	0.11847511		1377.98	0.13982643		1907.99	-0.01118304		2437.98	0.07248445		2968.01	0.02023435		3498	0.01802052		4028	-0.00892001
318.19	0.42544976		848.19	0.11844591		1378.18	0.14044221		1908.19	-0.01111627		2438.18	0.0726873		2968.21	0.02010488		3498.2	0.01790949		4028.2	-0.00863192
318.39	0.42555653		848.39	0.11852463		1378.38	0.14039803		1908.39	-0.01146604		2438.38	0.07294731		2968.41	0.01981748		3498.4	0.0170531		4028.4	-0.00877073
318.59	0.42615127		848.59	0.1182413		1378.58	0.14076127		1908.59	-0.01208014		2438.58	0.07385156		2968.61	0.02045048		3498.6	0.01668241		4028.6	-0.00852691
318.79	0.42537031		848.79	0.11832127		1378.78	0.14059664		1908.79	-0.01349811		2438.78	0.07441872		2968.81	0.02047421		3498.8	0.01660094		4028.8	-0.00858988
318.99	0.42510401		848.99	0.11921245		1378.98	0.14056154		1908.99	-0.01394329		2438.98	0.07466182		2969.01	0.02075223		3499	0.01706172		4029	-0.00863174
319.19	0.42607141		849.19	0.11833279		1379.18	0.14041324		1909.19	-0.01419877		2439.18	0.07478983		2969.21	0.02130493		3499.2	0.01686618		4029.2	-0.00838659
319.39	0.42623083		849.39	0.11732269		1379.38	0.13939189		1909.39	-0.01396753		2439.38	0.07571438		2969.41	0.0211878		3499.4	0.01674742		4029.4	-0.00843612
319.59	0.42712979		849.59	0.11723806		1379.58	0.13935588		1909.59	-0.0139021		2439.58	0.07500412		2969.61	0.02126687		3499.6	0.01664162		4029.6	-0.00829146
319.79	0.42781742		849.79	0.11633244		1379.78	0.1396991		1909.79	-0.01364198		2439.78	0.07489807		2969.81	0.02074396		3499.8	0.01731257		4029.8	-0.00757777
319.99	0.4276075		849.99	0.11660534		1379.98	0.1396591		1909.99	-0.01318087		2439.98	0.07471295		2970.01	0.01979401		3500	0.01736968		4030	-0.00660444
320.19	0.42817822		850.19	0.11643017		1380.18	0.13998485		1910.19	-0.01341279		2440.18	0.0736463		2970.21	0.01940243		3500.2	0.01776564		4030.2	-0.0067279
320.39	0.42941424		850.39	0.11706742		1380.38	0.14023705		1910.39	-0.01285986		2440.38	0.07321946		2970.41	0.02061119		3500.4	0.01863252		4030.4	-0.00705298
320.59	0.4298658		850.59	0.11744104		1380.58	0.14049392		1910.59	-0.01292683		2440.58	0.07262412		2970.61	0.01954177		3500.6	0.01911396		4030.6	-0.00722615
320.79	0.42951857		850.79	0.11791891		1380.78	0.14102095		1910.79	-0.0135192		2440.78	0.07217981		2970.81	0.01904705		3500.8	0.0202701		4030.8	-0.00686902
320.99	0.42972535		850.99	0.11666509		1380.98	0.14045866		1910.99	-0.01384096		2440.98	0.07098338		2971.01	0.019202		3501	0.02029259		4031	-0.00676017
321.19	0.42984519		851.19	0.11769756		1381.18	0.14025138		1911.19	-0.01353813		2441.18	0.07086245		2971.21	0.01870717		3501.2	0.02073002		4031.2	-0.00709089
321.39	0.43048		851.39	0.11830054		1381.38	0.14043865		1911.39	-0.01328971		2441.38	0.07035848		2971.41	0.01895076		3501.4	0.02064272		4031.4	-0.00643864
321.59	0.4311448		851.59	0.11848553		1381.58	0.13975596		1911.59	-0.01342776		2441.58	0.07099186		2971.61	0.0193164		3501.6	0.02086693		4031.6	-0.00703783
321.79	0.4305197		851.79	0.1191144		1381.78	0.1402358		1911.79	-0.01349666		2441.78	0.0715166		2971.81	0.0193702		3501.8	0.02064337		4031.8	-0.00663161
321.99	0.43093369		851.99	0.11934007		1381.98	0.14070995		1911.99	-0.0131526		2441.98	0.07145478		2972.01	0.02033581		3502	0.02026214		4032	-0.00685761
322.19	0.43150358		852.19	0.11978212		1382.18	0.14070793		1912.19	-0.01348985		2442.18	0.0715126		2972.21	0.02039229		3502.2	0.02069396		4032.2	-0.00697684
322.39	0.4314198		852.39	0.11940007		1382.38	0.14016105		1912.39	-0.013838		2442.38	0.07150234		2972.41	0.0198703		3502.4	0.01987019		4032.4	-0.00713553
322.59	0.43190036		852.59	0.11912906		1382.58	0.140658		1912.59	-0.01395252		2442.58	0.07165907		2972.61	0.02061104		3502.6	0.01979848		4032.6	-0.00713862
322.79	0.43131671		852.79	0.11935631		1382.78	0.14020753		1912.79	-0.01364391		2442.78	0.07220696		2972.81	0.02059342		3502.8	0.01976375		4032.8	-0.00690194
322.99	0.43142561		852.99	0.11902857		1382.98	0.1404138		1912.99	-0.01340412		2442.98	0.072496		2973.01	0.02101288		3503	0.02053427		4033	-0.00739732
323.19	0.4307567		853.19	0.11810981		1383.18	0.13971152		1913.19	-0.01224587		2443.18	0.07308873		2973.21	0.0206863		3503.2	0.02093017		4033.2	-0.00830163
323.39	0.43067674		853.39	0.11756975		1383.38	0.13963307		1913.39	-0.01157168		2443.38	0.07359892		2973.41	0.02003618		3503.4	0.02146557		4033.4	-0.00826361
323.59	0.4310576		853.59	0.11811009		1383.58	0.14045286		1913.59	-0.01115501		2443.58	0.07297704		2973.61	0.01950789		3503.6	0.02115002		4033.6	-0.00816194
323.79	0.431027		853.79	0.11853242		1383.78	0.14111775		1913.79	-0.01133495		2443.78	0.0735449		2973.81	0.01852215		3503.8	0.02182947		4033.8	-0.00794333
323.99	0.43116352		853.99	0.11936375		1383.98	0.14188714		1913.99	-0.01212859		2443.98	0.07284604		2974.01	0.01797621		3504	0.02136819		4034	-0.00857811
324.19	0.4315262		854.19	0.12006477		1384.18	0.14274586		1914.19	-0.01289118		2444.18	0.07265157		2974.21	0.01857238		3504.2	0.02182808		4034.2	-0.00854076
324.39	0.43184557		854.39	0.12082849		1384.38	0.14385457		1914.39	-0.01344177		2444.38	0.07267663		2974.41	0.0194049		3504.4	0.02225814		4034.4	-0.00806752
324.59	0.43166212		854.59	0.1208372		1384.58	0.14409829		1914.59	-0.01348175		2444.58	0.07248648		2974.61	0.01914233		3504.6	0.0224535		4034.6	-0.00791126
324.79	0.43181469		854.79	0.12053264		1384.78	0.14497196		1914.79	-0.0145558		2444.78	0.07296639		2974.81	0.01951607		3504.8	0.02300389		4034.8	-0.00763515
324.99	0.43197938		854.99	0.12053244		1384.98	0.14542023		1914.99	-0.01491386		2444.98	0.07325184		2975.01	0.02026241		3505	0.0224815		4035	-0.00855336
325.19	0.43249915		855.19	0.12168557		1385.18	0.14598412		1915.19	-0.01575177		2445.18	0.07380289		2975.21	0.0199233		3505.2	0.02251123		4035.2	-0.00850187
325.39	0.43297029		855.39	0.1223387		1385.38	0.14640102		1915.39	-0.0155499		2445.38	0.07307409		2975.41	0.01952293		3505.4	0.02250703		4035.4	-0.00789525
325.59	0.43343927		855.59	0.12232127		1385.58	0.14670339		1915.59	-0.01566986		2445.58	0.0726767		2975.61	0.01932398		3505.6	0.02222457		4035.6	-0.00847674
325.79	0.43395272		855.79	0.12297144		1385.78	0.14763866		1915.79	-0.01581027		2445.78	0.07268476		2975.81	0.01851201		3505.8	0.02088214		4035.8	-0.00779947
325.99	0.43449779		855.99	0.12331701		1385.98	0.1479763		1915.99	-0.01607099		2445.98	0.07222044		2976.01	0.01863235		3506	0.02111321		4036	-0.00806063
326.19	0.43481016		856.19	0.12293679		1386.18	0.14746149		1916.19	-0.01637322		2446.18	0.07196141		2976.21	0.01799488		3506.2	0.02103724		4036.2	-0.00757231
326.39	0.43448981		856.39	0.1227502		1386.38	0.14689923		1916.39	-0.01629685		2446.38	0.07268363		2976.41	0.0171759		3506.4	0.02022389		4036.4	-0.00719793
326.59	0.43521372		856.59	0.12334396		1386.58	0.14734467		1916.59	-0.01564171		2446.58	0.07367409		2976.61	0.01731878		3506.6	0.02019009		4036.6	-0.00732763
326.79	0.434782		856.79	0.12361617		1386.78	0.14641644		1916.79	-0.01571943		2446.78	0.07476635		2976.81	0.01676683		3506.8	0.01995495		4036.8	-0.00716692
326.99	0.43420728		856.99	0.12413506		1386.98	0.14649627		1916.99	-0.0150663		2446.98	0.07577028		2977.01	0.01655392		3507	0.02010818		4037	-0.0082806
327.19	0.43437204		857.19	0.12436511		1387.18	0.14574593		1917.19	-0.01362352		2447.18	0.07540732		2977.21	0.01638686		3507.2	0.01986419		4037.2	-0.00902465
327.39	0.43488934		857.39	0.12409399		1387.38	0.14502874		1917.39	-0.01343272		2447.38	0.07526074		2977.41	0.01706034		3507.4	0.01952618		4037.4	-0.0090152
327.59	0.43520607		857.59	0.12404913		1387.58	0.14464017		1917.59	-0.01354104		2447.58	0.07586979		2977.61	0.01705385		3507.6	0.01912185		4037.6	-0.00968938
327.79	0.43494482		857.79	0.1242659		1387.78	0.14405191		1917.79	-0.01374392		2447.78	0.07595706		2977.81	0.01690679		3507.8	0.01869129		4037.8	-0.00936212
327.99	0.43627054		857.99	0.12436089		1387.98	0.14385652		1917.99	-0.01370019		2447.98	0.07462329		2978.01	0.01789456		3508	0.01749992		4038	-0.00977529
328.19	0.4358391		858.19	0.12501822		1388.18	0.14355804		1918.19	-0.0139577		2448.18	0.07420959		2978.21	0.01912709		3508.2	0.01810854		4038.2	-0.00993234
328.39	0.4368321		858.39	0.12520303		1388.38	0.14370176		1918.39	-0.01432557		2448.38	0.07355033		2978.41	0.01990671		3508.4	0.01830875		4038.4	-0.01007562
328.59	0.43771645		858.59	0.12523706		1388.58	0.14355741		1918.59	-0.01414619		2448.58	0.07353605		2978.61	0.02073639		3508.6	0.01793349		4038.6	-0.01105448
328.79	0.43806884		858.79	0.12545691		1388.78	0.14434768		1918.79	-0.01456647		2448.78	0.07406839		2978.81	0.02134101		3508.8	0.01842197		4038.8	-0.01145434
328.99	0.43838622		858.99	0.12611414		1388.98	0.14438711		1918.99	-0.01405582		2448.98	0.07336513		2979.01	0.0219225		3509	0.01843943		4039	-0.01204544
329.19	0.43828324		859.19	0.1268187		1389.18	0.14445905		1919.19	-0.01376162		2449.18	0.07266883		2979.21	0.02181823		3509.2	0.01891204		4039.2	-0.01249506
329.39	0.43879453		859.39	0.12702175		1389.38	0.14440631		1919.39	-0.01297456		2449.38	0.0717116		2979.41	0.02167843		3509.4	0.01935981		4039.4	-0.01179153
329.59	0.43926636		859.59	0.12682852		1389.58	0.14461724		1919.59	-0.01281719		2449.58	0.07154069		2979.61	0.02221385		3509.6	0.01922927		4039.6	-0.01105851
329.79	0.44028313		859.79	0.1275308		1389.78	0.14524407		1919.79	-0.01253955		2449.78	0.07194276		2979.81	0.0219455		3509.8	0.01986383		4039.8	-0.01037066
329.99	0.44064409		859.99	0.12742287		1389.98	0.14557843		1919.99	-0.012323		2449.98	0.07200273		2980.01	0.02294564		3510	0.02116466		4040	-0.00965114
330.19	0.44048897		860.19	0.12726749		1390.18	0.14474442		1920.19	-0.01270803		2450.18	0.07216275		2980.21	0.02278348		3510.2	0.02124924		4040.2	-0.00899951
330.39	0.43993323		860.39	0.12746607		1390.38	0.14535287		1920.39	-0.01261868		2450.38	0.07344391		2980.41	0.022203		3510.4	0.02139637		4040.4	-0.0085141
330.59	0.43968028		860.59	0.12759499		1390.58	0.1459169		1920.59	-0.01204912		2450.58	0.07427235		2980.61	0.02209049		3510.6	0.02199419		4040.6	-0.00771854
330.79	0.43949287		860.79	0.12716145		1390.78	0.14660258		1920.79	-0.01260917		2450.78	0.07504078		2980.81	0.02230325		3510.8	0.02168506		4040.8	-0.00741698
330.99	0.44002132		860.99	0.1267586		1390.98	0.1469363		1920.99	-0.01212958		2450.98	0.07570951		2981.01	0.02217467		3511	0.02165845		4041	-0.00655413
331.19	0.44051496		861.19	0.12585692		1391.18	0.14695621		1921.19	-0.01193684		2451.18	0.0755877		2981.21	0.02157868		3511.2	0.02159502		4041.2	-0.00577953
331.39	0.44105473		861.39	0.12531825		1391.38	0.14731142		1921.39	-0.01294084		2451.38	0.07544659		2981.41	0.02143671		3511.4	0.02166682		4041.4	-0.00636474
331.59	0.44141812		861.59	0.12537782		1391.58	0.14771774		1921.59	-0.01316432		2451.58	0.07615607		2981.61	0.02080596		3511.6	0.02075963		4041.6	-0.00670578
331.79	0.44180733		861.79	0.12548887		1391.78	0.14872699		1921.79	-0.01353844		2451.78	0.07506534		2981.81	0.02015315		3511.8	0.01968326		4041.8	-0.00627448
331.99	0.44334659		861.99	0.12575424		1391.98	0.14833923		1921.99	-0.01441648		2451.98	0.07416332		2982.01	0.02043104		3512	0.01963794		4042	-0.00725414
332.19	0.44309431		862.19	0.12555433		1392.18	0.14936074		1922.19	-0.0148314		2452.18	0.07374268		2982.21	0.02024136		3512.2	0.01940232		4042.2	-0.00775498
332.39	0.44350459		862.39	0.12534504		1392.38	0.15015715		1922.39	-0.01542037		2452.38	0.07317395		2982.41	0.01992764		3512.4	0.01886874		4042.4	-0.00783087
332.59	0.44346525		862.59	0.12501489		1392.58	0.15044111		1922.59	-0.01562201		2452.58	0.07224536		2982.61	0.01905093		3512.6	0.01815611		4042.6	-0.00871184
332.79	0.44337627		862.79	0.12449436		1392.78	0.15053754		1922.79	-0.01565417		2452.78	0.07251193		2982.81	0.01861834		3512.8	0.01749627		4042.8	-0.00956079
332.99	0.44354679		862.99	0.12410961		1392.98	0.15050766		1922.99	-0.01546142		2452.98	0.07112977		2983.01	0.0187183		3513	0.0173011		4043	-0.01033432
333.19	0.44374591		863.19	0.12406576		1393.18	0.14962911		1923.19	-0.01530826		2453.18	0.07018243		2983.21	0.01789991		3513.2	0.01758305		4043.2	-0.01104629
333.39	0.44359631		863.39	0.1236436		1393.38	0.14869683		1923.39	-0.0159766		2453.38	0.07002918		2983.41	0.01796234		3513.4	0.01727278		4043.4	-0.01043851
333.59	0.44386125		863.59	0.12388988		1393.58	0.1493895		1923.59	-0.0158961		2453.58	0.07035339		2983.61	0.01814461		3513.6	0.01706827		4043.6	-0.00977943
333.79	0.44502757		863.79	0.12373088		1393.78	0.14967307		1923.79	-0.01548827		2453.78	0.07160185		2983.81	0.01837034		3513.8	0.01773733		4043.8	-0.00981161
333.99	0.44451707		863.99	0.1242304		1393.98	0.14992101		1923.99	-0.01596274		2453.98	0.07186234		2984.01	0.01854733		3514	0.01795071		4044	-0.01002589
334.19	0.44395599		864.19	0.12551085		1394.18	0.14944581		1924.19	-0.01652929		2454.18	0.07197124		2984.21	0.01780434		3514.2	0.01732537		4044.2	-0.01027957
334.39	0.44350016		864.39	0.12538936		1394.38	0.14989188		1924.39	-0.01656989		2454.38	0.07352112		2984.41	0.0176447		3514.4	0.01750473		4044.4	-0.01064709
334.59	0.44320528		864.59	0.12520211		1394.58	0.14998804		1924.59	-0.01618139		2454.58	0.07496191		2984.61	0.01765076		3514.6	0.01827803		4044.6	-0.01059088
334.79	0.44339085		864.79	0.12517336		1394.78	0.14995582		1924.79	-0.01638511		2454.78	0.07533996		2984.81	0.01757693		3514.8	0.01754336		4044.8	-0.0103773
334.99	0.44373047		864.99	0.12564148		1394.98	0.14994959		1924.99	-0.01614168		2454.98	0.07563358		2985.01	0.01691985		3515	0.01776833		4045	-0.00919431
335.19	0.44426503		865.19	0.12700173		1395.18	0.15101505		1925.19	-0.01584453		2455.18	0.07556027		2985.21	0.01664935		3515.2	0.01773387		4045.2	-0.00862053
335.39	0.44418477		865.39	0.12776251		1395.38	0.15170773		1925.39	-0.01592624		2455.38	0.07584131		2985.41	0.01786933		3515.4	0.01773493		4045.4	-0.00937841
335.59	0.44386593		865.59	0.12837795		1395.58	0.15230875		1925.59	-0.01546265		2455.58	0.07645377		2985.61	0.01803883		3515.6	0.01746781		4045.6	-0.00925754
335.79	0.44302506		865.79	0.12889158		1395.78	0.15333764		1925.79	-0.01568176		2455.78	0.0761127		2985.81	0.01871525		3515.8	0.01770369		4045.8	-0.00844623
335.99	0.44265565		865.99	0.12933073		1395.98	0.15239075		1925.99	-0.0152591		2455.98	0.07587621		2986.01	0.01940979		3516	0.01844621		4046	-0.00900199
336.19	0.44211937		866.19	0.12901015		1396.18	0.1533754		1926.19	-0.01460793		2456.18	0.07632258		2986.21	0.01968051		3516.2	0.01789187		4046.2	-0.00768527
336.39	0.44209571		866.39	0.12850152		1396.38	0.1531324		1926.39	-0.01447247		2456.38	0.07596746		2986.41	0.01969699		3516.4	0.0181151		4046.4	-0.007834
336.59	0.44280249		866.59	0.12774152		1396.58	0.15218502		1926.59	-0.01381058		2456.58	0.07607496		2986.61	0.01984019		3516.6	0.01791866		4046.6	-0.00805654
336.79	0.4424113		866.79	0.12656608		1396.78	0.15191978		1926.79	-0.01364244		2456.78	0.07688916		2986.81	0.0205345		3516.8	0.0177537		4046.8	-0.00872341
336.99	0.44273795		866.99	0.12641375		1396.98	0.15241261		1926.99	-0.01280547		2456.98	0.07655618		2987.01	0.02084552		3517	0.0183148		4047	-0.00883937
337.19	0.44330046		867.19	0.12562666		1397.18	0.15218747		1927.19	-0.01243814		2457.18	0.07694029		2987.21	0.0212126		3517.2	0.01817071		4047.2	-0.00868649
337.39	0.44357866		867.39	0.12491239		1397.38	0.15177478		1927.39	-0.01227973		2457.38	0.07782657		2987.41	0.02169389		3517.4	0.01708926		4047.4	-0.00833792
337.59	0.44469848		867.59	0.12424047		1397.58	0.15218054		1927.59	-0.0120059		2457.58	0.07735101		2987.61	0.02160894		3517.6	0.01669234		4047.6	-0.00849878
337.79	0.44570628		867.79	0.12475631		1397.78	0.15212109		1927.79	-0.01242415		2457.78	0.07791197		2987.81	0.02081621		3517.8	0.01752935		4047.8	-0.00958147
337.99	0.44643427		867.99	0.12566553		1397.98	0.15253852		1927.99	-0.01245395		2457.98	0.07720581		2988.01	0.01982277		3518	0.01703973		4048	-0.0098775
338.19	0.44726864		868.19	0.12560682		1398.18	0.15222885		1928.19	-0.01318483		2458.18	0.07660927		2988.21	0.01932504		3518.2	0.01748268		4048.2	-0.01010217
338.39	0.44745823		868.39	0.12476867		1398.38	0.15244477		1928.39	-0.01350847		2458.38	0.07716807		2988.41	0.01816819		3518.4	0.01840032		4048.4	-0.01030707
338.59	0.44760298		868.59	0.12471049		1398.58	0.15259797		1928.59	-0.013556		2458.58	0.07661578		2988.61	0.01837473		3518.6	0.01890288		4048.6	-0.01012078
338.79	0.44830818		868.79	0.12541239		1398.78	0.15293594		1928.79	-0.01325391		2458.78	0.07602935		2988.81	0.01776904		3518.8	0.01902214		4048.8	-0.00959463
338.99	0.44862643		868.99	0.1261366		1398.98	0.15344828		1928.99	-0.01339545		2458.98	0.07572939		2989.01	0.01743475		3519	0.01956645		4049	-0.00884304
339.19	0.44890981		869.19	0.12710306		1399.18	0.15362136		1929.19	-0.01332928		2459.18	0.07507977		2989.21	0.01682694		3519.2	0.01983212		4049.2	-0.00775417
339.39	0.44798441		869.39	0.12742995		1399.38	0.15345754		1929.39	-0.0142097		2459.38	0.07539201		2989.41	0.01813247		3519.4	0.02002215		4049.4	-0.00785607
339.59	0.44813054		869.59	0.12852319		1399.58	0.1534814		1929.59	-0.01439195		2459.58	0.07424921		2989.61	0.01842751		3519.6	0.01995942		4049.6	-0.00843918
339.79	0.44693167		869.79	0.12933828		1399.78	0.15301709		1929.79	-0.01535827		2459.78	0.07369996		2989.81	0.01853883		3519.8	0.02007021		4049.8	-0.00779883
339.99	0.44734474		869.99	0.13011917		1399.98	0.15196483		1929.99	-0.01548903		2459.98	0.07325596		2990.01	0.01797236		3520	0.0199291		4050	-0.00759594
340.19	0.44711993		870.19	0.13028794		1400.18	0.15213086		1930.19	-0.01547456		2460.18	0.07364433		2990.21	0.01823561		3520.2	0.02020539		4050.2	-0.0075181
340.39	0.44712202		870.39	0.1311763		1400.38	0.15131746		1930.39	-0.01476297		2460.38	0.07303967		2990.41	0.01819936		3520.4	0.0203402		4050.4	-0.00811224
340.59	0.44696747		870.59	0.13235175		1400.58	0.15068755		1930.59	-0.01461524		2460.58	0.0727713		2990.61	0.01883508		3520.6	0.02022155		4050.6	-0.00856418
340.79	0.44606994		870.79	0.13266964		1400.78	0.15129795		1930.79	-0.01482727		2460.78	0.07331693		2990.81	0.0194574		3520.8	0.0194636		4050.8	-0.00841294
340.99	0.44661206		870.99	0.13298396		1400.98	0.1514349		1930.99	-0.01471764		2460.98	0.07392556		2991.01	0.0192573		3521	0.01885477		4051	-0.00781498
341.19	0.44685325		871.19	0.13268872		1401.18	0.1519062		1931.19	-0.01587811		2461.18	0.07447857		2991.21	0.01945125		3521.2	0.0174131		4051.2	-0.00769797
341.39	0.44665123		871.39	0.13283297		1401.38	0.15176022		1931.39	-0.01556207		2461.38	0.07459815		2991.41	0.0191244		3521.4	0.01680301		4051.4	-0.00801372
341.59	0.44670599		871.59	0.13251766		1401.58	0.15242527		1931.59	-0.01671807		2461.58	0.07435966		2991.61	0.01906529		3521.6	0.01701467		4051.6	-0.00840195
341.79	0.4469016		871.79	0.13340733		1401.78	0.15341458		1931.79	-0.01715496		2461.78	0.07515943		2991.81	0.01859555		3521.8	0.01826863		4051.8	-0.00940159
341.99	0.44835361		871.99	0.13328455		1401.98	0.15422825		1931.99	-0.01748369		2461.98	0.07602252		2992.01	0.018985		3522	0.01803514		4052	-0.00947033
342.19	0.44856398		872.19	0.13275035		1402.18	0.15486781		1932.19	-0.01839137		2462.18	0.075737		2992.21	0.01891655		3522.2	0.01757372		4052.2	-0.00907888
342.39	0.44879833		872.39	0.13226746		1402.38	0.15612337		1932.39	-0.0185566		2462.38	0.07642936		2992.41	0.01852565		3522.4	0.01758248		4052.4	-0.00951776
342.59	0.44906256		872.59	0.13178698		1402.58	0.15701929		1932.59	-0.01875826		2462.58	0.07625195		2992.61	0.01935636		3522.6	0.01756374		4052.6	-0.01007824
342.79	0.44970267		872.79	0.13111707		1402.78	0.15779918		1932.79	-0.01859208		2462.78	0.07599203		2992.81	0.01922801		3522.8	0.01761113		4052.8	-0.00950031
342.99	0.45000778		872.99	0.13076031		1402.98	0.15811294		1932.99	-0.0192634		2462.98	0.0759322		2993.01	0.01977648		3523	0.01774432		4053	-0.00954929
343.19	0.45058701		873.19	0.13096727		1403.18	0.15792491		1933.19	-0.01916466		2463.18	0.07602994		2993.21	0.01983094		3523.2	0.01776548		4053.2	-0.00868477
343.39	0.45039502		873.39	0.13106554		1403.38	0.15803036		1933.39	-0.01991863		2463.38	0.0753463		2993.41	0.0210632		3523.4	0.01822846		4053.4	-0.0090914
343.59	0.45047535		873.59	0.13162807		1403.58	0.15798999		1933.59	-0.0199732		2463.58	0.07440187		2993.61	0.0201957		3523.6	0.01849207		4053.6	-0.00922792
343.79	0.44967978		873.79	0.13270073		1403.78	0.15782993		1933.79	-0.02025243		2463.78	0.0739092		2993.81	0.01982789		3523.8	0.01877094		4053.8	-0.00814737
343.99	0.44957097		873.99	0.13291006		1403.98	0.15701195		1933.99	-0.01923196		2463.98	0.07365361		2994.01	0.02038784		3524	0.0191173		4054	-0.00753192
344.19	0.44952285		874.19	0.13261998		1404.18	0.1565527		1934.19	-0.01750172		2464.18	0.07332277		2994.21	0.02099342		3524.2	0.01956022		4054.2	-0.00833101
344.39	0.45010135		874.39	0.13290767		1404.38	0.15576894		1934.39	-0.01709755		2464.38	0.07241304		2994.41	0.02122691		3524.4	0.0190674		4054.4	-0.00770062
344.59	0.45028151		874.59	0.13255621		1404.58	0.15514847		1934.59	-0.01725547		2464.58	0.07229255		2994.61	0.0215466		3524.6	0.01915469		4054.6	-0.00705203
344.79	0.45011334		874.79	0.13256537		1404.78	0.15534234		1934.79	-0.01733968		2464.78	0.072799		2994.81	0.02147753		3524.8	0.01888682		4054.8	-0.00618926
344.99	0.45020879		874.99	0.13226856		1404.98	0.1553259		1934.99	-0.01787726		2464.98	0.07315281		2995.01	0.02052125		3525	0.01828685		4055	-0.00571213
345.19	0.45054885		875.19	0.13284741		1405.18	0.15662726		1935.19	-0.01745658		2465.18	0.07307607		2995.21	0.02125885		3525.2	0.01791868		4055.2	-0.00536997
345.39	0.45015357		875.39	0.1323704		1405.38	0.15650726		1935.39	-0.01581566		2465.38	0.07329798		2995.41	0.02112594		3525.4	0.01843091		4055.4	-0.00513628
345.59	0.45053346		875.59	0.13231645		1405.58	0.15681836		1935.59	-0.01551493		2465.58	0.07279255		2995.61	0.0206915		3525.6	0.01885994		4055.6	-0.00580239
345.79	0.45007888		875.79	0.13336312		1405.78	0.15722786		1935.79	-0.01574633		2465.78	0.07283271		2995.81	0.02029566		3525.8	0.01997009		4055.8	-0.00620778
345.99	0.45139204		875.99	0.13340411		1405.98	0.15770227		1935.99	-0.01623518		2465.98	0.07331397		2996.01	0.02028358		3526	0.01869897		4056	-0.00641616
346.19	0.45141022		876.19	0.13334718		1406.18	0.15779335		1936.19	-0.01600569		2466.18	0.07317426		2996.21	0.01938145		3526.2	0.01772254		4056.2	-0.00574782
346.39	0.45203338		876.39	0.13336009		1406.38	0.15860717		1936.39	-0.015854		2466.38	0.07391154		2996.41	0.01863858		3526.4	0.01847661		4056.4	-0.00683612
346.59	0.45192513		876.59	0.13328505		1406.58	0.15849024		1936.59	-0.01655568		2466.58	0.07386975		2996.61	0.0186172		3526.6	0.01825081		4056.6	-0.00721168
346.79	0.45242941		876.79	0.13396142		1406.78	0.15883419		1936.79	-0.01613176		2466.78	0.07367231		2996.81	0.0187024		3526.8	0.01867757		4056.8	-0.00716798
346.99	0.45248353		876.99	0.13525801		1406.98	0.15892808		1936.99	-0.01648125		2466.98	0.07428776		2997.01	0.01891584		3527	0.01988525		4057	-0.00701522
347.19	0.45244809		877.19	0.13638683		1407.18	0.15741446		1937.19	-0.01576957		2467.18	0.07505708		2997.21	0.01862627		3527.2	0.02023344		4057.2	-0.00656433
347.39	0.45190595		877.39	0.13711994		1407.38	0.15746909		1937.39	-0.01589281		2467.38	0.07496196		2997.41	0.01849684		3527.4	0.02070923		4057.4	-0.00654972
347.59	0.45096315		877.59	0.13773772		1407.58	0.15737415		1937.59	-0.01505109		2467.58	0.07604881		2997.61	0.01796189		3527.6	0.02149251		4057.6	-0.00646003
347.79	0.45067801		877.79	0.13765932		1407.78	0.15694551		1937.79	-0.01440025		2467.78	0.07693643		2997.81	0.01876644		3527.8	0.02154354		4057.8	-0.00672876
347.99	0.45036763		877.99	0.13726644		1407.98	0.15597414		1937.99	-0.01398374		2467.98	0.07788325		2998.01	0.01968354		3528	0.02122303		4058	-0.00791364
348.19	0.45081238		878.19	0.13604241		1408.18	0.15559016		1938.19	-0.01323706		2468.18	0.07826529		2998.21	0.019789		3528.2	0.02069518		4058.2	-0.0087091
348.39	0.45076548		878.39	0.13521284		1408.38	0.15639466		1938.39	-0.01386971		2468.38	0.07806921		2998.41	0.02019197		3528.4	0.02010027		4058.4	-0.0087615
348.59	0.45112675		878.59	0.13544439		1408.58	0.15634271		1938.59	-0.01422806		2468.58	0.07847758		2998.61	0.02049903		3528.6	0.02027435		4058.6	-0.00921615
348.79	0.45137061		878.79	0.13575745		1408.78	0.1577215		1938.79	-0.01399519		2468.78	0.07797463		2998.81	0.02084084		3528.8	0.01923011		4058.8	-0.01042699
348.99	0.45257112		878.99	0.13620634		1408.98	0.15797329		1938.99	-0.01414121		2468.98	0.07786578		2999.01	0.02081483		3529	0.0181802		4059	-0.01022513
349.19	0.45339574		879.19	0.13607509		1409.18	0.15825098		1939.19	-0.01296177		2469.18	0.07747581		2999.21	0.02226739		3529.2	0.01907801		4059.2	-0.01042773
349.39	0.45427674		879.39	0.13499617		1409.38	0.15837273		1939.39	-0.01271163		2469.38	0.07765115		2999.41	0.02176359		3529.4	0.01908504		4059.4	-0.01102624
349.59	0.45524489		879.59	0.13565963		1409.58	0.15864587		1939.59	-0.01347324		2469.58	0.07713052		2999.61	0.02171063		3529.6	0.01929343		4059.6	-0.01178316
349.79	0.4560578		879.79	0.13547785		1409.78	0.1587586		1939.79	-0.01447885		2469.78	0.07713414		2999.81	0.02168588		3529.8	0.0187819		4059.8	-0.0111683
349.99	0.45679436		879.99	0.13485835		1409.98	0.15933853		1939.99	-0.01526304		2469.98	0.07753973		3000.01	0.02115053		3530	0.01715851		4060	-0.01055978
350.19	0.45754669		880.19	0.13532937		1410.18	0.15868504		1940.19	-0.01550501		2470.18	0.07811546		3000.21	0.02061843		3530.2	0.01777442		4060.2	-0.01024837
350.39	0.4580452		880.39	0.13507596		1410.38	0.1593947		1940.39	-0.01634817		2470.38	0.07728441		3000.41	0.02045457		3530.4	0.01754618		4060.4	-0.01035541
350.59	0.4577378		880.59	0.1350899		1410.58	0.15958406		1940.59	-0.0167102		2470.58	0.07618008		3000.61	0.02068059		3530.6	0.01696552		4060.6	-0.00955684
350.79	0.45876919		880.79	0.1353235		1410.78	0.16053153		1940.79	-0.01593357		2470.78	0.07530758		3000.81	0.02049257		3530.8	0.01772861		4060.8	-0.009334
350.99	0.45903187		880.99	0.13577285		1410.98	0.16082547		1940.99	-0.01601277		2470.98	0.0757747		3001.01	0.0205841		3531	0.0184111		4061	-0.00871955
351.19	0.45885947		881.19	0.13590982		1411.18	0.16019922		1941.19	-0.01534645		2471.18	0.07529904		3001.21	0.02010267		3531.2	0.01885663		4061.2	-0.00836716
351.39	0.45783869		881.39	0.13567503		1411.38	0.15980611		1941.39	-0.01379451		2471.38	0.07485227		3001.41	0.01942223		3531.4	0.01947475		4061.4	-0.00740864
351.59	0.45708956		881.59	0.13546322		1411.58	0.16025705		1941.59	-0.01357058		2471.58	0.07516515		3001.61	0.01897507		3531.6	0.01998174		4061.6	-0.00727467
351.79	0.45657559		881.79	0.13599987		1411.78	0.16001043		1941.79	-0.0137931		2471.78	0.07501706		3001.81	0.02025225		3531.8	0.01953164		4061.8	-0.00732454
351.99	0.45566392		881.99	0.13678626		1411.98	0.16057678		1941.99	-0.01414547		2471.98	0.07541977		3002.01	0.02119954		3532	0.01955183		4062	-0.00805285
352.19	0.45554768		882.19	0.13614125		1412.18	0.16115906		1942.19	-0.01367206		2472.18	0.07458414		3002.21	0.0213474		3532.2	0.01995871		4062.2	-0.00792336
352.39	0.45513298		882.39	0.13656515		1412.38	0.16159164		1942.39	-0.01324596		2472.38	0.07450482		3002.41	0.02116475		3532.4	0.01955762		4062.4	-0.00882713
352.59	0.45579868		882.59	0.13760946		1412.58	0.16235209		1942.59	-0.01285293		2472.58	0.07539239		3002.61	0.02128187		3532.6	0.02017162		4062.6	-0.00934041
352.79	0.45574626		882.79	0.13797385		1412.78	0.16259632		1942.79	-0.01219267		2472.78	0.07533313		3002.81	0.02117268		3532.8	0.02041788		4062.8	-0.01022106
352.99	0.4562496		882.99	0.1385496		1412.98	0.16273792		1942.99	-0.0125357		2472.98	0.0754035		3003.01	0.02132939		3533	0.02096407		4063	-0.0090021
353.19	0.45672021		883.19	0.13846171		1413.18	0.16292648		1943.19	-0.01226957		2473.18	0.07618458		3003.21	0.02156961		3533.2	0.02301384		4063.2	-0.0092633
353.39	0.45798994		883.39	0.13848961		1413.38	0.16253367		1943.39	-0.01338565		2473.38	0.07605947		3003.41	0.0204153		3533.4	0.02308934		4063.4	-0.00862698
353.59	0.45754495		883.59	0.13901276		1413.58	0.16308866		1943.59	-0.01422798		2473.58	0.07679786		3003.61	0.02014769		3533.6	0.02252478		4063.6	-0.00786188
353.79	0.45796752		883.79	0.13916839		1413.78	0.16348694		1943.79	-0.01492024		2473.78	0.07659158		3003.81	0.02017222		3533.8	0.02174946		4063.8	-0.00744809
353.99	0.45736859		883.99	0.13923045		1413.98	0.16376439		1943.99	-0.01622252		2473.98	0.07751842		3004.01	0.01961875		3534	0.0213024		4064	-0.00706933
354.19	0.45816625		884.19	0.1392862		1414.18	0.16373392		1944.19	-0.01622979		2474.18	0.0779106		3004.21	0.01943544		3534.2	0.02120811		4064.2	-0.00761982
354.39	0.45906577		884.39	0.13916973		1414.38	0.16477357		1944.39	-0.01608518		2474.38	0.07669493		3004.41	0.01876296		3534.4	0.02020043		4064.4	-0.0075212
354.59	0.46007547		884.59	0.13909233		1414.58	0.16552829		1944.59	-0.01575409		2474.58	0.0761607		3004.61	0.01823005		3534.6	0.02017609		4064.6	-0.00765971
354.79	0.46111904		884.79	0.13886433		1414.78	0.16568387		1944.79	-0.01541908		2474.78	0.07571569		3004.81	0.01793709		3534.8	0.02042517		4064.8	-0.00774424
354.99	0.4613364		884.99	0.13907491		1414.98	0.166015		1944.99	-0.01548048		2474.98	0.07475046		3005.01	0.01809232		3535	0.0195334		4065	-0.00697341
355.19	0.46207095		885.19	0.13954417		1415.18	0.16557734		1945.19	-0.01601578		2475.18	0.07350927		3005.21	0.01746325		3535.2	0.01910963		4065.2	-0.00524339
355.39	0.46186374		885.39	0.13932936		1415.38	0.16486501		1945.39	-0.01526316		2475.38	0.07365792		3005.41	0.01769473		3535.4	0.01844981		4065.4	-0.00496595
355.59	0.4624331		885.59	0.13942202		1415.58	0.16601292		1945.59	-0.01680326		2475.58	0.0735725		3005.61	0.01768216		3535.6	0.01810161		4065.6	-0.0055424
355.79	0.46246533		885.79	0.13965367		1415.78	0.16624025		1945.79	-0.01766453		2475.78	0.07334767		3005.81	0.01925592		3535.8	0.01813683		4065.8	-0.00635238
355.99	0.46288044		885.99	0.1392808		1415.98	0.16657282		1945.99	-0.01815241		2475.98	0.07474613		3006.01	0.0188394		3536	0.01961673		4066	-0.00682566
356.19	0.46320582		886.19	0.13872095		1416.18	0.16613327		1946.19	-0.01745279		2476.18	0.07464786		3006.21	0.01875893		3536.2	0.01922998		4066.2	-0.00699262
356.39	0.46261691		886.39	0.13827266		1416.38	0.16598278		1946.39	-0.01689515		2476.38	0.07586365		3006.41	0.01857985		3536.4	0.01859337		4066.4	-0.00802365
356.59	0.46273501		886.59	0.13853197		1416.58	0.16686699		1946.59	-0.01681814		2476.58	0.07630569		3006.61	0.01845447		3536.6	0.01977455		4066.6	-0.00781898
356.79	0.4627387		886.79	0.13749841		1416.78	0.16606675		1946.79	-0.01676062		2476.78	0.07574727		3006.81	0.01888105		3536.8	0.02018862		4066.8	-0.00824124
356.99	0.46328894		886.99	0.13772939		1416.98	0.16644585		1946.99	-0.01708981		2476.98	0.07565752		3007.01	0.0200518		3537	0.02122539		4067	-0.00766484
357.19	0.46314129		887.19	0.13822931		1417.18	0.16585721		1947.19	-0.01639929		2477.18	0.07596294		3007.21	0.02008735		3537.2	0.02231679		4067.2	-0.00761498
357.39	0.46263428		887.39	0.1385682		1417.38	0.16527553		1947.39	-0.01584408		2477.38	0.07581788		3007.41	0.02019812		3537.4	0.02157367		4067.4	-0.00702314
357.59	0.46140569		887.59	0.13816835		1417.58	0.16677244		1947.59	-0.01550534		2477.58	0.07648165		3007.61	0.02071832		3537.6	0.02131312		4067.6	-0.00699836
357.79	0.4614523		887.79	0.13897221		1417.78	0.16685709		1947.79	-0.01553441		2477.78	0.07580823		3007.81	0.02117735		3537.8	0.02116143		4067.8	-0.00721812
357.99	0.46155276		887.99	0.13897171		1417.98	0.16727446		1947.99	-0.01465909		2477.98	0.07562839		3008.01	0.02059681		3538	0.02101328		4068	-0.0072109
358.19	0.46183089		888.19	0.13975501		1418.18	0.16747203		1948.19	-0.01385084		2478.18	0.07547515		3008.21	0.02065983		3538.2	0.02081993		4068.2	-0.00720846
358.39	0.46220485		888.39	0.14045111		1418.38	0.16705911		1948.39	-0.01335431		2478.38	0.07457838		3008.41	0.02063231		3538.4	0.02028411		4068.4	-0.00772498
358.59	0.46117345		888.59	0.14077524		1418.58	0.16725311		1948.59	-0.01326848		2478.58	0.07488911		3008.61	0.01992998		3538.6	0.0201872		4068.6	-0.00732205
358.79	0.46128759		888.79	0.14142696		1418.78	0.16632047		1948.79	-0.01303567		2478.78	0.07484774		3008.81	0.01936184		3538.8	0.01914031		4068.8	-0.00688624
358.99	0.46154901		888.99	0.14192791		1418.98	0.16673917		1948.99	-0.01367024		2478.98	0.07395907		3009.01	0.01942189		3539	0.01869933		4069	-0.00646969
359.19	0.46184774		889.19	0.14241921		1419.18	0.16708183		1949.19	-0.01341615		2479.18	0.07459547		3009.21	0.01921761		3539.2	0.01903943		4069.2	-0.00591392
359.39	0.46097761		889.39	0.14172044		1419.38	0.16749961		1949.39	-0.0131171		2479.38	0.07490761		3009.41	0.01942384		3539.4	0.018612		4069.4	-0.00682084
359.59	0.46139124		889.59	0.14155068		1419.58	0.16861578		1949.59	-0.01405479		2479.58	0.07516328		3009.61	0.01904745		3539.6	0.01843257		4069.6	-0.00749514
359.79	0.46189166		889.79	0.14141384		1419.78	0.16878559		1949.79	-0.01509767		2479.78	0.07508184		3009.81	0.01943478		3539.8	0.01938851		4069.8	-0.00804407
359.99	0.46219196		889.99	0.1410092		1419.98	0.16862237		1949.99	-0.0145114		2479.98	0.075831		3010.01	0.01906623		3540	0.01995252		4070	-0.00835197
360.19	0.46259936		890.19	0.14086845		1420.18	0.16851562		1950.19	-0.01452442		2480.18	0.07568899		3010.21	0.01947802		3540.2	0.01912665		4070.2	-0.00904456
360.39	0.46197506		890.39	0.14029896		1420.38	0.16838137		1950.39	-0.01479724		2480.38	0.0754017		3010.41	0.01879478		3540.4	0.01912491		4070.4	-0.00995398
360.59	0.46243496		890.59	0.14032052		1420.58	0.1684546		1950.59	-0.014732		2480.58	0.07504794		3010.61	0.01923943		3540.6	0.02025328		4070.6	-0.01034298
360.79	0.46325661		890.79	0.13960698		1420.78	0.16819605		1950.79	-0.01466417		2480.78	0.07500349		3010.81	0.02012124		3540.8	0.020587		4070.8	-0.01110843
360.99	0.46310947		890.99	0.14085897		1420.98	0.16755058		1950.99	-0.01455406		2480.98	0.07503963		3011.01	0.02056019		3541	0.02179808		4071	-0.01130152
361.19	0.46312229		891.19	0.14163171		1421.18	0.16753018		1951.19	-0.01393581		2481.18	0.07554991		3011.21	0.02042291		3541.2	0.02118235		4071.2	-0.01120518
361.39	0.46327111		891.39	0.14148348		1421.38	0.16681001		1951.39	-0.0136404		2481.38	0.07616259		3011.41	0.02081237		3541.4	0.02011918		4071.4	-0.0113888
361.59	0.46377589		891.59	0.1415493		1421.58	0.16692564		1951.59	-0.01369673		2481.58	0.07542351		3011.61	0.02094541		3541.6	0.02052567		4071.6	-0.01054153
361.79	0.46406752		891.79	0.14295996		1421.78	0.16716349		1951.79	-0.01299611		2481.78	0.07430261		3011.81	0.02037292		3541.8	0.01936615		4071.8	-0.01023362
361.99	0.46377412		891.99	0.14315396		1421.98	0.16703221		1951.99	-0.01227499		2481.98	0.07445799		3012.01	0.02022621		3542	0.01909366		4072	-0.01007736
362.19	0.4634406		892.19	0.14404061		1422.18	0.16659234		1952.19	-0.01242401		2482.18	0.07572785		3012.21	0.02059274		3542.2	0.01864547		4072.2	-0.00985022
362.39	0.4634417		892.39	0.14433938		1422.38	0.16665169		1952.39	-0.01309234		2482.38	0.07621799		3012.41	0.02047936		3542.4	0.01873755		4072.4	-0.01020624
362.59	0.46255914		892.59	0.14532022		1422.58	0.16711626		1952.59	-0.0127277		2482.58	0.07672616		3012.61	0.02019549		3542.6	0.01924189		4072.6	-0.0092473
362.79	0.46317205		892.79	0.14587564		1422.78	0.16741747		1952.79	-0.01259922		2482.78	0.07679518		3012.81	0.0200281		3542.8	0.0183326		4072.8	-0.00837808
362.99	0.46320544		892.99	0.1459251		1422.98	0.16821392		1952.99	-0.01298997		2482.98	0.07631479		3013.01	0.02131895		3543	0.0184819		4073	-0.00784409
363.19	0.46323359		893.19	0.14573221		1423.18	0.16864655		1953.19	-0.01251019		2483.18	0.07619054		3013.21	0.02084642		3543.2	0.01816711		4073.2	-0.00790704
363.39	0.46285985		893.39	0.14623651		1423.38	0.16881166		1953.39	-0.01326595		2483.38	0.07585676		3013.41	0.0209606		3543.4	0.01708808		4073.4	-0.00786895
363.59	0.46395552		893.59	0.14647566		1423.58	0.16921457		1953.59	-0.01381071		2483.58	0.07598294		3013.61	0.02112836		3543.6	0.01776883		4073.6	-0.0082142
363.79	0.46480418		893.79	0.14654276		1423.78	0.16935305		1953.79	-0.01369825		2483.78	0.0760274		3013.81	0.02123042		3543.8	0.01829283		4073.8	-0.00797443
363.99	0.46553604		893.99	0.14620722		1423.98	0.17025791		1953.99	-0.0140109		2483.98	0.07641753		3014.01	0.02078956		3544	0.01766215		4074	-0.00797361
364.19	0.46711699		894.19	0.14583306		1424.18	0.17023536		1954.19	-0.01498529		2484.18	0.07622109		3014.21	0.02109336		3544.2	0.01775137		4074.2	-0.00797043
364.39	0.46729653		894.39	0.14513761		1424.38	0.17033711		1954.39	-0.01534565		2484.38	0.07646461		3014.41	0.02088335		3544.4	0.01792684		4074.4	-0.00809764
364.59	0.46809071		894.59	0.14560843		1424.58	0.17065912		1954.59	-0.01548907		2484.58	0.07670165		3014.61	0.02189522		3544.6	0.01786574		4074.6	-0.00889839
364.79	0.46873474		894.79	0.14568668		1424.78	0.17032605		1954.79	-0.01635916		2484.78	0.07734528		3014.81	0.02280796		3544.8	0.01737173		4074.8	-0.00903092
364.99	0.46935752		894.99	0.14615431		1424.98	0.1703831		1954.99	-0.01660127		2484.98	0.077213		3015.01	0.022889		3545	0.01754718		4075	-0.00957866
365.19	0.47044952		895.19	0.14545926		1425.18	0.17033602		1955.19	-0.01688417		2485.18	0.07795054		3015.21	0.02323225		3545.2	0.01645064		4075.2	-0.00961969
365.39	0.47019046		895.39	0.14464488		1425.38	0.16938474		1955.39	-0.01683228		2485.38	0.07788198		3015.41	0.02248825		3545.4	0.01615608		4075.4	-0.00942573
365.59	0.47039479		895.59	0.14442246		1425.58	0.16918546		1955.59	-0.01699137		2485.58	0.07714816		3015.61	0.02161251		3545.6	0.01683355		4075.6	-0.00875347
365.79	0.46881764		895.79	0.143616		1425.78	0.17010485		1955.79	-0.01656461		2485.78	0.07707308		3015.81	0.02089519		3545.8	0.01597557		4075.8	-0.00857653
365.99	0.4680975		895.99	0.1430881		1425.98	0.17040791		1955.99	-0.01719609		2485.98	0.0778645		3016.01	0.02173997		3546	0.01678475		4076	-0.0081525
366.19	0.46788317		896.19	0.14334583		1426.18	0.17022848		1956.19	-0.01662214		2486.18	0.07803175		3016.21	0.02161005		3546.2	0.01621687		4076.2	-0.008631
366.39	0.46804117		896.39	0.14396289		1426.38	0.17030847		1956.39	-0.01673134		2486.38	0.07821529		3016.41	0.02195759		3546.4	0.01769735		4076.4	-0.00792021
366.59	0.46690766		896.59	0.14394015		1426.58	0.17057278		1956.59	-0.01604407		2486.58	0.0775942		3016.61	0.02224571		3546.6	0.01760441		4076.6	-0.00685689
366.79	0.46713684		896.79	0.14439519		1426.78	0.17123717		1956.79	-0.01557306		2486.78	0.07663926		3016.81	0.02224071		3546.8	0.01720197		4076.8	-0.00639748
366.99	0.46606737		896.99	0.14505804		1426.98	0.17093955		1956.99	-0.01591459		2486.98	0.07615725		3017.01	0.02229835		3547	0.01791673		4077	-0.00728113
367.19	0.46617256		897.19	0.1454567		1427.18	0.17103732		1957.19	-0.01483845		2487.18	0.07596446		3017.21	0.02100788		3547.2	0.01782944		4077.2	-0.0077138
367.39	0.46575293		897.39	0.1469938		1427.38	0.17056705		1957.39	-0.01464092		2487.38	0.07560176		3017.41	0.02163004		3547.4	0.01781361		4077.4	-0.00732764
367.59	0.4669284		897.59	0.14718562		1427.58	0.17097375		1957.59	-0.01445114		2487.58	0.07595444		3017.61	0.02106647		3547.6	0.01860706		4077.6	-0.00806748
367.79	0.46753606		897.79	0.14688645		1427.78	0.17139364		1957.79	-0.01465955		2487.78	0.07593419		3017.81	0.02080547		3547.8	0.01831031		4077.8	-0.00773176
367.99	0.46864474		897.99	0.1468346		1427.98	0.1717073		1957.99	-0.01513908		2487.98	0.07611709		3018.01	0.02063776		3548	0.01830552		4078	-0.00821985
368.19	0.46967283		898.19	0.1468649		1428.18	0.17159454		1958.19	-0.01501414		2488.18	0.07598493		3018.21	0.02069753		3548.2	0.01853288		4078.2	-0.00859047
368.39	0.46919315		898.39	0.14710368		1428.38	0.17157808		1958.39	-0.01515638		2488.38	0.07662901		3018.41	0.02012931		3548.4	0.01903498		4078.4	-0.00843308
368.59	0.46906131		898.59	0.14790632		1428.58	0.17120561		1958.59	-0.01501508		2488.58	0.07648599		3018.61	0.02063039		3548.6	0.01845166		4078.6	-0.0085289
368.79	0.46986458		898.79	0.14816912		1428.78	0.17128976		1958.79	-0.01548895		2488.78	0.07667849		3018.81	0.02070799		3548.8	0.0187383		4078.8	-0.00802496
368.99	0.46978058		898.99	0.14791124		1428.98	0.17100641		1958.99	-0.01491302		2488.98	0.07602581		3019.01	0.01928982		3549	0.01918878		4079	-0.00861654
369.19	0.46936746		899.19	0.1473542		1429.18	0.1707727		1959.19	-0.01527249		2489.18	0.07617807		3019.21	0.01833673		3549.2	0.01896234		4079.2	-0.0085784
369.39	0.46818513		899.39	0.14706173		1429.38	0.17026761		1959.39	-0.01555575		2489.38	0.07594557		3019.41	0.01758897		3549.4	0.01895893		4079.4	-0.00821411
369.59	0.46831721		899.59	0.1471782		1429.58	0.17034659		1959.59	-0.01583305		2489.58	0.07493446		3019.61	0.01752394		3549.6	0.01808428		4079.6	-0.00872075
369.79	0.46728166		899.79	0.14681249		1429.78	0.17032526		1959.79	-0.01545185		2489.78	0.07572012		3019.81	0.01757207		3549.8	0.01737918		4079.8	-0.00842773
369.99	0.46721688		899.99	0.14710069		1429.98	0.16913625		1959.99	-0.01565889		2489.98	0.07609318		3020.01	0.01823368		3550	0.01767419		4080	-0.00897444
370.19	0.46743339		900.19	0.14741298		1430.18	0.16790853		1960.19	-0.01555619		2490.18	0.07569026		3020.21	0.01794254		3550.2	0.01761455		4080.2	-0.00994374
370.39	0.4682847		900.39	0.14765081		1430.38	0.16820277		1960.39	-0.01623857		2490.38	0.07525894		3020.41	0.01875119		3550.4	0.01807703		4080.4	-0.00926132
370.59	0.46752146		900.59	0.14700465		1430.58	0.16881983		1960.59	-0.01540677		2490.58	0.07410525		3020.61	0.0190653		3550.6	0.01796201		4080.6	-0.00983366
370.79	0.46820395		900.79	0.14762551		1430.78	0.16922037		1960.79	-0.01587761		2490.78	0.07451313		3020.81	0.01868875		3550.8	0.01729301		4080.8	-0.01013831
370.99	0.46800551		900.99	0.14769768		1430.98	0.16886283		1960.99	-0.01646814		2490.98	0.07475572		3021.01	0.01850107		3551	0.01695618		4081	-0.0107513
371.19	0.46909981		901.19	0.14771495		1431.18	0.16883262		1961.19	-0.0161049		2491.18	0.07445811		3021.21	0.01989061		3551.2	0.01657009		4081.2	-0.01099284
371.39	0.46992541		901.39	0.14864007		1431.38	0.16866753		1961.39	-0.01639863		2491.38	0.0734213		3021.41	0.02110874		3551.4	0.01749044		4081.4	-0.01118486
371.59	0.47127474		901.59	0.14842272		1431.58	0.16970352		1961.59	-0.0167251		2491.58	0.07447047		3021.61	0.0213245		3551.6	0.01784544		4081.6	-0.01146348
371.79	0.47093928		901.79	0.14757397		1431.78	0.17125189		1961.79	-0.01680099		2491.78	0.07488231		3021.81	0.02169693		3551.8	0.01822202		4081.8	-0.01069214
371.99	0.47166295		901.99	0.1472192		1431.98	0.17172208		1961.99	-0.01619346		2491.98	0.07570935		3022.01	0.02181963		3552	0.01889601		4082	-0.01093079
372.19	0.47186595		902.19	0.14780192		1432.18	0.17237485		1962.19	-0.01591627		2492.18	0.075541		3022.21	0.02113776		3552.2	0.0197084		4082.2	-0.01099701
372.39	0.47189744		902.39	0.14803509		1432.38	0.17277626		1962.39	-0.01594439		2492.38	0.07548385		3022.41	0.02113327		3552.4	0.02088827		4082.4	-0.01024393
372.59	0.47206153		902.59	0.14826546		1432.58	0.17284279		1962.59	-0.01556921		2492.58	0.07618131		3022.61	0.02111042		3552.6	0.02137783		4082.6	-0.00956773
372.79	0.47204563		902.79	0.1491955		1432.78	0.17378595		1962.79	-0.01459044		2492.78	0.07600579		3022.81	0.0202606		3552.8	0.02222309		4082.8	-0.00956292
372.99	0.47174883		902.99	0.14944842		1432.98	0.17445224		1962.99	-0.01352198		2492.98	0.07569986		3023.01	0.01927072		3553	0.02237158		4083	-0.0097298
373.19	0.47253359		903.19	0.14946211		1433.18	0.17512141		1963.19	-0.01354197		2493.18	0.07511385		3023.21	0.01906455		3553.2	0.02200498		4083.2	-0.00930296
373.39	0.47336369		903.39	0.14981785		1433.38	0.17626722		1963.39	-0.01356078		2493.38	0.07436266		3023.41	0.0184669		3553.4	0.02209717		4083.4	-0.00971138
373.59	0.47386002		903.59	0.15004912		1433.58	0.17652605		1963.59	-0.01334099		2493.58	0.07352545		3023.61	0.01792551		3553.6	0.02230151		4083.6	-0.01021806
373.79	0.47331225		903.79	0.15015504		1433.78	0.17604584		1963.79	-0.01378778		2493.78	0.07472455		3023.81	0.01716101		3553.8	0.02297826		4083.8	-0.00973062
373.99	0.47325625		903.99	0.1504261		1433.98	0.17600356		1963.99	-0.01367269		2493.98	0.07442404		3024.01	0.01691532		3554	0.02292102		4084	-0.01011019
374.19	0.47386155		904.19	0.15083268		1434.18	0.17674757		1964.19	-0.01369443		2494.18	0.07383619		3024.21	0.01647019		3554.2	0.02260744		4084.2	-0.00999934
374.39	0.47443018		904.39	0.15117111		1434.38	0.17682089		1964.39	-0.01353393		2494.38	0.07438478		3024.41	0.01606632		3554.4	0.02183497		4084.4	-0.00854707
374.59	0.47447288		904.59	0.15142111		1434.58	0.1770587		1964.59	-0.01376735		2494.58	0.07467665		3024.61	0.0159199		3554.6	0.02184553		4084.6	-0.00839035
374.79	0.47505415		904.79	0.15171743		1434.78	0.17741272		1964.79	-0.0155302		2494.78	0.07493265		3024.81	0.01672339		3554.8	0.02080615		4084.8	-0.00779953
374.99	0.47492345		904.99	0.15130916		1434.98	0.1778375		1964.99	-0.01545176		2494.98	0.07501825		3025.01	0.01787207		3555	0.02076484		4085	-0.00751996
375.19	0.47518318		905.19	0.15076191		1435.18	0.17800065		1965.19	-0.01555077		2495.18	0.07552879		3025.21	0.01965826		3555.2	0.02063867		4085.2	-0.0074788
375.39	0.47590683		905.39	0.15126198		1435.38	0.17847867		1965.39	-0.01579068		2495.38	0.07553605		3025.41	0.01967278		3555.4	0.02019602		4085.4	-0.00725901
375.59	0.47562101		905.59	0.15106308		1435.58	0.1784866		1965.59	-0.01628484		2495.58	0.07676447		3025.61	0.01980278		3555.6	0.01831135		4085.6	-0.00675687
375.79	0.47444261		905.79	0.15075734		1435.78	0.17832736		1965.79	-0.01654343		2495.78	0.07786871		3025.81	0.02040646		3555.8	0.01704462		4085.8	-0.0069043
375.99	0.47494239		905.99	0.15149512		1435.98	0.17732748		1965.99	-0.01706562		2495.98	0.07844406		3026.01	0.02129989		3556	0.01565604		4086	-0.00728842
376.19	0.47501885		906.19	0.15121935		1436.18	0.17716961		1966.19	-0.01764322		2496.18	0.07878407		3026.21	0.0212834		3556.2	0.01563353		4086.2	-0.00728378
376.39	0.47551578		906.39	0.15008898		1436.38	0.17676029		1966.39	-0.0180063		2496.38	0.07900704		3026.41	0.02205003		3556.4	0.01615103		4086.4	-0.00759569
376.59	0.47526407		906.59	0.14984231		1436.58	0.17605791		1966.59	-0.01779392		2496.58	0.08036347		3026.61	0.02209875		3556.6	0.01661843		4086.6	-0.00795328
376.79	0.47524398		906.79	0.15071809		1436.78	0.17598931		1966.79	-0.01737743		2496.78	0.08047796		3026.81	0.02149954		3556.8	0.01666985		4086.8	-0.00904048
376.99	0.47618787		906.99	0.15115869		1436.98	0.17607593		1966.99	-0.01793401		2496.98	0.08109795		3027.01	0.02115255		3557	0.01624964		4087	-0.00959857
377.19	0.47608461		907.19	0.15111152		1437.18	0.17528837		1967.19	-0.01835699		2497.18	0.08016437		3027.21	0.02147395		3557.2	0.01700855		4087.2	-0.01036092
377.39	0.47590283		907.39	0.15099042		1437.38	0.17532531		1967.39	-0.01781815		2497.38	0.07925616		3027.41	0.021206		3557.4	0.01816785		4087.4	-0.01047199
377.59	0.47524726		907.59	0.15180877		1437.58	0.17433734		1967.59	-0.01730374		2497.58	0.07878803		3027.61	0.02127461		3557.6	0.01886059		4087.6	-0.01098283
377.79	0.4750998		907.79	0.15221464		1437.78	0.17457518		1967.79	-0.01751271		2497.78	0.07862294		3027.81	0.02145005		3557.8	0.01907209		4087.8	-0.01105592
377.99	0.47530549		907.99	0.15236817		1437.98	0.17500013		1967.99	-0.01666952		2497.98	0.07799208		3028.01	0.02178502		3558	0.01899932		4088	-0.01082324
378.19	0.47554666		908.19	0.15283769		1438.18	0.17536342		1968.19	-0.01650625		2498.18	0.0774471		3028.21	0.02197594		3558.2	0.01948052		4088.2	-0.0104027
378.39	0.47574166		908.39	0.15324699		1438.38	0.1754297		1968.39	-0.01665251		2498.38	0.07740916		3028.41	0.02207685		3558.4	0.01983632		4088.4	-0.00947664
378.59	0.47565336		908.59	0.15329049		1438.58	0.17618722		1968.59	-0.01673039		2498.58	0.07650577		3028.61	0.02251565		3558.6	0.0200984		4088.6	-0.00951934
378.79	0.47553787		908.79	0.15331124		1438.78	0.17684212		1968.79	-0.01633124		2498.78	0.07612852		3028.81	0.0228518		3558.8	0.0200895		4088.8	-0.00901833
378.99	0.47550599		908.99	0.15302158		1438.98	0.17725049		1968.99	-0.01565841		2498.98	0.07658144		3029.01	0.02280702		3559	0.01986983		4089	-0.00849183
379.19	0.47586477		909.19	0.1534436		1439.18	0.17718682		1969.19	-0.01530095		2499.18	0.07634265		3029.21	0.02307764		3559.2	0.01906579		4089.2	-0.00837852
379.39	0.47597499		909.39	0.15454391		1439.38	0.17737384		1969.39	-0.01499326		2499.38	0.07594086		3029.41	0.02265664		3559.4	0.01794055		4089.4	-0.00787613
379.59	0.47579582		909.59	0.15476273		1439.58	0.17712692		1969.59	-0.01469307		2499.58	0.0763629		3029.61	0.02278975		3559.6	0.01661034		4089.6	-0.00733861
379.79	0.4756204		909.79	0.1550047		1439.78	0.1771575		1969.79	-0.01457894		2499.78	0.07703492		3029.81	0.02321275		3559.8	0.01594925		4089.8	-0.00704709
379.99	0.4756204		909.99	0.1550047		1439.98	0.1771575		1969.99	-0.01457894		2499.98	0.07703492		3030.01	0.02321275		3560	0.01594925		4090	-0.00704709
380.19	0.47587202		910.19	0.15523302		1440.18	0.17748277		1970.19	-0.01489659		2500.18	0.07589753		3030.21	0.02266703		3560.2	0.01477742		4090.2	-0.00688588
380.39	0.4764719		910.39	0.15574201		1440.38	0.1778217		1970.39	-0.01529643		2500.38	0.07407612		3030.41	0.02288864		3560.4	0.01388678		4090.4	-0.00657638
380.59	0.47675015		910.59	0.15643076		1440.58	0.17892536		1970.59	-0.01557908		2500.58	0.07246405		3030.61	0.02245292		3560.6	0.01253041		4090.6	-0.0059644
380.79	0.47693891		910.79	0.1569193		1440.78	0.17909012		1970.79	-0.01570682		2500.78	0.07096232		3030.81	0.02139636		3560.8	0.01191163		4090.8	-0.00550443
380.99	0.47648246		910.99	0.15784287		1440.98	0.17996585		1970.99	-0.01594551		2500.98	0.0691772		3031.01	0.02057199		3561	0.01071209		4091	-0.00511771
381.19	0.47658207		911.19	0.15850255		1441.18	0.1797853		1971.19	-0.01610098		2501.18	0.06689598		3031.21	0.0197304		3561.2	0.00990621		4091.2	-0.00456597
381.39	0.47708058		911.39	0.15874979		1441.38	0.18015987		1971.39	-0.01619678		2501.38	0.06559765		3031.41	0.01951457		3561.4	0.00916979		4091.4	-0.00501328
381.59	0.47682256		911.59	0.16023204		1441.58	0.17982665		1971.59	-0.0169523		2501.58	0.0640658		3031.61	0.01955438		3561.6	0.00862051		4091.6	-0.00517785
381.79	0.47697978		911.79	0.16032106		1441.78	0.1793904		1971.79	-0.0172049		2501.78	0.06227357		3031.81	0.01921016		3561.8	0.00769282		4091.8	-0.00533823
381.99	0.47661305		911.99	0.16080012		1441.98	0.17971611		1971.99	-0.01720004		2501.98	0.0612628		3032.01	0.01974172		3562	0.0073759		4092	-0.00603126
382.19	0.47613839		912.19	0.16062141		1442.18	0.17856738		1972.19	-0.01681948		2502.18	0.05921032		3032.21	0.01984634		3562.2	0.0071185		4092.2	-0.00690055
382.39	0.47550335		912.39	0.16101112		1442.38	0.17836593		1972.39	-0.018158		2502.38	0.0572325		3032.41	0.02020731		3562.4	0.00588923		4092.4	-0.0072902
382.59	0.47566682		912.59	0.16062665		1442.58	0.17985563		1972.59	-0.01793531		2502.58	0.05534928		3032.61	0.02011538		3562.6	0.00544373		4092.6	-0.00678894
382.79	0.47614508		912.79	0.16038828		1442.78	0.17991474		1972.79	-0.01819404		2502.78	0.05321304		3032.81	0.01964401		3562.8	0.0045513		4092.8	-0.00694276
382.99	0.47598369		912.99	0.16071642		1442.98	0.17938872		1972.99	-0.0183138		2502.98	0.05197509		3033.01	0.01868483		3563	0.00426962		4093	-0.0073504
383.19	0.47545873		913.19	0.16115324		1443.18	0.17878071		1973.19	-0.01795514		2503.18	0.05141598		3033.21	0.01832679		3563.2	0.00469676		4093.2	-0.0079151
383.39	0.4752118		913.39	0.16201626		1443.38	0.1793548		1973.39	-0.01725117		2503.38	0.05045269		3033.41	0.01850711		3563.4	0.00459692		4093.4	-0.00793458
383.59	0.47510284		913.59	0.16185798		1443.58	0.17749306		1973.59	-0.01707617		2503.58	0.05036826		3033.61	0.01803542		3563.6	0.00457619		4093.6	-0.00865312
383.79	0.4747666		913.79	0.1612065		1443.78	0.17752138		1973.79	-0.01694759		2503.78	0.04983272		3033.81	0.01765681		3563.8	0.00508847		4093.8	-0.00856954
383.99	0.47416045		913.99	0.16092159		1443.98	0.17676701		1973.99	-0.01651403		2503.98	0.04937027		3034.01	0.01770529		3564	0.00471788		4094	-0.00819333
384.19	0.47349072		914.19	0.16016529		1444.18	0.17738563		1974.19	-0.01678453		2504.18	0.04897653		3034.21	0.01805865		3564.2	0.00407104		4094.2	-0.00850642
384.39	0.4734738		914.39	0.16004158		1444.38	0.17856279		1974.39	-0.01604505		2504.38	0.04846309		3034.41	0.01801161		3564.4	0.00388711		4094.4	-0.00888021
384.59	0.47331802		914.59	0.15974397		1444.58	0.17919704		1974.59	-0.01582555		2504.58	0.04869533		3034.61	0.01672687		3564.6	0.00384683		4094.6	-0.0085632
384.79	0.47357688		914.79	0.15948653		1444.78	0.17903869		1974.79	-0.0158059		2504.78	0.04846484		3034.81	0.01598897		3564.8	0.00508998		4094.8	-0.00818693
384.99	0.47357989		914.99	0.15929718		1444.98	0.17910407		1974.99	-0.01595372		2504.98	0.04799681		3035.01	0.01560079		3565	0.00575723		4095	-0.00849661
385.19	0.47430595		915.19	0.15871322		1445.18	0.1787121		1975.19	-0.01661481		2505.18	0.04812889		3035.21	0.01544858		3565.2	0.00603492		4095.2	-0.00807299
385.39	0.47483259		915.39	0.15815537		1445.38	0.17893754		1975.39	-0.01669837		2505.38	0.04814201		3035.41	0.01580214		3565.4	0.00623901		4095.4	-0.00894532
385.59	0.47474487		915.59	0.1586102		1445.58	0.17869687		1975.59	-0.01688666		2505.58	0.04757965		3035.61	0.01599204		3565.6	0.0064415		4095.6	-0.00884502
385.79	0.47564083		915.79	0.1578214		1445.78	0.17881109		1975.79	-0.01651833		2505.78	0.04694421		3035.81	0.01602835		3565.8	0.00629787		4095.8	-0.00932726
385.99	0.4764277		915.99	0.15794234		1445.98	0.17961515		1975.99	-0.01670345		2505.98	0.04613976		3036.01	0.01706771		3566	0.00606228		4096	-0.00888234
386.19	0.47704547		916.19	0.15783687		1446.18	0.1788508		1976.19	-0.01787973		2506.18	0.0446283		3036.21	0.01681452		3566.2	0.00518798		4096.2	-0.00884312
386.39	0.4778635		916.39	0.15833501		1446.38	0.18012055		1976.39	-0.01854596		2506.38	0.04354546		3036.41	0.01756113		3566.4	0.00504204		4096.4	-0.00892375
386.59	0.47806191		916.59	0.1592462		1446.58	0.18062507		1976.59	-0.01770055		2506.58	0.04201355		3036.61	0.01731526		3566.6	0.00491623		4096.6	-0.00891236
386.79	0.47878949		916.79	0.16031385		1446.78	0.18064097		1976.79	-0.01845624		2506.78	0.04160516		3036.81	0.01759578		3566.8	0.00444932		4096.8	-0.00952877
386.99	0.47853773		916.99	0.16107043		1446.98	0.18025137		1976.99	-0.0184128		2506.98	0.04179897		3037.01	0.01763666		3567	0.00427143		4097	-0.00944952
387.19	0.47793497		917.19	0.16153334		1447.18	0.17988541		1977.19	-0.01794467		2507.18	0.04276874		3037.21	0.01750252		3567.2	0.00508793		4097.2	-0.00890705
387.39	0.47800358		917.39	0.16203984		1447.38	0.17980585		1977.39	-0.01801798		2507.38	0.04286101		3037.41	0.01709129		3567.4	0.00475619		4097.4	-0.0083085
387.59	0.47751425		917.59	0.16192684		1447.58	0.17863272		1977.59	-0.01878261		2507.58	0.04329598		3037.61	0.01646267		3567.6	0.00489196		4097.6	-0.00768131
387.79	0.4769478		917.79	0.16209325		1447.78	0.17958513		1977.79	-0.01870438		2507.78	0.04312475		3037.81	0.01641334		3567.8	0.0054445		4097.8	-0.00666255
387.99	0.47629717		917.99	0.16172486		1447.98	0.17890073		1977.99	-0.01832313		2507.98	0.04304471		3038.01	0.01652084		3568	0.0047339		4098	-0.00541548
388.19	0.47588705		918.19	0.16138409		1448.18	0.1799321		1978.19	-0.0185479		2508.18	0.04408248		3038.21	0.01610341		3568.2	0.0050055		4098.2	-0.00540481
388.39	0.47641338		918.39	0.16155287		1448.38	0.18043956		1978.39	-0.01706021		2508.38	0.04369468		3038.41	0.01527397		3568.4	0.00526578		4098.4	-0.00618075
388.59	0.47675822		918.59	0.16177784		1448.58	0.17965247		1978.59	-0.01716426		2508.58	0.04378593		3038.61	0.01477968		3568.6	0.00606421		4098.6	-0.00579631
388.79	0.4766477		918.79	0.1612487		1448.78	0.17982662		1978.79	-0.0175805		2508.78	0.043134		3038.81	0.01521743		3568.8	0.00633557		4098.8	-0.00594927
388.99	0.47645814		918.99	0.16088412		1448.98	0.17962879		1978.99	-0.01655281		2508.98	0.04286182		3039.01	0.01564362		3569	0.0060428		4099	-0.00635197
389.19	0.47638482		919.19	0.16108193		1449.18	0.1802377		1979.19	-0.0156731		2509.18	0.042143		3039.21	0.01628632		3569.2	0.00553837		4099.2	-0.00525319
389.39	0.47637487		919.39	0.16139333		1449.38	0.18075226		1979.39	-0.0152991		2509.38	0.04070604		3039.41	0.01628329		3569.4	0.00470965		4099.4	-0.00546946
389.59	0.47591776		919.59	0.16117768		1449.58	0.18147424		1979.59	-0.01498698		2509.58	0.0403179		3039.61	0.01648303		3569.6	0.0047814		4099.6	-0.00595967
389.79	0.47678782		919.79	0.16154913		1449.78	0.18155915		1979.79	-0.0142744		2509.78	0.03957226		3039.81	0.01722609		3569.8	0.00520837		4099.8	-0.00670646
389.99	0.47703962		919.99	0.16129533		1449.98	0.18185183		1979.99	-0.01463353		2509.98	0.03832224		3040.01	0.01697495		3570	0.00426121		4100	-0.00611047
390.19	0.47721577		920.19	0.16185123		1450.18	0.18156542		1980.19	-0.01553081		2510.18	0.0370333		3040.21	0.01758634		3570.2	0.00406995		4100.2	-0.00738014
390.39	0.47695438		920.39	0.16177741		1450.38	0.18171577		1980.39	-0.0150603		2510.38	0.03623675		3040.41	0.01807731		3570.4	0.00317428		4100.4	-0.00840147
390.59	0.47690255		920.59	0.16257613		1450.58	0.1812618		1980.59	-0.01515829		2510.58	0.03602707		3040.61	0.01758026		3570.6	0.00255058		4100.6	-0.00929237
390.79	0.47738276		920.79	0.16187163		1450.78	0.18149004		1980.79	-0.01510563		2510.78	0.0362124		3040.81	0.01717092		3570.8	0.00187062		4100.8	-0.01009364
390.99	0.47713673		920.99	0.16195045		1450.98	0.1813596		1980.99	-0.01495384		2510.98	0.03675085		3041.01	0.01658113		3571	0.00244641		4101	-0.01032374
391.19	0.47674839		921.19	0.16116895		1451.18	0.18171152		1981.19	-0.01541686		2511.18	0.03765402		3041.21	0.01562986		3571.2	0.00322377		4101.2	-0.01021646
391.39	0.47720288		921.39	0.16125241		1451.38	0.18116814		1981.39	-0.01582306		2511.38	0.03760774		3041.41	0.01470508		3571.4	0.00361553		4101.4	-0.01067813
391.59	0.47697914		921.59	0.1610656		1451.58	0.18174758		1981.59	-0.01653696		2511.58	0.03805018		3041.61	0.01541524		3571.6	0.00363235		4101.6	-0.01080531
391.79	0.47730583		921.79	0.16076604		1451.78	0.18184703		1981.79	-0.016735		2511.78	0.03830745		3041.81	0.01601702		3571.8	0.00408808		4101.8	-0.01056261
391.99	0.47798436		921.99	0.16079301		1451.98	0.1814419		1981.99	-0.01701556		2511.98	0.03854426		3042.01	0.01577303		3572	0.0034457		4102	-0.01028147
392.19	0.47762825		922.19	0.16030698		1452.18	0.18181688		1982.19	-0.01772739		2512.18	0.0396879		3042.21	0.01522907		3572.2	0.0035658		4102.2	-0.01083981
392.39	0.47743135		922.39	0.16038903		1452.38	0.1815972		1982.39	-0.01805641		2512.38	0.03975762		3042.41	0.01519598		3572.4	0.00357685		4102.4	-0.01119945
392.59	0.47727928		922.59	0.16073201		1452.58	0.18149572		1982.59	-0.0185193		2512.58	0.03992855		3042.61	0.01533285		3572.6	0.00327773		4102.6	-0.01054638
392.79	0.47726714		922.79	0.16118172		1452.78	0.18247426		1982.79	-0.01845935		2512.78	0.03933391		3042.81	0.01595421		3572.8	0.00276848		4102.8	-0.01020754
392.99	0.47745768		922.99	0.1623		1452.98	0.18287633		1982.99	-0.01762541		2512.98	0.03947447		3043.01	0.01600501		3573	0.00305019		4103	-0.01008614
393.19	0.47737203		923.19	0.16287893		1453.18	0.1835267		1983.19	-0.01823834		2513.18	0.03918604		3043.21	0.01604556		3573.2	0.00352428		4103.2	-0.00962929
393.39	0.47699036		923.39	0.16374549		1453.38	0.18409679		1983.39	-0.01915743		2513.38	0.03898742		3043.41	0.01620346		3573.4	0.00323385		4103.4	-0.0095643
393.59	0.47609962		923.59	0.16384024		1453.58	0.18431729		1983.59	-0.01936208		2513.58	0.03859928		3043.61	0.01693147		3573.6	0.00359487		4103.6	-0.00957778
393.79	0.47685588		923.79	0.16446908		1453.78	0.18429254		1983.79	-0.0192916		2513.78	0.03836717		3043.81	0.01713399		3573.8	0.00378511		4103.8	-0.00983217
393.99	0.47627642		923.99	0.16432709		1453.98	0.18443918		1983.99	-0.01920638		2513.98	0.03746499		3044.01	0.0170476		3574	0.0023294		4104	-0.00969079
394.19	0.47670089		924.19	0.16455946		1454.18	0.18350181		1984.19	-0.01934097		2514.18	0.03713485		3044.21	0.01826226		3574.2	0.00161991		4104.2	-0.01055761
394.39	0.47667928		924.39	0.16426912		1454.38	0.18298076		1984.39	-0.01901221		2514.38	0.03726272		3044.41	0.01841703		3574.4	0.00054653		4104.4	-0.01043279
394.59	0.47715006		924.59	0.16486251		1454.58	0.18242729		1984.59	-0.01875816		2514.58	0.03596363		3044.61	0.01789952		3574.6	0.00066904		4104.6	-0.01090384
394.79	0.47669523		924.79	0.16457202		1454.78	0.18257382		1984.79	-0.01898265		2514.78	0.03423536		3044.81	0.01737787		3574.8	0.0006004		4104.8	-0.01104463
394.99	0.47740797		924.99	0.16469923		1454.98	0.18131697		1984.99	-0.01900636		2514.98	0.03436966		3045.01	0.01637916		3575	0.00145944		4105	-0.01066547
395.19	0.47721644		925.19	0.16402356		1455.18	0.18049833		1985.19	-0.0190513		2515.18	0.03403151		3045.21	0.01676264		3575.2	0.00084216		4105.2	-0.01103382
395.39	0.47707285		925.39	0.16415411		1455.38	0.17976865		1985.39	-0.01902791		2515.38	0.0347162		3045.41	0.0163905		3575.4	0.00004586		4105.4	-0.01114548
395.59	0.47726381		925.59	0.1643216		1455.58	0.17936445		1985.59	-0.019221		2515.58	0.03397489		3045.61	0.01693428		3575.6	-0.00110737		4105.6	-0.01087926
395.79	0.47763981		925.79	0.16428935		1455.78	0.1779606		1985.79	-0.01933911		2515.78	0.03397489		3045.81	0.0166817		3575.8	-0.00074042		4105.8	-0.01019724
395.99	0.4778175		925.99	0.16425048		1455.98	0.17681336		1985.99	-0.01912507		2515.98	0.03417224		3046.01	0.01587819		3576	-0.00061111		4106	-0.00989898
396.19	0.47686196		926.19	0.16307413		1456.18	0.17591789		1986.19	-0.0189279		2516.18	0.03448641		3046.21	0.01567425		3576.2	-0.00057796		4106.2	-0.0094425
396.39	0.4768697		926.39	0.1632046		1456.38	0.17609486		1986.39	-0.01888976		2516.38	0.03486904		3046.41	0.01582229		3576.4	-0.00043139		4106.4	-0.00891454
396.59	0.47671965		926.59	0.16354384		1456.58	0.17657634		1986.59	-0.01800374		2516.58	0.03471474		3046.61	0.01558198		3576.6	0.00010201		4106.6	-0.00904077
396.79	0.47699622		926.79	0.16352511		1456.78	0.17714843		1986.79	-0.0179637		2516.78	0.03359632		3046.81	0.01554965		3576.8	-0.00002694		4106.8	-0.00894257
396.99	0.47708767		926.99	0.16305349		1456.98	0.17772374		1986.99	-0.01782619		2516.98	0.033303		3047.01	0.01598796		3577	0.00091443		4107	-0.008989
397.19	0.47704352		927.19	0.16252891		1457.18	0.17879365		1987.19	-0.01742353		2517.18	0.033143		3047.21	0.0160723		3577.2	0.00172325		4107.2	-0.00902743
397.39	0.47665019		927.39	0.16282694		1457.38	0.17902751		1987.39	-0.01689337		2517.38	0.03250274		3047.41	0.01663518		3577.4	0.00174154		4107.4	-0.00834626
397.59	0.47593652		927.59	0.16224125		1457.58	0.18016527		1987.59	-0.01702561		2517.58	0.03226348		3047.61	0.01612128		3577.6	0.00128053		4107.6	-0.00855833
397.79	0.476402		927.79	0.16169905		1457.78	0.1805146		1987.79	-0.01618683		2517.78	0.03165867		3047.81	0.0157458		3577.8	0.00244393		4107.8	-0.00905357
397.99	0.47562111		927.99	0.16078188		1457.98	0.18090013		1987.99	-0.01597466		2517.98	0.03087765		3048.01	0.01537532		3578	0.00293026		4108	-0.00953264
398.19	0.47560702		928.19	0.16030477		1458.18	0.17995144		1988.19	-0.01616756		2518.18	0.03050781		3048.21	0.01526952		3578.2	0.00356779		4108.2	-0.00999218
398.39	0.47570862		928.39	0.16052927		1458.38	0.18052386		1988.39	-0.0161138		2518.38	0.03005799		3048.41	0.01424176		3578.4	0.00380686		4108.4	-0.00950522
398.59	0.47532978		928.59	0.16040299		1458.58	0.18076185		1988.59	-0.01610576		2518.58	0.02908521		3048.61	0.0131528		3578.6	0.00408928		4108.6	-0.01000916
398.79	0.4757856		928.79	0.16021583		1458.78	0.18121927		1988.79	-0.01701614		2518.78	0.02858911		3048.81	0.0122066		3578.8	0.00392504		4108.8	-0.00929632
398.99	0.47720115		928.99	0.15993132		1458.98	0.18069637		1988.99	-0.0175356		2518.98	0.02960633		3049.01	0.01131524		3579	0.00366104		4109	-0.00924947
399.19	0.47684779		929.19	0.15986024		1459.18	0.18152257		1989.19	-0.01760226		2519.18	0.02995452		3049.21	0.01153527		3579.2	0.00265672		4109.2	-0.00940287
399.39	0.4772921		929.39	0.15976784		1459.38	0.1817227		1989.39	-0.01741225		2519.38	0.03059125		3049.41	0.01046216		3579.4	0.00200165		4109.4	-0.00941333
399.59	0.47847277		929.59	0.15938348		1459.58	0.18101986		1989.59	-0.01780174		2519.58	0.03019833		3049.61	0.011355		3579.6	0.00131871		4109.6	-0.00888102
399.79	0.47947152		929.79	0.15908363		1459.78	0.18078009		1989.79	-0.01784802		2519.78	0.03057496		3049.81	0.01149706		3579.8	0.00165573		4109.8	-0.00898834
399.99	0.47935843		929.99	0.15845583		1459.98	0.18056462		1989.99	-0.01792813		2519.98	0.03085599		3050.01	0.01122112		3580	0.00105971		4110	-0.00885628
400.19	0.47956027		930.19	0.15780131		1460.18	0.18058427		1990.19	-0.01865928		2520.18	0.03149313		3050.21	0.01168562		3580.2	0.00127588		4110.2	-0.00868459
400.39	0.48010547		930.39	0.15816832		1460.38	0.18063724		1990.39	-0.01932234		2520.38	0.03173585		3050.41	0.01228664		3580.4	0.00089715		4110.4	-0.00874001
400.59	0.48036482		930.59	0.15876223		1460.58	0.1809972		1990.59	-0.0193978		2520.58	0.03130418		3050.61	0.01269016		3580.6	0.00062884		4110.6	-0.00969462
400.79	0.48132676		930.79	0.15892895		1460.78	0.18166748		1990.79	-0.01994424		2520.78	0.03074276		3050.81	0.01344456		3580.8	0.00020172		4110.8	-0.00967858
400.99	0.48128416		930.99	0.1586334		1460.98	0.18256121		1990.99	-0.01974267		2520.98	0.0308383		3051.01	0.01533612		3581	0.00052364		4111	-0.0101378
401.19	0.48138611		931.19	0.15888236		1461.18	0.18297516		1991.19	-0.01868068		2521.18	0.0307367		3051.21	0.01536126		3581.2	0.00064901		4111.2	-0.01149428
401.39	0.48066315		931.39	0.15935122		1461.38	0.18294222		1991.39	-0.01840447		2521.38	0.03084834		3051.41	0.01599344		3581.4	0.00046513		4111.4	-0.01217778
401.59	0.47954664		931.59	0.1592274		1461.58	0.18325252		1991.59	-0.01847625		2521.58	0.03087098		3051.61	0.01619681		3581.6	0.00112342		4111.6	-0.01278947
401.79	0.4785572		931.79	0.15887455		1461.78	0.18326776		1991.79	-0.01903574		2521.78	0.03055238		3051.81	0.01652798		3581.8	0.00198288		4111.8	-0.01364116
401.99	0.47756269		931.99	0.15850063		1461.98	0.1834767		1991.99	-0.01882632		2521.98	0.03060556		3052.01	0.01611935		3582	0.00239705		4112	-0.01445365
402.19	0.47628721		932.19	0.15941066		1462.18	0.18248973		1992.19	-0.01803326		2522.18	0.02952818		3052.21	0.01667178		3582.2	0.00300382		4112.2	-0.01419748
402.39	0.47590947		932.39	0.15977606		1462.38	0.18340338		1992.39	-0.01772784		2522.38	0.02912417		3052.41	0.01616119		3582.4	0.00315745		4112.4	-0.01288636
402.59	0.47516541		932.59	0.15946431		1462.58	0.18431211		1992.59	-0.01740201		2522.58	0.02881288		3052.61	0.01666099		3582.6	0.00321774		4112.6	-0.01233372
402.79	0.47487862		932.79	0.15996772		1462.78	0.18494227		1992.79	-0.01793748		2522.78	0.02862706		3052.81	0.01619157		3582.8	0.0031223		4112.8	-0.0113134
402.99	0.47461835		932.99	0.1597488		1462.98	0.18473032		1992.99	-0.01763974		2522.98	0.02961609		3053.01	0.01634744		3583	0.00323894		4113	-0.01087541
403.19	0.47362297		933.19	0.15970367		1463.18	0.1850595		1993.19	-0.01664723		2523.18	0.02962643		3053.21	0.01586142		3583.2	0.00342218		4113.2	-0.00991845
403.39	0.47394711		933.39	0.15949384		1463.38	0.18445723		1993.39	-0.01673307		2523.38	0.02979329		3053.41	0.01564793		3583.4	0.00312843		4113.4	-0.00877798
403.59	0.47411977		933.59	0.15950391		1463.58	0.18420926		1993.59	-0.01730574		2523.58	0.02941528		3053.61	0.01530067		3583.6	0.00267099		4113.6	-0.00776603
403.79	0.47491594		933.79	0.16002965		1463.78	0.18328176		1993.79	-0.01696436		2523.78	0.02909776		3053.81	0.01437302		3583.8	0.00271567		4113.8	-0.00847184
403.99	0.47452648		933.99	0.16021998		1463.98	0.18233961		1993.99	-0.01751868		2523.98	0.02989378		3054.01	0.01379104		3584	0.00300897		4114	-0.00896971
404.19	0.47577052		934.19	0.16073244		1464.18	0.18098325		1994.19	-0.01775229		2524.18	0.02910227		3054.21	0.01395867		3584.2	0.00341607		4114.2	-0.00893678
404.39	0.47672765		934.39	0.16140578		1464.38	0.18044433		1994.39	-0.0178071		2524.38	0.02900542		3054.41	0.01380713		3584.4	0.00262095		4114.4	-0.00880467
404.59	0.47671863		934.59	0.16170047		1464.58	0.18015356		1994.59	-0.01798653		2524.58	0.02905767		3054.61	0.01421451		3584.6	0.00209475		4114.6	-0.00966846
404.79	0.47797472		934.79	0.16131657		1464.78	0.17981791		1994.79	-0.01808463		2524.78	0.0296217		3054.81	0.01392172		3584.8	0.00222519		4114.8	-0.01042786
404.99	0.47907472		934.99	0.16097221		1464.98	0.17855764		1994.99	-0.01855888		2524.98	0.02867295		3055.01	0.01440289		3585	0.00195545		4115	-0.01134926
405.19	0.47970781		935.19	0.16113674		1465.18	0.17793707		1995.19	-0.01853486		2525.18	0.02839791		3055.21	0.01356079		3585.2	0.00241177		4115.2	-0.01210505
405.39	0.47962418		935.39	0.16101347		1465.38	0.17754046		1995.39	-0.0184408		2525.38	0.02855726		3055.41	0.01291319		3585.4	0.00303105		4115.4	-0.01174326
405.59	0.47948143		935.59	0.16030663		1465.58	0.17763021		1995.59	-0.01832452		2525.58	0.02796214		3055.61	0.01305194		3585.6	0.00266433		4115.6	-0.01174039
405.79	0.47961449		935.79	0.1603532		1465.78	0.17791608		1995.79	-0.01883004		2525.78	0.02671791		3055.81	0.01261058		3585.8	0.00198822		4115.8	-0.01178107
405.99	0.47972786		935.99	0.16024707		1465.98	0.17800843		1995.99	-0.01767624		2525.98	0.02616566		3056.01	0.01292584		3586	0.00202913		4116	-0.01181793
406.19	0.47947401		936.19	0.16009503		1466.18	0.17801682		1996.19	-0.01728926		2526.18	0.02591882		3056.21	0.01287618		3586.2	0.00222847		4116.2	-0.01117138
406.39	0.47959462		936.39	0.1591847		1466.38	0.17857718		1996.39	-0.01660596		2526.38	0.02645856		3056.41	0.0121717		3586.4	0.00185386		4116.4	-0.01020945
406.59	0.47845187		936.59	0.15865922		1466.58	0.17883141		1996.59	-0.01666754		2526.58	0.02746962		3056.61	0.01268948		3586.6	0.00217961		4116.6	-0.01048424
406.79	0.47807665		936.79	0.15841664		1466.78	0.17892138		1996.79	-0.01704698		2526.78	0.02809125		3056.81	0.01252061		3586.8	0.00249259		4116.8	-0.01056117
406.99	0.47782164		936.99	0.15872571		1466.98	0.17836619		1996.99	-0.01675686		2526.98	0.02906232		3057.01	0.01208046		3587	0.00258001		4117	-0.01024666
407.19	0.47732617		937.19	0.1590793		1467.18	0.17902025		1997.19	-0.0165147		2527.18	0.02981202		3057.21	0.01110547		3587.2	0.00260347		4117.2	-0.01013351
407.39	0.47726455		937.39	0.15981005		1467.38	0.18029375		1997.39	-0.0166457		2527.38	0.03089668		3057.41	0.01099739		3587.4	0.00234146		4117.4	-0.01014471
407.59	0.47687498		937.59	0.15999267		1467.58	0.18077587		1997.59	-0.01699302		2527.58	0.0312427		3057.61	0.01074252		3587.6	0.00186053		4117.6	-0.01032953
407.79	0.47649245		937.79	0.15998664		1467.78	0.18019896		1997.79	-0.01689368		2527.78	0.03141817		3057.81	0.01122007		3587.8	0.00189228		4117.8	-0.01080881
407.99	0.47563488		937.99	0.159728		1467.98	0.18146708		1997.99	-0.01766728		2527.98	0.03208373		3058.01	0.01166745		3588	0.00220503		4118	-0.01106595
408.19	0.47472928		938.19	0.1599743		1468.18	0.18143003		1998.19	-0.01821263		2528.18	0.03111495		3058.21	0.011327		3588.2	0.00254829		4118.2	-0.01013214
408.39	0.47382454		938.39	0.16062667		1468.38	0.18140183		1998.39	-0.01849498		2528.38	0.03219902		3058.41	0.01149195		3588.4	0.00253605		4118.4	-0.00972622
408.59	0.47328428		938.59	0.16088359		1468.58	0.18133127		1998.59	-0.0186704		2528.58	0.03239148		3058.61	0.01158074		3588.6	0.00358534		4118.6	-0.01018066
408.79	0.47394216		938.79	0.1611892		1468.78	0.18158681		1998.79	-0.01968884		2528.78	0.03184155		3058.81	0.01117484		3588.8	0.00362998		4118.8	-0.0111667
408.99	0.47417484		938.99	0.16174345		1468.98	0.18152663		1998.99	-0.02075858		2528.98	0.03072367		3059.01	0.0108326		3589	0.00351367		4119	-0.00970335
409.19	0.47401552		939.19	0.16197701		1469.18	0.18240825		1999.19	-0.02131203		2529.18	0.02983548		3059.21	0.01035678		3589.2	0.0043256		4119.2	-0.00913317
409.39	0.47410755		939.39	0.16180797		1469.38	0.1828921		1999.39	-0.02067531		2529.38	0.02880619		3059.41	0.00986485		3589.4	0.00450698		4119.4	-0.00892213
409.59	0.47493316		939.59	0.16165754		1469.58	0.18324851		1999.59	-0.02052712		2529.58	0.02701639		3059.61	0.0097437		3589.6	0.00406274		4119.6	-0.00943353
409.79	0.47646082		939.79	0.16128226		1469.78	0.18305635		1999.79	-0.02048108		2529.78	0.02576026		3059.81	0.01017583		3589.8	0.00418962		4119.8	-0.01019229
409.99	0.47600122		939.99	0.15994909		1469.98	0.18258737		1999.99	-0.02056882		2529.98	0.02564996		3060.01	0.01078293		3590	0.00431761		4120	-0.01126386
410.19	0.47732446		940.19	0.15924381		1470.18	0.18198193		2000.19	-0.02069483		2530.18	0.02575545		3060.21	0.01032268		3590.2	0.00464142		4120.2	-0.01146641
410.39	0.47745913		940.39	0.15815749		1470.38	0.18183973		2000.39	-0.02029833		2530.38	0.02523017		3060.41	0.01109388		3590.4	0.00453454		4120.4	-0.0116573
410.59	0.47728491		940.59	0.15765037		1470.58	0.18150814		2000.59	-0.02089783		2530.58	0.02450922		3060.61	0.0121586		3590.6	0.00483812		4120.6	-0.01270539
410.79	0.47765585		940.79	0.1569237		1470.78	0.18137774		2000.79	-0.02084435		2530.78	0.02374305		3060.81	0.01196202		3590.8	0.00543232		4120.8	-0.01272832
410.99	0.47780651		940.99	0.1571852		1470.98	0.18053092		2000.99	-0.02094985		2530.98	0.02391259		3061.01	0.01177555		3591	0.00570109		4121	-0.01212289
411.19	0.47845428		941.19	0.15675587		1471.18	0.18025667		2001.19	-0.02036102		2531.18	0.0251688		3061.21	0.01223182		3591.2	0.00520914		4121.2	-0.01278412
411.39	0.47790386		941.39	0.15642819		1471.38	0.18064987		2001.39	-0.02042966		2531.38	0.02493975		3061.41	0.01294031		3591.4	0.00515596		4121.4	-0.01239244
411.59	0.47861927		941.59	0.1565288		1471.58	0.18040398		2001.59	-0.02032643		2531.58	0.02538476		3061.61	0.01291143		3591.6	0.00468869		4121.6	-0.01150789
411.79	0.4783835		941.79	0.15635665		1471.78	0.18105658		2001.79	-0.01955486		2531.78	0.02590993		3061.81	0.01330915		3591.8	0.00467745		4121.8	-0.01131932
411.99	0.47892751		941.99	0.15716294		1471.98	0.18109792		2001.99	-0.01977715		2531.98	0.0267775		3062.01	0.01299179		3592	0.00486913		4122	-0.01046019
412.19	0.47848397		942.19	0.15844938		1472.18	0.17998994		2002.19	-0.01972784		2532.18	0.02727934		3062.21	0.01262508		3592.2	0.00477478		4122.2	-0.01031707
412.39	0.47868474		942.39	0.15945135		1472.38	0.17963653		2002.39	-0.01974636		2532.38	0.02812309		3062.41	0.0119656		3592.4	0.00419713		4122.4	-0.00981229
412.59	0.47885418		942.59	0.15963842		1472.58	0.18036684		2002.59	-0.01960682		2532.58	0.0288695		3062.61	0.0109593		3592.6	0.00395749		4122.6	-0.0100488
412.79	0.47784618		942.79	0.15978796		1472.78	0.17983135		2002.79	-0.01989042		2532.78	0.02843608		3062.81	0.00988525		3592.8	0.00322342		4122.8	-0.00973484
412.99	0.47820169		942.99	0.15997307		1472.98	0.18039956		2002.99	-0.0192614		2532.98	0.02829714		3063.01	0.00922288		3593	0.00309182		4123	-0.00775738
413.19	0.47838097		943.19	0.15995402		1473.18	0.18013948		2003.19	-0.0190338		2533.18	0.02785137		3063.21	0.0088139		3593.2	0.00336524		4123.2	-0.00882762
413.39	0.47876656		943.39	0.1597527		1473.38	0.17992281		2003.39	-0.01834624		2533.38	0.02768696		3063.41	0.00770292		3593.4	0.00302354		4123.4	-0.00899437
413.59	0.47908807		943.59	0.15994886		1473.58	0.179327		2003.59	-0.01833574		2533.58	0.02704609		3063.61	0.00796317		3593.6	0.00264873		4123.6	-0.00936276
413.79	0.47929021		943.79	0.15901081		1473.78	0.17906624		2003.79	-0.01846321		2533.78	0.02720109		3063.81	0.009052		3593.8	0.00139034		4123.8	-0.00999895
413.99	0.47824422		943.99	0.15880325		1473.98	0.17911405		2003.99	-0.01906457		2533.98	0.02715858		3064.01	0.00920442		3594	0.00138557		4124	-0.01006624
414.19	0.47834625		944.19	0.15844833		1474.18	0.17912474		2004.19	-0.01851664		2534.18	0.02746137		3064.21	0.00899903		3594.2	0.00096691		4124.2	-0.01037277
414.39	0.4774768		944.39	0.15790193		1474.38	0.17883565		2004.39	-0.01812303		2534.38	0.02637987		3064.41	0.01077006		3594.4	0.00091194		4124.4	-0.0103884
414.59	0.47734332		944.59	0.15837333		1474.58	0.17821959		2004.59	-0.0185862		2534.58	0.02606175		3064.61	0.0120349		3594.6	0.0006645		4124.6	-0.01056653
414.79	0.47651262		944.79	0.15882706		1474.78	0.17827522		2004.79	-0.01804329		2534.78	0.02521847		3064.81	0.01311946		3594.8	0.00119978		4124.8	-0.01134598
414.99	0.47582813		944.99	0.15937337		1474.98	0.17800728		2004.99	-0.01837373		2534.98	0.02502895		3065.01	0.01476963		3595	0.00136255		4125	-0.01183823
415.19	0.47581267		945.19	0.15901203		1475.18	0.17795854		2005.19	-0.01820024		2535.18	0.02606161		3065.21	0.01522798		3595.2	0.00043623		4125.2	-0.01311133
415.39	0.47565802		945.39	0.15920923		1475.38	0.17824033		2005.39	-0.01795375		2535.38	0.02544282		3065.41	0.01535619		3595.4	0.0002212		4125.4	-0.01304457
415.59	0.47694474		945.59	0.1598947		1475.58	0.17829416		2005.59	-0.01729056		2535.58	0.02670788		3065.61	0.01556261		3595.6	0.00053976		4125.6	-0.01372577
415.79	0.4769964		945.79	0.15962964		1475.78	0.17852112		2005.79	-0.01768064		2535.78	0.02719078		3065.81	0.01609686		3595.8	0.00027907		4125.8	-0.01472789
415.99	0.47758594		945.99	0.15978784		1475.98	0.1777906		2005.99	-0.0185547		2535.98	0.02726531		3066.01	0.01580256		3596	0.0006718		4126	-0.015625
416.19	0.4771252		946.19	0.15951461		1476.18	0.17834224		2006.19	-0.01923352		2536.18	0.02677709		3066.21	0.0156064		3596.2	0.00109811		4126.2	-0.01747209
416.39	0.47701241		946.39	0.15863182		1476.38	0.17864521		2006.39	-0.01983436		2536.38	0.02581996		3066.41	0.01439791		3596.4	0.00168944		4126.4	-0.01727339
416.59	0.47673671		946.59	0.15837655		1476.58	0.17885433		2006.59	-0.01997194		2536.58	0.0257429		3066.61	0.01387442		3596.6	0.00129919		4126.6	-0.01794073
416.79	0.47672824		946.79	0.15838202		1476.78	0.17894584		2006.79	-0.0198961		2536.78	0.02510505		3066.81	0.01345709		3596.8	0.00165004		4126.8	-0.01762789
416.99	0.47782096		946.99	0.15837972		1476.98	0.1791895		2006.99	-0.01936473		2536.98	0.02410254		3067.01	0.01356383		3597	0.00173262		4127	-0.01706289
417.19	0.47856441		947.19	0.15762524		1477.18	0.17832603		2007.19	-0.01945685		2537.18	0.02420741		3067.21	0.01269868		3597.2	0.00176769		4127.2	-0.01678398
417.39	0.47918219		947.39	0.15775654		1477.38	0.17886984		2007.39	-0.01919552		2537.38	0.02475517		3067.41	0.01244011		3597.4	0.00197263		4127.4	-0.01617815
417.59	0.47905239		947.59	0.15744332		1477.58	0.17845552		2007.59	-0.01947386		2537.58	0.02459509		3067.61	0.01327684		3597.6	0.0021221		4127.6	-0.01547626
417.79	0.47953849		947.79	0.15650176		1477.78	0.17845488		2007.79	-0.01943846		2537.78	0.02480538		3067.81	0.01306709		3597.8	0.00174136		4127.8	-0.01476066
417.99	0.47935049		947.99	0.156499		1477.98	0.17864887		2007.99	-0.01965707		2537.98	0.02385291		3068.01	0.01332781		3598	0.00179425		4128	-0.01461843
418.19	0.47905744		948.19	0.15644651		1478.18	0.17766116		2008.19	-0.01901341		2538.18	0.02350515		3068.21	0.01356289		3598.2	0.00133651		4128.2	-0.01420348
418.39	0.47916211		948.39	0.15696959		1478.38	0.17727797		2008.39	-0.01965807		2538.38	0.02338993		3068.41	0.01421824		3598.4	0.00126224		4128.4	-0.01391884
418.59	0.47923753		948.59	0.15767569		1478.58	0.17746607		2008.59	-0.01928121		2538.58	0.02376594		3068.61	0.01409301		3598.6	0.00068619		4128.6	-0.01335822
418.79	0.47782141		948.79	0.15781818		1478.78	0.17826803		2008.79	-0.01875909		2538.78	0.02362695		3068.81	0.01402972		3598.8	0.00090411		4128.8	-0.01295694
418.99	0.47672845		948.99	0.1572375		1478.98	0.17798426		2008.99	-0.0193891		2538.98	0.02443448		3069.01	0.01419506		3599	0.00101274		4129	-0.01241641
419.19	0.47653411		949.19	0.15566915		1479.18	0.17792369		2009.19	-0.01993473		2539.18	0.02555147		3069.21	0.01302175		3599.2	0.00071114		4129.2	-0.0121507
419.39	0.47599364		949.39	0.15663167		1479.38	0.17760287		2009.39	-0.02016995		2539.38	0.0264128		3069.41	0.01274586		3599.4	0.00134631		4129.4	-0.0122726
419.59	0.47619855		949.59	0.15675423		1479.58	0.1780811		2009.59	-0.02067587		2539.58	0.02735976		3069.61	0.01273359		3599.6	0.00176534		4129.6	-0.0127906
419.79	0.47564247		949.79	0.15646263		1479.78	0.17891868		2009.79	-0.02150751		2539.78	0.0273573		3069.81	0.01236216		3599.8	0.00149701		4129.8	-0.0133868
419.99	0.47579882		949.99	0.15611959		1479.98	0.17941334		2009.99	-0.02195817		2539.98	0.02744754		3070.01	0.0119189		3600	0.00190591		4130	-0.01356942
420.19	0.47552432		950.19	0.15567051		1480.18	0.17962892		2010.19	-0.0225258		2540.18	0.0263225		3070.21	0.01208821		3600.2	0.00208415		4130.2	-0.01385141
420.39	0.4751741		950.39	0.15624177		1480.38	0.17878972		2010.39	-0.0228208		2540.38	0.02620987		3070.41	0.01224678		3600.4	0.0020806		4130.4	-0.01327861
420.59	0.4748226		950.59	0.15721276		1480.58	0.17898635		2010.59	-0.02286747		2540.58	0.02600479		3070.61	0.01264323		3600.6	0.00153192		4130.6	-0.01365851
420.79	0.47453049		950.79	0.15769122		1480.78	0.17915124		2010.79	-0.02204234		2540.78	0.02574962		3070.81	0.01337668		3600.8	0.00167846		4130.8	-0.01405324
420.99	0.47408184		950.99	0.15792181		1480.98	0.17856302		2010.99	-0.02138107		2540.98	0.02492186		3071.01	0.0143387		3601	0.00205595		4131	-0.014153
421.19	0.47420021		951.19	0.15781961		1481.18	0.17868228		2011.19	-0.02034403		2541.18	0.02559528		3071.21	0.01442332		3601.2	0.00162894		4131.2	-0.01282396
421.39	0.47465505		951.39	0.15741921		1481.38	0.17933786		2011.39	-0.01966786		2541.38	0.02505525		3071.41	0.01445226		3601.4	0.00208515		4131.4	-0.01317005
421.59	0.47550218		951.59	0.15678945		1481.58	0.17922212		2011.59	-0.01963963		2541.58	0.02451318		3071.61	0.01421532		3601.6	0.00149856		4131.6	-0.01277836
421.79	0.47669166		951.79	0.15639403		1481.78	0.17941135		2011.79	-0.01977668		2541.78	0.02352079		3071.81	0.01439318		3601.8	0.00088406		4131.8	-0.01269668
421.99	0.47763032		951.99	0.15665474		1481.98	0.17994516		2011.99	-0.01917648		2541.98	0.02222569		3072.01	0.0142685		3602	0.00069609		4132	-0.01313761
422.19	0.47769432		952.19	0.15622826		1482.18	0.17964865		2012.19	-0.01920781		2542.18	0.02217915		3072.21	0.01317653		3602.2	0.00038378		4132.2	-0.01334481
422.39	0.47746562		952.39	0.15519549		1482.38	0.17954051		2012.39	-0.01965708		2542.38	0.02293496		3072.41	0.01260188		3602.4	0.00056141		4132.4	-0.01273919
422.59	0.47669803		952.59	0.15447374		1482.58	0.17943142		2012.59	-0.01949511		2542.58	0.02273894		3072.61	0.01221751		3602.6	0.00051355		4132.6	-0.01187188
422.79	0.47525429		952.79	0.15428327		1482.78	0.18001861		2012.79	-0.01997731		2542.78	0.02292892		3072.81	0.01221237		3602.8	0.00009351		4132.8	-0.01209553
422.99	0.47438267		952.99	0.15413573		1482.98	0.17964444		2012.99	-0.02123696		2542.98	0.0231525		3073.01	0.01235009		3603	0.00041076		4133	-0.0124619
423.19	0.47433139		953.19	0.15358979		1483.18	0.180003		2013.19	-0.02215595		2543.18	0.02315147		3073.21	0.01233047		3603.2	0.00095521		4133.2	-0.01173853
423.39	0.47439182		953.39	0.15512409		1483.38	0.17964629		2013.39	-0.02228458		2543.38	0.02392574		3073.41	0.01251004		3603.4	0.00047469		4133.4	-0.01143176
423.59	0.47489097		953.59	0.15504266		1483.58	0.18011772		2013.59	-0.02211918		2543.58	0.02341339		3073.61	0.01252367		3603.6	0.00006843		4133.6	-0.01114806
423.79	0.47493994		953.79	0.15549406		1483.78	0.17966437		2013.79	-0.02174867		2543.78	0.02315916		3073.81	0.01254535		3603.8	0.0007095		4133.8	-0.0116356
423.99	0.47537701		953.99	0.15584893		1483.98	0.17958218		2013.99	-0.02201795		2543.98	0.02316531		3074.01	0.01278927		3604	0.00153387		4134	-0.01099945
424.19	0.47430624		954.19	0.15682345		1484.18	0.17870569		2014.19	-0.02208524		2544.18	0.02211305		3074.21	0.01363739		3604.2	0.00145143		4134.2	-0.01062558
424.39	0.47340759		954.39	0.15833207		1484.38	0.17853916		2014.39	-0.02150099		2544.38	0.02235052		3074.41	0.01394951		3604.4	0.00220349		4134.4	-0.01088329
424.59	0.47296925		954.59	0.15912788		1484.58	0.17862242		2014.59	-0.02118094		2544.58	0.02244102		3074.61	0.01452108		3604.6	0.00263902		4134.6	-0.01184478
424.79	0.47281953		954.79	0.15942067		1484.78	0.17844423		2014.79	-0.02100697		2544.78	0.02203039		3074.81	0.01524054		3604.8	0.00328517		4134.8	-0.01264446
424.99	0.47344181		954.99	0.16019553		1484.98	0.1782084		2014.99	-0.02078135		2544.98	0.02105338		3075.01	0.0155467		3605	0.00330258		4135	-0.01217988
425.19	0.47401657		955.19	0.16003262		1485.18	0.17832486		2015.19	-0.01978959		2545.18	0.02134189		3075.21	0.01549266		3605.2	0.00248523		4135.2	-0.01074879
425.39	0.47477798		955.39	0.15890979		1485.38	0.17930416		2015.39	-0.01969896		2545.38	0.02125995		3075.41	0.01558887		3605.4	0.00227642		4135.4	-0.0111691
425.59	0.47598481		955.59	0.15898464		1485.58	0.18080968		2015.59	-0.0198025		2545.58	0.02103737		3075.61	0.0154032		3605.6	0.00172418		4135.6	-0.01154865
425.79	0.47666877		955.79	0.15854352		1485.78	0.18157451		2015.79	-0.02024331		2545.78	0.02079662		3075.81	0.01570998		3605.8	0.0015532		4135.8	-0.01192481
425.99	0.47698264		955.99	0.15812416		1485.98	0.18212817		2015.99	-0.02019381		2545.98	0.02133723		3076.01	0.01553756		3606	0.00071599		4136	-0.01238407
426.19	0.47629266		956.19	0.15799384		1486.18	0.18174489		2016.19	-0.02111045		2546.18	0.02237989		3076.21	0.01500517		3606.2	-0.00051141		4136.2	-0.01227086
426.39	0.4767377		956.39	0.15706812		1486.38	0.18139625		2016.39	-0.02137574		2546.38	0.02306551		3076.41	0.01459777		3606.4	-0.00084947		4136.4	-0.01140615
426.59	0.47625504		956.59	0.15719302		1486.58	0.17994749		2016.59	-0.02190437		2546.58	0.02373231		3076.61	0.01399939		3606.6	-0.00266612		4136.6	-0.01131486
426.79	0.47629666		956.79	0.15720469		1486.78	0.1794155		2016.79	-0.02201632		2546.78	0.02436825		3076.81	0.0136891		3606.8	-0.00304766		4136.8	-0.01188708
426.99	0.47697581		956.99	0.1569702		1486.98	0.1789516		2016.99	-0.02188842		2546.98	0.0250003		3077.01	0.01349735		3607	-0.00322695		4137	-0.01128808
427.19	0.47748911		957.19	0.1568441		1487.18	0.17881032		2017.19	-0.02147941		2547.18	0.02513115		3077.21	0.01290506		3607.2	-0.00331079		4137.2	-0.01118619
427.39	0.47778382		957.39	0.15762778		1487.38	0.17912004		2017.39	-0.02102619		2547.38	0.02531558		3077.41	0.01253551		3607.4	-0.00465846		4137.4	-0.01137011
427.59	0.4772903		957.59	0.15776136		1487.58	0.17936023		2017.59	-0.02092126		2547.58	0.02525244		3077.61	0.01119237		3607.6	-0.00454801		4137.6	-0.01217623
427.79	0.4779098		957.79	0.15877627		1487.78	0.17857523		2017.79	-0.02004469		2547.78	0.02481743		3077.81	0.01078565		3607.8	-0.00333828		4137.8	-0.01249176
427.99	0.47746638		957.99	0.15911949		1487.98	0.17839891		2017.99	-0.02044317		2547.98	0.02460819		3078.01	0.01000034		3608	-0.00291906		4138	-0.01207584
428.19	0.47612089		958.19	0.15914245		1488.18	0.17787752		2018.19	-0.02041715		2548.18	0.02473577		3078.21	0.00946937		3608.2	-0.00249394		4138.2	-0.01342599
428.39	0.47607468		958.39	0.15936956		1488.38	0.17708528		2018.39	-0.02036649		2548.38	0.02473363		3078.41	0.00954337		3608.4	-0.00169133		4138.4	-0.01389398
428.59	0.47608364		958.59	0.16009439		1488.58	0.17648034		2018.59	-0.02162851		2548.58	0.02479919		3078.61	0.01053373		3608.6	-0.00078572		4138.6	-0.01389004
428.79	0.47618936		958.79	0.16020398		1488.78	0.175994		2018.79	-0.02198365		2548.78	0.02318598		3078.81	0.01114969		3608.8	-0.00034375		4138.8	-0.01402413
428.99	0.47593505		958.99	0.16063319		1488.98	0.17642794		2018.99	-0.02166895		2548.98	0.02280951		3079.01	0.01141779		3609	-0.00008168		4139	-0.01406646
429.19	0.47627951		959.19	0.16022575		1489.18	0.17640984		2019.19	-0.02189913		2549.18	0.02283881		3079.21	0.01167338		3609.2	0.00033549		4139.2	-0.01373921
429.39	0.47530535		959.39	0.15970627		1489.38	0.17754098		2019.39	-0.0220379		2549.38	0.02252164		3079.41	0.01175145		3609.4	0.0003757		4139.4	-0.01463418
429.59	0.47559727		959.59	0.15971381		1489.58	0.17770734		2019.59	-0.0224563		2549.58	0.02190796		3079.61	0.01185967		3609.6	0.00147132		4139.6	-0.01458288
429.79	0.47528603		959.79	0.15960979		1489.78	0.17724071		2019.79	-0.02209144		2549.78	0.02278938		3079.81	0.01282069		3609.8	0.00109284		4139.8	-0.01434919
429.99	0.47501005		959.99	0.15962547		1489.98	0.17651287		2019.99	-0.02200933		2549.98	0.02317398		3080.01	0.0136608		3610	0.00048894		4140	-0.01344865
430.19	0.47530781		960.19	0.15961388		1490.18	0.17587541		2020.19	-0.0217533		2550.18	0.0232523		3080.21	0.01324688		3610.2	0.00064455		4140.2	-0.01313015
430.39	0.47639133		960.39	0.15866128		1490.38	0.17617158		2020.39	-0.02205191		2550.38	0.02315015		3080.41	0.01360455		3610.4	0.00024791		4140.4	-0.01293
430.59	0.47664794		960.59	0.15849056		1490.58	0.17492708		2020.59	-0.02203775		2550.58	0.02431137		3080.61	0.01400725		3610.6	-0.00089477		4140.6	-0.0128808
430.79	0.4776818		960.79	0.15807507		1490.78	0.17476159		2020.79	-0.02152803		2550.78	0.0242587		3080.81	0.0137314		3610.8	-0.00104013		4140.8	-0.01365199
430.99	0.47862629		960.99	0.15799886		1490.98	0.17558192		2020.99	-0.02042731		2550.98	0.02386467		3081.01	0.01292143		3611	-0.00136542		4141	-0.01396598
431.19	0.47881286		961.19	0.15788748		1491.18	0.17596587		2021.19	-0.02070202		2551.18	0.02372629		3081.21	0.01203178		3611.2	-0.00192404		4141.2	-0.01406827
431.39	0.47870128		961.39	0.15782422		1491.38	0.17595337		2021.39	-0.0204197		2551.38	0.02333517		3081.41	0.01204406		3611.4	-0.0026647		4141.4	-0.01416704
431.59	0.47829733		961.59	0.15753063		1491.58	0.17659031		2021.59	-0.02065295		2551.58	0.02301379		3081.61	0.01154104		3611.6	-0.00195046		4141.6	-0.01505224
431.79	0.47929712		961.79	0.15740706		1491.78	0.17661929		2021.79	-0.02091987		2551.78	0.02275967		3081.81	0.01233401		3611.8	-0.00164188		4141.8	-0.01521319
431.99	0.47838725		961.99	0.15698678		1491.98	0.1773411		2021.99	-0.02143706		2551.98	0.02299576		3082.01	0.01186063		3612	-0.00223271		4142	-0.01573813
432.19	0.4777645		962.19	0.15686242		1492.18	0.1772834		2022.19	-0.02197865		2552.18	0.02338526		3082.21	0.0122216		3612.2	-0.00256689		4142.2	-0.01714227
432.39	0.47779705		962.39	0.1575552		1492.38	0.1765145		2022.39	-0.02251763		2552.38	0.02324108		3082.41	0.01268749		3612.4	-0.00234422		4142.4	-0.01618852
432.59	0.4769955		962.59	0.15768074		1492.58	0.17734976		2022.59	-0.02313631		2552.58	0.02308206		3082.61	0.01343144		3612.6	-0.00176252		4142.6	-0.01699446
432.79	0.47679536		962.79	0.15667642		1492.78	0.17727055		2022.79	-0.02255583		2552.78	0.0223238		3082.81	0.01202829		3612.8	-0.00118038		4142.8	-0.01766221
432.99	0.4767278		962.99	0.15589162		1492.98	0.17717434		2022.99	-0.02259686		2552.98	0.02198066		3083.01	0.01165307		3613	-0.00118151		4143	-0.01779995
433.19	0.477087		963.19	0.1552341		1493.18	0.17671245		2023.19	-0.02309955		2553.18	0.02166158		3083.21	0.01104967		3613.2	-0.00115667		4143.2	-0.01741956
433.39	0.4758727		963.39	0.15481162		1493.38	0.17679759		2023.39	-0.02245523		2553.38	0.02163805		3083.41	0.01069416		3613.4	-0.00140175		4143.4	-0.01660872
433.59	0.47630222		963.59	0.15461555		1493.58	0.17630311		2023.59	-0.02297368		2553.58	0.02183619		3083.61	0.01091006		3613.6	-0.00041483		4143.6	-0.01506214
433.79	0.47573184		963.79	0.1544733		1493.78	0.17640322		2023.79	-0.02293923		2553.78	0.021966		3083.81	0.01091324		3613.8	-0.00143393		4143.8	-0.01442672
433.99	0.47564201		963.99	0.1544459		1493.98	0.17631748		2023.99	-0.02378884		2553.98	0.02173104		3084.01	0.01186074		3614	-0.00148044		4144	-0.01384217
434.19	0.47609463		964.19	0.15437276		1494.18	0.17700189		2024.19	-0.02334403		2554.18	0.02175932		3084.21	0.01161154		3614.2	-0.00164475		4144.2	-0.01353951
434.39	0.47615198		964.39	0.15409143		1494.38	0.17734543		2024.39	-0.02397012		2554.38	0.02246905		3084.41	0.01226087		3614.4	-0.00251835		4144.4	-0.01331378
434.59	0.47695209		964.59	0.15446683		1494.58	0.17749226		2024.59	-0.0238169		2554.58	0.02270991		3084.61	0.01212739		3614.6	-0.00331846		4144.6	-0.01298004
434.79	0.47709982		964.79	0.15509431		1494.78	0.1782609		2024.79	-0.02307614		2554.78	0.02230732		3084.81	0.01087454		3614.8	-0.0032186		4144.8	-0.01262289
434.99	0.47624327		964.99	0.15589506		1494.98	0.17894276		2024.99	-0.02241393		2554.98	0.0217844		3085.01	0.00983035		3615	-0.00158607		4145	-0.01238652
435.19	0.4755503		965.19	0.15591011		1495.18	0.17812554		2025.19	-0.02300086		2555.18	0.02197974		3085.21	0.00995902		3615.2	-0.00165688		4145.2	-0.01200185
435.39	0.47512566		965.39	0.15582426		1495.38	0.1782618		2025.39	-0.02258296		2555.38	0.02213404		3085.41	0.01089984		3615.4	-0.00122161		4145.4	-0.01227106
435.59	0.47510873		965.59	0.15613353		1495.58	0.17900537		2025.59	-0.0235389		2555.58	0.02213914		3085.61	0.01198573		3615.6	-0.00066737		4145.6	-0.01270402
435.79	0.47497861		965.79	0.15576416		1495.78	0.17884244		2025.79	-0.02313185		2555.78	0.02249794		3085.81	0.01150816		3615.8	-0.00126909		4145.8	-0.01359341
435.99	0.47414292		965.99	0.15536603		1495.98	0.17871291		2025.99	-0.02292395		2555.98	0.02326261		3086.01	0.01043049		3616	-0.00129168		4146	-0.01475165
436.19	0.47363889		966.19	0.15539146		1496.18	0.17817593		2026.19	-0.02297497		2556.18	0.02343257		3086.21	0.01066903		3616.2	-0.00077863		4146.2	-0.01556524
436.39	0.47265357		966.39	0.1551926		1496.38	0.17781292		2026.39	-0.02284406		2556.38	0.02327349		3086.41	0.00987966		3616.4	-0.00028431		4146.4	-0.01573545
436.59	0.47196933		966.59	0.15427502		1496.58	0.17799372		2026.59	-0.02272296		2556.58	0.02302587		3086.61	0.00936036		3616.6	-0.00033084		4146.6	-0.01710637
436.79	0.47287019		966.79	0.15337614		1496.78	0.17732796		2026.79	-0.0220601		2556.78	0.0232358		3086.81	0.00822546		3616.8	-0.00074972		4146.8	-0.01750111
436.99	0.47412225		966.99	0.15331108		1496.98	0.1765914		2026.99	-0.02189691		2556.98	0.02277738		3087.01	0.00881782		3617	-0.00145812		4147	-0.0171246
437.19	0.47478182		967.19	0.15341208		1497.18	0.1767801		2027.19	-0.02101698		2557.18	0.02298206		3087.21	0.00895841		3617.2	-0.00131406		4147.2	-0.01766609
437.39	0.47441431		967.39	0.1530581		1497.38	0.17613037		2027.39	-0.02097156		2557.38	0.02310129		3087.41	0.00989099		3617.4	-0.00064208		4147.4	-0.01687045
437.59	0.47470637		967.59	0.15331558		1497.58	0.17630211		2027.59	-0.02119645		2557.58	0.02307325		3087.61	0.01064868		3617.6	-0.00045699		4147.6	-0.01628611
437.79	0.47449584		967.79	0.15440121		1497.78	0.17574072		2027.79	-0.02062201		2557.78	0.02263932		3087.81	0.01112663		3617.8	-0.00110011		4147.8	-0.01658465
437.99	0.47525446		967.99	0.15498129		1497.98	0.1763026		2027.99	-0.02069668		2557.98	0.02275682		3088.01	0.0130135		3618	-0.00099071		4148	-0.01627329
438.19	0.47559566		968.19	0.15547243		1498.18	0.17677068		2028.19	-0.01979952		2558.18	0.02259251		3088.21	0.01307965		3618.2	-0.00119068		4148.2	-0.01567067
438.39	0.47633805		968.39	0.15555446		1498.38	0.17783498		2028.39	-0.02028513		2558.38	0.02148517		3088.41	0.01387016		3618.4	-0.00112545		4148.4	-0.0152981
438.59	0.47709022		968.59	0.15652506		1498.58	0.17950161		2028.59	-0.01984436		2558.58	0.01993407		3088.61	0.01421035		3618.6	-0.00110078		4148.6	-0.01457881
438.79	0.47657595		968.79	0.15777202		1498.78	0.1798716		2028.79	-0.01999079		2558.78	0.01977789		3088.81	0.01379168		3618.8	-0.0005725		4148.8	-0.01384882
438.99	0.47582494		968.99	0.15822937		1498.98	0.17979586		2028.99	-0.02027049		2558.98	0.01946259		3089.01	0.01424863		3619	0.00048236		4149	-0.01378138
439.19	0.47646624		969.19	0.157854		1499.18	0.17893742		2029.19	-0.02102199		2559.18	0.01967827		3089.21	0.01483569		3619.2	0.0004598		4149.2	-0.01256712
439.39	0.475889		969.39	0.15815806		1499.38	0.17851369		2029.39	-0.02133592		2559.38	0.01963296		3089.41	0.01525852		3619.4	0.00096192		4149.4	-0.01205325
439.59	0.47635177		969.59	0.15777963		1499.58	0.17795891		2029.59	-0.02287727		2559.58	0.01928397		3089.61	0.01517699		3619.6	0.00070227		4149.6	-0.012364
439.79	0.47614068		969.79	0.15812902		1499.78	0.17798065		2029.79	-0.02378588		2559.78	0.01952863		3089.81	0.01335731		3619.8	0.00080236		4149.8	-0.01324481
439.99	0.4755917		969.99	0.15821954		1499.98	0.17772162		2029.99	-0.02517396		2559.98	0.01960739		3090.01	0.01228626		3620	0.00180969		4150	-0.01348965
440.19	0.47500068		970.19	0.15812562		1500.18	0.17677955		2030.19	-0.0257098		2560.18	0.01960437		3090.21	0.01217461		3620.2	0.00192471		4150.2	-0.01339944
440.39	0.47392076		970.39	0.15742291		1500.38	0.1764435		2030.39	-0.02650559		2560.38	0.0189645		3090.41	0.01121374		3620.4	0.00327846		4150.4	-0.01382779
440.59	0.47384564		970.59	0.15663112		1500.58	0.17587357		2030.59	-0.0270423		2560.58	0.01935598		3090.61	0.01130903		3620.6	0.00384464		4150.6	-0.01523261
440.79	0.47378423		970.79	0.15616913		1500.78	0.17569139		2030.79	-0.0269291		2560.78	0.02019654		3090.81	0.01085454		3620.8	0.00297796		4150.8	-0.01523451
440.99	0.47353972		970.99	0.1561772		1500.98	0.17487852		2030.99	-0.02616474		2560.98	0.02053572		3091.01	0.01117338		3621	0.0028238		4151	-0.01529259
441.19	0.47346121		971.19	0.155708		1501.18	0.17461913		2031.19	-0.02534643		2561.18	0.02137602		3091.21	0.01097367		3621.2	0.00272697		4151.2	-0.01623205
441.39	0.47314429		971.39	0.15541731		1501.38	0.17333193		2031.39	-0.02491192		2561.38	0.02155611		3091.41	0.01166596		3621.4	0.00361166		4151.4	-0.01548828
441.59	0.47332318		971.59	0.15557844		1501.58	0.17334007		2031.59	-0.02426012		2561.58	0.0212851		3091.61	0.0121598		3621.6	0.00297256		4151.6	-0.01565077
441.79	0.47296291		971.79	0.15604322		1501.78	0.17315134		2031.79	-0.02329348		2561.78	0.0211916		3091.81	0.01235057		3621.8	0.00285101		4151.8	-0.01555276
441.99	0.47367108		971.99	0.15588468		1501.98	0.17381746		2031.99	-0.02343218		2561.98	0.02108005		3092.01	0.01301316		3622	0.00197716		4152	-0.01501417
442.19	0.47377332		972.19	0.15521693		1502.18	0.17426703		2032.19	-0.02303194		2562.18	0.02049784		3092.21	0.01241498		3622.2	0.001141		4152.2	-0.01453549
442.39	0.47399554		972.39	0.15453851		1502.38	0.17578461		2032.39	-0.02223317		2562.38	0.01904154		3092.41	0.01255843		3622.4	0.00039264		4152.4	-0.01428708
442.59	0.47392104		972.59	0.15482611		1502.58	0.17608359		2032.59	-0.0225361		2562.58	0.01856232		3092.61	0.01208426		3622.6	0.00034023		4152.6	-0.01383559
442.79	0.47409888		972.79	0.15571566		1502.78	0.17743231		2032.79	-0.02259465		2562.78	0.0189786		3092.81	0.01178708		3622.8	-0.00007465		4152.8	-0.01407324
442.99	0.47453427		972.99	0.15523203		1502.98	0.17797424		2032.99	-0.02317374		2562.98	0.01833708		3093.01	0.01139213		3623	-0.00065661		4153	-0.01412701
443.19	0.47530174		973.19	0.15562418		1503.18	0.17788184		2033.19	-0.02359869		2563.18	0.01785319		3093.21	0.01108911		3623.2	-0.00088982		4153.2	-0.01347043
443.39	0.4749109		973.39	0.15634459		1503.38	0.17815093		2033.39	-0.02402812		2563.38	0.01686632		3093.41	0.01076847		3623.4	-0.0012688		4153.4	-0.01406288
443.59	0.47557472		973.59	0.15660192		1503.58	0.17831971		2033.59	-0.02530554		2563.58	0.01728558		3093.61	0.01001438		3623.6	-0.00175011		4153.6	-0.01468054
443.79	0.47492388		973.79	0.15779888		1503.78	0.1784004		2033.79	-0.02532466		2563.78	0.01697646		3093.81	0.00979329		3623.8	-0.00104847		4153.8	-0.0151125
443.99	0.47442237		973.99	0.15694059		1503.98	0.17869635		2033.99	-0.02491743		2563.98	0.01719066		3094.01	0.0098181		3624	-0.0014839		4154	-0.01573238
444.19	0.4738378		974.19	0.15665353		1504.18	0.17825221		2034.19	-0.02488345		2564.18	0.0170827		3094.21	0.0101891		3624.2	-0.00113955		4154.2	-0.01582003
444.39	0.47360829		974.39	0.15606211		1504.38	0.17893596		2034.39	-0.02506602		2564.38	0.01640947		3094.41	0.01010394		3624.4	-0.00009613		4154.4	-0.01668704
444.59	0.47354754		974.59	0.15550408		1504.58	0.17912314		2034.59	-0.02503752		2564.58	0.01728245		3094.61	0.01058474		3624.6	-0.00204		4154.6	-0.01777379
444.79	0.47338296		974.79	0.15486537		1504.78	0.17951976		2034.79	-0.02421538		2564.78	0.0182693		3094.81	0.01061982		3624.8	-0.00305339		4154.8	-0.01770763
444.99	0.47356938		974.99	0.15500407		1504.98	0.17881374		2034.99	-0.02290591		2564.98	0.01849359		3095.01	0.01140479		3625	-0.00301211		4155	-0.01771312
445.19	0.47329131		975.19	0.15446563		1505.18	0.17886303		2035.19	-0.0217631		2565.18	0.01899522		3095.21	0.01195581		3625.2	-0.00265347		4155.2	-0.01744145
445.39	0.47361804		975.39	0.15459864		1505.38	0.1786292		2035.39	-0.0216485		2565.38	0.01936048		3095.41	0.01272177		3625.4	-0.00183576		4155.4	-0.01683904
445.59	0.47379224		975.59	0.15433033		1505.58	0.17921466		2035.59	-0.02206357		2565.58	0.02031671		3095.61	0.01364293		3625.6	-0.0018115		4155.6	-0.01627106
445.79	0.47407469		975.79	0.15396437		1505.78	0.17874583		2035.79	-0.02177219		2565.78	0.02090455		3095.81	0.01360314		3625.8	-0.0019114		4155.8	-0.01552064
445.99	0.47517803		975.99	0.15442306		1505.98	0.1782813		2035.99	-0.0222667		2565.98	0.02122212		3096.01	0.01353534		3626	-0.00227482		4156	-0.0149498
446.19	0.47539504		976.19	0.15388639		1506.18	0.17806137		2036.19	-0.02224668		2566.18	0.02174234		3096.21	0.01341866		3626.2	-0.00179105		4156.2	-0.01399018
446.39	0.47595813		976.39	0.15410627		1506.38	0.1780081		2036.39	-0.02152388		2566.38	0.02187254		3096.41	0.01315354		3626.4	-0.00129694		4156.4	-0.01421285
446.59	0.47632877		976.59	0.15347111		1506.58	0.1775952		2036.59	-0.02228987		2566.58	0.02197595		3096.61	0.01252309		3626.6	-0.00120509		4156.6	-0.01312422
446.79	0.47648989		976.79	0.15359781		1506.78	0.17776409		2036.79	-0.02191023		2566.78	0.02205309		3096.81	0.01276982		3626.8	-0.00106255		4156.8	-0.01401392
446.99	0.47611611		976.99	0.1533054		1506.98	0.17682524		2036.99	-0.02338157		2566.98	0.02118391		3097.01	0.01221002		3627	-0.00055048		4157	-0.01442248
447.19	0.47503586		977.19	0.15346726		1507.18	0.17602481		2037.19	-0.02370076		2567.18	0.02072133		3097.21	0.01216192		3627.2	0.00029017		4157.2	-0.01405542
447.39	0.4739757		977.39	0.15344739		1507.38	0.17555697		2037.39	-0.02403452		2567.38	0.02091447		3097.41	0.01204993		3627.4	-0.00018039		4157.4	-0.01383718
447.59	0.4731105		977.59	0.15377648		1507.58	0.1750914		2037.59	-0.02437501		2567.58	0.02123487		3097.61	0.01191357		3627.6	-0.00003305		4157.6	-0.01382705
447.79	0.47218611		977.79	0.15380374		1507.78	0.17555947		2037.79	-0.02406206		2567.78	0.01979626		3097.81	0.01180167		3627.8	-0.0003074		4157.8	-0.01482972
447.99	0.47187625		977.99	0.15356351		1507.98	0.17618518		2037.99	-0.02496079		2567.98	0.02026773		3098.01	0.01160432		3628	-0.00064296		4158	-0.01551098
448.19	0.47173715		978.19	0.15394695		1508.18	0.17659065		2038.19	-0.02571226		2568.18	0.0191176		3098.21	0.01201323		3628.2	-0.00043005		4158.2	-0.01559666
448.39	0.47173291		978.39	0.15290338		1508.38	0.17677806		2038.39	-0.02587592		2568.38	0.01847621		3098.41	0.01155131		3628.4	-0.00104934		4158.4	-0.01603484
448.59	0.47171485		978.59	0.15305716		1508.58	0.17695816		2038.59	-0.02545291		2568.58	0.01819192		3098.61	0.01190878		3628.6	-0.00207261		4158.6	-0.01678869
448.79	0.47209714		978.79	0.15333755		1508.78	0.1772337		2038.79	-0.02439109		2568.78	0.01818556		3098.81	0.01187336		3628.8	-0.00140886		4158.8	-0.01615718
448.99	0.47274271		978.99	0.15379235		1508.98	0.17665936		2038.99	-0.02443351		2568.98	0.01713791		3099.01	0.01147319		3629	-0.00219353		4159	-0.01604277
449.19	0.47349989		979.19	0.15397925		1509.18	0.1776687		2039.19	-0.02388444		2569.18	0.01703756		3099.21	0.01159066		3629.2	-0.00200739		4159.2	-0.01523368
449.39	0.47550878		979.39	0.15500943		1509.38	0.17745942		2039.39	-0.02530552		2569.38	0.01710123		3099.41	0.01119457		3629.4	-0.00204212		4159.4	-0.0146395
449.59	0.47571058		979.59	0.15492086		1509.58	0.177149		2039.59	-0.02517394		2569.58	0.01671225		3099.61	0.01058577		3629.6	-0.00190518		4159.6	-0.01382508
449.79	0.47684059		979.79	0.15591497		1509.78	0.17676439		2039.79	-0.02440138		2569.78	0.01669006		3099.81	0.00989259		3629.8	-0.00244923		4159.8	-0.01380136
449.99	0.47824596		979.99	0.1566858		1509.98	0.17679078		2039.99	-0.02369444		2569.98	0.01709283		3100.01	0.00980189		3630	-0.00182466		4160	-0.01350546
450.19	0.47861902		980.19	0.15627651		1510.18	0.17661538		2040.19	-0.02403894		2570.18	0.01837163		3100.21	0.01007545		3630.2	-0.00127068		4160.2	-0.01281835
450.39	0.47907494		980.39	0.15544196		1510.38	0.17701768		2040.39	-0.02331192		2570.38	0.01917227		3100.41	0.00992425		3630.4	-0.00147776		4160.4	-0.01262101
450.59	0.47873194		980.59	0.15486685		1510.58	0.17704635		2040.59	-0.02332277		2570.58	0.01927701		3100.61	0.00962217		3630.6	-0.00173899		4160.6	-0.0120768
450.79	0.47737862		980.79	0.15564483		1510.78	0.17665464		2040.79	-0.02338338		2570.78	0.01948141		3100.81	0.00978714		3630.8	-0.00145328		4160.8	-0.01337309
450.99	0.47681511		980.99	0.15588371		1510.98	0.17674423		2040.99	-0.02418818		2570.98	0.020579		3101.01	0.00904445		3631	-0.00189907		4161	-0.01368791
451.19	0.47640305		981.19	0.15565249		1511.18	0.17659853		2041.19	-0.02381821		2571.18	0.02110974		3101.21	0.00904051		3631.2	-0.00183676		4161.2	-0.01376229
451.39	0.47534007		981.39	0.15562833		1511.38	0.17691953		2041.39	-0.02356136		2571.38	0.02089484		3101.41	0.00898007		3631.4	-0.00195743		4161.4	-0.01463071
451.59	0.47400746		981.59	0.15579898		1511.58	0.17770162		2041.59	-0.02392598		2571.58	0.02080633		3101.61	0.00896887		3631.6	-0.00069199		4161.6	-0.01594606
451.79	0.47417472		981.79	0.15555781		1511.78	0.17831497		2041.79	-0.0243041		2571.78	0.02064387		3101.81	0.00879037		3631.8	-0.00028646		4161.8	-0.01773913
451.99	0.47414918		981.99	0.15594751		1511.98	0.17809164		2041.99	-0.0247291		2571.98	0.02099758		3102.01	0.00856908		3632	0.00005604		4162	-0.01797355
452.19	0.47454264		982.19	0.15588616		1512.18	0.1777122		2042.19	-0.02395848		2572.18	0.0202357		3102.21	0.00822752		3632.2	-0.00038323		4162.2	-0.01822271
452.39	0.47419721		982.39	0.1552697		1512.38	0.17724202		2042.39	-0.02294618		2572.38	0.02080709		3102.41	0.00825591		3632.4	-0.00030859		4162.4	-0.01826164
452.59	0.47456379		982.59	0.15559488		1512.58	0.17734195		2042.59	-0.02265842		2572.58	0.02090651		3102.61	0.00814601		3632.6	-0.00056727		4162.6	-0.01910069
452.79	0.47514971		982.79	0.15562037		1512.78	0.17710434		2042.79	-0.02183665		2572.78	0.02086497		3102.81	0.00815094		3632.8	-0.0009452		4162.8	-0.01883618
452.99	0.47537006		982.99	0.15543036		1512.98	0.17675151		2042.99	-0.02216944		2572.98	0.01943828		3103.01	0.00850598		3633	-0.00158672		4163	-0.01908031
453.19	0.47547282		983.19	0.15550563		1513.18	0.17732113		2043.19	-0.02131374		2573.18	0.01910384		3103.21	0.00916315		3633.2	-0.00106814		4163.2	-0.01841669
453.39	0.47573002		983.39	0.15565102		1513.38	0.17671677		2043.39	-0.02207695		2573.38	0.01836446		3103.41	0.00911659		3633.4	-0.00101328		4163.4	-0.01777547
453.59	0.47577265		983.59	0.15570208		1513.58	0.17652562		2043.59	-0.0208848		2573.58	0.01823751		3103.61	0.00877995		3633.6	-0.00084199		4163.6	-0.01735767
453.79	0.47647914		983.79	0.15683822		1513.78	0.1761052		2043.79	-0.02041344		2573.78	0.01939727		3103.81	0.00927618		3633.8	-0.00082575		4163.8	-0.01667721
453.99	0.47658251		983.99	0.15653592		1513.98	0.17592138		2043.99	-0.02053798		2573.98	0.01987459		3104.01	0.01040471		3634	-0.00029835		4164	-0.01673144
454.19	0.47631707		984.19	0.15725787		1514.18	0.17634893		2044.19	-0.0209863		2574.18	0.02050898		3104.21	0.01114591		3634.2	-0.0007443		4164.2	-0.01589997
454.39	0.47622653		984.39	0.15732433		1514.38	0.17651938		2044.39	-0.02051116		2574.38	0.02031304		3104.41	0.01103054		3634.4	-0.00157143		4164.4	-0.0157062
454.59	0.47606571		984.59	0.1582634		1514.58	0.17625406		2044.59	-0.0206208		2574.58	0.02038284		3104.61	0.01049175		3634.6	-0.00133583		4164.6	-0.01500864
454.79	0.47532889		984.79	0.15933318		1514.78	0.17556193		2044.79	-0.02147076		2574.78	0.02022971		3104.81	0.0097645		3634.8	-0.00124394		4164.8	-0.01416325
454.99	0.47628871		984.99	0.1590959		1514.98	0.1757119		2044.99	-0.02246422		2574.98	0.02090139		3105.01	0.00881928		3635	-0.00089082		4165	-0.01455356
455.19	0.47613011		985.19	0.15903996		1515.18	0.17499605		2045.19	-0.0224919		2575.18	0.02011371		3105.21	0.00901843		3635.2	0.00062486		4165.2	-0.01522666
455.39	0.47598311		985.39	0.15895695		1515.38	0.17456328		2045.39	-0.0236083		2575.38	0.01918261		3105.41	0.00825995		3635.4	0.00105562		4165.4	-0.01599738
455.59	0.4756986		985.59	0.15869767		1515.58	0.17442164		2045.59	-0.02496681		2575.58	0.01931752		3105.61	0.00799688		3635.6	0.00142566		4165.6	-0.01650585
455.79	0.47615953		985.79	0.15774688		1515.78	0.17405902		2045.79	-0.02526629		2575.78	0.01897763		3105.81	0.00690501		3635.8	0.00143221		4165.8	-0.01734348
455.99	0.47527145		985.99	0.1570544		1515.98	0.17366678		2045.99	-0.0252768		2575.98	0.01783588		3106.01	0.00587779		3636	0.00134997		4166	-0.01721302
456.19	0.47512834		986.19	0.15628121		1516.18	0.17398344		2046.19	-0.02543128		2576.18	0.01808454		3106.21	0.00576869		3636.2	0.00134408		4166.2	-0.01717982
456.39	0.47464607		986.39	0.15593165		1516.38	0.17457392		2046.39	-0.02610388		2576.38	0.01885274		3106.41	0.00601717		3636.4	0.00045483		4166.4	-0.01766275
456.59	0.47490322		986.59	0.15538959		1516.58	0.17549477		2046.59	-0.02676689		2576.58	0.01792372		3106.61	0.00599315		3636.6	0.00031112		4166.6	-0.01795299
456.79	0.4754676		986.79	0.15522324		1516.78	0.17618797		2046.79	-0.02664998		2576.78	0.01776379		3106.81	0.00668518		3636.8	0.0005524		4166.8	-0.01724934
456.99	0.47548613		986.99	0.15522524		1516.98	0.17604059		2046.99	-0.02704481		2576.98	0.01739519		3107.01	0.00752728		3637	0.00048487		4167	-0.01678101
457.19	0.47590791		987.19	0.15502515		1517.18	0.17685671		2047.19	-0.02635129		2577.18	0.01765412		3107.21	0.00800201		3637.2	0.00057441		4167.2	-0.01608555
457.39	0.47644037		987.39	0.15590851		1517.38	0.17631514		2047.39	-0.02644708		2577.38	0.01766338		3107.41	0.00846433		3637.4	0.00040541		4167.4	-0.01492861
457.59	0.47610426		987.59	0.15722226		1517.58	0.17571574		2047.59	-0.0258028		2577.58	0.01816854		3107.61	0.00894891		3637.6	0.00010786		4167.6	-0.01437897
457.79	0.4761668		987.79	0.15837093		1517.78	0.17632182		2047.79	-0.02602142		2577.78	0.01910472		3107.81	0.00900304		3637.8	-0.00019667		4167.8	-0.01371754
457.99	0.47592362		987.99	0.15846388		1517.98	0.17643509		2047.99	-0.02565781		2577.98	0.01833116		3108.01	0.00978012		3638	-0.00054479		4168	-0.01394054
458.19	0.47611989		988.19	0.15989086		1518.18	0.17687029		2048.19	-0.02571576		2578.18	0.01840571		3108.21	0.01070562		3638.2	-0.00014029		4168.2	-0.01336323
458.39	0.47637965		988.39	0.15980797		1518.38	0.17642233		2048.39	-0.02636306		2578.38	0.01826356		3108.41	0.01077435		3638.4	-0.00039946		4168.4	-0.01355468
458.59	0.47615052		988.59	0.1603032		1518.58	0.17593545		2048.59	-0.0261954		2578.58	0.01806694		3108.61	0.01047635		3638.6	-0.00005251		4168.6	-0.01346797
458.79	0.47559323		988.79	0.16065524		1518.78	0.17517386		2048.79	-0.02686447		2578.78	0.01812411		3108.81	0.00999782		3638.8	-0.00031543		4168.8	-0.01419013
458.99	0.47556759		988.99	0.15957384		1518.98	0.17518236		2048.99	-0.0268817		2578.98	0.01858415		3109.01	0.01020418		3639	0.00021978		4169	-0.01564955
459.19	0.4742524		989.19	0.15927394		1519.18	0.17429691		2049.19	-0.02632046		2579.18	0.01807687		3109.21	0.01036251		3639.2	0.00037136		4169.2	-0.01571731
459.39	0.47405663		989.39	0.15771633		1519.38	0.17389686		2049.39	-0.02692523		2579.38	0.01846488		3109.41	0.00974481		3639.4	-0.00055668		4169.4	-0.01636613
459.59	0.47301495		989.59	0.15635114		1519.58	0.17415304		2049.59	-0.02666237		2579.58	0.01840628		3109.61	0.00923596		3639.6	-0.00130818		4169.6	-0.01728358
459.79	0.47195218		989.79	0.15503175		1519.78	0.17457653		2049.79	-0.02644148		2579.78	0.0184398		3109.81	0.00805159		3639.8	-0.00093527		4169.8	-0.01834615
459.99	0.47153811		989.99	0.15442301		1519.98	0.17489667		2049.99	-0.02686917		2579.98	0.01768011		3110.01	0.00766278		3640	0.0000837		4170	-0.01903593
460.19	0.47160933		990.19	0.15390352		1520.18	0.17518214		2050.19	-0.02709071		2580.18	0.0184416		3110.21	0.00728535		3640.2	-0.0000867		4170.2	-0.01962052
460.39	0.47142044		990.39	0.15288842		1520.38	0.17521658		2050.39	-0.02709285		2580.38	0.01846092		3110.41	0.00776632		3640.4	-0.00022873		4170.4	-0.01951616
460.59	0.47212908		990.59	0.15216333		1520.58	0.17631093		2050.59	-0.0266047		2580.58	0.01877105		3110.61	0.0076742		3640.6	0.00081073		4170.6	-0.01861443
460.79	0.47238465		990.79	0.152447		1520.78	0.17577489		2050.79	-0.02612619		2580.78	0.01897679		3110.81	0.00704989		3640.8	0.00081601		4170.8	-0.01749519
460.99	0.47189568		990.99	0.15248647		1520.98	0.17462005		2050.99	-0.02547456		2580.98	0.01928451		3111.01	0.00746161		3641	0.00091473		4171	-0.01709773
461.19	0.47302753		991.19	0.15275112		1521.18	0.17526403		2051.19	-0.02522887		2581.18	0.01904649		3111.21	0.00735264		3641.2	0.0014683		4171.2	-0.01565235
461.39	0.47409209		991.39	0.153343		1521.38	0.17442061		2051.39	-0.02569996		2581.38	0.01965979		3111.41	0.00679042		3641.4	0.00186549		4171.4	-0.01500112
461.59	0.47462656		991.59	0.15369941		1521.58	0.17519234		2051.59	-0.02589362		2581.58	0.01999959		3111.61	0.00726757		3641.6	0.00175166		4171.6	-0.01506487
461.79	0.47489249		991.79	0.15463303		1521.78	0.17574841		2051.79	-0.02551163		2581.78	0.02057142		3111.81	0.00635507		3641.8	0.00166786		4171.8	-0.01550528
461.99	0.47529801		991.99	0.15452424		1521.98	0.17522873		2051.99	-0.02546307		2581.98	0.02042984		3112.01	0.00752811		3642	0.00113256		4172	-0.01552588
462.19	0.47576192		992.19	0.15601118		1522.18	0.17601176		2052.19	-0.02612696		2582.18	0.02057404		3112.21	0.00760085		3642.2	0.00128354		4172.2	-0.01556664
462.39	0.47554035		992.39	0.15632478		1522.38	0.17665264		2052.39	-0.02678772		2582.38	0.02046795		3112.41	0.00745505		3642.4	-0.00002874		4172.4	-0.01627244
462.59	0.47377286		992.59	0.15722723		1522.58	0.17750281		2052.59	-0.02671736		2582.58	0.02039243		3112.61	0.00818879		3642.6	0.00058048		4172.6	-0.01608877
462.79	0.47365338		992.79	0.15772524		1522.78	0.17798868		2052.79	-0.02758559		2582.78	0.02023163		3112.81	0.00858095		3642.8	0.00049027		4172.8	-0.01500423
462.99	0.47337029		992.99	0.15771593		1522.98	0.1791267		2052.99	-0.02740865		2582.98	0.01956941		3113.01	0.00929934		3643	0.00013076		4173	-0.01510949
463.19	0.47245681		993.19	0.15762481		1523.18	0.17921003		2053.19	-0.02794857		2583.18	0.01875049		3113.21	0.00892618		3643.2	-0.00071492		4173.2	-0.01487673
463.39	0.47263599		993.39	0.15706272		1523.38	0.17871266		2053.39	-0.02868733		2583.38	0.01892608		3113.41	0.0086729		3643.4	-0.00097741		4173.4	-0.01532647
463.59	0.47238819		993.59	0.15695204		1523.58	0.17991117		2053.59	-0.02872353		2583.58	0.01810998		3113.61	0.00860984		3643.6	-0.00111094		4173.6	-0.01579726
463.79	0.47166098		993.79	0.15652242		1523.78	0.180188		2053.79	-0.02938743		2583.78	0.01796924		3113.81	0.00896308		3643.8	-0.00095261		4173.8	-0.01626456
463.99	0.47149561		993.99	0.15568816		1523.98	0.18040385		2053.99	-0.02976565		2583.98	0.01708085		3114.01	0.00945101		3644	-0.00073751		4174	-0.01714831
464.19	0.47094309		994.19	0.15510642		1524.18	0.18026937		2054.19	-0.02902921		2584.18	0.0169938		3114.21	0.00987444		3644.2	-0.00153108		4174.2	-0.01678427
464.39	0.47059329		994.39	0.154844		1524.38	0.18026092		2054.39	-0.02791765		2584.38	0.01670707		3114.41	0.01003133		3644.4	-0.00140002		4174.4	-0.01662005
464.59	0.47057752		994.59	0.15423912		1524.58	0.17986707		2054.59	-0.02622868		2584.58	0.01672567		3114.61	0.00939291		3644.6	-0.00207054		4174.6	-0.0169947
464.79	0.47026207		994.79	0.15374539		1524.78	0.17873021		2054.79	-0.02494433		2584.78	0.01659557		3114.81	0.00925003		3644.8	-0.00232095		4174.8	-0.01625327
464.99	0.47060765		994.99	0.15246932		1524.98	0.17842916		2054.99	-0.02475355		2584.98	0.01716463		3115.01	0.0096669		3645	-0.00230593		4175	-0.01632728
465.19	0.47217882		995.19	0.15305289		1525.18	0.17816912		2055.19	-0.02422507		2585.18	0.01693011		3115.21	0.0088946		3645.2	-0.00249815		4175.2	-0.01611229
465.39	0.47280868		995.39	0.15311569		1525.38	0.17765142		2055.39	-0.02348682		2585.38	0.01794693		3115.41	0.00834532		3645.4	-0.00306127		4175.4	-0.0169907
465.59	0.47360974		995.59	0.15366108		1525.58	0.17795279		2055.59	-0.02273828		2585.58	0.01774111		3115.61	0.00872138		3645.6	-0.00415892		4175.6	-0.01787346
465.79	0.47443329		995.79	0.15476521		1525.78	0.17802098		2055.79	-0.02230694		2585.78	0.01836694		3115.81	0.00779306		3645.8	-0.00440683		4175.8	-0.01787623
465.99	0.47504014		995.99	0.15420024		1525.98	0.17744091		2055.99	-0.02266322		2585.98	0.01860434		3116.01	0.0084429		3646	-0.00498001		4176	-0.01725551
466.19	0.47472397		996.19	0.1554267		1526.18	0.17751068		2056.19	-0.02348712		2586.18	0.01851507		3116.21	0.00872458		3646.2	-0.00411378		4176.2	-0.01645814
466.39	0.47423494		996.39	0.15593381		1526.38	0.17759779		2056.39	-0.02406161		2586.38	0.01805258		3116.41	0.00977351		3646.4	-0.00399519		4176.4	-0.016255
466.59	0.47430122		996.59	0.15664468		1526.58	0.17713994		2056.59	-0.02452213		2586.58	0.01778522		3116.61	0.01040187		3646.6	-0.00348746		4176.6	-0.01559786
466.79	0.47558536		996.79	0.1573947		1526.78	0.17728626		2056.79	-0.02534825		2586.78	0.01691773		3116.81	0.01009383		3646.8	-0.00309726		4176.8	-0.01526556
466.99	0.47570749		996.99	0.15754287		1526.98	0.1775271		2056.99	-0.02572441		2586.98	0.01596629		3117.01	0.01048534		3647	-0.00261117		4177	-0.01586418
467.19	0.475016		997.19	0.15699213		1527.18	0.17651094		2057.19	-0.02683417		2587.18	0.01532384		3117.21	0.00936569		3647.2	-0.00159931		4177.2	-0.01629921
467.39	0.47514253		997.39	0.15681376		1527.38	0.17607186		2057.39	-0.02719443		2587.38	0.01506838		3117.41	0.00975314		3647.4	-0.00070606		4177.4	-0.01638007
467.59	0.47452472		997.59	0.15701594		1527.58	0.17665084		2057.59	-0.0278997		2587.58	0.01482843		3117.61	0.00988461		3647.6	-0.00040278		4177.6	-0.01744516
467.79	0.47352934		997.79	0.15735128		1527.78	0.17625818		2057.79	-0.02845079		2587.78	0.01475266		3117.81	0.00995762		3647.8	-0.0004703		4177.8	-0.01883436
467.99	0.47262271		997.99	0.15710484		1527.98	0.1753177		2057.99	-0.02792636		2587.98	0.01462654		3118.01	0.00953956		3648	-0.00037235		4178	-0.01878234
468.19	0.47201749		998.19	0.15669161		1528.18	0.17497596		2058.19	-0.02721068		2588.18	0.01481727		3118.21	0.00926928		3648.2	-0.00069794		4178.2	-0.01922855
468.39	0.47190273		998.39	0.15575482		1528.38	0.17469178		2058.39	-0.02587972		2588.38	0.01551313		3118.41	0.00872296		3648.4	-0.00056767		4178.4	-0.019512
468.59	0.47132504		998.59	0.15469702		1528.58	0.17404439		2058.59	-0.02557749		2588.58	0.01617178		3118.61	0.00845705		3648.6	-0.00085978		4178.6	-0.0189705
468.79	0.47184953		998.79	0.15434565		1528.78	0.17451747		2058.79	-0.0250846		2588.78	0.016789		3118.81	0.00841199		3648.8	-0.00063596		4178.8	-0.01802948
468.99	0.47216003		998.99	0.15395958		1528.98	0.17493109		2058.99	-0.02531978		2588.98	0.01714883		3119.01	0.00844111		3649	-0.00073416		4179	-0.01783342
469.19	0.47253712		999.19	0.15435884		1529.18	0.1752137		2059.19	-0.0244943		2589.18	0.01759197		3119.21	0.00796095		3649.2	-0.00073008		4179.2	-0.01725148
469.39	0.47333226		999.39	0.15349233		1529.38	0.17611582		2059.39	-0.02538803		2589.38	0.01819699		3119.41	0.00752323		3649.4	-0.00110855		4179.4	-0.01733151
469.59	0.47438906		999.59	0.15415587		1529.58	0.17631868		2059.59	-0.02541035		2589.58	0.01778397		3119.61	0.00806638		3649.6	-0.00130982		4179.6	-0.01691164
469.79	0.47465803		999.79	0.15432741		1529.78	0.1764429		2059.79	-0.02588772		2589.78	0.01851987		3119.81	0.00839116		3649.8	-0.00143143		4179.8	-0.01561326
469.99	0.4742166		999.99	0.15382854		1529.98	0.17555921		2059.99	-0.02613323		2589.98	0.01783131		3120.01	0.00836023		3650	-0.0020207		4180	-0.01449316
470.19	0.47474747		1000.19	0.15482227		1530.18	0.17559499		2060.19	-0.0264463		2590.18	0.01801287		3120.21	0.00913804		3650.2	-0.00199817		4180.2	-0.01322004
470.39	0.47524367		1000.39	0.15405931		1530.38	0.17448939		2060.39	-0.02670897		2590.38	0.01699666		3120.41	0.00914258		3650.4	-0.00250347		4180.4	-0.01312809
470.59	0.47624506		1000.59	0.15388063		1530.58	0.17465104		2060.59	-0.02652341		2590.58	0.01758664		3120.61	0.00929606		3650.6	-0.00356385		4180.6	-0.01304334
470.79	0.47583802		1000.79	0.15369749		1530.78	0.17540419		2060.79	-0.02650124		2590.78	0.01693427		3120.81	0.00879842		3650.8	-0.00288018		4180.8	-0.01255632
470.99	0.4759413		1000.99	0.15316403		1530.98	0.17516176		2060.99	-0.02731004		2590.98	0.01650794		3121.01	0.00852526		3651	-0.00308591		4181	-0.01263912
471.19	0.47483807		1001.19	0.15249261		1531.18	0.17492691		2061.19	-0.02745477		2591.18	0.01655512		3121.21	0.00736448		3651.2	-0.00222937		4181.2	-0.01274959
471.39	0.47424764		1001.39	0.15244175		1531.38	0.17460949		2061.39	-0.02682178		2591.38	0.01602901		3121.41	0.00771247		3651.4	-0.00272856		4181.4	-0.01281059
471.59	0.47334437		1001.59	0.1530269		1531.58	0.17403946		2061.59	-0.02724267		2591.58	0.01555509		3121.61	0.00782565		3651.6	-0.00292831		4181.6	-0.01339176
471.79	0.47354011		1001.79	0.15275653		1531.78	0.1740318		2061.79	-0.02677791		2591.78	0.01605101		3121.81	0.0084424		3651.8	-0.0033671		4181.8	-0.01366501
471.99	0.4732072		1001.99	0.15252961		1531.98	0.17313286		2061.99	-0.02586662		2591.98	0.01582146		3122.01	0.00828713		3652	-0.00409648		4182	-0.01351102
472.19	0.47293781		1002.19	0.1519941		1532.18	0.17407771		2062.19	-0.02605083		2592.18	0.01628289		3122.21	0.00823802		3652.2	-0.00410552		4182.2	-0.01491238
472.39	0.47311987		1002.39	0.15123749		1532.38	0.1743691		2062.39	-0.02534505		2592.38	0.01740917		3122.41	0.007957		3652.4	-0.00291295		4182.4	-0.01453836
472.59	0.47275658		1002.59	0.15120338		1532.58	0.17440577		2062.59	-0.024952		2592.58	0.01749463		3122.61	0.00837433		3652.6	-0.00258583		4182.6	-0.01498063
472.79	0.47285642		1002.79	0.15103761		1532.78	0.17503901		2062.79	-0.0251331		2592.78	0.01697657		3122.81	0.0089251		3652.8	-0.00258148		4182.8	-0.01504405
472.99	0.47296518		1002.99	0.15127579		1532.98	0.1760794		2062.99	-0.02511753		2592.98	0.01706295		3123.01	0.0086402		3653	-0.00233188		4183	-0.01523776
473.19	0.47350518		1003.19	0.15224192		1533.18	0.17641285		2063.19	-0.02540076		2593.18	0.01710374		3123.21	0.00831777		3653.2	-0.00227541		4183.2	-0.01600166
473.39	0.47335145		1003.39	0.15327838		1533.38	0.17691185		2063.39	-0.02572285		2593.38	0.01633616		3123.41	0.00792961		3653.4	-0.00239243		4183.4	-0.01663567
473.59	0.47323517		1003.59	0.15486188		1533.58	0.17700441		2063.59	-0.02583917		2593.58	0.01660197		3123.61	0.00840691		3653.6	-0.00243338		4183.6	-0.01716104
473.79	0.47339173		1003.79	0.15442476		1533.78	0.17752672		2063.79	-0.02644107		2593.78	0.01600356		3123.81	0.00797764		3653.8	-0.00304234		4183.8	-0.01731834
473.99	0.47330746		1003.99	0.15481993		1533.98	0.17692638		2063.99	-0.02722786		2593.98	0.0150069		3124.01	0.00696646		3654	-0.00325975		4184	-0.01785609
474.19	0.47410161		1004.19	0.15487446		1534.18	0.1765147		2064.19	-0.02670624		2594.18	0.01498321		3124.21	0.00744712		3654.2	-0.00377901		4184.2	-0.0179636
474.39	0.47390216		1004.39	0.15514703		1534.38	0.17515575		2064.39	-0.02740134		2594.38	0.01431792		3124.41	0.00667685		3654.4	-0.00389021		4184.4	-0.01800017
474.59	0.47412745		1004.59	0.15551512		1534.58	0.17614983		2064.59	-0.02777413		2594.58	0.01437978		3124.61	0.00486524		3654.6	-0.00402845		4184.6	-0.01784243
474.79	0.47420615		1004.79	0.15608508		1534.78	0.17602636		2064.79	-0.02859302		2594.78	0.01390622		3124.81	0.0035293		3654.8	-0.00308675		4184.8	-0.01709358
474.99	0.47371463		1004.99	0.15556357		1534.98	0.17609585		2064.99	-0.02921511		2594.98	0.01324447		3125.01	0.00343043		3655	-0.00428237		4185	-0.01671315
475.19	0.47331678		1005.19	0.15546366		1535.18	0.17563204		2065.19	-0.02852557		2595.18	0.0125475		3125.21	0.00323173		3655.2	-0.00393992		4185.2	-0.01623841
475.39	0.47378783		1005.39	0.15559649		1535.38	0.1749227		2065.39	-0.02808812		2595.38	0.01136612		3125.41	0.00341908		3655.4	-0.00519009		4185.4	-0.01668305
475.59	0.47416374		1005.59	0.15559103		1535.58	0.17520441		2065.59	-0.02861502		2595.58	0.01136794		3125.61	0.0044025		3655.6	-0.00462645		4185.6	-0.01709609
475.79	0.47482556		1005.79	0.15474931		1535.78	0.17507779		2065.79	-0.02825167		2595.78	0.01142496		3125.81	0.00461779		3655.8	-0.00466637		4185.8	-0.01789984
475.99	0.47466847		1005.99	0.15477916		1535.98	0.17417461		2065.99	-0.02786027		2595.98	0.01142507		3126.01	0.00458459		3656	-0.0045641		4186	-0.01820814
476.19	0.47412529		1006.19	0.15424961		1536.18	0.174468		2066.19	-0.02761586		2596.18	0.01200397		3126.21	0.00578093		3656.2	-0.0032907		4186.2	-0.01717718
476.39	0.47390967		1006.39	0.1539108		1536.38	0.17422126		2066.39	-0.02710804		2596.38	0.01258549		3126.41	0.00590483		3656.4	-0.00243585		4186.4	-0.01606828
476.59	0.4740202		1006.59	0.1537124		1536.58	0.17394942		2066.59	-0.02663383		2596.58	0.01151223		3126.61	0.00699673		3656.6	-0.002607		4186.6	-0.01613176
476.79	0.47432047		1006.79	0.15337293		1536.78	0.17370982		2066.79	-0.0270681		2596.78	0.01089483		3126.81	0.0074784		3656.8	-0.00309733		4186.8	-0.01562263
476.99	0.47462442		1006.99	0.15353752		1536.98	0.17459461		2066.99	-0.02643997		2596.98	0.01138963		3127.01	0.0076163		3657	-0.0026973		4187	-0.01643344
477.19	0.47461329		1007.19	0.1541085		1537.18	0.1746679		2067.19	-0.02633471		2597.18	0.01153898		3127.21	0.00812869		3657.2	-0.00242019		4187.2	-0.01647862
477.39	0.47354687		1007.39	0.15399418		1537.38	0.17505296		2067.39	-0.02570875		2597.38	0.01100296		3127.41	0.00939821		3657.4	-0.00256309		4187.4	-0.01696374
477.59	0.47398303		1007.59	0.15338068		1537.58	0.17487874		2067.59	-0.0257376		2597.58	0.01151518		3127.61	0.01042976		3657.6	-0.00280636		4187.6	-0.0174181
477.79	0.47424515		1007.79	0.15334481		1537.78	0.17517112		2067.79	-0.02578879		2597.78	0.01159387		3127.81	0.01129791		3657.8	-0.00280356		4187.8	-0.01693009
477.99	0.47394668		1007.99	0.1539328		1537.98	0.17497864		2067.99	-0.02611304		2597.98	0.01203725		3128.01	0.01150984		3658	-0.00212245		4188	-0.01649897
478.19	0.47476036		1008.19	0.15489096		1538.18	0.17498825		2068.19	-0.02568158		2598.18	0.0115212		3128.21	0.01174168		3658.2	-0.00250822		4188.2	-0.01553131
478.39	0.47472202		1008.39	0.1557026		1538.38	0.17446097		2068.39	-0.02701289		2598.38	0.01149637		3128.41	0.0111552		3658.4	-0.00185932		4188.4	-0.01544176
478.59	0.47500668		1008.59	0.15562436		1538.58	0.1747351		2068.59	-0.0268345		2598.58	0.01182321		3128.61	0.00949401		3658.6	-0.00188229		4188.6	-0.01539582
478.79	0.4748958		1008.79	0.15568004		1538.78	0.17435334		2068.79	-0.02670249		2598.78	0.01184734		3128.81	0.00960237		3658.8	-0.00227862		4188.8	-0.01587311
478.99	0.47444776		1008.99	0.15495085		1538.98	0.17402788		2068.99	-0.02641854		2598.98	0.01154598		3129.01	0.00992498		3659	-0.00372382		4189	-0.01624837
479.19	0.47488916		1009.19	0.15570192		1539.18	0.17341232		2069.19	-0.02636032		2599.18	0.01133233		3129.21	0.00934255		3659.2	-0.00299755		4189.2	-0.01656583
479.39	0.47452624		1009.39	0.15538973		1539.38	0.17308566		2069.39	-0.02663043		2599.38	0.01116144		3129.41	0.00873177		3659.4	-0.00378285		4189.4	-0.01756829
479.59	0.47359026		1009.59	0.15554926		1539.58	0.17299236		2069.59	-0.02641654		2599.58	0.0121723		3129.61	0.00906036		3659.6	-0.00266692		4189.6	-0.01802031
479.79	0.47381331		1009.79	0.15504796		1539.78	0.17314165		2069.79	-0.02658478		2599.78	0.01267338		3129.81	0.00828732		3659.8	-0.00276598		4189.8	-0.01828864
479.99	0.47303028		1009.99	0.1554244		1539.98	0.17317812		2069.99	-0.02611197		2599.98	0.01303349		3130.01	0.0084806		3660	-0.00298284		4190	-0.01812498
480.19	0.47240291		1010.19	0.15554181		1540.18	0.17315234		2070.19	-0.02600715		2600.18	0.01379589		3130.21	0.00837069		3660.2	-0.00256443		4190.2	-0.01716667
480.39	0.47222576		1010.39	0.15500516		1540.38	0.17391142		2070.39	-0.02593364		2600.38	0.01440545		3130.41	0.00715606		3660.4	-0.00265407		4190.4	-0.01775456
480.59	0.47302391		1010.59	0.1535718		1540.58	0.17424869		2070.59	-0.02539659		2600.58	0.0140127		3130.61	0.00783888		3660.6	-0.00259446		4190.6	-0.01833861
480.79	0.47366742		1010.79	0.15296016		1540.78	0.17434614		2070.79	-0.02585124		2600.78	0.0148141		3130.81	0.00742143		3660.8	-0.00321059		4190.8	-0.01866627
480.99	0.4730057		1010.99	0.15330373		1540.98	0.17522277		2070.99	-0.02593188		2600.98	0.01579442		3131.01	0.00762814		3661	-0.00366827		4191	-0.01858695
481.19	0.4726051		1011.19	0.15349373		1541.18	0.17503274		2071.19	-0.02628206		2601.18	0.01563451		3131.21	0.00796007		3661.2	-0.00386737		4191.2	-0.01825597
481.39	0.47214079		1011.39	0.15342922		1541.38	0.17500447		2071.39	-0.02615035		2601.38	0.01640164		3131.41	0.00849116		3661.4	-0.00448289		4191.4	-0.01872581
481.59	0.4722919		1011.59	0.15334431		1541.58	0.1753334		2071.59	-0.02625778		2601.58	0.01627656		3131.61	0.00843418		3661.6	-0.00456215		4191.6	-0.01829865
481.79	0.47262159		1011.79	0.15396559		1541.78	0.17550438		2071.79	-0.02759429		2601.78	0.01613206		3131.81	0.00879249		3661.8	-0.00453481		4191.8	-0.01736736
481.99	0.47346138		1011.99	0.15375903		1541.98	0.17514735		2071.99	-0.02814184		2601.98	0.01568829		3132.01	0.00876698		3662	-0.00452974		4192	-0.017214
482.19	0.47454797		1012.19	0.15428249		1542.18	0.17483672		2072.19	-0.02854213		2602.18	0.01526537		3132.21	0.00813349		3662.2	-0.00428974		4192.2	-0.01722945
482.39	0.47486609		1012.39	0.15405881		1542.38	0.17508519		2072.39	-0.02913228		2602.38	0.01516317		3132.41	0.00797791		3662.4	-0.00493866		4192.4	-0.01774793
482.59	0.47470736		1012.59	0.15399924		1542.58	0.17464278		2072.59	-0.02884059		2602.58	0.0148975		3132.61	0.00689133		3662.6	-0.00514813		4192.6	-0.01762732
482.79	0.47506975		1012.79	0.15342164		1542.78	0.17441102		2072.79	-0.02997011		2602.78	0.01437165		3132.81	0.00723467		3662.8	-0.00530736		4192.8	-0.01918027
482.99	0.47463062		1012.99	0.15293988		1542.98	0.17491123		2072.99	-0.03050186		2602.98	0.0134547		3133.01	0.00714247		3663	-0.00540176		4193	-0.01956296
483.19	0.47447169		1013.19	0.15394522		1543.18	0.17548277		2073.19	-0.03074304		2603.18	0.01214587		3133.21	0.00657647		3663.2	-0.00487868		4193.2	-0.01983478
483.39	0.47339513		1013.39	0.15322085		1543.38	0.17509119		2073.39	-0.03069532		2603.38	0.01241405		3133.41	0.00675176		3663.4	-0.00457283		4193.4	-0.02067859
483.59	0.47229759		1013.59	0.15298057		1543.58	0.17585181		2073.59	-0.030121		2603.58	0.01255993		3133.61	0.00643689		3663.6	-0.00331797		4193.6	-0.02081432
483.79	0.47290131		1013.79	0.15200513		1543.78	0.17617631		2073.79	-0.02999961		2603.78	0.01265007		3133.81	0.00601575		3663.8	-0.00364445		4193.8	-0.02132903
483.99	0.47231347		1013.99	0.15234442		1543.98	0.17659095		2073.99	-0.02938774		2603.98	0.01269724		3134.01	0.00624424		3664	-0.00371847		4194	-0.02122319
484.19	0.47280447		1014.19	0.1522561		1544.18	0.1763435		2074.19	-0.02936692		2604.18	0.01383835		3134.21	0.00625799		3664.2	-0.00192105		4194.2	-0.02060594
484.39	0.47223315		1014.39	0.15101341		1544.38	0.17686902		2074.39	-0.02906734		2604.38	0.01348631		3134.41	0.0065466		3664.4	-0.00172572		4194.4	-0.0203302
484.59	0.47273849		1014.59	0.15054318		1544.58	0.17678554		2074.59	-0.02905836		2604.58	0.01382247		3134.61	0.00700197		3664.6	-0.00153805		4194.6	-0.01964743
484.79	0.47206884		1014.79	0.15124291		1544.78	0.1763786		2074.79	-0.03012001		2604.78	0.01455143		3134.81	0.00716494		3664.8	-0.00212516		4194.8	-0.01940419
484.99	0.4712677		1014.99	0.15218604		1544.98	0.17600427		2074.99	-0.03022681		2604.98	0.01435472		3135.01	0.00800808		3665	-0.00133073		4195	-0.01898319
485.19	0.47114063		1015.19	0.15202185		1545.18	0.17530217		2075.19	-0.03058355		2605.18	0.01339123		3135.21	0.00767689		3665.2	-0.00016504		4195.2	-0.01949353
485.39	0.47083637		1015.39	0.15233296		1545.38	0.17479207		2075.39	-0.02981633		2605.38	0.01395255		3135.41	0.00735522		3665.4	0.0001902		4195.4	-0.01990583
485.59	0.47041114		1015.59	0.15261617		1545.58	0.17436298		2075.59	-0.0294839		2605.58	0.01327238		3135.61	0.0079065		3665.6	0.00049969		4195.6	-0.01949778
485.79	0.47125308		1015.79	0.15218056		1545.78	0.17312015		2075.79	-0.03031747		2605.78	0.01327296		3135.81	0.00856013		3665.8	0.00010852		4195.8	-0.01937391
485.99	0.47233446		1015.99	0.15185226		1545.98	0.1727055		2075.99	-0.03048398		2605.98	0.01444363		3136.01	0.00806679		3666	0.00057995		4196	-0.01933107
486.19	0.47265851		1016.19	0.15254724		1546.18	0.17317082		2076.19	-0.03096492		2606.18	0.01460214		3136.21	0.00755044		3666.2	-0.0002448		4196.2	-0.01947398
486.39	0.4723634		1016.39	0.15265839		1546.38	0.17338521		2076.39	-0.03117771		2606.38	0.01458677		3136.41	0.00780489		3666.4	-0.00119243		4196.4	-0.01932983
486.59	0.47269138		1016.59	0.1521396		1546.58	0.17324544		2076.59	-0.03130066		2606.58	0.01469195		3136.61	0.00657209		3666.6	-0.00155757		4196.6	-0.01993198
486.79	0.47302974		1016.79	0.1523733		1546.78	0.17408937		2076.79	-0.03189131		2606.78	0.01441135		3136.81	0.00611181		3666.8	-0.00142062		4196.8	-0.0202253
486.99	0.47238279		1016.99	0.15259818		1546.98	0.17474822		2076.99	-0.03148151		2606.98	0.0134817		3137.01	0.00596169		3667	-0.0014736		4197	-0.02000304
487.19	0.47213398		1017.19	0.15325555		1547.18	0.17473789		2077.19	-0.03032763		2607.18	0.0127627		3137.21	0.00602029		3667.2	-0.00202544		4197.2	-0.0201861
487.39	0.4710422		1017.39	0.15306902		1547.38	0.17519045		2077.39	-0.02993548		2607.38	0.01376269		3137.41	0.00612945		3667.4	-0.00246286		4197.4	-0.02088298
487.59	0.47125403		1017.59	0.15371065		1547.58	0.17552489		2077.59	-0.0291349		2607.58	0.01338343		3137.61	0.0065523		3667.6	-0.0027398		4197.6	-0.02083217
487.79	0.47176769		1017.79	0.15394963		1547.78	0.17611732		2077.79	-0.02868388		2607.78	0.01368468		3137.81	0.00649176		3667.8	-0.003538		4197.8	-0.02006036
487.99	0.47194247		1017.99	0.15434186		1547.98	0.17747132		2077.99	-0.02896606		2607.98	0.01336243		3138.01	0.00680502		3668	-0.00378914		4198	-0.01943941
488.19	0.47218606		1018.19	0.1542894		1548.18	0.17721329		2078.19	-0.02929073		2608.18	0.01336509		3138.21	0.00698827		3668.2	-0.00327244		4198.2	-0.01929528
488.39	0.47183921		1018.39	0.15382358		1548.38	0.17781266		2078.39	-0.02961913		2608.38	0.01301016		3138.41	0.00702378		3668.4	-0.00415561		4198.4	-0.01915162
488.59	0.47202544		1018.59	0.15464056		1548.58	0.1776257		2078.59	-0.0295532		2608.58	0.0133091		3138.61	0.00704726		3668.6	-0.00374596		4198.6	-0.01924675
488.79	0.47162545		1018.79	0.15477709		1548.78	0.17782302		2078.79	-0.02985172		2608.78	0.01294804		3138.81	0.00812637		3668.8	-0.00364772		4198.8	-0.01997303
488.99	0.47213642		1018.99	0.15508199		1548.98	0.1773673		2078.99	-0.02936832		2608.98	0.01234341		3139.01	0.00865335		3669	-0.00178781		4199	-0.02016638
489.19	0.47226008		1019.19	0.15472662		1549.18	0.17714933		2079.19	-0.02857416		2609.18	0.0124222		3139.21	0.00785462		3669.2	-0.00149947		4199.2	-0.02031513
489.39	0.47197463		1019.39	0.15468499		1549.38	0.17668685		2079.39	-0.02852494		2609.38	0.0128078		3139.41	0.00787802		3669.4	-0.00123294		4199.4	-0.02139621
489.59	0.47201818		1019.59	0.15436833		1549.58	0.17594149		2079.59	-0.02861466		2609.58	0.01262048		3139.61	0.00783801		3669.6	-0.00128865		4199.6	-0.02105646
489.79	0.47278825		1019.79	0.15466783		1549.78	0.17535886		2079.79	-0.02905683		2609.78	0.01274874		3139.81	0.00770461		3669.8	-0.00185626		4199.8	-0.02104889
489.99	0.47292816		1019.99	0.15473816		1549.98	0.17461965		2079.99	-0.02919402		2609.98	0.0141809		3140.01	0.00726326		3670	-0.0019104		4200	-0.0209555
490.19	0.47323776		1020.19	0.15491203		1550.18	0.17454941		2080.19	-0.02884377		2610.18	0.01441209		3140.21	0.00660815		3670.2	-0.00208143		4200.2	-0.02108314
490.39	0.47369938		1020.39	0.15549938		1550.38	0.17372515		2080.39	-0.0290132		2610.38	0.01468484		3140.41	0.00658303		3670.4	-0.00210595		4200.4	-0.0209804
490.59	0.47371781		1020.59	0.15607182		1550.58	0.17344775		2080.59	-0.02911681		2610.58	0.01564381		3140.61	0.00530151		3670.6	-0.00200072		4200.6	-0.02158044
490.79	0.47347959		1020.79	0.15607465		1550.78	0.17299817		2080.79	-0.02902114		2610.78	0.01562218		3140.81	0.00530806		3670.8	-0.00141173		4200.8	-0.02142265
490.99	0.47246232		1020.99	0.15657789		1550.98	0.17204975		2080.99	-0.02859379		2610.98	0.01547832		3141.01	0.00539838		3671	-0.00172813		4201	-0.02154968
491.19	0.47149895		1021.19	0.1567146		1551.18	0.17169722		2081.19	-0.02852678		2611.18	0.01542315		3141.21	0.00537918		3671.2	-0.00221436		4201.2	-0.02156981
491.39	0.47174064		1021.39	0.15692002		1551.38	0.17159529		2081.39	-0.02818868		2611.38	0.01537339		3141.41	0.00504244		3671.4	-0.00223909		4201.4	-0.02149535
491.59	0.47199597		1021.59	0.15686764		1551.58	0.17097252		2081.59	-0.02787727		2611.58	0.01486603		3141.61	0.00552059		3671.6	-0.00276122		4201.6	-0.0206408
491.79	0.47218309		1021.79	0.15634471		1551.78	0.17204401		2081.79	-0.02828056		2611.78	0.01440267		3141.81	0.00442197		3671.8	-0.00344638		4201.8	-0.01957069
491.99	0.47225382		1021.99	0.15566569		1551.98	0.17202288		2081.99	-0.02926423		2611.98	0.01438305		3142.01	0.00425531		3672	-0.00392376		4202	-0.02003536
492.19	0.47197661		1022.19	0.15449673		1552.18	0.17258121		2082.19	-0.02933637		2612.18	0.01585672		3142.21	0.00457421		3672.2	-0.00310878		4202.2	-0.01956553
492.39	0.47292264		1022.39	0.1539047		1552.38	0.17323097		2082.39	-0.0292416		2612.38	0.01634553		3142.41	0.00444647		3672.4	-0.00233475		4202.4	-0.01888597
492.59	0.47353588		1022.59	0.15344092		1552.58	0.17313354		2082.59	-0.02949067		2612.58	0.01614423		3142.61	0.0047772		3672.6	-0.00159623		4202.6	-0.0177676
492.79	0.47391321		1022.79	0.15246273		1552.78	0.17375499		2082.79	-0.02950827		2612.78	0.0158721		3142.81	0.00519918		3672.8	-0.00134788		4202.8	-0.01763015
492.99	0.47425619		1022.99	0.15221505		1552.98	0.17289826		2082.99	-0.02930526		2612.98	0.01585234		3143.01	0.00535443		3673	-0.00143677		4203	-0.01745388
493.19	0.47450312		1023.19	0.15189438		1553.18	0.17306284		2083.19	-0.02848998		2613.18	0.01502427		3143.21	0.004849		3673.2	-0.00101793		4203.2	-0.01796485
493.39	0.4748275		1023.39	0.15226649		1553.38	0.17275907		2083.39	-0.02841633		2613.38	0.01460819		3143.41	0.00547489		3673.4	-0.0011738		4203.4	-0.0177071
493.59	0.47491932		1023.59	0.1515565		1553.58	0.17329034		2083.59	-0.02811849		2613.58	0.01429427		3143.61	0.00571053		3673.6	-0.00196151		4203.6	-0.01696037
493.79	0.47511949		1023.79	0.15166515		1553.78	0.17323715		2083.79	-0.02774833		2613.78	0.01456784		3143.81	0.00676867		3673.8	-0.00278344		4203.8	-0.01576725
493.99	0.47561754		1023.99	0.15002227		1553.98	0.1730344		2083.99	-0.02753328		2613.98	0.0145949		3144.01	0.00657567		3674	-0.00197813		4204	-0.01606147
494.19	0.47582145		1024.19	0.15009798		1554.18	0.17272655		2084.19	-0.02753346		2614.18	0.01433576		3144.21	0.00610572		3674.2	-0.0019812		4204.2	-0.01638584
494.39	0.47526261		1024.39	0.15021859		1554.38	0.17349779		2084.39	-0.02761478		2614.38	0.01453991		3144.41	0.00630586		3674.4	-0.00279362		4204.4	-0.01615647
494.59	0.47427352		1024.59	0.15032895		1554.58	0.17325516		2084.59	-0.02663212		2614.58	0.01582425		3144.61	0.00576987		3674.6	-0.00234581		4204.6	-0.01641022
494.79	0.47391133		1024.79	0.14993031		1554.78	0.17220624		2084.79	-0.02614269		2614.78	0.01485392		3144.81	0.00549471		3674.8	-0.00275507		4204.8	-0.01605858
494.99	0.47263513		1024.99	0.15090172		1554.98	0.17254175		2084.99	-0.0262709		2614.98	0.01453328		3145.01	0.00531484		3675	-0.00319035		4205	-0.01591167
495.19	0.47236472		1025.19	0.15087842		1555.18	0.17229683		2085.19	-0.02628541		2615.18	0.01397001		3145.21	0.00475385		3675.2	-0.0041317		4205.2	-0.01627808
495.39	0.4721778		1025.39	0.15055329		1555.38	0.17247467		2085.39	-0.02645245		2615.38	0.01364637		3145.41	0.00477177		3675.4	-0.0046814		4205.4	-0.01723546
495.59	0.47193087		1025.59	0.15161934		1555.58	0.17325029		2085.59	-0.02666081		2615.58	0.01369031		3145.61	0.00508941		3675.6	-0.00544962		4205.6	-0.0168704
495.79	0.47157235		1025.79	0.15154438		1555.78	0.17376477		2085.79	-0.02675568		2615.78	0.01401817		3145.81	0.00419771		3675.8	-0.00595638		4205.8	-0.01667485
495.99	0.4715288		1025.99	0.15163274		1555.98	0.17365772		2085.99	-0.02681816		2615.98	0.01391668		3146.01	0.00473726		3676	-0.00548688		4206	-0.01719603
496.19	0.47204393		1026.19	0.15212138		1556.18	0.1740088		2086.19	-0.02676847		2616.18	0.01477961		3146.21	0.00509459		3676.2	-0.00436583		4206.2	-0.01632126
496.39	0.47293896		1026.39	0.15234816		1556.38	0.17373476		2086.39	-0.02745653		2616.38	0.01472909		3146.41	0.00563658		3676.4	-0.0039749		4206.4	-0.01631586
496.59	0.47279964		1026.59	0.15227894		1556.58	0.17339914		2086.59	-0.02812603		2616.58	0.01396308		3146.61	0.00550631		3676.6	-0.00381575		4206.6	-0.01640527
496.79	0.47324473		1026.79	0.15207597		1556.78	0.17255649		2086.79	-0.02808774		2616.78	0.01369417		3146.81	0.0056257		3676.8	-0.00380305		4206.8	-0.01714073
496.99	0.47294483		1026.99	0.15253735		1556.98	0.17249354		2086.99	-0.02913861		2616.98	0.01333274		3147.01	0.00666588		3677	-0.00403255		4207	-0.01736068
497.19	0.47358561		1027.19	0.15269877		1557.18	0.17302466		2087.19	-0.02918138		2617.18	0.01249868		3147.21	0.00652977		3677.2	-0.00242614		4207.2	-0.017477
497.39	0.47342055		1027.39	0.15250345		1557.38	0.17336979		2087.39	-0.02947801		2617.38	0.01210818		3147.41	0.00635734		3677.4	-0.00270159		4207.4	-0.01743695
497.59	0.4727815		1027.59	0.15095976		1557.58	0.1738506		2087.59	-0.03021363		2617.58	0.01140579		3147.61	0.00597767		3677.6	-0.00244593		4207.6	-0.01785122
497.79	0.47347668		1027.79	0.15123586		1557.78	0.17379449		2087.79	-0.03005977		2617.78	0.01190325		3147.81	0.00534576		3677.8	-0.00262482		4207.8	-0.01764568
497.99	0.47316439		1027.99	0.15000168		1557.98	0.17341743		2087.99	-0.02974381		2617.98	0.01127988		3148.01	0.00438576		3678	-0.00240619		4208	-0.01847845
498.19	0.47261516		1028.19	0.15014979		1558.18	0.17334689		2088.19	-0.03038738		2618.18	0.01198998		3148.21	0.00411399		3678.2	-0.00354239		4208.2	-0.01884279
498.39	0.47187137		1028.39	0.14961287		1558.38	0.17367568		2088.39	-0.03023528		2618.38	0.01270275		3148.41	0.00386486		3678.4	-0.00377749		4208.4	-0.01827377
498.59	0.47192224		1028.59	0.15053654		1558.58	0.17333348		2088.59	-0.0305094		2618.58	0.01277891		3148.61	0.00391873		3678.6	-0.00405611		4208.6	-0.01903313
498.79	0.47193076		1028.79	0.151132		1558.78	0.17313172		2088.79	-0.03117922		2618.78	0.0125081		3148.81	0.00430459		3678.8	-0.00479396		4208.8	-0.01966401
498.99	0.47167775		1028.99	0.15177334		1558.98	0.17413491		2088.99	-0.0324013		2618.98	0.01205387		3149.01	0.00463455		3679	-0.00578738		4209	-0.02169351
499.19	0.4717731		1029.19	0.15197244		1559.18	0.17415953		2089.19	-0.03199461		2619.18	0.01239854		3149.21	0.00433956		3679.2	-0.00667394		4209.2	-0.0223981
499.39	0.47177469		1029.39	0.1517455		1559.38	0.17518865		2089.39	-0.03185409		2619.38	0.01276126		3149.41	0.00443906		3679.4	-0.00677043		4209.4	-0.02245844
499.59	0.47249766		1029.59	0.15250499		1559.58	0.17503903		2089.59	-0.03068588		2619.58	0.01237319		3149.61	0.00425879		3679.6	-0.00725864		4209.6	-0.02187814
499.79	0.47302384		1029.79	0.15268559		1559.78	0.17379216		2089.79	-0.03097057		2619.78	0.0130979		3149.81	0.00313866		3679.8	-0.0068792		4209.8	-0.02147185
499.99	0.47391932		1029.99	0.15266164		1559.98	0.17379952		2089.99	-0.03040968		2619.98	0.01233293		3150.01	0.00327871		3680	-0.00632565		4210	-0.02044757
500.19	0.47410823		1030.19	0.15267787		1560.18	0.1742551		2090.19	-0.02986092		2620.18	0.01350603		3150.21	0.00298169		3680.2	-0.00689711		4210.2	-0.02042405
500.39	0.4742733		1030.39	0.1518371		1560.38	0.17425762		2090.39	-0.02974426		2620.38	0.01374206		3150.41	0.00371847		3680.4	-0.0068373		4210.4	-0.0194075
500.59	0.47456935		1030.59	0.15224682		1560.58	0.17444451		2090.59	-0.0298096		2620.58	0.01300822		3150.61	0.00310117		3680.6	-0.00742042		4210.6	-0.01834945
500.79	0.4747129		1030.79	0.15214275		1560.78	0.17477898		2090.79	-0.03009565		2620.78	0.01355623		3150.81	0.00373355		3680.8	-0.00709623		4210.8	-0.01767584
500.99	0.47355684		1030.99	0.153135		1560.98	0.17552566		2090.99	-0.03104141		2620.98	0.01360133		3151.01	0.00441252		3681	-0.00648509		4211	-0.0171024
501.19	0.47409041		1031.19	0.1534719		1561.18	0.17499295		2091.19	-0.03034396		2621.18	0.01349118		3151.21	0.00416334		3681.2	-0.00556717		4211.2	-0.01790341
501.39	0.47290705		1031.39	0.15326823		1561.38	0.17458665		2091.39	-0.03014057		2621.38	0.01307172		3151.41	0.00446484		3681.4	-0.00591965		4211.4	-0.01779108
501.59	0.472653		1031.59	0.15296116		1561.58	0.17459277		2091.59	-0.03014022		2621.58	0.01371089		3151.61	0.00506945		3681.6	-0.00530308		4211.6	-0.01728874
501.79	0.47230896		1031.79	0.15237826		1561.78	0.1740279		2091.79	-0.02969665		2621.78	0.01340054		3151.81	0.00525544		3681.8	-0.00596528		4211.8	-0.01706707
501.99	0.47092839		1031.99	0.15206687		1561.98	0.17380647		2091.99	-0.02990673		2621.98	0.01247882		3152.01	0.00591377		3682	-0.00530483		4212	-0.01703818
502.19	0.4705645		1032.19	0.15097113		1562.18	0.17345797		2092.19	-0.03143429		2622.18	0.01322033		3152.21	0.00611559		3682.2	-0.00464711		4212.2	-0.01742972
502.39	0.469528		1032.39	0.15085097		1562.38	0.17261766		2092.39	-0.03184316		2622.38	0.01334872		3152.41	0.00652765		3682.4	-0.00339759		4212.4	-0.01719157
502.59	0.46987354		1032.59	0.15150029		1562.58	0.17324466		2092.59	-0.03142751		2622.58	0.01287021		3152.61	0.00649631		3682.6	-0.00311588		4212.6	-0.01797258
502.79	0.47037148		1032.79	0.15228361		1562.78	0.17321639		2092.79	-0.03145192		2622.78	0.01233276		3152.81	0.00716513		3682.8	-0.00305169		4212.8	-0.01870419
502.99	0.47079408		1032.99	0.15256675		1562.98	0.173075		2092.99	-0.03201801		2622.98	0.01139597		3153.01	0.00719306		3683	-0.00267323		4213	-0.01911299
503.19	0.4716935		1033.19	0.15293879		1563.18	0.1735807		2093.19	-0.03103735		2623.18	0.01133802		3153.21	0.00650092		3683.2	-0.00182535		4213.2	-0.01893795
503.39	0.47208431		1033.39	0.1537381		1563.38	0.17332391		2093.39	-0.03021598		2623.38	0.01067314		3153.41	0.00606766		3683.4	-0.0007467		4213.4	-0.01912053
503.59	0.47280655		1033.59	0.15406617		1563.58	0.17198697		2093.59	-0.03004859		2623.58	0.01003992		3153.61	0.0053271		3683.6	0.00062901		4213.6	-0.01919558
503.79	0.47345291		1033.79	0.15490383		1563.78	0.17152382		2093.79	-0.02976032		2623.78	0.00978247		3153.81	0.00434851		3683.8	0.00132252		4213.8	-0.0184161
503.99	0.47359311		1033.99	0.15525354		1563.98	0.17229849		2093.99	-0.02839719		2623.98	0.00954896		3154.01	0.00397069		3684	0.00082176		4214	-0.01835531
504.19	0.47355794		1034.19	0.15550452		1564.18	0.17292382		2094.19	-0.02800387		2624.18	0.00931103		3154.21	0.00374571		3684.2	0.0000743		4214.2	-0.01855276
504.39	0.4731346		1034.39	0.15539877		1564.38	0.17343305		2094.39	-0.02858926		2624.38	0.00970374		3154.41	0.00353119		3684.4	0.00044109		4214.4	-0.0176544
504.59	0.47238291		1034.59	0.15624684		1564.58	0.17400145		2094.59	-0.02888445		2624.58	0.00978406		3154.61	0.00265899		3684.6	0.00011471		4214.6	-0.01719724
504.79	0.47230247		1034.79	0.1564506		1564.78	0.1747364		2094.79	-0.02928969		2624.78	0.01076934		3154.81	0.00223967		3684.8	-0.00001545		4214.8	-0.01810551
504.99	0.47246008		1034.99	0.15711646		1564.98	0.17454138		2094.99	-0.0302304		2624.98	0.01060552		3155.01	0.00266532		3685	-0.00037494		4215	-0.01891721
505.19	0.47253552		1035.19	0.15637185		1565.18	0.17401793		2095.19	-0.0299607		2625.18	0.01085491		3155.21	0.00294046		3685.2	-0.00098133		4215.2	-0.02066218
505.39	0.47164832		1035.39	0.15539287		1565.38	0.17404748		2095.39	-0.0302064		2625.38	0.0116723		3155.41	0.00341177		3685.4	-0.00135328		4215.4	-0.02124626
505.59	0.4714444		1035.59	0.15487685		1565.58	0.17399694		2095.59	-0.03066024		2625.58	0.01265793		3155.61	0.00377975		3685.6	-0.00108817		4215.6	-0.02200999
505.79	0.47107856		1035.79	0.15377451		1565.78	0.17345043		2095.79	-0.03128038		2625.78	0.01111309		3155.81	0.00389004		3685.8	-0.00198843		4215.8	-0.02244857
505.99	0.47014973		1035.99	0.15325428		1565.98	0.17379526		2095.99	-0.03232915		2625.98	0.01127562		3156.01	0.00414129		3686	-0.00178209		4216	-0.02308567
506.19	0.46935776		1036.19	0.15169103		1566.18	0.17350385		2096.19	-0.03239512		2626.18	0.0118957		3156.21	0.00402668		3686.2	-0.00268654		4216.2	-0.02400188
506.39	0.46996217		1036.39	0.15142997		1566.38	0.17389042		2096.39	-0.03219598		2626.38	0.01193643		3156.41	0.00494586		3686.4	-0.0035122		4216.4	-0.02407569
506.59	0.47037566		1036.59	0.1509368		1566.58	0.17495941		2096.59	-0.03225231		2626.58	0.01114478		3156.61	0.00513721		3686.6	-0.00472138		4216.6	-0.02472506
506.79	0.47087497		1036.79	0.15050381		1566.78	0.17495797		2096.79	-0.0334656		2626.78	0.01029751		3156.81	0.0060952		3686.8	-0.00579189		4216.8	-0.02500446
506.99	0.47128364		1036.99	0.15026363		1566.98	0.17387402		2096.99	-0.03409968		2626.98	0.00993671		3157.01	0.00618893		3687	-0.00636049		4217	-0.02521236
507.19	0.47214636		1037.19	0.15040444		1567.18	0.1737823		2097.19	-0.03270434		2627.18	0.00967573		3157.21	0.00637592		3687.2	-0.00707763		4217.2	-0.02594344
507.39	0.47194452		1037.39	0.15081768		1567.38	0.17324151		2097.39	-0.03254073		2627.38	0.00925012		3157.41	0.00659914		3687.4	-0.00674605		4217.4	-0.02545337
507.59	0.4723933		1037.59	0.15020038		1567.58	0.17279603		2097.59	-0.03306332		2627.58	0.00963176		3157.61	0.00675156		3687.6	-0.00684755		4217.6	-0.02431114
507.79	0.47252527		1037.79	0.15037779		1567.78	0.17278768		2097.79	-0.03229405		2627.78	0.00933406		3157.81	0.00655452		3687.8	-0.00743393		4217.8	-0.02367708
507.99	0.47223853		1037.99	0.15073655		1567.98	0.17286362		2097.99	-0.03176938		2627.98	0.01057187		3158.01	0.00603412		3688	-0.00780953		4218	-0.02233127
508.19	0.47213968		1038.19	0.15011875		1568.18	0.17257077		2098.19	-0.03190067		2628.18	0.01045356		3158.21	0.00598643		3688.2	-0.00766883		4218.2	-0.0206608
508.39	0.47198998		1038.39	0.14985057		1568.38	0.17282332		2098.39	-0.03241193		2628.38	0.01119325		3158.41	0.00588765		3688.4	-0.006374		4218.4	-0.02011054
508.59	0.47186238		1038.59	0.15050706		1568.58	0.17196437		2098.59	-0.03253529		2628.58	0.01082521		3158.61	0.00531095		3688.6	-0.00658283		4218.6	-0.01892587
508.79	0.47168327		1038.79	0.14992504		1568.78	0.17223098		2098.79	-0.03337035		2628.78	0.01124611		3158.81	0.00530842		3688.8	-0.00640788		4218.8	-0.01908857
508.99	0.47160419		1038.99	0.15054306		1568.98	0.17078994		2098.99	-0.03355492		2628.98	0.01080086		3159.01	0.00577397		3689	-0.00524305		4219	-0.01975679
509.19	0.47048915		1039.19	0.15029155		1569.18	0.17001162		2099.19	-0.03238033		2629.18	0.01098066		3159.21	0.00589218		3689.2	-0.00406705		4219.2	-0.02013799
509.39	0.47073749		1039.39	0.15028205		1569.38	0.17009214		2099.39	-0.03179089		2629.38	0.01193452		3159.41	0.00575149		3689.4	-0.00351783		4219.4	-0.01976723
509.59	0.47010159		1039.59	0.15020666		1569.58	0.16938682		2099.59	-0.03193947		2629.58	0.01222607		3159.61	0.00603327		3689.6	-0.00381979		4219.6	-0.01952409
509.79	0.47053887		1039.79	0.15008837		1569.78	0.1699584		2099.79	-0.03125736		2629.78	0.01076534		3159.81	0.00567643		3689.8	-0.00349898		4219.8	-0.01903052
509.99	0.47123551		1039.99	0.15019591		1569.98	0.17069537		2099.99	-0.03045411		2629.98	0.0108313		3160.01	0.00555949		3690	-0.00341441		4220	-0.01989694
510.19	0.47172571		1040.19	0.15025202		1570.18	0.17178872		2100.19	-0.03041768		2630.18	0.01080458		3160.21	0.00621398		3690.2	-0.0039378		4220.2	-0.0209639
510.39	0.47335528		1040.39	0.14933246		1570.38	0.17296899		2100.39	-0.03121874		2630.38	0.01027217		3160.41	0.0060395		3690.4	-0.00511812		4220.4	-0.02132931
510.59	0.4737221		1040.59	0.14922093		1570.58	0.17428001		2100.59	-0.0310808		2630.58	0.01033088		3160.61	0.00595872		3690.6	-0.00567995		4220.6	-0.02167166
510.79	0.47466659		1040.79	0.14906235		1570.78	0.17502208		2100.79	-0.03063417		2630.78	0.01070814		3160.81	0.00570617		3690.8	-0.00619392		4220.8	-0.02188382
510.99	0.47487664		1040.99	0.14939444		1570.98	0.17608933		2100.99	-0.0299643		2630.98	0.01069723		3161.01	0.00519431		3691	-0.00647499		4221	-0.02187835
511.19	0.47606389		1041.19	0.15014603		1571.18	0.17689454		2101.19	-0.02939163		2631.18	0.0115613		3161.21	0.00449895		3691.2	-0.00631483		4221.2	-0.02215446
511.39	0.47581709		1041.39	0.15041232		1571.38	0.17842631		2101.39	-0.03041198		2631.38	0.01180318		3161.41	0.00436362		3691.4	-0.00602006		4221.4	-0.02177062
511.59	0.47622618		1041.59	0.15113403		1571.58	0.17896725		2101.59	-0.02979242		2631.58	0.01239219		3161.61	0.00428166		3691.6	-0.00582499		4221.6	-0.02149219
511.79	0.47646231		1041.79	0.15135854		1571.78	0.17866341		2101.79	-0.02879075		2631.78	0.01189195		3161.81	0.00342025		3691.8	-0.00569578		4221.8	-0.02121667
511.99	0.47602279		1041.99	0.15219902		1571.98	0.17807742		2101.99	-0.02909904		2631.98	0.01204607		3162.01	0.00368254		3692	-0.00610221		4222	-0.01995017
512.19	0.47599231		1042.19	0.15194543		1572.18	0.17692991		2102.19	-0.03062637		2632.18	0.01198954		3162.21	0.00368216		3692.2	-0.00475476		4222.2	-0.01966559
512.39	0.47557639		1042.39	0.15209453		1572.38	0.17705177		2102.39	-0.03207935		2632.38	0.01136811		3162.41	0.00300342		3692.4	-0.00359329		4222.4	-0.0197657
512.59	0.47439679		1042.59	0.15259583		1572.58	0.17510612		2102.59	-0.03286126		2632.58	0.01076965		3162.61	0.00260681		3692.6	-0.00362416		4222.6	-0.01973104
512.79	0.47265462		1042.79	0.15209184		1572.78	0.1746028		2102.79	-0.03353828		2632.78	0.01086062		3162.81	0.00325098		3692.8	-0.00268754		4222.8	-0.01993963
512.99	0.47179681		1042.99	0.15260772		1572.98	0.17318927		2102.99	-0.03376956		2632.98	0.01095992		3163.01	0.00313425		3693	-0.00228041		4223	-0.02156451
513.19	0.47078938		1043.19	0.15229346		1573.18	0.17257481		2103.19	-0.03340529		2633.18	0.01157521		3163.21	0.00386271		3693.2	-0.00162566		4223.2	-0.02142689
513.39	0.47042906		1043.39	0.15228859		1573.38	0.17227532		2103.39	-0.0349127		2633.38	0.01214697		3163.41	0.0038748		3693.4	-0.00181129		4223.4	-0.02163947
513.59	0.46982525		1043.59	0.15207348		1573.58	0.17057425		2103.59	-0.03605444		2633.58	0.01153438		3163.61	0.00407972		3693.6	-0.00159128		4223.6	-0.02182479
513.79	0.47069832		1043.79	0.15190359		1573.78	0.17009393		2103.79	-0.03532449		2633.78	0.0106577		3163.81	0.00390082		3693.8	-0.0008673		4223.8	-0.0222225
513.99	0.47076612		1043.99	0.15132816		1573.98	0.16945856		2103.99	-0.03541086		2633.98	0.01073114		3164.01	0.00497705		3694	-0.0011578		4224	-0.02435787
514.19	0.46999583		1044.19	0.15105884		1574.18	0.16983559		2104.19	-0.03617013		2634.18	0.01014911		3164.21	0.00584548		3694.2	-0.00183665		4224.2	-0.02534898
514.39	0.46967362		1044.39	0.15081917		1574.38	0.17097211		2104.39	-0.03529578		2634.38	0.00952112		3164.41	0.00584022		3694.4	-0.00292113		4224.4	-0.02523968
514.59	0.46894779		1044.59	0.15063722		1574.58	0.17132083		2104.59	-0.03411519		2634.58	0.00997992		3164.61	0.0063457		3694.6	-0.00269537		4224.6	-0.02528767
514.79	0.46906704		1044.79	0.15043397		1574.78	0.17203413		2104.79	-0.03257956		2634.78	0.00999539		3164.81	0.00552079		3694.8	-0.00286159		4224.8	-0.02444894
514.99	0.46975815		1044.99	0.1498711		1574.98	0.17233124		2104.99	-0.03207781		2634.98	0.00969173		3165.01	0.00506256		3695	-0.00261525		4225	-0.02342583
515.19	0.47020981		1045.19	0.15018774		1575.18	0.17315979		2105.19	-0.03119731		2635.18	0.01071661		3165.21	0.00476475		3695.2	-0.00262902		4225.2	-0.02318904
515.39	0.47011068		1045.39	0.14974916		1575.38	0.17456946		2105.39	-0.03057792		2635.38	0.0108747		3165.41	0.00461963		3695.4	-0.00365157		4225.4	-0.02214029
515.59	0.47049443		1045.59	0.15033814		1575.58	0.17375652		2105.59	-0.02972237		2635.58	0.01024896		3165.61	0.00354245		3695.6	-0.00374334		4225.6	-0.02153512
515.79	0.47095787		1045.79	0.14953185		1575.78	0.17338538		2105.79	-0.0303061		2635.78	0.00929309		3165.81	0.00285244		3695.8	-0.00421235		4225.8	-0.02159638
515.99	0.47137614		1045.99	0.1494459		1575.98	0.17392936		2105.99	-0.03026565		2635.98	0.00845029		3166.01	0.0030968		3696	-0.0044165		4226	-0.02076773
516.19	0.4726446		1046.19	0.14884405		1576.18	0.17423279		2106.19	-0.03082505		2636.18	0.00840946		3166.21	0.00218156		3696.2	-0.00385929		4226.2	-0.0198232
516.39	0.47238484		1046.39	0.14876553		1576.38	0.17377675		2106.39	-0.03054885		2636.38	0.00756021		3166.41	0.00158285		3696.4	-0.00430094		4226.4	-0.01964061
516.59	0.47244756		1046.59	0.14831901		1576.58	0.17328637		2106.59	-0.03091492		2636.58	0.00831363		3166.61	0.00172134		3696.6	-0.00500193		4226.6	-0.01909407
516.79	0.47247604		1046.79	0.14762185		1576.78	0.17446308		2106.79	-0.03132791		2636.78	0.00847664		3166.81	0.00206414		3696.8	-0.00589939		4226.8	-0.01915776
516.99	0.47215612		1046.99	0.14826406		1576.98	0.17457134		2106.99	-0.03183399		2636.98	0.00886813		3167.01	0.00197682		3697	-0.00671976		4227	-0.02057537
517.19	0.47237517		1047.19	0.14831835		1577.18	0.17428997		2107.19	-0.03316129		2637.18	0.00916187		3167.21	0.0027141		3697.2	-0.00561252		4227.2	-0.02059203
517.39	0.47198977		1047.39	0.14776498		1577.38	0.17396846		2107.39	-0.03427355		2637.38	0.00932996		3167.41	0.00212186		3697.4	-0.00610453		4227.4	-0.02078463
517.59	0.47191976		1047.59	0.14747023		1577.58	0.17325081		2107.59	-0.03383077		2637.58	0.00897393		3167.61	0.00194685		3697.6	-0.00646988		4227.6	-0.02114225
517.79	0.47218166		1047.79	0.14676103		1577.78	0.17238398		2107.79	-0.03277707		2637.78	0.01016491		3167.81	0.00249455		3697.8	-0.00617725		4227.8	-0.02233269
517.99	0.47155066		1047.99	0.14725573		1577.98	0.17290858		2107.99	-0.03298589		2637.98	0.01002523		3168.01	0.0036472		3698	-0.00689004		4228	-0.0233955
518.19	0.4709859		1048.19	0.14857332		1578.18	0.17368377		2108.19	-0.03257922		2638.18	0.00911907		3168.21	0.00392883		3698.2	-0.00703175		4228.2	-0.02357595
518.39	0.47038351		1048.39	0.14959816		1578.38	0.17354345		2108.39	-0.03194746		2638.38	0.00984411		3168.41	0.00471307		3698.4	-0.0066174		4228.4	-0.02364472
518.59	0.47109317		1048.59	0.14974369		1578.58	0.17355267		2108.59	-0.03192926		2638.58	0.0098286		3168.61	0.00553883		3698.6	-0.00569217		4228.6	-0.0236182
518.79	0.4724534		1048.79	0.15039396		1578.78	0.1739832		2108.79	-0.03147137		2638.78	0.0090321		3168.81	0.00605806		3698.8	-0.00558508		4228.8	-0.02277553
518.99	0.47279213		1048.99	0.15015303		1578.98	0.17426208		2108.99	-0.03125619		2638.98	0.00926421		3169.01	0.00610279		3699	-0.00489147		4229	-0.02321791
519.19	0.47198175		1049.19	0.15088645		1579.18	0.1747485		2109.19	-0.03167353		2639.18	0.01027482		3169.21	0.00676967		3699.2	-0.00505162		4229.2	-0.02370383
519.39	0.47263816		1049.39	0.15149277		1579.38	0.17396652		2109.39	-0.0326687		2639.38	0.01019828		3169.41	0.00632325		3699.4	-0.00497728		4229.4	-0.02342052
519.59	0.47358012		1049.59	0.15169572		1579.58	0.17381361		2109.59	-0.03323985		2639.58	0.00963369		3169.61	0.00653496		3699.6	-0.00434772		4229.6	-0.02289561
519.79	0.47406638		1049.79	0.15254539		1579.78	0.17478802		2109.79	-0.03383516		2639.78	0.0092459		3169.81	0.00741513		3699.8	-0.00431075		4229.8	-0.02311969
519.99	0.47412611		1049.99	0.15292661		1579.98	0.17500605		2109.99	-0.03312048		2639.98	0.00957504		3170.01	0.00757354		3700	-0.00356717		4230	-0.02149295
520.19	0.47415056		1050.19	0.15316774		1580.18	0.17497693		2110.19	-0.03338145		2640.18	0.00949838		3170.21	0.00708135		3700.2	-0.00343506		4230.2	-0.02076702
520.39	0.47324675		1050.39	0.1528326		1580.38	0.17390979		2110.39	-0.03337253		2640.38	0.01023344		3170.41	0.007478		3700.4	-0.00387636		4230.4	-0.02095158
520.59	0.47267963		1050.59	0.15183953		1580.58	0.17454744		2110.59	-0.03375575		2640.58	0.0106396		3170.61	0.00706621		3700.6	-0.004143		4230.6	-0.02073465
520.79	0.47196399		1050.79	0.15127489		1580.78	0.17392852		2110.79	-0.03426862		2640.78	0.00986095		3170.81	0.00671059		3700.8	-0.00501036		4230.8	-0.02144487
520.99	0.47070306		1050.99	0.15147686		1580.98	0.17240463		2110.99	-0.03481207		2640.98	0.01002798		3171.01	0.00665684		3701	-0.00454348		4231	-0.02172256
521.19	0.46994161		1051.19	0.14956974		1581.18	0.17212243		2111.19	-0.03511462		2641.18	0.00991494		3171.21	0.00623629		3701.2	-0.00408438		4231.2	-0.02149811
521.39	0.46938165		1051.39	0.14818652		1581.38	0.17229501		2111.39	-0.03516173		2641.38	0.009995		3171.41	0.00541077		3701.4	-0.00509141		4231.4	-0.02131529
521.59	0.46921175		1051.59	0.1473014		1581.58	0.17200248		2111.59	-0.03505072		2641.58	0.00869992		3171.61	0.00511126		3701.6	-0.00516107		4231.6	-0.02211315
521.79	0.469541		1051.79	0.14698609		1581.78	0.17096858		2111.79	-0.03504763		2641.78	0.00893001		3171.81	0.00504595		3701.8	-0.00468603		4231.8	-0.0216971
521.99	0.46905459		1051.99	0.14738273		1581.98	0.17168		2111.99	-0.03565134		2641.98	0.00866154		3172.01	0.00568018		3702	-0.00526236		4232	-0.02289295
522.19	0.46854418		1052.19	0.14816072		1582.18	0.17190325		2112.19	-0.03563071		2642.18	0.00851663		3172.21	0.0058142		3702.2	-0.00476827		4232.2	-0.02351566
522.39	0.46834886		1052.39	0.1478421		1582.38	0.17103592		2112.39	-0.03598172		2642.38	0.00878851		3172.41	0.00580677		3702.4	-0.00448086		4232.4	-0.02369466
522.59	0.46906064		1052.59	0.14775233		1582.58	0.17112545		2112.59	-0.03613217		2642.58	0.00707569		3172.61	0.00622859		3702.6	-0.00523744		4232.6	-0.02348747
522.79	0.46892533		1052.79	0.14763559		1582.78	0.17155263		2112.79	-0.03638255		2642.78	0.00669401		3172.81	0.00587886		3702.8	-0.0055084		4232.8	-0.02309352
522.99	0.46895813		1052.99	0.1478301		1582.98	0.17179755		2112.99	-0.03682721		2642.98	0.00777466		3173.01	0.00553664		3703	-0.00608957		4233	-0.02351788
523.19	0.46961976		1053.19	0.14871661		1583.18	0.17133552		2113.19	-0.03759748		2643.18	0.00838165		3173.21	0.00519941		3703.2	-0.00580797		4233.2	-0.023169
523.39	0.46972939		1053.39	0.14857882		1583.38	0.17147173		2113.39	-0.03768316		2643.38	0.00939006		3173.41	0.00456543		3703.4	-0.00589928		4233.4	-0.02243538
523.59	0.46993546		1053.59	0.1493099		1583.58	0.17260155		2113.59	-0.03667729		2643.58	0.01055059		3173.61	0.00462465		3703.6	-0.00611224		4233.6	-0.02171142
523.79	0.46954146		1053.79	0.1504913		1583.78	0.17245009		2113.79	-0.03594498		2643.78	0.01066737		3173.81	0.00407732		3703.8	-0.00619918		4233.8	-0.0220713
523.99	0.46949686		1053.99	0.15188365		1583.98	0.17229464		2113.99	-0.03572917		2643.98	0.01101674		3174.01	0.00270767		3704	-0.00599075		4234	-0.02196982
524.19	0.4684999		1054.19	0.15274344		1584.18	0.17240325		2114.19	-0.03573257		2644.18	0.01102109		3174.21	0.00241429		3704.2	-0.00612157		4234.2	-0.02214184
524.39	0.4683064		1054.39	0.15346888		1584.38	0.17179928		2114.39	-0.03507704		2644.38	0.01177302		3174.41	0.00336412		3704.4	-0.00672527		4234.4	-0.02316508
524.59	0.46671435		1054.59	0.15330479		1584.58	0.1714379		2114.59	-0.03451067		2644.58	0.0112764		3174.61	0.0024235		3704.6	-0.00624651		4234.6	-0.02279017
524.79	0.4663147		1054.79	0.15337432		1584.78	0.17035565		2114.79	-0.03530814		2644.78	0.01099737		3174.81	0.00251472		3704.8	-0.00580009		4234.8	-0.02252244
524.99	0.4659958		1054.99	0.15346067		1584.98	0.16989709		2114.99	-0.03475478		2644.98	0.01086255		3175.01	0.00228552		3705	-0.00546831		4235	-0.02272039
525.19	0.46569059		1055.19	0.15180633		1585.18	0.17061212		2115.19	-0.03424601		2645.18	0.01045693		3175.21	0.00233222		3705.2	-0.00518946		4235.2	-0.02293965
525.39	0.46671195		1055.39	0.15217714		1585.38	0.17055951		2115.39	-0.03391862		2645.38	0.0107993		3175.41	0.00211715		3705.4	-0.00537627		4235.4	-0.02299858
525.59	0.4669728		1055.59	0.15193988		1585.58	0.16985828		2115.59	-0.03333949		2645.58	0.01000597		3175.61	0.00251628		3705.6	-0.0051505		4235.6	-0.02341675
525.79	0.46742028		1055.79	0.15249454		1585.78	0.16944576		2115.79	-0.03369459		2645.78	0.0109308		3175.81	0.00291796		3705.8	-0.00514193		4235.8	-0.0233867
525.99	0.46775793		1055.99	0.15191992		1585.98	0.16909177		2115.99	-0.03381868		2645.98	0.01186167		3176.01	0.00321714		3706	-0.00542704		4236	-0.0239741
526.19	0.46821494		1056.19	0.15245863		1586.18	0.16919111		2116.19	-0.03342167		2646.18	0.01201541		3176.21	0.00265523		3706.2	-0.00598793		4236.2	-0.02280633
526.39	0.46904579		1056.39	0.15172395		1586.38	0.16855727		2116.39	-0.03223678		2646.38	0.01274089		3176.41	0.00304728		3706.4	-0.00682048		4236.4	-0.02273005
526.59	0.47036595		1056.59	0.15163664		1586.58	0.16882713		2116.59	-0.0321546		2646.58	0.01227539		3176.61	0.00344265		3706.6	-0.00778755		4236.6	-0.02305063
526.79	0.47127924		1056.79	0.15099575		1586.78	0.16952052		2116.79	-0.03180944		2646.78	0.01321384		3176.81	0.00394815		3706.8	-0.00794953		4236.8	-0.02300755
526.99	0.47231299		1056.99	0.15125356		1586.98	0.16985086		2116.99	-0.03201404		2646.98	0.01402336		3177.01	0.00420104		3707	-0.00814958		4237	-0.02393746
527.19	0.47296151		1057.19	0.15058237		1587.18	0.17008466		2117.19	-0.03194358		2647.18	0.01450979		3177.21	0.00481954		3707.2	-0.00724627		4237.2	-0.02333809
527.39	0.47268368		1057.39	0.1499231		1587.38	0.17048199		2117.39	-0.03140624		2647.38	0.01469066		3177.41	0.00523218		3707.4	-0.00744725		4237.4	-0.02350749
527.59	0.47362899		1057.59	0.15028434		1587.58	0.17035835		2117.59	-0.03110585		2647.58	0.01419193		3177.61	0.00495878		3707.6	-0.00762036		4237.6	-0.02344021
527.79	0.47380331		1057.79	0.15073277		1587.78	0.17040981		2117.79	-0.03188866		2647.78	0.01408576		3177.81	0.00448319		3707.8	-0.00795207		4237.8	-0.02440885
527.99	0.47345996		1057.99	0.15191854		1587.98	0.17117614		2117.99	-0.03290908		2647.98	0.01392442		3178.01	0.00389812		3708	-0.00825127		4238	-0.02484003
528.19	0.47319038		1058.19	0.15170849		1588.18	0.17107445		2118.19	-0.03277155		2648.18	0.01412756		3178.21	0.00424085		3708.2	-0.00751607		4238.2	-0.02458493
528.39	0.4732527		1058.39	0.15178313		1588.38	0.17153517		2118.39	-0.03224251		2648.38	0.01419387		3178.41	0.00498641		3708.4	-0.00744602		4238.4	-0.02513
528.59	0.47250778		1058.59	0.15083481		1588.58	0.1714811		2118.59	-0.03273658		2648.58	0.01421747		3178.61	0.00354782		3708.6	-0.00634616		4238.6	-0.02432558
528.79	0.47296731		1058.79	0.15079794		1588.78	0.17187472		2118.79	-0.0324253		2648.78	0.01352187		3178.81	0.00384655		3708.8	-0.00598577		4238.8	-0.02400831
528.99	0.47292248		1058.99	0.15098423		1588.98	0.17172263		2118.99	-0.03193257		2648.98	0.01334713		3179.01	0.00328504		3709	-0.00647231		4239	-0.02426342
529.19	0.47238141		1059.19	0.15047777		1589.18	0.17172889		2119.19	-0.03186865		2649.18	0.01246144		3179.21	0.00362027		3709.2	-0.00616924		4239.2	-0.0232078
529.39	0.47280667		1059.39	0.15052648		1589.38	0.17213119		2119.39	-0.03212595		2649.38	0.01169274		3179.41	0.0034058		3709.4	-0.00574417		4239.4	-0.02305648
529.59	0.47271244		1059.59	0.14996146		1589.58	0.17263223		2119.59	-0.0325072		2649.58	0.01084964		3179.61	0.00311333		3709.6	-0.00608124		4239.6	-0.02300956
529.79	0.47304846		1059.79	0.15017091		1589.78	0.17278288		2119.79	-0.03325387		2649.78	0.01049307		3179.81	0.00264508		3709.8	-0.00636719		4239.8	-0.02221139
529.99	0.47335893		1059.99	0.1503042		1589.98	0.17251826		2119.99	-0.03318026		2649.98	0.01072278		3180.01	0.00194488		3710	-0.00639275		4240	-0.02067257
530.19	0.47364934		1060.19	0.15047594		1590.18	0.17330937		2120.19	-0.03279341		2650.18	0.01068591		3180.21	0.00163535		3710.2	-0.00640065		4240.2	-0.01978119
530.39	0.47326152		1060.39	0.15001199		1590.38	0.17310674		2120.39	-0.03198365		2650.38	0.01105512		3180.41	0.00233192		3710.4	-0.00677122		4240.4	-0.02044456
530.59	0.47365214		1060.59	0.15037395		1590.58	0.17362776		2120.59	-0.03230592		2650.58	0.01011801		3180.61	0.00215896		3710.6	-0.00692318		4240.6	-0.02067698
530.79	0.47274708		1060.79	0.15031074		1590.78	0.17400883		2120.79	-0.03263451		2650.78	0.01019195		3180.81	0.00250753		3710.8	-0.00710928		4240.8	-0.02053224
530.99	0.47185771		1060.99	0.15083954		1590.98	0.17414312		2120.99	-0.03293277		2650.98	0.01023258		3181.01	0.0021676		3711	-0.00699664		4241	-0.0203906
531.19	0.47078533		1061.19	0.15025789		1591.18	0.17344762		2121.19	-0.03327007		2651.18	0.00976165		3181.21	0.00304601		3711.2	-0.00691018		4241.2	-0.02032454
531.39	0.47037875		1061.39	0.15107751		1591.38	0.17254998		2121.39	-0.0338074		2651.38	0.00890399		3181.41	0.00242569		3711.4	-0.00704287		4241.4	-0.02063862
531.59	0.47073879		1061.59	0.15149698		1591.58	0.17144162		2121.59	-0.03448045		2651.58	0.00849364		3181.61	0.00197432		3711.6	-0.00763239		4241.6	-0.02043133
531.79	0.47009771		1061.79	0.15127138		1591.78	0.17173107		2121.79	-0.03413641		2651.78	0.00860817		3181.81	0.00204599		3711.8	-0.00781739		4241.8	-0.02103965
531.99	0.47005468		1061.99	0.15126716		1591.98	0.17101207		2121.99	-0.03411431		2651.98	0.00744485		3182.01	0.00180659		3712	-0.00781103		4242	-0.02148947
532.19	0.46963782		1062.19	0.15111884		1592.18	0.17039586		2122.19	-0.03354135		2652.18	0.00795647		3182.21	0.00234471		3712.2	-0.00779172		4242.2	-0.02174582
532.39	0.46940851		1062.39	0.15056078		1592.38	0.17043673		2122.39	-0.03362639		2652.38	0.00768915		3182.41	0.00351331		3712.4	-0.00822036		4242.4	-0.02227974
532.59	0.46885183		1062.59	0.1500183		1592.58	0.16897873		2122.59	-0.03348866		2652.58	0.00770996		3182.61	0.00364553		3712.6	-0.00861235		4242.6	-0.02257611
532.79	0.46891954		1062.79	0.14928811		1592.78	0.1686716		2122.79	-0.03287801		2652.78	0.00734685		3182.81	0.00393743		3712.8	-0.00850595		4242.8	-0.02292695
532.99	0.46860829		1062.99	0.14904485		1592.98	0.16835245		2122.99	-0.03369177		2652.98	0.00686362		3183.01	0.00405338		3713	-0.00840312		4243	-0.02337801
533.19	0.46870228		1063.19	0.14901232		1593.18	0.16769759		2123.19	-0.03410268		2653.18	0.00590073		3183.21	0.00413341		3713.2	-0.0079345		4243.2	-0.02285358
533.39	0.46886757		1063.39	0.14849302		1593.38	0.16868538		2123.39	-0.03465876		2653.38	0.00627926		3183.41	0.00365602		3713.4	-0.00736722		4243.4	-0.02347838
533.59	0.46915515		1063.59	0.14784367		1593.58	0.1688064		2123.59	-0.03440181		2653.58	0.00698409		3183.61	0.00385947		3713.6	-0.00817004		4243.6	-0.02363346
533.79	0.46894707		1063.79	0.14730473		1593.78	0.16903906		2123.79	-0.03478015		2653.78	0.0065147		3183.81	0.00477845		3713.8	-0.00793469		4243.8	-0.02353218
533.99	0.4688912		1063.99	0.14800311		1593.98	0.16890411		2123.99	-0.03458225		2653.98	0.00708487		3184.01	0.00556873		3714	-0.0072977		4244	-0.02326119
534.19	0.46912882		1064.19	0.14757111		1594.18	0.169091		2124.19	-0.03431314		2654.18	0.0082655		3184.21	0.00613712		3714.2	-0.00695565		4244.2	-0.02273569
534.39	0.46856075		1064.39	0.1474099		1594.38	0.16946017		2124.39	-0.0338404		2654.38	0.0088692		3184.41	0.00656582		3714.4	-0.00785456		4244.4	-0.02270891
534.59	0.46924449		1064.59	0.14734646		1594.58	0.17067198		2124.59	-0.03320403		2654.58	0.00899793		3184.61	0.00633386		3714.6	-0.00772187		4244.6	-0.02278706
534.79	0.46897119		1064.79	0.14721154		1594.78	0.17055488		2124.79	-0.03400767		2654.78	0.00980458		3184.81	0.00560922		3714.8	-0.00796984		4244.8	-0.02286567
534.99	0.46909092		1064.99	0.14837455		1594.98	0.17080017		2124.99	-0.03350763		2654.98	0.00972311		3185.01	0.00555228		3715	-0.00738162		4245	-0.02276981
535.19	0.46902125		1065.19	0.14852591		1595.18	0.1709781		2125.19	-0.03385292		2655.18	0.00941592		3185.21	0.00587953		3715.2	-0.00700952		4245.2	-0.02264067
535.39	0.46984067		1065.39	0.1489214		1595.38	0.17103563		2125.39	-0.03387137		2655.38	0.00974054		3185.41	0.00548524		3715.4	-0.00658848		4245.4	-0.021774
535.59	0.47051205		1065.59	0.14875114		1595.58	0.1719396		2125.59	-0.03355464		2655.58	0.00876773		3185.61	0.00459867		3715.6	-0.0062996		4245.6	-0.02264799
535.79	0.47080174		1065.79	0.14847176		1595.78	0.17299559		2125.79	-0.03275065		2655.78	0.00906805		3185.81	0.00490929		3715.8	-0.00591843		4245.8	-0.02302215
535.99	0.47056901		1065.99	0.14866101		1595.98	0.17280567		2125.99	-0.03259596		2655.98	0.00859572		3186.01	0.00526466		3716	-0.00614787		4246	-0.0236304
536.19	0.46977707		1066.19	0.14899572		1596.18	0.17293055		2126.19	-0.03232226		2656.18	0.00903729		3186.21	0.00559709		3716.2	-0.00671347		4246.2	-0.02333903
536.39	0.47003355		1066.39	0.1496745		1596.38	0.17299017		2126.39	-0.03281111		2656.38	0.00905192		3186.41	0.00514707		3716.4	-0.00771104		4246.4	-0.02372442
536.59	0.46901488		1066.59	0.15036593		1596.58	0.17277665		2126.59	-0.03312822		2656.58	0.00936642		3186.61	0.00416265		3716.6	-0.007605		4246.6	-0.0241216
536.79	0.46928062		1066.79	0.15055315		1596.78	0.1730606		2126.79	-0.03373542		2656.78	0.00930716		3186.81	0.00276358		3716.8	-0.00784068		4246.8	-0.02463645
536.99	0.46911655		1066.99	0.15163974		1596.98	0.17264161		2126.99	-0.03411746		2656.98	0.00905208		3187.01	0.00246865		3717	-0.00768379		4247	-0.02418654
537.19	0.46905222		1067.19	0.15218096		1597.18	0.17159974		2127.19	-0.03479014		2657.18	0.00914569		3187.21	0.0020798		3717.2	-0.00755331		4247.2	-0.02458509
537.39	0.46864496		1067.39	0.15111304		1597.38	0.1721009		2127.39	-0.03520568		2657.38	0.01017407		3187.41	0.00177814		3717.4	-0.00754398		4247.4	-0.02522294
537.59	0.46862491		1067.59	0.15032227		1597.58	0.17178684		2127.59	-0.03537814		2657.58	0.01047229		3187.61	0.0022961		3717.6	-0.00828558		4247.6	-0.02523815
537.79	0.46824663		1067.79	0.15051192		1597.78	0.17216843		2127.79	-0.03568424		2657.78	0.01128622		3187.81	0.00266064		3717.8	-0.00843552		4247.8	-0.02531796
537.99	0.46870836		1067.99	0.15017532		1597.98	0.17236699		2127.99	-0.03644174		2657.98	0.01288649		3188.01	0.00242544		3718	-0.00749639		4248	-0.0247831
538.19	0.46845179		1068.19	0.14923001		1598.18	0.17287058		2128.19	-0.03651986		2658.18	0.01441497		3188.21	0.00211247		3718.2	-0.00677617		4248.2	-0.0243478
538.39	0.46819802		1068.39	0.14875941		1598.38	0.17335121		2128.39	-0.03642855		2658.38	0.01432249		3188.41	0.00157538		3718.4	-0.00709795		4248.4	-0.02442317
538.59	0.4685615		1068.59	0.14822949		1598.58	0.17393096		2128.59	-0.03612326		2658.58	0.01515904		3188.61	0.00121684		3718.6	-0.00654343		4248.6	-0.02509631
538.79	0.46857879		1068.79	0.14810337		1598.78	0.17332085		2128.79	-0.03623285		2658.78	0.01495149		3188.81	0.00106265		3718.8	-0.00613981		4248.8	-0.02522608
538.99	0.46817265		1068.99	0.14842626		1598.98	0.17374388		2128.99	-0.03625463		2658.98	0.01472287		3189.01	0.00103719		3719	-0.00582629		4249	-0.02537865
539.19	0.46783341		1069.19	0.14727123		1599.18	0.17331309		2129.19	-0.03594733		2659.18	0.01407221		3189.21	0.0018004		3719.2	-0.00598837		4249.2	-0.02600866
539.39	0.468368		1069.39	0.14687701		1599.38	0.17255786		2129.39	-0.03570559		2659.38	0.01347788		3189.41	0.00257217		3719.4	-0.00489429		4249.4	-0.02650433
539.59	0.46852659		1069.59	0.1465808		1599.58	0.17316637		2129.59	-0.03484245		2659.58	0.01116516		3189.61	0.00312466		3719.6	-0.00469338		4249.6	-0.02719767
539.79	0.46829871		1069.79	0.14682588		1599.78	0.17289355		2129.79	-0.03363023		2659.78	0.01109316		3189.81	0.00429582		3719.8	-0.00509093		4249.8	-0.02670596
539.99	0.46800053		1069.99	0.14722207		1599.98	0.17200221		2129.99	-0.03274608		2659.98	0.00953951		3190.01	0.00474797		3720	-0.00550222		4250	-0.02723439
540.19	0.4675747		1070.19	0.14842583		1600.18	0.17076707		2130.19	-0.0328054		2660.18	0.00949417		3190.21	0.00428447		3720.2	-0.00598383		4250.2	-0.02691919
540.39	0.46739672		1070.39	0.14967783		1600.38	0.17093074		2130.39	-0.03287731		2660.38	0.00971085		3190.41	0.00387669		3720.4	-0.00632968		4250.4	-0.02701361
540.59	0.46665505		1070.59	0.14920589		1600.58	0.1695404		2130.59	-0.0326157		2660.58	0.00833503		3190.61	0.00379926		3720.6	-0.00577402		4250.6	-0.02706398
540.79	0.4666164		1070.79	0.1492693		1600.78	0.16837673		2130.79	-0.03225626		2660.78	0.00805472		3190.81	0.00367236		3720.8	-0.00639834		4250.8	-0.02651438
540.99	0.46691852		1070.99	0.14901525		1600.98	0.16817226		2130.99	-0.0319742		2660.98	0.00738423		3191.01	0.00399639		3721	-0.00616119		4251	-0.02628584
541.19	0.46804404		1071.19	0.14863778		1601.18	0.16766232		2131.19	-0.03189868		2661.18	0.00654871		3191.21	0.00425682		3721.2	-0.00698904		4251.2	-0.02656899
541.39	0.46842844		1071.39	0.14780323		1601.38	0.16817217		2131.39	-0.03180938		2661.38	0.00694166		3191.41	0.00406064		3721.4	-0.00718123		4251.4	-0.02537032
541.59	0.46847315		1071.59	0.14815076		1601.58	0.1685586		2131.59	-0.03229311		2661.58	0.00794558		3191.61	0.00484633		3721.6	-0.00772653		4251.6	-0.02453043
541.79	0.46919413		1071.79	0.14786802		1601.78	0.16961286		2131.79	-0.03175386		2661.78	0.00891782		3191.81	0.00486117		3721.8	-0.00642196		4251.8	-0.02475405
541.99	0.47008502		1071.99	0.14787185		1601.98	0.17051444		2131.99	-0.03227056		2661.98	0.01006686		3192.01	0.00477701		3722	-0.00555678		4252	-0.02434469
542.19	0.47017227		1072.19	0.14903151		1602.18	0.17102614		2132.19	-0.03188208		2662.18	0.01067274		3192.21	0.00458066		3722.2	-0.00469103		4252.2	-0.02398446
542.39	0.4701412		1072.39	0.14915245		1602.38	0.17153197		2132.39	-0.0316918		2662.38	0.01103503		3192.41	0.00457017		3722.4	-0.0053677		4252.4	-0.02415583
542.59	0.47070882		1072.59	0.1487128		1602.58	0.17193609		2132.59	-0.03224708		2662.58	0.01147213		3192.61	0.00364962		3722.6	-0.00539303		4252.6	-0.02427199
542.79	0.47098216		1072.79	0.14862392		1602.78	0.17185		2132.79	-0.03248704		2662.78	0.01010953		3192.81	0.0038083		3722.8	-0.00597409		4252.8	-0.0240914
542.99	0.470818		1072.99	0.1489486		1602.98	0.17187467		2132.99	-0.03295925		2662.98	0.01022242		3193.01	0.00415457		3723	-0.00651126		4253	-0.02405457
543.19	0.47128507		1073.19	0.1494027		1603.18	0.17169224		2133.19	-0.03350943		2663.18	0.00797272		3193.21	0.00528456		3723.2	-0.00662999		4253.2	-0.0233556
543.39	0.4714451		1073.39	0.1500699		1603.38	0.17118789		2133.39	-0.03360706		2663.38	0.00658716		3193.41	0.00521743		3723.4	-0.00633437		4253.4	-0.0224265
543.59	0.47149304		1073.59	0.14969775		1603.58	0.17081338		2133.59	-0.03353723		2663.58	0.00550012		3193.61	0.00524975		3723.6	-0.00755093		4253.6	-0.02211626
543.79	0.47069826		1073.79	0.15036955		1603.78	0.17033136		2133.79	-0.03426231		2663.78	0.00629152		3193.81	0.00432171		3723.8	-0.00781789		4253.8	-0.02246137
543.99	0.47026051		1073.99	0.15096828		1603.98	0.16972165		2133.99	-0.03464784		2663.98	0.00557572		3194.01	0.00412128		3724	-0.00769763		4254	-0.0223119
544.19	0.46957742		1074.19	0.15124992		1604.18	0.16831749		2134.19	-0.03466163		2664.18	0.00655397		3194.21	0.00283085		3724.2	-0.00829235		4254.2	-0.02169378
544.39	0.46786866		1074.39	0.15156636		1604.38	0.1682599		2134.39	-0.0348885		2664.38	0.00637629		3194.41	0.00245301		3724.4	-0.00873127		4254.4	-0.02184419
544.59	0.46664782		1074.59	0.15034447		1604.58	0.16759288		2134.59	-0.03489175		2664.58	0.00583974		3194.61	0.00186965		3724.6	-0.00908011		4254.6	-0.02180139
544.79	0.4662963		1074.79	0.15024126		1604.78	0.1678193		2134.79	-0.03469117		2664.78	0.00669417		3194.81	0.00173116		3724.8	-0.00905923		4254.8	-0.02203339
544.99	0.46688558		1074.99	0.14948996		1604.98	0.16790153		2134.99	-0.03407824		2664.98	0.00607178		3195.01	0.00106265		3725	-0.00933659		4255	-0.02250035
545.19	0.46798973		1075.19	0.14906215		1605.18	0.16824139		2135.19	-0.0341554		2665.18	0.00626879		3195.21	0.00104827		3725.2	-0.01001366		4255.2	-0.0225346
545.39	0.46806388		1075.39	0.14811032		1605.38	0.16933845		2135.39	-0.03423141		2665.38	0.00725174		3195.41	0.00127396		3725.4	-0.00907485		4255.4	-0.02236502
545.59	0.46854025		1075.59	0.14787504		1605.58	0.17025047		2135.59	-0.03478946		2665.58	0.0079019		3195.61	0.00095342		3725.6	-0.0089457		4255.6	-0.02273752
545.79	0.4694211		1075.79	0.14726956		1605.78	0.17086868		2135.79	-0.03386952		2665.78	0.00794036		3195.81	0.00033635		3725.8	-0.00784295		4255.8	-0.02364627
545.99	0.46969293		1075.99	0.14728017		1605.98	0.17182389		2135.99	-0.03419545		2665.98	0.00887662		3196.01	0.00019072		3726	-0.00775116		4256	-0.02337561
546.19	0.47043225		1076.19	0.14738679		1606.18	0.17159153		2136.19	-0.03379317		2666.18	0.00836474		3196.21	0.00009601		3726.2	-0.00731643		4256.2	-0.02351233
546.39	0.46968276		1076.39	0.14645484		1606.38	0.17282598		2136.39	-0.03412367		2666.38	0.00807697		3196.41	0.00027036		3726.4	-0.00745599		4256.4	-0.02352101
546.59	0.47017581		1076.59	0.14614294		1606.58	0.17315059		2136.59	-0.03501479		2666.58	0.00760712		3196.61	-0.00050143		3726.6	-0.00736903		4256.6	-0.02362777
546.79	0.46961798		1076.79	0.14613006		1606.78	0.17367003		2136.79	-0.03460582		2666.78	0.00671984		3196.81	0.00048725		3726.8	-0.00831949		4256.8	-0.02409647
546.99	0.47002206		1076.99	0.14751803		1606.98	0.17424107		2136.99	-0.03536003		2666.98	0.00663078		3197.01	0.00095907		3727	-0.00780474		4257	-0.02386451
547.19	0.47005388		1077.19	0.14839373		1607.18	0.17422091		2137.19	-0.03659432		2667.18	0.00536889		3197.21	0.00136111		3727.2	-0.00686479		4257.2	-0.02407028
547.39	0.46858728		1077.39	0.14947648		1607.38	0.17331706		2137.39	-0.03668793		2667.38	0.00523841		3197.41	0.00144603		3727.4	-0.00716654		4257.4	-0.02488333
547.59	0.46833052		1077.59	0.14930572		1607.58	0.17317195		2137.59	-0.03742044		2667.58	0.00594669		3197.61	0.00204152		3727.6	-0.00730544		4257.6	-0.0248993
547.79	0.46707513		1077.79	0.14980222		1607.78	0.17278558		2137.79	-0.03711726		2667.78	0.00599412		3197.81	0.00210599		3727.8	-0.00709418		4257.8	-0.02507854
547.99	0.46669509		1077.99	0.15062989		1607.98	0.17309928		2137.99	-0.03661432		2667.98	0.00577758		3198.01	0.00219177		3728	-0.00693459		4258	-0.02480214
548.19	0.46641659		1078.19	0.15071296		1608.18	0.17247113		2138.19	-0.03613205		2668.18	0.00657088		3198.21	0.00164679		3728.2	-0.00690079		4258.2	-0.02405396
548.39	0.46499145		1078.39	0.15070035		1608.38	0.17260251		2138.39	-0.03622172		2668.38	0.00635804		3198.41	0.00193299		3728.4	-0.00638758		4258.4	-0.02376679
548.59	0.4654731		1078.59	0.15010913		1608.58	0.17264522		2138.59	-0.03625656		2668.58	0.00676364		3198.61	0.00159912		3728.6	-0.0060328		4258.6	-0.02301311
548.79	0.46556834		1078.79	0.14994896		1608.78	0.17244091		2138.79	-0.03603791		2668.78	0.00689059		3198.81	0.00206455		3728.8	-0.00575221		4258.8	-0.02327742
548.99	0.46617854		1078.99	0.14924608		1608.98	0.1724657		2138.99	-0.03601236		2668.98	0.00730302		3199.01	0.00149949		3729	-0.00630602		4259	-0.02205572
549.19	0.4668215		1079.19	0.1488595		1609.18	0.17234133		2139.19	-0.0363554		2669.18	0.00789481		3199.21	0.00172854		3729.2	-0.00691085		4259.2	-0.02231687
549.39	0.4672797		1079.39	0.14822273		1609.38	0.17210932		2139.39	-0.03679607		2669.38	0.00881534		3199.41	0.00170199		3729.4	-0.00646502		4259.4	-0.02219044
549.59	0.46811554		1079.59	0.14789785		1609.58	0.17159606		2139.59	-0.03678554		2669.58	0.00914255		3199.61	0.00170586		3729.6	-0.0069739		4259.6	-0.02165663
549.79	0.46871431		1079.79	0.14778623		1609.78	0.17101441		2139.79	-0.03615336		2669.78	0.00945974		3199.81	0.00203462		3729.8	-0.0070118		4259.8	-0.02179307
549.99	0.46917628		1079.99	0.14736449		1609.98	0.17122941		2139.99	-0.03626065		2669.98	0.00970076		3200.01	0.00194661		3730	-0.00753648		4260	-0.02139686
550.19	0.46936248		1080.19	0.14711068		1610.18	0.17097927		2140.19	-0.03648048		2670.18	0.00955352		3200.21	0.00189308		3730.2	-0.00821809		4260.2	-0.02206665
550.39	0.4686671		1080.39	0.14624219		1610.38	0.17139145		2140.39	-0.03647103		2670.38	0.00934194		3200.41	0.00212006		3730.4	-0.00829178		4260.4	-0.02214761
550.59	0.46922243		1080.59	0.14640918		1610.58	0.17121477		2140.59	-0.03637451		2670.58	0.0093642		3200.61	0.00154437		3730.6	-0.00864178		4260.6	-0.02357605
550.79	0.46918092		1080.79	0.1472953		1610.78	0.17151806		2140.79	-0.03613765		2670.78	0.00921509		3200.81	0.00121255		3730.8	-0.0090152		4260.8	-0.02462861
550.99	0.46954604		1080.99	0.1485981		1610.98	0.17133021		2140.99	-0.03699645		2670.98	0.00875999		3201.01	0.00093258		3731	-0.00841991		4261	-0.02504999
551.19	0.4696873		1081.19	0.14853773		1611.18	0.17040248		2141.19	-0.03683803		2671.18	0.00853867		3201.21	0.00098249		3731.2	-0.00838818		4261.2	-0.02550406
551.39	0.46897349		1081.39	0.14879002		1611.38	0.17090453		2141.39	-0.03700509		2671.38	0.00782612		3201.41	0.00065873		3731.4	-0.00893115		4261.4	-0.0250392
551.59	0.46975577		1081.59	0.14874745		1611.58	0.17117641		2141.59	-0.03613863		2671.58	0.00732604		3201.61	0.00033685		3731.6	-0.00845994		4261.6	-0.02510124
551.79	0.46960795		1081.79	0.14904228		1611.78	0.17118228		2141.79	-0.03537103		2671.78	0.00609345		3201.81	-0.00044853		3731.8	-0.00888273		4261.8	-0.02545671
551.99	0.46992726		1081.99	0.14913194		1611.98	0.17250459		2141.99	-0.03530419		2671.98	0.00594067		3202.01	-0.00127307		3732	-0.00845695		4262	-0.0248831
552.19	0.47020601		1082.19	0.14882573		1612.18	0.17259741		2142.19	-0.03530566		2672.18	0.00586237		3202.21	-0.00077401		3732.2	-0.00838959		4262.2	-0.02403783
552.39	0.46937747		1082.39	0.14903104		1612.38	0.17220464		2142.39	-0.03554175		2672.38	0.00536317		3202.41	0.00010701		3732.4	-0.0089596		4262.4	-0.0243348
552.59	0.46939759		1082.59	0.14877405		1612.58	0.17249568		2142.59	-0.03636206		2672.58	0.00531139		3202.61	0.00012552		3732.6	-0.00932951		4262.6	-0.02370381
552.79	0.46826226		1082.79	0.14755146		1612.78	0.17235421		2142.79	-0.03582657		2672.78	0.0061337		3202.81	0.00094138		3732.8	-0.01022605		4262.8	-0.02344875
552.99	0.46842533		1082.99	0.14704568		1612.98	0.17169176		2142.99	-0.03561417		2672.98	0.00653003		3203.01	0.00114922		3733	-0.01056844		4263	-0.02196567
553.19	0.46864835		1083.19	0.14756898		1613.18	0.1715558		2143.19	-0.03542052		2673.18	0.00672701		3203.21	0.00196671		3733.2	-0.01102584		4263.2	-0.02266747
553.39	0.46829378		1083.39	0.14732432		1613.38	0.17167694		2143.39	-0.03562299		2673.38	0.00761648		3203.41	0.00292877		3733.4	-0.01134214		4263.4	-0.02195579
553.59	0.46915942		1083.59	0.14712182		1613.58	0.17143331		2143.59	-0.03538065		2673.58	0.00833224		3203.61	0.00322449		3733.6	-0.0115202		4263.6	-0.0222969
553.79	0.46899145		1083.79	0.14765477		1613.78	0.17146051		2143.79	-0.03597634		2673.78	0.0090545		3203.81	0.00355732		3733.8	-0.01137764		4263.8	-0.02268257
553.99	0.46902577		1083.99	0.14770123		1613.98	0.17202373		2143.99	-0.03605368		2673.98	0.00903091		3204.01	0.00411746		3734	-0.01156503		4264	-0.02291718
554.19	0.4687994		1084.19	0.14779584		1614.18	0.17224834		2144.19	-0.03528951		2674.18	0.00942877		3204.21	0.00460595		3734.2	-0.01114438		4264.2	-0.0234707
554.39	0.46959693		1084.39	0.14828445		1614.38	0.17222871		2144.39	-0.03444789		2674.38	0.00936354		3204.41	0.00469738		3734.4	-0.01055897		4264.4	-0.0235332
554.59	0.46966803		1084.59	0.14904497		1614.58	0.17261827		2144.59	-0.03396948		2674.58	0.00883012		3204.61	0.00473001		3734.6	-0.01089368		4264.6	-0.02442776
554.79	0.46987559		1084.79	0.14987828		1614.78	0.17194832		2144.79	-0.03364569		2674.78	0.00783787		3204.81	0.00414401		3734.8	-0.0105307		4264.8	-0.02451858
554.99	0.47018947		1084.99	0.14963968		1614.98	0.17109306		2144.99	-0.03396494		2674.98	0.0076333		3205.01	0.00376103		3735	-0.01022617		4265	-0.02450951
555.19	0.4702037		1085.19	0.15004418		1615.18	0.17058389		2145.19	-0.03336483		2675.18	0.0071844		3205.21	0.00326612		3735.2	-0.01070663		4265.2	-0.02433199
555.39	0.46923406		1085.39	0.15054516		1615.38	0.170364		2145.39	-0.03347803		2675.38	0.00731074		3205.41	0.00253249		3735.4	-0.00972782		4265.4	-0.02483566
555.59	0.46917025		1085.59	0.15148386		1615.58	0.17021342		2145.59	-0.03302377		2675.58	0.00662982		3205.61	0.00204557		3735.6	-0.00933046		4265.6	-0.02587886
555.79	0.4692344		1085.79	0.15137546		1615.78	0.17058987		2145.79	-0.03373994		2675.78	0.00628392		3205.81	0.00172639		3735.8	-0.00993483		4265.8	-0.02598018
555.99	0.4689505		1085.99	0.15108796		1615.98	0.17039338		2145.99	-0.03426964		2675.98	0.00642035		3206.01	0.00089904		3736	-0.0087581		4266	-0.02642593
556.19	0.4678984		1086.19	0.15082649		1616.18	0.16961485		2146.19	-0.03580343		2676.18	0.00648663		3206.21	0.00060612		3736.2	-0.00863769		4266.2	-0.02729232
556.39	0.46716591		1086.39	0.15034171		1616.38	0.1689709		2146.39	-0.03629286		2676.38	0.00698154		3206.41	0.00049803		3736.4	-0.00865575		4266.4	-0.02737214
556.59	0.46719188		1086.59	0.14917726		1616.58	0.16873878		2146.59	-0.03707173		2676.58	0.0068543		3206.61	0.00008499		3736.6	-0.00866363		4266.6	-0.02660089
556.79	0.46690296		1086.79	0.14751814		1616.78	0.16815931		2146.79	-0.03719896		2676.78	0.00675034		3206.81	0.00087399		3736.8	-0.00853567		4266.8	-0.02645476
556.99	0.46800065		1086.99	0.14804527		1616.98	0.16820434		2146.99	-0.03815451		2676.98	0.00629384		3207.01	0.00080835		3737	-0.00798237		4267	-0.02563767
557.19	0.46774308		1087.19	0.1482858		1617.18	0.16864566		2147.19	-0.03847632		2677.18	0.00693122		3207.21	0.0000304		3737.2	-0.00811633		4267.2	-0.02633319
557.39	0.4674658		1087.39	0.14799291		1617.38	0.16835325		2147.39	-0.03927161		2677.38	0.0083365		3207.41	0.00022464		3737.4	-0.00783972		4267.4	-0.02582883
557.59	0.4689592		1087.59	0.14803354		1617.58	0.1680716		2147.59	-0.03959313		2677.58	0.00889999		3207.61	0.0000852		3737.6	-0.00696491		4267.6	-0.02598888
557.79	0.4690422		1087.79	0.14806605		1617.78	0.16835197		2147.79	-0.03915934		2677.78	0.00961916		3207.81	0.00069895		3737.8	-0.00652553		4267.8	-0.02556743
557.99	0.46960635		1087.99	0.14779208		1617.98	0.16916106		2147.99	-0.03829255		2677.98	0.00970502		3208.01	0.00103215		3738	-0.00638005		4268	-0.02536624
558.19	0.46988711		1088.19	0.14748143		1618.18	0.16954028		2148.19	-0.03731366		2678.18	0.01053391		3208.21	0.00119541		3738.2	-0.00628152		4268.2	-0.02515741
558.39	0.47042015		1088.39	0.14730592		1618.38	0.16995117		2148.39	-0.03694159		2678.38	0.01065092		3208.41	0.00138437		3738.4	-0.00693645		4268.4	-0.02487499
558.59	0.47023595		1088.59	0.14698462		1618.58	0.16995087		2148.59	-0.03651158		2678.58	0.01051844		3208.61	0.00206273		3738.6	-0.00789698		4268.6	-0.02465085
558.79	0.47049212		1088.79	0.14684222		1618.78	0.16995067		2148.79	-0.0363517		2678.78	0.01092213		3208.81	0.00180701		3738.8	-0.00828378		4268.8	-0.02403556
558.99	0.47038559		1088.99	0.14674051		1618.98	0.17037294		2148.99	-0.03647962		2678.98	0.0117953		3209.01	0.00208566		3739	-0.00940432		4269	-0.02363912
559.19	0.47011108		1089.19	0.14725504		1619.18	0.17093517		2149.19	-0.03630084		2679.18	0.01200107		3209.21	0.00240341		3739.2	-0.01073803		4269.2	-0.02328282
559.39	0.46988913		1089.39	0.14720264		1619.38	0.17171793		2149.39	-0.03681418		2679.38	0.01258188		3209.41	0.0027161		3739.4	-0.01087421		4269.4	-0.02310679
559.59	0.47005508		1089.59	0.14716708		1619.58	0.17302037		2149.59	-0.03715011		2679.58	0.01195706		3209.61	0.0030169		3739.6	-0.01200812		4269.6	-0.02271953
559.79	0.47019308		1089.79	0.14706146		1619.78	0.17355127		2149.79	-0.03783582		2679.78	0.0122595		3209.81	0.00304901		3739.8	-0.0131517		4269.8	-0.02238766
