# Supplementary material for: Functional development of a V3/glycan-specific broadly neutralizing antibody isolated from a case of HIV superinfection
Source: eLife journal article supplement (doi:10.7554/elife.68110), 2021-07-15
Supplement: fig2-data2 [file B1.xls]

Vers 3.43 Data Simulation
Conc1	1E-06	1E-06	1E-06	1E-06	1E-06
Start1	199.99	730	1259.99	1790	2320
Stop1	559.79	1089.8	1619.79	2149.8	2679.8
Time1	Data1	Sim1	Time2	Data2	Sim2	Time3	Data3	Sim3	Time4	Data4	Sim4	Time5	Data5	Sim5
199.99	0.00815965		730	-0.00807876		1259.99	-0.00835025		1790	0.00311418		2320	0.00106465
200.19	0.00869792		730.2	-0.00858412		1260.19	-0.00854535		1790.2	0.00247158		2320.2	0.00068476
200.39	0.00943691		730.4	-0.00903192		1260.39	-0.00899926		1790.4	0.00285041		2320.4	0.00031726
200.59	0.01004215		730.6	-0.00887438		1260.59	-0.00957158		1790.6	0.00307138		2320.6	0.00071413
200.79	0.0110546		730.8	-0.00965161		1260.79	-0.01058077		1790.8	0.0034427		2320.8	-0.00010865
200.99	0.01248318		731	-0.00896411		1260.99	-0.01068651		1791	0.00304693		2321	-0.00095459
201.19	0.01486286		731.2	-0.00933952		1261.19	-0.01058485		1791.2	0.00391818		2321.2	-0.00118261
201.39	0.01595593		731.4	-0.00878694		1261.39	-0.01101439		1791.4	0.00461258		2321.4	-0.00089285
201.59	0.01807162		731.6	-0.00917413		1261.59	-0.01111832		1791.6	0.00532101		2321.6	-0.00079085
201.79	0.0196509		731.8	-0.00946795		1261.79	-0.01131951		1791.8	0.00680216		2321.8	-0.00090485
201.99	0.02142199		732	-0.00958173		1261.99	-0.0111791		1792	0.0079461		2322	-0.00051571
202.19	0.02315923		732.2	-0.00977512		1262.19	-0.01083385		1792.2	0.00884065		2322.2	-0.00024533
202.39	0.02541611		732.4	-0.01002341		1262.39	-0.01102948		1792.4	0.0098985		2322.4	-0.00054651
202.59	0.02782896		732.6	-0.00998373		1262.59	-0.01146721		1792.6	0.01010975		2322.6	-0.00073218
202.79	0.02985104		732.8	-0.0095262		1262.79	-0.01097357		1792.8	0.01085614		2322.8	-0.00039496
202.99	0.03175641		733	-0.00946501		1262.99	-0.0114961		1793	0.01117161		2323	-0.00010047
203.19	0.03291466		733.2	-0.00936637		1263.19	-0.01078674		1793.2	0.0103813		2323.2	0.00125818
203.39	0.03458912		733.4	-0.0085932		1263.39	-0.01033984		1793.4	0.00999905		2323.4	0.00127905
203.59	0.0356449		733.6	-0.00975315		1263.59	-0.01089474		1793.6	0.00987898		2323.6	0.00070537
203.79	0.03759333		733.8	-0.01046741		1263.79	-0.01072613		1793.8	0.00933626		2323.8	0.00028983
203.99	0.03888542		734	-0.0094278		1263.99	-0.01071168		1794	0.00916314		2324	-0.00002429
204.19	0.04011957		734.2	-0.0088751		1264.19	-0.01064385		1794.2	0.00961746		2324.2	-0.0006639
204.39	0.04137291		734.4	-0.00839465		1264.39	-0.0114771		1794.4	0.01040388		2324.4	-0.0007597
204.59	0.04209339		734.6	-0.007859		1264.59	-0.01164958		1794.6	0.01044815		2324.6	-0.0010166
204.79	0.04322455		734.8	-0.00863199		1264.79	-0.01146688		1794.8	0.01102851		2324.8	-0.00268081
204.99	0.04357858		735	-0.0076232		1264.99	-0.01099465		1795	0.01109199		2325	-0.00250378
205.19	0.0450692		735.2	-0.00817475		1265.19	-0.01009827		1795.2	0.01227339		2325.2	-0.00194517
205.39	0.04508084		735.4	-0.00760635		1265.39	-0.00992559		1795.4	0.01308133		2325.4	-0.00172315
205.59	0.04626672		735.6	-0.00821688		1265.59	-0.00962855		1795.6	0.0138443		2325.6	-0.00121559
205.79	0.04629349		735.8	-0.00847805		1265.79	-0.00914445		1795.8	0.01513328		2325.8	-0.00089064
205.99	0.04629058		736	-0.00828832		1265.99	-0.00885521		1796	0.01495694		2326	0.00001184
206.19	0.04685508		736.2	-0.00812788		1266.19	-0.00819069		1796.2	0.01422441		2326.2	0.00057331
206.39	0.04821493		736.4	-0.00738634		1266.39	-0.00874631		1796.4	0.01398147		2326.4	0.00048958
206.59	0.04905657		736.6	-0.00676005		1266.59	-0.00851089		1796.6	0.01379663		2326.6	0.0007387
206.79	0.0492536		736.8	-0.00633164		1266.79	-0.00763225		1796.8	0.01376165		2326.8	0.00005764
206.99	0.05041504		737	-0.00568236		1266.99	-0.0075447		1797	0.01226695		2327	0.00104663
207.19	0.05036354		737.2	-0.00507453		1267.19	-0.00776484		1797.2	0.01276622		2327.2	0.00156232
207.39	0.0526885		737.4	-0.00546388		1267.39	-0.00792196		1797.4	0.01161752		2327.4	0.00081782
207.59	0.05338468		737.6	-0.00599304		1267.59	-0.00836686		1797.6	0.01114311		2327.6	-0.00017285
207.79	0.05495586		737.8	-0.00547712		1267.79	-0.0084329		1797.8	0.01120753		2327.8	-0.00099055
207.99	0.05592951		738	-0.00428025		1267.99	-0.00901614		1798	0.01139634		2328	-0.00153441
208.19	0.05709617		738.2	-0.00421378		1268.19	-0.00995533		1798.2	0.01178016		2328.2	-0.00202569
208.39	0.05730647		738.4	-0.00457747		1268.39	-0.01056705		1798.4	0.01150815		2328.4	-0.00280026
208.59	0.05753603		738.6	-0.00530007		1268.59	-0.009884		1798.6	0.01188007		2328.6	-0.00308253
208.79	0.05735531		738.8	-0.00634673		1268.79	-0.00959933		1798.8	0.01250326		2328.8	-0.0031295
208.99	0.05709913		739	-0.00622274		1268.99	-0.01023756		1799	0.01273634		2329	-0.0032852
209.19	0.05798062		739.2	-0.00677547		1269.19	-0.0102559		1799.2	0.01315227		2329.2	-0.002833
209.39	0.05833556		739.4	-0.00759316		1269.39	-0.01069309		1799.4	0.01377728		2329.4	-0.00246821
209.59	0.05876551		739.6	-0.00768189		1269.59	-0.010957		1799.6	0.01397493		2329.6	-0.00161124
209.79	0.05880982		739.8	-0.00817639		1269.79	-0.01038964		1799.8	0.01425318		2329.8	-0.0021785
209.99	0.05902422		740	-0.0081708		1269.99	-0.01003757		1800	0.01403406		2330	-0.00197716
210.19	0.05954147		740.2	-0.00824514		1270.19	-0.00868653		1800.2	0.01413534		2330.2	-0.00223986
210.39	0.06068906		740.4	-0.0079831		1270.39	-0.00816493		1800.4	0.01393902		2330.4	-0.0030485
210.59	0.06075978		740.6	-0.00695272		1270.59	-0.00729687		1800.6	0.01410743		2330.6	-0.00316923
210.79	0.06082857		740.8	-0.00639025		1270.79	-0.00658867		1800.8	0.01345776		2330.8	-0.00267924
210.99	0.06161602		741	-0.00606601		1270.99	-0.00743362		1801	0.01310745		2331	-0.00135073
211.19	0.06301217		741.2	-0.00549188		1271.19	-0.00753861		1801.2	0.01314439		2331.2	-0.0006127
211.39	0.06500383		741.4	-0.00540532		1271.39	-0.00689965		1801.4	0.01165493		2331.4	-0.00014037
211.59	0.06537206		741.6	-0.00456796		1271.59	-0.00715736		1801.6	0.01105796		2331.6	-0.00046078
211.79	0.06648364		741.8	-0.00468045		1271.79	-0.00712343		1801.8	0.01089745		2331.8	-0.00069854
211.99	0.06748159		742	-0.00377402		1271.99	-0.00758364		1802	0.0105192		2332	-0.00043917
212.19	0.06838035		742.2	-0.00377079		1272.19	-0.00833476		1802.2	0.00949817		2332.2	-0.00077997
212.39	0.06866505		742.4	-0.00391064		1272.39	-0.00859089		1802.4	0.00887009		2332.4	-0.00086428
212.59	0.06958966		742.6	-0.0046907		1272.59	-0.00815971		1802.6	0.00861014		2332.6	-0.00080369
212.79	0.06967249		742.8	-0.00433173		1272.79	-0.00884591		1802.8	0.00852713		2332.8	-0.00031563
212.99	0.06964217		743	-0.00382382		1272.99	-0.01043179		1803	0.00855192		2333	-0.00101064
213.19	0.0701257		743.2	-0.00420894		1273.19	-0.01109852		1803.2	0.00874276		2333.2	-0.00097734
213.39	0.07083305		743.4	-0.00513879		1273.39	-0.01099229		1803.4	0.00886138		2333.4	-0.0012741
213.59	0.07101723		743.6	-0.00493043		1273.59	-0.01136819		1803.6	0.00949244		2333.6	-0.00212609
213.79	0.0711087		743.8	-0.00536419		1273.79	-0.01161076		1803.8	0.01004018		2333.8	-0.00250166
213.99	0.07150362		744	-0.0050687		1273.99	-0.0115518		1804	0.01115601		2334	-0.0024323
214.19	0.07136464		744.2	-0.00475848		1274.19	-0.01091688		1804.2	0.01205133		2334.2	-0.00268257
214.39	0.07108035		744.4	-0.00492154		1274.39	-0.01041766		1804.4	0.01271006		2334.4	-0.00240304
214.59	0.07022521		744.6	-0.00504256		1274.59	-0.00982896		1804.6	0.01357368		2334.6	-0.00135761
214.79	0.07013481		744.8	-0.00476865		1274.79	-0.00912336		1804.8	0.01291532		2334.8	-0.00079389
214.99	0.06997392		745	-0.00488317		1274.99	-0.00920717		1805	0.01291581		2335	0.00022939
215.19	0.0704211		745.2	-0.00464787		1275.19	-0.00819932		1805.2	0.01228978		2335.2	0.00089443
215.39	0.0708515		745.4	-0.00448558		1275.39	-0.00788564		1805.4	0.01171064		2335.4	0.00118858
215.59	0.07068814		745.6	-0.00423721		1275.59	-0.00788726		1805.6	0.01093956		2335.6	0.0008333
215.79	0.07208396		745.8	-0.00492973		1275.79	-0.00789156		1805.8	0.01058334		2335.8	0.00141144
215.99	0.07347308		746	-0.00557933		1275.99	-0.00769537		1806	0.01044452		2336	0.00189799
216.19	0.07464974		746.2	-0.00506939		1276.19	-0.00725124		1806.2	0.00942489		2336.2	0.00174243
216.39	0.07577528		746.4	-0.00497745		1276.39	-0.00710676		1806.4	0.00894219		2336.4	0.00169911
216.59	0.07617426		746.6	-0.00512152		1276.59	-0.00665537		1806.6	0.00908609		2336.6	0.00162777
216.79	0.07626171		746.8	-0.0046899		1276.79	-0.00672844		1806.8	0.00873893		2336.8	0.00224594
216.99	0.07735098		747	-0.00563516		1276.99	-0.00767782		1807	0.00912433		2337	0.00067035
217.19	0.07847987		747.2	-0.00625293		1277.19	-0.00796422		1807.2	0.00908643		2337.2	-0.00044446
217.39	0.07947509		747.4	-0.00688907		1277.39	-0.0086203		1807.4	0.0100501		2337.4	-0.0007576
217.59	0.07948563		747.6	-0.0067212		1277.59	-0.00885262		1807.6	0.01051701		2337.6	-0.00201478
217.79	0.07950938		747.8	-0.00671327		1277.79	-0.00986878		1807.8	0.01133047		2337.8	-0.00288924
217.99	0.07944834		748	-0.00570929		1277.99	-0.00940684		1808	0.01176787		2338	-0.00310296
218.19	0.0787889		748.2	-0.00515516		1278.19	-0.00899469		1808.2	0.01215878		2338.2	-0.00376486
218.39	0.07843052		748.4	-0.00554717		1278.39	-0.00898479		1808.4	0.01302704		2338.4	-0.0035655
218.59	0.07851891		748.6	-0.00436575		1278.59	-0.00876523		1808.6	0.01321495		2338.6	-0.00335802
218.79	0.07883659		748.8	-0.00365275		1278.79	-0.008457		1808.8	0.0129788		2338.8	-0.00451218
218.99	0.07889765		749	-0.00369903		1278.99	-0.00890067		1809	0.01304648		2339	-0.00401571
219.19	0.07959328		749.2	-0.00334015		1279.19	-0.0089634		1809.2	0.01313261		2339.2	-0.0042332
219.39	0.07989188		749.4	-0.00314028		1279.39	-0.00866936		1809.4	0.01283788		2339.4	-0.00375791
219.59	0.08028013		749.6	-0.00420588		1279.59	-0.00858602		1809.6	0.01227996		2339.6	-0.00360642
219.79	0.08123561		749.8	-0.00480569		1279.79	-0.00924182		1809.8	0.011873		2339.8	-0.00289049
219.99	0.080868		750	-0.00469842		1279.99	-0.00814814		1810	0.01185084		2340	-0.002747
220.19	0.08094173		750.2	-0.00373593		1280.19	-0.00909639		1810.2	0.01092023		2340.2	-0.0020799
220.39	0.08101316		750.4	-0.00495486		1280.39	-0.00976759		1810.4	0.0113689		2340.4	-0.00179678
220.59	0.08102595		750.6	-0.00596471		1280.59	-0.0100112		1810.6	0.01215944		2340.6	-0.00134388
220.79	0.08137		750.8	-0.00725432		1280.79	-0.00958064		1810.8	0.01197708		2340.8	-0.00046598
220.99	0.0821504		751	-0.00727609		1280.99	-0.01067025		1811	0.01314364		2341	-0.00045293
221.19	0.08155692		751.2	-0.00727453		1281.19	-0.01027802		1811.2	0.01311347		2341.2	-0.00068094
221.39	0.08138982		751.4	-0.00763527		1281.39	-0.00989077		1811.4	0.01387886		2341.4	-0.00020979
221.59	0.08008451		751.6	-0.00772531		1281.59	-0.00863872		1811.6	0.01346376		2341.6	-0.00091456
221.79	0.07962473		751.8	-0.0072411		1281.79	-0.00924869		1811.8	0.0137153		2341.8	-0.00088451
221.99	0.07905807		752	-0.00560716		1281.99	-0.00825473		1812	0.01385469		2342	-0.00010568
222.19	0.07876903		752.2	-0.00473266		1282.19	-0.00845871		1812.2	0.01427266		2342.2	-0.00094847
222.39	0.07932187		752.4	-0.00433568		1282.39	-0.00873265		1812.4	0.01533648		2342.4	-0.00152414
222.59	0.07954961		752.6	-0.0040207		1282.59	-0.00799545		1812.6	0.01493358		2342.6	-0.00220049
222.79	0.07994523		752.8	-0.00407447		1282.79	-0.00802767		1812.8	0.0143206		2342.8	-0.00348652
222.99	0.08084266		753	-0.00351265		1282.99	-0.00765788		1813	0.01417195		2343	-0.00327326
223.19	0.08143135		753.2	-0.00304863		1283.19	-0.00690515		1813.2	0.01478003		2343.2	-0.00321225
223.39	0.08167919		753.4	-0.00298672		1283.39	-0.00643572		1813.4	0.01315429		2343.4	-0.0034463
223.59	0.08225312		753.6	-0.00332844		1283.59	-0.00657213		1813.6	0.01240309		2343.6	-0.00384262
223.79	0.08258721		753.8	-0.00285009		1283.79	-0.00619563		1813.8	0.01212577		2343.8	-0.00386081
223.99	0.08301887		754	-0.00369557		1283.99	-0.00650679		1814	0.01179185		2344	-0.00343645
224.19	0.08409525		754.2	-0.0038998		1284.19	-0.00734129		1814.2	0.01090524		2344.2	-0.00300719
224.39	0.0845959		754.4	-0.00545146		1284.39	-0.00693019		1814.4	0.01190161		2344.4	-0.00290604
224.59	0.08490549		754.6	-0.0058515		1284.59	-0.0067753		1814.6	0.01211233		2344.6	-0.00225457
224.79	0.08511776		754.8	-0.00634162		1284.79	-0.00653196		1814.8	0.01159212		2344.8	-0.00100559
224.99	0.08558483		755	-0.00571287		1284.99	-0.00719615		1815	0.01112969		2345	-0.0008079
225.19	0.08557358		755.2	-0.00651223		1285.19	-0.00732788		1815.2	0.01046954		2345.2	-0.00099185
225.39	0.08572155		755.4	-0.00745879		1285.39	-0.00725732		1815.4	0.01036194		2345.4	-0.00183883
225.59	0.08625659		755.6	-0.00756437		1285.59	-0.00751382		1815.6	0.01044445		2345.6	-0.00211908
225.79	0.08661931		755.8	-0.00767492		1285.79	-0.00836979		1815.8	0.01085696		2345.8	-0.00168369
225.99	0.08546268		756	-0.0072654		1285.99	-0.00895456		1816	0.01154593		2346	-0.0019021
226.19	0.08594175		756.2	-0.00748348		1286.19	-0.01014158		1816.2	0.0117429		2346.2	-0.00224777
226.39	0.08665888		756.4	-0.00813609		1286.39	-0.01011271		1816.4	0.01298106		2346.4	-0.00324428
226.59	0.0867921		756.6	-0.0092581		1286.59	-0.00993909		1816.6	0.01256533		2346.6	-0.00354883
226.79	0.08688286		756.8	-0.00866242		1286.79	-0.00997667		1816.8	0.01320415		2346.8	-0.00341612
226.99	0.08793644		757	-0.00797808		1286.99	-0.00983044		1817	0.01479217		2347	-0.00292261
227.19	0.08709937		757.2	-0.00746691		1287.19	-0.00954177		1817.2	0.01522867		2347.2	-0.00316858
227.39	0.08681918		757.4	-0.00698605		1287.39	-0.01021113		1817.4	0.01460986		2347.4	-0.00340591
227.59	0.0862994		757.6	-0.00677475		1287.59	-0.00958301		1817.6	0.01527377		2347.6	-0.00348705
227.79	0.08600104		757.8	-0.00648989		1287.79	-0.00953505		1817.8	0.01489967		2347.8	-0.00374609
227.99	0.08596364		758	-0.00585898		1287.99	-0.01071235		1818	0.01506742		2348	-0.00375638
228.19	0.08563126		758.2	-0.00528322		1288.19	-0.01076173		1818.2	0.01491343		2348.2	-0.00375355
228.39	0.08541884		758.4	-0.00522537		1288.39	-0.01010363		1818.4	0.01631395		2348.4	-0.00394503
228.59	0.08539071		758.6	-0.00435716		1288.59	-0.01014468		1818.6	0.01689846		2348.6	-0.00375238
228.79	0.08612601		758.8	-0.00383724		1288.79	-0.00929689		1818.8	0.01566197		2348.8	-0.00392203
228.99	0.0868643		759	-0.00364151		1288.99	-0.00988168		1819	0.01530024		2349	-0.00412455
229.19	0.08667949		759.2	-0.00356659		1289.19	-0.01031787		1819.2	0.01485115		2349.2	-0.00425825
229.39	0.08700756		759.4	-0.00382604		1289.39	-0.00966447		1819.4	0.01477588		2349.4	-0.00460814
229.59	0.08764537		759.6	-0.0028635		1289.59	-0.00994285		1819.6	0.01457392		2349.6	-0.0021962
229.79	0.0867189		759.8	-0.00331525		1289.79	-0.00995748		1819.8	0.01437133		2349.8	-0.00152763
229.99	0.08592195		760	-0.00314956		1289.99	-0.01022587		1820	0.01445796		2350	-0.00090545
230.19	0.08754918		760.2	-0.00374443		1290.19	-0.00975924		1820.2	0.014606		2350.2	-0.00052911
230.39	0.08796932		760.4	-0.00470322		1290.39	-0.00893		1820.4	0.01406666		2350.4	-0.00066247
230.59	0.08813226		760.6	-0.00501489		1290.59	-0.00848833		1820.6	0.01325294		2350.6	-0.00017921
230.79	0.08846546		760.8	-0.00434283		1290.79	-0.00825233		1820.8	0.01292715		2350.8	0.000511
230.99	0.08832057		761	-0.00417051		1290.99	-0.00833282		1821	0.01368722		2351	-0.00013044
231.19	0.08698063		761.2	-0.0040824		1291.19	-0.00831915		1821.2	0.0129981		2351.2	-0.00065534
231.39	0.08692601		761.4	-0.0036073		1291.39	-0.00873513		1821.4	0.013813		2351.4	-0.00154248
231.59	0.0871832		761.6	-0.00365941		1291.59	-0.00890152		1821.6	0.01393776		2351.6	-0.00237724
231.79	0.0874715		761.8	-0.00361993		1291.79	-0.0090929		1821.8	0.01382235		2351.8	-0.00367274
231.99	0.08796282		762	-0.00355259		1291.99	-0.01012518		1822	0.01432695		2352	-0.00403122
232.19	0.08881273		762.2	-0.00449017		1292.19	-0.00892161		1822.2	0.01471832		2352.2	-0.00468374
232.39	0.08958351		762.4	-0.00428083		1292.39	-0.00765563		1822.4	0.01616355		2352.4	-0.00536467
232.59	0.09047605		762.6	-0.00503126		1292.59	-0.00717409		1822.6	0.01601837		2352.6	-0.00481485
232.79	0.09090783		762.8	-0.00504587		1292.79	-0.00626838		1822.8	0.01466274		2352.8	-0.00514934
232.99	0.09137097		763	-0.00524772		1292.99	-0.00766696		1823	0.0143841		2353	-0.00454817
233.19	0.09106803		763.2	-0.0048489		1293.19	-0.00712963		1823.2	0.01393245		2353.2	-0.00462544
233.39	0.09150251		763.4	-0.00494136		1293.39	-0.00606299		1823.4	0.01396187		2353.4	-0.00318417
233.59	0.09099217		763.6	-0.00497686		1293.59	-0.006428		1823.6	0.01321825		2353.6	-0.00205915
233.79	0.09121311		763.8	-0.00648561		1293.79	-0.00576914		1823.8	0.01243258		2353.8	-0.001976
233.99	0.09169719		764	-0.00608464		1293.99	-0.00493074		1824	0.01211592		2354	-0.00232705
234.19	0.09229721		764.2	-0.00541455		1294.19	-0.00479513		1824.2	0.01138729		2354.2	-0.00191034
234.39	0.0926091		764.4	-0.00526566		1294.39	-0.00408572		1824.4	0.01022577		2354.4	-0.00181197
234.59	0.09216578		764.6	-0.00483082		1294.59	-0.00396879		1824.6	0.00940698		2354.6	-0.00149118
234.79	0.09199123		764.8	-0.00502616		1294.79	-0.00399258		1824.8	0.01059789		2354.8	-0.00217493
234.99	0.09113428		765	-0.00526193		1294.99	-0.00456038		1825	0.01125457		2355	-0.002819
235.19	0.09165408		765.2	-0.00541814		1295.19	-0.00484854		1825.2	0.01120619		2355.2	-0.00270657
235.39	0.09257695		765.4	-0.0053327		1295.39	-0.00453636		1825.4	0.01151551		2355.4	-0.00241741
235.59	0.09339626		765.6	-0.00567016		1295.59	-0.00548221		1825.6	0.01186945		2355.6	-0.00237716
235.79	0.09372091		765.8	-0.00564338		1295.79	-0.00478844		1825.8	0.01218375		2355.8	-0.00203333
235.99	0.09392605		766	-0.00530802		1295.99	-0.00532117		1826	0.01304549		2356	-0.00182273
236.19	0.09417238		766.2	-0.00538691		1296.19	-0.00422157		1826.2	0.01423026		2356.2	-0.00122841
236.39	0.09430083		766.4	-0.00512428		1296.39	-0.00486864		1826.4	0.01446298		2356.4	-0.00073587
236.59	0.09416111		766.6	-0.00517553		1296.59	-0.00537067		1826.6	0.01413592		2356.6	-0.00038369
236.79	0.09436983		766.8	-0.00438468		1296.79	-0.00604492		1826.8	0.01402507		2356.8	-0.00136049
236.99	0.09454923		767	-0.00412504		1296.99	-0.00682098		1827	0.01353985		2357	-0.00109492
237.19	0.09446149		767.2	-0.00457712		1297.19	-0.00590033		1827.2	0.01407396		2357.2	-0.00130419
237.39	0.09470191		767.4	-0.00541144		1297.39	-0.0065615		1827.4	0.0138525		2357.4	-0.0007435
237.59	0.0944347		767.6	-0.00566116		1297.59	-0.00752335		1827.6	0.01298485		2357.6	-0.0009299
237.79	0.09453276		767.8	-0.00618831		1297.79	-0.00686658		1827.8	0.0126567		2357.8	-0.00143223
237.99	0.09344074		768	-0.00555946		1297.99	-0.00679436		1828	0.01216036		2358	-0.00216388
238.19	0.09230845		768.2	-0.00515225		1298.19	-0.00736705		1828.2	0.01092087		2358.2	-0.00207312
238.39	0.09228502		768.4	-0.0060705		1298.39	-0.00648242		1828.4	0.01035917		2358.4	-0.00365116
238.59	0.09084496		768.6	-0.00685792		1298.59	-0.00718218		1828.6	0.01039098		2358.6	-0.00430949
238.79	0.09097968		768.8	-0.00675691		1298.79	-0.00688215		1828.8	0.01114801		2358.8	-0.00532976
238.99	0.09073539		769	-0.00682369		1298.99	-0.00719594		1829	0.00991058		2359	-0.00509755
239.19	0.09235368		769.2	-0.00717934		1299.19	-0.00580253		1829.2	0.01020488		2359.2	-0.00491378
239.39	0.09277521		769.4	-0.0071332		1299.39	-0.00595625		1829.4	0.01044806		2359.4	-0.00403691
239.59	0.09328714		769.6	-0.00714746		1299.59	-0.00636992		1829.6	0.01065412		2359.6	-0.00463577
239.79	0.09366987		769.8	-0.0074317		1299.79	-0.00581297		1829.8	0.01079007		2359.8	-0.00409416
239.99	0.09363558		770	-0.00672147		1299.99	-0.00633823		1830	0.01180394		2360	-0.00453471
240.19	0.09396711		770.2	-0.00683197		1300.19	-0.00604787		1830.2	0.01239755		2360.2	-0.00371188
240.39	0.09502556		770.4	-0.00576655		1300.39	-0.00681061		1830.4	0.01226435		2360.4	-0.00401946
240.59	0.09510026		770.6	-0.00499344		1300.59	-0.00690175		1830.6	0.01238261		2360.6	-0.00362946
240.79	0.09587455		770.8	-0.00453921		1300.79	-0.00749585		1830.8	0.01187985		2360.8	-0.00388254
240.99	0.09560229		771	-0.00440601		1300.99	-0.00790241		1831	0.01082652		2361	-0.003257
241.19	0.0963913		771.2	-0.00452326		1301.19	-0.0085338		1831.2	0.01108192		2361.2	-0.00288104
241.39	0.09614944		771.4	-0.00394528		1301.39	-0.00991984		1831.4	0.01037364		2361.4	-0.00332639
241.59	0.09537694		771.6	-0.00295735		1301.59	-0.00991318		1831.6	0.01017662		2361.6	-0.00229113
241.79	0.09490714		771.8	-0.00315208		1301.79	-0.00969842		1831.8	0.01015837		2361.8	-0.00268556
241.99	0.09464929		772	-0.00282664		1301.99	-0.01003951		1832	0.0094169		2362	-0.00288773
242.19	0.09502883		772.2	-0.00261446		1302.19	-0.00947958		1832.2	0.00936765		2362.2	-0.00352291
242.39	0.095148		772.4	-0.00253713		1302.39	-0.00873997		1832.4	0.01074074		2362.4	-0.00405532
242.59	0.09460246		772.6	-0.00239683		1302.59	-0.00925407		1832.6	0.01156641		2362.6	-0.00372233
242.79	0.09507043		772.8	-0.00207904		1302.79	-0.00899248		1832.8	0.01168528		2362.8	-0.0036928
242.99	0.09543742		773	-0.00354873		1302.99	-0.00862475		1833	0.01234204		2363	-0.00282024
243.19	0.09605404		773.2	-0.00322423		1303.19	-0.00665137		1833.2	0.0128569		2363.2	-0.00174079
243.39	0.09665574		773.4	-0.00415029		1303.39	-0.00692731		1833.4	0.01244755		2363.4	-0.00129957
243.59	0.09695884		773.6	-0.00407691		1303.59	-0.00616078		1833.6	0.01196578		2363.6	-0.00151302
243.79	0.09636743		773.8	-0.00385069		1303.79	-0.0052607		1833.8	0.01209532		2363.8	-0.00160054
243.99	0.09637933		774	-0.0030767		1303.99	-0.00391726		1834	0.0128181		2364	-0.0017988
244.19	0.09646731		774.2	-0.00294764		1304.19	-0.00247461		1834.2	0.01290941		2364.2	-0.00196796
244.39	0.09579186		774.4	-0.00265699		1304.39	-0.00226093		1834.4	0.01320187		2364.4	-0.00241019
244.59	0.09495848		774.6	-0.00310354		1304.59	-0.00163091		1834.6	0.01309753		2364.6	-0.00253414
244.79	0.09497118		774.8	-0.00322719		1304.79	-0.0025739		1834.8	0.0125478		2364.8	-0.00321303
244.99	0.09453632		775	-0.00364081		1304.99	-0.00271564		1835	0.01184685		2365	-0.00370019
245.19	0.09457009		775.2	-0.00346927		1305.19	-0.00239536		1835.2	0.01226315		2365.2	-0.00421669
245.39	0.09482508		775.4	-0.00407212		1305.39	-0.00380896		1835.4	0.01223447		2365.4	-0.00410549
245.59	0.09550472		775.6	-0.00416981		1305.59	-0.0049874		1835.6	0.01281937		2365.6	-0.00367874
245.79	0.09706685		775.8	-0.00463701		1305.79	-0.00517367		1835.8	0.01314002		2365.8	-0.00465075
245.99	0.09758764		776	-0.00504641		1305.99	-0.00532616		1836	0.01359382		2366	-0.00457911
246.19	0.09831037		776.2	-0.00554187		1306.19	-0.00466362		1836.2	0.01431708		2366.2	-0.00417669
246.39	0.09885114		776.4	-0.00558496		1306.39	-0.00574623		1836.4	0.01491694		2366.4	-0.00448402
246.59	0.09963116		776.6	-0.00625112		1306.59	-0.00645711		1836.6	0.0151116		2366.6	-0.00427659
246.79	0.10004964		776.8	-0.00741358		1306.79	-0.00705274		1836.8	0.01464859		2366.8	-0.00371982
246.99	0.10099046		777	-0.00776361		1306.99	-0.00673026		1837	0.0141086		2367	-0.00269993
247.19	0.1012631		777.2	-0.00656889		1307.19	-0.00679226		1837.2	0.01380366		2367.2	-0.00255099
247.39	0.10226621		777.4	-0.00637464		1307.39	-0.00753055		1837.4	0.01289363		2367.4	-0.00272703
247.59	0.10175961		777.6	-0.00567624		1307.59	-0.00653819		1837.6	0.01274125		2367.6	-0.00291243
247.79	0.10191542		777.8	-0.00535193		1307.79	-0.00615666		1837.8	0.01202767		2367.8	-0.00369541
247.99	0.10187181		778	-0.00550673		1307.99	-0.00535798		1838	0.01225657		2368	-0.00375799
248.19	0.10160828		778.2	-0.00490545		1308.19	-0.00514574		1838.2	0.01247243		2368.2	-0.00365243
248.39	0.10001881		778.4	-0.0051679		1308.39	-0.00515138		1838.4	0.01245678		2368.4	-0.00379966
248.59	0.10054245		778.6	-0.00520265		1308.59	-0.00527492		1838.6	0.0121842		2368.6	-0.00324512
248.79	0.10064716		778.8	-0.00415472		1308.79	-0.00558639		1838.8	0.01211086		2368.8	-0.00349562
248.99	0.100707		779	-0.0044605		1308.99	-0.00440892		1839	0.01257351		2369	-0.00351448
249.19	0.10150804		779.2	-0.00491268		1309.19	-0.00462045		1839.2	0.01254395		2369.2	-0.00302981
249.39	0.10214668		779.4	-0.00514961		1309.39	-0.00540129		1839.4	0.01257703		2369.4	-0.00214554
249.59	0.10204872		779.6	-0.00457997		1309.59	-0.0045159		1839.6	0.01284411		2369.6	-0.00229891
249.79	0.10149117		779.8	-0.00446616		1309.79	-0.00329991		1839.8	0.01309544		2369.8	-0.00171991
249.99	0.10099051		780	-0.00422788		1309.99	-0.00321692		1840	0.01285743		2370	-0.00110394
250.19	0.10066467		780.2	-0.00393702		1310.19	-0.00298236		1840.2	0.01270739		2370.2	-0.00096476
250.39	0.1011285		780.4	-0.00430681		1310.39	-0.00382933		1840.4	0.01299077		2370.4	-0.00109751
250.59	0.10018982		780.6	-0.00475468		1310.59	-0.00405507		1840.6	0.01284082		2370.6	0.00000255
250.79	0.10000527		780.8	-0.00485059		1310.79	-0.0047342		1840.8	0.01185254		2370.8	0.00014821
250.99	0.10050782		781	-0.00370409		1310.99	-0.00495749		1841	0.01192107		2371	-0.00104238
251.19	0.10055901		781.2	-0.00312334		1311.19	-0.00523765		1841.2	0.01258963		2371.2	-0.00199541
251.39	0.10022444		781.4	-0.00267137		1311.39	-0.00444752		1841.4	0.01295344		2371.4	-0.00223542
251.59	0.10011181		781.6	-0.00325429		1311.59	-0.00423176		1841.6	0.01321946		2371.6	-0.00334566
251.79	0.1003221		781.8	-0.00305813		1311.79	-0.00461384		1841.8	0.0126788		2371.8	-0.00419553
251.99	0.10023763		782	-0.00309384		1311.99	-0.00440911		1842	0.01266302		2372	-0.00607477
252.19	0.10086372		782.2	-0.00282891		1312.19	-0.004576		1842.2	0.0125189		2372.2	-0.00608458
252.39	0.10013783		782.4	-0.00391933		1312.39	-0.00493659		1842.4	0.0117146		2372.4	-0.0068025
252.59	0.10091149		782.6	-0.00381678		1312.59	-0.0052264		1842.6	0.01171937		2372.6	-0.00643406
252.79	0.10056217		782.8	-0.00342094		1312.79	-0.00524097		1842.8	0.0118224		2372.8	-0.00666058
252.99	0.10035167		783	-0.00485245		1312.99	-0.00533572		1843	0.0118491		2373	-0.00588845
253.19	0.10085768		783.2	-0.00587894		1313.19	-0.00663925		1843.2	0.01101594		2373.2	-0.00493747
253.39	0.10004862		783.4	-0.0058884		1313.39	-0.00675289		1843.4	0.01064512		2373.4	-0.00486594
253.59	0.10028824		783.6	-0.00564447		1313.59	-0.00690267		1843.6	0.01060969		2373.6	-0.00328234
253.79	0.1000663		783.8	-0.00610547		1313.79	-0.00721255		1843.8	0.01101611		2373.8	-0.00329692
253.99	0.10034186		784	-0.00614847		1313.99	-0.00745713		1844	0.01094042		2374	-0.00249765
254.19	0.10105692		784.2	-0.0064133		1314.19	-0.00701265		1844.2	0.01044504		2374.2	-0.00178411
254.39	0.10238071		784.4	-0.00611812		1314.39	-0.00710746		1844.4	0.01025881		2374.4	-0.00096059
254.59	0.10274816		784.6	-0.00557984		1314.59	-0.00719487		1844.6	0.00984503		2374.6	0.00007551
254.79	0.10405732		784.8	-0.00478106		1314.79	-0.00724396		1844.8	0.0100743		2374.8	-0.00011754
254.99	0.10453306		785	-0.00402417		1314.99	-0.00655912		1845	0.01048056		2375	-0.00013223
255.19	0.10498629		785.2	-0.003952		1315.19	-0.0053649		1845.2	0.01126947		2375.2	-0.0003772
255.39	0.10490653		785.4	-0.00354898		1315.39	-0.00500913		1845.4	0.01151309		2375.4	-0.00016926
255.59	0.10531971		785.6	-0.00369195		1315.59	-0.00433592		1845.6	0.01038923		2375.6	-0.00063018
255.79	0.10578596		785.8	-0.00381		1315.79	-0.00372762		1845.8	0.01066328		2375.8	-0.00146355
255.99	0.10600948		786	-0.00418697		1315.99	-0.00356232		1846	0.01037761		2376	-0.00235318
256.19	0.10538935		786.2	-0.0040234		1316.19	-0.00396916		1846.2	0.01084915		2376.2	-0.00149347
256.39	0.10436767		786.4	-0.00471785		1316.39	-0.00387785		1846.4	0.01012001		2376.4	-0.00196791
256.59	0.10378748		786.6	-0.0053255		1316.59	-0.00442228		1846.6	0.00968465		2376.6	-0.00146877
256.79	0.10287993		786.8	-0.00547078		1316.79	-0.00455749		1846.8	0.01080984		2376.8	-0.00108315
256.99	0.10177289		787	-0.00636914		1316.99	-0.00570803		1847	0.01164347		2377	-0.00104438
257.19	0.10161267		787.2	-0.00683214		1317.19	-0.00610703		1847.2	0.01204962		2377.2	-0.00145888
257.39	0.10111016		787.4	-0.00707022		1317.39	-0.0060334		1847.4	0.01275153		2377.4	-0.00200544
257.59	0.10139069		787.6	-0.0066107		1317.59	-0.00649275		1847.6	0.01283878		2377.6	-0.00197004
257.79	0.10110005		787.8	-0.00668867		1317.79	-0.00689179		1847.8	0.01280181		2377.8	-0.00336506
257.99	0.10055896		788	-0.00622768		1317.99	-0.00699276		1848	0.01255479		2378	-0.00208413
258.19	0.10147503		788.2	-0.00606224		1318.19	-0.00691268		1848.2	0.0125245		2378.2	-0.00213487
258.39	0.1018928		788.4	-0.00544634		1318.39	-0.00756681		1848.4	0.01288261		2378.4	-0.00166045
258.59	0.10275697		788.6	-0.00535166		1318.59	-0.00791477		1848.6	0.01283375		2378.6	-0.00216378
258.79	0.10310932		788.8	-0.0054753		1318.79	-0.00828929		1848.8	0.01244013		2378.8	-0.00281881
258.99	0.10350637		789	-0.00448063		1318.99	-0.00695846		1849	0.01243302		2379	-0.00248722
259.19	0.10413637		789.2	-0.00368825		1319.19	-0.00712232		1849.2	0.012595		2379.2	-0.00327142
259.39	0.10374024		789.4	-0.00213505		1319.39	-0.00674178		1849.4	0.01214843		2379.4	-0.0025387
259.59	0.10400363		789.6	-0.00246742		1319.59	-0.00590765		1849.6	0.01124625		2379.6	-0.00166238
259.79	0.10504008		789.8	-0.00218478		1319.79	-0.00553621		1849.8	0.01116346		2379.8	-0.00150026
259.99	0.10558561		790	-0.00228317		1319.99	-0.0053038		1850	0.0103242		2380	-0.00149673
260.19	0.10581868		790.2	-0.00164464		1320.19	-0.00485854		1850.2	0.01007368		2380.2	-0.00140672
260.39	0.10599358		790.4	-0.00274866		1320.39	-0.00359714		1850.4	0.0092178		2380.4	-0.00084767
260.59	0.10622773		790.6	-0.00363988		1320.59	-0.00355919		1850.6	0.00882496		2380.6	-0.00048098
260.79	0.10618953		790.8	-0.00323991		1320.79	-0.00245428		1850.8	0.0099241		2380.8	-0.00072324
260.99	0.10563139		791	-0.00391883		1320.99	-0.00262915		1851	0.00990858		2381	-0.00121357
261.19	0.10506176		791.2	-0.00408516		1321.19	-0.00198007		1851.2	0.00928981		2381.2	-0.00202557
261.39	0.10608842		791.4	-0.00418347		1321.39	-0.0019876		1851.4	0.00873548		2381.4	-0.00232276
261.59	0.10539829		791.6	-0.00427859		1321.59	-0.00265366		1851.6	0.00808136		2381.6	-0.00251513
261.79	0.10548295		791.8	-0.00449548		1321.79	-0.00265004		1851.8	0.00818478		2381.8	-0.00258439
261.99	0.10433112		792	-0.00511022		1321.99	-0.00241552		1852	0.00920402		2382	-0.00166889
262.19	0.10434767		792.2	-0.00470986		1322.19	-0.00303272		1852.2	0.01006859		2382.2	-0.00218401
262.39	0.10342867		792.4	-0.00457898		1322.39	-0.00371834		1852.4	0.0107657		2382.4	-0.00282354
262.59	0.10328963		792.6	-0.00501903		1322.59	-0.00433637		1852.6	0.01065539		2382.6	-0.00457792
262.79	0.10329626		792.8	-0.00537774		1322.79	-0.0047428		1852.8	0.01124795		2382.8	-0.00381532
262.99	0.10294014		793	-0.00399024		1322.99	-0.0043846		1853	0.01218246		2383	-0.0039911
263.19	0.10263975		793.2	-0.00355808		1323.19	-0.0047618		1853.2	0.01244259		2383.2	-0.00404282
263.39	0.10284772		793.4	-0.00248719		1323.39	-0.00373018		1853.4	0.0126713		2383.4	-0.00297208
263.59	0.10352278		793.6	-0.00361411		1323.59	-0.00449556		1853.6	0.01293821		2383.6	-0.00215917
263.79	0.10404136		793.8	-0.00277196		1323.79	-0.00505632		1853.8	0.0125605		2383.8	-0.00331343
263.99	0.10361251		794	-0.00275286		1323.99	-0.00529213		1854	0.01296803		2384	-0.00337998
264.19	0.10341503		794.2	-0.00260573		1324.19	-0.00521404		1854.2	0.01309927		2384.2	-0.00306921
264.39	0.10376222		794.4	-0.00307065		1324.39	-0.0048489		1854.4	0.01309021		2384.4	-0.00305165
264.59	0.10465388		794.6	-0.00368482		1324.59	-0.00514737		1854.6	0.01169164		2384.6	-0.00410286
264.79	0.1048		794.8	-0.00387116		1324.79	-0.00460185		1854.8	0.01146777		2384.8	-0.00522776
264.99	0.10480707		795	-0.00445506		1324.99	-0.00451699		1855	0.01125107		2385	-0.00570539
265.19	0.10628555		795.2	-0.00448074		1325.19	-0.00391256		1855.2	0.01078978		2385.2	-0.00619129
265.39	0.10791133		795.4	-0.00469702		1325.39	-0.00410038		1855.4	0.01037345		2385.4	-0.00586057
265.59	0.10758499		795.6	-0.00525574		1325.59	-0.00397494		1855.6	0.01094724		2385.6	-0.00528252
265.79	0.10789681		795.8	-0.0050685		1325.79	-0.00395156		1855.8	0.01121785		2385.8	-0.00508759
265.99	0.10758796		796	-0.00462418		1325.99	-0.00426316		1856	0.01139568		2386	-0.00398722
266.19	0.10729012		796.2	-0.00486346		1326.19	-0.00445738		1856.2	0.01105263		2386.2	-0.00291868
266.39	0.10767672		796.4	-0.00539866		1326.39	-0.00444023		1856.4	0.0118		2386.4	-0.00216422
266.59	0.10850885		796.6	-0.0060291		1326.59	-0.00530746		1856.6	0.01180308		2386.6	-0.00182522
266.79	0.10882702		796.8	-0.00648265		1326.79	-0.00524773		1856.8	0.01263339		2386.8	-0.00055681
266.99	0.10857367		797	-0.00549639		1326.99	-0.00482859		1857	0.01256901		2387	-0.00136924
267.19	0.10883053		797.2	-0.00542575		1327.19	-0.00449418		1857.2	0.01355199		2387.2	-0.00102404
267.39	0.10899482		797.4	-0.0047704		1327.39	-0.00407703		1857.4	0.0142818		2387.4	-0.00086261
267.59	0.10792276		797.6	-0.00567418		1327.59	-0.00556653		1857.6	0.01422798		2387.6	-0.00121297
267.79	0.10701652		797.8	-0.00509149		1327.79	-0.00547538		1857.8	0.01395531		2387.8	-0.00197946
267.99	0.10609648		798	-0.00512807		1327.99	-0.0052757		1858	0.01427123		2388	-0.00115202
268.19	0.10666527		798.2	-0.00494182		1328.19	-0.00590127		1858.2	0.0136689		2388.2	-0.00141749
268.39	0.10737538		798.4	-0.00509811		1328.39	-0.00607335		1858.4	0.01313107		2388.4	-0.00242254
268.59	0.10685941		798.6	-0.00524949		1328.59	-0.00617771		1858.6	0.01243433		2388.6	-0.00322251
268.79	0.10647782		798.8	-0.00520968		1328.79	-0.00613954		1858.8	0.01238169		2388.8	-0.00388281
268.99	0.10682945		799	-0.00536141		1328.99	-0.00550993		1859	0.01215465		2389	-0.00415364
269.19	0.10770034		799.2	-0.00501439		1329.19	-0.00529615		1859.2	0.01216637		2389.2	-0.00402877
269.39	0.10689763		799.4	-0.00463662		1329.39	-0.00517754		1859.4	0.01142064		2389.4	-0.00389417
269.59	0.10640057		799.6	-0.00417402		1329.59	-0.00494909		1859.6	0.01200306		2389.6	-0.00391021
269.79	0.10592792		799.8	-0.00375629		1329.79	-0.00438123		1859.8	0.01156743		2389.8	-0.00411293
269.99	0.10701409		800	-0.00337393		1329.99	-0.00400738		1860	0.01106532		2390	-0.00313007
270.19	0.10645896		800.2	-0.00507407		1330.19	-0.00398582		1860.2	0.01109825		2390.2	-0.00202236
270.39	0.10697232		800.4	-0.00458317		1330.39	-0.0044024		1860.4	0.01126069		2390.4	-0.00174259
270.59	0.10646787		800.6	-0.00496424		1330.59	-0.004457		1860.6	0.01188206		2390.6	-0.00269745
270.79	0.106165		800.8	-0.0045662		1330.79	-0.00382978		1860.8	0.01236479		2390.8	-0.00336212
270.99	0.10584565		801	-0.00479886		1330.99	-0.00345463		1861	0.01237907		2391	-0.00509527
271.19	0.10600959		801.2	-0.00565325		1331.19	-0.00359585		1861.2	0.01271189		2391.2	-0.0057131
271.39	0.10646077		801.4	-0.00619296		1331.39	-0.00294753		1861.4	0.01269237		2391.4	-0.00639798
271.59	0.10613503		801.6	-0.00671765		1331.59	-0.00336756		1861.6	0.01210912		2391.6	-0.00580756
271.79	0.10614306		801.8	-0.00625415		1331.79	-0.00312519		1861.8	0.01255596		2391.8	-0.00551888
271.99	0.10672478		802	-0.00633437		1331.99	-0.0032514		1862	0.01183532		2392	-0.00483435
272.19	0.10696031		802.2	-0.00655181		1332.19	-0.0037185		1862.2	0.011858		2392.2	-0.00473886
272.39	0.10755142		802.4	-0.00646437		1332.39	-0.00412246		1862.4	0.0124658		2392.4	-0.00478166
272.59	0.10754103		802.6	-0.00633166		1332.59	-0.00440504		1862.6	0.01263855		2392.6	-0.00428758
272.79	0.10879985		802.8	-0.00665892		1332.79	-0.00477125		1862.8	0.01264652		2392.8	-0.00466435
272.99	0.11033395		803	-0.00656911		1332.99	-0.00491997		1863	0.01354753		2393	-0.00460128
273.19	0.11089473		803.2	-0.00571823		1333.19	-0.00542156		1863.2	0.01423584		2393.2	-0.0038105
273.39	0.11086373		803.4	-0.00488283		1333.39	-0.00571379		1863.4	0.01371533		2393.4	-0.00397765
273.59	0.11022479		803.6	-0.00402937		1333.59	-0.0058762		1863.6	0.0137134		2393.6	-0.00403513
273.79	0.10998564		803.8	-0.00427599		1333.79	-0.00473056		1863.8	0.01374727		2393.8	-0.00390054
273.99	0.11027983		804	-0.00394974		1333.99	-0.00524761		1864	0.01330085		2394	-0.00257316
274.19	0.10912318		804.2	-0.00385047		1334.19	-0.00509582		1864.2	0.01292802		2394.2	-0.00199659
274.39	0.10866827		804.4	-0.00242149		1334.39	-0.00499994		1864.4	0.01293743		2394.4	-0.00215078
274.59	0.10808787		804.6	-0.00201143		1334.59	-0.00479098		1864.6	0.01317462		2394.6	-0.00300806
274.79	0.10782978		804.8	-0.00217279		1334.79	-0.00547159		1864.8	0.01287562		2394.8	-0.0031058
274.99	0.10734408		805	-0.00358233		1334.99	-0.00571226		1865	0.01261059		2395	-0.00429205
275.19	0.1079652		805.2	-0.00323288		1335.19	-0.00562879		1865.2	0.01186315		2395.2	-0.00381822
275.39	0.10779201		805.4	-0.00307378		1335.39	-0.00491624		1865.4	0.01219357		2395.4	-0.00369023
275.59	0.1072565		805.6	-0.0034337		1335.59	-0.00495926		1865.6	0.01169775		2395.6	-0.00262324
275.79	0.10759541		805.8	-0.00356274		1335.79	-0.00451606		1865.8	0.01187613		2395.8	-0.0027069
275.99	0.10802798		806	-0.00456282		1335.99	-0.00386165		1866	0.01195656		2396	-0.00275608
276.19	0.10862714		806.2	-0.00443035		1336.19	-0.00374054		1866.2	0.01238353		2396.2	-0.00205337
276.39	0.10974188		806.4	-0.0046725		1336.39	-0.0037739		1866.4	0.01255774		2396.4	-0.0017812
276.59	0.11026872		806.6	-0.00510595		1336.59	-0.00416107		1866.6	0.01356701		2396.6	-0.00205321
276.79	0.11175629		806.8	-0.00493644		1336.79	-0.00458084		1866.8	0.0143824		2396.8	-0.00281805
276.99	0.11224493		807	-0.00530345		1336.99	-0.005094		1867	0.01514814		2397	-0.00341155
277.19	0.11246906		807.2	-0.0056768		1337.19	-0.00463999		1867.2	0.01502977		2397.2	-0.00432399
277.39	0.1124881		807.4	-0.00611064		1337.39	-0.0043315		1867.4	0.0150515		2397.4	-0.00575505
277.59	0.11208735		807.6	-0.00581583		1337.59	-0.00428698		1867.6	0.01553583		2397.6	-0.00639658
277.79	0.11245579		807.8	-0.00659292		1337.79	-0.0040772		1867.8	0.01558825		2397.8	-0.0068242
277.99	0.11285211		808	-0.00651766		1337.99	-0.00447103		1868	0.01489856		2398	-0.00670648
278.19	0.11291398		808.2	-0.00603786		1338.19	-0.00447891		1868.2	0.01488006		2398.2	-0.00691604
278.39	0.11287746		808.4	-0.00678981		1338.39	-0.0043203		1868.4	0.0143694		2398.4	-0.00731811
278.59	0.11253376		808.6	-0.00717208		1338.59	-0.00458057		1868.6	0.01255226		2398.6	-0.00747746
278.79	0.11201495		808.8	-0.0083849		1338.79	-0.00425218		1868.8	0.01175946		2398.8	-0.00746037
278.99	0.11195642		809	-0.00866336		1338.99	-0.00341474		1869	0.01145257		2399	-0.00765468
279.19	0.11247029		809.2	-0.00832987		1339.19	-0.00243871		1869.2	0.01063686		2399.2	-0.00658196
279.39	0.1123773		809.4	-0.00829896		1339.39	-0.00237699		1869.4	0.01005609		2399.4	-0.00618694
279.59	0.11138489		809.6	-0.00925078		1339.59	-0.00213448		1869.6	0.00934739		2399.6	-0.00593983
279.79	0.11096952		809.8	-0.00951291		1339.79	-0.00130154		1869.8	0.0098655		2399.8	-0.00549588
279.99	0.11092995		810	-0.0094293		1339.99	-0.00084379		1870	0.00975974		2400	-0.00468556
280.19	0.11093288		810.2	-0.0089459		1340.19	-0.00012798		1870.2	0.00970743		2400.2	-0.00321744
280.39	0.10996922		810.4	-0.00891063		1340.39	-0.00069643		1870.4	0.01084489		2400.4	-0.00266691
280.59	0.10979909		810.6	-0.00834039		1340.59	-0.00102454		1870.6	0.01160011		2400.6	-0.00275849
280.79	0.11039103		810.8	-0.0079275		1340.79	-0.00099227		1870.8	0.01176161		2400.8	-0.00295572
280.99	0.11001721		811	-0.00799308		1340.99	-0.0008573		1871	0.01241817		2401	-0.00320592
281.19	0.11021442		811.2	-0.00796412		1341.19	-0.00088918		1871.2	0.013108		2401.2	-0.00363762
281.39	0.11004062		811.4	-0.0068262		1341.39	-0.00210748		1871.4	0.01398559		2401.4	-0.00365885
281.59	0.10979889		811.6	-0.00572096		1341.59	-0.00263183		1871.6	0.01414687		2401.6	-0.00331245
281.79	0.10962467		811.8	-0.00552277		1341.79	-0.00251587		1871.8	0.01391268		2401.8	-0.00379401
281.99	0.10975346		812	-0.00513316		1341.99	-0.00195629		1872	0.01442832		2402	-0.00475908
282.19	0.10949859		812.2	-0.00452561		1342.19	-0.00251958		1872.2	0.01442413		2402.2	-0.00474125
282.39	0.10948577		812.4	-0.00528651		1342.39	-0.00222729		1872.4	0.01408959		2402.4	-0.0053586
282.59	0.10968196		812.6	-0.00501174		1342.59	-0.00153905		1872.6	0.01271039		2402.6	-0.00504396
282.79	0.1102901		812.8	-0.00516275		1342.79	-0.00077341		1872.8	0.01303928		2402.8	-0.00504082
282.99	0.11000824		813	-0.00417491		1342.99	-0.00048079		1873	0.01317568		2403	-0.00512554
283.19	0.11099826		813.2	-0.00388089		1343.19	-0.00090584		1873.2	0.01267594		2403.2	-0.00509972
283.39	0.11118322		813.4	-0.00381102		1343.39	-0.00205267		1873.4	0.01158682		2403.4	-0.00502723
283.59	0.11077795		813.6	-0.00483092		1343.59	-0.00134575		1873.6	0.01172295		2403.6	-0.00609135
283.79	0.11168594		813.8	-0.00485147		1343.79	-0.00161824		1873.8	0.01174826		2403.8	-0.00548058
283.99	0.11281499		814	-0.00462227		1343.99	-0.00193311		1874	0.01179699		2404	-0.00513488
284.19	0.11330898		814.2	-0.00563939		1344.19	-0.00227469		1874.2	0.0116807		2404.2	-0.0041058
284.39	0.11286351		814.4	-0.00550407		1344.39	-0.00278268		1874.4	0.01212044		2404.4	-0.00298115
284.59	0.11326883		814.6	-0.00475745		1344.59	-0.00314872		1874.6	0.01170045		2404.6	-0.002459
284.79	0.11331388		814.8	-0.0040585		1344.79	-0.00341425		1874.8	0.01265474		2404.8	-0.00221403
284.99	0.11352973		815	-0.00343841		1344.99	-0.00417084		1875	0.01371205		2405	-0.00211349
285.19	0.11351089		815.2	-0.00311063		1345.19	-0.00451736		1875.2	0.01386316		2405.2	-0.00204601
285.39	0.11365068		815.4	-0.00209656		1345.39	-0.00519418		1875.4	0.01339012		2405.4	-0.00192443
285.59	0.11289582		815.6	-0.0024705		1345.59	-0.00456775		1875.6	0.01332704		2405.6	-0.00227339
285.79	0.11232155		815.8	-0.00247792		1345.79	-0.00437278		1875.8	0.01375735		2405.8	-0.00321083
285.99	0.1126692		816	-0.00251052		1345.99	-0.00368972		1876	0.01358925		2406	-0.00365487
286.19	0.11269785		816.2	-0.00311791		1346.19	-0.00446366		1876.2	0.01328965		2406.2	-0.00359752
286.39	0.11272502		816.4	-0.00300185		1346.39	-0.00376316		1876.4	0.01389509		2406.4	-0.00435363
286.59	0.11204046		816.6	-0.00255356		1346.59	-0.00312251		1876.6	0.01400268		2406.6	-0.00461329
286.79	0.1114		816.8	-0.00262533		1346.79	-0.00324665		1876.8	0.01423161		2406.8	-0.00557815
286.99	0.11029792		817	-0.00274866		1346.99	-0.00331253		1877	0.01344148		2407	-0.00661824
287.19	0.11125403		817.2	-0.0032069		1347.19	-0.00379883		1877.2	0.01292817		2407.2	-0.00732007
287.39	0.11077351		817.4	-0.00350853		1347.39	-0.00388737		1877.4	0.01235744		2407.4	-0.0066727
287.59	0.11031298		817.6	-0.00428325		1347.59	-0.00310873		1877.6	0.01183424		2407.6	-0.00699836
287.79	0.11025174		817.8	-0.00456107		1347.79	-0.00311122		1877.8	0.01117204		2407.8	-0.00594175
287.99	0.11002746		818	-0.00496558		1347.99	-0.00335015		1878	0.0114182		2408	-0.00610108
288.19	0.11037505		818.2	-0.00621218		1348.19	-0.00280598		1878.2	0.01126905		2408.2	-0.00419191
288.39	0.10929711		818.4	-0.00547799		1348.39	-0.00295804		1878.4	0.01170946		2408.4	-0.00375767
288.59	0.10969104		818.6	-0.0052949		1348.59	-0.00347922		1878.6	0.01177603		2408.6	-0.00363179
288.79	0.11107498		818.8	-0.00540592		1348.79	-0.00355162		1878.8	0.01182392		2408.8	-0.00389698
288.99	0.11157753		819	-0.00557457		1348.99	-0.00438839		1879	0.01191017		2409	-0.00379007
289.19	0.11158842		819.2	-0.00544566		1349.19	-0.00401075		1879.2	0.01109535		2409.2	-0.00357815
289.39	0.11208219		819.4	-0.00481701		1349.39	-0.0046748		1879.4	0.01138448		2409.4	-0.00357809
289.59	0.11156384		819.6	-0.00471726		1349.59	-0.00442209		1879.6	0.01178466		2409.6	-0.00399772
289.79	0.11174514		819.8	-0.00397113		1349.79	-0.0044705		1879.8	0.01188983		2409.8	-0.00412514
289.99	0.11253424		820	-0.00329007		1349.99	-0.00459807		1880	0.01138975		2410	-0.0036697
290.19	0.11226394		820.2	-0.0035266		1350.19	-0.00467149		1880.2	0.01249235		2410.2	-0.00388478
290.39	0.11116591		820.4	-0.00238694		1350.39	-0.0042961		1880.4	0.01366488		2410.4	-0.00463467
290.59	0.11038387		820.6	-0.00259733		1350.59	-0.00434612		1880.6	0.01374292		2410.6	-0.00541651
290.79	0.11050902		820.8	-0.00209662		1350.79	-0.00396191		1880.8	0.01365428		2410.8	-0.00607137
290.99	0.11065306		821	-0.00199226		1350.99	-0.00419325		1881	0.01415573		2411	-0.00662156
291.19	0.11072712		821.2	-0.00156271		1351.19	-0.00426475		1881.2	0.01481721		2411.2	-0.00586607
291.39	0.11071712		821.4	-0.0017629		1351.39	-0.0038298		1881.4	0.01462663		2411.4	-0.00490005
291.59	0.11120712		821.6	-0.00176856		1351.59	-0.00305981		1881.6	0.01401506		2411.6	-0.00555697
291.79	0.11136875		821.8	-0.001691		1351.79	-0.00138166		1881.8	0.01429645		2411.8	-0.00551555
291.99	0.11177431		822	-0.00223667		1351.99	-0.00055794		1882	0.01449331		2412	-0.00554094
292.19	0.11231192		822.2	-0.00354163		1352.19	-0.00072418		1882.2	0.01420712		2412.2	-0.00447389
292.39	0.11180643		822.4	-0.003688		1352.39	-0.0011228		1882.4	0.0135368		2412.4	-0.00485096
292.59	0.11272008		822.6	-0.00404973		1352.59	-0.00109021		1882.6	0.0131165		2412.6	-0.00532617
292.79	0.11396444		822.8	-0.00480439		1352.79	-0.00125819		1882.8	0.0125133		2412.8	-0.00543631
292.99	0.1137439		823	-0.00509718		1352.99	-0.00157864		1883	0.01220783		2413	-0.00524403
293.19	0.11440149		823.2	-0.00560103		1353.19	-0.0016682		1883.2	0.0125682		2413.2	-0.005629
293.39	0.11509321		823.4	-0.00556582		1353.39	-0.00203212		1883.4	0.01314334		2413.4	-0.00565917
293.59	0.11496516		823.6	-0.00533187		1353.59	-0.00167242		1883.6	0.01270863		2413.6	-0.00571648
293.79	0.11518218		823.8	-0.00551258		1353.79	-0.00160094		1883.8	0.01298629		2413.8	-0.00468611
293.99	0.11482709		824	-0.00458332		1353.99	-0.00224668		1884	0.01328751		2414	-0.00362384
294.19	0.11432358		824.2	-0.00436071		1354.19	-0.00149173		1884.2	0.01450505		2414.2	-0.00390108
294.39	0.11386018		824.4	-0.00315767		1354.39	-0.00162345		1884.4	0.01410438		2414.4	-0.00431218
294.59	0.11467438		824.6	-0.00307695		1354.59	-0.00168549		1884.6	0.01449884		2414.6	-0.00424348
294.79	0.11486154		824.8	-0.00263194		1354.79	-0.00186924		1884.8	0.01595784		2414.8	-0.00412918
294.99	0.11446177		825	-0.00302205		1354.99	-0.00190446		1885	0.01603185		2415	-0.00383114
295.19	0.11384953		825.2	-0.00289299		1355.19	-0.00219793		1885.2	0.01625258		2415.2	-0.00358085
295.39	0.11378533		825.4	-0.00268069		1355.39	-0.00229875		1885.4	0.01583963		2415.4	-0.00353452
295.59	0.11298802		825.6	-0.0015635		1355.59	-0.00198873		1885.6	0.01565034		2415.6	-0.00413369
295.79	0.11208348		825.8	-0.00210798		1355.79	-0.00155298		1885.8	0.01585729		2415.8	-0.00372333
295.99	0.11152278		826	-0.0019569		1355.99	-0.00221368		1886	0.01550981		2416	-0.00401558
296.19	0.11198029		826.2	-0.00171979		1356.19	-0.00344844		1886.2	0.01516392		2416.2	-0.00417395
296.39	0.11272631		826.4	-0.00137201		1356.39	-0.00297305		1886.4	0.01508817		2416.4	-0.00454773
296.59	0.11362287		826.6	-0.00067233		1356.59	-0.0032414		1886.6	0.01457519		2416.6	-0.00566628
296.79	0.11330964		826.8	-0.00149813		1356.79	-0.00310588		1886.8	0.01445256		2416.8	-0.0059554
296.99	0.11352856		827	-0.00141247		1356.99	-0.00349203		1887	0.01419736		2417	-0.00675727
297.19	0.11431543		827.2	-0.00245235		1357.19	-0.00353234		1887.2	0.01470296		2417.2	-0.00721997
297.39	0.11389885		827.4	-0.00294634		1357.39	-0.00315887		1887.4	0.0147553		2417.4	-0.00696945
297.59	0.11371115		827.6	-0.00265251		1357.59	-0.00254634		1887.6	0.01421456		2417.6	-0.00696586
297.79	0.11368793		827.8	-0.00288851		1357.79	-0.0024723		1887.8	0.01410327		2417.8	-0.00706309
297.99	0.11305582		828	-0.00290561		1357.99	-0.00259286		1888	0.0144414		2418	-0.006759
298.19	0.11332987		828.2	-0.00359278		1358.19	-0.00134494		1888.2	0.01396735		2418.2	-0.00636974
298.39	0.11350117		828.4	-0.00448909		1358.39	-0.00092415		1888.4	0.01385478		2418.4	-0.00592563
298.59	0.11318191		828.6	-0.00508959		1358.59	-0.00094106		1888.6	0.01436803		2418.6	-0.00593621
298.79	0.11184547		828.8	-0.00547727		1358.79	-0.00147989		1888.8	0.01375017		2418.8	-0.00648292
298.99	0.11092496		829	-0.00586571		1358.99	-0.00228059		1889	0.01248968		2419	-0.00650638
299.19	0.11019093		829.2	-0.00645108		1359.19	-0.00338334		1889.2	0.012678		2419.2	-0.00685927
299.39	0.11044626		829.4	-0.00595975		1359.39	-0.00376977		1889.4	0.01242429		2419.4	-0.00665696
299.59	0.11013623		829.6	-0.00551471		1359.59	-0.00413762		1889.6	0.01231608		2419.6	-0.0064997
299.79	0.11119946		829.8	-0.00582595		1359.79	-0.00513434		1889.8	0.01241885		2419.8	-0.00588646
299.99	0.11211311		830	-0.00515728		1359.99	-0.00476588		1890	0.01208684		2420	-0.00534081
300.19	0.11356979		830.2	-0.00444664		1360.19	-0.00466745		1890.2	0.01302326		2420.2	-0.00577207
300.39	0.11445246		830.4	-0.00369475		1360.39	-0.00461838		1890.4	0.01425596		2420.4	-0.00554836
300.59	0.1149587		830.6	-0.00303503		1360.59	-0.0055012		1890.6	0.01430252		2420.6	-0.00593321
300.79	0.11450951		830.8	-0.00314235		1360.79	-0.00504565		1890.8	0.01476603		2420.8	-0.00592161
300.99	0.11484695		831	-0.0032412		1360.99	-0.00512558		1891	0.01519876		2421	-0.00529977
301.19	0.1144116		831.2	-0.00354802		1361.19	-0.00564702		1891.2	0.01509524		2421.2	-0.00473071
301.39	0.11359862		831.4	-0.00305562		1361.39	-0.00590034		1891.4	0.0158836		2421.4	-0.0053269
301.59	0.1138833		831.6	-0.00194006		1361.59	-0.00529746		1891.6	0.01555694		2421.6	-0.00551154
301.79	0.1130903		831.8	-0.0023211		1361.79	-0.0046155		1891.8	0.01654849		2421.8	-0.00521255
301.99	0.11330672		832	-0.00235581		1361.99	-0.00463449		1892	0.01745584		2422	-0.00443512
302.19	0.11296047		832.2	-0.0019499		1362.19	-0.00394186		1892.2	0.01798564		2422.2	-0.00441803
302.39	0.11227866		832.4	-0.00216801		1362.39	-0.00445163		1892.4	0.01822024		2422.4	-0.00460885
302.59	0.11106833		832.6	-0.00110082		1362.59	-0.00498974		1892.6	0.01771015		2422.6	-0.00505776
302.79	0.11115545		832.8	-0.00136006		1362.79	-0.00477805		1892.8	0.01666589		2422.8	-0.00578457
302.99	0.11057701		833	-0.00232882		1362.99	-0.00471296		1893	0.01666531		2423	-0.00612953
303.19	0.11018585		833.2	-0.0025423		1363.19	-0.00481794		1893.2	0.01666871		2423.2	-0.00627059
303.39	0.11166489		833.4	-0.00246944		1363.39	-0.00432304		1893.4	0.01563778		2423.4	-0.00534637
303.59	0.11209636		833.6	-0.0026072		1363.59	-0.0040202		1893.6	0.0152994		2423.6	-0.00412238
303.79	0.11322296		833.8	-0.00319707		1363.79	-0.00359337		1893.8	0.01420626		2423.8	-0.00367374
303.99	0.11331371		834	-0.00331149		1363.99	-0.00236781		1894	0.0138621		2424	-0.00344064
304.19	0.11407433		834.2	-0.00328964		1364.19	-0.00185852		1894.2	0.01372339		2424.2	-0.00405718
304.39	0.11528159		834.4	-0.00323958		1364.39	-0.00222892		1894.4	0.01292192		2424.4	-0.00379232
304.59	0.11490241		834.6	-0.00319918		1364.59	-0.00203723		1894.6	0.01204065		2424.6	-0.00438477
304.79	0.11440042		834.8	-0.00306466		1364.79	-0.00061401		1894.8	0.0122356		2424.8	-0.00440397
304.99	0.11416062		835	-0.00260768		1364.99	-0.00104891		1895	0.01220246		2425	-0.00388105
305.19	0.11514845		835.2	-0.00184997		1365.19	-0.00189265		1895.2	0.01182079		2425.2	-0.00460827
305.39	0.11544684		835.4	-0.00078454		1365.39	-0.00207446		1895.4	0.01216288		2425.4	-0.00478432
305.59	0.11520319		835.6	-0.00096302		1365.59	-0.00233374		1895.6	0.01254609		2425.6	-0.00439939
305.79	0.11516557		835.8	-0.00038975		1365.79	-0.0023602		1895.8	0.01334188		2425.8	-0.00351619
305.99	0.11588578		836	0.00031175		1365.99	-0.00319689		1896	0.01442367		2426	-0.00359952
306.19	0.11440704		836.2	0.00017879		1366.19	-0.00342934		1896.2	0.01515676		2426.2	-0.00341816
306.39	0.11409026		836.4	-0.00033504		1366.39	-0.00407864		1896.4	0.0147002		2426.4	-0.00376225
306.59	0.11386876		836.6	-0.00044553		1366.59	-0.00387001		1896.6	0.01463985		2426.6	-0.00429832
306.79	0.11403135		836.8	-0.00067241		1366.79	-0.00400847		1896.8	0.01493432		2426.8	-0.00457384
306.99	0.11253804		837	-0.00149924		1366.99	-0.00444895		1897	0.01525121		2427	-0.00510785
307.19	0.11216696		837.2	-0.00193859		1367.19	-0.00482578		1897.2	0.0148616		2427.2	-0.00453732
307.39	0.11245823		837.4	-0.00287236		1367.39	-0.00480889		1897.4	0.01474207		2427.4	-0.00423971
307.59	0.11214538		837.6	-0.00309768		1367.59	-0.00448168		1897.6	0.01438089		2427.6	-0.00417752
307.79	0.11184467		837.8	-0.00397457		1367.79	-0.00398067		1897.8	0.01330115		2427.8	-0.00507899
307.99	0.11148017		838	-0.00442206		1367.99	-0.00351168		1898	0.01333255		2428	-0.00502707
308.19	0.11233797		838.2	-0.00508559		1368.19	-0.00350265		1898.2	0.0116213		2428.2	-0.00569627
308.39	0.11253407		838.4	-0.00485336		1368.39	-0.00348041		1898.4	0.01111851		2428.4	-0.00624086
308.59	0.11314637		838.6	-0.00487297		1368.59	-0.00275619		1898.6	0.01132758		2428.6	-0.00630356
308.79	0.11365667		838.8	-0.00423996		1368.79	-0.00263161		1898.8	0.01105957		2428.8	-0.00642342
308.99	0.11441131		839	-0.00464305		1368.99	-0.00288531		1899	0.01059928		2429	-0.00641931
309.19	0.11446858		839.2	-0.00435474		1369.19	-0.00308199		1899.2	0.01133419		2429.2	-0.00653661
309.39	0.11432012		839.4	-0.00423369		1369.39	-0.00300809		1899.4	0.01172899		2429.4	-0.00585499
309.59	0.11472966		839.6	-0.00468192		1369.59	-0.00231976		1899.6	0.01312947		2429.6	-0.00574971
309.79	0.11477334		839.8	-0.00416004		1369.79	-0.0021597		1899.8	0.01313923		2429.8	-0.00503939
309.99	0.11462013		840	-0.00451125		1369.99	-0.00255977		1900	0.01411084		2430	-0.00563472
310.19	0.11464358		840.2	-0.00475502		1370.19	-0.00300237		1900.2	0.01414785		2430.2	-0.00623724
310.39	0.11513181		840.4	-0.0044744		1370.39	-0.00313183		1900.4	0.01314414		2430.4	-0.00640076
310.59	0.11543058		840.6	-0.00437866		1370.59	-0.00342579		1900.6	0.01409152		2430.6	-0.00612075
310.79	0.11555762		840.8	-0.00311416		1370.79	-0.00342315		1900.8	0.01506319		2430.8	-0.00595673
310.99	0.11494913		841	-0.00384026		1370.99	-0.00371173		1901	0.01604971		2431	-0.0070535
311.19	0.11490412		841.2	-0.0034606		1371.19	-0.00324376		1901.2	0.01649821		2431.2	-0.00637049
311.39	0.11503171		841.4	-0.00297984		1371.39	-0.0031863		1901.4	0.01730538		2431.4	-0.00670275
311.59	0.11488014		841.6	-0.00291486		1371.59	-0.00252446		1901.6	0.016635		2431.6	-0.00684424
311.79	0.11524526		841.8	-0.00313342		1371.79	-0.00333095		1901.8	0.01696488		2431.8	-0.00653318
311.99	0.11643581		842	-0.00298739		1371.99	-0.00323801		1902	0.01684602		2432	-0.00612233
312.19	0.117089		842.2	-0.00320662		1372.19	-0.0035961		1902.2	0.01597053		2432.2	-0.00670265
312.39	0.11704469		842.4	-0.00308654		1372.39	-0.00400149		1902.4	0.01608509		2432.4	-0.00639038
312.59	0.11802741		842.6	-0.00271183		1372.59	-0.00445673		1902.6	0.01587007		2432.6	-0.00603934
312.79	0.11732154		842.8	-0.00217591		1372.79	-0.00484217		1902.8	0.01494073		2432.8	-0.0060936
312.99	0.11717664		843	-0.00352514		1372.99	-0.00430723		1903	0.01428812		2433	-0.0059293
313.19	0.11661599		843.2	-0.00284122		1373.19	-0.00455562		1903.2	0.01343424		2433.2	-0.00542859
313.39	0.11740403		843.4	-0.00325742		1373.39	-0.00436059		1903.4	0.01236458		2433.4	-0.00530918
313.59	0.11722836		843.6	-0.00295743		1373.59	-0.00369665		1903.6	0.01214251		2433.6	-0.00490238
313.79	0.11676839		843.8	-0.00271474		1373.79	-0.00389471		1903.8	0.01096812		2433.8	-0.0049034
313.99	0.11648545		844	-0.0031504		1373.99	-0.00346793		1904	0.01086652		2434	-0.00523428
314.19	0.11733344		844.2	-0.00322811		1374.19	-0.00295366		1904.2	0.01024883		2434.2	-0.00478708
314.39	0.11665277		844.4	-0.00282256		1374.39	-0.00283944		1904.4	0.00953574		2434.4	-0.00357799
314.59	0.11659404		844.6	-0.00275924		1374.59	-0.00270956		1904.6	0.01085001		2434.6	-0.0036733
314.79	0.11615123		844.8	-0.00183616		1374.79	-0.00280185		1904.8	0.0115806		2434.8	-0.00369381
314.99	0.1144204		845	-0.00288433		1374.99	-0.00291638		1905	0.01210934		2435	-0.00404363
315.19	0.11372822		845.2	-0.00295193		1375.19	-0.00261687		1905.2	0.01287368		2435.2	-0.00333774
315.39	0.11343452		845.4	-0.00305236		1375.39	-0.00327535		1905.4	0.01424553		2435.4	-0.00396234
315.59	0.11358505		845.6	-0.00359028		1375.59	-0.00408226		1905.6	0.0144928		2435.6	-0.00429158
315.79	0.11449653		845.8	-0.00399389		1375.79	-0.00459615		1905.8	0.01574556		2435.8	-0.00448729
315.99	0.11492721		846	-0.00417696		1375.99	-0.00350024		1906	0.01607265		2436	-0.00528149
316.19	0.11423281		846.2	-0.0043634		1376.19	-0.00358084		1906.2	0.01693118		2436.2	-0.00562766
316.39	0.1143201		846.4	-0.00391506		1376.39	-0.00339481		1906.4	0.01732933		2436.4	-0.00604721
316.59	0.1141246		846.6	-0.002722		1376.59	-0.00296632		1906.6	0.01684048		2436.6	-0.00709027
316.79	0.11400674		846.8	-0.00268705		1376.79	-0.0023823		1906.8	0.01571542		2436.8	-0.00774605
316.99	0.11440307		847	-0.0022024		1376.99	-0.00126163		1907	0.01478473		2437	-0.00795019
317.19	0.11441426		847.2	-0.00161575		1377.19	0.00003269		1907.2	0.01520863		2437.2	-0.00899424
317.39	0.11472947		847.4	-0.00146423		1377.39	0.00070084		1907.4	0.01579621		2437.4	-0.00974669
317.59	0.11569575		847.6	-0.00055372		1377.59	0.0019399		1907.6	0.01651394		2437.6	-0.0095863
317.79	0.116678		847.8	-0.00058427		1377.79	0.00182831		1907.8	0.01601872		2437.8	-0.00985417
317.99	0.11705411		848	-0.00044631		1377.99	0.00222381		1908	0.01630915		2438	-0.00933648
318.19	0.11780911		848.2	-0.00026161		1378.19	0.00240228		1908.2	0.01631217		2438.2	-0.00871229
318.39	0.1176063		848.4	0.00014434		1378.39	0.00171788		1908.4	0.0161834		2438.4	-0.00775571
318.59	0.11772509		848.6	0.00041695		1378.59	0.00050877		1908.6	0.01632764		2438.6	-0.00774495
318.79	0.11690706		848.8	0.00082139		1378.79	0.00015036		1908.8	0.0161998		2438.8	-0.00730252
318.99	0.11677473		849	0.0004641		1378.99	-0.00061111		1909	0.01639847		2439	-0.00674507
319.19	0.11768524		849.2	0.00064605		1379.19	-0.00148058		1909.2	0.01740149		2439.2	-0.00575359
319.39	0.11752652		849.4	0.00038811		1379.39	-0.00243095		1909.4	0.01730703		2439.4	-0.00539405
319.59	0.11794595		849.6	-0.00009194		1379.59	-0.00321613		1909.6	0.01650431		2439.6	-0.00524646
319.79	0.11750771		849.8	-0.00030176		1379.79	-0.00274583		1909.8	0.01677901		2439.8	-0.0045696
319.99	0.11727628		850	-0.00070749		1379.99	-0.00325095		1910	0.01688154		2440	-0.00469261
320.19	0.11678164		850.2	-0.00071731		1380.19	-0.00387502		1910.2	0.01721493		2440.2	-0.00405959
320.39	0.11592051		850.4	-0.00059416		1380.39	-0.00320901		1910.4	0.01714214		2440.4	-0.00452524
320.59	0.11454389		850.6	-0.00031182		1380.59	-0.00381516		1910.6	0.01679015		2440.6	-0.00504928
320.79	0.11511486		850.8	-0.00070369		1380.79	-0.00300665		1910.8	0.01699481		2440.8	-0.00494528
320.99	0.11529551		851	-0.0008302		1380.99	-0.00279298		1911	0.01672953		2441	-0.0052106
321.19	0.11434841		851.2	-0.00203626		1381.19	-0.0025471		1911.2	0.01758231		2441.2	-0.00581986
321.39	0.114096		851.4	-0.00201244		1381.39	-0.00342557		1911.4	0.01652163		2441.4	-0.00513054
321.59	0.11385964		851.6	-0.00192979		1381.59	-0.00374863		1911.6	0.01635351		2441.6	-0.00535001
321.79	0.11323017		851.8	-0.0022167		1381.79	-0.00354199		1911.8	0.0160672		2441.8	-0.00525229
321.99	0.1130975		852	-0.00246406		1381.99	-0.00244854		1912	0.01681202		2442	-0.00568313
322.19	0.11322143		852.2	-0.00243599		1382.19	-0.00222373		1912.2	0.01587281		2442.2	-0.00628325
322.39	0.11336918		852.4	-0.00171134		1382.39	-0.00148095		1912.4	0.01587162		2442.4	-0.00666112
322.59	0.1132864		852.6	-0.00138162		1382.59	-0.00142632		1912.6	0.01562188		2442.6	-0.00718783
322.79	0.11365014		852.8	-0.00136735		1382.79	-0.00050676		1912.8	0.01528759		2442.8	-0.00739283
322.99	0.11459256		853	-0.0015107		1382.99	-0.00073701		1913	0.01516652		2443	-0.00749234
323.19	0.11452083		853.2	-0.00132183		1383.19	0.00024936		1913.2	0.01437747		2443.2	-0.00779631
323.39	0.11470602		853.4	-0.00181211		1383.39	0.00029882		1913.4	0.01345045		2443.4	-0.00787377
323.59	0.11517331		853.6	-0.0008818		1383.59	-0.00004992		1913.6	0.01309731		2443.6	-0.0080927
323.79	0.11562949		853.8	-0.00172285		1383.79	-0.00006902		1913.8	0.0126797		2443.8	-0.00737578
323.99	0.11660002		854	-0.002659		1383.99	-0.00103447		1914	0.0121173		2444	-0.00782409
324.19	0.11701739		854.2	-0.00308293		1384.19	-0.00155924		1914.2	0.01182188		2444.2	-0.00754069
324.39	0.11730316		854.4	-0.0039111		1384.39	-0.00142108		1914.4	0.01211616		2444.4	-0.00693319
324.59	0.1175727		854.6	-0.00465638		1384.59	-0.00212525		1914.6	0.01093649		2444.6	-0.00670805
324.79	0.11785614		854.8	-0.00432412		1384.79	-0.00242239		1914.8	0.01145102		2444.8	-0.00649788
324.99	0.11732575		855	-0.00497626		1384.99	-0.00390284		1915	0.01101706		2445	-0.00583828
325.19	0.11679891		855.2	-0.00503956		1385.19	-0.00446334		1915.2	0.01183025		2445.2	-0.00582224
325.39	0.11650992		855.4	-0.0047734		1385.39	-0.00376687		1915.4	0.01182761		2445.4	-0.00526722
325.59	0.11570012		855.6	-0.00562857		1385.59	-0.00372595		1915.6	0.01352435		2445.6	-0.00526361
325.79	0.11545419		855.8	-0.00627416		1385.79	-0.0034625		1915.8	0.01479608		2445.8	-0.00480849
325.99	0.11586772		856	-0.00601369		1385.99	-0.00403798		1916	0.01552648		2446	-0.00544312
326.19	0.11557853		856.2	-0.00554367		1386.19	-0.00388567		1916.2	0.01584116		2446.2	-0.00604709
326.39	0.11575652		856.4	-0.00538303		1386.39	-0.00361118		1916.4	0.01769925		2446.4	-0.00734431
326.59	0.11621334		856.6	-0.00483859		1386.59	-0.00400126		1916.6	0.01814756		2446.6	-0.00707036
326.79	0.11576303		856.8	-0.00419185		1386.79	-0.0043043		1916.8	0.01830079		2446.8	-0.00675514
326.99	0.1151407		857	-0.0036242		1386.99	-0.00405779		1917	0.01832092		2447	-0.00638265
327.19	0.11509315		857.2	-0.00292502		1387.19	-0.00333671		1917.2	0.01827959		2447.2	-0.00712969
327.39	0.11543277		857.4	-0.00287857		1387.39	-0.00325988		1917.4	0.01802611		2447.4	-0.00598135
327.59	0.11440693		857.6	-0.00246851		1387.59	-0.00365773		1917.6	0.01886385		2447.6	-0.00646324
327.79	0.11498905		857.8	-0.00328532		1387.79	-0.00329465		1917.8	0.01810778		2447.8	-0.00622001
327.99	0.11471001		858	-0.00266951		1387.99	-0.00363875		1918	0.01741812		2448	-0.00656106
328.19	0.11507479		858.2	-0.00323575		1388.19	-0.00304429		1918.2	0.01700824		2448.2	-0.00640478
328.39	0.11516831		858.4	-0.00362095		1388.39	-0.00199261		1918.4	0.01665207		2448.4	-0.00558183
328.59	0.11443743		858.6	-0.00351157		1388.59	-0.00113577		1918.6	0.01604879		2448.6	-0.00705438
328.79	0.11460705		858.8	-0.00256013		1388.79	-0.00123909		1918.8	0.01670919		2448.8	-0.007113
328.99	0.11561495		859	-0.00376803		1388.99	-0.00040566		1919	0.01635589		2449	-0.0066512
329.19	0.11635281		859.2	-0.00362068		1389.19	0.00105002		1919.2	0.01574962		2449.2	-0.00676355
329.39	0.11635913		859.4	-0.00507165		1389.39	0.00190572		1919.4	0.01554211		2449.4	-0.00550673
329.59	0.11655916		859.6	-0.00724246		1389.59	0.00117743		1919.6	0.01582638		2449.6	-0.00544954
329.79	0.11673331		859.8	-0.00747914		1389.79	0.00110154		1919.8	0.01501913		2449.8	-0.00584213
329.99	0.11782535		860	-0.00671145		1389.99	0.00139724		1920	0.01470762		2450	-0.00635226
330.19	0.11744007		860.2	-0.00669805		1390.19	0.00142754		1920.2	0.01496001		2450.2	-0.00662639
330.39	0.11755788		860.4	-0.00612148		1390.39	0.00113364		1920.4	0.01472878		2450.4	-0.00620384
330.59	0.11747275		860.6	-0.00507217		1390.59	0.0006889		1920.6	0.01437339		2450.6	-0.00442571
330.79	0.11654411		860.8	-0.00496203		1390.79	-0.00036982		1920.8	0.01420428		2450.8	-0.00363357
330.99	0.11650657		861	-0.00488542		1390.99	-0.00020807		1921	0.01443857		2451	-0.0037401
331.19	0.11583196		861.2	-0.00435516		1391.19	-0.00015707		1921.2	0.01450495		2451.2	-0.00371389
331.39	0.11513154		861.4	-0.00450329		1391.39	0.00043007		1921.4	0.01448154		2451.4	-0.00279827
331.59	0.11458038		861.6	-0.0041333		1391.59	0.00024624		1921.6	0.01541899		2451.6	-0.00417242
331.79	0.11502482		861.8	-0.00324365		1391.79	0.00026045		1921.8	0.01493537		2451.8	-0.00440491
331.99	0.11473434		862	-0.00240316		1391.99	0.00044737		1922	0.01505349		2452	-0.00370376
332.19	0.11567245		862.2	-0.00267843		1392.19	0.00174035		1922.2	0.01616585		2452.2	-0.00332958
332.39	0.11562689		862.4	-0.00227638		1392.39	0.002915		1922.4	0.01646976		2452.4	-0.00439953
332.59	0.11620423		862.6	-0.00186402		1392.59	0.00273663		1922.6	0.01636151		2452.6	-0.00498894
332.79	0.11787686		862.8	-0.00102738		1392.79	0.00217483		1922.8	0.01631869		2452.8	-0.00451829
332.99	0.1186148		863	-0.00126067		1392.99	0.00155928		1923	0.01578299		2453	-0.00520615
333.19	0.11892477		863.2	-0.00088445		1393.19	0.00133244		1923.2	0.01473263		2453.2	-0.00525982
333.39	0.11947758		863.4	-0.00155171		1393.39	0.00089122		1923.4	0.01436661		2453.4	-0.00495011
333.59	0.1198006		863.6	-0.0020098		1393.59	0.00125204		1923.6	0.01439983		2453.6	-0.00510088
333.79	0.1201873		863.8	-0.00120216		1393.79	0.00132781		1923.8	0.0142738		2453.8	-0.00499564
333.99	0.12081724		864	-0.0011199		1393.99	0.0007134		1924	0.01389041		2454	-0.00570936
334.19	0.11965771		864.2	-0.00101485		1394.19	0.00062414		1924.2	0.01321805		2454.2	-0.00527249
334.39	0.11976535		864.4	-0.00120471		1394.39	-0.00006943		1924.4	0.01247644		2454.4	-0.00468902
334.59	0.11979388		864.6	-0.00196421		1394.59	-0.00118582		1924.6	0.01246551		2454.6	-0.00491702
334.79	0.11958843		864.8	-0.00234477		1394.79	-0.00204091		1924.8	0.01255881		2454.8	-0.00490317
334.99	0.11953347		865	-0.00289406		1394.99	-0.00212285		1925	0.01199514		2455	-0.00491533
335.19	0.11846999		865.2	-0.00421816		1395.19	-0.00225138		1925.2	0.01265882		2455.2	-0.00407261
335.39	0.11873774		865.4	-0.00549767		1395.39	-0.00210854		1925.4	0.01278069		2455.4	-0.00489384
335.59	0.1188445		865.6	-0.00601454		1395.59	-0.00235265		1925.6	0.01381651		2455.6	-0.00485047
335.79	0.11873809		865.8	-0.00600136		1395.79	-0.00132402		1925.8	0.01494942		2455.8	-0.00331185
335.99	0.11849771		866	-0.00618504		1395.99	-0.0009054		1926	0.01574153		2456	-0.00275879
336.19	0.11800618		866.2	-0.00667507		1396.19	-0.00005726		1926.2	0.01606754		2456.2	-0.00315079
336.39	0.1169492		866.4	-0.00612386		1396.39	-0.00036896		1926.4	0.01516102		2456.4	-0.00392219
336.59	0.11767112		866.6	-0.00503886		1396.59	-0.00157188		1926.6	0.01551074		2456.6	-0.00344196
336.79	0.11744386		866.8	-0.00483348		1396.79	-0.00243787		1926.8	0.01562707		2456.8	-0.00343511
336.99	0.11728372		867	-0.00389912		1396.99	-0.00274518		1927	0.01603237		2457	-0.0043099
337.19	0.11672263		867.2	-0.00294305		1397.19	-0.00211208		1927.2	0.01643546		2457.2	-0.00393497
337.39	0.11644207		867.4	-0.00219852		1397.39	-0.00179545		1927.4	0.01734207		2457.4	-0.00406059
337.59	0.11679571		867.6	-0.00135263		1397.59	-0.00138309		1927.6	0.01818006		2457.6	-0.00456079
337.79	0.11762025		867.8	-0.00016566		1397.79	-0.00198051		1927.8	0.01783067		2457.8	-0.00510192
337.99	0.11770359		868	0.00046218		1397.99	-0.00266415		1928	0.01667141		2458	-0.00586862
338.19	0.11705438		868.2	0.00099622		1398.19	-0.00190999		1928.2	0.01658988		2458.2	-0.005782
338.39	0.11666951		868.4	0.00084528		1398.39	-0.00302916		1928.4	0.01670373		2458.4	-0.00560909
338.59	0.11671871		868.6	0.00089493		1398.59	-0.00352873		1928.6	0.01658995		2458.6	-0.00583676
338.79	0.1170063		868.8	0.001336		1398.79	-0.00370197		1928.8	0.01680831		2458.8	-0.00521512
338.99	0.11668552		869	0.00107504		1398.99	-0.00399859		1929	0.01709008		2459	-0.00552594
339.19	0.11676648		869.2	0.0001531		1399.19	-0.00373691		1929.2	0.01811619		2459.2	-0.00519537
339.39	0.11751069		869.4	0.00006141		1399.39	-0.00309684		1929.4	0.01786595		2459.4	-0.00526175
339.59	0.11769701		869.6	-0.00054141		1399.59	-0.00192965		1929.6	0.01809867		2459.6	-0.00436972
339.79	0.11739605		869.8	-0.00079897		1399.79	0.0001957		1929.8	0.01777553		2459.8	-0.00406606
339.99	0.11749255		870	-0.00161218		1399.99	0.00088334		1930	0.01736443		2460	-0.00421195
340.19	0.11716924		870.2	-0.00169499		1400.19	0.0012838		1930.2	0.01691778		2460.2	-0.00394122
340.39	0.11771566		870.4	-0.00170973		1400.39	0.00082728		1930.4	0.01622484		2460.4	-0.00417493
340.59	0.11872674		870.6	-0.00348227		1400.59	0.00101875		1930.6	0.01684669		2460.6	-0.00440117
340.79	0.11809692		870.8	-0.00464166		1400.79	0.0010852		1930.8	0.01671033		2460.8	-0.00428518
340.99	0.11907172		871	-0.0049542		1400.99	0.00166728		1931	0.01766592		2461	-0.0044694
341.19	0.11878702		871.2	-0.00537653		1401.19	0.00174375		1931.2	0.01642159		2461.2	-0.0045506
341.39	0.11971248		871.4	-0.00530217		1401.39	0.00207269		1931.4	0.01642299		2461.4	-0.0045724
341.59	0.12038801		871.6	-0.00481603		1401.59	0.00140992		1931.6	0.01518691		2461.6	-0.00500537
341.79	0.12020396		871.8	-0.00456718		1401.79	0.00105519		1931.8	0.01439479		2461.8	-0.0054415
341.99	0.11959569		872	-0.00514347		1401.99	0.00059764		1932	0.01366754		2462	-0.00668533
342.19	0.11824052		872.2	-0.00516772		1402.19	0.00000506		1932.2	0.01389218		2462.2	-0.00729941
342.39	0.11765326		872.4	-0.00480478		1402.39	-0.00116007		1932.4	0.01437994		2462.4	-0.00703577
342.59	0.1170258		872.6	-0.00424668		1402.59	-0.00144844		1932.6	0.01459614		2462.6	-0.00743493
342.79	0.11678667		872.8	-0.00302044		1402.79	-0.00142319		1932.8	0.01476876		2462.8	-0.00747291
342.99	0.11607271		873	-0.00197113		1402.99	-0.00163256		1933	0.0149341		2463	-0.00777626
343.19	0.1166349		873.2	-0.00071333		1403.19	-0.00186514		1933.2	0.01508717		2463.2	-0.00741801
343.39	0.1160776		873.4	-0.00019234		1403.39	-0.00191661		1933.4	0.0153624		2463.4	-0.00702335
343.59	0.11679388		873.6	-0.00004819		1403.59	-0.00061148		1933.6	0.01569967		2463.6	-0.00713506
343.79	0.11691734		873.8	0.00022946		1403.79	-0.00001183		1933.8	0.01637928		2463.8	-0.0068322
343.99	0.11792899		874	0.00027264		1403.99	-0.0000819		1934	0.01755269		2464	-0.00686952
344.19	0.11810907		874.2	0.00034153		1404.19	-0.00021808		1934.2	0.01785816		2464.2	-0.00740269
344.39	0.11888156		874.4	-0.00027318		1404.39	-0.00032215		1934.4	0.01733874		2464.4	-0.00663483
344.59	0.11858395		874.6	-0.00129773		1404.59	-0.00021883		1934.6	0.01792559		2464.6	-0.00622377
344.79	0.11809556		874.8	-0.00150551		1404.79	-0.00039183		1934.8	0.01741436		2464.8	-0.00597062
344.99	0.11940834		875	-0.00171709		1404.99	0.00018758		1935	0.0176401		2465	-0.00556862
345.19	0.11969812		875.2	-0.00126732		1405.19	-0.00023694		1935.2	0.01699807		2465.2	-0.00679809
345.39	0.11943542		875.4	-0.00155453		1405.39	0.00014812		1935.4	0.0170537		2465.4	-0.00606446
345.59	0.11973643		875.6	-0.00187458		1405.59	-0.00062512		1935.6	0.01648564		2465.6	-0.00733726
345.79	0.11949536		875.8	-0.0022698		1405.79	-0.00111797		1935.8	0.01630951		2465.8	-0.00731395
345.99	0.11919711		876	-0.00324501		1405.99	-0.00222038		1936	0.0155369		2466	-0.00766717
346.19	0.11840211		876.2	-0.00289515		1406.19	-0.00336857		1936.2	0.01594858		2466.2	-0.0069627
346.39	0.11828176		876.4	-0.002977		1406.39	-0.00359792		1936.4	0.01611093		2466.4	-0.00639703
346.59	0.11781876		876.6	-0.00348097		1406.59	-0.00360139		1936.6	0.01585461		2466.6	-0.00648799
346.79	0.11821354		876.8	-0.00325834		1406.79	-0.00406181		1936.8	0.01581632		2466.8	-0.00603336
346.99	0.11858273		877	-0.00332166		1406.99	-0.0049827		1937	0.01589635		2467	-0.00570384
347.19	0.11894039		877.2	-0.00351254		1407.19	-0.00539601		1937.2	0.01655217		2467.2	-0.00611579
347.39	0.11893573		877.4	-0.00356106		1407.39	-0.00558715		1937.4	0.01663623		2467.4	-0.00583242
347.59	0.12021013		877.6	-0.00248631		1407.59	-0.00474145		1937.6	0.01724284		2467.6	-0.00615424
347.79	0.11943035		877.8	-0.0019324		1407.79	-0.0048617		1937.8	0.01741681		2467.8	-0.00581795
347.99	0.11996976		878	-0.00188675		1407.99	-0.00431659		1938	0.01712062		2468	-0.00581102
348.19	0.12002491		878.2	-0.00207428		1408.19	-0.0039992		1938.2	0.01684834		2468.2	-0.00533249
348.39	0.12063688		878.4	-0.00131161		1408.39	-0.00386288		1938.4	0.01636819		2468.4	-0.00491961
348.59	0.12027556		878.6	-0.00153005		1408.59	-0.00317484		1938.6	0.01637099		2468.6	-0.0056728
348.79	0.12047605		878.8	-0.00114005		1408.79	-0.00243593		1938.8	0.01620525		2468.8	-0.00616341
348.99	0.12104382		879	-0.00071318		1408.99	-0.00167594		1939	0.01580998		2469	-0.00599536
349.19	0.12142078		879.2	-0.00035489		1409.19	-0.00106765		1939.2	0.01547017		2469.2	-0.00639742
349.39	0.1199618		879.4	-0.00007494		1409.39	-0.00041777		1939.4	0.01414082		2469.4	-0.00533725
349.59	0.12040281		879.6	0.00106384		1409.59	-0.00116191		1939.6	0.0137715		2469.6	-0.00523409
349.79	0.11984813		879.8	0.00061249		1409.79	-0.00134456		1939.8	0.01270802		2469.8	-0.00474258
349.99	0.11885631		880	0.00045252		1409.99	-0.00077702		1940	0.01205396		2470	-0.00500518
350.19	0.11820895		880.2	0.00031768		1410.19	-0.00088597		1940.2	0.01216753		2470.2	-0.00403733
350.39	0.11776776		880.4	0.00011718		1410.39	-0.00145616		1940.4	0.01208071		2470.4	-0.00337748
350.59	0.11800586		880.6	-0.00043707		1410.59	-0.00184968		1940.6	0.0119467		2470.6	-0.00328696
350.79	0.11749703		880.8	-0.00020417		1410.79	-0.00199422		1940.8	0.01224883		2470.8	-0.00326718
350.99	0.11720771		881	-0.0005016		1410.99	-0.0011602		1941	0.01228391		2471	-0.00304352
351.19	0.1172245		881.2	-0.00061299		1411.19	-0.00081233		1941.2	0.01296006		2471.2	-0.00363577
351.39	0.11780248		881.4	-0.00045565		1411.39	-0.00078047		1941.4	0.01305514		2471.4	-0.00261963
351.59	0.1181602		881.6	-0.00030158		1411.59	0.0003254		1941.6	0.01347112		2471.6	-0.00288265
351.79	0.11800379		881.8	-0.00161506		1411.79	0.00126939		1941.8	0.01318849		2471.8	-0.00288472
351.99	0.1193693		882	-0.00305369		1411.99	0.00183517		1942	0.01336182		2472	-0.00354293
352.19	0.11968099		882.2	-0.00340278		1412.19	0.00182295		1942.2	0.01386099		2472.2	-0.00443349
352.39	0.12067336		882.4	-0.00339807		1412.39	0.00280149		1942.4	0.01405403		2472.4	-0.00492619
352.59	0.12142061		882.6	-0.0039717		1412.59	0.00364844		1942.6	0.0138966		2472.6	-0.00510457
352.79	0.12220553		882.8	-0.0032216		1412.79	0.0040546		1942.8	0.01409146		2472.8	-0.00573166
352.99	0.1229924		883	-0.00324212		1412.99	0.00394096		1943	0.01381471		2473	-0.00585652
353.19	0.12338115		883.2	-0.00258389		1413.19	0.00386626		1943.2	0.01506972		2473.2	-0.00635715
353.39	0.12234816		883.4	-0.00138349		1413.39	0.00302043		1943.4	0.01513763		2473.4	-0.0067027
353.59	0.12281201		883.6	-0.00112115		1413.59	0.00188425		1943.6	0.01626066		2473.6	-0.00733099
353.79	0.12231028		883.8	-0.00199372		1413.79	0.00137169		1943.8	0.01685801		2473.8	-0.00883772
353.99	0.1213068		884	-0.00108358		1413.99	0.00140218		1944	0.0173639		2474	-0.00852129
354.19	0.12075382		884.2	-0.00111848		1414.19	0.00020163		1944.2	0.0173907		2474.2	-0.00847834
354.39	0.11982287		884.4	-0.00055327		1414.39	-0.00092344		1944.4	0.01695533		2474.4	-0.00899015
354.59	0.11949349		884.6	-0.00044167		1414.59	-0.00103693		1944.6	0.01624139		2474.6	-0.0085739
354.79	0.11829434		884.8	-0.00018072		1414.79	-0.00101633		1944.8	0.01660037		2474.8	-0.00861705
354.99	0.11829884		885	-0.0006209		1414.99	-0.00132367		1945	0.01655692		2475	-0.00762041
355.19	0.118519		885.2	-0.0013361		1415.19	-0.00262388		1945.2	0.01635446		2475.2	-0.00740608
355.39	0.11843545		885.4	-0.00200282		1415.39	-0.00239986		1945.4	0.01612376		2475.4	-0.00739083
355.59	0.11805361		885.6	-0.00192055		1415.59	-0.00210904		1945.6	0.01584044		2475.6	-0.00779019
355.79	0.11783386		885.8	-0.00198184		1415.79	-0.00171023		1945.8	0.01581272		2475.8	-0.00755385
355.99	0.11764208		886	-0.00140882		1415.99	-0.00238168		1946	0.01653415		2476	-0.00771969
356.19	0.11741706		886.2	-0.00073318		1416.19	-0.00284028		1946.2	0.01593735		2476.2	-0.00729479
356.39	0.1177658		886.4	-0.00027488		1416.39	-0.00313222		1946.4	0.01579499		2476.4	-0.00677439
356.59	0.11814679		886.6	-0.00008412		1416.59	-0.00302662		1946.6	0.01511507		2476.6	-0.0061374
356.79	0.11837681		886.8	0.00088096		1416.79	-0.00296298		1946.8	0.01602102		2476.8	-0.00665584
356.99	0.11860014		887	0.00066565		1416.99	-0.00384624		1947	0.01657258		2477	-0.00652076
357.19	0.11809211		887.2	0.00073926		1417.19	-0.00433231		1947.2	0.01782542		2477.2	-0.00655532
357.39	0.11765329		887.4	0.00120207		1417.39	-0.00524679		1947.4	0.01864451		2477.4	-0.00639117
357.59	0.11753601		887.6	0.00020564		1417.59	-0.00569355		1947.6	0.01955131		2477.6	-0.00720613
357.79	0.11727173		887.8	0.0001745		1417.79	-0.00567307		1947.8	0.01997014		2477.8	-0.00686002
357.99	0.11728972		888	-0.00011324		1417.99	-0.00477557		1948	0.01965186		2478	-0.00625886
358.19	0.11733456		888.2	-0.00132249		1418.19	-0.00456826		1948.2	0.01891576		2478.2	-0.00723928
358.39	0.11739178		888.4	-0.00139116		1418.39	-0.00371959		1948.4	0.0179866		2478.4	-0.0059751
358.59	0.11812442		888.6	-0.00210712		1418.59	-0.00299987		1948.6	0.01782643		2478.6	-0.00513799
358.79	0.11746463		888.8	-0.00258687		1418.79	-0.00213036		1948.8	0.01782783		2478.8	-0.00451845
358.99	0.11835734		889	-0.00362723		1418.99	-0.00199365		1949	0.01656758		2479	-0.00386096
359.19	0.1185351		889.2	-0.00470782		1419.19	-0.00152406		1949.2	0.01681702		2479.2	-0.00426269
359.39	0.11834336		889.4	-0.0047618		1419.39	-0.00013028		1949.4	0.01678577		2479.4	-0.00494392
359.59	0.11850081		889.6	-0.00441916		1419.59	0.000677		1949.6	0.01655062		2479.6	-0.0048032
359.79	0.11868694		889.8	-0.00382859		1419.79	0.0012627		1949.8	0.01727573		2479.8	-0.00518186
359.99	0.11890838		890	-0.00303551		1419.99	0.00137589		1950	0.01675201		2480	-0.00593935
360.19	0.11895152		890.2	-0.00296118		1420.19	0.00132449		1950.2	0.015345		2480.2	-0.00636853
360.39	0.11882164		890.4	-0.00209027		1420.39	0.00125057		1950.4	0.01461304		2480.4	-0.00651946
360.59	0.11892476		890.6	-0.00148102		1420.59	0.00136683		1950.6	0.0146869		2480.6	-0.00634494
360.79	0.11930091		890.8	-0.00023381		1420.79	0.00090862		1950.8	0.01550991		2480.8	-0.00699234
360.99	0.11937		891	-0.00036388		1420.99	0.00014905		1951	0.01534639		2481	-0.00714126
361.19	0.11929167		891.2	0.00051303		1421.19	-0.00011018		1951.2	0.01640188		2481.2	-0.00691975
361.39	0.11915608		891.4	0.00133932		1421.39	-0.00087653		1951.4	0.01758773		2481.4	-0.00659048
361.59	0.1194416		891.6	0.00098955		1421.59	-0.00097835		1951.6	0.01776433		2481.6	-0.0062398
361.79	0.12002487		891.8	0.00164185		1421.79	-0.00170492		1951.8	0.01796626		2481.8	-0.00536076
361.99	0.11970321		892	0.00150612		1421.99	-0.00072165		1952	0.01785494		2482	-0.00426621
362.19	0.11979627		892.2	0.00085283		1422.19	-0.00083925		1952.2	0.01782279		2482.2	-0.00389455
362.39	0.11982072		892.4	0.00052066		1422.39	-0.00051359		1952.4	0.01794092		2482.4	-0.00230241
362.59	0.11941193		892.6	0.00004388		1422.59	-0.00054358		1952.6	0.01788393		2482.6	-0.00179808
362.79	0.11915353		892.8	0.00033402		1422.79	0.00034499		1952.8	0.01750836		2482.8	-0.00095661
362.99	0.12008274		893	0.00027218		1422.99	0.00023166		1953	0.01702245		2483	-0.00179842
363.19	0.11945672		893.2	-0.00037108		1423.19	0.00013144		1953.2	0.01823327		2483.2	-0.00201248
363.39	0.11875036		893.4	-0.00088197		1423.39	0.00091555		1953.4	0.01707954		2483.4	-0.00285336
363.59	0.11936125		893.6	-0.00146373		1423.59	0.0006486		1953.6	0.01676046		2483.6	-0.00377232
363.79	0.1187538		893.8	-0.00177012		1423.79	0.00073797		1953.8	0.01608035		2483.8	-0.00471618
363.99	0.11894542		894	-0.00184863		1423.99	0.00125535		1954	0.01497904		2484	-0.00475866
364.19	0.11846587		894.2	-0.00203023		1424.19	0.00092534		1954.2	0.01504168		2484.2	-0.0048939
364.39	0.1189107		894.4	-0.00147404		1424.39	0.0003894		1954.4	0.01413925		2484.4	-0.00487383
364.59	0.11873304		894.6	-0.00145502		1424.59	-0.00016415		1954.6	0.01435572		2484.6	-0.00535523
364.79	0.11882948		894.8	-0.00154915		1424.79	-0.00066541		1954.8	0.01411589		2484.8	-0.00638568
364.99	0.11906302		895	-0.00154338		1424.99	-0.00113892		1955	0.01462802		2485	-0.006594
365.19	0.11936591		895.2	-0.00085363		1425.19	-0.00121383		1955.2	0.01508658		2485.2	-0.00668388
365.39	0.11878676		895.4	-0.00138563		1425.39	-0.00181803		1955.4	0.01566071		2485.4	-0.00627703
365.59	0.11932298		895.6	-0.00189057		1425.59	-0.00181445		1955.6	0.01508323		2485.6	-0.00545432
365.79	0.12013886		895.8	-0.00158348		1425.79	-0.00113439		1955.8	0.01563891		2485.8	-0.00467609
365.99	0.12029352		896	-0.00200605		1425.99	-0.00059509		1956	0.01622345		2486	-0.00379197
366.19	0.12056334		896.2	-0.00266842		1426.19	-0.00058218		1956.2	0.01615727		2486.2	-0.00343374
366.39	0.12063885		896.4	-0.00298701		1426.39	-0.00006119		1956.4	0.01627804		2486.4	-0.00285644
366.59	0.12026541		896.6	-0.00214484		1426.59	0.00023531		1956.6	0.01658174		2486.6	-0.00274435
366.79	0.12031297		896.8	-0.00192224		1426.79	0.00089649		1956.8	0.01709468		2486.8	-0.00329206
366.99	0.12030884		897	-0.00193406		1426.99	0.00058697		1957	0.01753702		2487	-0.00393331
367.19	0.11970966		897.2	-0.00206133		1427.19	0.00018313		1957.2	0.01768057		2487.2	-0.00387935
367.39	0.11947257		897.4	-0.00266739		1427.39	-0.00011477		1957.4	0.01646316		2487.4	-0.00513763
367.59	0.12009403		897.6	-0.00235067		1427.59	-0.00008925		1957.6	0.01671888		2487.6	-0.00564108
367.79	0.11994498		897.8	-0.00243931		1427.79	0.00003141		1957.8	0.01622933		2487.8	-0.00605347
367.99	0.12076848		898	-0.00249046		1427.99	-0.00048412		1958	0.01667834		2488	-0.00587355
368.19	0.12123223		898.2	-0.00246047		1428.19	-0.00098062		1958.2	0.01628811		2488.2	-0.00664672
368.39	0.12236296		898.4	-0.00257201		1428.39	-0.00199585		1958.4	0.01595108		2488.4	-0.00710767
368.59	0.12196128		898.6	-0.00292931		1428.59	-0.00215617		1958.6	0.01646557		2488.6	-0.00810273
368.79	0.12176791		898.8	-0.00268252		1428.79	-0.00309489		1958.8	0.01743171		2488.8	-0.00851687
368.99	0.12183861		899	-0.00300079		1428.99	-0.00289013		1959	0.01786034		2489	-0.00901594
369.19	0.12136208		899.2	-0.00321368		1429.19	-0.00254617		1959.2	0.01670646		2489.2	-0.00885042
369.39	0.12171999		899.4	-0.00322926		1429.39	-0.00262352		1959.4	0.01640207		2489.4	-0.00809654
369.59	0.12253659		899.6	-0.00302031		1429.59	-0.00176599		1959.6	0.01590208		2489.6	-0.00734486
369.79	0.12331085		899.8	-0.00249073		1429.79	-0.00089629		1959.8	0.01582765		2489.8	-0.00712228
369.99	0.12343503		900	-0.0026472		1429.99	-0.00078136		1960	0.01508309		2490	-0.00644766
370.19	0.12291567		900.2	-0.0026706		1430.19	-0.00000585		1960.2	0.0145787		2490.2	-0.0064333
370.39	0.12341121		900.4	-0.00280651		1430.39	0.000444		1960.4	0.01516105		2490.4	-0.00617446
370.59	0.12303459		900.6	-0.00207625		1430.59	0.00027051		1960.6	0.01521441		2490.6	-0.00639025
370.79	0.12253103		900.8	-0.00289893		1430.79	0.00061027		1960.8	0.01484335		2490.8	-0.00691348
370.99	0.12289818		901	-0.00181935		1430.99	0.00091754		1961	0.01525876		2491	-0.00659111
371.19	0.12231176		901.2	-0.00159626		1431.19	0.00015998		1961.2	0.01475927		2491.2	-0.00620594
371.39	0.12197799		901.4	-0.00189088		1431.39	-0.00076094		1961.4	0.01475212		2491.4	-0.00608681
371.59	0.12130735		901.6	-0.00122439		1431.59	-0.00087522		1961.6	0.01478729		2491.6	-0.005641
371.79	0.12069814		901.8	-0.00087608		1431.79	-0.00141041		1961.8	0.01501687		2491.8	-0.00521979
371.99	0.12042955		902	-0.00046012		1431.99	-0.00179433		1962	0.0152993		2492	-0.00405057
372.19	0.12002114		902.2	-0.00103512		1432.19	-0.00187154		1962.2	0.0151832		2492.2	-0.00390199
372.39	0.11928872		902.4	-0.00112132		1432.39	-0.00256378		1962.4	0.01657971		2492.4	-0.00338116
372.59	0.11712132		902.6	-0.00050847		1432.59	-0.00282657		1962.6	0.01600445		2492.6	-0.00319294
372.79	0.11682051		902.8	-0.0000089		1432.79	-0.0026024		1962.8	0.01612933		2492.8	-0.00273326
372.99	0.11711492		903	-0.00019473		1432.99	-0.00208975		1963	0.01533131		2493	-0.00300071
373.19	0.11777798		903.2	0.00048429		1433.19	-0.00177038		1963.2	0.01572815		2493.2	-0.00233075
373.39	0.11889166		903.4	0.0009476		1433.39	-0.00094635		1963.4	0.0157669		2493.4	-0.00284456
373.59	0.11934057		903.6	0.00134503		1433.59	0.00017137		1963.6	0.01604098		2493.6	-0.00287312
373.79	0.120042		903.8	0.00169283		1433.79	0.00078088		1963.8	0.01619225		2493.8	-0.00372216
373.99	0.12057806		904	0.00129344		1433.99	0.00140354		1964	0.0164439		2494	-0.00399413
374.19	0.12170579		904.2	0.00077554		1434.19	0.00152698		1964.2	0.01711242		2494.2	-0.00550117
374.39	0.12379679		904.4	-0.00006225		1434.39	0.0021882		1964.4	0.01667446		2494.4	-0.00583798
374.59	0.12492944		904.6	-0.00036809		1434.59	0.00195707		1964.6	0.01635954		2494.6	-0.00667667
374.79	0.12549596		904.8	-0.00046028		1434.79	0.00246235		1964.8	0.01608212		2494.8	-0.00722621
374.99	0.12594226		905	0.00020148		1434.99	0.00237261		1965	0.01648969		2495	-0.00746258
375.19	0.1248107		905.2	-0.00135861		1435.19	0.00070715		1965.2	0.01701051		2495.2	-0.00735531
375.39	0.12389242		905.4	-0.00150812		1435.39	0.00016426		1965.4	0.01762698		2495.4	-0.00820985
375.59	0.12342199		905.6	-0.00099597		1435.59	-0.00003768		1965.6	0.01699995		2495.6	-0.00813769
375.79	0.12300777		905.8	-0.00143796		1435.79	-0.00027255		1965.8	0.0171106		2495.8	-0.00757016
375.99	0.12196325		906	-0.00224294		1435.99	-0.0008649		1966	0.01636859		2496	-0.00675571
376.19	0.12056143		906.2	-0.00251086		1436.19	-0.00176061		1966.2	0.01700818		2496.2	-0.00732001
376.39	0.11944083		906.4	-0.00185401		1436.39	-0.00289144		1966.4	0.01710964		2496.4	-0.00668593
376.59	0.11849412		906.6	-0.00216316		1436.59	-0.00326018		1966.6	0.01620449		2496.6	-0.00656761
376.79	0.1194485		906.8	-0.00179704		1436.79	-0.00345677		1966.8	0.01681704		2496.8	-0.00638149
376.99	0.1201865		907	-0.0016539		1436.99	-0.0034325		1967	0.01801379		2497	-0.00714075
377.19	0.12091985		907.2	-0.00222842		1437.19	-0.00320511		1967.2	0.01905899		2497.2	-0.0064679
377.39	0.12061032		907.4	-0.00263869		1437.39	-0.00284244		1967.4	0.01897871		2497.4	-0.00655386
377.59	0.12117379		907.6	-0.00328932		1437.59	-0.00285044		1967.6	0.0196682		2497.6	-0.00597614
377.79	0.12160856		907.8	-0.0041905		1437.79	-0.00289546		1967.8	0.0198049		2497.8	-0.00637091
377.99	0.12254262		908	-0.00467068		1437.99	-0.00247575		1968	0.01940875		2498	-0.00622761
378.19	0.12397418		908.2	-0.00506082		1438.19	-0.00227426		1968.2	0.01905003		2498.2	-0.00653967
378.39	0.12520626		908.4	-0.00500387		1438.39	-0.0015092		1968.4	0.01817397		2498.4	-0.00648049
378.59	0.12557807		908.6	-0.0042623		1438.59	-0.00116269		1968.6	0.01795239		2498.6	-0.00662281
378.79	0.12538548		908.8	-0.0035799		1438.79	-0.00058371		1968.8	0.01745897		2498.8	-0.00694664
378.99	0.12516527		909	-0.00335564		1438.99	-0.00013699		1969	0.0175156		2499	-0.00748586
379.19	0.1244872		909.2	-0.00306538		1439.19	0.00000112		1969.2	0.01774162		2499.2	-0.00753857
379.39	0.12456994		909.4	-0.00166063		1439.39	0.00083391		1969.4	0.0168997		2499.4	-0.00814543
379.59	0.1247121		909.6	-0.00062682		1439.59	0.0015351		1969.6	0.01582094		2499.6	-0.00763028
379.79	0.12387709		909.8	-0.00014574		1439.79	0.00194251		1969.8	0.01556853		2499.8	-0.00767302
379.99	0.12387709		910	-0.00014574		1439.99	0.00194251		1970	0.01556853		2500	-0.00767302
380.19	0.12253798		910.2	0.00038181		1440.19	0.0019013		1970.2	0.01422943		2500.2	-0.00870707
380.39	0.12118256		910.4	0.00072253		1440.39	0.00244131		1970.4	0.01253229		2500.4	-0.00948775
380.59	0.11910626		910.6	0.00117848		1440.59	0.00330287		1970.6	0.01129935		2500.6	-0.01090561
380.79	0.11656977		910.8	0.00210005		1440.79	0.00359222		1970.8	0.01033342		2500.8	-0.01199479
380.99	0.11365923		911	0.00333008		1440.99	0.00422788		1971	0.01012369		2501	-0.01269678
381.19	0.11192211		911.2	0.00418572		1441.19	0.00529019		1971.2	0.00950792		2501.2	-0.01335951
381.39	0.11000135		911.4	0.00551633		1441.39	0.00591301		1971.4	0.00922864		2501.4	-0.013726
381.59	0.1083087		911.6	0.00658652		1441.59	0.00557064		1971.6	0.00868		2501.6	-0.01323542
381.79	0.10669482		911.8	0.00663419		1441.79	0.00605226		1971.8	0.00892938		2501.8	-0.01250821
381.99	0.10490005		912	0.00753575		1441.99	0.0058206		1972	0.00941972		2502	-0.01230405
382.19	0.10347979		912.2	0.00710714		1442.19	0.00632219		1972.2	0.01009195		2502.2	-0.01143942
382.39	0.10160495		912.4	0.00764288		1442.39	0.00674677		1972.4	0.01188675		2502.4	-0.01179839
382.59	0.10040552		912.6	0.00766816		1442.59	0.00665814		1972.6	0.01304811		2502.6	-0.01120206
382.79	0.10005529		912.8	0.00670354		1442.79	0.00705075		1972.8	0.01284412		2502.8	-0.01178615
382.99	0.09897171		913	0.00725761		1442.99	0.0073868		1973	0.01337686		2503	-0.01121451
383.19	0.09796182		913.2	0.00623914		1443.19	0.00734832		1973.2	0.01365399		2503.2	-0.0102631
383.39	0.09753698		913.4	0.00543184		1443.39	0.00769593		1973.4	0.01325041		2503.4	-0.00989547
383.59	0.09657925		913.6	0.00438288		1443.59	0.00820663		1973.6	0.01315966		2503.6	-0.00920217
383.79	0.09480192		913.8	0.00415929		1443.79	0.00852169		1973.8	0.0118976		2503.8	-0.00856479
383.99	0.09555886		914	0.00293266		1443.99	0.008497		1974	0.0110585		2504	-0.00939282
384.19	0.09444354		914.2	0.0023155		1444.19	0.00750835		1974.2	0.01043684		2504.2	-0.00952698
384.39	0.09360455		914.4	0.00201617		1444.39	0.00759517		1974.4	0.00939949		2504.4	-0.01028697
384.59	0.0919156		914.6	0.00195197		1444.59	0.00745967		1974.6	0.00949537		2504.6	-0.01091535
384.79	0.09035975		914.8	0.00226444		1444.79	0.0066599		1974.8	0.00941046		2504.8	-0.01106729
384.99	0.08887184		915	0.00261499		1444.99	0.00743956		1975	0.00953611		2505	-0.01141013
385.19	0.08953747		915.2	0.00314892		1445.19	0.00720477		1975.2	0.00859696		2505.2	-0.0114968
385.39	0.08867513		915.4	0.00383104		1445.39	0.00660451		1975.4	0.00842534		2505.4	-0.0111243
385.59	0.08915358		915.6	0.00435823		1445.59	0.00591876		1975.6	0.00839319		2505.6	-0.01021231
385.79	0.08854012		915.8	0.00378951		1445.79	0.00652502		1975.8	0.00869622		2505.8	-0.01010641
385.99	0.08812643		916	0.00373877		1445.99	0.00644331		1976	0.00849554		2506	-0.01064492
386.19	0.08760622		916.2	0.00313647		1446.19	0.00697508		1976.2	0.00893655		2506.2	-0.0103883
386.39	0.08810095		916.4	0.00335009		1446.39	0.00664726		1976.4	0.00971411		2506.4	-0.00988171
386.59	0.08863162		916.6	0.00325448		1446.59	0.00656669		1976.6	0.01007861		2506.6	-0.00936861
386.79	0.0876382		916.8	0.00282185		1446.79	0.00680591		1976.8	0.01071446		2506.8	-0.00879033
386.99	0.0872123		917	0.0038068		1446.99	0.00658222		1977	0.01139272		2507	-0.00881098
387.19	0.08623106		917.2	0.00352642		1447.19	0.00634816		1977.2	0.01113989		2507.2	-0.00866032
387.39	0.08641584		917.4	0.00372874		1447.39	0.00616182		1977.4	0.0122089		2507.4	-0.00872124
387.59	0.08507379		917.6	0.00420697		1447.59	0.00671396		1977.6	0.01191951		2507.6	-0.00875419
387.79	0.08525635		917.8	0.00448851		1447.79	0.00596637		1977.8	0.01226117		2507.8	-0.00929938
387.99	0.08561052		918	0.00394645		1447.99	0.00679758		1978	0.01219957		2508	-0.01027891
388.19	0.08419772		918.2	0.00419813		1448.19	0.00614961		1978.2	0.01172351		2508.2	-0.01053926
388.39	0.08296428		918.4	0.00505576		1448.39	0.00618868		1978.4	0.01088185		2508.4	-0.01107038
388.59	0.08178925		918.6	0.00550402		1448.59	0.0064757		1978.6	0.01097142		2508.6	-0.01056114
388.79	0.08195376		918.8	0.00612502		1448.79	0.00674691		1978.8	0.0104434		2508.8	-0.01156772
388.99	0.08110731		919	0.0056543		1448.99	0.00732965		1979	0.01001077		2509	-0.0115359
389.19	0.08178025		919.2	0.00608377		1449.19	0.00648722		1979.2	0.00887347		2509.2	-0.01094667
389.39	0.08088677		919.4	0.0064854		1449.39	0.00693766		1979.4	0.00865504		2509.4	-0.01015681
389.59	0.08180312		919.6	0.00719105		1449.59	0.00725193		1979.6	0.00829784		2509.6	-0.00960081
389.79	0.08198751		919.8	0.00568368		1449.79	0.00811162		1979.8	0.0082766		2509.8	-0.01030491
389.99	0.08219456		920	0.00475358		1449.99	0.00977754		1980	0.00782034		2510	-0.01090035
390.19	0.08144007		920.2	0.0053786		1450.19	0.00977735		1980.2	0.00784873		2510.2	-0.01033187
390.39	0.08209309		920.4	0.00496747		1450.39	0.0095946		1980.4	0.00799853		2510.4	-0.00995275
390.59	0.0815133		920.6	0.00489765		1450.59	0.00924324		1980.6	0.00910689		2510.6	-0.00970538
390.79	0.08146272		920.8	0.00418376		1450.79	0.00935019		1980.8	0.01018721		2510.8	-0.00951055
390.99	0.08096905		921	0.004795		1450.99	0.00939134		1981	0.01109921		2511	-0.00891519
391.19	0.08081915		921.2	0.00505066		1451.19	0.00908697		1981.2	0.01165223		2511.2	-0.00849209
391.39	0.0816876		921.4	0.00573188		1451.39	0.00886605		1981.4	0.01303291		2511.4	-0.00869078
391.59	0.08059086		921.6	0.00660391		1451.59	0.00851014		1981.6	0.01278938		2511.6	-0.00853214
391.79	0.08089053		921.8	0.00732971		1451.79	0.00773373		1981.8	0.01286961		2511.8	-0.0092039
391.99	0.07979604		922	0.00782551		1451.99	0.00798647		1982	0.01265821		2512	-0.01007363
392.19	0.07884509		922.2	0.00878571		1452.19	0.00771581		1982.2	0.01229547		2512.2	-0.01004954
392.39	0.07809147		922.4	0.00883657		1452.39	0.00745533		1982.4	0.01242464		2512.4	-0.01003844
392.59	0.07844516		922.6	0.0091568		1452.59	0.00766081		1982.6	0.01304249		2512.6	-0.0101789
392.79	0.07841392		922.8	0.0089685		1452.79	0.00707031		1982.8	0.01248475		2512.8	-0.01061508
392.99	0.07686575		923	0.00855551		1452.99	0.00666525		1983	0.01243977		2513	-0.01040572
393.19	0.07647758		923.2	0.00877029		1453.19	0.00630678		1983.2	0.01156755		2513.2	-0.01080947
393.39	0.07540105		923.4	0.00868246		1453.39	0.00666251		1983.4	0.01260037		2513.4	-0.01092154
393.59	0.0753463		923.6	0.00840001		1453.59	0.00646202		1983.6	0.01279699		2513.6	-0.01190263
393.79	0.07510938		923.8	0.00801993		1453.79	0.00783549		1983.8	0.01277424		2513.8	-0.01319591
393.99	0.0746182		924	0.00763907		1453.99	0.00933723		1984	0.01216104		2514	-0.01301767
394.19	0.07400679		924.2	0.00843706		1454.19	0.00855839		1984.2	0.01210605		2514.2	-0.01285659
394.39	0.07453544		924.4	0.00703855		1454.39	0.00931388		1984.4	0.01228102		2514.4	-0.01277662
394.59	0.07417842		924.6	0.00699671		1454.59	0.00972257		1984.6	0.01335318		2514.6	-0.01256489
394.79	0.07452097		924.8	0.00695992		1454.79	0.01051973		1984.8	0.01400891		2514.8	-0.01168633
394.99	0.07373902		925	0.00720019		1454.99	0.01071768		1985	0.01461629		2515	-0.01072201
395.19	0.07491325		925.2	0.00789836		1455.19	0.01025262		1985.2	0.01445552		2515.2	-0.01113208
395.39	0.07465716		925.4	0.00922069		1455.39	0.01050557		1985.4	0.01359283		2515.4	-0.01107048
395.59	0.07457019		925.6	0.01014205		1455.59	0.00970395		1985.6	0.01277958		2515.6	-0.01081257
395.79	0.07474784		925.8	0.00996444		1455.79	0.00952329		1985.8	0.01228725		2515.8	-0.01101737
395.99	0.07457012		926	0.00962781		1455.99	0.00963835		1986	0.01280131		2516	-0.01061655
396.19	0.07486646		926.2	0.00976887		1456.19	0.00973142		1986.2	0.01165552		2516.2	-0.01013228
396.39	0.07552065		926.4	0.00898404		1456.39	0.00951975		1986.4	0.01164364		2516.4	-0.00964543
396.59	0.07592863		926.6	0.00825867		1456.59	0.0092815		1986.6	0.01136263		2516.6	-0.00959553
396.79	0.07475504		926.8	0.00706513		1456.79	0.00892781		1986.8	0.01104996		2516.8	-0.00999921
396.99	0.07416876		927	0.00647449		1456.99	0.0077096		1987	0.01069873		2517	-0.01089264
397.19	0.07349185		927.2	0.00486602		1457.19	0.00732874		1987.2	0.01057751		2517.2	-0.01032993
397.39	0.07253581		927.4	0.00418029		1457.39	0.00692383		1987.4	0.01139973		2517.4	-0.01052494
397.59	0.07210786		927.6	0.00358433		1457.59	0.00615436		1987.6	0.01124909		2517.6	-0.01039494
397.79	0.07211671		927.8	0.00406399		1457.79	0.00711502		1987.8	0.01089521		2517.8	-0.01044497
397.99	0.07209192		928	0.00297387		1457.99	0.00655327		1988	0.01128755		2518	-0.01036731
398.19	0.07189713		928.2	0.00311908		1458.19	0.00542428		1988.2	0.01177361		2518.2	-0.01066946
398.39	0.07169345		928.4	0.00261798		1458.39	0.00590867		1988.4	0.01372994		2518.4	-0.01036823
398.59	0.07105516		928.6	0.00350539		1458.59	0.00651788		1988.6	0.01482873		2518.6	-0.01070467
398.79	0.07059557		928.8	0.00454822		1458.79	0.00645193		1988.8	0.01529753		2518.8	-0.01077881
398.99	0.07089669		929	0.00530252		1458.99	0.00560648		1989	0.015642		2519	-0.01124672
399.19	0.07057673		929.2	0.00607819		1459.19	0.00552266		1989.2	0.01514316		2519.2	-0.01161
399.39	0.07012316		929.4	0.0068819		1459.39	0.0059931		1989.4	0.01416973		2519.4	-0.01155889
399.59	0.07069605		929.6	0.00614965		1459.59	0.00609665		1989.6	0.01445262		2519.6	-0.01178358
399.79	0.07078505		929.8	0.00587659		1459.79	0.0070227		1989.8	0.01443378		2519.8	-0.01233054
399.99	0.07063782		930	0.00731428		1459.99	0.00742818		1990	0.0136032		2520	-0.01257625
400.19	0.07140019		930.2	0.00782886		1460.19	0.00825379		1990.2	0.0117702		2520.2	-0.01253268
400.39	0.07134167		930.4	0.00716202		1460.39	0.01001555		1990.4	0.01133957		2520.4	-0.01263226
400.59	0.07148863		930.6	0.00737923		1460.59	0.00998865		1990.6	0.01007138		2520.6	-0.0130518
400.79	0.07024351		930.8	0.00738374		1460.79	0.01046294		1990.8	0.01000033		2520.8	-0.01333113
400.99	0.06945804		931	0.00787346		1460.99	0.00981274		1991	0.00842162		2521	-0.01251776
401.19	0.06935929		931.2	0.00740345		1461.19	0.01039026		1991.2	0.00869469		2521.2	-0.01194179
401.39	0.06911239		931.4	0.00848405		1461.39	0.00951226		1991.4	0.00892381		2521.4	-0.0114553
401.59	0.06878623		931.6	0.00924135		1461.59	0.0090596		1991.6	0.00873866		2521.6	-0.01027119
401.79	0.06836529		931.8	0.01007157		1461.79	0.00869935		1991.8	0.00856359		2521.8	-0.01014322
401.99	0.06819812		932	0.00923175		1461.99	0.00839158		1992	0.0093974		2522	-0.01036289
402.19	0.06761877		932.2	0.0095441		1462.19	0.00823115		1992.2	0.01033307		2522.2	-0.01006664
402.39	0.06686644		932.4	0.0097725		1462.39	0.00941251		1992.4	0.01181848		2522.4	-0.00968434
402.59	0.06657493		932.6	0.00989391		1462.59	0.00970741		1992.6	0.0110847		2522.6	-0.00958156
402.79	0.06603756		932.8	0.00970051		1462.79	0.00862443		1992.8	0.01138725		2522.8	-0.00932184
402.99	0.06610691		933	0.00955193		1462.99	0.00863431		1993	0.01207211		2523	-0.00969772
403.19	0.06533467		933.2	0.00894949		1463.19	0.00939793		1993.2	0.01256277		2523.2	-0.00917386
403.39	0.06475545		933.4	0.00857022		1463.39	0.00959237		1993.4	0.01266605		2523.4	-0.00971588
403.59	0.06523076		933.6	0.00797871		1463.59	0.00943976		1993.6	0.01313419		2523.6	-0.01022729
403.79	0.06558189		933.8	0.00804211		1463.79	0.00993825		1993.8	0.01252582		2523.8	-0.01082255
403.99	0.06533286		934	0.00806247		1463.99	0.01016307		1994	0.01177967		2524	-0.01060725
404.19	0.06544052		934.2	0.00803216		1464.19	0.01069134		1994.2	0.01103361		2524.2	-0.01035191
404.39	0.06503032		934.4	0.00744636		1464.39	0.01155826		1994.4	0.01099474		2524.4	-0.01080554
404.59	0.06567362		934.6	0.00732981		1464.59	0.01098043		1994.6	0.01100601		2524.6	-0.01121628
404.79	0.06514636		934.8	0.0071264		1464.79	0.01098331		1994.8	0.01131683		2524.8	-0.01115645
404.99	0.06489926		935	0.00772369		1464.99	0.01083982		1995	0.01115768		2525	-0.01115163
405.19	0.06502389		935.2	0.00791248		1465.19	0.01071292		1995.2	0.01178549		2525.2	-0.01086541
405.39	0.06416399		935.4	0.00913504		1465.39	0.01004946		1995.4	0.01245324		2525.4	-0.01006934
405.59	0.06338763		935.6	0.00826333		1465.59	0.00933542		1995.6	0.01299495		2525.6	-0.00968938
405.79	0.06256708		935.8	0.00786052		1465.79	0.00895448		1995.8	0.01378315		2525.8	-0.01044596
405.99	0.06278533		936	0.00738069		1465.99	0.00926056		1996	0.01415373		2526	-0.010857
406.19	0.06307357		936.2	0.00752801		1466.19	0.00831776		1996.2	0.01419743		2526.2	-0.01097919
406.39	0.06368869		936.4	0.00764262		1466.39	0.0089418		1996.4	0.01395078		2526.4	-0.01096734
406.59	0.06370649		936.6	0.00744186		1466.59	0.00860978		1996.6	0.01342047		2526.6	-0.01132579
406.79	0.06380225		936.8	0.00650334		1466.79	0.00842188		1996.8	0.01431139		2526.8	-0.01086897
406.99	0.06401731		937	0.00643024		1466.99	0.00895117		1997	0.01505088		2527	-0.01119957
407.19	0.06343086		937.2	0.00571043		1467.19	0.00804907		1997.2	0.01529183		2527.2	-0.01127717
407.39	0.06251045		937.4	0.00559078		1467.39	0.00708532		1997.4	0.01503594		2527.4	-0.01200546
407.59	0.06282476		937.6	0.00551088		1467.59	0.00651899		1997.6	0.01546678		2527.6	-0.01220577
407.79	0.0628083		937.8	0.00560734		1467.79	0.00689931		1997.8	0.01430313		2527.8	-0.01217295
407.99	0.06208228		938	0.00674569		1467.99	0.00740846		1998	0.0137558		2528	-0.01272961
408.19	0.06175627		938.2	0.00737116		1468.19	0.00762763		1998.2	0.01336915		2528.2	-0.0130983
408.39	0.06224015		938.4	0.00737121		1468.39	0.00865895		1998.4	0.01329669		2528.4	-0.01225822
408.59	0.06292325		938.6	0.00757537		1468.59	0.00931768		1998.6	0.0126238		2528.6	-0.01182791
408.79	0.06354429		938.8	0.00765139		1468.79	0.00925564		1998.8	0.01183168		2528.8	-0.010916
408.99	0.06325481		939	0.00752155		1468.99	0.00987262		1999	0.01123083		2529	-0.0101429
409.19	0.06302103		939.2	0.00756848		1469.19	0.01060785		1999.2	0.01118087		2529.2	-0.00959755
409.39	0.0630854		939.4	0.0073824		1469.39	0.00990532		1999.4	0.01105039		2529.4	-0.00916914
409.59	0.06316277		939.6	0.00625248		1469.59	0.00986114		1999.6	0.01111762		2529.6	-0.00884213
409.79	0.06403562		939.8	0.00684721		1469.79	0.01076896		1999.8	0.01066137		2529.8	-0.00947384
409.99	0.06544464		940	0.00635455		1469.99	0.01062582		2000	0.01005371		2530	-0.00919661
410.19	0.06623337		940.2	0.00679537		1470.19	0.01113688		2000.2	0.00972934		2530.2	-0.0087271
410.39	0.06660279		940.4	0.00615805		1470.39	0.01211917		2000.4	0.00987866		2530.4	-0.00814084
410.59	0.06673387		940.6	0.00537566		1470.59	0.01171488		2000.6	0.01034868		2530.6	-0.00849472
410.79	0.06680203		940.8	0.00478205		1470.79	0.01098761		2000.8	0.01057937		2530.8	-0.0081576
410.99	0.06564443		941	0.00431661		1470.99	0.00991877		2001	0.01049723		2531	-0.00868733
411.19	0.06480728		941.2	0.00460566		1471.19	0.00876805		2001.2	0.01084037		2531.2	-0.00904667
411.39	0.06325115		941.4	0.00450734		1471.39	0.00829563		2001.4	0.01119779		2531.4	-0.00855502
411.59	0.06271674		941.6	0.00558843		1471.59	0.00823252		2001.6	0.01180893		2531.6	-0.00928921
411.79	0.06218681		941.8	0.00677613		1471.79	0.00924766		2001.8	0.01129982		2531.8	-0.00933566
411.99	0.06161055		942	0.00779028		1471.99	0.0095055		2002	0.01206261		2532	-0.00964797
412.19	0.06100964		942.2	0.00806813		1472.19	0.00885839		2002.2	0.01227009		2532.2	-0.00899746
412.39	0.06072566		942.4	0.00826756		1472.39	0.00899884		2002.4	0.0120184		2532.4	-0.00860679
412.59	0.06114633		942.6	0.0073118		1472.59	0.00880567		2002.6	0.01084137		2532.6	-0.00856055
412.79	0.06128056		942.8	0.00672903		1472.79	0.00913547		2002.8	0.01077133		2532.8	-0.00863781
412.99	0.06047459		943	0.00606105		1472.99	0.00924286		2003	0.01022319		2533	-0.00874647
413.19	0.06007914		943.2	0.00639206		1473.19	0.00974164		2003.2	0.01040163		2533.2	-0.00925606
413.39	0.0603707		943.4	0.00644899		1473.39	0.00980257		2003.4	0.00966296		2533.4	-0.00908568
413.59	0.06035067		943.6	0.00612709		1473.59	0.01048431		2003.6	0.00946594		2533.6	-0.00963901
413.79	0.0608775		943.8	0.00686455		1473.79	0.01004349		2003.8	0.0094358		2533.8	-0.00955506
413.99	0.06077334		944	0.00697006		1473.99	0.01007166		2004	0.00926077		2534	-0.00909145
414.19	0.06024799		944.2	0.00719513		1474.19	0.01100943		2004.2	0.00915363		2534.2	-0.00854121
414.39	0.05958998		944.4	0.00684082		1474.39	0.0108015		2004.4	0.00951649		2534.4	-0.00859046
414.59	0.05922898		944.6	0.00691997		1474.59	0.00998907		2004.6	0.00956853		2534.6	-0.00902427
414.79	0.057926		944.8	0.00773174		1474.79	0.00883834		2004.8	0.00960088		2534.8	-0.00927139
414.99	0.05763321		945	0.00756304		1474.99	0.00843127		2005	0.01019287		2535	-0.0099563
415.19	0.05741172		945.2	0.00827731		1475.19	0.00892846		2005.2	0.01010233		2535.2	-0.0102496
415.39	0.0553137		945.4	0.00822023		1475.39	0.00865182		2005.4	0.01044761		2535.4	-0.00996266
415.59	0.05599434		945.6	0.00912047		1475.59	0.00910935		2005.6	0.01071534		2535.6	-0.01047166
415.79	0.0564382		945.8	0.00916316		1475.79	0.00943709		2005.8	0.01056635		2535.8	-0.01057877
415.99	0.05608851		946	0.00907639		1475.99	0.00876963		2006	0.01052195		2536	-0.0103246
416.19	0.05653416		946.2	0.00843967		1476.19	0.0082407		2006.2	0.01041814		2536.2	-0.01128036
416.39	0.05686227		946.4	0.00733736		1476.39	0.00781782		2006.4	0.00992855		2536.4	-0.01096958
416.59	0.05757804		946.6	0.00661289		1476.59	0.00801336		2006.6	0.00989167		2536.6	-0.01069512
416.79	0.05807492		946.8	0.00591681		1476.79	0.00848167		2006.8	0.01035639		2536.8	-0.01053126
416.99	0.05835861		947	0.0061015		1476.99	0.00863895		2007	0.01006534		2537	-0.0113041
417.19	0.05864731		947.2	0.00714369		1477.19	0.00908881		2007.2	0.01042001		2537.2	-0.01138702
417.39	0.0586612		947.4	0.00722314		1477.39	0.01015839		2007.4	0.00976655		2537.4	-0.0112531
417.59	0.05787048		947.6	0.00670519		1477.59	0.00977791		2007.6	0.00937517		2537.6	-0.01120704
417.79	0.05787466		947.8	0.0063493		1477.79	0.00984293		2007.8	0.00987853		2537.8	-0.01028273
417.99	0.05765722		948	0.00620726		1477.99	0.01092352		2008	0.00991887		2538	-0.00963386
418.19	0.05714643		948.2	0.00632035		1478.19	0.01194528		2008.2	0.00994243		2538.2	-0.00940628
418.39	0.05670498		948.4	0.00699423		1478.39	0.01141301		2008.4	0.0105123		2538.4	-0.009558
418.59	0.05636776		948.6	0.00706211		1478.59	0.01127933		2008.6	0.01069477		2538.6	-0.00907096
418.79	0.05550658		948.8	0.00758437		1478.79	0.01051003		2008.8	0.0107925		2538.8	-0.00950948
418.99	0.05607951		949	0.0077755		1478.99	0.01061465		2009	0.01134403		2539	-0.00966868
419.19	0.0553304		949.2	0.00777786		1479.19	0.01024748		2009.2	0.01147279		2539.2	-0.00921917
419.39	0.05527639		949.4	0.00851742		1479.39	0.00962319		2009.4	0.01209969		2539.4	-0.00790726
419.59	0.05653752		949.6	0.00797206		1479.59	0.00928079		2009.6	0.0118241		2539.6	-0.00811512
419.79	0.05630733		949.8	0.00780064		1479.79	0.00870726		2009.8	0.01256988		2539.8	-0.00895503
419.99	0.05646975		950	0.0069737		1479.99	0.00859677		2010	0.01226235		2540	-0.0086355
420.19	0.05745397		950.2	0.00674551		1480.19	0.00812989		2010.2	0.01303002		2540.2	-0.00854582
420.39	0.05776563		950.4	0.00680599		1480.39	0.00817577		2010.4	0.01359565		2540.4	-0.00829465
420.59	0.05838584		950.6	0.00767031		1480.59	0.00817142		2010.6	0.01390879		2540.6	-0.00886482
420.79	0.05873439		950.8	0.00760736		1480.79	0.00859616		2010.8	0.01402727		2540.8	-0.00875633
420.99	0.05862207		951	0.00876929		1480.99	0.00891036		2011	0.0141544		2541	-0.00950148
421.19	0.0573799		951.2	0.00843257		1481.19	0.00894585		2011.2	0.01380134		2541.2	-0.00931846
421.39	0.05674934		951.4	0.00763096		1481.39	0.00934271		2011.4	0.01299516		2541.4	-0.00949079
421.59	0.05542382		951.6	0.00702301		1481.59	0.0090851		2011.6	0.01251436		2541.6	-0.01005501
421.79	0.05537502		951.8	0.00705466		1481.79	0.00945828		2011.8	0.01210764		2541.8	-0.00956024
421.99	0.05508184		952	0.0080531		1481.99	0.01008433		2012	0.01181136		2542	-0.01061529
422.19	0.05465456		952.2	0.0085733		1482.19	0.00997998		2012.2	0.01178123		2542.2	-0.01116653
422.39	0.05391491		952.4	0.00855129		1482.39	0.00955566		2012.4	0.01129621		2542.4	-0.01130704
422.59	0.0533939		952.6	0.00829517		1482.59	0.00957417		2012.6	0.01125071		2542.6	-0.01086924
422.79	0.05324888		952.8	0.00874626		1482.79	0.00858456		2012.8	0.01135191		2542.8	-0.01152306
422.99	0.05306683		953	0.00936399		1482.99	0.00872445		2013	0.0114177		2543	-0.01081095
423.19	0.05315964		953.2	0.00835185		1483.19	0.00850762		2013.2	0.011413		2543.2	-0.01015443
423.39	0.05377771		953.4	0.00860794		1483.39	0.00823778		2013.4	0.01108136		2543.4	-0.00967659
423.59	0.05351176		953.6	0.00759633		1483.59	0.00826365		2013.6	0.01125964		2543.6	-0.01018678
423.79	0.0537177		953.8	0.00800585		1483.79	0.00886616		2013.8	0.01184717		2543.8	-0.01016218
423.99	0.0545599		954	0.00766767		1483.99	0.00923296		2014	0.0118429		2544	-0.01023456
424.19	0.05462344		954.2	0.00770191		1484.19	0.00924259		2014.2	0.01276688		2544.2	-0.01009554
424.39	0.05479384		954.4	0.00777234		1484.39	0.00976133		2014.4	0.01357081		2544.4	-0.00998858
424.59	0.0545697		954.6	0.00787222		1484.59	0.00931402		2014.6	0.01304514		2544.6	-0.01053332
424.79	0.05455692		954.8	0.00678744		1484.79	0.00955922		2014.8	0.0138622		2544.8	-0.01064738
424.99	0.05396449		955	0.00732236		1484.99	0.00957615		2015	0.01428039		2545	-0.01071697
425.19	0.05305107		955.2	0.0065372		1485.19	0.00972697		2015.2	0.01361235		2545.2	-0.01121935
425.39	0.05298526		955.4	0.00742267		1485.39	0.00975127		2015.4	0.01291316		2545.4	-0.01211279
425.59	0.0519331		955.6	0.00758159		1485.59	0.01010174		2015.6	0.01207477		2545.6	-0.01306216
425.79	0.05250228		955.8	0.00846854		1485.79	0.01036264		2015.8	0.01222524		2545.8	-0.01356315
425.99	0.05202067		956	0.0083714		1485.99	0.01073552		2016	0.0122775		2546	-0.01465153
426.19	0.0514839		956.2	0.00856764		1486.19	0.0102384		2016.2	0.01293986		2546.2	-0.01449343
426.39	0.0508643		956.4	0.0086064		1486.39	0.01012464		2016.4	0.01261154		2546.4	-0.01440833
426.59	0.05064759		956.6	0.00892406		1486.59	0.00969146		2016.6	0.01194063		2546.6	-0.01458407
426.79	0.05029046		956.8	0.0089568		1486.79	0.01004456		2016.8	0.01116191		2546.8	-0.01432016
426.99	0.05007453		957	0.00867443		1486.99	0.01045647		2017	0.01071406		2547	-0.01328141
427.19	0.05048298		957.2	0.00739245		1487.19	0.01019378		2017.2	0.0107342		2547.2	-0.01323848
427.39	0.05014092		957.4	0.00813555		1487.39	0.01003321		2017.4	0.01039327		2547.4	-0.01274629
427.59	0.05030742		957.6	0.00801442		1487.59	0.01013636		2017.6	0.01012584		2547.6	-0.01197988
427.79	0.05072766		957.8	0.00762812		1487.79	0.01007095		2017.8	0.01024845		2547.8	-0.01128077
427.99	0.05086297		958	0.00731259		1487.99	0.009718		2018	0.01036383		2548	-0.01170995
428.19	0.04988142		958.2	0.00613146		1488.19	0.00974981		2018.2	0.0104693		2548.2	-0.011442
428.39	0.04943296		958.4	0.00626291		1488.39	0.00954397		2018.4	0.01104673		2548.4	-0.01086234
428.59	0.049445		958.6	0.00594459		1488.59	0.00945154		2018.6	0.01059638		2548.6	-0.01230488
428.79	0.0501032		958.8	0.00577891		1488.79	0.00970115		2018.8	0.01119816		2548.8	-0.01147591
428.99	0.04934446		959	0.00672994		1488.99	0.00995858		2019	0.01116153		2549	-0.01070628
429.19	0.04988462		959.2	0.00602177		1489.19	0.01018335		2019.2	0.01028843		2549.2	-0.01115127
429.39	0.05014073		959.4	0.00674542		1489.39	0.01017949		2019.4	0.00965563		2549.4	-0.01128167
429.59	0.05079863		959.6	0.00698517		1489.59	0.0102898		2019.6	0.00971656		2549.6	-0.01100983
429.79	0.05106854		959.8	0.0071632		1489.79	0.01031648		2019.8	0.01004544		2549.8	-0.01112721
429.99	0.05048456		960	0.00735065		1489.99	0.00995267		2020	0.01007167		2550	-0.01101789
430.19	0.0500737		960.2	0.00763655		1490.19	0.00993272		2020.2	0.01125595		2550.2	-0.01115452
430.39	0.0500966		960.4	0.00728731		1490.39	0.01057657		2020.4	0.01164711		2550.4	-0.01099491
430.59	0.04963231		960.6	0.00688801		1490.59	0.0113486		2020.6	0.01063069		2550.6	-0.01050816
430.79	0.04849735		960.8	0.00709124		1490.79	0.01241356		2020.8	0.01064211		2550.8	-0.00989742
430.99	0.04893665		961	0.00739988		1490.99	0.01153609		2021	0.01039997		2551	-0.00971522
431.19	0.04888059		961.2	0.00701068		1491.19	0.01143404		2021.2	0.01029769		2551.2	-0.00938457
431.39	0.04922791		961.4	0.00694388		1491.39	0.01121091		2021.4	0.00969804		2551.4	-0.00852714
431.59	0.04986051		961.6	0.00625515		1491.59	0.01094719		2021.6	0.00934658		2551.6	-0.0082285
431.79	0.05042661		961.8	0.00605325		1491.79	0.01114536		2021.8	0.01029638		2551.8	-0.00789463
431.99	0.05075101		962	0.00570873		1491.99	0.01116768		2022	0.010826		2552	-0.00837336
432.19	0.05001405		962.2	0.00496951		1492.19	0.01105928		2022.2	0.01135735		2552.2	-0.00864458
432.39	0.05082244		962.4	0.00439625		1492.39	0.01183835		2022.4	0.0118059		2552.4	-0.00806279
432.59	0.0514882		962.6	0.00376451		1492.59	0.01241755		2022.6	0.01224057		2552.6	-0.00779453
432.79	0.05192819		962.8	0.00362401		1492.79	0.01267267		2022.8	0.01218222		2552.8	-0.00659384
432.99	0.05110584		963	0.00345632		1492.99	0.01236578		2023	0.01174596		2553	-0.00591096
433.19	0.05132438		963.2	0.00316604		1493.19	0.01214208		2023.2	0.0113295		2553.2	-0.00603799
433.39	0.05164775		963.4	0.00482799		1493.39	0.011953		2023.4	0.01102812		2553.4	-0.00572274
433.59	0.05112718		963.6	0.00560411		1493.59	0.01179402		2023.6	0.0115356		2553.6	-0.00670622
433.79	0.05038147		963.8	0.00599806		1493.79	0.01155373		2023.8	0.01168804		2553.8	-0.00700767
433.99	0.04997301		964	0.0071398		1493.99	0.01078285		2024	0.01166012		2554	-0.0070555
434.19	0.04949148		964.2	0.00726972		1494.19	0.0114918		2024.2	0.01191828		2554.2	-0.00727724
434.39	0.04874727		964.4	0.00780321		1494.39	0.01191675		2024.4	0.01150213		2554.4	-0.00784114
434.59	0.0478213		964.6	0.00808362		1494.59	0.01155648		2024.6	0.01089495		2554.6	-0.00757146
434.79	0.04751365		964.8	0.00875168		1494.79	0.01075982		2024.8	0.01001956		2554.8	-0.00864863
434.99	0.04802467		965	0.00885038		1494.99	0.00966455		2025	0.01022457		2555	-0.00898003
435.19	0.04802651		965.2	0.00919769		1495.19	0.00941388		2025.2	0.01013535		2555.2	-0.00850487
435.39	0.04824887		965.4	0.0087409		1495.39	0.00828792		2025.4	0.00974539		2555.4	-0.0091615
435.59	0.04866614		965.6	0.00819597		1495.59	0.00856393		2025.6	0.0099729		2555.6	-0.00959303
435.79	0.0494258		965.8	0.00799359		1495.79	0.00835033		2025.8	0.01035376		2555.8	-0.00907395
435.99	0.04944008		966	0.00699001		1495.99	0.00814114		2026	0.01026627		2556	-0.00886813
436.19	0.04948522		966.2	0.00619244		1496.19	0.00830821		2026.2	0.00935633		2556.2	-0.00972068
436.39	0.05031949		966.4	0.00564662		1496.39	0.00904958		2026.4	0.00946266		2556.4	-0.00937005
436.59	0.05008734		966.6	0.00540705		1496.59	0.00886221		2026.6	0.00933676		2556.6	-0.00857157
436.79	0.04984865		966.8	0.00547585		1496.79	0.009018		2026.8	0.00822297		2556.8	-0.00912379
436.99	0.0496459		967	0.00463047		1496.99	0.00909788		2027	0.00763179		2557	-0.00958107
437.19	0.04958091		967.2	0.00505106		1497.19	0.00957376		2027.2	0.00827922		2557.2	-0.01040859
437.39	0.05034626		967.4	0.0064225		1497.39	0.00966194		2027.4	0.00884063		2557.4	-0.01090533
437.59	0.04990986		967.6	0.00650129		1497.59	0.00988602		2027.6	0.00894013		2557.6	-0.01163114
437.79	0.05086381		967.8	0.00623055		1497.79	0.01016673		2027.8	0.00838756		2557.8	-0.01151255
437.99	0.05135634		968	0.00661377		1497.99	0.01076418		2028	0.00880992		2558	-0.01164693
438.19	0.05117863		968.2	0.00647782		1498.19	0.01127136		2028.2	0.00946432		2558.2	-0.01248871
438.39	0.05040098		968.4	0.00706558		1498.39	0.01054487		2028.4	0.00996399		2558.4	-0.01317523
438.59	0.04976259		968.6	0.00719418		1498.59	0.01017403		2028.6	0.01093519		2558.6	-0.01301198
438.79	0.04970749		968.8	0.00711844		1498.79	0.01039598		2028.8	0.01044921		2558.8	-0.01350983
438.99	0.04865244		969	0.00748687		1498.99	0.01057366		2029	0.01206765		2559	-0.0134784
439.19	0.04884036		969.2	0.00734046		1499.19	0.00981724		2029.2	0.01195015		2559.2	-0.01278846
439.39	0.04811171		969.4	0.00680356		1499.39	0.00972638		2029.4	0.0116046		2559.4	-0.01299928
439.59	0.04739484		969.6	0.00633751		1499.59	0.01003108		2029.6	0.01147772		2559.6	-0.01219947
439.79	0.04670661		969.8	0.00632873		1499.79	0.00957509		2029.8	0.01163426		2559.8	-0.01121575
439.99	0.04586849		970	0.00579312		1499.99	0.00957233		2030	0.01183475		2560	-0.01187938
440.19	0.04539337		970.2	0.00516909		1500.19	0.00869808		2030.2	0.01163671		2560.2	-0.01188407
440.39	0.04490046		970.4	0.00460043		1500.39	0.00901144		2030.4	0.01142276		2560.4	-0.01090187
440.59	0.04424838		970.6	0.00425574		1500.59	0.00895544		2030.6	0.01152341		2560.6	-0.01033408
440.79	0.0445066		970.8	0.00423436		1500.79	0.00906271		2030.8	0.01162455		2560.8	-0.01085114
440.99	0.04439211		971	0.00437005		1500.99	0.00934865		2031	0.01184378		2561	-0.01104257
441.19	0.04406272		971.2	0.00480847		1501.19	0.00950095		2031.2	0.01317834		2561.2	-0.01074116
441.39	0.0443556		971.4	0.0047084		1501.39	0.00953956		2031.4	0.01377452		2561.4	-0.01075927
441.59	0.04432629		971.6	0.00440447		1501.59	0.00969786		2031.6	0.01395727		2561.6	-0.01080877
441.79	0.04565878		971.8	0.00442725		1501.79	0.0099982		2031.8	0.01412666		2561.8	-0.01112119
441.99	0.0461602		972	0.00547665		1501.99	0.00999019		2032	0.01469131		2562	-0.0108956
442.19	0.04587959		972.2	0.00649989		1502.19	0.00978674		2032.2	0.01454634		2562.2	-0.0111848
442.39	0.04569747		972.4	0.00717613		1502.39	0.01006915		2032.4	0.01446184		2562.4	-0.0103683
442.59	0.04555834		972.6	0.00779474		1502.59	0.0107777		2032.6	0.01403267		2562.6	-0.01113872
442.79	0.04636306		972.8	0.00779356		1502.79	0.01130692		2032.8	0.0132667		2562.8	-0.0112859
442.99	0.04635006		973	0.0082458		1502.99	0.01154611		2033	0.01298392		2563	-0.01137828
443.19	0.0463289		973.2	0.00838417		1503.19	0.01110348		2033.2	0.0120611		2563.2	-0.0110003
443.39	0.04544424		973.4	0.00884871		1503.39	0.01139781		2033.4	0.01138315		2563.4	-0.01079307
443.59	0.04510488		973.6	0.0091592		1503.59	0.01117266		2033.6	0.01124211		2563.6	-0.01058182
443.79	0.04430593		973.8	0.00853067		1503.79	0.0112293		2033.8	0.01100001		2563.8	-0.00971243
443.99	0.04432069		974	0.00813052		1503.99	0.01065953		2034	0.0107598		2564	-0.00976233
444.19	0.04432535		974.2	0.00720939		1504.19	0.00973621		2034.2	0.01011432		2564.2	-0.00886894
444.39	0.04447546		974.4	0.00710692		1504.39	0.01100229		2034.4	0.01012856		2564.4	-0.00869019
444.59	0.04395512		974.6	0.00781992		1504.59	0.01072331		2034.6	0.01123422		2564.6	-0.00800186
444.79	0.04411716		974.8	0.00754772		1504.79	0.01069862		2034.8	0.01149852		2564.8	-0.00742251
444.99	0.04381467		975	0.00685074		1504.99	0.01133879		2035	0.01153338		2565	-0.00750258
445.19	0.04394995		975.2	0.00583886		1505.19	0.01172827		2035.2	0.01205231		2565.2	-0.00759138
445.39	0.04432956		975.4	0.00594323		1505.39	0.01209541		2035.4	0.0126988		2565.4	-0.00764841
445.59	0.04575091		975.6	0.00648115		1505.59	0.01168667		2035.6	0.01295901		2565.6	-0.00847196
445.79	0.04635931		975.8	0.00711712		1505.79	0.01160109		2035.8	0.01346705		2565.8	-0.00881612
445.99	0.04638126		976	0.00774219		1505.99	0.01194698		2036	0.01303644		2566	-0.0089832
446.19	0.04578393		976.2	0.00830728		1506.19	0.0124361		2036.2	0.01284821		2566.2	-0.00921494
446.39	0.04613512		976.4	0.00811184		1506.39	0.01211422		2036.4	0.01236844		2566.4	-0.00926134
446.59	0.04601197		976.6	0.00806611		1506.59	0.01202795		2036.6	0.01166764		2566.6	-0.01048795
446.79	0.04587886		976.8	0.00762928		1506.79	0.0128386		2036.8	0.01140743		2566.8	-0.01093282
446.99	0.0456127		977	0.00762515		1506.99	0.012767		2037	0.01034697		2567	-0.0118355
447.19	0.04480569		977.2	0.0071068		1507.19	0.01265631		2037.2	0.0104627		2567.2	-0.01208794
447.39	0.04437612		977.4	0.0071862		1507.39	0.01267229		2037.4	0.00948572		2567.4	-0.01173674
447.59	0.04435325		977.6	0.0076538		1507.59	0.01208223		2037.6	0.00891867		2567.6	-0.01213633
447.79	0.04423905		977.8	0.00686914		1507.79	0.01175506		2037.8	0.00925411		2567.8	-0.01189695
447.99	0.04509414		978	0.00637125		1507.99	0.01108504		2038	0.00946676		2568	-0.01171208
448.19	0.04490737		978.2	0.00620405		1508.19	0.01079858		2038.2	0.0099676		2568.2	-0.01140136
448.39	0.0441706		978.4	0.00566029		1508.39	0.01187207		2038.4	0.01123973		2568.4	-0.01055022
448.59	0.04365233		978.6	0.00570085		1508.59	0.01142349		2038.6	0.01139045		2568.6	-0.00939982
448.79	0.04431356		978.8	0.00533162		1508.79	0.01229886		2038.8	0.0115054		2568.8	-0.00893963
448.99	0.04372033		979	0.00516075		1508.99	0.01303047		2039	0.0116747		2569	-0.00914219
449.19	0.04414578		979.2	0.00570531		1509.19	0.01285521		2039.2	0.01187048		2569.2	-0.00886584
449.39	0.04410128		979.4	0.00681724		1509.39	0.01305469		2039.4	0.01293991		2569.4	-0.00902149
449.59	0.04447137		979.6	0.00769178		1509.59	0.01323737		2039.6	0.01248397		2569.6	-0.01022767
449.79	0.04415001		979.8	0.00849722		1509.79	0.01345611		2039.8	0.01280756		2569.8	-0.00961317
449.99	0.04446443		980	0.00942281		1509.99	0.01467736		2040	0.01158155		2570	-0.00950495
450.19	0.04499085		980.2	0.00891465		1510.19	0.0143941		2040.2	0.01150636		2570.2	-0.00926556
450.39	0.04524996		980.4	0.00877888		1510.39	0.01435403		2040.4	0.01073789		2570.4	-0.00889188
450.59	0.04509648		980.6	0.00932665		1510.59	0.01545216		2040.6	0.01032877		2570.6	-0.00893472
450.79	0.04495722		980.8	0.00934117		1510.79	0.01487665		2040.8	0.0096952		2570.8	-0.00951262
450.99	0.04574309		981	0.00947129		1510.99	0.01442526		2041	0.0089771		2571	-0.00998385
451.19	0.0453671		981.2	0.00931745		1511.19	0.01392999		2041.2	0.009327		2571.2	-0.01041902
451.39	0.04505166		981.4	0.00983578		1511.39	0.01323256		2041.4	0.00940091		2571.4	-0.0121632
451.59	0.04487885		981.6	0.00951791		1511.59	0.0123333		2041.6	0.01018772		2571.6	-0.01294621
451.79	0.0439208		981.8	0.00878752		1511.79	0.01119782		2041.8	0.01144467		2571.8	-0.01372696
451.99	0.04324641		982	0.00773904		1511.99	0.01068068		2042	0.01181296		2572	-0.01377748
452.19	0.04237027		982.2	0.00744164		1512.19	0.01028813		2042.2	0.01233192		2572.2	-0.01439515
452.39	0.04188204		982.4	0.00711541		1512.39	0.01090522		2042.4	0.01358564		2572.4	-0.01397753
452.59	0.04165684		982.6	0.00775807		1512.59	0.01026547		2042.6	0.01358544		2572.6	-0.01399591
452.79	0.041152		982.8	0.00755879		1512.79	0.01048831		2042.8	0.01460834		2572.8	-0.01374709
452.99	0.04019164		983	0.00735947		1512.99	0.00992356		2043	0.01509791		2573	-0.01370551
453.19	0.04041553		983.2	0.00762753		1513.19	0.01027752		2043.2	0.01503221		2573.2	-0.01336045
453.39	0.04057412		983.4	0.00781799		1513.39	0.01086348		2043.4	0.01481431		2573.4	-0.01361073
453.59	0.04021226		983.6	0.00688678		1513.59	0.01147514		2043.6	0.01447004		2573.6	-0.01284833
453.79	0.04048286		983.8	0.00564747		1513.79	0.0113475		2043.8	0.01482119		2573.8	-0.01170295
453.99	0.04121231		984	0.00501932		1513.99	0.01133543		2044	0.01408697		2574	-0.01074427
454.19	0.04165593		984.2	0.00427498		1514.19	0.01122046		2044.2	0.01403758		2574.2	-0.00891107
454.39	0.04051334		984.4	0.00441484		1514.39	0.01201092		2044.4	0.01281718		2574.4	-0.00827546
454.59	0.0405412		984.6	0.00434596		1514.59	0.01140598		2044.6	0.01200567		2574.6	-0.00770506
454.79	0.04088542		984.8	0.00425592		1514.79	0.0100098		2044.8	0.01144795		2574.8	-0.00816946
454.99	0.04063257		985	0.00460416		1514.99	0.00884482		2045	0.01031071		2575	-0.00825013
455.19	0.03975944		985.2	0.00513133		1515.19	0.00832704		2045.2	0.01036149		2575.2	-0.00896247
455.39	0.03977621		985.4	0.00495033		1515.39	0.00794628		2045.4	0.01026809		2575.4	-0.00968364
455.59	0.03977304		985.6	0.00584612		1515.59	0.00635637		2045.6	0.00995012		2575.6	-0.00966536
455.79	0.03954641		985.8	0.00633231		1515.79	0.00592766		2045.8	0.01011883		2575.8	-0.01086485
455.99	0.0400084		986	0.00612238		1515.99	0.00682565		2046	0.01014282		2576	-0.01094427
456.19	0.04041069		986.2	0.0074019		1516.19	0.00690123		2046.2	0.01062073		2576.2	-0.01125247
456.39	0.04106866		986.4	0.00848546		1516.39	0.0070102		2046.4	0.01124379		2576.4	-0.01189277
456.59	0.04099444		986.6	0.00888553		1516.59	0.00699065		2046.6	0.0115729		2576.6	-0.01205106
456.79	0.04179077		986.8	0.00918564		1516.79	0.0078749		2046.8	0.01265091		2576.8	-0.01229065
456.99	0.04322266		987	0.01036448		1516.99	0.00878961		2047	0.01277418		2577	-0.01270621
457.19	0.04414851		987.2	0.01040563		1517.19	0.0101894		2047.2	0.01258192		2577.2	-0.01325322
457.39	0.04396736		987.4	0.00966547		1517.39	0.01149631		2047.4	0.01337705		2577.4	-0.0140838
457.59	0.04283234		987.6	0.00818707		1517.59	0.01201891		2047.6	0.01475734		2577.6	-0.01415673
457.79	0.04319809		987.8	0.00821442		1517.79	0.01227324		2047.8	0.01572503		2577.8	-0.0136164
457.99	0.04334119		988	0.00820923		1517.99	0.01234556		2048	0.01598594		2578	-0.01283876
458.19	0.04247379		988.2	0.00805968		1518.19	0.01275367		2048.2	0.01628812		2578.2	-0.01253406
458.39	0.04214128		988.4	0.00775795		1518.39	0.01283789		2048.4	0.01545652		2578.4	-0.01284943
458.59	0.04236855		988.6	0.00786355		1518.59	0.01176617		2048.6	0.01566064		2578.6	-0.01220629
458.79	0.04257107		988.8	0.00795569		1518.79	0.01095175		2048.8	0.01449359		2578.8	-0.01175045
458.99	0.04187584		989	0.00739948		1518.99	0.00979248		2049	0.01322925		2579	-0.01112835
459.19	0.04274854		989.2	0.00770086		1519.19	0.0100445		2049.2	0.01378648		2579.2	-0.01084068
459.39	0.0430531		989.4	0.00746963		1519.39	0.00939201		2049.4	0.01321766		2579.4	-0.01007195
459.59	0.04380805		989.6	0.00784959		1519.59	0.00849181		2049.6	0.01308563		2579.6	-0.01019694
459.79	0.04307557		989.8	0.00695763		1519.79	0.0092995		2049.8	0.01327368		2579.8	-0.01042428
459.99	0.04220692		990	0.00633627		1519.99	0.00925305		2050	0.0134202		2580	-0.01008269
460.19	0.04205879		990.2	0.00631006		1520.19	0.00867629		2050.2	0.01328272		2580.2	-0.00971877
460.39	0.04173216		990.4	0.00595892		1520.39	0.00886335		2050.4	0.01285458		2580.4	-0.01051168
460.59	0.04216923		990.6	0.00524936		1520.59	0.01018597		2050.6	0.01291001		2580.6	-0.00967956
460.79	0.04225448		990.8	0.0056113		1520.79	0.01133004		2050.8	0.01242289		2580.8	-0.00924822
460.99	0.04197623		991	0.00545696		1520.99	0.01196217		2051	0.01216529		2581	-0.0090559
461.19	0.04121066		991.2	0.00417995		1521.19	0.01279207		2051.2	0.01161967		2581.2	-0.01009835
461.39	0.04045924		991.4	0.00364268		1521.39	0.01291869		2051.4	0.01280641		2581.4	-0.01063426
461.59	0.04020403		991.6	0.00345506		1521.59	0.01195514		2051.6	0.01280623		2581.6	-0.01097791
461.79	0.04018684		991.8	0.00420935		1521.79	0.01249308		2051.8	0.01327778		2581.8	-0.01025542
461.99	0.03991271		992	0.00385903		1521.99	0.01233318		2052	0.01317403		2582	-0.0103941
462.19	0.03925309		992.2	0.00385336		1522.19	0.01232725		2052.2	0.01340303		2582.2	-0.01048971
462.39	0.03926471		992.4	0.00504563		1522.39	0.01295886		2052.4	0.01331057		2582.4	-0.0101174
462.59	0.03883662		992.6	0.00524077		1522.59	0.01319622		2052.6	0.01309434		2582.6	-0.01030845
462.79	0.03862245		992.8	0.00552398		1522.79	0.01386243		2052.8	0.01215435		2582.8	-0.01046895
462.99	0.03865781		993	0.00596149		1522.99	0.01371629		2053	0.01251411		2583	-0.01031864
463.19	0.03931208		993.2	0.00703106		1523.19	0.0131625		2053.2	0.01326367		2583.2	-0.00953983
463.39	0.03996872		993.4	0.00704043		1523.39	0.01358326		2053.4	0.01274244		2583.4	-0.00966795
463.59	0.0398751		993.6	0.00742718		1523.59	0.01318758		2053.6	0.01322405		2583.6	-0.01005342
463.79	0.03897632		993.8	0.0073221		1523.79	0.01351469		2053.8	0.01366201		2583.8	-0.01039061
463.99	0.03849771		994	0.00743429		1523.99	0.01361161		2054	0.01377		2584	-0.009892
464.19	0.03855661		994.2	0.00778101		1524.19	0.01419335		2054.2	0.01326932		2584.2	-0.00937675
464.39	0.03856645		994.4	0.00733007		1524.39	0.01457176		2054.4	0.01289334		2584.4	-0.00934606
464.59	0.03874045		994.6	0.00675138		1524.59	0.01419409		2054.6	0.01253481		2584.6	-0.00814598
464.79	0.03775866		994.8	0.00696874		1524.79	0.01392398		2054.8	0.01147435		2584.8	-0.00842189
464.99	0.03892064		995	0.00619305		1524.99	0.01358293		2055	0.01113337		2585	-0.00874679
465.19	0.03904373		995.2	0.00608565		1525.19	0.01296051		2055.2	0.01034907		2585.2	-0.00938215
465.39	0.03994708		995.4	0.00622444		1525.39	0.01209483		2055.4	0.01054904		2585.4	-0.00994732
465.59	0.04038644		995.6	0.00636383		1525.59	0.0112574		2055.6	0.01042686		2585.6	-0.01001795
465.79	0.03996668		995.8	0.00684811		1525.79	0.01137595		2055.8	0.0109189		2585.8	-0.00923878
465.99	0.04019878		996	0.0069373		1525.99	0.01039298		2056	0.01081778		2586	-0.0097337
466.19	0.03976286		996.2	0.00675036		1526.19	0.01054677		2056.2	0.01090112		2586.2	-0.00984117
466.39	0.03993818		996.4	0.00734424		1526.39	0.009811		2056.4	0.01034402		2586.4	-0.0104055
466.59	0.04032408		996.6	0.00670443		1526.59	0.00927711		2056.6	0.0098189		2586.6	-0.01038208
466.79	0.0398681		996.8	0.0066763		1526.79	0.0092162		2056.8	0.00942622		2586.8	-0.01001254
466.99	0.04041719		997	0.00608228		1526.99	0.00830621		2057	0.00976082		2587	-0.01030078
467.19	0.04078379		997.2	0.00566937		1527.19	0.00818851		2057.2	0.01057608		2587.2	-0.01094591
467.39	0.04094397		997.4	0.00483495		1527.39	0.00879046		2057.4	0.01035227		2587.4	-0.01139749
467.59	0.04039606		997.6	0.00543435		1527.59	0.0087785		2057.6	0.01110106		2587.6	-0.01089055
467.79	0.04035686		997.8	0.00470411		1527.79	0.00980144		2057.8	0.01134013		2587.8	-0.01037588
467.99	0.03970507		998	0.00443073		1527.99	0.0100403		2058	0.0117044		2588	-0.01009671
468.19	0.03908657		998.2	0.00310941		1528.19	0.01069756		2058.2	0.01232954		2588.2	-0.00894091
468.39	0.03840461		998.4	0.00223475		1528.39	0.01052133		2058.4	0.01260272		2588.4	-0.00863946
468.59	0.03816555		998.6	0.00219596		1528.59	0.01072022		2058.6	0.01234485		2588.6	-0.00828441
468.79	0.03774212		998.8	0.0026962		1528.79	0.01146319		2058.8	0.01173579		2588.8	-0.00920156
468.99	0.03773001		999	0.00247346		1528.99	0.01244794		2059	0.01161284		2589	-0.00949127
469.19	0.03734977		999.2	0.00349903		1529.19	0.01320493		2059.2	0.01155547		2589.2	-0.01017742
469.39	0.03821566		999.4	0.00455814		1529.39	0.01338532		2059.4	0.01148856		2589.4	-0.01117359
469.59	0.03810061		999.6	0.00572723		1529.59	0.01388954		2059.6	0.01212048		2589.6	-0.01127155
469.79	0.0379515		999.8	0.00694127		1529.79	0.01467263		2059.8	0.01227075		2589.8	-0.01120008
469.99	0.03838926		1000	0.0062707		1529.99	0.01487213		2060	0.01229863		2590	-0.01231944
470.19	0.03872529		1000.2	0.00546376		1530.19	0.01477653		2060.2	0.01273958		2590.2	-0.01217676
470.39	0.03959948		1000.4	0.00620615		1530.39	0.01368715		2060.4	0.0121558		2590.4	-0.01245455
470.59	0.04031737		1000.6	0.00584702		1530.59	0.01383481		2060.6	0.01177886		2590.6	-0.01215263
470.79	0.03980456		1000.8	0.00615367		1530.79	0.01422601		2060.8	0.01192588		2590.8	-0.01294488
470.99	0.0408229		1001	0.00616629		1530.99	0.01373002		2061	0.01281112		2591	-0.01294387
471.19	0.04011182		1001.2	0.00660071		1531.19	0.01343355		2061.2	0.01335231		2591.2	-0.01260701
471.39	0.0399372		1001.4	0.00716741		1531.39	0.01369651		2061.4	0.01341406		2591.4	-0.01237621
471.59	0.03959628		1001.6	0.00749931		1531.59	0.01340917		2061.6	0.01409308		2591.6	-0.01174946
471.79	0.03891867		1001.8	0.00705953		1531.79	0.01289145		2061.8	0.01468301		2591.8	-0.01185403
471.99	0.03817146		1002	0.00737177		1531.99	0.01196639		2062	0.0155834		2592	-0.01109099
472.19	0.03807877		1002.2	0.00710518		1532.19	0.01263236		2062.2	0.0156054		2592.2	-0.00936535
472.39	0.03775248		1002.4	0.00778291		1532.39	0.0118364		2062.4	0.01486662		2592.4	-0.00905359
472.59	0.03854588		1002.6	0.00809571		1532.59	0.01184799		2062.6	0.01460924		2592.6	-0.00887936
472.79	0.03849424		1002.8	0.00877805		1532.79	0.01175797		2062.8	0.0142456		2592.8	-0.00968584
472.99	0.0388895		1003	0.00834585		1532.99	0.01298192		2063	0.01409235		2593	-0.01065321
473.19	0.03969731		1003.2	0.0094842		1533.19	0.0127957		2063.2	0.01430809		2593.2	-0.01077619
473.39	0.03947122		1003.4	0.00987767		1533.39	0.01237849		2063.4	0.0143825		2593.4	-0.01188473
473.59	0.03979896		1003.6	0.00969992		1533.59	0.01264377		2063.6	0.01453541		2593.6	-0.01136097
473.79	0.04016656		1003.8	0.00907636		1533.79	0.01230568		2063.8	0.01460803		2593.8	-0.01162806
473.99	0.04054856		1004	0.00790661		1533.99	0.01172519		2064	0.01400237		2594	-0.01252625
474.19	0.04101603		1004.2	0.00790359		1534.19	0.0110901		2064.2	0.01420765		2594.2	-0.01215873
474.39	0.04163925		1004.4	0.00853745		1534.39	0.01089706		2064.4	0.01306728		2594.4	-0.01228931
474.59	0.04196027		1004.6	0.00730212		1534.59	0.01091624		2064.6	0.01287391		2594.6	-0.01248291
474.79	0.04149378		1004.8	0.00769873		1534.79	0.01046327		2064.8	0.01280589		2594.8	-0.01276194
474.99	0.0417038		1005	0.00724583		1534.99	0.00962036		2065	0.01199163		2595	-0.0128305
475.19	0.04042538		1005.2	0.0077018		1535.19	0.00980292		2065.2	0.01118501		2595.2	-0.01384888
475.39	0.04020745		1005.4	0.00759685		1535.39	0.01058574		2065.4	0.01114982		2595.4	-0.01433264
475.59	0.03932893		1005.6	0.00735417		1535.59	0.01038037		2065.6	0.01073464		2595.6	-0.01466798
475.79	0.03943327		1005.8	0.00667603		1535.79	0.01054504		2065.8	0.01067734		2595.8	-0.01472971
475.99	0.03955579		1006	0.00668807		1535.99	0.01089498		2066	0.01039506		2596	-0.01342224
476.19	0.04038271		1006.2	0.0065651		1536.19	0.0113546		2066.2	0.00986573		2596.2	-0.01304908
476.39	0.04038071		1006.4	0.00630361		1536.39	0.01085884		2066.4	0.00965289		2596.4	-0.01279543
476.59	0.04122537		1006.6	0.00633099		1536.59	0.01159699		2066.6	0.00971009		2596.6	-0.013683
476.79	0.04113068		1006.8	0.00635382		1536.79	0.01198942		2066.8	0.01038118		2596.8	-0.01357299
476.99	0.04150878		1007	0.00540721		1536.99	0.01181515		2067	0.01094465		2597	-0.01336093
477.19	0.04100375		1007.2	0.00528476		1537.19	0.01136934		2067.2	0.01153471		2597.2	-0.0122885
477.39	0.0414664		1007.4	0.00476815		1537.39	0.01139132		2067.4	0.0119356		2597.4	-0.01210429
477.59	0.04216443		1007.6	0.00459546		1537.59	0.01137085		2067.6	0.01200156		2597.6	-0.01074938
477.79	0.04206894		1007.8	0.00429278		1537.79	0.01109148		2067.8	0.01315103		2597.8	-0.01145521
477.99	0.04229479		1008	0.0050014		1537.99	0.01132612		2068	0.01386362		2598	-0.01085514
478.19	0.04230021		1008.2	0.00589083		1538.19	0.01149911		2068.2	0.01422065		2598.2	-0.01066316
478.39	0.04277299		1008.4	0.00617755		1538.39	0.01148122		2068.4	0.01374379		2598.4	-0.01045922
478.59	0.04159605		1008.6	0.00625434		1538.59	0.01103102		2068.6	0.01331291		2598.6	-0.01058163
478.79	0.04103003		1008.8	0.00708271		1538.79	0.01078807		2068.8	0.0127032		2598.8	-0.01107968
478.99	0.03987844		1009	0.00739126		1538.99	0.01131288		2069	0.01182766		2599	-0.01191192
479.19	0.03862891		1009.2	0.00783465		1539.19	0.01206265		2069.2	0.01187458		2599.2	-0.01239346
479.39	0.03723415		1009.4	0.00778599		1539.39	0.01208752		2069.4	0.01209273		2599.4	-0.01223273
479.59	0.03720017		1009.6	0.00725994		1539.59	0.01240778		2069.6	0.01184759		2599.6	-0.01329278
479.79	0.03737746		1009.8	0.00676049		1539.79	0.01292113		2069.8	0.01272985		2599.8	-0.01287099
479.99	0.03662076		1010	0.0068099		1539.99	0.01243122		2070	0.0122606		2600	-0.01335346
480.19	0.03661994		1010.2	0.00644182		1540.19	0.01267187		2070.2	0.01180096		2600.2	-0.01389731
480.39	0.03557143		1010.4	0.00560668		1540.39	0.01298819		2070.4	0.01134314		2600.4	-0.01382152
480.59	0.03529082		1010.6	0.00496951		1540.59	0.01279848		2070.6	0.01111738		2600.6	-0.01446914
480.79	0.0351055		1010.8	0.00422597		1540.79	0.01184089		2070.8	0.01151464		2600.8	-0.01407609
480.99	0.03522957		1011	0.00332805		1540.99	0.01156396		2071	0.01073178		2601	-0.01385675
481.19	0.03488073		1011.2	0.00362024		1541.19	0.01198155		2071.2	0.0105805		2601.2	-0.01358064
481.39	0.03512508		1011.4	0.00347476		1541.39	0.01161783		2071.4	0.01016543		2601.4	-0.01404502
481.59	0.03515689		1011.6	0.00351332		1541.59	0.01173475		2071.6	0.01015732		2601.6	-0.01373523
481.79	0.03554237		1011.8	0.00319703		1541.79	0.01181853		2071.8	0.01026319		2601.8	-0.01399188
481.99	0.03604669		1012	0.00375161		1541.99	0.01159776		2072	0.00899295		2602	-0.01308035
482.19	0.03571656		1012.2	0.00416965		1542.19	0.01152218		2072.2	0.00811608		2602.2	-0.01348875
482.39	0.03567771		1012.4	0.00446396		1542.39	0.0114167		2072.4	0.00755034		2602.4	-0.01284039
482.59	0.03502864		1012.6	0.00484212		1542.59	0.01172485		2072.6	0.00724212		2602.6	-0.01270108
482.79	0.03546868		1012.8	0.00496587		1542.79	0.01216444		2072.8	0.00749604		2602.8	-0.01297541
482.99	0.03446416		1013	0.00508705		1542.99	0.01258602		2073	0.00765077		2603	-0.01336294
483.19	0.03581034		1013.2	0.00510593		1543.19	0.01237133		2073.2	0.00803413		2603.2	-0.01290972
483.39	0.03704229		1013.4	0.00511924		1543.39	0.01207699		2073.4	0.00855318		2603.4	-0.01191507
483.59	0.03784905		1013.6	0.0048014		1543.59	0.01261531		2073.6	0.00923988		2603.6	-0.01169837
483.79	0.03852129		1013.8	0.00554087		1543.79	0.01272516		2073.8	0.00977248		2603.8	-0.01105849
483.99	0.03873584		1014	0.00480987		1543.99	0.01219027		2074	0.00968912		2604	-0.01114408
484.19	0.03996966		1014.2	0.00443463		1544.19	0.01250252		2074.2	0.01055362		2604.2	-0.01031743
484.39	0.03988458		1014.4	0.00374895		1544.39	0.01241293		2074.4	0.01017305		2604.4	-0.00969435
484.59	0.03997174		1014.6	0.00357933		1544.59	0.01239662		2074.6	0.01031893		2604.6	-0.01046976
484.79	0.03933422		1014.8	0.0039111		1544.79	0.01222465		2074.8	0.01005802		2604.8	-0.01124781
484.99	0.03911966		1015	0.00366315		1544.99	0.013037		2075	0.01057765		2605	-0.01188038
485.19	0.03850689		1015.2	0.00424592		1545.19	0.01269838		2075.2	0.01086543		2605.2	-0.01233147
485.39	0.03770683		1015.4	0.00380162		1545.39	0.01210399		2075.4	0.01051016		2605.4	-0.01298856
485.59	0.03796059		1015.6	0.00415285		1545.59	0.01230113		2075.6	0.01093459		2605.6	-0.01374442
485.79	0.03680301		1015.8	0.00397636		1545.79	0.01228581		2075.8	0.01091197		2605.8	-0.01405614
485.99	0.0360442		1016	0.00443408		1545.99	0.01159876		2076	0.01075445		2606	-0.01424818
486.19	0.03542012		1016.2	0.00563972		1546.19	0.01204557		2076.2	0.01109463		2606.2	-0.0143425
486.39	0.03494114		1016.4	0.00634262		1546.39	0.01194322		2076.4	0.0111456		2606.4	-0.01446501
486.59	0.03464861		1016.6	0.00643735		1546.59	0.01218282		2076.6	0.01133061		2606.6	-0.01515629
486.79	0.03436147		1016.8	0.00694239		1546.79	0.01215337		2076.8	0.01089026		2606.8	-0.01488759
486.99	0.03413705		1017	0.00696853		1546.99	0.01190098		2077	0.011388		2607	-0.01478531
487.19	0.03504369		1017.2	0.0069075		1547.19	0.01175149		2077.2	0.01128593		2607.2	-0.01398005
487.39	0.03513279		1017.4	0.00765801		1547.39	0.01084334		2077.4	0.01203376		2607.4	-0.01266776
487.59	0.0349934		1017.6	0.00810362		1547.59	0.01020521		2077.6	0.01204969		2607.6	-0.01209545
487.79	0.03562019		1017.8	0.00879791		1547.79	0.01035419		2077.8	0.01202704		2607.8	-0.0116641
487.99	0.03672429		1018	0.00813562		1547.99	0.00980073		2078	0.01305361		2608	-0.01036697
488.19	0.03768575		1018.2	0.00850058		1548.19	0.00972439		2078.2	0.01298443		2608.2	-0.00942807
488.39	0.03839116		1018.4	0.00835249		1548.39	0.01019586		2078.4	0.0116853		2608.4	-0.00891927
488.59	0.0390589		1018.6	0.0084278		1548.59	0.01060909		2078.6	0.01213479		2608.6	-0.00940162
488.79	0.0396829		1018.8	0.00812916		1548.79	0.01014147		2078.8	0.01201509		2608.8	-0.00943304
488.99	0.04005735		1019	0.00782731		1548.99	0.0100787		2079	0.01290854		2609	-0.0091727
489.19	0.04000043		1019.2	0.00793796		1549.19	0.00956237		2079.2	0.01185398		2609.2	-0.00923703
489.39	0.04004684		1019.4	0.00685503		1549.39	0.00910481		2079.4	0.01163646		2609.4	-0.00931766
489.59	0.04070087		1019.6	0.00748244		1549.59	0.00873419		2079.6	0.0125479		2609.6	-0.01028351
489.79	0.03952444		1019.8	0.00777665		1549.79	0.00858111		2079.8	0.01298922		2609.8	-0.01048899
489.99	0.03930383		1020	0.00840754		1549.99	0.00867542		2080	0.01217076		2610	-0.0106566
490.19	0.03917412		1020.2	0.00804888		1550.19	0.00868554		2080.2	0.01159953		2610.2	-0.01156035
490.39	0.037885		1020.4	0.00781547		1550.39	0.00840799		2080.4	0.01176389		2610.4	-0.01184919
490.59	0.03747882		1020.6	0.00711511		1550.59	0.00861641		2080.6	0.01178037		2610.6	-0.01169887
490.79	0.03640351		1020.8	0.00644597		1550.79	0.00945678		2080.8	0.0116452		2610.8	-0.01102804
490.99	0.03527629		1021	0.00606027		1550.99	0.00962965		2081	0.01206479		2611	-0.0117937
491.19	0.03429845		1021.2	0.00652769		1551.19	0.0098995		2081.2	0.01179398		2611.2	-0.0113058
491.39	0.03367234		1021.4	0.00708014		1551.39	0.0094227		2081.4	0.01222341		2611.4	-0.01078626
491.59	0.03334551		1021.6	0.00782788		1551.59	0.01037937		2081.6	0.01140931		2611.6	-0.01106131
491.79	0.03271756		1021.8	0.0077561		1551.79	0.01093428		2081.8	0.01079278		2611.8	-0.01136276
491.99	0.0329395		1022	0.00741449		1551.99	0.0107805		2082	0.01114911		2612	-0.01057172
492.19	0.03313854		1022.2	0.00778212		1552.19	0.01146059		2082.2	0.01063201		2612.2	-0.01096095
492.39	0.03410164		1022.4	0.00727601		1552.39	0.01234718		2082.4	0.01023604		2612.4	-0.01055295
492.59	0.03351587		1022.6	0.00712209		1552.59	0.01227309		2082.6	0.01073231		2612.6	-0.01128048
492.79	0.03326735		1022.8	0.00693519		1552.79	0.01230321		2082.8	0.01099608		2612.8	-0.01084352
492.99	0.03331737		1023	0.00663108		1552.99	0.01189839		2083	0.01119307		2613	-0.01050291
493.19	0.03449883		1023.2	0.00552524		1553.19	0.01177619		2083.2	0.01105004		2613.2	-0.01033368
493.39	0.03541914		1023.4	0.00528439		1553.39	0.01049709		2083.4	0.0122786		2613.4	-0.01044356
493.59	0.03582659		1023.6	0.00616041		1553.59	0.00980947		2083.6	0.01300154		2613.6	-0.01129235
493.79	0.03486228		1023.8	0.00672059		1553.79	0.00942501		2083.8	0.01293766		2613.8	-0.01110561
493.99	0.03538303		1024	0.00638357		1553.99	0.00941213		2084	0.01258426		2614	-0.01148376
494.19	0.03600306		1024.2	0.00532696		1554.19	0.00833		2084.2	0.01300908		2614.2	-0.01206434
494.39	0.03516748		1024.4	0.00549052		1554.39	0.00797817		2084.4	0.01336094		2614.4	-0.01101887
494.59	0.03547883		1024.6	0.00505967		1554.59	0.00803903		2084.6	0.013983		2614.6	-0.01119774
494.79	0.03541753		1024.8	0.00448376		1554.79	0.00808757		2084.8	0.01338133		2614.8	-0.01168871
494.99	0.03537461		1025	0.00501344		1554.99	0.00765899		2085	0.01327574		2615	-0.0122108
495.19	0.0354187		1025.2	0.00521045		1555.19	0.00767978		2085.2	0.01348413		2615.2	-0.01166535
495.39	0.03547861		1025.4	0.00466715		1555.39	0.00841371		2085.4	0.01340676		2615.4	-0.01181474
495.59	0.03504221		1025.6	0.00528273		1555.59	0.00921872		2085.6	0.01250266		2615.6	-0.01315299
495.79	0.03497221		1025.8	0.00382226		1555.79	0.00898073		2085.8	0.01133607		2615.8	-0.01361589
495.99	0.03469513		1026	0.00268651		1555.99	0.00904634		2086	0.01117361		2616	-0.01355516
496.19	0.03433336		1026.2	0.00307991		1556.19	0.00922796		2086.2	0.0109533		2616.2	-0.01441581
496.39	0.03421367		1026.4	0.00331501		1556.39	0.00928262		2086.4	0.01094001		2616.4	-0.014499
496.59	0.03349674		1026.6	0.00362219		1556.59	0.00911717		2086.6	0.01087709		2616.6	-0.01547679
496.79	0.03332819		1026.8	0.00432722		1556.79	0.00911721		2086.8	0.01103475		2616.8	-0.01544813
496.99	0.03397209		1027	0.00391565		1556.99	0.008608		2087	0.01047613		2617	-0.01571172
497.19	0.0342666		1027.2	0.00399408		1557.19	0.00871494		2087.2	0.01016127		2617.2	-0.01669101
497.39	0.03389801		1027.4	0.00464645		1557.39	0.00822151		2087.4	0.00972251		2617.4	-0.01651553
497.59	0.03301567		1027.6	0.00570649		1557.59	0.00763919		2087.6	0.00890074		2617.6	-0.01592053
497.79	0.03371489		1027.8	0.00633784		1557.79	0.00756349		2087.8	0.0086838		2617.8	-0.01552735
497.99	0.03464616		1028	0.00648624		1557.99	0.00817488		2088	0.00925977		2618	-0.01609484
498.19	0.03417845		1028.2	0.00723137		1558.19	0.00800663		2088.2	0.00919806		2618.2	-0.01505434
498.39	0.03358592		1028.4	0.00827777		1558.39	0.00808499		2088.4	0.01003672		2618.4	-0.0136181
498.59	0.03371125		1028.6	0.00837413		1558.59	0.00851214		2088.6	0.01074733		2618.6	-0.01281008
498.79	0.03322147		1028.8	0.00850601		1558.79	0.00914338		2088.8	0.01016303		2618.8	-0.01238998
498.99	0.0332574		1029	0.00831927		1558.99	0.00981838		2089	0.01052429		2619	-0.01132938
499.19	0.03359048		1029.2	0.00867839		1559.19	0.01108433		2089.2	0.0110594		2619.2	-0.01054066
499.39	0.03294463		1029.4	0.00837888		1559.39	0.01212584		2089.4	0.01017277		2619.4	-0.01028252
499.59	0.03280275		1029.6	0.00793005		1559.59	0.01263712		2089.6	0.00939145		2619.6	-0.01071275
499.79	0.03330779		1029.8	0.00695183		1559.79	0.01310355		2089.8	0.00885754		2619.8	-0.00935611
499.99	0.03345774		1030	0.00605994		1559.99	0.01361705		2090	0.0095497		2620	-0.00941812
500.19	0.03327907		1030.2	0.00627715		1560.19	0.01321738		2090.2	0.01012201		2620.2	-0.00949608
500.39	0.03344978		1030.4	0.00580143		1560.39	0.01300003		2090.4	0.0106335		2620.4	-0.00946904
500.59	0.03350225		1030.6	0.00530117		1560.59	0.01257935		2090.6	0.01083305		2620.6	-0.01058892
500.79	0.03362752		1030.8	0.00510878		1560.79	0.01226938		2090.8	0.01112892		2620.8	-0.01127426
500.99	0.03398905		1031	0.00381703		1560.99	0.01208179		2091	0.01036069		2621	-0.01254943
501.19	0.0338676		1031.2	0.00395942		1561.19	0.01140249		2091.2	0.01030322		2621.2	-0.01312236
501.39	0.03406719		1031.4	0.00357378		1561.39	0.01034483		2091.4	0.00964213		2621.4	-0.0132113
501.59	0.03449372		1031.6	0.00430024		1561.59	0.0088701		2091.6	0.00895606		2621.6	-0.01438054
501.79	0.03524207		1031.8	0.00428073		1561.79	0.00922501		2091.8	0.00935735		2621.8	-0.0153454
501.99	0.03503989		1032	0.0048396		1561.99	0.00854542		2092	0.0097226		2622	-0.01593412
502.19	0.03484892		1032.2	0.00514974		1562.19	0.00784311		2092.2	0.00969639		2622.2	-0.0146904
502.39	0.03408744		1032.4	0.00545786		1562.39	0.0081545		2092.4	0.01052736		2622.4	-0.01449822
502.59	0.0337996		1032.6	0.00451639		1562.59	0.00764513		2092.6	0.00987412		2622.6	-0.01486524
502.79	0.03388334		1032.8	0.00460166		1562.79	0.00801893		2092.8	0.00993332		2622.8	-0.01555039
502.99	0.0335503		1033	0.00330813		1562.99	0.00808576		2093	0.00993172		2623	-0.0149141
503.19	0.03349537		1033.2	0.00460227		1563.19	0.00974981		2093.2	0.01038108		2623.2	-0.01489922
503.39	0.03294118		1033.4	0.00454632		1563.39	0.01094889		2093.4	0.00953153		2623.4	-0.01375412
503.59	0.03361377		1033.6	0.00418924		1563.59	0.01175758		2093.6	0.01020075		2623.6	-0.01319362
503.79	0.03421697		1033.8	0.00449116		1563.79	0.01232335		2093.8	0.01057339		2623.8	-0.01219459
503.99	0.03382361		1034	0.00425874		1563.99	0.01221215		2094	0.01108254		2624	-0.01130262
504.19	0.03329228		1034.2	0.0035657		1564.19	0.01227964		2094.2	0.01186102		2624.2	-0.01069407
504.39	0.03260306		1034.4	0.0035541		1564.39	0.01285999		2094.4	0.01287352		2624.4	-0.01084052
504.59	0.0320464		1034.6	0.00389858		1564.59	0.01345595		2094.6	0.01309482		2624.6	-0.0103801
504.79	0.03184877		1034.8	0.00412132		1564.79	0.01371467		2094.8	0.01281774		2624.8	-0.00976679
504.99	0.03152051		1035	0.00452693		1564.99	0.01359987		2095	0.01300546		2625	-0.01037932
505.19	0.0312942		1035.2	0.00503193		1565.19	0.01233578		2095.2	0.0137122		2625.2	-0.01124925
505.39	0.03166063		1035.4	0.00626098		1565.39	0.01158471		2095.4	0.01352641		2625.4	-0.0113876
505.59	0.03136843		1035.6	0.00740349		1565.59	0.01193734		2095.6	0.01284292		2625.6	-0.0112568
505.79	0.03109727		1035.8	0.00792862		1565.79	0.01163416		2095.8	0.01316731		2625.8	-0.01031405
505.99	0.03183202		1036	0.00849783		1565.99	0.01041156		2096	0.01253313		2626	-0.01041584
506.19	0.03190048		1036.2	0.00864323		1566.19	0.00941769		2096.2	0.01265427		2626.2	-0.00992296
506.39	0.03078817		1036.4	0.00854711		1566.39	0.00986704		2096.4	0.01242325		2626.4	-0.01161812
506.59	0.03070555		1036.6	0.00862197		1566.59	0.00904274		2096.6	0.01183505		2626.6	-0.01229435
506.79	0.03066325		1036.8	0.00880938		1566.79	0.00972302		2096.8	0.01143417		2626.8	-0.01269371
506.99	0.03010146		1037	0.0090392		1566.99	0.00958179		2097	0.01173071		2627	-0.01294632
507.19	0.03110337		1037.2	0.01026951		1567.19	0.01040124		2097.2	0.01190883		2627.2	-0.01340371
507.39	0.0320289		1037.4	0.00957683		1567.39	0.00999751		2097.4	0.01048732		2627.4	-0.01322085
507.59	0.03355558		1037.6	0.00847255		1567.59	0.00923796		2097.6	0.01038146		2627.6	-0.01387075
507.79	0.0345736		1037.8	0.00710558		1567.79	0.00877182		2097.8	0.01003141		2627.8	-0.01417415
507.99	0.03428943		1038	0.00653427		1567.99	0.00893158		2098	0.009509		2628	-0.01434452
508.19	0.03512145		1038.2	0.00541005		1568.19	0.00960053		2098.2	0.00930842		2628.2	-0.01523451
508.39	0.0354509		1038.4	0.00517634		1568.39	0.0097805		2098.4	0.00929115		2628.4	-0.01547171
508.59	0.03586789		1038.6	0.00504902		1568.59	0.01043696		2098.6	0.00946663		2628.6	-0.01507394
508.79	0.03612084		1038.8	0.00513608		1568.79	0.00968592		2098.8	0.00982256		2628.8	-0.01609744
508.99	0.03640926		1039	0.00472321		1568.99	0.00946003		2099	0.01107045		2629	-0.01688495
509.19	0.03576142		1039.2	0.00509705		1569.19	0.00867143		2099.2	0.01146458		2629.2	-0.01629203
509.39	0.03567067		1039.4	0.00601131		1569.39	0.0082514		2099.4	0.01088046		2629.4	-0.01545631
509.59	0.03462563		1039.6	0.00582512		1569.59	0.0084875		2099.6	0.0103568		2629.6	-0.0150722
509.79	0.03392156		1039.8	0.00579508		1569.79	0.00778413		2099.8	0.01157351		2629.8	-0.01489613
509.99	0.03389108		1040	0.00624838		1569.99	0.00883165		2100	0.01177648		2630	-0.01447928
510.19	0.03322554		1040.2	0.00608482		1570.19	0.00888287		2100.2	0.01279862		2630.2	-0.01459252
510.39	0.03228576		1040.4	0.00573652		1570.39	0.0104041		2100.4	0.01288368		2630.4	-0.0156364
510.59	0.03175517		1040.6	0.00581556		1570.59	0.0107279		2100.6	0.01235109		2630.6	-0.01535725
510.79	0.03121929		1040.8	0.00481991		1570.79	0.01096914		2100.8	0.01264672		2630.8	-0.01496845
510.99	0.03119947		1041	0.00502615		1570.99	0.01200549		2101	0.01316868		2631	-0.01537304
511.19	0.03166371		1041.2	0.0052974		1571.19	0.01238275		2101.2	0.01265886		2631.2	-0.01517795
511.39	0.03225972		1041.4	0.00473941		1571.39	0.01198128		2101.4	0.01193679		2631.4	-0.01466271
511.59	0.03319005		1041.6	0.00384727		1571.59	0.01170983		2101.6	0.01247946		2631.6	-0.01431605
511.79	0.03327973		1041.8	0.00332542		1571.79	0.01270159		2101.8	0.01213851		2631.8	-0.01435123
511.99	0.03266669		1042	0.00463174		1571.99	0.01373297		2102	0.01173501		2632	-0.01421391
512.19	0.03365053		1042.2	0.00430022		1572.19	0.01439059		2102.2	0.0116864		2632.2	-0.01473596
512.39	0.03319458		1042.4	0.00406776		1572.39	0.01479887		2102.4	0.01163513		2632.4	-0.0153294
512.59	0.03302174		1042.6	0.00464272		1572.59	0.01507654		2102.6	0.01129151		2632.6	-0.01550442
512.79	0.03266229		1042.8	0.00452207		1572.79	0.01403643		2102.8	0.01085461		2632.8	-0.0153107
512.99	0.03292064		1043	0.00456205		1572.99	0.01390795		2103	0.0113591		2633	-0.01511172
513.19	0.03222543		1043.2	0.00529039		1573.19	0.01326023		2103.2	0.01086381		2633.2	-0.01464854
513.39	0.03183256		1043.4	0.00543163		1573.39	0.01250613		2103.4	0.01008343		2633.4	-0.01480408
513.59	0.03220419		1043.6	0.00518369		1573.59	0.01240654		2103.6	0.01069611		2633.6	-0.01422111
513.79	0.03246307		1043.8	0.00515322		1573.79	0.01254833		2103.8	0.01038689		2633.8	-0.01417442
513.99	0.03196609		1044	0.00533661		1573.99	0.01299294		2104	0.00978323		2634	-0.01314345
514.19	0.03226712		1044.2	0.00529364		1574.19	0.01166835		2104.2	0.01047262		2634.2	-0.01403857
514.39	0.03217177		1044.4	0.0048339		1574.39	0.01222613		2104.4	0.00957693		2634.4	-0.01394721
514.59	0.03138365		1044.6	0.00474667		1574.59	0.01160757		2104.6	0.00874585		2634.6	-0.01304127
514.79	0.03124409		1044.8	0.00538617		1574.79	0.01120157		2104.8	0.00875767		2634.8	-0.01222959
514.99	0.03086089		1045	0.00646636		1574.99	0.01118011		2105	0.00776176		2635	-0.01234623
515.19	0.03090803		1045.2	0.00711429		1575.19	0.01007222		2105.2	0.00759832		2635.2	-0.01151726
515.39	0.03024124		1045.4	0.00670145		1575.39	0.00915926		2105.4	0.00767224		2635.4	-0.01105507
515.59	0.03047848		1045.6	0.00743497		1575.59	0.00918308		2105.6	0.00778804		2635.6	-0.01158263
515.79	0.03014977		1045.8	0.00803909		1575.79	0.00986835		2105.8	0.00743525		2635.8	-0.01182625
515.99	0.02931179		1046	0.00883869		1575.99	0.010019		2106	0.00767805		2636	-0.01252222
516.19	0.02999178		1046.2	0.0081908		1576.19	0.01023567		2106.2	0.00736294		2636.2	-0.0132009
516.39	0.02996788		1046.4	0.00774897		1576.39	0.01026267		2106.4	0.00664948		2636.4	-0.01269876
516.59	0.03077748		1046.6	0.00800808		1576.59	0.01071177		2106.6	0.00652491		2636.6	-0.01223858
516.79	0.03133276		1046.8	0.00817191		1576.79	0.01087432		2106.8	0.00785864		2636.8	-0.01225944
516.99	0.03175028		1047	0.00809398		1576.99	0.01097699		2107	0.00831849		2637	-0.01292879
517.19	0.03103923		1047.2	0.00756144		1577.19	0.0108769		2107.2	0.00776028		2637.2	-0.01302523
517.39	0.03129362		1047.4	0.00673649		1577.39	0.01073507		2107.4	0.00776024		2637.4	-0.01227177
517.59	0.03162899		1047.6	0.00657626		1577.59	0.01133452		2107.6	0.00816963		2637.6	-0.01186591
517.79	0.03103414		1047.8	0.00644239		1577.79	0.01163593		2107.8	0.00739712		2637.8	-0.01164187
517.99	0.03024767		1048	0.00612171		1577.99	0.01255653		2108	0.00887762		2638	-0.01138746
518.19	0.03105549		1048.2	0.00574433		1578.19	0.01268918		2108.2	0.00965697		2638.2	-0.01127973
518.39	0.03128087		1048.4	0.00410842		1578.39	0.01332169		2108.4	0.00914567		2638.4	-0.01073641
518.59	0.03119739		1048.6	0.00394475		1578.59	0.01261668		2108.6	0.00957945		2638.6	-0.01028766
518.79	0.03145352		1048.8	0.00388061		1578.79	0.01294523		2108.8	0.00906565		2638.8	-0.01049352
518.99	0.03163331		1049	0.00317311		1578.99	0.01312726		2109	0.00962504		2639	-0.01036661
519.19	0.03198246		1049.2	0.00294925		1579.19	0.01343904		2109.2	0.00973213		2639.2	-0.01024129
519.39	0.03140602		1049.4	0.00250885		1579.39	0.01327066		2109.4	0.01008161		2639.4	-0.01135833
519.59	0.03197228		1049.6	0.00256571		1579.59	0.01361581		2109.6	0.01022526		2639.6	-0.0109976
519.79	0.03173089		1049.8	0.00159634		1579.79	0.01321679		2109.8	0.01066674		2639.8	-0.0111592
519.99	0.03152946		1050	0.0018247		1579.99	0.01368676		2110	0.01085241		2640	-0.01171683
520.19	0.03264136		1050.2	0.00225194		1580.19	0.01336096		2110.2	0.01084354		2640.2	-0.0121196
520.39	0.03316076		1050.4	0.00229899		1580.39	0.01231146		2110.4	0.01085221		2640.4	-0.01197289
520.59	0.03304713		1050.6	0.00267223		1580.59	0.01196789		2110.6	0.01064266		2640.6	-0.01188754
520.79	0.03313131		1050.8	0.00336697		1580.79	0.01110905		2110.8	0.01143645		2640.8	-0.01237343
520.99	0.03211466		1051	0.00391855		1580.99	0.01022634		2111	0.0107595		2641	-0.01232305
521.19	0.03118936		1051.2	0.00432452		1581.19	0.00994358		2111.2	0.01047559		2641.2	-0.01220094
521.39	0.03105931		1051.4	0.00516988		1581.39	0.01023296		2111.4	0.0112217		2641.4	-0.01103981
521.59	0.03098894		1051.6	0.00589242		1581.59	0.01000574		2111.6	0.01104313		2641.6	-0.01121895
521.79	0.03101855		1051.8	0.00642547		1581.79	0.00999965		2111.8	0.01101005		2641.8	-0.01135354
521.99	0.03119078		1052	0.0055449		1581.99	0.00992988		2112	0.01180414		2642	-0.01113267
522.19	0.03158869		1052.2	0.00490622		1582.19	0.00960722		2112.2	0.01222817		2642.2	-0.0108621
522.39	0.0314005		1052.4	0.00474718		1582.39	0.01014594		2112.4	0.01248354		2642.4	-0.0108869
522.59	0.03116618		1052.6	0.00484134		1582.59	0.01094302		2112.6	0.01387876		2642.6	-0.0109915
522.79	0.0313063		1052.8	0.00396432		1582.79	0.01144315		2112.8	0.01381729		2642.8	-0.01104255
522.99	0.03147248		1053	0.00286493		1582.99	0.01186772		2113	0.01487914		2643	-0.01109816
523.19	0.03054355		1053.2	0.00214768		1583.19	0.01176121		2113.2	0.01448109		2643.2	-0.01163703
523.39	0.02974714		1053.4	0.0007358		1583.39	0.01181288		2113.4	0.01392667		2643.4	-0.01163303
523.59	0.0296781		1053.6	0.00013153		1583.59	0.01156359		2113.6	0.01347417		2643.6	-0.01095494
523.79	0.02958518		1053.8	-0.00063049		1583.79	0.01159978		2113.8	0.01307413		2643.8	-0.01261885
523.99	0.02905139		1054	-0.00045761		1583.99	0.01201992		2114	0.01212764		2644	-0.01296928
524.19	0.02937043		1054.2	0.00100437		1584.19	0.01099888		2114.2	0.01217631		2644.2	-0.01369516
524.39	0.02949341		1054.4	0.00153974		1584.39	0.01019389		2114.4	0.01196551		2644.4	-0.0137553
524.59	0.02991692		1054.6	0.00175769		1584.59	0.01026084		2114.6	0.01110053		2644.6	-0.0135599
524.79	0.029879		1054.8	0.00258206		1584.79	0.01016223		2114.8	0.01083908		2644.8	-0.01392739
524.99	0.02895145		1055	0.00372989		1584.99	0.01025386		2115	0.01008753		2645	-0.0137801
525.19	0.02936064		1055.2	0.00388003		1585.19	0.00996612		2115.2	0.00975462		2645.2	-0.01360429
525.39	0.02993127		1055.4	0.00461945		1585.39	0.00941299		2115.4	0.00947275		2645.4	-0.01409009
525.59	0.02997049		1055.6	0.00461116		1585.59	0.00863564		2115.6	0.00938461		2645.6	-0.01408015
525.79	0.02957187		1055.8	0.00517338		1585.79	0.00874795		2115.8	0.00888422		2645.8	-0.01417122
525.99	0.0291935		1056	0.00439548		1585.99	0.00860573		2116	0.00860352		2646	-0.01404868
526.19	0.02920959		1056.2	0.00557701		1586.19	0.00972438		2116.2	0.00917123		2646.2	-0.01478516
526.39	0.02817731		1056.4	0.00612576		1586.39	0.0107655		2116.4	0.00925889		2646.4	-0.01506414
526.59	0.02888751		1056.6	0.00576297		1586.59	0.01099089		2116.6	0.01043654		2646.6	-0.01538128
526.79	0.02857667		1056.8	0.00527698		1586.79	0.01126924		2116.8	0.01020289		2646.8	-0.01552395
526.99	0.02824104		1057	0.00447931		1586.99	0.01164879		2117	0.01000056		2647	-0.0154283
527.19	0.02772854		1057.2	0.00468566		1587.19	0.0117066		2117.2	0.00900008		2647.2	-0.01544763
527.39	0.02764515		1057.4	0.00415593		1587.39	0.01245759		2117.4	0.00857177		2647.4	-0.01474279
527.59	0.02774983		1057.6	0.00381172		1587.59	0.01193492		2117.6	0.00827739		2647.6	-0.01504468
527.79	0.02742716		1057.8	0.0032853		1587.79	0.01223101		2117.8	0.00840384		2647.8	-0.01544663
527.99	0.02722454		1058	0.00376845		1587.99	0.01193739		2118	0.00872113		2648	-0.015022
528.19	0.02843692		1058.2	0.00462767		1588.19	0.01185935		2118.2	0.00941193		2648.2	-0.01538229
528.39	0.02923151		1058.4	0.00453413		1588.39	0.01205403		2118.4	0.00921889		2648.4	-0.01491514
528.59	0.02959781		1058.6	0.00404823		1588.59	0.01100344		2118.6	0.0089034		2648.6	-0.01442573
528.79	0.02903395		1058.8	0.00458527		1588.79	0.01062965		2118.8	0.00903813		2648.8	-0.01419166
528.99	0.0291882		1059	0.00485428		1588.99	0.01020108		2119	0.01026175		2649	-0.01418165
529.19	0.02922085		1059.2	0.00451575		1589.19	0.00924987		2119.2	0.01094534		2649.2	-0.0139003
529.39	0.02916889		1059.4	0.00449735		1589.39	0.00950091		2119.4	0.01123282		2649.4	-0.01439056
529.59	0.02797638		1059.6	0.00476972		1589.59	0.01005924		2119.6	0.01239552		2649.6	-0.01354779
529.79	0.0278015		1059.8	0.00495487		1589.79	0.01068641		2119.8	0.01165606		2649.8	-0.01352047
529.99	0.02846939		1060	0.00522231		1589.99	0.01106345		2120	0.01111866		2650	-0.01363369
530.19	0.02913265		1060.2	0.00654328		1590.19	0.01139882		2120.2	0.01076788		2650.2	-0.01363402
530.39	0.02861161		1060.4	0.00654727		1590.39	0.01134643		2120.4	0.01030733		2650.4	-0.01371413
530.59	0.028688		1060.6	0.00701824		1590.59	0.01133332		2120.6	0.01056719		2650.6	-0.01236449
530.79	0.02817578		1060.8	0.00685477		1590.79	0.01152442		2120.8	0.01002183		2650.8	-0.01247553
530.99	0.02821849		1061	0.0071397		1590.99	0.01141424		2121	0.0091518		2651	-0.01180663
531.19	0.02745242		1061.2	0.00788036		1591.19	0.01181205		2121.2	0.00870587		2651.2	-0.0118384
531.39	0.02775354		1061.4	0.00763783		1591.39	0.0116786		2121.4	0.00832531		2651.4	-0.01167511
531.59	0.02793014		1061.6	0.00747149		1591.59	0.01162687		2121.6	0.00769835		2651.6	-0.01254638
531.79	0.02753692		1061.8	0.00756123		1591.79	0.0117021		2121.8	0.0071679		2651.8	-0.01287338
531.99	0.0280765		1062	0.00737078		1591.99	0.01169036		2122	0.00703104		2652	-0.01264377
532.19	0.02786376		1062.2	0.00721988		1592.19	0.01130409		2122.2	0.00615025		2652.2	-0.01230989
532.39	0.02789264		1062.4	0.00727147		1592.39	0.01115011		2122.4	0.0056526		2652.4	-0.01207415
532.59	0.02790887		1062.6	0.00670675		1592.59	0.00970347		2122.6	0.00620803		2652.6	-0.01198803
532.79	0.02850867		1062.8	0.00643833		1592.79	0.00948874		2122.8	0.00798695		2652.8	-0.01157658
532.99	0.0283707		1063	0.00586423		1592.99	0.00941902		2123	0.00929167		2653	-0.01177661
533.19	0.02706456		1063.2	0.00536423		1593.19	0.00972195		2123.2	0.00934988		2653.2	-0.01170727
533.39	0.02678616		1063.4	0.00480703		1593.39	0.01052652		2123.4	0.0101852		2653.4	-0.01190473
533.59	0.02617913		1063.6	0.00532611		1593.59	0.01112211		2123.6	0.01025286		2653.6	-0.01177155
533.79	0.02589883		1063.8	0.00479319		1593.79	0.01134501		2123.8	0.00943361		2653.8	-0.01126882
533.99	0.02628796		1064	0.00443329		1593.99	0.01089204		2124	0.00945223		2654	-0.01088508
534.19	0.02558017		1064.2	0.00436907		1594.19	0.01096923		2124.2	0.00985354		2654.2	-0.01039939
534.39	0.02516241		1064.4	0.00395784		1594.39	0.01077057		2124.4	0.01076607		2654.4	-0.01092296
534.59	0.02535806		1064.6	0.00460275		1594.59	0.01057173		2124.6	0.01193063		2654.6	-0.01012628
534.79	0.02598705		1064.8	0.0051732		1594.79	0.01045372		2124.8	0.01242026		2654.8	-0.01164385
534.99	0.0259837		1065	0.00597853		1594.99	0.0108989		2125	0.01293485		2655	-0.01215294
535.19	0.0254279		1065.2	0.00646962		1595.19	0.01115614		2125.2	0.01287974		2655.2	-0.01249167
535.39	0.02565407		1065.4	0.006339		1595.39	0.01094134		2125.4	0.01263741		2655.4	-0.01309071
535.59	0.02487688		1065.6	0.00680944		1595.59	0.01125653		2125.6	0.01196005		2655.6	-0.01338969
535.79	0.02438863		1065.8	0.00614688		1595.79	0.01090235		2125.8	0.01129003		2655.8	-0.01283208
535.99	0.02420663		1066	0.00557693		1595.99	0.01123265		2126	0.0108846		2656	-0.01230418
536.19	0.02357175		1066.2	0.00587786		1596.19	0.01132663		2126.2	0.01054029		2656.2	-0.01205427
536.39	0.02472024		1066.4	0.00526073		1596.39	0.01107068		2126.4	0.01041692		2656.4	-0.01270305
536.59	0.02457921		1066.6	0.00541636		1596.59	0.01021782		2126.6	0.01113785		2656.6	-0.01228542
536.79	0.02427401		1066.8	0.00493727		1596.79	0.01044507		2126.8	0.01137085		2656.8	-0.012768
536.99	0.02320468		1067	0.00485531		1596.99	0.01086858		2127	0.0113929		2657	-0.01226618
537.19	0.02249336		1067.2	0.00547367		1597.19	0.01143681		2127.2	0.01147426		2657.2	-0.01256337
537.39	0.02319081		1067.4	0.00492968		1597.39	0.01144113		2127.4	0.01136658		2657.4	-0.01327317
537.59	0.02301889		1067.6	0.00530576		1597.59	0.01165244		2127.6	0.00995439		2657.6	-0.01334382
537.79	0.02347676		1067.8	0.0045518		1597.79	0.01152746		2127.8	0.00986246		2657.8	-0.01292249
537.99	0.0244814		1068	0.00416249		1597.99	0.01159055		2128	0.00996127		2658	-0.01294526
538.19	0.02512459		1068.2	0.00473778		1598.19	0.01175737		2128.2	0.01045317		2658.2	-0.01419734
538.39	0.02582545		1068.4	0.00521075		1598.39	0.01101756		2128.4	0.01063799		2658.4	-0.01475421
538.59	0.02666706		1068.6	0.00561392		1598.59	0.01116906		2128.6	0.01060444		2658.6	-0.01517358
538.79	0.02742024		1068.8	0.00634745		1598.79	0.0110838		2128.8	0.01069771		2658.8	-0.01584529
538.99	0.02707743		1069	0.00673324		1598.99	0.0109833		2129	0.0107667		2659	-0.01583524
539.19	0.02671578		1069.2	0.00660145		1599.19	0.01096859		2129.2	0.01062883		2659.2	-0.0152533
539.39	0.02688653		1069.4	0.00585254		1599.39	0.01089227		2129.4	0.00996073		2659.4	-0.01479489
539.59	0.02682311		1069.6	0.00503146		1599.59	0.01110241		2129.6	0.00917198		2659.6	-0.01426874
539.79	0.02708688		1069.8	0.00403284		1599.79	0.01123145		2129.8	0.00965164		2659.8	-0.01314925
539.99	0.02697068		1070	0.00426386		1599.99	0.01137682		2130	0.00959302		2660	-0.01326227
540.19	0.02730013		1070.2	0.0043553		1600.19	0.01184172		2130.2	0.01010772		2660.2	-0.01282822
540.39	0.02735559		1070.4	0.00355756		1600.39	0.01066979		2130.4	0.00976547		2660.4	-0.01324181
540.59	0.02714874		1070.6	0.00407652		1600.59	0.01118095		2130.6	0.01089451		2660.6	-0.01243401
540.79	0.02723015		1070.8	0.00352684		1600.79	0.01120111		2130.8	0.01164293		2660.8	-0.01168396
540.99	0.02714714		1071	0.004012		1600.99	0.01072887		2131	0.01295579		2661	-0.01151654
541.19	0.02722665		1071.2	0.00489202		1601.19	0.0098178		2131.2	0.01324594		2661.2	-0.0121949
541.39	0.02787892		1071.4	0.00476565		1601.39	0.00911444		2131.4	0.01291593		2661.4	-0.01298679
541.59	0.02744269		1071.6	0.004867		1601.59	0.00850423		2131.6	0.01196301		2661.6	-0.01375954
541.79	0.02738397		1071.8	0.00516937		1601.79	0.0085927		2131.8	0.01162841		2661.8	-0.01394189
541.99	0.0265157		1072	0.00510871		1601.99	0.00877261		2132	0.01179561		2662	-0.01474596
542.19	0.02634784		1072.2	0.00575716		1602.19	0.00896062		2132.2	0.01185715		2662.2	-0.01513002
542.39	0.0254878		1072.4	0.00559261		1602.39	0.00955855		2132.4	0.01122979		2662.4	-0.01490567
542.59	0.02549958		1072.6	0.00517884		1602.59	0.0100134		2132.6	0.01109604		2662.6	-0.01506726
542.79	0.02481902		1072.8	0.00534795		1602.79	0.01005205		2132.8	0.01105618		2662.8	-0.01555648
542.99	0.02412231		1073	0.00519593		1602.99	0.01014155		2133	0.01129569		2663	-0.01522872
543.19	0.02424811		1073.2	0.00475066		1603.19	0.01026143		2133.2	0.01076335		2663.2	-0.01471624
543.39	0.02385121		1073.4	0.00370323		1603.39	0.00972574		2133.4	0.00956643		2663.4	-0.01369841
543.59	0.02369316		1073.6	0.00349624		1603.59	0.00966236		2133.6	0.00921373		2663.6	-0.01253805
543.79	0.02376023		1073.8	0.00394585		1603.79	0.00905514		2133.8	0.00843212		2663.8	-0.01201914
543.99	0.02345449		1074	0.00355962		1603.99	0.01016141		2134	0.00747107		2664	-0.01249461
544.19	0.02385193		1074.2	0.00336927		1604.19	0.01050813		2134.2	0.00772172		2664.2	-0.01239785
544.39	0.02357569		1074.4	0.00320969		1604.39	0.00961311		2134.4	0.00638183		2664.4	-0.01214842
544.59	0.02370001		1074.6	0.00374092		1604.59	0.00997575		2134.6	0.00698999		2664.6	-0.01143709
544.79	0.02400316		1074.8	0.00361862		1604.79	0.00978873		2134.8	0.00670126		2664.8	-0.0112211
544.99	0.02354955		1075	0.00364165		1604.99	0.00944186		2135	0.0067097		2665	-0.01187488
545.19	0.02314788		1075.2	0.0045249		1605.19	0.00881856		2135.2	0.00595051		2665.2	-0.0121377
545.39	0.02210365		1075.4	0.00362167		1605.39	0.00978945		2135.4	0.00593028		2665.4	-0.01270465
545.59	0.02166342		1075.6	0.00345179		1605.59	0.01033063		2135.6	0.00478326		2665.6	-0.01361942
545.79	0.02142207		1075.8	0.00374436		1605.79	0.01132258		2135.8	0.00554139		2665.8	-0.01283991
545.99	0.02158111		1076	0.00335679		1605.99	0.01211047		2136	0.00601533		2666	-0.01291697
546.19	0.0218412		1076.2	0.00361263		1606.19	0.01240656		2136.2	0.00602304		2666.2	-0.01246874
546.39	0.02171255		1076.4	0.00373994		1606.39	0.01267134		2136.4	0.00645251		2666.4	-0.0124034
546.59	0.02174573		1076.6	0.00327233		1606.59	0.01169785		2136.6	0.00694586		2666.6	-0.01274792
546.79	0.0217897		1076.8	0.00386984		1606.79	0.01179859		2136.8	0.00726143		2666.8	-0.01232969
546.99	0.02205422		1077	0.00356227		1606.99	0.01113566		2137	0.00835586		2667	-0.01105933
547.19	0.02286791		1077.2	0.00384232		1607.19	0.01063974		2137.2	0.00842823		2667.2	-0.01034467
547.39	0.02348018		1077.4	0.00377895		1607.39	0.00916504		2137.4	0.00864333		2667.4	-0.0111546
547.59	0.02478021		1077.6	0.00401542		1607.59	0.0093047		2137.6	0.00902514		2667.6	-0.01098608
547.79	0.02541982		1077.8	0.003716		1607.79	0.00835246		2137.8	0.00927939		2667.8	-0.01214485
547.99	0.02589196		1078	0.00414413		1607.99	0.00821557		2138	0.01020626		2668	-0.01251622
548.19	0.02664463		1078.2	0.00478836		1608.19	0.00717955		2138.2	0.00981565		2668.2	-0.01263462
548.39	0.02647413		1078.4	0.00541221		1608.39	0.00649464		2138.4	0.00869404		2668.4	-0.01237763
548.59	0.02636223		1078.6	0.00584674		1608.59	0.00583579		2138.6	0.01033102		2668.6	-0.01261254
548.79	0.02625788		1078.8	0.00560293		1608.79	0.00648591		2138.8	0.01053777		2668.8	-0.01334533
548.99	0.02494575		1079	0.00604229		1608.99	0.00627549		2139	0.01065817		2669	-0.0129728
549.19	0.02426438		1079.2	0.00686913		1609.19	0.00697194		2139.2	0.01156269		2669.2	-0.01344617
549.39	0.02401767		1079.4	0.00673631		1609.39	0.00847028		2139.4	0.0123078		2669.4	-0.01371664
549.59	0.02504622		1079.6	0.00776215		1609.59	0.00892753		2139.6	0.01224229		2669.6	-0.01455053
549.79	0.02520746		1079.8	0.00784999		1609.79	0.00930213		2139.8	0.01302432		2669.8	-0.01414212
549.99	0.02587421		1080	0.00759715		1609.99	0.00990952		2140	0.0121126		2670	-0.01415986
550.19	0.02587049		1080.2	0.00836828		1610.19	0.01034867		2140.2	0.01214971		2670.2	-0.01447963
550.39	0.02658896		1080.4	0.00787634		1610.39	0.01037323		2140.4	0.01147955		2670.4	-0.01493194
550.59	0.02712815		1080.6	0.00735074		1610.59	0.01038316		2140.6	0.01129037		2670.6	-0.0152641
550.79	0.02791095		1080.8	0.00715063		1610.79	0.01104977		2140.8	0.01067104		2670.8	-0.01447796
550.99	0.02759027		1081	0.00633025		1610.99	0.0113555		2141	0.01036134		2671	-0.0144582
551.19	0.02844534		1081.2	0.00617493		1611.19	0.01150199		2141.2	0.01021867		2671.2	-0.01496528
551.39	0.02804946		1081.4	0.00535392		1611.39	0.01039509		2141.4	0.00938587		2671.4	-0.01565327
551.59	0.02837558		1081.6	0.00398149		1611.59	0.0104846		2141.6	0.00881242		2671.6	-0.01483786
551.79	0.02828763		1081.8	0.00348963		1611.79	0.01049112		2141.8	0.00871781		2671.8	-0.01493917
551.99	0.0276715		1082	0.00408443		1611.99	0.01019193		2142	0.0083399		2672	-0.01396455
552.19	0.02704289		1082.2	0.00420377		1612.19	0.01046992		2142.2	0.00709856		2672.2	-0.01392305
552.39	0.02648068		1082.4	0.00481959		1612.39	0.01036522		2142.4	0.00709341		2672.4	-0.01377653
552.59	0.02608735		1082.6	0.00453593		1612.59	0.01026658		2142.6	0.00783207		2672.6	-0.0132493
552.79	0.02616654		1082.8	0.00492244		1612.79	0.01056859		2142.8	0.00841623		2672.8	-0.01316235
552.99	0.0257155		1083	0.00599957		1612.99	0.01014197		2143	0.00870377		2673	-0.01202209
553.19	0.02514969		1083.2	0.0066813		1613.19	0.01110854		2143.2	0.01012487		2673.2	-0.01240243
553.39	0.025629		1083.4	0.00659727		1613.39	0.01090334		2143.4	0.00979383		2673.4	-0.01214549
553.59	0.02611071		1083.6	0.00752025		1613.59	0.01095725		2143.6	0.00909245		2673.6	-0.01143532
553.79	0.02651423		1083.8	0.00693983		1613.79	0.01058131		2143.8	0.00947602		2673.8	-0.01076916
553.99	0.02630153		1084	0.00692609		1613.99	0.01104261		2144	0.00922897		2674	-0.0103164
554.19	0.02628913		1084.2	0.00725764		1614.19	0.01081702		2144.2	0.0100956		2674.2	-0.01102277
554.39	0.02673022		1084.4	0.00657477		1614.39	0.0103683		2144.4	0.00958002		2674.4	-0.01067466
554.59	0.02667566		1084.6	0.00667523		1614.59	0.01016115		2144.6	0.01068526		2674.6	-0.01037165
554.79	0.02600585		1084.8	0.0056176		1614.79	0.01073842		2144.8	0.01046972		2674.8	-0.01017341
554.99	0.02549045		1085	0.00484925		1614.99	0.01129984		2145	0.01129704		2675	-0.010076
555.19	0.02478944		1085.2	0.00356605		1615.19	0.01136742		2145.2	0.01158915		2675.2	-0.01028702
555.39	0.02375278		1085.4	0.00330568		1615.39	0.01135817		2145.4	0.01099871		2675.4	-0.01051364
555.59	0.02429212		1085.6	0.00281991		1615.59	0.01202005		2145.6	0.01135055		2675.6	-0.01080671
555.79	0.02409354		1085.8	0.00236888		1615.79	0.01177306		2145.8	0.01157417		2675.8	-0.01211065
555.99	0.02419337		1086	0.0024216		1615.99	0.01160003		2146	0.01144858		2676	-0.01224451
556.19	0.02476268		1086.2	0.00242767		1616.19	0.01163558		2146.2	0.01144611		2676.2	-0.01393384
556.39	0.0245005		1086.4	0.00315224		1616.39	0.01106268		2146.4	0.01125479		2676.4	-0.01410233
556.59	0.02470505		1086.6	0.00298626		1616.59	0.01072335		2146.6	0.01116368		2676.6	-0.01399226
556.79	0.02481768		1086.8	0.0036272		1616.79	0.01047403		2146.8	0.01117193		2676.8	-0.0148786
556.99	0.02303782		1087	0.00392948		1616.99	0.01023304		2147	0.01012758		2677	-0.01491353
557.19	0.0230113		1087.2	0.00406205		1617.19	0.01048354		2147.2	0.00963295		2677.2	-0.01529185
557.39	0.02247459		1087.4	0.00491432		1617.39	0.00986531		2147.4	0.00818785		2677.4	-0.01489812
557.59	0.02269766		1087.6	0.00659086		1617.59	0.00997505		2147.6	0.00797923		2677.6	-0.0149306
557.79	0.02274376		1087.8	0.00569864		1617.79	0.00972442		2147.8	0.00814063		2677.8	-0.01519452
557.99	0.02225975		1088	0.00622141		1617.99	0.00986108		2148	0.00755367		2678	-0.01507443
558.19	0.0229746		1088.2	0.00610529		1618.19	0.00930587		2148.2	0.00764942		2678.2	-0.0148976
558.39	0.02325198		1088.4	0.00602241		1618.39	0.00883597		2148.4	0.00739213		2678.4	-0.01406539
558.59	0.02343879		1088.6	0.00580537		1618.59	0.00831823		2148.6	0.00831803		2678.6	-0.01374353
558.79	0.02349623		1088.8	0.00540606		1618.79	0.00846979		2148.8	0.0083943		2678.8	-0.01328697
558.99	0.02383576		1089	0.00572765		1618.99	0.00787992		2149	0.00919173		2679	-0.01252557
559.19	0.02361842		1089.2	0.00602968		1619.19	0.00713095		2149.2	0.00952004		2679.2	-0.01212433
559.39	0.02422337		1089.4	0.006801		1619.39	0.00615044		2149.4	0.01028683		2679.4	-0.01172929
559.59	0.02521712		1089.6	0.00663154		1619.59	0.00490202		2149.6	0.01143914		2679.6	-0.01118039
559.79	0.02567956		1089.8	0.00613498		1619.79	0.00359189		2149.8	0.01227275		2679.8	-0.01099703
