# Supplementary material for: Functional development of a V3/glycan-specific broadly neutralizing antibody isolated from a case of HIV superinfection
Source: eLife journal article supplement (doi:10.7554/elife.68110), 2021-07-15
Supplement: fig2-data2 [file B1.xls]

Vers 3.43 Data Simulation
Conc1	2.5E-07	2.5E-07	2.5E-07	2.5E-07	2.5E-07
Start1	200	729.99	1260	1790	2320
Stop1	559.8	1089.79	1619.8	2149.8	2679.8
Time1	Data1	Sim1	Time2	Data2	Sim2	Time3	Data3	Sim3	Time4	Data4	Sim4	Time5	Data5	Sim5
200	0.01772525		729.99	0.00080348		1260	0.00493682		1790	0.00042447		2320	-0.00726261
200.2	0.01659566		730.19	0.00024156		1260.2	0.00520133		1790.2	0.00073093		2320.2	-0.0070971
200.4	0.01606666		730.39	0.00015416		1260.4	0.00494082		1790.4	0.00086755		2320.4	-0.00680792
200.6	0.01610377		730.59	-0.00043771		1260.6	0.00482651		1790.6	0.00151998		2320.6	-0.00561849
200.8	0.01560817		730.79	-0.0005461		1260.8	0.00450712		1790.8	0.00077898		2320.8	-0.00492284
201	0.01537894		730.99	-0.00123105		1261	0.00410205		1791	0.00098618		2321	-0.00425792
201.2	0.01553214		731.19	-0.00135908		1261.2	0.00422494		1791.2	0.0009858		2321.2	-0.00418466
201.4	0.01602774		731.39	-0.00147687		1261.4	0.00447058		1791.4	0.00143783		2321.4	-0.00402833
201.6	0.01656872		731.59	-0.0009214		1261.6	0.00475859		1791.6	0.00155341		2321.6	-0.00302048
201.8	0.01724215		731.79	-0.00075224		1261.8	0.00434059		1791.8	0.00167752		2321.8	-0.00233526
202	0.01797468		731.99	-0.00030122		1262	0.00412494		1792	0.00188755		2322	-0.0018942
202.2	0.01938039		732.19	-0.0000657		1262.2	0.00427527		1792.2	0.00147675		2322.2	-0.00108455
202.4	0.02004216		732.39	-0.0006953		1262.4	0.00510162		1792.4	0.00194604		2322.4	-0.00116229
202.6	0.02091168		732.59	-0.00025827		1262.6	0.00498321		1792.6	0.00231741		2322.6	-0.00120725
202.8	0.02132182		732.79	0.00030301		1262.8	0.00510557		1792.8	0.00239465		2322.8	-0.00205289
203	0.02241171		732.99	0.00065078		1263	0.00479718		1793	0.00188879		2323	-0.00095406
203.2	0.02374429		733.19	-0.00024829		1263.2	0.00478514		1793.2	0.00201367		2323.2	-0.00149644
203.4	0.02476227		733.39	0.00071123		1263.4	0.00455856		1793.4	0.00220768		2323.4	-0.0021669
203.6	0.02534895		733.59	0.00052155		1263.6	0.0040978		1793.6	0.00243049		2323.6	-0.00267757
203.8	0.02607417		733.79	0.00045687		1263.8	0.00445751		1793.8	0.00215692		2323.8	-0.00379869
204	0.0272645		733.99	-0.00038384		1264	0.00447942		1794	0.00289457		2324	-0.00384775
204.2	0.0264973		734.19	-0.00090858		1264.2	0.00509705		1794.2	0.00358141		2324.2	-0.0041279
204.4	0.02721796		734.39	-0.00123726		1264.4	0.0053977		1794.4	0.00387681		2324.4	-0.00345117
204.6	0.02804351		734.59	-0.00173425		1264.6	0.00544521		1794.6	0.00459695		2324.6	-0.00277278
204.8	0.02793128		734.79	-0.00256989		1264.8	0.00591321		1794.8	0.00414581		2324.8	-0.00309941
205	0.02852059		734.99	-0.00312252		1265	0.00571114		1795	0.00554098		2325	-0.00284653
205.2	0.02837655		735.19	-0.00351261		1265.2	0.00630997		1795.2	0.00525634		2325.2	-0.00323949
205.4	0.02857668		735.39	-0.00358158		1265.4	0.00626658		1795.4	0.00582033		2325.4	-0.00279482
205.6	0.02877629		735.59	-0.00320759		1265.6	0.00596245		1795.6	0.00540081		2325.6	-0.00138659
205.8	0.0290946		735.79	-0.00368653		1265.8	0.00501797		1795.8	0.00560376		2325.8	-0.00066857
206	0.02937325		735.99	-0.00368248		1266	0.00474214		1796	0.00512756		2326	-0.00016121
206.2	0.02926923		736.19	-0.00340037		1266.2	0.00436534		1796.2	0.00413947		2326.2	0.00073686
206.4	0.02962533		736.39	-0.00315652		1266.4	0.00449517		1796.4	0.00375204		2326.4	-0.00010238
206.6	0.03040765		736.59	-0.00296447		1266.6	0.0037922		1796.6	0.00258024		2326.6	-0.00042074
206.8	0.03054333		736.79	-0.00316325		1266.8	0.00355004		1796.8	0.00211473		2326.8	-0.00006144
207	0.03090411		736.99	-0.00253249		1267	0.00339977		1797	0.0018079		2327	0.00027324
207.2	0.03206978		737.19	-0.00197834		1267.2	0.00348337		1797.2	0.00114148		2327.2	-0.0009287
207.4	0.03257929		737.39	-0.0011996		1267.4	0.00355763		1797.4	0.00122639		2327.4	-0.00159714
207.6	0.03289725		737.59	-0.00038613		1267.6	0.00338923		1797.6	0.00241858		2327.6	-0.00215272
207.8	0.03305931		737.79	0.00020252		1267.8	0.00340913		1797.8	0.00326161		2327.8	-0.00339067
208	0.03423252		737.99	0.00062468		1268	0.00297241		1798	0.00456857		2328	-0.00324741
208.2	0.03435483		738.19	0.00110445		1268.2	0.0036464		1798.2	0.00505246		2328.2	-0.00354104
208.4	0.03461868		738.39	0.00156188		1268.4	0.00448915		1798.4	0.00564858		2328.4	-0.00434903
208.6	0.03556434		738.59	0.00217751		1268.6	0.00445662		1798.6	0.00571469		2328.6	-0.00530088
208.8	0.03559951		738.79	0.00231165		1268.8	0.00503833		1798.8	0.00603838		2328.8	-0.00583544
209	0.03675184		738.99	0.00293302		1269	0.00525363		1799	0.00687574		2329	-0.00557901
209.2	0.03639465		739.19	0.00161698		1269.2	0.00558363		1799.2	0.00560085		2329.2	-0.00623574
209.4	0.03678763		739.39	0.0009473		1269.4	0.00481158		1799.4	0.00582629		2329.4	-0.00537278
209.6	0.03667501		739.59	0.00080658		1269.6	0.00467311		1799.6	0.00617998		2329.6	-0.00438953
209.8	0.03664198		739.79	0.00012771		1269.8	0.00433813		1799.8	0.0062256		2329.8	-0.00412073
210	0.03708024		739.99	0.00015371		1270	0.00491037		1800	0.00545872		2330	-0.00387532
210.2	0.0370794		740.19	0.00027962		1270.2	0.0050827		1800.2	0.00498117		2330.2	-0.00265604
210.4	0.03818595		740.39	-0.00073034		1270.4	0.00580508		1800.4	0.00456506		2330.4	-0.0025454
210.6	0.03862987		740.59	-0.00104442		1270.6	0.0059502		1800.6	0.00371055		2330.6	-0.00217554
210.8	0.0392681		740.79	-0.00094647		1270.8	0.00621982		1800.8	0.00371383		2330.8	-0.00117817
211	0.0401217		740.99	-0.00068483		1271	0.00645203		1801	0.00364876		2331	-0.0009751
211.2	0.0415304		741.19	-0.00026362		1271.2	0.00706842		1801.2	0.00312355		2331.2	-0.00117388
211.4	0.04247993		741.39	0.00011516		1271.4	0.00747354		1801.4	0.00418672		2331.4	-0.00114173
211.6	0.0421044		741.59	0.00111099		1271.6	0.00705726		1801.6	0.00492406		2331.6	-0.00118568
211.8	0.04298785		741.79	0.00100154		1271.8	0.0072828		1801.8	0.00467416		2331.8	-0.00169336
212	0.04415632		741.99	0.00113782		1272	0.00736721		1802	0.00493898		2332	-0.00124539
212.2	0.04443078		742.19	0.00236169		1272.2	0.00839804		1802.2	0.0044893		2332.2	-0.00228249
212.4	0.04473775		742.39	0.00192107		1272.4	0.00849946		1802.4	0.00429275		2332.4	-0.00387607
212.6	0.04557987		742.59	0.00204398		1272.6	0.00902049		1802.6	0.00371198		2332.6	-0.00456321
212.8	0.04622038		742.79	0.00161536		1272.8	0.00865812		1802.8	0.00393836		2332.8	-0.00449702
213	0.04713783		742.99	0.00113636		1273	0.00817842		1803	0.0036209		2333	-0.00438758
213.2	0.04531838		743.19	-0.00014961		1273.2	0.0067229		1803.2	0.00310718		2333.2	-0.00485807
213.4	0.04505155		743.39	0.00012147		1273.4	0.00586076		1803.4	0.00389951		2333.4	-0.00428955
213.6	0.04429088		743.59	0.00044596		1273.6	0.00614003		1803.6	0.00412052		2333.6	-0.00459888
213.8	0.0449068		743.79	0.00027707		1273.8	0.0057212		1803.8	0.00436732		2333.8	-0.00408404
214	0.04428096		743.99	0.00091874		1274	0.00636195		1804	0.00451671		2334	-0.00299726
214.2	0.04393638		744.19	0.00110276		1274.2	0.00588005		1804.2	0.0046437		2334.2	-0.001844
214.4	0.04416888		744.39	0.0016723		1274.4	0.00609876		1804.4	0.00524262		2334.4	-0.00220101
214.6	0.04429387		744.59	0.00289673		1274.6	0.00583262		1804.6	0.00677004		2334.6	-0.00150512
214.8	0.04445425		744.79	0.00362243		1274.8	0.00584305		1804.8	0.006798		2334.8	-0.00107999
215	0.04448207		744.99	0.00334033		1275	0.00564667		1805	0.00659141		2335	-0.00098282
215.2	0.04556787		745.19	0.00343213		1275.2	0.00568472		1805.2	0.00724343		2335.2	-0.00090917
215.4	0.0463567		745.39	0.00377632		1275.4	0.00521107		1805.4	0.00688659		2335.4	-0.0006573
215.6	0.04695235		745.59	0.00370151		1275.6	0.00430648		1805.6	0.00715829		2335.6	-0.00106574
215.8	0.04885905		745.79	0.0037702		1275.8	0.00368819		1805.8	0.00667316		2335.8	-0.00240299
216	0.04901631		745.99	0.00375914		1276	0.00264493		1806	0.00731879		2336	-0.00307578
216.2	0.04983115		746.19	0.00292178		1276.2	0.00277271		1806.2	0.00660453		2336.2	-0.00336753
216.4	0.05096249		746.39	0.00161626		1276.4	0.00285038		1806.4	0.00638181		2336.4	-0.00411221
216.6	0.0516617		746.59	0.00108321		1276.6	0.00278156		1806.6	0.00575073		2336.6	-0.00495205
216.8	0.05318668		746.79	0.00064599		1276.8	0.00207705		1806.8	0.00510022		2336.8	-0.00486856
217	0.05307586		746.99	0.00033431		1277	0.00196467		1807	0.00502053		2337	-0.00516696
217.2	0.05245427		747.19	0.0003462		1277.2	0.00278162		1807.2	0.00542021		2337.2	-0.00555963
217.4	0.05278863		747.39	0.00002795		1277.4	0.00305965		1807.4	0.00514887		2337.4	-0.00545556
217.6	0.05276522		747.59	-0.00093617		1277.6	0.00373311		1807.6	0.00487263		2337.6	-0.00542003
217.8	0.05352329		747.79	-0.00092218		1277.8	0.00427983		1807.8	0.00524217		2337.8	-0.00387724
218	0.05365903		747.99	-0.00071928		1278	0.00544173		1808	0.00554058		2338	-0.0035369
218.2	0.05375297		748.19	-0.00077417		1278.2	0.00546962		1808.2	0.0055358		2338.2	-0.00323271
218.4	0.05434337		748.39	0.0001304		1278.4	0.00657395		1808.4	0.00643911		2338.4	-0.00284662
218.6	0.05492717		748.59	0.00014449		1278.6	0.00754642		1808.6	0.00692418		2338.6	-0.00137878
218.8	0.05500577		748.79	-0.0000155		1278.8	0.00736945		1808.8	0.00591238		2338.8	-0.00117461
219	0.05591665		748.99	-0.00125849		1279	0.00699049		1809	0.00554609		2339	-0.00116884
219.2	0.05697789		749.19	-0.00170011		1279.2	0.00708276		1809.2	0.00584772		2339.2	-0.0007101
219.4	0.0578778		749.39	-0.00128128		1279.4	0.00715575		1809.4	0.00497314		2339.4	-0.00052764
219.6	0.05874391		749.59	-0.00188623		1279.6	0.00654096		1809.6	0.0053195		2339.6	-0.00133018
219.8	0.05848615		749.79	-0.00187851		1279.8	0.00618139		1809.8	0.00507504		2339.8	-0.00171345
220	0.05782103		749.99	-0.00177744		1280	0.00650879		1810	0.00592603		2340	-0.00135888
220.2	0.0582321		750.19	-0.00199347		1280.2	0.00713165		1810.2	0.00567665		2340.2	-0.00080843
220.4	0.05876875		750.39	-0.00186992		1280.4	0.00727507		1810.4	0.00544298		2340.4	-0.00111015
220.6	0.05793061		750.59	-0.00156265		1280.6	0.00723307		1810.6	0.00537075		2340.6	-0.00138564
220.8	0.0576118		750.79	-0.0013502		1280.8	0.0067241		1810.8	0.00542538		2340.8	-0.00149987
221	0.05691072		750.99	-0.0015265		1281	0.00656079		1811	0.0059376		2341	-0.00202187
221.2	0.05687126		751.19	-0.00113518		1281.2	0.00681728		1811.2	0.00626078		2341.2	-0.00273516
221.4	0.05652752		751.39	-0.00098558		1281.4	0.00551519		1811.4	0.00581254		2341.4	-0.00352341
221.6	0.05711281		751.59	-0.00055323		1281.6	0.00577696		1811.6	0.00590259		2341.6	-0.00338069
221.8	0.05805606		751.79	-0.00043767		1281.8	0.00590396		1811.8	0.00608944		2341.8	-0.00322913
222	0.05777139		751.99	-0.00052662		1282	0.00578458		1812	0.0064512		2342	-0.00395537
222.2	0.05716842		752.19	-0.00007879		1282.2	0.00497191		1812.2	0.00634729		2342.2	-0.00350906
222.4	0.0576336		752.39	0.00047573		1282.4	0.00534003		1812.4	0.0067453		2342.4	-0.00335467
222.6	0.05749202		752.59	0.00025425		1282.6	0.00587197		1812.6	0.00684953		2342.6	-0.00375508
222.8	0.05728083		752.79	-0.0000985		1282.8	0.0050456		1812.8	0.00655288		2342.8	-0.00398555
223	0.05805428		752.99	-0.00118937		1283	0.00503279		1813	0.00595895		2343	-0.00465661
223.2	0.05860048		753.19	-0.00143308		1283.2	0.0054003		1813.2	0.00580045		2343.2	-0.00423899
223.4	0.05884084		753.39	-0.00126651		1283.4	0.00525301		1813.4	0.00555836		2343.4	-0.00443922
223.6	0.05927509		753.59	-0.00163922		1283.6	0.00557548		1813.6	0.00597237		2343.6	-0.0047368
223.8	0.06024261		753.79	-0.0013294		1283.8	0.00603508		1813.8	0.00552417		2343.8	-0.0037976
224	0.06031613		753.99	-0.00053648		1284	0.00624767		1814	0.00586467		2344	-0.00377973
224.2	0.06067358		754.19	-0.00005662		1284.2	0.00641267		1814.2	0.00571142		2344.2	-0.00319488
224.4	0.06074882		754.39	-0.00006309		1284.4	0.00573053		1814.4	0.00558162		2344.4	-0.00322401
224.6	0.06116613		754.59	-0.00012972		1284.6	0.0055488		1814.6	0.005395		2344.6	-0.0031866
224.8	0.06216755		754.79	0.00023093		1284.8	0.0053138		1814.8	0.00514909		2344.8	-0.00331215
225	0.06366232		754.99	0.00062004		1285	0.00544874		1815	0.0059832		2345	-0.00294751
225.2	0.06385063		755.19	0.00168309		1285.2	0.00564326		1815.2	0.00685498		2345.2	-0.0036769
225.4	0.06339128		755.39	0.00279672		1285.4	0.00537217		1815.4	0.00627576		2345.4	-0.00365517
225.6	0.06360101		755.59	0.0031564		1285.6	0.00613735		1815.6	0.00644444		2345.6	-0.00356054
225.8	0.06438767		755.79	0.0031588		1285.8	0.00598846		1815.8	0.00666836		2345.8	-0.00420645
226	0.06352724		755.99	0.00368903		1286	0.00517053		1816	0.00688212		2346	-0.00401458
226.2	0.06333384		756.19	0.00380959		1286.2	0.00466556		1816.2	0.00715781		2346.2	-0.00351314
226.4	0.06288014		756.39	0.0037557		1286.4	0.00545928		1816.4	0.00712198		2346.4	-0.00406954
226.6	0.0627407		756.59	0.00389696		1286.6	0.00577003		1816.6	0.00682365		2346.6	-0.0041243
226.8	0.06291137		756.79	0.00429175		1286.8	0.0049707		1816.8	0.00702415		2346.8	-0.00443225
227	0.0628921		756.99	0.00489365		1287	0.0049879		1817	0.00721918		2347	-0.00455365
227.2	0.06355963		757.19	0.00522295		1287.2	0.00569919		1817.2	0.00737435		2347.2	-0.00477118
227.4	0.06376911		757.39	0.00521453		1287.4	0.00551365		1817.4	0.00792184		2347.4	-0.00447264
227.6	0.0643229		757.59	0.00560049		1287.6	0.00551563		1817.6	0.00858602		2347.6	-0.00468255
227.8	0.06543164		757.79	0.00544822		1287.8	0.00527504		1817.8	0.00872471		2347.8	-0.0046167
228	0.0654955		757.99	0.00612075		1288	0.00557231		1818	0.00953		2348	-0.00509723
228.2	0.06642184		758.19	0.00582995		1288.2	0.00627365		1818.2	0.00964782		2348.2	-0.00544763
228.4	0.06734234		758.39	0.00508391		1288.4	0.00629014		1818.4	0.01009805		2348.4	-0.00571893
228.6	0.06865314		758.59	0.00444321		1288.6	0.00642387		1818.6	0.01059888		2348.6	-0.0058398
228.8	0.06971158		758.79	0.00445355		1288.8	0.00650299		1818.8	0.01145508		2348.8	-0.00638608
229	0.07058087		758.99	0.00341873		1289	0.00679523		1819	0.01239659		2349	-0.00628043
229.2	0.06966656		759.19	0.0035255		1289.2	0.00702228		1819.2	0.0122916		2349.2	-0.00707862
229.4	0.069412		759.39	0.00355823		1289.4	0.00739892		1819.4	0.01085524		2349.4	-0.0063623
229.6	0.06979177		759.59	0.00345803		1289.6	0.00784158		1819.6	0.01058576		2349.6	-0.00659594
229.8	0.07062909		759.79	0.00291667		1289.8	0.00731679		1819.8	0.01025249		2349.8	-0.0055879
230	0.07037858		759.99	0.00171583		1290	0.00703581		1820	0.0092096		2350	-0.00495338
230.2	0.0699204		760.19	0.00068056		1290.2	0.00743521		1820.2	0.00848676		2350.2	-0.00397427
230.4	0.07002758		760.39	0.0008931		1290.4	0.00693111		1820.4	0.00818817		2350.4	-0.00359169
230.6	0.07006974		760.59	0.00091099		1290.6	0.00638237		1820.6	0.00769269		2350.6	-0.002794
230.8	0.07046074		760.79	0.00139476		1290.8	0.00636609		1820.8	0.00817134		2350.8	-0.00313276
231	0.0705564		760.99	0.00214313		1291	0.00666731		1821	0.00751352		2351	-0.00264244
231.2	0.07178646		761.19	0.00239801		1291.2	0.00620797		1821.2	0.00725073		2351.2	-0.00298749
231.4	0.07233663		761.39	0.00294973		1291.4	0.00531438		1821.4	0.00778967		2351.4	-0.00228069
231.6	0.07215052		761.59	0.00341798		1291.6	0.00525398		1821.6	0.00768248		2351.6	-0.00257177
231.8	0.0729664		761.79	0.00288536		1291.8	0.00646801		1821.8	0.00782455		2351.8	-0.00275924
232	0.07394497		761.99	0.00331695		1292	0.00718536		1822	0.0084221		2352	-0.00294683
232.2	0.074302		762.19	0.00242961		1292.2	0.0074739		1822.2	0.0083463		2352.2	-0.0042569
232.4	0.07430553		762.39	0.00295684		1292.4	0.00743195		1822.4	0.00840591		2352.4	-0.00508099
232.6	0.07504974		762.59	0.00283443		1292.6	0.00748193		1822.6	0.00819574		2352.6	-0.00614827
232.8	0.07558998		762.79	0.00282147		1292.8	0.00846119		1822.8	0.00809733		2352.8	-0.00659157
233	0.07484492		762.99	0.00259078		1293	0.00900872		1823	0.00743374		2353	-0.00590869
233.2	0.07436723		763.19	0.00325249		1293.2	0.00908971		1823.2	0.00719595		2353.2	-0.00617262
233.4	0.07475541		763.39	0.00298151		1293.4	0.00942977		1823.4	0.00661321		2353.4	-0.00593468
233.6	0.07500454		763.59	0.0032306		1293.6	0.00916563		1823.6	0.00668485		2353.6	-0.00590365
233.8	0.07511233		763.79	0.00227598		1293.8	0.00903865		1823.8	0.00598079		2353.8	-0.00489626
234	0.07496077		763.99	0.00169343		1294	0.00893254		1824	0.00586616		2354	-0.00441274
234.2	0.0744212		764.19	0.00132623		1294.2	0.00862033		1824.2	0.0065119		2354.2	-0.00302718
234.4	0.07502297		764.39	0.00162592		1294.4	0.0081603		1824.4	0.00654331		2354.4	-0.00190279
234.6	0.07523358		764.59	0.00115924		1294.6	0.00832902		1824.6	0.00596514		2354.6	-0.00145783
234.8	0.07564296		764.79	0.00130318		1294.8	0.00818859		1824.8	0.00640478		2354.8	-0.00161625
235	0.07650002		764.99	0.00173312		1295	0.00774314		1825	0.00667573		2355	-0.00134194
235.2	0.07700789		765.19	0.00154984		1295.2	0.00784669		1825.2	0.00770955		2355.2	-0.00097321
235.4	0.07707269		765.39	0.00120276		1295.4	0.00789305		1825.4	0.00807571		2355.4	-0.00044268
235.6	0.07624445		765.59	0.0008029		1295.6	0.00818472		1825.6	0.00778444		2355.6	-0.00037269
235.8	0.0770385		765.79	0.00021466		1295.8	0.00889464		1825.8	0.00836115		2355.8	-0.00039579
236	0.0775533		765.99	-0.00027042		1296	0.00832087		1826	0.00828812		2356	-0.00091297
236.2	0.07757142		766.19	-0.00103483		1296.2	0.00875182		1826.2	0.00832226		2356.2	-0.00219087
236.4	0.07781989		766.39	-0.00043974		1296.4	0.00856485		1826.4	0.00874909		2356.4	-0.00298001
236.6	0.07847621		766.59	-0.00048645		1296.6	0.0080138		1826.6	0.00918309		2356.6	-0.003231
236.8	0.078637		766.79	-0.00067625		1296.8	0.00870102		1826.8	0.00993168		2356.8	-0.00313115
237	0.07868124		766.99	-0.00091176		1297	0.00808691		1827	0.01082071		2357	-0.00395656
237.2	0.07940288		767.19	-0.00030958		1297.2	0.00709261		1827.2	0.01132018		2357.2	-0.00506309
237.4	0.07954542		767.39	0.00015772		1297.4	0.00703293		1827.4	0.01173895		2357.4	-0.00608564
237.6	0.07989855		767.59	0.00128044		1297.6	0.0069524		1827.6	0.0121746		2357.6	-0.00690668
237.8	0.07978601		767.79	0.00107091		1297.8	0.0067645		1827.8	0.01214094		2357.8	-0.00650934
238	0.07989352		767.99	0.00091614		1298	0.00624452		1828	0.012472		2358	-0.00608652
238.2	0.07999568		768.19	0.00084735		1298.2	0.00644015		1828.2	0.01270125		2358.2	-0.00581221
238.4	0.08073459		768.39	0.00108458		1298.4	0.00654721		1828.4	0.01160492		2358.4	-0.00531317
238.6	0.08109336		768.59	0.00115472		1298.6	0.00662279		1828.6	0.01115417		2358.6	-0.00597965
238.8	0.08139509		768.79	0.00057979		1298.8	0.0075102		1828.8	0.01161962		2358.8	-0.00562547
239	0.08156513		768.99	0.00054632		1299	0.00839846		1829	0.01056199		2359	-0.00563526
239.2	0.08065427		769.19	0.00092339		1299.2	0.00885227		1829.2	0.0100213		2359.2	-0.00581784
239.4	0.08047975		769.39	0.00092235		1299.4	0.00885437		1829.4	0.00804548		2359.4	-0.00493879
239.6	0.08033533		769.59	0.00137069		1299.6	0.00875411		1829.6	0.00721919		2359.6	-0.00435267
239.8	0.08045958		769.79	0.00052067		1299.8	0.00939649		1829.8	0.00658076		2359.8	-0.00377328
240	0.0811143		769.99	0.00013059		1300	0.00951789		1830	0.00559354		2360	-0.00335313
240.2	0.08106918		770.19	-0.00001258		1300.2	0.00941071		1830.2	0.00593244		2360.2	-0.00305334
240.4	0.08130847		770.39	0.00052858		1300.4	0.00979458		1830.4	0.00561032		2360.4	-0.00292542
240.6	0.08195844		770.59	0.00043248		1300.6	0.00955661		1830.6	0.00531554		2360.6	-0.00250471
240.8	0.08199641		770.79	-0.00030858		1300.8	0.0100123		1830.8	0.00556058		2360.8	-0.00215687
241	0.08222747		770.99	0.0005529		1301	0.00894083		1831	0.0060113		2361	-0.00269561
241.2	0.08336299		771.19	0.00145803		1301.2	0.00803084		1831.2	0.00573331		2361.2	-0.00279029
241.4	0.08400307		771.39	0.00227904		1301.4	0.00785141		1831.4	0.007155		2361.4	-0.00315742
241.6	0.08486386		771.59	0.0026422		1301.6	0.0069773		1831.6	0.00757471		2361.6	-0.00289207
241.8	0.08406908		771.79	0.0033249		1301.8	0.00579637		1831.8	0.00794287		2361.8	-0.00285955
242	0.08481698		771.99	0.00289594		1302	0.00557966		1832	0.00818643		2362	-0.00258297
242.2	0.08536383		772.19	0.00335729		1302.2	0.00592658		1832.2	0.00924959		2362.2	-0.0031807
242.4	0.08574151		772.39	0.00342504		1302.4	0.00639483		1832.4	0.00959286		2362.4	-0.00342
242.6	0.08528328		772.59	0.00358727		1302.6	0.00633653		1832.6	0.01035719		2362.6	-0.00374819
242.8	0.08473107		772.79	0.00298739		1302.8	0.00714268		1832.8	0.01102226		2362.8	-0.0038714
243	0.08426113		772.99	0.00376481		1303	0.00706091		1833	0.01075977		2363	-0.00537213
243.2	0.08426732		773.19	0.00400884		1303.2	0.00742598		1833.2	0.0110305		2363.2	-0.00516531
243.4	0.08425596		773.39	0.00420174		1303.4	0.00813739		1833.4	0.01023533		2363.4	-0.00495979
243.6	0.08456939		773.59	0.00371142		1303.6	0.00859889		1833.6	0.01002107		2363.6	-0.00532784
243.8	0.08420642		773.79	0.00274965		1303.8	0.00930134		1833.8	0.00966329		2363.8	-0.0054366
244	0.08468025		773.99	0.00329572		1304	0.00944559		1834	0.00890441		2364	-0.00532885
244.2	0.08380722		774.19	0.00345945		1304.2	0.00903088		1834.2	0.00915161		2364.2	-0.00567722
244.4	0.08442193		774.39	0.0031399		1304.4	0.01027606		1834.4	0.00824781		2364.4	-0.00620836
244.6	0.08434718		774.59	0.00263985		1304.6	0.01015898		1834.6	0.00798472		2364.6	-0.00642613
244.8	0.08385235		774.79	0.00231532		1304.8	0.01029494		1834.8	0.00802392		2364.8	-0.00611972
245	0.085175		774.99	0.00325762		1305	0.01008221		1835	0.00820025		2365	-0.00593822
245.2	0.0864504		775.19	0.0030883		1305.2	0.01012627		1835.2	0.0078829		2365.2	-0.00603173
245.4	0.08696503		775.39	0.00410227		1305.4	0.01022205		1835.4	0.00890165		2365.4	-0.00675137
245.6	0.08730056		775.59	0.00374278		1305.6	0.00965534		1835.6	0.00919271		2365.6	-0.00651348
245.8	0.08709507		775.79	0.00414561		1305.8	0.00982306		1835.8	0.00982871		2365.8	-0.00705202
246	0.0881803		775.99	0.00435324		1306	0.01049861		1836	0.01049582		2366	-0.00752101
246.2	0.08851651		776.19	0.00461567		1306.2	0.01017664		1836.2	0.01149336		2366.2	-0.0075415
246.4	0.08815227		776.39	0.00439401		1306.4	0.00994547		1836.4	0.01180691		2366.4	-0.00753032
246.6	0.08796649		776.59	0.00354337		1306.6	0.00970104		1836.6	0.01172866		2366.6	-0.00736418
246.8	0.08838724		776.79	0.0029655		1306.8	0.01016719		1836.8	0.01225739		2366.8	-0.00694721
247	0.08960875		776.99	0.00295746		1307	0.00982806		1837	0.01203652		2367	-0.00675965
247.2	0.08995993		777.19	0.00232242		1307.2	0.00934414		1837.2	0.01123799		2367.2	-0.0058596
247.4	0.09082904		777.39	0.0023092		1307.4	0.00886457		1837.4	0.01065882		2367.4	-0.00560357
247.6	0.09096575		777.59	0.00107327		1307.6	0.00834939		1837.6	0.01065572		2367.6	-0.00486412
247.8	0.09071844		777.79	0.00095741		1307.8	0.0076057		1837.8	0.01081934		2367.8	-0.00388696
248	0.09123296		777.99	0.00135562		1308	0.00722911		1838	0.01130521		2368	-0.00301697
248.2	0.0909464		778.19	0.00158686		1308.2	0.00735783		1838.2	0.01153785		2368.2	-0.00256442
248.4	0.09131391		778.39	0.00119882		1308.4	0.00793947		1838.4	0.01142692		2368.4	-0.00265764
248.6	0.09072912		778.59	0.00102785		1308.6	0.00801034		1838.6	0.0110009		2368.6	-0.00241766
248.8	0.09071674		778.79	0.0010382		1308.8	0.0069116		1838.8	0.0108717		2368.8	-0.00233865
249	0.09138442		778.99	0.00154414		1309	0.00638175		1839	0.01056209		2369	-0.00240289
249.2	0.09167922		779.19	0.0016947		1309.2	0.00628027		1839.2	0.0100444		2369.2	-0.00245947
249.4	0.09203718		779.39	0.00186607		1309.4	0.00623152		1839.4	0.01046436		2369.4	-0.00307179
249.6	0.09249798		779.59	0.00172186		1309.6	0.00601642		1839.6	0.01069504		2369.6	-0.00312481
249.8	0.09231053		779.79	0.00278353		1309.8	0.00603546		1839.8	0.01075792		2369.8	-0.00498598
250	0.09252611		779.99	0.00360594		1310	0.0058214		1840	0.01043293		2370	-0.00568069
250.2	0.09344651		780.19	0.00229194		1310.2	0.00545992		1840.2	0.00972467		2370.2	-0.00545076
250.4	0.09339254		780.39	0.00190882		1310.4	0.00670936		1840.4	0.00920958		2370.4	-0.00626046
250.6	0.09391806		780.59	0.00211276		1310.6	0.006886		1840.6	0.00887547		2370.6	-0.00587787
250.8	0.09459283		780.79	0.00218561		1310.8	0.00697623		1840.8	0.00829648		2370.8	-0.00510473
251	0.09473532		780.99	0.00252054		1311	0.00696579		1841	0.00779595		2371	-0.00507767
251.2	0.09479557		781.19	0.00203365		1311.2	0.00696734		1841.2	0.00690867		2371.2	-0.00468653
251.4	0.09552509		781.39	0.00146166		1311.4	0.0076567		1841.4	0.00713305		2371.4	-0.00438414
251.6	0.09511923		781.59	0.00131598		1311.6	0.00787097		1841.6	0.00727273		2371.6	-0.00432098
251.8	0.09549572		781.79	0.00124388		1311.8	0.00831447		1841.8	0.00787443		2371.8	-0.00370799
252	0.09514403		781.99	0.00129296		1312	0.00865289		1842	0.00879378		2372	-0.00305733
252.2	0.09536778		782.19	0.00210014		1312.2	0.00950976		1842.2	0.0080322		2372.2	-0.00250141
252.4	0.09594878		782.39	0.0024302		1312.4	0.00956378		1842.4	0.00876276		2372.4	-0.00285956
252.6	0.09624914		782.59	0.00264687		1312.6	0.00944691		1842.6	0.00832846		2372.6	-0.003287
252.8	0.09626044		782.79	0.0032508		1312.8	0.00869729		1842.8	0.00846123		2372.8	-0.00365592
253	0.09628568		782.99	0.00346314		1313	0.00978897		1843	0.00822423		2373	-0.00316209
253.2	0.09688137		783.19	0.00352502		1313.2	0.01014391		1843.2	0.00807066		2373.2	-0.00334238
253.4	0.0978817		783.39	0.00333259		1313.4	0.01053994		1843.4	0.00825175		2373.4	-0.0044105
253.6	0.09842299		783.59	0.00430434		1313.6	0.01073603		1843.6	0.00888035		2373.6	-0.00494441
253.8	0.09812823		783.79	0.00437843		1313.8	0.01080337		1843.8	0.00920952		2373.8	-0.00559667
254	0.09871873		783.99	0.00416592		1314	0.01134807		1844	0.00890046		2374	-0.00481673
254.2	0.09936545		784.19	0.00398194		1314.2	0.01238513		1844.2	0.00931865		2374.2	-0.00483251
254.4	0.09980207		784.39	0.00480628		1314.4	0.01313473		1844.4	0.01000217		2374.4	-0.00513479
254.6	0.09952975		784.59	0.0054969		1314.6	0.01267684		1844.6	0.01022204		2374.6	-0.00520256
254.8	0.09990919		784.79	0.00532473		1314.8	0.0124844		1844.8	0.00994505		2374.8	-0.00509329
255	0.09952353		784.99	0.00568813		1315	0.01143569		1845	0.01060525		2375	-0.00550177
255.2	0.10085633		785.19	0.00458263		1315.2	0.01024153		1845.2	0.0106782		2375.2	-0.00550743
255.4	0.100603		785.39	0.00363232		1315.4	0.0097443		1845.4	0.01132071		2375.4	-0.00626166
255.6	0.10070865		785.59	0.00347947		1315.6	0.00923601		1845.6	0.01167074		2375.6	-0.00600821
255.8	0.10043473		785.79	0.00291545		1315.8	0.00855351		1845.8	0.01250811		2375.8	-0.00508854
256	0.1002464		785.99	0.00208397		1316	0.00763443		1846	0.01246355		2376	-0.00473966
256.2	0.10109954		786.19	0.00333531		1316.2	0.00728471		1846.2	0.01250561		2376.2	-0.00485537
256.4	0.10132825		786.39	0.00320264		1316.4	0.0069842		1846.4	0.01308251		2376.4	-0.00531856
256.6	0.10075252		786.59	0.00369275		1316.6	0.00633558		1846.6	0.01199501		2376.6	-0.00629804
256.8	0.09952392		786.79	0.00357324		1316.8	0.00598426		1846.8	0.01135727		2376.8	-0.00604584
257	0.09922405		786.99	0.00353705		1317	0.00652151		1847	0.01140622		2377	-0.00468725
257.2	0.09980362		787.19	0.00365457		1317.2	0.00619619		1847.2	0.01070852		2377.2	-0.00461249
257.4	0.09898809		787.39	0.00359411		1317.4	0.00708113		1847.4	0.01062387		2377.4	-0.00459953
257.6	0.09892933		787.59	0.00419461		1317.6	0.0077541		1847.6	0.01072136		2377.6	-0.00498863
257.8	0.09799395		787.79	0.00382313		1317.8	0.00834249		1847.8	0.01059034		2377.8	-0.00559352
258	0.09803157		787.99	0.00390977		1318	0.00867038		1848	0.00992217		2378	-0.00585605
258.2	0.09758338		788.19	0.00447716		1318.2	0.0092541		1848.2	0.01076632		2378.2	-0.00708535
258.4	0.09767217		788.39	0.00537333		1318.4	0.00986393		1848.4	0.01121284		2378.4	-0.00753397
258.6	0.09698293		788.59	0.00539987		1318.6	0.00945019		1848.6	0.01118668		2378.6	-0.0077598
258.8	0.09770121		788.79	0.00572248		1318.8	0.00901109		1848.8	0.01139997		2378.8	-0.00757576
259	0.09772318		788.99	0.00551048		1319	0.00878792		1849	0.01178174		2379	-0.00833933
259.2	0.09856467		789.19	0.00360322		1319.2	0.00872089		1849.2	0.01199796		2379.2	-0.00855608
259.4	0.09820467		789.39	0.00312026		1319.4	0.00939413		1849.4	0.01173835		2379.4	-0.00806013
259.6	0.09856568		789.59	0.0028094		1319.6	0.01012263		1849.6	0.01177344		2379.6	-0.00755772
259.8	0.09941494		789.79	0.00204913		1319.8	0.01016738		1849.8	0.01179337		2379.8	-0.00718382
260	0.10032019		789.99	0.00198702		1320	0.01019023		1850	0.01196642		2380	-0.00719896
260.2	0.10131279		790.19	0.00297787		1320.2	0.01053675		1850.2	0.01231256		2380.2	-0.00668992
260.4	0.10137973		790.39	0.00254003		1320.4	0.0109287		1850.4	0.01207138		2380.4	-0.00702828
260.6	0.10184586		790.59	0.00298907		1320.6	0.01015955		1850.6	0.01167471		2380.6	-0.00718898
260.8	0.10192447		790.79	0.00303687		1320.8	0.01045082		1850.8	0.01175214		2380.8	-0.00576806
261	0.10290895		790.99	0.0033915		1321	0.01087409		1851	0.01213266		2381	-0.0043818
261.2	0.10313068		791.19	0.00422324		1321.2	0.01098472		1851.2	0.01085886		2381.2	-0.00388444
261.4	0.10281137		791.39	0.00421321		1321.4	0.0114942		1851.4	0.01139483		2381.4	-0.00445517
261.6	0.10392969		791.59	0.00418064		1321.6	0.01120266		1851.6	0.0112082		2381.6	-0.00422272
261.8	0.10395805		791.79	0.00346179		1321.8	0.0109648		1851.8	0.01079561		2381.8	-0.00475727
262	0.10486016		791.99	0.00356935		1322	0.01021616		1852	0.01099414		2382	-0.00441833
262.2	0.10533192		792.19	0.00411855		1322.2	0.01009495		1852.2	0.01074546		2382.2	-0.00452499
262.4	0.10615356		792.39	0.00435937		1322.4	0.00959835		1852.4	0.01083175		2382.4	-0.00420905
262.6	0.10654975		792.59	0.00383063		1322.6	0.00889728		1852.6	0.00995802		2382.6	-0.00418775
262.8	0.10693815		792.79	0.00412487		1322.8	0.00899175		1852.8	0.00939679		2382.8	-0.00501406
263	0.1070707		792.99	0.00358545		1323	0.00799539		1853	0.00821558		2383	-0.00572653
263.2	0.10662624		793.19	0.00303872		1323.2	0.00802536		1853.2	0.00792477		2383.2	-0.00587155
263.4	0.10660148		793.39	0.00286168		1323.4	0.00817935		1853.4	0.00777629		2383.4	-0.00536455
263.6	0.1068072		793.59	0.00278574		1323.6	0.00876853		1853.6	0.00789139		2383.6	-0.00601105
263.8	0.10778891		793.79	0.00288045		1323.8	0.00867299		1853.8	0.00904881		2383.8	-0.00586865
264	0.10831251		793.99	0.0033211		1324	0.008424		1854	0.01030012		2384	-0.00558858
264.2	0.10881778		794.19	0.00312166		1324.2	0.00833803		1854.2	0.01094594		2384.2	-0.00589636
264.4	0.10850169		794.39	0.00345787		1324.4	0.00866058		1854.4	0.0113286		2384.4	-0.00686257
264.6	0.10873459		794.59	0.00404678		1324.6	0.00803027		1854.6	0.01175482		2384.6	-0.00644084
264.8	0.1081671		794.79	0.0038272		1324.8	0.00803771		1854.8	0.01193353		2384.8	-0.00621984
265	0.10765087		794.99	0.00369788		1325	0.00744761		1855	0.01235254		2385	-0.00612661
265.2	0.10756811		795.19	0.00410464		1325.2	0.00688116		1855.2	0.01261875		2385.2	-0.00582877
265.4	0.10809013		795.39	0.00407479		1325.4	0.00695846		1855.4	0.01419132		2385.4	-0.00668689
265.6	0.10829963		795.59	0.00374739		1325.6	0.00569763		1855.6	0.01459637		2385.6	-0.00673302
265.8	0.10853289		795.79	0.00371291		1325.8	0.00551477		1855.8	0.01444169		2385.8	-0.00748464
266	0.10900567		795.99	0.00463702		1326	0.00547138		1856	0.01423143		2386	-0.00724543
266.2	0.10976649		796.19	0.00515109		1326.2	0.00540105		1856.2	0.01318507		2386.2	-0.00758346
266.4	0.1098529		796.39	0.00522775		1326.4	0.00533681		1856.4	0.01284864		2386.4	-0.00765607
266.6	0.1099069		796.59	0.00587623		1326.6	0.0053836		1856.6	0.01151557		2386.6	-0.00831258
266.8	0.10961618		796.79	0.00535653		1326.8	0.00551243		1856.8	0.01081462		2386.8	-0.00808388
267	0.10917459		796.99	0.00549328		1327	0.0052779		1857	0.01070974		2387	-0.00841694
267.2	0.10922949		797.19	0.00551094		1327.2	0.00687351		1857.2	0.01066717		2387.2	-0.00860456
267.4	0.10945538		797.39	0.00555075		1327.4	0.00706603		1857.4	0.01050179		2387.4	-0.00853226
267.6	0.10916621		797.59	0.00636255		1327.6	0.00746725		1857.6	0.01070921		2387.6	-0.00873036
267.8	0.10946097		797.79	0.00658287		1327.8	0.00760319		1857.8	0.01183691		2387.8	-0.00816907
268	0.10998372		797.99	0.00672473		1328	0.00815168		1858	0.01184445		2388	-0.007642
268.2	0.1100021		798.19	0.0063981		1328.2	0.00855417		1858.2	0.0117928		2388.2	-0.00778749
268.4	0.10964388		798.39	0.00666015		1328.4	0.00908561		1858.4	0.01152045		2388.4	-0.00819832
268.6	0.10909336		798.59	0.00579267		1328.6	0.00859221		1858.6	0.01203538		2388.6	-0.00807333
268.8	0.10873093		798.79	0.00513029		1328.8	0.00812656		1858.8	0.01166858		2388.8	-0.00811575
269	0.10923897		798.99	0.00509914		1329	0.0083044		1859	0.01207669		2389	-0.00819045
269.2	0.10968319		799.19	0.00510937		1329.2	0.00829861		1859.2	0.01229808		2389.2	-0.00770166
269.4	0.10965913		799.39	0.00505164		1329.4	0.00875646		1859.4	0.01258167		2389.4	-0.00765894
269.6	0.1095572		799.59	0.0038803		1329.6	0.00788277		1859.6	0.01221822		2389.6	-0.00734266
269.8	0.10960974		799.79	0.00412573		1329.8	0.00895462		1859.8	0.01136396		2389.8	-0.00699683
270	0.10945046		799.99	0.00451979		1330	0.00962715		1860	0.01136488		2390	-0.00655398
270.2	0.10969591		800.19	0.00407492		1330.2	0.00893849		1860.2	0.01169755		2390.2	-0.00567499
270.4	0.10913082		800.39	0.0041231		1330.4	0.00891819		1860.4	0.01182109		2390.4	-0.00491315
270.6	0.10894997		800.59	0.00351193		1330.6	0.00879564		1860.6	0.01142774		2390.6	-0.00518023
270.8	0.1085496		800.79	0.00227645		1330.8	0.00918239		1860.8	0.01214216		2390.8	-0.00436973
271	0.10799645		800.99	0.00206207		1331	0.00908111		1861	0.01269529		2391	-0.00500595
271.2	0.10839691		801.19	0.00159697		1331.2	0.00919053		1861.2	0.01233705		2391.2	-0.00559195
271.4	0.10757015		801.39	0.00213443		1331.4	0.00857022		1861.4	0.01272692		2391.4	-0.00529638
271.6	0.10738874		801.59	0.00218734		1331.6	0.0085079		1861.6	0.01367538		2391.6	-0.00549801
271.8	0.10813077		801.79	0.00252665		1331.8	0.00929603		1861.8	0.01455622		2391.8	-0.00521584
272	0.1088396		801.99	0.00260986		1332	0.00952523		1862	0.01456342		2392	-0.00510907
272.2	0.10912361		802.19	0.00212857		1332.2	0.00953973		1862.2	0.01510698		2392.2	-0.00613684
272.4	0.11018999		802.39	0.00240206		1332.4	0.00949495		1862.4	0.01481975		2392.4	-0.00737589
272.6	0.11139815		802.59	0.0024673		1332.6	0.00951279		1862.6	0.01501891		2392.6	-0.00732786
272.8	0.11307972		802.79	0.00355409		1332.8	0.00981558		1862.8	0.01449244		2392.8	-0.00720479
273	0.1148932		802.99	0.00448369		1333	0.01096835		1863	0.01408089		2393	-0.00686917
273.2	0.11526647		803.19	0.0044991		1333.2	0.0112227		1863.2	0.01381774		2393.2	-0.00659086
273.4	0.11585858		803.39	0.00466409		1333.4	0.01043466		1863.4	0.01368561		2393.4	-0.00627898
273.6	0.11657217		803.59	0.00430856		1333.6	0.01011057		1863.6	0.01335959		2393.6	-0.0063197
273.8	0.11657745		803.79	0.00492996		1333.8	0.0110551		1863.8	0.0130328		2393.8	-0.00702653
274	0.11611412		803.99	0.00524537		1334	0.01048125		1864	0.01351471		2394	-0.00706645
274.2	0.11609175		804.19	0.00536692		1334.2	0.00957155		1864.2	0.01351628		2394.2	-0.00698272
274.4	0.11546729		804.39	0.00612149		1334.4	0.00929187		1864.4	0.01248021		2394.4	-0.00673558
274.6	0.11503439		804.59	0.00551211		1334.6	0.00918376		1864.6	0.01170991		2394.6	-0.00657777
274.8	0.11384265		804.79	0.00579945		1334.8	0.00855083		1864.8	0.01186321		2394.8	-0.00654532
275	0.11272091		804.99	0.00580627		1335	0.00820719		1865	0.011499		2395	-0.00642629
275.2	0.1118037		805.19	0.00554349		1335.2	0.00781063		1865.2	0.01203225		2395.2	-0.00700866
275.4	0.11126451		805.39	0.005449		1335.4	0.00722384		1865.4	0.01202371		2395.4	-0.00679661
275.6	0.11124309		805.59	0.00539536		1335.6	0.00714652		1865.6	0.01226019		2395.6	-0.00677599
275.8	0.11122303		805.79	0.00634726		1335.8	0.00760372		1865.8	0.01211689		2395.8	-0.00685366
276	0.11162692		805.99	0.00624608		1336	0.00688005		1866	0.01148485		2396	-0.00697031
276.2	0.11213826		806.19	0.00619497		1336.2	0.00685587		1866.2	0.01156975		2396.2	-0.00787368
276.4	0.11347262		806.39	0.00659731		1336.4	0.00757219		1866.4	0.01141907		2396.4	-0.00833838
276.6	0.11430086		806.59	0.00730278		1336.6	0.00799606		1866.6	0.0116936		2396.6	-0.00709378
276.8	0.11567981		806.79	0.00747527		1336.8	0.00925205		1866.8	0.01130063		2396.8	-0.00687866
277	0.11549221		806.99	0.00776747		1337	0.01016795		1867	0.01050214		2397	-0.0072674
277.2	0.11594508		807.19	0.0070243		1337.2	0.01018177		1867.2	0.01075503		2397.2	-0.00778585
277.4	0.11637578		807.39	0.00697225		1337.4	0.00975077		1867.4	0.0104926		2397.4	-0.0080789
277.6	0.11710269		807.59	0.00658784		1337.6	0.01159424		1867.6	0.01054608		2397.6	-0.00876666
277.8	0.11701232		807.79	0.00652137		1337.8	0.01268056		1867.8	0.0106317		2397.8	-0.00914135
278	0.11737664		807.99	0.0061205		1338	0.01214348		1868	0.00995589		2398	-0.00917964
278.2	0.1179286		808.19	0.00601827		1338.2	0.01239753		1868.2	0.00949114		2398.2	-0.00921591
278.4	0.11771188		808.39	0.00594317		1338.4	0.01248603		1868.4	0.00821435		2398.4	-0.00840981
278.6	0.11666133		808.59	0.0051628		1338.6	0.0125617		1868.6	0.00856064		2398.6	-0.0081678
278.8	0.11601045		808.79	0.0050142		1338.8	0.01235104		1868.8	0.00838011		2398.8	-0.0078633
279	0.1162186		808.99	0.00477493		1339	0.01247368		1869	0.00865509		2399	-0.00731766
279.2	0.11649847		809.19	0.00454467		1339.2	0.01208302		1869.2	0.0090953		2399.2	-0.00682562
279.4	0.11664781		809.39	0.00457073		1339.4	0.01106426		1869.4	0.00834282		2399.4	-0.00660701
279.6	0.11670997		809.59	0.00562526		1339.6	0.01118423		1869.6	0.00818842		2399.6	-0.00596183
279.8	0.11674053		809.79	0.00538175		1339.8	0.01095429		1869.8	0.00821169		2399.8	-0.00548315
280	0.11745275		809.99	0.00533645		1340	0.01046099		1870	0.00799671		2400	-0.00493674
280.2	0.11811475		810.19	0.00491529		1340.2	0.01026086		1870.2	0.00879834		2400.2	-0.00517455
280.4	0.11798042		810.39	0.0055826		1340.4	0.01058237		1870.4	0.00966366		2400.4	-0.00486394
280.6	0.11830317		810.59	0.00576827		1340.6	0.010373		1870.6	0.00977796		2400.6	-0.00457295
280.8	0.11822504		810.79	0.00524709		1340.8	0.0111938		1870.8	0.00977719		2400.8	-0.00586952
281	0.11753082		810.99	0.0062786		1341	0.01100405		1871	0.0097236		2401	-0.00715694
281.2	0.11804615		811.19	0.00635168		1341.2	0.01115719		1871.2	0.01060483		2401.2	-0.00778601
281.4	0.11826294		811.39	0.00655381		1341.4	0.01134123		1871.4	0.01102805		2401.4	-0.00860494
281.6	0.11874282		811.59	0.00653345		1341.6	0.01156549		1871.6	0.01166994		2401.6	-0.00878406
281.8	0.118973		811.79	0.0067134		1341.8	0.01130641		1871.8	0.01169161		2401.8	-0.00916691
282	0.11895059		811.99	0.00613185		1342	0.01057629		1872	0.01056457		2402	-0.01032678
282.2	0.11902735		812.19	0.00568974		1342.2	0.01032266		1872.2	0.0106493		2402.2	-0.01129679
282.4	0.1185873		812.39	0.00505627		1342.4	0.00986832		1872.4	0.01044611		2402.4	-0.01135396
282.6	0.11878953		812.59	0.00527511		1342.6	0.00971703		1872.6	0.01094001		2402.6	-0.01178387
282.8	0.11929901		812.79	0.00554477		1342.8	0.00956968		1872.8	0.01107925		2402.8	-0.01117951
283	0.12001625		812.99	0.00606436		1343	0.00890094		1873	0.01089364		2403	-0.01089461
283.2	0.12013418		813.19	0.00579753		1343.2	0.00866732		1873.2	0.01100316		2403.2	-0.01043206
283.4	0.11958662		813.39	0.00557913		1343.4	0.00824035		1873.4	0.01187269		2403.4	-0.00991302
283.6	0.12008977		813.59	0.00607748		1343.6	0.00855692		1873.6	0.01180021		2403.6	-0.00830831
283.8	0.1205203		813.79	0.00562172		1343.8	0.00849369		1873.8	0.01214953		2403.8	-0.00805699
284	0.12072709		813.99	0.00592139		1344	0.00885464		1874	0.01216604		2404	-0.00791231
284.2	0.1214862		814.19	0.00563157		1344.2	0.00921345		1874.2	0.01272618		2404.2	-0.00710408
284.4	0.12101377		814.39	0.0061195		1344.4	0.00982688		1874.4	0.01289068		2404.4	-0.00637014
284.6	0.12224672		814.59	0.00566811		1344.6	0.01031617		1874.6	0.01227184		2404.6	-0.00623968
284.8	0.12237128		814.79	0.00533664		1344.8	0.01066761		1874.8	0.01231031		2404.8	-0.00581687
285	0.12250551		814.99	0.00600902		1345	0.01101529		1875	0.01185386		2405	-0.00574036
285.2	0.12330954		815.19	0.00538159		1345.2	0.01201987		1875.2	0.01240099		2405.2	-0.00591632
285.4	0.12416187		815.39	0.00547425		1345.4	0.01148406		1875.4	0.01172178		2405.4	-0.00640497
285.6	0.12406819		815.59	0.00569755		1345.6	0.01105245		1875.6	0.0110477		2405.6	-0.00716716
285.8	0.12398185		815.79	0.00547655		1345.8	0.01120188		1875.8	0.01025639		2405.8	-0.00712777
286	0.12415533		815.99	0.00396773		1346	0.0107186		1876	0.00911214		2406	-0.00808286
286.2	0.12531641		816.19	0.00315127		1346.2	0.01017097		1876.2	0.00953599		2406.2	-0.00857623
286.4	0.12495615		816.39	0.00344845		1346.4	0.00893947		1876.4	0.0092182		2406.4	-0.00812501
286.6	0.12559491		816.59	0.00418136		1346.6	0.00852003		1876.6	0.00922609		2406.6	-0.00784792
286.8	0.12547182		816.79	0.0047122		1346.8	0.00727562		1876.8	0.00946616		2406.8	-0.00685467
287	0.12610445		816.99	0.00450319		1347	0.00650838		1877	0.00896169		2407	-0.00673201
287.2	0.12516308		817.19	0.00420195		1347.2	0.00662305		1877.2	0.00932432		2407.2	-0.00624746
287.4	0.1249707		817.39	0.0041482		1347.4	0.00647457		1877.4	0.01035402		2407.4	-0.00664355
287.6	0.12454502		817.59	0.00445504		1347.6	0.00624579		1877.6	0.00982252		2407.6	-0.00722471
287.8	0.12449914		817.79	0.00467036		1347.8	0.00641625		1877.8	0.01011645		2407.8	-0.00861961
288	0.12385233		817.99	0.00440756		1348	0.00680844		1878	0.01088833		2408	-0.00756526
288.2	0.12477473		818.19	0.00464027		1348.2	0.00749703		1878.2	0.01110695		2408.2	-0.00742406
288.4	0.12416887		818.39	0.0051259		1348.4	0.00780808		1878.4	0.01202639		2408.4	-0.00760567
288.6	0.12425379		818.59	0.00558395		1348.6	0.00817597		1878.6	0.01276065		2408.6	-0.00698075
288.8	0.12378664		818.79	0.00525261		1348.8	0.00868634		1878.8	0.01367826		2408.8	-0.00741355
289	0.12297273		818.99	0.00552041		1349	0.00883698		1879	0.0136137		2409	-0.00780236
289.2	0.12391124		819.19	0.0052205		1349.2	0.00914605		1879.2	0.01393958		2409.2	-0.00879494
289.4	0.12359063		819.39	0.00559807		1349.4	0.00861022		1879.4	0.01346309		2409.4	-0.00899875
289.6	0.12288621		819.59	0.00554055		1349.6	0.00902658		1879.6	0.01250705		2409.6	-0.00833518
289.8	0.12356809		819.79	0.00557773		1349.8	0.00945389		1879.8	0.01216191		2409.8	-0.00693097
290	0.12407773		819.99	0.00464498		1350	0.01025294		1880	0.01217678		2410	-0.00683179
290.2	0.12376473		820.19	0.00444158		1350.2	0.01023882		1880.2	0.0121824		2410.2	-0.00612471
290.4	0.1233599		820.39	0.00497757		1350.4	0.01057378		1880.4	0.0111445		2410.4	-0.00565725
290.6	0.1245833		820.59	0.00569691		1350.6	0.01131016		1880.6	0.01116343		2410.6	-0.00494817
290.8	0.12494597		820.79	0.00582396		1350.8	0.0107866		1880.8	0.01068662		2410.8	-0.00466929
291	0.12562784		820.99	0.00545345		1351	0.01113299		1881	0.01092843		2411	-0.00547957
291.2	0.12516346		821.19	0.00502111		1351.2	0.01163242		1881.2	0.01152493		2411.2	-0.00537001
291.4	0.12609743		821.39	0.00466157		1351.4	0.01157252		1881.4	0.01207902		2411.4	-0.00625787
291.6	0.12613392		821.59	0.00451085		1351.6	0.01119449		1881.6	0.01098183		2411.6	-0.00698755
291.8	0.12684187		821.79	0.00539893		1351.8	0.01132133		1881.8	0.01104886		2411.8	-0.00687029
292	0.12745358		821.99	0.00502281		1352	0.0116483		1882	0.01225399		2412	-0.0069016
292.2	0.12770767		822.19	0.00505668		1352.2	0.01076094		1882.2	0.01242496		2412.2	-0.00822265
292.4	0.12691265		822.39	0.00591451		1352.4	0.0101083		1882.4	0.0135486		2412.4	-0.00794233
292.6	0.1273093		822.59	0.00573096		1352.6	0.00908024		1882.6	0.01378241		2412.6	-0.0082255
292.8	0.12775725		822.79	0.00525389		1352.8	0.00817701		1882.8	0.01326372		2412.8	-0.00970079
293	0.127973		822.99	0.00530372		1353	0.00728441		1883	0.01306509		2413	-0.01009286
293.2	0.12841588		823.19	0.00423953		1353.2	0.00744869		1883.2	0.01329632		2413.2	-0.01061364
293.4	0.1278687		823.39	0.00405632		1353.4	0.0075498		1883.4	0.01281539		2413.4	-0.00983783
293.6	0.12795149		823.59	0.00394768		1353.6	0.00775515		1883.6	0.01178249		2413.6	-0.00888926
293.8	0.12809094		823.79	0.00376915		1353.8	0.00824631		1883.8	0.01209669		2413.8	-0.00858843
294	0.12776882		823.99	0.00292926		1354	0.00862292		1884	0.01267568		2414	-0.00845495
294.2	0.12786718		824.19	0.00268888		1354.2	0.00834702		1884.2	0.01216477		2414.2	-0.00812986
294.4	0.12880571		824.39	0.00311997		1354.4	0.00861175		1884.4	0.01229651		2414.4	-0.00832227
294.6	0.12940083		824.59	0.00346638		1354.6	0.0081039		1884.6	0.01244313		2414.6	-0.00704863
294.8	0.12984229		824.79	0.00367908		1354.8	0.00821867		1884.8	0.01266305		2414.8	-0.00733221
295	0.13003312		824.99	0.0034993		1355	0.00897354		1885	0.01314188		2415	-0.0073675
295.2	0.13074781		825.19	0.00312931		1355.2	0.00909067		1885.2	0.01281696		2415.2	-0.00698281
295.4	0.13075162		825.39	0.00366412		1355.4	0.00934905		1885.4	0.01218441		2415.4	-0.00711223
295.6	0.13090326		825.59	0.00369163		1355.6	0.00903599		1885.6	0.01163184		2415.6	-0.00795651
295.8	0.13133034		825.79	0.00505105		1355.8	0.00978045		1885.8	0.01255541		2415.8	-0.00765841
296	0.13136558		825.99	0.00523405		1356	0.00991872		1886	0.01250037		2416	-0.00793821
296.2	0.13098738		826.19	0.00534444		1356.2	0.00899096		1886.2	0.01230036		2416.2	-0.00878201
296.4	0.13137518		826.39	0.00570799		1356.4	0.00866517		1886.4	0.01210418		2416.4	-0.00913721
296.6	0.13223914		826.59	0.00556932		1356.6	0.00803178		1886.6	0.01086036		2416.6	-0.01092274
296.8	0.13228279		826.79	0.0057438		1356.8	0.00786353		1886.8	0.01046509		2416.8	-0.01127957
297	0.13262817		826.99	0.00537453		1357	0.00775534		1887	0.01101113		2417	-0.01164957
297.2	0.13191544		827.19	0.00570187		1357.2	0.00832182		1887.2	0.01138255		2417.2	-0.0114538
297.4	0.13127854		827.39	0.00634233		1357.4	0.0087236		1887.4	0.01127368		2417.4	-0.01164668
297.6	0.1313315		827.59	0.00643622		1357.6	0.00834005		1887.6	0.01079126		2417.6	-0.0112676
297.8	0.13089469		827.79	0.00637707		1357.8	0.00897683		1887.8	0.01110293		2417.8	-0.01102402
298	0.13067861		827.99	0.00614875		1358	0.00899451		1888	0.01112131		2418	-0.01094279
298.2	0.1303946		828.19	0.00591444		1358.2	0.00920814		1888.2	0.01154828		2418.2	-0.010602
298.4	0.12999477		828.39	0.00544265		1358.4	0.00944506		1888.4	0.01210628		2418.4	-0.01058909
298.6	0.1296119		828.59	0.00550909		1358.6	0.00962054		1888.6	0.01273322		2418.6	-0.00906677
298.8	0.12941041		828.79	0.00549965		1358.8	0.01050631		1888.8	0.01306435		2418.8	-0.00856268
299	0.1293712		828.99	0.00513037		1359	0.01096988		1889	0.01334826		2419	-0.00851864
299.2	0.1301602		829.19	0.00569533		1359.2	0.01075815		1889.2	0.01378076		2419.2	-0.00821255
299.4	0.13010039		829.39	0.00588883		1359.4	0.01103657		1889.4	0.01386107		2419.4	-0.00789504
299.6	0.13081077		829.59	0.00566244		1359.6	0.01065399		1889.6	0.01376167		2419.6	-0.00777996
299.8	0.13120897		829.79	0.00576091		1359.8	0.01182817		1889.8	0.01369532		2419.8	-0.00734997
300	0.13147171		829.99	0.00604172		1360	0.01115001		1890	0.01362489		2420	-0.00748378
300.2	0.13205125		830.19	0.00588078		1360.2	0.01064295		1890.2	0.01346141		2420.2	-0.00872019
300.4	0.13205113		830.39	0.00604341		1360.4	0.01046295		1890.4	0.01276726		2420.4	-0.00860068
300.6	0.13241759		830.59	0.00599816		1360.6	0.01066688		1890.6	0.01195595		2420.6	-0.00878811
300.8	0.13123144		830.79	0.00594848		1360.8	0.01107598		1890.8	0.01183013		2420.8	-0.00877575
301	0.13132543		830.99	0.00544661		1361	0.01056817		1891	0.01246133		2421	-0.0099569
301.2	0.13036556		831.19	0.00567472		1361.2	0.01100985		1891.2	0.01152736		2421.2	-0.01014529
301.4	0.13047676		831.39	0.00560125		1361.4	0.01100276		1891.4	0.01106424		2421.4	-0.01022595
301.6	0.13057548		831.59	0.00553829		1361.6	0.01144419		1891.6	0.01068189		2421.6	-0.01018842
301.8	0.13029125		831.79	0.00496019		1361.8	0.01196127		1891.8	0.01075384		2421.8	-0.00998096
302	0.1298537		831.99	0.00424924		1362	0.01176079		1892	0.01057844		2422	-0.01010673
302.2	0.12935729		832.19	0.00376702		1362.2	0.01130603		1892.2	0.011697		2422.2	-0.0102512
302.4	0.1291771		832.39	0.00372413		1362.4	0.01117343		1892.4	0.01232628		2422.4	-0.00980756
302.6	0.13017382		832.59	0.00392676		1362.6	0.01062128		1892.6	0.01262788		2422.6	-0.00858993
302.8	0.13112051		832.79	0.00342241		1362.8	0.01072316		1892.8	0.01260887		2422.8	-0.00816236
303	0.13228503		832.99	0.00348667		1363	0.01057814		1893	0.0128044		2423	-0.00848014
303.2	0.13363681		833.19	0.0037312		1363.2	0.01055907		1893.2	0.01273552		2423.2	-0.00781733
303.4	0.13498583		833.39	0.00310999		1363.4	0.01180898		1893.4	0.01295585		2423.4	-0.00724588
303.6	0.13523225		833.59	0.00284868		1363.6	0.01120931		1893.6	0.01315439		2423.6	-0.00754631
303.8	0.13594625		833.79	0.00296972		1363.8	0.01169253		1893.8	0.01343105		2423.8	-0.00782168
304	0.1365236		833.99	0.00334301		1364	0.01118388		1894	0.01387262		2424	-0.00756648
304.2	0.13654524		834.19	0.00397681		1364.2	0.01190378		1894.2	0.0132615		2424.2	-0.00778277
304.4	0.13666464		834.39	0.00397196		1364.4	0.01270812		1894.4	0.0131389		2424.4	-0.00762503
304.6	0.13681188		834.59	0.00372438		1364.6	0.01330203		1894.6	0.01326212		2424.6	-0.00848726
304.8	0.13633528		834.79	0.00439958		1364.8	0.01351461		1894.8	0.01269993		2424.8	-0.00922188
305	0.13707754		834.99	0.00485379		1365	0.01264282		1895	0.01283492		2425	-0.00977982
305.2	0.13759317		835.19	0.00537325		1365.2	0.01228336		1895.2	0.01175741		2425.2	-0.00980349
305.4	0.13793207		835.39	0.00491601		1365.4	0.01150814		1895.4	0.0122833		2425.4	-0.01014295
305.6	0.13776678		835.59	0.0051266		1365.6	0.01158966		1895.6	0.0122144		2425.6	-0.0104774
305.8	0.13795182		835.79	0.0051701		1365.8	0.01091596		1895.8	0.0120391		2425.8	-0.01104479
306	0.13770565		835.99	0.00555747		1366	0.01032773		1896	0.01205368		2426	-0.01086756
306.2	0.13756012		836.19	0.00531492		1366.2	0.009123		1896.2	0.01239963		2426.2	-0.01088095
306.4	0.13776099		836.39	0.00556235		1366.4	0.00895822		1896.4	0.01258082		2426.4	-0.01032168
306.6	0.1386907		836.59	0.00488036		1366.6	0.00819511		1896.6	0.01193631		2426.6	-0.00933137
306.8	0.13828532		836.79	0.00522348		1366.8	0.00816095		1896.8	0.01194692		2426.8	-0.00912583
307	0.13825195		836.99	0.005195		1367	0.00826082		1897	0.01135114		2427	-0.00913537
307.2	0.13799854		837.19	0.00534921		1367.2	0.00887833		1897.2	0.0121901		2427.2	-0.00831172
307.4	0.13791145		837.39	0.00541118		1367.4	0.00933453		1897.4	0.01236822		2427.4	-0.00863964
307.6	0.13678022		837.59	0.00491284		1367.6	0.0088061		1897.6	0.01270779		2427.6	-0.00919884
307.8	0.1374717		837.79	0.00507989		1367.8	0.00888933		1897.8	0.01284871		2427.8	-0.00858076
308	0.13737085		837.99	0.00496696		1368	0.00876085		1898	0.01383846		2428	-0.00795339
308.2	0.13644508		838.19	0.00621947		1368.2	0.0096251		1898.2	0.01397992		2428.2	-0.00771005
308.4	0.13596182		838.39	0.00630752		1368.4	0.01013765		1898.4	0.01368853		2428.4	-0.00834848
308.6	0.13552577		838.59	0.00595436		1368.6	0.01004607		1898.6	0.01373874		2428.6	-0.0081592
308.8	0.13503824		838.79	0.00651764		1368.8	0.00945857		1898.8	0.01316898		2428.8	-0.00768377
309	0.13493797		838.99	0.00614651		1369	0.00867081		1899	0.01322366		2429	-0.00795852
309.2	0.1356648		839.19	0.00619505		1369.2	0.00847494		1899.2	0.01268262		2429.2	-0.0079789
309.4	0.13548954		839.39	0.00604364		1369.4	0.00817596		1899.4	0.01268488		2429.4	-0.00817078
309.6	0.13485882		839.59	0.00696306		1369.6	0.00891018		1899.6	0.01217514		2429.6	-0.00834438
309.8	0.13506952		839.79	0.00699844		1369.8	0.00902868		1899.8	0.01115612		2429.8	-0.00888837
310	0.13520595		839.99	0.00645712		1370	0.00853927		1900	0.01073988		2430	-0.00797323
310.2	0.13557247		840.19	0.00479638		1370.2	0.00774188		1900.2	0.00993871		2430.2	-0.00798143
310.4	0.13637455		840.39	0.00428421		1370.4	0.00787195		1900.4	0.0097988		2430.4	-0.00817982
310.6	0.13661581		840.59	0.00408703		1370.6	0.0072835		1900.6	0.00924963		2430.6	-0.00859455
310.8	0.1368498		840.79	0.0047186		1370.8	0.00723445		1900.8	0.00984188		2430.8	-0.00908903
311	0.13749416		840.99	0.00374577		1371	0.00745553		1901	0.01093383		2431	-0.00963683
311.2	0.13820682		841.19	0.00359553		1371.2	0.00815485		1901.2	0.01293394		2431.2	-0.00980651
311.4	0.13950909		841.39	0.00258061		1371.4	0.00885658		1901.4	0.01359882		2431.4	-0.01103025
311.6	0.13910271		841.59	0.00159749		1371.6	0.00958564		1901.6	0.01421806		2431.6	-0.01023212
311.8	0.14044668		841.79	0.00125232		1371.8	0.00921461		1901.8	0.01527297		2431.8	-0.01002712
312	0.14078884		841.99	0.00021862		1372	0.00977218		1902	0.01594656		2432	-0.00968423
312.2	0.14058484		842.19	0.00044078		1372.2	0.00997691		1902.2	0.01604964		2432.2	-0.00961225
312.4	0.14064241		842.39	0.00010683		1372.4	0.00952122		1902.4	0.01536825		2432.4	-0.00989823
312.6	0.1404092		842.59	-0.00048147		1372.6	0.00913151		1902.6	0.0150156		2432.6	-0.00962106
312.8	0.14068347		842.79	0.0002489		1372.8	0.00939792		1902.8	0.01443385		2432.8	-0.00956118
313	0.14090366		842.99	0.00084913		1373	0.00833505		1903	0.0141121		2433	-0.00986151
313.2	0.14095943		843.19	0.00192864		1373.2	0.00765789		1903.2	0.01294917		2433.2	-0.00903397
313.4	0.14052265		843.39	0.00220139		1373.4	0.0080615		1903.4	0.01241049		2433.4	-0.00869422
313.6	0.14022235		843.59	0.00281108		1373.6	0.00804738		1903.6	0.01157703		2433.6	-0.0088411
313.8	0.14065464		843.79	0.00321462		1373.8	0.00812742		1903.8	0.01078117		2433.8	-0.00814597
314	0.1404112		843.99	0.00337025		1374	0.00794168		1904	0.01100111		2434	-0.00849546
314.2	0.14017039		844.19	0.00330472		1374.2	0.00759235		1904.2	0.01051755		2434.2	-0.00914714
314.4	0.13957174		844.39	0.0043186		1374.4	0.00887862		1904.4	0.01081414		2434.4	-0.00989601
314.6	0.14005128		844.59	0.00476962		1374.6	0.00947807		1904.6	0.01078019		2434.6	-0.01037448
314.8	0.14053324		844.79	0.00560723		1374.8	0.01014934		1904.8	0.01233352		2434.8	-0.01068134
315	0.14058696		844.99	0.00536656		1375	0.01044657		1905	0.01341044		2435	-0.01137728
315.2	0.14168983		845.19	0.00524793		1375.2	0.01164574		1905.2	0.01400178		2435.2	-0.01144099
315.4	0.1421759		845.39	0.00517719		1375.4	0.01178456		1905.4	0.01478488		2435.4	-0.01137143
315.6	0.14125679		845.59	0.00562157		1375.6	0.01235144		1905.6	0.01467945		2435.6	-0.01119809
315.8	0.14286199		845.79	0.00493258		1375.8	0.01247297		1905.8	0.01577625		2435.8	-0.01191639
316	0.14339491		845.99	0.00446094		1376	0.01252253		1906	0.01568161		2436	-0.01196138
316.2	0.14280756		846.19	0.00522232		1376.2	0.01245308		1906.2	0.01586288		2436.2	-0.01224842
316.4	0.14288871		846.39	0.00594019		1376.4	0.01247496		1906.4	0.0148558		2436.4	-0.01133086
316.6	0.14286402		846.59	0.00532759		1376.6	0.01260034		1906.6	0.01527708		2436.6	-0.01072856
316.8	0.14301783		846.79	0.00563148		1376.8	0.0115484		1906.8	0.0152879		2436.8	-0.01037236
317	0.14233742		846.99	0.00566341		1377	0.01002742		1907	0.01524596		2437	-0.00913038
317.2	0.14232628		847.19	0.00552289		1377.2	0.0098517		1907.2	0.01458944		2437.2	-0.00798221
317.4	0.14269183		847.39	0.00581643		1377.4	0.0103541		1907.4	0.01437569		2437.4	-0.00845072
317.6	0.14213859		847.59	0.00618164		1377.6	0.00936588		1907.6	0.01368281		2437.6	-0.00871317
317.8	0.14172551		847.79	0.00644723		1377.8	0.00931128		1907.8	0.01296754		2437.8	-0.00846
318	0.14128899		847.99	0.0068041		1378	0.00933257		1908	0.01326286		2438	-0.00932743
318.2	0.14085471		848.19	0.00652484		1378.2	0.00954877		1908.2	0.01255872		2438.2	-0.00928264
318.4	0.14121712		848.39	0.00596329		1378.4	0.00915573		1908.4	0.01194626		2438.4	-0.0090005
318.6	0.14287335		848.59	0.00550352		1378.6	0.00970764		1908.6	0.01156253		2438.6	-0.00942292
318.8	0.14257124		848.79	0.00541323		1378.8	0.00928322		1908.8	0.01214894		2438.8	-0.00984749
319	0.14355039		848.99	0.00591181		1379	0.00871618		1909	0.01194726		2439	-0.01012838
319.2	0.14503271		849.19	0.00582336		1379.2	0.0086032		1909.2	0.01221684		2439.2	-0.01005708
319.4	0.1449005		849.39	0.00580632		1379.4	0.00819722		1909.4	0.01169342		2439.4	-0.01039044
319.6	0.14509607		849.59	0.00550616		1379.6	0.00873315		1909.6	0.01101017		2439.6	-0.01194097
319.8	0.14617227		849.79	0.00502991		1379.8	0.00884707		1909.8	0.01163799		2439.8	-0.01226127
320	0.14597847		849.99	0.00543486		1380	0.0093756		1910	0.01216174		2440	-0.01227031
320.2	0.14575997		850.19	0.00666812		1380.2	0.01036746		1910.2	0.01256546		2440.2	-0.01171573
320.4	0.14571295		850.39	0.00695619		1380.4	0.01115313		1910.4	0.0130559		2440.4	-0.01116899
320.6	0.14547033		850.59	0.00606046		1380.6	0.01159692		1910.6	0.01369578		2440.6	-0.01097208
320.8	0.14541901		850.79	0.00685268		1380.8	0.01143465		1910.8	0.01342028		2440.8	-0.01161503
321	0.14523376		850.99	0.0062794		1381	0.01160405		1911	0.01312251		2441	-0.01114903
321.2	0.14477858		851.19	0.00625566		1381.2	0.0114492		1911.2	0.01317029		2441.2	-0.01156392
321.4	0.14488542		851.39	0.00672031		1381.4	0.01200796		1911.4	0.01355881		2441.4	-0.01190218
321.6	0.14393438		851.59	0.00692209		1381.6	0.01167907		1911.6	0.01327678		2441.6	-0.01174325
321.8	0.14350333		851.79	0.00691935		1381.8	0.01102036		1911.8	0.01355942		2441.8	-0.01091924
322	0.14378173		851.99	0.00696772		1382	0.01021051		1912	0.01396452		2442	-0.01049588
322.2	0.14383198		852.19	0.00641772		1382.2	0.0093546		1912.2	0.01314325		2442.2	-0.00948444
322.4	0.14473479		852.39	0.00615908		1382.4	0.00851756		1912.4	0.01374765		2442.4	-0.00909214
322.6	0.14523124		852.59	0.00638817		1382.6	0.00924152		1912.6	0.01435875		2442.6	-0.0083767
322.8	0.14529537		852.79	0.00661729		1382.8	0.00768986		1912.8	0.01433899		2442.8	-0.00800239
323	0.14664216		852.99	0.0065128		1383	0.00700506		1913	0.01412014		2443	-0.00707133
323.2	0.14668715		853.19	0.0057506		1383.2	0.00666293		1913.2	0.01323379		2443.2	-0.00740214
323.4	0.14637248		853.39	0.00498357		1383.4	0.00616364		1913.4	0.01212985		2443.4	-0.00769693
323.6	0.14734016		853.59	0.00529792		1383.6	0.00593471		1913.6	0.01243674		2443.6	-0.00807269
323.8	0.14778122		853.79	0.00502664		1383.8	0.00599665		1913.8	0.01245802		2443.8	-0.00770766
324	0.14750328		853.99	0.00558789		1384	0.00664168		1914	0.01238659		2444	-0.00765312
324.2	0.14764098		854.19	0.00621065		1384.2	0.00751844		1914.2	0.01183912		2444.2	-0.00785484
324.4	0.14799727		854.39	0.00625368		1384.4	0.00825988		1914.4	0.0116802		2444.4	-0.00871563
324.6	0.14892102		854.59	0.00585391		1384.6	0.00759382		1914.6	0.01051159		2444.6	-0.00897686
324.8	0.14931972		854.79	0.00532995		1384.8	0.00748926		1914.8	0.0104903		2444.8	-0.00979427
325	0.14876698		854.99	0.00382826		1385	0.00792744		1915	0.01013716		2445	-0.01054236
325.2	0.14844358		855.19	0.00417267		1385.2	0.00902913		1915.2	0.01053596		2445.2	-0.01126865
325.4	0.14847078		855.39	0.00403776		1385.4	0.00972199		1915.4	0.01099006		2445.4	-0.01220712
325.6	0.14795218		855.59	0.00347308		1385.6	0.00965989		1915.6	0.01047493		2445.6	-0.01299271
325.8	0.14782788		855.79	0.00275889		1385.8	0.00997099		1915.8	0.01047903		2445.8	-0.01311191
326	0.14845452		855.99	0.00319269		1386	0.01018312		1916	0.01037326		2446	-0.0131564
326.2	0.14833121		856.19	0.00353716		1386.2	0.01097156		1916.2	0.01129659		2446.2	-0.01319125
326.4	0.14854426		856.39	0.00443499		1386.4	0.0112423		1916.4	0.0124238		2446.4	-0.01279535
326.6	0.14836989		856.59	0.00428077		1386.6	0.01108128		1916.6	0.01254803		2446.6	-0.01209075
326.8	0.14870465		856.79	0.00447654		1386.8	0.01090488		1916.8	0.01195703		2446.8	-0.01199509
327	0.14879986		856.99	0.00405619		1387	0.0111637		1917	0.01198436		2447	-0.01224393
327.2	0.1485974		857.19	0.00522039		1387.2	0.01135897		1917.2	0.01319385		2447.2	-0.01283221
327.4	0.14890296		857.39	0.00540164		1387.4	0.01079257		1917.4	0.01350959		2447.4	-0.01233867
327.6	0.14899871		857.59	0.00619805		1387.6	0.01159601		1917.6	0.01406573		2447.6	-0.01171006
327.8	0.14844002		857.79	0.00631413		1387.8	0.0110881		1917.8	0.0143999		2447.8	-0.01075341
328	0.1482115		857.99	0.00744286		1388	0.01054593		1918	0.0146851		2448	-0.01040245
328.2	0.14882374		858.19	0.00840813		1388.2	0.01028124		1918.2	0.01439153		2448.2	-0.01018346
328.4	0.14910339		858.39	0.00823694		1388.4	0.0094783		1918.4	0.01413845		2448.4	-0.00973734
328.6	0.14913321		858.59	0.00796722		1388.6	0.00921277		1918.6	0.01325285		2448.6	-0.00900199
328.8	0.14845602		858.79	0.00738776		1388.8	0.00910395		1918.8	0.01334407		2448.8	-0.00885805
329	0.14790933		858.99	0.00703676		1389	0.00908834		1919	0.01397225		2449	-0.00952501
329.2	0.14822179		859.19	0.00736211		1389.2	0.00944772		1919.2	0.01383524		2449.2	-0.0096735
329.4	0.14824938		859.39	0.00704496		1389.4	0.00916235		1919.4	0.0133464		2449.4	-0.01033087
329.6	0.14840903		859.59	0.00618444		1389.6	0.00908055		1919.6	0.01255246		2449.6	-0.01068846
329.8	0.14849083		859.79	0.0066745		1389.8	0.00995176		1919.8	0.01236907		2449.8	-0.0111353
330	0.1491156		859.99	0.00744506		1390	0.00903143		1920	0.01231856		2450	-0.01115113
330.2	0.15005294		860.19	0.00778021		1390.2	0.00900678		1920.2	0.01214158		2450.2	-0.01209792
330.4	0.15034847		860.39	0.00764853		1390.4	0.00889037		1920.4	0.01164264		2450.4	-0.01199195
330.6	0.15023015		860.59	0.00680551		1390.6	0.00893737		1920.6	0.01169608		2450.6	-0.0129166
330.8	0.15126523		860.79	0.00729937		1390.8	0.00838289		1920.8	0.01173887		2450.8	-0.01369735
331	0.15135407		860.99	0.00641812		1391	0.00808474		1921	0.01242222		2451	-0.01453243
331.2	0.15175578		861.19	0.00595337		1391.2	0.0079719		1921.2	0.01358481		2451.2	-0.01380249
331.4	0.15150804		861.39	0.00507998		1391.4	0.00728717		1921.4	0.01297519		2451.4	-0.01419465
331.6	0.15081503		861.59	0.00513997		1391.6	0.00803665		1921.6	0.01342525		2451.6	-0.01334448
331.8	0.15050959		861.79	0.00504827		1391.8	0.00761117		1921.8	0.01376089		2451.8	-0.01285829
332	0.15042453		861.99	0.00499747		1392	0.00728312		1922	0.01430331		2452	-0.01249373
332.2	0.14991809		862.19	0.00444616		1392.2	0.0075643		1922.2	0.01375856		2452.2	-0.01117943
332.4	0.1488874		862.39	0.00370439		1392.4	0.00796594		1922.4	0.01398458		2452.4	-0.01014812
332.6	0.14837734		862.59	0.00406159		1392.6	0.00831315		1922.6	0.01433236		2452.6	-0.00980672
332.8	0.14779787		862.79	0.00407873		1392.8	0.00758366		1922.8	0.01459529		2452.8	-0.01062316
333	0.14801111		862.99	0.0043024		1393	0.00771444		1923	0.01518132		2453	-0.01043961
333.2	0.14880596		863.19	0.00487044		1393.2	0.0079855		1923.2	0.01473954		2453.2	-0.00986111
333.4	0.14887829		863.39	0.00587949		1393.4	0.00801995		1923.4	0.01467125		2453.4	-0.00979488
333.6	0.14959356		863.59	0.00576566		1393.6	0.00847107		1923.6	0.01508448		2453.6	-0.00945789
333.8	0.15017073		863.79	0.00647152		1393.8	0.00879517		1923.8	0.01550885		2453.8	-0.00995306
334	0.15097759		863.99	0.00723825		1394	0.0081711		1924	0.01544767		2454	-0.01026817
334.2	0.15214757		864.19	0.00757666		1394.2	0.00842665		1924.2	0.0156938		2454.2	-0.01068989
334.4	0.15264267		864.39	0.00822125		1394.4	0.00902595		1924.4	0.01585868		2454.4	-0.01066059
334.6	0.15273052		864.59	0.00825107		1394.6	0.008652		1924.6	0.01591144		2454.6	-0.01080516
334.8	0.1536893		864.79	0.00852751		1394.8	0.00776427		1924.8	0.01581108		2454.8	-0.01010988
335	0.15382163		864.99	0.00804402		1395	0.00826112		1925	0.01491883		2455	-0.00956561
335.2	0.15387705		865.19	0.00840575		1395.2	0.00854213		1925.2	0.01452127		2455.2	-0.00959459
335.4	0.15387		865.39	0.00821356		1395.4	0.00855741		1925.4	0.01437639		2455.4	-0.0095749
335.6	0.15427476		865.59	0.00807283		1395.6	0.00931652		1925.6	0.0143653		2455.6	-0.00868326
335.8	0.15438732		865.79	0.00728609		1395.8	0.00974377		1925.8	0.01413435		2455.8	-0.00827342
336	0.15393543		865.99	0.00687321		1396	0.00967166		1926	0.01361647		2456	-0.00810715
336.2	0.15383403		866.19	0.00630787		1396.2	0.01099244		1926.2	0.01315975		2456.2	-0.00878197
336.4	0.15318859		866.39	0.00608717		1396.4	0.01161471		1926.4	0.01340715		2456.4	-0.00942436
336.6	0.15317433		866.59	0.00679385		1396.6	0.0114184		1926.6	0.01344601		2456.6	-0.01014522
336.8	0.15323103		866.79	0.00636724		1396.8	0.01142433		1926.8	0.01284335		2456.8	-0.01110292
337	0.15303182		866.99	0.00532455		1397	0.01104173		1927	0.01314148		2457	-0.00969014
337.2	0.15272637		867.19	0.00554855		1397.2	0.01073851		1927.2	0.01395617		2457.2	-0.00893889
337.4	0.15264995		867.39	0.00563089		1397.4	0.01148333		1927.4	0.01475315		2457.4	-0.00947947
337.6	0.15318163		867.59	0.00488907		1397.6	0.01196343		1927.6	0.01585652		2457.6	-0.00984488
337.8	0.152311		867.79	0.00534149		1397.8	0.01168984		1927.8	0.01561047		2457.8	-0.01036337
338	0.15218142		867.99	0.00586608		1398	0.01166246		1928	0.01652705		2458	-0.01078288
338.2	0.15233975		868.19	0.00640974		1398.2	0.01082427		1928.2	0.01700379		2458.2	-0.01135837
338.4	0.15221009		868.39	0.00702371		1398.4	0.01189175		1928.4	0.01658214		2458.4	-0.01081749
338.6	0.1520317		868.59	0.00666891		1398.6	0.01176709		1928.6	0.01635907		2458.6	-0.0103739
338.8	0.15157303		868.79	0.00703207		1398.8	0.01166391		1928.8	0.01704852		2458.8	-0.01016847
339	0.15181247		868.99	0.00665098		1399	0.01183946		1929	0.01646583		2459	-0.0107861
339.2	0.15223769		869.19	0.00638198		1399.2	0.01148314		1929.2	0.01655524		2459.2	-0.01122307
339.4	0.15330073		869.39	0.00615102		1399.4	0.01106214		1929.4	0.01655104		2459.4	-0.01034318
339.6	0.15408491		869.59	0.00656378		1399.6	0.01052443		1929.6	0.01614101		2459.6	-0.0100916
339.8	0.1542783		869.79	0.0062404		1399.8	0.01082175		1929.8	0.01516457		2459.8	-0.01036775
340	0.1544359		869.99	0.00657029		1400	0.01046212		1930	0.01520787		2460	-0.01087623
340.2	0.15466019		870.19	0.00633011		1400.2	0.01084557		1930.2	0.01523509		2460.2	-0.01078312
340.4	0.1544104		870.39	0.00651171		1400.4	0.01000267		1930.4	0.01439522		2460.4	-0.01016711
340.6	0.15450398		870.59	0.00703669		1400.6	0.00862647		1930.6	0.01373392		2460.6	-0.01013932
340.8	0.15438631		870.79	0.00704378		1400.8	0.00771189		1930.8	0.01351163		2460.8	-0.00996594
341	0.15356442		870.99	0.00694626		1401	0.00789297		1931	0.01367233		2461	-0.00904174
341.2	0.15319934		871.19	0.00756484		1401.2	0.00777931		1931.2	0.01349654		2461.2	-0.00894634
341.4	0.15334213		871.39	0.00709506		1401.4	0.00829591		1931.4	0.01323491		2461.4	-0.00979142
341.6	0.15271058		871.59	0.00707262		1401.6	0.00843831		1931.6	0.01241325		2461.6	-0.00999674
341.8	0.15162009		871.79	0.00718824		1401.8	0.00832523		1931.8	0.01205789		2461.8	-0.01072366
342	0.15115643		871.99	0.00647971		1402	0.0086794		1932	0.01284398		2462	-0.01051704
342.2	0.15154347		872.19	0.00749645		1402.2	0.0083687		1932.2	0.01252372		2462.2	-0.01044633
342.4	0.15161343		872.39	0.00692544		1402.4	0.00878598		1932.4	0.01362386		2462.4	-0.0096717
342.6	0.15188018		872.59	0.00666373		1402.6	0.00860263		1932.6	0.01399261		2462.6	-0.0101857
342.8	0.1521013		872.79	0.00649062		1402.8	0.0085724		1932.8	0.01535336		2462.8	-0.0102484
343	0.15337064		872.99	0.0054866		1403	0.00844809		1933	0.01488631		2463	-0.01071127
343.2	0.1545992		873.19	0.00531908		1403.2	0.00836897		1933.2	0.01533691		2463.2	-0.01022702
343.4	0.15603339		873.39	0.00551107		1403.4	0.0084561		1933.4	0.01583114		2463.4	-0.00982944
343.6	0.15648745		873.59	0.00585168		1403.6	0.00853439		1933.6	0.0158301		2463.6	-0.00896771
343.8	0.15708249		873.79	0.00535638		1403.8	0.00870162		1933.8	0.01550766		2463.8	-0.00900332
344	0.15802523		873.99	0.0056365		1404	0.00795319		1934	0.01554824		2464	-0.00791202
344.2	0.15841457		874.19	0.00602409		1404.2	0.00796283		1934.2	0.01547175		2464.2	-0.00810585
344.4	0.15918959		874.39	0.006031		1404.4	0.00694975		1934.4	0.01486727		2464.4	-0.00792608
344.6	0.15906512		874.59	0.00570195		1404.6	0.00627669		1934.6	0.01470164		2464.6	-0.0079996
344.8	0.15964172		874.79	0.00614931		1404.8	0.00616396		1934.8	0.01504941		2464.8	-0.00832214
345	0.15945841		874.99	0.00556924		1405	0.00619911		1935	0.01444734		2465	-0.00899808
345.2	0.15879005		875.19	0.00538377		1405.2	0.00593372		1935.2	0.01351123		2465.2	-0.00949596
345.4	0.15877641		875.39	0.00528551		1405.4	0.00645796		1935.4	0.01371322		2465.4	-0.01070993
345.6	0.15816094		875.59	0.00545961		1405.6	0.00708492		1935.6	0.0134489		2465.6	-0.01272002
345.8	0.15822703		875.79	0.00523948		1405.8	0.00727324		1935.8	0.01422371		2465.8	-0.01319543
346	0.15766927		875.99	0.00509305		1406	0.00760899		1936	0.01521575		2466	-0.01252226
346.2	0.15755355		876.19	0.00571754		1406.2	0.00705278		1936.2	0.01524394		2466.2	-0.01366928
346.4	0.1561138		876.39	0.00525071		1406.4	0.00754716		1936.4	0.01630443		2466.4	-0.01452613
346.6	0.15549147		876.59	0.00600089		1406.6	0.00857067		1936.6	0.01571782		2466.6	-0.01511839
346.8	0.15513003		876.79	0.00540992		1406.8	0.00925695		1936.8	0.01546171		2466.8	-0.01567982
347	0.15485568		876.99	0.00438184		1407	0.00929909		1937	0.01496468		2467	-0.0158623
347.2	0.15463044		877.19	0.0040337		1407.2	0.00924469		1937.2	0.0150191		2467.2	-0.01540439
347.4	0.15446295		877.39	0.00425661		1407.4	0.0093419		1937.4	0.01419508		2467.4	-0.01587361
347.6	0.15387147		877.59	0.00396571		1407.6	0.00892056		1937.6	0.01395075		2467.6	-0.01415789
347.8	0.15450758		877.79	0.00363327		1407.8	0.00814994		1937.8	0.01349584		2467.8	-0.01368041
348	0.15486052		877.99	0.00361568		1408	0.00764411		1938	0.01320832		2468	-0.01210552
348.2	0.15488286		878.19	0.00442602		1408.2	0.00824927		1938.2	0.01371109		2468.2	-0.0117857
348.4	0.15559921		878.39	0.00419094		1408.4	0.00769537		1938.4	0.01354174		2468.4	-0.01095402
348.6	0.15602837		878.59	0.0045906		1408.6	0.00812911		1938.6	0.01354229		2468.6	-0.01145949
348.8	0.15654985		878.79	0.00505102		1408.8	0.00843119		1938.8	0.01368394		2468.8	-0.0109068
349	0.15626287		878.99	0.00578247		1409	0.00831816		1939	0.01341031		2469	-0.01109175
349.2	0.15633988		879.19	0.00624137		1409.2	0.00896996		1939.2	0.01376533		2469.2	-0.01117781
349.4	0.15805007		879.39	0.00678189		1409.4	0.00941371		1939.4	0.01491003		2469.4	-0.0118679
349.6	0.15886166		879.59	0.00711797		1409.6	0.00954274		1939.6	0.01509765		2469.6	-0.01282516
349.8	0.15984549		879.79	0.00734298		1409.8	0.00944159		1939.8	0.01618565		2469.8	-0.01130243
350	0.15960468		879.99	0.00745154		1410	0.01036268		1940	0.01681828		2470	-0.01207355
350.2	0.15975803		880.19	0.00716172		1410.2	0.0108781		1940.2	0.01644464		2470.2	-0.01300706
350.4	0.15912643		880.39	0.00702204		1410.4	0.01204717		1940.4	0.01708549		2470.4	-0.01350958
350.6	0.15868226		880.59	0.0067652		1410.6	0.01207237		1940.6	0.01605169		2470.6	-0.01406942
350.8	0.1585984		880.79	0.0057386		1410.8	0.01237587		1940.8	0.01560078		2470.8	-0.0145189
351	0.15854785		880.99	0.00529285		1411	0.01148419		1941	0.01615867		2471	-0.01459437
351.2	0.15851881		881.19	0.00454918		1411.2	0.01134727		1941.2	0.01514703		2471.2	-0.01489266
351.4	0.15818692		881.39	0.00352278		1411.4	0.01159666		1941.4	0.01474887		2471.4	-0.01458914
351.6	0.15851958		881.59	0.00270765		1411.6	0.01160074		1941.6	0.0157303		2471.6	-0.01337721
351.8	0.1586766		881.79	0.00279633		1411.8	0.01138886		1941.8	0.01513311		2471.8	-0.01298046
352	0.1586422		881.99	0.00338717		1412	0.01182082		1942	0.01516819		2472	-0.01320034
352.2	0.15892544		882.19	0.00404181		1412.2	0.01259666		1942.2	0.01571413		2472.2	-0.01429601
352.4	0.1594166		882.39	0.00364793		1412.4	0.01254805		1942.4	0.01552779		2472.4	-0.01503492
352.6	0.15959741		882.59	0.00271779		1412.6	0.01349462		1942.6	0.01501814		2472.6	-0.01518229
352.8	0.1599141		882.79	0.00275533		1412.8	0.01236101		1942.8	0.01558385		2472.8	-0.01507308
353	0.16027477		882.99	0.00392592		1413	0.01105776		1943	0.01550066		2473	-0.01545066
353.2	0.16124737		883.19	0.00343795		1413.2	0.01051135		1943.2	0.01638954		2473.2	-0.01607057
353.4	0.16267504		883.39	0.00303098		1413.4	0.00949687		1943.4	0.01640798		2473.4	-0.0161839
353.6	0.16318828		883.59	0.00305792		1413.6	0.00827954		1943.6	0.01642878		2473.6	-0.01616214
353.8	0.16312165		883.79	0.00290166		1413.8	0.0075331		1943.8	0.0165604		2473.8	-0.01573267
354	0.16341276		883.99	0.00263908		1414	0.008041		1944	0.01611231		2474	-0.01557324
354.2	0.16309868		884.19	0.00218613		1414.2	0.00748441		1944.2	0.01554842		2474.2	-0.0151638
354.4	0.16222369		884.39	0.00225013		1414.4	0.00741067		1944.4	0.01555075		2474.4	-0.01528839
354.6	0.16172007		884.59	0.00279982		1414.6	0.00679837		1944.6	0.01536127		2474.6	-0.01485852
354.8	0.16139735		884.79	0.00354925		1414.8	0.00682467		1944.8	0.01615556		2474.8	-0.0141103
355	0.16160292		884.99	0.00392218		1415	0.00615233		1945	0.01619016		2475	-0.01329194
355.2	0.16133942		885.19	0.00394005		1415.2	0.00719558		1945.2	0.01567794		2475.2	-0.01213135
355.4	0.16126583		885.39	0.00458408		1415.4	0.00730815		1945.4	0.01631744		2475.4	-0.01147559
355.6	0.1614254		885.59	0.00536959		1415.6	0.00777123		1945.6	0.01641877		2475.6	-0.01181744
355.8	0.16110297		885.79	0.00612103		1415.8	0.00762016		1945.8	0.01591472		2475.8	-0.01160103
356	0.1625929		885.99	0.00672758		1416	0.00797038		1946	0.0159554		2476	-0.01220644
356.2	0.16263		886.19	0.0068755		1416.2	0.00884857		1946.2	0.01657628		2476.2	-0.01234183
356.4	0.16304373		886.39	0.00656335		1416.4	0.00895056		1946.4	0.01562099		2476.4	-0.01233011
356.6	0.16344978		886.59	0.00629878		1416.6	0.00901439		1946.6	0.0152379		2476.6	-0.01274712
356.8	0.16348627		886.79	0.00632205		1416.8	0.00882318		1946.8	0.01527968		2476.8	-0.01353647
357	0.16328392		886.99	0.00640207		1417	0.00893604		1947	0.01405726		2477	-0.0136301
357.2	0.16375247		887.19	0.00468382		1417.2	0.00895571		1947.2	0.01419196		2477.2	-0.01399491
357.4	0.1640252		887.39	0.00420331		1417.4	0.00895621		1947.4	0.01339397		2477.4	-0.01422096
357.6	0.16402141		887.59	0.00411599		1417.6	0.00947832		1947.6	0.01411149		2477.6	-0.01468571
357.8	0.16443714		887.79	0.00341045		1417.8	0.00965345		1947.8	0.01400637		2477.8	-0.0143291
358	0.16483017		887.99	0.00275325		1418	0.01031382		1948	0.01452257		2478	-0.01374799
358.2	0.16392637		888.19	0.0023732		1418.2	0.01043425		1948.2	0.01468639		2478.2	-0.01377755
358.4	0.16394977		888.39	0.00278428		1418.4	0.01040231		1948.4	0.01556225		2478.4	-0.01359629
358.6	0.16396987		888.59	0.00296505		1418.6	0.01090262		1948.6	0.01634977		2478.6	-0.01270759
358.8	0.16392871		888.79	0.00284641		1418.8	0.01126062		1948.8	0.01658047		2478.8	-0.01257703
359	0.16399095		888.99	0.00277573		1419	0.01123509		1949	0.01679123		2479	-0.01213117
359.2	0.16351075		889.19	0.00370763		1419.2	0.01147355		1949.2	0.01719837		2479.2	-0.01160276
359.4	0.16342042		889.39	0.00426621		1419.4	0.01191023		1949.4	0.01766774		2479.4	-0.01191463
359.6	0.16351662		889.59	0.00391635		1419.6	0.01207011		1949.6	0.01742322		2479.6	-0.01178575
359.8	0.16402281		889.79	0.00386102		1419.8	0.01167566		1949.8	0.01742076		2479.8	-0.01066297
360	0.16462031		889.99	0.00350592		1420	0.0116475		1950	0.01692805		2480	-0.01033423
360.2	0.16372899		890.19	0.00361195		1420.2	0.01179826		1950.2	0.01755385		2480.2	-0.01011599
360.4	0.16362648		890.39	0.00337649		1420.4	0.0112851		1950.4	0.01679424		2480.4	-0.01025545
360.6	0.16377845		890.59	0.00355953		1420.6	0.01114969		1950.6	0.01672954		2480.6	-0.01006928
360.8	0.16334204		890.79	0.00302114		1420.8	0.01128466		1950.8	0.01633224		2480.8	-0.01012527
361	0.16385079		890.99	0.00271238		1421	0.01109613		1951	0.01612662		2481	-0.01047188
361.2	0.16399926		891.19	0.00190835		1421.2	0.01055467		1951.2	0.01674342		2481.2	-0.01044398
361.4	0.16480645		891.39	0.00222454		1421.4	0.00991751		1951.4	0.01667573		2481.4	-0.01067487
361.6	0.16485883		891.59	0.0024041		1421.6	0.00975736		1951.6	0.01719406		2481.6	-0.01106958
361.8	0.16424866		891.79	0.00211223		1421.8	0.00893972		1951.8	0.01721532		2481.8	-0.01107063
362	0.16412936		891.99	0.00247414		1422	0.00899766		1952	0.01772846		2482	-0.01163624
362.2	0.1641134		892.19	0.00306561		1422.2	0.00896453		1952.2	0.01789377		2482.2	-0.01191716
362.4	0.16353185		892.39	0.00341975		1422.4	0.00807577		1952.4	0.0180568		2482.4	-0.01282929
362.6	0.16328995		892.59	0.00372651		1422.6	0.00852778		1952.6	0.01795596		2482.6	-0.0131562
362.8	0.16293587		892.79	0.00417803		1422.8	0.00961361		1952.8	0.01783019		2482.8	-0.01390689
363	0.16241314		892.99	0.00545516		1423	0.00943868		1953	0.01768399		2483	-0.01366638
363.2	0.16255251		893.19	0.00598734		1423.2	0.01028726		1953.2	0.0169603		2483.2	-0.01312523
363.4	0.16258147		893.39	0.00615904		1423.4	0.01185131		1953.4	0.01590894		2483.4	-0.01298859
363.6	0.16266051		893.59	0.00613131		1423.6	0.0116128		1953.6	0.01520291		2483.6	-0.01300504
363.8	0.16312445		893.79	0.00639325		1423.8	0.0125198		1953.8	0.01444717		2483.8	-0.01258259
364	0.1628865		893.99	0.00682705		1424	0.01266532		1954	0.01474246		2484	-0.01229978
364.2	0.16387896		894.19	0.00703489		1424.2	0.0131106		1954.2	0.01484666		2484.2	-0.01213684
364.4	0.16439941		894.39	0.00723735		1424.4	0.01373915		1954.4	0.0141188		2484.4	-0.01160555
364.6	0.16560007		894.59	0.00745342		1424.6	0.01396283		1954.6	0.01419224		2484.6	-0.01136468
364.8	0.16602002		894.79	0.00647495		1424.8	0.01403176		1954.8	0.01431736		2484.8	-0.0117905
365	0.16588099		894.99	0.00586379		1425	0.01388881		1955	0.01434517		2485	-0.01170418
365.2	0.16597532		895.19	0.00576827		1425.2	0.01316722		1955.2	0.01458381		2485.2	-0.01089323
365.4	0.1658782		895.39	0.00547183		1425.4	0.01267123		1955.4	0.01463649		2485.4	-0.01076289
365.6	0.16471476		895.59	0.00540155		1425.6	0.01249563		1955.6	0.01574498		2485.6	-0.01105596
365.8	0.16397784		895.79	0.00439517		1425.8	0.01201664		1955.8	0.0158334		2485.8	-0.01134008
366	0.16439187		895.99	0.00417186		1426	0.01091403		1956	0.01659028		2486	-0.01195205
366.2	0.1633102		896.19	0.00331009		1426.2	0.01034662		1956.2	0.0178168		2486.2	-0.01222016
366.4	0.16194108		896.39	0.00303683		1426.4	0.00921936		1956.4	0.01832886		2486.4	-0.01248877
366.6	0.16247374		896.59	0.00356312		1426.6	0.00945517		1956.6	0.01912423		2486.6	-0.01290198
366.8	0.16292295		896.79	0.00361285		1426.8	0.00921225		1956.8	0.01870221		2486.8	-0.01338247
367	0.16392613		896.99	0.00455018		1427	0.00844204		1957	0.01790482		2487	-0.01310298
367.2	0.16453004		897.19	0.00444043		1427.2	0.00803742		1957.2	0.01707428		2487.2	-0.01295783
367.4	0.16515097		897.39	0.00481808		1427.4	0.00791587		1957.4	0.01708363		2487.4	-0.01317579
367.6	0.1655382		897.59	0.00453762		1427.6	0.00689121		1957.6	0.01783049		2487.6	-0.01395931
367.8	0.16682194		897.79	0.0048525		1427.8	0.00741895		1957.8	0.01762535		2487.8	-0.01319375
368	0.16666979		897.99	0.00452639		1428	0.0071624		1958	0.01791368		2488	-0.01289745
368.2	0.16751075		898.19	0.00453536		1428.2	0.00749517		1958.2	0.01703762		2488.2	-0.01303232
368.4	0.16843007		898.39	0.00474536		1428.4	0.0082497		1958.4	0.01704851		2488.4	-0.01251758
368.6	0.16904649		898.59	0.00453199		1428.6	0.00916611		1958.6	0.01761565		2488.6	-0.01226623
368.8	0.16860808		898.79	0.00373284		1428.8	0.00988889		1958.8	0.01755595		2488.8	-0.01296795
369	0.16848163		898.99	0.00374241		1429	0.01076829		1959	0.01753577		2489	-0.01319714
369.2	0.16840784		899.19	0.0036202		1429.2	0.01150722		1959.2	0.0181367		2489.2	-0.01340413
369.4	0.16787273		899.39	0.00317584		1429.4	0.01178384		1959.4	0.01748861		2489.4	-0.01406281
369.6	0.16749588		899.59	0.0028708		1429.6	0.01270107		1959.6	0.0171615		2489.6	-0.01414229
369.8	0.16677809		899.79	0.00209457		1429.8	0.01392264		1959.8	0.01667561		2489.8	-0.01495889
370	0.16619366		899.99	0.0027578		1430	0.01414608		1960	0.01751364		2490	-0.01478928
370.2	0.16603976		900.19	0.0031957		1430.2	0.0147556		1960.2	0.01820972		2490.2	-0.01456145
370.4	0.16627028		900.39	0.00445184		1430.4	0.01420711		1960.4	0.01835218		2490.4	-0.01458751
370.6	0.16732528		900.59	0.0051212		1430.6	0.01409127		1960.6	0.01834649		2490.6	-0.0150649
370.8	0.16824417		900.79	0.0053061		1430.8	0.01320825		1960.8	0.01696966		2490.8	-0.01465934
371	0.16885758		900.99	0.00699783		1431	0.01330985		1961	0.01593175		2491	-0.01476049
371.2	0.16898016		901.19	0.00758041		1431.2	0.01214485		1961.2	0.01527819		2491.2	-0.01477659
371.4	0.16921485		901.39	0.00761448		1431.4	0.01187316		1961.4	0.01546951		2491.4	-0.01437276
371.6	0.16925568		901.59	0.00758911		1431.6	0.01060907		1961.6	0.01516208		2491.6	-0.01481361
371.8	0.16962114		901.79	0.00810381		1431.8	0.01084265		1961.8	0.01561068		2491.8	-0.0142702
372	0.16962574		901.99	0.00729732		1432	0.01071182		1962	0.01517334		2492	-0.01509204
372.2	0.16987596		902.19	0.00811094		1432.2	0.0105571		1962.2	0.01528581		2492.2	-0.01510929
372.4	0.17050355		902.39	0.00847736		1432.4	0.01093216		1962.4	0.0156528		2492.4	-0.01497426
372.6	0.17008078		902.59	0.00810854		1432.6	0.0109435		1962.6	0.01579212		2492.6	-0.01518616
372.8	0.17002224		902.79	0.00804965		1432.8	0.01096398		1962.8	0.01641361		2492.8	-0.0165809
373	0.16990492		902.99	0.00800266		1433	0.01089184		1963	0.01706461		2493	-0.01695264
373.2	0.16941304		903.19	0.00728808		1433.2	0.01107138		1963.2	0.01760584		2493.2	-0.01750706
373.4	0.16922237		903.39	0.00669028		1433.4	0.01145052		1963.4	0.01744271		2493.4	-0.01796924
373.6	0.16860456		903.59	0.00620272		1433.6	0.01221142		1963.6	0.01765184		2493.6	-0.01746823
373.8	0.16785031		903.79	0.00604792		1433.8	0.01237094		1963.8	0.01832811		2493.8	-0.01735391
374	0.16754777		903.99	0.00635583		1434	0.01235043		1964	0.01856114		2494	-0.01616696
374.2	0.16798024		904.19	0.00713415		1434.2	0.0118969		1964.2	0.01940978		2494.2	-0.0155637
374.4	0.1676182		904.39	0.00652872		1434.4	0.01156241		1964.4	0.01927313		2494.4	-0.01481258
374.6	0.16829305		904.59	0.00626726		1434.6	0.01163897		1964.6	0.01922185		2494.6	-0.01315751
374.8	0.16767035		904.79	0.00631239		1434.8	0.01098814		1964.8	0.01788899		2494.8	-0.01255712
375	0.16744748		904.99	0.00733438		1435	0.01111115		1965	0.01692326		2495	-0.01243133
375.2	0.16753144		905.19	0.00699703		1435.2	0.0115725		1965.2	0.01704894		2495.2	-0.01158826
375.4	0.16735718		905.39	0.00618681		1435.4	0.01207801		1965.4	0.01732614		2495.4	-0.01056128
375.6	0.16812801		905.59	0.00542369		1435.6	0.012148		1965.6	0.01761063		2495.6	-0.01071163
375.8	0.16892857		905.79	0.0053978		1435.8	0.01312888		1965.8	0.01789477		2495.8	-0.01024046
376	0.16932551		905.99	0.00525201		1436	0.01239405		1966	0.01629849		2496	-0.01000128
376.2	0.16976995		906.19	0.00573236		1436.2	0.01186328		1966.2	0.01612787		2496.2	-0.00991004
376.4	0.17042484		906.39	0.00575509		1436.4	0.01155409		1966.4	0.01565628		2496.4	-0.00996732
376.6	0.17188258		906.59	0.00504172		1436.6	0.01101566		1966.6	0.01556329		2496.6	-0.00965976
376.8	0.17270059		906.79	0.00463517		1436.8	0.01142468		1966.8	0.01636071		2496.8	-0.00980764
377	0.1723094		906.99	0.00377849		1437	0.01104998		1967	0.01635382		2497	-0.00960943
377.2	0.17318246		907.19	0.00335856		1437.2	0.0113674		1967.2	0.01615722		2497.2	-0.00959666
377.4	0.17344162		907.39	0.00400999		1437.4	0.01173262		1967.4	0.01526131		2497.4	-0.00969323
377.6	0.17371262		907.59	0.00430926		1437.6	0.01185448		1967.6	0.01416316		2497.6	-0.00930987
377.8	0.17417681		907.79	0.00530904		1437.8	0.01168706		1967.8	0.0142759		2497.8	-0.01029338
378	0.17454264		907.99	0.00620401		1438	0.0117836		1968	0.01445828		2498	-0.0108455
378.2	0.17499811		908.19	0.00730149		1438.2	0.0111392		1968.2	0.01487262		2498.2	-0.01156516
378.4	0.17466468		908.39	0.00690897		1438.4	0.01070395		1968.4	0.01451528		2498.4	-0.01185237
378.6	0.17451991		908.59	0.00759364		1438.6	0.01026187		1968.6	0.01465476		2498.6	-0.01193213
378.8	0.17334608		908.79	0.0076939		1438.8	0.00967169		1968.8	0.01439746		2498.8	-0.01311907
379	0.1732116		908.99	0.00783829		1439	0.00974031		1969	0.01494912		2499	-0.013331
379.2	0.17279219		909.19	0.00737071		1439.2	0.00997475		1969.2	0.01550793		2499.2	-0.01330291
379.4	0.17222205		909.39	0.00660849		1439.4	0.00936062		1969.4	0.01574351		2499.4	-0.01316409
379.6	0.17225569		909.59	0.00604003		1439.6	0.00861703		1969.6	0.01572686		2499.6	-0.01341277
379.8	0.17188724		909.79	0.00587401		1439.8	0.00773669		1969.8	0.01533584		2499.8	-0.01326137
380	0.17188724		909.99	0.00587401		1440	0.00773669		1970	0.01533584		2500	-0.01326137
380.2	0.17100013		910.19	0.00559247		1440.2	0.00649183		1970.2	0.01619812		2500.2	-0.01265366
380.4	0.16942311		910.39	0.0052436		1440.4	0.00524533		1970.4	0.01665837		2500.4	-0.01186737
380.6	0.16777407		910.59	0.0048459		1440.6	0.00361871		1970.6	0.01755968		2500.6	-0.01124662
380.8	0.16660524		910.79	0.00432715		1440.8	0.00384477		1970.8	0.0182154		2500.8	-0.01001598
381	0.16470118		910.99	0.00399282		1441	0.00335663		1971	0.01861695		2501	-0.00876787
381.2	0.16413445		911.19	0.00342366		1441.2	0.00369792		1971.2	0.01879971		2501.2	-0.00750137
381.4	0.16276125		911.39	0.00393311		1441.4	0.00336152		1971.4	0.0191318		2501.4	-0.0061884
381.6	0.16219669		911.59	0.00380649		1441.6	0.00324149		1971.6	0.01876953		2501.6	-0.00539014
381.8	0.16135107		911.79	0.00395605		1441.8	0.00386043		1971.8	0.01852438		2501.8	-0.00486986
382	0.1613458		911.99	0.00374018		1442	0.00446897		1972	0.01791204		2502	-0.00439926
382.2	0.16192277		912.19	0.00447674		1442.2	0.00479186		1972.2	0.01698327		2502.2	-0.00370683
382.4	0.16276456		912.39	0.00408898		1442.4	0.00421061		1972.4	0.0154625		2502.4	-0.00334892
382.6	0.16275259		912.59	0.00545037		1442.6	0.00422756		1972.6	0.01417006		2502.6	-0.00374256
382.8	0.16397841		912.79	0.00476632		1442.8	0.00423281		1972.8	0.01392819		2502.8	-0.00350622
383	0.16518552		912.99	0.0054019		1443	0.00355767		1973	0.01234277		2503	-0.00371269
383.2	0.16565538		913.19	0.00647715		1443.2	0.00326418		1973.2	0.01174334		2503.2	-0.00466581
383.4	0.16557143		913.39	0.00711447		1443.4	0.00424936		1973.4	0.01172336		2503.4	-0.00602042
383.6	0.16499106		913.59	0.00770588		1443.6	0.00430911		1973.6	0.01189334		2503.6	-0.00618248
383.8	0.16457417		913.79	0.00811819		1443.8	0.00385244		1973.8	0.01211727		2503.8	-0.00759046
384	0.16416509		913.99	0.00788107		1444	0.00264872		1974	0.01184549		2504	-0.00735942
384.2	0.1641467		914.19	0.00772821		1444.2	0.00268653		1974.2	0.01298089		2504.2	-0.00743841
384.4	0.16353663		914.39	0.00696797		1444.4	0.00300271		1974.4	0.01436775		2504.4	-0.00724101
384.6	0.16294242		914.59	0.00614891		1444.6	0.00383233		1974.6	0.01552421		2504.6	-0.00674726
384.8	0.16251735		914.79	0.00524495		1444.8	0.00510227		1974.8	0.0161995		2504.8	-0.00649435
385	0.16091812		914.99	0.00450549		1445	0.00538201		1975	0.01589126		2505	-0.0063471
385.2	0.16128407		915.19	0.00417916		1445.2	0.0062571		1975.2	0.01619995		2505.2	-0.00628108
385.4	0.16023136		915.39	0.00377064		1445.4	0.00607431		1975.4	0.01655233		2505.4	-0.00673357
385.6	0.160472		915.59	0.00334156		1445.6	0.00589352		1975.6	0.0158454		2505.6	-0.00720102
385.8	0.159402		915.79	0.00282601		1445.8	0.00612029		1975.8	0.01596403		2505.8	-0.00715748
386	0.15892477		915.99	0.00230484		1446	0.00550908		1976	0.01507641		2506	-0.00681495
386.2	0.15945566		916.19	0.00244472		1446.2	0.00473487		1976.2	0.01405434		2506.2	-0.00613439
386.4	0.15923492		916.39	0.00198871		1446.4	0.00346201		1976.4	0.01307234		2506.4	-0.00638592
386.6	0.15998515		916.59	0.00307082		1446.6	0.00265122		1976.6	0.0132441		2506.6	-0.00727393
386.8	0.16033282		916.79	0.00211023		1446.8	0.00235041		1976.8	0.01315446		2506.8	-0.00702731
387	0.16051732		916.99	0.00348033		1447	0.00189599		1977	0.01246213		2507	-0.00674633
387.2	0.15961925		917.19	0.00459628		1447.2	0.00266921		1977.2	0.01206966		2507.2	-0.00697071
387.4	0.15938502		917.39	0.00512558		1447.4	0.00330729		1977.4	0.01208363		2507.4	-0.00671345
387.6	0.15875143		917.59	0.00533308		1447.6	0.003163		1977.6	0.01177436		2507.6	-0.00588218
387.8	0.15821517		917.79	0.00565606		1447.8	0.00303282		1977.8	0.01260114		2507.8	-0.00622303
388	0.15809067		917.99	0.00566004		1448	0.00342133		1978	0.01273963		2508	-0.00587576
388.2	0.15856452		918.19	0.00502353		1448.2	0.00348673		1978.2	0.01423332		2508.2	-0.00582066
388.4	0.15786166		918.39	0.00485374		1448.4	0.00429872		1978.4	0.01576073		2508.4	-0.00531566
388.6	0.15736677		918.59	0.00475755		1448.6	0.00450129		1978.6	0.01630923		2508.6	-0.00488996
388.8	0.15681651		918.79	0.0054476		1448.8	0.00420753		1978.8	0.01670896		2508.8	-0.00532328
389	0.15583999		918.99	0.00533447		1449	0.0044261		1979	0.01741011		2509	-0.00481522
389.2	0.15633485		919.19	0.0052259		1449.2	0.00470958		1979.2	0.01824072		2509.2	-0.00524919
389.4	0.15626686		919.39	0.00525828		1449.4	0.00442396		1979.4	0.01845804		2509.4	-0.00640667
389.6	0.15574835		919.59	0.00589857		1449.6	0.00466385		1979.6	0.01843351		2509.6	-0.00669354
389.8	0.15509633		919.79	0.00528855		1449.8	0.00511766		1979.8	0.01850123		2509.8	-0.00689705
390	0.15516474		919.99	0.00558599		1450	0.00443358		1980	0.01784166		2510	-0.00717139
390.2	0.15636756		920.19	0.00513529		1450.2	0.00394511		1980.2	0.01725543		2510.2	-0.00775753
390.4	0.15645002		920.39	0.00482784		1450.4	0.00349321		1980.4	0.01692612		2510.4	-0.00908388
390.6	0.15763848		920.59	0.00445137		1450.6	0.00405343		1980.6	0.01730068		2510.6	-0.00996056
390.8	0.15773419		920.79	0.00329819		1450.8	0.00407893		1980.8	0.01610737		2510.8	-0.00931529
391	0.15815028		920.99	0.00329265		1451	0.00430962		1981	0.01475258		2511	-0.00872385
391.2	0.15892587		921.19	0.00263355		1451.2	0.00458634		1981.2	0.0136296		2511.2	-0.00859077
391.4	0.15910057		921.39	0.00270841		1451.4	0.00406895		1981.4	0.01242384		2511.4	-0.00841825
391.6	0.15895829		921.59	0.00222873		1451.6	0.00425403		1981.6	0.01188519		2511.6	-0.00836879
391.8	0.15811731		921.79	0.00231323		1451.8	0.00439726		1981.8	0.01186789		2511.8	-0.0083361
392	0.15841143		921.99	0.00215457		1452	0.00470232		1982	0.01222207		2512	-0.00876676
392.2	0.15879146		922.19	0.00136345		1452.2	0.00441401		1982.2	0.01315374		2512.2	-0.00857587
392.4	0.15700169		922.39	0.00206954		1452.4	0.00448693		1982.4	0.0136275		2512.4	-0.00753339
392.6	0.15671165		922.59	0.00239376		1452.6	0.00420174		1982.6	0.01411952		2512.6	-0.00711347
392.8	0.15607191		922.79	0.00338194		1452.8	0.00418823		1982.8	0.01471886		2512.8	-0.00688918
393	0.15573207		922.99	0.00303685		1453	0.00451769		1983	0.01562188		2513	-0.00718672
393.2	0.1560623		923.19	0.00369078		1453.2	0.00510589		1983.2	0.01560578		2513.2	-0.007686
393.4	0.15573257		923.39	0.00438342		1453.4	0.00507766		1983.4	0.01562587		2513.4	-0.0083071
393.6	0.15440257		923.59	0.00503735		1453.6	0.00554176		1983.6	0.01535628		2513.6	-0.00786517
393.8	0.15482936		923.79	0.00543827		1453.8	0.00532595		1983.8	0.01487534		2513.8	-0.00809635
394	0.15531397		923.99	0.00583416		1454	0.0045598		1984	0.01483954		2514	-0.00827816
394.2	0.15631703		924.19	0.00495711		1454.2	0.00382788		1984.2	0.01404062		2514.2	-0.00892013
394.4	0.15659471		924.39	0.004743		1454.4	0.00354955		1984.4	0.01387278		2514.4	-0.00944686
394.6	0.15717459		924.59	0.0050118		1454.6	0.00283054		1984.6	0.01374755		2514.6	-0.00955426
394.8	0.15738272		924.79	0.00420479		1454.8	0.00169468		1984.8	0.01220515		2514.8	-0.00930447
395	0.15757668		924.99	0.00350573		1455	0.00099284		1985	0.01119439		2515	-0.00956828
395.2	0.15757642		925.19	0.00341726		1455.2	-0.00021615		1985.2	0.01107021		2515.2	-0.00924624
395.4	0.15683894		925.39	0.00266692		1455.4	-0.0007276		1985.4	0.01009447		2515.4	-0.00973559
395.6	0.15594724		925.59	0.00179458		1455.6	-0.00029004		1985.6	0.01045136		2515.6	-0.00969127
395.8	0.15486315		925.79	0.0013422		1455.8	0.00067887		1985.8	0.01082989		2515.8	-0.00993842
396	0.15465438		925.99	0.00103364		1456	0.00090282		1986	0.01089034		2516	-0.00921183
396.2	0.15443469		926.19	0.00058919		1456.2	0.00044265		1986.2	0.01095909		2516.2	-0.00798154
396.4	0.15316291		926.39	0.00055762		1456.4	0.00052969		1986.4	0.01131783		2516.4	-0.0078639
396.6	0.1526692		926.59	-0.00035362		1456.6	0.00116867		1986.6	0.01211913		2516.6	-0.0080872
396.8	0.15190601		926.79	-0.00039202		1456.8	0.0019288		1986.8	0.01280791		2516.8	-0.00854565
397	0.15262256		926.99	-0.0007142		1457	0.00145591		1987	0.01283759		2517	-0.0083743
397.2	0.15204106		927.19	-0.00070303		1457.2	0.0017383		1987.2	0.01282654		2517.2	-0.00782397
397.4	0.15149896		927.39	-0.00049673		1457.4	0.0020265		1987.4	0.01244616		2517.4	-0.00833238
397.6	0.15192815		927.59	-0.00002426		1457.6	0.00165445		1987.6	0.01208805		2517.6	-0.00823905
397.8	0.15270572		927.79	0.00047369		1457.8	0.00202937		1987.8	0.0118151		2517.8	-0.0094489
398	0.15382747		927.99	0.00058899		1458	0.00151031		1988	0.01149266		2518	-0.01057662
398.2	0.15479502		928.19	0.00055579		1458.2	0.00108728		1988.2	0.01083167		2518.2	-0.01114105
398.4	0.15503075		928.39	0.00128235		1458.4	0.00077208		1988.4	0.01166452		2518.4	-0.01266558
398.6	0.15548542		928.59	0.00210041		1458.6	-0.00013686		1988.6	0.01125238		2518.6	-0.01327592
398.8	0.15515714		928.79	0.00123003		1458.8	-0.00024759		1988.8	0.01102175		2518.8	-0.01418086
399	0.15530326		928.99	0.00143814		1459	-0.00031178		1989	0.01116617		2519	-0.01427566
399.2	0.15460363		929.19	0.00120866		1459.2	-0.00004574		1989.2	0.011363		2519.2	-0.01522537
399.4	0.15380417		929.39	0.00050947		1459.4	0.00032468		1989.4	0.01174593		2519.4	-0.01515216
399.6	0.15307658		929.59	0.00117071		1459.6	0.00155448		1989.6	0.01155312		2519.6	-0.01450419
399.8	0.15260657		929.79	0.00099913		1459.8	0.00222781		1989.8	0.01217341		2519.8	-0.01382893
400	0.15166728		929.99	0.00180121		1460	0.00181774		1990	0.01187382		2520	-0.01256248
400.2	0.1510345		930.19	0.00174306		1460.2	0.00145884		1990.2	0.01198411		2520.2	-0.01202596
400.4	0.15023891		930.39	0.00173048		1460.4	0.00203563		1990.4	0.01297349		2520.4	-0.01191245
400.6	0.14953671		930.59	0.00107648		1460.6	0.00257805		1990.6	0.01300114		2520.6	-0.01065421
400.8	0.14869632		930.79	0.00159788		1460.8	0.00219377		1990.8	0.01265329		2520.8	-0.01010431
401	0.14815213		930.99	0.00145885		1461	0.00166913		1991	0.01214905		2521	-0.00885305
401.2	0.14748078		931.19	0.00150095		1461.2	0.0029956		1991.2	0.0124188		2521.2	-0.00889954
401.4	0.1480536		931.39	0.0007548		1461.4	0.00355069		1991.4	0.01094581		2521.4	-0.00880584
401.6	0.14866115		931.59	0.00117159		1461.6	0.00308866		1991.6	0.00984902		2521.6	-0.00851489
401.8	0.14848028		931.79	0.00176535		1461.8	0.00343182		1991.8	0.00964492		2521.8	-0.0086208
402	0.14920203		931.99	0.00196393		1462	0.00288011		1992	0.00938074		2522	-0.00827089
402.2	0.14968978		932.19	0.00247882		1462.2	0.00214474		1992.2	0.00978747		2522.2	-0.00811082
402.4	0.14994961		932.39	0.00255922		1462.4	0.00141266		1992.4	0.01059428		2522.4	-0.00962373
402.6	0.14982365		932.59	0.00250755		1462.6	0.00098839		1992.6	0.00946191		2522.6	-0.01024337
402.8	0.1496204		932.79	0.00223611		1462.8	0.00146843		1992.8	0.00967239		2522.8	-0.01086334
403	0.15043943		932.99	0.00252757		1463	0.00154653		1993	0.00948395		2523	-0.01083156
403.2	0.14982712		933.19	0.00184669		1463.2	0.0016041		1993.2	0.01006639		2523.2	-0.0119005
403.4	0.14891925		933.39	0.00185161		1463.4	0.00119958		1993.4	0.01134597		2523.4	-0.01117492
403.6	0.14896516		933.59	0.00060783		1463.6	0.00101096		1993.6	0.01109321		2523.6	-0.01187684
403.8	0.14842036		933.79	0.0001469		1463.8	0.00123369		1993.8	0.01225524		2523.8	-0.01218694
404	0.14753415		933.99	0.00012066		1464	0.00124789		1994	0.01275973		2524	-0.01230806
404.2	0.14658238		934.19	-0.000429		1464.2	0.00067616		1994.2	0.01350732		2524.2	-0.01236968
404.4	0.14724377		934.39	-0.00110119		1464.4	0.0013596		1994.4	0.01437121		2524.4	-0.01236218
404.6	0.14592985		934.59	-0.00216505		1464.6	0.00160012		1994.6	0.01376925		2524.6	-0.01192228
404.8	0.14541397		934.79	-0.00242487		1464.8	0.00154677		1994.8	0.01371862		2524.8	-0.01223363
405	0.14550434		934.99	-0.00242526		1465	0.00169721		1995	0.0129712		2525	-0.01167642
405.2	0.14640966		935.19	-0.00327828		1465.2	0.00216195		1995.2	0.01216951		2525.2	-0.01184467
405.4	0.14656754		935.39	-0.0041058		1465.4	0.00234949		1995.4	0.01010724		2525.4	-0.01162624
405.6	0.14671239		935.59	-0.00269821		1465.6	0.00127939		1995.6	0.00894868		2525.6	-0.01124739
405.8	0.14678121		935.79	-0.0020062		1465.8	0.00077508		1995.8	0.00860348		2525.8	-0.01088762
406	0.1464812		935.99	-0.00092541		1466	0.00064664		1996	0.00752113		2526	-0.01120505
406.2	0.14648687		936.19	-0.00079342		1466.2	-0.00002728		1996.2	0.00676297		2526.2	-0.01232106
406.4	0.14687066		936.39	-0.00058827		1466.4	-0.00028321		1996.4	0.00599948		2526.4	-0.01257745
406.6	0.14699044		936.59	0.00033276		1466.6	-0.0009532		1996.6	0.00525021		2526.6	-0.01288094
406.8	0.14780857		936.79	0.00078055		1466.8	-0.00201827		1996.8	0.00549905		2526.8	-0.01230124
407	0.14782804		936.99	0.00098694		1467	-0.00284369		1997	0.00540783		2527	-0.01273476
407.2	0.14707371		937.19	0.00061592		1467.2	-0.00305176		1997.2	0.00650417		2527.2	-0.01292745
407.4	0.14587548		937.39	-0.00012356		1467.4	-0.00276226		1997.4	0.0071555		2527.4	-0.01321616
407.6	0.14564368		937.59	-0.0006636		1467.6	-0.00258658		1997.6	0.00752851		2527.6	-0.013858
407.8	0.1446608		937.79	-0.00071544		1467.8	-0.00184807		1997.8	0.00899276		2527.8	-0.01321121
408	0.14457927		937.99	-0.00144587		1468	-0.00152287		1998	0.00996851		2528	-0.01272464
408.2	0.144222		938.19	-0.00140744		1468.2	-0.00120691		1998.2	0.01113916		2528.2	-0.01350165
408.4	0.14448273		938.39	-0.00182184		1468.4	-0.00023279		1998.4	0.01153045		2528.4	-0.01348861
408.6	0.14360206		938.59	-0.00240189		1468.6	0.00059917		1998.6	0.0115003		2528.6	-0.01277438
408.8	0.14458694		938.79	-0.00276893		1468.8	0.00117383		1998.8	0.0118167		2528.8	-0.01166308
409	0.14487824		938.99	-0.00316764		1469	0.00155355		1999	0.01174475		2529	-0.01216407
409.2	0.14581367		939.19	-0.00411174		1469.2	0.00212525		1999.2	0.01191032		2529.2	-0.01236214
409.4	0.14643105		939.39	-0.00451326		1469.4	0.0030306		1999.4	0.01211563		2529.4	-0.01230528
409.6	0.14738072		939.59	-0.00434215		1469.6	0.00269722		1999.6	0.01143747		2529.6	-0.01305737
409.8	0.1473951		939.79	-0.00375853		1469.8	0.00292376		1999.8	0.01152611		2529.8	-0.01329943
410	0.14669824		939.99	-0.00361695		1470	0.00309289		2000	0.01076036		2530	-0.01336467
410.2	0.14667317		940.19	-0.00337232		1470.2	0.00279757		2000.2	0.00970288		2530.2	-0.01375111
410.4	0.14743727		940.39	-0.00251121		1470.4	0.00226683		2000.4	0.00973079		2530.4	-0.01288939
410.6	0.14747636		940.59	-0.00273026		1470.6	0.00179442		2000.6	0.00990158		2530.6	-0.01364223
410.8	0.14705328		940.79	-0.00280832		1470.8	0.00106258		2000.8	0.00914575		2530.8	-0.0138215
411	0.14568929		940.99	-0.0026849		1471	0.00137945		2001	0.00925392		2531	-0.01370968
411.2	0.14496377		941.19	-0.00256957		1471.2	0.00162615		2001.2	0.00978139		2531.2	-0.01273885
411.4	0.14381003		941.39	-0.00207593		1471.4	0.00197367		2001.4	0.00898741		2531.4	-0.0128597
411.6	0.1437028		941.59	-0.00141453		1471.6	0.00093923		2001.6	0.00901897		2531.6	-0.0131041
411.8	0.14307065		941.79	-0.00200952		1471.8	0.00106905		2001.8	0.00951283		2531.8	-0.01255137
412	0.14356056		941.99	-0.00176326		1472	0.00123381		2002	0.00930168		2532	-0.01258163
412.2	0.14335406		942.19	-0.00145038		1472.2	0.00137524		2002.2	0.00981312		2532.2	-0.01311422
412.4	0.14336213		942.39	-0.00175987		1472.4	0.00093577		2002.4	0.01002901		2532.4	-0.0131835
412.6	0.14382353		942.59	-0.00222864		1472.6	0.00116831		2002.6	0.01085082		2532.6	-0.01232122
412.8	0.1449935		942.79	-0.00294088		1472.8	0.00053961		2002.8	0.01087422		2532.8	-0.0119141
413	0.14531951		942.99	-0.00344328		1473	0.00042136		2003	0.01144031		2533	-0.01314958
413.2	0.14686627		943.19	-0.00269429		1473.2	-0.00078785		2003.2	0.0118328		2533.2	-0.01269455
413.4	0.1471606		943.39	-0.00287397		1473.4	-0.00119458		2003.4	0.01184598		2533.4	-0.01354868
413.6	0.14790704		943.59	-0.0023491		1473.6	-0.00183056		2003.6	0.01077008		2533.6	-0.01476422
413.8	0.14720133		943.79	-0.00250464		1473.8	-0.0025342		2003.8	0.01007579		2533.8	-0.01463201
414	0.14666477		943.99	-0.00268042		1474	-0.00308577		2004	0.00896983		2534	-0.01499226
414.2	0.14640786		944.19	-0.00211267		1474.2	-0.00395518		2004.2	0.00823107		2534.2	-0.01516625
414.4	0.14585397		944.39	-0.00255195		1474.4	-0.00480754		2004.4	0.00815503		2534.4	-0.01522687
414.6	0.14579115		944.59	-0.00262803		1474.6	-0.00455369		2004.6	0.00837583		2534.6	-0.01567954
414.8	0.14449321		944.79	-0.00170973		1474.8	-0.00462764		2004.8	0.00826572		2534.8	-0.01559843
415	0.14318444		944.99	-0.00108268		1475	-0.00501988		2005	0.00925059		2535	-0.01446504
415.2	0.14245986		945.19	-0.00129537		1475.2	-0.00472662		2005.2	0.00940398		2535.2	-0.01401184
415.4	0.14187216		945.39	-0.00174251		1475.4	-0.00387935		2005.4	0.00925212		2535.4	-0.01401545
415.6	0.14109956		945.59	-0.00243377		1475.6	-0.00418205		2005.6	0.01006518		2535.6	-0.01353401
415.8	0.14011429		945.79	-0.00326188		1475.8	-0.00258505		2005.8	0.01023039		2535.8	-0.01292194
416	0.14089008		945.99	-0.00260584		1476	-0.00195875		2006	0.01095096		2536	-0.01247906
416.2	0.14064203		946.19	-0.00292363		1476.2	-0.00060741		2006.2	0.01161108		2536.2	-0.01162819
416.4	0.14073126		946.39	-0.00324207		1476.4	-0.00059178		2006.4	0.01236452		2536.4	-0.01182675
416.6	0.14131668		946.59	-0.00443605		1476.6	0.00023853		2006.6	0.01304659		2536.6	-0.01103238
416.8	0.14211134		946.79	-0.00504621		1476.8	0.00122438		2006.8	0.01257116		2536.8	-0.01088938
417	0.14200944		946.99	-0.00485291		1477	0.0017458		2007	0.01308755		2537	-0.01155459
417.2	0.14273205		947.19	-0.00423126		1477.2	0.00088594		2007.2	0.01293912		2537.2	-0.0126172
417.4	0.14296859		947.39	-0.00495365		1477.4	0.00074198		2007.4	0.01163962		2537.4	-0.01365256
417.6	0.14361459		947.59	-0.00455049		1477.6	0.00105604		2007.6	0.01114265		2537.6	-0.01497669
417.8	0.14340534		947.79	-0.00439889		1477.8	0.00038252		2007.8	0.01003522		2537.8	-0.01478907
418	0.14351339		947.99	-0.00340625		1478	0.00009711		2008	0.00943559		2538	-0.0144531
418.2	0.14366214		948.19	-0.00263747		1478.2	-0.00074291		2008.2	0.00851378		2538.2	-0.01405441
418.4	0.14304828		948.39	-0.00274216		1478.4	-0.00030575		2008.4	0.00819293		2538.4	-0.01515546
418.6	0.14405329		948.59	-0.00231262		1478.6	-0.0003257		2008.6	0.00884189		2538.6	-0.01524218
418.8	0.1429702		948.79	-0.00242817		1478.8	-0.00066568		2008.8	0.00892523		2538.8	-0.01510716
419	0.14195745		948.99	-0.00292128		1479	-0.00161155		2009	0.00968683		2539	-0.01451111
419.2	0.14123649		949.19	-0.00372923		1479.2	-0.00155274		2009.2	0.00938773		2539.2	-0.01457939
419.4	0.14085032		949.39	-0.00353931		1479.4	-0.00111447		2009.4	0.0090951		2539.4	-0.01388794
419.6	0.13905925		949.59	-0.00349888		1479.6	-0.00143032		2009.6	0.00972803		2539.6	-0.01293154
419.8	0.13925524		949.79	-0.00359881		1479.8	-0.00065478		2009.8	0.00999497		2539.8	-0.012845
420	0.1397451		949.99	-0.00336371		1480	-0.00052224		2010	0.01106865		2540	-0.01232519
420.2	0.13904385		950.19	-0.00426338		1480.2	0.00020098		2010.2	0.0112383		2540.2	-0.0110546
420.4	0.13973017		950.39	-0.00455355		1480.4	0.00029791		2010.4	0.01140939		2540.4	-0.01194028
420.6	0.13984633		950.59	-0.00513241		1480.6	0.00074889		2010.6	0.01164965		2540.6	-0.01250098
420.8	0.13956533		950.79	-0.00470209		1480.8	0.00105766		2010.8	0.01146418		2540.8	-0.01273512
421	0.13968114		950.99	-0.00469365		1481	0.00004383		2011	0.01117944		2541	-0.0141618
421.2	0.13963236		951.19	-0.00433781		1481.2	-0.00091931		2011.2	0.0107397		2541.2	-0.01592061
421.4	0.13971577		951.39	-0.00332191		1481.4	-0.00090854		2011.4	0.01021945		2541.4	-0.01683281
421.6	0.14022644		951.59	-0.00164658		1481.6	-0.00166458		2011.6	0.01023199		2541.6	-0.01749572
421.8	0.14012543		951.79	-0.00011968		1481.8	-0.0020748		2011.8	0.0089247		2541.8	-0.01695618
422	0.1407464		951.99	0.00057431		1482	-0.00199425		2012	0.00818737		2542	-0.01833782
422.2	0.140968		952.19	0.00107859		1482.2	-0.00267424		2012.2	0.00760545		2542.2	-0.01911756
422.4	0.14052022		952.39	0.0010516		1482.4	-0.00314266		2012.4	0.00815031		2542.4	-0.01949941
422.6	0.14141669		952.59	0.00097711		1482.6	-0.00367823		2012.6	0.00863087		2542.6	-0.01883499
422.8	0.14090531		952.79	0.00061022		1482.8	-0.00394683		2012.8	0.00879201		2542.8	-0.01860614
423	0.14084642		952.99	0.00077092		1483	-0.00451946		2013	0.00964969		2543	-0.01896073
423.2	0.14049145		953.19	0.00073908		1483.2	-0.00480393		2013.2	0.01004212		2543.2	-0.01845278
423.4	0.14019027		953.39	0.00006579		1483.4	-0.00412878		2013.4	0.01097577		2543.4	-0.01777493
423.6	0.13848334		953.59	-0.0010282		1483.6	-0.00419116		2013.6	0.01201674		2543.6	-0.0167168
423.8	0.13934248		953.79	-0.00235797		1483.8	-0.00355742		2013.8	0.01214684		2543.8	-0.01643246
424	0.13896049		953.99	-0.00241715		1484	-0.00326917		2014	0.01242839		2544	-0.01608385
424.2	0.13857008		954.19	-0.00298928		1484.2	-0.00183004		2014.2	0.01242835		2544.2	-0.01518918
424.4	0.13871976		954.39	-0.00301101		1484.4	-0.00139908		2014.4	0.0113319		2544.4	-0.01555868
424.6	0.13816889		954.59	-0.0038439		1484.6	-0.00170607		2014.6	0.01190987		2544.6	-0.01560426
424.8	0.13836978		954.79	-0.00395974		1484.8	-0.00215664		2014.8	0.01141988		2544.8	-0.0160999
425	0.13858921		954.99	-0.00418414		1485	-0.00231196		2015	0.01084936		2545	-0.0174049
425.2	0.13792882		955.19	-0.00349584		1485.2	-0.00242932		2015.2	0.01049351		2545.2	-0.0181703
425.4	0.1373862		955.39	-0.00270474		1485.4	-0.00297232		2015.4	0.0093153		2545.4	-0.01831413
425.6	0.13705144		955.59	-0.00231037		1485.6	-0.00413522		2015.6	0.00826279		2545.6	-0.01880594
425.8	0.13715414		955.79	-0.00170716		1485.8	-0.0036095		2015.8	0.00679229		2545.8	-0.01957
426	0.13819158		955.99	-0.00229529		1486	-0.0035117		2016	0.00642351		2546	-0.02006093
426.2	0.13759715		956.19	-0.00299791		1486.2	-0.00436712		2016.2	0.00609754		2546.2	-0.01871794
426.4	0.1372701		956.39	-0.00337313		1486.4	-0.0041804		2016.4	0.00645111		2546.4	-0.01762983
426.6	0.13802091		956.59	-0.00422049		1486.6	-0.00415441		2016.6	0.00694634		2546.6	-0.01746891
426.8	0.13832778		956.79	-0.00424871		1486.8	-0.00398687		2016.8	0.00774504		2546.8	-0.01705014
427	0.13742085		956.99	-0.00434837		1487	-0.00397549		2017	0.00845097		2547	-0.01680811
427.2	0.13682855		957.19	-0.00571704		1487.2	-0.00405429		2017.2	0.00925154		2547.2	-0.01601394
427.4	0.13615906		957.39	-0.00650348		1487.4	-0.00383395		2017.4	0.01005661		2547.4	-0.01627035
427.6	0.13625636		957.59	-0.00646691		1487.6	-0.00344339		2017.6	0.01059386		2547.6	-0.01509304
427.8	0.13725008		957.79	-0.00657878		1487.8	-0.00291377		2017.8	0.01114246		2547.8	-0.01472085
428	0.13663456		957.99	-0.00524976		1488	-0.00227552		2018	0.01166498		2548	-0.01475505
428.2	0.13732954		958.19	-0.00585309		1488.2	-0.00153987		2018.2	0.01197312		2548.2	-0.01388807
428.4	0.13815031		958.39	-0.00538404		1488.4	-0.00157481		2018.4	0.01163719		2548.4	-0.01478257
428.6	0.13883245		958.59	-0.00535182		1488.6	-0.00178474		2018.6	0.012098		2548.6	-0.01587942
428.8	0.13918982		958.79	-0.00418174		1488.8	-0.00129047		2018.8	0.01100995		2548.8	-0.01661662
429	0.13920464		958.99	-0.0038359		1489	-0.00064815		2019	0.01046869		2549	-0.01703646
429.2	0.13966561		959.19	-0.00309107		1489.2	-0.00127099		2019.2	0.01001404		2549.2	-0.01740043
429.4	0.13979618		959.39	-0.00264803		1489.4	-0.00184224		2019.4	0.00950537		2549.4	-0.01824856
429.6	0.13925268		959.59	-0.00272911		1489.6	-0.00161217		2019.6	0.0089672		2549.6	-0.01944712
429.8	0.13986132		959.79	-0.0029941		1489.8	-0.00180511		2019.8	0.00856454		2549.8	-0.01957859
430	0.14039368		959.99	-0.00344645		1490	-0.00208047		2020	0.00872875		2550	-0.01861013
430.2	0.13915814		960.19	-0.00453775		1490.2	-0.0021466		2020.2	0.00834978		2550.2	-0.0178247
430.4	0.13853776		960.39	-0.0050005		1490.4	-0.00201828		2020.4	0.0083177		2550.4	-0.01751954
430.6	0.13840968		960.59	-0.00560734		1490.6	-0.00220325		2020.6	0.00823563		2550.6	-0.01723332
430.8	0.1376128		960.79	-0.00600152		1490.8	-0.00215016		2020.8	0.00864524		2550.8	-0.01648091
431	0.13686505		960.99	-0.00678338		1491	-0.00273064		2021	0.00872489		2551	-0.01577302
431.2	0.13709166		961.19	-0.00833012		1491.2	-0.00310427		2021.2	0.00953692		2551.2	-0.01485374
431.4	0.13646054		961.39	-0.00793455		1491.4	-0.00382588		2021.4	0.00980805		2551.4	-0.01389499
431.6	0.13643221		961.59	-0.00817671		1491.6	-0.00341776		2021.6	0.01067013		2551.6	-0.01211595
431.8	0.13595201		961.79	-0.00864697		1491.8	-0.00401484		2021.8	0.01080421		2551.8	-0.0117655
432	0.13567087		961.99	-0.00791212		1492	-0.0038407		2022	0.01026653		2552	-0.0117232
432.2	0.13676003		962.19	-0.00794565		1492.2	-0.00412512		2022.2	0.00904549		2552.2	-0.01239839
432.4	0.13731537		962.39	-0.00704354		1492.4	-0.00437441		2022.4	0.0078725		2552.4	-0.01333065
432.6	0.13741599		962.59	-0.00619456		1492.6	-0.00447079		2022.6	0.00700829		2552.6	-0.01369159
432.8	0.13727607		962.79	-0.00536374		1492.8	-0.00390762		2022.8	0.00588044		2552.8	-0.01415831
433	0.13732506		962.99	-0.00510707		1493	-0.00401877		2023	0.00547271		2553	-0.01507115
433.2	0.13720258		963.19	-0.00441843		1493.2	-0.00482073		2023.2	0.00572955		2553.2	-0.01645767
433.4	0.13560077		963.39	-0.00338716		1493.4	-0.00504747		2023.4	0.00574876		2553.4	-0.01783595
433.6	0.13461976		963.59	-0.00356318		1493.6	-0.00460732		2023.6	0.00578213		2553.6	-0.01848193
433.8	0.13489657		963.79	-0.00361735		1493.8	-0.00479018		2023.8	0.00610152		2553.8	-0.01875556
434	0.13449676		963.99	-0.00359174		1494	-0.00468527		2024	0.00631376		2554	-0.01905759
434.2	0.13336669		964.19	-0.00445595		1494.2	-0.00390528		2024.2	0.0067402		2554.2	-0.01908157
434.4	0.1334764		964.39	-0.00362776		1494.4	-0.00376456		2024.4	0.0065866		2554.4	-0.01931997
434.6	0.13340569		964.59	-0.00404845		1494.6	-0.00269456		2024.6	0.00785236		2554.6	-0.01888171
434.8	0.13335637		964.79	-0.00427669		1494.8	-0.00282554		2024.8	0.00968355		2554.8	-0.01814569
435	0.13370796		964.99	-0.00490419		1495	-0.00232836		2025	0.01045447		2555	-0.01724818
435.2	0.13348774		965.19	-0.00563885		1495.2	-0.00233117		2025.2	0.0104231		2555.2	-0.01695059
435.4	0.13386465		965.39	-0.00573753		1495.4	-0.00281333		2025.4	0.01125111		2555.4	-0.01607913
435.6	0.13517731		965.59	-0.00664025		1495.6	-0.00270374		2025.6	0.01185532		2555.6	-0.01611054
435.8	0.13620434		965.79	-0.00679778		1495.8	-0.00323673		2025.8	0.01111222		2555.8	-0.01605145
436	0.13639345		965.99	-0.00653898		1496	-0.00324999		2026	0.00929461		2556	-0.01573667
436.2	0.13723897		966.19	-0.00663366		1496.2	-0.00397564		2026.2	0.00748432		2556.2	-0.01626754
436.4	0.13813048		966.39	-0.00679608		1496.4	-0.00447762		2026.4	0.00650618		2556.4	-0.01593097
436.6	0.13781444		966.59	-0.0068895		1496.6	-0.00452672		2026.6	0.00542843		2556.6	-0.01558076
436.8	0.13723988		966.79	-0.00675284		1496.8	-0.00515314		2026.8	0.00471918		2556.8	-0.0157059
437	0.13614821		966.99	-0.0065771		1497	-0.00600131		2027	0.0044085		2557	-0.01608687
437.2	0.13558969		967.19	-0.00641411		1497.2	-0.00684379		2027.2	0.00442992		2557.2	-0.01649757
437.4	0.13480512		967.39	-0.00605824		1497.4	-0.00655653		2027.4	0.00425497		2557.4	-0.01688592
437.6	0.13444644		967.59	-0.00598918		1497.6	-0.00629487		2027.6	0.00375649		2557.6	-0.01711495
437.8	0.13411581		967.79	-0.00556479		1497.8	-0.00649441		2027.8	0.00388462		2557.8	-0.01764556
438	0.13376728		967.99	-0.00523395		1498	-0.00639858		2028	0.00412773		2558	-0.01774681
438.2	0.13338151		968.19	-0.00512884		1498.2	-0.00638681		2028.2	0.00571577		2558.2	-0.01673766
438.4	0.1336311		968.39	-0.00458956		1498.4	-0.00533265		2028.4	0.00635247		2558.4	-0.01675028
438.6	0.13257048		968.59	-0.00603826		1498.6	-0.00447581		2028.6	0.00790057		2558.6	-0.01568383
438.8	0.13239095		968.79	-0.00622622		1498.8	-0.00419548		2028.8	0.0085428		2558.8	-0.01586596
439	0.13314917		968.99	-0.00765594		1499	-0.00441795		2029	0.00960527		2559	-0.0158727
439.2	0.13378894		969.19	-0.00772414		1499.2	-0.00405411		2029.2	0.01083298		2559.2	-0.01570301
439.4	0.13506664		969.39	-0.00832953		1499.4	-0.00342389		2029.4	0.01154822		2559.4	-0.01485704
439.6	0.13617879		969.59	-0.00872729		1499.6	-0.00259037		2029.6	0.01057055		2559.6	-0.01546374
439.8	0.13651044		969.79	-0.00972702		1499.8	-0.00228537		2029.8	0.00963153		2559.8	-0.01487101
440	0.13751805		969.99	-0.00965598		1500	-0.00164291		2030	0.00867756		2560	-0.01448782
440.2	0.13874767		970.19	-0.00919622		1500.2	-0.00129926		2030.2	0.00789228		2560.2	-0.01447759
440.4	0.13935365		970.39	-0.00887733		1500.4	-0.00136822		2030.4	0.00755424		2560.4	-0.01473997
440.6	0.13943045		970.59	-0.00846267		1500.6	-0.00146744		2030.6	0.00718882		2560.6	-0.01474771
440.8	0.13871311		970.79	-0.00788548		1500.8	-0.00211139		2030.8	0.00747686		2560.8	-0.01503921
441	0.13831387		970.99	-0.00810787		1501	-0.00211178		2031	0.00720437		2561	-0.0158767
441.2	0.13862003		971.19	-0.00824301		1501.2	-0.00207936		2031.2	0.00646091		2561.2	-0.0160247
441.4	0.13766268		971.39	-0.00787976		1501.4	-0.00215499		2031.4	0.00580674		2561.4	-0.01771838
441.6	0.13645022		971.59	-0.00690512		1501.6	-0.00311794		2031.6	0.00508459		2561.6	-0.01869495
441.8	0.13571154		971.79	-0.00629761		1501.8	-0.00310898		2031.8	0.00536489		2561.8	-0.01881071
442	0.13473821		971.99	-0.00648036		1502	-0.0030007		2032	0.00631687		2562	-0.01892543
442.2	0.1341339		972.19	-0.00683473		1502.2	-0.00287152		2032.2	0.00749155		2562.2	-0.01868575
442.4	0.13342325		972.39	-0.00670377		1502.4	-0.00200756		2032.4	0.00759104		2562.4	-0.01886582
442.6	0.13266022		972.59	-0.00730859		1502.6	-0.00198492		2032.6	0.0081968		2562.6	-0.01835376
442.8	0.1324511		972.79	-0.00731684		1502.8	-0.0020914		2032.8	0.00879905		2562.8	-0.01849173
443	0.13186464		972.99	-0.00720144		1503	-0.00287637		2033	0.00989124		2563	-0.01781227
443.2	0.13148977		973.19	-0.007022		1503.2	-0.00210697		2033.2	0.01055708		2563.2	-0.01692901
443.4	0.13144999		973.39	-0.00729617		1503.4	-0.00201245		2033.4	0.00893141		2563.4	-0.01611067
443.6	0.13177022		973.59	-0.00728841		1503.6	-0.00236176		2033.6	0.00890868		2563.6	-0.01614762
443.8	0.13268023		973.79	-0.00788986		1503.8	-0.00329566		2033.8	0.00838619		2563.8	-0.01572183
444	0.13367502		973.99	-0.00679063		1504	-0.00280175		2034	0.00819409		2564	-0.01566146
444.2	0.13438714		974.19	-0.00615958		1504.2	-0.00379695		2034.2	0.00776669		2564.2	-0.01551271
444.4	0.13607372		974.39	-0.00565061		1504.4	-0.00437047		2034.4	0.00808133		2564.4	-0.0160017
444.6	0.13633649		974.59	-0.00573248		1504.6	-0.00477662		2034.6	0.00729461		2564.6	-0.01578944
444.8	0.13663183		974.79	-0.00603702		1504.8	-0.00549214		2034.8	0.00717409		2564.8	-0.01627264
445	0.13684523		974.99	-0.00658923		1505	-0.0055686		2035	0.00681947		2565	-0.01744085
445.2	0.13711087		975.19	-0.00733114		1505.2	-0.00569213		2035.2	0.00607887		2565.2	-0.01792194
445.4	0.13661235		975.39	-0.00681037		1505.4	-0.0056347		2035.4	0.00675671		2565.4	-0.01848243
445.6	0.13624222		975.59	-0.00625999		1505.6	-0.00466292		2035.6	0.00696952		2565.6	-0.01835621
445.8	0.13563608		975.79	-0.00645362		1505.8	-0.00371362		2035.8	0.00803656		2565.8	-0.01805019
446	0.13502325		975.99	-0.00729971		1506	-0.00332338		2036	0.00878314		2566	-0.01865569
446.2	0.13539932		976.19	-0.00676114		1506.2	-0.0026516		2036.2	0.00900641		2566.2	-0.01829559
446.4	0.13518665		976.39	-0.00691075		1506.4	-0.00256298		2036.4	0.00913105		2566.4	-0.01735945
446.6	0.13489391		976.59	-0.00700575		1506.6	-0.00193249		2036.6	0.01005999		2566.6	-0.01706203
446.8	0.13402529		976.79	-0.00705511		1506.8	-0.0018709		2036.8	0.01022979		2566.8	-0.01689779
447	0.13291987		976.99	-0.00771791		1507	-0.00156173		2037	0.01011534		2567	-0.01688592
447.2	0.13311385		977.19	-0.00862566		1507.2	-0.00118877		2037.2	0.00977854		2567.2	-0.01618211
447.4	0.13262831		977.39	-0.0080143		1507.4	-0.00177753		2037.4	0.00800268		2567.4	-0.01676012
447.6	0.13284018		977.59	-0.00761958		1507.6	-0.00222454		2037.6	0.00754012		2567.6	-0.01680953
447.8	0.13330861		977.79	-0.00796839		1507.8	-0.00249402		2037.8	0.00660811		2567.8	-0.01692729
448	0.13326375		977.99	-0.0066254		1508	-0.00179435		2038	0.00637644		2568	-0.01714316
448.2	0.13349702		978.19	-0.00650295		1508.2	-0.00243552		2038.2	0.0060775		2568.2	-0.01798846
448.4	0.13322574		978.39	-0.00678734		1508.4	-0.00286143		2038.4	0.00542919		2568.4	-0.01814178
448.6	0.13243117		978.59	-0.00611971		1508.6	-0.00400703		2038.6	0.00432317		2568.6	-0.01832429
448.8	0.13275592		978.79	-0.00579089		1508.8	-0.00500919		2038.8	0.00480538		2568.8	-0.01935761
449	0.13208701		978.99	-0.00625651		1509	-0.00509662		2039	0.00425478		2569	-0.01912607
449.2	0.13207165		979.19	-0.00676599		1509.2	-0.00484374		2039.2	0.00395507		2569.2	-0.01933721
449.4	0.13098055		979.39	-0.0065091		1509.4	-0.00511676		2039.4	0.00443976		2569.4	-0.01878691
449.6	0.13033998		979.59	-0.00647568		1509.6	-0.00515213		2039.6	0.00455361		2569.6	-0.01914238
449.8	0.13002293		979.79	-0.00696015		1509.8	-0.00611624		2039.8	0.00494273		2569.8	-0.01907116
450	0.12989559		979.99	-0.0066564		1510	-0.00589766		2040	0.00561335		2570	-0.01880094
450.2	0.13057282		980.19	-0.00595327		1510.2	-0.00615324		2040.2	0.00578651		2570.2	-0.01815622
450.4	0.13108001		980.39	-0.00662436		1510.4	-0.00563117		2040.4	0.00670339		2570.4	-0.01775416
450.6	0.13144943		980.59	-0.006228		1510.6	-0.00480216		2040.6	0.00690372		2570.6	-0.01770079
450.8	0.13148686		980.79	-0.00652396		1510.8	-0.00451849		2040.8	0.00679927		2570.8	-0.0181114
451	0.13143025		980.99	-0.00696925		1511	-0.00470435		2041	0.00644624		2571	-0.01785937
451.2	0.13187578		981.19	-0.00710456		1511.2	-0.00446658		2041.2	0.00614961		2571.2	-0.01771458
451.4	0.13239367		981.39	-0.00659123		1511.4	-0.00424347		2041.4	0.00660167		2571.4	-0.01827681
451.6	0.13264538		981.59	-0.00687642		1511.6	-0.00320175		2041.6	0.0072717		2571.6	-0.01777606
451.8	0.13311136		981.79	-0.00716798		1511.8	-0.0032687		2041.8	0.00702083		2571.8	-0.01779926
452	0.13300838		981.99	-0.00708824		1512	-0.0031533		2042	0.00697777		2572	-0.0185786
452.2	0.13246222		982.19	-0.00743819		1512.2	-0.003458		2042.2	0.00698104		2572.2	-0.01931916
452.4	0.13198672		982.39	-0.00736981		1512.4	-0.00352299		2042.4	0.00684952		2572.4	-0.0184283
452.6	0.13204555		982.59	-0.00770337		1512.6	-0.00438187		2042.6	0.00669926		2572.6	-0.01893098
452.8	0.13212644		982.79	-0.00840134		1512.8	-0.00495172		2042.8	0.0065531		2572.8	-0.01914878
453	0.1314274		982.99	-0.00925491		1513	-0.00380808		2043	0.00606315		2573	-0.01862257
453.2	0.13039687		983.19	-0.00902134		1513.2	-0.00420595		2043.2	0.0063168		2573.2	-0.01951846
453.4	0.12901914		983.39	-0.00899397		1513.4	-0.00524799		2043.4	0.00651738		2573.4	-0.01936962
453.6	0.12905986		983.59	-0.00897665		1513.6	-0.00591889		2043.6	0.00693363		2573.6	-0.0191152
453.8	0.12810538		983.79	-0.00892388		1513.8	-0.0058722		2043.8	0.00692107		2573.8	-0.01876429
454	0.12713072		983.99	-0.00886309		1514	-0.00549292		2044	0.00698673		2574	-0.01853076
454.2	0.12691182		984.19	-0.00935782		1514.2	-0.00573659		2044.2	0.00672757		2574.2	-0.01854086
454.4	0.1268731		984.39	-0.00981659		1514.4	-0.00531389		2044.4	0.00762941		2574.4	-0.01766446
454.6	0.12667248		984.59	-0.00966544		1514.6	-0.00570463		2044.6	0.00720203		2574.6	-0.01701797
454.8	0.12619593		984.79	-0.00988189		1514.8	-0.00612367		2044.8	0.00738571		2574.8	-0.01725483
455	0.12654693		984.99	-0.00984241		1515	-0.00618497		2045	0.00730649		2575	-0.01729482
455.2	0.12756353		985.19	-0.01029871		1515.2	-0.00574392		2045.2	0.00723435		2575.2	-0.01798477
455.4	0.12831183		985.39	-0.00973312		1515.4	-0.0058442		2045.4	0.00712979		2575.4	-0.01814665
455.6	0.12874819		985.59	-0.00987865		1515.6	-0.00592545		2045.6	0.00635176		2575.6	-0.01845469
455.8	0.12912835		985.79	-0.00972953		1515.8	-0.00634337		2045.8	0.00497029		2575.8	-0.01866699
456	0.12949186		985.99	-0.00996382		1516	-0.00625376		2046	0.00505795		2576	-0.01930274
456.2	0.12924195		986.19	-0.00883726		1516.2	-0.00645654		2046.2	0.00532547		2576.2	-0.01898182
456.4	0.13052949		986.39	-0.00925726		1516.4	-0.00637512		2046.4	0.0049535		2576.4	-0.01908878
456.6	0.1311626		986.59	-0.00956249		1516.6	-0.00716236		2046.6	0.00470683		2576.6	-0.01935587
456.8	0.1313185		986.79	-0.0091142		1516.8	-0.00606904		2046.8	0.00473328		2576.8	-0.01966568
457	0.13050539		986.99	-0.00910674		1517	-0.00467459		2047	0.00486946		2577	-0.01974568
457.2	0.1301104		987.19	-0.008363		1517.2	-0.00493325		2047.2	0.00495091		2577.2	-0.0202187
457.4	0.12986945		987.39	-0.00879277		1517.4	-0.00537731		2047.4	0.00567591		2577.4	-0.01936265
457.6	0.12952182		987.59	-0.0089993		1517.6	-0.0054409		2047.6	0.00645371		2577.6	-0.01856926
457.8	0.12902705		987.79	-0.00986383		1517.8	-0.00460178		2047.8	0.00713541		2577.8	-0.01782366
458	0.12873006		987.99	-0.0109242		1518	-0.00412973		2048	0.00747361		2578	-0.01768623
458.2	0.12881827		988.19	-0.01113924		1518.2	-0.00462492		2048.2	0.00844566		2578.2	-0.0168288
458.4	0.12887313		988.39	-0.01153624		1518.4	-0.0040343		2048.4	0.00822224		2578.4	-0.01605655
458.6	0.12817757		988.59	-0.01146125		1518.6	-0.00387233		2048.6	0.00817013		2578.6	-0.01628878
458.8	0.12815428		988.79	-0.01125163		1518.8	-0.00351785		2048.8	0.00744297		2578.8	-0.01575905
459	0.12867849		988.99	-0.01160732		1519	-0.00395497		2049	0.00713054		2579	-0.01629686
459.2	0.12881268		989.19	-0.01152684		1519.2	-0.0041975		2049.2	0.00582683		2579.2	-0.01699559
459.4	0.12851392		989.39	-0.0110217		1519.4	-0.0041406		2049.4	0.00532014		2579.4	-0.01712256
459.6	0.12863347		989.59	-0.01109288		1519.6	-0.00453682		2049.6	0.00454408		2579.6	-0.0172726
459.8	0.12848301		989.79	-0.01058061		1519.8	-0.00503374		2049.8	0.00430323		2579.8	-0.01732738
460	0.12895862		989.99	-0.01013097		1520	-0.00570793		2050	0.00424017		2580	-0.01777643
460.2	0.12882971		990.19	-0.00949342		1520.2	-0.00635553		2050.2	0.00441717		2580.2	-0.01799151
460.4	0.12961026		990.39	-0.00978395		1520.4	-0.0065326		2050.4	0.00405816		2580.4	-0.01875825
460.6	0.12969384		990.59	-0.00958788		1520.6	-0.0062698		2050.6	0.00409857		2580.6	-0.01916153
460.8	0.12897189		990.79	-0.00977497		1520.8	-0.00568863		2050.8	0.00372962		2580.8	-0.02020879
461	0.1283299		990.99	-0.00932699		1521	-0.00586369		2051	0.00412966		2581	-0.01965897
461.2	0.12850413		991.19	-0.00907656		1521.2	-0.00644902		2051.2	0.00476091		2581.2	-0.01979226
461.4	0.12800368		991.39	-0.00877349		1521.4	-0.00678077		2051.4	0.00613344		2581.4	-0.01933922
461.6	0.12791971		991.59	-0.00886109		1521.6	-0.00771577		2051.6	0.00643317		2581.6	-0.01899083
461.8	0.12856396		991.79	-0.01015426		1521.8	-0.00810987		2051.8	0.00635119		2581.8	-0.01892926
462	0.1282956		991.99	-0.00955092		1522	-0.00780667		2052	0.00641919		2582	-0.01877386
462.2	0.12883054		992.19	-0.00960205		1522.2	-0.0081525		2052.2	0.00704801		2582.2	-0.01843255
462.4	0.12912412		992.39	-0.00940329		1522.4	-0.00712957		2052.4	0.00568473		2582.4	-0.01923812
462.6	0.12906553		992.59	-0.00901872		1522.6	-0.00782803		2052.6	0.00553229		2582.6	-0.01927181
462.8	0.12909527		992.79	-0.00902528		1522.8	-0.00807962		2052.8	0.00432832		2582.8	-0.0189815
463	0.12981769		992.99	-0.00903846		1523	-0.00815026		2053	0.00380145		2583	-0.01944755
463.2	0.13046353		993.19	-0.0074865		1523.2	-0.00720552		2053.2	0.00269829		2583.2	-0.01978301
463.4	0.13118328		993.39	-0.00688748		1523.4	-0.00751657		2053.4	0.00265583		2583.4	-0.01928778
463.6	0.13126401		993.59	-0.00649959		1523.6	-0.00763545		2053.6	0.00220177		2583.6	-0.01885179
463.8	0.13122337		993.79	-0.00602572		1523.8	-0.00760356		2053.8	0.00273559		2583.8	-0.01869782
464	0.13097852		993.99	-0.00640007		1524	-0.00760757		2054	0.00286499		2584	-0.01941082
464.2	0.13030582		994.19	-0.00713785		1524.2	-0.00772281		2054.2	0.00283308		2584.2	-0.01886949
464.4	0.12958908		994.39	-0.00705466		1524.4	-0.00743809		2054.4	0.00307131		2584.4	-0.01855567
464.6	0.12954105		994.59	-0.00709651		1524.6	-0.00722244		2054.6	0.00318914		2584.6	-0.01868226
464.8	0.12838162		994.79	-0.0076184		1524.8	-0.00701843		2054.8	0.00395749		2584.8	-0.01890648
465	0.12692704		994.99	-0.00803836		1525	-0.00641735		2055	0.00475442		2585	-0.01895585
465.2	0.12630365		995.19	-0.00903678		1525.2	-0.00630705		2055.2	0.00503911		2585.2	-0.01947999
465.4	0.12532002		995.39	-0.00947738		1525.4	-0.0057235		2055.4	0.00601551		2585.4	-0.01942954
465.6	0.12496894		995.59	-0.01039753		1525.6	-0.00614385		2055.6	0.00630803		2585.6	-0.0192575
465.8	0.1246589		995.79	-0.01129973		1525.8	-0.00558788		2055.8	0.00657619		2585.8	-0.01960099
466	0.1241051		995.99	-0.01130508		1526	-0.00466638		2056	0.00761192		2586	-0.01977793
466.2	0.12510589		996.19	-0.01197651		1526.2	-0.00497936		2056.2	0.0077606		2586.2	-0.02132539
466.4	0.12524001		996.39	-0.01095459		1526.4	-0.00509672		2056.4	0.00663196		2586.4	-0.02214466
466.6	0.12493875		996.59	-0.01068854		1526.6	-0.00529488		2056.6	0.00658817		2586.6	-0.02190824
466.8	0.12527027		996.79	-0.01055575		1526.8	-0.00569667		2056.8	0.00551998		2586.8	-0.02177126
467	0.12648485		996.99	-0.00972304		1527	-0.00528771		2057	0.00511508		2587	-0.02193572
467.2	0.12809438		997.19	-0.00879529		1527.2	-0.0052204		2057.2	0.00461761		2587.2	-0.02203564
467.4	0.12880878		997.39	-0.00881048		1527.4	-0.00630749		2057.4	0.00455982		2587.4	-0.02230929
467.6	0.12865098		997.59	-0.00779503		1527.6	-0.00654557		2057.6	0.0042689		2587.6	-0.02270613
467.8	0.12946512		997.79	-0.00688816		1527.8	-0.00729218		2057.8	0.00394484		2587.8	-0.02370449
468	0.12958857		997.99	-0.00706675		1528	-0.00753948		2058	0.00344587		2588	-0.02438436
468.2	0.12920915		998.19	-0.00702774		1528.2	-0.00763047		2058.2	0.00318442		2588.2	-0.02332898
468.4	0.1288478		998.39	-0.00652685		1528.4	-0.0078269		2058.4	0.00285114		2588.4	-0.02351406
468.6	0.12922282		998.59	-0.00668882		1528.6	-0.00779464		2058.6	0.00289877		2588.6	-0.02312638
468.8	0.12908882		998.79	-0.00700739		1528.8	-0.00696307		2058.8	0.00379085		2588.8	-0.02249683
469	0.12746608		998.99	-0.00720036		1529	-0.00619385		2059	0.00337107		2589	-0.02219131
469.2	0.1275133		999.19	-0.00749785		1529.2	-0.00649162		2059.2	0.00325273		2589.2	-0.0213317
469.4	0.12654686		999.39	-0.00796518		1529.4	-0.00595654		2059.4	0.00387365		2589.4	-0.02055863
469.6	0.12622984		999.59	-0.0083153		1529.6	-0.00594902		2059.6	0.00447274		2589.6	-0.01988723
469.8	0.12598069		999.79	-0.00924206		1529.8	-0.00572866		2059.8	0.00484783		2589.8	-0.02021368
470	0.12626968		999.99	-0.00951991		1530	-0.00538938		2060	0.00493449		2590	-0.0199751
470.2	0.12776389		1000.19	-0.0102664		1530.2	-0.0059786		2060.2	0.00447874		2590.2	-0.02103778
470.4	0.12715179		1000.39	-0.00996104		1530.4	-0.00559521		2060.4	0.00515758		2590.4	-0.02089611
470.6	0.12705194		1000.59	-0.01067219		1530.6	-0.00508315		2060.6	0.00512712		2590.6	-0.02107487
470.8	0.12781347		1000.79	-0.01080263		1530.8	-0.00525993		2060.8	0.00490852		2590.8	-0.02210911
471	0.12889489		1000.99	-0.01080119		1531	-0.00496579		2061	0.00587939		2591	-0.02287485
471.2	0.13024722		1001.19	-0.01029796		1531.2	-0.00497732		2061.2	0.00617186		2591.2	-0.022738
471.4	0.13023142		1001.39	-0.00907955		1531.4	-0.00515472		2061.4	0.00596131		2591.4	-0.02367286
471.6	0.13014991		1001.59	-0.0073809		1531.6	-0.00523161		2061.6	0.0048522		2591.6	-0.02424814
471.8	0.13032217		1001.79	-0.00565333		1531.8	-0.00635127		2061.8	0.0040646		2591.8	-0.02532357
472	0.130037		1001.99	-0.00576191		1532	-0.00640761		2062	0.00356503		2592	-0.02562781
472.2	0.12951792		1002.19	-0.00542402		1532.2	-0.00717261		2062.2	0.00322162		2592.2	-0.02519886
472.4	0.12914134		1002.39	-0.00490569		1532.4	-0.00753071		2062.4	0.00194699		2592.4	-0.02537805
472.6	0.12915348		1002.59	-0.00458633		1532.6	-0.00755634		2062.6	0.00229438		2592.6	-0.02449083
472.8	0.12913213		1002.79	-0.00502545		1532.8	-0.00785655		2062.8	0.00289787		2592.8	-0.02409207
473	0.12772151		1002.99	-0.00552706		1533	-0.00873454		2063	0.00255039		2593	-0.02362077
473.2	0.12759605		1003.19	-0.00631558		1533.2	-0.00939432		2063.2	0.00289321		2593.2	-0.0232203
473.4	0.12651657		1003.39	-0.00696376		1533.4	-0.00927922		2063.4	0.00374411		2593.4	-0.02338735
473.6	0.12643694		1003.59	-0.00802168		1533.6	-0.00879742		2063.6	0.00448614		2593.6	-0.02285599
473.8	0.12638359		1003.79	-0.00900011		1533.8	-0.008478		2063.8	0.00408358		2593.8	-0.02291284
474	0.12719826		1003.99	-0.01026328		1534	-0.00791231		2064	0.00439981		2594	-0.02262552
474.2	0.12788497		1004.19	-0.01138371		1534.2	-0.00781353		2064.2	0.00464292		2594.2	-0.0235037
474.4	0.12720495		1004.39	-0.01171082		1534.4	-0.00764803		2064.4	0.00578118		2594.4	-0.02342107
474.6	0.12795319		1004.59	-0.01202779		1534.6	-0.00714882		2064.6	0.00582053		2594.6	-0.02385612
474.8	0.12842956		1004.79	-0.0114931		1534.8	-0.007033		2064.8	0.0055336		2594.8	-0.02387192
475	0.12851988		1004.99	-0.01124579		1535	-0.00771234		2065	0.00545008		2595	-0.02386176
475.2	0.12849662		1005.19	-0.01008103		1535.2	-0.007764		2065.2	0.00481586		2595.2	-0.02395847
475.4	0.12792722		1005.39	-0.00894915		1535.4	-0.00826656		2065.4	0.00353247		2595.4	-0.02377755
475.6	0.12748106		1005.59	-0.00882522		1535.6	-0.00842612		2065.6	0.00206508		2595.6	-0.02411205
475.8	0.12722758		1005.79	-0.00817164		1535.8	-0.00996906		2065.8	0.00184338		2595.8	-0.0240453
476	0.12730548		1005.99	-0.00886394		1536	-0.00962693		2066	0.00122428		2596	-0.02360042
476.2	0.12612532		1006.19	-0.00927747		1536.2	-0.01014249		2066.2	0.00043437		2596.2	-0.02316918
476.4	0.12610935		1006.39	-0.01013206		1536.4	-0.0096877		2066.4	0.00016135		2596.4	-0.02349069
476.6	0.12519787		1006.59	-0.01050119		1536.6	-0.00984958		2066.6	0.00067792		2596.6	-0.02331703
476.8	0.12464559		1006.79	-0.01103478		1536.8	-0.00972145		2066.8	0.0016074		2596.8	-0.02247596
477	0.12427057		1006.99	-0.01121555		1537	-0.00909613		2067	0.00215794		2597	-0.02140038
477.2	0.12356436		1007.19	-0.01094051		1537.2	-0.00845731		2067.2	0.00301508		2597.2	-0.02099401
477.4	0.12346514		1007.39	-0.01070204		1537.4	-0.00799015		2067.4	0.00388035		2597.4	-0.02067065
477.6	0.12385186		1007.59	-0.01150744		1537.6	-0.00688343		2067.6	0.00450301		2597.6	-0.0195397
477.8	0.12418957		1007.79	-0.01194803		1537.8	-0.00739976		2067.8	0.00494552		2597.8	-0.01940749
478	0.12506628		1007.99	-0.01188346		1538	-0.00698775		2068	0.00689722		2598	-0.01922059
478.2	0.12497347		1008.19	-0.01111325		1538.2	-0.00679842		2068.2	0.00683689		2598.2	-0.01980821
478.4	0.12582305		1008.39	-0.01107405		1538.4	-0.00778755		2068.4	0.00744043		2598.4	-0.02115721
478.6	0.12644222		1008.59	-0.01075759		1538.6	-0.00843165		2068.6	0.00719591		2598.6	-0.02241634
478.8	0.12631169		1008.79	-0.01046939		1538.8	-0.00926852		2068.8	0.00635512		2598.8	-0.02301066
479	0.12630815		1008.99	-0.00931766		1539	-0.01051649		2069	0.00678667		2599	-0.02454222
479.2	0.12722645		1009.19	-0.00902666		1539.2	-0.01013834		2069.2	0.00663898		2599.2	-0.02530834
479.4	0.12749552		1009.39	-0.00926707		1539.4	-0.01058488		2069.4	0.00549151		2599.4	-0.02534166
479.6	0.12759614		1009.59	-0.00969927		1539.6	-0.01029522		2069.6	0.00587419		2599.6	-0.02538493
479.8	0.12717427		1009.79	-0.00980843		1539.8	-0.01080477		2069.8	0.00576542		2599.8	-0.02532602
480	0.12721329		1009.99	-0.01037611		1540	-0.00959179		2070	0.00577001		2600	-0.02540614
480.2	0.12609873		1010.19	-0.01148617		1540.2	-0.00907564		2070.2	0.00501766		2600.2	-0.02584231
480.4	0.12564537		1010.39	-0.01133437		1540.4	-0.00890649		2070.4	0.00471566		2600.4	-0.02591092
480.6	0.12479352		1010.59	-0.01056462		1540.6	-0.00872859		2070.6	0.00463467		2600.6	-0.02551651
480.8	0.12459699		1010.79	-0.01078537		1540.8	-0.00833482		2070.8	0.00501663		2600.8	-0.02371974
481	0.12489181		1010.99	-0.0113648		1541	-0.00787207		2071	0.00501479		2601	-0.02243878
481.2	0.1240491		1011.19	-0.01133433		1541.2	-0.00818264		2071.2	0.00484816		2601.2	-0.02187447
481.4	0.12411313		1011.39	-0.01215059		1541.4	-0.00813617		2071.4	0.00466072		2601.4	-0.02137034
481.6	0.12415293		1011.59	-0.01333896		1541.6	-0.00821468		2071.6	0.00448054		2601.6	-0.02054853
481.8	0.12425641		1011.79	-0.01381628		1541.8	-0.00945851		2071.8	0.00509612		2601.8	-0.02054966
482	0.1251466		1011.99	-0.01393115		1542	-0.00918361		2072	0.00544292		2602	-0.02049411
482.2	0.12519563		1012.19	-0.01384595		1542.2	-0.00953051		2072.2	0.00467921		2602.2	-0.02111842
482.4	0.1257023		1012.39	-0.01440148		1542.4	-0.01067057		2072.4	0.00417284		2602.4	-0.0212845
482.6	0.12542287		1012.59	-0.01420323		1542.6	-0.01107647		2072.6	0.00321562		2602.6	-0.02075258
482.8	0.12529486		1012.79	-0.01353567		1542.8	-0.01138727		2072.8	0.00203099		2602.8	-0.02061814
483	0.12542676		1012.99	-0.01239487		1543	-0.01139341		2073	0.00206487		2603	-0.02069516
483.2	0.12549729		1013.19	-0.0131636		1543.2	-0.0109986		2073.2	0.0014723		2603.2	-0.02077233
483.4	0.12475236		1013.39	-0.01289842		1543.4	-0.01126748		2073.4	0.00161743		2603.4	-0.02085364
483.6	0.12407872		1013.59	-0.01265149		1543.6	-0.0101788		2073.6	0.00258121		2603.6	-0.02043328
483.8	0.12331702		1013.79	-0.01258437		1543.8	-0.00974519		2073.8	0.00249172		2603.8	-0.02062941
484	0.12245683		1013.99	-0.0124553		1544	-0.00921513		2074	0.00307453		2604	-0.02014793
484.2	0.12155173		1014.19	-0.01124085		1544.2	-0.00931138		2074.2	0.00308243		2604.2	-0.02020489
484.4	0.12096211		1014.39	-0.0100753		1544.4	-0.0091886		2074.4	0.00341162		2604.4	-0.02088656
484.6	0.12097599		1014.59	-0.00959119		1544.6	-0.00845213		2074.6	0.00514565		2604.6	-0.02155633
484.8	0.12039639		1014.79	-0.01036034		1544.8	-0.0080682		2074.8	0.00680207		2604.8	-0.02139778
485	0.12027644		1014.99	-0.01075951		1545	-0.00680971		2075	0.00861959		2605	-0.0223505
485.2	0.11940123		1015.19	-0.01154961		1545.2	-0.00689265		2075.2	0.00880558		2605.2	-0.02332297
485.4	0.1201622		1015.39	-0.01126904		1545.4	-0.00666184		2075.4	0.00901949		2605.4	-0.02348937
485.6	0.12112794		1015.59	-0.01218795		1545.6	-0.00696808		2075.6	0.00948068		2605.6	-0.02329492
485.8	0.12146496		1015.79	-0.01246109		1545.8	-0.00666409		2075.8	0.00982349		2605.8	-0.02434838
486	0.1220683		1015.99	-0.01218286		1546	-0.00632733		2076	0.00954503		2606	-0.02427494
486.2	0.1225256		1016.19	-0.01188711		1546.2	-0.00627406		2076.2	0.00976064		2606.2	-0.02483466
486.4	0.12232267		1016.39	-0.01172165		1546.4	-0.00665955		2076.4	0.00852723		2606.4	-0.0249521
486.6	0.1223607		1016.59	-0.01141904		1546.6	-0.00773226		2076.6	0.0075563		2606.6	-0.02637016
486.8	0.12293864		1016.79	-0.01108606		1546.8	-0.00856388		2076.8	0.00651022		2606.8	-0.02711989
487	0.12368486		1016.99	-0.01117943		1547	-0.00849214		2077	0.00617771		2607	-0.02739825
487.2	0.12336059		1017.19	-0.01099373		1547.2	-0.00893711		2077.2	0.00533901		2607.2	-0.02764349
487.4	0.12359254		1017.39	-0.01079868		1547.4	-0.01004898		2077.4	0.00441762		2607.4	-0.02795889
487.6	0.12311333		1017.59	-0.01049468		1547.6	-0.01052576		2077.6	0.00229419		2607.6	-0.02741103
487.8	0.12268086		1017.79	-0.01015557		1547.8	-0.01137897		2077.8	0.00165645		2607.8	-0.02591637
488	0.12150727		1017.99	-0.00960788		1548	-0.01152508		2078	0.00160116		2608	-0.02484101
488.2	0.12162522		1018.19	-0.00886486		1548.2	-0.01199838		2078.2	0.00175148		2608.2	-0.02432192
488.4	0.12154991		1018.39	-0.00872874		1548.4	-0.01170545		2078.4	0.0019948		2608.4	-0.02390183
488.6	0.12117845		1018.59	-0.00900433		1548.6	-0.01141177		2078.6	0.00322937		2608.6	-0.02313305
488.8	0.120252		1018.79	-0.01027457		1548.8	-0.01104859		2078.8	0.00442816		2608.8	-0.02239081
489	0.11991369		1018.99	-0.0110794		1549	-0.00956791		2079	0.00509379		2609	-0.02143337
489.2	0.11955171		1019.19	-0.0112181		1549.2	-0.00934041		2079.2	0.00407605		2609.2	-0.0197232
489.4	0.12046838		1019.39	-0.01046523		1549.4	-0.00857748		2079.4	0.00372092		2609.4	-0.01836472
489.6	0.11999176		1019.59	-0.01179861		1549.6	-0.0081494		2079.6	0.00305007		2609.6	-0.01847753
489.8	0.12046154		1019.79	-0.01202312		1549.8	-0.00739909		2079.8	0.00343011		2609.8	-0.01916516
490	0.12139553		1019.99	-0.01180558		1550	-0.00730416		2080	0.00364779		2610	-0.01913667
490.2	0.12214731		1020.19	-0.01223756		1550.2	-0.00714698		2080.2	0.00431343		2610.2	-0.02040772
490.4	0.12189332		1020.39	-0.01164489		1550.4	-0.00746595		2080.4	0.00336968		2610.4	-0.02171725
490.6	0.12232034		1020.59	-0.01225833		1550.6	-0.00809159		2080.6	0.0027086		2610.6	-0.02365326
490.8	0.12301626		1020.79	-0.01214429		1550.8	-0.00808388		2080.8	0.00247872		2610.8	-0.02373677
491	0.12276862		1020.99	-0.01202234		1551	-0.00855774		2081	0.00189547		2611	-0.02488768
491.2	0.12215576		1021.19	-0.01152243		1551.2	-0.00843216		2081.2	0.00170117		2611.2	-0.02487675
491.4	0.12261768		1021.39	-0.01107948		1551.4	-0.00914003		2081.4	0.0011906		2611.4	-0.02556517
491.6	0.12194015		1021.59	-0.01016794		1551.6	-0.00896857		2081.6	0.00029546		2611.6	-0.02354203
491.8	0.1215989		1021.79	-0.0095808		1551.8	-0.00931553		2081.8	0.00166888		2611.8	-0.02244919
492	0.12113341		1021.99	-0.01004602		1552	-0.01033291		2082	0.00157871		2612	-0.02241967
492.2	0.12081416		1022.19	-0.01006572		1552.2	-0.01109153		2082.2	0.00253215		2612.2	-0.02205566
492.4	0.12036733		1022.39	-0.00962849		1552.4	-0.01078374		2082.4	0.00313937		2612.4	-0.02121444
492.6	0.11995633		1022.59	-0.01018694		1552.6	-0.01036725		2082.6	0.00349634		2612.6	-0.02086626
492.8	0.11997979		1022.79	-0.01068241		1552.8	-0.00959765		2082.8	0.00430122		2612.8	-0.02056336
493	0.12037537		1022.99	-0.01152824		1553	-0.00982976		2083	0.00468198		2613	-0.02000527
493.2	0.12027059		1023.19	-0.01164458		1553.2	-0.01014124		2083.2	0.00392078		2613.2	-0.0208812
493.4	0.12058689		1023.39	-0.01100812		1553.4	-0.01063363		2083.4	0.00296518		2613.4	-0.02155396
493.6	0.12096655		1023.59	-0.01111213		1553.6	-0.01021576		2083.6	0.0029548		2613.6	-0.02270638
493.8	0.12195166		1023.79	-0.0110399		1553.8	-0.00960945		2083.8	0.00328428		2613.8	-0.02299986
494	0.12237214		1023.99	-0.01178038		1554	-0.00909989		2084	0.00239683		2614	-0.02372186
494.2	0.12305474		1024.19	-0.01185374		1554.2	-0.009324		2084.2	0.0012952		2614.2	-0.02525375
494.4	0.12301245		1024.39	-0.01245752		1554.4	-0.00978698		2084.4	0.00053526		2614.4	-0.02680333
494.6	0.12273632		1024.59	-0.01250386		1554.6	-0.01035696		2084.6	-0.00000861		2614.6	-0.02792733
494.8	0.12178817		1024.79	-0.01217787		1554.8	-0.01013736		2084.8	0.00005069		2614.8	-0.02791062
495	0.12168635		1024.99	-0.01224152		1555	-0.0095196		2085	0.00023322		2615	-0.02839634
495.2	0.12187917		1025.19	-0.01166413		1555.2	-0.00800271		2085.2	0.00036336		2615.2	-0.02735497
495.4	0.12278729		1025.39	-0.01180244		1555.4	-0.00855534		2085.4	0.00012001		2615.4	-0.02721548
495.6	0.12315137		1025.59	-0.01207343		1555.6	-0.00807368		2085.6	-0.00008568		2615.6	-0.02615979
495.8	0.12252457		1025.79	-0.0124598		1555.8	-0.00814878		2085.8	0.00070741		2615.8	-0.02654475
496	0.12249086		1025.99	-0.01285585		1556	-0.00796739		2086	0.00038145		2616	-0.02584775
496.2	0.12162644		1026.19	-0.01275386		1556.2	-0.00733099		2086.2	0.00157864		2616.2	-0.02484739
496.4	0.12175843		1026.39	-0.01290751		1556.4	-0.00625914		2086.4	0.00182376		2616.4	-0.02314456
496.6	0.12233036		1026.59	-0.01306569		1556.6	-0.00599344		2086.6	0.00141358		2616.6	-0.02272294
496.8	0.12282676		1026.79	-0.01349312		1556.8	-0.00611753		2086.8	0.00209253		2616.8	-0.02230878
497	0.12308429		1026.99	-0.01408631		1557	-0.00663953		2087	0.00197222		2617	-0.02303849
497.2	0.12309414		1027.19	-0.01267926		1557.2	-0.0056538		2087.2	0.00115236		2617.2	-0.02406466
497.4	0.12318572		1027.39	-0.011252		1557.4	-0.0056427		2087.4	0.00092349		2617.4	-0.0236396
497.6	0.12378934		1027.59	-0.01128055		1557.6	-0.00537215		2087.6	0.00160743		2617.6	-0.02329954
497.8	0.12409009		1027.79	-0.0112806		1557.8	-0.00534131		2087.8	0.00133272		2617.8	-0.02274435
498	0.12438086		1027.99	-0.01136986		1558	-0.00589874		2088	0.00148096		2618	-0.02282565
498.2	0.12493412		1028.19	-0.01011161		1558.2	-0.00673041		2088.2	0.00193947		2618.2	-0.02330442
498.4	0.12432936		1028.39	-0.01021859		1558.4	-0.00784857		2088.4	0.00214628		2618.4	-0.023684
498.6	0.12311507		1028.59	-0.00924619		1558.6	-0.00805321		2088.6	0.00225218		2618.6	-0.02392235
498.8	0.12213022		1028.79	-0.00933372		1558.8	-0.00733162		2088.8	0.00253731		2618.8	-0.02270952
499	0.12192335		1028.99	-0.00950797		1559	-0.00740252		2089	0.00365503		2619	-0.02288028
499.2	0.12157516		1029.19	-0.00929495		1559.2	-0.0070029		2089.2	0.00345206		2619.2	-0.02276328
499.4	0.12131877		1029.39	-0.01028209		1559.4	-0.00795134		2089.4	0.00379581		2619.4	-0.02308327
499.6	0.12064001		1029.59	-0.01073358		1559.6	-0.00772857		2089.6	0.0043939		2619.6	-0.02286069
499.8	0.11985569		1029.79	-0.01074579		1559.8	-0.00698024		2089.8	0.00521341		2619.8	-0.02136899
500	0.11945594		1029.99	-0.01115795		1560	-0.00718779		2090	0.00532447		2620	-0.02023453
500.2	0.11891322		1030.19	-0.01136667		1560.2	-0.00702361		2090.2	0.00541623		2620.2	-0.01956164
500.4	0.11973905		1030.39	-0.0120648		1560.4	-0.00677647		2090.4	0.00572235		2620.4	-0.01854692
500.6	0.12045667		1030.59	-0.01157327		1560.6	-0.00772896		2090.6	0.0049313		2620.6	-0.01949916
500.8	0.12084918		1030.79	-0.01212344		1560.8	-0.0079163		2090.8	0.00459491		2620.8	-0.02016813
501	0.12080228		1030.99	-0.01186137		1561	-0.00773551		2091	0.00402882		2621	-0.02147284
501.2	0.12149397		1031.19	-0.01185449		1561.2	-0.00848976		2091.2	0.00308652		2621.2	-0.02132924
501.4	0.12193758		1031.39	-0.01236572		1561.4	-0.00918059		2091.4	0.0023591		2621.4	-0.02178648
501.6	0.12229381		1031.59	-0.01248201		1561.6	-0.00986765		2091.6	0.00219151		2621.6	-0.02153031
501.8	0.12276741		1031.79	-0.0122655		1561.8	-0.01020907		2091.8	0.00263548		2621.8	-0.02284569
502	0.12288156		1031.99	-0.01260085		1562	-0.01055854		2092	0.00243749		2622	-0.02328912
502.2	0.12390745		1032.19	-0.01198029		1562.2	-0.01093786		2092.2	0.00154784		2622.2	-0.02430386
502.4	0.12389762		1032.39	-0.012233		1562.4	-0.01177037		2092.4	0.00069668		2622.4	-0.02449841
502.6	0.12354353		1032.59	-0.01219046		1562.6	-0.01215425		2092.6	0.00039549		2622.6	-0.02475445
502.8	0.12296351		1032.79	-0.01238378		1562.8	-0.01094991		2092.8	-0.00001829		2622.8	-0.02427002
503	0.1220831		1032.99	-0.01169981		1563	-0.01154451		2093	-0.00007132		2623	-0.02512107
503.2	0.12113731		1033.19	-0.01056501		1563.2	-0.01121419		2093.2	-0.0009837		2623.2	-0.0252798
503.4	0.12014224		1033.39	-0.01078979		1563.4	-0.01087673		2093.4	-0.00081676		2623.4	-0.02491584
503.6	0.11938323		1033.59	-0.01056125		1563.6	-0.01059444		2093.6	-0.00004939		2623.6	-0.02433312
503.8	0.11861738		1033.79	-0.01003708		1563.8	-0.0091921		2093.8	0.00045311		2623.8	-0.02330633
504	0.11770972		1033.99	-0.01016638		1564	-0.00927773		2094	0.00028889		2624	-0.0234083
504.2	0.11720609		1034.19	-0.00981407		1564.2	-0.00901156		2094.2	0.00095336		2624.2	-0.02351363
504.4	0.1173351		1034.39	-0.01009825		1564.4	-0.00965837		2094.4	0.00190061		2624.4	-0.02303785
504.6	0.11753627		1034.59	-0.01013107		1564.6	-0.01000529		2094.6	0.00187602		2624.6	-0.02446785
504.8	0.11671642		1034.79	-0.01039735		1564.8	-0.01011313		2094.8	0.00168576		2624.8	-0.0243171
505	0.11676187		1034.99	-0.01088835		1565	-0.00975649		2095	0.00201403		2625	-0.02460096
505.2	0.11797438		1035.19	-0.01143092		1565.2	-0.0113122		2095.2	0.00222675		2625.2	-0.02482343
505.4	0.11801268		1035.39	-0.01185002		1565.4	-0.01153742		2095.4	0.00281958		2625.4	-0.02509076
505.6	0.11865038		1035.59	-0.01205182		1565.6	-0.01271997		2095.6	0.00313561		2625.6	-0.02560623
505.8	0.11984971		1035.79	-0.01256834		1565.8	-0.01308945		2095.8	0.00265532		2625.8	-0.02604365
506	0.12075241		1035.99	-0.01259046		1566	-0.01328972		2096	0.00181975		2626	-0.02583097
506.2	0.12192652		1036.19	-0.01187596		1566.2	-0.014225		2096.2	0.00141999		2626.2	-0.02652074
506.4	0.12216325		1036.39	-0.01268189		1566.4	-0.01461866		2096.4	0.00061716		2626.4	-0.02604437
506.6	0.12151175		1036.59	-0.01239058		1566.6	-0.01440116		2096.6	-0.00031411		2626.6	-0.02618728
506.8	0.12071348		1036.79	-0.01187765		1566.8	-0.01265157		2096.8	-0.000368		2626.8	-0.02608854
507	0.12060964		1036.99	-0.01171294		1567	-0.01296432		2097	-0.00109735		2627	-0.02651611
507.2	0.1198753		1037.19	-0.01176893		1567.2	-0.01255228		2097.2	-0.00132259		2627.2	-0.02612227
507.4	0.11922913		1037.39	-0.01238132		1567.4	-0.01172669		2097.4	-0.00135201		2627.4	-0.02497313
507.6	0.11837013		1037.59	-0.01267291		1567.6	-0.01128691		2097.6	-0.00013607		2627.6	-0.02459982
507.8	0.11778483		1037.79	-0.01323944		1567.8	-0.0100942		2097.8	-0.00014569		2627.8	-0.02449597
508	0.11730938		1037.99	-0.01298502		1568	-0.01002762		2098	0.00002572		2628	-0.02448921
508.2	0.11730705		1038.19	-0.01336848		1568.2	-0.01037322		2098.2	0.00082965		2628.2	-0.02455197
508.4	0.11755566		1038.39	-0.01362753		1568.4	-0.01080339		2098.4	0.0012126		2628.4	-0.02475313
508.6	0.11836451		1038.59	-0.01397547		1568.6	-0.01102287		2098.6	0.00178814		2628.6	-0.02568887
508.8	0.1185378		1038.79	-0.01345554		1568.8	-0.01060501		2098.8	0.00291128		2628.8	-0.02410229
509	0.11993001		1038.99	-0.01308501		1569	-0.01048895		2099	0.00359006		2629	-0.02480161
509.2	0.12089416		1039.19	-0.01259002		1569.2	-0.01073596		2099.2	0.0041281		2629.2	-0.02479011
509.4	0.12114159		1039.39	-0.01242607		1569.4	-0.0105055		2099.4	0.00309171		2629.4	-0.02428645
509.6	0.12219482		1039.59	-0.01189127		1569.6	-0.01096627		2099.6	0.00238937		2629.6	-0.0258908
509.8	0.12276134		1039.79	-0.01104693		1569.8	-0.01011201		2099.8	0.00158088		2629.8	-0.02578339
510	0.12274499		1039.99	-0.01030245		1570	-0.00980977		2100	0.00155084		2630	-0.02667703
510.2	0.12258116		1040.19	-0.0096924		1570.2	-0.00934376		2100.2	0.00124593		2630.2	-0.02758403
510.4	0.12171725		1040.39	-0.00963781		1570.4	-0.00871538		2100.4	0.00034255		2630.4	-0.02744503
510.6	0.1214756		1040.59	-0.00934245		1570.6	-0.00800843		2100.6	0.00053254		2630.6	-0.02780374
510.8	0.12092308		1040.79	-0.00992783		1570.8	-0.0070629		2100.8	0.00061827		2630.8	-0.02796635
511	0.11998387		1040.99	-0.01068598		1571	-0.00690323		2101	0.00072306		2631	-0.02693397
511.2	0.11906439		1041.19	-0.01103454		1571.2	-0.00721787		2101.2	0.00128172		2631.2	-0.02534466
511.4	0.11833254		1041.39	-0.01200655		1571.4	-0.00677078		2101.4	0.00088884		2631.4	-0.02471119
511.6	0.11805283		1041.59	-0.01319929		1571.6	-0.0064927		2101.6	0.00180158		2631.6	-0.02496202
511.8	0.11787799		1041.79	-0.01308421		1571.8	-0.00699118		2101.8	0.00147169		2631.8	-0.02447979
512	0.11754256		1041.99	-0.01319154		1572	-0.00735814		2102	0.00163094		2632	-0.02373128
512.2	0.11825644		1042.19	-0.01373826		1572.2	-0.00809653		2102.2	0.00224548		2632.2	-0.02402604
512.4	0.11931088		1042.39	-0.0146388		1572.4	-0.00906746		2102.4	0.00296165		2632.4	-0.02388026
512.6	0.11968334		1042.59	-0.01494254		1572.6	-0.00981465		2102.6	0.00379197		2632.6	-0.02393987
512.8	0.11999416		1042.79	-0.01562721		1572.8	-0.01019779		2102.8	0.00365945		2632.8	-0.02362668
513	0.12089726		1042.99	-0.01511966		1573	-0.01029238		2103	0.00294604		2633	-0.02474318
513.2	0.12189084		1043.19	-0.01455288		1573.2	-0.01122758		2103.2	0.00259349		2633.2	-0.02507801
513.4	0.12225806		1043.39	-0.01365378		1573.4	-0.01221688		2103.4	0.00165531		2633.4	-0.02568538
513.6	0.12256905		1043.59	-0.0131081		1573.6	-0.01275445		2103.6	0.00133396		2633.6	-0.02721703
513.8	0.12214702		1043.79	-0.01187451		1573.8	-0.01326001		2103.8	0.00090538		2633.8	-0.02724885
514	0.12169672		1043.99	-0.01127186		1574	-0.01394697		2104	0.00060981		2634	-0.02810827
514.2	0.12103388		1044.19	-0.01070665		1574.2	-0.0137794		2104.2	0.00038792		2634.2	-0.02913154
514.4	0.12033517		1044.39	-0.01076788		1574.4	-0.01348105		2104.4	0.00019535		2634.4	-0.02893605
514.6	0.11988975		1044.59	-0.01088829		1574.6	-0.01302739		2104.6	0.00041686		2634.6	-0.02850027
514.8	0.11848504		1044.79	-0.01050204		1574.8	-0.01297972		2104.8	0.00008658		2634.8	-0.02786595
515	0.11849941		1044.99	-0.0103164		1575	-0.01282304		2105	0.00110918		2635	-0.02648304
515.2	0.11888624		1045.19	-0.01113935		1575.2	-0.01315703		2105.2	0.00062003		2635.2	-0.02689059
515.4	0.11927462		1045.39	-0.01196178		1575.4	-0.01210664		2105.4	0.0001253		2635.4	-0.02680941
515.6	0.11891835		1045.59	-0.011977		1575.6	-0.01154777		2105.6	0.00079519		2635.6	-0.02578671
515.8	0.1187215		1045.79	-0.01188378		1575.8	-0.01106209		2105.8	0.00096755		2635.8	-0.02407703
516	0.11897463		1045.99	-0.01320399		1576	-0.01088125		2106	0.00120674		2636	-0.02356073
516.2	0.11985648		1046.19	-0.01396831		1576.2	-0.01055866		2106.2	0.00165679		2636.2	-0.02428492
516.4	0.11959436		1046.39	-0.01535137		1576.4	-0.01108567		2106.4	0.00171239		2636.4	-0.02368512
516.6	0.11877649		1046.59	-0.01541035		1576.6	-0.0114653		2106.6	0.00206107		2636.6	-0.02352236
516.8	0.11947013		1046.79	-0.01561255		1576.8	-0.01106698		2106.8	0.00197909		2636.8	-0.02359748
517	0.12037073		1046.99	-0.01484292		1577	-0.01094355		2107	0.00214585		2637	-0.02389107
517.2	0.12058051		1047.19	-0.01378963		1577.2	-0.01238671		2107.2	0.00130717		2637.2	-0.02488099
517.4	0.12065086		1047.39	-0.01349656		1577.4	-0.01224293		2107.4	0.00073914		2637.4	-0.02595988
517.6	0.12006677		1047.59	-0.01331424		1577.6	-0.01216815		2107.6	0.0005958		2637.6	-0.02709972
517.8	0.11971355		1047.79	-0.01229557		1577.8	-0.01219295		2107.8	0.00113927		2637.8	-0.02731489
518	0.11900392		1047.99	-0.01217363		1578	-0.01189685		2108	0.00123445		2638	-0.02821463
518.2	0.1183636		1048.19	-0.01224558		1578.2	-0.01171642		2108.2	0.00148671		2638.2	-0.02851638
518.4	0.11835495		1048.39	-0.012804		1578.4	-0.01162611		2108.4	0.00113999		2638.4	-0.02822163
518.6	0.11799277		1048.59	-0.0127507		1578.6	-0.01169377		2108.6	0.00132332		2638.6	-0.02715191
518.8	0.1184712		1048.79	-0.01244084		1578.8	-0.01196054		2108.8	0.00208577		2638.8	-0.02660321
519	0.11931984		1048.99	-0.0129944		1579	-0.01198751		2109	0.00381366		2639	-0.0259409
519.2	0.11931799		1049.19	-0.01344202		1579.2	-0.01187176		2109.2	0.00319427		2639.2	-0.02568475
519.4	0.11954812		1049.39	-0.01450432		1579.4	-0.01228621		2109.4	0.00316605		2639.4	-0.02462554
519.6	0.11882728		1049.59	-0.01465669		1579.6	-0.01234776		2109.6	0.00377857		2639.6	-0.02350994
519.8	0.11930277		1049.79	-0.01531093		1579.8	-0.0120685		2109.8	0.0041502		2639.8	-0.02309086
520	0.11991843		1049.99	-0.01611704		1580	-0.01162849		2110	0.00459897		2640	-0.02358977
520.2	0.11954439		1050.19	-0.01610285		1580.2	-0.01114166		2110.2	0.00446414		2640.2	-0.02394795
520.4	0.1191823		1050.39	-0.01605065		1580.4	-0.01131088		2110.4	0.00490257		2640.4	-0.023313
520.6	0.11951293		1050.59	-0.0154311		1580.6	-0.0105214		2110.6	0.00490716		2640.6	-0.02357564
520.8	0.11980986		1050.79	-0.01482379		1580.8	-0.00986535		2110.8	0.00497544		2640.8	-0.02455554
521	0.12010819		1050.99	-0.0145358		1581	-0.01031197		2111	0.00424019		2641	-0.02489006
521.2	0.12012532		1051.19	-0.01387897		1581.2	-0.01123781		2111.2	0.00427267		2641.2	-0.0259042
521.4	0.1201416		1051.39	-0.01372867		1581.4	-0.0114081		2111.4	0.00411379		2641.4	-0.02666409
521.6	0.11937017		1051.59	-0.01316578		1581.6	-0.01058017		2111.6	0.00380248		2641.6	-0.02721716
521.8	0.11965926		1051.79	-0.01195615		1581.8	-0.01170385		2111.8	0.00343357		2641.8	-0.02683141
522	0.11882994		1051.99	-0.01129098		1582	-0.0128376		2112	0.0022918		2642	-0.02749406
522.2	0.11845292		1052.19	-0.01126121		1582.2	-0.01294978		2112.2	0.0019432		2642.2	-0.02716652
522.4	0.11820122		1052.39	-0.01174182		1582.4	-0.01341916		2112.4	0.0017007		2642.4	-0.02707648
522.6	0.11780901		1052.59	-0.01112063		1582.6	-0.01299002		2112.6	0.00228619		2642.6	-0.02613152
522.8	0.11775242		1052.79	-0.01188324		1582.8	-0.01286012		2112.8	0.0024037		2642.8	-0.02479687
523	0.11742291		1052.99	-0.01253969		1583	-0.01244658		2113	0.0027051		2643	-0.0247415
523.2	0.11723973		1053.19	-0.01216268		1583.2	-0.01246085		2113.2	0.00205842		2643.2	-0.02450655
523.4	0.11737734		1053.39	-0.01332728		1583.4	-0.01256094		2113.4	0.00241516		2643.4	-0.02461931
523.6	0.11728997		1053.59	-0.01292946		1583.6	-0.01177077		2113.6	0.0035346		2643.6	-0.02453204
523.8	0.1172704		1053.79	-0.01332593		1583.8	-0.01165434		2113.8	0.00367519		2643.8	-0.02467558
524	0.11710354		1053.99	-0.01360523		1584	-0.01056164		2114	0.00386263		2644	-0.02460321
524.2	0.11688829		1054.19	-0.01324029		1584.2	-0.01073647		2114.2	0.00362776		2644.2	-0.02522272
524.4	0.117446		1054.39	-0.01305813		1584.4	-0.01028257		2114.4	0.00434838		2644.4	-0.02470356
524.6	0.11739337		1054.59	-0.01217095		1584.6	-0.01043206		2114.6	0.00411736		2644.6	-0.02526551
524.8	0.11778183		1054.79	-0.01175167		1584.8	-0.01042932		2114.8	0.00445844		2644.8	-0.02567857
525	0.11765506		1054.99	-0.0117418		1585	-0.01070592		2115	0.00458678		2645	-0.02576863
525.2	0.11738323		1055.19	-0.01137973		1585.2	-0.01154909		2115.2	0.00416675		2645.2	-0.02668087
525.4	0.11721188		1055.39	-0.01097706		1585.4	-0.01146264		2115.4	0.00290492		2645.4	-0.0262445
525.6	0.1173125		1055.59	-0.0100492		1585.6	-0.01120083		2115.6	0.00165399		2645.6	-0.02679903
525.8	0.11784715		1055.79	-0.00949037		1585.8	-0.01258281		2115.8	0.0006457		2645.8	-0.02668199
526	0.11731324		1055.99	-0.00934754		1586	-0.01230517		2116	0.00000226		2646	-0.02711454
526.2	0.11737082		1056.19	-0.00979374		1586.2	-0.01220087		2116.2	0.00015348		2646.2	-0.02678638
526.4	0.11701762		1056.39	-0.01069552		1586.4	-0.01258519		2116.4	-0.00026177		2646.4	-0.02688652
526.6	0.11656339		1056.59	-0.01127817		1586.6	-0.01213011		2116.6	-0.00081681		2646.6	-0.0257894
526.8	0.11507899		1056.79	-0.01267792		1586.8	-0.01154857		2116.8	-0.00102518		2646.8	-0.02434244
527	0.1143584		1056.99	-0.01349006		1587	-0.01135356		2117	-0.00076734		2647	-0.02440992
527.2	0.11369219		1057.19	-0.01406628		1587.2	-0.01180621		2117.2	-0.00043966		2647.2	-0.0244592
527.4	0.11326356		1057.39	-0.01493947		1587.4	-0.01130852		2117.4	0.00047659		2647.4	-0.02407908
527.6	0.11286285		1057.59	-0.01459495		1587.6	-0.0118988		2117.6	0.00114726		2647.6	-0.02350813
527.8	0.11315718		1057.79	-0.01486694		1587.8	-0.01271934		2117.8	0.00123176		2647.8	-0.02334967
528	0.11337542		1057.99	-0.01566506		1588	-0.01247557		2118	0.00156256		2648	-0.02330007
528.2	0.11333207		1058.19	-0.01549799		1588.2	-0.01323143		2118.2	0.00216837		2648.2	-0.0237348
528.4	0.11365137		1058.39	-0.01538597		1588.4	-0.01333899		2118.4	0.00275905		2648.4	-0.02359696
528.6	0.11324239		1058.59	-0.01477044		1588.6	-0.014005		2118.6	0.00245104		2648.6	-0.02470074
528.8	0.11335709		1058.79	-0.01423787		1588.8	-0.01412022		2118.8	0.00204823		2648.8	-0.02528977
529	0.11324676		1058.99	-0.01359235		1589	-0.01417877		2119	0.00192263		2649	-0.02535606
529.2	0.11411233		1059.19	-0.01274202		1589.2	-0.01454433		2119.2	0.00057096		2649.2	-0.02613674
529.4	0.11419724		1059.39	-0.01244399		1589.4	-0.01445121		2119.4	-0.00010528		2649.4	-0.02551359
529.6	0.11522323		1059.59	-0.01197424		1589.6	-0.01400096		2119.6	-0.00076634		2649.6	-0.02655514
529.8	0.1155482		1059.79	-0.01219959		1589.8	-0.01372557		2119.8	-0.00123769		2649.8	-0.0264634
530	0.1151124		1059.99	-0.01198129		1590	-0.01264849		2120	-0.00144268		2650	-0.02637556
530.2	0.11460159		1060.19	-0.01279628		1590.2	-0.01295802		2120.2	-0.00126569		2650.2	-0.02617152
530.4	0.11343542		1060.39	-0.01343672		1590.4	-0.01237299		2120.4	-0.00092649		2650.4	-0.02597536
530.6	0.11287009		1060.59	-0.01363875		1590.6	-0.0114419		2120.6	-0.00034425		2650.6	-0.02501062
530.8	0.11216627		1060.79	-0.01382442		1590.8	-0.0108023		2120.8	0.00023999		2650.8	-0.0238087
531	0.11227161		1060.99	-0.01474697		1591	-0.0107018		2121	0.00067143		2651	-0.02436859
531.2	0.11224078		1061.19	-0.01502061		1591.2	-0.01046083		2121.2	0.00205149		2651.2	-0.0239734
531.4	0.11253001		1061.39	-0.0154071		1591.4	-0.01051171		2121.4	0.00311398		2651.4	-0.02319807
531.6	0.1126745		1061.59	-0.01629453		1591.6	-0.01142991		2121.6	0.00395012		2651.6	-0.02335649
531.8	0.11311829		1061.79	-0.01664155		1591.8	-0.01206694		2121.8	0.00502026		2651.8	-0.02410951
532	0.11249272		1061.99	-0.01721299		1592	-0.01227195		2122	0.0049944		2652	-0.02423086
532.2	0.11265137		1062.19	-0.01713088		1592.2	-0.0127226		2122.2	0.00577669		2652.2	-0.02439242
532.4	0.11295312		1062.39	-0.01649328		1592.4	-0.01378416		2122.4	0.00545805		2652.4	-0.025039
532.6	0.11376453		1062.59	-0.01629201		1592.6	-0.0144204		2122.6	0.00446773		2652.6	-0.02595459
532.8	0.11400054		1062.79	-0.01529029		1592.8	-0.01493223		2122.8	0.00401354		2652.8	-0.02660425
533	0.11517745		1062.99	-0.01532854		1593	-0.01437029		2123	0.00378039		2653	-0.02666781
533.2	0.11621145		1063.19	-0.01490103		1593.2	-0.01403682		2123.2	0.00238159		2653.2	-0.02745256
533.4	0.11616131		1063.39	-0.01479517		1593.4	-0.01349549		2123.4	0.00132351		2653.4	-0.02754906
533.6	0.11606395		1063.59	-0.01420524		1593.6	-0.01299793		2123.6	0.00067668		2653.6	-0.02845373
533.8	0.11453294		1063.79	-0.01433721		1593.8	-0.01237674		2123.8	-0.00005646		2653.8	-0.02860686
534	0.11371363		1063.99	-0.01376123		1594	-0.01165058		2124	-0.00084523		2654	-0.0287652
534.2	0.11332619		1064.19	-0.01326194		1594.2	-0.01172292		2124.2	-0.0008245		2654.2	-0.02906859
534.4	0.11272382		1064.39	-0.01231731		1594.4	-0.01087457		2124.4	-0.00097871		2654.4	-0.02913311
534.6	0.11232358		1064.59	-0.01220705		1594.6	-0.01079545		2124.6	-0.00111212		2654.6	-0.02870262
534.8	0.11224607		1064.79	-0.01289287		1594.8	-0.01113349		2124.8	-0.00013305		2654.8	-0.02824429
535	0.11192638		1064.99	-0.01330484		1595	-0.01043024		2125	0.00016647		2655	-0.02896789
535.2	0.11125246		1065.19	-0.01376331		1595.2	-0.01035928		2125.2	0.00148885		2655.2	-0.02819555
535.4	0.11129815		1065.39	-0.01431037		1595.4	-0.01030155		2125.4	0.00246456		2655.4	-0.0284142
535.6	0.1111014		1065.59	-0.01495184		1595.6	-0.0106258		2125.6	0.00319698		2655.6	-0.0283286
535.8	0.11130932		1065.79	-0.0142111		1595.8	-0.01133726		2125.8	0.00375365		2655.8	-0.02872947
536	0.11103411		1065.99	-0.01434842		1596	-0.01118621		2126	0.00392992		2656	-0.02902945
536.2	0.11228545		1066.19	-0.01409057		1596.2	-0.01148147		2126.2	0.00447341		2656.2	-0.02913913
536.4	0.11320919		1066.39	-0.01292232		1596.4	-0.01204886		2126.4	0.00466707		2656.4	-0.02950364
536.6	0.11472658		1066.59	-0.01326654		1596.6	-0.01213949		2126.6	0.00416076		2656.6	-0.02968891
536.8	0.11558753		1066.79	-0.01198087		1596.8	-0.01222472		2126.8	0.00421892		2656.8	-0.02871532
537	0.11703918		1066.99	-0.01147074		1597	-0.01187042		2127	0.00477672		2657	-0.02859659
537.2	0.11697792		1067.19	-0.01144028		1597.2	-0.01210752		2127.2	0.00456036		2657.2	-0.02827491
537.4	0.11684831		1067.39	-0.01130809		1597.4	-0.01324572		2127.4	0.00393637		2657.4	-0.02832252
537.6	0.1171929		1067.59	-0.01070088		1597.6	-0.01286099		2127.6	0.0034013		2657.6	-0.02837243
537.8	0.11658771		1067.79	-0.01064548		1597.8	-0.01288659		2127.8	0.00228429		2657.8	-0.02825664
538	0.11643487		1067.99	-0.01031676		1598	-0.01338368		2128	0.00096631		2658	-0.02828683
538.2	0.11591616		1068.19	-0.01061922		1598.2	-0.01364819		2128.2	0.00105322		2658.2	-0.02769764
538.4	0.11507723		1068.39	-0.01143228		1598.4	-0.01343481		2128.4	0.0006776		2658.4	-0.02703743
538.6	0.11402741		1068.59	-0.01250453		1598.6	-0.01322304		2128.6	0.00020124		2658.6	-0.02627418
538.8	0.11405658		1068.79	-0.01348949		1598.8	-0.0126688		2128.8	0.00059199		2658.8	-0.02586292
539	0.11455389		1068.99	-0.01325999		1599	-0.01174648		2129	0.00082278		2659	-0.02591403
539.2	0.11383743		1069.19	-0.01424931		1599.2	-0.01165901		2129.2	0.00130085		2659.2	-0.02573448
539.4	0.11425468		1069.39	-0.01514018		1599.4	-0.01124996		2129.4	0.00135752		2659.4	-0.02571325
539.6	0.1137172		1069.59	-0.01581868		1599.6	-0.01127662		2129.6	0.00063161		2659.6	-0.02616449
539.8	0.11322756		1069.79	-0.01578854		1599.8	-0.01190058		2129.8	0.00129648		2659.8	-0.0269162
540	0.11343437		1069.99	-0.01603336		1600	-0.01144256		2130	0.00100149		2660	-0.02752634
540.2	0.1143428		1070.19	-0.01554554		1600.2	-0.01278806		2130.2	0.00112957		2660.2	-0.02784373
540.4	0.11412797		1070.39	-0.01528464		1600.4	-0.01323691		2130.4	0.00124213		2660.4	-0.02826817
540.6	0.11447492		1070.59	-0.01534466		1600.6	-0.01397244		2130.6	0.00131626		2660.6	-0.02808119
540.8	0.11497178		1070.79	-0.01492875		1600.8	-0.01351091		2130.8	0.00197877		2660.8	-0.0280449
541	0.11386673		1070.99	-0.01427175		1601	-0.01294237		2131	0.00380323		2661	-0.02865539
541.2	0.11351346		1071.19	-0.01407126		1601.2	-0.01278193		2131.2	0.00402154		2661.2	-0.02883322
541.4	0.11415134		1071.39	-0.0139418		1601.4	-0.01288298		2131.4	0.00327961		2661.4	-0.02926403
541.6	0.11456171		1071.59	-0.01232786		1601.6	-0.01170418		2131.6	0.00300711		2661.6	-0.02892864
541.8	0.11350883		1071.79	-0.01202213		1601.8	-0.01200066		2131.8	0.00311491		2661.8	-0.02851934
542	0.11369635		1071.99	-0.01230391		1602	-0.01173604		2132	0.00309037		2662	-0.02782501
542.2	0.11306018		1072.19	-0.01211173		1602.2	-0.01102462		2132.2	0.00328748		2662.2	-0.02604368
542.4	0.1124293		1072.39	-0.01224626		1602.4	-0.01044559		2132.4	0.0026957		2662.4	-0.02569148
542.6	0.11221345		1072.59	-0.0130093		1602.6	-0.01025409		2132.6	0.00184212		2662.6	-0.02525871
542.8	0.11313693		1072.79	-0.01273689		1602.8	-0.01062084		2132.8	0.00261512		2662.8	-0.02520953
543	0.11392544		1072.99	-0.01289362		1603	-0.00996414		2133	0.00229335		2663	-0.02503075
543.2	0.11344588		1073.19	-0.01415867		1603.2	-0.01030926		2133.2	0.00177369		2663.2	-0.0252947
543.4	0.11429898		1073.39	-0.01462069		1603.4	-0.01045901		2133.4	0.00121998		2663.4	-0.0253445
543.6	0.11460353		1073.59	-0.01535525		1603.6	-0.01130724		2133.6	0.00049287		2663.6	-0.02551547
543.8	0.11495145		1073.79	-0.01591698		1603.8	-0.012552		2133.8	0.00029406		2663.8	-0.02615053
544	0.11573616		1073.99	-0.01617532		1604	-0.01308497		2134	-0.0011715		2664	-0.02725751
544.2	0.11543495		1074.19	-0.01640042		1604.2	-0.01439436		2134.2	-0.00140289		2664.2	-0.0273979
544.4	0.11461347		1074.39	-0.0160622		1604.4	-0.01466826		2134.4	-0.00143859		2664.4	-0.02772621
544.6	0.11452286		1074.59	-0.01606046		1604.6	-0.01431998		2134.6	-0.00098285		2664.6	-0.02830888
544.8	0.11460703		1074.79	-0.01608496		1604.8	-0.01351661		2134.8	-0.00005334		2664.8	-0.02877527
545	0.11411875		1074.99	-0.01518348		1605	-0.01277533		2135	0.00075968		2665	-0.02870126
545.2	0.11420999		1075.19	-0.01563275		1605.2	-0.0122967		2135.2	0.00076575		2665.2	-0.02922269
545.4	0.11339717		1075.39	-0.01577246		1605.4	-0.01183794		2135.4	0.00075147		2665.4	-0.02926017
545.6	0.11325537		1075.59	-0.01431135		1605.6	-0.01101997		2135.6	0.00133209		2665.6	-0.02906799
545.8	0.11275636		1075.79	-0.01461494		1605.8	-0.01103546		2135.8	0.00233454		2665.8	-0.0282568
546	0.11219784		1075.99	-0.0149437		1606	-0.01000395		2136	0.00243486		2666	-0.02771955
546.2	0.11151937		1076.19	-0.01458119		1606.2	-0.01000763		2136.2	0.00245701		2666.2	-0.02760942
546.4	0.11113026		1076.39	-0.01421049		1606.4	-0.01023257		2136.4	0.00297847		2666.4	-0.02783429
546.6	0.11163618		1076.59	-0.01426873		1606.6	-0.01064913		2136.6	0.00292624		2666.6	-0.0272685
546.8	0.11140516		1076.79	-0.01394101		1606.8	-0.0114253		2136.8	0.00357816		2666.8	-0.02670485
547	0.1117493		1076.99	-0.01448145		1607	-0.01097069		2137	0.0026001		2667	-0.02620831
547.2	0.1125051		1077.19	-0.01485915		1607.2	-0.01127032		2137.2	0.00227278		2667.2	-0.02672951
547.4	0.11412512		1077.39	-0.01440381		1607.4	-0.01113463		2137.4	0.00189159		2667.4	-0.02713254
547.6	0.11475111		1077.59	-0.01450413		1607.6	-0.01228054		2137.6	0.00117677		2667.6	-0.02770996
547.8	0.11478669		1077.79	-0.01408074		1607.8	-0.01203227		2137.8	0.00024107		2667.8	-0.02875853
548	0.11490307		1077.99	-0.01361214		1608	-0.01211259		2138	0.00020099		2668	-0.02882609
548.2	0.11424264		1078.19	-0.01285097		1608.2	-0.01196252		2138.2	-0.00042165		2668.2	-0.02894509
548.4	0.11354065		1078.39	-0.01243619		1608.4	-0.01240619		2138.4	-0.00084245		2668.4	-0.02985874
548.6	0.11349151		1078.59	-0.01289523		1608.6	-0.01236929		2138.6	-0.00116662		2668.6	-0.03016428
548.8	0.11455387		1078.79	-0.01305701		1608.8	-0.01285004		2138.8	-0.00101401		2668.8	-0.03045156
549	0.11401815		1078.99	-0.01335074		1609	-0.01248321		2139	-0.00094168		2669	-0.03144336
549.2	0.11231274		1079.19	-0.01400739		1609.2	-0.01208923		2139.2	-0.00066445		2669.2	-0.03177502
549.4	0.11089516		1079.39	-0.01375522		1609.4	-0.01227895		2139.4	-0.00030194		2669.4	-0.03243269
549.6	0.11115303		1079.59	-0.01459167		1609.6	-0.01175625		2139.6	0.00059185		2669.6	-0.03194779
549.8	0.11018758		1079.79	-0.01551932		1609.8	-0.0121313		2139.8	0.0016887		2669.8	-0.03140504
550	0.11028396		1079.99	-0.0167494		1610	-0.01093423		2140	0.0031221		2670	-0.03138058
550.2	0.11057126		1080.19	-0.01597849		1610.2	-0.01216548		2140.2	0.00430412		2670.2	-0.03072543
550.4	0.11018922		1080.39	-0.0168764		1610.4	-0.01275467		2140.4	0.00582382		2670.4	-0.02957465
550.6	0.11010295		1080.59	-0.01815387		1610.6	-0.0131398		2140.6	0.00580815		2670.6	-0.0287243
550.8	0.10950046		1080.79	-0.01918915		1610.8	-0.01359323		2140.8	0.00549963		2670.8	-0.02836405
551	0.11014599		1080.99	-0.02048317		1611	-0.01327575		2141	0.00540937		2671	-0.02801644
551.2	0.11135227		1081.19	-0.02077253		1611.2	-0.01333669		2141.2	0.00490929		2671.2	-0.02851744
551.4	0.1116764		1081.39	-0.02002004		1611.4	-0.01338445		2141.4	0.00475863		2671.4	-0.02811449
551.6	0.11226842		1081.59	-0.01980012		1611.6	-0.01362666		2141.6	0.00300421		2671.6	-0.02778217
551.8	0.11206005		1081.79	-0.01914969		1611.8	-0.01300457		2141.8	0.0023793		2671.8	-0.02776979
552	0.11243987		1081.99	-0.01856873		1612	-0.01313795		2142	0.00123044		2672	-0.02814791
552.2	0.11256062		1082.19	-0.01839004		1612.2	-0.01430746		2142.2	-0.00009717		2672.2	-0.02899282
552.4	0.11236497		1082.39	-0.01787773		1612.4	-0.0152781		2142.4	-0.00118555		2672.4	-0.02938989
552.6	0.11356299		1082.59	-0.01727517		1612.6	-0.01515306		2142.6	-0.00207129		2672.6	-0.02903409
552.8	0.11391069		1082.79	-0.01722605		1612.8	-0.01532297		2142.8	-0.00217348		2672.8	-0.03014808
553	0.11294582		1082.99	-0.01701106		1613	-0.01502538		2143	-0.001864		2673	-0.03082879
553.2	0.11188692		1083.19	-0.01662215		1613.2	-0.01494064		2143.2	-0.00240244		2673.2	-0.03060335
553.4	0.11177065		1083.39	-0.01654334		1613.4	-0.01441985		2143.4	-0.00255422		2673.4	-0.03051164
553.6	0.11192978		1083.59	-0.01726031		1613.6	-0.01368607		2143.6	-0.00163795		2673.6	-0.03007685
553.8	0.11141418		1083.79	-0.01686226		1613.8	-0.01302626		2143.8	-0.00081645		2673.8	-0.03100254
554	0.11188792		1083.99	-0.01725588		1614	-0.0121148		2144	0.000884		2674	-0.03025378
554.2	0.11165015		1084.19	-0.01670904		1614.2	-0.01269774		2144.2	0.00114282		2674.2	-0.02949396
554.4	0.111909		1084.39	-0.01905761		1614.4	-0.01321617		2144.4	0.00128482		2674.4	-0.02933903
554.6	0.11137375		1084.59	-0.01931099		1614.6	-0.01343983		2144.6	0.00100218		2674.6	-0.02887845
554.8	0.11070267		1084.79	-0.02005726		1614.8	-0.01307591		2144.8	0.00099932		2674.8	-0.02900664
555	0.11095109		1084.99	-0.02041695		1615	-0.01290227		2145	0.00119528		2675	-0.02912443
555.2	0.11104891		1085.19	-0.02011336		1615.2	-0.01297659		2145.2	-0.00026007		2675.2	-0.02883289
555.4	0.1107798		1085.39	-0.0200423		1615.4	-0.01296654		2145.4	-0.00066368		2675.4	-0.02848727
555.6	0.11082496		1085.59	-0.01967701		1615.6	-0.01317739		2145.6	-0.00113798		2675.6	-0.02842126
555.8	0.11028588		1085.79	-0.01899852		1615.8	-0.01341658		2145.8	-0.00110524		2675.8	-0.02923301
556	0.11023731		1085.99	-0.01841319		1616	-0.01429099		2146	-0.00185099		2676	-0.02974603
556.2	0.11042706		1086.19	-0.01805547		1616.2	-0.01531028		2146.2	-0.00095976		2676.2	-0.03042406
556.4	0.11107389		1086.39	-0.01726839		1616.4	-0.01454514		2146.4	-0.00177276		2676.4	-0.02972795
556.6	0.11148767		1086.59	-0.01724209		1616.6	-0.0152434		2146.6	-0.00111225		2676.6	-0.02959021
556.8	0.1112642		1086.79	-0.01670852		1616.8	-0.01529821		2146.8	-0.00003109		2676.8	-0.03065513
557	0.11155224		1086.99	-0.01518732		1617	-0.01551302		2147	0.00011011		2677	-0.03143972
557.2	0.11169014		1087.19	-0.0150438		1617.2	-0.01559353		2147.2	0.0005831		2677.2	-0.03109185
557.4	0.11220159		1087.39	-0.01521934		1617.4	-0.01559798		2147.4	0.00074277		2677.4	-0.03083672
557.6	0.11181488		1087.59	-0.01532016		1617.6	-0.01524077		2147.6	0.00162885		2677.6	-0.03073974
557.8	0.11266279		1087.79	-0.01476726		1617.8	-0.01452364		2147.8	0.00145933		2677.8	-0.03131563
558	0.11342839		1087.99	-0.01493664		1618	-0.01452067		2148	0.0016978		2678	-0.03055016
558.2	0.11422769		1088.19	-0.01495649		1618.2	-0.01459394		2148.2	0.001302		2678.2	-0.03029031
558.4	0.11470025		1088.39	-0.01551293		1618.4	-0.01497884		2148.4	0.00124821		2678.4	-0.03009971
558.6	0.11418458		1088.59	-0.01509499		1618.6	-0.01446674		2148.6	0.00138726		2678.6	-0.02979017
558.8	0.11411391		1088.79	-0.01537258		1618.8	-0.01389368		2148.8	0.00124718		2678.8	-0.02975582
559	0.11412579		1088.99	-0.01549233		1619	-0.01400149		2149	0.00081672		2679	-0.02908644
559.2	0.11366446		1089.19	-0.0157623		1619.2	-0.01416383		2149.2	0.00036115		2679.2	-0.02795377
559.4	0.11314568		1089.39	-0.01561749		1619.4	-0.01424014		2149.4	0.00082833		2679.4	-0.02758838
559.6	0.11230978		1089.59	-0.01489313		1619.6	-0.01436536		2149.6	0.00082885		2679.6	-0.02678927
559.8	0.11210482		1089.79	-0.01484018		1619.8	-0.0142759		2149.8	0.00051468		2679.8	-0.02663148
