# Supplementary material for: Functional development of a V3/glycan-specific broadly neutralizing antibody isolated from a case of HIV superinfection
Source: eLife journal article supplement (doi:10.7554/elife.68110), 2021-07-15
Supplement: fig2-data2 [file B1.xls]

Vers 3.43 Data Simulation
Conc1	2.5E-07	2.5E-07	2.5E-07	2.5E-07
Start1	200.03	730.02	1260.02	1790.01
Stop1	559.82	1089.82	1619.82	2149.81
Time1	Data1	Sim1	Time2	Data2	Sim2	Time3	Data3	Sim3	Time4	Data4	Sim4
200.03	0.01500952		730.02	0.00264805		1260.02	0.01140382		1790.01	-0.00286491
200.23	0.01490675		730.22	0.00242439		1260.22	0.01148754		1790.21	-0.00361297
200.43	0.01424261		730.42	0.00172679		1260.42	0.01080017		1790.41	-0.0037032
200.63	0.01337372		730.62	0.00234255		1260.62	0.01121148		1790.61	-0.00318304
200.83	0.0133034		730.82	0.00255036		1260.82	0.01117587		1790.81	-0.00275162
201.03	0.01360346		731.02	0.00242941		1261.02	0.01079779		1791.01	-0.00267315
201.23	0.01445265		731.22	0.00263465		1261.22	0.01098379		1791.21	-0.00200614
201.43	0.01491191		731.42	0.00313884		1261.42	0.0108481		1791.41	-0.00199682
201.63	0.01661277		731.62	0.00338258		1261.62	0.01002237		1791.61	-0.00195939
201.83	0.01880123		731.82	0.00405946		1261.82	0.00952169		1791.81	-0.00140362
202.03	0.02062163		732.02	0.00412999		1262.02	0.00964141		1792.01	-0.00009123
202.23	0.02292484		732.22	0.00443001		1262.22	0.00865064		1792.21	-0.00009051
202.43	0.02528127		732.42	0.0035523		1262.42	0.00954086		1792.41	-0.00031137
202.63	0.02798903		732.62	0.00386541		1262.62	0.0091469		1792.61	0.00002287
202.83	0.03031549		732.82	0.00396067		1262.82	0.00941632		1792.81	-0.00062888
203.03	0.03257365		733.02	0.00376823		1263.02	0.0098477		1793.01	-0.00000746
203.23	0.03519055		733.22	0.00304014		1263.22	0.01050031		1793.21	0.00020286
203.43	0.03668694		733.42	0.00341837		1263.42	0.01017033		1793.41	-0.00002614
203.63	0.0387893		733.62	0.00415895		1263.62	0.00984802		1793.61	0.0008519
203.83	0.04102069		733.82	0.00403294		1263.82	0.01052546		1793.81	0.00063326
204.03	0.04294711		734.02	0.00393426		1264.02	0.01152402		1794.01	0.00004728
204.23	0.04537536		734.22	0.00375113		1264.22	0.01140097		1794.21	-0.00019163
204.43	0.04599956		734.42	0.0042125		1264.42	0.01092414		1794.41	0.00003332
204.63	0.0477662		734.62	0.00592052		1264.62	0.01225462		1794.61	-0.00019113
204.83	0.04984301		734.82	0.00661913		1264.82	0.01219986		1794.81	-0.00173386
205.03	0.05171077		735.02	0.00710542		1265.02	0.01222268		1795.01	-0.00272258
205.23	0.05353715		735.22	0.00825458		1265.22	0.01256047		1795.21	-0.00348594
205.43	0.0553312		735.42	0.00814196		1265.42	0.01190604		1795.41	-0.00382346
205.63	0.05731868		735.62	0.00846747		1265.62	0.01112867		1795.61	-0.00430983
205.83	0.05894353		735.82	0.00799706		1265.82	0.01080458		1795.81	-0.00422848
206.03	0.06089399		736.02	0.00780204		1266.02	0.01138074		1796.01	-0.00348205
206.23	0.06340335		736.22	0.0082747		1266.22	0.01058236		1796.21	-0.00474356
206.43	0.0660433		736.42	0.00765572		1266.42	0.01038298		1796.41	-0.00414394
206.63	0.06839044		736.62	0.00768609		1266.62	0.00942451		1796.61	-0.00407732
206.83	0.07065524		736.82	0.00750535		1266.82	0.00940901		1796.81	-0.00420036
207.03	0.07279142		737.02	0.00725299		1267.02	0.00955574		1797.01	-0.00314674
207.23	0.07454252		737.22	0.00721856		1267.22	0.01090582		1797.21	-0.00171563
207.43	0.07635203		737.42	0.00672191		1267.42	0.01106938		1797.41	-0.00126513
207.63	0.07888946		737.62	0.00702369		1267.62	0.01137323		1797.61	-0.00097837
207.83	0.08074153		737.82	0.00677289		1267.82	0.01186581		1797.81	-0.00064002
208.03	0.08222054		738.02	0.00758433		1268.02	0.0120165		1798.01	-0.00058846
208.23	0.08408133		738.22	0.00810465		1268.22	0.01131577		1798.21	-0.00112058
208.43	0.08561163		738.42	0.00931808		1268.42	0.01187454		1798.41	-0.00178593
208.63	0.08759217		738.62	0.01055991		1268.62	0.01228319		1798.61	-0.00189782
208.83	0.09004885		738.82	0.01114876		1268.82	0.01151154		1798.81	-0.00239991
209.03	0.09250376		739.02	0.01131514		1269.02	0.011685		1799.01	-0.0014423
209.23	0.09424027		739.22	0.01140929		1269.22	0.01158858		1799.21	-0.00079192
209.43	0.09601893		739.42	0.01041484		1269.42	0.01143355		1799.41	0.00002866
209.63	0.09619038		739.62	0.0110689		1269.62	0.01165085		1799.61	-0.00072854
209.83	0.09779138		739.82	0.0108983		1269.82	0.01171751		1799.81	-0.00027297
210.03	0.09972987		740.02	0.01153161		1270.02	0.01258042		1800.01	-0.00032969
210.23	0.1008069		740.22	0.01160542		1270.22	0.01218712		1800.21	-0.00139009
210.43	0.10156224		740.42	0.01087164		1270.42	0.01230907		1800.41	-0.00105855
210.63	0.10351197		740.62	0.01073142		1270.62	0.01215479		1800.61	-0.00080348
210.83	0.10535766		740.82	0.0103091		1270.82	0.01223652		1800.81	-0.00035781
211.03	0.10656686		741.02	0.0098125		1271.02	0.01284637		1801.01	0.00018617
211.23	0.10844441		741.22	0.00926643		1271.22	0.01396262		1801.21	0.00067682
211.43	0.10994392		741.42	0.00819302		1271.42	0.01400982		1801.41	0.00047079
211.63	0.11193298		741.62	0.00801947		1271.62	0.01536407		1801.61	0.00029141
211.83	0.11325831		741.82	0.0082771		1271.82	0.0160223		1801.81	0.00123034
212.03	0.11584523		742.02	0.008085		1272.02	0.01638976		1802.01	0.00116732
212.23	0.11826042		742.22	0.00778355		1272.22	0.01580784		1802.21	0.00058229
212.43	0.12022641		742.42	0.00859047		1272.42	0.0158737		1802.41	-0.00009866
212.63	0.12207926		742.62	0.00837771		1272.62	0.01477244		1802.61	-0.0001562
212.83	0.12460431		742.82	0.00909198		1272.82	0.01346266		1802.81	-0.00028502
213.03	0.12550992		743.02	0.00971931		1273.02	0.01382027		1803.01	-0.00042149
213.23	0.12647377		743.22	0.01052544		1273.22	0.01323647		1803.21	0.000294
213.43	0.12675162		743.42	0.01107728		1273.42	0.01307848		1803.41	-0.00015792
213.63	0.12634584		743.62	0.01219622		1273.62	0.01261872		1803.61	-0.00070766
213.83	0.12840548		743.82	0.01277051		1273.82	0.01258261		1803.81	-0.00152944
214.03	0.12926204		744.02	0.01330406		1274.02	0.01254425		1804.01	-0.00223421
214.23	0.13042907		744.22	0.0138902		1274.22	0.01189335		1804.21	-0.00233269
214.43	0.13125092		744.42	0.01311564		1274.42	0.01198472		1804.41	-0.00175636
214.63	0.13346131		744.62	0.01304426		1274.62	0.01195385		1804.61	-0.00135151
214.83	0.13512053		744.82	0.01274996		1274.82	0.01205883		1804.81	-0.00104208
215.03	0.13656324		745.02	0.01295879		1275.02	0.01286791		1805.01	-0.00164463
215.23	0.13875585		745.22	0.0128334		1275.22	0.01376597		1805.21	-0.0010132
215.43	0.14051136		745.42	0.01308181		1275.42	0.01528477		1805.41	-0.00075543
215.63	0.14193698		745.62	0.0137448		1275.62	0.0165777		1805.61	-0.00123075
215.83	0.14433682		745.82	0.01418307		1275.82	0.01636486		1805.81	-0.00081268
216.03	0.14658347		746.02	0.01326351		1276.02	0.01684331		1806.01	-0.00159514
216.23	0.14846571		746.22	0.01315437		1276.22	0.01645541		1806.21	-0.00268554
216.43	0.15006766		746.42	0.01308353		1276.42	0.01629065		1806.41	-0.00342869
216.63	0.15136456		746.62	0.01238223		1276.62	0.01656053		1806.61	-0.0033521
216.83	0.15247237		746.82	0.01315912		1276.82	0.01626354		1806.81	-0.00242844
217.03	0.15340556		747.02	0.01273315		1277.02	0.01643995		1807.01	-0.00195413
217.23	0.15468472		747.22	0.01201488		1277.22	0.01553967		1807.21	-0.00029058
217.43	0.15524436		747.42	0.01251284		1277.42	0.01526533		1807.41	-0.00122129
217.63	0.15604986		747.62	0.01343087		1277.62	0.01548117		1807.61	-0.00102341
217.83	0.15777498		747.82	0.01448566		1277.82	0.0158688		1807.81	-0.0015142
218.03	0.15825641		748.02	0.01404573		1278.02	0.01502299		1808.01	-0.00183593
218.23	0.15990661		748.22	0.01362245		1278.22	0.01465889		1808.21	-0.00096007
218.43	0.16049914		748.42	0.01334277		1278.42	0.01502082		1808.41	-0.00096686
218.63	0.16213161		748.62	0.01366008		1278.62	0.01475884		1808.61	-0.00060802
218.83	0.16374361		748.82	0.01393578		1278.82	0.01475981		1808.81	-0.00109997
219.03	0.16423594		749.02	0.01449737		1279.02	0.01542804		1809.01	-0.00221679
219.23	0.16547526		749.22	0.01469575		1279.22	0.01593006		1809.21	-0.00263732
219.43	0.16713212		749.42	0.01560415		1279.42	0.01575214		1809.41	-0.00422726
219.63	0.16855089		749.62	0.01594069		1279.62	0.01563385		1809.61	-0.00479193
219.83	0.17013488		749.82	0.0165619		1279.82	0.01535009		1809.81	-0.00353093
220.03	0.17185822		750.02	0.01578098		1280.02	0.01637236		1810.01	-0.0041619
220.23	0.17346998		750.22	0.01550188		1280.22	0.01584802		1810.21	-0.00478679
220.43	0.17451799		750.42	0.01512584		1280.42	0.01571051		1810.41	-0.00488403
220.63	0.17613536		750.62	0.0153886		1280.62	0.01547018		1810.61	-0.0044495
220.83	0.17694778		750.82	0.01539517		1280.82	0.0142655		1810.81	-0.00432933
221.03	0.17860315		751.02	0.01531064		1281.02	0.01337311		1811.01	-0.00384913
221.23	0.17950567		751.22	0.01498825		1281.22	0.01317908		1811.21	-0.00384916
221.43	0.1800107		751.42	0.01655301		1281.42	0.01323505		1811.41	-0.00398671
221.63	0.18028622		751.62	0.01600786		1281.62	0.01322707		1811.61	-0.00332326
221.83	0.18124003		751.82	0.01508427		1281.82	0.01271408		1811.81	-0.00285829
222.03	0.18167723		752.02	0.01441485		1282.02	0.01254941		1812.01	-0.00227682
222.23	0.18225672		752.22	0.01457883		1282.22	0.01383922		1812.21	-0.00137659
222.43	0.18245664		752.42	0.01503752		1282.42	0.01384545		1812.41	-0.00174819
222.63	0.18306687		752.62	0.01485884		1282.62	0.01415492		1812.61	-0.00120461
222.83	0.18413817		752.82	0.01506618		1282.82	0.01468807		1812.81	-0.00110863
223.03	0.18365389		753.02	0.0148346		1283.02	0.01476034		1813.01	-0.00034406
223.23	0.1844465		753.22	0.01535692		1283.22	0.01545677		1813.21	-0.00094622
223.43	0.18577398		753.42	0.0159464		1283.42	0.01607302		1813.41	-0.00034609
223.63	0.18638141		753.62	0.01616451		1283.62	0.01693924		1813.61	0.00016473
223.83	0.18735261		753.82	0.01612833		1283.82	0.01689738		1813.81	0.00065047
224.03	0.18846737		754.02	0.01572854		1284.02	0.01748695		1814.01	-0.0007364
224.23	0.18938888		754.22	0.01587721		1284.22	0.01628568		1814.21	-0.00050009
224.43	0.19093201		754.42	0.01627024		1284.42	0.01634438		1814.41	-0.00075075
224.63	0.19255995		754.62	0.01715255		1284.62	0.01582124		1814.61	-0.00178802
224.83	0.19409083		754.82	0.01749221		1284.82	0.01535812		1814.81	-0.00214842
225.03	0.19571567		755.02	0.01780411		1285.02	0.01604376		1815.01	-0.00118082
225.23	0.19673929		755.22	0.0172436		1285.22	0.0161672		1815.21	-0.00140943
225.43	0.19793241		755.42	0.01734919		1285.42	0.01622557		1815.41	-0.00129575
225.63	0.19962544		755.62	0.0163745		1285.62	0.01616349		1815.61	-0.0016082
225.83	0.20146659		755.82	0.01721143		1285.82	0.01650545		1815.81	-0.00070247
226.03	0.20290128		756.02	0.01820729		1286.02	0.0167059		1816.01	-0.00105836
226.23	0.2044735		756.22	0.0187096		1286.22	0.01672565		1816.21	-0.00183773
226.43	0.20546102		756.42	0.01907679		1286.42	0.01633021		1816.41	-0.00288485
226.63	0.20650145		756.62	0.01965085		1286.62	0.0156108		1816.61	-0.00341159
226.83	0.20743618		756.82	0.01915431		1286.82	0.01468112		1816.81	-0.00359025
227.03	0.2076389		757.02	0.01899209		1287.02	0.01585735		1817.01	-0.00379302
227.23	0.20828542		757.22	0.01987276		1287.22	0.01642356		1817.21	-0.0045016
227.43	0.20941462		757.42	0.02013349		1287.42	0.01689644		1817.41	-0.00417931
227.63	0.2096902		757.62	0.02050349		1287.62	0.01575762		1817.61	-0.00474337
227.83	0.21057475		757.82	0.0203478		1287.82	0.01517781		1817.81	-0.00460835
228.03	0.21107741		758.02	0.02099111		1288.02	0.01528955		1818.01	-0.00474143
228.23	0.21210636		758.22	0.02058356		1288.22	0.0151105		1818.21	-0.00458654
228.43	0.21341781		758.42	0.02114333		1288.42	0.01545603		1818.41	-0.00513124
228.63	0.21445713		758.62	0.02247515		1288.62	0.01551008		1818.61	-0.00508508
228.83	0.21516958		758.82	0.02273807		1288.82	0.01550408		1818.81	-0.00435945
229.03	0.21571132		759.02	0.02280385		1289.02	0.01668009		1819.01	-0.00317638
229.23	0.21684036		759.22	0.0223218		1289.22	0.01638685		1819.21	-0.00291328
229.43	0.21728428		759.42	0.02306647		1289.42	0.01647877		1819.41	-0.00259666
229.63	0.21839736		759.62	0.02323186		1289.62	0.01623849		1819.61	-0.00203298
229.83	0.21963798		759.82	0.0233284		1289.82	0.01641966		1819.81	-0.00089637
230.03	0.22115005		760.02	0.02355631		1290.02	0.01653181		1820.01	-0.00084849
230.23	0.2222228		760.22	0.02329083		1290.22	0.01666032		1820.21	-0.00081504
230.43	0.22358727		760.42	0.02226482		1290.42	0.01666505		1820.41	-0.00133255
230.63	0.22457503		760.62	0.02213919		1290.62	0.01618724		1820.61	-0.00081671
230.83	0.22498441		760.82	0.02155506		1290.82	0.01652839		1820.81	-0.00026728
231.03	0.22553255		761.02	0.02305165		1291.02	0.01769957		1821.01	0.00099245
231.23	0.22550529		761.22	0.02370784		1291.22	0.0168109		1821.21	0.00123229
231.43	0.22613249		761.42	0.02376		1291.42	0.01679471		1821.41	0.00132304
231.63	0.22688947		761.62	0.02337559		1291.62	0.01568793		1821.61	0.00081002
231.83	0.22816368		761.82	0.02340644		1291.82	0.01633711		1821.81	0.00055511
232.03	0.22865561		762.02	0.02365692		1292.02	0.01672888		1822.01	0.00019043
232.23	0.22916655		762.22	0.02427604		1292.22	0.01607265		1822.21	0.00008889
232.43	0.2298355		762.42	0.02536361		1292.42	0.01630118		1822.41	-0.00091276
232.63	0.23106058		762.62	0.02539159		1292.62	0.01523331		1822.61	-0.00158022
232.83	0.23182949		762.82	0.02536085		1292.82	0.01410296		1822.81	-0.00193574
233.03	0.23292556		763.02	0.02543808		1293.02	0.01467833		1823.01	-0.00231455
233.23	0.23397868		763.22	0.02467695		1293.22	0.01461542		1823.21	-0.0027615
233.43	0.23415698		763.42	0.02491357		1293.42	0.01506195		1823.41	-0.00326414
233.63	0.23557992		763.62	0.02454974		1293.62	0.01625741		1823.61	-0.00393023
233.83	0.23712866		763.82	0.02468043		1293.82	0.01794603		1823.81	-0.00372708
234.03	0.23850676		764.02	0.02487821		1294.02	0.01913462		1824.01	-0.00362325
234.23	0.23925627		764.22	0.02329373		1294.22	0.01943638		1824.21	-0.00359252
234.43	0.24074724		764.42	0.02265983		1294.42	0.01923667		1824.41	-0.00337235
234.63	0.24206732		764.62	0.02326297		1294.62	0.01954686		1824.61	-0.00273168
234.83	0.24217595		764.82	0.02420016		1294.82	0.01996101		1824.81	-0.00211399
235.03	0.24346334		765.02	0.0241842		1295.02	0.01928241		1825.01	-0.00154735
235.23	0.24408083		765.22	0.02349478		1295.22	0.01842727		1825.21	-0.00210245
235.43	0.24471846		765.42	0.02273401		1295.42	0.01748929		1825.41	-0.00206984
235.63	0.24579127		765.62	0.02314179		1295.62	0.0167983		1825.61	-0.00233054
235.83	0.24725117		765.82	0.02302539		1295.82	0.01691992		1825.81	-0.0015646
236.03	0.24735782		766.02	0.02291208		1296.02	0.01576037		1826.01	-0.00104859
236.23	0.24858222		766.22	0.02304732		1296.22	0.01435581		1826.21	-0.00059949
236.43	0.24972197		766.42	0.02272851		1296.42	0.01405472		1826.41	-0.00115127
236.63	0.25123113		766.62	0.02251101		1296.62	0.01324791		1826.61	-0.00125975
236.83	0.25142137		766.82	0.02290499		1296.82	0.01234992		1826.81	0.00029072
237.03	0.25214046		767.02	0.02251982		1297.02	0.01350979		1827.01	0.00081736
237.23	0.25195221		767.22	0.02246547		1297.22	0.01456862		1827.21	0.00085041
237.43	0.25209186		767.42	0.02374756		1297.42	0.01591137		1827.41	0.00017082
237.63	0.25257763		767.62	0.0249459		1297.62	0.01731666		1827.61	-0.00031598
237.83	0.25265095		767.82	0.02580048		1297.82	0.01809584		1827.81	-0.00023519
238.03	0.25251207		768.02	0.02593301		1298.02	0.01822409		1828.01	0.00016897
238.23	0.25327672		768.22	0.02604949		1298.22	0.0176822		1828.21	0.00039661
238.43	0.25342245		768.42	0.02728		1298.42	0.0176391		1828.41	0.00088378
238.63	0.25400021		768.62	0.02788467		1298.62	0.01882922		1828.61	0.00069828
238.83	0.2536489		768.82	0.02903637		1298.82	0.0194664		1828.81	0.00069852
239.03	0.2545335		769.02	0.02942867		1299.02	0.01812362		1829.01	0.00003026
239.23	0.25528729		769.22	0.03026628		1299.22	0.01834993		1829.21	-0.00066856
239.43	0.25660792		769.42	0.02967905		1299.42	0.01723824		1829.41	-0.00053552
239.63	0.25826106		769.62	0.02984389		1299.62	0.01717186		1829.61	-0.00110997
239.83	0.25979789		769.82	0.0289922		1299.82	0.01783946		1829.81	-0.00050967
240.03	0.2604791		770.02	0.02836907		1300.02	0.01730757		1830.01	0.00005897
240.23	0.26141382		770.22	0.02772599		1300.22	0.01702337		1830.21	0.0000756
240.43	0.26203962		770.42	0.02715953		1300.42	0.01719688		1830.41	0.00079344
240.63	0.26235078		770.62	0.02651522		1300.62	0.01687456		1830.61	0.00155563
240.83	0.26277024		770.82	0.02614309		1300.82	0.01565857		1830.81	0.0029845
241.03	0.26314083		771.02	0.02610801		1301.02	0.01634233		1831.01	0.0027829
241.23	0.26311353		771.22	0.02598443		1301.22	0.01716729		1831.21	0.00245928
241.43	0.26355273		771.42	0.02679634		1301.42	0.01733954		1831.41	0.00250146
241.63	0.26388721		771.62	0.02666673		1301.62	0.01745559		1831.61	0.00241675
241.83	0.26396669		771.82	0.02693458		1301.82	0.01737819		1831.81	0.00330233
242.03	0.26389514		772.02	0.027241		1302.02	0.01687278		1832.01	0.00415806
242.23	0.26400335		772.22	0.02754578		1302.22	0.01773546		1832.21	0.00424156
242.43	0.26434223		772.42	0.02792578		1302.42	0.01873519		1832.41	0.00325889
242.63	0.26539894		772.62	0.02842539		1302.62	0.01964616		1832.61	0.00224418
242.83	0.26626757		772.82	0.03031855		1302.82	0.02016043		1832.81	0.00205104
243.03	0.26733001		773.02	0.03164608		1303.02	0.01947846		1833.01	0.00036773
243.23	0.26920696		773.22	0.03227463		1303.22	0.0196819		1833.21	-0.00102003
243.43	0.27050408		773.42	0.03318559		1303.42	0.01919646		1833.41	-0.00118873
243.63	0.27224655		773.62	0.03353546		1303.62	0.01915263		1833.61	-0.00206365
243.83	0.27304982		773.82	0.03386433		1303.82	0.01920401		1833.81	-0.00221809
244.03	0.27383671		774.02	0.03356113		1304.02	0.01789964		1834.01	-0.00231044
244.23	0.2744563		774.22	0.03405241		1304.22	0.0170851		1834.21	-0.00235608
244.43	0.27480746		774.42	0.03417294		1304.42	0.01637172		1834.41	-0.00221786
244.63	0.27579319		774.62	0.03457493		1304.62	0.01574139		1834.61	-0.00234266
244.83	0.27640915		774.82	0.03445589		1304.82	0.01520222		1834.81	-0.00243762
245.03	0.27724164		775.02	0.03389885		1305.02	0.01505352		1835.01	-0.0018536
245.23	0.27734406		775.22	0.03388942		1305.22	0.01538775		1835.21	-0.00159254
245.43	0.27778372		775.42	0.03380948		1305.42	0.01611628		1835.41	-0.00102589
245.63	0.27895145		775.62	0.0329488		1305.62	0.01636928		1835.61	-0.00114733
245.83	0.27911109		775.82	0.03293195		1305.82	0.01665896		1835.81	0.00028486
246.03	0.27987541		776.02	0.03149609		1306.02	0.01667956		1836.01	0.00120853
246.23	0.28007375		776.22	0.03189665		1306.22	0.01804712		1836.21	0.0015279
246.43	0.28152276		776.42	0.03154444		1306.42	0.01830003		1836.41	0.00092598
246.63	0.28149439		776.62	0.03231577		1306.62	0.01845144		1836.61	0.00118868
246.83	0.28296605		776.82	0.03315269		1306.82	0.01865519		1836.81	0.00075706
247.03	0.28407624		777.02	0.03408235		1307.02	0.01821679		1837.01	0.00016639
247.23	0.28488918		777.22	0.03411568		1307.22	0.01847885		1837.21	-0.0000894
247.43	0.28510457		777.42	0.03448019		1307.42	0.01831032		1837.41	0.00149264
247.63	0.28545953		777.62	0.03390305		1307.62	0.01731748		1837.61	0.0012121
247.83	0.2857653		777.82	0.03451333		1307.82	0.01778741		1837.81	0.0013063
248.03	0.28679982		778.02	0.03480353		1308.02	0.01682856		1838.01	0.00141961
248.23	0.28768638		778.22	0.03480765		1308.22	0.01672003		1838.21	0.00177648
248.43	0.2883187		778.42	0.03490509		1308.42	0.01683982		1838.41	0.00079972
248.63	0.28976301		778.62	0.0346985		1308.62	0.01693935		1838.61	0.00074877
248.83	0.28951862		778.82	0.03444307		1308.82	0.01669742		1838.81	0.00084527
249.03	0.29040509		779.02	0.03424625		1309.02	0.01726503		1839.01	0.00177094
249.23	0.29046964		779.22	0.03482549		1309.22	0.0183787		1839.21	0.00177099
249.43	0.29156601		779.42	0.03460948		1309.42	0.01898881		1839.41	0.0015244
249.63	0.29244647		779.62	0.03439444		1309.62	0.01888867		1839.61	0.00147791
249.83	0.29300366		779.82	0.03480726		1309.82	0.01942344		1839.81	0.00220979
250.03	0.29356467		780.02	0.03450409		1310.02	0.01938945		1840.01	0.00249666
250.23	0.29315278		780.22	0.03670941		1310.22	0.01964777		1840.21	0.0027645
250.43	0.29361415		780.42	0.03677183		1310.42	0.01917568		1840.41	0.00212697
250.63	0.29324871		780.62	0.03734834		1310.62	0.01821767		1840.61	0.00153791
250.83	0.29379721		780.82	0.03783682		1310.82	0.01835279		1840.81	0.00120211
251.03	0.29344732		781.02	0.03821969		1311.02	0.01857642		1841.01	0.001427
251.23	0.29351396		781.22	0.03838208		1311.22	0.01831753		1841.21	0.00115022
251.43	0.29294184		781.42	0.03911871		1311.42	0.01818662		1841.41	0.00147157
251.63	0.29398248		781.62	0.03935312		1311.62	0.0178232		1841.61	0.00130361
251.83	0.29521641		781.82	0.03951769		1311.82	0.01820473		1841.81	0.00079183
252.03	0.29578077		782.02	0.03944931		1312.02	0.0166882		1842.01	0.00079017
252.23	0.29614917		782.22	0.03909242		1312.22	0.01697835		1842.21	0.00049858
252.43	0.29701014		782.42	0.03982624		1312.42	0.01676185		1842.41	0.00052942
252.63	0.29796508		782.62	0.03977315		1312.62	0.01734067		1842.61	0.00142551
252.83	0.29824977		782.82	0.03937566		1312.82	0.01739776		1842.81	0.00169213
253.03	0.29973142		783.02	0.0388902		1313.02	0.01834559		1843.01	0.00208555
253.23	0.30076027		783.22	0.03946715		1313.22	0.01946311		1843.21	0.00145394
253.43	0.30133647		783.42	0.03863324		1313.42	0.01943025		1843.41	0.00047089
253.63	0.30213293		783.62	0.0384574		1313.62	0.02040738		1843.61	0.00092686
253.83	0.30196885		783.82	0.03810087		1313.82	0.02018879		1843.81	0.00024923
254.03	0.3016857		784.02	0.03712196		1314.02	0.02024343		1844.01	0.00071865
254.23	0.30187816		784.22	0.03680718		1314.22	0.019411		1844.21	0.00086506
254.43	0.302401		784.42	0.03527967		1314.42	0.01914922		1844.41	-0.00033099
254.63	0.30328708		784.62	0.03463519		1314.62	0.01892208		1844.61	-0.00085769
254.83	0.30380001		784.82	0.03427103		1314.82	0.01954745		1844.81	-0.00070176
255.03	0.30458325		785.02	0.03381488		1315.02	0.01847744		1845.01	-0.00046656
255.23	0.30446576		785.22	0.03453484		1315.22	0.01801017		1845.21	0.00011593
255.43	0.30435443		785.42	0.03416574		1315.42	0.01791305		1845.41	0.00010651
255.63	0.30577905		785.62	0.03388989		1315.62	0.01709523		1845.61	0.00022905
255.83	0.30644706		785.82	0.03459801		1315.82	0.0170836		1845.81	-0.00029909
256.03	0.30672217		786.02	0.03498505		1316.02	0.01670106		1846.01	0.00029173
256.23	0.30662605		786.22	0.03596211		1316.22	0.01666533		1846.21	0.00011776
256.43	0.30794119		786.42	0.03631457		1316.42	0.01689158		1846.41	0.00114147
256.63	0.30908664		786.62	0.03707278		1316.62	0.01743074		1846.61	0.00181917
256.83	0.30914998		786.82	0.03769639		1316.82	0.01753224		1846.81	0.00178294
257.03	0.31044001		787.02	0.03822567		1317.02	0.01821435		1847.01	0.00109963
257.23	0.31111384		787.22	0.0393495		1317.22	0.01837088		1847.21	0.00037121
257.43	0.31219732		787.42	0.03928954		1317.42	0.01861734		1847.41	-0.00020252
257.63	0.31371103		787.62	0.03932634		1317.62	0.01939337		1847.61	-0.00058004
257.83	0.31424654		787.82	0.03961765		1317.82	0.01875954		1847.81	-0.00197747
258.03	0.31539901		788.02	0.03948879		1318.02	0.01958765		1848.01	-0.00196022
258.23	0.3167723		788.22	0.0408052		1318.22	0.01954718		1848.21	-0.00319844
258.43	0.31813871		788.42	0.04202184		1318.42	0.01988211		1848.41	-0.00468399
258.63	0.31871259		788.62	0.04284512		1318.62	0.01961009		1848.61	-0.00449082
258.83	0.31940049		788.82	0.04301271		1318.82	0.01886896		1848.81	-0.00374588
259.03	0.31903295		789.02	0.04410158		1319.02	0.01809434		1849.01	-0.00295306
259.23	0.31787388		789.22	0.04480606		1319.22	0.01870374		1849.21	-0.00227457
259.43	0.31911782		789.42	0.04346487		1319.42	0.01835377		1849.41	-0.00243845
259.63	0.31893178		789.62	0.04344619		1319.62	0.01791309		1849.61	-0.00263624
259.83	0.31908507		789.82	0.04434282		1319.82	0.0184031		1849.81	-0.00213732
260.03	0.31957947		790.02	0.04353972		1320.02	0.01793596		1850.01	-0.00146908
260.23	0.31963054		790.22	0.04362769		1320.22	0.0174103		1850.21	-0.00063904
260.43	0.32100094		790.42	0.04321794		1320.42	0.01786705		1850.41	-0.00006796
260.63	0.32147792		790.62	0.04355257		1320.62	0.01798558		1850.61	0.00100541
260.83	0.32162788		790.82	0.04392513		1320.82	0.01876686		1850.81	0.00096259
261.03	0.32252002		791.02	0.04323467		1321.02	0.01883349		1851.01	0.00090677
261.23	0.32256502		791.22	0.04333691		1321.22	0.01800991		1851.21	0.00176089
261.43	0.32344102		791.42	0.04343081		1321.42	0.01910902		1851.41	0.00143057
261.63	0.32413822		791.62	0.04307499		1321.62	0.01850811		1851.61	0.00132735
261.83	0.32441249		791.82	0.04461906		1321.82	0.0172688		1851.81	0.00061112
262.03	0.32488467		792.02	0.04538805		1322.02	0.01760779		1852.01	0.00085617
262.23	0.32507645		792.22	0.04636637		1322.22	0.01751109		1852.21	0.00099782
262.43	0.32639824		792.42	0.04676036		1322.42	0.01668412		1852.41	0.00058305
262.63	0.32696876		792.62	0.04649109		1322.62	0.01675812		1852.61	0.00135494
262.83	0.32758351		792.82	0.04716072		1322.82	0.01675941		1852.81	0.00173988
263.03	0.32654095		793.02	0.04790995		1323.02	0.01679003		1853.01	0.00245338
263.23	0.32650177		793.22	0.04679828		1323.22	0.01672165		1853.21	0.00237035
263.43	0.32870466		793.42	0.04630761		1323.42	0.0169706		1853.41	0.00258024
263.63	0.3281107		793.62	0.04649982		1323.62	0.0171707		1853.61	0.0021556
263.83	0.3289433		793.82	0.04672395		1323.82	0.01734876		1853.81	0.0020808
264.03	0.32994879		794.02	0.04651491		1324.02	0.01748479		1854.01	0.00152631
264.23	0.32965663		794.22	0.04621652		1324.22	0.01773777		1854.21	0.00092717
264.43	0.33056937		794.42	0.04597028		1324.42	0.0185284		1854.41	0.00063976
264.63	0.33051667		794.62	0.04578828		1324.62	0.01875046		1854.61	0.00105005
264.83	0.33008369		794.82	0.04508642		1324.82	0.01872431		1854.81	0.00000563
265.03	0.32859767		795.02	0.0440556		1325.02	0.01833522		1855.01	0.00005886
265.23	0.32919785		795.22	0.04392843		1325.22	0.01777291		1855.21	0.00026111
265.43	0.33024346		795.42	0.04379587		1325.42	0.01890963		1855.41	-0.00088297
265.63	0.33136987		795.62	0.04333701		1325.62	0.01762968		1855.61	-0.00096587
265.83	0.33193275		795.82	0.04376346		1325.82	0.01733313		1855.81	-0.00134634
266.03	0.33223698		796.02	0.04404989		1326.02	0.01697516		1856.01	-0.0005809
266.23	0.33291454		796.22	0.04373938		1326.22	0.01685042		1856.21	-0.0005342
266.43	0.33424453		796.42	0.04374101		1326.42	0.01581056		1856.41	-0.00115311
266.63	0.33381051		796.62	0.04417665		1326.62	0.01563312		1856.61	-0.00014969
266.83	0.33407286		796.82	0.04435194		1326.82	0.01573973		1856.81	0.00157918
267.03	0.33459859		797.02	0.04490988		1327.02	0.01542817		1857.01	0.00217184
267.23	0.33559973		797.22	0.04369358		1327.22	0.01594752		1857.21	0.00215889
267.43	0.33666448		797.42	0.04470609		1327.42	0.01655888		1857.41	0.00243824
267.63	0.33551853		797.62	0.0440449		1327.62	0.01650525		1857.61	0.00314284
267.83	0.3349487		797.82	0.04454741		1327.82	0.01717321		1857.81	0.00353147
268.03	0.33472379		798.02	0.04500412		1328.02	0.01766478		1858.01	0.00322059
268.23	0.33477218		798.22	0.0445977		1328.22	0.01759368		1858.21	0.00359197
268.43	0.3356105		798.42	0.04471467		1328.42	0.01764803		1858.41	0.00361367
268.63	0.33604079		798.62	0.04476384		1328.62	0.01745609		1858.61	0.00306787
268.83	0.33623587		798.82	0.04497902		1328.82	0.01811357		1858.81	0.00195709
269.03	0.33681692		799.02	0.04579118		1329.02	0.01947537		1859.01	0.00174473
269.23	0.3389949		799.22	0.04650752		1329.22	0.01971997		1859.21	0.00057897
269.43	0.33906319		799.42	0.04662996		1329.42	0.02012555		1859.41	-0.00034249
269.63	0.33903515		799.62	0.04741594		1329.62	0.01928846		1859.61	-0.00022648
269.83	0.33982353		799.82	0.0485142		1329.82	0.01875053		1859.81	0.00021768
270.03	0.34042747		800.02	0.04945657		1330.02	0.01694405		1860.01	-0.00072028
270.23	0.34128291		800.22	0.05011858		1330.22	0.01633486		1860.21	-0.00098292
270.43	0.34201043		800.42	0.05050821		1330.42	0.01594385		1860.41	0.00013307
270.63	0.34261157		800.62	0.05062248		1330.62	0.01520671		1860.61	0.00158952
270.83	0.34437428		800.82	0.05097676		1330.82	0.01558468		1860.81	0.00173382
271.03	0.34491628		801.02	0.05050531		1331.02	0.01478081		1861.01	0.00135482
271.23	0.34563189		801.22	0.0489451		1331.22	0.01450704		1861.21	0.00127682
271.43	0.34578307		801.42	0.049739		1331.42	0.01395152		1861.41	0.00258806
271.63	0.34548776		801.62	0.0490894		1331.62	0.01326381		1861.61	0.00370846
271.83	0.34500101		801.82	0.04985984		1331.82	0.01352212		1861.81	0.00352252
272.03	0.34574006		802.02	0.04994851		1332.02	0.01330272		1862.01	0.00312446
272.23	0.34677382		802.22	0.05042188		1332.22	0.01300217		1862.21	0.00252716
272.43	0.3479997		802.42	0.05086657		1332.42	0.01284197		1862.41	0.00225632
272.63	0.34836986		802.62	0.05141722		1332.62	0.01330939		1862.61	0.00170714
272.83	0.34800289		802.82	0.05162183		1332.82	0.01383922		1862.81	0.00069368
273.03	0.34800126		803.02	0.05112503		1333.02	0.0142729		1863.01	-0.00111881
273.23	0.3480165		803.22	0.05096119		1333.22	0.01403389		1863.21	-0.00198071
273.43	0.347433		803.42	0.051209		1333.42	0.01447805		1863.41	-0.00157814
273.63	0.34759727		803.62	0.05141974		1333.62	0.01488381		1863.61	-0.00205331
273.83	0.34877952		803.82	0.05182849		1333.82	0.01486347		1863.81	-0.00331944
274.03	0.34818937		804.02	0.05214731		1334.02	0.01521455		1864.01	-0.00381052
274.23	0.34899054		804.22	0.05290889		1334.22	0.01580009		1864.21	-0.00275921
274.43	0.34967962		804.42	0.05204811		1334.42	0.01687663		1864.41	-0.00184941
274.63	0.35016945		804.62	0.05197937		1334.62	0.01674283		1864.61	-0.00186416
274.83	0.35139166		804.82	0.05278891		1334.82	0.01760723		1864.81	-0.00203098
275.03	0.35142404		805.02	0.05167756		1335.02	0.01814902		1865.01	-0.00112724
275.23	0.35230558		805.22	0.05166385		1335.22	0.01882056		1865.21	-0.00086113
275.43	0.35279592		805.42	0.05297491		1335.42	0.01826156		1865.41	0.00068308
275.63	0.35404689		805.62	0.05321951		1335.62	0.01808109		1865.61	0.00116233
275.83	0.3542255		805.82	0.0542574		1335.82	0.01847468		1865.81	0.00213901
276.03	0.35517077		806.02	0.05452444		1336.02	0.01871988		1866.01	0.00248645
276.23	0.35617665		806.22	0.05470054		1336.22	0.01864969		1866.21	0.00334355
276.43	0.35698458		806.42	0.05455626		1336.42	0.01866238		1866.41	0.00497562
276.63	0.35700344		806.62	0.05364903		1336.62	0.01835648		1866.61	0.0051764
276.83	0.35676088		806.82	0.05264079		1336.82	0.01767774		1866.81	0.0048013
277.03	0.35680309		807.02	0.05196808		1337.02	0.01717649		1867.01	0.00450236
277.23	0.35670083		807.22	0.0508339		1337.22	0.01693003		1867.21	0.00518054
277.43	0.35640023		807.42	0.05092809		1337.42	0.01616249		1867.41	0.00505065
277.63	0.35624799		807.62	0.05038271		1337.62	0.01601841		1867.61	0.00485454
277.83	0.35617523		807.82	0.05037379		1337.82	0.01567959		1867.81	0.00372145
278.03	0.35580893		808.02	0.05062956		1338.02	0.01636442		1868.01	0.00376127
278.23	0.35652349		808.22	0.0502245		1338.22	0.0160885		1868.21	0.00396515
278.43	0.35666253		808.42	0.05047901		1338.42	0.01627382		1868.41	0.00320102
278.63	0.35697094		808.62	0.051994		1338.62	0.01623874		1868.61	0.0026412
278.83	0.35808966		808.82	0.05285654		1338.82	0.01717319		1868.81	0.00083987
279.03	0.35777575		809.02	0.05293643		1339.02	0.01788814		1869.01	-0.0001028
279.23	0.35905427		809.22	0.05409828		1339.22	0.01751291		1869.21	-0.00030125
279.43	0.36025446		809.42	0.05586565		1339.42	0.01758661		1869.41	-0.00023043
279.63	0.36107426		809.62	0.05709676		1339.62	0.01723792		1869.61	0.0001207
279.83	0.36055565		809.82	0.05803545		1339.82	0.01787577		1869.81	-0.00019617
280.03	0.36070739		810.02	0.05916653		1340.02	0.01782636		1870.01	0.00003585
280.23	0.36213528		810.22	0.05890197		1340.22	0.01807735		1870.21	0.00066823
280.43	0.36193231		810.42	0.0589078		1340.42	0.01848525		1870.41	0.00075482
280.63	0.36170599		810.62	0.05819105		1340.62	0.01824368		1870.61	-0.00012598
280.83	0.3609632		810.82	0.05850773		1340.82	0.01804783		1870.81	0.00046122
281.03	0.36097731		811.02	0.05790782		1341.02	0.01703131		1871.01	0.00047424
281.23	0.36154001		811.22	0.05708772		1341.22	0.01700853		1871.21	0.00071553
281.43	0.3622032		811.42	0.05775844		1341.42	0.01612103		1871.41	0.00135206
281.63	0.36299176		811.62	0.05695537		1341.62	0.01505957		1871.61	0.0018146
281.83	0.36393801		811.82	0.05609498		1341.82	0.01440223		1871.81	0.00093141
282.03	0.36378606		812.02	0.05575691		1342.02	0.01480861		1872.01	0.00151225
282.23	0.36340088		812.22	0.05511262		1342.22	0.01392105		1872.21	0.00235138
282.43	0.36438022		812.42	0.05543122		1342.42	0.01405996		1872.41	0.00165324
282.63	0.36442692		812.62	0.05517376		1342.62	0.01358693		1872.61	0.00088344
282.83	0.36440426		812.82	0.05463823		1342.82	0.01404808		1872.81	0.00026739
283.03	0.36514325		813.02	0.05453173		1343.02	0.01437783		1873.01	0.00163885
283.23	0.36578023		813.22	0.05494357		1343.22	0.01504309		1873.21	0.00249398
283.43	0.36575875		813.42	0.05563093		1343.42	0.01582655		1873.41	0.00193841
283.63	0.36579798		813.62	0.05574786		1343.62	0.01625642		1873.61	0.0020399
283.83	0.36524609		813.82	0.05585782		1343.82	0.01641052		1873.81	0.00162017
284.03	0.36557102		814.02	0.0559379		1344.02	0.0164538		1874.01	0.00101606
284.23	0.36617178		814.22	0.05547293		1344.22	0.01759736		1874.21	0.00081346
284.43	0.36525742		814.42	0.05577871		1344.42	0.0183464		1874.41	0.00077207
284.63	0.36586062		814.62	0.05615068		1344.62	0.01752143		1874.61	0.00039355
284.83	0.36650717		814.82	0.05690574		1344.82	0.01698122		1874.81	0.001056
285.03	0.36756193		815.02	0.05637456		1345.02	0.01624749		1875.01	0.00107761
285.23	0.36967657		815.22	0.05762535		1345.22	0.01622714		1875.21	0.00100851
285.43	0.37000277		815.42	0.0583802		1345.42	0.01431904		1875.41	0.00134913
285.63	0.37022078		815.62	0.05877291		1345.62	0.0136898		1875.61	0.00058061
285.83	0.37107826		815.82	0.05911781		1345.82	0.01359113		1875.81	0.00019678
286.03	0.37093919		816.02	0.05943323		1346.02	0.0136785		1876.01	0.00059464
286.23	0.37161901		816.22	0.06011085		1346.22	0.01325886		1876.21	0.00084292
286.43	0.37384273		816.42	0.06067928		1346.42	0.0138097		1876.41	0.00144304
286.63	0.37358254		816.62	0.06100597		1346.62	0.0129524		1876.61	0.00155551
286.83	0.37440767		816.82	0.06116008		1346.82	0.01376364		1876.81	0.00271057
287.03	0.37560236		817.02	0.06109317		1347.02	0.01508878		1877.01	0.00276913
287.23	0.37651318		817.22	0.06069696		1347.22	0.01606456		1877.21	0.0026739
287.43	0.3773026		817.42	0.06129812		1347.42	0.01631874		1877.41	0.00163737
287.63	0.3778825		817.62	0.06048094		1347.62	0.01687585		1877.61	0.00080961
287.83	0.37731657		817.82	0.06030145		1347.82	0.01611382		1877.81	0.00017274
288.03	0.37761767		818.02	0.05950065		1348.02	0.01673783		1878.01	-0.00059057
288.23	0.37684373		818.22	0.05904411		1348.22	0.01679413		1878.21	0.00010807
288.43	0.37692587		818.42	0.05856073		1348.42	0.01694858		1878.41	-0.00023581
288.63	0.37686812		818.62	0.059004		1348.62	0.01642339		1878.61	-0.00054369
288.83	0.37712518		818.82	0.05894998		1348.82	0.01656136		1878.81	-0.00088209
289.03	0.3766524		819.02	0.05875807		1349.02	0.01684693		1879.01	-0.00163054
289.23	0.37664812		819.22	0.05973737		1349.22	0.01666324		1879.21	-0.00236336
289.43	0.37522641		819.42	0.05985457		1349.42	0.01628215		1879.41	-0.00203281
289.63	0.37512262		819.62	0.0595843		1349.62	0.01745747		1879.61	-0.00178105
289.83	0.3750071		819.82	0.05902376		1349.82	0.01680944		1879.81	-0.00110769
290.03	0.37483632		820.02	0.05912375		1350.02	0.0167942		1880.01	-0.00042732
290.23	0.37502944		820.22	0.05973194		1350.22	0.01663513		1880.21	0.00050152
290.43	0.37600397		820.42	0.05991922		1350.42	0.0178133		1880.41	0.00075902
290.63	0.37612866		820.62	0.0602778		1350.62	0.01695289		1880.61	0.0010022
290.83	0.37778376		820.82	0.06041676		1350.82	0.01664405		1880.81	0.0009084
291.03	0.37825467		821.02	0.06054167		1351.02	0.01723834		1881.01	-0.00020864
291.23	0.37962904		821.22	0.06122382		1351.22	0.01747586		1881.21	-0.00041927
291.43	0.37967333		821.42	0.06163028		1351.42	0.01739874		1881.41	-0.00113898
291.63	0.37992103		821.62	0.06114102		1351.62	0.01775661		1881.61	-0.00163368
291.83	0.37972426		821.82	0.0617556		1351.82	0.01761461		1881.81	-0.00127988
292.03	0.3804319		822.02	0.06243757		1352.02	0.01766641		1882.01	-0.00205907
292.23	0.38105702		822.22	0.06334646		1352.22	0.01849249		1882.21	-0.00213301
292.43	0.38245662		822.42	0.06516815		1352.42	0.01913708		1882.41	-0.00244384
292.63	0.38250791		822.62	0.06591159		1352.62	0.01919856		1882.61	-0.00219088
292.83	0.38343978		822.82	0.06609496		1352.82	0.01942017		1882.81	-0.00217777
293.03	0.38313372		823.02	0.06630103		1353.02	0.01960629		1883.01	-0.00136728
293.23	0.38392723		823.22	0.06656606		1353.22	0.01924797		1883.21	-0.00055101
293.43	0.38414222		823.42	0.06561829		1353.42	0.01901495		1883.41	0.00065447
293.63	0.38391009		823.62	0.06472843		1353.62	0.01929324		1883.61	0.00137867
293.83	0.38402123		823.82	0.06447446		1353.82	0.01830522		1883.81	0.00138239
294.03	0.38426606		824.02	0.06384049		1354.02	0.01741442		1884.01	0.00189362
294.23	0.38564055		824.22	0.06322236		1354.22	0.01682299		1884.21	0.00214025
294.43	0.3857566		824.42	0.06329274		1354.42	0.01684242		1884.41	0.00260303
294.63	0.38659489		824.62	0.06287558		1354.62	0.01509259		1884.61	0.00297866
294.83	0.38693474		824.82	0.06219337		1354.82	0.0144238		1884.81	0.00227953
295.03	0.38575479		825.02	0.0623655		1355.02	0.01407903		1885.01	0.00223077
295.23	0.38571688		825.22	0.06213213		1355.22	0.01423148		1885.21	0.00283732
295.43	0.38539987		825.42	0.06217779		1355.42	0.01445451		1885.41	0.00312623
295.63	0.38508399		825.62	0.06312084		1355.62	0.01530369		1885.61	0.00319394
295.83	0.38449563		825.82	0.06372088		1355.82	0.01572335		1885.81	0.00261586
296.03	0.38486285		826.02	0.06491017		1356.02	0.01686206		1886.01	0.00156
296.23	0.38526037		826.22	0.0655789		1356.22	0.01764048		1886.21	0.00135884
296.43	0.38593638		826.42	0.06578641		1356.42	0.01851108		1886.41	0.00100964
296.63	0.38564594		826.62	0.06591639		1356.62	0.01817473		1886.61	0.0015539
296.83	0.38670295		826.82	0.06562717		1356.82	0.01834263		1886.81	0.00161691
297.03	0.38739899		827.02	0.06640559		1357.02	0.0186784		1887.01	0.00180131
297.23	0.38890507		827.22	0.0663783		1357.22	0.01920364		1887.21	0.00108272
297.43	0.3898853		827.42	0.0659353		1357.42	0.01869192		1887.41	0.00105573
297.63	0.39015336		827.62	0.06587813		1357.62	0.01884297		1887.61	0.00032923
297.83	0.39177178		827.82	0.06670643		1357.82	0.01820125		1887.81	-0.00033883
298.03	0.39230968		828.02	0.06662872		1358.02	0.01841574		1888.01	0.00049012
298.23	0.3932801		828.22	0.06696864		1358.22	0.01836333		1888.21	-0.00020904
298.43	0.39277519		828.42	0.06722271		1358.42	0.01834289		1888.41	0.00043832
298.63	0.39410427		828.62	0.06737555		1358.62	0.01681782		1888.61	-0.00081767
298.83	0.39375774		828.82	0.06724925		1358.82	0.01624858		1888.81	-0.00079007
299.03	0.39326257		829.02	0.06754377		1359.02	0.0158002		1889.01	0.00003782
299.23	0.39318679		829.22	0.06757556		1359.22	0.01572018		1889.21	-0.00019355
299.43	0.39325193		829.42	0.06775163		1359.42	0.01547473		1889.41	0.00025526
299.63	0.39251259		829.62	0.06716214		1359.62	0.01550126		1889.61	0.00036849
299.83	0.39242783		829.82	0.0658212		1359.82	0.015536		1889.81	-0.00065209
300.03	0.3922891		830.02	0.06578764		1360.02	0.01559918		1890.01	-0.00016953
300.23	0.39303319		830.22	0.06511024		1360.22	0.01492294		1890.21	0.00042752
300.43	0.39343769		830.42	0.06517803		1360.42	0.01441771		1890.41	0.00146248
300.63	0.39396233		830.62	0.06539847		1360.62	0.01363602		1890.61	0.00221336
300.83	0.39512874		830.82	0.06562983		1360.82	0.01389466		1890.81	0.00220511
301.03	0.39492179		831.02	0.06718544		1361.02	0.01369599		1891.01	0.00234027
301.23	0.39548911		831.22	0.06719762		1361.22	0.01242788		1891.21	0.00221043
301.43	0.39591305		831.42	0.06728418		1361.42	0.01188362		1891.41	0.00235548
301.63	0.39605753		831.62	0.06732608		1361.62	0.01242156		1891.61	0.00265422
301.83	0.39691631		831.82	0.06854662		1361.82	0.013856		1891.81	0.00252646
302.03	0.39683448		832.02	0.06927384		1362.02	0.01525137		1892.01	0.00312507
302.23	0.39641111		832.22	0.06947793		1362.22	0.01509432		1892.21	0.00223248
302.43	0.3968546		832.42	0.06957187		1362.42	0.0151012		1892.41	0.00200374
302.63	0.39741191		832.62	0.07027626		1362.62	0.01462149		1892.61	0.00152801
302.83	0.39768373		832.82	0.06967352		1362.82	0.01492557		1892.81	0.00207439
303.03	0.39797042		833.02	0.06955763		1363.02	0.01521979		1893.01	0.00224007
303.23	0.39867468		833.22	0.07013284		1363.22	0.01553132		1893.21	0.00205661
303.43	0.399128		833.42	0.07013655		1363.42	0.01623261		1893.41	0.00200361
303.63	0.39894299		833.62	0.07031742		1363.62	0.01715294		1893.61	0.00114572
303.83	0.39915002		833.82	0.07008632		1363.82	0.01797575		1893.81	0.00129979
304.03	0.39926764		834.02	0.07060549		1364.02	0.01822093		1894.01	0.0020042
304.23	0.40039742		834.22	0.07070872		1364.22	0.01802706		1894.21	0.00212989
304.43	0.39985055		834.42	0.07129174		1364.42	0.01779228		1894.41	0.00210016
304.63	0.40028932		834.62	0.071068		1364.62	0.01765855		1894.61	0.00179517
304.83	0.40079642		834.82	0.07100239		1364.82	0.01679315		1894.81	0.00190282
305.03	0.40108657		835.02	0.07055306		1365.02	0.01560902		1895.01	0.00238139
305.23	0.40298134		835.22	0.06988528		1365.22	0.01497467		1895.21	0.00225449
305.43	0.4036935		835.42	0.06931455		1365.42	0.01591632		1895.41	0.00137231
305.63	0.40373848		835.62	0.06902156		1365.62	0.01616581		1895.61	0.00199444
305.83	0.40400813		835.82	0.06983746		1365.82	0.01672818		1895.81	0.00189507
306.03	0.40404483		836.02	0.07035287		1366.02	0.01571629		1896.01	0.00184834
306.23	0.40434959		836.22	0.07033079		1366.22	0.01424876		1896.21	0.00120306
306.43	0.40524117		836.42	0.07056648		1366.42	0.0136225		1896.41	0.00165341
306.63	0.40575135		836.62	0.0716322		1366.62	0.01424397		1896.61	0.00268063
306.83	0.40581292		836.82	0.07173272		1366.82	0.01457904		1896.81	0.00183026
307.03	0.40514959		837.02	0.07241308		1367.02	0.01509933		1897.01	0.00174059
307.23	0.40553711		837.22	0.07374017		1367.22	0.01540163		1897.21	0.00197175
307.43	0.40481843		837.42	0.07412963		1367.42	0.01555339		1897.41	0.00208976
307.63	0.40390045		837.62	0.07416765		1367.62	0.01596187		1897.61	0.00178278
307.83	0.40284074		837.82	0.07379765		1367.82	0.01629968		1897.81	0.00191892
308.03	0.4025481		838.02	0.07391455		1368.02	0.01631142		1898.01	0.00132906
308.23	0.40197633		838.22	0.07315868		1368.22	0.01615275		1898.21	0.00137322
308.43	0.40185026		838.42	0.07335816		1368.42	0.01599837		1898.41	0.00147812
308.63	0.40218712		838.62	0.07214775		1368.62	0.01537408		1898.61	0.0014261
308.83	0.40258686		838.82	0.07134696		1368.82	0.01561677		1898.81	0.00114768
309.03	0.40345279		839.02	0.07062574		1369.02	0.01563201		1899.01	0.00052813
309.23	0.40432474		839.22	0.06999637		1369.22	0.01579687		1899.21	-0.00038729
309.43	0.4041749		839.42	0.06917844		1369.42	0.01595865		1899.41	-0.0006093
309.63	0.40481306		839.62	0.06982721		1369.62	0.01615105		1899.61	0.00048578
309.83	0.40571266		839.82	0.07000924		1369.82	0.01598147		1899.81	0.00006444
310.03	0.40609773		840.02	0.07018725		1370.02	0.01579008		1900.01	0.00024062
310.23	0.4072482		840.22	0.07062557		1370.22	0.01544861		1900.21	0.00094102
310.43	0.40809183		840.42	0.07092154		1370.42	0.01567404		1900.41	0.00154455
310.63	0.40863699		840.62	0.07140019		1370.62	0.01605765		1900.61	0.00226879
310.83	0.40927744		840.82	0.07233583		1370.82	0.0158667		1900.81	0.00074656
311.03	0.41004837		841.02	0.07254866		1371.02	0.01552873		1901.01	0.00128438
311.23	0.41065783		841.22	0.07354275		1371.22	0.01651491		1901.21	0.00113578
311.43	0.41045413		841.42	0.07380067		1371.42	0.01693482		1901.41	0.00127951
311.63	0.41053642		841.62	0.07393862		1371.62	0.01668517		1901.61	0.00077068
311.83	0.41016897		841.82	0.07438819		1371.82	0.01772121		1901.81	0.00026106
312.03	0.41068448		842.02	0.07479341		1372.02	0.01769257		1902.01	0.00061248
312.23	0.41020542		842.22	0.0745686		1372.22	0.0176858		1902.21	0.00066517
312.43	0.41018839		842.42	0.07496093		1372.42	0.01759401		1902.41	0.0000273
312.63	0.41018238		842.62	0.07489531		1372.62	0.01762091		1902.61	-0.00043219
312.83	0.41110247		842.82	0.07484383		1372.82	0.01768404		1902.81	-0.00088913
313.03	0.41201703		843.02	0.07399523		1373.02	0.0177605		1903.01	-0.00135197
313.23	0.41269142		843.22	0.07379387		1373.22	0.01789462		1903.21	-0.00048245
313.43	0.41288995		843.42	0.07438854		1373.42	0.01806127		1903.41	0.00087118
313.63	0.41314882		843.62	0.07502947		1373.62	0.01840744		1903.61	0.00181527
313.83	0.41280617		843.82	0.07517998		1373.82	0.01823045		1903.81	0.00248422
314.03	0.41361683		844.02	0.07548531		1374.02	0.01816111		1904.01	0.00285243
314.23	0.41438666		844.22	0.07511545		1374.22	0.0175782		1904.21	0.00311352
314.43	0.41509675		844.42	0.07533291		1374.42	0.01711135		1904.41	0.00271909
314.63	0.41493473		844.62	0.07546942		1374.62	0.0168864		1904.61	0.00274211
314.83	0.41606112		844.82	0.07583817		1374.82	0.01714265		1904.81	0.00113623
315.03	0.41640611		845.02	0.07566579		1375.02	0.01778597		1905.01	0.00112227
315.23	0.41674597		845.22	0.07641103		1375.22	0.01788777		1905.21	0.00161027
315.43	0.41738769		845.42	0.07604543		1375.42	0.01773717		1905.41	0.00221441
315.63	0.41722324		845.62	0.07577373		1375.62	0.01795888		1905.61	0.00203811
315.83	0.41659217		845.82	0.07536647		1375.82	0.01805163		1905.81	0.00215207
316.03	0.41627683		846.02	0.07597635		1376.02	0.01703286		1906.01	0.00282341
316.23	0.41580139		846.22	0.07587343		1376.22	0.01659002		1906.21	0.00203786
316.43	0.41564685		846.42	0.07626536		1376.42	0.01678571		1906.41	0.00276539
316.63	0.41672674		846.62	0.07700653		1376.62	0.01684468		1906.61	0.00282417
316.83	0.41712605		846.82	0.0767718		1376.82	0.01578066		1906.81	0.00265877
317.03	0.41649355		847.02	0.0768093		1377.02	0.01554187		1907.01	0.00287321
317.23	0.41703497		847.22	0.0776817		1377.22	0.01526001		1907.21	0.0039723
317.43	0.41657314		847.42	0.07825832		1377.42	0.01590045		1907.41	0.00432181
317.63	0.41653846		847.62	0.07833143		1377.62	0.01577803		1907.61	0.00395956
317.83	0.41732186		847.82	0.07899082		1377.82	0.01616067		1907.81	0.00371516
318.03	0.41827743		848.02	0.07937836		1378.02	0.01560618		1908.01	0.00238524
318.23	0.41823153		848.22	0.07988883		1378.22	0.01544429		1908.21	0.00256263
318.43	0.41866322		848.42	0.08092398		1378.42	0.01551137		1908.41	0.00220041
318.63	0.41949166		848.62	0.08115724		1378.62	0.01563237		1908.61	0.00168975
318.83	0.42038339		848.82	0.08013345		1378.82	0.01572562		1908.81	0.0005531
319.03	0.42133177		849.02	0.08024997		1379.02	0.01563746		1909.01	0.00030775
319.23	0.42225814		849.22	0.0804136		1379.22	0.01440628		1909.21	0.00000255
319.43	0.42289542		849.42	0.08013254		1379.42	0.01490993		1909.41	-0.0002854
319.63	0.42246397		849.62	0.08085094		1379.62	0.01409388		1909.61	-0.00058655
319.83	0.42249225		849.82	0.08095006		1379.82	0.01414948		1909.81	-0.00075536
320.03	0.42191313		850.02	0.08201886		1380.02	0.01437408		1910.01	-0.00090918
320.23	0.42204926		850.22	0.08155902		1380.22	0.01512812		1910.21	-0.00108692
320.43	0.42159679		850.42	0.08214643		1380.42	0.01566155		1910.41	-0.00057817
320.63	0.42220101		850.62	0.08209707		1380.62	0.01460232		1910.61	-0.00102251
320.83	0.42198618		850.82	0.08198772		1380.82	0.01316985		1910.81	-0.00039543
321.03	0.4219905		851.02	0.08120093		1381.02	0.01394034		1911.01	-0.00018408
321.23	0.42250438		851.22	0.08105479		1381.22	0.01510246		1911.21	0.00008974
321.43	0.4227159		851.42	0.08099387		1381.42	0.01684956		1911.41	-0.00023568
321.63	0.42376849		851.62	0.08126566		1381.62	0.01611217		1911.61	0.00000671
321.83	0.42452839		851.82	0.08187765		1381.82	0.01637132		1911.81	0.00028919
322.03	0.42452825		852.02	0.08253479		1382.02	0.01554478		1912.01	-0.00013143
322.23	0.42501695		852.22	0.08282917		1382.22	0.01551332		1912.21	0.00059958
322.43	0.42426379		852.42	0.08264631		1382.42	0.01422836		1912.41	-0.00020485
322.63	0.42444769		852.62	0.08139402		1382.62	0.01383527		1912.61	0.00001021
322.83	0.424216		852.82	0.08035723		1382.82	0.01294883		1912.81	-0.00012973
323.03	0.42551769		853.02	0.07979972		1383.02	0.0127224		1913.01	0.00014431
323.23	0.42547689		853.22	0.08031923		1383.22	0.01226859		1913.21	0.0002765
323.43	0.42538204		853.42	0.08089494		1383.42	0.0127258		1913.41	0.00151741
323.63	0.42490688		853.62	0.0819118		1383.62	0.01233033		1913.61	0.00168607
323.83	0.42476995		853.82	0.08114117		1383.82	0.01225037		1913.81	0.00181874
324.03	0.42467766		854.02	0.08038302		1384.02	0.01208492		1914.01	0.00214589
324.23	0.42575079		854.22	0.08009463		1384.22	0.0124998		1914.21	0.00237253
324.43	0.42626724		854.42	0.08022612		1384.42	0.01288894		1914.41	0.00236302
324.63	0.42693365		854.62	0.08029468		1384.62	0.01195522		1914.61	0.00268927
324.83	0.42741331		854.82	0.08034501		1384.82	0.01221862		1914.81	0.00276831
325.03	0.42820033		855.02	0.08028469		1385.02	0.01343009		1915.01	0.00283867
325.23	0.42848383		855.22	0.08064524		1385.22	0.01432156		1915.21	0.00276426
325.43	0.42896454		855.42	0.08190443		1385.42	0.01494371		1915.41	0.00249123
325.63	0.42955886		855.62	0.08248304		1385.62	0.01440125		1915.61	0.00268318
325.83	0.42886654		855.82	0.08244268		1385.82	0.01450557		1915.81	0.00280163
326.03	0.42931411		856.02	0.08354305		1386.02	0.01425346		1916.01	0.00268108
326.23	0.42908836		856.22	0.08416469		1386.22	0.01449036		1916.21	0.00224372
326.43	0.42767506		856.42	0.08397912		1386.42	0.01416006		1916.41	0.00088635
326.63	0.42896193		856.62	0.08419837		1386.62	0.01500064		1916.61	0.00115048
326.83	0.42922971		856.82	0.08419769		1386.82	0.01545298		1916.81	0.00071098
327.03	0.43024747		857.02	0.08458902		1387.02	0.01594519		1917.01	0.0005829
327.23	0.43028392		857.22	0.08591932		1387.22	0.01566619		1917.21	0.00042417
327.43	0.42998061		857.42	0.0866045		1387.42	0.01488422		1917.41	0.00080788
327.63	0.43044094		857.62	0.08672975		1387.62	0.0139534		1917.61	0.00021566
327.83	0.43139801		857.82	0.0857529		1387.82	0.01337535		1917.81	-0.00021424
328.03	0.43186092		858.02	0.08588352		1388.02	0.01397828		1918.01	0.0001674
328.23	0.43283951		858.22	0.08729225		1388.22	0.01370163		1918.21	0.00032839
328.43	0.43330683		858.42	0.08744864		1388.42	0.01341917		1918.41	0.00008243
328.63	0.43374862		858.62	0.08767891		1388.62	0.0125994		1918.61	-0.00036955
328.83	0.43321237		858.82	0.08714954		1388.82	0.01240147		1918.81	-0.00001861
329.03	0.43341124		859.02	0.08674197		1389.02	0.01278442		1919.01	0.00012726
329.23	0.43339066		859.22	0.0869577		1389.22	0.01241553		1919.21	0.00022166
329.43	0.43410679		859.42	0.08758155		1389.42	0.01224168		1919.41	0.00057114
329.63	0.43472684		859.62	0.0858783		1389.62	0.01132604		1919.61	0.00136763
329.83	0.43399247		859.82	0.08547982		1389.82	0.011195		1919.81	0.00143668
330.03	0.43452816		860.02	0.08608092		1390.02	0.01154979		1920.01	0.00088055
330.23	0.43407477		860.22	0.08502023		1390.22	0.01110991		1920.21	-0.0000738
330.43	0.43422185		860.42	0.08461845		1390.42	0.01091297		1920.41	-0.00054922
330.63	0.43506066		860.62	0.08434415		1390.62	0.01134924		1920.61	-0.00028879
330.83	0.43525411		860.82	0.08384365		1390.82	0.01185227		1920.81	-0.00019926
331.03	0.43596142		861.02	0.08351889		1391.02	0.01238402		1921.01	-0.0003817
331.23	0.4359166		861.22	0.08282679		1391.22	0.01224681		1921.21	-0.00054903
331.43	0.43553128		861.42	0.08318713		1391.42	0.01215627		1921.41	0.00024302
331.63	0.43677224		861.62	0.08250094		1391.62	0.01302313		1921.61	-0.00034528
331.83	0.43709063		861.82	0.08243966		1391.82	0.01295466		1921.81	0.00061576
332.03	0.43706032		862.02	0.08346504		1392.02	0.01307071		1922.01	0.00093009
332.23	0.4368503		862.22	0.08472152		1392.22	0.01237219		1922.21	0.00066981
332.43	0.43663567		862.42	0.08467718		1392.42	0.01290388		1922.41	0.00073572
332.63	0.43695643		862.62	0.08459683		1392.62	0.01336895		1922.61	0.00039536
332.83	0.43726658		862.82	0.08477051		1392.82	0.01300247		1922.81	0.00080045
333.03	0.43808607		863.02	0.08575745		1393.02	0.01293915		1923.01	0.00018008
333.23	0.43811628		863.22	0.08616848		1393.22	0.01211375		1923.21	0.00138159
333.43	0.43859281		863.42	0.08630184		1393.42	0.01205366		1923.41	0.00212347
333.63	0.43786783		863.62	0.08661196		1393.62	0.01072705		1923.61	0.00252257
333.83	0.43853839		863.82	0.08747014		1393.82	0.0109962		1923.81	0.00230704
334.03	0.43872481		864.02	0.08848093		1394.02	0.01108053		1924.01	0.00280937
334.23	0.43879032		864.22	0.08885067		1394.22	0.01037932		1924.21	0.0035585
334.43	0.43875451		864.42	0.08930837		1394.42	0.01118972		1924.41	0.00401648
334.63	0.43854242		864.62	0.08939052		1394.62	0.01148217		1924.61	0.00386983
334.83	0.43891921		864.82	0.08950397		1394.82	0.01225372		1924.81	0.00416027
335.03	0.43943191		865.02	0.08900323		1395.02	0.0128613		1925.01	0.00338626
335.23	0.43998818		865.22	0.08847968		1395.22	0.01304002		1925.21	0.00409933
335.43	0.4397729		865.42	0.08869898		1395.42	0.01329556		1925.41	0.0037979
335.63	0.44081264		865.62	0.08764222		1395.62	0.01369719		1925.61	0.00233536
335.83	0.4406054		865.82	0.08779706		1395.82	0.01399832		1925.81	0.0025587
336.03	0.44051808		866.02	0.0878937		1396.02	0.013788		1926.01	0.00174005
336.23	0.44033357		866.22	0.08827714		1396.22	0.01357175		1926.21	0.00215336
336.43	0.44115658		866.42	0.08736429		1396.42	0.01391976		1926.41	0.00266072
336.63	0.44229725		866.62	0.08736107		1396.62	0.01412636		1926.61	0.0029075
336.83	0.4428964		866.82	0.08739339		1396.82	0.01421636		1926.81	0.00281591
337.03	0.44246053		867.02	0.08766084		1397.02	0.01453765		1927.01	0.00178825
337.23	0.44205575		867.22	0.08752341		1397.22	0.01486724		1927.21	0.00214171
337.43	0.4427003		867.42	0.08747748		1397.42	0.01531337		1927.41	0.00211005
337.63	0.44256531		867.62	0.0864727		1397.62	0.01520487		1927.61	0.00213493
337.83	0.44362071		867.82	0.08646357		1397.82	0.01485713		1927.81	0.00146577
338.03	0.44281185		868.02	0.08722361		1398.02	0.01431378		1928.01	0.00176391
338.23	0.44288311		868.22	0.08712703		1398.22	0.01443891		1928.21	0.00199923
338.43	0.4424672		868.42	0.08743211		1398.42	0.01477143		1928.41	0.00170348
338.63	0.44327149		868.62	0.08773559		1398.62	0.01446193		1928.61	0.00074835
338.83	0.44326068		868.82	0.08774723		1398.82	0.01515178		1928.81	0.00003386
339.03	0.44355936		869.02	0.08839433		1399.02	0.01389346		1929.01	-0.00150541
339.23	0.44297181		869.22	0.0881099		1399.22	0.01416979		1929.21	-0.00118068
339.43	0.44281503		869.42	0.08780205		1399.42	0.01429458		1929.41	-0.00254063
339.63	0.44384711		869.62	0.08751024		1399.62	0.01474029		1929.61	-0.00277408
339.83	0.44410677		869.82	0.08849576		1399.82	0.01447917		1929.81	-0.0021107
340.03	0.44383603		870.02	0.08975412		1400.02	0.01401519		1930.01	-0.0015412
340.23	0.4448315		870.22	0.09067645		1400.22	0.01359082		1930.21	-0.00014353
340.43	0.44527555		870.42	0.09132147		1400.42	0.01331782		1930.41	0.00085045
340.63	0.44588634		870.62	0.09234509		1400.62	0.01363673		1930.61	0.00118471
340.83	0.44672842		870.82	0.09307839		1400.82	0.01347665		1930.81	0.00094256
341.03	0.44701817		871.02	0.09364429		1401.02	0.01363151		1931.01	0.00091265
341.23	0.44730462		871.22	0.09337395		1401.22	0.01405002		1931.21	0.00102135
341.43	0.44805658		871.42	0.0924515		1401.42	0.01491025		1931.41	0.00135239
341.63	0.4478921		871.62	0.09233004		1401.62	0.01488191		1931.61	0.00078161
341.83	0.4495053		871.82	0.09279029		1401.82	0.014477		1931.81	0.00095663
342.03	0.4500264		872.02	0.09267893		1402.02	0.01509173		1932.01	0.00153035
342.23	0.45009333		872.22	0.09325955		1402.22	0.01618934		1932.21	0.00185068
342.43	0.45005553		872.42	0.09352705		1402.42	0.01649457		1932.41	0.00147984
342.63	0.45031935		872.62	0.09347637		1402.62	0.01608764		1932.61	0.00006686
342.83	0.44874222		872.82	0.09379341		1402.82	0.01640868		1932.81	-0.00056949
343.03	0.44867125		873.02	0.0943125		1403.02	0.016006		1933.01	-0.00119545
343.23	0.44817773		873.22	0.09415296		1403.22	0.01637579		1933.21	-0.00139473
343.43	0.44784965		873.42	0.09452646		1403.42	0.01634536		1933.41	-0.00256875
343.63	0.44816778		873.62	0.09578225		1403.62	0.01613779		1933.61	-0.00194617
343.83	0.44786432		873.82	0.09713174		1403.82	0.01563259		1933.81	-0.00157794
344.03	0.44739795		874.02	0.09872462		1404.02	0.0153721		1934.01	-0.00136812
344.23	0.44798488		874.22	0.09841244		1404.22	0.01447121		1934.21	-0.0009597
344.43	0.44742952		874.42	0.09815001		1404.42	0.01457485		1934.41	-0.00047167
344.63	0.44742173		874.62	0.09780159		1404.62	0.01391591		1934.61	0.00011867
344.83	0.4480164		874.82	0.09775313		1404.82	0.01418105		1934.81	0.0006603
345.03	0.44792695		875.02	0.09690731		1405.02	0.01442216		1935.01	0.00076613
345.23	0.4483591		875.22	0.09570735		1405.22	0.01501777		1935.21	0.00045613
345.43	0.44914793		875.42	0.09454919		1405.42	0.01615787		1935.41	0.0007588
345.63	0.44941343		875.62	0.09414391		1405.62	0.01470567		1935.61	0.0008809
345.83	0.45054262		875.82	0.09325023		1405.82	0.01442859		1935.81	0.00244032
346.03	0.45108885		876.02	0.09357416		1406.02	0.01459895		1936.01	0.00239235
346.23	0.45154766		876.22	0.09326103		1406.22	0.01435854		1936.21	0.00222942
346.43	0.45240379		876.42	0.09324616		1406.42	0.01455645		1936.41	0.00237411
346.63	0.45338429		876.62	0.09308176		1406.62	0.01392563		1936.61	0.002102
346.83	0.45470805		876.82	0.09359673		1406.82	0.01395813		1936.81	0.00141
347.03	0.45625588		877.02	0.09368516		1407.02	0.01438951		1937.01	0.00111836
347.23	0.45739613		877.22	0.09445583		1407.22	0.01353953		1937.21	0.00061898
347.43	0.45831423		877.42	0.09510057		1407.42	0.01340824		1937.41	0.00079716
347.63	0.45913327		877.62	0.09584649		1407.62	0.01392895		1937.61	0.00154015
347.83	0.459442		877.82	0.0967084		1407.82	0.01399136		1937.81	0.00183444
348.03	0.45963797		878.02	0.09731131		1408.02	0.01368371		1938.01	0.00169325
348.23	0.45963946		878.22	0.09627068		1408.22	0.01463837		1938.21	0.0011554
348.43	0.45896184		878.42	0.09701528		1408.42	0.01504913		1938.41	0.00219244
348.63	0.45785909		878.62	0.09664145		1408.62	0.01448412		1938.61	0.00310679
348.83	0.4575212		878.82	0.0974252		1408.82	0.01559135		1938.81	0.00263015
349.03	0.45725202		879.02	0.09785045		1409.02	0.01612514		1939.01	0.00286654
349.23	0.45737198		879.22	0.09791871		1409.22	0.01616115		1939.21	0.0026667
349.43	0.45769632		879.42	0.09849654		1409.42	0.01632103		1939.41	0.00343957
349.63	0.45618592		879.62	0.09929208		1409.62	0.01346302		1939.61	0.00335538
349.83	0.45651108		879.82	0.09934937		1409.82	0.01312687		1939.81	0.00274581
350.03	0.45721335		880.02	0.09931651		1410.02	0.01338012		1940.01	0.0021286
350.23	0.45727305		880.22	0.0989764		1410.22	0.01286153		1940.21	0.0012617
350.43	0.45832328		880.42	0.09882259		1410.42	0.0133313		1940.41	0.00181456
350.63	0.45934367		880.62	0.09838052		1410.62	0.01373149		1940.61	0.00194461
350.83	0.45982651		880.82	0.09859564		1410.82	0.01401984		1940.81	0.00177507
351.03	0.45974784		881.02	0.09840761		1411.02	0.01424979		1941.01	0.00189596
351.23	0.46021087		881.22	0.09847378		1411.22	0.01395764		1941.21	0.00188727
351.43	0.46113513		881.42	0.09842554		1411.42	0.01418409		1941.41	0.00211133
351.63	0.46026496		881.62	0.0987523		1411.62	0.01508375		1941.61	0.00196502
351.83	0.46003767		881.82	0.09839906		1411.82	0.01528084		1941.81	0.00157374
352.03	0.46008012		882.02	0.09834725		1412.02	0.01580621		1942.01	0.00166809
352.23	0.45956482		882.22	0.09822808		1412.22	0.01700018		1942.21	0.00172422
352.43	0.45863392		882.42	0.0992334		1412.42	0.01726505		1942.41	0.0027592
352.63	0.45697362		882.62	0.09869988		1412.62	0.01706575		1942.61	0.00280156
352.83	0.45697226		882.82	0.09928479		1412.82	0.01685522		1942.81	0.00218818
353.03	0.45795159		883.02	0.09905497		1413.02	0.01590143		1943.01	0.00319411
353.23	0.45786153		883.22	0.09934314		1413.22	0.01499523		1943.21	0.00394988
353.43	0.45817744		883.42	0.09917698		1413.42	0.01453629		1943.41	0.00454567
353.63	0.4573373		883.62	0.09879209		1413.62	0.01268839		1943.61	0.00367457
353.83	0.45856847		883.82	0.09837303		1413.82	0.01288724		1943.81	0.00355519
354.03	0.45915596		884.02	0.09767663		1414.02	0.01296731		1944.01	0.00349696
354.23	0.459923		884.22	0.09690116		1414.22	0.01217982		1944.21	0.00341739
354.43	0.46106557		884.42	0.09648138		1414.42	0.01200322		1944.41	0.00406882
354.63	0.46090847		884.62	0.09647699		1414.62	0.01129019		1944.61	0.00392947
354.83	0.46116486		884.82	0.09665328		1414.82	0.01138405		1944.81	0.00332605
355.03	0.46141663		885.02	0.09673864		1415.02	0.01183285		1945.01	0.00350926
355.23	0.46211208		885.22	0.09662503		1415.22	0.01222882		1945.21	0.00422461
355.43	0.46299338		885.42	0.09717542		1415.42	0.01310866		1945.41	0.00440448
355.63	0.4618278		885.62	0.09729254		1415.62	0.01383823		1945.61	0.00449971
355.83	0.46264708		885.82	0.09769561		1415.82	0.01474234		1945.81	0.0040303
356.03	0.46305263		886.02	0.09881016		1416.02	0.01529437		1946.01	0.00433386
356.23	0.4625913		886.22	0.0992146		1416.22	0.01612863		1946.21	0.00391818
356.43	0.46289927		886.42	0.09976397		1416.42	0.01601901		1946.41	0.00339131
356.63	0.46275637		886.62	0.10051461		1416.62	0.01569414		1946.61	0.00376414
356.83	0.46340754		886.82	0.10085292		1416.82	0.014933		1946.81	0.00426315
357.03	0.46525281		887.02	0.10093747		1417.02	0.01532936		1947.01	0.0050188
357.23	0.46580347		887.22	0.10106494		1417.22	0.01642888		1947.21	0.00566594
357.43	0.46715879		887.42	0.10067145		1417.42	0.01533498		1947.41	0.0048497
357.63	0.4675986		887.62	0.10043998		1417.62	0.01541933		1947.61	0.00496798
357.83	0.46799433		887.82	0.10033644		1417.82	0.01478096		1947.81	0.00529815
358.03	0.46884176		888.02	0.0999628		1418.02	0.01436344		1948.01	0.00449449
358.23	0.46899216		888.22	0.10021461		1418.22	0.01404965		1948.21	0.00470242
358.43	0.46855446		888.42	0.10029773		1418.42	0.01345055		1948.41	0.00496068
358.63	0.46796556		888.62	0.10030322		1418.62	0.01234916		1948.61	0.00382441
358.83	0.46833991		888.82	0.1014944		1418.82	0.01239079		1948.81	0.00394792
359.03	0.46743874		889.02	0.10252818		1419.02	0.01223084		1949.01	0.00525411
359.23	0.46730497		889.22	0.1028284		1419.22	0.0126907		1949.21	0.0048078
359.43	0.46687447		889.42	0.10383972		1419.42	0.01405832		1949.41	0.00398207
359.63	0.46574288		889.62	0.10443601		1419.62	0.01456069		1949.61	0.00299217
359.83	0.46586402		889.82	0.10511565		1419.82	0.01514244		1949.81	0.00148814
360.03	0.46526317		890.02	0.10558015		1420.02	0.01544387		1950.01	0.00037866
360.23	0.46516816		890.22	0.104524		1420.22	0.01619686		1950.21	-0.00023001
360.43	0.46514351		890.42	0.10468392		1420.42	0.01604201		1950.41	-0.0007315
360.63	0.4649936		890.62	0.10481717		1420.62	0.01651266		1950.61	-0.00099939
360.83	0.46578366		890.82	0.10476334		1420.82	0.01639501		1950.81	-0.00042333
361.03	0.46710971		891.02	0.10359701		1421.02	0.01688415		1951.01	-0.00088883
361.23	0.46703505		891.22	0.1033173		1421.22	0.01681287		1951.21	-0.00060514
361.43	0.46659095		891.42	0.1026884		1421.42	0.01626435		1951.41	-0.00066444
361.63	0.46664899		891.62	0.10153072		1421.62	0.01625571		1951.61	0.00034342
361.83	0.46719081		891.82	0.10147431		1421.82	0.01587616		1951.81	0.00139933
362.03	0.46782107		892.02	0.10039679		1422.02	0.01605627		1952.01	0.00170631
362.23	0.46706826		892.22	0.10079448		1422.22	0.01559793		1952.21	0.00270015
362.43	0.46631883		892.42	0.10080754		1422.42	0.01492966		1952.41	0.00306706
362.63	0.46694291		892.62	0.101342		1422.62	0.01372863		1952.61	0.00238807
362.83	0.46781261		892.82	0.1021838		1422.82	0.01287208		1952.81	0.00251512
363.03	0.46754129		893.02	0.10243091		1423.02	0.01367019		1953.01	0.0029391
363.23	0.46781786		893.22	0.10278244		1423.22	0.01492911		1953.21	0.00218736
363.43	0.46753392		893.42	0.1035658		1423.42	0.01561948		1953.41	0.00240919
363.63	0.46762542		893.62	0.10380147		1423.62	0.01551627		1953.61	0.0026904
363.83	0.46870238		893.82	0.10386051		1423.82	0.01552831		1953.81	0.00188586
364.03	0.46925995		894.02	0.10461892		1424.02	0.01553896		1954.01	0.00149687
364.23	0.47003002		894.22	0.10451912		1424.22	0.01615163		1954.21	0.00182927
364.43	0.47055431		894.42	0.10585593		1424.42	0.01640523		1954.41	0.00263865
364.63	0.4713211		894.62	0.10685449		1424.62	0.01746637		1954.61	0.00278221
364.83	0.4722784		894.82	0.10743696		1424.82	0.01768781		1954.81	0.00407904
365.03	0.47278668		895.02	0.10700994		1425.02	0.01797606		1955.01	0.00381477
365.23	0.47256365		895.22	0.10698991		1425.22	0.01787277		1955.21	0.00463342
365.43	0.47281035		895.42	0.10604392		1425.42	0.01781283		1955.41	0.00502816
365.63	0.47407653		895.62	0.10548285		1425.62	0.01657695		1955.61	0.00527553
365.83	0.47469571		895.82	0.10567504		1425.82	0.0170928		1955.81	0.00461011
366.03	0.47392221		896.02	0.10514087		1426.02	0.01661173		1956.01	0.00411221
366.23	0.47299971		896.22	0.10521677		1426.22	0.01624139		1956.21	0.00393999
366.43	0.47316475		896.42	0.10473155		1426.42	0.01626249		1956.41	0.00352482
366.63	0.47454397		896.62	0.10407938		1426.62	0.01538747		1956.61	0.00326418
366.83	0.47467153		896.82	0.1044468		1426.82	0.01580016		1956.81	0.00276642
367.03	0.47469954		897.02	0.10485872		1427.02	0.01661801		1957.01	0.00349231
367.23	0.47466773		897.22	0.10516559		1427.22	0.01658701		1957.21	0.00283833
367.43	0.47451793		897.42	0.10584158		1427.42	0.01636329		1957.41	0.0033147
367.63	0.47458635		897.62	0.10602578		1427.62	0.01565641		1957.61	0.00346722
367.83	0.47438379		897.82	0.10704733		1427.82	0.01620173		1957.81	0.00280842
368.03	0.47456566		898.02	0.1074115		1428.02	0.01628416		1958.01	0.00246381
368.23	0.4744306		898.22	0.10803301		1428.22	0.0164137		1958.21	0.00268893
368.43	0.47499448		898.42	0.10842089		1428.42	0.01666668		1958.41	0.00327182
368.63	0.4753182		898.62	0.10857058		1428.62	0.01746722		1958.61	0.00288307
368.83	0.47566387		898.82	0.10828535		1428.82	0.01654762		1958.81	0.00358983
369.03	0.4759317		899.02	0.10892792		1429.02	0.01583456		1959.01	0.00283447
369.23	0.47550607		899.22	0.10921841		1429.22	0.01502633		1959.21	0.00270453
369.43	0.4755669		899.42	0.10925664		1429.42	0.01514497		1959.41	0.00136257
369.63	0.47576649		899.62	0.10969347		1429.62	0.01512409		1959.61	0.0004335
369.83	0.47480399		899.82	0.10971388		1429.82	0.01492892		1959.81	-0.00050358
370.03	0.47436122		900.02	0.10965861		1430.02	0.01478172		1960.01	-0.00062809
370.23	0.4748771		900.22	0.10928714		1430.22	0.01515342		1960.21	-0.00066725
370.43	0.47403135		900.42	0.10930794		1430.42	0.0155455		1960.41	0.00007797
370.63	0.47406029		900.62	0.10953974		1430.62	0.01594998		1960.61	-0.00053978
370.83	0.47384709		900.82	0.11030766		1430.82	0.01655358		1960.81	-0.00004922
371.03	0.47384688		901.02	0.11081029		1431.02	0.01608858		1961.01	0.0004739
371.23	0.47365694		901.22	0.11087062		1431.22	0.01610566		1961.21	0.00032685
371.43	0.473373		901.42	0.1111148		1431.42	0.01605655		1961.41	0.00210647
371.63	0.47399014		901.62	0.11015549		1431.62	0.01504991		1961.61	0.00279642
371.83	0.47458155		901.82	0.11048674		1431.82	0.01514104		1961.81	0.00306975
372.03	0.47605882		902.02	0.11011472		1432.02	0.01500715		1962.01	0.0038333
372.23	0.47565817		902.22	0.11037874		1432.22	0.01485664		1962.21	0.00406678
372.43	0.47655199		902.42	0.10961584		1432.42	0.01488341		1962.41	0.00481753
372.63	0.47759356		902.62	0.10903331		1432.62	0.01483375		1962.61	0.00490889
372.83	0.47839949		902.82	0.1090732		1432.82	0.0144757		1962.81	0.00552294
373.03	0.47874064		903.02	0.10962006		1433.02	0.01403164		1963.01	0.0049276
373.23	0.47897126		903.22	0.10945221		1433.22	0.01468645		1963.21	0.00475784
373.43	0.47856857		903.42	0.10911484		1433.42	0.01478569		1963.41	0.00383606
373.63	0.47842449		903.62	0.10913891		1433.62	0.01496396		1963.61	0.00265697
373.83	0.47840329		903.82	0.10856631		1433.82	0.01452554		1963.81	0.00214683
374.03	0.4790261		904.02	0.10894752		1434.02	0.01453109		1964.01	0.00129946
374.23	0.47836986		904.22	0.10864856		1434.22	0.01472834		1964.21	0.00131193
374.43	0.4771082		904.42	0.10906543		1434.42	0.01441604		1964.41	0.00067734
374.63	0.47725571		904.62	0.1100356		1434.62	0.01451803		1964.61	-0.00048065
374.83	0.47723234		904.82	0.11071935		1434.82	0.01478807		1964.81	0.00103911
375.03	0.47724927		905.02	0.11072629		1435.02	0.01459176		1965.01	0.00151015
375.23	0.47748135		905.22	0.11031966		1435.22	0.01465821		1965.21	0.00240629
375.43	0.47761922		905.42	0.11062546		1435.42	0.01446115		1965.41	0.0031604
375.63	0.47854905		905.62	0.11193137		1435.62	0.01396671		1965.61	0.0024884
375.83	0.4780812		905.82	0.1120651		1435.82	0.01488571		1965.81	0.00230814
376.03	0.47809862		906.02	0.11264867		1436.02	0.01554271		1966.01	0.00234642
376.23	0.47719718		906.22	0.11242619		1436.22	0.01552409		1966.21	0.00189214
376.43	0.47730812		906.42	0.11165781		1436.42	0.01538653		1966.41	0.0024245
376.63	0.47848408		906.62	0.11218197		1436.62	0.01549812		1966.61	0.00313493
376.83	0.47834491		906.82	0.11229274		1436.82	0.01591739		1966.81	0.00375307
377.03	0.4786604		907.02	0.11234485		1437.02	0.01575346		1967.01	0.00357211
377.23	0.479067		907.22	0.11215121		1437.22	0.01608159		1967.21	0.00296327
377.43	0.47962714		907.42	0.11221964		1437.42	0.01569529		1967.41	0.00226469
377.63	0.48045068		907.62	0.1119824		1437.62	0.01558118		1967.61	0.00120731
377.83	0.48135503		907.82	0.11208261		1437.82	0.01485543		1967.81	0.0007933
378.03	0.48162766		908.02	0.11261068		1438.02	0.01431837		1968.01	-0.00008119
378.23	0.48163502		908.22	0.11263395		1438.22	0.01399352		1968.21	-0.00032072
378.43	0.48187291		908.42	0.11326668		1438.42	0.01354867		1968.41	-0.00075331
378.63	0.48171078		908.62	0.11347353		1438.62	0.01350944		1968.61	-0.00029773
378.83	0.48194157		908.82	0.11325357		1438.82	0.013503		1968.81	0.00079292
379.03	0.48187053		909.02	0.11298099		1439.02	0.01300709		1969.01	0.0010308
379.23	0.48160601		909.22	0.11342287		1439.22	0.01292164		1969.21	0.00144203
379.43	0.48121223		909.42	0.11422344		1439.42	0.01293067		1969.41	0.00135741
379.63	0.48075088		909.62	0.11466215		1439.62	0.0128238		1969.61	0.00146919
379.83	0.47987721		909.82	0.11359295		1439.82	0.0130863		1969.81	0.00223138
380.02	0.47987721		910.02	0.11359295		1440.02	0.0130863		1970.01	0.00223138
380.22	0.48081426		910.22	0.11510988		1440.22	0.01251053		1970.21	0.00262989
380.42	0.48189307		910.42	0.11614089		1440.42	0.01142063		1970.41	0.00305294
380.62	0.48250753		910.62	0.11717125		1440.62	0.01102036		1970.61	0.00293753
380.82	0.48358253		910.82	0.11828806		1440.82	0.01094929		1970.81	0.0042795
381.02	0.48459064		911.02	0.11964058		1441.02	0.01067231		1971.01	0.0047361
381.22	0.48515826		911.22	0.12037391		1441.22	0.01043473		1971.21	0.00538379
381.42	0.48614696		911.42	0.12098433		1441.42	0.01019336		1971.41	0.00578922
381.62	0.48627443		911.62	0.12155832		1441.62	0.01039851		1971.61	0.00558507
381.82	0.48668682		911.82	0.12134803		1441.82	0.01024535		1971.81	0.00617303
382.02	0.48645632		912.02	0.12116409		1442.02	0.01046507		1972.01	0.00638414
382.22	0.48561683		912.22	0.12104405		1442.22	0.01109441		1972.21	0.00714523
382.42	0.48530117		912.42	0.12017143		1442.42	0.01173279		1972.41	0.0076509
382.62	0.48548789		912.62	0.11915833		1442.62	0.01105976		1972.61	0.00733471
382.82	0.48459332		912.82	0.11866216		1442.82	0.01102881		1972.81	0.00702941
383.02	0.48524411		913.02	0.11756469		1443.02	0.01008708		1973.01	0.00654052
383.22	0.48566457		913.22	0.11621794		1443.22	0.0094269		1973.21	0.00662951
383.42	0.48556864		913.42	0.1161832		1443.42	0.00915249		1973.41	0.00667179
383.62	0.48581166		913.62	0.11631048		1443.62	0.00874203		1973.61	0.00646751
383.82	0.48614053		913.82	0.11661739		1443.82	0.00790423		1973.81	0.00565918
384.02	0.48496735		914.02	0.11598993		1444.02	0.00802385		1974.01	0.00594764
384.22	0.48506223		914.22	0.11752925		1444.22	0.00811837		1974.21	0.00546351
384.42	0.48460307		914.42	0.11783127		1444.42	0.00845801		1974.41	0.00519205
384.62	0.48335537		914.62	0.11861427		1444.62	0.00920025		1974.61	0.00517793
384.82	0.48405058		914.82	0.11950236		1444.82	0.00934496		1974.81	0.00618249
385.02	0.48379805		915.02	0.12050333		1445.02	0.00879362		1975.01	0.00564363
385.22	0.48418779		915.22	0.12060783		1445.22	0.00815607		1975.21	0.00560201
385.42	0.4839811		915.42	0.12049272		1445.42	0.00789402		1975.41	0.00519412
385.62	0.48378856		915.62	0.12079434		1445.62	0.00785211		1975.61	0.0054174
385.82	0.48467711		915.82	0.12047773		1445.82	0.00734498		1975.81	0.00645643
386.02	0.48438598		916.02	0.12032422		1446.02	0.00716571		1976.01	0.00750368
386.22	0.48418284		916.22	0.12051128		1446.22	0.00721062		1976.21	0.00926842
386.42	0.48373437		916.42	0.11986912		1446.42	0.00687387		1976.41	0.00958748
386.62	0.4844233		916.62	0.12008701		1446.62	0.00526506		1976.61	0.0093047
386.82	0.48383126		916.82	0.11989344		1446.82	0.00643785		1976.81	0.00856374
387.02	0.48343353		917.02	0.11982528		1447.02	0.00618014		1977.01	0.00913908
387.22	0.48348857		917.22	0.11978466		1447.22	0.00584522		1977.21	0.00963138
387.42	0.48309746		917.42	0.12054985		1447.42	0.00621384		1977.41	0.00956274
387.62	0.48382453		917.62	0.12010138		1447.62	0.00657606		1977.61	0.00845772
387.82	0.48426384		917.82	0.12032651		1447.82	0.00703979		1977.81	0.00729494
388.02	0.48380156		918.02	0.12138888		1448.02	0.00784384		1978.01	0.0060254
388.22	0.48378853		918.22	0.12246022		1448.22	0.00719166		1978.21	0.00485987
388.42	0.48361858		918.42	0.12275099		1448.42	0.0079648		1978.41	0.00498506
388.62	0.4843324		918.62	0.12258287		1448.62	0.00762418		1978.61	0.00449099
388.82	0.48534226		918.82	0.12333666		1448.82	0.00697319		1978.81	0.00336161
389.02	0.484929		919.02	0.12354806		1449.02	0.0067729		1979.01	0.00344459
389.22	0.48497427		919.22	0.12267257		1449.22	0.00618799		1979.21	0.00233388
389.42	0.48482461		919.42	0.12290983		1449.42	0.00592223		1979.41	0.00261525
389.62	0.48504404		919.62	0.12289497		1449.62	0.00557178		1979.61	0.00370802
389.82	0.48592927		919.82	0.12182048		1449.82	0.00474801		1979.81	0.0043553
390.02	0.4853988		920.02	0.12098826		1450.02	0.0039547		1980.01	0.00587731
390.22	0.48490726		920.22	0.12030829		1450.22	0.00292498		1980.21	0.00690423
390.42	0.48437586		920.42	0.11935414		1450.42	0.00243786		1980.41	0.00730518
390.62	0.48452848		920.62	0.11873788		1450.62	0.00288437		1980.61	0.00765519
390.82	0.48393272		920.82	0.11753007		1450.82	0.00407701		1980.81	0.00871171
391.02	0.48413499		921.02	0.11729921		1451.02	0.00375284		1981.01	0.00938726
391.22	0.4837681		921.22	0.1167582		1451.22	0.00411561		1981.21	0.00944126
391.42	0.48390607		921.42	0.11680485		1451.42	0.00467961		1981.41	0.00945914
391.62	0.48401191		921.62	0.11601072		1451.62	0.00466317		1981.61	0.00782499
391.82	0.48391373		921.82	0.11640486		1451.82	0.00536085		1981.81	0.00686229
392.02	0.48389138		922.02	0.11733173		1452.02	0.00580382		1982.01	0.00672738
392.22	0.48374488		922.22	0.11721025		1452.22	0.0056185		1982.21	0.00678286
392.42	0.48330608		922.42	0.11725937		1452.42	0.00623128		1982.41	0.00620563
392.62	0.4825004		922.62	0.11694512		1452.62	0.00609379		1982.61	0.00474015
392.82	0.4817617		922.82	0.11722878		1452.82	0.00578298		1982.81	0.00373632
393.02	0.48196633		923.02	0.11721268		1453.02	0.00676041		1983.01	0.00336698
393.22	0.48226311		923.22	0.11704174		1453.22	0.0064462		1983.21	0.00278812
393.42	0.48289856		923.42	0.11798366		1453.42	0.00545849		1983.41	0.00305915
393.62	0.48213607		923.62	0.11754612		1453.62	0.00518184		1983.61	0.00319875
393.82	0.48182479		923.82	0.1175597		1453.82	0.00472659		1983.81	0.00327388
394.02	0.48072583		924.02	0.11709903		1454.02	0.00371847		1984.01	0.00359874
394.22	0.4799303		924.22	0.11604017		1454.22	0.00297719		1984.21	0.00387563
394.42	0.48046072		924.42	0.11628631		1454.42	0.00264377		1984.41	0.00449842
394.62	0.48072878		924.62	0.11564475		1454.62	0.00279778		1984.61	0.00415584
394.82	0.48169896		924.82	0.11477497		1454.82	0.00215994		1984.81	0.0051848
395.02	0.48197878		925.02	0.11471579		1455.02	0.00146202		1985.01	0.00458657
395.22	0.48069905		925.22	0.11551195		1455.22	0.00115108		1985.21	0.00589998
395.42	0.48056028		925.42	0.11613768		1455.42	0.00122332		1985.41	0.00606137
395.62	0.47935878		925.62	0.11644587		1455.62	0.00163427		1985.61	0.00589143
395.82	0.479943		925.82	0.1173852		1455.82	0.00311252		1985.81	0.0060797
396.02	0.48009607		926.02	0.11739436		1456.02	0.00346465		1986.01	0.0064438
396.22	0.47960357		926.22	0.11716746		1456.22	0.00288703		1986.21	0.00624661
396.42	0.47871489		926.42	0.11605992		1456.42	0.00249129		1986.41	0.00595259
396.62	0.47921649		926.62	0.11574887		1456.62	0.00271365		1986.61	0.00605962
396.82	0.480843		926.82	0.11543977		1456.82	0.00313014		1986.81	0.00602864
397.02	0.48185435		927.02	0.11590121		1457.02	0.00342027		1987.01	0.00726621
397.22	0.48331742		927.22	0.11591787		1457.22	0.00228014		1987.21	0.0077023
397.42	0.48314923		927.42	0.11675147		1457.42	0.00150526		1987.41	0.00764594
397.62	0.48304742		927.62	0.11683689		1457.62	0.00222396		1987.61	0.0076726
397.82	0.48383096		927.82	0.11644661		1457.82	0.00252967		1987.81	0.00726635
398.02	0.48398674		928.02	0.11542553		1458.02	0.00247486		1988.01	0.00731779
398.22	0.48441039		928.22	0.11526514		1458.22	0.00222626		1988.21	0.00767613
398.42	0.4851758		928.42	0.11493756		1458.42	0.00180961		1988.41	0.00811608
398.62	0.48551414		928.62	0.11431648		1458.62	0.00207759		1988.61	0.00786111
398.82	0.48622693		928.82	0.11494924		1458.82	0.00188788		1988.81	0.00832172
399.02	0.48518908		929.02	0.1151725		1459.02	0.00253951		1989.01	0.00773453
399.22	0.48441279		929.22	0.11651682		1459.22	0.00386551		1989.21	0.00662946
399.42	0.48367941		929.42	0.11689967		1459.42	0.00494705		1989.41	0.00637105
399.62	0.48361365		929.62	0.11674948		1459.62	0.00604905		1989.61	0.00523064
399.82	0.48441542		929.82	0.11751904		1459.82	0.00623796		1989.81	0.0039105
400.02	0.48391063		930.02	0.11771932		1460.02	0.00567371		1990.01	0.00309933
400.22	0.48332434		930.22	0.11745095		1460.22	0.00498009		1990.21	0.00210004
400.42	0.48256099		930.42	0.11720813		1460.42	0.0050581		1990.41	0.00137276
400.62	0.48267457		930.62	0.11742476		1460.62	0.00524518		1990.61	0.00071306
400.82	0.4818397		930.82	0.11705594		1460.82	0.00475988		1990.81	0.00063101
401.02	0.48166466		931.02	0.1167656		1461.02	0.00334589		1991.01	0.00069971
401.22	0.4821007		931.22	0.11710362		1461.22	0.00192651		1991.21	0.00043061
401.42	0.48105382		931.42	0.11644511		1461.42	0.00101542		1991.41	0.00123925
401.62	0.48140395		931.62	0.11596226		1461.62	0.00060917		1991.61	0.00165435
401.82	0.48205888		931.82	0.11576748		1461.82	-0.00014377		1991.81	0.00296208
402.02	0.48139571		932.02	0.11555415		1462.02	-0.00129894		1992.01	0.00467304
402.22	0.48089462		932.22	0.11599821		1462.22	-0.00308862		1992.21	0.00598582
402.42	0.48105423		932.42	0.11611906		1462.42	-0.00344678		1992.41	0.00727312
402.62	0.48153125		932.62	0.11701343		1462.62	-0.00372268		1992.61	0.00801677
402.82	0.48178252		932.82	0.11740227		1462.82	-0.003449		1992.81	0.00790935
403.02	0.48182834		933.02	0.11688845		1463.02	-0.00242042		1993.01	0.00784562
403.22	0.48168532		933.22	0.11766654		1463.22	-0.00163115		1993.21	0.0077344
403.42	0.48210659		933.42	0.11818257		1463.42	-0.00105521		1993.41	0.00861767
403.62	0.48216579		933.62	0.11901543		1463.62	0.00065068		1993.61	0.00608879
403.82	0.48295151		933.82	0.12013191		1463.82	0.00068433		1993.81	0.00464885
404.02	0.48382841		934.02	0.11991745		1464.02	0.00059821		1994.01	0.00322514
404.22	0.48387685		934.22	0.11988577		1464.22	0.00117876		1994.21	0.00233354
404.42	0.48361582		934.42	0.11925732		1464.42	0.00127883		1994.41	0.00186926
404.62	0.48364049		934.62	0.11856669		1464.62	0.00142457		1994.61	0.0015663
404.82	0.483069		934.82	0.11828441		1464.82	0.00136817		1994.81	0.00140033
405.02	0.48322098		935.02	0.11814823		1465.02	-0.00012022		1995.01	0.00045881
405.22	0.48258911		935.22	0.11815523		1465.22	-0.00037057		1995.21	0.00181167
405.42	0.48222458		935.42	0.11707354		1465.42	-0.00119503		1995.41	0.00148911
405.62	0.4827631		935.62	0.11716026		1465.62	-0.00137444		1995.61	0.00184795
405.82	0.48255927		935.82	0.11625375		1465.82	-0.00217458		1995.81	0.00275439
406.02	0.48128363		936.02	0.11623619		1466.02	-0.00247204		1996.01	0.00355953
406.22	0.48061258		936.22	0.11631135		1466.22	-0.00281379		1996.21	0.0043856
406.42	0.4807728		936.42	0.11602964		1466.42	-0.00258209		1996.41	0.00421933
406.62	0.48112903		936.62	0.1156284		1466.62	-0.00297673		1996.61	0.00471488
406.82	0.48080746		936.82	0.11529683		1466.82	-0.00304151		1996.81	0.00481942
407.02	0.48019874		937.02	0.11517562		1467.02	-0.0021135		1997.01	0.0052641
407.22	0.4800655		937.22	0.11620818		1467.22	-0.00101476		1997.21	0.00491294
407.42	0.48123685		937.42	0.11632322		1467.42	0.00075493		1997.41	0.00274377
407.62	0.48196387		937.62	0.11643355		1467.62	0.00195478		1997.61	0.00126678
407.82	0.48315491		937.82	0.11583609		1467.82	0.00221147		1997.81	0.00073005
408.02	0.48433219		938.02	0.11498984		1468.02	0.0025805		1998.01	0.00006763
408.22	0.48414597		938.22	0.11514055		1468.22	0.00269964		1998.21	0.0003869
408.42	0.48410553		938.42	0.11510372		1468.42	0.0024956		1998.41	0.0004669
408.62	0.48383818		938.62	0.11609541		1468.62	0.00280134		1998.61	-0.00002569
408.82	0.48302498		938.82	0.1164531		1468.82	0.00190598		1998.81	0.00020629
409.02	0.4827162		939.02	0.11681164		1469.02	0.00039259		1999.01	-0.00015507
409.22	0.4822281		939.22	0.11730263		1469.22	-0.00003202		1999.21	0.00092646
409.42	0.48169621		939.42	0.11759878		1469.42	-0.00094032		1999.41	0.00083019
409.62	0.48158111		939.62	0.11824486		1469.62	-0.00065699		1999.61	0.0021353
409.82	0.48097272		939.82	0.11872618		1469.82	-0.00116225		1999.81	0.00317316
410.02	0.48024065		940.02	0.11942299		1470.02	-0.00096945		2000.01	0.00330094
410.22	0.48093829		940.22	0.11929884		1470.22	-0.00176449		2000.21	0.00396202
410.42	0.48097305		940.42	0.11952603		1470.42	-0.00286743		2000.41	0.00412777
410.62	0.4824565		940.62	0.11985664		1470.62	-0.00343832		2000.61	0.00475796
410.82	0.48331591		940.82	0.11883137		1470.82	-0.00347797		2000.81	0.00532219
411.02	0.48380992		941.02	0.11874629		1471.02	-0.00285255		2001.01	0.00572039
411.22	0.48476242		941.22	0.1186773		1471.22	-0.0020774		2001.21	0.0044944
411.42	0.48616854		941.42	0.11677727		1471.42	-0.00125058		2001.41	0.0042284
411.62	0.486216		941.62	0.11685714		1471.62	-0.00151082		2001.61	0.0045098
411.82	0.48691652		941.82	0.1158018		1471.82	-0.00175086		2001.81	0.00470207
412.02	0.48678751		942.02	0.11448602		1472.02	-0.00215624		2002.01	0.00368043
412.22	0.48639209		942.22	0.11495544		1472.22	-0.00318158		2002.21	0.00344592
412.42	0.48517881		942.42	0.11528602		1472.42	-0.00287407		2002.41	0.0040314
412.62	0.48407017		942.62	0.11458836		1472.62	-0.00423202		2002.61	0.00364915
412.82	0.48418864		942.82	0.11387836		1472.82	-0.0056918		2002.81	0.00410908
413.02	0.48329519		943.02	0.11386288		1473.02	-0.00591656		2003.01	0.00377392
413.22	0.48122601		943.22	0.11415312		1473.22	-0.00576847		2003.21	0.00376265
413.42	0.48027745		943.42	0.11413701		1473.42	-0.00520691		2003.41	0.00431261
413.62	0.48072618		943.62	0.1150659		1473.62	-0.00476992		2003.61	0.00377058
413.82	0.48036965		943.82	0.11561405		1473.82	-0.00490928		2003.81	0.0033486
414.02	0.48047872		944.02	0.11592808		1474.02	-0.00450985		2004.01	0.0027933
414.22	0.48193671		944.22	0.1160415		1474.22	-0.00509349		2004.21	0.00325875
414.42	0.48208005		944.42	0.11687156		1474.42	-0.00466569		2004.41	0.00317618
414.62	0.48347638		944.62	0.11747134		1474.62	-0.00394408		2004.61	0.00310171
414.82	0.48364923		944.82	0.11697701		1474.82	-0.00397896		2004.81	0.00313663
415.02	0.4834157		945.02	0.11783841		1475.02	-0.00373774		2005.01	0.00316286
415.22	0.4834209		945.22	0.11807819		1475.22	-0.00333717		2005.21	0.00198262
415.42	0.48400283		945.42	0.11823352		1475.42	-0.00270447		2005.41	0.00226836
415.62	0.48410529		945.62	0.11944836		1475.62	-0.00350705		2005.61	0.00130811
415.82	0.48452541		945.82	0.1188149		1475.82	-0.00385212		2005.81	0.0015081
416.02	0.48417221		946.02	0.11823713		1476.02	-0.00311539		2006.01	0.00072542
416.22	0.48400612		946.22	0.11836969		1476.22	-0.00313881		2006.21	0.00104908
416.42	0.48338121		946.42	0.11817334		1476.42	-0.00314261		2006.41	0.00210438
416.62	0.48379529		946.62	0.11658557		1476.62	-0.00410161		2006.61	0.00208128
416.82	0.48349537		946.82	0.11634984		1476.82	-0.00448488		2006.81	0.00183719
417.02	0.48235672		947.02	0.11576365		1477.02	-0.00448811		2007.01	0.0020495
417.22	0.48136703		947.22	0.11606243		1477.22	-0.00411711		2007.21	0.00145216
417.42	0.48130295		947.42	0.11545363		1477.42	-0.00395278		2007.41	0.00127472
417.62	0.48069672		947.62	0.11578497		1477.62	-0.00404793		2007.61	0.00043386
417.82	0.48060656		947.82	0.11500131		1477.82	-0.0041876		2007.81	0.00065388
418.02	0.4805058		948.02	0.11417399		1478.02	-0.0046264		2008.01	0.00112491
418.22	0.48050388		948.22	0.11392805		1478.22	-0.00529122		2008.21	0.00130236
418.42	0.47976424		948.42	0.11477433		1478.42	-0.00459199		2008.41	0.00246688
418.62	0.47917266		948.62	0.11481414		1478.62	-0.00481895		2008.61	0.00340093
418.82	0.47927087		948.82	0.11520586		1478.82	-0.00501164		2008.81	0.0033599
419.02	0.47780688		949.02	0.11547148		1479.02	-0.004737		2009.01	0.00400854
419.22	0.47769107		949.22	0.11598456		1479.22	-0.00476351		2009.21	0.00383138
419.42	0.47832387		949.42	0.11619017		1479.42	-0.00459337		2009.41	0.00393838
419.62	0.47866493		949.62	0.11624377		1479.62	-0.00537652		2009.61	0.0040166
419.82	0.47897111		949.82	0.11670884		1479.82	-0.00504884		2009.81	0.00481889
420.02	0.47925245		950.02	0.11655298		1480.02	-0.00476326		2010.01	0.00533059
420.22	0.47942331		950.22	0.11666603		1480.22	-0.00453159		2010.21	0.00571679
420.42	0.47983804		950.42	0.11691867		1480.42	-0.00463282		2010.41	0.00636977
420.62	0.4802803		950.62	0.11615775		1480.62	-0.00473384		2010.61	0.00636547
420.82	0.48017742		950.82	0.1162103		1480.82	-0.00464944		2010.81	0.00587779
421.02	0.48067618		951.02	0.11608539		1481.02	-0.00428459		2011.01	0.00529878
421.22	0.48096068		951.22	0.11660498		1481.22	-0.00337991		2011.21	0.00363834
421.42	0.48135285		951.42	0.11523292		1481.42	-0.00345171		2011.41	0.00239827
421.62	0.48184098		951.62	0.11499967		1481.62	-0.0041001		2011.61	0.00184373
421.82	0.48226712		951.82	0.11436047		1481.82	-0.00429645		2011.81	0.00150437
422.02	0.48209929		952.02	0.11386742		1482.02	-0.00491588		2012.01	0.000953
422.22	0.48212891		952.22	0.11449186		1482.22	-0.00470101		2012.21	0.00070211
422.42	0.48236882		952.42	0.11459304		1482.42	-0.00454541		2012.41	0.00179218
422.62	0.48172963		952.62	0.11408546		1482.62	-0.00442114		2012.61	0.00166554
422.82	0.48190824		952.82	0.11420394		1482.82	-0.00447331		2012.81	0.00109796
423.02	0.48010867		953.02	0.11353384		1483.02	-0.0044066		2013.01	0.00019032
423.22	0.48143441		953.22	0.11272775		1483.22	-0.00412461		2013.21	-0.00043693
423.42	0.48106423		953.42	0.11275981		1483.42	-0.00448907		2013.41	-0.00137893
423.62	0.47997018		953.62	0.11278725		1483.62	-0.00459576		2013.61	-0.00084932
423.82	0.47910191		953.82	0.11251239		1483.82	-0.00461213		2013.81	-0.00103875
424.02	0.47854517		954.02	0.11290707		1484.02	-0.00489197		2014.01	-0.00111834
424.22	0.47804484		954.22	0.11259829		1484.22	-0.00448946		2014.21	-0.0007934
424.42	0.47735532		954.42	0.11383395		1484.42	-0.00466814		2014.41	-0.00060466
424.62	0.47702202		954.62	0.11452933		1484.62	-0.00490756		2014.61	0.00011751
424.82	0.47673424		954.82	0.11431989		1484.82	-0.00562869		2014.81	0.0005136
425.02	0.47735261		955.02	0.11458758		1485.02	-0.00636868		2015.01	0.00084305
425.22	0.47789149		955.22	0.11444399		1485.22	-0.00601464		2015.21	0.00066067
425.42	0.47817667		955.42	0.11444935		1485.42	-0.00672997		2015.41	0.00076744
425.62	0.47843115		955.62	0.11501373		1485.62	-0.00725164		2015.61	0.00155125
425.82	0.47929961		955.82	0.11474883		1485.82	-0.00747931		2015.81	0.00127776
426.02	0.48014484		956.02	0.11506867		1486.02	-0.0071683		2016.01	0.00152584
426.22	0.48033176		956.22	0.11561714		1486.22	-0.0065448		2016.21	0.00313323
426.42	0.4817994		956.42	0.1150846		1486.42	-0.00599791		2016.41	0.00290253
426.62	0.4817072		956.62	0.11470737		1486.62	-0.00503417		2016.61	0.00166615
426.82	0.48166329		956.82	0.11478093		1486.82	-0.0041138		2016.81	0.00082461
427.02	0.48108162		957.02	0.11502783		1487.02	-0.00294837		2017.01	-0.0000819
427.22	0.48157912		957.22	0.11408439		1487.22	-0.00236363		2017.21	-0.00033064
427.42	0.48069534		957.42	0.11463233		1487.42	-0.00235107		2017.41	-0.00126992
427.62	0.47982177		957.62	0.11420044		1487.62	-0.00195298		2017.61	-0.0015759
427.82	0.47989602		957.82	0.11363228		1487.82	-0.00195476		2017.81	-0.00280264
428.02	0.48050877		958.02	0.11448496		1488.02	-0.00214025		2018.01	-0.00294419
428.22	0.48010538		958.22	0.11427128		1488.22	-0.00213789		2018.21	-0.00254259
428.42	0.47932553		958.42	0.11524529		1488.42	-0.00243799		2018.41	-0.00252518
428.62	0.4791979		958.62	0.11454441		1488.62	-0.00377676		2018.61	-0.00160702
428.82	0.47941444		958.82	0.11369906		1488.82	-0.00507143		2018.81	-0.00090007
429.02	0.47941732		959.02	0.11344404		1489.02	-0.00587519		2019.01	0.0005912
429.22	0.47958177		959.22	0.11304741		1489.22	-0.00675166		2019.21	0.00020912
429.42	0.48064914		959.42	0.11352071		1489.42	-0.00864267		2019.41	0.00109326
429.62	0.48102098		959.62	0.11350955		1489.62	-0.00911144		2019.61	0.00169813
429.82	0.48207287		959.82	0.11306406		1489.82	-0.00936132		2019.81	0.00158497
430.02	0.48192657		960.02	0.11415213		1490.02	-0.00969929		2020.01	0.00267201
430.22	0.4819552		960.22	0.11449985		1490.22	-0.00970249		2020.21	0.00264343
430.42	0.48270555		960.42	0.11486875		1490.42	-0.00879662		2020.41	0.00170219
430.62	0.48209028		960.62	0.1158424		1490.62	-0.00785195		2020.61	0.0022284
430.82	0.48173789		960.82	0.11685509		1490.82	-0.00682338		2020.81	0.00225134
431.02	0.4816498		961.02	0.11744475		1491.02	-0.00582879		2021.01	0.00202747
431.22	0.48099813		961.22	0.1174465		1491.22	-0.00533493		2021.21	0.00177728
431.42	0.48059542		961.42	0.117826		1491.42	-0.00432598		2021.41	0.00127592
431.62	0.47984711		961.62	0.117592		1491.62	-0.00435063		2021.61	0.00132529
431.82	0.48018532		961.82	0.11673382		1491.82	-0.00366729		2021.81	0.00104033
432.02	0.48032586		962.02	0.1166266		1492.02	-0.00368861		2022.01	0.00150525
432.22	0.47952889		962.22	0.11593124		1492.22	-0.00380144		2022.21	0.00115876
432.42	0.47895294		962.42	0.11540281		1492.42	-0.00388242		2022.41	0.001319
432.62	0.47876532		962.62	0.11527185		1492.62	-0.004595		2022.61	0.00181499
432.82	0.47823846		962.82	0.11463523		1492.82	-0.00547972		2022.81	0.00213502
433.02	0.4781198		963.02	0.11383941		1493.02	-0.0064732		2023.01	0.00246012
433.22	0.47925566		963.22	0.11321431		1493.22	-0.00775845		2023.21	0.00165914
433.42	0.48018294		963.42	0.11350357		1493.42	-0.00871655		2023.41	0.00134834
433.62	0.48041659		963.62	0.11319602		1493.62	-0.00917165		2023.61	0.00142497
433.82	0.48020492		963.82	0.11298408		1493.82	-0.01000556		2023.81	0.00107344
434.02	0.48025551		964.02	0.11397411		1494.02	-0.01095559		2024.01	0.00099055
434.22	0.48051549		964.22	0.11461034		1494.22	-0.01105531		2024.21	0.00042839
434.42	0.48091993		964.42	0.11524376		1494.42	-0.01037875		2024.41	0.00028665
434.62	0.48067591		964.62	0.11526214		1494.62	-0.01048475		2024.61	0.0002063
434.82	0.48054168		964.82	0.11625221		1494.82	-0.0095602		2024.81	-0.00116792
435.02	0.47936321		965.02	0.11667967		1495.02	-0.00865598		2025.01	-0.000873
435.22	0.47837491		965.22	0.11705794		1495.22	-0.00801516		2025.21	-0.00074199
435.42	0.47873255		965.42	0.11704776		1495.42	-0.00695147		2025.41	-0.0007013
435.62	0.47836562		965.62	0.11711021		1495.62	-0.0065192		2025.61	-0.00061614
435.82	0.47869688		965.82	0.11666804		1495.82	-0.0052248		2025.81	-0.00110273
436.02	0.47865545		966.02	0.11698775		1496.02	-0.00527239		2026.01	0.00010803
436.22	0.47749678		966.22	0.11735548		1496.22	-0.00515496		2026.21	0.00050119
436.42	0.47679404		966.42	0.11800006		1496.42	-0.00493972		2026.41	0.00207495
436.62	0.4767423		966.62	0.11804008		1496.62	-0.00527404		2026.61	0.00265474
436.82	0.47681568		966.82	0.1166238		1496.82	-0.00646278		2026.81	0.0036734
437.02	0.47789665		967.02	0.11585558		1497.02	-0.00660055		2027.01	0.00417966
437.22	0.47900486		967.22	0.1158512		1497.22	-0.00741372		2027.21	0.00471173
437.42	0.47955226		967.42	0.11615406		1497.42	-0.00797835		2027.41	0.00457022
437.62	0.48003371		967.62	0.11537658		1497.62	-0.00803282		2027.61	0.00566215
437.82	0.47946936		967.82	0.11566335		1497.82	-0.00800929		2027.81	0.00523448
438.02	0.479829		968.02	0.11555074		1498.02	-0.0082281		2028.01	0.00499265
438.22	0.48006809		968.22	0.11481978		1498.22	-0.00814221		2028.21	0.00405699
438.42	0.48044504		968.42	0.11442571		1498.42	-0.00763547		2028.41	0.00361338
438.62	0.48057819		968.62	0.11477708		1498.62	-0.00714648		2028.61	0.00247966
438.82	0.48042276		968.82	0.11554545		1498.82	-0.00580625		2028.81	0.00099541
439.02	0.4800328		969.02	0.11543987		1499.02	-0.00661524		2029.01	0.0004382
439.22	0.48053413		969.22	0.11491802		1499.22	-0.00612574		2029.21	-0.00068466
439.42	0.48037009		969.42	0.11450154		1499.42	-0.00617563		2029.41	-0.0015323
439.62	0.48000827		969.62	0.11383071		1499.62	-0.00588787		2029.61	-0.00217591
439.82	0.47967963		969.82	0.11335875		1499.82	-0.00661759		2029.81	-0.00183365
440.02	0.47890533		970.02	0.1133641		1500.02	-0.00782048		2030.01	-0.00128236
440.22	0.47729434		970.22	0.11373939		1500.22	-0.00842862		2030.21	-0.00176379
440.42	0.47717067		970.42	0.11309307		1500.42	-0.00919445		2030.41	-0.00119176
440.62	0.47777137		970.62	0.11274437		1500.62	-0.01021964		2030.61	-0.00038895
440.82	0.47778589		970.82	0.1126829		1500.82	-0.01064594		2030.81	0.00092104
441.02	0.47740793		971.02	0.11375152		1501.02	-0.01021127		2031.01	0.00108742
441.22	0.47776361		971.22	0.11444164		1501.22	-0.01091338		2031.21	0.00261997
441.42	0.47749777		971.42	0.11419798		1501.42	-0.01071481		2031.41	0.00280461
441.62	0.47777609		971.62	0.11486708		1501.62	-0.00996246		2031.61	0.00359312
441.82	0.47800113		971.82	0.11518292		1501.82	-0.00967843		2031.81	0.00303704
442.02	0.4777529		972.02	0.11501865		1502.02	-0.00974872		2032.01	0.00262981
442.22	0.47813972		972.22	0.11478075		1502.22	-0.00891934		2032.21	0.00214634
442.42	0.47839734		972.42	0.11566051		1502.42	-0.00935688		2032.41	0.00147471
442.62	0.47867809		972.62	0.11642578		1502.62	-0.00970092		2032.61	0.00013919
442.82	0.47902635		972.82	0.11673045		1502.82	-0.01029394		2032.81	-0.00087944
443.02	0.47940372		973.02	0.1165045		1503.02	-0.01134576		2033.01	-0.00131716
443.22	0.47962696		973.22	0.11565812		1503.22	-0.01021799		2033.21	-0.00206336
443.42	0.47986138		973.42	0.11494079		1503.42	-0.010884		2033.41	-0.00289831
443.62	0.48068521		973.62	0.11363864		1503.62	-0.01073947		2033.61	-0.0029019
443.82	0.48041672		973.82	0.11290537		1503.82	-0.01262264		2033.81	-0.00211961
444.02	0.47970836		974.02	0.11162612		1504.02	-0.01264693		2034.01	-0.00279912
444.22	0.47887198		974.22	0.1112985		1504.22	-0.0126886		2034.21	-0.00236117
444.42	0.47975216		974.42	0.11034342		1504.42	-0.01263901		2034.41	-0.00139269
444.62	0.47984077		974.62	0.11059413		1504.62	-0.01246181		2034.61	-0.00033873
444.82	0.47868063		974.82	0.11076652		1504.82	-0.01116507		2034.81	0.00052499
445.02	0.47781507		975.02	0.11062631		1505.02	-0.01012417		2035.01	0.00070914
445.22	0.47809032		975.22	0.11024712		1505.22	-0.01014311		2035.21	0.00159134
445.42	0.47814925		975.42	0.10990045		1505.42	-0.00977358		2035.41	0.00184553
445.62	0.47822813		975.62	0.11130833		1505.62	-0.00838833		2035.61	0.00187439
445.82	0.47766656		975.82	0.11119441		1505.82	-0.00743815		2035.81	0.00114995
446.02	0.47698265		976.02	0.11109917		1506.02	-0.00768872		2036.01	0.00139215
446.22	0.47754473		976.22	0.11182066		1506.22	-0.00796674		2036.21	0.00156041
446.42	0.47746049		976.42	0.11265525		1506.42	-0.00941979		2036.41	0.00141278
446.62	0.47723609		976.62	0.11386474		1506.62	-0.01039398		2036.61	0.00023927
446.82	0.47723732		976.82	0.11495517		1506.82	-0.01016398		2036.81	-0.0003601
447.02	0.47613882		977.02	0.11458877		1507.02	-0.01048351		2037.01	-0.0007579
447.22	0.47554101		977.22	0.11362192		1507.22	-0.01002034		2037.21	-0.0022126
447.42	0.47546534		977.42	0.11316525		1507.42	-0.01170339		2037.41	-0.00286436
447.62	0.47526443		977.62	0.11260435		1507.62	-0.01138222		2037.61	-0.00312927
447.82	0.47472559		977.82	0.11194818		1507.82	-0.01192419		2037.81	-0.00354175
448.02	0.47388914		978.02	0.11060287		1508.02	-0.01118959		2038.01	-0.00501022
448.22	0.47306322		978.22	0.11048126		1508.22	-0.01151652		2038.21	-0.00506984
448.42	0.47308429		978.42	0.11045077		1508.42	-0.01114177		2038.41	-0.00549451
448.62	0.47285711		978.62	0.10996736		1508.62	-0.01090421		2038.61	-0.00575719
448.82	0.47322377		978.82	0.10977618		1508.82	-0.01072723		2038.81	-0.00566418
449.02	0.47409641		979.02	0.10948478		1509.02	-0.01050908		2039.01	-0.00507049
449.22	0.47477763		979.22	0.11009143		1509.22	-0.01059398		2039.21	-0.0042601
449.42	0.47459006		979.42	0.11079238		1509.42	-0.00961293		2039.41	-0.00368941
449.62	0.47498935		979.62	0.11225804		1509.62	-0.00859109		2039.61	-0.00374345
449.82	0.47601232		979.82	0.11249695		1509.82	-0.0085248		2039.81	-0.00334514
450.02	0.47677994		980.02	0.11328247		1510.02	-0.00878522		2040.01	-0.00172513
450.22	0.47785368		980.22	0.11395802		1510.22	-0.00824149		2040.21	-0.0015136
450.42	0.4774909		980.42	0.1139185		1510.42	-0.00849187		2040.41	-0.00128995
450.62	0.47760827		980.62	0.11425367		1510.62	-0.00809003		2040.61	-0.00151584
450.82	0.47826721		980.82	0.11338287		1510.82	-0.00707488		2040.81	-0.0007949
451.02	0.47812743		981.02	0.11230053		1511.02	-0.00733785		2041.01	-0.00163353
451.22	0.47767743		981.22	0.11215751		1511.22	-0.00617363		2041.21	-0.00222304
451.42	0.47795849		981.42	0.11229186		1511.42	-0.00616919		2041.41	-0.00167456
451.62	0.47763868		981.62	0.11186819		1511.62	-0.00554113		2041.61	-0.00168045
451.82	0.47747346		981.82	0.11126864		1511.82	-0.00592857		2041.81	-0.00204767
452.02	0.47642782		982.02	0.11086691		1512.02	-0.00651931		2042.01	-0.00204929
452.22	0.47625287		982.22	0.11085569		1512.22	-0.00731293		2042.21	-0.0017183
452.42	0.47663503		982.42	0.11112771		1512.42	-0.00804187		2042.41	-0.00222174
452.62	0.47820108		982.62	0.11088318		1512.62	-0.00895647		2042.61	-0.00247703
452.82	0.47917179		982.82	0.11211594		1512.82	-0.01036877		2042.81	-0.00306466
453.02	0.47939811		983.02	0.11261564		1513.02	-0.01109931		2043.01	-0.00296482
453.22	0.47956662		983.22	0.11399713		1513.22	-0.01180234		2043.21	-0.00340165
453.42	0.47917887		983.42	0.11450616		1513.42	-0.0120682		2043.41	-0.0036993
453.62	0.4796162		983.62	0.11475439		1513.62	-0.01192578		2043.61	-0.00312856
453.82	0.48001139		983.82	0.11524604		1513.82	-0.01214625		2043.81	-0.00324088
454.02	0.48067748		984.02	0.11575086		1514.02	-0.01213346		2044.01	-0.00190581
454.22	0.48157914		984.22	0.11518005		1514.22	-0.01156841		2044.21	-0.00185579
454.42	0.48147049		984.42	0.11523553		1514.42	-0.01207092		2044.41	-0.00097268
454.62	0.48202005		984.62	0.11470145		1514.62	-0.01138901		2044.61	-0.00045952
454.82	0.48157257		984.82	0.11425849		1514.82	-0.0114894		2044.81	-0.00051462
455.02	0.48077982		985.02	0.11416181		1515.02	-0.01171163		2045.01	-0.00058103
455.22	0.47992123		985.22	0.11395386		1515.22	-0.01061119		2045.21	0.00007549
455.42	0.47901752		985.42	0.11305512		1515.42	-0.01080974		2045.41	0.00039413
455.62	0.47778049		985.62	0.11263284		1515.62	-0.01120547		2045.61	-0.0002449
455.82	0.47768414		985.82	0.11273245		1515.82	-0.01095486		2045.81	0.00021431
456.02	0.47657436		986.02	0.11168529		1516.02	-0.01140321		2046.01	0.00075216
456.22	0.47667034		986.22	0.11225772		1516.22	-0.0104204		2046.21	0.00019153
456.42	0.47600019		986.42	0.11250615		1516.42	-0.00976518		2046.41	-0.00069169
456.62	0.47664236		986.62	0.11352014		1516.62	-0.00976385		2046.61	-0.00110677
456.82	0.47622398		986.82	0.11408431		1516.82	-0.01032262		2046.81	-0.00208704
457.02	0.47560299		987.02	0.11340609		1517.02	-0.00963847		2047.01	-0.0028408
457.22	0.47539769		987.22	0.1133261		1517.22	-0.00995539		2047.21	-0.00275237
457.42	0.47486257		987.42	0.1135396		1517.42	-0.009511		2047.41	-0.00252467
457.62	0.47459565		987.62	0.11412292		1517.62	-0.00963688		2047.61	-0.00221255
457.82	0.4742244		987.82	0.11486982		1517.82	-0.01032678		2047.81	-0.00135773
458.02	0.47529718		988.02	0.11480608		1518.02	-0.01046961		2048.01	-0.00046038
458.22	0.4746585		988.22	0.11472725		1518.22	-0.01067259		2048.21	-0.00068431
458.42	0.47478591		988.42	0.11414177		1518.42	-0.01167237		2048.41	-0.00045335
458.62	0.47428017		988.62	0.11353391		1518.62	-0.01135791		2048.61	-0.00001243
458.82	0.47356241		988.82	0.11314464		1518.82	-0.01208474		2048.81	-0.00034525
459.02	0.47329421		989.02	0.11178487		1519.02	-0.01287881		2049.01	-0.00091099
459.22	0.47380238		989.22	0.11141313		1519.22	-0.0131045		2049.21	-0.00078681
459.42	0.47368695		989.42	0.11087461		1519.42	-0.01413903		2049.41	-0.0017378
459.62	0.47428868		989.62	0.11030881		1519.62	-0.0156057		2049.61	-0.00194339
459.82	0.47520413		989.82	0.11020943		1519.82	-0.01518366		2049.81	-0.0016959
460.02	0.47638203		990.02	0.10988082		1520.02	-0.01493103		2050.01	-0.00232464
460.22	0.47703851		990.22	0.11124633		1520.22	-0.01421523		2050.21	-0.00368638
460.42	0.47701816		990.42	0.11143098		1520.42	-0.01414445		2050.41	-0.00430931
460.62	0.47885942		990.62	0.11186397		1520.62	-0.01402937		2050.61	-0.00437527
460.82	0.47965767		990.82	0.11150619		1520.82	-0.01393248		2050.81	-0.0042999
461.02	0.48029454		991.02	0.11142197		1521.02	-0.01404767		2051.01	-0.00366618
461.22	0.48093408		991.22	0.11247222		1521.22	-0.01447604		2051.21	-0.00187353
461.42	0.48018046		991.42	0.11311778		1521.42	-0.01365556		2051.41	-0.00183131
461.62	0.4802438		991.62	0.11341337		1521.62	-0.01295239		2051.61	-0.00147472
461.82	0.47921162		991.82	0.11425921		1521.82	-0.01251765		2051.81	-0.00145589
462.02	0.47975241		992.02	0.11377934		1522.02	-0.01225682		2052.01	-0.00217086
462.22	0.47870145		992.22	0.11366686		1522.22	-0.01280132		2052.21	-0.00219689
462.42	0.47831835		992.42	0.11280471		1522.42	-0.01278123		2052.41	-0.00192739
462.62	0.47680659		992.62	0.11275731		1522.62	-0.0118975		2052.61	-0.00216823
462.82	0.47593539		992.82	0.11180159		1522.82	-0.01209115		2052.81	-0.00320729
463.02	0.47575699		993.02	0.11132224		1523.02	-0.01240508		2053.01	-0.00353263
463.22	0.47532828		993.22	0.11129448		1523.22	-0.01277363		2053.21	-0.00413295
463.42	0.47515708		993.42	0.11074771		1523.42	-0.0131002		2053.41	-0.0046494
463.62	0.47506907		993.62	0.11119387		1523.62	-0.01352831		2053.61	-0.00435591
463.82	0.47608262		993.82	0.11199335		1523.82	-0.01275747		2053.81	-0.0054883
464.02	0.47662347		994.02	0.11178671		1524.02	-0.01304297		2054.01	-0.00563216
464.22	0.47605926		994.22	0.1116047		1524.22	-0.01404378		2054.21	-0.00575128
464.42	0.47693645		994.42	0.11129077		1524.42	-0.01406495		2054.41	-0.00456028
464.62	0.47839206		994.62	0.11055762		1524.62	-0.0143819		2054.61	-0.00313218
464.82	0.47833095		994.82	0.11145052		1524.82	-0.01477996		2054.81	-0.00214181
465.02	0.47803176		995.02	0.11168606		1525.02	-0.01462129		2055.01	-0.00097612
465.22	0.47768365		995.22	0.11206568		1525.22	-0.01380108		2055.21	-0.00066821
465.42	0.47762269		995.42	0.11209262		1525.42	-0.0134677		2055.41	-0.00144918
465.62	0.4778352		995.62	0.11209396		1525.62	-0.01195915		2055.61	-0.00191504
465.82	0.47747501		995.82	0.11293041		1525.82	-0.01221628		2055.81	-0.00255204
466.02	0.47710742		996.02	0.11272425		1526.02	-0.01212103		2056.01	-0.00214403
466.22	0.4765938		996.22	0.11274164		1526.22	-0.01247099		2056.21	-0.00197793
466.42	0.47604738		996.42	0.1126111		1526.42	-0.01191381		2056.41	-0.00172255
466.62	0.4752995		996.62	0.11288913		1526.62	-0.01182596		2056.61	-0.00166326
466.82	0.47484055		996.82	0.1126137		1526.82	-0.01150979		2056.81	-0.00093356
467.02	0.47479102		997.02	0.11312417		1527.02	-0.01195096		2057.01	-0.00088785
467.22	0.47437763		997.22	0.11385803		1527.22	-0.01232542		2057.21	-0.00088094
467.42	0.47437091		997.42	0.11397955		1527.42	-0.01235729		2057.41	-0.00032619
467.62	0.47526438		997.62	0.11419054		1527.62	-0.01307323		2057.61	-0.00107083
467.82	0.47561601		997.82	0.11333179		1527.82	-0.01314913		2057.81	-0.00100045
468.02	0.47583177		998.02	0.11287691		1528.02	-0.01336892		2058.01	-0.00041002
468.22	0.47651152		998.22	0.11297816		1528.22	-0.01442755		2058.21	-0.00034658
468.42	0.47778294		998.42	0.11235962		1528.42	-0.01408749		2058.41	-0.00018177
468.62	0.47804683		998.62	0.1128371		1528.62	-0.0150678		2058.61	-0.00053267
468.82	0.47851515		998.82	0.11326847		1528.82	-0.01429392		2058.81	-0.00099161
469.02	0.47854663		999.02	0.11329535		1529.02	-0.01366144		2059.01	-0.00142162
469.22	0.47867835		999.22	0.11276056		1529.22	-0.01303335		2059.21	-0.00194698
469.42	0.47987368		999.42	0.11247247		1529.42	-0.01236655		2059.41	-0.00303536
469.62	0.48030936		999.62	0.11307858		1529.62	-0.01110058		2059.61	-0.00380087
469.82	0.48018813		999.82	0.11395821		1529.82	-0.01101091		2059.81	-0.00394957
470.02	0.47959794		1000.02	0.11347444		1530.02	-0.00976977		2060.01	-0.00323811
470.22	0.47853989		1000.22	0.11296003		1530.22	-0.01032634		2060.21	-0.00277274
470.42	0.4786848		1000.42	0.11266767		1530.42	-0.01057328		2060.41	-0.00240212
470.62	0.47771829		1000.62	0.11332372		1530.62	-0.01053152		2060.61	-0.00257893
470.82	0.47753933		1000.82	0.11305412		1530.82	-0.01015325		2060.81	-0.00227927
471.02	0.47784409		1001.02	0.11267015		1531.02	-0.01116502		2061.01	-0.00250871
471.22	0.47758542		1001.22	0.11181624		1531.22	-0.01196228		2061.21	-0.00183882
471.42	0.4772158		1001.42	0.11050395		1531.42	-0.0136627		2061.41	-0.00262966
471.62	0.47785203		1001.62	0.10987499		1531.62	-0.01419431		2061.61	-0.00304812
471.82	0.47768726		1001.82	0.11031563		1531.82	-0.01399016		2061.81	-0.00227245
472.02	0.47934179		1002.02	0.11075884		1532.02	-0.01454735		2062.01	-0.00248899
472.22	0.48024654		1002.22	0.11011358		1532.22	-0.01550873		2062.21	-0.00333955
472.42	0.48107696		1002.42	0.1094055		1532.42	-0.01544408		2062.41	-0.0037204
472.62	0.48107655		1002.62	0.11000297		1532.62	-0.01652008		2062.61	-0.00453179
472.82	0.48172429		1002.82	0.11015095		1532.82	-0.01529074		2062.81	-0.00456068
473.02	0.48126925		1003.02	0.11152394		1533.02	-0.01472395		2063.01	-0.00481448
473.22	0.48110329		1003.22	0.11156017		1533.22	-0.01441449		2063.21	-0.00466593
473.42	0.48113232		1003.42	0.11247608		1533.42	-0.0145924		2063.41	-0.00550504
473.62	0.47999492		1003.62	0.11397513		1533.62	-0.01446943		2063.61	-0.00492271
473.82	0.47963002		1003.82	0.11382367		1533.82	-0.01434819		2063.81	-0.00516701
474.02	0.47876564		1004.02	0.11300034		1534.02	-0.01441567		2064.01	-0.00479437
474.22	0.47690718		1004.22	0.11270476		1534.22	-0.01531196		2064.21	-0.00489691
474.42	0.47624971		1004.42	0.11226202		1534.42	-0.01449497		2064.41	-0.00469675
474.62	0.47472019		1004.62	0.11285036		1534.62	-0.01400105		2064.61	-0.00435747
474.82	0.47410852		1004.82	0.11199811		1534.82	-0.01321664		2064.81	-0.00356678
475.02	0.473479		1005.02	0.11184476		1535.02	-0.01340603		2065.01	-0.00256833
475.22	0.47279337		1005.22	0.11076753		1535.22	-0.01378778		2065.21	-0.00209588
475.42	0.47209693		1005.42	0.1104913		1535.42	-0.01433716		2065.41	-0.00239928
475.62	0.47261817		1005.62	0.11042092		1535.62	-0.01395089		2065.61	-0.00160756
475.82	0.47451652		1005.82	0.10994024		1535.82	-0.0132367		2065.81	-0.00058283
476.02	0.47670109		1006.02	0.10877586		1536.02	-0.01375134		2066.01	0.00041901
476.22	0.47663191		1006.22	0.10765024		1536.22	-0.01372878		2066.21	0.00018678
476.42	0.47709897		1006.42	0.10767923		1536.42	-0.01420017		2066.41	0.00033762
476.62	0.47848283		1006.62	0.10825757		1536.62	-0.01476887		2066.61	-0.000028
476.82	0.47991291		1006.82	0.10913426		1536.82	-0.01458877		2066.81	0.00075561
477.02	0.4796963		1007.02	0.1090194		1537.02	-0.01479245		2067.01	0.00036354
477.22	0.47974335		1007.22	0.10832858		1537.22	-0.01588723		2067.21	0.00014349
477.42	0.48036907		1007.42	0.10852361		1537.42	-0.01652599		2067.41	-0.000494
477.62	0.48095687		1007.62	0.10948182		1537.62	-0.01594931		2067.61	-0.00040041
477.82	0.48130941		1007.82	0.10923978		1537.82	-0.01585189		2067.81	-0.00067879
478.02	0.48035479		1008.02	0.10934453		1538.02	-0.01487347		2068.01	-0.00011065
478.22	0.47981275		1008.22	0.10960375		1538.22	-0.01389816		2068.21	-0.00012187
478.42	0.47951664		1008.42	0.11035024		1538.42	-0.01412386		2068.41	-0.00018686
478.62	0.47888614		1008.62	0.11094063		1538.62	-0.01319634		2068.61	0.00000449
478.82	0.47770516		1008.82	0.11141062		1538.82	-0.01211009		2068.81	0.00036375
479.02	0.47686172		1009.02	0.11262041		1539.02	-0.01162965		2069.01	-0.0002499
479.22	0.47579164		1009.22	0.11209963		1539.22	-0.01124606		2069.21	0.00096598
479.42	0.47545438		1009.42	0.11256658		1539.42	-0.01101232		2069.41	0.00124288
479.62	0.4753833		1009.62	0.1115192		1539.62	-0.01143764		2069.61	0.00142354
479.82	0.47566691		1009.82	0.11095636		1539.82	-0.01120055		2069.81	0.00145578
480.02	0.47489329		1010.02	0.11077251		1540.02	-0.01305702		2070.01	0.00171664
480.22	0.47428874		1010.22	0.10996136		1540.22	-0.01394781		2070.21	0.00052642
480.42	0.47425753		1010.42	0.10990692		1540.42	-0.01487756		2070.41	0.00005821
480.62	0.47476498		1010.62	0.10972115		1540.62	-0.01499383		2070.61	-0.00039963
480.82	0.47456926		1010.82	0.10957906		1540.82	-0.01528734		2070.81	-0.00085916
481.02	0.47393116		1011.02	0.10854489		1541.02	-0.01540468		2071.01	-0.00115425
481.22	0.47427328		1011.22	0.10829126		1541.22	-0.01573838		2071.21	-0.0010751
481.42	0.47475099		1011.42	0.10803875		1541.42	-0.01523557		2071.41	-0.00130911
481.62	0.47482178		1011.62	0.1082788		1541.62	-0.01536367		2071.61	-0.00180277
481.82	0.47416394		1011.82	0.10781214		1541.82	-0.0161071		2071.81	-0.000956
482.02	0.47475121		1012.02	0.10805251		1542.02	-0.01600688		2072.01	-0.0013221
482.22	0.47532612		1012.22	0.10787738		1542.22	-0.01693205		2072.21	-0.0017709
482.42	0.47499793		1012.42	0.10790314		1542.42	-0.01755844		2072.41	-0.00203082
482.62	0.47494168		1012.62	0.10837238		1542.62	-0.01636841		2072.61	-0.00155468
482.82	0.475567		1012.82	0.10918677		1542.82	-0.01620973		2072.81	-0.00128365
483.02	0.47596177		1013.02	0.11001663		1543.02	-0.01606302		2073.01	-0.00152654
483.22	0.47620104		1013.22	0.10965745		1543.22	-0.01641598		2073.21	-0.0009666
483.42	0.47704495		1013.42	0.10974379		1543.42	-0.01701276		2073.41	-0.00252997
483.62	0.4761799		1013.62	0.10948884		1543.62	-0.01762238		2073.61	-0.00343854
483.82	0.47773201		1013.82	0.11069857		1543.82	-0.01734925		2073.81	-0.00364689
484.02	0.47784244		1014.02	0.1100789		1544.02	-0.0169477		2074.01	-0.00443088
484.22	0.47865763		1014.22	0.11105664		1544.22	-0.01589925		2074.21	-0.00475395
484.42	0.47918749		1014.42	0.11213239		1544.42	-0.01541424		2074.41	-0.0051207
484.62	0.47967859		1014.62	0.11234502		1544.62	-0.01577693		2074.61	-0.00468594
484.82	0.47932129		1014.82	0.11282789		1544.82	-0.01492768		2074.81	-0.00462455
485.02	0.47864152		1015.02	0.11278434		1545.02	-0.01514208		2075.01	-0.00404215
485.22	0.47814618		1015.22	0.11228127		1545.22	-0.01422152		2075.21	-0.00441182
485.42	0.47760233		1015.42	0.1124609		1545.42	-0.01376525		2075.41	-0.00512231
485.62	0.47645956		1015.62	0.11224482		1545.62	-0.01390569		2075.61	-0.00506009
485.82	0.47516239		1015.82	0.1116477		1545.82	-0.01372367		2075.81	-0.00467357
486.02	0.47459998		1016.02	0.11130143		1546.02	-0.01432643		2076.01	-0.00448984
486.22	0.47380892		1016.22	0.11112838		1546.22	-0.01493334		2076.21	-0.00419534
486.42	0.47335971		1016.42	0.11155397		1546.42	-0.01498573		2076.41	-0.00401547
486.62	0.47379507		1016.62	0.11127984		1546.62	-0.01472935		2076.61	-0.00352667
486.82	0.47362926		1016.82	0.11104588		1546.82	-0.01481593		2076.81	-0.00393151
487.02	0.47311903		1017.02	0.11071106		1547.02	-0.0158173		2077.01	-0.00421692
487.22	0.47276677		1017.22	0.10993958		1547.22	-0.01616047		2077.21	-0.00470619
487.42	0.47307381		1017.42	0.1096262		1547.42	-0.01575082		2077.41	-0.00536661
487.62	0.47335539		1017.62	0.10935503		1547.62	-0.01596248		2077.61	-0.00515707
487.82	0.4746758		1017.82	0.10938693		1547.82	-0.01550128		2077.81	-0.00397235
488.02	0.47517282		1018.02	0.10908314		1548.02	-0.01507249		2078.01	-0.00393923
488.22	0.47630356		1018.22	0.11088052		1548.22	-0.01559885		2078.21	-0.00340902
488.42	0.47717713		1018.42	0.11082787		1548.42	-0.01664067		2078.41	-0.00385687
488.62	0.4763231		1018.62	0.11081095		1548.62	-0.01741694		2078.61	-0.00360649
488.82	0.47574209		1018.82	0.11248909		1548.82	-0.01703607		2078.81	-0.00410899
489.02	0.47516375		1019.02	0.11294471		1549.02	-0.01705963		2079.01	-0.00313924
489.22	0.47498696		1019.22	0.1131574		1549.22	-0.01721629		2079.21	-0.00314186
489.42	0.47469881		1019.42	0.11374382		1549.42	-0.01830571		2079.41	-0.00316126
489.62	0.47368939		1019.62	0.11319208		1549.62	-0.01941771		2079.61	-0.00265635
489.82	0.47335532		1019.82	0.11324941		1549.82	-0.02072988		2079.81	-0.00314251
490.02	0.473708		1020.02	0.1134526		1550.02	-0.02167552		2080.01	-0.0025454
490.22	0.4743539		1020.22	0.11286219		1550.22	-0.02129086		2080.21	-0.002535
490.42	0.47475801		1020.42	0.11253732		1550.42	-0.02126651		2080.41	-0.00305516
490.62	0.47475901		1020.62	0.11103704		1550.62	-0.0215953		2080.61	-0.00296315
490.82	0.47438405		1020.82	0.11123338		1550.82	-0.02196983		2080.81	-0.00326387
491.02	0.47528845		1021.02	0.11007565		1551.02	-0.02261663		2081.01	-0.00307759
491.22	0.47510036		1021.22	0.10847009		1551.22	-0.02245593		2081.21	-0.00225846
491.42	0.47618436		1021.42	0.10758678		1551.42	-0.02126312		2081.41	-0.00175841
491.62	0.47665644		1021.62	0.10662792		1551.62	-0.02092853		2081.61	-0.00119152
491.82	0.47699476		1021.82	0.10673148		1551.82	-0.01951294		2081.81	-0.00132507
492.02	0.47812267		1022.02	0.10720367		1552.02	-0.01896931		2082.01	-0.00171814
492.22	0.47775751		1022.22	0.10757371		1552.22	-0.01897215		2082.21	-0.00292251
492.42	0.47729936		1022.42	0.1078087		1552.42	-0.01849124		2082.41	-0.00405414
492.62	0.4759212		1022.62	0.10812732		1552.62	-0.01868823		2082.61	-0.00308697
492.82	0.47569986		1022.82	0.10972431		1552.82	-0.01795972		2082.81	-0.00287635
493.02	0.47521656		1023.02	0.10905325		1553.02	-0.0178048		2083.01	-0.00260691
493.22	0.47377751		1023.22	0.10890168		1553.22	-0.0183112		2083.21	-0.00321952
493.42	0.47347501		1023.42	0.10914977		1553.42	-0.01737658		2083.41	-0.00287529
493.62	0.47331698		1023.62	0.10931692		1553.62	-0.01682346		2083.61	-0.00285319
493.82	0.47351052		1023.82	0.10916411		1553.82	-0.01608143		2083.81	-0.00376559
494.02	0.47445706		1024.02	0.10936515		1554.02	-0.01519482		2084.01	-0.00345878
494.22	0.47447751		1024.22	0.10869024		1554.22	-0.01519813		2084.21	-0.00362883
494.42	0.47451122		1024.42	0.10933237		1554.42	-0.01493618		2084.41	-0.00411081
494.62	0.47429687		1024.62	0.10991176		1554.62	-0.01529835		2084.61	-0.00378029
494.82	0.47507668		1024.82	0.11101013		1554.82	-0.01463207		2084.81	-0.00369256
495.02	0.47664687		1025.02	0.11082704		1555.02	-0.01481455		2085.01	-0.0035997
495.22	0.47674651		1025.22	0.11103285		1555.22	-0.01510904		2085.21	-0.00362282
495.42	0.47729944		1025.42	0.11128407		1555.42	-0.01508524		2085.41	-0.00342149
495.62	0.47705958		1025.62	0.11070821		1555.62	-0.01552411		2085.61	-0.00374394
495.82	0.47781746		1025.82	0.11136702		1555.82	-0.01564482		2085.81	-0.00428483
496.02	0.47818559		1026.02	0.11225918		1556.02	-0.01727801		2086.01	-0.00362916
496.22	0.47727973		1026.22	0.11246782		1556.22	-0.01700715		2086.21	-0.00445765
496.42	0.47702908		1026.42	0.11363836		1556.42	-0.01733627		2086.41	-0.00367896
496.62	0.47735498		1026.62	0.11354418		1556.62	-0.01798232		2086.61	-0.00358672
496.82	0.47645365		1026.82	0.11387446		1556.82	-0.01777768		2086.81	-0.00471128
497.02	0.47495393		1027.02	0.112265		1557.02	-0.0178018		2087.01	-0.00467293
497.22	0.47329215		1027.22	0.11209295		1557.22	-0.01796075		2087.21	-0.00367065
497.42	0.47245997		1027.42	0.11173307		1557.42	-0.01764044		2087.41	-0.00343279
497.62	0.47243252		1027.62	0.11053346		1557.62	-0.0173382		2087.61	-0.0038341
497.82	0.47164408		1027.82	0.11046307		1557.82	-0.0173318		2087.81	-0.00422599
498.02	0.47090823		1028.02	0.11033404		1558.02	-0.01741134		2088.01	-0.00288498
498.22	0.47095336		1028.22	0.10965086		1558.22	-0.01804916		2088.21	-0.00294809
498.42	0.47067459		1028.42	0.11023987		1558.42	-0.01735409		2088.41	-0.00237295
498.62	0.47068256		1028.62	0.10995742		1558.62	-0.01688061		2088.61	-0.00173525
498.82	0.47194668		1028.82	0.10946184		1558.82	-0.01724921		2088.81	-0.00124792
499.02	0.47287179		1029.02	0.10947396		1559.02	-0.01787966		2089.01	-0.00165725
499.22	0.47230119		1029.22	0.10928144		1559.22	-0.01751027		2089.21	-0.00175791
499.42	0.47225404		1029.42	0.10894346		1559.42	-0.01676192		2089.41	-0.0014618
499.62	0.47361447		1029.62	0.10848309		1559.62	-0.01550039		2089.61	-0.0009303
499.82	0.47425492		1029.82	0.10964107		1559.82	-0.01497727		2089.81	-0.00102988
500.02	0.47495538		1030.02	0.11051732		1560.02	-0.01521759		2090.01	-0.00092467
500.22	0.47563237		1030.22	0.11092913		1560.22	-0.01412841		2090.21	-0.00179984
500.42	0.47699226		1030.42	0.1115052		1560.42	-0.01395387		2090.41	-0.00168187
500.62	0.47731475		1030.62	0.11139486		1560.62	-0.01333024		2090.61	-0.00220844
500.82	0.47638662		1030.82	0.11154438		1560.82	-0.01424495		2090.81	-0.00196006
501.02	0.47613208		1031.02	0.11046536		1561.02	-0.01400317		2091.01	-0.00241913
501.22	0.4757079		1031.22	0.11080135		1561.22	-0.01469642		2091.21	-0.00198353
501.42	0.47494518		1031.42	0.11013302		1561.42	-0.01458093		2091.41	-0.00228564
501.62	0.47564203		1031.62	0.1093954		1561.62	-0.01495824		2091.61	-0.00210745
501.82	0.47469555		1031.82	0.10949579		1561.82	-0.01627846		2091.81	-0.00138038
502.02	0.47352882		1032.02	0.1090481		1562.02	-0.01694386		2092.01	-0.00077963
502.22	0.47353527		1032.22	0.10894944		1562.22	-0.01720702		2092.21	-0.00128715
502.42	0.47231634		1032.42	0.10839272		1562.42	-0.01727033		2092.41	-0.00056981
502.62	0.47198428		1032.62	0.10724273		1562.62	-0.01834879		2092.61	-0.00016621
502.82	0.47184324		1032.82	0.10691818		1562.82	-0.01961478		2092.81	-0.00100884
503.02	0.47192256		1033.02	0.10756453		1563.02	-0.02070377		2093.01	-0.00142742
503.22	0.4719772		1033.22	0.10737904		1563.22	-0.01984215		2093.21	-0.00126044
503.42	0.4723866		1033.42	0.10816116		1563.42	-0.01974004		2093.41	-0.00140198
503.62	0.47309592		1033.62	0.10780969		1563.62	-0.01951964		2093.61	-0.00071227
503.82	0.47177756		1033.82	0.10827578		1563.82	-0.02004408		2093.81	-0.00062282
504.02	0.4715977		1034.02	0.10927513		1564.02	-0.0202615		2094.01	-0.00116447
504.22	0.4711429		1034.22	0.11023115		1564.22	-0.01968305		2094.21	-0.0016342
504.42	0.47124535		1034.42	0.11105584		1564.42	-0.01899262		2094.41	-0.00068539
504.62	0.47135001		1034.62	0.11193137		1564.62	-0.0193631		2094.61	-0.00013937
504.82	0.47170284		1034.82	0.11251836		1564.82	-0.02022435		2094.81	-0.00064336
505.02	0.47148511		1035.02	0.11217865		1565.02	-0.01919694		2095.01	-0.00033613
505.22	0.47163157		1035.22	0.11307402		1565.22	-0.01885075		2095.21	0.00086457
505.42	0.47235259		1035.42	0.11258		1565.42	-0.01860137		2095.41	0.00102134
505.62	0.47184424		1035.62	0.11229878		1565.62	-0.01848989		2095.61	0.00014908
505.82	0.4720191		1035.82	0.11293909		1565.82	-0.01863066		2095.81	0.00090866
506.02	0.47213649		1036.02	0.11321952		1566.02	-0.01826701		2096.01	0.00100941
506.22	0.47288447		1036.22	0.11311981		1566.22	-0.01711778		2096.21	0.00104961
506.42	0.4731822		1036.42	0.11159117		1566.42	-0.01710279		2096.41	0.00172494
506.62	0.47420178		1036.62	0.11103439		1566.62	-0.01730669		2096.61	0.00116433
506.82	0.47535435		1036.82	0.1109183		1566.82	-0.01740607		2096.81	0.00060822
507.02	0.47689043		1037.02	0.11153325		1567.02	-0.01812576		2097.01	0.00062173
507.22	0.47753285		1037.22	0.11022309		1567.22	-0.01715572		2097.21	0.00139912
507.42	0.4768144		1037.42	0.11002553		1567.42	-0.01685112		2097.41	0.0007559
507.62	0.47668313		1037.62	0.10871439		1567.62	-0.01590494		2097.61	0.00086449
507.82	0.47525353		1037.82	0.10897274		1567.82	-0.016266		2097.81	0.00036099
508.02	0.47473934		1038.02	0.10934863		1568.02	-0.01611142		2098.01	-0.00095123
508.22	0.47475922		1038.22	0.10978418		1568.22	-0.01542453		2098.21	-0.0015965
508.42	0.47420305		1038.42	0.10945219		1568.42	-0.01566833		2098.41	-0.00235788
508.62	0.47412873		1038.62	0.10928881		1568.62	-0.0164866		2098.61	-0.00287833
508.82	0.47342418		1038.82	0.10895535		1568.82	-0.01635827		2098.81	-0.0040911
509.02	0.47302308		1039.02	0.10906585		1569.02	-0.01587442		2099.01	-0.00412683
509.22	0.47276837		1039.22	0.10972054		1569.22	-0.01626713		2099.21	-0.00471078
509.42	0.47298561		1039.42	0.11043196		1569.42	-0.01669974		2099.41	-0.00556988
509.62	0.47221802		1039.62	0.11146507		1569.62	-0.01730994		2099.61	-0.00574014
509.82	0.47310329		1039.82	0.11208754		1569.82	-0.01745905		2099.81	-0.00502422
510.02	0.47323525		1040.02	0.11202456		1570.02	-0.01811258		2100.01	-0.00453605
510.22	0.473476		1040.22	0.11194271		1570.22	-0.01806685		2100.21	-0.00379663
510.42	0.47281607		1040.42	0.11110672		1570.42	-0.01860531		2100.41	-0.00319614
510.62	0.47309277		1040.62	0.11133742		1570.62	-0.01962033		2100.61	-0.00220827
510.82	0.47340226		1040.82	0.11153379		1570.82	-0.02047334		2100.81	-0.00136319
511.02	0.47347528		1041.02	0.11161028		1571.02	-0.0199021		2101.01	-0.00030987
511.22	0.47209909		1041.22	0.11050671		1571.22	-0.01908268		2101.21	0.00159089
511.42	0.47208049		1041.42	0.10980749		1571.42	-0.01814711		2101.41	0.00208671
511.62	0.47219571		1041.62	0.10847552		1571.62	-0.01696229		2101.61	0.00356769
511.82	0.47167096		1041.82	0.10841094		1571.82	-0.0173689		2101.81	0.00260836
512.02	0.47134632		1042.02	0.10785653		1572.02	-0.01641022		2102.01	0.00130379
512.22	0.47143266		1042.22	0.10836406		1572.22	-0.01577569		2102.21	0.00024209
512.42	0.47047665		1042.42	0.10793661		1572.42	-0.01541526		2102.41	-0.00116439
512.62	0.47070056		1042.62	0.10763547		1572.62	-0.01544311		2102.61	-0.00171279
512.82	0.47039031		1042.82	0.10855262		1572.82	-0.01534668		2102.81	-0.00255716
513.02	0.47098544		1043.02	0.10910732		1573.02	-0.01552169		2103.01	-0.00286658
513.22	0.47059747		1043.22	0.10998973		1573.22	-0.0168811		2103.21	-0.00389944
513.42	0.47076991		1043.42	0.11066447		1573.42	-0.01709698		2103.41	-0.00441047
513.62	0.47024868		1043.62	0.11027201		1573.62	-0.01837869		2103.61	-0.00482576
513.82	0.47080693		1043.82	0.10954681		1573.82	-0.01948085		2103.81	-0.00621401
514.02	0.47110896		1044.02	0.10949942		1574.02	-0.02081585		2104.01	-0.00555261
514.22	0.47151366		1044.22	0.10880572		1574.22	-0.02208407		2104.21	-0.00473053
514.42	0.47197814		1044.42	0.10849586		1574.42	-0.02218197		2104.41	-0.00425965
514.62	0.4731254		1044.62	0.10848066		1574.62	-0.02184323		2104.61	-0.003276
514.82	0.47348544		1044.82	0.10836933		1574.82	-0.02140336		2104.81	-0.00372724
515.02	0.47341704		1045.02	0.10825888		1575.02	-0.02085734		2105.01	-0.00293946
515.22	0.47365546		1045.22	0.10878385		1575.22	-0.02016171		2105.21	-0.00227576
515.42	0.47399893		1045.42	0.10854255		1575.42	-0.01966757		2105.41	-0.00181538
515.62	0.47385673		1045.62	0.10816769		1575.62	-0.01860602		2105.61	-0.00204796
515.82	0.47362952		1045.82	0.1085022		1575.82	-0.0183655		2105.81	-0.00426899
516.02	0.47382403		1046.02	0.10922199		1576.02	-0.0178044		2106.01	-0.00560864
516.22	0.47357216		1046.22	0.11025801		1576.22	-0.01770712		2106.21	-0.0059366
516.42	0.47279548		1046.42	0.10982268		1576.42	-0.01733894		2106.41	-0.00728542
516.62	0.47327723		1046.62	0.11005681		1576.62	-0.01646388		2106.61	-0.00734919
516.82	0.47262709		1046.82	0.11090529		1576.82	-0.01694316		2106.81	-0.00736456
517.02	0.47246944		1047.02	0.11133829		1577.02	-0.01677525		2107.01	-0.00741551
517.22	0.47083384		1047.22	0.11159201		1577.22	-0.0174538		2107.21	-0.00756286
517.42	0.47015564		1047.42	0.11060671		1577.42	-0.01754105		2107.41	-0.00669891
517.62	0.47021914		1047.62	0.10947873		1577.62	-0.0187176		2107.61	-0.0064977
517.82	0.47116252		1047.82	0.10884141		1577.82	-0.01908887		2107.81	-0.00497586
518.02	0.47158057		1048.02	0.1086467		1578.02	-0.01920759		2108.01	-0.00302669
518.22	0.47249091		1048.22	0.10837063		1578.22	-0.01945097		2108.21	-0.00094488
518.42	0.4736785		1048.42	0.10850509		1578.42	-0.01912466		2108.41	0.00019466
518.62	0.47416487		1048.62	0.10830186		1578.62	-0.01871841		2108.61	0.00112614
518.82	0.47443173		1048.82	0.10771477		1578.82	-0.0179002		2108.81	0.00181294
519.02	0.47561969		1049.02	0.1084396		1579.02	-0.01731019		2109.01	0.00202325
519.22	0.47715025		1049.22	0.10923721		1579.22	-0.01645964		2109.21	0.00277314
519.42	0.47634496		1049.42	0.10914164		1579.42	-0.01553732		2109.41	0.00222769
519.62	0.47670005		1049.62	0.10901842		1579.62	-0.01496615		2109.61	0.0009845
519.82	0.47647983		1049.82	0.1092552		1579.82	-0.01474749		2109.81	-0.00049701
520.02	0.47645391		1050.02	0.1103428		1580.02	-0.01380221		2110.01	-0.00212069
520.22	0.47540338		1050.22	0.11021319		1580.22	-0.01354803		2110.21	-0.0031653
520.42	0.4750905		1050.42	0.10969611		1580.42	-0.01337012		2110.41	-0.00454204
520.62	0.47504648		1050.62	0.11064799		1580.62	-0.01240997		2110.61	-0.00433393
520.82	0.47376105		1050.82	0.11105459		1580.82	-0.01353865		2110.81	-0.00466442
521.02	0.47277204		1051.02	0.11168808		1581.02	-0.01402856		2111.01	-0.00490747
521.22	0.47172136		1051.22	0.11092972		1581.22	-0.01477378		2111.21	-0.00416425
521.42	0.47088067		1051.42	0.11020329		1581.42	-0.01630547		2111.41	-0.00293087
521.62	0.47069992		1051.62	0.11024789		1581.62	-0.01754688		2111.61	-0.00192277
521.82	0.47057143		1051.82	0.11070606		1581.82	-0.0176855		2111.81	-0.00074039
522.02	0.4694465		1052.02	0.11011048		1582.02	-0.01799537		2112.01	-0.00038844
522.22	0.46933398		1052.22	0.11064476		1582.22	-0.01817136		2112.21	0.00072859
522.42	0.46972554		1052.42	0.11082211		1582.42	-0.0190085		2112.41	0.00092321
522.62	0.47005631		1052.62	0.11096151		1582.62	-0.01825425		2112.61	0.00077906
522.82	0.47057932		1052.82	0.111472		1582.82	-0.01715751		2112.81	0.00080126
523.02	0.47214248		1053.02	0.11224456		1583.02	-0.01716251		2113.01	0.00016937
523.22	0.47307779		1053.22	0.11278609		1583.22	-0.01710439		2113.21	0.00043566
523.42	0.47229116		1053.42	0.11311346		1583.42	-0.01632968		2113.41	-0.00232597
523.62	0.47321077		1053.62	0.11332583		1583.62	-0.0168163		2113.61	-0.00422919
523.82	0.47288135		1053.82	0.11325947		1583.82	-0.01655047		2113.81	-0.00502323
524.02	0.47319014		1054.02	0.11372106		1584.02	-0.0155054		2114.01	-0.00592516
524.22	0.47330136		1054.22	0.11356193		1584.22	-0.0158652		2114.21	-0.00619247
524.42	0.47336165		1054.42	0.11382842		1584.42	-0.01698462		2114.41	-0.00734804
524.62	0.47264886		1054.62	0.11404135		1584.62	-0.0166392		2114.61	-0.00771506
524.82	0.47238507		1054.82	0.11361947		1584.82	-0.01723288		2114.81	-0.00866286
525.02	0.47271013		1055.02	0.11384558		1585.02	-0.01822551		2115.01	-0.00806501
525.22	0.47263558		1055.22	0.11316898		1585.22	-0.01820069		2115.21	-0.00680752
525.42	0.47240715		1055.42	0.11261416		1585.42	-0.01833521		2115.41	-0.00624627
525.62	0.47254472		1055.62	0.11184509		1585.62	-0.01836416		2115.61	-0.00545105
525.82	0.47266715		1055.82	0.1111874		1585.82	-0.0178062		2115.81	-0.005497
526.02	0.47205352		1056.02	0.10984478		1586.02	-0.01805966		2116.01	-0.00456129
526.22	0.47271756		1056.22	0.10989397		1586.22	-0.01808944		2116.21	-0.00330519
526.42	0.47318118		1056.42	0.10972494		1586.42	-0.01843919		2116.41	-0.00333166
526.62	0.47323366		1056.62	0.1094164		1586.62	-0.01755467		2116.61	-0.00292995
526.82	0.47294644		1056.82	0.10902158		1586.82	-0.01822903		2116.81	-0.00299146
527.02	0.47352288		1057.02	0.10798616		1587.02	-0.01775834		2117.01	-0.00329079
527.22	0.47344424		1057.22	0.10785323		1587.22	-0.01832679		2117.21	-0.00351553
527.42	0.47253381		1057.42	0.10763091		1587.42	-0.01822165		2117.41	-0.00462242
527.62	0.47280572		1057.62	0.10703028		1587.62	-0.01864566		2117.61	-0.00440155
527.82	0.47148479		1057.82	0.10715336		1587.82	-0.01876814		2117.81	-0.00372507
528.02	0.47133026		1058.02	0.10789206		1588.02	-0.01882713		2118.01	-0.00393813
528.22	0.47069015		1058.22	0.10861754		1588.22	-0.01892903		2118.21	-0.00505559
528.42	0.46962813		1058.42	0.10876732		1588.42	-0.02064346		2118.41	-0.00553204
528.62	0.46916122		1058.62	0.10886879		1588.62	-0.02032376		2118.61	-0.00538886
528.82	0.46995725		1058.82	0.10843392		1588.82	-0.0211715		2118.81	-0.00599855
529.02	0.47020169		1059.02	0.10817621		1589.02	-0.022059		2119.01	-0.00476671
529.22	0.47029077		1059.22	0.10778124		1589.22	-0.02154765		2119.21	-0.0055302
529.42	0.47068914		1059.42	0.10758496		1589.42	-0.02217078		2119.41	-0.00539398
529.62	0.47107185		1059.62	0.10697077		1589.62	-0.02245787		2119.61	-0.00578183
529.82	0.47222178		1059.82	0.1072745		1589.82	-0.0221513		2119.81	-0.00535782
530.02	0.4730009		1060.02	0.10632818		1590.02	-0.02212582		2120.01	-0.00526744
530.22	0.47332927		1060.22	0.10636291		1590.22	-0.02135647		2120.21	-0.00548808
530.42	0.4738981		1060.42	0.10627697		1590.42	-0.02166548		2120.41	-0.00614861
530.62	0.47380262		1060.62	0.10648261		1590.62	-0.02089736		2120.61	-0.00533783
530.82	0.47374448		1060.82	0.10591876		1590.82	-0.02108653		2120.81	-0.00647926
531.02	0.47401302		1061.02	0.10613161		1591.02	-0.02000647		2121.01	-0.00581103
531.22	0.47385309		1061.22	0.10642333		1591.22	-0.02088527		2121.21	-0.00520138
531.42	0.47357565		1061.42	0.10703535		1591.42	-0.02119612		2121.41	-0.005578
531.62	0.47325759		1061.62	0.10760237		1591.62	-0.02156123		2121.61	-0.00632633
531.82	0.47195813		1061.82	0.1088408		1591.82	-0.02224099		2121.81	-0.00574046
532.02	0.47090162		1062.02	0.10988503		1592.02	-0.02231386		2122.01	-0.00621924
532.22	0.47054724		1062.22	0.11072919		1592.22	-0.02287761		2122.21	-0.00576688
532.42	0.47027144		1062.42	0.11016102		1592.42	-0.0237537		2122.41	-0.00523933
532.62	0.46937212		1062.62	0.11026454		1592.62	-0.02382507		2122.61	-0.00545744
532.82	0.46924564		1062.82	0.1101381		1592.82	-0.02407052		2122.81	-0.00583792
533.02	0.46904111		1063.02	0.10955425		1593.02	-0.02376555		2123.01	-0.00584084
533.22	0.46966935		1063.22	0.10995471		1593.22	-0.02382506		2123.21	-0.00667783
533.42	0.4703906		1063.42	0.10961857		1593.42	-0.02379288		2123.41	-0.00644251
533.62	0.47114066		1063.62	0.10898118		1593.62	-0.02231902		2123.61	-0.00667743
533.82	0.47178671		1063.82	0.1087085		1593.82	-0.02113073		2123.81	-0.00642059
534.02	0.47233484		1064.02	0.10801139		1594.02	-0.02009488		2124.01	-0.00719916
534.22	0.47332936		1064.22	0.10759078		1594.22	-0.01883465		2124.21	-0.00642214
534.42	0.47397201		1064.42	0.10749715		1594.42	-0.01835407		2124.41	-0.00518332
534.62	0.47357057		1064.62	0.10735505		1594.62	-0.01678186		2124.61	-0.00469355
534.82	0.47389543		1064.82	0.10721737		1594.82	-0.01635792		2124.81	-0.00546348
535.02	0.4731394		1065.02	0.10742624		1595.02	-0.01634481		2125.01	-0.00494886
535.22	0.47347224		1065.22	0.10721198		1595.22	-0.01646502		2125.21	-0.00555126
535.42	0.47293579		1065.42	0.10755492		1595.42	-0.01623668		2125.41	-0.00643727
535.62	0.47202998		1065.62	0.10739854		1595.62	-0.0160865		2125.61	-0.00582242
535.82	0.47087198		1065.82	0.1073181		1595.82	-0.01681751		2125.81	-0.00526942
536.02	0.46997393		1066.02	0.1070217		1596.02	-0.01686945		2126.01	-0.00580598
536.22	0.46966123		1066.22	0.10646993		1596.22	-0.01744664		2126.21	-0.00486665
536.42	0.46870003		1066.42	0.10527278		1596.42	-0.0180134		2126.41	-0.00477955
536.62	0.46847723		1066.62	0.10523655		1596.62	-0.01934043		2126.61	-0.00435247
536.82	0.46894672		1066.82	0.10475659		1596.82	-0.01962269		2126.81	-0.00393627
537.02	0.4693392		1067.02	0.10289336		1597.02	-0.02107826		2127.01	-0.00382177
537.22	0.46941605		1067.22	0.10298992		1597.22	-0.02220897		2127.21	-0.00279959
537.42	0.47076431		1067.42	0.10270845		1597.42	-0.02269753		2127.41	-0.00227678
537.62	0.47071448		1067.62	0.10289901		1597.62	-0.02316858		2127.61	-0.00172822
537.82	0.47169551		1067.82	0.10334203		1597.82	-0.02325837		2127.81	-0.00122067
538.02	0.47238519		1068.02	0.1032095		1598.02	-0.02355634		2128.01	-0.00083156
538.22	0.47339412		1068.22	0.10429296		1598.22	-0.02287267		2128.21	-0.00004397
538.42	0.47305298		1068.42	0.1052732		1598.42	-0.02284981		2128.41	0.00094504
538.62	0.47340222		1068.62	0.10541808		1598.62	-0.02230955		2128.61	0.00005015
538.82	0.47349738		1068.82	0.10604483		1598.82	-0.02199355		2128.81	-0.00018654
539.02	0.47230452		1069.02	0.10594243		1599.02	-0.02106497		2129.01	-0.00088796
539.22	0.47306414		1069.22	0.1068275		1599.22	-0.01938401		2129.21	-0.00141721
539.42	0.47205221		1069.42	0.10807099		1599.42	-0.01844954		2129.41	-0.00220131
539.62	0.47175391		1069.62	0.10883079		1599.62	-0.0178082		2129.61	-0.00246985
539.82	0.4713216		1069.82	0.10943805		1599.82	-0.01785643		2129.81	-0.00401345
540.02	0.4711673		1070.02	0.1094796		1600.02	-0.01789322		2130.01	-0.00472823
540.22	0.47055733		1070.22	0.10911636		1600.22	-0.01791137		2130.21	-0.00443902
540.42	0.47063314		1070.42	0.10887507		1600.42	-0.0183006		2130.41	-0.00444786
540.62	0.47088111		1070.62	0.10912383		1600.62	-0.01830965		2130.61	-0.00406557
540.82	0.47015092		1070.82	0.10819094		1600.82	-0.01842055		2130.81	-0.00449559
541.02	0.4708021		1071.02	0.10751312		1601.02	-0.01905504		2131.01	-0.0052056
541.22	0.47093234		1071.22	0.10761173		1601.22	-0.02027683		2131.21	-0.00511188
541.42	0.47242985		1071.42	0.10741177		1601.42	-0.02111853		2131.41	-0.00524056
541.62	0.47265759		1071.62	0.10816146		1601.62	-0.02123796		2131.61	-0.00520764
541.82	0.47318439		1071.82	0.10877019		1601.82	-0.02090916		2131.81	-0.00512938
542.02	0.47282394		1072.02	0.10845036		1602.02	-0.02135611		2132.01	-0.00480807
542.22	0.47316986		1072.22	0.10927829		1602.22	-0.0220685		2132.21	-0.00390681
542.42	0.47354217		1072.42	0.10873309		1602.42	-0.02328039		2132.41	-0.00271217
542.62	0.47358882		1072.62	0.10825527		1602.62	-0.02337408		2132.61	-0.00338093
542.82	0.47270978		1072.82	0.10850716		1602.82	-0.02399723		2132.81	-0.00287093
543.02	0.47184754		1073.02	0.10905193		1603.02	-0.02335229		2133.01	-0.0031536
543.22	0.47198717		1073.22	0.10977668		1603.22	-0.02321883		2133.21	-0.00303267
543.42	0.47149665		1073.42	0.10987933		1603.42	-0.02349559		2133.41	-0.00328821
543.62	0.47205086		1073.62	0.10970716		1603.62	-0.02387484		2133.61	-0.00365326
543.82	0.47183298		1073.82	0.10989118		1603.82	-0.0240455		2133.81	-0.00394405
544.02	0.47060199		1074.02	0.10938501		1604.02	-0.024022		2134.01	-0.00349053
544.22	0.47027678		1074.22	0.10893111		1604.22	-0.02374712		2134.21	-0.00253072
544.42	0.47106512		1074.42	0.10858001		1604.42	-0.02343452		2134.41	-0.0022359
544.62	0.47059386		1074.62	0.10863464		1604.62	-0.02386933		2134.61	-0.00254522
544.82	0.47134033		1074.82	0.10695734		1604.82	-0.02430734		2134.81	-0.0034809
545.02	0.47228568		1075.02	0.10644778		1605.02	-0.02428595		2135.01	-0.00369301
545.22	0.4720304		1075.22	0.10665622		1605.22	-0.02495719		2135.21	-0.00380405
545.42	0.47281449		1075.42	0.10749209		1605.42	-0.02374985		2135.41	-0.00359798
545.62	0.47256475		1075.62	0.10858049		1605.62	-0.02343019		2135.61	-0.00408926
545.82	0.47237826		1075.82	0.10822803		1605.82	-0.02304622		2135.81	-0.00444741
546.02	0.47267148		1076.02	0.10793375		1606.02	-0.02380469		2136.01	-0.00478325
546.22	0.47311612		1076.22	0.10895147		1606.22	-0.02416753		2136.21	-0.00494941
546.42	0.47264425		1076.42	0.10904756		1606.42	-0.02284868		2136.41	-0.00533674
546.62	0.4718309		1076.62	0.10928558		1606.62	-0.02262974		2136.61	-0.00678918
546.82	0.47095427		1076.82	0.10935135		1606.82	-0.02241455		2136.81	-0.0072174
547.02	0.46987267		1077.02	0.10918335		1607.02	-0.02123109		2137.01	-0.00738564
547.22	0.46900675		1077.22	0.10896413		1607.22	-0.02113246		2137.21	-0.00767792
547.42	0.46829903		1077.42	0.1085038		1607.42	-0.02039509		2137.41	-0.00814326
547.62	0.46830362		1077.62	0.10877023		1607.62	-0.01949569		2137.61	-0.00864757
547.82	0.46786776		1077.82	0.10836865		1607.82	-0.01932294		2137.81	-0.00865685
548.02	0.46658991		1078.02	0.10819791		1608.02	-0.01944152		2138.01	-0.00899028
548.22	0.46724689		1078.22	0.10741182		1608.22	-0.02023283		2138.21	-0.00864018
548.42	0.46802888		1078.42	0.10705662		1608.42	-0.02133209		2138.41	-0.00800945
548.62	0.46832858		1078.62	0.10655981		1608.62	-0.02134519		2138.61	-0.00807763
548.82	0.46978433		1078.82	0.10611086		1608.82	-0.02210457		2138.81	-0.0071442
549.02	0.47016538		1079.02	0.10730268		1609.02	-0.02261055		2139.01	-0.00691954
549.22	0.47036233		1079.22	0.1080917		1609.22	-0.02296773		2139.21	-0.0058902
549.42	0.47159238		1079.42	0.10789108		1609.42	-0.02304863		2139.41	-0.00504682
549.62	0.47167465		1079.62	0.10696937		1609.62	-0.02327495		2139.61	-0.00548295
549.82	0.47190518		1079.82	0.1063446		1609.82	-0.02304272		2139.81	-0.00585182
550.02	0.47215005		1080.02	0.10698013		1610.02	-0.02316667		2140.01	-0.00560808
550.22	0.47191574		1080.22	0.1076122		1610.22	-0.02240055		2140.21	-0.00550284
550.42	0.47106206		1080.42	0.10641206		1610.42	-0.02151522		2140.41	-0.00609703
550.62	0.4710993		1080.62	0.10684764		1610.62	-0.02155172		2140.61	-0.00636053
550.82	0.47043758		1080.82	0.10690958		1610.82	-0.02065738		2140.81	-0.00606026
551.02	0.47005895		1081.02	0.1070889		1611.02	-0.02020331		2141.01	-0.00557936
551.22	0.46978124		1081.22	0.10682246		1611.22	-0.02053358		2141.21	-0.00618323
551.42	0.46961428		1081.42	0.10654651		1611.42	-0.01972926		2141.41	-0.00653578
551.62	0.46990582		1081.62	0.10614782		1611.62	-0.01971203		2141.61	-0.00609659
551.82	0.4698239		1081.82	0.10556245		1611.82	-0.02013196		2141.81	-0.0059327
552.02	0.46826154		1082.02	0.10602449		1612.02	-0.02035268		2142.01	-0.00595562
552.22	0.46950751		1082.22	0.10512272		1612.22	-0.02080438		2142.21	-0.0048841
552.42	0.47038412		1082.42	0.1056442		1612.42	-0.0214267		2142.41	-0.00366449
552.62	0.47166047		1082.62	0.10530178		1612.62	-0.02141907		2142.61	-0.00360657
552.82	0.47245439		1082.82	0.10561865		1612.82	-0.02237631		2142.81	-0.0027324
553.02	0.47363217		1083.02	0.10611015		1613.02	-0.02239693		2143.01	-0.00276296
553.22	0.47368067		1083.22	0.10523625		1613.22	-0.02234301		2143.21	-0.00181709
553.42	0.47436575		1083.42	0.1040522		1613.42	-0.02259245		2143.41	-0.00187825
553.62	0.47376951		1083.62	0.10345644		1613.62	-0.02235594		2143.61	-0.00223422
553.82	0.47308265		1083.82	0.10367576		1613.82	-0.02202944		2143.81	-0.00181938
554.02	0.47344601		1084.02	0.1034583		1614.02	-0.02130499		2144.01	-0.00168394
554.22	0.4722789		1084.22	0.10349712		1614.22	-0.02140634		2144.21	-0.00114407
554.42	0.47160399		1084.42	0.10329501		1614.42	-0.02073329		2144.41	-0.00043591
554.62	0.4717248		1084.62	0.10477323		1614.62	-0.02062785		2144.61	-0.0001822
554.82	0.47071244		1084.82	0.10550711		1614.82	-0.01986334		2144.81	-0.00054541
555.02	0.47038722		1085.02	0.10506195		1615.02	-0.01976698		2145.01	-0.00081836
555.22	0.46964105		1085.22	0.10570967		1615.22	-0.0201055		2145.21	-0.00072772
555.42	0.46960646		1085.42	0.10637956		1615.42	-0.01965678		2145.41	-0.00045693
555.62	0.46861827		1085.62	0.10685107		1615.62	-0.01966707		2145.61	-0.00039779
555.82	0.46868444		1085.82	0.10689329		1615.82	-0.02032275		2145.81	-0.000666
556.02	0.46784331		1086.02	0.10773793		1616.02	-0.02061864		2146.01	-0.00080151
556.22	0.46922975		1086.22	0.10763155		1616.22	-0.02116961		2146.21	-0.00081741
556.42	0.46977078		1086.42	0.10764978		1616.42	-0.02284035		2146.41	-0.00182563
556.62	0.47072593		1086.62	0.10732154		1616.62	-0.02314362		2146.61	-0.00236245
556.82	0.47126212		1086.82	0.10720081		1616.82	-0.02343853		2146.81	-0.00286179
557.02	0.47260188		1087.02	0.1070746		1617.02	-0.02374597		2147.01	-0.00294632
557.22	0.47220509		1087.22	0.10631578		1617.22	-0.02490378		2147.21	-0.00353721
557.42	0.47272316		1087.42	0.10502912		1617.42	-0.02591253		2147.41	-0.00391999
557.62	0.47274002		1087.62	0.10445692		1617.62	-0.02566105		2147.61	-0.00438763
557.82	0.4720297		1087.82	0.10388217		1617.82	-0.02566162		2147.81	-0.00472049
558.02	0.47183988		1088.02	0.10338687		1618.02	-0.02547579		2148.01	-0.00529925
558.22	0.47080848		1088.22	0.1037572		1618.22	-0.02548859		2148.21	-0.00510214
558.42	0.47079334		1088.42	0.10414768		1618.42	-0.02430489		2148.41	-0.00593299
558.62	0.47085943		1088.62	0.10471776		1618.62	-0.02343375		2148.61	-0.00703304
558.82	0.47009791		1088.82	0.10499561		1618.82	-0.02155939		2148.81	-0.00779263
559.02	0.47023268		1089.02	0.10531238		1619.02	-0.02064312		2149.01	-0.00824107
559.22	0.47030831		1089.22	0.10659556		1619.22	-0.0195787		2149.21	-0.00851261
559.42	0.47050181		1089.42	0.10718142		1619.42	-0.01833364		2149.41	-0.0094582
559.62	0.46990269		1089.62	0.10794358		1619.62	-0.01716095		2149.61	-0.01020476
559.82	0.47063054		1089.82	0.10814465		1619.82	-0.01656476		2149.81	-0.01027074
