# Supplementary material for: Functional development of a V3/glycan-specific broadly neutralizing antibody isolated from a case of HIV superinfection
Source: eLife journal article supplement (doi:10.7554/elife.68110), 2021-07-15
Supplement: fig2-data2 [file B3.xls]

Vers 3.43 Data Simulation
Conc1	2.5E-07	2.5E-07	2.5E-07	2.5E-07	2.5E-07	2.5E-07	2.5E-07
Start1	290	879.99	1469.99	2059.99	2650	3240	3830
Stop1	649.8	1239.79	1829.8	2419.79	3009.8	3599.8	4189.8
Time1	Data1	Sim1	Time2	Data2	Sim2	Time3	Data3	Sim3	Time4	Data4	Sim4	Time5	Data5	Sim5	Time6	Data6	Sim6	Time7	Data7	Sim7
290	-0.00602398		879.99	0.00054304		1469.99	-0.00326528		2059.99	0.00073728		2650	0.00248948		3240	0.01153969		3830	-0.00715511
290.2	-0.00619461		880.19	0.00202141		1470.19	-0.00231326		2060.19	0.0003564		2650.2	0.0012991		3240.2	0.01033501		3830.2	-0.0067386
290.4	-0.00616325		880.39	0.00222489		1470.39	-0.00160787		2060.39	-0.00035172		2650.4	0.00068616		3240.4	0.00979847		3830.4	-0.00703406
290.6	-0.00548		880.59	0.0027489		1470.59	-0.00103469		2060.59	-0.00049911		2650.6	0.00005394		3240.6	0.00878715		3830.6	-0.00777503
290.8	-0.00428814		880.79	0.00356015		1470.79	-0.00082826		2060.79	-0.00051519		2650.8	-0.00093271		3240.8	0.0076436		3830.8	-0.00810539
291	-0.00302174		880.99	0.00464942		1470.99	-0.00069263		2060.99	0.00002727		2651	-0.00146552		3241	0.00769489		3831	-0.00823587
291.2	-0.0011049		881.19	0.00460272		1471.19	0.00034169		2061.19	-0.00017215		2651.2	-0.00141172		3241.2	0.0076065		3831.2	-0.00880737
291.4	0.00139941		881.39	0.00544434		1471.39	0.00135776		2061.39	-0.00009867		2651.4	-0.00170918		3241.4	0.00775198		3831.4	-0.00934321
291.6	0.00502533		881.59	0.00602107		1471.59	0.0024282		2061.59	-0.00081032		2651.6	-0.00250184		3241.6	0.00762053		3831.6	-0.00962515
291.8	0.00802203		881.79	0.00628645		1471.79	0.00387725		2061.79	-0.00028953		2651.8	-0.00339997		3241.8	0.00870332		3831.8	-0.00999889
292	0.01168418		881.99	0.00762504		1471.99	0.00411663		2061.99	0.00020905		2652	-0.0027765		3242	0.00917447		3832	-0.01035808
292.2	0.01503186		882.19	0.00751352		1472.19	0.00495693		2062.19	0.00083959		2652.2	-0.00229885		3242.2	0.01046485		3832.2	-0.01052006
292.4	0.01821556		882.39	0.00783502		1472.39	0.00592777		2062.39	0.00045368		2652.4	-0.00196198		3242.4	0.01173083		3832.4	-0.01122946
292.6	0.02195115		882.59	0.00902164		1472.59	0.00648212		2062.59	-0.00004435		2652.6	-0.00191509		3242.6	0.01266428		3832.6	-0.01075777
292.8	0.02412234		882.79	0.00965698		1472.79	0.00639814		2062.79	-0.00001456		2652.8	-0.00130949		3242.8	0.01283546		3832.8	-0.00966935
293	0.02713642		882.99	0.00994462		1472.99	0.00648548		2062.99	0.00001045		2653	-0.00043545		3243	0.01468186		3833	-0.00908858
293.2	0.02971199		883.19	0.01142298		1473.19	0.00677326		2063.19	-0.00000087		2653.2	-0.00141623		3243.2	0.01542073		3833.2	-0.00880184
293.4	0.03308486		883.39	0.01264259		1473.39	0.00685287		2063.39	-0.0004011		2653.4	-0.00122047		3243.4	0.01535661		3833.4	-0.00832759
293.6	0.03488357		883.59	0.01330993		1473.59	0.00669131		2063.59	-0.00000396		2653.6	-0.00134775		3243.6	0.01483668		3833.6	-0.00756205
293.8	0.03717932		883.79	0.01429208		1473.79	0.00622135		2063.79	0.00044931		2653.8	-0.00098813		3243.8	0.01557193		3833.8	-0.00881102
294	0.03864876		883.99	0.01623295		1473.99	0.00740205		2063.99	0.00038242		2654	0.00024617		3244	0.01638156		3834	-0.00921053
294.2	0.04086014		884.19	0.01793499		1474.19	0.00830495		2064.19	-0.00026451		2654.2	-0.00007862		3244.2	0.01658349		3834.2	-0.00955421
294.4	0.04366044		884.39	0.01721394		1474.39	0.00844589		2064.39	-0.00020607		2654.4	0.00013367		3244.4	0.01733063		3834.4	-0.01012033
294.6	0.04699705		884.59	0.01843306		1474.59	0.00828661		2064.59	0.00031401		2654.6	0.00021199		3244.6	0.01622072		3834.6	-0.01056236
294.8	0.05063995		884.79	0.01950875		1474.79	0.00844452		2064.79	0.0011775		2654.8	-0.0006489		3244.8	0.01565341		3834.8	-0.01051495
295	0.05325686		884.99	0.02009756		1474.99	0.00910985		2064.99	0.00104454		2655	-0.00026151		3245	0.01604935		3835	-0.01042199
295.2	0.05708836		885.19	0.01985719		1475.19	0.01141304		2065.19	0.00044807		2655.2	0.0005578		3245.2	0.01543783		3835.2	-0.0103387
295.4	0.05998163		885.39	0.02104586		1475.39	0.01208699		2065.39	0.00106807		2655.4	0.00047012		3245.4	0.01526308		3835.4	-0.01027627
295.6	0.06363098		885.59	0.0214294		1475.59	0.01340612		2065.59	0.00047716		2655.6	0.00038897		3245.6	0.01459706		3835.6	-0.01011315
295.8	0.0661918		885.79	0.02232417		1475.79	0.01459159		2065.79	0.00195128		2655.8	0.00073286		3245.8	0.01524437		3835.8	-0.01001039
296	0.06955511		885.99	0.02362268		1475.99	0.01489475		2065.99	0.002425		2656	0.0021348		3246	0.01601185		3836	-0.0101135
296.2	0.07200126		886.19	0.023787		1476.19	0.01615337		2066.19	0.00266385		2656.2	0.00313597		3246.2	0.01667357		3836.2	-0.00916141
296.4	0.07508191		886.39	0.02497358		1476.39	0.01627065		2066.39	0.00233561		2656.4	0.00369225		3246.4	0.01753786		3836.4	-0.00957502
296.6	0.07700141		886.59	0.0255379		1476.59	0.0161985		2066.59	0.00204707		2656.6	0.00479719		3246.6	0.01700045		3836.6	-0.00896484
296.8	0.07868218		886.79	0.02606581		1476.79	0.0151153		2066.79	0.0021549		2656.8	0.00545246		3246.8	0.01774901		3836.8	-0.00873627
297	0.08121817		886.99	0.02709843		1476.99	0.01565422		2066.99	0.00250224		2657	0.00620569		3247	0.01950094		3837	-0.00840056
297.2	0.08331883		887.19	0.02821411		1477.19	0.01528782		2067.19	0.00325157		2657.2	0.00567708		3247.2	0.01970608		3837.2	-0.00856129
297.4	0.08529595		887.39	0.02942236		1477.39	0.01582741		2067.39	0.00320491		2657.4	0.00662675		3247.4	0.01940643		3837.4	-0.00851906
297.6	0.0865106		887.59	0.03046591		1477.59	0.01576159		2067.59	0.0042388		2657.6	0.00738662		3247.6	0.01943563		3837.6	-0.00841716
297.8	0.0879007		887.79	0.03164551		1477.79	0.01626221		2067.79	0.00445544		2657.8	0.00693296		3247.8	0.02054025		3837.8	-0.00913767
298	0.09031808		887.99	0.03361903		1477.99	0.01637406		2067.99	0.0043728		2658	0.00755548		3248	0.02063339		3838	-0.00835385
298.2	0.09333491		888.19	0.03490536		1478.19	0.01735682		2068.19	0.00464769		2658.2	0.00748571		3248.2	0.02016206		3838.2	-0.00772439
298.4	0.09631245		888.39	0.03466845		1478.39	0.01710699		2068.39	0.00532791		2658.4	0.0071115		3248.4	0.02044869		3838.4	-0.00699435
298.6	0.09951652		888.59	0.03633028		1478.59	0.01759837		2068.59	0.00565269		2658.6	0.00683354		3248.6	0.01926302		3838.6	-0.00687373
298.8	0.10163381		888.79	0.03689185		1478.79	0.0182742		2068.79	0.00511912		2658.8	0.00561439		3248.8	0.01969264		3838.8	-0.00681665
299	0.10359984		888.99	0.03691572		1478.99	0.01909585		2068.99	0.00448477		2659	0.0060017		3249	0.01986265		3839	-0.00645696
299.2	0.10641126		889.19	0.03705206		1479.19	0.02127696		2069.19	0.00369689		2659.2	0.00664072		3249.2	0.01972661		3839.2	-0.00607541
299.4	0.10731093		889.39	0.03757609		1479.39	0.02151743		2069.39	0.00392904		2659.4	0.00657936		3249.4	0.02040793		3839.4	-0.00602262
299.6	0.10973489		889.59	0.03792056		1479.59	0.02219248		2069.59	0.00362191		2659.6	0.00640044		3249.6	0.02021151		3839.6	-0.00595217
299.8	0.11193083		889.79	0.03847587		1479.79	0.02287047		2069.79	0.00388667		2659.8	0.00653743		3249.8	0.0208336		3839.8	-0.00550019
300	0.11465363		889.99	0.0385242		1479.99	0.02381431		2069.99	0.00375625		2660	0.00717		3250	0.0214997		3840	-0.00583965
300.2	0.11596344		890.19	0.03853079		1480.19	0.02441979		2070.19	0.00350297		2660.2	0.00762859		3250.2	0.02013156		3840.2	-0.00553236
300.4	0.11839121		890.39	0.03887446		1480.39	0.02420214		2070.39	0.00266283		2660.4	0.00717293		3250.4	0.02105079		3840.4	-0.00738502
300.6	0.11939184		890.59	0.03821773		1480.59	0.02419752		2070.59	0.00203374		2660.6	0.00672		3250.6	0.02001448		3840.6	-0.0081491
300.8	0.12208281		890.79	0.03870059		1480.79	0.02399429		2070.79	0.00248802		2660.8	0.00651823		3250.8	0.02141095		3840.8	-0.00883714
301	0.12341749		890.99	0.03875584		1480.99	0.02570541		2070.99	0.00241636		2661	0.00691595		3251	0.02147852		3841	-0.00930156
301.2	0.12528247		891.19	0.0390562		1481.19	0.02543063		2071.19	0.00281452		2661.2	0.00652208		3251.2	0.02189538		3841.2	-0.01023926
301.4	0.12653174		891.39	0.04010899		1481.39	0.02551191		2071.39	0.00335039		2661.4	0.00647398		3251.4	0.0221844		3841.4	-0.01010717
301.6	0.12758761		891.59	0.04126168		1481.59	0.02591509		2071.59	0.00401249		2661.6	0.00643715		3251.6	0.02227255		3841.6	-0.01084098
301.8	0.12867063		891.79	0.04359877		1481.79	0.02608697		2071.79	0.00335232		2661.8	0.00652833		3251.8	0.02316708		3841.8	-0.01071021
302	0.13108623		891.99	0.04540971		1481.99	0.02611507		2071.99	0.00310125		2662	0.00685842		3252	0.02369824		3842	-0.00948665
302.2	0.13235795		892.19	0.04658936		1482.19	0.02683152		2072.19	0.00347224		2662.2	0.0068815		3252.2	0.02397437		3842.2	-0.00955041
302.4	0.13438057		892.39	0.04797484		1482.39	0.02663941		2072.39	0.00389295		2662.4	0.00703234		3252.4	0.02449999		3842.4	-0.00880752
302.6	0.13669269		892.59	0.04927593		1482.59	0.02817997		2072.59	0.0031524		2662.6	0.00659307		3252.6	0.02417482		3842.6	-0.00850129
302.8	0.13788123		892.79	0.050083		1482.79	0.02899617		2072.79	0.00196642		2662.8	0.00717953		3252.8	0.02464525		3842.8	-0.00874466
303	0.14014144		892.99	0.05054356		1482.99	0.03036873		2072.99	0.00239075		2663	0.00825266		3253	0.02515469		3843	-0.00788224
303.2	0.14245633		893.19	0.05039705		1483.19	0.03228461		2073.19	0.00179788		2663.2	0.00921785		3253.2	0.02505649		3843.2	-0.00730739
303.4	0.14415985		893.39	0.05131823		1483.39	0.03186487		2073.39	0.00289401		2663.4	0.00915203		3253.4	0.02595255		3843.4	-0.00607771
303.6	0.14653297		893.59	0.05143922		1483.59	0.0318802		2073.59	0.00307032		2663.6	0.00995033		3253.6	0.02537938		3843.6	-0.00561737
303.8	0.1483735		893.79	0.05203245		1483.79	0.03221278		2073.79	0.00309958		2663.8	0.01139657		3253.8	0.02562272		3843.8	-0.00463399
304	0.15066632		893.99	0.05218089		1483.99	0.0324492		2073.99	0.00375764		2664	0.01198621		3254	0.02657638		3844	-0.00538023
304.2	0.15237724		894.19	0.05161464		1484.19	0.03193376		2074.19	0.00348495		2664.2	0.01182026		3254.2	0.02675428		3844.2	-0.00561889
304.4	0.15506829		894.39	0.05174542		1484.39	0.03162679		2074.39	0.00295204		2664.4	0.0123559		3254.4	0.02783746		3844.4	-0.00622356
304.6	0.15620014		894.59	0.05146299		1484.59	0.0309192		2074.59	0.00343135		2664.6	0.01283093		3254.6	0.02676556		3844.6	-0.00682365
304.8	0.15756837		894.79	0.05142754		1484.79	0.03183311		2074.79	0.00376374		2664.8	0.01360264		3254.8	0.02774351		3844.8	-0.0078043
305	0.15819063		894.99	0.05174587		1484.99	0.03212703		2074.99	0.00326049		2665	0.01370416		3255	0.02810165		3845	-0.0088065
305.2	0.15922637		895.19	0.05283803		1485.19	0.03197427		2075.19	0.00344239		2665.2	0.01332751		3255.2	0.02890695		3845.2	-0.00896654
305.4	0.15966391		895.39	0.0535226		1485.39	0.03173966		2075.39	0.00382038		2665.4	0.01310426		3255.4	0.02928947		3845.4	-0.00979637
305.6	0.1603145		895.59	0.05541673		1485.59	0.0324281		2075.59	0.00263759		2665.6	0.0133078		3255.6	0.02935251		3845.6	-0.01115575
305.8	0.16091567		895.79	0.05823622		1485.79	0.03228215		2075.79	0.00302953		2665.8	0.01308502		3255.8	0.02943792		3845.8	-0.01077481
306	0.16235797		895.99	0.05898565		1485.99	0.03268463		2075.99	0.00242295		2666	0.01291974		3256	0.02921315		3846	-0.0107589
306.2	0.16400935		896.19	0.05972826		1486.19	0.03330749		2076.19	0.00199509		2666.2	0.01343532		3256.2	0.02884956		3846.2	-0.01067825
306.4	0.16595893		896.39	0.06119043		1486.39	0.0343186		2076.39	0.00105776		2666.4	0.01322406		3256.4	0.02877491		3846.4	-0.01033652
306.6	0.16773041		896.59	0.06183653		1486.59	0.03579954		2076.59	0.00040603		2666.6	0.01204437		3256.6	0.02912341		3846.6	-0.0104694
306.8	0.16884745		896.79	0.06236911		1486.79	0.03654198		2076.79	-0.00046651		2666.8	0.01284933		3256.8	0.02945019		3846.8	-0.0110205
307	0.17051016		896.99	0.06281316		1486.99	0.0386033		2076.99	-0.00050764		2667	0.01270005		3257	0.03035188		3847	-0.01054493
307.2	0.17262325		897.19	0.0634944		1487.19	0.03949638		2077.19	0.00015451		2667.2	0.0127658		3257.2	0.03027793		3847.2	-0.00972838
307.4	0.17418791		897.39	0.06500749		1487.39	0.03941147		2077.39	0.00074958		2667.4	0.01201025		3257.4	0.03121614		3847.4	-0.00814506
307.6	0.17508213		897.59	0.06545968		1487.59	0.04019006		2077.59	0.00070046		2667.6	0.012541		3257.6	0.03054009		3847.6	-0.00683598
307.8	0.17693686		897.79	0.06642612		1487.79	0.0406769		2077.79	0.00082288		2667.8	0.01226925		3257.8	0.03088183		3847.8	-0.00613476
308	0.1794297		897.99	0.06649964		1487.99	0.04085715		2077.99	0.00148613		2668	0.01164919		3258	0.03123685		3848	-0.00550108
308.2	0.18036472		898.19	0.0667448		1488.19	0.04129225		2078.19	0.00216161		2668.2	0.01165892		3258.2	0.03094273		3848.2	-0.00413085
308.4	0.18104275		898.39	0.06744558		1488.39	0.04072855		2078.39	0.00308203		2668.4	0.01229685		3258.4	0.0302192		3848.4	-0.00336861
308.6	0.18154903		898.59	0.06757612		1488.59	0.04038854		2078.59	0.00450642		2668.6	0.01205463		3258.6	0.02906967		3848.6	-0.00341122
308.8	0.18184052		898.79	0.0673211		1488.79	0.04106325		2078.79	0.00526528		2668.8	0.01125367		3258.8	0.02951625		3848.8	-0.00346088
309	0.18217012		898.99	0.06820941		1488.99	0.04107578		2078.99	0.00535902		2669	0.01187697		3259	0.02962822		3849	-0.00320233
309.2	0.18198456		899.19	0.0689666		1489.19	0.04152251		2079.19	0.00683187		2669.2	0.01234865		3259.2	0.02967256		3849.2	-0.00246899
309.4	0.18293488		899.39	0.06896903		1489.39	0.04123259		2079.39	0.00709593		2669.4	0.01268523		3259.4	0.0298688		3849.4	-0.00416777
309.6	0.18364926		899.59	0.07006429		1489.59	0.04193293		2079.59	0.00702133		2669.6	0.01212749		3259.6	0.02920209		3849.6	-0.00460469
309.8	0.1855155		899.79	0.07086776		1489.79	0.04136751		2079.79	0.00836643		2669.8	0.01248671		3259.8	0.02940548		3849.8	-0.00479834
310	0.18788256		899.99	0.07051844		1489.99	0.04193163		2079.99	0.00761891		2670	0.01239289		3260	0.02981947		3850	-0.00537589
310.2	0.19022264		900.19	0.07013037		1490.19	0.04175271		2080.19	0.00756717		2670.2	0.01284221		3260.2	0.03059505		3850.2	-0.00571936
310.4	0.19216969		900.39	0.07084449		1490.39	0.04284336		2080.39	0.00702914		2670.4	0.01235765		3260.4	0.03210093		3850.4	-0.00610183
310.6	0.19375237		900.59	0.07140316		1490.59	0.04298785		2080.59	0.00597601		2670.6	0.01268977		3260.6	0.03286245		3850.6	-0.00666654
310.8	0.19557951		900.79	0.07169699		1490.79	0.04422823		2080.79	0.00526493		2670.8	0.01362822		3260.8	0.03344911		3850.8	-0.00773928
311	0.19731193		900.99	0.07292149		1490.99	0.04513987		2080.99	0.00502587		2671	0.01370698		3261	0.03398545		3851	-0.00815429
311.2	0.1986246		901.19	0.0744243		1491.19	0.04535925		2081.19	0.00540699		2671.2	0.01358642		3261.2	0.03442194		3851.2	-0.00771524
311.4	0.20062527		901.39	0.07487267		1491.39	0.04572162		2081.39	0.00400211		2671.4	0.01361654		3261.4	0.03439686		3851.4	-0.00807351
311.6	0.20272184		901.59	0.07620544		1491.59	0.04639523		2081.59	0.00296919		2671.6	0.01462553		3261.6	0.03328964		3851.6	-0.00838002
311.8	0.20483402		901.79	0.07741944		1491.79	0.04703656		2081.79	0.00266719		2671.8	0.01475891		3261.8	0.03386081		3851.8	-0.00865341
312	0.20534242		901.99	0.07819337		1491.99	0.04717554		2081.99	0.00238461		2672	0.01518784		3262	0.03413197		3852	-0.0086887
312.2	0.20547578		902.19	0.07906556		1492.19	0.04781907		2082.19	0.00238593		2672.2	0.01589554		3262.2	0.03428076		3852.2	-0.00909266
312.4	0.20706746		902.39	0.0792372		1492.39	0.04780643		2082.39	0.00184102		2672.4	0.01679714		3262.4	0.0334392		3852.4	-0.00998968
312.6	0.20755139		902.59	0.0800285		1492.59	0.04905313		2082.59	0.00154166		2672.6	0.01680403		3262.6	0.03318003		3852.6	-0.00890659
312.8	0.20704809		902.79	0.08021774		1492.79	0.04905155		2082.79	0.00105219		2672.8	0.01715938		3262.8	0.03468452		3852.8	-0.00932202
313	0.20709187		902.99	0.08122363		1492.99	0.05017113		2082.99	0.00071532		2673	0.01790016		3263	0.03450049		3853	-0.00899505
313.2	0.20753829		903.19	0.08166827		1493.19	0.05057076		2083.19	0.00166287		2673.2	0.01775291		3263.2	0.03496187		3853.2	-0.00879833
313.4	0.20792897		903.39	0.0820169		1493.39	0.05035298		2083.39	0.00193691		2673.4	0.01734522		3263.4	0.0351011		3853.4	-0.00995048
313.6	0.20860922		903.59	0.08286085		1493.59	0.05129877		2083.59	0.00299157		2673.6	0.01651367		3263.6	0.03529957		3853.6	-0.00911476
313.8	0.21030066		903.79	0.0830267		1493.79	0.05137759		2083.79	0.00375602		2673.8	0.01604886		3263.8	0.03610684		3853.8	-0.00902521
314	0.2113429		903.99	0.08303132		1493.99	0.05215763		2083.99	0.00396592		2674	0.01545104		3264	0.03596063		3854	-0.00826441
314.2	0.21300773		904.19	0.08350763		1494.19	0.05295875		2084.19	0.00447832		2674.2	0.01526987		3264.2	0.03653135		3854.2	-0.00780761
314.4	0.2137328		904.39	0.08405964		1494.39	0.05427405		2084.39	0.00468234		2674.4	0.01480402		3264.4	0.03751524		3854.4	-0.00672023
314.6	0.21431765		904.59	0.08453894		1494.59	0.05428098		2084.59	0.00411116		2674.6	0.01435767		3264.6	0.03742421		3854.6	-0.00676392
314.8	0.21525273		904.79	0.08475898		1494.79	0.05488011		2084.79	0.0052762		2674.8	0.01397701		3264.8	0.03761742		3854.8	-0.00618283
315	0.21657639		904.99	0.08522382		1494.99	0.05456949		2084.99	0.00551292		2675	0.01386163		3265	0.03746823		3855	-0.0061299
315.2	0.21775913		905.19	0.08573027		1495.19	0.05493869		2085.19	0.00531171		2675.2	0.01398079		3265.2	0.0380357		3855.2	-0.00592851
315.4	0.21968229		905.39	0.08583626		1495.39	0.05488415		2085.39	0.0051563		2675.4	0.01440088		3265.4	0.03836007		3855.4	-0.00653749
315.6	0.22165532		905.59	0.08683772		1495.59	0.05456386		2085.59	0.00499579		2675.6	0.01511242		3265.6	0.03882396		3855.6	-0.00671327
315.8	0.22229313		905.79	0.08772546		1495.79	0.05494914		2085.79	0.00522295		2675.8	0.01480151		3265.8	0.03962323		3855.8	-0.00616912
316	0.22247219		905.99	0.08836577		1495.99	0.05507231		2085.99	0.00395209		2676	0.01458027		3266	0.03948627		3856	-0.00646244
316.2	0.22447429		906.19	0.08828059		1496.19	0.05511782		2086.19	0.00411145		2676.2	0.01518065		3266.2	0.04042372		3856.2	-0.00650151
316.4	0.22582728		906.39	0.08865842		1496.39	0.05518981		2086.39	0.00386816		2676.4	0.01517766		3266.4	0.04021439		3856.4	-0.00609431
316.6	0.22648454		906.59	0.0896038		1496.59	0.05484461		2086.59	0.00273489		2676.6	0.01536634		3266.6	0.040923		3856.6	-0.00505559
316.8	0.22620117		906.79	0.08972716		1496.79	0.05425528		2086.79	0.0026544		2676.8	0.01515295		3266.8	0.04165555		3856.8	-0.00601725
317	0.22657004		906.99	0.09109734		1496.99	0.05505291		2086.99	0.00248515		2677	0.01471668		3267	0.04161518		3857	-0.00545159
317.2	0.22659876		907.19	0.09191926		1497.19	0.05442076		2087.19	0.00231933		2677.2	0.01511924		3267.2	0.04248014		3857.2	-0.00597769
317.4	0.22689403		907.39	0.09279889		1497.39	0.05486012		2087.39	0.0024863		2677.4	0.01520376		3267.4	0.04149728		3857.4	-0.00667703
317.6	0.22789826		907.59	0.09321962		1497.59	0.0561405		2087.59	0.00244048		2677.6	0.0152042		3267.6	0.04051286		3857.6	-0.00679523
317.8	0.2290095		907.79	0.09301089		1497.79	0.05665793		2087.79	0.00208273		2677.8	0.01481031		3267.8	0.04007893		3857.8	-0.00699033
318	0.23022289		907.99	0.09320487		1497.99	0.05813057		2087.99	0.00204906		2678	0.01596515		3268	0.0395345		3858	-0.00711954
318.2	0.23072921		908.19	0.09315323		1498.19	0.06007369		2088.19	0.00324047		2678.2	0.01578286		3268.2	0.0394678		3858.2	-0.00741575
318.4	0.23063257		908.39	0.09306446		1498.39	0.06101674		2088.39	0.0035364		2678.4	0.01664881		3268.4	0.03926803		3858.4	-0.00699902
318.6	0.23139708		908.59	0.09343964		1498.59	0.06211245		2088.59	0.00311747		2678.6	0.01616578		3268.6	0.03902052		3858.6	-0.00654192
318.8	0.2328976		908.79	0.09371331		1498.79	0.06235756		2088.79	0.00349312		2678.8	0.01675386		3268.8	0.03921679		3858.8	-0.00659263
319	0.23308289		908.99	0.09351759		1498.99	0.06275575		2088.99	0.00448488		2679	0.01786925		3269	0.03969914		3859	-0.00727115
319.2	0.23422079		909.19	0.09415539		1499.19	0.06299946		2089.19	0.00458044		2679.2	0.01868691		3269.2	0.04035549		3859.2	-0.00749742
319.4	0.23450675		909.39	0.0952989		1499.39	0.06370728		2089.39	0.00658493		2679.4	0.01832376		3269.4	0.04057729		3859.4	-0.00802031
319.6	0.23573119		909.59	0.09665663		1499.59	0.06435783		2089.59	0.00622628		2679.6	0.01881019		3269.6	0.04112347		3859.6	-0.00862968
319.8	0.23572955		909.79	0.09830078		1499.79	0.06528568		2089.79	0.00685756		2679.8	0.0179637		3269.8	0.0413219		3859.8	-0.00848958
320	0.23619344		909.99	0.09948701		1499.99	0.06539619		2089.99	0.00774197		2680	0.01818512		3270	0.04215782		3860	-0.00873664
320.2	0.23744442		910.19	0.10063118		1500.19	0.06381754		2090.19	0.00932028		2680.2	0.01848167		3270.2	0.04328324		3860.2	-0.0090977
320.4	0.23816151		910.39	0.10226851		1500.39	0.06268813		2090.39	0.00998495		2680.4	0.01859675		3270.4	0.04342759		3860.4	-0.00954674
320.6	0.23991133		910.59	0.1039317		1500.59	0.06234887		2090.59	0.01014361		2680.6	0.01907639		3270.6	0.04389572		3860.6	-0.00942709
320.8	0.2398505		910.79	0.10432854		1500.79	0.0622985		2090.79	0.01020361		2680.8	0.01882848		3270.8	0.04423727		3860.8	-0.00940498
321	0.24106374		910.99	0.1053005		1500.99	0.06222048		2090.99	0.00903231		2681	0.0197184		3271	0.04469796		3861	-0.00962348
321.2	0.24173956		911.19	0.10630911		1501.19	0.06214281		2091.19	0.00925025		2681.2	0.02039038		3271.2	0.04462679		3861.2	-0.01025182
321.4	0.24284472		911.39	0.10693888		1501.39	0.06270782		2091.39	0.0086452		2681.4	0.02077133		3271.4	0.04404173		3861.4	-0.01013297
321.6	0.24486324		911.59	0.10667517		1501.59	0.06369973		2091.59	0.00797771		2681.6	0.02149971		3271.6	0.04374829		3861.6	-0.01023078
321.8	0.24621142		911.79	0.10714226		1501.79	0.06465833		2091.79	0.00749136		2681.8	0.02196899		3271.8	0.04418475		3861.8	-0.00931974
322	0.24724054		911.99	0.10730916		1501.99	0.06621195		2091.99	0.006431		2682	0.02232899		3272	0.0443211		3862	-0.00939603
322.2	0.24813868		912.19	0.10756441		1502.19	0.06664366		2092.19	0.00625832		2682.2	0.02201151		3272.2	0.04368791		3862.2	-0.00776598
322.4	0.24945408		912.39	0.10732741		1502.39	0.0665856		2092.39	0.00515862		2682.4	0.02274398		3272.4	0.04328354		3862.4	-0.00667822
322.6	0.25034204		912.59	0.10788954		1502.59	0.0678855		2092.59	0.00377405		2682.6	0.02173478		3272.6	0.04299824		3862.6	-0.00588499
322.8	0.2512705		912.79	0.10840044		1502.79	0.06822462		2092.79	0.00341235		2682.8	0.0225028		3272.8	0.04278333		3862.8	-0.00538859
323	0.25129483		912.99	0.10828728		1502.99	0.06879671		2092.99	0.00373734		2683	0.02347421		3273	0.04250156		3863	-0.00440382
323.2	0.25271377		913.19	0.10873452		1503.19	0.06898654		2093.19	0.00297316		2683.2	0.02355779		3273.2	0.04247354		3863.2	-0.00453398
323.4	0.25264556		913.39	0.10984941		1503.39	0.06982566		2093.39	0.0036946		2683.4	0.02329546		3273.4	0.04246132		3863.4	-0.00415557
323.6	0.25321548		913.59	0.11017033		1503.59	0.07019602		2093.59	0.00284913		2683.6	0.02372532		3273.6	0.04240269		3863.6	-0.0043458
323.8	0.25318697		913.79	0.11116381		1503.79	0.06988583		2093.79	0.00436768		2683.8	0.02390065		3273.8	0.0433026		3863.8	-0.00363313
324	0.25399812		913.99	0.11236388		1503.99	0.06911367		2093.99	0.00585747		2684	0.02507301		3274	0.04385724		3864	-0.00421647
324.2	0.25483992		914.19	0.11333421		1504.19	0.06780819		2094.19	0.00600944		2684.2	0.0256627		3274.2	0.044604		3864.2	-0.00463409
324.4	0.25583671		914.39	0.11407174		1504.39	0.06799841		2094.39	0.00698057		2684.4	0.02645864		3274.4	0.04542637		3864.4	-0.00438446
324.6	0.25709396		914.59	0.11449445		1504.59	0.06855031		2094.59	0.00740916		2684.6	0.02689772		3274.6	0.04570072		3864.6	-0.00372012
324.8	0.2578855		914.79	0.11488757		1504.79	0.06882594		2094.79	0.00702962		2684.8	0.02724069		3274.8	0.04625953		3864.8	-0.00433925
325	0.25852088		914.99	0.11588748		1504.99	0.06915928		2094.99	0.00731389		2685	0.02716553		3275	0.0468137		3865	-0.00576345
325.2	0.25984811		915.19	0.11568213		1505.19	0.06946206		2095.19	0.00827943		2685.2	0.02632644		3275.2	0.04831337		3865.2	-0.00688085
325.4	0.26173343		915.39	0.11586113		1505.39	0.06987212		2095.39	0.0073828		2685.4	0.02625582		3275.4	0.04873096		3865.4	-0.0079122
325.6	0.26439627		915.59	0.11585118		1505.59	0.07067295		2095.59	0.00707637		2685.6	0.02617628		3275.6	0.04919457		3865.6	-0.00859948
325.8	0.26523695		915.79	0.11598149		1505.79	0.07186446		2095.79	0.00652472		2685.8	0.02597244		3275.8	0.04969985		3865.8	-0.00852984
326	0.26598323		915.99	0.11592247		1505.99	0.07297025		2095.99	0.00574176		2686	0.0249285		3276	0.04950173		3866	-0.00857773
326.2	0.2674656		916.19	0.11595658		1506.19	0.07381582		2096.19	0.00582931		2686.2	0.02453661		3276.2	0.04929715		3866.2	-0.00802327
326.4	0.26789682		916.39	0.11664029		1506.39	0.07368894		2096.39	0.0057041		2686.4	0.0244777		3276.4	0.04907326		3866.4	-0.00912818
326.6	0.26754614		916.59	0.11756976		1506.59	0.07483338		2096.59	0.00508251		2686.6	0.02291613		3276.6	0.04846753		3866.6	-0.00865468
326.8	0.26882313		916.79	0.11775737		1506.79	0.07551668		2096.79	0.00582486		2686.8	0.02323938		3276.8	0.04882043		3866.8	-0.00841917
327	0.26895292		916.99	0.11838679		1506.99	0.07500821		2096.99	0.00610457		2687	0.0231445		3277	0.04863121		3867	-0.00850576
327.2	0.2682865		917.19	0.11888371		1507.19	0.07466271		2097.19	0.00627838		2687.2	0.02376148		3277.2	0.04852598		3867.2	-0.00805664
327.4	0.26804989		917.39	0.12030756		1507.39	0.07508379		2097.39	0.00691541		2687.4	0.02398336		3277.4	0.04816959		3867.4	-0.00641714
327.6	0.26709564		917.59	0.12181846		1507.59	0.07498775		2097.59	0.00734852		2687.6	0.02374782		3277.6	0.04829118		3867.6	-0.00630137
327.8	0.26706103		917.79	0.12305977		1507.79	0.07565735		2097.79	0.00761053		2687.8	0.02457179		3277.8	0.04828883		3867.8	-0.00618416
328	0.26679325		917.99	0.12419616		1507.99	0.0751625		2097.99	0.00732779		2688	0.0249921		3278	0.04795781		3868	-0.00614264
328.2	0.26619585		918.19	0.12507667		1508.19	0.0744496		2098.19	0.00723757		2688.2	0.02490513		3278.2	0.0487273		3868.2	-0.0053746
328.4	0.26622243		918.39	0.12599617		1508.39	0.07394757		2098.39	0.00817045		2688.4	0.02496786		3278.4	0.0481045		3868.4	-0.00411964
328.6	0.26666031		918.59	0.12645911		1508.59	0.07381678		2098.59	0.00813782		2688.6	0.0251793		3278.6	0.04740319		3868.6	-0.00404102
328.8	0.26716231		918.79	0.12690396		1508.79	0.07374979		2098.79	0.00853991		2688.8	0.0247663		3278.8	0.04707921		3868.8	-0.00451352
329	0.26785371		918.99	0.1262968		1508.99	0.07388028		2098.99	0.00826641		2689	0.02431897		3279	0.04676164		3869	-0.00467148
329.2	0.26896348		919.19	0.12526937		1509.19	0.07397136		2099.19	0.0078428		2689.2	0.02419769		3279.2	0.04731621		3869.2	-0.0046544
329.4	0.27082401		919.39	0.1243087		1509.39	0.07573998		2099.39	0.00748682		2689.4	0.02504834		3279.4	0.04733898		3869.4	-0.00484319
329.6	0.27213962		919.59	0.1232765		1509.59	0.07669236		2099.59	0.00737252		2689.6	0.02470257		3279.6	0.04830174		3869.6	-0.00485199
329.8	0.27234419		919.79	0.1224271		1509.79	0.07825971		2099.79	0.00727418		2689.8	0.02518341		3279.8	0.04884163		3869.8	-0.00455205
330	0.27331687		919.99	0.12260585		1509.99	0.07942986		2099.99	0.00766485		2690	0.02560972		3280	0.04909925		3870	-0.00475029
330.2	0.27469668		920.19	0.12168183		1510.19	0.07944492		2100.19	0.00790391		2690.2	0.0259972		3280.2	0.04988165		3870.2	-0.00488966
330.4	0.27546733		920.39	0.12216111		1510.39	0.07984728		2100.39	0.00808632		2690.4	0.02716565		3280.4	0.05017137		3870.4	-0.00449987
330.6	0.27662032		920.59	0.12192816		1510.59	0.08147217		2100.59	0.00836095		2690.6	0.02719331		3280.6	0.05051695		3870.6	-0.00394295
330.8	0.27812042		920.79	0.12225356		1510.79	0.08232476		2100.79	0.00897999		2690.8	0.02872082		3280.8	0.05050098		3870.8	-0.0049215
331	0.27880882		920.99	0.12284952		1510.99	0.08213568		2100.99	0.00899137		2691	0.02892591		3281	0.05040839		3871	-0.00524172
331.2	0.27974418		921.19	0.12346281		1511.19	0.08261402		2101.19	0.00868292		2691.2	0.02999813		3281.2	0.05094253		3871.2	-0.00500966
331.4	0.27996924		921.39	0.12543427		1511.39	0.08269346		2101.39	0.00866359		2691.4	0.02989386		3281.4	0.05116086		3871.4	-0.00496357
331.6	0.28032487		921.59	0.12681591		1511.59	0.08270842		2101.59	0.00903472		2691.6	0.03005641		3281.6	0.05093491		3871.6	-0.00565461
331.8	0.28064373		921.79	0.12710215		1511.79	0.08234037		2101.79	0.00866759		2691.8	0.03024997		3281.8	0.05017341		3871.8	-0.00626256
332	0.28056506		921.99	0.12848495		1511.99	0.08103607		2101.99	0.00830813		2692	0.0298092		3282	0.05055908		3872	-0.00564255
332.2	0.28047775		922.19	0.12917564		1512.19	0.08027683		2102.19	0.00876095		2692.2	0.0294833		3282.2	0.05109506		3872.2	-0.00665784
332.4	0.28078625		922.39	0.1306246		1512.39	0.08000182		2102.39	0.00922338		2692.4	0.02967501		3282.4	0.0508004		3872.4	-0.00704149
332.6	0.28098672		922.59	0.13144796		1512.59	0.07967681		2102.59	0.00835038		2692.6	0.02867814		3282.6	0.05101389		3872.6	-0.00639149
332.8	0.28114802		922.79	0.13169981		1512.79	0.07911638		2102.79	0.00814979		2692.8	0.02821701		3282.8	0.05160883		3872.8	-0.00687628
333	0.28173915		922.99	0.13188265		1512.99	0.07887899		2102.99	0.00724129		2693	0.0284911		3283	0.05217669		3873	-0.00725149
333.2	0.28225864		923.19	0.13181387		1513.19	0.07890002		2103.19	0.00705896		2693.2	0.02910567		3283.2	0.0536624		3873.2	-0.00783794
333.4	0.2839125		923.39	0.13099242		1513.39	0.08006256		2103.39	0.00650646		2693.4	0.02916964		3283.4	0.05442266		3873.4	-0.00754496
333.6	0.28391122		923.59	0.13138047		1513.59	0.07943104		2103.59	0.00698368		2693.6	0.02818725		3283.6	0.05510954		3873.6	-0.00757611
333.8	0.28414307		923.79	0.13180314		1513.79	0.08065419		2103.79	0.00696897		2693.8	0.02898875		3283.8	0.05566808		3873.8	-0.007168
334	0.28537331		923.99	0.13117906		1513.99	0.0817974		2103.99	0.0062819		2694	0.02941655		3284	0.05563427		3874	-0.00689117
334.2	0.28620634		924.19	0.13033096		1514.19	0.08231484		2104.19	0.00559285		2694.2	0.02902358		3284.2	0.05601281		3874.2	-0.00598803
334.4	0.28714652		924.39	0.13120949		1514.39	0.08393992		2104.39	0.00540852		2694.4	0.02901058		3284.4	0.05619291		3874.4	-0.00568759
334.6	0.28764071		924.59	0.13138717		1514.59	0.08502503		2104.59	0.00551974		2694.6	0.02886173		3284.6	0.05627324		3874.6	-0.00663177
334.8	0.28753787		924.79	0.13229099		1514.79	0.08511969		2104.79	0.00482957		2694.8	0.02880008		3284.8	0.05602985		3874.8	-0.00690611
335	0.28806205		924.99	0.13300698		1514.99	0.08593148		2104.99	0.00437073		2695	0.02748212		3285	0.05673401		3875	-0.00631273
335.2	0.28802455		925.19	0.13437757		1515.19	0.08646049		2105.19	0.00462764		2695.2	0.02771771		3285.2	0.05676794		3875.2	-0.00487562
335.4	0.2875867		925.39	0.13632411		1515.39	0.08730899		2105.39	0.00485149		2695.4	0.02774298		3285.4	0.05731256		3875.4	-0.00474582
335.6	0.28836471		925.59	0.13703694		1515.59	0.08801874		2105.59	0.00549323		2695.6	0.02764783		3285.6	0.05772408		3875.6	-0.00436788
335.8	0.28901267		925.79	0.13768218		1515.79	0.08807439		2105.79	0.00560784		2695.8	0.02777532		3285.8	0.05747706		3875.8	-0.00397912
336	0.28979573		925.99	0.13907573		1515.99	0.08838797		2105.99	0.00566325		2696	0.02825127		3286	0.05815679		3876	-0.00408149
336.2	0.2904246		926.19	0.14009521		1516.19	0.08809919		2106.19	0.00570332		2696.2	0.02793965		3286.2	0.05914148		3876.2	-0.00499035
336.4	0.29144219		926.39	0.14156184		1516.39	0.08799219		2106.39	0.00542722		2696.4	0.02761871		3286.4	0.05926588		3876.4	-0.00420704
336.6	0.2927536		926.59	0.1418913		1516.59	0.08812383		2106.59	0.00464373		2696.6	0.02776257		3286.6	0.0594167		3876.6	-0.00358967
336.8	0.29306983		926.79	0.14229485		1516.79	0.0880909		2106.79	0.00442176		2696.8	0.02929006		3286.8	0.05991857		3876.8	-0.00486884
337	0.29433282		926.99	0.14314383		1516.99	0.08848996		2106.99	0.00407106		2697	0.0302693		3287	0.0601804		3877	-0.00571255
337.2	0.29567083		927.19	0.14299769		1517.19	0.08872873		2107.19	0.00451719		2697.2	0.03050509		3287.2	0.05984317		3877.2	-0.00565492
337.4	0.29749703		927.39	0.14218728		1517.39	0.08935954		2107.39	0.00431063		2697.4	0.02993242		3287.4	0.05911337		3877.4	-0.00550395
337.6	0.2985388		927.59	0.14211171		1517.59	0.08972045		2107.59	0.00514666		2697.6	0.02967659		3287.6	0.05884729		3877.6	-0.00604675
337.8	0.29930412		927.79	0.14204646		1517.79	0.09152806		2107.79	0.00444554		2697.8	0.02966228		3287.8	0.05928348		3877.8	-0.00613463
338	0.30063588		927.99	0.14059877		1517.99	0.09252019		2107.99	0.00385963		2698	0.02990929		3288	0.05902941		3878	-0.0063199
338.2	0.30033757		928.19	0.13943798		1518.19	0.09318002		2108.19	0.00383872		2698.2	0.03003988		3288.2	0.05938859		3878.2	-0.00543448
338.4	0.30040785		928.39	0.13898523		1518.39	0.0934556		2108.39	0.00352899		2698.4	0.03060392		3288.4	0.05957968		3878.4	-0.00572419
338.6	0.29964143		928.59	0.13810665		1518.59	0.09351051		2108.59	0.00458071		2698.6	0.03117649		3288.6	0.05921485		3878.6	-0.00523316
338.8	0.29848796		928.79	0.13803669		1518.79	0.09433337		2108.79	0.0045315		2698.8	0.03141757		3288.8	0.0598106		3878.8	-0.00420953
339	0.29780975		928.99	0.13760358		1518.99	0.09380941		2108.99	0.00412845		2699	0.0316751		3289	0.06034625		3879	-0.00416782
339.2	0.29800336		929.19	0.13702335		1519.19	0.09409665		2109.19	0.00461125		2699.2	0.03321998		3289.2	0.06126128		3879.2	-0.00402085
339.4	0.29767807		929.39	0.13826242		1519.39	0.09436021		2109.39	0.00498855		2699.4	0.03390751		3289.4	0.06254417		3879.4	-0.00502829
339.6	0.29765842		929.59	0.13864885		1519.59	0.09432858		2109.59	0.00594171		2699.6	0.03451845		3289.6	0.06294836		3879.6	-0.00505419
339.8	0.29862237		929.79	0.13925751		1519.79	0.09318324		2109.79	0.00608549		2699.8	0.03524038		3289.8	0.0625051		3879.8	-0.00528629
340	0.29940226		929.99	0.14089905		1519.99	0.09261022		2109.99	0.00591725		2700	0.03605925		3290	0.06252352		3880	-0.00595963
340.2	0.30028179		930.19	0.14208155		1520.19	0.09239497		2110.19	0.00615811		2700.2	0.03537031		3290.2	0.0621511		3880.2	-0.00587149
340.4	0.30081426		930.39	0.14363385		1520.39	0.0926878		2110.39	0.0063699		2700.4	0.03607312		3290.4	0.06184035		3880.4	-0.00609246
340.6	0.3014901		930.59	0.14474208		1520.59	0.09280661		2110.59	0.00723062		2700.6	0.03562606		3290.6	0.06215333		3880.6	-0.00732027
340.8	0.3019901		930.79	0.14585326		1520.79	0.09299382		2110.79	0.0069516		2700.8	0.035429		3290.8	0.06134363		3880.8	-0.00780292
341	0.30358629		930.99	0.14765859		1520.99	0.09356728		2110.99	0.00753108		2701	0.03465927		3291	0.06137604		3881	-0.00765886
341.2	0.30466423		931.19	0.14851622		1521.19	0.09379551		2111.19	0.0075599		2701.2	0.03392728		3291.2	0.06053836		3881.2	-0.00745459
341.4	0.30562775		931.39	0.14938396		1521.39	0.09447898		2111.39	0.00727198		2701.4	0.0334665		3291.4	0.06064859		3881.4	-0.00660321
341.6	0.30587128		931.59	0.15031979		1521.59	0.09555649		2111.59	0.00698137		2701.6	0.03299883		3291.6	0.06053576		3881.6	-0.00524975
341.8	0.3070101		931.79	0.15070097		1521.79	0.09607204		2111.79	0.00700055		2701.8	0.03207859		3291.8	0.06087558		3881.8	-0.00526076
342	0.30725114		931.99	0.15070396		1521.99	0.09604898		2111.99	0.00668556		2702	0.03246743		3292	0.06148744		3882	-0.00487752
342.2	0.30779267		932.19	0.15005079		1522.19	0.0961378		2112.19	0.00653353		2702.2	0.03216511		3292.2	0.06159743		3882.2	-0.0038936
342.4	0.30882864		932.39	0.15006147		1522.39	0.09530979		2112.39	0.00580891		2702.4	0.03161527		3292.4	0.06255828		3882.4	-0.00416257
342.6	0.30930053		932.59	0.15059115		1522.59	0.09486508		2112.59	0.00655615		2702.6	0.03135809		3292.6	0.06339274		3882.6	-0.00307424
342.8	0.30983597		932.79	0.15035394		1522.79	0.0951539		2112.79	0.0048914		2702.8	0.03181381		3292.8	0.06546786		3882.8	-0.00227522
343	0.31055092		932.99	0.15054157		1522.99	0.09417842		2112.99	0.00472559		2703	0.03148129		3293	0.06609123		3883	-0.00268168
343.2	0.31229419		933.19	0.15160201		1523.19	0.09470375		2113.19	0.00451101		2703.2	0.03190769		3293.2	0.06755571		3883.2	-0.00248211
343.4	0.31261471		933.39	0.15347164		1523.39	0.09467086		2113.39	0.00460455		2703.4	0.03259234		3293.4	0.0674974		3883.4	-0.00286935
343.6	0.31354046		933.59	0.15356262		1523.59	0.09493259		2113.59	0.00427289		2703.6	0.03253882		3293.6	0.06714792		3883.6	-0.00278812
343.8	0.3152967		933.79	0.15475238		1523.79	0.09396265		2113.79	0.00388611		2703.8	0.03355737		3293.8	0.06705393		3883.8	-0.00325235
344	0.3171187		933.99	0.15555577		1523.99	0.09459093		2113.99	0.00320262		2704	0.03431765		3294	0.06666617		3884	-0.00416612
344.2	0.31731031		934.19	0.15625459		1524.19	0.09567174		2114.19	0.00266343		2704.2	0.03438556		3294.2	0.0671958		3884.2	-0.00554236
344.4	0.3174893		934.39	0.15656469		1524.39	0.09585289		2114.39	0.00268476		2704.4	0.03484139		3294.4	0.06787746		3884.4	-0.00660919
344.6	0.31760519		934.59	0.15617132		1524.59	0.09658045		2114.59	0.0033107		2704.6	0.03477779		3294.6	0.06755586		3884.6	-0.00735891
344.8	0.3182483		934.79	0.15628484		1524.79	0.09819596		2114.79	0.00282763		2704.8	0.03596749		3294.8	0.06621367		3884.8	-0.00730999
345	0.31781376		934.99	0.15671478		1524.99	0.09999105		2114.99	0.00287778		2705	0.03665524		3295	0.06670167		3885	-0.00689497
345.2	0.3172455		935.19	0.15652681		1525.19	0.10102124		2115.19	0.0031074		2705.2	0.03659732		3295.2	0.06595978		3885.2	-0.00647536
345.4	0.31684485		935.39	0.15624282		1525.39	0.10154468		2115.39	0.00422568		2705.4	0.03689514		3295.4	0.06588189		3885.4	-0.00514622
345.6	0.31715719		935.59	0.15543672		1525.59	0.1024633		2115.59	0.00462494		2705.6	0.03702065		3295.6	0.06603023		3885.6	-0.00528214
345.8	0.3181292		935.79	0.15617353		1525.79	0.10243269		2115.79	0.00591497		2705.8	0.03644169		3295.8	0.06593915		3885.8	-0.00665946
346	0.31782988		935.99	0.15661544		1525.99	0.10323582		2115.99	0.00626259		2706	0.03652278		3296	0.06641204		3886	-0.00687386
346.2	0.31844095		936.19	0.15659703		1526.19	0.1028064		2116.19	0.00673539		2706.2	0.03586173		3296.2	0.06658578		3886.2	-0.00720774
346.4	0.3177431		936.39	0.15666362		1526.39	0.1026099		2116.39	0.0076751		2706.4	0.03571833		3296.4	0.06789654		3886.4	-0.00675113
346.6	0.31786272		936.59	0.15750709		1526.59	0.10256167		2116.59	0.00868814		2706.6	0.03622717		3296.6	0.06799206		3886.6	-0.00556057
346.8	0.31781507		936.79	0.15751846		1526.79	0.10304626		2116.79	0.00889162		2706.8	0.03652467		3296.8	0.06867359		3886.8	-0.00460672
347	0.31801168		936.99	0.1585422		1526.99	0.10292105		2116.99	0.01037133		2707	0.03686615		3297	0.06811201		3887	-0.0050157
347.2	0.31904612		937.19	0.1596095		1527.19	0.10238347		2117.19	0.00951893		2707.2	0.03781315		3297.2	0.06811478		3887.2	-0.00466592
347.4	0.32000085		937.39	0.15979205		1527.39	0.10203205		2117.39	0.00926659		2707.4	0.03847562		3297.4	0.06775012		3887.4	-0.00502158
347.6	0.32100826		937.59	0.16069112		1527.59	0.10202947		2117.59	0.00914567		2707.6	0.03901483		3297.6	0.06827975		3887.6	-0.00466595
347.8	0.32195016		937.79	0.16176499		1527.79	0.10116121		2117.79	0.00913605		2707.8	0.04027011		3297.8	0.06834833		3887.8	-0.00571226
348	0.3222091		937.99	0.16199277		1527.99	0.10282711		2117.99	0.00824421		2708	0.04010662		3298	0.06863027		3888	-0.00656896
348.2	0.32231291		938.19	0.1631843		1528.19	0.10400114		2118.19	0.00792418		2708.2	0.04022257		3298.2	0.06869824		3888.2	-0.00703698
348.4	0.32299599		938.39	0.16291107		1528.39	0.1037126		2118.39	0.00867778		2708.4	0.0400323		3298.4	0.06899334		3888.4	-0.00732384
348.6	0.32410187		938.59	0.16304671		1528.59	0.10443927		2118.59	0.00812804		2708.6	0.04008848		3298.6	0.06911111		3888.6	-0.00699137
348.8	0.32516453		938.79	0.1637376		1528.79	0.10595642		2118.79	0.00805137		2708.8	0.0394298		3298.8	0.0689505		3888.8	-0.00667844
349	0.32549692		938.99	0.16329933		1528.99	0.10634268		2118.99	0.0080227		2709	0.03946343		3299	0.06989004		3889	-0.00547445
349.2	0.32702911		939.19	0.16281294		1529.19	0.10668272		2119.19	0.00894558		2709.2	0.03832952		3299.2	0.06972474		3889.2	-0.00544862
349.4	0.32771194		939.39	0.16266749		1529.39	0.10658702		2119.39	0.00916446		2709.4	0.03804233		3299.4	0.06933384		3889.4	-0.00553119
349.6	0.32854882		939.59	0.16287038		1529.59	0.10758833		2119.59	0.00986625		2709.6	0.03755911		3299.6	0.06969042		3889.6	-0.00642799
349.8	0.3294874		939.79	0.16350748		1529.79	0.10813112		2119.79	0.00976331		2709.8	0.03666748		3299.8	0.06907084		3889.8	-0.00684035
350	0.32957363		939.99	0.16325758		1529.99	0.10873302		2119.99	0.01017087		2710	0.03586492		3300	0.0696014		3890	-0.0077186
350.2	0.32862504		940.19	0.16368613		1530.19	0.1084817		2120.19	0.01098506		2710.2	0.03504438		3300.2	0.06964718		3890.2	-0.00814831
350.4	0.32746264		940.39	0.16365411		1530.39	0.1086459		2120.39	0.01170105		2710.4	0.0353805		3300.4	0.0694763		3890.4	-0.00797745
350.6	0.3270073		940.59	0.1643506		1530.59	0.10739778		2120.59	0.01092519		2710.6	0.03595576		3300.6	0.06846166		3890.6	-0.00836718
350.8	0.32680366		940.79	0.16444532		1530.79	0.10630816		2120.79	0.01113789		2710.8	0.03665116		3300.8	0.06864465		3890.8	-0.00890126
351	0.32656415		940.99	0.16452776		1530.99	0.10551632		2120.99	0.0109531		2711	0.03705818		3301	0.0684556		3891	-0.00893854
351.2	0.3265051		941.19	0.16497538		1531.19	0.10595459		2121.19	0.00909866		2711.2	0.03771238		3301.2	0.06911136		3891.2	-0.0088328
351.4	0.32703063		941.39	0.16538699		1531.39	0.1058088		2121.39	0.00814846		2711.4	0.03805404		3301.4	0.06980653		3891.4	-0.00974186
351.6	0.3266118		941.59	0.16653143		1531.59	0.1065023		2121.59	0.00828253		2711.6	0.03851422		3301.6	0.07007966		3891.6	-0.00911968
351.8	0.32593893		941.79	0.16773799		1531.79	0.10746069		2121.79	0.00794171		2711.8	0.03758052		3301.8	0.07042912		3891.8	-0.00868188
352	0.32580167		941.99	0.16881648		1531.99	0.10893974		2121.99	0.00760113		2712	0.03659467		3302	0.07106982		3892	-0.00843157
352.2	0.3262772		942.19	0.17006478		1532.19	0.10857155		2122.19	0.00771501		2712.2	0.03616897		3302.2	0.07101773		3892.2	-0.00777722
352.4	0.32761969		942.39	0.17022897		1532.39	0.10784224		2122.39	0.00779009		2712.4	0.03594136		3302.4	0.07188715		3892.4	-0.00746898
352.6	0.3291132		942.59	0.17060924		1532.59	0.10875476		2122.59	0.00719374		2712.6	0.03557084		3302.6	0.07191226		3892.6	-0.00680024
352.8	0.33024742		942.79	0.17108079		1532.79	0.10842721		2122.79	0.00755852		2712.8	0.03583373		3302.8	0.07281205		3892.8	-0.00577635
353	0.3311964		942.99	0.17062067		1532.99	0.10848376		2122.99	0.00748702		2713	0.03602092		3303	0.07353671		3893	-0.00468452
353.2	0.33277436		943.19	0.17032249		1533.19	0.10902525		2123.19	0.0073984		2713.2	0.03570308		3303.2	0.07334405		3893.2	-0.00397957
353.4	0.33332545		943.39	0.17073564		1533.39	0.10921177		2123.39	0.00768035		2713.4	0.03538696		3303.4	0.07255492		3893.4	-0.00250874
353.6	0.33444776		943.59	0.17111987		1533.59	0.1094849		2123.59	0.00820136		2713.6	0.03544085		3303.6	0.07278957		3893.6	-0.00261156
353.8	0.33466774		943.79	0.17025329		1533.79	0.10982144		2123.79	0.0084893		2713.8	0.03619506		3303.8	0.07263357		3893.8	-0.0027975
354	0.33435839		943.99	0.17069734		1533.99	0.10912105		2123.99	0.00940302		2714	0.03640134		3304	0.07218851		3894	-0.00320513
354.2	0.33436084		944.19	0.17145195		1534.19	0.10872138		2124.19	0.00928421		2714.2	0.03726642		3304.2	0.07145019		3894.2	-0.00318025
354.4	0.33420765		944.39	0.17217024		1534.39	0.10749902		2124.39	0.00910813		2714.4	0.03863009		3304.4	0.07145448		3894.4	-0.00350851
354.6	0.33331571		944.59	0.17334358		1534.59	0.10643857		2124.59	0.00856475		2714.6	0.03986351		3304.6	0.07072593		3894.6	-0.00402137
354.8	0.33362858		944.79	0.17383236		1534.79	0.10615545		2124.79	0.00894425		2714.8	0.0405802		3304.8	0.07035519		3894.8	-0.00367273
355	0.33339157		944.99	0.17512592		1534.99	0.10720891		2124.99	0.00881619		2715	0.04219503		3305	0.07054174		3895	-0.00371589
355.2	0.33450532		945.19	0.17614475		1535.19	0.10830072		2125.19	0.0081425		2715.2	0.04342666		3305.2	0.07092021		3895.2	-0.00544737
355.4	0.33621795		945.39	0.17636843		1535.39	0.10810383		2125.39	0.00818385		2715.4	0.04344499		3305.4	0.07194601		3895.4	-0.00606358
355.6	0.33681482		945.59	0.17806727		1535.59	0.10997671		2125.59	0.00886032		2715.6	0.04268543		3305.6	0.07224683		3895.6	-0.0057568
355.8	0.33753011		945.79	0.17904452		1535.79	0.1114456		2125.79	0.0093277		2715.8	0.04158184		3305.8	0.07247683		3895.8	-0.00580323
356	0.33893867		945.99	0.17971043		1535.99	0.1114273		2125.99	0.01027539		2716	0.04154937		3306	0.07239538		3896	-0.00658837
356.2	0.34049491		946.19	0.17976465		1536.19	0.11185765		2126.19	0.01021121		2716.2	0.04207866		3306.2	0.0728302		3896.2	-0.00665964
356.4	0.34211498		946.39	0.17933789		1536.39	0.11324038		2126.39	0.0099856		2716.4	0.04175971		3306.4	0.07333341		3896.4	-0.00684883
356.6	0.34291413		946.59	0.17861178		1536.59	0.11429971		2126.59	0.01061376		2716.6	0.04141891		3306.6	0.07325507		3896.6	-0.00694789
356.8	0.34316976		946.79	0.17764414		1536.79	0.11402163		2126.79	0.01032303		2716.8	0.04100001		3306.8	0.07528921		3896.8	-0.00611805
357	0.34346783		946.99	0.17683865		1536.99	0.11545546		2126.99	0.01034904		2717	0.04042868		3307	0.07517587		3897	-0.00585042
357.2	0.34444222		947.19	0.17631613		1537.19	0.11516658		2127.19	0.01017741		2717.2	0.03976644		3307.2	0.07532905		3897.2	-0.00475788
357.4	0.34514866		947.39	0.17546782		1537.39	0.11515603		2127.39	0.01048721		2717.4	0.03956995		3307.4	0.07536978		3897.4	-0.00474708
357.6	0.3448623		947.59	0.17436095		1537.59	0.11496628		2127.59	0.00965718		2717.6	0.0397183		3307.6	0.07670677		3897.6	-0.00434074
357.8	0.34408784		947.79	0.17292389		1537.79	0.11475764		2127.79	0.01026334		2717.8	0.03964759		3307.8	0.07723811		3897.8	-0.00380425
358	0.34300615		947.99	0.17314021		1537.99	0.11417048		2127.99	0.00964294		2718	0.03905399		3308	0.07762506		3898	-0.00377634
358.2	0.34258555		948.19	0.17344406		1538.19	0.11519396		2128.19	0.00926609		2718.2	0.03902906		3308.2	0.07745578		3898.2	-0.00331214
358.4	0.3414425		948.39	0.174821		1538.39	0.11536536		2128.39	0.00857852		2718.4	0.03870302		3308.4	0.07713345		3898.4	-0.00311863
358.6	0.34087586		948.59	0.17550117		1538.59	0.11550382		2128.59	0.00771689		2718.6	0.03944783		3308.6	0.07717797		3898.6	-0.00258451
358.8	0.34132628		948.79	0.17655885		1538.79	0.11514786		2128.79	0.0075027		2718.8	0.03942429		3308.8	0.07632365		3898.8	-0.00169728
359	0.34177265		948.99	0.17817006		1538.99	0.11551907		2128.99	0.00641301		2719	0.04093547		3309	0.07756444		3899	-0.00183767
359.2	0.34294419		949.19	0.17950642		1539.19	0.11614247		2129.19	0.00659016		2719.2	0.04094806		3309.2	0.07792414		3899.2	-0.00218955
359.4	0.34361334		949.39	0.18025751		1539.39	0.11721494		2129.39	0.00645274		2719.4	0.04068388		3309.4	0.078486		3899.4	-0.0024234
359.6	0.34342722		949.59	0.18130247		1539.59	0.11797573		2129.59	0.00718286		2719.6	0.04013283		3309.6	0.07763061		3899.6	-0.00282962
359.8	0.34511151		949.79	0.18192516		1539.79	0.11881768		2129.79	0.00785322		2719.8	0.04062696		3309.8	0.07750124		3899.8	-0.00247877
360	0.34596505		949.99	0.18286379		1539.99	0.11951352		2129.99	0.00791124		2720	0.0414739		3310	0.07693985		3900	-0.00274452
360.2	0.3463954		950.19	0.18330518		1540.19	0.12126304		2130.19	0.00840477		2720.2	0.04177552		3310.2	0.07684519		3900.2	-0.00287718
360.4	0.3471751		950.39	0.18317957		1540.39	0.12257001		2130.39	0.00923482		2720.4	0.04143541		3310.4	0.07764098		3900.4	-0.00385259
360.6	0.34855538		950.59	0.1830736		1540.59	0.12205734		2130.59	0.01031284		2720.6	0.0417674		3310.6	0.0776462		3900.6	-0.00450987
360.8	0.34837713		950.79	0.18306106		1540.79	0.12269998		2130.79	0.01034888		2720.8	0.04234422		3310.8	0.07854057		3900.8	-0.00496158
361	0.34878319		950.99	0.18347658		1540.99	0.12267586		2130.99	0.01102865		2721	0.04273474		3311	0.0783553		3901	-0.00543507
361.2	0.3494145		951.19	0.18372147		1541.19	0.1215268		2131.19	0.01099237		2721.2	0.04272282		3311.2	0.07859379		3901.2	-0.00574896
361.4	0.34929053		951.39	0.18294224		1541.39	0.12208068		2131.39	0.0116351		2721.4	0.04383632		3311.4	0.07896132		3901.4	-0.0056936
361.6	0.3482223		951.59	0.18352851		1541.59	0.12224268		2131.59	0.01153932		2721.6	0.04320688		3311.6	0.07976608		3901.6	-0.00525348
361.8	0.34722191		951.79	0.18399562		1541.79	0.12163346		2131.79	0.01328828		2721.8	0.04340433		3311.8	0.08007724		3901.8	-0.00586174
362	0.3459434		951.99	0.1853411		1541.99	0.12171074		2131.99	0.01227718		2722	0.04321727		3312	0.08105564		3902	-0.00585714
362.2	0.34699404		952.19	0.18669473		1542.19	0.12228759		2132.19	0.0125969		2722.2	0.04337173		3312.2	0.0808613		3902.2	-0.00505647
362.4	0.34742135		952.39	0.18812664		1542.39	0.12209956		2132.39	0.01195737		2722.4	0.04375178		3312.4	0.08152837		3902.4	-0.00517788
362.6	0.34782748		952.59	0.18845732		1542.59	0.12166812		2132.59	0.01117687		2722.6	0.04444685		3312.6	0.08234992		3902.6	-0.00547792
362.8	0.34826493		952.79	0.18916752		1542.79	0.12185894		2132.79	0.01078134		2722.8	0.04485904		3312.8	0.0824415		3902.8	-0.00494107
363	0.34909784		952.99	0.1897714		1542.99	0.12326221		2132.99	0.00980374		2723	0.04558023		3313	0.08382063		3903	-0.0052508
363.2	0.35036064		953.19	0.1909486		1543.19	0.12470759		2133.19	0.00999133		2723.2	0.04561267		3313.2	0.08420612		3903.2	-0.00498218
363.4	0.35112782		953.39	0.19065027		1543.39	0.1255773		2133.39	0.0092055		2723.4	0.04540906		3313.4	0.08455056		3903.4	-0.00565256
363.6	0.35243917		953.59	0.19108152		1543.59	0.12591371		2133.59	0.00928082		2723.6	0.04487443		3313.6	0.08449626		3903.6	-0.00521434
363.8	0.35424046		953.79	0.19191109		1543.79	0.12725912		2133.79	0.00943278		2723.8	0.04522077		3313.8	0.08443731		3903.8	-0.00484553
364	0.35513856		953.99	0.19259801		1543.99	0.12812284		2133.99	0.00975797		2724	0.04435304		3314	0.08386257		3904	-0.00519253
364.2	0.3568253		954.19	0.19157901		1544.19	0.12902393		2134.19	0.01004868		2724.2	0.04446915		3314.2	0.08475347		3904.2	-0.00428626
364.4	0.35834499		954.39	0.1903432		1544.39	0.12862012		2134.39	0.00978245		2724.4	0.0443826		3314.4	0.08509493		3904.4	-0.00484279
364.6	0.35834661		954.59	0.18995532		1544.59	0.12888983		2134.59	0.0093727		2724.6	0.0441796		3314.6	0.08462714		3904.6	-0.00494322
364.8	0.35771087		954.79	0.19018313		1544.79	0.12954294		2134.79	0.00970376		2724.8	0.04404051		3314.8	0.08461627		3904.8	-0.00551635
365	0.3588149		954.99	0.19016283		1544.99	0.12904391		2134.99	0.00980085		2725	0.04408173		3315	0.08459517		3905	-0.00604656
365.2	0.35907411		955.19	0.19107934		1545.19	0.12821364		2135.19	0.01047451		2725.2	0.04390099		3315.2	0.08467772		3905.2	-0.00613459
365.4	0.3579307		955.39	0.19157014		1545.39	0.12833049		2135.39	0.0108356		2725.4	0.04384383		3315.4	0.08496221		3905.4	-0.00611481
365.6	0.35730592		955.59	0.1919035		1545.59	0.12713313		2135.59	0.01103591		2725.6	0.04307703		3315.6	0.08553822		3905.6	-0.00626846
365.8	0.35726337		955.79	0.19295453		1545.79	0.12668296		2135.79	0.01096823		2725.8	0.04337136		3315.8	0.0857494		3905.8	-0.00612565
366	0.35685492		955.99	0.19334924		1545.99	0.12596839		2135.99	0.00992508		2726	0.04277197		3316	0.08577786		3906	-0.00565088
366.2	0.35809956		956.19	0.19287836		1546.19	0.12571634		2136.19	0.01128702		2726.2	0.04300283		3316.2	0.08555699		3906.2	-0.00522834
366.4	0.35741359		956.39	0.19370839		1546.39	0.12550049		2136.39	0.0111945		2726.4	0.04266605		3316.4	0.08525464		3906.4	-0.00588434
366.6	0.35678757		956.59	0.19348399		1546.59	0.12542602		2136.59	0.01038355		2726.6	0.04335806		3316.6	0.08522833		3906.6	-0.00647833
366.8	0.35692429		956.79	0.19307174		1546.79	0.12649337		2136.79	0.01104976		2726.8	0.04389364		3316.8	0.08550828		3906.8	-0.0051095
367	0.35716566		956.99	0.19307721		1546.99	0.12671717		2136.99	0.01049917		2727	0.04477932		3317	0.08585693		3907	-0.00507286
367.2	0.35695666		957.19	0.19381703		1547.19	0.12748259		2137.19	0.01030886		2727.2	0.04538651		3317.2	0.08656363		3907.2	-0.00458617
367.4	0.35735179		957.39	0.19438074		1547.39	0.12718564		2137.39	0.01070259		2727.4	0.04617045		3317.4	0.08662913		3907.4	-0.00430937
367.6	0.35851407		957.59	0.19471473		1547.59	0.12762506		2137.59	0.01131225		2727.6	0.04654196		3317.6	0.08663684		3907.6	-0.00380415
367.8	0.35890606		957.79	0.19436361		1547.79	0.12848741		2137.79	0.01154175		2727.8	0.04742895		3317.8	0.08637719		3907.8	-0.00345369
368	0.35927847		957.99	0.19365209		1547.99	0.1288935		2137.99	0.01118999		2728	0.04711213		3318	0.08585505		3908	-0.00263257
368.2	0.35912056		958.19	0.19280337		1548.19	0.12960542		2138.19	0.01064382		2728.2	0.04802324		3318.2	0.08564638		3908.2	-0.00194658
368.4	0.35853262		958.39	0.19299765		1548.39	0.12850071		2138.39	0.0108869		2728.4	0.04834024		3318.4	0.08557354		3908.4	-0.00294056
368.6	0.35847856		958.59	0.19324225		1548.59	0.12940537		2138.59	0.01094441		2728.6	0.04896877		3318.6	0.08635737		3908.6	-0.00317627
368.8	0.35938012		958.79	0.1944525		1548.79	0.12906114		2138.79	0.01160799		2728.8	0.04979146		3318.8	0.08600747		3908.8	-0.00397233
369	0.35980343		958.99	0.19504086		1548.99	0.12864373		2138.99	0.01164592		2729	0.051138		3319	0.08663632		3909	-0.00481857
369.2	0.35951687		959.19	0.19603111		1549.19	0.12764929		2139.19	0.01193872		2729.2	0.05136753		3319.2	0.08716446		3909.2	-0.00481371
369.4	0.35897056		959.39	0.19653937		1549.39	0.12724059		2139.39	0.01242102		2729.4	0.05098402		3319.4	0.08754278		3909.4	-0.00500145
369.6	0.35957347		959.59	0.19669807		1549.59	0.12733985		2139.59	0.01253526		2729.6	0.05054841		3319.6	0.08780289		3909.6	-0.0049755
369.8	0.35981858		959.79	0.19740279		1549.79	0.12760268		2139.79	0.01085389		2729.8	0.04998442		3319.8	0.08780724		3909.8	-0.0051446
370	0.3603809		959.99	0.19770618		1549.99	0.12719155		2139.99	0.01133949		2730	0.04933476		3320	0.08789391		3910	-0.00483585
370.2	0.36069607		960.19	0.19814818		1550.19	0.12750475		2140.19	0.01178352		2730.2	0.0492394		3320.2	0.08828409		3910.2	-0.00563814
370.4	0.36023131		960.39	0.19922537		1550.39	0.12808696		2140.39	0.01084587		2730.4	0.04940949		3320.4	0.08802298		3910.4	-0.00646986
370.6	0.36039744		960.59	0.19892465		1550.59	0.12886498		2140.59	0.01033411		2730.6	0.0498126		3320.6	0.08898909		3910.6	-0.00696613
370.8	0.36137536		960.79	0.19895123		1550.79	0.13017023		2140.79	0.01028849		2730.8	0.04971766		3320.8	0.08979112		3910.8	-0.00614011
371	0.36233098		960.99	0.19941335		1550.99	0.13060687		2140.99	0.00938475		2731	0.04922979		3321	0.0897193		3911	-0.00607692
371.2	0.3629169		961.19	0.2009424		1551.19	0.1323561		2141.19	0.00892066		2731.2	0.04808254		3321.2	0.09042294		3911.2	-0.00611056
371.4	0.36436517		961.39	0.20102924		1551.39	0.13317784		2141.39	0.00803491		2731.4	0.047665		3321.4	0.08932112		3911.4	-0.00587714
371.6	0.36509364		961.59	0.20032941		1551.59	0.13472574		2141.59	0.0076934		2731.6	0.04710458		3321.6	0.08828594		3911.6	-0.00621425
371.8	0.36528515		961.79	0.19965441		1551.79	0.1357857		2141.79	0.00762074		2731.8	0.04671508		3321.8	0.08690187		3911.8	-0.0056016
372	0.36527806		961.99	0.19831513		1551.99	0.13595283		2141.99	0.00740063		2732	0.04623604		3322	0.08524956		3912	-0.00496575
372.2	0.36591452		962.19	0.19796275		1552.19	0.13601615		2142.19	0.00717966		2732.2	0.04611313		3322.2	0.08464296		3912.2	-0.00527975
372.4	0.36622201		962.39	0.19742338		1552.39	0.13546073		2142.39	0.00758996		2732.4	0.04601618		3322.4	0.08473451		3912.4	-0.00470987
372.6	0.36662712		962.59	0.19793289		1552.59	0.13653036		2142.59	0.00864009		2732.6	0.04673277		3322.6	0.08470854		3912.6	-0.00436019
372.8	0.3668559		962.79	0.1989713		1552.79	0.13647658		2142.79	0.00886924		2732.8	0.04668446		3322.8	0.08383808		3912.8	-0.00421112
373	0.36597975		962.99	0.19970336		1552.99	0.13602421		2142.99	0.00939797		2733	0.047231		3323	0.08492139		3913	-0.00347504
373.2	0.36630392		963.19	0.20087956		1553.19	0.13500892		2143.19	0.00972579		2733.2	0.04652387		3323.2	0.08524294		3913.2	-0.00264248
373.4	0.36611834		963.39	0.20179323		1553.39	0.13491061		2143.39	0.01033644		2733.4	0.04564482		3323.4	0.0855211		3913.4	-0.00184024
373.6	0.36651455		963.59	0.2018329		1553.59	0.13502036		2143.59	0.01066791		2733.6	0.04588672		3323.6	0.08678527		3913.6	-0.002037
373.8	0.36653791		963.79	0.2022665		1553.79	0.13488441		2143.79	0.01074918		2733.8	0.04638652		3323.8	0.08832362		3913.8	-0.00240402
374	0.36749744		963.99	0.20307182		1553.99	0.13494601		2143.99	0.01246175		2734	0.04676828		3324	0.08919561		3914	-0.00256573
374.2	0.36737178		964.19	0.2027275		1554.19	0.13471315		2144.19	0.01196426		2734.2	0.04727662		3324.2	0.08958724		3914.2	-0.00375355
374.4	0.36859622		964.39	0.20313872		1554.39	0.13456236		2144.39	0.01180573		2734.4	0.04830101		3324.4	0.09063972		3914.4	-0.00401266
374.6	0.36928822		964.59	0.20333634		1554.59	0.13543978		2144.59	0.01176976		2734.6	0.04794179		3324.6	0.09200342		3914.6	-0.00490152
374.8	0.37050608		964.79	0.20357927		1554.79	0.1355551		2144.79	0.01175289		2734.8	0.04741503		3324.8	0.09244666		3914.8	-0.00450777
375	0.37180831		964.99	0.20374939		1554.99	0.13543545		2144.99	0.01243494		2735	0.04711258		3325	0.09260126		3915	-0.0045648
375.2	0.37304869		965.19	0.2039511		1555.19	0.13650134		2145.19	0.01144959		2735.2	0.0471597		3325.2	0.09275487		3915.2	-0.0053516
375.4	0.37373498		965.39	0.20432511		1555.39	0.13688591		2145.39	0.01110565		2735.4	0.04807333		3325.4	0.09202243		3915.4	-0.00517889
375.6	0.37416012		965.59	0.20484305		1555.59	0.13639868		2145.59	0.01093586		2735.6	0.04894656		3325.6	0.09184622		3915.6	-0.00452951
375.8	0.37462914		965.79	0.20398514		1555.79	0.13655255		2145.79	0.01012139		2735.8	0.04935448		3325.8	0.09104409		3915.8	-0.00347609
376	0.37534812		965.99	0.20344725		1555.99	0.13596567		2145.99	0.009703		2736	0.04917815		3326	0.09129833		3916	-0.00347988
376.2	0.3751238		966.19	0.20425736		1556.19	0.13537409		2146.19	0.00834871		2736.2	0.04966414		3326.2	0.0917881		3916.2	-0.00307253
376.4	0.37476348		966.39	0.20442953		1556.39	0.13547535		2146.39	0.00877601		2736.4	0.04935939		3326.4	0.09181248		3916.4	-0.00180692
376.6	0.37469351		966.59	0.20545116		1556.59	0.13568735		2146.59	0.00920648		2736.6	0.05026438		3326.6	0.09132667		3916.6	-0.00088394
376.8	0.37378078		966.79	0.20677758		1556.79	0.13550017		2146.79	0.00866737		2736.8	0.05032951		3326.8	0.09060932		3916.8	-0.00022194
377	0.37290166		966.99	0.20755339		1556.99	0.13484585		2146.99	0.00852269		2737	0.05083829		3327	0.09110357		3917	0.00085269
377.2	0.37323832		967.19	0.20858811		1557.19	0.13462583		2147.19	0.00803809		2737.2	0.05076254		3327.2	0.09186072		3917.2	0.00022674
377.4	0.37290343		967.39	0.2096574		1557.39	0.13552588		2147.39	0.00794623		2737.4	0.05177586		3327.4	0.09278829		3917.4	0.00076577
377.6	0.37367575		967.59	0.21014889		1557.59	0.13541998		2147.59	0.00859203		2737.6	0.05255905		3327.6	0.09353367		3917.6	-0.00058346
377.8	0.37386697		967.79	0.21064957		1557.79	0.13577036		2147.79	0.00869006		2737.8	0.05322821		3327.8	0.09387187		3917.8	-0.001847
378	0.37408751		967.99	0.21051258		1557.99	0.13617117		2147.99	0.00896613		2738	0.05328769		3328	0.094198		3918	-0.00231639
378.2	0.37467948		968.19	0.21035822		1558.19	0.13645063		2148.19	0.00851187		2738.2	0.05303841		3328.2	0.09402157		3918.2	-0.00339787
378.4	0.37572071		968.39	0.21002427		1558.39	0.13695469		2148.39	0.00883206		2738.4	0.05299577		3328.4	0.09545023		3918.4	-0.00413115
378.6	0.37590588		968.59	0.20932189		1558.59	0.13861251		2148.59	0.00926536		2738.6	0.05271059		3328.6	0.09568519		3918.6	-0.00504142
378.8	0.37752646		968.79	0.20927867		1558.79	0.13842794		2148.79	0.00981506		2738.8	0.052538		3328.8	0.09556142		3918.8	-0.00525203
379	0.37783606		968.99	0.20945314		1558.99	0.14020578		2148.99	0.00982985		2739	0.05338638		3329	0.09569219		3919	-0.00603807
379.2	0.37860577		969.19	0.20949001		1559.19	0.14105924		2149.19	0.00860182		2739.2	0.05361687		3329.2	0.09531411		3919.2	-0.00635423
379.4	0.37865922		969.39	0.21019864		1559.39	0.14186627		2149.39	0.00901607		2739.4	0.05364096		3329.4	0.09530859		3919.4	-0.00613433
379.6	0.37868338		969.59	0.21002956		1559.59	0.14238006		2149.59	0.00823911		2739.6	0.05409557		3329.6	0.09529101		3919.6	-0.00537609
379.8	0.37940357		969.79	0.20917954		1559.79	0.14232118		2149.79	0.00799923		2739.8	0.05379544		3329.8	0.09473786		3919.8	-0.00638072
380	0.37864033		969.99	0.20902157		1559.99	0.14271863		2149.99	0.00847383		2740	0.05416125		3330	0.0950037		3920	-0.00659407
380.2	0.37771732		970.19	0.20944904		1560.19	0.14320127		2150.19	0.00777735		2740.2	0.05395508		3330.2	0.09483447		3920.2	-0.00634052
380.4	0.37802567		970.39	0.20953098		1560.39	0.14439727		2150.39	0.00820991		2740.4	0.05361478		3330.4	0.09442862		3920.4	-0.00599811
380.6	0.37727125		970.59	0.21111769		1560.59	0.14473739		2150.59	0.00874945		2740.6	0.05417846		3330.6	0.09359918		3920.6	-0.00586294
380.8	0.37690071		970.79	0.21217591		1560.79	0.14382585		2150.79	0.00900076		2740.8	0.05430648		3330.8	0.09311281		3920.8	-0.00536041
381	0.37778901		970.99	0.21309259		1560.99	0.14368988		2150.99	0.00842794		2741	0.05471086		3331	0.09381014		3921	-0.00437592
381.2	0.37834842		971.19	0.21398808		1561.19	0.1432095		2151.19	0.00744168		2741.2	0.055478		3331.2	0.09445722		3921.2	-0.0043917
381.4	0.37814851		971.39	0.21575181		1561.39	0.14317738		2151.39	0.0074862		2741.4	0.05611937		3331.4	0.09377606		3921.4	-0.00361074
381.6	0.3794011		971.59	0.21667353		1561.59	0.14221738		2151.59	0.00818684		2741.6	0.05581979		3331.6	0.09373252		3921.6	-0.00379772
381.8	0.37951241		971.79	0.21737993		1561.79	0.14220944		2151.79	0.0082089		2741.8	0.05563912		3331.8	0.09399158		3921.8	-0.00350565
382	0.38048371		971.99	0.2176601		1561.99	0.14242563		2151.99	0.00779217		2742	0.05531671		3332	0.09415184		3922	-0.00232302
382.2	0.38165076		972.19	0.21800569		1562.19	0.14178556		2152.19	0.00786156		2742.2	0.05517245		3332.2	0.09408881		3922.2	-0.00250381
382.4	0.38310632		972.39	0.21820639		1562.39	0.14127868		2152.39	0.00803636		2742.4	0.0555531		3332.4	0.09453488		3922.4	-0.0029105
382.6	0.38404335		972.59	0.2186341		1562.59	0.14233805		2152.59	0.00848727		2742.6	0.05713611		3332.6	0.09437589		3922.6	-0.00315581
382.8	0.38538914		972.79	0.21867185		1562.79	0.1424892		2152.79	0.00814967		2742.8	0.05790772		3332.8	0.09498741		3922.8	-0.00363479
383	0.38578828		972.99	0.21877882		1562.99	0.14287131		2152.99	0.00768214		2743	0.05864344		3333	0.09563497		3923	-0.0039395
383.2	0.38656021		973.19	0.21753736		1563.19	0.14199713		2153.19	0.00822948		2743.2	0.05856902		3333.2	0.09589887		3923.2	-0.00369177
383.4	0.38715901		973.39	0.21680901		1563.39	0.14299819		2153.39	0.00871547		2743.4	0.0582717		3333.4	0.09598516		3923.4	-0.00397179
383.6	0.38767063		973.59	0.21648352		1563.59	0.14353444		2153.59	0.00966691		2743.6	0.05911027		3333.6	0.09620492		3923.6	-0.00465603
383.8	0.38726353		973.79	0.21617259		1563.79	0.14337907		2153.79	0.01037436		2743.8	0.05855003		3333.8	0.0968043		3923.8	-0.00607506
384	0.38650201		973.99	0.21560097		1563.99	0.14495135		2153.99	0.01030783		2744	0.05891738		3334	0.09793851		3924	-0.00548483
384.2	0.38571737		974.19	0.21547195		1564.19	0.14515606		2154.19	0.00970029		2744.2	0.05830938		3334.2	0.09825521		3924.2	-0.00580876
384.4	0.38510688		974.39	0.21602051		1564.39	0.14574326		2154.39	0.00974367		2744.4	0.05823523		3334.4	0.09784716		3924.4	-0.00586848
384.6	0.38403044		974.59	0.21610763		1564.59	0.14560427		2154.59	0.00999745		2744.6	0.05731822		3334.6	0.09769683		3924.6	-0.00624269
384.8	0.38384851		974.79	0.21585226		1564.79	0.14548347		2154.79	0.01008491		2744.8	0.0571081		3334.8	0.09796708		3924.8	-0.00602407
385	0.38400534		974.99	0.21591295		1564.99	0.14632068		2154.99	0.00950585		2745	0.05663668		3335	0.09809245		3925	-0.00576157
385.2	0.38401391		975.19	0.2159382		1565.19	0.14611205		2155.19	0.00894032		2745.2	0.05667274		3335.2	0.09819798		3925.2	-0.00589458
385.4	0.38371128		975.39	0.21776244		1565.39	0.14660064		2155.39	0.00951182		2745.4	0.055854		3335.4	0.09729707		3925.4	-0.00582468
385.6	0.38410667		975.59	0.21796635		1565.59	0.14688929		2155.59	0.0085805		2745.6	0.05515933		3335.6	0.09712898		3925.6	-0.00618243
385.8	0.38403811		975.79	0.21774441		1565.79	0.14715511		2155.79	0.00825346		2745.8	0.05464542		3335.8	0.09610023		3925.8	-0.00640703
386	0.38428929		975.99	0.21915564		1565.99	0.14725988		2155.99	0.00765952		2746	0.05429513		3336	0.09655456		3926	-0.00576832
386.2	0.38467393		976.19	0.22019401		1566.19	0.14668249		2156.19	0.00774518		2746.2	0.05461111		3336.2	0.09704585		3926.2	-0.00585884
386.4	0.38548216		976.39	0.22077909		1566.39	0.14763151		2156.39	0.00758577		2746.4	0.05507788		3336.4	0.09745402		3926.4	-0.00615905
386.6	0.38616308		976.59	0.22154454		1566.59	0.14882351		2156.59	0.00738814		2746.6	0.05573181		3336.6	0.09814822		3926.6	-0.00664052
386.8	0.38735225		976.79	0.22139922		1566.79	0.14906327		2156.79	0.00739917		2746.8	0.05558041		3336.8	0.09844006		3926.8	-0.00677044
387	0.38758793		976.99	0.22108828		1566.99	0.14834594		2156.99	0.00704036		2747	0.05571029		3337	0.09828547		3927	-0.00701216
387.2	0.38813102		977.19	0.22062196		1567.19	0.14911609		2157.19	0.00641806		2747.2	0.05573359		3337.2	0.09784521		3927.2	-0.00648854
387.4	0.38934515		977.39	0.22184972		1567.39	0.15030672		2157.39	0.00693987		2747.4	0.05589591		3337.4	0.0978097		3927.4	-0.00597603
387.6	0.38969514		977.59	0.22224647		1567.59	0.15075978		2157.59	0.00749826		2747.6	0.05645784		3337.6	0.09862669		3927.6	-0.00554159
387.8	0.38951915		977.79	0.22187606		1567.79	0.15084719		2157.79	0.00684978		2747.8	0.05719328		3337.8	0.09975089		3927.8	-0.00529401
388	0.38966276		977.99	0.22185201		1567.99	0.15095181		2157.99	0.00649773		2748	0.05776697		3338	0.09991286		3928	-0.00461123
388.2	0.38923074		978.19	0.2217494		1568.19	0.15100006		2158.19	0.00598004		2748.2	0.05755225		3338.2	0.09964117		3928.2	-0.0049873
388.4	0.38898286		978.39	0.22233811		1568.39	0.15142483		2158.39	0.00617806		2748.4	0.05768782		3338.4	0.10069693		3928.4	-0.00489352
388.6	0.38951392		978.59	0.22205167		1568.59	0.15189848		2158.59	0.00589521		2748.6	0.05804885		3338.6	0.10076588		3928.6	-0.00589015
388.8	0.39022954		978.79	0.22267911		1568.79	0.15275325		2158.79	0.00689259		2748.8	0.05745068		3338.8	0.10101252		3928.8	-0.00565881
389	0.39055661		978.99	0.22274124		1568.99	0.15213515		2158.99	0.00732542		2749	0.05719234		3339	0.1014785		3929	-0.00464426
389.2	0.39130656		979.19	0.22296111		1569.19	0.15165212		2159.19	0.00743007		2749.2	0.05804365		3339.2	0.10181108		3929.2	-0.00497341
389.4	0.3906569		979.39	0.22332469		1569.39	0.15170169		2159.39	0.00828758		2749.4	0.05839806		3339.4	0.1022009		3929.4	-0.00525716
389.6	0.3900461		979.59	0.22324543		1569.59	0.15182979		2159.59	0.00802295		2749.6	0.05779318		3339.6	0.10302021		3929.6	-0.00595355
389.8	0.390309		979.79	0.22300049		1569.79	0.15083346		2159.79	0.00900123		2749.8	0.05753901		3339.8	0.10317323		3929.8	-0.00606334
390	0.38998243		979.99	0.22358885		1569.99	0.15030459		2159.99	0.00916015		2750	0.0569851		3340	0.10421988		3930	-0.00558991
390.2	0.39014952		980.19	0.22314054		1570.19	0.15037476		2160.19	0.00950738		2750.2	0.05697846		3340.2	0.10436334		3930.2	-0.00622332
390.4	0.39028282		980.39	0.22266252		1570.39	0.15125384		2160.39	0.00954475		2750.4	0.05704817		3340.4	0.10458046		3930.4	-0.00745753
390.6	0.39102339		980.59	0.22267363		1570.59	0.15133789		2160.59	0.00900805		2750.6	0.05676441		3340.6	0.10444759		3930.6	-0.00846394
390.8	0.39157734		980.79	0.22205021		1570.79	0.1518928		2160.79	0.00804268		2750.8	0.0571904		3340.8	0.10455342		3930.8	-0.00748578
391	0.39101046		980.99	0.22294207		1570.99	0.15186756		2160.99	0.00755684		2751	0.05687279		3341	0.10454246		3931	-0.00804883
391.2	0.39139579		981.19	0.22418139		1571.19	0.15255408		2161.19	0.00691159		2751.2	0.0572472		3341.2	0.10399903		3931.2	-0.00763256
391.4	0.39211206		981.39	0.22491531		1571.39	0.15277932		2161.39	0.00768047		2751.4	0.05731005		3341.4	0.10412338		3931.4	-0.00694873
391.6	0.39208438		981.59	0.22415117		1571.59	0.15280814		2161.59	0.00722527		2751.6	0.0580722		3341.6	0.10458867		3931.6	-0.0061295
391.8	0.39229131		981.79	0.22424021		1571.79	0.15297327		2161.79	0.0071548		2751.8	0.05833796		3341.8	0.1041523		3931.8	-0.0054763
392	0.39252343		981.99	0.22460936		1571.99	0.15292635		2161.99	0.00748475		2752	0.05879327		3342	0.10373458		3932	-0.00471481
392.2	0.39272234		982.19	0.22576455		1572.19	0.15289946		2162.19	0.00770594		2752.2	0.05867328		3342.2	0.10406934		3932.2	-0.00451289
392.4	0.39341037		982.39	0.22675373		1572.39	0.15308135		2162.39	0.00814486		2752.4	0.05929875		3342.4	0.10504167		3932.4	-0.00358385
392.6	0.39441917		982.59	0.22770781		1572.59	0.15372044		2162.59	0.00891378		2752.6	0.05926472		3342.6	0.10396288		3932.6	-0.00332569
392.8	0.39463906		982.79	0.22808147		1572.79	0.15337007		2162.79	0.01057219		2752.8	0.05827262		3342.8	0.10460039		3932.8	-0.00214602
393	0.39439181		982.99	0.22835369		1572.99	0.15229957		2162.99	0.01131245		2753	0.05912161		3343	0.1053651		3933	-0.0015505
393.2	0.39505793		983.19	0.22845563		1573.19	0.15241051		2163.19	0.01230374		2753.2	0.05892428		3343.2	0.10514885		3933.2	-0.00175385
393.4	0.39489845		983.39	0.22981938		1573.39	0.1524802		2163.39	0.01278202		2753.4	0.05935099		3343.4	0.10673231		3933.4	-0.0024192
393.6	0.39566638		983.59	0.23024642		1573.59	0.15287473		2163.59	0.01257496		2753.6	0.05914996		3343.6	0.10680346		3933.6	-0.00263976
393.8	0.39611159		983.79	0.22941735		1573.79	0.15281273		2163.79	0.01348939		2753.8	0.05933342		3343.8	0.10651074		3933.8	-0.00336443
394	0.39582921		983.99	0.22951555		1573.99	0.15417612		2163.99	0.01451017		2754	0.05907194		3344	0.10669703		3934	-0.00391143
394.2	0.39666697		984.19	0.22913682		1574.19	0.15558565		2164.19	0.01459213		2754.2	0.05954183		3344.2	0.10710457		3934.2	-0.00542488
394.4	0.39790426		984.39	0.22856609		1574.39	0.1572384		2164.39	0.01398998		2754.4	0.05966586		3344.4	0.10632097		3934.4	-0.00577437
394.6	0.39791213		984.59	0.22867179		1574.59	0.15788975		2164.59	0.01318548		2754.6	0.06080236		3344.6	0.10567082		3934.6	-0.0057327
394.8	0.39776292		984.79	0.22910009		1574.79	0.15844806		2164.79	0.01328347		2754.8	0.06039939		3344.8	0.10556869		3934.8	-0.00555144
395	0.39756292		984.99	0.22971087		1574.99	0.1584676		2164.99	0.01310913		2755	0.0598716		3345	0.10533625		3935	-0.00673851
395.2	0.39743086		985.19	0.22972069		1575.19	0.15916034		2165.19	0.01236999		2755.2	0.06013743		3345.2	0.10516533		3935.2	-0.00678053
395.4	0.39806021		985.39	0.22963935		1575.39	0.15992555		2165.39	0.01147339		2755.4	0.06094533		3345.4	0.10527892		3935.4	-0.00652712
395.6	0.39712981		985.59	0.23000985		1575.59	0.15992263		2165.59	0.01102194		2755.6	0.06139126		3345.6	0.10609668		3935.6	-0.00626614
395.8	0.39685334		985.79	0.23037942		1575.79	0.16016759		2165.79	0.01022526		2755.8	0.06127306		3345.8	0.105527		3935.8	-0.00606221
396	0.39714311		985.99	0.23128329		1575.99	0.16057937		2165.99	0.00949331		2756	0.06266183		3346	0.10655805		3936	-0.00597661
396.2	0.39733364		986.19	0.23244666		1576.19	0.15968167		2166.19	0.00889003		2756.2	0.0623532		3346.2	0.10701231		3936.2	-0.00631663
396.4	0.39779694		986.39	0.23250871		1576.39	0.15947363		2166.39	0.00785966		2756.4	0.06322331		3346.4	0.10766217		3936.4	-0.00601355
396.6	0.39782687		986.59	0.23299539		1576.59	0.15960683		2166.59	0.00794488		2756.6	0.0634567		3346.6	0.107281		3936.6	-0.00503951
396.8	0.3991689		986.79	0.23364457		1576.79	0.15936021		2166.79	0.00849308		2756.8	0.06315458		3346.8	0.10768743		3936.8	-0.00552423
397	0.39907966		986.99	0.2340581		1576.99	0.15979407		2166.99	0.00768747		2757	0.06341447		3347	0.10819945		3937	-0.00565772
397.2	0.39940741		987.19	0.23367839		1577.19	0.15852081		2167.19	0.00696951		2757.2	0.06292984		3347.2	0.10872732		3937.2	-0.00549933
397.4	0.40043844		987.39	0.23487941		1577.39	0.15878449		2167.39	0.00620235		2757.4	0.06408334		3347.4	0.10933		3937.4	-0.00592856
397.6	0.40106238		987.59	0.23420894		1577.59	0.15950504		2167.59	0.00552613		2757.6	0.06425509		3347.6	0.10847168		3937.6	-0.00582527
397.8	0.4006029		987.79	0.23385709		1577.79	0.16025532		2167.79	0.00604024		2757.8	0.06449978		3347.8	0.10774517		3937.8	-0.00618046
398	0.40057302		987.99	0.23428786		1577.99	0.16079222		2167.99	0.00617771		2758	0.06433863		3348	0.10752807		3938	-0.00606281
398.2	0.40081948		988.19	0.23377151		1578.19	0.16125801		2168.19	0.00658446		2758.2	0.06389169		3348.2	0.10731726		3938.2	-0.00554355
398.4	0.4008305		988.39	0.23333888		1578.39	0.16159181		2168.39	0.00722897		2758.4	0.06347535		3348.4	0.10600388		3938.4	-0.00528966
398.6	0.39946451		988.59	0.2332847		1578.59	0.16057871		2168.59	0.00724391		2758.6	0.06368529		3348.6	0.10603445		3938.6	-0.00522702
398.8	0.39919704		988.79	0.23337948		1578.79	0.16064178		2168.79	0.00774026		2758.8	0.06200406		3348.8	0.10641209		3938.8	-0.00583033
399	0.39931455		988.99	0.23362388		1578.99	0.16122337		2168.99	0.00797593		2759	0.06186192		3349	0.10674115		3939	-0.00517997
399.2	0.39749803		989.19	0.23402447		1579.19	0.16162523		2169.19	0.00777839		2759.2	0.06186586		3349.2	0.10710508		3939.2	-0.00531204
399.4	0.39742311		989.39	0.23436999		1579.39	0.16168483		2169.39	0.00912805		2759.4	0.06242961		3349.4	0.10793477		3939.4	-0.00604953
399.6	0.39643554		989.59	0.234465		1579.59	0.1614002		2169.59	0.01009801		2759.6	0.06319533		3349.6	0.10916112		3939.6	-0.00569632
399.8	0.39594781		989.79	0.23537679		1579.79	0.16131232		2169.79	0.00959583		2759.8	0.06289154		3349.8	0.10977045		3939.8	-0.00560928
400	0.39645613		989.99	0.23570861		1579.99	0.16055073		2169.99	0.00984632		2760	0.06372161		3350	0.11062534		3940	-0.00588979
400.2	0.39688334		990.19	0.23662479		1580.19	0.15965912		2170.19	0.01088831		2760.2	0.06352277		3350.2	0.11110977		3940.2	-0.00601624
400.4	0.39765905		990.39	0.23723833		1580.39	0.16009905		2170.39	0.01105284		2760.4	0.06382665		3350.4	0.11123604		3940.4	-0.00551993
400.6	0.39867741		990.59	0.23750074		1580.59	0.16102773		2170.59	0.01209464		2760.6	0.06389942		3350.6	0.11076681		3940.6	-0.00491068
400.8	0.39998679		990.79	0.23776747		1580.79	0.16138241		2170.79	0.01182538		2760.8	0.06376201		3350.8	0.11070174		3940.8	-0.00595213
401	0.40015144		990.99	0.23698307		1580.99	0.16060143		2170.99	0.0111443		2761	0.06395618		3351	0.11105988		3941	-0.00540413
401.2	0.40068759		991.19	0.23666956		1581.19	0.1603221		2171.19	0.01157752		2761.2	0.06405713		3351.2	0.11165183		3941.2	-0.00446662
401.4	0.40213894		991.39	0.23700626		1581.39	0.16099749		2171.39	0.01143756		2761.4	0.06501127		3351.4	0.1111671		3941.4	-0.00429713
401.6	0.40282723		991.59	0.23705246		1581.59	0.16119265		2171.59	0.01037664		2761.6	0.06476385		3351.6	0.11078168		3941.6	-0.00507724
401.8	0.40230667		991.79	0.23685206		1581.79	0.16144192		2171.79	0.01087011		2761.8	0.0643458		3351.8	0.11047731		3941.8	-0.00519531
402	0.40259642		991.99	0.23647287		1581.99	0.16171193		2171.99	0.01090388		2762	0.06357169		3352	0.11135834		3942	-0.00470142
402.2	0.40298957		992.19	0.23574044		1582.19	0.16279472		2172.19	0.01096949		2762.2	0.06295989		3352.2	0.11134304		3942.2	-0.00458214
402.4	0.40275849		992.39	0.23515653		1582.39	0.1631615		2172.39	0.01036507		2762.4	0.06306186		3352.4	0.11101069		3942.4	-0.00466754
402.6	0.40243121		992.59	0.23503905		1582.59	0.16330757		2172.59	0.00956133		2762.6	0.06241314		3352.6	0.11059011		3942.6	-0.00434895
402.8	0.40337294		992.79	0.23501982		1582.79	0.16392679		2172.79	0.0098706		2762.8	0.0620835		3352.8	0.10982489		3942.8	-0.00457955
403	0.40307078		992.99	0.23521948		1582.99	0.1648727		2172.99	0.01047066		2763	0.06332495		3353	0.11027281		3943	-0.00412129
403.2	0.40226215		993.19	0.23601682		1583.19	0.16497809		2173.19	0.01048781		2763.2	0.06329483		3353.2	0.11069746		3943.2	-0.00505338
403.4	0.40306852		993.39	0.23704173		1583.39	0.16563521		2173.39	0.0116835		2763.4	0.06316656		3353.4	0.11158225		3943.4	-0.00626153
403.6	0.40202476		993.59	0.23723769		1583.59	0.16543187		2173.59	0.01153838		2763.6	0.06341281		3353.6	0.11221798		3943.6	-0.00623049
403.8	0.40144624		993.79	0.23865085		1583.79	0.16454814		2173.79	0.01030934		2763.8	0.06221239		3353.8	0.11208216		3943.8	-0.00684136
404	0.40225463		993.99	0.23900123		1583.99	0.16404498		2173.99	0.01133978		2764	0.06272162		3354	0.11172953		3944	-0.00735624
404.2	0.40238362		994.19	0.24071344		1584.19	0.1647919		2174.19	0.01203148		2764.2	0.06241539		3354.2	0.11244834		3944.2	-0.00659026
404.4	0.40287996		994.39	0.24101736		1584.39	0.16576903		2174.39	0.01121164		2764.4	0.06230744		3354.4	0.11166353		3944.4	-0.00628474
404.6	0.4034137		994.59	0.24202518		1584.59	0.16637659		2174.59	0.01103924		2764.6	0.06236816		3354.6	0.11177417		3944.6	-0.00588012
404.8	0.40411251		994.79	0.24243608		1584.79	0.16643697		2174.79	0.01024563		2764.8	0.06164435		3354.8	0.11176253		3944.8	-0.00521824
405	0.4051925		994.99	0.2428802		1584.99	0.16693181		2174.99	0.0097881		2765	0.06318691		3355	0.11286838		3945	-0.0046226
405.2	0.40632174		995.19	0.24284319		1585.19	0.16747418		2175.19	0.00987141		2765.2	0.06361388		3355.2	0.11360878		3945.2	-0.00381121
405.4	0.40817421		995.39	0.24378322		1585.39	0.16698973		2175.39	0.00934573		2765.4	0.06374506		3355.4	0.11298701		3945.4	-0.00388313
405.6	0.4084867		995.59	0.24422972		1585.59	0.1676786		2175.59	0.00941778		2765.6	0.06327808		3355.6	0.11287171		3945.6	-0.0047385
405.8	0.40869855		995.79	0.24337309		1585.79	0.16760969		2175.79	0.00965074		2765.8	0.06319007		3355.8	0.11359173		3945.8	-0.00418783
406	0.40943299		995.99	0.24315978		1585.99	0.16685148		2175.99	0.00934964		2766	0.0635704		3356	0.11375008		3946	-0.00428044
406.2	0.40990409		996.19	0.24262329		1586.19	0.1678433		2176.19	0.00860179		2766.2	0.06377873		3356.2	0.1134831		3946.2	-0.00441976
406.4	0.41042122		996.39	0.24189462		1586.39	0.16752415		2176.39	0.00849367		2766.4	0.06438243		3356.4	0.11312055		3946.4	-0.00359668
406.6	0.41075526		996.59	0.24203259		1586.59	0.16738876		2176.59	0.00919929		2766.6	0.06432136		3356.6	0.11287244		3946.6	-0.00456021
406.8	0.41122038		996.79	0.24231207		1586.79	0.16772853		2176.79	0.00977143		2766.8	0.06534676		3356.8	0.11346064		3946.8	-0.00482328
407	0.4102654		996.99	0.24312257		1586.99	0.16860783		2176.99	0.01038868		2767	0.0658596		3357	0.11468074		3947	-0.00459293
407.2	0.41074124		997.19	0.24380555		1587.19	0.16858275		2177.19	0.01015367		2767.2	0.06579125		3357.2	0.11520604		3947.2	-0.00514971
407.4	0.4101871		997.39	0.24430498		1587.39	0.1692358		2177.39	0.01037501		2767.4	0.06590507		3357.4	0.11559717		3947.4	-0.00581281
407.6	0.40933001		997.59	0.24463052		1587.59	0.16886788		2177.59	0.01017758		2767.6	0.06654548		3357.6	0.11541813		3947.6	-0.00585324
407.8	0.40965881		997.79	0.24535763		1587.79	0.16870394		2177.79	0.01007871		2767.8	0.0675144		3357.8	0.11497582		3947.8	-0.00562277
408	0.40982956		997.99	0.24555212		1587.99	0.16857055		2177.99	0.01054221		2768	0.06831972		3358	0.11595051		3948	-0.00507577
408.2	0.40906491		998.19	0.24587206		1588.19	0.16951463		2178.19	0.00955962		2768.2	0.06827908		3358.2	0.11627445		3948.2	-0.00452924
408.4	0.40977602		998.39	0.24539233		1588.39	0.16937217		2178.39	0.00901006		2768.4	0.06846931		3358.4	0.11551269		3948.4	-0.00462446
408.6	0.41021412		998.59	0.24551259		1588.59	0.16913335		2178.59	0.00850052		2768.6	0.06900971		3358.6	0.11626739		3948.6	-0.00436171
408.8	0.41044427		998.79	0.24448749		1588.79	0.16915575		2178.79	0.00853167		2768.8	0.06956399		3358.8	0.11636062		3948.8	-0.00422661
409	0.41056803		998.99	0.24480099		1588.99	0.16929597		2178.99	0.00859577		2769	0.07061508		3359	0.11739359		3949	-0.00433067
409.2	0.41218549		999.19	0.24501406		1589.19	0.1686904		2179.19	0.00913677		2769.2	0.070457		3359.2	0.11689823		3949.2	-0.00403541
409.4	0.41238654		999.39	0.24598694		1589.39	0.16859342		2179.39	0.00947266		2769.4	0.07079985		3359.4	0.11630263		3949.4	-0.00413454
409.6	0.41273303		999.59	0.24553739		1589.59	0.16896277		2179.59	0.00935941		2769.6	0.0705013		3359.6	0.116746		3949.6	-0.00453999
409.8	0.41371457		999.79	0.2448563		1589.79	0.16833206		2179.79	0.01006998		2769.8	0.07057384		3359.8	0.1172739		3949.8	-0.00471528
410	0.41449409		999.99	0.24495735		1589.99	0.16788989		2179.99	0.00966767		2770	0.07111095		3360	0.11733229		3950	-0.0054032
410.2	0.41498038		1000.19	0.24437992		1590.19	0.16950684		2180.19	0.00929005		2770.2	0.0708095		3360.2	0.11871135		3950.2	-0.00583193
410.4	0.41511003		1000.39	0.24419654		1590.39	0.16919731		2180.39	0.00970049		2770.4	0.07121109		3360.4	0.11872027		3950.4	-0.0055272
410.6	0.41396062		1000.59	0.24528342		1590.59	0.16960719		2180.59	0.01022536		2770.6	0.07021224		3360.6	0.11927849		3950.6	-0.00645921
410.8	0.41381827		1000.79	0.24559727		1590.79	0.16957047		2180.79	0.01051508		2770.8	0.069819		3360.8	0.12002133		3950.8	-0.00587203
411	0.41363569		1000.99	0.24650724		1590.99	0.1697973		2180.99	0.01003637		2771	0.06903299		3361	0.11956074		3951	-0.00531419
411.2	0.41383		1001.19	0.24719957		1591.19	0.1702355		2181.19	0.00976372		2771.2	0.06893805		3361.2	0.11968614		3951.2	-0.00539213
411.4	0.41333189		1001.39	0.24803634		1591.39	0.1704826		2181.39	0.0099923		2771.4	0.06775894		3361.4	0.11876474		3951.4	-0.00611881
411.6	0.41298665		1001.59	0.24870989		1591.59	0.17069522		2181.59	0.00965354		2771.6	0.06833666		3361.6	0.11876985		3951.6	-0.00601532
411.8	0.41301085		1001.79	0.24964162		1591.79	0.1712565		2181.79	0.01005681		2771.8	0.06815493		3361.8	0.11864946		3951.8	-0.00577729
412	0.41316895		1001.99	0.24998094		1591.99	0.17069776		2181.99	0.00900446		2772	0.06791072		3362	0.1187271		3952	-0.00559721
412.2	0.41361376		1002.19	0.25010487		1592.19	0.17048985		2182.19	0.00888416		2772.2	0.06751941		3362.2	0.11793256		3952.2	-0.00626822
412.4	0.41511238		1002.39	0.24928509		1592.39	0.17043991		2182.39	0.00969127		2772.4	0.06813501		3362.4	0.11766207		3952.4	-0.00655312
412.6	0.41557054		1002.59	0.24958152		1592.59	0.1705656		2182.59	0.00954943		2772.6	0.06804605		3362.6	0.11816328		3952.6	-0.0065999
412.8	0.41620591		1002.79	0.24936898		1592.79	0.17076224		2182.79	0.00996864		2772.8	0.0680026		3362.8	0.11797772		3952.8	-0.00723981
413	0.41650636		1002.99	0.25110305		1592.99	0.17081873		2182.99	0.00963809		2773	0.0678987		3363	0.11811089		3953	-0.00739473
413.2	0.41862586		1003.19	0.25099615		1593.19	0.17145716		2183.19	0.00964036		2773.2	0.0687465		3363.2	0.11754546		3953.2	-0.00742492
413.4	0.41974755		1003.39	0.25102643		1593.39	0.17233936		2183.39	0.00959075		2773.4	0.06906026		3363.4	0.11767063		3953.4	-0.00718976
413.6	0.42103823		1003.59	0.25084591		1593.59	0.17311535		2183.59	0.00960134		2773.6	0.06871159		3363.6	0.1181575		3953.6	-0.00672751
413.8	0.42177097		1003.79	0.25099178		1593.79	0.17336657		2183.79	0.00965727		2773.8	0.06882315		3363.8	0.11921147		3953.8	-0.00617491
414	0.42217899		1003.99	0.25193061		1593.99	0.17406495		2183.99	0.00891238		2774	0.06882364		3364	0.12004947		3954	-0.00604717
414.2	0.42188132		1004.19	0.25173523		1594.19	0.17503613		2184.19	0.00873208		2774.2	0.06809929		3364.2	0.12073319		3954.2	-0.00488734
414.4	0.42106598		1004.39	0.25207701		1594.39	0.17473085		2184.39	0.00886596		2774.4	0.06827958		3364.4	0.11999739		3954.4	-0.00380832
414.6	0.42035929		1004.59	0.25287086		1594.59	0.17425164		2184.59	0.00809957		2774.6	0.06639005		3364.6	0.12073024		3954.6	-0.00277447
414.8	0.41964434		1004.79	0.25303901		1594.79	0.1742391		2184.79	0.00857663		2774.8	0.066093		3364.8	0.12091312		3954.8	-0.00122393
415	0.41971959		1004.99	0.25361977		1594.99	0.17476415		2184.99	0.00772857		2775	0.06633251		3365	0.12008917		3955	-0.00028147
415.2	0.41940003		1005.19	0.2534858		1595.19	0.17454121		2185.19	0.00862337		2775.2	0.06622119		3365.2	0.11992358		3955.2	-0.00019631
415.4	0.41865553		1005.39	0.25411364		1595.39	0.17466007		2185.39	0.00905831		2775.4	0.06671169		3365.4	0.1192928		3955.4	-0.00010968
415.6	0.41850272		1005.59	0.25543852		1595.59	0.17487342		2185.59	0.00854708		2775.6	0.0674848		3365.6	0.11979176		3955.6	-0.00023862
415.8	0.41895539		1005.79	0.25650585		1595.79	0.17491296		2185.79	0.00893376		2775.8	0.06754707		3365.8	0.1190658		3955.8	-0.00035675
416	0.41965589		1005.99	0.25659489		1595.99	0.17432081		2185.99	0.00894715		2776	0.06850752		3366	0.11878015		3956	-0.00067354
416.2	0.41987177		1006.19	0.25627636		1596.19	0.1744365		2186.19	0.00995935		2776.2	0.06872104		3366.2	0.11855066		3956.2	-0.00136911
416.4	0.42002837		1006.39	0.25574126		1596.39	0.17546067		2186.39	0.0108087		2776.4	0.06909144		3366.4	0.1188973		3956.4	-0.00249444
416.6	0.42113183		1006.59	0.25604604		1596.59	0.17511867		2186.59	0.01048917		2776.6	0.06895247		3366.6	0.119097		3956.6	-0.00329103
416.8	0.4210508		1006.79	0.25545836		1596.79	0.1754847		2186.79	0.01087625		2776.8	0.06931159		3366.8	0.11996477		3956.8	-0.00461086
417	0.42156436		1006.99	0.25482362		1596.99	0.17637418		2186.99	0.01151183		2777	0.06953687		3367	0.11986791		3957	-0.00618731
417.2	0.42223749		1007.19	0.25336074		1597.19	0.1768571		2187.19	0.01189466		2777.2	0.07017403		3367.2	0.1193294		3957.2	-0.00728412
417.4	0.42150403		1007.39	0.25270719		1597.39	0.17702518		2187.39	0.01106423		2777.4	0.06980661		3367.4	0.1198642		3957.4	-0.00741289
417.6	0.42140979		1007.59	0.25260714		1597.59	0.17667881		2187.59	0.01159648		2777.6	0.06933433		3367.6	0.12030072		3957.6	-0.00709679
417.8	0.42047243		1007.79	0.25238407		1597.79	0.17692864		2187.79	0.01131384		2777.8	0.06888708		3367.8	0.12083005		3957.8	-0.0074059
418	0.42048549		1007.99	0.25273796		1597.99	0.17713538		2187.99	0.01161513		2778	0.06944336		3368	0.12076898		3958	-0.00785122
418.2	0.42007489		1008.19	0.2522031		1598.19	0.17711612		2188.19	0.01150017		2778.2	0.0690441		3368.2	0.12154209		3958.2	-0.00730465
418.4	0.41941721		1008.39	0.25334561		1598.39	0.17629929		2188.39	0.01068635		2778.4	0.06938308		3368.4	0.12163369		3958.4	-0.00761999
418.6	0.41884578		1008.59	0.25349135		1598.59	0.1767732		2188.59	0.0100049		2778.6	0.06945212		3368.6	0.12154672		3958.6	-0.00740471
418.8	0.41853334		1008.79	0.25363957		1598.79	0.17737401		2188.79	0.01041508		2778.8	0.07147608		3368.8	0.12236024		3958.8	-0.00707786
419	0.41890262		1008.99	0.25447352		1598.99	0.17704295		2188.99	0.01049214		2779	0.07280005		3369	0.12223167		3959	-0.00653096
419.2	0.4186627		1009.19	0.25539402		1599.19	0.17598457		2189.19	0.01117084		2779.2	0.07328614		3369.2	0.12214075		3959.2	-0.00642007
419.4	0.41896859		1009.39	0.25757404		1599.39	0.17620655		2189.39	0.01060863		2779.4	0.07411424		3369.4	0.12253147		3959.4	-0.0056904
419.6	0.41990883		1009.59	0.25892194		1599.59	0.17609221		2189.59	0.01066112		2779.6	0.07402511		3369.6	0.1231205		3959.6	-0.00628814
419.8	0.42015748		1009.79	0.25969694		1599.79	0.17647353		2189.79	0.01129322		2779.8	0.07497626		3369.8	0.12392496		3959.8	-0.00615439
420	0.4205946		1009.99	0.26016492		1599.99	0.17665765		2189.99	0.01094764		2780	0.07510679		3370	0.12468668		3960	-0.00634634
420.2	0.42161393		1010.19	0.26021829		1600.19	0.17694205		2190.19	0.01134921		2780.2	0.07488522		3370.2	0.12541607		3960.2	-0.00605114
420.4	0.42331237		1010.39	0.2601886		1600.39	0.17758548		2190.39	0.01116458		2780.4	0.07486191		3370.4	0.12687981		3960.4	-0.00617555
420.6	0.42468778		1010.59	0.25967921		1600.59	0.17881043		2190.59	0.01069478		2780.6	0.07537739		3370.6	0.12730003		3960.6	-0.005794
420.8	0.42438545		1010.79	0.25876908		1600.79	0.17912064		2190.79	0.01033268		2780.8	0.07447809		3370.8	0.12810572		3960.8	-0.00603645
421	0.4252895		1010.99	0.25790057		1600.99	0.18035392		2190.99	0.01059951		2781	0.07458349		3371	0.1278236		3961	-0.00645392
421.2	0.42471324		1011.19	0.25773536		1601.19	0.18047701		2191.19	0.01094776		2781.2	0.07398566		3371.2	0.12837943		3961.2	-0.00661419
421.4	0.4242791		1011.39	0.256682		1601.39	0.18073047		2191.39	0.01081908		2781.4	0.07343434		3371.4	0.12946573		3961.4	-0.0065264
421.6	0.42448065		1011.59	0.25627372		1601.59	0.18075288		2191.59	0.01105419		2781.6	0.07247125		3371.6	0.12925834		3961.6	-0.00615191
421.8	0.42383141		1011.79	0.25570932		1601.79	0.1820679		2191.79	0.010871		2781.8	0.07269516		3371.8	0.12890983		3961.8	-0.00643055
422	0.4244243		1011.99	0.25499186		1601.99	0.18239272		2191.99	0.01143867		2782	0.07324447		3372	0.1291716		3962	-0.00685672
422.2	0.42397497		1012.19	0.25403914		1602.19	0.18258438		2192.19	0.01131769		2782.2	0.07262131		3372.2	0.12904883		3962.2	-0.00550236
422.4	0.42382814		1012.39	0.25496485		1602.39	0.18186245		2192.39	0.01009082		2782.4	0.0730863		3372.4	0.12857232		3962.4	-0.00593075
422.6	0.42322128		1012.59	0.25506814		1602.59	0.18314648		2192.59	0.01040813		2782.6	0.07408846		3372.6	0.12783141		3962.6	-0.00603276
422.8	0.42293727		1012.79	0.2559545		1602.79	0.18170821		2192.79	0.0105605		2782.8	0.0745746		3372.8	0.12867959		3962.8	-0.00537655
423	0.42212828		1012.99	0.25726046		1602.99	0.18063782		2192.99	0.0116033		2783	0.075185		3373	0.12721775		3963	-0.00496705
423.2	0.4220161		1013.19	0.25837088		1603.19	0.17995347		2193.19	0.01142617		2783.2	0.07519248		3373.2	0.12691799		3963.2	-0.00467097
423.4	0.42265033		1013.39	0.25972843		1603.39	0.18071627		2193.39	0.01169859		2783.4	0.07648661		3373.4	0.126015		3963.4	-0.00400514
423.6	0.42340856		1013.59	0.26116788		1603.59	0.18073399		2193.59	0.01172882		2783.6	0.07655499		3373.6	0.12622752		3963.6	-0.00407837
423.8	0.42360422		1013.79	0.26202991		1603.79	0.18058035		2193.79	0.01029677		2783.8	0.07736138		3373.8	0.12649441		3963.8	-0.00416102
424	0.42499587		1013.99	0.26258927		1603.99	0.18043896		2193.99	0.0101293		2784	0.0762317		3374	0.12619798		3964	-0.0033191
424.2	0.42660688		1014.19	0.26330619		1604.19	0.18071021		2194.19	0.01010818		2784.2	0.07600834		3374.2	0.12588202		3964.2	-0.00237176
424.4	0.42809995		1014.39	0.26351078		1604.39	0.18130854		2194.39	0.00930451		2784.4	0.07580838		3374.4	0.12587914		3964.4	-0.0022851
424.6	0.42797116		1014.59	0.26364336		1604.59	0.18230114		2194.59	0.0088305		2784.6	0.07558272		3374.6	0.12624478		3964.6	-0.00265547
424.8	0.42872495		1014.79	0.26436577		1604.79	0.1819166		2194.79	0.00773168		2784.8	0.07552707		3374.8	0.12650471		3964.8	-0.00279764
425	0.42992825		1014.99	0.26432015		1604.99	0.18293167		2194.99	0.00865505		2785	0.07600597		3375	0.12691311		3965	-0.00397848
425.2	0.43048503		1015.19	0.26455944		1605.19	0.18350196		2195.19	0.00893782		2785.2	0.07539786		3375.2	0.12731122		3965.2	-0.00550765
425.4	0.43099341		1015.39	0.26372779		1605.39	0.18355729		2195.39	0.00802223		2785.4	0.07505154		3375.4	0.12731163		3965.4	-0.00544192
425.6	0.43011706		1015.59	0.26396261		1605.59	0.18366697		2195.59	0.00832974		2785.6	0.07367208		3375.6	0.12676739		3965.6	-0.00503112
425.8	0.42995098		1015.79	0.26432445		1605.79	0.18457228		2195.79	0.00890985		2785.8	0.07389766		3375.8	0.12699558		3965.8	-0.00587686
426	0.42948287		1015.99	0.26410329		1605.99	0.1840328		2195.99	0.00935759		2786	0.07391643		3376	0.12739165		3966	-0.00643233
426.2	0.42912777		1016.19	0.26408015		1606.19	0.18399321		2196.19	0.00890478		2786.2	0.07359266		3376.2	0.12754356		3966.2	-0.00524294
426.4	0.42848611		1016.39	0.2650889		1606.39	0.18360943		2196.39	0.00866246		2786.4	0.07337338		3376.4	0.1280553		3966.4	-0.00637451
426.6	0.42800174		1016.59	0.26549921		1606.59	0.18402621		2196.59	0.00881748		2786.6	0.07322485		3376.6	0.12723204		3966.6	-0.00649459
426.8	0.42787579		1016.79	0.26544001		1606.79	0.18241891		2196.79	0.00950367		2786.8	0.07445017		3376.8	0.12726481		3966.8	-0.00585566
427	0.42730053		1016.99	0.26599539		1606.99	0.18266846		2196.99	0.00984831		2787	0.07532835		3377	0.12662212		3967	-0.00615463
427.2	0.42736527		1017.19	0.2662937		1607.19	0.18317236		2197.19	0.00982475		2787.2	0.07606029		3377.2	0.12713788		3967.2	-0.00587253
427.4	0.4285269		1017.39	0.26742476		1607.39	0.1842208		2197.39	0.00943419		2787.4	0.07764321		3377.4	0.1264777		3967.4	-0.00588714
427.6	0.42946978		1017.59	0.26885638		1607.59	0.18380341		2197.59	0.00868457		2787.6	0.07712662		3377.6	0.12756066		3967.6	-0.0054068
427.8	0.42979901		1017.79	0.26888338		1607.79	0.18441029		2197.79	0.00795412		2787.8	0.07749883		3377.8	0.12802865		3967.8	-0.00530541
428	0.43117574		1017.99	0.26888484		1607.99	0.18485069		2197.99	0.00824942		2788	0.07797639		3378	0.12836126		3968	-0.00555167
428.2	0.43248534		1018.19	0.26846855		1608.19	0.1855881		2198.19	0.00782879		2788.2	0.07883592		3378.2	0.12814889		3968.2	-0.00545949
428.4	0.43263043		1018.39	0.26837779		1608.39	0.18528417		2198.39	0.00769757		2788.4	0.07929113		3378.4	0.12901922		3968.4	-0.00613854
428.6	0.43233348		1018.59	0.26811045		1608.59	0.18637556		2198.59	0.0075337		2788.6	0.07964078		3378.6	0.13045738		3968.6	-0.00701504
428.8	0.43323655		1018.79	0.26712022		1608.79	0.18663799		2198.79	0.00724142		2788.8	0.08013888		3378.8	0.13037857		3968.8	-0.0069074
429	0.43390813		1018.99	0.26608658		1608.99	0.1875473		2198.99	0.00784096		2789	0.07999812		3379	0.13056152		3969	-0.00705079
429.2	0.43427613		1019.19	0.26565391		1609.19	0.18758767		2199.19	0.00785953		2789.2	0.07950582		3379.2	0.13059389		3969.2	-0.00738506
429.4	0.43304537		1019.39	0.26568331		1609.39	0.18726204		2199.39	0.0082224		2789.4	0.07885167		3379.4	0.13133593		3969.4	-0.00638329
429.6	0.43136851		1019.59	0.26696117		1609.59	0.1864016		2199.59	0.00890299		2789.6	0.07822702		3379.6	0.13181322		3969.6	-0.0062464
429.8	0.43055464		1019.79	0.2675373		1609.79	0.18653431		2199.79	0.00876157		2789.8	0.07836007		3379.8	0.13261813		3969.8	-0.00618092
430	0.43071217		1019.99	0.26701341		1609.99	0.18580112		2199.99	0.00945872		2790	0.07865392		3380	0.13267591		3970	-0.00608637
430.2	0.43133031		1020.19	0.26601807		1610.19	0.18557018		2200.19	0.00959221		2790.2	0.0778999		3380.2	0.13264909		3970.2	-0.00491724
430.4	0.43084003		1020.39	0.26668211		1610.39	0.18506367		2200.39	0.00881159		2790.4	0.07709803		3380.4	0.13206772		3970.4	-0.00460189
430.6	0.43081954		1020.59	0.2672473		1610.59	0.18492651		2200.59	0.00911681		2790.6	0.07809658		3380.6	0.13109271		3970.6	-0.00433485
430.8	0.43092536		1020.79	0.26787085		1610.79	0.18438465		2200.79	0.00961979		2790.8	0.07916574		3380.8	0.13046711		3970.8	-0.00445668
431	0.43063224		1020.99	0.26889398		1610.99	0.18406536		2200.99	0.00924544		2791	0.07941324		3381	0.12988969		3971	-0.00471456
431.2	0.43069624		1021.19	0.26854847		1611.19	0.18438422		2201.19	0.0089221		2791.2	0.07982486		3381.2	0.13024134		3971.2	-0.00489641
431.4	0.43221968		1021.39	0.26904551		1611.39	0.18472985		2201.39	0.0083515		2791.4	0.08018571		3381.4	0.13022577		3971.4	-0.00502389
431.6	0.43309446		1021.59	0.26928032		1611.59	0.18492403		2201.59	0.00829073		2791.6	0.0803039		3381.6	0.13028763		3971.6	-0.00479731
431.8	0.43363345		1021.79	0.26919406		1611.79	0.18462789		2201.79	0.00799351		2791.8	0.08141172		3381.8	0.13030775		3971.8	-0.00528169
432	0.43449966		1021.99	0.2697084		1611.99	0.18469186		2201.99	0.00784957		2792	0.0817649		3382	0.13031915		3972	-0.00594003
432.2	0.43467835		1022.19	0.26937348		1612.19	0.18520966		2202.19	0.00758693		2792.2	0.08169365		3382.2	0.12949934		3972.2	-0.00568059
432.4	0.43442912		1022.39	0.2694314		1612.39	0.18523103		2202.39	0.00839595		2792.4	0.08084731		3382.4	0.13065153		3972.4	-0.00703159
432.6	0.4354139		1022.59	0.26880927		1612.59	0.18713075		2202.59	0.0089797		2792.6	0.08086574		3382.6	0.13099568		3972.6	-0.00730746
432.8	0.4359193		1022.79	0.26802643		1612.79	0.18634921		2202.79	0.00978241		2792.8	0.08081723		3382.8	0.13089367		3972.8	-0.00664723
433	0.43574477		1022.99	0.26916439		1612.99	0.18618992		2202.99	0.01027862		2793	0.08127714		3383	0.13089982		3973	-0.00713599
433.2	0.43587522		1023.19	0.26982168		1613.19	0.18606709		2203.19	0.01075414		2793.2	0.08097304		3383.2	0.13175907		3973.2	-0.00811754
433.4	0.43493419		1023.39	0.27010884		1613.39	0.18638406		2203.39	0.01136793		2793.4	0.08099183		3383.4	0.13249793		3973.4	-0.00777206
433.6	0.4347603		1023.59	0.2710424		1613.59	0.18523426		2203.59	0.01224573		2793.6	0.07963237		3383.6	0.13310435		3973.6	-0.00804981
433.8	0.43512439		1023.79	0.27102799		1613.79	0.18539524		2203.79	0.01195033		2793.8	0.07930273		3383.8	0.13331765		3973.8	-0.00775328
434	0.43513893		1023.99	0.27103457		1613.99	0.18513282		2203.99	0.01271273		2794	0.079238		3384	0.13282423		3974	-0.00720365
434.2	0.43495191		1024.19	0.27150701		1614.19	0.18534128		2204.19	0.01184794		2794.2	0.0786589		3384.2	0.13278271		3974.2	-0.00575229
434.4	0.43449391		1024.39	0.2726441		1614.39	0.18535773		2204.39	0.01050687		2794.4	0.07977765		3384.4	0.13311331		3974.4	-0.00588555
434.6	0.43497922		1024.59	0.27262684		1614.59	0.18539564		2204.59	0.01074156		2794.6	0.08047824		3384.6	0.13343453		3974.6	-0.00592986
434.8	0.43611085		1024.79	0.27280904		1614.79	0.18586431		2204.79	0.01053718		2794.8	0.07998528		3384.8	0.13333805		3974.8	-0.00621199
435	0.43670256		1024.99	0.27202682		1614.99	0.18513286		2204.99	0.00995485		2795	0.08085793		3385	0.13360698		3975	-0.0057608
435.2	0.43722242		1025.19	0.27150844		1615.19	0.18557329		2205.19	0.00965444		2795.2	0.08049535		3385.2	0.13509386		3975.2	-0.00506913
435.4	0.43888036		1025.39	0.27129545		1615.39	0.18591267		2205.39	0.00945484		2795.4	0.08034768		3385.4	0.13556233		3975.4	-0.00468949
435.6	0.43919464		1025.59	0.27140229		1615.59	0.18644228		2205.59	0.00869612		2795.6	0.08107546		3385.6	0.13603072		3975.6	-0.0050246
435.8	0.43896683		1025.79	0.27215086		1615.79	0.18603735		2205.79	0.00855645		2795.8	0.08093224		3385.8	0.13723423		3975.8	-0.00543892
436	0.43958255		1025.99	0.27243108		1615.99	0.1871604		2205.99	0.00778327		2796	0.08054833		3386	0.13736436		3976	-0.00592918
436.2	0.43977493		1026.19	0.27202298		1616.19	0.18781556		2206.19	0.00711685		2796.2	0.08056497		3386.2	0.1369019		3976.2	-0.00643215
436.4	0.44020674		1026.39	0.27186272		1616.39	0.18934622		2206.39	0.00789967		2796.4	0.08001173		3386.4	0.13744315		3976.4	-0.00692441
436.6	0.44022634		1026.59	0.2717766		1616.59	0.19022628		2206.59	0.00749944		2796.6	0.08002458		3386.6	0.13724226		3976.6	-0.00650273
436.8	0.43988895		1026.79	0.27142342		1616.79	0.19002433		2206.79	0.00787549		2796.8	0.08077201		3386.8	0.13667305		3976.8	-0.00652445
437	0.43883847		1026.99	0.27224132		1616.99	0.19124654		2206.99	0.00735413		2797	0.08135176		3387	0.13611226		3977	-0.00752689
437.2	0.43870776		1027.19	0.27150044		1617.19	0.19213012		2207.19	0.00677607		2797.2	0.08142615		3387.2	0.13534639		3977.2	-0.0078219
437.4	0.43805561		1027.39	0.27137225		1617.39	0.19273488		2207.39	0.00721594		2797.4	0.08116252		3387.4	0.13540664		3977.4	-0.00736994
437.6	0.43760515		1027.59	0.27266239		1617.59	0.19254031		2207.59	0.00722745		2797.6	0.08033126		3387.6	0.13522701		3977.6	-0.00771033
437.8	0.43641816		1027.79	0.27282861		1617.79	0.19226727		2207.79	0.00631777		2797.8	0.08127343		3387.8	0.13479957		3977.8	-0.00677342
438	0.43553304		1027.99	0.27368811		1617.99	0.19200697		2207.99	0.0074089		2798	0.08236342		3388	0.13420189		3978	-0.00610076
438.2	0.43599702		1028.19	0.27476188		1618.19	0.19174243		2208.19	0.00642554		2798.2	0.08279873		3388.2	0.13442347		3978.2	-0.00583542
438.4	0.43688943		1028.39	0.27581042		1618.39	0.19155466		2208.39	0.00657778		2798.4	0.0836278		3388.4	0.13479102		3978.4	-0.0059669
438.6	0.4379345		1028.59	0.27644375		1618.59	0.1915582		2208.59	0.00725635		2798.6	0.08319767		3388.6	0.13458275		3978.6	-0.00545082
438.8	0.43914555		1028.79	0.27663343		1618.79	0.19144704		2208.79	0.00743343		2798.8	0.08330802		3388.8	0.13350178		3978.8	-0.00467159
439	0.44010866		1028.99	0.27713536		1618.99	0.19070785		2208.99	0.00845518		2799	0.08418809		3389	0.13359759		3979	-0.00390389
439.2	0.44104473		1029.19	0.27758545		1619.19	0.1915744		2209.19	0.00916405		2799.2	0.08418567		3389.2	0.13503873		3979.2	-0.00390053
439.4	0.44155059		1029.39	0.27706402		1619.39	0.19212963		2209.39	0.00894638		2799.4	0.08342681		3389.4	0.13504346		3979.4	-0.00484525
439.6	0.44185837		1029.59	0.2770142		1619.59	0.19278043		2209.59	0.00878087		2799.6	0.08351148		3389.6	0.13554837		3979.6	-0.00526173
439.8	0.44192151		1029.79	0.2769562		1619.79	0.1930734		2209.79	0.00992718		2799.8	0.08246451		3389.8	0.13667664		3979.8	-0.00578509
440	0.44202497		1029.99	0.27606399		1619.99	0.19317365		2209.99	0.0095704		2800	0.08178706		3390	0.13613183		3980	-0.00626746
440.2	0.44189588		1030.19	0.27539049		1620.19	0.19402918		2210.19	0.0095275		2800.2	0.08098801		3390.2	0.13630878		3980.2	-0.00582426
440.4	0.44155632		1030.39	0.27403228		1620.39	0.19572204		2210.39	0.01011831		2800.4	0.08044261		3390.4	0.13608489		3980.4	-0.00529322
440.6	0.44125848		1030.59	0.27312326		1620.59	0.19534472		2210.59	0.00958854		2800.6	0.08043694		3390.6	0.13562944		3980.6	-0.0051042
440.8	0.44116567		1030.79	0.27323588		1620.79	0.19547969		2210.79	0.01073066		2800.8	0.08109669		3390.8	0.13541042		3980.8	-0.00445569
441	0.44050943		1030.99	0.27354983		1620.99	0.19602074		2210.99	0.01028242		2801	0.08105006		3391	0.13597606		3981	-0.00535422
441.2	0.43969362		1031.19	0.27408033		1621.19	0.19636381		2211.19	0.00926563		2801.2	0.08072697		3391.2	0.13572197		3981.2	-0.00551547
441.4	0.44008426		1031.39	0.27450016		1621.39	0.19643771		2211.39	0.00956619		2801.4	0.0802186		3391.4	0.13631447		3981.4	-0.00631944
441.6	0.43978643		1031.59	0.27546265		1621.59	0.19557633		2211.59	0.00959855		2801.6	0.08063996		3391.6	0.13745967		3981.6	-0.00693915
441.8	0.43917828		1031.79	0.27591697		1621.79	0.19469688		2211.79	0.00956052		2801.8	0.08144704		3391.8	0.13811633		3981.8	-0.00642781
442	0.44003614		1031.99	0.27730738		1621.99	0.19454378		2211.99	0.01039091		2802	0.08204805		3392	0.13718926		3982	-0.00665409
442.2	0.44022799		1032.19	0.27833403		1622.19	0.19441972		2212.19	0.00960912		2802.2	0.08154561		3392.2	0.13835371		3982.2	-0.00609115
442.4	0.4414988		1032.39	0.2794473		1622.39	0.19429106		2212.39	0.00912459		2802.4	0.08225056		3392.4	0.13873467		3982.4	-0.00541498
442.6	0.44272113		1032.59	0.28021933		1622.59	0.19425735		2212.59	0.00840974		2802.6	0.08286822		3392.6	0.13840335		3982.6	-0.00558406
442.8	0.44399696		1032.79	0.28059221		1622.79	0.19438319		2212.79	0.00809335		2802.8	0.0831663		3392.8	0.13863343		3982.8	-0.00444829
443	0.44480764		1032.99	0.28100621		1622.99	0.19581622		2212.99	0.00909868		2803	0.08307163		3393	0.13924875		3983	-0.00465812
443.2	0.44526983		1033.19	0.28003494		1623.19	0.19619744		2213.19	0.00870489		2803.2	0.08320507		3393.2	0.13966917		3983.2	-0.00516573
443.4	0.44461647		1033.39	0.27903778		1623.39	0.19719548		2213.39	0.00817053		2803.4	0.08298269		3393.4	0.13954424		3983.4	-0.00495219
443.6	0.44506558		1033.59	0.27883184		1623.59	0.19869844		2213.59	0.00830567		2803.6	0.08345655		3393.6	0.14016961		3983.6	-0.0057218
443.8	0.44480016		1033.79	0.27771926		1623.79	0.19918782		2213.79	0.00896797		2803.8	0.08385919		3393.8	0.14078448		3983.8	-0.00611561
444	0.44535606		1033.99	0.27689981		1623.99	0.19989408		2213.99	0.00848926		2804	0.08430482		3394	0.14026368		3984	-0.00577472
444.2	0.44487293		1034.19	0.27669916		1624.19	0.20033026		2214.19	0.00851038		2804.2	0.08443449		3394.2	0.14080747		3984.2	-0.00532987
444.4	0.44450595		1034.39	0.27651162		1624.39	0.20031854		2214.39	0.00832253		2804.4	0.08507811		3394.4	0.14011923		3984.4	-0.00557447
444.6	0.44413708		1034.59	0.27698397		1624.59	0.19907817		2214.59	0.00808613		2804.6	0.0859042		3394.6	0.13999547		3984.6	-0.00553065
444.8	0.44366263		1034.79	0.27813517		1624.79	0.19881099		2214.79	0.00866168		2804.8	0.08645648		3394.8	0.13978938		3984.8	-0.00503309
445	0.44365044		1034.99	0.27802725		1624.99	0.19850772		2214.99	0.00744925		2805	0.08698185		3395	0.13990273		3985	-0.0059337
445.2	0.44283428		1035.19	0.27885965		1625.19	0.19777298		2215.19	0.0075197		2805.2	0.08758694		3395.2	0.13931934		3985.2	-0.00578741
445.4	0.44383516		1035.39	0.27862393		1625.39	0.19646833		2215.39	0.00722917		2805.4	0.08812663		3395.4	0.13959625		3985.4	-0.00604827
445.6	0.44396181		1035.59	0.27973736		1625.59	0.19471539		2215.59	0.00707001		2805.6	0.08894499		3395.6	0.14004038		3985.6	-0.00524637
445.8	0.44319339		1035.79	0.28119635		1625.79	0.19365809		2215.79	0.00774136		2805.8	0.08915615		3395.8	0.13948805		3985.8	-0.00550497
446	0.44327634		1035.99	0.2812531		1625.99	0.19276456		2215.99	0.00856912		2806	0.08895057		3396	0.13969724		3986	-0.0055171
446.2	0.44323417		1036.19	0.28248032		1626.19	0.19277905		2216.19	0.00855884		2806.2	0.08849664		3396.2	0.14052343		3986.2	-0.00480476
446.4	0.44456232		1036.39	0.28310359		1626.39	0.19211713		2216.39	0.00783912		2806.4	0.08884922		3396.4	0.1412202		3986.4	-0.00489385
446.6	0.44580073		1036.59	0.28344538		1626.59	0.19263672		2216.59	0.00796341		2806.6	0.08774046		3396.6	0.14110569		3986.6	-0.00538588
446.8	0.44631402		1036.79	0.28384454		1626.79	0.19322071		2216.79	0.00903056		2806.8	0.08702101		3396.8	0.14169154		3986.8	-0.00394357
447	0.44637857		1036.99	0.28329999		1626.99	0.19371453		2216.99	0.00968888		2807	0.08603301		3397	0.14156093		3987	-0.00410215
447.2	0.44708766		1037.19	0.28265102		1627.19	0.1945331		2217.19	0.00996814		2807.2	0.08545671		3397.2	0.14177862		3987.2	-0.00371097
447.4	0.44750316		1037.39	0.28236796		1627.39	0.19590572		2217.39	0.01006054		2807.4	0.08483543		3397.4	0.14250422		3987.4	-0.00425992
447.6	0.4481799		1037.59	0.28231284		1627.59	0.19739058		2217.59	0.01094671		2807.6	0.08424464		3397.6	0.14300532		3987.6	-0.00462246
447.8	0.44827499		1037.79	0.2811377		1627.79	0.19751169		2217.79	0.01087982		2807.8	0.08357858		3397.8	0.14308311		3987.8	-0.00409443
448	0.44868185		1037.99	0.28190012		1627.99	0.19872293		2217.99	0.01089944		2808	0.08336453		3398	0.14290284		3988	-0.00435772
448.2	0.44815379		1038.19	0.28183983		1628.19	0.19865214		2218.19	0.0118637		2808.2	0.08289051		3398.2	0.14287549		3988.2	-0.00483012
448.4	0.44850349		1038.39	0.28207107		1628.39	0.19865936		2218.39	0.01188789		2808.4	0.0837083		3398.4	0.14204433		3988.4	-0.00432238
448.6	0.44867686		1038.59	0.28232532		1628.59	0.19845573		2218.59	0.0122107		2808.6	0.08436186		3398.6	0.14240857		3988.6	-0.00381304
448.8	0.44790486		1038.79	0.28183193		1628.79	0.19885279		2218.79	0.0123086		2808.8	0.08520005		3398.8	0.14243281		3988.8	-0.00256401
449	0.44694047		1038.99	0.28124606		1628.99	0.19903781		2218.99	0.0117935		2809	0.08677738		3399	0.14287724		3989	-0.00265939
449.2	0.44620221		1039.19	0.28137388		1629.19	0.19832552		2219.19	0.0123407		2809.2	0.0880841		3399.2	0.14256307		3989.2	-0.00265368
449.4	0.44637307		1039.39	0.2812138		1629.39	0.19752966		2219.39	0.01206843		2809.4	0.08804627		3399.4	0.14235228		3989.4	-0.00243475
449.6	0.44670105		1039.59	0.28211028		1629.59	0.19682896		2219.59	0.01281363		2809.6	0.08850063		3399.6	0.14255942		3989.6	-0.00255829
449.8	0.44655454		1039.79	0.28254135		1629.79	0.19666911		2219.79	0.01337795		2809.8	0.08787036		3399.8	0.14311971		3989.8	-0.00339598
450	0.44711259		1039.99	0.28232022		1629.99	0.19783668		2219.99	0.01261911		2810	0.08744992		3400	0.14398105		3990	-0.00410489
450.2	0.44754496		1040.19	0.28349844		1630.19	0.19910215		2220.19	0.01218618		2810.2	0.08774432		3400.2	0.14362298		3990.2	-0.00422845
450.4	0.44879859		1040.39	0.28290144		1630.39	0.19947205		2220.39	0.0110993		2810.4	0.08818185		3400.4	0.14479231		3990.4	-0.00472107
450.6	0.44979625		1040.59	0.28352378		1630.59	0.20059588		2220.59	0.01081314		2810.6	0.08779222		3400.6	0.14521095		3990.6	-0.00536188
450.8	0.44978908		1040.79	0.28390038		1630.79	0.20111267		2220.79	0.01111688		2810.8	0.0879527		3400.8	0.14623951		3990.8	-0.00538853
451	0.4503975		1040.99	0.28357868		1630.99	0.20165488		2220.99	0.01081495		2811	0.08752833		3401	0.14642187		3991	-0.00620527
451.2	0.45198157		1041.19	0.28325191		1631.19	0.20300089		2221.19	0.01060739		2811.2	0.08661944		3401.2	0.14655353		3991.2	-0.00607255
451.4	0.45238533		1041.39	0.28317583		1631.39	0.20351999		2221.39	0.01048262		2811.4	0.08690921		3401.4	0.14687833		3991.4	-0.00675493
451.6	0.45215321		1041.59	0.28279163		1631.59	0.20435296		2221.59	0.01036217		2811.6	0.08544586		3401.6	0.14675601		3991.6	-0.00591002
451.8	0.45228284		1041.79	0.28251949		1631.79	0.20451838		2221.79	0.00955846		2811.8	0.08531164		3401.8	0.14715129		3991.8	-0.00610582
452	0.45271652		1041.99	0.28367554		1631.99	0.20459318		2221.99	0.00990821		2812	0.08557715		3402	0.14692758		3992	-0.00604583
452.2	0.45202712		1042.19	0.28394996		1632.19	0.20432397		2222.19	0.01045186		2812.2	0.08593673		3402.2	0.14731169		3992.2	-0.00554424
452.4	0.45188972		1042.39	0.28459441		1632.39	0.20385001		2222.39	0.00963713		2812.4	0.08659445		3402.4	0.14797294		3992.4	-0.00471661
452.6	0.45174754		1042.59	0.28408112		1632.59	0.2030293		2222.59	0.00890216		2812.6	0.08743553		3402.6	0.14827434		3992.6	-0.00471414
452.8	0.45119547		1042.79	0.283842		1632.79	0.20301907		2222.79	0.00864504		2812.8	0.08805061		3402.8	0.14656403		3992.8	-0.00507247
453	0.45033375		1042.99	0.28493296		1632.99	0.20218774		2222.99	0.0084503		2813	0.08879873		3403	0.14642441		3993	-0.00557225
453.2	0.45094659		1043.19	0.2856407		1633.19	0.2012466		2223.19	0.00895609		2813.2	0.08941797		3403.2	0.14559402		3993.2	-0.00571761
453.4	0.45139579		1043.39	0.28650858		1633.39	0.2003857		2223.39	0.00901495		2813.4	0.0888021		3403.4	0.14512571		3993.4	-0.00520127
453.6	0.45116033		1043.59	0.28806715		1633.59	0.19946838		2223.59	0.00903234		2813.6	0.08865112		3403.6	0.14475893		3993.6	-0.00598471
453.8	0.45110181		1043.79	0.28917803		1633.79	0.19980895		2223.79	0.00848675		2813.8	0.0878526		3403.8	0.14409504		3993.8	-0.00618813
454	0.45056845		1043.99	0.29023241		1633.99	0.20095162		2223.99	0.007459		2814	0.08782052		3404	0.14337246		3994	-0.00706032
454.2	0.45094777		1044.19	0.29088172		1634.19	0.20113735		2224.19	0.00786065		2814.2	0.08868149		3404.2	0.1425345		3994.2	-0.00724576
454.4	0.45181286		1044.39	0.29089447		1634.39	0.20124643		2224.39	0.00796498		2814.4	0.08812759		3404.4	0.14265915		3994.4	-0.00817392
454.6	0.45210946		1044.59	0.29168241		1634.59	0.20150148		2224.59	0.00819823		2814.6	0.08814679		3404.6	0.14322799		3994.6	-0.00897554
454.8	0.45222742		1044.79	0.29086241		1634.79	0.20233973		2224.79	0.00857352		2814.8	0.08858717		3404.8	0.14272497		3994.8	-0.0085212
455	0.4532286		1044.99	0.29076252		1634.99	0.20274675		2224.99	0.00884998		2815	0.08873388		3405	0.14308599		3995	-0.00933298
455.2	0.45533022		1045.19	0.29007451		1635.19	0.20395996		2225.19	0.00890095		2815.2	0.08880873		3405.2	0.14346378		3995.2	-0.00881849
455.4	0.45553516		1045.39	0.28956172		1635.39	0.20517883		2225.39	0.00875156		2815.4	0.08893423		3405.4	0.14419325		3995.4	-0.00900568
455.6	0.45566345		1045.59	0.28906513		1635.59	0.2064121		2225.59	0.00828584		2815.6	0.08774893		3405.6	0.14494047		3995.6	-0.0084757
455.8	0.45563933		1045.79	0.28959663		1635.79	0.20735275		2225.79	0.00823456		2815.8	0.088093		3405.8	0.14643572		3995.8	-0.00844146
456	0.45598144		1045.99	0.29030219		1635.99	0.20780141		2225.99	0.00843637		2816	0.0882433		3406	0.14670721		3996	-0.00779272
456.2	0.45574823		1046.19	0.29047598		1636.19	0.20807221		2226.19	0.00814178		2816.2	0.08865813		3406.2	0.14737947		3996.2	-0.00723402
456.4	0.45738012		1046.39	0.29018591		1636.39	0.20792668		2226.39	0.00807082		2816.4	0.08812404		3406.4	0.14732707		3996.4	-0.00727474
456.6	0.45824749		1046.59	0.28958162		1636.59	0.20743482		2226.59	0.00792325		2816.6	0.08854064		3406.6	0.14675633		3996.6	-0.00712689
456.8	0.45851656		1046.79	0.29050879		1636.79	0.20841462		2226.79	0.0091807		2816.8	0.08874319		3406.8	0.14679432		3996.8	-0.00718704
457	0.45709076		1046.99	0.29123531		1636.99	0.20797821		2226.99	0.00876454		2817	0.09025909		3407	0.1482417		3997	-0.00608571
457.2	0.45795597		1047.19	0.29143647		1637.19	0.20781234		2227.19	0.00923847		2817.2	0.09162653		3407.2	0.14713835		3997.2	-0.00534945
457.4	0.45802656		1047.39	0.29179427		1637.39	0.20725429		2227.39	0.0095142		2817.4	0.0913805		3407.4	0.14754334		3997.4	-0.00449405
457.6	0.45685219		1047.59	0.29289472		1637.59	0.207254		2227.59	0.01043487		2817.6	0.09170728		3407.6	0.14730646		3997.6	-0.00402462
457.8	0.45703025		1047.79	0.2936767		1637.79	0.20831223		2227.79	0.00978143		2817.8	0.09218587		3407.8	0.1472196		3997.8	-0.00433179
458	0.45679785		1047.99	0.29363238		1637.99	0.20758804		2227.99	0.00937688		2818	0.09295139		3408	0.14664985		3998	-0.00460319
458.2	0.45753515		1048.19	0.29346165		1638.19	0.2069256		2228.19	0.01025276		2818.2	0.0930114		3408.2	0.14688812		3998.2	-0.00455492
458.4	0.45683638		1048.39	0.29248371		1638.39	0.20689959		2228.39	0.01031825		2818.4	0.0930815		3408.4	0.14609576		3998.4	-0.00393834
458.6	0.45687605		1048.59	0.29176127		1638.59	0.20631945		2228.59	0.00967418		2818.6	0.09430032		3408.6	0.1461907		3998.6	-0.00401855
458.8	0.45692618		1048.79	0.29012689		1638.79	0.20635073		2228.79	0.01015851		2818.8	0.09453252		3408.8	0.14577826		3998.8	-0.00412186
459	0.45773074		1048.99	0.28907539		1638.99	0.2066897		2228.99	0.00899263		2819	0.09474154		3409	0.14649246		3999	-0.0055913
459.2	0.45724933		1049.19	0.28804236		1639.19	0.20829651		2229.19	0.00846714		2819.2	0.09444416		3409.2	0.1461316		3999.2	-0.00547989
459.4	0.45578339		1049.39	0.28699789		1639.39	0.20814318		2229.39	0.00751032		2819.4	0.09391781		3409.4	0.14627761		3999.4	-0.00531416
459.6	0.45525546		1049.59	0.28692175		1639.59	0.2087196		2229.59	0.00717158		2819.6	0.09288902		3409.6	0.14588969		3999.6	-0.00497609
459.8	0.45471264		1049.79	0.28759714		1639.79	0.20871059		2229.79	0.00664954		2819.8	0.09220631		3409.8	0.14657248		3999.8	-0.00471106
460	0.45487158		1049.99	0.28769322		1639.99	0.20864558		2229.99	0.00618096		2820	0.09126345		3410	0.14650052		4000	-0.00489143
460.2	0.45490703		1050.19	0.28879673		1640.19	0.20793953		2230.19	0.0054378		2820.2	0.09111197		3410.2	0.14632654		4000.2	-0.00514493
460.4	0.45551064		1050.39	0.28921851		1640.39	0.20831447		2230.39	0.00553263		2820.4	0.09043005		3410.4	0.14635094		4000.4	-0.00509402
460.6	0.45507195		1050.59	0.28990152		1640.59	0.20742189		2230.59	0.0053264		2820.6	0.09036368		3410.6	0.14759068		4000.6	-0.00513796
460.8	0.45515576		1050.79	0.2914164		1640.79	0.20760076		2230.79	0.00514334		2820.8	0.09021091		3410.8	0.14886151		4000.8	-0.00516276
461	0.4551361		1050.99	0.29261819		1640.99	0.20700924		2230.99	0.00503866		2821	0.09034033		3411	0.14877708		4001	-0.00509071
461.2	0.45696519		1051.19	0.29412778		1641.19	0.20768401		2231.19	0.006029		2821.2	0.09000519		3411.2	0.14776341		4001.2	-0.00495791
461.4	0.45752464		1051.39	0.29536993		1641.39	0.20801889		2231.39	0.00633172		2821.4	0.08915201		3411.4	0.14968263		4001.4	-0.00518289
461.6	0.4577706		1051.59	0.29740163		1641.59	0.20870784		2231.59	0.0072785		2821.6	0.08929017		3411.6	0.15117182		4001.6	-0.00573829
461.8	0.458361		1051.79	0.2975678		1641.79	0.20914011		2231.79	0.00793838		2821.8	0.08919388		3411.8	0.15133977		4001.8	-0.00691437
462	0.45822493		1051.99	0.29674948		1641.99	0.20845245		2231.99	0.00916745		2822	0.08854678		3412	0.15173563		4002	-0.00628656
462.2	0.45874608		1052.19	0.29677716		1642.19	0.20895577		2232.19	0.00984806		2822.2	0.08860858		3412.2	0.1510834		4002.2	-0.00599407
462.4	0.45811456		1052.39	0.29632112		1642.39	0.20932061		2232.39	0.01055205		2822.4	0.08985653		3412.4	0.15007044		4002.4	-0.00650787
462.6	0.4587172		1052.59	0.2959259		1642.59	0.20922351		2232.59	0.01049334		2822.6	0.090556		3412.6	0.14988156		4002.6	-0.00716661
462.8	0.45853887		1052.79	0.29480152		1642.79	0.21030881		2232.79	0.01115234		2822.8	0.09063826		3412.8	0.14933301		4002.8	-0.00714044
463	0.45805933		1052.99	0.29408458		1642.99	0.2115628		2232.99	0.01010777		2823	0.09116004		3413	0.14851669		4003	-0.00683489
463.2	0.45646871		1053.19	0.29326678		1643.19	0.21171223		2233.19	0.01040189		2823.2	0.09112458		3413.2	0.14850282		4003.2	-0.00551953
463.4	0.45567492		1053.39	0.29276245		1643.39	0.21077536		2233.39	0.01065769		2823.4	0.0915565		3413.4	0.14808189		4003.4	-0.00457999
463.6	0.45488808		1053.59	0.29260269		1643.59	0.21170585		2233.59	0.01100411		2823.6	0.09186486		3413.6	0.14815254		4003.6	-0.00434946
463.8	0.45501509		1053.79	0.29293222		1643.79	0.21188654		2233.79	0.01075424		2823.8	0.09184387		3413.8	0.14906539		4003.8	-0.0046156
464	0.45540441		1053.99	0.29407657		1643.99	0.21195148		2233.99	0.01087852		2824	0.09217289		3414	0.14925804		4004	-0.00471235
464.2	0.45613615		1054.19	0.2941419		1644.19	0.21062621		2234.19	0.01042238		2824.2	0.09333424		3414.2	0.1499137		4004.2	-0.00402591
464.4	0.45711309		1054.39	0.29440023		1644.39	0.21040348		2234.39	0.0098962		2824.4	0.09295842		3414.4	0.15136797		4004.4	-0.00367262
464.6	0.4578923		1054.59	0.29544718		1644.59	0.20865		2234.59	0.00951957		2824.6	0.09304937		3414.6	0.15236729		4004.6	-0.00418399
464.8	0.45912736		1054.79	0.29548951		1644.79	0.20873326		2234.79	0.00911073		2824.8	0.09283517		3414.8	0.15333598		4004.8	-0.00450554
465	0.46042833		1054.99	0.29587609		1644.99	0.20832302		2234.99	0.00930767		2825	0.0921107		3415	0.15340572		4005	-0.00511239
465.2	0.46214426		1055.19	0.29713418		1645.19	0.2082724		2235.19	0.00915234		2825.2	0.09202448		3415.2	0.15382997		4005.2	-0.0058267
465.4	0.46286872		1055.39	0.29828578		1645.39	0.20813017		2235.39	0.00882484		2825.4	0.09077764		3415.4	0.15613536		4005.4	-0.00630707
465.6	0.4633355		1055.59	0.29890086		1645.59	0.20856361		2235.59	0.00915395		2825.6	0.0903777		3415.6	0.15662781		4005.6	-0.00688423
465.8	0.46417711		1055.79	0.29839216		1645.79	0.20832425		2235.79	0.00893294		2825.8	0.09032731		3415.8	0.15602153		4005.8	-0.00684555
466	0.46480553		1055.99	0.29817763		1645.99	0.20816913		2235.99	0.0082442		2826	0.09034161		3416	0.15628481		4006	-0.00677231
466.2	0.46507034		1056.19	0.29914178		1646.19	0.20893029		2236.19	0.00783156		2826.2	0.09093268		3416.2	0.15509422		4006.2	-0.00658978
466.4	0.46455171		1056.39	0.29932306		1646.39	0.21005158		2236.39	0.00835396		2826.4	0.09138499		3416.4	0.15462312		4006.4	-0.00690424
466.6	0.46419173		1056.59	0.29962112		1646.59	0.21121551		2236.59	0.00778082		2826.6	0.09148531		3416.6	0.15416043		4006.6	-0.00614124
466.8	0.46296014		1056.79	0.29879476		1646.79	0.21114848		2236.79	0.00794		2826.8	0.09179163		3416.8	0.15354589		4006.8	-0.00580425
467	0.4612337		1056.99	0.29840463		1646.99	0.21173994		2236.99	0.0077615		2827	0.09263698		3417	0.15320562		4007	-0.00483848
467.2	0.46022761		1057.19	0.29780435		1647.19	0.21247705		2237.19	0.00915316		2827.2	0.0930428		3417.2	0.15368477		4007.2	-0.00392642
467.4	0.45966353		1057.39	0.29777882		1647.39	0.21347382		2237.39	0.00979368		2827.4	0.09369922		3417.4	0.15319274		4007.4	-0.00421131
467.6	0.45895689		1057.59	0.29698362		1647.59	0.21498008		2237.59	0.00997422		2827.6	0.09503233		3417.6	0.15373662		4007.6	-0.00395073
467.8	0.45915577		1057.79	0.29692968		1647.79	0.21547056		2237.79	0.00997692		2827.8	0.09493502		3417.8	0.153843		4007.8	-0.00396952
468	0.45887638		1057.99	0.29671341		1647.99	0.21567649		2237.99	0.00997886		2828	0.09550456		3418	0.15380724		4008	-0.00350014
468.2	0.45894016		1058.19	0.29535481		1648.19	0.21546075		2238.19	0.00964006		2828.2	0.09587579		3418.2	0.15406292		4008.2	-0.00297313
468.4	0.45894472		1058.39	0.29563693		1648.39	0.21616475		2238.39	0.00935294		2828.4	0.09588868		3418.4	0.153999		4008.4	-0.00317667
468.6	0.45882173		1058.59	0.29561891		1648.59	0.21600409		2238.59	0.00956191		2828.6	0.0961567		3418.6	0.15336871		4008.6	-0.00340694
468.8	0.45895847		1058.79	0.29511212		1648.79	0.21660908		2238.79	0.00943108		2828.8	0.09541339		3418.8	0.15342794		4008.8	-0.00345691
469	0.45955104		1058.99	0.29576007		1648.99	0.21646219		2238.99	0.00926896		2829	0.09487753		3419	0.1526259		4009	-0.00341295
469.2	0.45989849		1059.19	0.29662789		1649.19	0.21672575		2239.19	0.0092703		2829.2	0.09478381		3419.2	0.15205163		4009.2	-0.00341463
469.4	0.46026431		1059.39	0.29705397		1649.39	0.21731706		2239.39	0.00887587		2829.4	0.09394506		3419.4	0.1517366		4009.4	-0.00309096
469.6	0.46101622		1059.59	0.29693026		1649.59	0.21755961		2239.59	0.00872966		2829.6	0.09395472		3419.6	0.15114982		4009.6	-0.00304634
469.8	0.46193863		1059.79	0.29721313		1649.79	0.21758624		2239.79	0.00852702		2829.8	0.0940189		3419.8	0.15077006		4009.8	-0.00256839
470	0.46193863		1059.99	0.29721313		1650	0.21758624		2239.99	0.00852702		2830	0.0940189		3420	0.15077006		4010	-0.00256839
470.2	0.46271599		1060.19	0.29669431		1650.2	0.21763577		2240.19	0.00832288		2830.2	0.09436885		3420.2	0.14980957		4010.2	-0.00297064
470.4	0.46382238		1060.39	0.2957942		1650.4	0.2172839		2240.39	0.00765184		2830.4	0.09491985		3420.4	0.14888907		4010.4	-0.00300562
470.6	0.46401998		1060.59	0.29528086		1650.6	0.21738598		2240.59	0.00710453		2830.6	0.09510813		3420.6	0.14775434		4010.6	-0.0038507
470.8	0.46448482		1060.79	0.29431838		1650.8	0.21711753		2240.79	0.00734493		2830.8	0.09499336		3420.8	0.14614981		4010.8	-0.00379862
471	0.46497703		1060.99	0.29345711		1651	0.21715587		2240.99	0.00781938		2831	0.09523172		3421	0.14495235		4011	-0.00365149
471.2	0.46572824		1061.19	0.29344387		1651.2	0.2167782		2241.19	0.00791629		2831.2	0.09583718		3421.2	0.14390206		4011.2	-0.00374072
471.4	0.466355		1061.39	0.29336481		1651.4	0.21680978		2241.39	0.00802295		2831.4	0.09533163		3421.4	0.14391695		4011.4	-0.00334349
471.6	0.4661753		1061.59	0.29351499		1651.6	0.21692266		2241.59	0.0074833		2831.6	0.09549025		3421.6	0.14320767		4011.6	-0.00330652
471.8	0.4657495		1061.79	0.29414871		1651.8	0.21706189		2241.79	0.00709366		2831.8	0.0951476		3421.8	0.14260274		4011.8	-0.00365636
472	0.46546099		1061.99	0.29511167		1652	0.21760679		2241.99	0.00635843		2832	0.09466211		3422	0.14262788		4012	-0.00445414
472.2	0.46535147		1062.19	0.2958575		1652.2	0.2174049		2242.19	0.00605014		2832.2	0.09427629		3422.2	0.14343551		4012.2	-0.00406086
472.4	0.46484108		1062.39	0.29595335		1652.4	0.2168377		2242.39	0.00701773		2832.4	0.09314798		3422.4	0.14355572		4012.4	-0.00334058
472.6	0.46357756		1062.59	0.29663161		1652.6	0.21665295		2242.59	0.00776041		2832.6	0.09289539		3422.6	0.14365374		4012.6	-0.00353148
472.8	0.46327146		1062.79	0.29795773		1652.8	0.21719889		2242.79	0.00835507		2832.8	0.09291659		3422.8	0.14386122		4012.8	-0.00330274
473	0.46288667		1062.99	0.29854627		1653	0.21670459		2242.99	0.00816244		2833	0.0923541		3423	0.14343318		4013	-0.00210029
473.2	0.46227411		1063.19	0.29849292		1653.2	0.21608365		2243.19	0.00819576		2833.2	0.0924177		3423.2	0.14336123		4013.2	-0.00204032
473.4	0.46146917		1063.39	0.2986599		1653.4	0.21519808		2243.39	0.00818617		2833.4	0.09257762		3423.4	0.14384172		4013.4	-0.00198748
473.6	0.46078797		1063.59	0.29914568		1653.6	0.21535371		2243.59	0.00864608		2833.6	0.09301874		3423.6	0.14368652		4013.6	-0.00192469
473.8	0.46095715		1063.79	0.29919491		1653.8	0.21473799		2243.79	0.00723257		2833.8	0.09389139		3423.8	0.14378121		4013.8	-0.0018249
474	0.4624089		1063.99	0.29897192		1654	0.21433526		2243.99	0.00638185		2834	0.09298289		3424	0.14324363		4014	-0.00269449
474.2	0.4630594		1064.19	0.29835993		1654.2	0.21400996		2244.19	0.00611182		2834.2	0.09318395		3424.2	0.14368649		4014.2	-0.00312527
474.4	0.46324071		1064.39	0.29815728		1654.4	0.21337257		2244.39	0.00567871		2834.4	0.09382843		3424.4	0.14341688		4014.4	-0.00294992
474.6	0.46305098		1064.59	0.29822345		1654.6	0.21337618		2244.59	0.00598701		2834.6	0.09392853		3424.6	0.14347324		4014.6	-0.00306475
474.8	0.46366325		1064.79	0.29714798		1654.8	0.21254373		2244.79	0.00609435		2834.8	0.09416485		3424.8	0.14310339		4014.8	-0.00224082
475	0.46422598		1064.99	0.29627323		1655	0.21180012		2244.99	0.00489019		2835	0.0948121		3425	0.14379895		4015	-0.00153142
475.2	0.46445437		1065.19	0.29525941		1655.2	0.21073045		2245.19	0.00456818		2835.2	0.09602798		3425.2	0.1441554		4015.2	-0.00140201
475.4	0.46438514		1065.39	0.29487531		1655.4	0.21038768		2245.39	0.00377046		2835.4	0.09549154		3425.4	0.14507425		4015.4	-0.00170626
475.6	0.46426185		1065.59	0.2943132		1655.6	0.21000892		2245.59	0.0023719		2835.6	0.09568934		3425.6	0.14447856		4015.6	-0.00228332
475.8	0.46515281		1065.79	0.29379965		1655.8	0.2099262		2245.79	0.00148432		2835.8	0.09561499		3425.8	0.14531923		4015.8	-0.00311532
476	0.46544001		1065.99	0.29360134		1656	0.20985041		2245.99	0.0009656		2836	0.09520152		3426	0.14560914		4016	-0.00408171
476.2	0.46537892		1066.19	0.2930623		1656.2	0.20899236		2246.19	0.00110155		2836.2	0.09455987		3426.2	0.1457182		4016.2	-0.00399308
476.4	0.46426808		1066.39	0.29360329		1656.4	0.20874184		2246.39	0.00124174		2836.4	0.09391166		3426.4	0.14494409		4016.4	-0.00509103
476.6	0.46389831		1066.59	0.29413738		1656.6	0.20879067		2246.59	0.00082468		2836.6	0.09323122		3426.6	0.14430882		4016.6	-0.00510379
476.8	0.46344165		1066.79	0.2947188		1656.8	0.2092982		2246.79	0.00030894		2836.8	0.09317918		3426.8	0.14357412		4016.8	-0.00449763
477	0.46228196		1066.99	0.29488035		1657	0.20844324		2246.99	0.00096512		2837	0.09325533		3427	0.1430021		4017	-0.00429826
477.2	0.46065136		1067.19	0.29430728		1657.2	0.20844512		2247.19	0.00105305		2837.2	0.09309565		3427.2	0.14260585		4017.2	-0.00499193
477.4	0.45984496		1067.39	0.29411979		1657.4	0.20860858		2247.39	0.00194393		2837.4	0.09310185		3427.4	0.14222357		4017.4	-0.00538318
477.6	0.45996195		1067.59	0.29367172		1657.6	0.21048194		2247.59	0.00232478		2837.6	0.09286059		3427.6	0.1421947		4017.6	-0.00516899
477.8	0.46042226		1067.79	0.29253731		1657.8	0.21147735		2247.79	0.00257214		2837.8	0.09278948		3427.8	0.14212476		4017.8	-0.00548688
478	0.46039917		1067.99	0.2924946		1658	0.21261165		2247.99	0.00385213		2838	0.09162435		3428	0.1412536		4018	-0.00595065
478.2	0.46027371		1068.19	0.29212447		1658.2	0.21312564		2248.19	0.00546499		2838.2	0.09221483		3428.2	0.14097794		4018.2	-0.00646749
478.4	0.45967969		1068.39	0.29250478		1658.4	0.21349068		2248.39	0.00591623		2838.4	0.09287113		3428.4	0.14075912		4018.4	-0.00584564
478.6	0.45962999		1068.59	0.29212156		1658.6	0.21392497		2248.59	0.00625695		2838.6	0.09357086		3428.6	0.14046608		4018.6	-0.00601419
478.8	0.45935292		1068.79	0.29167527		1658.8	0.21296366		2248.79	0.00601184		2838.8	0.09360609		3428.8	0.14002407		4018.8	-0.0055604
479	0.45944632		1068.99	0.29076191		1659	0.21198367		2248.99	0.00590544		2839	0.09358786		3429	0.14019513		4019	-0.00508772
479.2	0.45998614		1069.19	0.28982037		1659.2	0.21212077		2249.19	0.00631275		2839.2	0.09365644		3429.2	0.14059471		4019.2	-0.00637951
479.4	0.45986484		1069.39	0.29060836		1659.4	0.21211446		2249.39	0.00526064		2839.4	0.09304401		3429.4	0.14136263		4019.4	-0.00720272
479.6	0.46074829		1069.59	0.29099389		1659.6	0.21213696		2249.59	0.00500787		2839.6	0.09338589		3429.6	0.14168078		4019.6	-0.00729351
479.8	0.46090364		1069.79	0.29109727		1659.8	0.21131892		2249.79	0.00424737		2839.8	0.09380034		3429.8	0.14129428		4019.8	-0.00770738
480	0.46113637		1069.99	0.29200295		1660	0.2110766		2249.99	0.00403164		2840	0.09320706		3430	0.14050885		4020	-0.00855116
480.2	0.46139587		1070.19	0.29268821		1660.2	0.21109216		2250.19	0.003688		2840.2	0.09312048		3430.2	0.13980131		4020.2	-0.00850722
480.4	0.46111479		1070.39	0.29421512		1660.4	0.21111048		2250.39	0.00352839		2840.4	0.09376792		3430.4	0.13877513		4020.4	-0.00793394
480.6	0.46105273		1070.59	0.2951914		1660.6	0.21139625		2250.59	0.0027637		2840.6	0.09324909		3430.6	0.13881937		4020.6	-0.0073405
480.8	0.46123066		1070.79	0.29553832		1660.8	0.21130227		2250.79	0.00291682		2840.8	0.09380229		3430.8	0.13934935		4020.8	-0.00695868
481	0.46066512		1070.99	0.29579719		1661	0.21136526		2250.99	0.00205598		2841	0.09390924		3431	0.13910838		4021	-0.00717935
481.2	0.46016125		1071.19	0.2956527		1661.2	0.21179426		2251.19	0.00187903		2841.2	0.09410689		3431.2	0.13933111		4021.2	-0.00632563
481.4	0.46085687		1071.39	0.29524848		1661.4	0.21201151		2251.39	0.00183151		2841.4	0.09380324		3431.4	0.13948553		4021.4	-0.00571764
481.6	0.46078791		1071.59	0.29463237		1661.6	0.21350128		2251.59	0.00214143		2841.6	0.09344517		3431.6	0.13972747		4021.6	-0.00475997
481.8	0.46081908		1071.79	0.29473781		1661.8	0.21393534		2251.79	0.00197288		2841.8	0.09437261		3431.8	0.14033066		4021.8	-0.00454896
482	0.46057441		1071.99	0.29483298		1662	0.21322191		2251.99	0.00233597		2842	0.09343472		3432	0.1392481		4022	-0.00541461
482.2	0.46144285		1072.19	0.29375035		1662.2	0.212566		2252.19	0.00244939		2842.2	0.09347102		3432.2	0.13909746		4022.2	-0.00527477
482.4	0.46152962		1072.39	0.29382764		1662.4	0.21193743		2252.39	0.00252384		2842.4	0.09343562		3432.4	0.13887158		4022.4	-0.00483998
482.6	0.46170881		1072.59	0.29344536		1662.6	0.21173833		2252.59	0.00149364		2842.6	0.0933218		3432.6	0.13861259		4022.6	-0.00486478
482.8	0.46149084		1072.79	0.29343489		1662.8	0.21072484		2252.79	0.001769		2842.8	0.09140912		3432.8	0.13873118		4022.8	-0.00484146
483	0.46192906		1072.99	0.29214948		1663	0.21037283		2252.99	0.00173914		2843	0.09048221		3433	0.13963195		4023	-0.00534659
483.2	0.46185653		1073.19	0.29216897		1663.2	0.20991484		2253.19	0.00102886		2843.2	0.0905527		3433.2	0.14012635		4023.2	-0.00648847
483.4	0.46107401		1073.39	0.29246453		1663.4	0.20875336		2253.39	0.00083786		2843.4	0.09022381		3433.4	0.13968658		4023.4	-0.00657803
483.6	0.46210315		1073.59	0.29219575		1663.6	0.20761982		2253.59	0.00172859		2843.6	0.09039875		3433.6	0.13986593		4023.6	-0.00718037
483.8	0.46208155		1073.79	0.29270922		1663.8	0.20631843		2253.79	0.00071754		2843.8	0.09061297		3433.8	0.13925096		4023.8	-0.00784986
484	0.46256437		1073.99	0.29313961		1664	0.20679471		2253.99	0.00097039		2844	0.09096758		3434	0.139657		4024	-0.00759691
484.2	0.46162374		1074.19	0.29360068		1664.2	0.20711726		2254.19	0.00119249		2844.2	0.09115228		3434.2	0.13947047		4024.2	-0.00729031
484.4	0.46108421		1074.39	0.29435756		1664.4	0.20703116		2254.39	0.00083315		2844.4	0.09092347		3434.4	0.1387066		4024.4	-0.00726308
484.6	0.46075889		1074.59	0.2942688		1664.6	0.20722308		2254.59	0.00060403		2844.6	0.09093282		3434.6	0.138798		4024.6	-0.00744541
484.8	0.46029221		1074.79	0.29365024		1664.8	0.20662161		2254.79	0.0012548		2844.8	0.09140001		3434.8	0.13872837		4024.8	-0.00666304
485	0.45888804		1074.99	0.29317952		1665	0.20719748		2254.99	0.00079329		2845	0.09167473		3435	0.13918768		4025	-0.0081356
485.2	0.45826423		1075.19	0.2927573		1665.2	0.20650316		2255.19	0.00107946		2845.2	0.09093147		3435.2	0.13890317		4025.2	-0.00723433
485.4	0.45789133		1075.39	0.29330842		1665.4	0.20723356		2255.39	0.00116893		2845.4	0.09123964		3435.4	0.13872294		4025.4	-0.00774192
485.6	0.45692197		1075.59	0.29428375		1665.6	0.20805354		2255.59	0.00106037		2845.6	0.09190355		3435.6	0.13915164		4025.6	-0.00816484
485.8	0.4576056		1075.79	0.2947772		1665.8	0.20816215		2255.79	0.00105057		2845.8	0.09276422		3435.8	0.13886649		4025.8	-0.00938145
486	0.45800686		1075.99	0.29497623		1666	0.20800842		2255.99	0.00072562		2846	0.0922842		3436	0.13798104		4026	-0.01002575
486.2	0.45868988		1076.19	0.29491697		1666.2	0.20874687		2256.19	0.00024816		2846.2	0.09197484		3436.2	0.13854505		4026.2	-0.00959488
486.4	0.45898489		1076.39	0.29605912		1666.4	0.20950336		2256.39	0.0000259		2846.4	0.09156367		3436.4	0.13823519		4026.4	-0.00931516
486.6	0.45889634		1076.59	0.29669041		1666.6	0.21017419		2256.59	-0.0008831		2846.6	0.09107287		3436.6	0.13814397		4026.6	-0.0100679
486.8	0.45973856		1076.79	0.29728354		1666.8	0.20984263		2256.79	-0.00066593		2846.8	0.09029205		3436.8	0.13814703		4026.8	-0.00994255
487	0.46046749		1076.99	0.29730952		1667	0.21000717		2256.99	-0.00064837		2847	0.09054863		3437	0.13883579		4027	-0.00995031
487.2	0.46128131		1077.19	0.29833916		1667.2	0.20953196		2257.19	-0.00160431		2847.2	0.09021126		3437.2	0.13961922		4027.2	-0.01083084
487.4	0.46220331		1077.39	0.29839584		1667.4	0.20919009		2257.39	-0.00112045		2847.4	0.08930698		3437.4	0.14015383		4027.4	-0.01074797
487.6	0.46298392		1077.59	0.29876101		1667.6	0.20888633		2257.59	-0.00119687		2847.6	0.08888774		3437.6	0.14151602		4027.6	-0.01070561
487.8	0.46316963		1077.79	0.29936165		1667.8	0.20909128		2257.79	-0.00187753		2847.8	0.08894176		3437.8	0.14237925		4027.8	-0.00984013
488	0.46278434		1077.99	0.29862975		1668	0.20949022		2257.99	-0.00124066		2848	0.08815752		3438	0.14296748		4028	-0.00875827
488.2	0.4626081		1078.19	0.29863407		1668.2	0.20959016		2258.19	-0.00084362		2848.2	0.08743859		3438.2	0.14345555		4028.2	-0.00968505
488.4	0.46265453		1078.39	0.29889577		1668.4	0.20903564		2258.39	-0.00117617		2848.4	0.08719222		3438.4	0.14296218		4028.4	-0.00900158
488.6	0.46285027		1078.59	0.29829704		1668.6	0.2084766		2258.59	-0.00127259		2848.6	0.08750545		3438.6	0.14283195		4028.6	-0.00830976
488.8	0.46253449		1078.79	0.29758005		1668.8	0.20730012		2258.79	-0.00107507		2848.8	0.08803795		3438.8	0.14351375		4028.8	-0.00843054
489	0.46258764		1078.99	0.29647918		1669	0.20765362		2258.99	-0.00191791		2849	0.08864478		3439	0.14346635		4029	-0.00932057
489.2	0.46159451		1079.19	0.29627277		1669.2	0.20648008		2259.19	-0.00209334		2849.2	0.08879617		3439.2	0.14286323		4029.2	-0.00841912
489.4	0.46139305		1079.39	0.29574204		1669.4	0.20739149		2259.39	-0.00162017		2849.4	0.08968523		3439.4	0.14278402		4029.4	-0.00870687
489.6	0.46136345		1079.59	0.29483344		1669.6	0.20656206		2259.59	-0.00168981		2849.6	0.08994393		3439.6	0.14225737		4029.6	-0.00866141
489.8	0.46145096		1079.79	0.29380006		1669.8	0.20620195		2259.79	-0.00099657		2849.8	0.09003657		3439.8	0.1407573		4029.8	-0.00869094
490	0.46029669		1079.99	0.29297372		1670	0.20560986		2259.99	-0.00166822		2850	0.08932975		3440	0.14005586		4030	-0.00880702
490.2	0.45897482		1080.19	0.29201226		1670.2	0.20581053		2260.19	-0.00081666		2850.2	0.08866195		3440.2	0.13996269		4030.2	-0.00801491
490.4	0.4581543		1080.39	0.29236385		1670.4	0.20659884		2260.39	-0.00078786		2850.4	0.08851866		3440.4	0.13899363		4030.4	-0.00841803
490.6	0.45773106		1080.59	0.29197162		1670.6	0.20677142		2260.59	-0.00118343		2850.6	0.08827839		3440.6	0.13840843		4030.6	-0.00898753
490.8	0.45765167		1080.79	0.29124236		1670.8	0.2062432		2260.79	-0.0017513		2850.8	0.08809102		3440.8	0.13858009		4030.8	-0.00868361
491	0.45685364		1080.99	0.29114644		1671	0.2070574		2260.99	-0.00089936		2851	0.08809428		3441	0.13898819		4031	-0.00984962
491.2	0.45623039		1081.19	0.29145079		1671.2	0.20710937		2261.19	-0.0015536		2851.2	0.08824007		3441.2	0.13984225		4031.2	-0.00999147
491.4	0.45620702		1081.39	0.29086253		1671.4	0.20803037		2261.39	-0.00171873		2851.4	0.08791555		3441.4	0.13897056		4031.4	-0.00900058
491.6	0.4561248		1081.59	0.29041845		1671.6	0.2085274		2261.59	-0.00266705		2851.6	0.08813124		3441.6	0.13907076		4031.6	-0.00896739
491.8	0.45587119		1081.79	0.29083748		1671.8	0.20952796		2261.79	-0.00332067		2851.8	0.08907089		3441.8	0.13986599		4031.8	-0.00903409
492	0.45530561		1081.99	0.29165651		1672	0.20999426		2261.99	-0.00348306		2852	0.08893253		3442	0.13975719		4032	-0.00885494
492.2	0.45509615		1082.19	0.29212267		1672.2	0.21041933		2262.19	-0.0041053		2852.2	0.08950614		3442.2	0.13978775		4032.2	-0.00967761
492.4	0.45558504		1082.39	0.2931953		1672.4	0.21067366		2262.39	-0.00476767		2852.4	0.08943859		3442.4	0.14042378		4032.4	-0.00934368
492.6	0.45657719		1082.59	0.29289582		1672.6	0.21096684		2262.59	-0.00581058		2852.6	0.08994317		3442.6	0.14057705		4032.6	-0.0092018
492.8	0.45613591		1082.79	0.2927512		1672.8	0.21142708		2262.79	-0.00558479		2852.8	0.09009222		3442.8	0.14099719		4032.8	-0.00890066
493	0.45624638		1082.99	0.29285056		1673	0.21206382		2262.99	-0.00590516		2853	0.09055331		3443	0.1409762		4033	-0.00912648
493.2	0.45678622		1083.19	0.2929793		1673.2	0.21173101		2263.19	-0.00518013		2853.2	0.09013425		3443.2	0.14166554		4033.2	-0.00914595
493.4	0.45742819		1083.39	0.29254369		1673.4	0.21234872		2263.39	-0.00443415		2853.4	0.09024905		3443.4	0.14054591		4033.4	-0.00952822
493.6	0.45775856		1083.59	0.29333667		1673.6	0.21086005		2263.59	-0.0033147		2853.6	0.09022597		3443.6	0.14044757		4033.6	-0.00976872
493.8	0.45785549		1083.79	0.29341133		1673.8	0.21104545		2263.79	-0.00210004		2853.8	0.08962053		3443.8	0.14028917		4033.8	-0.01010208
494	0.45748387		1083.99	0.29318563		1674	0.21038707		2263.99	-0.00108629		2854	0.08871466		3444	0.14053031		4034	-0.0107048
494.2	0.45705275		1084.19	0.2933157		1674.2	0.21071602		2264.19	-0.00007068		2854.2	0.08825451		3444.2	0.14105821		4034.2	-0.0107267
494.4	0.45791842		1084.39	0.29385938		1674.4	0.21060605		2264.39	0.00041322		2854.4	0.08795679		3444.4	0.14004238		4034.4	-0.01100758
494.6	0.45876484		1084.59	0.29278019		1674.6	0.20967025		2264.59	0.00047355		2854.6	0.08748544		3444.6	0.13978552		4034.6	-0.01080197
494.8	0.45888283		1084.79	0.2926881		1674.8	0.20822879		2264.79	0.00105587		2854.8	0.08729348		3444.8	0.13961363		4034.8	-0.01017372
495	0.45909359		1084.99	0.292871		1675	0.20810852		2264.99	0.00158652		2855	0.08756405		3445	0.13996987		4035	-0.01068118
495.2	0.45858127		1085.19	0.29242243		1675.2	0.2073729		2265.19	0.0012136		2855.2	0.08753018		3445.2	0.13993419		4035.2	-0.01013838
495.4	0.4591914		1085.39	0.29178636		1675.4	0.20732607		2265.39	0.00014543		2855.4	0.087865		3445.4	0.13871856		4035.4	-0.00941937
495.6	0.45877433		1085.59	0.29135248		1675.6	0.20681931		2265.59	-0.0008127		2855.6	0.0884283		3445.6	0.13877722		4035.6	-0.00946128
495.8	0.45809729		1085.79	0.29158327		1675.8	0.20722274		2265.79	-0.00127601		2855.8	0.08847903		3445.8	0.13934779		4035.8	-0.00914329
496	0.45793812		1085.99	0.29155921		1676	0.20703962		2265.99	-0.00125523		2856	0.0882903		3446	0.13914676		4036	-0.00925198
496.2	0.45764402		1086.19	0.29074001		1676.2	0.20690879		2266.19	-0.00172121		2856.2	0.08892362		3446.2	0.13939081		4036.2	-0.00967123
496.4	0.45741094		1086.39	0.29156489		1676.4	0.20658773		2266.39	-0.00206755		2856.4	0.08858565		3446.4	0.14085741		4036.4	-0.00976584
496.6	0.45663283		1086.59	0.29097139		1676.6	0.20734791		2266.59	-0.00236612		2856.6	0.0883456		3446.6	0.140444		4036.6	-0.01001608
496.8	0.45599898		1086.79	0.29086111		1676.8	0.20722475		2266.79	-0.00201367		2856.8	0.08743863		3446.8	0.14090692		4036.8	-0.0098771
497	0.45672076		1086.99	0.29114481		1677	0.20752465		2266.99	-0.00230319		2857	0.08907783		3447	0.14203545		4037	-0.01099218
497.2	0.45692812		1087.19	0.29133843		1677.2	0.20814479		2267.19	-0.00192238		2857.2	0.08980404		3447.2	0.14208048		4037.2	-0.01123546
497.4	0.45736598		1087.39	0.29096075		1677.4	0.20788677		2267.39	-0.00193012		2857.4	0.08989597		3447.4	0.14203679		4037.4	-0.01229652
497.6	0.45700927		1087.59	0.29185697		1677.6	0.20788117		2267.59	-0.00127759		2857.6	0.08918696		3447.6	0.14275114		4037.6	-0.01295855
497.8	0.45689094		1087.79	0.29154695		1677.8	0.20800677		2267.79	-0.00120094		2857.8	0.08986012		3447.8	0.14253199		4037.8	-0.01322766
498	0.45634268		1087.99	0.29188278		1678	0.20770063		2267.99	-0.00091802		2858	0.08999157		3448	0.14168653		4038	-0.01337112
498.2	0.45733451		1088.19	0.2919341		1678.2	0.20808898		2268.19	-0.00054402		2858.2	0.08893011		3448.2	0.1417631		4038.2	-0.01236155
498.4	0.45786336		1088.39	0.29240761		1678.4	0.20828358		2268.39	0.00003072		2858.4	0.08869226		3448.4	0.14073514		4038.4	-0.01112687
498.6	0.45678487		1088.59	0.29173784		1678.6	0.20831405		2268.59	0.00012165		2858.6	0.08783856		3448.6	0.14049607		4038.6	-0.01054604
498.8	0.45652988		1088.79	0.29260202		1678.8	0.20815447		2268.79	0.00136403		2858.8	0.08762416		3448.8	0.13936499		4038.8	-0.01002046
499	0.45606748		1088.99	0.29234018		1679	0.20870689		2268.99	0.00106633		2859	0.08750481		3449	0.13932526		4039	-0.00956752
499.2	0.45564787		1089.19	0.29209168		1679.2	0.20836977		2269.19	0.00085799		2859.2	0.0876157		3449.2	0.1383082		4039.2	-0.00926893
499.4	0.45576265		1089.39	0.29205357		1679.4	0.20803699		2269.39	-0.00046493		2859.4	0.08786546		3449.4	0.13719954		4039.4	-0.00871043
499.6	0.45601119		1089.59	0.29101569		1679.6	0.20748237		2269.59	-0.00088862		2859.6	0.08737624		3449.6	0.13694275		4039.6	-0.00884244
499.8	0.45597154		1089.79	0.29175119		1679.8	0.20722832		2269.79	-0.00124364		2859.8	0.08732023		3449.8	0.13648391		4039.8	-0.00864355
500	0.45624076		1089.99	0.29252651		1680	0.20655833		2269.99	-0.00181879		2860	0.08766745		3450	0.13522153		4040	-0.00942845
500.2	0.45694966		1090.19	0.29221008		1680.2	0.20681301		2270.19	-0.00272484		2860.2	0.08804407		3450.2	0.13512374		4040.2	-0.00929161
500.4	0.45686304		1090.39	0.29272692		1680.4	0.20651133		2270.39	-0.00350036		2860.4	0.08818458		3450.4	0.13513171		4040.4	-0.00918539
500.6	0.45692621		1090.59	0.29172681		1680.6	0.2065198		2270.59	-0.00361407		2860.6	0.08746025		3450.6	0.13457695		4040.6	-0.00972824
500.8	0.45757884		1090.79	0.29188036		1680.8	0.2056545		2270.79	-0.0044809		2860.8	0.08762121		3450.8	0.13504543		4040.8	-0.0092728
501	0.45804448		1090.99	0.2929187		1681	0.20661737		2270.99	-0.00577038		2861	0.08794672		3451	0.13629231		4041	-0.00938952
501.2	0.45798271		1091.19	0.29338484		1681.2	0.20691139		2271.19	-0.00606977		2861.2	0.0878022		3451.2	0.13569275		4041.2	-0.0101047
501.4	0.45806176		1091.39	0.29301204		1681.4	0.20689182		2271.39	-0.00607434		2861.4	0.0871436		3451.4	0.13593178		4041.4	-0.01109334
501.6	0.45668854		1091.59	0.29352645		1681.6	0.20751279		2271.59	-0.00578097		2861.6	0.0882642		3451.6	0.13621005		4041.6	-0.0114583
501.8	0.4559026		1091.79	0.29398321		1681.8	0.20765482		2271.79	-0.0055941		2861.8	0.0890848		3451.8	0.1366892		4041.8	-0.01158834
502	0.45531819		1091.99	0.2944401		1682	0.20857439		2271.99	-0.00485293		2862	0.08915708		3452	0.13715615		4042	-0.01166969
502.2	0.45524301		1092.19	0.29409553		1682.2	0.20942478		2272.19	-0.00454036		2862.2	0.08886529		3452.2	0.13784703		4042.2	-0.01115884
502.4	0.45352168		1092.39	0.29458324		1682.4	0.21034163		2272.39	-0.00368052		2862.4	0.08861112		3452.4	0.13777541		4042.4	-0.01143422
502.6	0.4521131		1092.59	0.294272		1682.6	0.21060891		2272.59	-0.00303303		2862.6	0.08932972		3452.6	0.13784926		4042.6	-0.01195634
502.8	0.45298935		1092.79	0.29429104		1682.8	0.21050628		2272.79	-0.00212785		2862.8	0.09011132		3452.8	0.13774903		4042.8	-0.01156973
503	0.45310264		1092.99	0.29391092		1683	0.20943004		2272.99	-0.00198597		2863	0.09016102		3453	0.13923734		4043	-0.01104174
503.2	0.4540999		1093.19	0.29372932		1683.2	0.20811861		2273.19	-0.00193545		2863.2	0.08963631		3453.2	0.13969323		4043.2	-0.01187338
503.4	0.45505245		1093.39	0.29356719		1683.4	0.20639856		2273.39	-0.00194601		2863.4	0.08855171		3453.4	0.14010332		4043.4	-0.01278406
503.6	0.45603847		1093.59	0.29327549		1683.6	0.20625105		2273.59	-0.00175687		2863.6	0.08778116		3453.6	0.14087439		4043.6	-0.01249614
503.8	0.45630639		1093.79	0.29407199		1683.8	0.20630125		2273.79	-0.00178441		2863.8	0.08713278		3453.8	0.14067389		4043.8	-0.01246441
504	0.45679605		1093.99	0.29431624		1684	0.20650749		2273.99	-0.00246318		2864	0.08647934		3454	0.14038931		4044	-0.01317249
504.2	0.45749021		1094.19	0.29400528		1684.2	0.20640439		2274.19	-0.00287953		2864.2	0.08635849		3454.2	0.14092867		4044.2	-0.01268595
504.4	0.45694783		1094.39	0.29325846		1684.4	0.20513941		2274.39	-0.00343549		2864.4	0.08556969		3454.4	0.13997435		4044.4	-0.01219102
504.6	0.45747314		1094.59	0.29310587		1684.6	0.20514208		2274.59	-0.00384092		2864.6	0.08351756		3454.6	0.14048717		4044.6	-0.01182347
504.8	0.45804589		1094.79	0.29437557		1684.8	0.20619559		2274.79	-0.00461098		2864.8	0.08307244		3454.8	0.14115766		4044.8	-0.01082512
505	0.45833945		1094.99	0.29523052		1685	0.2070796		2274.99	-0.00503517		2865	0.08202023		3455	0.14100889		4045	-0.01013435
505.2	0.45809865		1095.19	0.29464495		1685.2	0.20750906		2275.19	-0.0037894		2865.2	0.08212156		3455.2	0.13979013		4045.2	-0.01071282
505.4	0.45752805		1095.39	0.2949256		1685.4	0.20845687		2275.39	-0.00353773		2865.4	0.0827312		3455.4	0.13939605		4045.4	-0.01073008
505.6	0.45647733		1095.59	0.29409874		1685.6	0.2088675		2275.59	-0.00285372		2865.6	0.08340186		3455.6	0.13939194		4045.6	-0.00985613
505.8	0.4558481		1095.79	0.2936604		1685.8	0.20930343		2275.79	-0.00281756		2865.8	0.0847396		3455.8	0.13890414		4045.8	-0.01014612
506	0.45540592		1095.99	0.29295948		1686	0.21019577		2275.99	-0.00306326		2866	0.08566995		3456	0.13860865		4046	-0.01045526
506.2	0.45543269		1096.19	0.29211292		1686.2	0.21093339		2276.19	-0.00370126		2866.2	0.08687764		3456.2	0.13817335		4046.2	-0.01059892
506.4	0.45443912		1096.39	0.29115835		1686.4	0.21053509		2276.39	-0.00307357		2866.4	0.08696739		3456.4	0.13798681		4046.4	-0.0109928
506.6	0.45436188		1096.59	0.29037902		1686.6	0.20986807		2276.59	-0.00294303		2866.6	0.08819609		3456.6	0.13766709		4046.6	-0.01088554
506.8	0.45485618		1096.79	0.2895013		1686.8	0.2089304		2276.79	-0.00353496		2866.8	0.08757286		3456.8	0.13779693		4046.8	-0.01103675
507	0.45505223		1096.99	0.28876098		1687	0.2074538		2276.99	-0.00370517		2867	0.08735634		3457	0.13802822		4047	-0.01113501
507.2	0.45552265		1097.19	0.28915668		1687.2	0.20774189		2277.19	-0.00415122		2867.2	0.08655119		3457.2	0.13873066		4047.2	-0.01259524
507.4	0.45597945		1097.39	0.28956779		1687.4	0.20738568		2277.39	-0.00444754		2867.4	0.08632377		3457.4	0.13918291		4047.4	-0.0141309
507.6	0.45496002		1097.59	0.2897264		1687.6	0.20829128		2277.59	-0.00451419		2867.6	0.08650468		3457.6	0.13991729		4047.6	-0.01478308
507.8	0.45448498		1097.79	0.29039108		1687.8	0.2081286		2277.79	-0.00493087		2867.8	0.08609052		3457.8	0.14038323		4047.8	-0.01595979
508	0.45443603		1097.99	0.29086868		1688	0.20877411		2277.99	-0.00584403		2868	0.08534366		3458	0.14125613		4048	-0.01701221
508.2	0.45399715		1098.19	0.29094926		1688.2	0.20825536		2278.19	-0.00622236		2868.2	0.0845649		3458.2	0.14188817		4048.2	-0.01624851
508.4	0.45305161		1098.39	0.29038644		1688.4	0.20882099		2278.39	-0.00700309		2868.4	0.08316233		3458.4	0.14186922		4048.4	-0.01636456
508.6	0.45399376		1098.59	0.29119139		1688.6	0.20997275		2278.59	-0.00717192		2868.6	0.08168523		3458.6	0.14233706		4048.6	-0.01567312
508.8	0.45403161		1098.79	0.29209168		1688.8	0.21051122		2278.79	-0.00717103		2868.8	0.08177553		3458.8	0.14155092		4048.8	-0.01575781
509	0.45456549		1098.99	0.29218651		1689	0.20988487		2278.99	-0.00670988		2869	0.08171079		3459	0.14062494		4049	-0.01615517
509.2	0.45538999		1099.19	0.29204684		1689.2	0.20956775		2279.19	-0.00623636		2869.2	0.08195732		3459.2	0.14047896		4049.2	-0.01596773
509.4	0.45567862		1099.39	0.29281217		1689.4	0.20956182		2279.39	-0.00630607		2869.4	0.0832403		3459.4	0.14027622		4049.4	-0.01572758
509.6	0.45567554		1099.59	0.29106323		1689.6	0.20990208		2279.59	-0.00544083		2869.6	0.0835413		3459.6	0.13959822		4049.6	-0.01528654
509.8	0.45559256		1099.79	0.29094992		1689.8	0.20982406		2279.79	-0.00573747		2869.8	0.08512299		3459.8	0.13903887		4049.8	-0.01504898
510	0.4559047		1099.99	0.29041334		1690	0.2096166		2279.99	-0.00550497		2870	0.0861782		3460	0.13918991		4050	-0.01474442
510.2	0.45573936		1100.19	0.28912829		1690.2	0.2094678		2280.19	-0.0051332		2870.2	0.0867797		3460.2	0.13845705		4050.2	-0.01410209
510.4	0.45549938		1100.39	0.28824813		1690.4	0.20847401		2280.39	-0.00568796		2870.4	0.08620583		3460.4	0.13807943		4050.4	-0.01356698
510.6	0.45650761		1100.59	0.28860976		1690.6	0.20782936		2280.59	-0.00641387		2870.6	0.08609132		3460.6	0.13710055		4050.6	-0.01345089
510.8	0.45600796		1100.79	0.28853983		1690.8	0.20714287		2280.79	-0.00702928		2870.8	0.08553065		3460.8	0.13678172		4050.8	-0.01432318
511	0.45610746		1100.99	0.28850278		1691	0.20705879		2280.99	-0.00603452		2871	0.08601029		3461	0.13645163		4051	-0.01374081
511.2	0.45520445		1101.19	0.29000404		1691.2	0.2081535		2281.19	-0.00605205		2871.2	0.08606588		3461.2	0.13734306		4051.2	-0.01429255
511.4	0.45482226		1101.39	0.29006816		1691.4	0.20731395		2281.39	-0.00615447		2871.4	0.08695291		3461.4	0.13737559		4051.4	-0.01479689
511.6	0.45382726		1101.59	0.289858		1691.6	0.20751737		2281.59	-0.00632425		2871.6	0.0864574		3461.6	0.13769981		4051.6	-0.01490835
511.8	0.45416123		1101.79	0.29086441		1691.8	0.20776154		2281.79	-0.00662458		2871.8	0.0860043		3461.8	0.13813858		4051.8	-0.01525561
512	0.45431137		1101.99	0.29091053		1692	0.20790236		2281.99	-0.00745664		2872	0.08564613		3462	0.1375215		4052	-0.015092
512.2	0.45399496		1102.19	0.29041486		1692.2	0.20741731		2282.19	-0.00763431		2872.2	0.08450425		3462.2	0.13748963		4052.2	-0.01452796
512.4	0.45450401		1102.39	0.29041264		1692.4	0.20833921		2282.39	-0.0075782		2872.4	0.0841682		3462.4	0.13753723		4052.4	-0.0150742
512.6	0.45592534		1102.59	0.29148311		1692.6	0.20836602		2282.59	-0.00722433		2872.6	0.08388976		3462.6	0.13662717		4052.6	-0.0159953
512.8	0.45622476		1102.79	0.29162646		1692.8	0.2082425		2282.79	-0.00742517		2872.8	0.0849562		3462.8	0.13671534		4052.8	-0.01686113
513	0.4569923		1102.99	0.29143289		1693	0.20753148		2282.99	-0.00728623		2873	0.08547937		3463	0.13620372		4053	-0.01781507
513.2	0.45764589		1103.19	0.29136342		1693.2	0.20694664		2283.19	-0.00813691		2873.2	0.08567714		3463.2	0.13563178		4053.2	-0.01804836
513.4	0.4570772		1103.39	0.2915986		1693.4	0.2076148		2283.39	-0.00760091		2873.4	0.0857194		3463.4	0.13504165		4053.4	-0.01794549
513.6	0.45685667		1103.59	0.29073503		1693.6	0.20850765		2283.59	-0.00781595		2873.6	0.08522606		3463.6	0.13485134		4053.6	-0.0171242
513.8	0.45682297		1103.79	0.2911607		1693.8	0.20787789		2283.79	-0.00720506		2873.8	0.08528212		3463.8	0.13444989		4053.8	-0.01639806
514	0.45701777		1103.99	0.29069828		1694	0.20800271		2283.99	-0.00760703		2874	0.08518103		3464	0.13574347		4054	-0.01591671
514.2	0.45680823		1104.19	0.29025184		1694.2	0.20823846		2284.19	-0.00750515		2874.2	0.08424078		3464.2	0.13576318		4054.2	-0.01500858
514.4	0.45728145		1104.39	0.29033234		1694.4	0.20768822		2284.39	-0.0081717		2874.4	0.08419623		3464.4	0.13577615		4054.4	-0.01519458
514.6	0.45726026		1104.59	0.29114676		1694.6	0.2074918		2284.59	-0.00737014		2874.6	0.08353907		3464.6	0.13532571		4054.6	-0.01557872
514.8	0.45573616		1104.79	0.29088638		1694.8	0.20744575		2284.79	-0.00634314		2874.8	0.08322084		3464.8	0.13594196		4054.8	-0.01465961
515	0.45528391		1104.99	0.29188912		1695	0.20738		2284.99	-0.00630874		2875	0.082643		3465	0.13620881		4055	-0.01349401
515.2	0.4543708		1105.19	0.29285759		1695.2	0.207863		2285.19	-0.00726673		2875.2	0.08289235		3465.2	0.13723505		4055.2	-0.01302705
515.4	0.45495383		1105.39	0.29303151		1695.4	0.20680371		2285.39	-0.00788042		2875.4	0.08305463		3465.4	0.13786139		4055.4	-0.01333273
515.6	0.45488876		1105.59	0.2926857		1695.6	0.20730581		2285.59	-0.0081944		2875.6	0.08157994		3465.6	0.13766666		4055.6	-0.01357025
515.8	0.4550006		1105.79	0.2929317		1695.8	0.20690822		2285.79	-0.00850059		2875.8	0.08206767		3465.8	0.13736003		4055.8	-0.01419921
516	0.45499431		1105.99	0.29180143		1696	0.20621185		2285.99	-0.0095013		2876	0.08178262		3466	0.13669327		4056	-0.01355808
516.2	0.45545582		1106.19	0.29150963		1696.2	0.20561863		2286.19	-0.00869801		2876.2	0.08193503		3466.2	0.13730509		4056.2	-0.01345049
516.4	0.4558972		1106.39	0.29131153		1696.4	0.20589893		2286.39	-0.00778161		2876.4	0.08265442		3466.4	0.1371626		4056.4	-0.01363219
516.6	0.45591122		1106.59	0.2910747		1696.6	0.20560491		2286.59	-0.0079774		2876.6	0.08320211		3466.6	0.13573262		4056.6	-0.01454318
516.8	0.45513847		1106.79	0.28913632		1696.8	0.20539305		2286.79	-0.00796406		2876.8	0.08419747		3466.8	0.13533224		4056.8	-0.01438082
517	0.45545108		1106.99	0.28886817		1697	0.20511488		2286.99	-0.00778306		2877	0.08432553		3467	0.13425147		4057	-0.01479428
517.2	0.45592004		1107.19	0.28851068		1697.2	0.20559094		2287.19	-0.00827344		2877.2	0.08405027		3467.2	0.13451985		4057.2	-0.01502529
517.4	0.45534586		1107.39	0.28781823		1697.4	0.20719157		2287.39	-0.00762724		2877.4	0.083343		3467.4	0.13495149		4057.4	-0.01424249
517.6	0.45576394		1107.59	0.28674167		1697.6	0.20794742		2287.59	-0.0074677		2877.6	0.08369287		3467.6	0.13562347		4057.6	-0.01365244
517.8	0.45583572		1107.79	0.28579842		1697.8	0.20829373		2287.79	-0.00652597		2877.8	0.08371324		3467.8	0.1350885		4057.8	-0.01382003
518	0.45580374		1107.99	0.28531048		1698	0.20877005		2287.99	-0.00746094		2878	0.08469982		3468	0.13652705		4058	-0.0140841
518.2	0.45612213		1108.19	0.28428447		1698.2	0.20929893		2288.19	-0.00681206		2878.2	0.08551578		3468.2	0.13654385		4058.2	-0.01376925
518.4	0.45548703		1108.39	0.28461139		1698.4	0.20977499		2288.39	-0.00636773		2878.4	0.0861276		3468.4	0.13613174		4058.4	-0.01403381
518.6	0.45428908		1108.59	0.28507607		1698.6	0.2105652		2288.59	-0.00637046		2878.6	0.08618215		3468.6	0.13659703		4058.6	-0.01403455
518.8	0.45419945		1108.79	0.28521339		1698.8	0.21085661		2288.79	-0.00738386		2878.8	0.08631236		3468.8	0.13699457		4058.8	-0.01440151
519	0.45386512		1108.99	0.28674923		1699	0.21099862		2288.99	-0.00845504		2879	0.08593967		3469	0.13689576		4059	-0.01525363
519.2	0.4540129		1109.19	0.28728034		1699.2	0.21154823		2289.19	-0.00896323		2879.2	0.08569221		3469.2	0.13809038		4059.2	-0.01562617
519.4	0.45416008		1109.39	0.28667578		1699.4	0.21084224		2289.39	-0.00908061		2879.4	0.08543551		3469.4	0.13882138		4059.4	-0.01606528
519.6	0.453019		1109.59	0.28656497		1699.6	0.21071721		2289.59	-0.00916847		2879.6	0.08538554		3469.6	0.13924243		4059.6	-0.01613297
519.8	0.45235222		1109.79	0.28684185		1699.8	0.20947876		2289.79	-0.01032838		2879.8	0.08593783		3469.8	0.13895004		4059.8	-0.01537697
520	0.45222509		1109.99	0.28687033		1700	0.20856327		2289.99	-0.01021638		2880	0.08582196		3470	0.13865899		4060	-0.01466155
520.2	0.45201286		1110.19	0.28788761		1700.2	0.20829733		2290.19	-0.0091679		2880.2	0.08626287		3470.2	0.13897672		4060.2	-0.014555
520.4	0.451639		1110.39	0.28807022		1700.4	0.20842907		2290.39	-0.00886107		2880.4	0.08595196		3470.4	0.13866453		4060.4	-0.01466434
520.6	0.45124654		1110.59	0.28817776		1700.6	0.20838841		2290.59	-0.00921981		2880.6	0.0857562		3470.6	0.13857007		4060.6	-0.01467402
520.8	0.45188955		1110.79	0.28780389		1700.8	0.20762857		2290.79	-0.0081379		2880.8	0.08541858		3470.8	0.1389941		4060.8	-0.01449688
521	0.45291447		1110.99	0.28843374		1701	0.20806482		2290.99	-0.0080409		2881	0.08505024		3471	0.13925717		4061	-0.01417317
521.2	0.45307247		1111.19	0.28798615		1701.2	0.20856859		2291.19	-0.00786904		2881.2	0.08444554		3471.2	0.1393836		4061.2	-0.01346338
521.4	0.45309689		1111.39	0.28782448		1701.4	0.20874523		2291.39	-0.00724574		2881.4	0.08416339		3471.4	0.13980605		4061.4	-0.01306731
521.6	0.45373884		1111.59	0.28758385		1701.6	0.20927217		2291.59	-0.0072053		2881.6	0.08347781		3471.6	0.13982489		4061.6	-0.01233208
521.8	0.45363112		1111.79	0.28774267		1701.8	0.20908174		2291.79	-0.00716768		2881.8	0.08345786		3471.8	0.13972051		4061.8	-0.01214809
522	0.45355643		1111.99	0.28841648		1702	0.20894355		2291.99	-0.00769186		2882	0.08372426		3472	0.13916667		4062	-0.01186571
522.2	0.45367484		1112.19	0.28818141		1702.2	0.20889313		2292.19	-0.00794421		2882.2	0.08344089		3472.2	0.13914371		4062.2	-0.01088857
522.4	0.45404822		1112.39	0.28987223		1702.4	0.20884542		2292.39	-0.00803694		2882.4	0.08310411		3472.4	0.13838279		4062.4	-0.01147599
522.6	0.45358701		1112.59	0.29034559		1702.6	0.20917301		2292.59	-0.00884986		2882.6	0.08215142		3472.6	0.13901468		4062.6	-0.01232413
522.8	0.45407541		1112.79	0.29066651		1702.8	0.20883749		2292.79	-0.00991652		2882.8	0.08152862		3472.8	0.13819984		4062.8	-0.01248377
523	0.4536541		1112.99	0.29071986		1703	0.20833403		2292.99	-0.00971678		2883	0.08062754		3473	0.13797288		4063	-0.01213104
523.2	0.45404946		1113.19	0.29095453		1703.2	0.20788682		2293.19	-0.01009339		2883.2	0.08026706		3473.2	0.13925442		4063.2	-0.01238785
523.4	0.45362992		1113.39	0.29065274		1703.4	0.20748906		2293.39	-0.01022318		2883.4	0.08084234		3473.4	0.13974102		4063.4	-0.01224118
523.6	0.45335215		1113.59	0.29132045		1703.6	0.20686941		2293.59	-0.01021306		2883.6	0.08070663		3473.6	0.1391351		4063.6	-0.01251548
523.8	0.45299774		1113.79	0.29135757		1703.8	0.20639451		2293.79	-0.01077819		2883.8	0.07980723		3473.8	0.13840662		4063.8	-0.01240747
524	0.45315428		1113.99	0.29108675		1704	0.20658244		2293.99	-0.0103931		2884	0.07960108		3474	0.13857726		4064	-0.01261237
524.2	0.45231399		1114.19	0.29142018		1704.2	0.20664587		2294.19	-0.01020551		2884.2	0.0797038		3474.2	0.1379576		4064.2	-0.01294186
524.4	0.4521849		1114.39	0.29105846		1704.4	0.20710857		2294.39	-0.01005438		2884.4	0.07982242		3474.4	0.13804268		4064.4	-0.01392783
524.6	0.45240124		1114.59	0.28998118		1704.6	0.2070794		2294.59	-0.01006651		2884.6	0.07937859		3474.6	0.13815515		4064.6	-0.01410969
524.8	0.45317187		1114.79	0.28940185		1704.8	0.206697		2294.79	-0.00952623		2884.8	0.07959372		3474.8	0.13778827		4064.8	-0.01413062
525	0.45279296		1114.99	0.28884297		1705	0.20738559		2294.99	-0.00955385		2885	0.08019722		3475	0.13769873		4065	-0.01400518
525.2	0.45288151		1115.19	0.28866104		1705.2	0.20801906		2295.19	-0.00899305		2885.2	0.08003332		3475.2	0.13798495		4065.2	-0.01389575
525.4	0.45340266		1115.39	0.28919965		1705.4	0.20849389		2295.39	-0.00936097		2885.4	0.08120941		3475.4	0.1383048		4065.4	-0.01459281
525.6	0.45381183		1115.59	0.2890168		1705.6	0.20889845		2295.59	-0.00892069		2885.6	0.08051712		3475.6	0.13807918		4065.6	-0.01485465
525.8	0.45415985		1115.79	0.28917534		1705.8	0.2083355		2295.79	-0.00864848		2885.8	0.08157125		3475.8	0.13871461		4065.8	-0.01583392
526	0.45444715		1115.99	0.28936725		1706	0.20854442		2295.99	-0.0089334		2886	0.08175548		3476	0.13795397		4066	-0.01597625
526.2	0.4553101		1116.19	0.29030455		1706.2	0.20837255		2296.19	-0.00956407		2886.2	0.08221086		3476.2	0.13852559		4066.2	-0.01619566
526.4	0.45587969		1116.39	0.29085609		1706.4	0.20847852		2296.39	-0.01008011		2886.4	0.08194264		3476.4	0.13811368		4066.4	-0.01675563
526.6	0.45497066		1116.59	0.29011778		1706.6	0.20775719		2296.59	-0.00991127		2886.6	0.08233326		3476.6	0.13817686		4066.6	-0.01671124
526.8	0.45520994		1116.79	0.28981215		1706.8	0.20688514		2296.79	-0.00997251		2886.8	0.08255335		3476.8	0.1369126		4066.8	-0.01661521
527	0.45577127		1116.99	0.28947282		1707	0.20722938		2296.99	-0.00859657		2887	0.08266896		3477	0.13741122		4067	-0.01700468
527.2	0.4565463		1117.19	0.28938647		1707.2	0.20693077		2297.19	-0.00798613		2887.2	0.08320104		3477.2	0.13720832		4067.2	-0.01776804
527.4	0.45673087		1117.39	0.28895988		1707.4	0.20715319		2297.39	-0.00733044		2887.4	0.08298359		3477.4	0.13694319		4067.4	-0.01728855
527.6	0.45700653		1117.59	0.28887417		1707.6	0.20676771		2297.59	-0.0069006		2887.6	0.08199615		3477.6	0.13589968		4067.6	-0.01711428
527.8	0.45653859		1117.79	0.28927205		1707.8	0.20715589		2297.79	-0.00758972		2887.8	0.08181343		3477.8	0.1357353		4067.8	-0.01717182
528	0.45619704		1117.99	0.28934648		1708	0.20778018		2297.99	-0.0069613		2888	0.08257943		3478	0.13584659		4068	-0.01729804
528.2	0.45467494		1118.19	0.28960057		1708.2	0.20809867		2298.19	-0.00719079		2888.2	0.08301237		3478.2	0.13483205		4068.2	-0.01755807
528.4	0.45420967		1118.39	0.29000566		1708.4	0.20858955		2298.39	-0.00732365		2888.4	0.08292566		3478.4	0.13537424		4068.4	-0.0174994
528.6	0.45307512		1118.59	0.28909899		1708.6	0.20790793		2298.59	-0.00775475		2888.6	0.08258328		3478.6	0.13556379		4068.6	-0.01619032
528.8	0.45272684		1118.79	0.28953886		1708.8	0.20815971		2298.79	-0.00823817		2888.8	0.08325405		3478.8	0.13592344		4068.8	-0.01600083
529	0.45295527		1118.99	0.29008806		1709	0.20859349		2298.99	-0.00880355		2889	0.08343864		3479	0.13644742		4069	-0.01571262
529.2	0.45287528		1119.19	0.29007306		1709.2	0.20867926		2299.19	-0.00940952		2889.2	0.08408221		3479.2	0.13728458		4069.2	-0.01516388
529.4	0.45366084		1119.39	0.29033383		1709.4	0.20783038		2299.39	-0.00927251		2889.4	0.0848328		3479.4	0.13717723		4069.4	-0.01482229
529.6	0.45299451		1119.59	0.29008093		1709.6	0.20744188		2299.59	-0.00853747		2889.6	0.08449411		3479.6	0.13773307		4069.6	-0.0146973
529.8	0.45305423		1119.79	0.28961047		1709.8	0.20793715		2299.79	-0.00874935		2889.8	0.08530863		3479.8	0.13805479		4069.8	-0.01424585
530	0.4528193		1119.99	0.28954897		1710	0.20688068		2299.99	-0.01023857		2890	0.08557948		3480	0.13755797		4070	-0.01378668
530.2	0.45231775		1120.19	0.28914001		1710.2	0.20611803		2300.19	-0.01079666		2890.2	0.08576928		3480.2	0.137876		4070.2	-0.01388792
530.4	0.45268278		1120.39	0.28812825		1710.4	0.20529445		2300.39	-0.01096016		2890.4	0.08515839		3480.4	0.13688955		4070.4	-0.01351218
530.6	0.45311808		1120.59	0.28786631		1710.6	0.2043171		2300.59	-0.01127344		2890.6	0.08514539		3480.6	0.13659065		4070.6	-0.01346062
530.8	0.45393088		1120.79	0.28822452		1710.8	0.20392764		2300.79	-0.01109609		2890.8	0.08413395		3480.8	0.13553874		4070.8	-0.0136427
531	0.45407035		1120.99	0.28687729		1711	0.20350392		2300.99	-0.01057506		2891	0.08407316		3481	0.13534051		4071	-0.01450161
531.2	0.45379545		1121.19	0.28686577		1711.2	0.20277954		2301.19	-0.00997591		2891.2	0.08360956		3481.2	0.13496904		4071.2	-0.01553293
531.4	0.45355293		1121.39	0.28715299		1711.4	0.20268905		2301.39	-0.01047807		2891.4	0.08286076		3481.4	0.13464624		4071.4	-0.01607471
531.6	0.45360372		1121.59	0.28773514		1711.6	0.20321043		2301.59	-0.01115098		2891.6	0.08279357		3481.6	0.1339225		4071.6	-0.01784249
531.8	0.45330741		1121.79	0.28838923		1711.8	0.20419916		2301.79	-0.01132175		2891.8	0.08302644		3481.8	0.13318062		4071.8	-0.01917515
532	0.45271967		1121.99	0.28810443		1712	0.20447598		2301.99	-0.01010664		2892	0.08325771		3482	0.13299936		4072	-0.02002623
532.2	0.45148447		1122.19	0.28822943		1712.2	0.20476556		2302.19	-0.01074608		2892.2	0.08344335		3482.2	0.13233711		4072.2	-0.0196903
532.4	0.45216833		1122.39	0.28861378		1712.4	0.20422954		2302.39	-0.01094201		2892.4	0.08312846		3482.4	0.13262233		4072.4	-0.01930692
532.6	0.45220592		1122.59	0.28786834		1712.6	0.20456281		2302.59	-0.01112856		2892.6	0.08271745		3482.6	0.13242474		4072.6	-0.01943723
532.8	0.45256244		1122.79	0.28886543		1712.8	0.20571177		2302.79	-0.01159013		2892.8	0.08287917		3482.8	0.13267741		4072.8	-0.01984546
533	0.45292282		1122.99	0.2882987		1713	0.20569709		2302.99	-0.01165965		2893	0.08282492		3483	0.13291325		4073	-0.01996057
533.2	0.45309144		1123.19	0.28767826		1713.2	0.20556458		2303.19	-0.01097866		2893.2	0.08300682		3483.2	0.13300693		4073.2	-0.01904849
533.4	0.45366415		1123.39	0.28721844		1713.4	0.20586974		2303.39	-0.00992432		2893.4	0.08245235		3483.4	0.1325587		4073.4	-0.01886161
533.6	0.45325152		1123.59	0.28751898		1713.6	0.20610135		2303.59	-0.00905243		2893.6	0.08278634		3483.6	0.13283248		4073.6	-0.01908896
533.8	0.4537013		1123.79	0.28694394		1713.8	0.20676917		2303.79	-0.00860401		2893.8	0.08253056		3483.8	0.13322031		4073.8	-0.01865323
534	0.45310079		1123.99	0.28687168		1714	0.20569341		2303.99	-0.0089704		2894	0.08204112		3484	0.13426755		4074	-0.0180927
534.2	0.45282525		1124.19	0.28609332		1714.2	0.20579931		2304.19	-0.00890527		2894.2	0.08137765		3484.2	0.13450579		4074.2	-0.01757325
534.4	0.45306432		1124.39	0.28567		1714.4	0.20459607		2304.39	-0.00885799		2894.4	0.0809629		3484.4	0.13377109		4074.4	-0.01720469
534.6	0.45297792		1124.59	0.28622043		1714.6	0.20398366		2304.59	-0.00908692		2894.6	0.07979453		3484.6	0.13423673		4074.6	-0.01791375
534.8	0.45305491		1124.79	0.28623821		1714.8	0.20368894		2304.79	-0.00882269		2894.8	0.07948822		3484.8	0.13461266		4074.8	-0.01858369
535	0.45219856		1124.99	0.28563853		1715	0.20285398		2304.99	-0.00880502		2895	0.07895226		3485	0.13486984		4075	-0.02010036
535.2	0.45227258		1125.19	0.28713099		1715.2	0.20316184		2305.19	-0.00888037		2895.2	0.07829233		3485.2	0.13565209		4075.2	-0.02047502
535.4	0.45302131		1125.39	0.28681144		1715.4	0.20402016		2305.39	-0.0096102		2895.4	0.07814048		3485.4	0.13473733		4075.4	-0.02187149
535.6	0.45403805		1125.59	0.28651807		1715.6	0.2039835		2305.59	-0.00980949		2895.6	0.07902143		3485.6	0.13522277		4075.6	-0.02252823
535.8	0.45397774		1125.79	0.28593083		1715.8	0.20484059		2305.79	-0.00938256		2895.8	0.07900507		3485.8	0.13508061		4075.8	-0.02191808
536	0.45304014		1125.99	0.2848232		1716	0.20417706		2305.99	-0.00990777		2896	0.07921355		3486	0.1350332		4076	-0.02219178
536.2	0.45355888		1126.19	0.28561266		1716.2	0.20501563		2306.19	-0.01051215		2896.2	0.07966248		3486.2	0.13544332		4076.2	-0.02192361
536.4	0.45418924		1126.39	0.28531388		1716.4	0.20457484		2306.39	-0.01099898		2896.4	0.07941417		3486.4	0.13540058		4076.4	-0.02216258
536.6	0.45362626		1126.59	0.28522805		1716.6	0.20607023		2306.59	-0.01152444		2896.6	0.08002199		3486.6	0.13502768		4076.6	-0.02198865
536.8	0.45387141		1126.79	0.28535024		1716.8	0.20661755		2306.79	-0.01246793		2896.8	0.0799585		3486.8	0.13556277		4076.8	-0.02211853
537	0.45470248		1126.99	0.28468576		1717	0.20568843		2306.99	-0.01337308		2897	0.0800445		3487	0.13518085		4077	-0.02154743
537.2	0.45489507		1127.19	0.28491143		1717.2	0.20566716		2307.19	-0.01356966		2897.2	0.08015736		3487.2	0.13468594		4077.2	-0.02042655
537.4	0.45468481		1127.39	0.28471912		1717.4	0.20627533		2307.39	-0.0131225		2897.4	0.08012514		3487.4	0.1341352		4077.4	-0.01938367
537.6	0.45491547		1127.59	0.28539386		1717.6	0.20642838		2307.59	-0.01361598		2897.6	0.08052811		3487.6	0.13458799		4077.6	-0.01857959
537.8	0.45424524		1127.79	0.28520804		1717.8	0.20684735		2307.79	-0.0139162		2897.8	0.08008352		3487.8	0.13523276		4077.8	-0.01763591
538	0.45402454		1127.99	0.28502692		1718	0.20599396		2307.99	-0.01376557		2898	0.08048448		3488	0.13504965		4078	-0.01699619
538.2	0.45374857		1128.19	0.28504857		1718.2	0.20535501		2308.19	-0.01489553		2898.2	0.07992198		3488.2	0.13452639		4078.2	-0.0170899
538.4	0.45334733		1128.39	0.2859335		1718.4	0.20562675		2308.39	-0.01383746		2898.4	0.08004217		3488.4	0.13394974		4078.4	-0.01701189
538.6	0.45347985		1128.59	0.28632606		1718.6	0.20629307		2308.59	-0.01427594		2898.6	0.08009507		3488.6	0.13387591		4078.6	-0.01683353
538.8	0.45411906		1128.79	0.28616609		1718.8	0.20664226		2308.79	-0.01464911		2898.8	0.08061517		3488.8	0.13365948		4078.8	-0.01628095
539	0.45418848		1128.99	0.28631378		1719	0.20643048		2308.99	-0.01428333		2899	0.08012164		3489	0.1329765		4079	-0.01653765
539.2	0.45382011		1129.19	0.28615122		1719.2	0.20702122		2309.19	-0.01404312		2899.2	0.08129922		3489.2	0.13316709		4079.2	-0.01675997
539.4	0.45450079		1129.39	0.28495048		1719.4	0.20748407		2309.39	-0.01335184		2899.4	0.08257003		3489.4	0.13361639		4079.4	-0.01763533
539.6	0.45457267		1129.59	0.28432438		1719.6	0.2070145		2309.59	-0.01289203		2899.6	0.08293046		3489.6	0.13400316		4079.6	-0.01609898
539.8	0.45386205		1129.79	0.28394819		1719.8	0.20805906		2309.79	-0.0120651		2899.8	0.08306034		3489.8	0.13387054		4079.8	-0.01591392
540	0.45332448		1129.99	0.28378185		1720	0.20790129		2309.99	-0.01229643		2900	0.08292293		3490	0.13424482		4080	-0.01655643
540.2	0.45376968		1130.19	0.28416393		1720.2	0.20822666		2310.19	-0.01099112		2900.2	0.08245012		3490.2	0.13475784		4080.2	-0.01676593
540.4	0.4531778		1130.39	0.28352259		1720.4	0.20822439		2310.39	-0.0105421		2900.4	0.08260647		3490.4	0.13513951		4080.4	-0.01740001
540.6	0.4531784		1130.59	0.28373326		1720.6	0.20875107		2310.59	-0.00999565		2900.6	0.08253645		3490.6	0.13514659		4080.6	-0.0171768
540.8	0.45356347		1130.79	0.28325402		1720.8	0.20809293		2310.79	-0.01014401		2900.8	0.08132267		3490.8	0.13594156		4080.8	-0.01716536
541	0.45405451		1130.99	0.28324657		1721	0.2072893		2310.99	-0.0105174		2901	0.08104552		3491	0.13610754		4081	-0.01643842
541.2	0.45332055		1131.19	0.28366289		1721.2	0.20732479		2311.19	-0.00965207		2901.2	0.08016276		3491.2	0.13570063		4081.2	-0.01602077
541.4	0.45353307		1131.39	0.28478577		1721.4	0.20698119		2311.39	-0.00933768		2901.4	0.07902287		3491.4	0.13539073		4081.4	-0.01579392
541.6	0.45429829		1131.59	0.28545994		1721.6	0.2059872		2311.59	-0.01031636		2901.6	0.07855259		3491.6	0.13609496		4081.6	-0.01683967
541.8	0.45395683		1131.79	0.28601922		1721.8	0.20545781		2311.79	-0.00997754		2901.8	0.07799952		3491.8	0.1360165		4081.8	-0.01739963
542	0.45340452		1131.99	0.28650232		1722	0.2046788		2311.99	-0.01054277		2902	0.07837793		3492	0.1356727		4082	-0.01774862
542.2	0.4529818		1132.19	0.2876192		1722.2	0.20437473		2312.19	-0.01131013		2902.2	0.07767383		3492.2	0.13496082		4082.2	-0.01807066
542.4	0.45286192		1132.39	0.28799076		1722.4	0.20503343		2312.39	-0.01117849		2902.4	0.07795667		3492.4	0.13457327		4082.4	-0.01854072
542.6	0.45268585		1132.59	0.28686924		1722.6	0.2039877		2312.59	-0.01192769		2902.6	0.07800944		3492.6	0.13391138		4082.6	-0.01903433
542.8	0.45297086		1132.79	0.28678591		1722.8	0.20440063		2312.79	-0.01200649		2902.8	0.07770847		3492.8	0.13353437		4082.8	-0.01957095
543	0.45228476		1132.99	0.28631912		1723	0.20392094		2312.99	-0.01192896		2903	0.07801402		3493	0.13283085		4083	-0.01991652
543.2	0.45168679		1133.19	0.2857563		1723.2	0.20369646		2313.19	-0.01192023		2903.2	0.07919649		3493.2	0.13252376		4083.2	-0.0200259
543.4	0.45174663		1133.39	0.28527096		1723.4	0.20406045		2313.39	-0.01179469		2903.4	0.08003268		3493.4	0.13319147		4083.4	-0.01975907
543.6	0.45120851		1133.59	0.28470192		1723.6	0.20309998		2313.59	-0.01187675		2903.6	0.08012814		3493.6	0.13349386		4083.6	-0.01917665
543.8	0.45092674		1133.79	0.28404865		1723.8	0.20325188		2313.79	-0.01182019		2903.8	0.0811173		3493.8	0.13409964		4083.8	-0.01981405
544	0.45123721		1133.99	0.28388164		1724	0.2034136		2313.99	-0.01260313		2904	0.08124446		3494	0.13377894		4084	-0.02058406
544.2	0.45242156		1134.19	0.28277481		1724.2	0.2028899		2314.19	-0.01226091		2904.2	0.08109292		3494.2	0.13410817		4084.2	-0.02126797
544.4	0.45239536		1134.39	0.28219048		1724.4	0.2032492		2314.39	-0.01224228		2904.4	0.08170954		3494.4	0.13494417		4084.4	-0.02192315
544.6	0.45248965		1134.59	0.28199839		1724.6	0.20351684		2314.59	-0.01070971		2904.6	0.08150363		3494.6	0.13491478		4084.6	-0.02118643
544.8	0.45327086		1134.79	0.28087126		1724.8	0.20362797		2314.79	-0.01009925		2904.8	0.08195858		3494.8	0.13542507		4084.8	-0.02048668
545	0.4542004		1134.99	0.28056598		1725	0.20253231		2314.99	-0.00933301		2905	0.08206353		3495	0.13495098		4085	-0.02014724
545.2	0.45438912		1135.19	0.28078816		1725.2	0.2018574		2315.19	-0.00867934		2905.2	0.08224366		3495.2	0.1343835		4085.2	-0.01957437
545.4	0.45413473		1135.39	0.28192322		1725.4	0.20070357		2315.39	-0.00882658		2905.4	0.08232165		3495.4	0.13443511		4085.4	-0.01956596
545.6	0.4540862		1135.59	0.28097979		1725.6	0.20095335		2315.59	-0.00830523		2905.6	0.08213718		3495.6	0.13463803		4085.6	-0.01988424
545.8	0.45300999		1135.79	0.28116228		1725.8	0.20093218		2315.79	-0.00851702		2905.8	0.08245986		3495.8	0.13479193		4085.8	-0.01950349
546	0.45241059		1135.99	0.28204395		1726	0.20085199		2315.99	-0.00858789		2906	0.08311716		3496	0.13510196		4086	-0.01990937
546.2	0.45232252		1136.19	0.28208425		1726.2	0.20135765		2316.19	-0.00854631		2906.2	0.08254609		3496.2	0.13526436		4086.2	-0.01941784
546.4	0.451621		1136.39	0.28252028		1726.4	0.2021297		2316.39	-0.00925062		2906.4	0.08220946		3496.4	0.13483541		4086.4	-0.0203512
546.6	0.45099291		1136.59	0.28230833		1726.6	0.20202112		2316.59	-0.00934572		2906.6	0.08128551		3496.6	0.1346183		4086.6	-0.02122035
546.8	0.45016994		1136.79	0.28223993		1726.8	0.20264821		2316.79	-0.00883336		2906.8	0.08060659		3496.8	0.13439904		4086.8	-0.02075808
547	0.44944513		1136.99	0.28269453		1727	0.20327055		2316.99	-0.00878565		2907	0.07980652		3497	0.13377015		4087	-0.02082206
547.2	0.44868713		1137.19	0.28271043		1727.2	0.20406315		2317.19	-0.00983225		2907.2	0.07988417		3497.2	0.13440321		4087.2	-0.02085637
547.4	0.44673664		1137.39	0.2831131		1727.4	0.20406169		2317.39	-0.01163632		2907.4	0.07986021		3497.4	0.13523933		4087.4	-0.02080618
547.6	0.44636062		1137.59	0.28413969		1727.6	0.20355607		2317.59	-0.01292363		2907.6	0.0792784		3497.6	0.13526366		4087.6	-0.02075365
547.8	0.44611837		1137.79	0.28503713		1727.8	0.20479111		2317.79	-0.01363705		2907.8	0.07928131		3497.8	0.13397118		4087.8	-0.02143952
548	0.44647029		1137.99	0.2854072		1728	0.2058416		2317.99	-0.01440005		2908	0.07938035		3498	0.13336281		4088	-0.02191845
548.2	0.44707782		1138.19	0.28538439		1728.2	0.20609826		2318.19	-0.01501032		2908.2	0.07894054		3498.2	0.13360868		4088.2	-0.02275544
548.4	0.44643427		1138.39	0.28593299		1728.4	0.20644374		2318.39	-0.01409771		2908.4	0.07848676		3498.4	0.13296291		4088.4	-0.02277672
548.6	0.44691114		1138.59	0.28543029		1728.6	0.20706656		2318.59	-0.01318949		2908.6	0.07862137		3498.6	0.13170532		4088.6	-0.02192971
548.8	0.44726678		1138.79	0.28456782		1728.8	0.20666011		2318.79	-0.01380278		2908.8	0.07889659		3498.8	0.13131495		4088.8	-0.02172844
549	0.44790073		1138.99	0.28438437		1729	0.2065955		2318.99	-0.01345324		2909	0.07855026		3499	0.13099664		4089	-0.02171203
549.2	0.44863314		1139.19	0.28419679		1729.2	0.20652055		2319.19	-0.01368703		2909.2	0.07802126		3499.2	0.13106388		4089.2	-0.02162193
549.4	0.44762625		1139.39	0.28402322		1729.4	0.20549761		2319.39	-0.01353497		2909.4	0.07746953		3499.4	0.13075767		4089.4	-0.02159521
549.6	0.44783069		1139.59	0.28304097		1729.6	0.20565203		2319.59	-0.01268141		2909.6	0.07736643		3499.6	0.13178837		4089.6	-0.02156929
549.8	0.44779108		1139.79	0.28306671		1729.8	0.20497704		2319.79	-0.01294491		2909.8	0.0777638		3499.8	0.13235597		4089.8	-0.0213245
550	0.44882738		1139.99	0.28355531		1730	0.20488376		2319.99	-0.01188736		2910	0.07803418		3500	0.13324805		4090	-0.02094144
550.2	0.44881331		1140.19	0.28361014		1730.2	0.20445617		2320.19	-0.01135219		2910.2	0.0776817		3500.2	0.13427856		4090.2	-0.02092405
550.4	0.44894686		1140.39	0.28488585		1730.4	0.20363651		2320.39	-0.01117078		2910.4	0.07814701		3500.4	0.13425733		4090.4	-0.02219573
550.6	0.44914708		1140.59	0.28418213		1730.6	0.20268094		2320.59	-0.01021485		2910.6	0.07837465		3500.6	0.13567361		4090.6	-0.02217208
550.8	0.44997556		1140.79	0.28397309		1730.8	0.2020611		2320.79	-0.00929818		2910.8	0.07886106		3500.8	0.1363147		4090.8	-0.02126207
551	0.44982937		1140.99	0.28359606		1731	0.20229749		2320.99	-0.01018511		2911	0.07889906		3501	0.13719225		4091	-0.02135123
551.2	0.44936886		1141.19	0.28293067		1731.2	0.20153105		2321.19	-0.01009917		2911.2	0.07985272		3501.2	0.1377435		4091.2	-0.02138436
551.4	0.44857187		1141.39	0.28317026		1731.4	0.2004565		2321.39	-0.01032331		2911.4	0.08016233		3501.4	0.13792523		4091.4	-0.0210367
551.6	0.44900119		1141.59	0.28301458		1731.6	0.20098522		2321.59	-0.00990064		2911.6	0.08023193		3501.6	0.13814333		4091.6	-0.02138943
551.8	0.44912184		1141.79	0.28264006		1731.8	0.20172575		2321.79	-0.01048351		2911.8	0.08147835		3501.8	0.13719336		4091.8	-0.02191933
552	0.44935522		1141.99	0.28163912		1732	0.20231622		2321.99	-0.01062611		2912	0.0821778		3502	0.1367203		4092	-0.02184068
552.2	0.44991372		1142.19	0.28212552		1732.2	0.20230115		2322.19	-0.01134789		2912.2	0.08210646		3502.2	0.13475461		4092.2	-0.02251667
552.4	0.44976366		1142.39	0.28161355		1732.4	0.20257285		2322.39	-0.01166626		2912.4	0.08186235		3502.4	0.13340714		4092.4	-0.0221174
552.6	0.44978914		1142.59	0.28049921		1732.6	0.20343707		2322.59	-0.01240982		2912.6	0.08253748		3502.6	0.13265971		4092.6	-0.02114081
552.8	0.44967868		1142.79	0.28083001		1732.8	0.20440156		2322.79	-0.0126157		2912.8	0.08180877		3502.8	0.13243204		4092.8	-0.02081321
553	0.44981126		1142.99	0.28028384		1733	0.20541123		2322.99	-0.01272265		2913	0.08083601		3503	0.13199364		4093	-0.01964652
553.2	0.44941427		1143.19	0.28002282		1733.2	0.20523869		2323.19	-0.01371697		2913.2	0.08018176		3503.2	0.13219868		4093.2	-0.01921726
553.4	0.44841174		1143.39	0.28031747		1733.4	0.20472753		2323.39	-0.01394383		2913.4	0.08001273		3503.4	0.13201284		4093.4	-0.01840993
553.6	0.44858945		1143.59	0.28061285		1733.6	0.20554736		2323.59	-0.01400006		2913.6	0.07910803		3503.6	0.1319853		4093.6	-0.01845445
553.8	0.44946502		1143.79	0.28103338		1733.8	0.20563577		2323.79	-0.01404229		2913.8	0.07801909		3503.8	0.13149511		4093.8	-0.01841209
554	0.44989349		1143.99	0.28248493		1734	0.20529111		2323.99	-0.0133146		2914	0.07750122		3504	0.13190507		4094	-0.01828761
554.2	0.44976463		1144.19	0.28299788		1734.2	0.20514664		2324.19	-0.01274053		2914.2	0.07728556		3504.2	0.13233685		4094.2	-0.01958025
554.4	0.44957935		1144.39	0.2836771		1734.4	0.20402132		2324.39	-0.01315021		2914.4	0.0779078		3504.4	0.1324659		4094.4	-0.02001216
554.6	0.44965232		1144.59	0.28362598		1734.6	0.20259898		2324.59	-0.01277174		2914.6	0.07757798		3504.6	0.13288232		4094.6	-0.02047054
554.8	0.45006318		1144.79	0.28373322		1734.8	0.20204031		2324.79	-0.01172391		2914.8	0.0768619		3504.8	0.13320068		4094.8	-0.0213832
555	0.44884983		1144.99	0.28251573		1735	0.20126384		2324.99	-0.01132698		2915	0.07585519		3505	0.13355662		4095	-0.02262188
555.2	0.44915239		1145.19	0.28245303		1735.2	0.2007747		2325.19	-0.00996802		2915.2	0.07615706		3505.2	0.13335737		4095.2	-0.0240135
555.4	0.4483891		1145.39	0.28277323		1735.4	0.20000433		2325.39	-0.00955464		2915.4	0.07693931		3505.4	0.13371871		4095.4	-0.02428816
555.6	0.44802454		1145.59	0.28241474		1735.6	0.19994957		2325.59	-0.01033633		2915.6	0.07748198		3505.6	0.13367955		4095.6	-0.02395733
555.8	0.44769108		1145.79	0.28187502		1735.8	0.19927894		2325.79	-0.00993626		2915.8	0.07888634		3505.8	0.13281641		4095.8	-0.02334174
556	0.44766665		1145.99	0.28134902		1736	0.19860182		2325.99	-0.00924001		2916	0.07915448		3506	0.13293214		4096	-0.02271602
556.2	0.44735921		1146.19	0.28269299		1736.2	0.19859823		2326.19	-0.01024145		2916.2	0.07991578		3506.2	0.13264733		4096.2	-0.02184978
556.4	0.44722871		1146.39	0.28193409		1736.4	0.19843384		2326.39	-0.01066792		2916.4	0.0805087		3506.4	0.13362273		4096.4	-0.02139441
556.6	0.44768399		1146.59	0.2818615		1736.6	0.19895591		2326.59	-0.0108802		2916.6	0.08064835		3506.6	0.13352411		4096.6	-0.01957431
556.8	0.44743722		1146.79	0.28248097		1736.8	0.19947001		2326.79	-0.01090321		2916.8	0.08055036		3506.8	0.13395931		4096.8	-0.01881648
557	0.44700427		1146.99	0.28121584		1737	0.19932688		2326.99	-0.01118154		2917	0.08149655		3507	0.13402349		4097	-0.0176808
557.2	0.44740421		1147.19	0.28217852		1737.2	0.19983512		2327.19	-0.01163853		2917.2	0.08221719		3507.2	0.13424436		4097.2	-0.01761319
557.4	0.44838129		1147.39	0.2820473		1737.4	0.20031584		2327.39	-0.01176366		2917.4	0.0818423		3507.4	0.13370261		4097.4	-0.01727618
557.6	0.44965264		1147.59	0.28248092		1737.6	0.20166797		2327.59	-0.01271646		2917.6	0.08124074		3507.6	0.13370199		4097.6	-0.0178452
557.8	0.45002012		1147.79	0.28274369		1737.8	0.20187478		2327.79	-0.01218496		2917.8	0.08098209		3507.8	0.13356151		4097.8	-0.01809483
558	0.45006285		1147.99	0.28231264		1738	0.20222017		2327.99	-0.01256855		2918	0.08045662		3508	0.13366965		4098	-0.01857088
558.2	0.45033345		1148.19	0.28120634		1738.2	0.20264864		2328.19	-0.01299115		2918.2	0.08112563		3508.2	0.1330565		4098.2	-0.02006884
558.4	0.45094097		1148.39	0.28096439		1738.4	0.20226193		2328.39	-0.01403683		2918.4	0.08035547		3508.4	0.13252822		4098.4	-0.02091632
558.6	0.45068549		1148.59	0.28052514		1738.6	0.20206591		2328.59	-0.01423819		2918.6	0.0792951		3508.6	0.13293405		4098.6	-0.02184004
558.8	0.4502188		1148.79	0.27961191		1738.8	0.20253362		2328.79	-0.01401823		2918.8	0.0790184		3508.8	0.13299451		4098.8	-0.02256487
559	0.44974392		1148.99	0.27891455		1739	0.20266497		2328.99	-0.0142416		2919	0.07901385		3509	0.13362144		4099	-0.02299727
559.2	0.45018507		1149.19	0.27948402		1739.2	0.20253902		2329.19	-0.01441341		2919.2	0.08039309		3509.2	0.13317955		4099.2	-0.02290096
559.4	0.44882606		1149.39	0.28018655		1739.4	0.20230119		2329.39	-0.01494859		2919.4	0.0803984		3509.4	0.13394806		4099.4	-0.02206192
559.6	0.44982461		1149.59	0.27978622		1739.6	0.2016404		2329.59	-0.0153892		2919.6	0.07943424		3509.6	0.13418241		4099.6	-0.02139041
559.8	0.44930182		1149.79	0.27909238		1739.8	0.20075137		2329.79	-0.01472194		2919.8	0.08006299		3509.8	0.13497176		4099.8	-0.02056519
560	0.44884178		1149.99	0.27955062		1740	0.20047452		2329.99	-0.01531346		2920	0.08006392		3510	0.1354764		4100	-0.02039826
560.2	0.44958344		1150.19	0.28031731		1740.2	0.20042191		2330.19	-0.01588783		2920.2	0.07950495		3510.2	0.13560206		4100.2	-0.01943827
560.4	0.45021376		1150.39	0.27919715		1740.4	0.19950614		2330.39	-0.01587221		2920.4	0.07933985		3510.4	0.1352705		4100.4	-0.01947731
560.6	0.45115637		1150.59	0.28033218		1740.6	0.19931191		2330.59	-0.01559089		2920.6	0.07883303		3510.6	0.13526923		4100.6	-0.01751858
560.8	0.45016759		1150.79	0.28087651		1740.8	0.1992181		2330.79	-0.0152364		2920.8	0.07861663		3510.8	0.13496683		4100.8	-0.01724463
561	0.44946822		1150.99	0.28111381		1741	0.19938904		2330.99	-0.01500273		2921	0.0783105		3511	0.13523056		4101	-0.0166273
561.2	0.45007368		1151.19	0.28310992		1741.2	0.19988236		2331.19	-0.01510869		2921.2	0.07786128		3511.2	0.13477641		4101.2	-0.01677476
561.4	0.45037984		1151.39	0.28241483		1741.4	0.19932828		2331.39	-0.01445175		2921.4	0.07727631		3511.4	0.13453067		4101.4	-0.01688186
561.6	0.44990376		1151.59	0.28218969		1741.6	0.19895273		2331.59	-0.0146788		2921.6	0.07733911		3511.6	0.13495824		4101.6	-0.01691844
561.8	0.44903993		1151.79	0.28102051		1741.8	0.19828613		2331.79	-0.01393721		2921.8	0.0775634		3511.8	0.13396091		4101.8	-0.01765501
562	0.44974364		1151.99	0.27979635		1742	0.19850329		2331.99	-0.0143004		2922	0.07760753		3512	0.13386481		4102	-0.01772456
562.2	0.44981195		1152.19	0.27898384		1742.2	0.19791306		2332.19	-0.01411077		2922.2	0.07734368		3512.2	0.13278167		4102.2	-0.01847582
562.4	0.44967139		1152.39	0.27910895		1742.4	0.19815732		2332.39	-0.0139508		2922.4	0.07641332		3512.4	0.13259636		4102.4	-0.0190789
562.6	0.44843616		1152.59	0.27885693		1742.6	0.19890475		2332.59	-0.01310569		2922.6	0.07666094		3512.6	0.13231036		4102.6	-0.01962397
562.8	0.44821372		1152.79	0.27887254		1742.8	0.19890246		2332.79	-0.01278393		2922.8	0.07770222		3512.8	0.13134051		4102.8	-0.01997194
563	0.44768111		1152.99	0.27883647		1743	0.19924863		2332.99	-0.01308419		2923	0.07840244		3513	0.13171093		4103	-0.01963268
563.2	0.44752973		1153.19	0.278511		1743.2	0.19921638		2333.19	-0.01362263		2923.2	0.07875962		3513.2	0.13133805		4103.2	-0.01902113
563.4	0.4468039		1153.39	0.27777835		1743.4	0.19938227		2333.39	-0.01345826		2923.4	0.0784814		3513.4	0.13169179		4103.4	-0.01924908
563.6	0.44758962		1153.59	0.27727059		1743.6	0.19962589		2333.59	-0.01319914		2923.6	0.07866479		3513.6	0.13144329		4103.6	-0.01955303
563.8	0.44672026		1153.79	0.2761869		1743.8	0.20014788		2333.79	-0.01366477		2923.8	0.07930534		3513.8	0.13192159		4103.8	-0.01978466
564	0.44699288		1153.99	0.27668052		1744	0.2007814		2333.99	-0.01397534		2924	0.07818959		3514	0.13199122		4104	-0.02024553
564.2	0.44754434		1154.19	0.27703918		1744.2	0.20128101		2334.19	-0.01395023		2924.2	0.07702455		3514.2	0.13358685		4104.2	-0.0202149
564.4	0.44741502		1154.39	0.27729948		1744.4	0.20149372		2334.39	-0.01499749		2924.4	0.07670795		3514.4	0.13366052		4104.4	-0.02033905
564.6	0.44694278		1154.59	0.27832955		1744.6	0.20241272		2334.59	-0.01579396		2924.6	0.07611544		3514.6	0.13480736		4104.6	-0.01953042
564.8	0.44583706		1154.79	0.2781269		1744.8	0.20241766		2334.79	-0.01700991		2924.8	0.07532991		3514.8	0.13415267		4104.8	-0.01978511
565	0.44606447		1154.99	0.27842678		1745	0.20281014		2334.99	-0.01680732		2925	0.07536665		3515	0.13510878		4105	-0.02049891
565.2	0.44718786		1155.19	0.27798828		1745.2	0.20211011		2335.19	-0.01720278		2925.2	0.07585166		3515.2	0.13437595		4105.2	-0.02154919
565.4	0.44758035		1155.39	0.27658411		1745.4	0.20141319		2335.39	-0.01720067		2925.4	0.07582929		3515.4	0.13501352		4105.4	-0.02165691
565.6	0.44765389		1155.59	0.27645467		1745.6	0.20082394		2335.59	-0.0178655		2925.6	0.07559284		3515.6	0.13539106		4105.6	-0.02277943
565.8	0.44740321		1155.79	0.27654568		1745.8	0.20035661		2335.79	-0.01796162		2925.8	0.07505442		3515.8	0.13556229		4105.8	-0.02386313
566	0.44811715		1155.99	0.27801007		1746	0.20045865		2335.99	-0.01756182		2926	0.07443007		3516	0.13551584		4106	-0.0235515
566.2	0.44837777		1156.19	0.27866629		1746.2	0.19929578		2336.19	-0.01692614		2926.2	0.0743439		3516.2	0.13442537		4106.2	-0.02398235
566.4	0.44944504		1156.39	0.27926487		1746.4	0.1992723		2336.39	-0.01614384		2926.4	0.07494361		3516.4	0.13330024		4106.4	-0.02431875
566.6	0.44871045		1156.59	0.2791805		1746.6	0.19910759		2336.59	-0.01605366		2926.6	0.07578743		3516.6	0.13263273		4106.6	-0.02369282
566.8	0.44889734		1156.79	0.27955937		1746.8	0.19871561		2336.79	-0.01678419		2926.8	0.07724876		3516.8	0.13208445		4106.8	-0.02381048
567	0.44852107		1156.99	0.27951992		1747	0.19812968		2336.99	-0.01678139		2927	0.07737004		3517	0.13154222		4107	-0.02243144
567.2	0.44905252		1157.19	0.2796553		1747.2	0.19702815		2337.19	-0.01664583		2927.2	0.07808969		3517.2	0.1307101		4107.2	-0.02223041
567.4	0.44911202		1157.39	0.27989219		1747.4	0.19647448		2337.39	-0.01572537		2927.4	0.07873367		3517.4	0.13044448		4107.4	-0.02239678
567.6	0.4497285		1157.59	0.28117956		1747.6	0.19690847		2337.59	-0.01607958		2927.6	0.07911808		3517.6	0.13065328		4107.6	-0.02280213
567.8	0.45020505		1157.79	0.28091434		1747.8	0.1966707		2337.79	-0.01553101		2927.8	0.07875211		3517.8	0.13107659		4107.8	-0.02302121
568	0.44995662		1157.99	0.28227491		1748	0.19647077		2337.99	-0.01519658		2928	0.07855145		3518	0.13158924		4108	-0.02226025
568.2	0.44977356		1158.19	0.28233852		1748.2	0.19702616		2338.19	-0.01477138		2928.2	0.07754399		3518.2	0.13259051		4108.2	-0.02270965
568.4	0.45001486		1158.39	0.28251152		1748.4	0.19656419		2338.39	-0.01659522		2928.4	0.07726222		3518.4	0.13235323		4108.4	-0.02176339
568.6	0.44952802		1158.59	0.28224743		1748.6	0.19656272		2338.59	-0.01710115		2928.6	0.07670689		3518.6	0.13321363		4108.6	-0.0214035
568.8	0.4497226		1158.79	0.28179515		1748.8	0.1965802		2338.79	-0.01744223		2928.8	0.07616922		3518.8	0.13212144		4108.8	-0.02101065
569	0.45049754		1158.99	0.2809394		1749	0.198458		2338.99	-0.01772167		2929	0.0760261		3519	0.1330683		4109	-0.02151922
569.2	0.45110133		1159.19	0.27990998		1749.2	0.19831554		2339.19	-0.01766992		2929.2	0.07538371		3519.2	0.13339443		4109.2	-0.02190884
569.4	0.45082738		1159.39	0.27940852		1749.4	0.19850971		2339.39	-0.01769106		2929.4	0.07490521		3519.4	0.13365737		4109.4	-0.02177939
569.6	0.44959882		1159.59	0.27935974		1749.6	0.19840941		2339.59	-0.01767932		2929.6	0.07382203		3519.6	0.13374908		4109.6	-0.02262211
569.8	0.44952812		1159.79	0.27971916		1749.8	0.19847702		2339.79	-0.0173175		2929.8	0.07365285		3519.8	0.13429774		4109.8	-0.02247551
570	0.44998424		1159.99	0.280404		1750	0.19961225		2339.99	-0.01624438		2930	0.07385601		3520	0.13332098		4110	-0.02145278
570.2	0.45045562		1160.19	0.27939607		1750.2	0.19962129		2340.19	-0.01656776		2930.2	0.07439724		3520.2	0.1322204		4110.2	-0.02115999
570.4	0.45116895		1160.39	0.27847569		1750.4	0.20012168		2340.39	-0.01708447		2930.4	0.0750015		3520.4	0.13186038		4110.4	-0.02035066
570.6	0.45025819		1160.59	0.27803809		1750.6	0.20027303		2340.59	-0.01636757		2930.6	0.07561144		3520.6	0.13128213		4110.6	-0.02031178
570.8	0.45086627		1160.79	0.27842124		1750.8	0.20053357		2340.79	-0.01519303		2930.8	0.07676815		3520.8	0.13006542		4110.8	-0.02003241
571	0.4510393		1160.99	0.27812245		1751	0.19976266		2340.99	-0.01411312		2931	0.07728194		3521	0.12920322		4111	-0.01896517
571.2	0.45109986		1161.19	0.27801911		1751.2	0.19912644		2341.19	-0.01315813		2931.2	0.07854219		3521.2	0.12993358		4111.2	-0.01921548
571.4	0.45117929		1161.39	0.27691694		1751.4	0.19933489		2341.39	-0.01195885		2931.4	0.07966964		3521.4	0.12988055		4111.4	-0.01935697
571.6	0.45140541		1161.59	0.27712311		1751.6	0.19983467		2341.59	-0.01146078		2931.6	0.08065548		3521.6	0.12931745		4111.6	-0.01990615
571.8	0.45143088		1161.79	0.2767533		1751.8	0.20006028		2341.79	-0.01092336		2931.8	0.07990453		3521.8	0.12936123		4111.8	-0.01985939
572	0.45023796		1161.99	0.27721867		1752	0.20032979		2341.99	-0.0108582		2932	0.08071155		3522	0.12982116		4112	-0.01968153
572.2	0.45024353		1162.19	0.27721279		1752.2	0.19999043		2342.19	-0.01199717		2932.2	0.08003523		3522.2	0.13030733		4112.2	-0.02022482
572.4	0.44986083		1162.39	0.27775533		1752.4	0.19904864		2342.39	-0.01368236		2932.4	0.08038704		3522.4	0.13015452		4112.4	-0.01969782
572.6	0.44965802		1162.59	0.27779507		1752.6	0.20008019		2342.59	-0.0140281		2932.6	0.08009651		3522.6	0.13026055		4112.6	-0.02048699
572.8	0.45003695		1162.79	0.27742209		1752.8	0.20116989		2342.79	-0.01478574		2932.8	0.08009674		3522.8	0.12979663		4112.8	-0.02030561
573	0.450145		1162.99	0.27683266		1753	0.20208838		2342.99	-0.01545289		2933	0.07985331		3523	0.13093131		4113	-0.02110354
573.2	0.44919323		1163.19	0.27713892		1753.2	0.20090717		2343.19	-0.01540672		2933.2	0.07857436		3523.2	0.13123967		4113.2	-0.02193118
573.4	0.44810905		1163.39	0.27781045		1753.4	0.2007552		2343.39	-0.01665851		2933.4	0.07821785		3523.4	0.13135946		4113.4	-0.02255852
573.6	0.44749516		1163.59	0.27834773		1753.6	0.20086864		2343.59	-0.01661739		2933.6	0.07771505		3523.6	0.13199432		4113.6	-0.02270406
573.8	0.44805603		1163.79	0.27954127		1753.8	0.20071812		2343.79	-0.01714397		2933.8	0.07768098		3523.8	0.13214108		4113.8	-0.02264352
574	0.44737972		1163.99	0.28036527		1754	0.20123171		2343.99	-0.01738874		2934	0.07792317		3524	0.13160823		4114	-0.02191692
574.2	0.44794161		1164.19	0.28025453		1754.2	0.20038604		2344.19	-0.01885698		2934.2	0.07870546		3524.2	0.13224279		4114.2	-0.02147453
574.4	0.44807661		1164.39	0.28021749		1754.4	0.1997436		2344.39	-0.01877383		2934.4	0.0800347		3524.4	0.13214986		4114.4	-0.02095549
574.6	0.44747423		1164.59	0.28013		1754.6	0.19927602		2344.59	-0.0166764		2934.6	0.08031696		3524.6	0.13145975		4114.6	-0.02121521
574.8	0.44759813		1164.79	0.27995941		1754.8	0.19965276		2344.79	-0.01631885		2934.8	0.08094417		3524.8	0.13152711		4114.8	-0.02032968
575	0.44785344		1164.99	0.27951059		1755	0.19969149		2344.99	-0.01529465		2935	0.08072101		3525	0.13164291		4115	-0.01977695
575.2	0.44773198		1165.19	0.2795879		1755.2	0.1992879		2345.19	-0.01472505		2935.2	0.0810135		3525.2	0.13108944		4115.2	-0.01927216
575.4	0.44784588		1165.39	0.2787403		1755.4	0.19994525		2345.39	-0.01497984		2935.4	0.08118454		3525.4	0.13020851		4115.4	-0.01935982
575.6	0.44665717		1165.59	0.27910458		1755.6	0.19978193		2345.59	-0.01506473		2935.6	0.08105686		3525.6	0.12994235		4115.6	-0.01871614
575.8	0.44672536		1165.79	0.27883197		1755.8	0.19968477		2345.79	-0.01547343		2935.8	0.08100158		3525.8	0.1296938		4115.8	-0.01862975
576	0.44625916		1165.99	0.27889359		1756	0.19956685		2345.99	-0.01543033		2936	0.08250957		3526	0.12876997		4116	-0.01889701
576.2	0.44687215		1166.19	0.27832536		1756.2	0.1988463		2346.19	-0.01676603		2936.2	0.08227527		3526.2	0.12867766		4116.2	-0.01984269
576.4	0.44672355		1166.39	0.27816908		1756.4	0.19866932		2346.39	-0.01733495		2936.4	0.08169665		3526.4	0.12797096		4116.4	-0.02003459
576.6	0.4470643		1166.59	0.2778613		1756.6	0.20005815		2346.59	-0.01794803		2936.6	0.08023754		3526.6	0.12690903		4116.6	-0.02098151
576.8	0.44778442		1166.79	0.27746211		1756.8	0.19983392		2346.79	-0.01736936		2936.8	0.0787072		3526.8	0.12714566		4116.8	-0.02129931
577	0.44768544		1166.99	0.27701916		1757	0.19949435		2346.99	-0.01781097		2937	0.07763831		3527	0.12676993		4117	-0.02299469
577.2	0.44707194		1167.19	0.27696699		1757.2	0.19892008		2347.19	-0.01871172		2937.2	0.07631204		3527.2	0.12727239		4117.2	-0.02412934
577.4	0.44773093		1167.39	0.27725295		1757.4	0.19857633		2347.39	-0.01907483		2937.4	0.07544471		3527.4	0.12702841		4117.4	-0.02513755
577.6	0.44798384		1167.59	0.27686893		1757.6	0.19790837		2347.59	-0.018757		2937.6	0.07472303		3527.6	0.1274584		4117.6	-0.02586131
577.8	0.44821451		1167.79	0.27736316		1757.8	0.19732139		2347.79	-0.01909833		2937.8	0.07462971		3527.8	0.12707018		4117.8	-0.02642995
578	0.44821327		1167.99	0.27690798		1758	0.19718767		2347.99	-0.01894854		2938	0.07527668		3528	0.12693185		4118	-0.02600726
578.2	0.44854132		1168.19	0.27605461		1758.2	0.197246		2348.19	-0.01842146		2938.2	0.07536777		3528.2	0.12745202		4118.2	-0.02631585
578.4	0.44857409		1168.39	0.27565018		1758.4	0.19706369		2348.39	-0.01653925		2938.4	0.07619663		3528.4	0.12750986		4118.4	-0.02618436
578.6	0.44870827		1168.59	0.27550781		1758.6	0.19696646		2348.59	-0.01515078		2938.6	0.07559081		3528.6	0.12837322		4118.6	-0.02598707
578.8	0.44896755		1168.79	0.27533923		1758.8	0.19704557		2348.79	-0.01510084		2938.8	0.07569518		3528.8	0.12920368		4118.8	-0.02423899
579	0.44838727		1168.99	0.27646783		1759	0.19674557		2348.99	-0.0143005		2939	0.07573767		3529	0.13049905		4119	-0.02345388
579.2	0.44833859		1169.19	0.27683217		1759.2	0.19697559		2349.19	-0.01450347		2939.2	0.07597174		3529.2	0.13041824		4119.2	-0.02219029
579.4	0.44693733		1169.39	0.27775838		1759.4	0.19728386		2349.39	-0.01487935		2939.4	0.07555773		3529.4	0.13179849		4119.4	-0.02138782
579.6	0.44551019		1169.59	0.27803428		1759.6	0.19618567		2349.59	-0.0142855		2939.6	0.07622657		3529.6	0.13218718		4119.6	-0.01981561
579.8	0.44536143		1169.79	0.27762587		1759.8	0.19663385		2349.79	-0.01371754		2939.8	0.07578631		3529.8	0.13192717		4119.8	-0.01936317
580	0.44464239		1169.99	0.27826977		1760	0.19665824		2349.99	-0.01390315		2940	0.07606556		3530	0.13225302		4120	-0.01960872
580.2	0.44418133		1170.19	0.27751072		1760.2	0.19679236		2350.19	-0.01424262		2940.2	0.07569113		3530.2	0.13306022		4120.2	-0.01914286
580.4	0.44406669		1170.39	0.27802844		1760.4	0.19689951		2350.39	-0.01375301		2940.4	0.07607341		3530.4	0.13196729		4120.4	-0.01899304
580.6	0.44525698		1170.59	0.27705979		1760.6	0.1971284		2350.59	-0.01379918		2940.6	0.07558447		3530.6	0.13166532		4120.6	-0.01910558
580.8	0.44596081		1170.79	0.27695075		1760.8	0.19640319		2350.79	-0.01381116		2940.8	0.07476246		3530.8	0.13173307		4120.8	-0.02020772
581	0.44602552		1170.99	0.27635996		1761	0.19693906		2350.99	-0.01466388		2941	0.07450077		3531	0.13094872		4121	-0.02105763
581.2	0.44594733		1171.19	0.27601743		1761.2	0.19744794		2351.19	-0.01554779		2941.2	0.07456833		3531.2	0.13111141		4121.2	-0.02076611
581.4	0.44559017		1171.39	0.27551671		1761.4	0.19710755		2351.39	-0.01509749		2941.4	0.07391833		3531.4	0.13168508		4121.4	-0.02106716
581.6	0.4448867		1171.59	0.27533215		1761.6	0.19691868		2351.59	-0.0152838		2941.6	0.07378621		3531.6	0.13233244		4121.6	-0.02183535
581.8	0.44518011		1171.79	0.2742745		1761.8	0.19762231		2351.79	-0.01533251		2941.8	0.07375244		3531.8	0.13121162		4121.8	-0.02257707
582	0.44544266		1171.99	0.27319719		1762	0.19770107		2351.99	-0.0147183		2942	0.0730283		3532	0.13094918		4122	-0.02254923
582.2	0.44616776		1172.19	0.27343972		1762.2	0.19846102		2352.19	-0.01423505		2942.2	0.07343775		3532.2	0.130653		4122.2	-0.0227606
582.4	0.44593305		1172.39	0.27361397		1762.4	0.19862998		2352.39	-0.0138938		2942.4	0.07434467		3532.4	0.1304041		4122.4	-0.02264517
582.6	0.44548587		1172.59	0.27434117		1762.6	0.19920917		2352.59	-0.01441753		2942.6	0.07382139		3532.6	0.13076653		4122.6	-0.0228084
582.8	0.44516387		1172.79	0.27468478		1762.8	0.19983409		2352.79	-0.0150087		2942.8	0.07408264		3532.8	0.13057642		4122.8	-0.02179181
583	0.44529569		1172.99	0.27589154		1763	0.20078127		2352.99	-0.0147352		2943	0.07469295		3533	0.1312341		4123	-0.02175179
583.2	0.44488476		1173.19	0.2764186		1763.2	0.20154767		2353.19	-0.01476055		2943.2	0.07472054		3533.2	0.13009512		4123.2	-0.02068315
583.4	0.44389375		1173.39	0.27731165		1763.4	0.2016148		2353.39	-0.01437571		2943.4	0.07431523		3533.4	0.13097105		4123.4	-0.01976501
583.6	0.44319529		1173.59	0.27682674		1763.6	0.20065421		2353.59	-0.01358769		2943.6	0.07456743		3533.6	0.13100996		4123.6	-0.01907901
583.8	0.44232685		1173.79	0.27699111		1763.8	0.20132959		2353.79	-0.01387461		2943.8	0.0746949		3533.8	0.13033168		4123.8	-0.01900238
584	0.44215142		1173.99	0.27814387		1764	0.2011037		2353.99	-0.01508115		2944	0.07584837		3534	0.13092452		4124	-0.01996586
584.2	0.44221035		1174.19	0.2773712		1764.2	0.2015903		2354.19	-0.01498856		2944.2	0.07698381		3534.2	0.13112123		4124.2	-0.02015593
584.4	0.44223136		1174.39	0.27661862		1764.4	0.20075039		2354.39	-0.01511037		2944.4	0.0785016		3534.4	0.13049002		4124.4	-0.02077197
584.6	0.44266073		1174.59	0.2753916		1764.6	0.20045452		2354.59	-0.01587096		2944.6	0.07838972		3534.6	0.13053477		4124.6	-0.02125031
584.8	0.44261282		1174.79	0.27536126		1764.8	0.20083614		2354.79	-0.01595942		2944.8	0.07793804		3534.8	0.12967622		4124.8	-0.02280373
585	0.44217111		1174.99	0.27470961		1765	0.20120875		2354.99	-0.01649122		2945	0.07817185		3535	0.13002277		4125	-0.02269857
585.2	0.44211372		1175.19	0.27397975		1765.2	0.20079162		2355.19	-0.01632673		2945.2	0.07822003		3535.2	0.12990223		4125.2	-0.02297607
585.4	0.4414743		1175.39	0.27340896		1765.4	0.19974682		2355.39	-0.01565058		2945.4	0.07817043		3535.4	0.13044746		4125.4	-0.02394367
585.6	0.44171147		1175.59	0.27299781		1765.6	0.19929467		2355.59	-0.01590372		2945.6	0.07828452		3535.6	0.13011382		4125.6	-0.02473735
585.8	0.44235532		1175.79	0.27211718		1765.8	0.19932307		2355.79	-0.01554304		2945.8	0.07806032		3535.8	0.12938312		4125.8	-0.02536312
586	0.44324535		1175.99	0.27272861		1766	0.19869062		2355.99	-0.01535135		2946	0.0779771		3536	0.12891697		4126	-0.02466657
586.2	0.44387108		1176.19	0.27407955		1766.2	0.19894643		2356.19	-0.01529299		2946.2	0.07809392		3536.2	0.12903667		4126.2	-0.02418326
586.4	0.44335045		1176.39	0.27400821		1766.4	0.19865924		2356.39	-0.01460036		2946.4	0.07742219		3536.4	0.12790406		4126.4	-0.0246117
586.6	0.44368986		1176.59	0.27483411		1766.6	0.1980198		2356.59	-0.01491947		2946.6	0.07677939		3536.6	0.12785643		4126.6	-0.02383686
586.8	0.44436952		1176.79	0.27516249		1766.8	0.19774606		2356.79	-0.01490991		2946.8	0.0765874		3536.8	0.12740279		4126.8	-0.02190292
587	0.44494374		1176.99	0.27627706		1767	0.19800503		2356.99	-0.01479368		2947	0.07663437		3537	0.12750491		4127	-0.02160557
587.2	0.44435395		1177.19	0.2769192		1767.2	0.1972527		2357.19	-0.01494257		2947.2	0.07622124		3537.2	0.12784446		4127.2	-0.02093112
587.4	0.44453386		1177.39	0.27762339		1767.4	0.1969252		2357.39	-0.01534013		2947.4	0.07537362		3537.4	0.12825306		4127.4	-0.02142284
587.6	0.44479355		1177.59	0.27855538		1767.6	0.19610418		2357.59	-0.01620116		2947.6	0.07473811		3537.6	0.12797213		4127.6	-0.02161005
587.8	0.44460264		1177.79	0.27940341		1767.8	0.19619588		2357.79	-0.01730513		2947.8	0.07484159		3537.8	0.12799727		4127.8	-0.02250552
588	0.44518344		1177.99	0.27952775		1768	0.19624944		2357.99	-0.01843623		2948	0.07416106		3538	0.12908307		4128	-0.02350142
588.2	0.44522254		1178.19	0.27830741		1768.2	0.19643211		2358.19	-0.01796148		2948.2	0.07409006		3538.2	0.12941308		4128.2	-0.02440353
588.4	0.44547227		1178.39	0.2772657		1768.4	0.19608981		2358.39	-0.01839083		2948.4	0.07395027		3538.4	0.12965626		4128.4	-0.02566564
588.6	0.44628521		1178.59	0.27749387		1768.6	0.19643408		2358.59	-0.01821343		2948.6	0.07359998		3538.6	0.13022248		4128.6	-0.02663513
588.8	0.44596329		1178.79	0.27766249		1768.8	0.19644729		2358.79	-0.01772964		2948.8	0.07283037		3538.8	0.13072116		4128.8	-0.02837101
589	0.44599062		1178.99	0.27733775		1769	0.19591762		2358.99	-0.01806248		2949	0.07271735		3539	0.13062467		4129	-0.02849299
589.2	0.44652784		1179.19	0.27702147		1769.2	0.19584498		2359.19	-0.0167733		2949.2	0.07328277		3539.2	0.13025712		4129.2	-0.02884201
589.4	0.44580064		1179.39	0.27634811		1769.4	0.19626313		2359.39	-0.01586155		2949.4	0.07490596		3539.4	0.13038169		4129.4	-0.02933725
589.6	0.44536194		1179.59	0.2760083		1769.6	0.19635749		2359.59	-0.01540318		2949.6	0.07528175		3539.6	0.13062859		4129.6	-0.02893452
589.8	0.44514143		1179.79	0.27650371		1769.8	0.19668535		2359.79	-0.01445683		2949.8	0.07583758		3539.8	0.13010266		4129.8	-0.02789914
590	0.44451172		1179.99	0.27665342		1770	0.19672929		2359.99	-0.01462866		2950	0.07652829		3540	0.13073515		4130	-0.02722904
590.2	0.44428491		1180.19	0.27678893		1770.2	0.19635777		2360.19	-0.01399514		2950.2	0.07591999		3540.2	0.13099134		4130.2	-0.02624203
590.4	0.44459543		1180.39	0.27629226		1770.4	0.19643932		2360.39	-0.01366769		2950.4	0.07643491		3540.4	0.13066601		4130.4	-0.02559523
590.6	0.44434242		1180.59	0.27702674		1770.6	0.19614941		2360.59	-0.01409922		2950.6	0.07725165		3540.6	0.13126705		4130.6	-0.02427848
590.8	0.4452952		1180.79	0.27701247		1770.8	0.19634893		2360.79	-0.01479431		2950.8	0.07815763		3540.8	0.13129186		4130.8	-0.02314066
591	0.44470652		1180.99	0.27694206		1771	0.19665364		2360.99	-0.01589374		2951	0.07808975		3541	0.13095125		4131	-0.02351228
591.2	0.44506939		1181.19	0.27644987		1771.2	0.19625992		2361.19	-0.01614656		2951.2	0.07875345		3541.2	0.13092468		4131.2	-0.02299118
591.4	0.44539285		1181.39	0.27655492		1771.4	0.19609262		2361.39	-0.01670235		2951.4	0.07853643		3541.4	0.13037007		4131.4	-0.0235173
591.6	0.44602071		1181.59	0.27614602		1771.6	0.1955721		2361.59	-0.01723675		2951.6	0.07901544		3541.6	0.13030403		4131.6	-0.02238202
591.8	0.44556185		1181.79	0.27572601		1771.8	0.19525351		2361.79	-0.01728805		2951.8	0.07880114		3541.8	0.13060796		4131.8	-0.02227368
592	0.44609835		1181.99	0.27428297		1772	0.19536885		2361.99	-0.01739877		2952	0.07827544		3542	0.13072971		4132	-0.02220133
592.2	0.44611004		1182.19	0.27342028		1772.2	0.19530853		2362.19	-0.01691494		2952.2	0.07752164		3542.2	0.13100021		4132.2	-0.02317021
592.4	0.44632429		1182.39	0.27405631		1772.4	0.19451546		2362.39	-0.01726492		2952.4	0.07699284		3542.4	0.13159649		4132.4	-0.02410665
592.6	0.44580739		1182.59	0.27482806		1772.6	0.19415148		2362.59	-0.01640615		2952.6	0.07683208		3542.6	0.13211451		4132.6	-0.02404757
592.8	0.44489103		1182.79	0.27442201		1772.8	0.19361814		2362.79	-0.01664339		2952.8	0.0761001		3542.8	0.13203616		4132.8	-0.02456508
593	0.44484345		1182.99	0.27381448		1773	0.1935187		2362.99	-0.01664841		2953	0.07579986		3543	0.13195715		4133	-0.02415241
593.2	0.44362641		1183.19	0.27285184		1773.2	0.19382985		2363.19	-0.0157884		2953.2	0.07565331		3543.2	0.13178391		4133.2	-0.02467058
593.4	0.44255971		1183.39	0.27218664		1773.4	0.19416961		2363.39	-0.0153197		2953.4	0.076155		3543.4	0.1324139		4133.4	-0.02503533
593.6	0.44212607		1183.59	0.27254826		1773.6	0.19351357		2363.59	-0.01579438		2953.6	0.07554773		3543.6	0.13211816		4133.6	-0.02410448
593.8	0.44268888		1183.79	0.27274353		1773.8	0.19392978		2363.79	-0.01529909		2953.8	0.07543541		3543.8	0.13142356		4133.8	-0.02328025
594	0.4422279		1183.99	0.27228794		1774	0.19376259		2363.99	-0.01569879		2954	0.07541275		3544	0.13222036		4134	-0.02312578
594.2	0.44351041		1184.19	0.27210238		1774.2	0.19341373		2364.19	-0.0158428		2954.2	0.07505666		3544.2	0.13193233		4134.2	-0.02211031
594.4	0.44441433		1184.39	0.27174763		1774.4	0.19374426		2364.39	-0.01623198		2954.4	0.07529019		3544.4	0.13246699		4134.4	-0.02259908
594.6	0.44395769		1184.59	0.27161386		1774.6	0.19333266		2364.59	-0.01641798		2954.6	0.07568625		3544.6	0.13216826		4134.6	-0.02281658
594.8	0.44389767		1184.79	0.27107191		1774.8	0.19328681		2364.79	-0.01801114		2954.8	0.07590037		3544.8	0.13178029		4134.8	-0.02200463
595	0.44396031		1184.99	0.27062528		1775	0.1930033		2364.99	-0.01821581		2955	0.07579055		3545	0.131416		4135	-0.02175429
595.2	0.44477441		1185.19	0.27130251		1775.2	0.19320288		2365.19	-0.01892576		2955.2	0.07656628		3545.2	0.13132628		4135.2	-0.0215056
595.4	0.44535968		1185.39	0.27162837		1775.4	0.19307568		2365.39	-0.02055172		2955.4	0.07649953		3545.4	0.13144765		4135.4	-0.02140202
595.6	0.44579069		1185.59	0.27157977		1775.6	0.19323959		2365.59	-0.02154837		2955.6	0.07665261		3545.6	0.1307505		4135.6	-0.02050953
595.8	0.44557849		1185.79	0.27195804		1775.8	0.19396412		2365.79	-0.0217822		2955.8	0.07586664		3545.8	0.13068439		4135.8	-0.02071145
596	0.44642878		1185.99	0.272425		1776	0.19559657		2365.99	-0.02245811		2956	0.07551189		3546	0.13017981		4136	-0.02211512
596.2	0.44665114		1186.19	0.27281804		1776.2	0.19668416		2366.19	-0.02387993		2956.2	0.07508419		3546.2	0.13026373		4136.2	-0.0228049
596.4	0.44585899		1186.39	0.27300206		1776.4	0.19681931		2366.39	-0.0246214		2956.4	0.07562383		3546.4	0.12970944		4136.4	-0.02408121
596.6	0.44537093		1186.59	0.27253412		1776.6	0.19776585		2366.59	-0.02421223		2956.6	0.07521415		3546.6	0.12967883		4136.6	-0.02415712
596.8	0.44492691		1186.79	0.27224572		1776.8	0.19828105		2366.79	-0.02441505		2956.8	0.07404104		3546.8	0.13005327		4136.8	-0.02472072
597	0.44431601		1186.99	0.27210516		1777	0.1993104		2366.99	-0.02405135		2957	0.07444727		3547	0.13078184		4137	-0.02554479
597.2	0.44381923		1187.19	0.27201331		1777.2	0.19939789		2367.19	-0.02363469		2957.2	0.07418856		3547.2	0.13099159		4137.2	-0.02481081
597.4	0.44463305		1187.39	0.27223581		1777.4	0.19920379		2367.39	-0.02288222		2957.4	0.07419763		3547.4	0.13130387		4137.4	-0.02463975
597.6	0.44468765		1187.59	0.27192853		1777.6	0.19829816		2367.59	-0.02223646		2957.6	0.07333033		3547.6	0.13048437		4137.6	-0.0241293
597.8	0.44525402		1187.79	0.27135724		1777.8	0.19831081		2367.79	-0.02103005		2957.8	0.07320382		3547.8	0.12991036		4137.8	-0.02410359
598	0.44361913		1187.99	0.27113063		1778	0.19764637		2367.99	-0.02029607		2958	0.07397633		3548	0.12993871		4138	-0.02352308
598.2	0.44385249		1188.19	0.27169017		1778.2	0.196957		2368.19	-0.01961533		2958.2	0.07425821		3548.2	0.12959339		4138.2	-0.02332498
598.4	0.44378956		1188.39	0.27192424		1778.4	0.19632683		2368.39	-0.01817048		2958.4	0.07464325		3548.4	0.12935638		4138.4	-0.023259
598.6	0.44392882		1188.59	0.27248647		1778.6	0.1950824		2368.59	-0.01700323		2958.6	0.07508649		3548.6	0.13011897		4138.6	-0.02316237
598.8	0.4436969		1188.79	0.27308801		1778.8	0.19513203		2368.79	-0.01708381		2958.8	0.07545551		3548.8	0.13048479		4138.8	-0.02211107
599	0.44493358		1188.99	0.27307143		1779	0.19426091		2368.99	-0.01655841		2959	0.07508665		3549	0.13019686		4139	-0.02260906
599.2	0.44506339		1189.19	0.27414371		1779.2	0.19410045		2369.19	-0.01674814		2959.2	0.07540812		3549.2	0.1303643		4139.2	-0.02286443
599.4	0.4456036		1189.39	0.27427197		1779.4	0.19362421		2369.39	-0.01710136		2959.4	0.07499403		3549.4	0.13061362		4139.4	-0.02293856
599.6	0.44509039		1189.59	0.27452064		1779.6	0.19388952		2369.59	-0.01720139		2959.6	0.07448705		3549.6	0.13051156		4139.6	-0.02339069
599.8	0.44453036		1189.79	0.27506799		1779.8	0.19550332		2369.79	-0.01762994		2959.8	0.0736492		3549.8	0.1306118		4139.8	-0.02423262
600	0.44449828		1189.99	0.27499489		1780	0.1967444		2369.99	-0.01882593		2960	0.07335401		3550	0.12998126		4140	-0.02508218
600.2	0.44377329		1190.19	0.2743293		1780.2	0.19684659		2370.19	-0.01976441		2960.2	0.07434424		3550.2	0.12943006		4140.2	-0.02527108
600.4	0.44229671		1190.39	0.27432936		1780.4	0.19691916		2370.39	-0.01920144		2960.4	0.07417677		3550.4	0.12894902		4140.4	-0.02607687
600.6	0.44200493		1190.59	0.27455117		1780.6	0.19716758		2370.59	-0.01895248		2960.6	0.07330162		3550.6	0.12893857		4140.6	-0.02595715
600.8	0.44097464		1190.79	0.27506954		1780.8	0.19737745		2370.79	-0.01933936		2960.8	0.07265907		3550.8	0.12977963		4140.8	-0.02580712
601	0.44037869		1190.99	0.27564005		1781	0.19756756		2370.99	-0.0198004		2961	0.07310954		3551	0.12965141		4141	-0.02603684
601.2	0.43949782		1191.19	0.27505777		1781.2	0.19716349		2371.19	-0.0199064		2961.2	0.07164647		3551.2	0.12967288		4141.2	-0.02550622
601.4	0.43955842		1191.39	0.27419151		1781.4	0.1962172		2371.39	-0.01964555		2961.4	0.07120983		3551.4	0.1291568		4141.4	-0.0256427
601.6	0.43861602		1191.59	0.27387731		1781.6	0.19609918		2371.59	-0.02007765		2961.6	0.07025788		3551.6	0.12949042		4141.6	-0.02549592
601.8	0.43860566		1191.79	0.27393285		1781.8	0.19642324		2371.79	-0.02055873		2961.8	0.07106768		3551.8	0.12953397		4141.8	-0.02520843
602	0.43858462		1191.99	0.27462404		1782	0.19580072		2371.99	-0.02155576		2962	0.0720124		3552	0.1300771		4142	-0.02408449
602.2	0.43983827		1192.19	0.27461173		1782.2	0.19581273		2372.19	-0.02248538		2962.2	0.07209635		3552.2	0.13083057		4142.2	-0.02397454
602.4	0.44062519		1192.39	0.27403002		1782.4	0.19611984		2372.39	-0.02262542		2962.4	0.07274423		3552.4	0.13087612		4142.4	-0.02400034
602.6	0.44174501		1192.59	0.2736259		1782.6	0.19580487		2372.59	-0.02290777		2962.6	0.07303064		3552.6	0.13262226		4142.6	-0.02464734
602.8	0.44284562		1192.79	0.27402297		1782.8	0.19653085		2372.79	-0.02375937		2962.8	0.07318887		3552.8	0.13212365		4142.8	-0.02419523
603	0.44446004		1192.99	0.27368697		1783	0.19579828		2372.99	-0.02468691		2963	0.07339928		3553	0.13161914		4143	-0.02442104
603.2	0.44537664		1193.19	0.27455221		1783.2	0.19550609		2373.19	-0.02473951		2963.2	0.07450854		3553.2	0.13141891		4143.2	-0.02395683
603.4	0.44580355		1193.39	0.27424814		1783.4	0.19495674		2373.39	-0.02519945		2963.4	0.07425321		3553.4	0.13067811		4143.4	-0.02382441
603.6	0.44560698		1193.59	0.27413554		1783.6	0.19514045		2373.59	-0.02532422		2963.6	0.07415633		3553.6	0.13077477		4143.6	-0.02432237
603.8	0.44447449		1193.79	0.27440401		1783.8	0.19537234		2373.79	-0.0246191		2963.8	0.07410868		3553.8	0.1303292		4143.8	-0.02406558
604	0.44439879		1193.99	0.27357352		1784	0.19481741		2373.99	-0.02428866		2964	0.07416174		3554	0.12974414		4144	-0.02448431
604.2	0.44377601		1194.19	0.27368571		1784.2	0.19440755		2374.19	-0.02327708		2964.2	0.07409545		3554.2	0.12924626		4144.2	-0.02447623
604.4	0.44307449		1194.39	0.27339391		1784.4	0.19405424		2374.39	-0.02220326		2964.4	0.07349159		3554.4	0.12889608		4144.4	-0.02483308
604.6	0.44249102		1194.59	0.27304182		1784.6	0.1946753		2374.59	-0.02159074		2964.6	0.07369043		3554.6	0.12871536		4144.6	-0.02579361
604.8	0.44106908		1194.79	0.27244945		1784.8	0.19405502		2374.79	-0.0203502		2964.8	0.07301032		3554.8	0.12869207		4144.8	-0.02618342
605	0.44071587		1194.99	0.27188018		1785	0.19416714		2374.99	-0.01980268		2965	0.0727474		3555	0.12760191		4145	-0.02605351
605.2	0.44039148		1195.19	0.27131003		1785.2	0.19431752		2375.19	-0.01927154		2965.2	0.07162271		3555.2	0.12817669		4145.2	-0.02547216
605.4	0.44011985		1195.39	0.27109689		1785.4	0.19476025		2375.39	-0.01835789		2965.4	0.07125144		3555.4	0.12812722		4145.4	-0.02533098
605.6	0.43986203		1195.59	0.27089262		1785.6	0.19570055		2375.59	-0.01771858		2965.6	0.07160876		3555.6	0.12903544		4145.6	-0.02543658
605.8	0.44011613		1195.79	0.27097826		1785.8	0.19589046		2375.79	-0.01770801		2965.8	0.07176917		3555.8	0.12976448		4145.8	-0.02543094
606	0.44043819		1195.99	0.27101617		1786	0.19623248		2375.99	-0.0185165		2966	0.07154146		3556	0.13042222		4146	-0.0252488
606.2	0.44117968		1196.19	0.27136691		1786.2	0.19736583		2376.19	-0.01835807		2966.2	0.07047286		3556.2	0.13145508		4146.2	-0.02534973
606.4	0.44149705		1196.39	0.27148482		1786.4	0.19789515		2376.39	-0.01918136		2966.4	0.07060675		3556.4	0.13168534		4146.4	-0.02523551
606.6	0.44279179		1196.59	0.27152391		1786.6	0.19741428		2376.59	-0.02052042		2966.6	0.07049165		3556.6	0.13234276		4146.6	-0.02520219
606.8	0.44332315		1196.79	0.2721529		1786.8	0.1973732		2376.79	-0.02231883		2966.8	0.07003972		3556.8	0.13128243		4146.8	-0.02446714
607	0.44447417		1196.99	0.27211433		1787	0.19653863		2376.99	-0.0234015		2967	0.070438		3557	0.13051019		4147	-0.02426723
607.2	0.44519214		1197.19	0.27251091		1787.2	0.19587368		2377.19	-0.02394859		2967.2	0.07025314		3557.2	0.13056782		4147.2	-0.02394548
607.4	0.44556991		1197.39	0.27179854		1787.4	0.19523527		2377.39	-0.0236414		2967.4	0.07060255		3557.4	0.13038595		4147.4	-0.02443142
607.6	0.44518311		1197.59	0.27150536		1787.6	0.1954092		2377.59	-0.02397844		2967.6	0.07085928		3557.6	0.12996833		4147.6	-0.02464549
607.8	0.4447743		1197.79	0.2712873		1787.8	0.19448552		2377.79	-0.02354561		2967.8	0.07074685		3557.8	0.12939727		4147.8	-0.02401309
608	0.44493242		1197.99	0.27031389		1788	0.19407723		2377.99	-0.02323241		2968	0.07118585		3558	0.12891052		4148	-0.02420499
608.2	0.44380198		1198.19	0.27019209		1788.2	0.19348777		2378.19	-0.02294127		2968.2	0.07099773		3558.2	0.12834999		4148.2	-0.02461048
608.4	0.44321912		1198.39	0.26983975		1788.4	0.19304445		2378.39	-0.02231959		2968.4	0.0717067		3558.4	0.1271336		4148.4	-0.02530985
608.6	0.4430824		1198.59	0.26906894		1788.6	0.19314634		2378.59	-0.02099804		2968.6	0.07241416		3558.6	0.12667814		4148.6	-0.02489621
608.8	0.44258794		1198.79	0.26925664		1788.8	0.19198541		2378.79	-0.01971102		2968.8	0.07251813		3558.8	0.12497923		4148.8	-0.02425746
609	0.44287844		1198.99	0.27016069		1789	0.19334638		2378.99	-0.01896287		2969	0.07373998		3559	0.12468909		4149	-0.02354026
609.2	0.44312662		1199.19	0.27064321		1789.2	0.19437976		2379.19	-0.01823746		2969.2	0.07456335		3559.2	0.12507842		4149.2	-0.02399505
609.4	0.44221951		1199.39	0.27020868		1789.4	0.19477765		2379.39	-0.01749512		2969.4	0.07539716		3559.4	0.12465454		4149.4	-0.02419055
609.6	0.44255607		1199.59	0.27124337		1789.6	0.19462842		2379.59	-0.01795674		2969.6	0.07583216		3559.6	0.12510115		4149.6	-0.02431909
609.8	0.442263		1199.79	0.27240449		1789.8	0.19585852		2379.79	-0.01865179		2969.8	0.07564419		3559.8	0.12560154		4149.8	-0.02434241
610	0.44193567		1199.99	0.27289807		1790	0.19662626		2379.99	-0.0193019		2970	0.0757478		3560	0.12614691		4150	-0.02417247
610.2	0.442454		1200.19	0.27419442		1790.2	0.19717405		2380.19	-0.01988152		2970.2	0.07597064		3560.2	0.12740626		4150.2	-0.02454607
610.4	0.4418427		1200.39	0.27435491		1790.4	0.19756839		2380.39	-0.02164633		2970.4	0.07568359		3560.4	0.12736011		4150.4	-0.02495679
610.6	0.44185893		1200.59	0.27440732		1790.6	0.19739831		2380.59	-0.02317516		2970.6	0.07487502		3560.6	0.12766371		4150.6	-0.02532065
610.8	0.44241354		1200.79	0.27515348		1790.8	0.19784855		2380.79	-0.02487841		2970.8	0.07432165		3560.8	0.12802191		4150.8	-0.02507521
611	0.44354807		1200.99	0.27524312		1791	0.19804744		2380.99	-0.02582169		2971	0.07417108		3561	0.12831714		4151	-0.02542591
611.2	0.44363884		1201.19	0.27485969		1791.2	0.19842672		2381.19	-0.02636587		2971.2	0.07425617		3561.2	0.12930644		4151.2	-0.02612276
611.4	0.44460039		1201.39	0.27358271		1791.4	0.19825494		2381.39	-0.0265778		2971.4	0.07424445		3561.4	0.12882282		4151.4	-0.02648704
611.6	0.44458254		1201.59	0.27361115		1791.6	0.19805647		2381.59	-0.02691452		2971.6	0.07398905		3561.6	0.12872516		4151.6	-0.02675123
611.8	0.4447029		1201.79	0.27344677		1791.8	0.1961532		2381.79	-0.0268358		2971.8	0.07367327		3561.8	0.12938706		4151.8	-0.02637852
612	0.44492523		1201.99	0.27199596		1792	0.19631996		2381.99	-0.02624743		2972	0.07378268		3562	0.12961728		4152	-0.02727313
612.2	0.44387384		1202.19	0.271075		1792.2	0.19548983		2382.19	-0.02607786		2972.2	0.072514		3562.2	0.12922814		4152.2	-0.02750132
612.4	0.44423442		1202.39	0.2697755		1792.4	0.19509839		2382.39	-0.02515248		2972.4	0.07288941		3562.4	0.12858832		4152.4	-0.02695935
612.6	0.4440338		1202.59	0.26998431		1792.6	0.1948259		2382.59	-0.02383577		2972.6	0.07334206		3562.6	0.12916528		4152.6	-0.02511604
612.8	0.44380428		1202.79	0.27036614		1792.8	0.1939593		2382.79	-0.02272002		2972.8	0.07314097		3562.8	0.12957654		4152.8	-0.02496539
613	0.44432485		1202.99	0.27012756		1793	0.19494273		2382.99	-0.02206431		2973	0.0734415		3563	0.12919666		4153	-0.02495989
613.2	0.44465174		1203.19	0.26972044		1793.2	0.19407386		2383.19	-0.02202356		2973.2	0.07367661		3563.2	0.12875018		4153.2	-0.02495291
613.4	0.44348922		1203.39	0.26952115		1793.4	0.19381933		2383.39	-0.02202539		2973.4	0.07307509		3563.4	0.12903314		4153.4	-0.0243379
613.6	0.44295688		1203.59	0.27016576		1793.6	0.19340408		2383.59	-0.02211555		2973.6	0.07289375		3563.6	0.12951822		4153.6	-0.02384612
613.8	0.44260342		1203.79	0.27067501		1793.8	0.19404308		2383.79	-0.02160997		2973.8	0.07291961		3563.8	0.12915009		4153.8	-0.02338698
614	0.44182987		1203.99	0.27185647		1794	0.19364326		2383.99	-0.02085104		2974	0.07306091		3564	0.1296432		4154	-0.02349798
614.2	0.44130025		1204.19	0.27322609		1794.2	0.19412518		2384.19	-0.02164638		2974.2	0.07333236		3564.2	0.13037994		4154.2	-0.02373367
614.4	0.44066888		1204.39	0.27421365		1794.4	0.19442196		2384.39	-0.0218446		2974.4	0.07180582		3564.4	0.13028367		4154.4	-0.02346476
614.6	0.44111459		1204.59	0.27499438		1794.6	0.19427315		2384.59	-0.02222614		2974.6	0.07202527		3564.6	0.12996591		4154.6	-0.02413918
614.8	0.44128262		1204.79	0.27583139		1794.8	0.19458594		2384.79	-0.02272253		2974.8	0.07200797		3564.8	0.12973235		4154.8	-0.02470611
615	0.44115291		1204.99	0.27619259		1795	0.19498726		2384.99	-0.02278262		2975	0.0721436		3565	0.12929029		4155	-0.02557652
615.2	0.44127945		1205.19	0.27575292		1795.2	0.19472087		2385.19	-0.02254634		2975.2	0.07160726		3565.2	0.13039297		4155.2	-0.02708054
615.4	0.44129138		1205.39	0.27566679		1795.4	0.19483749		2385.39	-0.02263757		2975.4	0.07120353		3565.4	0.13037794		4155.4	-0.02783254
615.6	0.44076224		1205.59	0.27572922		1795.6	0.19419884		2385.59	-0.02237048		2975.6	0.07088282		3565.6	0.13074212		4155.6	-0.02812626
615.8	0.44079479		1205.79	0.2742112		1795.8	0.19417105		2385.79	-0.02291383		2975.8	0.0714105		3565.8	0.13092428		4155.8	-0.02863546
616	0.44028826		1205.99	0.27257242		1796	0.19520979		2385.99	-0.02119094		2976	0.07169139		3566	0.13079078		4156	-0.02874837
616.2	0.43865295		1206.19	0.27209894		1796.2	0.19470122		2386.19	-0.0204619		2976.2	0.07196382		3566.2	0.13004529		4156.2	-0.02825581
616.4	0.43880843		1206.39	0.27172199		1796.4	0.19406148		2386.39	-0.02007388		2976.4	0.073318		3566.4	0.13013437		4156.4	-0.02844373
616.6	0.43885421		1206.59	0.27299936		1796.6	0.19372254		2386.59	-0.01961778		2976.6	0.07369795		3566.6	0.12994603		4156.6	-0.02782843
616.8	0.43833659		1206.79	0.27239263		1796.8	0.19328		2386.79	-0.019884		2976.8	0.07317503		3566.8	0.12893486		4156.8	-0.02721085
617	0.43863526		1206.99	0.27270336		1797	0.19343496		2386.99	-0.01985337		2977	0.07329927		3567	0.12798749		4157	-0.02621761
617.2	0.43847329		1207.19	0.27188159		1797.2	0.19267427		2387.19	-0.01986584		2977.2	0.07394219		3567.2	0.12871129		4157.2	-0.0246001
617.4	0.4382132		1207.39	0.27151154		1797.4	0.19320614		2387.39	-0.02047044		2977.4	0.07314879		3567.4	0.12951504		4157.4	-0.02310442
617.6	0.43954447		1207.59	0.27206066		1797.6	0.19243158		2387.59	-0.02102115		2977.6	0.07383926		3567.6	0.12924097		4157.6	-0.02243184
617.8	0.43971943		1207.79	0.27288276		1797.8	0.19275073		2387.79	-0.02275429		2977.8	0.07384893		3567.8	0.12866436		4157.8	-0.02248096
618	0.43962939		1207.99	0.27359113		1798	0.19329671		2387.99	-0.02353973		2978	0.07433591		3568	0.129405		4158	-0.02224978
618.2	0.43940131		1208.19	0.27286427		1798.2	0.19364984		2388.19	-0.02433848		2978.2	0.07333423		3568.2	0.12979654		4158.2	-0.02230285
618.4	0.43996044		1208.39	0.27332642		1798.4	0.19254022		2388.39	-0.02392785		2978.4	0.07324324		3568.4	0.12954169		4158.4	-0.0228556
618.6	0.44023554		1208.59	0.27380544		1798.6	0.19252181		2388.59	-0.0236688		2978.6	0.07293348		3568.6	0.12992201		4158.6	-0.02351257
618.8	0.43966996		1208.79	0.27406103		1798.8	0.19297934		2388.79	-0.02364083		2978.8	0.07288699		3568.8	0.13029028		4158.8	-0.02365531
619	0.44049044		1208.99	0.27420904		1799	0.19319976		2388.99	-0.02414822		2979	0.07202878		3569	0.13051346		4159	-0.02420281
619.2	0.44041073		1209.19	0.27426424		1799.2	0.19294115		2389.19	-0.0229129		2979.2	0.07086838		3569.2	0.13116607		4159.2	-0.02546482
619.4	0.44023974		1209.39	0.27336978		1799.4	0.1926178		2389.39	-0.02261338		2979.4	0.07182498		3569.4	0.13063325		4159.4	-0.0251608
619.6	0.44095468		1209.59	0.27163403		1799.6	0.19208082		2389.59	-0.02193213		2979.6	0.07133633		3569.6	0.13067749		4159.6	-0.02542644
619.8	0.44122115		1209.79	0.27102146		1799.8	0.19261482		2389.79	-0.02096921		2979.8	0.07236498		3569.8	0.13062803		4159.8	-0.02601253
620	0.44093111		1209.99	0.27049947		1800	0.19252046		2389.99	-0.01922117		2980	0.07241621		3570	0.13045696		4160	-0.02553305
620.2	0.4414329		1210.19	0.27058717		1800.2	0.19231073		2390.19	-0.01937575		2980.2	0.07251624		3570.2	0.12937322		4160.2	-0.02665275
620.4	0.44244084		1210.39	0.27052586		1800.4	0.19225623		2390.39	-0.01947003		2980.4	0.0729866		3570.4	0.12838595		4160.4	-0.02682502
620.6	0.44292262		1210.59	0.27063917		1800.6	0.19339903		2390.59	-0.01990009		2980.6	0.07286817		3570.6	0.1279241		4160.6	-0.02593057
620.8	0.44219507		1210.79	0.26961106		1800.8	0.19326437		2390.79	-0.0202765		2980.8	0.07340004		3570.8	0.12694759		4160.8	-0.02512081
621	0.44355601		1210.99	0.26930172		1801	0.19325682		2390.99	-0.02022488		2981	0.07389889		3571	0.12706316		4161	-0.02575814
621.2	0.44425299		1211.19	0.26884742		1801.2	0.19364647		2391.19	-0.02091238		2981.2	0.07368425		3571.2	0.12677369		4161.2	-0.02539536
621.4	0.44411126		1211.39	0.26963262		1801.4	0.19410645		2391.39	-0.02215345		2981.4	0.07363725		3571.4	0.12635436		4161.4	-0.02578686
621.6	0.44470376		1211.59	0.26933537		1801.6	0.19385576		2391.59	-0.02245756		2981.6	0.07454148		3571.6	0.12533028		4161.6	-0.02590604
621.8	0.44331742		1211.79	0.26989924		1801.8	0.19370671		2391.79	-0.02348576		2981.8	0.07483108		3571.8	0.12433838		4161.8	-0.02629501
622	0.44306457		1211.99	0.26949505		1802	0.19361054		2391.99	-0.023068		2982	0.07500997		3572	0.12464934		4162	-0.02644446
622.2	0.44201134		1212.19	0.26885209		1802.2	0.19302093		2392.19	-0.02397585		2982.2	0.07481248		3572.2	0.12497562		4162.2	-0.02757162
622.4	0.44184373		1212.39	0.26977888		1802.4	0.19239214		2392.39	-0.0240136		2982.4	0.07562001		3572.4	0.1258507		4162.4	-0.02830291
622.6	0.44183579		1212.59	0.27020365		1802.6	0.19353809		2392.59	-0.02416541		2982.6	0.0756155		3572.6	0.12690293		4162.6	-0.02925186
622.8	0.44227947		1212.79	0.2701898		1802.8	0.19312164		2392.79	-0.02468263		2982.8	0.07639433		3572.8	0.12635472		4162.8	-0.02986289
623	0.4426176		1212.99	0.27120475		1803	0.19300466		2392.99	-0.0245999		2983	0.07566944		3573	0.12637901		4163	-0.03017233
623.2	0.44230163		1213.19	0.27141668		1803.2	0.19247578		2393.19	-0.02367858		2983.2	0.07539995		3573.2	0.12612944		4163.2	-0.02992718
623.4	0.44266988		1213.39	0.27045896		1803.4	0.19215146		2393.39	-0.02334298		2983.4	0.075685		3573.4	0.12652186		4163.4	-0.03008486
623.6	0.44252581		1213.59	0.26986833		1803.6	0.1926542		2393.59	-0.02325094		2983.6	0.07467574		3573.6	0.12711277		4163.6	-0.02990609
623.8	0.44187729		1213.79	0.27052665		1803.8	0.19214672		2393.79	-0.02207806		2983.8	0.07444322		3573.8	0.12737906		4163.8	-0.02918326
624	0.44154973		1213.99	0.27028549		1804	0.19221931		2393.99	-0.02143921		2984	0.07324333		3574	0.12749436		4164	-0.02914831
624.2	0.4418909		1214.19	0.27032599		1804.2	0.19233077		2394.19	-0.02054389		2984.2	0.07245685		3574.2	0.12776511		4164.2	-0.0285257
624.4	0.44156402		1214.39	0.26972319		1804.4	0.19259541		2394.39	-0.02023549		2984.4	0.07243782		3574.4	0.1278751		4164.4	-0.02767639
624.6	0.44129002		1214.59	0.26923899		1804.6	0.19298932		2394.59	-0.02017996		2984.6	0.07241342		3574.6	0.12868081		4164.6	-0.02741147
624.8	0.44082089		1214.79	0.26808285		1804.8	0.19237823		2394.79	-0.02018757		2984.8	0.07197911		3574.8	0.12809201		4164.8	-0.02666864
625	0.44106986		1214.99	0.26788885		1805	0.19282086		2394.99	-0.02097887		2985	0.07084962		3575	0.12827793		4165	-0.02645944
625.2	0.4406342		1215.19	0.26780912		1805.2	0.19317573		2395.19	-0.02139391		2985.2	0.06931101		3575.2	0.12866825		4165.2	-0.02558051
625.4	0.43986187		1215.39	0.26751791		1805.4	0.19299047		2395.39	-0.021959		2985.4	0.06939023		3575.4	0.12804496		4165.4	-0.0254773
625.6	0.44044399		1215.59	0.26690658		1805.6	0.19283153		2395.59	-0.02128732		2985.6	0.06994273		3575.6	0.12744369		4165.6	-0.02495096
625.8	0.43989133		1215.79	0.26823887		1805.8	0.19200973		2395.79	-0.02233622		2985.8	0.07074067		3575.8	0.12701361		4165.8	-0.02603076
626	0.44029921		1215.99	0.26783031		1806	0.19136005		2395.99	-0.0228173		2986	0.07072644		3576	0.12842244		4166	-0.02640962
626.2	0.44043601		1216.19	0.26768966		1806.2	0.19184183		2396.19	-0.02439846		2986.2	0.07052171		3576.2	0.12856432		4166.2	-0.02740125
626.4	0.44055437		1216.39	0.26769108		1806.4	0.19210331		2396.39	-0.02412265		2986.4	0.07081972		3576.4	0.12942608		4166.4	-0.02821686
626.6	0.44064288		1216.59	0.26768806		1806.6	0.19237496		2396.59	-0.02432043		2986.6	0.07100946		3576.6	0.1284056		4166.6	-0.02929866
626.8	0.44066461		1216.79	0.26751046		1806.8	0.19086354		2396.79	-0.02437184		2986.8	0.07103373		3576.8	0.12794903		4166.8	-0.02899841
627	0.44052116		1216.99	0.26880238		1807	0.19088808		2396.99	-0.02418205		2987	0.07075557		3577	0.12742756		4167	-0.02898481
627.2	0.44067067		1217.19	0.26858323		1807.2	0.19066773		2397.19	-0.02357897		2987.2	0.07056446		3577.2	0.12701365		4167.2	-0.02900413
627.4	0.44017506		1217.39	0.26805667		1807.4	0.19135727		2397.39	-0.02293695		2987.4	0.07102793		3577.4	0.1269191		4167.4	-0.02904933
627.6	0.4394733		1217.59	0.26837231		1807.6	0.19197857		2397.59	-0.02285549		2987.6	0.07148823		3577.6	0.12684745		4167.6	-0.02800258
627.8	0.44050436		1217.79	0.26923534		1807.8	0.19168315		2397.79	-0.02206768		2987.8	0.07241543		3577.8	0.12660704		4167.8	-0.02816758
628	0.43986932		1217.99	0.26917235		1808	0.19195842		2397.99	-0.02230813		2988	0.07231451		3578	0.12643226		4168	-0.02817677
628.2	0.43981991		1218.19	0.26909937		1808.2	0.19250872		2398.19	-0.02205482		2988.2	0.07265413		3578.2	0.12679976		4168.2	-0.02760281
628.4	0.44013361		1218.39	0.26918168		1808.4	0.19254904		2398.39	-0.02283439		2988.4	0.0724868		3578.4	0.12652933		4168.4	-0.02736558
628.6	0.44067589		1218.59	0.26865237		1808.6	0.19285206		2398.59	-0.02373104		2988.6	0.07246579		3578.6	0.12738229		4168.6	-0.02670605
628.8	0.44137183		1218.79	0.26833284		1808.8	0.1937263		2398.79	-0.02447255		2988.8	0.0723805		3578.8	0.12713205		4168.8	-0.02559199
629	0.4417763		1218.99	0.26843409		1809	0.19390238		2398.99	-0.02521185		2989	0.07255732		3579	0.12716808		4169	-0.02617732
629.2	0.441928		1219.19	0.26851635		1809.2	0.19398206		2399.19	-0.02540516		2989.2	0.07236797		3579.2	0.1272942		4169.2	-0.02661778
629.4	0.44265516		1219.39	0.26917328		1809.4	0.19360399		2399.39	-0.02574891		2989.4	0.07310247		3579.4	0.12682407		4169.4	-0.02673036
629.6	0.44368583		1219.59	0.26970777		1809.6	0.19310756		2399.59	-0.02642095		2989.6	0.07335183		3579.6	0.12768519		4169.6	-0.02723972
629.8	0.44374433		1219.79	0.26996643		1809.8	0.19230763		2399.79	-0.02735999		2989.8	0.07272474		3579.8	0.12787805		4169.8	-0.02782175
630	0.44411367		1219.99	0.26963611		1810	0.19195111		2399.99	-0.02769912		2990	0.07223972		3580	0.12814301		4170	-0.02722404
630.2	0.4440016		1220.19	0.26920199		1810.2	0.1921303		2400.19	-0.02883384		2990.2	0.07070845		3580.2	0.12765414		4170.2	-0.02752494
630.4	0.44343013		1220.39	0.26944783		1810.4	0.19168436		2400.39	-0.02898926		2990.4	0.0707213		3580.4	0.12793723		4170.4	-0.02744395
630.6	0.44322695		1220.59	0.26991319		1810.6	0.1908349		2400.59	-0.02883804		2990.6	0.07010475		3580.6	0.12787696		4170.6	-0.02715591
630.8	0.44260686		1220.79	0.26977687		1810.8	0.19028252		2400.79	-0.02802336		2990.8	0.06997019		3580.8	0.12876146		4170.8	-0.0263748
631	0.44228659		1220.99	0.26977055		1811	0.19075348		2400.99	-0.02714739		2991	0.06963645		3581	0.12866897		4171	-0.02667039
631.2	0.4415415		1221.19	0.26878333		1811.2	0.19112877		2401.19	-0.02588203		2991.2	0.06994077		3581.2	0.12872467		4171.2	-0.02630149
631.4	0.44083427		1221.39	0.26781457		1811.4	0.19138183		2401.39	-0.02481995		2991.4	0.07006187		3581.4	0.12854977		4171.4	-0.02609018
631.6	0.44121015		1221.59	0.26779319		1811.6	0.19159179		2401.59	-0.02394757		2991.6	0.07096753		3581.6	0.12853737		4171.6	-0.025928
631.8	0.44099362		1221.79	0.26720624		1811.8	0.19053988		2401.79	-0.02336504		2991.8	0.07058226		3581.8	0.1284092		4171.8	-0.02666454
632	0.43957323		1221.99	0.26710678		1812	0.19003285		2401.99	-0.02337083		2992	0.07028428		3582	0.12824103		4172	-0.02564812
632.2	0.43878067		1222.19	0.26742201		1812.2	0.19042156		2402.19	-0.0226859		2992.2	0.07082253		3582.2	0.12868586		4172.2	-0.02523101
632.4	0.43919335		1222.39	0.26684429		1812.4	0.19029337		2402.39	-0.02283899		2992.4	0.07016785		3582.4	0.12916386		4172.4	-0.024241
632.6	0.43889498		1222.59	0.26653808		1812.6	0.19016532		2402.59	-0.02252961		2992.6	0.07019078		3582.6	0.12951188		4172.6	-0.02363977
632.8	0.43918478		1222.79	0.26673115		1812.8	0.19037143		2402.79	-0.02183621		2992.8	0.07034647		3582.8	0.1293291		4172.8	-0.02433241
633	0.43896434		1222.99	0.26639781		1813	0.18973753		2402.99	-0.02126428		2993	0.07118244		3583	0.12951311		4173	-0.02561253
633.2	0.43848246		1223.19	0.26550096		1813.2	0.19013231		2403.19	-0.02079995		2993.2	0.07131884		3583.2	0.12911751		4173.2	-0.02623355
633.4	0.4394258		1223.39	0.26554603		1813.4	0.19028509		2403.39	-0.02132614		2993.4	0.07061217		3583.4	0.12930776		4173.4	-0.02730738
633.6	0.43926357		1223.59	0.2659305		1813.6	0.1905024		2403.59	-0.02179819		2993.6	0.07095539		3583.6	0.12862786		4173.6	-0.02800234
633.8	0.43953443		1223.79	0.2656403		1813.8	0.19065831		2403.79	-0.02157654		2993.8	0.07111575		3583.8	0.1281586		4173.8	-0.02785537
634	0.43968874		1223.99	0.26640249		1814	0.19050682		2403.99	-0.02288486		2994	0.07156961		3584	0.1283032		4174	-0.02819477
634.2	0.4398328		1224.19	0.26640276		1814.2	0.19096099		2404.19	-0.02386647		2994.2	0.07065356		3584.2	0.12820591		4174.2	-0.02852131
634.4	0.44006522		1224.39	0.2670211		1814.4	0.19169456		2404.39	-0.02352816		2994.4	0.07081553		3584.4	0.12772058		4174.4	-0.02839605
634.6	0.43984119		1224.59	0.26716813		1814.6	0.19191243		2404.59	-0.02332301		2994.6	0.07121411		3584.6	0.1284185		4174.6	-0.02888553
634.8	0.43946653		1224.79	0.26645492		1814.8	0.19264571		2404.79	-0.02288689		2994.8	0.07195167		3584.8	0.1291001		4174.8	-0.02882693
635	0.43915828		1224.99	0.26540744		1815	0.193084		2404.99	-0.0225351		2995	0.0713334		3585	0.12918428		4175	-0.02931202
635.2	0.43857516		1225.19	0.26542144		1815.2	0.1929508		2405.19	-0.02239372		2995.2	0.07235624		3585.2	0.12798438		4175.2	-0.02919482
635.4	0.43838813		1225.39	0.26508517		1815.4	0.19380211		2405.39	-0.02171806		2995.4	0.071812		3585.4	0.12782857		4175.4	-0.02888991
635.6	0.4388661		1225.59	0.26536696		1815.6	0.19428665		2405.59	-0.02149372		2995.6	0.07210078		3585.6	0.12745464		4175.6	-0.02753409
635.8	0.43851495		1225.79	0.26560232		1815.8	0.19361653		2405.79	-0.02207183		2995.8	0.07152668		3585.8	0.12727009		4175.8	-0.02675851
636	0.4387877		1225.99	0.26659248		1816	0.19386058		2405.99	-0.02304696		2996	0.07223593		3586	0.12693292		4176	-0.02472507
636.2	0.43855651		1226.19	0.26613477		1816.2	0.19430176		2406.19	-0.02301051		2996.2	0.07238224		3586.2	0.12687808		4176.2	-0.02406589
636.4	0.4401593		1226.39	0.26619883		1816.4	0.19442303		2406.39	-0.02320282		2996.4	0.07097157		3586.4	0.12651429		4176.4	-0.02367401
636.6	0.44001759		1226.59	0.26758805		1816.6	0.19402332		2406.59	-0.02352964		2996.6	0.07147441		3586.6	0.12713631		4176.6	-0.02382462
636.8	0.44121589		1226.79	0.26800435		1816.8	0.19374518		2406.79	-0.02349351		2996.8	0.07205477		3586.8	0.1275488		4176.8	-0.02440935
637	0.44078759		1226.99	0.26818831		1817	0.19344064		2406.99	-0.02363008		2997	0.07246661		3587	0.12813191		4177	-0.02483514
637.2	0.44092059		1227.19	0.26910105		1817.2	0.1932224		2407.19	-0.02381163		2997.2	0.07226273		3587.2	0.12740515		4177.2	-0.02530009
637.4	0.44170295		1227.39	0.27081812		1817.4	0.19249188		2407.39	-0.02506651		2997.4	0.07261187		3587.4	0.12760286		4177.4	-0.02600423
637.6	0.44194558		1227.59	0.27101271		1817.6	0.19244186		2407.59	-0.02487549		2997.6	0.07294153		3587.6	0.12777421		4177.6	-0.02659423
637.8	0.44288021		1227.79	0.27044807		1817.8	0.19123479		2407.79	-0.02588059		2997.8	0.07264696		3587.8	0.1284582		4177.8	-0.02749156
638	0.44333765		1227.99	0.27038904		1818	0.19172639		2407.99	-0.02635548		2998	0.0714806		3588	0.1289589		4178	-0.02880864
638.2	0.44280933		1228.19	0.27042277		1818.2	0.19183068		2408.19	-0.02567116		2998.2	0.07056207		3588.2	0.12831943		4178.2	-0.02936703
638.4	0.44280834		1228.39	0.27020419		1818.4	0.19202759		2408.39	-0.0253411		2998.4	0.07084446		3588.4	0.12815385		4178.4	-0.03024857
638.6	0.44149572		1228.59	0.26925469		1818.6	0.19130757		2408.59	-0.02471826		2998.6	0.07157858		3588.6	0.12942033		4178.6	-0.03024893
638.8	0.44025933		1228.79	0.26765498		1818.8	0.19096471		2408.79	-0.02478667		2998.8	0.07096867		3588.8	0.12931197		4178.8	-0.02981218
639	0.43925275		1228.99	0.26668556		1819	0.19047149		2408.99	-0.02455044		2999	0.07023824		3589	0.12812109		4179	-0.03083565
639.2	0.43895837		1229.19	0.26606686		1819.2	0.19044762		2409.19	-0.02367008		2999.2	0.07031966		3589.2	0.12701793		4179.2	-0.03101748
639.4	0.43938773		1229.39	0.26417152		1819.4	0.19146365		2409.39	-0.02234037		2999.4	0.07000723		3589.4	0.12766951		4179.4	-0.03074476
639.6	0.43940069		1229.59	0.26430163		1819.6	0.19124155		2409.59	-0.02207835		2999.6	0.07036993		3589.6	0.12709161		4179.6	-0.02971287
639.8	0.43923049		1229.79	0.26356127		1819.8	0.1917054		2409.79	-0.02235281		2999.8	0.07011338		3589.8	0.12716328		4179.8	-0.02912238
640	0.43936389		1229.99	0.26348299		1820	0.1919452		2409.99	-0.0220807		3000	0.07102098		3590	0.12645709		4180	-0.02901765
640.2	0.43961481		1230.19	0.26370554		1820.2	0.19275776		2410.19	-0.02246804		3000.2	0.07089594		3590.2	0.1264461		4180.2	-0.0285861
640.4	0.43961235		1230.39	0.26553277		1820.4	0.19261524		2410.39	-0.02286828		3000.4	0.07074099		3590.4	0.12658496		4180.4	-0.02875537
640.6	0.43908434		1230.59	0.2661465		1820.6	0.19219702		2410.59	-0.02325562		3000.6	0.07128148		3590.6	0.12744043		4180.6	-0.02793373
640.8	0.439883		1230.79	0.26701397		1820.8	0.19205824		2410.79	-0.02369127		3000.8	0.0716656		3590.8	0.12713066		4180.8	-0.02738162
641	0.43956892		1230.99	0.26737859		1821	0.19183202		2410.99	-0.02492636		3001	0.07244056		3591	0.12765549		4181	-0.02787408
641.2	0.43954149		1231.19	0.26924899		1821.2	0.19169383		2411.19	-0.02597653		3001.2	0.073142		3591.2	0.12701183		4181.2	-0.02801709
641.4	0.43882964		1231.39	0.26883876		1821.4	0.19161879		2411.39	-0.02621055		3001.4	0.07244851		3591.4	0.12685604		4181.4	-0.02827573
641.6	0.43829965		1231.59	0.26829337		1821.6	0.19164528		2411.59	-0.02578551		3001.6	0.07153291		3591.6	0.12729557		4181.6	-0.02987636
641.8	0.43756461		1231.79	0.26854744		1821.8	0.19127819		2411.79	-0.02569384		3001.8	0.0707063		3591.8	0.12691973		4181.8	-0.03077147
642	0.43709116		1231.99	0.26862891		1822	0.19187321		2411.99	-0.0247678		3002	0.06968452		3592	0.12721702		4182	-0.03072531
642.2	0.43530083		1232.19	0.26913832		1822.2	0.19150065		2412.19	-0.02428219		3002.2	0.0687884		3592.2	0.12665421		4182.2	-0.03093705
642.4	0.43508651		1232.39	0.26902024		1822.4	0.19155381		2412.39	-0.02388678		3002.4	0.06902263		3592.4	0.12737957		4182.4	-0.03164429
642.6	0.43427497		1232.59	0.2685821		1822.6	0.19035131		2412.59	-0.02353138		3002.6	0.0677894		3592.6	0.12744542		4182.6	-0.03116236
642.8	0.43465377		1232.79	0.26762193		1822.8	0.18985857		2412.79	-0.02354811		3002.8	0.0669768		3592.8	0.12712468		4182.8	-0.03170715
643	0.43477837		1232.99	0.26721116		1823	0.18892065		2412.99	-0.02241383		3003	0.0671291		3593	0.12672384		4183	-0.03334787
643.2	0.4357729		1233.19	0.26691566		1823.2	0.1886315		2413.19	-0.02124509		3003.2	0.06690739		3593.2	0.12691876		4183.2	-0.0321293
643.4	0.43676209		1233.39	0.26625347		1823.4	0.18926897		2413.39	-0.02197734		3003.4	0.06712736		3593.4	0.12727232		4183.4	-0.03240137
643.6	0.43795681		1233.59	0.26685539		1823.6	0.18984025		2413.59	-0.02237927		3003.6	0.06624174		3593.6	0.12675101		4183.6	-0.03157787
643.8	0.43868843		1233.79	0.26652153		1823.8	0.19097819		2413.79	-0.02209129		3003.8	0.0665119		3593.8	0.12701036		4183.8	-0.03100913
644	0.43930937		1233.99	0.26733663		1824	0.1912646		2413.99	-0.02239389		3004	0.06703498		3594	0.12634817		4184	-0.03055906
644.2	0.43954667		1234.19	0.26775306		1824.2	0.19286868		2414.19	-0.02376895		3004.2	0.06668561		3594.2	0.12701832		4184.2	-0.02992549
644.4	0.43911181		1234.39	0.26693162		1824.4	0.19281427		2414.39	-0.02468225		3004.4	0.06686796		3594.4	0.12716109		4184.4	-0.03034563
644.6	0.43984371		1234.59	0.26627181		1824.6	0.19380078		2414.59	-0.02580489		3004.6	0.0668025		3594.6	0.12768757		4184.6	-0.02937687
644.8	0.44039203		1234.79	0.26651395		1824.8	0.19429135		2414.79	-0.02725924		3004.8	0.06815755		3594.8	0.12742167		4184.8	-0.02917889
645	0.44049414		1234.99	0.26569999		1825	0.19386998		2414.99	-0.02766771		3005	0.06834083		3595	0.12762973		4185	-0.0290619
645.2	0.43916894		1235.19	0.26690223		1825.2	0.1938668		2415.19	-0.02761302		3005.2	0.06842191		3595.2	0.12712949		4185.2	-0.02914242
645.4	0.43899067		1235.39	0.26612887		1825.4	0.19337019		2415.39	-0.02707629		3005.4	0.06802564		3595.4	0.12649531		4185.4	-0.03068624
645.6	0.43797428		1235.59	0.26620681		1825.6	0.19314196		2415.59	-0.02707972		3005.6	0.06888614		3595.6	0.12619309		4185.6	-0.03069126
645.8	0.43675287		1235.79	0.26613612		1825.8	0.19324803		2415.79	-0.02650758		3005.8	0.06893099		3595.8	0.12629471		4185.8	-0.03027212
646	0.43614268		1235.99	0.26691545		1826	0.19324265		2415.99	-0.02567457		3006	0.06897607		3596	0.12674907		4186	-0.02992806
646.2	0.43591936		1236.19	0.26724806		1826.2	0.19381996		2416.19	-0.02485375		3006.2	0.06920331		3596.2	0.12577517		4186.2	-0.03067766
646.4	0.43657253		1236.39	0.26709664		1826.4	0.19399942		2416.39	-0.02455139		3006.4	0.0701987		3596.4	0.12603261		4186.4	-0.03088605
646.6	0.43685212		1236.59	0.2668689		1826.6	0.19331614		2416.59	-0.02380131		3006.6	0.0700188		3596.6	0.1255193		4186.6	-0.03000965
646.8	0.43753041		1236.79	0.26646078		1826.8	0.19222623		2416.79	-0.02307106		3006.8	0.07158934		3596.8	0.12565901		4186.8	-0.03043985
647	0.43812222		1236.99	0.26694064		1827	0.19107084		2416.99	-0.02230115		3007	0.07296235		3597	0.12560742		4187	-0.03088695
647.2	0.43882124		1237.19	0.26713393		1827.2	0.19085081		2417.19	-0.02283284		3007.2	0.0735226		3597.2	0.12574782		4187.2	-0.02950782
647.4	0.43991671		1237.39	0.26748029		1827.4	0.19108332		2417.39	-0.02334941		3007.4	0.0735026		3597.4	0.12540234		4187.4	-0.02967381
647.6	0.44080469		1237.59	0.26795468		1827.6	0.19122033		2417.59	-0.02291754		3007.6	0.07402273		3597.6	0.12574306		4187.6	-0.02896921
647.8	0.44008546		1237.79	0.26775887		1827.8	0.19156089		2417.79	-0.02290162		3007.8	0.07445162		3597.8	0.12570108		4187.8	-0.02873886
648	0.43983728		1237.99	0.26751767		1828	0.19181596		2417.99	-0.02346224		3008	0.07390677		3598	0.12556754		4188	-0.02874961
648.2	0.43926784		1238.19	0.26672287		1828.2	0.19219349		2418.19	-0.02423754		3008.2	0.07361168		3598.2	0.12616938		4188.2	-0.02902977
648.4	0.43905858		1238.39	0.26616222		1828.4	0.19161079		2418.39	-0.02470435		3008.4	0.07286019		3598.4	0.12628722		4188.4	-0.02922711
648.6	0.43937285		1238.59	0.26661518		1828.6	0.191584		2418.59	-0.02501221		3008.6	0.07224598		3598.6	0.12669385		4188.6	-0.02866894
648.8	0.43921773		1238.79	0.26676513		1828.8	0.19080112		2418.79	-0.02463676		3008.8	0.07195066		3598.8	0.12653725		4188.8	-0.02889029
649	0.43891946		1238.99	0.26698187		1829	0.19004263		2418.99	-0.02412513		3009	0.07111624		3599	0.12666716		4189	-0.0291883
649.2	0.43818617		1239.19	0.26789177		1829.2	0.18992658		2419.19	-0.02418738		3009.2	0.0711594		3599.2	0.12669252		4189.2	-0.03007458
649.4	0.43807304		1239.39	0.26772994		1829.4	0.18946167		2419.39	-0.0241088		3009.4	0.0709333		3599.4	0.12663502		4189.4	-0.03070746
649.6	0.43681739		1239.59	0.26790672		1829.6	0.18955321		2419.59	-0.02371246		3009.6	0.07093854		3599.6	0.12669342		4189.6	-0.02969796
649.8	0.43623437		1239.79	0.26830833		1829.8	0.18956999		2419.79	-0.02309763		3009.8	0.070565		3599.8	0.12742791		4189.8	-0.03018365
