# Supplementary material for: Functional development of a V3/glycan-specific broadly neutralizing antibody isolated from a case of HIV superinfection
Source: eLife journal article supplement (doi:10.7554/elife.68110), 2021-07-15
Supplement: fig2-data2 [file B3.xls]

Vers 3.43 Data Simulation
Conc1	2.5E-07	2.5E-07	2.5E-07	2.5E-07	2.5E-07
Start1	200	729.99	1259.99	1789.98	2320.01
Stop1	559.8	1089.79	1619.78	2149.78	2679.81
Time1	Data1	Sim1	Time2	Data2	Sim2	Time3	Data3	Sim3	Time4	Data4	Sim4	Time5	Data5	Sim5
200	0.00739228		729.99	0.01841426		1259.99	0.00125469		1789.98	0.01059317		2320.01	-0.0049444
200.2	0.0066496		730.19	0.01815925		1260.19	0.00274508		1790.18	0.0094992		2320.21	-0.0049064
200.4	0.00675836		730.39	0.01850824		1260.39	0.00286927		1790.38	0.00827776		2320.41	-0.00415734
200.6	0.0073052		730.59	0.01920221		1260.59	0.00386326		1790.58	0.00689425		2320.61	-0.00403401
200.8	0.00751279		730.79	0.01985673		1260.79	0.00393258		1790.78	0.00609268		2320.81	-0.0034935
201	0.00820554		730.99	0.01987187		1260.99	0.00437182		1790.98	0.00617146		2321.01	-0.00288467
201.2	0.00847126		731.19	0.02034384		1261.19	0.0043745		1791.18	0.0062664		2321.21	-0.00263562
201.4	0.00991134		731.39	0.02090599		1261.39	0.00419615		1791.38	0.00623993		2321.41	-0.00223635
201.6	0.01046568		731.59	0.02137697		1261.59	0.00401906		1791.58	0.0063245		2321.61	-0.00221271
201.8	0.01199101		731.79	0.02164029		1261.79	0.00378134		1791.78	0.00677722		2321.81	-0.00194421
202	0.01469445		731.99	0.02189019		1261.99	0.00350418		1791.98	0.00728058		2322.01	-0.0019599
202.2	0.01651667		732.19	0.02198595		1262.19	0.00240985		1792.18	0.00838286		2322.21	-0.00248202
202.4	0.01867199		732.39	0.02280199		1262.39	0.00170067		1792.38	0.0081584		2322.41	-0.00245976
202.6	0.02048282		732.59	0.02315777		1262.59	0.00117099		1792.58	0.00720021		2322.61	-0.00292279
202.8	0.02256875		732.79	0.02368299		1262.79	0.00198713		1792.78	0.00702115		2322.81	-0.00296276
203	0.02380873		732.99	0.02433781		1262.99	0.00222757		1792.98	0.0070436		2323.01	-0.00368507
203.2	0.02652907		733.19	0.02493434		1263.19	0.00249232		1793.18	0.00640832		2323.21	-0.00347536
203.4	0.02955998		733.39	0.02487371		1263.39	0.00266668		1793.38	0.00555469		2323.41	-0.00350538
203.6	0.03209167		733.59	0.02576488		1263.59	0.0027987		1793.58	0.00505254		2323.61	-0.00376638
203.8	0.03374984		733.79	0.02562771		1263.79	0.00350846		1793.78	0.00401007		2323.81	-0.00466464
204	0.03614796		733.99	0.02588487		1263.99	0.00426577		1793.98	0.00359119		2324.01	-0.00449963
204.2	0.03907778		734.19	0.02632817		1264.19	0.00453744		1794.18	0.00404907		2324.21	-0.0045761
204.4	0.04281832		734.39	0.02743502		1264.39	0.00412262		1794.38	0.00376201		2324.41	-0.00433878
204.6	0.04519715		734.59	0.0278049		1264.59	0.00524243		1794.58	0.00351329		2324.61	-0.00526496
204.8	0.0476622		734.79	0.02803953		1264.79	0.00423757		1794.78	0.00327379		2324.81	-0.00407917
205	0.04991827		734.99	0.0280516		1264.99	0.0045277		1794.98	0.00356682		2325.01	-0.00423054
205.2	0.05196743		735.19	0.02953148		1265.19	0.00351593		1795.18	0.00385122		2325.21	-0.00421905
205.4	0.05479539		735.39	0.03071502		1265.39	0.00311498		1795.38	0.00401949		2325.41	-0.00411454
205.6	0.05700069		735.59	0.03152002		1265.59	0.00291352		1795.58	0.00386852		2325.61	-0.00421541
205.8	0.06012087		735.79	0.0319927		1265.79	0.00295213		1795.78	0.00462866		2325.81	-0.00389112
206	0.06193754		735.99	0.03239071		1265.99	0.00234122		1795.98	0.00532874		2326.01	-0.00411706
206.2	0.06292899		736.19	0.03252306		1266.19	0.00195292		1796.18	0.00584365		2326.21	-0.00431998
206.4	0.06470048		736.39	0.03221685		1266.39	0.00149857		1796.38	0.00603791		2326.41	-0.00380821
206.6	0.06675793		736.59	0.03274149		1266.59	0.0016171		1796.58	0.00606555		2326.61	-0.00396632
206.8	0.06792642		736.79	0.03319161		1266.79	0.00214234		1796.78	0.00680692		2326.81	-0.00409605
207	0.06979511		736.99	0.03438049		1266.99	0.00223353		1796.98	0.00708276		2327.01	-0.00441631
207.2	0.07220922		737.19	0.03552793		1267.19	0.00263221		1797.18	0.00624536		2327.21	-0.00486231
207.4	0.07402669		737.39	0.03571283		1267.39	0.00284893		1797.38	0.00559693		2327.41	-0.00530761
207.6	0.07572701		737.59	0.03602989		1267.59	0.00333573		1797.58	0.00675386		2327.61	-0.00579062
207.8	0.07718514		737.79	0.03687181		1267.79	0.00389562		1797.78	0.00642019		2327.81	-0.00582761
208	0.07905824		737.99	0.03742363		1267.99	0.00397362		1797.98	0.00617485		2328.01	-0.00458796
208.2	0.08040465		738.19	0.03782819		1268.19	0.00352788		1798.18	0.00609102		2328.21	-0.0046748
208.4	0.08181995		738.39	0.03869269		1268.39	0.0037393		1798.38	0.00546407		2328.41	-0.00467828
208.6	0.08323749		738.59	0.03857819		1268.59	0.00358387		1798.58	0.00487314		2328.61	-0.0049849
208.8	0.08586836		738.79	0.03937573		1268.79	0.00304612		1798.78	0.00384395		2328.81	-0.00348363
209	0.0887025		738.99	0.03987803		1268.99	0.00406187		1798.98	0.00458743		2329.01	-0.00297929
209.2	0.09115741		739.19	0.04092369		1269.19	0.0033591		1799.18	0.00457408		2329.21	-0.00233205
209.4	0.09374073		739.39	0.04049781		1269.39	0.00405338		1799.38	0.00441165		2329.41	-0.00234738
209.6	0.0961227		739.59	0.04000649		1269.59	0.0039921		1799.58	0.00406135		2329.61	-0.00183814
209.8	0.09760905		739.79	0.03983559		1269.79	0.00405293		1799.78	0.00486893		2329.81	-0.00196477
210	0.09884289		739.99	0.04009164		1269.99	0.0035557		1799.98	0.00525676		2330.01	-0.00182588
210.2	0.10082871		740.19	0.04012889		1270.19	0.00379425		1800.18	0.00545725		2330.21	-0.00200702
210.4	0.10249781		740.39	0.04064505		1270.39	0.00405927		1800.38	0.00632831		2330.41	-0.00286704
210.6	0.1040214		740.59	0.04178085		1270.59	0.00468974		1800.58	0.00669516		2330.61	-0.00291691
210.8	0.10523115		740.79	0.04258003		1270.79	0.00474772		1800.78	0.00682498		2330.81	-0.00370405
211	0.10738797		740.99	0.04352099		1270.99	0.00537068		1800.98	0.00710608		2331.01	-0.00430287
211.2	0.10956174		741.19	0.04415936		1271.19	0.00452825		1801.18	0.00690941		2331.21	-0.0046312
211.4	0.11122094		741.39	0.04389297		1271.39	0.00408696		1801.38	0.00678837		2331.41	-0.00517163
211.6	0.11216224		741.59	0.04419943		1271.59	0.00495456		1801.58	0.006976		2331.61	-0.00547667
211.8	0.11240153		741.79	0.04487299		1271.79	0.00438445		1801.78	0.00686808		2331.81	-0.00499409
212	0.1129228		741.99	0.04533389		1271.99	0.00346868		1801.98	0.0068652		2332.01	-0.00449199
212.2	0.11409426		742.19	0.04641085		1272.19	0.00256173		1802.18	0.00725582		2332.21	-0.00492468
212.4	0.11623467		742.39	0.04783725		1272.39	0.00169811		1802.38	0.0078473		2332.41	-0.0057384
212.6	0.11899857		742.59	0.04846256		1272.59	0.00180512		1802.58	0.00818445		2332.61	-0.00568541
212.8	0.12054358		742.79	0.04967766		1272.79	0.00217738		1802.78	0.0079095		2332.81	-0.00544113
213	0.12283282		742.99	0.0507042		1272.99	0.00224709		1802.98	0.00889434		2333.01	-0.00589391
213.2	0.12339821		743.19	0.05104816		1273.19	0.00157917		1803.18	0.00878639		2333.21	-0.0069417
213.4	0.12535355		743.39	0.05075199		1273.39	0.00151384		1803.38	0.0084253		2333.41	-0.00773829
213.6	0.12711468		743.59	0.05071789		1273.59	0.00095184		1803.58	0.00808293		2333.61	-0.00787848
213.8	0.12824045		743.79	0.05147981		1273.79	0.0015747		1803.78	0.00786269		2333.81	-0.00802863
214	0.13013217		743.99	0.05223252		1273.99	0.00183434		1803.98	0.00838178		2334.01	-0.00818553
214.2	0.13158784		744.19	0.05280162		1274.19	0.00240181		1804.18	0.00839318		2334.21	-0.00813113
214.4	0.13298282		744.39	0.05356435		1274.39	0.00268218		1804.38	0.00855381		2334.41	-0.00821963
214.6	0.13389944		744.59	0.05455138		1274.59	0.00194043		1804.58	0.00889554		2334.61	-0.0073581
214.8	0.13598617		744.79	0.05493683		1274.79	0.00175247		1804.78	0.00901212		2334.81	-0.00756129
215	0.13742225		744.99	0.05597038		1274.99	0.00138295		1804.98	0.00882925		2335.01	-0.00733391
215.2	0.13912883		745.19	0.05667268		1275.19	0.00055262		1805.18	0.00870012		2335.21	-0.00715748
215.4	0.14051987		745.39	0.05658782		1275.39	0.00082994		1805.38	0.00852493		2335.41	-0.00716926
215.6	0.14089178		745.59	0.05716666		1275.59	0.00122129		1805.58	0.00833445		2335.61	-0.00737931
215.8	0.14239207		745.79	0.05736034		1275.79	0.00092969		1805.78	0.00931777		2335.81	-0.00698964
216	0.14438579		745.99	0.0577111		1275.99	0.00059582		1805.98	0.00919859		2336.01	-0.00661785
216.2	0.14633397		746.19	0.05840989		1276.19	0.00011288		1806.18	0.00939034		2336.21	-0.00679011
216.4	0.14826142		746.39	0.0589712		1276.39	0.00106538		1806.38	0.0098717		2336.41	-0.00784817
216.6	0.14964062		746.59	0.05967515		1276.59	0.00166452		1806.58	0.01062621		2336.61	-0.00776326
216.8	0.15061285		746.79	0.06082065		1276.79	0.00152201		1806.78	0.01085392		2336.81	-0.00805345
217	0.15255517		746.99	0.06122912		1276.99	0.00184852		1806.98	0.01112769		2337.01	-0.00698393
217.2	0.15367592		747.19	0.06156744		1277.19	0.00234547		1807.18	0.01065359		2337.21	-0.00688528
217.4	0.15527285		747.39	0.0617751		1277.39	0.00280613		1807.38	0.00980723		2337.41	-0.00641219
217.6	0.15622497		747.59	0.06162857		1277.59	0.00268882		1807.58	0.00938713		2337.61	-0.00541947
217.8	0.1567288		747.79	0.0631689		1277.79	0.00346072		1807.78	0.00880757		2337.81	-0.00451618
218	0.15801212		747.99	0.06339248		1277.99	0.00334555		1807.98	0.00906008		2338.01	-0.00518473
218.2	0.15828629		748.19	0.06370375		1278.19	0.00303549		1808.18	0.00810407		2338.21	-0.00442352
218.4	0.15891844		748.39	0.06425558		1278.39	0.00211234		1808.38	0.00748671		2338.41	-0.00465627
218.6	0.15977794		748.59	0.06479528		1278.59	0.00134795		1808.58	0.00794042		2338.61	-0.00398461
218.8	0.16111827		748.79	0.06569274		1278.79	0.00124492		1808.78	0.00771862		2338.81	-0.00420927
219	0.16177509		748.99	0.06624617		1278.99	0.00084071		1808.98	0.00694786		2339.01	-0.00419301
219.2	0.16236256		749.19	0.06627637		1279.19	0.00119738		1809.18	0.00684854		2339.21	-0.00455428
219.4	0.16324745		749.39	0.06650293		1279.39	0.00096676		1809.38	0.00627956		2339.41	-0.00537065
219.6	0.1650292		749.59	0.06687454		1279.59	0.00119967		1809.58	0.0063066		2339.61	-0.00625835
219.8	0.16630512		749.79	0.06697194		1279.79	0.00116452		1809.78	0.00675893		2339.81	-0.00647978
220	0.16857266		749.99	0.06735339		1279.99	0.00084691		1809.98	0.00725028		2340.01	-0.00666974
220.2	0.17045748		750.19	0.06713841		1280.19	0.00105825		1810.18	0.00799138		2340.21	-0.00777616
220.4	0.17202458		750.39	0.06748957		1280.39	0.00243573		1810.38	0.00858956		2340.41	-0.00771339
220.6	0.17385816		750.59	0.06794944		1280.59	0.00142143		1810.58	0.00916388		2340.61	-0.00707514
220.8	0.17560926		750.79	0.06850885		1280.79	0.00090624		1810.78	0.00967086		2340.81	-0.00629238
221	0.1767956		750.99	0.06953969		1280.99	0.00118449		1810.98	0.00954724		2341.01	-0.00552434
221.2	0.17820404		751.19	0.06988019		1281.19	0.0010965		1811.18	0.00955532		2341.21	-0.00587914
221.4	0.17886117		751.39	0.06987529		1281.39	0.00086709		1811.38	0.00896643		2341.41	-0.00558237
221.6	0.17986236		751.59	0.06990094		1281.59	0.00053531		1811.58	0.00938519		2341.61	-0.00622963
221.8	0.17997294		751.79	0.07103926		1281.79	0.00179459		1811.78	0.00928013		2341.81	-0.00690958
222	0.1802384		751.99	0.07118157		1281.99	0.0019139		1811.98	0.00956789		2342.01	-0.00770019
222.2	0.18014641		752.19	0.07117188		1282.19	0.00242174		1812.18	0.0094435		2342.21	-0.00769394
222.4	0.18042222		752.39	0.07130896		1282.39	0.00289492		1812.38	0.00996983		2342.41	-0.0075925
222.6	0.18096806		752.59	0.07075716		1282.59	0.00324847		1812.58	0.01073401		2342.61	-0.0070473
222.8	0.18102011		752.79	0.07086841		1282.79	0.00426799		1812.78	0.01068051		2342.81	-0.00765251
223	0.18127636		752.99	0.07038028		1282.99	0.00450345		1812.98	0.01049759		2343.01	-0.0076055
223.2	0.18130121		753.19	0.07052581		1283.19	0.00491623		1813.18	0.01115669		2343.21	-0.00835447
223.4	0.1817847		753.39	0.07059099		1283.39	0.00411485		1813.38	0.01125769		2343.41	-0.00887385
223.6	0.18317407		753.59	0.07118642		1283.59	0.00485101		1813.58	0.01179065		2343.61	-0.00951648
223.8	0.18386269		753.79	0.0714581		1283.79	0.0047172		1813.78	0.01151848		2343.81	-0.00959559
224	0.1860076		753.99	0.07192444		1283.99	0.00409709		1813.98	0.01116321		2344.01	-0.00924959
224.2	0.18702827		754.19	0.07199373		1284.19	0.00445897		1814.18	0.00982293		2344.21	-0.00896657
224.4	0.18843101		754.39	0.07295816		1284.39	0.00401164		1814.38	0.00890256		2344.41	-0.00769674
224.6	0.18965599		754.59	0.07345415		1284.59	0.00297106		1814.58	0.00788216		2344.61	-0.00671122
224.8	0.19084308		754.79	0.0751986		1284.79	0.00313562		1814.78	0.00794723		2344.81	-0.0060579
225	0.19232652		754.99	0.07674111		1284.99	0.00302212		1814.98	0.00689048		2345.01	-0.00587399
225.2	0.19408752		755.19	0.0777684		1285.19	0.00309579		1815.18	0.00619961		2345.21	-0.0060796
225.4	0.19506818		755.39	0.07856139		1285.39	0.00226611		1815.38	0.00567263		2345.41	-0.00636525
225.6	0.19557757		755.59	0.07957796		1285.59	0.00200902		1815.58	0.00537351		2345.61	-0.00694226
225.8	0.19615649		755.79	0.0810311		1285.79	0.00181651		1815.78	0.005439		2345.81	-0.0067499
226	0.19664407		755.99	0.08159301		1285.99	0.0009119		1815.98	0.00619089		2346.01	-0.0069577
226.2	0.19725649		756.19	0.08145156		1286.19	0.00149168		1816.18	0.00675995		2346.21	-0.00714384
226.4	0.19740718		756.39	0.08196514		1286.39	0.00159242		1816.38	0.00714711		2346.41	-0.00713547
226.6	0.19787509		756.59	0.08182321		1286.59	0.00181785		1816.58	0.00795642		2346.61	-0.0079423
226.8	0.19841607		756.79	0.08237131		1286.79	0.00214319		1816.78	0.0091277		2346.81	-0.00816716
227	0.19849449		756.99	0.08286238		1286.99	0.00186862		1816.98	0.01006735		2347.01	-0.00780925
227.2	0.19871157		757.19	0.08306614		1287.19	0.00254885		1817.18	0.01080699		2347.21	-0.00815595
227.4	0.19951832		757.39	0.08290532		1287.39	0.00253118		1817.38	0.01094297		2347.41	-0.00814738
227.6	0.20020687		757.59	0.08360336		1287.59	0.00235299		1817.58	0.01118631		2347.61	-0.00784651
227.8	0.20163812		757.79	0.08324522		1287.79	0.0023634		1817.78	0.01027153		2347.81	-0.00704616
228	0.2026168		757.99	0.08263228		1287.99	0.00300299		1817.98	0.00936527		2348.01	-0.00684881
228.2	0.20385107		758.19	0.08238377		1288.19	0.00360925		1818.18	0.00910678		2348.21	-0.00653374
228.4	0.20508666		758.39	0.08327679		1288.39	0.00445768		1818.38	0.00918816		2348.41	-0.00645019
228.6	0.20599924		758.59	0.08369922		1288.59	0.00549471		1818.58	0.00937143		2348.61	-0.00687643
228.8	0.20738976		758.79	0.08505398		1288.79	0.00633238		1818.78	0.00966787		2348.81	-0.00781276
229	0.2090472		758.99	0.08557372		1288.99	0.0059713		1818.98	0.00985216		2349.01	-0.00827344
229.2	0.21116554		759.19	0.08593047		1289.19	0.00556208		1819.18	0.00954841		2349.21	-0.00973969
229.4	0.21243336		759.39	0.08544521		1289.39	0.00363382		1819.38	0.00912362		2349.41	-0.01036279
229.6	0.21322187		759.59	0.08627185		1289.59	0.00312773		1819.58	0.00908571		2349.61	-0.01104778
229.8	0.21366287		759.79	0.08646921		1289.79	0.00242229		1819.78	0.01009998		2349.81	-0.01105746
230	0.21368361		759.99	0.08708358		1289.99	0.00236837		1819.98	0.01035831		2350.01	-0.01120045
230.2	0.21466373		760.19	0.08850574		1290.19	0.00268618		1820.18	0.01000816		2350.21	-0.01056869
230.4	0.21515313		760.39	0.08969753		1290.39	0.0025328		1820.38	0.01042985		2350.41	-0.01082214
230.6	0.216199		760.59	0.08974955		1290.59	0.0023093		1820.58	0.01134324		2350.61	-0.01064674
230.8	0.21695069		760.79	0.09049688		1290.79	0.00163213		1820.78	0.01118721		2350.81	-0.00936432
231	0.21648214		760.99	0.0901385		1290.99	0.00216478		1820.98	0.01098234		2351.01	-0.00928793
231.2	0.21718575		761.19	0.08925973		1291.19	0.00206819		1821.18	0.0112951		2351.21	-0.0089778
231.4	0.21777828		761.39	0.08929384		1291.39	0.00153584		1821.38	0.01149093		2351.41	-0.00798804
231.6	0.21916721		761.59	0.08876962		1291.59	0.00142083		1821.58	0.01138454		2351.61	-0.00715581
231.8	0.21981759		761.79	0.08836425		1291.79	0.00245982		1821.78	0.0107535		2351.81	-0.00702414
232	0.22072763		761.99	0.0876791		1291.99	0.00281963		1821.98	0.01107866		2352.01	-0.00782606
232.2	0.22184495		762.19	0.08768307		1292.19	0.00324762		1822.18	0.01180613		2352.21	-0.00792867
232.4	0.22213735		762.39	0.08810626		1292.39	0.00386488		1822.38	0.01209576		2352.41	-0.00875678
232.6	0.22327412		762.59	0.08943064		1292.59	0.00415972		1822.58	0.01201153		2352.61	-0.00956477
232.8	0.22470756		762.79	0.08967502		1292.79	0.00451665		1822.78	0.0120786		2352.81	-0.01012091
233	0.22643221		762.99	0.08992058		1292.99	0.00433772		1822.98	0.01205874		2353.01	-0.01057257
233.2	0.22762153		763.19	0.09023013		1293.19	0.00431846		1823.18	0.01199886		2353.21	-0.01172487
233.4	0.22839862		763.39	0.09102589		1293.39	0.00367865		1823.38	0.01273371		2353.41	-0.01089799
233.6	0.22879399		763.59	0.09190925		1293.59	0.00468037		1823.58	0.01307951		2353.61	-0.01032031
233.8	0.22838449		763.79	0.09279263		1293.79	0.00495988		1823.78	0.01271774		2353.81	-0.00908842
234	0.22988913		763.99	0.09477462		1293.99	0.00539723		1823.98	0.01220528		2354.01	-0.00808096
234.2	0.23090267		764.19	0.09655986		1294.19	0.00565196		1824.18	0.01229321		2354.21	-0.00731545
234.4	0.23134682		764.39	0.09688633		1294.39	0.0054237		1824.38	0.01324427		2354.41	-0.00727051
234.6	0.23240391		764.59	0.09695518		1294.59	0.00515302		1824.58	0.01391616		2354.61	-0.00712337
234.8	0.23305009		764.79	0.0969677		1294.79	0.00550316		1824.78	0.01456329		2354.81	-0.0070745
235	0.2326403		764.99	0.09651045		1294.99	0.0056995		1824.98	0.01553628		2355.01	-0.00733838
235.2	0.23367009		765.19	0.09630661		1295.19	0.00574865		1825.18	0.01535287		2355.21	-0.00637746
235.4	0.23387017		765.39	0.09715965		1295.39	0.00549099		1825.38	0.01442284		2355.41	-0.00553971
235.6	0.23517024		765.59	0.09671999		1295.59	0.00540427		1825.58	0.01395293		2355.61	-0.0056076
235.8	0.2351237		765.79	0.09687568		1295.79	0.00593209		1825.78	0.01402512		2355.81	-0.00575773
236	0.23537677		765.99	0.09720166		1295.99	0.00570557		1825.98	0.01398491		2356.01	-0.00676716
236.2	0.23575278		766.19	0.09674818		1296.19	0.0058975		1826.18	0.01343265		2356.21	-0.00650378
236.4	0.23623953		766.39	0.09843752		1296.39	0.00590272		1826.38	0.01311182		2356.41	-0.00709738
236.6	0.23769444		766.59	0.09993771		1296.59	0.00608354		1826.58	0.01280703		2356.61	-0.00693283
236.8	0.23919958		766.79	0.09969925		1296.79	0.00676147		1826.78	0.01280769		2356.81	-0.00833929
237	0.2403682		766.99	0.10060138		1296.99	0.00686274		1826.98	0.01169156		2357.01	-0.00869259
237.2	0.24090285		767.19	0.10070341		1297.19	0.00665493		1827.18	0.01185352		2357.21	-0.0087656
237.4	0.24228051		767.39	0.10076164		1297.39	0.00585182		1827.38	0.01211146		2357.41	-0.00843965
237.6	0.24303492		767.59	0.10130649		1297.59	0.00621864		1827.58	0.01181208		2357.61	-0.00864699
237.8	0.24338079		767.79	0.10177876		1297.79	0.00580754		1827.78	0.01117319		2357.81	-0.00920031
238	0.24558642		767.99	0.10245119		1297.99	0.00539127		1827.98	0.01100162		2358.01	-0.00927376
238.2	0.24710018		768.19	0.10296478		1298.19	0.00538861		1828.18	0.0126506		2358.21	-0.01022482
238.4	0.2485972		768.39	0.10314215		1298.39	0.00478904		1828.38	0.01395456		2358.41	-0.01046576
238.6	0.25073918		768.59	0.10289477		1298.59	0.00436071		1828.58	0.01464955		2358.61	-0.01040266
238.8	0.25128342		768.79	0.10276005		1298.79	0.00431263		1828.78	0.01546621		2358.81	-0.01058171
239	0.25126205		768.99	0.10292431		1298.99	0.00321255		1828.98	0.01505505		2359.01	-0.0099593
239.2	0.25209124		769.19	0.10383198		1299.19	0.00361339		1829.18	0.01366915		2359.21	-0.00986309
239.4	0.2518953		769.39	0.10503889		1299.39	0.00289112		1829.38	0.01346125		2359.41	-0.00977628
239.6	0.25189755		769.59	0.10519346		1299.59	0.00337687		1829.58	0.01348922		2359.61	-0.00974725
239.8	0.25138099		769.79	0.10580027		1299.79	0.00388874		1829.78	0.01322676		2359.81	-0.00994135
240	0.25061443		769.99	0.10723206		1299.99	0.00359437		1829.98	0.0122205		2360.01	-0.01000548
240.2	0.25140166		770.19	0.10803257		1300.19	0.00458474		1830.18	0.01069537		2360.21	-0.0096046
240.4	0.25103165		770.39	0.10939646		1300.39	0.0053053		1830.38	0.01048223		2360.41	-0.00913595
240.6	0.25118556		770.59	0.10865477		1300.59	0.00551831		1830.58	0.01022305		2360.61	-0.00928334
240.8	0.25126615		770.79	0.10878333		1300.79	0.00605899		1830.78	0.00971203		2360.81	-0.01018062
241	0.25146972		770.99	0.1083867		1300.99	0.00614049		1830.98	0.00889385		2361.01	-0.00969995
241.2	0.25191835		771.19	0.10791692		1301.19	0.00596849		1831.18	0.00918054		2361.21	-0.00933534
241.4	0.25206559		771.39	0.10719636		1301.39	0.00598142		1831.38	0.01017412		2361.41	-0.00946562
241.6	0.25261505		771.59	0.10700875		1301.59	0.00574049		1831.58	0.01038661		2361.61	-0.01012572
241.8	0.25279853		771.79	0.10642449		1301.79	0.0061556		1831.78	0.01075532		2361.81	-0.01092534
242	0.25402164		771.99	0.10673193		1301.99	0.00661049		1831.98	0.01133922		2362.01	-0.01063962
242.2	0.25418288		772.19	0.10645398		1302.19	0.00684483		1832.18	0.01307031		2362.21	-0.01128085
242.4	0.25496042		772.39	0.10718623		1302.39	0.00629963		1832.38	0.01334095		2362.41	-0.01081439
242.6	0.25583915		772.59	0.10639313		1302.59	0.00579219		1832.58	0.01279013		2362.61	-0.01066219
242.8	0.25600898		772.79	0.10681848		1302.79	0.00536213		1832.78	0.01315566		2362.81	-0.01091148
243	0.25611817		772.99	0.10777798		1302.99	0.0050183		1832.98	0.01262335		2363.01	-0.01079883
243.2	0.25634352		773.19	0.10945081		1303.19	0.00568683		1833.18	0.01286288		2363.21	-0.01132332
243.4	0.25604525		773.39	0.10985298		1303.39	0.00548267		1833.38	0.01313522		2363.41	-0.01091978
243.6	0.25593553		773.59	0.11000374		1303.59	0.00552576		1833.58	0.01253875		2363.61	-0.01048641
243.8	0.25624676		773.79	0.11067702		1303.79	0.00510411		1833.78	0.01228831		2363.81	-0.01061804
244	0.25730991		773.99	0.11149399		1303.99	0.00492816		1833.98	0.01159302		2364.01	-0.01000229
244.2	0.25841653		774.19	0.11146272		1304.19	0.00564607		1834.18	0.01086409		2364.21	-0.00974509
244.4	0.25851023		774.39	0.11164742		1304.39	0.00538183		1834.38	0.01073968		2364.41	-0.00932169
244.6	0.25983315		774.59	0.11179302		1304.59	0.00467625		1834.58	0.01129746		2364.61	-0.00962699
244.8	0.26115134		774.79	0.11287665		1304.79	0.00451605		1834.78	0.01147639		2364.81	-0.00870264
245	0.26211124		774.99	0.11287909		1304.99	0.00405534		1834.98	0.01168382		2365.01	-0.00879233
245.2	0.26262386		775.19	0.11322622		1305.19	0.00355199		1835.18	0.01110459		2365.21	-0.00872473
245.4	0.26289502		775.39	0.11358376		1305.39	0.00406968		1835.38	0.01167403		2365.41	-0.00863282
245.6	0.26383336		775.59	0.11398376		1305.59	0.00425824		1835.58	0.01179868		2365.61	-0.00897817
245.8	0.26466665		775.79	0.11484255		1305.79	0.00484445		1835.78	0.01210377		2365.81	-0.00889698
246	0.26483401		775.99	0.11610058		1305.99	0.00486792		1835.98	0.01232578		2366.01	-0.00840164
246.2	0.26599706		776.19	0.11680392		1306.19	0.00409597		1836.18	0.01273594		2366.21	-0.00858744
246.4	0.2667965		776.39	0.1176746		1306.39	0.00379468		1836.38	0.01245662		2366.41	-0.00755899
246.6	0.2667604		776.59	0.11712773		1306.59	0.0042552		1836.58	0.01281817		2366.61	-0.00780801
246.8	0.26683398		776.79	0.1180342		1306.79	0.00395506		1836.78	0.01256919		2366.81	-0.00789654
247	0.26671887		776.99	0.11860593		1306.99	0.00427592		1836.98	0.0134239		2367.01	-0.00752189
247.2	0.26657293		777.19	0.11881965		1307.19	0.00418245		1837.18	0.01365959		2367.21	-0.00713635
247.4	0.26622538		777.39	0.11836384		1307.39	0.0035402		1837.38	0.01397419		2367.41	-0.0074006
247.6	0.26690192		777.59	0.11807384		1307.59	0.00300595		1837.58	0.01399686		2367.61	-0.00744359
247.8	0.26774265		777.79	0.11815078		1307.79	0.00293519		1837.78	0.01407602		2367.81	-0.00770433
248	0.26801229		777.99	0.11826327		1307.99	0.00367974		1837.98	0.01338038		2368.01	-0.00716806
248.2	0.26834991		778.19	0.11888961		1308.19	0.00417854		1838.18	0.01261351		2368.21	-0.00744431
248.4	0.2690434		778.39	0.11960539		1308.39	0.00473346		1838.38	0.01161812		2368.41	-0.00762178
248.6	0.27012274		778.59	0.11918259		1308.59	0.00419543		1838.58	0.01156886		2368.61	-0.00770183
248.8	0.27073298		778.79	0.1197021		1308.79	0.00447585		1838.78	0.01123204		2368.81	-0.00757072
249	0.27086199		778.99	0.11950279		1308.99	0.00488556		1838.98	0.00981494		2369.01	-0.00847521
249.2	0.27204243		779.19	0.11973552		1309.19	0.00517199		1839.18	0.00820378		2369.21	-0.00878516
249.4	0.27300108		779.39	0.12023037		1309.39	0.00571163		1839.38	0.0082933		2369.41	-0.00819946
249.6	0.27379538		779.59	0.12099305		1309.59	0.00645831		1839.58	0.00786651		2369.61	-0.00908085
249.8	0.27462426		779.79	0.1216432		1309.79	0.00576933		1839.78	0.00747854		2369.81	-0.00907868
250	0.27511899		779.99	0.12262446		1309.99	0.00641365		1839.98	0.00762478		2370.01	-0.00920641
250.2	0.27591772		780.19	0.12302972		1310.19	0.00626261		1840.18	0.00790053		2370.21	-0.00926135
250.4	0.27548288		780.39	0.12273403		1310.39	0.0065142		1840.38	0.00821253		2370.41	-0.00868618
250.6	0.27549944		780.59	0.12310735		1310.59	0.00683513		1840.58	0.00799904		2370.61	-0.00945514
250.8	0.2759995		780.79	0.12387774		1310.79	0.00583132		1840.78	0.00738392		2370.81	-0.00904275
251	0.27621874		780.99	0.12369288		1310.99	0.00572414		1840.98	0.00869375		2371.01	-0.00858495
251.2	0.27628662		781.19	0.12449917		1311.19	0.00532005		1841.18	0.00843997		2371.21	-0.00896072
251.4	0.27642626		781.39	0.12501179		1311.39	0.00572076		1841.38	0.00970067		2371.41	-0.00977267
251.6	0.27748973		781.59	0.12482351		1311.59	0.00568137		1841.58	0.00972479		2371.61	-0.00901318
251.8	0.27763134		781.79	0.12545617		1311.79	0.00598714		1841.78	0.00968275		2371.81	-0.00913794
252	0.2780798		781.99	0.12551867		1311.99	0.00644569		1841.98	0.00963702		2372.01	-0.00807648
252.2	0.27932499		782.19	0.12618634		1312.19	0.00548901		1842.18	0.00977679		2372.21	-0.00786114
252.4	0.28132156		782.39	0.12580614		1312.39	0.00562945		1842.38	0.0104402		2372.41	-0.00743457
252.6	0.28185778		782.59	0.1259817		1312.59	0.00472731		1842.58	0.010836		2372.61	-0.00775315
252.8	0.28278036		782.79	0.12647621		1312.79	0.00528457		1842.78	0.01130633		2372.81	-0.00770508
253	0.28316016		782.99	0.12616568		1312.99	0.00551432		1842.98	0.01052791		2373.01	-0.00845796
253.2	0.28362825		783.19	0.12653304		1313.19	0.00467767		1843.18	0.01103686		2373.21	-0.00848909
253.4	0.28464056		783.39	0.12744013		1313.39	0.00456676		1843.38	0.01101702		2373.41	-0.00832905
253.6	0.28508729		783.59	0.12812519		1313.59	0.00531524		1843.58	0.01105129		2373.61	-0.00959065
253.8	0.28593706		783.79	0.12903052		1313.79	0.00485871		1843.78	0.01163561		2373.81	-0.01039401
254	0.28679243		783.99	0.12937255		1313.99	0.00533066		1843.98	0.01188369		2374.01	-0.01027113
254.2	0.28710713		784.19	0.12941366		1314.19	0.00461525		1844.18	0.01182774		2374.21	-0.00988815
254.4	0.28829868		784.39	0.12978769		1314.39	0.00438624		1844.38	0.01199294		2374.41	-0.00997269
254.6	0.28835871		784.59	0.13038824		1314.59	0.00467173		1844.58	0.01218958		2374.61	-0.01002462
254.8	0.28879438		784.79	0.13158664		1314.79	0.00443281		1844.78	0.01219047		2374.81	-0.00995879
255	0.28957757		784.99	0.13117861		1314.99	0.00462338		1844.98	0.0123417		2375.01	-0.00972687
255.2	0.28912001		785.19	0.1320838		1315.19	0.00491448		1845.18	0.01236236		2375.21	-0.00975167
255.4	0.28914549		785.39	0.13234524		1315.39	0.00550334		1845.38	0.01321279		2375.41	-0.00987229
255.6	0.29018305		785.59	0.13169336		1315.59	0.00468531		1845.58	0.0123327		2375.61	-0.01005676
255.8	0.29013954		785.79	0.13186237		1315.79	0.00432304		1845.78	0.011464		2375.81	-0.0109535
256	0.29034458		785.99	0.13186438		1315.99	0.0040533		1845.98	0.01271045		2376.01	-0.01191674
256.2	0.29054903		786.19	0.13226439		1316.19	0.00297656		1846.18	0.01329791		2376.21	-0.01264491
256.4	0.29101281		786.39	0.13174704		1316.39	0.0028222		1846.38	0.01310662		2376.41	-0.0130748
256.6	0.29093626		786.59	0.13161949		1316.59	0.00267954		1846.58	0.01181254		2376.61	-0.01342175
256.8	0.29076589		786.79	0.13245215		1316.79	0.00303731		1846.78	0.01101389		2376.81	-0.01296681
257	0.29010468		786.99	0.13322939		1316.99	0.0028636		1846.98	0.01062678		2377.01	-0.01264906
257.2	0.29097386		787.19	0.13436748		1317.19	0.00265201		1847.18	0.01048303		2377.21	-0.01168585
257.4	0.29201604		787.39	0.13578726		1317.39	0.00288223		1847.38	0.01010673		2377.41	-0.01207245
257.6	0.29205745		787.59	0.1364658		1317.59	0.00376413		1847.58	0.01044131		2377.61	-0.01227166
257.8	0.29235416		787.79	0.13758672		1317.79	0.00388452		1847.78	0.01045031		2377.81	-0.01281625
258	0.29335103		787.99	0.13744995		1317.99	0.00473095		1847.98	0.00957753		2378.01	-0.01152749
258.2	0.29409171		788.19	0.13758057		1318.19	0.00483153		1848.18	0.00995151		2378.21	-0.01158312
258.4	0.29468815		788.39	0.13830455		1318.39	0.00488057		1848.38	0.01106463		2378.41	-0.01139347
258.6	0.29514018		788.59	0.13810838		1318.59	0.00552642		1848.58	0.01128367		2378.61	-0.01083293
258.8	0.29569253		788.79	0.13845534		1318.79	0.00627842		1848.78	0.01114164		2378.81	-0.01015036
259	0.29656035		788.99	0.13746636		1318.99	0.00591123		1848.98	0.01165492		2379.01	-0.01016693
259.2	0.2964937		789.19	0.13794649		1319.19	0.00637365		1849.18	0.01213997		2379.21	-0.01041988
259.4	0.29732412		789.39	0.13784373		1319.39	0.00686971		1849.38	0.01324663		2379.41	-0.01064011
259.6	0.29817648		789.59	0.1370036		1319.59	0.0063109		1849.58	0.01314106		2379.61	-0.01108061
259.8	0.29795947		789.79	0.13682247		1319.79	0.00526021		1849.78	0.01302745		2379.81	-0.01131125
260	0.2988875		789.99	0.13645567		1319.99	0.00486437		1849.98	0.01418695		2380.01	-0.01218835
260.2	0.29900069		790.19	0.13673676		1320.19	0.00398526		1850.18	0.0133065		2380.21	-0.01145274
260.4	0.2997044		790.39	0.13655584		1320.39	0.00394107		1850.38	0.01274556		2380.41	-0.01145771
260.6	0.30039868		790.59	0.13672582		1320.59	0.00408845		1850.58	0.01244779		2380.61	-0.01064328
260.8	0.30063147		790.79	0.13768497		1320.79	0.00436286		1850.78	0.01194364		2380.81	-0.00954238
261	0.3011341		790.99	0.1376022		1320.99	0.00380461		1850.98	0.01177897		2381.01	-0.0088008
261.2	0.30189957		791.19	0.13770676		1321.19	0.00403707		1851.18	0.01154785		2381.21	-0.00865927
261.4	0.30293233		791.39	0.13790305		1321.39	0.00407365		1851.38	0.01101002		2381.41	-0.00821031
261.6	0.30386963		791.59	0.13740639		1321.59	0.00405813		1851.58	0.01045899		2381.61	-0.00774279
261.8	0.30371682		791.79	0.13817901		1321.79	0.00400278		1851.78	0.01007303		2381.81	-0.0084502
262	0.30489395		791.99	0.13794195		1321.99	0.00418364		1851.98	0.00975596		2382.01	-0.00816273
262.2	0.30478806		792.19	0.13801339		1322.19	0.00333989		1852.18	0.0101688		2382.21	-0.00899637
262.4	0.30535008		792.39	0.13948824		1322.39	0.00320317		1852.38	0.00998755		2382.41	-0.00869268
262.6	0.30592314		792.59	0.1401659		1322.59	0.00414984		1852.58	0.01003346		2382.61	-0.00909932
262.8	0.30560582		792.79	0.1401511		1322.79	0.00481374		1852.78	0.00980941		2382.81	-0.00911225
263	0.3056157		792.99	0.14065299		1322.99	0.00478145		1852.98	0.00980845		2383.01	-0.00968111
263.2	0.30523473		793.19	0.14192273		1323.19	0.00588842		1853.18	0.00975513		2383.21	-0.00960861
263.4	0.30467804		793.39	0.14242389		1323.39	0.00537143		1853.38	0.01040259		2383.41	-0.00949928
263.6	0.30420182		793.59	0.14283764		1323.59	0.00525846		1853.58	0.00970953		2383.61	-0.00971277
263.8	0.30417656		793.79	0.14376963		1323.79	0.00612418		1853.78	0.00939521		2383.81	-0.0100829
264	0.30449585		793.99	0.14379955		1323.99	0.00654879		1853.98	0.01019157		2384.01	-0.01150504
264.2	0.30344342		794.19	0.14482762		1324.19	0.00745638		1854.18	0.01021221		2384.21	-0.01145598
264.4	0.30416706		794.39	0.14428117		1324.39	0.0084153		1854.38	0.00963806		2384.41	-0.01167608
264.6	0.30454475		794.59	0.14441013		1324.59	0.00793061		1854.58	0.0097866		2384.61	-0.01121432
264.8	0.30497504		794.79	0.14413349		1324.79	0.00737789		1854.78	0.00917222		2384.81	-0.0108759
265	0.30467233		794.99	0.1436041		1324.99	0.00636521		1854.98	0.00989184		2385.01	-0.01085698
265.2	0.3056071		795.19	0.14380089		1325.19	0.00673999		1855.18	0.00962769		2385.21	-0.01154607
265.4	0.30664209		795.39	0.14407524		1325.39	0.0063491		1855.38	0.00889907		2385.41	-0.01150132
265.6	0.30723933		795.59	0.14401982		1325.59	0.00547648		1855.58	0.0092096		2385.61	-0.01216453
265.8	0.30760865		795.79	0.1453007		1325.79	0.00487293		1855.78	0.00992782		2385.81	-0.01234506
266	0.3080144		795.99	0.1453933		1325.99	0.00440529		1855.98	0.00994312		2386.01	-0.01220894
266.2	0.30820583		796.19	0.14661889		1326.19	0.00403533		1856.18	0.01007818		2386.21	-0.01226598
266.4	0.30874058		796.39	0.14776424		1326.39	0.0037502		1856.38	0.01040333		2386.41	-0.01186136
266.6	0.30866521		796.59	0.1487796		1326.59	0.00400275		1856.58	0.01073193		2386.61	-0.0124528
266.8	0.30906427		796.79	0.14899809		1326.79	0.00334936		1856.78	0.0109186		2386.81	-0.01208166
267	0.30912421		796.99	0.15050837		1326.99	0.00291587		1856.98	0.01182769		2387.01	-0.01200619
267.2	0.30925355		797.19	0.15101571		1327.19	0.00226052		1857.18	0.01238023		2387.21	-0.01192038
267.4	0.30955374		797.39	0.1502838		1327.39	0.00169903		1857.38	0.01274808		2387.41	-0.01198436
267.6	0.31002839		797.59	0.15067958		1327.59	0.00282547		1857.58	0.01245536		2387.61	-0.01211724
267.8	0.31175667		797.79	0.15036836		1327.79	0.00414787		1857.78	0.01260481		2387.81	-0.01206244
268	0.31235561		797.99	0.14979363		1327.99	0.00300006		1857.98	0.01348474		2388.01	-0.01219694
268.2	0.31268264		798.19	0.14945044		1328.19	0.00355892		1858.18	0.01289586		2388.21	-0.0114637
268.4	0.31318492		798.39	0.14921244		1328.39	0.00305954		1858.38	0.01241869		2388.41	-0.01137841
268.6	0.31402591		798.59	0.14989679		1328.59	0.00277445		1858.58	0.01292666		2388.61	-0.01139862
268.8	0.31384521		798.79	0.15029261		1328.79	0.00239042		1858.78	0.01228868		2388.81	-0.01150022
269	0.31465284		798.99	0.15084533		1328.99	0.00284896		1858.98	0.01228247		2389.01	-0.01099559
269.2	0.31606888		799.19	0.1514761		1329.19	0.00346324		1859.18	0.01165613		2389.21	-0.01109872
269.4	0.31625752		799.39	0.15103808		1329.39	0.0036234		1859.38	0.01112509		2389.41	-0.01034259
269.6	0.31682331		799.59	0.15074131		1329.59	0.00337714		1859.58	0.01179256		2389.61	-0.01001406
269.8	0.31662885		799.79	0.15122753		1329.79	0.00403043		1859.78	0.0120451		2389.81	-0.01022845
270	0.31640397		799.99	0.151319		1329.99	0.00463134		1859.98	0.01168133		2390.01	-0.00999516
270.2	0.3166014		800.19	0.15194523		1330.19	0.00458813		1860.18	0.01151883		2390.21	-0.01028384
270.4	0.31669379		800.39	0.1534825		1330.39	0.00456413		1860.38	0.01253463		2390.41	-0.01058475
270.6	0.31662412		800.59	0.1550738		1330.59	0.00520749		1860.58	0.01266208		2390.61	-0.01072779
270.8	0.31759035		800.79	0.15444789		1330.79	0.00537667		1860.78	0.01310163		2390.81	-0.01024087
271	0.31786522		800.99	0.15372982		1330.99	0.00583762		1860.98	0.0131862		2391.01	-0.00989756
271.2	0.3186394		801.19	0.15343272		1331.19	0.00657705		1861.18	0.01286359		2391.21	-0.00938591
271.4	0.31948167		801.39	0.1523662		1331.39	0.00692732		1861.38	0.01311301		2391.41	-0.01009514
271.6	0.32054024		801.59	0.15287123		1331.59	0.00743216		1861.58	0.01269		2391.61	-0.01059057
271.8	0.32228491		801.79	0.1525478		1331.79	0.00706076		1861.78	0.01331976		2391.81	-0.01092093
272	0.32261444		801.99	0.15273277		1331.99	0.00582193		1861.98	0.01372189		2392.01	-0.01087739
272.2	0.32285827		802.19	0.15331816		1332.19	0.00543934		1862.18	0.01278658		2392.21	-0.0120579
272.4	0.32332951		802.39	0.15388019		1332.39	0.00498251		1862.38	0.01220265		2392.41	-0.01218145
272.6	0.32378756		802.59	0.15444731		1332.59	0.0043068		1862.58	0.01211799		2392.61	-0.01255727
272.8	0.32377193		802.79	0.15458192		1332.79	0.00320009		1862.78	0.01212908		2392.81	-0.01302383
273	0.32471951		802.99	0.15418748		1332.99	0.00275305		1862.98	0.01225805		2393.01	-0.01310428
273.2	0.32451823		803.19	0.1542899		1333.19	0.00295101		1863.18	0.0121618		2393.21	-0.01371271
273.4	0.3237919		803.39	0.15365596		1333.39	0.00264888		1863.38	0.01136085		2393.41	-0.01440603
273.6	0.32389003		803.59	0.15336931		1333.59	0.00237366		1863.58	0.01166655		2393.61	-0.0151801
273.8	0.32399702		803.79	0.1537107		1333.79	0.00305066		1863.78	0.0118889		2393.81	-0.01489724
274	0.32349204		803.99	0.15482671		1333.99	0.00348102		1863.98	0.01187961		2394.01	-0.01440484
274.2	0.32319526		804.19	0.15575262		1334.19	0.00389827		1864.18	0.01215439		2394.21	-0.01413635
274.4	0.32390655		804.39	0.15740624		1334.39	0.00410233		1864.38	0.0127281		2394.41	-0.01351264
274.6	0.32398934		804.59	0.15662452		1334.59	0.00547201		1864.58	0.01205548		2394.61	-0.01264279
274.8	0.32389171		804.79	0.15597947		1334.79	0.00615729		1864.78	0.01127337		2394.81	-0.01165701
275	0.32455849		804.99	0.15672889		1334.99	0.00728004		1864.98	0.01095266		2395.01	-0.01097644
275.2	0.32465003		805.19	0.15796614		1335.19	0.00774713		1865.18	0.01107925		2395.21	-0.01023306
275.4	0.32499537		805.39	0.15883833		1335.39	0.00749529		1865.38	0.01083752		2395.41	-0.01070511
275.6	0.32601557		805.59	0.16018939		1335.59	0.00711814		1865.58	0.00982398		2395.61	-0.01043191
275.8	0.32685976		805.79	0.16092426		1335.79	0.00658907		1865.78	0.00948879		2395.81	-0.0103679
276	0.32704927		805.99	0.1621313		1335.99	0.00671792		1865.98	0.00894411		2396.01	-0.00994717
276.2	0.32763092		806.19	0.16324072		1336.19	0.00590664		1866.18	0.00897873		2396.21	-0.01078964
276.4	0.32799551		806.39	0.1623107		1336.39	0.00643327		1866.38	0.00934261		2396.41	-0.01079197
276.6	0.32781738		806.59	0.16289003		1336.59	0.00682591		1866.58	0.00959838		2396.61	-0.01082667
276.8	0.32790405		806.79	0.16263734		1336.79	0.00704869		1866.78	0.0091493		2396.81	-0.01122102
277	0.32743624		806.99	0.16221923		1336.99	0.00693481		1866.98	0.00877546		2397.01	-0.01141006
277.2	0.32710704		807.19	0.16201495		1337.19	0.00718972		1867.18	0.00828013		2397.21	-0.01179049
277.4	0.32748851		807.39	0.16106423		1337.39	0.00633557		1867.38	0.00806848		2397.41	-0.01231811
277.6	0.32782133		807.59	0.16092428		1337.59	0.00585213		1867.58	0.00931396		2397.61	-0.01212673
277.8	0.32771689		807.79	0.16121776		1337.79	0.00629838		1867.78	0.0095905		2397.81	-0.01241715
278	0.3273575		807.99	0.16096226		1337.99	0.0064716		1867.98	0.01031024		2398.01	-0.01310228
278.2	0.3281056		808.19	0.16095861		1338.19	0.00623336		1868.18	0.01067962		2398.21	-0.01333139
278.4	0.32939268		808.39	0.16030821		1338.39	0.00585		1868.38	0.01069026		2398.41	-0.01406378
278.6	0.32911537		808.59	0.15971743		1338.59	0.00607297		1868.58	0.010559		2398.61	-0.01391589
278.8	0.32887952		808.79	0.16050519		1338.79	0.00579709		1868.78	0.0102881		2398.81	-0.01423431
279	0.32969491		808.99	0.16192325		1338.99	0.00642062		1868.98	0.01070332		2399.01	-0.01494754
279.2	0.32898553		809.19	0.16249305		1339.19	0.00528814		1869.18	0.01068821		2399.21	-0.0155577
279.4	0.32975725		809.39	0.16358565		1339.39	0.00489245		1869.38	0.01095917		2399.41	-0.01549591
279.6	0.33060977		809.59	0.16417125		1339.59	0.00399142		1869.58	0.01156552		2399.61	-0.01535851
279.8	0.33100519		809.79	0.16458449		1339.79	0.00407375		1869.78	0.01100787		2399.81	-0.01550167
280	0.33201263		809.99	0.1657699		1339.99	0.00377423		1869.98	0.01118619		2400.01	-0.0153633
280.2	0.33220058		810.19	0.16612976		1340.19	0.00380023		1870.18	0.01185486		2400.21	-0.01536633
280.4	0.33197365		810.39	0.16601509		1340.39	0.00487817		1870.38	0.01181422		2400.41	-0.01487614
280.6	0.33199756		810.59	0.16717788		1340.59	0.00515894		1870.58	0.011789		2400.61	-0.01374199
280.8	0.33186072		810.79	0.16692108		1340.79	0.00423696		1870.78	0.01159022		2400.81	-0.01354648
281	0.33193857		810.99	0.16702463		1340.99	0.00439086		1870.98	0.01204774		2401.01	-0.01314202
281.2	0.33288431		811.19	0.16756019		1341.19	0.00398556		1871.18	0.01164659		2401.21	-0.01351975
281.4	0.33306717		811.39	0.16781764		1341.39	0.00353888		1871.38	0.01244416		2401.41	-0.01315652
281.6	0.33359846		811.59	0.16803209		1341.59	0.003644		1871.58	0.01263535		2401.61	-0.01216827
281.8	0.33365638		811.79	0.16832219		1341.79	0.00352801		1871.78	0.01282899		2401.81	-0.01205937
282	0.33452188		811.99	0.16807638		1341.99	0.00369287		1871.98	0.01330671		2402.01	-0.01127327
282.2	0.33500503		812.19	0.16811987		1342.19	0.00448578		1872.18	0.01308969		2402.21	-0.01062095
282.4	0.33579268		812.39	0.16768507		1342.39	0.00452521		1872.38	0.01378812		2402.41	-0.0107468
282.6	0.33537825		812.59	0.16835062		1342.59	0.00412966		1872.58	0.01356777		2402.61	-0.00964432
282.8	0.33551521		812.79	0.16876931		1342.79	0.00455182		1872.78	0.01402907		2402.81	-0.00965523
283	0.33576277		812.99	0.16921819		1342.99	0.00484312		1872.98	0.0145633		2403.01	-0.00975235
283.2	0.33546551		813.19	0.16926724		1343.19	0.00491629		1873.18	0.01427689		2403.21	-0.01008904
283.4	0.3367256		813.39	0.16974886		1343.39	0.00532791		1873.38	0.01484433		2403.41	-0.00952179
283.6	0.33748832		813.59	0.17039008		1343.59	0.00507595		1873.58	0.01393951		2403.61	-0.00980116
283.8	0.33763591		813.79	0.17093532		1343.79	0.004797		1873.78	0.01317522		2403.81	-0.01028628
284	0.3376522		813.99	0.17206143		1343.99	0.00464028		1873.98	0.01313433		2404.01	-0.0106484
284.2	0.33774022		814.19	0.17226889		1344.19	0.00509373		1874.18	0.01283302		2404.21	-0.0107452
284.4	0.33805485		814.39	0.17314134		1344.39	0.00518355		1874.38	0.01288035		2404.41	-0.01214125
284.6	0.33842142		814.59	0.17400017		1344.59	0.00514815		1874.58	0.01256138		2404.61	-0.01285353
284.8	0.33838893		814.79	0.1742081		1344.79	0.00588945		1874.78	0.01250705		2404.81	-0.01339209
285	0.33913481		814.99	0.17545327		1344.99	0.00633313		1874.98	0.01228044		2405.01	-0.01377765
285.2	0.33984524		815.19	0.17551895		1345.19	0.00580451		1875.18	0.01163603		2405.21	-0.01488722
285.4	0.33938301		815.39	0.1755104		1345.39	0.00520511		1875.38	0.01204825		2405.41	-0.01485768
285.6	0.33960613		815.59	0.17537795		1345.59	0.00520257		1875.58	0.01110126		2405.61	-0.01428004
285.8	0.33858812		815.79	0.17454413		1345.79	0.00452536		1875.78	0.01206191		2405.81	-0.01416717
286	0.33933615		815.99	0.17356923		1345.99	0.00534555		1875.98	0.01184814		2406.01	-0.01431569
286.2	0.33894097		816.19	0.17319816		1346.19	0.0054755		1876.18	0.01314673		2406.21	-0.01374076
286.4	0.33851776		816.39	0.17271535		1346.39	0.00503637		1876.38	0.01379681		2406.41	-0.01405613
286.6	0.33918219		816.59	0.17152709		1346.59	0.00529742		1876.58	0.01392016		2406.61	-0.01372312
286.8	0.33894705		816.79	0.17106492		1346.79	0.00541297		1876.78	0.01478902		2406.81	-0.01366863
287	0.33878379		816.99	0.1701284		1346.99	0.00560284		1876.98	0.01480232		2407.01	-0.01358824
287.2	0.33926592		817.19	0.1698427		1347.19	0.00565035		1877.18	0.0147121		2407.21	-0.01402291
287.4	0.34033793		817.39	0.16965965		1347.39	0.0056349		1877.38	0.01444222		2407.41	-0.01391443
287.6	0.3407293		817.59	0.1701324		1347.59	0.00500939		1877.58	0.01348532		2407.61	-0.01435889
287.8	0.3409049		817.79	0.17063286		1347.79	0.00443874		1877.78	0.01329806		2407.81	-0.0152724
288	0.34177662		817.99	0.17018743		1347.99	0.00493311		1877.98	0.01261428		2408.01	-0.01599104
288.2	0.34313551		818.19	0.17012674		1348.19	0.00545828		1878.18	0.01246104		2408.21	-0.01642458
288.4	0.34365606		818.39	0.17083223		1348.39	0.00634491		1878.38	0.01278274		2408.41	-0.01726953
288.6	0.34528364		818.59	0.17149931		1348.59	0.00685391		1878.58	0.01280822		2408.61	-0.01719877
288.8	0.34642163		818.79	0.17214114		1348.79	0.00758407		1878.78	0.01229881		2408.81	-0.0175785
289	0.34800583		818.99	0.17356436		1348.99	0.00687186		1878.98	0.01169221		2409.01	-0.01745875
289.2	0.34885021		819.19	0.17357697		1349.19	0.00622383		1879.18	0.01177875		2409.21	-0.01745667
289.4	0.34884325		819.39	0.17417611		1349.39	0.00589421		1879.38	0.01210742		2409.41	-0.0168917
289.6	0.34947102		819.59	0.17467028		1349.59	0.00571047		1879.58	0.0116011		2409.61	-0.01582903
289.8	0.3492588		819.79	0.1743719		1349.79	0.00520729		1879.78	0.01261162		2409.81	-0.01568849
290	0.35052975		819.99	0.17567084		1349.99	0.00557379		1879.98	0.01277969		2410.01	-0.01576498
290.2	0.34946927		820.19	0.1762616		1350.19	0.0053315		1880.18	0.01308625		2410.21	-0.01459117
290.4	0.34941232		820.39	0.1760303		1350.39	0.0051448		1880.38	0.01269503		2410.41	-0.01445342
290.6	0.34994301		820.59	0.17673061		1350.59	0.00559241		1880.58	0.01309653		2410.61	-0.01354643
290.8	0.34895588		820.79	0.17751044		1350.79	0.00544733		1880.78	0.01340899		2410.81	-0.01216111
291	0.34954033		820.99	0.17761838		1350.99	0.0048749		1880.98	0.01270817		2411.01	-0.01107315
291.2	0.35061467		821.19	0.17804404		1351.19	0.005337		1881.18	0.01241251		2411.21	-0.01110136
291.4	0.34997165		821.39	0.17892516		1351.39	0.00485718		1881.38	0.01219241		2411.41	-0.01131455
291.6	0.34988645		821.59	0.17908929		1351.59	0.00474766		1881.58	0.01217878		2411.61	-0.01074342
291.8	0.3492511		821.79	0.17936656		1351.79	0.00522301		1881.78	0.01242024		2411.81	-0.01137076
292	0.34925045		821.99	0.17901505		1351.99	0.0058251		1881.98	0.01244124		2412.01	-0.01144069
292.2	0.3494153		822.19	0.18007963		1352.19	0.00641346		1882.18	0.01277165		2412.21	-0.01149458
292.4	0.34988647		822.39	0.18064006		1352.39	0.00629058		1882.38	0.01292304		2412.41	-0.01143669
292.6	0.35089299		822.59	0.18130184		1352.59	0.00603067		1882.58	0.01271564		2412.61	-0.0114007
292.8	0.35054976		822.79	0.18123367		1352.79	0.00568157		1882.78	0.01219985		2412.81	-0.01145898
293	0.35087598		822.99	0.18175909		1352.99	0.00524845		1882.98	0.01252686		2413.01	-0.01173473
293.2	0.35152657		823.19	0.18110602		1353.19	0.00447078		1883.18	0.01217988		2413.21	-0.01209057
293.4	0.35181283		823.39	0.18127477		1353.39	0.00466394		1883.38	0.01157329		2413.41	-0.01179145
293.6	0.35221629		823.59	0.18150854		1353.59	0.00432624		1883.58	0.01140539		2413.61	-0.01189759
293.8	0.35246419		823.79	0.18122405		1353.79	0.00384022		1883.78	0.01178626		2413.81	-0.01189079
294	0.35172165		823.99	0.18143922		1353.99	0.00348039		1883.98	0.01172296		2414.01	-0.01256704
294.2	0.35138829		824.19	0.18142463		1354.19	0.00362127		1884.18	0.01065889		2414.21	-0.01190943
294.4	0.35211704		824.39	0.18187124		1354.39	0.00337211		1884.38	0.01115588		2414.41	-0.01133875
294.6	0.35321731		824.59	0.18313172		1354.59	0.00443756		1884.58	0.01091832		2414.61	-0.01072021
294.8	0.3541006		824.79	0.1832602		1354.79	0.00438686		1884.78	0.01194228		2414.81	-0.01066035
295	0.35547854		824.99	0.18345099		1354.99	0.00390259		1884.98	0.01175439		2415.01	-0.01102161
295.2	0.35594987		825.19	0.18381379		1355.19	0.00458558		1885.18	0.01241291		2415.21	-0.01163337
295.4	0.3553825		825.39	0.18383999		1355.39	0.00412762		1885.38	0.01252925		2415.41	-0.01212453
295.6	0.35547018		825.59	0.1838114		1355.59	0.00589339		1885.58	0.01327286		2415.61	-0.01214891
295.8	0.35510454		825.79	0.18403191		1355.79	0.00651296		1885.78	0.013416		2415.81	-0.01309525
296	0.3554117		825.99	0.18404987		1355.99	0.00640543		1885.98	0.01366553		2416.01	-0.01268413
296.2	0.35535645		826.19	0.18459009		1356.19	0.00658018		1886.18	0.01421931		2416.21	-0.01269927
296.4	0.35525772		826.39	0.18397795		1356.39	0.00660084		1886.38	0.01440557		2416.41	-0.01199651
296.6	0.35599378		826.59	0.18393016		1356.59	0.00707778		1886.58	0.01462629		2416.61	-0.01258506
296.8	0.35581412		826.79	0.18372412		1356.79	0.00675234		1886.78	0.0147207		2416.81	-0.01347041
297	0.35614354		826.99	0.1834945		1356.99	0.00683742		1886.98	0.01388233		2417.01	-0.01332923
297.2	0.35721198		827.19	0.18321039		1357.19	0.00604106		1887.18	0.01361461		2417.21	-0.01296319
297.4	0.35753264		827.39	0.18377003		1357.39	0.00555775		1887.38	0.01318606		2417.41	-0.01224457
297.6	0.35734745		827.59	0.18391216		1357.59	0.00486645		1887.58	0.0132611		2417.61	-0.01277884
297.8	0.35730092		827.79	0.18368499		1357.79	0.00388336		1887.78	0.01324658		2417.81	-0.01245373
298	0.35596931		827.99	0.18346277		1357.99	0.00319363		1887.98	0.01335278		2418.01	-0.01267738
298.2	0.3571688		828.19	0.18418822		1358.19	0.00310347		1888.18	0.01231157		2418.21	-0.01176463
298.4	0.35725637		828.39	0.18505452		1358.39	0.00196745		1888.38	0.0127198		2418.41	-0.01168686
298.6	0.35690485		828.59	0.1855942		1358.59	0.00244557		1888.58	0.01313641		2418.61	-0.01211938
298.8	0.35711207		828.79	0.18576233		1358.79	0.00177723		1888.78	0.01449145		2418.81	-0.01283367
299	0.35739263		828.99	0.1859659		1358.99	0.00214664		1888.98	0.01452622		2419.01	-0.01344022
299.2	0.3570778		829.19	0.1862256		1359.19	0.00192642		1889.18	0.01528863		2419.21	-0.01339872
299.4	0.35722358		829.39	0.18647083		1359.39	0.00190646		1889.38	0.01508237		2419.41	-0.01350457
299.6	0.35757335		829.59	0.18713842		1359.59	0.00325897		1889.58	0.01632659		2419.61	-0.0135042
299.8	0.35820985		829.79	0.18771952		1359.79	0.00380652		1889.78	0.01577671		2419.81	-0.0124473
300	0.35931007		829.99	0.18880367		1359.99	0.00347992		1889.98	0.0160159		2420.01	-0.01227637
300.2	0.35924983		830.19	0.18938309		1360.19	0.00508389		1890.18	0.0157637		2420.21	-0.01278769
300.4	0.36033248		830.39	0.18939091		1360.39	0.00634113		1890.38	0.01500272		2420.41	-0.01238421
300.6	0.36235095		830.59	0.189769		1360.59	0.00664081		1890.58	0.01429623		2420.61	-0.01254888
300.8	0.36252617		830.79	0.18996773		1360.79	0.00600277		1890.78	0.01331363		2420.81	-0.01222944
301	0.36310035		830.99	0.19001645		1360.99	0.005717		1890.98	0.01305921		2421.01	-0.01162967
301.2	0.36408503		831.19	0.19039476		1361.19	0.00573206		1891.18	0.01353491		2421.21	-0.01239847
301.4	0.36383422		831.39	0.19037253		1361.39	0.00579746		1891.38	0.01312245		2421.41	-0.01242
301.6	0.36313117		831.59	0.18996728		1361.59	0.00592729		1891.58	0.01232131		2421.61	-0.01222061
301.8	0.36319848		831.79	0.18914894		1361.79	0.00543001		1891.78	0.01238651		2421.81	-0.01189211
302	0.36209753		831.99	0.18883456		1361.99	0.00500492		1891.98	0.01238392		2422.01	-0.01192712
302.2	0.36233041		832.19	0.18844248		1362.19	0.00501543		1892.18	0.01173618		2422.21	-0.01173262
302.4	0.36194554		832.39	0.18774756		1362.39	0.0047638		1892.38	0.01267641		2422.41	-0.01239048
302.6	0.36072108		832.59	0.18828877		1362.59	0.00492099		1892.58	0.01235654		2422.61	-0.01292147
302.8	0.36141613		832.79	0.18887447		1362.79	0.00353686		1892.78	0.01293435		2422.81	-0.01390611
303	0.36071657		832.99	0.18817565		1362.99	0.00344867		1892.98	0.01306135		2423.01	-0.01394772
303.2	0.36098456		833.19	0.18950443		1363.19	0.00252546		1893.18	0.01353465		2423.21	-0.01333076
303.4	0.3613112		833.39	0.19035161		1363.39	0.00282648		1893.38	0.01269091		2423.41	-0.01448476
303.6	0.36219585		833.59	0.19073515		1363.59	0.00314431		1893.58	0.01281751		2423.61	-0.01485764
303.8	0.36235226		833.79	0.19145439		1363.79	0.00314238		1893.78	0.01233669		2423.81	-0.01490242
304	0.36273238		833.99	0.19173382		1363.99	0.00268286		1893.98	0.01283416		2424.01	-0.01522457
304.2	0.36242828		834.19	0.19062079		1364.19	0.0033345		1894.18	0.01284234		2424.21	-0.01583577
304.4	0.3627687		834.39	0.19066001		1364.39	0.00263862		1894.38	0.01252986		2424.41	-0.01548761
304.6	0.36210351		834.59	0.19083528		1364.59	0.00232083		1894.58	0.0127772		2424.61	-0.01606156
304.8	0.36231216		834.79	0.19143662		1364.79	0.00244281		1894.78	0.01309176		2424.81	-0.01605147
305	0.36200575		834.99	0.19196957		1364.99	0.0044788		1894.98	0.01355211		2425.01	-0.01534489
305.2	0.36228881		835.19	0.19174982		1365.19	0.0060815		1895.18	0.01406238		2425.21	-0.01528629
305.4	0.36238029		835.39	0.19185191		1365.39	0.00666418		1895.38	0.01405592		2425.41	-0.01519005
305.6	0.36325359		835.59	0.19259898		1365.59	0.00682452		1895.58	0.01325463		2425.61	-0.01419248
305.8	0.3646953		835.79	0.19251365		1365.79	0.00680454		1895.78	0.01339241		2425.81	-0.01384165
306	0.36471956		835.99	0.19271399		1365.99	0.006342		1895.98	0.01377838		2426.01	-0.01410788
306.2	0.36587045		836.19	0.19232269		1366.19	0.00598511		1896.18	0.01455728		2426.21	-0.01363792
306.4	0.36683919		836.39	0.19286534		1366.39	0.00548756		1896.38	0.01437248		2426.41	-0.0140817
306.6	0.36704288		836.59	0.19415451		1366.59	0.00446376		1896.58	0.01334445		2426.61	-0.01482692
306.8	0.36776061		836.79	0.19378011		1366.79	0.00377087		1896.78	0.01384284		2426.81	-0.01524041
307	0.36859551		836.99	0.19319055		1366.99	0.00512127		1896.98	0.01347531		2427.01	-0.01453055
307.2	0.36980528		837.19	0.19433021		1367.19	0.00481522		1897.18	0.01300293		2427.21	-0.01510246
307.4	0.37002781		837.39	0.19416407		1367.39	0.00516196		1897.38	0.01167431		2427.41	-0.01646418
307.6	0.3695381		837.59	0.19386064		1367.59	0.00414554		1897.58	0.01133895		2427.61	-0.01643059
307.8	0.36906856		837.79	0.19474734		1367.79	0.00448255		1897.78	0.01154737		2427.81	-0.01673881
308	0.36943607		837.99	0.19452634		1367.99	0.00388095		1897.98	0.01179543		2428.01	-0.01701876
308.2	0.36889786		838.19	0.19440342		1368.19	0.00330523		1898.18	0.01136619		2428.21	-0.01768306
308.4	0.36842274		838.39	0.19581571		1368.39	0.00338988		1898.38	0.0111919		2428.41	-0.0169656
308.6	0.36849502		838.59	0.19602673		1368.59	0.00353141		1898.58	0.01113509		2428.61	-0.01680769
308.8	0.37025282		838.79	0.19578786		1368.79	0.0041482		1898.78	0.01120881		2428.81	-0.01619499
309	0.36953486		838.99	0.19651796		1368.99	0.00504538		1898.98	0.01114216		2429.01	-0.01494569
309.2	0.37050515		839.19	0.19710349		1369.19	0.00422739		1899.18	0.01137257		2429.21	-0.01496357
309.4	0.37049612		839.39	0.19850102		1369.39	0.00367646		1899.38	0.01114243		2429.41	-0.01451336
309.6	0.37127013		839.59	0.19971118		1369.59	0.00300377		1899.58	0.01078067		2429.61	-0.01369277
309.8	0.37152655		839.79	0.19918617		1369.79	0.00266754		1899.78	0.01113523		2429.81	-0.01321883
310	0.37137048		839.99	0.19920503		1369.99	0.00129806		1899.98	0.01215875		2430.01	-0.01316628
310.2	0.37188938		840.19	0.19868013		1370.19	0.00135163		1900.18	0.0126776		2430.21	-0.01281149
310.4	0.37174832		840.39	0.19931501		1370.39	0.00144353		1900.38	0.01201278		2430.41	-0.01207237
310.6	0.37180454		840.59	0.19888905		1370.59	0.00196427		1900.58	0.01291213		2430.61	-0.0119911
310.8	0.37232246		840.79	0.19866832		1370.79	0.00257451		1900.78	0.01295923		2430.81	-0.01153383
311	0.37181005		840.99	0.19814492		1370.99	0.00328734		1900.98	0.01314513		2431.01	-0.01132354
311.2	0.37141331		841.19	0.19832821		1371.19	0.00269951		1901.18	0.01292971		2431.21	-0.01176625
311.4	0.37147943		841.39	0.19908567		1371.39	0.00334421		1901.38	0.01315914		2431.41	-0.0112682
311.6	0.37071713		841.59	0.19893084		1371.59	0.00378907		1901.58	0.01458585		2431.61	-0.01093696
311.8	0.37146162		841.79	0.19926337		1371.79	0.0044276		1901.78	0.01504904		2431.81	-0.01111711
312	0.37259473		841.99	0.19901695		1371.99	0.00318747		1901.98	0.01503809		2432.01	-0.01244817
312.2	0.37356167		842.19	0.19920447		1372.19	0.0032844		1902.18	0.01504689		2432.21	-0.01224334
312.4	0.37471599		842.39	0.19897902		1372.39	0.00371008		1902.38	0.01511973		2432.41	-0.0115999
312.6	0.37401038		842.59	0.19778346		1372.59	0.00268999		1902.58	0.01509182		2432.61	-0.01242758
312.8	0.37408836		842.79	0.19708107		1372.79	0.00307038		1902.78	0.01524104		2432.81	-0.01329919
313	0.37371592		842.99	0.19785951		1372.99	0.00289808		1902.98	0.01429772		2433.01	-0.0135137
313.2	0.37411787		843.19	0.19849399		1373.19	0.00232432		1903.18	0.01341805		2433.21	-0.01466648
313.4	0.37416776		843.39	0.19930999		1373.39	0.00201946		1903.38	0.01330607		2433.41	-0.01482828
313.6	0.3744043		843.59	0.19898439		1373.59	0.00260734		1903.58	0.01352457		2433.61	-0.01598179
313.8	0.37521451		843.79	0.19857824		1373.79	0.00225755		1903.78	0.01321924		2433.81	-0.0163752
314	0.37549772		843.99	0.19871387		1373.99	0.00107749		1903.98	0.01311119		2434.01	-0.01745222
314.2	0.37576112		844.19	0.19907042		1374.19	0.00211206		1904.18	0.01262836		2434.21	-0.01798318
314.4	0.37616165		844.39	0.19963186		1374.39	0.00181822		1904.38	0.01223002		2434.41	-0.01696839
314.6	0.37722392		844.59	0.20014635		1374.59	0.00195955		1904.58	0.01270134		2434.61	-0.01680455
314.8	0.37733801		844.79	0.20113469		1374.79	0.00112087		1904.78	0.01307545		2434.81	-0.01628327
315	0.37674713		844.99	0.20189331		1374.99	0.00118165		1904.98	0.01360223		2435.01	-0.01604913
315.2	0.37689324		845.19	0.20243184		1375.19	0.00203514		1905.18	0.01390617		2435.21	-0.01532633
315.4	0.37772456		845.39	0.20328595		1375.39	0.00222856		1905.38	0.01500829		2435.41	-0.0145288
315.6	0.37751833		845.59	0.20393408		1375.59	0.00335798		1905.58	0.01558979		2435.61	-0.01416701
315.8	0.37766146		845.79	0.20444647		1375.79	0.00325516		1905.78	0.01497105		2435.81	-0.01470612
316	0.37938395		845.99	0.20560563		1375.99	0.00281248		1905.98	0.01514068		2436.01	-0.0150015
316.2	0.37901012		846.19	0.2054397		1376.19	0.0043119		1906.18	0.01454438		2436.21	-0.01421459
316.4	0.37812627		846.39	0.20496706		1376.39	0.00500888		1906.38	0.01381679		2436.41	-0.0140546
316.6	0.37706199		846.59	0.20475337		1376.59	0.00520235		1906.58	0.01339158		2436.61	-0.01524541
316.8	0.37770951		846.79	0.20512626		1376.79	0.00580116		1906.78	0.01319117		2436.81	-0.01610828
317	0.37827611		846.99	0.20555646		1376.99	0.00546005		1906.98	0.01249868		2437.01	-0.01646632
317.2	0.37880054		847.19	0.20629294		1377.19	0.00600729		1907.18	0.0122496		2437.21	-0.01645235
317.4	0.37974232		847.39	0.20624496		1377.39	0.00631884		1907.38	0.01231695		2437.41	-0.01662991
317.6	0.37999829		847.59	0.20577738		1377.59	0.00672187		1907.58	0.0118674		2437.61	-0.01765707
317.8	0.38084576		847.79	0.20549124		1377.79	0.00590298		1907.78	0.01188753		2437.81	-0.01806323
318	0.3809567		847.99	0.2054095		1377.99	0.00431327		1907.98	0.01172475		2438.01	-0.01804631
318.2	0.38187686		848.19	0.2053549		1378.19	0.00450314		1908.18	0.01167522		2438.21	-0.01695433
318.4	0.38241774		848.39	0.20494291		1378.39	0.00323916		1908.38	0.01218109		2438.41	-0.01603401
318.6	0.38249454		848.59	0.20612095		1378.59	0.0028058		1908.58	0.01262084		2438.61	-0.01591272
318.8	0.38169205		848.79	0.20558781		1378.79	0.00251955		1908.78	0.01318811		2438.81	-0.01631459
319	0.38093129		848.99	0.20535587		1378.99	0.00235364		1908.98	0.01297169		2439.01	-0.0154885
319.2	0.3805611		849.19	0.20515363		1379.19	0.00195638		1909.18	0.01322183		2439.21	-0.01546294
319.4	0.38080373		849.39	0.2054489		1379.39	0.00107222		1909.38	0.01379595		2439.41	-0.01485877
319.6	0.38025938		849.59	0.20620848		1379.59	0.00105164		1909.58	0.01383168		2439.61	-0.01442324
319.8	0.37991461		849.79	0.20665264		1379.79	0.00020648		1909.78	0.01352113		2439.81	-0.01470223
320	0.38089906		849.99	0.20695481		1379.99	0.00033553		1909.98	0.01337785		2440.01	-0.01520138
320.2	0.38007627		850.19	0.20666747		1380.19	0.00059843		1910.18	0.01327631		2440.21	-0.01541073
320.4	0.38061454		850.39	0.20733814		1380.39	0.00081671		1910.38	0.01303249		2440.41	-0.01505024
320.6	0.3805472		850.59	0.2077111		1380.59	0.00072245		1910.58	0.01298261		2440.61	-0.01512412
320.8	0.3810307		850.79	0.20859895		1380.79	0.00079756		1910.78	0.01309409		2440.81	-0.01492435
321	0.38197091		850.99	0.20929412		1380.99	0.00154196		1910.98	0.01275682		2441.01	-0.01505522
321.2	0.38285536		851.19	0.21051326		1381.19	0.00284668		1911.18	0.01257094		2441.21	-0.01474476
321.4	0.38327866		851.39	0.21098154		1381.39	0.00266765		1911.38	0.01284819		2441.41	-0.01532149
321.6	0.38388649		851.59	0.21144306		1381.59	0.00227042		1911.58	0.01303493		2441.61	-0.0161124
321.8	0.38490491		851.79	0.2116904		1381.79	0.00194308		1911.78	0.01371514		2441.81	-0.01631076
322	0.38557667		851.99	0.21184572		1381.99	0.00151962		1911.98	0.01322806		2442.01	-0.01601149
322.2	0.38561203		852.19	0.21162049		1382.19	0.00243261		1912.18	0.01357045		2442.21	-0.01541455
322.4	0.38631201		852.39	0.21208405		1382.39	0.00284051		1912.38	0.01330067		2442.41	-0.01584259
322.6	0.38594341		852.59	0.21223308		1382.59	0.0034058		1912.58	0.01328269		2442.61	-0.01628632
322.8	0.38560208		852.79	0.21129173		1382.79	0.00307893		1912.78	0.01346867		2442.81	-0.01647806
323	0.38550843		852.99	0.21113863		1382.99	0.00231698		1912.98	0.01389609		2443.01	-0.01550383
323.2	0.38585693		853.19	0.21208138		1383.19	0.00249307		1913.18	0.01371461		2443.21	-0.01588534
323.4	0.38656893		853.39	0.21228905		1383.39	0.00255943		1913.38	0.0137035		2443.41	-0.0150755
323.6	0.38721242		853.59	0.21198561		1383.59	0.00208497		1913.58	0.01408042		2443.61	-0.01556988
323.8	0.38763677		853.79	0.21197952		1383.79	0.00167885		1913.78	0.01334706		2443.81	-0.01614169
324	0.38774389		853.99	0.21147868		1383.99	0.00196156		1913.98	0.01417163		2444.01	-0.01635455
324.2	0.38806796		854.19	0.21097039		1384.19	0.0013678		1914.18	0.01416251		2444.21	-0.01566171
324.4	0.3875835		854.39	0.21165006		1384.39	0.00130051		1914.38	0.01402179		2444.41	-0.01491557
324.6	0.38707894		854.59	0.21074007		1384.59	0.00153745		1914.58	0.01372021		2444.61	-0.0142814
324.8	0.38744301		854.79	0.21079423		1384.79	0.00183129		1914.78	0.01323852		2444.81	-0.01460145
325	0.38730014		854.99	0.21128719		1384.99	0.0017233		1914.98	0.0124799		2445.01	-0.01520525
325.2	0.38697174		855.19	0.21090218		1385.19	0.00158893		1915.18	0.01254684		2445.21	-0.01514633
325.4	0.38607104		855.39	0.21061575		1385.39	0.00149608		1915.38	0.01217165		2445.41	-0.01623569
325.6	0.38682649		855.59	0.21070105		1385.59	0.00124699		1915.58	0.01123462		2445.61	-0.01664243
325.8	0.38686715		855.79	0.21043722		1385.79	0.00153188		1915.78	0.01159462		2445.81	-0.01670802
326	0.38602848		855.99	0.21033435		1385.99	0.0017273		1915.98	0.01091588		2446.01	-0.01587405
326.2	0.38545443		856.19	0.21075564		1386.19	0.00196005		1916.18	0.01145859		2446.21	-0.01479755
326.4	0.38578809		856.39	0.21167424		1386.39	0.00248579		1916.38	0.01197785		2446.41	-0.01469379
326.6	0.38513022		856.59	0.21172025		1386.59	0.00211952		1916.58	0.01218731		2446.61	-0.01497199
326.8	0.38641754		856.79	0.21183266		1386.79	0.00103805		1916.78	0.01148798		2446.81	-0.01530961
327	0.38688711		856.99	0.21214344		1386.99	0.00141353		1916.98	0.01155412		2447.01	-0.01518372
327.2	0.38833797		857.19	0.21295338		1387.19	0.0008554		1917.18	0.01155095		2447.21	-0.0149316
327.4	0.39011148		857.39	0.21264792		1387.39	0.00087174		1917.38	0.01220545		2447.41	-0.01472838
327.6	0.39063148		857.59	0.21159316		1387.59	0.0007496		1917.58	0.01318571		2447.61	-0.01500507
327.8	0.39085053		857.79	0.21224918		1387.79	0.00078279		1917.78	0.01196708		2447.81	-0.01535924
328	0.39070488		857.99	0.21243819		1387.99	0.00130996		1917.98	0.01335112		2448.01	-0.0156578
328.2	0.39133495		858.19	0.2120499		1388.19	0.0008237		1918.18	0.01325079		2448.21	-0.01547621
328.4	0.39123245		858.39	0.21291965		1388.39	0.0003089		1918.38	0.0141245		2448.41	-0.01471613
328.6	0.39233272		858.59	0.21213596		1388.59	0.00067922		1918.58	0.01461548		2448.61	-0.01469337
328.8	0.39298707		858.79	0.21258643		1388.79	0.00012877		1918.78	0.01426777		2448.81	-0.01581421
329	0.39264453		858.99	0.21277009		1388.99	0.0006207		1918.98	0.01448809		2449.01	-0.01579599
329.2	0.39210305		859.19	0.21233666		1389.19	0.00079713		1919.18	0.01464528		2449.21	-0.01589456
329.4	0.39161974		859.39	0.2123903		1389.39	0.00090748		1919.38	0.01434667		2449.41	-0.01656688
329.6	0.39159503		859.59	0.21282338		1389.59	0.00126604		1919.58	0.01493512		2449.61	-0.01596666
329.8	0.39044111		859.79	0.21240284		1389.79	0.0014699		1919.78	0.01555208		2449.81	-0.01527232
330	0.39026778		859.99	0.21318408		1389.99	0.00172499		1919.98	0.01570262		2450.01	-0.01390905
330.2	0.39072161		860.19	0.2137037		1390.19	0.0025252		1920.18	0.0162849		2450.21	-0.01292975
330.4	0.39072978		860.39	0.21413619		1390.39	0.00248599		1920.38	0.01605914		2450.41	-0.01296692
330.6	0.39194169		860.59	0.21461404		1390.59	0.00202288		1920.58	0.01507673		2450.61	-0.01305876
330.8	0.39276214		860.79	0.21502779		1390.79	0.00153617		1920.78	0.01371612		2450.81	-0.01338786
331	0.39255997		860.99	0.21529409		1390.99	0.00154193		1920.98	0.01433679		2451.01	-0.01307901
331.2	0.39368419		861.19	0.21512853		1391.19	0.00117459		1921.18	0.01494643		2451.21	-0.01313691
331.4	0.39407077		861.39	0.21508885		1391.39	0.00111565		1921.38	0.01539992		2451.41	-0.01330438
331.6	0.39370032		861.59	0.21420827		1391.59	0.00074487		1921.58	0.01553674		2451.61	-0.01363792
331.8	0.39350555		861.79	0.21515844		1391.79	0.00098973		1921.78	0.01465801		2451.81	-0.01454371
332	0.39267962		861.99	0.21592833		1391.99	0.00001845		1921.98	0.01542268		2452.01	-0.01518798
332.2	0.39307909		862.19	0.21598921		1392.19	-0.0002019		1922.18	0.01476741		2452.21	-0.01481878
332.4	0.39344254		862.39	0.21655537		1392.39	0.00001488		1922.38	0.01418303		2452.41	-0.01531397
332.6	0.39377449		862.59	0.2160763		1392.59	0.00077437		1922.58	0.01332616		2452.61	-0.01544135
332.8	0.39343423		862.79	0.21680981		1392.79	0.0006677		1922.78	0.0129465		2452.81	-0.01621727
333	0.3928169		862.99	0.21692935		1392.99	0.00177072		1922.98	0.01322843		2453.01	-0.01505788
333.2	0.39244366		863.19	0.21664026		1393.19	0.00190328		1923.18	0.01297317		2453.21	-0.0149221
333.4	0.39166004		863.39	0.21652711		1393.39	0.00259305		1923.38	0.0133248		2453.41	-0.01470678
333.6	0.39172943		863.59	0.21691272		1393.59	0.00344452		1923.58	0.01367813		2453.61	-0.01383568
333.8	0.39251147		863.79	0.21682591		1393.79	0.00299212		1923.78	0.01332752		2453.81	-0.01294958
334	0.39339821		863.99	0.21698871		1393.99	0.00363023		1923.98	0.01377423		2454.01	-0.01239963
334.2	0.39425002		864.19	0.21682515		1394.19	0.00368417		1924.18	0.01376705		2454.21	-0.01155851
334.4	0.39461309		864.39	0.21706004		1394.39	0.00329235		1924.38	0.01330585		2454.41	-0.0119774
334.6	0.39613115		864.59	0.21703081		1394.59	0.00390135		1924.58	0.01400376		2454.61	-0.01236894
334.8	0.39631012		864.79	0.21740529		1394.79	0.00335446		1924.78	0.01354829		2454.81	-0.01298637
335	0.39712284		864.99	0.21704445		1394.99	0.00283352		1924.98	0.01479345		2455.01	-0.01348497
335.2	0.39697731		865.19	0.21617838		1395.19	0.00253591		1925.18	0.01596715		2455.21	-0.01422435
335.4	0.397052		865.39	0.2162188		1395.39	0.00137449		1925.38	0.01638105		2455.41	-0.01436699
335.6	0.39636688		865.59	0.2159236		1395.59	0.00115995		1925.58	0.01592995		2455.61	-0.01497032
335.8	0.39610076		865.79	0.2168925		1395.79	0.00106596		1925.78	0.01570922		2455.81	-0.01560974
336	0.39553326		865.99	0.21730395		1395.99	0.00044476		1925.98	0.01531678		2456.01	-0.0166706
336.2	0.39614946		866.19	0.2168967		1396.19	0.0013177		1926.18	0.01539506		2456.21	-0.01720908
336.4	0.39626103		866.39	0.21732184		1396.39	0.00074179		1926.38	0.01433389		2456.41	-0.01784208
336.6	0.39642572		866.59	0.21767484		1396.59	0.00107892		1926.58	0.01438136		2456.61	-0.0168376
336.8	0.39608364		866.79	0.21884721		1396.79	0.00077728		1926.78	0.0152184		2456.81	-0.01688174
337	0.39594328		866.99	0.21919515		1396.99	0.00147866		1926.98	0.01539294		2457.01	-0.01592231
337.2	0.39594909		867.19	0.21963522		1397.19	0.00147213		1927.18	0.0149145		2457.21	-0.01592772
337.4	0.39529608		867.39	0.22076213		1397.39	0.00164863		1927.38	0.01532298		2457.41	-0.01497516
337.6	0.39616826		867.59	0.22166282		1397.59	0.0016956		1927.58	0.01521129		2457.61	-0.01444354
337.8	0.39628796		867.79	0.2210779		1397.79	0.00149081		1927.78	0.0153994		2457.81	-0.01364455
338	0.39641628		867.99	0.22109354		1397.99	0.00151287		1927.98	0.01586131		2458.01	-0.01337131
338.2	0.39768016		868.19	0.22096309		1398.19	0.0011976		1928.18	0.01515802		2458.21	-0.01392299
338.4	0.39760452		868.39	0.2216902		1398.39	0.00136098		1928.38	0.01480519		2458.41	-0.0141729
338.6	0.3984497		868.59	0.22186606		1398.59	0.00160252		1928.58	0.01554971		2458.61	-0.01433834
338.8	0.39909129		868.79	0.22227415		1398.79	0.00076363		1928.78	0.01583984		2458.81	-0.01481176
339	0.3990169		868.99	0.22182974		1398.99	0.00025727		1928.98	0.01589365		2459.01	-0.01547982
339.2	0.39832938		869.19	0.22111423		1399.19	-0.00053173		1929.18	0.01596118		2459.21	-0.01548875
339.4	0.39820693		869.39	0.22130514		1399.39	-0.00108264		1929.38	0.01550784		2459.41	-0.01559251
339.6	0.39763249		869.59	0.22095726		1399.59	-0.00153335		1929.58	0.01442686		2459.61	-0.01627624
339.8	0.39815692		869.79	0.22134358		1399.79	-0.00194129		1929.78	0.01417963		2459.81	-0.01672511
340	0.39867808		869.99	0.22132266		1399.99	-0.00195521		1929.98	0.01423781		2460.01	-0.01721788
340.2	0.39905267		870.19	0.22140948		1400.19	-0.00218643		1930.18	0.01380452		2460.21	-0.01656068
340.4	0.39976877		870.39	0.22097345		1400.39	-0.00246969		1930.38	0.01301309		2460.41	-0.01604037
340.6	0.39975261		870.59	0.22064931		1400.59	-0.00122408		1930.58	0.01234349		2460.61	-0.01581555
340.8	0.40014626		870.79	0.22125627		1400.79	-0.00057963		1930.78	0.01197357		2460.81	-0.01522716
341	0.40028782		870.99	0.22088627		1400.99	0.00069353		1930.98	0.01196413		2461.01	-0.01536395
341.2	0.40066997		871.19	0.22132789		1401.19	0.0016657		1931.18	0.01169614		2461.21	-0.01486578
341.4	0.40050666		871.39	0.22148331		1401.39	0.00331306		1931.38	0.01216529		2461.41	-0.01513925
341.6	0.40127649		871.59	0.22091837		1401.59	0.00377361		1931.58	0.01245559		2461.61	-0.01578247
341.8	0.40179364		871.79	0.22062585		1401.79	0.00401589		1931.78	0.01263406		2461.81	-0.01640854
342	0.40289175		871.99	0.22196299		1401.99	0.00430855		1931.98	0.012396		2462.01	-0.01671959
342.2	0.40325384		872.19	0.22240162		1402.19	0.00389054		1932.18	0.01194584		2462.21	-0.01777235
342.4	0.40374012		872.39	0.22367563		1402.39	0.00398283		1932.38	0.01319136		2462.41	-0.01795795
342.6	0.40392683		872.59	0.22376746		1402.59	0.00383653		1932.58	0.01411251		2462.61	-0.01865278
342.8	0.4036725		872.79	0.22421632		1402.79	0.00317819		1932.78	0.01504295		2462.81	-0.01862338
343	0.40285578		872.99	0.22423426		1402.99	0.00254409		1932.98	0.01538826		2463.01	-0.01863182
343.2	0.40285031		873.19	0.2235572		1403.19	0.0015167		1933.18	0.01625112		2463.21	-0.01836018
343.4	0.40293481		873.39	0.22408577		1403.39	0.0008985		1933.38	0.01691908		2463.41	-0.01870843
343.6	0.40370659		873.59	0.22375992		1403.59	-0.00015785		1933.58	0.01708707		2463.61	-0.01906434
343.8	0.40418132		873.79	0.22484741		1403.79	-0.00146165		1933.78	0.01732344		2463.81	-0.01794008
344	0.40469789		873.99	0.22462325		1403.99	-0.00220542		1933.98	0.01843498		2464.01	-0.01700342
344.2	0.40490038		874.19	0.22463531		1404.19	-0.00238382		1934.18	0.01821189		2464.21	-0.01629524
344.4	0.40548895		874.39	0.22428796		1404.39	-0.00254613		1934.38	0.01841759		2464.41	-0.01639783
344.6	0.40500226		874.59	0.22448884		1404.59	-0.00185413		1934.58	0.01787734		2464.61	-0.01632781
344.8	0.40514343		874.79	0.2251799		1404.79	-0.00216377		1934.78	0.01886262		2464.81	-0.01543116
345	0.40501621		874.99	0.22492198		1404.99	-0.00110413		1934.98	0.01871783		2465.01	-0.01572869
345.2	0.40538972		875.19	0.22540226		1405.19	-0.0010495		1935.18	0.01917522		2465.21	-0.01551238
345.4	0.40611554		875.39	0.22522619		1405.39	-0.00005141		1935.38	0.01933885		2465.41	-0.0157739
345.6	0.40697363		875.59	0.22501299		1405.59	-0.00071371		1935.58	0.01840992		2465.61	-0.01581031
345.8	0.40730893		875.79	0.22532243		1405.79	-0.00017473		1935.78	0.0185094		2465.81	-0.01644983
346	0.40722504		875.99	0.22609291		1405.99	0.00024117		1935.98	0.01799325		2466.01	-0.01628127
346.2	0.40705195		876.19	0.225977		1406.19	0.00025846		1936.18	0.01699127		2466.21	-0.01699892
346.4	0.40756828		876.39	0.2265671		1406.39	0.00140605		1936.38	0.01698266		2466.41	-0.01733836
346.6	0.40715841		876.59	0.22593231		1406.59	0.00213199		1936.58	0.016242		2466.61	-0.01745471
346.8	0.4071713		876.79	0.22578726		1406.79	0.00200968		1936.78	0.01642037		2466.81	-0.01713818
347	0.40728134		876.99	0.22490354		1406.99	0.00221635		1936.98	0.01644892		2467.01	-0.01760863
347.2	0.40771314		877.19	0.22414579		1407.19	0.00202682		1937.18	0.01618268		2467.21	-0.01765074
347.4	0.40859455		877.39	0.22483798		1407.39	0.00224545		1937.38	0.01615789		2467.41	-0.01811261
347.6	0.40848978		877.59	0.22398013		1407.59	0.00206396		1937.58	0.01572963		2467.61	-0.01811287
347.8	0.40822844		877.79	0.22426392		1407.79	0.00157382		1937.78	0.01479473		2467.81	-0.01789597
348	0.40832206		877.99	0.22390015		1407.99	0.00187034		1937.98	0.01551428		2468.01	-0.01856429
348.2	0.40761341		878.19	0.22429742		1408.19	0.00193699		1938.18	0.01441978		2468.21	-0.01854711
348.4	0.40715875		878.39	0.22476283		1408.39	0.00164425		1938.38	0.01407834		2468.41	-0.01912288
348.6	0.40614113		878.59	0.22489678		1408.59	0.0023435		1938.58	0.01443114		2468.61	-0.01873527
348.8	0.40653204		878.79	0.22556247		1408.79	0.0017638		1938.78	0.01488704		2468.81	-0.01789571
349	0.40759055		878.99	0.22573867		1408.99	0.00238773		1938.98	0.01458702		2469.01	-0.01734889
349.2	0.40758179		879.19	0.22592544		1409.19	0.00231621		1939.18	0.01481772		2469.21	-0.0172048
349.4	0.4076664		879.39	0.22664133		1409.39	0.00301062		1939.38	0.01448001		2469.41	-0.01713163
349.6	0.40761233		879.59	0.22721973		1409.59	0.00290385		1939.58	0.01343918		2469.61	-0.01727881
349.8	0.40798847		879.79	0.22788012		1409.79	0.00322781		1939.78	0.01367849		2469.81	-0.01681886
350	0.40819746		879.99	0.22969269		1409.99	0.00328477		1939.98	0.01282446		2470.01	-0.01646409
350.2	0.40932328		880.19	0.23030001		1410.19	0.00339874		1940.18	0.01229377		2470.21	-0.01632929
350.4	0.40994358		880.39	0.23084491		1410.39	0.00329435		1940.38	0.01254562		2470.41	-0.01611102
350.6	0.40953242		880.59	0.2305585		1410.59	0.00302927		1940.58	0.01253822		2470.61	-0.0160208
350.8	0.40928065		880.79	0.23091978		1410.79	0.00156766		1940.78	0.01280892		2470.81	-0.01545939
351	0.40922614		880.99	0.23122883		1410.99	0.00145552		1940.98	0.01292862		2471.01	-0.01529647
351.2	0.40990252		881.19	0.2316981		1411.19	0.00126136		1941.18	0.01311483		2471.21	-0.01490395
351.4	0.41046926		881.39	0.23146844		1411.39	0.00142994		1941.38	0.01287957		2471.41	-0.01540017
351.6	0.41045737		881.59	0.23081749		1411.59	0.00120482		1941.58	0.01297927		2471.61	-0.01530538
351.8	0.40990576		881.79	0.23113301		1411.79	0.00097735		1941.78	0.01332167		2471.81	-0.01604711
352	0.40923247		881.99	0.23140977		1411.99	0.00188579		1941.98	0.01405855		2472.01	-0.01622628
352.2	0.40928018		882.19	0.23119609		1412.19	0.00188771		1942.18	0.01372264		2472.21	-0.01630577
352.4	0.40935953		882.39	0.23138949		1412.39	0.00253966		1942.38	0.01464057		2472.41	-0.01649394
352.6	0.40936059		882.59	0.23094798		1412.59	0.00269321		1942.58	0.01589132		2472.61	-0.01607188
352.8	0.40952718		882.79	0.23151959		1412.79	0.00256261		1942.78	0.01619433		2472.81	-0.01641039
353	0.40984136		882.99	0.23143646		1412.99	0.00325396		1942.98	0.0160334		2473.01	-0.01658075
353.2	0.40965364		883.19	0.23163466		1413.19	0.00375315		1943.18	0.01613804		2473.21	-0.01721429
353.4	0.41009035		883.39	0.23216511		1413.39	0.00410122		1943.38	0.01630574		2473.41	-0.01757598
353.6	0.4104067		883.59	0.23249428		1413.59	0.00369302		1943.58	0.01597542		2473.61	-0.01734637
353.8	0.41100174		883.79	0.23210985		1413.79	0.0035653		1943.78	0.01673306		2473.81	-0.01706758
354	0.41133741		883.99	0.23221429		1413.99	0.00290275		1943.98	0.01710497		2474.01	-0.01695896
354.2	0.41177673		884.19	0.23194087		1414.19	0.00204025		1944.18	0.01695702		2474.21	-0.01637599
354.4	0.41123261		884.39	0.23113549		1414.39	0.00159374		1944.38	0.01745998		2474.41	-0.01598562
354.6	0.41127304		884.59	0.23117749		1414.59	0.00167873		1944.58	0.01752956		2474.61	-0.01548088
354.8	0.41224063		884.79	0.23064655		1414.79	0.00018782		1944.78	0.01790235		2474.81	-0.01591507
355	0.412472		884.99	0.23115631		1414.99	-0.0000797		1944.98	0.0178143		2475.01	-0.01530909
355.2	0.41320909		885.19	0.2310159		1415.19	0.00044275		1945.18	0.01681843		2475.21	-0.01519189
355.4	0.41373189		885.39	0.23045357		1415.39	0.00026903		1945.38	0.01634566		2475.41	-0.01516341
355.6	0.41450952		885.59	0.23076011		1415.59	0.00019495		1945.58	0.01657456		2475.61	-0.01463939
355.8	0.41408545		885.79	0.23102427		1415.79	0.00053338		1945.78	0.01632073		2475.81	-0.01517554
356	0.41466627		885.99	0.23060243		1415.99	0.0011666		1945.98	0.0161088		2476.01	-0.01497838
356.2	0.41594739		886.19	0.23076654		1416.19	0.00101669		1946.18	0.01592095		2476.21	-0.01537551
356.4	0.41555717		886.39	0.23188082		1416.39	0.00077921		1946.38	0.01603811		2476.41	-0.01565892
356.6	0.4155954		886.59	0.23233465		1416.59	0.00065108		1946.58	0.01590737		2476.61	-0.01565681
356.8	0.41487132		886.79	0.23323749		1416.79	0.00118586		1946.78	0.015794		2476.81	-0.01547747
357	0.41511437		886.99	0.2327681		1416.99	0.00118944		1946.98	0.01556475		2477.01	-0.01546712
357.2	0.41476478		887.19	0.23245308		1417.19	0.00192057		1947.18	0.01607503		2477.21	-0.0150622
357.4	0.41441554		887.39	0.23280566		1417.39	0.00193764		1947.38	0.0161686		2477.41	-0.01550643
357.6	0.41429235		887.59	0.23393124		1417.59	0.00189181		1947.58	0.01638028		2477.61	-0.01527691
357.8	0.41413292		887.79	0.23377803		1417.79	0.00202706		1947.78	0.01739937		2477.81	-0.01522413
358	0.41456276		887.99	0.23460983		1417.99	0.00140081		1947.98	0.01736002		2478.01	-0.0151588
358.2	0.41363991		888.19	0.23558301		1418.19	0.00145235		1948.18	0.01735758		2478.21	-0.01461899
358.4	0.41382441		888.39	0.23491525		1418.39	0.00210125		1948.38	0.01727287		2478.41	-0.01474158
358.6	0.4145647		888.59	0.23539333		1418.59	0.00250231		1948.58	0.01714991		2478.61	-0.01468903
358.8	0.41495338		888.79	0.23594861		1418.79	0.00118803		1948.78	0.0171041		2478.81	-0.0150293
359	0.41526556		888.99	0.23702914		1418.99	0.0018441		1948.98	0.0166062		2479.01	-0.01454106
359.2	0.41563363		889.19	0.23716411		1419.19	0.00199694		1949.18	0.01573046		2479.21	-0.01546527
359.4	0.41625826		889.39	0.23734743		1419.39	0.00124466		1949.38	0.01533993		2479.41	-0.01561097
359.6	0.41683701		889.59	0.23725972		1419.59	0.00194412		1949.58	0.01443373		2479.61	-0.01540323
359.8	0.41709626		889.79	0.23751892		1419.79	0.00235395		1949.78	0.01374948		2479.81	-0.01514506
360	0.41771958		889.99	0.23757899		1419.99	0.00242239		1949.98	0.01404804		2480.01	-0.01490003
360.2	0.41763735		890.19	0.23837029		1420.19	0.00237006		1950.18	0.01433304		2480.21	-0.01530803
360.4	0.4171375		890.39	0.23903416		1420.39	0.00164131		1950.38	0.01421968		2480.41	-0.01519212
360.6	0.4175122		890.59	0.23913587		1420.59	0.00240542		1950.58	0.01425679		2480.61	-0.01474152
360.8	0.4166278		890.79	0.23906172		1420.79	0.0026618		1950.78	0.01429593		2480.81	-0.01452237
361	0.41642923		890.99	0.23912693		1420.99	0.00208595		1950.98	0.01439089		2481.01	-0.0145482
361.2	0.41644726		891.19	0.23945158		1421.19	0.00274235		1951.18	0.01402447		2481.21	-0.01493731
361.4	0.41734634		891.39	0.24047863		1421.39	0.00244046		1951.38	0.01394515		2481.41	-0.01595594
361.6	0.41797124		891.59	0.24068216		1421.59	0.00263563		1951.58	0.01413831		2481.61	-0.01625274
361.8	0.41767212		891.79	0.23996886		1421.79	0.0018719		1951.78	0.01432907		2481.81	-0.01699939
362	0.41863455		891.99	0.23973323		1421.99	0.0017125		1951.98	0.0136512		2482.01	-0.01701942
362.2	0.41889081		892.19	0.23858318		1422.19	0.00193282		1952.18	0.01305982		2482.21	-0.0174167
362.4	0.42017433		892.39	0.2371204		1422.39	0.00163494		1952.38	0.0128585		2482.41	-0.01796472
362.6	0.42033136		892.59	0.23730546		1422.59	0.00173457		1952.58	0.01328582		2482.61	-0.01791695
362.8	0.42088588		892.79	0.23722369		1422.79	0.00134761		1952.78	0.01295848		2482.81	-0.01864696
363	0.42162066		892.99	0.23633892		1422.99	0.00141148		1952.98	0.01278379		2483.01	-0.01955755
363.2	0.42156142		893.19	0.23625294		1423.19	0.00118529		1953.18	0.01234892		2483.21	-0.019812
363.4	0.4215445		893.39	0.23581548		1423.39	0.00186198		1953.38	0.01241211		2483.41	-0.01991374
363.6	0.42187469		893.59	0.23642528		1423.59	0.00265726		1953.58	0.01252089		2483.61	-0.01874417
363.8	0.42209838		893.79	0.23749647		1423.79	0.00278038		1953.78	0.01372121		2483.81	-0.01811732
364	0.42166861		893.99	0.23806355		1423.99	0.00261289		1953.98	0.0149547		2484.01	-0.01846224
364.2	0.42104477		894.19	0.23914469		1424.19	0.0022273		1954.18	0.01599419		2484.21	-0.01879553
364.4	0.42057527		894.39	0.23970458		1424.39	0.0021183		1954.38	0.01606709		2484.41	-0.01926548
364.6	0.42036076		894.59	0.24058741		1424.59	0.00338791		1954.58	0.01741016		2484.61	-0.01869028
364.8	0.41906831		894.79	0.24172475		1424.79	0.00305678		1954.78	0.01798095		2484.81	-0.01760291
365	0.41880495		894.99	0.24240131		1424.99	0.00235775		1954.98	0.01818632		2485.01	-0.01728721
365.2	0.41856169		895.19	0.24353181		1425.19	0.00259914		1955.18	0.01706338		2485.21	-0.01690971
365.4	0.41859568		895.39	0.24370963		1425.39	0.00224592		1955.38	0.01728106		2485.41	-0.01679445
365.6	0.41887695		895.59	0.24342833		1425.59	0.00192218		1955.58	0.01805724		2485.61	-0.01641029
365.8	0.41875905		895.79	0.24325468		1425.79	0.0023349		1955.78	0.01765205		2485.81	-0.01618389
366	0.41978925		895.99	0.24307505		1425.99	0.00289545		1955.98	0.01752302		2486.01	-0.01557762
366.2	0.42002862		896.19	0.24180116		1426.19	0.00211916		1956.18	0.01699486		2486.21	-0.01576649
366.4	0.42101328		896.39	0.24177531		1426.39	0.00184272		1956.38	0.0166681		2486.41	-0.01549522
366.6	0.41993849		896.59	0.24068178		1426.59	0.00232971		1956.58	0.01626689		2486.61	-0.01568079
366.8	0.42101027		896.79	0.24027159		1426.79	0.00206517		1956.78	0.015932		2486.81	-0.01621927
367	0.42183456		896.99	0.24049214		1426.99	0.00167626		1956.98	0.01595831		2487.01	-0.01592049
367.2	0.42178528		897.19	0.24100742		1427.19	0.00203247		1957.18	0.01661389		2487.21	-0.01585025
367.4	0.42164688		897.39	0.2410844		1427.39	0.00165998		1957.38	0.01666281		2487.41	-0.01619244
367.6	0.42196309		897.59	0.24213686		1427.59	0.00188384		1957.58	0.01679155		2487.61	-0.01576732
367.8	0.42253899		897.79	0.24197891		1427.79	0.00172245		1957.78	0.01692846		2487.81	-0.01616138
368	0.4219882		897.99	0.24212054		1427.99	0.00133182		1957.98	0.01715354		2488.01	-0.01706184
368.2	0.42198942		898.19	0.24281929		1428.19	0.00093189		1958.18	0.01732687		2488.21	-0.01743945
368.4	0.42168778		898.39	0.24303316		1428.39	0.00077804		1958.38	0.01690813		2488.41	-0.01818868
368.6	0.42156668		898.59	0.24425029		1428.59	0.00139221		1958.58	0.01695857		2488.61	-0.01754874
368.8	0.4210305		898.79	0.245241		1428.79	0.00076414		1958.78	0.01604057		2488.81	-0.01821805
369	0.42054562		898.99	0.24484106		1428.99	0.00095187		1958.98	0.01587467		2489.01	-0.01856019
369.2	0.42010224		899.19	0.24545541		1429.19	0.00150847		1959.18	0.01556854		2489.21	-0.01845368
369.4	0.42072307		899.39	0.24496969		1429.39	0.0020591		1959.38	0.01589342		2489.41	-0.01838433
369.6	0.42158147		899.59	0.24407416		1429.59	0.00328739		1959.58	0.01633987		2489.61	-0.01779965
369.8	0.42131126		899.79	0.24354942		1429.79	0.00450356		1959.78	0.01564518		2489.81	-0.01723168
370	0.42209459		899.99	0.2430992		1429.99	0.00463366		1959.98	0.01553022		2490.01	-0.0172479
370.2	0.42271163		900.19	0.24214493		1430.19	0.00344922		1960.18	0.01396072		2490.21	-0.01736396
370.4	0.42379225		900.39	0.24191885		1430.39	0.0041241		1960.38	0.01396837		2490.41	-0.01793888
370.6	0.42337334		900.59	0.24106335		1430.59	0.00395929		1960.58	0.01459941		2490.61	-0.01815576
370.8	0.42532917		900.79	0.24164918		1430.79	0.00384531		1960.78	0.01461299		2490.81	-0.0183344
371	0.4262523		900.99	0.241292		1430.99	0.0036724		1960.98	0.01508409		2491.01	-0.01812464
371.2	0.4263846		901.19	0.24141277		1431.19	0.00299768		1961.18	0.01565107		2491.21	-0.01874318
371.4	0.42601537		901.39	0.24189117		1431.39	0.00215556		1961.38	0.01542445		2491.41	-0.01866795
371.6	0.42711538		901.59	0.24142023		1431.59	0.00183921		1961.58	0.01596063		2491.61	-0.01777631
371.8	0.42676468		901.79	0.24149433		1431.79	0.00117254		1961.78	0.01687723		2491.81	-0.01794229
372	0.42535453		901.99	0.24215802		1431.99	0.00058782		1961.98	0.01751849		2492.01	-0.0181093
372.2	0.42542078		902.19	0.24352246		1432.19	0.00000551		1962.18	0.01701614		2492.21	-0.01857775
372.4	0.4255496		902.39	0.24468916		1432.39	-0.0010677		1962.38	0.01741527		2492.41	-0.01914084
372.6	0.42439633		902.59	0.2454025		1432.59	-0.00141654		1962.58	0.01767921		2492.61	-0.0193707
372.8	0.42402601		902.79	0.24610613		1432.79	-0.00175908		1962.78	0.018365		2492.81	-0.02007886
373	0.42267635		902.99	0.24589992		1432.99	-0.00096133		1962.98	0.01872088		2493.01	-0.01996777
373.2	0.42219228		903.19	0.24662383		1433.19	-0.0007723		1963.18	0.0188016		2493.21	-0.0195417
373.4	0.422354		903.39	0.24600474		1433.39	0.00027984		1963.38	0.01867021		2493.41	-0.01950852
373.6	0.4218317		903.59	0.24608049		1433.59	0.00089823		1963.58	0.01878831		2493.61	-0.01958649
373.8	0.42209779		903.79	0.24687087		1433.79	0.00138448		1963.78	0.01894966		2493.81	-0.01893239
374	0.42325958		903.99	0.24781358		1433.99	0.00118218		1963.98	0.01888213		2494.01	-0.01922843
374.2	0.42390886		904.19	0.24881166		1434.19	0.00037932		1964.18	0.01810623		2494.21	-0.02013042
374.4	0.42450788		904.39	0.2485693		1434.39	0.00142546		1964.38	0.01816572		2494.41	-0.02004521
374.6	0.42453512		904.59	0.24840286		1434.59	0.00148733		1964.58	0.01853703		2494.61	-0.02069389
374.8	0.42529403		904.79	0.24902967		1434.79	0.00224651		1964.78	0.01790681		2494.81	-0.02095884
375	0.42545944		904.99	0.2492223		1434.99	0.00282911		1964.98	0.01723999		2495.01	-0.02124603
375.2	0.42497579		905.19	0.24991858		1435.19	0.00331838		1965.18	0.01650853		2495.21	-0.02149684
375.4	0.42473866		905.39	0.2498739		1435.39	0.00337393		1965.38	0.0165352		2495.41	-0.02083342
375.6	0.42489434		905.59	0.24880468		1435.59	0.00318007		1965.58	0.01714106		2495.61	-0.01999562
375.8	0.42390363		905.79	0.24943396		1435.79	0.00333777		1965.78	0.01741594		2495.81	-0.01997971
376	0.42432056		905.99	0.24928273		1435.99	0.00342606		1965.98	0.01577106		2496.01	-0.01967191
376.2	0.42497295		906.19	0.24907729		1436.19	0.00271474		1966.18	0.01507892		2496.21	-0.01941088
376.4	0.42473875		906.39	0.24886159		1436.39	0.00151608		1966.38	0.01413979		2496.41	-0.01913702
376.6	0.42476514		906.59	0.24827396		1436.59	0.00118411		1966.58	0.01290984		2496.61	-0.01878346
376.8	0.42612372		906.79	0.24827225		1436.79	0.00150959		1966.78	0.0127206		2496.81	-0.01906415
377	0.4258865		906.99	0.24743962		1436.99	0.00163512		1966.98	0.01279914		2497.01	-0.01936374
377.2	0.42637324		907.19	0.2464683		1437.19	0.00126729		1967.18	0.0135629		2497.21	-0.01887061
377.4	0.42655783		907.39	0.24545471		1437.39	0.00204794		1967.38	0.01368157		2497.41	-0.01976757
377.6	0.42705585		907.59	0.2458511		1437.59	0.0014068		1967.58	0.01392935		2497.61	-0.01914713
377.8	0.42849237		907.79	0.24611887		1437.79	0.00114179		1967.78	0.01425943		2497.81	-0.01928972
378	0.42938835		907.99	0.24650558		1437.99	0.00057506		1967.98	0.01434555		2498.01	-0.01995796
378.2	0.4298248		908.19	0.2462859		1438.19	0.00037204		1968.18	0.01421422		2498.21	-0.0205483
378.4	0.43049133		908.39	0.24561521		1438.39	0.00079567		1968.38	0.0141485		2498.41	-0.0201142
378.6	0.43096418		908.59	0.24587855		1438.59	0.00085236		1968.58	0.01454086		2498.61	-0.02072464
378.8	0.43169587		908.79	0.24655717		1438.79	0.00151841		1968.78	0.01429332		2498.81	-0.0204506
379	0.43181289		908.99	0.24640881		1438.99	0.00191755		1968.98	0.01390661		2499.01	-0.02033632
379.2	0.43195563		909.19	0.24636585		1439.19	0.0019898		1969.18	0.01435962		2499.21	-0.01970843
379.4	0.43217363		909.39	0.24640444		1439.39	0.00158183		1969.38	0.01517435		2499.41	-0.01893744
379.6	0.43237573		909.59	0.24612242		1439.59	0.00147677		1969.58	0.01543858		2499.61	-0.01799644
379.8	0.43265865		909.79	0.24632502		1439.79	0.0017454		1969.78	0.01502364		2499.81	-0.01714832
380	0.43265865		909.99	0.24632502		1439.98	0.0017454		1969.98	0.01502364		2500.01	-0.01714832
380.2	0.43243216		910.19	0.24489034		1440.18	0.00217273		1970.18	0.01441923		2500.21	-0.0166048
380.4	0.43234677		910.39	0.24422639		1440.38	0.00232651		1970.38	0.01343608		2500.41	-0.01651014
380.6	0.43236762		910.59	0.24307239		1440.58	0.0022655		1970.58	0.01234041		2500.61	-0.01546624
380.8	0.43234199		910.79	0.24222989		1440.78	0.00323196		1970.78	0.01193049		2500.81	-0.01459046
381	0.43257086		910.99	0.2415511		1440.98	0.00369703		1970.98	0.01080788		2501.01	-0.01353379
381.2	0.43221228		911.19	0.24128894		1441.18	0.00365205		1971.18	0.00984276		2501.21	-0.01349203
381.4	0.43272801		911.39	0.24115368		1441.38	0.00423823		1971.38	0.0089192		2501.41	-0.01319679
381.6	0.43217771		911.59	0.24066081		1441.58	0.00479946		1971.58	0.00838695		2501.61	-0.01323947
381.8	0.43159577		911.79	0.24047873		1441.78	0.00439082		1971.78	0.0082982		2501.81	-0.01353222
382	0.4310547		911.99	0.24041599		1441.98	0.00510785		1971.98	0.00857099		2502.01	-0.01330634
382.2	0.43075387		912.19	0.24068795		1442.18	0.00474973		1972.18	0.00869391		2502.21	-0.01359073
382.4	0.43118443		912.39	0.24049591		1442.38	0.00429969		1972.38	0.00851413		2502.41	-0.01342253
382.6	0.43138099		912.59	0.24135662		1442.58	0.00379815		1972.58	0.00875513		2502.61	-0.01282581
382.8	0.43134817		912.79	0.24088823		1442.78	0.00456042		1972.78	0.00889112		2502.81	-0.01259567
383	0.43169513		912.99	0.24165166		1442.98	0.00443276		1972.98	0.00808884		2503.01	-0.01262366
383.2	0.43181209		913.19	0.24176519		1443.18	0.00368208		1973.18	0.00891292		2503.21	-0.01270867
383.4	0.43127909		913.39	0.24258447		1443.38	0.00349601		1973.38	0.00839945		2503.41	-0.01155667
383.6	0.4313053		913.59	0.24287285		1443.58	0.00340806		1973.58	0.00858333		2503.61	-0.01134372
383.8	0.4315195		913.79	0.24253753		1443.78	0.00292701		1973.78	0.00887282		2503.81	-0.01179396
384	0.43064461		913.99	0.24346982		1443.98	0.00310218		1973.98	0.00839455		2504.01	-0.01171211
384.2	0.43094358		914.19	0.24394844		1444.18	0.00255038		1974.18	0.0091077		2504.21	-0.01209539
384.4	0.4314032		914.39	0.24465652		1444.38	0.0017092		1974.38	0.00883724		2504.41	-0.01253924
384.6	0.43237827		914.59	0.24378845		1444.58	0.00159558		1974.58	0.00916462		2504.61	-0.01283946
384.8	0.43307389		914.79	0.24414616		1444.78	0.00139738		1974.78	0.00967666		2504.81	-0.01314492
385	0.43311957		914.99	0.24380321		1444.98	0.00041967		1974.98	0.0093072		2505.01	-0.01324236
385.2	0.43336834		915.19	0.24375411		1445.18	-0.00021758		1975.18	0.00891109		2505.21	-0.01359113
385.4	0.43432927		915.39	0.24334267		1445.38	0.00006448		1975.38	0.00899202		2505.41	-0.01258497
385.6	0.43361482		915.59	0.24201919		1445.58	0.00058903		1975.58	0.00969607		2505.61	-0.01241154
385.8	0.43404492		915.79	0.24142979		1445.78	0.00013727		1975.78	0.00998859		2505.81	-0.01185808
386	0.43366861		915.99	0.2408837		1445.98	0.00150239		1975.98	0.01015663		2506.01	-0.01085327
386.2	0.43407326		916.19	0.24157076		1446.18	0.00166303		1976.18	0.00964849		2506.21	-0.01044089
386.4	0.4333893		916.39	0.24207623		1446.38	0.00204831		1976.38	0.01002844		2506.41	-0.01053689
386.6	0.43361186		916.59	0.24250664		1446.58	0.00212366		1976.58	0.0101682		2506.61	-0.01049302
386.8	0.43317878		916.79	0.24239232		1446.78	0.00257812		1976.78	0.00959977		2506.81	-0.01047072
387	0.43379309		916.99	0.24372889		1446.98	0.00194276		1976.98	0.00903844		2507.01	-0.01048135
387.2	0.43362415		917.19	0.24404147		1447.18	0.00235938		1977.18	0.00906439		2507.21	-0.01010122
387.4	0.43289866		917.39	0.24488273		1447.38	0.0027611		1977.38	0.00880787		2507.41	-0.01038052
387.6	0.43322224		917.59	0.24547461		1447.58	0.00263127		1977.58	0.0084054		2507.61	-0.01085034
387.8	0.4344199		917.79	0.24665034		1447.78	0.00239645		1977.78	0.00849736		2507.81	-0.01051648
388	0.43384651		917.99	0.24683536		1447.98	0.00175575		1977.98	0.00825155		2508.01	-0.01045645
388.2	0.43424685		918.19	0.2468409		1448.18	0.00110431		1978.18	0.00813785		2508.21	-0.01185719
388.4	0.43459375		918.39	0.24640757		1448.38	0.00051039		1978.38	0.00787877		2508.41	-0.01223995
388.6	0.43442274		918.59	0.2457089		1448.58	0.000537		1978.58	0.00795255		2508.61	-0.01301429
388.8	0.4338618		918.79	0.24527264		1448.78	0.00018439		1978.78	0.00810771		2508.81	-0.01259723
389	0.43387989		918.99	0.24447108		1448.98	0.0008152		1978.98	0.00785629		2509.01	-0.01243052
389.2	0.43450614		919.19	0.24456652		1449.18	0.00188196		1979.18	0.00705172		2509.21	-0.01239627
389.4	0.4342701		919.39	0.24342814		1449.38	0.00297741		1979.38	0.00743912		2509.41	-0.0124803
389.6	0.43397204		919.59	0.24322386		1449.58	0.00371984		1979.58	0.00722025		2509.61	-0.01252517
389.8	0.43387707		919.79	0.24359567		1449.78	0.00411457		1979.78	0.00707348		2509.81	-0.01240304
390	0.43316015		919.99	0.24378786		1449.98	0.00490705		1979.98	0.00790716		2510.01	-0.0121828
390.2	0.43357202		920.19	0.24472502		1450.18	0.00467069		1980.18	0.00695637		2510.21	-0.01192635
390.4	0.43298005		920.39	0.24392385		1450.38	0.0039362		1980.38	0.0068874		2510.41	-0.0117215
390.6	0.43297231		920.59	0.24341382		1450.58	0.0033873		1980.58	0.00627565		2510.61	-0.01233057
390.8	0.43215717		920.79	0.24372147		1450.78	0.00352428		1980.78	0.00569101		2510.81	-0.01236033
391	0.43233927		920.99	0.24411371		1450.98	0.00303719		1980.98	0.00610789		2511.01	-0.01207344
391.2	0.43351515		921.19	0.24343744		1451.18	0.00340364		1981.18	0.00555757		2511.21	-0.01232086
391.4	0.43350428		921.39	0.24365211		1451.38	0.00264814		1981.38	0.00560532		2511.41	-0.01317407
391.6	0.43413908		921.59	0.24418328		1451.58	0.00102532		1981.58	0.00539314		2511.61	-0.01323636
391.8	0.43503367		921.79	0.24467964		1451.78	0.00008809		1981.78	0.00592869		2511.81	-0.01237376
392	0.43397693		921.99	0.24370013		1451.98	-0.00069311		1981.98	0.00593733		2512.01	-0.01205175
392.2	0.43392023		922.19	0.24391071		1452.18	-0.00053151		1982.18	0.00559085		2512.21	-0.01144904
392.4	0.43355627		922.39	0.24323995		1452.38	-0.00022019		1982.38	0.00622176		2512.41	-0.01136838
392.6	0.43280366		922.59	0.24308713		1452.58	0.00033416		1982.58	0.00648278		2512.61	-0.01105126
392.8	0.43323205		922.79	0.24290223		1452.78	0.00113952		1982.78	0.00613224		2512.81	-0.01100123
393	0.4335827		922.99	0.24297618		1452.98	0.00266473		1982.98	0.00607094		2513.01	-0.01162337
393.2	0.43389511		923.19	0.24261206		1453.18	0.00407708		1983.18	0.00560014		2513.21	-0.0123352
393.4	0.43316639		923.39	0.24239324		1453.38	0.0051135		1983.38	0.00516549		2513.41	-0.01257576
393.6	0.43401378		923.59	0.24265801		1453.58	0.00538072		1983.58	0.00455498		2513.61	-0.01207639
393.8	0.43380832		923.79	0.24284052		1453.78	0.00560443		1983.78	0.00470128		2513.81	-0.01221768
394	0.43431675		923.99	0.24189054		1453.98	0.00526519		1983.98	0.00515012		2514.01	-0.01226374
394.2	0.43431989		924.19	0.24220301		1454.18	0.00550864		1984.18	0.00359816		2514.21	-0.01218031
394.4	0.43413029		924.39	0.24192737		1454.38	0.00560986		1984.38	0.0040877		2514.41	-0.01257927
394.6	0.43329908		924.59	0.24252413		1454.58	0.00614969		1984.58	0.00408528		2514.61	-0.01370631
394.8	0.43390149		924.79	0.24353646		1454.78	0.00650497		1984.78	0.00432865		2514.81	-0.01349484
395	0.43467853		924.99	0.24402626		1454.98	0.00641301		1984.98	0.00491473		2515.01	-0.01424282
395.2	0.43499275		925.19	0.24420879		1455.18	0.0058353		1985.18	0.00491848		2515.21	-0.01425074
395.4	0.43359126		925.39	0.24489717		1455.38	0.00562785		1985.38	0.0052974		2515.41	-0.01393451
395.6	0.43441905		925.59	0.24581305		1455.58	0.00472903		1985.58	0.00552863		2515.61	-0.01379002
395.8	0.43464836		925.79	0.24598202		1455.78	0.00460588		1985.78	0.00598903		2515.81	-0.0136894
396	0.43413752		925.99	0.24566774		1455.98	0.00408816		1985.98	0.00603499		2516.01	-0.01375082
396.2	0.43379124		926.19	0.2452489		1456.18	0.00496245		1986.18	0.00698402		2516.21	-0.01321295
396.4	0.43294402		926.39	0.2458102		1456.38	0.00401521		1986.38	0.00702113		2516.41	-0.01379923
396.6	0.43207659		926.59	0.24543078		1456.58	0.00383595		1986.58	0.0070412		2516.61	-0.01275247
396.8	0.43276631		926.79	0.24503968		1456.78	0.00336903		1986.78	0.00646464		2516.81	-0.01278081
397	0.4321433		926.99	0.24507458		1456.98	0.00414093		1986.98	0.00660035		2517.01	-0.01320419
397.2	0.43249488		927.19	0.24490235		1457.18	0.00422242		1987.18	0.00490003		2517.21	-0.01381636
397.4	0.43157987		927.39	0.24511979		1457.38	0.00360632		1987.38	0.00363735		2517.41	-0.01285102
397.6	0.43323992		927.59	0.24451173		1457.58	0.00280879		1987.58	0.00333782		2517.61	-0.01251659
397.8	0.43332135		927.79	0.24441575		1457.78	0.00171807		1987.78	0.00334465		2517.81	-0.01273352
398	0.43292075		927.99	0.24339809		1457.98	0.00161027		1987.98	0.00324788		2518.01	-0.01259256
398.2	0.43266329		928.19	0.24357437		1458.18	0.00117917		1988.18	0.00265347		2518.21	-0.01240522
398.4	0.43274171		928.39	0.24344984		1458.38	0.00074464		1988.38	0.00306624		2518.41	-0.01262871
398.6	0.43207673		928.59	0.24429619		1458.58	0.00089146		1988.58	0.00220258		2518.61	-0.01310525
398.8	0.43317798		928.79	0.24495016		1458.78	0.00095461		1988.78	0.00202341		2518.81	-0.01361735
399	0.43252912		928.99	0.24474076		1458.98	0.00153128		1988.98	0.00183994		2519.01	-0.0142446
399.2	0.43272922		929.19	0.2448213		1459.18	0.00099548		1989.18	0.00188432		2519.21	-0.01395699
399.4	0.43250401		929.39	0.24433351		1459.38	0.00258137		1989.38	0.00170424		2519.41	-0.01438697
399.6	0.43356985		929.59	0.2445416		1459.58	0.0030074		1989.58	0.00221036		2519.61	-0.0150944
399.8	0.43340833		929.79	0.24409822		1459.78	0.00328708		1989.78	0.00259549		2519.81	-0.01578932
400	0.43304696		929.99	0.24336046		1459.98	0.00383269		1989.98	0.00352381		2520.01	-0.01534358
400.2	0.43300771		930.19	0.24362193		1460.18	0.0057011		1990.18	0.00434906		2520.21	-0.01508755
400.4	0.43152061		930.39	0.24396509		1460.38	0.00529382		1990.38	0.00426948		2520.41	-0.01537869
400.6	0.4317219		930.59	0.24297713		1460.58	0.00628546		1990.58	0.00502754		2520.61	-0.01474546
400.8	0.43226458		930.79	0.2428633		1460.78	0.00632496		1990.78	0.00555978		2520.81	-0.01511994
401	0.43081029		930.99	0.24281914		1460.98	0.00735193		1990.98	0.00550234		2521.01	-0.0151418
401.2	0.43108326		931.19	0.24270262		1461.18	0.00730487		1991.18	0.00541712		2521.21	-0.01481407
401.4	0.43039136		931.39	0.24260596		1461.38	0.00643227		1991.38	0.00608931		2521.41	-0.01387715
401.6	0.43163662		931.59	0.24209935		1461.58	0.00627734		1991.58	0.00694262		2521.61	-0.01430481
401.8	0.43064873		931.79	0.24227783		1461.78	0.0052404		1991.78	0.00719131		2521.81	-0.01394965
402	0.42991158		931.99	0.24294703		1461.98	0.00507745		1991.98	0.00749827		2522.01	-0.01346069
402.2	0.43039326		932.19	0.24321756		1462.18	0.00434742		1992.18	0.0074309		2522.21	-0.01350962
402.4	0.43110788		932.39	0.24371477		1462.38	0.0035144		1992.38	0.00643957		2522.41	-0.01422951
402.6	0.43118527		932.59	0.24495604		1462.58	0.00273135		1992.58	0.00553607		2522.61	-0.0149177
402.8	0.43211645		932.79	0.24493318		1462.78	0.00267039		1992.78	0.00571776		2522.81	-0.01530402
403	0.43266976		932.99	0.24478673		1462.98	0.00221122		1992.98	0.00577018		2523.01	-0.0146962
403.2	0.43377971		933.19	0.24460247		1463.18	0.0014816		1993.18	0.00469132		2523.21	-0.01405626
403.4	0.43355276		933.39	0.244061		1463.38	0.00188814		1993.38	0.00428364		2523.41	-0.01362142
403.6	0.43444664		933.59	0.24461274		1463.58	0.00147321		1993.58	0.00463251		2523.61	-0.01355421
403.8	0.43534684		933.79	0.24409478		1463.78	0.00179465		1993.78	0.00490997		2523.81	-0.01327103
404	0.4356158		933.99	0.24416507		1463.98	0.00275167		1993.98	0.00495165		2524.01	-0.01262888
404.2	0.43589012		934.19	0.24415658		1464.18	0.00340963		1994.18	0.00431343		2524.21	-0.01327864
404.4	0.43533448		934.39	0.24305846		1464.38	0.00394891		1994.38	0.00334732		2524.41	-0.01268762
404.6	0.43679726		934.59	0.24260992		1464.58	0.00447279		1994.58	0.00408911		2524.61	-0.0122696
404.8	0.43662318		934.79	0.24233829		1464.78	0.00397014		1994.78	0.00450481		2524.81	-0.01225938
405	0.43543428		934.99	0.24273278		1464.98	0.00421588		1994.98	0.0046993		2525.01	-0.01255196
405.2	0.43576036		935.19	0.24355799		1465.18	0.00395003		1995.18	0.00539593		2525.21	-0.01242823
405.4	0.43475227		935.39	0.24300664		1465.38	0.0028902		1995.38	0.0059299		2525.41	-0.01391129
405.6	0.43511698		935.59	0.24286317		1465.58	0.00340802		1995.58	0.00589125		2525.61	-0.01454377
405.8	0.43418943		935.79	0.24344514		1465.78	0.00313412		1995.78	0.00551139		2525.81	-0.01500871
406	0.43397866		935.99	0.24398753		1465.98	0.00331599		1995.98	0.00562359		2526.01	-0.01483611
406.2	0.43397609		936.19	0.24436289		1466.18	0.0027183		1996.18	0.00505352		2526.21	-0.01530275
406.4	0.43406289		936.39	0.24440835		1466.38	0.00198725		1996.38	0.00501443		2526.41	-0.01607637
406.6	0.43445503		936.59	0.2443328		1466.58	0.00220887		1996.58	0.00597275		2526.61	-0.01617539
406.8	0.43463632		936.79	0.24394567		1466.78	0.00277106		1996.78	0.00612836		2526.81	-0.01598419
407	0.4354537		936.99	0.24318329		1466.98	0.00255568		1996.98	0.00533629		2527.01	-0.01504564
407.2	0.43462672		937.19	0.24266287		1467.18	0.00255453		1997.18	0.00467064		2527.21	-0.01422389
407.4	0.43465408		937.39	0.24169939		1467.38	0.00363605		1997.38	0.00488508		2527.41	-0.01408995
407.6	0.43481		937.59	0.24133542		1467.58	0.00447132		1997.58	0.00491078		2527.61	-0.01395432
407.8	0.43419223		937.79	0.24059755		1467.78	0.00541073		1997.78	0.00397136		2527.81	-0.01360944
408	0.43402908		937.99	0.24072509		1467.98	0.00588748		1997.98	0.0033037		2528.01	-0.01273845
408.2	0.4338095		938.19	0.24043951		1468.18	0.0057966		1998.18	0.00315154		2528.21	-0.01255936
408.4	0.43253667		938.39	0.24131402		1468.38	0.00604454		1998.38	0.00268848		2528.41	-0.01199787
408.6	0.4322729		938.59	0.24234178		1468.58	0.00564296		1998.58	0.00335021		2528.61	-0.01238661
408.8	0.43090408		938.79	0.24277449		1468.78	0.00537788		1998.78	0.0031497		2528.81	-0.01305405
409	0.42950568		938.99	0.24333639		1468.98	0.00478202		1998.98	0.00323351		2529.01	-0.01413822
409.2	0.42948378		939.19	0.24361877		1469.18	0.00372188		1999.18	0.00291254		2529.21	-0.01326315
409.4	0.42935552		939.39	0.2436769		1469.38	0.00313959		1999.38	0.00162021		2529.41	-0.01384668
409.6	0.42943127		939.59	0.2437788		1469.58	0.00389586		1999.58	0.00084092		2529.61	-0.01355171
409.8	0.42950104		939.79	0.24455057		1469.78	0.0037299		1999.78	0.00073506		2529.81	-0.01363417
410	0.42923347		939.99	0.24496376		1469.98	0.00304492		1999.98	0.00133514		2530.01	-0.01362716
410.2	0.42960191		940.19	0.24496072		1470.18	0.00264358		2000.18	0.00132533		2530.21	-0.0142252
410.4	0.42986643		940.39	0.24434923		1470.38	0.00268185		2000.38	0.00201417		2530.41	-0.01423654
410.6	0.43064935		940.59	0.244353		1470.58	0.00316343		2000.58	0.00213716		2530.61	-0.01432223
410.8	0.43065615		940.79	0.24485598		1470.78	0.00285432		2000.78	0.0019083		2530.81	-0.01473687
411	0.4315245		940.99	0.24419022		1470.98	0.00335846		2000.98	0.00184241		2531.01	-0.01479508
411.2	0.43064609		941.19	0.24384457		1471.18	0.003582		2001.18	0.00171241		2531.21	-0.01489347
411.4	0.43178557		941.39	0.24319649		1471.38	0.0051148		2001.38	0.0015454		2531.41	-0.01597849
411.6	0.43199538		941.59	0.24345954		1471.58	0.00514356		2001.58	0.00230822		2531.61	-0.01589235
411.8	0.43233393		941.79	0.24346124		1471.78	0.00546229		2001.78	0.00250503		2531.81	-0.01600288
412	0.43259739		941.99	0.24368638		1471.98	0.00567285		2001.98	0.00256016		2532.01	-0.01565735
412.2	0.43220844		942.19	0.2442706		1472.18	0.00549107		2002.18	0.00288565		2532.21	-0.01629997
412.4	0.43191431		942.39	0.24421862		1472.38	0.00561424		2002.38	0.00277122		2532.41	-0.01687146
412.6	0.43150992		942.59	0.24444752		1472.58	0.00485892		2002.58	0.00331516		2532.61	-0.01695523
412.8	0.43164956		942.79	0.24413366		1472.78	0.00488961		2002.78	0.00387197		2532.81	-0.01718955
413	0.43174628		942.99	0.24449803		1472.98	0.00385726		2002.98	0.00382674		2533.01	-0.01725445
413.2	0.43245867		943.19	0.24467187		1473.18	0.0041115		2003.18	0.00364885		2533.21	-0.01661386
413.4	0.43266643		943.39	0.24462857		1473.38	0.00437131		2003.38	0.00321629		2533.41	-0.01620676
413.6	0.43244307		943.59	0.24420299		1473.58	0.00398751		2003.58	0.00375209		2533.61	-0.01576142
413.8	0.43274623		943.79	0.24411383		1473.78	0.0031751		2003.78	0.00364565		2533.81	-0.01531021
414	0.43161786		943.99	0.2435172		1473.98	0.00219205		2003.98	0.00338645		2534.01	-0.01508624
414.2	0.43128437		944.19	0.2436735		1474.18	0.00217567		2004.18	0.00316902		2534.21	-0.01478697
414.4	0.4310757		944.39	0.24358785		1474.38	0.00156736		2004.38	0.00294081		2534.41	-0.01459949
414.6	0.43067438		944.59	0.24349861		1474.58	0.00150677		2004.58	0.00252025		2534.61	-0.01512166
414.8	0.43010345		944.79	0.24340502		1474.78	0.00075865		2004.78	0.00212908		2534.81	-0.01478621
415	0.43021203		944.99	0.24301908		1474.98	0.00178291		2004.98	0.00142743		2535.01	-0.01481322
415.2	0.42929349		945.19	0.24272645		1475.18	0.00156471		2005.18	0.00067809		2535.21	-0.01495824
415.4	0.43007546		945.39	0.24277865		1475.38	0.00180284		2005.38	0.00096168		2535.41	-0.01494279
415.6	0.43051083		945.59	0.24297002		1475.58	0.0015221		2005.58	0.00099434		2535.61	-0.01456513
415.8	0.43089677		945.79	0.24270648		1475.78	0.00209002		2005.78	0.00029541		2535.81	-0.01420217
416	0.43081807		945.99	0.24282484		1475.98	0.00200857		2005.98	-0.0004825		2536.01	-0.01313845
416.2	0.4312		946.19	0.24336885		1476.18	0.00268654		2006.18	-0.00003701		2536.21	-0.01323422
416.4	0.43104396		946.39	0.24316818		1476.38	0.00280571		2006.38	0.00054771		2536.41	-0.01240818
416.6	0.43094879		946.59	0.24455244		1476.58	0.00185071		2006.58	0.000924		2536.61	-0.01173123
416.8	0.43185893		946.79	0.24462636		1476.78	0.00300935		2006.78	0.00117267		2536.81	-0.01259868
417	0.43160082		946.99	0.24446073		1476.98	0.00325519		2006.98	0.0006507		2537.01	-0.01304513
417.2	0.43236126		947.19	0.24387655		1477.18	0.00417044		2007.18	0.00085321		2537.21	-0.01252132
417.4	0.4322835		947.39	0.2438297		1477.38	0.00419237		2007.38	0.00031366		2537.41	-0.01123604
417.6	0.43270088		947.59	0.24360107		1477.58	0.00453722		2007.58	-0.00076268		2537.61	-0.01085044
417.8	0.43266221		947.79	0.24314068		1477.78	0.00513895		2007.78	-0.00106194		2537.81	-0.0113604
418	0.43231133		947.99	0.24324864		1477.98	0.00517701		2007.98	-0.00056418		2538.01	-0.01242678
418.2	0.43275194		948.19	0.2430013		1478.18	0.00586716		2008.18	0.00034936		2538.21	-0.01331294
418.4	0.43280049		948.39	0.24176693		1478.38	0.00593331		2008.38	-0.00003283		2538.41	-0.0127851
418.6	0.43327904		948.59	0.24115925		1478.58	0.00611946		2008.58	-0.00008575		2538.61	-0.01301139
418.8	0.43303211		948.79	0.24156903		1478.78	0.00605714		2008.78	0.00006271		2538.81	-0.01284316
419	0.43318357		948.99	0.24125813		1478.98	0.00621474		2008.98	0.00033562		2539.01	-0.01393608
419.2	0.43313461		949.19	0.24097387		1479.18	0.00533785		2009.18	0.00054493		2539.21	-0.01413046
419.4	0.43370565		949.39	0.24103544		1479.38	0.00442345		2009.38	0.00125053		2539.41	-0.01440518
419.6	0.43323836		949.59	0.24038594		1479.58	0.00458181		2009.58	0.00102919		2539.61	-0.01413767
419.8	0.43288364		949.79	0.24034307		1479.78	0.00487535		2009.78	0.0010752		2539.81	-0.01394805
420	0.43183446		949.99	0.24062501		1479.98	0.00538117		2009.98	0.00148092		2540.01	-0.01426497
420.2	0.43086526		950.19	0.24131818		1480.18	0.00542548		2010.18	0.00224969		2540.21	-0.01455835
420.4	0.42955418		950.39	0.24189799		1480.38	0.00455831		2010.38	0.00210554		2540.41	-0.01416963
420.6	0.42931789		950.59	0.24293332		1480.58	0.00434015		2010.58	0.00172789		2540.61	-0.01473065
420.8	0.42833105		950.79	0.24236501		1480.78	0.0045538		2010.78	0.00175168		2540.81	-0.01476911
421	0.42831252		950.99	0.24156815		1480.98	0.00390274		2010.98	0.00124367		2541.01	-0.01564477
421.2	0.42863734		951.19	0.24221912		1481.18	0.00384394		2011.18	0.00096272		2541.21	-0.01499312
421.4	0.42834716		951.39	0.24270032		1481.38	0.00323904		2011.38	0.00028148		2541.41	-0.01458028
421.6	0.42865987		951.59	0.24364496		1481.58	0.00296094		2011.58	-0.00056793		2541.61	-0.01512417
421.8	0.42890956		951.79	0.24358572		1481.78	0.00189428		2011.78	0.00007553		2541.81	-0.01563082
422	0.42958412		951.99	0.24460621		1481.98	0.00160403		2011.98	0.0010175		2542.01	-0.01506484
422.2	0.43066001		952.19	0.24423216		1482.18	0.00212904		2012.18	0.00049248		2542.21	-0.01383709
422.4	0.43114097		952.39	0.24391725		1482.38	0.00148405		2012.38	-0.00010834		2542.41	-0.01351391
422.6	0.43238873		952.59	0.24383269		1482.58	0.00115016		2012.58	0.00032545		2542.61	-0.01330689
422.8	0.43300719		952.79	0.24444114		1482.78	0.0005939		2012.78	0.00090051		2542.81	-0.01295479
423	0.43316688		952.99	0.24415682		1482.98	0.0008674		2012.98	0.00039609		2543.01	-0.01342864
423.2	0.43285423		953.19	0.24362995		1483.18	0.00127625		2013.18	-0.00014706		2543.21	-0.01348661
423.4	0.43264431		953.39	0.24337611		1483.38	0.00126585		2013.38	-0.000814		2543.41	-0.0141377
423.6	0.43212441		953.59	0.24314225		1483.58	0.00246463		2013.58	-0.00182581		2543.61	-0.01342405
423.8	0.4319289		953.79	0.24361504		1483.78	0.00307396		2013.78	-0.00165108		2543.81	-0.01406626
424	0.43104202		953.99	0.2438596		1483.98	0.0031565		2013.98	-0.0018866		2544.01	-0.01443801
424.2	0.43066002		954.19	0.24351509		1484.18	0.00281546		2014.18	-0.00256101		2544.21	-0.01389841
424.4	0.43038922		954.39	0.24352794		1484.38	0.00267819		2014.38	-0.00277841		2544.41	-0.01384235
424.6	0.4305024		954.59	0.24376598		1484.58	0.00326799		2014.58	-0.00249979		2544.61	-0.0137713
424.8	0.43005104		954.79	0.24397477		1484.78	0.00352738		2014.78	-0.0027968		2544.81	-0.01358514
425	0.43026844		954.99	0.24444467		1484.98	0.00327898		2014.98	-0.00298365		2545.01	-0.0152014
425.2	0.4306615		955.19	0.24539283		1485.18	0.00327413		2015.18	-0.00234977		2545.21	-0.01348595
425.4	0.43087164		955.39	0.24529623		1485.38	0.00308461		2015.38	-0.00195705		2545.41	-0.0136215
425.6	0.43116242		955.59	0.24561747		1485.58	0.00230084		2015.58	-0.00148895		2545.61	-0.01396194
425.8	0.43080621		955.79	0.24511615		1485.78	0.0018022		2015.78	-0.00123745		2545.81	-0.01381103
426	0.43073883		955.99	0.24547216		1485.98	0.00172726		2015.98	-0.00147216		2546.01	-0.01246046
426.2	0.43110709		956.19	0.24455973		1486.18	0.0021318		2016.18	-0.00144319		2546.21	-0.01276022
426.4	0.43057742		956.39	0.24393848		1486.38	0.00176261		2016.38	-0.00063648		2546.41	-0.01319058
426.6	0.43090679		956.59	0.24342863		1486.58	0.00217464		2016.58	0.00009601		2546.61	-0.01374565
426.8	0.43029085		956.79	0.24305306		1486.78	0.00185313		2016.78	0.00068458		2546.81	-0.01330182
427	0.42948474		956.99	0.2423843		1486.98	0.00193421		2016.98	0.0005087		2547.01	-0.01384191
427.2	0.42897777		957.19	0.24133956		1487.18	0.00180152		2017.18	0.00069371		2547.21	-0.0139309
427.4	0.4297543		957.39	0.24161252		1487.38	0.00174805		2017.38	0.00050053		2547.41	-0.01438517
427.6	0.4300787		957.59	0.24166484		1487.58	0.00193305		2017.58	0.00055364		2547.61	-0.01441263
427.8	0.42982949		957.79	0.24173333		1487.78	0.00165072		2017.78	0.00129838		2547.81	-0.01539423
428	0.4299022		957.99	0.24166015		1487.98	0.00158504		2017.98	0.00117502		2548.01	-0.01585416
428.2	0.43034026		958.19	0.24087614		1488.18	0.00199929		2018.18	0.00158696		2548.21	-0.01525962
428.4	0.43052782		958.39	0.24208211		1488.38	0.00199481		2018.38	0.00205293		2548.41	-0.01563721
428.6	0.43033579		958.59	0.24369848		1488.58	0.00266133		2018.58	0.00176218		2548.61	-0.01605304
428.8	0.43018524		958.79	0.24434386		1488.78	0.00326106		2018.78	0.00176927		2548.81	-0.01628606
429	0.43057868		958.99	0.24479089		1488.98	0.00297085		2018.98	0.00265752		2549.01	-0.01679709
429.2	0.43104718		959.19	0.2446047		1489.18	0.0030238		2019.18	0.00375538		2549.21	-0.01590685
429.4	0.43043512		959.39	0.24466175		1489.38	0.00378695		2019.38	0.00314375		2549.41	-0.0163182
429.6	0.4296476		959.59	0.24468712		1489.58	0.00345805		2019.58	0.00244428		2549.61	-0.01615049
429.8	0.42845212		959.79	0.24431889		1489.78	0.00318107		2019.78	0.00147135		2549.81	-0.01611965
430	0.42773454		959.99	0.24392904		1489.98	0.00312953		2019.98	0.00044907		2550.01	-0.01503654
430.2	0.42733987		960.19	0.24376836		1490.18	0.00331704		2020.18	0.00042981		2550.21	-0.01561523
430.4	0.42674201		960.39	0.2432452		1490.38	0.00368298		2020.38	-0.00013866		2550.41	-0.01559985
430.6	0.4263031		960.59	0.24286292		1490.58	0.00359501		2020.58	-0.00075451		2550.61	-0.01609822
430.8	0.42497003		960.79	0.24307734		1490.78	0.0030799		2020.78	-0.00063792		2550.81	-0.01489422
431	0.42489749		960.99	0.24251409		1490.98	0.00272623		2020.98	-0.00166732		2551.01	-0.0147368
431.2	0.42486611		961.19	0.24231551		1491.18	0.00297681		2021.18	-0.00183094		2551.21	-0.01513212
431.4	0.4255087		961.39	0.242891		1491.38	0.00305321		2021.38	-0.00192897		2551.41	-0.01523733
431.6	0.42524411		961.59	0.24313583		1491.58	0.00222688		2021.58	-0.00251702		2551.61	-0.01580435
431.8	0.4255495		961.79	0.24293811		1491.78	0.00249639		2021.78	-0.00228899		2551.81	-0.01632626
432	0.42663678		961.99	0.24253619		1491.98	0.00206526		2021.98	-0.00242723		2552.01	-0.01562307
432.2	0.42802197		962.19	0.24200408		1492.18	0.00236041		2022.18	-0.00211092		2552.21	-0.01588665
432.4	0.42828437		962.39	0.24280116		1492.38	0.00179891		2022.38	-0.0018589		2552.41	-0.01614335
432.6	0.42899533		962.59	0.24314773		1492.58	0.00184931		2022.58	-0.00140953		2552.61	-0.01628879
432.8	0.42924853		962.79	0.24273125		1492.78	0.00283787		2022.78	-0.00103653		2552.81	-0.01610256
433	0.43029301		962.99	0.24301197		1492.98	0.00366427		2022.98	-0.00095107		2553.01	-0.01648604
433.2	0.43126641		963.19	0.24272148		1493.18	0.00444514		2023.18	-0.0007625		2553.21	-0.01620738
433.4	0.43214366		963.39	0.24249501		1493.38	0.00466852		2023.38	-0.00062341		2553.41	-0.01562313
433.6	0.4326432		963.59	0.24217299		1493.58	0.00420112		2023.58	0.000516		2553.61	-0.0157891
433.8	0.43207044		963.79	0.24116335		1493.78	0.00299938		2023.78	0.0009019		2553.81	-0.01536941
434	0.43213726		963.99	0.24136551		1493.98	0.00273004		2023.98	-0.00014206		2554.01	-0.01437888
434.2	0.43304984		964.19	0.24135211		1494.18	0.00257133		2024.18	0.0003638		2554.21	-0.01507088
434.4	0.43352634		964.39	0.24101449		1494.38	0.00314621		2024.38	0.00001366		2554.41	-0.01505946
434.6	0.43241436		964.59	0.24135275		1494.58	0.00222772		2024.58	-0.0000811		2554.61	-0.01508432
434.8	0.43168463		964.79	0.24157267		1494.78	0.0030143		2024.78	0.00009095		2554.81	-0.01585227
435	0.43234796		964.99	0.24065762		1494.98	0.0023564		2024.98	-0.00045084		2555.01	-0.01583267
435.2	0.43229878		965.19	0.24100851		1495.18	0.00173004		2025.18	-0.00014231		2555.21	-0.01639786
435.4	0.43167004		965.39	0.24103695		1495.38	0.00164616		2025.38	-0.00061752		2555.41	-0.01621701
435.6	0.43083144		965.59	0.24059973		1495.58	0.00089875		2025.58	-0.00076931		2555.61	-0.01617334
435.8	0.43143207		965.79	0.24002983		1495.78	0.0015741		2025.78	-0.00102576		2555.81	-0.01697512
436	0.43092028		965.99	0.23948584		1495.98	0.00124545		2025.98	-0.00084476		2556.01	-0.01713362
436.2	0.43029177		966.19	0.23927038		1496.18	0.00198612		2026.18	-0.00149822		2556.21	-0.01800056
436.4	0.42930791		966.39	0.24006237		1496.38	0.00185259		2026.38	-0.00192158		2556.41	-0.01736392
436.6	0.42999211		966.59	0.24016581		1496.58	0.00225613		2026.58	-0.0019054		2556.61	-0.0178868
436.8	0.42984321		966.79	0.2402777		1496.78	0.00306924		2026.78	-0.00181316		2556.81	-0.01773333
437	0.43060963		966.99	0.24053498		1496.98	0.00356876		2026.98	-0.00143326		2557.01	-0.01823746
437.2	0.43080098		967.19	0.24091266		1497.18	0.00294272		2027.18	-0.00051416		2557.21	-0.01860527
437.4	0.43026887		967.39	0.24181224		1497.38	0.00216369		2027.38	0.0004962		2557.41	-0.0176869
437.6	0.42938694		967.59	0.24190122		1497.58	0.00148068		2027.58	0.000855		2557.61	-0.0173104
437.8	0.42817616		967.79	0.24237586		1497.78	0.00053308		2027.78	0.00041776		2557.81	-0.01685298
438	0.42970204		967.99	0.24296417		1497.98	0.00058533		2027.98	-0.00048305		2558.01	-0.01678404
438.2	0.43044697		968.19	0.24263507		1498.18	0.00038479		2028.18	-0.00034788		2558.21	-0.0169653
438.4	0.43041686		968.39	0.24245076		1498.38	0.00069288		2028.38	-0.00114682		2558.41	-0.01711318
438.6	0.43023105		968.59	0.24265554		1498.58	0.00047567		2028.58	-0.00099673		2558.61	-0.01777399
438.8	0.43050094		968.79	0.24231793		1498.78	0.00160768		2028.78	-0.00099644		2558.81	-0.0180454
439	0.43078105		968.99	0.24222922		1498.98	0.00119167		2028.98	-0.00126386		2559.01	-0.01816149
439.2	0.43012411		969.19	0.24202243		1499.18	0.00151264		2029.18	-0.00183901		2559.21	-0.01783655
439.4	0.42931343		969.39	0.24137232		1499.38	0.00220167		2029.38	-0.00210514		2559.41	-0.01801879
439.6	0.42963113		969.59	0.24095554		1499.58	0.00223576		2029.58	-0.00160609		2559.61	-0.01760354
439.8	0.42955821		969.79	0.24104874		1499.78	0.00284706		2029.78	-0.00248129		2559.81	-0.01792811
440	0.42960876		969.99	0.24112006		1499.98	0.00225097		2029.98	-0.00242137		2560.01	-0.01785922
440.2	0.43007838		970.19	0.2414017		1500.18	0.00257603		2030.18	-0.00342974		2560.21	-0.01786056
440.4	0.43076473		970.39	0.24147998		1500.38	0.0023128		2030.38	-0.0030235		2560.41	-0.0178582
440.6	0.43206523		970.59	0.24131373		1500.58	0.00197668		2030.58	-0.00212612		2560.61	-0.01836446
440.8	0.43249791		970.79	0.24051029		1500.78	0.00210542		2030.78	-0.00242579		2560.81	-0.01795681
441	0.43276904		970.99	0.23993634		1500.98	0.00188728		2030.98	-0.00252292		2561.01	-0.01843966
441.2	0.43261427		971.19	0.23985704		1501.18	0.00116348		2031.18	-0.00248508		2561.21	-0.01869269
441.4	0.43248826		971.39	0.24045702		1501.38	0.00083951		2031.38	-0.00270378		2561.41	-0.01738409
441.6	0.43283821		971.59	0.24034264		1501.58	-0.00014315		2031.58	-0.00370319		2561.61	-0.01781004
441.8	0.43259641		971.79	0.24082973		1501.78	0.00037323		2031.78	-0.00442753		2561.81	-0.01828286
442	0.43358244		971.99	0.24015526		1501.98	0.00009851		2031.98	-0.00579305		2562.01	-0.01815212
442.2	0.43262009		972.19	0.24065287		1502.18	0.00022017		2032.18	-0.00633362		2562.21	-0.01767388
442.4	0.4329395		972.39	0.24080702		1502.38	0.0005429		2032.38	-0.00624855		2562.41	-0.01802007
442.6	0.43271506		972.59	0.24064841		1502.58	0.00109837		2032.58	-0.0064069		2562.61	-0.01782607
442.8	0.431985		972.79	0.24117627		1502.78	0.00120734		2032.78	-0.00629668		2562.81	-0.01725561
443	0.43192381		972.99	0.2417686		1502.98	0.0014559		2032.98	-0.00688796		2563.01	-0.01724392
443.2	0.43169489		973.19	0.24220281		1503.18	0.00181535		2033.18	-0.0065641		2563.21	-0.01636711
443.4	0.43099596		973.39	0.2422304		1503.38	0.00249108		2033.38	-0.00571294		2563.41	-0.01623635
443.6	0.43097634		973.59	0.24270574		1503.58	0.00242935		2033.58	-0.00466132		2563.61	-0.0160127
443.8	0.43091655		973.79	0.24381849		1503.78	0.00266348		2033.78	-0.00529435		2563.81	-0.01568176
444	0.43108966		973.99	0.24457833		1503.98	0.00333856		2033.98	-0.00472587		2564.01	-0.01581993
444.2	0.43078207		974.19	0.24462564		1504.18	0.00405682		2034.18	-0.00501976		2564.21	-0.01586547
444.4	0.43009759		974.39	0.24419199		1504.38	0.00323309		2034.38	-0.00411995		2564.41	-0.01559022
444.6	0.42977943		974.59	0.24360387		1504.58	0.0028691		2034.58	-0.00344217		2564.61	-0.01559027
444.8	0.42909719		974.79	0.24264083		1504.78	0.00248976		2034.78	-0.00329729		2564.81	-0.01545846
445	0.42814849		974.99	0.24230984		1504.98	0.00255022		2034.98	-0.00294062		2565.01	-0.01594421
445.2	0.42788807		975.19	0.24228988		1505.18	0.00179635		2035.18	-0.00272714		2565.21	-0.01575991
445.4	0.42688444		975.39	0.24308734		1505.38	0.00135247		2035.38	-0.00272885		2565.41	-0.01594034
445.6	0.42546375		975.59	0.24294728		1505.58	0.00117533		2035.58	-0.00298468		2565.61	-0.01692909
445.8	0.42452782		975.79	0.24254404		1505.78	0.00168274		2035.78	-0.00354087		2565.81	-0.01659956
446	0.42389258		975.99	0.24272837		1505.98	0.00135825		2035.98	-0.00362936		2566.01	-0.01664392
446.2	0.42350361		976.19	0.24320657		1506.18	0.00145934		2036.18	-0.00352719		2566.21	-0.01667461
446.4	0.42465306		976.39	0.242172		1506.38	0.00175255		2036.38	-0.00340356		2566.41	-0.01722527
446.6	0.42448331		976.59	0.24249775		1506.58	0.00182161		2036.58	-0.00349595		2566.61	-0.01811797
446.8	0.42514511		976.79	0.24225987		1506.78	0.00115152		2036.78	-0.00359457		2566.81	-0.01827913
447	0.42511872		976.99	0.24239224		1506.98	0.00221332		2036.98	-0.00386168		2567.01	-0.01836978
447.2	0.42610884		977.19	0.24166022		1507.18	0.00157368		2037.18	-0.00300992		2567.21	-0.01876015
447.4	0.42680138		977.39	0.24119321		1507.38	0.00211897		2037.38	-0.00355328		2567.41	-0.01906538
447.6	0.42749081		977.59	0.24075346		1507.58	0.00216155		2037.58	-0.00337147		2567.61	-0.01939358
447.8	0.42851628		977.79	0.24095404		1507.78	0.00246075		2037.78	-0.00392687		2567.81	-0.01875627
448	0.42756739		977.99	0.24072929		1507.98	0.00311093		2037.98	-0.00354518		2568.01	-0.01855217
448.2	0.42732333		978.19	0.24079116		1508.18	0.00238559		2038.18	-0.0036877		2568.21	-0.01798746
448.4	0.42733438		978.39	0.24055362		1508.38	0.00263129		2038.38	-0.00355917		2568.41	-0.01801222
448.6	0.4275107		978.59	0.23977539		1508.58	0.00339882		2038.58	-0.0037093		2568.61	-0.01754743
448.8	0.42792073		978.79	0.23959281		1508.78	0.0033542		2038.78	-0.00374371		2568.81	-0.01731411
449	0.42840529		978.99	0.23904101		1508.98	0.00356985		2038.98	-0.00399272		2569.01	-0.01651692
449.2	0.42815834		979.19	0.23955258		1509.18	0.00302258		2039.18	-0.00380736		2569.21	-0.01626384
449.4	0.4265072		979.39	0.23890924		1509.38	0.00314322		2039.38	-0.00374662		2569.41	-0.01600243
449.6	0.4259928		979.59	0.23806983		1509.58	0.0031939		2039.58	-0.00476587		2569.61	-0.01571813
449.8	0.42629666		979.79	0.23750613		1509.78	0.00380063		2039.78	-0.00468981		2569.81	-0.01534831
450	0.42586993		979.99	0.23746901		1509.98	0.00402424		2039.98	-0.00402037		2570.01	-0.01579134
450.2	0.42610072		980.19	0.23753844		1510.18	0.00481536		2040.18	-0.0036355		2570.21	-0.01627615
450.4	0.42589037		980.39	0.23760069		1510.38	0.0051167		2040.38	-0.00365266		2570.41	-0.01672333
450.6	0.42607493		980.59	0.23851647		1510.58	0.00508748		2040.58	-0.00346248		2570.61	-0.01755491
450.8	0.42619259		980.79	0.23843236		1510.78	0.00517483		2040.78	-0.00352629		2570.81	-0.01742882
451	0.42585303		980.99	0.23922316		1510.98	0.00416111		2040.98	-0.00327251		2571.01	-0.01750239
451.2	0.42706761		981.19	0.2389416		1511.18	0.00281441		2041.18	-0.00345963		2571.21	-0.01844959
451.4	0.42714312		981.39	0.23924361		1511.38	0.00283635		2041.38	-0.00363899		2571.41	-0.01814953
451.6	0.42687314		981.59	0.23881347		1511.58	0.00191912		2041.58	-0.00219753		2571.61	-0.01834022
451.8	0.42628688		981.79	0.23967165		1511.78	0.00177228		2041.78	-0.00219848		2571.81	-0.01767369
452	0.42574942		981.99	0.24050129		1511.98	0.00182174		2041.98	-0.00180381		2572.01	-0.01764264
452.2	0.42560371		982.19	0.24108723		1512.18	0.00171701		2042.18	-0.00157882		2572.21	-0.01717157
452.4	0.42614287		982.39	0.2410447		1512.38	0.00193097		2042.38	-0.0023839		2572.41	-0.01727007
452.6	0.42582321		982.59	0.2405375		1512.58	0.00102712		2042.58	-0.00227209		2572.61	-0.01645164
452.8	0.42595091		982.79	0.24097666		1512.78	0.00056256		2042.78	-0.00280109		2572.81	-0.0162399
453	0.42560803		982.99	0.24050006		1512.98	0.00024373		2042.98	-0.00313099		2573.01	-0.01470414
453.2	0.42536525		983.19	0.24017286		1513.18	-0.00004834		2043.18	-0.00315864		2573.21	-0.01467899
453.4	0.42499647		983.39	0.23936984		1513.38	0.00017606		2043.38	-0.00388218		2573.41	-0.01451662
453.6	0.42526943		983.59	0.23861696		1513.58	0.00009405		2043.58	-0.00443103		2573.61	-0.01469649
453.8	0.42578219		983.79	0.23873923		1513.78	0.00025402		2043.78	-0.00392104		2573.81	-0.01497665
454	0.42561394		983.99	0.238962		1513.98	0.00066087		2043.98	-0.00459848		2574.01	-0.01529134
454.2	0.42568755		984.19	0.23989979		1514.18	0.00228064		2044.18	-0.00434178		2574.21	-0.01621833
454.4	0.4260038		984.39	0.24017951		1514.38	0.00131987		2044.38	-0.00505403		2574.41	-0.01653935
454.6	0.42700075		984.59	0.24093909		1514.58	0.00154363		2044.58	-0.00438079		2574.61	-0.01724457
454.8	0.42631822		984.79	0.24124913		1514.78	0.00093245		2044.78	-0.0048788		2574.81	-0.01800224
455	0.42663746		984.99	0.24134442		1514.98	0.00055101		2044.98	-0.0054576		2575.01	-0.01831224
455.2	0.42689443		985.19	0.24104962		1515.18	0.00081054		2045.18	-0.00600492		2575.21	-0.01905963
455.4	0.42731097		985.39	0.24083388		1515.38	0.0008354		2045.38	-0.00537614		2575.41	-0.01922439
455.6	0.42689154		985.59	0.24090221		1515.58	0.00062138		2045.58	-0.00514459		2575.61	-0.01954627
455.8	0.4271203		985.79	0.24104819		1515.78	0.00056978		2045.78	-0.00584463		2575.81	-0.01906369
456	0.42791272		985.99	0.2415074		1515.98	0.00008635		2045.98	-0.00522163		2576.01	-0.01943118
456.2	0.42708542		986.19	0.24056025		1516.18	-0.00018327		2046.18	-0.00599368		2576.21	-0.01936137
456.4	0.42708652		986.39	0.24029182		1516.38	-0.00030687		2046.38	-0.00645524		2576.41	-0.01944275
456.6	0.42727727		986.59	0.23995085		1516.58	-0.0002791		2046.58	-0.00593923		2576.61	-0.01904843
456.8	0.42730192		986.79	0.24014799		1516.78	0.00047343		2046.78	-0.00595974		2576.81	-0.01821748
457	0.42704832		986.99	0.23989023		1516.98	0.00085687		2046.98	-0.0052665		2577.01	-0.0172401
457.2	0.42750688		987.19	0.23959058		1517.18	0.00130282		2047.18	-0.00549089		2577.21	-0.01712326
457.4	0.42753655		987.39	0.23979034		1517.38	0.00151697		2047.38	-0.00572271		2577.41	-0.01718038
457.6	0.42780449		987.59	0.23990226		1517.58	0.00162535		2047.58	-0.00559928		2577.61	-0.01665068
457.8	0.42796342		987.79	0.24036161		1517.78	0.00146869		2047.78	-0.00573127		2577.81	-0.01632681
458	0.42771405		987.99	0.24092938		1517.98	0.00200682		2047.98	-0.00487482		2578.01	-0.01599996
458.2	0.42778328		988.19	0.24181719		1518.18	0.0013212		2048.18	-0.00340932		2578.21	-0.01576777
458.4	0.42772052		988.39	0.24246176		1518.38	0.000295		2048.38	-0.00346593		2578.41	-0.01510067
458.6	0.42728941		988.59	0.24334914		1518.58	0.00083307		2048.58	-0.00244048		2578.61	-0.01491018
458.8	0.42631868		988.79	0.24312633		1518.78	0.00078397		2048.78	-0.00268053		2578.81	-0.01447905
459	0.42629564		988.99	0.24405384		1518.98	0.00085885		2048.98	-0.00280721		2579.01	-0.01429157
459.2	0.42625132		989.19	0.24423603		1519.18	0.00027302		2049.18	-0.0027793		2579.21	-0.01496953
459.4	0.42622382		989.39	0.2442248		1519.38	0.00033192		2049.38	-0.00205318		2579.41	-0.01555854
459.6	0.42500424		989.59	0.2440397		1519.58	-0.00098034		2049.58	-0.00223999		2579.61	-0.01498702
459.8	0.42544068		989.79	0.24378354		1519.78	-0.00090667		2049.78	-0.00214032		2579.81	-0.01582788
460	0.42533154		989.99	0.24329078		1519.98	-0.00073923		2049.98	-0.00208925		2580.01	-0.0171386
460.2	0.42435378		990.19	0.24200142		1520.18	-0.00046995		2050.18	-0.00265181		2580.21	-0.01760419
460.4	0.42367895		990.39	0.24200847		1520.38	-0.00041849		2050.38	-0.00292516		2580.41	-0.01764001
460.6	0.42366375		990.59	0.24140856		1520.58	-0.00038849		2050.58	-0.00353585		2580.61	-0.01740708
460.8	0.42297026		990.79	0.24087721		1520.78	0.00041008		2050.78	-0.00493011		2580.81	-0.01786707
461	0.42234666		990.99	0.23974488		1520.98	0.00056953		2050.98	-0.00510888		2581.01	-0.01776547
461.2	0.42244726		991.19	0.23833006		1521.18	0.00042724		2051.18	-0.00622483		2581.21	-0.01784518
461.4	0.4234022		991.39	0.23809121		1521.38	-0.00011839		2051.38	-0.0061841		2581.41	-0.01835323
461.6	0.42385155		991.59	0.23815183		1521.58	0.00010617		2051.58	-0.00681767		2581.61	-0.01781479
461.8	0.42403482		991.79	0.2371402		1521.78	-0.00083004		2051.78	-0.00744523		2581.81	-0.01739502
462	0.42416956		991.99	0.23716801		1521.98	-0.00105601		2051.98	-0.00689089		2582.01	-0.0177203
462.2	0.42411847		992.19	0.23695437		1522.18	-0.00121393		2052.18	-0.00714228		2582.21	-0.01722428
462.4	0.42475619		992.39	0.2373384		1522.38	-0.00089338		2052.38	-0.00668023		2582.41	-0.0168596
462.6	0.42539754		992.59	0.2369044		1522.58	-0.00096944		2052.58	-0.00558211		2582.61	-0.01627779
462.8	0.42603059		992.79	0.23676855		1522.78	-0.00108804		2052.78	-0.00489791		2582.81	-0.01601537
463	0.42658822		992.99	0.23820455		1522.98	-0.00128672		2052.98	-0.00484354		2583.01	-0.01572376
463.2	0.42684468		993.19	0.23903122		1523.18	-0.00116749		2053.18	-0.00403402		2583.21	-0.01517791
463.4	0.42677415		993.39	0.23992093		1523.38	-0.00078781		2053.38	-0.00310022		2583.41	-0.01499416
463.6	0.42657612		993.59	0.24030995		1523.58	-0.00046129		2053.58	-0.00255419		2583.61	-0.01487265
463.8	0.42745466		993.79	0.24109022		1523.78	0.00018848		2053.78	-0.00257386		2583.81	-0.01533892
464	0.42688456		993.99	0.24086432		1523.98	0.00084764		2053.98	-0.00225764		2584.01	-0.01479707
464.2	0.42644159		994.19	0.24122715		1524.18	0.00129663		2054.18	-0.00283947		2584.21	-0.01504889
464.4	0.42655774		994.39	0.2408994		1524.38	0.00105646		2054.38	-0.00290175		2584.41	-0.01527305
464.6	0.4269007		994.59	0.24009751		1524.58	0.00156926		2054.58	-0.00305112		2584.61	-0.01596249
464.8	0.42701461		994.79	0.23990528		1524.78	0.00175435		2054.78	-0.00335048		2584.81	-0.01681618
465	0.42671		994.99	0.2401366		1524.98	0.00166288		2054.98	-0.00291612		2585.01	-0.01692883
465.2	0.4263498		995.19	0.23990896		1525.18	0.00088485		2055.18	-0.00423847		2585.21	-0.01775962
465.4	0.42656503		995.39	0.23994311		1525.38	0.00067619		2055.38	-0.0052445		2585.41	-0.01808113
465.6	0.42680017		995.59	0.24082683		1525.58	0.00042014		2055.58	-0.0055961		2585.61	-0.01919366
465.8	0.42682828		995.79	0.24031691		1525.78	0.00016229		2055.78	-0.00525218		2585.81	-0.01928932
466	0.42689472		995.99	0.24010758		1525.98	0.00007655		2055.98	-0.00508726		2586.01	-0.01997856
466.2	0.42698348		996.19	0.2402652		1526.18	0.00026918		2056.18	-0.00519017		2586.21	-0.01996052
466.4	0.42821018		996.39	0.24038818		1526.38	0.00036874		2056.38	-0.00476779		2586.41	-0.02070984
466.6	0.42821747		996.59	0.24039548		1526.58	0.00064295		2056.58	-0.00455759		2586.61	-0.0205358
466.8	0.42851183		996.79	0.24141319		1526.78	0.00094791		2056.78	-0.00515136		2586.81	-0.02047951
467	0.42879178		996.99	0.24265938		1526.98	0.00124654		2056.98	-0.00604213		2587.01	-0.01976382
467.2	0.42851971		997.19	0.24351158		1527.18	0.00091821		2057.18	-0.00580154		2587.21	-0.01929284
467.4	0.42833448		997.39	0.24384115		1527.38	0.00091796		2057.38	-0.00560848		2587.41	-0.01908304
467.6	0.42748202		997.59	0.24371204		1527.58	0.0011268		2057.58	-0.00563044		2587.61	-0.01842657
467.8	0.42721825		997.79	0.24419993		1527.78	0.0009532		2057.78	-0.00605418		2587.81	-0.01780036
468	0.42566367		997.99	0.24349096		1527.98	0.0018456		2057.98	-0.00565172		2588.01	-0.01778626
468.2	0.42528045		998.19	0.24288165		1528.18	0.00101572		2058.18	-0.00553822		2588.21	-0.0182585
468.4	0.42417736		998.39	0.24194634		1528.38	0.00086545		2058.38	-0.00480368		2588.41	-0.01774169
468.6	0.42297348		998.59	0.24067739		1528.58	0.00109608		2058.58	-0.00547306		2588.61	-0.01768782
468.8	0.42271684		998.79	0.24147748		1528.78	0.00031516		2058.78	-0.00616257		2588.81	-0.01741114
469	0.42176904		998.99	0.24048376		1528.98	-0.00020044		2058.98	-0.00687752		2589.01	-0.01796368
469.2	0.42098815		999.19	0.24024911		1529.18	-0.00065887		2059.18	-0.00799372		2589.21	-0.01824998
469.4	0.42166394		999.39	0.23949956		1529.38	-0.00088297		2059.38	-0.00824028		2589.41	-0.01881647
469.6	0.42287979		999.59	0.23976551		1529.58	-0.0012876		2059.58	-0.00760286		2589.61	-0.01966382
469.8	0.42341765		999.79	0.23930457		1529.78	-0.00109842		2059.78	-0.00726945		2589.81	-0.01902146
470	0.42510239		999.99	0.23887545		1529.98	-0.00159607		2059.98	-0.00772101		2590.01	-0.02003974
470.2	0.42597667		1000.19	0.23825584		1530.18	-0.00148961		2060.18	-0.00731175		2590.21	-0.02040961
470.4	0.4262628		1000.39	0.23856594		1530.38	-0.00149854		2060.38	-0.00700266		2590.41	-0.02081324
470.6	0.42643924		1000.59	0.23936621		1530.58	-0.00199813		2060.58	-0.00633424		2590.61	-0.01970191
470.8	0.42691745		1000.79	0.23972898		1530.78	-0.00181601		2060.78	-0.00593501		2590.81	-0.01908993
471	0.42728846		1000.99	0.23941125		1530.98	-0.00222324		2060.98	-0.00480255		2591.01	-0.0187638
471.2	0.42726099		1001.19	0.23963018		1531.18	-0.00272719		2061.18	-0.00327754		2591.21	-0.01788274
471.4	0.42665999		1001.39	0.23945205		1531.38	-0.00259009		2061.38	-0.00245385		2591.41	-0.01714468
471.6	0.42591974		1001.59	0.23959617		1531.58	-0.00246949		2061.58	-0.00213607		2591.61	-0.01662033
471.8	0.42579776		1001.79	0.23999636		1531.78	-0.0019531		2061.78	-0.00159818		2591.81	-0.01585442
472	0.42472188		1001.99	0.23966576		1531.98	-0.0018773		2061.98	-0.00137104		2592.01	-0.01607255
472.2	0.42400425		1002.19	0.23992473		1532.18	-0.00244555		2062.18	-0.00106489		2592.21	-0.01554862
472.4	0.42274198		1002.39	0.24018135		1532.38	-0.001515		2062.38	-0.00158027		2592.41	-0.01553275
472.6	0.42310851		1002.59	0.23946132		1532.58	-0.00096579		2062.58	-0.00203465		2592.61	-0.01610328
472.8	0.42280663		1002.79	0.2400009		1532.78	-0.00029119		2062.78	-0.00344915		2592.81	-0.01560233
473	0.42254107		1002.99	0.23894144		1532.98	0.00096471		2062.98	-0.00451304		2593.01	-0.01643843
473.2	0.42251731		1003.19	0.23999191		1533.18	0.00198555		2063.18	-0.00524341		2593.21	-0.0160996
473.4	0.42298433		1003.39	0.23981707		1533.38	0.00180613		2063.38	-0.00638044		2593.41	-0.01634751
473.6	0.42437008		1003.59	0.23988046		1533.58	0.00218257		2063.58	-0.00662206		2593.61	-0.01688569
473.8	0.42530129		1003.79	0.24029323		1533.78	0.00229324		2063.78	-0.00625467		2593.81	-0.01764822
474	0.42641624		1003.99	0.23938591		1533.98	0.00258149		2063.98	-0.0056098		2594.01	-0.01873591
474.2	0.42595053		1004.19	0.2394531		1534.18	0.00232542		2064.18	-0.00484075		2594.21	-0.01892003
474.4	0.42487476		1004.39	0.24066866		1534.38	0.00164677		2064.38	-0.0046836		2594.41	-0.01879391
474.6	0.42531548		1004.59	0.2403853		1534.58	0.00151834		2064.58	-0.00409131		2594.61	-0.01816445
474.8	0.42488385		1004.79	0.24081694		1534.78	0.00177031		2064.78	-0.00371252		2594.81	-0.01832105
475	0.42511089		1004.99	0.24122932		1534.98	0.00113726		2064.98	-0.00366743		2595.01	-0.01829317
475.2	0.42590027		1005.19	0.24118942		1535.18	0.00129303		2065.18	-0.00355176		2595.21	-0.01794228
475.4	0.42559983		1005.39	0.24107106		1535.38	0.00097633		2065.38	-0.00342172		2595.41	-0.01805709
475.6	0.42548083		1005.59	0.24144693		1535.58	-0.00013954		2065.58	-0.00343243		2595.61	-0.01844346
475.8	0.42522279		1005.79	0.24175261		1535.78	-0.00074772		2065.78	-0.00297743		2595.81	-0.01781542
476	0.42496942		1005.99	0.24167582		1535.98	-0.00235467		2065.98	-0.00360344		2596.01	-0.01778035
476.2	0.42415489		1006.19	0.24173618		1536.18	-0.00254849		2066.18	-0.00356957		2596.21	-0.01737225
476.4	0.42434376		1006.39	0.2407918		1536.38	-0.00173298		2066.38	-0.00483592		2596.41	-0.01703459
476.6	0.42502719		1006.59	0.2397675		1536.58	-0.0007037		2066.58	-0.0057246		2596.61	-0.01667079
476.8	0.42488528		1006.79	0.23960829		1536.78	0.0004823		2066.78	-0.00647324		2596.81	-0.01603158
477	0.42584217		1006.99	0.23935795		1536.98	0.00095496		2066.98	-0.00595047		2597.01	-0.01649575
477.2	0.42609844		1007.19	0.2395734		1537.18	0.00053638		2067.18	-0.00557563		2597.21	-0.01595339
477.4	0.42662457		1007.39	0.23899636		1537.38	0.00032507		2067.38	-0.00536232		2597.41	-0.01622335
477.6	0.42790145		1007.59	0.23845489		1537.58	0.00054431		2067.58	-0.0045987		2597.61	-0.01716975
477.8	0.42815321		1007.79	0.23877715		1537.78	0.00070711		2067.78	-0.00385878		2597.81	-0.01763412
478	0.42858523		1007.99	0.23893614		1537.98	0.00086393		2067.98	-0.00290427		2598.01	-0.01843492
478.2	0.42867621		1008.19	0.23924306		1538.18	0.00013929		2068.18	-0.00285143		2598.21	-0.01852364
478.4	0.4288289		1008.39	0.239195		1538.38	0.00001683		2068.38	-0.00295134		2598.41	-0.01790351
478.6	0.42975921		1008.59	0.23936858		1538.58	0.00007181		2068.58	-0.00294786		2598.61	-0.01744727
478.8	0.4292381		1008.79	0.24050448		1538.78	0.00081983		2068.78	-0.00221096		2598.81	-0.01748708
479	0.42942524		1008.99	0.24047224		1538.98	0.00082158		2068.98	-0.00201619		2599.01	-0.01791148
479.2	0.42994497		1009.19	0.24020168		1539.18	0.00077466		2069.18	-0.00084218		2599.21	-0.01808917
479.4	0.42885574		1009.39	0.24082317		1539.38	-0.00064821		2069.38	-0.00073037		2599.41	-0.01868605
479.6	0.42789828		1009.59	0.24059982		1539.58	-0.00206598		2069.58	-0.00137447		2599.61	-0.01862563
479.8	0.42778728		1009.79	0.24067557		1539.78	-0.00195903		2069.78	-0.00192295		2599.81	-0.01767746
480	0.42753279		1009.99	0.2400362		1539.98	-0.00215952		2069.98	-0.00352052		2600.01	-0.01734579
480.2	0.42753343		1010.19	0.23989923		1540.18	-0.00177213		2070.18	-0.00405779		2600.21	-0.0175307
480.4	0.426508		1010.39	0.23936698		1540.38	-0.00116153		2070.38	-0.00537207		2600.41	-0.01840921
480.6	0.42579771		1010.59	0.23996958		1540.58	-0.00106389		2070.58	-0.00622034		2600.61	-0.01986819
480.8	0.42569067		1010.79	0.23945957		1540.78	-0.00058574		2070.78	-0.00632219		2600.81	-0.02002613
481	0.42591656		1010.99	0.23882635		1540.98	-0.00096512		2070.98	-0.00655523		2601.01	-0.01974876
481.2	0.42553288		1011.19	0.23888939		1541.18	-0.00112998		2071.18	-0.00657999		2601.21	-0.01955224
481.4	0.42501728		1011.39	0.23859789		1541.38	-0.00057923		2071.38	-0.00704366		2601.41	-0.01984972
481.6	0.42527244		1011.59	0.23902991		1541.58	-0.00011239		2071.58	-0.00720289		2601.61	-0.01944192
481.8	0.4251744		1011.79	0.23945801		1541.78	0.00009374		2071.78	-0.00609929		2601.81	-0.01975182
482	0.42449311		1011.99	0.24013168		1541.98	0.00025065		2071.98	-0.00498083		2602.01	-0.02014341
482.2	0.42462482		1012.19	0.23960376		1542.18	0.00045132		2072.18	-0.00483156		2602.21	-0.01854909
482.4	0.42433151		1012.39	0.23915684		1542.38	0.0003497		2072.38	-0.00376826		2602.41	-0.01764859
482.6	0.42410618		1012.59	0.23978939		1542.58	0.00049146		2072.58	-0.00320819		2602.61	-0.01657893
482.8	0.42349177		1012.79	0.24015897		1542.78	0.00143093		2072.78	-0.00172569		2602.81	-0.01698352
483	0.4243269		1012.99	0.24042267		1542.98	0.00069214		2072.98	-0.00120644		2603.01	-0.01739705
483.2	0.42472625		1013.19	0.23987196		1543.18	0.00018142		2073.18	-0.00068029		2603.21	-0.0164811
483.4	0.42506697		1013.39	0.24000977		1543.38	-0.00060774		2073.38	-0.00179027		2603.41	-0.01675127
483.6	0.42455927		1013.59	0.23908995		1543.58	-0.00101574		2073.58	-0.00231648		2603.61	-0.0165287
483.8	0.42460671		1013.79	0.23917928		1543.78	-0.00094157		2073.78	-0.00282223		2603.81	-0.01681166
484	0.42423548		1013.99	0.23840365		1543.98	-0.00151131		2073.98	-0.00393206		2604.01	-0.01665472
484.2	0.4233928		1014.19	0.23887776		1544.18	-0.00201414		2074.18	-0.00542217		2604.21	-0.01795296
484.4	0.42231066		1014.39	0.2389261		1544.38	-0.00194288		2074.38	-0.00720779		2604.41	-0.01921223
484.6	0.42325809		1014.59	0.238861		1544.58	-0.00295906		2074.58	-0.00851317		2604.61	-0.02008789
484.8	0.42459585		1014.79	0.23810719		1544.78	-0.00257677		2074.78	-0.009136		2604.81	-0.01992288
485	0.42523414		1014.99	0.23763707		1544.98	-0.00312794		2074.98	-0.01029537		2605.01	-0.0205402
485.2	0.42469063		1015.19	0.23791406		1545.18	-0.00300377		2075.18	-0.01056312		2605.21	-0.02070806
485.4	0.42530375		1015.39	0.23780821		1545.38	-0.00349724		2075.38	-0.0109914		2605.41	-0.02074734
485.6	0.42618254		1015.59	0.23735324		1545.58	-0.00352414		2075.58	-0.01030514		2605.61	-0.0205795
485.8	0.42660996		1015.79	0.23800922		1545.78	-0.00415172		2075.78	-0.0094341		2605.81	-0.02109368
486	0.42647191		1015.99	0.23806148		1545.98	-0.00355507		2075.98	-0.00896518		2606.01	-0.0203809
486.2	0.42691914		1016.19	0.23696922		1546.18	-0.00378701		2076.18	-0.0088049		2606.21	-0.0190288
486.4	0.42646576		1016.39	0.23678349		1546.38	-0.00495517		2076.38	-0.00783388		2606.41	-0.01918774
486.6	0.4267741		1016.59	0.23747538		1546.58	-0.00461347		2076.58	-0.00743833		2606.61	-0.01867024
486.8	0.42744054		1016.79	0.23805025		1546.78	-0.00432996		2076.78	-0.00591688		2606.81	-0.01832296
487	0.42744479		1016.99	0.23870418		1546.98	-0.00388103		2076.98	-0.00509163		2607.01	-0.01699695
487.2	0.42721488		1017.19	0.2379251		1547.18	-0.0031464		2077.18	-0.00507881		2607.21	-0.01567144
487.4	0.42646428		1017.39	0.2393263		1547.38	-0.00282869		2077.38	-0.00485709		2607.41	-0.01544536
487.6	0.42445112		1017.59	0.23953543		1547.58	-0.00212486		2077.58	-0.00464708		2607.61	-0.0153019
487.8	0.42373749		1017.79	0.23994247		1547.78	-0.0014268		2077.78	-0.00458857		2607.81	-0.01494143
488	0.42350395		1017.99	0.2403585		1547.98	-0.00133456		2077.98	-0.00450891		2608.01	-0.01532512
488.2	0.42271398		1018.19	0.24089056		1548.18	-0.00061836		2078.18	-0.00530363		2608.21	-0.0158518
488.4	0.42314867		1018.39	0.2412129		1548.38	-0.00092025		2078.38	-0.00540831		2608.41	-0.01618575
488.6	0.42384487		1018.59	0.24101416		1548.58	-0.00114268		2078.58	-0.00521502		2608.61	-0.01702106
488.8	0.42374364		1018.79	0.24180482		1548.78	-0.00085055		2078.78	-0.00545409		2608.81	-0.01704288
489	0.42362594		1018.99	0.24144965		1548.98	-0.00172154		2078.98	-0.00588407		2609.01	-0.01688634
489.2	0.42357872		1019.19	0.24107641		1549.18	-0.00227069		2079.18	-0.00534757		2609.21	-0.01705625
489.4	0.42409754		1019.39	0.23972239		1549.38	-0.00357855		2079.38	-0.00588147		2609.41	-0.01780814
489.6	0.42413533		1019.59	0.23887552		1549.58	-0.00347467		2079.58	-0.00617355		2609.61	-0.01861598
489.8	0.42426557		1019.79	0.23892695		1549.78	-0.0035892		2079.78	-0.00570857		2609.81	-0.01882007
490	0.42391314		1019.99	0.23722019		1549.98	-0.0029878		2079.98	-0.0052815		2610.01	-0.01888401
490.2	0.42328135		1020.19	0.23632926		1550.18	-0.00453199		2080.18	-0.00539519		2610.21	-0.01949518
490.4	0.42333743		1020.39	0.23609179		1550.38	-0.00449928		2080.38	-0.00532307		2610.41	-0.01914629
490.6	0.42367145		1020.59	0.23559077		1550.58	-0.00421204		2080.58	-0.00578795		2610.61	-0.01903118
490.8	0.4236984		1020.79	0.23636229		1550.78	-0.003521		2080.78	-0.00599071		2610.81	-0.01811978
491	0.42327383		1020.99	0.23674093		1550.98	-0.00232526		2080.98	-0.0067845		2611.01	-0.0181563
491.2	0.42391569		1021.19	0.23703431		1551.18	-0.00190442		2081.18	-0.00747938		2611.21	-0.01764894
491.4	0.42338581		1021.39	0.23825602		1551.38	-0.0007575		2081.38	-0.00732108		2611.41	-0.0173246
491.6	0.42373113		1021.59	0.2383117		1551.58	0.00001394		2081.58	-0.00744958		2611.61	-0.01766723
491.8	0.42379096		1021.79	0.23849754		1551.78	-0.00031688		2081.78	-0.00720713		2611.81	-0.0180429
492	0.42421863		1021.99	0.23952342		1551.98	0.0002585		2081.98	-0.00725039		2612.01	-0.0185993
492.2	0.42522401		1022.19	0.23982981		1552.18	0.00117069		2082.18	-0.00736711		2612.21	-0.01828945
492.4	0.42591207		1022.39	0.24085745		1552.38	0.00094955		2082.38	-0.00786943		2612.41	-0.01854907
492.6	0.42636751		1022.59	0.24104372		1552.58	0.00072725		2082.58	-0.00817198		2612.61	-0.01832777
492.8	0.42598069		1022.79	0.24138469		1552.78	-0.00013383		2082.78	-0.00808358		2612.81	-0.01819593
493	0.42561235		1022.99	0.24045485		1552.98	-0.00084865		2082.98	-0.00797941		2613.01	-0.01784743
493.2	0.42542421		1023.19	0.24020356		1553.18	-0.00126955		2083.18	-0.00814383		2613.21	-0.0183932
493.4	0.42478671		1023.39	0.24012489		1553.38	-0.0023699		2083.38	-0.00880234		2613.41	-0.01870173
493.6	0.42448385		1023.59	0.24073566		1553.58	-0.00196404		2083.58	-0.008308		2613.61	-0.01808494
493.8	0.42446096		1023.79	0.24044485		1553.78	-0.00165847		2083.78	-0.00703372		2613.81	-0.01728596
494	0.42421474		1023.99	0.23999996		1553.98	-0.00247017		2083.98	-0.00684595		2614.01	-0.01717118
494.2	0.42396148		1024.19	0.24010996		1554.18	-0.00271263		2084.18	-0.00702463		2614.21	-0.01664884
494.4	0.42488979		1024.39	0.23984902		1554.38	-0.00268839		2084.38	-0.00682483		2614.41	-0.01577116
494.6	0.42533535		1024.59	0.2402298		1554.58	-0.00364937		2084.58	-0.00726672		2614.61	-0.01579722
494.8	0.42568866		1024.79	0.24095833		1554.78	-0.00322685		2084.78	-0.00659187		2614.81	-0.01583666
495	0.42640557		1024.99	0.24077869		1554.98	-0.00307907		2084.98	-0.006201		2615.01	-0.01522369
495.2	0.42693098		1025.19	0.24111132		1555.18	-0.00239732		2085.18	-0.00579528		2615.21	-0.01459529
495.4	0.42621092		1025.39	0.24022699		1555.38	-0.00176273		2085.38	-0.00556146		2615.41	-0.01523324
495.6	0.42596644		1025.59	0.23952818		1555.58	-0.00211966		2085.58	-0.00527863		2615.61	-0.01625204
495.8	0.42556289		1025.79	0.23985708		1555.78	-0.00223985		2085.78	-0.00514358		2615.81	-0.01737455
496	0.42646437		1025.99	0.23976804		1555.98	-0.00147975		2085.98	-0.00516157		2616.01	-0.01814583
496.2	0.42777937		1026.19	0.23884275		1556.18	-0.00171835		2086.18	-0.00554874		2616.21	-0.01903652
496.4	0.42724967		1026.39	0.23876574		1556.38	-0.00100716		2086.38	-0.00681374		2616.41	-0.01965713
496.6	0.42675193		1026.59	0.23798429		1556.58	-0.00195504		2086.58	-0.00732174		2616.61	-0.02003839
496.8	0.42675342		1026.79	0.23773236		1556.78	-0.00223745		2086.78	-0.00711803		2616.81	-0.02068402
497	0.42538177		1026.99	0.23736141		1556.98	-0.00236639		2086.98	-0.00797749		2617.01	-0.02093493
497.2	0.42482559		1027.19	0.23795224		1557.18	-0.00321792		2087.18	-0.00870526		2617.21	-0.0212789
497.4	0.4241509		1027.39	0.23808871		1557.38	-0.00421984		2087.38	-0.00884784		2617.41	-0.02040682
497.6	0.42341267		1027.59	0.23915218		1557.58	-0.00392028		2087.58	-0.00834988		2617.61	-0.01958111
497.8	0.42402732		1027.79	0.23890594		1557.78	-0.00374736		2087.78	-0.00838544		2617.81	-0.01969405
498	0.42383728		1027.99	0.23888108		1557.98	-0.0040724		2087.98	-0.00835034		2618.01	-0.01965652
498.2	0.42336881		1028.19	0.23915144		1558.18	-0.00256739		2088.18	-0.00850332		2618.21	-0.01866258
498.4	0.42449353		1028.39	0.23993579		1558.38	-0.00300103		2088.38	-0.00819037		2618.41	-0.01875184
498.6	0.42475151		1028.59	0.24002125		1558.58	-0.00266245		2088.58	-0.00722305		2618.61	-0.01852412
498.8	0.42460852		1028.79	0.23958392		1558.78	-0.00219466		2088.78	-0.00642414		2618.81	-0.01814641
499	0.4248862		1028.99	0.23964024		1558.98	-0.00149085		2088.98	-0.00696793		2619.01	-0.0174219
499.2	0.42491897		1029.19	0.24013396		1559.18	-0.00078724		2089.18	-0.00599174		2619.21	-0.01732307
499.4	0.42475231		1029.39	0.23994131		1559.38	-0.00014186		2089.38	-0.00614649		2619.41	-0.01697068
499.6	0.42581613		1029.59	0.24017966		1559.58	0.00011492		2089.58	-0.00597192		2619.61	-0.01696092
499.8	0.42695252		1029.79	0.24031343		1559.78	0.00047608		2089.78	-0.00659176		2619.81	-0.01639117
500	0.42674629		1029.99	0.23971858		1559.98	0.00084984		2089.98	-0.00700735		2620.01	-0.01626435
500.2	0.42610583		1030.19	0.23886537		1560.18	0.0004502		2090.18	-0.00804609		2620.21	-0.01606796
500.4	0.42499699		1030.39	0.23820262		1560.38	0.00099802		2090.38	-0.00878271		2620.41	-0.01589936
500.6	0.42465497		1030.59	0.23777661		1560.58	-0.00006399		2090.58	-0.0082743		2620.61	-0.0162076
500.8	0.42373839		1030.79	0.23758706		1560.78	0.00024477		2090.78	-0.00824666		2620.81	-0.01693689
501	0.42186188		1030.99	0.23747502		1560.98	-0.00062453		2090.98	-0.00836392		2621.01	-0.01628092
501.2	0.42124165		1031.19	0.23784357		1561.18	-0.00123914		2091.18	-0.00821691		2621.21	-0.01623552
501.4	0.42031257		1031.39	0.23842597		1561.38	-0.00194291		2091.38	-0.00759633		2621.41	-0.0162973
501.6	0.41991315		1031.59	0.23910708		1561.58	-0.00176948		2091.58	-0.00763429		2621.61	-0.01685179
501.8	0.42008753		1031.79	0.23872861		1561.78	-0.00223903		2091.78	-0.00765567		2621.81	-0.01758221
502	0.42015522		1031.99	0.23912052		1561.98	-0.00217583		2091.98	-0.00678598		2622.01	-0.01797186
502.2	0.42027075		1032.19	0.23997352		1562.18	-0.00191414		2092.18	-0.00659858		2622.21	-0.0180256
502.4	0.42129249		1032.39	0.24085376		1562.38	-0.00280733		2092.38	-0.00680142		2622.41	-0.01819977
502.6	0.42120408		1032.59	0.23988708		1562.58	-0.00260775		2092.58	-0.00683526		2622.61	-0.01799302
502.8	0.42161946		1032.79	0.24002712		1562.78	-0.00234279		2092.78	-0.0078535		2622.81	-0.01807097
503	0.42169754		1032.99	0.24028194		1562.98	-0.00146221		2092.98	-0.00843074		2623.01	-0.01834753
503.2	0.42225293		1033.19	0.24066467		1563.18	-0.00065323		2093.18	-0.00864076		2623.21	-0.0175969
503.4	0.42309674		1033.39	0.23958659		1563.38	-0.00033587		2093.38	-0.00933486		2623.41	-0.01760713
503.6	0.42373758		1033.59	0.23939712		1563.58	-0.00043649		2093.58	-0.00940607		2623.61	-0.01830859
503.8	0.42331445		1033.79	0.23944637		1563.78	-0.00038878		2093.78	-0.00978184		2623.81	-0.01777526
504	0.42271525		1033.99	0.23847926		1563.98	-0.00004078		2093.98	-0.00918577		2624.01	-0.01876138
504.2	0.42263453		1034.19	0.23791392		1564.18	-0.00001588		2094.18	-0.00917808		2624.21	-0.01928532
504.4	0.42207092		1034.39	0.23775627		1564.38	0.00059289		2094.38	-0.00855536		2624.41	-0.01927135
504.6	0.42157969		1034.59	0.23870177		1564.58	0.0005144		2094.58	-0.00730321		2624.61	-0.01993679
504.8	0.42063177		1034.79	0.23915957		1564.78	0.00045402		2094.78	-0.00676791		2624.81	-0.02055933
505	0.41962975		1034.99	0.23963893		1564.98	0.00016141		2094.98	-0.00603151		2625.01	-0.02075873
505.2	0.41935387		1035.19	0.23954061		1565.18	0.00062097		2095.18	-0.0057184		2625.21	-0.02196332
505.4	0.41961195		1035.39	0.2390636		1565.38	-0.00033589		2095.38	-0.0050437		2625.41	-0.02189606
505.6	0.42088199		1035.59	0.23903642		1565.58	-0.00052743		2095.58	-0.00463178		2625.61	-0.02130433
505.8	0.42171665		1035.79	0.23982879		1565.78	-0.00070301		2095.78	-0.00362412		2625.81	-0.02122746
506	0.42193653		1035.99	0.23954305		1565.98	-0.00133715		2095.98	-0.00301374		2626.01	-0.02108329
506.2	0.42219237		1036.19	0.23911355		1566.18	-0.00203776		2096.18	-0.00324378		2626.21	-0.02078631
506.4	0.42223635		1036.39	0.23837934		1566.38	-0.00190089		2096.38	-0.00481772		2626.41	-0.02065485
506.6	0.4221213		1036.59	0.23683841		1566.58	-0.00134833		2096.58	-0.00631347		2626.61	-0.02056159
506.8	0.42200649		1036.79	0.23694193		1566.78	-0.00141437		2096.78	-0.00687269		2626.81	-0.02024406
507	0.42123139		1036.99	0.23639441		1566.98	-0.00106594		2096.98	-0.00727654		2627.01	-0.01989787
507.2	0.42204706		1037.19	0.23631547		1567.18	-0.00130999		2097.18	-0.00821406		2627.21	-0.01944636
507.4	0.4224513		1037.39	0.23528839		1567.38	-0.00178531		2097.38	-0.00806768		2627.41	-0.01909106
507.6	0.42293049		1037.59	0.23587309		1567.58	-0.0018536		2097.58	-0.00847761		2627.61	-0.01868438
507.8	0.42268242		1037.79	0.2364059		1567.78	-0.00237199		2097.78	-0.00860306		2627.81	-0.01783533
508	0.42349128		1037.99	0.23615861		1567.98	-0.00246887		2097.98	-0.00762499		2628.01	-0.01844118
508.2	0.42266552		1038.19	0.23720529		1568.18	-0.00276438		2098.18	-0.00794075		2628.21	-0.01790002
508.4	0.42145539		1038.39	0.23736885		1568.38	-0.00358252		2098.38	-0.00805105		2628.41	-0.01796217
508.6	0.42083165		1038.59	0.23761605		1568.58	-0.00409081		2098.58	-0.00800729		2628.61	-0.01798017
508.8	0.42037288		1038.79	0.23775961		1568.78	-0.00433729		2098.78	-0.00811112		2628.81	-0.01843062
509	0.41987925		1038.99	0.23820801		1568.98	-0.00380815		2098.98	-0.00786951		2629.01	-0.01776
509.2	0.42060344		1039.19	0.23763865		1569.18	-0.00392521		2099.18	-0.00786964		2629.21	-0.01852766
509.4	0.42099015		1039.39	0.23788083		1569.38	-0.00420271		2099.38	-0.00773015		2629.41	-0.01818996
509.6	0.42111053		1039.59	0.23879301		1569.58	-0.00389147		2099.58	-0.00687647		2629.61	-0.01845985
509.8	0.42091896		1039.79	0.23973579		1569.78	-0.00345801		2099.78	-0.00708859		2629.81	-0.01989249
510	0.41983412		1039.99	0.23889548		1569.98	-0.00422451		2099.98	-0.00754552		2630.01	-0.02118941
510.2	0.42067858		1040.19	0.239159		1570.18	-0.00403025		2100.18	-0.00813929		2630.21	-0.02214318
510.4	0.42092291		1040.39	0.23942627		1570.38	-0.0028898		2100.38	-0.00920632		2630.41	-0.02216716
510.6	0.4214388		1040.59	0.24009763		1570.58	-0.00227113		2100.58	-0.00930504		2630.61	-0.02292846
510.8	0.42220774		1040.79	0.24068535		1570.78	-0.00185448		2100.78	-0.00952179		2630.81	-0.0231457
511	0.42197912		1040.99	0.24038377		1570.98	-0.000743		2100.98	-0.00983902		2631.01	-0.02343641
511.2	0.42138305		1041.19	0.24042706		1571.18	-0.00015075		2101.18	-0.00930047		2631.21	-0.02330967
511.4	0.42159277		1041.39	0.2392232		1571.38	-0.0000555		2101.38	-0.00928645		2631.41	-0.02241319
511.6	0.42133679		1041.59	0.23988166		1571.58	-0.00054166		2101.58	-0.00846969		2631.61	-0.02262249
511.8	0.42134107		1041.79	0.24045189		1571.78	-0.00048283		2101.78	-0.00797846		2631.81	-0.02239153
512	0.42179162		1041.99	0.24023642		1571.98	-0.00010221		2101.98	-0.00693624		2632.01	-0.02236379
512.2	0.41995387		1042.19	0.24047228		1572.18	-0.00006435		2102.18	-0.00733167		2632.21	-0.02136974
512.4	0.4193001		1042.39	0.23956475		1572.38	-0.00050766		2102.38	-0.00676221		2632.41	-0.02092946
512.6	0.41878249		1042.59	0.24009591		1572.58	-0.00065202		2102.58	-0.00643098		2632.61	-0.0198064
512.8	0.41843073		1042.79	0.24019729		1572.78	-0.00113665		2102.78	-0.00644673		2632.81	-0.01977185
513	0.41795115		1042.99	0.24006513		1572.98	-0.00181931		2102.98	-0.00627932		2633.01	-0.01934037
513.2	0.4175882		1043.19	0.23888121		1573.18	-0.00269986		2103.18	-0.00754844		2633.21	-0.01958399
513.4	0.41714959		1043.39	0.23901764		1573.38	-0.00339563		2103.38	-0.00844112		2633.41	-0.01911223
513.6	0.41729029		1043.59	0.23871307		1573.58	-0.00387843		2103.58	-0.00907575		2633.61	-0.01932563
513.8	0.41723018		1043.79	0.23905631		1573.78	-0.00424106		2103.78	-0.00963794		2633.81	-0.01932813
514	0.41756618		1043.99	0.23886534		1573.98	-0.00533147		2103.98	-0.01036511		2634.01	-0.019086
514.2	0.4181365		1044.19	0.23931357		1574.18	-0.00463997		2104.18	-0.01106435		2634.21	-0.0188119
514.4	0.419708		1044.39	0.23933214		1574.38	-0.00355032		2104.38	-0.01108446		2634.41	-0.01912868
514.6	0.42059482		1044.59	0.23989354		1574.58	-0.00356889		2104.58	-0.01135273		2634.61	-0.02028948
514.8	0.4210613		1044.79	0.24006104		1574.78	-0.00316217		2104.78	-0.01191007		2634.81	-0.02020734
515	0.42077467		1044.99	0.23938043		1574.98	-0.00284019		2104.98	-0.01120382		2635.01	-0.02131506
515.2	0.42087665		1045.19	0.23992091		1575.18	-0.00283545		2105.18	-0.01000381		2635.21	-0.02203868
515.4	0.42217732		1045.39	0.23958392		1575.38	-0.00344259		2105.38	-0.00974783		2635.41	-0.02237278
515.6	0.42225715		1045.59	0.24062882		1575.58	-0.00340006		2105.58	-0.00856015		2635.61	-0.0228002
515.8	0.4230148		1045.79	0.24088838		1575.78	-0.00315508		2105.78	-0.00841433		2635.81	-0.0223251
516	0.4227545		1045.99	0.2408139		1575.98	-0.00374524		2105.98	-0.0081108		2636.01	-0.02245208
516.2	0.42157627		1046.19	0.24133019		1576.18	-0.00410817		2106.18	-0.00815943		2636.21	-0.02222986
516.4	0.42144871		1046.39	0.24051688		1576.38	-0.00519056		2106.38	-0.00774797		2636.41	-0.02229012
516.6	0.42098394		1046.59	0.2407289		1576.58	-0.00590905		2106.58	-0.00789985		2636.61	-0.02245093
516.8	0.42078793		1046.79	0.24033743		1576.78	-0.00649511		2106.78	-0.007636		2636.81	-0.02253355
517	0.41978725		1046.99	0.23970063		1576.98	-0.00806983		2106.98	-0.00776471		2637.01	-0.02218019
517.2	0.41910336		1047.19	0.23862464		1577.18	-0.00823438		2107.18	-0.0085615		2637.21	-0.02138382
517.4	0.41966452		1047.39	0.23833461		1577.38	-0.00768068		2107.38	-0.00831652		2637.41	-0.02145963
517.6	0.41941405		1047.59	0.23822651		1577.58	-0.00686877		2107.58	-0.00789273		2637.61	-0.02082732
517.8	0.41875129		1047.79	0.23831376		1577.78	-0.0058421		2107.78	-0.00735602		2637.81	-0.0205842
518	0.4188015		1047.99	0.23825372		1577.98	-0.00529879		2107.98	-0.00760362		2638.01	-0.02073154
518.2	0.41891934		1048.19	0.23781186		1578.18	-0.00373857		2108.18	-0.00796121		2638.21	-0.0206473
518.4	0.4198077		1048.39	0.23671566		1578.38	-0.00311186		2108.38	-0.007809		2638.41	-0.0216607
518.6	0.41951805		1048.59	0.2362853		1578.58	-0.00271873		2108.58	-0.00768019		2638.61	-0.02196246
518.8	0.41966159		1048.79	0.23590914		1578.78	-0.00192119		2108.78	-0.00729271		2638.81	-0.02197292
519	0.42005879		1048.99	0.23428561		1578.98	-0.00171557		2108.98	-0.00726937		2639.01	-0.02280906
519.2	0.4201465		1049.19	0.23464414		1579.18	-0.00169719		2109.18	-0.00780385		2639.21	-0.02227738
519.4	0.42015425		1049.39	0.23398367		1579.38	-0.00189795		2109.38	-0.00812708		2639.41	-0.02211959
519.6	0.41987298		1049.59	0.23391667		1579.58	-0.00134792		2109.58	-0.00788019		2639.61	-0.02154383
519.8	0.42034399		1049.79	0.2334551		1579.78	-0.0018597		2109.78	-0.00881387		2639.81	-0.02112481
520	0.42008156		1049.99	0.23270297		1579.98	-0.00241886		2109.98	-0.00950867		2640.01	-0.02006846
520.2	0.41923402		1050.19	0.23305833		1580.18	-0.00275616		2110.18	-0.00953398		2640.21	-0.01979917
520.4	0.41888682		1050.39	0.23377558		1580.38	-0.00308096		2110.38	-0.00985297		2640.41	-0.01961666
520.6	0.41909075		1050.59	0.2352169		1580.58	-0.00308541		2110.58	-0.01027353		2640.61	-0.01836752
520.8	0.4187012		1050.79	0.23638154		1580.78	-0.0030974		2110.78	-0.01008099		2640.81	-0.01819593
521	0.41781244		1050.99	0.23684441		1580.98	-0.00348476		2110.98	-0.0108131		2641.01	-0.01750904
521.2	0.418218		1051.19	0.23751334		1581.18	-0.0019871		2111.18	-0.01082908		2641.21	-0.01748688
521.4	0.41841659		1051.39	0.23894396		1581.38	0.00004186		2111.38	-0.01075751		2641.41	-0.01791054
521.6	0.41765704		1051.59	0.23943774		1581.58	0.00084473		2111.58	-0.01036367		2641.61	-0.01790817
521.8	0.41769211		1051.79	0.2397098		1581.78	0.00193681		2111.78	-0.01007793		2641.81	-0.01855331
522	0.41816107		1051.99	0.24018427		1581.98	0.00132952		2111.98	-0.00992384		2642.01	-0.01860845
522.2	0.41868587		1052.19	0.23990593		1582.18	0.00130089		2112.18	-0.01019626		2642.21	-0.01979753
522.4	0.41858652		1052.39	0.240045		1582.38	0.00125143		2112.38	-0.00904121		2642.41	-0.02054088
522.6	0.41923805		1052.59	0.23998155		1582.58	0.00155564		2112.58	-0.00831586		2642.61	-0.02135083
522.8	0.4196616		1052.79	0.23913628		1582.78	0.00074363		2112.78	-0.00869388		2642.81	-0.0219196
523	0.42027416		1052.99	0.23807712		1582.98	0.0004092		2112.98	-0.00885718		2643.01	-0.02273361
523.2	0.42062634		1053.19	0.23826088		1583.18	-0.00008279		2113.18	-0.00853964		2643.21	-0.02227952
523.4	0.42068652		1053.39	0.23814507		1583.38	-0.00026627		2113.38	-0.00727234		2643.41	-0.02268674
523.6	0.42095613		1053.59	0.23796791		1583.58	-0.0006639		2113.58	-0.00642948		2643.61	-0.02211428
523.8	0.4219094		1053.79	0.23735538		1583.78	-0.00238264		2113.78	-0.00731455		2643.81	-0.02122454
524	0.42129426		1053.99	0.23736245		1583.98	-0.00291306		2113.98	-0.00790312		2644.01	-0.02028818
524.2	0.42073953		1054.19	0.23729034		1584.18	-0.0036411		2114.18	-0.00751153		2644.21	-0.02077282
524.4	0.42133339		1054.39	0.23830387		1584.38	-0.00381183		2114.38	-0.00799739		2644.41	-0.01970518
524.6	0.42150115		1054.59	0.23824212		1584.58	-0.00425925		2114.58	-0.00889493		2644.61	-0.0189903
524.8	0.4205222		1054.79	0.23773947		1584.78	-0.00425575		2114.78	-0.00933478		2644.81	-0.01915464
525	0.42011824		1054.99	0.23756865		1584.98	-0.00351232		2114.98	-0.00998677		2645.01	-0.01912257
525.2	0.42021248		1055.19	0.23785347		1585.18	-0.00284319		2115.18	-0.01042545		2645.21	-0.01961889
525.4	0.419765		1055.39	0.23738747		1585.38	-0.00187195		2115.38	-0.01196162		2645.41	-0.01966031
525.6	0.4199543		1055.59	0.23702853		1585.58	-0.00226948		2115.58	-0.01187333		2645.61	-0.01907759
525.8	0.42077149		1055.79	0.23733732		1585.78	-0.00264563		2115.78	-0.0122398		2645.81	-0.01974115
526	0.42067623		1055.99	0.23742126		1585.98	-0.00333257		2115.98	-0.01236219		2646.01	-0.02026158
526.2	0.4209401		1056.19	0.23742771		1586.18	-0.00299635		2116.18	-0.01262049		2646.21	-0.02120549
526.4	0.42032738		1056.39	0.23795236		1586.38	-0.00255204		2116.38	-0.01249416		2646.41	-0.0215702
526.6	0.42024953		1056.59	0.23715206		1586.58	-0.00257934		2116.58	-0.01287181		2646.61	-0.02249162
526.8	0.41970045		1056.79	0.23673439		1586.78	-0.00272028		2116.78	-0.01280856		2646.81	-0.02253995
527	0.42010762		1056.99	0.23785888		1586.98	-0.00286058		2116.98	-0.01171136		2647.01	-0.02242442
527.2	0.41972862		1057.19	0.23848624		1587.18	-0.00277161		2117.18	-0.01078648		2647.21	-0.02240754
527.4	0.41967178		1057.39	0.23913968		1587.38	-0.00271129		2117.38	-0.01039633		2647.41	-0.02324602
527.6	0.41870464		1057.59	0.23871717		1587.58	-0.0035877		2117.58	-0.00995982		2647.61	-0.02314077
527.8	0.41903688		1057.79	0.23866837		1587.78	-0.00421626		2117.78	-0.0096131		2647.81	-0.02319808
528	0.41791812		1057.99	0.23889836		1587.98	-0.00353943		2117.98	-0.00858803		2648.01	-0.02342964
528.2	0.4177641		1058.19	0.23851456		1588.18	-0.00466204		2118.18	-0.0071978		2648.21	-0.02380313
528.4	0.41871652		1058.39	0.24015716		1588.38	-0.00579705		2118.38	-0.00676635		2648.41	-0.02355526
528.6	0.41809648		1058.59	0.23933258		1588.58	-0.00633527		2118.58	-0.00648046		2648.61	-0.02376598
528.8	0.4178776		1058.79	0.23874304		1588.78	-0.00619502		2118.78	-0.00617763		2648.81	-0.02307971
529	0.41851258		1058.99	0.23916408		1588.98	-0.00590387		2118.98	-0.00610994		2649.01	-0.02377018
529.2	0.41937774		1059.19	0.23918307		1589.18	-0.00671762		2119.18	-0.00616963		2649.21	-0.02318423
529.4	0.41987954		1059.39	0.2379089		1589.38	-0.00687715		2119.38	-0.0069044		2649.41	-0.02252755
529.6	0.42028922		1059.59	0.2377782		1589.58	-0.00740715		2119.58	-0.00668339		2649.61	-0.02270471
529.8	0.42115701		1059.79	0.2372727		1589.78	-0.00712604		2119.78	-0.00690533		2649.81	-0.02306479
530	0.42163904		1059.99	0.23576151		1589.98	-0.00707688		2119.98	-0.00771361		2650.01	-0.02293077
530.2	0.42231643		1060.19	0.23570222		1590.18	-0.0059443		2120.18	-0.00835384		2650.21	-0.0232889
530.4	0.42283099		1060.39	0.23579485		1590.38	-0.00562835		2120.38	-0.00938058		2650.41	-0.02261115
530.6	0.42322193		1060.59	0.23504195		1590.58	-0.00497017		2120.58	-0.00961767		2650.61	-0.02154434
530.8	0.42251981		1060.79	0.23517099		1590.78	-0.00441514		2120.78	-0.01035022		2650.81	-0.0208438
531	0.42250054		1060.99	0.23530632		1590.98	-0.0050055		2120.98	-0.01039283		2651.01	-0.0204585
531.2	0.42237382		1061.19	0.23501236		1591.18	-0.00467035		2121.18	-0.01147073		2651.21	-0.02045269
531.4	0.42127654		1061.39	0.23568939		1591.38	-0.00516786		2121.38	-0.0114201		2651.41	-0.02022753
531.6	0.42014637		1061.59	0.23606603		1591.58	-0.0052519		2121.58	-0.01085245		2651.61	-0.02027572
531.8	0.41995326		1061.79	0.23702797		1591.78	-0.0046547		2121.78	-0.01062104		2651.81	-0.02044983
532	0.4190034		1061.99	0.23725437		1591.98	-0.00554807		2121.98	-0.01040271		2652.01	-0.01974783
532.2	0.41933119		1062.19	0.23770881		1592.18	-0.00619608		2122.18	-0.01031462		2652.21	-0.01994195
532.4	0.41927548		1062.39	0.23816787		1592.38	-0.00622339		2122.38	-0.00988588		2652.41	-0.01929368
532.6	0.41875485		1062.59	0.23729176		1592.58	-0.00567015		2122.58	-0.00968204		2652.61	-0.01991222
532.8	0.41802761		1062.79	0.23734894		1592.78	-0.00507492		2122.78	-0.00974059		2652.81	-0.01988177
533	0.41863176		1062.99	0.23762423		1592.98	-0.00546327		2122.98	-0.009032		2653.01	-0.02078958
533.2	0.41823162		1063.19	0.23744502		1593.18	-0.00535265		2123.18	-0.00810406		2653.21	-0.0200195
533.4	0.41786763		1063.39	0.2367707		1593.38	-0.00465738		2123.38	-0.00816704		2653.41	-0.02033257
533.6	0.41824063		1063.59	0.23636601		1593.58	-0.0040538		2123.58	-0.00803325		2653.61	-0.02193546
533.8	0.41901608		1063.79	0.23540099		1593.78	-0.00302279		2123.78	-0.00744789		2653.81	-0.02244929
534	0.42028943		1063.99	0.23476731		1593.98	-0.00207482		2123.98	-0.00832901		2654.01	-0.02296362
534.2	0.42080469		1064.19	0.23505545		1594.18	-0.00158507		2124.18	-0.00857431		2654.21	-0.02272435
534.4	0.42102974		1064.39	0.23412391		1594.38	-0.0017907		2124.38	-0.00967272		2654.41	-0.02166054
534.6	0.42068694		1064.59	0.23309571		1594.58	-0.00195687		2124.58	-0.01026623		2654.61	-0.02112445
534.8	0.42020288		1064.79	0.23296815		1594.78	-0.00267425		2124.78	-0.01135375		2654.81	-0.02183293
535	0.41960535		1064.99	0.23239071		1594.98	-0.0038006		2124.98	-0.01088773		2655.01	-0.02271971
535.2	0.42004684		1065.19	0.23340856		1595.18	-0.00396417		2125.18	-0.01129628		2655.21	-0.02261157
535.4	0.41923527		1065.39	0.23465432		1595.38	-0.004045		2125.38	-0.01133791		2655.41	-0.0220585
535.6	0.41885752		1065.59	0.2348559		1595.58	-0.00387169		2125.58	-0.01148918		2655.61	-0.0221483
535.8	0.41847406		1065.79	0.2358099		1595.78	-0.00432342		2125.78	-0.0121426		2655.81	-0.02191789
536	0.41834305		1065.99	0.23607463		1595.98	-0.00513581		2125.98	-0.01245361		2656.01	-0.02178559
536.2	0.41715436		1066.19	0.23705855		1596.18	-0.00431184		2126.18	-0.01198962		2656.21	-0.02158092
536.4	0.41666654		1066.39	0.23737002		1596.38	-0.00489067		2126.38	-0.01158494		2656.41	-0.02133514
536.6	0.41680978		1066.59	0.23832634		1596.58	-0.00497748		2126.58	-0.01098819		2656.61	-0.02189858
536.8	0.41659902		1066.79	0.23916406		1596.78	-0.00457696		2126.78	-0.00980465		2656.81	-0.02060758
537	0.41718577		1066.99	0.23959465		1596.98	-0.0050065		2126.98	-0.00911996		2657.01	-0.02045847
537.2	0.41678522		1067.19	0.2394971		1597.18	-0.00438453		2127.18	-0.00923393		2657.21	-0.02014278
537.4	0.41651562		1067.39	0.23976459		1597.38	-0.00446242		2127.38	-0.00888433		2657.41	-0.02102888
537.6	0.41710156		1067.59	0.23930366		1597.58	-0.00389222		2127.58	-0.0086242		2657.61	-0.02163671
537.8	0.41837008		1067.79	0.23830103		1597.78	-0.00409956		2127.78	-0.00831806		2657.81	-0.02139402
538	0.41928339		1067.99	0.23784376		1597.98	-0.00425501		2127.98	-0.00873341		2658.01	-0.02078454
538.2	0.41878224		1068.19	0.23663321		1598.18	-0.00463351		2128.18	-0.00913533		2658.21	-0.02039483
538.4	0.41941179		1068.39	0.2354898		1598.38	-0.00446711		2128.38	-0.00954373		2658.41	-0.02026182
538.6	0.42110394		1068.59	0.23456848		1598.58	-0.00531119		2128.58	-0.00910848		2658.61	-0.02036659
538.8	0.4208687		1068.79	0.23400613		1598.78	-0.00610585		2128.78	-0.00922615		2658.81	-0.02119994
539	0.42034176		1068.99	0.23330368		1598.98	-0.00660833		2128.98	-0.00963038		2659.01	-0.02087115
539.2	0.42120807		1069.19	0.23402926		1599.18	-0.00623869		2129.18	-0.01032982		2659.21	-0.01949587
539.4	0.42106444		1069.39	0.23484939		1599.38	-0.00636482		2129.38	-0.01080135		2659.41	-0.01926731
539.6	0.42058009		1069.59	0.23519916		1599.58	-0.00685301		2129.58	-0.0107623		2659.61	-0.01946549
539.8	0.42030099		1069.79	0.2361058		1599.78	-0.00723673		2129.78	-0.01112659		2659.81	-0.01985489
540	0.41977256		1069.99	0.23571363		1599.98	-0.00733638		2129.98	-0.01096323		2660.01	-0.02055596
540.2	0.41887225		1070.19	0.23534227		1600.18	-0.00719828		2130.18	-0.0106116		2660.21	-0.02053162
540.4	0.41926709		1070.39	0.2351269		1600.38	-0.00746528		2130.38	-0.01090744		2660.41	-0.02117623
540.6	0.41963379		1070.59	0.23534105		1600.58	-0.00699468		2130.58	-0.01100534		2660.61	-0.02147126
540.8	0.42000315		1070.79	0.23477725		1600.78	-0.00643279		2130.78	-0.01109724		2660.81	-0.02187258
541	0.41951911		1070.99	0.23439825		1600.98	-0.00647877		2130.98	-0.01199579		2661.01	-0.02288201
541.2	0.41927374		1071.19	0.23407989		1601.18	-0.00585887		2131.18	-0.01140197		2661.21	-0.02343717
541.4	0.41916112		1071.39	0.23404787		1601.38	-0.00619352		2131.38	-0.01062729		2661.41	-0.02426601
541.6	0.41933669		1071.59	0.23212793		1601.58	-0.00530562		2131.58	-0.01018488		2661.61	-0.02373429
541.8	0.4187694		1071.79	0.23054267		1601.78	-0.00543974		2131.78	-0.01026923		2661.81	-0.02364885
542	0.41746964		1071.99	0.23062071		1601.98	-0.00476136		2131.98	-0.00983798		2662.01	-0.02238753
542.2	0.41785217		1072.19	0.23047965		1602.18	-0.0044287		2132.18	-0.0098485		2662.21	-0.02213391
542.4	0.41842178		1072.39	0.23079123		1602.38	-0.00438827		2132.38	-0.00944567		2662.41	-0.02188166
542.6	0.41869548		1072.59	0.23161719		1602.58	-0.00509415		2132.58	-0.00885895		2662.61	-0.02136892
542.8	0.41898452		1072.79	0.23274303		1602.78	-0.00511548		2132.78	-0.0097758		2662.81	-0.0214558
543	0.41963188		1072.99	0.23346066		1602.98	-0.00454546		2132.98	-0.0095373		2663.01	-0.02085599
543.2	0.42049989		1073.19	0.23525007		1603.18	-0.00373115		2133.18	-0.00880493		2663.21	-0.02107598
543.4	0.42064287		1073.39	0.23691301		1603.38	-0.00357405		2133.38	-0.00898951		2663.41	-0.02164467
543.6	0.42072232		1073.59	0.23721402		1603.58	-0.00367901		2133.58	-0.00989291		2663.61	-0.02122542
543.8	0.42157392		1073.79	0.23786329		1603.78	-0.00321231		2133.78	-0.01053549		2663.81	-0.02140266
544	0.42204248		1073.99	0.23734391		1603.98	-0.00269558		2133.98	-0.01102102		2664.01	-0.02253916
544.2	0.42233459		1074.19	0.23752023		1604.18	-0.00269298		2134.18	-0.01182327		2664.21	-0.02291201
544.4	0.42207744		1074.39	0.238243		1604.38	-0.00181128		2134.38	-0.01263681		2664.41	-0.02308507
544.6	0.42230209		1074.59	0.23808023		1604.58	-0.00046208		2134.58	-0.01287333		2664.61	-0.02379879
544.8	0.42203249		1074.79	0.23791198		1604.78	-0.00029466		2134.78	-0.01324945		2664.81	-0.02448908
545	0.42100589		1074.99	0.23739839		1604.98	-0.00053239		2134.98	-0.01347385		2665.01	-0.02386385
545.2	0.4207426		1075.19	0.23592895		1605.18	-0.00052211		2135.18	-0.01299892		2665.21	-0.0238488
545.4	0.42035915		1075.39	0.23448339		1605.38	-0.00084805		2135.38	-0.01330909		2665.41	-0.02389371
545.6	0.41910873		1075.59	0.2333577		1605.58	-0.00061094		2135.58	-0.01322613		2665.61	-0.02297903
545.8	0.41798936		1075.79	0.23370523		1605.78	-0.00130517		2135.78	-0.01332121		2665.81	-0.02271539
546	0.41812414		1075.99	0.23446812		1605.98	-0.00148879		2135.98	-0.01281562		2666.01	-0.0219623
546.2	0.41817412		1076.19	0.23432353		1606.18	-0.00258474		2136.18	-0.01229475		2666.21	-0.02251108
546.4	0.41741081		1076.39	0.23515297		1606.38	-0.00324385		2136.38	-0.01160212		2666.41	-0.0224584
546.6	0.41815166		1076.59	0.2356701		1606.58	-0.00408359		2136.58	-0.01069377		2666.61	-0.02160203
546.8	0.41892817		1076.79	0.23620884		1606.78	-0.00508578		2136.78	-0.01050586		2666.81	-0.02148671
547	0.41856524		1076.99	0.23663284		1606.98	-0.00561688		2136.98	-0.00992947		2667.01	-0.02130008
547.2	0.41985979		1077.19	0.2377339		1607.18	-0.00560363		2137.18	-0.01011089		2667.21	-0.02218327
547.4	0.42063387		1077.39	0.23760796		1607.38	-0.00589653		2137.38	-0.01073394		2667.41	-0.02199265
547.6	0.42122314		1077.59	0.23797006		1607.58	-0.00628333		2137.58	-0.01099877		2667.61	-0.02243091
547.8	0.42201235		1077.79	0.23779181		1607.78	-0.0064592		2137.78	-0.01107138		2667.81	-0.0233572
548	0.42112568		1077.99	0.2375066		1607.98	-0.00663498		2137.98	-0.01139853		2668.01	-0.02467803
548.2	0.42130032		1078.19	0.23803238		1608.18	-0.00624147		2138.18	-0.0121482		2668.21	-0.0244791
548.4	0.42065332		1078.39	0.23739568		1608.38	-0.00499697		2138.38	-0.01219398		2668.41	-0.02483966
548.6	0.42077965		1078.59	0.23614649		1608.58	-0.00467801		2138.58	-0.01224436		2668.61	-0.02511165
548.8	0.42024393		1078.79	0.23504955		1608.78	-0.00519402		2138.78	-0.01219489		2668.81	-0.02511825
549	0.41963286		1078.99	0.23417128		1608.98	-0.004842		2138.98	-0.01211245		2669.01	-0.02407063
549.2	0.41965777		1079.19	0.23309141		1609.18	-0.00411617		2139.18	-0.01283933		2669.21	-0.02496293
549.4	0.4189151		1079.39	0.23332609		1609.38	-0.0039886		2139.38	-0.01344129		2669.41	-0.02433058
549.6	0.41810434		1079.59	0.23322848		1609.58	-0.00392378		2139.58	-0.01374114		2669.61	-0.02406529
549.8	0.41735974		1079.79	0.23330909		1609.78	-0.00395066		2139.78	-0.01328634		2669.81	-0.02364466
550	0.41702087		1079.99	0.23301059		1609.98	-0.00426807		2139.98	-0.0126484		2670.01	-0.02286575
550.2	0.41628422		1080.19	0.23243523		1610.18	-0.00574667		2140.18	-0.01186129		2670.21	-0.02194733
550.4	0.41608888		1080.39	0.23303062		1610.38	-0.00601974		2140.38	-0.01122679		2670.41	-0.0212838
550.6	0.41577786		1080.59	0.23323668		1610.58	-0.00614037		2140.58	-0.01078554		2670.61	-0.02094295
550.8	0.41536622		1080.79	0.23447573		1610.78	-0.00657375		2140.78	-0.0112128		2670.81	-0.02106999
551	0.41573697		1080.99	0.23491357		1610.98	-0.00677049		2140.98	-0.01083126		2671.01	-0.02090711
551.2	0.41618328		1081.19	0.23492324		1611.18	-0.00687745		2141.18	-0.01122444		2671.21	-0.02192411
551.4	0.4156375		1081.39	0.23516301		1611.38	-0.00754815		2141.38	-0.01108596		2671.41	-0.02282327
551.6	0.41492748		1081.59	0.23606499		1611.58	-0.00794752		2141.58	-0.01117943		2671.61	-0.02351036
551.8	0.41553998		1081.79	0.2359864		1611.78	-0.00866665		2141.78	-0.01123916		2671.81	-0.02427038
552	0.4152876		1081.99	0.23642711		1611.98	-0.00762646		2141.98	-0.01151894		2672.01	-0.02436886
552.2	0.41618755		1082.19	0.23619012		1612.18	-0.00680232		2142.18	-0.01167249		2672.21	-0.02381998
552.4	0.41721139		1082.39	0.23547555		1612.38	-0.00588447		2142.38	-0.01148158		2672.41	-0.02413363
552.6	0.41794657		1082.59	0.23536113		1612.58	-0.00501907		2142.58	-0.01184397		2672.61	-0.02360279
552.8	0.41796167		1082.79	0.23540302		1612.78	-0.00462815		2142.78	-0.01212111		2672.81	-0.02347737
553	0.41773463		1082.99	0.23568084		1612.98	-0.00451548		2142.98	-0.01338951		2673.01	-0.02317588
553.2	0.41796171		1083.19	0.23512571		1613.18	-0.00411511		2143.18	-0.01405797		2673.21	-0.02303466
553.4	0.4176629		1083.39	0.23552276		1613.38	-0.00438223		2143.38	-0.01428164		2673.41	-0.02229524
553.6	0.41794737		1083.59	0.23492106		1613.58	-0.00445946		2143.58	-0.01418832		2673.61	-0.02194912
553.8	0.4179554		1083.79	0.23435714		1613.78	-0.00468668		2143.78	-0.01325563		2673.81	-0.02099856
554	0.41754314		1083.99	0.2341499		1613.98	-0.00534089		2143.98	-0.01216167		2674.01	-0.0205286
554.2	0.41806191		1084.19	0.2337364		1614.18	-0.00570108		2144.18	-0.01128984		2674.21	-0.02062964
554.4	0.41799759		1084.39	0.23429822		1614.38	-0.00584831		2144.38	-0.01118546		2674.41	-0.02089322
554.6	0.417272		1084.59	0.23363772		1614.58	-0.00636197		2144.58	-0.01060401		2674.61	-0.02109788
554.8	0.4169736		1084.79	0.23395781		1614.78	-0.0065676		2144.78	-0.01081607		2674.81	-0.020806
555	0.41626425		1084.99	0.23334296		1614.98	-0.00661419		2144.98	-0.01045983		2675.01	-0.02092114
555.2	0.41599629		1085.19	0.23346399		1615.18	-0.00660711		2145.18	-0.01076431		2675.21	-0.02205951
555.4	0.41568226		1085.39	0.23424165		1615.38	-0.00623853		2145.38	-0.01045404		2675.41	-0.02222989
555.6	0.41581516		1085.59	0.23340803		1615.58	-0.00539898		2145.58	-0.01129885		2675.61	-0.02216078
555.8	0.41589703		1085.79	0.23251051		1615.78	-0.004924		2145.78	-0.01116898		2675.81	-0.02358059
556	0.41573546		1085.99	0.23183857		1615.98	-0.00360078		2145.98	-0.01128027		2676.01	-0.02313723
556.2	0.41674367		1086.19	0.23118996		1616.18	-0.00343722		2146.18	-0.01074273		2676.21	-0.02323463
556.4	0.41758717		1086.39	0.2313408		1616.38	-0.00253721		2146.38	-0.01093485		2676.41	-0.02406525
556.6	0.41842666		1086.59	0.23168666		1616.58	-0.00254218		2146.58	-0.01158739		2676.61	-0.02481454
556.8	0.41858557		1086.79	0.23200714		1616.78	-0.00319906		2146.78	-0.01196311		2676.81	-0.02602397
557	0.41903104		1086.99	0.2320752		1616.98	-0.00340516		2146.98	-0.01187787		2677.01	-0.02625025
557.2	0.41987431		1087.19	0.23133447		1617.18	-0.00379462		2147.18	-0.01148648		2677.21	-0.02580332
557.4	0.41946973		1087.39	0.23180885		1617.38	-0.00439434		2147.38	-0.01184562		2677.41	-0.02575364
557.6	0.41984835		1087.59	0.23191733		1617.58	-0.00535312		2147.58	-0.0114375		2677.61	-0.02491467
557.8	0.41958172		1087.79	0.23299523		1617.78	-0.00605496		2147.78	-0.01087505		2677.81	-0.0247395
558	0.41950833		1087.99	0.23441597		1617.98	-0.00701664		2147.98	-0.01056508		2678.01	-0.02477548
558.2	0.41992414		1088.19	0.23530732		1618.18	-0.00804967		2148.18	-0.01065202		2678.21	-0.02449567
558.4	0.41945433		1088.39	0.23629916		1618.38	-0.0091725		2148.38	-0.0113052		2678.41	-0.02396508
558.6	0.41892856		1088.59	0.2366282		1618.58	-0.01003155		2148.58	-0.01102036		2678.61	-0.02359367
558.8	0.41897696		1088.79	0.2375186		1618.78	-0.0100936		2148.78	-0.01161245		2678.81	-0.02312574
559	0.41860511		1088.99	0.23774578		1618.98	-0.01024518		2148.98	-0.01183064		2679.01	-0.022976
559.2	0.41852723		1089.19	0.23818204		1619.18	-0.01081154		2149.18	-0.01192279		2679.21	-0.0225003
559.4	0.41774408		1089.39	0.23773208		1619.38	-0.01083427		2149.38	-0.01225918		2679.41	-0.02222966
559.6	0.41768379		1089.59	0.23661908		1619.58	-0.01117897		2149.58	-0.01246904		2679.61	-0.0224381
559.8	0.41742683		1089.79	0.23607049		1619.78	-0.01142717		2149.78	-0.01183696		2679.81	-0.02281061
