# Supplementary material for: Functional development of a V3/glycan-specific broadly neutralizing antibody isolated from a case of HIV superinfection
Source: eLife journal article supplement (doi:10.7554/elife.68110), 2021-07-15
Supplement: fig2-data2 [file B3.xls]

Vers 3.43 Data Simulation
Conc1	5E-07	5E-07	5E-07	5E-07	5E-07	5E-07
Start1	290	879.99	1469.99	2059.98	2649.98	3239.98
Stop1	649.8	1239.79	1829.79	2419.78	3009.78	3599.78
Time1	Data1	Sim1	Time2	Data2	Sim2	Time3	Data3	Sim3	Time4	Data4	Sim4	Time5	Data5	Sim5	Time6	Data6	Sim6
290	0.00769643		879.99	-0.00441946		1469.99	0.00078245		2059.98	-0.00310105		2649.98	0.00511796		3239.98	-0.00609006
290.2	0.00871136		880.19	-0.00449051		1470.19	0.00052579		2060.18	-0.00277091		2650.18	0.00408732		3240.18	-0.0047957
290.4	0.00889475		880.39	-0.00505039		1470.39	0.00026181		2060.38	-0.00209747		2650.38	0.00308178		3240.38	-0.00355298
290.6	0.00988452		880.59	-0.0061453		1470.59	-0.00001679		2060.58	-0.00256705		2650.58	0.00168699		3240.58	-0.00276503
290.8	0.01069168		880.79	-0.00689117		1470.79	0.0002423		2060.78	-0.00279069		2650.78	0.00142287		3240.78	-0.00199012
291	0.01140485		880.99	-0.00714347		1470.99	-0.00019184		2060.98	-0.00303881		2650.98	0.00046745		3240.98	-0.00231866
291.2	0.01203254		881.19	-0.00710444		1471.19	-0.00017005		2061.18	-0.00331699		2651.18	0.00010627		3241.18	-0.00228618
291.4	0.01246077		881.39	-0.00676924		1471.39	-0.00004941		2061.38	-0.00274404		2651.38	-0.00003391		3241.38	-0.00350992
291.6	0.01237478		881.59	-0.00661776		1471.59	-0.00043181		2061.58	-0.00205911		2651.58	-0.00013084		3241.58	-0.00415535
291.8	0.01204675		881.79	-0.00634756		1471.79	-0.00012485		2061.78	-0.00187408		2651.78	0.00042317		3241.78	-0.00489445
292	0.01190535		881.99	-0.0054592		1471.99	0.00029775		2061.98	-0.00140517		2651.98	0.00115995		3241.98	-0.00480694
292.2	0.01098624		882.19	-0.0045301		1472.19	0.0000941		2062.18	-0.00132779		2652.18	0.00156451		3242.18	-0.00455163
292.4	0.01144713		882.39	-0.00485131		1472.39	0.00043442		2062.38	-0.00155278		2652.38	0.00108541		3242.38	-0.0053368
292.6	0.01105743		882.59	-0.00495606		1472.59	0.00092266		2062.58	-0.00175061		2652.58	0.00066866		3242.58	-0.00621458
292.8	0.01145335		882.79	-0.00547135		1472.79	0.00164466		2062.78	-0.00065224		2652.78	0.00127813		3242.78	-0.00632087
293	0.01150848		882.99	-0.0061665		1472.99	0.00243674		2062.98	-0.00194515		2652.98	0.00186251		3242.98	-0.00621304
293.2	0.01196787		883.19	-0.00697156		1473.19	0.00240088		2063.18	-0.00281644		2653.18	0.00246561		3243.18	-0.00623032
293.4	0.01260005		883.39	-0.00760689		1473.39	0.0021117		2063.38	-0.00318593		2653.38	0.00248132		3243.38	-0.00576173
293.6	0.01384791		883.59	-0.0081068		1473.59	0.00225869		2063.58	-0.00398159		2653.58	0.00199293		3243.58	-0.00546996
293.8	0.01409475		883.79	-0.00869653		1473.79	0.00248521		2063.78	-0.00354898		2653.78	0.0021461		3243.78	-0.00480215
294	0.01509574		883.99	-0.00892071		1473.99	0.00293162		2063.98	-0.00349724		2653.98	0.00176987		3243.98	-0.00386491
294.2	0.01554257		884.19	-0.00810159		1474.19	0.00309862		2064.18	-0.00350956		2654.18	0.00216837		3244.18	-0.00324808
294.4	0.01509585		884.39	-0.00801224		1474.39	0.00400621		2064.38	-0.00353998		2654.38	0.0018278		3244.38	-0.00273434
294.6	0.01602928		884.59	-0.00780107		1474.59	0.004487		2064.58	-0.00423886		2654.58	0.00236663		3244.58	-0.00290688
294.8	0.01584514		884.79	-0.00727678		1474.79	0.00489058		2064.78	-0.00434771		2654.78	0.00252672		3244.78	-0.00366185
295	0.01719508		884.99	-0.00642123		1474.99	0.0042638		2064.98	-0.00349435		2654.98	0.00167795		3244.98	-0.00503229
295.2	0.01775308		885.19	-0.00577403		1475.19	0.00457383		2065.18	-0.00308679		2655.18	0.00141503		3245.18	-0.00512721
295.4	0.01767045		885.39	-0.00506214		1475.39	0.00482415		2065.38	-0.0019556		2655.38	0.00107548		3245.38	-0.00595367
295.6	0.01755425		885.59	-0.00447436		1475.59	0.00458494		2065.58	-0.00123552		2655.58	0.00086034		3245.58	-0.00562702
295.8	0.01748261		885.79	-0.00404853		1475.79	0.00447774		2065.78	-0.00116737		2655.78	0.00031322		3245.78	-0.00485176
296	0.01792063		885.99	-0.0034957		1475.99	0.00465538		2065.98	-0.00006412		2655.98	-0.00033834		3245.98	-0.00454416
296.2	0.01734114		886.19	-0.00352475		1476.19	0.0041669		2066.18	-0.00082392		2656.18	-0.00144054		3246.18	-0.0038245
296.4	0.0187254		886.39	-0.00461103		1476.39	0.00448651		2066.38	-0.00075173		2656.38	-0.00221061		3246.38	-0.00464042
296.6	0.0184377		886.59	-0.00486702		1476.59	0.00556736		2066.58	0.00015256		2656.58	-0.00129759		3246.58	-0.00540664
296.8	0.01907979		886.79	-0.0057383		1476.79	0.00548824		2066.78	0.00009683		2656.78	-0.00004564		3246.78	-0.00500683
297	0.01960554		886.99	-0.00627988		1476.99	0.00525861		2066.98	-0.0006122		2656.98	0.00087452		3246.98	-0.00488867
297.2	0.01955767		887.19	-0.0065321		1477.19	0.0045206		2067.18	-0.00092947		2657.18	0.00204971		3247.18	-0.00523279
297.4	0.01972246		887.39	-0.00636666		1477.39	0.00450885		2067.38	-0.00120398		2657.38	0.0023247		3247.38	-0.00512238
297.6	0.01957758		887.59	-0.00582056		1477.59	0.00517063		2067.58	-0.00065366		2657.58	0.00310627		3247.58	-0.00520547
297.8	0.01898437		887.79	-0.00504202		1477.79	0.00586104		2067.78	-0.00122249		2657.78	0.00344033		3247.78	-0.00431034
298	0.01920953		887.99	-0.00432518		1477.99	0.00563767		2067.98	-0.00135669		2657.98	0.00363029		3247.98	-0.00447191
298.2	0.01922484		888.19	-0.00298536		1478.19	0.00617581		2068.18	-0.00179554		2658.18	0.00475767		3248.18	-0.00402647
298.4	0.01857122		888.39	-0.00194837		1478.39	0.00666687		2068.38	-0.00078319		2658.38	0.004719		3248.38	-0.00396966
298.6	0.01850909		888.59	-0.00166722		1478.59	0.00608321		2068.58	-0.0001292		2658.58	0.00524776		3248.58	-0.00429529
298.8	0.01848324		888.79	-0.00106056		1478.79	0.00578438		2068.78	0.00007809		2658.78	0.0044346		3248.78	-0.00453917
299	0.01957183		888.99	-0.00089485		1478.99	0.00552409		2068.98	0.00103709		2658.98	0.0043156		3248.98	-0.00431655
299.2	0.0190435		889.19	-0.00040931		1479.19	0.00517138		2069.18	0.0004925		2659.18	0.00311458		3249.18	-0.00347424
299.4	0.01896292		889.39	-0.00037317		1479.39	0.00518858		2069.38	0.00123162		2659.38	0.00264428		3249.38	-0.00352597
299.6	0.01965836		889.59	-0.00005167		1479.59	0.004909		2069.58	0.00211375		2659.58	0.00227747		3249.58	-0.00321279
299.8	0.02020348		889.79	-0.0007028		1479.79	0.00400778		2069.78	0.00252456		2659.78	0.00202716		3249.78	-0.00251063
300	0.0205959		889.99	-0.0017112		1479.99	0.0044387		2069.98	0.00321474		2659.98	0.00245561		3249.98	-0.00329039
300.2	0.02106227		890.19	-0.00256048		1480.19	0.00456122		2070.18	0.00245907		2660.18	0.00258674		3250.18	-0.00304365
300.4	0.02224104		890.39	-0.00403537		1480.39	0.00502674		2070.38	0.00319268		2660.38	0.00285813		3250.38	-0.00381014
300.6	0.02228649		890.59	-0.00461189		1480.59	0.00614563		2070.58	0.00324401		2660.58	0.0033044		3250.58	-0.0045174
300.8	0.02297511		890.79	-0.00531351		1480.79	0.00592181		2070.78	0.00284752		2660.78	0.00312238		3250.78	-0.00350184
301	0.02376827		890.99	-0.00539666		1480.99	0.00580799		2070.98	0.00168018		2660.98	0.00352798		3250.98	-0.00343482
301.2	0.0237607		891.19	-0.00517008		1481.19	0.00638964		2071.18	0.00054149		2661.18	0.0036303		3251.18	-0.00420674
301.4	0.02493213		891.39	-0.00473109		1481.39	0.00611032		2071.38	-0.00080346		2661.38	0.00341138		3251.38	-0.00389958
301.6	0.02584902		891.59	-0.00484462		1481.59	0.00638434		2071.58	-0.00131551		2661.58	0.00325638		3251.58	-0.00410406
301.8	0.02589794		891.79	-0.0045069		1481.79	0.00593968		2071.78	-0.00296967		2661.78	0.00281717		3251.78	-0.00357278
302	0.0262052		891.99	-0.00450146		1481.99	0.00577133		2071.98	-0.0029038		2661.98	0.0031196		3251.98	-0.00401743
302.2	0.02599565		892.19	-0.00361682		1482.19	0.00561452		2072.18	-0.00301305		2662.18	0.00328004		3252.18	-0.00335636
302.4	0.02560734		892.39	-0.00291591		1482.39	0.00487518		2072.38	-0.00241908		2662.38	0.00234186		3252.38	-0.00406205
302.6	0.02547813		892.59	-0.00225274		1482.59	0.00465546		2072.58	-0.00259521		2662.58	0.00188409		3252.58	-0.00336608
302.8	0.02605104		892.79	-0.00203181		1482.79	0.004441		2072.78	-0.00207401		2662.78	0.00186514		3252.78	-0.00334379
303	0.02614704		892.99	-0.00142904		1482.99	0.0039698		2072.98	-0.00247442		2662.98	0.00166197		3252.98	-0.00322406
303.2	0.02563486		893.19	-0.00071519		1483.19	0.00363811		2073.18	-0.00287128		2663.18	0.0010203		3253.18	-0.00307265
303.4	0.02565736		893.39	0.0002815		1483.39	0.00417965		2073.38	-0.00173672		2663.38	0.00143717		3253.38	-0.00383454
303.6	0.02549973		893.59	0.00092714		1483.59	0.00454094		2073.58	-0.00115141		2663.58	0.00198483		3253.58	-0.00410844
303.8	0.02585431		893.79	0.00087992		1483.79	0.00434663		2073.78	-0.00144686		2663.78	0.00249432		3253.78	-0.00505573
304	0.02609992		893.99	0.00047247		1483.99	0.00526783		2073.98	-0.0012121		2663.98	0.00269125		3253.98	-0.00608033
304.2	0.0273285		894.19	0.00060381		1484.19	0.00546033		2074.18	-0.00129731		2664.18	0.00300813		3254.18	-0.00638607
304.4	0.02770707		894.39	-0.0005271		1484.39	0.00644739		2074.38	-0.00098666		2664.38	0.00324945		3254.38	-0.00692529
304.6	0.0283369		894.59	-0.00164679		1484.59	0.00646286		2074.58	-0.0011376		2664.58	0.00356441		3254.58	-0.00644576
304.8	0.02886201		894.79	-0.0024552		1484.79	0.00674864		2074.78	-0.00117326		2664.78	0.00408289		3254.78	-0.00600442
305	0.02914442		894.99	-0.00316537		1484.99	0.0062282		2074.98	-0.00272693		2664.98	0.0048189		3254.98	-0.00599067
305.2	0.02874429		895.19	-0.00347909		1485.19	0.00660805		2075.18	-0.00348322		2665.18	0.00485612		3255.18	-0.00621617
305.4	0.02922891		895.39	-0.00463302		1485.39	0.00621761		2075.38	-0.00410754		2665.38	0.0051283		3255.38	-0.00507631
305.6	0.02959573		895.59	-0.00615767		1485.59	0.00576565		2075.58	-0.00376298		2665.58	0.0055171		3255.58	-0.00527672
305.8	0.02876215		895.79	-0.00560919		1485.79	0.00537658		2075.78	-0.00409763		2665.78	0.00582568		3255.78	-0.00426749
306	0.02876803		895.99	-0.00542768		1485.99	0.00556276		2075.98	-0.00385126		2665.98	0.00627402		3255.98	-0.00385197
306.2	0.02891597		896.19	-0.00472022		1486.19	0.00476731		2076.18	-0.00294837		2666.18	0.00526899		3256.18	-0.00355791
306.4	0.0291692		896.39	-0.00507102		1486.39	0.00457054		2076.38	-0.00236248		2666.38	0.00479574		3256.38	-0.00318402
306.6	0.02935947		896.59	-0.00531878		1486.59	0.00477469		2076.58	-0.00171996		2666.58	0.00487053		3256.58	-0.00245625
306.8	0.02928058		896.79	-0.00560256		1486.79	0.00491331		2076.78	-0.00012693		2666.78	0.0050167		3256.78	-0.00361726
307	0.0283845		896.99	-0.00486023		1486.99	0.00515913		2076.98	-0.00032045		2666.98	0.00477125		3256.98	-0.00378121
307.2	0.02725551		897.19	-0.00391529		1487.19	0.00627168		2077.18	-0.00014469		2667.18	0.00463904		3257.18	-0.00389817
307.4	0.02696685		897.39	-0.00278984		1487.39	0.00647732		2077.38	0.00000405		2667.38	0.00469879		3257.38	-0.00495969
307.6	0.02663898		897.59	-0.00271061		1487.59	0.0070993		2077.58	0.00004481		2667.58	0.00460216		3257.58	-0.00594091
307.8	0.02790656		897.79	-0.00225212		1487.79	0.00694288		2077.78	0.00010969		2667.78	0.00456191		3257.78	-0.00599508
308	0.02895854		897.99	-0.00283016		1487.99	0.00685141		2077.98	0.00089836		2667.98	0.0044329		3257.98	-0.0062142
308.2	0.02979552		898.19	-0.00258563		1488.19	0.00673373		2078.18	0.00158965		2668.18	0.00463916		3258.18	-0.00587015
308.4	0.03063527		898.39	-0.00357899		1488.39	0.00750411		2078.38	0.00183401		2668.38	0.00538672		3258.38	-0.00654509
308.6	0.03143574		898.59	-0.00325651		1488.59	0.006523		2078.58	0.00258264		2668.58	0.00611496		3258.58	-0.005717
308.8	0.03143792		898.79	-0.00370504		1488.79	0.00735187		2078.78	0.00286189		2668.78	0.00648923		3258.78	-0.00587903
309	0.0314522		898.99	-0.00335049		1488.99	0.00768958		2078.98	0.00251134		2668.98	0.00719386		3258.98	-0.00515541
309.2	0.0315141		899.19	-0.00385691		1489.19	0.00811925		2079.18	0.00234463		2669.18	0.0075037		3259.18	-0.00462118
309.4	0.03245921		899.39	-0.00428321		1489.39	0.0079394		2079.38	0.00151913		2669.38	0.00755684		3259.38	-0.00406628
309.6	0.03293643		899.59	-0.00307683		1489.59	0.00788386		2079.58	0.00224192		2669.58	0.00802586		3259.58	-0.00428756
309.8	0.03236291		899.79	-0.00164651		1489.79	0.00818521		2079.78	0.00161706		2669.78	0.00808694		3259.78	-0.00388669
310	0.03282425		899.99	-0.00151215		1489.99	0.00739092		2079.98	0.00221019		2669.98	0.00811306		3259.98	-0.00455505
310.2	0.03358355		900.19	-0.00175255		1490.19	0.00675458		2080.18	0.00211762		2670.18	0.00723451		3260.18	-0.00470101
310.4	0.03313027		900.39	-0.00220596		1490.39	0.00669127		2080.38	0.00247225		2670.38	0.00783159		3260.38	-0.00487179
310.6	0.03269885		900.59	-0.00164542		1490.59	0.00682691		2080.58	0.00233731		2670.58	0.00749564		3260.58	-0.00539854
310.8	0.03165325		900.79	-0.00133253		1490.79	0.00676302		2080.78	0.0028816		2670.78	0.00616964		3260.78	-0.00547638
311	0.03127757		900.99	-0.00123408		1490.99	0.00594522		2080.98	0.00166844		2670.98	0.00586883		3260.98	-0.00458726
311.2	0.03123984		901.19	-0.00049174		1491.19	0.00652495		2081.18	0.00053924		2671.18	0.00558911		3261.18	-0.00499741
311.4	0.03164508		901.39	-0.00025753		1491.39	0.00505143		2081.38	0.00036903		2671.38	0.00511804		3261.38	-0.00508545
311.6	0.03133815		901.59	-0.00048435		1491.59	0.00517091		2081.58	0.00098545		2671.58	0.00412665		3261.58	-0.00577179
311.8	0.03155007		901.79	-0.00023993		1491.79	0.00427129		2081.78	0.00120458		2671.78	0.00418861		3261.78	-0.0050823
312	0.03190506		901.99	-0.00044004		1491.99	0.0035608		2081.98	0.00134915		2671.98	0.00325573		3261.98	-0.0050746
312.2	0.03171021		902.19	0.00109591		1492.19	0.00317956		2082.18	0.00166083		2672.18	0.00346419		3262.18	-0.00483844
312.4	0.0329704		902.39	0.00031267		1492.39	0.0037907		2082.38	0.00154336		2672.38	0.00443826		3262.38	-0.00524837
312.6	0.03231011		902.59	0.00080121		1492.59	0.0040275		2082.58	0.00229665		2672.58	0.00447241		3262.58	-0.00423611
312.8	0.03243833		902.79	-0.00035284		1492.79	0.0048479		2082.78	0.00236339		2672.78	0.00488286		3262.78	-0.00399776
313	0.03218607		902.99	-0.00027667		1492.99	0.00490089		2082.98	0.00195925		2672.98	0.00575912		3262.98	-0.00258813
313.2	0.03257878		903.19	-0.00056273		1493.19	0.00518539		2083.18	0.00165355		2673.18	0.00572919		3263.18	-0.00235726
313.4	0.0329727		903.39	-0.0001191		1493.39	0.00600556		2083.38	0.00150233		2673.38	0.00666831		3263.38	-0.00271297
313.6	0.03284945		903.59	0.00112417		1493.59	0.00711287		2083.58	0.00261585		2673.58	0.00674314		3263.58	-0.00290356
313.8	0.03270843		903.79	0.00197435		1493.79	0.00721678		2083.78	0.00301023		2673.78	0.00732947		3263.78	-0.00343428
314	0.03311425		903.99	0.00218264		1493.99	0.00760545		2083.98	0.00367439		2673.98	0.00812202		3263.98	-0.00409224
314.2	0.0341068		904.19	0.00260917		1494.19	0.00827884		2084.18	0.00304175		2674.18	0.00762557		3264.18	-0.00376288
314.4	0.03371754		904.39	0.00313518		1494.39	0.00805562		2084.38	0.00334625		2674.38	0.00820981		3264.38	-0.00422437
314.6	0.03370645		904.59	0.00348153		1494.59	0.00812113		2084.58	0.00312382		2674.58	0.00726036		3264.58	-0.00471989
314.8	0.03377647		904.79	0.00301819		1494.79	0.00774537		2084.78	0.00345168		2674.78	0.00605435		3264.78	-0.00464321
315	0.03445437		904.99	0.0025887		1494.99	0.00713208		2084.98	0.0028208		2674.98	0.00666215		3264.98	-0.00564409
315.2	0.03520219		905.19	0.00286065		1495.19	0.00745753		2085.18	0.00298062		2675.18	0.0058598		3265.18	-0.00614659
315.4	0.03556408		905.39	0.00267285		1495.39	0.00676439		2085.38	0.00353978		2675.38	0.00513573		3265.38	-0.00617109
315.6	0.03542562		905.59	0.00181231		1495.59	0.00707235		2085.58	0.00366296		2675.58	0.00497262		3265.58	-0.00710607
315.8	0.03640919		905.79	0.00208444		1495.79	0.00620424		2085.78	0.00251713		2675.78	0.00466738		3265.78	-0.00713366
316	0.03694979		905.99	0.00197733		1495.99	0.00599928		2085.98	0.00267073		2675.98	0.00427072		3265.98	-0.00744784
316.2	0.03728155		906.19	0.00209687		1496.19	0.00640728		2086.18	0.00238589		2676.18	0.00521434		3266.18	-0.00754691
316.4	0.03824719		906.39	-0.00018477		1496.39	0.00715291		2086.38	0.00152334		2676.38	0.00559134		3266.38	-0.00707904
316.6	0.03787631		906.59	-0.0009946		1496.59	0.00672382		2086.58	0.00105144		2676.58	0.00583579		3266.58	-0.00592317
316.8	0.03898706		906.79	-0.00185538		1496.79	0.00609641		2086.78	0.00062434		2676.78	0.00615377		3266.78	-0.00528367
317	0.03916214		906.99	-0.00183892		1496.99	0.00634712		2086.98	-0.00028951		2676.98	0.00660154		3266.98	-0.00409532
317.2	0.03983178		907.19	-0.0012281		1497.19	0.00725325		2087.18	-0.00052773		2677.18	0.00686615		3267.18	-0.00466748
317.4	0.03943415		907.39	-0.00146056		1497.39	0.00814657		2087.38	-0.00066417		2677.38	0.00769044		3267.38	-0.00495851
317.6	0.03920165		907.59	-0.00041097		1497.59	0.00859275		2087.58	-0.00031395		2677.58	0.00729075		3267.58	-0.00492859
317.8	0.03940908		907.79	0.00047971		1497.79	0.00828111		2087.78	0.00030382		2677.78	0.00794994		3267.78	-0.00476309
318	0.03865422		907.99	0.00006119		1497.99	0.00795368		2087.98	0.00030511		2677.98	0.0085362		3267.98	-0.00482119
318.2	0.03818346		908.19	0.0003703		1498.19	0.00792561		2088.18	0.00015398		2678.18	0.00819738		3268.18	-0.00508536
318.4	0.0371603		908.39	0.00066182		1498.39	0.00836774		2088.38	0.00034857		2678.38	0.00833019		3268.38	-0.00544625
318.6	0.03637053		908.59	0.00068228		1498.59	0.008458		2088.58	0.00038134		2678.58	0.00735868		3268.58	-0.0057565
318.8	0.0359875		908.79	0.00101092		1498.79	0.00819827		2088.78	0.00055235		2678.78	0.00742613		3268.78	-0.00508074
319	0.03524429		908.99	0.00100135		1498.99	0.00883218		2088.98	0.0015019		2678.98	0.00741295		3268.98	-0.00560248
319.2	0.03523099		909.19	0.00069719		1499.19	0.00936511		2089.18	0.00235951		2679.18	0.00628615		3269.18	-0.00532516
319.4	0.03475549		909.39	-0.00000271		1499.39	0.00919272		2089.38	0.00262805		2679.38	0.00632754		3269.38	-0.00575201
319.6	0.03422761		909.59	-0.00076069		1499.59	0.00940547		2089.58	0.00290451		2679.58	0.00661139		3269.58	-0.00615792
319.8	0.03470649		909.79	-0.0009512		1499.79	0.00957117		2089.78	0.00295766		2679.78	0.00616383		3269.78	-0.00704884
320	0.03376862		909.99	-0.00108569		1499.99	0.009859		2089.98	0.00357251		2679.98	0.006407		3269.98	-0.00630924
320.2	0.03388513		910.19	-0.00199288		1500.19	0.01048689		2090.18	0.00280857		2680.18	0.00612779		3270.18	-0.00571534
320.4	0.03413546		910.39	-0.00246149		1500.39	0.01074929		2090.38	0.00225128		2680.38	0.00628638		3270.38	-0.0055448
320.6	0.0339102		910.59	-0.0020706		1500.59	0.01064493		2090.58	0.00315173		2680.58	0.00602923		3270.58	-0.00470917
320.8	0.0342232		910.79	-0.00203749		1500.79	0.01130231		2090.78	0.00381995		2680.78	0.00571986		3270.78	-0.00479377
321	0.03469012		910.99	-0.00156295		1500.99	0.0119176		2090.98	0.00402689		2680.98	0.00672544		3270.98	-0.00454681
321.2	0.03389017		911.19	-0.00133809		1501.19	0.01210522		2091.18	0.00475129		2681.18	0.00722012		3271.18	-0.00530973
321.4	0.03422916		911.39	-0.00119687		1501.39	0.01265535		2091.38	0.00538493		2681.38	0.0072017		3271.38	-0.00587858
321.6	0.03520763		911.59	0.00013712		1501.59	0.01190059		2091.58	0.0057385		2681.58	0.00708655		3271.58	-0.00550392
321.8	0.03612869		911.79	0.00031092		1501.79	0.01145796		2091.78	0.005626		2681.78	0.00705277		3271.78	-0.005316
322	0.03605583		911.99	-0.00019979		1501.99	0.01107167		2091.98	0.00578566		2681.98	0.00713141		3271.98	-0.0052654
322.2	0.03680431		912.19	0.00081435		1502.19	0.01143006		2092.18	0.00539048		2682.18	0.00718519		3272.18	-0.00527845
322.4	0.03809216		912.39	0.00207159		1502.39	0.01146458		2092.38	0.00502513		2682.38	0.00756819		3272.38	-0.00548167
322.6	0.03853835		912.59	0.00147117		1502.59	0.01024679		2092.58	0.00403957		2682.58	0.0074003		3272.58	-0.0058305
322.8	0.03881745		912.79	0.00095251		1502.79	0.0102249		2092.78	0.00384289		2682.78	0.00786955		3272.78	-0.00543361
323	0.03916254		912.99	0.00056575		1502.99	0.01001958		2092.98	0.00439506		2682.98	0.00734051		3272.98	-0.00572003
323.2	0.04013419		913.19	0.00077154		1503.19	0.00914848		2093.18	0.0038593		2683.18	0.00601602		3273.18	-0.00628328
323.4	0.0405655		913.39	0.00033955		1503.39	0.00886587		2093.38	0.00291126		2683.38	0.0063808		3273.38	-0.00574743
323.6	0.04124302		913.59	-0.00007725		1503.59	0.00974888		2093.58	0.00260424		2683.58	0.00657395		3273.58	-0.00670581
323.8	0.04223827		913.79	-0.00004126		1503.79	0.00987805		2093.78	0.00136763		2683.78	0.00644475		3273.78	-0.00689446
324	0.04119486		913.99	-0.00001328		1503.99	0.0096791		2093.98	0.00069738		2683.98	0.00598768		3273.98	-0.00566326
324.2	0.04152548		914.19	-0.00073105		1504.19	0.00977907		2094.18	0.00042605		2684.18	0.00537409		3274.18	-0.00585551
324.4	0.0414655		914.39	-0.00039238		1504.39	0.00974569		2094.38	0.00092782		2684.38	0.00560998		3274.38	-0.00505366
324.6	0.04088402		914.59	-0.00142222		1504.59	0.01030869		2094.58	0.00213361		2684.58	0.00592394		3274.58	-0.00463119
324.8	0.04074364		914.79	-0.00111849		1504.79	0.01108386		2094.78	0.00168681		2684.78	0.00659335		3274.78	-0.00427427
325	0.04132355		914.99	-0.00010535		1504.99	0.01118255		2094.98	0.00196285		2684.98	0.00764062		3274.98	-0.00432267
325.2	0.04039077		915.19	0.00063417		1505.19	0.0112285		2095.18	0.00172543		2685.18	0.00756277		3275.18	-0.00426022
325.4	0.04121839		915.39	0.00194138		1505.39	0.01144314		2095.38	0.0017611		2685.38	0.00754238		3275.38	-0.00443497
325.6	0.04175904		915.59	0.00244279		1505.59	0.01087416		2095.58	0.00260403		2685.58	0.00715296		3275.58	-0.00376741
325.8	0.04243804		915.79	0.00271024		1505.79	0.01030676		2095.78	0.00272837		2685.78	0.00713187		3275.78	-0.0041723
326	0.04207758		915.99	0.00342551		1505.99	0.00957203		2095.98	0.00360546		2685.98	0.00771306		3275.98	-0.00463991
326.2	0.04219602		916.19	0.0046974		1506.19	0.0098339		2096.18	0.0037865		2686.18	0.00848299		3276.18	-0.00485392
326.4	0.04218326		916.39	0.00437001		1506.39	0.00946796		2096.38	0.0041147		2686.38	0.00849287		3276.38	-0.00513709
326.6	0.04127347		916.59	0.00312917		1506.59	0.00876981		2096.58	0.00386854		2686.58	0.00766981		3276.58	-0.00499923
326.8	0.0408288		916.79	0.00324341		1506.79	0.0077099		2096.78	0.00420723		2686.78	0.00778745		3276.78	-0.00480833
327	0.04189328		916.99	0.00434137		1506.99	0.00727991		2096.98	0.00435264		2686.98	0.00686773		3276.98	-0.00510708
327.2	0.04178445		917.19	0.00382248		1507.19	0.00767219		2097.18	0.00445409		2687.18	0.0064073		3277.18	-0.00572885
327.4	0.04308134		917.39	0.00277605		1507.39	0.00796131		2097.38	0.0048288		2687.38	0.00729268		3277.38	-0.00530792
327.6	0.0437041		917.59	0.00271009		1507.59	0.00895264		2097.58	0.00554263		2687.58	0.00711529		3277.58	-0.00543821
327.8	0.04396467		917.79	0.00170629		1507.79	0.00884281		2097.78	0.00486006		2687.78	0.00669844		3277.78	-0.00472079
328	0.04374197		917.99	0.00142995		1507.99	0.00884928		2097.98	0.00479811		2687.98	0.00606773		3277.98	-0.00464181
328.2	0.04465479		918.19	0.00082053		1508.19	0.00920067		2098.18	0.00370174		2688.18	0.00635337		3278.18	-0.00388944
328.4	0.04406138		918.39	0.00033336		1508.39	0.00983996		2098.38	0.00308581		2688.38	0.00755272		3278.38	-0.00359935
328.6	0.04408444		918.59	-0.00077035		1508.59	0.01111068		2098.58	0.00249506		2688.58	0.00856252		3278.58	-0.00441236
328.8	0.04452154		918.79	-0.00013323		1508.79	0.01082286		2098.78	0.00138809		2688.78	0.00830495		3278.78	-0.00432551
329	0.04510264		918.99	0.00031773		1508.99	0.0108622		2098.98	0.00206349		2688.98	0.0093514		3278.98	-0.00447919
329.2	0.04463262		919.19	0.00046591		1509.19	0.01103281		2099.18	0.00187216		2689.18	0.00960245		3279.18	-0.00325928
329.4	0.0449834		919.39	0.00063041		1509.39	0.01093445		2099.38	0.00234191		2689.38	0.00985568		3279.38	-0.00341129
329.6	0.04481804		919.59	0.00018816		1509.59	0.0105579		2099.58	0.00287537		2689.58	0.00987347		3279.58	-0.00327051
329.8	0.04384802		919.79	0.00037025		1509.79	0.00984119		2099.78	0.00248969		2689.78	0.01012466		3279.78	-0.00338516
330	0.04329317		919.99	0.00024221		1509.99	0.01032245		2099.98	0.0027098		2689.98	0.01035861		3279.98	-0.00357871
330.2	0.04383382		920.19	0.0000575		1510.19	0.01027694		2100.18	0.00331865		2690.18	0.00973646		3280.18	-0.0032819
330.4	0.04307694		920.39	-0.0002047		1510.39	0.00951338		2100.38	0.00372066		2690.38	0.00885352		3280.38	-0.00356958
330.6	0.04328122		920.59	0.00032183		1510.59	0.00894526		2100.58	0.00362261		2690.58	0.00856583		3280.58	-0.00339522
330.8	0.04309028		920.79	0.00142807		1510.79	0.00778096		2100.78	0.00403197		2690.78	0.00854334		3280.78	-0.00267824
331	0.04369243		920.99	0.00232812		1510.99	0.00788891		2100.98	0.00507282		2690.98	0.00801932		3280.98	-0.00248365
331.2	0.04405674		921.19	0.00277414		1511.19	0.00790758		2101.18	0.00602491		2691.18	0.00819817		3281.18	-0.00162493
331.4	0.04472564		921.39	0.00377887		1511.39	0.00783353		2101.38	0.00647792		2691.38	0.00774818		3281.38	-0.00113367
331.6	0.04450202		921.59	0.00523684		1511.59	0.00898061		2101.58	0.00633915		2691.58	0.00691253		3281.58	-0.00090795
331.8	0.04450252		921.79	0.00515121		1511.79	0.00836008		2101.78	0.00497394		2691.78	0.00651772		3281.78	-0.00038092
332	0.0441248		921.99	0.00610335		1511.99	0.00846412		2101.98	0.00410266		2691.98	0.00664878		3281.98	-0.0010034
332.2	0.04474974		922.19	0.00633587		1512.19	0.0092542		2102.18	0.00363188		2692.18	0.00723128		3282.18	-0.00001355
332.4	0.04484133		922.39	0.00568447		1512.39	0.00996072		2102.38	0.00424528		2692.38	0.00773205		3282.38	-0.0008166
332.6	0.04562339		922.59	0.00591815		1512.59	0.01141316		2102.58	0.00369699		2692.58	0.00736642		3282.58	-0.001217
332.8	0.04521262		922.79	0.006442		1512.79	0.01162147		2102.78	0.00448624		2692.78	0.00783433		3282.78	-0.000855
333	0.04502517		922.99	0.00675945		1512.99	0.01213578		2102.98	0.00469435		2692.98	0.00869366		3282.98	-0.00106773
333.2	0.04477378		923.19	0.00563293		1513.19	0.01333349		2103.18	0.00452873		2693.18	0.00913466		3283.18	-0.00142521
333.4	0.04472372		923.39	0.00543107		1513.39	0.01317616		2103.38	0.00446493		2693.38	0.00870863		3283.38	-0.00159417
333.6	0.04473292		923.59	0.00448778		1513.59	0.01322868		2103.58	0.00439477		2693.58	0.00810209		3283.58	-0.00201542
333.8	0.04513419		923.79	0.0042787		1513.79	0.01363306		2103.78	0.00456709		2693.78	0.00816341		3283.78	-0.00260998
334	0.04621529		923.99	0.0033663		1513.99	0.01384724		2103.98	0.00459663		2693.98	0.00751585		3283.98	-0.00376663
334.2	0.0465357		924.19	0.00328003		1514.19	0.01322387		2104.18	0.0049085		2694.18	0.00661224		3284.18	-0.0043618
334.4	0.04666757		924.39	0.00310332		1514.39	0.01343092		2104.38	0.00522603		2694.38	0.00555109		3284.38	-0.00478973
334.6	0.04759481		924.59	0.00277081		1514.59	0.01297741		2104.58	0.00499679		2694.58	0.00542491		3284.58	-0.00514073
334.8	0.0462899		924.79	0.00268744		1514.79	0.01216242		2104.78	0.00550293		2694.78	0.00495599		3284.78	-0.00491438
335	0.0471199		924.99	0.00282747		1514.99	0.0119595		2104.98	0.0056958		2694.98	0.00493736		3284.98	-0.00480503
335.2	0.04768115		925.19	0.00280452		1515.19	0.0128822		2105.18	0.00512635		2695.18	0.00502452		3285.18	-0.00456226
335.4	0.04721699		925.39	0.00288931		1515.39	0.01300934		2105.38	0.0043715		2695.38	0.00420267		3285.38	-0.00505314
335.6	0.04781978		925.59	0.00283635		1515.59	0.0131098		2105.58	0.00416464		2695.58	0.00403589		3285.58	-0.00511179
335.8	0.04778357		925.79	0.00260345		1515.79	0.01182395		2105.78	0.00422692		2695.78	0.00456981		3285.78	-0.00395091
336	0.04787382		925.99	0.0027232		1515.99	0.01210024		2105.98	0.00429484		2695.98	0.00492955		3285.98	-0.00393725
336.2	0.04891508		926.19	0.00326659		1516.19	0.01328701		2106.18	0.00456674		2696.18	0.00625439		3286.18	-0.00336404
336.4	0.04873488		926.39	0.00336751		1516.39	0.01368929		2106.38	0.00444391		2696.38	0.00731503		3286.38	-0.00354377
336.6	0.04773196		926.59	0.0038993		1516.59	0.01397398		2106.58	0.00376075		2696.58	0.00847701		3286.58	-0.00366549
336.8	0.04700706		926.79	0.00411431		1516.79	0.01394886		2106.78	0.00522399		2696.78	0.00917983		3286.78	-0.00388299
337	0.04654316		926.99	0.00433614		1516.99	0.01397323		2106.98	0.00396558		2696.98	0.00963295		3286.98	-0.00370015
337.2	0.0467912		927.19	0.00431258		1517.19	0.01441877		2107.18	0.00450608		2697.18	0.00990603		3287.18	-0.00307106
337.4	0.04677002		927.39	0.00520398		1517.39	0.01331508		2107.38	0.00537831		2697.38	0.00858265		3287.38	-0.00166429
337.6	0.04697267		927.59	0.00481135		1517.59	0.01297309		2107.58	0.00566774		2697.58	0.00761066		3287.58	-0.00242238
337.8	0.04662307		927.79	0.00508158		1517.79	0.01323856		2107.78	0.0061073		2697.78	0.00753291		3287.78	-0.00252749
338	0.0467112		927.99	0.00424068		1517.99	0.01242068		2107.98	0.00650011		2697.98	0.00669288		3287.98	-0.00288532
338.2	0.04601136		928.19	0.00362193		1518.19	0.01167922		2108.18	0.00645357		2698.18	0.00650172		3288.18	-0.00334829
338.4	0.04563057		928.39	0.00260575		1518.39	0.01095592		2108.38	0.00674195		2698.38	0.00557517		3288.38	-0.00329405
338.6	0.04541449		928.59	0.00272414		1518.59	0.01017229		2108.58	0.00694629		2698.58	0.00557252		3288.58	-0.00365607
338.8	0.04449139		928.79	0.00295534		1518.79	0.01000416		2108.78	0.00670464		2698.78	0.0054909		3288.78	-0.00373043
339	0.04553708		928.99	0.00302492		1518.99	0.01033708		2108.98	0.00625913		2698.98	0.00588023		3288.98	-0.00307586
339.2	0.04606089		929.19	0.00256378		1519.19	0.01125317		2109.18	0.00631206		2699.18	0.00565766		3289.18	-0.00407139
339.4	0.04556321		929.39	0.0026808		1519.39	0.01143638		2109.38	0.00538847		2699.38	0.00581276		3289.38	-0.00463316
339.6	0.04553734		929.59	0.00348591		1519.59	0.01196821		2109.58	0.00556373		2699.58	0.00703927		3289.58	-0.0050129
339.8	0.04527597		929.79	0.00270125		1519.79	0.01175166		2109.78	0.00559689		2699.78	0.0075112		3289.78	-0.00451228
340	0.04467752		929.99	0.0036096		1519.99	0.01260568		2109.98	0.00520034		2699.98	0.00811114		3289.98	-0.00516106
340.2	0.04489781		930.19	0.00447336		1520.19	0.01290032		2110.18	0.00497332		2700.18	0.00969463		3290.18	-0.00549971
340.4	0.04515474		930.39	0.00417253		1520.39	0.01296413		2110.38	0.00511428		2700.38	0.01061544		3290.38	-0.00564198
340.6	0.04526774		930.59	0.00371959		1520.59	0.01300736		2110.58	0.00522191		2700.58	0.01124088		3290.58	-0.00616991
340.8	0.04620555		930.79	0.00419687		1520.79	0.01335559		2110.78	0.00561071		2700.78	0.01028462		3290.78	-0.00551931
341	0.04640497		930.99	0.0041903		1520.99	0.01322014		2110.98	0.00522394		2700.98	0.01071003		3290.98	-0.00421513
341.2	0.04767569		931.19	0.00425694		1521.19	0.01338245		2111.18	0.00658491		2701.18	0.01026703		3291.18	-0.0043171
341.4	0.04854009		931.39	0.00386002		1521.39	0.01313551		2111.38	0.00651204		2701.38	0.00906106		3291.38	-0.00407155
341.6	0.04964689		931.59	0.00372023		1521.59	0.01277723		2111.58	0.0058761		2701.58	0.00877501		3291.58	-0.00456619
341.8	0.05019065		931.79	0.0030789		1521.79	0.01281029		2111.78	0.005457		2701.78	0.0092548		3291.78	-0.00435982
342	0.05096364		931.99	0.00271532		1521.99	0.01122158		2111.98	0.00590089		2701.98	0.00842602		3291.98	-0.00402814
342.2	0.05012068		932.19	0.00273769		1522.19	0.0099638		2112.18	0.00528615		2702.18	0.00813546		3292.18	-0.00350387
342.4	0.05052066		932.39	0.0029213		1522.39	0.00939015		2112.38	0.00556395		2702.38	0.00718597		3292.38	-0.00304441
342.6	0.05101701		932.59	0.00335355		1522.59	0.00957608		2112.58	0.00579831		2702.58	0.00706824		3292.58	-0.00313036
342.8	0.05027283		932.79	0.00333909		1522.79	0.00952002		2112.78	0.00435641		2702.78	0.00777461		3292.78	-0.00360275
343	0.05049262		932.99	0.0039714		1522.99	0.00972511		2112.98	0.00508159		2702.98	0.00752245		3292.98	-0.00311074
343.2	0.04979099		933.19	0.00387319		1523.19	0.01050525		2113.18	0.00530222		2703.18	0.00787231		3293.18	-0.00405771
343.4	0.04864903		933.39	0.00427742		1523.39	0.01110998		2113.38	0.00485671		2703.38	0.00863049		3293.38	-0.0044988
343.6	0.04850914		933.59	0.00453408		1523.59	0.01165273		2113.58	0.00510613		2703.58	0.00939265		3293.58	-0.00490595
343.8	0.0482414		933.79	0.00327132		1523.79	0.01163306		2113.78	0.00478396		2703.78	0.00973743		3293.78	-0.00520421
344	0.04813003		933.99	0.00541702		1523.99	0.01202261		2113.98	0.00529966		2703.98	0.01058293		3293.98	-0.00556127
344.2	0.04908423		934.19	0.00485474		1524.19	0.01259422		2114.18	0.00526342		2704.18	0.01092032		3294.18	-0.00553708
344.4	0.04961864		934.39	0.00502445		1524.39	0.0126947		2114.38	0.00602577		2704.38	0.01144157		3294.38	-0.00556753
344.6	0.04998036		934.59	0.00556233		1524.59	0.01259164		2114.58	0.00583098		2704.58	0.01110425		3294.58	-0.00508547
344.8	0.05036256		934.79	0.00659344		1524.79	0.01352908		2114.78	0.00568124		2704.78	0.01112837		3294.78	-0.00390495
345	0.04987457		934.99	0.00700995		1524.99	0.01412852		2114.98	0.00543827		2704.98	0.01179687		3294.98	-0.00383165
345.2	0.05107946		935.19	0.00670475		1525.19	0.01505489		2115.18	0.00565213		2705.18	0.01163564		3295.18	-0.00429034
345.4	0.05235463		935.39	0.00654723		1525.39	0.01523293		2115.38	0.0044711		2705.38	0.01095819		3295.38	-0.00445723
345.6	0.05241479		935.59	0.00697942		1525.59	0.01461614		2115.58	0.00387106		2705.58	0.01077129		3295.58	-0.00406278
345.8	0.05247811		935.79	0.00647452		1525.79	0.01471437		2115.78	0.00415158		2705.78	0.010222		3295.78	-0.00334012
346	0.05238799		935.99	0.00739636		1525.99	0.01404024		2115.98	0.00422996		2705.98	0.00889999		3295.98	-0.00241123
346.2	0.05183338		936.19	0.00674559		1526.19	0.01393262		2116.18	0.00386302		2706.18	0.0092918		3296.18	-0.00196368
346.4	0.05303289		936.39	0.00577973		1526.39	0.01378597		2116.38	0.00404537		2706.38	0.00883092		3296.38	-0.00246426
346.6	0.05295617		936.59	0.00588351		1526.59	0.01371463		2116.58	0.0036157		2706.58	0.00848749		3296.58	-0.00246399
346.8	0.0520919		936.79	0.0060998		1526.79	0.01324335		2116.78	0.00325096		2706.78	0.00884236		3296.78	-0.00274534
347	0.05329942		936.99	0.0052968		1526.99	0.0128873		2116.98	0.00409489		2706.98	0.0088549		3296.98	-0.00240815
347.2	0.05306118		937.19	0.00440878		1527.19	0.01225537		2117.18	0.00402076		2707.18	0.00963721		3297.18	-0.00300034
347.4	0.05289657		937.39	0.00373772		1527.39	0.01175899		2117.38	0.00389457		2707.38	0.01050087		3297.38	-0.00354884
347.6	0.05318511		937.59	0.00360061		1527.59	0.01089124		2117.58	0.00267777		2707.58	0.01050414		3297.58	-0.00384209
347.8	0.05385403		937.79	0.00358575		1527.79	0.01046976		2117.78	0.00241804		2707.78	0.01043263		3297.78	-0.00382451
348	0.05366335		937.99	0.00463235		1527.99	0.0108106		2117.98	0.00298599		2707.98	0.01041445		3297.98	-0.00409372
348.2	0.05422399		938.19	0.0042427		1528.19	0.01121748		2118.18	0.00302626		2708.18	0.01020147		3298.18	-0.00367712
348.4	0.05421716		938.39	0.00480713		1528.39	0.01126893		2118.38	0.00357592		2708.38	0.01044625		3298.38	-0.0031039
348.6	0.05421696		938.59	0.00567519		1528.59	0.01202697		2118.58	0.00359539		2708.58	0.01070205		3298.58	-0.00261124
348.8	0.05382791		938.79	0.00694899		1528.79	0.01327822		2118.78	0.00355611		2708.78	0.01030536		3298.78	-0.00292258
349	0.05337192		938.99	0.00667936		1528.99	0.0137013		2118.98	0.00463998		2708.98	0.01005546		3298.98	-0.00338976
349.2	0.05404514		939.19	0.00597095		1529.19	0.01466922		2119.18	0.00528524		2709.18	0.00966001		3299.18	-0.00331723
349.4	0.05408651		939.39	0.00564248		1529.39	0.01466203		2119.38	0.00488946		2709.38	0.00974905		3299.38	-0.00342275
349.6	0.0529442		939.59	0.00613139		1529.59	0.01500434		2119.58	0.00554601		2709.58	0.00968412		3299.58	-0.0025778
349.8	0.05303739		939.79	0.00664134		1529.79	0.01516988		2119.78	0.00676005		2709.78	0.009301		3299.78	-0.00213647
350	0.05343067		939.99	0.00666757		1529.99	0.01522413		2119.98	0.00738031		2709.98	0.00898171		3299.98	-0.00209203
350.2	0.0536406		940.19	0.00621128		1530.19	0.0151725		2120.18	0.0076855		2710.18	0.00906336		3300.18	-0.00209442
350.4	0.05472472		940.39	0.00594917		1530.39	0.01527487		2120.38	0.00769944		2710.38	0.00914979		3300.38	-0.00248396
350.6	0.0539595		940.59	0.00679839		1530.59	0.01539019		2120.58	0.00789071		2710.58	0.00845146		3300.58	-0.00220233
350.8	0.05352944		940.79	0.00595557		1530.79	0.01440342		2120.78	0.00822459		2710.78	0.00861927		3300.78	-0.00239545
351	0.05434603		940.99	0.00512646		1530.99	0.01355435		2120.98	0.00791142		2710.98	0.00882387		3300.98	-0.00237111
351.2	0.05374991		941.19	0.00586382		1531.19	0.01300745		2121.18	0.00771674		2711.18	0.00885073		3301.18	-0.00326181
351.4	0.0541601		941.39	0.00557153		1531.39	0.01277697		2121.38	0.007028		2711.38	0.00833012		3301.38	-0.00411266
351.6	0.05463624		941.59	0.00742478		1531.59	0.01271333		2121.58	0.00616861		2711.58	0.00775146		3301.58	-0.00415304
351.8	0.05496477		941.79	0.00723665		1531.79	0.01335046		2121.78	0.00660197		2711.78	0.00810923		3301.78	-0.00416834
352	0.05402225		941.99	0.00743279		1531.99	0.01361461		2121.98	0.00573531		2711.98	0.00894		3301.98	-0.0044571
352.2	0.05441341		942.19	0.00736387		1532.19	0.01347495		2122.18	0.00588058		2712.18	0.00949247		3302.18	-0.00446057
352.4	0.05366749		942.39	0.0076093		1532.39	0.0136234		2122.38	0.00560926		2712.38	0.0105774		3302.38	-0.00498937
352.6	0.05357515		942.59	0.00754805		1532.59	0.01334437		2122.58	0.00581593		2712.58	0.01108093		3302.58	-0.00555777
352.8	0.05263273		942.79	0.00722368		1532.79	0.01291603		2122.78	0.00628896		2712.78	0.01088903		3302.78	-0.00639856
353	0.05242328		942.99	0.00685856		1532.99	0.01282413		2122.98	0.00741992		2712.98	0.01189661		3302.98	-0.00659417
353.2	0.05182275		943.19	0.00698707		1533.19	0.01219664		2123.18	0.00694446		2713.18	0.01205132		3303.18	-0.00669159
353.4	0.05161349		943.39	0.00704678		1533.39	0.01173594		2123.38	0.00746079		2713.38	0.01295531		3303.38	-0.00668389
353.6	0.05081113		943.59	0.00715796		1533.59	0.01281209		2123.58	0.00762219		2713.58	0.01203861		3303.58	-0.00663415
353.8	0.05120795		943.79	0.00634988		1533.79	0.01176323		2123.78	0.00871419		2713.78	0.01192691		3303.78	-0.00681906
354	0.05210356		943.99	0.00522864		1533.99	0.01158385		2123.98	0.00852298		2713.98	0.01250194		3303.98	-0.00679306
354.2	0.05225605		944.19	0.00463852		1534.19	0.0117377		2124.18	0.00808141		2714.18	0.0117889		3304.18	-0.00715937
354.4	0.05188061		944.39	0.00382753		1534.39	0.01113373		2124.38	0.00839715		2714.38	0.01135058		3304.38	-0.00765348
354.6	0.05180553		944.59	0.00413154		1534.59	0.0117027		2124.58	0.00856633		2714.58	0.01020383		3304.58	-0.00703494
354.8	0.05326312		944.79	0.00322419		1534.79	0.01188267		2124.78	0.00853835		2714.78	0.01020255		3304.78	-0.00701671
355	0.0539965		944.99	0.0031975		1534.99	0.01295096		2124.98	0.00733334		2714.98	0.0099016		3304.98	-0.00771764
355.2	0.05416848		945.19	0.00385758		1535.19	0.01321333		2125.18	0.00682745		2715.18	0.0099962		3305.18	-0.00745339
355.4	0.05525504		945.39	0.00424142		1535.39	0.01369444		2125.38	0.00618843		2715.38	0.0101975		3305.38	-0.00765635
355.6	0.05595543		945.59	0.00540984		1535.59	0.01355613		2125.58	0.00612903		2715.58	0.01065166		3305.58	-0.00735928
355.8	0.05633688		945.79	0.00479807		1535.79	0.0133766		2125.78	0.00556773		2715.78	0.01108699		3305.78	-0.00669627
356	0.05635606		945.99	0.0052909		1535.99	0.01328958		2125.98	0.00452018		2715.98	0.01131454		3305.98	-0.00623804
356.2	0.05765649		946.19	0.00541845		1536.19	0.01333929		2126.18	0.0041991		2716.18	0.01096798		3306.18	-0.00605831
356.4	0.0579078		946.39	0.00628001		1536.39	0.01379493		2126.38	0.00401177		2716.38	0.01148457		3306.38	-0.00570215
356.6	0.05830901		946.59	0.00682474		1536.59	0.01381587		2126.58	0.0047658		2716.58	0.01118953		3306.58	-0.00567015
356.8	0.05784338		946.79	0.00853936		1536.79	0.01382393		2126.78	0.00577484		2716.78	0.01046717		3306.78	-0.00533349
357	0.05774226		946.99	0.00903962		1536.99	0.01378067		2126.98	0.00619228		2716.98	0.01052891		3306.98	-0.00504351
357.2	0.057026		947.19	0.00961625		1537.19	0.01363347		2127.18	0.00559052		2717.18	0.00969737		3307.18	-0.00487379
357.4	0.05719763		947.39	0.00912594		1537.39	0.01459925		2127.38	0.0058758		2717.38	0.00931843		3307.38	-0.00433316
357.6	0.05664244		947.59	0.00900203		1537.59	0.01444575		2127.58	0.00560167		2717.58	0.00853773		3307.58	-0.00494749
357.8	0.05684362		947.79	0.00777774		1537.79	0.01312777		2127.78	0.00630756		2717.78	0.00930745		3307.78	-0.00528508
358	0.05720654		947.99	0.00687805		1537.99	0.01332345		2127.98	0.00556158		2717.98	0.00975307		3307.98	-0.00582593
358.2	0.05665743		948.19	0.00615769		1538.19	0.01345185		2128.18	0.00573652		2718.18	0.00913423		3308.18	-0.00649823
358.4	0.05588139		948.39	0.00502984		1538.39	0.01358627		2128.38	0.00542993		2718.38	0.0095073		3308.38	-0.00690829
358.6	0.0558018		948.59	0.00443516		1538.59	0.01400186		2128.58	0.00490626		2718.58	0.00902472		3308.58	-0.00696517
358.8	0.05579637		948.79	0.00349382		1538.79	0.01371934		2128.78	0.00404378		2718.78	0.00968567		3308.78	-0.00753108
359	0.05406375		948.99	0.0031447		1538.99	0.01351117		2128.98	0.00303787		2718.98	0.01032208		3308.98	-0.00812509
359.2	0.05421591		949.19	0.00246077		1539.19	0.01287602		2129.18	0.00305204		2719.18	0.01139108		3309.18	-0.0073148
359.4	0.05511323		949.39	0.00225547		1539.39	0.01284041		2129.38	0.0024734		2719.38	0.01230429		3309.38	-0.00783281
359.6	0.05548429		949.59	0.00289069		1539.59	0.01215871		2129.58	0.00304431		2719.58	0.01208765		3309.58	-0.00778317
359.8	0.05572392		949.79	0.00353873		1539.79	0.01325538		2129.78	0.0027276		2719.78	0.01221105		3309.78	-0.00683152
360	0.05653138		949.99	0.00363318		1539.99	0.01404202		2129.98	0.00249025		2719.98	0.011658		3309.98	-0.00645307
360.2	0.05711768		950.19	0.00430836		1540.19	0.01514967		2130.18	0.00227831		2720.18	0.01173924		3310.18	-0.00587561
360.4	0.0579197		950.39	0.00588694		1540.39	0.01526211		2130.38	0.00242961		2720.38	0.01249465		3310.38	-0.00518638
360.6	0.05873436		950.59	0.00617857		1540.59	0.01554407		2130.58	0.00309363		2720.58	0.01244299		3310.58	-0.00512555
360.8	0.05983405		950.79	0.00674874		1540.79	0.01558009		2130.78	0.00334223		2720.78	0.01201417		3310.78	-0.00460721
361	0.05989661		950.99	0.00646317		1540.99	0.01575089		2130.98	0.00347647		2720.98	0.01187078		3310.98	-0.00498167
361.2	0.06013251		951.19	0.00750391		1541.19	0.01658053		2131.18	0.00362441		2721.18	0.0110002		3311.18	-0.00480167
361.4	0.06038035		951.39	0.00748455		1541.39	0.01638018		2131.38	0.00411649		2721.38	0.01048911		3311.38	-0.00395535
361.6	0.06048814		951.59	0.00800727		1541.59	0.01590966		2131.58	0.00469799		2721.58	0.01085663		3311.58	-0.00412612
361.8	0.0615945		951.79	0.00745283		1541.79	0.0154171		2131.78	0.00531663		2721.78	0.01034284		3311.78	-0.00380444
362	0.06213663		951.99	0.00803524		1541.99	0.01543351		2131.98	0.00559605		2721.98	0.01041132		3311.98	-0.00356739
362.2	0.06184068		952.19	0.0079419		1542.19	0.01512338		2132.18	0.00578429		2722.18	0.00986667		3312.18	-0.0033321
362.4	0.06128182		952.39	0.00722759		1542.39	0.0149529		2132.38	0.00548686		2722.38	0.00955045		3312.38	-0.00376229
362.6	0.05961108		952.59	0.0079069		1542.59	0.01431933		2132.58	0.00545144		2722.58	0.00939517		3312.58	-0.00457169
362.8	0.05930757		952.79	0.00786009		1542.79	0.01430812		2132.78	0.00574717		2722.78	0.01018456		3312.78	-0.00455934
363	0.05911068		952.99	0.0080285		1542.99	0.01443284		2132.98	0.00597666		2722.98	0.01103039		3312.98	-0.00537369
363.2	0.05897136		953.19	0.00759157		1543.19	0.0136046		2133.18	0.00562635		2723.18	0.01106314		3313.18	-0.00562066
363.4	0.05746519		953.39	0.00819719		1543.39	0.01321405		2133.38	0.00634203		2723.38	0.01155276		3313.38	-0.00615664
363.6	0.0567668		953.59	0.00870417		1543.59	0.01348525		2133.58	0.00693664		2723.58	0.01102223		3313.58	-0.00670576
363.8	0.05600009		953.79	0.00903816		1543.79	0.01427377		2133.78	0.00737155		2723.78	0.01148569		3313.78	-0.00681872
364	0.05581912		953.99	0.00827674		1543.99	0.01464804		2133.98	0.00647375		2723.98	0.01127305		3313.98	-0.00580069
364.2	0.05531214		954.19	0.00918367		1544.19	0.01492315		2134.18	0.00606604		2724.18	0.01221901		3314.18	-0.00578648
364.4	0.05599438		954.39	0.00968818		1544.39	0.01369881		2134.38	0.00584499		2724.38	0.0122362		3314.38	-0.0058949
364.6	0.05626904		954.59	0.00940908		1544.59	0.01470484		2134.58	0.0062286		2724.58	0.01191116		3314.58	-0.00626977
364.8	0.05647381		954.79	0.00950941		1544.79	0.01437183		2134.78	0.00648167		2724.78	0.01059989		3314.78	-0.00663933
365	0.05572731		954.99	0.01000181		1544.99	0.01472616		2134.98	0.00644905		2724.98	0.01026523		3314.98	-0.00747771
365.2	0.05550645		955.19	0.0098089		1545.19	0.01440699		2135.18	0.00674988		2725.18	0.00973888		3315.18	-0.00695234
365.4	0.05585244		955.39	0.00965735		1545.39	0.0134958		2135.38	0.00785583		2725.38	0.00958435		3315.38	-0.00712151
365.6	0.05710392		955.59	0.0092973		1545.59	0.01386312		2135.58	0.00853567		2725.58	0.00941031		3315.58	-0.00644079
365.8	0.05818818		955.79	0.0094066		1545.79	0.01363088		2135.78	0.00923094		2725.78	0.00857464		3315.78	-0.00620793
366	0.05843192		955.99	0.00909913		1545.99	0.01430072		2135.98	0.00873831		2725.98	0.00960739		3315.98	-0.00596026
366.2	0.05835611		956.19	0.0082742		1546.19	0.01377282		2136.18	0.00905509		2726.18	0.00983676		3316.18	-0.00728831
366.4	0.05822156		956.39	0.00770651		1546.39	0.01431039		2136.38	0.00893771		2726.38	0.01034346		3316.38	-0.00726639
366.6	0.05753463		956.59	0.00776961		1546.59	0.0145995		2136.58	0.00938098		2726.58	0.01131408		3316.58	-0.00821505
366.8	0.05782752		956.79	0.00777384		1546.79	0.01436399		2136.78	0.00919342		2726.78	0.01190956		3316.78	-0.00928262
367	0.05824996		956.99	0.00702627		1546.99	0.01472928		2136.98	0.00863838		2726.98	0.01213417		3316.98	-0.0088494
367.2	0.05782507		957.19	0.00669892		1547.19	0.01430342		2137.18	0.00815882		2727.18	0.01193497		3317.18	-0.00858132
367.4	0.05761391		957.39	0.00600475		1547.39	0.01461536		2137.38	0.00918098		2727.38	0.01165631		3317.38	-0.00827317
367.6	0.05839281		957.59	0.00501377		1547.59	0.01502885		2137.58	0.00884863		2727.58	0.01155201		3317.58	-0.00801032
367.8	0.05883416		957.79	0.00519176		1547.79	0.01470488		2137.78	0.00890665		2727.78	0.01200018		3317.78	-0.00679683
368	0.05923219		957.99	0.00500985		1547.99	0.01476094		2137.98	0.00746696		2727.98	0.01187246		3317.98	-0.00594221
368.2	0.05987239		958.19	0.00588064		1548.19	0.01447261		2138.18	0.00796852		2728.18	0.01221952		3318.18	-0.00623928
368.4	0.06038253		958.39	0.00609573		1548.39	0.01382285		2138.38	0.0081199		2728.38	0.01140533		3318.38	-0.00619633
368.6	0.06098484		958.59	0.00609402		1548.59	0.0137221		2138.58	0.00821986		2728.58	0.01150889		3318.58	-0.00652034
368.8	0.06059339		958.79	0.00636704		1548.79	0.01358933		2138.78	0.00839143		2728.78	0.01104142		3318.78	-0.00656889
369	0.06007062		958.99	0.00729405		1548.99	0.01414948		2138.98	0.00785199		2728.98	0.01182366		3318.98	-0.00669443
369.2	0.05975053		959.19	0.00702291		1549.19	0.01371707		2139.18	0.00823587		2729.18	0.01173235		3319.18	-0.00660892
369.4	0.06064966		959.39	0.00708009		1549.39	0.01383542		2139.38	0.00822644		2729.38	0.0122682		3319.38	-0.00679859
369.6	0.06124526		959.59	0.00771462		1549.59	0.0140577		2139.58	0.008396		2729.58	0.01239903		3319.58	-0.0052039
369.8	0.06059852		959.79	0.00803033		1549.79	0.01342662		2139.78	0.00795564		2729.78	0.01215207		3319.78	-0.00533562
370	0.06038469		959.99	0.00896367		1549.99	0.01349523		2139.98	0.00682323		2729.98	0.01334903		3319.98	-0.00560028
370.2	0.05956953		960.19	0.00958464		1550.19	0.01385815		2140.18	0.00670472		2730.18	0.01401707		3320.18	-0.00523312
370.4	0.0587583		960.39	0.01043421		1550.39	0.0147191		2140.38	0.00563759		2730.38	0.01442566		3320.38	-0.003664
370.6	0.05722246		960.59	0.01034658		1550.59	0.0146468		2140.58	0.00537601		2730.58	0.01514053		3320.58	-0.00465743
370.8	0.0573455		960.79	0.01112415		1550.79	0.01430326		2140.78	0.00458316		2730.78	0.01498566		3320.78	-0.00434315
371	0.05795308		960.99	0.01093851		1550.99	0.0141051		2140.98	0.00424686		2730.98	0.01451471		3320.98	-0.0029189
371.2	0.05811816		961.19	0.01091513		1551.19	0.01432187		2141.18	0.00542236		2731.18	0.01513483		3321.18	-0.00380978
371.4	0.05846295		961.39	0.01031482		1551.39	0.01412143		2141.38	0.0068568		2731.38	0.01515694		3321.38	-0.00431754
371.6	0.0589293		961.59	0.00958643		1551.59	0.01379691		2141.58	0.00723483		2731.58	0.0160827		3321.58	-0.00409807
371.8	0.05908979		961.79	0.0100346		1551.79	0.01378053		2141.78	0.00744842		2731.78	0.01643491		3321.78	-0.00406795
372	0.05908948		961.99	0.0099004		1551.99	0.01487231		2141.98	0.00841234		2731.98	0.01655701		3321.98	-0.00495446
372.2	0.06054937		962.19	0.00938913		1552.19	0.01556007		2142.18	0.00911281		2732.18	0.01593369		3322.18	-0.00617554
372.4	0.06062749		962.39	0.00866112		1552.39	0.01631285		2142.38	0.01022917		2732.38	0.01587398		3322.38	-0.00720763
372.6	0.06145477		962.59	0.00780025		1552.59	0.0172867		2142.58	0.01004084		2732.58	0.01564138		3322.58	-0.00760789
372.8	0.06177481		962.79	0.00755673		1552.79	0.01870944		2142.78	0.0103336		2732.78	0.01477036		3322.78	-0.00790388
373	0.06203428		962.99	0.00778772		1552.99	0.01878373		2142.98	0.00916531		2732.98	0.01411611		3322.98	-0.00885478
373.2	0.06230218		963.19	0.00772585		1553.19	0.01808355		2143.18	0.00905226		2733.18	0.01341795		3323.18	-0.00883394
373.4	0.0638096		963.39	0.00739436		1553.39	0.01815981		2143.38	0.00951264		2733.38	0.01270811		3323.38	-0.00823778
373.6	0.06421892		963.59	0.00720591		1553.59	0.01807118		2143.58	0.01003277		2733.58	0.01144569		3323.58	-0.00832216
373.8	0.06390043		963.79	0.00716277		1553.79	0.0167673		2143.78	0.00847308		2733.78	0.01152252		3323.78	-0.00887613
374	0.06424714		963.99	0.00787848		1553.99	0.01721654		2143.98	0.00753212		2733.98	0.0111202		3323.98	-0.00816701
374.2	0.06408674		964.19	0.00782749		1554.19	0.01685535		2144.18	0.0065059		2734.18	0.01053035		3324.18	-0.00669081
374.4	0.06384681		964.39	0.00860459		1554.39	0.01568083		2144.38	0.00560245		2734.38	0.01056243		3324.38	-0.00639959
374.6	0.0636988		964.59	0.00896701		1554.59	0.01461949		2144.58	0.00540317		2734.58	0.01083726		3324.58	-0.00667105
374.8	0.06381856		964.79	0.00993088		1554.79	0.01356206		2144.78	0.00530296		2734.78	0.01094993		3324.78	-0.00624762
375	0.06282639		964.99	0.01076581		1554.99	0.01329512		2144.98	0.0052356		2734.98	0.01121679		3324.98	-0.00651402
375.2	0.06201057		965.19	0.01129401		1555.19	0.01421975		2145.18	0.00634088		2735.18	0.01188727		3325.18	-0.00667692
375.4	0.06182255		965.39	0.01106315		1555.39	0.01428757		2145.38	0.00634797		2735.38	0.01201152		3325.38	-0.00671083
375.6	0.06127537		965.59	0.01105248		1555.59	0.0141095		2145.58	0.0062452		2735.58	0.01231099		3325.58	-0.00624645
375.8	0.06050107		965.79	0.01087286		1555.79	0.0145184		2145.78	0.00660818		2735.78	0.01216305		3325.78	-0.00632441
376	0.06061203		965.99	0.01079944		1555.99	0.01477732		2145.98	0.00737337		2735.98	0.01227321		3325.98	-0.00689393
376.2	0.06074498		966.19	0.00994263		1556.19	0.01511152		2146.18	0.00727161		2736.18	0.01215748		3326.18	-0.00702168
376.4	0.06032446		966.39	0.00921188		1556.39	0.01576871		2146.38	0.00844914		2736.38	0.0125593		3326.38	-0.0062424
376.6	0.06025048		966.59	0.00872484		1556.59	0.01599064		2146.58	0.00852277		2736.58	0.01192931		3326.58	-0.00644789
376.8	0.06066823		966.79	0.00897298		1556.79	0.01624114		2146.78	0.00907426		2736.78	0.01197504		3326.78	-0.006907
377	0.06030291		966.99	0.00922547		1556.99	0.01624064		2146.98	0.00893311		2736.98	0.0121067		3326.98	-0.00686722
377.2	0.06019118		967.19	0.00924854		1557.19	0.01603244		2147.18	0.00974698		2737.18	0.01162455		3327.18	-0.00672629
377.4	0.06145685		967.39	0.00847414		1557.39	0.01559409		2147.38	0.01032177		2737.38	0.01141806		3327.38	-0.00698522
377.6	0.06210086		967.59	0.00841966		1557.59	0.01477833		2147.58	0.01016984		2737.58	0.01086497		3327.58	-0.00780605
377.8	0.06191332		967.79	0.00856828		1557.79	0.01408576		2147.78	0.01023525		2737.78	0.01119358		3327.78	-0.0080314
378	0.06233194		967.99	0.00877703		1557.99	0.01475311		2147.98	0.01062825		2737.98	0.01045548		3327.98	-0.00707743
378.2	0.06237172		968.19	0.00949832		1558.19	0.01478574		2148.18	0.01039938		2738.18	0.01097153		3328.18	-0.00725565
378.4	0.0621657		968.39	0.01064138		1558.39	0.01451046		2148.38	0.01020108		2738.38	0.01154657		3328.38	-0.00713555
378.6	0.06177012		968.59	0.01054469		1558.59	0.01458576		2148.58	0.00994865		2738.58	0.01144773		3328.58	-0.0070087
378.8	0.06075476		968.79	0.01152444		1558.79	0.01492546		2148.78	0.01018427		2738.78	0.01143128		3328.78	-0.00721181
379	0.06059385		968.99	0.01230918		1558.99	0.01508153		2148.98	0.00941029		2738.98	0.01134376		3328.98	-0.00672871
379.2	0.06071073		969.19	0.0113958		1559.19	0.01511483		2149.18	0.00957237		2739.18	0.01194913		3329.18	-0.00616462
379.4	0.06120171		969.39	0.01051977		1559.39	0.01469591		2149.38	0.00930813		2739.38	0.01205604		3329.38	-0.00588699
379.6	0.06112971		969.59	0.01039788		1559.59	0.01413981		2149.58	0.00905281		2739.58	0.01248967		3329.58	-0.00514651
379.8	0.06066942		969.79	0.00962015		1559.79	0.01466631		2149.78	0.00922399		2739.78	0.0125731		3329.78	-0.00471063
380	0.06106884		969.99	0.0093778		1559.99	0.01425533		2149.98	0.00867008		2739.98	0.01258881		3329.98	-0.00508155
380.2	0.06126687		970.19	0.00882178		1560.19	0.01539119		2150.18	0.00822971		2740.18	0.0129601		3330.18	-0.00452516
380.4	0.06103861		970.39	0.00858263		1560.39	0.01582913		2150.38	0.00820212		2740.38	0.01392787		3330.38	-0.00553832
380.6	0.06116077		970.59	0.00834141		1560.59	0.01659421		2150.58	0.0070864		2740.58	0.01396036		3330.58	-0.0065126
380.8	0.06167466		970.79	0.0086257		1560.79	0.01658378		2150.78	0.00643228		2740.78	0.01444402		3330.78	-0.00590153
381	0.06140504		970.99	0.00922946		1560.99	0.01634725		2150.98	0.00611522		2740.98	0.01404849		3330.98	-0.00649596
381.2	0.06098556		971.19	0.00895948		1561.19	0.01597138		2151.18	0.00550373		2741.18	0.01390285		3331.18	-0.00739347
381.4	0.06212768		971.39	0.00876383		1561.39	0.0155951		2151.38	0.00537777		2741.38	0.01316751		3331.38	-0.00783359
381.6	0.06197118		971.59	0.00889007		1561.59	0.01584775		2151.58	0.00584789		2741.58	0.01277374		3331.58	-0.00777843
381.8	0.06105517		971.79	0.00847988		1561.79	0.01652385		2151.78	0.00568501		2741.78	0.01295607		3331.78	-0.0072436
382	0.06135268		971.99	0.00897062		1561.99	0.01676681		2151.98	0.00581322		2741.98	0.01290144		3331.98	-0.00711817
382.2	0.06065653		972.19	0.00878067		1562.19	0.01748922		2152.18	0.00546639		2742.18	0.01218475		3332.18	-0.00670426
382.4	0.06013282		972.39	0.00926375		1562.39	0.01708337		2152.38	0.0047099		2742.38	0.01251006		3332.38	-0.00653458
382.6	0.05946445		972.59	0.0099976		1562.59	0.01731196		2152.58	0.00446587		2742.58	0.01286675		3332.58	-0.00617979
382.8	0.0600423		972.79	0.01106125		1562.79	0.01671729		2152.78	0.00520542		2742.78	0.01268663		3332.78	-0.00582448
383	0.0600875		972.99	0.01096687		1562.99	0.01621896		2152.98	0.0053476		2742.98	0.01301083		3332.98	-0.00476711
383.2	0.06026081		973.19	0.01114373		1563.19	0.01588153		2153.18	0.00536826		2743.18	0.0129901		3333.18	-0.00487024
383.4	0.06026932		973.39	0.01194755		1563.39	0.01654635		2153.38	0.00606744		2743.38	0.01220519		3333.38	-0.00413794
383.6	0.06019675		973.59	0.01224509		1563.59	0.01719617		2153.58	0.00594538		2743.58	0.01279648		3333.58	-0.0040991
383.8	0.0601828		973.79	0.01292643		1563.79	0.01773113		2153.78	0.00651632		2743.78	0.01216454		3333.78	-0.00471023
384	0.06070632		973.99	0.01335716		1563.99	0.01766228		2153.98	0.00609601		2743.98	0.01207165		3333.98	-0.00531227
384.2	0.06095832		974.19	0.01362167		1564.19	0.01864509		2154.18	0.00659804		2744.18	0.01286503		3334.18	-0.00504283
384.4	0.0613586		974.39	0.01359745		1564.39	0.01833976		2154.38	0.00664741		2744.38	0.01325133		3334.38	-0.00664976
384.6	0.0613032		974.59	0.01376385		1564.59	0.01832866		2154.58	0.00664149		2744.58	0.01296106		3334.58	-0.0068987
384.8	0.06189947		974.79	0.01390626		1564.79	0.01692931		2154.78	0.00734915		2744.78	0.01333897		3334.78	-0.00653619
385	0.06240617		974.99	0.01297358		1564.99	0.01663176		2154.98	0.00774699		2744.98	0.01328821		3334.98	-0.00762751
385.2	0.06317521		975.19	0.01156669		1565.19	0.01605868		2155.18	0.00846516		2745.18	0.01376459		3335.18	-0.00775517
385.4	0.06430382		975.39	0.01137228		1565.39	0.01602273		2155.38	0.00900687		2745.38	0.013195		3335.38	-0.00697862
385.6	0.06397541		975.59	0.00995474		1565.59	0.01660509		2155.58	0.00910688		2745.58	0.01312528		3335.58	-0.00602238
385.8	0.06402616		975.79	0.00967223		1565.79	0.01671715		2155.78	0.0088715		2745.78	0.01310893		3335.78	-0.00494212
386	0.06466462		975.99	0.00872325		1565.99	0.01681188		2155.98	0.009183		2745.98	0.01289653		3335.98	-0.00529638
386.2	0.06472446		976.19	0.0082697		1566.19	0.01634193		2156.18	0.00889673		2746.18	0.01339537		3336.18	-0.00432518
386.4	0.06471136		976.39	0.00879693		1566.39	0.01589236		2156.38	0.00876872		2746.38	0.01426188		3336.38	-0.00395934
386.6	0.06479103		976.59	0.00872119		1566.59	0.01574325		2156.58	0.00935603		2746.58	0.01396337		3336.58	-0.00400217
386.8	0.06564537		976.79	0.00924978		1566.79	0.01536062		2156.78	0.00913256		2746.78	0.01369787		3336.78	-0.00347609
387	0.06468879		976.99	0.00991321		1566.99	0.01563167		2156.98	0.00901617		2746.98	0.01396716		3336.98	-0.00328374
387.2	0.06482721		977.19	0.01080358		1567.19	0.01612326		2157.18	0.00853433		2747.18	0.01352328		3337.18	-0.00368844
387.4	0.06477816		977.39	0.0111951		1567.39	0.01743561		2157.38	0.00943576		2747.38	0.0135392		3337.38	-0.00445705
387.6	0.06528568		977.59	0.01199972		1567.59	0.01728394		2157.58	0.00834395		2747.58	0.01390526		3337.58	-0.00514246
387.8	0.06508641		977.79	0.01268893		1567.79	0.01758435		2157.78	0.00893314		2747.78	0.01369895		3337.78	-0.00547306
388	0.06493295		977.99	0.01268041		1567.99	0.01710068		2157.98	0.00847641		2747.98	0.01368471		3337.98	-0.00581377
388.2	0.06474885		978.19	0.01304275		1568.19	0.01704282		2158.18	0.00853973		2748.18	0.01399906		3338.18	-0.00579337
388.4	0.06524128		978.39	0.0133446		1568.39	0.01657916		2158.38	0.00819708		2748.38	0.01388692		3338.38	-0.0074447
388.6	0.06517064		978.59	0.0134566		1568.59	0.01630832		2158.58	0.00833257		2748.58	0.0139466		3338.58	-0.00713117
388.8	0.06492337		978.79	0.01303233		1568.79	0.01591608		2158.78	0.00871876		2748.78	0.01392593		3338.78	-0.00748287
389	0.06440468		978.99	0.01231321		1568.99	0.01616414		2158.98	0.00901536		2748.98	0.0132682		3338.98	-0.00709839
389.2	0.06474938		979.19	0.01261314		1569.19	0.01514765		2159.18	0.00967451		2749.18	0.01292062		3339.18	-0.00681298
389.4	0.06393144		979.39	0.01230893		1569.39	0.0154351		2159.38	0.00990612		2749.38	0.01213342		3339.38	-0.00560936
389.6	0.06328048		979.59	0.01162658		1569.59	0.01575811		2159.58	0.00882892		2749.58	0.01231851		3339.58	-0.00485865
389.8	0.06369788		979.79	0.01201058		1569.79	0.01492584		2159.78	0.00845246		2749.78	0.01236908		3339.78	-0.00398131
390	0.06491374		979.99	0.01141105		1569.99	0.01481204		2159.98	0.00853767		2749.98	0.01223437		3339.98	-0.00409292
390.2	0.06541375		980.19	0.01148068		1570.19	0.01411145		2160.18	0.00867675		2750.18	0.01206273		3340.18	-0.00353268
390.4	0.06574057		980.39	0.01131755		1570.39	0.0146841		2160.38	0.00793721		2750.38	0.01150147		3340.38	-0.00305663
390.6	0.06594841		980.59	0.01084668		1570.59	0.01471091		2160.58	0.00727809		2750.58	0.0120888		3340.58	-0.00290694
390.8	0.06561324		980.79	0.01049169		1570.79	0.01432951		2160.78	0.00668119		2750.78	0.01249466		3340.78	-0.00250574
391	0.0655229		980.99	0.00990519		1570.99	0.01476292		2160.98	0.00715063		2750.98	0.01283556		3340.98	-0.00222094
391.2	0.06656985		981.19	0.01001586		1571.19	0.01454833		2161.18	0.00720463		2751.18	0.0128863		3341.18	-0.00345079
391.4	0.06716246		981.39	0.00992479		1571.39	0.01422078		2161.38	0.00694846		2751.38	0.01338003		3341.38	-0.00432382
391.6	0.06808889		981.59	0.00977358		1571.59	0.01361542		2161.58	0.00710313		2751.58	0.01317773		3341.58	-0.00460059
391.8	0.06802965		981.79	0.00916733		1571.79	0.01377727		2161.78	0.00767845		2751.78	0.01326545		3341.78	-0.0038447
392	0.06841337		981.99	0.00960957		1571.99	0.01311322		2161.98	0.00840952		2751.98	0.01252418		3341.98	-0.00408324
392.2	0.06876596		982.19	0.0093017		1572.19	0.01347587		2162.18	0.00881111		2752.18	0.01285578		3342.18	-0.00445039
392.4	0.06931124		982.39	0.00952583		1572.39	0.01354486		2162.38	0.0093102		2752.38	0.0127471		3342.38	-0.00513159
392.6	0.06910464		982.59	0.0099541		1572.59	0.01390254		2162.58	0.01042636		2752.58	0.01276923		3342.58	-0.00492864
392.8	0.06829126		982.79	0.01057889		1572.79	0.01363271		2162.78	0.01116958		2752.78	0.01231248		3342.78	-0.00489373
393	0.06804883		982.99	0.01040467		1572.99	0.01291943		2162.98	0.01121637		2752.98	0.01202304		3342.98	-0.00418026
393.2	0.06837297		983.19	0.01098923		1573.19	0.01247915		2163.18	0.0113		2753.18	0.01314626		3343.18	-0.00397351
393.4	0.06801033		983.39	0.01043317		1573.39	0.01273854		2163.38	0.01062485		2753.38	0.01287483		3343.38	-0.00297865
393.6	0.06820847		983.59	0.01071095		1573.59	0.013359		2163.58	0.00951642		2753.58	0.0131943		3343.58	-0.00302306
393.8	0.06860326		983.79	0.01060041		1573.79	0.01361408		2163.78	0.00932419		2753.78	0.01284653		3343.78	-0.00338613
394	0.06856878		983.99	0.01065075		1573.99	0.01403008		2163.98	0.00960697		2753.98	0.01298663		3343.98	-0.00385929
394.2	0.06716538		984.19	0.01099827		1574.19	0.01375448		2164.18	0.00989891		2754.18	0.0123624		3344.18	-0.00454838
394.4	0.06648771		984.39	0.01093363		1574.39	0.01483335		2164.38	0.00909999		2754.38	0.01327294		3344.38	-0.00511021
394.6	0.06534866		984.59	0.01131136		1574.59	0.01524285		2164.58	0.00994549		2754.58	0.01431372		3344.58	-0.00498928
394.8	0.06477985		984.79	0.01096733		1574.79	0.01524545		2164.78	0.00987765		2754.78	0.01439639		3344.78	-0.00601649
395	0.06577557		984.99	0.01144676		1574.99	0.0155157		2164.98	0.0108399		2754.98	0.01484143		3344.98	-0.00590288
395.2	0.06594348		985.19	0.01149119		1575.19	0.01545518		2165.18	0.01091799		2755.18	0.01557888		3345.18	-0.0068993
395.4	0.06542946		985.39	0.01185692		1575.39	0.01577652		2165.38	0.01069834		2755.38	0.01564148		3345.38	-0.00712291
395.6	0.06540115		985.59	0.011733		1575.59	0.01615072		2165.58	0.01095586		2755.58	0.01460786		3345.58	-0.00765447
395.8	0.06545211		985.79	0.01160318		1575.79	0.01576113		2165.78	0.0113374		2755.78	0.01407756		3345.78	-0.00726437
396	0.0655886		985.99	0.01187417		1575.99	0.01556591		2165.98	0.01253236		2755.98	0.01398536		3345.98	-0.00807392
396.2	0.06603142		986.19	0.01167486		1576.19	0.0159053		2166.18	0.0124324		2756.18	0.01369988		3346.18	-0.008341
396.4	0.06664504		986.39	0.01255589		1576.39	0.01620838		2166.38	0.01195865		2756.38	0.0128007		3346.38	-0.00841136
396.6	0.06692038		986.59	0.01206408		1576.59	0.01594662		2166.58	0.01166455		2756.58	0.01257922		3346.58	-0.00738462
396.8	0.06766212		986.79	0.0123445		1576.79	0.01597202		2166.78	0.01122139		2756.78	0.01198477		3346.78	-0.00694805
397	0.06801366		986.99	0.01174624		1576.99	0.01633591		2166.98	0.0098406		2756.98	0.01328641		3346.98	-0.00675514
397.2	0.06888597		987.19	0.01157965		1577.19	0.01675262		2167.18	0.00875748		2757.18	0.01363153		3347.18	-0.00585877
397.4	0.06874637		987.39	0.01128897		1577.39	0.01656309		2167.38	0.00767146		2757.38	0.01309422		3347.38	-0.0053574
397.6	0.06902385		987.59	0.01125255		1577.59	0.0169373		2167.58	0.00757709		2757.58	0.01332626		3347.58	-0.0047117
397.8	0.06919635		987.79	0.01098221		1577.79	0.01739124		2167.78	0.00724788		2757.78	0.01355681		3347.78	-0.00477588
398	0.06836808		987.99	0.01090235		1577.99	0.01692679		2167.98	0.00707119		2757.98	0.01356352		3347.98	-0.00523387
398.2	0.06776337		988.19	0.0109248		1578.19	0.01764749		2168.18	0.00747626		2758.18	0.01320467		3348.18	-0.0050863
398.4	0.0674376		988.39	0.01088058		1578.39	0.01858959		2168.38	0.00749694		2758.38	0.01397765		3348.38	-0.0046369
398.6	0.06682874		988.59	0.01143459		1578.59	0.01863787		2168.58	0.00745431		2758.58	0.0143965		3348.58	-0.00408896
398.8	0.06654771		988.79	0.0101264		1578.79	0.01801036		2168.78	0.00748915		2758.78	0.01467007		3348.78	-0.00380644
399	0.06631548		988.99	0.00916017		1578.99	0.01811541		2168.98	0.00812714		2758.98	0.01503538		3348.98	-0.00333062
399.2	0.06594144		989.19	0.00880058		1579.19	0.01840982		2169.18	0.00810353		2759.18	0.0159647		3349.18	-0.00365654
399.4	0.06552442		989.39	0.00886564		1579.39	0.01819464		2169.38	0.00790392		2759.38	0.01511212		3349.38	-0.00381977
399.6	0.06521801		989.59	0.00907322		1579.59	0.01761773		2169.58	0.00842429		2759.58	0.0144694		3349.58	-0.00317228
399.8	0.0654		989.79	0.00886938		1579.79	0.01696901		2169.78	0.00948375		2759.78	0.01394957		3349.78	-0.00294876
400	0.06580902		989.99	0.0089167		1579.99	0.01696946		2169.98	0.01004965		2759.98	0.01401308		3349.98	-0.00295784
400.2	0.06610705		990.19	0.00944433		1580.19	0.01714865		2170.18	0.01043038		2760.18	0.01243672		3350.18	-0.0030031
400.4	0.06692638		990.39	0.00921925		1580.39	0.01769052		2170.38	0.01068128		2760.38	0.01302166		3350.38	-0.0033859
400.6	0.06631739		990.59	0.00926581		1580.59	0.01745123		2170.58	0.01050611		2760.58	0.01381329		3350.58	-0.00279105
400.8	0.06706834		990.79	0.01013516		1580.79	0.01811225		2170.78	0.01069655		2760.78	0.01438221		3350.78	-0.00329422
401	0.06775615		990.99	0.00995854		1580.99	0.01869708		2170.98	0.00981064		2760.98	0.01516516		3350.98	-0.00382734
401.2	0.06900346		991.19	0.01058399		1581.19	0.01871545		2171.18	0.01022121		2761.18	0.0145814		3351.18	-0.00414264
401.4	0.06976152		991.39	0.01181867		1581.39	0.01897265		2171.38	0.00991156		2761.38	0.01462651		3351.38	-0.00472339
401.6	0.07055375		991.59	0.01277108		1581.59	0.01981841		2171.58	0.01020686		2761.58	0.01395386		3351.58	-0.00479407
401.8	0.0709597		991.79	0.01194782		1581.79	0.0197568		2171.78	0.01024126		2761.78	0.01396457		3351.78	-0.00605023
402	0.06997612		991.99	0.01121922		1581.99	0.01939969		2171.98	0.01048288		2761.98	0.01398369		3351.98	-0.00621781
402.2	0.07033064		992.19	0.01090106		1582.19	0.01963835		2172.18	0.01062888		2762.18	0.01352804		3352.18	-0.00620035
402.4	0.0702156		992.39	0.01093954		1582.39	0.0192486		2172.38	0.01052293		2762.38	0.01336499		3352.38	-0.00633824
402.6	0.07019146		992.59	0.01026529		1582.59	0.01823659		2172.58	0.01056575		2762.58	0.01349479		3352.58	-0.00664459
402.8	0.07082062		992.79	0.00904373		1582.79	0.01796696		2172.78	0.01076243		2762.78	0.0137851		3352.78	-0.00681483
403	0.07113969		992.99	0.00892576		1582.99	0.0186232		2172.98	0.01041566		2762.98	0.01398476		3352.98	-0.00783798
403.2	0.0720003		993.19	0.01014533		1583.19	0.01910455		2173.18	0.01060505		2763.18	0.01425074		3353.18	-0.00832493
403.4	0.07150173		993.39	0.01097338		1583.39	0.0178451		2173.38	0.01124042		2763.38	0.01326216		3353.38	-0.00744085
403.6	0.07105823		993.59	0.01088008		1583.59	0.0175439		2173.58	0.0115917		2763.58	0.01351006		3353.58	-0.0073688
403.8	0.07011309		993.79	0.01084901		1583.79	0.01808442		2173.78	0.01156972		2763.78	0.01312808		3353.78	-0.00660318
404	0.07029202		993.99	0.01106519		1583.99	0.01871416		2173.98	0.01236868		2763.98	0.01325395		3353.98	-0.00636588
404.2	0.0701813		994.19	0.0110817		1584.19	0.01840464		2174.18	0.0127874		2764.18	0.01321463		3354.18	-0.00611058
404.4	0.0696856		994.39	0.01131818		1584.39	0.01794426		2174.38	0.01195984		2764.38	0.01460397		3354.38	-0.006123
404.6	0.06795721		994.59	0.01166584		1584.59	0.01781476		2174.58	0.01094524		2764.58	0.01447497		3354.58	-0.0059819
404.8	0.06856779		994.79	0.01177524		1584.79	0.01883418		2174.78	0.01074506		2764.78	0.01479685		3354.78	-0.00609862
405	0.06880617		994.99	0.01196408		1584.99	0.01920249		2174.98	0.01043536		2764.98	0.01476376		3354.98	-0.00617308
405.2	0.06877943		995.19	0.01210358		1585.19	0.01940798		2175.18	0.0103911		2765.18	0.01493009		3355.18	-0.0061795
405.4	0.06866221		995.39	0.01202455		1585.39	0.02001065		2175.38	0.00999469		2765.38	0.01472314		3355.38	-0.00607947
405.6	0.06830969		995.59	0.01216194		1585.59	0.01982838		2175.58	0.00958061		2765.58	0.01483989		3355.58	-0.00614234
405.8	0.06920171		995.79	0.01120348		1585.79	0.01901766		2175.78	0.00880695		2765.78	0.01520998		3355.78	-0.00621099
406	0.06911952		995.99	0.0114887		1585.99	0.01904965		2175.98	0.00823224		2765.98	0.01505889		3355.98	-0.00570224
406.2	0.07035676		996.19	0.01103911		1586.19	0.01874963		2176.18	0.00759469		2766.18	0.01478088		3356.18	-0.00616581
406.4	0.07096082		996.39	0.01096154		1586.39	0.01874914		2176.38	0.00765813		2766.38	0.01479679		3356.38	-0.005986
406.6	0.07185869		996.59	0.01139199		1586.59	0.01798416		2176.58	0.00773402		2766.58	0.01539823		3356.58	-0.00621218
406.8	0.07356907		996.79	0.01166615		1586.79	0.01850908		2176.78	0.00719351		2766.78	0.01538132		3356.78	-0.00667083
407	0.07406091		996.99	0.0122926		1586.99	0.01852329		2176.98	0.00756077		2766.98	0.01491243		3356.98	-0.00686758
407.2	0.07546364		997.19	0.0126293		1587.19	0.01814774		2177.18	0.00835331		2767.18	0.0150217		3357.18	-0.00711017
407.4	0.07487454		997.39	0.0128644		1587.39	0.0177507		2177.38	0.00964606		2767.38	0.01432619		3357.38	-0.00723475
407.6	0.07432995		997.59	0.01292244		1587.59	0.01836648		2177.58	0.00931689		2767.58	0.01330778		3357.58	-0.00795044
407.8	0.07383252		997.79	0.01426672		1587.79	0.01859234		2177.78	0.01000352		2767.78	0.01295768		3357.78	-0.00741411
408	0.07422163		997.99	0.01426541		1587.99	0.0181152		2177.98	0.01046794		2767.98	0.01291922		3357.98	-0.00771522
408.2	0.07326703		998.19	0.01463469		1588.19	0.01717312		2178.18	0.01000483		2768.18	0.01261633		3358.18	-0.00817973
408.4	0.07200325		998.39	0.01484498		1588.39	0.01714396		2178.38	0.00942023		2768.38	0.01170227		3358.38	-0.00802308
408.6	0.07062063		998.59	0.01499647		1588.59	0.01782959		2178.58	0.00973712		2768.58	0.01150248		3358.58	-0.00787449
408.8	0.07057165		998.79	0.01465065		1588.79	0.0179441		2178.78	0.00963123		2768.78	0.0119879		3358.78	-0.00755231
409	0.07010784		998.99	0.01404616		1588.99	0.01760504		2178.98	0.00997079		2768.98	0.0123371		3358.98	-0.00736725
409.2	0.06956366		999.19	0.01365577		1589.19	0.01789409		2179.18	0.00989609		2769.18	0.01239884		3359.18	-0.0070042
409.4	0.06946223		999.39	0.0138558		1589.39	0.01777188		2179.38	0.00941492		2769.38	0.01285623		3359.38	-0.00670957
409.6	0.06969075		999.59	0.01479681		1589.59	0.01746848		2179.58	0.00903562		2769.58	0.01373068		3359.58	-0.00635014
409.8	0.06994049		999.79	0.01502362		1589.79	0.01713236		2179.78	0.00853903		2769.78	0.01450507		3359.78	-0.00573231
410	0.07013313		999.99	0.01450144		1589.99	0.01778351		2179.98	0.00924566		2769.98	0.0154902		3359.98	-0.00605774
410.2	0.07071201		1000.19	0.01418363		1590.19	0.01719063		2180.18	0.0098155		2770.18	0.01564813		3360.18	-0.00621474
410.4	0.07123083		1000.39	0.01410273		1590.39	0.01669478		2180.38	0.01056084		2770.38	0.01586477		3360.38	-0.00620089
410.6	0.07195665		1000.59	0.01477473		1590.59	0.01670664		2180.58	0.01131328		2770.58	0.01578929		3360.58	-0.00638215
410.8	0.072744		1000.79	0.01353686		1590.79	0.01732984		2180.78	0.01194963		2770.78	0.01565194		3360.78	-0.00699624
411	0.07333465		1000.99	0.01244234		1590.99	0.01692035		2180.98	0.01289313		2770.98	0.0152276		3360.98	-0.00778676
411.2	0.07415735		1001.19	0.01187837		1591.19	0.01695157		2181.18	0.01411977		2771.18	0.01501059		3361.18	-0.0096412
411.4	0.07340158		1001.39	0.01234381		1591.39	0.01758234		2181.38	0.01474945		2771.38	0.01438318		3361.38	-0.01001564
411.6	0.07406517		1001.59	0.01215419		1591.59	0.01745385		2181.58	0.01555274		2771.58	0.01377642		3361.58	-0.00958662
411.8	0.07487056		1001.79	0.01266012		1591.79	0.01772476		2181.78	0.01639948		2771.78	0.01401796		3361.78	-0.00869951
412	0.0745798		1001.99	0.01276306		1591.99	0.01794463		2181.98	0.01543106		2771.98	0.01357396		3361.98	-0.00792148
412.2	0.07419451		1002.19	0.01250287		1592.19	0.01878407		2182.18	0.01508793		2772.18	0.01294704		3362.18	-0.00751871
412.4	0.07454415		1002.39	0.01210522		1592.39	0.01938632		2182.38	0.01409022		2772.38	0.01176634		3362.38	-0.00676766
412.6	0.07423449		1002.59	0.01277705		1592.59	0.01952104		2182.58	0.01309484		2772.58	0.01296411		3362.58	-0.00624644
412.8	0.0752029		1002.79	0.01241967		1592.79	0.02000151		2182.78	0.01244339		2772.78	0.01311406		3362.78	-0.00570869
413	0.07474973		1002.99	0.01262966		1592.99	0.02024266		2182.98	0.0121537		2772.98	0.01387595		3362.98	-0.00556426
413.2	0.07392961		1003.19	0.01248441		1593.19	0.02011815		2183.18	0.01141306		2773.18	0.01446263		3363.18	-0.00522099
413.4	0.07364885		1003.39	0.01284799		1593.39	0.02024085		2183.38	0.01041545		2773.38	0.01429641		3363.38	-0.00473949
413.6	0.07318065		1003.59	0.01303071		1593.59	0.02008251		2183.58	0.0100324		2773.58	0.01456893		3363.58	-0.00373053
413.8	0.07237974		1003.79	0.01302109		1593.79	0.02013518		2183.78	0.00907488		2773.78	0.01548776		3363.78	-0.00367234
414	0.07244056		1003.99	0.01305454		1593.99	0.02021371		2183.98	0.00941293		2773.98	0.01619717		3363.98	-0.00400071
414.2	0.07202843		1004.19	0.01350995		1594.19	0.01936777		2184.18	0.0098826		2774.18	0.01649088		3364.18	-0.00385884
414.4	0.07163512		1004.39	0.01265301		1594.39	0.01897222		2184.38	0.0096462		2774.38	0.01665837		3364.38	-0.0042674
414.6	0.07188905		1004.59	0.01239102		1594.59	0.01934746		2184.58	0.00948795		2774.58	0.01624677		3364.58	-0.00439262
414.8	0.07183193		1004.79	0.01080831		1594.79	0.01951647		2184.78	0.01021585		2774.78	0.01612783		3364.78	-0.00491589
415	0.07199682		1004.99	0.0107069		1594.99	0.0193093		2184.98	0.01111142		2774.98	0.01532588		3364.98	-0.00565156
415.2	0.0721951		1005.19	0.01163569		1595.19	0.01992569		2185.18	0.0117176		2775.18	0.01596236		3365.18	-0.00632936
415.4	0.07184211		1005.39	0.01176568		1595.39	0.02020936		2185.38	0.01137243		2775.38	0.01645911		3365.38	-0.00626554
415.6	0.07277247		1005.59	0.01206736		1595.59	0.02014946		2185.58	0.01229305		2775.58	0.01649542		3365.58	-0.00584492
415.8	0.07226985		1005.79	0.01349107		1595.79	0.01998684		2185.78	0.01180398		2775.78	0.01605632		3365.78	-0.00564195
416	0.07230684		1005.99	0.01356734		1595.99	0.0202413		2185.98	0.01110291		2775.98	0.01631187		3365.98	-0.0054115
416.2	0.07277625		1006.19	0.01390269		1596.19	0.02070737		2186.18	0.01124865		2776.18	0.01622802		3366.18	-0.00544386
416.4	0.07337855		1006.39	0.01506996		1596.39	0.02002895		2186.38	0.01074557		2776.38	0.0163213		3366.38	-0.00527043
416.6	0.07366548		1006.59	0.01564487		1596.59	0.01979977		2186.58	0.01115131		2776.58	0.01743994		3366.58	-0.00539703
416.8	0.0737881		1006.79	0.01505474		1596.79	0.02057977		2186.78	0.01146682		2776.78	0.01710033		3366.78	-0.00552837
417	0.07284159		1006.99	0.01526284		1596.99	0.02002625		2186.98	0.01123313		2776.98	0.01738138		3366.98	-0.00566243
417.2	0.07230854		1007.19	0.01476862		1597.19	0.01969005		2187.18	0.01146115		2777.18	0.01673414		3367.18	-0.00649181
417.4	0.07302143		1007.39	0.01533422		1597.39	0.01949527		2187.38	0.01135691		2777.38	0.016173		3367.38	-0.00565959
417.6	0.07337951		1007.59	0.01505212		1597.59	0.01889593		2187.58	0.01112972		2777.58	0.01638149		3367.58	-0.00514981
417.8	0.07380819		1007.79	0.01594284		1597.79	0.01862156		2187.78	0.0105731		2777.78	0.01649218		3367.78	-0.00495755
418	0.0742848		1007.99	0.01577404		1597.99	0.01786993		2187.98	0.01062289		2777.98	0.01650318		3367.98	-0.00482444
418.2	0.07472008		1008.19	0.01564826		1598.19	0.01761786		2188.18	0.01095894		2778.18	0.01581675		3368.18	-0.00435519
418.4	0.07473836		1008.39	0.01504848		1598.39	0.01721554		2188.38	0.01050002		2778.38	0.01494806		3368.38	-0.00397343
418.6	0.07580669		1008.59	0.01492748		1598.59	0.01733766		2188.58	0.01124417		2778.58	0.01401704		3368.58	-0.00374958
418.8	0.07567696		1008.79	0.01439483		1598.79	0.0174462		2188.78	0.01240471		2778.78	0.01400675		3368.78	-0.00328145
419	0.07516809		1008.99	0.01465271		1598.99	0.0177152		2188.98	0.01206966		2778.98	0.01374131		3368.98	-0.00443184
419.2	0.07511192		1009.19	0.01534457		1599.19	0.01804384		2189.18	0.01140876		2779.18	0.013997		3369.18	-0.00525801
419.4	0.0738645		1009.39	0.01482081		1599.39	0.01819268		2189.38	0.01038236		2779.38	0.01395168		3369.38	-0.00522098
419.6	0.07388206		1009.59	0.01510386		1599.59	0.01778205		2189.58	0.0113427		2779.58	0.01406401		3369.58	-0.00477938
419.8	0.07289618		1009.79	0.01512841		1599.79	0.01755669		2189.78	0.01124876		2779.78	0.01348431		3369.78	-0.00454637
420	0.07361882		1009.99	0.01457814		1599.99	0.01785303		2189.98	0.0112924		2779.98	0.01437364		3369.98	-0.00460198
420.2	0.07329266		1010.19	0.01422822		1600.19	0.01813965		2190.18	0.01117494		2780.18	0.0147415		3370.18	-0.00533135
420.4	0.0731746		1010.39	0.01376952		1600.39	0.01788929		2190.38	0.01144524		2780.38	0.01573964		3370.38	-0.00561536
420.6	0.07322347		1010.59	0.01225755		1600.59	0.01862851		2190.58	0.01139844		2780.58	0.01581732		3370.58	-0.00625337
420.8	0.07358317		1010.79	0.01184434		1600.79	0.01936747		2190.78	0.01063637		2780.78	0.01625298		3370.78	-0.0062502
421	0.07378246		1010.99	0.01189173		1600.99	0.01910526		2190.98	0.01025066		2780.98	0.01565062		3370.98	-0.00610847
421.2	0.07464199		1011.19	0.01191625		1601.19	0.01940536		2191.18	0.01028178		2781.18	0.01592053		3371.18	-0.00669266
421.4	0.07633934		1011.39	0.0125098		1601.39	0.01949536		2191.38	0.01041511		2781.38	0.01514143		3371.38	-0.00659373
421.6	0.07676581		1011.59	0.01232879		1601.59	0.02041203		2191.58	0.01046366		2781.58	0.014631		3371.58	-0.00649432
421.8	0.07722716		1011.79	0.01347891		1601.79	0.02087315		2191.78	0.01072223		2781.78	0.01368023		3371.78	-0.00635403
422	0.07788492		1011.99	0.01368802		1601.99	0.02153128		2191.98	0.01103974		2781.98	0.01337133		3371.98	-0.00600034
422.2	0.07846837		1012.19	0.01426263		1602.19	0.02168374		2192.18	0.01201361		2782.18	0.01331519		3372.18	-0.00552397
422.4	0.07933817		1012.39	0.0146236		1602.39	0.02119551		2192.38	0.01283773		2782.38	0.01301118		3372.38	-0.00552006
422.6	0.07994862		1012.59	0.01440077		1602.59	0.02137713		2192.58	0.01340141		2782.58	0.0129245		3372.58	-0.00571909
422.8	0.08040715		1012.79	0.01374605		1602.79	0.02176301		2192.78	0.01367174		2782.78	0.01374297		3372.78	-0.00586379
423	0.07929014		1012.99	0.01421325		1602.99	0.02154837		2192.98	0.01320178		2782.98	0.01346462		3372.98	-0.00708423
423.2	0.07910247		1013.19	0.01478988		1603.19	0.02099314		2193.18	0.01305794		2783.18	0.01338193		3373.18	-0.00609319
423.4	0.07822412		1013.39	0.01415995		1603.39	0.02076749		2193.38	0.01273776		2783.38	0.0136463		3373.38	-0.00533479
423.6	0.07828911		1013.59	0.01381644		1603.59	0.02043476		2193.58	0.01373144		2783.58	0.01406784		3373.58	-0.00524863
423.8	0.077077		1013.79	0.01364267		1603.79	0.01983483		2193.78	0.01277045		2783.78	0.01388809		3373.78	-0.00513967
424	0.07699594		1013.99	0.01292641		1603.99	0.01912434		2193.98	0.01271927		2783.98	0.01508226		3373.98	-0.00507524
424.2	0.07668727		1014.19	0.01132384		1604.19	0.01866912		2194.18	0.01233015		2784.18	0.01474189		3374.18	-0.00487664
424.4	0.07592223		1014.39	0.01080129		1604.39	0.01788403		2194.38	0.01166228		2784.38	0.01522621		3374.38	-0.00460927
424.6	0.07594412		1014.59	0.01006772		1604.59	0.01743785		2194.58	0.01101715		2784.58	0.01549543		3374.58	-0.00451012
424.8	0.07599		1014.79	0.01037291		1604.79	0.01691167		2194.78	0.01027753		2784.78	0.01620579		3374.78	-0.00455238
425	0.07608898		1014.99	0.01019209		1604.99	0.01631657		2194.98	0.00951906		2784.98	0.01501526		3374.98	-0.00438732
425.2	0.07619687		1015.19	0.01138644		1605.19	0.01619254		2195.18	0.00933849		2785.18	0.01530578		3375.18	-0.00488589
425.4	0.07612159		1015.39	0.01210099		1605.39	0.01705173		2195.38	0.00908793		2785.38	0.01473693		3375.38	-0.00574283
425.6	0.07694364		1015.59	0.01244529		1605.59	0.01702437		2195.58	0.00916399		2785.58	0.01474547		3375.58	-0.00552897
425.8	0.07798466		1015.79	0.01413024		1605.79	0.01683708		2195.78	0.00881234		2785.78	0.01370041		3375.78	-0.00558162
426	0.07808718		1015.99	0.01444925		1605.99	0.01744121		2195.98	0.00900101		2785.98	0.01343899		3375.98	-0.00591783
426.2	0.07874487		1016.19	0.01507273		1606.19	0.01756073		2196.18	0.0092701		2786.18	0.0128184		3376.18	-0.0065748
426.4	0.08021995		1016.39	0.01592454		1606.39	0.01728026		2196.38	0.00904736		2786.38	0.01243068		3376.38	-0.00782886
426.6	0.08036728		1016.59	0.01620554		1606.59	0.01713445		2196.58	0.00884482		2786.58	0.01292358		3376.58	-0.00801635
426.8	0.0817065		1016.79	0.01577829		1606.79	0.01743733		2196.78	0.00918573		2786.78	0.01300607		3376.78	-0.00765662
427	0.08119395		1016.99	0.0162216		1606.99	0.01673519		2196.98	0.00910044		2786.98	0.01313779		3376.98	-0.00722161
427.2	0.08154336		1017.19	0.01661178		1607.19	0.01704518		2197.18	0.00947327		2787.18	0.0127424		3377.18	-0.00721245
427.4	0.08109537		1017.39	0.01636178		1607.39	0.01825556		2197.38	0.00983125		2787.38	0.01287173		3377.38	-0.00731452
427.6	0.08073573		1017.59	0.01592162		1607.59	0.01858838		2197.58	0.00981498		2787.58	0.01284935		3377.58	-0.00804143
427.8	0.08055497		1017.79	0.01606621		1607.79	0.01856173		2197.78	0.00988424		2787.78	0.01309611		3377.78	-0.00873782
428	0.08075488		1017.99	0.01485487		1607.99	0.01825169		2197.98	0.0107721		2787.98	0.01346267		3377.98	-0.0083558
428.2	0.08040209		1018.19	0.01419351		1608.19	0.01847875		2198.18	0.01039163		2788.18	0.01390079		3378.18	-0.00806148
428.4	0.07895617		1018.39	0.01464765		1608.39	0.01833015		2198.38	0.00997164		2788.38	0.01507307		3378.38	-0.00828382
428.6	0.07843297		1018.59	0.01384223		1608.59	0.01802253		2198.58	0.0102795		2788.58	0.01545633		3378.58	-0.0087713
428.8	0.07800867		1018.79	0.01388448		1608.79	0.01835124		2198.78	0.00903578		2788.78	0.01544621		3378.78	-0.00893741
429	0.07772682		1018.99	0.01319092		1608.99	0.01861705		2198.98	0.00803453		2788.98	0.01564165		3378.98	-0.00879969
429.2	0.07716313		1019.19	0.01345675		1609.19	0.01849036		2199.18	0.00679245		2789.18	0.01603264		3379.18	-0.00888967
429.4	0.07729743		1019.39	0.01345935		1609.39	0.01901695		2199.38	0.00609961		2789.38	0.01623274		3379.38	-0.00902835
429.6	0.07792862		1019.59	0.01268568		1609.59	0.01852506		2199.58	0.00578249		2789.58	0.01579052		3379.58	-0.00887772
429.8	0.07725688		1019.79	0.01229366		1609.79	0.01928582		2199.78	0.00498178		2789.78	0.01536605		3379.78	-0.00815936
430	0.07684825		1019.99	0.01141033		1609.99	0.01951314		2199.98	0.0052422		2789.98	0.01520307		3379.98	-0.0082406
430.2	0.07679807		1020.19	0.01174553		1610.19	0.0201748		2200.18	0.0044403		2790.18	0.01543659		3380.18	-0.00805293
430.4	0.07707947		1020.39	0.01203244		1610.39	0.01942444		2200.38	0.00460073		2790.38	0.01586635		3380.38	-0.00812768
430.6	0.07626785		1020.59	0.01210741		1610.59	0.01960465		2200.58	0.00444196		2790.58	0.01592558		3380.58	-0.00733538
430.8	0.07614643		1020.79	0.01197153		1610.79	0.02107712		2200.78	0.00534948		2790.78	0.01493738		3380.78	-0.00647589
431	0.07629715		1020.99	0.01251631		1610.99	0.02106291		2200.98	0.00612182		2790.98	0.01466476		3380.98	-0.00701964
431.2	0.0756837		1021.19	0.01273944		1611.19	0.02165157		2201.18	0.00741097		2791.18	0.01314514		3381.18	-0.00764646
431.4	0.07548937		1021.39	0.01326704		1611.39	0.02196815		2201.38	0.00803198		2791.38	0.01253699		3381.38	-0.00736099
431.6	0.07590153		1021.59	0.0140888		1611.59	0.0211162		2201.58	0.0085713		2791.58	0.01199714		3381.58	-0.00735959
431.8	0.07706778		1021.79	0.01478046		1611.79	0.02150563		2201.78	0.0091726		2791.78	0.01229018		3381.78	-0.00654171
432	0.07726996		1021.99	0.01504256		1611.99	0.02013191		2201.98	0.00924541		2791.98	0.01242938		3381.98	-0.00566907
432.2	0.07703453		1022.19	0.01505775		1612.19	0.01962371		2202.18	0.0102827		2792.18	0.0130876		3382.18	-0.00513692
432.4	0.07743467		1022.39	0.01501034		1612.39	0.01971184		2202.38	0.01046065		2792.38	0.01309149		3382.38	-0.0050633
432.6	0.07821768		1022.59	0.01417332		1612.59	0.01984593		2202.58	0.01008437		2792.58	0.01284234		3382.58	-0.00515081
432.8	0.07931476		1022.79	0.01466243		1612.79	0.02092142		2202.78	0.00926015		2792.78	0.01243089		3382.78	-0.00561428
433	0.07979433		1022.99	0.0137251		1612.99	0.02038278		2202.98	0.00904743		2792.98	0.01263211		3382.98	-0.00546129
433.2	0.07939521		1023.19	0.01463888		1613.19	0.02030161		2203.18	0.00860826		2793.18	0.01261238		3383.18	-0.00540974
433.4	0.07945458		1023.39	0.01468111		1613.39	0.02101359		2203.38	0.00843715		2793.38	0.01269537		3383.38	-0.00532978
433.6	0.07959071		1023.59	0.01398203		1613.59	0.02135277		2203.58	0.00825924		2793.58	0.0130623		3383.58	-0.0048914
433.8	0.07974527		1023.79	0.01332412		1613.79	0.02155021		2203.78	0.00815024		2793.78	0.01388171		3383.78	-0.0041124
434	0.07920558		1023.99	0.01238471		1613.99	0.02131894		2203.98	0.00843955		2793.98	0.01488853		3383.98	-0.00442413
434.2	0.07838126		1024.19	0.01274539		1614.19	0.02152983		2204.18	0.0075466		2794.18	0.01508337		3384.18	-0.00524241
434.4	0.07772665		1024.39	0.01225165		1614.39	0.02090709		2204.38	0.00773444		2794.38	0.0143532		3384.38	-0.00573876
434.6	0.07667458		1024.59	0.01208837		1614.59	0.02187326		2204.58	0.00735534		2794.58	0.01434338		3384.58	-0.00571425
434.8	0.07674357		1024.79	0.01235987		1614.79	0.0218866		2204.78	0.0089378		2794.78	0.0135179		3384.78	-0.00490252
435	0.0768246		1024.99	0.01205807		1614.99	0.02026525		2204.98	0.00942722		2794.98	0.01394475		3384.98	-0.0053271
435.2	0.07654833		1025.19	0.01160193		1615.19	0.01900405		2205.18	0.00943985		2795.18	0.01354323		3385.18	-0.00500895
435.4	0.07723		1025.39	0.01245016		1615.39	0.01796741		2205.38	0.00948983		2795.38	0.01358898		3385.38	-0.00467137
435.6	0.07707626		1025.59	0.0122863		1615.59	0.01723802		2205.58	0.00975062		2795.58	0.01397613		3385.58	-0.00449552
435.8	0.07708351		1025.79	0.01188038		1615.79	0.01818026		2205.78	0.00984866		2795.78	0.0154462		3385.78	-0.0052699
436	0.07658962		1025.99	0.01220958		1615.99	0.01694656		2205.98	0.01076882		2795.98	0.01629287		3385.98	-0.0056763
436.2	0.07669858		1026.19	0.01212587		1616.19	0.01722077		2206.18	0.01240489		2796.18	0.01708334		3386.18	-0.00629611
436.4	0.07762936		1026.39	0.01300903		1616.39	0.01820293		2206.38	0.01176698		2796.38	0.01633408		3386.38	-0.00628489
436.6	0.07783992		1026.59	0.01393054		1616.59	0.01902403		2206.58	0.01199528		2796.58	0.01621606		3386.58	-0.00655293
436.8	0.07775791		1026.79	0.0151915		1616.79	0.01971383		2206.78	0.0123759		2796.78	0.0161821		3386.78	-0.00731979
437	0.07721842		1026.99	0.0166944		1616.99	0.01921412		2206.98	0.01209206		2796.98	0.01624076		3386.98	-0.00658371
437.2	0.07698051		1027.19	0.01782793		1617.19	0.02051151		2207.18	0.01254001		2797.18	0.01646388		3387.18	-0.0064066
437.4	0.0775106		1027.39	0.01717514		1617.39	0.0213233		2207.38	0.0128721		2797.38	0.01638173		3387.38	-0.00642882
437.6	0.07804621		1027.59	0.01761206		1617.59	0.02163958		2207.58	0.01337237		2797.58	0.01640635		3387.58	-0.00614268
437.8	0.07805574		1027.79	0.01723239		1617.79	0.02159907		2207.78	0.01340524		2797.78	0.01659368		3387.78	-0.00694443
438	0.07790815		1027.99	0.01709726		1617.99	0.02152385		2207.98	0.01242623		2797.98	0.01631069		3387.98	-0.00728438
438.2	0.07878963		1028.19	0.01765534		1618.19	0.02211143		2208.18	0.01174598		2798.18	0.0156737		3388.18	-0.00835219
438.4	0.07935638		1028.39	0.01653474		1618.39	0.02274293		2208.38	0.0118206		2798.38	0.01514399		3388.38	-0.00807364
438.6	0.079498		1028.59	0.01721122		1618.59	0.02251069		2208.58	0.01207554		2798.58	0.01496814		3388.58	-0.00797657
438.8	0.0801425		1028.79	0.0168158		1618.79	0.02133022		2208.78	0.01229845		2798.78	0.01465967		3388.78	-0.00738793
439	0.07967761		1028.99	0.01649615		1618.99	0.020313		2208.98	0.01209728		2798.98	0.01408565		3388.98	-0.00765459
439.2	0.08041913		1029.19	0.01608223		1619.19	0.02087797		2209.18	0.01185291		2799.18	0.01390962		3389.18	-0.00808587
439.4	0.07998826		1029.39	0.01605184		1619.39	0.0210291		2209.38	0.01197812		2799.38	0.01386392		3389.38	-0.00837849
439.6	0.07908247		1029.59	0.01525291		1619.59	0.02132873		2209.58	0.01197589		2799.58	0.01412275		3389.58	-0.00863947
439.8	0.07846442		1029.79	0.0148094		1619.79	0.02232626		2209.78	0.01231955		2799.78	0.01432695		3389.78	-0.00931284
440	0.07848663		1029.99	0.01504768		1619.99	0.02065253		2209.98	0.01223188		2799.98	0.01402944		3389.98	-0.00942684
440.2	0.07827831		1030.19	0.01458981		1620.19	0.02124795		2210.18	0.01155321		2800.18	0.01399054		3390.18	-0.00906453
440.4	0.07846326		1030.39	0.01473411		1620.39	0.02174649		2210.38	0.01156091		2800.38	0.01271125		3390.38	-0.00785753
440.6	0.0777455		1030.59	0.01460277		1620.59	0.0215959		2210.58	0.01175807		2800.58	0.01335706		3390.58	-0.00702558
440.8	0.07804618		1030.79	0.01558514		1620.79	0.02099927		2210.78	0.01125221		2800.78	0.01316756		3390.78	-0.00664558
441	0.07782641		1030.99	0.01593515		1620.99	0.02088075		2210.98	0.01123917		2800.98	0.01279394		3390.98	-0.00568341
441.2	0.07902418		1031.19	0.01561029		1621.19	0.02200127		2211.18	0.01177747		2801.18	0.01250994		3391.18	-0.00577628
441.4	0.0786623		1031.39	0.01575365		1621.39	0.02196648		2211.38	0.01197523		2801.38	0.01280238		3391.38	-0.00554561
441.6	0.07981046		1031.59	0.0158953		1621.59	0.02139123		2211.58	0.01111876		2801.58	0.01293806		3391.58	-0.00575472
441.8	0.08101628		1031.79	0.01564505		1621.79	0.02086659		2211.78	0.01082857		2801.78	0.01323444		3391.78	-0.00628231
442	0.08163588		1031.99	0.01561835		1621.99	0.02149046		2211.98	0.01049997		2801.98	0.01326031		3391.98	-0.00623346
442.2	0.08233705		1032.19	0.01526829		1622.19	0.02119113		2212.18	0.0113067		2802.18	0.01390877		3392.18	-0.00751497
442.4	0.08236693		1032.39	0.01470349		1622.39	0.02042798		2212.38	0.012272		2802.38	0.01346321		3392.38	-0.00768363
442.6	0.0822911		1032.59	0.0148635		1622.59	0.01968816		2212.58	0.01265581		2802.58	0.01349727		3392.58	-0.00800273
442.8	0.08224631		1032.79	0.01459918		1622.79	0.01968484		2212.78	0.01340987		2802.78	0.01376448		3392.78	-0.00834539
443	0.08223661		1032.99	0.01564609		1622.99	0.02056878		2212.98	0.01364198		2802.98	0.01391537		3392.98	-0.00945113
443.2	0.08268702		1033.19	0.01616229		1623.19	0.02135781		2213.18	0.0137372		2803.18	0.01489607		3393.18	-0.0094012
443.4	0.08199663		1033.39	0.01586945		1623.39	0.02097788		2213.38	0.01372328		2803.38	0.01511051		3393.38	-0.00997014
443.6	0.08175286		1033.59	0.01615624		1623.59	0.0215913		2213.58	0.0132621		2803.58	0.01566235		3393.58	-0.00989226
443.8	0.08170338		1033.79	0.01597584		1623.79	0.02155488		2213.78	0.01335855		2803.78	0.01625946		3393.78	-0.01003626
444	0.08159129		1033.99	0.01674102		1623.99	0.02081256		2213.98	0.01269414		2803.98	0.01591346		3393.98	-0.00964016
444.2	0.08127549		1034.19	0.01670611		1624.19	0.02190066		2214.18	0.01199673		2804.18	0.01533026		3394.18	-0.00816017
444.4	0.08172196		1034.39	0.01743753		1624.39	0.02188055		2214.38	0.01176305		2804.38	0.0145191		3394.38	-0.00740493
444.6	0.08132479		1034.59	0.01795341		1624.59	0.02199813		2214.58	0.01052156		2804.58	0.0144214		3394.58	-0.0067347
444.8	0.08171877		1034.79	0.01914731		1624.79	0.02249919		2214.78	0.00924744		2804.78	0.01342417		3394.78	-0.00664241
445	0.08106881		1034.99	0.01828772		1624.99	0.02324934		2214.98	0.00936266		2804.98	0.01304641		3394.98	-0.00646597
445.2	0.08143612		1035.19	0.01840175		1625.19	0.02443514		2215.18	0.00881489		2805.18	0.01263289		3395.18	-0.00587096
445.4	0.08059645		1035.39	0.01768086		1625.39	0.02326287		2215.38	0.00841866		2805.38	0.01268778		3395.38	-0.00569242
445.6	0.08082907		1035.59	0.01735064		1625.59	0.02287797		2215.58	0.00813138		2805.58	0.01265932		3395.58	-0.00581151
445.8	0.08045666		1035.79	0.01691079		1625.79	0.0223979		2215.78	0.00865103		2805.78	0.01230679		3395.78	-0.00563831
446	0.07982155		1035.99	0.01615764		1625.99	0.02266681		2215.98	0.00907982		2805.98	0.01167185		3395.98	-0.00583807
446.2	0.07980113		1036.19	0.01534645		1626.19	0.02115764		2216.18	0.00965881		2806.18	0.01195517		3396.18	-0.00643929
446.4	0.07954388		1036.39	0.01472978		1626.39	0.02148132		2216.38	0.0109898		2806.38	0.01197098		3396.38	-0.00640371
446.6	0.08027536		1036.59	0.0147751		1626.59	0.02219729		2216.58	0.01123364		2806.58	0.01289715		3396.58	-0.00709002
446.8	0.08029292		1036.79	0.01558718		1626.79	0.02136957		2216.78	0.01190341		2806.78	0.01315448		3396.78	-0.0077231
447	0.0808699		1036.99	0.01544637		1626.99	0.02193558		2216.98	0.0132489		2806.98	0.01330394		3396.98	-0.00778577
447.2	0.08065491		1037.19	0.01568006		1627.19	0.02124394		2217.18	0.01353137		2807.18	0.01328954		3397.18	-0.00722215
447.4	0.08099849		1037.39	0.01558038		1627.39	0.02029045		2217.38	0.01367721		2807.38	0.01403937		3397.38	-0.00732057
447.6	0.08172414		1037.59	0.01581029		1627.59	0.02012684		2217.58	0.01328458		2807.58	0.01489633		3397.58	-0.00756153
447.8	0.08254842		1037.79	0.01550623		1627.79	0.01953883		2217.78	0.01375475		2807.78	0.01432413		3397.78	-0.00752022
448	0.08294125		1037.99	0.01652612		1627.99	0.01926339		2217.98	0.01440505		2807.98	0.01450154		3397.98	-0.00717486
448.2	0.08412897		1038.19	0.01681502		1628.19	0.01922463		2218.18	0.0138921		2808.18	0.01463439		3398.18	-0.00719731
448.4	0.08454551		1038.39	0.01725375		1628.39	0.01926087		2218.38	0.01274776		2808.38	0.01448395		3398.38	-0.00771943
448.6	0.08424099		1038.59	0.01735124		1628.59	0.01959795		2218.58	0.01336597		2808.58	0.0139454		3398.58	-0.0076605
448.8	0.08359118		1038.79	0.01698509		1628.79	0.01951416		2218.78	0.01276348		2808.78	0.01379566		3398.78	-0.00765914
449	0.08346825		1038.99	0.01642859		1628.99	0.019852		2218.98	0.01349729		2808.98	0.01441112		3398.98	-0.00771042
449.2	0.08352541		1039.19	0.01701577		1629.19	0.02004329		2219.18	0.01250702		2809.18	0.01457042		3399.18	-0.00672728
449.4	0.08333341		1039.39	0.01670992		1629.39	0.01959841		2219.38	0.01274537		2809.38	0.01453981		3399.38	-0.00758442
449.6	0.08288808		1039.59	0.01643546		1629.59	0.0201967		2219.58	0.01263234		2809.58	0.01479554		3399.58	-0.00723828
449.8	0.08305774		1039.79	0.01546972		1629.79	0.02021623		2219.78	0.0116211		2809.78	0.01553771		3399.78	-0.00632897
450	0.08309599		1039.99	0.01505647		1629.99	0.02088607		2219.98	0.01160092		2809.98	0.01626469		3399.98	-0.00585586
450.2	0.08364672		1040.19	0.01436559		1630.19	0.02044351		2220.18	0.0116433		2810.18	0.01643349		3400.18	-0.00637118
450.4	0.08418103		1040.39	0.01403657		1630.39	0.02186329		2220.38	0.01139065		2810.38	0.01628199		3400.38	-0.00651315
450.6	0.08462007		1040.59	0.01432038		1630.59	0.02213844		2220.58	0.01074611		2810.58	0.01676588		3400.58	-0.00697186
450.8	0.08424372		1040.79	0.01479512		1630.79	0.02152387		2220.78	0.01073083		2810.78	0.01567		3400.78	-0.00777578
451	0.08367448		1040.99	0.01473941		1630.99	0.02338934		2220.98	0.01105278		2810.98	0.01463123		3400.98	-0.0079454
451.2	0.08327309		1041.19	0.01560223		1631.19	0.02347531		2221.18	0.00973797		2811.18	0.0153053		3401.18	-0.008483
451.4	0.08366332		1041.39	0.01530053		1631.39	0.02326865		2221.38	0.0095767		2811.38	0.01516111		3401.38	-0.00873181
451.6	0.08384663		1041.59	0.01493407		1631.59	0.02364153		2221.58	0.00955941		2811.58	0.01480356		3401.58	-0.0093386
451.8	0.08427222		1041.79	0.01545369		1631.79	0.02338292		2221.78	0.01022791		2811.78	0.01451245		3401.78	-0.00824264
452	0.08417453		1041.99	0.01560782		1631.99	0.02270703		2221.98	0.01133757		2811.98	0.01510614		3401.98	-0.00822862
452.2	0.08417795		1042.19	0.01599515		1632.19	0.02244774		2222.18	0.01123042		2812.18	0.01438787		3402.18	-0.007789
452.4	0.08400076		1042.39	0.01613019		1632.39	0.02196357		2222.38	0.01112204		2812.38	0.01392515		3402.38	-0.00722844
452.6	0.08376452		1042.59	0.01592118		1632.59	0.02150647		2222.58	0.0119899		2812.58	0.0137134		3402.58	-0.0070733
452.8	0.08407786		1042.79	0.01538415		1632.79	0.02126549		2222.78	0.01203187		2812.78	0.0143702		3402.78	-0.00724699
453	0.08511823		1042.99	0.01562816		1632.99	0.02161		2222.98	0.01237669		2812.98	0.01460014		3402.98	-0.00674468
453.2	0.08542121		1043.19	0.01583958		1633.19	0.02086521		2223.18	0.01222363		2813.18	0.01446592		3403.18	-0.00647258
453.4	0.08538569		1043.39	0.01485823		1633.39	0.02130567		2223.38	0.01258756		2813.38	0.01421711		3403.38	-0.00674297
453.6	0.08546782		1043.59	0.01452495		1633.59	0.02090155		2223.58	0.01156005		2813.58	0.01414627		3403.58	-0.00568178
453.8	0.08510814		1043.79	0.0143135		1633.79	0.02077028		2223.78	0.01089845		2813.78	0.01449496		3403.78	-0.00487197
454	0.08432426		1043.99	0.01484627		1633.99	0.02068785		2223.98	0.01231418		2813.98	0.01393141		3403.98	-0.0059074
454.2	0.08418582		1044.19	0.01506206		1634.19	0.02105533		2224.18	0.01235001		2814.18	0.01298834		3404.18	-0.00663353
454.4	0.08309894		1044.39	0.01498661		1634.39	0.02176306		2224.38	0.01173207		2814.38	0.01313491		3404.38	-0.00725391
454.6	0.08164602		1044.59	0.01482152		1634.59	0.02177054		2224.58	0.01220171		2814.58	0.01356584		3404.58	-0.00844566
454.8	0.08063629		1044.79	0.01501218		1634.79	0.02206657		2224.78	0.01238133		2814.78	0.01297902		3404.78	-0.00935273
455	0.08037944		1044.99	0.01438223		1634.99	0.02335479		2224.98	0.01230027		2814.98	0.01350654		3404.98	-0.00943178
455.2	0.07997685		1045.19	0.01435634		1635.19	0.02281841		2225.18	0.01233606		2815.18	0.01432947		3405.18	-0.01039238
455.4	0.07956407		1045.39	0.01346948		1635.39	0.02195884		2225.38	0.01255156		2815.38	0.01453256		3405.38	-0.00972979
455.6	0.07981151		1045.59	0.01346958		1635.59	0.02179198		2225.58	0.01287704		2815.58	0.01558894		3405.58	-0.00957412
455.8	0.07960697		1045.79	0.01398442		1635.79	0.02065488		2225.78	0.01436921		2815.78	0.0157092		3405.78	-0.00859967
456	0.08003269		1045.99	0.01413773		1635.99	0.01979153		2225.98	0.01573166		2815.98	0.01539808		3405.98	-0.00811636
456.2	0.08080402		1046.19	0.01429869		1636.19	0.0191413		2226.18	0.01578507		2816.18	0.01559209		3406.18	-0.00726015
456.4	0.08169008		1046.39	0.01416442		1636.39	0.0183331		2226.38	0.01519508		2816.38	0.01473117		3406.38	-0.00694504
456.6	0.08247915		1046.59	0.01481762		1636.59	0.01895609		2226.58	0.01532221		2816.58	0.01433597		3406.58	-0.00692638
456.8	0.08370937		1046.79	0.01519774		1636.79	0.01962166		2226.78	0.01620901		2816.78	0.014959		3406.78	-0.00698893
457	0.0852054		1046.99	0.01607333		1636.99	0.01972412		2226.98	0.01538399		2816.98	0.01476578		3406.98	-0.0070857
457.2	0.08579783		1047.19	0.01597021		1637.19	0.01979941		2227.18	0.01438704		2817.18	0.01357243		3407.18	-0.00704974
457.4	0.08672993		1047.39	0.01628588		1637.39	0.02119307		2227.38	0.01356695		2817.38	0.01289883		3407.38	-0.00649857
457.6	0.08783357		1047.59	0.01700164		1637.59	0.02146102		2227.58	0.01263975		2817.58	0.01293074		3407.58	-0.00595813
457.8	0.08731392		1047.79	0.01670491		1637.79	0.02164433		2227.78	0.01336549		2817.78	0.01292786		3407.78	-0.00637509
458	0.0871082		1047.99	0.01762161		1637.99	0.02207009		2227.98	0.01415325		2817.98	0.0131351		3407.98	-0.00636369
458.2	0.0876727		1048.19	0.01632837		1638.19	0.02288879		2228.18	0.0130384		2818.18	0.01339464		3408.18	-0.00643703
458.4	0.08770445		1048.39	0.01606718		1638.39	0.02341555		2228.38	0.01229182		2818.38	0.01342338		3408.38	-0.00689069
458.6	0.08768068		1048.59	0.01532048		1638.59	0.02371631		2228.58	0.01353151		2818.58	0.01428605		3408.58	-0.0072798
458.8	0.08766911		1048.79	0.01496922		1638.79	0.02392649		2228.78	0.01294271		2818.78	0.01479794		3408.78	-0.00692452
459	0.0880133		1048.99	0.01449639		1638.99	0.02482108		2228.98	0.01166342		2818.98	0.01579216		3408.98	-0.00751761
459.2	0.08711146		1049.19	0.01467993		1639.19	0.02447127		2229.18	0.0112896		2819.18	0.01668657		3409.18	-0.00904757
459.4	0.08622046		1049.39	0.01396993		1639.39	0.02400443		2229.38	0.01167572		2819.38	0.01705354		3409.38	-0.00805576
459.6	0.08540823		1049.59	0.01416305		1639.59	0.02334162		2229.58	0.01211767		2819.58	0.01674153		3409.58	-0.00758529
459.8	0.0844166		1049.79	0.01415006		1639.79	0.02185313		2229.78	0.01255103		2819.78	0.01600517		3409.78	-0.00679716
460	0.08488161		1049.99	0.01461104		1639.99	0.02126188		2229.98	0.01211083		2819.98	0.01547507		3409.98	-0.00643877
460.2	0.08393291		1050.19	0.01463429		1640.19	0.0210179		2230.18	0.01143705		2820.18	0.01490431		3410.18	-0.00681912
460.4	0.08333936		1050.39	0.01538306		1640.39	0.02056008		2230.38	0.01077035		2820.38	0.01419355		3410.38	-0.00693787
460.6	0.0832112		1050.59	0.01611591		1640.59	0.02136641		2230.58	0.01059222		2820.58	0.01468146		3410.58	-0.00776326
460.8	0.08344926		1050.79	0.0161091		1640.79	0.02161263		2230.78	0.0112012		2820.78	0.01574068		3410.78	-0.00854169
461	0.08367049		1050.99	0.01654161		1640.99	0.02149745		2230.98	0.01049035		2820.98	0.01502182		3410.98	-0.00868055
461.2	0.08353448		1051.19	0.01664142		1641.19	0.02147515		2231.18	0.01017519		2821.18	0.01489182		3411.18	-0.00785211
461.4	0.08327005		1051.39	0.01700647		1641.39	0.02163999		2231.38	0.00959878		2821.38	0.01513007		3411.38	-0.00777853
461.6	0.08360405		1051.59	0.01686858		1641.59	0.02163329		2231.58	0.00988745		2821.58	0.01539776		3411.58	-0.00751975
461.8	0.08325164		1051.79	0.01660609		1641.79	0.02103795		2231.78	0.01100727		2821.78	0.01543176		3411.78	-0.00745613
462	0.08285102		1051.99	0.01663368		1641.99	0.02140203		2231.98	0.01124735		2821.98	0.01540497		3411.98	-0.00730593
462.2	0.08235078		1052.19	0.01630719		1642.19	0.02209821		2232.18	0.01163163		2822.18	0.01540599		3412.18	-0.00814546
462.4	0.08299624		1052.39	0.01699695		1642.39	0.02268937		2232.38	0.01218966		2822.38	0.01566183		3412.38	-0.0078119
462.6	0.08288846		1052.59	0.01610448		1642.59	0.02233531		2232.58	0.01309256		2822.58	0.01587472		3412.58	-0.00766557
462.8	0.08272466		1052.79	0.01595634		1642.79	0.02238747		2232.78	0.01343741		2822.78	0.01517272		3412.78	-0.00763712
463	0.08307693		1052.99	0.01596509		1642.99	0.02231351		2232.98	0.01372037		2822.98	0.015504		3412.98	-0.00846271
463.2	0.0827631		1053.19	0.01620375		1643.19	0.02196717		2233.18	0.01490699		2823.18	0.0146661		3413.18	-0.00910069
463.4	0.08247666		1053.39	0.01626471		1643.39	0.02092285		2233.38	0.01513054		2823.38	0.01500523		3413.38	-0.00817068
463.6	0.08276629		1053.59	0.01657298		1643.59	0.02089224		2233.58	0.01475681		2823.58	0.01594185		3413.58	-0.00805709
463.8	0.08363727		1053.79	0.01634787		1643.79	0.02085643		2233.78	0.0145513		2823.78	0.0161395		3413.78	-0.00874572
464	0.08437181		1053.99	0.0169468		1643.99	0.02199199		2233.98	0.01511175		2823.98	0.01618025		3413.98	-0.00897899
464.2	0.08431967		1054.19	0.01646291		1644.19	0.02193863		2234.18	0.01513218		2824.18	0.01687432		3414.18	-0.00952032
464.4	0.08516345		1054.39	0.01578859		1644.39	0.02166255		2234.38	0.01532605		2824.38	0.01779796		3414.38	-0.01002255
464.6	0.08566987		1054.59	0.01533796		1644.59	0.0225307		2234.58	0.01524624		2824.58	0.01808358		3414.58	-0.01045821
464.8	0.08563925		1054.79	0.01567898		1644.79	0.02258068		2234.78	0.01571113		2824.78	0.01897737		3414.78	-0.01031906
465	0.08579486		1054.99	0.01619242		1644.99	0.02148226		2234.98	0.01581167		2824.98	0.01812772		3414.98	-0.00933073
465.2	0.08591116		1055.19	0.01538029		1645.19	0.02159895		2235.18	0.01475662		2825.18	0.0190373		3415.18	-0.0094378
465.4	0.08507323		1055.39	0.01547488		1645.39	0.02196263		2235.38	0.01458836		2825.38	0.01820198		3415.38	-0.00877821
465.6	0.08572303		1055.59	0.0155253		1645.59	0.02200369		2235.58	0.01492118		2825.58	0.01814283		3415.58	-0.00829476
465.8	0.08505413		1055.79	0.01526797		1645.79	0.02104202		2235.78	0.01497317		2825.78	0.01774809		3415.78	-0.00821255
466	0.08366273		1055.99	0.0152463		1645.99	0.02213591		2235.98	0.01540042		2825.98	0.01792272		3415.98	-0.00794602
466.2	0.08397032		1056.19	0.01582153		1646.19	0.02262253		2236.18	0.01556869		2826.18	0.01750414		3416.18	-0.00811443
466.4	0.08468947		1056.39	0.01584601		1646.39	0.02201492		2236.38	0.0149544		2826.38	0.01709568		3416.38	-0.00786381
466.6	0.08471549		1056.59	0.01584833		1646.59	0.02166553		2236.58	0.01424636		2826.58	0.0163802		3416.58	-0.00836347
466.8	0.0852273		1056.79	0.0163048		1646.79	0.02139669		2236.78	0.01469744		2826.78	0.01564558		3416.78	-0.00843326
467	0.0863371		1056.99	0.01677903		1646.99	0.02160552		2236.98	0.01405747		2826.98	0.01616246		3416.98	-0.00876442
467.2	0.08679589		1057.19	0.01654444		1647.19	0.0226311		2237.18	0.01321557		2827.18	0.0165833		3417.18	-0.00886411
467.4	0.08683587		1057.39	0.01699821		1647.39	0.02249696		2237.38	0.01226365		2827.38	0.0180687		3417.38	-0.0088649
467.6	0.08778931		1057.59	0.01654883		1647.59	0.02318765		2237.58	0.01124169		2827.58	0.01812843		3417.58	-0.00834173
467.8	0.088602		1057.79	0.01613674		1647.79	0.02363641		2237.78	0.01158569		2827.78	0.01837166		3417.78	-0.00896305
468	0.08912824		1057.99	0.01626305		1647.99	0.02405626		2237.98	0.01197888		2827.98	0.01871187		3417.98	-0.00904678
468.2	0.08966489		1058.19	0.01616752		1648.19	0.02337424		2238.18	0.01197974		2828.18	0.01897265		3418.18	-0.00890308
468.4	0.08992778		1058.39	0.01653498		1648.39	0.02306625		2238.38	0.01238322		2828.38	0.01874826		3418.38	-0.00881356
468.6	0.08979654		1058.59	0.0173186		1648.59	0.02292767		2238.58	0.01233364		2828.58	0.01812333		3418.58	-0.00793206
468.8	0.08942278		1058.79	0.01848658		1648.79	0.02199145		2238.78	0.01312869		2828.78	0.017775		3418.78	-0.00684945
469	0.08937719		1058.99	0.01912585		1648.99	0.02119698		2238.98	0.01373011		2828.98	0.0164993		3418.98	-0.0054043
469.2	0.08874384		1059.19	0.01945344		1649.19	0.02143685		2239.18	0.01363354		2829.18	0.01605899		3419.18	-0.00477201
469.4	0.08760712		1059.39	0.02104936		1649.39	0.02074869		2239.38	0.01473429		2829.38	0.01451522		3419.38	-0.00300233
469.6	0.08706905		1059.59	0.02175602		1649.59	0.01997917		2239.58	0.01499071		2829.58	0.01376058		3419.58	-0.00229184
469.8	0.0859765		1059.79	0.02277888		1649.79	0.01951915		2239.78	0.0157674		2829.78	0.0129778		3419.78	-0.00145073
470	0.0859765		1059.99	0.02277888		1649.99	0.01951915		2239.98	0.0157674		2829.98	0.0129778		3419.98	-0.00145073
470.2	0.08568623		1060.19	0.02160285		1650.19	0.02006874		2240.18	0.01583388		2830.18	0.01299019		3420.18	-0.00241729
470.4	0.08446957		1060.39	0.02099763		1650.39	0.02047946		2240.38	0.01653948		2830.38	0.01355671		3420.38	-0.00267931
470.6	0.08419968		1060.59	0.02068055		1650.59	0.02109767		2240.58	0.01640518		2830.58	0.01324007		3420.58	-0.00327357
470.8	0.0834178		1060.79	0.0206949		1650.79	0.02055587		2240.78	0.01646045		2830.78	0.01310218		3420.78	-0.0034976
471	0.08333319		1060.99	0.02005051		1650.99	0.02031992		2240.98	0.01597858		2830.98	0.01318179		3420.98	-0.00393079
471.2	0.08242865		1061.19	0.01991575		1651.19	0.02055918		2241.18	0.01594237		2831.18	0.01333009		3421.18	-0.00501168
471.4	0.08142497		1061.39	0.01996423		1651.39	0.02013688		2241.38	0.01571266		2831.38	0.01405254		3421.38	-0.00467909
471.6	0.08069407		1061.59	0.01962034		1651.59	0.0195813		2241.58	0.01529861		2831.58	0.01340345		3421.58	-0.00451403
471.8	0.08030283		1061.79	0.0195736		1651.79	0.01980797		2241.78	0.01497535		2831.78	0.01305522		3421.78	-0.00475495
472	0.07963732		1061.99	0.02047904		1651.99	0.01967669		2241.98	0.01510721		2831.98	0.01243578		3421.98	-0.00519885
472.2	0.07966185		1062.19	0.02033159		1652.19	0.01992742		2242.18	0.01520505		2832.18	0.01243162		3422.18	-0.00459572
472.4	0.07944802		1062.39	0.02005063		1652.39	0.02023436		2242.38	0.01597858		2832.38	0.01139378		3422.38	-0.00389236
472.6	0.08022034		1062.59	0.02035907		1652.59	0.02047928		2242.58	0.01614468		2832.58	0.0105352		3422.58	-0.00445346
472.8	0.07967922		1062.79	0.02065007		1652.79	0.02052433		2242.78	0.01646833		2832.78	0.00970152		3422.78	-0.00333847
473	0.08001437		1062.99	0.02031449		1652.99	0.02025379		2242.98	0.01596687		2832.98	0.0088873		3422.98	-0.00268949
473.2	0.07916585		1063.19	0.02056108		1653.19	0.01961719		2243.18	0.01579776		2833.18	0.00776188		3423.18	-0.00312869
473.4	0.0788725		1063.39	0.02001909		1653.39	0.02058701		2243.38	0.01553819		2833.38	0.00748934		3423.38	-0.00359498
473.6	0.0782508		1063.59	0.02077975		1653.59	0.02001616		2243.58	0.01494318		2833.58	0.00734113		3423.58	-0.00404141
473.8	0.07814484		1063.79	0.02091248		1653.79	0.02009685		2243.78	0.01457978		2833.78	0.00723146		3423.78	-0.00406483
474	0.07898023		1063.99	0.02115695		1653.99	0.0206383		2243.98	0.01457504		2833.98	0.00664492		3423.98	-0.00410542
474.2	0.07925902		1064.19	0.02086392		1654.19	0.02054334		2244.18	0.01393911		2834.18	0.00709008		3424.18	-0.00446718
474.4	0.07802595		1064.39	0.0220286		1654.39	0.02071618		2244.38	0.01338884		2834.38	0.00736459		3424.38	-0.00468208
474.6	0.07860402		1064.59	0.02243279		1654.59	0.02050274		2244.58	0.01137236		2834.58	0.00755684		3424.58	-0.00449056
474.8	0.07816348		1064.79	0.02217059		1654.79	0.01975879		2244.78	0.01061042		2834.78	0.00865606		3424.78	-0.00460768
475	0.07780585		1064.99	0.0218648		1654.99	0.01952238		2244.98	0.00999429		2834.98	0.00922319		3424.98	-0.00546323
475.2	0.07759654		1065.19	0.02194816		1655.19	0.01988119		2245.18	0.00970325		2835.18	0.00996478		3425.18	-0.00606139
475.4	0.07725885		1065.39	0.02189959		1655.39	0.01863458		2245.38	0.00951375		2835.38	0.01024028		3425.38	-0.00526268
475.6	0.07744534		1065.59	0.02096184		1655.59	0.01826246		2245.58	0.00977976		2835.58	0.0094246		3425.58	-0.00530697
475.8	0.07819044		1065.79	0.02071631		1655.79	0.01840648		2245.78	0.01013975		2835.78	0.00951482		3425.78	-0.00602206
476	0.07806315		1065.99	0.02062464		1655.99	0.01816988		2245.98	0.00992134		2835.98	0.00884599		3425.98	-0.0061358
476.2	0.07881068		1066.19	0.0197039		1656.19	0.01862652		2246.18	0.01021536		2836.18	0.00968491		3426.18	-0.00616456
476.4	0.07848282		1066.39	0.02069222		1656.39	0.01851406		2246.38	0.01024528		2836.38	0.0092097		3426.38	-0.00556726
476.6	0.07723104		1066.59	0.02103041		1656.59	0.01800867		2246.58	0.01091398		2836.58	0.00977099		3426.58	-0.005681
476.8	0.07611101		1066.79	0.02070592		1656.79	0.01749036		2246.78	0.01147863		2836.78	0.00987326		3426.78	-0.00534752
477	0.07502651		1066.99	0.02030904		1656.99	0.01702871		2246.98	0.01053528		2836.98	0.00997439		3426.98	-0.00509836
477.2	0.07433226		1067.19	0.02039533		1657.19	0.01769481		2247.18	0.01069546		2837.18	0.01047099		3427.18	-0.00589083
477.4	0.07454593		1067.39	0.02048023		1657.39	0.01818056		2247.38	0.01119184		2837.38	0.00956973		3427.38	-0.00591296
477.6	0.07468157		1067.59	0.02075829		1657.59	0.01728801		2247.58	0.01127591		2837.58	0.00921169		3427.58	-0.00546224
477.8	0.07499891		1067.79	0.02039751		1657.79	0.01813386		2247.78	0.01178228		2837.78	0.00916303		3427.78	-0.00453705
478	0.07557627		1067.99	0.02058332		1657.99	0.01875904		2247.98	0.01272362		2837.98	0.00892423		3427.98	-0.00424184
478.2	0.07500676		1068.19	0.02067789		1658.19	0.01853766		2248.18	0.01285367		2838.18	0.00908816		3428.18	-0.00435042
478.4	0.0733092		1068.39	0.0208706		1658.39	0.01930054		2248.38	0.01287194		2838.38	0.00915556		3428.38	-0.00427788
478.6	0.0738141		1068.59	0.0206771		1658.59	0.01975099		2248.58	0.01295527		2838.58	0.00978306		3428.58	-0.00384635
478.8	0.07341076		1068.79	0.02062439		1658.79	0.01894027		2248.78	0.01364738		2838.78	0.00925223		3428.78	-0.0045772
479	0.07345644		1068.99	0.02070793		1658.99	0.0195207		2248.98	0.01403025		2838.98	0.00855966		3428.98	-0.00445342
479.2	0.07407279		1069.19	0.02096781		1659.19	0.02041046		2249.18	0.01361556		2839.18	0.00847114		3429.18	-0.00390006
479.4	0.07396467		1069.39	0.02193006		1659.39	0.0198858		2249.38	0.0137615		2839.38	0.00804443		3429.38	-0.00410668
479.6	0.0745095		1069.59	0.02117678		1659.59	0.02028829		2249.58	0.01397274		2839.58	0.00728024		3429.58	-0.00417228
479.8	0.07483185		1069.79	0.02128075		1659.79	0.01974181		2249.78	0.01387228		2839.78	0.00708533		3429.78	-0.00467496
480	0.07436569		1069.99	0.0216877		1659.99	0.01973912		2249.98	0.01278376		2839.98	0.00625253		3429.98	-0.00467452
480.2	0.07392304		1070.19	0.02124		1660.19	0.01983395		2250.18	0.01320163		2840.18	0.00664527		3430.18	-0.00535784
480.4	0.07364599		1070.39	0.02150006		1660.39	0.01939931		2250.38	0.01269907		2840.38	0.00610073		3430.38	-0.00530631
480.6	0.07320818		1070.59	0.02020884		1660.59	0.01956474		2250.58	0.01280852		2840.58	0.00593891		3430.58	-0.00633449
480.8	0.07354156		1070.79	0.01886465		1660.79	0.01974962		2250.78	0.01263965		2840.78	0.00699292		3430.78	-0.00676115
481	0.07351917		1070.99	0.01856357		1660.99	0.01992803		2250.98	0.01139786		2840.98	0.00727785		3430.98	-0.00688998
481.2	0.07377415		1071.19	0.0179103		1661.19	0.02019063		2251.18	0.01176133		2841.18	0.00731787		3431.18	-0.00685438
481.4	0.07417752		1071.39	0.01705434		1661.39	0.01952303		2251.38	0.01232051		2841.38	0.00685966		3431.38	-0.00558299
481.6	0.07386197		1071.59	0.01653557		1661.59	0.01907302		2251.58	0.01197827		2841.58	0.00813603		3431.58	-0.00451214
481.8	0.07375805		1071.79	0.01609988		1661.79	0.01916141		2251.78	0.01189551		2841.78	0.00912614		3431.78	-0.00420672
482	0.07321267		1071.99	0.01583149		1661.99	0.01857494		2251.98	0.01263293		2841.98	0.00914349		3431.98	-0.00374141
482.2	0.07236379		1072.19	0.01536627		1662.19	0.01814067		2252.18	0.01262578		2842.18	0.00914932		3432.18	-0.00421047
482.4	0.07139192		1072.39	0.01459532		1662.39	0.01829907		2252.38	0.01193821		2842.38	0.00909528		3432.38	-0.00347354
482.6	0.07159207		1072.59	0.01496972		1662.59	0.01846796		2252.58	0.01157945		2842.58	0.0087976		3432.58	-0.00367987
482.8	0.0704885		1072.79	0.01516762		1662.79	0.01742211		2252.78	0.01026633		2842.78	0.00797458		3432.78	-0.00358562
483	0.06969796		1072.99	0.01495594		1662.99	0.01890439		2252.98	0.00952729		2842.98	0.00860025		3432.98	-0.0039008
483.2	0.06913121		1073.19	0.0154297		1663.19	0.01877819		2253.18	0.00885525		2843.18	0.00803494		3433.18	-0.00459769
483.4	0.06847985		1073.39	0.01612565		1663.39	0.01835276		2253.38	0.00928098		2843.38	0.0075725		3433.38	-0.00548042
483.6	0.06805324		1073.59	0.01598955		1663.59	0.01887991		2253.58	0.00967644		2843.58	0.00595686		3433.58	-0.0044175
483.8	0.0672049		1073.79	0.01627362		1663.79	0.01832391		2253.78	0.00987273		2843.78	0.00567178		3433.78	-0.00481334
484	0.06733228		1073.99	0.01662158		1663.99	0.0186921		2253.98	0.00925347		2843.98	0.00447331		3433.98	-0.00484752
484.2	0.06720428		1074.19	0.01678931		1664.19	0.01896024		2254.18	0.0095967		2844.18	0.00426914		3434.18	-0.00567188
484.4	0.06742481		1074.39	0.01777474		1664.39	0.01869957		2254.38	0.00938284		2844.38	0.00415741		3434.38	-0.00660758
484.6	0.06724554		1074.59	0.01786551		1664.59	0.01858684		2254.58	0.00955361		2844.58	0.00449541		3434.58	-0.00705783
484.8	0.06730942		1074.79	0.01821804		1664.79	0.01874635		2254.78	0.01001199		2844.78	0.00548591		3434.78	-0.00734914
485	0.0668177		1074.99	0.01869721		1664.99	0.01862461		2254.98	0.01017194		2844.98	0.00499014		3434.98	-0.00720911
485.2	0.06711129		1075.19	0.01852013		1665.19	0.0189523		2255.18	0.01071467		2845.18	0.00492542		3435.18	-0.00603043
485.4	0.06682244		1075.39	0.01903976		1665.39	0.01866972		2255.38	0.01086711		2845.38	0.00512715		3435.38	-0.00576002
485.6	0.06706587		1075.59	0.01934374		1665.59	0.01806684		2255.58	0.01107762		2845.58	0.00548532		3435.58	-0.0055326
485.8	0.0675774		1075.79	0.01924422		1665.79	0.01919646		2255.78	0.01073611		2845.78	0.00519541		3435.78	-0.00550731
486	0.06744112		1075.99	0.01906543		1665.99	0.01963265		2255.98	0.01124594		2845.98	0.00573449		3435.98	-0.00484825
486.2	0.06776035		1076.19	0.01899863		1666.19	0.02002001		2256.18	0.01100271		2846.18	0.00597923		3436.18	-0.0050342
486.4	0.06746694		1076.39	0.01801736		1666.39	0.02045335		2256.38	0.01077341		2846.38	0.00571274		3436.38	-0.00443901
486.6	0.06770503		1076.59	0.01771801		1666.59	0.02082147		2256.58	0.0104778		2846.58	0.00622511		3436.58	-0.00536173
486.8	0.06667842		1076.79	0.01696341		1666.79	0.02022154		2256.78	0.00908712		2846.78	0.00685863		3436.78	-0.00538042
487	0.06683684		1076.99	0.01613494		1666.99	0.02077512		2256.98	0.00917398		2846.98	0.0072054		3436.98	-0.00545985
487.2	0.06713003		1077.19	0.01621583		1667.19	0.02010026		2257.18	0.00972733		2847.18	0.00626057		3437.18	-0.00532456
487.4	0.06758177		1077.39	0.01635009		1667.39	0.01939694		2257.38	0.0103077		2847.38	0.00602026		3437.38	-0.00526572
487.6	0.06786288		1077.59	0.0164576		1667.59	0.01952814		2257.58	0.01010648		2847.58	0.00525417		3437.58	-0.00448783
487.8	0.06750395		1077.79	0.0162644		1667.79	0.01813234		2257.78	0.00983848		2847.78	0.00523229		3437.78	-0.00473977
488	0.06793411		1077.99	0.01631267		1667.99	0.01818737		2257.98	0.01003083		2847.98	0.00489859		3437.98	-0.00446805
488.2	0.06752127		1078.19	0.0171496		1668.19	0.01724676		2258.18	0.00973808		2848.18	0.00502493		3438.18	-0.00447689
488.4	0.06747281		1078.39	0.01707554		1668.39	0.01780908		2258.38	0.00942883		2848.38	0.00566381		3438.38	-0.00452301
488.6	0.0675086		1078.59	0.01685636		1668.59	0.01793721		2258.58	0.00919273		2848.58	0.00573422		3438.58	-0.00435998
488.8	0.06731183		1078.79	0.01665868		1668.79	0.01854508		2258.78	0.00869031		2848.78	0.00614719		3438.78	-0.00490697
489	0.06589905		1078.99	0.01612418		1668.99	0.01835476		2258.98	0.00847114		2848.98	0.00551886		3438.98	-0.00469282
489.2	0.06588737		1079.19	0.015672		1669.19	0.01901066		2259.18	0.00737982		2849.18	0.00610063		3439.18	-0.00480455
489.4	0.06559222		1079.39	0.01619276		1669.39	0.01880022		2259.38	0.00685573		2849.38	0.00609994		3439.38	-0.00506945
489.6	0.06648411		1079.59	0.01588807		1669.59	0.01950501		2259.58	0.0067399		2849.58	0.00647019		3439.58	-0.00549184
489.8	0.06623474		1079.79	0.01655537		1669.79	0.0204184		2259.78	0.00652129		2849.78	0.00708614		3439.78	-0.00602839
490	0.06655624		1079.99	0.01617071		1669.99	0.01994019		2259.98	0.0070992		2849.98	0.00824313		3439.98	-0.0068585
490.2	0.06681976		1080.19	0.01607227		1670.19	0.02060982		2260.18	0.00702719		2850.18	0.00885578		3440.18	-0.00768573
490.4	0.06681586		1080.39	0.01558444		1670.39	0.02112591		2260.38	0.00663639		2850.38	0.00887263		3440.38	-0.00802887
490.6	0.06744447		1080.59	0.01551805		1670.59	0.02061829		2260.58	0.00578173		2850.58	0.00995383		3440.58	-0.00886662
490.8	0.06697203		1080.79	0.01561237		1670.79	0.01983006		2260.78	0.00479518		2850.78	0.01012786		3440.78	-0.00899989
491	0.06762112		1080.99	0.01524636		1670.99	0.01951461		2260.98	0.00545929		2850.98	0.00994783		3440.98	-0.00890025
491.2	0.0678603		1081.19	0.01510556		1671.19	0.01792361		2261.18	0.00649297		2851.18	0.00989263		3441.18	-0.00934756
491.4	0.06817132		1081.39	0.01482425		1671.39	0.01686128		2261.38	0.00719295		2851.38	0.01002998		3441.38	-0.0089848
491.6	0.06942628		1081.59	0.01401619		1671.59	0.01593887		2261.58	0.00726345		2851.58	0.0096691		3441.58	-0.00845146
491.8	0.06957748		1081.79	0.01408836		1671.79	0.01484867		2261.78	0.0076578		2851.78	0.00948792		3441.78	-0.00794724
492	0.07025778		1081.99	0.01397789		1671.99	0.01390763		2261.98	0.00863417		2851.98	0.00976437		3441.98	-0.00813264
492.2	0.07120595		1082.19	0.01449527		1672.19	0.01371341		2262.18	0.00811732		2852.18	0.00943471		3442.18	-0.00774949
492.4	0.07098495		1082.39	0.01383576		1672.39	0.01378677		2262.38	0.00841526		2852.38	0.00974925		3442.38	-0.00806173
492.6	0.07071359		1082.59	0.01333457		1672.59	0.01318259		2262.58	0.00867186		2852.58	0.00919417		3442.58	-0.00831968
492.8	0.07075024		1082.79	0.01364637		1672.79	0.01271122		2262.78	0.00845743		2852.78	0.00780852		3442.78	-0.00905263
493	0.07056127		1082.99	0.01261817		1672.99	0.01234915		2262.98	0.00930342		2852.98	0.00720653		3442.98	-0.00932568
493.2	0.07058659		1083.19	0.01255836		1673.19	0.01245095		2263.18	0.00901415		2853.18	0.00722199		3443.18	-0.00934446
493.4	0.07056527		1083.39	0.01276936		1673.39	0.01275409		2263.38	0.00903157		2853.38	0.00626882		3443.38	-0.00953163
493.6	0.07131466		1083.59	0.01229701		1673.59	0.01325112		2263.58	0.01006414		2853.58	0.00640704		3443.58	-0.01053129
493.8	0.07115695		1083.79	0.01244068		1673.79	0.01371255		2263.78	0.01038097		2853.78	0.00689027		3443.78	-0.00966056
494	0.07136114		1083.99	0.01300387		1673.99	0.01406533		2263.98	0.01065768		2853.98	0.00649103		3443.98	-0.00959976
494.2	0.07100356		1084.19	0.01406267		1674.19	0.01449005		2264.18	0.01018446		2854.18	0.00552093		3444.18	-0.0096441
494.4	0.06989906		1084.39	0.01535706		1674.39	0.01470089		2264.38	0.00917229		2854.38	0.00483812		3444.38	-0.00989983
494.6	0.06933608		1084.59	0.01553748		1674.59	0.01454917		2264.58	0.00839454		2854.58	0.00458818		3444.58	-0.00916499
494.8	0.06827901		1084.79	0.01608293		1674.79	0.01444275		2264.78	0.00772667		2854.78	0.00442022		3444.78	-0.00824698
495	0.06710996		1084.99	0.016021		1674.99	0.01399652		2264.98	0.00841809		2854.98	0.00457246		3444.98	-0.0074122
495.2	0.06669461		1085.19	0.01691975		1675.19	0.01297052		2265.18	0.00874544		2855.18	0.0046015		3445.18	-0.00645213
495.4	0.06650196		1085.39	0.01749168		1675.39	0.01295938		2265.38	0.00869814		2855.38	0.00499685		3445.38	-0.00564165
495.6	0.06689775		1085.59	0.01667573		1675.59	0.01286737		2265.58	0.00816767		2855.58	0.00537457		3445.58	-0.00527648
495.8	0.0654237		1085.79	0.01764159		1675.79	0.01378901		2265.78	0.00771389		2855.78	0.00573808		3445.78	-0.00523276
496	0.06481066		1085.99	0.0176529		1675.99	0.01363159		2265.98	0.00749154		2855.98	0.0054995		3445.98	-0.00557073
496.2	0.06515648		1086.19	0.01697074		1676.19	0.01452614		2266.18	0.00682976		2856.18	0.00518176		3446.18	-0.00592607
496.4	0.06443331		1086.39	0.01652925		1676.39	0.01367017		2266.38	0.0063602		2856.38	0.00510626		3446.38	-0.00698018
496.6	0.06430487		1086.59	0.01621874		1676.59	0.01371193		2266.58	0.00707707		2856.58	0.00492117		3446.58	-0.00735009
496.8	0.06491119		1086.79	0.01622801		1676.79	0.01352688		2266.78	0.00672716		2856.78	0.00490782		3446.78	-0.00845747
497	0.06390973		1086.99	0.01504236		1676.99	0.01361964		2266.98	0.00711435		2856.98	0.00682846		3446.98	-0.00916898
497.2	0.06369806		1087.19	0.01441458		1677.19	0.01401973		2267.18	0.00683488		2857.18	0.00656208		3447.18	-0.00919948
497.4	0.06416799		1087.39	0.01381072		1677.39	0.01411405		2267.38	0.00746366		2857.38	0.00705074		3447.38	-0.00933669
497.6	0.0649505		1087.59	0.01318002		1677.59	0.01388319		2267.58	0.00833197		2857.58	0.00708531		3447.58	-0.00937011
497.8	0.06425977		1087.79	0.01390881		1677.79	0.01405632		2267.78	0.00770263		2857.78	0.00759762		3447.78	-0.00847194
498	0.06408629		1087.99	0.0154307		1677.99	0.01340364		2267.98	0.00793646		2857.98	0.00705245		3447.98	-0.00806692
498.2	0.06403911		1088.19	0.0152063		1678.19	0.01295348		2268.18	0.00798123		2858.18	0.00625563		3448.18	-0.00813352
498.4	0.06310213		1088.39	0.01562526		1678.39	0.01271341		2268.38	0.00760393		2858.38	0.00648302		3448.38	-0.00740779
498.6	0.0641022		1088.59	0.01452869		1678.59	0.0127676		2268.58	0.00818766		2858.58	0.00611162		3448.58	-0.00642283
498.8	0.06381594		1088.79	0.01479568		1678.79	0.01256404		2268.78	0.00790343		2858.78	0.00562961		3448.78	-0.00615639
499	0.06389886		1088.99	0.01567474		1678.99	0.01253178		2268.98	0.0084237		2858.98	0.00598332		3448.98	-0.00643672
499.2	0.06432878		1089.19	0.01616733		1679.19	0.01298107		2269.18	0.00836725		2859.18	0.00558841		3449.18	-0.00592342
499.4	0.06403324		1089.39	0.01610799		1679.39	0.01355981		2269.38	0.00777295		2859.38	0.00560806		3449.38	-0.00567739
499.6	0.06444227		1089.59	0.01500833		1679.59	0.01348844		2269.58	0.00719569		2859.58	0.0056364		3449.58	-0.00603687
499.8	0.0640129		1089.79	0.01520858		1679.79	0.01394255		2269.78	0.00670605		2859.78	0.00496033		3449.78	-0.00652325
500	0.06437374		1089.99	0.01488936		1679.99	0.01350217		2269.98	0.00718343		2859.98	0.00413849		3449.98	-0.00702604
500.2	0.06527489		1090.19	0.014665		1680.19	0.01327541		2270.18	0.00750031		2860.18	0.00373084		3450.18	-0.00758499
500.4	0.0657979		1090.39	0.01473178		1680.39	0.01286312		2270.38	0.00738416		2860.38	0.00372306		3450.38	-0.00821785
500.6	0.06591291		1090.59	0.01477481		1680.59	0.01268712		2270.58	0.00860444		2860.58	0.00457904		3450.58	-0.00836751
500.8	0.06569112		1090.79	0.01393544		1680.79	0.01259133		2270.78	0.00810307		2860.78	0.0051427		3450.78	-0.00930886
501	0.0649558		1090.99	0.01352374		1680.99	0.01246735		2270.98	0.00825587		2860.98	0.00510815		3450.98	-0.0102588
501.2	0.0651014		1091.19	0.01321235		1681.19	0.0123616		2271.18	0.00820945		2861.18	0.00449431		3451.18	-0.00989891
501.4	0.06409187		1091.39	0.01359749		1681.39	0.011609		2271.38	0.00830623		2861.38	0.0048788		3451.38	-0.00930211
501.6	0.06326354		1091.59	0.01348447		1681.59	0.01126938		2271.58	0.00751988		2861.58	0.00451583		3451.58	-0.00829933
501.8	0.06202081		1091.79	0.01408668		1681.79	0.01172236		2271.78	0.00666312		2861.78	0.00554885		3451.78	-0.00841793
502	0.06098514		1091.99	0.01390112		1681.99	0.01106796		2271.98	0.00631408		2861.98	0.00569712		3451.98	-0.00751517
502.2	0.0601696		1092.19	0.01335236		1682.19	0.01102284		2272.18	0.00615413		2862.18	0.00546792		3452.18	-0.00765429
502.4	0.05947128		1092.39	0.01271994		1682.39	0.01113884		2272.38	0.00562506		2862.38	0.00560213		3452.38	-0.00726442
502.6	0.05946528		1092.59	0.01245553		1682.59	0.01136338		2272.58	0.00505851		2862.58	0.0048001		3452.58	-0.00770802
502.8	0.05950183		1092.79	0.01334035		1682.79	0.01078862		2272.78	0.00362277		2862.78	0.00453103		3452.78	-0.00884131
503	0.06027164		1092.99	0.01418916		1682.99	0.0106854		2272.98	0.00353899		2862.98	0.00504391		3452.98	-0.00961012
503.2	0.06052224		1093.19	0.01413202		1683.19	0.01084293		2273.18	0.00240532		2863.18	0.00481956		3453.18	-0.0105274
503.4	0.06028543		1093.39	0.01439447		1683.39	0.01090832		2273.38	0.00168694		2863.38	0.00449328		3453.38	-0.01092558
503.6	0.06057863		1093.59	0.01463484		1683.59	0.01052262		2273.58	0.00160542		2863.58	0.00450794		3453.58	-0.01189984
503.8	0.06053346		1093.79	0.01550378		1683.79	0.01166602		2273.78	0.00207499		2863.78	0.00461395		3453.78	-0.01175042
504	0.06142527		1093.99	0.01606143		1683.99	0.01180087		2273.98	0.00257615		2863.98	0.00472099		3453.98	-0.01201098
504.2	0.06187773		1094.19	0.01540316		1684.19	0.01131245		2274.18	0.0035326		2864.18	0.0046976		3454.18	-0.01201655
504.4	0.06266434		1094.39	0.01472774		1684.39	0.01110274		2274.38	0.00343874		2864.38	0.00473968		3454.38	-0.0124549
504.6	0.06301211		1094.59	0.01483934		1684.59	0.0110975		2274.58	0.00447958		2864.58	0.00449829		3454.58	-0.01264037
504.8	0.06230387		1094.79	0.01371211		1684.79	0.01086991		2274.78	0.00498593		2864.78	0.00435004		3454.78	-0.01295606
505	0.06281394		1094.99	0.01461584		1684.99	0.01135235		2274.98	0.00517725		2864.98	0.00396989		3454.98	-0.01340731
505.2	0.06196916		1095.19	0.01519861		1685.19	0.01166171		2275.18	0.00513732		2865.18	0.00425125		3455.18	-0.01246701
505.4	0.06151462		1095.39	0.01535933		1685.39	0.01171757		2275.38	0.00506678		2865.38	0.00490008		3455.38	-0.0113016
505.6	0.06131257		1095.59	0.01576883		1685.59	0.01222604		2275.58	0.00472648		2865.58	0.00476883		3455.58	-0.01047379
505.8	0.06180319		1095.79	0.01562489		1685.79	0.01263743		2275.78	0.00457563		2865.78	0.00579642		3455.78	-0.01107319
506	0.06193235		1095.99	0.01525894		1685.99	0.0112812		2275.98	0.00451526		2865.98	0.00592691		3455.98	-0.00992393
506.2	0.06214271		1096.19	0.01458366		1686.19	0.01124661		2276.18	0.00514906		2866.18	0.00614151		3456.18	-0.01052342
506.4	0.06286562		1096.39	0.0135288		1686.39	0.01122278		2276.38	0.00459698		2866.38	0.0063433		3456.38	-0.01017332
506.6	0.06268041		1096.59	0.01330073		1686.59	0.01014594		2276.58	0.00407681		2866.58	0.00632797		3456.58	-0.01067136
506.8	0.06333387		1096.79	0.01295697		1686.79	0.01004866		2276.78	0.00405206		2866.78	0.00662742		3456.78	-0.01161396
507	0.0642666		1096.99	0.01278506		1686.99	0.01073175		2276.98	0.00451338		2866.98	0.00673221		3456.98	-0.0110578
507.2	0.06388751		1097.19	0.01272124		1687.19	0.01190394		2277.18	0.00444915		2867.18	0.00627038		3457.18	-0.01156574
507.4	0.06311928		1097.39	0.01237955		1687.39	0.01172456		2277.38	0.00453967		2867.38	0.00513348		3457.38	-0.0111855
507.6	0.06310844		1097.59	0.01205748		1687.59	0.01155227		2277.58	0.0043934		2867.58	0.00538721		3457.58	-0.01095273
507.8	0.06373496		1097.79	0.01190861		1687.79	0.01142035		2277.78	0.00476945		2867.78	0.00525021		3457.78	-0.01055541
508	0.06359409		1097.99	0.01102426		1687.99	0.01019555		2277.98	0.00560753		2867.98	0.00504394		3457.98	-0.01018617
508.2	0.06247757		1098.19	0.0096163		1688.19	0.00970849		2278.18	0.00727779		2868.18	0.00365586		3458.18	-0.0101566
508.4	0.06215184		1098.39	0.01070028		1688.39	0.00983825		2278.38	0.00725932		2868.38	0.00312806		3458.38	-0.01051083
508.6	0.06129527		1098.59	0.01058249		1688.59	0.01032918		2278.58	0.00816608		2868.58	0.00294072		3458.58	-0.01063153
508.8	0.06138804		1098.79	0.01033855		1688.79	0.01064668		2278.78	0.00895938		2868.78	0.00239427		3458.78	-0.01010637
509	0.06175972		1098.99	0.01204704		1688.99	0.01087577		2278.98	0.00824985		2868.98	0.00178746		3458.98	-0.01019648
509.2	0.06187253		1099.19	0.01228918		1689.19	0.01128769		2279.18	0.00830927		2869.18	0.00147166		3459.18	-0.00926128
509.4	0.06232392		1099.39	0.01313335		1689.39	0.0112838		2279.38	0.00830066		2869.38	0.00146651		3459.38	-0.00914709
509.6	0.0626348		1099.59	0.01449703		1689.59	0.01105322		2279.58	0.0079693		2869.58	0.00162262		3459.58	-0.00924362
509.8	0.063077		1099.79	0.01393066		1689.79	0.0111305		2279.78	0.00755332		2869.78	0.00297089		3459.78	-0.00944461
510	0.06224185		1099.99	0.01373217		1689.99	0.01095632		2279.98	0.0078136		2869.98	0.00323148		3459.98	-0.00899696
510.2	0.06213763		1100.19	0.01348713		1690.19	0.0120347		2280.18	0.00805996		2870.18	0.00338596		3460.18	-0.00908924
510.4	0.06154316		1100.39	0.01307588		1690.39	0.01275531		2280.38	0.00741935		2870.38	0.00321394		3460.38	-0.00899151
510.6	0.06058829		1100.59	0.01298734		1690.59	0.01211333		2280.58	0.00774522		2870.58	0.00320825		3460.58	-0.00993185
510.8	0.06072479		1100.79	0.01252851		1690.79	0.0130641		2280.78	0.0078338		2870.78	0.00252214		3460.78	-0.0097583
511	0.06117629		1100.99	0.01254412		1690.99	0.01345008		2280.98	0.00702634		2870.98	0.0027983		3460.98	-0.00904637
511.2	0.06058008		1101.19	0.01153331		1691.19	0.01372549		2281.18	0.00695312		2871.18	0.00312411		3461.18	-0.01006513
511.4	0.06043686		1101.39	0.01068283		1691.39	0.01313279		2281.38	0.00559679		2871.38	0.00328438		3461.38	-0.00980614
511.6	0.06109019		1101.59	0.01088486		1691.59	0.01283074		2281.58	0.00560315		2871.58	0.00426232		3461.58	-0.0100607
511.8	0.06145042		1101.79	0.01084842		1691.79	0.01157021		2281.78	0.00587548		2871.78	0.00459186		3461.78	-0.01122391
512	0.05987584		1101.99	0.00990832		1691.99	0.01213541		2281.98	0.00646644		2871.98	0.00529855		3461.98	-0.01120321
512.2	0.05894124		1102.19	0.00861696		1692.19	0.01257893		2282.18	0.00640145		2872.18	0.00563456		3462.18	-0.01167151
512.4	0.05900428		1102.39	0.00914386		1692.39	0.01239213		2282.38	0.0057877		2872.38	0.00689249		3462.38	-0.01217045
512.6	0.05964045		1102.59	0.0081638		1692.59	0.01244569		2282.58	0.0052332		2872.58	0.00696412		3462.58	-0.01153857
512.8	0.05999854		1102.79	0.00895343		1692.79	0.01181639		2282.78	0.00491519		2872.78	0.0065114		3462.78	-0.01067422
513	0.05973355		1102.99	0.01038018		1692.99	0.01135676		2282.98	0.00355082		2872.98	0.0063411		3462.98	-0.01058642
513.2	0.05996241		1103.19	0.01035871		1693.19	0.01173888		2283.18	0.00402339		2873.18	0.00541403		3463.18	-0.01047858
513.4	0.05982854		1103.39	0.01141621		1693.39	0.01120266		2283.38	0.00375088		2873.38	0.00513734		3463.38	-0.01041777
513.6	0.05963044		1103.59	0.01153469		1693.59	0.01020646		2283.58	0.00308631		2873.58	0.00530133		3463.58	-0.0104074
513.8	0.05928941		1103.79	0.01114278		1693.79	0.0107376		2283.78	0.00332436		2873.78	0.00469588		3463.78	-0.0105792
514	0.05927612		1103.99	0.01156442		1693.99	0.01055045		2283.98	0.00332536		2873.98	0.00378319		3463.98	-0.01053921
514.2	0.05896279		1104.19	0.01230427		1694.19	0.01015435		2284.18	0.00342636		2874.18	0.00244242		3464.18	-0.01113713
514.4	0.05933166		1104.39	0.01218239		1694.39	0.00986646		2284.38	0.00416325		2874.38	0.00161546		3464.38	-0.01244881
514.6	0.06000424		1104.59	0.01245187		1694.59	0.00914145		2284.58	0.00438806		2874.58	0.00040625		3464.58	-0.01246113
514.8	0.06094609		1104.79	0.01231932		1694.79	0.00880065		2284.78	0.00323592		2874.78	-0.00016624		3464.78	-0.01155809
515	0.06125951		1104.99	0.01231627		1694.99	0.00880351		2284.98	0.00315782		2874.98	0.00065205		3464.98	-0.0108209
515.2	0.0617248		1105.19	0.01167839		1695.19	0.00895041		2285.18	0.00351794		2875.18	0.00106732		3465.18	-0.01095921
515.4	0.06155623		1105.39	0.01150286		1695.39	0.00869821		2285.38	0.00359371		2875.38	0.00155038		3465.38	-0.00991279
515.6	0.06176949		1105.59	0.01159445		1695.59	0.00875699		2285.58	0.00468273		2875.58	0.00198119		3465.58	-0.00996363
515.8	0.06133603		1105.79	0.01071581		1695.79	0.0092144		2285.78	0.00443493		2875.78	0.00224639		3465.78	-0.01035124
516	0.06065435		1105.99	0.00907135		1695.99	0.01013442		2285.98	0.00481481		2875.98	0.00355072		3465.98	-0.00946181
516.2	0.06063071		1106.19	0.0081594		1696.19	0.0097787		2286.18	0.00496193		2876.18	0.00394815		3466.18	-0.00908942
516.4	0.06032324		1106.39	0.00902649		1696.39	0.01028875		2286.38	0.00498268		2876.38	0.00379368		3466.38	-0.0091202
516.6	0.06067115		1106.59	0.0093296		1696.59	0.0098775		2286.58	0.00437157		2876.58	0.00389153		3466.58	-0.00748953
516.8	0.05972603		1106.79	0.00999238		1696.79	0.01014025		2286.78	0.00452618		2876.78	0.00351627		3466.78	-0.00758531
517	0.06022302		1106.99	0.01010232		1696.99	0.01025391		2286.98	0.00505301		2876.98	0.00289138		3466.98	-0.00811393
517.2	0.05969732		1107.19	0.00945698		1697.19	0.01088886		2287.18	0.00520849		2877.18	0.00257446		3467.18	-0.00834472
517.4	0.05955531		1107.39	0.00958644		1697.39	0.00998832		2287.38	0.005022		2877.38	0.00229504		3467.38	-0.0080412
517.6	0.05851157		1107.59	0.00996674		1697.59	0.01014535		2287.58	0.00550692		2877.58	0.00253845		3467.58	-0.00897712
517.8	0.05767923		1107.79	0.01040824		1697.79	0.0105408		2287.78	0.00587639		2877.78	0.00280292		3467.78	-0.00931786
518	0.05663338		1107.99	0.01073422		1697.99	0.00955751		2287.98	0.00550975		2877.98	0.00320265		3467.98	-0.00955915
518.2	0.05635888		1108.19	0.01054108		1698.19	0.00895949		2288.18	0.00583545		2878.18	0.00238453		3468.18	-0.01035032
518.4	0.05663998		1108.39	0.01066791		1698.39	0.00909129		2288.38	0.00552817		2878.38	0.00272916		3468.38	-0.01027819
518.6	0.05603172		1108.59	0.01120564		1698.59	0.00835965		2288.58	0.00397556		2878.58	0.00254887		3468.58	-0.01022444
518.8	0.05558678		1108.79	0.01106012		1698.79	0.00794926		2288.78	0.00230625		2878.78	0.00389619		3468.78	-0.00981699
519	0.05588933		1108.99	0.01095363		1698.99	0.00811198		2288.98	0.00274326		2878.98	0.00426837		3468.98	-0.00908151
519.2	0.05578263		1109.19	0.01095151		1699.19	0.00819965		2289.18	0.00209371		2879.18	0.00539437		3469.18	-0.00905596
519.4	0.05618531		1109.39	0.01031836		1699.39	0.00789254		2289.38	0.00186613		2879.38	0.00624001		3469.38	-0.01001308
519.6	0.05719511		1109.59	0.0100137		1699.59	0.00837702		2289.58	0.00145848		2879.58	0.00508017		3469.58	-0.01004628
519.8	0.05785106		1109.79	0.00941282		1699.79	0.00862053		2289.78	0.0011172		2879.78	0.0042578		3469.78	-0.01071901
520	0.05752925		1109.99	0.0085321		1699.99	0.00826699		2289.98	0.00160384		2879.98	0.00413041		3469.98	-0.01078345
520.2	0.05773974		1110.19	0.00872465		1700.19	0.0082304		2290.18	0.00168825		2880.18	0.00298296		3470.18	-0.01052945
520.4	0.05826924		1110.39	0.00898944		1700.39	0.00850996		2290.38	0.00187551		2880.38	0.00238975		3470.38	-0.01070217
520.6	0.05870684		1110.59	0.00949707		1700.59	0.00831719		2290.58	0.00263376		2880.58	0.00182804		3470.58	-0.01031304
520.8	0.05850558		1110.79	0.00965067		1700.79	0.00889633		2290.78	0.00396411		2880.78	0.00116558		3470.78	-0.01113506
521	0.05855768		1110.99	0.00932806		1700.99	0.00868678		2290.98	0.00468547		2880.98	0.00056851		3470.98	-0.01195996
521.2	0.05827596		1111.19	0.00979735		1701.19	0.00887088		2291.18	0.00529446		2881.18	0.00009163		3471.18	-0.01179381
521.4	0.05809083		1111.39	0.01060522		1701.39	0.00876049		2291.38	0.00636698		2881.38	-0.00041328		3471.38	-0.01220435
521.6	0.0568856		1111.59	0.01222974		1701.59	0.00925981		2291.58	0.00712914		2881.58	-0.00073965		3471.58	-0.01270045
521.8	0.0572145		1111.79	0.01231623		1701.79	0.00895802		2291.78	0.00713675		2881.78	-0.00055687		3471.78	-0.01295418
522	0.05711442		1111.99	0.01221947		1701.99	0.00938892		2291.98	0.00659201		2881.98	-0.00089783		3471.98	-0.01313625
522.2	0.05747522		1112.19	0.012155		1702.19	0.00974687		2292.18	0.00644302		2882.18	-0.00121335		3472.18	-0.01314242
522.4	0.05701211		1112.39	0.01323469		1702.39	0.01033274		2292.38	0.00513086		2882.38	0.00005168		3472.38	-0.01285749
522.6	0.05740909		1112.59	0.01470981		1702.59	0.01024267		2292.58	0.00454519		2882.58	0.00016269		3472.58	-0.01343931
522.8	0.05850758		1112.79	0.01488729		1702.79	0.01043438		2292.78	0.00469472		2882.78	0.00113838		3472.78	-0.01336494
523	0.06008407		1112.99	0.01591755		1702.99	0.01036192		2292.98	0.00376444		2882.98	0.00113402		3472.98	-0.01278722
523.2	0.05940224		1113.19	0.01603785		1703.19	0.01047636		2293.18	0.00285719		2883.18	0.00211638		3473.18	-0.01385392
523.4	0.05986784		1113.39	0.01558377		1703.39	0.00995096		2293.38	0.0026822		2883.38	0.0020569		3473.38	-0.01385119
523.6	0.05967171		1113.59	0.01544196		1703.59	0.01070026		2293.58	0.00231488		2883.58	0.00035615		3473.58	-0.01269574
523.8	0.05890674		1113.79	0.01462577		1703.79	0.01059481		2293.78	0.00260275		2883.78	0.00083046		3473.78	-0.01246833
524	0.05706098		1113.99	0.01427811		1703.99	0.01072925		2293.98	0.0020658		2883.98	0.00224826		3473.98	-0.01216486
524.2	0.05702225		1114.19	0.01387722		1704.19	0.01035219		2294.18	0.00213539		2884.18	0.00251932		3474.18	-0.01142897
524.4	0.05647153		1114.39	0.01303467		1704.39	0.01054435		2294.38	0.00264644		2884.38	0.0024837		3474.38	-0.01093994
524.6	0.05604603		1114.59	0.01263955		1704.59	0.01022391		2294.58	0.00386658		2884.58	0.00245109		3474.58	-0.01084979
524.8	0.05681496		1114.79	0.01234157		1704.79	0.00890929		2294.78	0.00432084		2884.78	0.00364841		3474.78	-0.01096871
525	0.05706678		1114.99	0.01141497		1704.99	0.00866565		2294.98	0.00469858		2884.98	0.00404722		3474.98	-0.0112993
525.2	0.05744432		1115.19	0.01143815		1705.19	0.00790239		2295.18	0.00542674		2885.18	0.00361649		3475.18	-0.01260401
525.4	0.0578087		1115.39	0.01154983		1705.39	0.00799866		2295.38	0.00541816		2885.38	0.0034761		3475.38	-0.01379435
525.6	0.05738198		1115.59	0.01134407		1705.59	0.00775686		2295.58	0.00498509		2885.58	0.00257402		3475.58	-0.01398823
525.8	0.0580871		1115.79	0.01020067		1705.79	0.00760643		2295.78	0.00479611		2885.78	0.0033237		3475.78	-0.01525035
526	0.05817209		1115.99	0.00991659		1705.99	0.00806415		2295.98	0.00487249		2885.98	0.00269919		3475.98	-0.0152146
526.2	0.05772357		1116.19	0.01033368		1706.19	0.00847563		2296.18	0.00570442		2886.18	0.00266405		3476.18	-0.01538962
526.4	0.05771727		1116.39	0.01108745		1706.39	0.00964594		2296.38	0.00511938		2886.38	0.00301272		3476.38	-0.01492084
526.6	0.05804008		1116.59	0.01205032		1706.59	0.00954204		2296.58	0.00548777		2886.58	0.00288015		3476.58	-0.01443087
526.8	0.05825035		1116.79	0.01210966		1706.79	0.00959523		2296.78	0.00559929		2886.78	0.00293359		3476.78	-0.01404258
527	0.05704082		1116.99	0.01292639		1706.99	0.00914068		2296.98	0.00500114		2886.98	0.00208572		3476.98	-0.013407
527.2	0.05638146		1117.19	0.01263062		1707.19	0.00891611		2297.18	0.00445965		2887.18	0.00149304		3477.18	-0.01353246
527.4	0.05579432		1117.39	0.01273719		1707.39	0.00911212		2297.38	0.00448013		2887.38	0.00176804		3477.38	-0.01254294
527.6	0.05544819		1117.59	0.0125003		1707.59	0.01037152		2297.58	0.004105		2887.58	0.00048031		3477.58	-0.01183451
527.8	0.05493879		1117.79	0.01222382		1707.79	0.01021073		2297.78	0.00426172		2887.78	0.00151584		3477.78	-0.01201905
528	0.05365581		1117.99	0.01201738		1707.99	0.00987811		2297.98	0.00420402		2887.98	0.00166946		3477.98	-0.01172055
528.2	0.05426535		1118.19	0.0118962		1708.19	0.00999566		2298.18	0.00392461		2888.18	0.00141963		3478.18	-0.01089167
528.4	0.05442594		1118.39	0.01083299		1708.39	0.01022261		2298.38	0.0037701		2888.38	0.00175326		3478.38	-0.01110345
528.6	0.05510119		1118.59	0.01132566		1708.59	0.00912587		2298.58	0.00399731		2888.58	0.00260153		3478.58	-0.0111509
528.8	0.05553293		1118.79	0.01069727		1708.79	0.00856347		2298.78	0.00352693		2888.78	0.00409002		3478.78	-0.011256
529	0.05513442		1118.99	0.00985396		1708.99	0.00801803		2298.98	0.0028956		2888.98	0.00333212		3478.98	-0.01187827
529.2	0.05592966		1119.19	0.0103626		1709.19	0.00719843		2299.18	0.00302912		2889.18	0.00227984		3479.18	-0.01378467
529.4	0.05598243		1119.39	0.01092423		1709.39	0.00683461		2299.38	0.00280998		2889.38	0.00283793		3479.38	-0.01364115
529.6	0.05521722		1119.59	0.01020402		1709.59	0.00615027		2299.58	0.00272387		2889.58	0.0025307		3479.58	-0.01377824
529.8	0.05544512		1119.79	0.01065845		1709.79	0.00614625		2299.78	0.00316182		2889.78	0.00369256		3479.78	-0.01485228
530	0.05596683		1119.99	0.01061989		1709.99	0.0066191		2299.98	0.00356878		2889.98	0.00312315		3479.98	-0.01451762
530.2	0.05580638		1120.19	0.01072595		1710.19	0.00691349		2300.18	0.00427466		2890.18	0.00380295		3480.18	-0.01413077
530.4	0.0555924		1120.39	0.01115645		1710.39	0.00805475		2300.38	0.00429698		2890.38	0.00383341		3480.38	-0.01327584
530.6	0.05516155		1120.59	0.0113845		1710.59	0.00787873		2300.58	0.00441522		2890.58	0.00414667		3480.58	-0.01319612
530.8	0.05517628		1120.79	0.0114075		1710.79	0.00718264		2300.78	0.00414286		2890.78	0.0036917		3480.78	-0.01374445
531	0.0549729		1120.99	0.01194927		1710.99	0.0072378		2300.98	0.00499222		2890.98	0.00298957		3480.98	-0.01388417
531.2	0.05541841		1121.19	0.01186475		1711.19	0.00786646		2301.18	0.00491206		2891.18	0.00295242		3481.18	-0.01380061
531.4	0.05443318		1121.39	0.01185835		1711.39	0.0080025		2301.38	0.00530185		2891.38	0.00328427		3481.38	-0.01420305
531.6	0.0551361		1121.59	0.01208116		1711.59	0.0081387		2301.58	0.00556581		2891.58	0.00242435		3481.58	-0.01397558
531.8	0.05548221		1121.79	0.01243667		1711.79	0.00678618		2301.78	0.00534677		2891.78	0.00250212		3481.78	-0.01434092
532	0.05509381		1121.99	0.01191293		1711.99	0.00746181		2301.98	0.00512585		2891.98	0.00154887		3481.98	-0.01380595
532.2	0.05550012		1122.19	0.0118565		1712.19	0.00853577		2302.18	0.00406467		2892.18	0.00234744		3482.18	-0.01374074
532.4	0.05591619		1122.39	0.01050715		1712.39	0.00814594		2302.38	0.00429846		2892.38	0.00267744		3482.38	-0.01401373
532.6	0.05607928		1122.59	0.01110908		1712.59	0.00740911		2302.58	0.00335139		2892.58	0.00334825		3482.58	-0.01364614
532.8	0.05584934		1122.79	0.01019095		1712.79	0.00725986		2302.78	0.0029772		2892.78	0.00299107		3482.78	-0.01363941
533	0.05579831		1122.99	0.01036706		1712.99	0.00649313		2302.98	0.0023222		2892.98	0.00195507		3482.98	-0.01389188
533.2	0.05637278		1123.19	0.01088817		1713.19	0.00663495		2303.18	0.00241317		2893.18	0.00213878		3483.18	-0.01375137
533.4	0.0561827		1123.39	0.01052202		1713.39	0.00635379		2303.38	0.00229985		2893.38	0.00249658		3483.38	-0.01263427
533.6	0.05621656		1123.59	0.00985544		1713.59	0.00628335		2303.58	0.00220451		2893.58	0.00244559		3483.58	-0.01251168
533.8	0.05636598		1123.79	0.01024452		1713.79	0.00593066		2303.78	0.00188276		2893.78	0.00266523		3483.78	-0.01211752
534	0.05642921		1123.99	0.00983772		1713.99	0.00603092		2303.98	0.00273018		2893.98	0.00226512		3483.98	-0.01236601
534.2	0.05489863		1124.19	0.00945161		1714.19	0.00658876		2304.18	0.00414356		2894.18	0.00218721		3484.18	-0.01212834
534.4	0.05361128		1124.39	0.00951988		1714.39	0.00727074		2304.38	0.00447636		2894.38	0.00226048		3484.38	-0.01230508
534.6	0.05363213		1124.59	0.0097437		1714.59	0.00658022		2304.58	0.00413461		2894.58	0.00280272		3484.58	-0.0124399
534.8	0.05319415		1124.79	0.00974614		1714.79	0.00592991		2304.78	0.00429818		2894.78	0.0022387		3484.78	-0.01285293
535	0.05240502		1124.99	0.0102618		1714.99	0.00668523		2304.98	0.00658457		2894.98	0.00195947		3484.98	-0.01283522
535.2	0.0522342		1125.19	0.01057257		1715.19	0.00683667		2305.18	0.00663131		2895.18	0.00187413		3485.18	-0.01252918
535.4	0.05151111		1125.39	0.01022614		1715.39	0.00614481		2305.38	0.00665724		2895.38	0.00136678		3485.38	-0.01212472
535.6	0.05126914		1125.59	0.01059575		1715.59	0.00598705		2305.58	0.00664537		2895.58	0.00144584		3485.58	-0.01189461
535.8	0.05165795		1125.79	0.01037269		1715.79	0.00622169		2305.78	0.00651483		2895.78	0.00158807		3485.78	-0.01137785
536	0.05157766		1125.99	0.01017754		1715.99	0.00691039		2305.98	0.00650255		2895.98	0.00087215		3485.98	-0.01174893
536.2	0.05228051		1126.19	0.00951412		1716.19	0.00669127		2306.18	0.00598114		2896.18	0.00215125		3486.18	-0.01185496
536.4	0.05253882		1126.39	0.00873055		1716.39	0.00682514		2306.38	0.00652327		2896.38	0.00223242		3486.38	-0.01230707
536.6	0.05317508		1126.59	0.00934244		1716.59	0.00688586		2306.58	0.00536578		2896.58	0.00196401		3486.58	-0.0118944
536.8	0.05400627		1126.79	0.00866427		1716.79	0.00698526		2306.78	0.00439958		2896.78	0.00195484		3486.78	-0.01131278
537	0.05380349		1126.99	0.00932971		1716.99	0.00636938		2306.98	0.00333235		2896.98	0.00220471		3486.98	-0.01168262
537.2	0.05485734		1127.19	0.00948773		1717.19	0.00685302		2307.18	0.00337158		2897.18	0.00237065		3487.18	-0.01163974
537.4	0.05513721		1127.39	0.00902413		1717.39	0.0067949		2307.38	0.0030533		2897.38	0.00231091		3487.38	-0.01159283
537.6	0.05479997		1127.59	0.00921851		1717.59	0.00672392		2307.58	0.00242377		2897.58	0.00180262		3487.58	-0.01149115
537.8	0.05499377		1127.79	0.00932879		1717.79	0.00591432		2307.78	0.00148393		2897.78	0.00152561		3487.78	-0.01143068
538	0.05427676		1127.99	0.00884493		1717.99	0.00631619		2307.98	0.001689		2897.98	0.00137984		3487.98	-0.01235157
538.2	0.05379194		1128.19	0.00835843		1718.19	0.00619054		2308.18	0.00129743		2898.18	0.00116107		3488.18	-0.011951
538.4	0.05390369		1128.39	0.00874435		1718.39	0.00589858		2308.38	0.00115052		2898.38	0.00155648		3488.38	-0.0126265
538.6	0.05444994		1128.59	0.00967917		1718.59	0.0061827		2308.58	0.00086236		2898.58	0.00153949		3488.58	-0.01293245
538.8	0.05368004		1128.79	0.00924329		1718.79	0.00566394		2308.78	0.00053923		2898.78	0.00110334		3488.78	-0.01337766
539	0.05318156		1128.99	0.00942193		1718.99	0.00592809		2308.98	0.0017627		2898.98	0.00124376		3488.98	-0.013578
539.2	0.052823		1129.19	0.00927992		1719.19	0.00614736		2309.18	0.00144112		2899.18	0.001115		3489.18	-0.01301074
539.4	0.05181366		1129.39	0.0088265		1719.39	0.00541796		2309.38	0.00139983		2899.38	0.00167804		3489.38	-0.01296581
539.6	0.05142653		1129.59	0.00814634		1719.59	0.00545279		2309.58	0.00146789		2899.58	0.00195848		3489.58	-0.01311865
539.8	0.05151745		1129.79	0.00823216		1719.79	0.00642688		2309.78	0.00216955		2899.78	0.00150675		3489.78	-0.01260515
540	0.05194364		1129.99	0.00803086		1719.99	0.0058175		2309.98	0.00224703		2899.98	0.00105839		3489.98	-0.01266806
540.2	0.05239977		1130.19	0.00754975		1720.19	0.00668617		2310.18	0.0026715		2900.18	0.00185425		3490.18	-0.01195068
540.4	0.0524393		1130.39	0.00716509		1720.39	0.0065192		2310.38	0.0038113		2900.38	0.00137163		3490.38	-0.0112813
540.6	0.0527904		1130.59	0.0079947		1720.59	0.00692778		2310.58	0.00332233		2900.58	0.00117657		3490.58	-0.01028903
540.8	0.05260899		1130.79	0.00806152		1720.79	0.00628763		2310.78	0.00290433		2900.78	0.00112195		3490.78	-0.01031335
541	0.05196692		1130.99	0.00850249		1720.99	0.00600102		2310.98	0.00283061		2900.98	0.00006595		3490.98	-0.01030314
541.2	0.05218624		1131.19	0.00869254		1721.19	0.00741406		2311.18	0.00293346		2901.18	0.00003526		3491.18	-0.01035196
541.4	0.05321189		1131.39	0.0088281		1721.39	0.00681806		2311.38	0.00219047		2901.38	-0.00037468		3491.38	-0.00926882
541.6	0.05338317		1131.59	0.00856787		1721.59	0.00691483		2311.58	0.00164174		2901.58	-0.0012041		3491.58	-0.00978941
541.8	0.05341639		1131.79	0.00852328		1721.79	0.00704564		2311.78	0.00044115		2901.78	-0.00051369		3491.78	-0.01020732
542	0.05336321		1131.99	0.00802517		1721.99	0.00698859		2311.98	0.00123842		2901.98	-0.00069563		3491.98	-0.01060728
542.2	0.05358718		1132.19	0.00769953		1722.19	0.0071769		2312.18	0.00048549		2902.18	-0.00070327		3492.18	-0.01165074
542.4	0.05380736		1132.39	0.00812011		1722.39	0.00727617		2312.38	0.00065377		2902.38	-0.00085454		3492.38	-0.01301056
542.6	0.0545423		1132.59	0.00897927		1722.59	0.00759164		2312.58	-0.00022458		2902.58	-0.00092463		3492.58	-0.01322132
542.8	0.05455064		1132.79	0.00882394		1722.79	0.00681206		2312.78	-0.00083608		2902.78	-0.00040047		3492.78	-0.01382385
543	0.05408118		1132.99	0.00876848		1722.99	0.00762785		2312.98	0.00031632		2902.98	-0.00009988		3492.98	-0.0146043
543.2	0.0538276		1133.19	0.00863689		1723.19	0.0081618		2313.18	0.00046246		2903.18	-0.00106336		3493.18	-0.0145097
543.4	0.0538657		1133.39	0.00903041		1723.39	0.00739216		2313.38	0.00029024		2903.38	-0.00112347		3493.38	-0.0149575
543.6	0.05392798		1133.59	0.00827302		1723.59	0.00751007		2313.58	0.00086448		2903.58	-0.00189866		3493.58	-0.01488994
543.8	0.05330025		1133.79	0.00860094		1723.79	0.00799408		2313.78	0.00114594		2903.78	-0.00205705		3493.78	-0.01465627
544	0.05418845		1133.99	0.00838902		1723.99	0.00799846		2313.98	0.0016793		2903.98	-0.00143259		3493.98	-0.01403771
544.2	0.05374285		1134.19	0.0084541		1724.19	0.00817627		2314.18	0.00324984		2904.18	-0.00107097		3494.18	-0.01329205
544.4	0.05334101		1134.39	0.00792195		1724.39	0.00737201		2314.38	0.00333821		2904.38	-0.00067236		3494.38	-0.01215316
544.6	0.05287058		1134.59	0.00869726		1724.59	0.00755897		2314.58	0.0029866		2904.58	-0.00017612		3494.58	-0.01201811
544.8	0.0527544		1134.79	0.00910734		1724.79	0.00715857		2314.78	0.00204892		2904.78	-0.00034954		3494.78	-0.01135702
545	0.05247331		1134.99	0.00872726		1724.99	0.00672611		2314.98	0.00238345		2904.98	-0.00070887		3494.98	-0.01036001
545.2	0.05273419		1135.19	0.00821818		1725.19	0.00671626		2315.18	0.0027055		2905.18	-0.00054773		3495.18	-0.01059759
545.4	0.05425069		1135.39	0.00811232		1725.39	0.00495224		2315.38	0.00297106		2905.38	-0.0009909		3495.38	-0.01036627
545.6	0.05327357		1135.59	0.00802264		1725.59	0.00519423		2315.58	0.00245603		2905.58	-0.00050871		3495.58	-0.01133124
545.8	0.05253655		1135.79	0.00849965		1725.79	0.00471934		2315.78	0.00302537		2905.78	-0.00008317		3495.78	-0.01115587
546	0.0524857		1135.99	0.00791552		1725.99	0.00409804		2315.98	0.00305678		2905.98	0.00067619		3495.98	-0.01158528
546.2	0.05240969		1136.19	0.00879819		1726.19	0.00368326		2316.18	0.00182294		2906.18	0.00093828		3496.18	-0.01236202
546.4	0.05229822		1136.39	0.00954906		1726.39	0.00289928		2316.38	0.00243537		2906.38	0.00135805		3496.38	-0.01255011
546.6	0.05235129		1136.59	0.00998252		1726.59	0.00320853		2316.58	0.00146553		2906.58	0.00208373		3496.58	-0.01278989
546.8	0.0528505		1136.79	0.00973018		1726.79	0.00295385		2316.78	0.00139036		2906.78	0.00313813		3496.78	-0.01342555
547	0.05251528		1136.99	0.0094942		1726.99	0.00326045		2316.98	0.00115602		2906.98	0.00321833		3496.98	-0.01382435
547.2	0.05282486		1137.19	0.0098097		1727.19	0.00361243		2317.18	0.00055621		2907.18	0.00252851		3497.18	-0.01460061
547.4	0.05369683		1137.39	0.00999172		1727.39	0.00355939		2317.38	0.00037256		2907.38	0.00223057		3497.38	-0.01444574
547.6	0.0538381		1137.59	0.00954288		1727.59	0.00418401		2317.58	0.0004838		2907.58	0.00249794		3497.58	-0.01389962
547.8	0.05331547		1137.79	0.00934012		1727.79	0.00540189		2317.78	0.00096276		2907.78	0.00233008		3497.78	-0.01373453
548	0.05407988		1137.99	0.00875172		1727.99	0.00652473		2317.98	0.0019052		2907.98	0.00311464		3497.98	-0.01322582
548.2	0.05406878		1138.19	0.00828254		1728.19	0.00632713		2318.18	0.00249639		2908.18	0.00329473		3498.18	-0.01317956
548.4	0.05471157		1138.39	0.00755513		1728.39	0.00634539		2318.38	0.00158789		2908.38	0.00341835		3498.38	-0.01264086
548.6	0.0550109		1138.59	0.00809947		1728.59	0.00631615		2318.58	0.00163169		2908.58	0.00232171		3498.58	-0.01266865
548.8	0.05502659		1138.79	0.00743643		1728.79	0.00606944		2318.78	0.00140684		2908.78	0.00133544		3498.78	-0.01204166
549	0.05557482		1138.99	0.00667816		1728.99	0.00547301		2318.98	0.00190954		2908.98	0.00008865		3498.98	-0.0112929
549.2	0.05577482		1139.19	0.00607791		1729.19	0.00605947		2319.18	0.00125693		2909.18	-0.00035697		3499.18	-0.01192418
549.4	0.05558347		1139.39	0.0074495		1729.39	0.00567719		2319.38	0.00161519		2909.38	-0.00085541		3499.38	-0.01176942
549.6	0.05395706		1139.59	0.00785573		1729.59	0.00623867		2319.58	0.0013477		2909.58	-0.00016819		3499.58	-0.01196129
549.8	0.05331056		1139.79	0.00809687		1729.79	0.00598154		2319.78	0.00130513		2909.78	-0.00123136		3499.78	-0.01218281
550	0.05286581		1139.99	0.00803772		1729.99	0.00657539		2319.98	0.00007799		2909.98	-0.00058605		3499.98	-0.01206025
550.2	0.05320201		1140.19	0.00946136		1730.19	0.00547808		2320.18	-0.00039297		2910.18	-0.0011632		3500.18	-0.0121023
550.4	0.05265717		1140.39	0.00948551		1730.39	0.00565378		2320.38	-0.00038872		2910.38	-0.00106375		3500.38	-0.01227777
550.6	0.0529355		1140.59	0.0097749		1730.59	0.00670509		2320.58	-0.00211616		2910.58	-0.0000947		3500.58	-0.01272911
550.8	0.0533292		1140.79	0.00944291		1730.79	0.00699985		2320.78	-0.0022645		2910.78	0.00073029		3500.78	-0.0137225
551	0.05270614		1140.99	0.00929352		1730.99	0.00689566		2320.98	-0.00252261		2910.98	-0.00014301		3500.98	-0.01403566
551.2	0.05304148		1141.19	0.00967668		1731.19	0.00756299		2321.18	-0.00187216		2911.18	-0.00033215		3501.18	-0.01498345
551.4	0.05279227		1141.39	0.00942845		1731.39	0.00779979		2321.38	-0.00115013		2911.38	-0.00042551		3501.38	-0.01418997
551.6	0.05168253		1141.59	0.00903101		1731.59	0.00768754		2321.58	-0.00134732		2911.58	0.00052736		3501.58	-0.0142678
551.8	0.05208911		1141.79	0.00851553		1731.79	0.00822214		2321.78	-0.00034281		2911.78	0.00079503		3501.78	-0.01484029
552	0.05276453		1141.99	0.00817058		1731.99	0.0079163		2321.98	-0.0002283		2911.98	0.00123602		3501.98	-0.01429618
552.2	0.052647		1142.19	0.007497		1732.19	0.00697774		2322.18	-0.00065329		2912.18	0.00187435		3502.18	-0.01461168
552.4	0.05276283		1142.39	0.00751857		1732.39	0.00606944		2322.38	-0.00091847		2912.38	0.00179953		3502.38	-0.01481426
552.6	0.05233728		1142.59	0.00793874		1732.59	0.00524155		2322.58	-0.00106885		2912.58	0.00162126		3502.58	-0.01430333
552.8	0.05250103		1142.79	0.00740274		1732.79	0.0046143		2322.78	-0.00169369		2912.78	0.0014169		3502.78	-0.0144376
553	0.05225535		1142.99	0.00777924		1732.99	0.00412233		2322.98	-0.00197052		2912.98	0.00152866		3502.98	-0.01478188
553.2	0.05162588		1143.19	0.00760333		1733.19	0.00435891		2323.18	-0.00141312		2913.18	0.00106012		3503.18	-0.01482243
553.4	0.05073021		1143.39	0.0076357		1733.39	0.00424694		2323.38	-0.00064686		2913.38	0.00087974		3503.38	-0.01407115
553.6	0.05055689		1143.59	0.00779511		1733.59	0.00452504		2323.58	-0.00156734		2913.58	0.00071483		3503.58	-0.01449144
553.8	0.05042584		1143.79	0.0089682		1733.79	0.00499839		2323.78	-0.00171837		2913.78	0.00030081		3503.78	-0.01416901
554	0.05067256		1143.99	0.00913278		1733.99	0.00562463		2323.98	-0.00116993		2913.98	0.00018802		3503.98	-0.01430911
554.2	0.05083675		1144.19	0.00974476		1734.19	0.0052522		2324.18	-0.00051928		2914.18	0.00018432		3504.18	-0.01418433
554.4	0.05085177		1144.39	0.00985722		1734.39	0.00606324		2324.38	-0.00008607		2914.38	0.00045106		3504.38	-0.01538132
554.6	0.05138598		1144.59	0.00976686		1734.59	0.00670456		2324.58	-0.00025641		2914.58	0.00167513		3504.58	-0.01671113
554.8	0.05084768		1144.79	0.00920753		1734.79	0.00695055		2324.78	0.00102992		2914.78	0.00086657		3504.78	-0.01753632
555	0.0508475		1144.99	0.00886507		1734.99	0.00689187		2324.98	0.0017477		2914.98	-0.00002179		3504.98	-0.01724146
555.2	0.05064535		1145.19	0.00901968		1735.19	0.00732518		2325.18	0.00240235		2915.18	0.00062867		3505.18	-0.01733134
555.4	0.05011251		1145.39	0.00826209		1735.39	0.00734204		2325.38	0.00283073		2915.38	0.0010853		3505.38	-0.01685678
555.6	0.05019981		1145.59	0.00787397		1735.59	0.00723226		2325.58	0.00266096		2915.58	0.00136661		3505.58	-0.01634071
555.8	0.05140654		1145.79	0.00696914		1735.79	0.00778832		2325.78	0.00345341		2915.78	0.0009682		3505.78	-0.01639793
556	0.0511476		1145.99	0.00683667		1735.99	0.00716024		2325.98	0.00240679		2915.98	0.00117031		3505.98	-0.01662134
556.2	0.05143447		1146.19	0.00612397		1736.19	0.00632856		2326.18	0.00186491		2916.18	0.00130723		3506.18	-0.01707358
556.4	0.05179472		1146.39	0.00577429		1736.39	0.00638958		2326.38	0.00162753		2916.38	0.00069797		3506.38	-0.01702792
556.6	0.0524006		1146.59	0.00560447		1736.59	0.0059088		2326.58	0.00043919		2916.58	0.0008114		3506.58	-0.01646498
556.8	0.05296874		1146.79	0.00513977		1736.79	0.00584384		2326.78	-0.00090775		2916.78	0.00001536		3506.78	-0.0163456
557	0.05307377		1146.99	0.00543498		1736.99	0.00596875		2326.98	-0.00111295		2916.98	0.00014912		3506.98	-0.0153117
557.2	0.05314931		1147.19	0.00536489		1737.19	0.00661287		2327.18	-0.00091639		2917.18	-0.00038473		3507.18	-0.0142784
557.4	0.05306981		1147.39	0.00553273		1737.39	0.00629053		2327.38	-0.00127537		2917.38	-0.00022705		3507.38	-0.01320416
557.6	0.05273913		1147.59	0.00639866		1737.59	0.00585611		2327.58	-0.00171947		2917.58	-0.0009588		3507.58	-0.01363813
557.8	0.05148052		1147.79	0.00683713		1737.79	0.00615885		2327.78	-0.00114705		2917.78	-0.00127223		3507.78	-0.0129887
558	0.05141736		1147.99	0.00558584		1737.99	0.00587229		2327.98	-0.0009207		2917.98	-0.00267803		3507.98	-0.01290789
558.2	0.05145998		1148.19	0.00551758		1738.19	0.00535055		2328.18	-0.00128849		2918.18	-0.0030312		3508.18	-0.01237878
558.4	0.05102746		1148.39	0.00568921		1738.39	0.00497578		2328.38	-0.00134824		2918.38	-0.00307031		3508.38	-0.01283287
558.6	0.04987352		1148.59	0.00625219		1738.59	0.00489952		2328.58	-0.00162565		2918.58	-0.00272029		3508.58	-0.01252041
558.8	0.04831822		1148.79	0.0067561		1738.79	0.00494506		2328.78	-0.00174383		2918.78	-0.00308206		3508.78	-0.01191022
559	0.04797945		1148.99	0.0067887		1738.99	0.00406102		2328.98	-0.00182372		2918.98	-0.00338699		3508.98	-0.01200983
559.2	0.04718283		1149.19	0.00676991		1739.19	0.003367		2329.18	-0.00099901		2919.18	-0.00298979		3509.18	-0.01208842
559.4	0.04667927		1149.39	0.0059718		1739.39	0.00294059		2329.38	-0.00003869		2919.38	-0.00310971		3509.38	-0.01218002
559.6	0.04654477		1149.59	0.0053016		1739.59	0.00283972		2329.58	0.0004378		2919.58	-0.00255911		3509.58	-0.01217053
559.8	0.04725813		1149.79	0.00512105		1739.79	0.00286554		2329.78	0.00032775		2919.78	-0.00229199		3509.78	-0.01238422
560	0.04790583		1149.99	0.00606982		1739.99	0.0023445		2329.98	0.00005476		2919.98	-0.00185074		3509.98	-0.01387833
560.2	0.04872819		1150.19	0.00662293		1740.19	0.00276074		2330.18	-0.00047964		2920.18	-0.00217679		3510.18	-0.01434503
560.4	0.04957727		1150.39	0.00643873		1740.39	0.00298137		2330.38	-0.00064602		2920.38	-0.00209787		3510.38	-0.01509759
560.6	0.05044625		1150.59	0.00803126		1740.59	0.00324309		2330.58	-0.00116926		2920.58	-0.00154923		3510.58	-0.01528713
560.8	0.05123418		1150.79	0.00807936		1740.79	0.00414499		2330.78	-0.00176539		2920.78	-0.00162563		3510.78	-0.01501367
561	0.05213445		1150.99	0.00885584		1740.99	0.00456038		2330.98	-0.00116773		2920.98	-0.00133253		3510.98	-0.01473758
561.2	0.05220484		1151.19	0.00863808		1741.19	0.00428786		2331.18	-0.00058251		2921.18	-0.0019887		3511.18	-0.01490755
561.4	0.05251793		1151.39	0.00953292		1741.39	0.0036436		2331.38	-0.00011187		2921.38	-0.00193887		3511.38	-0.01506742
561.6	0.05191613		1151.59	0.00983576		1741.59	0.00429125		2331.58	-0.00018568		2921.58	-0.00205638		3511.58	-0.01601318
561.8	0.0520166		1151.79	0.00979253		1741.79	0.00548773		2331.78	-0.00093635		2921.78	-0.00235065		3511.78	-0.01626194
562	0.05214284		1151.99	0.00913819		1741.99	0.00583315		2331.98	-0.0017746		2921.98	-0.00288823		3511.98	-0.01612417
562.2	0.05313135		1152.19	0.00993222		1742.19	0.00542842		2332.18	-0.00289513		2922.18	-0.00260796		3512.18	-0.01598156
562.4	0.05228128		1152.39	0.00996468		1742.39	0.00505136		2332.38	-0.00295635		2922.38	-0.00173235		3512.38	-0.01627747
562.6	0.05150474		1152.59	0.01042071		1742.59	0.00485254		2332.58	-0.00390426		2922.58	-0.00152522		3512.58	-0.0170534
562.8	0.05161114		1152.79	0.00973882		1742.79	0.00502987		2332.78	-0.00398966		2922.78	-0.00129271		3512.78	-0.01799636
563	0.05184977		1152.99	0.00816733		1742.99	0.00444314		2332.98	-0.00373331		2922.98	-0.00121895		3512.98	-0.0195432
563.2	0.05149757		1153.19	0.0075398		1743.19	0.00479249		2333.18	-0.00283828		2923.18	-0.000994		3513.18	-0.01902885
563.4	0.05122014		1153.39	0.00675231		1743.39	0.00501587		2333.38	-0.00322808		2923.38	-0.00116158		3513.38	-0.01902326
563.6	0.05155072		1153.59	0.00629006		1743.59	0.00515747		2333.58	-0.00401371		2923.58	-0.00069141		3513.58	-0.01908145
563.8	0.05200567		1153.79	0.00648729		1743.79	0.00445841		2333.78	-0.00477645		2923.78	-0.00082475		3513.78	-0.01880777
564	0.05127513		1153.99	0.00591704		1743.99	0.00447832		2333.98	-0.00428673		2923.98	-0.00105087		3513.98	-0.01955266
564.2	0.05025114		1154.19	0.00506393		1744.19	0.00494638		2334.18	-0.00405205		2924.18	-0.00138407		3514.18	-0.01856969
564.4	0.05053301		1154.39	0.00422185		1744.39	0.00486933		2334.38	-0.00325932		2924.38	-0.00054035		3514.38	-0.01772271
564.6	0.05023749		1154.59	0.00394159		1744.59	0.00533921		2334.58	-0.00298375		2924.58	-0.0004715		3514.58	-0.01699905
564.8	0.05073143		1154.79	0.00293777		1744.79	0.00499982		2334.78	-0.00352533		2924.78	-0.00010625		3514.78	-0.01641281
565	0.05073854		1154.99	0.00287904		1744.99	0.0045856		2334.98	-0.00239894		2924.98	-0.00022055		3514.98	-0.01660241
565.2	0.05027117		1155.19	0.0027501		1745.19	0.00365365		2335.18	-0.0012066		2925.18	-0.00069382		3515.18	-0.01652983
565.4	0.04990154		1155.39	0.00337401		1745.39	0.00383043		2335.38	-0.00103685		2925.38	0.00045302		3515.38	-0.01689211
565.6	0.04957158		1155.59	0.00349758		1745.59	0.00421626		2335.58	-0.00129698		2925.58	0.00083706		3515.58	-0.01715122
565.8	0.04951606		1155.79	0.00419062		1745.79	0.00381776		2335.78	-0.00182484		2925.78	0.0001726		3515.78	-0.0162697
566	0.04910905		1155.99	0.00411887		1745.99	0.00386317		2335.98	-0.00193217		2925.98	0.0000284		3515.98	-0.01572458
566.2	0.04950931		1156.19	0.00481061		1746.19	0.00244942		2336.18	-0.00148869		2926.18	0.00032735		3516.18	-0.01639044
566.4	0.04841866		1156.39	0.00412156		1746.39	0.00258286		2336.38	-0.0012348		2926.38	0.00009334		3516.38	-0.01696137
566.6	0.04820386		1156.59	0.00436855		1746.59	0.00258938		2336.58	-0.00066894		2926.58	-0.00016546		3516.58	-0.01731375
566.8	0.04860229		1156.79	0.00400642		1746.79	0.00267773		2336.78	-0.00068468		2926.78	0.00026669		3516.78	-0.01718327
567	0.04907162		1156.99	0.005155		1746.99	0.00263655		2336.98	-0.00072428		2926.98	0.00029658		3516.98	-0.0173613
567.2	0.04854745		1157.19	0.00596974		1747.19	0.00284874		2337.18	-0.00115017		2927.18	-0.00039073		3517.18	-0.01700435
567.4	0.04867102		1157.39	0.00646767		1747.39	0.00326661		2337.38	-0.00107301		2927.38	-0.00015663		3517.38	-0.01744564
567.6	0.04887751		1157.59	0.00600429		1747.59	0.00343206		2337.58	-0.00144948		2927.58	-0.00022712		3517.58	-0.01780924
567.8	0.04799133		1157.79	0.00613223		1747.79	0.00269183		2337.78	-0.00128143		2927.78	-0.00016314		3517.78	-0.0178551
568	0.04759859		1157.99	0.00621464		1747.99	0.00366306		2337.98	-0.00125744		2927.98	-0.0003495		3517.98	-0.01757059
568.2	0.04839937		1158.19	0.00592633		1748.19	0.00370543		2338.18	-0.0008153		2928.18	-0.00028765		3518.18	-0.01726798
568.4	0.04912033		1158.39	0.00626708		1748.39	0.00375408		2338.38	-0.00014753		2928.38	-0.00013985		3518.38	-0.01672203
568.6	0.04906132		1158.59	0.00605822		1748.59	0.00313005		2338.58	-0.00012039		2928.58	-0.00114449		3518.58	-0.01730423
568.8	0.04997775		1158.79	0.00588949		1748.79	0.00281941		2338.78	-0.00017702		2928.78	-0.0003363		3518.78	-0.01742802
569	0.04961324		1158.99	0.0043802		1748.99	0.00255807		2338.98	0.0001891		2928.98	-0.00087401		3518.98	-0.01806896
569.2	0.0496237		1159.19	0.00384577		1749.19	0.00198127		2339.18	0.00038893		2929.18	-0.00112811		3519.18	-0.01740424
569.4	0.04979978		1159.39	0.00344643		1749.39	0.00247667		2339.38	-0.00032769		2929.38	-0.00087058		3519.38	-0.01735241
569.6	0.0495027		1159.59	0.00323085		1749.59	0.00206977		2339.58	-0.00030404		2929.58	-0.00156883		3519.58	-0.01719803
569.8	0.0490319		1159.79	0.00304446		1749.79	0.00176972		2339.78	-0.00030681		2929.78	-0.00244611		3519.78	-0.0162802
570	0.04961202		1159.99	0.00318655		1749.99	0.00209801		2339.98	-0.00035434		2929.98	-0.00245709		3519.98	-0.01668211
570.2	0.04972996		1160.19	0.00300332		1750.19	0.00230549		2340.18	0.00061004		2930.18	-0.00256743		3520.18	-0.01685009
570.4	0.0500892		1160.39	0.00386803		1750.39	0.00239126		2340.38	0.00048846		2930.38	-0.00269361		3520.38	-0.0163235
570.6	0.05019613		1160.59	0.00452736		1750.59	0.0019589		2340.58	0.00116369		2930.58	-0.00189018		3520.58	-0.01578455
570.8	0.05097993		1160.79	0.0047437		1750.79	0.00140559		2340.78	0.00077977		2930.78	-0.00095043		3520.78	-0.01588259
571	0.05124996		1160.99	0.00533504		1750.99	0.00259095		2340.98	0.00017111		2930.98	-0.00131891		3520.98	-0.01652751
571.2	0.05111857		1161.19	0.00520416		1751.19	0.0025644		2341.18	-0.00098338		2931.18	-0.00096127		3521.18	-0.01740863
571.4	0.0515911		1161.39	0.005045		1751.39	0.00291601		2341.38	-0.00027981		2931.38	-0.00080032		3521.38	-0.01825069
571.6	0.05228209		1161.59	0.00489302		1751.59	0.00230771		2341.58	-0.00079067		2931.58	-0.00097856		3521.58	-0.01916584
571.8	0.0518183		1161.79	0.00507544		1751.79	0.00228807		2341.78	-0.00148208		2931.78	-0.00201073		3521.78	-0.01858477
572	0.05166642		1161.99	0.00549302		1751.99	0.00257713		2341.98	-0.00133366		2931.98	-0.00228695		3521.98	-0.01774564
572.2	0.0514497		1162.19	0.0052119		1752.19	0.00213318		2342.18	-0.00062943		2932.18	-0.001811		3522.18	-0.0178139
572.4	0.05098269		1162.39	0.00506448		1752.39	0.00237647		2342.38	-0.00073226		2932.38	-0.00227238		3522.38	-0.0175455
572.6	0.05052826		1162.59	0.00440001		1752.59	0.00311776		2342.58	-0.00124871		2932.58	-0.00239006		3522.58	-0.01870809
572.8	0.05138444		1162.79	0.00352689		1752.79	0.00363021		2342.78	-0.00148686		2932.78	-0.00232831		3522.78	-0.0189232
573	0.05075423		1162.99	0.00275578		1752.99	0.00407371		2342.98	-0.00224441		2932.98	-0.00295555		3522.98	-0.01900037
573.2	0.05057592		1163.19	0.00320873		1753.19	0.00542426		2343.18	-0.00250185		2933.18	-0.00342711		3523.18	-0.01868104
573.4	0.04993125		1163.39	0.00323263		1753.39	0.00581208		2343.38	-0.00299848		2933.38	-0.00367785		3523.38	-0.01891885
573.6	0.04865216		1163.59	0.00356738		1753.59	0.00642959		2343.58	-0.00278598		2933.58	-0.0042359		3523.58	-0.01878686
573.8	0.04785922		1163.79	0.00421803		1753.79	0.00621962		2343.78	-0.00331775		2933.78	-0.00403867		3523.78	-0.01838146
574	0.04848959		1163.99	0.00533866		1753.99	0.00709923		2343.98	-0.00407494		2933.98	-0.00366204		3523.98	-0.01731724
574.2	0.0473388		1164.19	0.00514418		1754.19	0.00730493		2344.18	-0.00372332		2934.18	-0.00303361		3524.18	-0.01689669
574.4	0.04714782		1164.39	0.00659367		1754.39	0.0064496		2344.38	-0.00351321		2934.38	-0.00285017		3524.38	-0.01650369
574.6	0.04656461		1164.59	0.00598065		1754.59	0.00625939		2344.58	-0.00333423		2934.58	-0.00267295		3524.58	-0.01665187
574.8	0.04679903		1164.79	0.00541435		1754.79	0.00619446		2344.78	-0.00312042		2934.78	-0.00251594		3524.78	-0.01665113
575	0.04707542		1164.99	0.00577378		1754.99	0.00669936		2344.98	-0.00319878		2934.98	-0.00269852		3524.98	-0.0171093
575.2	0.0477913		1165.19	0.0059102		1755.19	0.00493864		2345.18	-0.0031183		2935.18	-0.0025074		3525.18	-0.01710167
575.4	0.04889884		1165.39	0.00565269		1755.39	0.0050923		2345.38	-0.00224969		2935.38	-0.00180417		3525.38	-0.01766724
575.6	0.04902678		1165.59	0.00596879		1755.59	0.00432045		2345.58	-0.00220095		2935.58	-0.00210683		3525.58	-0.01655415
575.8	0.04888331		1165.79	0.00570567		1755.79	0.0037105		2345.78	-0.00211385		2935.78	-0.00221549		3525.78	-0.01603481
576	0.04855708		1165.99	0.00641834		1755.99	0.00259911		2345.98	-0.00169083		2935.98	-0.00127183		3525.98	-0.01680813
576.2	0.04860521		1166.19	0.00610114		1756.19	0.00254482		2346.18	-0.00231611		2936.18	-0.00010343		3526.18	-0.01680534
576.4	0.04958881		1166.39	0.00571404		1756.39	0.00232512		2346.38	-0.00266143		2936.38	-0.00029534		3526.38	-0.01779145
576.6	0.0505752		1166.59	0.00548247		1756.59	0.00240436		2346.58	-0.00263828		2936.58	0.00033456		3526.58	-0.01838416
576.8	0.05165091		1166.79	0.00535274		1756.79	0.00155859		2346.78	-0.00199432		2936.78	0.00005982		3526.78	-0.01853597
577	0.04989188		1166.99	0.00604998		1756.99	0.00281554		2346.98	-0.00281314		2936.98	-0.00023852		3526.98	-0.01896753
577.2	0.04980316		1167.19	0.00624713		1757.19	0.00269376		2347.18	-0.00296153		2937.18	-0.00102198		3527.18	-0.01909061
577.4	0.04939599		1167.39	0.00663799		1757.39	0.00140581		2347.38	-0.00429478		2937.38	-0.00033239		3527.38	-0.01951781
577.6	0.04890131		1167.59	0.00722509		1757.59	0.00166032		2347.58	-0.00437109		2937.58	-0.00053656		3527.58	-0.01921208
577.8	0.04870316		1167.79	0.00699086		1757.79	0.0015355		2347.78	-0.00531008		2937.78	-0.00057585		3527.78	-0.01856547
578	0.04870907		1167.99	0.00636005		1757.99	0.0014622		2347.98	-0.00543769		2937.98	-0.00103539		3527.98	-0.01789623
578.2	0.04817404		1168.19	0.00631642		1758.19	0.00024512		2348.18	-0.0042712		2938.18	-0.00138384		3528.18	-0.01809968
578.4	0.04773486		1168.39	0.00687177		1758.39	0.00021883		2348.38	-0.00312584		2938.38	-0.0022797		3528.38	-0.0181491
578.6	0.04746927		1168.59	0.00732255		1758.59	0.00025804		2348.58	-0.00313		2938.58	-0.00261676		3528.58	-0.01773945
578.8	0.04756422		1168.79	0.00771059		1758.79	0.00108359		2348.78	-0.00223955		2938.78	-0.00246803		3528.78	-0.01713794
579	0.04811155		1168.99	0.00872534		1758.99	0.00079335		2348.98	-0.00180494		2938.98	-0.00226986		3528.98	-0.01763591
579.2	0.04756488		1169.19	0.00861389		1759.19	0.00062535		2349.18	-0.00203453		2939.18	-0.0019705		3529.18	-0.01668988
579.4	0.04745545		1169.39	0.00895824		1759.39	0.00141388		2349.38	-0.00194084		2939.38	-0.00120326		3529.38	-0.01729677
579.6	0.04632997		1169.59	0.00895224		1759.59	0.00131056		2349.58	-0.00196098		2939.58	-0.0017735		3529.58	-0.01607522
579.8	0.04614783		1169.79	0.00893873		1759.79	0.0014859		2349.78	-0.00146869		2939.78	-0.00045949		3529.78	-0.01629373
580	0.04539982		1169.99	0.00859441		1759.99	0.00178577		2349.98	-0.00230951		2939.98	-0.00053684		3529.98	-0.01625401
580.2	0.04530244		1170.19	0.00773201		1760.19	0.0020821		2350.18	-0.0027731		2940.18	0.0000787		3530.18	-0.01575466
580.4	0.04583514		1170.39	0.00781774		1760.39	0.00129732		2350.38	-0.00246608		2940.38	-0.00016835		3530.38	-0.01589564
580.6	0.04542191		1170.59	0.00782799		1760.59	0.0015366		2350.58	-0.00247158		2940.58	0.00006739		3530.58	-0.01580188
580.8	0.04529019		1170.79	0.00783		1760.79	0.00166572		2350.78	-0.00227049		2940.78	-0.00140961		3530.78	-0.01586027
581	0.04407184		1170.99	0.00832449		1760.99	0.00256508		2350.98	-0.00330823		2940.98	-0.00149509		3530.98	-0.0164584
581.2	0.04482494		1171.19	0.00805285		1761.19	0.00187003		2351.18	-0.00279279		2941.18	-0.00170683		3531.18	-0.01571673
581.4	0.04507835		1171.39	0.00788626		1761.39	0.00136546		2351.38	-0.00334807		2941.38	-0.00109352		3531.38	-0.01542232
581.6	0.04569498		1171.59	0.00651746		1761.59	0.00123751		2351.58	-0.00231284		2941.58	-0.00142348		3531.58	-0.01492704
581.8	0.04615579		1171.79	0.00591362		1761.79	0.00061257		2351.78	-0.00226105		2941.78	-0.0021188		3531.78	-0.01574457
582	0.04648852		1171.99	0.00517585		1761.99	-0.00050404		2351.98	-0.00100176		2941.98	-0.00255619		3531.98	-0.01603322
582.2	0.0464724		1172.19	0.00507078		1762.19	-0.00058611		2352.18	0.00030023		2942.18	-0.00302252		3532.18	-0.01586002
582.4	0.04587127		1172.39	0.0048103		1762.39	-0.00074078		2352.38	0.00052731		2942.38	-0.00313353		3532.38	-0.01576756
582.6	0.0455941		1172.59	0.00428209		1762.59	-0.00148023		2352.58	0.00105561		2942.58	-0.00349742		3532.58	-0.01546019
582.8	0.04471395		1172.79	0.00305519		1762.79	-0.00145992		2352.78	0.00205345		2942.78	-0.00384284		3532.78	-0.01487018
583	0.04522115		1172.99	0.00266321		1762.99	-0.00249814		2352.98	0.00164461		2942.98	-0.00384323		3532.98	-0.01586317
583.2	0.04470657		1173.19	0.00216221		1763.19	-0.00144139		2353.18	0.00153322		2943.18	-0.00331647		3533.18	-0.01560238
583.4	0.04483764		1173.39	0.00129191		1763.39	-0.00082074		2353.38	0.00168609		2943.38	-0.00374184		3533.38	-0.01625412
583.6	0.04481028		1173.59	0.00077784		1763.59	-0.00054339		2353.58	0.00082962		2943.58	-0.00420177		3533.58	-0.01682333
583.8	0.04432477		1173.79	0.00053242		1763.79	-0.00087697		2353.78	0.00103246		2943.78	-0.00312799		3533.78	-0.01783783
584	0.04457449		1173.99	0.00032445		1763.99	-0.00059658		2353.98	-0.00094044		2943.98	-0.00437275		3533.98	-0.01935668
584.2	0.04501815		1174.19	0.00117799		1764.19	-0.00046555		2354.18	-0.00148631		2944.18	-0.00369784		3534.18	-0.02025781
584.4	0.04462683		1174.39	0.00236318		1764.39	0.00055268		2354.38	-0.00225964		2944.38	-0.00337502		3534.38	-0.02027555
584.6	0.0447324		1174.59	0.00257454		1764.59	0.00188577		2354.58	-0.00295375		2944.58	-0.0034942		3534.58	-0.02087559
584.8	0.04549383		1174.79	0.00377662		1764.79	0.00196002		2354.78	-0.00335986		2944.78	-0.00341409		3534.78	-0.02112591
585	0.04507865		1174.99	0.00477445		1764.99	0.00311917		2354.98	-0.00277388		2944.98	-0.00257486		3534.98	-0.02201817
585.2	0.04561586		1175.19	0.00523334		1765.19	0.00322068		2355.18	-0.00256023		2945.18	-0.00297841		3535.18	-0.02152229
585.4	0.04604902		1175.39	0.00483464		1765.39	0.00303386		2355.38	-0.00295879		2945.38	-0.00256388		3535.38	-0.02157339
585.6	0.04667184		1175.59	0.00494955		1765.59	0.00317914		2355.58	-0.00308038		2945.58	-0.00231223		3535.58	-0.022364
585.8	0.04673236		1175.79	0.0055217		1765.79	0.00308314		2355.78	-0.00258979		2945.78	-0.00299497		3535.78	-0.02243158
586	0.04568264		1175.99	0.00552355		1765.99	0.00323605		2355.98	-0.00160756		2945.98	-0.00339794		3535.98	-0.02151943
586.2	0.04461638		1176.19	0.00539934		1766.19	0.00368339		2356.18	-0.00211427		2946.18	-0.00367605		3536.18	-0.02003347
586.4	0.04421562		1176.39	0.00519925		1766.39	0.00272567		2356.38	-0.00141186		2946.38	-0.00388342		3536.38	-0.01942387
586.6	0.04401316		1176.59	0.00458355		1766.59	0.00196187		2356.58	-0.00043485		2946.58	-0.00384449		3536.58	-0.01862244
586.8	0.04434698		1176.79	0.00411245		1766.79	0.00174707		2356.78	0.00003067		2946.78	-0.00311501		3536.78	-0.01735015
587	0.04496624		1176.99	0.00392041		1766.99	0.00148845		2356.98	-0.00040439		2946.98	-0.00310716		3536.98	-0.01793635
587.2	0.0451641		1177.19	0.00391929		1767.19	0.0023868		2357.18	-0.00023914		2947.18	-0.00265384		3537.18	-0.01758881
587.4	0.04583349		1177.39	0.00302275		1767.39	0.00160128		2357.38	-0.00027298		2947.38	-0.00310011		3537.38	-0.01777977
587.6	0.04556381		1177.59	0.0030178		1767.59	0.00096872		2357.58	-0.00200531		2947.58	-0.00290589		3537.58	-0.01807691
587.8	0.04640971		1177.79	0.00268124		1767.79	0.00079406		2357.78	-0.00260889		2947.78	-0.00246042		3537.78	-0.01817367
588	0.04728828		1177.99	0.00265295		1767.99	0.0014632		2357.98	-0.00408848		2947.98	-0.00308655		3537.98	-0.01759604
588.2	0.04758844		1178.19	0.00287152		1768.19	0.00167902		2358.18	-0.00423252		2948.18	-0.00239839		3538.18	-0.01777411
588.4	0.04690877		1178.39	0.00315519		1768.39	0.00196932		2358.38	-0.00463858		2948.38	-0.00215401		3538.38	-0.01771619
588.6	0.04765268		1178.59	0.0036074		1768.59	0.00140615		2358.58	-0.0041821		2948.58	-0.00254514		3538.58	-0.01799729
588.8	0.04781522		1178.79	0.00425438		1768.79	0.00088265		2358.78	-0.00428209		2948.78	-0.00267609		3538.78	-0.01821582
589	0.04748153		1178.99	0.0042307		1768.99	0.0008849		2358.98	-0.00464599		2948.98	-0.00353026		3538.98	-0.0186547
589.2	0.04649944		1179.19	0.00450929		1769.19	0.000468		2359.18	-0.00493933		2949.18	-0.00435968		3539.18	-0.01806995
589.4	0.04616512		1179.39	0.00392144		1769.39	0.00057441		2359.38	-0.00475087		2949.38	-0.0046654		3539.38	-0.01785268
589.6	0.04628943		1179.59	0.0045509		1769.59	0.00045461		2359.58	-0.00476291		2949.58	-0.00538912		3539.58	-0.01733974
589.8	0.04552642		1179.79	0.0047857		1769.79	0.0002172		2359.78	-0.00463714		2949.78	-0.00632056		3539.78	-0.01600933
590	0.04451006		1179.99	0.00513032		1769.99	0.00024689		2359.98	-0.00439012		2949.98	-0.00637501		3539.98	-0.01520533
590.2	0.04481955		1180.19	0.00550555		1770.19	0.00056964		2360.18	-0.0044778		2950.18	-0.00590507		3540.18	-0.01430375
590.4	0.04516414		1180.39	0.00563141		1770.39	0.00023195		2360.38	-0.00346542		2950.38	-0.00535097		3540.38	-0.01487818
590.6	0.04516468		1180.59	0.00504924		1770.59	-0.0000059		2360.58	-0.00281425		2950.58	-0.00450412		3540.58	-0.01408088
590.8	0.04535256		1180.79	0.00388687		1770.79	0.00035009		2360.78	-0.00291687		2950.78	-0.00460255		3540.78	-0.01429757
591	0.04531232		1180.99	0.00351853		1770.99	0.00103725		2360.98	-0.00290868		2950.98	-0.00451864		3540.98	-0.01526297
591.2	0.04665438		1181.19	0.00332865		1771.19	0.00185369		2361.18	-0.003157		2951.18	-0.00362789		3541.18	-0.01507066
591.4	0.04738541		1181.39	0.00251237		1771.39	0.00171554		2361.38	-0.00299083		2951.38	-0.00313626		3541.38	-0.0150086
591.6	0.04757442		1181.59	0.00244209		1771.59	0.00211589		2361.58	-0.00328863		2951.58	-0.00215267		3541.58	-0.01469521
591.8	0.04858918		1181.79	0.00175959		1771.79	0.00254895		2361.78	-0.00300005		2951.78	-0.00201473		3541.78	-0.01491752
592	0.0481148		1181.99	0.00148918		1771.99	0.00267644		2361.98	-0.00233458		2951.98	-0.00139028		3541.98	-0.01506243
592.2	0.04697493		1182.19	0.00133434		1772.19	0.00299121		2362.18	-0.00198818		2952.18	-0.00138448		3542.18	-0.01599622
592.4	0.04618581		1182.39	0.00199851		1772.39	0.00192301		2362.38	-0.00147592		2952.38	-0.00106331		3542.38	-0.01646124
592.6	0.04602161		1182.59	0.00136608		1772.59	0.00229263		2362.58	-0.00178068		2952.58	-0.00112496		3542.58	-0.01675055
592.8	0.04412886		1182.79	0.00218703		1772.79	0.00209497		2362.78	-0.00183223		2952.78	-0.0011594		3542.78	-0.01686088
593	0.04310143		1182.99	0.00294865		1772.99	0.00250579		2362.98	-0.00215028		2952.98	-0.00154691		3542.98	-0.01738788
593.2	0.04173134		1183.19	0.00355742		1773.19	0.00338152		2363.18	-0.00140374		2953.18	-0.00202152		3543.18	-0.01735373
593.4	0.04198979		1183.39	0.00420608		1773.39	0.00359934		2363.38	-0.0015812		2953.38	-0.00299715		3543.38	-0.01772346
593.6	0.04098264		1183.59	0.00509043		1773.59	0.00327144		2363.58	-0.00205407		2953.58	-0.00366853		3543.58	-0.01764924
593.8	0.04073273		1183.79	0.00591492		1773.79	0.00261123		2363.78	-0.00249675		2953.78	-0.00393623		3543.78	-0.01735668
594	0.04103988		1183.99	0.00697674		1773.99	0.00288007		2363.98	-0.00235637		2953.98	-0.00417676		3543.98	-0.01802075
594.2	0.04110362		1184.19	0.00714454		1774.19	0.00228781		2364.18	-0.00239756		2954.18	-0.00472347		3544.18	-0.01826189
594.4	0.04135993		1184.39	0.00624134		1774.39	0.0022903		2364.38	-0.00212802		2954.38	-0.00510163		3544.38	-0.01827786
594.6	0.04172566		1184.59	0.00575257		1774.59	0.00243832		2364.58	-0.00159065		2954.58	-0.00570115		3544.58	-0.01741659
594.8	0.04275973		1184.79	0.00473841		1774.79	0.00276183		2364.78	-0.00195224		2954.78	-0.00635028		3544.78	-0.01789234
595	0.04435825		1184.99	0.00459012		1774.99	0.00357851		2364.98	-0.0017989		2954.98	-0.0059478		3544.98	-0.01740152
595.2	0.04523807		1185.19	0.00476083		1775.19	0.00398525		2365.18	-0.00151284		2955.18	-0.00618418		3545.18	-0.01687342
595.4	0.04637168		1185.39	0.00479146		1775.39	0.00382707		2365.38	-0.00074125		2955.38	-0.00538841		3545.38	-0.01754776
595.6	0.04690963		1185.59	0.00493745		1775.59	0.00397706		2365.58	-0.00099214		2955.58	-0.00517849		3545.58	-0.01829087
595.8	0.04696686		1185.79	0.00402101		1775.79	0.00397915		2365.78	-0.00144161		2955.78	-0.00554628		3545.78	-0.01900634
596	0.04676262		1185.99	0.00363865		1775.99	0.00333034		2365.98	-0.00126742		2955.98	-0.0053747		3545.98	-0.0189478
596.2	0.04632323		1186.19	0.0029727		1776.19	0.00344887		2366.18	-0.00178388		2956.18	-0.00514289		3546.18	-0.01927797
596.4	0.04667888		1186.39	0.00217393		1776.39	0.0030393		2366.38	-0.00137552		2956.38	-0.00480568		3546.38	-0.02028819
596.6	0.04630149		1186.59	0.00115001		1776.59	0.00305717		2366.58	-0.00200207		2956.58	-0.0043438		3546.58	-0.02097161
596.8	0.04578041		1186.79	0.00119761		1776.79	0.0029642		2366.78	-0.00158983		2956.78	-0.00360857		3546.78	-0.02114304
597	0.04684429		1186.99	0.00093693		1776.99	0.00371769		2366.98	-0.00195107		2956.98	-0.00315031		3546.98	-0.02094996
597.2	0.04601629		1187.19	0.00047771		1777.19	0.00311572		2367.18	-0.00150229		2957.18	-0.00342584		3547.18	-0.02086198
597.4	0.04618276		1187.39	0.00099689		1777.39	0.00196781		2367.38	-0.00106744		2957.38	-0.00346242		3547.38	-0.02047705
597.6	0.04585832		1187.59	0.00097449		1777.59	0.00043645		2367.58	-0.00119918		2957.58	-0.00315995		3547.58	-0.02085915
597.8	0.04704391		1187.79	0.00158981		1777.79	-0.00002059		2367.78	-0.00099634		2957.78	-0.00302383		3547.78	-0.02012288
598	0.04689678		1187.99	0.00268269		1777.99	-0.0004502		2367.98	-0.00062169		2957.98	-0.00331267		3547.98	-0.01999786
598.2	0.04677806		1188.19	0.00196892		1778.19	-0.00157907		2368.18	-0.00011054		2958.18	-0.00320963		3548.18	-0.01873255
598.4	0.04705388		1188.39	0.00168801		1778.39	-0.00026174		2368.38	0.0000867		2958.38	-0.00287926		3548.38	-0.01801097
598.6	0.04777859		1188.59	0.00213553		1778.59	0.00044648		2368.58	0.00023437		2958.58	-0.00328165		3548.58	-0.01752175
598.8	0.04783289		1188.79	0.00244356		1778.79	0.00036995		2368.78	0.00098255		2958.78	-0.00384396		3548.78	-0.01729175
599	0.04790003		1188.99	0.00341201		1778.99	0.0012037		2368.98	0.00085331		2958.98	-0.00349913		3548.98	-0.01724126
599.2	0.04693813		1189.19	0.00502515		1779.19	0.00112748		2369.18	0.00044015		2959.18	-0.00393692		3549.18	-0.0178294
599.4	0.04675716		1189.39	0.00535513		1779.39	0.00103316		2369.38	-0.00005859		2959.38	-0.0033887		3549.38	-0.01855374
599.6	0.04628135		1189.59	0.00553175		1779.59	0.00073124		2369.58	-0.00164277		2959.58	-0.00323813		3549.58	-0.01867756
599.8	0.04549845		1189.79	0.00544146		1779.79	0.00111992		2369.78	-0.00210837		2959.78	-0.00349812		3549.78	-0.01921125
600	0.04477571		1189.99	0.00574228		1779.99	0.00070401		2369.98	-0.00230525		2959.98	-0.00408242		3549.98	-0.0189675
600.2	0.0446028		1190.19	0.00511146		1780.19	0.00109707		2370.18	-0.00259906		2960.18	-0.00346576		3550.18	-0.01969788
600.4	0.04420814		1190.39	0.00447876		1780.39	0.00152251		2370.38	-0.00293894		2960.38	-0.00326958		3550.38	-0.01992967
600.6	0.04350287		1190.59	0.00428298		1780.59	0.00155175		2370.58	-0.00406972		2960.58	-0.00221402		3550.58	-0.02008452
600.8	0.04331823		1190.79	0.00424538		1780.79	0.00223271		2370.78	-0.00402348		2960.78	-0.00173778		3550.78	-0.0191027
601	0.04325613		1190.99	0.00399366		1780.99	0.00259594		2370.98	-0.00412818		2960.98	-0.00204389		3550.98	-0.01833656
601.2	0.04190833		1191.19	0.00278837		1781.19	0.00168169		2371.18	-0.00339072		2961.18	-0.00274748		3551.18	-0.01809393
601.4	0.04169202		1191.39	0.00343049		1781.39	0.00107579		2371.38	-0.00359865		2961.38	-0.00291683		3551.38	-0.01846784
601.6	0.04197887		1191.59	0.00305351		1781.59	0.00090696		2371.58	-0.00437258		2961.58	-0.00220687		3551.58	-0.01900191
601.8	0.04220269		1191.79	0.00370408		1781.79	0.0002943		2371.78	-0.00408738		2961.78	-0.00239033		3551.78	-0.01857085
602	0.04221237		1191.99	0.00364852		1781.99	-0.00019864		2371.98	-0.00477244		2961.98	-0.00232166		3551.98	-0.01879596
602.2	0.04350005		1192.19	0.00356393		1782.19	-0.00022837		2372.18	-0.00467185		2962.18	-0.00242158		3552.18	-0.01900923
602.4	0.04310759		1192.39	0.00375376		1782.39	0.00095825		2372.38	-0.00441898		2962.38	-0.00290061		3552.38	-0.01927319
602.6	0.04442274		1192.59	0.00389705		1782.59	-0.00013405		2372.58	-0.00356625		2962.58	-0.00365962		3552.58	-0.01920691
602.8	0.04445157		1192.79	0.00497938		1782.79	-0.00145739		2372.78	-0.00293264		2962.78	-0.00378118		3552.78	-0.01992193
603	0.0453782		1192.99	0.0053407		1782.99	-0.00085421		2372.98	-0.0036509		2962.98	-0.00359182		3552.98	-0.02026002
603.2	0.04534523		1193.19	0.00524132		1783.19	-0.001042		2373.18	-0.00367906		2963.18	-0.00338933		3553.18	-0.02073354
603.4	0.04520719		1193.39	0.0046318		1783.39	-0.00155475		2373.38	-0.00345693		2963.38	-0.00255972		3553.38	-0.02051879
603.6	0.0457821		1193.59	0.00440381		1783.59	-0.00157305		2373.58	-0.00357037		2963.58	-0.00226143		3553.58	-0.0207196
603.8	0.04494659		1193.79	0.00504176		1783.79	-0.00131191		2373.78	-0.00267365		2963.78	-0.00314583		3553.78	-0.02126125
604	0.04439388		1193.99	0.00465822		1783.99	-0.00180993		2373.98	-0.00361855		2963.98	-0.00279103		3553.98	-0.02060993
604.2	0.04493351		1194.19	0.00384398		1784.19	-0.0013248		2374.18	-0.00379174		2964.18	-0.00172431		3554.18	-0.02016956
604.4	0.04451795		1194.39	0.00394911		1784.39	-0.00067717		2374.38	-0.00470175		2964.38	-0.00096889		3554.38	-0.02011712
604.6	0.04422107		1194.59	0.00421509		1784.59	-0.00048377		2374.58	-0.00429217		2964.58	-0.00105628		3554.58	-0.0199747
604.8	0.04389887		1194.79	0.00368048		1784.79	-0.00044599		2374.78	-0.00406319		2964.78	-0.00209498		3554.78	-0.01894132
605	0.04385836		1194.99	0.00258259		1784.99	-0.00004192		2374.98	-0.0033166		2964.98	-0.00310035		3554.98	-0.01968162
605.2	0.04273184		1195.19	0.00230896		1785.19	-0.00095882		2375.18	-0.0029432		2965.18	-0.00272431		3555.18	-0.02027241
605.4	0.04237081		1195.39	0.00226695		1785.39	-0.0008232		2375.38	-0.00296288		2965.38	-0.00307276		3555.38	-0.02088051
605.6	0.04330527		1195.59	0.00163643		1785.59	-0.00038475		2375.58	-0.00303677		2965.58	-0.00245912		3555.58	-0.02058399
605.8	0.04293493		1195.79	0.00211149		1785.79	-0.00066238		2375.78	-0.00298824		2965.78	-0.00280382		3555.78	-0.02131898
606	0.042742		1195.99	0.00180223		1785.99	-0.00052736		2375.98	-0.00327321		2965.98	-0.00271222		3555.98	-0.02134322
606.2	0.04287982		1196.19	0.00332248		1786.19	-0.00093072		2376.18	-0.00291809		2966.18	-0.00270117		3556.18	-0.02179442
606.4	0.04173316		1196.39	0.00378567		1786.39	-0.00043964		2376.38	-0.00194869		2966.38	-0.00291743		3556.38	-0.02109212
606.6	0.04188315		1196.59	0.00434565		1786.59	-0.00102935		2376.58	-0.00095803		2966.58	-0.00227583		3556.58	-0.02081491
606.8	0.04193512		1196.79	0.0046358		1786.79	-0.00086517		2376.78	-0.00049707		2966.78	-0.00170262		3556.78	-0.02136756
607	0.04221764		1196.99	0.00391649		1786.99	-0.00001797		2376.98	-0.00010295		2966.98	-0.00170576		3556.98	-0.01999786
607.2	0.04170364		1197.19	0.00354905		1787.19	-0.0002109		2377.18	-0.00013601		2967.18	-0.00175772		3557.18	-0.02014165
607.4	0.04087062		1197.39	0.00379283		1787.39	-0.00028261		2377.38	-0.0006977		2967.38	-0.00155827		3557.38	-0.01988873
607.6	0.04005965		1197.59	0.00264987		1787.59	-0.00034835		2377.58	-0.0016215		2967.58	-0.00186842		3557.58	-0.02013971
607.8	0.03944238		1197.79	0.0027169		1787.79	-0.00038965		2377.78	-0.00196359		2967.78	-0.00174502		3557.78	-0.0201852
608	0.04007992		1197.99	0.00196643		1787.99	-0.00080297		2377.98	-0.0031798		2967.98	-0.0011167		3557.98	-0.020821
608.2	0.03994748		1198.19	0.00195575		1788.19	-0.0010295		2378.18	-0.00310469		2968.18	-0.00220516		3558.18	-0.02113179
608.4	0.03951861		1198.39	0.00228909		1788.39	-0.0008758		2378.38	-0.00363273		2968.38	-0.00359283		3558.38	-0.02174188
608.6	0.04017321		1198.59	0.00218208		1788.59	-0.00038311		2378.58	-0.00375231		2968.58	-0.00475042		3558.58	-0.02219167
608.8	0.04041844		1198.79	0.00162855		1788.79	-0.00029431		2378.78	-0.00428899		2968.78	-0.00586158		3558.78	-0.0224451
609	0.04074161		1198.99	0.00134483		1788.99	-0.00030802		2378.98	-0.00391075		2968.98	-0.00693605		3558.98	-0.02308079
609.2	0.04111565		1199.19	0.00144943		1789.19	-0.00019675		2379.18	-0.00387513		2969.18	-0.00692958		3559.18	-0.02244004
609.4	0.04151277		1199.39	0.00112788		1789.39	0.00053633		2379.38	-0.00444507		2969.38	-0.00789207		3559.38	-0.02320203
609.6	0.04232487		1199.59	0.00161791		1789.59	0.00174901		2379.58	-0.00524863		2969.58	-0.00774297		3559.58	-0.02371917
609.8	0.04157687		1199.79	0.00222579		1789.79	0.00161049		2379.78	-0.0053452		2969.78	-0.0071371		3559.78	-0.02421167
610	0.04135745		1199.99	0.00223641		1789.99	0.00134266		2379.98	-0.00509246		2969.98	-0.00651361		3559.98	-0.02358549
610.2	0.04147457		1200.19	0.00330573		1790.19	0.00146095		2380.18	-0.00409036		2970.18	-0.00560969		3560.18	-0.02360912
610.4	0.04137949		1200.39	0.00293546		1790.39	0.00206938		2380.38	-0.00358533		2970.38	-0.00522142		3560.38	-0.02192316
610.6	0.04194942		1200.59	0.00300661		1790.59	0.00168433		2380.58	-0.00349688		2970.58	-0.00388284		3560.58	-0.02135617
610.8	0.04326785		1200.79	0.00200586		1790.79	0.0013423		2380.78	-0.00264152		2970.78	-0.00376305		3560.78	-0.0199325
611	0.04320639		1200.99	0.00173316		1790.99	0.00133591		2380.98	-0.00294678		2970.98	-0.0036384		3560.98	-0.01889592
611.2	0.04284982		1201.19	0.00200867		1791.19	0.00141075		2381.18	-0.00353403		2971.18	-0.00222858		3561.18	-0.01893792
611.4	0.04211306		1201.39	0.00194968		1791.39	0.001032		2381.38	-0.00439919		2971.38	-0.00117448		3561.38	-0.01875717
611.6	0.04156298		1201.59	0.00118549		1791.59	0.00030055		2381.58	-0.00532546		2971.58	-0.00079467		3561.58	-0.01868996
611.8	0.04178506		1201.79	0.00211348		1791.79	-0.00042258		2381.78	-0.00494905		2971.78	-0.00037025		3561.78	-0.01813373
612	0.04177909		1201.99	0.0022845		1791.99	-0.00139347		2381.98	-0.00477428		2971.98	-0.00039111		3561.98	-0.01902088
612.2	0.04092683		1202.19	0.00272155		1792.19	-0.00121182		2382.18	-0.00454326		2972.18	-0.00205318		3562.18	-0.01981937
612.4	0.04133375		1202.39	0.00271585		1792.39	-0.0011888		2382.38	-0.00469729		2972.38	-0.00246961		3562.38	-0.01984961
612.6	0.04175892		1202.59	0.00193632		1792.59	-0.00097426		2382.58	-0.00476937		2972.58	-0.00211338		3562.58	-0.01999919
612.8	0.04198235		1202.79	0.00195932		1792.79	-0.00140702		2382.78	-0.00491804		2972.78	-0.00339215		3562.78	-0.01904904
613	0.04177145		1202.99	0.00152994		1792.99	-0.0006927		2382.98	-0.00447284		2972.98	-0.00486475		3562.98	-0.01870763
613.2	0.04176986		1203.19	0.00167603		1793.19	-0.00029558		2383.18	-0.00455441		2973.18	-0.00598388		3563.18	-0.01870932
613.4	0.04152741		1203.39	0.00138972		1793.39	0.00103303		2383.38	-0.0047999		2973.38	-0.00669284		3563.38	-0.01971763
613.6	0.04181031		1203.59	0.00134671		1793.59	0.0021215		2383.58	-0.00450081		2973.58	-0.0062594		3563.58	-0.01920807
613.8	0.04123982		1203.79	0.00028459		1793.79	0.00189257		2383.78	-0.00435489		2973.78	-0.00626229		3563.78	-0.01842296
614	0.0410616		1203.99	-0.00041168		1793.99	0.00294975		2383.98	-0.00449035		2973.98	-0.00655387		3563.98	-0.0183853
614.2	0.04162905		1204.19	-0.00063194		1794.19	0.00303508		2384.18	-0.00433798		2974.18	-0.00686632		3564.18	-0.01871034
614.4	0.04207777		1204.39	-0.00117908		1794.39	0.00292737		2384.38	-0.00489099		2974.38	-0.00689735		3564.38	-0.01874878
614.6	0.04241734		1204.59	-0.00098538		1794.59	0.00228458		2384.58	-0.0042314		2974.58	-0.00601713		3564.58	-0.0188472
614.8	0.04288553		1204.79	-0.00087783		1794.79	0.00166809		2384.78	-0.00392946		2974.78	-0.00579999		3564.78	-0.0185186
615	0.04297969		1204.99	-0.00052487		1794.99	0.00098415		2384.98	-0.0050137		2974.98	-0.00502836		3564.98	-0.01977697
615.2	0.04343199		1205.19	0.00045599		1795.19	0.00083928		2385.18	-0.0060811		2975.18	-0.00352649		3565.18	-0.01955417
615.4	0.04332722		1205.39	0.00073864		1795.39	0.0003997		2385.38	-0.00711244		2975.38	-0.00303454		3565.38	-0.01978613
615.6	0.04302162		1205.59	0.00109908		1795.59	0.00000535		2385.58	-0.00690808		2975.58	-0.00220941		3565.58	-0.0200006
615.8	0.04233792		1205.79	0.0017132		1795.79	-0.0005486		2385.78	-0.00618326		2975.78	-0.00127736		3565.78	-0.0199201
616	0.04253718		1205.99	0.00231845		1795.99	-0.0002101		2385.98	-0.00581127		2975.98	-0.00102605		3565.98	-0.0211173
616.2	0.04214575		1206.19	0.00288519		1796.19	0.00011271		2386.18	-0.0046402		2976.18	-0.00142004		3566.18	-0.02171523
616.4	0.04253884		1206.39	0.00230998		1796.39	0.00001821		2386.38	-0.00514168		2976.38	-0.00104203		3566.38	-0.02182822
616.6	0.04211182		1206.59	0.00154139		1796.59	0.00049251		2386.58	-0.00555371		2976.58	-0.00165578		3566.58	-0.02174431
616.8	0.04192435		1206.79	0.00218613		1796.79	0.00109913		2386.78	-0.00518251		2976.78	-0.00240889		3566.78	-0.0223421
617	0.04177075		1206.99	0.00203463		1796.99	0.00166292		2386.98	-0.0044333		2976.98	-0.00363107		3566.98	-0.02347023
617.2	0.04122372		1207.19	0.00186857		1797.19	0.00218376		2387.18	-0.00483621		2977.18	-0.00440126		3567.18	-0.02362443
617.4	0.04166822		1207.39	0.00120357		1797.39	0.00329902		2387.38	-0.00468752		2977.38	-0.00416491		3567.38	-0.02357138
617.6	0.04179233		1207.59	0.00057796		1797.59	0.00321345		2387.58	-0.00501985		2977.58	-0.00361515		3567.58	-0.02354667
617.8	0.04048071		1207.79	0.00022209		1797.79	0.0029123		2387.78	-0.00558573		2977.78	-0.0050119		3567.78	-0.02294749
618	0.04013614		1207.99	0.00073107		1797.99	0.00276407		2387.98	-0.00607241		2977.98	-0.00586334		3567.98	-0.02326421
618.2	0.04018954		1208.19	0.00129882		1798.19	0.00131626		2388.18	-0.00618121		2978.18	-0.00601136		3568.18	-0.02385884
618.4	0.04022613		1208.39	0.00172307		1798.39	0.000175		2388.38	-0.0067744		2978.38	-0.00539414		3568.38	-0.02315047
618.6	0.04099221		1208.59	0.00287733		1798.59	-0.00105589		2388.58	-0.00698613		2978.58	-0.00445416		3568.58	-0.02230052
618.8	0.04164467		1208.79	0.00342883		1798.79	-0.00186577		2388.78	-0.00743313		2978.78	-0.00478988		3568.78	-0.02201741
619	0.04193804		1208.99	0.00325395		1798.99	-0.00239333		2388.98	-0.00762623		2978.98	-0.00403675		3568.98	-0.02216111
619.2	0.04207011		1209.19	0.00397465		1799.19	-0.00240453		2389.18	-0.00821808		2979.18	-0.00354142		3569.18	-0.02124509
619.4	0.04195972		1209.39	0.00370166		1799.39	-0.00328995		2389.38	-0.00672417		2979.38	-0.00368894		3569.38	-0.02056005
619.6	0.04159117		1209.59	0.0039795		1799.59	-0.00344569		2389.58	-0.00579779		2979.58	-0.00345323		3569.58	-0.01999425
619.8	0.04100944		1209.79	0.00390342		1799.79	-0.00353412		2389.78	-0.00498643		2979.78	-0.00304835		3569.78	-0.01946232
620	0.04183523		1209.99	0.00383348		1799.99	-0.0032545		2389.98	-0.00416387		2979.98	-0.00376543		3569.98	-0.0194457
620.2	0.04164185		1210.19	0.00384271		1800.19	-0.00389405		2390.18	-0.0021177		2980.18	-0.00346263		3570.18	-0.01955691
620.4	0.04145421		1210.39	0.00309206		1800.39	-0.00297838		2390.38	-0.00255242		2980.38	-0.00317824		3570.38	-0.02013788
620.6	0.04103783		1210.59	0.0028183		1800.59	-0.0027788		2390.58	-0.00220264		2980.58	-0.00344267		3570.58	-0.01998885
620.8	0.04141912		1210.79	0.00242741		1800.79	-0.00240005		2390.78	-0.00102177		2980.78	-0.00359057		3570.78	-0.02058865
621	0.04149158		1210.99	0.0018167		1800.99	-0.00178845		2390.98	-0.00120543		2980.98	-0.00338369		3570.98	-0.02110976
621.2	0.04089946		1211.19	0.00061797		1801.19	-0.00133661		2391.18	-0.00176219		2981.18	-0.0032235		3571.18	-0.02055908
621.4	0.04161576		1211.39	0.00046697		1801.39	-0.00111571		2391.38	-0.00311329		2981.38	-0.0024914		3571.38	-0.02026131
621.6	0.04141688		1211.59	0.00049171		1801.59	-0.00095916		2391.58	-0.00323499		2981.58	-0.0019475		3571.58	-0.02053455
621.8	0.04095246		1211.79	0.00094377		1801.79	-0.0017134		2391.78	-0.0040295		2981.78	-0.00310199		3571.78	-0.02038163
622	0.04078158		1211.99	0.00122039		1801.99	-0.00157569		2391.98	-0.00414307		2981.98	-0.0029613		3571.98	-0.02087608
622.2	0.04075863		1212.19	0.00159192		1802.19	-0.00176086		2392.18	-0.0045611		2982.18	-0.00206955		3572.18	-0.02096872
622.4	0.04102424		1212.39	0.00238243		1802.39	-0.00236427		2392.38	-0.00591502		2982.38	-0.00143925		3572.38	-0.0204374
622.6	0.04089604		1212.59	0.00315054		1802.59	-0.00274572		2392.58	-0.00635705		2982.58	-0.00156045		3572.58	-0.02080898
622.8	0.0402517		1212.79	0.00302099		1802.79	-0.00356851		2392.78	-0.00704822		2982.78	-0.00206011		3572.78	-0.02083049
623	0.04032946		1212.99	0.00338646		1802.99	-0.00401615		2392.98	-0.00729013		2982.98	-0.00222618		3572.98	-0.02072209
623.2	0.03976232		1213.19	0.00353129		1803.19	-0.00492124		2393.18	-0.00743422		2983.18	-0.0030221		3573.18	-0.02035829
623.4	0.03967263		1213.39	0.00338021		1803.39	-0.00599673		2393.38	-0.00544128		2983.38	-0.00313395		3573.38	-0.02066427
623.6	0.03895438		1213.59	0.00361616		1803.59	-0.00542023		2393.58	-0.00558817		2983.58	-0.00276317		3573.58	-0.02097606
623.8	0.03875389		1213.79	0.00301805		1803.79	-0.00557287		2393.78	-0.0052165		2983.78	-0.00257149		3573.78	-0.02070376
624	0.03893237		1213.99	0.00320359		1803.99	-0.00604039		2393.98	-0.00421213		2983.98	-0.00329129		3573.98	-0.02149822
624.2	0.03780825		1214.19	0.00292423		1804.19	-0.00574789		2394.18	-0.0028925		2984.18	-0.00330435		3574.18	-0.02162248
624.4	0.03869518		1214.39	0.00236011		1804.39	-0.00433819		2394.38	-0.00306588		2984.38	-0.0030307		3574.38	-0.02172546
624.6	0.03889925		1214.59	0.00197694		1804.59	-0.00391234		2394.58	-0.00256905		2984.58	-0.00353956		3574.58	-0.02104346
624.8	0.03882319		1214.79	0.00136768		1804.79	-0.00293349		2394.78	-0.0033997		2984.78	-0.00324787		3574.78	-0.02146573
625	0.03890973		1214.99	0.00054808		1804.99	-0.00188361		2394.98	-0.00382831		2984.98	-0.00258332		3574.98	-0.02197175
625.2	0.03932866		1215.19	0.00060677		1805.19	-0.00209787		2395.18	-0.00364288		2985.18	-0.00374995		3575.18	-0.02171114
625.4	0.04048459		1215.39	0.00044494		1805.39	-0.00131357		2395.38	-0.00474025		2985.38	-0.00311573		3575.38	-0.02255694
625.6	0.04077316		1215.59	0.00015371		1805.59	-0.00162349		2395.58	-0.00413702		2985.58	-0.00460972		3575.58	-0.02305479
625.8	0.04164994		1215.79	0.00034189		1805.79	-0.001755		2395.78	-0.00512306		2985.78	-0.00548475		3575.78	-0.02370654
626	0.04205252		1215.99	0.00043127		1805.99	-0.00107647		2395.98	-0.00535828		2985.98	-0.00521817		3575.98	-0.02361134
626.2	0.04242198		1216.19	0.0009029		1806.19	-0.00074392		2396.18	-0.00661294		2986.18	-0.00550776		3576.18	-0.02307706
626.4	0.04185149		1216.39	0.0010152		1806.39	-0.00079381		2396.38	-0.00764128		2986.38	-0.00533863		3576.38	-0.02247232
626.6	0.04149784		1216.59	0.00098485		1806.59	-0.00115763		2396.58	-0.00834796		2986.58	-0.00584544		3576.58	-0.02130875
626.8	0.0405656		1216.79	0.00118357		1806.79	-0.00248688		2396.78	-0.00852235		2986.78	-0.00686564		3576.78	-0.02073083
627	0.0410005		1216.99	0.0017115		1806.99	-0.00237579		2396.98	-0.00861986		2986.98	-0.00686008		3576.98	-0.02016157
627.2	0.04052276		1217.19	0.00179391		1807.19	-0.0028787		2397.18	-0.0075852		2987.18	-0.00682134		3577.18	-0.02055726
627.4	0.04080704		1217.39	0.00250716		1807.39	-0.00276109		2397.38	-0.00624428		2987.38	-0.00632883		3577.38	-0.02078033
627.6	0.03997029		1217.59	0.00250619		1807.59	-0.00232438		2397.58	-0.00674738		2987.58	-0.00596156		3577.58	-0.01978932
627.8	0.03955391		1217.79	0.00203772		1807.79	-0.00223942		2397.78	-0.00672941		2987.78	-0.00607729		3577.78	-0.01923995
628	0.03952734		1217.99	0.0021213		1807.99	-0.00240314		2397.98	-0.00540619		2987.98	-0.00613276		3577.98	-0.01982513
628.2	0.03940997		1218.19	0.00153175		1808.19	-0.00159436		2398.18	-0.00475524		2988.18	-0.00534459		3578.18	-0.01889665
628.4	0.04079694		1218.39	0.00194599		1808.39	-0.001059		2398.38	-0.00461686		2988.38	-0.00451442		3578.38	-0.01920261
628.6	0.03977676		1218.59	0.00126713		1808.59	-0.00133		2398.58	-0.00474644		2988.58	-0.00417617		3578.58	-0.01907048
628.8	0.04029672		1218.79	0.00064294		1808.79	-0.00135643		2398.78	-0.00514002		2988.78	-0.00324298		3578.78	-0.01956257
629	0.04083809		1218.99	-0.00052482		1808.99	-0.00176456		2398.98	-0.00359298		2988.98	-0.00395119		3578.98	-0.02044079
629.2	0.04165303		1219.19	-0.0004255		1809.19	-0.00235036		2399.18	-0.00315042		2989.18	-0.00402591		3579.18	-0.02118579
629.4	0.04215362		1219.39	-0.00101966		1809.39	-0.00228788		2399.38	-0.00419641		2989.38	-0.00287522		3579.38	-0.02160571
629.6	0.04210038		1219.59	-0.00099141		1809.59	-0.00265662		2399.58	-0.00324401		2989.58	-0.0039393		3579.58	-0.02198059
629.8	0.04259798		1219.79	-0.00056264		1809.79	-0.0019047		2399.78	-0.0032679		2989.78	-0.00371797		3579.78	-0.02198904
630	0.04327309		1219.99	-0.00043738		1809.99	-0.00138531		2399.98	-0.0028201		2989.98	-0.00387824		3579.98	-0.02158818
630.2	0.04255443		1220.19	-0.00077689		1810.19	-0.00080781		2400.18	-0.00313792		2990.18	-0.00358436		3580.18	-0.02191803
630.4	0.04176329		1220.39	-0.00063924		1810.39	-0.00090672		2400.38	-0.00295558		2990.38	-0.00303406		3580.38	-0.02194864
630.6	0.04194263		1220.59	-0.00009666		1810.59	-0.00091801		2400.58	-0.00317475		2990.58	-0.00405598		3580.58	-0.02244063
630.8	0.04206321		1220.79	-0.00024741		1810.79	-0.00128739		2400.78	-0.00364208		2990.78	-0.00477193		3580.78	-0.02266121
631	0.04304646		1220.99	-0.00013075		1810.99	-0.0001976		2400.98	-0.00307377		2990.98	-0.00434175		3580.98	-0.02236673
631.2	0.04247056		1221.19	0.00004058		1811.19	0.00053487		2401.18	-0.00267894		2991.18	-0.00477791		3581.18	-0.02283962
631.4	0.04153335		1221.39	-0.0001052		1811.39	0.00063586		2401.38	-0.00315518		2991.38	-0.00466289		3581.38	-0.02251398
631.6	0.04045999		1221.59	-0.00054137		1811.59	0.00038093		2401.58	-0.00370728		2991.58	-0.00438227		3581.58	-0.02247029
631.8	0.04008039		1221.79	-0.00045604		1811.79	0.00064106		2401.78	-0.00449924		2991.78	-0.00376357		3581.78	-0.02311063
632	0.040766		1221.99	-0.00058281		1811.99	-0.00026654		2401.98	-0.00442687		2991.98	-0.0031986		3581.98	-0.0232492
632.2	0.04041915		1222.19	-0.00053735		1812.19	-0.0007008		2402.18	-0.00500385		2992.18	-0.00327362		3582.18	-0.02278737
632.4	0.03969092		1222.39	-0.00064954		1812.39	-0.00119256		2402.38	-0.00556611		2992.38	-0.0035518		3582.38	-0.02293872
632.6	0.03855954		1222.59	-0.00092223		1812.59	-0.00263639		2402.58	-0.00619043		2992.58	-0.00290151		3582.58	-0.02257767
632.8	0.03898308		1222.79	-0.00108341		1812.79	-0.00338701		2402.78	-0.00658172		2992.78	-0.00232172		3582.78	-0.02310962
633	0.03843401		1222.99	-0.00139533		1812.99	-0.00464641		2402.98	-0.00613884		2992.98	-0.00310463		3582.98	-0.02339021
633.2	0.03749624		1223.19	-0.00154674		1813.19	-0.00534263		2403.18	-0.00644547		2993.18	-0.00263602		3583.18	-0.0230213
633.4	0.03715229		1223.39	-0.00153281		1813.39	-0.00531278		2403.38	-0.00637483		2993.38	-0.00305706		3583.38	-0.0225073
633.6	0.03704467		1223.59	-0.00045816		1813.59	-0.00423825		2403.58	-0.00531524		2993.58	-0.00478282		3583.58	-0.02210269
633.8	0.03703811		1223.79	0.00012999		1813.79	-0.00394259		2403.78	-0.00581068		2993.78	-0.00594971		3583.78	-0.02149246
634	0.03806495		1223.99	0.00105656		1813.99	-0.00392064		2403.98	-0.00541407		2993.98	-0.0056299		3583.98	-0.02109186
634.2	0.03759176		1224.19	0.00154787		1814.19	-0.00289415		2404.18	-0.00548834		2994.18	-0.00516463		3584.18	-0.02177691
634.4	0.03812851		1224.39	0.00184642		1814.39	-0.00198034		2404.38	-0.0049758		2994.38	-0.00579858		3584.38	-0.02090934
634.6	0.03832559		1224.59	0.00103672		1814.59	-0.00076045		2404.58	-0.00494118		2994.58	-0.00666298		3584.58	-0.02053111
634.8	0.03872037		1224.79	0.00022693		1814.79	-0.00007368		2404.78	-0.00480242		2994.78	-0.00742691		3584.78	-0.02002155
635	0.03933836		1224.99	0.00031726		1814.99	0.00141802		2404.98	-0.00389648		2994.98	-0.00789978		3584.98	-0.01984312
635.2	0.03923758		1225.19	-0.00033589		1815.19	0.00235201		2405.18	-0.00388902		2995.18	-0.00775877		3585.18	-0.02025082
635.4	0.03893425		1225.39	0.00020917		1815.39	0.00231537		2405.38	-0.00448677		2995.38	-0.00780127		3585.38	-0.02079637
635.6	0.03856547		1225.59	-0.00009691		1815.59	0.00305685		2405.58	-0.0040407		2995.58	-0.00696813		3585.58	-0.02119277
635.8	0.03940697		1225.79	-0.00106919		1815.79	0.00260598		2405.78	-0.00495213		2995.78	-0.00696222		3585.78	-0.02199091
636	0.0397597		1225.99	-0.00140245		1815.99	0.00260272		2405.98	-0.00461618		2995.98	-0.00757284		3585.98	-0.02178798
636.2	0.03858638		1226.19	-0.00161119		1816.19	0.00216415		2406.18	-0.00520529		2996.18	-0.00813104		3586.18	-0.02122823
636.4	0.03824652		1226.39	-0.00162965		1816.39	0.00191618		2406.38	-0.0059069		2996.38	-0.00802757		3586.38	-0.02104343
636.6	0.03832812		1226.59	-0.00214939		1816.59	0.00030934		2406.58	-0.00574574		2996.58	-0.00731272		3586.58	-0.02155195
636.8	0.03888904		1226.79	-0.00307283		1816.79	-0.0001624		2406.78	-0.00570033		2996.78	-0.00694897		3586.78	-0.02123973
637	0.03886462		1226.99	-0.00282076		1816.99	-0.00101455		2406.98	-0.00525274		2996.98	-0.00750917		3586.98	-0.02085215
637.2	0.03866364		1227.19	-0.00280603		1817.19	-0.00118617		2407.18	-0.00575703		2997.18	-0.0068016		3587.18	-0.02082723
637.4	0.03977824		1227.39	-0.00210065		1817.39	-0.00091142		2407.38	-0.00589231		2997.38	-0.00633063		3587.38	-0.02046592
637.6	0.03954169		1227.59	-0.00108165		1817.59	-0.00109446		2407.58	-0.00593025		2997.58	-0.00597478		3587.58	-0.02037222
637.8	0.03949258		1227.79	-0.00069833		1817.79	-0.00215662		2407.78	-0.00541165		2997.78	-0.00508149		3587.78	-0.02098569
638	0.04014096		1227.99	-0.0002724		1817.99	-0.00263837		2407.98	-0.00527085		2997.98	-0.00385981		3587.98	-0.0209766
638.2	0.04031733		1228.19	-0.00045959		1818.19	-0.00291806		2408.18	-0.0054135		2998.18	-0.0031635		3588.18	-0.02180042
638.4	0.03935401		1228.39	-0.00097213		1818.39	-0.00339638		2408.38	-0.00618713		2998.38	-0.00294471		3588.38	-0.02144453
638.6	0.03788026		1228.59	-0.0010146		1818.59	-0.00327242		2408.58	-0.00622744		2998.58	-0.00273739		3588.58	-0.02188912
638.8	0.03838834		1228.79	-0.00076708		1818.79	-0.00363711		2408.78	-0.00611528		2998.78	-0.0027459		3588.78	-0.02212101
639	0.03865829		1228.99	-0.00025811		1818.99	-0.00316438		2408.98	-0.00586755		2998.98	-0.00247114		3588.98	-0.02236191
639.2	0.03838352		1229.19	-0.0007952		1819.19	-0.00282334		2409.18	-0.00557843		2999.18	-0.00200382		3589.18	-0.02285566
639.4	0.0378916		1229.39	-0.00014039		1819.39	-0.00271625		2409.38	-0.00629528		2999.38	-0.00232622		3589.38	-0.02311727
639.6	0.03778472		1229.59	-0.00067826		1819.59	-0.00220964		2409.58	-0.00691807		2999.58	-0.00217942		3589.58	-0.02293945
639.8	0.03826026		1229.79	-0.00153878		1819.79	-0.00313917		2409.78	-0.0080105		2999.78	-0.00253197		3589.78	-0.02378939
640	0.03775046		1229.99	-0.00160389		1819.99	-0.00237174		2409.98	-0.00829112		2999.98	-0.00315543		3589.98	-0.02311247
640.2	0.03751765		1230.19	-0.00202754		1820.19	-0.0026449		2410.18	-0.0087068		3000.18	-0.00372974		3590.18	-0.02250605
640.4	0.03777529		1230.39	-0.00144381		1820.39	-0.00225714		2410.38	-0.00862307		3000.38	-0.00416257		3590.38	-0.02223946
640.6	0.03849877		1230.59	-0.00166373		1820.59	-0.00237822		2410.58	-0.00768163		3000.58	-0.00457847		3590.58	-0.02189609
640.8	0.03889648		1230.79	-0.00127584		1820.79	-0.0020092		2410.78	-0.00694171		3000.78	-0.00510488		3590.78	-0.02149783
641	0.03952141		1230.99	-0.00105033		1820.99	-0.00204643		2410.98	-0.00636149		3000.98	-0.00504843		3590.98	-0.02193866
641.2	0.03960046		1231.19	-0.00120053		1821.19	-0.00301561		2411.18	-0.00609184		3001.18	-0.00433967		3591.18	-0.02178298
641.4	0.03977334		1231.39	-0.00082378		1821.39	-0.00270832		2411.38	-0.00637307		3001.38	-0.00373794		3591.38	-0.02188724
641.6	0.03951963		1231.59	-0.00065363		1821.59	-0.00265397		2411.58	-0.00611699		3001.58	-0.00389973		3591.58	-0.02253424
641.8	0.04001393		1231.79	-0.00102805		1821.79	-0.00265401		2411.78	-0.00621651		3001.78	-0.00418452		3591.78	-0.02285896
642	0.03957422		1231.99	-0.00131332		1821.99	-0.00217093		2411.98	-0.00656098		3001.98	-0.00402973		3591.98	-0.02325513
642.2	0.03939147		1232.19	-0.00116703		1822.19	-0.00287186		2412.18	-0.00684333		3002.18	-0.00343462		3592.18	-0.02411547
642.4	0.03803526		1232.39	-0.00030552		1822.39	-0.00288292		2412.38	-0.00677715		3002.38	-0.00367309		3592.38	-0.02497823
642.6	0.03746972		1232.59	-0.00026869		1822.59	-0.00329141		2412.58	-0.00659741		3002.58	-0.00366438		3592.58	-0.02559375
642.8	0.03821444		1232.79	-0.00052486		1822.79	-0.00292114		2412.78	-0.00665959		3002.78	-0.00414415		3592.78	-0.02553768
643	0.03782005		1232.99	-0.00124911		1822.99	-0.00293912		2412.98	-0.00621756		3002.98	-0.00467068		3592.98	-0.02593696
643.2	0.03784961		1233.19	-0.00096353		1823.19	-0.00288757		2413.18	-0.00615756		3003.18	-0.00432116		3593.18	-0.02576466
643.4	0.03751043		1233.39	-0.00083358		1823.39	-0.00408123		2413.38	-0.00679877		3003.38	-0.00432706		3593.38	-0.02574788
643.6	0.03686408		1233.59	-0.00134056		1823.59	-0.00498095		2413.58	-0.00800428		3003.58	-0.00466061		3593.58	-0.02514065
643.8	0.03665561		1233.79	-0.00249193		1823.79	-0.00561254		2413.78	-0.00692418		3003.78	-0.00517542		3593.78	-0.02513912
644	0.03649058		1233.99	-0.00210918		1823.99	-0.00516787		2413.98	-0.0067673		3003.98	-0.00591137		3593.98	-0.02396653
644.2	0.03587675		1234.19	-0.00177166		1824.19	-0.00501965		2414.18	-0.00648965		3004.18	-0.00643159		3594.18	-0.02322226
644.4	0.03639712		1234.39	-0.00064268		1824.39	-0.00527879		2414.38	-0.00575728		3004.38	-0.00719244		3594.38	-0.02247517
644.6	0.03617434		1234.59	-0.00035893		1824.59	-0.00558852		2414.58	-0.00526686		3004.58	-0.00739111		3594.58	-0.02172082
644.8	0.03593881		1234.79	-0.00055158		1824.79	-0.00651764		2414.78	-0.00445105		3004.78	-0.00633263		3594.78	-0.02194063
645	0.0367071		1234.99	-0.00085637		1824.99	-0.00625321		2414.98	-0.0051096		3004.98	-0.00535295		3594.98	-0.02175925
645.2	0.03685969		1235.19	-0.00032286		1825.19	-0.00664544		2415.18	-0.0062831		3005.18	-0.00472798		3595.18	-0.02115471
645.4	0.03689476		1235.39	0.00017834		1825.39	-0.00587196		2415.38	-0.00736994		3005.38	-0.00475054		3595.38	-0.02143358
645.6	0.03698902		1235.59	-0.0007276		1825.59	-0.00576676		2415.58	-0.00762564		3005.58	-0.00496551		3595.58	-0.02207937
645.8	0.03744919		1235.79	-0.00110419		1825.79	-0.00550045		2415.78	-0.00837453		3005.78	-0.00494292		3595.78	-0.02262732
646	0.03702106		1235.99	-0.00115849		1825.99	-0.00540331		2415.98	-0.00773676		3005.98	-0.00468763		3595.98	-0.02355803
646.2	0.03762386		1236.19	-0.00088583		1826.19	-0.00617967		2416.18	-0.00824252		3006.18	-0.00444308		3596.18	-0.02421752
646.4	0.03756868		1236.39	-0.00076624		1826.39	-0.00592653		2416.38	-0.00742229		3006.38	-0.00470578		3596.38	-0.02401181
646.6	0.03743253		1236.59	-0.00167899		1826.59	-0.00572592		2416.58	-0.00874415		3006.58	-0.00517501		3596.58	-0.02352491
646.8	0.03762606		1236.79	-0.00149999		1826.79	-0.00465441		2416.78	-0.00851128		3006.78	-0.00630417		3596.78	-0.02353624
647	0.03808102		1236.99	-0.001389		1826.99	-0.00563333		2416.98	-0.00815497		3006.98	-0.00638554		3596.98	-0.02436781
647.2	0.03767578		1237.19	-0.00042078		1827.19	-0.00509674		2417.18	-0.00818021		3007.18	-0.00658124		3597.18	-0.02368527
647.4	0.03755749		1237.39	-0.0004468		1827.39	-0.00590187		2417.38	-0.00812861		3007.38	-0.00736376		3597.38	-0.02470971
647.6	0.03751466		1237.59	-0.00091006		1827.59	-0.00464448		2417.58	-0.00788201		3007.58	-0.00825381		3597.58	-0.02411585
647.8	0.0380777		1237.79	-0.00077818		1827.79	-0.00358274		2417.78	-0.00727105		3007.78	-0.00823136		3597.78	-0.02401666
648	0.03786603		1237.99	-0.00033063		1827.99	-0.0029152		2417.98	-0.00762438		3007.98	-0.00803299		3597.98	-0.02347416
648.2	0.03758017		1238.19	-0.00061004		1828.19	-0.00255353		2418.18	-0.00758742		3008.18	-0.00809886		3598.18	-0.02328543
648.4	0.03790684		1238.39	-0.00029871		1828.39	-0.00237078		2418.38	-0.00717888		3008.38	-0.00784292		3598.38	-0.02313218
648.6	0.03717018		1238.59	-0.00063584		1828.59	-0.00210508		2418.58	-0.00723698		3008.58	-0.0071739		3598.58	-0.02326938
648.8	0.0376397		1238.79	-0.00123191		1828.79	-0.00202453		2418.78	-0.00702989		3008.78	-0.00644748		3598.78	-0.02365167
649	0.03796207		1238.99	-0.00175203		1828.99	-0.00123411		2418.98	-0.00749046		3008.98	-0.00682031		3598.98	-0.02353494
649.2	0.03761549		1239.19	-0.0021378		1829.19	-0.00149277		2419.18	-0.00752002		3009.18	-0.00695637		3599.18	-0.02364149
649.4	0.03713097		1239.39	-0.0029301		1829.39	-0.00190696		2419.38	-0.00718286		3009.38	-0.00749621		3599.38	-0.02426309
649.6	0.03686128		1239.59	-0.00411696		1829.59	-0.00198735		2419.58	-0.00678547		3009.58	-0.00757289		3599.58	-0.02458997
649.8	0.03677885		1239.79	-0.00446699		1829.79	-0.00202485		2419.78	-0.00609558		3009.78	-0.00775818		3599.78	-0.02453278
