# Supplementary material for: Functional development of a V3/glycan-specific broadly neutralizing antibody isolated from a case of HIV superinfection
Source: eLife journal article supplement (doi:10.7554/elife.68110), 2021-07-15
Supplement: fig2-data2 [file B5.xls]

Vers 3.43 Data Simulation
Conc1	1E-06	1E-06	1E-06	1E-06	1E-06
Start1	290.01	880.01	1470	2060	2650
Stop1	649.81	1239.81	1829.8	2419.8	3009.8
Time1	Data1	Sim1	Time2	Data2	Sim2	Time3	Data3	Sim3	Time4	Data4	Sim4	Time5	Data5	Sim5
290.01	0.00346131		880.01	0.00059488		1470	-0.00514546		2060	-0.00661188		2650	0.01293519
290.21	0.00398672		880.21	0.00039483		1470.2	-0.00430404		2060.2	-0.00411588		2650.2	0.01408602
290.41	0.00440382		880.41	0.00130393		1470.4	-0.00320634		2060.4	-0.00275224		2650.4	0.0155649
290.61	0.00505515		880.61	0.00161004		1470.6	-0.00141935		2060.6	-0.0007814		2650.6	0.01738263
290.81	0.0056487		880.81	0.00128741		1470.8	-0.00000691		2060.8	0.00104239		2650.8	0.01880359
291.01	0.00578256		881.01	0.00179299		1471	0.00109175		2061	0.00311867		2651	0.02012332
291.21	0.00651977		881.21	0.0020904		1471.2	0.00203251		2061.2	0.00497446		2651.2	0.02204421
291.41	0.00789813		881.41	0.00296282		1471.4	0.00299463		2061.4	0.0066501		2651.4	0.02418025
291.61	0.00841644		881.61	0.00401896		1471.6	0.00382543		2061.6	0.00741437		2651.6	0.02605144
291.81	0.00971562		881.81	0.00518573		1471.8	0.00457107		2061.8	0.00772771		2651.8	0.02761283
292.01	0.01020218		882.01	0.00566498		1472	0.00521493		2062	0.0078041		2652	0.02901564
292.21	0.01062267		882.21	0.00608056		1472.2	0.00574263		2062.2	0.00730649		2652.2	0.02982024
292.41	0.01141859		882.41	0.0070749		1472.4	0.00591172		2062.4	0.00779609		2652.4	0.03092128
292.61	0.0120186		882.61	0.0066626		1472.6	0.00677114		2062.6	0.00763594		2652.6	0.03240369
292.81	0.01246565		882.81	0.00697631		1472.8	0.00709064		2062.8	0.00847458		2652.8	0.03340654
293.01	0.0134584		883.01	0.00881691		1473	0.00771612		2063	0.00819734		2653	0.03472489
293.21	0.01408085		883.21	0.00890435		1473.2	0.00837298		2063.2	0.00900267		2653.2	0.03554179
293.41	0.01407731		883.41	0.00927774		1473.4	0.00867561		2063.4	0.00916257		2653.4	0.03576396
293.61	0.01386855		883.61	0.00972975		1473.6	0.00808042		2063.6	0.00949528		2653.6	0.0361079
293.81	0.01298685		883.81	0.00974477		1473.8	0.0081715		2063.8	0.0103893		2653.8	0.0360677
294.01	0.0117702		884.01	0.01007162		1474	0.0078783		2064	0.01111559		2654	0.03556986
294.21	0.01188597		884.21	0.00960009		1474.2	0.0079956		2064.2	0.01146748		2654.2	0.03583999
294.41	0.01139669		884.41	0.00991435		1474.4	0.00866113		2064.4	0.01168394		2654.4	0.03561898
294.61	0.01140857		884.61	0.00947939		1474.6	0.00872721		2064.6	0.01313986		2654.6	0.0353609
294.81	0.01088781		884.81	0.00894308		1474.8	0.00842722		2064.8	0.0132375		2654.8	0.03585883
295.01	0.01073327		885.01	0.00913277		1475	0.00719247		2065	0.01399312		2655	0.03662648
295.21	0.01118553		885.21	0.00965638		1475.2	0.00660834		2065.2	0.01476051		2655.2	0.0372697
295.41	0.01164697		885.41	0.0102622		1475.4	0.00543841		2065.4	0.01462359		2655.4	0.03755757
295.61	0.01175549		885.61	0.01056312		1475.6	0.00526627		2065.6	0.01490573		2655.6	0.03788334
295.81	0.01269758		885.81	0.01038085		1475.8	0.00503172		2065.8	0.0150456		2655.8	0.03789495
296.01	0.01235552		886.01	0.00985531		1476	0.00518263		2066	0.01512457		2656	0.03811485
296.21	0.01249216		886.21	0.00958864		1476.2	0.00577719		2066.2	0.01523744		2656.2	0.03772835
296.41	0.01311299		886.41	0.0092331		1476.4	0.00547278		2066.4	0.01574825		2656.4	0.0372857
296.61	0.01244151		886.61	0.00873985		1476.6	0.00601949		2066.6	0.01551718		2656.6	0.03768966
296.81	0.01245476		886.81	0.00944342		1476.8	0.00668919		2066.8	0.01593464		2656.8	0.03710831
297.01	0.01213207		887.01	0.00973927		1477	0.00703943		2067	0.01479361		2657	0.03744386
297.21	0.01180788		887.21	0.00771962		1477.2	0.00667668		2067.2	0.01535505		2657.2	0.03649055
297.41	0.01170335		887.41	0.00780972		1477.4	0.00673877		2067.4	0.01522285		2657.4	0.03652707
297.61	0.01192994		887.61	0.00825616		1477.6	0.00638094		2067.6	0.01483861		2657.6	0.037417
297.81	0.01063236		887.81	0.00837716		1477.8	0.00700931		2067.8	0.01476417		2657.8	0.03758852
298.01	0.01037276		888.01	0.00777753		1478	0.00668545		2068	0.01417421		2658	0.03735009
298.21	0.010395		888.21	0.00665603		1478.2	0.0072737		2068.2	0.01364704		2658.2	0.0367887
298.41	0.01079853		888.41	0.00659506		1478.4	0.00792988		2068.4	0.01416683		2658.4	0.03743687
298.61	0.01141342		888.61	0.00716537		1478.6	0.00761394		2068.6	0.01342314		2658.6	0.03775356
298.81	0.01157134		888.81	0.00702595		1478.8	0.00827298		2068.8	0.01252418		2658.8	0.0385899
299.01	0.01180392		889.01	0.0071507		1479	0.00832824		2069	0.01271478		2659	0.03919038
299.21	0.01126074		889.21	0.00651515		1479.2	0.00945793		2069.2	0.01287562		2659.2	0.03889655
299.41	0.01187124		889.41	0.00615245		1479.4	0.00948399		2069.4	0.01279174		2659.4	0.03878689
299.61	0.01228378		889.61	0.00636893		1479.6	0.01113791		2069.6	0.01368901		2659.6	0.03873384
299.81	0.01156731		889.81	0.00622489		1479.8	0.01154649		2069.8	0.01300702		2659.8	0.03861869
300.01	0.01096624		890.01	0.00589761		1480	0.0114256		2070	0.01359804		2660	0.0384531
300.21	0.01073226		890.21	0.00550743		1480.2	0.01156068		2070.2	0.01415288		2660.2	0.03838636
300.41	0.01104505		890.41	0.00564786		1480.4	0.01058128		2070.4	0.01415567		2660.4	0.03838314
300.61	0.01091778		890.61	0.00581695		1480.6	0.01087848		2070.6	0.01366523		2660.6	0.03865019
300.81	0.01070723		890.81	0.00594549		1480.8	0.01098359		2070.8	0.01353023		2660.8	0.03895676
301.01	0.01035769		891.01	0.00551694		1481	0.00961911		2071	0.01372813		2661	0.03958173
301.21	0.01091457		891.21	0.00502736		1481.2	0.00851087		2071.2	0.01421211		2661.2	0.03961821
301.41	0.01089227		891.41	0.00611926		1481.4	0.00820003		2071.4	0.01399048		2661.4	0.0408378
301.61	0.01000047		891.61	0.00742201		1481.6	0.00728044		2071.6	0.0132168		2661.6	0.04142186
301.81	0.00930771		891.81	0.00773648		1481.8	0.00650273		2071.8	0.0135642		2661.8	0.04172835
302.01	0.00903041		892.01	0.0070806		1482	0.00531587		2072	0.01351644		2662	0.04164541
302.21	0.00835556		892.21	0.00769034		1482.2	0.00528094		2072.2	0.01333343		2662.2	0.04169027
302.41	0.00827972		892.41	0.00739417		1482.4	0.00489645		2072.4	0.01358228		2662.4	0.0420575
302.61	0.00808843		892.61	0.00838457		1482.6	0.00468599		2072.6	0.01275983		2662.6	0.04188723
302.81	0.00763186		892.81	0.00814012		1482.8	0.00517166		2072.8	0.01319645		2662.8	0.04272328
303.01	0.00735933		893.01	0.00794781		1483	0.00571578		2073	0.0139589		2663	0.0424837
303.21	0.00775668		893.21	0.00701394		1483.2	0.00668662		2073.2	0.01403666		2663.2	0.04201683
303.41	0.00791316		893.41	0.00825244		1483.4	0.00673346		2073.4	0.01364331		2663.4	0.04157283
303.61	0.00749225		893.61	0.00873435		1483.6	0.00762268		2073.6	0.01356498		2663.6	0.04171123
303.81	0.00738941		893.81	0.00843216		1483.8	0.00774884		2073.8	0.01207317		2663.8	0.04142501
304.01	0.00685183		894.01	0.00918681		1484	0.00763438		2074	0.0122069		2664	0.04167882
304.21	0.00710276		894.21	0.00953961		1484.2	0.00801207		2074.2	0.01147944		2664.2	0.04251017
304.41	0.00753279		894.41	0.00965603		1484.4	0.00858015		2074.4	0.01105065		2664.4	0.04244464
304.61	0.00738017		894.61	0.0094946		1484.6	0.00875726		2074.6	0.01064989		2664.6	0.04290445
304.81	0.00749924		894.81	0.00927145		1484.8	0.00805558		2074.8	0.01093676		2664.8	0.04370647
305.01	0.00798178		895.01	0.00846055		1485	0.00719816		2075	0.01141093		2665	0.04434001
305.21	0.00868642		895.21	0.00822372		1485.2	0.00667892		2075.2	0.01143472		2665.2	0.04413676
305.41	0.00875243		895.41	0.00793303		1485.4	0.0068143		2075.4	0.01189856		2665.4	0.0445965
305.61	0.00799382		895.61	0.00739146		1485.6	0.00618519		2075.6	0.01183481		2665.6	0.044737
305.81	0.00709351		895.81	0.00627612		1485.8	0.00558757		2075.8	0.01169598		2665.8	0.04462669
306.01	0.00631578		896.01	0.00510927		1486	0.00559614		2076	0.01162137		2666	0.04477401
306.21	0.00580814		896.21	0.00464425		1486.2	0.0057006		2076.2	0.01174123		2666.2	0.04552812
306.41	0.00682369		896.41	0.00367728		1486.4	0.00565202		2076.4	0.01225114		2666.4	0.04583128
306.61	0.00656762		896.61	0.00401452		1486.6	0.00625283		2076.6	0.0122232		2666.6	0.04661439
306.81	0.0063523		896.81	0.00339517		1486.8	0.00670542		2076.8	0.0129795		2666.8	0.04670205
307.01	0.00642212		897.01	0.00384451		1487	0.00700861		2077	0.01330277		2667	0.04572172
307.21	0.00660903		897.21	0.0039573		1487.2	0.00707329		2077.2	0.01320001		2667.2	0.04575479
307.41	0.00631459		897.41	0.00433238		1487.4	0.00723868		2077.4	0.01280361		2667.4	0.04522478
307.61	0.00637992		897.61	0.00510865		1487.6	0.00826416		2077.6	0.01312367		2667.6	0.04494304
307.81	0.00670717		897.81	0.0057246		1487.8	0.00755996		2077.8	0.01266614		2667.8	0.04400587
308.01	0.00577961		898.01	0.00685201		1488	0.00711796		2078	0.01310009		2668	0.04415164
308.21	0.00717296		898.21	0.0066365		1488.2	0.00752176		2078.2	0.01297338		2668.2	0.04355373
308.41	0.00767223		898.41	0.00617539		1488.4	0.00785637		2078.4	0.01332454		2668.4	0.0431077
308.61	0.00724145		898.61	0.00660463		1488.6	0.00722974		2078.6	0.0132237		2668.6	0.04307914
308.81	0.00819152		898.81	0.00630204		1488.8	0.00662129		2078.8	0.01399732		2668.8	0.04302338
309.01	0.00859683		899.01	0.00573815		1489	0.00667072		2079	0.01460803		2669	0.04269819
309.21	0.00866657		899.21	0.00554353		1489.2	0.00694203		2079.2	0.01503096		2669.2	0.04196498
309.41	0.00839549		899.41	0.00538429		1489.4	0.00695057		2079.4	0.01492436		2669.4	0.04174937
309.61	0.00790517		899.61	0.00521704		1489.6	0.00695526		2079.6	0.01436174		2669.6	0.0412894
309.81	0.00712476		899.81	0.00631024		1489.8	0.00675825		2079.8	0.01367792		2669.8	0.04155273
310.01	0.00758169		900.01	0.00575533		1490	0.00722079		2080	0.01375481		2670	0.04137072
310.21	0.00770823		900.21	0.00578894		1490.2	0.00805466		2080.2	0.01383938		2670.2	0.04208966
310.41	0.00822963		900.41	0.00489062		1490.4	0.0087193		2080.4	0.01327973		2670.4	0.04276295
310.61	0.00720404		900.61	0.0042873		1490.6	0.0095901		2080.6	0.01361389		2670.6	0.04394865
310.81	0.00745979		900.81	0.00432463		1490.8	0.00998238		2080.8	0.01364971		2670.8	0.04475345
311.01	0.00715866		901.01	0.00516602		1491	0.00977612		2081	0.01420278		2671	0.04486137
311.21	0.00671201		901.21	0.00486489		1491.2	0.01019395		2081.2	0.01407707		2671.2	0.045341
311.41	0.00612479		901.41	0.00481205		1491.4	0.01085696		2081.4	0.01432841		2671.4	0.04614177
311.61	0.00590405		901.61	0.0051153		1491.6	0.01047437		2081.6	0.01458219		2671.6	0.04619139
311.81	0.00636512		901.81	0.00470176		1491.8	0.00970748		2081.8	0.01468065		2671.8	0.04676879
312.01	0.00636618		902.01	0.00494264		1492	0.01015684		2082	0.01424326		2672	0.04704689
312.21	0.00695174		902.21	0.00493217		1492.2	0.01048164		2082.2	0.01446224		2672.2	0.04689732
312.41	0.00723691		902.41	0.00528048		1492.4	0.01020676		2082.4	0.0150449		2672.4	0.04704232
312.61	0.00721974		902.61	0.00611172		1492.6	0.01034802		2082.6	0.01563726		2672.6	0.04683408
312.81	0.00899052		902.81	0.00586624		1492.8	0.01023083		2082.8	0.01602308		2672.8	0.04720859
313.01	0.00981177		903.01	0.00572408		1493	0.01027875		2083	0.01547352		2673	0.04697188
313.21	0.00933605		903.21	0.00620375		1493.2	0.01005312		2083.2	0.01508921		2673.2	0.04673791
313.41	0.00935779		903.41	0.00683218		1493.4	0.00948408		2083.4	0.0149149		2673.4	0.04658933
313.61	0.01050607		903.61	0.00662646		1493.6	0.00840085		2083.6	0.01433182		2673.6	0.04642993
313.81	0.00974381		903.81	0.00720651		1493.8	0.00800225		2083.8	0.0134067		2673.8	0.04653008
314.01	0.00936737		904.01	0.00609566		1494	0.00737141		2084	0.01315961		2674	0.04592569
314.21	0.00894391		904.21	0.00558112		1494.2	0.00757381		2084.2	0.01274018		2674.2	0.04648116
314.41	0.00921856		904.41	0.00553787		1494.4	0.00704339		2084.4	0.01250596		2674.4	0.04670249
314.61	0.00872825		904.61	0.00552857		1494.6	0.00673466		2084.6	0.01291641		2674.6	0.04716812
314.81	0.00787274		904.81	0.00588919		1494.8	0.0062792		2084.8	0.01239464		2674.8	0.04731549
315.01	0.00653354		905.01	0.00578874		1495	0.00654152		2085	0.01246329		2675	0.04623563
315.21	0.00534074		905.21	0.00505395		1495.2	0.00659508		2085.2	0.01155855		2675.2	0.04609727
315.41	0.00496562		905.41	0.00460187		1495.4	0.0066666		2085.4	0.01218659		2675.4	0.04561699
315.61	0.00466467		905.61	0.00415778		1495.6	0.00620965		2085.6	0.0120815		2675.6	0.04513652
315.81	0.00433225		905.81	0.00467471		1495.8	0.00656644		2085.8	0.0121668		2675.8	0.04579346
316.01	0.00394026		906.01	0.00481758		1496	0.00675028		2086	0.01190779		2676	0.04511783
316.21	0.00426652		906.21	0.00466164		1496.2	0.00705777		2086.2	0.01235338		2676.2	0.04514625
316.41	0.00484736		906.41	0.00480627		1496.4	0.00765227		2086.4	0.01252669		2676.4	0.04455269
316.61	0.00547572		906.61	0.00435543		1496.6	0.00845136		2086.6	0.01253422		2676.6	0.04500462
316.81	0.00629915		906.81	0.0040672		1496.8	0.00894952		2086.8	0.01192558		2676.8	0.04535803
317.01	0.00692399		907.01	0.0043669		1497	0.00892459		2087	0.01216268		2677	0.04532189
317.21	0.00601106		907.21	0.00479533		1497.2	0.00894681		2087.2	0.01268562		2677.2	0.04598297
317.41	0.00646438		907.41	0.00481244		1497.4	0.00900233		2087.4	0.01291484		2677.4	0.04672369
317.61	0.00711949		907.61	0.00493461		1497.6	0.00906029		2087.6	0.01245985		2677.6	0.04747307
317.81	0.00658994		907.81	0.00555285		1497.8	0.00895169		2087.8	0.01328657		2677.8	0.04860055
318.01	0.0068604		908.01	0.00589376		1498	0.00790554		2088	0.01407921		2678	0.04870783
318.21	0.00730322		908.21	0.00586944		1498.2	0.00762077		2088.2	0.01461172		2678.2	0.0491553
318.41	0.00761921		908.41	0.00622771		1498.4	0.00639283		2088.4	0.01502257		2678.4	0.04988161
318.61	0.00755109		908.61	0.00532401		1498.6	0.0064747		2088.6	0.01460396		2678.6	0.05058566
318.81	0.00799072		908.81	0.0056011		1498.8	0.00614653		2088.8	0.01444324		2678.8	0.05061537
319.01	0.00780601		909.01	0.00483372		1499	0.00680244		2089	0.01425423		2679	0.04951995
319.21	0.00773344		909.21	0.00452463		1499.2	0.00592376		2089.2	0.01446098		2679.2	0.04923243
319.41	0.00756179		909.41	0.00412429		1499.4	0.00540642		2089.4	0.01465414		2679.4	0.04875398
319.61	0.00779363		909.61	0.00380802		1499.6	0.004451		2089.6	0.01489424		2679.6	0.04845162
319.81	0.00755656		909.81	0.00410048		1499.8	0.00404394		2089.8	0.01389358		2679.8	0.04829662
320.01	0.00747942		910.01	0.00352042		1500	0.00334776		2090	0.01336357		2680	0.04747227
320.21	0.00808857		910.21	0.00350567		1500.2	0.00354752		2090.2	0.01275069		2680.2	0.04704177
320.41	0.00820716		910.41	0.00269221		1500.4	0.00322888		2090.4	0.01275057		2680.4	0.04666107
320.61	0.00902879		910.61	0.00298059		1500.6	0.00343468		2090.6	0.01264463		2680.6	0.04655998
320.81	0.00866194		910.81	0.00231949		1500.8	0.00379298		2090.8	0.01268808		2680.8	0.04591402
321.01	0.00866839		911.01	0.00228723		1501	0.00344452		2091	0.01343291		2681	0.04568252
321.21	0.00826412		911.21	0.00278345		1501.2	0.00342587		2091.2	0.01319879		2681.2	0.04544607
321.41	0.00865341		911.41	0.00290962		1501.4	0.00364903		2091.4	0.01402725		2681.4	0.04504142
321.61	0.00891697		911.61	0.00360211		1501.6	0.00400974		2091.6	0.01392742		2681.6	0.04515556
321.81	0.00938685		911.81	0.00331494		1501.8	0.00388793		2091.8	0.01467583		2681.8	0.04519974
322.01	0.00792271		912.01	0.00340973		1502	0.0045455		2092	0.01503325		2682	0.04531176
322.21	0.00812012		912.21	0.00247837		1502.2	0.00410484		2092.2	0.01442802		2682.2	0.04477951
322.41	0.00840045		912.41	0.00182416		1502.4	0.00407701		2092.4	0.0148187		2682.4	0.04499916
322.61	0.00796991		912.61	0.00214914		1502.6	0.00557262		2092.6	0.01481224		2682.6	0.04540041
322.81	0.00753612		912.81	0.00234378		1502.8	0.00593206		2092.8	0.01481423		2682.8	0.04503436
323.01	0.00586703		913.01	0.00217513		1503	0.00650439		2093	0.01521048		2683	0.04440246
323.21	0.00532902		913.21	0.00213641		1503.2	0.00638284		2093.2	0.01559018		2683.2	0.04468238
323.41	0.00456909		913.41	0.00226748		1503.4	0.00680762		2093.4	0.01505944		2683.4	0.04483956
323.61	0.00405501		913.61	0.00326671		1503.6	0.006597		2093.6	0.01491564		2683.6	0.04509069
323.81	0.00287698		913.81	0.00370443		1503.8	0.00677688		2093.8	0.01381099		2683.8	0.04502042
324.01	0.00272464		914.01	0.00392896		1504	0.0073511		2094	0.01431194		2684	0.04544238
324.21	0.00377293		914.21	0.00433923		1504.2	0.00829951		2094.2	0.01429011		2684.2	0.04597699
324.41	0.00300012		914.41	0.00406819		1504.4	0.00829684		2094.4	0.0148855		2684.4	0.04593135
324.61	0.00342998		914.61	0.00454463		1504.6	0.00954751		2094.6	0.01516022		2684.6	0.04493495
324.81	0.00346618		914.81	0.00368428		1504.8	0.01026903		2094.8	0.01468647		2684.8	0.04525572
325.01	0.00425194		915.01	0.00376669		1505	0.01007981		2095	0.01490177		2685	0.04529808
325.21	0.00541507		915.21	0.00400097		1505.2	0.00996963		2095.2	0.01480774		2685.2	0.04489622
325.41	0.00573193		915.41	0.00342291		1505.4	0.00991261		2095.4	0.01532206		2685.4	0.04535765
325.61	0.00594295		915.61	0.00302164		1505.6	0.01004929		2095.6	0.01456784		2685.6	0.0457763
325.81	0.00680882		915.81	0.00231698		1505.8	0.01049704		2095.8	0.01453426		2685.8	0.04620274
326.01	0.00771185		916.01	0.0013654		1506	0.01000792		2096	0.01392049		2686	0.04629136
326.21	0.00863658		916.21	0.00105329		1506.2	0.0086671		2096.2	0.01296228		2686.2	0.04644984
326.41	0.00887193		916.41	0.00054762		1506.4	0.00803588		2096.4	0.01295425		2686.4	0.04727063
326.61	0.00838114		916.61	0.00113941		1506.6	0.00782768		2096.6	0.0124558		2686.6	0.04738532
326.81	0.00818354		916.81	0.00065008		1506.8	0.00770803		2096.8	0.01190617		2686.8	0.04813165
327.01	0.00701584		917.01	0.00054197		1507	0.00700266		2097	0.0116452		2687	0.04844213
327.21	0.00680162		917.21	0.00089656		1507.2	0.00642247		2097.2	0.01037737		2687.2	0.04935769
327.41	0.00720726		917.41	0.00192664		1507.4	0.00616696		2097.4	0.01020129		2687.4	0.04959578
327.61	0.00665096		917.61	0.00202231		1507.6	0.00531892		2097.6	0.01007747		2687.6	0.05012093
327.81	0.00609		917.81	0.00128776		1507.8	0.00519719		2097.8	0.01037588		2687.8	0.05017414
328.01	0.00547946		918.01	0.00200481		1508	0.00548311		2098	0.01054762		2688	0.05014122
328.21	0.00566055		918.21	0.00290502		1508.2	0.00501683		2098.2	0.01092775		2688.2	0.05033385
328.41	0.00367432		918.41	0.00386893		1508.4	0.00529884		2098.4	0.01144567		2688.4	0.04927601
328.61	0.00307859		918.61	0.00401592		1508.6	0.00623352		2098.6	0.01204365		2688.6	0.0495646
328.81	0.00243105		918.81	0.00417582		1508.8	0.00637911		2098.8	0.01206587		2688.8	0.05039478
329.01	0.0022217		919.01	0.00374656		1509	0.005591		2099	0.01275225		2689	0.05089002
329.21	0.00213269		919.21	0.00316212		1509.2	0.00519846		2099.2	0.01337039		2689.2	0.0515445
329.41	0.00162627		919.41	0.00326741		1509.4	0.00549709		2099.4	0.01325397		2689.4	0.05227827
329.61	0.00159182		919.61	0.00350165		1509.6	0.00499345		2099.6	0.01303927		2689.6	0.05201251
329.81	0.00209691		919.81	0.00402871		1509.8	0.00551199		2099.8	0.01335645		2689.8	0.05195039
330.01	0.0021515		920.01	0.00381719		1510	0.00494352		2100	0.01325091		2690	0.05069772
330.21	0.00148859		920.21	0.00378417		1510.2	0.00546107		2100.2	0.01400749		2690.2	0.05031317
330.41	0.00195075		920.41	0.00275148		1510.4	0.00569728		2100.4	0.0140557		2690.4	0.04931814
330.61	0.00160851		920.61	0.00226892		1510.6	0.00649617		2100.6	0.01479155		2690.6	0.04857964
330.81	0.00117548		920.81	0.00119339		1510.8	0.00716571		2100.8	0.01415018		2690.8	0.04890133
331.01	0.0015055		921.01	0.00084104		1511	0.00689539		2101	0.01387497		2691	0.04729488
331.21	0.00242628		921.21	0.00114565		1511.2	0.00722316		2101.2	0.013538		2691.2	0.04652523
331.41	0.00309214		921.41	0.00086627		1511.4	0.00807266		2101.4	0.01451088		2691.4	0.04610973
331.61	0.00268104		921.61	0.00034658		1511.6	0.0091968		2101.6	0.01422267		2691.6	0.04583905
331.81	0.00270869		921.81	0.00050906		1511.8	0.00988167		2101.8	0.01414532		2691.8	0.04538913
332.01	0.00263348		922.01	0.00114704		1512	0.01040707		2102	0.01399319		2692	0.04470006
332.21	0.00269084		922.21	0.00169227		1512.2	0.01001948		2102.2	0.01429447		2692.2	0.04423986
332.41	0.00152635		922.41	0.00300102		1512.4	0.01033724		2102.4	0.01478816		2692.4	0.04390789
332.61	0.0017043		922.61	0.00280389		1512.6	0.01026904		2102.6	0.01504525		2692.6	0.04427799
332.81	0.00236229		922.81	0.00281915		1512.8	0.01058828		2102.8	0.01400051		2692.8	0.0449608
333.01	0.00285761		923.01	0.0022633		1513	0.00980917		2103	0.01376261		2693	0.04621981
333.21	0.0031666		923.21	0.00260884		1513.2	0.01010977		2103.2	0.01385463		2693.2	0.04653431
333.41	0.00306086		923.41	0.00344516		1513.4	0.0094305		2103.4	0.01411976		2693.4	0.04668403
333.61	0.00375332		923.61	0.00377413		1513.6	0.00818956		2103.6	0.01468373		2693.6	0.04634078
333.81	0.00405256		923.81	0.00356006		1513.8	0.0093917		2103.8	0.01610651		2693.8	0.04628399
334.01	0.00392608		924.01	0.00291308		1514	0.00831021		2104	0.0163949		2694	0.04641838
334.21	0.00421342		924.21	0.00265873		1514.2	0.00772249		2104.2	0.01741842		2694.2	0.04658655
334.41	0.00413056		924.41	0.00253024		1514.4	0.0066203		2104.4	0.0168357		2694.4	0.04685979
334.61	0.00395095		924.61	0.00248541		1514.6	0.00547038		2104.6	0.01693453		2694.6	0.0476452
334.81	0.00339126		924.81	0.00304257		1514.8	0.00467753		2104.8	0.01642126		2694.8	0.04768648
335.01	0.00332378		925.01	0.00392399		1515	0.00471373		2105	0.01654746		2695	0.04705602
335.21	0.00216577		925.21	0.00528373		1515.2	0.0055409		2105.2	0.016307		2695.2	0.04741512
335.41	0.00242462		925.41	0.00611295		1515.4	0.0063189		2105.4	0.01595374		2695.4	0.04843613
335.61	0.00223414		925.61	0.0067041		1515.6	0.00722217		2105.6	0.01518687		2695.6	0.04798174
335.81	0.00243611		925.81	0.00709423		1515.8	0.00679644		2105.8	0.01424626		2695.8	0.04773651
336.01	0.00191396		926.01	0.00691868		1516	0.00686845		2106	0.01343558		2696	0.04768241
336.21	0.0017407		926.21	0.00774653		1516.2	0.00698335		2106.2	0.01291833		2696.2	0.04653894
336.41	0.00193853		926.41	0.0083229		1516.4	0.00794837		2106.4	0.01316063		2696.4	0.04637018
336.61	0.00279128		926.61	0.00802208		1516.6	0.00860003		2106.6	0.01234404		2696.6	0.04605682
336.81	0.00279457		926.81	0.0074096		1516.8	0.00943771		2106.8	0.01157257		2696.8	0.0462332
337.01	0.00296399		927.01	0.00710026		1517	0.00953462		2107	0.01216891		2697	0.04628971
337.21	0.00303176		927.21	0.00670844		1517.2	0.00966416		2107.2	0.01274025		2697.2	0.0460082
337.41	0.00242639		927.41	0.00542792		1517.4	0.00977452		2107.4	0.01323245		2697.4	0.04563546
337.61	0.00270856		927.61	0.0048248		1517.6	0.01019052		2107.6	0.01379336		2697.6	0.04559464
337.81	0.00238152		927.81	0.00380183		1517.8	0.01051891		2107.8	0.01441529		2697.8	0.04580153
338.01	0.0016616		928.01	0.00337738		1518	0.0090095		2108	0.01396451		2698	0.04609825
338.21	0.00174197		928.21	0.00344197		1518.2	0.0081266		2108.2	0.01385536		2698.2	0.0459689
338.41	0.00186242		928.41	0.00269468		1518.4	0.00761281		2108.4	0.01296077		2698.4	0.04645191
338.61	0.00167019		928.61	0.00224262		1518.6	0.00684746		2108.6	0.01331706		2698.6	0.04729809
338.81	0.00080467		928.81	0.00309006		1518.8	0.00605992		2108.8	0.01307887		2698.8	0.04692633
339.01	0.00093901		929.01	0.00326125		1519	0.00667222		2109	0.01265067		2699	0.04742956
339.21	0.00092618		929.21	0.00349561		1519.2	0.00618756		2109.2	0.01194526		2699.2	0.04802435
339.41	0.00227979		929.41	0.00220032		1519.4	0.00607305		2109.4	0.01207844		2699.4	0.04809554
339.61	0.00192448		929.61	0.00190641		1519.6	0.00561572		2109.6	0.01168238		2699.6	0.04795917
339.81	0.00192729		929.81	0.00136041		1519.8	0.00485344		2109.8	0.01110615		2699.8	0.04886297
340.01	0.00165315		930.01	0.00091441		1520	0.00460662		2110	0.01110017		2700	0.0484727
340.21	0.00203434		930.21	0.00114255		1520.2	0.00474975		2110.2	0.01130121		2700.2	0.04831597
340.41	0.00301693		930.41	0.00088936		1520.4	0.00421831		2110.4	0.01201735		2700.4	0.0481472
340.61	0.00344465		930.61	0.00085606		1520.6	0.0038288		2110.6	0.01217772		2700.6	0.04826007
340.81	0.00375545		930.81	0.00061046		1520.8	0.00316177		2110.8	0.01322986		2700.8	0.04844538
341.01	0.00374396		931.01	0.00052121		1521	0.00387491		2111	0.01394717		2701	0.04861739
341.21	0.002882		931.21	0.00014466		1521.2	0.00398304		2111.2	0.01419449		2701.2	0.04813758
341.41	0.00223292		931.41	0.00047301		1521.4	0.00477887		2111.4	0.0144005		2701.4	0.0484102
341.61	0.00217019		931.61	0.00126754		1521.6	0.00538994		2111.6	0.0152914		2701.6	0.04951141
341.81	0.00194842		931.81	0.00158148		1521.8	0.00568218		2111.8	0.01520498		2701.8	0.04964817
342.01	0.00177635		932.01	0.00145537		1522	0.00592203		2112	0.0151955		2702	0.04928819
342.21	0.00244703		932.21	0.00211208		1522.2	0.00558442		2112.2	0.01515379		2702.2	0.04937425
342.41	0.00262898		932.41	0.00182755		1522.4	0.006043		2112.4	0.01529973		2702.4	0.05007655
342.61	0.00254126		932.61	0.00217682		1522.6	0.00525625		2112.6	0.01630006		2702.6	0.04986118
342.81	0.00274839		932.81	0.00295851		1522.8	0.00463637		2112.8	0.0163705		2702.8	0.05018171
343.01	0.00272841		933.01	0.00269222		1523	0.00481887		2113	0.01610395		2703	0.04979885
343.21	0.00243647		933.21	0.00151033		1523.2	0.0047121		2113.2	0.01618113		2703.2	0.04974179
343.41	0.00227676		933.41	0.00033572		1523.4	0.00527061		2113.4	0.01683097		2703.4	0.04932739
343.61	0.00175526		933.61	0.00037332		1523.6	0.00541641		2113.6	0.01602796		2703.6	0.04903842
343.81	0.00139868		933.81	-0.00015377		1523.8	0.00574576		2113.8	0.01586624		2703.8	0.04840909
344.01	0.00114832		934.01	-0.00011064		1524	0.00670862		2114	0.01526399		2704	0.04745064
344.21	0.00211912		934.21	-0.00001664		1524.2	0.00770905		2114.2	0.01513795		2704.2	0.04724249
344.41	0.00230856		934.41	-0.00011014		1524.4	0.00729946		2114.4	0.01450852		2704.4	0.04622641
344.61	0.00173097		934.61	0.00018528		1524.6	0.00682177		2114.6	0.01405025		2704.6	0.04592415
344.81	0.00205369		934.81	0.00047626		1524.8	0.00656961		2114.8	0.01460658		2704.8	0.04650896
345.01	0.00098096		935.01	0.00097418		1525	0.00739347		2115	0.01366697		2705	0.04625754
345.21	0.00087092		935.21	0.0009971		1525.2	0.00695969		2115.2	0.0138296		2705.2	0.04652698
345.41	0.00050733		935.41	0.00174039		1525.4	0.00665842		2115.4	0.01374086		2705.4	0.04777054
345.61	0.00036063		935.61	0.0023219		1525.6	0.00636672		2115.6	0.01365726		2705.6	0.0484999
345.81	0.00005048		935.81	0.00256452		1525.8	0.00559468		2115.8	0.01473113		2705.8	0.04820717
346.01	0.00054534		936.01	0.00232988		1526	0.0050605		2116	0.01479806		2706	0.04845453
346.21	0.00118719		936.21	0.00303129		1526.2	0.00442254		2116.2	0.01486874		2706.2	0.04912381
346.41	0.00150095		936.41	0.00336729		1526.4	0.00377417		2116.4	0.01567049		2706.4	0.04968727
346.61	0.00256265		936.61	0.0040946		1526.6	0.00286164		2116.6	0.01597115		2706.6	0.04982055
346.81	0.00350368		936.81	0.0038455		1526.8	0.00288547		2116.8	0.01578771		2706.8	0.05036114
347.01	0.00388733		937.01	0.00342136		1527	0.00285214		2117	0.0158184		2707	0.04995839
347.21	0.0040187		937.21	0.00251439		1527.2	0.00294905		2117.2	0.01583451		2707.2	0.05025356
347.41	0.0043479		937.41	0.00206695		1527.4	0.00324408		2117.4	0.01534018		2707.4	0.04898057
347.61	0.00404113		937.61	0.00133889		1527.6	0.00415518		2117.6	0.01457299		2707.6	0.04792869
347.81	0.00363815		937.81	0.00128182		1527.8	0.00492732		2117.8	0.01440446		2707.8	0.04784444
348.01	0.00319711		938.01	0.00046874		1528	0.00599697		2118	0.01341354		2708	0.04726912
348.21	0.00413487		938.21	-0.00001578		1528.2	0.00640111		2118.2	0.01334696		2708.2	0.04677587
348.41	0.00286796		938.41	-0.00025713		1528.4	0.006252		2118.4	0.01173319		2708.4	0.04727448
348.61	0.00308399		938.61	0.00068716		1528.6	0.00603163		2118.6	0.01240898		2708.6	0.04749868
348.81	0.0035775		938.81	-0.00041359		1528.8	0.00718022		2118.8	0.01278267		2708.8	0.0479215
349.01	0.00282515		939.01	-0.00053583		1529	0.00716794		2119	0.01189818		2709	0.04756627
349.21	0.00271297		939.21	-0.000709		1529.2	0.00728827		2119.2	0.01234659		2709.2	0.04698195
349.41	0.00148911		939.41	0.00042568		1529.4	0.00735743		2119.4	0.01175232		2709.4	0.0472695
349.61	0.00147756		939.61	0.0002427		1529.6	0.0074163		2119.6	0.01173966		2709.6	0.04785355
349.81	0.00067786		939.81	0.00015475		1529.8	0.00733094		2119.8	0.01341527		2709.8	0.04760184
350.01	0.00057466		940.01	0.00035178		1530	0.00714711		2120	0.01246452		2710	0.04758817
350.21	0.00035045		940.21	0.00077879		1530.2	0.00724987		2120.2	0.01178182		2710.2	0.04741736
350.41	0.00001523		940.41	0.00101014		1530.4	0.00718931		2120.4	0.01187009		2710.4	0.04738811
350.61	0.00041637		940.61	0.00125118		1530.6	0.0070802		2120.6	0.01148168		2710.6	0.04790306
350.81	0.00030101		940.81	0.00109211		1530.8	0.00665933		2120.8	0.01204072		2710.8	0.04809517
351.01	-0.00011721		941.01	0.00197917		1531	0.005918		2121	0.01179063		2711	0.04752169
351.21	-0.00087626		941.21	0.00259509		1531.2	0.00594594		2121.2	0.01188155		2711.2	0.04693626
351.41	-0.00176294		941.41	0.00219819		1531.4	0.00633141		2121.4	0.01250738		2711.4	0.04650186
351.61	-0.00191505		941.61	0.00207332		1531.6	0.00654534		2121.6	0.01363484		2711.6	0.04678531
351.81	-0.00115345		941.81	0.00267586		1531.8	0.00680626		2121.8	0.01387398		2711.8	0.04677923
352.01	-0.00069772		942.01	0.00177456		1532	0.0065578		2122	0.01434259		2712	0.04688285
352.21	-0.00019654		942.21	0.00247572		1532.2	0.00783791		2122.2	0.01498966		2712.2	0.04776528
352.41	-0.00025768		942.41	0.00274469		1532.4	0.00795568		2122.4	0.01508019		2712.4	0.04809956
352.61	0.00140258		942.61	0.00242598		1532.6	0.00777098		2122.6	0.01697114		2712.6	0.04826082
352.81	0.00198831		942.81	0.00115973		1532.8	0.00831505		2122.8	0.01676184		2712.8	0.0484718
353.01	0.00233422		943.01	0.00185017		1533	0.007687		2123	0.01659215		2713	0.04872903
353.21	0.0020548		943.21	0.00146985		1533.2	0.00816223		2123.2	0.01713656		2713.2	0.04830347
353.41	0.00152022		943.41	0.00193884		1533.4	0.00821623		2123.4	0.01657644		2713.4	0.04894359
353.61	0.00185784		943.61	0.00089978		1533.6	0.00709609		2123.6	0.0161689		2713.6	0.04919312
353.81	0.00146957		943.81	0.00085638		1533.8	0.00623234		2123.8	0.01629288		2713.8	0.04862705
354.01	0.00132888		944.01	0.00037025		1534	0.00573695		2124	0.01466014		2714	0.04864541
354.21	0.00105322		944.21	-0.0001536		1534.2	0.00597599		2124.2	0.01440319		2714.2	0.04867295
354.41	0.0007051		944.41	0.00026561		1534.4	0.0059302		2124.4	0.01441657		2714.4	0.04858905
354.61	0.0008035		944.61	0.00082788		1534.6	0.00591198		2124.6	0.01364169		2714.6	0.0487135
354.81	0.00092095		944.81	0.00086223		1534.8	0.00617523		2124.8	0.0137694		2714.8	0.0484466
355.01	0.00139485		945.01	0.00157116		1535	0.00607142		2125	0.01389055		2715	0.04813004
355.21	0.00074487		945.21	0.00098456		1535.2	0.00663878		2125.2	0.01486132		2715.2	0.04808235
355.41	0.00050731		945.41	0.00045042		1535.4	0.00651884		2125.4	0.01494965		2715.4	0.04814624
355.61	0.00121818		945.61	0.0008735		1535.6	0.0065618		2125.6	0.01524924		2715.6	0.04844477
355.81	0.00142179		945.81	0.00135671		1535.8	0.00630804		2125.8	0.01431759		2715.8	0.04842332
356.01	0.00052302		946.01	0.00136299		1536	0.00649467		2126	0.01461466		2716	0.0491352
356.21	0.00008352		946.21	0.00169487		1536.2	0.00745138		2126.2	0.01415233		2716.2	0.04909605
356.41	0.00015106		946.41	0.00190861		1536.4	0.00641403		2126.4	0.01399641		2716.4	0.04946217
356.61	0.00044626		946.61	0.00229095		1536.6	0.0066545		2126.6	0.01511944		2716.6	0.04923223
356.81	0.00029764		946.81	0.00174498		1536.8	0.00624013		2126.8	0.01378362		2716.8	0.0491556
357.01	0.00122487		947.01	0.00224552		1537	0.00624996		2127	0.01412807		2717	0.04971577
357.21	0.00104199		947.21	0.00172298		1537.2	0.00590132		2127.2	0.01360172		2717.2	0.04917971
357.41	0.0008947		947.41	0.00209254		1537.4	0.00525824		2127.4	0.01330816		2717.4	0.04963511
357.61	0.00156249		947.61	0.00157364		1537.6	0.0041406		2127.6	0.01359826		2717.6	0.04943864
357.81	0.00211364		947.81	0.00114478		1537.8	0.00421123		2127.8	0.01374604		2717.8	0.04935646
358.01	0.00254466		948.01	0.00058776		1538	0.00404953		2128	0.01371773		2718	0.04997052
358.21	0.00222883		948.21	0.00019867		1538.2	0.00438132		2128.2	0.01385362		2718.2	0.05019989
358.41	0.00148949		948.41	0.0010957		1538.4	0.00406296		2128.4	0.01375589		2718.4	0.05048013
358.61	0.0019871		948.61	0.0008919		1538.6	0.00378854		2128.6	0.01385915		2718.6	0.04998178
358.81	0.00191325		948.81	0.00038122		1538.8	0.00377928		2128.8	0.01401536		2718.8	0.05075808
359.01	0.00230305		949.01	0.00036483		1539	0.00416721		2129	0.01441746		2719	0.05141351
359.21	0.00122353		949.21	-0.00036652		1539.2	0.00421272		2129.2	0.01481923		2719.2	0.05129043
359.41	0.0007407		949.41	-0.00009511		1539.4	0.00473254		2129.4	0.0146495		2719.4	0.05094584
359.61	-0.00015825		949.61	0.00054458		1539.6	0.00474564		2129.6	0.01482053		2719.6	0.05098869
359.81	-0.0009253		949.81	0.00106667		1539.8	0.00515124		2129.8	0.01437873		2719.8	0.05098007
360.01	-0.00189628		950.01	0.00150179		1540	0.00535922		2130	0.01360807		2720	0.05130353
360.21	-0.00142911		950.21	0.00130844		1540.2	0.00543937		2130.2	0.01368493		2720.2	0.05114351
360.41	-0.00185902		950.41	0.00152884		1540.4	0.00550663		2130.4	0.01361633		2720.4	0.05121055
360.61	-0.00168799		950.61	0.00129602		1540.6	0.00545685		2130.6	0.01475378		2720.6	0.04996097
360.81	-0.00058588		950.81	0.00028184		1540.8	0.0050334		2130.8	0.01367653		2720.8	0.0500193
361.01	0.00013181		951.01	0.00011936		1541	0.00581339		2131	0.01439813		2721	0.04963825
361.21	-0.00093515		951.21	-0.00017162		1541.2	0.00496295		2131.2	0.01395193		2721.2	0.04899247
361.41	-0.00127729		951.41	-0.00100874		1541.4	0.005		2131.4	0.01483411		2721.4	0.04881824
361.61	-0.0007227		951.61	-0.0017901		1541.6	0.0053837		2131.6	0.01449726		2721.6	0.04823352
361.81	-0.00036295		951.81	-0.0021593		1541.8	0.00433615		2131.8	0.01451091		2721.8	0.04850124
362.01	-0.00064014		952.01	-0.00186135		1542	0.00363742		2132	0.01456537		2722	0.04823531
362.21	-0.00118475		952.21	-0.00146575		1542.2	0.00398824		2132.2	0.01404758		2722.2	0.04873071
362.41	-0.0011765		952.41	-0.00049974		1542.4	0.00401557		2132.4	0.01397756		2722.4	0.04846716
362.61	-0.00060701		952.61	-0.00073434		1542.6	0.00421228		2132.6	0.01369531		2722.6	0.04831634
362.81	-0.00093618		952.81	-0.00021234		1542.8	0.00568323		2132.8	0.01348757		2722.8	0.04920665
363.01	-0.00039071		953.01	-0.00017206		1543	0.00658675		2133	0.01342904		2723	0.04944837
363.21	-0.00099471		953.21	0.00003629		1543.2	0.00712725		2133.2	0.01423856		2723.2	0.04937556
363.41	-0.0015966		953.41	0.00070885		1543.4	0.00792769		2133.4	0.01478341		2723.4	0.04951087
363.61	-0.00202382		953.61	0.00145281		1543.6	0.00805746		2133.6	0.01474631		2723.6	0.04997402
363.81	-0.00213945		953.81	0.00151308		1543.8	0.00888373		2133.8	0.01477341		2723.8	0.05050083
364.01	-0.00186715		954.01	0.00129572		1544	0.00864177		2134	0.0145238		2724	0.05039229
364.21	-0.00197048		954.21	0.00158041		1544.2	0.00923812		2134.2	0.01474548		2724.2	0.05035007
364.41	-0.00240813		954.41	0.0012774		1544.4	0.00893744		2134.4	0.01482567		2724.4	0.04977774
364.61	-0.00233196		954.61	0.00130025		1544.6	0.00817274		2134.6	0.01500984		2724.6	0.04923802
364.81	-0.00214789		954.81	0.00148517		1544.8	0.00845007		2134.8	0.0142907		2724.8	0.04915478
365.01	-0.00287493		955.01	0.00124719		1545	0.00826108		2135	0.01479136		2725	0.04872452
365.21	-0.00334157		955.21	0.00154678		1545.2	0.00708288		2135.2	0.01488213		2725.2	0.04915306
365.41	-0.00349895		955.41	0.00075762		1545.4	0.00734285		2135.4	0.01558902		2725.4	0.04876566
365.61	-0.00292142		955.61	0.00072109		1545.6	0.00714996		2135.6	0.01508494		2725.6	0.04905021
365.81	-0.0025537		955.81	0.00064942		1545.8	0.00644489		2135.8	0.01479075		2725.8	0.04933657
366.01	-0.00214345		956.01	0.0003499		1546	0.00702823		2136	0.01409134		2726	0.04910152
366.21	-0.00229146		956.21	-0.00040376		1546.2	0.00733706		2136.2	0.01310862		2726.2	0.04981312
366.41	-0.00207402		956.41	-0.00020965		1546.4	0.00675882		2136.4	0.01278298		2726.4	0.04981893
366.61	-0.00204721		956.61	-0.00001594		1546.6	0.00722242		2136.6	0.01356263		2726.6	0.05033503
366.81	-0.00156202		956.81	-0.00081125		1546.8	0.0085739		2136.8	0.01308959		2726.8	0.05028021
367.01	-0.00122187		957.01	-0.00190913		1547	0.00915929		2137	0.01309672		2727	0.05088096
367.21	-0.00048212		957.21	-0.00230998		1547.2	0.00995444		2137.2	0.01366711		2727.2	0.05122267
367.41	-0.00026879		957.41	-0.00220006		1547.4	0.00981394		2137.4	0.01344493		2727.4	0.05102852
367.61	0.00007926		957.61	-0.0023082		1547.6	0.00944107		2137.6	0.01287917		2727.6	0.04967963
367.81	-0.00006067		957.81	-0.00248006		1547.8	0.00961513		2137.8	0.01320074		2727.8	0.04962355
368.01	0.00015233		958.01	-0.00248663		1548	0.00918143		2138	0.01398207		2728	0.04902103
368.21	-0.0008816		958.21	-0.00196015		1548.2	0.0088521		2138.2	0.01410696		2728.2	0.04869171
368.41	-0.00076762		958.41	-0.00206785		1548.4	0.00814766		2138.4	0.01481612		2728.4	0.04826723
368.61	-0.00078608		958.61	-0.00123447		1548.6	0.00763177		2138.6	0.01486361		2728.6	0.04865625
368.81	-0.00114066		958.81	-0.00077683		1548.8	0.00731397		2138.8	0.01428413		2728.8	0.04828681
369.01	-0.0016504		959.01	-0.00184993		1549	0.00665847		2139	0.0147202		2729	0.0480069
369.21	-0.00156294		959.21	-0.0016169		1549.2	0.0064759		2139.2	0.01481172		2729.2	0.04901104
369.41	-0.00103776		959.41	-0.00150025		1549.4	0.00667371		2139.4	0.01469756		2729.4	0.04849727
369.61	-0.00033879		959.61	-0.00063891		1549.6	0.00658713		2139.6	0.01425537		2729.6	0.04916426
369.81	-0.00004433		959.81	-0.00072571		1549.8	0.00707323		2139.8	0.01384834		2729.8	0.04994853
370.01	-0.00047806		960.01	0.00004838		1550	0.00791325		2140	0.01373571		2730	0.04970017
370.21	-0.00131674		960.21	0.00042258		1550.2	0.00800174		2140.2	0.01368722		2730.2	0.04923624
370.41	-0.00158902		960.41	0.00154877		1550.4	0.00854449		2140.4	0.01361705		2730.4	0.04978612
370.61	-0.00175738		960.61	0.00146149		1550.6	0.00987308		2140.6	0.0143002		2730.6	0.05001653
370.81	-0.00102089		960.81	0.00081456		1550.8	0.01106564		2140.8	0.01369328		2730.8	0.05024973
371.01	-0.00089059		961.01	0.00097616		1551	0.01153055		2141	0.01351639		2731	0.04996231
371.21	-0.00065469		961.21	0.00024957		1551.2	0.01182733		2141.2	0.01314545		2731.2	0.04989666
371.41	-0.0016126		961.41	-0.00010618		1551.4	0.01153696		2141.4	0.01343608		2731.4	0.04923366
371.61	-0.0021574		961.61	-0.00133137		1551.6	0.0111063		2141.6	0.01361144		2731.6	0.04882778
371.81	-0.00272548		961.81	-0.00235536		1551.8	0.0107758		2141.8	0.01460756		2731.8	0.05004806
372.01	-0.00269784		962.01	-0.00306489		1552	0.01019739		2142	0.01464932		2732	0.05033247
372.21	-0.00383519		962.21	-0.00321868		1552.2	0.00939719		2142.2	0.01445452		2732.2	0.04991418
372.41	-0.00395274		962.41	-0.00432094		1552.4	0.00901667		2142.4	0.0144638		2732.4	0.05019114
372.61	-0.00364263		962.61	-0.00517645		1552.6	0.00804441		2142.6	0.01380906		2732.6	0.0509675
372.81	-0.004162		962.81	-0.00596323		1552.8	0.00680692		2142.8	0.0136728		2732.8	0.05071336
373.01	-0.00392422		963.01	-0.00614114		1553	0.00622831		2143	0.01397135		2733	0.05104432
373.21	-0.00338527		963.21	-0.00563984		1553.2	0.00599526		2143.2	0.01401976		2733.2	0.05126183
373.41	-0.00214906		963.41	-0.00462592		1553.4	0.00504402		2143.4	0.01469754		2733.4	0.0505931
373.61	-0.00194455		963.61	-0.0037059		1553.6	0.00490485		2143.6	0.01473519		2733.6	0.05047327
373.81	-0.00103779		963.81	-0.00336366		1553.8	0.00500055		2143.8	0.01501279		2733.8	0.0505271
374.01	-0.0003555		964.01	-0.00208728		1554	0.00487834		2144	0.0152083		2734	0.04964629
374.21	0.00039474		964.21	-0.0010698		1554.2	0.00503889		2144.2	0.01472493		2734.2	0.04880454
374.41	0.00097284		964.41	-0.00053943		1554.4	0.00536631		2144.4	0.0142053		2734.4	0.04923802
374.61	0.0015349		964.61	-0.00032729		1554.6	0.005751		2144.6	0.01459157		2734.6	0.04846689
374.81	0.00218051		964.81	0.00048071		1554.8	0.00625058		2144.8	0.01427748		2734.8	0.04832399
375.01	0.00167217		965.01	-0.00041292		1555	0.00664		2145	0.01389498		2735	0.04731749
375.21	0.00117549		965.21	-0.00016415		1555.2	0.00730604		2145.2	0.01371474		2735.2	0.04672785
375.41	0.00037677		965.41	-0.00037123		1555.4	0.00765142		2145.4	0.01358446		2735.4	0.0463396
375.61	-0.00024389		965.61	-0.0011593		1555.6	0.00809093		2145.6	0.01349083		2735.6	0.04730567
375.81	-0.00032254		965.81	-0.00099443		1555.8	0.00774434		2145.8	0.01406828		2735.8	0.04872069
376.01	0.00004062		966.01	-0.00090657		1556	0.00712625		2146	0.01331504		2736	0.04849598
376.21	-0.00109166		966.21	-0.00053495		1556.2	0.00678034		2146.2	0.01338341		2736.2	0.04802683
376.41	-0.00087317		966.41	-0.00126764		1556.4	0.00725332		2146.4	0.01257423		2736.4	0.04910769
376.61	-0.00097358		966.61	-0.00089446		1556.6	0.00676102		2146.6	0.0123806		2736.6	0.04982624
376.81	-0.00241072		966.81	-0.00030662		1556.8	0.00717268		2146.8	0.01340833		2736.8	0.04999522
377.01	-0.00278915		967.01	-0.00058059		1557	0.00709447		2147	0.01350787		2737	0.05036764
377.21	-0.00297811		967.21	-0.00113367		1557.2	0.0066988		2147.2	0.01422959		2737.2	0.0505962
377.41	-0.00203581		967.41	-0.00058715		1557.4	0.0062713		2147.4	0.01482186		2737.4	0.0510457
377.61	-0.00266313		967.61	-0.00102024		1557.6	0.00668613		2147.6	0.01436682		2737.6	0.05057752
377.81	-0.00243674		967.81	-0.00111609		1557.8	0.00720239		2147.8	0.01498326		2737.8	0.05065745
378.01	-0.00188778		968.01	-0.00106598		1558	0.00776206		2148	0.01500821		2738	0.05030998
378.21	-0.00204345		968.21	-0.00192486		1558.2	0.00821749		2148.2	0.01372566		2738.2	0.04919103
378.41	-0.00285709		968.41	-0.00362328		1558.4	0.00787197		2148.4	0.01396332		2738.4	0.04882857
378.61	-0.00268173		968.61	-0.00335353		1558.6	0.00775432		2148.6	0.01414063		2738.6	0.04835358
378.81	-0.00236658		968.81	-0.00295014		1558.8	0.00800314		2148.8	0.0144193		2738.8	0.04822932
379.01	-0.00235236		969.01	-0.00283116		1559	0.00794947		2149	0.01352624		2739	0.04761404
379.21	-0.00234952		969.21	-0.00171047		1559.2	0.00814231		2149.2	0.01297866		2739.2	0.04652857
379.41	-0.00275788		969.41	-0.00184076		1559.4	0.00878099		2149.4	0.01274341		2739.4	0.04736966
379.61	-0.00303597		969.61	-0.00167115		1559.6	0.00889517		2149.6	0.01286975		2739.6	0.04785337
379.81	-0.00233138		969.81	-0.00078452		1559.8	0.00803485		2149.8	0.01260385		2739.8	0.04727051
380.01	-0.00185681		970.01	-0.00015989		1560	0.00770552		2150	0.01139567		2740	0.04672165
380.21	-0.00247408		970.21	0.00025696		1560.2	0.00790711		2150.2	0.01115953		2740.2	0.04689562
380.41	-0.00171292		970.41	-0.00055247		1560.4	0.00812096		2150.4	0.01109102		2740.4	0.04731152
380.61	-0.00221345		970.61	-0.00014907		1560.6	0.00784506		2150.6	0.01157116		2740.6	0.04818917
380.81	-0.00244978		970.81	0.00023759		1560.8	0.00850202		2150.8	0.01217661		2740.8	0.04767036
381.01	-0.00195073		971.01	-0.0003526		1561	0.00868679		2151	0.01258713		2741	0.04823997
381.21	-0.0014415		971.21	-0.0008282		1561.2	0.00930685		2151.2	0.01314188		2741.2	0.04779642
381.41	-0.0020032		971.41	-0.00119124		1561.4	0.00907141		2151.4	0.01312417		2741.4	0.04760129
381.61	-0.00250018		971.61	-0.00198403		1561.6	0.00947986		2151.6	0.01383016		2741.6	0.04764995
381.81	-0.0021689		971.81	-0.00216777		1561.8	0.00946216		2151.8	0.01455729		2741.8	0.04799849
382.01	-0.00207145		972.01	-0.00278735		1562	0.00864333		2152	0.01500264		2742	0.04833756
382.21	-0.00215905		972.21	-0.0033908		1562.2	0.0076975		2152.2	0.01487995		2742.2	0.04731151
382.41	-0.00279358		972.41	-0.00305806		1562.4	0.00671826		2152.4	0.01558609		2742.4	0.04795291
382.61	-0.00188425		972.61	-0.00253118		1562.6	0.00679894		2152.6	0.01530633		2742.6	0.04857248
382.81	-0.0018528		972.81	-0.00328719		1562.8	0.00632602		2152.8	0.01488104		2742.8	0.04892821
383.01	-0.00228756		973.01	-0.00333282		1563	0.00612824		2153	0.01360393		2743	0.0493549
383.21	-0.00293111		973.21	-0.00335257		1563.2	0.00553799		2153.2	0.01322201		2743.2	0.04891368
383.41	-0.00274365		973.41	-0.00265461		1563.4	0.0060178		2153.4	0.01270433		2743.4	0.049543
383.61	-0.00279948		973.61	-0.00314562		1563.6	0.00516055		2153.6	0.01243412		2743.6	0.04991117
383.81	-0.00308928		973.81	-0.00320202		1563.8	0.00432221		2153.8	0.01242772		2743.8	0.04984783
384.01	-0.0029039		974.01	-0.00348426		1564	0.00448899		2154	0.01257013		2744	0.05064335
384.21	-0.00271797		974.21	-0.0034648		1564.2	0.00449309		2154.2	0.01366665		2744.2	0.05072161
384.41	-0.0024234		974.41	-0.00333018		1564.4	0.00547412		2154.4	0.01411138		2744.4	0.0511543
384.61	-0.00241383		974.61	-0.00274579		1564.6	0.00605384		2154.6	0.01475364		2744.6	0.05131741
384.81	-0.00212614		974.81	-0.00260288		1564.8	0.00712588		2154.8	0.01526999		2744.8	0.05046475
385.01	-0.00185232		975.01	-0.00258332		1565	0.00766		2155	0.01583766		2745	0.05041198
385.21	-0.00229519		975.21	-0.00264819		1565.2	0.00785241		2155.2	0.01650059		2745.2	0.0495248
385.41	-0.00387256		975.41	-0.00228959		1565.4	0.00772427		2155.4	0.01695272		2745.4	0.04886704
385.61	-0.00354228		975.61	-0.00195674		1565.6	0.00846708		2155.6	0.01753147		2745.6	0.04872388
385.81	-0.00336201		975.81	-0.00148371		1565.8	0.00865688		2155.8	0.01798009		2745.8	0.04823254
386.01	-0.00379895		976.01	-0.00117181		1566	0.00893043		2156	0.01838323		2746	0.04758181
386.21	-0.00458229		976.21	-0.00055538		1566.2	0.00988256		2156.2	0.01873309		2746.2	0.04666464
386.41	-0.00559618		976.41	-0.0000342		1566.4	0.01010101		2156.4	0.01822763		2746.4	0.04659399
386.61	-0.00563048		976.61	-0.00059476		1566.6	0.01093183		2156.6	0.01787764		2746.6	0.04611013
386.81	-0.00618669		976.81	0.00000885		1566.8	0.0104666		2156.8	0.01755535		2746.8	0.04579593
387.01	-0.00651845		977.01	-0.00026227		1567	0.01047728		2157	0.01753217		2747	0.04579083
387.21	-0.0063272		977.21	0.00063194		1567.2	0.00928169		2157.2	0.01784074		2747.2	0.04552566
387.41	-0.00548847		977.41	0.00119868		1567.4	0.00989194		2157.4	0.01759737		2747.4	0.04620412
387.61	-0.0052401		977.61	0.00071404		1567.6	0.00865872		2157.6	0.01720211		2747.6	0.04704484
387.81	-0.00518934		977.81	0.001006		1567.8	0.0087124		2157.8	0.01684303		2747.8	0.0470487
388.01	-0.00450364		978.01	0.00082652		1568	0.0092577		2158	0.01702844		2748	0.04783119
388.21	-0.00463894		978.21	0.00054639		1568.2	0.00909729		2158.2	0.0173862		2748.2	0.04811412
388.41	-0.004842		978.41	0.00002404		1568.4	0.00937588		2158.4	0.01755798		2748.4	0.04842481
388.61	-0.00461631		978.61	-0.00004629		1568.6	0.00908039		2158.6	0.01760938		2748.6	0.04847285
388.81	-0.00514864		978.81	-0.00023181		1568.8	0.00829551		2158.8	0.01644981		2748.8	0.04858833
389.01	-0.00525301		979.01	-0.0005002		1569	0.00815114		2159	0.0159502		2749	0.04864914
389.21	-0.00637495		979.21	-0.00071128		1569.2	0.00762536		2159.2	0.01550061		2749.2	0.04921722
389.41	-0.00637324		979.41	-0.00060285		1569.4	0.00767537		2159.4	0.01532864		2749.4	0.04960339
389.61	-0.00539385		979.61	-0.00096313		1569.6	0.00757305		2159.6	0.0153837		2749.6	0.04984854
389.81	-0.00456392		979.81	-0.00113077		1569.8	0.00767175		2159.8	0.01587537		2749.8	0.05014584
390.01	-0.00485841		980.01	-0.00137868		1570	0.0073587		2160	0.01614157		2750	0.05062804
390.21	-0.0048647		980.21	-0.00157136		1570.2	0.00768117		2160.2	0.01615076		2750.2	0.05026437
390.41	-0.00472294		980.41	-0.00062766		1570.4	0.00762552		2160.4	0.01517405		2750.4	0.05010175
390.61	-0.00499876		980.61	-0.00095671		1570.6	0.00780527		2160.6	0.01559588		2750.6	0.05029943
390.81	-0.00501731		980.81	-0.00118632		1570.8	0.00740954		2160.8	0.01609093		2750.8	0.05020782
391.01	-0.0045083		981.01	-0.00239443		1571	0.0071226		2161	0.01655468		2751	0.05003098
391.21	-0.0040698		981.21	-0.00160456		1571.2	0.00704446		2161.2	0.01696523		2751.2	0.04902551
391.41	-0.003542		981.41	-0.00154076		1571.4	0.00800879		2161.4	0.01645382		2751.4	0.04927454
391.61	-0.00350933		981.61	-0.00217617		1571.6	0.00755948		2161.6	0.01620092		2751.6	0.0492609
391.81	-0.00365397		981.81	-0.00272904		1571.8	0.00769436		2161.8	0.01648343		2751.8	0.04865272
392.01	-0.00414257		982.01	-0.00327304		1572	0.00752263		2162	0.01665137		2752	0.04833887
392.21	-0.00528565		982.21	-0.00288705		1572.2	0.00758142		2162.2	0.01702851		2752.2	0.0476755
392.41	-0.00548272		982.41	-0.00258458		1572.4	0.00698831		2162.4	0.0166615		2752.4	0.04717565
392.61	-0.00587329		982.61	-0.00210889		1572.6	0.00712024		2162.6	0.01569787		2752.6	0.04689718
392.81	-0.00577025		982.81	-0.00142922		1572.8	0.00662633		2162.8	0.01485996		2752.8	0.04778518
393.01	-0.00529847		983.01	-0.00132609		1573	0.00672315		2163	0.01470083		2753	0.04832854
393.21	-0.0053994		983.21	-0.00090107		1573.2	0.00664909		2163.2	0.01432033		2753.2	0.04874207
393.41	-0.00478654		983.41	-0.00082246		1573.4	0.00747493		2163.4	0.01375733		2753.4	0.04885023
393.61	-0.00393282		983.61	-0.00169831		1573.6	0.00662894		2163.6	0.01430988		2753.6	0.04908978
393.81	-0.00318511		983.81	-0.0019306		1573.8	0.00690139		2163.8	0.01488168		2753.8	0.04962846
394.01	-0.00334081		984.01	-0.00213093		1574	0.00689421		2164	0.0146172		2754	0.04953004
394.21	-0.00272163		984.21	-0.00179934		1574.2	0.00823802		2164.2	0.01470868		2754.2	0.05007083
394.41	-0.00358368		984.41	-0.00137378		1574.4	0.00843257		2164.4	0.01500191		2754.4	0.05071043
394.61	-0.00404031		984.61	-0.00212391		1574.6	0.00807597		2164.6	0.01545339		2754.6	0.05095141
394.81	-0.0040409		984.81	-0.00235887		1574.8	0.0074081		2164.8	0.01530803		2754.8	0.05087986
395.01	-0.00405468		985.01	-0.00282729		1575	0.00715869		2165	0.01601912		2755	0.05086532
395.21	-0.00422109		985.21	-0.00296176		1575.2	0.00796025		2165.2	0.0171768		2755.2	0.05077906
395.41	-0.00498654		985.41	-0.0039575		1575.4	0.00845323		2165.4	0.01769938		2755.4	0.0515278
395.61	-0.00551846		985.61	-0.0046649		1575.6	0.00839162		2165.6	0.0184851		2755.6	0.05157297
395.81	-0.00629836		985.81	-0.00443865		1575.8	0.00853386		2165.8	0.01902671		2755.8	0.05133743
396.01	-0.00695339		986.01	-0.00399476		1576	0.00846861		2166	0.01869486		2756	0.05127839
396.21	-0.00734319		986.21	-0.00378549		1576.2	0.00813735		2166.2	0.01860187		2756.2	0.05010258
396.41	-0.00690454		986.41	-0.0043565		1576.4	0.00753325		2166.4	0.01791347		2756.4	0.04928145
396.61	-0.00649521		986.61	-0.00388345		1576.6	0.0084395		2166.6	0.01830807		2756.6	0.04957069
396.81	-0.0058673		986.81	-0.0030847		1576.8	0.00861322		2166.8	0.017503		2756.8	0.04998102
397.01	-0.00574921		987.01	-0.0037212		1577	0.00967971		2167	0.01679233		2757	0.04975454
397.21	-0.00535269		987.21	-0.00403349		1577.2	0.01101768		2167.2	0.01579452		2757.2	0.04980177
397.41	-0.00546539		987.41	-0.00486383		1577.4	0.01159577		2167.4	0.01546381		2757.4	0.04939012
397.61	-0.00476435		987.61	-0.00465279		1577.6	0.01145945		2167.6	0.01578544		2757.6	0.05001451
397.81	-0.00446514		987.81	-0.00407223		1577.8	0.01252295		2167.8	0.01572979		2757.8	0.04885823
398.01	-0.00450712		988.01	-0.00355433		1578	0.01246229		2168	0.01507354		2758	0.04897817
398.21	-0.00376066		988.21	-0.00282942		1578.2	0.01266295		2168.2	0.0144782		2758.2	0.04925961
398.41	-0.00380924		988.41	-0.00272231		1578.4	0.01208402		2168.4	0.01378559		2758.4	0.04917976
398.61	-0.0033473		988.61	-0.00223766		1578.6	0.01121441		2168.6	0.01351028		2758.6	0.04916395
398.81	-0.00312969		988.81	-0.00266877		1578.8	0.01036441		2168.8	0.01338112		2758.8	0.04926998
399.01	-0.00271357		989.01	-0.00309542		1579	0.01061939		2169	0.01416917		2759	0.04959367
399.21	-0.00256819		989.21	-0.00279558		1579.2	0.01019279		2169.2	0.01366359		2759.2	0.05008733
399.41	-0.00313306		989.41	-0.00267371		1579.4	0.00962111		2169.4	0.01291284		2759.4	0.05026175
399.61	-0.0031683		989.61	-0.00220562		1579.6	0.00924484		2169.6	0.01327034		2759.6	0.05024248
399.81	-0.00287152		989.81	-0.00113122		1579.8	0.00833595		2169.8	0.01321786		2759.8	0.05066884
400.01	-0.00232706		990.01	-0.00088684		1580	0.00780077		2170	0.01311054		2760	0.04999835
400.21	-0.00211052		990.21	-0.00116563		1580.2	0.0075483		2170.2	0.01357283		2760.2	0.04974096
400.41	-0.00280364		990.41	-0.00124731		1580.4	0.007758		2170.4	0.01417136		2760.4	0.05009893
400.61	-0.00298676		990.61	-0.00073095		1580.6	0.00765934		2170.6	0.01495534		2760.6	0.05067932
400.81	-0.00364265		990.81	-0.0006605		1580.8	0.00739103		2170.8	0.01447076		2760.8	0.0510929
401.01	-0.00440122		991.01	-0.00145516		1581	0.00772059		2171	0.01508737		2761	0.05152878
401.21	-0.00452857		991.21	-0.00217842		1581.2	0.00723389		2171.2	0.01507129		2761.2	0.05129139
401.41	-0.00537581		991.41	-0.00282732		1581.4	0.00709694		2171.4	0.01523073		2761.4	0.05066461
401.61	-0.00520921		991.61	-0.00254517		1581.6	0.00722202		2171.6	0.01485395		2761.6	0.05035035
401.81	-0.00521464		991.81	-0.00267016		1581.8	0.00782208		2171.8	0.01486138		2761.8	0.04931094
402.01	-0.00473266		992.01	-0.00274064		1582	0.008303		2172	0.01397387		2762	0.04907085
402.21	-0.00419581		992.21	-0.00250402		1582.2	0.00790374		2172.2	0.01325626		2762.2	0.04866339
402.41	-0.00480193		992.41	-0.00257279		1582.4	0.00791465		2172.4	0.01330175		2762.4	0.04834427
402.61	-0.00504602		992.61	-0.00272878		1582.6	0.00741304		2172.6	0.01330385		2762.6	0.04755365
402.81	-0.00502133		992.81	-0.00311775		1582.8	0.00680185		2172.8	0.01306806		2762.8	0.04743961
403.01	-0.00451714		993.01	-0.00281046		1583	0.00805034		2173	0.01244045		2763	0.04741911
403.21	-0.00458321		993.21	-0.00197166		1583.2	0.00702898		2173.2	0.01197169		2763.2	0.04708411
403.41	-0.00544969		993.41	-0.00182699		1583.4	0.00680387		2173.4	0.01230679		2763.4	0.04670762
403.61	-0.00526099		993.61	-0.00169234		1583.6	0.0076768		2173.6	0.01319976		2763.6	0.04650686
403.81	-0.00534449		993.81	-0.00113054		1583.8	0.00806458		2173.8	0.01312199		2763.8	0.04743157
404.01	-0.00600055		994.01	-0.00157193		1584	0.00813978		2174	0.01388813		2764	0.04733863
404.21	-0.00662181		994.21	-0.00211684		1584.2	0.00838093		2174.2	0.01486372		2764.2	0.04793787
404.41	-0.00755259		994.41	-0.00244134		1584.4	0.00807585		2174.4	0.01503551		2764.4	0.04813414
404.61	-0.00718046		994.61	-0.00285346		1584.6	0.00782411		2174.6	0.01580857		2764.6	0.04834961
404.81	-0.00737813		994.81	-0.00305936		1584.8	0.00794787		2174.8	0.01605113		2764.8	0.04924081
405.01	-0.0067609		995.01	-0.00366725		1585	0.00781789		2175	0.01640974		2765	0.05024537
405.21	-0.00589316		995.21	-0.00487627		1585.2	0.00776694		2175.2	0.01606127		2765.2	0.05081882
405.41	-0.00625473		995.41	-0.00558998		1585.4	0.00802498		2175.4	0.01562586		2765.4	0.05068806
405.61	-0.00546764		995.61	-0.00575668		1585.6	0.0078498		2175.6	0.01563106		2765.6	0.05144637
405.81	-0.00462451		995.81	-0.00505186		1585.8	0.00861585		2175.8	0.01540068		2765.8	0.05202695
406.01	-0.00372798		996.01	-0.00524786		1586	0.00859777		2176	0.01466597		2766	0.05214915
406.21	-0.00325254		996.21	-0.00526908		1586.2	0.00851494		2176.2	0.01488984		2766.2	0.05207564
406.41	-0.00374728		996.41	-0.00571456		1586.4	0.00835851		2176.4	0.01422804		2766.4	0.05215739
406.61	-0.00342554		996.61	-0.00692587		1586.6	0.00794567		2176.6	0.01445078		2766.6	0.05186897
406.81	-0.00333905		996.81	-0.00683717		1586.8	0.00766939		2176.8	0.01391605		2766.8	0.05260712
407.01	-0.00299864		997.01	-0.00674731		1587	0.00836472		2177	0.01244964		2767	0.05275016
407.21	-0.00281701		997.21	-0.00630713		1587.2	0.00754318		2177.2	0.01201556		2767.2	0.05311841
407.41	-0.00307954		997.41	-0.00607053		1587.4	0.00814192		2177.4	0.0119759		2767.4	0.05352896
407.61	-0.00235071		997.61	-0.00554139		1587.6	0.00852461		2177.6	0.01193331		2767.6	0.05387806
407.81	-0.00287638		997.81	-0.00557368		1587.8	0.00779487		2177.8	0.01121362		2767.8	0.05404997
408.01	-0.00296299		998.01	-0.00514388		1588	0.00750206		2178	0.01131989		2768	0.05393111
408.21	-0.0035734		998.21	-0.00430292		1588.2	0.00808406		2178.2	0.01060748		2768.2	0.05358417
408.41	-0.00410269		998.41	-0.00431104		1588.4	0.00849287		2178.4	0.0103862		2768.4	0.053328
408.61	-0.00418039		998.61	-0.00418642		1588.6	0.00884369		2178.6	0.01117218		2768.6	0.0533791
408.81	-0.00480421		998.81	-0.00307401		1588.8	0.00849835		2178.8	0.01126746		2768.8	0.05392706
409.01	-0.00491822		999.01	-0.00354075		1589	0.00754205		2179	0.01186353		2769	0.05342752
409.21	-0.005892		999.21	-0.00326269		1589.2	0.00802812		2179.2	0.01222323		2769.2	0.05257881
409.41	-0.00714775		999.41	-0.0029435		1589.4	0.00760045		2179.4	0.01266142		2769.4	0.05145266
409.61	-0.00718411		999.61	-0.0020969		1589.6	0.00813022		2179.6	0.0138524		2769.6	0.05070785
409.81	-0.00774275		999.81	-0.00156893		1589.8	0.0088759		2179.8	0.01408185		2769.8	0.04965684
410.01	-0.00822016		1000.01	-0.00236802		1590	0.00900199		2180	0.01472915		2770	0.04841453
410.21	-0.00866355		1000.21	-0.00250966		1590.2	0.00920308		2180.2	0.01583003		2770.2	0.04790542
410.41	-0.00925083		1000.41	-0.00248625		1590.4	0.00926392		2180.4	0.01650418		2770.4	0.04843396
410.61	-0.0091538		1000.61	-0.00300792		1590.6	0.0098812		2180.6	0.01720593		2770.6	0.04806783
410.81	-0.00847481		1000.81	-0.00319711		1590.8	0.00991682		2180.8	0.01597269		2770.8	0.04874784
411.01	-0.00783906		1001.01	-0.00333574		1591	0.00978642		2181	0.01577719		2771	0.04905991
411.21	-0.00667329		1001.21	-0.0035515		1591.2	0.00981863		2181.2	0.01561231		2771.2	0.0502364
411.41	-0.00645531		1001.41	-0.00396308		1591.4	0.00943956		2181.4	0.01620714		2771.4	0.05039188
411.61	-0.00559158		1001.61	-0.00466939		1591.6	0.0079151		2181.6	0.01594699		2771.6	0.05078791
411.81	-0.00584199		1001.81	-0.00482075		1591.8	0.00740206		2181.8	0.01446523		2771.8	0.05072018
412.01	-0.00471567		1002.01	-0.00429957		1592	0.00726899		2182	0.01450843		2772	0.05113383
412.21	-0.00463109		1002.21	-0.00449367		1592.2	0.0071279		2182.2	0.01445429		2772.2	0.05172145
412.41	-0.00409613		1002.41	-0.00522417		1592.4	0.00752686		2182.4	0.01478795		2772.4	0.05163726
412.61	-0.00316762		1002.61	-0.00496675		1592.6	0.00724533		2182.6	0.01515691		2772.6	0.05207573
412.81	-0.00328376		1002.81	-0.00477199		1592.8	0.00763095		2182.8	0.01525363		2772.8	0.05207106
413.01	-0.00349633		1003.01	-0.00631118		1593	0.00822494		2183	0.01601409		2773	0.05111155
413.21	-0.0039666		1003.21	-0.00528583		1593.2	0.00859119		2183.2	0.01618026		2773.2	0.05109226
413.41	-0.00469645		1003.41	-0.005557		1593.4	0.00812796		2183.4	0.01615621		2773.4	0.05042747
413.61	-0.00550183		1003.61	-0.00502519		1593.6	0.00827352		2183.6	0.01641235		2773.6	0.04973157
413.81	-0.005636		1003.81	-0.00526409		1593.8	0.00905599		2183.8	0.01646209		2773.8	0.04859138
414.01	-0.00481668		1004.01	-0.00528717		1594	0.00936814		2184	0.01703125		2774	0.04835777
414.21	-0.00546861		1004.21	-0.00488731		1594.2	0.00962407		2184.2	0.0165139		2774.2	0.04884054
414.41	-0.00555523		1004.41	-0.00406705		1594.4	0.00989948		2184.4	0.0167639		2774.4	0.04911428
414.61	-0.00520099		1004.61	-0.00430139		1594.6	0.0095813		2184.6	0.01605621		2774.6	0.04827897
414.81	-0.00515261		1004.81	-0.00429259		1594.8	0.00895379		2184.8	0.01535642		2774.8	0.04823461
415.01	-0.00615149		1005.01	-0.00330142		1595	0.00892363		2185	0.01489919		2775	0.04850637
415.21	-0.00584791		1005.21	-0.00351202		1595.2	0.00934144		2185.2	0.01412316		2775.2	0.04837444
415.41	-0.0058403		1005.41	-0.00352035		1595.4	0.00941906		2185.4	0.01441863		2775.4	0.04816473
415.61	-0.00558557		1005.61	-0.00317665		1595.6	0.00923527		2185.6	0.01387817		2775.6	0.04923199
415.81	-0.00573882		1005.81	-0.00241308		1595.8	0.00927651		2185.8	0.01357893		2775.8	0.04943779
416.01	-0.00471675		1006.01	-0.0018633		1596	0.0093919		2186	0.01375085		2776	0.04975679
416.21	-0.00442972		1006.21	-0.00279315		1596.2	0.00939043		2186.2	0.01415872		2776.2	0.0501053
416.41	-0.00389562		1006.41	-0.00310794		1596.4	0.01009891		2186.4	0.01397721		2776.4	0.04936439
416.61	-0.00409531		1006.61	-0.00363901		1596.6	0.01051958		2186.6	0.01419758		2776.6	0.04973637
416.81	-0.00507427		1006.81	-0.0041152		1596.8	0.01018411		2186.8	0.01440092		2776.8	0.04974296
417.01	-0.00577591		1007.01	-0.00415254		1597	0.00977899		2187	0.01460238		2777	0.04980004
417.21	-0.00614466		1007.21	-0.00351916		1597.2	0.00857732		2187.2	0.01449858		2777.2	0.04929305
417.41	-0.00626879		1007.41	-0.00472495		1597.4	0.00769208		2187.4	0.01413033		2777.4	0.04904554
417.61	-0.00720136		1007.61	-0.00430399		1597.6	0.00721619		2187.6	0.01414545		2777.6	0.0490905
417.81	-0.00659296		1007.81	-0.00491528		1597.8	0.0069103		2187.8	0.01452792		2777.8	0.04933659
418.01	-0.0067561		1008.01	-0.00551048		1598	0.00522919		2188	0.01477508		2778	0.04977019
418.21	-0.00785084		1008.21	-0.00499239		1598.2	0.00496077		2188.2	0.01440578		2778.2	0.05057685
418.41	-0.00743737		1008.41	-0.00421698		1598.4	0.00404799		2188.4	0.01481861		2778.4	0.05010692
418.61	-0.007388		1008.61	-0.00437377		1598.6	0.00414185		2188.6	0.01445428		2778.6	0.04933757
418.81	-0.00784516		1008.81	-0.00498429		1598.8	0.00433284		2188.8	0.01413622		2778.8	0.04986549
419.01	-0.00848176		1009.01	-0.00451203		1599	0.00465533		2189	0.01315014		2779	0.05030427
419.21	-0.00758504		1009.21	-0.00473627		1599.2	0.00517772		2189.2	0.01267549		2779.2	0.04971276
419.41	-0.00768144		1009.41	-0.00449034		1599.4	0.00573391		2189.4	0.0126042		2779.4	0.05090694
419.61	-0.00779158		1009.61	-0.00416186		1599.6	0.00555056		2189.6	0.01294123		2779.6	0.05125121
419.81	-0.0079273		1009.81	-0.00402907		1599.8	0.00642012		2189.8	0.01271859		2779.8	0.05088543
420.01	-0.00722907		1010.01	-0.00356132		1600	0.0068362		2190	0.01298118		2780	0.05067463
420.21	-0.00733753		1010.21	-0.00433943		1600.2	0.00743072		2190.2	0.01325753		2780.2	0.05116437
420.41	-0.00800738		1010.41	-0.00440744		1600.4	0.00827687		2190.4	0.01312986		2780.4	0.05105461
420.61	-0.00872824		1010.61	-0.00442512		1600.6	0.00910052		2190.6	0.01402182		2780.6	0.05117585
420.81	-0.00904435		1010.81	-0.00338297		1600.8	0.00941347		2190.8	0.01438222		2780.8	0.05176301
421.01	-0.00857455		1011.01	-0.00279861		1601	0.00962788		2191	0.01448008		2781	0.05174384
421.21	-0.00847525		1011.21	-0.00307049		1601.2	0.01024345		2191.2	0.01448749		2781.2	0.05141362
421.41	-0.00895483		1011.41	-0.00315761		1601.4	0.01110025		2191.4	0.01425521		2781.4	0.0516101
421.61	-0.01035091		1011.61	-0.00192272		1601.6	0.01139715		2191.6	0.01533612		2781.6	0.05152669
421.81	-0.00997885		1011.81	-0.002768		1601.8	0.01145716		2191.8	0.01562276		2781.8	0.05111841
422.01	-0.01025799		1012.01	-0.00274522		1602	0.01164846		2192	0.01556745		2782	0.0504351
422.21	-0.0097207		1012.21	-0.00197647		1602.2	0.01133072		2192.2	0.01547253		2782.2	0.05040954
422.41	-0.00973105		1012.41	-0.00176737		1602.4	0.01018911		2192.4	0.01578286		2782.4	0.04881308
422.61	-0.01027776		1012.61	-0.00186467		1602.6	0.01009124		2192.6	0.01556404		2782.6	0.0492564
422.81	-0.01022555		1012.81	-0.00231059		1602.8	0.009932		2192.8	0.0153484		2782.8	0.04922703
423.01	-0.00997465		1013.01	-0.00193087		1603	0.00965262		2193	0.01493028		2783	0.04858602
423.21	-0.0097444		1013.21	-0.00184825		1603.2	0.01028164		2193.2	0.01476809		2783.2	0.0467652
423.41	-0.0093372		1013.41	-0.00186466		1603.4	0.01006538		2193.4	0.01532061		2783.4	0.04727832
423.61	-0.00839649		1013.61	-0.00185645		1603.6	0.00947066		2193.6	0.01592585		2783.6	0.04665443
423.81	-0.00801747		1013.81	-0.00151109		1603.8	0.00960659		2193.8	0.01563981		2783.8	0.04690499
424.01	-0.00708396		1014.01	-0.00139193		1604	0.00952129		2194	0.01615866		2784	0.04740825
424.21	-0.00708525		1014.21	-0.00190097		1604.2	0.00945955		2194.2	0.01568498		2784.2	0.04785291
424.41	-0.00611638		1014.41	-0.00218632		1604.4	0.00865545		2194.4	0.01614733		2784.4	0.04830174
424.61	-0.00554536		1014.61	-0.00203294		1604.6	0.00881795		2194.6	0.01602478		2784.6	0.04939137
424.81	-0.0047074		1014.81	-0.00175702		1604.8	0.0090357		2194.8	0.01593791		2784.8	0.04992904
425.01	-0.00490077		1015.01	-0.00258694		1605	0.00905527		2195	0.01519631		2785	0.04931823
425.21	-0.00540672		1015.21	-0.00363467		1605.2	0.00978179		2195.2	0.01542739		2785.2	0.04919322
425.41	-0.00573202		1015.41	-0.00444047		1605.4	0.01047482		2195.4	0.01498827		2785.4	0.048413
425.61	-0.00612838		1015.61	-0.00446971		1605.6	0.01033454		2195.6	0.01463225		2785.6	0.04862028
425.81	-0.006251		1015.81	-0.00586086		1605.8	0.01016828		2195.8	0.01388746		2785.8	0.04889474
426.01	-0.00634754		1016.01	-0.00661572		1606	0.00946547		2196	0.01371122		2786	0.04891359
426.21	-0.00694201		1016.21	-0.00626322		1606.2	0.00854739		2196.2	0.01436526		2786.2	0.04886178
426.41	-0.00735725		1016.41	-0.00505626		1606.4	0.00882558		2196.4	0.01441603		2786.4	0.04938599
426.61	-0.00799778		1016.61	-0.00441779		1606.6	0.00885901		2196.6	0.01400458		2786.6	0.05045469
426.81	-0.0084062		1016.81	-0.00395646		1606.8	0.00872451		2196.8	0.01459783		2786.8	0.04917804
427.01	-0.00888004		1017.01	-0.00377262		1607	0.00855047		2197	0.01513022		2787	0.04891111
427.21	-0.00967663		1017.21	-0.00335432		1607.2	0.00900436		2197.2	0.01502582		2787.2	0.04824034
427.41	-0.00928591		1017.41	-0.00278827		1607.4	0.00847964		2197.4	0.0161664		2787.4	0.04914061
427.61	-0.00981922		1017.61	-0.00253978		1607.6	0.00832737		2197.6	0.01656473		2787.6	0.04830819
427.81	-0.00973061		1017.81	-0.00174148		1607.8	0.00843226		2197.8	0.01647821		2787.8	0.04918315
428.01	-0.00932166		1018.01	-0.00197172		1608	0.00852326		2198	0.01692795		2788	0.04958795
428.21	-0.00894519		1018.21	-0.00218894		1608.2	0.00786668		2198.2	0.01701492		2788.2	0.04995291
428.41	-0.00825563		1018.41	-0.00268629		1608.4	0.00749664		2198.4	0.01660835		2788.4	0.05042029
428.61	-0.00799403		1018.61	-0.00282989		1608.6	0.00766219		2198.6	0.01672197		2788.6	0.05022647
428.81	-0.00697571		1018.81	-0.00301094		1608.8	0.00806445		2198.8	0.01672951		2788.8	0.04884387
429.01	-0.00737209		1019.01	-0.00335541		1609	0.00840727		2199	0.01603635		2789	0.04811498
429.21	-0.00652581		1019.21	-0.00404072		1609.2	0.00877977		2199.2	0.0163533		2789.2	0.0481029
429.41	-0.00636708		1019.41	-0.00428738		1609.4	0.00957199		2199.4	0.01526247		2789.4	0.04688831
429.61	-0.00634302		1019.61	-0.00473682		1609.6	0.00945735		2199.6	0.01470231		2789.6	0.04753263
429.81	-0.00656851		1019.81	-0.00613851		1609.8	0.00949497		2199.8	0.01418088		2789.8	0.0469209
430.01	-0.00657143		1020.01	-0.0060895		1610	0.00952887		2200	0.01442312		2790	0.04609314
430.21	-0.00721018		1020.21	-0.00470637		1610.2	0.01015503		2200.2	0.01498761		2790.2	0.04590832
430.41	-0.00644921		1020.41	-0.00393786		1610.4	0.01055981		2200.4	0.01464394		2790.4	0.04594267
430.61	-0.00678069		1020.61	-0.00426571		1610.6	0.0098937		2200.6	0.01468364		2790.6	0.04600586
430.81	-0.00791948		1020.81	-0.00443089		1610.8	0.00972439		2200.8	0.01513054		2790.8	0.04518782
431.01	-0.00903681		1021.01	-0.00482028		1611	0.01006804		2201	0.01531412		2791	0.04633249
431.21	-0.00962071		1021.21	-0.00483651		1611.2	0.0102346		2201.2	0.01529538		2791.2	0.04692561
431.41	-0.01045583		1021.41	-0.00474676		1611.4	0.01008357		2201.4	0.01658434		2791.4	0.04785552
431.61	-0.01148099		1021.61	-0.0048872		1611.6	0.00999461		2201.6	0.01638342		2791.6	0.04799623
431.81	-0.01140078		1021.81	-0.00447083		1611.8	0.01004363		2201.8	0.01623389		2791.8	0.04929803
432.01	-0.01082468		1022.01	-0.00515323		1612	0.00981603		2202	0.01619817		2792	0.04963124
432.21	-0.01065564		1022.21	-0.00497847		1612.2	0.00927081		2202.2	0.01604062		2792.2	0.05065572
432.41	-0.0104909		1022.41	-0.00397488		1612.4	0.00904795		2202.4	0.01558915		2792.4	0.05167029
432.61	-0.01021241		1022.61	-0.00338146		1612.6	0.00926991		2202.6	0.01585492		2792.6	0.05160576
432.81	-0.01032188		1022.81	-0.00313579		1612.8	0.01008264		2202.8	0.01447096		2792.8	0.05118962
433.01	-0.01068405		1023.01	-0.0026638		1613	0.01024425		2203	0.01445919		2793	0.05164924
433.21	-0.01081921		1023.21	-0.00300985		1613.2	0.01057232		2203.2	0.01492957		2793.2	0.05119348
433.41	-0.01105326		1023.41	-0.00279322		1613.4	0.010435		2203.4	0.0146441		2793.4	0.04990816
433.61	-0.01077587		1023.61	-0.00267192		1613.6	0.01006097		2203.6	0.01423969		2793.6	0.05048527
433.81	-0.01148868		1023.81	-0.00292083		1613.8	0.01055188		2203.8	0.0137212		2793.8	0.04900658
434.01	-0.01116589		1024.01	-0.00337256		1614	0.01066314		2204	0.01451161		2794	0.0492045
434.21	-0.01011229		1024.21	-0.00322644		1614.2	0.01145482		2204.2	0.01444245		2794.2	0.04884805
434.41	-0.00995661		1024.41	-0.00373566		1614.4	0.01074318		2204.4	0.01362863		2794.4	0.04871591
434.61	-0.00998995		1024.61	-0.00440817		1614.6	0.01022788		2204.6	0.01350324		2794.6	0.04915588
434.81	-0.01083606		1024.81	-0.00398505		1614.8	0.01080837		2204.8	0.01394149		2794.8	0.04843291
435.01	-0.01079104		1025.01	-0.00427384		1615	0.01077283		2205	0.01445064		2795	0.04863315
435.21	-0.01091476		1025.21	-0.00411578		1615.2	0.01006304		2205.2	0.01480657		2795.2	0.0487756
435.41	-0.01088241		1025.41	-0.00451538		1615.4	0.00955565		2205.4	0.01516545		2795.4	0.04921404
435.61	-0.01071695		1025.61	-0.00474095		1615.6	0.00940632		2205.6	0.01527682		2795.6	0.04885892
435.81	-0.01051805		1025.81	-0.00543083		1615.8	0.00924767		2205.8	0.01533985		2795.8	0.04874795
436.01	-0.01030181		1026.01	-0.00621719		1616	0.00812335		2206	0.01515036		2796	0.04929048
436.21	-0.01117957		1026.21	-0.00609868		1616.2	0.00732871		2206.2	0.01533438		2796.2	0.05003712
436.41	-0.01147913		1026.41	-0.00596124		1616.4	0.00745453		2206.4	0.01504964		2796.4	0.05070031
436.61	-0.0113647		1026.61	-0.00595635		1616.6	0.00786766		2206.6	0.01527481		2796.6	0.05015653
436.81	-0.01117801		1026.81	-0.00566214		1616.8	0.00767588		2206.8	0.01455263		2796.8	0.05047314
437.01	-0.01080572		1027.01	-0.00509203		1617	0.00762332		2207	0.01459134		2797	0.05014166
437.21	-0.011168		1027.21	-0.00479997		1617.2	0.00761164		2207.2	0.01412884		2797.2	0.04965345
437.41	-0.01114176		1027.41	-0.00457469		1617.4	0.00715812		2207.4	0.01400602		2797.4	0.04980251
437.61	-0.01043117		1027.61	-0.00433887		1617.6	0.00761704		2207.6	0.01279777		2797.6	0.0497514
437.81	-0.00962375		1027.81	-0.00426763		1617.8	0.00846347		2207.8	0.01321675		2797.8	0.04949861
438.01	-0.00874707		1028.01	-0.00439029		1618	0.00840234		2208	0.0139052		2798	0.04975294
438.21	-0.00803711		1028.21	-0.00366436		1618.2	0.00874288		2208.2	0.01346747		2798.2	0.04966412
438.41	-0.00868671		1028.41	-0.0033773		1618.4	0.00852235		2208.4	0.01301517		2798.4	0.0499791
438.61	-0.00813771		1028.61	-0.0035699		1618.6	0.00925483		2208.6	0.01359017		2798.6	0.05036023
438.81	-0.00880824		1028.81	-0.00311126		1618.8	0.00985853		2208.8	0.01407179		2798.8	0.05028028
439.01	-0.00842058		1029.01	-0.00360293		1619	0.00993327		2209	0.01422264		2799	0.05068411
439.21	-0.00840921		1029.21	-0.0028106		1619.2	0.0097903		2209.2	0.01513234		2799.2	0.05177018
439.41	-0.00808059		1029.41	-0.00389136		1619.4	0.00995171		2209.4	0.01528487		2799.4	0.05232146
439.61	-0.00860505		1029.61	-0.00437142		1619.6	0.01052602		2209.6	0.01594351		2799.6	0.05203242
439.81	-0.00974512		1029.81	-0.00471127		1619.8	0.01027925		2209.8	0.01625735		2799.8	0.05179245
440.01	-0.0097577		1030.01	-0.00401219		1620	0.01016083		2210	0.01655675		2800	0.05129289
440.21	-0.01001164		1030.21	-0.00381897		1620.2	0.01039378		2210.2	0.01703771		2800.2	0.05122341
440.41	-0.00932043		1030.41	-0.00375363		1620.4	0.01040842		2210.4	0.01764399		2800.4	0.05087651
440.61	-0.00901198		1030.61	-0.00360883		1620.6	0.01134646		2210.6	0.01732571		2800.6	0.05092552
440.81	-0.00875965		1030.81	-0.00357145		1620.8	0.01093959		2210.8	0.0163473		2800.8	0.05037123
441.01	-0.00903977		1031.01	-0.00416391		1621	0.01142307		2211	0.01594435		2801	0.04925604
441.21	-0.00954151		1031.21	-0.00433721		1621.2	0.01138911		2211.2	0.01603461		2801.2	0.04880063
441.41	-0.00904323		1031.41	-0.00466224		1621.4	0.01095227		2211.4	0.01594025		2801.4	0.04837581
441.61	-0.00793739		1031.61	-0.00481622		1621.6	0.01147921		2211.6	0.01527824		2801.6	0.04742225
441.81	-0.00791269		1031.81	-0.00551993		1621.8	0.01092953		2211.8	0.01523166		2801.8	0.04676474
442.01	-0.00888482		1032.01	-0.00615276		1622	0.01014058		2212	0.0151328		2802	0.04527904
442.21	-0.00883019		1032.21	-0.00625539		1622.2	0.0101301		2212.2	0.01402368		2802.2	0.04538704
442.41	-0.00962918		1032.41	-0.00696528		1622.4	0.01015688		2212.4	0.01315711		2802.4	0.04514536
442.61	-0.01039468		1032.61	-0.00729949		1622.6	0.00925241		2212.6	0.01266263		2802.6	0.04591862
442.81	-0.01103323		1032.81	-0.00699709		1622.8	0.00877054		2212.8	0.01290729		2802.8	0.04659294
443.01	-0.0110719		1033.01	-0.00660373		1623	0.00810246		2213	0.01256042		2803	0.04670747
443.21	-0.01135948		1033.21	-0.00619164		1623.2	0.00758259		2213.2	0.01241157		2803.2	0.04809612
443.41	-0.0119067		1033.41	-0.00756504		1623.4	0.00699091		2213.4	0.012302		2803.4	0.04817564
443.61	-0.01251451		1033.61	-0.00703163		1623.6	0.00667298		2213.6	0.01315197		2803.6	0.04829168
443.81	-0.01275173		1033.81	-0.00609982		1623.8	0.00635747		2213.8	0.013732		2803.8	0.04830668
444.01	-0.01139884		1034.01	-0.00522264		1624	0.00671059		2214	0.01468493		2804	0.04858828
444.21	-0.01101502		1034.21	-0.00587974		1624.2	0.00681931		2214.2	0.01531109		2804.2	0.04944337
444.41	-0.00996572		1034.41	-0.00654419		1624.4	0.00729304		2214.4	0.01594835		2804.4	0.05005532
444.61	-0.00980708		1034.61	-0.00669084		1624.6	0.00826466		2214.6	0.01510092		2804.6	0.05102041
444.81	-0.00925743		1034.81	-0.00652934		1624.8	0.00840289		2214.8	0.01599847		2804.8	0.05076884
445.01	-0.00891583		1035.01	-0.00631701		1625	0.00955581		2215	0.01654694		2805	0.05097694
445.21	-0.00839793		1035.21	-0.00550081		1625.2	0.009846		2215.2	0.01685448		2805.2	0.05118459
445.41	-0.00772276		1035.41	-0.00551321		1625.4	0.00921886		2215.4	0.01713065		2805.4	0.05180059
445.61	-0.00811562		1035.61	-0.00593727		1625.6	0.00962319		2215.6	0.01777823		2805.6	0.05143588
445.81	-0.00848548		1035.81	-0.00639432		1625.8	0.00936962		2215.8	0.01763392		2805.8	0.0510508
446.01	-0.00879442		1036.01	-0.00558514		1626	0.00922888		2216	0.01819424		2806	0.05144694
446.21	-0.00847685		1036.21	-0.00509237		1626.2	0.00952828		2216.2	0.01813285		2806.2	0.05183816
446.41	-0.00910069		1036.41	-0.00501135		1626.4	0.01065062		2216.4	0.01749119		2806.4	0.05216062
446.61	-0.00942207		1036.61	-0.00431598		1626.6	0.00999994		2216.6	0.01780812		2806.6	0.05297357
446.81	-0.00993119		1036.81	-0.00470228		1626.8	0.01101084		2216.8	0.01766689		2806.8	0.05238063
447.01	-0.01051172		1037.01	-0.00414762		1627	0.01065962		2217	0.01644654		2807	0.0514649
447.21	-0.01061025		1037.21	-0.00467361		1627.2	0.01058867		2217.2	0.01565569		2807.2	0.0525063
447.41	-0.01066493		1037.41	-0.00553668		1627.4	0.01013808		2217.4	0.01660375		2807.4	0.05140218
447.61	-0.01076466		1037.61	-0.00517312		1627.6	0.00972959		2217.6	0.01643415		2807.6	0.05101882
447.81	-0.01071446		1037.81	-0.0052415		1627.8	0.00973754		2217.8	0.01626103		2807.8	0.05100396
448.01	-0.00999997		1038.01	-0.00540218		1628	0.00987526		2218	0.01647811		2808	0.05081371
448.21	-0.01018486		1038.21	-0.00625875		1628.2	0.00983662		2218.2	0.01583112		2808.2	0.05070068
448.41	-0.01005076		1038.41	-0.00665138		1628.4	0.01017317		2218.4	0.01555816		2808.4	0.05017061
448.61	-0.01028788		1038.61	-0.00640333		1628.6	0.01045418		2218.6	0.0147915		2808.6	0.04946692
448.81	-0.00964257		1038.81	-0.00624304		1628.8	0.01000158		2218.8	0.01601778		2808.8	0.04889045
449.01	-0.00866489		1039.01	-0.00597812		1629	0.00943567		2219	0.01554806		2809	0.04913533
449.21	-0.00769788		1039.21	-0.00648649		1629.2	0.00829753		2219.2	0.01610696		2809.2	0.0489108
449.41	-0.00811724		1039.41	-0.00695918		1629.4	0.0070519		2219.4	0.01708433		2809.4	0.04920514
449.61	-0.00836732		1039.61	-0.00785712		1629.6	0.00716581		2219.6	0.01659821		2809.6	0.04902477
449.81	-0.00737153		1039.81	-0.00778035		1629.8	0.0071179		2219.8	0.01648543		2809.8	0.0494881
450.01	-0.00664963		1040.01	-0.00682984		1630	0.00681555		2220	0.01675108		2810	0.04973932
450.21	-0.00629419		1040.21	-0.00660932		1630.2	0.0078581		2220.2	0.01679732		2810.2	0.04956265
450.41	-0.00704761		1040.41	-0.00712272		1630.4	0.00911841		2220.4	0.01689109		2810.4	0.05011801
450.61	-0.00694168		1040.61	-0.00708138		1630.6	0.00935051		2220.6	0.01656288		2810.6	0.05072777
450.81	-0.00738524		1040.81	-0.0068352		1630.8	0.01012928		2220.8	0.01604913		2810.8	0.04977776
451.01	-0.00783736		1041.01	-0.00655151		1631	0.00977353		2221	0.01569521		2811	0.04984843
451.21	-0.00807175		1041.21	-0.00724486		1631.2	0.0097591		2221.2	0.01606431		2811.2	0.05108455
451.41	-0.00915441		1041.41	-0.00786409		1631.4	0.00962729		2221.4	0.01697032		2811.4	0.05048942
451.61	-0.01021458		1041.61	-0.0080015		1631.6	0.00988703		2221.6	0.01630486		2811.6	0.05018472
451.81	-0.01091158		1041.81	-0.00797285		1631.8	0.00997725		2221.8	0.0168162		2811.8	0.0504603
452.01	-0.01133846		1042.01	-0.00680789		1632	0.01016882		2222	0.01686409		2812	0.05000372
452.21	-0.01203489		1042.21	-0.00684233		1632.2	0.01034559		2222.2	0.01652615		2812.2	0.04996735
452.41	-0.01291804		1042.41	-0.00685666		1632.4	0.01068978		2222.4	0.01687917		2812.4	0.04920495
452.61	-0.01306305		1042.61	-0.00617236		1632.6	0.01091451		2222.6	0.01696108		2812.6	0.04904963
452.81	-0.01224061		1042.81	-0.0062465		1632.8	0.00984473		2222.8	0.01785021		2812.8	0.04933026
453.01	-0.01168203		1043.01	-0.006282		1633	0.00982601		2223	0.01730744		2813	0.04990722
453.21	-0.01111321		1043.21	-0.00550543		1633.2	0.0092419		2223.2	0.01707198		2813.2	0.05040579
453.41	-0.01091871		1043.41	-0.00521898		1633.4	0.00918672		2223.4	0.01672223		2813.4	0.05075241
453.61	-0.01001409		1043.61	-0.00533267		1633.6	0.00910752		2223.6	0.01591619		2813.6	0.05088635
453.81	-0.00985968		1043.81	-0.00395597		1633.8	0.00963079		2223.8	0.0157198		2813.8	0.05107283
454.01	-0.0096043		1044.01	-0.0031673		1634	0.0098095		2224	0.01603497		2814	0.05068517
454.21	-0.01043933		1044.21	-0.00327174		1634.2	0.01047453		2224.2	0.01612367		2814.2	0.05103892
454.41	-0.01027035		1044.41	-0.00348509		1634.4	0.00988142		2224.4	0.01657126		2814.4	0.05194993
454.61	-0.00965414		1044.61	-0.00239211		1634.6	0.00958575		2224.6	0.01514055		2814.6	0.0526718
454.81	-0.01011977		1044.81	-0.00243941		1634.8	0.00882714		2224.8	0.01600135		2814.8	0.05213732
455.01	-0.00991848		1045.01	-0.00254206		1635	0.0080453		2225	0.01652377		2815	0.05250958
455.21	-0.00977531		1045.21	-0.00295683		1635.2	0.00820475		2225.2	0.01712997		2815.2	0.05292327
455.41	-0.01025422		1045.41	-0.00392269		1635.4	0.0078269		2225.4	0.01734442		2815.4	0.05226647
455.61	-0.00902615		1045.61	-0.00392382		1635.6	0.00805181		2225.6	0.01705649		2815.6	0.05149618
455.81	-0.00873584		1045.81	-0.00414856		1635.8	0.00799603		2225.8	0.01757338		2815.8	0.0514851
456.01	-0.00881681		1046.01	-0.0046217		1636	0.00934795		2226	0.01731296		2816	0.05083954
456.21	-0.00861074		1046.21	-0.00547709		1636.2	0.00953213		2226.2	0.0178291		2816.2	0.05109102
456.41	-0.00887885		1046.41	-0.00582431		1636.4	0.00944003		2226.4	0.01789714		2816.4	0.05107631
456.61	-0.00840091		1046.61	-0.00630451		1636.6	0.0102536		2226.6	0.01785204		2816.6	0.05082263
456.81	-0.00776692		1046.81	-0.00678815		1636.8	0.00948251		2226.8	0.01714383		2816.8	0.05123744
457.01	-0.00758028		1047.01	-0.00657658		1637	0.00990101		2227	0.01622311		2817	0.05068621
457.21	-0.00726772		1047.21	-0.00617982		1637.2	0.01015248		2227.2	0.01526408		2817.2	0.05107527
457.41	-0.00761222		1047.41	-0.00678771		1637.4	0.01058563		2227.4	0.01501271		2817.4	0.05070466
457.61	-0.00843561		1047.61	-0.00673888		1637.6	0.01089319		2227.6	0.01523699		2817.6	0.05026381
457.81	-0.00944733		1047.81	-0.00608137		1637.8	0.01216927		2227.8	0.01547797		2817.8	0.04968284
458.01	-0.00982217		1048.01	-0.00628418		1638	0.01145556		2228	0.01622625		2818	0.04964712
458.21	-0.01017401		1048.21	-0.00702948		1638.2	0.01201387		2228.2	0.01648585		2818.2	0.04986623
458.41	-0.00987155		1048.41	-0.00703335		1638.4	0.01118039		2228.4	0.0169097		2818.4	0.05066377
458.61	-0.00982633		1048.61	-0.00693042		1638.6	0.01116457		2228.6	0.01702926		2818.6	0.05059003
458.81	-0.01049924		1048.81	-0.00745055		1638.8	0.01085199		2228.8	0.01755954		2818.8	0.05093757
459.01	-0.01041826		1049.01	-0.00677377		1639	0.01031383		2229	0.01755636		2819	0.05143828
459.21	-0.01090053		1049.21	-0.00681922		1639.2	0.01165412		2229.2	0.01780783		2819.2	0.05098685
459.41	-0.01116137		1049.41	-0.00720932		1639.4	0.01094659		2229.4	0.0174459		2819.4	0.05068319
459.61	-0.01049739		1049.61	-0.00664734		1639.6	0.01129289		2229.6	0.01735607		2819.6	0.05062642
459.81	-0.00971986		1049.81	-0.00763853		1639.8	0.01182566		2229.8	0.01795782		2819.8	0.05026502
460.01	-0.00957557		1050.01	-0.00799951		1640	0.01268158		2230	0.01743844		2820	0.05051257
460.21	-0.00978867		1050.21	-0.00749433		1640.2	0.0120965		2230.2	0.01738203		2820.2	0.05104687
460.41	-0.00958308		1050.41	-0.007402		1640.4	0.01213822		2230.4	0.01737907		2820.4	0.05083845
460.61	-0.00980359		1050.61	-0.00733857		1640.6	0.01297562		2230.6	0.01726744		2820.6	0.05042899
460.81	-0.00960978		1050.81	-0.00693543		1640.8	0.01231566		2230.8	0.01584514		2820.8	0.05058608
461.01	-0.00954591		1051.01	-0.00623251		1641	0.01248437		2231	0.01566383		2821	0.04991615
461.21	-0.0089733		1051.21	-0.00606876		1641.2	0.01256505		2231.2	0.01579281		2821.2	0.05076412
461.41	-0.00918397		1051.41	-0.00595624		1641.4	0.01196652		2231.4	0.01649842		2821.4	0.05010438
461.61	-0.00888565		1051.61	-0.00581548		1641.6	0.01208322		2231.6	0.01701604		2821.6	0.04981325
461.81	-0.0083342		1051.81	-0.00605633		1641.8	0.01202188		2231.8	0.01810941		2821.8	0.05002737
462.01	-0.00799388		1052.01	-0.00679071		1642	0.01167302		2232	0.01828661		2822	0.05013071
462.21	-0.00798807		1052.21	-0.00741446		1642.2	0.01252479		2232.2	0.0183349		2822.2	0.05055187
462.41	-0.00791496		1052.41	-0.00788625		1642.4	0.01195483		2232.4	0.01840494		2822.4	0.05129935
462.61	-0.00835106		1052.61	-0.00761492		1642.6	0.01193553		2232.6	0.01783873		2822.6	0.05113898
462.81	-0.00960704		1052.81	-0.00826914		1642.8	0.01154699		2232.8	0.0170503		2822.8	0.05203471
463.01	-0.01000285		1053.01	-0.00798452		1643	0.0112162		2233	0.01724622		2823	0.05144071
463.21	-0.010134		1053.21	-0.00825702		1643.2	0.01177426		2233.2	0.01758709		2823.2	0.05054817
463.41	-0.00981769		1053.41	-0.00853023		1643.4	0.01029633		2233.4	0.01690005		2823.4	0.05069256
463.61	-0.00857737		1053.61	-0.0082334		1643.6	0.01018724		2233.6	0.01737362		2823.6	0.05060113
463.81	-0.007935		1053.81	-0.00734455		1643.8	0.00943608		2233.8	0.01763413		2823.8	0.04976129
464.01	-0.00889092		1054.01	-0.00707805		1644	0.00926472		2234	0.01709027		2824	0.04974599
464.21	-0.00918679		1054.21	-0.00635388		1644.2	0.00820212		2234.2	0.01746447		2824.2	0.04931064
464.41	-0.00892798		1054.41	-0.00515354		1644.4	0.00804624		2234.4	0.01829024		2824.4	0.04868241
464.61	-0.00949572		1054.61	-0.00446617		1644.6	0.00824513		2234.6	0.01836471		2824.6	0.0481788
464.81	-0.00973912		1054.81	-0.00389183		1644.8	0.00791759		2234.8	0.01769675		2824.8	0.04764989
465.01	-0.00976213		1055.01	-0.00259416		1645	0.00751562		2235	0.01764718		2825	0.04698358
465.21	-0.00928405		1055.21	-0.00272851		1645.2	0.008159		2235.2	0.01839605		2825.2	0.0472802
465.41	-0.01012431		1055.41	-0.00229307		1645.4	0.00814618		2235.4	0.01854945		2825.4	0.04766053
465.61	-0.00999218		1055.61	-0.00240764		1645.6	0.00864001		2235.6	0.01754784		2825.6	0.04897949
465.81	-0.00995157		1055.81	-0.00281952		1645.8	0.00825215		2235.8	0.01780988		2825.8	0.04967386
466.01	-0.01078573		1056.01	-0.00262288		1646	0.00813209		2236	0.01750812		2826	0.04986219
466.21	-0.01165287		1056.21	-0.00343027		1646.2	0.00935106		2236.2	0.01765985		2826.2	0.05119063
466.41	-0.01215657		1056.41	-0.00438452		1646.4	0.00946762		2236.4	0.01741885		2826.4	0.05120292
466.61	-0.01284467		1056.61	-0.00440147		1646.6	0.0089255		2236.6	0.01605708		2826.6	0.05073029
466.81	-0.01319153		1056.81	-0.00502131		1646.8	0.00916217		2236.8	0.01594766		2826.8	0.05063885
467.01	-0.01307021		1057.01	-0.00548748		1647	0.00873683		2237	0.01529932		2827	0.05052217
467.21	-0.01224517		1057.21	-0.0062275		1647.2	0.00849199		2237.2	0.01509045		2827.2	0.05079387
467.41	-0.01153412		1057.41	-0.00608005		1647.4	0.00714509		2237.4	0.01492506		2827.4	0.05109828
467.61	-0.01131356		1057.61	-0.0067686		1647.6	0.00688995		2237.6	0.01504176		2827.6	0.0510461
467.81	-0.011395		1057.81	-0.0065931		1647.8	0.00624131		2237.8	0.01527062		2827.8	0.05021925
468.01	-0.01096542		1058.01	-0.00778022		1648	0.00620612		2238	0.01530147		2828	0.04966591
468.21	-0.01035445		1058.21	-0.00753133		1648.2	0.00589455		2238.2	0.0153304		2828.2	0.04907879
468.41	-0.00995597		1058.41	-0.00728661		1648.4	0.00669549		2238.4	0.01552518		2828.4	0.04833642
468.61	-0.00969469		1058.61	-0.00770046		1648.6	0.00726916		2238.6	0.01535185		2828.6	0.04758064
468.81	-0.00918623		1058.81	-0.00791493		1648.8	0.00780042		2238.8	0.01447613		2828.8	0.04717047
469.01	-0.00838636		1059.01	-0.00803609		1649	0.00848765		2239	0.01390931		2829	0.04688687
469.21	-0.00768561		1059.21	-0.00861221		1649.2	0.00981558		2239.2	0.01392658		2829.2	0.04729339
469.41	-0.0075852		1059.41	-0.00843603		1649.4	0.01009988		2239.4	0.01327084		2829.4	0.04759961
469.61	-0.00687189		1059.61	-0.00876996		1649.6	0.01051659		2239.6	0.01254063		2829.6	0.04744101
469.81	-0.00669326		1059.81	-0.00879641		1649.8	0.01081926		2239.8	0.01306214		2829.8	0.04683949
470.01	-0.00669326		1060.01	-0.00879641		1650	0.01081926		2240	0.01306214		2830	0.04683949
470.21	-0.00866709		1060.21	-0.00798281		1650.2	0.01013498		2240.2	0.01256857		2830.2	0.04515826
470.41	-0.01059047		1060.41	-0.00783016		1650.4	0.00917655		2240.4	0.01214306		2830.4	0.04244646
470.61	-0.01330668		1060.61	-0.00857192		1650.6	0.00852531		2240.6	0.01092927		2830.6	0.03975345
470.81	-0.015734		1060.81	-0.00950074		1650.8	0.00751105		2240.8	0.01012674		2830.8	0.03706566
471.01	-0.01746711		1061.01	-0.01081274		1651	0.00691744		2241	0.00988021		2831	0.03450006
471.21	-0.01938602		1061.21	-0.01167125		1651.2	0.00590689		2241.2	0.00931425		2831.2	0.03141939
471.41	-0.02128243		1061.41	-0.0129415		1651.4	0.00529519		2241.4	0.00826887		2831.4	0.02891494
471.61	-0.02198392		1061.61	-0.01524521		1651.6	0.00449748		2241.6	0.00698879		2831.6	0.02581873
471.81	-0.02227006		1061.81	-0.01721377		1651.8	0.00321969		2241.8	0.00642464		2831.8	0.02259908
472.01	-0.02253008		1062.01	-0.01843766		1652	0.00263374		2242	0.00640212		2832	0.02111878
472.21	-0.02258614		1062.21	-0.01972847		1652.2	0.00234472		2242.2	0.00516568		2832.2	0.01942724
472.41	-0.02266627		1062.41	-0.02047681		1652.4	0.00242253		2242.4	0.00444986		2832.4	0.01820342
472.61	-0.02328885		1062.61	-0.02101856		1652.6	0.00289641		2242.6	0.00434247		2832.6	0.01690691
472.81	-0.02276052		1062.81	-0.02146352		1652.8	0.00315736		2242.8	0.00319102		2832.8	0.01618497
473.01	-0.02268398		1063.01	-0.02154075		1653	0.00311801		2243	0.00243652		2833	0.01563858
473.21	-0.02340376		1063.21	-0.02090943		1653.2	0.00264508		2243.2	0.00157364		2833.2	0.01515906
473.41	-0.02371406		1063.41	-0.02106335		1653.4	0.00316522		2243.4	0.00130713		2833.4	0.01526004
473.61	-0.02371302		1063.61	-0.02046611		1653.6	0.00415345		2243.6	0.0007347		2833.6	0.01462726
473.81	-0.0230681		1063.81	-0.01995779		1653.8	0.00403443		2243.8	0.00046535		2833.8	0.01430523
474.01	-0.02230521		1064.01	-0.01855865		1654	0.00414127		2244	-0.0005751		2834	0.01363545
474.21	-0.02249965		1064.21	-0.01764508		1654.2	0.00463323		2244.2	-0.00090381		2834.2	0.01301964
474.41	-0.02295273		1064.41	-0.0176996		1654.4	0.00441769		2244.4	-0.00151504		2834.4	0.01254276
474.61	-0.02420152		1064.61	-0.01809018		1654.6	0.00473061		2244.6	-0.00188681		2834.6	0.01210177
474.81	-0.02342861		1064.81	-0.017307		1654.8	0.00509695		2244.8	-0.00138123		2834.8	0.01226218
475.01	-0.02265497		1065.01	-0.0168771		1655	0.00605321		2245	-0.00113278		2835	0.0127041
475.21	-0.02192538		1065.21	-0.01658994		1655.2	0.00634203		2245.2	-0.00197731		2835.2	0.0113601
475.41	-0.02138139		1065.41	-0.01692999		1655.4	0.00659719		2245.4	-0.00237596		2835.4	0.01047779
475.61	-0.02004178		1065.61	-0.01750497		1655.6	0.00668434		2245.6	-0.00181497		2835.6	0.00949737
475.81	-0.01993514		1065.81	-0.0166827		1655.8	0.00675468		2245.8	-0.0006571		2835.8	0.00890672
476.01	-0.02041992		1066.01	-0.01583318		1656	0.00694921		2246	-0.00005644		2836	0.00856448
476.21	-0.02061988		1066.21	-0.01532349		1656.2	0.00715374		2246.2	0.00017846		2836.2	0.00737542
476.41	-0.02034485		1066.41	-0.01554459		1656.4	0.00750687		2246.4	0.00048036		2836.4	0.00686025
476.61	-0.02052995		1066.61	-0.01557909		1656.6	0.00743318		2246.6	0.00016064		2836.6	0.0072154
476.81	-0.01995813		1066.81	-0.01613679		1656.8	0.00707098		2246.8	-0.00023988		2836.8	0.00720898
477.01	-0.02047226		1067.01	-0.01585242		1657	0.00673268		2247	-0.0006397		2837	0.0065107
477.21	-0.02122938		1067.21	-0.01618837		1657.2	0.00835514		2247.2	0.00016777		2837.2	0.00645643
477.41	-0.02086213		1067.41	-0.01706612		1657.4	0.00911193		2247.4	0.00059766		2837.4	0.00609841
477.61	-0.02088867		1067.61	-0.01651445		1657.6	0.00922172		2247.6	0.00029566		2837.6	0.00597861
477.81	-0.02048054		1067.81	-0.01642037		1657.8	0.0086091		2247.8	0.00018861		2837.8	0.00583107
478.01	-0.02029867		1068.01	-0.01609591		1658	0.00962047		2248	0.00071408		2838	0.00524939
478.21	-0.0211204		1068.21	-0.01608631		1658.2	0.01018402		2248.2	0.00161062		2838.2	0.00498198
478.41	-0.02042133		1068.41	-0.01563169		1658.4	0.00972716		2248.4	0.00133886		2838.4	0.00539032
478.61	-0.01973809		1068.61	-0.01556768		1658.6	0.00991911		2248.6	0.00195875		2838.6	0.00468653
478.81	-0.01787794		1068.81	-0.01500933		1658.8	0.01026801		2248.8	0.00185711		2838.8	0.00528595
479.01	-0.01753075		1069.01	-0.01539621		1659	0.01050282		2249	0.00185841		2839	0.00521403
479.21	-0.01683309		1069.21	-0.01521158		1659.2	0.01084441		2249.2	0.00146643		2839.2	0.00381142
479.41	-0.01652171		1069.41	-0.01451306		1659.4	0.01102693		2249.4	0.00166067		2839.4	0.0034183
479.61	-0.01571774		1069.61	-0.01382821		1659.6	0.01091631		2249.6	0.00249697		2839.6	0.003628
479.81	-0.01669598		1069.81	-0.01322008		1659.8	0.01043652		2249.8	0.00252132		2839.8	0.0034578
480.01	-0.01656462		1070.01	-0.01237106		1660	0.0094302		2250	0.00284433		2840	0.0027068
480.21	-0.01670934		1070.21	-0.01212157		1660.2	0.00899985		2250.2	0.00219193		2840.2	0.00294384
480.41	-0.0161465		1070.41	-0.01199387		1660.4	0.00839323		2250.4	0.00149624		2840.4	0.00363332
480.61	-0.01640951		1070.61	-0.01198736		1660.6	0.00841634		2250.6	0.00133196		2840.6	0.0041029
480.81	-0.0165454		1070.81	-0.01141679		1660.8	0.0078823		2250.8	0.00117021		2840.8	0.00413969
481.01	-0.01763636		1071.01	-0.0111788		1661	0.00792424		2251	0.00068359		2841	0.0040833
481.21	-0.01773499		1071.21	-0.01144089		1661.2	0.00838982		2251.2	0.00103248		2841.2	0.00472815
481.41	-0.01773375		1071.41	-0.01150133		1661.4	0.00782677		2251.4	0.00037157		2841.4	0.00528687
481.61	-0.01812225		1071.61	-0.01011297		1661.6	0.00815941		2251.6	0.00008603		2841.6	0.00486653
481.81	-0.0176537		1071.81	-0.01022696		1661.8	0.00786191		2251.8	0.00087524		2841.8	0.00511458
482.01	-0.01751214		1072.01	-0.0107099		1662	0.0085359		2252	0.00179117		2842	0.00496381
482.21	-0.01732006		1072.21	-0.01088456		1662.2	0.007877		2252.2	0.00216117		2842.2	0.00520975
482.41	-0.01787063		1072.41	-0.0109111		1662.4	0.00750276		2252.4	0.00235727		2842.4	0.00444939
482.61	-0.0182717		1072.61	-0.01148609		1662.6	0.00804202		2252.6	0.00241901		2842.6	0.0044758
482.81	-0.01834921		1072.81	-0.01137372		1662.8	0.00804087		2252.8	0.0021752		2842.8	0.00526276
483.01	-0.01901524		1073.01	-0.01204617		1663	0.00941649		2253	0.00196004		2843	0.00492299
483.21	-0.01884559		1073.21	-0.01183629		1663.2	0.00990165		2253.2	0.00148196		2843.2	0.00484865
483.41	-0.01870925		1073.41	-0.01282739		1663.4	0.01012153		2253.4	0.00190514		2843.4	0.00526897
483.61	-0.01961866		1073.61	-0.01350428		1663.6	0.0097236		2253.6	0.00229729		2843.6	0.00525317
483.81	-0.02054269		1073.81	-0.01358701		1663.8	0.00994919		2253.8	0.00161519		2843.8	0.00495024
484.01	-0.01995991		1074.01	-0.01349382		1664	0.01000893		2254	0.00195779		2844	0.00488769
484.21	-0.02000188		1074.21	-0.01366475		1664.2	0.00950716		2254.2	0.00180144		2844.2	0.00430478
484.41	-0.02014032		1074.41	-0.01338105		1664.4	0.01001511		2254.4	0.00180473		2844.4	0.00448253
484.61	-0.0207924		1074.61	-0.01314703		1664.6	0.00969547		2254.6	0.00109874		2844.6	0.0037641
484.81	-0.02019287		1074.81	-0.01305023		1664.8	0.00945284		2254.8	0.00077787		2844.8	0.00406817
485.01	-0.02039572		1075.01	-0.01323511		1665	0.00927787		2255	0.00051787		2845	0.00400687
485.21	-0.0200029		1075.21	-0.01330209		1665.2	0.00920868		2255.2	0.0003607		2845.2	0.00410211
485.41	-0.01968323		1075.41	-0.01250493		1665.4	0.00871089		2255.4	0.00123798		2845.4	0.00371832
485.61	-0.01981605		1075.61	-0.0115029		1665.6	0.00794658		2255.6	0.00103227		2845.6	0.00381339
485.81	-0.01914339		1075.81	-0.01194225		1665.8	0.00712914		2255.8	0.00100036		2845.8	0.00460229
486.01	-0.01939903		1076.01	-0.0117762		1666	0.00744324		2256	0.00143083		2846	0.00431929
486.21	-0.01952468		1076.21	-0.01182943		1666.2	0.0072394		2256.2	0.00143567		2846.2	0.0041026
486.41	-0.02024947		1076.41	-0.01126823		1666.4	0.0082166		2256.4	0.00082096		2846.4	0.00377986
486.61	-0.01948328		1076.61	-0.01079492		1666.6	0.00889805		2256.6	0.00038051		2846.6	0.00425972
486.81	-0.01866405		1076.81	-0.01061175		1666.8	0.00906742		2256.8	0.0006691		2846.8	0.00408943
487.01	-0.01888679		1077.01	-0.01130744		1667	0.00948063		2257	0.00134312		2847	0.00439046
487.21	-0.01815596		1077.21	-0.01074898		1667.2	0.00856593		2257.2	0.00140834		2847.2	0.00429949
487.41	-0.01818527		1077.41	-0.0111803		1667.4	0.00876979		2257.4	0.00193791		2847.4	0.00416088
487.61	-0.01852498		1077.61	-0.01094444		1667.6	0.00855046		2257.6	0.00112354		2847.6	0.00413548
487.81	-0.01824077		1077.81	-0.01079103		1667.8	0.00859558		2257.8	0.00042034		2847.8	0.00343522
488.01	-0.01777957		1078.01	-0.01091781		1668	0.00785541		2258	0.000396		2848	0.00340505
488.21	-0.01805242		1078.21	-0.01056712		1668.2	0.00781322		2258.2	-0.00028775		2848.2	0.00258099
488.41	-0.01833835		1078.41	-0.0105521		1668.4	0.00786281		2258.4	-0.0005312		2848.4	0.00311742
488.61	-0.01772195		1078.61	-0.01001155		1668.6	0.00779158		2258.6	-0.00077953		2848.6	0.0034201
488.81	-0.01804208		1078.81	-0.01139186		1668.8	0.00829452		2258.8	-0.00024326		2848.8	0.00362764
489.01	-0.01829627		1079.01	-0.01128694		1669	0.00838333		2259	-0.00015634		2849	0.00381823
489.21	-0.01871814		1079.21	-0.01156815		1669.2	0.00876384		2259.2	0.00048656		2849.2	0.00334074
489.41	-0.0186498		1079.41	-0.01179986		1669.4	0.00907292		2259.4	0.0018529		2849.4	0.00316394
489.61	-0.0184675		1079.61	-0.01221256		1669.6	0.00905794		2259.6	0.00216978		2849.6	0.00403734
489.81	-0.01741405		1079.81	-0.01335713		1669.8	0.01036539		2259.8	0.00234433		2849.8	0.00408528
490.01	-0.01759393		1080.01	-0.01373252		1670	0.0112527		2260	0.00288625		2850	0.00355071
490.21	-0.01741669		1080.21	-0.01378797		1670.2	0.01209528		2260.2	0.00358298		2850.2	0.00361222
490.41	-0.01715028		1080.41	-0.01385014		1670.4	0.0131066		2260.4	0.00386264		2850.4	0.00347155
490.61	-0.01659115		1080.61	-0.01363902		1670.6	0.01308135		2260.6	0.00466141		2850.6	0.0025362
490.81	-0.01606315		1080.81	-0.01333499		1670.8	0.01303704		2260.8	0.00597176		2850.8	0.0026119
491.01	-0.0159078		1081.01	-0.01351532		1671	0.01237178		2261	0.00673377		2851	0.00249867
491.21	-0.01533688		1081.21	-0.01311738		1671.2	0.01175621		2261.2	0.00670443		2851.2	0.00149989
491.41	-0.0153249		1081.41	-0.01384557		1671.4	0.01206187		2261.4	0.0068942		2851.4	0.00063833
491.61	-0.01517865		1081.61	-0.01412033		1671.6	0.01092548		2261.6	0.00597288		2851.6	0.00101381
491.81	-0.01580466		1081.81	-0.01316849		1671.8	0.01009602		2261.8	0.00627397		2851.8	0.00018399
492.01	-0.01586248		1082.01	-0.01272284		1672	0.0091955		2262	0.0060734		2852	0.00050994
492.21	-0.01673798		1082.21	-0.01175015		1672.2	0.00851163		2262.2	0.00564115		2852.2	0.00088437
492.41	-0.01686444		1082.41	-0.01182007		1672.4	0.0077587		2262.4	0.00584961		2852.4	0.00106015
492.61	-0.01744116		1082.61	-0.01191933		1672.6	0.00773891		2262.6	0.00553858		2852.6	0.0009507
492.81	-0.01815534		1082.81	-0.01261142		1672.8	0.00711977		2262.8	0.00617665		2852.8	0.00115723
493.01	-0.01734346		1083.01	-0.01137935		1673	0.00710274		2263	0.00648399		2853	0.0011164
493.21	-0.01768426		1083.21	-0.01138838		1673.2	0.00692792		2263.2	0.00616066		2853.2	0.00024451
493.41	-0.01768083		1083.41	-0.01096391		1673.4	0.00649638		2263.4	0.00628318		2853.4	0.00045047
493.61	-0.01705687		1083.61	-0.01190221		1673.6	0.00654774		2263.6	0.00501336		2853.6	0.00060541
493.81	-0.01649045		1083.81	-0.01199356		1673.8	0.00685498		2263.8	0.00363626		2853.8	0.00075307
494.01	-0.01712737		1084.01	-0.01099549		1674	0.0068059		2264	0.00366268		2854	0.00025282
494.21	-0.01693438		1084.21	-0.01161471		1674.2	0.00710627		2264.2	0.00281095		2854.2	-0.00002978
494.41	-0.0161415		1084.41	-0.01211492		1674.4	0.00709565		2264.4	0.00224893		2854.4	-0.00010906
494.61	-0.01611584		1084.61	-0.01224288		1674.6	0.00729549		2264.6	0.00197782		2854.6	-0.00018619
494.81	-0.01662961		1084.81	-0.01262703		1674.8	0.00684815		2264.8	0.00207487		2854.8	0.0000338
495.01	-0.01677383		1085.01	-0.01335758		1675	0.00678111		2265	0.00129497		2855	-0.00026314
495.21	-0.01747918		1085.21	-0.01369605		1675.2	0.00646836		2265.2	0.0014852		2855.2	0.00008743
495.41	-0.01750772		1085.41	-0.01431906		1675.4	0.00638745		2265.4	0.00134225		2855.4	0.00030541
495.61	-0.01823729		1085.61	-0.01402995		1675.6	0.00634754		2265.6	0.00070088		2855.6	0.00234521
495.81	-0.0198207		1085.81	-0.0138894		1675.8	0.00689579		2265.8	0.00081665		2855.8	0.002022
496.01	-0.02000483		1086.01	-0.01395399		1676	0.0075378		2266	0.00124209		2856	0.00255685
496.21	-0.02140406		1086.21	-0.01483507		1676.2	0.00727626		2266.2	0.00183095		2856.2	0.00319516
496.41	-0.02237623		1086.41	-0.01539117		1676.4	0.00820419		2266.4	0.00222921		2856.4	0.00305838
496.61	-0.0233629		1086.61	-0.01542243		1676.6	0.00846689		2266.6	0.00286494		2856.6	0.00303949
496.81	-0.02292102		1086.81	-0.01477121		1676.8	0.00940929		2266.8	0.00342641		2856.8	0.00465971
497.01	-0.02237573		1087.01	-0.0149199		1677	0.00988462		2267	0.00325611		2857	0.00354185
497.21	-0.02244515		1087.21	-0.01564288		1677.2	0.00981012		2267.2	0.00287015		2857.2	0.00363523
497.41	-0.02296254		1087.41	-0.01572033		1677.4	0.01018726		2267.4	0.00356596		2857.4	0.00373667
497.61	-0.02224453		1087.61	-0.01649799		1677.6	0.0107165		2267.6	0.00280307		2857.6	0.00325877
497.81	-0.02220092		1087.81	-0.0149554		1677.8	0.01118061		2267.8	0.0034901		2857.8	0.00258659
498.01	-0.02203492		1088.01	-0.01463376		1678	0.0111489		2268	0.00357139		2858	0.00110589
498.21	-0.02133899		1088.21	-0.01464856		1678.2	0.01069864		2268.2	0.00321772		2858.2	-0.00006925
498.41	-0.02076381		1088.41	-0.01390639		1678.4	0.01040812		2268.4	0.0038422		2858.4	0.00079935
498.61	-0.02016736		1088.61	-0.0139495		1678.6	0.00973508		2268.6	0.0033033		2858.6	-0.00066143
498.81	-0.02046947		1088.81	-0.01385154		1678.8	0.00958406		2268.8	0.00285367		2858.8	-0.00056605
499.01	-0.01996002		1089.01	-0.01387749		1679	0.00900717		2269	0.00251848		2859	-0.00022671
499.21	-0.01930987		1089.21	-0.01360695		1679.2	0.00892351		2269.2	0.00272273		2859.2	0.00032692
499.41	-0.01887953		1089.41	-0.01402092		1679.4	0.00921649		2269.4	0.00246023		2859.4	0.00012026
499.61	-0.0185484		1089.61	-0.01383964		1679.6	0.00913763		2269.6	0.00154053		2859.6	0.00030053
499.81	-0.01873748		1089.81	-0.0138429		1679.8	0.00814208		2269.8	0.00205435		2859.8	-0.00066826
500.01	-0.01845825		1090.01	-0.01407277		1680	0.00872037		2270	0.00289754		2860	-0.00030635
500.21	-0.01942778		1090.21	-0.01564373		1680.2	0.00838279		2270.2	0.00314541		2860.2	-0.00038285
500.41	-0.01961032		1090.41	-0.01488253		1680.4	0.00858528		2270.4	0.00287679		2860.4	-0.00050395
500.61	-0.01947531		1090.61	-0.01523211		1680.6	0.00909387		2270.6	0.00393727		2860.6	-0.0006072
500.81	-0.01874439		1090.81	-0.0157713		1680.8	0.00951323		2270.8	0.00428331		2860.8	0.00029359
501.01	-0.01897417		1091.01	-0.01684508		1681	0.00978201		2271	0.00348735		2861	-0.00013371
501.21	-0.01965065		1091.21	-0.01653329		1681.2	0.00899407		2271.2	0.00406838		2861.2	0.00047397
501.41	-0.01965463		1091.41	-0.01589039		1681.4	0.00872345		2271.4	0.00407729		2861.4	0.00012736
501.61	-0.01945727		1091.61	-0.01470082		1681.6	0.00900578		2271.6	0.00430514		2861.6	-0.00078783
501.81	-0.01933208		1091.81	-0.01418498		1681.8	0.00909666		2271.8	0.00482279		2861.8	-0.00158363
502.01	-0.01840811		1092.01	-0.01462811		1682	0.00884144		2272	0.00470059		2862	-0.00226956
502.21	-0.01841865		1092.21	-0.01398182		1682.2	0.00885174		2272.2	0.00485676		2862.2	-0.00151223
502.41	-0.0179622		1092.41	-0.0143813		1682.4	0.00882942		2272.4	0.00526671		2862.4	-0.00115586
502.61	-0.01696221		1092.61	-0.01426284		1682.6	0.00929349		2272.6	0.00523741		2862.6	-0.00201166
502.81	-0.01730953		1092.81	-0.01364094		1682.8	0.00985172		2272.8	0.00537923		2862.8	-0.00076061
503.01	-0.01687217		1093.01	-0.01314164		1683	0.00934214		2273	0.00586224		2863	-0.00034642
503.21	-0.01667373		1093.21	-0.0126568		1683.2	0.00952497		2273.2	0.00555113		2863.2	0.0004499
503.41	-0.01688717		1093.41	-0.01372388		1683.4	0.00942508		2273.4	0.00579576		2863.4	0.00066888
503.61	-0.01725084		1093.61	-0.0144074		1683.6	0.00838011		2273.6	0.00515935		2863.6	0.00139663
503.81	-0.01717793		1093.81	-0.01428959		1683.8	0.0085665		2273.8	0.00609178		2863.8	0.00207811
504.01	-0.01709719		1094.01	-0.01470093		1684	0.00920154		2274	0.006185		2864	0.00256612
504.21	-0.01823631		1094.21	-0.01457353		1684.2	0.00914287		2274.2	0.00680399		2864.2	0.00261931
504.41	-0.01916903		1094.41	-0.01409886		1684.4	0.00868756		2274.4	0.00658251		2864.4	0.00261696
504.61	-0.01994686		1094.61	-0.01427479		1684.6	0.0090264		2274.6	0.00682076		2864.6	0.00236229
504.81	-0.02033835		1094.81	-0.01487144		1684.8	0.00857884		2274.8	0.00561062		2864.8	0.00313452
505.01	-0.02106049		1095.01	-0.01502629		1685	0.00875296		2275	0.00527728		2865	0.00273619
505.21	-0.02105317		1095.21	-0.01498531		1685.2	0.00807132		2275.2	0.00519388		2865.2	0.00141861
505.41	-0.01998787		1095.41	-0.01564074		1685.4	0.00851858		2275.4	0.00505915		2865.4	0.00117642
505.61	-0.02050285		1095.61	-0.01503555		1685.6	0.00917851		2275.6	0.0053773		2865.6	0.00048906
505.81	-0.01985397		1095.81	-0.01612101		1685.8	0.00876095		2275.8	0.00466548		2865.8	0.00016618
506.01	-0.01891783		1096.01	-0.01647495		1686	0.00831042		2276	0.00458079		2866	0.00002204
506.21	-0.01941447		1096.21	-0.01627423		1686.2	0.00819895		2276.2	0.00417687		2866.2	0.00044072
506.41	-0.01931895		1096.41	-0.01596855		1686.4	0.00831984		2276.4	0.00462064		2866.4	-0.00068519
506.61	-0.01900607		1096.61	-0.01526992		1686.6	0.00861636		2276.6	0.00413273		2866.6	-0.00052552
506.81	-0.01928191		1096.81	-0.01583879		1686.8	0.00824529		2276.8	0.00380247		2866.8	-0.0013452
507.01	-0.01966489		1097.01	-0.01538987		1687	0.00802547		2277	0.00401397		2867	-0.00100772
507.21	-0.01988864		1097.21	-0.01561212		1687.2	0.00772296		2277.2	0.00321786		2867.2	-0.00075994
507.41	-0.02055699		1097.41	-0.01650317		1687.4	0.00727699		2277.4	0.00368064		2867.4	-0.00093739
507.61	-0.02106733		1097.61	-0.01542469		1687.6	0.00676731		2277.6	0.00310313		2867.6	-0.00126529
507.81	-0.02050835		1097.81	-0.01478087		1687.8	0.00760967		2277.8	0.00295602		2867.8	-0.00125327
508.01	-0.02059491		1098.01	-0.01445918		1688	0.00723694		2278	0.00203228		2868	-0.00104007
508.21	-0.02191565		1098.21	-0.01380533		1688.2	0.00792147		2278.2	0.00255459		2868.2	-0.00089128
508.41	-0.02212491		1098.41	-0.01369979		1688.4	0.00707459		2278.4	0.00172141		2868.4	-0.00091864
508.61	-0.02235789		1098.61	-0.01445538		1688.6	0.00717201		2278.6	0.00146981		2868.6	-0.00028668
508.81	-0.02176815		1098.81	-0.01466575		1688.8	0.00750146		2278.8	0.00115893		2868.8	-0.00061033
509.01	-0.02198609		1099.01	-0.01433739		1689	0.00798431		2279	0.00111701		2869	-0.00157867
509.21	-0.02064086		1099.21	-0.01421667		1689.2	0.00795881		2279.2	0.00102612		2869.2	-0.00249209
509.41	-0.01987969		1099.41	-0.01440853		1689.4	0.00774236		2279.4	0.00131414		2869.4	-0.0021499
509.61	-0.01975859		1099.61	-0.0138935		1689.6	0.00744774		2279.6	0.00159605		2869.6	-0.00278183
509.81	-0.01928788		1099.81	-0.01405906		1689.8	0.00677057		2279.8	0.00172239		2869.8	-0.0028309
510.01	-0.01898998		1100.01	-0.0143957		1690	0.00630329		2280	0.00296691		2870	-0.00190694
510.21	-0.01926015		1100.21	-0.01457297		1690.2	0.00746642		2280.2	0.00305387		2870.2	-0.00221643
510.41	-0.0196386		1100.41	-0.01393933		1690.4	0.00801436		2280.4	0.00373202		2870.4	-0.00221776
510.61	-0.02021401		1100.61	-0.01462827		1690.6	0.00796685		2280.6	0.00434455		2870.6	-0.00267747
510.81	-0.0201521		1100.81	-0.01432777		1690.8	0.00795532		2280.8	0.00521222		2870.8	-0.00377862
511.01	-0.02079405		1101.01	-0.01356354		1691	0.00757484		2281	0.00598984		2871	-0.00308986
511.21	-0.02015647		1101.21	-0.01372972		1691.2	0.00672372		2281.2	0.00529424		2871.2	-0.00336119
511.41	-0.02036074		1101.41	-0.01442899		1691.4	0.00720669		2281.4	0.0059963		2871.4	-0.0033503
511.61	-0.02005741		1101.61	-0.01464108		1691.6	0.00818353		2281.6	0.00570305		2871.6	-0.00286439
511.81	-0.01901295		1101.81	-0.01548102		1691.8	0.00911185		2281.8	0.0052411		2871.8	-0.00189679
512.01	-0.01804721		1102.01	-0.01583437		1692	0.00942391		2282	0.00495453		2872	-0.00063566
512.21	-0.0188918		1102.21	-0.01592984		1692.2	0.0098363		2282.2	0.0050323		2872.2	0.00043948
512.41	-0.01847165		1102.41	-0.01583412		1692.4	0.00935177		2282.4	0.00354521		2872.4	0.00013572
512.61	-0.01836592		1102.61	-0.01653169		1692.6	0.0101839		2282.6	0.00365633		2872.6	0.00101942
512.81	-0.01828589		1102.81	-0.01560536		1692.8	0.01056879		2282.8	0.00349531		2872.8	0.00060422
513.01	-0.01798076		1103.01	-0.01507317		1693	0.01069756		2283	0.00341603		2873	0.00059275
513.21	-0.01644862		1103.21	-0.01563181		1693.2	0.01047635		2283.2	0.00325673		2873.2	-0.0003973
513.41	-0.01670044		1103.41	-0.01517891		1693.4	0.01016222		2283.4	0.00248827		2873.4	-0.00134835
513.61	-0.01657367		1103.61	-0.01522839		1693.6	0.01009023		2283.6	0.00245722		2873.6	-0.00115755
513.81	-0.01709238		1103.81	-0.01527667		1693.8	0.00969716		2283.8	0.00176071		2873.8	-0.00113247
514.01	-0.01726507		1104.01	-0.01502314		1694	0.0092941		2284	0.0022213		2874	-0.00152216
514.21	-0.01765742		1104.21	-0.01461486		1694.2	0.00929418		2284.2	0.00179764		2874.2	-0.00163265
514.41	-0.0186442		1104.41	-0.01422134		1694.4	0.00808778		2284.4	0.00195433		2874.4	-0.00156215
514.61	-0.01915699		1104.61	-0.01371047		1694.6	0.00683939		2284.6	0.00302437		2874.6	-0.00246268
514.81	-0.01836732		1104.81	-0.01334166		1694.8	0.0064737		2284.8	0.0031915		2874.8	-0.00280467
515.01	-0.01841991		1105.01	-0.01410965		1695	0.00614136		2285	0.00328296		2875	-0.00281955
515.21	-0.01771292		1105.21	-0.01460401		1695.2	0.00503894		2285.2	0.00291141		2875.2	-0.00277427
515.41	-0.01820935		1105.41	-0.01557954		1695.4	0.00579135		2285.4	0.00330127		2875.4	-0.00172771
515.61	-0.01831547		1105.61	-0.01534352		1695.6	0.00589144		2285.6	0.00326888		2875.6	-0.00082758
515.81	-0.01760746		1105.81	-0.01535341		1695.8	0.00619803		2285.8	0.00364659		2875.8	-0.00042376
516.01	-0.0178158		1106.01	-0.01625863		1696	0.00753248		2286	0.00354671		2876	0.0005458
516.21	-0.01955244		1106.21	-0.01637787		1696.2	0.00765935		2286.2	0.00381682		2876.2	0.00058427
516.41	-0.01980396		1106.41	-0.01664933		1696.4	0.00845275		2286.4	0.00395644		2876.4	-0.00010461
516.61	-0.02019812		1106.61	-0.01738985		1696.6	0.0090717		2286.6	0.00468942		2876.6	0.00018717
516.81	-0.02037225		1106.81	-0.01696673		1696.8	0.0094976		2286.8	0.00442963		2876.8	-0.00096382
517.01	-0.01952411		1107.01	-0.01716113		1697	0.01067313		2287	0.00373506		2877	-0.00126404
517.21	-0.01932678		1107.21	-0.01750984		1697.2	0.01135713		2287.2	0.00329062		2877.2	-0.00171554
517.41	-0.01965693		1107.41	-0.01650778		1697.4	0.01182792		2287.4	0.00269883		2877.4	-0.00272353
517.61	-0.01925512		1107.61	-0.01665186		1697.6	0.01183582		2287.6	0.00289011		2877.6	-0.00220805
517.81	-0.01975063		1107.81	-0.01592727		1697.8	0.01122088		2287.8	0.00172348		2877.8	-0.00328862
518.01	-0.01984694		1108.01	-0.01541915		1698	0.01109623		2288	0.001567		2878	-0.00341875
518.21	-0.0203928		1108.21	-0.01511128		1698.2	0.01117134		2288.2	0.00086366		2878.2	-0.00298195
518.41	-0.0197968		1108.41	-0.0146281		1698.4	0.01013325		2288.4	0.00075349		2878.4	-0.00343005
518.61	-0.01955046		1108.61	-0.0140014		1698.6	0.00978063		2288.6	0.00092506		2878.6	-0.0030279
518.81	-0.01881375		1108.81	-0.01404629		1698.8	0.00974092		2288.8	0.00032614		2878.8	-0.00343021
519.01	-0.0183706		1109.01	-0.01427351		1699	0.00987419		2289	-0.00031041		2879	-0.00328079
519.21	-0.01830819		1109.21	-0.01389382		1699.2	0.00878586		2289.2	-0.00137151		2879.2	-0.00214723
519.41	-0.01863584		1109.41	-0.01362833		1699.4	0.01002375		2289.4	-0.00084874		2879.4	-0.00114295
519.61	-0.01940031		1109.61	-0.01297304		1699.6	0.01000591		2289.6	-0.00075686		2879.6	-0.00053501
519.81	-0.01919477		1109.81	-0.01413874		1699.8	0.01048925		2289.8	-0.00030429		2879.8	-0.00052903
520.01	-0.01988942		1110.01	-0.01493304		1700	0.01139832		2290	-0.00064348		2880	-0.00051088
520.21	-0.01997314		1110.21	-0.01538814		1700.2	0.01057418		2290.2	-0.00011128		2880.2	-0.00096836
520.41	-0.01984793		1110.41	-0.01542182		1700.4	0.01015998		2290.4	0.00009072		2880.4	-0.00114922
520.61	-0.01965262		1110.61	-0.01509238		1700.6	0.00971136		2290.6	-0.0000682		2880.6	-0.00099464
520.81	-0.01995604		1110.81	-0.01554313		1700.8	0.00962899		2290.8	-0.00025172		2880.8	-0.00153914
521.01	-0.01946754		1111.01	-0.01553158		1701	0.00991637		2291	0.00032436		2881	-0.001113
521.21	-0.01941139		1111.21	-0.01514463		1701.2	0.00991187		2291.2	0.0014815		2881.2	-0.00162976
521.41	-0.02003526		1111.41	-0.01444679		1701.4	0.00940741		2291.4	0.00132813		2881.4	-0.00269836
521.61	-0.01971864		1111.61	-0.01445434		1701.6	0.00903746		2291.6	0.00142637		2881.6	-0.00312389
521.81	-0.01932745		1111.81	-0.01449905		1701.8	0.00819611		2291.8	0.00031145		2881.8	-0.00411059
522.01	-0.01941486		1112.01	-0.01532536		1702	0.00802047		2292	0.00035159		2882	-0.00346585
522.21	-0.01898309		1112.21	-0.01552296		1702.2	0.00749548		2292.2	0.00054699		2882.2	-0.0037601
522.41	-0.01816259		1112.41	-0.01566525		1702.4	0.0064613		2292.4	0.00100988		2882.4	-0.00406285
522.61	-0.01815704		1112.61	-0.01528392		1702.6	0.00671996		2292.6	0.0012527		2882.6	-0.00429168
522.81	-0.01760799		1112.81	-0.01526118		1702.8	0.00633366		2292.8	0.00134382		2882.8	-0.00465205
523.01	-0.01682548		1113.01	-0.01624835		1703	0.00695479		2293	0.00132		2883	-0.00487366
523.21	-0.01686537		1113.21	-0.01602396		1703.2	0.00628117		2293.2	0.00105196		2883.2	-0.00412957
523.41	-0.01705044		1113.41	-0.01611037		1703.4	0.0068537		2293.4	0.00185979		2883.4	-0.00364692
523.61	-0.01743311		1113.61	-0.01593285		1703.6	0.00684976		2293.6	0.00175162		2883.6	-0.00383068
523.81	-0.0171182		1113.81	-0.01621847		1703.8	0.00703595		2293.8	0.00194436		2883.8	-0.00345341
524.01	-0.01742163		1114.01	-0.01620354		1704	0.00778958		2294	0.00203211		2884	-0.00319703
524.21	-0.01690904		1114.21	-0.01589559		1704.2	0.00700522		2294.2	0.00231085		2884.2	-0.0021038
524.41	-0.01751358		1114.41	-0.01584941		1704.4	0.00672216		2294.4	0.00257059		2884.4	-0.00181353
524.61	-0.01728151		1114.61	-0.01605547		1704.6	0.00698393		2294.6	0.00303507		2884.6	-0.00173726
524.81	-0.01754751		1114.81	-0.01602545		1704.8	0.00700274		2294.8	0.00378484		2884.8	-0.00193544
525.01	-0.01786023		1115.01	-0.0150734		1705	0.00714868		2295	0.00407475		2885	-0.00180559
525.21	-0.0186154		1115.21	-0.01462056		1705.2	0.0074249		2295.2	0.00431474		2885.2	-0.00109629
525.41	-0.0194016		1115.41	-0.01428378		1705.4	0.00667024		2295.4	0.00358377		2885.4	-0.00124876
525.61	-0.01873815		1115.61	-0.01472668		1705.6	0.00759562		2295.6	0.0036074		2885.6	-0.0022969
525.81	-0.01824393		1115.81	-0.01491399		1705.8	0.00733226		2295.8	0.00326431		2885.8	-0.00249813
526.01	-0.01903487		1116.01	-0.01513056		1706	0.00740997		2296	0.00352417		2886	-0.00328644
526.21	-0.01953871		1116.21	-0.01504242		1706.2	0.00720536		2296.2	0.00387027		2886.2	-0.00466874
526.41	-0.02067758		1116.41	-0.01463698		1706.4	0.00753856		2296.4	0.00456663		2886.4	-0.00606516
526.61	-0.02073947		1116.61	-0.01526583		1706.6	0.00795844		2296.6	0.00538333		2886.6	-0.00575109
526.81	-0.02109587		1116.81	-0.0157756		1706.8	0.00760739		2296.8	0.00504733		2886.8	-0.00575013
527.01	-0.02060671		1117.01	-0.01691094		1707	0.00827748		2297	0.00484028		2887	-0.00676618
527.21	-0.02055869		1117.21	-0.01627153		1707.2	0.00786914		2297.2	0.00463667		2887.2	-0.00636347
527.41	-0.02014247		1117.41	-0.0161457		1707.4	0.00799459		2297.4	0.00510451		2887.4	-0.00704233
527.61	-0.02040583		1117.61	-0.01626175		1707.6	0.00849047		2297.6	0.00492727		2887.6	-0.00804698
527.81	-0.02041237		1117.81	-0.01639788		1707.8	0.00912865		2297.8	0.00479514		2887.8	-0.00693724
528.01	-0.02023655		1118.01	-0.01702358		1708	0.00984426		2298	0.00451354		2888	-0.00719195
528.21	-0.0202924		1118.21	-0.01723207		1708.2	0.0097082		2298.2	0.00457921		2888.2	-0.0060714
528.41	-0.01988063		1118.41	-0.0171599		1708.4	0.0098401		2298.4	0.00450159		2888.4	-0.0059248
528.61	-0.01960341		1118.61	-0.01657124		1708.6	0.00948713		2298.6	0.00459696		2888.6	-0.00476339
528.81	-0.02002148		1118.81	-0.01647266		1708.8	0.0086361		2298.8	0.00418873		2888.8	-0.00439883
529.01	-0.02129617		1119.01	-0.01676465		1709	0.00827249		2299	0.0032663		2889	-0.00417682
529.21	-0.02108414		1119.21	-0.01680623		1709.2	0.00888317		2299.2	0.00358732		2889.2	-0.00372821
529.41	-0.02048714		1119.41	-0.01706072		1709.4	0.00856385		2299.4	0.00286001		2889.4	-0.00428031
529.61	-0.01938911		1119.61	-0.01765661		1709.6	0.00941776		2299.6	0.0029949		2889.6	-0.00519196
529.81	-0.01927643		1119.81	-0.01738785		1709.8	0.00878097		2299.8	0.00246815		2889.8	-0.00532543
530.01	-0.0203243		1120.01	-0.01706896		1710	0.00841485		2300	0.0021307		2890	-0.00504702
530.21	-0.0213841		1120.21	-0.01698787		1710.2	0.00855103		2300.2	0.00176483		2890.2	-0.0047108
530.41	-0.02173802		1120.41	-0.01750855		1710.4	0.00856139		2300.4	0.00159553		2890.4	-0.00361041
530.61	-0.02095556		1120.61	-0.0185078		1710.6	0.00806922		2300.6	0.00142541		2890.6	-0.00249369
530.81	-0.02092846		1120.81	-0.01811059		1710.8	0.00810679		2300.8	0.00155343		2890.8	-0.00190415
531.01	-0.02051304		1121.01	-0.0178941		1711	0.00784322		2301	0.00217289		2891	-0.00251569
531.21	-0.01991667		1121.21	-0.01716765		1711.2	0.00719969		2301.2	0.00199885		2891.2	-0.00207357
531.41	-0.01924775		1121.41	-0.01733767		1711.4	0.00674556		2301.4	0.00202456		2891.4	-0.00321965
531.61	-0.01910941		1121.61	-0.01700417		1711.6	0.00705718		2301.6	0.00206431		2891.6	-0.00332573
531.81	-0.0190386		1121.81	-0.01639447		1711.8	0.0075206		2301.8	0.00192951		2891.8	-0.00290916
532.01	-0.01918665		1122.01	-0.01573556		1712	0.00723259		2302	0.00178804		2892	-0.00342258
532.21	-0.01915912		1122.21	-0.0162291		1712.2	0.00697609		2302.2	0.00228205		2892.2	-0.00332803
532.41	-0.01832418		1122.41	-0.0156189		1712.4	0.0059966		2302.4	0.00214762		2892.4	-0.00370741
532.61	-0.01859233		1122.61	-0.01554646		1712.6	0.00542979		2302.6	0.00316745		2892.6	-0.00350969
532.81	-0.01919456		1122.81	-0.0167791		1712.8	0.00567059		2302.8	0.00314634		2892.8	-0.00505021
533.01	-0.01989225		1123.01	-0.01729687		1713	0.00615586		2303	0.00370821		2893	-0.00506513
533.21	-0.01848952		1123.21	-0.01716775		1713.2	0.00645119		2303.2	0.00380287		2893.2	-0.00536494
533.41	-0.0182661		1123.41	-0.01719595		1713.4	0.00534628		2303.4	0.00400877		2893.4	-0.00559618
533.61	-0.01852947		1123.61	-0.01765577		1713.6	0.00500864		2303.6	0.00419058		2893.6	-0.00565619
533.81	-0.01953928		1123.81	-0.01742577		1713.8	0.00521512		2303.8	0.00388687		2893.8	-0.00479629
534.01	-0.02026857		1124.01	-0.01806634		1714	0.00528299		2304	0.00308191		2894	-0.00399421
534.21	-0.02087302		1124.21	-0.01767187		1714.2	0.00524403		2304.2	0.00315583		2894.2	-0.00384265
534.41	-0.02008308		1124.41	-0.01770983		1714.4	0.00514358		2304.4	0.00274643		2894.4	-0.00321407
534.61	-0.01940408		1124.61	-0.01742209		1714.6	0.00594293		2304.6	0.00273488		2894.6	-0.00266448
534.81	-0.01945461		1124.81	-0.01646712		1714.8	0.0067238		2304.8	0.00371352		2894.8	-0.00159558
535.01	-0.01938388		1125.01	-0.0158335		1715	0.0060904		2305	0.00329595		2895	-0.0022476
535.21	-0.01846182		1125.21	-0.0161176		1715.2	0.00636955		2305.2	0.00215624		2895.2	-0.00271444
535.41	-0.01770821		1125.41	-0.01622263		1715.4	0.00651989		2305.4	0.00159986		2895.4	-0.00350883
535.61	-0.01748317		1125.61	-0.01591316		1715.6	0.00689784		2305.6	0.00152447		2895.6	-0.00380571
535.81	-0.01747935		1125.81	-0.01624734		1715.8	0.00724834		2305.8	0.0018699		2895.8	-0.00418028
536.01	-0.01740031		1126.01	-0.01674103		1716	0.00710863		2306	0.00163471		2896	-0.00378599
536.21	-0.01690767		1126.21	-0.01742568		1716.2	0.00760546		2306.2	0.00215721		2896.2	-0.00421653
536.41	-0.01689977		1126.41	-0.01667539		1716.4	0.00818851		2306.4	0.00214671		2896.4	-0.00441857
536.61	-0.01779553		1126.61	-0.01670419		1716.6	0.00928968		2306.6	0.00273714		2896.6	-0.00438497
536.81	-0.01830253		1126.81	-0.01700928		1716.8	0.00935084		2306.8	0.00240391		2896.8	-0.00512574
537.01	-0.01846081		1127.01	-0.01725511		1717	0.00898089		2307	0.00229641		2897	-0.00462214
537.21	-0.01800543		1127.21	-0.01632051		1717.2	0.00889673		2307.2	0.00188373		2897.2	-0.00467144
537.41	-0.01876249		1127.41	-0.01691838		1717.4	0.00892745		2307.4	0.00224578		2897.4	-0.00405063
537.61	-0.01911508		1127.61	-0.01743383		1717.6	0.00918582		2307.6	0.00203418		2897.6	-0.00354087
537.81	-0.01943927		1127.81	-0.01727283		1717.8	0.00964975		2307.8	0.00220556		2897.8	-0.00297365
538.01	-0.01949874		1128.01	-0.01702688		1718	0.01010875		2308	0.0017283		2898	-0.0039206
538.21	-0.02002778		1128.21	-0.01531702		1718.2	0.00930031		2308.2	0.00187597		2898.2	-0.00442503
538.41	-0.01910955		1128.41	-0.01478182		1718.4	0.00957091		2308.4	0.00234525		2898.4	-0.00481951
538.61	-0.01931965		1128.61	-0.01402394		1718.6	0.00966075		2308.6	0.00237355		2898.6	-0.00423651
538.81	-0.0193737		1128.81	-0.01374088		1718.8	0.00890909		2308.8	0.0022827		2898.8	-0.00561478
539.01	-0.01946535		1129.01	-0.01423229		1719	0.00799565		2309	0.00117015		2899	-0.00607323
539.21	-0.01935081		1129.21	-0.01483197		1719.2	0.00801124		2309.2	0.00035169		2899.2	-0.00703769
539.41	-0.01912887		1129.41	-0.01519261		1719.4	0.00836668		2309.4	0.00032024		2899.4	-0.00699071
539.61	-0.02022371		1129.61	-0.0152632		1719.6	0.00733632		2309.6	0.00043177		2899.6	-0.00738565
539.81	-0.02046303		1129.81	-0.01575988		1719.8	0.0077177		2309.8	0.00063436		2899.8	-0.00697782
540.01	-0.0207455		1130.01	-0.01507641		1720	0.00790679		2310	-0.00023618		2900	-0.00649528
540.21	-0.02090337		1130.21	-0.01443982		1720.2	0.00813978		2310.2	-0.00006446		2900.2	-0.00711491
540.41	-0.02077787		1130.41	-0.0141406		1720.4	0.00822495		2310.4	-0.0007808		2900.4	-0.00763007
540.61	-0.02106782		1130.61	-0.0139878		1720.6	0.00828195		2310.6	-0.00134071		2900.6	-0.00729386
540.81	-0.02136738		1130.81	-0.0143033		1720.8	0.00754578		2310.8	-0.00169597		2900.8	-0.00639855
541.01	-0.02104945		1131.01	-0.01501006		1721	0.00786261		2311	-0.00169126		2901	-0.00580442
541.21	-0.02097467		1131.21	-0.01497007		1721.2	0.00825474		2311.2	-0.00153084		2901.2	-0.00535294
541.41	-0.02089208		1131.41	-0.01605458		1721.4	0.00802698		2311.4	-0.00181752		2901.4	-0.00384011
541.61	-0.02100531		1131.61	-0.01661493		1721.6	0.00792427		2311.6	-0.00154619		2901.6	-0.00359949
541.81	-0.02093574		1131.81	-0.01659385		1721.8	0.00807326		2311.8	-0.00106061		2901.8	-0.00348251
542.01	-0.02109771		1132.01	-0.01625755		1722	0.00737037		2312	-0.00046563		2902	-0.00428869
542.21	-0.02187848		1132.21	-0.01559399		1722.2	0.00608791		2312.2	-0.00008812		2902.2	-0.00360682
542.41	-0.0214511		1132.41	-0.01615252		1722.4	0.00662748		2312.4	0.00151311		2902.4	-0.00319651
542.61	-0.02236905		1132.61	-0.01664064		1722.6	0.00572728		2312.6	0.00098436		2902.6	-0.00290919
542.81	-0.02241853		1132.81	-0.0170217		1722.8	0.00519842		2312.8	0.00048796		2902.8	-0.00347605
543.01	-0.02269206		1133.01	-0.01708002		1723	0.00522831		2313	0.00015965		2903	-0.0033878
543.21	-0.02220861		1133.21	-0.01745395		1723.2	0.00566614		2313.2	0.00099423		2903.2	-0.00391915
543.41	-0.02206118		1133.41	-0.01837148		1723.4	0.00582715		2313.4	0.00212557		2903.4	-0.00405199
543.61	-0.02298081		1133.61	-0.01842608		1723.6	0.00573413		2313.6	0.00255123		2903.6	-0.00399167
543.81	-0.02234118		1133.81	-0.01864698		1723.8	0.00649517		2313.8	0.00245442		2903.8	-0.00425379
544.01	-0.02215692		1134.01	-0.01805757		1724	0.00638451		2314	0.00262729		2904	-0.00448675
544.21	-0.02137581		1134.21	-0.01840925		1724.2	0.00622417		2314.2	0.00280381		2904.2	-0.00536709
544.41	-0.02053795		1134.41	-0.01848695		1724.4	0.00664305		2314.4	0.00275647		2904.4	-0.00545088
544.61	-0.02103815		1134.61	-0.01903452		1724.6	0.00696337		2314.6	0.00253987		2904.6	-0.00501128
544.81	-0.02111149		1134.81	-0.01955807		1724.8	0.00745098		2314.8	0.00225522		2904.8	-0.00534885
545.01	-0.02028447		1135.01	-0.0200322		1725	0.00849286		2315	0.0027094		2905	-0.0061994
545.21	-0.02047767		1135.21	-0.02054815		1725.2	0.00789193		2315.2	0.00144382		2905.2	-0.00622422
545.41	-0.02040922		1135.41	-0.02079626		1725.4	0.00764972		2315.4	0.0004551		2905.4	-0.00575845
545.61	-0.02044184		1135.61	-0.0218118		1725.6	0.00807153		2315.6	0.00019437		2905.6	-0.00591121
545.81	-0.02031583		1135.81	-0.02072986		1725.8	0.00776461		2315.8	-0.00010947		2905.8	-0.00580234
546.01	-0.02117412		1136.01	-0.02006684		1726	0.00735136		2316	0.00008396		2906	-0.00510807
546.21	-0.02174797		1136.21	-0.01991704		1726.2	0.00807875		2316.2	-0.00077425		2906.2	-0.0048385
546.41	-0.02209533		1136.41	-0.01939454		1726.4	0.00843528		2316.4	-0.00043061		2906.4	-0.00462649
546.61	-0.02236367		1136.61	-0.01876743		1726.6	0.00766243		2316.6	-0.00082127		2906.6	-0.00464324
546.81	-0.02186789		1136.81	-0.01825578		1726.8	0.00787961		2316.8	-0.00086815		2906.8	-0.00474079
547.01	-0.02261354		1137.01	-0.01751176		1727	0.00785864		2317	-0.00031735		2907	-0.00502554
547.21	-0.02283603		1137.21	-0.01758343		1727.2	0.00820861		2317.2	0.00026199		2907.2	-0.00441859
547.41	-0.02330114		1137.41	-0.01808795		1727.4	0.0084765		2317.4	0.00038101		2907.4	-0.00419644
547.61	-0.02413444		1137.61	-0.01771841		1727.6	0.00859987		2317.6	0.00096341		2907.6	-0.00517798
547.81	-0.02348456		1137.81	-0.01776856		1727.8	0.00835499		2317.8	0.00096338		2907.8	-0.00573697
548.01	-0.02369413		1138.01	-0.0175269		1728	0.00909416		2318	0.00154853		2908	-0.00577112
548.21	-0.02327962		1138.21	-0.01720803		1728.2	0.00881218		2318.2	0.00162446		2908.2	-0.00620318
548.41	-0.02375347		1138.41	-0.01705277		1728.4	0.00949311		2318.4	0.00100321		2908.4	-0.00489533
548.61	-0.02370681		1138.61	-0.01723107		1728.6	0.00970804		2318.6	0.001024		2908.6	-0.00664453
548.81	-0.02352172		1138.81	-0.01693459		1728.8	0.00977843		2318.8	0.00123894		2908.8	-0.00719629
549.01	-0.02278452		1139.01	-0.0174717		1729	0.00946022		2319	0.00156523		2909	-0.00715242
549.21	-0.022619		1139.21	-0.01752821		1729.2	0.00804665		2319.2	0.00081611		2909.2	-0.00720509
549.41	-0.02162179		1139.41	-0.01724573		1729.4	0.0073625		2319.4	0.0004494		2909.4	-0.00728656
549.61	-0.0207093		1139.61	-0.01697146		1729.6	0.00669173		2319.6	0.00055914		2909.6	-0.00742732
549.81	-0.02031694		1139.81	-0.01617762		1729.8	0.00621665		2319.8	0.0002083		2909.8	-0.00825099
550.01	-0.01984087		1140.01	-0.01674839		1730	0.00606812		2320	0.00025543		2910	-0.00739449
550.21	-0.01810787		1140.21	-0.01709227		1730.2	0.00599384		2320.2	0.00001084		2910.2	-0.00764472
550.41	-0.01705348		1140.41	-0.01691385		1730.4	0.00529564		2320.4	0.00025983		2910.4	-0.00728945
550.61	-0.01612819		1140.61	-0.0173384		1730.6	0.00519316		2320.6	0.00002003		2910.6	-0.00708332
550.81	-0.0160864		1140.81	-0.01710402		1730.8	0.00487202		2320.8	-0.00001986		2910.8	-0.00616308
551.01	-0.01674336		1141.01	-0.01709272		1731	0.00506635		2321	-0.00004663		2911	-0.00596279
551.21	-0.01586495		1141.21	-0.0180044		1731.2	0.00592082		2321.2	-0.00018839		2911.2	-0.00593657
551.41	-0.01596163		1141.41	-0.01885738		1731.4	0.00611453		2321.4	-0.00019635		2911.4	-0.00611093
551.61	-0.01656617		1141.61	-0.01859628		1731.6	0.00653159		2321.6	-0.00009181		2911.6	-0.00616942
551.81	-0.01674736		1141.81	-0.01885573		1731.8	0.00668645		2321.8	-0.00026863		2911.8	-0.00460513
552.01	-0.01746852		1142.01	-0.01883607		1732	0.00738063		2322	-0.00001198		2912	-0.00416618
552.21	-0.01814874		1142.21	-0.01823778		1732.2	0.00728927		2322.2	0.00028598		2912.2	-0.00365133
552.41	-0.01907613		1142.41	-0.01791854		1732.4	0.00810054		2322.4	0.00051249		2912.4	-0.00270446
552.61	-0.01931178		1142.61	-0.01767734		1732.6	0.00814283		2322.6	0.00169077		2912.6	-0.00414025
552.81	-0.02025882		1142.81	-0.01791766		1732.8	0.00885007		2322.8	0.00248554		2912.8	-0.00353968
553.01	-0.02031494		1143.01	-0.01817521		1733	0.00923918		2323	0.00260576		2913	-0.00351481
553.21	-0.02079863		1143.21	-0.01759011		1733.2	0.00905046		2323.2	0.0030283		2913.2	-0.00374634
553.41	-0.02150351		1143.41	-0.01752461		1733.4	0.00867304		2323.4	0.00259965		2913.4	-0.00433332
553.61	-0.02188887		1143.61	-0.01736542		1733.6	0.00912036		2323.6	0.00318373		2913.6	-0.00426432
553.81	-0.02206716		1143.81	-0.01834844		1733.8	0.00966942		2323.8	0.00247814		2913.8	-0.00509457
554.01	-0.0221702		1144.01	-0.01865386		1734	0.00938467		2324	0.00314604		2914	-0.00441408
554.21	-0.02157683		1144.21	-0.0191102		1734.2	0.00954237		2324.2	0.00328826		2914.2	-0.00579317
554.41	-0.02180847		1144.41	-0.01886575		1734.4	0.00930778		2324.4	0.0027754		2914.4	-0.00592329
554.61	-0.02187545		1144.61	-0.01791832		1734.6	0.00983243		2324.6	0.00274354		2914.6	-0.00631403
554.81	-0.0219968		1144.81	-0.01779422		1734.8	0.00947576		2324.8	0.00308835		2914.8	-0.00659583
555.01	-0.02158151		1145.01	-0.01894997		1735	0.0093779		2325	0.00294722		2915	-0.0073654
555.21	-0.02050976		1145.21	-0.0193367		1735.2	0.00853893		2325.2	0.00274589		2915.2	-0.00804396
555.41	-0.02129805		1145.41	-0.01925809		1735.4	0.00817256		2325.4	0.00230835		2915.4	-0.00781257
555.61	-0.02120739		1145.61	-0.01956574		1735.6	0.00783717		2325.6	0.00311048		2915.6	-0.00763351
555.81	-0.02100905		1145.81	-0.01934436		1735.8	0.00763702		2325.8	0.00372352		2915.8	-0.00744233
556.01	-0.02052158		1146.01	-0.01878697		1736	0.00853335		2326	0.00457507		2916	-0.00839231
556.21	-0.02027838		1146.21	-0.01726173		1736.2	0.00868283		2326.2	0.00400232		2916.2	-0.00830282
556.41	-0.02018954		1146.41	-0.01757694		1736.4	0.00877223		2326.4	0.00433572		2916.4	-0.00713661
556.61	-0.02035653		1146.61	-0.01758877		1736.6	0.00889831		2326.6	0.00472202		2916.6	-0.00619016
556.81	-0.02039626		1146.81	-0.01804462		1736.8	0.00935275		2326.8	0.00419034		2916.8	-0.00646653
557.01	-0.02070768		1147.01	-0.01774928		1737	0.00896075		2327	0.00351595		2917	-0.00564238
557.21	-0.02091512		1147.21	-0.01713183		1737.2	0.00826107		2327.2	0.00320854		2917.2	-0.00511152
557.41	-0.02106656		1147.41	-0.01768817		1737.4	0.00796526		2327.4	0.00242426		2917.4	-0.00453894
557.61	-0.02082765		1147.61	-0.01812959		1737.6	0.00820439		2327.6	0.00239204		2917.6	-0.00402222
557.81	-0.02087261		1147.81	-0.01834272		1737.8	0.00827684		2327.8	0.00181374		2917.8	-0.00482454
558.01	-0.02089651		1148.01	-0.01768534		1738	0.00822946		2328	0.0024902		2918	-0.00435392
558.21	-0.02075871		1148.21	-0.01813376		1738.2	0.00803461		2328.2	0.00151216		2918.2	-0.00419364
558.41	-0.02050148		1148.41	-0.01829391		1738.4	0.00748954		2328.4	0.00093389		2918.4	-0.00392017
558.61	-0.01953947		1148.61	-0.01818004		1738.6	0.00738783		2328.6	0.00065781		2918.6	-0.00389147
558.81	-0.0187851		1148.81	-0.01928698		1738.8	0.00730385		2328.8	-0.00015675		2918.8	-0.00414418
559.01	-0.01828938		1149.01	-0.01963648		1739	0.00597089		2329	-0.00017521		2919	-0.00469948
559.21	-0.01741454		1149.21	-0.01924975		1739.2	0.00583521		2329.2	-0.00061326		2919.2	-0.0049554
559.41	-0.01803151		1149.41	-0.01879966		1739.4	0.00660773		2329.4	-0.00021694		2919.4	-0.00536609
559.61	-0.01782944		1149.61	-0.01818876		1739.6	0.00601497		2329.6	0.00034608		2919.6	-0.00567353
559.81	-0.017079		1149.81	-0.01670394		1739.8	0.00671082		2329.8	-0.00036247		2919.8	-0.0059937
560.01	-0.01747441		1150.01	-0.01566175		1740	0.00691207		2330	0.00022014		2920	-0.00618311
560.21	-0.01726209		1150.21	-0.01447253		1740.2	0.00666245		2330.2	-0.00041319		2920.2	-0.00571483
560.41	-0.01778442		1150.41	-0.01477734		1740.4	0.00660926		2330.4	0.00045214		2920.4	-0.00562801
560.61	-0.0172218		1150.61	-0.0138704		1740.6	0.00632929		2330.6	0.00021527		2920.6	-0.00546093
560.81	-0.01647015		1150.81	-0.01388513		1740.8	0.00565012		2330.8	-0.00017209		2920.8	-0.0062248
561.01	-0.01627067		1151.01	-0.01328475		1741	0.00519422		2331	0.00071746		2921	-0.00562978
561.21	-0.01607131		1151.21	-0.01390494		1741.2	0.00505365		2331.2	0.00143076		2921.2	-0.00510689
561.41	-0.0165752		1151.41	-0.01464543		1741.4	0.00527212		2331.4	0.00187949		2921.4	-0.00496769
561.61	-0.01713891		1151.61	-0.01476045		1741.6	0.00545191		2331.6	0.00224207		2921.6	-0.00496153
561.81	-0.01769194		1151.81	-0.01477788		1741.8	0.00509163		2331.8	0.00243152		2921.8	-0.00533588
562.01	-0.01838398		1152.01	-0.0159165		1742	0.00467059		2332	0.00307921		2922	-0.00496127
562.21	-0.01969184		1152.21	-0.0174069		1742.2	0.00365006		2332.2	0.00221607		2922.2	-0.00522416
562.41	-0.02019465		1152.41	-0.01857836		1742.4	0.00364398		2332.4	0.00176011		2922.4	-0.00589563
562.61	-0.02046485		1152.61	-0.01929612		1742.6	0.00452118		2332.6	0.00111436		2922.6	-0.00618242
562.81	-0.02188148		1152.81	-0.01992721		1742.8	0.00470054		2332.8	0.00032482		2922.8	-0.00640737
563.01	-0.02341119		1153.01	-0.01915365		1743	0.00460911		2333	0.00081453		2923	-0.00583233
563.21	-0.02386179		1153.21	-0.01950508		1743.2	0.00605446		2333.2	0.00061202		2923.2	-0.00543863
563.41	-0.02466134		1153.41	-0.01899126		1743.4	0.0059544		2333.4	0.00056079		2923.4	-0.0055881
563.61	-0.02444761		1153.61	-0.01860862		1743.6	0.00508294		2333.6	0.00010165		2923.6	-0.00506967
563.81	-0.02428289		1153.81	-0.01863752		1743.8	0.00531395		2333.8	-0.00088421		2923.8	-0.00503848
564.01	-0.02495663		1154.01	-0.01806371		1744	0.00589782		2334	-0.00106099		2924	-0.00445839
564.21	-0.02411313		1154.21	-0.01817596		1744.2	0.00592111		2334.2	-0.00142112		2924.2	-0.00443187
564.41	-0.02366027		1154.41	-0.01854115		1744.4	0.00615016		2334.4	-0.00154004		2924.4	-0.00417294
564.61	-0.02247568		1154.61	-0.01843609		1744.6	0.0054274		2334.6	-0.00115789		2924.6	-0.00334458
564.81	-0.0217754		1154.81	-0.01825693		1744.8	0.00569518		2334.8	-0.00114275		2924.8	-0.00284014
565.01	-0.02073368		1155.01	-0.0189968		1745	0.00603854		2335	0.00007834		2925	-0.00244632
565.21	-0.0208946		1155.21	-0.01940699		1745.2	0.00639067		2335.2	0.00064554		2925.2	-0.00236355
565.41	-0.02094802		1155.41	-0.01923987		1745.4	0.00604842		2335.4	0.00125844		2925.4	-0.00243362
565.61	-0.02066761		1155.61	-0.01896846		1745.6	0.00570397		2335.6	0.00176264		2925.6	-0.00192458
565.81	-0.02132145		1155.81	-0.01854447		1745.8	0.00492605		2335.8	0.00161073		2925.8	-0.00307945
566.01	-0.02171371		1156.01	-0.01835984		1746	0.00524019		2336	0.00222962		2926	-0.00351451
566.21	-0.02165844		1156.21	-0.01846728		1746.2	0.00526025		2336.2	0.0016729		2926.2	-0.00475893
566.41	-0.02124807		1156.41	-0.01905887		1746.4	0.00552087		2336.4	0.00147239		2926.4	-0.00516449
566.61	-0.02065102		1156.61	-0.01925286		1746.6	0.00665597		2336.6	0.00221995		2926.6	-0.00599479
566.81	-0.02092428		1156.81	-0.01863022		1746.8	0.00720757		2336.8	0.00258352		2926.8	-0.00545713
567.01	-0.02114053		1157.01	-0.01805291		1747	0.00813442		2337	0.00431879		2927	-0.00582451
567.21	-0.02046123		1157.21	-0.01830845		1747.2	0.00808564		2337.2	0.00431902		2927.2	-0.00607207
567.41	-0.01943969		1157.41	-0.01791295		1747.4	0.00785928		2337.4	0.0041256		2927.4	-0.00666041
567.61	-0.01871614		1157.61	-0.01812016		1747.6	0.00761872		2337.6	0.0039389		2927.6	-0.00695004
567.81	-0.01926917		1157.81	-0.0187617		1747.8	0.00781046		2337.8	0.00323132		2927.8	-0.00721586
568.01	-0.01790514		1158.01	-0.01869801		1748	0.00852335		2338	0.00337621		2928	-0.00743184
568.21	-0.01772853		1158.21	-0.01947235		1748.2	0.00874051		2338.2	0.00341714		2928.2	-0.00808704
568.41	-0.01776251		1158.41	-0.02017082		1748.4	0.009429		2338.4	0.00313113		2928.4	-0.00876377
568.61	-0.01788634		1158.61	-0.02064097		1748.6	0.0089098		2338.6	0.00332886		2928.6	-0.00912831
568.81	-0.01829661		1158.81	-0.0206027		1748.8	0.0096244		2338.8	0.00256525		2928.8	-0.00919498
569.01	-0.01799309		1159.01	-0.02138233		1749	0.00961942		2339	0.00358447		2929	-0.00917305
569.21	-0.01924688		1159.21	-0.02113686		1749.2	0.01008032		2339.2	0.00381163		2929.2	-0.00905876
569.41	-0.01969055		1159.41	-0.02104541		1749.4	0.00963425		2339.4	0.00361696		2929.4	-0.0080991
569.61	-0.01995873		1159.61	-0.02099266		1749.6	0.00905694		2339.6	0.0028216		2929.6	-0.00741246
569.81	-0.02029331		1159.81	-0.02048289		1749.8	0.00834067		2339.8	0.00217042		2929.8	-0.00751822
570.01	-0.02094676		1160.01	-0.02039937		1750	0.00852875		2340	0.00209654		2930	-0.00687263
570.21	-0.02082583		1160.21	-0.02073762		1750.2	0.00779301		2340.2	0.00175066		2930.2	-0.00711302
570.41	-0.02109352		1160.41	-0.02105236		1750.4	0.0076703		2340.4	0.00112078		2930.4	-0.00619354
570.61	-0.02117839		1160.61	-0.02053947		1750.6	0.00830107		2340.6	0.00137636		2930.6	-0.00659966
570.81	-0.02207765		1160.81	-0.02051799		1750.8	0.00843679		2340.8	0.00143799		2930.8	-0.00573036
571.01	-0.02287268		1161.01	-0.01996067		1751	0.00821406		2341	0.00218824		2931	-0.00580288
571.21	-0.02240452		1161.21	-0.02019512		1751.2	0.00780009		2341.2	0.00150016		2931.2	-0.00558354
571.41	-0.02209171		1161.41	-0.0204537		1751.4	0.00854923		2341.4	0.00117049		2931.4	-0.00611695
571.61	-0.0221495		1161.61	-0.01981985		1751.6	0.00831318		2341.6	0.00082535		2931.6	-0.00663974
571.81	-0.02224373		1161.81	-0.02015325		1751.8	0.00815199		2341.8	0.00095055		2931.8	-0.00673182
572.01	-0.02085507		1162.01	-0.02022934		1752	0.00843453		2342	0.00190437		2932	-0.00699029
572.21	-0.02128729		1162.21	-0.02037322		1752.2	0.00920861		2342.2	0.00112215		2932.2	-0.00764418
572.41	-0.02118799		1162.41	-0.02103838		1752.4	0.00908878		2342.4	0.00014362		2932.4	-0.00760716
572.61	-0.02125301		1162.61	-0.02084753		1752.6	0.00884677		2342.6	-0.00005495		2932.6	-0.00805222
572.81	-0.02142866		1162.81	-0.01992505		1752.8	0.00915361		2342.8	-0.0001052		2932.8	-0.00824215
573.01	-0.02136903		1163.01	-0.02017352		1753	0.00876423		2343	0.0009762		2933	-0.00744614
573.21	-0.02130527		1163.21	-0.02022362		1753.2	0.00860723		2343.2	0.00058175		2933.2	-0.00737549
573.41	-0.020678		1163.41	-0.01973594		1753.4	0.0073654		2343.4	0.00008524		2933.4	-0.00668181
573.61	-0.02028378		1163.61	-0.02045554		1753.6	0.00686774		2343.6	-0.00036205		2933.6	-0.0065427
573.81	-0.02051849		1163.81	-0.01998982		1753.8	0.00637962		2343.8	0.00024344		2933.8	-0.0062146
574.01	-0.02149882		1164.01	-0.0195607		1754	0.00567879		2344	0.00029028		2934	-0.00633343
574.21	-0.02161617		1164.21	-0.01976649		1754.2	0.00495432		2344.2	0.00020057		2934.2	-0.0062312
574.41	-0.02212573		1164.41	-0.02035004		1754.4	0.00542633		2344.4	0.0005939		2934.4	-0.00548326
574.61	-0.02176791		1164.61	-0.01993522		1754.6	0.00475999		2344.6	0.00165176		2934.6	-0.00559084
574.81	-0.02250605		1164.81	-0.02054934		1754.8	0.00458236		2344.8	0.00180547		2934.8	-0.00479806
575.01	-0.02269047		1165.01	-0.02042399		1755	0.00486048		2345	0.0015771		2935	-0.00460743
575.21	-0.0221819		1165.21	-0.02053542		1755.2	0.00537434		2345.2	0.00087117		2935.2	-0.00475571
575.41	-0.0220495		1165.41	-0.02056862		1755.4	0.00579765		2345.4	0.0012354		2935.4	-0.00484523
575.61	-0.02134023		1165.61	-0.02004774		1755.6	0.00472262		2345.6	0.0020784		2935.6	-0.00565492
575.81	-0.02098454		1165.81	-0.02036657		1755.8	0.00511264		2345.8	0.00187021		2935.8	-0.00517856
576.01	-0.02031962		1166.01	-0.02055332		1756	0.00457977		2346	0.0016721		2936	-0.00584374
576.21	-0.01988607		1166.21	-0.02022755		1756.2	0.00481606		2346.2	-0.00010701		2936.2	-0.00624684
576.41	-0.01960069		1166.41	-0.02041201		1756.4	0.00395995		2346.4	-0.00055931		2936.4	-0.00617637
576.61	-0.01945983		1166.61	-0.01953785		1756.6	0.00461451		2346.6	-0.00041816		2936.6	-0.00648846
576.81	-0.0195653		1166.81	-0.01890365		1756.8	0.00462841		2346.8	-0.00028411		2936.8	-0.00589553
577.01	-0.0187202		1167.01	-0.0198301		1757	0.0043528		2347	0.0004381		2937	-0.00584054
577.21	-0.01837898		1167.21	-0.01999326		1757.2	0.00451713		2347.2	0.00030233		2937.2	-0.00586794
577.41	-0.01777161		1167.41	-0.01954135		1757.4	0.0044234		2347.4	0.00060695		2937.4	-0.00571683
577.61	-0.01811986		1167.61	-0.02070873		1757.6	0.00436489		2347.6	0.00119484		2937.6	-0.00629985
577.81	-0.01837056		1167.81	-0.02037565		1757.8	0.00347676		2347.8	0.00173752		2937.8	-0.00627499
578.01	-0.01902258		1168.01	-0.0203481		1758	0.00294975		2348	0.00236743		2938	-0.007121
578.21	-0.01909666		1168.21	-0.02085657		1758.2	0.00310819		2348.2	0.00281749		2938.2	-0.0067858
578.41	-0.0192174		1168.41	-0.02057122		1758.4	0.00359003		2348.4	0.00340199		2938.4	-0.00608307
578.61	-0.01983384		1168.61	-0.02080171		1758.6	0.00311798		2348.6	0.00378722		2938.6	-0.00648404
578.81	-0.02058517		1168.81	-0.02061245		1758.8	0.00447991		2348.8	0.00425039		2938.8	-0.00660709
579.01	-0.02106226		1169.01	-0.02059262		1759	0.00521593		2349	0.00429382		2939	-0.00659332
579.21	-0.02141915		1169.21	-0.01929044		1759.2	0.00525795		2349.2	0.00509986		2939.2	-0.00727723
579.41	-0.02146526		1169.41	-0.01910416		1759.4	0.00524984		2349.4	0.00604383		2939.4	-0.00748911
579.61	-0.02199468		1169.61	-0.01861769		1759.6	0.00501357		2349.6	0.00662014		2939.6	-0.00840542
579.81	-0.02308625		1169.81	-0.01900297		1759.8	0.00485034		2349.8	0.00459459		2939.8	-0.00795112
580.01	-0.02325797		1170.01	-0.01919882		1760	0.00415809		2350	0.0045625		2940	-0.00763028
580.21	-0.0236277		1170.21	-0.01884165		1760.2	0.00409136		2350.2	0.00419449		2940.2	-0.00697309
580.41	-0.02387149		1170.41	-0.01964869		1760.4	0.00422813		2350.4	0.00405122		2940.4	-0.00646793
580.61	-0.02349508		1170.61	-0.01924705		1760.6	0.00510225		2350.6	0.00349044		2940.6	-0.00626294
580.81	-0.02366987		1170.81	-0.01941301		1760.8	0.00535973		2350.8	0.0029037		2940.8	-0.00611159
581.01	-0.02348496		1171.01	-0.01958028		1761	0.0046338		2351	0.00323929		2941	-0.00629036
581.21	-0.02366694		1171.21	-0.01982212		1761.2	0.00452252		2351.2	0.0025532		2941.2	-0.00602057
581.41	-0.023124		1171.41	-0.01936342		1761.4	0.00519205		2351.4	0.00156352		2941.4	-0.00670194
581.61	-0.02280466		1171.61	-0.01972326		1761.6	0.00488154		2351.6	0.00158888		2941.6	-0.00685111
581.81	-0.02186842		1171.81	-0.01952137		1761.8	0.00555665		2351.8	0.0011224		2941.8	-0.00725223
582.01	-0.02246368		1172.01	-0.01972587		1762	0.00619946		2352	0.00158332		2942	-0.0072628
582.21	-0.02183038		1172.21	-0.02015731		1762.2	0.00601502		2352.2	0.00095465		2942.2	-0.0069957
582.41	-0.0228744		1172.41	-0.02016199		1762.4	0.00667217		2352.4	0.00078432		2942.4	-0.00714447
582.61	-0.02350752		1172.61	-0.02096069		1762.6	0.0078392		2352.6	0.00133534		2942.6	-0.00800933
582.81	-0.0239564		1172.81	-0.01980392		1762.8	0.00774329		2352.8	0.00149221		2942.8	-0.00824657
583.01	-0.0248098		1173.01	-0.0202024		1763	0.007201		2353	0.00134196		2943	-0.0086116
583.21	-0.02477871		1173.21	-0.01951046		1763.2	0.00781285		2353.2	0.00273882		2943.2	-0.00888932
583.41	-0.02467549		1173.41	-0.02015437		1763.4	0.00829726		2353.4	0.00329353		2943.4	-0.00857959
583.61	-0.02514659		1173.61	-0.02061866		1763.6	0.00831316		2353.6	0.00332124		2943.6	-0.00814723
583.81	-0.02450878		1173.81	-0.0206578		1763.8	0.00825327		2353.8	0.00175172		2943.8	-0.00757412
584.01	-0.02371289		1174.01	-0.02018126		1764	0.0088117		2354	0.00251995		2944	-0.00645832
584.21	-0.0226808		1174.21	-0.02011875		1764.2	0.00802269		2354.2	0.00230523		2944.2	-0.00566555
584.41	-0.02107776		1174.41	-0.01966057		1764.4	0.00790789		2354.4	0.00205256		2944.4	-0.00519391
584.61	-0.02009331		1174.61	-0.01856301		1764.6	0.00728948		2354.6	0.00097609		2944.6	-0.00504693
584.81	-0.0195906		1174.81	-0.01778586		1764.8	0.00624208		2354.8	0.00032354		2944.8	-0.00458516
585.01	-0.01865801		1175.01	-0.01687758		1765	0.00524512		2355	0.00092385		2945	-0.00468598
585.21	-0.01748174		1175.21	-0.01756991		1765.2	0.0053593		2355.2	0.00073822		2945.2	-0.00446379
585.41	-0.01653418		1175.41	-0.01738202		1765.4	0.00620651		2355.4	0.00005899		2945.4	-0.0047597
585.61	-0.01604847		1175.61	-0.01709816		1765.6	0.00639899		2355.6	0.00050605		2945.6	-0.00429932
585.81	-0.01672648		1175.81	-0.01729401		1765.8	0.00653281		2355.8	-0.00002213		2945.8	-0.00400857
586.01	-0.01831018		1176.01	-0.01847638		1766	0.00563349		2356	-0.00001114		2946	-0.00326818
586.21	-0.01932774		1176.21	-0.01945517		1766.2	0.00523593		2356.2	-0.00028141		2946.2	-0.0043868
586.41	-0.02066595		1176.41	-0.02043681		1766.4	0.00519506		2356.4	0.00009014		2946.4	-0.00513541
586.61	-0.02185464		1176.61	-0.02069606		1766.6	0.00477578		2356.6	0.00037118		2946.6	-0.00554666
586.81	-0.02364783		1176.81	-0.02032656		1766.8	0.00327539		2356.8	0.00068745		2946.8	-0.00689192
587.01	-0.02452599		1177.01	-0.02088008		1767	0.00441615		2357	0.00153242		2947	-0.00712474
587.21	-0.02524483		1177.21	-0.02068039		1767.2	0.00499153		2357.2	0.00187109		2947.2	-0.00678606
587.41	-0.02582767		1177.41	-0.02103088		1767.4	0.00549429		2357.4	0.00166259		2947.4	-0.00657672
587.61	-0.0258814		1177.61	-0.02120739		1767.6	0.00647801		2357.6	0.00198652		2947.6	-0.00669598
587.81	-0.02489207		1177.81	-0.02114616		1767.8	0.00671772		2357.8	0.00218447		2947.8	-0.00721196
588.01	-0.0247256		1178.01	-0.02128089		1768	0.00718843		2358	0.00293133		2948	-0.00650005
588.21	-0.02436304		1178.21	-0.02130917		1768.2	0.00719686		2358.2	0.0028987		2948.2	-0.0058481
588.41	-0.02437162		1178.41	-0.02048204		1768.4	0.00683297		2358.4	0.00250948		2948.4	-0.00650326
588.61	-0.02437284		1178.61	-0.02086099		1768.6	0.00702044		2358.6	0.00213195		2948.6	-0.00659367
588.81	-0.02364981		1178.81	-0.02019471		1768.8	0.00699628		2358.8	0.00306587		2948.8	-0.00672198
589.01	-0.02289588		1179.01	-0.01975975		1769	0.00797376		2359	0.00321343		2949	-0.00739423
589.21	-0.02256192		1179.21	-0.02015481		1769.2	0.00846991		2359.2	0.00314759		2949.2	-0.0071236
589.41	-0.02254657		1179.41	-0.0204842		1769.4	0.00911455		2359.4	0.00239696		2949.4	-0.00729975
589.61	-0.02291089		1179.61	-0.02065414		1769.6	0.00872671		2359.6	0.00196493		2949.6	-0.00704371
589.81	-0.02245985		1179.81	-0.020897		1769.8	0.00841194		2359.8	0.00145699		2949.8	-0.00683147
590.01	-0.02188128		1180.01	-0.02145157		1770	0.00802132		2360	0.00112141		2950	-0.0068239
590.21	-0.02168368		1180.21	-0.02132852		1770.2	0.00765768		2360.2	0.0004503		2950.2	-0.00764416
590.41	-0.02085674		1180.41	-0.02076505		1770.4	0.00602116		2360.4	0.00013919		2950.4	-0.00769732
590.61	-0.02140693		1180.61	-0.02031449		1770.6	0.00557094		2360.6	-0.0001542		2950.6	-0.00770458
590.81	-0.02121279		1180.81	-0.02095864		1770.8	0.00515755		2360.8	-0.00115599		2950.8	-0.00794235
591.01	-0.02118471		1181.01	-0.02094713		1771	0.00525864		2361	-0.00215593		2951	-0.00735452
591.21	-0.02170396		1181.21	-0.02093999		1771.2	0.00471889		2361.2	-0.00200542		2951.2	-0.00770712
591.41	-0.02182636		1181.41	-0.02186164		1771.4	0.00499851		2361.4	-0.00170934		2951.4	-0.00826318
591.61	-0.02098958		1181.61	-0.02185652		1771.6	0.00467205		2361.6	-0.00094983		2951.6	-0.00862851
591.81	-0.02128473		1181.81	-0.02192886		1771.8	0.00446231		2361.8	-0.00072842		2951.8	-0.00865065
592.01	-0.02202449		1182.01	-0.02196902		1772	0.00551935		2362	-0.00111053		2952	-0.00870456
592.21	-0.02228497		1182.21	-0.02151463		1772.2	0.00482953		2362.2	-0.00139492		2952.2	-0.00839856
592.41	-0.02190069		1182.41	-0.0209991		1772.4	0.00400297		2362.4	-0.0016556		2952.4	-0.00896949
592.61	-0.02177261		1182.61	-0.02166867		1772.6	0.00471468		2362.6	-0.00116045		2952.6	-0.00903801
592.81	-0.02134555		1182.81	-0.02136541		1772.8	0.00520506		2362.8	-0.00125153		2952.8	-0.0089442
593.01	-0.02161878		1183.01	-0.02091614		1773	0.00549893		2363	-0.00116493		2953	-0.00946525
593.21	-0.02176287		1183.21	-0.02181586		1773.2	0.00612777		2363.2	-0.00010339		2953.2	-0.00912204
593.41	-0.02154601		1183.41	-0.02248099		1773.4	0.00616118		2363.4	-0.00072955		2953.4	-0.00943764
593.61	-0.02111425		1183.61	-0.02210788		1773.6	0.00598117		2363.6	-0.00043861		2953.6	-0.00912032
593.81	-0.02058795		1183.81	-0.02189944		1773.8	0.00688271		2363.8	0.0003869		2953.8	-0.00885223
594.01	-0.02043033		1184.01	-0.0221415		1774	0.00618533		2364	0.00057674		2954	-0.00846069
594.21	-0.01997979		1184.21	-0.02270136		1774.2	0.00582508		2364.2	0.00000523		2954.2	-0.00818636
594.41	-0.0202328		1184.41	-0.02278199		1774.4	0.00581022		2364.4	-0.00018418		2954.4	-0.00761503
594.61	-0.02077247		1184.61	-0.02414125		1774.6	0.00641842		2364.6	-0.00068824		2954.6	-0.00719678
594.81	-0.02079206		1184.81	-0.02500031		1774.8	0.00634347		2364.8	-0.00159012		2954.8	-0.0065116
595.01	-0.02150554		1185.01	-0.02406909		1775	0.00672668		2365	-0.00130741		2955	-0.00646252
595.21	-0.02290398		1185.21	-0.0236754		1775.2	0.00659549		2365.2	-0.00086472		2955.2	-0.00606786
595.41	-0.02362842		1185.41	-0.02363232		1775.4	0.00649565		2365.4	-0.00092485		2955.4	-0.00520614
595.61	-0.02338834		1185.61	-0.02313602		1775.6	0.00680292		2365.6	-0.00115805		2955.6	-0.00498805
595.81	-0.02372595		1185.81	-0.02361689		1775.8	0.00676451		2365.8	-0.0014552		2955.8	-0.00517781
596.01	-0.02330028		1186.01	-0.02305235		1776	0.00747202		2366	-0.00177684		2956	-0.00602853
596.21	-0.0230305		1186.21	-0.02206937		1776.2	0.00679833		2366.2	-0.00196859		2956.2	-0.00635015
596.41	-0.02267054		1186.41	-0.02212893		1776.4	0.00693204		2366.4	-0.00238783		2956.4	-0.00714341
596.61	-0.02250704		1186.61	-0.02261267		1776.6	0.00754049		2366.6	-0.0022342		2956.6	-0.00781164
596.81	-0.02203708		1186.81	-0.0220193		1776.8	0.00736201		2366.8	-0.00167625		2956.8	-0.00816716
597.01	-0.02229673		1187.01	-0.02193044		1777	0.00664846		2367	-0.0009706		2957	-0.00881512
597.21	-0.02263416		1187.21	-0.021741		1777.2	0.00668513		2367.2	-0.00076348		2957.2	-0.00901576
597.41	-0.02316113		1187.41	-0.02109831		1777.4	0.00578607		2367.4	-0.00119787		2957.4	-0.00981013
597.61	-0.02372669		1187.61	-0.0204253		1777.6	0.00517385		2367.6	0.00011856		2957.6	-0.01030168
597.81	-0.0235618		1187.81	-0.02035592		1777.8	0.00508618		2367.8	-0.0001624		2957.8	-0.01088508
598.01	-0.02376209		1188.01	-0.02065583		1778	0.00434349		2368	-0.00100527		2958	-0.01183293
598.21	-0.02316801		1188.21	-0.02130125		1778.2	0.00403874		2368.2	-0.00204679		2958.2	-0.0118486
598.41	-0.02407145		1188.41	-0.02142805		1778.4	0.00444183		2368.4	-0.00194611		2958.4	-0.01192006
598.61	-0.02423135		1188.61	-0.02202171		1778.6	0.00471537		2368.6	-0.0013909		2958.6	-0.0121318
598.81	-0.02502977		1188.81	-0.02167257		1778.8	0.00490842		2368.8	-0.00164706		2958.8	-0.01152008
599.01	-0.02465639		1189.01	-0.02096672		1779	0.00518891		2369	-0.00179344		2959	-0.01133173
599.21	-0.02535653		1189.21	-0.02140766		1779.2	0.00525007		2369.2	-0.00236572		2959.2	-0.01079962
599.41	-0.02541657		1189.41	-0.02167247		1779.4	0.00527838		2369.4	-0.00213147		2959.4	-0.01049614
599.61	-0.0239675		1189.61	-0.02185494		1779.6	0.00608917		2369.6	-0.00200556		2959.6	-0.0111473
599.81	-0.02376885		1189.81	-0.02194088		1779.8	0.00584233		2369.8	-0.0022607		2959.8	-0.01090976
600.01	-0.02296664		1190.01	-0.0217031		1780	0.00580057		2370	-0.00221385		2960	-0.01099229
600.21	-0.02223526		1190.21	-0.02137488		1780.2	0.00461842		2370.2	-0.0018557		2960.2	-0.01045755
600.41	-0.02125988		1190.41	-0.02120539		1780.4	0.00456796		2370.4	-0.00110273		2960.4	-0.00995772
600.61	-0.02063398		1190.61	-0.02102524		1780.6	0.00446578		2370.6	-0.00018288		2960.6	-0.00882244
600.81	-0.02036487		1190.81	-0.02013591		1780.8	0.00349934		2370.8	0.00050945		2960.8	-0.00758061
601.01	-0.02065965		1191.01	-0.01995852		1781	0.00281433		2371	0.00001035		2961	-0.00655438
601.21	-0.02087341		1191.21	-0.01915018		1781.2	0.00313477		2371.2	-0.00053016		2961.2	-0.00579323
601.41	-0.02090783		1191.41	-0.01876903		1781.4	0.00317037		2371.4	-0.00061797		2961.4	-0.00575856
601.61	-0.02071339		1191.61	-0.01874669		1781.6	0.00323205		2371.6	-0.00023865		2961.6	-0.00663166
601.81	-0.02065249		1191.81	-0.01878577		1781.8	0.00282213		2371.8	-0.00080172		2961.8	-0.00700003
602.01	-0.02050179		1192.01	-0.01943057		1782	0.00269496		2372	-0.00118406		2962	-0.00803972
602.21	-0.02039871		1192.21	-0.0195385		1782.2	0.00246013		2372.2	-0.00060794		2962.2	-0.00803967
602.41	-0.02141319		1192.41	-0.01944338		1782.4	0.00352749		2372.4	-0.00067497		2962.4	-0.00849195
602.61	-0.02193577		1192.61	-0.01981358		1782.6	0.00374905		2372.6	-0.0004184		2962.6	-0.00929101
602.81	-0.0230318		1192.81	-0.01968955		1782.8	0.00408573		2372.8	-0.00097808		2962.8	-0.00967
603.01	-0.02190353		1193.01	-0.01945638		1783	0.00519212		2373	-0.00160538		2963	-0.01039703
603.21	-0.02297392		1193.21	-0.02003173		1783.2	0.00518608		2373.2	-0.00230647		2963.2	-0.0102783
603.41	-0.02340734		1193.41	-0.02060881		1783.4	0.00553121		2373.4	-0.00243995		2963.4	-0.01033147
603.61	-0.02280603		1193.61	-0.02101486		1783.6	0.00630154		2373.6	-0.00234766		2963.6	-0.01036033
603.81	-0.02293033		1193.81	-0.02110246		1783.8	0.00608053		2373.8	-0.00288693		2963.8	-0.01028287
604.01	-0.02229713		1194.01	-0.02132961		1784	0.00537069		2374	-0.00289463		2964	-0.01037848
604.21	-0.02229795		1194.21	-0.02110775		1784.2	0.00562329		2374.2	-0.00256927		2964.2	-0.00918785
604.41	-0.0227434		1194.41	-0.02162053		1784.4	0.00673024		2374.4	-0.00196917		2964.4	-0.00822653
604.61	-0.02358173		1194.61	-0.02174926		1784.6	0.00734507		2374.6	-0.00170464		2964.6	-0.00742368
604.81	-0.02400705		1194.81	-0.02131591		1784.8	0.00686368		2374.8	-0.00176417		2964.8	-0.00681718
605.01	-0.02434151		1195.01	-0.02177979		1785	0.00725937		2375	-0.00225788		2965	-0.00654321
605.21	-0.02376508		1195.21	-0.02228744		1785.2	0.0081149		2375.2	-0.00228422		2965.2	-0.00658012
605.41	-0.02403145		1195.41	-0.022507		1785.4	0.00770026		2375.4	-0.00166959		2965.4	-0.00776785
605.61	-0.02430779		1195.61	-0.02300868		1785.6	0.00741367		2375.6	-0.00101335		2965.6	-0.00801753
605.81	-0.02463426		1195.81	-0.02337762		1785.8	0.00727242		2375.8	-0.0015433		2965.8	-0.00818607
606.01	-0.02457135		1196.01	-0.02320257		1786	0.00741516		2376	-0.00220724		2966	-0.00870467
606.21	-0.02462817		1196.21	-0.02348424		1786.2	0.00775261		2376.2	-0.0010351		2966.2	-0.00876008
606.41	-0.02467452		1196.41	-0.02343819		1786.4	0.00783363		2376.4	-0.00184769		2966.4	-0.00814927
606.61	-0.02473846		1196.61	-0.02354857		1786.6	0.00781964		2376.6	-0.00034153		2966.6	-0.00826948
606.81	-0.02518046		1196.81	-0.0234902		1786.8	0.0079917		2376.8	0.00019407		2966.8	-0.00893762
607.01	-0.02457669		1197.01	-0.02338774		1787	0.00775431		2377	-0.00082819		2967	-0.00907388
607.21	-0.02485025		1197.21	-0.02390602		1787.2	0.00672126		2377.2	-0.00151141		2967.2	-0.00870729
607.41	-0.02534506		1197.41	-0.02425495		1787.4	0.00734077		2377.4	-0.0008164		2967.4	-0.00958509
607.61	-0.02461498		1197.61	-0.02409277		1787.6	0.00728161		2377.6	-0.00124654		2967.6	-0.00973712
607.81	-0.02378351		1197.81	-0.0229419		1787.8	0.00705218		2377.8	-0.00164394		2967.8	-0.00962359
608.01	-0.02428548		1198.01	-0.02249597		1788	0.00635725		2378	-0.00190736		2968	-0.00879618
608.21	-0.02410341		1198.21	-0.02228763		1788.2	0.00649279		2378.2	-0.00105128		2968.2	-0.00792031
608.41	-0.02438553		1198.41	-0.02153614		1788.4	0.00633226		2378.4	-0.00012991		2968.4	-0.00824521
608.61	-0.02474462		1198.61	-0.0201012		1788.6	0.00639256		2378.6	0.00021686		2968.6	-0.00838435
608.81	-0.02464427		1198.81	-0.01974541		1788.8	0.00590177		2378.8	0.000457		2968.8	-0.0084009
609.01	-0.02447242		1199.01	-0.02027304		1789	0.0061635		2379	-0.00005162		2969	-0.00892586
609.21	-0.02363241		1199.21	-0.01999406		1789.2	0.00615754		2379.2	-0.0002483		2969.2	-0.00924168
609.41	-0.02438148		1199.41	-0.01972912		1789.4	0.00546617		2379.4	-0.00016031		2969.4	-0.00901676
609.61	-0.02441509		1199.61	-0.01953447		1789.6	0.00610909		2379.6	-0.0004531		2969.6	-0.0085939
609.81	-0.02392441		1199.81	-0.01993939		1789.8	0.0064463		2379.8	-0.00112846		2969.8	-0.00931918
610.01	-0.02242769		1200.01	-0.0203996		1790	0.00625747		2380	-0.00162433		2970	-0.00912208
610.21	-0.02101951		1200.21	-0.02157426		1790.2	0.00586634		2380.2	-0.00106427		2970.2	-0.00859166
610.41	-0.02090189		1200.41	-0.02133414		1790.4	0.00575739		2380.4	-0.00203931		2970.4	-0.00824912
610.61	-0.02132489		1200.61	-0.02162077		1790.6	0.00576763		2380.6	-0.00171851		2970.6	-0.00898077
610.81	-0.02196669		1200.81	-0.02172325		1790.8	0.0050046		2380.8	-0.00223		2970.8	-0.0099824
611.01	-0.02221273		1201.01	-0.02175094		1791	0.00472937		2381	-0.00311067		2971	-0.01047135
611.21	-0.0222785		1201.21	-0.02164024		1791.2	0.00467551		2381.2	-0.00332255		2971.2	-0.01065861
611.41	-0.02179201		1201.41	-0.02153207		1791.4	0.00452118		2381.4	-0.00325008		2971.4	-0.01175658
611.61	-0.02177615		1201.61	-0.02140151		1791.6	0.00389724		2381.6	-0.00373874		2971.6	-0.0110606
611.81	-0.02167955		1201.81	-0.02094263		1791.8	0.00405102		2381.8	-0.00314564		2971.8	-0.01055046
612.01	-0.02260626		1202.01	-0.021415		1792	0.00418905		2382	-0.00227765		2972	-0.01045029
612.21	-0.02237161		1202.21	-0.02109428		1792.2	0.00426968		2382.2	-0.00131781		2972.2	-0.01066258
612.41	-0.02285058		1202.41	-0.02121218		1792.4	0.00426546		2382.4	-0.00201572		2972.4	-0.01066794
612.61	-0.02350143		1202.61	-0.02099913		1792.6	0.00491472		2382.6	-0.0013436		2972.6	-0.00980478
612.81	-0.02461113		1202.81	-0.02167085		1792.8	0.00485161		2382.8	-0.00176341		2972.8	-0.01009549
613.01	-0.02510207		1203.01	-0.02174994		1793	0.00474238		2383	-0.00198643		2973	-0.00974696
613.21	-0.02527474		1203.21	-0.02079528		1793.2	0.00475445		2383.2	-0.00224549		2973.2	-0.00898977
613.41	-0.02540773		1203.41	-0.02087567		1793.4	0.00426574		2383.4	-0.00250092		2973.4	-0.00887676
613.61	-0.02499513		1203.61	-0.0205057		1793.6	0.00460161		2383.6	-0.00329329		2973.6	-0.00889362
613.81	-0.0254452		1203.81	-0.02154881		1793.8	0.00457566		2383.8	-0.00350278		2973.8	-0.00886591
614.01	-0.02545236		1204.01	-0.02175656		1794	0.00406966		2384	-0.00419833		2974	-0.00863623
614.21	-0.0265444		1204.21	-0.02153203		1794.2	0.00343756		2384.2	-0.00375884		2974.2	-0.00840498
614.41	-0.02756204		1204.41	-0.02096335		1794.4	0.00376516		2384.4	-0.0034656		2974.4	-0.00858977
614.61	-0.02779144		1204.61	-0.02028469		1794.6	0.00373111		2384.6	-0.00293266		2974.6	-0.00880568
614.81	-0.02778886		1204.81	-0.01967578		1794.8	0.0042982		2384.8	-0.00265265		2974.8	-0.00933578
615.01	-0.02726834		1205.01	-0.019296		1795	0.00458455		2385	-0.00200365		2975	-0.01015674
615.21	-0.02659261		1205.21	-0.01807993		1795.2	0.00439759		2385.2	-0.00216022		2975.2	-0.01078342
615.41	-0.02620567		1205.41	-0.01790041		1795.4	0.00447314		2385.4	-0.00089113		2975.4	-0.01213511
615.61	-0.02664092		1205.61	-0.01806126		1795.6	0.00529942		2385.6	-0.00009494		2975.6	-0.01184771
615.81	-0.0256972		1205.81	-0.01896152		1795.8	0.00572987		2385.8	0.0006344		2975.8	-0.0123166
616.01	-0.02549162		1206.01	-0.01959194		1796	0.00540539		2386	0.00046127		2976	-0.01250332
616.21	-0.02494518		1206.21	-0.01926058		1796.2	0.00507886		2386.2	-0.00050142		2976.2	-0.01238613
616.41	-0.02427019		1206.41	-0.01996379		1796.4	0.0052761		2386.4	-0.00125884		2976.4	-0.01238996
616.61	-0.0235614		1206.61	-0.0204344		1796.6	0.00576812		2386.6	-0.00030421		2976.6	-0.01208915
616.81	-0.02359112		1206.81	-0.02176535		1796.8	0.00594646		2386.8	-0.00064565		2976.8	-0.01194991
617.01	-0.02247951		1207.01	-0.02159425		1797	0.00658502		2387	-0.00009359		2977	-0.01058383
617.21	-0.02248105		1207.21	-0.02098557		1797.2	0.00609462		2387.2	-0.00156281		2977.2	-0.00997165
617.41	-0.02204859		1207.41	-0.02111705		1797.4	0.00527796		2387.4	-0.00251014		2977.4	-0.01021717
617.61	-0.02280147		1207.61	-0.02119284		1797.6	0.00564541		2387.6	-0.00281347		2977.6	-0.00897608
617.81	-0.02420112		1207.81	-0.02160577		1797.8	0.00589472		2387.8	-0.00331281		2977.8	-0.00890925
618.01	-0.02379078		1208.01	-0.02090154		1798	0.00489507		2388	-0.00425869		2978	-0.00873645
618.21	-0.02395585		1208.21	-0.0213415		1798.2	0.00463003		2388.2	-0.004225		2978.2	-0.00841884
618.41	-0.02383122		1208.41	-0.02095985		1798.4	0.00449698		2388.4	-0.00399723		2978.4	-0.00884422
618.61	-0.02341584		1208.61	-0.01988795		1798.6	0.00492772		2388.6	-0.0037364		2978.6	-0.00910908
618.81	-0.02322612		1208.81	-0.01909285		1798.8	0.00461846		2388.8	-0.00362922		2978.8	-0.00945999
619.01	-0.02308756		1209.01	-0.01806599		1799	0.00376679		2389	-0.00301502		2979	-0.00996755
619.21	-0.02357696		1209.21	-0.01721051		1799.2	0.00320544		2389.2	-0.00232477		2979.2	-0.01075818
619.41	-0.0237152		1209.41	-0.01786675		1799.4	0.00317717		2389.4	-0.00206251		2979.4	-0.01112981
619.61	-0.02262956		1209.61	-0.01830765		1799.6	0.00279375		2389.6	-0.00203374		2979.6	-0.0107568
619.81	-0.02226602		1209.81	-0.01906679		1799.8	0.00233914		2389.8	-0.00241397		2979.8	-0.01152494
620.01	-0.02230863		1210.01	-0.01894639		1800	0.00239685		2390	-0.00215787		2980	-0.01177458
620.21	-0.02110119		1210.21	-0.01959018		1800.2	0.0025919		2390.2	-0.0021388		2980.2	-0.01172716
620.41	-0.02072194		1210.41	-0.02102527		1800.4	0.00374825		2390.4	-0.00163274		2980.4	-0.01111553
620.61	-0.01992091		1210.61	-0.0216617		1800.6	0.00436824		2390.6	-0.00099857		2980.6	-0.01075144
620.81	-0.02001949		1210.81	-0.02186778		1800.8	0.00473454		2390.8	-0.00116523		2980.8	-0.010452
621.01	-0.02040134		1211.01	-0.02133484		1801	0.0054909		2391	-0.00119161		2981	-0.00987266
621.21	-0.02067704		1211.21	-0.02133765		1801.2	0.0057429		2391.2	-0.00341747		2981.2	-0.01058165
621.41	-0.02081619		1211.41	-0.02119117		1801.4	0.00565003		2391.4	-0.00357996		2981.4	-0.01041339
621.61	-0.02112085		1211.61	-0.02062734		1801.6	0.00631557		2391.6	-0.0041324		2981.6	-0.01020015
621.81	-0.02155169		1211.81	-0.02018835		1801.8	0.00687809		2391.8	-0.00442766		2981.8	-0.01111036
622.01	-0.02090589		1212.01	-0.01981386		1802	0.00633397		2392	-0.00403986		2982	-0.01141282
622.21	-0.02146075		1212.21	-0.01952066		1802.2	0.00632686		2392.2	-0.00380757		2982.2	-0.01148022
622.41	-0.02146328		1212.41	-0.01841376		1802.4	0.0059999		2392.4	-0.00328138		2982.4	-0.01125396
622.61	-0.02133017		1212.61	-0.0170199		1802.6	0.00593848		2392.6	-0.0026222		2982.6	-0.01129757
622.81	-0.02122372		1212.81	-0.01648851		1802.8	0.00481044		2392.8	-0.00264712		2982.8	-0.0113657
623.01	-0.02163226		1213.01	-0.01620675		1803	0.00432373		2393	-0.00180344		2983	-0.01135957
623.21	-0.02149285		1213.21	-0.01676673		1803.2	0.00380457		2393.2	-0.00115152		2983.2	-0.01122874
623.41	-0.0210711		1213.41	-0.01690795		1803.4	0.0037999		2393.4	-0.00142261		2983.4	-0.01062138
623.61	-0.02115849		1213.61	-0.01657447		1803.6	0.00400251		2393.6	-0.00007673		2983.6	-0.01069714
623.81	-0.0215918		1213.81	-0.01708393		1803.8	0.00414434		2393.8	0.0007004		2983.8	-0.0105176
624.01	-0.02208496		1214.01	-0.01721085		1804	0.0038994		2394	0.00158535		2984	-0.01027426
624.21	-0.02191611		1214.21	-0.0187849		1804.2	0.003381		2394.2	0.00109475		2984.2	-0.00935698
624.41	-0.02311353		1214.41	-0.01897577		1804.4	0.00398473		2394.4	0.00030887		2984.4	-0.00827265
624.61	-0.02362408		1214.61	-0.01849212		1804.6	0.00439558		2394.6	-0.00012252		2984.6	-0.00856915
624.81	-0.02430839		1214.81	-0.0185547		1804.8	0.00529801		2394.8	-0.00107873		2984.8	-0.00818768
625.01	-0.02454088		1215.01	-0.01895619		1805	0.00612586		2395	-0.00186896		2985	-0.00751791
625.21	-0.02458358		1215.21	-0.01992109		1805.2	0.00656599		2395.2	-0.00330194		2985.2	-0.00726728
625.41	-0.02536087		1215.41	-0.01982042		1805.4	0.00678659		2395.4	-0.00348817		2985.4	-0.00751254
625.61	-0.02566188		1215.61	-0.01944885		1805.6	0.00737872		2395.6	-0.00433343		2985.6	-0.00788296
625.81	-0.0258057		1215.81	-0.02041976		1805.8	0.00711832		2395.8	-0.00434558		2985.8	-0.00849635
626.01	-0.02567327		1216.01	-0.02025127		1806	0.00688467		2396	-0.00492743		2986	-0.00861341
626.21	-0.02513421		1216.21	-0.02024047		1806.2	0.007665		2396.2	-0.00533599		2986.2	-0.00905388
626.41	-0.02494416		1216.41	-0.02037705		1806.4	0.00699869		2396.4	-0.00489782		2986.4	-0.00971862
626.61	-0.02441912		1216.61	-0.02068573		1806.6	0.00655599		2396.6	-0.0042405		2986.6	-0.01078123
626.81	-0.02430224		1216.81	-0.0221355		1806.8	0.00569873		2396.8	-0.0040169		2986.8	-0.01106688
627.01	-0.02411249		1217.01	-0.02252753		1807	0.00533902		2397	-0.00294564		2987	-0.01041806
627.21	-0.02363129		1217.21	-0.02332541		1807.2	0.00540773		2397.2	-0.00261678		2987.2	-0.01030139
627.41	-0.0245272		1217.41	-0.02260411		1807.4	0.00537382		2397.4	-0.0022006		2987.4	-0.01035911
627.61	-0.02544499		1217.61	-0.0231958		1807.6	0.00527566		2397.6	-0.0014143		2987.6	-0.01055629
627.81	-0.02530848		1217.81	-0.02397132		1807.8	0.00376441		2397.8	-0.00136247		2987.8	-0.00999373
628.01	-0.02634813		1218.01	-0.02400634		1808	0.0030549		2398	-0.00162658		2988	-0.01034435
628.21	-0.02666658		1218.21	-0.02422271		1808.2	0.0026874		2398.2	-0.0006956		2988.2	-0.01025214
628.41	-0.02758969		1218.41	-0.02399376		1808.4	0.00325562		2398.4	-0.00067038		2988.4	-0.00980657
628.61	-0.02812298		1218.61	-0.02336574		1808.6	0.00378426		2398.6	0.00002094		2988.6	-0.00992613
628.81	-0.02776552		1218.81	-0.02305285		1808.8	0.00349587		2398.8	-0.00029383		2988.8	-0.00933
629.01	-0.02772581		1219.01	-0.02365893		1809	0.00288842		2399	-0.00002085		2989	-0.00912931
629.21	-0.02838221		1219.21	-0.02382275		1809.2	0.00402343		2399.2	-0.0003752		2989.2	-0.00930523
629.41	-0.02799102		1219.41	-0.02359296		1809.4	0.00428001		2399.4	-0.00136493		2989.4	-0.00962879
629.61	-0.02754003		1219.61	-0.02305239		1809.6	0.00375381		2399.6	-0.00192323		2989.6	-0.00941547
629.81	-0.02649845		1219.81	-0.02365266		1809.8	0.00365827		2399.8	-0.00245952		2989.8	-0.00923254
630.01	-0.0261219		1220.01	-0.02310121		1810	0.00440692		2400	-0.00257367		2990	-0.00928755
630.21	-0.02551015		1220.21	-0.02274038		1810.2	0.00503566		2400.2	-0.00267417		2990.2	-0.00987178
630.41	-0.02586659		1220.41	-0.02254341		1810.4	0.00416297		2400.4	-0.00279295		2990.4	-0.00985805
630.61	-0.02565026		1220.61	-0.0225549		1810.6	0.00473417		2400.6	-0.0027482		2990.6	-0.00980061
630.81	-0.02597196		1220.81	-0.02250881		1810.8	0.0045535		2400.8	-0.00357867		2990.8	-0.00971143
631.01	-0.02588468		1221.01	-0.02213114		1811	0.00465374		2401	-0.00359493		2991	-0.00937716
631.21	-0.02624478		1221.21	-0.02241714		1811.2	0.0049338		2401.2	-0.00389635		2991.2	-0.00944936
631.41	-0.02670769		1221.41	-0.02199885		1811.4	0.00457534		2401.4	-0.00451709		2991.4	-0.00903565
631.61	-0.02709341		1221.61	-0.02240192		1811.6	0.0039218		2401.6	-0.00465309		2991.6	-0.00955052
631.81	-0.02733731		1221.81	-0.02244681		1811.8	0.00283984		2401.8	-0.00362215		2991.8	-0.00994862
632.01	-0.02709702		1222.01	-0.02147169		1812	0.00264234		2402	-0.00248415		2992	-0.01071227
632.21	-0.02719885		1222.21	-0.020922		1812.2	0.00213957		2402.2	-0.00160837		2992.2	-0.01114734
632.41	-0.02748526		1222.41	-0.02019211		1812.4	0.00178448		2402.4	-0.00180684		2992.4	-0.01167719
632.61	-0.02705236		1222.61	-0.02019974		1812.6	0.00187496		2402.6	-0.00135111		2992.6	-0.01138629
632.81	-0.02733854		1222.81	-0.02116928		1812.8	0.0017804		2402.8	-0.00083304		2992.8	-0.01177539
633.01	-0.02714211		1223.01	-0.02170128		1813	0.00218003		2403	0.00024828		2993	-0.01184857
633.21	-0.02730673		1223.21	-0.02120101		1813.2	0.0024833		2403.2	-0.00005819		2993.2	-0.0121993
633.41	-0.02716427		1223.41	-0.02122912		1813.4	0.00249674		2403.4	-0.00013872		2993.4	-0.01211608
633.61	-0.02727526		1223.61	-0.02091429		1813.6	0.00327371		2403.6	0.00034069		2993.6	-0.01218448
633.81	-0.02742278		1223.81	-0.0208197		1813.8	0.0047087		2403.8	-0.00010107		2993.8	-0.01177603
634.01	-0.02760889		1224.01	-0.01996886		1814	0.00559998		2404	-0.000228		2994	-0.01253587
634.21	-0.02762512		1224.21	-0.01959445		1814.2	0.0060258		2404.2	-0.0005537		2994.2	-0.01323519
634.41	-0.02767686		1224.41	-0.01910752		1814.4	0.00638249		2404.4	-0.00079854		2994.4	-0.01249514
634.61	-0.02749962		1224.61	-0.01964511		1814.6	0.00627611		2404.6	-0.00179793		2994.6	-0.01247371
634.81	-0.02712493		1224.81	-0.02002039		1814.8	0.00649779		2404.8	-0.00238985		2994.8	-0.01291634
635.01	-0.02612341		1225.01	-0.02064879		1815	0.00646532		2405	-0.00206738		2995	-0.01216884
635.21	-0.02562867		1225.21	-0.02090641		1815.2	0.00630038		2405.2	-0.00261853		2995.2	-0.01124211
635.41	-0.02543081		1225.41	-0.02170411		1815.4	0.00566495		2405.4	-0.0025551		2995.4	-0.01036388
635.61	-0.02477626		1225.61	-0.02253458		1815.6	0.00548027		2405.6	-0.00238908		2995.6	-0.01103216
635.81	-0.02386255		1225.81	-0.02289821		1815.8	0.00544237		2405.8	-0.00184342		2995.8	-0.01047283
636.01	-0.02283682		1226.01	-0.02288369		1816	0.00548791		2406	-0.00239243		2996	-0.01054387
636.21	-0.02337762		1226.21	-0.02327537		1816.2	0.00608991		2406.2	-0.00240335		2996.2	-0.01000331
636.41	-0.0233786		1226.41	-0.02379273		1816.4	0.00604112		2406.4	-0.0022015		2996.4	-0.00989035
636.61	-0.02366803		1226.61	-0.02540595		1816.6	0.00523071		2406.6	-0.00190181		2996.6	-0.0096921
636.81	-0.02425005		1226.81	-0.02600296		1816.8	0.00440017		2406.8	-0.00072005		2996.8	-0.0102911
637.01	-0.02378625		1227.01	-0.02558174		1817	0.00352142		2407	0.00055252		2997	-0.01070569
637.21	-0.02365222		1227.21	-0.02517313		1817.2	0.00310269		2407.2	0.00129631		2997.2	-0.01116073
637.41	-0.02420638		1227.41	-0.02575264		1817.4	0.00375582		2407.4	0.00112876		2997.4	-0.01173794
637.61	-0.02407469		1227.61	-0.0259134		1817.6	0.00373943		2407.6	0.00100354		2997.6	-0.01243624
637.81	-0.02464588		1227.81	-0.02559645		1817.8	0.00376895		2407.8	0.00038998		2997.8	-0.01201975
638.01	-0.0241158		1228.01	-0.02442542		1818	0.00354949		2408	0.00032012		2998	-0.01240075
638.21	-0.02433045		1228.21	-0.02403405		1818.2	0.00292113		2408.2	0.00034453		2998.2	-0.01245064
638.41	-0.02410735		1228.41	-0.0238533		1818.4	0.00298569		2408.4	-0.00076984		2998.4	-0.01212309
638.61	-0.02465168		1228.61	-0.02482547		1818.6	0.00294185		2408.6	-0.00187952		2998.6	-0.01197553
638.81	-0.02447885		1228.81	-0.02485212		1818.8	0.00318913		2408.8	-0.00198529		2998.8	-0.01201089
639.01	-0.02409159		1229.01	-0.02457754		1819	0.00343556		2409	-0.00214705		2999	-0.01150791
639.21	-0.02385422		1229.21	-0.02432474		1819.2	0.00379093		2409.2	-0.00320351		2999.2	-0.01073598
639.41	-0.02390627		1229.41	-0.02504303		1819.4	0.00483505		2409.4	-0.00308413		2999.4	-0.01060946
639.61	-0.02319444		1229.61	-0.02539558		1819.6	0.00572553		2409.6	-0.00375335		2999.6	-0.0110465
639.81	-0.02270652		1229.81	-0.02486641		1819.8	0.006219		2409.8	-0.00399602		2999.8	-0.01065092
640.01	-0.02255623		1230.01	-0.02505988		1820	0.00658312		2410	-0.00345153		3000	-0.01129791
640.21	-0.02265854		1230.21	-0.0243209		1820.2	0.00604868		2410.2	-0.00273381		3000.2	-0.01032549
640.41	-0.02313337		1230.41	-0.02448552		1820.4	0.00519432		2410.4	-0.00263176		3000.4	-0.01018616
640.61	-0.0226751		1230.61	-0.02466534		1820.6	0.00525619		2410.6	-0.00172311		3000.6	-0.01058511
640.81	-0.02262032		1230.81	-0.02423929		1820.8	0.00629196		2410.8	-0.00089895		3000.8	-0.01072127
641.01	-0.02228412		1231.01	-0.02428444		1821	0.00656789		2411	0.00017655		3001	-0.01097736
641.21	-0.02226056		1231.21	-0.02470549		1821.2	0.00714593		2411.2	0.00055783		3001.2	-0.0113216
641.41	-0.02306252		1231.41	-0.02440336		1821.4	0.00663748		2411.4	0.00027905		3001.4	-0.01070982
641.61	-0.02346699		1231.61	-0.02389968		1821.6	0.00591911		2411.6	0.00076488		3001.6	-0.01064636
641.81	-0.02404851		1231.81	-0.02359278		1821.8	0.00601354		2411.8	0.00157455		3001.8	-0.00924883
642.01	-0.02399106		1232.01	-0.02231018		1822	0.00577323		2412	0.00149946		3002	-0.00943813
642.21	-0.0242827		1232.21	-0.02223909		1822.2	0.00498668		2412.2	0.00193842		3002.2	-0.00923994
642.41	-0.02475793		1232.41	-0.02224348		1822.4	0.00593842		2412.4	0.00145436		3002.4	-0.00956593
642.61	-0.02588358		1232.61	-0.022435		1822.6	0.00663531		2412.6	0.00119549		3002.6	-0.00956397
642.81	-0.0265551		1232.81	-0.02180244		1822.8	0.00651473		2412.8	0.00181375		3002.8	-0.01058659
643.01	-0.02719914		1233.01	-0.02165957		1823	0.00646333		2413	0.00264009		3003	-0.0111332
643.21	-0.02647558		1233.21	-0.02237336		1823.2	0.0061133		2413.2	0.00165778		3003.2	-0.01082708
643.41	-0.02690601		1233.41	-0.02282443		1823.4	0.00567906		2413.4	0.00226421		3003.4	-0.01162865
643.61	-0.02663375		1233.61	-0.02302743		1823.6	0.00409636		2413.6	0.00174543		3003.6	-0.01167815
643.81	-0.02581231		1233.81	-0.02240401		1823.8	0.00354778		2413.8	0.00123733		3003.8	-0.01289798
644.01	-0.0257758		1234.01	-0.02210811		1824	0.0028855		2414	0.00157592		3004	-0.01376709
644.21	-0.02586864		1234.21	-0.02196984		1824.2	0.00261068		2414.2	0.00117671		3004.2	-0.01345025
644.41	-0.02670331		1234.41	-0.0226901		1824.4	0.0030887		2414.4	0.00110541		3004.4	-0.01398627
644.61	-0.02675991		1234.61	-0.02279585		1824.6	0.0033343		2414.6	0.00064781		3004.6	-0.0145539
644.81	-0.02688012		1234.81	-0.02209396		1824.8	0.00309275		2414.8	-0.00106448		3004.8	-0.01442041
645.01	-0.02656819		1235.01	-0.02243038		1825	0.00250087		2415	-0.00092368		3005	-0.01439707
645.21	-0.02647476		1235.21	-0.02294029		1825.2	0.00222849		2415.2	-0.00103585		3005.2	-0.01438882
645.41	-0.02598918		1235.41	-0.02253738		1825.4	0.00162004		2415.4	-0.00113977		3005.4	-0.01378141
645.61	-0.02601705		1235.61	-0.02190555		1825.6	0.00149169		2415.6	-0.00133195		3005.6	-0.01386823
645.81	-0.02564165		1235.81	-0.02135093		1825.8	0.00214734		2415.8	-0.00146663		3005.8	-0.01409993
646.01	-0.0248807		1236.01	-0.02077457		1826	0.00193037		2416	-0.00230505		3006	-0.01383847
646.21	-0.02447238		1236.21	-0.02065797		1826.2	0.00255412		2416.2	-0.00125642		3006.2	-0.01353213
646.41	-0.02420251		1236.41	-0.02056725		1826.4	0.00384343		2416.4	-0.00123226		3006.4	-0.01452024
646.61	-0.02503402		1236.61	-0.0209715		1826.6	0.00382553		2416.6	-0.00007356		3006.6	-0.01451753
646.81	-0.02564957		1236.81	-0.02072637		1826.8	0.00371669		2416.8	0.00005074		3006.8	-0.01461661
647.01	-0.02544667		1237.01	-0.02114681		1827	0.00396348		2417	0.00026035		3007	-0.01463005
647.21	-0.02476479		1237.21	-0.02175444		1827.2	0.00469274		2417.2	-0.00010677		3007.2	-0.0139701
647.41	-0.02572396		1237.41	-0.02186141		1827.4	0.00363331		2417.4	0.00025586		3007.4	-0.0143776
647.61	-0.02545791		1237.61	-0.02137291		1827.6	0.00310415		2417.6	0.00005413		3007.6	-0.01424744
647.81	-0.02515452		1237.81	-0.02100938		1827.8	0.00378598		2417.8	-0.00036998		3007.8	-0.01422792
648.01	-0.02533543		1238.01	-0.02117744		1828	0.00400799		2418	-0.00039038		3008	-0.01332615
648.21	-0.02580124		1238.21	-0.02179911		1828.2	0.00452657		2418.2	-0.00099639		3008.2	-0.0127229
648.41	-0.02657137		1238.41	-0.02223161		1828.4	0.00458689		2418.4	-0.00159992		3008.4	-0.01237845
648.61	-0.02683328		1238.61	-0.02220794		1828.6	0.00482567		2418.6	-0.00282987		3008.6	-0.01175603
648.81	-0.02675364		1238.81	-0.02228405		1828.8	0.00529473		2418.8	-0.00370732		3008.8	-0.0113376
649.01	-0.02748049		1239.01	-0.02297462		1829	0.00572647		2419	-0.00355611		3009	-0.01166903
649.21	-0.02796824		1239.21	-0.02359915		1829.2	0.00614895		2419.2	-0.00382325		3009.2	-0.01167307
649.41	-0.02837991		1239.41	-0.02345549		1829.4	0.00653391		2419.4	-0.00410042		3009.4	-0.01215076
649.61	-0.02936316		1239.61	-0.02315655		1829.6	0.00686867		2419.6	-0.00454214		3009.6	-0.01227865
649.81	-0.02958999		1239.81	-0.02392467		1829.8	0.00731325		2419.8	-0.00490166		3009.8	-0.01317225
