# Supplementary material for: Functional development of a V3/glycan-specific broadly neutralizing antibody isolated from a case of HIV superinfection
Source: eLife journal article supplement (doi:10.7554/elife.68110), 2021-07-15
Supplement: fig2-data2 [file B5.xls]

Vers 3.43 Data Simulation
Conc1	1E-06	1E-06	1E-06	1E-06	1E-06	1E-06	1E-06
Start1	290	880	1470	2060	2649.99	3239.99	3829.98
Stop1	649.8	1239.79	1829.8	2419.8	3009.79	3599.78	4189.78
Time1	Data1	Sim1	Time2	Data2	Sim2	Time3	Data3	Sim3	Time4	Data4	Sim4	Time5	Data5	Sim5	Time6	Data6	Sim6	Time7	Data7	Sim7
290	0.00665537		880	0.00273287		1470	0.00452077		2060	0.00610107		2649.99	0.00372051		3239.99	-0.0002046		3829.98	0.00100817
290.2	0.00716971		880.2	0.00315566		1470.2	0.00383516		2060.2	0.00705251		2650.19	0.00331886		3240.19	-0.00005083		3830.18	-0.00040965
290.4	0.0087134		880.4	0.00344406		1470.4	0.00362849		2060.4	0.00780447		2650.39	0.00310141		3240.39	-0.00005681		3830.38	-0.00169912
290.6	0.00923446		880.6	0.00367644		1470.6	0.00302551		2060.6	0.00885513		2650.59	0.00277594		3240.59	-0.00013879		3830.58	-0.00230615
290.8	0.01002611		880.8	0.00415851		1470.8	0.00257335		2060.8	0.00984777		2650.79	0.00200248		3240.79	0.0004103		3830.78	-0.00275764
291	0.01152749		881	0.00411508		1471	0.00178858		2061	0.01054998		2650.99	0.00164489		3240.99	-0.00003919		3830.98	-0.00325912
291.2	0.01340027		881.2	0.00489767		1471.2	0.00227932		2061.2	0.01133365		2651.19	0.00161247		3241.19	-0.00054069		3831.18	-0.00378598
291.4	0.01446518		881.4	0.00482937		1471.4	0.00235722		2061.4	0.01147287		2651.39	0.00173547		3241.39	-0.00113351		3831.38	-0.00451994
291.6	0.01573501		881.6	0.0050517		1471.6	0.00157263		2061.6	0.01172873		2651.59	0.00175365		3241.59	-0.00208528		3831.58	-0.00476102
291.8	0.0171429		881.8	0.00473533		1471.8	0.00110427		2061.8	0.01202707		2651.79	0.00205292		3241.79	-0.00268826		3831.78	-0.00472261
292	0.01830416		882	0.00524935		1472	0.00101427		2062	0.01206172		2651.99	0.00160348		3241.99	-0.00284329		3831.98	-0.00537639
292.2	0.0198198		882.2	0.00496168		1472.2	0.00167999		2062.2	0.01186951		2652.19	0.00140045		3242.19	-0.00338897		3832.18	-0.00577687
292.4	0.02129923		882.4	0.00421224		1472.4	0.00191353		2062.4	0.01155451		2652.39	0.00168534		3242.39	-0.00292903		3832.38	-0.00600369
292.6	0.02226002		882.6	0.00420622		1472.6	0.00179794		2062.6	0.010782		2652.59	0.00149449		3242.59	-0.0028567		3832.58	-0.00637535
292.8	0.02343618		882.8	0.00527853		1472.8	0.00291521		2062.8	0.00971207		2652.79	0.0010332		3242.79	-0.00339855		3832.78	-0.0072861
293	0.0255829		883	0.00551427		1473	0.0038054		2063	0.00892796		2652.99	0.00058779		3242.99	-0.00326091		3832.98	-0.00666356
293.2	0.02640514		883.2	0.00560985		1473.2	0.00478717		2063.2	0.00895459		2653.19	0.000279		3243.19	-0.00346222		3833.18	-0.00706798
293.4	0.02826761		883.4	0.0064583		1473.4	0.00447287		2063.4	0.0088288		2653.39	-0.00037199		3243.39	-0.00310982		3833.38	-0.00704854
293.6	0.03107781		883.6	0.0070006		1473.6	0.00379597		2063.6	0.00905781		2653.59	-0.00060976		3243.59	-0.00246664		3833.58	-0.00687291
293.8	0.03290159		883.8	0.00787744		1473.8	0.00456824		2063.8	0.00981913		2653.79	-0.00063157		3243.79	-0.00197514		3833.78	-0.00593235
294	0.0344327		884	0.00825052		1474	0.00477809		2064	0.01022678		2653.99	-0.00066247		3243.99	-0.0018045		3833.98	-0.00551312
294.2	0.03575385		884.2	0.00900171		1474.2	0.0054113		2064.2	0.01051983		2654.19	-0.0013772		3244.19	-0.00148527		3834.18	-0.00512481
294.4	0.03841304		884.4	0.00941363		1474.4	0.0057305		2064.4	0.01077969		2654.39	-0.00114121		3244.39	-0.00117046		3834.38	-0.00409241
294.6	0.03911189		884.6	0.01008579		1474.6	0.00613075		2064.6	0.01076041		2654.59	-0.00089376		3244.59	-0.00093526		3834.58	-0.00308569
294.8	0.04106969		884.8	0.01058341		1474.8	0.00700033		2064.8	0.01083396		2654.79	-0.00048444		3244.79	-0.00035269		3834.78	-0.00225363
295	0.04353099		885	0.01157488		1475	0.00773651		2065	0.01126464		2654.99	-0.00039243		3244.99	-0.00087951		3834.98	-0.00221525
295.2	0.04586323		885.2	0.01263162		1475.2	0.0086722		2065.2	0.01102402		2655.19	-0.00051852		3245.19	-0.0008992		3835.18	-0.00189286
295.4	0.04714128		885.4	0.01200561		1475.4	0.00781898		2065.4	0.01108636		2655.39	0.00008319		3245.39	-0.00042205		3835.38	-0.00071462
295.6	0.0483407		885.6	0.01148149		1475.6	0.00743383		2065.6	0.01189295		2655.59	0.00000317		3245.59	-0.00032465		3835.58	-0.00041522
295.8	0.04983733		885.8	0.01108354		1475.8	0.00763289		2065.8	0.01170474		2655.79	0.00005977		3245.79	0.0004345		3835.78	-0.00042552
296	0.0515971		886	0.01163124		1476	0.00779875		2066	0.01205229		2655.99	-0.00001289		3245.99	0.00142883		3835.98	-0.00144809
296.2	0.05325269		886.2	0.01092768		1476.2	0.00806024		2066.2	0.01163018		2656.19	0.00061842		3246.19	0.00202779		3836.18	-0.00199473
296.4	0.05436849		886.4	0.00994542		1476.4	0.0085207		2066.4	0.01128729		2656.39	0.00206432		3246.39	0.00236892		3836.38	-0.00205832
296.6	0.05584191		886.6	0.00970665		1476.6	0.00890662		2066.6	0.01131076		2656.59	0.00298282		3246.59	0.00213842		3836.58	-0.002104
296.8	0.05786501		886.8	0.00994875		1476.8	0.00841302		2066.8	0.01134577		2656.79	0.00244734		3246.79	0.00253694		3836.78	-0.00340372
297	0.05853035		887	0.00934782		1477	0.00769225		2067	0.01280515		2656.99	0.0017231		3246.99	0.00211003		3836.98	-0.00322955
297.2	0.0591497		887.2	0.00878536		1477.2	0.00635241		2067.2	0.01345562		2657.19	0.0020196		3247.19	0.00208471		3837.18	-0.00396592
297.4	0.06055607		887.4	0.00877357		1477.4	0.00542982		2067.4	0.01444306		2657.39	0.00179429		3247.39	0.00156575		3837.38	-0.00294233
297.6	0.06153622		887.6	0.00861386		1477.6	0.00556367		2067.6	0.01468428		2657.59	0.0018545		3247.59	0.00046704		3837.58	-0.00258242
297.8	0.06293453		887.8	0.00823794		1477.8	0.00579952		2067.8	0.01538491		2657.79	0.00183378		3247.79	-0.00027926		3837.78	-0.00157174
298	0.06393143		888	0.00856394		1478	0.00576261		2068	0.0158881		2657.99	0.00129201		3247.99	-0.00059602		3837.98	-0.00092636
298.2	0.06505582		888.2	0.00885072		1478.2	0.00519497		2068.2	0.01611428		2658.19	0.00089499		3248.19	-0.00081908		3838.18	-0.00003609
298.4	0.06650225		888.4	0.00916005		1478.4	0.00526042		2068.4	0.01603386		2658.39	0.00106951		3248.39	-0.0021228		3838.38	0.00006928
298.6	0.06765369		888.6	0.00975876		1478.6	0.00612523		2068.6	0.01583788		2658.59	0.00086762		3248.59	-0.00294379		3838.58	0.00038142
298.8	0.06928531		888.8	0.01081556		1478.8	0.00683233		2068.8	0.01617163		2658.79	0.00041624		3248.79	-0.00335439		3838.78	0.00157778
299	0.07066572		889	0.01225512		1479	0.00653969		2069	0.01613251		2658.99	-0.00107434		3248.99	-0.00366982		3838.98	0.00200537
299.2	0.0719154		889.2	0.0114857		1479.2	0.00607185		2069.2	0.0152872		2659.19	-0.00083226		3249.19	-0.00384174		3839.18	0.00229597
299.4	0.07306983		889.4	0.01152696		1479.4	0.0060752		2069.4	0.01513803		2659.39	-0.00049288		3249.39	-0.00309714		3839.38	0.00304504
299.6	0.0740312		889.6	0.01130844		1479.6	0.00664018		2069.6	0.01439624		2659.59	-0.000658		3249.59	-0.00381334		3839.58	0.00315391
299.8	0.07606892		889.8	0.01163445		1479.8	0.00664488		2069.8	0.01339088		2659.79	-0.00017801		3249.79	-0.00304039		3839.78	0.00359672
300	0.07774599		890	0.01179624		1480	0.00673991		2070	0.01318824		2659.99	0.00076845		3249.99	-0.00230921		3839.98	0.00298188
300.2	0.07801944		890.2	0.01190271		1480.2	0.00756563		2070.2	0.01297533		2660.19	0.00030678		3250.19	-0.00200063		3840.18	0.0029761
300.4	0.07885328		890.4	0.01247029		1480.4	0.00809733		2070.4	0.01305886		2660.39	0.00091311		3250.39	-0.00128944		3840.38	0.00237082
300.6	0.08016787		890.6	0.01301754		1480.6	0.00791861		2070.6	0.01283518		2660.59	0.00059637		3250.59	-0.00088708		3840.58	0.00155826
300.8	0.08072215		890.8	0.01311594		1480.8	0.00723529		2070.8	0.012588		2660.79	-0.00113036		3250.79	-0.00070729		3840.78	0.0004523
301	0.08127463		891	0.01291609		1481	0.00769643		2071	0.0135146		2660.99	-0.00115837		3250.99	-0.00060737		3840.98	-0.00042084
301.2	0.08218594		891.2	0.01310852		1481.2	0.00802379		2071.2	0.01332515		2661.19	-0.00095423		3251.19	-0.00056996		3841.18	-0.00153041
301.4	0.08384484		891.4	0.01320666		1481.4	0.00850258		2071.4	0.01360298		2661.39	-0.00167221		3251.39	-0.00103418		3841.38	-0.00211607
301.6	0.0847868		891.6	0.01305875		1481.6	0.00911149		2071.6	0.01369057		2661.59	-0.00175651		3251.59	-0.00115436		3841.58	-0.00293499
301.8	0.0864212		891.8	0.01322911		1481.8	0.00844419		2071.8	0.01544563		2661.79	-0.0014593		3251.79	-0.00111875		3841.78	-0.00290781
302	0.08709465		892	0.01376352		1482	0.00890371		2072	0.01538725		2661.99	-0.00137568		3251.99	-0.00111053		3841.98	-0.0032072
302.2	0.08868729		892.2	0.01401853		1482.2	0.00925132		2072.2	0.01573242		2662.19	-0.00195356		3252.19	-0.00164816		3842.18	-0.0032869
302.4	0.08946682		892.4	0.01509058		1482.4	0.00942514		2072.4	0.01605477		2662.39	-0.00180841		3252.39	-0.00212237		3842.38	-0.00319617
302.6	0.09156752		892.6	0.01534427		1482.6	0.0091279		2072.6	0.01596676		2662.59	-0.00193794		3252.59	-0.00266198		3842.58	-0.00279746
302.8	0.09214336		892.8	0.01581575		1482.8	0.00910442		2072.8	0.01576308		2662.79	-0.00178428		3252.79	-0.00278791		3842.78	-0.00279312
303	0.09379338		893	0.01553141		1483	0.00858702		2073	0.0151467		2662.99	-0.00067347		3252.99	-0.00253985		3842.98	-0.0029194
303.2	0.09538052		893.2	0.0148312		1483.2	0.00835793		2073.2	0.01475712		2663.19	-0.00036968		3253.19	-0.00273298		3843.18	-0.00293946
303.4	0.09681663		893.4	0.01474605		1483.4	0.00760862		2073.4	0.01511641		2663.39	0.0001549		3253.39	-0.00312236		3843.38	-0.00184194
303.6	0.09812132		893.6	0.01417054		1483.6	0.00742348		2073.6	0.01472976		2663.59	0.00110113		3253.59	-0.00363329		3843.58	-0.00036412
303.8	0.09921131		893.8	0.01380225		1483.8	0.00797207		2073.8	0.01391149		2663.79	0.00150421		3253.79	-0.00308576		3843.78	-0.00063062
304	0.09915421		894	0.01333269		1484	0.00817563		2074	0.01372704		2663.99	0.00121883		3253.99	-0.00367665		3843.98	-0.00003885
304.2	0.09856259		894.2	0.01427997		1484.2	0.00870428		2074.2	0.01362536		2664.19	-0.0002124		3254.19	-0.00402479		3844.18	0.00014429
304.4	0.09892722		894.4	0.01474555		1484.4	0.00948713		2074.4	0.0135616		2664.39	-0.00061665		3254.39	-0.00391107		3844.38	0.00038018
304.6	0.09939287		894.6	0.0143828		1484.6	0.0095288		2074.6	0.01350976		2664.59	-0.00176581		3254.59	-0.0040647		3844.58	0.00038243
304.8	0.09932392		894.8	0.01355858		1484.8	0.01022864		2074.8	0.01433709		2664.79	-0.00284047		3254.79	-0.00380044		3844.78	0.00017902
305	0.0995981		895	0.01358633		1485	0.01100642		2075	0.01530257		2664.99	-0.00223629		3254.99	-0.00328829		3844.98	-0.00073657
305.2	0.09982587		895.2	0.01421623		1485.2	0.01135537		2075.2	0.01553413		2665.19	-0.00266723		3255.19	-0.00333005		3845.18	-0.00095345
305.4	0.10154214		895.4	0.01415999		1485.4	0.0116346		2075.4	0.01577212		2665.39	-0.00244602		3255.39	-0.00351316		3845.38	-0.00011473
305.6	0.10184766		895.6	0.01365127		1485.6	0.01209415		2075.6	0.01667071		2665.59	-0.0019317		3255.59	-0.00272686		3845.58	0.00046897
305.8	0.10242059		895.8	0.0141712		1485.8	0.01198011		2075.8	0.01706232		2665.79	-0.00194283		3255.79	-0.00360427		3845.78	0.00110489
306	0.1033548		896	0.01426179		1486	0.01262323		2076	0.01737719		2665.99	-0.00240713		3255.99	-0.00306519		3845.98	0.00095558
306.2	0.10430782		896.2	0.01425733		1486.2	0.0123605		2076.2	0.01776541		2666.19	-0.00227332		3256.19	-0.00302931		3846.18	0.00044816
306.4	0.10535511		896.4	0.01429297		1486.4	0.01193606		2076.4	0.0175147		2666.39	-0.00186334		3256.39	-0.00361016		3846.38	0.00057812
306.6	0.10638223		896.6	0.01426103		1486.6	0.0121438		2076.6	0.01775596		2666.59	-0.00176956		3256.59	-0.00471335		3846.58	-0.00036838
306.8	0.10667188		896.8	0.01450379		1486.8	0.01202596		2076.8	0.01772738		2666.79	-0.00055156		3256.79	-0.00443224		3846.78	-0.00076984
307	0.10870941		897	0.01458026		1487	0.0108677		2077	0.0176441		2666.99	0.00102806		3256.99	-0.0042985		3846.98	-0.00074935
307.2	0.10935381		897.2	0.01523522		1487.2	0.00970543		2077.2	0.01889375		2667.19	0.00023613		3257.19	-0.00425797		3847.18	-0.00084677
307.4	0.11035033		897.4	0.01492568		1487.4	0.00891198		2077.4	0.01918829		2667.39	0.00100617		3257.39	-0.00422259		3847.38	-0.0006842
307.6	0.11142059		897.6	0.01490852		1487.6	0.00881685		2077.6	0.01854251		2667.59	0.00079142		3257.59	-0.00329617		3847.58	-0.00125777
307.8	0.11227003		897.8	0.01411581		1487.8	0.00860305		2077.8	0.01798317		2667.79	0.00079649		3257.79	-0.00315968		3847.78	-0.00187107
308	0.11247119		898	0.01442008		1488	0.00818803		2078	0.01766457		2667.99	-0.0004455		3257.99	-0.00311075		3847.98	-0.0012268
308.2	0.11292272		898.2	0.01573526		1488.2	0.00848259		2078.2	0.01774985		2668.19	-0.00144348		3258.19	-0.00325181		3848.18	-0.00149906
308.4	0.11278066		898.4	0.01552183		1488.4	0.00883386		2078.4	0.01861599		2668.39	-0.00237693		3258.39	-0.00288029		3848.38	-0.00033741
308.6	0.1135098		898.6	0.0160044		1488.6	0.00793042		2078.6	0.01809578		2668.59	-0.00333583		3258.59	-0.00256152		3848.58	-0.00025072
308.8	0.11434059		898.8	0.01556325		1488.8	0.00873142		2078.8	0.01885751		2668.79	-0.00333258		3258.79	-0.00196709		3848.78	-0.000259
309	0.11574938		899	0.01620629		1489	0.00904778		2079	0.01929901		2668.99	-0.00300146		3258.99	-0.00136419		3848.98	-0.00056279
309.2	0.11723914		899.2	0.01693669		1489.2	0.0093786		2079.2	0.01925053		2669.19	-0.00372159		3259.19	-0.00154564		3849.18	0.00053815
309.4	0.11888308		899.4	0.01728441		1489.4	0.01032092		2079.4	0.01862486		2669.39	-0.00285374		3259.39	-0.00083278		3849.38	0.00188987
309.6	0.11938467		899.6	0.01621329		1489.6	0.01131273		2079.6	0.01947573		2669.59	-0.00349742		3259.59	0.00010831		3849.58	0.00220757
309.8	0.11954922		899.8	0.0167168		1489.8	0.01167157		2079.8	0.02010207		2669.79	-0.00368348		3259.79	-0.00063365		3849.78	0.00209665
310	0.12020471		900	0.01672629		1490	0.01258739		2080	0.02024389		2669.99	-0.00320339		3259.99	-0.0000888		3849.98	0.00079616
310.2	0.12066596		900.2	0.01684881		1490.2	0.01265231		2080.2	0.02005247		2670.19	-0.00241174		3260.19	-0.00000362		3850.18	-0.00057368
310.4	0.12123818		900.4	0.01740077		1490.4	0.0142437		2080.4	0.01995196		2670.39	-0.00179058		3260.39	-0.00031726		3850.38	-0.00101201
310.6	0.12146092		900.6	0.01820258		1490.6	0.01458232		2080.6	0.0201255		2670.59	-0.00110137		3260.59	-0.00049656		3850.58	-0.00153498
310.8	0.12223473		900.8	0.01821684		1490.8	0.01455574		2080.8	0.01990987		2670.79	0.00002932		3260.79	-0.00021956		3850.78	-0.00157423
311	0.12356788		901	0.01875542		1491	0.01438957		2081	0.01934873		2670.99	0.00095716		3260.99	0.00031938		3850.98	-0.00131142
311.2	0.12440747		901.2	0.01941798		1491.2	0.01469981		2081.2	0.01932073		2671.19	0.00110416		3261.19	0.00026033		3851.18	-0.00126166
311.4	0.12520223		901.4	0.01957058		1491.4	0.01440803		2081.4	0.01852444		2671.39	0.00211819		3261.39	0.00049676		3851.38	-0.00051953
311.6	0.12594332		901.6	0.01940092		1491.6	0.01337805		2081.6	0.01853654		2671.59	0.00247725		3261.59	0.00079775		3851.58	-0.00099483
311.8	0.12738263		901.8	0.01980578		1491.8	0.01302309		2081.8	0.01802002		2671.79	0.00317371		3261.79	-0.00033725		3851.78	-0.00062969
312	0.12785943		902	0.02028777		1492	0.01271714		2082	0.01831058		2671.99	0.00234056		3261.99	-0.00140977		3851.98	-0.00032579
312.2	0.12840661		902.2	0.02049631		1492.2	0.01197854		2082.2	0.01887836		2672.19	0.00169843		3262.19	-0.00224199		3852.18	0.00007402
312.4	0.12978632		902.4	0.02008065		1492.4	0.0119369		2082.4	0.01983712		2672.39	0.00130439		3262.39	-0.00273788		3852.38	0.00063273
312.6	0.13160574		902.6	0.02025461		1492.6	0.01152954		2082.6	0.01956709		2672.59	0.00151082		3262.59	-0.0032166		3852.58	-0.00009185
312.8	0.13322367		902.8	0.01942911		1492.8	0.0118239		2082.8	0.02066822		2672.79	0.00138157		3262.79	-0.00269743		3852.78	-0.00034413
313	0.13388135		903	0.018239		1493	0.01219201		2083	0.02137565		2672.99	0.00098372		3262.99	-0.00310176		3852.98	-0.00024793
313.2	0.13467406		903.2	0.01837043		1493.2	0.01285075		2083.2	0.02119088		2673.19	0.00014027		3263.19	-0.00413302		3853.18	0.00062166
313.4	0.13552266		903.4	0.01831375		1493.4	0.01354491		2083.4	0.02114438		2673.39	0.0004213		3263.39	-0.00399252		3853.38	0.0010687
313.6	0.13544024		903.6	0.0175398		1493.6	0.01401636		2083.6	0.02249367		2673.59	0.0003013		3263.59	-0.00403725		3853.58	0.00029716
313.8	0.13574752		903.8	0.01851372		1493.8	0.01398398		2083.8	0.02209189		2673.79	0.00057138		3263.79	-0.00376506		3853.78	-0.00004449
314	0.13685205		904	0.0179938		1494	0.01421676		2084	0.02120292		2673.99	0.00094564		3263.99	-0.00333484		3853.98	-0.00008975
314.2	0.1373993		904.2	0.01781009		1494.2	0.01403727		2084.2	0.02159799		2674.19	0.0002233		3264.19	-0.00307708		3854.18	0.00034123
314.4	0.13762918		904.4	0.0179324		1494.4	0.01524683		2084.4	0.0210774		2674.39	0.00009874		3264.39	-0.00234536		3854.38	0.00069399
314.6	0.13745265		904.6	0.01748599		1494.6	0.01424185		2084.6	0.02127956		2674.59	0.00010099		3264.59	-0.00257772		3854.58	0.00162888
314.8	0.1374147		904.8	0.0174245		1494.8	0.01435151		2084.8	0.0212171		2674.79	-0.00004402		3264.79	-0.00230366		3854.78	0.00179376
315	0.13748128		905	0.01830935		1495	0.01399709		2085	0.02032518		2674.99	0.00003187		3264.99	-0.00149241		3854.98	0.00240179
315.2	0.13733646		905.2	0.0186272		1495.2	0.01353861		2085.2	0.02045831		2675.19	0.00063976		3265.19	-0.00110734		3855.18	0.00184037
315.4	0.13819578		905.4	0.01992317		1495.4	0.0129527		2085.4	0.02161582		2675.39	0.00126826		3265.39	-0.00013804		3855.38	0.00218242
315.6	0.13906691		905.6	0.0201708		1495.6	0.01183635		2085.6	0.02181368		2675.59	0.00098537		3265.59	0.00023965		3855.58	0.00205076
315.8	0.14017177		905.8	0.02054994		1495.8	0.01131928		2085.8	0.02198816		2675.79	0.00097567		3265.79	0.00012594		3855.78	0.00161725
316	0.14094983		906	0.0205655		1496	0.01036291		2086	0.02332914		2675.99	0.00055469		3265.99	0.00020127		3855.98	0.00155788
316.2	0.14157312		906.2	0.02023358		1496.2	0.01057288		2086.2	0.02365013		2676.19	-0.00006095		3266.19	0.00059297		3856.18	0.0010983
316.4	0.14263988		906.4	0.02006993		1496.4	0.01102008		2086.4	0.02417705		2676.39	0.00056424		3266.39	0.00005431		3856.38	0.00041703
316.6	0.14326225		906.6	0.01953027		1496.6	0.01070958		2086.6	0.02418574		2676.59	0.00011601		3266.59	0.00010165		3856.58	-0.0006582
316.8	0.14304595		906.8	0.01942269		1496.8	0.01098258		2086.8	0.02464584		2676.79	-0.00038493		3266.79	0.00014724		3856.78	-0.00075001
317	0.14300571		907	0.01881686		1497	0.01147023		2087	0.02500985		2676.99	-0.0002438		3266.99	-0.00018147		3856.98	-0.0013792
317.2	0.14468182		907.2	0.01999859		1497.2	0.01273251		2087.2	0.02467439		2677.19	-0.00041156		3267.19	-0.00084102		3857.18	-0.00160794
317.4	0.14538337		907.4	0.02107246		1497.4	0.01274876		2087.4	0.02535459		2677.39	0.00028929		3267.39	-0.00177346		3857.38	-0.0022322
317.6	0.14516512		907.6	0.02109742		1497.6	0.01264171		2087.6	0.02591456		2677.59	0.0006125		3267.59	-0.00186376		3857.58	-0.00245012
317.8	0.14606058		907.8	0.02103963		1497.8	0.01318883		2087.8	0.0250889		2677.79	0.00077276		3267.79	-0.00199469		3857.78	-0.00192333
318	0.14702288		908	0.02007655		1498	0.01351406		2088	0.0253008		2677.99	0.00024604		3267.99	-0.00278758		3857.98	-0.00197719
318.2	0.1481876		908.2	0.01973815		1498.2	0.01366527		2088.2	0.02530385		2678.19	-0.0006077		3268.19	-0.00295041		3858.18	-0.00192022
318.4	0.14818238		908.4	0.01981965		1498.4	0.01459109		2088.4	0.0253547		2678.39	-0.0008584		3268.39	-0.00263656		3858.38	-0.00196283
318.6	0.14811766		908.6	0.01933851		1498.6	0.01539446		2088.6	0.02526587		2678.59	-0.0008157		3268.59	-0.0032732		3858.58	-0.00166627
318.8	0.14874023		908.8	0.02018342		1498.8	0.01607218		2088.8	0.02414902		2678.79	-0.00062598		3268.79	-0.00353649		3858.78	-0.00230288
319	0.14899736		909	0.02069306		1499	0.01587638		2089	0.02275801		2678.99	-0.00079669		3268.99	-0.00339031		3858.98	-0.00268255
319.2	0.1503546		909.2	0.02121644		1499.2	0.01585984		2089.2	0.02230036		2679.19	0.00033047		3269.19	-0.00277029		3859.18	-0.0022483
319.4	0.15125224		909.4	0.02225645		1499.4	0.01590457		2089.4	0.02282947		2679.39	0.00116694		3269.39	-0.00271114		3859.38	-0.00135439
319.6	0.15192342		909.6	0.0226497		1499.6	0.01508612		2089.6	0.02254951		2679.59	0.00179545		3269.59	-0.00245775		3859.58	-0.00026821
319.8	0.15254014		909.8	0.02361225		1499.8	0.0149727		2089.8	0.02175438		2679.79	0.00283618		3269.79	-0.00365075		3859.78	-0.00107009
320	0.15366776		910	0.02381086		1500	0.01504163		2090	0.02232421		2679.99	0.00373544		3269.99	-0.00402723		3859.98	-0.0006745
320.2	0.15428009		910.2	0.0238415		1500.2	0.01502095		2090.2	0.02200529		2680.19	0.00346752		3270.19	-0.00397088		3860.18	-0.00035179
320.4	0.15483762		910.4	0.02473945		1500.4	0.01439016		2090.4	0.02171083		2680.39	0.00406815		3270.39	-0.0042922		3860.38	0.00060471
320.6	0.15585685		910.6	0.02542453		1500.6	0.01414094		2090.6	0.02204301		2680.59	0.00322799		3270.59	-0.00383096		3860.58	0.00046231
320.8	0.15533349		910.8	0.02602131		1500.8	0.01363573		2090.8	0.02202978		2680.79	0.00300267		3270.79	-0.00370605		3860.78	0.00009285
321	0.15635934		911	0.02583237		1501	0.01356167		2091	0.02295196		2680.99	0.00215926		3270.99	-0.0033948		3860.98	-0.00040826
321.2	0.15627679		911.2	0.0264206		1501.2	0.01341228		2091.2	0.02429862		2681.19	0.00098664		3271.19	-0.0039352		3861.18	-0.00046891
321.4	0.15634319		911.4	0.02651387		1501.4	0.01296205		2091.4	0.02608614		2681.39	0.00036257		3271.39	-0.00488535		3861.38	0.00074906
321.6	0.15576349		911.6	0.02557173		1501.6	0.01302482		2091.6	0.02721515		2681.59	0.00019917		3271.59	-0.00405653		3861.58	0.00149423
321.8	0.15648058		911.8	0.02521538		1501.8	0.01300152		2091.8	0.02800922		2681.79	0.00031757		3271.79	-0.00391956		3861.78	0.00140348
322	0.15719826		912	0.02420015		1502	0.01288927		2092	0.02860021		2681.99	-0.00108011		3271.99	-0.00338415		3861.98	0.00153518
322.2	0.15785352		912.2	0.02412012		1502.2	0.01361937		2092.2	0.02806822		2682.19	-0.00139146		3272.19	-0.00227585		3862.18	0.00257341
322.4	0.15709054		912.4	0.0248351		1502.4	0.01434145		2092.4	0.0285516		2682.39	-0.00198629		3272.39	-0.00248868		3862.38	0.00259325
322.6	0.15727259		912.6	0.02460845		1502.6	0.01437546		2092.6	0.02806356		2682.59	-0.00136533		3272.59	-0.00284369		3862.58	0.00217312
322.8	0.15806977		912.8	0.02460951		1502.8	0.0139154		2092.8	0.02620379		2682.79	-0.00179241		3272.79	-0.00280068		3862.78	0.00146906
323	0.15819756		913	0.02484804		1503	0.01425294		2093	0.0257808		2682.99	-0.001664		3272.99	-0.00290661		3862.98	0.00108814
323.2	0.15867835		913.2	0.02501721		1503.2	0.01461553		2093.2	0.02521604		2683.19	0.00009902		3273.19	-0.00291199		3863.18	0.00138167
323.4	0.15839053		913.4	0.02522299		1503.4	0.01576363		2093.4	0.02548547		2683.39	0.00082583		3273.39	-0.00290932		3863.38	0.0011629
323.6	0.15917611		913.6	0.02519905		1503.6	0.01552573		2093.6	0.02448815		2683.59	0.00247768		3273.59	-0.00233992		3863.58	0.0008933
323.8	0.16001017		913.8	0.02552641		1503.8	0.01613478		2093.8	0.02363435		2683.79	0.00333287		3273.79	-0.00319121		3863.78	-0.00013301
324	0.1613451		914	0.02546786		1504	0.01657575		2094	0.02391446		2683.99	0.00365647		3273.99	-0.00214924		3863.98	-0.00025143
324.2	0.16190468		914.2	0.02573345		1504.2	0.01680129		2094.2	0.0230332		2684.19	0.00267222		3274.19	-0.00138888		3864.18	-0.00029456
324.4	0.16334533		914.4	0.02527932		1504.4	0.01724761		2094.4	0.02267986		2684.39	0.00354416		3274.39	-0.0011926		3864.38	-0.00073277
324.6	0.16528663		914.6	0.02519393		1504.6	0.01739879		2094.6	0.02314855		2684.59	0.00305181		3274.59	-0.00063332		3864.58	-0.0026117
324.8	0.16535737		914.8	0.0245069		1504.8	0.01766348		2094.8	0.02338794		2684.79	0.00270661		3274.79	-0.00015219		3864.78	-0.00288793
325	0.16599596		915	0.0247954		1505	0.01818397		2095	0.02442202		2684.99	0.00312078		3274.99	0.00034535		3864.98	-0.00296081
325.2	0.16552489		915.2	0.02508668		1505.2	0.01883208		2095.2	0.02563092		2685.19	0.00303879		3275.19	-0.00009112		3865.18	-0.00205923
325.4	0.16656754		915.4	0.024896		1505.4	0.01900836		2095.4	0.02693681		2685.39	0.00287665		3275.39	0.00008529		3865.38	-0.00066201
325.6	0.16693421		915.6	0.02529072		1505.6	0.01863538		2095.6	0.02798757		2685.59	0.00255965		3275.59	0.00029701		3865.58	-0.00116311
325.8	0.16811509		915.8	0.02571222		1505.8	0.01883004		2095.8	0.02835999		2685.79	0.00189869		3275.79	0.00035016		3865.78	-0.00060202
326	0.16951223		916	0.02552867		1506	0.01889031		2096	0.02968372		2685.99	0.0011509		3275.99	0.00072839		3865.98	0.00065165
326.2	0.16993932		916.2	0.02628261		1506.2	0.01874993		2096.2	0.02981257		2686.19	0.0015807		3276.19	-0.00074874		3866.18	0.00105336
326.4	0.1700883		916.4	0.02613813		1506.4	0.01895536		2096.4	0.03108401		2686.39	0.00076079		3276.39	-0.00207595		3866.38	0.00056559
326.6	0.17006534		916.6	0.02565121		1506.6	0.01879067		2096.6	0.0312819		2686.59	0.00060862		3276.59	-0.00280563		3866.58	0.00092022
326.8	0.17029631		916.8	0.02558862		1506.8	0.01864658		2096.8	0.03016237		2686.79	-0.00042843		3276.79	-0.00293298		3866.78	0.00166847
327	0.17045604		917	0.0256428		1507	0.01869496		2097	0.03086578		2686.99	0.00005373		3276.99	-0.0037845		3866.98	0.00245768
327.2	0.17015296		917.2	0.02568598		1507.2	0.01845178		2097.2	0.02989733		2687.19	0.00072019		3277.19	-0.00429481		3867.18	0.00273193
327.4	0.17013864		917.4	0.02532595		1507.4	0.01833209		2097.4	0.02993117		2687.39	0.00023769		3277.39	-0.00462347		3867.38	0.00389052
327.6	0.16963889		917.6	0.025202		1507.6	0.01695406		2097.6	0.02968173		2687.59	0.0002862		3277.59	-0.00463678		3867.58	0.00443662
327.8	0.1705357		917.8	0.02581846		1507.8	0.0167646		2097.8	0.02996925		2687.79	-0.00053679		3277.79	-0.00608699		3867.78	0.00417838
328	0.17074612		918	0.02642291		1508	0.0165188		2098	0.02975538		2687.99	-0.00028959		3277.99	-0.00583882		3867.98	0.00420224
328.2	0.17116597		918.2	0.02597929		1508.2	0.016239		2098.2	0.0289354		2688.19	-0.00022178		3278.19	-0.00509511		3868.18	0.00465881
328.4	0.17307099		918.4	0.0263789		1508.4	0.01630989		2098.4	0.02894636		2688.39	0.00145649		3278.39	-0.00519683		3868.38	0.0050556
328.6	0.17318111		918.6	0.02690408		1508.6	0.01637873		2098.6	0.02922765		2688.59	0.00184004		3278.59	-0.00470592		3868.58	0.0049323
328.8	0.17354222		918.8	0.0267108		1508.8	0.01693182		2098.8	0.02877287		2688.79	0.00192145		3278.79	-0.00477303		3868.78	0.0046513
329	0.17406814		919	0.02776545		1509	0.01768271		2099	0.0297938		2688.99	0.00211615		3278.99	-0.00489804		3868.98	0.00378795
329.2	0.17421651		919.2	0.02781741		1509.2	0.01835546		2099.2	0.02992969		2689.19	0.00171596		3279.19	-0.00550728		3869.18	0.00398356
329.4	0.17597118		919.4	0.02741189		1509.4	0.0181659		2099.4	0.03030543		2689.39	0.00097999		3279.39	-0.00541804		3869.38	0.00375919
329.6	0.17776608		919.6	0.02799504		1509.6	0.01897423		2099.6	0.03018165		2689.59	0.00146088		3279.59	-0.00546344		3869.58	0.0029501
329.8	0.17851931		919.8	0.02828042		1509.8	0.01958208		2099.8	0.0306536		2689.79	0.00157461		3279.79	-0.00514348		3869.78	0.00291265
330	0.17994354		920	0.0279659		1510	0.02017169		2100	0.03201072		2689.99	0.00220282		3279.99	-0.00465717		3869.98	0.00220834
330.2	0.17991213		920.2	0.02807752		1510.2	0.01998481		2100.2	0.03218728		2690.19	0.00244793		3280.19	-0.00439675		3870.18	0.00077628
330.4	0.18011321		920.4	0.02813556		1510.4	0.02055261		2100.4	0.03314732		2690.39	0.00179948		3280.39	-0.00395729		3870.38	-0.00023242
330.6	0.1795703		920.6	0.02865099		1510.6	0.02004842		2100.6	0.03296268		2690.59	0.00217338		3280.59	-0.00324856		3870.58	-0.00033283
330.8	0.17953872		920.8	0.02860822		1510.8	0.01933459		2100.8	0.03302873		2690.79	0.00245132		3280.79	-0.00343162		3870.78	-0.00003609
331	0.17938683		921	0.02862747		1511	0.01931069		2101	0.03334669		2690.99	0.00328033		3280.99	-0.00341607		3870.98	-0.00084672
331.2	0.17914143		921.2	0.02852169		1511.2	0.0180767		2101.2	0.0329389		2691.19	0.00325831		3281.19	-0.00457066		3871.18	-0.00100801
331.4	0.17986539		921.4	0.02862356		1511.4	0.01759018		2101.4	0.03376391		2691.39	0.0023251		3281.39	-0.00508319		3871.38	-0.00059687
331.6	0.17983798		921.6	0.02892584		1511.6	0.01725182		2101.6	0.03421207		2691.59	0.00242886		3281.59	-0.00403375		3871.58	-0.00033449
331.8	0.18018382		921.8	0.02939232		1511.8	0.0173551		2101.8	0.03370682		2691.79	0.00308605		3281.79	-0.00423684		3871.78	-0.00047671
332	0.18005756		922	0.02900577		1512	0.01714928		2102	0.03325714		2691.99	0.0038735		3281.99	-0.0032845		3871.98	0.00095769
332.2	0.18061832		922.2	0.02884248		1512.2	0.0174044		2102.2	0.0331972		2692.19	0.00377721		3282.19	-0.00303137		3872.18	0.00155499
332.4	0.18188511		922.4	0.02861495		1512.4	0.01771663		2102.4	0.03327029		2692.39	0.00354225		3282.39	-0.00376513		3872.38	0.00276159
332.6	0.18273651		922.6	0.02791865		1512.6	0.01783463		2102.6	0.0331476		2692.59	0.0035435		3282.59	-0.00377699		3872.58	0.00216358
332.8	0.18315085		922.8	0.02766177		1512.8	0.01872274		2102.8	0.03340528		2692.79	0.00312714		3282.79	-0.00382475		3872.78	0.00192658
333	0.18271884		923	0.02739642		1513	0.01904966		2103	0.03426927		2692.99	0.00330176		3282.99	-0.00372036		3872.98	0.00257257
333.2	0.18353401		923.2	0.02690333		1513.2	0.01889388		2103.2	0.03297905		2693.19	0.00393419		3283.19	-0.00423487		3873.18	0.0027507
333.4	0.18501219		923.4	0.02636697		1513.4	0.01909789		2103.4	0.03214529		2693.39	0.00398242		3283.39	-0.00479887		3873.38	0.00280028
333.6	0.18686393		923.6	0.02721844		1513.6	0.01979645		2103.6	0.03159663		2693.59	0.00453245		3283.59	-0.00430897		3873.58	0.00233777
333.8	0.18707072		923.8	0.02766951		1513.8	0.01979187		2103.8	0.03253228		2693.79	0.00412202		3283.79	-0.00384741		3873.78	0.00157198
334	0.18835899		924	0.02762868		1514	0.01997509		2104	0.03242895		2693.99	0.00433712		3283.99	-0.00322999		3873.98	0.00094071
334.2	0.18848399		924.2	0.02842916		1514.2	0.01916473		2104.2	0.0326242		2694.19	0.00443885		3284.19	-0.00341356		3874.18	0.00008603
334.4	0.18842545		924.4	0.02945536		1514.4	0.01862264		2104.4	0.03218335		2694.39	0.0045621		3284.39	-0.00429413		3874.38	-0.00056802
334.6	0.18830797		924.6	0.03070685		1514.6	0.0181062		2104.6	0.03208556		2694.59	0.00481091		3284.59	-0.00405801		3874.58	-0.00057694
334.8	0.18836227		924.8	0.03085841		1514.8	0.01771967		2104.8	0.0317923		2694.79	0.00418021		3284.79	-0.00442428		3874.78	-0.00075506
335	0.19000631		925	0.03115376		1515	0.01734134		2105	0.03196186		2694.99	0.00400657		3284.99	-0.00395893		3874.98	-0.0008213
335.2	0.19044885		925.2	0.03137014		1515.2	0.01722885		2105.2	0.03168792		2695.19	0.00260578		3285.19	-0.00452366		3875.18	0.00013112
335.4	0.19154719		925.4	0.03213785		1515.4	0.01775426		2105.4	0.03173953		2695.39	0.00233393		3285.39	-0.00369104		3875.38	-0.00027654
335.6	0.19118404		925.6	0.03276967		1515.6	0.01796822		2105.6	0.03093058		2695.59	0.00293876		3285.59	-0.00319226		3875.58	0.0002622
335.8	0.19049444		925.8	0.03258364		1515.8	0.01827566		2105.8	0.03020899		2695.79	0.0024507		3285.79	-0.00320311		3875.78	0.00134702
336	0.18962392		926	0.03199359		1516	0.01790983		2106	0.03077256		2695.99	0.00195831		3285.99	-0.00248521		3875.98	0.00228217
336.2	0.18966334		926.2	0.03210799		1516.2	0.01837774		2106.2	0.03096589		2696.19	0.00092052		3286.19	-0.00269045		3876.18	0.00275151
336.4	0.18971782		926.4	0.03128275		1516.4	0.01878817		2106.4	0.0316431		2696.39	0.00071012		3286.39	-0.00203449		3876.38	0.00371892
336.6	0.19035247		926.6	0.03158372		1516.6	0.01930187		2106.6	0.03204115		2696.59	0.00118623		3286.59	-0.00135723		3876.58	0.00380213
336.8	0.18935753		926.8	0.03180599		1516.8	0.01934451		2106.8	0.0323915		2696.79	0.00161446		3286.79	-0.00144113		3876.78	0.00569062
337	0.18947054		927	0.03133346		1517	0.0197279		2107	0.03270629		2696.99	0.00112079		3286.99	-0.00195303		3876.98	0.00586322
337.2	0.19028021		927.2	0.0319009		1517.2	0.02006204		2107.2	0.03238302		2697.19	0.00092031		3287.19	-0.00281685		3877.18	0.00567502
337.4	0.19120616		927.4	0.03123873		1517.4	0.02048601		2107.4	0.03236235		2697.39	0.00021104		3287.39	-0.00297579		3877.38	0.00562847
337.6	0.19215147		927.6	0.03120855		1517.6	0.02102328		2107.6	0.03290118		2697.59	0.00047438		3287.59	-0.00275258		3877.58	0.00458218
337.8	0.19192049		927.8	0.03169669		1517.8	0.02122308		2107.8	0.03346068		2697.79	0.00103012		3287.79	-0.00287866		3877.78	0.00388876
338	0.19277036		928	0.03230853		1518	0.02146804		2108	0.03315156		2697.99	0.00152461		3287.99	-0.00386777		3877.98	0.00424767
338.2	0.19316004		928.2	0.03294732		1518.2	0.02097818		2108.2	0.03281923		2698.19	0.00282619		3288.19	-0.0050167		3878.18	0.00379583
338.4	0.19358967		928.4	0.03396155		1518.4	0.01969291		2108.4	0.03298805		2698.39	0.00268164		3288.39	-0.00563696		3878.38	0.00335028
338.6	0.19423035		928.6	0.03540474		1518.6	0.01968443		2108.6	0.03262451		2698.59	0.00284067		3288.59	-0.00560255		3878.58	0.0028754
338.8	0.19479642		928.8	0.03489645		1518.8	0.02001389		2108.8	0.03156869		2698.79	0.0026985		3288.79	-0.00520805		3878.78	0.00315459
339	0.19496722		929	0.03560621		1519	0.01966952		2109	0.03203031		2698.99	0.00269308		3288.99	-0.00510906		3878.98	0.0036259
339.2	0.19456926		929.2	0.03576933		1519.2	0.01968753		2109.2	0.03071163		2699.19	0.00248117		3289.19	-0.00528897		3879.18	0.0034458
339.4	0.19562036		929.4	0.0365959		1519.4	0.01905236		2109.4	0.03043011		2699.39	0.00275035		3289.39	-0.00464445		3879.38	0.00285106
339.6	0.19521876		929.6	0.03655968		1519.6	0.01900979		2109.6	0.03096567		2699.59	0.00326698		3289.59	-0.00519401		3879.58	0.00317594
339.8	0.19449972		929.8	0.03600439		1519.8	0.01962064		2109.8	0.03173412		2699.79	0.00241853		3289.79	-0.00448645		3879.78	0.00338001
340	0.19446329		930	0.03651634		1520	0.01918215		2110	0.03244087		2699.99	0.00265341		3289.99	-0.00380286		3879.98	0.00282311
340.2	0.19542389		930.2	0.03659482		1520.2	0.01936523		2110.2	0.03205697		2700.19	0.00192915		3290.19	-0.00378845		3880.18	0.00254402
340.4	0.19613221		930.4	0.03531615		1520.4	0.01959171		2110.4	0.03316255		2700.39	0.00237974		3290.39	-0.00402443		3880.38	0.00235131
340.6	0.19733216		930.6	0.03521557		1520.6	0.01885263		2110.6	0.03324381		2700.59	0.00246337		3290.59	-0.00487367		3880.58	0.00293987
340.8	0.19636185		930.8	0.0347491		1520.8	0.01928013		2110.8	0.03389777		2700.79	0.00200573		3290.79	-0.00560754		3880.78	0.0033247
341	0.19679533		931	0.0342239		1521	0.02076613		2111	0.03375992		2700.99	0.00117872		3290.99	-0.00584994		3880.98	0.00197815
341.2	0.19758395		931.2	0.03387861		1521.2	0.02079211		2111.2	0.03337992		2701.19	0.00129224		3291.19	-0.00638604		3881.18	0.00164119
341.4	0.19846907		931.4	0.03346548		1521.4	0.02099638		2111.4	0.03326069		2701.39	0.0013288		3291.39	-0.00691969		3881.38	0.00134265
341.6	0.19971286		931.6	0.03281976		1521.6	0.02112789		2111.6	0.03378722		2701.59	0.00240171		3291.59	-0.00798274		3881.58	0.0011873
341.8	0.20044409		931.8	0.0336673		1521.8	0.02154579		2111.8	0.03354494		2701.79	0.00254224		3291.79	-0.00900011		3881.78	0.00121365
342	0.20054446		932	0.03358765		1522	0.02158079		2112	0.03335937		2701.99	0.00268		3291.99	-0.00962912		3881.98	0.00136246
342.2	0.20090528		932.2	0.0333695		1522.2	0.02089691		2112.2	0.03306457		2702.19	0.00333595		3292.19	-0.00939569		3882.18	0.0003788
342.4	0.20156579		932.4	0.03400006		1522.4	0.02038167		2112.4	0.03312818		2702.39	0.00307375		3292.39	-0.00884564		3882.38	-0.00080438
342.6	0.20189691		932.6	0.03508126		1522.6	0.02127879		2112.6	0.03197641		2702.59	0.00331574		3292.59	-0.00759575		3882.58	-0.00072103
342.8	0.20212444		932.8	0.03542126		1522.8	0.02128209		2112.8	0.03215119		2702.79	0.00336697		3292.79	-0.00713521		3882.78	-0.0002905
343	0.20166987		933	0.03554998		1523	0.02108606		2113	0.03255503		2702.99	0.00290276		3292.99	-0.00694213		3882.98	-0.00045816
343.2	0.20227182		933.2	0.03528059		1523.2	0.02169333		2113.2	0.03154658		2703.19	0.003172		3293.19	-0.00649786		3883.18	-0.00073765
343.4	0.2033454		933.4	0.03599427		1523.4	0.02223103		2113.4	0.03304885		2703.39	0.00285008		3293.39	-0.00553538		3883.38	-0.00025107
343.6	0.20396837		933.6	0.03610197		1523.6	0.02233959		2113.6	0.03388844		2703.59	0.00289166		3293.59	-0.0051456		3883.58	-0.00103216
343.8	0.20407169		933.8	0.03697809		1523.8	0.02305879		2113.8	0.03395432		2703.79	0.00180531		3293.79	-0.00501672		3883.78	-0.00136048
344	0.20503648		934	0.0369386		1524	0.02236567		2114	0.03387676		2703.99	0.00217485		3293.99	-0.00436654		3883.98	-0.00123689
344.2	0.20560413		934.2	0.03639706		1524.2	0.02231416		2114.2	0.03431468		2704.19	0.00228973		3294.19	-0.00432707		3884.18	-0.00114592
344.4	0.20579146		934.4	0.03542404		1524.4	0.02257654		2114.4	0.03578084		2704.39	0.0029537		3294.39	-0.00520043		3884.38	-0.00005898
344.6	0.20570941		934.6	0.03577286		1524.6	0.02237623		2114.6	0.03647621		2704.59	0.0030624		3294.59	-0.00558933		3884.58	0.00007215
344.8	0.20484944		934.8	0.03605418		1524.8	0.02281553		2114.8	0.03630622		2704.79	0.00252833		3294.79	-0.00593153		3884.78	0.00084117
345	0.20593853		935	0.03576206		1525	0.02220441		2115	0.03520905		2704.99	0.00263244		3294.99	-0.00645559		3884.98	0.001419
345.2	0.20606163		935.2	0.03597549		1525.2	0.02150848		2115.2	0.03614145		2705.19	0.00227446		3295.19	-0.00717078		3885.18	0.00197458
345.4	0.20664081		935.4	0.03589849		1525.4	0.02165786		2115.4	0.03584854		2705.39	0.00184775		3295.39	-0.00748648		3885.38	0.00205879
345.6	0.20701877		935.6	0.03534931		1525.6	0.02143604		2115.6	0.03586725		2705.59	0.0021236		3295.59	-0.00722019		3885.58	0.00216508
345.8	0.2065083		935.8	0.03609499		1525.8	0.02179427		2115.8	0.03496144		2705.79	0.00189422		3295.79	-0.0069761		3885.78	0.00162464
346	0.20603848		936	0.03566074		1526	0.02196298		2116	0.03466127		2705.99	0.00197119		3295.99	-0.00676267		3885.98	0.00147763
346.2	0.20640962		936.2	0.03588154		1526.2	0.02199121		2116.2	0.0348277		2706.19	0.00237224		3296.19	-0.00710688		3886.18	0.00082822
346.4	0.20676394		936.4	0.03660289		1526.4	0.02252652		2116.4	0.03509619		2706.39	0.00317009		3296.39	-0.00739719		3886.38	0.00040898
346.6	0.20723034		936.6	0.03804197		1526.6	0.0230448		2116.6	0.03454862		2706.59	0.00330243		3296.59	-0.00795561		3886.58	0.0005823
346.8	0.20684754		936.8	0.03772351		1526.8	0.02339243		2116.8	0.03530713		2706.79	0.00281552		3296.79	-0.00856913		3886.78	0.00046329
347	0.20639416		937	0.03712507		1527	0.0240161		2117	0.03519765		2706.99	0.00234501		3296.99	-0.00805458		3886.98	-0.00000327
347.2	0.20643085		937.2	0.0376683		1527.2	0.02422653		2117.2	0.03468313		2707.19	0.00215947		3297.19	-0.00749483		3887.18	-0.00016875
347.4	0.20715862		937.4	0.03759297		1527.4	0.02411202		2117.4	0.03535786		2707.39	0.00180028		3297.39	-0.00670033		3887.38	-0.00057395
347.6	0.20783641		937.6	0.03775633		1527.6	0.02358528		2117.6	0.03493002		2707.59	0.00224551		3297.59	-0.00618325		3887.58	-0.00178644
347.8	0.20907461		937.8	0.03837133		1527.8	0.02335664		2117.8	0.03497845		2707.79	0.00187305		3297.79	-0.00597351		3887.78	-0.00123838
348	0.20973806		938	0.03746228		1528	0.02272815		2118	0.03540651		2707.99	0.00240095		3297.99	-0.00521639		3887.98	-0.00076207
348.2	0.20997729		938.2	0.03736725		1528.2	0.02275171		2118.2	0.03630125		2708.19	0.00269766		3298.19	-0.00498488		3888.18	-0.00034765
348.4	0.20976581		938.4	0.03656701		1528.4	0.02339068		2118.4	0.0365643		2708.39	0.00318314		3298.39	-0.00517882		3888.38	-0.00029165
348.6	0.20945991		938.6	0.03595864		1528.6	0.02312803		2118.6	0.03643386		2708.59	0.00287491		3298.59	-0.00491038		3888.58	-0.00030218
348.8	0.20954493		938.8	0.03600559		1528.8	0.02251497		2118.8	0.03599698		2708.79	0.00268289		3298.79	-0.00418094		3888.78	0.00041612
349	0.21011431		939	0.03530231		1529	0.02217101		2119	0.03667769		2708.99	0.00310176		3298.99	-0.00312355		3888.98	0.00137167
349.2	0.210528		939.2	0.0356395		1529.2	0.02257032		2119.2	0.03730237		2709.19	0.00327014		3299.19	-0.00205562		3889.18	0.00129157
349.4	0.2109064		939.4	0.03515825		1529.4	0.02236044		2119.4	0.03636626		2709.39	0.0034474		3299.39	-0.00158988		3889.38	0.00114496
349.6	0.21081074		939.6	0.03435746		1529.6	0.02268202		2119.6	0.03664331		2709.59	0.00361088		3299.59	-0.00107734		3889.58	0.00216052
349.8	0.21184259		939.8	0.03453728		1529.8	0.02247483		2119.8	0.03672756		2709.79	0.00329544		3299.79	-0.001193		3889.78	0.00214683
350	0.21213347		940	0.03452161		1530	0.02297731		2120	0.03697692		2709.99	0.00257749		3299.99	-0.00220449		3889.98	0.00265456
350.2	0.21292801		940.2	0.03525605		1530.2	0.0240959		2120.2	0.03698851		2710.19	0.00247712		3300.19	-0.00247583		3890.18	0.00264344
350.4	0.21363308		940.4	0.03636694		1530.4	0.02496826		2120.4	0.03805875		2710.39	0.00289553		3300.39	-0.00235495		3890.38	0.00240176
350.6	0.21469026		940.6	0.03777296		1530.6	0.02454864		2120.6	0.03758843		2710.59	0.00231625		3300.59	-0.00230282		3890.58	0.0024153
350.8	0.21468231		940.8	0.03847853		1530.8	0.02543399		2120.8	0.03803353		2710.79	0.00205087		3300.79	-0.00162275		3890.78	0.00325993
351	0.21483746		941	0.03914337		1531	0.0248512		2121	0.03731907		2710.99	0.00134291		3300.99	-0.00161196		3890.98	0.00158737
351.2	0.21507223		941.2	0.03962119		1531.2	0.02427576		2121.2	0.03747347		2711.19	0.00077394		3301.19	-0.00177967		3891.18	0.00117397
351.4	0.21491189		941.4	0.03973412		1531.4	0.02495448		2121.4	0.03702032		2711.39	0.00075766		3301.39	-0.00188177		3891.38	0.0006069
351.6	0.21657469		941.6	0.04084684		1531.6	0.02448584		2121.6	0.03704077		2711.59	0.00069994		3301.59	-0.00183548		3891.58	0.00025186
351.8	0.2172545		941.8	0.04189075		1531.8	0.02416086		2121.8	0.03754237		2711.79	0.00049563		3301.79	-0.00254041		3891.78	-0.00002784
352	0.21693384		942	0.04130599		1532	0.02460749		2122	0.03769983		2711.99	0.00104101		3301.99	-0.0024708		3891.98	-0.00062377
352.2	0.21726298		942.2	0.04136676		1532.2	0.02576921		2122.2	0.03783469		2712.19	0.00083444		3302.19	-0.00285596		3892.18	-0.00167845
352.4	0.21704502		942.4	0.04099514		1532.4	0.02629139		2122.4	0.03741051		2712.39	0.00131855		3302.39	-0.00257325		3892.38	-0.00247309
352.6	0.21725895		942.6	0.04199283		1532.6	0.02585222		2122.6	0.0363712		2712.59	0.00072899		3302.59	-0.00236408		3892.58	-0.00200428
352.8	0.21811773		942.8	0.04239655		1532.8	0.02567		2122.8	0.03681925		2712.79	0.00147159		3302.79	-0.00176955		3892.78	-0.00172537
353	0.21905351		943	0.04220363		1533	0.02566929		2123	0.03829957		2712.99	0.00176156		3302.99	-0.0012166		3892.98	-0.00124774
353.2	0.21976621		943.2	0.04222794		1533.2	0.02495115		2123.2	0.03885166		2713.19	0.00126037		3303.19	-0.00160079		3893.18	-0.00194837
353.4	0.21983412		943.4	0.04098213		1533.4	0.02427239		2123.4	0.03833384		2713.39	0.0016973		3303.39	-0.00306027		3893.38	-0.00183235
353.6	0.22035364		943.6	0.0402612		1533.6	0.02400381		2123.6	0.03798529		2713.59	0.0013654		3303.59	-0.00322177		3893.58	-0.00098806
353.8	0.22112924		943.8	0.04008456		1533.8	0.0237826		2123.8	0.03828278		2713.79	0.00087857		3303.79	-0.00383109		3893.78	-0.00028085
354	0.22138088		944	0.03928841		1534	0.02382474		2124	0.03851313		2713.99	0.00115823		3303.99	-0.00464324		3893.98	0.00030047
354.2	0.22180323		944.2	0.03983768		1534.2	0.02452512		2124.2	0.0379172		2714.19	0.00121098		3304.19	-0.00450642		3894.18	0.00017369
354.4	0.22164401		944.4	0.04095971		1534.4	0.02480622		2124.4	0.03857795		2714.39	0.00190562		3304.39	-0.00435055		3894.38	0.00071178
354.6	0.22222405		944.6	0.04127404		1534.6	0.02423953		2124.6	0.03800641		2714.59	0.0013172		3304.59	-0.00343997		3894.58	0.00210566
354.8	0.22300569		944.8	0.04122227		1534.8	0.02458167		2124.8	0.03791451		2714.79	0.00127894		3304.79	-0.00351881		3894.78	0.0029331
355	0.22240949		945	0.04016635		1535	0.02454409		2125	0.03748744		2714.99	-0.00003886		3304.99	-0.00438804		3894.98	0.00315258
355.2	0.22204307		945.2	0.04027993		1535.2	0.02474077		2125.2	0.03843137		2715.19	0.00020302		3305.19	-0.00426404		3895.18	0.00424865
355.4	0.22098561		945.4	0.04093804		1535.4	0.02559671		2125.4	0.03786312		2715.39	0.0007922		3305.39	-0.00432272		3895.38	0.00486452
355.6	0.22213764		945.6	0.04081862		1535.6	0.02547889		2125.6	0.03843255		2715.59	0.00142788		3305.59	-0.00374701		3895.58	0.00447375
355.8	0.22232529		945.8	0.04062585		1535.8	0.02552592		2125.8	0.03923937		2715.79	0.00262278		3305.79	-0.00360805		3895.78	0.00442423
356	0.22284904		946	0.04055232		1536	0.02571873		2126	0.0390237		2715.99	0.0028363		3305.99	-0.00303519		3895.98	0.00385108
356.2	0.22363929		946.2	0.04055619		1536.2	0.02681174		2126.2	0.03947792		2716.19	0.00257703		3306.19	-0.00345916		3896.18	0.00252477
356.4	0.2234933		946.4	0.04060618		1536.4	0.02745585		2126.4	0.03905747		2716.39	0.00308287		3306.39	-0.00285446		3896.38	0.00204236
356.6	0.2245439		946.6	0.04079554		1536.6	0.02765271		2126.6	0.03987812		2716.59	0.00379847		3306.59	-0.00324136		3896.58	0.00254472
356.8	0.22514745		946.8	0.03990962		1536.8	0.02775083		2126.8	0.04142527		2716.79	0.00467424		3306.79	-0.00364991		3896.78	0.00221902
357	0.22559221		947	0.03992684		1537	0.02759949		2127	0.04154846		2716.99	0.00427342		3306.99	-0.00382986		3896.98	0.00106643
357.2	0.22584888		947.2	0.03935766		1537.2	0.02657197		2127.2	0.0417445		2717.19	0.00426796		3307.19	-0.0050734		3897.18	0.00087836
357.4	0.22574772		947.4	0.0383376		1537.4	0.02606421		2127.4	0.0409409		2717.39	0.0051157		3307.39	-0.00610749		3897.38	0.00089113
357.6	0.22661642		947.6	0.03756938		1537.6	0.02579894		2127.6	0.0407831		2717.59	0.00451725		3307.59	-0.00561522		3897.58	0.00143291
357.8	0.22689653		947.8	0.03639725		1537.8	0.02635757		2127.8	0.04064801		2717.79	0.00454013		3307.79	-0.00573967		3897.78	0.00195118
358	0.22763799		948	0.03693857		1538	0.02525466		2128	0.0405503		2717.99	0.0054358		3307.99	-0.00580057		3897.98	0.00105765
358.2	0.22795039		948.2	0.03788911		1538.2	0.02582069		2128.2	0.04000958		2718.19	0.00450874		3308.19	-0.0058445		3898.18	0.00125719
358.4	0.2282092		948.4	0.03829661		1538.4	0.0261069		2128.4	0.039356		2718.39	0.0048774		3308.39	-0.00535249		3898.38	0.00230483
358.6	0.22900675		948.6	0.03740294		1538.6	0.02474376		2128.6	0.03904697		2718.59	0.00338468		3308.59	-0.00437045		3898.58	0.00294507
358.8	0.22941424		948.8	0.03691308		1538.8	0.02503063		2128.8	0.03839222		2718.79	0.00283104		3308.79	-0.00483475		3898.78	0.00331808
359	0.22875042		949	0.03767835		1539	0.02576827		2129	0.03767886		2718.99	0.00187285		3308.99	-0.00451515		3898.98	0.00416979
359.2	0.22861451		949.2	0.03854565		1539.2	0.0248093		2129.2	0.03814721		2719.19	0.00206383		3309.19	-0.00385807		3899.18	0.00307555
359.4	0.22813469		949.4	0.03933556		1539.4	0.02480965		2129.4	0.03713246		2719.39	0.00206178		3309.39	-0.0039392		3899.38	0.00352343
359.6	0.22936346		949.6	0.03885453		1539.6	0.02467392		2129.6	0.03819062		2719.59	0.00193054		3309.59	-0.00323268		3899.58	0.00316439
359.8	0.229906		949.8	0.03953436		1539.8	0.02452211		2129.8	0.03944263		2719.79	0.00140146		3309.79	-0.00299138		3899.78	0.00383682
360	0.2304759		950	0.04017563		1540	0.02466973		2130	0.0397666		2719.99	0.00146866		3309.99	-0.00405953		3899.98	0.00360415
360.2	0.23111876		950.2	0.04044569		1540.2	0.02591856		2130.2	0.04086997		2720.19	0.0006098		3310.19	-0.00422503		3900.18	0.00310896
360.4	0.2307088		950.4	0.04032082		1540.4	0.02567626		2130.4	0.04127922		2720.39	0.00113755		3310.39	-0.0041726		3900.38	0.00340106
360.6	0.2307041		950.6	0.04094454		1540.6	0.02568341		2130.6	0.04192216		2720.59	0.00158303		3310.59	-0.00451201		3900.58	0.00383539
360.8	0.23113745		950.8	0.0414548		1540.8	0.02533345		2130.8	0.04147628		2720.79	0.00174504		3310.79	-0.00486664		3900.78	0.00320919
361	0.23157178		951	0.04209208		1541	0.02580024		2131	0.04193525		2720.99	0.00090854		3310.99	-0.00525343		3900.98	0.0028467
361.2	0.23212056		951.2	0.04143251		1541.2	0.02611314		2131.2	0.04232088		2721.19	0.00191708		3311.19	-0.00568481		3901.18	0.00307048
361.4	0.23230996		951.4	0.04147487		1541.4	0.02573242		2131.4	0.04231245		2721.39	0.00155204		3311.39	-0.00539919		3901.38	0.00255041
361.6	0.23284273		951.6	0.04234574		1541.6	0.02666932		2131.6	0.04207992		2721.59	0.00204006		3311.59	-0.00514897		3901.58	0.00288032
361.8	0.23263022		951.8	0.04277246		1541.8	0.02612482		2131.8	0.0414231		2721.79	0.00245073		3311.79	-0.00431362		3901.78	0.00235475
362	0.23275626		952	0.04377217		1542	0.02541911		2132	0.04188136		2721.99	0.00326324		3311.99	-0.00441826		3901.98	0.00157143
362.2	0.23277011		952.2	0.04379205		1542.2	0.02552224		2132.2	0.04160658		2722.19	0.00271811		3312.19	-0.0045472		3902.18	0.00138524
362.4	0.23305074		952.4	0.04355664		1542.4	0.02517541		2132.4	0.04028087		2722.39	0.00311419		3312.39	-0.00427208		3902.38	0.00086539
362.6	0.23297364		952.6	0.04384511		1542.6	0.02426759		2132.6	0.04049076		2722.59	0.00154753		3312.59	-0.00352066		3902.58	0.00068789
362.8	0.23280597		952.8	0.04417022		1542.8	0.02493408		2132.8	0.04014618		2722.79	0.00056954		3312.79	-0.00301639		3902.78	0.00038163
363	0.23250128		953	0.04509754		1543	0.02446002		2133	0.03983809		2722.99	0.00089557		3312.99	-0.00316215		3902.98	0.00007497
363.2	0.23189494		953.2	0.04471819		1543.2	0.02399661		2133.2	0.04045706		2723.19	0.00054301		3313.19	-0.00391637		3903.18	-0.00077634
363.4	0.23225591		953.4	0.04543264		1543.4	0.02429874		2133.4	0.04033727		2723.39	0.00014026		3313.39	-0.00454943		3903.38	-0.00045286
363.6	0.23223059		953.6	0.0448954		1543.6	0.02435591		2133.6	0.04130755		2723.59	-0.00027545		3313.59	-0.00394329		3903.58	0.0000069
363.8	0.2323557		953.8	0.04482627		1543.8	0.02475432		2133.8	0.04196988		2723.79	-0.00173071		3313.79	-0.00424045		3903.78	0.00038099
364	0.23140005		954	0.04462211		1544	0.02450465		2134	0.04188654		2723.99	-0.0013353		3313.99	-0.005461		3903.98	0.00072713
364.2	0.23128965		954.2	0.04441164		1544.2	0.02494124		2134.2	0.04188052		2724.19	-0.00194992		3314.19	-0.00477452		3904.18	0.00060165
364.4	0.23097154		954.4	0.04373648		1544.4	0.02501378		2134.4	0.04198838		2724.39	-0.00108219		3314.39	-0.00435176		3904.38	0.00084373
364.6	0.23145227		954.6	0.04384673		1544.6	0.02529843		2134.6	0.042443		2724.59	-0.00034229		3314.59	-0.00478755		3904.58	0.00094327
364.8	0.2329545		954.8	0.04321841		1544.8	0.02539571		2134.8	0.04340416		2724.79	0.00053235		3314.79	-0.00467377		3904.78	0.00192311
365	0.23272339		955	0.04286687		1545	0.02596358		2135	0.04424939		2724.99	0.00049872		3314.99	-0.00498655		3904.98	0.00200979
365.2	0.23317963		955.2	0.04240895		1545.2	0.02610437		2135.2	0.04483663		2725.19	0.00234305		3315.19	-0.00464957		3905.18	0.0026313
365.4	0.233081		955.4	0.04283917		1545.4	0.02580788		2135.4	0.04594225		2725.39	0.00182948		3315.39	-0.00455256		3905.38	0.00257593
365.6	0.23326039		955.6	0.04329661		1545.6	0.02697137		2135.6	0.04619817		2725.59	0.00285502		3315.59	-0.0046792		3905.58	0.00320584
365.8	0.23397297		955.8	0.04246566		1545.8	0.02688018		2135.8	0.04632192		2725.79	0.00390918		3315.79	-0.00335456		3905.78	0.00258683
366	0.23460446		956	0.04273194		1546	0.0264518		2136	0.04713956		2725.99	0.00529309		3315.99	-0.00357295		3905.98	0.00207656
366.2	0.23552256		956.2	0.04232535		1546.2	0.02678055		2136.2	0.04655673		2726.19	0.00505202		3316.19	-0.00437067		3906.18	0.00178226
366.4	0.23715271		956.4	0.04297882		1546.4	0.02644742		2136.4	0.04619364		2726.39	0.00496066		3316.39	-0.0046051		3906.38	0.00193159
366.6	0.23810627		956.6	0.04341456		1546.6	0.02680529		2136.6	0.04643054		2726.59	0.00418151		3316.59	-0.00456155		3906.58	0.00203677
366.8	0.23779168		956.8	0.04337906		1546.8	0.02778914		2136.8	0.04600209		2726.79	0.00437716		3316.79	-0.00452434		3906.78	0.00153597
367	0.23871666		957	0.04353649		1547	0.02814053		2137	0.04553166		2726.99	0.00552411		3316.99	-0.00593144		3906.98	0.00161963
367.2	0.23900216		957.2	0.04369794		1547.2	0.02848311		2137.2	0.04550907		2727.19	0.00491513		3317.19	-0.00532788		3907.18	0.00077398
367.4	0.23963681		957.4	0.04381203		1547.4	0.02851513		2137.4	0.04503756		2727.39	0.00428304		3317.39	-0.00549948		3907.38	0.00027582
367.6	0.23976904		957.6	0.04343312		1547.6	0.02848577		2137.6	0.04504655		2727.59	0.00335371		3317.59	-0.00580359		3907.58	0.00041238
367.8	0.23933058		957.8	0.04384797		1547.8	0.02894988		2137.8	0.04561371		2727.79	0.00265722		3317.79	-0.00602769		3907.78	-0.00044136
368	0.2390611		958	0.04450207		1548	0.0285012		2138	0.04531736		2727.99	0.00304452		3317.99	-0.00555387		3907.98	-0.00005765
368.2	0.23969789		958.2	0.04437181		1548.2	0.02920922		2138.2	0.04531218		2728.19	0.0026843		3318.19	-0.00480002		3908.18	0.00003825
368.4	0.23990588		958.4	0.04474303		1548.4	0.02912401		2138.4	0.04575381		2728.39	0.0026627		3318.39	-0.00471547		3908.38	-0.00037419
368.6	0.24012536		958.6	0.04552031		1548.6	0.02853361		2138.6	0.04626552		2728.59	0.00264581		3318.59	-0.00519318		3908.58	0.00021373
368.8	0.2403959		958.8	0.04627812		1548.8	0.02844797		2138.8	0.04625141		2728.79	0.00269887		3318.79	-0.00536275		3908.78	0.00101336
369	0.24055605		959	0.04661387		1549	0.0280081		2139	0.04747654		2728.99	0.00268726		3318.99	-0.00590115		3908.98	0.0001061
369.2	0.24071063		959.2	0.0472641		1549.2	0.02808579		2139.2	0.04803088		2729.19	0.00306878		3319.19	-0.00627806		3909.18	0.00076841
369.4	0.24092456		959.4	0.0480032		1549.4	0.0283998		2139.4	0.04799615		2729.39	0.00222495		3319.39	-0.00709736		3909.38	-0.00003238
369.6	0.24150375		959.6	0.04851575		1549.6	0.02826025		2139.6	0.04845153		2729.59	0.00247793		3319.59	-0.00725337		3909.58	-0.00073839
369.8	0.24196165		959.8	0.04898682		1549.8	0.02820072		2139.8	0.04852965		2729.79	0.00348216		3319.79	-0.00688247		3909.78	-0.0017838
370	0.24197626		960	0.0492746		1550	0.02762018		2140	0.0478371		2729.99	0.0033665		3319.99	-0.00742695		3909.98	-0.00186801
370.2	0.24200034		960.2	0.04909097		1550.2	0.02895923		2140.2	0.0476142		2730.19	0.00313521		3320.19	-0.00815248		3910.18	-0.00116102
370.4	0.24197694		960.4	0.05005247		1550.4	0.02997914		2140.4	0.0467475		2730.39	0.00284527		3320.39	-0.00745498		3910.38	-0.00110459
370.6	0.24180994		960.6	0.04940467		1550.6	0.03159397		2140.6	0.04661543		2730.59	0.00345824		3320.59	-0.00692963		3910.58	-0.00059313
370.8	0.24154186		960.8	0.04885871		1550.8	0.03243622		2140.8	0.04568487		2730.79	0.00400617		3320.79	-0.00625974		3910.78	0.000335
371	0.24199109		961	0.04839453		1551	0.03271275		2141	0.0449694		2730.99	0.00386356		3320.99	-0.00681922		3910.98	0.00060076
371.2	0.24136502		961.2	0.04785835		1551.2	0.03288691		2141.2	0.04458155		2731.19	0.0033502		3321.19	-0.00611087		3911.18	0.00034898
371.4	0.24139182		961.4	0.04754422		1551.4	0.03344865		2141.4	0.04487503		2731.39	0.00239099		3321.39	-0.00642661		3911.38	0.00038859
371.6	0.24198718		961.6	0.04728672		1551.6	0.03373746		2141.6	0.04488541		2731.59	0.00180929		3321.59	-0.00641498		3911.58	0.00060399
371.8	0.24154266		961.8	0.04761349		1551.8	0.03414385		2141.8	0.04450799		2731.79	0.00161401		3321.79	-0.00515505		3911.78	0.00002266
372	0.24243177		962	0.04757417		1552	0.03370665		2142	0.04463399		2731.99	0.00065904		3321.99	-0.00458349		3911.98	0.00087377
372.2	0.24319364		962.2	0.04678065		1552.2	0.03419296		2142.2	0.04465149		2732.19	0.00053018		3322.19	-0.00459855		3912.18	0.00133586
372.4	0.24376566		962.4	0.04727777		1552.4	0.03374753		2142.4	0.0450835		2732.39	0.00025275		3322.39	-0.00467609		3912.38	0.00145117
372.6	0.24402431		962.6	0.04687302		1552.6	0.03286373		2142.6	0.04561007		2732.59	-0.00041919		3322.59	-0.00522691		3912.58	0.00214818
372.8	0.24519165		962.8	0.04684379		1552.8	0.03298538		2142.8	0.04543614		2732.79	-0.00033607		3322.79	-0.00529865		3912.78	0.00243303
373	0.24536236		963	0.04708515		1553	0.03305784		2143	0.04626573		2732.99	-0.00061582		3322.99	-0.00543426		3912.98	0.00164654
373.2	0.24607062		963.2	0.04746847		1553.2	0.03326581		2143.2	0.04546952		2733.19	-0.0007515		3323.19	-0.00593234		3913.18	0.0022185
373.4	0.24713101		963.4	0.0487794		1553.4	0.03233462		2143.4	0.04607269		2733.39	-0.00094849		3323.39	-0.00651913		3913.38	0.00176174
373.6	0.24763095		963.6	0.04847752		1553.6	0.03108343		2143.6	0.04605845		2733.59	-0.00055484		3323.59	-0.00632405		3913.58	0.00158112
373.8	0.24778124		963.8	0.04927479		1553.8	0.03017623		2143.8	0.0460417		2733.79	0.00013864		3323.79	-0.00693425		3913.78	0.0016244
374	0.24758585		964	0.04904784		1554	0.03024596		2144	0.04521848		2733.99	0.00086223		3323.99	-0.00645054		3913.98	0.00277204
374.2	0.24746733		964.2	0.0492033		1554.2	0.03122018		2144.2	0.045699		2734.19	0.00140685		3324.19	-0.00606247		3914.18	0.00309174
374.4	0.24770249		964.4	0.04893226		1554.4	0.0306871		2144.4	0.04451428		2734.39	0.00196483		3324.39	-0.00558799		3914.38	0.00326234
374.6	0.24845363		964.6	0.04897763		1554.6	0.03005267		2144.6	0.04444776		2734.59	0.0026895		3324.59	-0.00580074		3914.58	0.00389343
374.8	0.2486377		964.8	0.04907534		1554.8	0.02909008		2144.8	0.0426588		2734.79	0.00358784		3324.79	-0.0060384		3914.78	0.00370873
375	0.24832606		965	0.04957501		1555	0.02842413		2145	0.04286954		2734.99	0.00412295		3324.99	-0.00640123		3914.98	0.00311159
375.2	0.2479878		965.2	0.04992505		1555.2	0.02749074		2145.2	0.04272501		2735.19	0.00393687		3325.19	-0.00592222		3915.18	0.00282471
375.4	0.24735807		965.4	0.05063926		1555.4	0.02641427		2145.4	0.04259752		2735.39	0.00414739		3325.39	-0.00608258		3915.38	0.00209709
375.6	0.2482039		965.6	0.05025998		1555.6	0.0251569		2145.6	0.04280043		2735.59	0.00484178		3325.59	-0.00582021		3915.58	0.00165523
375.8	0.24805525		965.8	0.0502895		1555.8	0.02450293		2145.8	0.04319166		2735.79	0.00462957		3325.79	-0.00533602		3915.78	0.00112614
376	0.24794258		966	0.04940983		1556	0.02428933		2146	0.04398663		2735.99	0.00407999		3325.99	-0.00571092		3915.98	0.00083132
376.2	0.24817819		966.2	0.04846494		1556.2	0.02456988		2146.2	0.04491174		2736.19	0.00456528		3326.19	-0.00572306		3916.18	0.00077827
376.4	0.24799482		966.4	0.04824591		1556.4	0.02494767		2146.4	0.0455603		2736.39	0.00392123		3326.39	-0.00533138		3916.38	0.00072315
376.6	0.24771236		966.6	0.04746478		1556.6	0.02519527		2146.6	0.04629127		2736.59	0.00274835		3326.59	-0.00413295		3916.58	0.00073781
376.8	0.24870183		966.8	0.04736972		1556.8	0.02692275		2146.8	0.04672547		2736.79	0.00342501		3326.79	-0.00369454		3916.78	0.00016929
377	0.24903451		967	0.04761964		1557	0.02804778		2147	0.04707469		2736.99	0.00366639		3326.99	-0.00372337		3916.98	0.00010785
377.2	0.25019361		967.2	0.04765367		1557.2	0.02881163		2147.2	0.04725307		2737.19	0.00401854		3327.19	-0.00313481		3917.18	0.00031021
377.4	0.25031095		967.4	0.04842788		1557.4	0.02846608		2147.4	0.04847149		2737.39	0.0041595		3327.39	-0.00319287		3917.38	0.00080417
377.6	0.24933763		967.6	0.04811865		1557.6	0.02869649		2147.6	0.04871892		2737.59	0.00469806		3327.59	-0.00355728		3917.58	0.00135823
377.8	0.2488751		967.8	0.04841647		1557.8	0.02919415		2147.8	0.04933408		2737.79	0.0040959		3327.79	-0.00397998		3917.78	0.0019296
378	0.24892451		968	0.04775881		1558	0.03074887		2148	0.04916433		2737.99	0.00405569		3327.99	-0.00321662		3917.98	0.00240734
378.2	0.24910208		968.2	0.04752411		1558.2	0.03148525		2148.2	0.04945772		2738.19	0.00348826		3328.19	-0.00406392		3918.18	0.00257684
378.4	0.24964158		968.4	0.04783788		1558.4	0.03124388		2148.4	0.04878841		2738.39	0.00323833		3328.39	-0.00481222		3918.38	0.00326099
378.6	0.24991429		968.6	0.04920639		1558.6	0.03204285		2148.6	0.04809537		2738.59	0.00329015		3328.59	-0.00527944		3918.58	0.00359088
378.8	0.24937317		968.8	0.04942144		1558.8	0.03231982		2148.8	0.04760374		2738.79	0.00340824		3328.79	-0.00597792		3918.78	0.00390014
379	0.24923217		969	0.04924381		1559	0.03214115		2149	0.0476368		2738.99	0.0023885		3328.99	-0.00668739		3918.98	0.00453724
379.2	0.24967054		969.2	0.04942414		1559.2	0.03131518		2149.2	0.0469698		2739.19	0.00181207		3329.19	-0.00733175		3919.18	0.00459666
379.4	0.25015033		969.4	0.04950728		1559.4	0.03096865		2149.4	0.04634823		2739.39	0.00151996		3329.39	-0.00685877		3919.38	0.00533596
379.6	0.25109299		969.6	0.04945502		1559.6	0.03060917		2149.6	0.0467952		2739.59	0.00046991		3329.59	-0.00702049		3919.58	0.00512911
379.8	0.25127012		969.8	0.0492151		1559.8	0.03048501		2149.8	0.04630951		2739.79	-0.00109335		3329.79	-0.00768202		3919.78	0.00477025
380	0.25182211		970	0.04915036		1560	0.03021231		2150	0.04558486		2739.99	-0.00155709		3329.99	-0.00741783		3919.98	0.00451718
380.2	0.25331856		970.2	0.04865148		1560.2	0.02975748		2150.2	0.04581778		2740.19	-0.00200279		3330.19	-0.00766621		3920.18	0.00446565
380.4	0.25464618		970.4	0.04849026		1560.4	0.0296586		2150.4	0.04597573		2740.39	-0.00163196		3330.39	-0.00730381		3920.38	0.00442195
380.6	0.254797		970.6	0.04804182		1560.6	0.02956405		2150.6	0.04650032		2740.59	-0.00132092		3330.59	-0.00758371		3920.58	0.00415337
380.8	0.25590214		970.8	0.04854153		1560.8	0.02985575		2150.8	0.04654513		2740.79	-0.00001488		3330.79	-0.00805201		3920.78	0.00265578
381	0.25661927		971	0.04998479		1561	0.03040799		2151	0.04627122		2740.99	0.00042541		3330.99	-0.00802795		3920.98	0.00242001
381.2	0.25626412		971.2	0.0507264		1561.2	0.03026269		2151.2	0.04653124		2741.19	0.00066993		3331.19	-0.00761083		3921.18	0.00182174
381.4	0.25548027		971.4	0.05114944		1561.4	0.02914249		2151.4	0.04737624		2741.39	0.00112734		3331.39	-0.00800759		3921.38	0.00226429
381.6	0.25463582		971.6	0.05190867		1561.6	0.0291151		2151.6	0.04807866		2741.59	0.00098161		3331.59	-0.00803549		3921.58	0.00247026
381.8	0.25436502		971.8	0.0520471		1561.8	0.02910547		2151.8	0.04845974		2741.79	0.00082863		3331.79	-0.00799539		3921.78	0.0019126
382	0.25389492		972	0.05206162		1562	0.02923571		2152	0.04930626		2741.99	0.00083392		3331.99	-0.00809627		3921.98	0.00105233
382.2	0.25373764		972.2	0.05169118		1562.2	0.03020605		2152.2	0.04957762		2742.19	0.00057136		3332.19	-0.00848288		3922.18	0.00130725
382.4	0.25343396		972.4	0.05154928		1562.4	0.03113318		2152.4	0.0496922		2742.39	0.00142458		3332.39	-0.00792945		3922.38	0.0014956
382.6	0.25343116		972.6	0.05185903		1562.6	0.03208215		2152.6	0.04947111		2742.59	0.00236637		3332.59	-0.00730498		3922.58	0.00161272
382.8	0.25301413		972.8	0.05075286		1562.8	0.03208949		2152.8	0.04958702		2742.79	0.00211198		3332.79	-0.00782894		3922.78	0.00199476
383	0.25393279		973	0.05034466		1563	0.03172075		2153	0.04940474		2742.99	0.0019231		3332.99	-0.00662059		3922.98	0.00232395
383.2	0.25520706		973.2	0.05064564		1563.2	0.03200033		2153.2	0.05009518		2743.19	0.00247042		3333.19	-0.00583279		3923.18	0.00246715
383.4	0.25486066		973.4	0.05038754		1563.4	0.03256712		2153.4	0.05002957		2743.39	0.0026027		3333.39	-0.00539896		3923.38	0.00311572
383.6	0.25603921		973.6	0.05049173		1563.6	0.03224271		2153.6	0.04991835		2743.59	0.00274425		3333.59	-0.00563673		3923.58	0.0028633
383.8	0.25701998		973.8	0.0501098		1563.8	0.03140536		2153.8	0.05003365		2743.79	0.00274481		3333.79	-0.00490036		3923.78	0.00240411
384	0.25798658		974	0.04938277		1564	0.03090301		2154	0.05015758		2743.99	0.00297834		3333.99	-0.00504802		3923.98	0.00274604
384.2	0.25830348		974.2	0.04883807		1564.2	0.03084231		2154.2	0.05019428		2744.19	0.003109		3334.19	-0.00617041		3924.18	0.00200679
384.4	0.25852061		974.4	0.04879407		1564.4	0.03121351		2154.4	0.05027481		2744.39	0.00456756		3334.39	-0.00580995		3924.38	0.00227259
384.6	0.25740685		974.6	0.05011704		1564.6	0.03164452		2154.6	0.05020193		2744.59	0.0038902		3334.59	-0.00635214		3924.58	0.00117677
384.8	0.25793838		974.8	0.05129321		1564.8	0.03197937		2154.8	0.0500385		2744.79	0.00397182		3334.79	-0.00644058		3924.78	0.00078087
385	0.25788584		975	0.05222091		1565	0.0316544		2155	0.04965644		2744.99	0.00366715		3334.99	-0.00685109		3924.98	0.00075396
385.2	0.25741554		975.2	0.05189748		1565.2	0.03069242		2155.2	0.04963383		2745.19	0.00355289		3335.19	-0.00695008		3925.18	0.00130068
385.4	0.25763168		975.4	0.05181146		1565.4	0.0302857		2155.4	0.0500661		2745.39	0.00284758		3335.39	-0.00712154		3925.38	0.00188721
385.6	0.2576466		975.6	0.05179256		1565.6	0.02994557		2155.6	0.05042946		2745.59	0.00213091		3335.59	-0.00725383		3925.58	0.00203416
385.8	0.25707511		975.8	0.0516121		1565.8	0.02883816		2155.8	0.05004466		2745.79	0.00183954		3335.79	-0.00804805		3925.78	0.00215614
386	0.25718093		976	0.05200708		1566	0.02861556		2156	0.04977157		2745.99	0.0016773		3335.99	-0.00778266		3925.98	0.00269631
386.2	0.25771334		976.2	0.05203317		1566.2	0.02974118		2156.2	0.04917438		2746.19	0.00193112		3336.19	-0.00773569		3926.18	0.00300301
386.4	0.257594		976.4	0.05193868		1566.4	0.03002636		2156.4	0.04929167		2746.39	0.0023287		3336.39	-0.00730538		3926.38	0.00344411
386.6	0.25810119		976.6	0.05228135		1566.6	0.03043659		2156.6	0.04882271		2746.59	0.00216803		3336.59	-0.00733501		3926.58	0.00339059
386.8	0.25851188		976.8	0.05179669		1566.8	0.03068866		2156.8	0.04860717		2746.79	0.00190128		3336.79	-0.00827421		3926.78	0.00342192
387	0.25939966		977	0.05306421		1567	0.03044065		2157	0.04928877		2746.99	0.00184526		3336.99	-0.00838374		3926.98	0.0034005
387.2	0.25956138		977.2	0.05369523		1567.2	0.03142449		2157.2	0.04940399		2747.19	0.00217931		3337.19	-0.00934429		3927.18	0.00373051
387.4	0.26013124		977.4	0.05330187		1567.4	0.03149881		2157.4	0.04943679		2747.39	0.00217485		3337.39	-0.00943869		3927.38	0.00317381
387.6	0.26225006		977.6	0.05383688		1567.6	0.03116077		2157.6	0.04940783		2747.59	0.00149839		3337.59	-0.00823053		3927.58	0.00278561
387.8	0.26223363		977.8	0.053207		1567.8	0.03092241		2157.8	0.05003457		2747.79	0.00032845		3337.79	-0.00936267		3927.78	0.0018852
388	0.26190657		978	0.05248971		1568	0.03150843		2158	0.05048226		2747.99	0.00015159		3337.99	-0.00993496		3927.98	0.0016975
388.2	0.26165568		978.2	0.05236831		1568.2	0.03202905		2158.2	0.05058074		2748.19	0.00066661		3338.19	-0.00882554		3928.18	0.00093494
388.4	0.26180342		978.4	0.05230752		1568.4	0.03243735		2158.4	0.05064838		2748.39	0.00053463		3338.39	-0.00812722		3928.38	0.00109295
388.6	0.26128759		978.6	0.05314281		1568.6	0.03230138		2158.6	0.05080517		2748.59	-0.00032252		3338.59	-0.00824927		3928.58	0.00006614
388.8	0.26143448		978.8	0.05285459		1568.8	0.03232425		2158.8	0.05129386		2748.79	-0.00036119		3338.79	-0.00765568		3928.78	0.0003705
389	0.26180986		979	0.05221813		1569	0.03188558		2159	0.0512006		2748.99	-0.00081884		3338.99	-0.00704051		3928.98	-0.00009842
389.2	0.26185068		979.2	0.05178838		1569.2	0.03219283		2159.2	0.05152638		2749.19	-0.00116604		3339.19	-0.00626089		3929.18	0.00059434
389.4	0.26196171		979.4	0.05198746		1569.4	0.03220426		2159.4	0.05175876		2749.39	-0.00085983		3339.39	-0.00583439		3929.38	0.00073086
389.6	0.26159111		979.6	0.05204925		1569.6	0.03078015		2159.6	0.05250403		2749.59	-0.00028441		3339.59	-0.00570107		3929.58	0.0009359
389.8	0.26184459		979.8	0.05273566		1569.8	0.03080425		2159.8	0.05272838		2749.79	0.00039091		3339.79	-0.00557212		3929.78	0.00144277
390	0.26232874		980	0.05384749		1570	0.03129501		2160	0.05284105		2749.99	0.00151551		3339.99	-0.00467115		3929.98	0.00087682
390.2	0.26288417		980.2	0.05368036		1570.2	0.03180582		2160.2	0.05271208		2750.19	0.00178911		3340.19	-0.00445277		3930.18	0.00104079
390.4	0.26307858		980.4	0.05386361		1570.4	0.032053		2160.4	0.05328473		2750.39	0.00203657		3340.39	-0.00424328		3930.38	0.00192019
390.6	0.26373405		980.6	0.05391248		1570.6	0.03180174		2160.6	0.05323973		2750.59	0.00221065		3340.59	-0.00538922		3930.58	0.00197282
390.8	0.26379808		980.8	0.05404087		1570.8	0.03224735		2160.8	0.0531468		2750.79	0.00272612		3340.79	-0.00647548		3930.78	0.00131263
391	0.26412464		981	0.05503282		1571	0.03171262		2161	0.05330559		2750.99	0.00307208		3340.99	-0.00786447		3930.98	0.00166005
391.2	0.26561757		981.2	0.05459098		1571.2	0.03247282		2161.2	0.0532096		2751.19	0.00291371		3341.19	-0.00849278		3931.18	0.00121623
391.4	0.26640142		981.4	0.05396887		1571.4	0.03215426		2161.4	0.05361767		2751.39	0.00352534		3341.39	-0.00871481		3931.38	0.0012156
391.6	0.26694266		981.6	0.05436888		1571.6	0.03217899		2161.6	0.05357447		2751.59	0.00399475		3341.59	-0.00997809		3931.58	0.00086215
391.8	0.26689886		981.8	0.05405235		1571.8	0.03175298		2161.8	0.05331507		2751.79	0.00409797		3341.79	-0.01165552		3931.78	0.00092873
392	0.26691968		982	0.05333446		1572	0.03220796		2162	0.05395477		2751.99	0.0047446		3341.99	-0.01119485		3931.98	0.00072502
392.2	0.26757336		982.2	0.05229881		1572.2	0.03233054		2162.2	0.05370236		2752.19	0.00536818		3342.19	-0.01050579		3932.18	0.0010548
392.4	0.26763118		982.4	0.05295323		1572.4	0.03235105		2162.4	0.05292317		2752.39	0.00492571		3342.39	-0.01057098		3932.38	0.00107162
392.6	0.26716417		982.6	0.05284755		1572.6	0.03262105		2162.6	0.05278832		2752.59	0.00517506		3342.59	-0.01027249		3932.58	0.00113345
392.8	0.26743816		982.8	0.05233021		1572.8	0.03353785		2162.8	0.0523789		2752.79	0.00490459		3342.79	-0.00908476		3932.78	0.00147105
393	0.26775032		983	0.05186285		1573	0.03353088		2163	0.05135171		2752.99	0.00438704		3342.99	-0.00823531		3932.98	0.00143167
393.2	0.26699997		983.2	0.05242113		1573.2	0.03356234		2163.2	0.05127734		2753.19	0.00416184		3343.19	-0.00744646		3933.18	0.00190634
393.4	0.26706255		983.4	0.05301084		1573.4	0.03323835		2163.4	0.05103333		2753.39	0.00465759		3343.39	-0.00776461		3933.38	0.00251698
393.6	0.26723518		983.6	0.05322277		1573.6	0.0340585		2163.6	0.05182669		2753.59	0.00375755		3343.59	-0.00735571		3933.58	0.00272898
393.8	0.2681101		983.8	0.05432888		1573.8	0.03485421		2163.8	0.05149716		2753.79	0.00261292		3343.79	-0.00685237		3933.78	0.00310894
394	0.26777329		984	0.05494769		1574	0.03460786		2164	0.05120898		2753.99	0.00173286		3343.99	-0.00692498		3933.98	0.00334553
394.2	0.26789405		984.2	0.05576404		1574.2	0.0348943		2164.2	0.05087118		2754.19	0.00099319		3344.19	-0.00635602		3934.18	0.00397121
394.4	0.26815667		984.4	0.05650809		1574.4	0.0350117		2164.4	0.05082888		2754.39	0.00083397		3344.39	-0.00689169		3934.38	0.00407422
394.6	0.26812298		984.6	0.05669259		1574.6	0.0341631		2164.6	0.05029734		2754.59	-0.00025184		3344.59	-0.00745107		3934.58	0.00372722
394.8	0.26733436		984.8	0.05741179		1574.8	0.03431056		2164.8	0.05016562		2754.79	-0.00012116		3344.79	-0.00759225		3934.78	0.00299635
395	0.26716619		985	0.05815563		1575	0.03407736		2165	0.05004269		2754.99	-0.00041727		3344.99	-0.00795117		3934.98	0.00341084
395.2	0.26801525		985.2	0.05829531		1575.2	0.03430441		2165.2	0.05015355		2755.19	-0.00052209		3345.19	-0.00805628		3935.18	0.00355655
395.4	0.26670929		985.4	0.05879279		1575.4	0.03414549		2165.4	0.05049985		2755.39	0.00010145		3345.39	-0.00879102		3935.38	0.0046729
395.6	0.26592684		985.6	0.05949664		1575.6	0.03442639		2165.6	0.05126373		2755.59	0.00011854		3345.59	-0.0096984		3935.58	0.00311201
395.8	0.2665568		985.8	0.05904505		1575.8	0.03403251		2165.8	0.05168267		2755.79	0.00087322		3345.79	-0.00991588		3935.78	0.00372807
396	0.26683724		986	0.05767886		1576	0.03457583		2166	0.05281173		2755.99	0.00152148		3345.99	-0.00973345		3935.98	0.00326313
396.2	0.26778181		986.2	0.05723188		1576.2	0.03462954		2166.2	0.05322181		2756.19	0.00201668		3346.19	-0.00930766		3936.18	0.00327325
396.4	0.2684233		986.4	0.05742901		1576.4	0.03457271		2166.4	0.05354387		2756.39	0.00235929		3346.39	-0.00876684		3936.38	0.00347521
396.6	0.26861327		986.6	0.0568238		1576.6	0.03470776		2166.6	0.053305		2756.59	0.00234125		3346.59	-0.00804919		3936.58	0.00320558
396.8	0.27008801		986.8	0.05611288		1576.8	0.03456626		2166.8	0.05261684		2756.79	0.00218205		3346.79	-0.00726419		3936.78	0.00293618
397	0.27044498		987	0.05563735		1577	0.03461483		2167	0.05240661		2756.99	0.00189661		3346.99	-0.00740129		3936.98	0.00279237
397.2	0.27138499		987.2	0.05561479		1577.2	0.03466516		2167.2	0.05336455		2757.19	0.00150712		3347.19	-0.00739786		3937.18	0.00263878
397.4	0.27186786		987.4	0.05556041		1577.4	0.03555477		2167.4	0.05389333		2757.39	0.00128865		3347.39	-0.00743738		3937.38	0.00274427
397.6	0.27221332		987.6	0.05521713		1577.6	0.03665143		2167.6	0.05459027		2757.59	0.0012529		3347.59	-0.00657698		3937.58	0.00127568
397.8	0.27245416		987.8	0.05547232		1577.8	0.03670332		2167.8	0.05444606		2757.79	0.00152617		3347.79	-0.00577328		3937.78	0.00075616
398	0.2726472		988	0.05552268		1578	0.03711125		2168	0.05439161		2757.99	0.00244245		3347.99	-0.00524624		3937.98	0.00017945
398.2	0.27308376		988.2	0.05600539		1578.2	0.03701332		2168.2	0.05450544		2758.19	0.00388656		3348.19	-0.00445987		3938.18	-0.00014986
398.4	0.27350498		988.4	0.05617328		1578.4	0.03623372		2168.4	0.05402725		2758.39	0.00413694		3348.39	-0.00517239		3938.38	-0.00030202
398.6	0.27342483		988.6	0.05630691		1578.6	0.03516769		2168.6	0.05416263		2758.59	0.00328846		3348.59	-0.00542447		3938.58	0.00000761
398.8	0.27346283		988.8	0.05661022		1578.8	0.03499178		2168.8	0.05418094		2758.79	0.00423716		3348.79	-0.0051019		3938.78	0.00041253
399	0.27336881		989	0.05612879		1579	0.035233		2169	0.05380789		2758.99	0.00392381		3348.99	-0.00530037		3938.98	0.00081562
399.2	0.27345016		989.2	0.05610857		1579.2	0.03410638		2169.2	0.05338127		2759.19	0.00366971		3349.19	-0.00635809		3939.18	0.00220443
399.4	0.27234404		989.4	0.05611546		1579.4	0.03417322		2169.4	0.05387956		2759.39	0.00260708		3349.39	-0.00676013		3939.38	0.00257331
399.6	0.27248957		989.6	0.0570882		1579.6	0.03384061		2169.6	0.05481642		2759.59	0.00326762		3349.59	-0.00692987		3939.58	0.00230326
399.8	0.27392118		989.8	0.05690685		1579.8	0.0333269		2169.8	0.05478839		2759.79	0.0043229		3349.79	-0.00688436		3939.78	0.00323397
400	0.2739356		990	0.05667937		1580	0.03366279		2170	0.05534286		2759.99	0.00377674		3349.99	-0.00597695		3939.98	0.00272369
400.2	0.27450777		990.2	0.05800121		1580.2	0.0339951		2170.2	0.05536066		2760.19	0.00263228		3350.19	-0.00644685		3940.18	0.00289171
400.4	0.27461953		990.4	0.05851875		1580.4	0.03409526		2170.4	0.05603474		2760.39	0.00233251		3350.39	-0.00601418		3940.38	0.00307572
400.6	0.27467087		990.6	0.05925675		1580.6	0.03385372		2170.6	0.05625679		2760.59	0.0016853		3350.59	-0.00617407		3940.58	0.00301789
400.8	0.2750287		990.8	0.05873433		1580.8	0.03422596		2170.8	0.056595		2760.79	0.00180332		3350.79	-0.00651452		3940.78	0.0039152
401	0.27467682		991	0.05908209		1581	0.03406875		2171	0.05725312		2760.99	0.00079154		3350.99	-0.00635776		3940.98	0.0038357
401.2	0.27421807		991.2	0.06049323		1581.2	0.0343072		2171.2	0.05770388		2761.19	0.00019971		3351.19	-0.00622986		3941.18	0.00319296
401.4	0.27323222		991.4	0.06123051		1581.4	0.03424689		2171.4	0.05819885		2761.39	0.00092485		3351.39	-0.00552392		3941.38	0.00282386
401.6	0.27287366		991.6	0.06174379		1581.6	0.03396149		2171.6	0.0579602		2761.59	0.00152723		3351.59	-0.00474459		3941.58	0.0015829
401.8	0.27314366		991.8	0.06235014		1581.8	0.03472744		2171.8	0.05830151		2761.79	0.00171148		3351.79	-0.00423637		3941.78	0.00144267
402	0.27321312		992	0.06264243		1582	0.03462698		2172	0.0584633		2761.99	0.00177753		3351.99	-0.00426705		3941.98	0.00192639
402.2	0.27282915		992.2	0.06245528		1582.2	0.0340372		2172.2	0.05872802		2762.19	0.00197892		3352.19	-0.00426065		3942.18	0.00198951
402.4	0.27415025		992.4	0.06206308		1582.4	0.03362699		2172.4	0.05774859		2762.39	0.00143454		3352.39	-0.00458301		3942.38	0.001407
402.6	0.27425944		992.6	0.06177135		1582.6	0.03394007		2172.6	0.05809575		2762.59	0.00145968		3352.59	-0.00438815		3942.58	0.00156566
402.8	0.27531535		992.8	0.06151308		1582.8	0.03354222		2172.8	0.0570555		2762.79	0.00211602		3352.79	-0.00449666		3942.78	0.00141461
403	0.27485773		993	0.06137565		1583	0.03368991		2173	0.05710491		2762.99	0.0007183		3352.99	-0.00483098		3942.98	0.00124158
403.2	0.27499918		993.2	0.06119915		1583.2	0.03276558		2173.2	0.05656541		2763.19	0.00048375		3353.19	-0.00456583		3943.18	0.0015409
403.4	0.27522441		993.4	0.06072468		1583.4	0.03354058		2173.4	0.0566645		2763.39	0.00101295		3353.39	-0.0043651		3943.38	0.00141971
403.6	0.27632089		993.6	0.06050473		1583.6	0.03395786		2173.6	0.05644642		2763.59	0.00257209		3353.59	-0.00392077		3943.58	0.0014371
403.8	0.27702902		993.8	0.05988703		1583.8	0.03414925		2173.8	0.05590381		2763.79	0.0022407		3353.79	-0.00365398		3943.78	0.00180947
404	0.27759318		994	0.05928352		1584	0.03484304		2174	0.05666956		2763.99	0.0016762		3353.99	-0.0036709		3943.98	0.00145616
404.2	0.27839454		994.2	0.05922144		1584.2	0.03519215		2174.2	0.05716749		2764.19	0.00143288		3354.19	-0.00423418		3944.18	0.00173073
404.4	0.2790035		994.4	0.05809812		1584.4	0.03516007		2174.4	0.0578402		2764.39	0.00196153		3354.39	-0.00339105		3944.38	0.00203383
404.6	0.27948287		994.6	0.058334		1584.6	0.03494395		2174.6	0.05911069		2764.59	0.0025748		3354.59	-0.00416023		3944.58	0.0021109
404.8	0.27921986		994.8	0.05805105		1584.8	0.03451589		2174.8	0.05882168		2764.79	0.00349556		3354.79	-0.00433893		3944.78	0.0025909
405	0.27957802		995	0.05919743		1585	0.03372565		2175	0.05879615		2764.99	0.00275366		3354.99	-0.0046619		3944.98	0.0016951
405.2	0.2797216		995.2	0.05969238		1585.2	0.03403682		2175.2	0.05912789		2765.19	0.00275014		3355.19	-0.00549286		3945.18	0.00192023
405.4	0.27983313		995.4	0.05926367		1585.4	0.03402419		2175.4	0.05963227		2765.39	0.00313827		3355.39	-0.00498534		3945.38	0.00177081
405.6	0.27978054		995.6	0.05901196		1585.6	0.03493452		2175.6	0.05892017		2765.59	0.00270905		3355.59	-0.00528063		3945.58	0.0013734
405.8	0.27986726		995.8	0.05888956		1585.8	0.03564103		2175.8	0.05887803		2765.79	0.00181257		3355.79	-0.00576166		3945.78	0.00176241
406	0.27960022		996	0.05849262		1586	0.03542771		2176	0.05807648		2765.99	0.00234903		3355.99	-0.0066301		3945.98	0.00220128
406.2	0.28077169		996.2	0.05838211		1586.2	0.03550361		2176.2	0.05712674		2766.19	0.00233151		3356.19	-0.00688451		3946.18	0.0016194
406.4	0.28131446		996.4	0.05830916		1586.4	0.0362223		2176.4	0.0566495		2766.39	0.00168614		3356.39	-0.00742354		3946.38	0.00136529
406.6	0.28115604		996.6	0.05940883		1586.6	0.03696156		2176.6	0.05690119		2766.59	0.00128752		3356.59	-0.00821541		3946.58	0.001137
406.8	0.28174112		996.8	0.05884256		1586.8	0.03659657		2176.8	0.05634825		2766.79	0.0006176		3356.79	-0.00886103		3946.78	0.00069777
407	0.28146636		997	0.0584257		1587	0.0366907		2177	0.05687831		2766.99	-0.00021418		3356.99	-0.00899803		3946.98	0.00129241
407.2	0.28208499		997.2	0.05770544		1587.2	0.03644294		2177.2	0.0569258		2767.19	0.00017655		3357.19	-0.0089699		3947.18	0.00158208
407.4	0.28187135		997.4	0.05758717		1587.4	0.0368671		2177.4	0.05685619		2767.39	0.00031538		3357.39	-0.00952854		3947.38	0.00242188
407.6	0.28254084		997.6	0.05786031		1587.6	0.03744875		2177.6	0.05609322		2767.59	0.00014898		3357.59	-0.00898207		3947.58	0.0028141
407.8	0.28333069		997.8	0.05822299		1587.8	0.03736779		2177.8	0.05676077		2767.79	-0.00014202		3357.79	-0.00886024		3947.78	0.003259
408	0.28333449		998	0.05810678		1588	0.03751947		2178	0.05781262		2767.99	0.00021128		3357.99	-0.00866782		3947.98	0.00281224
408.2	0.28342846		998.2	0.05861785		1588.2	0.03693072		2178.2	0.05778969		2768.19	0.00110407		3358.19	-0.00796486		3948.18	0.00294817
408.4	0.28362647		998.4	0.05905664		1588.4	0.03573936		2178.4	0.05729456		2768.39	0.00176724		3358.39	-0.0071665		3948.38	0.00270112
408.6	0.28319669		998.6	0.06014523		1588.6	0.03560564		2178.6	0.05851486		2768.59	0.00330008		3358.59	-0.00692073		3948.58	0.00175009
408.8	0.28295856		998.8	0.06061197		1588.8	0.0350188		2178.8	0.05771921		2768.79	0.00405605		3358.79	-0.00705699		3948.78	0.00179793
409	0.28412367		999	0.06139308		1589	0.03552125		2179	0.0582024		2768.99	0.00294991		3358.99	-0.0064415		3948.98	0.00145488
409.2	0.28394052		999.2	0.06095137		1589.2	0.03622841		2179.2	0.05875379		2769.19	0.00345016		3359.19	-0.00618497		3949.18	0.00200994
409.4	0.28396227		999.4	0.06102835		1589.4	0.0359938		2179.4	0.05901517		2769.39	0.00372048		3359.39	-0.00555467		3949.38	0.00198766
409.6	0.28359688		999.6	0.06144114		1589.6	0.0366063		2179.6	0.05853581		2769.59	0.0040096		3359.59	-0.00544748		3949.58	0.00165146
409.8	0.28367467		999.8	0.06166249		1589.8	0.03660837		2179.8	0.05832317		2769.79	0.0043809		3359.79	-0.00525375		3949.78	0.00203148
410	0.28414364		1000	0.06252009		1590	0.0368517		2180	0.05778327		2769.99	0.0052148		3359.99	-0.00575142		3949.98	0.00125524
410.2	0.28471274		1000.2	0.06338501		1590.2	0.03657775		2180.2	0.05820513		2770.19	0.0037132		3360.19	-0.00500657		3950.18	0.00149555
410.4	0.28450085		1000.4	0.06340177		1590.4	0.03707693		2180.4	0.05894052		2770.39	0.0028079		3360.39	-0.00478537		3950.38	0.00142404
410.6	0.28477031		1000.6	0.06319947		1590.6	0.03676079		2180.6	0.05910161		2770.59	0.00263578		3360.59	-0.00542813		3950.58	0.0013979
410.8	0.28495333		1000.8	0.06184091		1590.8	0.03663136		2180.8	0.05943487		2770.79	0.00201397		3360.79	-0.00598176		3950.78	0.00166679
411	0.28557845		1001	0.0614573		1591	0.03639156		2181	0.05945639		2770.99	0.00154509		3360.99	-0.00652312		3950.98	0.0025433
411.2	0.28508868		1001.2	0.06152594		1591.2	0.036417		2181.2	0.05931105		2771.19	0.00127142		3361.19	-0.00682646		3951.18	0.00341741
411.4	0.28570443		1001.4	0.06206914		1591.4	0.03661941		2181.4	0.05932452		2771.39	0.00114875		3361.39	-0.00693858		3951.38	0.00386346
411.6	0.28571063		1001.6	0.06213159		1591.6	0.03612401		2181.6	0.05962813		2771.59	0.00093184		3361.59	-0.00797346		3951.58	0.00428878
411.8	0.28529808		1001.8	0.06172848		1591.8	0.03530039		2181.8	0.06045401		2771.79	0.00137358		3361.79	-0.00843049		3951.78	0.00403483
412	0.28422861		1002	0.0620444		1592	0.03466691		2182	0.06060602		2771.99	0.00152592		3361.99	-0.00914047		3951.98	0.00454703
412.2	0.28384947		1002.2	0.06237504		1592.2	0.03332686		2182.2	0.06026687		2772.19	0.00228817		3362.19	-0.00942837		3952.18	0.00485059
412.4	0.28300377		1002.4	0.06251342		1592.4	0.03326912		2182.4	0.05963552		2772.39	0.0020683		3362.39	-0.00971779		3952.38	0.0049354
412.6	0.28185014		1002.6	0.06251091		1592.6	0.03360017		2182.6	0.05932913		2772.59	0.00260771		3362.59	-0.0104888		3952.58	0.00423695
412.8	0.28233163		1002.8	0.06265685		1592.8	0.0333886		2182.8	0.05932202		2772.79	0.0017866		3362.79	-0.01124716		3952.78	0.00365823
413	0.28287794		1003	0.06276008		1593	0.0341073		2183	0.06020634		2772.99	0.00230699		3362.99	-0.01113513		3952.98	0.00360615
413.2	0.28285393		1003.2	0.0623844		1593.2	0.03415573		2183.2	0.05993948		2773.19	0.00383933		3363.19	-0.01212727		3953.18	0.00259519
413.4	0.2829627		1003.4	0.06249451		1593.4	0.03408571		2183.4	0.06000198		2773.39	0.0035293		3363.39	-0.01156292		3953.38	0.00248719
413.6	0.28253312		1003.6	0.06232081		1593.6	0.03514007		2183.6	0.05885751		2773.59	0.00388035		3363.59	-0.01108559		3953.58	0.00135077
413.8	0.28348244		1003.8	0.06201514		1593.8	0.03530994		2183.8	0.05898801		2773.79	0.00378009		3363.79	-0.01131773		3953.78	0.00205431
414	0.2844916		1004	0.06271423		1594	0.03534997		2184	0.0592627		2773.99	0.00286751		3363.99	-0.0114445		3953.98	0.0015033
414.2	0.28535298		1004.2	0.06181617		1594.2	0.03523148		2184.2	0.06011415		2774.19	0.00268376		3364.19	-0.00997871		3954.18	0.00173082
414.4	0.28654898		1004.4	0.06104464		1594.4	0.03585422		2184.4	0.06035538		2774.39	0.00326505		3364.39	-0.0097084		3954.38	0.00161221
414.6	0.28764185		1004.6	0.06096878		1594.6	0.03584968		2184.6	0.06019946		2774.59	0.00245196		3364.59	-0.00983403		3954.58	0.00268272
414.8	0.28901928		1004.8	0.06101093		1594.8	0.03683975		2184.8	0.05911998		2774.79	0.00174455		3364.79	-0.00952257		3954.78	0.00280183
415	0.28921463		1005	0.06158249		1595	0.03690086		2185	0.05912185		2774.99	0.00185084		3364.99	-0.00863111		3954.98	0.00325226
415.2	0.28958502		1005.2	0.06128563		1595.2	0.03682407		2185.2	0.05940934		2775.19	0.00193846		3365.19	-0.00767704		3955.18	0.00358408
415.4	0.29099147		1005.4	0.06146799		1595.4	0.03746657		2185.4	0.06087319		2775.39	0.00123667		3365.39	-0.00707382		3955.38	0.00317119
415.6	0.29011551		1005.6	0.06103458		1595.6	0.03697921		2185.6	0.06164292		2775.59	0.00141601		3365.59	-0.00793848		3955.58	0.00314459
415.8	0.28982213		1005.8	0.06106656		1595.8	0.03720682		2185.8	0.06192855		2775.79	0.00162392		3365.79	-0.00736306		3955.78	0.00337734
416	0.28982268		1006	0.06226753		1596	0.03706696		2186	0.06246155		2775.99	0.00162057		3365.99	-0.00740782		3955.98	0.00436168
416.2	0.28955695		1006.2	0.06230238		1596.2	0.0359254		2186.2	0.06179403		2776.19	0.0014113		3366.19	-0.00740941		3956.18	0.00450609
416.4	0.28895802		1006.4	0.06173011		1596.4	0.03653228		2186.4	0.06106392		2776.39	0.0008466		3366.39	-0.00737509		3956.38	0.00465852
416.6	0.28836869		1006.6	0.0615959		1596.6	0.0355823		2186.6	0.06060321		2776.59	0.00048288		3366.59	-0.00680504		3956.58	0.00407268
416.8	0.28966022		1006.8	0.06259019		1596.8	0.03475081		2186.8	0.06103042		2776.79	0.00041236		3366.79	-0.00692432		3956.78	0.00338678
417	0.28906864		1007	0.06287973		1597	0.03486693		2187	0.06064822		2776.99	0.00115108		3366.99	-0.00665309		3956.98	0.00364061
417.2	0.28883833		1007.2	0.06316404		1597.2	0.03478425		2187.2	0.06017306		2777.19	0.00051188		3367.19	-0.00703334		3957.18	0.00310252
417.4	0.28852567		1007.4	0.06295101		1597.4	0.0349189		2187.4	0.06065823		2777.39	-0.00042455		3367.39	-0.00692021		3957.38	0.00343533
417.6	0.28865685		1007.6	0.06235563		1597.6	0.03493906		2187.6	0.06030616		2777.59	0.00000558		3367.59	-0.00778833		3957.58	0.00360788
417.8	0.28876731		1007.8	0.06294459		1597.8	0.03535115		2187.8	0.0608034		2777.79	-0.0003158		3367.79	-0.00819851		3957.78	0.00442827
418	0.28817535		1008	0.0636608		1598	0.03603789		2188	0.06116827		2777.99	-0.00040035		3367.99	-0.00787913		3957.98	0.0031635
418.2	0.28775317		1008.2	0.0637588		1598.2	0.0366959		2188.2	0.06100802		2778.19	0.00079601		3368.19	-0.00698538		3958.18	0.00335188
418.4	0.28767614		1008.4	0.06439582		1598.4	0.03654986		2188.4	0.05973806		2778.39	0.0009228		3368.39	-0.00794307		3958.38	0.00343806
418.6	0.28818049		1008.6	0.06513842		1598.6	0.03732198		2188.6	0.05875679		2778.59	0.00037482		3368.59	-0.00867548		3958.58	0.00346472
418.8	0.28761269		1008.8	0.06541481		1598.8	0.03736525		2188.8	0.05790441		2778.79	0.00130471		3368.79	-0.00817126		3958.78	0.00294773
419	0.28791306		1009	0.06593463		1599	0.03729203		2189	0.05868502		2778.99	0.00300096		3368.99	-0.00818795		3958.98	0.00233284
419.2	0.28834686		1009.2	0.06576485		1599.2	0.03820448		2189.2	0.05849991		2779.19	0.00311275		3369.19	-0.00776191		3959.18	0.00186704
419.4	0.28889143		1009.4	0.06583803		1599.4	0.0397439		2189.4	0.05889743		2779.39	0.00321296		3369.39	-0.00801222		3959.38	0.00191814
419.6	0.28938413		1009.6	0.06542166		1599.6	0.03997458		2189.6	0.05941236		2779.59	0.00509037		3369.59	-0.0081794		3959.58	0.00206078
419.8	0.28985953		1009.8	0.06541438		1599.8	0.03983365		2189.8	0.059768		2779.79	0.00465323		3369.79	-0.00811636		3959.78	0.00262698
420	0.29068808		1010	0.06508568		1600	0.0389504		2190	0.05954682		2779.99	0.00457424		3369.99	-0.00788364		3959.98	0.00255818
420.2	0.29099483		1010.2	0.06450891		1600.2	0.03890609		2190.2	0.05895572		2780.19	0.00406382		3370.19	-0.00732195		3960.18	0.00304036
420.4	0.29211648		1010.4	0.06404064		1600.4	0.03808995		2190.4	0.05906509		2780.39	0.00429844		3370.39	-0.00679674		3960.38	0.00326231
420.6	0.29296377		1010.6	0.06477782		1600.6	0.03719544		2190.6	0.0591644		2780.59	0.0044498		3370.59	-0.00656228		3960.58	0.00338461
420.8	0.29362392		1010.8	0.06522322		1600.8	0.03671722		2190.8	0.05957041		2780.79	0.00353531		3370.79	-0.0069125		3960.78	0.00334369
421	0.29309889		1011	0.06512586		1601	0.03678329		2191	0.06026793		2780.99	0.00302492		3370.99	-0.00681136		3960.98	0.00381378
421.2	0.29420184		1011.2	0.06461108		1601.2	0.03670983		2191.2	0.06194583		2781.19	0.00194582		3371.19	-0.00778188		3961.18	0.00334207
421.4	0.29534087		1011.4	0.06431959		1601.4	0.03656681		2191.4	0.06267861		2781.39	0.00204668		3371.39	-0.0082738		3961.38	0.00417841
421.6	0.29519321		1011.6	0.06438089		1601.6	0.03684712		2191.6	0.06288784		2781.59	0.00099804		3371.59	-0.00824839		3961.58	0.0047772
421.8	0.29471557		1011.8	0.06469616		1601.8	0.03683858		2191.8	0.0634946		2781.79	0.0001842		3371.79	-0.00778667		3961.78	0.0042248
422	0.29386139		1012	0.06428883		1602	0.03700842		2192	0.06375918		2781.99	-0.0003721		3371.99	-0.00789825		3961.98	0.00414943
422.2	0.29403447		1012.2	0.06388788		1602.2	0.03721711		2192.2	0.06397528		2782.19	-0.00029928		3372.19	-0.00866187		3962.18	0.00443401
422.4	0.29415628		1012.4	0.06404112		1602.4	0.03679264		2192.4	0.06333832		2782.39	-0.00062719		3372.39	-0.00961823		3962.38	0.00407632
422.6	0.29490333		1012.6	0.06412183		1602.6	0.03711248		2192.6	0.06353857		2782.59	-0.00030745		3372.59	-0.0103328		3962.58	0.00414993
422.8	0.29423093		1012.8	0.06477046		1602.8	0.03689435		2192.8	0.06314738		2782.79	0.00071509		3372.79	-0.00972052		3962.78	0.00393171
423	0.29532222		1013	0.06549312		1603	0.03751812		2193	0.06266319		2782.99	0.001826		3372.99	-0.01011547		3962.98	0.00319334
423.2	0.29459632		1013.2	0.0660579		1603.2	0.03829134		2193.2	0.06289433		2783.19	0.00224788		3373.19	-0.00948968		3963.18	0.00358766
423.4	0.29533887		1013.4	0.06583349		1603.4	0.03901628		2193.4	0.06288787		2783.39	0.00326667		3373.39	-0.00964301		3963.38	0.00366137
423.6	0.29641261		1013.6	0.06537382		1603.6	0.03889682		2193.6	0.06313048		2783.59	0.00488772		3373.59	-0.00955431		3963.58	0.00364799
423.8	0.29575246		1013.8	0.06535362		1603.8	0.03846684		2193.8	0.06263321		2783.79	0.00476602		3373.79	-0.00901465		3963.78	0.00366933
424	0.2962385		1014	0.06544176		1604	0.03907372		2194	0.06165428		2783.99	0.00440468		3373.99	-0.00818309		3963.98	0.0032806
424.2	0.29609198		1014.2	0.06669127		1604.2	0.03963997		2194.2	0.06095297		2784.19	0.00463916		3374.19	-0.00736361		3964.18	0.00279581
424.4	0.29625171		1014.4	0.06640588		1604.4	0.03861843		2194.4	0.06041943		2784.39	0.00510538		3374.39	-0.00841987		3964.38	0.00209588
424.6	0.29581438		1014.6	0.0668957		1604.6	0.03954424		2194.6	0.06018002		2784.59	0.00444343		3374.59	-0.00960087		3964.58	0.00251729
424.8	0.29531815		1014.8	0.06709829		1604.8	0.03930004		2194.8	0.05984019		2784.79	0.00347185		3374.79	-0.0100215		3964.78	0.00240536
425	0.29563082		1015	0.06776198		1605	0.03878907		2195	0.05965318		2784.99	0.00325157		3374.99	-0.01034903		3964.98	0.00225923
425.2	0.29587047		1015.2	0.06707508		1605.2	0.03938712		2195.2	0.06034279		2785.19	0.00283801		3375.19	-0.01068123		3965.18	0.0014375
425.4	0.29615946		1015.4	0.06724491		1605.4	0.03928034		2195.4	0.0602456		2785.39	0.0018165		3375.39	-0.01028222		3965.38	0.00263921
425.6	0.29466078		1015.6	0.06663873		1605.6	0.03945872		2195.6	0.06103931		2785.59	-0.00001042		3375.59	-0.01008975		3965.58	0.00229889
425.8	0.29418533		1015.8	0.06715108		1605.8	0.03888443		2195.8	0.06147324		2785.79	-0.00087697		3375.79	-0.0102601		3965.78	0.00155248
426	0.2942273		1016	0.06695317		1606	0.03955396		2196	0.06232527		2785.99	-0.00130636		3375.99	-0.01094472		3965.98	0.00121019
426.2	0.29510013		1016.2	0.06701382		1606.2	0.04021915		2196.2	0.06299103		2786.19	-0.00149602		3376.19	-0.01139483		3966.18	0.00125529
426.4	0.29489972		1016.4	0.06709466		1606.4	0.04025094		2196.4	0.0631229		2786.39	-0.00146919		3376.39	-0.01135884		3966.38	0.00140656
426.6	0.29631871		1016.6	0.06673873		1606.6	0.03969606		2196.6	0.06368331		2786.59	-0.00136836		3376.59	-0.01169661		3966.58	0.00074712
426.8	0.2971307		1016.8	0.06721983		1606.8	0.04000183		2196.8	0.06435695		2786.79	-0.00042881		3376.79	-0.0112778		3966.78	0.00038272
427	0.29787904		1017	0.06721654		1607	0.0402142		2197	0.06434209		2786.99	0.00093164		3376.99	-0.01099814		3966.98	0.00047583
427.2	0.29804161		1017.2	0.06720699		1607.2	0.04014294		2197.2	0.06391649		2787.19	0.00127363		3377.19	-0.01069335		3967.18	0.00097466
427.4	0.29904438		1017.4	0.06685217		1607.4	0.04067697		2197.4	0.06303752		2787.39	0.00203003		3377.39	-0.01054543		3967.38	0.00153885
427.6	0.29898208		1017.6	0.06669653		1607.6	0.04054998		2197.6	0.06395448		2787.59	0.00244637		3377.59	-0.00976469		3967.58	0.00160916
427.8	0.29801536		1017.8	0.06649466		1607.8	0.04050918		2197.8	0.06349767		2787.79	0.00252208		3377.79	-0.00857629		3967.78	0.00175266
428	0.29853083		1018	0.06707729		1608	0.04153704		2198	0.06341972		2787.99	0.00164853		3377.99	-0.00828503		3967.98	0.00157852
428.2	0.29818489		1018.2	0.06743709		1608.2	0.04137173		2198.2	0.06361823		2788.19	0.00228146		3378.19	-0.00849829		3968.18	0.00159256
428.4	0.29799729		1018.4	0.06720598		1608.4	0.04063774		2198.4	0.06380714		2788.39	0.00314501		3378.39	-0.00955519		3968.38	0.00195932
428.6	0.29801521		1018.6	0.06825119		1608.6	0.04100782		2198.6	0.06391442		2788.59	0.00292183		3378.59	-0.00873355		3968.58	0.00286061
428.8	0.29747152		1018.8	0.06936521		1608.8	0.04054743		2198.8	0.06355436		2788.79	0.00337272		3378.79	-0.00761569		3968.78	0.00285894
429	0.29744868		1019	0.06989468		1609	0.04056998		2199	0.06370107		2788.99	0.00374135		3378.99	-0.0072561		3968.98	0.0029494
429.2	0.29727812		1019.2	0.06956784		1609.2	0.04112884		2199.2	0.06431195		2789.19	0.0030232		3379.19	-0.00649048		3969.18	0.00223776
429.4	0.29729968		1019.4	0.07038474		1609.4	0.04081496		2199.4	0.06458489		2789.39	0.00283755		3379.39	-0.00589156		3969.38	0.00292725
429.6	0.29613638		1019.6	0.07057547		1609.6	0.04106902		2199.6	0.06568485		2789.59	0.00295977		3379.59	-0.00613663		3969.58	0.00230233
429.8	0.2969142		1019.8	0.07163501		1609.8	0.04102769		2199.8	0.06561502		2789.79	0.00303575		3379.79	-0.0054825		3969.78	0.00248463
430	0.29718625		1020	0.07066769		1610	0.04147107		2200	0.06669241		2789.99	0.00329325		3379.99	-0.00533193		3969.98	0.00276695
430.2	0.29653849		1020.2	0.07005126		1610.2	0.04168263		2200.2	0.06674958		2790.19	0.0033849		3380.19	-0.00474811		3970.18	0.0032405
430.4	0.29629597		1020.4	0.06969642		1610.4	0.04190713		2200.4	0.06665079		2790.39	0.0033331		3380.39	-0.00541826		3970.38	0.00301867
430.6	0.29759779		1020.6	0.06942735		1610.6	0.04155303		2200.6	0.06678931		2790.59	0.00290924		3380.59	-0.00546609		3970.58	0.00277317
430.8	0.29769647		1020.8	0.06959469		1610.8	0.04178508		2200.8	0.06638448		2790.79	0.00386811		3380.79	-0.00562829		3970.78	0.00266784
431	0.29699852		1021	0.06953804		1611	0.04231284		2201	0.06570965		2790.99	0.00341704		3380.99	-0.00570771		3970.98	0.00340376
431.2	0.29696454		1021.2	0.06870647		1611.2	0.04127945		2201.2	0.06488001		2791.19	0.00286811		3381.19	-0.00688735		3971.18	0.00326613
431.4	0.29696005		1021.4	0.06890034		1611.4	0.04209993		2201.4	0.06456741		2791.39	0.00322826		3381.39	-0.00661326		3971.38	0.00331759
431.6	0.29674181		1021.6	0.06903726		1611.6	0.04195223		2201.6	0.0652924		2791.59	0.0025495		3381.59	-0.00672454		3971.58	0.00235011
431.8	0.29637697		1021.8	0.06929434		1611.8	0.04245823		2201.8	0.06478545		2791.79	0.00259151		3381.79	-0.00728624		3971.78	0.0017458
432	0.29689106		1022	0.06984532		1612	0.04272939		2202	0.06491016		2791.99	0.0016983		3381.99	-0.00826976		3971.98	0.00189524
432.2	0.29702219		1022.2	0.06955849		1612.2	0.04172807		2202.2	0.06530242		2792.19	0.00195255		3382.19	-0.00866845		3972.18	0.00239804
432.4	0.29711714		1022.4	0.06959321		1612.4	0.04110014		2202.4	0.0656359		2792.39	0.00161666		3382.39	-0.00822314		3972.38	0.00259912
432.6	0.29772056		1022.6	0.06990978		1612.6	0.04094672		2202.6	0.06513535		2792.59	0.00118786		3382.59	-0.00843596		3972.58	0.00290529
432.8	0.29852117		1022.8	0.06952566		1612.8	0.040595		2202.8	0.0651519		2792.79	0.00157843		3382.79	-0.00852249		3972.78	0.00252963
433	0.29956245		1023	0.06841156		1613	0.04005443		2203	0.06523788		2792.99	0.00147334		3382.99	-0.0086264		3972.98	0.00180618
433.2	0.3001125		1023.2	0.06786405		1613.2	0.03945978		2203.2	0.0661283		2793.19	0.00151396		3383.19	-0.00830776		3973.18	0.00111905
433.4	0.30130143		1023.4	0.0674154		1613.4	0.03927468		2203.4	0.06617891		2793.39	0.00185468		3383.39	-0.00898142		3973.38	0.00230623
433.6	0.30129653		1023.6	0.06743318		1613.6	0.03913128		2203.6	0.06616985		2793.59	0.00162972		3383.59	-0.00896414		3973.58	0.00250762
433.8	0.30271355		1023.8	0.06737859		1613.8	0.03874149		2203.8	0.06561977		2793.79	0.00145505		3383.79	-0.00846564		3973.78	0.00290641
434	0.30282665		1024	0.06704766		1614	0.03885095		2204	0.06583274		2793.99	0.00147565		3383.99	-0.00893955		3973.98	0.00303561
434.2	0.30300724		1024.2	0.06713416		1614.2	0.03890571		2204.2	0.06567707		2794.19	0.00119917		3384.19	-0.0092125		3974.18	0.00327449
434.4	0.30384779		1024.4	0.06778412		1614.4	0.03890995		2204.4	0.0658516		2794.39	0.0008874		3384.39	-0.00980645		3974.38	0.0040403
434.6	0.30498603		1024.6	0.06813876		1614.6	0.03954028		2204.6	0.06592297		2794.59	0.00069574		3384.59	-0.00957824		3974.58	0.00450503
434.8	0.30452866		1024.8	0.06859535		1614.8	0.04034426		2204.8	0.06641302		2794.79	0.000848		3384.79	-0.00960012		3974.78	0.00416131
435	0.30423635		1025	0.06923203		1615	0.0410815		2205	0.065705		2794.99	0.00054881		3384.99	-0.00986145		3974.98	0.00424889
435.2	0.30421851		1025.2	0.06937959		1615.2	0.04122964		2205.2	0.06513143		2795.19	0.00108593		3385.19	-0.01018261		3975.18	0.00271977
435.4	0.30391125		1025.4	0.07084936		1615.4	0.04228578		2205.4	0.06503702		2795.39	0.00134412		3385.39	-0.009228		3975.38	0.00200624
435.6	0.30349753		1025.6	0.07171456		1615.6	0.04271083		2205.6	0.06566784		2795.59	0.00127882		3385.59	-0.00991616		3975.58	0.00155853
435.8	0.30157307		1025.8	0.07256902		1615.8	0.04382417		2205.8	0.06569408		2795.79	0.00088189		3385.79	-0.01022202		3975.78	0.00206491
436	0.30164495		1026	0.07209051		1616	0.04370449		2206	0.0657882		2795.99	0.00089471		3385.99	-0.01064633		3975.98	0.00320219
436.2	0.30102669		1026.2	0.07295189		1616.2	0.04355118		2206.2	0.0665697		2796.19	0.00052641		3386.19	-0.01063019		3976.18	0.00319659
436.4	0.30082838		1026.4	0.07272149		1616.4	0.0435048		2206.4	0.06597127		2796.39	-0.00016687		3386.39	-0.00936773		3976.38	0.00327051
436.6	0.30083939		1026.6	0.07298099		1616.6	0.04361711		2206.6	0.0660864		2796.59	0.0010982		3386.59	-0.00969243		3976.58	0.00220451
436.8	0.30135855		1026.8	0.072404		1616.8	0.04298385		2206.8	0.06649945		2796.79	0.00095372		3386.79	-0.00841047		3976.78	0.00320974
437	0.30147229		1027	0.07274583		1617	0.04252567		2207	0.06620708		2796.99	0.00050494		3386.99	-0.00786701		3976.98	0.00330266
437.2	0.30192605		1027.2	0.07335137		1617.2	0.04213733		2207.2	0.06689209		2797.19	0.00017189		3387.19	-0.00762665		3977.18	0.00389765
437.4	0.30249428		1027.4	0.07330165		1617.4	0.04194867		2207.4	0.06624696		2797.39	0.00043739		3387.39	-0.00771711		3977.38	0.00483441
437.6	0.30263974		1027.6	0.07382801		1617.6	0.04155821		2207.6	0.06572902		2797.59	0.00094886		3387.59	-0.00693301		3977.58	0.00470983
437.8	0.3040944		1027.8	0.07321379		1617.8	0.04076892		2207.8	0.06546257		2797.79	0.00096835		3387.79	-0.00712168		3977.78	0.00425446
438	0.30390302		1028	0.07313894		1618	0.04084588		2208	0.06556487		2797.99	0.00124097		3387.99	-0.00716045		3977.98	0.00477704
438.2	0.30372189		1028.2	0.07325444		1618.2	0.04046495		2208.2	0.06567515		2798.19	0.00156056		3388.19	-0.00684816		3978.18	0.00495787
438.4	0.3041504		1028.4	0.07367508		1618.4	0.04062918		2208.4	0.0658919		2798.39	0.00243629		3388.39	-0.00717323		3978.38	0.00479914
438.6	0.30442409		1028.6	0.07388296		1618.6	0.04146881		2208.6	0.0654991		2798.59	0.00227363		3388.59	-0.00710599		3978.58	0.00436917
438.8	0.30393226		1028.8	0.07449752		1618.8	0.04227293		2208.8	0.06639287		2798.79	0.0031224		3388.79	-0.00685958		3978.78	0.00402033
439	0.3048059		1029	0.07433795		1619	0.04193305		2209	0.06570981		2798.99	0.00402759		3388.99	-0.00748653		3978.98	0.00367789
439.2	0.30492755		1029.2	0.07398399		1619.2	0.041922		2209.2	0.06640468		2799.19	0.00520818		3389.19	-0.00791862		3979.18	0.00334358
439.4	0.30510447		1029.4	0.07366283		1619.4	0.04217951		2209.4	0.06631038		2799.39	0.00553572		3389.39	-0.00826955		3979.38	0.00407945
439.6	0.30493263		1029.6	0.07368569		1619.6	0.04194312		2209.6	0.06672331		2799.59	0.0052893		3389.59	-0.00957929		3979.58	0.00464734
439.8	0.30382357		1029.8	0.07343678		1619.8	0.04174859		2209.8	0.06727327		2799.79	0.00445791		3389.79	-0.01018251		3979.78	0.00488857
440	0.30442319		1030	0.07307606		1620	0.04144432		2210	0.06758394		2799.99	0.00357889		3389.99	-0.01131926		3979.98	0.00475598
440.2	0.30441148		1030.2	0.07425409		1620.2	0.04102278		2210.2	0.06761942		2800.19	0.00150821		3390.19	-0.01126065		3980.18	0.00437661
440.4	0.30495673		1030.4	0.07319929		1620.4	0.04042096		2210.4	0.06729866		2800.39	0.00061047		3390.39	-0.01118466		3980.38	0.00490799
440.6	0.30544848		1030.6	0.07360699		1620.6	0.04078789		2210.6	0.06825679		2800.59	0.00053171		3390.59	-0.01134343		3980.58	0.00487548
440.8	0.30676159		1030.8	0.07345513		1620.8	0.04011403		2210.8	0.06794156		2800.79	-0.00153367		3390.79	-0.01113602		3980.78	0.00609613
441	0.30781118		1031	0.07375064		1621	0.04027664		2211	0.06777805		2800.99	-0.00252644		3390.99	-0.01155761		3980.98	0.00494308
441.2	0.30798957		1031.2	0.0726775		1621.2	0.03936567		2211.2	0.06838501		2801.19	-0.0030025		3391.19	-0.01146748		3981.18	0.00438435
441.4	0.30805598		1031.4	0.07226266		1621.4	0.03916654		2211.4	0.06789144		2801.39	-0.00270645		3391.39	-0.01197422		3981.38	0.00424753
441.6	0.30844568		1031.6	0.07153197		1621.6	0.0392522		2211.6	0.06762267		2801.59	-0.00310909		3391.59	-0.01098657		3981.58	0.00359033
441.8	0.30786296		1031.8	0.07157678		1621.8	0.03937194		2211.8	0.06814987		2801.79	-0.00208761		3391.79	-0.01102675		3981.78	0.00339693
442	0.30726405		1032	0.07165326		1622	0.0402855		2212	0.06863861		2801.99	-0.00171534		3391.99	-0.0101537		3981.98	0.00300908
442.2	0.30708016		1032.2	0.07181175		1622.2	0.04081296		2212.2	0.06896902		2802.19	-0.00101448		3392.19	-0.00973191		3982.18	0.0024331
442.4	0.30754442		1032.4	0.07260353		1622.4	0.04129337		2212.4	0.06930924		2802.39	-0.00025868		3392.39	-0.01009395		3982.38	0.00227541
442.6	0.30771221		1032.6	0.07287757		1622.6	0.04244429		2212.6	0.06912032		2802.59	0.00030569		3392.59	-0.00960807		3982.58	0.00199157
442.8	0.30719843		1032.8	0.07341025		1622.8	0.04292391		2212.8	0.06968415		2802.79	0.00185954		3392.79	-0.00918487		3982.78	0.00209123
443	0.3082148		1033	0.07370969		1623	0.04230434		2213	0.06904925		2802.99	0.00225723		3392.99	-0.00967366		3982.98	0.00252624
443.2	0.30744615		1033.2	0.07395236		1623.2	0.04245629		2213.2	0.06861518		2803.19	0.00253221		3393.19	-0.01000824		3983.18	0.00263703
443.4	0.30745249		1033.4	0.07447519		1623.4	0.04288953		2213.4	0.06822268		2803.39	0.00228248		3393.39	-0.00936892		3983.38	0.00254145
443.6	0.30716432		1033.6	0.07555633		1623.6	0.04254575		2213.6	0.06880041		2803.59	0.00200493		3393.59	-0.00923912		3983.58	0.002351
443.8	0.30681302		1033.8	0.07611915		1623.8	0.04235681		2213.8	0.06818437		2803.79	0.00115118		3393.79	-0.00864532		3983.78	0.00284104
444	0.30689959		1034	0.07587896		1624	0.04194183		2214	0.06754676		2803.99	0.00029748		3393.99	-0.00841177		3983.98	0.0032797
444.2	0.30671667		1034.2	0.0764506		1624.2	0.04109087		2214.2	0.06709833		2804.19	0.0001751		3394.19	-0.00780495		3984.18	0.00372366
444.4	0.30678463		1034.4	0.0758146		1624.4	0.04072788		2214.4	0.06571696		2804.39	0.00077291		3394.39	-0.00743361		3984.38	0.00409216
444.6	0.30679976		1034.6	0.07582239		1624.6	0.04158782		2214.6	0.06529087		2804.59	0.00026312		3394.59	-0.00699766		3984.58	0.00432977
444.8	0.30682902		1034.8	0.07565861		1624.8	0.04109674		2214.8	0.06539867		2804.79	-0.0001963		3394.79	-0.00740275		3984.78	0.00425056
445	0.30650805		1035	0.07447494		1625	0.04097363		2215	0.06492263		2804.99	-0.00007531		3394.99	-0.00777251		3984.98	0.00397075
445.2	0.3057834		1035.2	0.07376745		1625.2	0.04071115		2215.2	0.06539952		2805.19	0.00021877		3395.19	-0.00791993		3985.18	0.00391512
445.4	0.30588123		1035.4	0.07385621		1625.4	0.0410491		2215.4	0.06604313		2805.39	0.0006139		3395.39	-0.00813991		3985.38	0.00467261
445.6	0.30472322		1035.6	0.07321669		1625.6	0.04190019		2215.6	0.06690752		2805.59	0.00196832		3395.59	-0.00784623		3985.58	0.0051562
445.8	0.304168		1035.8	0.07340422		1625.8	0.04203076		2215.8	0.06798128		2805.79	0.00287118		3395.79	-0.00797041		3985.78	0.00510732
446	0.30408741		1036	0.07198597		1626	0.04279695		2216	0.067984		2805.99	0.00296204		3395.99	-0.00907681		3985.98	0.00520686
446.2	0.30438848		1036.2	0.07182922		1626.2	0.04296453		2216.2	0.06880415		2806.19	0.00388699		3396.19	-0.00989466		3986.18	0.00601345
446.4	0.30472929		1036.4	0.07198235		1626.4	0.04334906		2216.4	0.06962587		2806.39	0.00468014		3396.39	-0.01054798		3986.38	0.00566339
446.6	0.30492862		1036.6	0.07155682		1626.6	0.04397922		2216.6	0.07054922		2806.59	0.00475239		3396.59	-0.01092847		3986.58	0.00472113
446.8	0.30513084		1036.8	0.07200897		1626.8	0.04371886		2216.8	0.0711498		2806.79	0.00458088		3396.79	-0.0111316		3986.78	0.00396513
447	0.30653228		1037	0.07311145		1627	0.04425621		2217	0.07145147		2806.99	0.00453087		3396.99	-0.01085843		3986.98	0.00364819
447.2	0.30689913		1037.2	0.07292749		1627.2	0.04464122		2217.2	0.07097849		2807.19	0.00446527		3397.19	-0.01007091		3987.18	0.00288468
447.4	0.30806255		1037.4	0.07337764		1627.4	0.04489771		2217.4	0.07030144		2807.39	0.00428638		3397.39	-0.00873777		3987.38	0.00257526
447.6	0.30892653		1037.6	0.07364622		1627.6	0.04432545		2217.6	0.06983758		2807.59	0.00403411		3397.59	-0.00864807		3987.58	0.00273446
447.8	0.30965819		1037.8	0.07312834		1627.8	0.04281363		2217.8	0.06909498		2807.79	0.00324728		3397.79	-0.00822885		3987.78	0.00352433
448	0.30954975		1038	0.07258516		1628	0.04214892		2218	0.06878061		2807.99	0.00334749		3397.99	-0.00866917		3987.98	0.00262588
448.2	0.30921702		1038.2	0.07302685		1628.2	0.0421447		2218.2	0.06862693		2808.19	0.00371972		3398.19	-0.00890403		3988.18	0.00218839
448.4	0.30968552		1038.4	0.07257439		1628.4	0.04149104		2218.4	0.06850578		2808.39	0.00276168		3398.39	-0.00905572		3988.38	0.00211564
448.6	0.3093231		1038.6	0.07211379		1628.6	0.04129027		2218.6	0.06935337		2808.59	0.00119515		3398.59	-0.00978003		3988.58	0.00269079
448.8	0.30957769		1038.8	0.07131811		1628.8	0.04012963		2218.8	0.07017461		2808.79	0.00062349		3398.79	-0.00973869		3988.78	0.00218862
449	0.31035128		1039	0.0710713		1629	0.04009311		2219	0.07010154		2808.99	0.00110322		3398.99	-0.01046762		3988.98	0.00217391
449.2	0.31026248		1039.2	0.0712498		1629.2	0.03972368		2219.2	0.07054504		2809.19	0.00133877		3399.19	-0.01087156		3989.18	0.00278986
449.4	0.30965905		1039.4	0.07136983		1629.4	0.04003082		2219.4	0.07051487		2809.39	0.00088073		3399.39	-0.01097445		3989.38	0.00346632
449.6	0.30894794		1039.6	0.0714281		1629.6	0.04093782		2219.6	0.07086018		2809.59	0.00117979		3399.59	-0.01153945		3989.58	0.00388244
449.8	0.30940498		1039.8	0.07197133		1629.8	0.04108568		2219.8	0.07077335		2809.79	0.00146098		3399.79	-0.01167898		3989.78	0.00425659
450	0.30990134		1040	0.07249759		1630	0.04237558		2220	0.07049788		2809.99	0.00175582		3399.99	-0.0127339		3989.98	0.00529648
450.2	0.30982312		1040.2	0.07347466		1630.2	0.0427036		2220.2	0.07128978		2810.19	0.00199722		3400.19	-0.01237358		3990.18	0.00527706
450.4	0.30995591		1040.4	0.07432123		1630.4	0.04356577		2220.4	0.07172363		2810.39	0.00192245		3400.39	-0.01218622		3990.38	0.00462953
450.6	0.31054675		1040.6	0.07512622		1630.6	0.04444843		2220.6	0.07197896		2810.59	0.00178485		3400.59	-0.01161714		3990.58	0.0045175
450.8	0.31090676		1040.8	0.07666764		1630.8	0.04480753		2220.8	0.0717934		2810.79	0.00228286		3400.79	-0.01058349		3990.78	0.00509715
451	0.31100585		1041	0.07733224		1631	0.04541905		2221	0.07146396		2810.99	0.002448		3400.99	-0.00975651		3990.98	0.0062488
451.2	0.31154642		1041.2	0.07722184		1631.2	0.04503712		2221.2	0.0696939		2811.19	0.0018572		3401.19	-0.00933723		3991.18	0.00659873
451.4	0.31194644		1041.4	0.07803439		1631.4	0.04466649		2221.4	0.06987205		2811.39	0.00098382		3401.39	-0.00916038		3991.38	0.00652278
451.6	0.31194443		1041.6	0.07874456		1631.6	0.04426044		2221.6	0.07001479		2811.59	0.0006971		3401.59	-0.00922712		3991.58	0.00635239
451.8	0.31191798		1041.8	0.0787812		1631.8	0.04309014		2221.8	0.069764		2811.79	0.00066505		3401.79	-0.00927482		3991.78	0.00593478
452	0.31175518		1042	0.07936682		1632	0.04386858		2222	0.07051624		2811.99	0.00074254		3401.99	-0.01000147		3991.98	0.00470188
452.2	0.31177625		1042.2	0.07918531		1632.2	0.04354775		2222.2	0.07138888		2812.19	0.00022171		3402.19	-0.01067159		3992.18	0.00502092
452.4	0.31253778		1042.4	0.0786443		1632.4	0.04331025		2222.4	0.07278645		2812.39	-0.00062963		3402.39	-0.01122839		3992.38	0.00569512
452.6	0.31266318		1042.6	0.0785377		1632.6	0.04372771		2222.6	0.07316609		2812.59	-0.00010902		3402.59	-0.0115788		3992.58	0.00566499
452.8	0.31237045		1042.8	0.07803046		1632.8	0.04357708		2222.8	0.07351028		2812.79	0.00034473		3402.79	-0.01207619		3992.78	0.00508168
453	0.31235345		1043	0.07801553		1633	0.04372297		2223	0.07343266		2812.99	0.00140223		3402.99	-0.01197626		3992.98	0.00467073
453.2	0.31151394		1043.2	0.07768686		1633.2	0.04441412		2223.2	0.07417991		2813.19	0.00102363		3403.19	-0.01166556		3993.18	0.00460683
453.4	0.31144984		1043.4	0.07776763		1633.4	0.04511084		2223.4	0.07378939		2813.39	0.00124424		3403.39	-0.01159045		3993.38	0.00418115
453.6	0.31234351		1043.6	0.07772401		1633.6	0.04586871		2223.6	0.07415399		2813.59	0.0015597		3403.59	-0.01188716		3993.58	0.00360203
453.8	0.31237321		1043.8	0.07846299		1633.8	0.04575092		2223.8	0.07333308		2813.79	0.00266099		3403.79	-0.01152723		3993.78	0.00362723
454	0.31280149		1044	0.07809582		1634	0.04593009		2224	0.07286781		2813.99	0.0029041		3403.99	-0.0115759		3993.98	0.00326157
454.2	0.31214726		1044.2	0.07816876		1634.2	0.0461373		2224.2	0.07247292		2814.19	0.00260617		3404.19	-0.01093295		3994.18	0.00322171
454.4	0.31248209		1044.4	0.0788003		1634.4	0.04648555		2224.4	0.07209816		2814.39	0.00297675		3404.39	-0.01091571		3994.38	0.00287636
454.6	0.31331454		1044.6	0.07825836		1634.6	0.04644617		2224.6	0.07165524		2814.59	0.00315678		3404.59	-0.01081204		3994.58	0.00322885
454.8	0.31303338		1044.8	0.07828597		1634.8	0.04522792		2224.8	0.0711329		2814.79	0.00347757		3404.79	-0.01074195		3994.78	0.00371609
455	0.31260513		1045	0.07806046		1635	0.0452903		2225	0.07004158		2814.99	0.00247315		3404.99	-0.01062955		3994.98	0.00413169
455.2	0.31272567		1045.2	0.07848291		1635.2	0.04459675		2225.2	0.06900788		2815.19	0.00176891		3405.19	-0.0101347		3995.18	0.00338979
455.4	0.31304637		1045.4	0.07879178		1635.4	0.04369799		2225.4	0.06990554		2815.39	0.00093505		3405.39	-0.01026084		3995.38	0.0030425
455.6	0.31300327		1045.6	0.07900991		1635.6	0.04352837		2225.6	0.06945762		2815.59	0.0009779		3405.59	-0.01005405		3995.58	0.00228741
455.8	0.31300948		1045.8	0.07882626		1635.8	0.04337677		2225.8	0.0703035		2815.79	0.00070284		3405.79	-0.01009361		3995.78	0.00217072
456	0.31259199		1046	0.07879055		1636	0.04322239		2226	0.07185656		2815.99	0.00047372		3405.99	-0.0111887		3995.98	0.00210041
456.2	0.31228461		1046.2	0.07842186		1636.2	0.04192981		2226.2	0.0724712		2816.19	0.00036153		3406.19	-0.01194462		3996.18	0.00181404
456.4	0.31235583		1046.4	0.07891801		1636.4	0.04182305		2226.4	0.07347542		2816.39	0.00093958		3406.39	-0.01196342		3996.38	0.0013548
456.6	0.31248653		1046.6	0.07879921		1636.6	0.04198863		2226.6	0.07377207		2816.59	0.00127893		3406.59	-0.01143912		3996.58	0.00143728
456.8	0.31211329		1046.8	0.07778457		1636.8	0.04251004		2226.8	0.07513394		2816.79	0.0010767		3406.79	-0.01168923		3996.78	0.00206625
457	0.31277514		1047	0.07750741		1637	0.04305617		2227	0.07636964		2816.99	0.00118609		3406.99	-0.01092913		3996.98	0.00184233
457.2	0.31318438		1047.2	0.07697487		1637.2	0.04310606		2227.2	0.07714523		2817.19	0.00072725		3407.19	-0.01147162		3997.18	0.00230231
457.4	0.31462959		1047.4	0.07691568		1637.4	0.04275652		2227.4	0.07675433		2817.39	0.00144495		3407.39	-0.0116794		3997.38	0.00274065
457.6	0.31594421		1047.6	0.07734555		1637.6	0.04265296		2227.6	0.07712083		2817.59	0.00140704		3407.59	-0.01131863		3997.58	0.00241097
457.8	0.31640063		1047.8	0.07729042		1637.8	0.04282829		2227.8	0.07709622		2817.79	0.0027523		3407.79	-0.01123838		3997.78	0.00254891
458	0.31759871		1048	0.07709778		1638	0.04331795		2228	0.07699783		2817.99	0.00221837		3407.99	-0.01120345		3997.98	0.00223219
458.2	0.31802364		1048.2	0.07785863		1638.2	0.04359419		2228.2	0.07664954		2818.19	0.00238048		3408.19	-0.01062065		3998.18	0.0024192
458.4	0.31913465		1048.4	0.07767889		1638.4	0.0436731		2228.4	0.07646969		2818.39	0.00301448		3408.39	-0.01158695		3998.38	0.00240657
458.6	0.31946738		1048.6	0.07700155		1638.6	0.04361711		2228.6	0.07584223		2818.59	0.00279293		3408.59	-0.01153995		3998.58	0.00299298
458.8	0.31881292		1048.8	0.07732879		1638.8	0.04458814		2228.8	0.07561867		2818.79	0.00350314		3408.79	-0.01049365		3998.78	0.003337
459	0.31857991		1049	0.07713148		1639	0.04593402		2229	0.07440324		2818.99	0.00325474		3408.99	-0.01000296		3998.98	0.00445224
459.2	0.31830146		1049.2	0.07756827		1639.2	0.04634348		2229.2	0.07345921		2819.19	0.00335511		3409.19	-0.01061234		3999.18	0.00426057
459.4	0.31799549		1049.4	0.07757951		1639.4	0.04659767		2229.4	0.07371401		2819.39	0.00317323		3409.39	-0.01142992		3999.38	0.00479394
459.6	0.31690372		1049.6	0.0782391		1639.6	0.04756423		2229.6	0.07276075		2819.59	0.00318275		3409.59	-0.01123259		3999.58	0.00474222
459.8	0.31633449		1049.8	0.07793892		1639.8	0.04788687		2229.8	0.07250629		2819.79	0.00264934		3409.79	-0.01143032		3999.78	0.00472249
460	0.31532108		1050	0.07817138		1640	0.04651257		2230	0.07231496		2819.99	0.00291045		3409.99	-0.01232511		3999.98	0.00434227
460.2	0.31491042		1050.2	0.07813953		1640.2	0.046836		2230.2	0.07209664		2820.19	0.00334862		3410.19	-0.0121556		4000.18	0.00374795
460.4	0.31444559		1050.4	0.07842819		1640.4	0.04713629		2230.4	0.07145071		2820.39	0.0031881		3410.39	-0.01155613		4000.38	0.00436269
460.6	0.31506272		1050.6	0.07769329		1640.6	0.04871762		2230.6	0.07189002		2820.59	0.00337169		3410.59	-0.0111474		4000.58	0.00529593
460.8	0.31492687		1050.8	0.07714338		1640.8	0.04969161		2230.8	0.07241056		2820.79	0.00284951		3410.79	-0.01163469		4000.78	0.00617616
461	0.31509728		1051	0.07735003		1641	0.04917927		2231	0.07227954		2820.99	0.00216494		3410.99	-0.01100471		4000.98	0.00604255
461.2	0.31553176		1051.2	0.07733162		1641.2	0.04840744		2231.2	0.07269688		2821.19	0.00171738		3411.19	-0.01191592		4001.18	0.00552691
461.4	0.31641808		1051.4	0.07806372		1641.4	0.04803713		2231.4	0.07267572		2821.39	0.00269668		3411.39	-0.01145043		4001.38	0.00466009
461.6	0.31645507		1051.6	0.07762673		1641.6	0.04760682		2231.6	0.07328445		2821.59	0.00278969		3411.59	-0.01067656		4001.58	0.00429824
461.8	0.31700799		1051.8	0.07653816		1641.8	0.04794424		2231.8	0.07387068		2821.79	0.00221284		3411.79	-0.0112851		4001.78	0.00382576
462	0.31788734		1052	0.07724094		1642	0.04732809		2232	0.0741917		2821.99	0.00125468		3411.99	-0.01076464		4001.98	0.00334538
462.2	0.31839483		1052.2	0.07715697		1642.2	0.04667605		2232.2	0.07455705		2822.19	0.0008574		3412.19	-0.01035062		4002.18	0.00300177
462.4	0.31911169		1052.4	0.07626862		1642.4	0.04680987		2232.4	0.07566256		2822.39	0.00095118		3412.39	-0.01057101		4002.38	0.00233592
462.6	0.31890696		1052.6	0.07580574		1642.6	0.04651304		2232.6	0.07560513		2822.59	0.00087988		3412.59	-0.0098204		4002.58	0.00278319
462.8	0.31899187		1052.8	0.07682674		1642.8	0.04683136		2232.8	0.07586481		2822.79	0.00067908		3412.79	-0.00874999		4002.78	0.00282221
463	0.31887278		1053	0.07632409		1643	0.04597214		2233	0.07494643		2822.99	0.00015099		3412.99	-0.00916167		4002.98	0.00259223
463.2	0.31890819		1053.2	0.0772929		1643.2	0.04681101		2233.2	0.07480523		2823.19	0.00030701		3413.19	-0.00997857		4003.18	0.00240975
463.4	0.31900726		1053.4	0.07771703		1643.4	0.04646755		2233.4	0.07476221		2823.39	-0.00022508		3413.39	-0.00966944		4003.38	0.00318411
463.6	0.31941878		1053.6	0.0781519		1643.6	0.04657299		2233.6	0.07396144		2823.59	-0.00033486		3413.59	-0.00953693		4003.58	0.00343639
463.8	0.31976946		1053.8	0.07925361		1643.8	0.04685965		2233.8	0.0742852		2823.79	-0.00035942		3413.79	-0.00988875		4003.78	0.00313447
464	0.31927656		1054	0.07987085		1644	0.04620487		2234	0.07520816		2823.99	0.00040237		3413.99	-0.01064214		4003.98	0.00325989
464.2	0.31951025		1054.2	0.07994419		1644.2	0.04633507		2234.2	0.07523911		2824.19	0.00136689		3414.19	-0.0107799		4004.18	0.00280716
464.4	0.31940783		1054.4	0.08070808		1644.4	0.04558256		2234.4	0.07469704		2824.39	0.00120394		3414.39	-0.01032514		4004.38	0.0030804
464.6	0.31981614		1054.6	0.08078253		1644.6	0.04669537		2234.6	0.07472135		2824.59	0.00129417		3414.59	-0.01036334		4004.58	0.00296711
464.8	0.31966455		1054.8	0.08108541		1644.8	0.04727492		2234.8	0.07462765		2824.79	0.00091921		3414.79	-0.01093338		4004.78	0.00346593
465	0.3201949		1055	0.08143677		1645	0.04725751		2235	0.07412484		2824.99	0.00121215		3414.99	-0.01087643		4004.98	0.00299789
465.2	0.31988509		1055.2	0.08143149		1645.2	0.04719054		2235.2	0.07417498		2825.19	0.00214076		3415.19	-0.01184425		4005.18	0.00237987
465.4	0.32000678		1055.4	0.08122127		1645.4	0.04754887		2235.4	0.07273319		2825.39	0.0025254		3415.39	-0.01129721		4005.38	0.00270788
465.6	0.319987		1055.6	0.08087927		1645.6	0.04821644		2235.6	0.07304891		2825.59	0.00192395		3415.59	-0.0120385		4005.58	0.00308244
465.8	0.32001087		1055.8	0.08070098		1645.8	0.04887907		2235.8	0.07329083		2825.79	0.00161179		3415.79	-0.01331816		4005.78	0.00324454
466	0.32035014		1056	0.08118367		1646	0.04931912		2236	0.07273663		2825.99	0.00144469		3415.99	-0.01286877		4005.98	0.00271366
466.2	0.32047156		1056.2	0.07991041		1646.2	0.05028249		2236.2	0.07259798		2826.19	0.00149346		3416.19	-0.01309408		4006.18	0.00251721
466.4	0.32111066		1056.4	0.07939856		1646.4	0.05039424		2236.4	0.0726103		2826.39	0.00261339		3416.39	-0.01327015		4006.38	0.00253533
466.6	0.32108926		1056.6	0.07969486		1646.6	0.04918829		2236.6	0.07178567		2826.59	0.00232401		3416.59	-0.01307627		4006.58	0.00311914
466.8	0.32092641		1056.8	0.07981439		1646.8	0.04892994		2236.8	0.07193451		2826.79	0.00237151		3416.79	-0.01310819		4006.78	0.00277443
467	0.3212413		1057	0.07859198		1647	0.04824912		2237	0.07192357		2826.99	0.00315252		3416.99	-0.01287482		4006.98	0.00258991
467.2	0.32208119		1057.2	0.07888591		1647.2	0.04932002		2237.2	0.07195287		2827.19	0.00379718		3417.19	-0.01239784		4007.18	0.0034661
467.4	0.322184		1057.4	0.07838941		1647.4	0.04845332		2237.4	0.07177873		2827.39	0.00300042		3417.39	-0.01177394		4007.38	0.00387468
467.6	0.32289154		1057.6	0.07811097		1647.6	0.04799296		2237.6	0.07259499		2827.59	0.00306819		3417.59	-0.01224963		4007.58	0.0037838
467.8	0.32271962		1057.8	0.07832022		1647.8	0.04806643		2237.8	0.07356079		2827.79	0.00307234		3417.79	-0.0119278		4007.78	0.00309593
468	0.32267584		1058	0.07748399		1648	0.04720129		2238	0.07443864		2827.99	0.00307472		3417.99	-0.01159878		4007.98	0.00289661
468.2	0.32291077		1058.2	0.07745132		1648.2	0.0466618		2238.2	0.07508279		2828.19	0.00291056		3418.19	-0.01092223		4008.18	0.00270327
468.4	0.32269574		1058.4	0.07773509		1648.4	0.0463649		2238.4	0.07552253		2828.39	0.00223089		3418.39	-0.01025593		4008.38	0.00308996
468.6	0.32311704		1058.6	0.07774764		1648.6	0.04674114		2238.6	0.07604324		2828.59	0.00167123		3418.59	-0.01012786		4008.58	0.00343025
468.8	0.32343893		1058.8	0.07794572		1648.8	0.04682489		2238.8	0.07670113		2828.79	0.00144576		3418.79	-0.01023577		4008.78	0.00413848
469	0.32376114		1059	0.07829174		1649	0.04644351		2239	0.07698784		2828.99	0.00116349		3418.99	-0.00994225		4008.98	0.00450548
469.2	0.32334493		1059.2	0.07888891		1649.2	0.04631978		2239.2	0.07777596		2829.19	0.00070245		3419.19	-0.01026463		4009.18	0.00500229
469.4	0.3234671		1059.4	0.07959215		1649.4	0.04659158		2239.4	0.07805092		2829.39	-0.00016408		3419.39	-0.01050577		4009.38	0.00588355
469.6	0.32335952		1059.6	0.08008075		1649.6	0.04666398		2239.6	0.07890587		2829.59	-0.00046197		3419.59	-0.01144553		4009.58	0.00638443
469.8	0.32314984		1059.8	0.08037258		1649.8	0.04693111		2239.8	0.07921899		2829.79	-0.00043297		3419.79	-0.0119797		4009.78	0.00740172
470	0.32314984		1059.99	0.08037258		1650	0.04693111		2240	0.07921899		2829.99	-0.00043297		3419.98	-0.0119797		4009.98	0.00740172
470.2	0.32173389		1060.19	0.08118283		1650.2	0.04774437		2240.2	0.07849629		2830.19	-0.00127665		3420.18	-0.01217341		4010.18	0.00746169
470.4	0.32119547		1060.39	0.081203		1650.4	0.04771152		2240.4	0.07744212		2830.39	-0.00169456		3420.38	-0.01214881		4010.38	0.00739896
470.6	0.32041918		1060.59	0.08132326		1650.6	0.04744111		2240.6	0.07677471		2830.59	-0.00220244		3420.58	-0.01251079		4010.58	0.00627379
470.8	0.31918575		1060.79	0.08151933		1650.8	0.04708576		2240.8	0.07602599		2830.79	-0.00264388		3420.78	-0.01304938		4010.78	0.00575288
471	0.31876182		1060.99	0.08179113		1651	0.04671005		2241	0.07524171		2830.99	-0.00339447		3420.98	-0.01327848		4010.98	0.00580384
471.2	0.31801601		1061.19	0.08209277		1651.2	0.04639873		2241.2	0.07379954		2831.19	-0.00445997		3421.18	-0.01400071		4011.18	0.0055175
471.4	0.31748791		1061.39	0.08161981		1651.4	0.0456168		2241.4	0.07308198		2831.39	-0.00547134		3421.38	-0.01434191		4011.38	0.00468445
471.6	0.31704416		1061.59	0.08093562		1651.6	0.04504822		2241.6	0.07161152		2831.59	-0.00517682		3421.58	-0.01430902		4011.58	0.00454591
471.8	0.31693515		1061.79	0.08129201		1651.8	0.04391431		2241.8	0.07047897		2831.79	-0.00512508		3421.78	-0.014498		4011.78	0.00388548
472	0.31660308		1061.99	0.08035511		1652	0.0416358		2242	0.07021659		2831.99	-0.00542122		3421.98	-0.01498604		4011.98	0.00411618
472.2	0.31738414		1062.19	0.07930556		1652.2	0.03939472		2242.2	0.06957814		2832.19	-0.00542664		3422.18	-0.01536526		4012.18	0.00412739
472.4	0.31760504		1062.39	0.07800884		1652.4	0.03848642		2242.4	0.0685579		2832.39	-0.00508406		3422.38	-0.01486348		4012.38	0.00372369
472.6	0.31847834		1062.59	0.07764353		1652.6	0.0373658		2242.6	0.06819146		2832.59	-0.00446084		3422.58	-0.01500276		4012.58	0.00327857
472.8	0.31853236		1062.79	0.07702288		1652.8	0.03707868		2242.8	0.06832013		2832.79	-0.00527701		3422.78	-0.0151752		4012.78	0.00242075
473	0.31874097		1062.99	0.07609035		1653	0.0368416		2243	0.06819834		2832.99	-0.00597945		3422.98	-0.0159781		4012.98	0.00309797
473.2	0.3194349		1063.19	0.07557395		1653.2	0.03681522		2243.2	0.06920546		2833.19	-0.00492657		3423.18	-0.01635446		4013.18	0.00297182
473.4	0.31899267		1063.39	0.07491647		1653.4	0.03577585		2243.4	0.06947546		2833.39	-0.00514061		3423.38	-0.01627317		4013.38	0.00289291
473.6	0.31887238		1063.59	0.07521522		1653.6	0.03524273		2243.6	0.06954775		2833.59	-0.00398237		3423.58	-0.01607722		4013.58	0.0028812
473.8	0.31851028		1063.79	0.07637677		1653.8	0.03661923		2243.8	0.07044912		2833.79	-0.00343967		3423.78	-0.01663498		4013.78	0.00284981
474	0.31765498		1063.99	0.07688853		1654	0.03658434		2244	0.07011691		2833.99	-0.00336062		3423.98	-0.01614445		4013.98	0.00294564
474.2	0.31711897		1064.19	0.07620532		1654.2	0.03744763		2244.2	0.069456		2834.19	-0.00292923		3424.18	-0.01517377		4014.18	0.0031956
474.4	0.317137		1064.39	0.07613977		1654.4	0.03727966		2244.4	0.06903309		2834.39	-0.00286513		3424.38	-0.01451203		4014.38	0.00304845
474.6	0.31660081		1064.59	0.07575842		1654.6	0.03790023		2244.6	0.06892309		2834.59	-0.00308776		3424.58	-0.01449495		4014.58	0.00252941
474.8	0.31571351		1064.79	0.07602638		1654.8	0.03881769		2244.8	0.06827785		2834.79	-0.00294529		3424.78	-0.01414699		4014.78	0.00253452
475	0.31595739		1064.99	0.07604495		1655	0.03920291		2245	0.06806437		2834.99	-0.00337429		3424.98	-0.01339423		4014.98	0.00253618
475.2	0.31545743		1065.19	0.07657318		1655.2	0.03925502		2245.2	0.06698995		2835.19	-0.0045717		3425.18	-0.01331259		4015.18	0.00201313
475.4	0.3154109		1065.39	0.07576036		1655.4	0.0387601		2245.4	0.06685909		2835.39	-0.00449588		3425.38	-0.01305821		4015.38	0.00187065
475.6	0.31554888		1065.59	0.07528877		1655.6	0.03829957		2245.6	0.06574121		2835.59	-0.00428921		3425.58	-0.01247346		4015.58	0.00212992
475.8	0.31565045		1065.79	0.07520934		1655.8	0.03735195		2245.8	0.0661975		2835.79	-0.00529798		3425.78	-0.01268172		4015.78	0.00186157
476	0.31609141		1065.99	0.07336251		1656	0.03558842		2246	0.06712255		2835.99	-0.00634291		3425.98	-0.01255223		4015.98	0.0023643
476.2	0.31679344		1066.19	0.0731581		1656.2	0.03499664		2246.2	0.06716964		2836.19	-0.00603133		3426.18	-0.01288819		4016.18	0.00223292
476.4	0.31744597		1066.39	0.07239322		1656.4	0.03463167		2246.4	0.06748304		2836.39	-0.00631179		3426.38	-0.01266067		4016.38	0.0010018
476.6	0.31742057		1066.59	0.07281032		1656.6	0.03471598		2246.6	0.06789644		2836.59	-0.00680786		3426.58	-0.01260694		4016.58	0.0014156
476.8	0.31747478		1066.79	0.07202253		1656.8	0.03518821		2246.8	0.06764535		2836.79	-0.00719708		3426.78	-0.01251806		4016.78	0.00184127
477	0.316999		1066.99	0.07142044		1657	0.03531307		2247	0.06800714		2836.99	-0.00708676		3426.98	-0.01212193		4016.98	0.00118416
477.2	0.31720654		1067.19	0.07225398		1657.2	0.03513325		2247.2	0.06789924		2837.19	-0.00632034		3427.18	-0.0122737		4017.18	0.00077634
477.4	0.31663042		1067.39	0.07232036		1657.4	0.03450595		2247.4	0.06815146		2837.39	-0.00565979		3427.38	-0.01233769		4017.38	0.00053418
477.6	0.31597939		1067.59	0.07271552		1657.6	0.03462169		2247.6	0.06795279		2837.59	-0.00479828		3427.58	-0.01305573		4017.58	0.00061842
477.8	0.31415026		1067.79	0.07337349		1657.8	0.03535461		2247.8	0.06749114		2837.79	-0.00440283		3427.78	-0.01368906		4017.78	0.00080584
478	0.31308275		1067.99	0.07277046		1658	0.03512496		2248	0.06751566		2837.99	-0.00417417		3427.98	-0.01365739		4017.98	0.00070963
478.2	0.31161655		1068.19	0.07249208		1658.2	0.03614144		2248.2	0.06605165		2838.19	-0.0038629		3428.18	-0.01428634		4018.18	0.00186151
478.4	0.31089587		1068.39	0.07312331		1658.4	0.0367301		2248.4	0.06570163		2838.39	-0.00398372		3428.38	-0.01451183		4018.38	0.00171045
478.6	0.31050278		1068.59	0.07239224		1658.6	0.03694747		2248.6	0.06514575		2838.59	-0.00316729		3428.58	-0.01474926		4018.58	0.00128925
478.8	0.30978895		1068.79	0.07278588		1658.8	0.03723766		2248.8	0.06477323		2838.79	-0.00236056		3428.78	-0.01475603		4018.78	0.0000901
479	0.30947399		1068.99	0.07318037		1659	0.03631965		2249	0.06441286		2838.99	-0.0029322		3428.98	-0.01501476		4018.98	-0.00021444
479.2	0.30875633		1069.19	0.07282054		1659.2	0.03618354		2249.2	0.06398773		2839.19	-0.00247457		3429.18	-0.01521275		4019.18	0.00012592
479.4	0.30888727		1069.39	0.07237707		1659.4	0.03679612		2249.4	0.06383512		2839.39	-0.00161105		3429.38	-0.01536443		4019.38	-0.00042323
479.6	0.30883261		1069.59	0.07214772		1659.6	0.03666402		2249.6	0.06389238		2839.59	-0.00166973		3429.58	-0.01538782		4019.58	-0.00020955
479.8	0.30865763		1069.79	0.0723372		1659.8	0.03732818		2249.8	0.06475135		2839.79	-0.00153769		3429.78	-0.01528561		4019.78	-0.00057886
480	0.30963049		1069.99	0.07267992		1660	0.037241		2250	0.06583112		2839.99	-0.00142387		3429.98	-0.01523047		4019.98	-0.00104192
480.2	0.30937123		1070.19	0.07345127		1660.2	0.03767202		2250.2	0.06600297		2840.19	-0.001157		3430.18	-0.01639049		4020.18	-0.00144172
480.4	0.30990776		1070.39	0.07311781		1660.4	0.03821008		2250.4	0.06625053		2840.39	-0.0019549		3430.38	-0.01609258		4020.38	-0.00232567
480.6	0.30965012		1070.59	0.0729623		1660.6	0.03875494		2250.6	0.06605981		2840.59	-0.0014847		3430.58	-0.01509068		4020.58	-0.00093979
480.8	0.309904		1070.79	0.07275635		1660.8	0.03899353		2250.8	0.06487328		2840.79	-0.00175373		3430.78	-0.01500507		4020.78	-0.00105173
481	0.30981145		1070.99	0.07358841		1661	0.03876626		2251	0.06501796		2840.99	-0.00157842		3430.98	-0.01500506		4020.98	-0.00222152
481.2	0.31016667		1071.19	0.07446592		1661.2	0.03886299		2251.2	0.0647447		2841.19	-0.00191659		3431.18	-0.01547296		4021.18	-0.00178849
481.4	0.31027937		1071.39	0.07453342		1661.4	0.03934695		2251.4	0.06604932		2841.39	-0.00155539		3431.38	-0.01611324		4021.38	-0.00188584
481.6	0.30931005		1071.59	0.07516548		1661.6	0.03928929		2251.6	0.06542748		2841.59	-0.002194		3431.58	-0.01645632		4021.58	-0.00106248
481.8	0.30862651		1071.79	0.07588504		1661.8	0.03864116		2251.8	0.06488391		2841.79	-0.00243267		3431.78	-0.01718785		4021.78	-0.00038284
482	0.30869224		1071.99	0.07621517		1662	0.03865511		2252	0.06504116		2841.99	-0.00347496		3431.98	-0.01743898		4021.98	0.00021621
482.2	0.30843317		1072.19	0.07641967		1662.2	0.03875786		2252.2	0.06423967		2842.19	-0.00442443		3432.18	-0.01805389		4022.18	0.00093599
482.4	0.3081615		1072.39	0.07640842		1662.4	0.03802156		2252.4	0.0650784		2842.39	-0.00453803		3432.38	-0.01814935		4022.38	0.00003352
482.6	0.30735061		1072.59	0.07563058		1662.6	0.03711528		2252.6	0.06465329		2842.59	-0.00483432		3432.58	-0.01791315		4022.58	0.00010993
482.8	0.30714887		1072.79	0.07579671		1662.8	0.03679058		2252.8	0.06556128		2842.79	-0.00593398		3432.78	-0.01780694		4022.78	0.00020537
483	0.30679413		1072.99	0.07592542		1663	0.03589348		2253	0.06624086		2842.99	-0.00723304		3432.98	-0.0176503		4022.98	0.00093482
483.2	0.30595198		1073.19	0.07503984		1663.2	0.03555055		2253.2	0.06682209		2843.19	-0.0069832		3433.18	-0.01671175		4023.18	0.00209786
483.4	0.30585568		1073.39	0.07574945		1663.4	0.03530702		2253.4	0.06609752		2843.39	-0.00718048		3433.38	-0.0161021		4023.38	0.00258682
483.6	0.3048173		1073.59	0.0746445		1663.6	0.0342761		2253.6	0.06609692		2843.59	-0.00792397		3433.58	-0.01568971		4023.58	0.00420916
483.8	0.3042947		1073.79	0.07430061		1663.8	0.03425887		2253.8	0.06557901		2843.79	-0.00801467		3433.78	-0.01467183		4023.78	0.00352439
484	0.30389857		1073.99	0.07394522		1664	0.03279929		2254	0.06531709		2843.99	-0.00747027		3433.98	-0.01417793		4023.98	0.00431363
484.2	0.30383782		1074.19	0.07301654		1664.2	0.03252913		2254.2	0.06478289		2844.19	-0.00731236		3434.18	-0.01364309		4024.18	0.00480151
484.4	0.30419597		1074.39	0.07338939		1664.4	0.03265474		2254.4	0.06447009		2844.39	-0.00679057		3434.38	-0.01311798		4024.38	0.004742
484.6	0.30399488		1074.59	0.07247732		1664.6	0.03277309		2254.6	0.06402182		2844.59	-0.00660466		3434.58	-0.01227102		4024.58	0.00428542
484.8	0.30311215		1074.79	0.07274351		1664.8	0.03335921		2254.8	0.06317768		2844.79	-0.00610378		3434.78	-0.01262267		4024.78	0.00382428
485	0.30321261		1074.99	0.07351791		1665	0.03323906		2255	0.0627527		2844.99	-0.0055707		3434.98	-0.01261273		4024.98	0.00346112
485.2	0.30273808		1075.19	0.07354831		1665.2	0.03396523		2255.2	0.06266079		2845.19	-0.00515796		3435.18	-0.01229492		4025.18	0.00313507
485.4	0.30262633		1075.39	0.07405281		1665.4	0.03440935		2255.4	0.06273191		2845.39	-0.00460628		3435.38	-0.01333151		4025.38	0.00288975
485.6	0.30141815		1075.59	0.07506399		1665.6	0.03443077		2255.6	0.06209256		2845.59	-0.00496356		3435.58	-0.01262326		4025.58	0.00321713
485.8	0.30150553		1075.79	0.07497209		1665.8	0.0343806		2255.8	0.06158905		2845.79	-0.00455688		3435.78	-0.0135966		4025.78	0.00279267
486	0.30082239		1075.99	0.07527742		1666	0.03534676		2256	0.06127175		2845.99	-0.00490067		3435.98	-0.01411342		4025.98	0.00206558
486.2	0.3000401		1076.19	0.07530507		1666.2	0.03568055		2256.2	0.06176599		2846.19	-0.00479371		3436.18	-0.01459631		4026.18	0.00055572
486.4	0.29932673		1076.39	0.07464464		1666.4	0.03623952		2256.4	0.06164288		2846.39	-0.00488334		3436.38	-0.01552372		4026.38	0.00008907
486.6	0.29877621		1076.59	0.07511606		1666.6	0.0364559		2256.6	0.06167229		2846.59	-0.00530048		3436.58	-0.01521607		4026.58	-0.00012215
486.8	0.29883793		1076.79	0.07441863		1666.8	0.0374497		2256.8	0.063432		2846.79	-0.0057116		3436.78	-0.01568492		4026.78	-0.00018784
487	0.29862153		1076.99	0.0740203		1667	0.03719126		2257	0.06307063		2846.99	-0.0055508		3436.98	-0.0163595		4026.98	-0.00065682
487.2	0.29849956		1077.19	0.07303662		1667.2	0.03632638		2257.2	0.06280062		2847.19	-0.00568783		3437.18	-0.01659522		4027.18	-0.00053612
487.4	0.29853341		1077.39	0.07236903		1667.4	0.03623606		2257.4	0.06206836		2847.39	-0.00642039		3437.38	-0.0169293		4027.38	-0.00052963
487.6	0.29756827		1077.59	0.07155193		1667.6	0.03569494		2257.6	0.06230645		2847.59	-0.00704194		3437.58	-0.01760123		4027.58	-0.00079763
487.8	0.29795077		1077.79	0.07149673		1667.8	0.03508147		2257.8	0.06233172		2847.79	-0.00744377		3437.78	-0.01822839		4027.78	-0.00177849
488	0.29882988		1077.99	0.07143215		1668	0.03423879		2258	0.06295483		2847.99	-0.00666697		3437.98	-0.01855625		4027.98	-0.00127274
488.2	0.29936101		1078.19	0.07141366		1668.2	0.03429696		2258.2	0.06322238		2848.19	-0.00722523		3438.18	-0.01883717		4028.18	-0.00206643
488.4	0.29951185		1078.39	0.07137891		1668.4	0.03475595		2258.4	0.06369606		2848.39	-0.00706718		3438.38	-0.01976533		4028.38	-0.00301444
488.6	0.3000303		1078.59	0.0708897		1668.6	0.03448342		2258.6	0.06454721		2848.59	-0.00699204		3438.58	-0.02016909		4028.58	-0.00389359
488.8	0.30013474		1078.79	0.07110493		1668.8	0.03393801		2258.8	0.06457368		2848.79	-0.00663365		3438.78	-0.0200353		4028.78	-0.00357556
489	0.30015624		1078.99	0.0716635		1669	0.03385442		2259	0.06458864		2848.99	-0.00741399		3438.98	-0.02000946		4028.98	-0.00402905
489.2	0.29963068		1079.19	0.07224437		1669.2	0.0339676		2259.2	0.06541714		2849.19	-0.00790679		3439.18	-0.01994185		4029.18	-0.00376754
489.4	0.2987671		1079.39	0.07312602		1669.4	0.03390341		2259.4	0.06463892		2849.39	-0.00832851		3439.38	-0.02090294		4029.38	-0.00389765
489.6	0.29813725		1079.59	0.0735354		1669.6	0.03388938		2259.6	0.06414652		2849.59	-0.00848877		3439.58	-0.01997453		4029.58	-0.00315789
489.8	0.29857343		1079.79	0.07316176		1669.8	0.03369039		2259.8	0.06383146		2849.79	-0.00777878		3439.78	-0.01965249		4029.78	-0.00305541
490	0.29794045		1079.99	0.07346094		1670	0.03418785		2260	0.06312851		2849.99	-0.00749833		3439.98	-0.01980761		4029.98	-0.00262805
490.2	0.29725626		1080.19	0.07384157		1670.2	0.03380366		2260.2	0.0632789		2850.19	-0.0068505		3440.18	-0.01971715		4030.18	-0.00278391
490.4	0.29738758		1080.39	0.07333733		1670.4	0.03391225		2260.4	0.06129978		2850.39	-0.00697684		3440.38	-0.01953738		4030.38	-0.0014977
490.6	0.29668747		1080.59	0.07325495		1670.6	0.03343411		2260.6	0.06038497		2850.59	-0.00685005		3440.58	-0.01801507		4030.58	-0.0013728
490.8	0.29593522		1080.79	0.07189902		1670.8	0.03352106		2260.8	0.0603871		2850.79	-0.00676701		3440.78	-0.0178401		4030.78	-0.0005236
491	0.29606742		1080.99	0.07208301		1671	0.03236055		2261	0.05873764		2850.99	-0.00718999		3440.98	-0.01701175		4030.98	-0.00023905
491.2	0.2955076		1081.19	0.07129521		1671.2	0.0319078		2261.2	0.05904138		2851.19	-0.0077667		3441.18	-0.01597473		4031.18	0.00064092
491.4	0.29468724		1081.39	0.07133485		1671.4	0.03182707		2261.4	0.05857054		2851.39	-0.00875934		3441.38	-0.01605119		4031.38	0.00085382
491.6	0.29362766		1081.59	0.07192814		1671.6	0.03117101		2261.6	0.05920425		2851.59	-0.00812728		3441.58	-0.01586817		4031.58	0.000882
491.8	0.29401272		1081.79	0.07153272		1671.8	0.03111972		2261.8	0.05956122		2851.79	-0.00827985		3441.78	-0.0161042		4031.78	0.00095471
492	0.29431255		1081.99	0.07190735		1672	0.03133008		2262	0.06020509		2851.99	-0.00729679		3441.98	-0.01563431		4031.98	0.00083064
492.2	0.29348956		1082.19	0.0720217		1672.2	0.03116597		2262.2	0.06064079		2852.19	-0.00758104		3442.18	-0.01613839		4032.18	0.00048792
492.4	0.29444542		1082.39	0.07230196		1672.4	0.03157596		2262.4	0.06173903		2852.39	-0.00713284		3442.38	-0.0173196		4032.38	0.00048415
492.6	0.29446364		1082.59	0.07331786		1672.6	0.03206776		2262.6	0.06229433		2852.59	-0.00733576		3442.58	-0.01833576		4032.58	0.00057793
492.8	0.29429576		1082.79	0.07283958		1672.8	0.03261808		2262.8	0.06276789		2852.79	-0.0071783		3442.78	-0.01899653		4032.78	0.00112438
493	0.29413281		1082.99	0.07359064		1673	0.03330858		2263	0.06353426		2852.99	-0.00656291		3442.98	-0.02048643		4032.98	0.00022933
493.2	0.29405104		1083.19	0.07412826		1673.2	0.0340385		2263.2	0.06404605		2853.19	-0.00575739		3443.18	-0.02158737		4033.18	0.00067983
493.4	0.29417146		1083.39	0.07430052		1673.4	0.03506735		2263.4	0.06319906		2853.39	-0.00510153		3443.38	-0.0231537		4033.38	0.00047294
493.6	0.29435602		1083.59	0.07416428		1673.6	0.03587928		2263.6	0.06395613		2853.59	-0.00438672		3443.58	-0.02290438		4033.58	0.00143641
493.8	0.29429054		1083.79	0.07379391		1673.8	0.03611252		2263.8	0.06414047		2853.79	-0.00350142		3443.78	-0.02360245		4033.78	0.00110229
494	0.29459995		1083.99	0.07383818		1674	0.0357354		2264	0.06339097		2853.99	-0.00291232		3443.98	-0.02437022		4033.98	0.00074074
494.2	0.29473663		1084.19	0.07339891		1674.2	0.03567023		2264.2	0.0634024		2854.19	-0.00268261		3444.18	-0.0234317		4034.18	0.00038906
494.4	0.29483366		1084.39	0.07217881		1674.4	0.03493881		2264.4	0.06318234		2854.39	-0.00390909		3444.38	-0.02254092		4034.38	0.00058243
494.6	0.2944318		1084.59	0.07130397		1674.6	0.03410239		2264.6	0.06343834		2854.59	-0.00466825		3444.58	-0.02134926		4034.58	-0.00019138
494.8	0.2941783		1084.79	0.07070503		1674.8	0.03390957		2264.8	0.06366598		2854.79	-0.00517148		3444.78	-0.02064064		4034.78	0.00019595
495	0.29393797		1084.99	0.06972992		1675	0.03385142		2265	0.06380548		2854.99	-0.0057083		3444.98	-0.01893442		4034.98	-0.00011168
495.2	0.29376783		1085.19	0.06888845		1675.2	0.03353394		2265.2	0.06346438		2855.19	-0.00602701		3445.18	-0.01848819		4035.18	-0.00041022
495.4	0.29394391		1085.39	0.06879746		1675.4	0.03330576		2265.4	0.06322608		2855.39	-0.00716836		3445.38	-0.01814774		4035.38	-0.00125174
495.6	0.29401404		1085.59	0.06853844		1675.6	0.03269657		2265.6	0.06434739		2855.59	-0.00661397		3445.58	-0.01684938		4035.58	-0.00119649
495.8	0.29417542		1085.79	0.06798771		1675.8	0.03293226		2265.8	0.06419712		2855.79	-0.00710149		3445.78	-0.01631451		4035.78	-0.00178785
496	0.29446849		1085.99	0.0674239		1676	0.03286331		2266	0.06390237		2855.99	-0.00725738		3445.98	-0.01600216		4035.98	-0.00190792
496.2	0.29439609		1086.19	0.06728735		1676.2	0.03221581		2266.2	0.06380054		2856.19	-0.00741323		3446.18	-0.01631495		4036.18	-0.00188154
496.4	0.29443884		1086.39	0.0682697		1676.4	0.03296312		2266.4	0.06244559		2856.39	-0.00782654		3446.38	-0.01663123		4036.38	-0.00137779
496.6	0.29418935		1086.59	0.06774246		1676.6	0.03388172		2266.6	0.06161805		2856.59	-0.00772182		3446.58	-0.01627189		4036.58	-0.00089721
496.8	0.29520963		1086.79	0.06837976		1676.8	0.03396844		2266.8	0.06078155		2856.79	-0.00729371		3446.78	-0.01705829		4036.78	-0.00069752
497	0.29422281		1086.99	0.0692378		1677	0.03436151		2267	0.05998857		2856.99	-0.00670476		3446.98	-0.01710209		4036.98	-0.00120905
497.2	0.29336123		1087.19	0.06971342		1677.2	0.03552257		2267.2	0.0596897		2857.19	-0.00660175		3447.18	-0.01733543		4037.18	-0.00016809
497.4	0.29331579		1087.39	0.06996816		1677.4	0.03561403		2267.4	0.05842459		2857.39	-0.00627596		3447.38	-0.01835401		4037.38	0.00026205
497.6	0.29295722		1087.59	0.06990552		1677.6	0.03588185		2267.6	0.05842977		2857.59	-0.00546644		3447.58	-0.01849557		4037.58	0.00003862
497.8	0.29222488		1087.79	0.07019529		1677.8	0.035455		2267.8	0.0577268		2857.79	-0.00659953		3447.78	-0.0184911		4037.78	-0.00066609
498	0.292263		1087.99	0.06987001		1678	0.03515223		2268	0.05728649		2857.99	-0.00658728		3447.98	-0.01771973		4037.98	-0.00060795
498.2	0.29227135		1088.19	0.06897029		1678.2	0.03481885		2268.2	0.05798006		2858.19	-0.00815709		3448.18	-0.01677876		4038.18	-0.0004718
498.4	0.29149293		1088.39	0.0688506		1678.4	0.03465382		2268.4	0.05839983		2858.39	-0.00966005		3448.38	-0.01775157		4038.38	-0.00032971
498.6	0.29138667		1088.59	0.06881555		1678.6	0.03531589		2268.6	0.05871752		2858.59	-0.0102639		3448.58	-0.01770061		4038.58	0.00016077
498.8	0.29122106		1088.79	0.06863427		1678.8	0.03504076		2268.8	0.05902789		2858.79	-0.01105579		3448.78	-0.01803885		4038.78	0.00028052
499	0.29111206		1088.99	0.0678128		1679	0.03516685		2269	0.05952773		2858.99	-0.01148576		3448.98	-0.01795165		4038.98	-0.00035754
499.2	0.29161604		1089.19	0.06748113		1679.2	0.03460042		2269.2	0.05930561		2859.19	-0.01138049		3449.18	-0.01886867		4039.18	-0.00115414
499.4	0.29213488		1089.39	0.06710562		1679.4	0.0345687		2269.4	0.0609035		2859.39	-0.01141538		3449.38	-0.01976708		4039.38	-0.00102615
499.6	0.29182519		1089.59	0.06642134		1679.6	0.03441128		2269.6	0.06197881		2859.59	-0.01081557		3449.58	-0.02069253		4039.58	-0.0010615
499.8	0.29152632		1089.79	0.06625913		1679.8	0.03364376		2269.8	0.06157968		2859.79	-0.0103665		3449.78	-0.02072554		4039.78	-0.00131137
500	0.29151016		1089.99	0.06631476		1680	0.03311256		2270	0.06136983		2859.99	-0.01009088		3449.98	-0.02147375		4039.98	-0.00158305
500.2	0.29098558		1090.19	0.06681733		1680.2	0.03322941		2270.2	0.06161637		2860.19	-0.0092217		3450.18	-0.02201712		4040.18	-0.00146294
500.4	0.2899632		1090.39	0.06692979		1680.4	0.03373601		2270.4	0.06078351		2860.39	-0.00920757		3450.38	-0.02244415		4040.38	-0.00066597
500.6	0.28995312		1090.59	0.06630821		1680.6	0.03310256		2270.6	0.06121014		2860.59	-0.00739896		3450.58	-0.0221854		4040.58	-0.00093356
500.8	0.28969087		1090.79	0.06803351		1680.8	0.03315177		2270.8	0.06134663		2860.79	-0.00592406		3450.78	-0.02372975		4040.78	-0.00128709
501	0.28831537		1090.99	0.06824273		1681	0.03263152		2271	0.06208123		2860.99	-0.00469599		3450.98	-0.02376231		4040.98	-0.00205692
501.2	0.28830935		1091.19	0.06806278		1681.2	0.03285292		2271.2	0.06217774		2861.19	-0.00383235		3451.18	-0.0230486		4041.18	-0.00248068
501.4	0.28901222		1091.39	0.06710473		1681.4	0.03187228		2271.4	0.06136022		2861.39	-0.00349587		3451.38	-0.02372806		4041.38	-0.00310445
501.6	0.28898601		1091.59	0.06657714		1681.6	0.03198894		2271.6	0.060715		2861.59	-0.00348979		3451.58	-0.02298014		4041.58	-0.00328636
501.8	0.28786763		1091.79	0.06682074		1681.8	0.03161018		2271.8	0.06078754		2861.79	-0.00468376		3451.78	-0.0218494		4041.78	-0.00259578
502	0.2881395		1091.99	0.06667181		1682	0.03223472		2272	0.06050428		2861.99	-0.00399753		3451.98	-0.02100181		4041.98	-0.00155491
502.2	0.28869197		1092.19	0.06723405		1682.2	0.03226365		2272.2	0.06084078		2862.19	-0.00509005		3452.18	-0.01972954		4042.18	-0.00193124
502.4	0.28781192		1092.39	0.06711236		1682.4	0.03306405		2272.4	0.0606648		2862.39	-0.004812		3452.38	-0.01945397		4042.38	-0.00178617
502.6	0.28733975		1092.59	0.06714249		1682.6	0.03325444		2272.6	0.06128467		2862.59	-0.00526591		3452.58	-0.01824073		4042.58	-0.00192225
502.8	0.2882249		1092.79	0.06665014		1682.8	0.03371588		2272.8	0.06112468		2862.79	-0.0056217		3452.78	-0.01776444		4042.78	-0.00321223
503	0.28897657		1092.99	0.06710216		1683	0.03440346		2273	0.06141082		2862.99	-0.0050367		3452.98	-0.01693877		4042.98	-0.00298048
503.2	0.28917307		1093.19	0.06711598		1683.2	0.0343315		2273.2	0.06134898		2863.19	-0.00507264		3453.18	-0.01621546		4043.18	-0.00258779
503.4	0.28974529		1093.39	0.06721198		1683.4	0.03470635		2273.4	0.06169813		2863.39	-0.00536993		3453.38	-0.01587481		4043.38	-0.00130189
503.6	0.28933254		1093.59	0.06779232		1683.6	0.03502434		2273.6	0.0611237		2863.59	-0.0054911		3453.58	-0.0155728		4043.58	-0.00167749
503.8	0.28910452		1093.79	0.06854553		1683.8	0.03434017		2273.8	0.06067914		2863.79	-0.00569796		3453.78	-0.01528181		4043.78	-0.00124026
504	0.28903402		1093.99	0.06847759		1684	0.03461289		2274	0.06026589		2863.99	-0.00575714		3453.98	-0.0161977		4043.98	-0.0013522
504.2	0.28874079		1094.19	0.06853873		1684.2	0.03490634		2274.2	0.06090258		2864.19	-0.00555721		3454.18	-0.01731661		4044.18	-0.00043418
504.4	0.28841617		1094.39	0.06876753		1684.4	0.03466803		2274.4	0.06073203		2864.39	-0.00631103		3454.38	-0.01752812		4044.38	-0.00005761
504.6	0.28846231		1094.59	0.06970229		1684.6	0.03450823		2274.6	0.06107181		2864.59	-0.0059035		3454.58	-0.01809069		4044.58	-0.00093008
504.8	0.28871097		1094.79	0.07039472		1684.8	0.03435631		2274.8	0.06080045		2864.79	-0.00604935		3454.78	-0.02017451		4044.78	-0.00103207
505	0.28832849		1094.99	0.07021865		1685	0.03282981		2275	0.06097668		2864.99	-0.00768422		3454.98	-0.02042075		4044.98	-0.00096162
505.2	0.28857791		1095.19	0.06982912		1685.2	0.03174617		2275.2	0.06109055		2865.19	-0.00808865		3455.18	-0.01985301		4045.18	-0.0001563
505.4	0.28912895		1095.39	0.0693786		1685.4	0.03079354		2275.4	0.06089307		2865.39	-0.0093708		3455.38	-0.02040693		4045.38	0.00033473
505.6	0.28876642		1095.59	0.0694147		1685.6	0.03061325		2275.6	0.06035008		2865.59	-0.01066055		3455.58	-0.02061504		4045.58	0.00081763
505.8	0.28721286		1095.79	0.07004027		1685.8	0.0298526		2275.8	0.06046557		2865.79	-0.0110622		3455.78	-0.0202499		4045.78	0.00074813
506	0.28677438		1095.99	0.06987468		1686	0.02995534		2276	0.05920198		2865.99	-0.01063279		3455.98	-0.01937977		4045.98	0.00008628
506.2	0.28596407		1096.19	0.06962677		1686.2	0.02877886		2276.2	0.05895835		2866.19	-0.01100963		3456.18	-0.01822155		4046.18	-0.00094735
506.4	0.28535413		1096.39	0.06868306		1686.4	0.02855433		2276.4	0.0588922		2866.39	-0.01135975		3456.38	-0.01786941		4046.38	-0.00165848
506.6	0.28517578		1096.59	0.06897682		1686.6	0.0288149		2276.6	0.05820205		2866.59	-0.01056638		3456.58	-0.01723762		4046.58	-0.00252133
506.8	0.28515999		1096.79	0.06859284		1686.8	0.02859402		2276.8	0.05726393		2866.79	-0.01046665		3456.78	-0.01659055		4046.78	-0.00268062
507	0.28516415		1096.99	0.06864357		1687	0.02786693		2277	0.0569205		2866.99	-0.00988871		3456.98	-0.01652668		4046.98	-0.00220939
507.2	0.28423586		1097.19	0.06818413		1687.2	0.02730055		2277.2	0.05567561		2867.19	-0.00967043		3457.18	-0.01612418		4047.18	-0.00274172
507.4	0.28419828		1097.39	0.06816379		1687.4	0.02759107		2277.4	0.05572066		2867.39	-0.00885556		3457.38	-0.01662147		4047.38	-0.00357034
507.6	0.28362738		1097.59	0.06800277		1687.6	0.02809655		2277.6	0.0556877		2867.59	-0.00801368		3457.58	-0.01722436		4047.58	-0.00458195
507.8	0.28382908		1097.79	0.0676225		1687.8	0.0281415		2277.8	0.05597951		2867.79	-0.00721121		3457.78	-0.01847224		4047.78	-0.00447834
508	0.28529239		1097.99	0.06715872		1688	0.02843752		2278	0.05592501		2867.99	-0.0057958		3457.98	-0.01911935		4047.98	-0.00473428
508.2	0.28564407		1098.19	0.06669853		1688.2	0.02969302		2278.2	0.05644335		2868.19	-0.00610641		3458.18	-0.01983671		4048.18	-0.00483041
508.4	0.28648418		1098.39	0.06608966		1688.4	0.03073295		2278.4	0.0566336		2868.39	-0.00592818		3458.38	-0.01999089		4048.38	-0.00531466
508.6	0.28664671		1098.59	0.066065		1688.6	0.0316633		2278.6	0.05756209		2868.59	-0.00601061		3458.58	-0.02121915		4048.58	-0.005621
508.8	0.28697332		1098.79	0.0659975		1688.8	0.03103099		2278.8	0.05887746		2868.79	-0.00581821		3458.78	-0.02196824		4048.78	-0.00485271
509	0.28644663		1098.99	0.06638741		1689	0.03093977		2279	0.06067727		2868.99	-0.0063739		3458.98	-0.02214794		4048.98	-0.00375383
509.2	0.28658796		1099.19	0.06666783		1689.2	0.03106486		2279.2	0.06248595		2869.19	-0.00670559		3459.18	-0.02192795		4049.18	-0.0032733
509.4	0.28660774		1099.39	0.06683279		1689.4	0.03162264		2279.4	0.0629627		2869.39	-0.00800818		3459.38	-0.02135942		4049.38	-0.00350176
509.6	0.28581355		1099.59	0.0669967		1689.6	0.0316582		2279.6	0.06293775		2869.59	-0.00887092		3459.58	-0.02106518		4049.58	-0.00381895
509.8	0.28453301		1099.79	0.0672382		1689.8	0.0310544		2279.8	0.06286397		2869.79	-0.00920116		3459.78	-0.02021464		4049.78	-0.0038356
510	0.28415011		1099.99	0.06653419		1690	0.030665		2280	0.06340659		2869.99	-0.0092745		3459.98	-0.01940722		4049.98	-0.00435129
510.2	0.28365354		1100.19	0.06631522		1690.2	0.03055802		2280.2	0.06494399		2870.19	-0.00968721		3460.18	-0.01858644		4050.18	-0.00377774
510.4	0.28366513		1100.39	0.06656273		1690.4	0.02999855		2280.4	0.06449872		2870.39	-0.01034581		3460.38	-0.01860646		4050.38	-0.00359492
510.6	0.2828866		1100.59	0.06641429		1690.6	0.03012269		2280.6	0.06405383		2870.59	-0.01003492		3460.58	-0.01838402		4050.58	-0.00342472
510.8	0.28223026		1100.79	0.06630108		1690.8	0.02972346		2280.8	0.06331856		2870.79	-0.01102372		3460.78	-0.01894844		4050.78	-0.00296731
511	0.28295313		1100.99	0.06665628		1691	0.02974176		2281	0.06334629		2870.99	-0.01117126		3460.98	-0.01939945		4050.98	-0.00298065
511.2	0.28274145		1101.19	0.06682916		1691.2	0.029516		2281.2	0.06308025		2871.19	-0.01091854		3461.18	-0.01914523		4051.18	-0.00282426
511.4	0.28283036		1101.39	0.0674217		1691.4	0.030034		2281.4	0.06359509		2871.39	-0.01074702		3461.38	-0.01961278		4051.38	-0.00264827
511.6	0.28306082		1101.59	0.06737799		1691.6	0.03075554		2281.6	0.06295089		2871.59	-0.01027141		3461.58	-0.01973995		4051.58	-0.0026023
511.8	0.28441502		1101.79	0.06758625		1691.8	0.030899		2281.8	0.06203028		2871.79	-0.01022502		3461.78	-0.02041524		4051.78	-0.0020425
512	0.28478324		1101.99	0.06708541		1692	0.03121054		2282	0.06088493		2871.99	-0.00996777		3461.98	-0.020562		4051.98	-0.00200143
512.2	0.28452468		1102.19	0.06677755		1692.2	0.0324731		2282.2	0.0597599		2872.19	-0.0109453		3462.18	-0.02079167		4052.18	-0.0019341
512.4	0.284917		1102.39	0.06752302		1692.4	0.03183905		2282.4	0.05992755		2872.39	-0.01043586		3462.38	-0.02147928		4052.38	-0.00221791
512.6	0.2842345		1102.59	0.06784232		1692.6	0.03187998		2282.6	0.05967534		2872.59	-0.00974479		3462.58	-0.02214169		4052.58	-0.00210539
512.8	0.28413615		1102.79	0.06800563		1692.8	0.0310339		2282.8	0.0598766		2872.79	-0.00915582		3462.78	-0.02212468		4052.78	-0.00134966
513	0.28381947		1102.99	0.0682416		1693	0.03152756		2283	0.05891202		2872.99	-0.00955125		3462.98	-0.02218788		4052.98	-0.00129721
513.2	0.28389737		1103.19	0.06842098		1693.2	0.03118485		2283.2	0.05785875		2873.19	-0.00928358		3463.18	-0.0224294		4053.18	-0.0015933
513.4	0.28427098		1103.39	0.0677184		1693.4	0.03151579		2283.4	0.05722431		2873.39	-0.00897593		3463.38	-0.02136834		4053.38	-0.0017912
513.6	0.28378749		1103.59	0.06669202		1693.6	0.03101623		2283.6	0.05671891		2873.59	-0.00926099		3463.58	-0.0206783		4053.58	-0.00210191
513.8	0.28306878		1103.79	0.06593151		1693.8	0.03030628		2283.8	0.05627458		2873.79	-0.00875889		3463.78	-0.02036253		4053.78	-0.00290253
514	0.28405341		1103.99	0.0650831		1694	0.02989449		2284	0.05630668		2873.99	-0.00797333		3463.98	-0.01975686		4053.98	-0.00385998
514.2	0.28378946		1104.19	0.0645808		1694.2	0.02980996		2284.2	0.05629888		2874.19	-0.00788862		3464.18	-0.01941325		4054.18	-0.00352157
514.4	0.28339302		1104.39	0.0648974		1694.4	0.02945665		2284.4	0.05466803		2874.39	-0.00749567		3464.38	-0.02027497		4054.38	-0.00351835
514.6	0.28244626		1104.59	0.06382063		1694.6	0.03045222		2284.6	0.05472323		2874.59	-0.00690863		3464.58	-0.02031844		4054.58	-0.00396656
514.8	0.28187969		1104.79	0.06404994		1694.8	0.02979483		2284.8	0.05434177		2874.79	-0.00642893		3464.78	-0.02008406		4054.78	-0.00354838
515	0.28217904		1104.99	0.06413296		1695	0.02990966		2285	0.05566388		2874.99	-0.00563332		3464.98	-0.01965212		4054.98	-0.00368313
515.2	0.28192		1105.19	0.0639038		1695.2	0.02981519		2285.2	0.0568492		2875.19	-0.0055101		3465.18	-0.02002953		4055.18	-0.00420309
515.4	0.2817274		1105.39	0.06428608		1695.4	0.02983737		2285.4	0.05747902		2875.39	-0.00564562		3465.38	-0.02045557		4055.38	-0.00462804
515.6	0.28145101		1105.59	0.06391928		1695.6	0.03029014		2285.6	0.05733141		2875.59	-0.00607423		3465.58	-0.02030265		4055.58	-0.00457733
515.8	0.28175092		1105.79	0.06420257		1695.8	0.03033883		2285.8	0.0574073		2875.79	-0.00642633		3465.78	-0.0201267		4055.78	-0.00459766
516	0.28163958		1105.99	0.06378705		1696	0.03060935		2286	0.0579124		2875.99	-0.00690612		3465.98	-0.02009026		4055.98	-0.00501452
516.2	0.28077637		1106.19	0.06528541		1696.2	0.03168945		2286.2	0.05838717		2876.19	-0.00768894		3466.18	-0.02048856		4056.18	-0.00565386
516.4	0.28035019		1106.39	0.06593027		1696.4	0.03132532		2286.4	0.05944281		2876.39	-0.00734206		3466.38	-0.0208119		4056.38	-0.00595455
516.6	0.27973338		1106.59	0.06592589		1696.6	0.03170968		2286.6	0.05922367		2876.59	-0.00711408		3466.58	-0.02098256		4056.58	-0.00581568
516.8	0.27998667		1106.79	0.06654669		1696.8	0.03167954		2286.8	0.06000413		2876.79	-0.00838706		3466.78	-0.02103999		4056.78	-0.00470584
517	0.27958641		1106.99	0.0672874		1697	0.03165036		2287	0.05986183		2876.99	-0.00824774		3466.98	-0.02132623		4056.98	-0.0046491
517.2	0.27982049		1107.19	0.06782456		1697.2	0.03197299		2287.2	0.05915349		2877.19	-0.00821086		3467.18	-0.02232906		4057.18	-0.00361324
517.4	0.28018344		1107.39	0.0675617		1697.4	0.03209294		2287.4	0.05998469		2877.39	-0.008687		3467.38	-0.02127599		4057.38	-0.00313925
517.6	0.27942735		1107.59	0.06860494		1697.6	0.03058776		2287.6	0.0601553		2877.59	-0.00947715		3467.58	-0.02074356		4057.58	-0.00283922
517.8	0.27908498		1107.79	0.0694971		1697.8	0.02972524		2287.8	0.05889781		2877.79	-0.00942108		3467.78	-0.02120947		4057.78	-0.00291794
518	0.27947231		1107.99	0.06889597		1698	0.02886581		2288	0.05795847		2877.99	-0.00912759		3467.98	-0.02138952		4057.98	-0.00283722
518.2	0.27846415		1108.19	0.06831584		1698.2	0.02864792		2288.2	0.05672502		2878.19	-0.00907176		3468.18	-0.02149785		4058.18	-0.00207179
518.4	0.27719361		1108.39	0.06837664		1698.4	0.02811433		2288.4	0.05647422		2878.39	-0.00842917		3468.38	-0.02147245		4058.38	-0.00150664
518.6	0.27679895		1108.59	0.06784896		1698.6	0.02644792		2288.6	0.05596806		2878.59	-0.00758603		3468.58	-0.02087378		4058.58	-0.00134669
518.8	0.27765104		1108.79	0.06820219		1698.8	0.02605531		2288.8	0.05623976		2878.79	-0.00694624		3468.78	-0.02139294		4058.78	-0.00161327
519	0.27866703		1108.99	0.06821208		1699	0.02624786		2289	0.05686628		2878.99	-0.00674173		3468.98	-0.02200509		4058.98	-0.00250208
519.2	0.27854245		1109.19	0.06811066		1699.2	0.0257882		2289.2	0.05726256		2879.19	-0.00666147		3469.18	-0.02239378		4059.18	-0.00266573
519.4	0.27931428		1109.39	0.06763538		1699.4	0.0262021		2289.4	0.05681675		2879.39	-0.00644439		3469.38	-0.02255918		4059.38	-0.00282317
519.6	0.28003783		1109.59	0.06768302		1699.6	0.02660792		2289.6	0.05681652		2879.59	-0.00705959		3469.58	-0.02361451		4059.58	-0.00296097
519.8	0.28105853		1109.79	0.06763544		1699.8	0.02698265		2289.8	0.05736966		2879.79	-0.00729866		3469.78	-0.02375914		4059.78	-0.00400958
520	0.28119785		1109.99	0.06699157		1700	0.02781025		2290	0.05829559		2879.99	-0.00779833		3469.98	-0.0243502		4059.98	-0.00443365
520.2	0.28084995		1110.19	0.06729505		1700.2	0.02902347		2290.2	0.05824193		2880.19	-0.00793477		3470.18	-0.025436		4060.18	-0.00466325
520.4	0.28135967		1110.39	0.06698645		1700.4	0.02907231		2290.4	0.05815853		2880.39	-0.00806391		3470.38	-0.02533603		4060.38	-0.00472155
520.6	0.28158108		1110.59	0.06695437		1700.6	0.02914622		2290.6	0.05839878		2880.59	-0.00861912		3470.58	-0.02589597		4060.58	-0.00487945
520.8	0.28207892		1110.79	0.06733358		1700.8	0.02942618		2290.8	0.05929822		2880.79	-0.00921797		3470.78	-0.02604833		4060.78	-0.0042169
521	0.28253568		1110.99	0.06735204		1701	0.02994502		2291	0.05933975		2880.99	-0.00888704		3470.98	-0.02564919		4060.98	-0.00381952
521.2	0.28281414		1111.19	0.06738038		1701.2	0.03071998		2291.2	0.05888856		2881.19	-0.00907473		3471.18	-0.02437579		4061.18	-0.00271561
521.4	0.28253277		1111.39	0.0673695		1701.4	0.0305148		2291.4	0.05876709		2881.39	-0.0091327		3471.38	-0.02336684		4061.38	-0.00296498
521.6	0.28188381		1111.59	0.06761117		1701.6	0.02995739		2291.6	0.05886333		2881.59	-0.01003006		3471.58	-0.02294066		4061.58	-0.00240639
521.8	0.28223988		1111.79	0.06645887		1701.8	0.03090752		2291.8	0.0580915		2881.79	-0.00946744		3471.78	-0.02257199		4061.78	-0.00238246
522	0.282239		1111.99	0.06596349		1702	0.03115168		2292	0.05813458		2881.99	-0.00911012		3471.98	-0.02121022		4061.98	-0.00165465
522.2	0.28183305		1112.19	0.06585128		1702.2	0.03059393		2292.2	0.05794021		2882.19	-0.00905529		3472.18	-0.02026716		4062.18	-0.00100752
522.4	0.28099789		1112.39	0.06647577		1702.4	0.03022462		2292.4	0.0584376		2882.39	-0.00884658		3472.38	-0.01909806		4062.38	-0.00128569
522.6	0.28225624		1112.59	0.06668236		1702.6	0.03016943		2292.6	0.05805021		2882.59	-0.00830187		3472.58	-0.01946992		4062.58	-0.00166834
522.8	0.28208946		1112.79	0.06683312		1702.8	0.03075135		2292.8	0.05854726		2882.79	-0.00875208		3472.78	-0.01994638		4062.78	-0.00237063
523	0.28204949		1112.99	0.06735694		1703	0.03133886		2293	0.05887908		2882.99	-0.00816999		3472.98	-0.0203501		4062.98	-0.00254204
523.2	0.28177099		1113.19	0.06709569		1703.2	0.03073758		2293.2	0.0585984		2883.19	-0.00826181		3473.18	-0.02021581		4063.18	-0.00331806
523.4	0.28209036		1113.39	0.06694419		1703.4	0.03145257		2293.4	0.05919917		2883.39	-0.00902799		3473.38	-0.02072934		4063.38	-0.00413386
523.6	0.28161235		1113.59	0.06754823		1703.6	0.03062887		2293.6	0.05909216		2883.59	-0.00973192		3473.58	-0.02141097		4063.58	-0.00450804
523.8	0.28065729		1113.79	0.06709635		1703.8	0.03097768		2293.8	0.05881244		2883.79	-0.01035506		3473.78	-0.02148104		4063.78	-0.00511587
524	0.28001046		1113.99	0.0665703		1704	0.03100515		2294	0.05828238		2883.99	-0.01072307		3473.98	-0.02148838		4063.98	-0.00481458
524.2	0.27904678		1114.19	0.06682039		1704.2	0.0310723		2294.2	0.05808027		2884.19	-0.0115916		3474.18	-0.02221973		4064.18	-0.0045566
524.4	0.27826451		1114.39	0.06744636		1704.4	0.03118787		2294.4	0.05774117		2884.39	-0.01218941		3474.38	-0.02195352		4064.38	-0.00428748
524.6	0.27828113		1114.59	0.06676855		1704.6	0.03096315		2294.6	0.05807371		2884.59	-0.01254286		3474.58	-0.02151741		4064.58	-0.00406951
524.8	0.27819729		1114.79	0.06627056		1704.8	0.03102745		2294.8	0.05824533		2884.79	-0.01242484		3474.78	-0.02076945		4064.78	-0.00389284
525	0.27807723		1114.99	0.06579879		1705	0.03125253		2295	0.05781195		2884.99	-0.01233601		3474.98	-0.02015967		4064.98	-0.00313843
525.2	0.27717022		1115.19	0.0660465		1705.2	0.03105375		2295.2	0.05658533		2885.19	-0.01181759		3475.18	-0.01979527		4065.18	-0.00277667
525.4	0.27699606		1115.39	0.06575894		1705.4	0.03115785		2295.4	0.0565666		2885.39	-0.01163107		3475.38	-0.02133848		4065.38	-0.00297773
525.6	0.27722482		1115.59	0.06571173		1705.6	0.03097514		2295.6	0.05623481		2885.59	-0.01180307		3475.58	-0.02167142		4065.58	-0.0021943
525.8	0.27703071		1115.79	0.06502404		1705.8	0.03134424		2295.8	0.05648237		2885.79	-0.01124557		3475.78	-0.02188949		4065.78	-0.00185855
526	0.27674365		1115.99	0.06453404		1706	0.03037145		2296	0.05602368		2885.99	-0.01105107		3475.98	-0.02175829		4065.98	-0.00159037
526.2	0.2767608		1116.19	0.06362337		1706.2	0.03079276		2296.2	0.05543867		2886.19	-0.01074534		3476.18	-0.02272278		4066.18	-0.00230272
526.4	0.27701944		1116.39	0.0630978		1706.4	0.03131593		2296.4	0.05551244		2886.39	-0.01119491		3476.38	-0.0231208		4066.38	-0.00265304
526.6	0.27748186		1116.59	0.06207216		1706.6	0.03096371		2296.6	0.05624503		2886.59	-0.01117701		3476.58	-0.02424193		4066.58	-0.00265454
526.8	0.27686547		1116.79	0.06179852		1706.8	0.03007406		2296.8	0.05680744		2886.79	-0.01040758		3476.78	-0.02480576		4066.78	-0.0033953
527	0.27724236		1116.99	0.06164931		1707	0.03069813		2297	0.05601692		2886.99	-0.0094564		3476.98	-0.02471174		4066.98	-0.00400106
527.2	0.27643451		1117.19	0.06123382		1707.2	0.03001101		2297.2	0.05559019		2887.19	-0.00988758		3477.18	-0.0244465		4067.18	-0.00535514
527.4	0.27614801		1117.39	0.06171994		1707.4	0.02975331		2297.4	0.05570323		2887.39	-0.01035953		3477.38	-0.02439468		4067.38	-0.00553701
527.6	0.27543097		1117.59	0.06216448		1707.6	0.02939973		2297.6	0.05539128		2887.59	-0.00988329		3477.58	-0.02389859		4067.58	-0.00525695
527.8	0.27506389		1117.79	0.06303025		1707.8	0.02955782		2297.8	0.05565021		2887.79	-0.00993695		3477.78	-0.02381251		4067.78	-0.00478788
528	0.2751126		1117.99	0.0635382		1708	0.02971624		2298	0.05536427		2887.99	-0.01011182		3477.98	-0.022815		4067.98	-0.0042033
528.2	0.27402423		1118.19	0.06452289		1708.2	0.02999075		2298.2	0.05599909		2888.19	-0.01049556		3478.18	-0.02239156		4068.18	-0.00343101
528.4	0.27445534		1118.39	0.06411031		1708.4	0.02954232		2298.4	0.05619564		2888.39	-0.01012662		3478.38	-0.02077387		4068.38	-0.00295887
528.6	0.27444006		1118.59	0.0639776		1708.6	0.02812368		2298.6	0.05601481		2888.59	-0.00999696		3478.58	-0.01977101		4068.58	-0.0032629
528.8	0.27472714		1118.79	0.06441013		1708.8	0.0280532		2298.8	0.05568942		2888.79	-0.00983056		3478.78	-0.01981988		4068.78	-0.00360885
529	0.27477615		1118.99	0.06478383		1709	0.02791012		2299	0.05601781		2888.99	-0.01033372		3478.98	-0.02011112		4068.98	-0.00296074
529.2	0.2750641		1119.19	0.06539827		1709.2	0.02759498		2299.2	0.0558671		2889.19	-0.0102839		3479.18	-0.02015856		4069.18	-0.00260963
529.4	0.27595036		1119.39	0.06556917		1709.4	0.02712224		2299.4	0.05665103		2889.39	-0.01067965		3479.38	-0.02052138		4069.38	-0.00265724
529.6	0.27596644		1119.59	0.0661895		1709.6	0.02674274		2299.6	0.05579828		2889.59	-0.01146388		3479.58	-0.02055008		4069.58	-0.00209354
529.8	0.27564783		1119.79	0.06632851		1709.8	0.02675202		2299.8	0.05584636		2889.79	-0.01156898		3479.78	-0.02082659		4069.78	-0.00148739
530	0.27603269		1119.99	0.06539271		1710	0.02713183		2300	0.05559327		2889.99	-0.01093102		3479.98	-0.02121686		4069.98	-0.00186747
530.2	0.27579521		1120.19	0.065468		1710.2	0.02803647		2300.2	0.0558271		2890.19	-0.01064206		3480.18	-0.02123298		4070.18	-0.00227578
530.4	0.27538998		1120.39	0.06512974		1710.4	0.02761525		2300.4	0.05566201		2890.39	-0.01178975		3480.38	-0.02156612		4070.38	-0.00216031
530.6	0.2751368		1120.59	0.06506998		1710.6	0.02731919		2300.6	0.0559215		2890.59	-0.01160943		3480.58	-0.02243517		4070.58	-0.00209334
530.8	0.27528447		1120.79	0.06534942		1710.8	0.02746891		2300.8	0.05553649		2890.79	-0.01113472		3480.78	-0.0226038		4070.78	-0.00289344
531	0.27554461		1120.99	0.06490856		1711	0.02838645		2301	0.05462993		2890.99	-0.0118448		3480.98	-0.02259085		4070.98	-0.00284297
531.2	0.27564685		1121.19	0.06458062		1711.2	0.02833358		2301.2	0.05510934		2891.19	-0.0119562		3481.18	-0.02384401		4071.18	-0.00375332
531.4	0.2762462		1121.39	0.06498377		1711.4	0.02800784		2301.4	0.05553255		2891.39	-0.01176103		3481.38	-0.02371818		4071.38	-0.00387484
531.6	0.27671402		1121.59	0.06471392		1711.6	0.02874191		2301.6	0.05602451		2891.59	-0.0114055		3481.58	-0.02312266		4071.58	-0.00354096
531.8	0.27726892		1121.79	0.06460744		1711.8	0.02876907		2301.8	0.05602967		2891.79	-0.01216588		3481.78	-0.02366607		4071.78	-0.00388978
532	0.27730968		1121.99	0.06419726		1712	0.02904948		2302	0.05631436		2891.99	-0.01211553		3481.98	-0.02324563		4071.98	-0.0043097
532.2	0.27613513		1122.19	0.06386017		1712.2	0.02869816		2302.2	0.05701114		2892.19	-0.01179284		3482.18	-0.02270812		4072.18	-0.00400205
532.4	0.27628363		1122.39	0.062965		1712.4	0.02771939		2302.4	0.0566834		2892.39	-0.01123686		3482.38	-0.02221083		4072.38	-0.00398134
532.6	0.27617067		1122.59	0.0633575		1712.6	0.02732796		2302.6	0.05655979		2892.59	-0.01074789		3482.58	-0.02236263		4072.58	-0.00422562
532.8	0.27664605		1122.79	0.06273967		1712.8	0.02795452		2302.8	0.05686076		2892.79	-0.01100293		3482.78	-0.02254502		4072.78	-0.00472274
533	0.27494774		1122.99	0.06233169		1713	0.02688697		2303	0.05731594		2892.99	-0.01115873		3482.98	-0.02194626		4072.98	-0.00407146
533.2	0.27487895		1123.19	0.06292857		1713.2	0.02665897		2303.2	0.05647904		2893.19	-0.01095674		3483.18	-0.02165971		4073.18	-0.00322118
533.4	0.27453409		1123.39	0.06303066		1713.4	0.02639738		2303.4	0.05672959		2893.39	-0.01162127		3483.38	-0.02170228		4073.38	-0.00349124
533.6	0.27268254		1123.59	0.06340626		1713.6	0.02625975		2303.6	0.05623946		2893.59	-0.01098974		3483.58	-0.02216433		4073.58	-0.00307183
533.8	0.27137582		1123.79	0.06340293		1713.8	0.02614047		2303.8	0.05648051		2893.79	-0.01047166		3483.78	-0.02196314		4073.78	-0.00314853
534	0.27102243		1123.99	0.0625622		1714	0.02573506		2304	0.05700659		2893.99	-0.00973094		3483.98	-0.02239426		4073.98	-0.00327543
534.2	0.27068552		1124.19	0.06283494		1714.2	0.02567568		2304.2	0.05659989		2894.19	-0.00957471		3484.18	-0.02168444		4074.18	-0.00300336
534.4	0.27026191		1124.39	0.06273995		1714.4	0.02560836		2304.4	0.05623752		2894.39	-0.01088269		3484.38	-0.02277823		4074.38	-0.00233548
534.6	0.27011526		1124.59	0.06254766		1714.6	0.0254198		2304.6	0.05593916		2894.59	-0.00961032		3484.58	-0.02268424		4074.58	-0.0019106
534.8	0.27020436		1124.79	0.0631707		1714.8	0.02614041		2304.8	0.05633208		2894.79	-0.00945672		3484.78	-0.02266771		4074.78	-0.00206446
535	0.2702315		1124.99	0.06294216		1715	0.0263334		2305	0.05684552		2894.99	-0.00945164		3484.98	-0.02337376		4074.98	-0.00172598
535.2	0.27013117		1125.19	0.06271818		1715.2	0.02602958		2305.2	0.05687969		2895.19	-0.00961524		3485.18	-0.02396137		4075.18	-0.00227316
535.4	0.27054048		1125.39	0.06308017		1715.4	0.02660531		2305.4	0.05763893		2895.39	-0.00902539		3485.38	-0.02369016		4075.38	-0.00254708
535.6	0.27079161		1125.59	0.06293495		1715.6	0.02675442		2305.6	0.05787346		2895.59	-0.00970044		3485.58	-0.02332103		4075.58	-0.00250225
535.8	0.27151959		1125.79	0.06325871		1715.8	0.02749585		2305.8	0.05812282		2895.79	-0.00956162		3485.78	-0.02366208		4075.78	-0.00271135
536	0.27127716		1125.99	0.06352116		1716	0.02761257		2306	0.05821623		2895.99	-0.00963467		3485.98	-0.02368116		4075.98	-0.00402186
536.2	0.270709		1126.19	0.06396134		1716.2	0.02779747		2306.2	0.05789088		2896.19	-0.0097357		3486.18	-0.02295611		4076.18	-0.0035678
536.4	0.27089851		1126.39	0.06384378		1716.4	0.02790524		2306.4	0.05711002		2896.39	-0.00947117		3486.38	-0.0229158		4076.38	-0.00315202
536.6	0.27123292		1126.59	0.06453288		1716.6	0.02846515		2306.6	0.05649343		2896.59	-0.00993282		3486.58	-0.02253455		4076.58	-0.00367246
536.8	0.27074505		1126.79	0.06469799		1716.8	0.02842896		2306.8	0.0545228		2896.79	-0.0112276		3486.78	-0.02223077		4076.78	-0.00390602
537	0.26947172		1126.99	0.06566748		1717	0.02817235		2307	0.05420481		2896.99	-0.01147372		3486.98	-0.02189173		4076.98	-0.0030697
537.2	0.26980285		1127.19	0.06573696		1717.2	0.02865157		2307.2	0.05313703		2897.19	-0.01240356		3487.18	-0.02239894		4077.18	-0.00300518
537.4	0.26934398		1127.39	0.06494422		1717.4	0.02834962		2307.4	0.05348197		2897.39	-0.01309781		3487.38	-0.02266794		4077.38	-0.00391344
537.6	0.26868002		1127.59	0.06516091		1717.6	0.02769897		2307.6	0.05307228		2897.59	-0.01323724		3487.58	-0.02327618		4077.58	-0.00442811
537.8	0.26886921		1127.79	0.06470487		1717.8	0.02798609		2307.8	0.05360366		2897.79	-0.01381485		3487.78	-0.02376311		4077.78	-0.0041321
538	0.26964862		1127.99	0.06461457		1718	0.0272327		2308	0.05303581		2897.99	-0.01435552		3487.98	-0.02416562		4077.98	-0.0038041
538.2	0.26974438		1128.19	0.06425689		1718.2	0.02695366		2308.2	0.05258923		2898.19	-0.01470874		3488.18	-0.02454526		4078.18	-0.00351997
538.4	0.26965044		1128.39	0.06367878		1718.4	0.02641579		2308.4	0.05220459		2898.39	-0.01403244		3488.38	-0.02578451		4078.38	-0.00359648
538.6	0.26986004		1128.59	0.06339942		1718.6	0.02585126		2308.6	0.05207751		2898.59	-0.01231212		3488.58	-0.02557896		4078.58	-0.0033966
538.8	0.26984751		1128.79	0.06426668		1718.8	0.02538397		2308.8	0.05283186		2898.79	-0.01184517		3488.78	-0.02575924		4078.78	-0.0033976
539	0.27003075		1128.99	0.06337161		1719	0.02440525		2309	0.0529119		2898.99	-0.01127133		3488.98	-0.0270168		4078.98	-0.00347689
539.2	0.27054719		1129.19	0.06287255		1719.2	0.02490634		2309.2	0.0530734		2899.19	-0.01065992		3489.18	-0.02733807		4079.18	-0.00337894
539.4	0.27164171		1129.39	0.06302361		1719.4	0.02490192		2309.4	0.0530985		2899.39	-0.00918953		3489.38	-0.0273528		4079.38	-0.00343831
539.6	0.27252817		1129.59	0.06212931		1719.6	0.02515221		2309.6	0.05293947		2899.59	-0.00939431		3489.58	-0.02736789		4079.58	-0.00229947
539.8	0.27330985		1129.79	0.06157449		1719.8	0.02475281		2309.8	0.05278628		2899.79	-0.00964313		3489.78	-0.02798013		4079.78	-0.00249887
540	0.27252794		1129.99	0.06144393		1720	0.02450291		2310	0.0534119		2899.99	-0.00978819		3489.98	-0.02826634		4079.98	-0.00320139
540.2	0.27288592		1130.19	0.0620015		1720.2	0.02492608		2310.2	0.05333853		2900.19	-0.00960425		3490.18	-0.02701216		4080.18	-0.0021362
540.4	0.27313566		1130.39	0.06171282		1720.4	0.02563671		2310.4	0.05250406		2900.39	-0.00964741		3490.38	-0.0271118		4080.38	-0.00197516
540.6	0.27281219		1130.59	0.06166727		1720.6	0.02596517		2310.6	0.05088779		2900.59	-0.01007579		3490.58	-0.02640641		4080.58	-0.00241273
540.8	0.27229166		1130.79	0.06200366		1720.8	0.02679385		2310.8	0.05012644		2900.79	-0.00994064		3490.78	-0.0250931		4080.78	-0.00201719
541	0.27113318		1130.99	0.06184304		1721	0.02710797		2311	0.05079503		2900.99	-0.00979039		3490.98	-0.02472006		4080.98	-0.00132369
541.2	0.26963338		1131.19	0.06090875		1721.2	0.02730123		2311.2	0.05007361		2901.19	-0.01009033		3491.18	-0.0239494		4081.18	-0.00153031
541.4	0.26918629		1131.39	0.06070485		1721.4	0.02771645		2311.4	0.05051959		2901.39	-0.00985638		3491.38	-0.02318714		4081.38	-0.00172833
541.6	0.26802284		1131.59	0.06110318		1721.6	0.02816582		2311.6	0.0505731		2901.59	-0.01068281		3491.58	-0.02329632		4081.58	-0.00189352
541.8	0.26706337		1131.79	0.06163577		1721.8	0.02879265		2311.8	0.05101434		2901.79	-0.01112043		3491.78	-0.02348813		4081.78	-0.00145646
542	0.26651571		1131.99	0.06180745		1722	0.02899565		2312	0.05033469		2901.99	-0.01142379		3491.98	-0.02327227		4081.98	-0.00190816
542.2	0.26694389		1132.19	0.06228593		1722.2	0.02884944		2312.2	0.05088771		2902.19	-0.01077917		3492.18	-0.02367942		4082.18	-0.00249553
542.4	0.26789171		1132.39	0.06335127		1722.4	0.02858948		2312.4	0.05163839		2902.39	-0.01020689		3492.38	-0.02309101		4082.38	-0.00270611
542.6	0.26848282		1132.59	0.06427963		1722.6	0.02751739		2312.6	0.05275018		2902.59	-0.01006127		3492.58	-0.02290825		4082.58	-0.00252674
542.8	0.26852711		1132.79	0.06524557		1722.8	0.02654427		2312.8	0.05269793		2902.79	-0.01032686		3492.78	-0.02306529		4082.78	-0.00272994
543	0.26917769		1132.99	0.06490015		1723	0.02561827		2313	0.05383288		2902.99	-0.0103843		3492.98	-0.02415022		4082.98	-0.0029129
543.2	0.27050633		1133.19	0.06485341		1723.2	0.0265792		2313.2	0.0542936		2903.19	-0.00978302		3493.18	-0.0244027		4083.18	-0.00264229
543.4	0.2714179		1133.39	0.06493234		1723.4	0.02647583		2313.4	0.05443804		2903.39	-0.01018916		3493.38	-0.024539		4083.38	-0.00236651
543.6	0.2717673		1133.59	0.06388183		1723.6	0.02632178		2313.6	0.05572206		2903.59	-0.01062078		3493.58	-0.02524951		4083.58	-0.00192956
543.8	0.27223914		1133.79	0.06432169		1723.8	0.02576273		2313.8	0.05582567		2903.79	-0.011012		3493.78	-0.02603538		4083.78	-0.002815
544	0.27221085		1133.99	0.06376296		1724	0.02607005		2314	0.05627929		2903.99	-0.01103318		3493.98	-0.02659172		4083.98	-0.00320018
544.2	0.27265372		1134.19	0.06291346		1724.2	0.02639559		2314.2	0.05602925		2904.19	-0.01182521		3494.18	-0.02643302		4084.18	-0.00261225
544.4	0.27238907		1134.39	0.06205096		1724.4	0.0263319		2314.4	0.05466343		2904.39	-0.01172242		3494.38	-0.02718266		4084.38	-0.00287976
544.6	0.27174444		1134.59	0.06087518		1724.6	0.02672457		2314.6	0.05379393		2904.59	-0.01143888		3494.58	-0.02646357		4084.58	-0.00287406
544.8	0.27094785		1134.79	0.06051532		1724.8	0.02677952		2314.8	0.0545032		2904.79	-0.01111462		3494.78	-0.02557651		4084.78	-0.00261116
545	0.26969191		1134.99	0.05932355		1725	0.02631266		2315	0.05417663		2904.99	-0.01145601		3494.98	-0.02587313		4084.98	-0.00198432
545.2	0.2683835		1135.19	0.05937965		1725.2	0.02740916		2315.2	0.05389257		2905.19	-0.01156305		3495.18	-0.02538308		4085.18	-0.0015884
545.4	0.26808899		1135.39	0.05888418		1725.4	0.02705724		2315.4	0.05417472		2905.39	-0.01136668		3495.38	-0.02572395		4085.38	-0.001712
545.6	0.26680585		1135.59	0.058224		1725.6	0.02766038		2315.6	0.0541805		2905.59	-0.01230406		3495.58	-0.02580428		4085.58	-0.00139107
545.8	0.26646781		1135.79	0.05807191		1725.8	0.02852487		2315.8	0.05375747		2905.79	-0.01268171		3495.78	-0.02532905		4085.78	-0.00135215
546	0.26675597		1135.99	0.05787348		1726	0.02838381		2316	0.05353176		2905.99	-0.01323352		3495.98	-0.02504497		4085.98	-0.00130868
546.2	0.26777982		1136.19	0.05787509		1726.2	0.02754821		2316.2	0.05416845		2906.19	-0.01324132		3496.18	-0.02470807		4086.18	-0.00163116
546.4	0.2678609		1136.39	0.05832488		1726.4	0.02727007		2316.4	0.05425254		2906.39	-0.0142343		3496.38	-0.02445204		4086.38	-0.00082421
546.6	0.26795147		1136.59	0.05805752		1726.6	0.02651627		2316.6	0.05433305		2906.59	-0.01401408		3496.58	-0.02464766		4086.58	-0.0007784
546.8	0.26760935		1136.79	0.05876179		1726.8	0.02644574		2316.8	0.05469963		2906.79	-0.01340677		3496.78	-0.02454399		4086.78	-0.00090861
547	0.26769871		1136.99	0.05927186		1727	0.026148		2317	0.05651429		2906.99	-0.01302491		3496.98	-0.02472519		4086.98	-0.00133319
547.2	0.26848251		1137.19	0.06003481		1727.2	0.02738068		2317.2	0.05635681		2907.19	-0.01220909		3497.18	-0.02478447		4087.18	-0.00054317
547.4	0.26839702		1137.39	0.0600921		1727.4	0.02739154		2317.4	0.05700217		2907.39	-0.0128966		3497.38	-0.02454028		4087.38	-0.0002847
547.6	0.26840366		1137.59	0.05974656		1727.6	0.02696333		2317.6	0.05722384		2907.59	-0.01267206		3497.58	-0.02575151		4087.58	-0.00030652
547.8	0.26860082		1137.79	0.06050803		1727.8	0.02728582		2317.8	0.05635099		2907.79	-0.01276925		3497.78	-0.02657443		4087.78	0.00018417
548	0.26803267		1137.99	0.06083908		1728	0.02699541		2318	0.056754		2907.99	-0.01286245		3497.98	-0.02696679		4087.98	-0.00009007
548.2	0.26775115		1138.19	0.06150557		1728.2	0.02701093		2318.2	0.05601417		2908.19	-0.01309824		3498.18	-0.02651351		4088.18	-0.000451
548.4	0.26747334		1138.39	0.06243449		1728.4	0.02674463		2318.4	0.05499823		2908.39	-0.01315605		3498.38	-0.02606654		4088.38	-0.00112203
548.6	0.26682573		1138.59	0.0622228		1728.6	0.0275557		2318.6	0.05539446		2908.59	-0.01244271		3498.58	-0.02546499		4088.58	-0.00136685
548.8	0.26645504		1138.79	0.0621525		1728.8	0.02733075		2318.8	0.05523727		2908.79	-0.01167549		3498.78	-0.02496697		4088.78	-0.00230391
549	0.26648051		1138.99	0.06208623		1729	0.02764651		2319	0.05456813		2908.99	-0.01172778		3498.98	-0.02545755		4088.98	-0.002634
549.2	0.26583394		1139.19	0.06254521		1729.2	0.02792737		2319.2	0.05415532		2909.19	-0.01143599		3499.18	-0.02499733		4089.18	-0.00298425
549.4	0.2659432		1139.39	0.06101551		1729.4	0.02744694		2319.4	0.05384511		2909.39	-0.011372		3499.38	-0.02431393		4089.38	-0.00406925
549.6	0.26606139		1139.59	0.06039989		1729.6	0.02817225		2319.6	0.05296062		2909.59	-0.01174404		3499.58	-0.02338596		4089.58	-0.00387222
549.8	0.26721801		1139.79	0.06030041		1729.8	0.02779618		2319.8	0.05269951		2909.79	-0.01175912		3499.78	-0.02301089		4089.78	-0.00450277
550	0.26766436		1139.99	0.06075056		1730	0.0274951		2320	0.05208182		2909.99	-0.01233191		3499.98	-0.02325327		4089.98	-0.00471123
550.2	0.26871597		1140.19	0.06040895		1730.2	0.02797001		2320.2	0.05161245		2910.19	-0.01252554		3500.18	-0.02411586		4090.18	-0.0051664
550.4	0.26935053		1140.39	0.05990851		1730.4	0.02825441		2320.4	0.05119936		2910.39	-0.0120843		3500.38	-0.02504418		4090.38	-0.0046859
550.6	0.26960902		1140.59	0.05912287		1730.6	0.02851182		2320.6	0.05128124		2910.59	-0.01196267		3500.58	-0.02501935		4090.58	-0.00541416
550.8	0.26925086		1140.79	0.05931645		1730.8	0.02831428		2320.8	0.05166095		2910.79	-0.01099054		3500.78	-0.02525637		4090.78	-0.00547514
551	0.26963726		1140.99	0.05896571		1731	0.02824718		2321	0.05209977		2910.99	-0.01074871		3500.98	-0.02541816		4090.98	-0.00519581
551.2	0.26972995		1141.19	0.05974727		1731.2	0.02761938		2321.2	0.05236623		2911.19	-0.01024911		3501.18	-0.02531491		4091.18	-0.00421789
551.4	0.26898236		1141.39	0.0592073		1731.4	0.02674858		2321.4	0.05235694		2911.39	-0.00992307		3501.38	-0.02553116		4091.38	-0.00431861
551.6	0.26779925		1141.59	0.0595387		1731.6	0.02617714		2321.6	0.05229534		2911.59	-0.00975561		3501.58	-0.02683722		4091.58	-0.00402755
551.8	0.26693434		1141.79	0.06009583		1731.8	0.02602548		2321.8	0.05225225		2911.79	-0.00923092		3501.78	-0.02710333		4091.78	-0.00376906
552	0.26635592		1141.99	0.06030771		1732	0.02594311		2322	0.0527833		2911.99	-0.00857609		3501.98	-0.02601751		4091.98	-0.00334968
552.2	0.26565358		1142.19	0.05997905		1732.2	0.02585813		2322.2	0.05224624		2912.19	-0.00945338		3502.18	-0.02513634		4092.18	-0.00331244
552.4	0.26470971		1142.39	0.06033368		1732.4	0.02578062		2322.4	0.05310679		2912.39	-0.00909777		3502.38	-0.02465079		4092.38	-0.00241143
552.6	0.26380077		1142.59	0.05991936		1732.6	0.0259659		2322.6	0.05329062		2912.59	-0.008393		3502.58	-0.02419545		4092.58	-0.0023748
552.8	0.26341025		1142.79	0.05905576		1732.8	0.02519033		2322.8	0.05372381		2912.79	-0.00864466		3502.78	-0.02437811		4092.78	-0.00189948
553	0.26195865		1142.99	0.0593058		1733	0.02491971		2323	0.05409218		2912.99	-0.0092648		3502.98	-0.02505315		4092.98	-0.00186262
553.2	0.26127014		1143.19	0.05939561		1733.2	0.02460843		2323.2	0.05370817		2913.19	-0.00931304		3503.18	-0.02502862		4093.18	-0.00275541
553.4	0.26173437		1143.39	0.05932527		1733.4	0.02408881		2323.4	0.05406008		2913.39	-0.01025215		3503.38	-0.02446572		4093.38	-0.00298379
553.6	0.26193397		1143.59	0.05959124		1733.6	0.0234457		2323.6	0.05359856		2913.59	-0.01113839		3503.58	-0.02491128		4093.58	-0.00302797
553.8	0.26280152		1143.79	0.05998785		1733.8	0.02322184		2323.8	0.05417143		2913.79	-0.01247569		3503.78	-0.02529006		4093.78	-0.00379154
554	0.26399516		1143.99	0.06013936		1734	0.02370745		2324	0.05376802		2913.99	-0.0132093		3503.98	-0.02644694		4093.98	-0.00398155
554.2	0.26463676		1144.19	0.05872431		1734.2	0.02308187		2324.2	0.0534372		2914.19	-0.01363706		3504.18	-0.02823128		4094.18	-0.0044538
554.4	0.26482054		1144.39	0.05774781		1734.4	0.02298027		2324.4	0.05354038		2914.39	-0.01331162		3504.38	-0.02822008		4094.38	-0.00447607
554.6	0.26537464		1144.59	0.05768077		1734.6	0.02274372		2324.6	0.05381407		2914.59	-0.01440861		3504.58	-0.02790567		4094.58	-0.00506822
554.8	0.26493342		1144.79	0.05778802		1734.8	0.02225736		2324.8	0.05370143		2914.79	-0.01369738		3504.78	-0.02748378		4094.78	-0.00536209
555	0.26586169		1144.99	0.0577595		1735	0.02222612		2325	0.05402463		2914.99	-0.01436128		3504.98	-0.0283663		4094.98	-0.00594104
555.2	0.26531272		1145.19	0.05878566		1735.2	0.02140236		2325.2	0.05396218		2915.19	-0.01356915		3505.18	-0.02809399		4095.18	-0.00566237
555.4	0.26401581		1145.39	0.05792072		1735.4	0.02197564		2325.4	0.05362205		2915.39	-0.01295935		3505.38	-0.02777785		4095.38	-0.00638959
555.6	0.26343541		1145.59	0.05735518		1735.6	0.02215241		2325.6	0.05304798		2915.59	-0.01310934		3505.58	-0.0277002		4095.58	-0.0066093
555.8	0.26391275		1145.79	0.05750073		1735.8	0.0232744		2325.8	0.05256566		2915.79	-0.01294525		3505.78	-0.02703147		4095.78	-0.006356
556	0.26394726		1145.99	0.05727809		1736	0.02389718		2326	0.05134137		2915.99	-0.01309662		3505.98	-0.02539218		4095.98	-0.00503978
556.2	0.26353048		1146.19	0.05730078		1736.2	0.02379824		2326.2	0.05063031		2916.19	-0.01344905		3506.18	-0.02514977		4096.18	-0.00470409
556.4	0.26300383		1146.39	0.05777171		1736.4	0.02362447		2326.4	0.05087986		2916.39	-0.01341199		3506.38	-0.02548743		4096.38	-0.00444852
556.6	0.26259752		1146.59	0.05752511		1736.6	0.02380161		2326.6	0.05039745		2916.59	-0.01393923		3506.58	-0.0249034		4096.58	-0.00415094
556.8	0.26207463		1146.79	0.05671224		1736.8	0.02386802		2326.8	0.05068745		2916.79	-0.01402218		3506.78	-0.02599733		4096.78	-0.0034932
557	0.26194481		1146.99	0.05745247		1737	0.02353878		2327	0.05086946		2916.99	-0.0146692		3506.98	-0.02613358		4096.98	-0.00441375
557.2	0.26289182		1147.19	0.05721167		1737.2	0.02293415		2327.2	0.05058443		2917.19	-0.01473056		3507.18	-0.0264382		4097.18	-0.00402638
557.4	0.2633502		1147.39	0.05803512		1737.4	0.02220325		2327.4	0.0509731		2917.39	-0.01496786		3507.38	-0.02608421		4097.38	-0.00311516
557.6	0.26311812		1147.59	0.05783703		1737.6	0.02158385		2327.6	0.05122502		2917.59	-0.01551619		3507.58	-0.02583607		4097.58	-0.0032153
557.8	0.2638763		1147.79	0.05818065		1737.8	0.02142919		2327.8	0.0522505		2917.79	-0.01604623		3507.78	-0.02549858		4097.78	-0.00263458
558	0.26471691		1147.99	0.05774983		1738	0.02097663		2328	0.05239244		2917.99	-0.01524867		3507.98	-0.02630588		4097.98	-0.00260305
558.2	0.26494063		1148.19	0.05723889		1738.2	0.020286		2328.2	0.05268905		2918.19	-0.0144623		3508.18	-0.02664064		4098.18	-0.00231532
558.4	0.26561586		1148.39	0.05810031		1738.4	0.02012299		2328.4	0.05239299		2918.39	-0.01352602		3508.38	-0.02589209		4098.38	-0.00159374
558.6	0.26621842		1148.59	0.0585813		1738.6	0.02041238		2328.6	0.05222843		2918.59	-0.01346993		3508.58	-0.02590472		4098.58	-0.00131593
558.8	0.26583526		1148.79	0.05890914		1738.8	0.02096401		2328.8	0.05196427		2918.79	-0.01331189		3508.78	-0.02623169		4098.78	-0.00152775
559	0.26643338		1148.99	0.05895588		1739	0.02127975		2329	0.05184899		2918.99	-0.01278695		3508.98	-0.02721201		4098.98	-0.00134372
559.2	0.26597686		1149.19	0.05923712		1739.2	0.02159569		2329.2	0.05179621		2919.19	-0.01164323		3509.18	-0.02603304		4099.18	-0.00138148
559.4	0.26569871		1149.39	0.0589208		1739.4	0.02284618		2329.4	0.05174271		2919.39	-0.0119314		3509.38	-0.02531458		4099.38	-0.00263834
559.6	0.2658761		1149.59	0.05926714		1739.6	0.02304476		2329.6	0.05101059		2919.59	-0.01191048		3509.58	-0.02502447		4099.58	-0.00254163
559.8	0.26560104		1149.79	0.05988022		1739.8	0.02395054		2329.8	0.05047671		2919.79	-0.01187544		3509.78	-0.0252005		4099.78	-0.00250701
560	0.26493		1149.99	0.05960546		1740	0.02456716		2330	0.04973439		2919.99	-0.01118435		3509.98	-0.02496641		4099.98	-0.00279641
560.2	0.26447483		1150.19	0.05968476		1740.2	0.02552338		2330.2	0.04976178		2920.19	-0.01059178		3510.18	-0.02591689		4100.18	-0.00379283
560.4	0.26445085		1150.39	0.05982811		1740.4	0.0263608		2330.4	0.05040776		2920.39	-0.01095154		3510.38	-0.02615964		4100.38	-0.00544705
560.6	0.26344838		1150.59	0.05920452		1740.6	0.02737526		2330.6	0.05052706		2920.59	-0.01102487		3510.58	-0.0260347		4100.58	-0.00529053
560.8	0.26343089		1150.79	0.05893021		1740.8	0.0272867		2330.8	0.05161569		2920.79	-0.01088319		3510.78	-0.0269935		4100.78	-0.00601574
561	0.26424624		1150.99	0.0592528		1741	0.02649275		2331	0.05284582		2920.99	-0.01091722		3510.98	-0.02675482		4100.98	-0.00683065
561.2	0.26296975		1151.19	0.0595027		1741.2	0.02653346		2331.2	0.05268505		2921.19	-0.01089948		3511.18	-0.02661193		4101.18	-0.00717866
561.4	0.26159746		1151.39	0.05998063		1741.4	0.0267391		2331.4	0.05344451		2921.39	-0.01073568		3511.38	-0.02621801		4101.38	-0.00831228
561.6	0.26122159		1151.59	0.05980958		1741.6	0.02624394		2331.6	0.05461503		2921.59	-0.01139292		3511.58	-0.02561879		4101.58	-0.00842564
561.8	0.26110115		1151.79	0.05963646		1741.8	0.02648039		2331.8	0.05511328		2921.79	-0.01112371		3511.78	-0.02597685		4101.78	-0.00814755
562	0.26115182		1151.99	0.05897495		1742	0.02645208		2332	0.05584786		2921.99	-0.00985662		3511.98	-0.02636233		4101.98	-0.00823471
562.2	0.26111587		1152.19	0.05883043		1742.2	0.02589605		2332.2	0.05545287		2922.19	-0.00974804		3512.18	-0.02541683		4102.18	-0.00697665
562.4	0.26000423		1152.39	0.05912587		1742.4	0.02509898		2332.4	0.05413502		2922.39	-0.00999834		3512.38	-0.02494185		4102.38	-0.00574003
562.6	0.26011263		1152.59	0.06001438		1742.6	0.02496072		2332.6	0.05353456		2922.59	-0.0102465		3512.58	-0.02516598		4102.58	-0.00517162
562.8	0.25936541		1152.79	0.06003018		1742.8	0.02412901		2332.8	0.05304147		2922.79	-0.01056173		3512.78	-0.02461597		4102.78	-0.00467348
563	0.25968479		1152.99	0.05921511		1743	0.02394809		2333	0.05243891		2922.99	-0.01080876		3512.98	-0.02390212		4102.98	-0.00430415
563.2	0.26057016		1153.19	0.05900586		1743.2	0.02377447		2333.2	0.05115674		2923.19	-0.01050791		3513.18	-0.02341242		4103.18	-0.00433519
563.4	0.2607109		1153.39	0.05930626		1743.4	0.02351269		2333.4	0.05072565		2923.39	-0.01122183		3513.38	-0.02277172		4103.38	-0.00430205
563.6	0.26020854		1153.59	0.05953272		1743.6	0.02285529		2333.6	0.04996659		2923.59	-0.01096675		3513.58	-0.02260491		4103.58	-0.00414354
563.8	0.2603366		1153.79	0.05908331		1743.8	0.02274208		2333.8	0.0493261		2923.79	-0.0111945		3513.78	-0.02272987		4103.78	-0.0042285
564	0.26038259		1153.99	0.0584381		1744	0.02336401		2334	0.04963452		2923.99	-0.01230895		3513.98	-0.02227182		4103.98	-0.00454435
564.2	0.25998261		1154.19	0.05811602		1744.2	0.02287808		2334.2	0.0498267		2924.19	-0.0126122		3514.18	-0.02301453		4104.18	-0.00466025
564.4	0.26044711		1154.39	0.05698329		1744.4	0.02309415		2334.4	0.04962962		2924.39	-0.01325454		3514.38	-0.02326355		4104.38	-0.0046316
564.6	0.26041137		1154.59	0.05628001		1744.6	0.02324108		2334.6	0.0495997		2924.59	-0.01376554		3514.58	-0.02453902		4104.58	-0.00444765
564.8	0.26130152		1154.79	0.0563966		1744.8	0.02255722		2334.8	0.04996656		2924.79	-0.01360952		3514.78	-0.02465901		4104.78	-0.00573898
565	0.26050754		1154.99	0.05605093		1745	0.02168013		2335	0.04977692		2924.99	-0.0131818		3514.98	-0.024557		4104.98	-0.00666913
565.2	0.25973831		1155.19	0.05553245		1745.2	0.02190376		2335.2	0.04942498		2925.19	-0.01369431		3515.18	-0.02496254		4105.18	-0.00719015
565.4	0.26075135		1155.39	0.0550189		1745.4	0.02290776		2335.4	0.05049999		2925.39	-0.01362247		3515.38	-0.02548042		4105.38	-0.00692027
565.6	0.26167485		1155.59	0.05549358		1745.6	0.02295465		2335.6	0.05102458		2925.59	-0.01360414		3515.58	-0.02614047		4105.58	-0.00621631
565.8	0.2612845		1155.79	0.05530855		1745.8	0.0231918		2335.8	0.05079733		2925.79	-0.01315554		3515.78	-0.02607367		4105.78	-0.00637075
566	0.26157294		1155.99	0.05495291		1746	0.0229198		2336	0.05090384		2925.99	-0.01259396		3515.98	-0.02547223		4105.98	-0.00643899
566.2	0.26178297		1156.19	0.05544155		1746.2	0.02289336		2336.2	0.05035666		2926.19	-0.01258631		3516.18	-0.02568687		4106.18	-0.00590179
566.4	0.26214816		1156.39	0.05536698		1746.4	0.02234908		2336.4	0.05027669		2926.39	-0.01140302		3516.38	-0.02619402		4106.38	-0.00564734
566.6	0.26256862		1156.59	0.0556377		1746.6	0.02274028		2336.6	0.05047288		2926.59	-0.01116974		3516.58	-0.02681869		4106.58	-0.00559388
566.8	0.26240765		1156.79	0.05536649		1746.8	0.02319426		2336.8	0.05076008		2926.79	-0.01091483		3516.78	-0.0272333		4106.78	-0.00558365
567	0.26221774		1156.99	0.05554761		1747	0.02328649		2337	0.05017285		2926.99	-0.01036199		3516.98	-0.02744001		4106.98	-0.00614008
567.2	0.26268148		1157.19	0.05622545		1747.2	0.02255131		2337.2	0.04950938		2927.19	-0.00924674		3517.18	-0.02793468		4107.18	-0.00655585
567.4	0.26137554		1157.39	0.05646218		1747.4	0.02186397		2337.4	0.05016296		2927.39	-0.0097836		3517.38	-0.02764177		4107.38	-0.00724737
567.6	0.26052216		1157.59	0.05668316		1747.6	0.02211041		2337.6	0.04978077		2927.59	-0.01011954		3517.58	-0.02713751		4107.58	-0.00717168
567.8	0.26037822		1157.79	0.05689359		1747.8	0.02175546		2337.8	0.05068641		2927.79	-0.010646		3517.78	-0.02690887		4107.78	-0.00686194
568	0.26014289		1157.99	0.05713463		1748	0.02197242		2338	0.05151468		2927.99	-0.01159196		3517.98	-0.02698772		4107.98	-0.00718692
568.2	0.25886472		1158.19	0.05673288		1748.2	0.02222387		2338.2	0.05137471		2928.19	-0.01171729		3518.18	-0.02734346		4108.18	-0.0070115
568.4	0.2582239		1158.39	0.0564988		1748.4	0.02296049		2338.4	0.05068376		2928.39	-0.0123601		3518.38	-0.02795254		4108.38	-0.00691266
568.6	0.25767966		1158.59	0.05736703		1748.6	0.02291899		2338.6	0.05121304		2928.59	-0.01222263		3518.58	-0.02824401		4108.58	-0.007641
568.8	0.25660128		1158.79	0.05755751		1748.8	0.02289251		2338.8	0.05079271		2928.79	-0.01151689		3518.78	-0.02776136		4108.78	-0.00786568
569	0.25648155		1158.99	0.05701439		1749	0.02234745		2339	0.05114749		2928.99	-0.01130616		3518.98	-0.02811166		4108.98	-0.00718067
569.2	0.2578311		1159.19	0.05743449		1749.2	0.02338215		2339.2	0.05158723		2929.19	-0.0119091		3519.18	-0.02837811		4109.18	-0.00597564
569.4	0.25848732		1159.39	0.05773215		1749.4	0.0244351		2339.4	0.05241384		2929.39	-0.01146929		3519.38	-0.02853726		4109.38	-0.00544002
569.6	0.25801602		1159.59	0.05853765		1749.6	0.02419696		2339.6	0.05219561		2929.59	-0.01144099		3519.58	-0.02794077		4109.58	-0.00544958
569.8	0.25782082		1159.79	0.05858954		1749.8	0.02397874		2339.8	0.05158274		2929.79	-0.01151912		3519.78	-0.02734182		4109.78	-0.00465959
570	0.25900607		1159.99	0.05916002		1750	0.02401013		2340	0.05187648		2929.99	-0.01135719		3519.98	-0.0274521		4109.98	-0.00473029
570.2	0.25974313		1160.19	0.05973632		1750.2	0.02435856		2340.2	0.05242888		2930.19	-0.0113264		3520.18	-0.02792799		4110.18	-0.0041244
570.4	0.26031878		1160.39	0.05927769		1750.4	0.02415782		2340.4	0.05221307		2930.39	-0.0111297		3520.38	-0.02747551		4110.38	-0.00350809
570.6	0.2596103		1160.59	0.05994334		1750.6	0.02437139		2340.6	0.05184692		2930.59	-0.01097872		3520.58	-0.02823885		4110.58	-0.00350328
570.8	0.25974366		1160.79	0.06010551		1750.8	0.02397905		2340.8	0.05151913		2930.79	-0.01036561		3520.78	-0.02858279		4110.78	-0.00396674
571	0.25955457		1160.99	0.06005454		1751	0.02267935		2341	0.05086132		2930.99	-0.010292		3520.98	-0.02833296		4110.98	-0.00447339
571.2	0.26001248		1161.19	0.05974852		1751.2	0.02215763		2341.2	0.05132041		2931.19	-0.00993973		3521.18	-0.02853905		4111.18	-0.00459779
571.4	0.25955768		1161.39	0.05915598		1751.4	0.02188624		2341.4	0.05086161		2931.39	-0.01092125		3521.38	-0.02804151		4111.38	-0.00434457
571.6	0.25981859		1161.59	0.06003065		1751.6	0.02224544		2341.6	0.05102505		2931.59	-0.01165012		3521.58	-0.02712493		4111.58	-0.00393417
571.8	0.25987808		1161.79	0.06027		1751.8	0.0216475		2341.8	0.05088539		2931.79	-0.01231564		3521.78	-0.0266996		4111.78	-0.0045408
572	0.26018708		1161.99	0.06054668		1752	0.02172561		2342	0.05088968		2931.99	-0.01301188		3521.98	-0.02615609		4111.98	-0.00516232
572.2	0.25866962		1162.19	0.06006793		1752.2	0.02235946		2342.2	0.05026378		2932.19	-0.0136664		3522.18	-0.02532295		4112.18	-0.00540586
572.4	0.25786938		1162.39	0.06081995		1752.4	0.02263228		2342.4	0.04979056		2932.39	-0.01402908		3522.38	-0.02547611		4112.38	-0.00560162
572.6	0.25781222		1162.59	0.06133852		1752.6	0.02239685		2342.6	0.05010403		2932.59	-0.01425806		3522.58	-0.02489772		4112.58	-0.00598942
572.8	0.25781043		1162.79	0.06044513		1752.8	0.02215215		2342.8	0.04974994		2932.79	-0.01374547		3522.78	-0.02450929		4112.78	-0.00565796
573	0.25850207		1162.99	0.05951712		1753	0.0221409		2343	0.05074253		2932.99	-0.014729		3522.98	-0.02441189		4112.98	-0.00623183
573.2	0.25819145		1163.19	0.05901313		1753.2	0.02278081		2343.2	0.05099715		2933.19	-0.0149271		3523.18	-0.02454607		4113.18	-0.00574821
573.4	0.2577284		1163.39	0.05831892		1753.4	0.02221452		2343.4	0.05135286		2933.39	-0.01502002		3523.38	-0.02512545		4113.38	-0.00562497
573.6	0.2577043		1163.59	0.05792302		1753.6	0.02245276		2343.6	0.05108962		2933.59	-0.01611518		3523.58	-0.02498675		4113.58	-0.00536309
573.8	0.25797059		1163.79	0.05839232		1753.8	0.02240239		2343.8	0.05050117		2933.79	-0.01619634		3523.78	-0.02505063		4113.78	-0.0048022
574	0.25820534		1163.99	0.05925468		1754	0.0219966		2344	0.05133738		2933.99	-0.01534713		3523.98	-0.0256489		4113.98	-0.00541404
574.2	0.25745391		1164.19	0.05897542		1754.2	0.02175708		2344.2	0.05130832		2934.19	-0.01486432		3524.18	-0.02611434		4114.18	-0.00530555
574.4	0.25665666		1164.39	0.05788593		1754.4	0.02159618		2344.4	0.05137819		2934.39	-0.01408316		3524.38	-0.02636338		4114.38	-0.00509208
574.6	0.25649254		1164.59	0.05782989		1754.6	0.02095537		2344.6	0.05168721		2934.59	-0.01323211		3524.58	-0.02806187		4114.58	-0.00556275
574.8	0.25709361		1164.79	0.0570246		1754.8	0.02041008		2344.8	0.05218373		2934.79	-0.01313411		3524.78	-0.0284186		4114.78	-0.00520705
575	0.25727991		1164.99	0.05609242		1755	0.01977754		2345	0.05218818		2934.99	-0.01292768		3524.98	-0.02883732		4114.98	-0.00526065
575.2	0.25651523		1165.19	0.05549605		1755.2	0.02018047		2345.2	0.05224265		2935.19	-0.01299194		3525.18	-0.02877573		4115.18	-0.00563093
575.4	0.2560786		1165.39	0.05474081		1755.4	0.02035467		2345.4	0.05195155		2935.39	-0.01414128		3525.38	-0.02874358		4115.38	-0.00580674
575.6	0.25573965		1165.59	0.05585387		1755.6	0.02002181		2345.6	0.05162799		2935.59	-0.01449396		3525.58	-0.02795112		4115.58	-0.00642391
575.8	0.25536531		1165.79	0.05555521		1755.8	0.01978944		2345.8	0.05147732		2935.79	-0.01430533		3525.78	-0.02779199		4115.78	-0.0073923
576	0.25562435		1165.99	0.0557165		1756	0.01920614		2346	0.05136297		2935.99	-0.01363437		3525.98	-0.02737331		4115.98	-0.00757145
576.2	0.25398066		1166.19	0.05547928		1756.2	0.01996562		2346.2	0.0501946		2936.19	-0.01351759		3526.18	-0.02651003		4116.18	-0.00832134
576.4	0.25394036		1166.39	0.0557869		1756.4	0.01998531		2346.4	0.04946056		2936.39	-0.01372585		3526.38	-0.02636839		4116.38	-0.00895077
576.6	0.25394936		1166.59	0.05578034		1756.6	0.01974361		2346.6	0.04890856		2936.59	-0.01324029		3526.58	-0.02545761		4116.58	-0.009778
576.8	0.25434413		1166.79	0.05572293		1756.8	0.02057945		2346.8	0.04778967		2936.79	-0.01325113		3526.78	-0.02512291		4116.78	-0.00981411
577	0.25365071		1166.99	0.05523728		1757	0.02132808		2347	0.04742879		2936.99	-0.01367146		3526.98	-0.0250114		4116.98	-0.01086679
577.2	0.25376243		1167.19	0.05532489		1757.2	0.02103348		2347.2	0.04662042		2937.19	-0.01330557		3527.18	-0.02547259		4117.18	-0.01045235
577.4	0.2541764		1167.39	0.05633047		1757.4	0.02033115		2347.4	0.04684392		2937.39	-0.01315926		3527.38	-0.02600149		4117.38	-0.01001867
577.6	0.25439617		1167.59	0.056657		1757.6	0.02119905		2347.6	0.04761751		2937.59	-0.01317312		3527.58	-0.02563857		4117.58	-0.00983018
577.8	0.25485008		1167.79	0.05761794		1757.8	0.01999027		2347.8	0.04797568		2937.79	-0.01220996		3527.78	-0.02542213		4117.78	-0.00901022
578	0.25485488		1167.99	0.05801071		1758	0.02037685		2348	0.04837772		2937.99	-0.01097842		3527.98	-0.02606405		4117.98	-0.00845125
578.2	0.25503233		1168.19	0.05761555		1758.2	0.02058078		2348.2	0.04810343		2938.19	-0.01100486		3528.18	-0.02615832		4118.18	-0.00835302
578.4	0.25607158		1168.39	0.05770429		1758.4	0.02112507		2348.4	0.04857338		2938.39	-0.01105823		3528.38	-0.02626899		4118.38	-0.00764086
578.6	0.25739498		1168.59	0.05792362		1758.6	0.02102653		2348.6	0.04881765		2938.59	-0.01049818		3528.58	-0.02656883		4118.58	-0.00662256
578.8	0.2579844		1168.79	0.05752805		1758.8	0.02082961		2348.8	0.04851064		2938.79	-0.01105003		3528.78	-0.02540586		4118.78	-0.00636424
579	0.25764786		1168.99	0.0572115		1759	0.02134442		2349	0.04871462		2938.99	-0.01148005		3528.98	-0.02541633		4118.98	-0.00618185
579.2	0.25711805		1169.19	0.05736019		1759.2	0.02213254		2349.2	0.04891605		2939.19	-0.01245934		3529.18	-0.02547159		4119.18	-0.00544147
579.4	0.25662293		1169.39	0.05656148		1759.4	0.02266096		2349.4	0.04926292		2939.39	-0.01325513		3529.38	-0.02566878		4119.38	-0.00514348
579.6	0.25734964		1169.59	0.05666685		1759.6	0.02220294		2349.6	0.04960382		2939.59	-0.01369221		3529.58	-0.02541148		4119.58	-0.00426457
579.8	0.25654241		1169.79	0.05535313		1759.8	0.02321347		2349.8	0.05007748		2939.79	-0.01330771		3529.78	-0.02556696		4119.78	-0.00403918
580	0.25634022		1169.99	0.0551551		1760	0.02348384		2350	0.04920228		2939.99	-0.01346723		3529.98	-0.02539693		4119.98	-0.00446246
580.2	0.25484037		1170.19	0.05492327		1760.2	0.02516843		2350.2	0.04888161		2940.19	-0.01421355		3530.18	-0.02508909		4120.18	-0.00466277
580.4	0.25551508		1170.39	0.05487055		1760.4	0.02513602		2350.4	0.0490028		2940.39	-0.01508937		3530.38	-0.02524214		4120.38	-0.00600788
580.6	0.25469269		1170.59	0.05477685		1760.6	0.02630204		2350.6	0.0488068		2940.59	-0.01478834		3530.58	-0.02483718		4120.58	-0.00562267
580.8	0.25456704		1170.79	0.05465021		1760.8	0.02619129		2350.8	0.04846703		2940.79	-0.01530355		3530.78	-0.02510822		4120.78	-0.00603232
581	0.2539978		1170.99	0.05363931		1761	0.02614937		2351	0.04831129		2940.99	-0.01468217		3530.98	-0.02616441		4120.98	-0.00751768
581.2	0.25370863		1171.19	0.0539865		1761.2	0.02551854		2351.2	0.04884162		2941.19	-0.01413452		3531.18	-0.02673889		4121.18	-0.00748722
581.4	0.25371525		1171.39	0.05418074		1761.4	0.02546916		2351.4	0.0496875		2941.39	-0.01385304		3531.38	-0.02729166		4121.38	-0.00732953
581.6	0.25396918		1171.59	0.05473841		1761.6	0.02545409		2351.6	0.05033508		2941.59	-0.01367011		3531.58	-0.02771952		4121.58	-0.00751304
581.8	0.25396721		1171.79	0.05532256		1761.8	0.02511267		2351.8	0.04979992		2941.79	-0.01299694		3531.78	-0.02765548		4121.78	-0.00703414
582	0.25378598		1171.99	0.05593278		1762	0.02558508		2352	0.04925371		2941.99	-0.01232543		3531.98	-0.02868286		4121.98	-0.00726889
582.2	0.25358734		1172.19	0.05600927		1762.2	0.02465632		2352.2	0.04873447		2942.19	-0.0118771		3532.18	-0.02898775		4122.18	-0.0075723
582.4	0.25334159		1172.39	0.05654149		1762.4	0.02418387		2352.4	0.0486619		2942.39	-0.0123535		3532.38	-0.02925255		4122.38	-0.00793289
582.6	0.25266664		1172.59	0.05628814		1762.6	0.02282187		2352.6	0.04898539		2942.59	-0.01202595		3532.58	-0.02884188		4122.58	-0.00844961
582.8	0.25268538		1172.79	0.0572654		1762.8	0.02272979		2352.8	0.04911142		2942.79	-0.01273751		3532.78	-0.02885143		4122.78	-0.00905389
583	0.25198297		1172.99	0.0573705		1763	0.02282544		2353	0.0497533		2942.99	-0.01298892		3532.98	-0.02935669		4122.98	-0.00784537
583.2	0.25274509		1173.19	0.05697227		1763.2	0.02187673		2353.2	0.05013555		2943.19	-0.01306875		3533.18	-0.02943291		4123.18	-0.00724877
583.4	0.25339036		1173.39	0.05615432		1763.4	0.02162456		2353.4	0.05024209		2943.39	-0.0133212		3533.38	-0.02868271		4123.38	-0.00707862
583.6	0.25396162		1173.59	0.0562125		1763.6	0.02111578		2353.6	0.05035102		2943.59	-0.01327908		3533.58	-0.02863886		4123.58	-0.00673844
583.8	0.25273639		1173.79	0.05538527		1763.8	0.02156231		2353.8	0.04992942		2943.79	-0.01357865		3533.78	-0.02790285		4123.78	-0.0074795
584	0.25303179		1173.99	0.05577572		1764	0.02163653		2354	0.05057686		2943.99	-0.01422458		3533.98	-0.02743857		4123.98	-0.00849703
584.2	0.25355096		1174.19	0.05560646		1764.2	0.02144586		2354.2	0.05170708		2944.19	-0.01530303		3534.18	-0.02685277		4124.18	-0.0077945
584.4	0.25441065		1174.39	0.05580114		1764.4	0.02137348		2354.4	0.05189859		2944.39	-0.01619141		3534.38	-0.02648687		4124.38	-0.00820289
584.6	0.2542484		1174.59	0.05573298		1764.6	0.02233105		2354.6	0.05282595		2944.59	-0.01609209		3534.58	-0.02666021		4124.58	-0.00744727
584.8	0.25407138		1174.79	0.05560171		1764.8	0.02216668		2354.8	0.05225004		2944.79	-0.01568185		3534.78	-0.02612922		4124.78	-0.0079158
585	0.25413519		1174.99	0.05519011		1765	0.02220552		2355	0.05220105		2944.99	-0.01569768		3534.98	-0.02559668		4124.98	-0.00845884
585.2	0.25264897		1175.19	0.05513579		1765.2	0.02152977		2355.2	0.05251436		2945.19	-0.01528442		3535.18	-0.025093		4125.18	-0.0081736
585.4	0.25297561		1175.39	0.0555579		1765.4	0.02126661		2355.4	0.05220069		2945.39	-0.0149729		3535.38	-0.02536296		4125.38	-0.00814925
585.6	0.25258838		1175.59	0.05694186		1765.6	0.02146842		2355.6	0.05141725		2945.59	-0.01484837		3535.58	-0.02528569		4125.58	-0.00775483
585.8	0.25220537		1175.79	0.05611869		1765.8	0.02186649		2355.8	0.05083981		2945.79	-0.01454508		3535.78	-0.02446692		4125.78	-0.00757793
586	0.25179361		1175.99	0.05575039		1766	0.02193736		2356	0.05038947		2945.99	-0.01407796		3535.98	-0.02603319		4125.98	-0.0074445
586.2	0.25143723		1176.19	0.05449809		1766.2	0.02215929		2356.2	0.04998065		2946.19	-0.0136662		3536.18	-0.02641812		4126.18	-0.00777448
586.4	0.25093037		1176.39	0.05502409		1766.4	0.02275523		2356.4	0.05013055		2946.39	-0.01423519		3536.38	-0.02678246		4126.38	-0.00800726
586.6	0.25103462		1176.59	0.05449258		1766.6	0.02275289		2356.6	0.04987659		2946.59	-0.01357805		3536.58	-0.0270558		4126.58	-0.0081975
586.8	0.25184823		1176.79	0.05475952		1766.8	0.02308343		2356.8	0.04947625		2946.79	-0.01347048		3536.78	-0.02771573		4126.78	-0.00790771
587	0.25173709		1176.99	0.05428654		1767	0.02192903		2357	0.04872471		2946.99	-0.01279576		3536.98	-0.02767371		4126.98	-0.00748732
587.2	0.2523925		1177.19	0.05447848		1767.2	0.02101929		2357.2	0.04879849		2947.19	-0.01228665		3537.18	-0.02817191		4127.18	-0.00725525
587.4	0.25234877		1177.39	0.05460557		1767.4	0.02113613		2357.4	0.04773185		2947.39	-0.01290287		3537.38	-0.02818587		4127.38	-0.00693586
587.6	0.25155603		1177.59	0.05446623		1767.6	0.02054208		2357.6	0.04711907		2947.59	-0.0126536		3537.58	-0.02875981		4127.58	-0.00649505
587.8	0.25149494		1177.79	0.05398398		1767.8	0.02077041		2357.8	0.04854436		2947.79	-0.01363771		3537.78	-0.02823787		4127.78	-0.00619165
588	0.25206956		1177.99	0.05462437		1768	0.0211422		2358	0.04887575		2947.99	-0.01403763		3537.98	-0.0281677		4127.98	-0.00621128
588.2	0.25282461		1178.19	0.05427183		1768.2	0.02096313		2358.2	0.04894206		2948.19	-0.0140767		3538.18	-0.02865253		4128.18	-0.00562852
588.4	0.25283387		1178.39	0.05386398		1768.4	0.021647		2358.4	0.0489629		2948.39	-0.01361559		3538.38	-0.02927954		4128.38	-0.00547421
588.6	0.25349993		1178.59	0.05415717		1768.6	0.0214359		2358.6	0.04990548		2948.59	-0.01301424		3538.58	-0.02957089		4128.58	-0.0050703
588.8	0.25368758		1178.79	0.05389729		1768.8	0.01996472		2358.8	0.04869405		2948.79	-0.01228709		3538.78	-0.02835405		4128.78	-0.00466573
589	0.25466605		1178.99	0.05371295		1769	0.01826036		2359	0.04876052		2948.99	-0.01289375		3538.98	-0.0280738		4128.98	-0.00462434
589.2	0.25434408		1179.19	0.0535417		1769.2	0.01712587		2359.2	0.04883725		2949.19	-0.01261757		3539.18	-0.02860652		4129.18	-0.00471945
589.4	0.25544749		1179.39	0.0545805		1769.4	0.01725607		2359.4	0.0492128		2949.39	-0.01231323		3539.38	-0.02832439		4129.38	-0.0050443
589.6	0.25530988		1179.59	0.05428739		1769.6	0.0176617		2359.6	0.0490574		2949.59	-0.01252722		3539.58	-0.02767995		4129.58	-0.00475474
589.8	0.25607206		1179.79	0.05320766		1769.8	0.01781991		2359.8	0.04888907		2949.79	-0.01268049		3539.78	-0.02769268		4129.78	-0.00540413
590	0.25644413		1179.99	0.05391509		1770	0.01809535		2360	0.0488958		2949.99	-0.0126489		3539.98	-0.028829		4129.98	-0.00515338
590.2	0.25713224		1180.19	0.05375468		1770.2	0.0183788		2360.2	0.04863333		2950.19	-0.01378448		3540.18	-0.02911815		4130.18	-0.00541327
590.4	0.25720338		1180.39	0.05431924		1770.4	0.01868711		2360.4	0.04895085		2950.39	-0.01396567		3540.38	-0.0289556		4130.38	-0.00573542
590.6	0.25799505		1180.59	0.05353235		1770.6	0.01827143		2360.6	0.04811921		2950.59	-0.01492758		3540.58	-0.02888752		4130.58	-0.0060815
590.8	0.25774636		1180.79	0.05383978		1770.8	0.01806067		2360.8	0.04856029		2950.79	-0.01538526		3540.78	-0.02908226		4130.78	-0.00670107
591	0.25612597		1180.99	0.05448825		1771	0.01792316		2361	0.04834791		2950.99	-0.01561847		3540.98	-0.02918304		4130.98	-0.00754726
591.2	0.25444828		1181.19	0.05464914		1771.2	0.01798629		2361.2	0.04838807		2951.19	-0.01650743		3541.18	-0.02960174		4131.18	-0.00706061
591.4	0.25311064		1181.39	0.05400987		1771.4	0.01796881		2361.4	0.04765558		2951.39	-0.0175751		3541.38	-0.02878951		4131.38	-0.00697839
591.6	0.25140149		1181.59	0.05349495		1771.6	0.01813623		2361.6	0.04737692		2951.59	-0.01694796		3541.58	-0.02829377		4131.58	-0.0070168
591.8	0.25026875		1181.79	0.05338363		1771.8	0.01838085		2361.8	0.04780213		2951.79	-0.01779417		3541.78	-0.02778186		4131.78	-0.00710876
592	0.24985687		1181.99	0.05293431		1772	0.01866707		2362	0.04703167		2951.99	-0.01705475		3541.98	-0.02733887		4131.98	-0.007416
592.2	0.24995023		1182.19	0.05329173		1772.2	0.01818071		2362.2	0.04742632		2952.19	-0.01650921		3542.18	-0.02733008		4132.18	-0.00790619
592.4	0.25021784		1182.39	0.05363444		1772.4	0.01767515		2362.4	0.04806039		2952.39	-0.01530502		3542.38	-0.02832883		4132.38	-0.00733466
592.6	0.25002315		1182.59	0.05443622		1772.6	0.01691113		2362.6	0.048125		2952.59	-0.01595209		3542.58	-0.02835458		4132.58	-0.00731887
592.8	0.24993214		1182.79	0.05465619		1772.8	0.01652154		2362.8	0.04762371		2952.79	-0.0147685		3542.78	-0.02799709		4132.78	-0.00742578
593	0.24985581		1182.99	0.05480357		1773	0.0169244		2363	0.04760031		2952.99	-0.01455012		3542.98	-0.02784636		4132.98	-0.00676509
593.2	0.2485323		1183.19	0.0550583		1773.2	0.01673417		2363.2	0.04767716		2953.19	-0.01415324		3543.18	-0.02682528		4133.18	-0.00752245
593.4	0.24869419		1183.39	0.05505428		1773.4	0.01717217		2363.4	0.04825743		2953.39	-0.01351353		3543.38	-0.02654827		4133.38	-0.0072761
593.6	0.24833148		1183.59	0.0539053		1773.6	0.01692987		2363.6	0.04807163		2953.59	-0.01438866		3543.58	-0.02656795		4133.58	-0.00657677
593.8	0.24947895		1183.79	0.05494849		1773.8	0.01739982		2363.8	0.04736519		2953.79	-0.01492535		3543.78	-0.02722759		4133.78	-0.0063509
594	0.24997625		1183.99	0.05520942		1774	0.01797685		2364	0.04820933		2953.99	-0.01494862		3543.98	-0.02740896		4133.98	-0.00581499
594.2	0.25083174		1184.19	0.05466192		1774.2	0.01890266		2364.2	0.04870102		2954.19	-0.01526605		3544.18	-0.02813943		4134.18	-0.00565959
594.4	0.25090967		1184.39	0.05452788		1774.4	0.01935924		2364.4	0.04909976		2954.39	-0.01424713		3544.38	-0.02853955		4134.38	-0.00563786
594.6	0.25128743		1184.59	0.05391044		1774.6	0.01957755		2364.6	0.04914169		2954.59	-0.01409606		3544.58	-0.02888866		4134.58	-0.00515177
594.8	0.25114948		1184.79	0.05391898		1774.8	0.02003765		2364.8	0.0488784		2954.79	-0.0129885		3544.78	-0.02940208		4134.78	-0.00574271
595	0.25023708		1184.99	0.05335079		1775	0.02036101		2365	0.04817727		2954.99	-0.01378647		3544.98	-0.02976073		4134.98	-0.00643131
595.2	0.24993359		1185.19	0.05241131		1775.2	0.02052311		2365.2	0.04834631		2955.19	-0.01395413		3545.18	-0.02974814		4135.18	-0.00532802
595.4	0.25072257		1185.39	0.05222323		1775.4	0.02041006		2365.4	0.04775092		2955.39	-0.01450544		3545.38	-0.02864202		4135.38	-0.00557717
595.6	0.25055266		1185.59	0.05248638		1775.6	0.02012883		2365.6	0.04691872		2955.59	-0.01407423		3545.58	-0.02819623		4135.58	-0.00572117
595.8	0.25076865		1185.79	0.0524884		1775.8	0.02000793		2365.8	0.04683538		2955.79	-0.0147922		3545.78	-0.02796547		4135.78	-0.00458441
596	0.25172239		1185.99	0.05215164		1776	0.01967623		2366	0.04712622		2955.99	-0.0137859		3545.98	-0.02824614		4135.98	-0.00565264
596.2	0.25144369		1186.19	0.05271971		1776.2	0.0191923		2366.2	0.04665579		2956.19	-0.01349186		3546.18	-0.028845		4136.18	-0.00613435
596.4	0.25184894		1186.39	0.05206603		1776.4	0.01908629		2366.4	0.04666145		2956.39	-0.01258556		3546.38	-0.02946772		4136.38	-0.00575926
596.6	0.25189712		1186.59	0.05201639		1776.6	0.01981648		2366.6	0.04646435		2956.59	-0.01269867		3546.58	-0.02840517		4136.58	-0.00685628
596.8	0.2519896		1186.79	0.05173998		1776.8	0.01987573		2366.8	0.04545011		2956.79	-0.01164201		3546.78	-0.02758254		4136.78	-0.00638923
597	0.25118496		1186.99	0.05107839		1777	0.01938407		2367	0.04554552		2956.99	-0.01261393		3546.98	-0.02665347		4136.98	-0.00625325
597.2	0.25053217		1187.19	0.05191162		1777.2	0.01839994		2367.2	0.04595085		2957.19	-0.01448967		3547.18	-0.02599201		4137.18	-0.00619579
597.4	0.25113508		1187.39	0.05146767		1777.4	0.01793026		2367.4	0.04598761		2957.39	-0.01453163		3547.38	-0.02670244		4137.38	-0.00569893
597.6	0.2502752		1187.59	0.05176235		1777.6	0.0174375		2367.6	0.04602677		2957.59	-0.01501739		3547.58	-0.02729374		4137.58	-0.00569111
597.8	0.24981321		1187.79	0.05330204		1777.8	0.01750223		2367.8	0.04622017		2957.79	-0.01478924		3547.78	-0.02817023		4137.78	-0.00532866
598	0.24925416		1187.99	0.05415331		1778	0.01778718		2368	0.04733957		2957.99	-0.01505974		3547.98	-0.0275944		4137.98	-0.00598949
598.2	0.24867235		1188.19	0.05470956		1778.2	0.01755766		2368.2	0.04744228		2958.19	-0.01460167		3548.18	-0.02884034		4138.18	-0.00636855
598.4	0.24805074		1188.39	0.05443303		1778.4	0.01706724		2368.4	0.04791684		2958.39	-0.01436968		3548.38	-0.02932844		4138.38	-0.00623629
598.6	0.2488745		1188.59	0.05403557		1778.6	0.0169117		2368.6	0.04766015		2958.59	-0.01402944		3548.58	-0.02956716		4138.58	-0.00569013
598.8	0.24900926		1188.79	0.05390493		1778.8	0.01701683		2368.8	0.04694155		2958.79	-0.01454748		3548.78	-0.02940317		4138.78	-0.00603647
599	0.24905917		1188.99	0.05396916		1779	0.01753961		2369	0.04749405		2958.99	-0.01607594		3548.98	-0.02980909		4138.98	-0.00589416
599.2	0.24942916		1189.19	0.05376431		1779.2	0.01795444		2369.2	0.04751488		2959.19	-0.01602053		3549.18	-0.03012226		4139.18	-0.00584876
599.4	0.25021676		1189.39	0.05392008		1779.4	0.01765912		2369.4	0.04709288		2959.39	-0.0166578		3549.38	-0.02926111		4139.38	-0.00684917
599.6	0.250022		1189.59	0.05328585		1779.6	0.01749539		2369.6	0.04677475		2959.59	-0.01711164		3549.58	-0.0300253		4139.58	-0.00637278
599.8	0.25051338		1189.79	0.05308145		1779.8	0.0173214		2369.8	0.04642066		2959.79	-0.01751798		3549.78	-0.03010824		4139.78	-0.00667957
600	0.25090897		1189.99	0.05271373		1780	0.01696772		2370	0.04644143		2959.99	-0.01619555		3549.98	-0.03054418		4139.98	-0.00761459
600.2	0.25163845		1190.19	0.05264942		1780.2	0.01706957		2370.2	0.04628889		2960.19	-0.01608144		3550.18	-0.03014285		4140.18	-0.00734789
600.4	0.25324028		1190.39	0.05207771		1780.4	0.01772702		2370.4	0.04664731		2960.39	-0.01530218		3550.38	-0.03048224		4140.38	-0.00764946
600.6	0.25320732		1190.59	0.05220837		1780.6	0.01762206		2370.6	0.0457632		2960.59	-0.01480789		3550.58	-0.03027841		4140.58	-0.00801327
600.8	0.25324666		1190.79	0.05190619		1780.8	0.01748949		2370.8	0.04572308		2960.79	-0.01535147		3550.78	-0.03055886		4140.78	-0.00731879
601	0.25307012		1190.99	0.05181098		1781	0.01737283		2371	0.04602928		2960.99	-0.01569992		3550.98	-0.03010223		4140.98	-0.00692913
601.2	0.25344778		1191.19	0.05253507		1781.2	0.01748175		2371.2	0.04633487		2961.19	-0.01531022		3551.18	-0.03011207		4141.18	-0.005922
601.4	0.25276694		1191.39	0.05194235		1781.4	0.0179783		2371.4	0.0462534		2961.39	-0.01345222		3551.38	-0.03064453		4141.38	-0.00622438
601.6	0.25195452		1191.59	0.052232		1781.6	0.01870455		2371.6	0.04668387		2961.59	-0.01360083		3551.58	-0.03126547		4141.58	-0.00643504
601.8	0.25147665		1191.79	0.05304733		1781.8	0.01956754		2371.8	0.04644735		2961.79	-0.01374703		3551.78	-0.03130181		4141.78	-0.0057381
602	0.25162849		1191.99	0.05326418		1782	0.02091894		2372	0.04697724		2961.99	-0.01436695		3551.98	-0.03049125		4141.98	-0.00614759
602.2	0.25092002		1192.19	0.05264857		1782.2	0.02038109		2372.2	0.04681518		2962.19	-0.01422328		3552.18	-0.03158238		4142.18	-0.00663131
602.4	0.250562		1192.39	0.05228039		1782.4	0.02106143		2372.4	0.04690061		2962.39	-0.01414521		3552.38	-0.03223103		4142.38	-0.00711678
602.6	0.24922081		1192.59	0.05272398		1782.6	0.02086359		2372.6	0.04645242		2962.59	-0.01401614		3552.58	-0.03212442		4142.58	-0.00703484
602.8	0.24884759		1192.79	0.05342372		1782.8	0.02197186		2372.8	0.04691809		2962.79	-0.01470775		3552.78	-0.03228453		4142.78	-0.00750923
603	0.24872238		1192.99	0.05434511		1783	0.0223504		2373	0.04626176		2962.99	-0.01484554		3552.98	-0.03239356		4142.98	-0.00793866
603.2	0.24857618		1193.19	0.05412456		1783.2	0.02254365		2373.2	0.04578438		2963.19	-0.01540779		3553.18	-0.03181622		4143.18	-0.008877
603.4	0.24844982		1193.39	0.05440186		1783.4	0.02237042		2373.4	0.04560742		2963.39	-0.01681755		3553.38	-0.03157287		4143.38	-0.00936429
603.6	0.24805781		1193.59	0.05482513		1783.6	0.02207812		2373.6	0.0459321		2963.59	-0.01690667		3553.58	-0.03183811		4143.58	-0.00891767
603.8	0.24763436		1193.79	0.05486149		1783.8	0.02147313		2373.8	0.04580988		2963.79	-0.0165621		3553.78	-0.03139336		4143.78	-0.00971235
604	0.24708919		1193.99	0.05461861		1784	0.02134894		2374	0.045932		2963.99	-0.01526329		3553.98	-0.03148816		4143.98	-0.00963645
604.2	0.24789462		1194.19	0.05417825		1784.2	0.0205419		2374.2	0.04626356		2964.19	-0.01452734		3554.18	-0.03167292		4144.18	-0.00882925
604.4	0.24787567		1194.39	0.05439597		1784.4	0.02085323		2374.4	0.04667751		2964.39	-0.01368792		3554.38	-0.03241774		4144.38	-0.00809561
604.6	0.24703506		1194.59	0.05458002		1784.6	0.018568		2374.6	0.04684699		2964.59	-0.0134437		3554.58	-0.03135644		4144.58	-0.00875382
604.8	0.24747217		1194.79	0.05380949		1784.8	0.01818428		2374.8	0.04763337		2964.79	-0.01352176		3554.78	-0.03051752		4144.78	-0.00774094
605	0.24805846		1194.99	0.05291722		1785	0.01742922		2375	0.0474287		2964.99	-0.01269051		3554.98	-0.02916683		4144.98	-0.00669222
605.2	0.2484975		1195.19	0.05229962		1785.2	0.0169522		2375.2	0.04747168		2965.19	-0.01216372		3555.18	-0.02865939		4145.18	-0.00629708
605.4	0.24881485		1195.39	0.05194724		1785.4	0.01749633		2375.4	0.0473156		2965.39	-0.01256001		3555.38	-0.02862571		4145.38	-0.00594647
605.6	0.24964101		1195.59	0.05179821		1785.6	0.01702376		2375.6	0.0475883		2965.59	-0.01250311		3555.58	-0.02866015		4145.58	-0.00581282
605.8	0.25046217		1195.79	0.05107182		1785.8	0.01690601		2375.8	0.04652423		2965.79	-0.01233548		3555.78	-0.0281188		4145.78	-0.00563036
606	0.25043883		1195.99	0.05065913		1786	0.0169115		2376	0.04757325		2965.99	-0.0134105		3555.98	-0.02831386		4145.98	-0.00615502
606.2	0.25016587		1196.19	0.05014513		1786.2	0.01613497		2376.2	0.04741793		2966.19	-0.0135363		3556.18	-0.0286961		4146.18	-0.00707152
606.4	0.24947459		1196.39	0.05022155		1786.4	0.01713581		2376.4	0.04741991		2966.39	-0.01375564		3556.38	-0.02905929		4146.38	-0.00735256
606.6	0.24930846		1196.59	0.0498796		1786.6	0.01652027		2376.6	0.04809492		2966.59	-0.01429616		3556.58	-0.02861191		4146.58	-0.00710789
606.8	0.25067984		1196.79	0.04967223		1786.8	0.01754339		2376.8	0.04764616		2966.79	-0.0159046		3556.78	-0.0290966		4146.78	-0.0071181
607	0.2507833		1196.99	0.04910804		1787	0.01612532		2377	0.04634156		2966.99	-0.015905		3556.98	-0.02871994		4146.98	-0.00723766
607.2	0.25071894		1197.19	0.04879655		1787.2	0.01661012		2377.2	0.04620183		2967.19	-0.01740649		3557.18	-0.02927844		4147.18	-0.00689508
607.4	0.25021849		1197.39	0.04851016		1787.4	0.01659711		2377.4	0.04653799		2967.39	-0.01735281		3557.38	-0.0300635		4147.38	-0.00627303
607.6	0.24974329		1197.59	0.04890657		1787.6	0.01701024		2377.6	0.04727706		2967.59	-0.01683942		3557.58	-0.03036488		4147.58	-0.00623956
607.8	0.24928229		1197.79	0.04845669		1787.8	0.01668098		2377.8	0.04682252		2967.79	-0.01643149		3557.78	-0.03077821		4147.78	-0.00645942
608	0.25026767		1197.99	0.04869099		1788	0.01614065		2378	0.04789723		2967.99	-0.01584976		3557.98	-0.0303207		4147.98	-0.00631753
608.2	0.2511082		1198.19	0.04912517		1788.2	0.01533241		2378.2	0.04804106		2968.19	-0.01582764		3558.18	-0.03091134		4148.18	-0.00578566
608.4	0.25076442		1198.39	0.0501709		1788.4	0.01561084		2378.4	0.04855595		2968.39	-0.01572844		3558.38	-0.03147078		4148.38	-0.00592721
608.6	0.25071127		1198.59	0.0500025		1788.6	0.01409324		2378.6	0.04856022		2968.59	-0.0156507		3558.58	-0.03068855		4148.58	-0.00588659
608.8	0.2504532		1198.79	0.05046111		1788.8	0.01448369		2378.8	0.04900754		2968.79	-0.01549912		3558.78	-0.03143172		4148.78	-0.00440764
609	0.25092479		1198.99	0.05092849		1789	0.01442289		2379	0.04857247		2968.99	-0.0152171		3558.98	-0.03195089		4148.98	-0.00482078
609.2	0.25077307		1199.19	0.05131007		1789.2	0.01420144		2379.2	0.04797298		2969.19	-0.0149566		3559.18	-0.03271414		4149.18	-0.00520695
609.4	0.25068934		1199.39	0.05230573		1789.4	0.01471706		2379.4	0.04795962		2969.39	-0.01518757		3559.38	-0.03335195		4149.38	-0.00491607
609.6	0.25004993		1199.59	0.05209309		1789.6	0.01525955		2379.6	0.04731067		2969.59	-0.01465878		3559.58	-0.03356199		4149.58	-0.00575521
609.8	0.24934718		1199.79	0.05217911		1789.8	0.01644565		2379.8	0.04639358		2969.79	-0.01499782		3559.78	-0.03321346		4149.78	-0.0061304
610	0.24864803		1199.99	0.05335999		1790	0.017615		2380	0.04637053		2969.99	-0.01520502		3559.98	-0.03307709		4149.98	-0.00648852
610.2	0.24791536		1200.19	0.05329235		1790.2	0.01823996		2380.2	0.04619994		2970.19	-0.01532644		3560.18	-0.0326482		4150.18	-0.00703729
610.4	0.24674196		1200.39	0.05331647		1790.4	0.01966266		2380.4	0.04606984		2970.39	-0.0157839		3560.38	-0.03231949		4150.38	-0.00712772
610.6	0.24713073		1200.59	0.05273681		1790.6	0.01959674		2380.6	0.04617923		2970.59	-0.01558447		3560.58	-0.03196633		4150.58	-0.00748296
610.8	0.24777027		1200.79	0.05219781		1790.8	0.01950066		2380.8	0.04461773		2970.79	-0.01580718		3560.78	-0.03169418		4150.78	-0.00695265
611	0.24759441		1200.99	0.05162538		1791	0.01903736		2381	0.04389766		2970.99	-0.01599256		3560.98	-0.03165757		4150.98	-0.00704316
611.2	0.24751159		1201.19	0.05192958		1791.2	0.0197355		2381.2	0.04399727		2971.19	-0.01620817		3561.18	-0.03171858		4151.18	-0.00668643
611.4	0.24758982		1201.39	0.05179307		1791.4	0.01958963		2381.4	0.04362841		2971.39	-0.01537121		3561.38	-0.03140642		4151.38	-0.00696127
611.6	0.24764534		1201.59	0.05162935		1791.6	0.01931535		2381.6	0.04389701		2971.59	-0.01508802		3561.58	-0.03047086		4151.58	-0.007296
611.8	0.24813378		1201.79	0.05105287		1791.8	0.0187146		2381.8	0.04346949		2971.79	-0.01425058		3561.78	-0.02927009		4151.78	-0.00724191
612	0.24885208		1201.99	0.05180616		1792	0.01879982		2382	0.04422911		2971.99	-0.01397957		3561.98	-0.02856319		4151.98	-0.00756166
612.2	0.24836288		1202.19	0.05148746		1792.2	0.0184667		2382.2	0.04384987		2972.19	-0.01421887		3562.18	-0.02867081		4152.18	-0.00735053
612.4	0.24796816		1202.39	0.0516543		1792.4	0.01786547		2382.4	0.04435863		2972.39	-0.01369309		3562.38	-0.02865577		4152.38	-0.00647466
612.6	0.24730885		1202.59	0.05170824		1792.6	0.01654419		2382.6	0.04472025		2972.59	-0.01390227		3562.58	-0.02852659		4152.58	-0.00611525
612.8	0.24654622		1202.79	0.0524329		1792.8	0.01612702		2382.8	0.04493308		2972.79	-0.01339533		3562.78	-0.02983884		4152.78	-0.00591328
613	0.2471879		1202.99	0.05156471		1793	0.01691265		2383	0.04410918		2972.99	-0.01245548		3562.98	-0.03123532		4152.98	-0.00575305
613.2	0.2467087		1203.19	0.05150595		1793.2	0.01716455		2383.2	0.04450315		2973.19	-0.01266728		3563.18	-0.03156128		4153.18	-0.00547233
613.4	0.2460889		1203.39	0.05128941		1793.4	0.01781633		2383.4	0.04444249		2973.39	-0.01368985		3563.38	-0.0317533		4153.38	-0.00592193
613.6	0.24573487		1203.59	0.0507245		1793.6	0.01883572		2383.6	0.04525371		2973.59	-0.01374479		3563.58	-0.03159876		4153.58	-0.00698375
613.8	0.24475177		1203.79	0.05125347		1793.8	0.01842472		2383.8	0.04521298		2973.79	-0.01361298		3563.78	-0.03119605		4153.78	-0.00744007
614	0.24426512		1203.99	0.05116646		1794	0.0183441		2384	0.04484688		2973.99	-0.01321867		3563.98	-0.03106847		4153.98	-0.00827919
614.2	0.24396545		1204.19	0.05051622		1794.2	0.0179582		2384.2	0.04552572		2974.19	-0.01328135		3564.18	-0.03080132		4154.18	-0.00869716
614.4	0.24384967		1204.39	0.05002531		1794.4	0.01904595		2384.4	0.04572432		2974.39	-0.01263574		3564.38	-0.0303729		4154.38	-0.00880198
614.6	0.24471277		1204.59	0.04985134		1794.6	0.01901884		2384.6	0.04537107		2974.59	-0.01188277		3564.58	-0.03071485		4154.58	-0.00975987
614.8	0.24515815		1204.79	0.04891303		1794.8	0.0185414		2384.8	0.04481121		2974.79	-0.01210249		3564.78	-0.03094901		4154.78	-0.00956799
615	0.24491722		1204.99	0.04842239		1795	0.01858735		2385	0.04603774		2974.99	-0.01269224		3564.98	-0.03174033		4154.98	-0.01024642
615.2	0.24475202		1205.19	0.04790358		1795.2	0.01785663		2385.2	0.04622764		2975.19	-0.01235159		3565.18	-0.03181894		4155.18	-0.00956154
615.4	0.24494974		1205.39	0.04724272		1795.4	0.01768677		2385.4	0.04575345		2975.39	-0.01240923		3565.38	-0.03176987		4155.38	-0.00983109
615.6	0.24565857		1205.59	0.04733083		1795.6	0.01678814		2385.6	0.04623192		2975.59	-0.01250994		3565.58	-0.03126432		4155.58	-0.00900803
615.8	0.2456458		1205.79	0.04686493		1795.8	0.01686915		2385.8	0.04594435		2975.79	-0.0133444		3565.78	-0.03103547		4155.78	-0.00918436
616	0.24553509		1205.99	0.04819805		1796	0.0161018		2386	0.04680989		2975.99	-0.01388991		3565.98	-0.03090589		4155.98	-0.00979323
616.2	0.24525224		1206.19	0.04781885		1796.2	0.01579706		2386.2	0.04665967		2976.19	-0.01455837		3566.18	-0.02924504		4156.18	-0.00900653
616.4	0.24467265		1206.39	0.04892844		1796.4	0.01543369		2386.4	0.04575187		2976.39	-0.01512877		3566.38	-0.02906153		4156.38	-0.00823458
616.6	0.2442675		1206.59	0.04928191		1796.6	0.01579909		2386.6	0.04585753		2976.59	-0.01595482		3566.58	-0.02917099		4156.58	-0.00785597
616.8	0.24462536		1206.79	0.05000525		1796.8	0.01575205		2386.8	0.0455273		2976.79	-0.01638456		3566.78	-0.02977203		4156.78	-0.00686599
617	0.24502629		1206.99	0.05001394		1797	0.01624013		2387	0.04584933		2976.99	-0.01650528		3566.98	-0.02967475		4156.98	-0.00662032
617.2	0.24444358		1207.19	0.05062409		1797.2	0.01630579		2387.2	0.04619097		2977.19	-0.017458		3567.18	-0.0288317		4157.18	-0.00728578
617.4	0.24464077		1207.39	0.05058765		1797.4	0.0159498		2387.4	0.04616566		2977.39	-0.01812304		3567.38	-0.02874586		4157.38	-0.00777476
617.6	0.24497365		1207.59	0.05054644		1797.6	0.01566814		2387.6	0.04629563		2977.59	-0.01778075		3567.58	-0.02789829		4157.58	-0.00845563
617.8	0.2451637		1207.79	0.04973478		1797.8	0.01550138		2387.8	0.04459386		2977.79	-0.01730997		3567.78	-0.02688476		4157.78	-0.00863095
618	0.24470889		1207.99	0.05005982		1798	0.01610111		2388	0.0441523		2977.99	-0.01673839		3567.98	-0.02685825		4157.98	-0.00866823
618.2	0.24488527		1208.19	0.05054269		1798.2	0.01669571		2388.2	0.04414944		2978.19	-0.01629166		3568.18	-0.02645921		4158.18	-0.00906022
618.4	0.2440995		1208.39	0.0505872		1798.4	0.01723691		2388.4	0.0443125		2978.39	-0.01570566		3568.38	-0.02661286		4158.38	-0.00919041
618.6	0.24424445		1208.59	0.05060395		1798.6	0.01687472		2388.6	0.04434528		2978.59	-0.01519671		3568.58	-0.02706008		4158.58	-0.00945901
618.8	0.24463456		1208.79	0.04914922		1798.8	0.01734391		2388.8	0.04449546		2978.79	-0.01545044		3568.78	-0.026751		4158.78	-0.00910284
619	0.24507901		1208.99	0.04852916		1799	0.01730858		2389	0.04517854		2978.99	-0.01540437		3568.98	-0.02737065		4158.98	-0.00899166
619.2	0.2448171		1209.19	0.04788949		1799.2	0.01744263		2389.2	0.04445762		2979.19	-0.01583592		3569.18	-0.02777804		4159.18	-0.00837378
619.4	0.24465738		1209.39	0.0474087		1799.4	0.01762565		2389.4	0.04413371		2979.39	-0.01605536		3569.38	-0.0276787		4159.38	-0.00811173
619.6	0.24487079		1209.59	0.04687198		1799.6	0.01722819		2389.6	0.0445751		2979.59	-0.01611324		3569.58	-0.02818288		4159.58	-0.00770769
619.8	0.24512841		1209.79	0.04639558		1799.8	0.01742759		2389.8	0.04484924		2979.79	-0.01613739		3569.78	-0.02831456		4159.78	-0.00883349
620	0.24490186		1209.99	0.04731835		1800	0.0172533		2390	0.04525526		2979.99	-0.01530459		3569.98	-0.02764773		4159.98	-0.00879062
620.2	0.24445613		1210.19	0.04703373		1800.2	0.01888073		2390.2	0.04451573		2980.19	-0.01540009		3570.18	-0.02698137		4160.18	-0.00810032
620.4	0.2438903		1210.39	0.04759011		1800.4	0.01856978		2390.4	0.04418238		2980.39	-0.01618636		3570.38	-0.02779255		4160.38	-0.00762406
620.6	0.24393302		1210.59	0.04790389		1800.6	0.01912855		2390.6	0.04449161		2980.59	-0.01574094		3570.58	-0.02787625		4160.58	-0.00776582
620.8	0.24450762		1210.79	0.0489467		1800.8	0.01870137		2390.8	0.04433079		2980.79	-0.01521706		3570.78	-0.02794449		4160.78	-0.00693229
621	0.24472874		1210.99	0.04858824		1801	0.01983956		2391	0.04417944		2980.99	-0.01516996		3570.98	-0.02806591		4160.98	-0.00683169
621.2	0.24435048		1211.19	0.04888584		1801.2	0.0205637		2391.2	0.04365031		2981.19	-0.01518307		3571.18	-0.02896986		4161.18	-0.00656069
621.4	0.24408958		1211.39	0.04898956		1801.4	0.02041667		2391.4	0.04407078		2981.39	-0.01551886		3571.38	-0.02869739		4161.38	-0.00668104
621.6	0.24432162		1211.59	0.04918111		1801.6	0.02020071		2391.6	0.04408268		2981.59	-0.01507346		3571.58	-0.02916132		4161.58	-0.00673497
621.8	0.24420719		1211.79	0.04968592		1801.8	0.0204334		2391.8	0.04384735		2981.79	-0.01571126		3571.78	-0.02906937		4161.78	-0.00648415
622	0.24208116		1211.99	0.05149267		1802	0.01982749		2392	0.04422289		2981.99	-0.0155112		3571.98	-0.03006029		4161.98	-0.0067466
622.2	0.24175843		1212.19	0.05186112		1802.2	0.019407		2392.2	0.04483779		2982.19	-0.01505443		3572.18	-0.03011635		4162.18	-0.00706095
622.4	0.24183432		1212.39	0.05272907		1802.4	0.01871126		2392.4	0.04499301		2982.39	-0.01535825		3572.38	-0.03079798		4162.38	-0.00688109
622.6	0.2425308		1212.59	0.05257747		1802.6	0.01854757		2392.6	0.04448303		2982.59	-0.0153302		3572.58	-0.03029704		4162.58	-0.00715023
622.8	0.24288039		1212.79	0.05225162		1802.8	0.01834316		2392.8	0.04316935		2982.79	-0.0155941		3572.78	-0.02993461		4162.78	-0.00798085
623	0.24260373		1212.99	0.0522879		1803	0.01760173		2393	0.04374032		2982.99	-0.0148244		3572.98	-0.03058606		4162.98	-0.00823159
623.2	0.24174975		1213.19	0.05188972		1803.2	0.01777205		2393.2	0.04333233		2983.19	-0.01552075		3573.18	-0.03054248		4163.18	-0.00841006
623.4	0.24158567		1213.39	0.05138868		1803.4	0.01670109		2393.4	0.04379875		2983.39	-0.01584424		3573.38	-0.03050451		4163.38	-0.0079995
623.6	0.24241209		1213.59	0.05055561		1803.6	0.01580471		2393.6	0.04508081		2983.59	-0.01523018		3573.58	-0.03055235		4163.58	-0.00848622
623.8	0.24294094		1213.79	0.05028772		1803.8	0.0154136		2393.8	0.04517037		2983.79	-0.01517858		3573.78	-0.03061975		4163.78	-0.0092912
624	0.24298036		1213.99	0.04978949		1804	0.01529434		2394	0.04596166		2983.99	-0.01482584		3573.98	-0.02990874		4163.98	-0.0091655
624.2	0.24372344		1214.19	0.04907043		1804.2	0.01589684		2394.2	0.04593167		2984.19	-0.01503721		3574.18	-0.02990819		4164.18	-0.00926407
624.4	0.24352184		1214.39	0.04909587		1804.4	0.01526267		2394.4	0.04582112		2984.39	-0.01461872		3574.38	-0.02974863		4164.38	-0.00949728
624.6	0.24375391		1214.59	0.04904478		1804.6	0.01573909		2394.6	0.04612314		2984.59	-0.01418577		3574.58	-0.02933367		4164.58	-0.00892756
624.8	0.24414912		1214.79	0.04919764		1804.8	0.01567815		2394.8	0.0464719		2984.79	-0.01478881		3574.78	-0.02953173		4164.78	-0.00904214
625	0.24363602		1214.99	0.04911623		1805	0.01695574		2395	0.04669589		2984.99	-0.01569583		3574.98	-0.03011016		4164.98	-0.0089201
625.2	0.24240509		1215.19	0.04974551		1805.2	0.01649659		2395.2	0.04658955		2985.19	-0.01537417		3575.18	-0.02938635		4165.18	-0.00839026
625.4	0.24206429		1215.39	0.04998427		1805.4	0.01553535		2395.4	0.04741941		2985.39	-0.01571909		3575.38	-0.02960172		4165.38	-0.00913255
625.6	0.24194813		1215.59	0.05040169		1805.6	0.01574105		2395.6	0.04786028		2985.59	-0.01665415		3575.58	-0.03031785		4165.58	-0.00847105
625.8	0.24114188		1215.79	0.05112341		1805.8	0.01616245		2395.8	0.04761695		2985.79	-0.01746266		3575.78	-0.02967601		4165.78	-0.00803676
626	0.23974286		1215.99	0.0513558		1806	0.01627934		2396	0.04705166		2985.99	-0.01680915		3575.98	-0.03017936		4165.98	-0.00764068
626.2	0.23961208		1216.19	0.05153374		1806.2	0.01686043		2396.2	0.04608687		2986.19	-0.01673686		3576.18	-0.03023548		4166.18	-0.00761245
626.4	0.24063049		1216.39	0.05208285		1806.4	0.01730742		2396.4	0.04534778		2986.39	-0.01740202		3576.38	-0.03105984		4166.38	-0.00793918
626.6	0.23996216		1216.59	0.05156934		1806.6	0.01769308		2396.6	0.04396935		2986.59	-0.01695765		3576.58	-0.03087304		4166.58	-0.00851279
626.8	0.23964863		1216.79	0.05177425		1806.8	0.01690745		2396.8	0.04400024		2986.79	-0.01676736		3576.78	-0.03112575		4166.78	-0.00828112
627	0.23901826		1216.99	0.05154854		1807	0.01643147		2397	0.04518753		2986.99	-0.01637724		3576.98	-0.03146391		4166.98	-0.00787469
627.2	0.23810986		1217.19	0.05128223		1807.2	0.01592478		2397.2	0.04463639		2987.19	-0.01692397		3577.18	-0.03104423		4167.18	-0.00723803
627.4	0.2379628		1217.39	0.05141684		1807.4	0.01527967		2397.4	0.04546362		2987.39	-0.01655266		3577.38	-0.03072522		4167.38	-0.00649342
627.6	0.2377805		1217.59	0.04986064		1807.6	0.0156853		2397.6	0.04548968		2987.59	-0.01596668		3577.58	-0.02974816		4167.58	-0.00659833
627.8	0.23783269		1217.79	0.04988866		1807.8	0.01523318		2397.8	0.04424074		2987.79	-0.01538352		3577.78	-0.03024314		4167.78	-0.00686148
628	0.23879289		1217.99	0.0501255		1808	0.01411606		2398	0.04371888		2987.99	-0.01468979		3577.98	-0.02944443		4167.98	-0.00645918
628.2	0.23966528		1218.19	0.05013335		1808.2	0.01359316		2398.2	0.0430356		2988.19	-0.0144183		3578.18	-0.02901545		4168.18	-0.00633137
628.4	0.23908233		1218.39	0.05074797		1808.4	0.01307826		2398.4	0.04259262		2988.39	-0.01360684		3578.38	-0.02924932		4168.38	-0.00590374
628.6	0.23919484		1218.59	0.05153835		1808.6	0.01265391		2398.6	0.04294321		2988.59	-0.01395805		3578.58	-0.02948568		4168.58	-0.00583937
628.8	0.2390787		1218.79	0.05248174		1808.8	0.01287773		2398.8	0.04241293		2988.79	-0.01418418		3578.78	-0.02957501		4168.78	-0.00702668
629	0.23867357		1218.99	0.0530851		1809	0.01279205		2399	0.04311917		2988.99	-0.0147224		3578.98	-0.02988119		4168.98	-0.00706317
629.2	0.2378382		1219.19	0.05346023		1809.2	0.01194522		2399.2	0.04352105		2989.19	-0.01462634		3579.18	-0.03023637		4169.18	-0.00754993
629.4	0.2379641		1219.39	0.05246368		1809.4	0.01259627		2399.4	0.04376452		2989.39	-0.01503621		3579.38	-0.0315801		4169.38	-0.00907063
629.6	0.23785707		1219.59	0.05185096		1809.6	0.01369659		2399.6	0.0438234		2989.59	-0.01563622		3579.58	-0.03156582		4169.58	-0.00914314
629.8	0.23820415		1219.79	0.05184009		1809.8	0.01384963		2399.8	0.04323126		2989.79	-0.01548356		3579.78	-0.03208089		4169.78	-0.01029144
630	0.23786976		1219.99	0.05148379		1810	0.01355235		2400	0.04286894		2989.99	-0.01594577		3579.98	-0.03292251		4169.98	-0.01088878
630.2	0.23843976		1220.19	0.0512065		1810.2	0.01385659		2400.2	0.04257154		2990.19	-0.01671293		3580.18	-0.03396934		4170.18	-0.0116823
630.4	0.239827		1220.39	0.05085237		1810.4	0.01457106		2400.4	0.04361044		2990.39	-0.01735153		3580.38	-0.0352502		4170.38	-0.01257827
630.6	0.24044649		1220.59	0.05077546		1810.6	0.01523028		2400.6	0.04384292		2990.59	-0.01750882		3580.58	-0.03508652		4170.58	-0.01325042
630.8	0.24057015		1220.79	0.04981851		1810.8	0.01465316		2400.8	0.04463949		2990.79	-0.01795717		3580.78	-0.03485086		4170.78	-0.01303681
631	0.24035784		1220.99	0.04926667		1811	0.01478815		2401	0.04482613		2990.99	-0.01759292		3580.98	-0.03464404		4170.98	-0.01378352
631.2	0.24031212		1221.19	0.04896335		1811.2	0.01486742		2401.2	0.04424514		2991.19	-0.01714037		3581.18	-0.03386811		4171.18	-0.01363521
631.4	0.24025395		1221.39	0.04820344		1811.4	0.01473886		2401.4	0.04448893		2991.39	-0.01712789		3581.38	-0.03368117		4171.38	-0.01288989
631.6	0.24070967		1221.59	0.0473007		1811.6	0.01552931		2401.6	0.0434087		2991.59	-0.01715502		3581.58	-0.03340662		4171.58	-0.01259868
631.8	0.24107884		1221.79	0.04749953		1811.8	0.01498847		2401.8	0.04248251		2991.79	-0.01623735		3581.78	-0.03318258		4171.78	-0.01182234
632	0.24236032		1221.99	0.04750901		1812	0.01461409		2402	0.04152118		2991.99	-0.01620676		3581.98	-0.03145123		4171.98	-0.01149365
632.2	0.24235765		1222.19	0.04771834		1812.2	0.01466562		2402.2	0.04144254		2992.19	-0.0159078		3582.18	-0.03110272		4172.18	-0.01218467
632.4	0.24201293		1222.39	0.04805317		1812.4	0.01444392		2402.4	0.04145347		2992.39	-0.01551783		3582.38	-0.03149478		4172.38	-0.01192365
632.6	0.24176468		1222.59	0.04904247		1812.6	0.01411921		2402.6	0.04157827		2992.59	-0.01553494		3582.58	-0.03107928		4172.58	-0.01292228
632.8	0.24090665		1222.79	0.04925015		1812.8	0.0143353		2402.8	0.04148341		2992.79	-0.01553466		3582.78	-0.03052491		4172.78	-0.01279316
633	0.24022174		1222.99	0.04929615		1813	0.01368266		2403	0.04279618		2992.99	-0.01502009		3582.98	-0.0309995		4172.98	-0.01229521
633.2	0.23946443		1223.19	0.04993342		1813.2	0.01415112		2403.2	0.04279225		2993.19	-0.01446446		3583.18	-0.03119508		4173.18	-0.01227767
633.4	0.23915188		1223.39	0.04925089		1813.4	0.01538984		2403.4	0.04253926		2993.39	-0.01417036		3583.38	-0.03089274		4173.38	-0.01267447
633.6	0.23846603		1223.59	0.04958437		1813.6	0.01572137		2403.6	0.04312432		2993.59	-0.01497044		3583.58	-0.03045089		4173.58	-0.01269635
633.8	0.23797372		1223.79	0.04939067		1813.8	0.0159628		2403.8	0.04345456		2993.79	-0.01562081		3583.78	-0.03037277		4173.78	-0.01288488
634	0.23760989		1223.99	0.05035514		1814	0.01591272		2404	0.04378997		2993.99	-0.0164546		3583.98	-0.03086332		4173.98	-0.01166367
634.2	0.23833348		1224.19	0.05068363		1814.2	0.01674525		2404.2	0.0442195		2994.19	-0.01658674		3584.18	-0.03126178		4174.18	-0.0115205
634.4	0.23906142		1224.39	0.05099788		1814.4	0.01674778		2404.4	0.04426167		2994.39	-0.01696001		3584.38	-0.0321369		4174.38	-0.01132864
634.6	0.23907082		1224.59	0.05119666		1814.6	0.01672612		2404.6	0.04457458		2994.59	-0.01695544		3584.58	-0.03181484		4174.58	-0.01106296
634.8	0.23799789		1224.79	0.05051247		1814.8	0.01584559		2404.8	0.04418217		2994.79	-0.01753478		3584.78	-0.03214637		4174.78	-0.01032285
635	0.23821312		1224.99	0.05129075		1815	0.01548967		2405	0.04361554		2994.99	-0.01712944		3584.98	-0.03248434		4174.98	-0.00954884
635.2	0.23779096		1225.19	0.05101569		1815.2	0.01491597		2405.2	0.04359888		2995.19	-0.01813982		3585.18	-0.03220309		4175.18	-0.00879441
635.4	0.23816791		1225.39	0.05031068		1815.4	0.01493831		2405.4	0.0443316		2995.39	-0.01888948		3585.38	-0.0331126		4175.38	-0.00803792
635.6	0.23850865		1225.59	0.049944		1815.6	0.01566021		2405.6	0.04440234		2995.59	-0.01961238		3585.58	-0.03309793		4175.58	-0.00809448
635.8	0.23880994		1225.79	0.04872301		1815.8	0.01465467		2405.8	0.04418763		2995.79	-0.01943058		3585.78	-0.0323525		4175.78	-0.00825299
636	0.23947146		1225.99	0.04805732		1816	0.01416839		2406	0.04358202		2995.99	-0.01905106		3585.98	-0.0322133		4175.98	-0.00908576
636.2	0.23988576		1226.19	0.04815529		1816.2	0.01304758		2406.2	0.04434417		2996.19	-0.01845731		3586.18	-0.03343259		4176.18	-0.00900967
636.4	0.2404523		1226.39	0.04755027		1816.4	0.01264905		2406.4	0.04481603		2996.39	-0.01771482		3586.38	-0.0329254		4176.38	-0.00832476
636.6	0.24038425		1226.59	0.04777215		1816.6	0.01277926		2406.6	0.04454582		2996.59	-0.01683825		3586.58	-0.03250026		4176.58	-0.00874334
636.8	0.24059043		1226.79	0.04740348		1816.8	0.01307999		2406.8	0.04467178		2996.79	-0.01645619		3586.78	-0.03252639		4176.78	-0.00776671
637	0.24156411		1226.99	0.04834267		1817	0.01324611		2407	0.04537951		2996.99	-0.01585449		3586.98	-0.03223335		4176.98	-0.0077522
637.2	0.24123825		1227.19	0.04901676		1817.2	0.01419815		2407.2	0.04551687		2997.19	-0.01614678		3587.18	-0.03191492		4177.18	-0.00904497
637.4	0.24111808		1227.39	0.04829242		1817.4	0.01504274		2407.4	0.04641373		2997.39	-0.01597831		3587.38	-0.0321123		4177.38	-0.01002922
637.6	0.24104612		1227.59	0.04772786		1817.6	0.0149826		2407.6	0.04734579		2997.59	-0.0164156		3587.58	-0.03201554		4177.58	-0.0100197
637.8	0.24159275		1227.79	0.04767333		1817.8	0.01566863		2407.8	0.04723205		2997.79	-0.01638584		3587.78	-0.03253619		4177.78	-0.01014038
638	0.2418378		1227.99	0.04862991		1818	0.01570671		2408	0.04745596		2997.99	-0.01578087		3587.98	-0.03305142		4177.98	-0.01028337
638.2	0.24202024		1228.19	0.04859163		1818.2	0.01562651		2408.2	0.04696699		2998.19	-0.01573477		3588.18	-0.03281895		4178.18	-0.01008071
638.4	0.24129822		1228.39	0.04845087		1818.4	0.0156372		2408.4	0.04603039		2998.39	-0.01636617		3588.38	-0.03376674		4178.38	-0.01001729
638.6	0.24042521		1228.59	0.04849962		1818.6	0.01639504		2408.6	0.04567474		2998.59	-0.01615515		3588.58	-0.03245563		4178.58	-0.01048401
638.8	0.24009668		1228.79	0.0487859		1818.8	0.01584162		2408.8	0.04475093		2998.79	-0.01725464		3588.78	-0.03199477		4178.78	-0.01028361
639	0.23967035		1228.99	0.04908764		1819	0.01666474		2409	0.04413786		2998.99	-0.01787496		3588.98	-0.03261957		4178.98	-0.01031857
639.2	0.23916264		1229.19	0.04839043		1819.2	0.01652993		2409.2	0.04421902		2999.19	-0.01854492		3589.18	-0.0324683		4179.18	-0.01012146
639.4	0.23897343		1229.39	0.04895718		1819.4	0.0161284		2409.4	0.04372195		2999.39	-0.01871988		3589.38	-0.03272036		4179.38	-0.01058078
639.6	0.23838952		1229.59	0.04874296		1819.6	0.01602972		2409.6	0.04347079		2999.59	-0.01913701		3589.58	-0.03210076		4179.58	-0.01089456
639.8	0.2379527		1229.79	0.04809174		1819.8	0.01572767		2409.8	0.04256597		2999.79	-0.018828		3589.78	-0.03246384		4179.78	-0.01115657
640	0.23732324		1229.99	0.04795037		1820	0.01558318		2410	0.04300826		2999.99	-0.01818444		3589.98	-0.03343894		4179.98	-0.01094297
640.2	0.23749422		1230.19	0.04835698		1820.2	0.01467807		2410.2	0.04343647		3000.19	-0.0182831		3590.18	-0.03399416		4180.18	-0.00970951
640.4	0.23659008		1230.39	0.04888853		1820.4	0.01492186		2410.4	0.04353702		3000.39	-0.01835689		3590.38	-0.03372346		4180.38	-0.00980423
640.6	0.23654836		1230.59	0.0496786		1820.6	0.01567982		2410.6	0.04308493		3000.59	-0.01872689		3590.58	-0.0340639		4180.58	-0.00989346
640.8	0.23612232		1230.79	0.05035008		1820.8	0.01601948		2410.8	0.04272049		3000.79	-0.01913902		3590.78	-0.03437624		4180.78	-0.00939733
641	0.23576304		1230.99	0.05107758		1821	0.01597162		2411	0.04277926		3000.99	-0.01837864		3590.98	-0.03437994		4180.98	-0.01003479
641.2	0.23533073		1231.19	0.05067442		1821.2	0.016352		2411.2	0.04264149		3001.19	-0.01859319		3591.18	-0.03579578		4181.18	-0.01064552
641.4	0.2357294		1231.39	0.05043835		1821.4	0.0164878		2411.4	0.04288372		3001.39	-0.01978314		3591.38	-0.03598988		4181.38	-0.01072366
641.6	0.23539369		1231.59	0.05036095		1821.6	0.01601719		2411.6	0.04281674		3001.59	-0.01965138		3591.58	-0.03625957		4181.58	-0.01053819
641.8	0.23543876		1231.79	0.04982593		1821.8	0.01706851		2411.8	0.04294809		3001.79	-0.02027145		3591.78	-0.03620013		4181.78	-0.01112871
642	0.23529592		1231.99	0.04942225		1822	0.01660508		2412	0.04277506		3001.99	-0.01908002		3591.98	-0.03540478		4181.98	-0.01124678
642.2	0.23543366		1232.19	0.04869588		1822.2	0.01712616		2412.2	0.04234902		3002.19	-0.0200503		3592.18	-0.03484206		4182.18	-0.01043408
642.4	0.23468179		1232.39	0.04823521		1822.4	0.01721714		2412.4	0.04226972		3002.39	-0.01988948		3592.38	-0.03458273		4182.38	-0.01035118
642.6	0.23500853		1232.59	0.04839328		1822.6	0.01724054		2412.6	0.04170397		3002.59	-0.01913417		3592.58	-0.03329171		4182.58	-0.01063011
642.8	0.23508728		1232.79	0.04826835		1822.8	0.01565724		2412.8	0.04202063		3002.79	-0.01946058		3592.78	-0.03316273		4182.78	-0.01052507
643	0.23491676		1232.99	0.04764012		1823	0.01547571		2413	0.04214848		3002.99	-0.01905234		3592.98	-0.03216616		4182.98	-0.00952437
643.2	0.23473905		1233.19	0.0476484		1823.2	0.01476475		2413.2	0.04236114		3003.19	-0.01824967		3593.18	-0.03153674		4183.18	-0.00913269
643.4	0.23476486		1233.39	0.04771659		1823.4	0.0141067		2413.4	0.04225377		3003.39	-0.01879366		3593.38	-0.03071379		4183.38	-0.01018246
643.6	0.23392219		1233.59	0.04739252		1823.6	0.01397567		2413.6	0.04258014		3003.59	-0.0179281		3593.58	-0.03037209		4183.58	-0.00990874
643.8	0.23302855		1233.79	0.04722912		1823.8	0.0135142		2413.8	0.04223732		3003.79	-0.0177451		3593.78	-0.03162749		4183.78	-0.00944601
644	0.23374554		1233.99	0.04782532		1824	0.01287373		2414	0.04256468		3003.99	-0.017808		3593.98	-0.03148059		4183.98	-0.00918392
644.2	0.23392229		1234.19	0.04841076		1824.2	0.01255763		2414.2	0.04194655		3004.19	-0.01811084		3594.18	-0.03121438		4184.18	-0.00876909
644.4	0.23389932		1234.39	0.04918266		1824.4	0.01258853		2414.4	0.04169777		3004.39	-0.01751343		3594.38	-0.03149402		4184.38	-0.00857507
644.6	0.23424023		1234.59	0.04938403		1824.6	0.01290417		2414.6	0.04150811		3004.59	-0.01732127		3594.58	-0.03138521		4184.58	-0.00824508
644.8	0.23441879		1234.79	0.04943083		1824.8	0.01233364		2414.8	0.0413735		3004.79	-0.01680759		3594.78	-0.03193291		4184.78	-0.00807001
645	0.23478121		1234.99	0.04888128		1825	0.01258913		2415	0.04140684		3004.99	-0.01674263		3594.98	-0.03258978		4184.98	-0.00815508
645.2	0.23558289		1235.19	0.04816324		1825.2	0.01385775		2415.2	0.04122486		3005.19	-0.01749446		3595.18	-0.03326361		4185.18	-0.0085522
645.4	0.23528041		1235.39	0.04841735		1825.4	0.0137982		2415.4	0.04126454		3005.39	-0.01830645		3595.38	-0.03324773		4185.38	-0.00879628
645.6	0.23550246		1235.59	0.04778764		1825.6	0.01417821		2415.6	0.04144526		3005.59	-0.01691139		3595.58	-0.0338909		4185.58	-0.00901935
645.8	0.23657059		1235.79	0.04735127		1825.8	0.01492619		2415.8	0.04153578		3005.79	-0.01726832		3595.78	-0.03354128		4185.78	-0.00909181
646	0.23715033		1235.99	0.04703557		1826	0.01480318		2416	0.04057849		3005.99	-0.01701282		3595.98	-0.03359405		4185.98	-0.0079742
646.2	0.23718643		1236.19	0.04694702		1826.2	0.01555044		2416.2	0.04086812		3006.19	-0.01715248		3596.18	-0.03358711		4186.18	-0.00787875
646.4	0.23778276		1236.39	0.04706408		1826.4	0.0154076		2416.4	0.04134879		3006.39	-0.01664243		3596.38	-0.03330798		4186.38	-0.00870258
646.6	0.2374519		1236.59	0.04691358		1826.6	0.01531951		2416.6	0.04171422		3006.59	-0.01564466		3596.58	-0.03373824		4186.58	-0.00902946
646.8	0.23687071		1236.79	0.04716632		1826.8	0.01417216		2416.8	0.04328133		3006.79	-0.01548637		3596.78	-0.03274832		4186.78	-0.00949403
647	0.2367892		1236.99	0.04665652		1827	0.01378299		2417	0.04431698		3006.99	-0.01571894		3596.98	-0.03230386		4186.98	-0.00876736
647.2	0.23654636		1237.19	0.04702932		1827.2	0.01381539		2417.2	0.04448692		3007.19	-0.01588652		3597.18	-0.0330197		4187.18	-0.00969032
647.4	0.2365654		1237.39	0.04772545		1827.4	0.01279853		2417.4	0.04450662		3007.39	-0.01588517		3597.38	-0.03278199		4187.38	-0.00963364
647.6	0.23635651		1237.59	0.0487257		1827.6	0.01290459		2417.6	0.04420816		3007.59	-0.01524651		3597.58	-0.03285593		4187.58	-0.00980538
647.8	0.23683453		1237.79	0.04965787		1827.8	0.01289758		2417.8	0.04437432		3007.79	-0.015712		3597.78	-0.03300292		4187.78	-0.01042326
648	0.2374353		1237.99	0.05053328		1828	0.01268812		2418	0.04426166		3007.99	-0.01605465		3597.98	-0.03225978		4187.98	-0.01122717
648.2	0.23696663		1238.19	0.050803		1828.2	0.01242829		2418.2	0.0440375		3008.19	-0.01631614		3598.18	-0.0323406		4188.18	-0.01123126
648.4	0.2369338		1238.39	0.05118389		1828.4	0.01199161		2418.4	0.0437091		3008.39	-0.01647804		3598.38	-0.0328173		4188.38	-0.01100034
648.6	0.23672558		1238.59	0.05127042		1828.6	0.01155032		2418.6	0.04326449		3008.59	-0.01747892		3598.58	-0.03293957		4188.58	-0.01107237
648.8	0.23649715		1238.79	0.05092346		1828.8	0.01115642		2418.8	0.04216186		3008.79	-0.01830136		3598.78	-0.03326169		4188.78	-0.0108603
649	0.23585595		1238.99	0.05050873		1829	0.01151582		2419	0.04058086		3008.99	-0.01942541		3598.98	-0.03362106		4188.98	-0.01066609
649.2	0.23573533		1239.19	0.05012602		1829.2	0.01158958		2419.2	0.03920992		3009.19	-0.01983958		3599.18	-0.03388878		4189.18	-0.01036971
649.4	0.23532235		1239.39	0.05033426		1829.4	0.01088927		2419.4	0.03755975		3009.39	-0.0207393		3599.38	-0.03431393		4189.38	-0.00979464
649.6	0.23577752		1239.59	0.04966462		1829.6	0.01076296		2419.6	0.0357531		3009.59	-0.02114608		3599.58	-0.03452549		4189.58	-0.00901282
649.8	0.23585865		1239.79	0.04948334		1829.8	0.01024865		2419.8	0.0338428		3009.79	-0.0222951		3599.78	-0.03476252		4189.78	-0.00811664
