# Supplementary material for: Functional development of a V3/glycan-specific broadly neutralizing antibody isolated from a case of HIV superinfection
Source: eLife journal article supplement (doi:10.7554/elife.68110), 2021-07-15
Supplement: fig2-data2 [file B5.xls]

Vers 3.43 Data Simulation
Conc1	2.5E-07	2.5E-07	2.5E-07	2.5E-07	2.5E-07	2.5E-07
Start1	290	879.99	1470.01	2060	2650	3240
Stop1	649.8	1239.79	1829.81	2419.8	3009.8	3599.79
Time1	Data1	Sim1	Time2	Data2	Sim2	Time3	Data3	Sim3	Time4	Data4	Sim4	Time5	Data5	Sim5	Time6	Data6	Sim6
290	0.00503671		879.99	-0.00278922		1470.01	-0.00360225		2060	0.00715112		2650	-0.00071315		3240	0.00360545
290.2	0.00519193		880.19	-0.00250486		1470.21	-0.00409139		2060.2	0.00710393		2650.2	-0.00162451		3240.2	0.00413155
290.4	0.00495501		880.39	-0.0021603		1470.41	-0.00468666		2060.4	0.00686014		2650.4	-0.00250291		3240.4	0.0049316
290.6	0.00464389		880.59	-0.0016226		1470.61	-0.00481244		2060.6	0.00719255		2650.6	-0.00345819		3240.6	0.00560451
290.8	0.00478928		880.79	-0.00129045		1470.81	-0.0047447		2060.8	0.0082352		2650.8	-0.00455212		3240.8	0.00550849
291	0.00549058		880.99	-0.00147454		1471.01	-0.0041199		2061	0.00780536		2651	-0.00545962		3241	0.00615777
291.2	0.00585297		881.19	-0.00126595		1471.21	-0.00379972		2061.2	0.00794651		2651.2	-0.00544756		3241.2	0.0072509
291.4	0.0064094		881.39	-0.00146756		1471.41	-0.0039836		2061.4	0.00864833		2651.4	-0.00551139		3241.4	0.00838292
291.6	0.00755511		881.59	-0.00103079		1471.61	-0.00389554		2061.6	0.0087497		2651.6	-0.00584175		3241.6	0.00885747
291.8	0.00837072		881.79	-0.000959		1471.81	-0.00341747		2061.8	0.00869718		2651.8	-0.00602753		3241.8	0.00898025
292	0.00942619		881.99	-0.00130392		1472.01	-0.00268209		2062	0.00831907		2652	-0.00532998		3242	0.00856047
292.2	0.01053218		882.19	-0.0015551		1472.21	-0.00282806		2062.2	0.00782427		2652.2	-0.00475893		3242.2	0.00838187
292.4	0.01094577		882.39	-0.00146591		1472.41	-0.00279504		2062.4	0.00764956		2652.4	-0.00505605		3242.4	0.0077203
292.6	0.0129194		882.59	-0.00168502		1472.61	-0.00280391		2062.6	0.00702065		2652.6	-0.00508802		3242.6	0.00691918
292.8	0.01401973		882.79	-0.00238027		1472.81	-0.00305026		2062.8	0.00743129		2652.8	-0.00531972		3242.8	0.00697467
293	0.01467283		882.99	-0.00241549		1473.01	-0.00324151		2063	0.00738955		2653	-0.0046893		3243	0.00653286
293.2	0.0147249		883.19	-0.00275321		1473.21	-0.00323572		2063.2	0.0070635		2653.2	-0.00515672		3243.2	0.00673386
293.4	0.01601429		883.39	-0.00173898		1473.41	-0.00341013		2063.4	0.00755706		2653.4	-0.00436421		3243.4	0.00708757
293.6	0.01670041		883.59	-0.00193622		1473.61	-0.00386428		2063.6	0.00808188		2653.6	-0.00346284		3243.6	0.00767885
293.8	0.01718591		883.79	-0.00136662		1473.81	-0.00408776		2063.8	0.00910655		2653.8	-0.00235437		3243.8	0.00685923
294	0.01771125		883.99	-0.00126156		1474.01	-0.00414628		2064	0.00894536		2654	-0.00238019		3244	0.00715249
294.2	0.01883106		884.19	-0.00124194		1474.21	-0.00416516		2064.2	0.00861435		2654.2	-0.0025613		3244.2	0.00639087
294.4	0.01961537		884.39	-0.00070972		1474.41	-0.0043061		2064.4	0.00882881		2654.4	-0.00233232		3244.4	0.00684221
294.6	0.0201732		884.59	-0.00003275		1474.61	-0.0040781		2064.6	0.00997096		2654.6	-0.00342598		3244.6	0.00678243
294.8	0.02176479		884.79	-0.00036959		1474.81	-0.00381242		2064.8	0.01105348		2654.8	-0.00416813		3244.8	0.00644175
295	0.02401488		884.99	-0.00044956		1475.01	-0.0033135		2065	0.0106021		2655	-0.00408881		3245	0.00709982
295.2	0.02551855		885.19	0.00062987		1475.21	-0.00385762		2065.2	0.01228203		2655.2	-0.00358982		3245.2	0.00720022
295.4	0.02699961		885.39	0.00118907		1475.41	-0.00384201		2065.4	0.01251533		2655.4	-0.00404698		3245.4	0.00667653
295.6	0.028614		885.59	0.00208615		1475.61	-0.00395597		2065.6	0.01251372		2655.6	-0.00456578		3245.6	0.00598371
295.8	0.02987535		885.79	0.00281878		1475.81	-0.00324007		2065.8	0.0121836		2655.8	-0.00494737		3245.8	0.00555229
296	0.03009341		885.99	0.00370336		1476.01	-0.00305649		2066	0.01224659		2656	-0.00522402		3246	0.00505169
296.2	0.03130237		886.19	0.00393235		1476.21	-0.00368811		2066.2	0.01134513		2656.2	-0.00548782		3246.2	0.00473582
296.4	0.03205742		886.39	0.00338488		1476.41	-0.00258211		2066.4	0.01188958		2656.4	-0.00550519		3246.4	0.00468858
296.6	0.03326162		886.59	0.00362256		1476.61	-0.0033078		2066.6	0.01142756		2656.6	-0.0058534		3246.6	0.00424914
296.8	0.03359701		886.79	0.00326822		1476.81	-0.00306336		2066.8	0.01123264		2656.8	-0.00520857		3246.8	0.0044989
297	0.03390903		886.99	0.00345554		1477.01	-0.00351897		2067	0.01087012		2657	-0.00502731		3247	0.00374276
297.2	0.03451754		887.19	0.00322716		1477.21	-0.00348683		2067.2	0.01009914		2657.2	-0.00475661		3247.2	0.00378832
297.4	0.03475419		887.39	0.00309025		1477.41	-0.00303057		2067.4	0.01010423		2657.4	-0.00416634		3247.4	0.00378409
297.6	0.03519013		887.59	0.00263054		1477.61	-0.00232593		2067.6	0.0096499		2657.6	-0.00309783		3247.6	0.00308608
297.8	0.03542533		887.79	0.00183898		1477.81	-0.00131803		2067.8	0.0093747		2657.8	-0.00320375		3247.8	0.00230362
298	0.03621595		887.99	0.00184045		1478.01	-0.00082509		2068	0.00839753		2658	-0.00378717		3248	0.0026121
298.2	0.03722302		888.19	0.00208523		1478.21	-0.00152873		2068.2	0.00856108		2658.2	-0.0039153		3248.2	0.001862
298.4	0.03827477		888.39	0.00227918		1478.41	-0.00158438		2068.4	0.00845897		2658.4	-0.00398629		3248.4	0.00278947
298.6	0.03889448		888.59	0.00275942		1478.61	-0.00092764		2068.6	0.00929143		2658.6	-0.00535256		3248.6	0.00292702
298.8	0.0401155		888.79	0.00202616		1478.81	-0.00124969		2068.8	0.01046168		2658.8	-0.00531686		3248.8	0.00287897
299	0.04133861		888.99	0.00199141		1479.01	-0.00246189		2069	0.01079636		2659	-0.00520929		3249	0.00311006
299.2	0.04143275		889.19	0.00205738		1479.21	-0.00345402		2069.2	0.01168356		2659.2	-0.00529786		3249.2	0.00311441
299.4	0.04239367		889.39	0.0022565		1479.41	-0.00344172		2069.4	0.01185875		2659.4	-0.00542296		3249.4	0.0035255
299.6	0.04362299		889.59	0.00237597		1479.61	-0.0034121		2069.6	0.01299767		2659.6	-0.00588913		3249.6	0.00459376
299.8	0.04402571		889.79	0.00284846		1479.81	-0.00277042		2069.8	0.01394775		2659.8	-0.00659813		3249.8	0.0044006
300	0.04412466		889.99	0.00327305		1480.01	-0.00285098		2070	0.0147727		2660	-0.0067388		3250	0.00383451
300.2	0.0460579		890.19	0.00239417		1480.21	-0.00280243		2070.2	0.01487231		2660.2	-0.00624138		3250.2	0.00342597
300.4	0.04685719		890.39	0.00238393		1480.41	-0.00260572		2070.4	0.01590386		2660.4	-0.00630377		3250.4	0.00367837
300.6	0.04754673		890.59	0.00259504		1480.61	-0.00338514		2070.6	0.01574271		2660.6	-0.00647858		3250.6	0.0041312
300.8	0.04849041		890.79	0.00150126		1480.81	-0.00336496		2070.8	0.01610909		2660.8	-0.00639093		3250.8	0.00426085
301	0.04990582		890.99	0.00171849		1481.01	-0.00342519		2071	0.01670391		2661	-0.00655282		3251	0.00344397
301.2	0.05188805		891.19	0.00142858		1481.21	-0.00357477		2071.2	0.01658601		2661.2	-0.00651311		3251.2	0.00371136
301.4	0.05229392		891.39	0.00099436		1481.41	-0.00330415		2071.4	0.01629604		2661.4	-0.00615367		3251.4	0.00340077
301.6	0.05395153		891.59	0.00127127		1481.61	-0.00334854		2071.6	0.01635031		2661.6	-0.00613119		3251.6	0.00266549
301.8	0.05437034		891.79	0.00170843		1481.81	-0.00367827		2071.8	0.01573978		2661.8	-0.00616651		3251.8	0.00297647
302	0.05573829		891.99	0.00253387		1482.01	-0.00423853		2072	0.01428789		2662	-0.00571221		3252	0.00330988
302.2	0.05671974		892.19	0.00335918		1482.21	-0.00468533		2072.2	0.01453058		2662.2	-0.00454239		3252.2	0.00299646
302.4	0.05775812		892.39	0.00357659		1482.41	-0.00446641		2072.4	0.01388871		2662.4	-0.00357373		3252.4	0.00322209
302.6	0.05765456		892.59	0.00446691		1482.61	-0.00379911		2072.6	0.01426141		2662.6	-0.00369864		3252.6	0.00374644
302.8	0.05794254		892.79	0.00404472		1482.81	-0.00406938		2072.8	0.01425885		2662.8	-0.00338636		3252.8	0.00354923
303	0.05883909		892.99	0.00448289		1483.01	-0.00510533		2073	0.01395767		2663	-0.00346123		3253	0.00425536
303.2	0.05957939		893.19	0.004236		1483.21	-0.00493598		2073.2	0.01357901		2663.2	-0.00308435		3253.2	0.00435469
303.4	0.06020239		893.39	0.00506288		1483.41	-0.00367801		2073.4	0.01399331		2663.4	-0.00369732		3253.4	0.0049551
303.6	0.06066772		893.59	0.00541059		1483.61	-0.00293382		2073.6	0.01395517		2663.6	-0.00396539		3253.6	0.00558411
303.8	0.0611188		893.79	0.00541972		1483.81	-0.00307501		2073.8	0.01338851		2663.8	-0.00457084		3253.8	0.0047971
304	0.06211074		893.99	0.0054918		1484.01	-0.00241829		2074	0.01245318		2664	-0.00375603		3254	0.00474589
304.2	0.06327979		894.19	0.00521827		1484.21	-0.00242553		2074.2	0.01195807		2664.2	-0.00400966		3254.2	0.00402132
304.4	0.06429372		894.39	0.00543079		1484.41	-0.00263386		2074.4	0.01105463		2664.4	-0.00398476		3254.4	0.00419617
304.6	0.06453751		894.59	0.00540508		1484.61	-0.00261126		2074.6	0.01130366		2664.6	-0.00419881		3254.6	0.0045462
304.8	0.06552106		894.79	0.00556081		1484.81	-0.00210606		2074.8	0.01112208		2664.8	-0.00509103		3254.8	0.00373042
305	0.06681269		894.99	0.00659894		1485.01	-0.00194166		2075	0.01208401		2665	-0.00463944		3255	0.00376239
305.2	0.06789292		895.19	0.00666017		1485.21	-0.0021372		2075.2	0.01217072		2665.2	-0.0044479		3255.2	0.00389037
305.4	0.06730713		895.39	0.00603601		1485.41	-0.00126946		2075.4	0.01249301		2665.4	-0.00400875		3255.4	0.00419692
305.6	0.06875943		895.59	0.00615532		1485.61	-0.00143088		2075.6	0.012921		2665.6	-0.00417002		3255.6	0.00465406
305.8	0.06897987		895.79	0.00657358		1485.81	-0.00146462		2075.8	0.01324102		2665.8	-0.00307069		3255.8	0.0054398
306	0.0706654		895.99	0.00685461		1486.01	-0.00152667		2076	0.01376761		2666	-0.0023647		3256	0.00597447
306.2	0.07131101		896.19	0.00664972		1486.21	-0.00141816		2076.2	0.01459625		2666.2	-0.00164638		3256.2	0.00645476
306.4	0.07256029		896.39	0.00736869		1486.41	-0.00097261		2076.4	0.01504709		2666.4	-0.00185218		3256.4	0.00599526
306.6	0.07311233		896.59	0.00797802		1486.61	-0.00016122		2076.6	0.01627936		2666.6	-0.00237534		3256.6	0.00573298
306.8	0.07365816		896.79	0.00796475		1486.81	-0.00041528		2076.8	0.01677054		2666.8	-0.00317362		3256.8	0.00555635
307	0.07458644		896.99	0.0087864		1487.01	-0.00145897		2077	0.01730695		2667	-0.00356691		3257	0.00641143
307.2	0.07495248		897.19	0.00878539		1487.21	-0.00090303		2077.2	0.01693385		2667.2	-0.0037617		3257.2	0.00617179
307.4	0.07556622		897.39	0.00998845		1487.41	-0.00025658		2077.4	0.0171866		2667.4	-0.00485462		3257.4	0.00670958
307.6	0.07692011		897.59	0.0101839		1487.61	-0.00017699		2077.6	0.01712405		2667.6	-0.0047845		3257.6	0.00672697
307.8	0.07791895		897.79	0.01047445		1487.81	-0.00027638		2077.8	0.01650088		2667.8	-0.00565322		3257.8	0.00632117
308	0.07871669		897.99	0.01063287		1488.01	0.00052579		2078	0.01586634		2668	-0.00460435		3258	0.00583608
308.2	0.07936492		898.19	0.01051441		1488.21	-0.0000802		2078.2	0.01517721		2668.2	-0.00489979		3258.2	0.00465713
308.4	0.07969805		898.39	0.01062646		1488.41	0.0002979		2078.4	0.01445451		2668.4	-0.00440222		3258.4	0.00481004
308.6	0.07926667		898.59	0.01043112		1488.61	0.00050377		2078.6	0.01485474		2668.6	-0.00440681		3258.6	0.00357811
308.8	0.0796571		898.79	0.0107574		1488.81	0.00016425		2078.8	0.01401324		2668.8	-0.00419461		3258.8	0.00230732
309	0.07987578		898.99	0.01078889		1489.01	-0.00004101		2079	0.01457548		2669	-0.00375914		3259	0.00219723
309.2	0.08019362		899.19	0.01035625		1489.21	0.00054272		2079.2	0.01406682		2669.2	-0.00395641		3259.2	0.00145298
309.4	0.07987756		899.39	0.00940225		1489.41	-0.00045495		2079.4	0.01459952		2669.4	-0.0030473		3259.4	0.00160199
309.6	0.0813903		899.59	0.00879733		1489.61	-0.00097371		2079.6	0.01382309		2669.6	-0.00365173		3259.6	0.00133018
309.8	0.08252319		899.79	0.0094061		1489.81	-0.00165777		2079.8	0.01426971		2669.8	-0.00417504		3259.8	0.00087594
310	0.083751		899.99	0.00987617		1490.01	-0.00202907		2080	0.01342602		2670	-0.00440862		3260	0.00083308
310.2	0.08489983		900.19	0.00980244		1490.21	-0.00195798		2080.2	0.01340491		2670.2	-0.00474503		3260.2	0.00147046
310.4	0.08610936		900.39	0.01022704		1490.41	-0.00235935		2080.4	0.0141997		2670.4	-0.00486512		3260.4	-0.0000763
310.6	0.08633097		900.59	0.01033591		1490.61	-0.0025545		2080.6	0.01444654		2670.6	-0.00586085		3260.6	0.00082282
310.8	0.08593759		900.79	0.01037559		1490.81	-0.00316651		2080.8	0.01424775		2670.8	-0.00611717		3260.8	0.00142156
311	0.08708204		900.99	0.01043958		1491.01	-0.00299996		2081	0.0145451		2671	-0.0050561		3261	0.0019282
311.2	0.08800267		901.19	0.01025537		1491.21	-0.00266062		2081.2	0.01474323		2671.2	-0.00486514		3261.2	0.00246377
311.4	0.089053		901.39	0.010601		1491.41	-0.0026189		2081.4	0.01557645		2671.4	-0.0053667		3261.4	0.00296438
311.6	0.08929041		901.59	0.01085061		1491.61	-0.00264624		2081.6	0.01639376		2671.6	-0.00526969		3261.6	0.00372465
311.8	0.08963802		901.79	0.01104089		1491.81	-0.00259276		2081.8	0.01626673		2671.8	-0.00452129		3261.8	0.00478707
312	0.09010359		901.99	0.01117631		1492.01	-0.00240768		2082	0.01627314		2672	-0.00341415		3262	0.00569125
312.2	0.09020279		902.19	0.0109923		1492.21	-0.00219908		2082.2	0.01670096		2672.2	-0.00329336		3262.2	0.00497939
312.4	0.09105611		902.39	0.01103434		1492.41	-0.00168636		2082.4	0.01682568		2672.4	-0.00313126		3262.4	0.00489694
312.6	0.09150415		902.59	0.01018741		1492.61	-0.00140477		2082.6	0.01704916		2672.6	-0.00274058		3262.6	0.00442651
312.8	0.09274382		902.79	0.01055235		1492.81	-0.00177327		2082.8	0.01645179		2672.8	-0.00262952		3262.8	0.00417533
313	0.09353207		902.99	0.0102142		1493.01	-0.00197545		2083	0.01722742		2673	-0.00279831		3263	0.00419193
313.2	0.0936989		903.19	0.01008746		1493.21	-0.00219266		2083.2	0.01694374		2673.2	-0.00299955		3263.2	0.00404378
313.4	0.09472873		903.39	0.00961731		1493.41	-0.00304491		2083.4	0.01743899		2673.4	-0.00231891		3263.4	0.00364513
313.6	0.09642859		903.59	0.00973609		1493.61	-0.0020891		2083.6	0.01723032		2673.6	-0.00330524		3263.6	0.00301366
313.8	0.09775181		903.79	0.01001622		1493.81	-0.00166717		2083.8	0.0170893		2673.8	-0.00330579		3263.8	0.00296611
314	0.09907175		903.99	0.00941533		1494.01	-0.00164974		2084	0.01591251		2674	-0.0032155		3264	0.00412849
314.2	0.09978746		904.19	0.00852781		1494.21	-0.00146308		2084.2	0.01674425		2674.2	-0.00274201		3264.2	0.00512185
314.4	0.09984515		904.39	0.0087521		1494.41	-0.00167934		2084.4	0.01660674		2674.4	-0.00298113		3264.4	0.00506963
314.6	0.09981209		904.59	0.00847278		1494.61	-0.00190647		2084.6	0.01590257		2674.6	-0.00301447		3264.6	0.00647208
314.8	0.10026109		904.79	0.0082373		1494.81	-0.00231287		2084.8	0.01592769		2674.8	-0.00160541		3264.8	0.00662502
315	0.10111518		904.99	0.00857426		1495.01	-0.00241755		2085	0.01589305		2675	-0.00063225		3265	0.00703564
315.2	0.10193031		905.19	0.00926785		1495.21	-0.00220155		2085.2	0.01600428		2675.2	-0.00070509		3265.2	0.00668654
315.4	0.1026165		905.39	0.00946844		1495.41	-0.00232708		2085.4	0.01718221		2675.4	-0.00110035		3265.4	0.00606026
315.6	0.10240375		905.59	0.01082495		1495.61	-0.00224758		2085.6	0.01749444		2675.6	-0.00089622		3265.6	0.00594169
315.8	0.10271496		905.79	0.01092433		1495.81	-0.0020638		2085.8	0.01727291		2675.8	-0.00110894		3265.8	0.00574399
316	0.10279301		905.99	0.01200422		1496.01	-0.00135131		2086	0.01766449		2676	-0.00172661		3266	0.00577961
316.2	0.10344513		906.19	0.01179977		1496.21	-0.00135063		2086.2	0.01833198		2676.2	-0.00169048		3266.2	0.00430543
316.4	0.10390159		906.39	0.01159245		1496.41	-0.00167646		2086.4	0.01797659		2676.4	-0.00157413		3266.4	0.00445401
316.6	0.10435034		906.59	0.01185263		1496.61	-0.00145138		2086.6	0.01809129		2676.6	-0.00186223		3266.6	0.0042999
316.8	0.10455538		906.79	0.01264872		1496.81	-0.00186332		2086.8	0.01876601		2676.8	-0.00280598		3266.8	0.0039457
317	0.10426182		906.99	0.01268587		1497.01	-0.00259537		2087	0.01948359		2677	-0.00292669		3267	0.00392868
317.2	0.10456272		907.19	0.01275161		1497.21	-0.00226505		2087.2	0.01980548		2677.2	-0.00325966		3267.2	0.00394809
317.4	0.10416214		907.39	0.0128932		1497.41	-0.00220731		2087.4	0.0202489		2677.4	-0.0034386		3267.4	0.0039116
317.6	0.10483464		907.59	0.013237		1497.61	-0.00173546		2087.6	0.02045519		2677.6	-0.0040977		3267.6	0.00433367
317.8	0.10487572		907.79	0.01249712		1497.81	-0.0015133		2087.8	0.01956096		2677.8	-0.00471967		3267.8	0.00461272
318	0.10577262		907.99	0.01179004		1498.01	-0.00190521		2088	0.01912535		2678	-0.00453594		3268	0.00553104
318.2	0.1050389		908.19	0.0119199		1498.21	-0.00185729		2088.2	0.01952836		2678.2	-0.00438939		3268.2	0.00568992
318.4	0.10513188		908.39	0.01256964		1498.41	-0.00220279		2088.4	0.01860388		2678.4	-0.00475103		3268.4	0.00538963
318.6	0.10540528		908.59	0.01259587		1498.61	-0.00255692		2088.6	0.017705		2678.6	-0.00395421		3268.6	0.0045622
318.8	0.1062928		908.79	0.01379116		1498.81	-0.00119278		2088.8	0.01739716		2678.8	-0.00284293		3268.8	0.00402669
319	0.10712861		908.99	0.01416164		1499.01	-0.00031477		2089	0.01723614		2679	-0.00365981		3269	0.00295507
319.2	0.10812698		909.19	0.01495234		1499.21	-0.000015		2089.2	0.01681422		2679.2	-0.00344879		3269.2	0.00239492
319.4	0.10918978		909.39	0.01495296		1499.41	-0.00031217		2089.4	0.01762182		2679.4	-0.0038143		3269.4	0.00235959
319.6	0.10894988		909.59	0.01577538		1499.61	0.00030311		2089.6	0.01639841		2679.6	-0.00449618		3269.6	0.00278356
319.8	0.10922329		909.79	0.01574922		1499.81	0.00076042		2089.8	0.01595626		2679.8	-0.00460515		3269.8	0.00320161
320	0.11006898		909.99	0.01655172		1500.01	0.00137781		2090	0.01605681		2680	-0.00380946		3270	0.0033343
320.2	0.11116451		910.19	0.01658026		1500.21	-0.00007724		2090.2	0.01615982		2680.2	-0.00322735		3270.2	0.00251827
320.4	0.11169105		910.39	0.01699658		1500.41	0.00001151		2090.4	0.01538765		2680.4	-0.00315568		3270.4	0.00283906
320.6	0.11313698		910.59	0.01799723		1500.61	0.00037879		2090.6	0.01499657		2680.6	-0.00347077		3270.6	0.00218483
320.8	0.11335265		910.79	0.01864081		1500.81	0.00078123		2090.8	0.01640407		2680.8	-0.00358994		3270.8	0.00190547
321	0.11328907		910.99	0.0189752		1501.01	0.00076575		2091	0.01702381		2681	-0.00309342		3271	0.00201076
321.2	0.11366772		911.19	0.01928085		1501.21	0.00112853		2091.2	0.01793685		2681.2	-0.00283434		3271.2	0.00288694
321.4	0.11464508		911.39	0.01968689		1501.41	0.00074489		2091.4	0.01888212		2681.4	-0.00345476		3271.4	0.00265274
321.6	0.11597407		911.59	0.02006789		1501.61	0.00028013		2091.6	0.01902427		2681.6	-0.00309414		3271.6	0.0024983
321.8	0.11631824		911.79	0.02041536		1501.81	0.00071127		2091.8	0.01932729		2681.8	-0.00277969		3271.8	0.00197244
322	0.11698735		911.99	0.0199025		1502.01	-0.00025365		2092	0.01992706		2682	-0.00207355		3272	0.00145343
322.2	0.11803906		912.19	0.02020943		1502.21	-0.00084751		2092.2	0.01953863		2682.2	-0.00207881		3272.2	0.00047741
322.4	0.11879349		912.39	0.0202052		1502.41	-0.00123436		2092.4	0.0195507		2682.4	-0.00190645		3272.4	-0.00072747
322.6	0.11958594		912.59	0.02013483		1502.61	-0.00050567		2092.6	0.01877499		2682.6	-0.00140388		3272.6	-0.00123194
322.8	0.12110781		912.79	0.01974709		1502.81	0.00114918		2092.8	0.01921155		2682.8	-0.00178296		3272.8	-0.00114866
323	0.12192173		912.99	0.01939959		1503.01	0.00121386		2093	0.01910131		2683	-0.00269136		3273	-0.00093028
323.2	0.12313819		913.19	0.01885099		1503.21	-0.00064208		2093.2	0.01912026		2683.2	-0.00185068		3273.2	-0.00058726
323.4	0.12454794		913.39	0.0180988		1503.41	-0.00047462		2093.4	0.01983167		2683.4	-0.00224744		3273.4	0.00015854
323.6	0.12536778		913.59	0.01743458		1503.61	-0.00025417		2093.6	0.0187033		2683.6	-0.00281082		3273.6	0.00106669
323.8	0.12666537		913.79	0.01694702		1503.81	-0.00076701		2093.8	0.01845231		2683.8	-0.00186917		3273.8	0.00135782
324	0.12744151		913.99	0.01637096		1504.01	-0.00076729		2094	0.01849716		2684	-0.00151758		3274	0.00128266
324.2	0.12823427		914.19	0.01606577		1504.21	-0.0010354		2094.2	0.01808488		2684.2	-0.00166274		3274.2	0.00136117
324.4	0.1289473		914.39	0.01633797		1504.41	-0.00059244		2094.4	0.0174425		2684.4	-0.00148941		3274.4	0.00184828
324.6	0.12991478		914.59	0.01675842		1504.61	-0.00078841		2094.6	0.01715729		2684.6	-0.00187071		3274.6	0.00204516
324.8	0.12907642		914.79	0.01612987		1504.81	-0.000796		2094.8	0.01816211		2684.8	-0.00130244		3274.8	0.00281671
325	0.12809258		914.99	0.01584436		1505.01	-0.00145101		2095	0.0186683		2685	-0.00107557		3275	0.00381149
325.2	0.12770586		915.19	0.01596334		1505.21	-0.00224822		2095.2	0.01898133		2685.2	-0.00023813		3275.2	0.00479698
325.4	0.12786162		915.39	0.0162899		1505.41	-0.00208663		2095.4	0.01907785		2685.4	-0.00019584		3275.4	0.00447813
325.6	0.12705058		915.59	0.01709156		1505.61	-0.00172876		2095.6	0.01903052		2685.6	0.00004526		3275.6	0.00570542
325.8	0.12744209		915.79	0.01747713		1505.81	-0.00109523		2095.8	0.01923377		2685.8	-0.00095097		3275.8	0.00567314
326	0.12750223		915.99	0.0173144		1506.01	-0.00160164		2096	0.01910943		2686	-0.00114598		3276	0.00586691
326.2	0.12794607		916.19	0.01759273		1506.21	-0.00072769		2096.2	0.01895995		2686.2	-0.00172888		3276.2	0.0068155
326.4	0.12744456		916.39	0.01795126		1506.41	-0.00049002		2096.4	0.01987201		2686.4	-0.00181311		3276.4	0.00591911
326.6	0.1280712		916.59	0.01788391		1506.61	0.00073357		2096.6	0.0200467		2686.6	-0.00247451		3276.6	0.00592091
326.8	0.12868607		916.79	0.01815145		1506.81	0.00124905		2096.8	0.021111		2686.8	-0.00359259		3276.8	0.00544989
327	0.12862037		916.99	0.01780444		1507.01	0.00036359		2097	0.02147638		2687	-0.0033064		3277	0.00496958
327.2	0.12923795		917.19	0.01749261		1507.21	-0.00086945		2097.2	0.02106966		2687.2	-0.00325107		3277.2	0.0043457
327.4	0.1302897		917.39	0.01810588		1507.41	0.00011109		2097.4	0.0208432		2687.4	-0.00418706		3277.4	0.00391855
327.6	0.13094059		917.59	0.01720869		1507.61	-0.00024821		2097.6	0.01995362		2687.6	-0.00453714		3277.6	0.00288384
327.8	0.13113337		917.79	0.01720117		1507.81	-0.00011375		2097.8	0.02008335		2687.8	-0.00336161		3277.8	0.00192375
328	0.13164499		917.99	0.01765328		1508.01	0.00005215		2098	0.02011562		2688	-0.00289454		3278	0.00101763
328.2	0.13287131		918.19	0.01788426		1508.21	-0.00032824		2098.2	0.01949256		2688.2	-0.00311327		3278.2	0.00035648
328.4	0.13352758		918.39	0.01868955		1508.41	-0.00112762		2098.4	0.01969234		2688.4	-0.0028015		3278.4	0.00012452
328.6	0.13398352		918.59	0.0183838		1508.61	-0.00126065		2098.6	0.01908203		2688.6	-0.00281425		3278.6	0.00068441
328.8	0.13397833		918.79	0.01831556		1508.81	-0.00122898		2098.8	0.01977692		2688.8	-0.00218489		3278.8	0.00002348
329	0.13398072		918.99	0.01889411		1509.01	-0.00111904		2099	0.02047743		2689	-0.00199191		3279	-0.00033611
329.2	0.13472423		919.19	0.01873225		1509.21	-0.00113199		2099.2	0.02016634		2689.2	-0.00189144		3279.2	0.00021975
329.4	0.13597665		919.39	0.01903199		1509.41	0.00022853		2099.4	0.01988912		2689.4	-0.00215651		3279.4	0.00046895
329.6	0.13753199		919.59	0.01927253		1509.61	0.0006313		2099.6	0.01992677		2689.6	-0.00248275		3279.6	0.00151193
329.8	0.1388948		919.79	0.0189804		1509.81	0.00079977		2099.8	0.01954984		2689.8	-0.00374156		3279.8	0.00123423
330	0.1398422		919.99	0.01947015		1510.01	0.00092851		2100	0.0200809		2690	-0.00330084		3280	0.0016014
330.2	0.14063805		920.19	0.01952499		1510.21	0.00101835		2100.2	0.02037253		2690.2	-0.00380082		3280.2	0.00228149
330.4	0.14157333		920.39	0.01995165		1510.41	-0.00033376		2100.4	0.02064687		2690.4	-0.00403212		3280.4	0.00125018
330.6	0.14222464		920.59	0.01918939		1510.61	-0.00024725		2100.6	0.0205118		2690.6	-0.00505392		3280.6	0.00132609
330.8	0.14278354		920.79	0.01811276		1510.81	-0.00117509		2100.8	0.02074755		2690.8	-0.00502964		3280.8	0.00146129
331	0.14291847		920.99	0.01788468		1511.01	-0.00282551		2101	0.02050316		2691	-0.00519249		3281	0.00176703
331.2	0.1435177		921.19	0.01811544		1511.21	-0.00299659		2101.2	0.01979572		2691.2	-0.00573829		3281.2	0.0019986
331.4	0.14385724		921.39	0.01816971		1511.41	-0.00282419		2101.4	0.01982112		2691.4	-0.00610604		3281.4	0.00135075
331.6	0.14481203		921.59	0.01769291		1511.61	-0.00303075		2101.6	0.01958184		2691.6	-0.00579245		3281.6	0.00136207
331.8	0.14447547		921.79	0.01793918		1511.81	-0.00340361		2101.8	0.01968837		2691.8	-0.00488318		3281.8	0.00111374
332	0.14447279		921.99	0.01767685		1512.01	-0.00401645		2102	0.01982673		2692	-0.00460938		3282	0.00087485
332.2	0.14455991		922.19	0.01717662		1512.21	-0.00356399		2102.2	0.02034926		2692.2	-0.00511517		3282.2	0.00150271
332.4	0.14495273		922.39	0.01776789		1512.41	-0.00319547		2102.4	0.02099238		2692.4	-0.00479429		3282.4	0.00255665
332.6	0.14443835		922.59	0.01793801		1512.61	-0.00267057		2102.6	0.021317		2692.6	-0.00449935		3282.6	0.00411512
332.8	0.14416102		922.79	0.0187924		1512.81	-0.00275815		2102.8	0.02246206		2692.8	-0.00420763		3282.8	0.00398404
333	0.14373889		922.99	0.01904331		1513.01	-0.00124732		2103	0.02265778		2693	-0.00364899		3283	0.00436086
333.2	0.14464944		923.19	0.01869567		1513.21	-0.000159		2103.2	0.02313013		2693.2	-0.0031827		3283.2	0.00520073
333.4	0.14565344		923.39	0.01945724		1513.41	0.00092756		2103.4	0.02346806		2693.4	-0.00269045		3283.4	0.00488369
333.6	0.14636023		923.59	0.01936467		1513.61	0.00121022		2103.6	0.0235922		2693.6	-0.00201043		3283.6	0.00446761
333.8	0.14701482		923.79	0.01998975		1513.81	0.00184165		2103.8	0.02343677		2693.8	-0.00221781		3283.8	0.00363599
334	0.14747849		923.99	0.02107298		1514.01	0.00140956		2104	0.02304416		2694	-0.0013724		3284	0.00285285
334.2	0.14791332		924.19	0.02148101		1514.21	0.00123608		2104.2	0.0227407		2694.2	-0.00090118		3284.2	0.00222386
334.4	0.14851114		924.39	0.02180907		1514.41	0.00160457		2104.4	0.02232234		2694.4	-0.00124436		3284.4	0.00177869
334.6	0.14926925		924.59	0.02205806		1514.61	0.00236043		2104.6	0.02221771		2694.6	-0.00126082		3284.6	0.00167107
334.8	0.14980805		924.79	0.02260344		1514.81	0.00220042		2104.8	0.0225996		2694.8	-0.00180319		3284.8	0.00189092
335	0.15045731		924.99	0.02370448		1515.01	0.00278413		2105	0.02197485		2695	-0.0024346		3285	0.00159392
335.2	0.15112422		925.19	0.02435655		1515.21	0.00376558		2105.2	0.02110957		2695.2	-0.00212016		3285.2	0.0006217
335.4	0.15129239		925.39	0.02439482		1515.41	0.00376274		2105.4	0.02085691		2695.4	-0.0022461		3285.4	-0.00106687
335.6	0.1522813		925.59	0.02377429		1515.61	0.00303078		2105.6	0.02068554		2695.6	-0.00171263		3285.6	-0.00096079
335.8	0.15127023		925.79	0.02279594		1515.81	0.00194728		2105.8	0.02074961		2695.8	-0.00130225		3285.8	-0.00115764
336	0.15171006		925.99	0.02259164		1516.01	0.00106622		2106	0.02053135		2696	-0.00100195		3286	-0.00088512
336.2	0.15260399		926.19	0.02172212		1516.21	0.00063345		2106.2	0.021291		2696.2	-0.00070112		3286.2	0.00058055
336.4	0.15247317		926.39	0.02255246		1516.41	0.00021162		2106.4	0.02138314		2696.4	-0.00101006		3286.4	0.00158011
336.6	0.15148057		926.59	0.0234792		1516.61	0.00061709		2106.6	0.0209644		2696.6	-0.00002198		3286.6	0.00268122
336.8	0.15152293		926.79	0.02341056		1516.81	0.00042341		2106.8	0.0211128		2696.8	0.00044884		3286.8	0.00205022
337	0.15218028		926.99	0.02305743		1517.01	0.00065503		2107	0.02105102		2697	0.00066051		3287	0.0024871
337.2	0.15278938		927.19	0.02202891		1517.21	-0.00045215		2107.2	0.02041723		2697.2	0.0009312		3287.2	0.00286195
337.4	0.15311394		927.39	0.02184477		1517.41	-0.00105703		2107.4	0.02053163		2697.4	0.00051354		3287.4	0.0024979
337.6	0.15315347		927.59	0.02120005		1517.61	-0.00163018		2107.6	0.02017867		2697.6	-0.0000861		3287.6	0.00245043
337.8	0.15370203		927.79	0.02158402		1517.81	-0.00232066		2107.8	0.01924678		2697.8	-0.00051426		3287.8	0.00231304
338	0.15494584		927.99	0.02124782		1518.01	-0.00332065		2108	0.0193052		2698	-0.0012474		3288	0.00178708
338.2	0.15545106		928.19	0.02104489		1518.21	-0.00308086		2108.2	0.01924371		2698.2	-0.00053241		3288.2	0.00125797
338.4	0.15621164		928.39	0.02116868		1518.41	-0.00241209		2108.4	0.01911439		2698.4	-0.00181771		3288.4	0.00185062
338.6	0.15631761		928.59	0.02078729		1518.61	-0.00306364		2108.6	0.01941324		2698.6	-0.00241906		3288.6	0.00183207
338.8	0.15742779		928.79	0.02090315		1518.81	-0.00190942		2108.8	0.01985734		2698.8	-0.0027022		3288.8	0.00152181
339	0.15886549		928.99	0.02029666		1519.01	-0.00120442		2109	0.0189092		2699	-0.00248128		3289	0.00062001
339.2	0.15989082		929.19	0.02025418		1519.21	-0.00114887		2109.2	0.01995495		2699.2	-0.00164242		3289.2	-0.00039
339.4	0.1599721		929.39	0.01990408		1519.41	-0.00110731		2109.4	0.02076809		2699.4	-0.00202454		3289.4	-0.00085344
339.6	0.16136185		929.59	0.01930406		1519.61	-0.00160615		2109.6	0.02129214		2699.6	-0.00105914		3289.6	-0.0002765
339.8	0.16271633		929.79	0.02015253		1519.81	-0.00150004		2109.8	0.02199123		2699.8	-0.00096165		3289.8	-0.00003526
340	0.16374336		929.99	0.02172495		1520.01	-0.00186699		2110	0.02258843		2700	-0.00023207		3290	-0.00004995
340.2	0.1648728		930.19	0.02204744		1520.21	-0.00204744		2110.2	0.02347286		2700.2	0.00031794		3290.2	0.00098939
340.4	0.16455524		930.39	0.02328011		1520.41	-0.00131172		2110.4	0.02329253		2700.4	-0.00028807		3290.4	0.0012901
340.6	0.16410897		930.59	0.02432481		1520.61	-0.00077899		2110.6	0.02294405		2700.6	0.00101409		3290.6	0.00167061
340.8	0.16398518		930.79	0.0249115		1520.81	-0.00182244		2110.8	0.02332002		2700.8	0.00158272		3290.8	0.00200991
341	0.16383655		930.99	0.02563355		1521.01	-0.00264577		2111	0.02220577		2701	0.00108216		3291	0.00334546
341.2	0.16365073		931.19	0.02629998		1521.21	-0.00305227		2111.2	0.02171132		2701.2	0.00114567		3291.2	0.00363555
341.4	0.16421127		931.39	0.02646724		1521.41	-0.00242441		2111.4	0.02236428		2701.4	0.000732		3291.4	0.00380695
341.6	0.16397835		931.59	0.02645961		1521.61	-0.00286929		2111.6	0.02217167		2701.6	-0.00006108		3291.6	0.00437494
341.8	0.16440518		931.79	0.02615897		1521.81	-0.00278468		2111.8	0.02242855		2701.8	0.00000938		3291.8	0.00420411
342	0.16432312		931.99	0.0262709		1522.01	-0.00310259		2112	0.02289155		2702	-0.00071359		3292	0.003729
342.2	0.16415358		932.19	0.02662468		1522.21	-0.00275353		2112.2	0.02244287		2702.2	0.00092873		3292.2	0.00264613
342.4	0.16356786		932.39	0.02704458		1522.41	-0.00202066		2112.4	0.02299726		2702.4	0.00006226		3292.4	0.00349798
342.6	0.16290806		932.59	0.0263254		1522.61	-0.00208515		2112.6	0.02337396		2702.6	-0.00041596		3292.6	0.00371709
342.8	0.16414722		932.79	0.02699237		1522.81	-0.00052392		2112.8	0.02396282		2702.8	-0.00006137		3292.8	0.00417307
343	0.16479475		932.99	0.02673145		1523.01	-0.00040036		2113	0.02372901		2703	-0.00031172		3293	0.00439812
343.2	0.16525744		933.19	0.02674274		1523.21	0.00064806		2113.2	0.02486016		2703.2	-0.00023008		3293.2	0.00456385
343.4	0.16535018		933.39	0.02729719		1523.41	0.00114004		2113.4	0.02486016		2703.4	-0.00089891		3293.4	0.00464487
343.6	0.16679856		933.59	0.02778375		1523.61	0.00092168		2113.6	0.02529441		2703.6	-0.00058675		3293.6	0.00533745
343.8	0.16749081		933.79	0.02827532		1523.81	0.00149913		2113.8	0.02591788		2703.8	-0.00026138		3293.8	0.00598156
344	0.16737896		933.99	0.02782739		1524.01	0.00042512		2114	0.02625353		2704	-0.00019754		3294	0.00641292
344.2	0.16812215		934.19	0.02757699		1524.21	0.00025773		2114.2	0.02589801		2704.2	-0.00045912		3294.2	0.007528
344.4	0.16741956		934.39	0.02794142		1524.41	0.00011867		2114.4	0.02574447		2704.4	-0.00080637		3294.4	0.00730317
344.6	0.16762393		934.59	0.02768351		1524.61	-0.00038318		2114.6	0.02521435		2704.6	0.00012849		3294.6	0.00686057
344.8	0.1688123		934.79	0.02751284		1524.81	-0.00091185		2114.8	0.02502025		2704.8	0.00022273		3294.8	0.00740813
345	0.16955047		934.99	0.02758292		1525.01	-0.00073377		2115	0.02471001		2705	-0.00026881		3295	0.00696246
345.2	0.17059648		935.19	0.02729574		1525.21	-0.00105033		2115.2	0.02499358		2705.2	-0.00031376		3295.2	0.00589639
345.4	0.17106025		935.39	0.0261982		1525.41	-0.00107789		2115.4	0.02515188		2705.4	-0.00066768		3295.4	0.00493007
345.6	0.170649		935.59	0.0249972		1525.61	-0.00172921		2115.6	0.02521348		2705.6	-0.00051944		3295.6	0.00401824
345.8	0.17162277		935.79	0.02456092		1525.81	-0.00170168		2115.8	0.02464901		2705.8	-0.00059005		3295.8	0.00279909
346	0.17140803		935.99	0.02501827		1526.01	-0.0023518		2116	0.02424755		2706	-0.00019475		3296	0.00183874
346.2	0.17193411		936.19	0.02496514		1526.21	-0.00186476		2116.2	0.02414381		2706.2	0.00142499		3296.2	0.00092047
346.4	0.17167922		936.39	0.02508333		1526.41	-0.00140474		2116.4	0.02340463		2706.4	0.00114317		3296.4	0.00107429
346.6	0.17209435		936.59	0.02446802		1526.61	-0.0017299		2116.6	0.02262504		2706.6	0.00138657		3296.6	0.00053164
346.8	0.17283494		936.79	0.02537506		1526.81	-0.00176195		2116.8	0.02223768		2706.8	0.00134856		3296.8	0.00058185
347	0.17309445		936.99	0.02612589		1527.01	-0.00218305		2117	0.02197096		2707	0.00081769		3297	0.00047491
347.2	0.17294117		937.19	0.02658688		1527.21	-0.001709		2117.2	0.02244463		2707.2	0.00040313		3297.2	0.00036036
347.4	0.17238645		937.39	0.02738241		1527.41	-0.00192667		2117.4	0.02313003		2707.4	0.00044335		3297.4	0.00043148
347.6	0.17225101		937.59	0.02809147		1527.61	-0.00180391		2117.6	0.0232933		2707.6	0.00044742		3297.6	0.00119483
347.8	0.17236669		937.79	0.02758331		1527.81	-0.0017211		2117.8	0.02334233		2707.8	0.00088639		3297.8	0.00073153
348	0.17274382		937.99	0.02765895		1528.01	-0.00252931		2118	0.02307821		2708	0.00034437		3298	0.00129849
348.2	0.17331488		938.19	0.02919723		1528.21	-0.00282134		2118.2	0.0227352		2708.2	0.00019326		3298.2	0.00100756
348.4	0.17336865		938.39	0.02922637		1528.41	-0.00300724		2118.4	0.0225831		2708.4	0.00021329		3298.4	0.00023745
348.6	0.17402392		938.59	0.02900457		1528.61	-0.00287495		2118.6	0.0228575		2708.6	0.00005887		3298.6	0.00002757
348.8	0.17432113		938.79	0.02952235		1528.81	-0.00258844		2118.8	0.0230795		2708.8	-0.00015259		3298.8	0.00052384
349	0.17413927		938.99	0.02998635		1529.01	-0.00260481		2119	0.02323965		2709	0.00009592		3299	0.00024936
349.2	0.17531865		939.19	0.0294396		1529.21	-0.00273396		2119.2	0.02327431		2709.2	0.00011908		3299.2	-0.00015145
349.4	0.17553219		939.39	0.02898443		1529.41	-0.00225877		2119.4	0.02347314		2709.4	-0.00032288		3299.4	0.00037321
349.6	0.17633238		939.59	0.02838643		1529.61	-0.00244116		2119.6	0.02375815		2709.6	-0.0002491		3299.6	0.00120188
349.8	0.17800062		939.79	0.02863862		1529.81	-0.00254025		2119.8	0.02336157		2709.8	-0.00082739		3299.8	0.00073413
350	0.17868866		939.99	0.02819146		1530.01	-0.00242899		2120	0.02344965		2710	0.00032321		3300	0.00046449
350.2	0.17987356		940.19	0.02770978		1530.21	-0.00162089		2120.2	0.02254624		2710.2	0.00023701		3300.2	0.00025749
350.4	0.18041331		940.39	0.02818605		1530.41	-0.00161009		2120.4	0.02181748		2710.4	0.00023895		3300.4	-0.00042503
350.6	0.18108192		940.59	0.02884655		1530.61	-0.00130688		2120.6	0.0228491		2710.6	0.00072224		3300.6	-0.00060886
350.8	0.18138407		940.79	0.02979357		1530.81	-0.00065994		2120.8	0.02385335		2710.8	0.00034567		3300.8	-0.00006044
351	0.18160426		940.99	0.0298608		1531.01	-0.00025078		2121	0.02507313		2711	0.0011848		3301	-0.0005508
351.2	0.18125923		941.19	0.02993053		1531.21	0.00087724		2121.2	0.02548049		2711.2	0.0018283		3301.2	-0.00078231
351.4	0.18137771		941.39	0.03021553		1531.41	0.00133811		2121.4	0.02511714		2711.4	0.0011742		3301.4	-0.00045136
351.6	0.18157182		941.59	0.03086231		1531.61	0.00189641		2121.6	0.02510365		2711.6	0.00115617		3301.6	-0.0004719
351.8	0.18138456		941.79	0.03053484		1531.81	0.00244413		2121.8	0.02477354		2711.8	0.00063871		3301.8	-0.00002027
352	0.1819029		941.99	0.03131064		1532.01	0.0022331		2122	0.02404722		2712	0.00064672		3302	0.00094929
352.2	0.18206051		942.19	0.03181815		1532.21	0.00107593		2122.2	0.02458384		2712.2	0.00077108		3302.2	0.00108942
352.4	0.18250438		942.39	0.03135998		1532.41	0.00154492		2122.4	0.02418236		2712.4	0.00117796		3302.4	0.00189022
352.6	0.18227317		942.59	0.03202492		1532.61	0.00108339		2122.6	0.02488936		2712.6	0.00078534		3302.6	0.00228498
352.8	0.18233588		942.79	0.03175769		1532.81	0.00022612		2122.8	0.02519202		2712.8	0.00097343		3302.8	0.00246787
353	0.18297198		942.99	0.03128653		1533.01	-0.00021312		2123	0.02516334		2713	0.00054262		3303	0.00319502
353.2	0.18450567		943.19	0.031206		1533.21	-0.0007886		2123.2	0.02525213		2713.2	0.00008995		3303.2	0.00275995
353.4	0.18484136		943.39	0.03229001		1533.41	-0.00175364		2123.4	0.02554426		2713.4	0.00007093		3303.4	0.00293432
353.6	0.18643076		943.59	0.03195719		1533.61	-0.00280157		2123.6	0.02555036		2713.6	0.00016863		3303.6	0.00198924
353.8	0.18703572		943.79	0.03138594		1533.81	-0.00383428		2123.8	0.02457583		2713.8	-0.00017069		3303.8	0.00089857
354	0.18733475		943.99	0.03063018		1534.01	-0.00390685		2124	0.02467801		2714	0.00020754		3304	0.00073353
354.2	0.18722245		944.19	0.03169931		1534.21	-0.00432515		2124.2	0.02455968		2714.2	-0.00023125		3304.2	0.00055652
354.4	0.18726219		944.39	0.03248998		1534.41	-0.00436299		2124.4	0.0248849		2714.4	0.00051973		3304.4	-0.00001704
354.6	0.18760281		944.59	0.03232734		1534.61	-0.00330038		2124.6	0.02562956		2714.6	0.00096817		3304.6	-0.00007923
354.8	0.1873713		944.79	0.03139239		1534.81	-0.00290888		2124.8	0.02548019		2714.8	0.00175371		3304.8	0.00018221
355	0.18761565		944.99	0.03154215		1535.01	-0.00269774		2125	0.02558315		2715	0.0014271		3305	-0.00070951
355.2	0.18756824		945.19	0.03257705		1535.21	-0.00217484		2125.2	0.02569713		2715.2	0.00134799		3305.2	-0.00091818
355.4	0.18774494		945.39	0.03303697		1535.41	-0.00109511		2125.4	0.02535095		2715.4	0.00080377		3305.4	-0.00000036
355.6	0.18768929		945.59	0.03385468		1535.61	-0.00058363		2125.6	0.02666027		2715.6	0.00106473		3305.6	0.00016062
355.8	0.1880801		945.79	0.03361199		1535.81	-0.00012529		2125.8	0.02558013		2715.8	0.00103143		3305.8	0.00080127
356	0.18920079		945.99	0.03403821		1536.01	0.0000715		2126	0.02632464		2716	0.00148225		3306	0.00103977
356.2	0.19005442		946.19	0.03504778		1536.21	0.00057171		2126.2	0.02757252		2716.2	0.00134763		3306.2	0.00128256
356.4	0.19061469		946.39	0.03476581		1536.41	0.0027058		2126.4	0.02759036		2716.4	0.00101909		3306.4	0.00105668
356.6	0.1906977		946.59	0.03494456		1536.61	0.00298678		2126.6	0.02740638		2716.6	-0.00014735		3306.6	0.0007274
356.8	0.1910767		946.79	0.03382019		1536.81	0.00325164		2126.8	0.02613112		2716.8	-0.00048064		3306.8	0.00076392
357	0.19186983		946.99	0.03438451		1537.01	0.00393309		2127	0.02611726		2717	-0.00036093		3307	0.00050991
357.2	0.19246013		947.19	0.03491799		1537.21	0.00367181		2127.2	0.02591032		2717.2	0.00017485		3307.2	-0.00028869
357.4	0.19278031		947.39	0.03491144		1537.41	0.0043788		2127.4	0.02561318		2717.4	0.00043706		3307.4	-0.00076311
357.6	0.19381094		947.59	0.03410249		1537.61	0.00413269		2127.6	0.02495578		2717.6	0.00049675		3307.6	-0.00068185
357.8	0.19381809		947.79	0.03407369		1537.81	0.00325221		2127.8	0.02372177		2717.8	0.00118805		3307.8	-0.00051163
358	0.19402009		947.99	0.03367094		1538.01	0.00289166		2128	0.02373635		2718	0.00111339		3308	-0.00027311
358.2	0.19391936		948.19	0.0350852		1538.21	0.00248567		2128.2	0.02272125		2718.2	0.0010834		3308.2	-0.00007121
358.4	0.19416158		948.39	0.03390949		1538.41	0.0018762		2128.4	0.02230188		2718.4	-0.00006126		3308.4	0.00002027
358.6	0.19381977		948.59	0.03366593		1538.61	0.00177026		2128.6	0.02269946		2718.6	-0.00026933		3308.6	0.00006632
358.8	0.19333482		948.79	0.03382621		1538.81	0.00068354		2128.8	0.02282835		2718.8	-0.00036272		3308.8	0.00064076
359	0.19374646		948.99	0.0346566		1539.01	-0.00012345		2129	0.02327712		2719	-0.00097619		3309	0.00043377
359.2	0.19394139		949.19	0.03444701		1539.21	-0.00121042		2129.2	0.02367001		2719.2	-0.00036482		3309.2	0.00080061
359.4	0.19414784		949.39	0.03367945		1539.41	-0.00199482		2129.4	0.02425926		2719.4	-0.00073934		3309.4	0.0020597
359.6	0.19449819		949.59	0.03363521		1539.61	-0.00342909		2129.6	0.02459575		2719.6	-0.00080104		3309.6	0.00217596
359.8	0.19479889		949.79	0.03353275		1539.81	-0.00384835		2129.8	0.0238797		2719.8	-0.00045491		3309.8	0.00285371
360	0.19508083		949.99	0.03319765		1540.01	-0.00330273		2130	0.0252853		2720	-0.0008238		3310	0.0031958
360.2	0.19505956		950.19	0.03364178		1540.21	-0.00278061		2130.2	0.02532595		2720.2	-0.00007306		3310.2	0.00277761
360.4	0.19463738		950.39	0.03268154		1540.41	-0.00220697		2130.4	0.02512317		2720.4	-0.000354		3310.4	0.00223079
360.6	0.19489381		950.59	0.03211952		1540.61	-0.00224551		2130.6	0.02516926		2720.6	-0.00052923		3310.6	0.00211141
360.8	0.19471492		950.79	0.03297213		1540.81	-0.00199582		2130.8	0.02523707		2720.8	0.00051695		3310.8	0.00119692
361	0.19515387		950.99	0.03468175		1541.01	-0.00204857		2131	0.02670096		2721	0.00143541		3311	0.00126858
361.2	0.19509653		951.19	0.03405168		1541.21	-0.00270891		2131.2	0.02621876		2721.2	0.0023173		3311.2	0.00133773
361.4	0.19572796		951.39	0.0331405		1541.41	-0.00208538		2131.4	0.02677382		2721.4	0.00292362		3311.4	0.00115276
361.6	0.1969566		951.59	0.03376784		1541.61	-0.00268693		2131.6	0.0264239		2721.6	0.0047139		3311.6	0.00164144
361.8	0.19741133		951.79	0.03340732		1541.81	-0.00196203		2131.8	0.02610948		2721.8	0.00443614		3311.8	0.00185883
362	0.19706965		951.99	0.03343849		1542.01	-0.00088801		2132	0.02712959		2722	0.00326157		3312	0.00258901
362.2	0.1962281		952.19	0.03439512		1542.21	-0.00025739		2132.2	0.02665186		2722.2	0.00286336		3312.2	0.00322273
362.4	0.19554089		952.39	0.03359436		1542.41	-0.00014507		2132.4	0.02706954		2722.4	0.00210692		3312.4	0.00317226
362.6	0.19622585		952.59	0.03451712		1542.61	0.00014264		2132.6	0.02697731		2722.6	0.00175252		3312.6	0.00300607
362.8	0.19728977		952.79	0.03388024		1542.81	-0.00057085		2132.8	0.02757931		2722.8	0.00128626		3312.8	0.0035235
363	0.19818479		952.99	0.03363671		1543.01	-0.0008951		2133	0.02706905		2723	0.00080395		3313	0.00399354
363.2	0.19848464		953.19	0.03322942		1543.21	-0.00129594		2133.2	0.02779476		2723.2	0.00030656		3313.2	0.00490435
363.4	0.19925663		953.39	0.03309644		1543.41	-0.0013754		2133.4	0.02797122		2723.4	-0.0005009		3313.4	0.00537895
363.6	0.19954367		953.59	0.03328745		1543.61	-0.00215646		2133.6	0.02734696		2723.6	-0.00027644		3313.6	0.00505955
363.8	0.1995224		953.79	0.03382269		1543.81	-0.0013463		2133.8	0.02766595		2723.8	-0.00001392		3313.8	0.00447264
364	0.200367		953.99	0.03354545		1544.01	-0.00173529		2134	0.02802203		2724	0.00030409		3314	0.0036534
364.2	0.20112591		954.19	0.03385565		1544.21	-0.0019964		2134.2	0.02797953		2724.2	0.0010538		3314.2	0.00267243
364.4	0.20126486		954.39	0.03425558		1544.41	-0.00244645		2134.4	0.02798597		2724.4	0.0000272		3314.4	0.00198853
364.6	0.20215154		954.59	0.03448016		1544.61	-0.00223691		2134.6	0.02817605		2724.6	0.00042851		3314.6	0.00119295
364.8	0.20273265		954.79	0.03621521		1544.81	-0.0029946		2134.8	0.02699434		2724.8	0.00111678		3314.8	0.00131459
365	0.20361712		954.99	0.03640399		1545.01	-0.00267903		2135	0.02693137		2725	0.0012686		3315	0.00200526
365.2	0.20353152		955.19	0.03616324		1545.21	-0.00268604		2135.2	0.02658672		2725.2	0.00259669		3315.2	0.00188853
365.4	0.20407902		955.39	0.03625266		1545.41	-0.00169898		2135.4	0.02695293		2725.4	0.00224965		3315.4	0.00154618
365.6	0.20389163		955.59	0.03742201		1545.61	-0.00132156		2135.6	0.02642759		2725.6	0.00251888		3315.6	0.00232378
365.8	0.20346306		955.79	0.0380336		1545.81	0.00020699		2135.8	0.02663038		2725.8	0.00176508		3315.8	0.00194598
366	0.20259099		955.99	0.0389648		1546.01	0.00063418		2136	0.02628938		2726	0.00197986		3316	0.00236358
366.2	0.20301587		956.19	0.03964687		1546.21	0.00088797		2136.2	0.02555951		2726.2	0.00182319		3316.2	0.00215396
366.4	0.20430029		956.39	0.0394546		1546.41	0.00150543		2136.4	0.02481119		2726.4	0.00101379		3316.4	0.00144897
366.6	0.20610322		956.59	0.04025701		1546.61	0.00108664		2136.6	0.02466522		2726.6	0.00079888		3316.6	0.00106399
366.8	0.20636509		956.79	0.03982468		1546.81	0.00114996		2136.8	0.02540776		2726.8	0.00034254		3316.8	0.00151872
367	0.20635791		956.99	0.04044385		1547.01	0.00197539		2137	0.02443722		2727	-0.00027562		3317	0.00180393
367.2	0.20717744		957.19	0.03983096		1547.21	0.00186044		2137.2	0.0250007		2727.2	-0.0004783		3317.2	0.00210602
367.4	0.20756017		957.39	0.03961065		1547.41	0.00163498		2137.4	0.02452835		2727.4	-0.00138487		3317.4	0.00234843
367.6	0.20746857		957.59	0.03905557		1547.61	0.00074918		2137.6	0.02455815		2727.6	-0.00109329		3317.6	0.00193828
367.8	0.20789821		957.79	0.03883999		1547.81	0.00089602		2137.8	0.02427701		2727.8	-0.00108707		3317.8	0.00268684
368	0.20834633		957.99	0.03777053		1548.01	-0.00026333		2138	0.02409441		2728	-0.00101365		3318	0.003157
368.2	0.20959019		958.19	0.0371022		1548.21	-0.00020489		2138.2	0.02338284		2728.2	-0.00142168		3318.2	0.00331141
368.4	0.20941887		958.39	0.03674722		1548.41	-0.00075445		2138.4	0.02348423		2728.4	-0.00197974		3318.4	0.00329976
368.6	0.2106989		958.59	0.03766019		1548.61	-0.00052195		2138.6	0.02331241		2728.6	-0.0013063		3318.6	0.0038303
368.8	0.2111816		958.79	0.03770217		1548.81	-0.00074655		2138.8	0.02334665		2728.8	-0.00128755		3318.8	0.00469179
369	0.21104221		958.99	0.03826182		1549.01	0.00017639		2139	0.02396338		2729	-0.00135635		3319	0.00401682
369.2	0.21100598		959.19	0.0379988		1549.21	-0.00030782		2139.2	0.02476177		2729.2	-0.00075589		3319.2	0.0040324
369.4	0.21084135		959.39	0.03826977		1549.41	-0.00004059		2139.4	0.02530358		2729.4	-0.00158742		3319.4	0.00335159
369.6	0.21090196		959.59	0.03929415		1549.61	0.00096074		2139.6	0.02562822		2729.6	-0.00120458		3319.6	0.00318938
369.8	0.21118551		959.79	0.04013117		1549.81	0.00126175		2139.8	0.02644564		2729.8	-0.00052928		3319.8	0.0021027
370	0.21027941		959.99	0.04018588		1550.01	0.00191216		2140	0.02650853		2730	0.00013785		3320	0.00219594
370.2	0.21130575		960.19	0.04064799		1550.21	0.00224387		2140.2	0.02678872		2730.2	0.0001454		3320.2	0.00168186
370.4	0.21172865		960.39	0.04048302		1550.41	0.00270011		2140.4	0.02648883		2730.4	0.0009171		3320.4	0.00139556
370.6	0.21211007		960.59	0.04065119		1550.61	0.00216988		2140.6	0.027316		2730.6	0.00179287		3320.6	0.00122179
370.8	0.21180654		960.79	0.04015213		1550.81	0.00206794		2140.8	0.02745085		2730.8	0.00174018		3320.8	0.00111278
371	0.21211183		960.99	0.04009303		1551.01	0.0022306		2141	0.02666568		2731	0.00137718		3321	0.00100927
371.2	0.21181075		961.19	0.03954173		1551.21	0.00195916		2141.2	0.02709327		2731.2	0.00068504		3321.2	0.00142877
371.4	0.21135717		961.39	0.0397868		1551.41	0.00119821		2141.4	0.02682962		2731.4	-0.00035593		3321.4	0.00188908
371.6	0.21118091		961.59	0.03920826		1551.61	0.0010693		2141.6	0.02619612		2731.6	-0.00029934		3321.6	0.00244475
371.8	0.2113579		961.79	0.03945688		1551.81	0.00079818		2141.8	0.02550453		2731.8	0.00017177		3321.8	0.00387443
372	0.21132175		961.99	0.03946476		1552.01	-0.00020157		2142	0.02530515		2732	0.00026951		3322	0.00418877
372.2	0.21246789		962.19	0.04009631		1552.21	-0.00045704		2142.2	0.02454996		2732.2	-0.00005041		3322.2	0.0035766
372.4	0.212718		962.39	0.04009896		1552.41	-0.00071829		2142.4	0.02483552		2732.4	-0.00022735		3322.4	0.00279424
372.6	0.21476227		962.59	0.04148975		1552.61	-0.00120883		2142.6	0.02481388		2732.6	-0.00071041		3322.6	0.00342513
372.8	0.21504646		962.79	0.04156268		1552.81	-0.00133753		2142.8	0.02483216		2732.8	-0.00107065		3322.8	0.0024219
373	0.21570633		962.99	0.04325216		1553.01	-0.00126677		2143	0.02577179		2733	-0.00115753		3323	0.00144066
373.2	0.21631484		963.19	0.04341153		1553.21	-0.00082637		2143.2	0.02664313		2733.2	-0.00080774		3323.2	0.0009249
373.4	0.21587623		963.39	0.04490436		1553.41	-0.00021825		2143.4	0.02712339		2733.4	-0.00114299		3323.4	0.00051469
373.6	0.21619682		963.59	0.04572683		1553.61	0.00025536		2143.6	0.02679557		2733.6	-0.00030618		3323.6	-0.00006525
373.8	0.21538098		963.79	0.04533177		1553.81	0.00042096		2143.8	0.02725308		2733.8	0.00012949		3323.8	-0.00020328
374	0.21575715		963.99	0.04465121		1554.01	0.00076245		2144	0.02728157		2734	0.00061104		3324	-0.0004338
374.2	0.21711031		964.19	0.04450843		1554.21	0.00094622		2144.2	0.02788062		2734.2	0.00068787		3324.2	-0.00046029
374.4	0.21721344		964.39	0.0441563		1554.41	0.00119188		2144.4	0.02876722		2734.4	0.00119235		3324.4	-0.00094466
374.6	0.21714362		964.59	0.04349909		1554.61	0.00128572		2144.6	0.02910061		2734.6	0.00135817		3324.6	-0.00130534
374.8	0.21648773		964.79	0.04322968		1554.81	0.00163891		2144.8	0.02912559		2734.8	0.00160394		3324.8	-0.00121589
375	0.21638416		964.99	0.04249487		1555.01	0.00274832		2145	0.02903439		2735	0.00121552		3325	-0.00021254
375.2	0.21586733		965.19	0.04213775		1555.21	0.00282776		2145.2	0.02986213		2735.2	0.00090646		3325.2	0.00032935
375.4	0.2161723		965.39	0.04211879		1555.41	0.00325228		2145.4	0.02990444		2735.4	0.00087104		3325.4	0.00023102
375.6	0.21618012		965.59	0.04103371		1555.61	0.00441		2145.6	0.02966019		2735.6	0.00232163		3325.6	0.00104541
375.8	0.21619874		965.79	0.04129887		1555.81	0.0042547		2145.8	0.02932652		2735.8	0.0029936		3325.8	0.00107049
376	0.21636141		965.99	0.04151084		1556.01	0.00345543		2146	0.02844177		2736	0.00267307		3326	0.00108049
376.2	0.21630711		966.19	0.04143755		1556.21	0.00323425		2146.2	0.02870577		2736.2	0.00222925		3326.2	-0.00032758
376.4	0.21771015		966.39	0.04164566		1556.41	0.00306515		2146.4	0.02855421		2736.4	0.0022543		3326.4	0.00020633
376.6	0.21830178		966.59	0.04332129		1556.61	0.00309749		2146.6	0.0285468		2736.6	0.00262041		3326.6	0.00063412
376.8	0.21776893		966.79	0.0442801		1556.81	0.00351843		2146.8	0.02856799		2736.8	0.00321046		3326.8	-0.00019409
377	0.2173483		966.99	0.04571322		1557.01	0.00360008		2147	0.02917611		2737	0.00376418		3327	-0.00004818
377.2	0.21598897		967.19	0.04605271		1557.21	0.00352423		2147.2	0.02929361		2737.2	0.00421572		3327.2	-0.00023648
377.4	0.21586321		967.39	0.04624811		1557.41	0.00367563		2147.4	0.0285224		2737.4	0.00386442		3327.4	0.0000643
377.6	0.21580039		967.59	0.04619897		1557.61	0.00448818		2147.6	0.02775774		2737.6	0.00397334		3327.6	-0.00000201
377.8	0.2158603		967.79	0.04593819		1557.81	0.00450971		2147.8	0.02808657		2737.8	0.00328501		3327.8	0.00055971
378	0.2170354		967.99	0.04584384		1558.01	0.00354982		2148	0.02808852		2738	0.00278514		3328	0.00122125
378.2	0.21660053		968.19	0.04522015		1558.21	0.00409434		2148.2	0.02821819		2738.2	0.00228947		3328.2	0.00067888
378.4	0.21723063		968.39	0.04505346		1558.41	0.00389959		2148.4	0.02805861		2738.4	0.00191205		3328.4	0.00114707
378.6	0.21821661		968.59	0.04397044		1558.61	0.00384319		2148.6	0.02726814		2738.6	0.00157048		3328.6	0.0012019
378.8	0.21866947		968.79	0.04310646		1558.81	0.00386376		2148.8	0.02726854		2738.8	0.00158123		3328.8	0.00251441
379	0.22000562		968.99	0.0416175		1559.01	0.00372092		2149	0.02745679		2739	0.00094164		3329	0.00304873
379.2	0.22094106		969.19	0.0418134		1559.21	0.00333557		2149.2	0.02776789		2739.2	-0.00015238		3329.2	0.00212217
379.4	0.22144558		969.39	0.04073475		1559.41	0.00357609		2149.4	0.02746314		2739.4	-0.00065668		3329.4	0.00163312
379.6	0.22276307		969.59	0.03991672		1559.61	0.00258092		2149.6	0.02658497		2739.6	-0.00090304		3329.6	0.00222154
379.8	0.22337412		969.79	0.04018096		1559.81	0.00184456		2149.8	0.02603795		2739.8	-0.00126326		3329.8	0.00137556
380	0.22497417		969.99	0.04006845		1560.01	0.00087796		2150	0.025936		2740	-0.00123141		3330	0.00152138
380.2	0.22576296		970.19	0.04016515		1560.21	0.00091333		2150.2	0.02712359		2740.2	-0.00106754		3330.2	0.00089171
380.4	0.22640281		970.39	0.04053049		1560.41	0.00091421		2150.4	0.02737124		2740.4	0.00011683		3330.4	0.00097372
380.6	0.2265664		970.59	0.04096841		1560.61	0.00113889		2150.6	0.02796941		2740.6	0.00099308		3330.6	0.00023432
380.8	0.22639709		970.79	0.04155052		1560.81	-0.00011353		2150.8	0.02870688		2740.8	0.00105063		3330.8	0.00019437
381	0.22541515		970.99	0.04188129		1561.01	-0.00072029		2151	0.02907909		2741	0.00166258		3331	-0.00013224
381.2	0.22510348		971.19	0.04304042		1561.21	-0.00037403		2151.2	0.02963607		2741.2	0.00223384		3331.2	-0.00037258
381.4	0.2254333		971.39	0.04318377		1561.41	0.00077758		2151.4	0.02908644		2741.4	0.00243156		3331.4	-0.00031067
381.6	0.22539047		971.59	0.04449459		1561.61	0.00080199		2151.6	0.0289957		2741.6	0.00257529		3331.6	-0.00042024
381.8	0.22519483		971.79	0.04385628		1561.81	-0.00057126		2151.8	0.02924805		2741.8	0.00294608		3331.8	0.00024788
382	0.22550084		971.99	0.04435466		1562.01	-0.00088202		2152	0.02910157		2742	0.00309145		3332	0.00051836
382.2	0.2251612		972.19	0.04454961		1562.21	-0.00007041		2152.2	0.02951399		2742.2	0.00350677		3332.2	-0.00025129
382.4	0.22581764		972.39	0.04546292		1562.41	0.00001418		2152.4	0.02985363		2742.4	0.00375613		3332.4	0.00012561
382.6	0.22481825		972.59	0.04539748		1562.61	-0.00008993		2152.6	0.0302158		2742.6	0.00362515		3332.6	-0.00061507
382.8	0.22454485		972.79	0.04547334		1562.81	-0.000426		2152.8	0.02989749		2742.8	0.00413402		3332.8	-0.00008637
383	0.22501185		972.99	0.04608125		1563.01	-0.00080183		2153	0.03022421		2743	0.00319604		3333	-0.0007538
383.2	0.22510044		973.19	0.04650228		1563.21	-0.00136883		2153.2	0.02983748		2743.2	0.00297443		3333.2	-0.00106766
383.4	0.22481866		973.39	0.0457636		1563.41	-0.00151248		2153.4	0.02923683		2743.4	0.00338425		3333.4	-0.00069624
383.6	0.22607084		973.59	0.04718486		1563.61	-0.0012646		2153.6	0.0293124		2743.6	0.00390141		3333.6	-0.00032238
383.8	0.22674946		973.79	0.04736657		1563.81	-0.00069306		2153.8	0.02931692		2743.8	0.00448955		3333.8	-0.00096346
384	0.22768618		973.99	0.04739852		1564.01	-0.00093857		2154	0.02985861		2744	0.00427612		3334	-0.00008604
384.2	0.22750671		974.19	0.04785483		1564.21	-0.00063012		2154.2	0.03104049		2744.2	0.0040679		3334.2	-0.00083184
384.4	0.22720546		974.39	0.04822979		1564.41	-0.00008817		2154.4	0.0315038		2744.4	0.00361617		3334.4	-0.00088354
384.6	0.22792141		974.59	0.04809715		1564.61	0.00026868		2154.6	0.03099385		2744.6	0.00285234		3334.6	-0.00109508
384.8	0.22747385		974.79	0.04809138		1564.81	-0.00011823		2154.8	0.03129806		2744.8	0.00164498		3334.8	-0.00065272
385	0.22811855		974.99	0.04805593		1565.01	0.00089919		2155	0.03053803		2745	0.00157019		3335	-0.00053798
385.2	0.22894743		975.19	0.04862284		1565.21	0.00235919		2155.2	0.03058633		2745.2	0.00177695		3335.2	-0.00019477
385.4	0.22925926		975.39	0.04762236		1565.41	0.00316594		2155.4	0.02983519		2745.4	0.00204149		3335.4	0.00002616
385.6	0.22956816		975.59	0.04782097		1565.61	0.00325487		2155.6	0.02988094		2745.6	0.00191981		3335.6	-0.00014086
385.8	0.22986395		975.79	0.04704509		1565.81	0.00340645		2155.8	0.03070772		2745.8	0.00220521		3335.8	0.00106315
386	0.22977313		975.99	0.04889037		1566.01	0.00497333		2156	0.03073232		2746	0.00227576		3336	0.00132142
386.2	0.22951868		976.19	0.04933766		1566.21	0.00486261		2156.2	0.03168562		2746.2	0.00205177		3336.2	0.00152875
386.4	0.22954218		976.39	0.04876158		1566.41	0.00479528		2156.4	0.03234543		2746.4	0.00246233		3336.4	0.00189757
386.6	0.22945638		976.59	0.0490197		1566.61	0.00506047		2156.6	0.03262827		2746.6	0.00288396		3336.6	0.00163563
386.8	0.23016192		976.79	0.04940109		1566.81	0.00447972		2156.8	0.03290009		2746.8	0.00297457		3336.8	0.00221115
387	0.23133716		976.99	0.04955969		1567.01	0.00402705		2157	0.03359526		2747	0.00291035		3337	0.00242136
387.2	0.2313004		977.19	0.04893415		1567.21	0.00276823		2157.2	0.03393252		2747.2	0.00395164		3337.2	0.0025595
387.4	0.23152696		977.39	0.04917159		1567.41	0.00281447		2157.4	0.03401506		2747.4	0.0036603		3337.4	0.00317335
387.6	0.23243		977.59	0.05066338		1567.61	0.00195546		2157.6	0.0342442		2747.6	0.00366177		3337.6	0.00320343
387.8	0.23232049		977.79	0.0505407		1567.81	0.00040438		2157.8	0.03394433		2747.8	0.00257355		3337.8	0.00318039
388	0.23220335		977.99	0.05002388		1568.01	-0.00086042		2158	0.03438252		2748	0.00185443		3338	0.00466261
388.2	0.23200745		978.19	0.0496885		1568.21	-0.0008547		2158.2	0.03359583		2748.2	0.00199499		3338.2	0.00343621
388.4	0.23234067		978.39	0.05017093		1568.41	-0.00045256		2158.4	0.03322057		2748.4	0.00146847		3338.4	0.00413606
388.6	0.23286626		978.59	0.049769		1568.61	-0.00081873		2158.6	0.03253245		2748.6	0.00085894		3338.6	0.00416154
388.8	0.23306534		978.79	0.04938432		1568.81	-0.00071778		2158.8	0.03187295		2748.8	-0.00004933		3338.8	0.00442352
389	0.23362156		978.99	0.04924351		1569.01	0.0006178		2159	0.030706		2749	0.00018823		3339	0.00360102
389.2	0.23385828		979.19	0.04874541		1569.21	0.00133341		2159.2	0.03054071		2749.2	-0.00001583		3339.2	0.00267228
389.4	0.23275647		979.39	0.04893873		1569.41	0.00110074		2159.4	0.03033094		2749.4	-0.0004794		3339.4	0.00196607
389.6	0.23250778		979.59	0.04901514		1569.61	0.00165532		2159.6	0.03055939		2749.6	-0.00078266		3339.6	0.00150358
389.8	0.23265804		979.79	0.04914067		1569.81	0.00260162		2159.8	0.03045872		2749.8	-0.00138365		3339.8	0.00202207
390	0.23182273		979.99	0.05009987		1570.01	0.00336731		2160	0.02970671		2750	-0.00155241		3340	0.00143589
390.2	0.23222003		980.19	0.05062524		1570.21	0.00326552		2160.2	0.0297399		2750.2	-0.00185196		3340.2	0.00100073
390.4	0.23356301		980.39	0.05125482		1570.41	0.00445992		2160.4	0.02917419		2750.4	-0.00198076		3340.4	0.00043541
390.6	0.23451117		980.59	0.05247912		1570.61	0.00488273		2160.6	0.02917964		2750.6	-0.00131374		3340.6	-0.00012534
390.8	0.23517039		980.79	0.05302941		1570.81	0.00411657		2160.8	0.02919973		2750.8	-0.0014302		3340.8	0.00027066
391	0.23593743		980.99	0.05305266		1571.01	0.00385657		2161	0.02852965		2751	-0.00068593		3341	-0.00027117
391.2	0.23609184		981.19	0.05318472		1571.21	0.00386598		2161.2	0.02934235		2751.2	-0.00048557		3341.2	-0.00041698
391.4	0.23681556		981.39	0.05385631		1571.41	0.00341467		2161.4	0.02903666		2751.4	-0.00053377		3341.4	0.00017269
391.6	0.23701472		981.59	0.05487149		1571.61	0.00260689		2161.6	0.02882225		2751.6	0.00016081		3341.6	-0.00066676
391.8	0.23685768		981.79	0.0539459		1571.81	0.00175608		2161.8	0.02890594		2751.8	0.00119249		3341.8	0.00023735
392	0.23697178		981.99	0.05321409		1572.01	0.00136205		2162	0.02866643		2752	0.00180216		3342	0.00113594
392.2	0.2363496		982.19	0.05289324		1572.21	0.002037		2162.2	0.02853307		2752.2	0.0022647		3342.2	0.00055643
392.4	0.23687876		982.39	0.05328692		1572.41	0.00233781		2162.4	0.0297785		2752.4	0.00204972		3342.4	0.00106584
392.6	0.23688213		982.59	0.05188622		1572.61	0.00295208		2162.6	0.02984615		2752.6	0.00201106		3342.6	0.00078129
392.8	0.23700115		982.79	0.05097445		1572.81	0.00249935		2162.8	0.03016431		2752.8	0.00186894		3342.8	-0.00007893
393	0.2367392		982.99	0.05080477		1573.01	0.00185139		2163	0.03012564		2753	0.00123779		3343	-0.00010716
393.2	0.23765442		983.19	0.05002146		1573.21	0.00158397		2163.2	0.03057954		2753.2	0.00079694		3343.2	-0.00037591
393.4	0.23741921		983.39	0.04994649		1573.41	0.000906		2163.4	0.03167297		2753.4	0.00009843		3343.4	0.00014378
393.6	0.23837417		983.59	0.04936885		1573.61	0.00100218		2163.6	0.03148165		2753.6	-0.00119634		3343.6	0.00035481
393.8	0.23902953		983.79	0.04960693		1573.81	0.00115004		2163.8	0.03120116		2753.8	-0.0017418		3343.8	0.00048683
394	0.23957121		983.99	0.05065399		1574.01	0.00054378		2164	0.03116479		2754	-0.00180499		3344	0.00060511
394.2	0.24036038		984.19	0.05214329		1574.21	0.00031131		2164.2	0.03114937		2754.2	-0.00242673		3344.2	0.00125259
394.4	0.24162874		984.39	0.05229746		1574.41	0.0002309		2164.4	0.0304221		2754.4	-0.00304163		3344.4	0.00168762
394.6	0.24146397		984.59	0.05310668		1574.61	0.00013949		2164.6	0.03063456		2754.6	-0.00252949		3344.6	0.00224215
394.8	0.24140909		984.79	0.05387558		1574.81	-0.00039478		2164.8	0.03031726		2754.8	-0.00222433		3344.8	0.00219061
395	0.24132185		984.99	0.05475545		1575.01	0.00022627		2165	0.02984412		2755	-0.00139333		3345	0.00217533
395.2	0.24175848		985.19	0.05532728		1575.21	0.00037695		2165.2	0.03013629		2755.2	-0.00045688		3345.2	0.00246472
395.4	0.24223187		985.39	0.05570708		1575.41	-0.00059644		2165.4	0.0303452		2755.4	0.00028041		3345.4	0.00149724
395.6	0.2422738		985.59	0.05610821		1575.61	-0.00034388		2165.6	0.03006032		2755.6	0.00132222		3345.6	0.00055655
395.8	0.24236057		985.79	0.05578005		1575.81	0.00049779		2165.8	0.02998812		2755.8	0.00244247		3345.8	0.00119084
396	0.24187647		985.99	0.05610168		1576.01	0.00120777		2166	0.02995647		2756	0.00173615		3346	0.00039972
396.2	0.24149588		986.19	0.05596265		1576.21	0.00254171		2166.2	0.03070264		2756.2	0.00224251		3346.2	-0.00009014
396.4	0.24104673		986.39	0.05502932		1576.41	0.00327885		2166.4	0.03069143		2756.4	0.00283518		3346.4	-0.00060429
396.6	0.24158345		986.59	0.05355511		1576.61	0.00276727		2166.6	0.03078406		2756.6	0.00291103		3346.6	-0.00087571
396.8	0.2426957		986.79	0.05385528		1576.81	0.00227125		2166.8	0.03101303		2756.8	0.0024675		3346.8	-0.00120753
397	0.24357085		986.99	0.05386772		1577.01	0.00170088		2167	0.03138637		2757	0.00212592		3347	-0.00102504
397.2	0.24440174		987.19	0.05229427		1577.21	0.00242784		2167.2	0.03134243		2757.2	0.00261577		3347.2	-0.00239342
397.4	0.24447858		987.39	0.05231253		1577.41	0.00186231		2167.4	0.03181565		2757.4	0.00272133		3347.4	-0.00158098
397.6	0.24495151		987.59	0.05155009		1577.61	0.0017552		2167.6	0.03179021		2757.6	0.00146067		3347.6	-0.0019021
397.8	0.24556444		987.79	0.05150572		1577.81	0.00146003		2167.8	0.03214819		2757.8	0.00215271		3347.8	-0.00121438
398	0.24538921		987.99	0.05174742		1578.01	0.0011306		2168	0.03156294		2758	0.00185117		3348	-0.00041763
398.2	0.24560812		988.19	0.05275272		1578.21	0.00130365		2168.2	0.03094141		2758.2	0.00108284		3348.2	-0.00035059
398.4	0.24609258		988.39	0.05336556		1578.41	0.00154134		2168.4	0.0295232		2758.4	0.00030709		3348.4	-0.00026667
398.6	0.24581387		988.59	0.05461328		1578.61	0.00109818		2168.6	0.02963085		2758.6	0.00069521		3348.6	-0.00083453
398.8	0.24554176		988.79	0.05475277		1578.81	0.00040436		2168.8	0.02846132		2758.8	0.00157997		3348.8	-0.00112843
399	0.24593901		988.99	0.05456269		1579.01	0.0007419		2169	0.02802919		2759	0.00178577		3349	-0.00119226
399.2	0.2464219		989.19	0.05407663		1579.21	0.00080875		2169.2	0.02779774		2759.2	0.002205		3349.2	-0.0023679
399.4	0.24702011		989.39	0.05411092		1579.41	0.000292		2169.4	0.02804948		2759.4	0.00194588		3349.4	-0.00341879
399.6	0.24677395		989.59	0.05497679		1579.61	0.00134379		2169.6	0.02800642		2759.6	0.00184271		3349.6	-0.00337194
399.8	0.24739294		989.79	0.05459634		1579.81	0.00178573		2169.8	0.02837318		2759.8	0.00098187		3349.8	-0.00311332
400	0.24721992		989.99	0.05455443		1580.01	0.00213427		2170	0.0286844		2760	0.0010048		3350	-0.00336579
400.2	0.24685978		990.19	0.05421241		1580.21	0.00236599		2170.2	0.02917698		2760.2	0.00181925		3350.2	-0.00354906
400.4	0.24705714		990.39	0.05376339		1580.41	0.00259036		2170.4	0.02897974		2760.4	0.00127357		3350.4	-0.00318168
400.6	0.24861016		990.59	0.05389903		1580.61	0.00210034		2170.6	0.03037525		2760.6	0.001784		3350.6	-0.00264533
400.8	0.2489457		990.79	0.05397439		1580.81	0.00290968		2170.8	0.03122268		2760.8	0.00248163		3350.8	-0.00182146
401	0.24876704		990.99	0.05339248		1581.01	0.00332206		2171	0.03214841		2761	0.00336395		3351	-0.00162048
401.2	0.24849681		991.19	0.05311308		1581.21	0.00380515		2171.2	0.03172366		2761.2	0.00364552		3351.2	-0.00121915
401.4	0.24907838		991.39	0.0531956		1581.41	0.00372498		2171.4	0.03286993		2761.4	0.00338147		3351.4	0.00076315
401.6	0.24962081		991.59	0.05203492		1581.61	0.0035351		2171.6	0.03307194		2761.6	0.0025562		3351.6	0.00128905
401.8	0.25043511		991.79	0.05207226		1581.81	0.00350557		2171.8	0.03312685		2761.8	0.00254902		3351.8	0.0027579
402	0.25053019		991.99	0.05294279		1582.01	0.00378891		2172	0.03320581		2762	0.00249462		3352	0.00322867
402.2	0.25125714		992.19	0.05348385		1582.21	0.00357587		2172.2	0.03356886		2762.2	0.00166268		3352.2	0.00274318
402.4	0.25127489		992.39	0.05363054		1582.41	0.00291432		2172.4	0.03286483		2762.4	0.00171333		3352.4	0.00249992
402.6	0.25148732		992.59	0.05356981		1582.61	0.0018096		2172.6	0.03291625		2762.6	0.00237701		3352.6	0.00158357
402.8	0.25080206		992.79	0.05348001		1582.81	0.00165048		2172.8	0.03196845		2762.8	0.0026112		3352.8	0.00160447
403	0.25073841		992.99	0.0533465		1583.01	0.00209414		2173	0.03210332		2763	0.00233089		3353	0.00116512
403.2	0.25016426		993.19	0.05379812		1583.21	0.0019964		2173.2	0.03165644		2763.2	0.00255794		3353.2	0.0008015
403.4	0.24973292		993.39	0.05530244		1583.41	0.00177987		2173.4	0.03169267		2763.4	0.00187732		3353.4	0.00028914
403.6	0.24933862		993.59	0.05609983		1583.61	0.00159006		2173.6	0.03206638		2763.6	0.00178294		3353.6	0.00056177
403.8	0.25028231		993.79	0.05600624		1583.81	0.00056081		2173.8	0.03154502		2763.8	0.00215457		3353.8	0.00005775
404	0.24994946		993.99	0.05676102		1584.01	0.00126457		2174	0.03081172		2764	0.00285872		3354	-0.00043814
404.2	0.24997986		994.19	0.05707523		1584.21	0.00138107		2174.2	0.0306622		2764.2	0.00362285		3354.2	-0.00125238
404.4	0.25026394		994.39	0.0568033		1584.41	0.00163465		2174.4	0.03088451		2764.4	0.00321688		3354.4	-0.00026214
404.6	0.25028881		994.59	0.0569841		1584.61	0.00195791		2174.6	0.03168489		2764.6	0.00456576		3354.6	0.00031322
404.8	0.24970589		994.79	0.0565727		1584.81	0.00288411		2174.8	0.0313536		2764.8	0.00533135		3354.8	0.00062628
405	0.24972243		994.99	0.05648143		1585.01	0.00359987		2175	0.0302658		2765	0.00547723		3355	-0.00032882
405.2	0.25046841		995.19	0.05583689		1585.21	0.00371992		2175.2	0.0300541		2765.2	0.00465855		3355.2	0.00017093
405.4	0.25058736		995.39	0.05529138		1585.41	0.00365982		2175.4	0.03010724		2765.4	0.00334991		3355.4	0.00025604
405.6	0.25162655		995.59	0.05414999		1585.61	0.00337786		2175.6	0.03031656		2765.6	0.00262509		3355.6	-0.00097781
405.8	0.25317471		995.79	0.0539613		1585.81	0.00361963		2175.8	0.03033123		2765.8	0.00186268		3355.8	-0.00066344
406	0.25326759		995.99	0.05434671		1586.01	0.00382126		2176	0.03092092		2766	0.00133101		3356	-0.00128294
406.2	0.25419098		996.19	0.0533094		1586.21	0.00349305		2176.2	0.03075551		2766.2	0.00060978		3356.2	-0.00128295
406.4	0.25451805		996.39	0.05269111		1586.41	0.00313778		2176.4	0.03030645		2766.4	0.00047888		3356.4	-0.00100192
406.6	0.2552202		996.59	0.05328907		1586.61	0.00344423		2176.6	0.03042769		2766.6	0.00017421		3356.6	-0.00042793
406.8	0.25464672		996.79	0.05406954		1586.81	0.00372385		2176.8	0.03053609		2766.8	0.00010086		3356.8	-0.00042108
407	0.25457918		996.99	0.05502604		1587.01	0.00388265		2177	0.03086534		2767	0.00041325		3357	0.00004431
407.2	0.25399816		997.19	0.05572183		1587.21	0.0032742		2177.2	0.0312707		2767.2	0.00041405		3357.2	-0.00073718
407.4	0.25440963		997.39	0.05627148		1587.41	0.00283714		2177.4	0.03187658		2767.4	0.00068038		3357.4	-0.00161714
407.6	0.25405295		997.59	0.05660433		1587.61	0.00188046		2177.6	0.0315917		2767.6	0.00080034		3357.6	-0.00160521
407.8	0.25423059		997.79	0.05701804		1587.81	0.00145058		2177.8	0.03116915		2767.8	0.00124509		3357.8	-0.00225378
408	0.2538432		997.99	0.05795857		1588.01	0.00179516		2178	0.03120788		2768	0.00141858		3358	-0.00248771
408.2	0.25356977		998.19	0.05855862		1588.21	0.00158748		2178.2	0.03227142		2768.2	0.00245114		3358.2	-0.00270548
408.4	0.25308785		998.39	0.05897096		1588.41	0.00134457		2178.4	0.03342753		2768.4	0.00265451		3358.4	-0.00249468
408.6	0.25287742		998.59	0.05987124		1588.61	0.00214027		2178.6	0.03365938		2768.6	0.00307911		3358.6	-0.00253015
408.8	0.25217172		998.79	0.06012455		1588.81	0.00303452		2178.8	0.03360247		2768.8	0.00364869		3358.8	-0.00256653
409	0.25322402		998.99	0.06072846		1589.01	0.00359534		2179	0.03285538		2769	0.00273669		3359	-0.00271117
409.2	0.25350015		999.19	0.06028992		1589.21	0.00310109		2179.2	0.03284117		2769.2	0.00139603		3359.2	-0.00190973
409.4	0.25326832		999.39	0.06124634		1589.41	0.00249089		2179.4	0.03295643		2769.4	0.00091539		3359.4	-0.00174618
409.6	0.25448404		999.59	0.06058973		1589.61	0.00250099		2179.6	0.03208904		2769.6	0.00073523		3359.6	-0.00108725
409.8	0.25527459		999.79	0.06086916		1589.81	0.0028459		2179.8	0.03200989		2769.8	0.00051252		3359.8	0.00044396
410	0.25520242		999.99	0.06139142		1590.01	0.00280861		2180	0.03221872		2770	0.00037222		3360	0.00064681
410.2	0.25582761		1000.19	0.06097277		1590.21	0.00220852		2180.2	0.03267092		2770.2	0.00067246		3360.2	0.00082909
410.4	0.25605269		1000.39	0.06135913		1590.41	0.00223376		2180.4	0.03211795		2770.4	0.00039699		3360.4	0.0010306
410.6	0.25611686		1000.59	0.06239281		1590.61	0.00207989		2180.6	0.03198648		2770.6	0.00031654		3360.6	0.00141135
410.8	0.25543235		1000.79	0.06293176		1590.81	0.00131493		2180.8	0.03175129		2770.8	0.00011517		3360.8	0.00093109
411	0.25627133		1000.99	0.06285869		1591.01	0.0006622		2181	0.03136091		2771	0.00064297		3361	0.0014755
411.2	0.25650616		1001.19	0.06264124		1591.21	-0.00000595		2181.2	0.03114533		2771.2	0.00099336		3361.2	0.00002832
411.4	0.25713469		1001.39	0.06194622		1591.41	-0.00045863		2181.4	0.03091731		2771.4	0.00157724		3361.4	-0.0002802
411.6	0.25679628		1001.59	0.06284236		1591.61	-0.0007469		2181.6	0.02984983		2771.6	0.00145211		3361.6	-0.00028902
411.8	0.25675429		1001.79	0.06266306		1591.81	-0.00065897		2181.8	0.03022351		2771.8	0.00189371		3361.8	-0.00050309
412	0.25744453		1001.99	0.06243257		1592.01	0.00016329		2182	0.02991608		2772	0.00145974		3362	-0.00057944
412.2	0.25686009		1002.19	0.06160024		1592.21	0.00086321		2182.2	0.029802		2772.2	0.00148353		3362.2	-0.00102089
412.4	0.25660252		1002.39	0.06135762		1592.41	0.0015769		2182.4	0.0298446		2772.4	0.00154102		3362.4	-0.00096731
412.6	0.25679864		1002.59	0.06116841		1592.61	0.00274763		2182.6	0.02952043		2772.6	0.00092156		3362.6	-0.00022165
412.8	0.25679999		1002.79	0.06177213		1592.81	0.00347206		2182.8	0.02901711		2772.8	0.00119017		3362.8	0.00083522
413	0.25777673		1002.99	0.06182724		1593.01	0.00342609		2183	0.02875266		2773	0.00034939		3363	0.00120969
413.2	0.25743802		1003.19	0.06109503		1593.21	0.0025563		2183.2	0.02809413		2773.2	0.00063809		3363.2	0.00199057
413.4	0.25791088		1003.39	0.06149294		1593.41	0.00350676		2183.4	0.0282751		2773.4	0.00130554		3363.4	0.00222843
413.6	0.25839246		1003.59	0.06058768		1593.61	0.00380522		2183.6	0.02721051		2773.6	0.00140399		3363.6	0.00254755
413.8	0.25897474		1003.79	0.06123321		1593.81	0.00434689		2183.8	0.02897816		2773.8	0.00186213		3363.8	0.00196619
414	0.25885384		1003.99	0.06142369		1594.01	0.0041242		2184	0.02874266		2774	0.0018865		3364	0.00049611
414.2	0.25926004		1004.19	0.06132605		1594.21	0.0036348		2184.2	0.02932786		2774.2	0.00131042		3364.2	-0.00059159
414.4	0.25979023		1004.39	0.06169863		1594.41	0.00392963		2184.4	0.02877534		2774.4	0.00088582		3364.4	-0.00069671
414.6	0.25990375		1004.59	0.06226253		1594.61	0.00342752		2184.6	0.02962255		2774.6	0.00141956		3364.6	-0.00002889
414.8	0.26048473		1004.79	0.06262221		1594.81	0.00280871		2184.8	0.03036529		2774.8	0.00229613		3364.8	-0.00037535
415	0.26193739		1004.99	0.0629495		1595.01	0.00245483		2185	0.03078301		2775	0.00330922		3365	-0.00087639
415.2	0.26186957		1005.19	0.06230637		1595.21	0.00131464		2185.2	0.03095859		2775.2	0.0035013		3365.2	-0.00169726
415.4	0.26139683		1005.39	0.0620198		1595.41	0.00083936		2185.4	0.03104796		2775.4	0.00323587		3365.4	-0.00233681
415.6	0.26115621		1005.59	0.06228163		1595.61	0.00026042		2185.6	0.0318299		2775.6	0.00233162		3365.6	-0.00247411
415.8	0.26009452		1005.79	0.06157771		1595.81	-0.0000798		2185.8	0.03189847		2775.8	0.00155916		3365.8	-0.00282214
416	0.26025954		1005.99	0.06158127		1596.01	0.00005426		2186	0.03066567		2776	0.00065341		3366	-0.00252669
416.2	0.25947972		1006.19	0.06163435		1596.21	0.00016918		2186.2	0.03040192		2776.2	0.00034288		3366.2	-0.00307672
416.4	0.25934813		1006.39	0.06155817		1596.41	0.00089134		2186.4	0.03080532		2776.4	-0.0002248		3366.4	-0.00335299
416.6	0.25984005		1006.59	0.06172269		1596.61	0.00038573		2186.6	0.03007872		2776.6	-0.00071495		3366.6	-0.00332255
416.8	0.26078427		1006.79	0.06198756		1596.81	0.00081452		2186.8	0.02978421		2776.8	-0.00123934		3366.8	-0.0035681
417	0.26109846		1006.99	0.06161418		1597.01	0.00078656		2187	0.02943467		2777	-0.00169909		3367	-0.00362889
417.2	0.26178956		1007.19	0.0611296		1597.21	0.00139588		2187.2	0.02889798		2777.2	-0.00025075		3367.2	-0.0034721
417.4	0.26317398		1007.39	0.06062599		1597.41	0.00229442		2187.4	0.02929841		2777.4	0.00001316		3367.4	-0.00319355
417.6	0.2637869		1007.59	0.06001194		1597.61	0.00212067		2187.6	0.02891366		2777.6	0.0004194		3367.6	-0.00301352
417.8	0.26477244		1007.79	0.06027962		1597.81	0.00262745		2187.8	0.03028207		2777.8	0.00018105		3367.8	-0.0029237
418	0.26468218		1007.99	0.06046224		1598.01	0.00301235		2188	0.03037073		2778	-0.00009562		3368	-0.00302882
418.2	0.26567286		1008.19	0.06047024		1598.21	0.00434563		2188.2	0.03042518		2778.2	-0.00027059		3368.2	-0.00223708
418.4	0.26605444		1008.39	0.06137607		1598.41	0.00503658		2188.4	0.03075336		2778.4	0.00075262		3368.4	-0.00136153
418.6	0.2658287		1008.59	0.06240737		1598.61	0.00415663		2188.6	0.03198351		2778.6	0.0018485		3368.6	-0.0006612
418.8	0.26572798		1008.79	0.0630053		1598.81	0.00342751		2188.8	0.03231165		2778.8	0.00267994		3368.8	-0.00061337
419	0.2654843		1008.99	0.06263511		1599.01	0.00311956		2189	0.03287559		2779	0.00255335		3369	-0.00000939
419.2	0.26514591		1009.19	0.06218059		1599.21	0.00242369		2189.2	0.03326455		2779.2	0.00293854		3369.2	0.00056657
419.4	0.26457177		1009.39	0.06274338		1599.41	0.00239954		2189.4	0.03381501		2779.4	0.00331647		3369.4	-0.00020818
419.6	0.26476444		1009.59	0.06233561		1599.61	0.00203027		2189.6	0.0340058		2779.6	0.00288824		3369.6	0.00054004
419.8	0.26459977		1009.79	0.062844		1599.81	0.00290749		2189.8	0.03284478		2779.8	0.00263452		3369.8	0.00028417
420	0.26543585		1009.99	0.06241525		1600.01	0.0031255		2190	0.03280843		2780	0.00272619		3370	0.00025839
420.2	0.26516606		1010.19	0.06207699		1600.21	0.00366249		2190.2	0.03336609		2780.2	0.00273979		3370.2	-0.0003191
420.4	0.26532833		1010.39	0.06157986		1600.41	0.00371588		2190.4	0.03294358		2780.4	0.00207212		3370.4	-0.00043049
420.6	0.2653846		1010.59	0.06151665		1600.61	0.00285806		2190.6	0.03232509		2780.6	0.0019574		3370.6	-0.00036929
420.8	0.26595603		1010.79	0.06206942		1600.81	0.00345042		2190.8	0.03253133		2780.8	0.00241997		3370.8	-0.00009236
421	0.26659492		1010.99	0.06163493		1601.01	0.00360503		2191	0.0321059		2781	0.00375887		3371	0.00035464
421.2	0.2677771		1011.19	0.0613244		1601.21	0.00379888		2191.2	0.03227634		2781.2	0.00453438		3371.2	0.00025832
421.4	0.26804106		1011.39	0.06157876		1601.41	0.00342723		2191.4	0.03205347		2781.4	0.00436056		3371.4	0.00057367
421.6	0.26753443		1011.59	0.06145884		1601.61	0.00392214		2191.6	0.03153504		2781.6	0.00525511		3371.6	0.00043327
421.8	0.26757004		1011.79	0.06144141		1601.81	0.00414883		2191.8	0.03177764		2781.8	0.00518149		3371.8	0.00030295
422	0.26739423		1011.99	0.0621784		1602.01	0.00522998		2192	0.03184812		2782	0.00510812		3372	0.00064983
422.2	0.26756355		1012.19	0.06301804		1602.21	0.00518281		2192.2	0.0315205		2782.2	0.00524824		3372.2	0.00085049
422.4	0.26708817		1012.39	0.0634918		1602.41	0.00428088		2192.4	0.03200517		2782.4	0.00604482		3372.4	0.00060162
422.6	0.26605468		1012.59	0.06354512		1602.61	0.00356173		2192.6	0.03194347		2782.6	0.00645823		3372.6	0.00023163
422.8	0.26651172		1012.79	0.06432952		1602.81	0.00350909		2192.8	0.03169175		2782.8	0.00693854		3372.8	0.00048255
423	0.26699035		1012.99	0.06337956		1603.01	0.00368752		2193	0.03177525		2783	0.00639059		3373	0.00101828
423.2	0.26799156		1013.19	0.06356398		1603.21	0.00323035		2193.2	0.03172559		2783.2	0.00602189		3373.2	0.00041112
423.4	0.26874086		1013.39	0.06374378		1603.41	0.00201421		2193.4	0.03195678		2783.4	0.00531426		3373.4	0.00022787
423.6	0.26901755		1013.59	0.06422106		1603.61	0.00175761		2193.6	0.03179189		2783.6	0.004618		3373.6	0.00015198
423.8	0.26956939		1013.79	0.06538166		1603.81	0.00129846		2193.8	0.03190807		2783.8	0.00427841		3373.8	-0.00007758
424	0.269433		1013.99	0.06600826		1604.01	-0.0002237		2194	0.03169686		2784	0.00425166		3374	0.00029365
424.2	0.26893829		1014.19	0.06644127		1604.21	-0.00002472		2194.2	0.03141227		2784.2	0.00362599		3374.2	0.00030673
424.4	0.26939135		1014.39	0.06707119		1604.41	-0.00070968		2194.4	0.03106352		2784.4	0.00273647		3374.4	0.00070673
424.6	0.26934828		1014.59	0.06765567		1604.61	-0.00065171		2194.6	0.03082032		2784.6	0.00288514		3374.6	0.00046612
424.8	0.27068497		1014.79	0.068469		1604.81	-0.00036445		2194.8	0.03055241		2784.8	0.00365042		3374.8	0.00035163
425	0.27164782		1014.99	0.06847624		1605.01	-0.00022352		2195	0.03004213		2785	0.00304543		3375	-0.00008155
425.2	0.27181275		1015.19	0.06873895		1605.21	-0.00010333		2195.2	0.03037093		2785.2	0.00146381		3375.2	-0.00029094
425.4	0.27130565		1015.39	0.06880156		1605.41	-0.00011884		2195.4	0.03016595		2785.4	0.00200236		3375.4	-0.00073144
425.6	0.27094867		1015.59	0.06850618		1605.61	0.00065019		2195.6	0.02997308		2785.6	0.00230174		3375.6	-0.0019124
425.8	0.27047064		1015.79	0.06845338		1605.81	0.0005857		2195.8	0.02991092		2785.8	0.00212708		3375.8	-0.00245285
426	0.26985492		1015.99	0.06793831		1606.01	0.00072443		2196	0.03075836		2786	0.00227935		3376	-0.00195155
426.2	0.26884571		1016.19	0.06765444		1606.21	0.00113286		2196.2	0.03014672		2786.2	0.00301128		3376.2	-0.00238341
426.4	0.26887754		1016.39	0.06623295		1606.41	0.00207925		2196.4	0.03001259		2786.4	0.00379085		3376.4	-0.00353932
426.6	0.26902283		1016.59	0.06622093		1606.61	0.00247794		2196.6	0.02950688		2786.6	0.00393025		3376.6	-0.00401707
426.8	0.26998581		1016.79	0.0661104		1606.81	0.00322015		2196.8	0.02962778		2786.8	0.00410957		3376.8	-0.00403955
427	0.27041514		1016.99	0.06466143		1607.01	0.00289322		2197	0.02994528		2787	0.00335838		3377	-0.00436441
427.2	0.27125383		1017.19	0.06415208		1607.21	0.00254501		2197.2	0.03087394		2787.2	0.0027448		3377.2	-0.00483761
427.4	0.27136699		1017.39	0.06431575		1607.41	0.0019287		2197.4	0.03146094		2787.4	0.00228827		3377.4	-0.00445566
427.6	0.27138534		1017.59	0.06417508		1607.61	0.0022896		2197.6	0.03148394		2787.6	0.0025053		3377.6	-0.0036218
427.8	0.27155057		1017.79	0.06379575		1607.81	0.00194038		2197.8	0.03079788		2787.8	0.003005		3377.8	-0.00302295
428	0.27178854		1017.99	0.06392233		1608.01	0.00156899		2198	0.03048702		2788	0.00315937		3378	-0.00333463
428.2	0.27246446		1018.19	0.06262737		1608.21	0.00153652		2198.2	0.03125777		2788.2	0.00318556		3378.2	-0.00326534
428.4	0.27347899		1018.39	0.06330089		1608.41	0.00099313		2198.4	0.03228322		2788.4	0.00279038		3378.4	-0.00262628
428.6	0.27356304		1018.59	0.06310227		1608.61	0.00160574		2198.6	0.03249443		2788.6	0.00332206		3378.6	-0.00261236
428.8	0.27477303		1018.79	0.06408077		1608.81	0.00124126		2198.8	0.03265753		2788.8	0.00336427		3378.8	-0.00208667
429	0.27565683		1018.99	0.06517852		1609.01	0.00024769		2199	0.03318538		2789	0.00252883		3379	-0.00131415
429.2	0.27571091		1019.19	0.0657899		1609.21	-0.00059504		2199.2	0.03394606		2789.2	0.0018533		3379.2	-0.00183204
429.4	0.27502371		1019.39	0.06622682		1609.41	-0.00124315		2199.4	0.03377262		2789.4	0.0032459		3379.4	-0.00218643
429.6	0.27541746		1019.59	0.06675856		1609.61	-0.00122769		2199.6	0.03360502		2789.6	0.00381948		3379.6	-0.00286682
429.8	0.27537704		1019.79	0.06625435		1609.81	-0.00167067		2199.8	0.03424742		2789.8	0.00467253		3379.8	-0.00302005
430	0.27537646		1019.99	0.06612594		1610.01	-0.00196111		2200	0.03447664		2790	0.00488142		3380	-0.00263231
430.2	0.27559084		1020.19	0.06662884		1610.21	-0.00117751		2200.2	0.03317113		2790.2	0.00495576		3380.2	-0.003511
430.4	0.27680982		1020.39	0.06706865		1610.41	-0.00069211		2200.4	0.03328561		2790.4	0.00562603		3380.4	-0.00468599
430.6	0.2779139		1020.59	0.06720318		1610.61	-0.0005751		2200.6	0.03291743		2790.6	0.00551882		3380.6	-0.00462781
430.8	0.27905016		1020.79	0.0671956		1610.81	-0.0006842		2200.8	0.03280234		2790.8	0.00444852		3380.8	-0.00442283
431	0.27941217		1020.99	0.06758497		1611.01	-0.00128944		2201	0.0333593		2791	0.00275572		3381	-0.00396853
431.2	0.27964621		1021.19	0.06779391		1611.21	-0.00113632		2201.2	0.0337029		2791.2	0.00241273		3381.2	-0.00313668
431.4	0.27986707		1021.39	0.06781304		1611.41	-0.00115481		2201.4	0.03354247		2791.4	0.00132714		3381.4	-0.00260622
431.6	0.27927853		1021.59	0.06783197		1611.61	-0.00137684		2201.6	0.03411255		2791.6	0.00120483		3381.6	-0.00135782
431.8	0.27868924		1021.79	0.06785919		1611.81	-0.00091705		2201.8	0.0333778		2791.8	0.00140239		3381.8	-0.00188636
432	0.27877779		1021.99	0.06838891		1612.01	-0.0002957		2202	0.03452393		2792	0.00134008		3382	-0.00182887
432.2	0.27809767		1022.19	0.06834757		1612.21	0.0001331		2202.2	0.03515298		2792.2	0.00032379		3382.2	-0.00074949
432.4	0.27692915		1022.39	0.06897428		1612.41	0.00047174		2202.4	0.03586516		2792.4	0.00014325		3382.4	0.00003357
432.6	0.27530027		1022.59	0.06917624		1612.61	0.00009271		2202.6	0.03525622		2792.6	-0.00007598		3382.6	0.00040775
432.8	0.27503524		1022.79	0.07013256		1612.81	-0.00082916		2202.8	0.03560514		2792.8	-0.00097663		3382.8	0.0005589
433	0.27406438		1022.99	0.06934697		1613.01	-0.00195185		2203	0.03601853		2793	-0.00131624		3383	-0.0001609
433.2	0.27393868		1023.19	0.06935615		1613.21	-0.00175812		2203.2	0.03595053		2793.2	-0.00158853		3383.2	-0.00121444
433.4	0.27336193		1023.39	0.06909607		1613.41	-0.00142698		2203.4	0.03544876		2793.4	0.00029371		3383.4	-0.00147606
433.6	0.27388234		1023.59	0.06830481		1613.61	-0.00143439		2203.6	0.03544122		2793.6	0.00118054		3383.6	-0.00194415
433.8	0.27387068		1023.79	0.06694998		1613.81	-0.00116249		2203.8	0.03597685		2793.8	0.001574		3383.8	-0.00303586
434	0.2738369		1023.99	0.06729079		1614.01	-0.00123223		2204	0.0349721		2794	0.00162202		3384	-0.00257356
434.2	0.27423472		1024.19	0.06707248		1614.21	-0.00055263		2204.2	0.03355534		2794.2	0.00214176		3384.2	-0.00319664
434.4	0.27658909		1024.39	0.06754335		1614.41	-0.00053025		2204.4	0.03375104		2794.4	0.00339465		3384.4	-0.00301171
434.6	0.27835296		1024.59	0.06787334		1614.61	-0.00115357		2204.6	0.03332705		2794.6	0.00338381		3384.6	-0.00227197
434.8	0.27917519		1024.79	0.06803147		1614.81	-0.00171412		2204.8	0.03294599		2794.8	0.00279433		3384.8	-0.00179757
435	0.27966964		1024.99	0.0685896		1615.01	-0.00089906		2205	0.03315678		2795	0.00355315		3385	-0.00160699
435.2	0.28052777		1025.19	0.06844687		1615.21	-0.00002325		2205.2	0.03363265		2795.2	0.00473747		3385.2	-0.0013493
435.4	0.28195474		1025.39	0.06880031		1615.41	-0.00016449		2205.4	0.03345606		2795.4	0.00463506		3385.4	-0.00112734
435.6	0.2827837		1025.59	0.06919384		1615.61	-0.00044558		2205.6	0.03365494		2795.6	0.00520034		3385.6	-0.00008676
435.8	0.28321961		1025.79	0.06973071		1615.81	0.00050283		2205.8	0.03287224		2795.8	0.00555843		3385.8	0.00009167
436	0.28425584		1025.99	0.06989046		1616.01	0.00056062		2206	0.03379203		2796	0.00535783		3386	0.00034178
436.2	0.28499167		1026.19	0.06952283		1616.21	0.00072511		2206.2	0.03403033		2796.2	0.00378845		3386.2	0.0007267
436.4	0.28388167		1026.39	0.06938088		1616.41	0.00021204		2206.4	0.03386179		2796.4	0.00348575		3386.4	0.0011844
436.6	0.28339863		1026.59	0.07010351		1616.61	-0.00048211		2206.6	0.03457191		2796.6	0.00273564		3386.6	0.00121018
436.8	0.28302993		1026.79	0.07000171		1616.81	-0.00034064		2206.8	0.03577612		2796.8	0.00259705		3386.8	0.00027311
437	0.28267631		1026.99	0.06949794		1617.01	-0.00120155		2207	0.03585839		2797	0.00268694		3387	-0.00058953
437.2	0.28286878		1027.19	0.0706065		1617.21	-0.00059728		2207.2	0.03623311		2797.2	0.00299984		3387.2	-0.00067718
437.4	0.28241537		1027.39	0.07018507		1617.41	-0.00095482		2207.4	0.03645838		2797.4	0.0034726		3387.4	-0.00137909
437.6	0.28154744		1027.59	0.07038546		1617.61	-0.00120084		2207.6	0.03743526		2797.6	0.00342051		3387.6	-0.00191767
437.8	0.28116994		1027.79	0.07051131		1617.81	-0.00022027		2207.8	0.03740623		2797.8	0.00312438		3387.8	-0.00259552
438	0.28096645		1027.99	0.07185104		1618.01	-0.00029196		2208	0.03666895		2798	0.00273806		3388	-0.00187455
438.2	0.28119442		1028.19	0.07233116		1618.21	0.00048429		2208.2	0.03626739		2798.2	0.00313448		3388.2	-0.00222335
438.4	0.28251047		1028.39	0.07326088		1618.41	0.00069069		2208.4	0.03681927		2798.4	0.00338119		3388.4	-0.00253886
438.6	0.28189109		1028.59	0.07319612		1618.61	0.00093527		2208.6	0.03636499		2798.6	0.00276293		3388.6	-0.00337125
438.8	0.28196752		1028.79	0.07295931		1618.81	0.00141294		2208.8	0.03547808		2798.8	0.00313973		3388.8	-0.00335695
439	0.28250876		1028.99	0.07277128		1619.01	0.00224614		2209	0.03598005		2799	0.00367892		3389	-0.00374023
439.2	0.28310915		1029.19	0.07233965		1619.21	0.00208631		2209.2	0.03546645		2799.2	0.00399543		3389.2	-0.00327748
439.4	0.28389661		1029.39	0.07252479		1619.41	0.00113786		2209.4	0.03394563		2799.4	0.00350273		3389.4	-0.00334224
439.6	0.2848234		1029.59	0.07293431		1619.61	0.00152956		2209.6	0.03248809		2799.6	0.00316252		3389.6	-0.00336557
439.8	0.28494942		1029.79	0.07372128		1619.81	0.00180099		2209.8	0.03177908		2799.8	0.00294206		3389.8	-0.00356325
440	0.28578532		1029.99	0.07336361		1620.01	0.00210426		2210	0.03170243		2800	0.00373822		3390	-0.00357518
440.2	0.28541748		1030.19	0.07341735		1620.21	0.00256079		2210.2	0.03133756		2800.2	0.00341791		3390.2	-0.00312251
440.4	0.28519225		1030.39	0.07427948		1620.41	0.00204759		2210.4	0.03078877		2800.4	0.00407139		3390.4	-0.00229269
440.6	0.28544783		1030.59	0.07532286		1620.61	0.00181193		2210.6	0.03063149		2800.6	0.00432618		3390.6	-0.00246832
440.8	0.28510603		1030.79	0.07496665		1620.81	0.0008959		2210.8	0.03035544		2800.8	0.00425971		3390.8	-0.00267965
441	0.28542534		1030.99	0.07452747		1621.01	0.00020145		2211	0.03060839		2801	0.00409431		3391	-0.00222881
441.2	0.28537328		1031.19	0.07401045		1621.21	0.00053518		2211.2	0.03080385		2801.2	0.0043869		3391.2	-0.00223694
441.4	0.28485988		1031.39	0.07362442		1621.41	-0.00023173		2211.4	0.03051654		2801.4	0.00389398		3391.4	-0.00215352
441.6	0.28390998		1031.59	0.07369164		1621.61	-0.0005283		2211.6	0.03127999		2801.6	0.00352673		3391.6	-0.00127224
441.8	0.28343278		1031.79	0.07289348		1621.81	-0.00034441		2211.8	0.03055117		2801.8	0.00313165		3391.8	-0.00038312
442	0.28407215		1031.99	0.07309088		1622.01	-0.00106942		2212	0.03106359		2802	0.00253828		3392	-0.00073617
442.2	0.28379873		1032.19	0.07305322		1622.21	-0.00065122		2212.2	0.03133121		2802.2	0.00225799		3392.2	-0.00094397
442.4	0.28404462		1032.39	0.07265831		1622.41	-0.00071795		2212.4	0.0323869		2802.4	0.00251807		3392.4	-0.00102583
442.6	0.2840737		1032.59	0.07139983		1622.61	-0.00050584		2212.6	0.0329573		2802.6	0.00221341		3392.6	-0.00088536
442.8	0.284118		1032.79	0.07106722		1622.81	-0.00012896		2212.8	0.03321458		2802.8	0.00231199		3392.8	-0.00082986
443	0.28435157		1032.99	0.07035247		1623.01	-0.00017473		2213	0.03334431		2803	0.00228431		3393	-0.00166344
443.2	0.28498712		1033.19	0.07065374		1623.21	-0.0002148		2213.2	0.03305695		2803.2	0.00203277		3393.2	-0.00127125
443.4	0.28537672		1033.39	0.07103504		1623.41	0.00015915		2213.4	0.03283629		2803.4	0.00151578		3393.4	-0.00104889
443.6	0.28568042		1033.59	0.07096412		1623.61	0.00123963		2213.6	0.03306366		2803.6	0.00192212		3393.6	-0.00118207
443.8	0.28555125		1033.79	0.07125495		1623.81	0.00165418		2213.8	0.03382945		2803.8	0.00177904		3393.8	-0.00060933
444	0.28513217		1033.99	0.07088062		1624.01	0.0021031		2214	0.03381383		2804	0.00178852		3394	-0.00042603
444.2	0.28541869		1034.19	0.07174323		1624.21	0.0026075		2214.2	0.03379432		2804.2	0.00208849		3394.2	-0.00050191
444.4	0.28589497		1034.39	0.07326515		1624.41	0.00248219		2214.4	0.03418		2804.4	0.00199181		3394.4	-0.0011015
444.6	0.28522997		1034.59	0.07411276		1624.61	0.00275718		2214.6	0.03475771		2804.6	0.00200609		3394.6	-0.00151377
444.8	0.28475027		1034.79	0.07434084		1624.81	0.0021686		2214.8	0.03485501		2804.8	0.00230764		3394.8	-0.00143404
445	0.28480522		1034.99	0.07415905		1625.01	0.00271543		2215	0.03493091		2805	0.00148676		3395	-0.00185181
445.2	0.28459413		1035.19	0.07464978		1625.21	0.00243342		2215.2	0.03510984		2805.2	0.00193989		3395.2	-0.00283761
445.4	0.28484532		1035.39	0.075254		1625.41	0.00203946		2215.4	0.03490932		2805.4	0.00163922		3395.4	-0.00257817
445.6	0.28504866		1035.59	0.07490714		1625.61	0.00205149		2215.6	0.03460565		2805.6	0.00075514		3395.6	-0.00247866
445.8	0.28510221		1035.79	0.07499864		1625.81	0.00233244		2215.8	0.03336014		2805.8	0.00084246		3395.8	-0.00283791
446	0.28689637		1035.99	0.07577455		1626.01	0.00264463		2216	0.03305573		2806	0.00115425		3396	-0.00260404
446.2	0.28654832		1036.19	0.07554241		1626.21	0.00322252		2216.2	0.03282247		2806.2	0.00202378		3396.2	-0.00244885
446.4	0.28729929		1036.39	0.07555505		1626.41	0.00279824		2216.4	0.03308058		2806.4	0.00262688		3396.4	-0.00254434
446.6	0.28726222		1036.59	0.07473616		1626.61	0.00272014		2216.6	0.03224299		2806.6	0.00230437		3396.6	-0.00306339
446.8	0.28705298		1036.79	0.0748237		1626.81	0.00285123		2216.8	0.03170308		2806.8	0.00255156		3396.8	-0.00303101
447	0.28752095		1036.99	0.07463085		1627.01	0.00273821		2217	0.03115382		2807	0.00293736		3397	-0.00297384
447.2	0.28837149		1037.19	0.07484036		1627.21	0.00260411		2217.2	0.03132028		2807.2	0.00287811		3397.2	-0.00267833
447.4	0.28819362		1037.39	0.07422939		1627.41	0.00354965		2217.4	0.03067513		2807.4	0.00314069		3397.4	-0.00185127
447.6	0.28761761		1037.59	0.07349023		1627.61	0.00406971		2217.6	0.03149544		2807.6	0.00303781		3397.6	-0.00161246
447.8	0.28797489		1037.79	0.07327766		1627.81	0.00312237		2217.8	0.03142816		2807.8	0.00238391		3397.8	-0.00135104
448	0.28767477		1037.99	0.07295186		1628.01	0.00326729		2218	0.03181268		2808	0.00254783		3398	-0.00134276
448.2	0.28725832		1038.19	0.07388046		1628.21	0.00254923		2218.2	0.03267814		2808.2	0.00318382		3398.2	-0.0013691
448.4	0.28741406		1038.39	0.07444883		1628.41	0.00238411		2218.4	0.03340726		2808.4	0.00258918		3398.4	-0.00153769
448.6	0.28777455		1038.59	0.07388217		1628.61	0.00211766		2218.6	0.03385564		2808.6	0.0032262		3398.6	-0.00105711
448.8	0.28819177		1038.79	0.0738969		1628.81	0.00203313		2218.8	0.0332564		2808.8	0.00350917		3398.8	-0.00089419
449	0.28974555		1038.99	0.07380649		1629.01	0.00252632		2219	0.0337167		2809	0.00301799		3399	-0.00226955
449.2	0.29029741		1039.19	0.07392257		1629.21	0.00155303		2219.2	0.03311589		2809.2	0.00357149		3399.2	-0.00283908
449.4	0.29183389		1039.39	0.07375194		1629.41	0.00171811		2219.4	0.03250736		2809.4	0.00314248		3399.4	-0.00214085
449.6	0.29238489		1039.59	0.07414187		1629.61	0.0012864		2219.6	0.03163144		2809.6	0.00337667		3399.6	-0.00138598
449.8	0.2935454		1039.79	0.0747275		1629.81	0.00082622		2219.8	0.03084981		2809.8	0.0030473		3399.8	-0.00074879
450	0.29499002		1039.99	0.07495478		1630.01	0.0005314		2220	0.03032218		2810	0.00345679		3400	0.0000069
450.2	0.29502896		1040.19	0.07518402		1630.21	-0.00031194		2220.2	0.03055043		2810.2	0.00364844		3400.2	-0.00105947
450.4	0.29504422		1040.39	0.07518691		1630.41	-0.00037086		2220.4	0.03040791		2810.4	0.00273675		3400.4	-0.00092806
450.6	0.29446939		1040.59	0.07519105		1630.61	-0.000375		2220.6	0.03028091		2810.6	0.00299048		3400.6	-0.00098544
450.8	0.29463769		1040.79	0.07561745		1630.81	0.00013575		2220.8	0.03119331		2810.8	0.00322235		3400.8	-0.00108033
451	0.29426876		1040.99	0.07606009		1631.01	-0.00020786		2221	0.0314965		2811	0.00367375		3401	-0.00151932
451.2	0.2945198		1041.19	0.0763325		1631.21	-0.00029278		2221.2	0.03259666		2811.2	0.00360414		3401.2	-0.00138532
451.4	0.29398851		1041.39	0.07620305		1631.41	0.00072903		2221.4	0.03270572		2811.4	0.0027911		3401.4	-0.00119083
451.6	0.29416304		1041.59	0.07580244		1631.61	0.00076024		2221.6	0.03378644		2811.6	0.00258159		3401.6	-0.00124481
451.8	0.29419293		1041.79	0.07516895		1631.81	-0.00015358		2221.8	0.03357574		2811.8	0.00274979		3401.8	-0.00183737
452	0.29355504		1041.99	0.07575666		1632.01	0.00047954		2222	0.03467399		2812	0.003298		3402	-0.00134557
452.2	0.29236135		1042.19	0.07613204		1632.21	0.00017721		2222.2	0.03534944		2812.2	0.00277033		3402.2	-0.00137277
452.4	0.29266624		1042.39	0.07555948		1632.41	0.00108776		2222.4	0.03578125		2812.4	0.00356843		3402.4	-0.00231807
452.6	0.2921674		1042.59	0.07498072		1632.61	0.00042118		2222.6	0.0361606		2812.6	0.00458913		3402.6	-0.00206962
452.8	0.29195808		1042.79	0.07516399		1632.81	0.0007505		2222.8	0.03663555		2812.8	0.0057327		3402.8	-0.00270302
453	0.2923562		1042.99	0.07488517		1633.01	0.00054474		2223	0.03606533		2813	0.00541935		3403	-0.00404384
453.2	0.29219391		1043.19	0.07438137		1633.21	0.00029943		2223.2	0.03443096		2813.2	0.00511619		3403.2	-0.00336942
453.4	0.29249518		1043.39	0.07520156		1633.41	0.0002848		2223.4	0.03463884		2813.4	0.00513097		3403.4	-0.00337186
453.6	0.29271658		1043.59	0.0751232		1633.61	0.00014041		2223.6	0.03514523		2813.6	0.00497908		3403.6	-0.00316625
453.8	0.2929167		1043.79	0.07531703		1633.81	-0.00028359		2223.8	0.03488562		2813.8	0.00406957		3403.8	-0.0031152
454	0.29286815		1043.99	0.07463385		1634.01	0.00031764		2224	0.03478492		2814	0.00442076		3404	-0.00356648
454.2	0.29311333		1044.19	0.07462642		1634.21	0.0000619		2224.2	0.03508717		2814.2	0.00416346		3404.2	-0.00342868
454.4	0.2928977		1044.39	0.07440742		1634.41	0.00031948		2224.4	0.03507291		2814.4	0.00350766		3404.4	-0.00331064
454.6	0.29413501		1044.59	0.07477715		1634.61	-0.0000305		2224.6	0.03517657		2814.6	0.00358946		3404.6	-0.00301862
454.8	0.29408573		1044.79	0.07496468		1634.81	0.00022136		2224.8	0.03535314		2814.8	0.00283171		3404.8	-0.00286118
455	0.29425849		1044.99	0.07575446		1635.01	0.00013743		2225	0.03551784		2815	0.00263369		3405	-0.00204914
455.2	0.29515431		1045.19	0.07544541		1635.21	0.00080074		2225.2	0.03544367		2815.2	0.00136256		3405.2	-0.00197777
455.4	0.29585108		1045.39	0.07692087		1635.41	0.00150946		2225.4	0.03500754		2815.4	0.00059916		3405.4	-0.00264118
455.6	0.29645021		1045.59	0.0768583		1635.61	0.00171001		2225.6	0.03534393		2815.6	0.0005758		3405.6	-0.00210248
455.8	0.29694311		1045.79	0.0772065		1635.81	0.00126355		2225.8	0.0350838		2815.8	0.00009351		3405.8	-0.0020589
456	0.297051		1045.99	0.07854959		1636.01	0.00108335		2226	0.03545367		2816	0.0003696		3406	-0.00169481
456.2	0.29660154		1046.19	0.07872139		1636.21	0.00058252		2226.2	0.0356154		2816.2	-0.00015333		3406.2	-0.00143787
456.4	0.29730136		1046.39	0.07892802		1636.41	0.00065967		2226.4	0.03615167		2816.4	0.00046021		3406.4	-0.00187097
456.6	0.29748699		1046.59	0.0786194		1636.61	-0.00033216		2226.6	0.03619248		2816.6	0.00144631		3406.6	-0.00100901
456.8	0.29860937		1046.79	0.07905955		1636.81	0.00005599		2226.8	0.03635196		2816.8	0.00150192		3406.8	-0.00137363
457	0.2986332		1046.99	0.07943537		1637.01	0.00047651		2227	0.0349626		2817	0.00088398		3407	-0.00194873
457.2	0.29892033		1047.19	0.08006735		1637.21	0.00112821		2227.2	0.03432373		2817.2	0.00090828		3407.2	-0.00159548
457.4	0.29865118		1047.39	0.08000921		1637.41	0.00060687		2227.4	0.03483073		2817.4	0.00144427		3407.4	-0.00199997
457.6	0.2975641		1047.59	0.07948603		1637.61	0.00114227		2227.6	0.03528459		2817.6	0.001846		3407.6	-0.0018098
457.8	0.29710656		1047.79	0.08002351		1637.81	0.00093748		2227.8	0.03447241		2817.8	0.00207656		3407.8	-0.00134842
458	0.29687095		1047.99	0.07984618		1638.01	0.00133436		2228	0.03433695		2818	0.00283008		3408	-0.0018757
458.2	0.29690367		1048.19	0.07976147		1638.21	0.00131277		2228.2	0.0339472		2818.2	0.00297921		3408.2	-0.00129399
458.4	0.29648716		1048.39	0.08018497		1638.41	0.00134235		2228.4	0.03363468		2818.4	0.00313253		3408.4	-0.0007234
458.6	0.29721423		1048.59	0.07999403		1638.61	0.00166744		2228.6	0.03377114		2818.6	0.0026802		3408.6	-0.00049423
458.8	0.29582862		1048.79	0.07938591		1638.81	0.00183445		2228.8	0.0345316		2818.8	0.00265873		3408.8	-0.00095414
459	0.29649684		1048.99	0.07905865		1639.01	0.00172222		2229	0.03514949		2819	0.00214478		3409	-0.00140422
459.2	0.29718381		1049.19	0.07911424		1639.21	0.00166637		2229.2	0.03531211		2819.2	0.00159286		3409.2	-0.00314491
459.4	0.29728093		1049.39	0.07985535		1639.41	0.00238808		2229.4	0.03557936		2819.4	0.00188547		3409.4	-0.00413645
459.6	0.29772218		1049.59	0.07860415		1639.61	0.00141897		2229.6	0.03571161		2819.6	0.00268417		3409.6	-0.00395176
459.8	0.299047		1049.79	0.07850303		1639.81	-0.00011944		2229.8	0.03554477		2819.8	0.00326248		3409.8	-0.00392068
460	0.29876087		1049.99	0.07822589		1640.01	-0.00115432		2230	0.03532171		2820	0.00424148		3410	-0.00460238
460.2	0.29856529		1050.19	0.07795512		1640.21	-0.00108935		2230.2	0.03558796		2820.2	0.00508191		3410.2	-0.00472375
460.4	0.29927978		1050.39	0.07817132		1640.41	-0.00098779		2230.4	0.0355864		2820.4	0.00522138		3410.4	-0.00432442
460.6	0.29911156		1050.59	0.0782246		1640.61	-0.0009236		2230.6	0.03532851		2820.6	0.0061897		3410.6	-0.00413366
460.8	0.29940146		1050.79	0.07956375		1640.81	-0.0002783		2230.8	0.03546248		2820.8	0.0056023		3410.8	-0.00454047
461	0.2991927		1050.99	0.07974288		1641.01	0.00028591		2231	0.03524988		2821	0.0058426		3411	-0.00505674
461.2	0.29983569		1051.19	0.08003826		1641.21	0.0006566		2231.2	0.03488865		2821.2	0.00616403		3411.2	-0.00447996
461.4	0.29950905		1051.39	0.0804718		1641.41	-0.00015262		2231.4	0.03451371		2821.4	0.00641986		3411.4	-0.00365128
461.6	0.29994161		1051.59	0.08132627		1641.61	0.00030061		2231.6	0.03463623		2821.6	0.0068537		3411.6	-0.00208558
461.8	0.30093124		1051.79	0.08241688		1641.81	0.00093523		2231.8	0.03429004		2821.8	0.00629419		3411.8	-0.00162394
462	0.30065201		1051.99	0.08316617		1642.01	0.0013195		2232	0.03442157		2822	0.0062424		3412	-0.00222129
462.2	0.30069899		1052.19	0.08281088		1642.21	0.00139459		2232.2	0.03442156		2822.2	0.00584403		3412.2	-0.00165973
462.4	0.3010813		1052.39	0.08276083		1642.41	0.00125243		2232.4	0.03517252		2822.4	0.00548701		3412.4	-0.00092339
462.6	0.30214453		1052.59	0.08211998		1642.61	0.00149422		2232.6	0.03615666		2822.6	0.00430931		3412.6	-0.00195639
462.8	0.30211643		1052.79	0.08167636		1642.81	0.00222916		2232.8	0.03644365		2822.8	0.00410408		3412.8	-0.00294413
463	0.30387038		1052.99	0.08120841		1643.01	0.00234805		2233	0.03637764		2823	0.00312584		3413	-0.00372436
463.2	0.30449572		1053.19	0.08144009		1643.21	0.00234427		2233.2	0.03651322		2823.2	0.00341615		3413.2	-0.00435207
463.4	0.30410068		1053.39	0.08026006		1643.41	0.00297277		2233.4	0.03607078		2823.4	0.00434517		3413.4	-0.00406937
463.6	0.30478711		1053.59	0.07930546		1643.61	0.00156226		2233.6	0.03674497		2823.6	0.00450089		3413.6	-0.00335554
463.8	0.30528429		1053.79	0.07857739		1643.81	0.0019034		2233.8	0.03535205		2823.8	0.00422505		3413.8	-0.00342535
464	0.30418197		1053.99	0.07857019		1644.01	0.00197555		2234	0.03457268		2824	0.00404605		3414	-0.00343881
464.2	0.30455743		1054.19	0.078619		1644.21	0.00287207		2234.2	0.035074		2824.2	0.00415591		3414.2	-0.00365878
464.4	0.30498832		1054.39	0.0790342		1644.41	0.00237664		2234.4	0.03536924		2824.4	0.0030007		3414.4	-0.0030781
464.6	0.30402503		1054.59	0.07897392		1644.61	0.0028933		2234.6	0.03604322		2824.6	0.00289467		3414.6	-0.00401974
464.8	0.30398395		1054.79	0.07908649		1644.81	0.00316646		2234.8	0.03662201		2824.8	0.00239658		3414.8	-0.00447534
465	0.30379892		1054.99	0.07952409		1645.01	0.00292248		2235	0.03639155		2825	0.00210252		3415	-0.0042942
465.2	0.30304707		1055.19	0.07971191		1645.21	0.0027387		2235.2	0.03628105		2825.2	0.00219717		3415.2	-0.00351929
465.4	0.30214058		1055.39	0.08076995		1645.41	0.00233451		2235.4	0.03667576		2825.4	0.00184431		3415.4	-0.00208145
465.6	0.30287256		1055.59	0.08150169		1645.61	0.00258958		2235.6	0.03694924		2825.6	0.00209838		3415.6	-0.00220923
465.8	0.30205706		1055.79	0.08233737		1645.81	0.00232031		2235.8	0.03651039		2825.8	0.00200065		3415.8	-0.00261178
466	0.3007833		1055.99	0.08209566		1646.01	0.00173196		2236	0.03680049		2826	0.00286906		3416	-0.00210814
466.2	0.30071292		1056.19	0.0820784		1646.21	0.00191974		2236.2	0.03632443		2826.2	0.00344667		3416.2	-0.0008497
466.4	0.30077119		1056.39	0.08233137		1646.41	0.00228326		2236.4	0.03675109		2826.4	0.00332942		3416.4	-0.00035117
466.6	0.30147064		1056.59	0.08226443		1646.61	0.00285187		2236.6	0.03734446		2826.6	0.00302212		3416.6	-0.00026008
466.8	0.30217244		1056.79	0.08237289		1646.81	0.00239446		2236.8	0.03708874		2826.8	0.00355271		3416.8	0.00045339
467	0.30299563		1056.99	0.08196469		1647.01	0.00201903		2237	0.03776656		2827	0.00375043		3417	0.00127458
467.2	0.30317841		1057.19	0.0824642		1647.21	0.00245439		2237.2	0.03723354		2827.2	0.0041134		3417.2	0.00145206
467.4	0.30328552		1057.39	0.08233792		1647.41	0.00252991		2237.4	0.03708117		2827.4	0.00457779		3417.4	0.00157423
467.6	0.30421894		1057.59	0.08209102		1647.61	0.00239184		2237.6	0.03722617		2827.6	0.00404664		3417.6	0.00162143
467.8	0.30525853		1057.79	0.08278845		1647.81	0.00198845		2237.8	0.03666555		2827.8	0.0041973		3417.8	0.00086436
468	0.30599958		1057.99	0.08398474		1648.01	0.0010219		2238	0.03743359		2828	0.00406633		3418	0.00050721
468.2	0.30721008		1058.19	0.08436801		1648.21	0.00107342		2238.2	0.0380198		2828.2	0.00410775		3418.2	-0.00073314
468.4	0.30721848		1058.39	0.08509402		1648.41	0.00046927		2238.4	0.03774498		2828.4	0.00385514		3418.4	-0.00126583
468.6	0.30657434		1058.59	0.08537071		1648.61	0.00077909		2238.6	0.03727628		2828.6	0.00381879		3418.6	-0.0022824
468.8	0.30610814		1058.79	0.08593999		1648.81	0.00090117		2238.8	0.03655012		2828.8	0.00366888		3418.8	-0.00287967
469	0.3052705		1058.99	0.08649574		1649.01	0.0007929		2239	0.03552396		2829	0.00335225		3419	-0.00319533
469.2	0.304405		1059.19	0.08635686		1649.21	0.00145463		2239.2	0.03491021		2829.2	0.00351467		3419.2	-0.00350569
469.4	0.30383795		1059.39	0.08724881		1649.41	0.00165201		2239.4	0.03369047		2829.4	0.00348409		3419.4	-0.0035205
469.6	0.30373892		1059.59	0.08740503		1649.61	0.00184654		2239.6	0.03221338		2829.6	0.00388686		3419.6	-0.00423371
469.8	0.30275583		1059.79	0.08707774		1649.81	0.00228684		2239.8	0.03077972		2829.8	0.00432473		3419.8	-0.00341385
470	0.30275583		1059.99	0.08707774		1650.01	0.00228684		2240	0.03077972		2830	0.00432473		3419.99	-0.00341385
470.2	0.30381796		1060.19	0.08787523		1650.21	0.00285705		2240.2	0.03145206		2830.2	0.00413587		3420.19	-0.00459203
470.4	0.30449863		1060.39	0.08859546		1650.41	0.00254574		2240.4	0.03139868		2830.4	0.00434205		3420.39	-0.00527275
470.6	0.3055171		1060.59	0.08950592		1650.61	0.00303407		2240.6	0.03168379		2830.6	0.00456594		3420.59	-0.00659545
470.8	0.30608206		1060.79	0.08995053		1650.81	0.00304741		2240.8	0.03198259		2830.8	0.00431974		3420.79	-0.00728861
471	0.3063219		1060.99	0.09073911		1651.01	0.0033567		2241	0.03146774		2831	0.00475313		3420.99	-0.00881238
471.2	0.30683615		1061.19	0.09114493		1651.21	0.0034311		2241.2	0.031641		2831.2	0.00446776		3421.19	-0.00919155
471.4	0.30698608		1061.39	0.09180857		1651.41	0.00309313		2241.4	0.03144268		2831.4	0.0053022		3421.39	-0.00950631
471.6	0.30801576		1061.59	0.09268419		1651.61	0.0032464		2241.6	0.03144713		2831.6	0.00509895		3421.59	-0.00971559
471.8	0.30859252		1061.79	0.09257658		1651.81	0.00379346		2241.8	0.03127202		2831.8	0.00536164		3421.79	-0.01017446
472	0.30864543		1061.99	0.09194092		1652.01	0.00371862		2242	0.03075133		2832	0.00506986		3421.99	-0.0099796
472.2	0.30875378		1062.19	0.09204917		1652.21	0.00339787		2242.2	0.03029144		2832.2	0.00515992		3422.19	-0.00978652
472.4	0.30907784		1062.39	0.0904973		1652.41	0.00441635		2242.4	0.03002724		2832.4	0.00503701		3422.39	-0.01005966
472.6	0.30835728		1062.59	0.08988323		1652.61	0.00462666		2242.6	0.02984762		2832.6	0.00447659		3422.59	-0.00996884
472.8	0.30831723		1062.79	0.09053114		1652.81	0.00455675		2242.8	0.02890015		2832.8	0.00359315		3422.79	-0.01009475
473	0.30743445		1062.99	0.08962727		1653.01	0.00477018		2243	0.02814153		2833	0.00278958		3422.99	-0.01055312
473.2	0.30820232		1063.19	0.08929762		1653.21	0.00392172		2243.2	0.02811205		2833.2	0.0033835		3423.19	-0.01092761
473.4	0.30830888		1063.39	0.08939754		1653.41	0.00405668		2243.4	0.02844289		2833.4	0.0028053		3423.39	-0.01042856
473.6	0.30781723		1063.59	0.08873837		1653.61	0.00404876		2243.6	0.02773677		2833.6	0.0026287		3423.59	-0.01049927
473.8	0.3085517		1063.79	0.08842186		1653.81	0.00309914		2243.8	0.02677851		2833.8	0.00229547		3423.79	-0.01045182
474	0.30852935		1063.99	0.08779883		1654.01	0.00346526		2244	0.02662465		2834	0.00192685		3423.99	-0.01037327
474.2	0.30789995		1064.19	0.08760182		1654.21	0.00337771		2244.2	0.0265998		2834.2	0.00169659		3424.19	-0.01037979
474.4	0.30694801		1064.39	0.08705718		1654.41	0.00228937		2244.4	0.02553229		2834.4	0.00224171		3424.39	-0.01018551
474.6	0.30698941		1064.59	0.08678012		1654.61	0.00265272		2244.6	0.02526354		2834.6	0.00227494		3424.59	-0.0102749
474.8	0.30650154		1064.79	0.08655736		1654.81	0.00277782		2244.8	0.02538725		2834.8	0.00180478		3424.79	-0.00959606
475	0.30605646		1064.99	0.08697951		1655.01	0.00230233		2245	0.02469695		2835	0.00305352		3424.99	-0.0101698
475.2	0.3065575		1065.19	0.08712916		1655.21	0.00117536		2245.2	0.02428719		2835.2	0.0028263		3425.19	-0.009101
475.4	0.30640477		1065.39	0.08825607		1655.41	0.0014938		2245.4	0.02415285		2835.4	0.0035617		3425.39	-0.00864923
475.6	0.30698119		1065.59	0.08945113		1655.61	0.00169917		2245.6	0.02403617		2835.6	0.00371667		3425.59	-0.0082792
475.8	0.30633792		1065.79	0.08844956		1655.81	0.00197458		2245.8	0.02369857		2835.8	0.0047351		3425.79	-0.00854048
476	0.30532098		1065.99	0.08794		1656.01	0.00178135		2246	0.0238356		2836	0.00481546		3425.99	-0.00766057
476.2	0.30579852		1066.19	0.08900793		1656.21	0.00230783		2246.2	0.02443435		2836.2	0.00583811		3426.19	-0.00753423
476.4	0.30613484		1066.39	0.0887302		1656.41	0.00311398		2246.4	0.02446615		2836.4	0.00751316		3426.39	-0.00649168
476.6	0.30641039		1066.59	0.08950465		1656.61	0.00399393		2246.6	0.02444245		2836.6	0.00708646		3426.59	-0.00620469
476.8	0.30743035		1066.79	0.09004654		1656.81	0.00364922		2246.8	0.02432526		2836.8	0.00738396		3426.79	-0.00676061
477	0.30689553		1066.99	0.08936257		1657.01	0.00394677		2247	0.02507054		2837	0.0074668		3426.99	-0.00657567
477.2	0.30730683		1067.19	0.09040804		1657.21	0.00425586		2247.2	0.02552943		2837.2	0.00725135		3427.19	-0.00569854
477.4	0.30693642		1067.39	0.09057072		1657.41	0.00565876		2247.4	0.0266676		2837.4	0.0060652		3427.39	-0.00521096
477.6	0.30691551		1067.59	0.09040745		1657.61	0.00649101		2247.6	0.02657403		2837.6	0.00524557		3427.59	-0.00563546
477.8	0.30712373		1067.79	0.09044942		1657.81	0.00705688		2247.8	0.02818204		2837.8	0.00395177		3427.79	-0.00540887
478	0.30685718		1067.99	0.09073512		1658.01	0.0077687		2248	0.02886543		2838	0.00320566		3427.99	-0.0059512
478.2	0.30612087		1068.19	0.09030593		1658.21	0.00820007		2248.2	0.0292705		2838.2	0.00226445		3428.19	-0.00712738
478.4	0.30638136		1068.39	0.08997814		1658.41	0.00771597		2248.4	0.02913881		2838.4	0.00147097		3428.39	-0.00725936
478.6	0.30727193		1068.59	0.0897272		1658.61	0.00818074		2248.6	0.02896626		2838.6	0.00060294		3428.59	-0.00760057
478.8	0.30813017		1068.79	0.08978235		1658.81	0.00751787		2248.8	0.02880189		2838.8	-0.00038293		3428.79	-0.00748072
479	0.30895254		1068.99	0.08969655		1659.01	0.00566706		2249	0.0276258		2839	-0.00029197		3428.99	-0.00866304
479.2	0.30881441		1069.19	0.08955849		1659.21	0.00475412		2249.2	0.02681694		2839.2	-0.00112566		3429.19	-0.0088442
479.4	0.30797922		1069.39	0.08949516		1659.41	0.0046113		2249.4	0.02603563		2839.4	-0.00074376		3429.39	-0.00976
479.6	0.30710685		1069.59	0.08883369		1659.61	0.0034973		2249.6	0.02489343		2839.6	0.00008107		3429.59	-0.01023251
479.8	0.30715289		1069.79	0.0876258		1659.81	0.00299386		2249.8	0.02468297		2839.8	0.00127151		3429.79	-0.01108684
480	0.3065925		1069.99	0.08741143		1660.01	0.00242124		2250	0.02409687		2840	0.00238432		3429.99	-0.01068819
480.2	0.30721352		1070.19	0.08782143		1660.21	0.00185946		2250.2	0.02350858		2840.2	0.0035973		3430.19	-0.01076254
480.4	0.30714673		1070.39	0.08745301		1660.41	0.00050459		2250.4	0.02228601		2840.4	0.00435979		3430.39	-0.01104229
480.6	0.30636925		1070.59	0.08722186		1660.61	0.00007283		2250.6	0.02182554		2840.6	0.00404618		3430.59	-0.01157198
480.8	0.30551407		1070.79	0.08724744		1660.81	-0.00106066		2250.8	0.02252606		2840.8	0.00376263		3430.79	-0.01152483
481	0.30475936		1070.99	0.08700168		1661.01	-0.00045814		2251	0.02315114		2841	0.00296124		3430.99	-0.01085748
481.2	0.30547823		1071.19	0.0875115		1661.21	0.00071713		2251.2	0.02316272		2841.2	0.00328184		3431.19	-0.01068459
481.4	0.30494458		1071.39	0.08728047		1661.41	0.00191033		2251.4	0.02439451		2841.4	0.00293682		3431.39	-0.01068522
481.6	0.30547768		1071.59	0.08775724		1661.61	0.00292445		2251.6	0.02467461		2841.6	0.00243116		3431.59	-0.01013445
481.8	0.30598507		1071.79	0.08808536		1661.81	0.00299518		2251.8	0.02584396		2841.8	0.00190458		3431.79	-0.01028236
482	0.30570205		1071.99	0.08893501		1662.01	0.00357139		2252	0.02528885		2842	0.00186217		3431.99	-0.01068638
482.2	0.30584955		1072.19	0.08873792		1662.21	0.00421456		2252.2	0.02592597		2842.2	0.00150405		3432.19	-0.01151933
482.4	0.30663866		1072.39	0.08861556		1662.41	0.00425358		2252.4	0.02617159		2842.4	0.00070463		3432.39	-0.01090472
482.6	0.30743742		1072.59	0.08942577		1662.61	0.00546852		2252.6	0.02614632		2842.6	-0.0000197		3432.59	-0.01060841
482.8	0.30789214		1072.79	0.08958698		1662.81	0.0048143		2252.8	0.02672465		2842.8	-0.00042552		3432.79	-0.01031379
483	0.30692213		1072.99	0.08973911		1663.01	0.00481866		2253	0.02678176		2843	-0.00029894		3432.99	-0.01165867
483.2	0.3057999		1073.19	0.09009435		1663.21	0.0052525		2253.2	0.02697219		2843.2	-0.00043027		3433.19	-0.01142618
483.4	0.30590532		1073.39	0.09030329		1663.41	0.00502425		2253.4	0.02665226		2843.4	0.00027299		3433.39	-0.0118787
483.6	0.30549179		1073.59	0.09038511		1663.61	0.00545075		2253.6	0.02669946		2843.6	0.00148685		3433.59	-0.0115544
483.8	0.30516607		1073.79	0.09036708		1663.81	0.00512677		2253.8	0.02626195		2843.8	0.00252611		3433.79	-0.01124755
484	0.30423761		1073.99	0.0897441		1664.01	0.00463205		2254	0.02559986		2844	0.00268762		3433.99	-0.01075326
484.2	0.30449768		1074.19	0.08907201		1664.21	0.00396139		2254.2	0.02509518		2844.2	0.00237214		3434.19	-0.0097158
484.4	0.30410955		1074.39	0.08884737		1664.41	0.00341255		2254.4	0.02462809		2844.4	0.00164243		3434.39	-0.00946287
484.6	0.30383881		1074.59	0.08793824		1664.61	0.00360333		2254.6	0.02405208		2844.6	0.0016597		3434.59	-0.00968231
484.8	0.30371245		1074.79	0.08766239		1664.81	0.00334557		2254.8	0.02428897		2844.8	0.00113686		3434.79	-0.00946989
485	0.30431678		1074.99	0.08723911		1665.01	0.00365399		2255	0.02328372		2845	0.00196698		3434.99	-0.00970964
485.2	0.30374772		1075.19	0.08683112		1665.21	0.00402041		2255.2	0.02241589		2845.2	0.00199646		3435.19	-0.01006631
485.4	0.30337687		1075.39	0.0866052		1665.41	0.0039393		2255.4	0.0227771		2845.4	0.00188166		3435.39	-0.0101443
485.6	0.30319573		1075.59	0.08592802		1665.61	0.00440025		2255.6	0.02294154		2845.6	0.00182888		3435.59	-0.01011891
485.8	0.30323241		1075.79	0.08528346		1665.81	0.00364527		2255.8	0.02301201		2845.8	0.00232277		3435.79	-0.01107833
486	0.30344878		1075.99	0.0852474		1666.01	0.00361452		2256	0.02338962		2846	0.00183072		3435.99	-0.01144273
486.2	0.30378059		1076.19	0.08447121		1666.21	0.00374776		2256.2	0.02448581		2846.2	0.00152911		3436.19	-0.01204169
486.4	0.30412961		1076.39	0.08419027		1666.41	0.00349913		2256.4	0.02386267		2846.4	0.0009616		3436.39	-0.01276124
486.6	0.30370236		1076.59	0.08544219		1666.61	0.00308804		2256.6	0.02344174		2846.6	0.00085799		3436.59	-0.01289044
486.8	0.30362274		1076.79	0.08634714		1666.81	0.00187764		2256.8	0.02431156		2846.8	0.00158693		3436.79	-0.01405086
487	0.30341474		1076.99	0.08725815		1667.01	0.00210743		2257	0.02426993		2847	0.00173243		3436.99	-0.01414456
487.2	0.30348264		1077.19	0.0877554		1667.21	0.00178937		2257.2	0.02374636		2847.2	0.00148818		3437.19	-0.01318599
487.4	0.30293085		1077.39	0.08768356		1667.41	0.00095244		2257.4	0.023199		2847.4	0.00241082		3437.39	-0.01334218
487.6	0.30278869		1077.59	0.08789964		1667.61	0.00141121		2257.6	0.02233634		2847.6	0.00297899		3437.59	-0.01246684
487.8	0.30230736		1077.79	0.08736958		1667.81	0.00142629		2257.8	0.02192942		2847.8	0.00289368		3437.79	-0.01127752
488	0.30354053		1077.99	0.08719292		1668.01	0.0019278		2258	0.02150636		2848	0.00208809		3437.99	-0.01057195
488.2	0.30485944		1078.19	0.08787006		1668.21	0.00220313		2258.2	0.02163782		2848.2	0.00192186		3438.19	-0.0096282
488.4	0.30581222		1078.39	0.08801534		1668.41	0.00224613		2258.4	0.02103862		2848.4	0.00128809		3438.39	-0.00974002
488.6	0.30620237		1078.59	0.0877351		1668.61	0.00241848		2258.6	0.01998441		2848.6	0.00207458		3438.59	-0.0094646
488.8	0.30576102		1078.79	0.08804868		1668.81	0.00232025		2258.8	0.01997862		2848.8	0.00256784		3438.79	-0.00955109
489	0.30584129		1078.99	0.08858525		1669.01	0.0025119		2259	0.01982839		2849	0.00236718		3438.99	-0.00984722
489.2	0.30478988		1079.19	0.08774507		1669.21	0.00319851		2259.2	0.01997122		2849.2	0.00168529		3439.19	-0.00975253
489.4	0.3050912		1079.39	0.08764022		1669.41	0.00325392		2259.4	0.02139279		2849.4	0.00172775		3439.39	-0.00955569
489.6	0.30505044		1079.59	0.08701918		1669.61	0.00360192		2259.6	0.02214594		2849.6	0.00142286		3439.59	-0.00947401
489.8	0.30557903		1079.79	0.08647243		1669.81	0.00280373		2259.8	0.02287958		2849.8	0.00212664		3439.79	-0.01046787
490	0.3054701		1079.99	0.08614929		1670.01	0.00285464		2260	0.0233004		2850	0.0017498		3439.99	-0.01051533
490.2	0.30519418		1080.19	0.08698358		1670.21	0.00274319		2260.2	0.02335154		2850.2	0.00242428		3440.19	-0.01131216
490.4	0.30544501		1080.39	0.08755178		1670.41	0.00276543		2260.4	0.02293074		2850.4	0.00284055		3440.39	-0.01231425
490.6	0.30547656		1080.59	0.08893782		1670.61	0.00208036		2260.6	0.02198408		2850.6	0.00264912		3440.59	-0.0118712
490.8	0.30642408		1080.79	0.08948281		1670.81	0.00212494		2260.8	0.02191701		2850.8	0.00241444		3440.79	-0.0122596
491	0.30630799		1080.99	0.08856595		1671.01	0.00172036		2261	0.02110295		2851	0.00186272		3440.99	-0.01206174
491.2	0.3061475		1081.19	0.08838579		1671.21	0.00084326		2261.2	0.02003592		2851.2	0.00142273		3441.19	-0.01206804
491.4	0.30553096		1081.39	0.08801105		1671.41	0.00053828		2261.4	0.01960025		2851.4	0.00213116		3441.39	-0.01277738
491.6	0.30608925		1081.59	0.08778442		1671.61	0.00113502		2261.6	0.01949547		2851.6	0.00143707		3441.59	-0.01182542
491.8	0.30586279		1081.79	0.08720388		1671.81	0.00133423		2261.8	0.01993142		2851.8	0.00137099		3441.79	-0.01141664
492	0.30628		1081.99	0.08795255		1672.01	0.00133604		2262	0.02025159		2852	0.00017499		3441.99	-0.01234642
492.2	0.30667384		1082.19	0.08811582		1672.21	0.0013694		2262.2	0.02061563		2852.2	-0.00011514		3442.19	-0.01249977
492.4	0.30615714		1082.39	0.08758465		1672.41	0.00136889		2262.4	0.02083615		2852.4	-0.00078932		3442.39	-0.01218647
492.6	0.30512246		1082.59	0.08848832		1672.61	0.00106215		2262.6	0.02124359		2852.6	-0.00024309		3442.59	-0.01231035
492.8	0.30466256		1082.79	0.08837992		1672.81	0.00067455		2262.8	0.02124423		2852.8	-0.00062452		3442.79	-0.01308462
493	0.30425398		1082.99	0.08834663		1673.01	0.00007594		2263	0.02183501		2853	-0.00125042		3442.99	-0.01253402
493.2	0.30409137		1083.19	0.08650335		1673.21	-0.00003532		2263.2	0.02235116		2853.2	-0.0013506		3443.19	-0.01193668
493.4	0.30351381		1083.39	0.08659735		1673.41	-0.00014457		2263.4	0.02343099		2853.4	-0.00046474		3443.39	-0.01117718
493.6	0.30375201		1083.59	0.08701962		1673.61	0.0006247		2263.6	0.02348302		2853.6	0.00005963		3443.59	-0.01152807
493.8	0.30296434		1083.79	0.08686324		1673.81	0.00065402		2263.8	0.0238098		2853.8	0.00044493		3443.79	-0.01209031
494	0.30272205		1083.99	0.08710302		1674.01	0.00128275		2264	0.02298482		2854	0.00107481		3443.99	-0.01123059
494.2	0.30287408		1084.19	0.0871618		1674.21	0.00219608		2264.2	0.02283773		2854.2	0.00289548		3444.19	-0.01170088
494.4	0.30365755		1084.39	0.08621728		1674.41	0.00260201		2264.4	0.0213966		2854.4	0.00323787		3444.39	-0.01176416
494.6	0.30434994		1084.59	0.0858419		1674.61	0.00282325		2264.6	0.02083171		2854.6	0.00300393		3444.59	-0.01155085
494.8	0.30452762		1084.79	0.08570384		1674.81	0.00288442		2264.8	0.0207829		2854.8	0.00334311		3444.79	-0.01159868
495	0.30442076		1084.99	0.0848156		1675.01	0.00287676		2265	0.02099419		2855	0.00316863		3444.99	-0.01125778
495.2	0.3048159		1085.19	0.08458119		1675.21	0.00394207		2265.2	0.02096563		2855.2	0.00346302		3445.19	-0.01066435
495.4	0.3035452		1085.39	0.08344926		1675.41	0.00429328		2265.4	0.02095488		2855.4	0.00304768		3445.39	-0.01050245
495.6	0.30352144		1085.59	0.08336268		1675.61	0.00417436		2265.6	0.02055642		2855.6	0.00219778		3445.59	-0.0094056
495.8	0.30299666		1085.79	0.08377831		1675.81	0.00502635		2265.8	0.02063788		2855.8	0.00192595		3445.79	-0.00952414
496	0.30289883		1085.99	0.08395895		1676.01	0.00518137		2266	0.02017541		2856	0.00110523		3445.99	-0.01020421
496.2	0.30292585		1086.19	0.08379937		1676.21	0.00562623		2266.2	0.02008036		2856.2	0.00037348		3446.19	-0.00962717
496.4	0.30194585		1086.39	0.08422892		1676.41	0.0055729		2266.4	0.02081349		2856.4	-0.00055417		3446.39	-0.00939661
496.6	0.3026276		1086.59	0.08537479		1676.61	0.00448552		2266.6	0.01992996		2856.6	0.0002095		3446.59	-0.00970839
496.8	0.30230397		1086.79	0.08463746		1676.81	0.00416114		2266.8	0.01917823		2856.8	-0.00076022		3446.79	-0.00937158
497	0.30260264		1086.99	0.08507725		1677.01	0.00380426		2267	0.01908444		2857	-0.00130168		3446.99	-0.00905551
497.2	0.30284898		1087.19	0.08561026		1677.21	0.00337574		2267.2	0.01852423		2857.2	-0.00122019		3447.19	-0.00934644
497.4	0.30189251		1087.39	0.08696514		1677.41	0.0028712		2267.4	0.01911621		2857.4	-0.00063139		3447.39	-0.00860397
497.6	0.30246366		1087.59	0.08725045		1677.61	0.00286477		2267.6	0.01855511		2857.6	-0.00145718		3447.59	-0.00920756
497.8	0.30249235		1087.79	0.08725018		1677.81	0.00230165		2267.8	0.01912265		2857.8	-0.0010486		3447.79	-0.00999399
498	0.30339788		1087.99	0.08724509		1678.01	0.0020574		2268	0.01874057		2858	-0.0000195		3447.99	-0.00961523
498.2	0.3033424		1088.19	0.08731867		1678.21	0.00192141		2268.2	0.01912823		2858.2	0.00037099		3448.19	-0.01076912
498.4	0.30457444		1088.39	0.08684922		1678.41	0.00089619		2268.4	0.01942246		2858.4	-0.00041276		3448.39	-0.01175359
498.6	0.30545799		1088.59	0.08678095		1678.61	0.00116312		2268.6	0.0202596		2858.6	-0.00105102		3448.59	-0.01071475
498.8	0.30522533		1088.79	0.08630954		1678.81	0.00159675		2268.8	0.01997366		2858.8	-0.00105953		3448.79	-0.01052127
499	0.30574256		1088.99	0.08539049		1679.01	0.00154961		2269	0.019935		2859	-0.00046075		3448.99	-0.01075062
499.2	0.30582264		1089.19	0.08447965		1679.21	0.00201224		2269.2	0.02021646		2859.2	0.00048692		3449.19	-0.01134116
499.4	0.3057828		1089.39	0.08430145		1679.41	0.00156691		2269.4	0.02062055		2859.4	0.00048128		3449.39	-0.01159332
499.6	0.30613384		1089.59	0.08537387		1679.61	0.00199474		2269.6	0.02003189		2859.6	-0.00053779		3449.59	-0.01207217
499.8	0.30634225		1089.79	0.08482052		1679.81	0.00240759		2269.8	0.02046955		2859.8	-0.00104815		3449.79	-0.01285213
500	0.30633877		1089.99	0.08481536		1680.01	0.00204211		2270	0.02008548		2860	-0.00103857		3449.99	-0.01350676
500.2	0.30603998		1090.19	0.08483595		1680.21	0.00195521		2270.2	0.02067939		2860.2	-0.00175863		3450.19	-0.01343042
500.4	0.30629074		1090.39	0.08408882		1680.41	0.00201079		2270.4	0.02044379		2860.4	-0.00211745		3450.39	-0.01294905
500.6	0.30658841		1090.59	0.08462689		1680.61	0.00167134		2270.6	0.01958072		2860.6	-0.00130702		3450.59	-0.01308622
500.8	0.30538685		1090.79	0.08411605		1680.81	0.00215847		2270.8	0.01961258		2860.8	-0.00220901		3450.79	-0.01327543
501	0.30558583		1090.99	0.08445993		1681.01	0.00232553		2271	0.01951927		2861	-0.00195327		3450.99	-0.0132203
501.2	0.30446851		1091.19	0.08467426		1681.21	0.00215263		2271.2	0.01896022		2861.2	-0.00096652		3451.19	-0.0131506
501.4	0.30327453		1091.39	0.08398918		1681.41	0.00133074		2271.4	0.01880671		2861.4	-0.00032946		3451.39	-0.01216672
501.6	0.3034773		1091.59	0.08422182		1681.61	0.00123817		2271.6	0.01839666		2861.6	-0.00060303		3451.59	-0.01215577
501.8	0.30354549		1091.79	0.08464705		1681.81	0.0009576		2271.8	0.01867033		2861.8	0.00060174		3451.79	-0.01273703
502	0.30255782		1091.99	0.08476598		1682.01	0.00110191		2272	0.01734563		2862	0.00038897		3451.99	-0.01278727
502.2	0.3019584		1092.19	0.0842204		1682.21	0.00134802		2272.2	0.01679351		2862.2	-0.00035241		3452.19	-0.01390737
502.4	0.30246567		1092.39	0.08368369		1682.41	0.00111178		2272.4	0.0163517		2862.4	-0.00005254		3452.39	-0.01367728
502.6	0.30113831		1092.59	0.0831319		1682.61	0.00144429		2272.6	0.015274		2862.6	-0.00085911		3452.59	-0.0124756
502.8	0.29989369		1092.79	0.08281874		1682.81	0.00206898		2272.8	0.01471932		2862.8	0.00022914		3452.79	-0.01353355
503	0.30023556		1092.99	0.08294461		1683.01	0.00104129		2273	0.014531		2863	0.00110679		3452.99	-0.01346477
503.2	0.29948208		1093.19	0.08313685		1683.21	0.00131546		2273.2	0.01496434		2863.2	0.00077191		3453.19	-0.0136221
503.4	0.30029267		1093.39	0.08418911		1683.41	0.00098884		2273.4	0.01492201		2863.4	-0.00029645		3453.39	-0.0128491
503.6	0.30048576		1093.59	0.08495766		1683.61	0.00059691		2273.6	0.01416713		2863.6	-0.00216292		3453.59	-0.01361421
503.8	0.30015021		1093.79	0.08411101		1683.81	0.00009564		2273.8	0.0148402		2863.8	-0.00241955		3453.79	-0.01385282
504	0.30020285		1093.99	0.08402805		1684.01	-0.00023965		2274	0.01567892		2864	-0.00254698		3453.99	-0.01417124
504.2	0.30055964		1094.19	0.08333885		1684.21	0.00007658		2274.2	0.01690104		2864.2	-0.00304156		3454.19	-0.01328275
504.4	0.30146215		1094.39	0.08268978		1684.41	0.00026035		2274.4	0.0170853		2864.4	-0.00329067		3454.39	-0.01266214
504.6	0.30138218		1094.59	0.08346744		1684.61	0.00067776		2274.6	0.01722857		2864.6	-0.00240031		3454.59	-0.01289091
504.8	0.30194527		1094.79	0.08336538		1684.81	0.00056019		2274.8	0.01754269		2864.8	-0.00242298		3454.79	-0.01251634
505	0.30244788		1094.99	0.08289641		1685.01	0.00048724		2275	0.01654264		2865	-0.00150714		3454.99	-0.01183894
505.2	0.30268573		1095.19	0.08306855		1685.21	0.00060779		2275.2	0.01591587		2865.2	-0.00049441		3455.19	-0.01114461
505.4	0.30294826		1095.39	0.0827892		1685.41	-0.00077744		2275.4	0.01564718		2865.4	-0.00073336		3455.39	-0.01140274
505.6	0.30371932		1095.59	0.08288392		1685.61	-0.00043545		2275.6	0.0161988		2865.6	-0.00057998		3455.59	-0.01180002
505.8	0.30435895		1095.79	0.08275789		1685.81	-0.00028557		2275.8	0.01640723		2865.8	0.00073248		3455.79	-0.01285077
506	0.30478251		1095.99	0.0823529		1686.01	0.00020295		2276	0.0155899		2866	0.00025307		3455.99	-0.01328601
506.2	0.30549421		1096.19	0.08191368		1686.21	0.0001518		2276.2	0.01552718		2866.2	0.00067272		3456.19	-0.01347385
506.4	0.30536926		1096.39	0.08266051		1686.41	-0.00032744		2276.4	0.01521648		2866.4	0.00068642		3456.39	-0.01276446
506.6	0.30535526		1096.59	0.0821967		1686.61	0.00007344		2276.6	0.0147722		2866.6	0.00021708		3456.59	-0.0135447
506.8	0.30631691		1096.79	0.08226361		1686.81	0.00026873		2276.8	0.01496291		2866.8	0.00048575		3456.79	-0.01388171
507	0.30652452		1096.99	0.08229908		1687.01	-0.00050203		2277	0.0150207		2867	0.00066811		3456.99	-0.01318826
507.2	0.30608302		1097.19	0.0830025		1687.21	0.00026481		2277.2	0.01546715		2867.2	0.00014577		3457.19	-0.0139907
507.4	0.30618923		1097.39	0.08412502		1687.41	0.00008438		2277.4	0.01582626		2867.4	-0.00036739		3457.39	-0.01361946
507.6	0.30582154		1097.59	0.085417		1687.61	0.00031009		2277.6	0.01671514		2867.6	-0.00107993		3457.59	-0.01408617
507.8	0.30475639		1097.79	0.08501593		1687.81	0.0007071		2277.8	0.01852198		2867.8	-0.00118129		3457.79	-0.01445023
508	0.30524806		1097.99	0.08576664		1688.01	0.00088532		2278	0.01994166		2868	-0.0003911		3457.99	-0.01399706
508.2	0.30415317		1098.19	0.08598966		1688.21	0.00195606		2278.2	0.01990088		2868.2	-0.00146731		3458.19	-0.01253752
508.4	0.30440617		1098.39	0.08621131		1688.41	0.00163402		2278.4	0.01949854		2868.4	-0.00195516		3458.39	-0.01108249
508.6	0.30381826		1098.59	0.08653029		1688.61	0.00176765		2278.6	0.01940325		2868.6	-0.00223766		3458.59	-0.01042872
508.8	0.30415697		1098.79	0.08665362		1688.81	0.00143115		2278.8	0.01826366		2868.8	-0.00259876		3458.79	-0.00952141
509	0.30366887		1098.99	0.08700996		1689.01	0.0010576		2279	0.01721208		2869	-0.00178869		3458.99	-0.00915996
509.2	0.30398928		1099.19	0.08684858		1689.21	0.00023494		2279.2	0.01702216		2869.2	-0.00133128		3459.19	-0.00880065
509.4	0.30305952		1099.39	0.0861153		1689.41	-0.00057064		2279.4	0.01627128		2869.4	-0.0016284		3459.39	-0.00948971
509.6	0.30314526		1099.59	0.08518161		1689.61	-0.00011219		2279.6	0.01632902		2869.6	-0.00066591		3459.59	-0.00983676
509.8	0.30293424		1099.79	0.08460401		1689.81	-0.00011167		2279.8	0.01648463		2869.8	-0.00033818		3459.79	-0.01026657
510	0.30344695		1099.99	0.08421553		1690.01	0.00010505		2280	0.01587565		2870	-0.00006657		3459.99	-0.01021309
510.2	0.30330474		1100.19	0.08317991		1690.21	0.00028311		2280.2	0.01541855		2870.2	0.000187		3460.19	-0.01061143
510.4	0.30297851		1100.39	0.08301099		1690.41	-0.00044181		2280.4	0.01437009		2870.4	0.00051281		3460.39	-0.01138032
510.6	0.30378455		1100.59	0.0819009		1690.61	0.00013192		2280.6	0.01469242		2870.6	0.0003148		3460.59	-0.01258401
510.8	0.30369368		1100.79	0.08138695		1690.81	0.00010123		2280.8	0.0152938		2870.8	-0.00033443		3460.79	-0.01241088
511	0.30314114		1100.99	0.08170373		1691.01	0.00014425		2281	0.01499708		2871	-0.00084189		3460.99	-0.01300075
511.2	0.30265358		1101.19	0.08240033		1691.21	0.00021876		2281.2	0.01553964		2871.2	-0.00264323		3461.19	-0.0145461
511.4	0.30224747		1101.39	0.08369833		1691.41	-0.00034937		2281.4	0.01567556		2871.4	-0.00311251		3461.39	-0.01418715
511.6	0.30214241		1101.59	0.0847379		1691.61	-0.00013185		2281.6	0.01647367		2871.6	-0.00404599		3461.59	-0.01379162
511.8	0.30157846		1101.79	0.08436974		1691.81	0.00022866		2281.8	0.01664884		2871.8	-0.00409318		3461.79	-0.014658
512	0.30216074		1101.99	0.08466307		1692.01	0.00020147		2282	0.01595011		2872	-0.00433885		3461.99	-0.01369963
512.2	0.30132164		1102.19	0.08456838		1692.21	-0.00035716		2282.2	0.01497173		2872.2	-0.0060538		3462.19	-0.01270335
512.4	0.30174125		1102.39	0.08479263		1692.41	-0.00156524		2282.4	0.01466347		2872.4	-0.00597446		3462.39	-0.01202627
512.6	0.30205176		1102.59	0.08523844		1692.61	-0.00177698		2282.6	0.01446872		2872.6	-0.00592078		3462.59	-0.01196413
512.8	0.30204702		1102.79	0.08544733		1692.81	-0.00242016		2282.8	0.0133609		2872.8	-0.00484477		3462.79	-0.01201932
513	0.30221061		1102.99	0.08583603		1693.01	-0.00316428		2283	0.01348001		2873	-0.00433109		3462.99	-0.01173192
513.2	0.30224055		1103.19	0.08460567		1693.21	-0.00306053		2283.2	0.01382627		2873.2	-0.0030401		3463.19	-0.01130395
513.4	0.30162453		1103.39	0.08376227		1693.41	-0.00225034		2283.4	0.01406795		2873.4	-0.00253392		3463.39	-0.01135618
513.6	0.30199537		1103.59	0.08293231		1693.61	-0.00234918		2283.6	0.01535823		2873.6	-0.00185137		3463.59	-0.01200364
513.8	0.30206573		1103.79	0.08267899		1693.81	-0.00219645		2283.8	0.01525668		2873.8	-0.00166101		3463.79	-0.0127439
514	0.30293672		1103.99	0.08274938		1694.01	-0.0022758		2284	0.0160682		2874	-0.00109996		3463.99	-0.01225197
514.2	0.30282831		1104.19	0.08188595		1694.21	-0.00248464		2284.2	0.01570757		2874.2	-0.00069809		3464.19	-0.01204354
514.4	0.30331376		1104.39	0.08201428		1694.41	-0.00261969		2284.4	0.01584276		2874.4	0.0005066		3464.39	-0.01259603
514.6	0.30348877		1104.59	0.08152066		1694.61	-0.00187737		2284.6	0.01669364		2874.6	0.00013922		3464.59	-0.01247302
514.8	0.3039231		1104.79	0.08176913		1694.81	-0.00172409		2284.8	0.01734093		2874.8	-0.00056355		3464.79	-0.0121891
515	0.30379993		1104.99	0.08196591		1695.01	-0.00157748		2285	0.01646318		2875	-0.00108879		3464.99	-0.01206064
515.2	0.30328664		1105.19	0.0825951		1695.21	-0.00148115		2285.2	0.01708553		2875.2	-0.00133364		3465.19	-0.01212586
515.4	0.30305942		1105.39	0.08382255		1695.41	-0.00096468		2285.4	0.01718158		2875.4	-0.00079106		3465.39	-0.01144477
515.6	0.30301518		1105.59	0.08409648		1695.61	-0.00053271		2285.6	0.01750279		2875.6	-0.00110226		3465.59	-0.01208068
515.8	0.30257663		1105.79	0.08362035		1695.81	-0.00087928		2285.8	0.01706927		2875.8	-0.00008253		3465.79	-0.01277067
516	0.30210234		1105.99	0.08312606		1696.01	-0.00138664		2286	0.01658776		2876	0.00059425		3465.99	-0.01225059
516.2	0.30154276		1106.19	0.08370955		1696.21	-0.00118764		2286.2	0.01597931		2876.2	0.00039968		3466.19	-0.01163126
516.4	0.30165079		1106.39	0.08373335		1696.41	-0.00083865		2286.4	0.01511523		2876.4	0.00081423		3466.39	-0.01160043
516.6	0.30223224		1106.59	0.08392347		1696.61	-0.00018284		2286.6	0.01481499		2876.6	0.00050258		3466.59	-0.0124596
516.8	0.30198417		1106.79	0.0840964		1696.81	-0.00009471		2286.8	0.01416997		2876.8	0.00027239		3466.79	-0.01315897
517	0.30262019		1106.99	0.08393992		1697.01	-0.00025949		2287	0.01485899		2877	-0.0006577		3466.99	-0.01316636
517.2	0.3027776		1107.19	0.08310641		1697.21	0.00008117		2287.2	0.01490601		2877.2	0.00038486		3467.19	-0.0134614
517.4	0.30319327		1107.39	0.08347413		1697.41	-0.00049701		2287.4	0.01487398		2877.4	-0.00037401		3467.39	-0.01479108
517.6	0.30372512		1107.59	0.08383916		1697.61	-0.00104236		2287.6	0.01518099		2877.6	-0.00098999		3467.59	-0.01574719
517.8	0.30409984		1107.79	0.08472983		1697.81	-0.00097521		2287.8	0.01437407		2877.8	-0.0018769		3467.79	-0.01604216
518	0.30393127		1107.99	0.08431087		1698.01	-0.0021324		2288	0.01463547		2878	-0.0014965		3467.99	-0.01555274
518.2	0.3041399		1108.19	0.08425053		1698.21	-0.00243645		2288.2	0.01367708		2878.2	-0.00115573		3468.19	-0.01537381
518.4	0.30361694		1108.39	0.08431347		1698.41	-0.0023799		2288.4	0.01405453		2878.4	-0.00078505		3468.39	-0.01638441
518.6	0.30248378		1108.59	0.08384241		1698.61	-0.00272391		2288.6	0.01431206		2878.6	-0.00142149		3468.59	-0.01627395
518.8	0.30233884		1108.79	0.08359704		1698.81	-0.00254302		2288.8	0.01454167		2878.8	-0.00197198		3468.79	-0.01609197
519	0.30179499		1108.99	0.08352295		1699.01	-0.00336719		2289	0.01399755		2879	-0.00243349		3468.99	-0.01583716
519.2	0.30101321		1109.19	0.08349416		1699.21	-0.0037669		2289.2	0.01458119		2879.2	-0.00288987		3469.19	-0.01586902
519.4	0.30005504		1109.39	0.08370073		1699.41	-0.00438096		2289.4	0.01470539		2879.4	-0.00341454		3469.39	-0.01608218
519.6	0.29973771		1109.59	0.08246854		1699.61	-0.00393741		2289.6	0.01500826		2879.6	-0.00213677		3469.59	-0.01623678
519.8	0.29850793		1109.79	0.08209516		1699.81	-0.0040386		2289.8	0.01527199		2879.8	-0.00081402		3469.79	-0.01579238
520	0.29844711		1109.99	0.08175366		1700.01	-0.00295325		2290	0.01579857		2880	-0.00069661		3469.99	-0.0159132
520.2	0.29947758		1110.19	0.08170912		1700.21	-0.00192097		2290.2	0.01546056		2880.2	-0.00070792		3470.19	-0.01608797
520.4	0.30065702		1110.39	0.08150979		1700.41	-0.00207905		2290.4	0.0160054		2880.4	-0.00095465		3470.39	-0.01677276
520.6	0.30077261		1110.59	0.08164832		1700.61	-0.00202969		2290.6	0.01648973		2880.6	-0.00161459		3470.59	-0.01776214
520.8	0.30040122		1110.79	0.08172448		1700.81	-0.00254937		2290.8	0.01644764		2880.8	-0.00146098		3470.79	-0.01695132
521	0.30178261		1110.99	0.08148378		1701.01	-0.00291598		2291	0.01678033		2881	-0.00129876		3470.99	-0.01776762
521.2	0.3017877		1111.19	0.08100657		1701.21	-0.00342441		2291.2	0.01678523		2881.2	-0.00007802		3471.19	-0.01780863
521.4	0.30319617		1111.39	0.08168781		1701.41	-0.00401194		2291.4	0.01721486		2881.4	-0.00071112		3471.39	-0.01813893
521.6	0.30404223		1111.59	0.08173974		1701.61	-0.00320473		2291.6	0.01761784		2881.6	-0.0006516		3471.59	-0.01714514
521.8	0.30485231		1111.79	0.08222171		1701.81	-0.00363539		2291.8	0.01739558		2881.8	-0.00096996		3471.79	-0.0167473
522	0.30621822		1111.99	0.08213424		1702.01	-0.00435874		2292	0.01698988		2882	-0.00029013		3471.99	-0.01663528
522.2	0.3071635		1112.19	0.08269491		1702.21	-0.00425366		2292.2	0.01728309		2882.2	-0.00043225		3472.19	-0.0166376
522.4	0.30604383		1112.39	0.08254901		1702.41	-0.00372654		2292.4	0.01769645		2882.4	-0.00103046		3472.39	-0.01698436
522.6	0.30565173		1112.59	0.08221083		1702.61	-0.00363536		2292.6	0.01751007		2882.6	-0.00176474		3472.59	-0.01647905
522.8	0.30500061		1112.79	0.08314405		1702.81	-0.00383984		2292.8	0.0170861		2882.8	-0.00280926		3472.79	-0.01540192
523	0.30433029		1112.99	0.08400527		1703.01	-0.00440895		2293	0.01626822		2883	-0.00366982		3472.99	-0.01558492
523.2	0.30366284		1113.19	0.08371764		1703.21	-0.00418985		2293.2	0.01545378		2883.2	-0.00399992		3473.19	-0.01520215
523.4	0.30225714		1113.39	0.08405679		1703.41	-0.00389042		2293.4	0.01518539		2883.4	-0.00449671		3473.39	-0.01467483
523.6	0.30206028		1113.59	0.08304477		1703.61	-0.00322883		2293.6	0.01449242		2883.6	-0.00339212		3473.59	-0.01435651
523.8	0.30214663		1113.79	0.08434119		1703.81	-0.00311189		2293.8	0.01441656		2883.8	-0.00458026		3473.79	-0.01478508
524	0.30255854		1113.99	0.08390863		1704.01	-0.00213047		2294	0.01495268		2884	-0.00529211		3473.99	-0.0149401
524.2	0.30220369		1114.19	0.08333092		1704.21	-0.0026122		2294.2	0.01457521		2884.2	-0.00506685		3474.19	-0.01501782
524.4	0.30128334		1114.39	0.08394991		1704.41	-0.00305056		2294.4	0.01438454		2884.4	-0.00558723		3474.39	-0.01496232
524.6	0.29964218		1114.59	0.08409065		1704.61	-0.00272776		2294.6	0.01404408		2884.6	-0.00502406		3474.59	-0.01472357
524.8	0.29962145		1114.79	0.08412916		1704.81	-0.00299735		2294.8	0.01294774		2884.8	-0.00400069		3474.79	-0.01491354
525	0.30074718		1114.99	0.08448514		1705.01	-0.00205025		2295	0.013253		2885	-0.00336008		3474.99	-0.01564397
525.2	0.29999891		1115.19	0.0844736		1705.21	-0.00167036		2295.2	0.01366168		2885.2	-0.00258033		3475.19	-0.01461603
525.4	0.30109751		1115.39	0.08560315		1705.41	-0.00158828		2295.4	0.01366127		2885.4	-0.00278915		3475.39	-0.01400966
525.6	0.30076683		1115.59	0.08571593		1705.61	-0.00121416		2295.6	0.0140434		2885.6	-0.00216998		3475.59	-0.01281022
525.8	0.30157167		1115.79	0.08583892		1705.81	-0.00187835		2295.8	0.01342197		2885.8	-0.00141113		3475.79	-0.01275948
526	0.30249248		1115.99	0.08572065		1706.01	-0.00157832		2296	0.01326868		2886	-0.00078526		3475.99	-0.01321008
526.2	0.30223453		1116.19	0.08504316		1706.21	-0.00174189		2296.2	0.01338991		2886.2	0.00000309		3476.19	-0.01341446
526.4	0.30221956		1116.39	0.08419228		1706.41	-0.00085951		2296.4	0.01364569		2886.4	-0.00024546		3476.39	-0.01311035
526.6	0.30209728		1116.59	0.08475923		1706.61	-0.00178904		2296.6	0.01366569		2886.6	-0.00016377		3476.59	-0.01309218
526.8	0.30243893		1116.79	0.08523847		1706.81	-0.00238372		2296.8	0.01356152		2886.8	-0.00082511		3476.79	-0.01268686
527	0.30271397		1116.99	0.08479673		1707.01	-0.0022892		2297	0.01332241		2887	-0.00031719		3476.99	-0.01312027
527.2	0.30306437		1117.19	0.08439458		1707.21	-0.00290883		2297.2	0.01286609		2887.2	-0.00093519		3477.19	-0.01296083
527.4	0.30246379		1117.39	0.08435572		1707.41	-0.00337698		2297.4	0.01266113		2887.4	-0.00160811		3477.39	-0.01229004
527.6	0.30253387		1117.59	0.08417969		1707.61	-0.00358082		2297.6	0.01219057		2887.6	-0.00188705		3477.59	-0.01287081
527.8	0.30295055		1117.79	0.08435809		1707.81	-0.00385777		2297.8	0.01272525		2887.8	-0.00294538		3477.79	-0.01306373
528	0.302628		1117.99	0.08324977		1708.01	-0.00400681		2298	0.01352307		2888	-0.001949		3477.99	-0.01283958
528.2	0.30242794		1118.19	0.08334839		1708.21	-0.00494372		2298.2	0.01358278		2888.2	-0.00159035		3478.19	-0.01285246
528.4	0.30166156		1118.39	0.0837076		1708.41	-0.00366545		2298.4	0.01385326		2888.4	-0.00188732		3478.39	-0.0130901
528.6	0.30166097		1118.59	0.0829473		1708.61	-0.00281138		2298.6	0.01436169		2888.6	-0.001758		3478.59	-0.01346223
528.8	0.30204741		1118.79	0.0836661		1708.81	-0.00177268		2298.8	0.0131007		2888.8	-0.00155541		3478.79	-0.01406206
529	0.30194862		1118.99	0.08444383		1709.01	-0.00051924		2299	0.01358789		2889	-0.0015362		3478.99	-0.01380059
529.2	0.301679		1119.19	0.08494643		1709.21	-0.00004845		2299.2	0.01294744		2889.2	-0.00081793		3479.19	-0.01346573
529.4	0.30150352		1119.39	0.08548437		1709.41	-0.00092342		2299.4	0.01241614		2889.4	-0.0006658		3479.39	-0.0133224
529.6	0.30173571		1119.59	0.08489177		1709.61	-0.00031179		2299.6	0.0124323		2889.6	-0.00050127		3479.59	-0.01312016
529.8	0.30225107		1119.79	0.08497091		1709.81	0.0005636		2299.8	0.0119792		2889.8	-0.00060055		3479.79	-0.01325083
530	0.30275566		1119.99	0.08441045		1710.01	0.00047911		2300	0.01235077		2890	-0.00125734		3479.99	-0.01401703
530.2	0.30401278		1120.19	0.0835003		1710.21	-0.00002615		2300.2	0.01240124		2890.2	-0.00168374		3480.19	-0.01417091
530.4	0.30468838		1120.39	0.08353356		1710.41	-0.00043183		2300.4	0.01372453		2890.4	-0.00217838		3480.39	-0.01419284
530.6	0.30455147		1120.59	0.08438479		1710.61	-0.00140876		2300.6	0.01405449		2890.6	-0.00347919		3480.59	-0.01436731
530.8	0.30475363		1120.79	0.08343665		1710.81	-0.00131138		2300.8	0.01338295		2890.8	-0.0042895		3480.79	-0.01334728
531	0.30492224		1120.99	0.08381531		1711.01	-0.00204094		2301	0.01285521		2891	-0.00411574		3480.99	-0.013607
531.2	0.30473734		1121.19	0.08314321		1711.21	-0.00292131		2301.2	0.01258738		2891.2	-0.00461864		3481.19	-0.01386335
531.4	0.30401358		1121.39	0.08296982		1711.41	-0.00383342		2301.4	0.0121111		2891.4	-0.00444496		3481.39	-0.01349028
531.6	0.30256538		1121.59	0.08270722		1711.61	-0.00471426		2301.6	0.01246815		2891.6	-0.00462001		3481.59	-0.01356997
531.8	0.30259293		1121.79	0.08160362		1711.81	-0.00590147		2301.8	0.01265093		2891.8	-0.00414492		3481.79	-0.01304091
532	0.3026335		1121.99	0.08184839		1712.01	-0.00655826		2302	0.01307276		2892	-0.00352245		3481.99	-0.01344352
532.2	0.30207324		1122.19	0.08229309		1712.21	-0.00680295		2302.2	0.01252682		2892.2	-0.00384175		3482.19	-0.01431594
532.4	0.30087457		1122.39	0.08178255		1712.41	-0.00621686		2302.4	0.01242647		2892.4	-0.00382584		3482.39	-0.01511413
532.6	0.30127888		1122.59	0.08163311		1712.61	-0.00615257		2302.6	0.01182516		2892.6	-0.00320422		3482.59	-0.01545638
532.8	0.30156085		1122.79	0.08274781		1712.81	-0.00556025		2302.8	0.01089974		2892.8	-0.00233558		3482.79	-0.01620596
533	0.3016248		1122.99	0.08326325		1713.01	-0.00505839		2303	0.01090172		2893	-0.00225154		3482.99	-0.01692436
533.2	0.30171201		1123.19	0.08317326		1713.21	-0.00536403		2303.2	0.01092816		2893.2	-0.00198345		3483.19	-0.0168649
533.4	0.30129734		1123.39	0.08321376		1713.41	-0.00478539		2303.4	0.01080211		2893.4	-0.00201313		3483.39	-0.01738164
533.6	0.30163131		1123.59	0.08332424		1713.61	-0.00430443		2303.6	0.01110434		2893.6	-0.00267297		3483.59	-0.01768667
533.8	0.3021149		1123.79	0.08400256		1713.81	-0.00337738		2303.8	0.01152262		2893.8	-0.00240334		3483.79	-0.01789699
534	0.30176402		1123.99	0.08402334		1714.01	-0.00343926		2304	0.01104589		2894	-0.00206575		3483.99	-0.01814681
534.2	0.30264145		1124.19	0.08429624		1714.21	-0.00309373		2304.2	0.01095844		2894.2	-0.00201598		3484.19	-0.01817416
534.4	0.30231156		1124.39	0.08542233		1714.41	-0.00302178		2304.4	0.01068356		2894.4	-0.0016891		3484.39	-0.01785563
534.6	0.30204737		1124.59	0.08472312		1714.61	-0.0030574		2304.6	0.00992741		2894.6	-0.00204506		3484.59	-0.01837356
534.8	0.30129619		1124.79	0.08373757		1714.81	-0.00300951		2304.8	0.00834607		2894.8	-0.00239594		3484.79	-0.01805349
535	0.30110638		1124.99	0.08405903		1715.01	-0.0033108		2305	0.00869003		2895	-0.00214155		3484.99	-0.01783982
535.2	0.30033898		1125.19	0.08348731		1715.21	-0.0039292		2305.2	0.00868513		2895.2	-0.00181938		3485.19	-0.01647925
535.4	0.29950382		1125.39	0.08365507		1715.41	-0.00478138		2305.4	0.00806666		2895.4	-0.00160919		3485.39	-0.01554027
535.6	0.29908997		1125.59	0.08435322		1715.61	-0.00606677		2305.6	0.00814988		2895.6	-0.00145929		3485.59	-0.01489338
535.8	0.30026302		1125.79	0.08500736		1715.81	-0.00659661		2305.8	0.00829684		2895.8	-0.0008702		3485.79	-0.01505597
536	0.30055733		1125.99	0.08556412		1716.01	-0.0073141		2306	0.00846107		2896	-0.00076227		3485.99	-0.01547784
536.2	0.30045003		1126.19	0.08552669		1716.21	-0.00743411		2306.2	0.00853263		2896.2	-0.00039657		3486.19	-0.01563469
536.4	0.30031754		1126.39	0.08510325		1716.41	-0.0076689		2306.4	0.0090851		2896.4	-0.00060965		3486.39	-0.01525918
536.6	0.3015788		1126.59	0.084845		1716.61	-0.00745138		2306.6	0.00921131		2896.6	-0.00053468		3486.59	-0.01586822
536.8	0.30110871		1126.79	0.08542602		1716.81	-0.00726314		2306.8	0.00989266		2896.8	-0.00033668		3486.79	-0.01686848
537	0.30133122		1126.99	0.08534826		1717.01	-0.00736481		2307	0.01086021		2897	-0.00123935		3486.99	-0.01630902
537.2	0.30070512		1127.19	0.08461393		1717.21	-0.00736258		2307.2	0.01191318		2897.2	-0.00092471		3487.19	-0.0157833
537.4	0.30044596		1127.39	0.08539291		1717.41	-0.00561318		2307.4	0.01246029		2897.4	-0.00023734		3487.39	-0.01618958
537.6	0.30037147		1127.59	0.08586181		1717.61	-0.00506538		2307.6	0.01241349		2897.6	-0.00017623		3487.59	-0.01625456
537.8	0.30010938		1127.79	0.08559265		1717.81	-0.00365424		2307.8	0.01278739		2897.8	0.00019376		3487.79	-0.01624995
538	0.29898753		1127.99	0.08535336		1718.01	-0.00253293		2308	0.01201885		2898	0.00082156		3487.99	-0.01672772
538.2	0.29926606		1128.19	0.0852565		1718.21	-0.00194323		2308.2	0.0118581		2898.2	0.00049922		3488.19	-0.01732816
538.4	0.29888192		1128.39	0.0853108		1718.41	-0.00134779		2308.4	0.01128602		2898.4	0.00022348		3488.39	-0.01784054
538.6	0.29877251		1128.59	0.08415941		1718.61	-0.00183516		2308.6	0.01170636		2898.6	-0.00112293		3488.59	-0.01862612
538.8	0.2980304		1128.79	0.0836055		1718.81	-0.0019368		2308.8	0.01095538		2898.8	-0.00275815		3488.79	-0.01778693
539	0.29828218		1128.99	0.08369351		1719.01	-0.00224979		2309	0.01152351		2899	-0.00231092		3488.99	-0.01714656
539.2	0.29880985		1129.19	0.08325971		1719.21	-0.00341654		2309.2	0.01173211		2899.2	-0.00219023		3489.19	-0.01663959
539.4	0.29966513		1129.39	0.08379608		1719.41	-0.00376636		2309.4	0.01090893		2899.4	-0.00222847		3489.39	-0.01604959
539.6	0.30130698		1129.59	0.08510069		1719.61	-0.0046942		2309.6	0.01038727		2899.6	-0.00208922		3489.59	-0.01618551
539.8	0.30220651		1129.79	0.08516761		1719.81	-0.00463941		2309.8	0.01116962		2899.8	-0.00233246		3489.79	-0.01611375
540	0.3033252		1129.99	0.08438437		1720.01	-0.00598619		2310	0.01125392		2900	-0.00290748		3489.99	-0.01664317
540.2	0.30401861		1130.19	0.08420005		1720.21	-0.00730436		2310.2	0.01190147		2900.2	-0.00283748		3490.19	-0.01684068
540.4	0.30463198		1130.39	0.08407833		1720.41	-0.00810193		2310.4	0.01173592		2900.4	-0.00297931		3490.39	-0.01673968
540.6	0.30567778		1130.59	0.08376823		1720.61	-0.00826978		2310.6	0.01199294		2900.6	-0.00242777		3490.59	-0.01763063
540.8	0.30505235		1130.79	0.08434216		1720.81	-0.00918119		2310.8	0.01202165		2900.8	-0.00220793		3490.79	-0.01667772
541	0.30642869		1130.99	0.0842673		1721.01	-0.00858375		2311	0.01231095		2901	-0.00236915		3490.99	-0.01540145
541.2	0.3047475		1131.19	0.08395091		1721.21	-0.00779879		2311.2	0.01178461		2901.2	-0.0014444		3491.19	-0.01608804
541.4	0.3038727		1131.39	0.08375639		1721.41	-0.00686418		2311.4	0.01170127		2901.4	-0.00119619		3491.39	-0.01631059
541.6	0.30266528		1131.59	0.08262081		1721.61	-0.00611787		2311.6	0.01118849		2901.6	-0.00144092		3491.59	-0.01684197
541.8	0.30165367		1131.79	0.08189034		1721.81	-0.00437292		2311.8	0.01098414		2901.8	-0.0015297		3491.79	-0.017195
542	0.30071731		1131.99	0.08213859		1722.01	-0.00368787		2312	0.01063268		2902	-0.00166682		3491.99	-0.0180737
542.2	0.30060437		1132.19	0.08220302		1722.21	-0.0036821		2312.2	0.01022693		2902.2	-0.00298626		3492.19	-0.01804561
542.4	0.30016392		1132.39	0.08150736		1722.41	-0.00307315		2312.4	0.01089977		2902.4	-0.00428589		3492.39	-0.01778381
542.6	0.29971841		1132.59	0.08107346		1722.61	-0.00323765		2312.6	0.01142775		2902.6	-0.00572116		3492.59	-0.01684047
542.8	0.29888596		1132.79	0.08021055		1722.81	-0.00307388		2312.8	0.01137295		2902.8	-0.00597155		3492.79	-0.01669758
543	0.29909476		1132.99	0.08073133		1723.01	-0.00265104		2313	0.01144392		2903	-0.0053996		3492.99	-0.01748585
543.2	0.29987773		1133.19	0.08023208		1723.21	-0.00239172		2313.2	0.01146661		2903.2	-0.00505852		3493.19	-0.01657866
543.4	0.30120633		1133.39	0.08069426		1723.41	-0.00237567		2313.4	0.0101778		2903.4	-0.00547423		3493.39	-0.01568362
543.6	0.30218124		1133.59	0.08111052		1723.61	-0.00308819		2313.6	0.00899429		2903.6	-0.00564333		3493.59	-0.01614775
543.8	0.30265842		1133.79	0.08091431		1723.81	-0.00375676		2313.8	0.00938841		2903.8	-0.00571842		3493.79	-0.01577654
544	0.30328431		1133.99	0.08109566		1724.01	-0.00479506		2314	0.00915815		2904	-0.00524586		3493.99	-0.01617285
544.2	0.30385935		1134.19	0.08143322		1724.21	-0.0059155		2314.2	0.00970932		2904.2	-0.0045278		3494.19	-0.01558153
544.4	0.30390224		1134.39	0.08165599		1724.41	-0.00581164		2314.4	0.00950815		2904.4	-0.0038757		3494.39	-0.0152229
544.6	0.30388269		1134.59	0.08139759		1724.61	-0.00585929		2314.6	0.0091064		2904.6	-0.0036465		3494.59	-0.01445911
544.8	0.30328932		1134.79	0.08178628		1724.81	-0.00684181		2314.8	0.00829801		2904.8	-0.00282846		3494.79	-0.01297523
545	0.30301965		1134.99	0.08148565		1725.01	-0.00591944		2315	0.00839139		2905	-0.00269337		3494.99	-0.01250465
545.2	0.30090238		1135.19	0.08099188		1725.21	-0.00599675		2315.2	0.0090578		2905.2	-0.00315007		3495.19	-0.0127321
545.4	0.29965081		1135.39	0.08109142		1725.41	-0.00539772		2315.4	0.01004879		2905.4	-0.00360783		3495.39	-0.01223764
545.6	0.29822004		1135.59	0.08099411		1725.61	-0.00528525		2315.6	0.0105043		2905.6	-0.00431264		3495.59	-0.01255802
545.8	0.29759005		1135.79	0.08170599		1725.81	-0.00462324		2315.8	0.00985443		2905.8	-0.00431701		3495.79	-0.01206902
546	0.2977986		1135.99	0.08230676		1726.01	-0.00504533		2316	0.01098256		2906	-0.00487974		3495.99	-0.01184229
546.2	0.29741648		1136.19	0.08213085		1726.21	-0.00475293		2316.2	0.01144918		2906.2	-0.00644066		3496.19	-0.01067157
546.4	0.29718778		1136.39	0.08152238		1726.41	-0.00406609		2316.4	0.01249512		2906.4	-0.00704971		3496.39	-0.01050482
546.6	0.29713015		1136.59	0.08127905		1726.61	-0.00397989		2316.6	0.01272506		2906.6	-0.00670242		3496.59	-0.01080272
546.8	0.29800147		1136.79	0.08110513		1726.81	-0.00434356		2316.8	0.01278927		2906.8	-0.00609026		3496.79	-0.01186573
547	0.29854179		1136.99	0.08115968		1727.01	-0.00425903		2317	0.01272897		2907	-0.00563667		3496.99	-0.01199604
547.2	0.29945028		1137.19	0.08069688		1727.21	-0.00423234		2317.2	0.01173389		2907.2	-0.00545652		3497.19	-0.0114799
547.4	0.30035109		1137.39	0.08081591		1727.41	-0.00424672		2317.4	0.01068306		2907.4	-0.00570611		3497.39	-0.01159283
547.6	0.30125793		1137.59	0.08087437		1727.61	-0.00464051		2317.6	0.00938128		2907.6	-0.00434627		3497.59	-0.01214293
547.8	0.30171726		1137.79	0.08067605		1727.81	-0.00449367		2317.8	0.00923339		2907.8	-0.00351736		3497.79	-0.01333698
548	0.30264156		1137.99	0.08107384		1728.01	-0.00455434		2318	0.00910649		2908	-0.0031347		3497.99	-0.01479826
548.2	0.3032621		1138.19	0.08072597		1728.21	-0.00476593		2318.2	0.00893393		2908.2	-0.00253171		3498.19	-0.01566296
548.4	0.30336973		1138.39	0.08027583		1728.41	-0.00472199		2318.4	0.00920223		2908.4	-0.00118077		3498.39	-0.01632641
548.6	0.30383566		1138.59	0.0801269		1728.61	-0.00469829		2318.6	0.00857709		2908.6	-0.00094001		3498.59	-0.01674237
548.8	0.30397995		1138.79	0.08118344		1728.81	-0.00461377		2318.8	0.00799746		2908.8	-0.00051546		3498.79	-0.0173323
549	0.30366217		1138.99	0.08140301		1729.01	-0.00459878		2319	0.00830221		2909	-0.00174873		3498.99	-0.01828005
549.2	0.30352181		1139.19	0.08210584		1729.21	-0.00424603		2319.2	0.00954617		2909.2	-0.00163208		3499.19	-0.01868484
549.4	0.30268454		1139.39	0.08267901		1729.41	-0.00453992		2319.4	0.00988668		2909.4	-0.00158673		3499.39	-0.01855002
549.6	0.30222378		1139.59	0.08250852		1729.61	-0.00504087		2319.6	0.00984697		2909.6	-0.00195589		3499.59	-0.01896122
549.8	0.30165546		1139.79	0.08312373		1729.81	-0.00477854		2319.8	0.01028137		2909.8	-0.00179945		3499.79	-0.01872649
550	0.301549		1139.99	0.08372626		1730.01	-0.00424576		2320	0.01084255		2910	-0.00204064		3499.99	-0.01900871
550.2	0.30036371		1140.19	0.08365633		1730.21	-0.00450415		2320.2	0.01146586		2910.2	-0.00321023		3500.19	-0.01853015
550.4	0.30005092		1140.39	0.0833293		1730.41	-0.00450474		2320.4	0.01168806		2910.4	-0.00260907		3500.39	-0.01961739
550.6	0.29971817		1140.59	0.08336126		1730.61	-0.00446368		2320.6	0.01229151		2910.6	-0.00226838		3500.59	-0.01982429
550.8	0.29975846		1140.79	0.08405066		1730.81	-0.00494935		2320.8	0.01282497		2910.8	-0.00249998		3500.79	-0.01911583
551	0.29810529		1140.99	0.08400423		1731.01	-0.00506286		2321	0.01239154		2911	-0.00220297		3500.99	-0.01797716
551.2	0.297587		1141.19	0.08404515		1731.21	-0.00462313		2321.2	0.01172763		2911.2	-0.0014998		3501.19	-0.01730602
551.4	0.29773488		1141.39	0.08331841		1731.41	-0.00437989		2321.4	0.01213316		2911.4	-0.00165056		3501.39	-0.01787113
551.6	0.29754251		1141.59	0.08319063		1731.61	-0.004943		2321.6	0.01176008		2911.6	-0.00118282		3501.59	-0.01849493
551.8	0.29728828		1141.79	0.08363415		1731.81	-0.00419333		2321.8	0.01117859		2911.8	-0.00162368		3501.79	-0.01950337
552	0.29772844		1141.99	0.08398485		1732.01	-0.00339874		2322	0.01160574		2912	-0.00177319		3501.99	-0.01899809
552.2	0.29734858		1142.19	0.08320322		1732.21	-0.00314651		2322.2	0.01148873		2912.2	-0.00107144		3502.19	-0.01887807
552.4	0.29834645		1142.39	0.08300006		1732.41	-0.00342806		2322.4	0.0113602		2912.4	-0.0006676		3502.39	-0.01817108
552.6	0.29886867		1142.59	0.08274899		1732.61	-0.00340473		2322.6	0.01038932		2912.6	-0.00212725		3502.59	-0.0186381
552.8	0.29889577		1142.79	0.083013		1732.81	-0.00328952		2322.8	0.00898727		2912.8	-0.00256934		3502.79	-0.01774324
553	0.29923702		1142.99	0.08174669		1733.01	-0.00359531		2323	0.00881497		2913	-0.0035648		3502.99	-0.01746978
553.2	0.29947108		1143.19	0.08129822		1733.21	-0.0031199		2323.2	0.00822137		2913.2	-0.00410393		3503.19	-0.01771607
553.4	0.29955145		1143.39	0.08073795		1733.41	-0.00372086		2323.4	0.00712168		2913.4	-0.00547743		3503.39	-0.01755224
553.6	0.29890831		1143.59	0.08050798		1733.61	-0.00445308		2323.6	0.00623447		2913.6	-0.00559681		3503.59	-0.01794953
553.8	0.29825517		1143.79	0.08068813		1733.81	-0.00483606		2323.8	0.0063873		2913.8	-0.00587162		3503.79	-0.01809995
554	0.29841594		1143.99	0.08156293		1734.01	-0.00523428		2324	0.0059409		2914	-0.00642512		3503.99	-0.0188046
554.2	0.29810531		1144.19	0.08095951		1734.21	-0.00552287		2324.2	0.00705454		2914.2	-0.00693597		3504.19	-0.01841746
554.4	0.29880879		1144.39	0.08124103		1734.41	-0.00592852		2324.4	0.00682313		2914.4	-0.00628761		3504.39	-0.01873466
554.6	0.29886987		1144.59	0.08213053		1734.61	-0.00601383		2324.6	0.0069014		2914.6	-0.00585041		3504.59	-0.01923973
554.8	0.29862613		1144.79	0.08246754		1734.81	-0.0063484		2324.8	0.00773894		2914.8	-0.00501557		3504.79	-0.01816911
555	0.29874312		1144.99	0.08206433		1735.01	-0.00668406		2325	0.00780664		2915	-0.00414184		3504.99	-0.01766964
555.2	0.29871881		1145.19	0.08318465		1735.21	-0.00583281		2325.2	0.00844797		2915.2	-0.00407191		3505.19	-0.01776814
555.4	0.29915227		1145.39	0.08362528		1735.41	-0.00573572		2325.4	0.00986989		2915.4	-0.00371785		3505.39	-0.01861392
555.6	0.29894033		1145.59	0.08456345		1735.61	-0.00584635		2325.6	0.00977345		2915.6	-0.00287013		3505.59	-0.01843795
555.8	0.29903893		1145.79	0.08484606		1735.81	-0.00397695		2325.8	0.00968801		2915.8	-0.00187899		3505.79	-0.01769834
556	0.29938489		1145.99	0.08482396		1736.01	-0.00374408		2326	0.01051492		2916	-0.00151514		3505.99	-0.01771226
556.2	0.29938021		1146.19	0.08436599		1736.21	-0.00363414		2326.2	0.01034931		2916.2	-0.00118277		3506.19	-0.01819225
556.4	0.29996519		1146.39	0.08348493		1736.41	-0.00314131		2326.4	0.00980999		2916.4	-0.00129681		3506.39	-0.01760593
556.6	0.29957027		1146.59	0.08299651		1736.61	-0.00278261		2326.6	0.00958545		2916.6	-0.00195535		3506.59	-0.0182623
556.8	0.29888477		1146.79	0.08235192		1736.81	-0.00267157		2326.8	0.00800109		2916.8	-0.00199959		3506.79	-0.01809184
557	0.29918455		1146.99	0.08130472		1737.01	-0.00324676		2327	0.00761842		2917	-0.0035458		3506.99	-0.0191924
557.2	0.2982		1147.19	0.08098543		1737.21	-0.00351391		2327.2	0.00684334		2917.2	-0.00496186		3507.19	-0.02021466
557.4	0.2978561		1147.39	0.08050181		1737.41	-0.00462585		2327.4	0.00614939		2917.4	-0.00598281		3507.39	-0.01985749
557.6	0.29744615		1147.59	0.08070146		1737.61	-0.00596213		2327.6	0.00609099		2917.6	-0.00595826		3507.59	-0.02012326
557.8	0.29734961		1147.79	0.08112863		1737.81	-0.0060891		2327.8	0.00676822		2917.8	-0.00699755		3507.79	-0.02026986
558	0.29755779		1147.99	0.08156902		1738.01	-0.0067016		2328	0.0070261		2918	-0.00764274		3507.99	-0.0209064
558.2	0.29761582		1148.19	0.08142084		1738.21	-0.00722501		2328.2	0.0073348		2918.2	-0.00762436		3508.19	-0.02071354
558.4	0.2984192		1148.39	0.08163647		1738.41	-0.00724135		2328.4	0.00722721		2918.4	-0.00737789		3508.39	-0.02104754
558.6	0.29835869		1148.59	0.08202749		1738.61	-0.00754142		2328.6	0.00756406		2918.6	-0.00702275		3508.59	-0.02139355
558.8	0.29911712		1148.79	0.08187484		1738.81	-0.00706279		2328.8	0.00918723		2918.8	-0.00627698		3508.79	-0.02038824
559	0.29973332		1148.99	0.08163622		1739.01	-0.00717507		2329	0.01000262		2919	-0.00654793		3508.99	-0.01950423
559.2	0.29955341		1149.19	0.08248656		1739.21	-0.00692172		2329.2	0.01030995		2919.2	-0.00648294		3509.19	-0.01946681
559.4	0.30017593		1149.39	0.08177362		1739.41	-0.00674648		2329.4	0.01057072		2919.4	-0.00533829		3509.39	-0.0191371
559.6	0.30076133		1149.59	0.08197867		1739.61	-0.00666138		2329.6	0.01015275		2919.6	-0.00499146		3509.59	-0.01826268
559.8	0.30086951		1149.79	0.08137917		1739.81	-0.00576415		2329.8	0.01022723		2919.8	-0.00461477		3509.79	-0.01840402
560	0.30142811		1149.99	0.08117258		1740.01	-0.00514959		2330	0.01011506		2920	-0.00540114		3509.99	-0.01939202
560.2	0.30136202		1150.19	0.08059923		1740.21	-0.00395187		2330.2	0.00967324		2920.2	-0.00597791		3510.19	-0.0190978
560.4	0.3015095		1150.39	0.07947468		1740.41	-0.00355787		2330.4	0.00988951		2920.4	-0.00578223		3510.39	-0.01820392
560.6	0.30106333		1150.59	0.07959532		1740.61	-0.00408656		2330.6	0.00956268		2920.6	-0.00569033		3510.59	-0.01804827
560.8	0.30049533		1150.79	0.07859177		1740.81	-0.0052001		2330.8	0.00896645		2920.8	-0.00574232		3510.79	-0.01765672
561	0.30062713		1150.99	0.07849558		1741.01	-0.00556086		2331	0.00830658		2921	-0.00707518		3510.99	-0.01721836
561.2	0.29991042		1151.19	0.07821065		1741.21	-0.00622603		2331.2	0.00754472		2921.2	-0.00771531		3511.19	-0.0169089
561.4	0.30009433		1151.39	0.0793486		1741.41	-0.00706616		2331.4	0.00663931		2921.4	-0.00768652		3511.39	-0.0163869
561.6	0.29999488		1151.59	0.07964901		1741.61	-0.00748244		2331.6	0.00631647		2921.6	-0.00792021		3511.59	-0.01612185
561.8	0.29941221		1151.79	0.08003403		1741.81	-0.00843584		2331.8	0.0068303		2921.8	-0.00826961		3511.79	-0.01698775
562	0.29922194		1151.99	0.08025796		1742.01	-0.00903973		2332	0.00621027		2922	-0.00894481		3511.99	-0.01809152
562.2	0.29860616		1152.19	0.08054051		1742.21	-0.00882267		2332.2	0.00605938		2922.2	-0.00945633		3512.19	-0.01915628
562.4	0.2990132		1152.39	0.08053883		1742.41	-0.00889055		2332.4	0.00613247		2922.4	-0.00899404		3512.39	-0.01932011
562.6	0.29905792		1152.59	0.08128808		1742.61	-0.00873507		2332.6	0.00691219		2922.6	-0.00815901		3512.59	-0.01879184
562.8	0.29959262		1152.79	0.08143258		1742.81	-0.00772564		2332.8	0.00723419		2922.8	-0.00676192		3512.79	-0.01854848
563	0.29993418		1152.99	0.08069054		1743.01	-0.00758676		2333	0.00672718		2923	-0.00662255		3512.99	-0.01845478
563.2	0.30005519		1153.19	0.08048061		1743.21	-0.00726933		2333.2	0.00598274		2923.2	-0.0064425		3513.19	-0.01918969
563.4	0.30009893		1153.39	0.08114839		1743.41	-0.00603086		2333.4	0.00564057		2923.4	-0.00506671		3513.39	-0.01963551
563.6	0.30101559		1153.59	0.08107199		1743.61	-0.005524		2333.6	0.0059247		2923.6	-0.00442621		3513.59	-0.02044835
563.8	0.30111151		1153.79	0.07956871		1743.81	-0.00463524		2333.8	0.00652503		2923.8	-0.00491931		3513.79	-0.02086528
564	0.30193495		1153.99	0.07956167		1744.01	-0.00408753		2334	0.00639287		2924	-0.00528515		3513.99	-0.02087502
564.2	0.30183538		1154.19	0.07965473		1744.21	-0.00380568		2334.2	0.00706832		2924.2	-0.00526953		3514.19	-0.02097739
564.4	0.30244992		1154.39	0.07950011		1744.41	-0.00471535		2334.4	0.00837628		2924.4	-0.00400107		3514.39	-0.02005629
564.6	0.30183504		1154.59	0.07981444		1744.61	-0.00516396		2334.6	0.0079042		2924.6	-0.00348298		3514.59	-0.01998679
564.8	0.30172306		1154.79	0.07922233		1744.81	-0.00490156		2334.8	0.00799195		2924.8	-0.00384443		3514.79	-0.01966814
565	0.30168173		1154.99	0.07968161		1745.01	-0.00506235		2335	0.0075874		2925	-0.00434112		3514.99	-0.01936144
565.2	0.30113467		1155.19	0.07968981		1745.21	-0.0057474		2335.2	0.00773217		2925.2	-0.00463363		3515.19	-0.01940783
565.4	0.30097665		1155.39	0.08058769		1745.41	-0.00633559		2335.4	0.00758915		2925.4	-0.00441724		3515.39	-0.01937033
565.6	0.30040062		1155.59	0.08022744		1745.61	-0.00642622		2335.6	0.00814114		2925.6	-0.00603083		3515.59	-0.02013292
565.8	0.30085059		1155.79	0.08072061		1745.81	-0.00727837		2335.8	0.00850133		2925.8	-0.00629007		3515.79	-0.02091883
566	0.3004773		1155.99	0.08095665		1746.01	-0.00705103		2336	0.00820814		2926	-0.00732648		3515.99	-0.0212012
566.2	0.30045196		1156.19	0.08097773		1746.21	-0.00665353		2336.2	0.00819108		2926.2	-0.00746401		3516.19	-0.0216096
566.4	0.30060707		1156.39	0.08107907		1746.41	-0.0072492		2336.4	0.00828664		2926.4	-0.00668673		3516.39	-0.02071498
566.6	0.30080075		1156.59	0.08162785		1746.61	-0.00641721		2336.6	0.00808591		2926.6	-0.0053677		3516.59	-0.02045578
566.8	0.30124562		1156.79	0.082072		1746.81	-0.00568131		2336.8	0.00719437		2926.8	-0.00437123		3516.79	-0.02094155
567	0.30120716		1156.99	0.08136707		1747.01	-0.00523387		2337	0.00714683		2927	-0.00480789		3516.99	-0.02086186
567.2	0.30044172		1157.19	0.08142578		1747.21	-0.00554359		2337.2	0.00729424		2927.2	-0.00463014		3517.19	-0.02105879
567.4	0.30013083		1157.39	0.08219418		1747.41	-0.00492887		2337.4	0.00747331		2927.4	-0.00403954		3517.39	-0.02120957
567.6	0.30030375		1157.59	0.08093911		1747.61	-0.00444417		2337.6	0.00808352		2927.6	-0.0037447		3517.59	-0.02131389
567.8	0.29971109		1157.79	0.07978007		1747.81	-0.00520416		2337.8	0.0081894		2927.8	-0.00492451		3517.79	-0.02058525
568	0.29970224		1157.99	0.07967895		1748.01	-0.00531565		2338	0.00841529		2928	-0.00470765		3517.99	-0.01980934
568.2	0.29937176		1158.19	0.0791305		1748.21	-0.00550456		2338.2	0.00902123		2928.2	-0.005158		3518.19	-0.01958371
568.4	0.29958868		1158.39	0.07876793		1748.41	-0.00636224		2338.4	0.00907385		2928.4	-0.00491552		3518.39	-0.0187629
568.6	0.29908927		1158.59	0.07862062		1748.61	-0.00573182		2338.6	0.00910916		2928.6	-0.00515627		3518.59	-0.01839956
568.8	0.29877134		1158.79	0.07841329		1748.81	-0.00557634		2338.8	0.00930755		2928.8	-0.00541478		3518.79	-0.01730524
569	0.29898976		1158.99	0.07848122		1749.01	-0.00580312		2339	0.00910708		2929	-0.00532805		3518.99	-0.01707014
569.2	0.2990902		1159.19	0.07827385		1749.21	-0.00560595		2339.2	0.00907979		2929.2	-0.00568637		3519.19	-0.0170763
569.4	0.29959602		1159.39	0.07869758		1749.41	-0.00525575		2339.4	0.00828901		2929.4	-0.00563401		3519.39	-0.01696617
569.6	0.29912908		1159.59	0.07905334		1749.61	-0.00441548		2339.6	0.00752053		2929.6	-0.00669874		3519.59	-0.01667858
569.8	0.29941679		1159.79	0.07899573		1749.81	-0.00445994		2339.8	0.00689682		2929.8	-0.00629568		3519.79	-0.0166978
570	0.29860684		1159.99	0.07912748		1750.01	-0.0042208		2340	0.00625629		2930	-0.00643463		3519.99	-0.01682408
570.2	0.29850424		1160.19	0.07885835		1750.21	-0.00391799		2340.2	0.00594591		2930.2	-0.0053596		3520.19	-0.01729498
570.4	0.29831255		1160.39	0.07974215		1750.41	-0.00380879		2340.4	0.0054838		2930.4	-0.00452878		3520.39	-0.01725568
570.6	0.29887895		1160.59	0.07997785		1750.61	-0.00343992		2340.6	0.00506422		2930.6	-0.00404979		3520.59	-0.01758465
570.8	0.29882498		1160.79	0.08039488		1750.81	-0.00223785		2340.8	0.00535884		2930.8	-0.00393378		3520.79	-0.01817259
571	0.29811535		1160.99	0.08025316		1751.01	-0.00277507		2341	0.00546503		2931	-0.00454075		3520.99	-0.01796802
571.2	0.29743314		1161.19	0.08097751		1751.21	-0.00299925		2341.2	0.00545691		2931.2	-0.00491028		3521.19	-0.01888508
571.4	0.29730591		1161.39	0.08112362		1751.41	-0.00233814		2341.4	0.00555839		2931.4	-0.00486682		3521.39	-0.01868284
571.6	0.29678925		1161.59	0.08005008		1751.61	-0.00234745		2341.6	0.00581301		2931.6	-0.00468114		3521.59	-0.01916905
571.8	0.29637503		1161.79	0.07958632		1751.81	-0.00339075		2341.8	0.00556711		2931.8	-0.00578728		3521.79	-0.01876454
572	0.29698936		1161.99	0.07958662		1752.01	-0.00328574		2342	0.00643827		2932	-0.00567726		3521.99	-0.01792267
572.2	0.297465		1162.19	0.07957129		1752.21	-0.00360309		2342.2	0.0068391		2932.2	-0.00617344		3522.19	-0.01860854
572.4	0.29748857		1162.39	0.07941276		1752.41	-0.00450023		2342.4	0.00683788		2932.4	-0.0066353		3522.39	-0.01915095
572.6	0.29685393		1162.59	0.0793994		1752.61	-0.00471169		2342.6	0.00747338		2932.6	-0.00636017		3522.59	-0.01885677
572.8	0.29676735		1162.79	0.07895872		1752.81	-0.00492171		2342.8	0.00697233		2932.8	-0.00673106		3522.79	-0.01929942
573	0.29755732		1162.99	0.07934073		1753.01	-0.00453273		2343	0.00635183		2933	-0.00756569		3522.99	-0.02029937
573.2	0.29756464		1163.19	0.07948571		1753.21	-0.0043417		2343.2	0.00628064		2933.2	-0.00739792		3523.19	-0.02076951
573.4	0.29838941		1163.39	0.08028347		1753.41	-0.00444668		2343.4	0.00520585		2933.4	-0.00694836		3523.39	-0.0208735
573.6	0.29796127		1163.59	0.08029861		1753.61	-0.00480279		2343.6	0.00507293		2933.6	-0.00627572		3523.59	-0.02068611
573.8	0.29902696		1163.79	0.08056079		1753.81	-0.00479579		2343.8	0.00581168		2933.8	-0.00625922		3523.79	-0.02093084
574	0.29963283		1163.99	0.08076785		1754.01	-0.00490598		2344	0.00578463		2934	-0.00637963		3523.99	-0.02087102
574.2	0.29952181		1164.19	0.08124799		1754.21	-0.00492594		2344.2	0.00582601		2934.2	-0.00629342		3524.19	-0.02170865
574.4	0.29956072		1164.39	0.08150081		1754.41	-0.00425278		2344.4	0.00559948		2934.4	-0.00672597		3524.39	-0.0215248
574.6	0.30033547		1164.59	0.08119615		1754.61	-0.00426662		2344.6	0.0066234		2934.6	-0.00665799		3524.59	-0.0214614
574.8	0.30050309		1164.79	0.081809		1754.81	-0.00393883		2344.8	0.00657278		2934.8	-0.00691024		3524.79	-0.02141745
575	0.30043906		1164.99	0.08225125		1755.01	-0.00477282		2345	0.00652095		2935	-0.00751303		3524.99	-0.01998373
575.2	0.30133858		1165.19	0.08237139		1755.21	-0.00508293		2345.2	0.00670655		2935.2	-0.0076862		3525.19	-0.01901584
575.4	0.30117123		1165.39	0.08139277		1755.41	-0.00586958		2345.4	0.00745137		2935.4	-0.00724906		3525.39	-0.01826898
575.6	0.30109616		1165.59	0.08138502		1755.61	-0.00594346		2345.6	0.00789135		2935.6	-0.00756843		3525.59	-0.01840833
575.8	0.30150323		1165.79	0.08067189		1755.81	-0.00591633		2345.8	0.00800572		2935.8	-0.00683534		3525.79	-0.01771835
576	0.30169058		1165.99	0.08106782		1756.01	-0.00603787		2346	0.00865856		2936	-0.00724337		3525.99	-0.01776006
576.2	0.30151203		1166.19	0.08069179		1756.21	-0.00657046		2346.2	0.00813012		2936.2	-0.00705395		3526.19	-0.01779591
576.4	0.3005693		1166.39	0.08015584		1756.41	-0.00705931		2346.4	0.00804269		2936.4	-0.0072351		3526.39	-0.01887955
576.6	0.29980125		1166.59	0.08011485		1756.61	-0.00624874		2346.6	0.0073114		2936.6	-0.0063637		3526.59	-0.01835708
576.8	0.29985895		1166.79	0.07959843		1756.81	-0.0062621		2346.8	0.00640485		2936.8	-0.00701136		3526.79	-0.01970306
577	0.29967989		1166.99	0.08059359		1757.01	-0.00669559		2347	0.00594057		2937	-0.00698631		3526.99	-0.01997316
577.2	0.29919165		1167.19	0.07978861		1757.21	-0.00718546		2347.2	0.00580292		2937.2	-0.00583053		3527.19	-0.0201637
577.4	0.29967193		1167.39	0.0796974		1757.41	-0.0071184		2347.4	0.00566911		2937.4	-0.00568209		3527.39	-0.01979777
577.6	0.29891592		1167.59	0.07964534		1757.61	-0.00727465		2347.6	0.00519922		2937.6	-0.00590567		3527.59	-0.02011524
577.8	0.29924639		1167.79	0.08056078		1757.81	-0.00675063		2347.8	0.00483016		2937.8	-0.00687622		3527.79	-0.02023231
578	0.2980828		1167.99	0.08014492		1758.01	-0.00640473		2348	0.00473412		2938	-0.00724004		3527.99	-0.02058387
578.2	0.29647313		1168.19	0.08115923		1758.21	-0.00594526		2348.2	0.00464749		2938.2	-0.00750289		3528.19	-0.02123947
578.4	0.29724913		1168.39	0.08060017		1758.41	-0.0062829		2348.4	0.00457819		2938.4	-0.00761088		3528.39	-0.02010004
578.6	0.29771202		1168.59	0.08001823		1758.61	-0.0063838		2348.6	0.00513095		2938.6	-0.0081698		3528.59	-0.02016545
578.8	0.29793064		1168.79	0.07939249		1758.81	-0.00652961		2348.8	0.00467172		2938.8	-0.00888809		3528.79	-0.0190568
579	0.29814754		1168.99	0.07958205		1759.01	-0.00654852		2349	0.00560728		2939	-0.00836564		3528.99	-0.01844798
579.2	0.29861293		1169.19	0.07913667		1759.21	-0.00661566		2349.2	0.0065351		2939.2	-0.00828636		3529.19	-0.01851096
579.4	0.29806586		1169.39	0.07839705		1759.41	-0.00745403		2349.4	0.00703389		2939.4	-0.0071694		3529.39	-0.01896002
579.6	0.29849172		1169.59	0.07861375		1759.61	-0.00733128		2349.6	0.00701208		2939.6	-0.00658984		3529.59	-0.01937044
579.8	0.29913576		1169.79	0.07759784		1759.81	-0.00748336		2349.8	0.00687096		2939.8	-0.0054597		3529.79	-0.01888581
580	0.29909039		1169.99	0.0782369		1760.01	-0.00817996		2350	0.00687302		2940	-0.00581366		3529.99	-0.01879617
580.2	0.29956217		1170.19	0.07796462		1760.21	-0.00779028		2350.2	0.00717174		2940.2	-0.00483134		3530.19	-0.01933477
580.4	0.29972587		1170.39	0.07715961		1760.41	-0.00690842		2350.4	0.0076912		2940.4	-0.00500684		3530.39	-0.02043877
580.6	0.29979424		1170.59	0.07703458		1760.61	-0.00733027		2350.6	0.00706089		2940.6	-0.00459172		3530.59	-0.01945113
580.8	0.29929034		1170.79	0.0765563		1760.81	-0.00839621		2350.8	0.00652362		2940.8	-0.00455967		3530.79	-0.02018977
581	0.29880564		1170.99	0.07695465		1761.01	-0.0088023		2351	0.00621793		2941	-0.00377825		3530.99	-0.01974397
581.2	0.29770028		1171.19	0.07725195		1761.21	-0.00853		2351.2	0.0056929		2941.2	-0.00365007		3531.19	-0.01958572
581.4	0.29726616		1171.39	0.07817011		1761.41	-0.00812665		2351.4	0.00518716		2941.4	-0.00392675		3531.39	-0.01912397
581.6	0.29648302		1171.59	0.07911904		1761.61	-0.00827234		2351.6	0.00427448		2941.6	-0.00474593		3531.59	-0.01910497
581.8	0.29561969		1171.79	0.07969026		1761.81	-0.00777735		2351.8	0.00477939		2941.8	-0.00497975		3531.79	-0.01855266
582	0.29451213		1171.99	0.07961612		1762.01	-0.00899449		2352	0.00411234		2942	-0.00559437		3531.99	-0.01822525
582.2	0.29366392		1172.19	0.08046359		1762.21	-0.00941278		2352.2	0.00429496		2942.2	-0.00569288		3532.19	-0.01840305
582.4	0.29409044		1172.39	0.08047731		1762.41	-0.00943387		2352.4	0.00418941		2942.4	-0.00598343		3532.39	-0.01757407
582.6	0.29400923		1172.59	0.08056265		1762.61	-0.00822967		2352.6	0.0045833		2942.6	-0.00598928		3532.59	-0.01893593
582.8	0.29429672		1172.79	0.0808072		1762.81	-0.00899886		2352.8	0.00437232		2942.8	-0.00543057		3532.79	-0.01896553
583	0.29418767		1172.99	0.08068733		1763.01	-0.00863318		2353	0.00495788		2943	-0.005151		3532.99	-0.02022652
583.2	0.29435001		1173.19	0.08035914		1763.21	-0.00847085		2353.2	0.00573124		2943.2	-0.00556445		3533.19	-0.0204791
583.4	0.29469534		1173.39	0.07936033		1763.41	-0.00936179		2353.4	0.00548902		2943.4	-0.00593795		3533.39	-0.02021198
583.6	0.29577194		1173.59	0.07932268		1763.61	-0.00904379		2353.6	0.0056138		2943.6	-0.00657232		3533.59	-0.0207497
583.8	0.29622491		1173.79	0.07829874		1763.81	-0.00806751		2353.8	0.00650439		2943.8	-0.00662322		3533.79	-0.02000904
584	0.29592613		1173.99	0.0783907		1764.01	-0.00806498		2354	0.0077829		2944	-0.00691823		3533.99	-0.02110832
584.2	0.29653858		1174.19	0.07728211		1764.21	-0.00745263		2354.2	0.0082104		2944.2	-0.0069848		3534.19	-0.02174212
584.4	0.29734036		1174.39	0.07602035		1764.41	-0.00659073		2354.4	0.00866989		2944.4	-0.0066792		3534.39	-0.02158616
584.6	0.29748407		1174.59	0.07669283		1764.61	-0.00646787		2354.6	0.00922847		2944.6	-0.0060571		3534.59	-0.02121364
584.8	0.29811315		1174.79	0.07670272		1764.81	-0.00578485		2354.8	0.00879026		2944.8	-0.00571046		3534.79	-0.02158841
585	0.2988164		1174.99	0.07830104		1765.01	-0.00525441		2355	0.00931148		2945	-0.00503166		3534.99	-0.02071462
585.2	0.29786977		1175.19	0.078764		1765.21	-0.00436073		2355.2	0.00972377		2945.2	-0.00519655		3535.19	-0.02032436
585.4	0.29798664		1175.39	0.07936174		1765.41	-0.00435889		2355.4	0.01034352		2945.4	-0.00470768		3535.39	-0.02026648
585.6	0.29824172		1175.59	0.07938064		1765.61	-0.004207		2355.6	0.01064217		2945.6	-0.00463811		3535.59	-0.01984983
585.8	0.29761805		1175.79	0.07929726		1765.81	-0.00436628		2355.8	0.01043683		2945.8	-0.00416299		3535.79	-0.01935602
586	0.29748731		1175.99	0.07924035		1766.01	-0.00574677		2356	0.00972967		2946	-0.00402944		3535.99	-0.01931628
586.2	0.2967082		1176.19	0.079957		1766.21	-0.00553901		2356.2	0.00981064		2946.2	-0.00330879		3536.19	-0.02019324
586.4	0.29754595		1176.39	0.08077125		1766.41	-0.00533113		2356.4	0.00905535		2946.4	-0.0040938		3536.39	-0.02072485
586.6	0.29766656		1176.59	0.08018836		1766.61	-0.00568691		2356.6	0.00886002		2946.6	-0.00401484		3536.59	-0.02099685
586.8	0.29675241		1176.79	0.07958608		1766.81	-0.00725421		2356.8	0.00794981		2946.8	-0.00496402		3536.79	-0.02037408
587	0.29657271		1176.99	0.07909838		1767.01	-0.00676781		2357	0.00824197		2947	-0.0059096		3536.99	-0.02077576
587.2	0.29694783		1177.19	0.07939169		1767.21	-0.0069729		2357.2	0.00784499		2947.2	-0.00696632		3537.19	-0.02017387
587.4	0.29656856		1177.39	0.07875599		1767.41	-0.00785745		2357.4	0.00558994		2947.4	-0.00739601		3537.39	-0.01972029
587.6	0.29650906		1177.59	0.07866076		1767.61	-0.00844777		2357.6	0.00413675		2947.6	-0.00706687		3537.59	-0.01980455
587.8	0.29658817		1177.79	0.07839453		1767.81	-0.00823928		2357.8	0.00388277		2947.8	-0.00728458		3537.79	-0.0193412
588	0.29637959		1177.99	0.0777381		1768.01	-0.00884171		2358	0.00334262		2948	-0.00760561		3537.99	-0.02001667
588.2	0.29677298		1178.19	0.07630667		1768.21	-0.0084893		2358.2	0.00201492		2948.2	-0.00780755		3538.19	-0.0191612
588.4	0.29785938		1178.39	0.07697495		1768.41	-0.00781633		2358.4	0.00235423		2948.4	-0.00796212		3538.39	-0.01910619
588.6	0.29758889		1178.59	0.07769231		1768.61	-0.00773867		2358.6	0.00197435		2948.6	-0.00817155		3538.59	-0.01871972
588.8	0.29797139		1178.79	0.07789244		1768.81	-0.00716318		2358.8	0.00137443		2948.8	-0.00878646		3538.79	-0.01865663
589	0.29758497		1178.99	0.07836995		1769.01	-0.00698539		2359	0.00202879		2949	-0.00929536		3538.99	-0.01868921
589.2	0.29704931		1179.19	0.07746247		1769.21	-0.00594808		2359.2	0.00266215		2949.2	-0.00910625		3539.19	-0.01916243
589.4	0.29757924		1179.39	0.07827497		1769.41	-0.00633874		2359.4	0.00258869		2949.4	-0.00852578		3539.39	-0.01940355
589.6	0.29818179		1179.59	0.07766273		1769.61	-0.00609523		2359.6	0.00176716		2949.6	-0.00860127		3539.59	-0.0186593
589.8	0.29729696		1179.79	0.07767854		1769.81	-0.00604593		2359.8	0.00245598		2949.8	-0.00884275		3539.79	-0.01878479
590	0.29713963		1179.99	0.0782087		1770.01	-0.00641046		2360	0.00326374		2950	-0.00837845		3539.99	-0.01943486
590.2	0.29693263		1180.19	0.07847577		1770.21	-0.00652399		2360.2	0.00309025		2950.2	-0.00799513		3540.19	-0.02017552
590.4	0.29664277		1180.39	0.07869338		1770.41	-0.00660674		2360.4	0.00500138		2950.4	-0.00908258		3540.39	-0.02031394
590.6	0.29497391		1180.59	0.07820782		1770.61	-0.0076187		2360.6	0.00587805		2950.6	-0.0079857		3540.59	-0.02027068
590.8	0.29486174		1180.79	0.07880896		1770.81	-0.0082728		2360.8	0.00616065		2950.8	-0.00845082		3540.79	-0.02085909
591	0.29528006		1180.99	0.07950963		1771.01	-0.00822127		2361	0.00635001		2951	-0.00805342		3540.99	-0.0218225
591.2	0.29541554		1181.19	0.07951172		1771.21	-0.00837922		2361.2	0.00614882		2951.2	-0.00721073		3541.19	-0.02137436
591.4	0.29553932		1181.39	0.07950033		1771.41	-0.00904883		2361.4	0.00593616		2951.4	-0.00729355		3541.39	-0.02194488
591.6	0.29603389		1181.59	0.07974488		1771.61	-0.0090213		2361.6	0.0068735		2951.6	-0.00731427		3541.59	-0.02176948
591.8	0.29696334		1181.79	0.080197		1771.81	-0.00822905		2361.8	0.00737521		2951.8	-0.00748404		3541.79	-0.0210065
592	0.29670609		1181.99	0.08009016		1772.01	-0.00826346		2362	0.00762241		2952	-0.00711114		3541.99	-0.02073889
592.2	0.2968354		1182.19	0.07992623		1772.21	-0.00828626		2362.2	0.00734168		2952.2	-0.00775779		3542.19	-0.01999531
592.4	0.29730289		1182.39	0.08114854		1772.41	-0.0078975		2362.4	0.00744682		2952.4	-0.00782989		3542.39	-0.02019085
592.6	0.29719545		1182.59	0.0806548		1772.61	-0.00758999		2362.6	0.00696792		2952.6	-0.00691214		3542.59	-0.02039755
592.8	0.29830734		1182.79	0.08055346		1772.81	-0.00656797		2362.8	0.00680144		2952.8	-0.00745108		3542.79	-0.02004097
593	0.29863253		1182.99	0.07972328		1773.01	-0.00626378		2363	0.00680511		2953	-0.00711601		3542.99	-0.01926505
593.2	0.29944786		1183.19	0.07961253		1773.21	-0.00550999		2363.2	0.00604399		2953.2	-0.00566289		3543.19	-0.01834641
593.4	0.29954867		1183.39	0.07963686		1773.41	-0.00579262		2363.4	0.00506319		2953.4	-0.00521224		3543.39	-0.01820042
593.6	0.30028863		1183.59	0.07960223		1773.61	-0.00460446		2363.6	0.00586279		2953.6	-0.00567939		3543.59	-0.01665812
593.8	0.30005946		1183.79	0.07954352		1773.81	-0.00434842		2363.8	0.00658847		2953.8	-0.00617024		3543.79	-0.01629953
594	0.29965966		1183.99	0.07955465		1774.01	-0.00430386		2364	0.00670084		2954	-0.00615162		3543.99	-0.01568942
594.2	0.29916213		1184.19	0.0795087		1774.21	-0.00488912		2364.2	0.00723735		2954.2	-0.00649473		3544.19	-0.01566871
594.4	0.29785185		1184.39	0.07917662		1774.41	-0.00638661		2364.4	0.00846393		2954.4	-0.00703684		3544.39	-0.01537796
594.6	0.29722387		1184.59	0.07890466		1774.61	-0.00704052		2364.6	0.00772887		2954.6	-0.00627757		3544.59	-0.01507923
594.8	0.29733509		1184.79	0.07893182		1774.81	-0.00805587		2364.8	0.00724095		2954.8	-0.00721645		3544.79	-0.01588131
595	0.29682742		1184.99	0.0781992		1775.01	-0.00846709		2365	0.00634448		2955	-0.00740369		3544.99	-0.01668134
595.2	0.29627764		1185.19	0.07766152		1775.21	-0.0088687		2365.2	0.00659641		2955.2	-0.0077676		3545.19	-0.01768735
595.4	0.29498915		1185.39	0.07775576		1775.41	-0.00971614		2365.4	0.00657915		2955.4	-0.0086077		3545.39	-0.0191482
595.6	0.29447713		1185.59	0.07830587		1775.61	-0.00970717		2365.6	0.00634334		2955.6	-0.0089511		3545.59	-0.01898751
595.8	0.29443758		1185.79	0.07805782		1775.81	-0.01041903		2365.8	0.00581294		2955.8	-0.00961417		3545.79	-0.01956415
596	0.29367254		1185.99	0.07840686		1776.01	-0.01069657		2366	0.00599367		2956	-0.00932908		3545.99	-0.02119943
596.2	0.29350123		1186.19	0.07741966		1776.21	-0.01034755		2366.2	0.00550117		2956.2	-0.00943275		3546.19	-0.02240301
596.4	0.2937408		1186.39	0.07806748		1776.41	-0.01014339		2366.4	0.00543902		2956.4	-0.00841795		3546.39	-0.02276223
596.6	0.29467581		1186.59	0.07723122		1776.61	-0.01044693		2366.6	0.00504154		2956.6	-0.00800044		3546.59	-0.02280961
596.8	0.29457016		1186.79	0.07694412		1776.81	-0.00957471		2366.8	0.00479908		2956.8	-0.00871168		3546.79	-0.02247793
597	0.29459976		1186.99	0.07653429		1777.01	-0.00933437		2367	0.004793		2957	-0.00830806		3546.99	-0.02289896
597.2	0.29550164		1187.19	0.07722896		1777.21	-0.00791547		2367.2	0.0040674		2957.2	-0.00839907		3547.19	-0.02305719
597.4	0.29598553		1187.39	0.07716046		1777.41	-0.00701413		2367.4	0.00472512		2957.4	-0.00878638		3547.39	-0.02291222
597.6	0.29676518		1187.59	0.07755425		1777.61	-0.00556569		2367.6	0.00532537		2957.6	-0.00979983		3547.59	-0.02144968
597.8	0.29689581		1187.79	0.07759708		1777.81	-0.00575671		2367.8	0.00498588		2957.8	-0.01022845		3547.79	-0.02067755
598	0.29674171		1187.99	0.07853095		1778.01	-0.00580492		2368	0.00529234		2958	-0.00983893		3547.99	-0.02037783
598.2	0.29714636		1188.19	0.07886758		1778.21	-0.00598158		2368.2	0.00543876		2958.2	-0.00916682		3548.19	-0.02007182
598.4	0.29730318		1188.39	0.07789754		1778.41	-0.0061932		2368.4	0.00518134		2958.4	-0.00896173		3548.39	-0.01986975
598.6	0.29739322		1188.59	0.07725474		1778.61	-0.00586085		2368.6	0.00447345		2958.6	-0.00872801		3548.59	-0.01993263
598.8	0.2989347		1188.79	0.07728428		1778.81	-0.00719304		2368.8	0.00392454		2958.8	-0.00882303		3548.79	-0.02049518
599	0.29917759		1188.99	0.07718284		1779.01	-0.00731519		2369	0.00341782		2959	-0.00843009		3548.99	-0.02044751
599.2	0.29864937		1189.19	0.07813605		1779.21	-0.00748484		2369.2	0.00440242		2959.2	-0.0090193		3549.19	-0.02069738
599.4	0.29763257		1189.39	0.07841656		1779.41	-0.0076708		2369.4	0.00426683		2959.4	-0.00846594		3549.39	-0.02111356
599.6	0.29801336		1189.59	0.07807417		1779.61	-0.0082491		2369.6	0.00387413		2959.6	-0.00856109		3549.59	-0.02128593
599.8	0.29809426		1189.79	0.07741388		1779.81	-0.00884831		2369.8	0.00341456		2959.8	-0.00789419		3549.79	-0.02129167
600	0.29784551		1189.99	0.07728637		1780.01	-0.00836392		2370	0.00381578		2960	-0.00705233		3549.99	-0.02169851
600.2	0.29795235		1190.19	0.0773276		1780.21	-0.00798263		2370.2	0.00364757		2960.2	-0.00689531		3550.19	-0.02131147
600.4	0.29756438		1190.39	0.07829811		1780.41	-0.00801649		2370.4	0.00447104		2960.4	-0.00644198		3550.39	-0.02064843
600.6	0.2967499		1190.59	0.07792259		1780.61	-0.00774831		2370.6	0.00439469		2960.6	-0.00691366		3550.59	-0.01985095
600.8	0.29538891		1190.79	0.07841053		1780.81	-0.00740197		2370.8	0.00407385		2960.8	-0.00706489		3550.79	-0.02023174
601	0.2951477		1190.99	0.07824622		1781.01	-0.00635144		2371	0.00392559		2961	-0.00671418		3550.99	-0.01995352
601.2	0.29514731		1191.19	0.07887102		1781.21	-0.00600725		2371.2	0.0031982		2961.2	-0.00779045		3551.19	-0.01951937
601.4	0.29504262		1191.39	0.07864145		1781.41	-0.00546455		2371.4	0.00394958		2961.4	-0.0076066		3551.39	-0.01903332
601.6	0.29560201		1191.59	0.07895705		1781.61	-0.00533535		2371.6	0.0038558		2961.6	-0.00778276		3551.59	-0.01937005
601.8	0.29585574		1191.79	0.07951692		1781.81	-0.00564729		2371.8	0.00379578		2961.8	-0.00826446		3551.79	-0.01961127
602	0.29558457		1191.99	0.08018846		1782.01	-0.00514268		2372	0.00412686		2962	-0.00793055		3551.99	-0.02055652
602.2	0.29488667		1192.19	0.08001668		1782.21	-0.00456818		2372.2	0.00429842		2962.2	-0.00783475		3552.19	-0.02036721
602.4	0.29517001		1192.39	0.07979709		1782.41	-0.00511003		2372.4	0.00491873		2962.4	-0.0084014		3552.39	-0.02114315
602.6	0.29482144		1192.59	0.07980307		1782.61	-0.00587272		2372.6	0.00489546		2962.6	-0.00816584		3552.59	-0.02194863
602.8	0.29594436		1192.79	0.08039576		1782.81	-0.00636224		2372.8	0.00451866		2962.8	-0.00825139		3552.79	-0.02233164
603	0.29523734		1192.99	0.0804459		1783.01	-0.00681436		2373	0.00465668		2963	-0.00808362		3552.99	-0.02188706
603.2	0.2955143		1193.19	0.07980507		1783.21	-0.00727459		2373.2	0.00486846		2963.2	-0.00890086		3553.19	-0.02266869
603.4	0.29566957		1193.39	0.07953134		1783.41	-0.00636826		2373.4	0.00428429		2963.4	-0.00840605		3553.39	-0.02345937
603.6	0.29561212		1193.59	0.0788612		1783.61	-0.00670538		2373.6	0.00378062		2963.6	-0.00843998		3553.59	-0.02247701
603.8	0.29620406		1193.79	0.07871092		1783.81	-0.00661294		2373.8	0.00298372		2963.8	-0.00839289		3553.79	-0.02207923
604	0.29625492		1193.99	0.07849532		1784.01	-0.00589181		2374	0.00319347		2964	-0.00829738		3553.99	-0.02296808
604.2	0.29603835		1194.19	0.07902041		1784.21	-0.00593971		2374.2	0.00345367		2964.2	-0.00753815		3554.19	-0.02279201
604.4	0.29558874		1194.39	0.07895612		1784.41	-0.00607677		2374.4	0.00382025		2964.4	-0.0064534		3554.39	-0.02245589
604.6	0.29664458		1194.59	0.07828333		1784.61	-0.00561574		2374.6	0.00350618		2964.6	-0.00754083		3554.59	-0.02166684
604.8	0.29729908		1194.79	0.07778982		1784.81	-0.00541614		2374.8	0.00270551		2964.8	-0.00787402		3554.79	-0.02214336
605	0.2991301		1194.99	0.0770851		1785.01	-0.00533395		2375	0.0031535		2965	-0.00766828		3554.99	-0.02145945
605.2	0.30024291		1195.19	0.07715563		1785.21	-0.00607813		2375.2	0.0032023		2965.2	-0.00872572		3555.19	-0.02116744
605.4	0.30115659		1195.39	0.07646723		1785.41	-0.00550033		2375.4	0.00332224		2965.4	-0.00787482		3555.39	-0.02132738
605.6	0.3013238		1195.59	0.07673169		1785.61	-0.00576573		2375.6	0.00360689		2965.6	-0.00890638		3555.59	-0.02174476
605.8	0.30131163		1195.79	0.0766664		1785.81	-0.00599146		2375.8	0.0035972		2965.8	-0.0092448		3555.79	-0.02133274
606	0.30112647		1195.99	0.07703644		1786.01	-0.0061546		2376	0.00397337		2966	-0.00865753		3555.99	-0.02192985
606.2	0.30029646		1196.19	0.07750295		1786.21	-0.00661931		2376.2	0.00404067		2966.2	-0.00858964		3556.19	-0.02200943
606.4	0.30032334		1196.39	0.07742525		1786.41	-0.00737697		2376.4	0.00410442		2966.4	-0.00829567		3556.39	-0.02276998
606.6	0.29902841		1196.59	0.07697741		1786.61	-0.00804878		2376.6	0.0035805		2966.6	-0.00813875		3556.59	-0.02277939
606.8	0.2990732		1196.79	0.07715911		1786.81	-0.00847525		2376.8	0.00329726		2966.8	-0.00858146		3556.79	-0.02172362
607	0.29842425		1196.99	0.07758812		1787.01	-0.00921139		2377	0.0033825		2967	-0.00858095		3556.99	-0.02053271
607.2	0.29823958		1197.19	0.07730545		1787.21	-0.00873781		2377.2	0.00377612		2967.2	-0.00840037		3557.19	-0.02082793
607.4	0.29684913		1197.39	0.07834274		1787.41	-0.00776285		2377.4	0.00406524		2967.4	-0.00769442		3557.39	-0.02028311
607.6	0.29602367		1197.59	0.07844043		1787.61	-0.00782373		2377.6	0.00396466		2967.6	-0.0067095		3557.59	-0.01993688
607.8	0.29559868		1197.79	0.07890841		1787.81	-0.00881534		2377.8	0.00365465		2967.8	-0.0055631		3557.79	-0.02089507
608	0.2950155		1197.99	0.07945951		1788.01	-0.00903631		2378	0.00417514		2968	-0.00460855		3557.99	-0.02132249
608.2	0.29485744		1198.19	0.07981156		1788.21	-0.00972638		2378.2	0.00469835		2968.2	-0.00460688		3558.19	-0.02161284
608.4	0.29534086		1198.39	0.08010289		1788.41	-0.00954961		2378.4	0.00423221		2968.4	-0.0038498		3558.39	-0.0222092
608.6	0.2965656		1198.59	0.08018025		1788.61	-0.00864653		2378.6	0.00377662		2968.6	-0.00546394		3558.59	-0.02259471
608.8	0.29664255		1198.79	0.08064582		1788.81	-0.00824116		2378.8	0.00371895		2968.8	-0.00517831		3558.79	-0.02201807
609	0.29683854		1198.99	0.080144		1789.01	-0.00810719		2379	0.00451507		2969	-0.00526777		3558.99	-0.02208852
609.2	0.29620287		1199.19	0.07981051		1789.21	-0.00773267		2379.2	0.00473736		2969.2	-0.00590455		3559.19	-0.0221138
609.4	0.296219		1199.39	0.07969054		1789.41	-0.00697643		2379.4	0.00437745		2969.4	-0.00597929		3559.39	-0.02314338
609.6	0.29595688		1199.59	0.08016517		1789.61	-0.0070418		2379.6	0.00459749		2969.6	-0.00759182		3559.59	-0.02342688
609.8	0.29673751		1199.79	0.07905793		1789.81	-0.00669102		2379.8	0.00480889		2969.8	-0.00771161		3559.79	-0.02437498
610	0.29627813		1199.99	0.07810606		1790.01	-0.00639413		2380	0.00476108		2970	-0.00757415		3559.99	-0.02511077
610.2	0.29646296		1200.19	0.07815181		1790.21	-0.00665343		2380.2	0.00471262		2970.2	-0.00802158		3560.19	-0.02529407
610.4	0.29628006		1200.39	0.07669402		1790.41	-0.00706214		2380.4	0.00424973		2970.4	-0.00779863		3560.39	-0.02553268
610.6	0.29603358		1200.59	0.07603555		1790.61	-0.00752833		2380.6	0.00459394		2970.6	-0.00799517		3560.59	-0.02549815
610.8	0.29632764		1200.79	0.07545367		1790.81	-0.00737007		2380.8	0.00441387		2970.8	-0.00869357		3560.79	-0.02490039
611	0.29576961		1200.99	0.07503304		1791.01	-0.00778894		2381	0.00448236		2971	-0.00897022		3560.99	-0.02366038
611.2	0.29625487		1201.19	0.07433119		1791.21	-0.00755575		2381.2	0.00441899		2971.2	-0.00851138		3561.19	-0.0237885
611.4	0.2957309		1201.39	0.07429657		1791.41	-0.00835535		2381.4	0.0041084		2971.4	-0.00867367		3561.39	-0.02318395
611.6	0.2958845		1201.59	0.07421766		1791.61	-0.00849618		2381.6	0.00447936		2971.6	-0.00724129		3561.59	-0.02300073
611.8	0.29535605		1201.79	0.07436592		1791.81	-0.00945948		2381.8	0.00391671		2971.8	-0.00712358		3561.79	-0.02212281
612	0.29565325		1201.99	0.07487457		1792.01	-0.01049663		2382	0.00423651		2972	-0.00691626		3561.99	-0.02209969
612.2	0.29566645		1202.19	0.07534385		1792.21	-0.01068557		2382.2	0.00403533		2972.2	-0.00748731		3562.19	-0.02231922
612.4	0.29558619		1202.39	0.07603181		1792.41	-0.01117268		2382.4	0.00430248		2972.4	-0.00628102		3562.39	-0.02228882
612.6	0.29523404		1202.59	0.07667937		1792.61	-0.01119262		2382.6	0.00413487		2972.6	-0.00732948		3562.59	-0.02122692
612.8	0.29511182		1202.79	0.07636884		1792.81	-0.0103696		2382.8	0.00491885		2972.8	-0.00664805		3562.79	-0.02097886
613	0.29521405		1202.99	0.07570126		1793.01	-0.01015787		2383	0.00477352		2973	-0.00630344		3562.99	-0.02118056
613.2	0.29503667		1203.19	0.07595446		1793.21	-0.01079914		2383.2	0.00451513		2973.2	-0.00579028		3563.19	-0.02097703
613.4	0.29489524		1203.39	0.07678147		1793.41	-0.01078247		2383.4	0.00433085		2973.4	-0.00695582		3563.39	-0.02124776
613.6	0.2946451		1203.59	0.07668129		1793.61	-0.01117636		2383.6	0.00489228		2973.6	-0.00754887		3563.59	-0.02124091
613.8	0.29499816		1203.79	0.07539918		1793.81	-0.01050046		2383.8	0.00527074		2973.8	-0.00690656		3563.79	-0.02188867
614	0.29441931		1203.99	0.07589408		1794.01	-0.01015866		2384	0.00558214		2974	-0.00677144		3563.99	-0.02166955
614.2	0.29590534		1204.19	0.07673292		1794.21	-0.01054805		2384.2	0.0053952		2974.2	-0.00733853		3564.19	-0.02169275
614.4	0.29494692		1204.39	0.07595893		1794.41	-0.01021707		2384.4	0.00494849		2974.4	-0.00738555		3564.39	-0.02143734
614.6	0.29512527		1204.59	0.0769964		1794.61	-0.00959121		2384.6	0.00524015		2974.6	-0.00786228		3564.59	-0.0210701
614.8	0.29432182		1204.79	0.07765733		1794.81	-0.00932541		2384.8	0.00477906		2974.8	-0.00851209		3564.79	-0.02003612
615	0.29376434		1204.99	0.07816533		1795.01	-0.00889905		2385	0.0046755		2975	-0.00911673		3564.99	-0.02019274
615.2	0.29470021		1205.19	0.07787747		1795.21	-0.00799597		2385.2	0.00400901		2975.2	-0.00889881		3565.19	-0.02076034
615.4	0.29448604		1205.39	0.07870947		1795.41	-0.00740741		2385.4	0.00413115		2975.4	-0.00839623		3565.39	-0.02029352
615.6	0.29482887		1205.59	0.07961903		1795.61	-0.00660751		2385.6	0.00396381		2975.6	-0.00732362		3565.59	-0.02101124
615.8	0.29459484		1205.79	0.08079485		1795.81	-0.00638451		2385.8	0.00389231		2975.8	-0.00741235		3565.79	-0.02173387
616	0.29539923		1205.99	0.08134846		1796.01	-0.0068681		2386	0.00432749		2976	-0.00720192		3565.99	-0.02217282
616.2	0.29541332		1206.19	0.08160916		1796.21	-0.00566212		2386.2	0.00375879		2976.2	-0.00673258		3566.19	-0.02267053
616.4	0.2958616		1206.39	0.08158507		1796.41	-0.00651763		2386.4	0.00416749		2976.4	-0.00577416		3566.39	-0.02344019
616.6	0.29609055		1206.59	0.08124584		1796.61	-0.00610767		2386.6	0.00345564		2976.6	-0.0065517		3566.59	-0.02347196
616.8	0.29689036		1206.79	0.08083444		1796.81	-0.00549905		2386.8	0.00331394		2976.8	-0.00610863		3566.79	-0.02389297
617	0.29747993		1206.99	0.08067338		1797.01	-0.00640845		2387	0.00267455		2977	-0.00597282		3566.99	-0.02456547
617.2	0.29656176		1207.19	0.08039765		1797.21	-0.00800127		2387.2	0.00340051		2977.2	-0.00622047		3567.19	-0.02513435
617.4	0.29582622		1207.39	0.08017741		1797.41	-0.00811438		2387.4	0.00357934		2977.4	-0.006621		3567.39	-0.02468085
617.6	0.29627845		1207.59	0.07966964		1797.61	-0.00812863		2387.6	0.00370961		2977.6	-0.00675146		3567.59	-0.02571778
617.8	0.29647075		1207.79	0.07885218		1797.81	-0.00887768		2387.8	0.0033431		2977.8	-0.00673846		3567.79	-0.0259233
618	0.29580682		1207.99	0.07883825		1798.01	-0.00950306		2388	0.00359944		2978	-0.00793624		3567.99	-0.0251773
618.2	0.29578757		1208.19	0.07918428		1798.21	-0.00968393		2388.2	0.00281062		2978.2	-0.00866341		3568.19	-0.02502278
618.4	0.29451624		1208.39	0.07914388		1798.41	-0.00963787		2388.4	0.00269661		2978.4	-0.00868977		3568.39	-0.02442737
618.6	0.29406174		1208.59	0.07961221		1798.61	-0.00938757		2388.6	0.00326494		2978.6	-0.00806316		3568.59	-0.02435757
618.8	0.29352441		1208.79	0.0791143		1798.81	-0.00968576		2388.8	0.00236179		2978.8	-0.00791904		3568.79	-0.02438664
619	0.29383892		1208.99	0.0783642		1799.01	-0.00930676		2389	0.00168597		2979	-0.00782618		3568.99	-0.02493106
619.2	0.29477844		1209.19	0.07786977		1799.21	-0.00901591		2389.2	0.00145297		2979.2	-0.0071856		3569.19	-0.02446289
619.4	0.29476998		1209.39	0.07861394		1799.41	-0.00806806		2389.4	0.00171536		2979.4	-0.0076618		3569.39	-0.02392566
619.6	0.29506846		1209.59	0.07880055		1799.61	-0.00777796		2389.6	0.00169023		2979.6	-0.00703473		3569.59	-0.02340061
619.8	0.29561407		1209.79	0.07815074		1799.81	-0.00718535		2389.8	0.00178636		2979.8	-0.00701124		3569.79	-0.02254311
620	0.29653916		1209.99	0.07716166		1800.01	-0.00745755		2390	0.00200467		2980	-0.00750372		3569.99	-0.02151417
620.2	0.29665196		1210.19	0.07806088		1800.21	-0.00661771		2390.2	0.00170915		2980.2	-0.00740468		3570.19	-0.02122068
620.4	0.29673909		1210.39	0.0779487		1800.41	-0.00707911		2390.4	0.0025962		2980.4	-0.00837818		3570.39	-0.02145641
620.6	0.2964198		1210.59	0.07775623		1800.61	-0.00722427		2390.6	0.00229476		2980.6	-0.00943142		3570.59	-0.02080494
620.8	0.29742215		1210.79	0.07782038		1800.81	-0.00756216		2390.8	0.00285136		2980.8	-0.0100683		3570.79	-0.02091214
621	0.2967809		1210.99	0.07724521		1801.01	-0.00770643		2391	0.00334846		2981	-0.010067		3570.99	-0.02132299
621.2	0.29528174		1211.19	0.07666455		1801.21	-0.00873716		2391.2	0.00406453		2981.2	-0.01083883		3571.19	-0.02152286
621.4	0.29502785		1211.39	0.07663427		1801.41	-0.00839859		2391.4	0.00364368		2981.4	-0.01142834		3571.39	-0.02176492
621.6	0.29552658		1211.59	0.07587782		1801.61	-0.00886993		2391.6	0.00373363		2981.6	-0.01196874		3571.59	-0.02267837
621.8	0.29499648		1211.79	0.07493024		1801.81	-0.00984736		2391.8	0.00372893		2981.8	-0.01171613		3571.79	-0.02233758
622	0.294499		1211.99	0.07556427		1802.01	-0.00958364		2392	0.00323985		2982	-0.01165017		3571.99	-0.02203885
622.2	0.29389775		1212.19	0.07675592		1802.21	-0.00967381		2392.2	0.00294101		2982.2	-0.01121415		3572.19	-0.02251767
622.4	0.29485582		1212.39	0.07624602		1802.41	-0.0112029		2392.4	0.00195275		2982.4	-0.01047633		3572.39	-0.02262256
622.6	0.29458126		1212.59	0.07588987		1802.61	-0.0111772		2392.6	0.00168148		2982.6	-0.0099962		3572.59	-0.02314102
622.8	0.29489525		1212.79	0.07600012		1802.81	-0.01151876		2392.8	0.00003591		2982.8	-0.00931235		3572.79	-0.02301518
623	0.29461278		1212.99	0.07683858		1803.01	-0.01153972		2393	-0.0003722		2983	-0.00876851		3572.99	-0.02297888
623.2	0.29477335		1213.19	0.07662713		1803.21	-0.011764		2393.2	0.00002084		2983.2	-0.00836148		3573.19	-0.02279762
623.4	0.29450641		1213.39	0.07732813		1803.41	-0.01115955		2393.4	-0.00024669		2983.4	-0.00865802		3573.39	-0.02211009
623.6	0.29435189		1213.59	0.07705387		1803.61	-0.01145442		2393.6	0.00005171		2983.6	-0.00744316		3573.59	-0.0216764
623.8	0.29405203		1213.79	0.07625085		1803.81	-0.01121617		2393.8	-0.00036903		2983.8	-0.00697189		3573.79	-0.02138349
624	0.29416964		1213.99	0.07684692		1804.01	-0.01101384		2394	-0.00031603		2984	-0.0073351		3573.99	-0.0217402
624.2	0.29371856		1214.19	0.07752932		1804.21	-0.01030225		2394.2	-0.00043965		2984.2	-0.00788317		3574.19	-0.02229349
624.4	0.29361392		1214.39	0.07707136		1804.41	-0.01075231		2394.4	0.00050143		2984.4	-0.00782246		3574.39	-0.02310854
624.6	0.29384168		1214.59	0.07754609		1804.61	-0.01005414		2394.6	0.00058844		2984.6	-0.00813067		3574.59	-0.02357231
624.8	0.29439325		1214.79	0.07745108		1804.81	-0.00931596		2394.8	0.00121469		2984.8	-0.00835219		3574.79	-0.02442335
625	0.29316199		1214.99	0.07765892		1805.01	-0.0083743		2395	0.00114101		2985	-0.00865388		3574.99	-0.02467787
625.2	0.29275611		1215.19	0.0773832		1805.21	-0.00853637		2395.2	0.00159282		2985.2	-0.00928994		3575.19	-0.02510607
625.4	0.29266364		1215.39	0.07706631		1805.41	-0.00745144		2395.4	0.00132303		2985.4	-0.00951349		3575.39	-0.02543882
625.6	0.29304154		1215.59	0.07597601		1805.61	-0.00766816		2395.6	0.00088347		2985.6	-0.00891374		3575.59	-0.02493981
625.8	0.29359463		1215.79	0.07537997		1805.81	-0.0076905		2395.8	0.00075293		2985.8	-0.00946955		3575.79	-0.02389674
626	0.29361277		1215.99	0.07548632		1806.01	-0.00797913		2396	-0.0003607		2986	-0.00899489		3575.99	-0.02345588
626.2	0.29459941		1216.19	0.07545916		1806.21	-0.00896056		2396.2	-0.00076275		2986.2	-0.00968819		3576.19	-0.02359249
626.4	0.29583187		1216.39	0.07475991		1806.41	-0.00903993		2396.4	-0.00185181		2986.4	-0.01028244		3576.39	-0.02310618
626.6	0.29553826		1216.59	0.07493661		1806.61	-0.00827041		2396.6	-0.001349		2986.6	-0.00992648		3576.59	-0.02247944
626.8	0.29596103		1216.79	0.0753824		1806.81	-0.00891765		2396.8	-0.00258173		2986.8	-0.00924537		3576.79	-0.02178932
627	0.29560251		1216.99	0.0761257		1807.01	-0.00955648		2397	-0.00187633		2987	-0.00906879		3576.99	-0.02159568
627.2	0.29577611		1217.19	0.07543433		1807.21	-0.01000623		2397.2	-0.00122743		2987.2	-0.00943301		3577.19	-0.02163925
627.4	0.29559766		1217.39	0.07552424		1807.41	-0.01011086		2397.4	-0.00069015		2987.4	-0.01022732		3577.39	-0.02123671
627.6	0.29576834		1217.59	0.07567042		1807.61	-0.01056087		2397.6	-0.00024347		2987.6	-0.01006924		3577.59	-0.0211262
627.8	0.29637884		1217.79	0.0758023		1807.81	-0.01057948		2397.8	-0.00002067		2987.8	-0.01000359		3577.79	-0.02046975
628	0.29706856		1217.99	0.0758372		1808.01	-0.01089544		2398	0.00083161		2988	-0.01075734		3577.99	-0.02065448
628.2	0.2975618		1218.19	0.07589351		1808.21	-0.0115637		2398.2	0.00208141		2988.2	-0.01101968		3578.19	-0.02137434
628.4	0.29776738		1218.39	0.07681777		1808.41	-0.01094625		2398.4	0.00248284		2988.4	-0.0105167		3578.39	-0.02227875
628.6	0.29784401		1218.59	0.07724782		1808.61	-0.00978746		2398.6	0.00229866		2988.6	-0.01046334		3578.59	-0.02370222
628.8	0.29757516		1218.79	0.07698918		1808.81	-0.00994135		2398.8	0.00257084		2988.8	-0.01096913		3578.79	-0.02441791
629	0.29727866		1218.99	0.07718178		1809.01	-0.00900113		2399	0.0017035		2989	-0.01085727		3578.99	-0.02466786
629.2	0.29733394		1219.19	0.07688071		1809.21	-0.00913446		2399.2	0.00215126		2989.2	-0.01093456		3579.19	-0.02457756
629.4	0.29724901		1219.39	0.07621352		1809.41	-0.00885266		2399.4	0.00145924		2989.4	-0.01050928		3579.39	-0.02445958
629.6	0.29780475		1219.59	0.07552498		1809.61	-0.00982653		2399.6	0.00033607		2989.6	-0.00951533		3579.59	-0.02398898
629.8	0.29709617		1219.79	0.07527468		1809.81	-0.01031741		2399.8	-0.00070802		2989.8	-0.00955632		3579.79	-0.02389005
630	0.29686115		1219.99	0.07461835		1810.01	-0.01032676		2400	-0.00183108		2990	-0.00907985		3579.99	-0.02371553
630.2	0.29650381		1220.19	0.07508022		1810.21	-0.01054534		2400.2	-0.00227394		2990.2	-0.00884345		3580.19	-0.02382844
630.4	0.29577393		1220.39	0.07488914		1810.41	-0.01040127		2400.4	-0.00271651		2990.4	-0.00816697		3580.39	-0.02375039
630.6	0.29504649		1220.59	0.07542167		1810.61	-0.01074743		2400.6	-0.00234874		2990.6	-0.00769373		3580.59	-0.02371613
630.8	0.29544494		1220.79	0.0754476		1810.81	-0.01121583		2400.8	-0.00290344		2990.8	-0.00749238		3580.79	-0.02358326
631	0.29496028		1220.99	0.07616881		1811.01	-0.01147068		2401	-0.00290047		2991	-0.00841119		3580.99	-0.02385823
631.2	0.29448805		1221.19	0.07640868		1811.21	-0.01143281		2401.2	-0.00348533		2991.2	-0.00924506		3581.19	-0.02394436
631.4	0.29446207		1221.39	0.07709911		1811.41	-0.01160555		2401.4	-0.00251001		2991.4	-0.00970721		3581.39	-0.02380582
631.6	0.29454134		1221.59	0.07918197		1811.61	-0.01160983		2401.6	-0.00268832		2991.6	-0.00981134		3581.59	-0.02388691
631.8	0.2951143		1221.79	0.07875275		1811.81	-0.01084361		2401.8	-0.00162153		2991.8	-0.00977762		3581.79	-0.02353679
632	0.29468296		1221.99	0.07863592		1812.01	-0.01131636		2402	-0.00073087		2992	-0.00999353		3581.99	-0.02424086
632.2	0.29494774		1222.19	0.07954732		1812.21	-0.01054941		2402.2	-0.00004211		2992.2	-0.01039858		3582.19	-0.02488436
632.4	0.29408596		1222.39	0.07865015		1812.41	-0.01009963		2402.4	-0.0006086		2992.4	-0.01004076		3582.39	-0.02552447
632.6	0.29440956		1222.59	0.07781192		1812.61	-0.00959094		2402.6	-0.00034696		2992.6	-0.00991372		3582.59	-0.0253244
632.8	0.29434178		1222.79	0.07683316		1812.81	-0.01010381		2402.8	-0.0000023		2992.8	-0.01064867		3582.79	-0.02450105
633	0.29521411		1222.99	0.07662351		1813.01	-0.00982375		2403	-0.00022461		2993	-0.00996282		3582.99	-0.0244256
633.2	0.29496677		1223.19	0.07596402		1813.21	-0.00987766		2403.2	0.00081084		2993.2	-0.01027226		3583.19	-0.02390994
633.4	0.29482546		1223.39	0.0746073		1813.41	-0.00990046		2403.4	0.00084285		2993.4	-0.00994882		3583.39	-0.02369352
633.6	0.29492064		1223.59	0.07421638		1813.61	-0.01008619		2403.6	0.00086162		2993.6	-0.00984946		3583.59	-0.02424668
633.8	0.29449167		1223.79	0.07308541		1813.81	-0.00987103		2403.8	0.0006396		2993.8	-0.00958671		3583.79	-0.02444893
634	0.29525275		1223.99	0.07149285		1814.01	-0.00987299		2404	0.0010559		2994	-0.00981149		3583.99	-0.02382086
634.2	0.29514421		1224.19	0.07168596		1814.21	-0.01052777		2404.2	0.00168394		2994.2	-0.00922772		3584.19	-0.0238888
634.4	0.29596863		1224.39	0.07079199		1814.41	-0.01068652		2404.4	0.00266798		2994.4	-0.00971672		3584.39	-0.02338786
634.6	0.29598375		1224.59	0.07141684		1814.61	-0.01153971		2404.6	0.00284544		2994.6	-0.00983367		3584.59	-0.02292013
634.8	0.29678585		1224.79	0.0714848		1814.81	-0.01188639		2404.8	0.00255647		2994.8	-0.00984111		3584.79	-0.02273966
635	0.29616238		1224.99	0.0723467		1815.01	-0.01161849		2405	0.00232398		2995	-0.0101748		3584.99	-0.02270595
635.2	0.29580277		1225.19	0.07344177		1815.21	-0.0112984		2405.2	0.00330434		2995.2	-0.00930097		3585.19	-0.02265821
635.4	0.29597933		1225.39	0.07366489		1815.41	-0.01100792		2405.4	0.00337676		2995.4	-0.00969842		3585.39	-0.02261486
635.6	0.2949194		1225.59	0.07573181		1815.61	-0.01032744		2405.6	0.00289851		2995.6	-0.0100411		3585.59	-0.02264575
635.8	0.29521762		1225.79	0.07557159		1815.81	-0.01022081		2405.8	0.0026162		2995.8	-0.00937859		3585.79	-0.02199354
636	0.29504801		1225.99	0.07628891		1816.01	-0.01051715		2406	0.00222898		2996	-0.00936045		3585.99	-0.02205917
636.2	0.29478461		1226.19	0.07647492		1816.21	-0.00996206		2406.2	0.00106341		2996.2	-0.00904978		3586.19	-0.02173445
636.4	0.29487696		1226.39	0.07607498		1816.41	-0.01006979		2406.4	0.00040276		2996.4	-0.00890068		3586.39	-0.0215698
636.6	0.29480466		1226.59	0.07693076		1816.61	-0.00962624		2406.6	0.00048283		2996.6	-0.00859108		3586.59	-0.02137294
636.8	0.2950727		1226.79	0.07681711		1816.81	-0.01001715		2406.8	0.00048793		2996.8	-0.00881894		3586.79	-0.02170859
637	0.29502901		1226.99	0.07799796		1817.01	-0.01023241		2407	0.00063697		2997	-0.00879279		3586.99	-0.02216358
637.2	0.29465421		1227.19	0.07791997		1817.21	-0.0096006		2407.2	-0.00002537		2997.2	-0.00856513		3587.19	-0.02365544
637.4	0.29465295		1227.39	0.07720478		1817.41	-0.0092743		2407.4	0.00034245		2997.4	-0.00834632		3587.39	-0.02462564
637.6	0.29513446		1227.59	0.077252		1817.61	-0.00920804		2407.6	0.00068264		2997.6	-0.00776159		3587.59	-0.02569302
637.8	0.29547251		1227.79	0.07531972		1817.81	-0.00914697		2407.8	0.00009795		2997.8	-0.00707914		3587.79	-0.02685365
638	0.29546756		1227.99	0.07525846		1818.01	-0.00956917		2408	0.00093559		2998	-0.00774407		3587.99	-0.02724199
638.2	0.29546928		1228.19	0.07440294		1818.21	-0.0103318		2408.2	0.00154787		2998.2	-0.00723825		3588.19	-0.0273627
638.4	0.29496456		1228.39	0.07383744		1818.41	-0.01052182		2408.4	0.00236539		2998.4	-0.00733347		3588.39	-0.02788199
638.6	0.29464013		1228.59	0.07461178		1818.61	-0.01021649		2408.6	0.00257189		2998.6	-0.00724418		3588.59	-0.0287923
638.8	0.29330494		1228.79	0.07322435		1818.81	-0.00993973		2408.8	0.00281221		2998.8	-0.00679155		3588.79	-0.02975724
639	0.29261533		1228.99	0.0732839		1819.01	-0.00995323		2409	0.00292374		2999	-0.00596471		3588.99	-0.02943851
639.2	0.29178283		1229.19	0.07338948		1819.21	-0.00969988		2409.2	0.00267842		2999.2	-0.00638992		3589.19	-0.02962628
639.4	0.29148074		1229.39	0.07250684		1819.41	-0.00992557		2409.4	0.00132424		2999.4	-0.00749934		3589.39	-0.02887392
639.6	0.29136096		1229.59	0.07318957		1819.61	-0.0101896		2409.6	0.00075972		2999.6	-0.00750097		3589.59	-0.0288171
639.8	0.29167805		1229.79	0.0728221		1819.81	-0.01027537		2409.8	0.00033659		2999.8	-0.00665291		3589.79	-0.02827087
640	0.29096229		1229.99	0.07273807		1820.01	-0.00967436		2410	-0.00015379		3000	-0.00679896		3589.99	-0.02819382
640.2	0.29051629		1230.19	0.07277516		1820.21	-0.00996277		2410.2	-0.00086255		3000.2	-0.00774177		3590.19	-0.02722348
640.4	0.29064443		1230.39	0.07353371		1820.41	-0.00965955		2410.4	-0.0009109		3000.4	-0.0082078		3590.39	-0.0269762
640.6	0.29059862		1230.59	0.07391804		1820.61	-0.01017532		2410.6	-0.00079484		3000.6	-0.00846624		3590.59	-0.025686
640.8	0.2912675		1230.79	0.07474817		1820.81	-0.01076554		2410.8	-0.00127894		3000.8	-0.00894702		3590.79	-0.02539481
641	0.29176536		1230.99	0.07542407		1821.01	-0.01126844		2411	-0.00107961		3001	-0.00940959		3590.99	-0.02482293
641.2	0.29219263		1231.19	0.0754289		1821.21	-0.01066625		2411.2	-0.00125718		3001.2	-0.00946405		3591.19	-0.02525246
641.4	0.29266924		1231.39	0.07459334		1821.41	-0.01053761		2411.4	-0.00072679		3001.4	-0.01048826		3591.39	-0.02447629
641.6	0.29388469		1231.59	0.07474864		1821.61	-0.01088281		2411.6	-0.00077152		3001.6	-0.01111772		3591.59	-0.02434699
641.8	0.29415746		1231.79	0.0737587		1821.81	-0.01000975		2411.8	-0.00052455		3001.8	-0.01187604		3591.79	-0.02420663
642	0.2942217		1231.99	0.0738722		1822.01	-0.01037127		2412	0.00042274		3002	-0.01250656		3591.99	-0.02380442
642.2	0.29571288		1232.19	0.07314357		1822.21	-0.01023666		2412.2	0.00062218		3002.2	-0.01239841		3592.19	-0.02445982
642.4	0.29576808		1232.39	0.07372878		1822.41	-0.00996631		2412.4	0.00118219		3002.4	-0.01228828		3592.39	-0.0245942
642.6	0.29603455		1232.59	0.0743686		1822.61	-0.00950673		2412.6	0.00124285		3002.6	-0.01188692		3592.59	-0.02490697
642.8	0.29509439		1232.79	0.07335342		1822.81	-0.01091552		2412.8	0.00059517		3002.8	-0.0108777		3592.79	-0.02519805
643	0.29519662		1232.99	0.07389329		1823.01	-0.01057799		2413	0.00012584		3003	-0.00963774		3592.99	-0.02460006
643.2	0.29529013		1233.19	0.07394805		1823.21	-0.010843		2413.2	0.00084721		3003.2	-0.00962238		3593.19	-0.02476952
643.4	0.29556779		1233.39	0.07379292		1823.41	-0.01136042		2413.4	0.00099719		3003.4	-0.009422		3593.39	-0.02496785
643.6	0.29565297		1233.59	0.07429908		1823.61	-0.0115034		2413.6	0.00147201		3003.6	-0.00872607		3593.59	-0.02545416
643.8	0.29454492		1233.79	0.0746701		1823.81	-0.01134703		2413.8	0.00151807		3003.8	-0.00881865		3593.79	-0.02587817
644	0.29430911		1233.99	0.07551065		1824.01	-0.01037179		2414	0.00110004		3004	-0.00927547		3593.99	-0.02525232
644.2	0.29434092		1234.19	0.0757395		1824.21	-0.01059741		2414.2	0.00108266		3004.2	-0.0096857		3594.19	-0.02489535
644.4	0.29379327		1234.39	0.07598186		1824.41	-0.0106465		2414.4	0.00066203		3004.4	-0.00948298		3594.39	-0.02530607
644.6	0.2938373		1234.59	0.07588589		1824.61	-0.01134525		2414.6	0.00043008		3004.6	-0.00892706		3594.59	-0.02455343
644.8	0.29329592		1234.79	0.07576766		1824.81	-0.01178624		2414.8	0.00006623		3004.8	-0.00904702		3594.79	-0.02492686
645	0.29332183		1234.99	0.07547425		1825.01	-0.01220949		2415	-0.00019638		3005	-0.00975898		3594.99	-0.02460523
645.2	0.29321239		1235.19	0.07489491		1825.21	-0.01227372		2415.2	-0.00040137		3005.2	-0.01007935		3595.19	-0.02399241
645.4	0.29383705		1235.39	0.0749618		1825.41	-0.01249007		2415.4	-0.0007816		3005.4	-0.01023768		3595.39	-0.02365752
645.6	0.29419626		1235.59	0.07537288		1825.61	-0.01193292		2415.6	-0.00162423		3005.6	-0.01101512		3595.59	-0.02391679
645.8	0.29421124		1235.79	0.07539533		1825.81	-0.01139507		2415.8	-0.00159846		3005.8	-0.01119723		3595.79	-0.02462787
646	0.29413104		1235.99	0.07552805		1826.01	-0.01221524		2416	-0.00209922		3006	-0.01077182		3595.99	-0.02483467
646.2	0.29493537		1236.19	0.07457603		1826.21	-0.01215896		2416.2	-0.00175821		3006.2	-0.01090231		3596.19	-0.02547754
646.4	0.29441288		1236.39	0.07497257		1826.41	-0.01325557		2416.4	-0.00164887		3006.4	-0.0095372		3596.39	-0.0249833
646.6	0.29417164		1236.59	0.07504492		1826.61	-0.01417184		2416.6	-0.00204415		3006.6	-0.00951108		3596.59	-0.02577517
646.8	0.29403348		1236.79	0.07466446		1826.81	-0.0145939		2416.8	-0.0015742		3006.8	-0.00905877		3596.79	-0.02555012
647	0.29427706		1236.99	0.07508646		1827.01	-0.01437053		2417	-0.00078421		3007	-0.00858182		3596.99	-0.02539617
647.2	0.29447228		1237.19	0.07549385		1827.21	-0.01506093		2417.2	0.00049872		3007.2	-0.00962942		3597.19	-0.02539976
647.4	0.2940316		1237.39	0.07543078		1827.41	-0.01552159		2417.4	0.00066016		3007.4	-0.01068749		3597.39	-0.02563411
647.6	0.29412301		1237.59	0.07542779		1827.61	-0.01494032		2417.6	0.00084525		3007.6	-0.01091331		3597.59	-0.02541771
647.8	0.29400404		1237.79	0.07503846		1827.81	-0.01454541		2417.8	0.00098719		3007.8	-0.0117979		3597.79	-0.02574442
648	0.2941496		1237.99	0.07513109		1828.01	-0.01360664		2418	0.00153197		3008	-0.01176957		3597.99	-0.0251774
648.2	0.29377254		1238.19	0.07420855		1828.21	-0.01385619		2418.2	0.00154651		3008.2	-0.01149864		3598.19	-0.02520897
648.4	0.29350314		1238.39	0.07362025		1828.41	-0.01340481		2418.4	0.00104087		3008.4	-0.0111442		3598.39	-0.02507956
648.6	0.29361728		1238.59	0.0733867		1828.61	-0.0129488		2418.6	0.00083863		3008.6	-0.01009646		3598.59	-0.02433114
648.8	0.29342346		1238.79	0.07341086		1828.81	-0.01226858		2418.8	0.00058087		3008.8	-0.00983121		3598.79	-0.0234843
649	0.2939116		1238.99	0.07381845		1829.01	-0.01124231		2419	-0.00019847		3009	-0.00886389		3598.99	-0.0228787
649.2	0.29444184		1239.19	0.07402375		1829.21	-0.01001171		2419.2	-0.00039592		3009.2	-0.00754369		3599.19	-0.0219692
649.4	0.29474203		1239.39	0.07533721		1829.41	-0.00880469		2419.4	-0.00131601		3009.4	-0.00648039		3599.39	-0.02161285
649.6	0.29498605		1239.59	0.07573247		1829.61	-0.00725367		2419.6	-0.00244588		3009.6	-0.00590226		3599.59	-0.02156909
649.8	0.29485435		1239.79	0.07613173		1829.81	-0.00654154		2419.8	-0.00255106		3009.8	-0.00416152		3599.79	-0.02114402
