# Supplementary material for: Functional development of a V3/glycan-specific broadly neutralizing antibody isolated from a case of HIV superinfection
Source: eLife journal article supplement (doi:10.7554/elife.68110), 2021-07-15
Supplement: fig2-data2 [file B7.xls]

Vers 3.43 Data Simulation
Conc1	5E-07	5E-07	5E-07	5E-07	5E-07	5E-07	5E-07
Start1	200	730.02	1260.01	1790.04	2320.04	2850.04	3380.04
Stop1	559.79	1089.82	1619.81	2149.84	2679.84	3209.84	3739.84
Time1	Data1	Sim1	Time2	Data2	Sim2	Time3	Data3	Sim3	Time4	Data4	Sim4	Time5	Data5	Sim5	Time6	Data6	Sim6	Time7	Data7	Sim7
200	0.00597622		730.02	-0.00183389		1260.01	0.00329381		1790.04	0.00408539		2320.04	-0.00249717		2850.04	0.00121215		3380.04	-0.00228353
200.2	0.00635239		730.22	-0.00086936		1260.21	0.00454816		1790.24	0.00353931		2320.24	-0.00208614		2850.24	0.00015281		3380.24	-0.00197689
200.4	0.00692615		730.42	-0.00056536		1260.41	0.00571757		1790.44	0.0032567		2320.44	-0.00221403		2850.44	-0.00105274		3380.44	-0.00194932
200.6	0.00680003		730.62	0.00029856		1260.61	0.00684094		1790.64	0.00398324		2320.64	-0.00220776		2850.64	-0.00253827		3380.64	-0.00186465
200.8	0.00738032		730.82	0.00187657		1260.81	0.00791988		1790.84	0.00395166		2320.84	-0.00288214		2850.84	-0.00386891		3380.84	-0.00108794
201	0.00739739		731.02	0.00320605		1261.01	0.00878157		1791.04	0.00379962		2321.04	-0.00321025		2851.04	-0.00481408		3381.04	-0.00048114
201.2	0.00812524		731.22	0.00429427		1261.21	0.00914021		1791.24	0.00267555		2321.24	-0.00397205		2851.24	-0.0061854		3381.24	0.00004199
201.4	0.00890837		731.42	0.00441924		1261.41	0.00993605		1791.44	0.00257046		2321.44	-0.0041898		2851.44	-0.00642212		3381.44	0.00032065
201.6	0.01029922		731.62	0.00387701		1261.61	0.01030191		1791.64	0.00238617		2321.64	-0.00412465		2851.64	-0.00660878		3381.64	0.00085137
201.8	0.01082512		731.82	0.00299722		1261.81	0.01051076		1791.84	0.00217697		2321.84	-0.00437443		2851.84	-0.00694727		3381.84	0.00083419
202	0.01129376		732.02	0.00257136		1262.01	0.01090374		1792.04	0.00159529		2322.04	-0.00462759		2852.04	-0.00704505		3382.04	0.0010682
202.2	0.01198805		732.22	0.00097122		1262.21	0.01067414		1792.24	0.00151413		2322.24	-0.00475082		2852.24	-0.00695674		3382.24	0.00159257
202.4	0.01219578		732.42	0.00078448		1262.41	0.01105967		1792.44	0.00110474		2322.44	-0.00547808		2852.44	-0.00687785		3382.44	0.00150061
202.6	0.0126976		732.62	0.00089158		1262.61	0.010525		1792.64	0.00205636		2322.64	-0.00649531		2852.64	-0.00746348		3382.64	0.00173993
202.8	0.01431133		732.82	0.00121111		1262.81	0.01079638		1792.84	0.00261592		2322.84	-0.00620071		2852.84	-0.00813723		3382.84	0.00209391
203	0.01433217		733.02	-0.00011897		1263.01	0.010376		1793.04	0.00261983		2323.04	-0.00609372		2853.04	-0.0079186		3383.04	0.00225048
203.2	0.01444091		733.22	-0.00040122		1263.21	0.01116462		1793.24	0.00248474		2323.24	-0.00545857		2853.24	-0.00795948		3383.24	0.00261264
203.4	0.01407268		733.42	-0.00040952		1263.41	0.01095178		1793.44	0.00308171		2323.44	-0.00474229		2853.44	-0.00857253		3383.44	0.00222543
203.6	0.0146854		733.62	-0.00062487		1263.61	0.0106482		1793.64	0.00347641		2323.64	-0.00363967		2853.64	-0.00817119		3383.64	0.00192139
203.8	0.01560799		733.82	-0.00069374		1263.81	0.01074732		1793.84	0.00340572		2323.84	-0.00283839		2853.84	-0.00785675		3383.84	0.00270144
204	0.01627054		734.02	-0.00165667		1264.01	0.01070103		1794.04	0.00396934		2324.04	-0.00208732		2854.04	-0.00667802		3384.04	0.00200928
204.2	0.01665385		734.22	-0.00081999		1264.21	0.01147764		1794.24	0.00333859		2324.24	-0.002236		2854.24	-0.0068878		3384.24	0.00180672
204.4	0.01674838		734.42	-0.00048669		1264.41	0.01122801		1794.44	0.00372179		2324.44	-0.00284435		2854.44	-0.00708273		3384.44	0.00145355
204.6	0.01625099		734.62	0.00082213		1264.61	0.01128627		1794.64	0.00415629		2324.64	-0.0028027		2854.64	-0.00716776		3384.64	0.00097015
204.8	0.01708478		734.82	0.00223885		1264.81	0.01142436		1794.84	0.0037047		2324.84	-0.00383576		2854.84	-0.00695778		3384.84	0.0014499
205	0.01665688		735.02	0.00311096		1265.01	0.01052914		1795.04	0.00341998		2325.04	-0.00425388		2855.04	-0.00606248		3385.04	0.00142103
205.2	0.01726427		735.22	0.00300264		1265.21	0.01016332		1795.24	0.00278475		2325.24	-0.00502415		2855.24	-0.00600059		3385.24	0.00042288
205.4	0.01844074		735.42	0.00259267		1265.41	0.01052037		1795.44	0.00273447		2325.44	-0.00561377		2855.44	-0.00545649		3385.44	-0.00047853
205.6	0.01815921		735.62	0.00280047		1265.61	0.01008339		1795.64	0.0024077		2325.64	-0.00693488		2855.64	-0.00561771		3385.64	-0.00122812
205.8	0.018015		735.82	0.00313808		1265.81	0.01003488		1795.84	0.00235674		2325.84	-0.00747319		2855.84	-0.00552771		3385.84	-0.00187049
206	0.01800414		736.02	0.00337671		1266.01	0.01019651		1796.04	0.00130095		2326.04	-0.00754693		2856.04	-0.00553597		3386.04	-0.00118765
206.2	0.01823582		736.22	0.00280052		1266.21	0.01047349		1796.24	0.00149852		2326.24	-0.00807546		2856.24	-0.00594405		3386.24	-0.00149687
206.4	0.01810655		736.42	0.00394675		1266.41	0.01050164		1796.44	0.00138806		2326.44	-0.00900173		2856.44	-0.00483582		3386.44	-0.00200636
206.6	0.01838104		736.62	0.00372219		1266.61	0.01038465		1796.64	0.00190636		2326.64	-0.00928913		2856.64	-0.005193		3386.64	-0.00152976
206.8	0.0188945		736.82	0.00388456		1266.81	0.01078328		1796.84	0.00149038		2326.84	-0.00838407		2856.84	-0.00511541		3386.84	-0.00128088
207	0.01751656		737.02	0.00353479		1267.01	0.00999126		1797.04	0.00139695		2327.04	-0.00883744		2857.04	-0.00491297		3387.04	0.00013694
207.2	0.01771909		737.22	0.00371719		1267.21	0.01041859		1797.24	0.0016098		2327.24	-0.00823256		2857.24	-0.00485553		3387.24	0.00011443
207.4	0.01757162		737.42	0.00356773		1267.41	0.00949967		1797.44	0.00287236		2327.44	-0.00859078		2857.44	-0.00515423		3387.44	-0.00018968
207.6	0.01839026		737.62	0.00245956		1267.61	0.00986564		1797.64	0.00284618		2327.64	-0.00780803		2857.64	-0.00448954		3387.64	-0.00004639
207.8	0.01839523		737.82	0.00236308		1267.81	0.01083234		1797.84	0.00204437		2327.84	-0.00796183		2857.84	-0.00388076		3387.84	0.00083998
208	0.01908896		738.02	0.00194652		1268.01	0.01099821		1798.04	0.00164338		2328.04	-0.00687677		2858.04	-0.0035348		3388.04	0.00038372
208.2	0.01992115		738.22	0.00219699		1268.21	0.01101323		1798.24	0.00014963		2328.24	-0.00772841		2858.24	-0.00353556		3388.24	0.00010461
208.4	0.01978194		738.42	0.00250874		1268.41	0.01071273		1798.44	0.00061317		2328.44	-0.00750666		2858.44	-0.00335909		3388.44	0.0003065
208.6	0.02057833		738.62	0.00262875		1268.61	0.01067163		1798.64	-0.00013477		2328.64	-0.00749484		2858.64	-0.00279046		3388.64	-0.00002898
208.8	0.02165317		738.82	0.00248048		1268.81	0.01057647		1798.84	0.00077039		2328.84	-0.00765427		2858.84	-0.00262048		3388.84	0.00006698
209	0.02195681		739.02	0.00203278		1269.01	0.00997075		1799.04	0.00023114		2329.04	-0.00714858		2859.04	-0.00192498		3389.04	0.00009838
209.2	0.02337464		739.22	0.00189153		1269.21	0.01001374		1799.24	-0.00001583		2329.24	-0.0072624		2859.24	-0.00189539		3389.24	-0.00124858
209.4	0.02497928		739.42	0.00143822		1269.41	0.0092375		1799.44	-0.0001245		2329.44	-0.00656303		2859.44	-0.00246359		3389.44	-0.00134329
209.6	0.02497746		739.62	0.00068992		1269.61	0.00897161		1799.64	0.00029666		2329.64	-0.00607429		2859.64	-0.00281152		3389.64	-0.00207807
209.8	0.02675953		739.82	0.00015717		1269.81	0.00915125		1799.84	0.00056821		2329.84	-0.00498446		2859.84	-0.00285001		3389.84	-0.00116828
210	0.02743742		740.02	-0.00014223		1270.01	0.0098577		1800.04	0.00040062		2330.04	-0.00526064		2860.04	-0.00307602		3390.04	-0.00012326
210.2	0.02790622		740.22	-0.00003507		1270.21	0.0103068		1800.24	0.00057249		2330.24	-0.00513808		2860.24	-0.00331984		3390.24	-0.00089933
210.4	0.02786773		740.42	0.00020467		1270.41	0.00934956		1800.44	0.00055466		2330.44	-0.00514408		2860.44	-0.00261537		3390.44	-0.00026696
210.6	0.02808431		740.62	-0.00021359		1270.61	0.00910791		1800.64	0.00110421		2330.64	-0.00470313		2860.64	-0.00317713		3390.64	0.00002962
210.8	0.02727568		740.82	0.0001352		1270.81	0.00905912		1800.84	0.00073009		2330.84	-0.00500938		2860.84	-0.00340919		3390.84	0.00016834
211	0.0263882		741.02	0.00029278		1271.01	0.0085895		1801.04	0.00156223		2331.04	-0.0056452		2861.04	-0.00376117		3391.04	0.00039657
211.2	0.02637935		741.22	0.00004757		1271.21	0.00933591		1801.24	0.00127247		2331.24	-0.00538396		2861.24	-0.00390291		3391.24	-0.00010791
211.4	0.02605462		741.42	0.00055154		1271.41	0.00903806		1801.44	0.00139215		2331.44	-0.00491879		2861.44	-0.00441331		3391.44	0.00010094
211.6	0.02578039		741.62	0.00064877		1271.61	0.00963434		1801.64	0.00001611		2331.64	-0.00419747		2861.64	-0.00356104		3391.64	-0.00014277
211.8	0.02470029		741.82	0.00194732		1271.81	0.00956476		1801.84	-0.00055587		2331.84	-0.00415669		2861.84	-0.00281444		3391.84	0.00086442
212	0.02483155		742.02	0.00212545		1272.01	0.00877521		1802.04	-0.00162969		2332.04	-0.0040157		2862.04	-0.0016798		3392.04	0.00137987
212.2	0.02461869		742.22	0.00303677		1272.21	0.00867798		1802.24	-0.00179114		2332.24	-0.00509916		2862.24	-0.00074421		3392.24	0.00172747
212.4	0.02424541		742.42	0.00365749		1272.41	0.00793894		1802.44	-0.0012733		2332.44	-0.0050206		2862.44	-0.00019714		3392.44	0.0021394
212.6	0.02518435		742.62	0.00384734		1272.61	0.00707632		1802.64	-0.00193492		2332.64	-0.00540068		2862.64	0.00038119		3392.64	0.00232925
212.8	0.02511078		742.82	0.00343234		1272.81	0.00691281		1802.84	-0.00126192		2332.84	-0.00482613		2862.84	0.00088112		3392.84	0.00176218
213	0.02583164		743.02	0.00357122		1273.01	0.00675462		1803.04	-0.00244431		2333.04	-0.00396242		2863.04	0.00119335		3393.04	0.0021485
213.2	0.02611393		743.22	0.00354676		1273.21	0.00645897		1803.24	-0.00276249		2333.24	-0.00385829		2863.24	0.00138374		3393.24	0.00104467
213.4	0.02668982		743.42	0.00243398		1273.41	0.0057321		1803.44	-0.00227962		2333.44	-0.00315757		2863.44	0.00043011		3393.44	0.00055068
213.6	0.02699054		743.62	0.00167671		1273.61	0.00629426		1803.64	-0.0022236		2333.64	-0.00333161		2863.64	0.0002198		3393.64	0.00028141
213.8	0.02736307		743.82	0.00197483		1273.81	0.00656739		1803.84	-0.00145928		2333.84	-0.00369621		2863.84	0.00058221		3393.84	0.00099613
214	0.02742571		744.02	0.00179979		1274.01	0.00549063		1804.04	-0.00127013		2334.04	-0.00359289		2864.04	0.00016617		3394.04	0.001018
214.2	0.02752292		744.22	0.00202111		1274.21	0.00569092		1804.24	-0.00158122		2334.24	-0.00334011		2864.24	-0.00106174		3394.24	0.0000882
214.4	0.02780525		744.42	0.00195962		1274.41	0.00567897		1804.44	-0.0011432		2334.44	-0.00402294		2864.44	-0.00160157		3394.44	0.0000761
214.6	0.02789212		744.62	0.00153273		1274.61	0.00574613		1804.64	-0.0005864		2334.64	-0.00404443		2864.64	-0.00267119		3394.64	-0.00028481
214.8	0.02709606		744.82	0.00095998		1274.81	0.00651606		1804.84	0.00067013		2334.84	-0.00417015		2864.84	-0.00337646		3394.84	-0.00108603
215	0.02757688		745.02	0.00087407		1275.01	0.00661323		1805.04	0.00222132		2335.04	-0.00405934		2865.04	-0.00326163		3395.04	-0.0015272
215.2	0.02812673		745.22	0.00062172		1275.21	0.00715251		1805.24	0.00232645		2335.24	-0.00400457		2865.24	-0.00319144		3395.24	-0.00161831
215.4	0.02852381		745.42	0.0012403		1275.41	0.00709544		1805.44	0.00245313		2335.44	-0.0038076		2865.44	-0.00320955		3395.44	-0.00179751
215.6	0.02935317		745.62	0.00138051		1275.61	0.00704251		1805.64	0.00198195		2335.64	-0.00449884		2865.64	-0.00164789		3395.64	-0.00167927
215.8	0.03000685		745.82	0.00183517		1275.81	0.00726945		1805.84	0.00309049		2335.84	-0.00553688		2865.84	-0.00089315		3395.84	-0.00099923
216	0.03089589		746.02	0.00225154		1276.01	0.00728354		1806.04	0.00301381		2336.04	-0.00574572		2866.04	-0.000755		3396.04	-0.00124703
216.2	0.03098139		746.22	0.0031643		1276.21	0.00740794		1806.24	0.00427826		2336.24	-0.00640074		2866.24	-0.00051318		3396.24	-0.00125633
216.4	0.03036466		746.42	0.00376191		1276.41	0.00767034		1806.44	0.00438268		2336.44	-0.0063955		2866.44	-0.00062507		3396.44	-0.00140295
216.6	0.03148442		746.62	0.00436479		1276.61	0.00777916		1806.64	0.00412143		2336.64	-0.0066704		2866.64	-0.00035581		3396.64	-0.00131966
216.8	0.03145877		746.82	0.00525154		1276.81	0.00867998		1806.84	0.00383837		2336.84	-0.00681588		2866.84	-0.0003101		3396.84	-0.0024358
217	0.03218462		747.02	0.00631683		1277.01	0.00966934		1807.04	0.00359425		2337.04	-0.00751718		2867.04	-0.00045263		3397.04	-0.00169927
217.2	0.03207934		747.22	0.00674898		1277.21	0.00987196		1807.24	0.00335011		2337.24	-0.00773118		2867.24	-0.00069599		3397.24	-0.00271688
217.4	0.03267952		747.42	0.00761865		1277.41	0.01003827		1807.44	0.00304062		2337.44	-0.0074046		2867.44	-0.00084353		3397.44	-0.00308904
217.6	0.03284902		747.62	0.00754961		1277.61	0.01003008		1807.64	0.00303816		2337.64	-0.00704231		2867.64	-0.00047502		3397.64	-0.00303123
217.8	0.0328574		747.82	0.00729191		1277.81	0.00922571		1807.84	0.00340354		2337.84	-0.00704115		2867.84	-0.00022065		3397.84	-0.00317684
218	0.03312093		748.02	0.00662755		1278.01	0.00936743		1808.04	0.00301021		2338.04	-0.00717915		2868.04	-0.00177711		3398.04	-0.00316324
218.2	0.03322739		748.22	0.00680674		1278.21	0.01121248		1808.24	0.00252311		2338.24	-0.00755005		2868.24	-0.00308673		3398.24	-0.00278776
218.4	0.03305305		748.42	0.00631457		1278.41	0.01153066		1808.44	0.00298163		2338.44	-0.00676471		2868.44	-0.0032848		3398.44	-0.00323289
218.6	0.03291587		748.62	0.00559587		1278.61	0.0116637		1808.64	0.00228643		2338.64	-0.00628895		2868.64	-0.00425872		3398.64	-0.0027817
218.8	0.03346173		748.82	0.00560451		1278.81	0.01168253		1808.84	0.00288403		2338.84	-0.00631218		2868.84	-0.00407696		3398.84	-0.00264958
219	0.03424857		749.02	0.00473072		1279.01	0.01149532		1809.04	0.0026965		2339.04	-0.00645491		2869.04	-0.00428869		3399.04	-0.00188516
219.2	0.03518043		749.22	0.00374856		1279.21	0.01203553		1809.24	0.00195573		2339.24	-0.00575311		2869.24	-0.00432109		3399.24	-0.001874
219.4	0.03603109		749.42	0.00280199		1279.41	0.01236786		1809.44	0.0012801		2339.44	-0.00611144		2869.44	-0.00468148		3399.44	-0.00187482
219.6	0.03700263		749.62	0.00212878		1279.61	0.01283595		1809.64	0.00122462		2339.64	-0.00675696		2869.64	-0.00518664		3399.64	-0.00148581
219.8	0.03616412		749.82	0.0026563		1279.81	0.01302926		1809.84	0.00235472		2339.84	-0.00662931		2869.84	-0.00518343		3399.84	-0.00152297
220	0.03506459		750.02	0.00354517		1280.01	0.01340023		1810.04	0.00157232		2340.04	-0.00580546		2870.04	-0.00523292		3400.04	-0.00153414
220.2	0.03441001		750.22	0.00430996		1280.21	0.01420569		1810.24	0.00167724		2340.24	-0.005969		2870.24	-0.00492444		3400.24	-0.0009355
220.4	0.03419695		750.42	0.00490689		1280.41	0.01474492		1810.44	0.00123355		2340.44	-0.00562483		2870.44	-0.00509903		3400.44	-0.00086808
220.6	0.03509506		750.62	0.00572071		1280.61	0.0147449		1810.64	0.00072199		2340.64	-0.0061016		2870.64	-0.00485959		3400.64	-0.00057151
220.8	0.0350793		750.82	0.00667592		1280.81	0.0147054		1810.84	0.00013548		2340.84	-0.00637156		2870.84	-0.00451839		3400.84	-0.00159479
221	0.03517809		751.02	0.00676534		1281.01	0.0149516		1811.04	-0.00041559		2341.04	-0.00607562		2871.04	-0.00448021		3401.04	-0.00111509
221.2	0.03499892		751.22	0.00757013		1281.21	0.01378829		1811.24	-0.00097015		2341.24	-0.00493868		2871.24	-0.00426495		3401.24	-0.00183304
221.4	0.03531097		751.42	0.00741507		1281.41	0.01298235		1811.44	-0.00130008		2341.44	-0.00420525		2871.44	-0.00312674		3401.44	-0.00188867
221.6	0.03556658		751.62	0.00656167		1281.61	0.01188078		1811.64	-0.00060238		2341.64	-0.00336048		2871.64	-0.00249816		3401.64	-0.00223916
221.8	0.03578829		751.82	0.00681445		1281.81	0.0117113		1811.84	-0.0006989		2341.84	-0.00334132		2871.84	-0.00226816		3401.84	-0.00247688
222	0.0356762		752.02	0.00727323		1282.01	0.01191242		1812.04	-0.00070167		2342.04	-0.00321071		2872.04	-0.00299496		3402.04	-0.00195206
222.2	0.03535202		752.22	0.00754089		1282.21	0.01222446		1812.24	-0.00067765		2342.24	-0.00311423		2872.24	-0.00272673		3402.24	-0.00082438
222.4	0.03497045		752.42	0.00725465		1282.41	0.01209034		1812.44	-0.00095883		2342.44	-0.00248522		2872.44	-0.00144575		3402.44	-0.00157028
222.6	0.03542088		752.62	0.00691086		1282.61	0.01153737		1812.64	-0.00180536		2342.64	-0.00280166		2872.64	-0.00122432		3402.64	-0.00092055
222.8	0.0356838		752.82	0.00659733		1282.81	0.01121428		1812.84	-0.00064885		2342.84	-0.00279214		2872.84	-0.00117221		3402.84	-0.00068176
223	0.03537481		753.02	0.00556458		1283.01	0.01219902		1813.04	0.00023721		2343.04	-0.00340523		2873.04	-0.00155903		3403.04	-0.00061801
223.2	0.03581153		753.22	0.0048491		1283.21	0.01286253		1813.24	0.00110653		2343.24	-0.00359104		2873.24	-0.00136587		3403.24	-0.00061179
223.4	0.03673121		753.42	0.00459448		1283.41	0.01268995		1813.44	0.00182462		2343.44	-0.00425754		2873.44	-0.00268377		3403.44	-0.00158506
223.6	0.03660102		753.62	0.00484627		1283.61	0.01291547		1813.64	0.00221513		2343.64	-0.00450257		2873.64	-0.00332685		3403.64	-0.00144122
223.8	0.0360065		753.82	0.00553773		1283.81	0.01280679		1813.84	0.00271347		2343.84	-0.00402656		2873.84	-0.00186679		3403.84	-0.00172711
224	0.03655321		754.02	0.00513872		1284.01	0.01325791		1814.04	0.00169774		2344.04	-0.00393741		2874.04	-0.00180045		3404.04	-0.00226562
224.2	0.03701762		754.22	0.00407689		1284.21	0.01319459		1814.24	0.00205251		2344.24	-0.00478121		2874.24	-0.00198926		3404.24	-0.00244333
224.4	0.03762656		754.42	0.00426537		1284.41	0.01251069		1814.44	0.00197595		2344.44	-0.00471956		2874.44	-0.00105475		3404.44	-0.00362665
224.6	0.03786593		754.62	0.00406102		1284.61	0.01184032		1814.64	0.00188105		2344.64	-0.00502665		2874.64	-0.00033495		3404.64	-0.00323003
224.8	0.0386044		754.82	0.00309598		1284.81	0.0109913		1814.84	0.00151994		2344.84	-0.00515833		2874.84	-0.00020105		3404.84	-0.00338205
225	0.03827582		755.02	0.00270508		1285.01	0.01137307		1815.04	0.00194047		2345.04	-0.00481019		2875.04	-0.00017497		3405.04	-0.0030574
225.2	0.03830283		755.22	0.00322121		1285.21	0.01010214		1815.24	0.00258473		2345.24	-0.0040595		2875.24	0.00030332		3405.24	-0.00304488
225.4	0.03957505		755.42	0.00258178		1285.41	0.01003875		1815.44	0.00267545		2345.44	-0.00344871		2875.44	0.0000968		3405.44	-0.00379223
225.6	0.03982502		755.62	0.0031983		1285.61	0.0099685		1815.64	0.002061		2345.64	-0.00309083		2875.64	-0.00050808		3405.64	-0.00388011
225.8	0.0402239		755.82	0.00410929		1285.81	0.00994272		1815.84	0.00237023		2345.84	-0.00369153		2875.84	-0.00030249		3405.84	-0.00341337
226	0.0403195		756.02	0.00483365		1286.01	0.00967633		1816.04	0.0022822		2346.04	-0.00280011		2876.04	0.00000587		3406.04	-0.00249126
226.2	0.03941166		756.22	0.00506353		1286.21	0.01099688		1816.24	0.0013034		2346.24	-0.00312855		2876.24	0.00025296		3406.24	-0.00163624
226.4	0.03943933		756.42	0.00599807		1286.41	0.01045217		1816.44	0.00035517		2346.44	-0.00287923		2876.44	0.000461		3406.44	-0.00196707
226.6	0.0393298		756.62	0.00641561		1286.61	0.0110508		1816.64	0.0004669		2346.64	-0.0028684		2876.64	-0.00078319		3406.64	-0.00175352
226.8	0.03914665		756.82	0.00763169		1286.81	0.01150933		1816.84	0.00065702		2346.84	-0.00332188		2876.84	-0.00145294		3406.84	-0.00198411
227	0.03834232		757.02	0.00793927		1287.01	0.01210738		1817.04	0.00159421		2347.04	-0.00387048		2877.04	-0.00240855		3407.04	-0.00226819
227.2	0.03861575		757.22	0.00832837		1287.21	0.01162993		1817.24	0.00140187		2347.24	-0.00404763		2877.24	-0.00308286		3407.24	-0.00258409
227.4	0.03857993		757.42	0.00915827		1287.41	0.01079309		1817.44	0.00096126		2347.44	-0.00377574		2877.44	-0.00379666		3407.44	-0.00364627
227.6	0.03848698		757.62	0.00927924		1287.61	0.01123446		1817.64	0.00062607		2347.64	-0.0038831		2877.64	-0.00351935		3407.64	-0.00303645
227.8	0.0383216		757.82	0.00912822		1287.81	0.01115865		1817.84	0.00095329		2347.84	-0.00448424		2877.84	-0.00244481		3407.84	-0.00358199
228	0.03868241		758.02	0.00773763		1288.01	0.0106547		1818.04	0.00035763		2348.04	-0.0041915		2878.04	-0.00178614		3408.04	-0.00423444
228.2	0.03990271		758.22	0.00695217		1288.21	0.01106081		1818.24	0.00175356		2348.24	-0.00476133		2878.24	-0.00091763		3408.24	-0.00439182
228.4	0.0401736		758.42	0.00687014		1288.41	0.01160179		1818.44	0.00194238		2348.44	-0.00456609		2878.44	0.0005307		3408.44	-0.00465376
228.6	0.04017019		758.62	0.00604823		1288.61	0.01238384		1818.64	0.00189145		2348.64	-0.00534543		2878.64	0.00116286		3408.64	-0.00337705
228.8	0.04034291		758.82	0.00550246		1288.81	0.01341207		1818.84	0.00213227		2348.84	-0.00590168		2878.84	0.00136953		3408.84	-0.00414868
229	0.04091254		759.02	0.00506795		1289.01	0.01444089		1819.04	0.00195548		2349.04	-0.00564532		2879.04	0.00146678		3409.04	-0.00473098
229.2	0.04186492		759.22	0.00394226		1289.21	0.01403931		1819.24	0.00153022		2349.24	-0.00549411		2879.24	0.00134002		3409.24	-0.00494044
229.4	0.04300987		759.42	0.00310964		1289.41	0.01463138		1819.44	0.00127122		2349.44	-0.00558804		2879.44	0.00061526		3409.44	-0.00554826
229.6	0.04266229		759.62	0.00334692		1289.61	0.0146468		1819.64	0.00117939		2349.64	-0.00584574		2879.64	0.00049814		3409.64	-0.00543934
229.8	0.04352874		759.82	0.00313193		1289.81	0.01492889		1819.84	0.00126269		2349.84	-0.00559051		2879.84	0.0010615		3409.84	-0.00540733
230	0.04359111		760.02	0.00371382		1290.01	0.0151831		1820.04	0.00055616		2350.04	-0.00509752		2880.04	0.0009767		3410.04	-0.00502537
230.2	0.04329127		760.22	0.00372067		1290.21	0.01519459		1820.24	-0.0003122		2350.24	-0.00581839		2880.24	0.00004626		3410.24	-0.00455316
230.4	0.04405962		760.42	0.00429034		1290.41	0.0142834		1820.44	0.00004148		2350.44	-0.00536053		2880.44	-0.0005063		3410.44	-0.00437635
230.6	0.0438545		760.62	0.00459689		1290.61	0.01434455		1820.64	-0.00002711		2350.64	-0.00416142		2880.64	-0.00162592		3410.64	-0.00431253
230.8	0.04352119		760.82	0.00585812		1290.81	0.01412869		1820.84	0.0000265		2350.84	-0.00420555		2880.84	-0.00231751		3410.84	-0.0041498
231	0.04335106		761.02	0.00599505		1291.01	0.01445226		1821.04	0.00119287		2351.04	-0.00331693		2881.04	-0.00333689		3411.04	-0.00356068
231.2	0.04342556		761.22	0.00676986		1291.21	0.01346531		1821.24	0.00103049		2351.24	-0.00333699		2881.24	-0.00317988		3411.24	-0.00307437
231.4	0.04330014		761.42	0.0070132		1291.41	0.01362353		1821.44	0.00189803		2351.44	-0.00247785		2881.44	-0.00296286		3411.44	-0.00250075
231.6	0.0439482		761.62	0.00651759		1291.61	0.01371562		1821.64	0.00270364		2351.64	-0.0023658		2881.64	-0.00301196		3411.64	-0.00115186
231.8	0.04457222		761.82	0.00610836		1291.81	0.01299564		1821.84	0.00291699		2351.84	-0.0018996		2881.84	-0.00234289		3411.84	-0.00053122
232	0.04535587		762.02	0.00562836		1292.01	0.01303637		1822.04	0.00250735		2352.04	-0.00080922		2882.04	-0.00102168		3412.04	-0.00064142
232.2	0.04626838		762.22	0.00521048		1292.21	0.01362932		1822.24	0.00348089		2352.24	-0.00089587		2882.24	-0.00143405		3412.24	-0.00097111
232.4	0.04554125		762.42	0.00462944		1292.41	0.01371987		1822.44	0.00266035		2352.44	-0.00092139		2882.44	-0.00119145		3412.44	-0.00155004
232.6	0.04558675		762.62	0.00448957		1292.61	0.01401273		1822.64	0.0034155		2352.64	-0.00164825		2882.64	-0.00139692		3412.64	-0.00143456
232.8	0.04610227		762.82	0.00387529		1292.81	0.01308758		1822.84	0.00248722		2352.84	-0.0020967		2882.84	-0.00137733		3412.84	-0.00224141
233	0.04735817		763.02	0.00330291		1293.01	0.01288266		1823.04	0.0019748		2353.04	-0.00234747		2883.04	-0.00126568		3413.04	-0.00284812
233.2	0.04725336		763.22	0.00236099		1293.21	0.01245317		1823.24	0.00160071		2353.24	-0.00263873		2883.24	-0.00070133		3413.24	-0.00336264
233.4	0.04710084		763.42	0.00234755		1293.41	0.0129915		1823.44	0.00167147		2353.44	-0.00322202		2883.44	-0.00053325		3413.44	-0.00452766
233.6	0.04733872		763.62	0.00261373		1293.61	0.01231665		1823.64	0.00100206		2353.64	-0.00362723		2883.64	-0.00025798		3413.64	-0.00597794
233.8	0.04731076		763.82	0.00234506		1293.81	0.01193506		1823.84	-0.00043363		2353.84	-0.00405365		2883.84	-0.00035855		3413.84	-0.00640228
234	0.04727054		764.02	0.00297823		1294.01	0.01138176		1824.04	0.00020782		2354.04	-0.00596632		2884.04	-0.00021566		3414.04	-0.00689191
234.2	0.04708673		764.22	0.00404151		1294.21	0.01094574		1824.24	-0.00012097		2354.24	-0.00574181		2884.24	-0.00067528		3414.24	-0.00709831
234.4	0.04645567		764.42	0.00452672		1294.41	0.01092094		1824.44	-0.00025811		2354.44	-0.00492553		2884.44	-0.00044174		3414.44	-0.00724369
234.6	0.04674424		764.62	0.00582876		1294.61	0.01128965		1824.64	-0.00009079		2354.64	-0.00449126		2884.64	-0.00181809		3414.64	-0.00670808
234.8	0.04624664		764.82	0.00703386		1294.81	0.01230872		1824.84	0.00004561		2354.84	-0.0042614		2884.84	-0.00159565		3414.84	-0.0062905
235	0.04622714		765.02	0.00798976		1295.01	0.01326824		1825.04	0.00123585		2355.04	-0.00333119		2885.04	-0.00139064		3415.04	-0.00547322
235.2	0.04554465		765.22	0.00839943		1295.21	0.01330757		1825.24	0.0016088		2355.24	-0.00284967		2885.24	-0.00083746		3415.24	-0.00523679
235.4	0.04541914		765.42	0.00814519		1295.41	0.01410324		1825.44	0.00185607		2355.44	-0.00230103		2885.44	-0.00099603		3415.44	-0.00488328
235.6	0.04614977		765.62	0.00771115		1295.61	0.01416333		1825.64	0.00216194		2355.64	-0.00205533		2885.64	-0.00140803		3415.64	-0.00504671
235.8	0.04604142		765.82	0.00799975		1295.81	0.01483279		1825.84	0.00195312		2355.84	-0.00117588		2885.84	-0.00133641		3415.84	-0.004952
236	0.04625549		766.02	0.00749669		1296.01	0.01574718		1826.04	0.00192697		2356.04	-0.00020272		2886.04	-0.00151476		3416.04	-0.00513269
236.2	0.04604639		766.22	0.00728514		1296.21	0.01616872		1826.24	0.0019634		2356.24	0.00072256		2886.24	-0.0019435		3416.24	-0.00563377
236.4	0.04556138		766.42	0.00696441		1296.41	0.01686782		1826.44	0.00134948		2356.44	0.00028198		2886.44	-0.00201769		3416.44	-0.00578425
236.6	0.04609706		766.62	0.00704624		1296.61	0.01672816		1826.64	0.00174912		2356.64	0.00043139		2886.64	-0.00161543		3416.64	-0.00532936
236.8	0.04719876		766.82	0.0073007		1296.81	0.01663672		1826.84	0.00016997		2356.84	0.00069414		2886.84	-0.00120715		3416.84	-0.00533015
237	0.04736011		767.02	0.00659708		1297.01	0.01715064		1827.04	0.00053578		2357.04	0.00125118		2887.04	-0.00075029		3417.04	-0.00546257
237.2	0.04683755		767.22	0.00591175		1297.21	0.01755782		1827.24	-0.00014029		2357.24	0.00033453		2887.24	-0.00042856		3417.24	-0.00601431
237.4	0.04672513		767.42	0.00587784		1297.41	0.01762863		1827.44	0.00025171		2357.44	-0.00063535		2887.44	-0.00031985		3417.44	-0.0052281
237.6	0.04770962		767.62	0.00470759		1297.61	0.01593844		1827.64	-0.0004171		2357.64	-0.00044318		2887.64	-0.00090903		3417.64	-0.00583327
237.8	0.04733272		767.82	0.00385777		1297.81	0.01490533		1827.84	0.00030768		2357.84	-0.0014965		2887.84	-0.00124308		3417.84	-0.00635147
238	0.0480945		768.02	0.00383169		1298.01	0.01331482		1828.04	0.00101186		2358.04	-0.00285233		2888.04	-0.0013236		3418.04	-0.00666701
238.2	0.04784078		768.22	0.00409473		1298.21	0.01196364		1828.24	0.00055908		2358.24	-0.00281893		2888.24	-0.00168715		3418.24	-0.00700992
238.4	0.0479678		768.42	0.0031972		1298.41	0.01079984		1828.44	0.00063263		2358.44	-0.00326654		2888.44	-0.00081727		3418.44	-0.00706426
238.6	0.04911645		768.62	0.00312971		1298.61	0.01066774		1828.64	0.00166976		2358.64	-0.00337929		2888.64	-0.00134879		3418.64	-0.00684144
238.8	0.04845388		768.82	0.00358401		1298.81	0.00995732		1828.84	0.00182513		2358.84	-0.00381095		2888.84	-0.00033637		3418.84	-0.00658565
239	0.04946084		769.02	0.00375543		1299.01	0.00971609		1829.04	0.00283943		2359.04	-0.00380403		2889.04	-0.0007924		3419.04	-0.00615521
239.2	0.05021715		769.22	0.00341466		1299.21	0.00834197		1829.24	0.00363458		2359.24	-0.00454542		2889.24	-0.00022146		3419.24	-0.00665738
239.4	0.05077488		769.42	0.00384279		1299.41	0.0087799		1829.44	0.00300712		2359.44	-0.00538563		2889.44	-0.00058305		3419.44	-0.006771
239.6	0.05125772		769.62	0.00405568		1299.61	0.00916778		1829.64	0.00377657		2359.64	-0.00507701		2889.64	-0.00030258		3419.64	-0.0077799
239.8	0.05095471		769.82	0.00411112		1299.81	0.00997608		1829.84	0.00371287		2359.84	-0.00392345		2889.84	-0.00062094		3419.84	-0.00723613
240	0.05124917		770.02	0.00428703		1300.01	0.00989825		1830.04	0.00368875		2360.04	-0.00287243		2890.04	-0.0006123		3420.04	-0.00773205
240.2	0.05119286		770.22	0.00601659		1300.21	0.01061478		1830.24	0.00362552		2360.24	-0.00243524		2890.24	0.00038101		3420.24	-0.00863873
240.4	0.05150573		770.42	0.00612675		1300.41	0.01115445		1830.44	0.00275433		2360.44	-0.00294357		2890.44	-0.00010869		3420.44	-0.00871872
240.6	0.05174791		770.62	0.00652851		1300.61	0.01111332		1830.64	0.003536		2360.64	-0.00146315		2890.64	-0.00021991		3420.64	-0.00831627
240.8	0.05080094		770.82	0.00675458		1300.81	0.01189941		1830.84	0.00325128		2360.84	-0.00079261		2890.84	-0.00095579		3420.84	-0.00796332
241	0.04956532		771.02	0.00586144		1301.01	0.01237852		1831.04	0.00262873		2361.04	-0.00052283		2891.04	-0.00205048		3421.04	-0.00761943
241.2	0.04896251		771.22	0.00641159		1301.21	0.01341946		1831.24	0.00196724		2361.24	-0.00120949		2891.24	-0.00323298		3421.24	-0.00749501
241.4	0.04930558		771.42	0.00633448		1301.41	0.01320105		1831.44	0.00176301		2361.44	-0.00104301		2891.44	-0.00353879		3421.44	-0.00640283
241.6	0.04935591		771.62	0.00501469		1301.61	0.01282983		1831.64	0.00105739		2361.64	0.00004161		2891.64	-0.00518176		3421.64	-0.00734585
241.8	0.0491394		771.82	0.0054669		1301.81	0.01265292		1831.84	0.00126603		2361.84	-0.00020002		2891.84	-0.00539113		3421.84	-0.00792856
242	0.04945182		772.02	0.00502817		1302.01	0.01153202		1832.04	0.00105469		2362.04	-0.00036119		2892.04	-0.00501847		3422.04	-0.00738705
242.2	0.04952299		772.22	0.00436042		1302.21	0.01153091		1832.24	0.0006747		2362.24	-0.00149344		2892.24	-0.00480223		3422.24	-0.00712629
242.4	0.04994062		772.42	0.00346745		1302.41	0.01169231		1832.44	0.0007654		2362.44	-0.00133917		2892.44	-0.00361977		3422.44	-0.0062274
242.6	0.05097215		772.62	0.00417143		1302.61	0.01220616		1832.64	0.00086073		2362.64	-0.00134748		2892.64	-0.00421997		3422.64	-0.00526755
242.8	0.05096643		772.82	0.00469493		1302.81	0.01102154		1832.84	0.00018443		2362.84	-0.00197659		2892.84	-0.00393636		3422.84	-0.00380192
243	0.05124084		773.02	0.004692		1303.01	0.01208054		1833.04	0.0000289		2363.04	-0.00226354		2893.04	-0.00380522		3423.04	-0.00323451
243.2	0.0510378		773.22	0.00557984		1303.21	0.01238759		1833.24	0.00018384		2363.24	-0.00328213		2893.24	-0.00240886		3423.24	-0.00268575
243.4	0.05083054		773.42	0.00610806		1303.41	0.01376698		1833.44	0.00013884		2363.44	-0.00319079		2893.44	-0.00167239		3423.44	-0.00292163
243.6	0.05051191		773.62	0.00592364		1303.61	0.01410019		1833.64	0.00163209		2363.64	-0.00272022		2893.64	-0.00079068		3423.64	-0.0036613
243.8	0.05103204		773.82	0.00575917		1303.81	0.01466793		1833.84	0.00187446		2363.84	-0.00207761		2893.84	0.00001978		3423.84	-0.00325934
244	0.05123575		774.02	0.00695848		1304.01	0.01526374		1834.04	0.00259399		2364.04	-0.00192456		2894.04	0.00112241		3424.04	-0.00383708
244.2	0.05172574		774.22	0.00751725		1304.21	0.01556474		1834.24	0.00251878		2364.24	-0.00207651		2894.24	0.00145582		3424.24	-0.00377061
244.4	0.05174944		774.42	0.00619649		1304.41	0.01552592		1834.44	0.00234161		2364.44	-0.00240707		2894.44	0.00125031		3424.44	-0.00389183
244.6	0.05096274		774.62	0.00602862		1304.61	0.01560804		1834.64	0.00306618		2364.64	-0.00187416		2894.64	0.00111281		3424.64	-0.00367402
244.8	0.05044035		774.82	0.00614571		1304.81	0.01585883		1834.84	0.0025745		2364.84	-0.00200314		2894.84	0.00148764		3424.84	-0.00442514
245	0.05056726		775.02	0.00575055		1305.01	0.01514614		1835.04	0.00185495		2365.04	-0.00270872		2895.04	0.00099888		3425.04	-0.0052887
245.2	0.05133986		775.22	0.00556787		1305.21	0.01483761		1835.24	0.00233245		2365.24	-0.00283948		2895.24	0.00048284		3425.24	-0.00564782
245.4	0.0516597		775.42	0.00536882		1305.41	0.01407253		1835.44	0.0028911		2365.44	-0.00291692		2895.44	0.00052656		3425.44	-0.00657845
245.6	0.05167976		775.62	0.00512038		1305.61	0.01384608		1835.64	0.00322013		2365.64	-0.00200386		2895.64	-0.00071558		3425.64	-0.00700317
245.8	0.05190928		775.82	0.0042458		1305.81	0.0126746		1835.84	0.0026		2365.84	-0.00225186		2895.84	-0.00060055		3425.84	-0.00769281
246	0.05206242		776.02	0.00395352		1306.01	0.01206674		1836.04	0.00283557		2366.04	-0.00273367		2896.04	-0.00107147		3426.04	-0.0074482
246.2	0.05273777		776.22	0.00433302		1306.21	0.011804		1836.24	0.00241927		2366.24	-0.00338573		2896.24	-0.00187589		3426.24	-0.00787126
246.4	0.05267854		776.42	0.00499589		1306.41	0.01147876		1836.44	0.00234714		2366.44	-0.00296937		2896.44	-0.00208232		3426.44	-0.00808493
246.6	0.05362294		776.62	0.0053306		1306.61	0.01107147		1836.64	0.00206161		2366.64	-0.00312708		2896.64	-0.00275502		3426.64	-0.00765111
246.8	0.0529179		776.82	0.00483725		1306.81	0.01075139		1836.84	0.00121935		2366.84	-0.00273883		2896.84	-0.00306457		3426.84	-0.00780834
247	0.05251076		777.02	0.00503217		1307.01	0.01182484		1837.04	0.00080459		2367.04	-0.002455		2897.04	-0.00262724		3427.04	-0.00818758
247.2	0.0526439		777.22	0.00439429		1307.21	0.01197739		1837.24	0.0001662		2367.24	-0.00258605		2897.24	-0.00235463		3427.24	-0.00778152
247.4	0.05280571		777.42	0.00454887		1307.41	0.01224919		1837.44	0.00071414		2367.44	-0.00247298		2897.44	-0.00286747		3427.44	-0.00802189
247.6	0.05373763		777.62	0.00470254		1307.61	0.01255024		1837.64	0.00035198		2367.64	-0.00209728		2897.64	-0.00284882		3427.64	-0.00707962
247.8	0.05463523		777.82	0.0046704		1307.81	0.01280709		1837.84	-0.00006044		2367.84	-0.00264812		2897.84	-0.002368		3427.84	-0.00663329
248	0.05470925		778.02	0.00459395		1308.01	0.013285		1838.04	-0.00017654		2368.04	-0.00231755		2898.04	-0.00188137		3428.04	-0.00663046
248.2	0.05559217		778.22	0.00269618		1308.21	0.01298946		1838.24	-0.00103869		2368.24	-0.00299264		2898.24	-0.00220669		3428.24	-0.00596981
248.4	0.05550582		778.42	0.00193395		1308.41	0.01317651		1838.44	-0.00098127		2368.44	-0.00302264		2898.44	-0.00116065		3428.44	-0.00516842
248.6	0.05544578		778.62	0.00268271		1308.61	0.01258299		1838.64	-0.0009376		2368.64	-0.00345912		2898.64	-0.00112351		3428.64	-0.00509445
248.8	0.05575088		778.82	0.00303795		1308.81	0.01175851		1838.84	-0.00092482		2368.84	-0.00360779		2898.84	-0.00004005		3428.84	-0.00563808
249	0.05564585		779.02	0.0030385		1309.01	0.01084057		1839.04	-0.00092217		2369.04	-0.00430034		2899.04	-0.00070068		3429.04	-0.00606718
249.2	0.05633539		779.22	0.00329611		1309.21	0.01147459		1839.24	-0.00030076		2369.24	-0.00390187		2899.24	-0.00064136		3429.24	-0.00593849
249.4	0.05550853		779.42	0.00404319		1309.41	0.01167728		1839.44	0.00047953		2369.44	-0.00345518		2899.44	-0.00041864		3429.44	-0.00613183
249.6	0.05594889		779.62	0.00401472		1309.61	0.01198677		1839.64	-0.00007172		2369.64	-0.00333783		2899.64	-0.00056251		3429.64	-0.00581892
249.8	0.05563255		779.82	0.00450038		1309.81	0.01205688		1839.84	0.00005032		2369.84	-0.00412842		2899.84	-0.00072691		3429.84	-0.00574584
250	0.05661746		780.02	0.00576049		1310.01	0.01265026		1840.04	0.00128813		2370.04	-0.00441595		2900.04	-0.00079454		3430.04	-0.00538003
250.2	0.05665974		780.22	0.00592179		1310.21	0.01222684		1840.24	0.00148159		2370.24	-0.00507932		2900.24	-0.00044625		3430.24	-0.00635344
250.4	0.05533905		780.42	0.0068911		1310.41	0.01283635		1840.44	0.0011873		2370.44	-0.00555657		2900.44	-0.00045003		3430.44	-0.00620254
250.6	0.05551655		780.62	0.0069		1310.61	0.01338985		1840.64	0.00138491		2370.64	-0.00540987		2900.64	0.00003238		3430.64	-0.00616924
250.8	0.05519894		780.82	0.0070596		1310.81	0.01347105		1840.84	0.00118898		2370.84	-0.00555435		2900.84	0.00007577		3430.84	-0.00685443
251	0.05436151		781.02	0.00703858		1311.01	0.0138931		1841.04	0.00081101		2371.04	-0.0050764		2901.04	0.00075437		3431.04	-0.00681862
251.2	0.05369605		781.22	0.00613537		1311.21	0.01426559		1841.24	0.00123392		2371.24	-0.00595385		2901.24	0.0004651		3431.24	-0.00605269
251.4	0.05334659		781.42	0.00675447		1311.41	0.01434137		1841.44	0.00226004		2371.44	-0.00560104		2901.44	-0.00046153		3431.44	-0.00571704
251.6	0.0532942		781.62	0.00666667		1311.61	0.01483422		1841.64	0.00200999		2371.64	-0.00590518		2901.64	-0.0002317		3431.64	-0.0052415
251.8	0.05300869		781.82	0.00636888		1311.81	0.0151289		1841.84	0.00235141		2371.84	-0.00565531		2901.84	0.00015701		3431.84	-0.00553148
252	0.05337037		782.02	0.00585006		1312.01	0.0154748		1842.04	0.00194396		2372.04	-0.0045577		2902.04	0.00029429		3432.04	-0.00562854
252.2	0.05414044		782.22	0.00556592		1312.21	0.01517253		1842.24	0.00157991		2372.24	-0.0042541		2902.24	-0.00035142		3432.24	-0.0050849
252.4	0.05380084		782.42	0.0066877		1312.41	0.01518802		1842.44	0.00166766		2372.44	-0.00267943		2902.44	0.00029675		3432.44	-0.00460651
252.6	0.05408622		782.62	0.0066703		1312.61	0.01505203		1842.64	0.00140174		2372.64	-0.00277587		2902.64	0.00054455		3432.64	-0.00564874
252.8	0.05465467		782.82	0.00606838		1312.81	0.01414796		1842.84	0.00175048		2372.84	-0.00174319		2902.84	0.00061329		3432.84	-0.00585331
253	0.05494028		783.02	0.006157		1313.01	0.01421065		1843.04	0.00271144		2373.04	-0.00105202		2903.04	0.00053026		3433.04	-0.00658073
253.2	0.05536352		783.22	0.00681202		1313.21	0.01436647		1843.24	0.00303873		2373.24	-0.0001171		2903.24	0.00077302		3433.24	-0.0066039
253.4	0.05561028		783.42	0.00716199		1313.41	0.01353201		1843.44	0.00420049		2373.44	0.00073251		2903.44	0.00019485		3433.44	-0.00658574
253.6	0.05719397		783.62	0.0066047		1313.61	0.01336014		1843.64	0.00371989		2373.64	0.0000271		2903.64	-0.00011169		3433.64	-0.00598489
253.8	0.05721927		783.82	0.0080537		1313.81	0.0120504		1843.84	0.00445048		2373.84	-0.00088172		2903.84	-0.00085331		3433.84	-0.00656849
254	0.05766403		784.02	0.00858157		1314.01	0.01137088		1844.04	0.00429832		2374.04	-0.00113305		2904.04	-0.00125077		3434.04	-0.00676532
254.2	0.05738199		784.22	0.00870879		1314.21	0.01044731		1844.24	0.00381853		2374.24	-0.001579		2904.24	-0.0016955		3434.24	-0.00757185
254.4	0.05698462		784.42	0.00922042		1314.41	0.01026127		1844.44	0.0033254		2374.44	-0.0014835		2904.44	-0.00164815		3434.44	-0.0070785
254.6	0.05774934		784.62	0.00895405		1314.61	0.01000465		1844.64	0.00339771		2374.64	-0.00150549		2904.64	-0.00122887		3434.64	-0.00744736
254.8	0.05790735		784.82	0.00874892		1314.81	0.01049377		1844.84	0.00284102		2374.84	-0.00209845		2904.84	-0.00083095		3434.84	-0.00758852
255	0.05746432		785.02	0.00822867		1315.01	0.01094552		1845.04	0.0023554		2375.04	-0.00181962		2905.04	-0.00055738		3435.04	-0.00756799
255.2	0.05702242		785.22	0.00735805		1315.21	0.01167156		1845.24	0.00351981		2375.24	-0.0022371		2905.24	-0.00034992		3435.24	-0.00757646
255.4	0.05642274		785.42	0.00782732		1315.41	0.01260724		1845.44	0.00309659		2375.44	-0.0021722		2905.44	-0.00108219		3435.44	-0.0080177
255.6	0.05690696		785.62	0.00745758		1315.61	0.01378561		1845.64	0.00249056		2375.64	-0.00251754		2905.64	-0.00087244		3435.64	-0.00829033
255.8	0.05680002		785.82	0.00732486		1315.81	0.01487217		1845.84	0.0022622		2375.84	-0.00176796		2905.84	-0.00053176		3435.84	-0.00812463
256	0.05691006		786.02	0.00672761		1316.01	0.01496966		1846.04	0.00227687		2376.04	-0.00140762		2906.04	-0.00012671		3436.04	-0.00775362
256.2	0.05707578		786.22	0.00561729		1316.21	0.01503396		1846.24	0.0021325		2376.24	-0.00082906		2906.24	-0.00023406		3436.24	-0.00740223
256.4	0.05727578		786.42	0.00435017		1316.41	0.01518792		1846.44	0.00179222		2376.44	-0.00082095		2906.44	-0.00006606		3436.44	-0.00759701
256.6	0.05738738		786.62	0.00254148		1316.61	0.01542686		1846.64	0.00275844		2376.64	-0.00136305		2906.64	-0.00034726		3436.64	-0.00766826
256.8	0.05752841		786.82	0.00132423		1316.81	0.0149184		1846.84	0.00394352		2376.84	-0.0001299		2906.84	-0.00077225		3436.84	-0.00762177
257	0.05756435		787.02	0.00105617		1317.01	0.01562528		1847.04	0.00455625		2377.04	0.00007008		2907.04	-0.00058073		3437.04	-0.00740969
257.2	0.05753285		787.22	0.00076431		1317.21	0.01575097		1847.24	0.0041932		2377.24	-0.00006012		2907.24	-0.00120899		3437.24	-0.0069247
257.4	0.05783354		787.42	-0.00008383		1317.41	0.01509685		1847.44	0.00517232		2377.44	-0.00069701		2907.44	-0.00191532		3437.44	-0.00635026
257.6	0.05887933		787.62	-0.00027936		1317.61	0.01491488		1847.64	0.00532725		2377.64	-0.00118172		2907.64	-0.00230091		3437.64	-0.00611025
257.8	0.05818098		787.82	0.00118708		1317.81	0.01375945		1847.84	0.00576823		2377.84	-0.00175094		2907.84	-0.00329819		3437.84	-0.00667569
258	0.05788724		788.02	0.0010503		1318.01	0.01373574		1848.04	0.00620684		2378.04	-0.00164812		2908.04	-0.00380871		3438.04	-0.00533791
258.2	0.0587033		788.22	0.00041912		1318.21	0.01386367		1848.24	0.00573782		2378.24	-0.00193002		2908.24	-0.00382666		3438.24	-0.00487556
258.4	0.0585818		788.42	0.00078902		1318.41	0.01427619		1848.44	0.00539395		2378.44	-0.00172409		2908.44	-0.00415616		3438.44	-0.00459033
258.6	0.05877539		788.62	0.00136481		1318.61	0.014625		1848.64	0.00486338		2378.64	-0.00224147		2908.64	-0.00436556		3438.64	-0.00488942
258.8	0.05860268		788.82	0.00259509		1318.81	0.01574064		1848.84	0.00414188		2378.84	-0.00273956		2908.84	-0.00345057		3438.84	-0.00496225
259	0.05893205		789.02	0.00361421		1319.01	0.0153675		1849.04	0.00390908		2379.04	-0.00352095		2909.04	-0.00351204		3439.04	-0.00479101
259.2	0.05812278		789.22	0.00475199		1319.21	0.01613504		1849.24	0.0041393		2379.24	-0.00374612		2909.24	-0.00321232		3439.24	-0.00507031
259.4	0.05739571		789.42	0.00577253		1319.41	0.01696457		1849.44	0.00344546		2379.44	-0.00437577		2909.44	-0.00315892		3439.44	-0.00475225
259.6	0.05724164		789.62	0.00634133		1319.61	0.0164881		1849.64	0.00252944		2379.64	-0.00411137		2909.64	-0.00217576		3439.64	-0.00497491
259.8	0.05620762		789.82	0.00734835		1319.81	0.01612391		1849.84	0.00286874		2379.84	-0.00346865		2909.84	-0.00134648		3439.84	-0.0050519
260	0.05676832		790.02	0.0079336		1320.01	0.01542405		1850.04	0.00274084		2380.04	-0.0026732		2910.04	-0.00018078		3440.04	-0.0053659
260.2	0.05699982		790.22	0.00752802		1320.21	0.01548133		1850.24	0.00189317		2380.24	-0.00269469		2910.24	-0.0004572		3440.24	-0.00666261
260.4	0.05734071		790.42	0.00823832		1320.41	0.01479404		1850.44	0.0005443		2380.44	-0.0029051		2910.44	-0.00034648		3440.44	-0.00687567
260.6	0.05754093		790.62	0.00818407		1320.61	0.01485443		1850.64	0.00036949		2380.64	-0.00230284		2910.64	0.00022029		3440.64	-0.00772307
260.8	0.05697996		790.82	0.00847796		1320.81	0.01451894		1850.84	-0.0010488		2380.84	-0.00100192		2910.84	0.00065844		3440.84	-0.0082648
261	0.05729057		791.02	0.008772		1321.01	0.01467607		1851.04	-0.00140485		2381.04	-0.00109528		2911.04	0.00136346		3441.04	-0.00822696
261.2	0.05694485		791.22	0.00874435		1321.21	0.01353492		1851.24	-0.00225605		2381.24	-0.00127478		2911.24	0.00185174		3441.24	-0.00933061
261.4	0.05744201		791.42	0.008678		1321.41	0.01307228		1851.44	-0.00244887		2381.44	-0.00145965		2911.44	0.00266503		3441.44	-0.00975672
261.6	0.0581396		791.62	0.00901872		1321.61	0.01301439		1851.64	-0.00305786		2381.64	-0.00021451		2911.64	0.00383201		3441.64	-0.0098405
261.8	0.05730381		791.82	0.00849937		1321.81	0.01238485		1851.84	-0.00358243		2381.84	0.00054299		2911.84	0.003397		3441.84	-0.00973361
262	0.05769025		792.02	0.00744129		1322.01	0.01264697		1852.04	-0.00253411		2382.04	0.00122277		2912.04	0.0030828		3442.04	-0.00900566
262.2	0.05942555		792.22	0.00716098		1322.21	0.01252467		1852.24	-0.00275426		2382.24	0.00120789		2912.24	0.00304596		3442.24	-0.00858247
262.4	0.05937825		792.42	0.00690434		1322.41	0.01310002		1852.44	-0.00251793		2382.44	0.00124225		2912.44	0.00226341		3442.44	-0.00829767
262.6	0.05908314		792.62	0.00700079		1322.61	0.01371693		1852.64	-0.00250252		2382.64	0.00075033		2912.64	0.00233185		3442.64	-0.00810659
262.8	0.05977925		792.82	0.00760282		1322.81	0.01396674		1852.84	-0.00145919		2382.84	0.00082776		2912.84	0.00230124		3442.84	-0.00768403
263	0.06011201		793.02	0.00736294		1323.01	0.01473582		1853.04	-0.00073171		2383.04	0.00066915		2913.04	0.00047081		3443.04	-0.00733386
263.2	0.05990376		793.22	0.00718906		1323.21	0.01574127		1853.24	0.00064237		2383.24	-0.00006866		2913.24	0.00004441		3443.24	-0.00743513
263.4	0.05995946		793.42	0.00723201		1323.41	0.01623055		1853.44	0.00184364		2383.44	-0.00012268		2913.44	0.00021681		3443.44	-0.00708064
263.6	0.06050868		793.62	0.0069607		1323.61	0.01649063		1853.64	0.00271984		2383.64	0.00032847		2913.64	0.00058219		3443.64	-0.00737101
263.8	0.06061823		793.82	0.00709749		1323.81	0.01762492		1853.84	0.00444437		2383.84	0.00023161		2913.84	0.0002906		3443.84	-0.00766838
264	0.06156278		794.02	0.00741066		1324.01	0.0184459		1854.04	0.00521045		2384.04	-0.00007326		2914.04	0.00003857		3444.04	-0.00806483
264.2	0.06102337		794.22	0.00685224		1324.21	0.01883063		1854.24	0.00566797		2384.24	-0.00062342		2914.24	-0.00083298		3444.24	-0.00808339
264.4	0.06060779		794.42	0.00784847		1324.41	0.01852836		1854.44	0.00578676		2384.44	-0.00150208		2914.44	-0.00137437		3444.44	-0.0079402
264.6	0.0609218		794.62	0.00762427		1324.61	0.01854525		1854.64	0.00613413		2384.64	-0.00163679		2914.64	-0.00089567		3444.64	-0.00806107
264.8	0.06065487		794.82	0.00784878		1324.81	0.0184428		1854.84	0.00615357		2384.84	-0.00210257		2914.84	-0.00104434		3444.84	-0.00756152
265	0.06171985		795.02	0.00814832		1325.01	0.01786754		1855.04	0.00673707		2385.04	-0.00223011		2915.04	-0.00045489		3445.04	-0.0077787
265.2	0.06213807		795.22	0.00786579		1325.21	0.01651119		1855.24	0.00541904		2385.24	-0.00294351		2915.24	-0.00025581		3445.24	-0.00781749
265.4	0.06241644		795.42	0.00772606		1325.41	0.01676789		1855.44	0.00426761		2385.44	-0.00282492		2915.44	0.00114698		3445.44	-0.00705338
265.6	0.06269694		795.62	0.0069323		1325.61	0.01608118		1855.64	0.00359779		2385.64	-0.00128529		2915.64	0.00148643		3445.64	-0.00697121
265.8	0.06279372		795.82	0.00688873		1325.81	0.01529766		1855.84	0.00334247		2385.84	-0.0008179		2915.84	0.00088911		3445.84	-0.00733389
266	0.06332897		796.02	0.00621474		1326.01	0.01468449		1856.04	0.00330877		2386.04	-0.00077489		2916.04	0.00085566		3446.04	-0.00652598
266.2	0.06381832		796.22	0.00603512		1326.21	0.01387375		1856.24	0.00214173		2386.24	-0.00094241		2916.24	0.00132041		3446.24	-0.00693782
266.4	0.0629559		796.42	0.00553998		1326.41	0.01451178		1856.44	0.00153099		2386.44	-0.00112147		2916.44	0.00157619		3446.44	-0.00709923
266.6	0.06269916		796.62	0.00568711		1326.61	0.01386314		1856.64	0.00099775		2386.64	-0.0010262		2916.64	0.0019472		3446.64	-0.00760275
266.8	0.06302173		796.82	0.00546383		1326.81	0.01375539		1856.84	0.00205701		2386.84	-0.00013452		2916.84	0.00127985		3446.84	-0.00743656
267	0.06246025		797.02	0.0054023		1327.01	0.01451648		1857.04	0.00143186		2387.04	0.00083313		2917.04	0.00081304		3447.04	-0.00812136
267.2	0.0628828		797.22	0.00465594		1327.21	0.01509337		1857.24	0.00241255		2387.24	0.00033206		2917.24	0.00124007		3447.24	-0.00821484
267.4	0.06348209		797.42	0.00423642		1327.41	0.01504953		1857.44	0.00315833		2387.44	0.00159216		2917.44	0.00176287		3447.44	-0.00837342
267.6	0.06376059		797.62	0.00330039		1327.61	0.01587722		1857.64	0.00371451		2387.64	0.00147596		2917.64	0.00182372		3447.64	-0.00912478
267.8	0.06342914		797.82	0.00353621		1327.81	0.01649448		1857.84	0.00360218		2387.84	0.00073058		2917.84	0.00154683		3447.84	-0.01007976
268	0.06316988		798.02	0.0030666		1328.01	0.01721822		1858.04	0.00440191		2388.04	0.00012025		2918.04	0.0016571		3448.04	-0.01001458
268.2	0.06269235		798.22	0.00287057		1328.21	0.01757817		1858.24	0.00432332		2388.24	-0.00002668		2918.24	0.00205828		3448.24	-0.00994674
268.4	0.06378582		798.42	0.00371637		1328.41	0.01739063		1858.44	0.00472183		2388.44	-0.00090743		2918.44	0.00160444		3448.44	-0.01010256
268.6	0.06437101		798.62	0.00380244		1328.61	0.01762638		1858.64	0.0044535		2388.64	-0.00054117		2918.64	0.00056702		3448.64	-0.00961235
268.8	0.06492917		798.82	0.00369405		1328.81	0.01793518		1858.84	0.0041468		2388.84	-0.00153735		2918.84	0.00029921		3448.84	-0.00980578
269	0.06531128		799.02	0.00429565		1329.01	0.01726365		1859.04	0.0037781		2389.04	-0.00136283		2919.04	0.00050415		3449.04	-0.00918082
269.2	0.06536815		799.22	0.00458609		1329.21	0.01731798		1859.24	0.00267049		2389.24	-0.00231035		2919.24	0.00048893		3449.24	-0.00902263
269.4	0.0653629		799.42	0.00485429		1329.41	0.01739015		1859.44	0.00248969		2389.44	-0.00247288		2919.44	0.00087367		3449.44	-0.00924343
269.6	0.06489268		799.62	0.00503311		1329.61	0.01724515		1859.64	0.00189702		2389.64	-0.00215565		2919.64	0.00082385		3449.64	-0.0098971
269.8	0.06443838		799.82	0.00571911		1329.81	0.01764969		1859.84	0.00128623		2389.84	-0.00335038		2919.84	0.0002514		3449.84	-0.0101935
270	0.06396641		800.02	0.00602727		1330.01	0.01697984		1860.04	0.0003957		2390.04	-0.00292933		2920.04	-0.00016		3450.04	-0.01055464
270.2	0.06373328		800.22	0.00670352		1330.21	0.01685075		1860.24	0.00021926		2390.24	-0.00282135		2920.24	0.00017749		3450.24	-0.01045906
270.4	0.06327588		800.42	0.00750001		1330.41	0.01701428		1860.44	-0.00030074		2390.44	-0.00238519		2920.44	0.00004743		3450.44	-0.00996611
270.6	0.06271766		800.62	0.00749442		1330.61	0.01767882		1860.64	-0.001102		2390.64	-0.00232176		2920.64	0.00014258		3450.64	-0.00997262
270.8	0.062576		800.82	0.00733488		1330.81	0.01831834		1860.84	-0.00088344		2390.84	-0.00112529		2920.84	-0.00005608		3450.84	-0.00966096
271	0.0632713		801.02	0.00726213		1331.01	0.01893542		1861.04	-0.0018492		2391.04	-0.00073402		2921.04	-0.00062073		3451.04	-0.00965274
271.2	0.06420563		801.22	0.00665998		1331.21	0.01859964		1861.24	-0.0011683		2391.24	-0.0008274		2921.24	-0.00090579		3451.24	-0.00910082
271.4	0.0647682		801.42	0.00647975		1331.41	0.01758834		1861.44	-0.00133516		2391.44	-0.00106039		2921.44	-0.00060632		3451.44	-0.00921297
271.6	0.06493589		801.62	0.0056399		1331.61	0.01780807		1861.64	-0.00166811		2391.64	-0.00119661		2921.64	0.00011145		3451.64	-0.00978866
271.8	0.06526711		801.82	0.00562571		1331.81	0.01796861		1861.84	-0.00228151		2391.84	-0.00063736		2921.84	0.00026637		3451.84	-0.00982344
272	0.06520158		802.02	0.00505388		1332.01	0.01786855		1862.04	-0.00169667		2392.04	-0.00041918		2922.04	0.00049755		3452.04	-0.00959174
272.2	0.06568124		802.22	0.00520673		1332.21	0.01726394		1862.24	-0.00061092		2392.24	-0.00005975		2922.24	0.00029466		3452.24	-0.01010406
272.4	0.06651957		802.42	0.00603243		1332.41	0.01691339		1862.44	0.00030754		2392.44	-0.00064616		2922.44	0.00011328		3452.44	-0.01014047
272.6	0.06620583		802.62	0.00594125		1332.61	0.0160395		1862.64	0.0007129		2392.64	-0.00020294		2922.64	0.00053831		3452.64	-0.01017648
272.8	0.06706458		802.82	0.00485237		1332.81	0.01484837		1862.84	0.00108424		2392.84	-0.00046554		2922.84	0.00166583		3452.84	-0.01009753
273	0.06698796		803.02	0.00605559		1333.01	0.01415103		1863.04	0.00141381		2393.04	-0.00045405		2923.04	0.00096182		3453.04	-0.0099393
273.2	0.06711176		803.22	0.00703037		1333.21	0.0141528		1863.24	0.00209072		2393.24	-0.00095926		2923.24	0.0007515		3453.24	-0.01090515
273.4	0.06653689		803.42	0.00735909		1333.41	0.01406405		1863.44	0.00251978		2393.44	-0.00116317		2923.44	0.00102393		3453.44	-0.01133651
273.6	0.06617121		803.62	0.0073618		1333.61	0.01476527		1863.64	0.00256543		2393.64	-0.00110741		2923.64	0.00059497		3453.64	-0.01096361
273.8	0.06596825		803.82	0.00753666		1333.81	0.0153554		1863.84	0.00312183		2393.84	-0.00114838		2923.84	-0.00055426		3453.84	-0.01130691
274	0.06596958		804.02	0.00780922		1334.01	0.01509398		1864.04	0.00350746		2394.04	-0.000666		2924.04	-0.00054049		3454.04	-0.01015101
274.2	0.06541336		804.22	0.00783796		1334.21	0.01570692		1864.24	0.00365307		2394.24	-0.0001716		2924.24	0.00010047		3454.24	-0.00965044
274.4	0.06578906		804.42	0.00789576		1334.41	0.0172076		1864.44	0.0030064		2394.44	-0.00017508		2924.44	-0.00001102		3454.44	-0.00951029
274.6	0.06483462		804.62	0.00739507		1334.61	0.01794554		1864.64	0.00206569		2394.64	-0.00056747		2924.64	0.00023329		3454.64	-0.00836158
274.8	0.06534616		804.82	0.00664007		1334.81	0.01839668		1864.84	0.00212554		2394.84	-0.00031547		2924.84	-0.00004388		3454.84	-0.00804331
275	0.06537925		805.02	0.0071851		1335.01	0.01897802		1865.04	0.00234759		2395.04	0.00000493		2925.04	-0.00054451		3455.04	-0.00735533
275.2	0.06469948		805.22	0.0071169		1335.21	0.01882176		1865.24	0.00197883		2395.24	0.00047696		2925.24	-0.00041099		3455.24	-0.00738003
275.4	0.06443523		805.42	0.00675507		1335.41	0.01908098		1865.44	0.00219892		2395.44	0.00007304		2925.44	-0.00014687		3455.44	-0.00732798
275.6	0.06366952		805.62	0.00607776		1335.61	0.0192538		1865.64	0.00223886		2395.64	0.00069103		2925.64	-0.00027013		3455.64	-0.00740032
275.8	0.06439718		805.82	0.0058257		1335.81	0.01880778		1865.84	0.00182876		2395.84	0.00093048		2925.84	-0.00140451		3455.84	-0.00754173
276	0.06399721		806.02	0.00573241		1336.01	0.01868732		1866.04	0.00291879		2396.04	-0.00000763		2926.04	-0.00090254		3456.04	-0.00744669
276.2	0.06406433		806.22	0.00690296		1336.21	0.01880718		1866.24	0.00368726		2396.24	-0.00068939		2926.24	-0.00004091		3456.24	-0.00754131
276.4	0.06442137		806.42	0.00771625		1336.41	0.01800506		1866.44	0.00276379		2396.44	-0.00138687		2926.44	0.00106813		3456.44	-0.00806768
276.6	0.06431608		806.62	0.00746602		1336.61	0.01704241		1866.64	0.00255629		2396.64	-0.00110283		2926.64	0.00131961		3456.64	-0.00840246
276.8	0.06425914		806.82	0.00754673		1336.81	0.01680371		1866.84	0.00183669		2396.84	-0.00115176		2926.84	0.00124802		3456.84	-0.00815587
277	0.06366901		807.02	0.00869892		1337.01	0.01662395		1867.04	0.00166403		2397.04	-0.00165477		2927.04	0.00083452		3457.04	-0.00835501
277.2	0.06387009		807.22	0.00914548		1337.21	0.01600653		1867.24	0.00195103		2397.24	-0.00127578		2927.24	0.00111245		3457.24	-0.00834034
277.4	0.06400277		807.42	0.00938655		1337.41	0.01584237		1867.44	0.00157345		2397.44	-0.00132274		2927.44	0.00166737		3457.44	-0.00840928
277.6	0.06486699		807.62	0.00867637		1337.61	0.0164774		1867.64	0.00141526		2397.64	-0.0008682		2927.64	0.00065026		3457.64	-0.0083318
277.8	0.06455697		807.82	0.00795718		1337.81	0.01663836		1867.84	0.00202535		2397.84	-0.00042926		2927.84	0.00056846		3457.84	-0.00881584
278	0.06500307		808.02	0.00834686		1338.01	0.01659844		1868.04	0.00168965		2398.04	-0.0006026		2928.04	0.00107441		3458.04	-0.0084998
278.2	0.06533087		808.22	0.00813976		1338.21	0.01763586		1868.24	0.00120554		2398.24	0.00003313		2928.24	0.00132949		3458.24	-0.00916796
278.4	0.06630159		808.42	0.00759995		1338.41	0.01824126		1868.44	0.00091071		2398.44	0.000122		2928.44	0.00095638		3458.44	-0.00903768
278.6	0.06569726		808.62	0.00686299		1338.61	0.01797756		1868.64	0.00047755		2398.64	0.00053204		2928.64	0.00080865		3458.64	-0.00931832
278.8	0.06607929		808.82	0.00551518		1338.81	0.01864205		1868.84	0.0005509		2398.84	0.00092367		2928.84	-0.00007358		3458.84	-0.01042847
279	0.0653989		809.02	0.00555982		1339.01	0.01867949		1869.04	0.0002477		2399.04	0.0018396		2929.04	-0.00037252		3459.04	-0.01031386
279.2	0.06497339		809.22	0.00482048		1339.21	0.01817075		1869.24	-0.0000347		2399.24	0.00129412		2929.24	-0.00040249		3459.24	-0.01115088
279.4	0.06487606		809.42	0.00416072		1339.41	0.01716454		1869.44	0.00045664		2399.44	0.00116537		2929.44	-0.00042729		3459.44	-0.0114325
279.6	0.06546895		809.62	0.00388537		1339.61	0.01629854		1869.64	0.00058826		2399.64	0.0010756		2929.64	-0.00105547		3459.64	-0.01173881
279.8	0.06630385		809.82	0.00430556		1339.81	0.01639209		1869.84	0.00090208		2399.84	0.00041301		2929.84	-0.00103834		3459.84	-0.01126239
280	0.06613934		810.02	0.0047287		1340.01	0.01730888		1870.04	0.00167924		2400.04	-0.00069813		2930.04	-0.00056782		3460.04	-0.01117364
280.2	0.06652937		810.22	0.00461983		1340.21	0.01775721		1870.24	0.00164018		2400.24	-0.00110125		2930.24	-0.00022622		3460.24	-0.01107829
280.4	0.06699281		810.42	0.00452446		1340.41	0.01757928		1870.44	0.00150112		2400.44	-0.00164587		2930.44	-0.0004233		3460.44	-0.01098904
280.6	0.06620684		810.62	0.00527989		1340.61	0.01771439		1870.64	0.00180024		2400.64	-0.00204611		2930.64	-0.00045229		3460.64	-0.01042686
280.8	0.06646546		810.82	0.00625365		1340.81	0.01727928		1870.84	0.00183044		2400.84	-0.00209327		2930.84	-0.0003125		3460.84	-0.00921432
281	0.06675463		811.02	0.0069681		1341.01	0.01740619		1871.04	0.00293428		2401.04	-0.00196347		2931.04	0.00044907		3461.04	-0.00943113
281.2	0.06705679		811.22	0.00762736		1341.21	0.01747315		1871.24	0.00314627		2401.24	-0.00181401		2931.24	0.0005744		3461.24	-0.00895419
281.4	0.06707612		811.42	0.00851633		1341.41	0.01791679		1871.44	0.00259912		2401.44	-0.0017364		2931.44	0.00116297		3461.44	-0.00928681
281.6	0.06784345		811.62	0.00938304		1341.61	0.01818281		1871.64	0.00312816		2401.64	-0.00123692		2931.64	0.00015617		3461.64	-0.00891267
281.8	0.06741425		811.82	0.01074665		1341.81	0.01837974		1871.84	0.00410078		2401.84	-0.0012371		2931.84	0.00049211		3461.84	-0.00855873
282	0.06774742		812.02	0.01115559		1342.01	0.01873361		1872.04	0.00340391		2402.04	-0.00196307		2932.04	0.00014292		3462.04	-0.00886919
282.2	0.06805414		812.22	0.01084583		1342.21	0.0193718		1872.24	0.00349936		2402.24	-0.00141382		2932.24	0.00008065		3462.24	-0.00817665
282.4	0.06815008		812.42	0.01034028		1342.41	0.01831428		1872.44	0.00354473		2402.44	-0.00142006		2932.44	0.00056675		3462.44	-0.00865116
282.6	0.06785251		812.62	0.01037429		1342.61	0.01823235		1872.64	0.00384676		2402.64	-0.0004487		2932.64	0.0005095		3462.64	-0.00924572
282.8	0.06765717		812.82	0.00955096		1342.81	0.01723757		1872.84	0.00332536		2402.84	-0.00005607		2932.84	0.00019431		3462.84	-0.0097556
283	0.0677036		813.02	0.0091563		1343.01	0.01707219		1873.04	0.00322122		2403.04	0.00009283		2933.04	0.00030355		3463.04	-0.01022598
283.2	0.0678046		813.22	0.00904661		1343.21	0.01628295		1873.24	0.00383706		2403.24	-0.0000343		2933.24	-0.00017831		3463.24	-0.01009096
283.4	0.0679002		813.42	0.00855047		1343.41	0.0160372		1873.44	0.00374393		2403.44	0.00108621		2933.44	-0.00135132		3463.44	-0.00995031
283.6	0.0688484		813.62	0.0082629		1343.61	0.01545706		1873.64	0.00386169		2403.64	0.00040429		2933.64	-0.00194731		3463.64	-0.00919734
283.8	0.06847358		813.82	0.00773518		1343.81	0.01560027		1873.84	0.00419294		2403.84	-0.00011294		2933.84	-0.00184752		3463.84	-0.00895205
284	0.06911101		814.02	0.006887		1344.01	0.01595704		1874.04	0.00413176		2404.04	0.0005551		2934.04	-0.00310888		3464.04	-0.00971227
284.2	0.06913178		814.22	0.00634876		1344.21	0.01608194		1874.24	0.00413926		2404.24	0.00054551		2934.24	-0.00328874		3464.24	-0.00940982
284.4	0.0692902		814.42	0.00629624		1344.41	0.01608294		1874.44	0.00371906		2404.44	0.00068669		2934.44	-0.00337527		3464.44	-0.0091074
284.6	0.06934182		814.62	0.00674644		1344.61	0.01549188		1874.64	0.00359429		2404.64	0.00038111		2934.64	-0.0034418		3464.64	-0.00940119
284.8	0.07006966		814.82	0.00687232		1344.81	0.01565653		1874.84	0.00338		2404.84	0.0002851		2934.84	-0.00377729		3464.84	-0.0091313
285	0.07075002		815.02	0.00634003		1345.01	0.01559863		1875.04	0.00313158		2405.04	0.00038834		2935.04	-0.00268467		3465.04	-0.00942869
285.2	0.07049157		815.22	0.00702085		1345.21	0.01599854		1875.24	0.00254491		2405.24	0.00045342		2935.24	-0.00293375		3465.24	-0.00947361
285.4	0.07028931		815.42	0.00805554		1345.41	0.0162492		1875.44	0.00185044		2405.44	0.00070203		2935.44	-0.00250903		3465.44	-0.01015826
285.6	0.0712476		815.62	0.00944973		1345.61	0.01641643		1875.64	0.00193559		2405.64	0.0006889		2935.64	-0.00208568		3465.64	-0.00967194
285.8	0.07058848		815.82	0.01011474		1345.81	0.01693908		1875.84	0.00156731		2405.84	0.00031824		2935.84	-0.00173092		3465.84	-0.01030256
286	0.07047406		816.02	0.00996356		1346.01	0.01720331		1876.04	0.00073096		2406.04	-0.00034329		2936.04	-0.00136087		3466.04	-0.0105698
286.2	0.07039862		816.22	0.01136225		1346.21	0.01680885		1876.24	0.00027472		2406.24	-0.00002379		2936.24	-0.00057226		3466.24	-0.01047041
286.4	0.07007408		816.42	0.01202867		1346.41	0.01670173		1876.44	0.00045384		2406.44	0.00003797		2936.44	0.00001129		3466.44	-0.01147689
286.6	0.06997189		816.62	0.01274965		1346.61	0.01744817		1876.64	0.0003812		2406.64	-0.00018446		2936.64	-0.00018159		3466.64	-0.01164703
286.8	0.07006391		816.82	0.0124283		1346.81	0.01729057		1876.84	-0.00061575		2406.84	-0.00063564		2936.84	-0.00041986		3466.84	-0.01180012
287	0.07025002		817.02	0.01243145		1347.01	0.01776991		1877.04	-0.00045829		2407.04	-0.00088428		2937.04	-0.0007585		3467.04	-0.01204272
287.2	0.07001226		817.22	0.01200715		1347.21	0.01686877		1877.24	-0.00019419		2407.24	-0.00038725		2937.24	-0.00112742		3467.24	-0.01104828
287.4	0.07036773		817.42	0.01182218		1347.41	0.01668006		1877.44	-0.00090043		2407.44	-0.00030699		2937.44	-0.00076309		3467.44	-0.01129004
287.6	0.07000297		817.62	0.01123328		1347.61	0.01608443		1877.64	-0.00139767		2407.64	-0.00004815		2937.64	-0.00072881		3467.64	-0.01026764
287.8	0.06962274		817.82	0.01036328		1347.81	0.0164414		1877.84	-0.00175719		2407.84	0.00016726		2937.84	-0.00120614		3467.84	-0.01097172
288	0.06881936		818.02	0.00970359		1348.01	0.01718123		1878.04	-0.00180595		2408.04	0.00010765		2938.04	-0.00218828		3468.04	-0.01131039
288.2	0.06864696		818.22	0.00872699		1348.21	0.0166026		1878.24	-0.00161567		2408.24	-0.00046543		2938.24	-0.00227771		3468.24	-0.01068333
288.4	0.06947553		818.42	0.00756608		1348.41	0.01664369		1878.44	-0.0017013		2408.44	-0.00042346		2938.44	-0.00211065		3468.44	-0.01079938
288.6	0.07033589		818.62	0.00686199		1348.61	0.01573106		1878.64	-0.00140436		2408.64	-0.00155742		2938.64	-0.00258354		3468.64	-0.0107796
288.8	0.07027792		818.82	0.00638357		1348.81	0.01656621		1878.84	-0.00118339		2408.84	-0.00128634		2938.84	-0.00278997		3468.84	-0.01105525
289	0.07079672		819.02	0.00518414		1349.01	0.01671141		1879.04	-0.00128075		2409.04	-0.00098317		2939.04	-0.00191717		3469.04	-0.01109351
289.2	0.07092425		819.22	0.00574274		1349.21	0.01723982		1879.24	-0.00136879		2409.24	-0.00046872		2939.24	-0.00181651		3469.24	-0.01108046
289.4	0.07146426		819.42	0.00573284		1349.41	0.01695457		1879.44	-0.00157498		2409.44	-0.00034997		2939.44	-0.00089779		3469.44	-0.01085756
289.6	0.07241157		819.62	0.00537692		1349.61	0.01657078		1879.64	-0.00191544		2409.64	0.00024833		2939.64	-0.00047788		3469.64	-0.00997014
289.8	0.0721372		819.82	0.00498618		1349.81	0.01654482		1879.84	-0.00186151		2409.84	-0.00108443		2939.84	-0.0002671		3469.84	-0.01075243
290	0.07278429		820.02	0.00498701		1350.01	0.01673364		1880.04	-0.00248843		2410.04	-0.00167379		2940.04	0.00113908		3470.04	-0.01099014
290.2	0.07317003		820.22	0.00580932		1350.21	0.01669042		1880.24	-0.00249936		2410.24	-0.00130009		2940.24	0.00146803		3470.24	-0.01070079
290.4	0.07296054		820.42	0.00594753		1350.41	0.01660792		1880.44	-0.00176532		2410.44	-0.00160619		2940.44	0.00201503		3470.44	-0.01120111
290.6	0.07371002		820.62	0.00603753		1350.61	0.0160874		1880.64	-0.00193053		2410.64	-0.00228266		2940.64	0.00237366		3470.64	-0.01126864
290.8	0.07483702		820.82	0.00584059		1350.81	0.01557525		1880.84	-0.0021023		2410.84	-0.0014639		2940.84	0.00223694		3470.84	-0.01165645
291	0.07570406		821.02	0.00590199		1351.01	0.01462642		1881.04	-0.00181755		2411.04	-0.0014293		2941.04	0.00208802		3471.04	-0.01217492
291.2	0.07589179		821.22	0.00576168		1351.21	0.01423808		1881.24	-0.00148326		2411.24	-0.00077569		2941.24	0.00196908		3471.24	-0.01113827
291.4	0.07635363		821.42	0.00690364		1351.41	0.01439842		1881.44	-0.0022025		2411.44	-0.00090609		2941.44	0.00152611		3471.44	-0.01062996
291.6	0.07606575		821.62	0.00674715		1351.61	0.01425793		1881.64	-0.00281917		2411.64	-0.00113097		2941.64	0.00056972		3471.64	-0.01029538
291.8	0.07604922		821.82	0.00646147		1351.81	0.01454197		1881.84	-0.00282081		2411.84	-0.00297872		2941.84	0.00051325		3471.84	-0.01037032
292	0.07539169		822.02	0.00740992		1352.01	0.01467647		1882.04	-0.00174881		2412.04	-0.00295731		2942.04	0.00029221		3472.04	-0.01050726
292.2	0.07603761		822.22	0.00731225		1352.21	0.01453548		1882.24	-0.00150282		2412.24	-0.00284676		2942.24	-0.00011849		3472.24	-0.01008996
292.4	0.0765331		822.42	0.00749762		1352.41	0.01486412		1882.44	-0.00058931		2412.44	-0.00312021		2942.44	-0.00041232		3472.44	-0.00977851
292.6	0.07699241		822.62	0.00718388		1352.61	0.01479103		1882.64	-0.00032651		2412.64	-0.00321106		2942.64	-0.00130351		3472.64	-0.00946882
292.8	0.07594257		822.82	0.00770109		1352.81	0.01569593		1882.84	0.00014545		2412.84	-0.00195638		2942.84	-0.00121262		3472.84	-0.00946956
293	0.07513411		823.02	0.00666406		1353.01	0.0155384		1883.04	0.0005925		2413.04	-0.00134373		2943.04	-0.00170695		3473.04	-0.00885209
293.2	0.0749692		823.22	0.00681271		1353.21	0.01562418		1883.24	0.00081005		2413.24	-0.00074637		2943.24	-0.00240541		3473.24	-0.00883762
293.4	0.07469286		823.42	0.00635445		1353.41	0.01567044		1883.44	0.00058406		2413.44	-0.00034517		2943.44	-0.0019198		3473.44	-0.00953803
293.6	0.0740468		823.62	0.00594037		1353.61	0.01618227		1883.64	0.00133551		2413.64	0.00007829		2943.64	-0.00222325		3473.64	-0.00993914
293.8	0.07401373		823.82	0.00575383		1353.81	0.0168359		1883.84	0.00212823		2413.84	-0.00017587		2943.84	-0.00169935		3473.84	-0.01090258
294	0.07411019		824.02	0.00601113		1354.01	0.01738973		1884.04	0.00194057		2414.04	0.00125757		2944.04	-0.00139487		3474.04	-0.01108846
294.2	0.07288973		824.22	0.00584714		1354.21	0.01752887		1884.24	0.00288054		2414.24	0.00200259		2944.24	-0.00147282		3474.24	-0.01040126
294.4	0.07165006		824.42	0.00536887		1354.41	0.01722304		1884.44	0.00299561		2414.44	0.00199347		2944.44	-0.00100733		3474.44	-0.01118751
294.6	0.07134184		824.62	0.00524904		1354.61	0.01684433		1884.64	0.00279294		2414.64	0.00289935		2944.64	-0.00093362		3474.64	-0.01070549
294.8	0.0720231		824.82	0.00500811		1354.81	0.01636983		1884.84	0.00295674		2414.84	0.00306296		2944.84	-0.00140325		3474.84	-0.01083667
295	0.07176344		825.02	0.00444596		1355.01	0.01641673		1885.04	0.00321482		2415.04	0.00239355		2945.04	-0.00190791		3475.04	-0.01138493
295.2	0.07162709		825.22	0.00496151		1355.21	0.01688584		1885.24	0.00332292		2415.24	0.00257064		2945.24	-0.00147635		3475.24	-0.01032373
295.4	0.07273854		825.42	0.00541318		1355.41	0.01707456		1885.44	0.0023433		2415.44	0.00193846		2945.44	-0.00130213		3475.44	-0.00973128
295.6	0.07297913		825.62	0.00510397		1355.61	0.01737752		1885.64	0.00246153		2415.64	0.00080913		2945.64	-0.0002437		3475.64	-0.00865683
295.8	0.072534		825.82	0.00467022		1355.81	0.01780236		1885.84	0.00252928		2415.84	0.00008463		2945.84	-0.00005313		3475.84	-0.00822897
296	0.0729658		826.02	0.00485627		1356.01	0.0181516		1886.04	0.00242293		2416.04	0.00036478		2946.04	0.00026276		3476.04	-0.00852419
296.2	0.07359596		826.22	0.0040204		1356.21	0.01871366		1886.24	0.00183394		2416.24	-0.000319		2946.24	0.00060706		3476.24	-0.00863049
296.4	0.07394007		826.42	0.00342351		1356.41	0.01806533		1886.44	0.00180156		2416.44	-0.00081034		2946.44	0.00038528		3476.44	-0.00856569
296.6	0.07428592		826.62	0.00294282		1356.61	0.01809965		1886.64	0.00128562		2416.64	-0.00098755		2946.64	0.0010858		3476.64	-0.00889354
296.8	0.0737835		826.82	0.00268144		1356.81	0.01820496		1886.84	0.00069478		2416.84	-0.0008773		2946.84	0.00224567		3476.84	-0.00838951
297	0.07362692		827.02	0.00194372		1357.01	0.01912863		1887.04	0.00136521		2417.04	-0.00029167		2947.04	0.00231134		3477.04	-0.00879702
297.2	0.0745943		827.22	0.00269604		1357.21	0.01974211		1887.24	0.00073148		2417.24	-0.00078129		2947.24	0.00269485		3477.24	-0.00971214
297.4	0.07472997		827.42	0.00275767		1357.41	0.01929165		1887.44	0.00018777		2417.44	-0.00023974		2947.44	0.00372805		3477.44	-0.0105432
297.6	0.07433375		827.62	0.00349891		1357.61	0.01960041		1887.64	0.00084128		2417.64	0.00011987		2947.64	0.00417942		3477.64	-0.01140143
297.8	0.07485707		827.82	0.00284062		1357.81	0.0192483		1887.84	0.00063719		2417.84	0.00068482		2947.84	0.00473308		3477.84	-0.01217372
298	0.07517526		828.02	0.00410233		1358.01	0.01966501		1888.04	-0.00009779		2418.04	0.00106508		2948.04	0.00431923		3478.04	-0.01162136
298.2	0.07496754		828.22	0.00440573		1358.21	0.0194261		1888.24	-0.00038788		2418.24	0.00117622		2948.24	0.00470495		3478.24	-0.01096068
298.4	0.07489636		828.42	0.00510659		1358.41	0.01930343		1888.44	-0.00090661		2418.44	0.00195819		2948.44	0.00462053		3478.44	-0.0106604
298.6	0.07475907		828.62	0.00583265		1358.61	0.01842317		1888.64	-0.00085964		2418.64	0.00234904		2948.64	0.00455256		3478.64	-0.00934405
298.8	0.0757763		828.82	0.00618665		1358.81	0.01858668		1888.84	-0.00039161		2418.84	0.00268956		2948.84	0.00289236		3478.84	-0.00922562
299	0.07544154		829.02	0.00566613		1359.01	0.01887425		1889.04	-0.0002415		2419.04	0.0027267		2949.04	0.00231777		3479.04	-0.01013846
299.2	0.07624062		829.22	0.00669538		1359.21	0.01946826		1889.24	-0.00003014		2419.24	0.00337226		2949.24	0.00258838		3479.24	-0.00899962
299.4	0.07671541		829.42	0.00652399		1359.41	0.01910335		1889.44	0.00024111		2419.44	0.00277127		2949.44	0.00231616		3479.44	-0.00836572
299.6	0.07585552		829.62	0.00582938		1359.61	0.01988767		1889.64	0.00104036		2419.64	0.00243647		2949.64	0.00183194		3479.64	-0.00824366
299.8	0.07565869		829.82	0.00573402		1359.81	0.01991219		1889.84	0.00074261		2419.84	0.00262973		2949.84	0.00114248		3479.84	-0.00868312
300	0.07569257		830.02	0.00544633		1360.01	0.01971237		1890.04	0.00054872		2420.04	0.00284819		2950.04	0.00136657		3480.04	-0.00868929
300.2	0.07533233		830.22	0.00511214		1360.21	0.02023845		1890.24	0.00113355		2420.24	0.00289365		2950.24	0.00060346		3480.24	-0.00843433
300.4	0.07537087		830.42	0.00480136		1360.41	0.0190582		1890.44	0.00102317		2420.44	0.00215672		2950.44	0.00025861		3480.44	-0.00866589
300.6	0.07578991		830.62	0.00482654		1360.61	0.01932112		1890.64	0.00051915		2420.64	0.00198836		2950.64	0.00101515		3480.64	-0.00821483
300.8	0.07628331		830.82	0.00509016		1360.81	0.01977736		1890.84	0.00021965		2420.84	0.00182543		2950.84	0.00152058		3480.84	-0.00825188
301	0.07625861		831.02	0.00510809		1361.01	0.01964105		1891.04	0.0008522		2421.04	0.00130501		2951.04	0.00173586		3481.04	-0.0092138
301.2	0.07607393		831.22	0.0057951		1361.21	0.01849823		1891.24	-0.00012469		2421.24	0.00070952		2951.24	0.00084815		3481.24	-0.00996977
301.4	0.0761571		831.42	0.00615839		1361.41	0.01673158		1891.44	-0.00025089		2421.44	0.000599		2951.44	0.00131871		3481.44	-0.01167744
301.6	0.07603158		831.62	0.00765452		1361.61	0.01612208		1891.64	0.00011481		2421.64	0.00035847		2951.64	0.0009855		3481.64	-0.01283651
301.8	0.07664767		831.82	0.00787561		1361.81	0.01540335		1891.84	-0.00069049		2421.84	0.00027717		2951.84	0.00121944		3481.84	-0.01269715
302	0.07741148		832.02	0.00926533		1362.01	0.0154955		1892.04	-0.0012189		2422.04	0.00063482		2952.04	0.00083607		3482.04	-0.01208412
302.2	0.07711048		832.22	0.00976995		1362.21	0.01522309		1892.24	-0.0009871		2422.24	0.00102271		2952.24	0.00187639		3482.24	-0.01038859
302.4	0.07705131		832.42	0.01012682		1362.41	0.01463842		1892.44	-0.00069794		2422.44	0.0011773		2952.44	0.00144908		3482.44	-0.00943866
302.6	0.07649578		832.62	0.00972207		1362.61	0.01355063		1892.64	-0.00006607		2422.64	0.00072194		2952.64	0.00098651		3482.64	-0.00883529
302.8	0.07706869		832.82	0.00892233		1362.81	0.01393948		1892.84	0.0000027		2422.84	0.00080125		2952.84	0.00086864		3482.84	-0.00850799
303	0.07704337		833.02	0.00815438		1363.01	0.01399222		1893.04	0.00005826		2423.04	0.00093329		2953.04	0.00220033		3483.04	-0.00930251
303.2	0.07737476		833.22	0.00734354		1363.21	0.01426205		1893.24	0.0000985		2423.24	0.00111078		2953.24	0.00202542		3483.24	-0.00810418
303.4	0.07713898		833.42	0.00633555		1363.41	0.01403444		1893.44	0.00003934		2423.44	0.00132473		2953.44	0.00213797		3483.44	-0.00668336
303.6	0.07618499		833.62	0.00513873		1363.61	0.01519962		1893.64	-0.00003517		2423.64	0.00222638		2953.64	0.00207163		3483.64	-0.00634069
303.8	0.07623489		833.82	0.00468433		1363.81	0.01519659		1893.84	-0.00072516		2423.84	0.00220149		2953.84	0.00302331		3483.84	-0.00631355
304	0.07645088		834.02	0.00362183		1364.01	0.01564407		1894.04	-0.00039719		2424.04	0.00233862		2954.04	0.00250669		3484.04	-0.00645508
304.2	0.07670589		834.22	0.00422444		1364.21	0.01684396		1894.24	-0.00091115		2424.24	0.00187777		2954.24	0.00226215		3484.24	-0.00625271
304.4	0.07743765		834.42	0.00407798		1364.41	0.01714331		1894.44	-0.00132904		2424.44	0.00075711		2954.44	0.00277922		3484.44	-0.0079649
304.6	0.07747672		834.62	0.00450399		1364.61	0.01846966		1894.64	-0.00180838		2424.64	0.00016843		2954.64	0.00298066		3484.64	-0.0075053
304.8	0.07807506		834.82	0.00444921		1364.81	0.01878924		1894.84	-0.00136094		2424.84	-0.00054326		2954.84	0.00324588		3484.84	-0.00878904
305	0.07769627		835.02	0.00436595		1365.01	0.01925566		1895.04	-0.00154076		2425.04	-0.00153513		2955.04	0.00328244		3485.04	-0.00968507
305.2	0.07761862		835.22	0.00524345		1365.21	0.01931636		1895.24	-0.00126686		2425.24	-0.00092985		2955.24	0.00329051		3485.24	-0.01138907
305.4	0.07824967		835.42	0.00581632		1365.41	0.01874143		1895.44	-0.00048386		2425.44	-0.00075144		2955.44	0.00403722		3485.44	-0.01305169
305.6	0.07782114		835.62	0.00664659		1365.61	0.01891403		1895.64	-0.00033491		2425.64	-0.00057471		2955.64	0.00439272		3485.64	-0.01308996
305.8	0.07851657		835.82	0.00704344		1365.81	0.01857274		1895.84	-0.00033356		2425.84	-0.00051283		2955.84	0.00436722		3485.84	-0.01259638
306	0.07839385		836.02	0.00852016		1366.01	0.01865685		1896.04	-0.00030774		2426.04	-0.00068576		2956.04	0.00321174		3486.04	-0.01187202
306.2	0.07767494		836.22	0.00965802		1366.21	0.01827953		1896.24	-0.00014824		2426.24	-0.0008887		2956.24	0.00339528		3486.24	-0.01123599
306.4	0.07785103		836.42	0.00950666		1366.41	0.01827118		1896.44	-0.00005706		2426.44	-0.00134153		2956.44	0.00247921		3486.44	-0.01126738
306.6	0.07734447		836.62	0.00947085		1366.61	0.01860222		1896.64	0.00013587		2426.64	-0.0016859		2956.64	0.00235905		3486.64	-0.01075695
306.8	0.07783275		836.82	0.00945124		1366.81	0.01942946		1896.84	-0.00058752		2426.84	-0.00138582		2956.84	0.00240242		3486.84	-0.0096756
307	0.07687927		837.02	0.00979647		1367.01	0.01998506		1897.04	-0.00153344		2427.04	-0.0004541		2957.04	0.00217486		3487.04	-0.00944851
307.2	0.07662474		837.22	0.01019702		1367.21	0.01958486		1897.24	-0.002403		2427.24	-0.00030785		2957.24	0.00092732		3487.24	-0.00868804
307.4	0.07608899		837.42	0.00945118		1367.41	0.02016138		1897.44	-0.00242481		2427.44	0.00005388		2957.44	0.00081166		3487.44	-0.00753871
307.6	0.07512687		837.62	0.00892823		1367.61	0.02032026		1897.64	-0.00235132		2427.64	-0.0003165		2957.64	-0.00035269		3487.64	-0.00873541
307.8	0.07456833		837.82	0.00886508		1367.81	0.0199484		1897.84	-0.00271029		2427.84	-0.0007428		2957.84	-0.00042755		3487.84	-0.00965935
308	0.07457781		838.02	0.00923872		1368.01	0.02030049		1898.04	-0.00274368		2428.04	-0.00110852		2958.04	-0.00191279		3488.04	-0.00928311
308.2	0.07350135		838.22	0.01011231		1368.21	0.02022529		1898.24	-0.00280355		2428.24	-0.00160513		2958.24	-0.00231163		3488.24	-0.00983177
308.4	0.07398968		838.42	0.00991048		1368.41	0.02028075		1898.44	-0.00199062		2428.44	-0.00209696		2958.44	-0.00202556		3488.44	-0.01087661
308.6	0.0742498		838.62	0.00950079		1368.61	0.0204658		1898.64	-0.00181981		2428.64	-0.00204659		2958.64	-0.00213809		3488.64	-0.01109993
308.8	0.07482582		838.82	0.00924886		1368.81	0.02013503		1898.84	-0.00108252		2428.84	-0.0015029		2958.84	-0.00252598		3488.84	-0.0126282
309	0.07448664		839.02	0.00881399		1369.01	0.02035574		1899.04	-0.00078714		2429.04	-0.00118239		2959.04	-0.0019223		3489.04	-0.01375041
309.2	0.07532281		839.22	0.00840721		1369.21	0.01973361		1899.24	-0.00009392		2429.24	0.00033801		2959.24	-0.00090095		3489.24	-0.01512929
309.4	0.07596429		839.42	0.00846367		1369.41	0.01868299		1899.44	0.00066675		2429.44	0.00075757		2959.44	-0.00165189		3489.44	-0.01579503
309.6	0.07642626		839.62	0.00827282		1369.61	0.01879376		1899.64	0.00022055		2429.64	0.0007716		2959.64	-0.00161575		3489.64	-0.01590917
309.8	0.07759681		839.82	0.00820496		1369.81	0.01788428		1899.84	-0.00002449		2429.84	0.00103214		2959.84	-0.00251698		3489.84	-0.01581666
310	0.07762876		840.02	0.00798978		1370.01	0.01747969		1900.04	0.00014882		2430.04	0.00079589		2960.04	-0.00264794		3490.04	-0.01593628
310.2	0.07772716		840.22	0.00730734		1370.21	0.01729832		1900.24	0.0009586		2430.24	0.00190239		2960.24	-0.00199574		3490.24	-0.01647596
310.4	0.07895722		840.42	0.00715151		1370.41	0.01838391		1900.44	0.00167086		2430.44	0.00239059		2960.44	-0.00126749		3490.44	-0.0150691
310.6	0.07967431		840.62	0.00759689		1370.61	0.01901371		1900.64	0.00176378		2430.64	0.00261962		2960.64	-0.00090326		3490.64	-0.01394658
310.8	0.08020619		840.82	0.00712296		1370.81	0.01966531		1900.84	0.001912		2430.84	0.00304775		2960.84	-0.00042422		3490.84	-0.01298476
311	0.07939561		841.02	0.00695067		1371.01	0.02016773		1901.04	0.00156658		2431.04	0.00357452		2961.04	-0.00019569		3491.04	-0.01165251
311.2	0.08019044		841.22	0.00686511		1371.21	0.0205729		1901.24	0.00192887		2431.24	0.00338327		2961.24	0.00015834		3491.24	-0.01022918
311.4	0.07987222		841.42	0.00612231		1371.41	0.02124028		1901.44	0.0026361		2431.44	0.00284745		2961.44	0.00117332		3491.44	-0.00903465
311.6	0.07931762		841.62	0.00668376		1371.61	0.02007793		1901.64	0.00279283		2431.64	0.00228295		2961.64	0.00096613		3491.64	-0.00882668
311.8	0.07853423		841.82	0.00703039		1371.81	0.01996904		1901.84	0.00187486		2431.84	0.00217039		2961.84	0.00160452		3491.84	-0.0083172
312	0.07847755		842.02	0.00733305		1372.01	0.02026813		1902.04	0.00139132		2432.04	0.00141955		2962.04	0.0018864		3492.04	-0.00742923
312.2	0.0779935		842.22	0.00739137		1372.21	0.02023399		1902.24	0.00143677		2432.24	0.00156769		2962.24	0.00210879		3492.24	-0.00804714
312.4	0.07817712		842.42	0.00770369		1372.41	0.02032205		1902.44	0.00104567		2432.44	0.00122803		2962.44	0.00207565		3492.44	-0.00832776
312.6	0.07804034		842.62	0.00712728		1372.61	0.0208003		1902.64	0.00057174		2432.64	0.00112295		2962.64	0.0017511		3492.64	-0.00895553
312.8	0.07757824		842.82	0.00762953		1372.81	0.02091258		1902.84	0.00010153		2432.84	0.00084013		2962.84	0.00115031		3492.84	-0.00901764
313	0.07756993		843.02	0.00693478		1373.01	0.02111092		1903.04	-0.00007259		2433.04	0.00149987		2963.04	0.00202605		3493.04	-0.00934631
313.2	0.07875621		843.22	0.00747021		1373.21	0.02063385		1903.24	-0.00017451		2433.24	0.00152903		2963.24	0.00218179		3493.24	-0.01030514
313.4	0.07901705		843.42	0.00753399		1373.41	0.02079244		1903.44	-0.00041334		2433.44	0.00131671		2963.44	0.00100821		3493.44	-0.01176864
313.6	0.07967995		843.62	0.00644606		1373.61	0.02069324		1903.64	-0.00124817		2433.64	0.00162345		2963.64	0.00112489		3493.64	-0.01214116
313.8	0.07957318		843.82	0.00620721		1373.81	0.0200028		1903.84	-0.0005537		2433.84	0.00177945		2963.84	0.001293		3493.84	-0.01295221
314	0.08050617		844.02	0.00628915		1374.01	0.02025053		1904.04	-0.00005967		2434.04	0.00212372		2964.04	0.00131888		3494.04	-0.01333753
314.2	0.08137999		844.22	0.00675318		1374.21	0.02044092		1904.24	-0.00047285		2434.24	0.00305028		2964.24	0.00097121		3494.24	-0.01426611
314.4	0.08307014		844.42	0.00657847		1374.41	0.02110336		1904.44	-0.00042766		2434.44	0.00282141		2964.44	0.0009066		3494.44	-0.01436524
314.6	0.08335578		844.62	0.00520625		1374.61	0.02114286		1904.64	-0.00065746		2434.64	0.00218137		2964.64	0.00046306		3494.64	-0.01480669
314.8	0.0831319		844.82	0.00418507		1374.81	0.0209615		1904.84	-0.00036995		2434.84	0.00197315		2964.84	0.00019034		3494.84	-0.01527671
315	0.08251731		845.02	0.00453386		1375.01	0.02069765		1905.04	-0.00024766		2435.04	0.00170092		2965.04	0.00055794		3495.04	-0.01440043
315.2	0.0830193		845.22	0.00520823		1375.21	0.02024413		1905.24	0.0000888		2435.24	0.00178697		2965.24	0.00191625		3495.24	-0.01415845
315.4	0.08195316		845.42	0.00615038		1375.41	0.0195612		1905.44	-0.00010285		2435.44	0.00161503		2965.44	0.00277792		3495.44	-0.01471553
315.6	0.0806859		845.62	0.00702471		1375.61	0.01794358		1905.64	0.00009877		2435.64	0.0019158		2965.64	0.00247669		3495.64	-0.01472522
315.8	0.07919358		845.82	0.00738557		1375.81	0.01792041		1905.84	-0.00052911		2435.84	0.00197972		2965.84	0.00385447		3495.84	-0.014851
316	0.07782488		846.02	0.00675316		1376.01	0.01792485		1906.04	-0.00034884		2436.04	0.00166895		2966.04	0.00443923		3496.04	-0.01466871
316.2	0.07639721		846.22	0.00675929		1376.21	0.01751148		1906.24	0.0002702		2436.24	0.00203589		2966.24	0.00364126		3496.24	-0.0143693
316.4	0.07543499		846.42	0.00720429		1376.41	0.01666136		1906.44	0.00040641		2436.44	0.00258572		2966.44	0.00360091		3496.44	-0.01429484
316.6	0.07508852		846.62	0.00696593		1376.61	0.01676729		1906.64	0.0005698		2436.64	0.00294156		2966.64	0.00404327		3496.64	-0.01350326
316.8	0.07495346		846.82	0.0070843		1376.81	0.01618062		1906.84	0.00102948		2436.84	0.00300312		2966.84	0.00378295		3496.84	-0.01207626
317	0.07516432		847.02	0.00682425		1377.01	0.01563846		1907.04	0.00147887		2437.04	0.00403803		2967.04	0.00393756		3497.04	-0.01195094
317.2	0.07527607		847.22	0.00704696		1377.21	0.01570021		1907.24	0.00176166		2437.24	0.00454909		2967.24	0.00397383		3497.24	-0.01213612
317.4	0.07495936		847.42	0.00720848		1377.41	0.0160033		1907.44	0.0018838		2437.44	0.00463438		2967.44	0.00390902		3497.44	-0.01200338
317.6	0.07543969		847.62	0.00677203		1377.61	0.01541069		1907.64	0.00097762		2437.64	0.0045589		2967.64	0.0038887		3497.64	-0.01175286
317.8	0.07518662		847.82	0.00707346		1377.81	0.01546785		1907.84	0.00124724		2437.84	0.00432697		2967.84	0.0044092		3497.84	-0.01125858
318	0.07697651		848.02	0.00681533		1378.01	0.01564037		1908.04	0.00040921		2438.04	0.00367313		2968.04	0.00401172		3498.04	-0.01162781
318.2	0.07671365		848.22	0.00604163		1378.21	0.01494013		1908.24	-0.00016206		2438.24	0.00304106		2968.24	0.00348146		3498.24	-0.01229468
318.4	0.07813517		848.42	0.00516007		1378.41	0.0148169		1908.44	-0.00026827		2438.44	0.0019464		2968.44	0.00330579		3498.44	-0.01169017
318.6	0.07770458		848.62	0.0044331		1378.61	0.01444955		1908.64	-0.00064619		2438.64	0.0007819		2968.64	0.00291909		3498.64	-0.01221494
318.8	0.07770297		848.82	0.00517774		1378.81	0.014438		1908.84	-0.00029595		2438.84	0.00124102		2968.84	0.00271878		3498.84	-0.01144819
319	0.07826053		849.02	0.00635523		1379.01	0.01456967		1909.04	-0.00024881		2439.04	0.00043304		2969.04	0.00307456		3499.04	-0.01113873
319.2	0.0795502		849.22	0.00699536		1379.21	0.01486944		1909.24	-0.00019866		2439.24	0.00067233		2969.24	0.00366081		3499.24	-0.01123535
319.4	0.07929843		849.42	0.00821373		1379.41	0.01573162		1909.44	-0.00082803		2439.44	-0.00031101		2969.44	0.00381051		3499.44	-0.0112872
319.6	0.07971605		849.62	0.00862338		1379.61	0.01614589		1909.64	-0.00036657		2439.64	-0.00022024		2969.64	0.00403211		3499.64	-0.01104426
319.8	0.0802819		849.82	0.00918324		1379.81	0.0174142		1909.84	-0.00078455		2439.84	-0.00017368		2969.84	0.0045752		3499.84	-0.0111066
320	0.08091124		850.02	0.00892788		1380.01	0.01817435		1910.04	-0.00115841		2440.04	-0.00019717		2970.04	0.0040598		3500.04	-0.01106657
320.2	0.08133069		850.22	0.00996668		1380.21	0.0186705		1910.24	-0.00109933		2440.24	0.00101294		2970.24	0.00401551		3500.24	-0.01129131
320.4	0.08210468		850.42	0.01012593		1380.41	0.01919668		1910.44	-0.0017223		2440.44	0.00225094		2970.44	0.00415155		3500.44	-0.01136074
320.6	0.08288728		850.62	0.01017111		1380.61	0.01998889		1910.64	-0.00185396		2440.64	0.00208049		2970.64	0.00439865		3500.64	-0.01165377
320.8	0.08352691		850.82	0.00996369		1380.81	0.0207502		1910.84	-0.00103623		2440.84	0.00300576		2970.84	0.00476674		3500.84	-0.01130515
321	0.08360284		851.02	0.00939011		1381.01	0.02128065		1911.04	-0.00118612		2441.04	0.004423		2971.04	0.00497501		3501.04	-0.01206507
321.2	0.08314179		851.22	0.00941488		1381.21	0.02147174		1911.24	-0.00096653		2441.24	0.00536861		2971.24	0.00501726		3501.24	-0.01294556
321.4	0.08314956		851.42	0.00878526		1381.41	0.02183515		1911.44	-0.00070282		2441.44	0.0044747		2971.44	0.00492772		3501.44	-0.01362853
321.6	0.08315616		851.62	0.00755077		1381.61	0.02170265		1911.64	-0.0008114		2441.64	0.00490693		2971.64	0.00459961		3501.64	-0.01374845
321.8	0.08260443		851.82	0.00765623		1381.81	0.02138301		1911.84	-0.0004634		2441.84	0.00472058		2971.84	0.00525757		3501.84	-0.01410295
322	0.08247832		852.02	0.00706268		1382.01	0.02059618		1912.04	-0.00047676		2442.04	0.00377394		2972.04	0.00533986		3502.04	-0.01467067
322.2	0.08184406		852.22	0.00535031		1382.21	0.02017378		1912.24	-0.00108117		2442.24	0.00316005		2972.24	0.00523117		3502.24	-0.01465754
322.4	0.08236241		852.42	0.00554049		1382.41	0.02045788		1912.44	-0.00105818		2442.44	0.00164048		2972.44	0.00519072		3502.44	-0.01394264
322.6	0.0813933		852.62	0.00482323		1382.61	0.02038249		1912.64	-0.00088169		2442.64	0.0011372		2972.64	0.00461377		3502.64	-0.01383635
322.8	0.08135658		852.82	0.00512612		1382.81	0.02015863		1912.84	-0.00033695		2442.84	0.00063289		2972.84	0.00472627		3502.84	-0.013409
323	0.08205794		853.02	0.00523712		1383.01	0.02027538		1913.04	0.0002029		2443.04	-0.00072453		2973.04	0.00500235		3503.04	-0.01397022
323.2	0.08248297		853.22	0.00549135		1383.21	0.02030245		1913.24	-0.00008535		2443.24	-0.0012143		2973.24	0.00575677		3503.24	-0.01363979
323.4	0.08258261		853.42	0.00545439		1383.41	0.02020915		1913.44	-0.00014836		2443.44	-0.00200497		2973.44	0.0055885		3503.44	-0.01320022
323.6	0.08338572		853.62	0.00502833		1383.61	0.01976482		1913.64	-0.00023252		2443.64	-0.00152894		2973.64	0.00641295		3503.64	-0.01346616
323.8	0.08391642		853.82	0.00560114		1383.81	0.01929752		1913.84	-0.00071175		2443.84	-0.00136037		2973.84	0.00569795		3503.84	-0.01286677
324	0.08463939		854.02	0.00599725		1384.01	0.01859106		1914.04	-0.0011076		2444.04	-0.00092712		2974.04	0.00543778		3504.04	-0.01236944
324.2	0.08437645		854.22	0.00682759		1384.21	0.01918217		1914.24	-0.00042553		2444.24	-0.00036096		2974.24	0.00602493		3504.24	-0.01176521
324.4	0.08463505		854.42	0.0074295		1384.41	0.01875872		1914.44	0.00050031		2444.44	0.00022822		2974.44	0.00566228		3504.44	-0.01128088
324.6	0.08492344		854.62	0.00744912		1384.61	0.01880863		1914.64	0.00042069		2444.64	0.00120697		2974.64	0.00552397		3504.64	-0.01188157
324.8	0.08500618		854.82	0.00749265		1384.81	0.01842045		1914.84	0.00087441		2444.84	0.00226012		2974.84	0.00529262		3504.84	-0.01141639
325	0.08531193		855.02	0.00814023		1385.01	0.01813754		1915.04	-0.00023945		2445.04	0.00296951		2975.04	0.00474041		3505.04	-0.01206057
325.2	0.08484303		855.22	0.00846546		1385.21	0.01859568		1915.24	-0.00040439		2445.24	0.00397212		2975.24	0.00473526		3505.24	-0.01243627
325.4	0.08467783		855.42	0.00798948		1385.41	0.01947338		1915.44	-0.00047399		2445.44	0.00411852		2975.44	0.00410416		3505.44	-0.0123391
325.6	0.08461915		855.62	0.00862213		1385.61	0.01863945		1915.64	-0.0005957		2445.64	0.00466696		2975.64	0.00399545		3505.64	-0.01232303
325.8	0.08392655		855.82	0.00941986		1385.81	0.01942701		1915.84	-0.0014078		2445.84	0.00456654		2975.84	0.00441134		3505.84	-0.01353599
326	0.083632		856.02	0.0087433		1386.01	0.01974925		1916.04	-0.00153801		2446.04	0.00441242		2976.04	0.00380766		3506.04	-0.01355014
326.2	0.08357262		856.22	0.00863794		1386.21	0.02076151		1916.24	-0.00172854		2446.24	0.00398752		2976.24	0.00390569		3506.24	-0.01411661
326.4	0.08358328		856.42	0.00889528		1386.41	0.02128566		1916.44	-0.0015436		2446.44	0.00353338		2976.44	0.00381371		3506.44	-0.01376394
326.6	0.08248562		856.62	0.00903296		1386.61	0.02118047		1916.64	-0.00116235		2446.64	0.00347731		2976.64	0.00395244		3506.64	-0.01434363
326.8	0.08239765		856.82	0.00942967		1386.81	0.02156189		1916.84	-0.00134557		2446.84	0.00290118		2976.84	0.00418858		3506.84	-0.01508436
327	0.08308898		857.02	0.00873833		1387.01	0.02162199		1917.04	-0.00131748		2447.04	0.00288053		2977.04	0.00462118		3507.04	-0.01454034
327.2	0.08342695		857.22	0.00870594		1387.21	0.02117362		1917.24	-0.00147608		2447.24	0.00230303		2977.24	0.0045034		3507.24	-0.01517879
327.4	0.08372143		857.42	0.00853483		1387.41	0.02081583		1917.44	-0.00079108		2447.44	0.00218217		2977.44	0.00371745		3507.44	-0.01513997
327.6	0.08417932		857.62	0.00795502		1387.61	0.02036998		1917.64	-0.00128147		2447.64	0.00208687		2977.64	0.00428166		3507.64	-0.01539226
327.8	0.08410053		857.82	0.00892342		1387.81	0.01988601		1917.84	-0.00096681		2447.84	0.00182511		2977.84	0.00393089		3507.84	-0.01513101
328	0.08477336		858.02	0.0089357		1388.01	0.01912338		1918.04	-0.00032388		2448.04	0.00189498		2978.04	0.00328826		3508.04	-0.01474964
328.2	0.08440148		858.22	0.00844182		1388.21	0.0185138		1918.24	0.00023732		2448.24	0.0022154		2978.24	0.00414359		3508.24	-0.01407977
328.4	0.08497569		858.42	0.00851682		1388.41	0.01675099		1918.44	-0.00022035		2448.44	0.00283496		2978.44	0.00379833		3508.44	-0.013903
328.6	0.08520241		858.62	0.00764358		1388.61	0.01617573		1918.64	-0.00093446		2448.64	0.00281382		2978.64	0.00361144		3508.64	-0.0136558
328.8	0.08550241		858.82	0.00791379		1388.81	0.01578415		1918.84	-0.00114898		2448.84	0.00258831		2978.84	0.00440098		3508.84	-0.01335895
329	0.08582548		859.02	0.00745757		1389.01	0.01550479		1919.04	-0.00201746		2449.04	0.0027912		2979.04	0.00451914		3509.04	-0.01334477
329.2	0.08481854		859.22	0.00691695		1389.21	0.01638252		1919.24	-0.00245038		2449.24	0.0034222		2979.24	0.00453714		3509.24	-0.01287203
329.4	0.0844714		859.42	0.00633115		1389.41	0.01570281		1919.44	-0.00136006		2449.44	0.00409579		2979.44	0.0036704		3509.44	-0.01392876
329.6	0.08384944		859.62	0.00610238		1389.61	0.01516312		1919.64	-0.00076438		2449.64	0.00355624		2979.64	0.00352215		3509.64	-0.01408595
329.8	0.08321649		859.82	0.00556826		1389.81	0.01635172		1919.84	-0.00090248		2449.84	0.00325076		2979.84	0.0034081		3509.84	-0.01518938
330	0.08341347		860.02	0.00554023		1390.01	0.01639272		1920.04	0.00011114		2450.04	0.00336766		2980.04	0.00244494		3510.04	-0.01571168
330.2	0.08305203		860.22	0.00552377		1390.21	0.01724179		1920.24	-0.00004347		2450.24	0.00317381		2980.24	0.00279422		3510.24	-0.01577278
330.4	0.08334149		860.42	0.00524048		1390.41	0.01792853		1920.44	0.00016917		2450.44	0.0034504		2980.44	0.00290404		3510.44	-0.01537701
330.6	0.08274023		860.62	0.00584942		1390.61	0.01860473		1920.64	0.00016529		2450.64	0.00367071		2980.64	0.00258557		3510.64	-0.01538007
330.8	0.08371948		860.82	0.00571683		1390.81	0.01941913		1920.84	-0.00014812		2450.84	0.00334062		2980.84	0.00173923		3510.84	-0.01431565
331	0.08381347		861.02	0.00612913		1391.01	0.01933345		1921.04	-0.00011918		2451.04	0.00353249		2981.04	0.00161945		3511.04	-0.01372858
331.2	0.08414735		861.22	0.00672317		1391.21	0.01929795		1921.24	0.00039025		2451.24	0.00302301		2981.24	0.00133996		3511.24	-0.01376338
331.4	0.08508154		861.42	0.00784308		1391.41	0.01918288		1921.44	-0.00043211		2451.44	0.0023383		2981.44	0.00127696		3511.44	-0.01343528
331.6	0.08610195		861.62	0.0085535		1391.61	0.01896837		1921.64	-0.00120893		2451.64	0.00200092		2981.64	0.00280534		3511.64	-0.01355718
331.8	0.08742138		861.82	0.00972705		1391.81	0.01880196		1921.84	-0.00113487		2451.84	0.00126677		2981.84	0.00327519		3511.84	-0.01371012
332	0.08822934		862.02	0.00953456		1392.01	0.01831744		1922.04	-0.00080507		2452.04	0.000783		2982.04	0.00252221		3512.04	-0.01306659
332.2	0.08862088		862.22	0.00984411		1392.21	0.01795344		1922.24	-0.00185969		2452.24	0.00065677		2982.24	0.00359549		3512.24	-0.01240112
332.4	0.08910605		862.42	0.01001471		1392.41	0.01728179		1922.44	-0.00280383		2452.44	0.00054412		2982.44	0.00311137		3512.44	-0.01207768
332.6	0.08886557		862.62	0.00953253		1392.61	0.01739079		1922.64	-0.00219488		2452.64	0.00024873		2982.64	0.00312925		3512.64	-0.01203233
332.8	0.08890722		862.82	0.00967114		1392.81	0.0172689		1922.84	-0.00233279		2452.84	-0.00021377		2982.84	0.00310457		3512.84	-0.01229832
333	0.08854415		863.02	0.00905775		1393.01	0.01660903		1923.04	-0.00289116		2453.04	-0.00046974		2983.04	0.00350034		3513.04	-0.01271344
333.2	0.08741991		863.22	0.00873106		1393.21	0.01657371		1923.24	-0.0024996		2453.24	-0.0001001		2983.24	0.00326671		3513.24	-0.01294751
333.4	0.08654662		863.42	0.00836865		1393.41	0.01574212		1923.44	-0.00197672		2453.44	-0.00037557		2983.44	0.00251321		3513.44	-0.01412315
333.6	0.08618247		863.62	0.00873358		1393.61	0.01601548		1923.64	-0.00258277		2453.64	-0.00137738		2983.64	0.00262642		3513.64	-0.01386567
333.8	0.08520902		863.82	0.00823014		1393.81	0.01715419		1923.84	-0.00180399		2453.84	-0.00175309		2983.84	0.00251727		3513.84	-0.01494485
334	0.08414916		864.02	0.00785834		1394.01	0.01811595		1924.04	-0.00169885		2454.04	-0.0005863		2984.04	0.00338387		3514.04	-0.01468466
334.2	0.08289435		864.22	0.00630021		1394.21	0.01911899		1924.24	-0.0018551		2454.24	-0.00026839		2984.24	0.00403891		3514.24	-0.01469907
334.4	0.08197989		864.42	0.0064192		1394.41	0.019653		1924.44	-0.00152518		2454.44	0.00050866		2984.44	0.00359477		3514.44	-0.01465273
334.6	0.08126325		864.62	0.0058404		1394.61	0.02017925		1924.64	-0.00196775		2454.64	0.00124002		2984.64	0.00304678		3514.64	-0.01442052
334.8	0.08084728		864.82	0.00581994		1394.81	0.02078145		1924.84	-0.00148154		2454.84	0.00144303		2984.84	0.00351603		3514.84	-0.01382099
335	0.08090075		865.02	0.00595683		1395.01	0.02066173		1925.04	-0.00111672		2455.04	0.0020561		2985.04	0.00449291		3515.04	-0.01362253
335.2	0.08136965		865.22	0.00609711		1395.21	0.02128184		1925.24	-0.00114681		2455.24	0.00183143		2985.24	0.00519699		3515.24	-0.01337885
335.4	0.0824964		865.42	0.00723148		1395.41	0.02180065		1925.44	-0.00126531		2455.44	0.0018745		2985.44	0.00492487		3515.44	-0.01422429
335.6	0.08269528		865.62	0.00815452		1395.61	0.02292012		1925.64	-0.00102372		2455.64	0.00222436		2985.64	0.00517426		3515.64	-0.01404488
335.8	0.08293454		865.82	0.00813394		1395.81	0.02377589		1925.84	-0.00092404		2455.84	0.00275739		2985.84	0.00487267		3515.84	-0.01395349
336	0.08298453		866.02	0.00803871		1396.01	0.02342043		1926.04	-0.00077521		2456.04	0.00365525		2986.04	0.0043564		3516.04	-0.01366762
336.2	0.08340288		866.22	0.0084689		1396.21	0.02385939		1926.24	-0.00181897		2456.24	0.00451784		2986.24	0.00364434		3516.24	-0.01323935
336.4	0.08390915		866.42	0.00881944		1396.41	0.02388928		1926.44	-0.00112665		2456.44	0.0051551		2986.44	0.00277076		3516.44	-0.01293921
336.6	0.0836733		866.62	0.00969737		1396.61	0.02457801		1926.64	0.00017787		2456.64	0.00491332		2986.64	0.00270752		3516.64	-0.01271841
336.8	0.08394629		866.82	0.00927214		1396.81	0.02452128		1926.84	0.0005194		2456.84	0.00411501		2986.84	0.00328427		3516.84	-0.0130339
337	0.08463972		867.02	0.00938114		1397.01	0.02359874		1927.04	0.00069857		2457.04	0.00410299		2987.04	0.00364799		3517.04	-0.01326183
337.2	0.08434898		867.22	0.00997944		1397.21	0.02330251		1927.24	0.00069779		2457.24	0.00337302		2987.24	0.00262569		3517.24	-0.0136052
337.4	0.0845662		867.42	0.01061677		1397.41	0.02337826		1927.44	0.0005371		2457.44	0.00246539		2987.44	0.00223507		3517.44	-0.01465486
337.6	0.08435871		867.62	0.01025136		1397.61	0.02317509		1927.64	0.00069343		2457.64	0.00224211		2987.64	0.00254334		3517.64	-0.01460273
337.8	0.08334458		867.82	0.00877746		1397.81	0.0233392		1927.84	0.00189436		2457.84	0.00205182		2987.84	0.00296315		3517.84	-0.01490164
338	0.08309465		868.02	0.00852272		1398.01	0.02335507		1928.04	0.00180895		2458.04	0.001953		2988.04	0.00462587		3518.04	-0.01521004
338.2	0.08298568		868.22	0.00833161		1398.21	0.02284978		1928.24	0.00231693		2458.24	0.00168701		2988.24	0.00403891		3518.24	-0.01597156
338.4	0.08296359		868.42	0.00956923		1398.41	0.02240362		1928.44	0.00205192		2458.44	0.00214951		2988.44	0.00382167		3518.44	-0.01618042
338.6	0.08345221		868.62	0.00910062		1398.61	0.02185585		1928.64	0.0025718		2458.64	0.00202672		2988.64	0.00402872		3518.64	-0.01629141
338.8	0.08378918		868.82	0.00925725		1398.81	0.0215199		1928.84	0.00334885		2458.84	0.0022708		2988.84	0.00396731		3518.84	-0.01657136
339	0.08408683		869.02	0.00892363		1399.01	0.02121816		1929.04	0.00338534		2459.04	0.00233844		2989.04	0.00406787		3519.04	-0.01657806
339.2	0.0842203		869.22	0.00856665		1399.21	0.02178897		1929.24	0.00281601		2459.24	0.00242137		2989.24	0.00291479		3519.24	-0.01617631
339.4	0.08471126		869.42	0.00848392		1399.41	0.02159137		1929.44	0.00290745		2459.44	0.00307013		2989.44	0.00199853		3519.44	-0.01535454
339.6	0.08426541		869.62	0.00829655		1399.61	0.02173034		1929.64	0.00120851		2459.64	0.00307861		2989.64	0.0018227		3519.64	-0.01410716
339.8	0.08454093		869.82	0.00751672		1399.81	0.02164319		1929.84	0.00021551		2459.84	0.00387261		2989.84	0.00155781		3519.84	-0.01409881
340	0.08561526		870.02	0.00805447		1400.01	0.02129742		1930.04	-0.00088918		2460.04	0.00482729		2990.04	0.00192261		3520.04	-0.01407363
340.2	0.08588708		870.22	0.00856187		1400.21	0.0216276		1930.24	-0.00156891		2460.24	0.00529558		2990.24	0.001627		3520.24	-0.01325718
340.4	0.08653423		870.42	0.00841051		1400.41	0.02192237		1930.44	-0.0018462		2460.44	0.00560586		2990.44	0.0015957		3520.44	-0.01254053
340.6	0.08739946		870.62	0.00807456		1400.61	0.02210926		1930.64	-0.00234216		2460.64	0.00518132		2990.64	0.00180126		3520.64	-0.01222254
340.8	0.08815291		870.82	0.00702146		1400.81	0.02181023		1930.84	-0.00311875		2460.84	0.00426491		2990.84	0.00245464		3520.84	-0.01230559
341	0.08860529		871.02	0.00756731		1401.01	0.02054416		1931.04	-0.00289666		2461.04	0.00336986		2991.04	0.00271654		3521.04	-0.01308158
341.2	0.08859223		871.22	0.00741012		1401.21	0.02085026		1931.24	-0.00348757		2461.24	0.00261955		2991.24	0.00383577		3521.24	-0.01400479
341.4	0.08925616		871.42	0.00717168		1401.41	0.02051146		1931.44	-0.00318459		2461.44	0.00211709		2991.44	0.00475362		3521.44	-0.01429637
341.6	0.08850283		871.62	0.00757044		1401.61	0.02028927		1931.64	-0.00244963		2461.64	0.00174821		2991.64	0.00522859		3521.64	-0.01443873
341.8	0.08859101		871.82	0.00769847		1401.81	0.02047938		1931.84	-0.00127695		2461.84	0.00171806		2991.84	0.00636932		3521.84	-0.014334
342	0.08861886		872.02	0.0086342		1402.01	0.02078572		1932.04	-0.0015671		2462.04	0.00130455		2992.04	0.00714871		3522.04	-0.0148697
342.2	0.08872378		872.22	0.00862134		1402.21	0.02092627		1932.24	-0.00131448		2462.24	0.00204905		2992.24	0.00702361		3522.24	-0.01494539
342.4	0.08872343		872.42	0.00950959		1402.41	0.02131101		1932.44	-0.00105317		2462.44	0.00168995		2992.44	0.00707651		3522.44	-0.01481871
342.6	0.08864209		872.62	0.00970447		1402.61	0.0213615		1932.64	-0.00031159		2462.64	0.00221528		2992.64	0.00582781		3522.64	-0.01457557
342.8	0.08862008		872.82	0.00967706		1402.81	0.02215554		1932.84	-0.00012558		2462.84	0.00314273		2992.84	0.00504899		3522.84	-0.01378531
343	0.08746981		873.02	0.00987882		1403.01	0.02282712		1933.04	0.00001008		2463.04	0.00410913		2993.04	0.00483717		3523.04	-0.01342425
343.2	0.08793403		873.22	0.00968778		1403.21	0.02269288		1933.24	-0.00025733		2463.24	0.00447667		2993.24	0.00345129		3523.24	-0.01258111
343.4	0.08735366		873.42	0.00986701		1403.41	0.02268893		1933.44	-0.00128574		2463.44	0.00523338		2993.44	0.00358117		3523.44	-0.01221955
343.6	0.0868151		873.62	0.01049756		1403.61	0.02276613		1933.64	-0.002219		2463.64	0.00517687		2993.64	0.0038387		3523.64	-0.01191402
343.8	0.08666911		873.82	0.01088491		1403.81	0.02205491		1933.84	-0.00296051		2463.84	0.00591056		2993.84	0.0038162		3523.84	-0.01277651
344	0.08683193		874.02	0.01144242		1404.01	0.0218262		1934.04	-0.00433498		2464.04	0.00621429		2994.04	0.00380193		3524.04	-0.01254136
344.2	0.08709895		874.22	0.01077072		1404.21	0.02128685		1934.24	-0.00443281		2464.24	0.00575277		2994.24	0.00187435		3524.24	-0.01196508
344.4	0.08725666		874.42	0.01087911		1404.41	0.02099154		1934.44	-0.0052776		2464.44	0.00513949		2994.44	0.00109417		3524.44	-0.01189953
344.6	0.08727482		874.62	0.01113402		1404.61	0.02061958		1934.64	-0.00541755		2464.64	0.00424283		2994.64	0.00140996		3524.64	-0.01238172
344.8	0.0875246		874.82	0.01099927		1404.81	0.02017608		1934.84	-0.00468208		2464.84	0.00365807		2994.84	0.00134487		3524.84	-0.01268366
345	0.08780186		875.02	0.01108756		1405.01	0.01971329		1935.04	-0.00301199		2465.04	0.00363489		2995.04	0.0019628		3525.04	-0.01420758
345.2	0.08910309		875.22	0.01085512		1405.21	0.02052991		1935.24	-0.00257844		2465.24	0.00386353		2995.24	0.00179519		3525.24	-0.01414445
345.4	0.08926362		875.42	0.0110481		1405.41	0.02031227		1935.44	-0.00234759		2465.44	0.00342925		2995.44	0.00147795		3525.44	-0.0144386
345.6	0.08902385		875.62	0.01065428		1405.61	0.0202476		1935.64	-0.00166607		2465.64	0.00248331		2995.64	0.00187607		3525.64	-0.0150464
345.8	0.08991575		875.82	0.00963556		1405.81	0.02105767		1935.84	-0.00170833		2465.84	0.00232771		2995.84	0.00276584		3525.84	-0.01481046
346	0.09032319		876.02	0.00920174		1406.01	0.02168727		1936.04	-0.00112651		2466.04	0.0026843		2996.04	0.00313668		3526.04	-0.01549213
346.2	0.0908317		876.22	0.00895116		1406.21	0.02168889		1936.24	-0.00041998		2466.24	0.00300878		2996.24	0.00338323		3526.24	-0.01511868
346.4	0.09127609		876.42	0.00955832		1406.41	0.02179517		1936.44	-0.00061395		2466.44	0.00336664		2996.44	0.00336643		3526.44	-0.01478814
346.6	0.09110342		876.62	0.00991076		1406.61	0.02132836		1936.64	-0.0007418		2466.64	0.00469342		2996.64	0.00333181		3526.64	-0.0140423
346.8	0.09002441		876.82	0.00943099		1406.81	0.02149368		1936.84	-0.00073151		2466.84	0.00474813		2996.84	0.00400937		3526.84	-0.01393934
347	0.08932812		877.02	0.00934111		1407.01	0.02077278		1937.04	-0.00047151		2467.04	0.0049077		2997.04	0.00533931		3527.04	-0.01417871
347.2	0.08974005		877.22	0.00904381		1407.21	0.02039092		1937.24	-0.00055872		2467.24	0.00472195		2997.24	0.0054459		3527.24	-0.01333929
347.4	0.0887457		877.42	0.01007963		1407.41	0.02015236		1937.44	-0.00153263		2467.44	0.00485705		2997.44	0.00610716		3527.44	-0.01324415
347.6	0.08778498		877.62	0.0103499		1407.61	0.01987917		1937.64	-0.00208047		2467.64	0.00412024		2997.64	0.00645104		3527.64	-0.01304665
347.8	0.0880969		877.82	0.01028691		1407.81	0.01949288		1937.84	-0.00248604		2467.84	0.00294696		2997.84	0.00658199		3527.84	-0.01253423
348	0.08757156		878.02	0.01043235		1408.01	0.0202275		1938.04	-0.00243305		2468.04	0.00178361		2998.04	0.00581242		3528.04	-0.01243506
348.2	0.08742142		878.22	0.00978393		1408.21	0.01919781		1938.24	-0.00261383		2468.24	0.00151476		2998.24	0.0052482		3528.24	-0.01243221
348.4	0.08669826		878.42	0.01066768		1408.41	0.02000119		1938.44	-0.0037394		2468.44	0.00157743		2998.44	0.00557154		3528.44	-0.0123669
348.6	0.08661082		878.62	0.0101633		1408.61	0.02068606		1938.64	-0.00388729		2468.64	0.00129246		2998.64	0.00503115		3528.64	-0.01221755
348.8	0.08689729		878.82	0.00934917		1408.81	0.02124653		1938.84	-0.00365107		2468.84	0.00159145		2998.84	0.00347621		3528.84	-0.01196958
349	0.08699687		879.02	0.00929861		1409.01	0.02206706		1939.04	-0.00341568		2469.04	0.00219504		2999.04	0.00282824		3529.04	-0.01222009
349.2	0.087575		879.22	0.00836801		1409.21	0.02262073		1939.24	-0.00374462		2469.24	0.0021521		2999.24	0.00182369		3529.24	-0.01132964
349.4	0.08764126		879.42	0.00753575		1409.41	0.02216669		1939.44	-0.00467297		2469.44	0.00089415		2999.44	0.00211802		3529.44	-0.01199307
349.6	0.08744851		879.62	0.00597574		1409.61	0.02222548		1939.64	-0.00434442		2469.64	0.00059978		2999.64	0.00248672		3529.64	-0.01234474
349.8	0.08823318		879.82	0.00499042		1409.81	0.02297796		1939.84	-0.00367881		2469.84	0.00049802		2999.84	0.00286121		3529.84	-0.01271194
350	0.08784958		880.02	0.00454428		1410.01	0.02268459		1940.04	-0.00309742		2470.04	0.0009132		3000.04	0.00309036		3530.04	-0.0130063
350.2	0.08790962		880.22	0.00478847		1410.21	0.02243017		1940.24	-0.0035585		2470.24	0.00068732		3000.24	0.00332608		3530.24	-0.01328619
350.4	0.08774153		880.42	0.00538626		1410.41	0.02312361		1940.44	-0.00406063		2470.44	0.0005423		3000.44	0.00366664		3530.44	-0.01401424
350.6	0.08722215		880.62	0.00517505		1410.61	0.02264956		1940.64	-0.00396564		2470.64	0.00093621		3000.64	0.00508886		3530.64	-0.01454669
350.8	0.08657193		880.82	0.00466512		1410.81	0.02232232		1940.84	-0.00363889		2470.84	0.00076408		3000.84	0.0058381		3530.84	-0.01551031
351	0.08696356		881.02	0.00493141		1411.01	0.02246316		1941.04	-0.0037111		2471.04	0.00116296		3001.04	0.00628267		3531.04	-0.01565459
351.2	0.0868806		881.22	0.00608066		1411.21	0.02174087		1941.24	-0.00340931		2471.24	0.00118824		3001.24	0.00612717		3531.24	-0.01477957
351.4	0.08667565		881.42	0.0068597		1411.41	0.02093131		1941.44	-0.00385548		2471.44	0.0017159		3001.44	0.00646945		3531.44	-0.01552761
351.6	0.08651871		881.62	0.00739901		1411.61	0.02033421		1941.64	-0.00439301		2471.64	0.00104003		3001.64	0.00763676		3531.64	-0.01560261
351.8	0.0875019		881.82	0.00780592		1411.81	0.01985783		1941.84	-0.00306505		2471.84	0.00104635		3001.84	0.00791276		3531.84	-0.0159757
352	0.08667577		882.02	0.00765359		1412.01	0.02001296		1942.04	-0.00260957		2472.04	0.0014633		3002.04	0.00801459		3532.04	-0.01640396
352.2	0.08755521		882.22	0.00728474		1412.21	0.01964306		1942.24	-0.00324762		2472.24	0.00196742		3002.24	0.00711887		3532.24	-0.0157946
352.4	0.08782817		882.42	0.00794042		1412.41	0.02113181		1942.44	-0.00349781		2472.44	0.00322217		3002.44	0.00716892		3532.44	-0.01439477
352.6	0.08873723		882.62	0.00758437		1412.61	0.02101161		1942.64	-0.0031074		2472.64	0.00401544		3002.64	0.00713649		3532.64	-0.01330284
352.8	0.08900076		882.82	0.00816682		1412.81	0.02104489		1942.84	-0.00314146		2472.84	0.00510731		3002.84	0.00637777		3532.84	-0.0129108
353	0.08956961		883.02	0.00906782		1413.01	0.02083179		1943.04	-0.0022977		2473.04	0.00620102		3003.04	0.00607095		3533.04	-0.012275
353.2	0.0898036		883.22	0.00822311		1413.21	0.02037202		1943.24	-0.0019454		2473.24	0.00616725		3003.24	0.00609202		3533.24	-0.01198995
353.4	0.09011454		883.42	0.00818817		1413.41	0.02027758		1943.44	-0.00210628		2473.44	0.00542554		3003.44	0.00614885		3533.44	-0.01119126
353.6	0.09053553		883.62	0.00773352		1413.61	0.0207026		1943.64	-0.00160258		2473.64	0.00588582		3003.64	0.00595984		3533.64	-0.0111502
353.8	0.0908371		883.82	0.0083495		1413.81	0.02161068		1943.84	-0.00133916		2473.84	0.00463081		3003.84	0.00604156		3533.84	-0.01036034
354	0.09082141		884.02	0.00891068		1414.01	0.02146592		1944.04	-0.00101231		2474.04	0.00421716		3004.04	0.00621434		3534.04	-0.01042544
354.2	0.09107985		884.22	0.00887933		1414.21	0.0218232		1944.24	-0.00054316		2474.24	0.00363482		3004.24	0.00639493		3534.24	-0.01064987
354.4	0.091251		884.42	0.00894947		1414.41	0.02316355		1944.44	-0.00059905		2474.44	0.00310127		3004.44	0.00626556		3534.44	-0.01141259
354.6	0.09125156		884.62	0.00896072		1414.61	0.02251417		1944.64	-0.00053513		2474.64	0.00367223		3004.64	0.00682728		3534.64	-0.01170301
354.8	0.09072541		884.82	0.00941755		1414.81	0.02192312		1944.84	-0.00126183		2474.84	0.00268707		3004.84	0.00681644		3534.84	-0.01227086
355	0.09112642		885.02	0.0102683		1415.01	0.02153459		1945.04	-0.00126117		2475.04	0.00226037		3005.04	0.00672563		3535.04	-0.01196417
355.2	0.09004305		885.22	0.01031529		1415.21	0.01989115		1945.24	-0.00094398		2475.24	0.0020668		3005.24	0.00730023		3535.24	-0.01231052
355.4	0.09036457		885.42	0.01026579		1415.41	0.01959735		1945.44	-0.00141851		2475.44	0.00198447		3005.44	0.00748042		3535.44	-0.01332759
355.6	0.09004399		885.62	0.01114526		1415.61	0.01908517		1945.64	-0.00188122		2475.64	0.00164852		3005.64	0.00743569		3535.64	-0.01358178
355.8	0.09052487		885.82	0.01011947		1415.81	0.01964738		1945.84	-0.001252		2475.84	0.00218354		3005.84	0.00671995		3535.84	-0.01445236
356	0.09003697		886.02	0.00916961		1416.01	0.02014994		1946.04	-0.00156192		2476.04	0.0018763		3006.04	0.00636635		3536.04	-0.01438582
356.2	0.09079779		886.22	0.0092636		1416.21	0.0198382		1946.24	-0.00236685		2476.24	0.00263965		3006.24	0.0057029		3536.24	-0.0141839
356.4	0.09035747		886.42	0.00917567		1416.41	0.0198593		1946.44	-0.00214389		2476.44	0.00352026		3006.44	0.00675713		3536.44	-0.01422638
356.6	0.090381		886.62	0.00896397		1416.61	0.0192974		1946.64	-0.00265889		2476.64	0.0035727		3006.64	0.00719345		3536.64	-0.01487959
356.8	0.08986944		886.82	0.00909992		1416.81	0.01921127		1946.84	-0.00298433		2476.84	0.00445647		3006.84	0.00656723		3536.84	-0.01566846
357	0.08928358		887.02	0.00893227		1417.01	0.01902088		1947.04	-0.00261231		2477.04	0.00475121		3007.04	0.0061671		3537.04	-0.01633693
357.2	0.08915183		887.22	0.00840409		1417.21	0.0191619		1947.24	-0.00313669		2477.24	0.00447798		3007.24	0.00558128		3537.24	-0.01636046
357.4	0.09031153		887.42	0.00747624		1417.41	0.01939341		1947.44	-0.00328972		2477.44	0.00444663		3007.44	0.00516858		3537.44	-0.01639084
357.6	0.09130976		887.62	0.00746296		1417.61	0.01907833		1947.64	-0.00311277		2477.64	0.00368428		3007.64	0.00469551		3537.64	-0.01684859
357.8	0.0912563		887.82	0.00755351		1417.81	0.01875536		1947.84	-0.00263246		2477.84	0.00249616		3007.84	0.00440518		3537.84	-0.01626815
358	0.09098652		888.02	0.00753403		1418.01	0.01797408		1948.04	-0.00168484		2478.04	0.00199081		3008.04	0.004581		3538.04	-0.01697837
358.2	0.09081512		888.22	0.00654192		1418.21	0.01822565		1948.24	-0.00217609		2478.24	0.00191706		3008.24	0.0041114		3538.24	-0.01664793
358.4	0.09049597		888.42	0.00714102		1418.41	0.01899461		1948.44	-0.00264241		2478.44	0.00133823		3008.44	0.00414104		3538.44	-0.01753545
358.6	0.09003883		888.62	0.0075087		1418.61	0.01813923		1948.64	-0.00252698		2478.64	0.00153017		3008.64	0.00491793		3538.64	-0.01747588
358.8	0.0894415		888.82	0.00683917		1418.81	0.01796293		1948.84	-0.00196176		2478.84	0.00130424		3008.84	0.00514064		3538.84	-0.01685899
359	0.08908951		889.02	0.00706928		1419.01	0.01759149		1949.04	-0.00098504		2479.04	0.00127482		3009.04	0.00540587		3539.04	-0.01600339
359.2	0.08835182		889.22	0.00661033		1419.21	0.01732087		1949.24	-0.00039724		2479.24	0.00085723		3009.24	0.00529163		3539.24	-0.01605632
359.4	0.08914122		889.42	0.00703912		1419.41	0.01806811		1949.44	-0.0005501		2479.44	0.00015438		3009.44	0.00522169		3539.44	-0.01538217
359.6	0.08847442		889.62	0.00776783		1419.61	0.01800191		1949.64	-0.00087329		2479.64	0.00032872		3009.64	0.00472111		3539.64	-0.01568046
359.8	0.08893954		889.82	0.0067336		1419.81	0.01841714		1949.84	-0.00045113		2479.84	0.00002563		3009.84	0.00480611		3539.84	-0.01578047
360	0.08843502		890.02	0.0064257		1420.01	0.01851159		1950.04	0.00005236		2480.04	-0.00009793		3010.04	0.00499229		3540.04	-0.01503275
360.2	0.08860673		890.22	0.00758806		1420.21	0.01896947		1950.24	-0.00042125		2480.24	0.00095897		3010.24	0.00537634		3540.24	-0.01490892
360.4	0.08893917		890.42	0.00767322		1420.41	0.02009687		1950.44	-0.00012414		2480.44	0.00096297		3010.44	0.00543109		3540.44	-0.01484592
360.6	0.08930838		890.62	0.00674512		1420.61	0.01983127		1950.64	-0.00017935		2480.64	0.00136964		3010.64	0.00550143		3540.64	-0.01508572
360.8	0.09019		890.82	0.00728916		1420.81	0.02019801		1950.84	-0.00028697		2480.84	0.00181314		3010.84	0.00526906		3540.84	-0.01449212
361	0.09042186		891.02	0.00720122		1421.01	0.02054187		1951.04	-0.00038382		2481.04	0.00206009		3011.04	0.00502042		3541.04	-0.01469246
361.2	0.09183379		891.22	0.00733534		1421.21	0.02123844		1951.24	-0.00080847		2481.24	0.0021211		3011.24	0.00515186		3541.24	-0.01345367
361.4	0.09282151		891.42	0.00651197		1421.41	0.02154631		1951.44	-0.00069249		2481.44	0.00225337		3011.44	0.00485217		3541.44	-0.0137369
361.6	0.09317383		891.62	0.00839862		1421.61	0.02139195		1951.64	-0.00083426		2481.64	0.00168675		3011.64	0.00444345		3541.64	-0.01313572
361.8	0.09285597		891.82	0.00892431		1421.81	0.02171301		1951.84	-0.00101741		2481.84	0.00157048		3011.84	0.00455848		3541.84	-0.0135013
362	0.09205592		892.02	0.00860132		1422.01	0.02246056		1952.04	-0.00160031		2482.04	0.00238858		3012.04	0.00462954		3542.04	-0.01397699
362.2	0.09271		892.22	0.00862906		1422.21	0.02307882		1952.24	-0.0027937		2482.24	0.00281844		3012.24	0.00484353		3542.24	-0.01369722
362.4	0.09223727		892.42	0.00929063		1422.41	0.02307346		1952.44	-0.00300417		2482.44	0.00237917		3012.44	0.00532543		3542.44	-0.01428877
362.6	0.09164568		892.62	0.00964471		1422.61	0.02269868		1952.64	-0.00282081		2482.64	0.00245524		3012.64	0.00553257		3542.64	-0.0140831
362.8	0.09094121		892.82	0.00945161		1422.81	0.0228449		1952.84	-0.00147963		2482.84	0.0017903		3012.84	0.00556911		3542.84	-0.01380209
363	0.09001941		893.02	0.01051119		1423.01	0.02221198		1953.04	-0.00118667		2483.04	0.00133992		3013.04	0.00555712		3543.04	-0.01448575
363.2	0.09008513		893.22	0.01036552		1423.21	0.02135687		1953.24	-0.00066412		2483.24	0.00061844		3013.24	0.00600074		3543.24	-0.0152098
363.4	0.08959297		893.42	0.01064581		1423.41	0.02202611		1953.44	-0.0006742		2483.44	0.00046224		3013.44	0.00642936		3543.44	-0.01501497
363.6	0.08968465		893.62	0.01100244		1423.61	0.02202569		1953.64	-0.00045808		2483.64	0.0000514		3013.64	0.00588838		3543.64	-0.01522365
363.8	0.08964511		893.82	0.01008154		1423.81	0.02263597		1953.84	-0.00070666		2483.84	0.00032842		3013.84	0.00644411		3543.84	-0.01518243
364	0.08857076		894.02	0.01061397		1424.01	0.02325351		1954.04	-0.00040719		2484.04	0.00011643		3014.04	0.00651551		3544.04	-0.01519761
364.2	0.0891007		894.22	0.0110982		1424.21	0.02302332		1954.24	-0.00104032		2484.24	0.00002801		3014.24	0.0063233		3544.24	-0.0161572
364.4	0.09039875		894.42	0.01017641		1424.41	0.02264377		1954.44	-0.00077819		2484.44	-0.00066841		3014.44	0.00613661		3544.44	-0.01609836
364.6	0.09041627		894.62	0.00838497		1424.61	0.02133785		1954.64	-0.00103107		2484.64	-0.0003195		3014.64	0.00642653		3544.64	-0.01578052
364.8	0.0910087		894.82	0.00894015		1424.81	0.02168761		1954.84	-0.00087766		2484.84	0.0001306		3014.84	0.0063986		3544.84	-0.01559954
365	0.09100181		895.02	0.00853327		1425.01	0.02212118		1955.04	-0.00099279		2485.04	0.00081343		3015.04	0.00624727		3545.04	-0.0160503
365.2	0.09186191		895.22	0.00863299		1425.21	0.02325818		1955.24	-0.00120664		2485.24	0.0003532		3015.24	0.00587629		3545.24	-0.0148545
365.4	0.09242934		895.42	0.00780309		1425.41	0.02379951		1955.44	-0.00131567		2485.44	0.00104419		3015.44	0.00553008		3545.44	-0.01552375
365.6	0.09310104		895.62	0.00883512		1425.61	0.02377645		1955.64	-0.00215789		2485.64	0.00088569		3015.64	0.00573612		3545.64	-0.01623265
365.8	0.09318201		895.82	0.0084137		1425.81	0.02405469		1955.84	-0.00225897		2485.84	0.00085664		3015.84	0.00630219		3545.84	-0.01684275
366	0.09249488		896.02	0.00867786		1426.01	0.02350033		1956.04	-0.00279887		2486.04	0.00183758		3016.04	0.00572297		3546.04	-0.01687922
366.2	0.09269838		896.22	0.00934088		1426.21	0.02349321		1956.24	-0.003026		2486.24	0.00175126		3016.24	0.00572875		3546.24	-0.01722952
366.4	0.09243646		896.42	0.00977287		1426.41	0.02312268		1956.44	-0.00315786		2486.44	0.0010363		3016.44	0.00542167		3546.44	-0.01757489
366.6	0.0925097		896.62	0.01016945		1426.61	0.02331962		1956.64	-0.00299485		2486.64	0.00105951		3016.64	0.0059248		3546.64	-0.01777264
366.8	0.09260696		896.82	0.009655		1426.81	0.02399566		1956.84	-0.0022052		2486.84	0.0011392		3016.84	0.00576075		3546.84	-0.01738082
367	0.09246167		897.02	0.01031706		1427.01	0.02258262		1957.04	-0.00240014		2487.04	0.00197506		3017.04	0.00617816		3547.04	-0.01727933
367.2	0.09289383		897.22	0.01003467		1427.21	0.02171766		1957.24	-0.00170538		2487.24	0.00216773		3017.24	0.00721544		3547.24	-0.01692113
367.4	0.0930666		897.42	0.01056892		1427.41	0.02221827		1957.44	-0.00124577		2487.44	0.00263413		3017.44	0.00754813		3547.44	-0.01669617
367.6	0.09350922		897.62	0.01102474		1427.61	0.02198923		1957.64	-0.0015373		2487.64	0.00316361		3017.64	0.00784709		3547.64	-0.01665122
367.8	0.09322886		897.82	0.01066225		1427.81	0.02151048		1957.84	-0.00231747		2487.84	0.00309269		3017.84	0.00842154		3547.84	-0.01668102
368	0.09353355		898.02	0.01158669		1428.01	0.02059292		1958.04	-0.00197772		2488.04	0.00305973		3018.04	0.00838763		3548.04	-0.0169553
368.2	0.09383049		898.22	0.01115494		1428.21	0.01953674		1958.24	-0.0022506		2488.24	0.00327835		3018.24	0.00871068		3548.24	-0.017009
368.4	0.09344319		898.42	0.01008641		1428.41	0.02032218		1958.44	-0.00250786		2488.44	0.00395309		3018.44	0.00849807		3548.44	-0.01653215
368.6	0.09281249		898.62	0.0094555		1428.61	0.01988586		1958.64	-0.00238869		2488.64	0.00534267		3018.64	0.00815608		3548.64	-0.0154
368.8	0.09311113		898.82	0.01027163		1428.81	0.02019512		1958.84	-0.00217434		2488.84	0.00601093		3018.84	0.00730904		3548.84	-0.01530257
369	0.09321507		899.02	0.0098861		1429.01	0.02050112		1959.04	-0.00299627		2489.04	0.00571627		3019.04	0.00706727		3549.04	-0.01379331
369.2	0.0937018		899.22	0.00954061		1429.21	0.02049939		1959.24	-0.00380292		2489.24	0.00595093		3019.24	0.00669421		3549.24	-0.01250908
369.4	0.09377807		899.42	0.00897748		1429.41	0.02024716		1959.44	-0.00384638		2489.44	0.00642182		3019.44	0.00514062		3549.44	-0.01247655
369.6	0.09321224		899.62	0.00967031		1429.61	0.01913356		1959.64	-0.00493936		2489.64	0.00623606		3019.64	0.00517318		3549.64	-0.01190437
369.8	0.09279828		899.82	0.00968509		1429.81	0.02015417		1959.84	-0.00491357		2489.84	0.00610303		3019.84	0.00501973		3549.84	-0.01140943
370	0.0917458		900.02	0.00995174		1430.01	0.02004713		1960.04	-0.00471789		2490.04	0.00577441		3020.04	0.00439432		3550.04	-0.01091049
370.2	0.09209795		900.22	0.00963974		1430.21	0.02057614		1960.24	-0.00396248		2490.24	0.00488402		3020.24	0.00443884		3550.24	-0.01095674
370.4	0.09261958		900.42	0.00982647		1430.41	0.02038658		1960.44	-0.0041651		2490.44	0.00411347		3020.44	0.00454497		3550.44	-0.0105184
370.6	0.0927583		900.62	0.01020569		1430.61	0.02144171		1960.64	-0.00418972		2490.64	0.00366616		3020.64	0.00548891		3550.64	-0.01022967
370.8	0.09274283		900.82	0.01117701		1430.81	0.02176716		1960.84	-0.00421651		2490.84	0.0036252		3020.84	0.00572707		3550.84	-0.00973004
371	0.09271661		901.02	0.01212253		1431.01	0.02114031		1961.04	-0.00395703		2491.04	0.00360036		3021.04	0.00642662		3551.04	-0.01081082
371.2	0.09291818		901.22	0.01281086		1431.21	0.02130028		1961.24	-0.0031724		2491.24	0.00337507		3021.24	0.00687539		3551.24	-0.01114831
371.4	0.09245652		901.42	0.0132576		1431.41	0.02108739		1961.44	-0.00319594		2491.44	0.00350084		3021.44	0.00746636		3551.44	-0.01188708
371.6	0.09185179		901.62	0.01416345		1431.61	0.02125324		1961.64	-0.00382577		2491.64	0.00345301		3021.64	0.00812885		3551.64	-0.01212322
371.8	0.09216234		901.82	0.01380628		1431.81	0.02135291		1961.84	-0.00378427		2491.84	0.00271265		3021.84	0.0078642		3551.84	-0.01253679
372	0.0923049		902.02	0.01407882		1432.01	0.02159814		1962.04	-0.00369711		2492.04	0.00239926		3022.04	0.00785868		3552.04	-0.01311297
372.2	0.09115531		902.22	0.01345794		1432.21	0.02223533		1962.24	-0.00377672		2492.24	0.0018621		3022.24	0.00731415		3552.24	-0.01296118
372.4	0.09127006		902.42	0.01306241		1432.41	0.02327805		1962.44	-0.0036297		2492.44	0.00263848		3022.44	0.00672755		3552.44	-0.01246552
372.6	0.09168581		902.62	0.01242054		1432.61	0.02277248		1962.64	-0.00312855		2492.64	0.00265245		3022.64	0.00640968		3552.64	-0.0118329
372.8	0.09224065		902.82	0.01272549		1432.81	0.02271353		1962.84	-0.00276404		2492.84	0.00243083		3022.84	0.00623263		3552.84	-0.01218051
373	0.09190765		903.02	0.0118791		1433.01	0.02257301		1963.04	-0.00269234		2493.04	0.00249303		3023.04	0.00580451		3553.04	-0.01230927
373.2	0.09204567		903.22	0.01197939		1433.21	0.02173962		1963.24	-0.00180422		2493.24	0.00295115		3023.24	0.00558531		3553.24	-0.01248323
373.4	0.09195541		903.42	0.01189456		1433.41	0.02138828		1963.44	-0.00154891		2493.44	0.0033777		3023.44	0.00474807		3553.44	-0.01258192
373.6	0.09252808		903.62	0.01132486		1433.61	0.0212859		1963.64	-0.00178139		2493.64	0.00307559		3023.64	0.00534244		3553.64	-0.01289186
373.8	0.09289636		903.82	0.01104579		1433.81	0.02264665		1963.84	-0.00151196		2493.84	0.00235513		3023.84	0.00439454		3553.84	-0.01370386
374	0.09272196		904.02	0.01114363		1434.01	0.02181276		1964.04	-0.00093609		2494.04	0.0020896		3024.04	0.00437919		3554.04	-0.01485901
374.2	0.0932023		904.22	0.01106935		1434.21	0.02172363		1964.24	-0.00119444		2494.24	0.00173815		3024.24	0.00375991		3554.24	-0.01525579
374.4	0.09385056		904.42	0.01051734		1434.41	0.02208275		1964.44	-0.00153035		2494.44	0.0019271		3024.44	0.00413299		3554.44	-0.01535348
374.6	0.09392721		904.62	0.01143311		1434.61	0.02295299		1964.64	-0.00167674		2494.64	0.00175023		3024.64	0.00410531		3554.64	-0.01588241
374.8	0.09405722		904.82	0.01155354		1434.81	0.02244754		1964.84	-0.00175519		2494.84	0.0023284		3024.84	0.00372695		3554.84	-0.01646251
375	0.0941081		905.02	0.01110468		1435.01	0.0219375		1965.04	-0.00157123		2495.04	0.00258711		3025.04	0.00290194		3555.04	-0.01768827
375.2	0.09387849		905.22	0.01122869		1435.21	0.0209346		1965.24	-0.00163559		2495.24	0.00199209		3025.24	0.00363338		3555.24	-0.01752912
375.4	0.09384943		905.42	0.01074286		1435.41	0.02041628		1965.44	-0.00143232		2495.44	0.00208943		3025.44	0.00430027		3555.44	-0.01766831
375.6	0.09496215		905.62	0.01098925		1435.61	0.02022581		1965.64	-0.00171016		2495.64	0.00182173		3025.64	0.00470197		3555.64	-0.01716971
375.8	0.09621177		905.82	0.00978203		1435.81	0.01984115		1965.84	-0.0017107		2495.84	0.0012956		3025.84	0.0041365		3555.84	-0.01689163
376	0.09665132		906.02	0.00918496		1436.01	0.01881165		1966.04	-0.00142402		2496.04	0.00121402		3026.04	0.00439766		3556.04	-0.01610746
376.2	0.09653143		906.22	0.00901373		1436.21	0.01898797		1966.24	-0.00120877		2496.24	0.00127058		3026.24	0.0045949		3556.24	-0.01530045
376.4	0.09708055		906.42	0.00822247		1436.41	0.01872759		1966.44	-0.00043396		2496.44	0.00192594		3026.44	0.00511703		3556.44	-0.01405296
376.6	0.09707487		906.62	0.00833337		1436.61	0.018837		1966.64	-0.00001572		2496.64	0.00175008		3026.64	0.00530437		3556.64	-0.01411778
376.8	0.09726699		906.82	0.009101		1436.81	0.01898784		1966.84	0.00004791		2496.84	0.00258193		3026.84	0.00604027		3556.84	-0.01425187
377	0.0972481		907.02	0.00806711		1437.01	0.01897922		1967.04	-0.00048961		2497.04	0.00377248		3027.04	0.00631571		3557.04	-0.01396844
377.2	0.09822718		907.22	0.00848767		1437.21	0.01871759		1967.24	0.0007007		2497.24	0.00399254		3027.24	0.00687281		3557.24	-0.01376814
377.4	0.09779225		907.42	0.00869976		1437.41	0.01951445		1967.44	-0.00049435		2497.44	0.00440224		3027.44	0.00692699		3557.44	-0.01339619
377.6	0.09769253		907.62	0.00824577		1437.61	0.02046311		1967.64	-0.00090504		2497.64	0.00374389		3027.64	0.00616616		3557.64	-0.01353874
377.8	0.09758286		907.82	0.0090591		1437.81	0.02084729		1967.84	-0.00120555		2497.84	0.00320294		3027.84	0.00590542		3557.84	-0.01385033
378	0.09732939		908.02	0.00945068		1438.01	0.02095988		1968.04	-0.00135885		2498.04	0.00303685		3028.04	0.00608872		3558.04	-0.01433339
378.2	0.09723609		908.22	0.00951338		1438.21	0.02132775		1968.24	-0.00174817		2498.24	0.00258996		3028.24	0.00573215		3558.24	-0.01386429
378.4	0.09729845		908.42	0.00966325		1438.41	0.02180927		1968.44	-0.00163814		2498.44	0.00267533		3028.44	0.00605582		3558.44	-0.01399769
378.6	0.0969198		908.62	0.01060048		1438.61	0.02206284		1968.64	-0.00204828		2498.64	0.00254752		3028.64	0.00561561		3558.64	-0.01441264
378.8	0.09677194		908.82	0.01070018		1438.81	0.02201166		1968.84	-0.00244884		2498.84	0.00262905		3028.84	0.00548293		3558.84	-0.0146093
379	0.0965551		909.02	0.01104709		1439.01	0.02201853		1969.04	-0.00314388		2499.04	0.00243571		3029.04	0.00524744		3559.04	-0.01479416
379.2	0.09647264		909.22	0.01145507		1439.21	0.02206703		1969.24	-0.00375519		2499.24	0.00179344		3029.24	0.00617272		3559.24	-0.0144284
379.4	0.09663835		909.42	0.01139943		1439.41	0.02226046		1969.44	-0.00414569		2499.44	0.00217141		3029.44	0.0062438		3559.44	-0.01419902
379.6	0.09681212		909.62	0.01147024		1439.61	0.02207189		1969.64	-0.00504132		2499.64	0.00235222		3029.64	0.00611135		3559.64	-0.01381887
379.8	0.09640271		909.82	0.01099281		1439.81	0.02202244		1969.84	-0.00531997		2499.84	0.00261509		3029.84	0.00597033		3559.84	-0.01383357
379.99	0.09640271		910.02	0.01099281		1440.01	0.02202244		1970.04	-0.00531997		2500.04	0.00261509		3030.04	0.00597033		3560.04	-0.01383357
380.19	0.09699727		910.22	0.01110088		1440.21	0.02186704		1970.24	-0.00587148		2500.24	0.00248515		3030.24	0.00662169		3560.24	-0.0133453
380.39	0.09716701		910.42	0.01098947		1440.41	0.02120742		1970.44	-0.00549617		2500.44	0.0025381		3030.44	0.00705704		3560.44	-0.01381541
380.59	0.09747216		910.62	0.01073763		1440.61	0.02128188		1970.64	-0.00547922		2500.64	0.0021849		3030.64	0.00752937		3560.64	-0.0134325
380.79	0.09797976		910.82	0.01095464		1440.81	0.02170417		1970.84	-0.00616332		2500.84	0.00226499		3030.84	0.00804405		3560.84	-0.01228173
380.99	0.09806501		911.02	0.01033712		1441.01	0.02210156		1971.04	-0.00712376		2501.04	0.00241804		3031.04	0.00834648		3561.04	-0.0118357
381.19	0.09852837		911.22	0.00907018		1441.21	0.02153592		1971.24	-0.00713806		2501.24	0.00193522		3031.24	0.00894938		3561.24	-0.01218963
381.39	0.09800115		911.42	0.00832057		1441.41	0.02193338		1971.44	-0.00773784		2501.44	0.00135007		3031.44	0.008819		3561.44	-0.0121804
381.59	0.09728702		911.62	0.00853329		1441.61	0.02136359		1971.64	-0.0087994		2501.64	0.0009025		3031.64	0.00838397		3561.64	-0.01175856
381.79	0.09734758		911.82	0.00833782		1441.81	0.0210223		1971.84	-0.00912814		2501.84	0.00155891		3031.84	0.00842289		3561.84	-0.01121448
381.99	0.09741193		912.02	0.00807024		1442.01	0.02059883		1972.04	-0.0095147		2502.04	0.00180684		3032.04	0.00830196		3562.04	-0.0117232
382.19	0.09689616		912.22	0.00829402		1442.21	0.02097311		1972.24	-0.00936688		2502.24	0.00247237		3032.24	0.00702377		3562.24	-0.01111043
382.39	0.09679871		912.42	0.00866504		1442.41	0.0208253		1972.44	-0.00904396		2502.44	0.00309693		3032.44	0.00571574		3562.44	-0.01074531
382.59	0.09649656		912.62	0.00846374		1442.61	0.02021874		1972.64	-0.00917978		2502.64	0.00342394		3032.64	0.00376368		3562.64	-0.0105768
382.79	0.0969374		912.82	0.00866354		1442.81	0.02020339		1972.84	-0.00868006		2502.84	0.00334112		3032.84	0.00332462		3562.84	-0.01084609
382.99	0.09668596		913.02	0.00870146		1443.01	0.01978996		1973.04	-0.00851564		2503.04	0.00263218		3033.04	0.00337132		3563.04	-0.01143465
383.19	0.09599012		913.22	0.00916594		1443.21	0.01955614		1973.24	-0.00831772		2503.24	0.0034791		3033.24	0.00322152		3563.24	-0.01108444
383.39	0.09543837		913.42	0.00927875		1443.41	0.01867643		1973.44	-0.00728936		2503.44	0.0032096		3033.44	0.00348079		3563.44	-0.01117027
383.59	0.09587409		913.62	0.01066703		1443.61	0.01893931		1973.64	-0.00722227		2503.64	0.0031869		3033.64	0.00353756		3563.64	-0.01150116
383.79	0.09537887		913.82	0.01035165		1443.81	0.01873296		1973.84	-0.0070614		2503.84	0.00313087		3033.84	0.00350717		3563.84	-0.01212435
383.99	0.09562602		914.02	0.01016138		1444.01	0.01903058		1974.04	-0.00666489		2504.04	0.00454702		3034.04	0.00363485		3564.04	-0.01223412
384.19	0.09419822		914.22	0.0107944		1444.21	0.01858676		1974.24	-0.00569675		2504.24	0.00379828		3034.24	0.00431273		3564.24	-0.01337823
384.39	0.0935369		914.42	0.01160975		1444.41	0.01856038		1974.44	-0.00456616		2504.44	0.0039633		3034.44	0.00468297		3564.44	-0.01421743
384.59	0.09365634		914.62	0.01237993		1444.61	0.0198863		1974.64	-0.00510301		2504.64	0.0037262		3034.64	0.00508087		3564.64	-0.01459814
384.79	0.09329189		914.82	0.01243755		1444.81	0.01985382		1974.84	-0.00571786		2504.84	0.0043799		3034.84	0.00574298		3564.84	-0.01511455
384.99	0.09255561		915.02	0.01261273		1445.01	0.02014553		1975.04	-0.00623487		2505.04	0.00422771		3035.04	0.00591631		3565.04	-0.01654672
385.19	0.09238866		915.22	0.01190077		1445.21	0.01981997		1975.24	-0.00594663		2505.24	0.00326532		3035.24	0.00660625		3565.24	-0.0169728
385.39	0.09193453		915.42	0.01270747		1445.41	0.01990436		1975.44	-0.00661985		2505.44	0.00385985		3035.44	0.00627446		3565.44	-0.01669203
385.59	0.09197369		915.62	0.01389001		1445.61	0.01807244		1975.64	-0.00703672		2505.64	0.00401899		3035.64	0.00627932		3565.64	-0.01611748
385.79	0.09197104		915.82	0.01329459		1445.81	0.0179713		1975.84	-0.00714535		2505.84	0.00513923		3035.84	0.00649103		3565.84	-0.0164201
385.99	0.09233819		916.02	0.01289375		1446.01	0.01762667		1976.04	-0.00779103		2506.04	0.00587689		3036.04	0.00614078		3566.04	-0.01643277
386.19	0.09228993		916.22	0.01275046		1446.21	0.01786766		1976.24	-0.0073469		2506.24	0.00623308		3036.24	0.00544557		3566.24	-0.01541276
386.39	0.09208868		916.42	0.01274149		1446.41	0.01680385		1976.44	-0.00790459		2506.44	0.00601846		3036.44	0.00453883		3566.44	-0.01447566
386.59	0.09190999		916.62	0.0121043		1446.61	0.01600201		1976.64	-0.00827833		2506.64	0.0055923		3036.64	0.00387034		3566.64	-0.0138167
386.79	0.09152264		916.82	0.0112983		1446.81	0.01602236		1976.84	-0.00786635		2506.84	0.00481112		3036.84	0.00446959		3566.84	-0.01347165
386.99	0.09111954		917.02	0.01097002		1447.01	0.01611661		1977.04	-0.00798883		2507.04	0.00430134		3037.04	0.0041078		3567.04	-0.01202648
387.19	0.09030609		917.22	0.0094436		1447.21	0.01621804		1977.24	-0.00808091		2507.24	0.00566914		3037.24	0.00412938		3567.24	-0.01106555
387.39	0.09097544		917.42	0.00893911		1447.41	0.01665208		1977.44	-0.00827235		2507.44	0.00502932		3037.44	0.00476792		3567.44	-0.0113154
387.59	0.0916208		917.62	0.00886147		1447.61	0.01714684		1977.64	-0.00924772		2507.64	0.00578664		3037.64	0.00591805		3567.64	-0.01066579
387.79	0.09116209		917.82	0.00881734		1447.81	0.01733534		1977.84	-0.00965887		2507.84	0.00601822		3037.84	0.00537536		3567.84	-0.01077345
387.99	0.09116514		918.02	0.01009086		1448.01	0.01833761		1978.04	-0.00966384		2508.04	0.00571359		3038.04	0.00608937		3568.04	-0.01099396
388.19	0.09062649		918.22	0.009938		1448.21	0.0184096		1978.24	-0.00987655		2508.24	0.00421525		3038.24	0.00631039		3568.24	-0.01198143
388.39	0.09133494		918.42	0.01006385		1448.41	0.01970146		1978.44	-0.01049765		2508.44	0.00405389		3038.44	0.00619441		3568.44	-0.01215946
388.59	0.09160052		918.62	0.01055189		1448.61	0.02066824		1978.64	-0.01049361		2508.64	0.00368791		3038.64	0.00569407		3568.64	-0.01317213
388.79	0.09077232		918.82	0.01010368		1448.81	0.02058218		1978.84	-0.01009928		2508.84	0.00329481		3038.84	0.0056887		3568.84	-0.01361856
388.99	0.0906026		919.02	0.01131172		1449.01	0.02069276		1979.04	-0.01001208		2509.04	0.00279619		3039.04	0.00509023		3569.04	-0.01372475
389.19	0.09078336		919.22	0.01100805		1449.21	0.02067637		1979.24	-0.0088984		2509.24	0.00211473		3039.24	0.00520093		3569.24	-0.01364848
389.39	0.09127509		919.42	0.01242712		1449.41	0.02017961		1979.44	-0.00818905		2509.44	0.00237269		3039.44	0.00509226		3569.44	-0.01339995
389.59	0.09082201		919.62	0.01291388		1449.61	0.02000526		1979.64	-0.00711561		2509.64	0.00146714		3039.64	0.00499983		3569.64	-0.01457664
389.79	0.09026881		919.82	0.01286094		1449.81	0.02063163		1979.84	-0.0062932		2509.84	0.00169718		3039.84	0.00608809		3569.84	-0.01517254
389.99	0.09096914		920.02	0.01288574		1450.01	0.02023055		1980.04	-0.00565472		2510.04	0.00171599		3040.04	0.00627252		3570.04	-0.01500218
390.19	0.09043105		920.22	0.0124116		1450.21	0.02001186		1980.24	-0.00485478		2510.24	0.0006392		3040.24	0.00596819		3570.24	-0.0154092
390.39	0.09019699		920.42	0.01265428		1450.41	0.01954642		1980.44	-0.00502278		2510.44	0.00018586		3040.44	0.004451		3570.44	-0.01447472
390.59	0.08969613		920.62	0.01209899		1450.61	0.0196858		1980.64	-0.00462828		2510.64	0.00017705		3040.64	0.00475485		3570.64	-0.01454844
390.79	0.08904123		920.82	0.01118595		1450.81	0.01998018		1980.84	-0.00492695		2510.84	0.00023087		3040.84	0.00533338		3570.84	-0.01464691
390.99	0.08841185		921.02	0.01125631		1451.01	0.0201775		1981.04	-0.00542009		2511.04	0.0009727		3041.04	0.00513904		3571.04	-0.01494264
391.19	0.08811166		921.22	0.01058408		1451.21	0.02044078		1981.24	-0.00589876		2511.24	0.00232735		3041.24	0.00465518		3571.24	-0.01496968
391.39	0.08855939		921.42	0.01095296		1451.41	0.02122344		1981.44	-0.00622792		2511.44	0.00217584		3041.44	0.00458142		3571.44	-0.0149352
391.59	0.08799649		921.62	0.01044806		1451.61	0.02001121		1981.64	-0.00649397		2511.64	0.00307372		3041.64	0.00428454		3571.64	-0.0137773
391.79	0.08711762		921.82	0.00998296		1451.81	0.02048421		1981.84	-0.00703563		2511.84	0.00360237		3041.84	0.00316976		3571.84	-0.01375383
391.99	0.08705831		922.02	0.00905782		1452.01	0.01998708		1982.04	-0.00701929		2512.04	0.00285926		3042.04	0.00331589		3572.04	-0.01372807
392.19	0.08684772		922.22	0.00747592		1452.21	0.01996147		1982.24	-0.00805415		2512.24	0.00331843		3042.24	0.00284682		3572.24	-0.013747
392.39	0.08601346		922.42	0.0072745		1452.41	0.01898988		1982.44	-0.00803279		2512.44	0.004017		3042.44	0.00186284		3572.44	-0.01363013
392.59	0.08543743		922.62	0.00744615		1452.61	0.01850315		1982.64	-0.00751171		2512.64	0.00411708		3042.64	0.00098918		3572.64	-0.01339814
392.79	0.08445253		922.82	0.00673668		1452.81	0.01756749		1982.84	-0.00830485		2512.84	0.005122		3042.84	0.00132489		3572.84	-0.01411379
392.99	0.08424595		923.02	0.00686924		1453.01	0.01728863		1983.04	-0.00829896		2513.04	0.0052756		3043.04	0.00137217		3573.04	-0.01397639
393.19	0.08456306		923.22	0.00646061		1453.21	0.01759011		1983.24	-0.00742695		2513.24	0.0050432		3043.24	0.00160038		3573.24	-0.01460073
393.39	0.08498789		923.42	0.00665815		1453.41	0.01709512		1983.44	-0.00668151		2513.44	0.00491957		3043.44	0.00263876		3573.44	-0.01461726
393.59	0.08436798		923.62	0.00649689		1453.61	0.01802321		1983.64	-0.00660105		2513.64	0.00491279		3043.64	0.00299467		3573.64	-0.0155082
393.79	0.08445189		923.82	0.00722716		1453.81	0.01779353		1983.84	-0.00667006		2513.84	0.00495687		3043.84	0.00364375		3573.84	-0.01553496
393.99	0.08450586		924.02	0.00787615		1454.01	0.0174808		1984.04	-0.00682783		2514.04	0.00421972		3044.04	0.00362022		3574.04	-0.01595537
394.19	0.08416069		924.22	0.00809357		1454.21	0.01764879		1984.24	-0.00728726		2514.24	0.00329349		3044.24	0.00426451		3574.24	-0.01657327
394.39	0.08455586		924.42	0.00851603		1454.41	0.01736888		1984.44	-0.0068156		2514.44	0.00347382		3044.44	0.00498944		3574.44	-0.01629393
394.59	0.08429053		924.62	0.00975593		1454.61	0.01764398		1984.64	-0.00708489		2514.64	0.00343143		3044.64	0.00651824		3574.64	-0.01640218
394.79	0.08382821		924.82	0.01012875		1454.81	0.01782158		1984.84	-0.00746546		2514.84	0.00279957		3044.84	0.00650275		3574.84	-0.01636016
394.99	0.08401311		925.02	0.01088038		1455.01	0.01796068		1985.04	-0.00708828		2515.04	0.00302692		3045.04	0.00576836		3575.04	-0.01650364
395.19	0.08448651		925.22	0.01074293		1455.21	0.01792028		1985.24	-0.00674564		2515.24	0.00302868		3045.24	0.00597567		3575.24	-0.01533947
395.39	0.08475539		925.42	0.01058595		1455.41	0.01734846		1985.44	-0.00573377		2515.44	0.00169951		3045.44	0.00637863		3575.44	-0.01448663
395.59	0.08455309		925.62	0.01053131		1455.61	0.01650513		1985.64	-0.00560153		2515.64	0.00219926		3045.64	0.00627618		3575.64	-0.01357008
395.79	0.08558051		925.82	0.01051755		1455.81	0.01699444		1985.84	-0.00596531		2515.84	0.00261638		3045.84	0.00613164		3575.84	-0.0131467
395.99	0.08612733		926.02	0.01036382		1456.01	0.01601782		1986.04	-0.00640005		2516.04	0.00259791		3046.04	0.00520928		3576.04	-0.01233809
396.19	0.08613923		926.22	0.01026246		1456.21	0.01583208		1986.24	-0.00711706		2516.24	0.00294689		3046.24	0.00485125		3576.24	-0.01197466
396.39	0.08595279		926.42	0.01013198		1456.41	0.01541948		1986.44	-0.00700899		2516.44	0.0028912		3046.44	0.00417436		3576.44	-0.01185471
396.59	0.0866917		926.62	0.00977913		1456.61	0.01588769		1986.64	-0.00726846		2516.64	0.00264006		3046.64	0.00432186		3576.64	-0.01193471
396.79	0.08700956		926.82	0.00881748		1456.81	0.01616944		1986.84	-0.00804139		2516.84	0.0037894		3046.84	0.00393886		3576.84	-0.01175532
396.99	0.08775491		927.02	0.00811237		1457.01	0.01633777		1987.04	-0.00772627		2517.04	0.0034281		3047.04	0.00380804		3577.04	-0.01188143
397.19	0.0890416		927.22	0.00781589		1457.21	0.01607331		1987.24	-0.00810324		2517.24	0.0040441		3047.24	0.00324021		3577.24	-0.01155086
397.39	0.08880389		927.42	0.00776106		1457.41	0.01635308		1987.44	-0.00856516		2517.44	0.0042429		3047.44	0.00334817		3577.44	-0.01142724
397.59	0.08907444		927.62	0.00777652		1457.61	0.01687163		1987.64	-0.00956389		2517.64	0.00435814		3047.64	0.00301135		3577.64	-0.01159544
397.79	0.08868086		927.82	0.00780362		1457.81	0.01655266		1987.84	-0.0091029		2517.84	0.00412695		3047.84	0.00346434		3577.84	-0.01246099
397.99	0.08844643		928.02	0.00793799		1458.01	0.01660489		1988.04	-0.00893894		2518.04	0.00359965		3048.04	0.00347308		3578.04	-0.01338416
398.19	0.08758244		928.22	0.00747781		1458.21	0.01633261		1988.24	-0.0095867		2518.24	0.00391068		3048.24	0.00390221		3578.24	-0.01424947
398.39	0.08718731		928.42	0.00732907		1458.41	0.0162798		1988.44	-0.00940278		2518.44	0.00355433		3048.44	0.00473647		3578.44	-0.01423986
398.59	0.0864353		928.62	0.00813075		1458.61	0.01647053		1988.64	-0.00996274		2518.64	0.00304373		3048.64	0.00528315		3578.64	-0.0147849
398.79	0.0853729		928.82	0.00833574		1458.81	0.0164643		1988.84	-0.00992217		2518.84	0.00258511		3048.84	0.00515877		3578.84	-0.01463266
398.99	0.08584551		929.02	0.00793705		1459.01	0.01631525		1989.04	-0.00949214		2519.04	0.00228681		3049.04	0.00495759		3579.04	-0.01520872
399.19	0.08583442		929.22	0.00710671		1459.21	0.01641653		1989.24	-0.00923732		2519.24	0.00120193		3049.24	0.00498927		3579.24	-0.01467732
399.39	0.08631418		929.42	0.00704174		1459.41	0.01650291		1989.44	-0.00887299		2519.44	0.00072513		3049.44	0.00471314		3579.44	-0.01433986
399.59	0.08639366		929.62	0.00671883		1459.61	0.01682342		1989.64	-0.00887975		2519.64	0.00187676		3049.64	0.0032176		3579.64	-0.01395444
399.79	0.08667686		929.82	0.00650691		1459.81	0.01736287		1989.84	-0.00831765		2519.84	0.00150275		3049.84	0.00194004		3579.84	-0.01387056
399.99	0.08593472		930.02	0.00609186		1460.01	0.01755199		1990.04	-0.00829256		2520.04	0.00105233		3050.04	0.0011641		3580.04	-0.01329762
400.19	0.08593171		930.22	0.00641092		1460.21	0.01788128		1990.24	-0.00800095		2520.24	0.00032629		3050.24	0.00078584		3580.24	-0.01356057
400.39	0.08569909		930.42	0.00663416		1460.41	0.0175352		1990.44	-0.00732071		2520.44	0.00105244		3050.44	0.00042442		3580.44	-0.01430544
400.59	0.0861077		930.62	0.00645618		1460.61	0.0170516		1990.64	-0.00714541		2520.64	0.00088476		3050.64	0.00107222		3580.64	-0.01402975
400.79	0.08691315		930.82	0.00656816		1460.81	0.01665829		1990.84	-0.00687562		2520.84	0.00102897		3050.84	0.0007861		3580.84	-0.01386981
400.99	0.08721221		931.02	0.00730795		1461.01	0.01573586		1991.04	-0.00641514		2521.04	0.00111211		3051.04	0.00157208		3581.04	-0.01482629
401.19	0.0867672		931.22	0.00779802		1461.21	0.01533885		1991.24	-0.00641261		2521.24	0.0006223		3051.24	0.00188794		3581.24	-0.01471144
401.39	0.08654626		931.42	0.00781574		1461.41	0.01467184		1991.44	-0.00646358		2521.44	0.00060724		3051.44	0.0019529		3581.44	-0.01474364
401.59	0.08700448		931.62	0.00755357		1461.61	0.01442918		1991.64	-0.00630083		2521.64	0.00033646		3051.64	0.00264002		3581.64	-0.01515802
401.79	0.08604595		931.82	0.00804116		1461.81	0.01381134		1991.84	-0.00636698		2521.84	-0.000216		3051.84	0.00331718		3581.84	-0.01572327
401.99	0.08630128		932.02	0.00882486		1462.01	0.0132759		1992.04	-0.00711372		2522.04	-0.00003201		3052.04	0.00329242		3582.04	-0.0163923
402.19	0.0847783		932.22	0.00971537		1462.21	0.01338989		1992.24	-0.00715552		2522.24	0.00010255		3052.24	0.00428255		3582.24	-0.01675692
402.39	0.08466154		932.42	0.01020153		1462.41	0.01346982		1992.44	-0.00657888		2522.44	-0.00075771		3052.44	0.00553327		3582.44	-0.01705118
402.59	0.08442139		932.62	0.01075527		1462.61	0.01359509		1992.64	-0.00701276		2522.64	-0.00030547		3052.64	0.0061393		3582.64	-0.01700508
402.79	0.08375479		932.82	0.0113117		1462.81	0.01370077		1992.84	-0.00738594		2522.84	-0.00057752		3052.84	0.00595043		3582.84	-0.01609277
402.99	0.08344202		933.02	0.0106104		1463.01	0.01399088		1993.04	-0.00811169		2523.04	0.000121		3053.04	0.00569198		3583.04	-0.01644449
403.19	0.08261115		933.22	0.01007706		1463.21	0.01473847		1993.24	-0.00861967		2523.24	0.00002007		3053.24	0.00561935		3583.24	-0.01636513
403.39	0.08215448		933.42	0.01007793		1463.41	0.01530784		1993.44	-0.00929098		2523.44	-0.00000718		3053.44	0.00559721		3583.44	-0.01646277
403.59	0.08189792		933.62	0.00947022		1463.61	0.01614111		1993.64	-0.00943393		2523.64	0.00006591		3053.64	0.00496533		3583.64	-0.01630852
403.79	0.08209871		933.82	0.0091615		1463.81	0.01704785		1993.84	-0.00922356		2523.84	-0.00031811		3053.84	0.00466549		3583.84	-0.01612069
403.99	0.08218342		934.02	0.00905286		1464.01	0.01728488		1994.04	-0.01018013		2524.04	-0.00017322		3054.04	0.00397561		3584.04	-0.01545794
404.19	0.08247947		934.22	0.00876266		1464.21	0.0173213		1994.24	-0.01060111		2524.24	0.0003808		3054.24	0.00347036		3584.24	-0.01537561
404.39	0.0827748		934.42	0.00831884		1464.41	0.01673046		1994.44	-0.01083198		2524.44	0.00034884		3054.44	0.00393956		3584.44	-0.01557371
404.59	0.08291707		934.62	0.00763593		1464.61	0.01688046		1994.64	-0.01122738		2524.64	-0.00009246		3054.64	0.00433444		3584.64	-0.01480052
404.79	0.08340514		934.82	0.00763419		1464.81	0.01695306		1994.84	-0.01051953		2524.84	-0.00044836		3054.84	0.00478324		3584.84	-0.01488263
404.99	0.08320082		935.02	0.00768732		1465.01	0.01746864		1995.04	-0.01022773		2525.04	-0.00000471		3055.04	0.00468221		3585.04	-0.01489848
405.19	0.08346219		935.22	0.00715404		1465.21	0.01687472		1995.24	-0.01120366		2525.24	-0.00057343		3055.24	0.00442131		3585.24	-0.01391469
405.39	0.08486191		935.42	0.00636271		1465.41	0.01627295		1995.44	-0.0114356		2525.44	-0.00038618		3055.44	0.00385698		3585.44	-0.01286259
405.59	0.08493905		935.62	0.00642671		1465.61	0.01587034		1995.64	-0.0109345		2525.64	-0.00041728		3055.64	0.00388248		3585.64	-0.01323428
405.79	0.08484499		935.82	0.00748247		1465.81	0.01499308		1995.84	-0.01077603		2525.84	-0.00107005		3055.84	0.00413678		3585.84	-0.01338104
405.99	0.08474589		936.02	0.00782386		1466.01	0.01396151		1996.04	-0.01033715		2526.04	-0.00023568		3056.04	0.00377986		3586.04	-0.01360939
406.19	0.08390195		936.22	0.00796236		1466.21	0.01386058		1996.24	-0.00920856		2526.24	0.00050356		3056.24	0.00404231		3586.24	-0.01376549
406.39	0.0843847		936.42	0.00835358		1466.41	0.01305546		1996.44	-0.00916405		2526.44	0.0012729		3056.44	0.00336689		3586.44	-0.0134042
406.59	0.08365914		936.62	0.00902576		1466.61	0.01317436		1996.64	-0.00985955		2526.64	0.00199486		3056.64	0.00311796		3586.64	-0.01366083
406.79	0.0820351		936.82	0.00888289		1466.81	0.01283604		1996.84	-0.00933466		2526.84	0.00256658		3056.84	0.00290934		3586.84	-0.01412357
406.99	0.08120135		937.02	0.00879906		1467.01	0.0138079		1997.04	-0.00946689		2527.04	0.00362905		3057.04	0.0025147		3587.04	-0.0149854
407.19	0.08128203		937.22	0.00866825		1467.21	0.01391089		1997.24	-0.00952339		2527.24	0.00254481		3057.24	0.0023686		3587.24	-0.01537085
407.39	0.08086276		937.42	0.00933698		1467.41	0.01432248		1997.44	-0.0094068		2527.44	0.00189491		3057.44	0.0029157		3587.44	-0.01552985
407.59	0.08102891		937.62	0.00944658		1467.61	0.01487661		1997.64	-0.00878982		2527.64	0.00192968		3057.64	0.00289763		3587.64	-0.01517908
407.79	0.08113421		937.82	0.00872694		1467.81	0.01503019		1997.84	-0.0085497		2527.84	0.00268943		3057.84	0.00296391		3587.84	-0.01553099
407.99	0.08052816		938.02	0.00901803		1468.01	0.01525949		1998.04	-0.00872162		2528.04	0.00287191		3058.04	0.00253033		3588.04	-0.01696341
408.19	0.08034377		938.22	0.00862207		1468.21	0.01575396		1998.24	-0.00846559		2528.24	0.00323008		3058.24	0.00314288		3588.24	-0.01736349
408.39	0.07979435		938.42	0.00824788		1468.41	0.01641698		1998.44	-0.00793074		2528.44	0.00377951		3058.44	0.00356302		3588.44	-0.01767113
408.59	0.07994752		938.62	0.00723322		1468.61	0.01704951		1998.64	-0.00771633		2528.64	0.00404853		3058.64	0.00411383		3588.64	-0.01771859
408.79	0.07996936		938.82	0.00749728		1468.81	0.01784911		1998.84	-0.00740878		2528.84	0.00392158		3058.84	0.00475341		3588.84	-0.01825301
408.99	0.08135448		939.02	0.00727691		1469.01	0.01842652		1999.04	-0.00763494		2529.04	0.00355746		3059.04	0.00452122		3589.04	-0.01829032
409.19	0.0816003		939.22	0.00572784		1469.21	0.01691731		1999.24	-0.00868011		2529.24	0.00295411		3059.24	0.00475183		3589.24	-0.01782534
409.39	0.0822613		939.42	0.00562421		1469.41	0.0167771		1999.44	-0.00851279		2529.44	0.00284423		3059.44	0.00461794		3589.44	-0.01857253
409.59	0.08210755		939.62	0.00644899		1469.61	0.01568377		1999.64	-0.00864764		2529.64	0.00280175		3059.64	0.00476944		3589.64	-0.0186398
409.79	0.08218656		939.82	0.00680788		1469.81	0.01551411		1999.84	-0.0085606		2529.84	0.00320459		3059.84	0.0047199		3589.84	-0.01868283
409.99	0.08166595		940.02	0.00688294		1470.01	0.01409049		2000.04	-0.00890905		2530.04	0.0041592		3060.04	0.00453476		3590.04	-0.01865691
410.19	0.08170943		940.22	0.00680134		1470.21	0.01525074		2000.24	-0.00962283		2530.24	0.00481284		3060.24	0.00426438		3590.24	-0.01839964
410.39	0.08289515		940.42	0.00739734		1470.41	0.01517147		2000.44	-0.00990222		2530.44	0.00504879		3060.44	0.003553		3590.44	-0.01784053
410.59	0.08320469		940.62	0.00768358		1470.61	0.01527614		2000.64	-0.01042407		2530.64	0.00498166		3060.64	0.00414155		3590.64	-0.01827397
410.79	0.08260956		940.82	0.00729929		1470.81	0.01524341		2000.84	-0.00918349		2530.84	0.00480607		3060.84	0.00373572		3590.84	-0.01798694
410.99	0.08329161		941.02	0.00766362		1471.01	0.01538511		2001.04	-0.00947133		2531.04	0.00369677		3061.04	0.00327019		3591.04	-0.01694564
411.19	0.0831263		941.22	0.00750715		1471.21	0.01491263		2001.24	-0.01039867		2531.24	0.00244844		3061.24	0.00356761		3591.24	-0.01721321
411.39	0.08283965		941.42	0.0078593		1471.41	0.01491359		2001.44	-0.01044039		2531.44	0.00157764		3061.44	0.00390168		3591.44	-0.01756174
411.59	0.08288747		941.62	0.00788273		1471.61	0.01469593		2001.64	-0.01038391		2531.64	0.00124481		3061.64	0.004038		3591.64	-0.01678676
411.79	0.08241032		941.82	0.00743077		1471.81	0.01457452		2001.84	-0.01014235		2531.84	0.00121311		3061.84	0.00416991		3591.84	-0.0183298
411.99	0.08172297		942.02	0.00764241		1472.01	0.0151325		2002.04	-0.00989915		2532.04	0.00056573		3062.04	0.00328839		3592.04	-0.0185176
412.19	0.08149255		942.22	0.00716217		1472.21	0.01532788		2002.24	-0.00988637		2532.24	-0.00006431		3062.24	0.00359429		3592.24	-0.0180733
412.39	0.08128681		942.42	0.00769546		1472.41	0.01545403		2002.44	-0.0097136		2532.44	-0.00051421		3062.44	0.00318847		3592.44	-0.0182871
412.59	0.08166959		942.62	0.00817841		1472.61	0.01628606		2002.64	-0.00989631		2532.64	-0.00138446		3062.64	0.00346178		3592.64	-0.01816405
412.79	0.08173125		942.82	0.00906204		1472.81	0.01736311		2002.84	-0.01026649		2532.84	-0.00212659		3062.84	0.00382254		3592.84	-0.01857367
412.99	0.08216755		943.02	0.00868351		1473.01	0.01733419		2003.04	-0.01103617		2533.04	-0.00302474		3063.04	0.00454076		3593.04	-0.01849154
413.19	0.08083943		943.22	0.00872777		1473.21	0.01637148		2003.24	-0.01141693		2533.24	-0.00346873		3063.24	0.00448507		3593.24	-0.01814028
413.39	0.08103624		943.42	0.010003		1473.41	0.01653166		2003.44	-0.01134224		2533.44	-0.00376408		3063.44	0.00424612		3593.44	-0.01812442
413.59	0.07975572		943.62	0.01057422		1473.61	0.01574425		2003.64	-0.01064959		2533.64	-0.00372473		3063.64	0.00446519		3593.64	-0.01782026
413.79	0.07917918		943.82	0.01036081		1473.81	0.01654849		2003.84	-0.01063232		2533.84	-0.0026131		3063.84	0.00395501		3593.84	-0.01843182
413.99	0.07841597		944.02	0.01111823		1474.01	0.01605408		2004.04	-0.0111247		2534.04	-0.00210537		3064.04	0.00443125		3594.04	-0.01847248
414.19	0.0786688		944.22	0.01118283		1474.21	0.01651195		2004.24	-0.01151896		2534.24	-0.00148724		3064.24	0.00442833		3594.24	-0.01822099
414.39	0.07882019		944.42	0.01082237		1474.41	0.0159304		2004.44	-0.01145541		2534.44	-0.0003692		3064.44	0.00445906		3594.44	-0.01810428
414.59	0.07877836		944.62	0.01035051		1474.61	0.01566007		2004.64	-0.01142229		2534.64	0.00012479		3064.64	0.00450578		3594.64	-0.01817169
414.79	0.07801273		944.82	0.00952782		1474.81	0.01551384		2004.84	-0.01020777		2534.84	0.00015885		3064.84	0.00349546		3594.84	-0.01805236
414.99	0.07872485		945.02	0.00912994		1475.01	0.01521471		2005.04	-0.0112764		2535.04	0.00108528		3065.04	0.00352199		3595.04	-0.01746559
415.19	0.07813255		945.22	0.0081325		1475.21	0.01428157		2005.24	-0.01168183		2535.24	0.0012936		3065.24	0.00274723		3595.24	-0.01769997
415.39	0.077828		945.42	0.00695861		1475.41	0.01412656		2005.44	-0.0115635		2535.44	0.00173786		3065.44	0.00227073		3595.44	-0.01703028
415.59	0.07850708		945.62	0.00626761		1475.61	0.01367155		2005.64	-0.01094031		2535.64	0.00154102		3065.64	0.00144373		3595.64	-0.0162861
415.79	0.07864004		945.82	0.00455067		1475.81	0.01343725		2005.84	-0.01064598		2535.84	0.0024078		3065.84	0.00030018		3595.84	-0.01692431
415.99	0.07916284		946.02	0.00328543		1476.01	0.01292067		2006.04	-0.01064983		2536.04	0.00247346		3066.04	-0.00026985		3596.04	-0.01615485
416.19	0.07975318		946.22	0.00330103		1476.21	0.01311489		2006.24	-0.01094103		2536.24	0.00216811		3066.24	-0.000291		3596.24	-0.01668255
416.39	0.0805337		946.42	0.00313919		1476.41	0.01338587		2006.44	-0.01034403		2536.44	0.00245563		3066.44	-0.00087843		3596.44	-0.01611587
416.59	0.08089596		946.62	0.00286682		1476.61	0.01448562		2006.64	-0.01040226		2536.64	0.00219548		3066.64	-0.00021161		3596.64	-0.01612593
416.79	0.08192153		946.82	0.00286674		1476.81	0.01388985		2006.84	-0.00999204		2536.84	0.00124595		3066.84	-0.00036311		3596.84	-0.01591226
416.99	0.08151483		947.02	0.00276703		1477.01	0.01300409		2007.04	-0.00990222		2537.04	0.00088159		3067.04	-0.0003006		3597.04	-0.01567997
417.19	0.08125653		947.22	0.0035799		1477.21	0.0117181		2007.24	-0.00950854		2537.24	0.00024032		3067.24	-0.0005587		3597.24	-0.0154564
417.39	0.08153579		947.42	0.00391823		1477.41	0.01119626		2007.44	-0.00990306		2537.44	-0.00023455		3067.44	-0.00047032		3597.44	-0.01546405
417.59	0.08152663		947.62	0.00530062		1477.61	0.01046282		2007.64	-0.00934823		2537.64	0.00007983		3067.64	0.00042581		3597.64	-0.01569399
417.79	0.08164004		947.82	0.00602771		1477.81	0.01075161		2007.84	-0.0101701		2537.84	0.00085467		3067.84	0.00053811		3597.84	-0.01631787
417.99	0.08124977		948.02	0.00673923		1478.01	0.00954362		2008.04	-0.00907908		2538.04	0.00135859		3068.04	0.00052839		3598.04	-0.01695014
418.19	0.08030169		948.22	0.00696495		1478.21	0.00933676		2008.24	-0.00875452		2538.24	0.00145941		3068.24	0.00089147		3598.24	-0.01733479
418.39	0.08001695		948.42	0.00725891		1478.41	0.00905473		2008.44	-0.00947058		2538.44	0.00138314		3068.44	0.00098896		3598.44	-0.01744825
418.59	0.08032228		948.62	0.00789852		1478.61	0.0094809		2008.64	-0.0090634		2538.64	0.00116776		3068.64	0.00110971		3598.64	-0.01686519
418.79	0.07895414		948.82	0.00908565		1478.81	0.01026935		2008.84	-0.00879756		2538.84	0.00080548		3068.84	0.00156115		3598.84	-0.01657956
418.99	0.07903039		949.02	0.00907553		1479.01	0.01027074		2009.04	-0.00948817		2539.04	0.00036111		3069.04	0.00163812		3599.04	-0.01676381
419.19	0.07840318		949.22	0.00858643		1479.21	0.01019885		2009.24	-0.00999449		2539.24	-0.00022049		3069.24	0.0006957		3599.24	-0.0169101
419.39	0.07867285		949.42	0.00765936		1479.41	0.01095599		2009.44	-0.01078137		2539.44	0.00010161		3069.44	0.00098663		3599.44	-0.01688344
419.59	0.0795435		949.62	0.00740057		1479.61	0.01138907		2009.64	-0.01037136		2539.64	-0.00060708		3069.64	0.00077659		3599.64	-0.01675599
419.79	0.07901695		949.82	0.00696886		1479.81	0.01227969		2009.84	-0.01118006		2539.84	-0.00026713		3069.84	0.00105368		3599.84	-0.01651553
419.99	0.07872375		950.02	0.00654859		1480.01	0.01276319		2010.04	-0.01173144		2540.04	-0.00045694		3070.04	0.00153615		3600.04	-0.01627819
420.19	0.07964415		950.22	0.00686085		1480.21	0.01401933		2010.24	-0.01238		2540.24	-0.00062886		3070.24	0.00146504		3600.24	-0.01629137
420.39	0.07908709		950.42	0.00654978		1480.41	0.01353099		2010.44	-0.01216094		2540.44	-0.000976		3070.44	0.00110934		3600.44	-0.01646961
420.59	0.07843742		950.62	0.00672362		1480.61	0.01452331		2010.64	-0.0125722		2540.64	-0.00191494		3070.64	0.00110182		3600.64	-0.01651368
420.79	0.07776459		950.82	0.00700696		1480.81	0.01453679		2010.84	-0.01193577		2540.84	-0.00159338		3070.84	0.00087345		3600.84	-0.01587627
420.99	0.0767995		951.02	0.00725065		1481.01	0.01468341		2011.04	-0.01281608		2541.04	-0.00200175		3071.04	0.00128107		3601.04	-0.01634897
421.19	0.07679801		951.22	0.00748732		1481.21	0.01412362		2011.24	-0.0131922		2541.24	-0.00286481		3071.24	0.00105228		3601.24	-0.01629246
421.39	0.07703042		951.42	0.00735512		1481.41	0.01491152		2011.44	-0.01351669		2541.44	-0.00311374		3071.44	0.00137988		3601.44	-0.01611834
421.59	0.07719941		951.62	0.00812964		1481.61	0.014974		2011.64	-0.01256506		2541.64	-0.00213365		3071.64	0.00173076		3601.64	-0.01610611
421.79	0.0764834		951.82	0.00760466		1481.81	0.01503568		2011.84	-0.0117472		2541.84	-0.00229509		3071.84	0.00123281		3601.84	-0.01634504
421.99	0.0762921		952.02	0.00600505		1482.01	0.01459983		2012.04	-0.01059452		2542.04	-0.00247511		3072.04	0.00099226		3602.04	-0.01661467
422.19	0.07585789		952.22	0.0057643		1482.21	0.01456369		2012.24	-0.01133888		2542.24	-0.00311153		3072.24	0.00169569		3602.24	-0.01651691
422.39	0.07607753		952.42	0.00562759		1482.41	0.01459119		2012.44	-0.01099948		2542.44	-0.0031212		3072.44	0.00186432		3602.44	-0.01585852
422.59	0.07563631		952.62	0.00570772		1482.61	0.01561884		2012.64	-0.00998926		2542.64	-0.00314134		3072.64	0.00187001		3602.64	-0.01596887
422.79	0.07574057		952.82	0.00503779		1482.81	0.0158527		2012.84	-0.00965482		2542.84	-0.00365178		3072.84	0.00235995		3602.84	-0.01617862
422.99	0.07636364		953.02	0.00369979		1483.01	0.01503843		2013.04	-0.00962288		2543.04	-0.00309053		3073.04	0.00140561		3603.04	-0.01641462
423.19	0.07633239		953.22	0.00359162		1483.21	0.01531941		2013.24	-0.00982091		2543.24	-0.00225028		3073.24	0.00128195		3603.24	-0.01704661
423.39	0.07647419		953.42	0.00369435		1483.41	0.01545466		2013.44	-0.00981592		2543.44	-0.00147633		3073.44	0.00188048		3603.44	-0.01662009
423.59	0.0764126		953.62	0.00419927		1483.61	0.01582641		2013.64	-0.00897867		2543.64	-0.00133098		3073.64	0.00141943		3603.64	-0.01702068
423.79	0.07623778		953.82	0.00433186		1483.81	0.01555839		2013.84	-0.00961759		2543.84	-0.00064423		3073.84	0.00122594		3603.84	-0.01707605
423.99	0.07715423		954.02	0.00385976		1484.01	0.01529086		2014.04	-0.00965172		2544.04	-0.00027854		3074.04	0.00061514		3604.04	-0.01702228
424.19	0.07786673		954.22	0.00413041		1484.21	0.01578419		2014.24	-0.01083023		2544.24	0.00006639		3074.24	0.00035344		3604.24	-0.01756686
424.39	0.0765795		954.42	0.00433024		1484.41	0.01537193		2014.44	-0.01122547		2544.44	0.00035028		3074.44	0.00011199		3604.44	-0.01801432
424.59	0.07643114		954.62	0.0040765		1484.61	0.01574282		2014.64	-0.01133284		2544.64	-0.00036487		3074.64	0.00041314		3604.64	-0.01859764
424.79	0.07650777		954.82	0.0044703		1484.81	0.01518675		2014.84	-0.01164051		2544.84	-0.00039668		3074.84	0.00117226		3604.84	-0.01870056
424.99	0.07656534		955.02	0.00465982		1485.01	0.01456005		2015.04	-0.01246264		2545.04	-0.00143556		3075.04	0.00107737		3605.04	-0.01928212
425.19	0.07638677		955.22	0.00469119		1485.21	0.01418663		2015.24	-0.01301062		2545.24	-0.00200878		3075.24	0.00108498		3605.24	-0.01886946
425.39	0.07659878		955.42	0.00575025		1485.41	0.01459293		2015.44	-0.01243086		2545.44	-0.00217719		3075.44	0.00140971		3605.44	-0.01886685
425.59	0.0769724		955.62	0.00675363		1485.61	0.01360192		2015.64	-0.01173417		2545.64	-0.00203831		3075.64	0.00093051		3605.64	-0.01865223
425.79	0.07670991		955.82	0.00660906		1485.81	0.01401511		2015.84	-0.01168589		2545.84	-0.00364129		3075.84	0.00062936		3605.84	-0.01801019
425.99	0.07585885		956.02	0.00611768		1486.01	0.013281		2016.04	-0.01240592		2546.04	-0.00369785		3076.04	0.00084978		3606.04	-0.01814092
426.19	0.07531777		956.22	0.00682605		1486.21	0.01303589		2016.24	-0.01220568		2546.24	-0.00475772		3076.24	0.00037535		3606.24	-0.0179765
426.39	0.07475712		956.42	0.00662667		1486.41	0.0131739		2016.44	-0.01098586		2546.44	-0.00435024		3076.44	0.00088616		3606.44	-0.01767576
426.59	0.07506043		956.62	0.00720306		1486.61	0.01273084		2016.64	-0.01017111		2546.64	-0.00463711		3076.64	0.00035318		3606.64	-0.01751738
426.79	0.07528013		956.82	0.00713634		1486.81	0.01225351		2016.84	-0.00983635		2546.84	-0.00406091		3076.84	-0.00008761		3606.84	-0.016818
426.99	0.0753229		957.02	0.0071153		1487.01	0.01179923		2017.04	-0.00950342		2547.04	-0.00360117		3077.04	-0.00038586		3607.04	-0.01561159
427.19	0.07521716		957.22	0.00773077		1487.21	0.0122312		2017.24	-0.01009499		2547.24	-0.00295222		3077.24	-0.00059111		3607.24	-0.01632958
427.39	0.07553487		957.42	0.00758433		1487.41	0.01212542		2017.44	-0.0095535		2547.44	-0.00223847		3077.44	-0.00116088		3607.44	-0.01541933
427.59	0.07531928		957.62	0.00729431		1487.61	0.01129529		2017.64	-0.00916032		2547.64	-0.00186302		3077.64	-0.00163599		3607.64	-0.01570075
427.79	0.07513674		957.82	0.00683843		1487.81	0.01156667		2017.84	-0.00865544		2547.84	-0.0015213		3077.84	-0.00072516		3607.84	-0.01627961
427.99	0.07613586		958.02	0.00663059		1488.01	0.01125774		2018.04	-0.00947998		2548.04	-0.00147681		3078.04	-0.00032166		3608.04	-0.01721632
428.19	0.07620188		958.22	0.00576117		1488.21	0.01234647		2018.24	-0.01023095		2548.24	-0.00080236		3078.24	0.0004051		3608.24	-0.01748066
428.39	0.07706511		958.42	0.00538685		1488.41	0.01213917		2018.44	-0.01053669		2548.44	-0.00081539		3078.44	0.00106013		3608.44	-0.0179754
428.59	0.07780593		958.62	0.00433717		1488.61	0.01219983		2018.64	-0.01112293		2548.64	-0.00140074		3078.64	0.00205299		3608.64	-0.01884819
428.79	0.07768034		958.82	0.00495193		1488.81	0.0126984		2018.84	-0.01152764		2548.84	-0.00086013		3078.84	0.00267884		3608.84	-0.01803057
428.99	0.07731619		959.02	0.00453391		1489.01	0.01310232		2019.04	-0.01167646		2549.04	-0.00019733		3079.04	0.00222875		3609.04	-0.01801955
429.19	0.07733776		959.22	0.00524415		1489.21	0.0140271		2019.24	-0.01196232		2549.24	-0.00051091		3079.24	0.00279231		3609.24	-0.01784407
429.39	0.07722368		959.42	0.00577376		1489.41	0.01483964		2019.44	-0.01169283		2549.44	-0.00074684		3079.44	0.00263026		3609.44	-0.01860538
429.59	0.07684383		959.62	0.00597712		1489.61	0.01507357		2019.64	-0.01187933		2549.64	-0.00059526		3079.64	0.00208178		3609.64	-0.01821402
429.79	0.07592322		959.82	0.00530443		1489.81	0.01557813		2019.84	-0.01215302		2549.84	-0.00160651		3079.84	0.00150846		3609.84	-0.01748084
429.99	0.07502438		960.02	0.0060247		1490.01	0.01431777		2020.04	-0.01261738		2550.04	-0.00158735		3080.04	0.00114866		3610.04	-0.01807201
430.19	0.07549189		960.22	0.00681799		1490.21	0.01454009		2020.24	-0.01245648		2550.24	-0.00242146		3080.24	-0.00005071		3610.24	-0.01751953
430.39	0.07509074		960.42	0.00620946		1490.41	0.01338298		2020.44	-0.01245074		2550.44	-0.00166984		3080.44	-0.00011896		3610.44	-0.01711427
430.59	0.07450294		960.62	0.00716338		1490.61	0.01228206		2020.64	-0.01251624		2550.64	-0.00134738		3080.64	-0.00141251		3610.64	-0.01649552
430.79	0.07411627		960.82	0.00659105		1490.81	0.01189414		2020.84	-0.01356166		2550.84	-0.00142126		3080.84	-0.0014313		3610.84	-0.01633284
430.99	0.07456423		961.02	0.00657942		1491.01	0.01063933		2021.04	-0.01381045		2551.04	-0.00164581		3081.04	-0.00159578		3611.04	-0.01644015
431.19	0.07435751		961.22	0.00726755		1491.21	0.00976742		2021.24	-0.01351657		2551.24	-0.00123359		3081.24	-0.0024221		3611.24	-0.01740182
431.39	0.0742747		961.42	0.00721751		1491.41	0.00880451		2021.44	-0.01248839		2551.44	-0.00200041		3081.44	-0.00250567		3611.44	-0.01693087
431.59	0.07361448		961.62	0.00752032		1491.61	0.00812731		2021.64	-0.01253983		2551.64	-0.00163577		3081.64	-0.00185143		3611.64	-0.01819866
431.79	0.07454433		961.82	0.00703584		1491.81	0.00905864		2021.84	-0.01170575		2551.84	-0.00254443		3081.84	-0.00159642		3611.84	-0.01899444
431.99	0.07559297		962.02	0.00591446		1492.01	0.00871103		2022.04	-0.01240801		2552.04	-0.0026345		3082.04	-0.00152576		3612.04	-0.01898695
432.19	0.07592151		962.22	0.00546924		1492.21	0.00999646		2022.24	-0.01137919		2552.24	-0.00294278		3082.24	-0.00140725		3612.24	-0.01858045
432.39	0.07758319		962.42	0.00582028		1492.41	0.01016199		2022.44	-0.01195074		2552.44	-0.00313347		3082.44	-0.00068019		3612.44	-0.01953933
432.59	0.0772668		962.62	0.00570888		1492.61	0.01027584		2022.64	-0.01217317		2552.64	-0.00291807		3082.64	0.00025051		3612.64	-0.01974712
432.79	0.07686471		962.82	0.00555133		1492.81	0.01109318		2022.84	-0.01224364		2552.84	-0.00308705		3082.84	0.00046786		3612.84	-0.0193065
432.99	0.07772543		963.02	0.00427741		1493.01	0.01206678		2023.04	-0.01237784		2553.04	-0.00289464		3083.04	0.00088418		3613.04	-0.01932161
433.19	0.07807677		963.22	0.00444495		1493.21	0.01267965		2023.24	-0.0124777		2553.24	-0.00333376		3083.24	0.00154375		3613.24	-0.01942816
433.39	0.07774201		963.42	0.00385165		1493.41	0.01369529		2023.44	-0.01216359		2553.44	-0.00282514		3083.44	0.00149146		3613.44	-0.01951988
433.59	0.07826339		963.62	0.00335518		1493.61	0.01337481		2023.64	-0.01171749		2553.64	-0.00295443		3083.64	0.00075161		3613.64	-0.01897706
433.79	0.07791899		963.82	0.00216148		1493.81	0.01296552		2023.84	-0.01121185		2553.84	-0.0028002		3083.84	-0.00013542		3613.84	-0.01882047
433.99	0.07798832		964.02	0.00291663		1494.01	0.01301709		2024.04	-0.01271288		2554.04	-0.00208296		3084.04	-0.00070913		3614.04	-0.01855211
434.19	0.07723576		964.22	0.00271522		1494.21	0.01335811		2024.24	-0.01234617		2554.24	-0.00185384		3084.24	-0.00073833		3614.24	-0.01784375
434.39	0.07638194		964.42	0.0016393		1494.41	0.01300705		2024.44	-0.01274531		2554.44	-0.00159355		3084.44	-0.00176733		3614.44	-0.01908525
434.59	0.0759818		964.62	0.00149305		1494.61	0.01238117		2024.64	-0.01207179		2554.64	-0.00178922		3084.64	-0.00195008		3614.64	-0.01988503
434.79	0.07612104		964.82	0.00126626		1494.81	0.0115803		2024.84	-0.01204908		2554.84	-0.00172334		3084.84	-0.00105387		3614.84	-0.02080716
434.99	0.07573251		965.02	0.00169903		1495.01	0.01074609		2025.04	-0.01179639		2555.04	-0.00215537		3085.04	-0.00160003		3615.04	-0.02120093
435.19	0.07538566		965.22	0.0023558		1495.21	0.01055963		2025.24	-0.01146011		2555.24	-0.00281574		3085.24	-0.00203906		3615.24	-0.0209657
435.39	0.07482348		965.42	0.00299313		1495.41	0.01103428		2025.44	-0.01111324		2555.44	-0.00370497		3085.44	-0.00232099		3615.44	-0.02098476
435.59	0.07470197		965.62	0.00288112		1495.61	0.01096626		2025.64	-0.01124976		2555.64	-0.00312119		3085.64	-0.002971		3615.64	-0.02119462
435.79	0.07547565		965.82	0.00308605		1495.81	0.01098628		2025.84	-0.01103281		2555.84	-0.00328387		3085.84	-0.003981		3615.84	-0.02055104
435.99	0.07466456		966.02	0.00348331		1496.01	0.00989509		2026.04	-0.01029824		2556.04	-0.0025427		3086.04	-0.00387088		3616.04	-0.02051589
436.19	0.07354075		966.22	0.0047976		1496.21	0.01017614		2026.24	-0.01031635		2556.24	-0.00284174		3086.24	-0.00349095		3616.24	-0.02075353
436.39	0.07371426		966.42	0.00476609		1496.41	0.00980372		2026.44	-0.01119585		2556.44	-0.00255372		3086.44	-0.00272005		3616.44	-0.02099399
436.59	0.07221927		966.62	0.00475116		1496.61	0.00917474		2026.64	-0.01174751		2556.64	-0.00249059		3086.64	-0.00257357		3616.64	-0.02000997
436.79	0.07315875		966.82	0.00431235		1496.81	0.0094293		2026.84	-0.01137273		2556.84	-0.00251433		3086.84	-0.0027605		3616.84	-0.02001696
436.99	0.07341769		967.02	0.00491514		1497.01	0.00960992		2027.04	-0.01150995		2557.04	-0.00220821		3087.04	-0.00191248		3617.04	-0.0198868
437.19	0.07235422		967.22	0.00576352		1497.21	0.00902274		2027.24	-0.01143866		2557.24	-0.00260878		3087.24	-0.00174697		3617.24	-0.01951351
437.39	0.071787		967.42	0.00524183		1497.41	0.00938935		2027.44	-0.01113404		2557.44	-0.00196593		3087.44	-0.00139025		3617.44	-0.01956376
437.59	0.07141928		967.62	0.00526813		1497.61	0.00911749		2027.64	-0.01168406		2557.64	-0.00204735		3087.64	-0.0014114		3617.64	-0.01985369
437.79	0.0709238		967.82	0.0048967		1497.81	0.00955416		2027.84	-0.01236424		2557.84	-0.0017144		3087.84	-0.00135945		3617.84	-0.0197062
437.99	0.07093418		968.02	0.00446996		1498.01	0.01010168		2028.04	-0.01285976		2558.04	-0.00175428		3088.04	-0.00100083		3618.04	-0.0193673
438.19	0.07029241		968.22	0.00417212		1498.21	0.01066761		2028.24	-0.01168241		2558.24	-0.00225446		3088.24	-0.00014459		3618.24	-0.01944033
438.39	0.07097282		968.42	0.00355744		1498.41	0.01080049		2028.44	-0.01191614		2558.44	-0.00243176		3088.44	-0.00145394		3618.44	-0.02094877
438.59	0.07110424		968.62	0.00261405		1498.61	0.01080863		2028.64	-0.01185541		2558.64	-0.00265738		3088.64	-0.00076307		3618.64	-0.0208509
438.79	0.07112328		968.82	0.00316175		1498.81	0.01077678		2028.84	-0.01223834		2558.84	-0.00328284		3088.84	-0.00016548		3618.84	-0.02091603
438.99	0.07180183		969.02	0.00286872		1499.01	0.0109404		2029.04	-0.01258568		2559.04	-0.00405815		3089.04	-0.0005177		3619.04	-0.02030737
439.19	0.0716895		969.22	0.00313095		1499.21	0.01129653		2029.24	-0.01286434		2559.24	-0.00356519		3089.24	-0.00078366		3619.24	-0.02007099
439.39	0.07248559		969.42	0.00281956		1499.41	0.01230517		2029.44	-0.01255588		2559.44	-0.00359488		3089.44	-0.00154131		3619.44	-0.02014064
439.59	0.07334304		969.62	0.00178498		1499.61	0.01193339		2029.64	-0.01313402		2559.64	-0.00321921		3089.64	-0.00213292		3619.64	-0.01935216
439.79	0.07402274		969.82	0.00161412		1499.81	0.01187919		2029.84	-0.01304801		2559.84	-0.00291009		3089.84	-0.00237263		3619.84	-0.01981047
439.99	0.07410662		970.02	0.00120582		1500.01	0.0121164		2030.04	-0.01249681		2560.04	-0.00305103		3090.04	-0.00146327		3620.04	-0.01984773
440.19	0.07359781		970.22	0.00128483		1500.21	0.01266788		2030.24	-0.01259149		2560.24	-0.00402132		3090.24	-0.00145472		3620.24	-0.01940367
440.39	0.07400323		970.42	0.00148498		1500.41	0.0124491		2030.44	-0.01230893		2560.44	-0.00385991		3090.44	-0.00119679		3620.44	-0.01944599
440.59	0.07425003		970.62	0.00219767		1500.61	0.01238227		2030.64	-0.01290413		2560.64	-0.003731		3090.64	-0.00173566		3620.64	-0.01930397
440.79	0.07534854		970.82	0.00266634		1500.81	0.01277941		2030.84	-0.0117083		2560.84	-0.0040285		3090.84	-0.00187647		3620.84	-0.02008147
440.99	0.07497797		971.02	0.00332723		1501.01	0.01286066		2031.04	-0.01179019		2561.04	-0.00465666		3091.04	-0.00099456		3621.04	-0.01956773
441.19	0.07474159		971.22	0.00351346		1501.21	0.01251199		2031.24	-0.01212639		2561.24	-0.00519664		3091.24	-0.00076043		3621.24	-0.01977608
441.39	0.07457376		971.42	0.00366289		1501.41	0.01271533		2031.44	-0.01199079		2561.44	-0.00457089		3091.44	0.0001283		3621.44	-0.02082656
441.59	0.07443303		971.62	0.00485124		1501.61	0.01248757		2031.64	-0.01278217		2561.64	-0.00570956		3091.64	-0.0000053		3621.64	-0.02113083
441.79	0.07403668		971.82	0.00559395		1501.81	0.01234031		2031.84	-0.01307788		2561.84	-0.00636833		3091.84	0.00071146		3621.84	-0.02138988
441.99	0.07266023		972.02	0.00600268		1502.01	0.01313683		2032.04	-0.01238457		2562.04	-0.006486		3092.04	0.00095099		3622.04	-0.02116423
442.19	0.07236849		972.22	0.00689509		1502.21	0.01373246		2032.24	-0.01213221		2562.24	-0.00591295		3092.24	0.00065668		3622.24	-0.02099253
442.39	0.07201756		972.42	0.00728869		1502.41	0.01323491		2032.44	-0.01234887		2562.44	-0.0055576		3092.44	-0.00020085		3622.44	-0.02175359
442.59	0.07130665		972.62	0.00728658		1502.61	0.01297479		2032.64	-0.01277421		2562.64	-0.00583707		3092.64	-0.00040473		3622.64	-0.02156621
442.79	0.07120401		972.82	0.00754069		1502.81	0.01295718		2032.84	-0.01240411		2562.84	-0.00588035		3092.84	-0.00047718		3622.84	-0.02111797
442.99	0.07018037		973.02	0.00719601		1503.01	0.01259143		2033.04	-0.01296836		2563.04	-0.00479008		3093.04	-0.00020621		3623.04	-0.02109244
443.19	0.06897559		973.22	0.0072526		1503.21	0.01265783		2033.24	-0.01244752		2563.24	-0.00470414		3093.24	0.0001925		3623.24	-0.02185589
443.39	0.06983225		973.42	0.00653671		1503.41	0.01297718		2033.44	-0.01177644		2563.44	-0.00457708		3093.44	0.00003924		3623.44	-0.02159477
443.59	0.07006522		973.62	0.00620995		1503.61	0.0121754		2033.64	-0.01181192		2563.64	-0.00477719		3093.64	-0.00010187		3623.64	-0.02093929
443.79	0.07006059		973.82	0.00583978		1503.81	0.01186083		2033.84	-0.01189985		2563.84	-0.00428541		3093.84	0.0004413		3623.84	-0.02156263
443.99	0.06985823		974.02	0.00464279		1504.01	0.01197747		2034.04	-0.0120722		2564.04	-0.00443087		3094.04	0.00054458		3624.04	-0.02112953
444.19	0.07015522		974.22	0.0045279		1504.21	0.01225625		2034.24	-0.01214047		2564.24	-0.00455293		3094.24	0.00029553		3624.24	-0.02103357
444.39	0.0703827		974.42	0.00412319		1504.41	0.01205557		2034.44	-0.01335204		2564.44	-0.00386171		3094.44	0.00084595		3624.44	-0.02118698
444.59	0.07097668		974.62	0.00350542		1504.61	0.01254397		2034.64	-0.01446298		2564.64	-0.00347607		3094.64	0.00044744		3624.64	-0.02127669
444.79	0.07212047		974.82	0.00305468		1504.81	0.01259334		2034.84	-0.01415303		2564.84	-0.00294622		3094.84	-0.00000966		3624.84	-0.02054343
444.99	0.07250063		975.02	0.00240055		1505.01	0.01158593		2035.04	-0.01452391		2565.04	-0.00292105		3095.04	0.0006125		3625.04	-0.02008916
445.19	0.07236656		975.22	0.00180029		1505.21	0.01115632		2035.24	-0.01562863		2565.24	-0.00299246		3095.24	0.00069133		3625.24	-0.02055465
445.39	0.07222056		975.42	0.00156711		1505.41	0.01113892		2035.44	-0.01569281		2565.44	-0.00248712		3095.44	0.00038939		3625.44	-0.0209555
445.59	0.07260241		975.62	0.00179839		1505.61	0.01158083		2035.64	-0.01711043		2565.64	-0.00264894		3095.64	-0.00045523		3625.64	-0.02109669
445.79	0.07175849		975.82	0.00208147		1505.81	0.01195427		2035.84	-0.01639026		2565.84	-0.00191392		3095.84	-0.00064594		3625.84	-0.02141039
445.99	0.07179436		976.02	0.00170177		1506.01	0.01280721		2036.04	-0.01560004		2566.04	-0.00060322		3096.04	-0.00176485		3626.04	-0.02125035
446.19	0.07235334		976.22	0.00123627		1506.21	0.01260187		2036.24	-0.01472863		2566.24	0.00031935		3096.24	-0.00258685		3626.24	-0.02138732
446.39	0.07181039		976.42	0.00173178		1506.41	0.01255152		2036.44	-0.01485994		2566.44	0.00099375		3096.44	-0.00270867		3626.44	-0.0208995
446.59	0.07163481		976.62	0.00150589		1506.61	0.01269214		2036.64	-0.01379447		2566.64	0.00120276		3096.64	-0.00344447		3626.64	-0.02076013
446.79	0.07075548		976.82	0.00179282		1506.81	0.01305255		2036.84	-0.01293626		2566.84	0.00129825		3096.84	-0.00347274		3626.84	-0.02057595
446.99	0.06968548		977.02	0.00282031		1507.01	0.01122788		2037.04	-0.01301983		2567.04	0.00182902		3097.04	-0.00351225		3627.04	-0.02084643
447.19	0.06927136		977.22	0.00314335		1507.21	0.01067542		2037.24	-0.01165875		2567.24	0.00125163		3097.24	-0.0041924		3627.24	-0.02126533
447.39	0.06936901		977.42	0.00365355		1507.41	0.01008774		2037.44	-0.0114945		2567.44	0.00063909		3097.44	-0.00462365		3627.44	-0.02100009
447.59	0.06928367		977.62	0.00352394		1507.61	0.00978566		2037.64	-0.01163703		2567.64	-0.00130295		3097.64	-0.00509567		3627.64	-0.02086925
447.79	0.0700411		977.82	0.00342807		1507.81	0.00954916		2037.84	-0.01198228		2567.84	-0.00165943		3097.84	-0.00480596		3627.84	-0.02128437
447.99	0.06960284		978.02	0.00355441		1508.01	0.01019308		2038.04	-0.012083		2568.04	-0.00209358		3098.04	-0.00514556		3628.04	-0.02135024
448.19	0.07032562		978.22	0.00493363		1508.21	0.01001817		2038.24	-0.01222924		2568.24	-0.00285776		3098.24	-0.00441474		3628.24	-0.02120699
448.39	0.07005327		978.42	0.00557553		1508.41	0.00985686		2038.44	-0.01349273		2568.44	-0.00314534		3098.44	-0.00410982		3628.44	-0.02073329
448.59	0.06982989		978.62	0.00639317		1508.61	0.0101144		2038.64	-0.01411117		2568.64	-0.00336991		3098.64	-0.00509262		3628.64	-0.0207082
448.79	0.0698492		978.82	0.0061274		1508.81	0.00977213		2038.84	-0.01470187		2568.84	-0.00342144		3098.84	-0.00467194		3628.84	-0.02045893
448.99	0.06909432		979.02	0.00599791		1509.01	0.00983636		2039.04	-0.01417086		2569.04	-0.00515561		3099.04	-0.00367639		3629.04	-0.02129471
449.19	0.06853743		979.22	0.00517119		1509.21	0.01089567		2039.24	-0.01546404		2569.24	-0.00513254		3099.24	-0.00356208		3629.24	-0.02205449
449.39	0.06836653		979.42	0.00479922		1509.41	0.01159843		2039.44	-0.01511263		2569.44	-0.00514667		3099.44	-0.00385766		3629.44	-0.02284817
449.59	0.06887175		979.62	0.00509729		1509.61	0.01202336		2039.64	-0.01515335		2569.64	-0.00477601		3099.64	-0.00365301		3629.64	-0.02330613
449.79	0.06830423		979.82	0.00513461		1509.81	0.01242882		2039.84	-0.01436647		2569.84	-0.0048889		3099.84	-0.00399529		3629.84	-0.02344989
449.99	0.0692316		980.02	0.00504473		1510.01	0.01265783		2040.04	-0.01397737		2570.04	-0.00423896		3100.04	-0.0039673		3630.04	-0.02324586
450.19	0.06872076		980.22	0.00422839		1510.21	0.01373173		2040.24	-0.01379193		2570.24	-0.00431023		3100.24	-0.00364349		3630.24	-0.02349819
450.39	0.06828497		980.42	0.00397266		1510.41	0.01368355		2040.44	-0.01308205		2570.44	-0.00314055		3100.44	-0.00390396		3630.44	-0.02291951
450.59	0.06844565		980.62	0.00371298		1510.61	0.01304299		2040.64	-0.01273986		2570.64	-0.00223745		3100.64	-0.00436415		3630.64	-0.02299808
450.79	0.06749135		980.82	0.00363943		1510.81	0.01280656		2040.84	-0.01380347		2570.84	-0.00183681		3100.84	-0.00441468		3630.84	-0.02324817
450.99	0.06728685		981.02	0.00323188		1511.01	0.01203139		2041.04	-0.01423513		2571.04	-0.00185478		3101.04	-0.00390813		3631.04	-0.02339328
451.19	0.06673096		981.22	0.00271882		1511.21	0.01215941		2041.24	-0.01347106		2571.24	-0.00246662		3101.24	-0.00418079		3631.24	-0.02359507
451.39	0.06736158		981.42	0.00250353		1511.41	0.01192082		2041.44	-0.01353441		2571.44	-0.00286317		3101.44	-0.00363046		3631.44	-0.02323724
451.59	0.06802943		981.62	0.0020783		1511.61	0.01256505		2041.64	-0.0131992		2571.64	-0.00297383		3101.64	-0.00355214		3631.64	-0.02247882
451.79	0.0688462		981.82	0.00246378		1511.81	0.01238579		2041.84	-0.01306769		2571.84	-0.00211854		3101.84	-0.00364772		3631.84	-0.02202316
451.99	0.06760278		982.02	0.00248917		1512.01	0.01300795		2042.04	-0.01347929		2572.04	-0.00218166		3102.04	-0.00341072		3632.04	-0.02127774
452.19	0.06810677		982.22	0.00310531		1512.21	0.01243896		2042.24	-0.01375798		2572.24	-0.00251985		3102.24	-0.0031002		3632.24	-0.02055387
452.39	0.06848994		982.42	0.00360866		1512.41	0.01204309		2042.44	-0.01424545		2572.44	-0.00299335		3102.44	-0.00288369		3632.44	-0.02010652
452.59	0.06839123		982.62	0.00292449		1512.61	0.01064299		2042.64	-0.0147653		2572.64	-0.00377181		3102.64	-0.0026612		3632.64	-0.02046661
452.79	0.06822775		982.82	0.00219881		1512.81	0.01116547		2042.84	-0.01551409		2572.84	-0.00385404		3102.84	-0.00159724		3632.84	-0.0207979
452.99	0.06831481		983.02	0.00240086		1513.01	0.01116147		2043.04	-0.01489434		2573.04	-0.0046763		3103.04	-0.00166309		3633.04	-0.02132562
453.19	0.06878912		983.22	0.00124493		1513.21	0.01062878		2043.24	-0.01598588		2573.24	-0.0043548		3103.24	-0.00237935		3633.24	-0.02157077
453.39	0.06892224		983.42	0.00096495		1513.41	0.01018653		2043.44	-0.01566461		2573.44	-0.00509353		3103.44	-0.00216577		3633.44	-0.0217858
453.59	0.06942554		983.62	0.00160429		1513.61	0.00970421		2043.64	-0.01611187		2573.64	-0.00492168		3103.64	-0.00207266		3633.64	-0.0222881
453.79	0.06995817		983.82	0.00144525		1513.81	0.00959832		2043.84	-0.01646379		2573.84	-0.00525556		3103.84	-0.0029257		3633.84	-0.02264478
453.99	0.07105339		984.02	0.00210853		1514.01	0.00871393		2044.04	-0.01592936		2574.04	-0.00498596		3104.04	-0.00268854		3634.04	-0.02282344
454.19	0.07053093		984.22	0.00175407		1514.21	0.00849355		2044.24	-0.01611437		2574.24	-0.00424465		3104.24	-0.00237411		3634.24	-0.02361314
454.39	0.06954431		984.42	0.00173071		1514.41	0.00725144		2044.44	-0.01534762		2574.44	-0.00352044		3104.44	-0.00279045		3634.44	-0.02349092
454.59	0.06872669		984.62	0.00214994		1514.61	0.00679689		2044.64	-0.01567574		2574.64	-0.00289878		3104.64	-0.00287555		3634.64	-0.02395471
454.79	0.06841163		984.82	0.00170735		1514.81	0.00677284		2044.84	-0.01500223		2574.84	-0.00326383		3104.84	-0.00264685		3634.84	-0.02428489
454.99	0.06789857		985.02	0.00168476		1515.01	0.00693113		2045.04	-0.01370229		2575.04	-0.00253002		3105.04	-0.00309556		3635.04	-0.02402697
455.19	0.06766274		985.22	0.00274305		1515.21	0.00773288		2045.24	-0.01335907		2575.24	-0.00164847		3105.24	-0.00358229		3635.24	-0.02330421
455.39	0.06731929		985.42	0.00250687		1515.41	0.00786631		2045.44	-0.01290754		2575.44	-0.0010858		3105.44	-0.00316772		3635.44	-0.02208406
455.59	0.06682883		985.62	0.00310578		1515.61	0.00858664		2045.64	-0.011844		2575.64	-0.00138583		3105.64	-0.00365858		3635.64	-0.0218478
455.79	0.06629243		985.82	0.00311547		1515.81	0.0086734		2045.84	-0.01228758		2575.84	-0.00163714		3105.84	-0.00321551		3635.84	-0.02175624
455.99	0.06586099		986.02	0.00350698		1516.01	0.00831538		2046.04	-0.01169757		2576.04	-0.00130333		3106.04	-0.00291542		3636.04	-0.0214408
456.19	0.06599585		986.22	0.00386451		1516.21	0.00715159		2046.24	-0.01057214		2576.24	-0.00152221		3106.24	-0.0032414		3636.24	-0.02151881
456.39	0.06565494		986.42	0.00369886		1516.41	0.00687468		2046.44	-0.01005018		2576.44	-0.00193447		3106.44	-0.00259793		3636.44	-0.02201245
456.59	0.06493173		986.62	0.00253587		1516.61	0.00692182		2046.64	-0.01146022		2576.64	-0.00224334		3106.64	-0.00258112		3636.64	-0.02203249
456.79	0.06489929		986.82	0.00260557		1516.81	0.0079337		2046.84	-0.01253203		2576.84	-0.00211879		3106.84	-0.00281208		3636.84	-0.02179841
456.99	0.06551672		987.02	0.00144715		1517.01	0.00721418		2047.04	-0.0123578		2577.04	-0.00220899		3107.04	-0.00347853		3637.04	-0.02242498
457.19	0.0651664		987.22	0.00047735		1517.21	0.00717745		2047.24	-0.01316252		2577.24	-0.0026508		3107.24	-0.00363695		3637.24	-0.02214645
457.39	0.06480339		987.42	0.00075024		1517.41	0.00750109		2047.44	-0.01422151		2577.44	-0.00341238		3107.44	-0.00335087		3637.44	-0.02199443
457.59	0.06519028		987.62	0.00128804		1517.61	0.00752155		2047.64	-0.01503182		2577.64	-0.00378498		3107.64	-0.00375034		3637.64	-0.02248077
457.79	0.06548139		987.82	0.00080081		1517.81	0.00752231		2047.84	-0.01519362		2577.84	-0.0046795		3107.84	-0.00401208		3637.84	-0.02242803
457.99	0.06546688		988.02	0.00093056		1518.01	0.00792812		2048.04	-0.01545865		2578.04	-0.00446155		3108.04	-0.00276659		3638.04	-0.02338111
458.19	0.06451132		988.22	-0.00048713		1518.21	0.0082012		2048.24	-0.01596747		2578.24	-0.00384988		3108.24	-0.00299545		3638.24	-0.02350403
458.39	0.06377949		988.42	-0.00096887		1518.41	0.00893916		2048.44	-0.01602155		2578.44	-0.00445189		3108.44	-0.00330392		3638.44	-0.02413765
458.59	0.06454246		988.62	-0.00126492		1518.61	0.00933872		2048.64	-0.01663711		2578.64	-0.00451924		3108.64	-0.00366908		3638.64	-0.02488804
458.79	0.06633692		988.82	-0.00173		1518.81	0.01021315		2048.84	-0.01640801		2578.84	-0.00524175		3108.84	-0.00396308		3638.84	-0.0245376
458.99	0.0667211		989.02	-0.00163588		1519.01	0.01215287		2049.04	-0.01594549		2579.04	-0.00432904		3109.04	-0.00447824		3639.04	-0.02447101
459.19	0.06694561		989.22	-0.00181521		1519.21	0.01273413		2049.24	-0.01624094		2579.24	-0.00517154		3109.24	-0.00432705		3639.24	-0.02374171
459.39	0.06678367		989.42	-0.00213715		1519.41	0.01258696		2049.44	-0.01483085		2579.44	-0.00536723		3109.44	-0.00386205		3639.44	-0.02322772
459.59	0.06699785		989.62	-0.00225961		1519.61	0.01277985		2049.64	-0.01422351		2579.64	-0.0059141		3109.64	-0.00348316		3639.64	-0.02477127
459.79	0.06756156		989.82	-0.00246755		1519.81	0.01218704		2049.84	-0.014063		2579.84	-0.00574383		3109.84	-0.00292664		3639.84	-0.02538204
459.99	0.06806648		990.02	-0.00201617		1520.01	0.01096332		2050.04	-0.01229853		2580.04	-0.00456918		3110.04	-0.00375659		3640.04	-0.02570733
460.19	0.06733725		990.22	-0.00227327		1520.21	0.01095662		2050.24	-0.01199781		2580.24	-0.00461841		3110.24	-0.00360997		3640.24	-0.0257443
460.39	0.06714175		990.42	-0.00205952		1520.41	0.01034493		2050.44	-0.0120421		2580.44	-0.00482251		3110.44	-0.00290505		3640.44	-0.02596564
460.59	0.06739429		990.62	-0.00247411		1520.61	0.00930172		2050.64	-0.01280752		2580.64	-0.00450086		3110.64	-0.00294293		3640.64	-0.02538056
460.79	0.06822151		990.82	-0.00168223		1520.81	0.00837763		2050.84	-0.01247613		2580.84	-0.00454312		3110.84	-0.00343718		3640.84	-0.02525262
460.99	0.06793141		991.02	-0.00162301		1521.01	0.00766881		2051.04	-0.01255742		2581.04	-0.00461444		3111.04	-0.00414607		3641.04	-0.02510115
461.19	0.06718164		991.22	-0.00003248		1521.21	0.00802237		2051.24	-0.01306033		2581.24	-0.00582462		3111.24	-0.00371798		3641.24	-0.02341029
461.39	0.06757695		991.42	0.00126072		1521.41	0.00782254		2051.44	-0.01373125		2581.44	-0.00646736		3111.44	-0.00369381		3641.44	-0.02254869
461.59	0.0676492		991.62	0.0007062		1521.61	0.00772468		2051.64	-0.01334454		2581.64	-0.00719313		3111.64	-0.00337389		3641.64	-0.0225534
461.79	0.06813143		991.82	0.00083733		1521.81	0.00806448		2051.84	-0.01326361		2581.84	-0.00682715		3111.84	-0.00304738		3641.84	-0.02211787
461.99	0.06858413		992.02	0.00150959		1522.01	0.00812135		2052.04	-0.01388612		2582.04	-0.00651826		3112.04	-0.00261086		3642.04	-0.02285081
462.19	0.06870112		992.22	0.00182962		1522.21	0.00779223		2052.24	-0.01574639		2582.24	-0.00713181		3112.24	-0.00315258		3642.24	-0.02247577
462.39	0.06915915		992.42	0.00157354		1522.41	0.00774526		2052.44	-0.01662615		2582.44	-0.00764609		3112.44	-0.00297699		3642.44	-0.02324514
462.59	0.0696881		992.62	0.00130592		1522.61	0.0079522		2052.64	-0.01680237		2582.64	-0.00784613		3112.64	-0.00299186		3642.64	-0.023095
462.79	0.0703031		992.82	0.00139805		1522.81	0.00952889		2052.84	-0.01677892		2582.84	-0.00731854		3112.84	-0.00388094		3642.84	-0.02260212
462.99	0.06991842		993.02	0.00149878		1523.01	0.01034232		2053.04	-0.01650281		2583.04	-0.00679513		3113.04	-0.004142		3643.04	-0.02294065
463.19	0.06893577		993.22	0.00127953		1523.21	0.00981098		2053.24	-0.0167616		2583.24	-0.00735905		3113.24	-0.00423753		3643.24	-0.0228185
463.39	0.06887363		993.42	0.00138162		1523.41	0.01009036		2053.44	-0.01535466		2583.44	-0.00626802		3113.44	-0.00344096		3643.44	-0.02322413
463.59	0.06927493		993.62	0.00103207		1523.61	0.01039545		2053.64	-0.01470506		2583.64	-0.0057196		3113.64	-0.00368157		3643.64	-0.02423615
463.79	0.06965955		993.82	0.00093111		1523.81	0.01033779		2053.84	-0.01424869		2583.84	-0.00456404		3113.84	-0.00334827		3643.84	-0.02420238
463.99	0.06939714		994.02	0.0004102		1524.01	0.01048241		2054.04	-0.0140843		2584.04	-0.00353442		3114.04	-0.00355535		3644.04	-0.02458721
464.19	0.06878402		994.22	-0.00034913		1524.21	0.01026102		2054.24	-0.01401792		2584.24	-0.00290626		3114.24	-0.00280185		3644.24	-0.02412111
464.39	0.06871746		994.42	-0.00096758		1524.41	0.00956299		2054.44	-0.0141001		2584.44	-0.00227199		3114.44	-0.00315603		3644.44	-0.02378093
464.59	0.06878655		994.62	-0.00143931		1524.61	0.00957456		2054.64	-0.01396812		2584.64	-0.0022551		3114.64	-0.00282684		3644.64	-0.02370528
464.79	0.06923707		994.82	-0.00152276		1524.81	0.01010628		2054.84	-0.01375203		2584.84	-0.00259766		3114.84	-0.0024557		3644.84	-0.02269098
464.99	0.0687486		995.02	-0.00179535		1525.01	0.010394		2055.04	-0.0141301		2585.04	-0.00284141		3115.04	-0.00153145		3645.04	-0.02209082
465.19	0.06856867		995.22	-0.00109207		1525.21	0.01074356		2055.24	-0.01346547		2585.24	-0.0037067		3115.24	-0.00130508		3645.24	-0.0211195
465.39	0.06985826		995.42	-0.00135286		1525.41	0.01067844		2055.44	-0.01346025		2585.44	-0.00443342		3115.44	-0.00098509		3645.44	-0.02020017
465.59	0.06962728		995.62	-0.0017443		1525.61	0.01080388		2055.64	-0.01332024		2585.64	-0.00544721		3115.64	-0.00103782		3645.64	-0.02041038
465.79	0.06967754		995.82	-0.00073173		1525.81	0.01054482		2055.84	-0.01380014		2585.84	-0.00561941		3115.84	-0.00107675		3645.84	-0.02084584
465.99	0.06881414		996.02	0.00017416		1526.01	0.00902183		2056.04	-0.01368671		2586.04	-0.00647312		3116.04	-0.00102182		3646.04	-0.02095844
466.19	0.06895061		996.22	-0.00010451		1526.21	0.00858234		2056.24	-0.01470185		2586.24	-0.00733705		3116.24	-0.00093132		3646.24	-0.02154964
466.39	0.06811358		996.42	-0.00003904		1526.41	0.00818725		2056.44	-0.01366072		2586.44	-0.0072197		3116.44	-0.00121406		3646.44	-0.02208611
466.59	0.06775721		996.62	0.00056469		1526.61	0.00766718		2056.64	-0.01420086		2586.64	-0.00775067		3116.64	-0.00156551		3646.64	-0.02306411
466.79	0.06770618		996.82	0.00043668		1526.81	0.00748584		2056.84	-0.0145329		2586.84	-0.00801147		3116.84	-0.00194275		3646.84	-0.02331189
466.99	0.06700096		997.02	0.00035018		1527.01	0.00704599		2057.04	-0.01432833		2587.04	-0.00818226		3117.04	-0.00266632		3647.04	-0.02409864
467.19	0.06652956		997.22	0.00011195		1527.21	0.00575082		2057.24	-0.01440788		2587.24	-0.00851541		3117.24	-0.00275886		3647.24	-0.02398777
467.39	0.06649185		997.42	0.00001716		1527.41	0.00583431		2057.44	-0.01385199		2587.44	-0.00783408		3117.44	-0.00411979		3647.44	-0.02324735
467.59	0.06662363		997.62	0.00101029		1527.61	0.00565972		2057.64	-0.01456267		2587.64	-0.00725862		3117.64	-0.00426231		3647.64	-0.02352617
467.79	0.06641022		997.82	0.00024895		1527.81	0.00568627		2057.84	-0.01539583		2587.84	-0.00645457		3117.84	-0.00302001		3647.84	-0.02439116
467.99	0.0656403		998.02	-0.00030304		1528.01	0.00500526		2058.04	-0.01583561		2588.04	-0.0065008		3118.04	-0.00332759		3648.04	-0.02393484
468.19	0.06530056		998.22	-0.00026773		1528.21	0.00469138		2058.24	-0.0154631		2588.24	-0.00608845		3118.24	-0.00335244		3648.24	-0.02359208
468.39	0.0650898		998.42	-0.00080013		1528.41	0.00471703		2058.44	-0.01593008		2588.44	-0.00622346		3118.44	-0.00328402		3648.44	-0.02354651
468.59	0.0653022		998.62	-0.00088083		1528.61	0.0051537		2058.64	-0.01541688		2588.64	-0.00653483		3118.64	-0.00283922		3648.64	-0.023417
468.79	0.06508416		998.82	-0.00067106		1528.81	0.00574172		2058.84	-0.01544382		2588.84	-0.00526795		3118.84	-0.00186358		3648.84	-0.02268293
468.99	0.06424695		999.02	0.00031535		1529.01	0.00607308		2059.04	-0.01549449		2589.04	-0.00492832		3119.04	-0.00205003		3649.04	-0.02255584
469.19	0.0643337		999.22	0.00045659		1529.21	0.00644613		2059.24	-0.01504084		2589.24	-0.00558448		3119.24	-0.00259965		3649.24	-0.02173773
469.39	0.06469647		999.42	0.00052601		1529.41	0.00669925		2059.44	-0.01516681		2589.44	-0.00573626		3119.44	-0.00249451		3649.44	-0.02248434
469.59	0.06330333		999.62	0.00049703		1529.61	0.00688065		2059.64	-0.01424362		2589.64	-0.00579335		3119.64	-0.00252427		3649.64	-0.02316146
469.79	0.06365595		999.82	0.00142465		1529.81	0.00678701		2059.84	-0.01365547		2589.84	-0.00569169		3119.84	-0.00240127		3649.84	-0.02344265
469.99	0.06385631		1000.02	0.00219268		1530.01	0.00665335		2060.04	-0.01266852		2590.04	-0.00583827		3120.04	-0.00194472		3650.04	-0.02375783
470.19	0.06513419		1000.22	0.00171446		1530.21	0.00657647		2060.24	-0.01263165		2590.24	-0.0059693		3120.24	-0.00180146		3650.24	-0.02428441
470.39	0.06489048		1000.42	0.00260294		1530.41	0.00565491		2060.44	-0.01178865		2590.44	-0.0061315		3120.44	-0.00238073		3650.44	-0.02453688
470.59	0.06585556		1000.62	0.00163054		1530.61	0.00562487		2060.64	-0.01213466		2590.64	-0.00671243		3120.64	-0.00260725		3650.64	-0.02455988
470.79	0.06617715		1000.82	0.00144837		1530.81	0.00621231		2060.84	-0.01186712		2590.84	-0.0061423		3120.84	-0.00384594		3650.84	-0.02373092
470.99	0.06639134		1001.02	0.00185286		1531.01	0.0066755		2061.04	-0.01215897		2591.04	-0.00507945		3121.04	-0.0058249		3651.04	-0.02277168
471.19	0.06633233		1001.22	0.00206794		1531.21	0.00595232		2061.24	-0.01266067		2591.24	-0.00555965		3121.24	-0.00699864		3651.24	-0.02170623
471.39	0.06639983		1001.42	0.00239956		1531.41	0.00672684		2061.44	-0.01295023		2591.44	-0.00583454		3121.44	-0.00774854		3651.44	-0.02141002
471.59	0.06750084		1001.62	0.0026352		1531.61	0.00675447		2061.64	-0.01328216		2591.64	-0.00603233		3121.64	-0.00719132		3651.64	-0.02274862
471.79	0.0665674		1001.82	0.00169518		1531.81	0.00705321		2061.84	-0.01330404		2591.84	-0.00639352		3121.84	-0.0068654		3651.84	-0.02352346
471.99	0.06632693		1002.02	0.00121457		1532.01	0.00728124		2062.04	-0.01449397		2592.04	-0.00692477		3122.04	-0.00705896		3652.04	-0.02304467
472.19	0.06716634		1002.22	0.00080333		1532.21	0.00811108		2062.24	-0.01468706		2592.24	-0.00654087		3122.24	-0.00719255		3652.24	-0.02340045
472.39	0.06666334		1002.42	-0.00012283		1532.41	0.0089057		2062.44	-0.01516028		2592.44	-0.00642279		3122.44	-0.00676425		3652.44	-0.02320433
472.59	0.06647991		1002.62	-0.00010043		1532.61	0.00961899		2062.64	-0.01523002		2592.64	-0.00585877		3122.64	-0.00679305		3652.64	-0.02321147
472.79	0.06546623		1002.82	-0.00022464		1532.81	0.00910888		2062.84	-0.01531466		2592.84	-0.005671		3122.84	-0.00554759		3652.84	-0.0238401
472.99	0.06595996		1003.02	-0.00068363		1533.01	0.00971074		2063.04	-0.0154256		2593.04	-0.00610466		3123.04	-0.0060857		3653.04	-0.0240213
473.19	0.06554113		1003.22	-0.00211942		1533.21	0.00897839		2063.24	-0.01529608		2593.24	-0.00657769		3123.24	-0.00550283		3653.24	-0.02477416
473.39	0.06476828		1003.42	-0.00233928		1533.41	0.00906191		2063.44	-0.01513193		2593.44	-0.0066713		3123.44	-0.0047511		3653.44	-0.02552476
473.59	0.06469421		1003.62	-0.00265446		1533.61	0.00880818		2063.64	-0.01436638		2593.64	-0.00762788		3123.64	-0.00376681		3653.64	-0.02566752
473.79	0.06454349		1003.82	-0.00224487		1533.81	0.00884334		2063.84	-0.01392262		2593.84	-0.00849405		3123.84	-0.00314503		3653.84	-0.02560977
473.99	0.06449742		1004.02	-0.00240116		1534.01	0.00909247		2064.04	-0.01334764		2594.04	-0.00885194		3124.04	-0.00285164		3654.04	-0.02586447
474.19	0.06431067		1004.22	-0.00191091		1534.21	0.00886799		2064.24	-0.01344428		2594.24	-0.00872279		3124.24	-0.00297969		3654.24	-0.02502337
474.39	0.06341993		1004.42	-0.00107123		1534.41	0.0087428		2064.44	-0.0135795		2594.44	-0.00949443		3124.44	-0.00278852		3654.44	-0.02561021
474.59	0.06317684		1004.62	-0.00103179		1534.61	0.00890827		2064.64	-0.01385112		2594.64	-0.00925731		3124.64	-0.00287857		3654.64	-0.02557344
474.79	0.06338626		1004.82	-0.00020018		1534.81	0.0089671		2064.84	-0.01287707		2594.84	-0.00863839		3124.84	-0.00303153		3654.84	-0.02464442
474.99	0.0636669		1005.02	-0.00016965		1535.01	0.00883167		2065.04	-0.01312736		2595.04	-0.00831422		3125.04	-0.00319867		3655.04	-0.0238896
475.19	0.06309726		1005.22	0.00049268		1535.21	0.00852407		2065.24	-0.01300104		2595.24	-0.00858563		3125.24	-0.00385305		3655.24	-0.02351937
475.39	0.06378353		1005.42	0.00050716		1535.41	0.00824321		2065.44	-0.01310268		2595.44	-0.00826867		3125.44	-0.00332143		3655.44	-0.02359941
475.59	0.06427364		1005.62	0.00027502		1535.61	0.00768234		2065.64	-0.01360408		2595.64	-0.00773325		3125.64	-0.00366283		3655.64	-0.02393056
475.79	0.06361206		1005.82	0.00036213		1535.81	0.00728189		2065.84	-0.01460326		2595.84	-0.0071402		3125.84	-0.00280553		3655.84	-0.02388108
475.99	0.06409604		1006.02	0.00071855		1536.01	0.00723437		2066.04	-0.01561977		2596.04	-0.00659211		3126.04	-0.00361724		3656.04	-0.02288292
476.19	0.06406835		1006.22	0.00134555		1536.21	0.00731686		2066.24	-0.01555096		2596.24	-0.00574048		3126.24	-0.00422098		3656.24	-0.02259235
476.39	0.06319629		1006.42	0.00066219		1536.41	0.00789582		2066.44	-0.01562934		2596.44	-0.00554473		3126.44	-0.00431935		3656.44	-0.02253345
476.59	0.06387438		1006.62	0.00037284		1536.61	0.00665894		2066.64	-0.01571408		2596.64	-0.00540572		3126.64	-0.0041974		3656.64	-0.02214199
476.79	0.06477908		1006.82	-0.00040896		1536.81	0.00570334		2066.84	-0.01636861		2596.84	-0.0056409		3126.84	-0.00410361		3656.84	-0.02170202
476.99	0.06569419		1007.02	-0.00141929		1537.01	0.00572493		2067.04	-0.01667191		2597.04	-0.00594161		3127.04	-0.00520785		3657.04	-0.02167016
477.19	0.06506858		1007.22	-0.00217493		1537.21	0.00487458		2067.24	-0.01702097		2597.24	-0.00634258		3127.24	-0.00503731		3657.24	-0.02196313
477.39	0.06475387		1007.42	-0.00238235		1537.41	0.00496361		2067.44	-0.01680594		2597.44	-0.00715376		3127.44	-0.00509395		3657.44	-0.02231566
477.59	0.06519608		1007.62	-0.00276508		1537.61	0.00416516		2067.64	-0.01607804		2597.64	-0.00802609		3127.64	-0.00545232		3657.64	-0.02310803
477.79	0.06414304		1007.82	-0.00270823		1537.81	0.00420557		2067.84	-0.01606358		2597.84	-0.00860266		3127.84	-0.00544627		3657.84	-0.0231905
477.99	0.06469176		1008.02	-0.00292766		1538.01	0.0045727		2068.04	-0.01629572		2598.04	-0.00920313		3128.04	-0.00649953		3658.04	-0.02384376
478.19	0.0648088		1008.22	-0.0024394		1538.21	0.00449191		2068.24	-0.01620892		2598.24	-0.00912067		3128.24	-0.00646611		3658.24	-0.02412791
478.39	0.06477779		1008.42	-0.00220171		1538.41	0.00463259		2068.44	-0.01617545		2598.44	-0.00988018		3128.44	-0.00582974		3658.44	-0.02451821
478.59	0.06509337		1008.62	-0.00215012		1538.61	0.00496252		2068.64	-0.01472703		2598.64	-0.01025893		3128.64	-0.00581844		3658.64	-0.02455338
478.79	0.06534938		1008.82	-0.00208623		1538.81	0.00585229		2068.84	-0.01341474		2598.84	-0.01043826		3128.84	-0.00487213		3658.84	-0.02405726
478.99	0.06514885		1009.02	-0.00244028		1539.01	0.00635453		2069.04	-0.01363735		2599.04	-0.0099617		3129.04	-0.00461868		3659.04	-0.0245395
479.19	0.06437704		1009.22	-0.00193708		1539.21	0.00632132		2069.24	-0.01331843		2599.24	-0.01004599		3129.24	-0.0046015		3659.24	-0.02485083
479.39	0.06443614		1009.42	-0.00154781		1539.41	0.00735102		2069.44	-0.0128648		2599.44	-0.00947941		3129.44	-0.00367887		3659.44	-0.02586946
479.59	0.06415305		1009.62	-0.00095674		1539.61	0.00825338		2069.64	-0.01230893		2599.64	-0.01003234		3129.64	-0.00435255		3659.64	-0.02621481
479.79	0.06298967		1009.82	-0.00138078		1539.81	0.00928736		2069.84	-0.01234374		2599.84	-0.00989601		3129.84	-0.0039413		3659.84	-0.02675011
479.99	0.06215586		1010.02	-0.00054492		1540.01	0.00941728		2070.04	-0.01280848		2600.04	-0.00954634		3130.04	-0.00529361		3660.04	-0.02686721
480.19	0.06164648		1010.22	-0.00054184		1540.21	0.01014241		2070.24	-0.01244065		2600.24	-0.00929834		3130.24	-0.00449953		3660.24	-0.0273839
480.39	0.06198671		1010.42	-0.00142105		1540.41	0.01036253		2070.44	-0.01248936		2600.44	-0.00891198		3130.44	-0.00476191		3660.44	-0.02745009
480.59	0.06240148		1010.62	-0.00108336		1540.61	0.00956091		2070.64	-0.01300534		2600.64	-0.00919903		3130.64	-0.00482934		3660.64	-0.02697224
480.79	0.06332357		1010.82	-0.0012836		1540.81	0.01035632		2070.84	-0.01349811		2600.84	-0.00943085		3130.84	-0.00522443		3660.84	-0.02664219
480.99	0.06354976		1011.02	-0.00171366		1541.01	0.00997119		2071.04	-0.01369131		2601.04	-0.00939881		3131.04	-0.00595569		3661.04	-0.02723892
481.19	0.06413682		1011.22	-0.00191617		1541.21	0.01019526		2071.24	-0.01361238		2601.24	-0.00847382		3131.24	-0.00540218		3661.24	-0.02778984
481.39	0.0641389		1011.42	-0.00245386		1541.41	0.01008319		2071.44	-0.01303946		2601.44	-0.00799451		3131.44	-0.00470206		3661.44	-0.02770197
481.59	0.06409713		1011.62	-0.00250242		1541.61	0.00862612		2071.64	-0.0128041		2601.64	-0.00784027		3131.64	-0.00490083		3661.64	-0.02724103
481.79	0.06419529		1011.82	-0.00211771		1541.81	0.00829848		2071.84	-0.01345192		2601.84	-0.00788588		3131.84	-0.00528038		3661.84	-0.02667922
481.99	0.06481902		1012.02	-0.0022445		1542.01	0.00720201		2072.04	-0.01335494		2602.04	-0.00756926		3132.04	-0.00590308		3662.04	-0.02648605
482.19	0.06536518		1012.22	-0.00149615		1542.21	0.0066643		2072.24	-0.01311685		2602.24	-0.00707343		3132.24	-0.00571581		3662.24	-0.02526517
482.39	0.06466851		1012.42	-0.00063342		1542.41	0.00573703		2072.44	-0.01307942		2602.44	-0.0075428		3132.44	-0.00553082		3662.44	-0.02474423
482.59	0.06408121		1012.62	-0.00121677		1542.61	0.00483533		2072.64	-0.01375513		2602.64	-0.00729933		3132.64	-0.00569686		3662.64	-0.02427873
482.79	0.06391578		1012.82	-0.00145801		1542.81	0.00464752		2072.84	-0.0142156		2602.84	-0.00727974		3132.84	-0.00590621		3662.84	-0.02343315
482.99	0.06382778		1013.02	-0.00162117		1543.01	0.00451968		2073.04	-0.0146189		2603.04	-0.00673147		3133.04	-0.00692223		3663.04	-0.02298678
483.19	0.0634918		1013.22	-0.00141517		1543.21	0.00465639		2073.24	-0.0139248		2603.24	-0.00695451		3133.24	-0.0081565		3663.24	-0.0228428
483.39	0.06335533		1013.42	-0.00081631		1543.41	0.00544497		2073.44	-0.0130965		2603.44	-0.00697108		3133.44	-0.00874701		3663.44	-0.02341984
483.59	0.06330353		1013.62	-0.00086873		1543.61	0.00539402		2073.64	-0.01282777		2603.64	-0.00785903		3133.64	-0.00953096		3663.64	-0.02395738
483.79	0.0628903		1013.82	-0.00118496		1543.81	0.00490944		2073.84	-0.01299406		2603.84	-0.00750775		3133.84	-0.00892612		3663.84	-0.02435915
483.99	0.06270718		1014.02	-0.00024703		1544.01	0.00449889		2074.04	-0.01339903		2604.04	-0.00786487		3134.04	-0.00973918		3664.04	-0.02457228
484.19	0.06276385		1014.22	-0.00032486		1544.21	0.00474029		2074.24	-0.01284912		2604.24	-0.00840159		3134.24	-0.00920692		3664.24	-0.02472545
484.39	0.06301878		1014.42	-0.00008534		1544.41	0.00527276		2074.44	-0.01325068		2604.44	-0.00908722		3134.44	-0.01007057		3664.44	-0.02513203
484.59	0.06263929		1014.62	0.00061655		1544.61	0.00553588		2074.64	-0.01407493		2604.64	-0.00972243		3134.64	-0.00883626		3664.64	-0.02512452
484.79	0.06328545		1014.82	0.00022821		1544.81	0.0065918		2074.84	-0.01343451		2604.84	-0.00888162		3134.84	-0.00854256		3664.84	-0.02560875
484.99	0.0635361		1015.02	0.00009907		1545.01	0.0069651		2075.04	-0.01369535		2605.04	-0.00823796		3135.04	-0.00821737		3665.04	-0.02643455
485.19	0.06342747		1015.22	0.00003525		1545.21	0.00834159		2075.24	-0.01337335		2605.24	-0.00752018		3135.24	-0.00707588		3665.24	-0.02710436
485.39	0.06356311		1015.42	-0.00013911		1545.41	0.00866251		2075.44	-0.01333163		2605.44	-0.00728682		3135.44	-0.00606798		3665.44	-0.02720423
485.59	0.06388128		1015.62	-0.00034865		1545.61	0.00825477		2075.64	-0.01357492		2605.64	-0.00709609		3135.64	-0.00551884		3665.64	-0.02765028
485.79	0.064005		1015.82	0.00000258		1545.81	0.00877702		2075.84	-0.01411093		2605.84	-0.00700364		3135.84	-0.00534892		3665.84	-0.02823119
485.99	0.06372949		1016.02	-0.00047207		1546.01	0.00816562		2076.04	-0.01402102		2606.04	-0.00699942		3136.04	-0.00498616		3666.04	-0.02949161
486.19	0.06381028		1016.22	-0.00066043		1546.21	0.00807534		2076.24	-0.01475023		2606.24	-0.00643323		3136.24	-0.00498972		3666.24	-0.02908728
486.39	0.06334385		1016.42	-0.0006971		1546.41	0.00793557		2076.44	-0.01499825		2606.44	-0.00644639		3136.44	-0.00470203		3666.44	-0.03003158
486.59	0.06391522		1016.62	-0.0014882		1546.61	0.00851078		2076.64	-0.01577917		2606.64	-0.00608802		3136.64	-0.00500346		3666.64	-0.02963025
486.79	0.06370248		1016.82	-0.0020474		1546.81	0.00804783		2076.84	-0.01489625		2606.84	-0.00640827		3136.84	-0.00499898		3666.84	-0.02946632
486.99	0.06258141		1017.02	-0.00168785		1547.01	0.00773738		2077.04	-0.01427924		2607.04	-0.00591908		3137.04	-0.00515649		3667.04	-0.02953575
487.19	0.06234745		1017.22	-0.00207564		1547.21	0.00806339		2077.24	-0.01353289		2607.24	-0.00701746		3137.24	-0.00454349		3667.24	-0.0300531
487.39	0.06216822		1017.42	-0.00125031		1547.41	0.00793763		2077.44	-0.01332304		2607.44	-0.00776842		3137.44	-0.00380556		3667.44	-0.03019184
487.59	0.06200013		1017.62	-0.00181197		1547.61	0.00759893		2077.64	-0.01285769		2607.64	-0.00827991		3137.64	-0.00342662		3667.64	-0.03014818
487.79	0.0613225		1017.82	-0.0020747		1547.81	0.00782824		2077.84	-0.01319571		2607.84	-0.0084704		3137.84	-0.00309828		3667.84	-0.02895739
487.99	0.06089433		1018.02	-0.00270623		1548.01	0.00734065		2078.04	-0.01294399		2608.04	-0.00936095		3138.04	-0.00345779		3668.04	-0.02827197
488.19	0.06092306		1018.22	-0.00243364		1548.21	0.00706492		2078.24	-0.01249748		2608.24	-0.00897641		3138.24	-0.0033314		3668.24	-0.02771644
488.39	0.0601313		1018.42	-0.00217215		1548.41	0.00694954		2078.44	-0.01246105		2608.44	-0.00940932		3138.44	-0.00368572		3668.44	-0.02742841
488.59	0.05917613		1018.62	-0.0018359		1548.61	0.00678777		2078.64	-0.01243101		2608.64	-0.00920388		3138.64	-0.00377436		3668.64	-0.02724304
488.79	0.05957176		1018.82	-0.00254226		1548.81	0.00719937		2078.84	-0.01110796		2608.84	-0.00778248		3138.84	-0.00404505		3668.84	-0.027788
488.99	0.05917221		1019.02	-0.00277765		1549.01	0.00727846		2079.04	-0.01140372		2609.04	-0.00808992		3139.04	-0.00443192		3669.04	-0.02781647
489.19	0.05994663		1019.22	-0.00341954		1549.21	0.00653546		2079.24	-0.01132145		2609.24	-0.00798599		3139.24	-0.00442433		3669.24	-0.02805564
489.39	0.06077577		1019.42	-0.0040348		1549.41	0.00651781		2079.44	-0.01087127		2609.44	-0.00778506		3139.44	-0.0049661		3669.44	-0.02755029
489.59	0.06113685		1019.62	-0.00470454		1549.61	0.00646825		2079.64	-0.01147929		2609.64	-0.00823171		3139.64	-0.00580043		3669.64	-0.02737794
489.79	0.06162907		1019.82	-0.00487116		1549.81	0.00656268		2079.84	-0.01114136		2609.84	-0.00924557		3139.84	-0.00621203		3669.84	-0.02743233
489.99	0.06279804		1020.02	-0.0055193		1550.01	0.00595166		2080.04	-0.01114311		2610.04	-0.0088549		3140.04	-0.00647092		3670.04	-0.02777812
490.19	0.06298773		1020.22	-0.00534602		1550.21	0.00595059		2080.24	-0.01159743		2610.24	-0.00841634		3140.24	-0.00630284		3670.24	-0.02665261
490.39	0.06378394		1020.42	-0.0044284		1550.41	0.0056146		2080.44	-0.01148391		2610.44	-0.00883365		3140.44	-0.00578279		3670.44	-0.02715233
490.59	0.06324029		1020.62	-0.00388348		1550.61	0.00542506		2080.64	-0.01190147		2610.64	-0.00946302		3140.64	-0.00591286		3670.64	-0.02675307
490.79	0.06319638		1020.82	-0.00323728		1550.81	0.00429842		2080.84	-0.01219298		2610.84	-0.01055126		3140.84	-0.00544069		3670.84	-0.02623984
490.99	0.0632496		1021.02	-0.00204789		1551.01	0.00410097		2081.04	-0.01278686		2611.04	-0.01099075		3141.04	-0.00541397		3671.04	-0.02622972
491.19	0.06388065		1021.22	-0.00185037		1551.21	0.00400402		2081.24	-0.01275284		2611.24	-0.01207187		3141.24	-0.00467142		3671.24	-0.02683114
491.39	0.06366968		1021.42	-0.00121344		1551.41	0.00366089		2081.44	-0.01261154		2611.44	-0.01132381		3141.44	-0.00394477		3671.44	-0.02531603
491.59	0.06290138		1021.62	-0.00165158		1551.61	0.00377372		2081.64	-0.01408429		2611.64	-0.01063382		3141.64	-0.00364502		3671.64	-0.02533425
491.79	0.06379501		1021.82	-0.00166737		1551.81	0.00425967		2081.84	-0.01460083		2611.84	-0.01085282		3141.84	-0.00380955		3671.84	-0.02506799
491.99	0.06417481		1022.02	-0.00183361		1552.01	0.00423009		2082.04	-0.01392988		2612.04	-0.01006862		3142.04	-0.00455138		3672.04	-0.02447792
492.19	0.06449277		1022.22	-0.00124697		1552.21	0.00466234		2082.24	-0.01392542		2612.24	-0.00908139		3142.24	-0.00453667		3672.24	-0.0250918
492.39	0.06370754		1022.42	-0.00109308		1552.41	0.00470039		2082.44	-0.01427354		2612.44	-0.00890724		3142.44	-0.00425935		3672.44	-0.02549476
492.59	0.06356804		1022.62	-0.00098013		1552.61	0.00579433		2082.64	-0.01346472		2612.64	-0.00792829		3142.64	-0.00463925		3672.64	-0.02595107
492.79	0.06324483		1022.82	-0.00129433		1552.81	0.00599618		2082.84	-0.01360833		2612.84	-0.00637537		3142.84	-0.00390217		3672.84	-0.02713519
492.99	0.06258537		1023.02	-0.00088949		1553.01	0.00545675		2083.04	-0.01437126		2613.04	-0.00646776		3143.04	-0.00421727		3673.04	-0.02641582
493.19	0.06314318		1023.22	-0.00177294		1553.21	0.00529646		2083.24	-0.01421942		2613.24	-0.00613022		3143.24	-0.00447387		3673.24	-0.02572941
493.39	0.06243166		1023.42	-0.00256712		1553.41	0.0060063		2083.44	-0.01451901		2613.44	-0.00590615		3143.44	-0.00491432		3673.44	-0.02518921
493.59	0.06199551		1023.62	-0.00325357		1553.61	0.00629431		2083.64	-0.0150432		2613.64	-0.00619346		3143.64	-0.005457		3673.64	-0.02473401
493.79	0.06196438		1023.82	-0.00375955		1553.81	0.00698634		2083.84	-0.01477659		2613.84	-0.00602511		3143.84	-0.00560609		3673.84	-0.02487168
493.99	0.06164233		1024.02	-0.00291193		1554.01	0.00744804		2084.04	-0.01537286		2614.04	-0.0056986		3144.04	-0.00602126		3674.04	-0.0249688
494.19	0.06008881		1024.22	-0.00267107		1554.21	0.00763489		2084.24	-0.01566378		2614.24	-0.00586649		3144.24	-0.00639747		3674.24	-0.02489628
494.39	0.05979624		1024.42	-0.00180842		1554.41	0.00680223		2084.44	-0.01562711		2614.44	-0.00667542		3144.44	-0.00678123		3674.44	-0.02598009
494.59	0.05876755		1024.62	-0.00166469		1554.61	0.0066898		2084.64	-0.01569264		2614.64	-0.00734213		3144.64	-0.00711409		3674.64	-0.02594632
494.79	0.05875362		1024.82	-0.001654		1554.81	0.00577127		2084.84	-0.01548872		2614.84	-0.00788924		3144.84	-0.00764211		3674.84	-0.02622751
494.99	0.05795022		1025.02	-0.0012047		1555.01	0.00519988		2085.04	-0.01491681		2615.04	-0.00824435		3145.04	-0.00732294		3675.04	-0.02654949
495.19	0.05740957		1025.22	-0.00166707		1555.21	0.00488339		2085.24	-0.01457157		2615.24	-0.0082776		3145.24	-0.00693094		3675.24	-0.02698373
495.39	0.05677835		1025.42	-0.00224681		1555.41	0.00543523		2085.44	-0.01484295		2615.44	-0.00757299		3145.44	-0.00662082		3675.44	-0.02581012
495.59	0.05653763		1025.62	-0.00305816		1555.61	0.00546236		2085.64	-0.01542068		2615.64	-0.00827469		3145.64	-0.00707293		3675.64	-0.02681355
495.79	0.05775616		1025.82	-0.00349197		1555.81	0.00572342		2085.84	-0.01486903		2615.84	-0.00855957		3145.84	-0.00711967		3675.84	-0.02661792
495.99	0.05670021		1026.02	-0.00353021		1556.01	0.00607135		2086.04	-0.01423046		2616.04	-0.00803521		3146.04	-0.00756964		3676.04	-0.02611379
496.19	0.05638632		1026.22	-0.00374802		1556.21	0.00522202		2086.24	-0.01418248		2616.24	-0.00755727		3146.24	-0.00692257		3676.24	-0.02629255
496.39	0.05599245		1026.42	-0.00331794		1556.41	0.00513355		2086.44	-0.01433374		2616.44	-0.00696514		3146.44	-0.00631409		3676.44	-0.02567897
496.59	0.05637854		1026.62	-0.00271461		1556.61	0.00573317		2086.64	-0.0137167		2616.64	-0.00717599		3146.64	-0.00700768		3676.64	-0.02594425
496.79	0.0562404		1026.82	-0.00246189		1556.81	0.00429651		2086.84	-0.0144522		2616.84	-0.00733967		3146.84	-0.00688145		3676.84	-0.02544003
496.99	0.05693544		1027.02	-0.00277293		1557.01	0.00367701		2087.04	-0.01370258		2617.04	-0.00716026		3147.04	-0.00701507		3677.04	-0.02424903
497.19	0.05705626		1027.22	-0.00383133		1557.21	0.00358497		2087.24	-0.01352325		2617.24	-0.00743799		3147.24	-0.00718557		3677.24	-0.02467088
497.39	0.05636328		1027.42	-0.004886		1557.41	0.00455542		2087.44	-0.01404719		2617.44	-0.00653927		3147.44	-0.00730643		3677.44	-0.02406991
497.59	0.05701434		1027.62	-0.00480127		1557.61	0.00525181		2087.64	-0.01392645		2617.64	-0.00572575		3147.64	-0.00733273		3677.64	-0.02327867
497.79	0.05758413		1027.82	-0.00424031		1557.81	0.00560725		2087.84	-0.01412841		2617.84	-0.00464149		3147.84	-0.00758862		3677.84	-0.0240724
497.99	0.05831864		1028.02	-0.00364938		1558.01	0.00545728		2088.04	-0.01396927		2618.04	-0.00491187		3148.04	-0.00728744		3678.04	-0.02483931
498.19	0.05919308		1028.22	-0.0042171		1558.21	0.00532501		2088.24	-0.01372011		2618.24	-0.00527967		3148.24	-0.00716675		3678.24	-0.02530401
498.39	0.0597206		1028.42	-0.00396243		1558.41	0.00545594		2088.44	-0.01339511		2618.44	-0.005594		3148.44	-0.00674402		3678.44	-0.02614326
498.59	0.06054707		1028.62	-0.00379796		1558.61	0.00539391		2088.64	-0.01299345		2618.64	-0.00579465		3148.64	-0.00630003		3678.64	-0.02641424
498.79	0.06015482		1028.82	-0.00389877		1558.81	0.0056458		2088.84	-0.0128048		2618.84	-0.00720958		3148.84	-0.00568799		3678.84	-0.02671876
498.99	0.06010062		1029.02	-0.00365876		1559.01	0.00564883		2089.04	-0.01289192		2619.04	-0.00796812		3149.04	-0.00417136		3679.04	-0.02671265
499.19	0.06050029		1029.22	-0.00402496		1559.21	0.00651152		2089.24	-0.0133875		2619.24	-0.00856651		3149.24	-0.00360982		3679.24	-0.02743005
499.39	0.06047918		1029.42	-0.00357657		1559.41	0.00685979		2089.44	-0.01343881		2619.44	-0.00899139		3149.44	-0.0038001		3679.44	-0.02735022
499.59	0.06056986		1029.62	-0.00393569		1559.61	0.00566211		2089.64	-0.01407683		2619.64	-0.00956268		3149.64	-0.00370634		3679.64	-0.0277027
499.79	0.06093418		1029.82	-0.00341911		1559.81	0.00661456		2089.84	-0.01478666		2619.84	-0.0099374		3149.84	-0.00370418		3679.84	-0.02714806
499.99	0.06003325		1030.02	-0.00321169		1560.01	0.00694132		2090.04	-0.01480308		2620.04	-0.01034306		3150.04	-0.00470814		3680.04	-0.02719659
500.19	0.06017933		1030.22	-0.00294001		1560.21	0.00707439		2090.24	-0.0152652		2620.24	-0.01028327		3150.24	-0.00587676		3680.24	-0.02683625
500.39	0.06013405		1030.42	-0.00224173		1560.41	0.00726248		2090.44	-0.01582128		2620.44	-0.01048031		3150.44	-0.00692472		3680.44	-0.02704265
500.59	0.05951619		1030.62	-0.00258985		1560.61	0.00682703		2090.64	-0.01658933		2620.64	-0.01165863		3150.64	-0.00792927		3680.64	-0.02687706
500.79	0.0589626		1030.82	-0.00259039		1560.81	0.00568203		2090.84	-0.01737324		2620.84	-0.01158579		3150.84	-0.00806838		3680.84	-0.02654361
500.99	0.05847362		1031.02	-0.00283093		1561.01	0.00626839		2091.04	-0.01688756		2621.04	-0.01007216		3151.04	-0.00842155		3681.04	-0.02675298
501.19	0.05756921		1031.22	-0.00416645		1561.21	0.00657947		2091.24	-0.01794225		2621.24	-0.01049284		3151.24	-0.00895217		3681.24	-0.02653688
501.39	0.05673142		1031.42	-0.00450232		1561.41	0.00719568		2091.44	-0.01813213		2621.44	-0.00913814		3151.44	-0.00949135		3681.44	-0.02622723
501.59	0.05712968		1031.62	-0.00377616		1561.61	0.00754224		2091.64	-0.0170601		2621.64	-0.00899445		3151.64	-0.00959998		3681.64	-0.02607701
501.79	0.05731929		1031.82	-0.00338052		1561.81	0.00752016		2091.84	-0.01756286		2621.84	-0.00889898		3151.84	-0.01040098		3681.84	-0.0263889
501.99	0.05745456		1032.02	-0.00374506		1562.01	0.00761324		2092.04	-0.0171357		2622.04	-0.00926852		3152.04	-0.01037765		3682.04	-0.02587091
502.19	0.05824798		1032.22	-0.00397082		1562.21	0.00784602		2092.24	-0.01718999		2622.24	-0.00982741		3152.24	-0.00928867		3682.24	-0.02595784
502.39	0.05730889		1032.42	-0.00406989		1562.41	0.00795116		2092.44	-0.01691468		2622.44	-0.00955558		3152.44	-0.00867797		3682.44	-0.02641504
502.59	0.05792457		1032.62	-0.00361969		1562.61	0.00649795		2092.64	-0.01673072		2622.64	-0.00969632		3152.64	-0.00737435		3682.64	-0.02631687
502.79	0.05738884		1032.82	-0.00383768		1562.81	0.0060881		2092.84	-0.01654853		2622.84	-0.00993752		3152.84	-0.00687333		3682.84	-0.02618769
502.99	0.05790145		1033.02	-0.00357485		1563.01	0.00538934		2093.04	-0.01657082		2623.04	-0.00979862		3153.04	-0.00547711		3683.04	-0.02622938
503.19	0.05884239		1033.22	-0.00323791		1563.21	0.00529098		2093.24	-0.01558046		2623.24	-0.00975325		3153.24	-0.00637552		3683.24	-0.0259587
503.39	0.05886715		1033.42	-0.00336173		1563.41	0.00451667		2093.44	-0.01538935		2623.44	-0.00977882		3153.44	-0.00610654		3683.44	-0.02572379
503.59	0.05993231		1033.62	-0.00438732		1563.61	0.00452803		2093.64	-0.01532772		2623.64	-0.01011506		3153.64	-0.00590497		3683.64	-0.02634542
503.79	0.05969632		1033.82	-0.00406799		1563.81	0.00483456		2093.84	-0.0145401		2623.84	-0.0114363		3153.84	-0.00686349		3683.84	-0.02669895
503.99	0.05939264		1034.02	-0.00308112		1564.01	0.00447218		2094.04	-0.01492616		2624.04	-0.01132993		3154.04	-0.00720963		3684.04	-0.0263693
504.19	0.05920572		1034.22	-0.00291054		1564.21	0.0042938		2094.24	-0.01392132		2624.24	-0.01054527		3154.24	-0.00784755		3684.24	-0.02603927
504.39	0.05945361		1034.42	-0.00350364		1564.41	0.00394226		2094.44	-0.01448926		2624.44	-0.01095637		3154.44	-0.00724775		3684.44	-0.02605723
504.59	0.0591063		1034.62	-0.00435897		1564.61	0.00334376		2094.64	-0.0146806		2624.64	-0.01126914		3154.64	-0.00653034		3684.64	-0.02577524
504.79	0.05874734		1034.82	-0.00360588		1564.81	0.003661		2094.84	-0.01383809		2624.84	-0.01153668		3154.84	-0.00557844		3684.84	-0.02612888
504.99	0.05867476		1035.02	-0.00377923		1565.01	0.00550259		2095.04	-0.01330548		2625.04	-0.01062515		3155.04	-0.00550161		3685.04	-0.02621309
505.19	0.05875105		1035.22	-0.00463032		1565.21	0.00597247		2095.24	-0.01387806		2625.24	-0.01125412		3155.24	-0.00495961		3685.24	-0.02635455
505.39	0.05835067		1035.42	-0.00371174		1565.41	0.00643868		2095.44	-0.01288005		2625.44	-0.01033387		3155.44	-0.00519312		3685.44	-0.02773611
505.59	0.05759368		1035.62	-0.0038088		1565.61	0.00759202		2095.64	-0.01172605		2625.64	-0.01028055		3155.64	-0.00586696		3685.64	-0.02695707
505.79	0.05710016		1035.82	-0.00393213		1565.81	0.00763667		2095.84	-0.01241009		2625.84	-0.01001393		3155.84	-0.00571698		3685.84	-0.02691474
505.99	0.05675399		1036.02	-0.00343757		1566.01	0.00740083		2096.04	-0.01256665		2626.04	-0.00976729		3156.04	-0.00500082		3686.04	-0.02701418
506.19	0.05747738		1036.22	-0.0034358		1566.21	0.00735764		2096.24	-0.01386099		2626.24	-0.00972124		3156.24	-0.00460963		3686.24	-0.02779507
506.39	0.05654672		1036.42	-0.00318404		1566.41	0.00737255		2096.44	-0.01433115		2626.44	-0.00922573		3156.44	-0.00470636		3686.44	-0.02781508
506.59	0.05746697		1036.62	-0.00278081		1566.61	0.00673043		2096.64	-0.01483998		2626.64	-0.0092908		3156.64	-0.00467537		3686.64	-0.02758408
506.79	0.05707966		1036.82	-0.00315336		1566.81	0.00626543		2096.84	-0.014565		2626.84	-0.00931188		3156.84	-0.00546328		3686.84	-0.02715812
506.99	0.0569104		1037.02	-0.00319399		1567.01	0.00595657		2097.04	-0.01496649		2627.04	-0.00946663		3157.04	-0.0044795		3687.04	-0.02617796
507.19	0.05661467		1037.22	-0.00324763		1567.21	0.00603439		2097.24	-0.01549491		2627.24	-0.00971335		3157.24	-0.0057342		3687.24	-0.02596046
507.39	0.05648952		1037.42	-0.00446465		1567.41	0.00592279		2097.44	-0.01657812		2627.44	-0.01027742		3157.44	-0.00537768		3687.44	-0.02608151
507.59	0.05586562		1037.62	-0.00470246		1567.61	0.00530388		2097.64	-0.01698949		2627.64	-0.01022557		3157.64	-0.00702598		3687.64	-0.02584217
507.79	0.05538677		1037.82	-0.00434477		1567.81	0.00428943		2097.84	-0.01699611		2627.84	-0.01093391		3157.84	-0.00743899		3687.84	-0.02557935
507.99	0.05573773		1038.02	-0.0035241		1568.01	0.00471806		2098.04	-0.01789159		2628.04	-0.01046361		3158.04	-0.00732226		3688.04	-0.02485764
508.19	0.05597665		1038.22	-0.00394762		1568.21	0.00418263		2098.24	-0.01779434		2628.24	-0.01076416		3158.24	-0.00699572		3688.24	-0.02384545
508.39	0.05657898		1038.42	-0.00444085		1568.41	0.00378036		2098.44	-0.0186262		2628.44	-0.01115389		3158.44	-0.00649736		3688.44	-0.02286285
508.59	0.05650843		1038.62	-0.00444531		1568.61	0.00302212		2098.64	-0.01821966		2628.64	-0.01090798		3158.64	-0.00581647		3688.64	-0.02277464
508.79	0.05695602		1038.82	-0.00396051		1568.81	0.00342478		2098.84	-0.01782476		2628.84	-0.0111254		3158.84	-0.00517415		3688.84	-0.02355788
508.99	0.05734754		1039.02	-0.00443622		1569.01	0.00356232		2099.04	-0.01808705		2629.04	-0.01042796		3159.04	-0.00590449		3689.04	-0.02440853
509.19	0.05781146		1039.22	-0.00422783		1569.21	0.00267786		2099.24	-0.01758696		2629.24	-0.01037541		3159.24	-0.00643231		3689.24	-0.02517282
509.39	0.05747775		1039.42	-0.00409351		1569.41	0.00269302		2099.44	-0.01686276		2629.44	-0.01027967		3159.44	-0.00744128		3689.44	-0.02679026
509.59	0.0569648		1039.62	-0.005064		1569.61	0.00332416		2099.64	-0.01636716		2629.64	-0.01073443		3159.64	-0.00813813		3689.64	-0.02626303
509.79	0.05782085		1039.82	-0.00536701		1569.81	0.00257651		2099.84	-0.0160058		2629.84	-0.01080828		3159.84	-0.0073067		3689.84	-0.02703135
509.99	0.05889224		1040.02	-0.00528372		1570.01	0.00311095		2100.04	-0.01647355		2630.04	-0.01055324		3160.04	-0.00748695		3690.04	-0.028263
510.19	0.05906795		1040.22	-0.00619817		1570.21	0.00320183		2100.24	-0.01717505		2630.24	-0.01069615		3160.24	-0.00772159		3690.24	-0.02886165
510.39	0.05931525		1040.42	-0.00669454		1570.41	0.00329959		2100.44	-0.01580488		2630.44	-0.01028797		3160.44	-0.00802562		3690.44	-0.02908429
510.59	0.06042845		1040.62	-0.0068554		1570.61	0.00286657		2100.64	-0.01526019		2630.64	-0.01046578		3160.64	-0.00827694		3690.64	-0.02861271
510.79	0.05961191		1040.82	-0.00764582		1570.81	0.0021715		2100.84	-0.01474217		2630.84	-0.00935458		3160.84	-0.00845025		3690.84	-0.02901635
510.99	0.05950006		1041.02	-0.00714915		1571.01	0.00239988		2101.04	-0.01570513		2631.04	-0.00889723		3161.04	-0.00803758		3691.04	-0.02878582
511.19	0.05898829		1041.22	-0.00667116		1571.21	0.00194205		2101.24	-0.01606136		2631.24	-0.00913024		3161.24	-0.00805288		3691.24	-0.0300095
511.39	0.05871946		1041.42	-0.00715598		1571.41	0.00178282		2101.44	-0.01648129		2631.44	-0.00899654		3161.44	-0.00863052		3691.44	-0.03021075
511.59	0.05802803		1041.62	-0.00683833		1571.61	0.00214145		2101.64	-0.01660226		2631.64	-0.00844366		3161.64	-0.00877721		3691.64	-0.03057377
511.79	0.05865093		1041.82	-0.00633711		1571.81	0.00171782		2101.84	-0.01740499		2631.84	-0.0091935		3161.84	-0.00772444		3691.84	-0.03060134
511.99	0.05869061		1042.02	-0.00596623		1572.01	0.00207563		2102.04	-0.0184365		2632.04	-0.00918943		3162.04	-0.00759073		3692.04	-0.02903026
512.19	0.0583577		1042.22	-0.00551592		1572.21	0.00080437		2102.24	-0.01849901		2632.24	-0.00904607		3162.24	-0.00641273		3692.24	-0.02791032
512.39	0.05873313		1042.42	-0.00548777		1572.41	0.00073378		2102.44	-0.01800145		2632.44	-0.00939683		3162.44	-0.00633124		3692.44	-0.0281032
512.59	0.05865217		1042.62	-0.00513841		1572.61	0.00015687		2102.64	-0.01749426		2632.64	-0.01033835		3162.64	-0.00572664		3692.64	-0.02955202
512.79	0.05815848		1042.82	-0.00516329		1572.81	-0.00038155		2102.84	-0.01753563		2632.84	-0.01066154		3162.84	-0.00583877		3692.84	-0.03027386
512.99	0.05808425		1043.02	-0.00467667		1573.01	-0.00015669		2103.04	-0.01749497		2633.04	-0.01149635		3163.04	-0.00571454		3693.04	-0.02978497
513.19	0.05760123		1043.22	-0.0040331		1573.21	0.00010898		2103.24	-0.01674784		2633.24	-0.01204299		3163.24	-0.00524195		3693.24	-0.02906645
513.39	0.05761864		1043.42	-0.00366703		1573.41	0.00047231		2103.44	-0.01578275		2633.44	-0.01262691		3163.44	-0.00462815		3693.44	-0.02895112
513.59	0.0578736		1043.62	-0.00485551		1573.61	0.00066572		2103.64	-0.01460421		2633.64	-0.013219		3163.64	-0.00467332		3693.64	-0.02796192
513.79	0.05788221		1043.82	-0.00499095		1573.81	0.0010785		2103.84	-0.01487436		2633.84	-0.01304991		3163.84	-0.00466585		3693.84	-0.02813599
513.99	0.05708916		1044.02	-0.00503245		1574.01	0.00213303		2104.04	-0.01471784		2634.04	-0.01364311		3164.04	-0.00504924		3694.04	-0.02879016
514.19	0.05660098		1044.22	-0.00519639		1574.21	0.00212254		2104.24	-0.01377633		2634.24	-0.01343052		3164.24	-0.00605295		3694.24	-0.02809146
514.39	0.05728951		1044.42	-0.00484785		1574.41	0.00267338		2104.44	-0.01252038		2634.44	-0.01270516		3164.44	-0.00636944		3694.44	-0.02820306
514.59	0.05712217		1044.62	-0.00450806		1574.61	0.00219007		2104.64	-0.01306045		2634.64	-0.01295919		3164.64	-0.0060429		3694.64	-0.02846014
514.79	0.05549886		1044.82	-0.004501		1574.81	0.00221473		2104.84	-0.01376828		2634.84	-0.011999		3164.84	-0.0067686		3694.84	-0.02893348
514.99	0.05572083		1045.02	-0.00317935		1575.01	0.00170097		2105.04	-0.01450953		2635.04	-0.01163362		3165.04	-0.00649045		3695.04	-0.02920578
515.19	0.05479709		1045.22	-0.00327541		1575.21	0.00148093		2105.24	-0.01413943		2635.24	-0.01097011		3165.24	-0.00674811		3695.24	-0.02984223
515.39	0.05567117		1045.42	-0.00381516		1575.41	0.0022638		2105.44	-0.01438656		2635.44	-0.01056802		3165.44	-0.00788292		3695.44	-0.02970508
515.59	0.05594701		1045.62	-0.00436081		1575.61	0.00304399		2105.64	-0.01450317		2635.64	-0.01028005		3165.64	-0.00795712		3695.64	-0.03040103
515.79	0.05645969		1045.82	-0.00448644		1575.81	0.00287954		2105.84	-0.0157603		2635.84	-0.01090099		3165.84	-0.00800473		3695.84	-0.03011691
515.99	0.05746492		1046.02	-0.00460075		1576.01	0.00290141		2106.04	-0.01588144		2636.04	-0.01034319		3166.04	-0.00842939		3696.04	-0.03039706
516.19	0.05680597		1046.22	-0.00466188		1576.21	0.00200958		2106.24	-0.01587323		2636.24	-0.01094967		3166.24	-0.00897426		3696.24	-0.03148659
516.39	0.05682443		1046.42	-0.0048817		1576.41	0.00172689		2106.44	-0.01663824		2636.44	-0.01181242		3166.44	-0.0089165		3696.44	-0.03227086
516.59	0.05633635		1046.62	-0.00580587		1576.61	0.00118988		2106.64	-0.01708278		2636.64	-0.01188457		3166.64	-0.00869111		3696.64	-0.03264718
516.79	0.05585941		1046.82	-0.0061982		1576.81	0.00117449		2106.84	-0.01772151		2636.84	-0.01187437		3166.84	-0.00934783		3696.84	-0.03217575
516.99	0.05642218		1047.02	-0.00577517		1577.01	0.00171222		2107.04	-0.0175292		2637.04	-0.01293715		3167.04	-0.00951775		3697.04	-0.03166382
517.19	0.05627475		1047.22	-0.00606798		1577.21	0.00171404		2107.24	-0.01706406		2637.24	-0.01284126		3167.24	-0.01001161		3697.24	-0.03148146
517.39	0.05669077		1047.42	-0.00662103		1577.41	0.00154587		2107.44	-0.01615672		2637.44	-0.01300675		3167.44	-0.01018048		3697.44	-0.03105983
517.59	0.05613658		1047.62	-0.00786136		1577.61	0.00222622		2107.64	-0.01697156		2637.64	-0.01294538		3167.64	-0.01088938		3697.64	-0.03091671
517.79	0.05576286		1047.82	-0.00739602		1577.81	0.00297562		2107.84	-0.01731461		2637.84	-0.01309434		3167.84	-0.01043562		3697.84	-0.03072588
517.99	0.05463474		1048.02	-0.00747038		1578.01	0.00271179		2108.04	-0.01706449		2638.04	-0.01265614		3168.04	-0.01056767		3698.04	-0.03058137
518.19	0.0549983		1048.22	-0.00725887		1578.21	0.00216301		2108.24	-0.01754613		2638.24	-0.01216528		3168.24	-0.01086801		3698.24	-0.03014228
518.39	0.05461896		1048.42	-0.0071862		1578.41	0.00153882		2108.44	-0.01793899		2638.44	-0.01201085		3168.44	-0.01021236		3698.44	-0.02993525
518.59	0.05358742		1048.62	-0.00674872		1578.61	0.00028589		2108.64	-0.01829431		2638.64	-0.01168542		3168.64	-0.00941006		3698.64	-0.0290553
518.79	0.05261215		1048.82	-0.00666886		1578.81	-0.00030263		2108.84	-0.01799086		2638.84	-0.01045387		3168.84	-0.00828386		3698.84	-0.02786823
518.99	0.05321647		1049.02	-0.00641881		1579.01	-0.00051612		2109.04	-0.01793026		2639.04	-0.00970796		3169.04	-0.00743817		3699.04	-0.02741437
519.19	0.05316945		1049.22	-0.00666686		1579.21	-0.00007438		2109.24	-0.01824345		2639.24	-0.00971527		3169.24	-0.00634618		3699.24	-0.02710831
519.39	0.05464979		1049.42	-0.00633314		1579.41	0.0008581		2109.44	-0.01805617		2639.44	-0.01007449		3169.44	-0.00594266		3699.44	-0.02748941
519.59	0.053533		1049.62	-0.00610574		1579.61	0.00124599		2109.64	-0.0183264		2639.64	-0.01108753		3169.64	-0.00523873		3699.64	-0.02728587
519.79	0.05401524		1049.82	-0.00530455		1579.81	0.00106833		2109.84	-0.01824027		2639.84	-0.01122806		3169.84	-0.00458424		3699.84	-0.02685414
519.99	0.05407327		1050.02	-0.00481274		1580.01	0.00110846		2110.04	-0.01825755		2640.04	-0.01140143		3170.04	-0.00424518		3700.04	-0.02653125
520.19	0.05338478		1050.22	-0.00454869		1580.21	0.00144952		2110.24	-0.01833968		2640.24	-0.01187167		3170.24	-0.00374493		3700.24	-0.02641757
520.39	0.0532281		1050.42	-0.00398381		1580.41	0.00066664		2110.44	-0.01834108		2640.44	-0.01214763		3170.44	-0.00295115		3700.44	-0.02671768
520.59	0.053328		1050.62	-0.0045843		1580.61	0.00109724		2110.64	-0.01739738		2640.64	-0.0124089		3170.64	-0.00313707		3700.64	-0.02646751
520.79	0.0540312		1050.82	-0.00391998		1580.81	0.00200348		2110.84	-0.01703782		2640.84	-0.01239856		3170.84	-0.00442011		3700.84	-0.02683264
520.99	0.05442366		1051.02	-0.00444243		1581.01	0.00219875		2111.04	-0.01702048		2641.04	-0.01269498		3171.04	-0.00513869		3701.04	-0.02755085
521.19	0.05470725		1051.22	-0.00440412		1581.21	0.00280468		2111.24	-0.01677952		2641.24	-0.01181144		3171.24	-0.00628194		3701.24	-0.02706411
521.39	0.05441544		1051.42	-0.00471314		1581.41	0.0025635		2111.44	-0.01624014		2641.44	-0.01171168		3171.44	-0.00623968		3701.44	-0.0268252
521.59	0.05457824		1051.62	-0.00491968		1581.61	0.00264433		2111.64	-0.01763942		2641.64	-0.01192266		3171.64	-0.0074431		3701.64	-0.0272626
521.79	0.05475532		1051.82	-0.0052051		1581.81	0.00243809		2111.84	-0.01765593		2641.84	-0.01180617		3171.84	-0.00839793		3701.84	-0.02677123
521.99	0.05439846		1052.02	-0.0062147		1582.01	0.00197672		2112.04	-0.01840279		2642.04	-0.01132017		3172.04	-0.00971293		3702.04	-0.0269344
522.19	0.05475333		1052.22	-0.00669415		1582.21	0.00099284		2112.24	-0.01816416		2642.24	-0.01142858		3172.24	-0.01050473		3702.24	-0.02639812
522.39	0.05446263		1052.42	-0.00729103		1582.41	0.0002588		2112.44	-0.01757186		2642.44	-0.01079315		3172.44	-0.01072647		3702.44	-0.02607531
522.59	0.05489973		1052.62	-0.00736311		1582.61	0.00000152		2112.64	-0.01810238		2642.64	-0.01067156		3172.64	-0.01030766		3702.64	-0.02559486
522.79	0.0552205		1052.82	-0.0081291		1582.81	-0.00076074		2112.84	-0.01854628		2642.84	-0.01031126		3172.84	-0.00949722		3702.84	-0.02507135
522.99	0.05533976		1053.02	-0.00860952		1583.01	-0.00016709		2113.04	-0.01930183		2643.04	-0.01081817		3173.04	-0.00971171		3703.04	-0.02585304
523.19	0.05483074		1053.22	-0.00846715		1583.21	0.00073212		2113.24	-0.01965556		2643.24	-0.01169866		3173.24	-0.00870807		3703.24	-0.02684014
523.39	0.05430951		1053.42	-0.0079975		1583.41	0.000917		2113.44	-0.01894916		2643.44	-0.0117296		3173.44	-0.00843279		3703.44	-0.02741233
523.59	0.05334823		1053.62	-0.00754451		1583.61	0.00078041		2113.64	-0.01852889		2643.64	-0.01336947		3173.64	-0.00823863		3703.64	-0.02648991
523.79	0.05405949		1053.82	-0.00762064		1583.81	0.00137347		2113.84	-0.01855304		2643.84	-0.01291582		3173.84	-0.00680204		3703.84	-0.02647094
523.99	0.05445748		1054.02	-0.00774764		1584.01	0.002153		2114.04	-0.01800947		2644.04	-0.01326438		3174.04	-0.00619423		3704.04	-0.02664073
524.19	0.05461122		1054.22	-0.0068014		1584.21	0.00148509		2114.24	-0.01699069		2644.24	-0.01345001		3174.24	-0.00603095		3704.24	-0.02773661
524.39	0.05451873		1054.42	-0.00661859		1584.41	0.00098622		2114.44	-0.01649831		2644.44	-0.01376193		3174.44	-0.00623459		3704.44	-0.02796168
524.59	0.05488649		1054.62	-0.00693491		1584.61	0.0018027		2114.64	-0.01629149		2644.64	-0.01311977		3174.64	-0.00680863		3704.64	-0.02802949
524.79	0.0559052		1054.82	-0.00700066		1584.81	0.00256031		2114.84	-0.01626702		2644.84	-0.01346021		3174.84	-0.00822218		3704.84	-0.02905696
524.99	0.05552161		1055.02	-0.00693129		1585.01	0.00245369		2115.04	-0.01654697		2645.04	-0.01400439		3175.04	-0.00805105		3705.04	-0.02867232
525.19	0.05534126		1055.22	-0.00589316		1585.21	0.00269081		2115.24	-0.01600652		2645.24	-0.01378622		3175.24	-0.00887083		3705.24	-0.02838588
525.39	0.05563801		1055.42	-0.00675963		1585.41	0.00278081		2115.44	-0.01620151		2645.44	-0.01368951		3175.44	-0.00880776		3705.44	-0.02933301
525.59	0.05501221		1055.62	-0.00744		1585.61	0.00279079		2115.64	-0.01675601		2645.64	-0.01417487		3175.64	-0.00998884		3705.64	-0.02868273
525.79	0.05503871		1055.82	-0.00754913		1585.81	0.00365369		2115.84	-0.01612306		2645.84	-0.01396191		3175.84	-0.01059449		3705.84	-0.02819812
525.99	0.05498572		1056.02	-0.00731302		1586.01	0.00373707		2116.04	-0.01618442		2646.04	-0.01414484		3176.04	-0.01075564		3706.04	-0.02866728
526.19	0.054091		1056.22	-0.00775416		1586.21	0.00293527		2116.24	-0.01558233		2646.24	-0.01397525		3176.24	-0.01098852		3706.24	-0.02876824
526.39	0.05393706		1056.42	-0.0075812		1586.41	0.00300257		2116.44	-0.01608507		2646.44	-0.01335085		3176.44	-0.01046305		3706.44	-0.02955517
526.59	0.0532277		1056.62	-0.00744903		1586.61	0.00287357		2116.64	-0.01643644		2646.64	-0.01325754		3176.64	-0.00987889		3706.64	-0.02997179
526.79	0.05188961		1056.82	-0.00730278		1586.81	0.00290237		2116.84	-0.01672659		2646.84	-0.01303921		3176.84	-0.00953695		3706.84	-0.03108636
526.99	0.05108522		1057.02	-0.00683288		1587.01	0.00399074		2117.04	-0.01630324		2647.04	-0.01322845		3177.04	-0.00957004		3707.04	-0.03210142
527.19	0.04934754		1057.22	-0.00630193		1587.21	0.0040732		2117.24	-0.01631842		2647.24	-0.01313809		3177.24	-0.00903705		3707.24	-0.03262207
527.39	0.04952856		1057.42	-0.00566029		1587.41	0.00375316		2117.44	-0.01550336		2647.44	-0.01245771		3177.44	-0.0080422		3707.44	-0.03243928
527.59	0.05027093		1057.62	-0.00608577		1587.61	0.00359353		2117.64	-0.01557374		2647.64	-0.01288802		3177.64	-0.00751318		3707.64	-0.03131798
527.79	0.05080775		1057.82	-0.00646589		1587.81	0.00431715		2117.84	-0.01589904		2647.84	-0.01197673		3177.84	-0.00702685		3707.84	-0.03122393
527.99	0.05154286		1058.02	-0.0063661		1588.01	0.00416883		2118.04	-0.01540939		2648.04	-0.01110706		3178.04	-0.00729213		3708.04	-0.03171694
528.19	0.05177774		1058.22	-0.00691304		1588.21	0.00317981		2118.24	-0.01609718		2648.24	-0.0113633		3178.24	-0.00772775		3708.24	-0.03166798
528.39	0.05230962		1058.42	-0.00724706		1588.41	0.00339		2118.44	-0.01615815		2648.44	-0.01076579		3178.44	-0.00792374		3708.44	-0.03129039
528.59	0.05254127		1058.62	-0.00748681		1588.61	0.00403032		2118.64	-0.01683183		2648.64	-0.0102687		3178.64	-0.00838082		3708.64	-0.0308147
528.79	0.0532432		1058.82	-0.00707615		1588.81	0.00412177		2118.84	-0.01674736		2648.84	-0.01028509		3178.84	-0.00819381		3708.84	-0.03155426
528.99	0.05283357		1059.02	-0.00671227		1589.01	0.00378765		2119.04	-0.01706112		2649.04	-0.01014737		3179.04	-0.00726115		3709.04	-0.03046431
529.19	0.05296572		1059.22	-0.00726417		1589.21	0.00415089		2119.24	-0.01747		2649.24	-0.00957758		3179.24	-0.00790703		3709.24	-0.03075092
529.39	0.05338831		1059.42	-0.00834017		1589.41	0.00423486		2119.44	-0.0187165		2649.44	-0.00946844		3179.44	-0.00784502		3709.44	-0.02976574
529.59	0.05315152		1059.62	-0.00817496		1589.61	0.0041873		2119.64	-0.0192374		2649.64	-0.01006939		3179.64	-0.00808913		3709.64	-0.02944566
529.79	0.05335076		1059.82	-0.00774439		1589.81	0.00450099		2119.84	-0.01879401		2649.84	-0.01022364		3179.84	-0.00853362		3709.84	-0.02975848
529.99	0.052757		1060.02	-0.00868133		1590.01	0.00387842		2120.04	-0.01929517		2650.04	-0.01014603		3180.04	-0.00888771		3710.04	-0.03082075
530.19	0.05106901		1060.22	-0.00925138		1590.21	0.00291706		2120.24	-0.01940051		2650.24	-0.01050255		3180.24	-0.0081829		3710.24	-0.03100888
530.39	0.04977337		1060.42	-0.00893527		1590.41	0.00307466		2120.44	-0.01964678		2650.44	-0.01019902		3180.44	-0.00820203		3710.44	-0.0313944
530.59	0.04865089		1060.62	-0.00877081		1590.61	0.00254986		2120.64	-0.01981503		2650.64	-0.01093917		3180.64	-0.00908352		3710.64	-0.03147189
530.79	0.04844317		1060.82	-0.00885677		1590.81	0.00256554		2120.84	-0.01990107		2650.84	-0.01115278		3180.84	-0.0096524		3710.84	-0.03119536
530.99	0.04876572		1061.02	-0.0087653		1591.01	0.00202458		2121.04	-0.01904175		2651.04	-0.01121798		3181.04	-0.00970976		3711.04	-0.03041146
531.19	0.04830143		1061.22	-0.00833504		1591.21	0.00115401		2121.24	-0.01876		2651.24	-0.01200187		3181.24	-0.00913976		3711.24	-0.03011709
531.39	0.04889496		1061.42	-0.00801228		1591.41	0.00157894		2121.44	-0.01865485		2651.44	-0.01237416		3181.44	-0.00871966		3711.44	-0.02954715
531.59	0.0492731		1061.62	-0.00888692		1591.61	0.00131599		2121.64	-0.01859228		2651.64	-0.01261199		3181.64	-0.00905133		3711.64	-0.02885846
531.79	0.04965993		1061.82	-0.00870705		1591.81	0.00212252		2121.84	-0.01855989		2651.84	-0.01336396		3181.84	-0.00929824		3711.84	-0.02871642
531.99	0.05041938		1062.02	-0.0091396		1592.01	0.00212777		2122.04	-0.01786451		2652.04	-0.01346619		3182.04	-0.00851244		3712.04	-0.02892557
532.19	0.05118148		1062.22	-0.00827236		1592.21	0.00246449		2122.24	-0.01794617		2652.24	-0.01448929		3182.24	-0.00872473		3712.24	-0.02940049
532.39	0.05196048		1062.42	-0.00814908		1592.41	0.00382364		2122.44	-0.01739458		2652.44	-0.01429325		3182.44	-0.00935047		3712.44	-0.02944771
532.59	0.05271497		1062.62	-0.0076009		1592.61	0.0042509		2122.64	-0.01754881		2652.64	-0.01433058		3182.64	-0.00935365		3712.64	-0.02991796
532.79	0.05336638		1062.82	-0.00652186		1592.81	0.00378749		2122.84	-0.01772812		2652.84	-0.01369717		3182.84	-0.00868397		3712.84	-0.03110547
532.99	0.05368976		1063.02	-0.00672821		1593.01	0.00447282		2123.04	-0.01819633		2653.04	-0.01425242		3183.04	-0.00856977		3713.04	-0.03115528
533.19	0.05449638		1063.22	-0.00693829		1593.21	0.00464191		2123.24	-0.01824297		2653.24	-0.01438958		3183.24	-0.00962504		3713.24	-0.03137033
533.39	0.05478264		1063.42	-0.00667622		1593.41	0.00429676		2123.44	-0.0184398		2653.44	-0.01421273		3183.44	-0.01064329		3713.44	-0.03149854
533.59	0.05538062		1063.62	-0.00657631		1593.61	0.00470877		2123.64	-0.01777467		2653.64	-0.01460638		3183.64	-0.01119075		3713.64	-0.03276252
533.79	0.05521799		1063.82	-0.00668965		1593.81	0.00474543		2123.84	-0.01755765		2653.84	-0.01418009		3183.84	-0.01164585		3713.84	-0.03341352
533.99	0.05518955		1064.02	-0.00724302		1594.01	0.00399544		2124.04	-0.01811819		2654.04	-0.01384288		3184.04	-0.01249622		3714.04	-0.03357439
534.19	0.05353		1064.22	-0.00721634		1594.21	0.00305318		2124.24	-0.01858863		2654.24	-0.01440953		3184.24	-0.01272991		3714.24	-0.03380529
534.39	0.05339252		1064.42	-0.00805375		1594.41	0.00273029		2124.44	-0.01835912		2654.44	-0.01456936		3184.44	-0.01318623		3714.44	-0.0334863
534.59	0.05369713		1064.62	-0.00814549		1594.61	0.00216913		2124.64	-0.01905602		2654.64	-0.01470193		3184.64	-0.01371662		3714.64	-0.03271721
534.79	0.05353947		1064.82	-0.00857789		1594.81	0.00143479		2124.84	-0.01913142		2654.84	-0.01411918		3184.84	-0.01254769		3714.84	-0.03184791
534.99	0.05340685		1065.02	-0.00764626		1595.01	0.00030004		2125.04	-0.01951781		2655.04	-0.01410241		3185.04	-0.01296998		3715.04	-0.03148513
535.19	0.05241239		1065.22	-0.00701502		1595.21	0.0002976		2125.24	-0.02011992		2655.24	-0.01462383		3185.24	-0.01280398		3715.24	-0.03118335
535.39	0.05185552		1065.42	-0.00748717		1595.41	0.00055591		2125.44	-0.02012664		2655.44	-0.01469395		3185.44	-0.01239615		3715.44	-0.03086532
535.59	0.05119833		1065.62	-0.00770767		1595.61	0.00119836		2125.64	-0.01967603		2655.64	-0.01511343		3185.64	-0.01161469		3715.64	-0.0303263
535.79	0.05133336		1065.82	-0.00665469		1595.81	0.00163154		2125.84	-0.01997368		2655.84	-0.01716812		3185.84	-0.01095441		3715.84	-0.0302423
535.99	0.05084978		1066.02	-0.00667838		1596.01	0.00156542		2126.04	-0.01998518		2656.04	-0.0167802		3186.04	-0.01011834		3716.04	-0.0303587
536.19	0.05085543		1066.22	-0.00610545		1596.21	0.00169398		2126.24	-0.0206714		2656.24	-0.01666365		3186.24	-0.01079079		3716.24	-0.03076975
536.39	0.05096942		1066.42	-0.00670752		1596.41	0.0024419		2126.44	-0.02002194		2656.44	-0.01685074		3186.44	-0.01158957		3716.44	-0.03085342
536.59	0.05057947		1066.62	-0.00639084		1596.61	0.00155029		2126.64	-0.01984453		2656.64	-0.01661972		3186.64	-0.01117007		3716.64	-0.03135902
536.79	0.04961133		1066.82	-0.00605262		1596.81	0.00128163		2126.84	-0.01934958		2656.84	-0.01589191		3186.84	-0.01116645		3716.84	-0.03129895
536.99	0.04961634		1067.02	-0.0054082		1597.01	0.00177784		2127.04	-0.01923622		2657.04	-0.01615288		3187.04	-0.01137317		3717.04	-0.03153635
537.19	0.05009631		1067.22	-0.00524506		1597.21	0.00178409		2127.24	-0.01814138		2657.24	-0.01589256		3187.24	-0.01238036		3717.24	-0.03198234
537.39	0.04991889		1067.42	-0.00548953		1597.41	0.00137907		2127.44	-0.01776254		2657.44	-0.01521588		3187.44	-0.01260347		3717.44	-0.03291155
537.59	0.05015636		1067.62	-0.00657398		1597.61	0.00122936		2127.64	-0.01771792		2657.64	-0.01518021		3187.64	-0.01176313		3717.64	-0.03315424
537.79	0.0503691		1067.82	-0.00760457		1597.81	0.00110155		2127.84	-0.01809634		2657.84	-0.01397474		3187.84	-0.012047		3717.84	-0.03321077
537.99	0.05041847		1068.02	-0.00809156		1598.01	0.00043525		2128.04	-0.01781374		2658.04	-0.01366421		3188.04	-0.01283828		3718.04	-0.03239396
538.19	0.05001397		1068.22	-0.00942031		1598.21	0.00005153		2128.24	-0.01814317		2658.24	-0.01367331		3188.24	-0.01264801		3718.24	-0.03215578
538.39	0.05042716		1068.42	-0.01009579		1598.41	0.00046746		2128.44	-0.01728284		2658.44	-0.01255766		3188.44	-0.01226505		3718.44	-0.03138203
538.59	0.05004543		1068.62	-0.00968359		1598.61	0.00070311		2128.64	-0.0171296		2658.64	-0.01108467		3188.64	-0.01230404		3718.64	-0.03040675
538.79	0.04991418		1068.82	-0.00969511		1598.81	0.00071411		2128.84	-0.016959		2658.84	-0.01066696		3188.84	-0.01246854		3718.84	-0.03105161
538.99	0.04972476		1069.02	-0.00912547		1599.01	0.00092622		2129.04	-0.01668374		2659.04	-0.01097716		3189.04	-0.01318321		3719.04	-0.03151475
539.19	0.04940457		1069.22	-0.00909809		1599.21	0.00169711		2129.24	-0.01725488		2659.24	-0.01084502		3189.24	-0.01287673		3719.24	-0.03145631
539.39	0.04974763		1069.42	-0.00847757		1599.41	0.00261997		2129.44	-0.01744221		2659.44	-0.01129072		3189.44	-0.01283629		3719.44	-0.03190309
539.59	0.04905383		1069.62	-0.00802802		1599.61	0.00300517		2129.64	-0.0183941		2659.64	-0.01188923		3189.64	-0.01287152		3719.64	-0.03147955
539.79	0.04923626		1069.82	-0.00681215		1599.81	0.00311463		2129.84	-0.0185051		2659.84	-0.01237853		3189.84	-0.01318746		3719.84	-0.03150513
539.99	0.04908547		1070.02	-0.0072183		1600.01	0.00276437		2130.04	-0.01820246		2660.04	-0.01194498		3190.04	-0.01340762		3720.04	-0.03183003
540.19	0.04969178		1070.22	-0.0067405		1600.21	0.00294944		2130.24	-0.01812366		2660.24	-0.01209095		3190.24	-0.01418556		3720.24	-0.03264487
540.39	0.04925447		1070.42	-0.0067414		1600.41	0.00360587		2130.44	-0.01794183		2660.44	-0.01252781		3190.44	-0.0141416		3720.44	-0.03229715
540.59	0.04888803		1070.62	-0.00650917		1600.61	0.00309571		2130.64	-0.01794323		2660.64	-0.0133978		3190.64	-0.014143		3720.64	-0.03214544
540.79	0.04872484		1070.82	-0.00606425		1600.81	0.00373454		2130.84	-0.0174568		2660.84	-0.01328057		3190.84	-0.01443856		3720.84	-0.03161533
540.99	0.04954595		1071.02	-0.00599166		1601.01	0.00408958		2131.04	-0.01800196		2661.04	-0.01313262		3191.04	-0.01402785		3721.04	-0.03167484
541.19	0.04989623		1071.22	-0.00697855		1601.21	0.00385302		2131.24	-0.01728401		2661.24	-0.0135535		3191.24	-0.01357925		3721.24	-0.0316655
541.39	0.0495656		1071.42	-0.00780091		1601.41	0.00311438		2131.44	-0.01769075		2661.44	-0.01399453		3191.44	-0.01232806		3721.44	-0.03175604
541.59	0.05037105		1071.62	-0.00867971		1601.61	0.00314597		2131.64	-0.01845975		2661.64	-0.01358137		3191.64	-0.01109612		3721.64	-0.03199365
541.79	0.05020536		1071.82	-0.0087395		1601.81	0.00284345		2131.84	-0.01858871		2661.84	-0.01295481		3191.84	-0.01067761		3721.84	-0.03137756
541.99	0.05061431		1072.02	-0.00869		1602.01	0.0021612		2132.04	-0.01864598		2662.04	-0.01311233		3192.04	-0.01029727		3722.04	-0.03064795
542.19	0.05036114		1072.22	-0.009618		1602.21	0.00198371		2132.24	-0.01878238		2662.24	-0.01246392		3192.24	-0.01007615		3722.24	-0.03090035
542.39	0.04970267		1072.42	-0.01008481		1602.41	0.00176062		2132.44	-0.01852202		2662.44	-0.01243445		3192.44	-0.00971575		3722.44	-0.03104258
542.59	0.04920203		1072.62	-0.00970796		1602.61	0.00095082		2132.64	-0.01866958		2662.64	-0.01286224		3192.64	-0.00916424		3722.64	-0.03140375
542.79	0.04930756		1072.82	-0.01012218		1602.81	0.00017098		2132.84	-0.01943336		2662.84	-0.01376331		3192.84	-0.0095596		3722.84	-0.03287983
542.99	0.04939477		1073.02	-0.0096512		1603.01	-0.00029123		2133.04	-0.01933154		2663.04	-0.01438169		3193.04	-0.00886491		3723.04	-0.03309191
543.19	0.04988693		1073.22	-0.00927299		1603.21	-0.00079329		2133.24	-0.02019433		2663.24	-0.01426286		3193.24	-0.0089121		3723.24	-0.03349148
543.39	0.05136013		1073.42	-0.00867846		1603.41	-0.00083992		2133.44	-0.01977096		2663.44	-0.01471729		3193.44	-0.00900715		3723.44	-0.03409264
543.59	0.05169877		1073.62	-0.00862052		1603.61	-0.00162605		2133.64	-0.01978533		2663.64	-0.01475115		3193.64	-0.00913717		3723.64	-0.03420629
543.79	0.05222095		1073.82	-0.00781966		1603.81	-0.00181847		2133.84	-0.01914658		2663.84	-0.01525362		3193.84	-0.0100703		3723.84	-0.03432523
543.99	0.05304273		1074.02	-0.00747761		1604.01	-0.0020142		2134.04	-0.01927332		2664.04	-0.01574337		3194.04	-0.01030695		3724.04	-0.03511707
544.19	0.05315905		1074.22	-0.00720796		1604.21	-0.00121161		2134.24	-0.0196011		2664.24	-0.01573128		3194.24	-0.0104756		3724.24	-0.03521773
544.39	0.05292755		1074.42	-0.00612917		1604.41	-0.00082407		2134.44	-0.0193864		2664.44	-0.01650636		3194.44	-0.01113554		3724.44	-0.03338843
544.59	0.05288522		1074.62	-0.00608062		1604.61	-0.00028187		2134.64	-0.01840443		2664.64	-0.01753505		3194.64	-0.01138255		3724.64	-0.03302337
544.79	0.05314459		1074.82	-0.00731989		1604.81	0.00045991		2134.84	-0.0177089		2664.84	-0.01750971		3194.84	-0.01238313		3724.84	-0.0318961
544.99	0.0543527		1075.02	-0.00658722		1605.01	0.00059469		2135.04	-0.01812194		2665.04	-0.01739255		3195.04	-0.01199356		3725.04	-0.03161078
545.19	0.05419468		1075.22	-0.00688805		1605.21	0.00047872		2135.24	-0.01671614		2665.24	-0.01778241		3195.24	-0.01214983		3725.24	-0.03195136
545.39	0.05445178		1075.42	-0.00662993		1605.41	0.00125022		2135.44	-0.01648279		2665.44	-0.01764227		3195.44	-0.01185051		3725.44	-0.03204076
545.59	0.05396992		1075.62	-0.00687745		1605.61	0.00223364		2135.64	-0.01705757		2665.64	-0.01682976		3195.64	-0.01103558		3725.64	-0.03158171
545.79	0.05271387		1075.82	-0.00687934		1605.81	0.00232626		2135.84	-0.01629415		2665.84	-0.01659947		3195.84	-0.01075676		3725.84	-0.03033573
545.99	0.05216121		1076.02	-0.00810391		1606.01	0.00319154		2136.04	-0.01640245		2666.04	-0.01605873		3196.04	-0.01082944		3726.04	-0.02988128
546.19	0.05084564		1076.22	-0.00815203		1606.21	0.0033879		2136.24	-0.0166504		2666.24	-0.01590143		3196.24	-0.01064567		3726.24	-0.03072969
546.39	0.04987234		1076.42	-0.0076905		1606.41	0.002258		2136.44	-0.01681473		2666.44	-0.01650865		3196.44	-0.00964844		3726.44	-0.02973415
546.59	0.0501476		1076.62	-0.00759921		1606.61	0.00147912		2136.64	-0.01680164		2666.64	-0.01594028		3196.64	-0.00895676		3726.64	-0.03006153
546.79	0.05004037		1076.82	-0.00833602		1606.81	0.00072372		2136.84	-0.01744248		2666.84	-0.01564918		3196.84	-0.00971375		3726.84	-0.03032751
546.99	0.05014955		1077.02	-0.00864284		1607.01	0.00091578		2137.04	-0.01716563		2667.04	-0.01579509		3197.04	-0.00999247		3727.04	-0.03070201
547.19	0.05071083		1077.22	-0.00931035		1607.21	0.00020077		2137.24	-0.0181217		2667.24	-0.0149679		3197.24	-0.0094504		3727.24	-0.03121065
547.39	0.05097205		1077.42	-0.0094261		1607.41	0.00002708		2137.44	-0.01823476		2667.44	-0.01508398		3197.44	-0.00938242		3727.44	-0.03172693
547.59	0.05036543		1077.62	-0.00930324		1607.61	0.00020821		2137.64	-0.01850602		2667.64	-0.01511339		3197.64	-0.00982384		3727.64	-0.03177613
547.79	0.04996831		1077.82	-0.00950911		1607.81	0.00048662		2137.84	-0.01919243		2667.84	-0.01525872		3197.84	-0.00994296		3727.84	-0.03172967
547.99	0.04970801		1078.02	-0.00938935		1608.01	0.0006769		2138.04	-0.01950529		2668.04	-0.01527543		3198.04	-0.00943776		3728.04	-0.03186312
548.19	0.04875446		1078.22	-0.00988737		1608.21	0.00069198		2138.24	-0.01827956		2668.24	-0.01501468		3198.24	-0.00965594		3728.24	-0.0322053
548.39	0.04787595		1078.42	-0.00968719		1608.41	-0.00030971		2138.44	-0.01826175		2668.44	-0.01572861		3198.44	-0.00957608		3728.44	-0.03188045
548.59	0.04672436		1078.62	-0.01082253		1608.61	-0.00039976		2138.64	-0.01747143		2668.64	-0.0155631		3198.64	-0.01009927		3728.64	-0.03299858
548.79	0.04675698		1078.82	-0.010439		1608.81	-0.00092803		2138.84	-0.01730449		2668.84	-0.01611815		3198.84	-0.01140152		3728.84	-0.0330702
548.99	0.04760797		1079.02	-0.00935261		1609.01	-0.0016407		2139.04	-0.01659272		2669.04	-0.01563434		3199.04	-0.01163039		3729.04	-0.0336767
549.19	0.04714441		1079.22	-0.01055429		1609.21	-0.00203254		2139.24	-0.0157304		2669.24	-0.01600314		3199.24	-0.01283036		3729.24	-0.03385822
549.39	0.04744776		1079.42	-0.01044361		1609.41	-0.0019228		2139.44	-0.01598625		2669.44	-0.01555729		3199.44	-0.01273036		3729.44	-0.03323048
549.59	0.04750772		1079.62	-0.01094092		1609.61	-0.00125945		2139.64	-0.01658463		2669.64	-0.01461475		3199.64	-0.01233668		3729.64	-0.03304896
549.79	0.04731227		1079.82	-0.011206		1609.81	-0.00097186		2139.84	-0.01611466		2669.84	-0.0141372		3199.84	-0.012136		3729.84	-0.03315932
549.99	0.04740178		1080.02	-0.0113692		1610.01	-0.00093735		2140.04	-0.0168951		2670.04	-0.01356643		3200.04	-0.01198472		3730.04	-0.03278222
550.19	0.04773343		1080.22	-0.01049859		1610.21	-0.00096408		2140.24	-0.01754419		2670.24	-0.01377219		3200.24	-0.01133019		3730.24	-0.03291789
550.39	0.0481312		1080.42	-0.01009256		1610.41	-0.00110333		2140.44	-0.01789857		2670.44	-0.01316453		3200.44	-0.01110206		3730.44	-0.03169533
550.59	0.04860036		1080.62	-0.01076361		1610.61	-0.00141773		2140.64	-0.01809152		2670.64	-0.01340389		3200.64	-0.01084464		3730.64	-0.03204621
550.79	0.04914414		1080.82	-0.01092221		1610.81	-0.00084374		2140.84	-0.01920022		2670.84	-0.01364299		3200.84	-0.01141072		3730.84	-0.03230629
550.99	0.04959185		1081.02	-0.0110776		1611.01	-0.00034575		2141.04	-0.02019812		2671.04	-0.01403338		3201.04	-0.01067282		3731.04	-0.03228568
551.19	0.04978165		1081.22	-0.01176986		1611.21	-0.00036193		2141.24	-0.02152666		2671.24	-0.01351677		3201.24	-0.00908654		3731.24	-0.03249946
551.39	0.04899139		1081.42	-0.01179913		1611.41	0.00027531		2141.44	-0.0220891		2671.44	-0.01386997		3201.44	-0.00901501		3731.44	-0.03222416
551.59	0.04906354		1081.62	-0.01157361		1611.61	0.00103338		2141.64	-0.02239362		2671.64	-0.01381015		3201.64	-0.00867518		3731.64	-0.0317252
551.79	0.04924407		1081.82	-0.01153411		1611.81	0.00132558		2141.84	-0.02302755		2671.84	-0.013801		3201.84	-0.00781854		3731.84	-0.03216079
551.99	0.04880641		1082.02	-0.01189861		1612.01	0.00157412		2142.04	-0.02221311		2672.04	-0.0133746		3202.04	-0.00760907		3732.04	-0.03190435
552.19	0.04804166		1082.22	-0.01209762		1612.21	0.00120171		2142.24	-0.02091303		2672.24	-0.01325765		3202.24	-0.00738815		3732.24	-0.0323875
552.39	0.04747319		1082.42	-0.01157728		1612.41	0.00121079		2142.44	-0.02061121		2672.44	-0.01369488		3202.44	-0.00716967		3732.44	-0.0323357
552.59	0.04775388		1082.62	-0.01074853		1612.61	0.00135855		2142.64	-0.01922528		2672.64	-0.01354251		3202.64	-0.0075926		3732.64	-0.03311835
552.79	0.04833493		1082.82	-0.01026427		1612.81	0.00098446		2142.84	-0.01927479		2672.84	-0.01431924		3202.84	-0.00815619		3732.84	-0.03230446
552.99	0.04920894		1083.02	-0.01048155		1613.01	0.00019287		2143.04	-0.01872567		2673.04	-0.01369682		3203.04	-0.00897207		3733.04	-0.0322554
553.19	0.04867836		1083.22	-0.01145097		1613.21	-0.00041209		2143.24	-0.01857799		2673.24	-0.01398394		3203.24	-0.00944553		3733.24	-0.03191893
553.39	0.04841053		1083.42	-0.011534		1613.41	-0.00119994		2143.44	-0.01841298		2673.44	-0.01353082		3203.44	-0.00946683		3733.44	-0.03138827
553.59	0.04806876		1083.62	-0.01191156		1613.61	-0.00128554		2143.64	-0.01808589		2673.64	-0.01346662		3203.64	-0.01062412		3733.64	-0.03110319
553.79	0.0474105		1083.82	-0.01220224		1613.81	-0.00187006		2143.84	-0.01759868		2673.84	-0.01314369		3203.84	-0.0105817		3733.84	-0.0308725
553.99	0.04714507		1084.02	-0.0120733		1614.01	-0.00213837		2144.04	-0.01659503		2674.04	-0.01316375		3204.04	-0.01106976		3734.04	-0.03110291
554.19	0.04736628		1084.22	-0.01204976		1614.21	-0.00139346		2144.24	-0.01748437		2674.24	-0.01408097		3204.24	-0.01130796		3734.24	-0.03112591
554.39	0.04738581		1084.42	-0.01132468		1614.41	-0.00152105		2144.44	-0.01652698		2674.44	-0.01393098		3204.44	-0.01181185		3734.44	-0.03065128
554.59	0.04712127		1084.62	-0.01187996		1614.61	-0.00216614		2144.64	-0.0172351		2674.64	-0.01483001		3204.64	-0.01197098		3734.64	-0.03112754
554.79	0.04735091		1084.82	-0.01146674		1614.81	-0.00222809		2144.84	-0.01860555		2674.84	-0.01476011		3204.84	-0.01312249		3734.84	-0.0318134
554.99	0.04758106		1085.02	-0.01112462		1615.01	-0.00280597		2145.04	-0.01960688		2675.04	-0.01501914		3205.04	-0.01349185		3735.04	-0.03140541
555.19	0.04749031		1085.22	-0.01085352		1615.21	-0.0021963		2145.24	-0.01953951		2675.24	-0.01509035		3205.24	-0.01416031		3735.24	-0.03179721
555.39	0.04725147		1085.42	-0.01096859		1615.41	-0.0018435		2145.44	-0.019378		2675.44	-0.01524518		3205.44	-0.01409287		3735.44	-0.03209046
555.59	0.04703545		1085.62	-0.01055504		1615.61	-0.00037549		2145.64	-0.01921851		2675.64	-0.01507872		3205.64	-0.01435453		3735.64	-0.03197502
555.79	0.04719527		1085.82	-0.01042206		1615.81	0.00023273		2145.84	-0.01952231		2675.84	-0.01523673		3205.84	-0.01376457		3735.84	-0.0328284
555.99	0.04756588		1086.02	-0.01113963		1616.01	0.00076257		2146.04	-0.01956654		2676.04	-0.01492082		3206.04	-0.01391325		3736.04	-0.03249329
556.19	0.04756899		1086.22	-0.01087066		1616.21	0.00071714		2146.24	-0.01944053		2676.24	-0.01454216		3206.24	-0.01386		3736.24	-0.03270559
556.39	0.04726859		1086.42	-0.01026068		1616.41	0.00190136		2146.44	-0.01906367		2676.44	-0.0154019		3206.44	-0.01330797		3736.44	-0.03356593
556.59	0.0480176		1086.62	-0.01085654		1616.61	0.00167852		2146.64	-0.01920148		2676.64	-0.01579564		3206.64	-0.01257047		3736.64	-0.03413701
556.79	0.04823104		1086.82	-0.012276		1616.81	0.00120305		2146.84	-0.02018343		2676.84	-0.01552991		3206.84	-0.01209364		3736.84	-0.0333222
556.99	0.04800889		1087.02	-0.01248058		1617.01	0.0007113		2147.04	-0.01913003		2677.04	-0.01542151		3207.04	-0.01198277		3737.04	-0.03433977
557.19	0.04738992		1087.22	-0.01320849		1617.21	0.0005571		2147.24	-0.01906262		2677.24	-0.01628558		3207.24	-0.01221255		3737.24	-0.03433822
557.39	0.04685235		1087.42	-0.01378452		1617.41	-0.00010641		2147.44	-0.01917084		2677.44	-0.01695459		3207.44	-0.01281975		3737.44	-0.0340957
557.59	0.04709194		1087.62	-0.01434184		1617.61	-0.00052562		2147.64	-0.01869128		2677.64	-0.01693118		3207.64	-0.01324172		3737.64	-0.03452699
557.79	0.04781847		1087.82	-0.01465466		1617.81	-0.00054981		2147.84	-0.01861831		2677.84	-0.01653564		3207.84	-0.01273231		3737.84	-0.03416255
557.99	0.0480987		1088.02	-0.01482603		1618.01	-0.0003356		2148.04	-0.01879765		2678.04	-0.01727694		3208.04	-0.01303121		3738.04	-0.03405056
558.19	0.04868456		1088.22	-0.01477004		1618.21	-0.00045256		2148.24	-0.01996774		2678.24	-0.01777814		3208.24	-0.01308005		3738.24	-0.03321087
558.39	0.04856538		1088.42	-0.01432477		1618.41	-0.00092222		2148.44	-0.01943144		2678.44	-0.01728537		3208.44	-0.01317259		3738.44	-0.03266864
558.59	0.0481673		1088.62	-0.01452112		1618.61	-0.00144162		2148.64	-0.02063143		2678.64	-0.01762793		3208.64	-0.01341786		3738.64	-0.03252069
558.79	0.04798879		1088.82	-0.01386879		1618.81	-0.00171937		2148.84	-0.02050704		2678.84	-0.01774168		3208.84	-0.01377583		3738.84	-0.03210031
558.99	0.04792881		1089.02	-0.01346353		1619.01	-0.00133088		2149.04	-0.02017435		2679.04	-0.01788302		3209.04	-0.01362739		3739.04	-0.03126481
559.19	0.04693337		1089.22	-0.01340537		1619.21	-0.00072412		2149.24	-0.01959783		2679.24	-0.01784894		3209.24	-0.01329933		3739.24	-0.03143347
559.39	0.04601188		1089.42	-0.01384034		1619.41	-0.00054081		2149.44	-0.01983589		2679.44	-0.01743484		3209.44	-0.01244		3739.44	-0.03134006
559.59	0.04513756		1089.62	-0.01318629		1619.61	-0.00008361		2149.64	-0.02019809		2679.64	-0.01700849		3209.64	-0.01257615		3739.64	-0.03107873
559.79	0.04461208		1089.82	-0.01288153		1619.81	-0.00065673		2149.84	-0.02066523		2679.84	-0.01697859		3209.84	-0.01179127		3739.84	-0.03158979
