# Supplementary material for: Functional development of a V3/glycan-specific broadly neutralizing antibody isolated from a case of HIV superinfection
Source: eLife journal article supplement (doi:10.7554/elife.68110), 2021-07-15
Supplement: fig2-data2 [file B7.xls]

Vers 3.43 Data Simulation
Conc1	1E-06	1E-06	1E-06	1E-06	1E-06	1E-06	1E-06	1E-06
Start1	200	729.99	1259.99	1789.98	2319.98	2849.98	3379.98	3909.98
Stop1	559.79	1089.79	1619.79	2149.78	2679.78	3209.78	3739.78	4269.78
Time1	Data1	Sim1	Time2	Data2	Sim2	Time3	Data3	Sim3	Time4	Data4	Sim4	Time5	Data5	Sim5	Time6	Data6	Sim6	Time7	Data7	Sim7	Time8	Data8	Sim8
200	0.00128265		729.99	0.00828277		1259.99	-0.00243552		1789.98	-0.00064242		2319.98	0.00470202		2849.98	0.0155888		3379.98	0.00645184		3909.98	0.00339388
200.2	0.00150098		730.19	0.00842503		1260.19	-0.00054301		1790.18	-0.00065082		2320.18	0.00484888		2850.18	0.01540442		3380.18	0.00661534		3910.18	0.00266567
200.4	0.0008153		730.39	0.00857496		1260.39	0.00096637		1790.38	-0.00176874		2320.38	0.00494409		2850.38	0.01536104		3380.38	0.00630533		3910.38	0.00092727
200.6	0.00073205		730.59	0.00858939		1260.59	0.00257874		1790.58	-0.00228473		2320.58	0.00521966		2850.58	0.01500338		3380.58	0.00613597		3910.58	-0.00001842
200.8	0.00121219		730.79	0.00865597		1260.79	0.00383177		1790.78	-0.002636		2320.78	0.00438006		2850.78	0.01495943		3380.78	0.0058473		3910.78	-0.00103912
201	0.00163534		730.99	0.00985607		1260.99	0.00587045		1790.98	-0.00255612		2320.98	0.00462802		2850.98	0.01471678		3380.98	0.00598374		3910.98	-0.00213194
201.2	0.00192906		731.19	0.01080002		1261.19	0.00634635		1791.18	-0.0026213		2321.18	0.00423861		2851.18	0.01464275		3381.18	0.00560935		3911.18	-0.00302492
201.4	0.00261504		731.39	0.01184542		1261.39	0.00684073		1791.38	-0.00283061		2321.38	0.00394146		2851.38	0.01488368		3381.38	0.00583643		3911.38	-0.00334913
201.6	0.00389262		731.59	0.01226599		1261.59	0.00770164		1791.58	-0.00287784		2321.58	0.00381613		2851.58	0.01482091		3381.58	0.00453515		3911.58	-0.00318587
201.8	0.00459198		731.79	0.01288719		1261.79	0.00700077		1791.78	-0.0028364		2321.78	0.00405147		2851.78	0.01501683		3381.78	0.00353008		3911.78	-0.00305609
202	0.00529216		731.99	0.01412828		1261.99	0.00664957		1791.98	-0.00334136		2321.98	0.00400767		2851.98	0.01584925		3381.98	0.00290042		3911.98	-0.00241458
202.2	0.00614836		732.19	0.01432914		1262.19	0.00604953		1792.18	-0.00276831		2322.18	0.00363045		2852.18	0.01672054		3382.18	0.00304446		3912.18	-0.00202597
202.4	0.00545305		732.39	0.01400622		1262.39	0.00582944		1792.38	-0.00242127		2322.38	0.00237458		2852.38	0.01742345		3382.38	0.00303958		3912.38	-0.00189605
202.6	0.00617484		732.59	0.01298227		1262.59	0.00684365		1792.58	-0.00261344		2322.58	0.00306049		2852.58	0.01770051		3382.58	0.00271017		3912.58	-0.00174538
202.8	0.0065929		732.79	0.01308109		1262.79	0.00750625		1792.78	-0.00167228		2322.78	0.00264295		2852.78	0.0186593		3382.78	0.00299074		3912.78	-0.00113824
203	0.00687312		732.99	0.01232986		1262.99	0.00764012		1792.98	-0.00037076		2322.98	0.00206607		2852.98	0.01992574		3382.98	0.00340709		3912.98	-0.00059471
203.2	0.00785515		733.19	0.01200942		1263.19	0.00682541		1793.18	-0.00086151		2323.18	0.00194766		2853.18	0.02088323		3383.18	0.00373634		3913.18	-0.00140873
203.4	0.00723925		733.39	0.01113784		1263.39	0.00792176		1793.38	-0.00039286		2323.38	0.00191807		2853.38	0.02202881		3383.38	0.00317776		3913.38	-0.00114315
203.6	0.00745713		733.59	0.01131454		1263.59	0.00798287		1793.58	-0.00069382		2323.58	0.00166362		2853.58	0.02346333		3383.58	0.00349786		3913.58	-0.00093736
203.8	0.00785138		733.79	0.01128121		1263.79	0.00762181		1793.78	-0.0008321		2323.78	0.00183698		2853.78	0.02501566		3383.78	0.00453552		3913.78	-0.00128963
204	0.00722859		733.99	0.0108882		1263.99	0.00691796		1793.98	-0.00148085		2323.98	0.00177974		2853.98	0.026675		3383.98	0.0047989		3913.98	-0.00229062
204.2	0.00685558		734.19	0.01147411		1264.19	0.00613054		1794.18	-0.00093422		2324.18	0.00173331		2854.18	0.02895201		3384.18	0.00576392		3914.18	-0.00322307
204.4	0.00677498		734.39	0.01182613		1264.39	0.00507377		1794.38	-0.00178882		2324.38	0.0019136		2854.38	0.03003895		3384.38	0.00649753		3914.38	-0.00436626
204.6	0.00723338		734.59	0.01246068		1264.59	0.00512948		1794.58	-0.00244888		2324.58	0.00190456		2854.58	0.03123053		3384.58	0.00776856		3914.58	-0.00487168
204.8	0.0082776		734.79	0.01333252		1264.79	0.00514768		1794.78	-0.00286587		2324.78	0.00178301		2854.78	0.03283223		3384.78	0.00876494		3914.78	-0.00539564
205	0.00832707		734.99	0.01402197		1264.99	0.00510665		1794.98	-0.00296699		2324.98	0.00249726		2854.98	0.03312142		3384.98	0.00957218		3914.98	-0.00673236
205.2	0.00939224		735.19	0.0144335		1265.19	0.00358268		1795.18	-0.00336241		2325.18	0.00256013		2855.18	0.03433005		3385.18	0.00926842		3915.18	-0.00698019
205.4	0.00928293		735.39	0.0148478		1265.39	0.00369172		1795.38	-0.00407127		2325.38	0.0028967		2855.38	0.03430982		3385.38	0.00887766		3915.38	-0.0072659
205.6	0.01006637		735.59	0.01480155		1265.59	0.00389109		1795.58	-0.00436973		2325.58	0.00401523		2855.58	0.03440066		3385.58	0.00759719		3915.58	-0.0072654
205.8	0.01017048		735.79	0.01540674		1265.79	0.00287749		1795.78	-0.00472867		2325.78	0.00456244		2855.78	0.03441593		3385.78	0.00759776		3915.78	-0.00811176
206	0.01034576		735.99	0.01595602		1265.99	0.00395749		1795.98	-0.00450108		2325.98	0.00443488		2855.98	0.03492329		3385.98	0.00806009		3915.98	-0.00816521
206.2	0.01055625		736.19	0.01474582		1266.19	0.00523388		1796.18	-0.00394567		2326.18	0.00384171		2856.18	0.03492515		3386.18	0.00822797		3916.18	-0.00804478
206.4	0.01005476		736.39	0.01424359		1266.39	0.0065711		1796.38	-0.00276398		2326.38	0.00329718		2856.38	0.03592657		3386.38	0.00796611		3916.38	-0.0079697
206.6	0.01013575		736.59	0.01311632		1266.59	0.00789816		1796.58	-0.00191752		2326.58	0.00467902		2856.58	0.03662588		3386.58	0.00712914		3916.58	-0.00723082
206.8	0.01000579		736.79	0.01378936		1266.79	0.0085335		1796.78	-0.00146449		2326.78	0.00454991		2856.78	0.03857701		3386.78	0.00671071		3916.78	-0.00653634
207	0.00992273		736.99	0.01370275		1266.99	0.01025541		1796.98	-0.00098573		2326.98	0.00389774		2856.98	0.03931367		3386.98	0.00748353		3916.98	-0.00606166
207.2	0.01003195		737.19	0.0130649		1267.19	0.01129011		1797.18	-0.00209189		2327.18	0.00371042		2857.18	0.03994693		3387.18	0.00675826		3917.18	-0.00630338
207.4	0.00927846		737.39	0.01222642		1267.39	0.01267079		1797.38	-0.00180356		2327.38	0.00390231		2857.38	0.04112335		3387.38	0.00574303		3917.38	-0.00537223
207.6	0.00894529		737.59	0.01180434		1267.59	0.01294711		1797.58	-0.00203306		2327.58	0.00395054		2857.58	0.04201858		3387.58	0.00592781		3917.58	-0.004874
207.8	0.00922673		737.79	0.0111313		1267.79	0.01289096		1797.78	-0.00128906		2327.78	0.00419318		2857.78	0.04322883		3387.78	0.00607783		3917.78	-0.0053279
208	0.00902647		737.99	0.01148585		1267.99	0.01277829		1797.98	-0.00098566		2327.98	0.00380207		2857.98	0.04416891		3387.98	0.00576376		3917.98	-0.00453317
208.2	0.00894109		738.19	0.01140365		1268.19	0.01140703		1798.18	-0.00049552		2328.18	0.00393549		2858.18	0.04534297		3388.18	0.00550619		3918.18	-0.00434598
208.4	0.00990161		738.39	0.01187313		1268.39	0.01100488		1798.38	-0.00109013		2328.38	0.00473		2858.38	0.04573293		3388.38	0.0062697		3918.38	-0.00381362
208.6	0.00947007		738.59	0.01208336		1268.59	0.01066227		1798.58	-0.00158708		2328.58	0.00492913		2858.58	0.04640883		3388.58	0.00615965		3918.58	-0.00344767
208.8	0.01019675		738.79	0.01212572		1268.79	0.00953832		1798.78	-0.00219251		2328.78	0.00473001		2858.78	0.0464862		3388.78	0.00646389		3918.78	-0.00355328
209	0.01079391		738.99	0.0120259		1268.99	0.00831491		1798.98	-0.00211899		2328.98	0.00459876		2858.98	0.04630679		3388.98	0.00628632		3918.98	-0.00453591
209.2	0.01153827		739.19	0.01247363		1269.19	0.00708988		1799.18	-0.00315618		2329.18	0.00527949		2859.18	0.04747067		3389.18	0.00532225		3919.18	-0.00460858
209.4	0.01090277		739.39	0.0132107		1269.39	0.00706465		1799.38	-0.00345643		2329.38	0.00565866		2859.38	0.0463334		3389.38	0.00479267		3919.38	-0.00489982
209.6	0.01253045		739.59	0.01393578		1269.59	0.00559844		1799.58	-0.00349771		2329.58	0.00585024		2859.58	0.04644045		3389.58	0.00422797		3919.58	-0.00501777
209.8	0.01294667		739.79	0.01450911		1269.79	0.00488479		1799.78	-0.0040298		2329.78	0.00474166		2859.78	0.04630543		3389.78	0.00377838		3919.78	-0.00614784
210	0.01310701		739.99	0.01509838		1269.99	0.0052754		1799.98	-0.00353604		2329.98	0.00454476		2859.98	0.04696681		3389.98	0.00373372		3919.98	-0.00609106
210.2	0.01286088		740.19	0.01433731		1270.19	0.00519411		1800.18	-0.00258077		2330.18	0.00340025		2860.18	0.0479037		3390.18	0.00305217		3920.18	-0.00556792
210.4	0.01283792		740.39	0.01363399		1270.39	0.0053042		1800.38	-0.00142507		2330.38	0.00254494		2860.38	0.04828096		3390.38	0.00316003		3920.38	-0.00634394
210.6	0.0130097		740.59	0.01373213		1270.59	0.00562869		1800.58	-0.00210538		2330.58	0.00162063		2860.58	0.04861915		3390.58	0.00332543		3920.58	-0.0061208
210.8	0.0127756		740.79	0.01354167		1270.79	0.00656452		1800.78	-0.00302775		2330.78	0.00035268		2860.78	0.04933424		3390.78	0.00422114		3920.78	-0.00652962
211	0.01167542		740.99	0.01367447		1270.99	0.00756841		1800.98	-0.00242807		2330.98	-0.00107574		2860.98	0.04926674		3390.98	0.00456962		3920.98	-0.00590104
211.2	0.01183221		741.19	0.01328108		1271.19	0.00750602		1801.18	-0.00320697		2331.18	-0.00108648		2861.18	0.0498388		3391.18	0.00401519		3921.18	-0.00617289
211.4	0.01088512		741.39	0.01308284		1271.39	0.00824678		1801.38	-0.00222115		2331.38	-0.00102965		2861.38	0.05089627		3391.38	0.00471725		3921.38	-0.00599762
211.6	0.01024599		741.59	0.01366435		1271.59	0.00847925		1801.58	-0.00159415		2331.58	-0.00102915		2861.58	0.05150527		3391.58	0.00479959		3921.58	-0.0064964
211.8	0.01049991		741.79	0.01458264		1271.79	0.00888946		1801.78	-0.00109222		2331.78	-0.00050528		2861.78	0.05397633		3391.78	0.00548449		3921.78	-0.00648525
212	0.01063704		741.99	0.01527674		1271.99	0.00836001		1801.98	-0.00094856		2331.98	-0.00027282		2861.98	0.05535457		3391.98	0.00550518		3921.98	-0.00596024
212.2	0.01016558		742.19	0.01556525		1272.19	0.00824715		1802.18	-0.00108968		2332.18	0.00043737		2862.18	0.05669154		3392.18	0.00616422		3922.18	-0.00666879
212.4	0.00959439		742.39	0.01626627		1272.39	0.00825979		1802.38	-0.00094096		2332.38	0.00150953		2862.38	0.05780936		3392.38	0.00693735		3922.38	-0.00698059
212.6	0.00990247		742.59	0.0162495		1272.59	0.00798754		1802.58	-0.00020974		2332.58	0.00110308		2862.58	0.05834055		3392.58	0.00702494		3922.58	-0.00711968
212.8	0.01102152		742.79	0.01667823		1272.79	0.00832817		1802.78	-0.00078625		2332.78	0.0012634		2862.78	0.05979231		3392.78	0.00718412		3922.78	-0.00746655
213	0.01190533		742.99	0.01718714		1272.99	0.00829828		1802.98	0.00013723		2332.98	0.00247831		2862.98	0.06076616		3392.98	0.00674066		3922.98	-0.00779315
213.2	0.01233467		743.19	0.01713315		1273.19	0.00790793		1803.18	0.000048		2333.18	0.00410408		2863.18	0.06169495		3393.18	0.00603282		3923.18	-0.00748734
213.4	0.01248115		743.39	0.01748086		1273.39	0.00834771		1803.38	0.0012295		2333.38	0.00500486		2863.38	0.06112693		3393.38	0.00598496		3923.38	-0.0076829
213.6	0.01366414		743.59	0.0163702		1273.59	0.00728016		1803.58	0.00098796		2333.58	0.00502155		2863.58	0.06189708		3393.58	0.00514296		3923.58	-0.00800624
213.8	0.01341299		743.79	0.01610139		1273.79	0.00823542		1803.78	0.00112834		2333.78	0.004776		2863.78	0.06199654		3393.78	0.00472771		3923.78	-0.00817805
214	0.01395073		743.99	0.01545841		1273.99	0.00860745		1803.98	0.00154502		2333.98	0.00488034		2863.98	0.06194753		3393.98	0.00391091		3923.98	-0.00785982
214.2	0.01426247		744.19	0.01393291		1274.19	0.00876782		1804.18	0.00205953		2334.18	0.00380124		2864.18	0.0624439		3394.18	0.00316796		3924.18	-0.00779187
214.4	0.01510429		744.39	0.01223269		1274.39	0.0090113		1804.38	0.0004926		2334.38	0.00303436		2864.38	0.06187256		3394.38	0.00326939		3924.38	-0.00779051
214.6	0.0150738		744.59	0.01220811		1274.59	0.00952263		1804.58	-0.00037843		2334.58	0.00238313		2864.58	0.06130434		3394.58	0.00301295		3924.58	-0.00721715
214.8	0.01415408		744.79	0.01167713		1274.79	0.01005697		1804.78	-0.00126409		2334.78	0.00207446		2864.78	0.06077108		3394.78	0.00237218		3924.78	-0.00657375
215	0.01406051		744.99	0.0112547		1274.99	0.00960685		1804.98	-0.00130722		2334.98	0.00162598		2864.98	0.06079683		3394.98	0.00247788		3924.98	-0.00623752
215.2	0.01477519		745.19	0.01091884		1275.19	0.00981992		1805.18	-0.00165295		2335.18	0.00178278		2865.18	0.06037271		3395.18	0.00234702		3925.18	-0.00688274
215.4	0.01405507		745.39	0.01124225		1275.39	0.00934645		1805.38	-0.00164261		2335.38	0.00149732		2865.38	0.0606497		3395.38	0.00263383		3925.38	-0.00777972
215.6	0.01444202		745.59	0.01229585		1275.59	0.00838322		1805.58	-0.00290774		2335.58	0.00196591		2865.58	0.0613463		3395.58	0.00295964		3925.58	-0.00708772
215.8	0.01406397		745.79	0.01243684		1275.79	0.0084241		1805.78	-0.00367086		2335.78	0.00225139		2865.78	0.06240841		3395.78	0.00347156		3925.78	-0.00674637
216	0.0143898		745.99	0.01243844		1275.99	0.00744926		1805.98	-0.00425462		2335.98	0.00173856		2865.98	0.06326029		3395.98	0.00415901		3925.98	-0.00769167
216.2	0.01369896		746.19	0.0128517		1276.19	0.00700727		1806.18	-0.00456971		2336.18	0.00195441		2866.18	0.06458848		3396.18	0.00480446		3926.18	-0.00799883
216.4	0.01365004		746.39	0.01271175		1276.39	0.00628171		1806.38	-0.00407797		2336.38	0.00154076		2866.38	0.06587948		3396.38	0.00441223		3926.38	-0.00787417
216.6	0.01396102		746.59	0.01321208		1276.59	0.00594899		1806.58	-0.00293966		2336.58	0.00122213		2866.58	0.0657849		3396.58	0.00523821		3926.58	-0.00797452
216.8	0.01411282		746.79	0.01323637		1276.79	0.00662223		1806.78	-0.00306363		2336.78	0.00163529		2866.78	0.06743013		3396.78	0.00536307		3926.78	-0.00733078
217	0.01435573		746.99	0.01351827		1276.99	0.0061343		1806.98	-0.00217741		2336.98	0.0017985		2866.98	0.06759973		3396.98	0.006354		3926.98	-0.00767681
217.2	0.01371822		747.19	0.01370423		1277.19	0.00671172		1807.18	-0.00165847		2337.18	0.00233789		2867.18	0.06847125		3397.18	0.00677529		3927.18	-0.00724742
217.4	0.01379614		747.39	0.01344293		1277.39	0.00780411		1807.38	-0.00122811		2337.38	0.00250056		2867.38	0.06862559		3397.38	0.00644402		3927.38	-0.0083452
217.6	0.01451617		747.59	0.01324724		1277.59	0.00800491		1807.58	-0.001697		2337.58	0.00246031		2867.58	0.0686064		3397.58	0.00609035		3927.58	-0.00793755
217.8	0.0139314		747.79	0.01383969		1277.79	0.00971404		1807.78	-0.00118612		2337.78	0.00202505		2867.78	0.06900042		3397.78	0.00510292		3927.78	-0.00820877
218	0.01438624		747.99	0.01338085		1277.99	0.0093831		1807.98	-0.00085601		2337.98	0.00243471		2867.98	0.06968292		3397.98	0.00512598		3927.98	-0.00806958
218.2	0.01432565		748.19	0.01265051		1278.19	0.00966325		1808.18	-0.00030926		2338.18	0.00189529		2868.18	0.07081924		3398.18	0.00498083		3928.18	-0.00757885
218.4	0.01425866		748.39	0.01235398		1278.39	0.00964917		1808.38	-0.00109757		2338.38	0.00155073		2868.38	0.07113294		3398.38	0.00557452		3928.38	-0.00645627
218.6	0.01319343		748.59	0.01223814		1278.59	0.01074711		1808.58	0.00054321		2338.58	0.00119856		2868.58	0.07104108		3398.58	0.00514579		3928.58	-0.00672429
218.8	0.01281555		748.79	0.01256245		1278.79	0.01096336		1808.78	0.0005574		2338.78	0.00141422		2868.78	0.07177332		3398.78	0.0051542		3928.78	-0.00722193
219	0.01295935		748.99	0.01189308		1278.99	0.0106161		1808.98	0.00007855		2338.98	0.00183326		2868.98	0.07165768		3398.98	0.00583456		3928.98	-0.00853248
219.2	0.01308971		749.19	0.01264403		1279.19	0.01096211		1809.18	-0.00047937		2339.18	0.00172703		2869.18	0.07182304		3399.18	0.00605748		3929.18	-0.00928212
219.4	0.01313222		749.39	0.01320552		1279.39	0.01018923		1809.38	-0.00082515		2339.38	0.0024162		2869.38	0.07298716		3399.38	0.00635314		3929.38	-0.00853694
219.6	0.01316672		749.59	0.01350688		1279.59	0.00965402		1809.58	-0.00157225		2339.58	0.00235511		2869.58	0.07353659		3399.58	0.00602742		3929.58	-0.00829188
219.8	0.01343111		749.79	0.01358124		1279.79	0.00972393		1809.78	-0.00205477		2339.78	0.00204939		2869.78	0.07395551		3399.78	0.0061151		3929.78	-0.00900278
220	0.01409904		749.99	0.01381783		1279.99	0.00926605		1809.98	-0.00311851		2339.98	0.00291094		2869.98	0.07466031		3399.98	0.00687531		3929.98	-0.01014926
220.2	0.01369074		750.19	0.01471232		1280.19	0.00852764		1810.18	-0.00329999		2340.18	0.00336668		2870.18	0.07488136		3400.18	0.00697227		3930.18	-0.0098574
220.4	0.01385187		750.39	0.01491938		1280.39	0.00882385		1810.38	-0.00323358		2340.38	0.00337527		2870.38	0.07509732		3400.38	0.00733138		3930.38	-0.01003919
220.6	0.01377459		750.59	0.0155671		1280.59	0.0086793		1810.58	-0.00293879		2340.58	0.00302702		2870.58	0.0742223		3400.58	0.00728667		3930.58	-0.01049031
220.8	0.01447742		750.79	0.01607996		1280.79	0.00980769		1810.78	-0.00348814		2340.78	0.00279711		2870.78	0.07518441		3400.78	0.00809215		3930.78	-0.01040909
221	0.01464501		750.99	0.01696008		1280.99	0.01002918		1810.98	-0.00364716		2340.98	0.00212431		2870.98	0.07488722		3400.98	0.00798016		3930.98	-0.01068391
221.2	0.01438542		751.19	0.01718749		1281.19	0.01035301		1811.18	-0.00406134		2341.18	0.00208189		2871.18	0.07489212		3401.18	0.00731002		3931.18	-0.01042782
221.4	0.01544348		751.39	0.01661521		1281.39	0.01042752		1811.38	-0.00420753		2341.38	0.00164875		2871.38	0.0744177		3401.38	0.00701034		3931.38	-0.01078379
221.6	0.01592833		751.59	0.01638048		1281.59	0.00956184		1811.58	-0.00362574		2341.58	0.00155215		2871.58	0.0752561		3401.58	0.007224		3931.58	-0.01029097
221.8	0.01614878		751.79	0.01605706		1281.79	0.00917892		1811.78	-0.002002		2341.78	0.00155828		2871.78	0.0761816		3401.78	0.00597265		3931.78	-0.00957201
222	0.01599634		751.99	0.01574845		1281.99	0.00835358		1811.98	-0.00160847		2341.98	0.00115664		2871.98	0.07638394		3401.98	0.00710169		3931.98	-0.0090671
222.2	0.01541408		752.19	0.01569712		1282.19	0.00782446		1812.18	-0.00123757		2342.18	0.00064342		2872.18	0.07720927		3402.18	0.00675531		3932.18	-0.00870024
222.4	0.01509304		752.39	0.01602349		1282.39	0.00806626		1812.38	-0.00101004		2342.38	0.00061442		2872.38	0.07758345		3402.38	0.00721436		3932.38	-0.00815689
222.6	0.01437721		752.59	0.01561293		1282.59	0.00710517		1812.58	0.00050776		2342.58	0.00035644		2872.58	0.07773686		3402.58	0.00660076		3932.58	-0.00919229
222.8	0.01523894		752.79	0.01619494		1282.79	0.00571195		1812.78	-0.00103723		2342.78	0.00091034		2872.78	0.07909587		3402.78	0.00671965		3932.78	-0.00926568
223	0.01503977		752.99	0.01526946		1282.99	0.00518457		1812.98	-0.00226785		2342.98	0.00049859		2872.98	0.07927195		3402.98	0.00734773		3932.98	-0.00995039
223.2	0.01564458		753.19	0.01477336		1283.19	0.00471514		1813.18	-0.00238613		2343.18	-0.00044151		2873.18	0.08107933		3403.18	0.00792435		3933.18	-0.00928159
223.4	0.01622721		753.39	0.01425839		1283.39	0.00374164		1813.38	-0.0021544		2343.38	-0.00046049		2873.38	0.08176352		3403.38	0.0075647		3933.38	-0.00896537
223.6	0.0160798		753.59	0.01445485		1283.59	0.00408524		1813.58	-0.0027467		2343.58	-0.00073923		2873.58	0.08206297		3403.58	0.00786465		3933.58	-0.00958794
223.8	0.01681481		753.79	0.014415		1283.79	0.00465633		1813.78	-0.0032636		2343.78	0.00025266		2873.78	0.08250568		3403.78	0.00867859		3933.78	-0.00973536
224	0.01722493		753.99	0.01375159		1283.99	0.00483366		1813.98	-0.00378353		2343.98	0.00139265		2873.98	0.08236789		3403.98	0.00852569		3933.98	-0.01020474
224.2	0.01705574		754.19	0.01447196		1284.19	0.00511219		1814.18	-0.00382429		2344.18	0.00150293		2874.18	0.08276622		3404.18	0.008656		3934.18	-0.01006031
224.4	0.0166808		754.39	0.01405768		1284.39	0.00579672		1814.38	-0.00393419		2344.38	0.0014592		2874.38	0.08285553		3404.38	0.00882854		3934.38	-0.01035143
224.6	0.0166294		754.59	0.01412715		1284.59	0.00687966		1814.58	-0.0037228		2344.58	0.00038079		2874.58	0.08251834		3404.58	0.00863663		3934.58	-0.01105194
224.8	0.01682344		754.79	0.01431208		1284.79	0.00843985		1814.78	-0.00335372		2344.78	0.00080467		2874.78	0.0825815		3404.78	0.00906844		3934.78	-0.0096354
225	0.01684724		754.99	0.01396907		1284.99	0.00879259		1814.98	-0.00310955		2344.98	0.0005471		2874.98	0.08248467		3404.98	0.00770691		3934.98	-0.00874705
225.2	0.01703426		755.19	0.01395899		1285.19	0.00858158		1815.18	-0.00224988		2345.18	0.00097594		2875.18	0.08264756		3405.18	0.00741612		3935.18	-0.00764385
225.4	0.01654948		755.39	0.01454237		1285.39	0.00894563		1815.38	-0.00055532		2345.38	0.00080407		2875.38	0.0825216		3405.38	0.00715525		3935.38	-0.00791386
225.6	0.01626386		755.59	0.01459752		1285.59	0.00854997		1815.58	-0.00004443		2345.58	0.00130381		2875.58	0.08322841		3405.58	0.00611236		3935.58	-0.00761396
225.8	0.01627256		755.79	0.01503078		1285.79	0.00854519		1815.78	0.00112553		2345.78	0.00122268		2875.78	0.08363015		3405.78	0.00484725		3935.78	-0.00722492
226	0.01529763		755.99	0.01543194		1285.99	0.00849583		1815.98	0.00158454		2345.98	0.0002669		2875.98	0.0850869		3405.98	0.0047128		3935.98	-0.0070882
226.2	0.01522682		756.19	0.01571402		1286.19	0.00787141		1816.18	0.00151591		2346.18	0.00037463		2876.18	0.08626363		3406.18	0.00365969		3936.18	-0.00615058
226.4	0.01579422		756.39	0.01588646		1286.39	0.00798516		1816.38	0.00158898		2346.38	-0.00040096		2876.38	0.08680576		3406.38	0.00358779		3936.38	-0.00573477
226.6	0.01685561		756.59	0.0163842		1286.59	0.00640539		1816.58	0.00173948		2346.58	-0.00118284		2876.58	0.08726502		3406.58	0.00302266		3936.58	-0.00602824
226.8	0.01733378		756.79	0.0160046		1286.79	0.00609817		1816.78	0.00161836		2346.78	-0.00178703		2876.78	0.08876413		3406.78	0.00361293		3936.78	-0.00625209
227	0.01717818		756.99	0.01576797		1286.99	0.00521193		1816.98	0.00242688		2346.98	-0.00264611		2876.98	0.08882399		3406.98	0.00456074		3936.98	-0.00764233
227.2	0.0179627		757.19	0.01589325		1287.19	0.0050111		1817.18	0.00261224		2347.18	-0.00265034		2877.18	0.09019331		3407.18	0.00471081		3937.18	-0.00768487
227.4	0.01904995		757.39	0.01579221		1287.39	0.00494801		1817.38	0.00217969		2347.38	-0.00274401		2877.38	0.09068958		3407.38	0.00524033		3937.38	-0.00726564
227.6	0.01854246		757.59	0.01593479		1287.59	0.00519304		1817.58	0.00154569		2347.58	-0.00170996		2877.58	0.09090801		3407.58	0.00535459		3937.58	-0.00715188
227.8	0.0192114		757.79	0.01522879		1287.79	0.00545731		1817.78	0.00086874		2347.78	-0.00145984		2877.78	0.09135916		3407.78	0.00572835		3937.78	-0.00808481
228	0.01976651		757.99	0.01539464		1287.99	0.00511311		1817.98	0.00046735		2347.98	-0.00074667		2877.98	0.09081919		3407.98	0.00611226		3937.98	-0.00835023
228.2	0.01898285		758.19	0.01558729		1288.19	0.00547117		1818.18	-0.00090141		2348.18	-0.00058997		2878.18	0.08996779		3408.18	0.00726395		3938.18	-0.00847507
228.4	0.01835422		758.39	0.01505837		1288.39	0.00538166		1818.38	-0.00069853		2348.38	-0.00027372		2878.38	0.08916181		3408.38	0.0081684		3938.38	-0.00837878
228.6	0.01831616		758.59	0.01529436		1288.59	0.00507305		1818.58	-0.00043277		2348.58	-0.00025448		2878.58	0.08891821		3408.58	0.00833801		3938.58	-0.00856189
228.8	0.01776049		758.79	0.01583723		1288.79	0.00517598		1818.78	-0.00050794		2348.78	0.0004544		2878.78	0.0884791		3408.78	0.00846227		3938.78	-0.00781019
229	0.01738677		758.99	0.01642694		1288.99	0.00512501		1818.98	-0.00045206		2348.98	0.00107011		2878.98	0.08834812		3408.98	0.00856756		3938.98	-0.00849804
229.2	0.01659808		759.19	0.01742396		1289.19	0.0055974		1819.18	-0.00023601		2349.18	0.0019631		2879.18	0.0882423		3409.18	0.0086238		3939.18	-0.00852756
229.4	0.01613402		759.39	0.01744152		1289.39	0.00651502		1819.38	-0.00050485		2349.38	0.0019991		2879.38	0.08857187		3409.38	0.00829408		3939.38	-0.00885665
229.6	0.01560387		759.59	0.0168592		1289.59	0.00640629		1819.58	-0.00119569		2349.58	0.00191415		2879.58	0.08950748		3409.58	0.00736256		3939.58	-0.00769392
229.8	0.01592558		759.79	0.0168465		1289.79	0.00665164		1819.78	-0.00041098		2349.78	0.00179596		2879.78	0.09024037		3409.78	0.00753801		3939.78	-0.0083072
230	0.01552673		759.99	0.01694091		1289.99	0.00640748		1819.98	-0.00047411		2349.98	0.00124058		2879.98	0.09055845		3409.98	0.0076537		3939.98	-0.00803388
230.2	0.01615981		760.19	0.01624131		1290.19	0.00663575		1820.18	-0.00163416		2350.18	0.00107257		2880.18	0.09059031		3410.18	0.00713031		3940.18	-0.00889416
230.4	0.01741353		760.39	0.01663297		1290.39	0.00612785		1820.38	-0.00099616		2350.38	0.00108669		2880.38	0.09048714		3410.38	0.00754832		3940.38	-0.00906224
230.6	0.01856543		760.59	0.01725018		1290.59	0.00584539		1820.58	-0.00028078		2350.58	0.00053489		2880.58	0.09075964		3410.58	0.00659226		3940.58	-0.00946447
230.8	0.01838854		760.79	0.01711409		1290.79	0.00635604		1820.78	0.00087382		2350.78	-0.00000598		2880.78	0.09162538		3410.78	0.00707293		3940.78	-0.01020678
231	0.01865388		760.99	0.01756723		1290.99	0.00688508		1820.98	0.00112002		2350.98	0.00025937		2880.98	0.09230591		3410.98	0.00672136		3940.98	-0.01101619
231.2	0.01889379		761.19	0.01734416		1291.19	0.00732647		1821.18	0.0005619		2351.18	0.00037905		2881.18	0.09304094		3411.18	0.00643302		3941.18	-0.01081575
231.4	0.01878703		761.39	0.01721013		1291.39	0.00730239		1821.38	-0.00024948		2351.38	0.00035021		2881.38	0.09368934		3411.38	0.00676188		3941.38	-0.01042208
231.6	0.01809755		761.59	0.01675325		1291.59	0.00676773		1821.58	0.00013351		2351.58	0.00086589		2881.58	0.09372733		3411.58	0.00656775		3941.58	-0.01116324
231.8	0.01884698		761.79	0.01625444		1291.79	0.00665693		1821.78	0.00062093		2351.78	0.0008347		2881.78	0.09387214		3411.78	0.00682203		3941.78	-0.01138899
232	0.01825028		761.99	0.01668904		1291.99	0.00556036		1821.98	0.00094827		2351.98	0.00138405		2881.98	0.0931815		3411.98	0.00789684		3941.98	-0.01076374
232.2	0.01795669		762.19	0.01590357		1292.19	0.00494538		1822.18	0.0002458		2352.18	0.00068207		2882.18	0.09331297		3412.18	0.00799478		3942.18	-0.0104797
232.4	0.01705879		762.39	0.01653009		1292.39	0.00427339		1822.38	0.00115132		2352.38	0.00056679		2882.38	0.09415152		3412.38	0.00749342		3942.38	-0.01092355
232.6	0.01625704		762.59	0.01676056		1292.59	0.00448527		1822.58	0.0010051		2352.58	0.00062437		2882.58	0.09481089		3412.58	0.00799726		3942.58	-0.01095737
232.8	0.01557883		762.79	0.01737122		1292.79	0.00513898		1822.78	0.00042876		2352.78	-0.00017253		2882.78	0.09576148		3412.78	0.00831483		3942.78	-0.01070665
233	0.01592282		762.99	0.01760142		1292.99	0.00549469		1822.98	0.00064287		2352.98	0.0011932		2882.98	0.09615157		3412.98	0.00797884		3942.98	-0.00957008
233.2	0.01626013		763.19	0.01843986		1293.19	0.00542895		1823.18	0.00028637		2353.18	0.00171244		2883.18	0.09695719		3413.18	0.0085643		3943.18	-0.00871693
233.4	0.01617472		763.39	0.01783365		1293.39	0.00544383		1823.38	-0.00035377		2353.38	0.00046831		2883.38	0.09778713		3413.38	0.00933274		3943.38	-0.00745003
233.6	0.01534989		763.59	0.01766329		1293.59	0.00548227		1823.58	-0.00079335		2353.58	0.00010198		2883.58	0.09764336		3413.58	0.01010838		3943.58	-0.00711728
233.8	0.01642221		763.79	0.0186683		1293.79	0.00611043		1823.78	-0.00200211		2353.78	-0.00051101		2883.78	0.09715626		3413.78	0.01086806		3943.78	-0.00808792
234	0.0167547		763.99	0.01830001		1293.99	0.00585577		1823.98	-0.00266997		2353.98	-0.00077167		2883.98	0.09731756		3413.98	0.01124291		3943.98	-0.00745668
234.2	0.01761807		764.19	0.01830861		1294.19	0.0061489		1824.18	-0.0045798		2354.18	-0.00061579		2884.18	0.09745783		3414.18	0.01017412		3944.18	-0.00768699
234.4	0.01851998		764.39	0.01888768		1294.39	0.0063154		1824.38	-0.00417837		2354.38	-0.00041063		2884.38	0.09712671		3414.38	0.01097796		3944.38	-0.00771455
234.6	0.01911147		764.59	0.01964089		1294.59	0.00739545		1824.58	-0.00436336		2354.58	-0.00102072		2884.58	0.09756571		3414.58	0.010551		3944.58	-0.00844564
234.8	0.01927599		764.79	0.01928021		1294.79	0.00837356		1824.78	-0.00528893		2354.78	-0.00006042		2884.78	0.09743359		3414.78	0.01029033		3944.78	-0.00905752
235	0.01950052		764.99	0.01860747		1294.99	0.00789612		1824.98	-0.00617741		2354.98	0.00082327		2884.98	0.09687221		3414.98	0.00960742		3944.98	-0.00969568
235.2	0.02017558		765.19	0.01776787		1295.19	0.00806059		1825.18	-0.0059566		2355.18	0.00088833		2885.18	0.09668017		3415.18	0.00931641		3945.18	-0.01018585
235.4	0.02034595		765.39	0.01738337		1295.39	0.00893877		1825.38	-0.00505396		2355.38	0.00095998		2885.38	0.0963097		3415.38	0.0089574		3945.38	-0.01058511
235.6	0.02161175		765.59	0.01615524		1295.59	0.00805167		1825.58	-0.00388994		2355.58	0.00100743		2885.58	0.09664923		3415.58	0.00884676		3945.58	-0.01138139
235.8	0.0217743		765.79	0.01445213		1295.79	0.00763837		1825.78	-0.00288		2355.78	0.00074385		2885.78	0.09670575		3415.78	0.0083318		3945.78	-0.01191659
236	0.02185453		765.99	0.01454163		1295.99	0.00727521		1825.98	-0.0029663		2355.98	-0.00017457		2885.98	0.09776502		3415.98	0.00889066		3945.98	-0.01168676
236.2	0.02148895		766.19	0.01386564		1296.19	0.00658557		1826.18	-0.00246304		2356.18	-0.00025812		2886.18	0.09902113		3416.18	0.00787749		3946.18	-0.01116636
236.4	0.0208082		766.39	0.01405381		1296.39	0.00677447		1826.38	-0.00106567		2356.38	-0.00036447		2886.38	0.10065362		3416.38	0.00755241		3946.38	-0.01125566
236.6	0.02045386		766.59	0.01356494		1296.59	0.00736687		1826.58	-0.00038377		2356.58	-0.00000986		2886.58	0.10181069		3416.58	0.00776042		3946.58	-0.01039121
236.8	0.02035917		766.79	0.0140406		1296.79	0.0064272		1826.78	0.00013275		2356.78	-0.00052317		2886.78	0.10344841		3416.78	0.00686401		3946.78	-0.0100668
237	0.02009047		766.99	0.0143289		1296.99	0.00634153		1826.98	0.00015869		2356.98	0.00092674		2886.98	0.10408066		3416.98	0.00682618		3946.98	-0.00944894
237.2	0.019286		767.19	0.01473315		1297.19	0.00549213		1827.18	0.00028299		2357.18	-0.00000517		2887.18	0.10523879		3417.18	0.00760561		3947.18	-0.00918534
237.4	0.01827718		767.39	0.01441257		1297.39	0.00642021		1827.38	0.00006448		2357.38	-0.00121908		2887.38	0.10601661		3417.38	0.00856448		3947.38	-0.00861002
237.6	0.01675654		767.59	0.01489878		1297.59	0.00727305		1827.58	-0.00033188		2357.58	-0.00190682		2887.58	0.10583291		3417.58	0.00867749		3947.58	-0.00844926
237.8	0.01697003		767.79	0.01520492		1297.79	0.00774255		1827.78	-0.00081299		2357.78	-0.00244537		2887.78	0.10601211		3417.78	0.00876059		3947.78	-0.00847482
238	0.01664673		767.99	0.01528607		1297.99	0.00735773		1827.98	-0.00038436		2357.98	-0.00237472		2887.98	0.1066304		3417.98	0.00931754		3947.98	-0.00756573
238.2	0.01659722		768.19	0.01590692		1298.19	0.00807315		1828.18	-0.00149346		2358.18	-0.00260171		2888.18	0.10638576		3418.18	0.00989759		3948.18	-0.00804656
238.4	0.01679121		768.39	0.01632731		1298.39	0.00803713		1828.38	-0.00085815		2358.38	-0.00264508		2888.38	0.10659239		3418.38	0.01127102		3948.38	-0.00854694
238.6	0.0164634		768.59	0.01647666		1298.59	0.0080658		1828.58	-0.00199001		2358.58	-0.00291664		2888.58	0.10746381		3418.58	0.01101754		3948.58	-0.00844148
238.8	0.01600467		768.79	0.01531207		1298.79	0.00792425		1828.78	-0.00229841		2358.78	-0.0028458		2888.78	0.1070218		3418.78	0.01123701		3948.78	-0.00910766
239	0.01573338		768.99	0.0156191		1298.99	0.00760853		1828.98	-0.00193202		2358.98	-0.00348081		2888.98	0.10703727		3418.98	0.01158862		3948.98	-0.00948838
239.2	0.01538895		769.19	0.01538789		1299.19	0.00940697		1829.18	-0.0010149		2359.18	-0.00457129		2889.18	0.10798527		3419.18	0.01213012		3949.18	-0.00978041
239.4	0.01569336		769.39	0.01586779		1299.39	0.00963951		1829.38	-0.00054414		2359.38	-0.0049488		2889.38	0.10840898		3419.38	0.01252496		3949.38	-0.00992672
239.6	0.01649379		769.59	0.01491278		1299.59	0.00908495		1829.58	-0.00073587		2359.58	-0.00528706		2889.58	0.10973399		3419.58	0.01302772		3949.58	-0.01032307
239.8	0.01588572		769.79	0.01401853		1299.79	0.00866977		1829.78	-0.00066455		2359.78	-0.0059827		2889.78	0.1099744		3419.78	0.01283748		3949.78	-0.01084535
240	0.01673141		769.99	0.01391272		1299.99	0.00856248		1829.98	-0.00031798		2359.98	-0.00600593		2889.98	0.11134836		3419.98	0.01244338		3949.98	-0.01041907
240.2	0.0161955		770.19	0.01420081		1300.19	0.00762772		1830.18	-0.00012409		2360.18	-0.00528649		2890.18	0.11218542		3420.18	0.01132712		3950.18	-0.01024781
240.4	0.01679034		770.39	0.01386494		1300.39	0.00808313		1830.38	0.00039242		2360.38	-0.00533526		2890.38	0.1121409		3420.38	0.01035475		3950.38	-0.01077286
240.6	0.016787		770.59	0.01395964		1300.59	0.00845996		1830.58	-0.00003622		2360.58	-0.00415636		2890.58	0.11139995		3420.58	0.00929294		3950.58	-0.01023709
240.8	0.01723582		770.79	0.01388416		1300.79	0.00773402		1830.78	-0.00003744		2360.78	-0.00363616		2890.78	0.11153064		3420.78	0.00855556		3950.78	-0.01031487
241	0.01727465		770.99	0.0140706		1300.99	0.00795283		1830.98	-0.00070269		2360.98	-0.00236022		2890.98	0.11147772		3420.98	0.00803768		3950.98	-0.01068455
241.2	0.01804436		771.19	0.01387966		1301.19	0.00809675		1831.18	-0.00067034		2361.18	-0.00194743		2891.18	0.11149399		3421.18	0.00776576		3951.18	-0.01037333
241.4	0.01863884		771.39	0.01356778		1301.39	0.00811938		1831.38	0.00006069		2361.38	-0.00156745		2891.38	0.11131162		3421.38	0.00783934		3951.38	-0.01042538
241.6	0.01870143		771.59	0.01409644		1301.59	0.00751301		1831.58	0.00077519		2361.58	-0.00045445		2891.58	0.11119942		3421.58	0.00694405		3951.58	-0.00996634
241.8	0.01914091		771.79	0.01395581		1301.79	0.00660366		1831.78	0.00096392		2361.78	0.00100597		2891.78	0.11131348		3421.78	0.00676303		3951.78	-0.01002932
242	0.01971053		771.99	0.01421979		1301.99	0.00568807		1831.98	0.00076899		2361.98	0.00103506		2891.98	0.11156018		3421.98	0.00728637		3951.98	-0.00900143
242.2	0.01985596		772.19	0.01440327		1302.19	0.0055229		1832.18	0.00043755		2362.18	0.00088872		2892.18	0.11165568		3422.18	0.00831253		3952.18	-0.00902214
242.4	0.02081856		772.39	0.01444318		1302.39	0.00450955		1832.38	-0.0002192		2362.38	0.00135099		2892.38	0.11266422		3422.38	0.0084822		3952.38	-0.00833162
242.6	0.01997469		772.59	0.0139173		1302.59	0.00409264		1832.58	-0.0009802		2362.58	0.00105024		2892.58	0.11404471		3422.58	0.00866534		3952.58	-0.00829047
242.8	0.01972907		772.79	0.01399809		1302.79	0.00390842		1832.78	-0.00114442		2362.78	0.00123993		2892.78	0.11498227		3422.78	0.00976975		3952.78	-0.00930555
243	0.01967702		772.99	0.01480743		1302.99	0.00360813		1832.98	-0.00238016		2362.98	0.00135874		2892.98	0.11641597		3422.98	0.01020406		3952.98	-0.00900252
243.2	0.01973834		773.19	0.01511225		1303.19	0.0043565		1833.18	-0.00221413		2363.18	0.00091661		2893.18	0.11699863		3423.18	0.01103624		3953.18	-0.00932986
243.4	0.02021601		773.39	0.01573109		1303.39	0.00386265		1833.38	-0.00192463		2363.38	0.00060209		2893.38	0.11721248		3423.38	0.01078283		3953.38	-0.00926824
243.6	0.01999392		773.59	0.01538878		1303.59	0.00350609		1833.58	-0.00125381		2363.58	0.00052237		2893.58	0.11748386		3423.58	0.01054438		3953.58	-0.01011937
243.8	0.02019219		773.79	0.01619357		1303.79	0.00436591		1833.78	-0.00103682		2363.78	0.00043971		2893.78	0.11731597		3423.78	0.01034095		3953.78	-0.01130719
244	0.02032576		773.99	0.01617366		1303.99	0.00525461		1833.98	-0.00054233		2363.98	0.00015243		2893.98	0.11733518		3423.98	0.00952986		3953.98	-0.01164939
244.2	0.01978027		774.19	0.0171601		1304.19	0.00509246		1834.18	-0.00103962		2364.18	-0.00004543		2894.18	0.11726277		3424.18	0.00903569		3954.18	-0.01217113
244.4	0.01988055		774.39	0.01701114		1304.39	0.00623625		1834.38	-0.00043894		2364.38	-0.00108058		2894.38	0.11700121		3424.38	0.00873704		3954.38	-0.01264615
244.6	0.01933072		774.59	0.01682813		1304.59	0.00639642		1834.58	-0.00022997		2364.58	-0.00117543		2894.58	0.11673087		3424.58	0.00918187		3954.58	-0.01218098
244.8	0.01885001		774.79	0.01623854		1304.79	0.00751343		1834.78	0.0003046		2364.78	-0.00151045		2894.78	0.11729918		3424.78	0.00940629		3954.78	-0.01367936
245	0.01851988		774.99	0.01694574		1304.99	0.00864762		1834.98	0.00030077		2364.98	-0.00202168		2894.98	0.11688959		3424.98	0.00893675		3954.98	-0.01356239
245.2	0.01820423		775.19	0.01674757		1305.19	0.009459		1835.18	0.00152338		2365.18	-0.00198872		2895.18	0.11651985		3425.18	0.00889875		3955.18	-0.01291557
245.4	0.01799094		775.39	0.01768096		1305.39	0.00865003		1835.38	0.00337377		2365.38	-0.00189914		2895.38	0.11728653		3425.38	0.00930547		3955.38	-0.01218868
245.6	0.01741945		775.59	0.01753323		1305.59	0.00901641		1835.58	0.00368048		2365.58	-0.00124248		2895.58	0.1171031		3425.58	0.00894065		3955.58	-0.01165106
245.8	0.01649761		775.79	0.01731738		1305.79	0.0092397		1835.78	0.0038557		2365.78	-0.00194961		2895.78	0.1166248		3425.78	0.00954154		3955.78	-0.01203826
246	0.01703662		775.99	0.01746887		1305.99	0.00994632		1835.98	0.00446355		2365.98	-0.00263674		2895.98	0.11672032		3425.98	0.01031234		3955.98	-0.01136277
246.2	0.0177101		776.19	0.01756576		1306.19	0.00963472		1836.18	0.00417054		2366.18	-0.00181868		2896.18	0.11723358		3426.18	0.01064405		3956.18	-0.01159844
246.4	0.01839584		776.39	0.01625823		1306.39	0.00905922		1836.38	0.00309356		2366.38	-0.00077383		2896.38	0.11736712		3426.38	0.01088503		3956.38	-0.01170964
246.6	0.01782549		776.59	0.01614535		1306.59	0.00877349		1836.58	0.00300546		2366.58	-0.00100533		2896.58	0.1176578		3426.58	0.01141383		3956.58	-0.01238524
246.8	0.01849446		776.79	0.0153748		1306.79	0.00829958		1836.78	0.00186404		2366.78	0.0000766		2896.78	0.11823433		3426.78	0.01116857		3956.78	-0.01378872
247	0.01956669		776.99	0.01484156		1306.99	0.00765944		1836.98	0.00145347		2366.98	0.00072096		2896.98	0.11784379		3426.98	0.01077015		3956.98	-0.01302956
247.2	0.01942422		777.19	0.0147591		1307.19	0.00787012		1837.18	0.00168527		2367.18	0.00091024		2897.18	0.11683918		3427.18	0.01041674		3957.18	-0.01298098
247.4	0.01958979		777.39	0.01448012		1307.39	0.00774914		1837.38	0.0018099		2367.38	0.00141781		2897.38	0.11723549		3427.38	0.00989658		3957.38	-0.01205543
247.6	0.01992238		777.59	0.0142087		1307.59	0.00745122		1837.58	0.00162984		2367.58	0.00193367		2897.58	0.11694544		3427.58	0.00922008		3957.58	-0.01202911
247.8	0.02160206		777.79	0.01444246		1307.79	0.00878155		1837.78	0.00124561		2367.78	0.00229156		2897.78	0.1169537		3427.78	0.00947462		3957.78	-0.01209596
248	0.02160803		777.99	0.01374106		1307.99	0.00860565		1837.98	0.00038559		2367.98	0.00137233		2897.98	0.11719813		3427.98	0.00881963		3957.98	-0.01178017
248.2	0.02218698		778.19	0.01422901		1308.19	0.00776185		1838.18	0.00003638		2368.18	0.00010727		2898.18	0.11836017		3428.18	0.00844076		3958.18	-0.01158672
248.4	0.02258973		778.39	0.01430627		1308.39	0.00737583		1838.38	-0.00059059		2368.38	-0.00080139		2898.38	0.11824574		3428.38	0.00842567		3958.38	-0.01163435
248.6	0.02164119		778.59	0.01371818		1308.59	0.00708467		1838.58	-0.00144004		2368.58	-0.00070459		2898.58	0.11892723		3428.58	0.00914252		3958.58	-0.01177101
248.8	0.0221341		778.79	0.01424934		1308.79	0.00804266		1838.78	-0.00160323		2368.78	-0.00149515		2898.78	0.1195914		3428.78	0.00952057		3958.78	-0.01186602
249	0.02172566		778.99	0.0149745		1308.99	0.00815447		1838.98	-0.00131926		2368.98	-0.00265801		2898.98	0.11960312		3428.98	0.00998811		3958.98	-0.00979726
249.2	0.02180501		779.19	0.01467294		1309.19	0.0077482		1839.18	-0.00018902		2369.18	-0.00224077		2899.18	0.12049001		3429.18	0.0106392		3959.18	-0.0090879
249.4	0.02139909		779.39	0.01601502		1309.39	0.0071143		1839.38	0.00077608		2369.38	-0.00295398		2899.38	0.12087794		3429.38	0.0119165		3959.38	-0.00819651
249.6	0.02178812		779.59	0.01609304		1309.59	0.00760671		1839.58	0.00080584		2369.58	-0.0032773		2899.58	0.12018143		3429.58	0.01196802		3959.58	-0.00848881
249.8	0.02093045		779.79	0.01685909		1309.79	0.00794314		1839.78	0.00134181		2369.78	-0.00399101		2899.78	0.12018321		3429.78	0.01319541		3959.78	-0.00899889
250	0.02104758		779.99	0.01666362		1309.99	0.00829242		1839.98	0.00189514		2369.98	-0.00448811		2899.98	0.1194989		3429.98	0.01332076		3959.98	-0.00914428
250.2	0.02126257		780.19	0.01559426		1310.19	0.0073867		1840.18	0.00140445		2370.18	-0.00365861		2900.18	0.11934852		3430.18	0.01365198		3960.18	-0.00968814
250.4	0.02032671		780.39	0.01532525		1310.39	0.00731296		1840.38	0.00177633		2370.38	-0.00396819		2900.38	0.11954088		3430.38	0.01388698		3960.38	-0.01085642
250.6	0.02035688		780.59	0.01559255		1310.59	0.00731948		1840.58	0.00210043		2370.58	-0.00419871		2900.58	0.1195839		3430.58	0.01287525		3960.58	-0.01163626
250.8	0.02016744		780.79	0.0151177		1310.79	0.00797887		1840.78	0.00137072		2370.78	-0.00369234		2900.78	0.1199496		3430.78	0.01196735		3960.78	-0.01251283
251	0.02086888		780.99	0.0158102		1310.99	0.00795816		1840.98	0.00130591		2370.98	-0.00369193		2900.98	0.12010016		3430.98	0.01208763		3960.98	-0.01163245
251.2	0.02005267		781.19	0.01624789		1311.19	0.00872692		1841.18	0.00086092		2371.18	-0.00410573		2901.18	0.12041562		3431.18	0.01186137		3961.18	-0.0110326
251.4	0.02002078		781.39	0.01628954		1311.39	0.00940588		1841.38	0.00067168		2371.38	-0.00396287		2901.38	0.12213101		3431.38	0.01153245		3961.38	-0.01034482
251.6	0.02080798		781.59	0.01608814		1311.59	0.00967358		1841.58	0.00038949		2371.58	-0.0039226		2901.58	0.12242952		3431.58	0.01059088		3961.58	-0.01002459
251.8	0.02187833		781.79	0.01683628		1311.79	0.01086867		1841.78	0.00077966		2371.78	-0.00344246		2901.78	0.12333587		3431.78	0.0100266		3961.78	-0.01021538
252	0.02179174		781.99	0.01758583		1311.99	0.01043514		1841.98	-0.00097547		2371.98	-0.00427483		2901.98	0.12351959		3431.98	0.00874237		3961.98	-0.00991421
252.2	0.02204104		782.19	0.01861957		1312.19	0.00974988		1842.18	-0.00153336		2372.18	-0.00415647		2902.18	0.12512943		3432.18	0.00858205		3962.18	-0.00990513
252.4	0.02216566		782.39	0.01854801		1312.39	0.00885836		1842.38	-0.00231969		2372.38	-0.00388424		2902.38	0.12600139		3432.38	0.00882707		3962.38	-0.00998152
252.6	0.02147223		782.59	0.01813308		1312.59	0.00929712		1842.58	-0.00256641		2372.58	-0.00281229		2902.58	0.12791081		3432.58	0.00962472		3962.58	-0.01135935
252.8	0.02279357		782.79	0.01839149		1312.79	0.00953956		1842.78	-0.00290121		2372.78	-0.00307325		2902.78	0.12810618		3432.78	0.01060029		3962.78	-0.01086954
253	0.0227965		782.99	0.01810202		1312.99	0.00970609		1842.98	-0.00306027		2372.98	-0.00232885		2902.98	0.12884103		3432.98	0.0114118		3962.98	-0.01039951
253.2	0.02341563		783.19	0.01753346		1313.19	0.00970232		1843.18	-0.0033951		2373.18	-0.00142341		2903.18	0.12949652		3433.18	0.01153179		3963.18	-0.01107795
253.4	0.02280015		783.39	0.01793985		1313.39	0.00895764		1843.38	-0.00272732		2373.38	-0.00167699		2903.38	0.1292468		3433.38	0.01251085		3963.38	-0.01204469
253.6	0.02352653		783.59	0.01687088		1313.59	0.00899559		1843.58	-0.00340975		2373.58	-0.00106867		2903.58	0.12884408		3433.58	0.01229259		3963.58	-0.01287683
253.8	0.02258662		783.79	0.0160552		1313.79	0.00930071		1843.78	-0.00320336		2373.78	-0.00102968		2903.78	0.1276699		3433.78	0.01304978		3963.78	-0.01349358
254	0.02258175		783.99	0.01433303		1313.99	0.00922052		1843.98	-0.00160829		2373.98	-0.00107636		2903.98	0.12698386		3433.98	0.01314196		3963.98	-0.01434628
254.2	0.02129304		784.19	0.01356469		1314.19	0.00893533		1844.18	-0.00166459		2374.18	-0.00010859		2904.18	0.12625724		3434.18	0.01340585		3964.18	-0.01503427
254.4	0.02085337		784.39	0.01358932		1314.39	0.00876901		1844.38	-0.00153247		2374.38	-0.00023197		2904.38	0.1263867		3434.38	0.01319797		3964.38	-0.0158032
254.6	0.02047551		784.59	0.01345754		1314.59	0.00960787		1844.58	-0.00136935		2374.58	0.00059218		2904.58	0.12584487		3434.58	0.01341504		3964.58	-0.01510133
254.8	0.02003532		784.79	0.01368539		1314.79	0.0101805		1844.78	-0.00182911		2374.78	-0.00006436		2904.78	0.12656155		3434.78	0.01400006		3964.78	-0.01484093
255	0.0204434		784.99	0.01396996		1314.99	0.00919994		1844.98	-0.00226775		2374.98	-0.00034359		2904.98	0.12720338		3434.98	0.01384954		3964.98	-0.01393596
255.2	0.01992551		785.19	0.01451975		1315.19	0.00892454		1845.18	-0.00155865		2375.18	-0.00104107		2905.18	0.1262054		3435.18	0.01313122		3965.18	-0.01339601
255.4	0.02013519		785.39	0.01471131		1315.39	0.00851951		1845.38	-0.00150635		2375.38	-0.00103881		2905.38	0.12574448		3435.38	0.01226777		3965.38	-0.01260714
255.6	0.02042044		785.59	0.01556144		1315.59	0.00805307		1845.58	-0.00137708		2375.58	-0.00051708		2905.58	0.12570561		3435.58	0.01155006		3965.58	-0.01198576
255.8	0.01978903		785.79	0.01616863		1315.79	0.00750803		1845.78	-0.00098491		2375.78	-0.00043999		2905.78	0.12593895		3435.78	0.01101534		3965.78	-0.01109576
256	0.01940183		785.99	0.01623815		1315.99	0.00622773		1845.98	-0.0013687		2375.98	-0.00088791		2905.98	0.1266902		3435.98	0.01098305		3965.98	-0.01114639
256.2	0.01944614		786.19	0.01640163		1316.19	0.00621015		1846.18	-0.00048228		2376.18	-0.00085027		2906.18	0.12794121		3436.18	0.01075041		3966.18	-0.01137117
256.4	0.0197969		786.39	0.0159771		1316.39	0.00648246		1846.38	-0.00057389		2376.38	-0.00059389		2906.38	0.12858314		3436.38	0.01144157		3966.38	-0.01156462
256.6	0.02079292		786.59	0.01608822		1316.59	0.00700231		1846.58	-0.00053819		2376.58	-0.00002704		2906.58	0.1296245		3436.58	0.0116683		3966.58	-0.01241529
256.8	0.02186628		786.79	0.01664673		1316.79	0.00761927		1846.78	-0.000642		2376.78	-0.00063106		2906.78	0.13091402		3436.78	0.01191378		3966.78	-0.01156814
257	0.02203969		786.99	0.01568033		1316.99	0.00835774		1846.98	-0.00059291		2376.98	-0.0003407		2906.98	0.13196251		3436.98	0.0109396		3966.98	-0.01100602
257.2	0.02136996		787.19	0.01535795		1317.19	0.00934368		1847.18	-0.00089315		2377.18	-0.00074111		2907.18	0.13240881		3437.18	0.0109423		3967.18	-0.01158949
257.4	0.0213061		787.39	0.01523		1317.39	0.00902488		1847.38	-0.00023341		2377.38	-0.00109978		2907.38	0.13245983		3437.38	0.01122276		3967.38	-0.0116518
257.6	0.02138552		787.59	0.01439338		1317.59	0.00996267		1847.58	-0.00014266		2377.58	-0.00092343		2907.58	0.13233885		3437.58	0.01077122		3967.58	-0.01149709
257.8	0.02062301		787.79	0.01475633		1317.79	0.01120987		1847.78	0.00027635		2377.78	-0.00166019		2907.78	0.13194308		3437.78	0.01096882		3967.78	-0.01157521
258	0.02058136		787.99	0.01480259		1317.99	0.01148488		1847.98	0.00086299		2377.98	-0.00191121		2907.98	0.13263147		3437.98	0.01094509		3967.98	-0.01113414
258.2	0.0207019		788.19	0.01561945		1318.19	0.01176315		1848.18	0.00007182		2378.18	-0.00166243		2908.18	0.13258226		3438.18	0.01129829		3968.18	-0.01054584
258.4	0.02066874		788.39	0.01611031		1318.39	0.01212254		1848.38	0.00017169		2378.38	-0.00120484		2908.38	0.13374004		3438.38	0.01191992		3968.38	-0.00987702
258.6	0.02059778		788.59	0.01596756		1318.59	0.01260699		1848.58	-0.00024391		2378.58	-0.00106015		2908.58	0.13364096		3438.58	0.01247303		3968.58	-0.01005407
258.8	0.02118617		788.79	0.01694394		1318.79	0.0115944		1848.78	-0.00095191		2378.78	-0.0019512		2908.78	0.13388012		3438.78	0.01299842		3968.78	-0.0105777
259	0.02136925		788.99	0.01711289		1318.99	0.01030771		1848.98	-0.00169194		2378.98	-0.00173648		2908.98	0.13326149		3438.98	0.01369755		3968.98	-0.01019217
259.2	0.02094785		789.19	0.01875445		1319.19	0.009281		1849.18	-0.00136977		2379.18	-0.00161677		2909.18	0.13167571		3439.18	0.01355938		3969.18	-0.01037648
259.4	0.02100633		789.39	0.01913686		1319.39	0.00873709		1849.38	-0.00232106		2379.38	-0.00103327		2909.38	0.13185577		3439.38	0.01297082		3969.38	-0.00987469
259.6	0.02028431		789.59	0.01931496		1319.59	0.00863086		1849.58	-0.00279119		2379.58	-0.00049797		2909.58	0.13347859		3439.58	0.01354455		3969.58	-0.0104789
259.8	0.02053699		789.79	0.01937873		1319.79	0.00785875		1849.78	-0.00266992		2379.78	-0.00010379		2909.78	0.13367096		3439.78	0.01335945		3969.78	-0.01110903
260	0.02006568		789.99	0.01836801		1319.99	0.00771887		1849.98	-0.00244466		2379.98	-0.00057319		2909.98	0.13430707		3439.98	0.01366232		3969.98	-0.01205435
260.2	0.02015407		790.19	0.01807026		1320.19	0.00791461		1850.18	-0.00173887		2380.18	-0.00063844		2910.18	0.13459663		3440.18	0.01348246		3970.18	-0.01214465
260.4	0.02022954		790.39	0.0169963		1320.39	0.00808815		1850.38	-0.00122101		2380.38	-0.00051449		2910.38	0.13586377		3440.38	0.01420528		3970.38	-0.01270779
260.6	0.0203301		790.59	0.0163447		1320.59	0.00811555		1850.58	-0.00096554		2380.58	-0.00102521		2910.58	0.13636667		3440.58	0.01352102		3970.58	-0.01298575
260.8	0.01994104		790.79	0.01547246		1320.79	0.00881737		1850.78	-0.0003054		2380.78	-0.00159619		2910.78	0.13716897		3440.78	0.01399735		3970.78	-0.01267855
261	0.01974882		790.99	0.01408533		1320.99	0.00904574		1850.98	-0.00041012		2380.98	-0.00183184		2910.98	0.13691157		3440.98	0.01312894		3970.98	-0.0117504
261.2	0.01954906		791.19	0.01389543		1321.19	0.00895399		1851.18	-0.00045741		2381.18	-0.00205382		2911.18	0.13697797		3441.18	0.01343285		3971.18	-0.01230821
261.4	0.02048394		791.39	0.01324609		1321.39	0.0095194		1851.38	0.00029493		2381.38	-0.002462		2911.38	0.13697078		3441.38	0.01278326		3971.38	-0.01299724
261.6	0.02053699		791.59	0.01352745		1321.59	0.01012248		1851.58	0.00156843		2381.58	-0.00278474		2911.58	0.13691362		3441.58	0.01254172		3971.58	-0.01327342
261.8	0.02080168		791.79	0.01351692		1321.79	0.01007485		1851.78	0.0019257		2381.78	-0.00290552		2911.78	0.13636934		3441.78	0.01141903		3971.78	-0.01331261
262	0.02211217		791.99	0.01390652		1321.99	0.00949908		1851.98	0.00264288		2381.98	-0.00292322		2911.98	0.13614572		3441.98	0.01106642		3971.98	-0.01360704
262.2	0.02341229		792.19	0.01407543		1322.19	0.0088423		1852.18	0.00269021		2382.18	-0.00226504		2912.18	0.13628274		3442.18	0.01206212		3972.18	-0.01381991
262.4	0.0239306		792.39	0.01411518		1322.39	0.00859396		1852.38	0.00316046		2382.38	-0.00220875		2912.38	0.13615711		3442.38	0.012306		3972.38	-0.01372836
262.6	0.02465765		792.59	0.01486667		1322.59	0.00797714		1852.58	0.00202864		2382.58	-0.00222922		2912.58	0.13526185		3442.58	0.01259238		3972.58	-0.01385423
262.8	0.02458605		792.79	0.01679915		1322.79	0.00630998		1852.78	0.00220307		2382.78	-0.00254993		2912.78	0.13517574		3442.78	0.01322173		3972.78	-0.01295256
263	0.02454043		792.99	0.01732099		1322.99	0.00572337		1852.98	0.00157168		2382.98	-0.00290609		2912.98	0.13461104		3442.98	0.01182541		3972.98	-0.01153006
263.2	0.02445996		793.19	0.01907329		1323.19	0.00504977		1853.18	0.00188744		2383.18	-0.00280786		2913.18	0.13456614		3443.18	0.01088171		3973.18	-0.01102695
263.4	0.02517137		793.39	0.01924116		1323.39	0.00554453		1853.38	0.0009307		2383.38	-0.00260679		2913.38	0.13527866		3443.38	0.01095582		3973.38	-0.01001532
263.6	0.02502816		793.59	0.01984222		1323.59	0.00573038		1853.58	0.00024528		2383.58	-0.00231535		2913.58	0.1362627		3443.58	0.01119596		3973.58	-0.01029159
263.8	0.0242076		793.79	0.01997103		1323.79	0.00534442		1853.78	-0.00034857		2383.78	-0.00196112		2913.78	0.13590157		3443.78	0.01091584		3973.78	-0.01020094
264	0.02267633		793.99	0.01895691		1323.99	0.00503562		1853.98	-0.00057671		2383.98	-0.00260606		2913.98	0.13745786		3443.98	0.01132513		3973.98	-0.00960683
264.2	0.02235529		794.19	0.01960033		1324.19	0.00463533		1854.18	-0.0006237		2384.18	-0.00284304		2914.18	0.13786019		3444.18	0.01104209		3974.18	-0.00939369
264.4	0.02233703		794.39	0.01998256		1324.39	0.00445513		1854.38	-0.00138799		2384.38	-0.00313881		2914.38	0.13845388		3444.38	0.01089639		3974.38	-0.00945005
264.6	0.02160705		794.59	0.01999842		1324.59	0.00438188		1854.58	-0.00219138		2384.58	-0.00401432		2914.58	0.1384251		3444.58	0.01047146		3974.58	-0.00865993
264.8	0.02150924		794.79	0.01989279		1324.79	0.00461597		1854.78	-0.00253906		2384.78	-0.00417292		2914.78	0.13835693		3444.78	0.01106558		3974.78	-0.0078585
265	0.02132887		794.99	0.02040899		1324.99	0.00477821		1854.98	-0.00273687		2384.98	-0.00360881		2914.98	0.13853195		3444.98	0.01011394		3974.98	-0.00731044
265.2	0.02083199		795.19	0.01996223		1325.19	0.00564027		1855.18	-0.00288818		2385.18	-0.00357686		2915.18	0.13786974		3445.18	0.01006047		3975.18	-0.00814458
265.4	0.02130898		795.39	0.0194969		1325.39	0.00701652		1855.38	-0.00192606		2385.38	-0.00383807		2915.38	0.13750353		3445.38	0.01036925		3975.38	-0.0086371
265.6	0.02057985		795.59	0.01920736		1325.59	0.00701974		1855.58	-0.00175161		2385.58	-0.00296431		2915.58	0.13705559		3445.58	0.01002835		3975.58	-0.00879425
265.8	0.02031852		795.79	0.01831622		1325.79	0.00769757		1855.78	-0.00152575		2385.78	-0.00282204		2915.78	0.13707529		3445.78	0.00924973		3975.78	-0.0097988
266	0.02136426		795.99	0.0187855		1325.99	0.0084031		1855.98	-0.00128171		2385.98	-0.00321174		2915.98	0.137215		3445.98	0.01063252		3975.98	-0.01131962
266.2	0.02162247		796.19	0.01931534		1326.19	0.00830407		1856.18	-0.00113617		2386.18	-0.00241634		2916.18	0.13798853		3446.18	0.01123794		3976.18	-0.01103359
266.4	0.02187058		796.39	0.01913021		1326.39	0.00887933		1856.38	0.00015021		2386.38	-0.00325508		2916.38	0.13787304		3446.38	0.01130058		3976.38	-0.01070358
266.6	0.02196435		796.59	0.01947501		1326.59	0.00894884		1856.58	0.00020168		2386.58	-0.00251377		2916.58	0.1381618		3446.58	0.01156901		3976.58	-0.0110389
266.8	0.02204251		796.79	0.01971371		1326.79	0.00829734		1856.78	0.00121379		2386.78	-0.00276089		2916.78	0.13871432		3446.78	0.01202539		3976.78	-0.01156756
267	0.02219735		796.99	0.01924397		1326.99	0.00855688		1856.98	0.00128829		2386.98	-0.00265921		2916.98	0.13921703		3446.98	0.0127128		3976.98	-0.01165794
267.2	0.02175309		797.19	0.01906629		1327.19	0.00824195		1857.18	0.00087344		2387.18	-0.00201856		2917.18	0.14040144		3447.18	0.01482174		3977.18	-0.01241011
267.4	0.02168414		797.39	0.01854198		1327.39	0.00830721		1857.38	0.00046354		2387.38	-0.00235453		2917.38	0.14129198		3447.38	0.01592696		3977.38	-0.01310295
267.6	0.02143689		797.59	0.01885274		1327.59	0.00761814		1857.58	0.00019506		2387.58	-0.0027049		2917.58	0.14272177		3447.58	0.01599374		3977.58	-0.01478243
267.8	0.02042885		797.79	0.01801698		1327.79	0.00685995		1857.78	0.00016632		2387.78	-0.00329076		2917.78	0.14315278		3447.78	0.01634545		3977.78	-0.01484428
268	0.0206871		797.99	0.01784897		1327.99	0.00667474		1857.98	0.00054049		2387.98	-0.00360078		2917.98	0.14424257		3447.98	0.01677205		3977.98	-0.01500508
268.2	0.0217086		798.19	0.0182073		1328.19	0.00689544		1858.18	0.0004617		2388.18	-0.00499538		2918.18	0.14433718		3448.18	0.01601171		3978.18	-0.01601241
268.4	0.02155627		798.39	0.01823903		1328.39	0.0067549		1858.38	0.00031899		2388.38	-0.00550196		2918.38	0.14412809		3448.38	0.01542071		3978.38	-0.01616782
268.6	0.02085541		798.59	0.01722729		1328.59	0.00708546		1858.58	0.00031322		2388.58	-0.00615063		2918.58	0.14492556		3448.58	0.01504663		3978.58	-0.01604749
268.8	0.02108731		798.79	0.0174286		1328.79	0.00736614		1858.78	0.00105195		2388.78	-0.00575259		2918.78	0.14477711		3448.78	0.01440975		3978.78	-0.01651815
269	0.02158353		798.99	0.01790117		1328.99	0.00773915		1858.98	0.00129479		2388.98	-0.0057426		2918.98	0.14525431		3448.98	0.01342729		3978.98	-0.01577907
269.2	0.02179825		799.19	0.01728346		1329.19	0.00840349		1859.18	0.00089179		2389.18	-0.00568215		2919.18	0.14438776		3449.18	0.01350721		3979.18	-0.01598238
269.4	0.02281705		799.39	0.01722187		1329.39	0.00848664		1859.38	0.00194865		2389.38	-0.00549982		2919.38	0.14474184		3449.38	0.01267694		3979.38	-0.01552149
269.6	0.02314734		799.59	0.017109		1329.59	0.00905566		1859.58	0.00137415		2389.58	-0.00499776		2919.58	0.1444424		3449.58	0.011182		3979.58	-0.01519633
269.8	0.0228246		799.79	0.01718761		1329.79	0.00943441		1859.78	0.00149851		2389.78	-0.00488474		2919.78	0.1451773		3449.78	0.01064101		3979.78	-0.01553189
270	0.02280172		799.99	0.01703216		1329.99	0.00917638		1859.98	0.00220701		2389.98	-0.00417754		2919.98	0.14538188		3449.98	0.01100401		3979.98	-0.01525044
270.2	0.02324772		800.19	0.01673462		1330.19	0.00959815		1860.18	0.0033963		2390.18	-0.00372859		2920.18	0.1459956		3450.18	0.01071145		3980.18	-0.01343028
270.4	0.02409716		800.39	0.01641066		1330.39	0.01015294		1860.38	0.00304733		2390.38	-0.00247284		2920.38	0.1461014		3450.38	0.01072963		3980.38	-0.0120001
270.6	0.0246312		800.59	0.01623868		1330.59	0.00947691		1860.58	0.00254585		2390.58	-0.00157219		2920.58	0.14654843		3450.58	0.01096057		3980.58	-0.01131613
270.8	0.02478356		800.79	0.01642551		1330.79	0.00882766		1860.78	0.00179009		2390.78	-0.00169328		2920.78	0.14743738		3450.78	0.01138404		3980.78	-0.01081194
271	0.02445444		800.99	0.01621638		1330.99	0.00795836		1860.98	0.00085374		2390.98	-0.00238867		2920.98	0.14796866		3450.98	0.01157065		3980.98	-0.01049557
271.2	0.0248186		801.19	0.01518923		1331.19	0.00757902		1861.18	-0.00019277		2391.18	-0.0023642		2921.18	0.14780904		3451.18	0.01191802		3981.18	-0.01013022
271.4	0.02446079		801.39	0.01456544		1331.39	0.00762496		1861.38	-0.00024372		2391.38	-0.00232148		2921.38	0.14755985		3451.38	0.01205318		3981.38	-0.00954744
271.6	0.02498023		801.59	0.0138846		1331.59	0.00765163		1861.58	-0.00029615		2391.58	-0.00287307		2921.58	0.14767279		3451.58	0.01180165		3981.58	-0.00942438
271.8	0.02451904		801.79	0.01334228		1331.79	0.00815281		1861.78	-0.00036834		2391.78	-0.0034927		2921.78	0.14710049		3451.78	0.01195442		3981.78	-0.00887309
272	0.02449146		801.99	0.01323938		1331.99	0.00904742		1861.98	-0.0004078		2391.98	-0.00362821		2921.98	0.14720334		3451.98	0.01184247		3981.98	-0.01037152
272.2	0.02433073		802.19	0.01288177		1332.19	0.00866368		1862.18	-0.00091545		2392.18	-0.00516409		2922.18	0.1469452		3452.18	0.01212262		3982.18	-0.0116708
272.4	0.02381424		802.39	0.01245394		1332.39	0.00860303		1862.38	-0.00076745		2392.38	-0.00506699		2922.38	0.14639824		3452.38	0.01280966		3982.38	-0.01226179
272.6	0.02354562		802.59	0.01235581		1332.59	0.00846035		1862.58	-0.00026619		2392.58	-0.00485164		2922.58	0.14680653		3452.58	0.01292766		3982.58	-0.01243053
272.8	0.02427761		802.79	0.01290179		1332.79	0.00917671		1862.78	0.00051871		2392.78	-0.00501291		2922.78	0.1461981		3452.78	0.01253513		3982.78	-0.01283654
273	0.02476703		802.99	0.01354924		1332.99	0.00919039		1862.98	0.00034514		2392.98	-0.00479702		2922.98	0.14572878		3452.98	0.01287919		3982.98	-0.01225197
273.2	0.02563453		803.19	0.0131162		1333.19	0.00952237		1863.18	0.00116192		2393.18	-0.00420353		2923.18	0.14576206		3453.18	0.01382489		3983.18	-0.01321671
273.4	0.02548852		803.39	0.01368896		1333.39	0.00898086		1863.38	0.00174367		2393.38	-0.00391371		2923.38	0.14600122		3453.38	0.01366344		3983.38	-0.01342666
273.6	0.02502402		803.59	0.0145538		1333.59	0.0086403		1863.58	0.00109727		2393.58	-0.00327053		2923.58	0.1453644		3453.58	0.01424543		3983.58	-0.01411204
273.8	0.02381555		803.79	0.01496992		1333.79	0.00747458		1863.78	0.00122069		2393.78	-0.00211919		2923.78	0.14546008		3453.78	0.01494117		3983.78	-0.01493785
274	0.02404466		803.99	0.01512068		1333.99	0.00765936		1863.98	0.00117923		2393.98	-0.00186079		2923.98	0.14640147		3453.98	0.01553199		3983.98	-0.01363631
274.2	0.0251871		804.19	0.01528019		1334.19	0.00738321		1864.18	0.00070452		2394.18	-0.0011987		2924.18	0.14657147		3454.18	0.01616303		3984.18	-0.01283007
274.4	0.02569563		804.39	0.01552569		1334.39	0.0068369		1864.38	-0.0002568		2394.38	0.00028736		2924.38	0.14699854		3454.38	0.01516779		3984.38	-0.01211938
274.6	0.02681442		804.59	0.01517382		1334.59	0.00601564		1864.58	-0.00062757		2394.58	-0.00030684		2924.58	0.1479201		3454.58	0.01475297		3984.58	-0.01193095
274.8	0.02646088		804.79	0.01513614		1334.79	0.00614304		1864.78	-0.001641		2394.78	-0.00047451		2924.78	0.14869868		3454.78	0.01417576		3984.78	-0.01257579
275	0.02615928		804.99	0.01530914		1334.99	0.00567668		1864.98	-0.00199461		2394.98	-0.0004556		2924.98	0.1487532		3454.98	0.01343886		3984.98	-0.01291047
275.2	0.02667963		805.19	0.01457343		1335.19	0.00578667		1865.18	-0.0020406		2395.18	-0.00022768		2925.18	0.14933469		3455.18	0.01429459		3985.18	-0.01191064
275.4	0.02583456		805.39	0.01485157		1335.39	0.00620833		1865.38	-0.00215028		2395.38	-0.00067268		2925.38	0.14971233		3455.38	0.01398638		3985.38	-0.01145668
275.6	0.0269697		805.59	0.01452979		1335.59	0.00684934		1865.58	-0.00179487		2395.58	-0.00162983		2925.58	0.15043302		3455.58	0.01389776		3985.58	-0.0114672
275.8	0.02665326		805.79	0.01487105		1335.79	0.00717276		1865.78	-0.00174305		2395.78	-0.00312675		2925.78	0.15139065		3455.78	0.01398843		3985.78	-0.01187691
276	0.02591478		805.99	0.01461016		1335.99	0.00694426		1865.98	-0.00173475		2395.98	-0.00422538		2925.98	0.15199905		3455.98	0.01405521		3985.98	-0.01321232
276.2	0.02543648		806.19	0.0149177		1336.19	0.00642822		1866.18	-0.00122998		2396.18	-0.00539145		2926.18	0.15156535		3456.18	0.014529		3986.18	-0.01307619
276.4	0.02523643		806.39	0.01446557		1336.39	0.00624698		1866.38	0.00037475		2396.38	-0.0054048		2926.38	0.15174834		3456.38	0.01370666		3986.38	-0.01326859
276.6	0.02508868		806.59	0.01499265		1336.59	0.00538163		1866.58	0.00173787		2396.58	-0.0057965		2926.58	0.1520893		3456.58	0.01317385		3986.58	-0.01311099
276.8	0.02490053		806.79	0.01504514		1336.79	0.00550317		1866.78	0.00281739		2396.78	-0.00687985		2926.78	0.15244531		3456.78	0.01269061		3986.78	-0.01273871
277	0.02404425		806.99	0.01553158		1336.99	0.00450733		1866.98	0.0045472		2396.98	-0.00715942		2926.98	0.15235274		3456.98	0.01310544		3986.98	-0.01297643
277.2	0.02376473		807.19	0.01594156		1337.19	0.0046487		1867.18	0.00552797		2397.18	-0.00728275		2927.18	0.1527123		3457.18	0.01325908		3987.18	-0.01308058
277.4	0.02275944		807.39	0.0172829		1337.39	0.00466833		1867.38	0.00530256		2397.38	-0.00746084		2927.38	0.15220878		3457.38	0.01264781		3987.38	-0.01322524
277.6	0.02241642		807.59	0.01773947		1337.59	0.00422657		1867.58	0.00523783		2397.58	-0.00753715		2927.58	0.15176298		3457.58	0.01214465		3987.58	-0.01345869
277.8	0.02230818		807.79	0.01793561		1337.79	0.00407204		1867.78	0.00528483		2397.78	-0.00697784		2927.78	0.15238321		3457.78	0.01163446		3987.78	-0.01379987
278	0.02236982		807.99	0.01841226		1337.99	0.00476091		1867.98	0.00511788		2397.98	-0.0063409		2927.98	0.15265568		3457.98	0.01162592		3987.98	-0.01294145
278.2	0.02236598		808.19	0.01851689		1338.19	0.00464918		1868.18	0.00563257		2398.18	-0.0051322		2928.18	0.15256151		3458.18	0.0117009		3988.18	-0.01300944
278.4	0.02252624		808.39	0.01847577		1338.39	0.00572827		1868.38	0.00503748		2398.38	-0.00446109		2928.38	0.15303967		3458.38	0.01151659		3988.38	-0.0132369
278.6	0.02323052		808.59	0.01900116		1338.59	0.00636765		1868.58	0.00413409		2398.58	-0.00411761		2928.58	0.15333676		3458.58	0.01217335		3988.58	-0.01315958
278.8	0.02289464		808.79	0.01893663		1338.79	0.00678424		1868.78	0.00317221		2398.78	-0.00304481		2928.78	0.15334747		3458.78	0.01237856		3988.78	-0.01388685
279	0.02324904		808.99	0.01873152		1338.99	0.00730181		1868.98	0.00234747		2398.98	-0.00208183		2928.98	0.15367862		3458.98	0.0129661		3988.98	-0.01341774
279.2	0.02304554		809.19	0.01799628		1339.19	0.00876162		1869.18	0.00142168		2399.18	-0.00187866		2929.18	0.15393336		3459.18	0.01443828		3989.18	-0.01303028
279.4	0.0234369		809.39	0.01795568		1339.39	0.01024795		1869.38	0.00020808		2399.38	-0.00206671		2929.38	0.15342509		3459.38	0.01533343		3989.38	-0.01327813
279.6	0.02411975		809.59	0.01694255		1339.59	0.01131053		1869.58	-0.0003336		2399.58	-0.00199639		2929.58	0.15365191		3459.58	0.01586702		3989.58	-0.01342707
279.8	0.02447721		809.79	0.01658184		1339.79	0.01056024		1869.78	-0.00028034		2399.78	-0.00244965		2929.78	0.1534577		3459.78	0.01528674		3989.78	-0.01428108
280	0.02444698		809.99	0.01672445		1339.99	0.00960103		1869.98	-0.00114879		2399.98	-0.00275452		2929.98	0.15346889		3459.98	0.01578052		3989.98	-0.0142679
280.2	0.02484885		810.19	0.01661304		1340.19	0.00927492		1870.18	-0.00031563		2400.18	-0.00179967		2930.18	0.15325048		3460.18	0.01591086		3990.18	-0.01401797
280.4	0.02429476		810.39	0.01617052		1340.39	0.00889351		1870.38	-0.00017629		2400.38	-0.00164225		2930.38	0.15287986		3460.38	0.0159516		3990.38	-0.01529342
280.6	0.02377315		810.59	0.01548757		1340.59	0.00792661		1870.58	-0.00072412		2400.58	-0.00293324		2930.58	0.15279789		3460.58	0.01609137		3990.58	-0.01518494
280.8	0.02285316		810.79	0.01559156		1340.79	0.00810586		1870.78	0.00007085		2400.78	-0.0033573		2930.78	0.15251821		3460.78	0.01586296		3990.78	-0.01545974
281	0.02280145		810.99	0.01636372		1340.99	0.00776109		1870.98	0.00041001		2400.98	-0.00405077		2930.98	0.15264922		3460.98	0.01545808		3990.98	-0.0157301
281.2	0.02327783		811.19	0.01707093		1341.19	0.00895326		1871.18	0.00076412		2401.18	-0.00425994		2931.18	0.15336621		3461.18	0.01497284		3991.18	-0.01569459
281.4	0.02385752		811.39	0.01770964		1341.39	0.0094983		1871.38	0.00096451		2401.38	-0.0047011		2931.38	0.15406664		3461.38	0.01431637		3991.38	-0.01618885
281.6	0.02359272		811.59	0.01870574		1341.59	0.00879306		1871.58	0.00184167		2401.58	-0.00471899		2931.58	0.15433999		3461.58	0.01414447		3991.58	-0.01603604
281.8	0.02366739		811.79	0.01989959		1341.79	0.00869247		1871.78	0.00169489		2401.78	-0.00463505		2931.78	0.15520275		3461.78	0.01334212		3991.78	-0.01527929
282	0.02404556		811.99	0.01997989		1341.99	0.00870397		1871.98	0.00173366		2401.98	-0.00476001		2931.98	0.15533227		3461.98	0.01321957		3991.98	-0.01469036
282.2	0.02445434		812.19	0.01939269		1342.19	0.00920826		1872.18	0.00116291		2402.18	-0.00552711		2932.18	0.15679557		3462.18	0.01306829		3992.18	-0.01443176
282.4	0.02492399		812.39	0.01804325		1342.39	0.00973142		1872.38	0.00053363		2402.38	-0.0057105		2932.38	0.15655306		3462.38	0.01300915		3992.38	-0.01476446
282.6	0.02488824		812.59	0.01838813		1342.59	0.00975889		1872.58	0.00091426		2402.58	-0.00507242		2932.58	0.15704404		3462.58	0.01255867		3992.58	-0.015014
282.8	0.02536053		812.79	0.01737559		1342.79	0.01011776		1872.78	0.0004326		2402.78	-0.00517148		2932.78	0.15616103		3462.78	0.01191401		3992.78	-0.01509157
283	0.02484714		812.99	0.0171546		1342.99	0.01027929		1872.98	0.00032819		2402.98	-0.00576305		2932.98	0.15609625		3462.98	0.01223484		3992.98	-0.01468141
283.2	0.02434698		813.19	0.01705726		1343.19	0.01084867		1873.18	0.00069937		2403.18	-0.00605074		2933.18	0.15609271		3463.18	0.01236928		3993.18	-0.01553661
283.4	0.02449672		813.39	0.01698255		1343.39	0.0104855		1873.38	0.00028937		2403.38	-0.006631		2933.38	0.15617318		3463.38	0.01294685		3993.38	-0.01581948
283.6	0.02440065		813.59	0.0161991		1343.59	0.00962942		1873.58	0.00116273		2403.58	-0.00652825		2933.58	0.15646405		3463.58	0.01312464		3993.58	-0.01633343
283.8	0.02539302		813.79	0.01611015		1343.79	0.00874365		1873.78	0.00235871		2403.78	-0.00614332		2933.78	0.15703856		3463.78	0.01321431		3993.78	-0.01657994
284	0.02576544		813.99	0.0165116		1343.99	0.00808638		1873.98	0.00210301		2403.98	-0.00629916		2933.98	0.15725067		3463.98	0.01461548		3993.98	-0.01640751
284.2	0.02557423		814.19	0.01640871		1344.19	0.00780847		1874.18	0.0026698		2404.18	-0.00559778		2934.18	0.15767864		3464.18	0.01545416		3994.18	-0.01680009
284.4	0.02502935		814.39	0.0161515		1344.39	0.00740034		1874.38	0.00222609		2404.38	-0.00694045		2934.38	0.15729316		3464.38	0.01638114		3994.38	-0.01760653
284.6	0.02495435		814.59	0.01569222		1344.59	0.00627919		1874.58	0.00318323		2404.58	-0.00772579		2934.58	0.15794397		3464.58	0.01682222		3994.58	-0.01738105
284.8	0.02560373		814.79	0.01672076		1344.79	0.00629356		1874.78	0.00415194		2404.78	-0.00697701		2934.78	0.15863837		3464.78	0.01700737		3994.78	-0.01780574
285	0.02558722		814.99	0.01755067		1344.99	0.00530854		1874.98	0.0034659		2404.98	-0.0068998		2934.98	0.15852999		3464.98	0.01690176		3994.98	-0.01635509
285.2	0.0259635		815.19	0.01748794		1345.19	0.00627887		1875.18	0.00354369		2405.18	-0.00642354		2935.18	0.15906184		3465.18	0.01728268		3995.18	-0.01559119
285.4	0.02594765		815.39	0.01850617		1345.39	0.00586669		1875.38	0.00305516		2405.38	-0.00631997		2935.38	0.15941177		3465.38	0.01721014		3995.38	-0.01526381
285.6	0.02543865		815.59	0.01860799		1345.59	0.00566384		1875.58	0.00155359		2405.58	-0.00675144		2935.58	0.15914619		3465.58	0.0167848		3995.58	-0.01484054
285.8	0.02549399		815.79	0.01803831		1345.79	0.0066304		1875.78	0.00022738		2405.78	-0.00662217		2935.78	0.15946012		3465.78	0.01595419		3995.78	-0.01353894
286	0.0257215		815.99	0.01742764		1345.99	0.0071107		1875.98	-0.00010889		2405.98	-0.00752623		2935.98	0.15930434		3465.98	0.01585796		3995.98	-0.01345643
286.2	0.02544979		816.19	0.01639202		1346.19	0.00746083		1876.18	-0.00051332		2406.18	-0.00727598		2936.18	0.16037852		3466.18	0.01515445		3996.18	-0.01267036
286.4	0.02470039		816.39	0.01598673		1346.39	0.00784681		1876.38	-0.00097285		2406.38	-0.00670666		2936.38	0.15947313		3466.38	0.01456419		3996.38	-0.01236728
286.6	0.02394525		816.59	0.0162403		1346.59	0.00753129		1876.58	-0.00081108		2406.58	-0.00592097		2936.58	0.16004977		3466.58	0.01453922		3996.58	-0.01201835
286.8	0.02444927		816.79	0.01544056		1346.79	0.00822573		1876.78	-0.00163405		2406.78	-0.00590987		2936.78	0.15931974		3466.78	0.01437523		3996.78	-0.01100488
287	0.02380878		816.99	0.01542476		1346.99	0.00827197		1876.98	-0.00221973		2406.98	-0.00520853		2936.98	0.16048307		3466.98	0.01414321		3996.98	-0.01132882
287.2	0.02324287		817.19	0.01527625		1347.19	0.0084837		1877.18	-0.00280575		2407.18	-0.0045849		2937.18	0.16101327		3467.18	0.01463748		3997.18	-0.01175883
287.4	0.02192173		817.39	0.0153012		1347.39	0.00776305		1877.38	-0.00315935		2407.38	-0.00459662		2937.38	0.16167645		3467.38	0.01539577		3997.38	-0.01121796
287.6	0.02239202		817.59	0.01500919		1347.59	0.00720393		1877.58	-0.00242966		2407.58	-0.00406043		2937.58	0.16163376		3467.58	0.01634303		3997.58	-0.01168665
287.8	0.02296339		817.79	0.01592554		1347.79	0.00689242		1877.78	-0.00163614		2407.78	-0.00333655		2937.78	0.16209659		3467.78	0.01607462		3997.78	-0.01151094
288	0.02323903		817.99	0.01656637		1347.99	0.00667163		1877.98	-0.00131189		2407.98	-0.00232265		2937.98	0.16239184		3467.98	0.0164008		3997.98	-0.01206153
288.2	0.0236863		818.19	0.01635416		1348.19	0.00636314		1878.18	-0.00044841		2408.18	-0.00254841		2938.18	0.16288156		3468.18	0.01641225		3998.18	-0.01303585
288.4	0.02477159		818.39	0.01637572		1348.39	0.0065304		1878.38	0.00051985		2408.38	-0.00248112		2938.38	0.16238028		3468.38	0.01667251		3998.38	-0.01393026
288.6	0.02527616		818.59	0.01645324		1348.59	0.00582462		1878.58	0.00106377		2408.58	-0.00223291		2938.58	0.16302784		3468.58	0.01672967		3998.58	-0.0153404
288.8	0.02503908		818.79	0.0167513		1348.79	0.00600828		1878.78	0.00126856		2408.78	-0.00171898		2938.78	0.16220566		3468.78	0.01688532		3998.78	-0.01554093
289	0.02510205		818.99	0.01704203		1348.99	0.00592651		1878.98	0.00159555		2408.98	-0.00140665		2938.98	0.16143771		3468.98	0.01689949		3998.98	-0.01551485
289.2	0.02567713		819.19	0.01718488		1349.19	0.00707269		1879.18	0.00152553		2409.18	-0.00141733		2939.18	0.1617289		3469.18	0.01700893		3999.18	-0.01560151
289.4	0.02590482		819.39	0.01800343		1349.39	0.00700136		1879.38	0.00150099		2409.38	-0.00151443		2939.38	0.161496		3469.38	0.01707219		3999.38	-0.01615413
289.6	0.02607948		819.59	0.01795664		1349.59	0.00820149		1879.58	0.0016594		2409.58	-0.00126639		2939.58	0.16083486		3469.58	0.0166306		3999.58	-0.0160903
289.8	0.02561458		819.79	0.0179188		1349.79	0.00903221		1879.78	0.00237347		2409.78	-0.00090902		2939.78	0.16129418		3469.78	0.01704571		3999.78	-0.01502855
290	0.02545115		819.99	0.01812302		1349.99	0.0094403		1879.98	0.0020769		2409.98	-0.00156671		2939.98	0.1620631		3469.98	0.01727339		3999.98	-0.01442188
290.2	0.02488416		820.19	0.017109		1350.19	0.01001897		1880.18	0.00236705		2410.18	-0.00088607		2940.18	0.16399392		3470.18	0.01750956		4000.18	-0.01354039
290.4	0.02423466		820.39	0.01707258		1350.39	0.01065294		1880.38	0.00218014		2410.38	-0.00080948		2940.38	0.1637796		3470.38	0.01796871		4000.38	-0.01319668
290.6	0.0235008		820.59	0.01676794		1350.59	0.01031111		1880.58	0.00186439		2410.58	-0.00072944		2940.58	0.16464825		3470.58	0.01822548		4000.58	-0.01217998
290.8	0.02378237		820.79	0.01696662		1350.79	0.01103669		1880.78	0.00135742		2410.78	-0.00147843		2940.78	0.1651065		3470.78	0.01877843		4000.78	-0.01142546
291	0.02382701		820.99	0.01703326		1350.99	0.01047631		1880.98	0.00124622		2410.98	-0.0017706		2940.98	0.16653288		3470.98	0.01888539		4000.98	-0.01108316
291.2	0.02344961		821.19	0.01713199		1351.19	0.00997613		1881.18	0.00068012		2411.18	-0.00261037		2941.18	0.16709139		3471.18	0.02017635		4001.18	-0.01020281
291.4	0.02326225		821.39	0.01715254		1351.39	0.0091365		1881.38	0.00098758		2411.38	-0.00390198		2941.38	0.16741883		3471.38	0.02028358		4001.38	-0.01018335
291.6	0.02488215		821.59	0.01739877		1351.59	0.00806852		1881.58	0.00100031		2411.58	-0.00446545		2941.58	0.16736968		3471.58	0.02083282		4001.58	-0.0099554
291.8	0.02512639		821.79	0.01831003		1351.79	0.00694387		1881.78	0.00152582		2411.78	-0.00437957		2941.78	0.16859921		3471.78	0.02041693		4001.78	-0.00992611
292	0.0259394		821.99	0.01766497		1351.99	0.00705361		1881.98	0.00250804		2411.98	-0.0041687		2941.98	0.1690408		3471.98	0.01987891		4001.98	-0.01154358
292.2	0.02680961		822.19	0.01783874		1352.19	0.00594809		1882.18	0.00245317		2412.18	-0.00503198		2942.18	0.16857829		3472.18	0.01997433		4002.18	-0.01279037
292.4	0.02802825		822.39	0.01779576		1352.39	0.00620628		1882.38	0.00302656		2412.38	-0.00539426		2942.38	0.16866536		3472.38	0.02030918		4002.38	-0.01337208
292.6	0.02835752		822.59	0.01765228		1352.59	0.00539287		1882.58	0.00304417		2412.58	-0.00697994		2942.58	0.16932472		3472.58	0.01984085		4002.58	-0.01366191
292.8	0.02793863		822.79	0.01780305		1352.79	0.00469882		1882.78	0.00390873		2412.78	-0.00777415		2942.78	0.16933034		3472.78	0.02000457		4002.78	-0.0124905
293	0.0291066		822.99	0.01809727		1352.99	0.00389358		1882.98	0.00397096		2412.98	-0.00798172		2942.98	0.16966882		3472.98	0.01970832		4002.98	-0.01288602
293.2	0.02897175		823.19	0.01801002		1353.19	0.00363835		1883.18	0.00394637		2413.18	-0.00787924		2943.18	0.16997962		3473.18	0.01855044		4003.18	-0.01304853
293.4	0.02947155		823.39	0.01853884		1353.39	0.00316691		1883.38	0.00372979		2413.38	-0.0078707		2943.38	0.169629		3473.38	0.01824318		4003.38	-0.01355885
293.6	0.02912241		823.59	0.01844157		1353.59	0.00362229		1883.58	0.00408334		2413.58	-0.00714161		2943.58	0.16999299		3473.58	0.01811193		4003.58	-0.01403704
293.8	0.02801662		823.79	0.01745101		1353.79	0.00384821		1883.78	0.00343248		2413.78	-0.007033		2943.78	0.17066048		3473.78	0.0180381		4003.78	-0.01407864
294	0.02755315		823.99	0.0169753		1353.99	0.0049151		1883.98	0.00286255		2413.98	-0.00630421		2943.98	0.17060279		3473.98	0.01801466		4003.98	-0.0143346
294.2	0.02710933		824.19	0.01741273		1354.19	0.00502652		1884.18	0.00293607		2414.18	-0.0061965		2944.18	0.17051389		3474.18	0.01796892		4004.18	-0.01382896
294.4	0.02636416		824.39	0.01788451		1354.39	0.00551594		1884.38	0.00275486		2414.38	-0.0053537		2944.38	0.1696644		3474.38	0.01755694		4004.38	-0.0141371
294.6	0.02540567		824.59	0.01821317		1354.59	0.00583323		1884.58	0.00274205		2414.58	-0.0053959		2944.58	0.16939996		3474.58	0.01779152		4004.58	-0.01401781
294.8	0.02555913		824.79	0.01843115		1354.79	0.0055498		1884.78	0.00301067		2414.78	-0.00527287		2944.78	0.16937717		3474.78	0.01783209		4004.78	-0.01403253
295	0.02504125		824.99	0.01803093		1354.99	0.00516532		1884.98	0.00323799		2414.98	-0.0047115		2944.98	0.16896828		3474.98	0.01743904		4004.98	-0.01433064
295.2	0.02462809		825.19	0.01791704		1355.19	0.00532056		1885.18	0.00302549		2415.18	-0.00463656		2945.18	0.16833022		3475.18	0.01847844		4005.18	-0.01484459
295.4	0.02472296		825.39	0.01842796		1355.39	0.00469991		1885.38	0.00399554		2415.38	-0.0041438		2945.38	0.16762285		3475.38	0.01771426		4005.38	-0.0156854
295.6	0.02441091		825.59	0.01917997		1355.59	0.00428402		1885.58	0.00357544		2415.58	-0.00390035		2945.58	0.16673225		3475.58	0.01766757		4005.58	-0.01582915
295.8	0.02419516		825.79	0.01959387		1355.79	0.00469449		1885.78	0.00411611		2415.78	-0.00300162		2945.78	0.16687997		3475.78	0.01752509		4005.78	-0.01651232
296	0.02473545		825.99	0.01952799		1355.99	0.00515016		1885.98	0.00466766		2415.98	-0.00237536		2945.98	0.16642044		3475.98	0.01772602		4005.98	-0.0169174
296.2	0.02488526		826.19	0.01958253		1356.19	0.00505978		1886.18	0.00427731		2416.18	-0.00307696		2946.18	0.16597205		3476.18	0.01840919		4006.18	-0.01619011
296.4	0.02544719		826.39	0.01936274		1356.39	0.00555686		1886.38	0.00502984		2416.38	-0.00377587		2946.38	0.16610037		3476.38	0.01797094		4006.38	-0.01549633
296.6	0.0260702		826.59	0.01915762		1356.59	0.00469994		1886.58	0.00459417		2416.58	-0.00533356		2946.58	0.16651804		3476.58	0.01766723		4006.58	-0.01474161
296.8	0.02628783		826.79	0.0189411		1356.79	0.00428194		1886.78	0.00413954		2416.78	-0.00595801		2946.78	0.16723763		3476.78	0.018603		4006.78	-0.0137841
297	0.02715835		826.99	0.01875036		1356.99	0.00496091		1886.98	0.00382965		2416.98	-0.0063826		2946.98	0.16689611		3476.98	0.0184606		4006.98	-0.01387719
297.2	0.02681935		827.19	0.01812132		1357.19	0.00496441		1887.18	0.00398147		2417.18	-0.00667994		2947.18	0.16760656		3477.18	0.01872433		4007.18	-0.01333797
297.4	0.02732353		827.39	0.01813384		1357.39	0.00498704		1887.38	0.00365185		2417.38	-0.00726394		2947.38	0.16837265		3477.38	0.0196279		4007.38	-0.01262571
297.6	0.02680111		827.59	0.01723578		1357.59	0.00555421		1887.58	0.00423583		2417.58	-0.00720739		2947.58	0.1686343		3477.58	0.01992953		4007.58	-0.01258436
297.8	0.02692975		827.79	0.01613722		1357.79	0.0060631		1887.78	0.00333419		2417.78	-0.0071087		2947.78	0.16924557		3477.78	0.01982083		4007.78	-0.01217648
298	0.02726353		827.99	0.01671701		1357.99	0.00640472		1887.98	0.00327483		2417.98	-0.00674401		2947.98	0.16921125		3477.98	0.02019603		4007.98	-0.01177956
298.2	0.02723893		828.19	0.01746841		1358.19	0.00654193		1888.18	0.00381502		2418.18	-0.00637488		2948.18	0.16960542		3478.18	0.01931071		4008.18	-0.01093038
298.4	0.02663934		828.39	0.01642835		1358.39	0.00743419		1888.38	0.00370786		2418.38	-0.00535973		2948.38	0.16993793		3478.38	0.01870457		4008.38	-0.01168006
298.6	0.02568061		828.59	0.01675891		1358.59	0.00703493		1888.58	0.0038892		2418.58	-0.00489514		2948.58	0.17021014		3478.58	0.01946074		4008.58	-0.01139139
298.8	0.02518702		828.79	0.01703321		1358.79	0.00668323		1888.78	0.00383294		2418.78	-0.00421293		2948.78	0.16963265		3478.78	0.0193646		4008.78	-0.0110948
299	0.02460863		828.99	0.0164443		1358.99	0.00728187		1888.98	0.00427874		2418.98	-0.00324703		2948.98	0.16982342		3478.98	0.01924989		4008.98	-0.01187639
299.2	0.02542989		829.19	0.0175162		1359.19	0.00702779		1889.18	0.00399115		2419.18	-0.00291404		2949.18	0.17011791		3479.18	0.01979226		4009.18	-0.01273322
299.4	0.02602196		829.39	0.01862843		1359.39	0.00749901		1889.38	0.00399758		2419.38	-0.00211412		2949.38	0.16992998		3479.38	0.01905752		4009.38	-0.01310664
299.6	0.02608813		829.59	0.01929758		1359.59	0.00753859		1889.58	0.00342181		2419.58	-0.00161563		2949.58	0.17009536		3479.58	0.01923722		4009.58	-0.01307513
299.8	0.02636349		829.79	0.02028934		1359.79	0.00693885		1889.78	0.00381209		2419.78	-0.00050285		2949.78	0.17042032		3479.78	0.01913811		4009.78	-0.01308543
300	0.02706852		829.99	0.02085116		1359.99	0.00660419		1889.98	0.00401237		2419.98	0.00025979		2949.98	0.17042365		3479.98	0.01893549		4009.98	-0.01372825
300.2	0.0271346		830.19	0.0214845		1360.19	0.00579381		1890.18	0.00391576		2420.18	-0.00017104		2950.18	0.17039236		3480.18	0.01924502		4010.18	-0.014266
300.4	0.02730024		830.39	0.0218259		1360.39	0.00532662		1890.38	0.00331188		2420.38	0.00003544		2950.38	0.17085921		3480.38	0.01878969		4010.38	-0.01449659
300.6	0.02843381		830.59	0.02176106		1360.59	0.00500165		1890.58	0.00278343		2420.58	-0.00009357		2950.58	0.17123411		3480.58	0.01842944		4010.58	-0.01484715
300.8	0.02871587		830.79	0.02181146		1360.79	0.00540369		1890.78	0.00207445		2420.78	-0.00029737		2950.78	0.17163858		3480.78	0.01906719		4010.78	-0.01433313
301	0.02847471		830.99	0.02149244		1360.99	0.00556698		1890.98	0.00262715		2420.98	-0.001079		2950.98	0.17208936		3480.98	0.01883123		4010.98	-0.01438886
301.2	0.02774536		831.19	0.02050702		1361.19	0.00498633		1891.18	0.00312508		2421.18	-0.00076096		2951.18	0.17289696		3481.18	0.01901883		4011.18	-0.01424611
301.4	0.02748331		831.39	0.01995713		1361.39	0.00546771		1891.38	0.00280996		2421.38	-0.0015872		2951.38	0.17363926		3481.38	0.01976714		4011.38	-0.01356095
301.6	0.0275292		831.59	0.01895628		1361.59	0.00599799		1891.58	0.00356772		2421.58	-0.00284535		2951.58	0.17331327		3481.58	0.0202301		4011.58	-0.01371115
301.8	0.0276771		831.79	0.01859769		1361.79	0.00590878		1891.78	0.00358122		2421.78	-0.00317901		2951.78	0.17390178		3481.78	0.02083875		4011.78	-0.01392317
302	0.02794539		831.99	0.01857787		1361.99	0.00596846		1891.98	0.00330356		2421.98	-0.00496297		2951.98	0.17372382		3481.98	0.02143553		4011.98	-0.01422326
302.2	0.02781112		832.19	0.01831536		1362.19	0.00677657		1892.18	0.00316231		2422.18	-0.00442007		2952.18	0.17419452		3482.18	0.02093194		4012.18	-0.01465712
302.4	0.02781432		832.39	0.01799228		1362.39	0.00753733		1892.38	0.00290944		2422.38	-0.00511115		2952.38	0.17501947		3482.38	0.02244817		4012.38	-0.01523313
302.6	0.02813257		832.59	0.0181266		1362.59	0.00768626		1892.58	0.00264942		2422.58	-0.00510696		2952.58	0.17609891		3482.58	0.02285541		4012.58	-0.01504527
302.8	0.0281633		832.79	0.01757916		1362.79	0.00839895		1892.78	0.00219189		2422.78	-0.00579748		2952.78	0.17500112		3482.78	0.02204104		4012.78	-0.01514324
303	0.02836996		832.99	0.01716676		1362.99	0.00852776		1892.98	0.00246045		2422.98	-0.00581493		2952.98	0.17527852		3482.98	0.02096927		4012.98	-0.01601476
303.2	0.02923759		833.19	0.01734878		1363.19	0.0085405		1893.18	0.0025127		2423.18	-0.00637701		2953.18	0.17541443		3483.18	0.02170102		4013.18	-0.01568769
303.4	0.02926949		833.39	0.01736751		1363.39	0.0092516		1893.38	0.00301415		2423.38	-0.0061833		2953.38	0.17491054		3483.38	0.02143218		4013.38	-0.01587797
303.6	0.02992673		833.59	0.01776058		1363.59	0.00853399		1893.58	0.00314487		2423.58	-0.00567825		2953.58	0.17510317		3483.58	0.02043333		4013.58	-0.01555428
303.8	0.03017717		833.79	0.01861561		1363.79	0.00782583		1893.78	0.00277661		2423.78	-0.00543327		2953.78	0.17541183		3483.78	0.01960749		4013.78	-0.01598461
304	0.03058915		833.99	0.01922692		1363.99	0.00778399		1893.98	0.00263215		2423.98	-0.00480134		2953.98	0.17584874		3483.98	0.01882706		4013.98	-0.01632851
304.2	0.03013113		834.19	0.01979361		1364.19	0.00647687		1894.18	0.00243433		2424.18	-0.0051877		2954.18	0.17569388		3484.18	0.01829655		4014.18	-0.01589912
304.4	0.02990703		834.39	0.02013767		1364.39	0.00666932		1894.38	0.00282773		2424.38	-0.00428179		2954.38	0.17625003		3484.38	0.01713746		4014.38	-0.01539554
304.6	0.03022147		834.59	0.02050111		1364.59	0.006705		1894.58	0.00282785		2424.58	-0.00435756		2954.58	0.17616047		3484.58	0.01664299		4014.58	-0.01589011
304.8	0.02951139		834.79	0.01998393		1364.79	0.00689559		1894.78	0.00268224		2424.78	-0.00408764		2954.78	0.17584546		3484.78	0.01671907		4014.78	-0.01521847
305	0.02853088		834.99	0.01970467		1364.99	0.00629718		1894.98	0.00365428		2424.98	-0.0042552		2954.98	0.17630068		3484.98	0.01657078		4014.98	-0.01429191
305.2	0.02749068		835.19	0.01843607		1365.19	0.00625794		1895.18	0.00399431		2425.18	-0.00374424		2955.18	0.17559757		3485.18	0.01693493		4015.18	-0.01353428
305.4	0.02786196		835.39	0.01853375		1365.39	0.00730211		1895.38	0.00446196		2425.38	-0.00420854		2955.38	0.17558068		3485.38	0.01773302		4015.38	-0.0126175
305.6	0.02794515		835.59	0.01817573		1365.59	0.00716862		1895.58	0.00535234		2425.58	-0.00539032		2955.58	0.17548041		3485.58	0.01849507		4015.58	-0.01248623
305.8	0.02745404		835.79	0.01843158		1365.79	0.00629171		1895.78	0.00383312		2425.78	-0.0047149		2955.78	0.17587354		3485.78	0.0190586		4015.78	-0.01284201
306	0.02756814		835.99	0.01792246		1365.99	0.00586064		1895.98	0.00223005		2425.98	-0.00556074		2955.98	0.17535162		3485.98	0.01970305		4015.98	-0.0132641
306.2	0.02780748		836.19	0.01838067		1366.19	0.00692061		1896.18	0.00192528		2426.18	-0.00424063		2956.18	0.17602497		3486.18	0.0203586		4016.18	-0.01331443
306.4	0.02752286		836.39	0.01798336		1366.39	0.00782825		1896.38	0.00222997		2426.38	-0.00499767		2956.38	0.17619483		3486.38	0.02104637		4016.38	-0.01228479
306.6	0.02746761		836.59	0.01770158		1366.59	0.00741581		1896.58	0.00215371		2426.58	-0.00484751		2956.58	0.17572889		3486.58	0.0201962		4016.58	-0.01215911
306.8	0.02661465		836.79	0.01712839		1366.79	0.00691482		1896.78	0.00230798		2426.78	-0.00584942		2956.78	0.17429506		3486.78	0.0201165		4016.78	-0.01237261
307	0.0261083		836.99	0.01758926		1366.99	0.00679709		1896.98	0.00252842		2426.98	-0.00583464		2956.98	0.17455806		3486.98	0.01980994		4016.98	-0.01343057
307.2	0.02643062		837.19	0.01771387		1367.19	0.00694406		1897.18	0.00260771		2427.18	-0.00636612		2957.18	0.17512813		3487.18	0.02068438		4017.18	-0.01281925
307.4	0.02676714		837.39	0.01809269		1367.39	0.00613862		1897.38	0.00245794		2427.38	-0.00626359		2957.38	0.17540019		3487.38	0.01986799		4017.38	-0.01377427
307.6	0.02774604		837.59	0.01749731		1367.59	0.00506405		1897.58	0.0019066		2427.58	-0.00615166		2957.58	0.17582155		3487.58	0.01924715		4017.58	-0.01331166
307.8	0.02776499		837.79	0.01764748		1367.79	0.00454572		1897.78	0.00184917		2427.78	-0.00597934		2957.78	0.17638818		3487.78	0.01927285		4017.78	-0.01420355
308	0.02764128		837.99	0.0183133		1367.99	0.00370259		1897.98	0.00184549		2427.98	-0.00593309		2957.98	0.17678849		3487.98	0.01864076		4017.98	-0.01425959
308.2	0.02739749		838.19	0.01821481		1368.19	0.00263329		1898.18	0.00185477		2428.18	-0.00582571		2958.18	0.17722898		3488.18	0.01882386		4018.18	-0.01438487
308.4	0.02740467		838.39	0.01799625		1368.39	0.00314898		1898.38	0.00233711		2428.38	-0.00542364		2958.38	0.17851877		3488.38	0.01848134		4018.38	-0.0138125
308.6	0.02708965		838.59	0.01740159		1368.59	0.00357187		1898.58	0.00204515		2428.58	-0.00536773		2958.58	0.17887063		3488.58	0.01785303		4018.58	-0.01448403
308.8	0.02654559		838.79	0.01714571		1368.79	0.00397376		1898.78	0.00241237		2428.78	-0.0044506		2958.78	0.17916932		3488.78	0.01739452		4018.78	-0.01512039
309	0.02693703		838.99	0.01718285		1368.99	0.00509996		1898.98	0.00321192		2428.98	-0.00433502		2958.98	0.17921365		3488.98	0.01754303		4018.98	-0.01564816
309.2	0.02665666		839.19	0.01645675		1369.19	0.00677106		1899.18	0.00286978		2429.18	-0.00350651		2959.18	0.17929316		3489.18	0.0174283		4019.18	-0.01572203
309.4	0.02794891		839.39	0.01612494		1369.39	0.00816984		1899.38	0.00275318		2429.38	-0.00271764		2959.38	0.17919992		3489.38	0.01756849		4019.38	-0.01562976
309.6	0.02724932		839.59	0.01563925		1369.59	0.00856068		1899.58	0.00183816		2429.58	-0.00354861		2959.58	0.1800065		3489.58	0.0190301		4019.58	-0.01588527
309.8	0.02729361		839.79	0.01545109		1369.79	0.00949792		1899.78	0.00085967		2429.78	-0.00271979		2959.78	0.18036802		3489.78	0.01896729		4019.78	-0.01601751
310	0.02697656		839.99	0.01495952		1369.99	0.00986835		1899.98	0.00061143		2429.98	-0.00343924		2959.98	0.17962674		3489.98	0.02057227		4019.98	-0.01662078
310.2	0.02739832		840.19	0.01564471		1370.19	0.0112602		1900.18	0.00094984		2430.18	-0.00337605		2960.18	0.18037499		3490.18	0.02099233		4020.18	-0.0170309
310.4	0.02755707		840.39	0.01554904		1370.39	0.01106141		1900.38	0.00177941		2430.38	-0.00432509		2960.38	0.18036429		3490.38	0.02073493		4020.38	-0.01633069
310.6	0.027228		840.59	0.01633845		1370.59	0.00991355		1900.58	0.00202795		2430.58	-0.00374716		2960.58	0.1803786		3490.58	0.02129006		4020.58	-0.01746881
310.8	0.02763641		840.79	0.01569635		1370.79	0.00976135		1900.78	0.00253384		2430.78	-0.00410429		2960.78	0.18060669		3490.78	0.02174073		4020.78	-0.01786395
311	0.02743498		840.99	0.01646851		1370.99	0.00968086		1900.98	0.00290103		2430.98	-0.00434169		2960.98	0.18076603		3490.98	0.02169974		4020.98	-0.01818104
311.2	0.02821867		841.19	0.01629102		1371.19	0.00845579		1901.18	0.00306947		2431.18	-0.00430458		2961.18	0.18074138		3491.18	0.02212333		4021.18	-0.01727882
311.4	0.02813952		841.39	0.01593005		1371.39	0.00712795		1901.38	0.00384302		2431.38	-0.00376284		2961.38	0.18087093		3491.38	0.02193568		4021.38	-0.01770113
311.6	0.02949862		841.59	0.01524133		1371.59	0.00584622		1901.58	0.00338378		2431.58	-0.00361441		2961.58	0.18016582		3491.58	0.02114251		4021.58	-0.0164498
311.8	0.03045869		841.79	0.01558365		1371.79	0.00507711		1901.78	0.00382654		2431.78	-0.00334804		2961.78	0.18069084		3491.78	0.02092716		4021.78	-0.01563644
312	0.03057136		841.99	0.01582113		1371.99	0.00442234		1901.98	0.00401326		2431.98	-0.00322339		2961.98	0.18097741		3491.98	0.02065892		4021.98	-0.01451506
312.2	0.02985067		842.19	0.01560683		1372.19	0.0035686		1902.18	0.00409024		2432.18	-0.00334187		2962.18	0.1814752		3492.18	0.02062379		4022.18	-0.01310543
312.4	0.02973084		842.39	0.01549858		1372.39	0.00399088		1902.38	0.00410909		2432.38	-0.00420415		2962.38	0.1813991		3492.38	0.01983175		4022.38	-0.01254057
312.6	0.02967652		842.59	0.01579864		1372.59	0.00427512		1902.58	0.00410468		2432.58	-0.00415366		2962.58	0.18083722		3492.58	0.01999447		4022.58	-0.01376112
312.8	0.02963139		842.79	0.01593102		1372.79	0.00455784		1902.78	0.00414863		2432.78	-0.00402895		2962.78	0.17996625		3492.78	0.01989637		4022.78	-0.01364963
313	0.02992552		842.99	0.01589678		1372.99	0.0054114		1902.98	0.00495247		2432.98	-0.00393466		2962.98	0.1795372		3492.98	0.01910701		4022.98	-0.01351317
313.2	0.02956655		843.19	0.01587893		1373.19	0.00517551		1903.18	0.00446593		2433.18	-0.00458571		2963.18	0.18004258		3493.18	0.01899608		4023.18	-0.01274931
313.4	0.02891447		843.39	0.01594843		1373.39	0.00543486		1903.38	0.00437702		2433.38	-0.00466936		2963.38	0.1797109		3493.38	0.0190084		4023.38	-0.01250461
313.6	0.02748169		843.59	0.01663652		1373.59	0.00548739		1903.58	0.00410551		2433.58	-0.0058313		2963.58	0.18016218		3493.58	0.01974205		4023.58	-0.01261508
313.8	0.02702431		843.79	0.01700309		1373.79	0.00530846		1903.78	0.00355014		2433.78	-0.00579977		2963.78	0.18073691		3493.78	0.01915965		4023.78	-0.01223339
314	0.02665298		843.99	0.01777437		1373.99	0.00467583		1903.98	0.00311045		2433.98	-0.00591153		2963.98	0.18105246		3493.98	0.02030275		4023.98	-0.01285405
314.2	0.02698314		844.19	0.01853529		1374.19	0.00515602		1904.18	0.00328177		2434.18	-0.00604377		2964.18	0.18156418		3494.18	0.01955726		4024.18	-0.01293389
314.4	0.0269858		844.39	0.01877378		1374.39	0.00472445		1904.38	0.00223588		2434.38	-0.00618169		2964.38	0.18156497		3494.38	0.019555		4024.38	-0.01225144
314.6	0.0258837		844.59	0.01877609		1374.59	0.0047643		1904.58	0.00208347		2434.58	-0.00476606		2964.58	0.1811026		3494.58	0.0198681		4024.58	-0.0130211
314.8	0.02654087		844.79	0.01825434		1374.79	0.00457238		1904.78	0.00285573		2434.78	-0.00528039		2964.78	0.1816477		3494.78	0.02000115		4024.78	-0.01340008
315	0.02597519		844.99	0.01883372		1374.99	0.0048047		1904.98	0.00209861		2434.98	-0.00554748		2964.98	0.18167197		3494.98	0.02001836		4024.98	-0.0137328
315.2	0.02607035		845.19	0.01876473		1375.19	0.00452034		1905.18	0.0019639		2435.18	-0.00494533		2965.18	0.18231833		3495.18	0.02083504		4025.18	-0.01388591
315.4	0.02628517		845.39	0.01828057		1375.39	0.00418087		1905.38	0.0025074		2435.38	-0.00541089		2965.38	0.18255479		3495.38	0.02056741		4025.38	-0.0145283
315.6	0.02745386		845.59	0.01748904		1375.59	0.00404586		1905.58	0.00074314		2435.58	-0.00565132		2965.58	0.18277663		3495.58	0.02033968		4025.58	-0.0141573
315.8	0.02786632		845.79	0.01722136		1375.79	0.00422085		1905.78	0.00092907		2435.78	-0.00605876		2965.78	0.18344042		3495.78	0.02157992		4025.78	-0.01469666
316	0.02768336		845.99	0.01725529		1375.99	0.00448309		1905.98	0.00113993		2435.98	-0.00614337		2965.98	0.18390583		3495.98	0.02266743		4025.98	-0.01546597
316.2	0.02786128		846.19	0.01681673		1376.19	0.00431407		1906.18	0.0002374		2436.18	-0.00719629		2966.18	0.18528984		3496.18	0.02331897		4026.18	-0.01547698
316.4	0.02806478		846.39	0.01632229		1376.39	0.0050639		1906.38	0.00030244		2436.38	-0.00745377		2966.38	0.18497928		3496.38	0.02370464		4026.38	-0.01659176
316.6	0.027966		846.59	0.01604934		1376.59	0.00552254		1906.58	0.00070959		2436.58	-0.0076488		2966.58	0.1854093		3496.58	0.02484158		4026.58	-0.01655556
316.8	0.02695537		846.79	0.01587453		1376.79	0.0059634		1906.78	0.00168883		2436.78	-0.00739654		2966.78	0.18626254		3496.78	0.02377204		4026.78	-0.01571776
317	0.02733555		846.99	0.01601624		1376.99	0.00693168		1906.98	0.00310279		2436.98	-0.00771366		2966.98	0.1864276		3496.98	0.02323663		4026.98	-0.01590833
317.2	0.02698257		847.19	0.0163053		1377.19	0.00629944		1907.18	0.00341523		2437.18	-0.00818241		2967.18	0.18710929		3497.18	0.02336607		4027.18	-0.01471124
317.4	0.02627649		847.39	0.01672837		1377.39	0.00692253		1907.38	0.00395474		2437.38	-0.00782922		2967.38	0.18642162		3497.38	0.0235905		4027.38	-0.01377049
317.6	0.02650049		847.59	0.01655555		1377.59	0.00648878		1907.58	0.00520592		2437.58	-0.00791284		2967.58	0.18689539		3497.58	0.02357817		4027.58	-0.01348027
317.8	0.0274745		847.79	0.01644047		1377.79	0.00682749		1907.78	0.0062542		2437.78	-0.00725036		2967.78	0.18732693		3497.78	0.02327754		4027.78	-0.01293419
318	0.0283943		847.99	0.01677344		1377.99	0.00648537		1907.98	0.00692533		2437.98	-0.00710672		2967.98	0.18749959		3497.98	0.02300815		4027.98	-0.01291043
318.2	0.02902295		848.19	0.01683818		1378.19	0.00684793		1908.18	0.00646361		2438.18	-0.00715161		2968.18	0.18684938		3498.18	0.02249458		4028.18	-0.0131862
318.4	0.02924371		848.39	0.0170017		1378.39	0.00641586		1908.38	0.00630388		2438.38	-0.00690084		2968.38	0.18608699		3498.38	0.0223069		4028.38	-0.01303345
318.6	0.029404		848.59	0.01781323		1378.59	0.00616328		1908.58	0.0075774		2438.58	-0.00640829		2968.58	0.18563122		3498.58	0.02301659		4028.58	-0.01421728
318.8	0.03021956		848.79	0.01789811		1378.79	0.00594011		1908.78	0.00757447		2438.78	-0.00652445		2968.78	0.18561406		3498.78	0.02294355		4028.78	-0.01438029
319	0.02972469		848.99	0.01934239		1378.99	0.00575747		1908.98	0.00753904		2438.98	-0.00688235		2968.98	0.1853172		3498.98	0.02427242		4028.98	-0.01385799
319.2	0.02968181		849.19	0.01924553		1379.19	0.00442598		1909.18	0.00739659		2439.18	-0.00715333		2969.18	0.18517732		3499.18	0.02455744		4029.18	-0.0141716
319.4	0.02970237		849.39	0.01791329		1379.39	0.00358373		1909.38	0.00611879		2439.38	-0.00759718		2969.38	0.18471468		3499.38	0.02408796		4029.38	-0.01501478
319.6	0.0288826		849.59	0.01691851		1379.59	0.00370541		1909.58	0.00354127		2439.58	-0.00584771		2969.58	0.18440125		3499.58	0.02444181		4029.58	-0.0154354
319.8	0.02879784		849.79	0.01690056		1379.79	0.00352461		1909.78	0.00354859		2439.78	-0.00631219		2969.78	0.18476602		3499.78	0.02416641		4029.78	-0.01603916
320	0.02879879		849.99	0.01728776		1379.99	0.00408879		1909.98	0.00302029		2439.98	-0.00531562		2969.98	0.18510554		3499.98	0.02393332		4029.98	-0.01603338
320.2	0.02851201		850.19	0.01653031		1380.19	0.00431529		1910.18	0.00255079		2440.18	-0.00534079		2970.18	0.18565404		3500.18	0.02333856		4030.18	-0.01571671
320.4	0.02671287		850.39	0.01693056		1380.39	0.00459123		1910.38	0.00234724		2440.38	-0.0048596		2970.38	0.18524369		3500.38	0.02295377		4030.38	-0.01566021
320.6	0.0264408		850.59	0.01646441		1380.59	0.00468341		1910.58	0.00167405		2440.58	-0.0044449		2970.58	0.18601115		3500.58	0.0232703		4030.58	-0.01555535
320.8	0.02621633		850.79	0.01600814		1380.79	0.00501407		1910.78	0.00290919		2440.78	-0.00395726		2970.78	0.18630231		3500.78	0.02199132		4030.78	-0.01620348
321	0.02713579		850.99	0.01543878		1380.99	0.00543696		1910.98	0.00420332		2440.98	-0.00399684		2970.98	0.18552323		3500.98	0.02174327		4030.98	-0.01617008
321.2	0.02620399		851.19	0.01531094		1381.19	0.00492393		1911.18	0.00431988		2441.18	-0.00418003		2971.18	0.18590993		3501.18	0.0213411		4031.18	-0.01539554
321.4	0.02603678		851.39	0.0145294		1381.39	0.00532253		1911.38	0.00570844		2441.38	-0.00393608		2971.38	0.18596427		3501.38	0.02091048		4031.38	-0.01577408
321.6	0.02711769		851.59	0.01442058		1381.59	0.00559539		1911.58	0.00701722		2441.58	-0.00361947		2971.58	0.18642342		3501.58	0.02076317		4031.58	-0.01712939
321.8	0.02862816		851.79	0.01397465		1381.79	0.00649573		1911.78	0.00768925		2441.78	-0.00384134		2971.78	0.18670273		3501.78	0.02042657		4031.78	-0.01777963
322	0.02935343		851.99	0.01490283		1381.99	0.00622108		1911.98	0.0071671		2441.98	-0.00478359		2971.98	0.18746362		3501.98	0.01997724		4031.98	-0.01867468
322.2	0.03004365		852.19	0.01636952		1382.19	0.00625628		1912.18	0.00711521		2442.18	-0.00437861		2972.18	0.18748714		3502.18	0.02038084		4032.18	-0.01950134
322.4	0.0304581		852.39	0.017019		1382.39	0.00562974		1912.38	0.00775039		2442.38	-0.00453332		2972.38	0.18731204		3502.38	0.02083585		4032.38	-0.01880974
322.6	0.03047581		852.59	0.01762736		1382.59	0.00481756		1912.58	0.00735364		2442.58	-0.00489545		2972.58	0.1879385		3502.58	0.02170892		4032.58	-0.01826036
322.8	0.0311232		852.79	0.01823578		1382.79	0.00443354		1912.78	0.00706485		2442.78	-0.00532036		2972.78	0.18772454		3502.78	0.02222666		4032.78	-0.01692979
323	0.03113017		852.99	0.01866675		1382.99	0.00375198		1912.98	0.00690958		2442.98	-0.00644493		2972.98	0.18877197		3502.98	0.02338686		4032.98	-0.01602034
323.2	0.03095754		853.19	0.01740603		1383.19	0.00329932		1913.18	0.00548137		2443.18	-0.00672289		2973.18	0.18913842		3503.18	0.02304899		4033.18	-0.01605306
323.4	0.03075571		853.39	0.01633611		1383.39	0.00373381		1913.38	0.00328625		2443.38	-0.00628098		2973.38	0.18970578		3503.38	0.0230087		4033.38	-0.01588893
323.6	0.03073027		853.59	0.01700572		1383.59	0.00366082		1913.58	0.00154614		2443.58	-0.00524475		2973.58	0.19028885		3503.58	0.02244079		4033.58	-0.01544685
323.8	0.03090757		853.79	0.01842856		1383.79	0.00409002		1913.78	0.00117762		2443.78	-0.00638373		2973.78	0.19086161		3503.78	0.02172346		4033.78	-0.01491484
324	0.03058301		853.99	0.01914394		1383.99	0.00442756		1913.98	-0.0000279		2443.98	-0.00558755		2973.98	0.19087207		3503.98	0.02193159		4033.98	-0.01394335
324.2	0.0299438		854.19	0.01892428		1384.19	0.00417166		1914.18	-0.00044062		2444.18	-0.00573505		2974.18	0.1916507		3504.18	0.02203528		4034.18	-0.01314188
324.4	0.02880486		854.39	0.01938067		1384.39	0.00406473		1914.38	-0.00074004		2444.38	-0.00611323		2974.38	0.19271705		3504.38	0.02261808		4034.38	-0.01312071
324.6	0.02868817		854.59	0.01854376		1384.59	0.00412267		1914.58	0.00021374		2444.58	-0.00631567		2974.58	0.19301596		3504.58	0.0232677		4034.58	-0.01348723
324.8	0.02812855		854.79	0.01876881		1384.79	0.00431598		1914.78	0.00133289		2444.78	-0.00705278		2974.78	0.19235315		3504.78	0.02311634		4034.78	-0.01341697
325	0.02721523		854.99	0.01846895		1384.99	0.00454241		1914.98	0.00233009		2444.98	-0.00726069		2974.98	0.19144633		3504.98	0.0231104		4034.98	-0.01229546
325.2	0.02575783		855.19	0.01796853		1385.19	0.00503211		1915.18	0.00336718		2445.18	-0.00719263		2975.18	0.19144201		3505.18	0.0227491		4035.18	-0.01124023
325.4	0.02591953		855.39	0.01784287		1385.39	0.00551083		1915.38	0.00509843		2445.38	-0.00736144		2975.38	0.19120568		3505.38	0.02186652		4035.38	-0.01170015
325.6	0.02596707		855.59	0.01774895		1385.59	0.00592054		1915.58	0.00575447		2445.58	-0.0076298		2975.58	0.19046827		3505.58	0.02255749		4035.58	-0.01320528
325.8	0.02610387		855.79	0.01714534		1385.79	0.00597279		1915.78	0.00615625		2445.78	-0.00731763		2975.78	0.19088544		3505.78	0.02208989		4035.78	-0.01402729
326	0.02555089		855.99	0.01764445		1385.99	0.00557477		1915.98	0.00633501		2445.98	-0.00689678		2975.98	0.19109747		3505.98	0.02124392		4035.98	-0.01472927
326.2	0.02549686		856.19	0.0164364		1386.19	0.00540423		1916.18	0.00646486		2446.18	-0.00644651		2976.18	0.19116236		3506.18	0.02119246		4036.18	-0.01457802
326.4	0.02540027		856.39	0.01518581		1386.39	0.00541283		1916.38	0.00653679		2446.38	-0.00625537		2976.38	0.1907729		3506.38	0.02154749		4036.38	-0.01427828
326.6	0.02595331		856.59	0.01452139		1386.59	0.00487642		1916.58	0.00681479		2446.58	-0.00666039		2976.58	0.19158354		3506.58	0.02184605		4036.58	-0.01393263
326.8	0.02735214		856.79	0.01402463		1386.79	0.00474835		1916.78	0.00641645		2446.78	-0.00738634		2976.78	0.19166217		3506.78	0.02188212		4036.78	-0.01425747
327	0.02763462		856.99	0.01200199		1386.99	0.00548858		1916.98	0.00607934		2446.98	-0.00771573		2976.98	0.19301266		3506.98	0.0212642		4036.98	-0.0144594
327.2	0.02829729		857.19	0.01104696		1387.19	0.00565641		1917.18	0.00562275		2447.18	-0.00739522		2977.18	0.19295505		3507.18	0.02162751		4037.18	-0.01467868
327.4	0.02950752		857.39	0.01089223		1387.39	0.00633932		1917.38	0.00489477		2447.38	-0.00737537		2977.38	0.19317509		3507.38	0.02076927		4037.38	-0.01504603
327.6	0.03054577		857.59	0.01172039		1387.59	0.00649844		1917.58	0.00422439		2447.58	-0.00738139		2977.58	0.19362258		3507.58	0.02087427		4037.58	-0.01490797
327.8	0.03019526		857.79	0.0123755		1387.79	0.00750387		1917.78	0.00367503		2447.78	-0.00740265		2977.78	0.1941854		3507.78	0.02106062		4037.78	-0.01426371
328	0.03027533		857.99	0.01304744		1387.99	0.00821322		1917.98	0.00286599		2447.98	-0.00732022		2977.98	0.19519285		3507.98	0.02210144		4037.98	-0.0134062
328.2	0.0302867		858.19	0.01329484		1388.19	0.00865069		1918.18	0.00301426		2448.18	-0.00743293		2978.18	0.19537181		3508.18	0.02308049		4038.18	-0.013327
328.4	0.03033798		858.39	0.01362409		1388.39	0.00920503		1918.38	0.00296599		2448.38	-0.00775831		2978.38	0.19522767		3508.38	0.02350903		4038.38	-0.01387878
328.6	0.03041959		858.59	0.01503674		1388.59	0.00936019		1918.58	0.00302616		2448.58	-0.00792885		2978.58	0.19480518		3508.58	0.02401191		4038.58	-0.01402423
328.8	0.03005864		858.79	0.01652845		1388.79	0.00949763		1918.78	0.00291515		2448.78	-0.00721815		2978.78	0.19428394		3508.78	0.02385929		4038.78	-0.01331541
329	0.0298782		858.99	0.01730057		1388.99	0.00918405		1918.98	0.00389351		2448.98	-0.00599738		2978.98	0.19422014		3508.98	0.02345075		4038.98	-0.0129185
329.2	0.0299535		859.19	0.01732983		1389.19	0.00943723		1919.18	0.00410193		2449.18	-0.00564065		2979.18	0.19448912		3509.18	0.02374617		4039.18	-0.01266296
329.4	0.02930837		859.39	0.01839154		1389.39	0.00856681		1919.38	0.00445297		2449.38	-0.00581978		2979.38	0.19462841		3509.38	0.02331348		4039.38	-0.01359326
329.6	0.02900037		859.59	0.01852279		1389.59	0.00881949		1919.58	0.00477905		2449.58	-0.00476964		2979.58	0.19440589		3509.58	0.02394647		4039.58	-0.01397042
329.8	0.02841513		859.79	0.01930512		1389.79	0.00903032		1919.78	0.00448392		2449.78	-0.00327166		2979.78	0.19497084		3509.78	0.02408519		4039.78	-0.01403431
330	0.02723999		859.99	0.01891224		1389.99	0.00943096		1919.98	0.00446881		2449.98	-0.00293969		2979.98	0.19454112		3509.98	0.02308779		4039.98	-0.01452009
330.2	0.02693699		860.19	0.01943901		1390.19	0.00955725		1920.18	0.00456263		2450.18	-0.0027958		2980.18	0.19422286		3510.18	0.02422574		4040.18	-0.01464246
330.4	0.02680681		860.39	0.02021483		1390.39	0.00907942		1920.38	0.00474239		2450.38	-0.00177987		2980.38	0.1941692		3510.38	0.02390461		4040.38	-0.01464125
330.6	0.02762704		860.59	0.02014988		1390.59	0.00877533		1920.58	0.00490576		2450.58	-0.00181725		2980.58	0.19488449		3510.58	0.02368601		4040.58	-0.01459932
330.8	0.02714425		860.79	0.01987954		1390.79	0.00807892		1920.78	0.00447464		2450.78	-0.00142701		2980.78	0.19519497		3510.78	0.02357234		4040.78	-0.01530905
331	0.02703848		860.99	0.01954231		1390.99	0.00818624		1920.98	0.00564377		2450.98	-0.00113643		2980.98	0.19493488		3510.98	0.02323704		4040.98	-0.01553141
331.2	0.02782922		861.19	0.01926216		1391.19	0.00797313		1921.18	0.00589633		2451.18	-0.00154113		2981.18	0.19458937		3511.18	0.02350688		4041.18	-0.01554518
331.4	0.02814561		861.39	0.01858382		1391.39	0.00797094		1921.38	0.00580658		2451.38	-0.00140642		2981.38	0.19428501		3511.38	0.02320502		4041.38	-0.0155963
331.6	0.02817132		861.59	0.0185231		1391.59	0.00815663		1921.58	0.00529858		2451.58	-0.00150392		2981.58	0.19363387		3511.58	0.02418976		4041.58	-0.01489171
331.8	0.02777946		861.79	0.01839306		1391.79	0.00817784		1921.78	0.00502609		2451.78	-0.00178073		2981.78	0.19403979		3511.78	0.02498996		4041.78	-0.01492803
332	0.02868219		861.99	0.01865519		1391.99	0.0078984		1921.98	0.00527912		2451.98	-0.00201821		2981.98	0.19392844		3511.98	0.02619328		4041.98	-0.01573734
332.2	0.02871567		862.19	0.01796876		1392.19	0.00775097		1922.18	0.00579713		2452.18	-0.00212365		2982.18	0.19324297		3512.18	0.02661128		4042.18	-0.01669865
332.4	0.02838953		862.39	0.01819256		1392.39	0.00846621		1922.38	0.00486064		2452.38	-0.00257898		2982.38	0.19417656		3512.38	0.02622166		4042.38	-0.01712442
332.6	0.02724951		862.59	0.01895474		1392.59	0.00816396		1922.58	0.00478795		2452.58	-0.00283431		2982.58	0.1944431		3512.58	0.02585094		4042.58	-0.01696635
332.8	0.02693483		862.79	0.01906067		1392.79	0.00805906		1922.78	0.00536748		2452.78	-0.00248163		2982.78	0.19484265		3512.78	0.02512015		4042.78	-0.0169107
333	0.02751987		862.99	0.01919666		1392.99	0.00741286		1922.98	0.00619895		2452.98	-0.0028278		2982.98	0.19529349		3512.98	0.02475909		4042.98	-0.01660703
333.2	0.02781099		863.19	0.01864374		1393.19	0.00711728		1923.18	0.00584423		2453.18	-0.00456453		2983.18	0.19514443		3513.18	0.02486582		4043.18	-0.01633262
333.4	0.02700036		863.39	0.01969576		1393.39	0.00704487		1923.38	0.00575328		2453.38	-0.00583302		2983.38	0.19590468		3513.38	0.02464974		4043.38	-0.01684198
333.6	0.02730853		863.59	0.02000311		1393.59	0.0071287		1923.58	0.0053891		2453.58	-0.00583191		2983.58	0.1962972		3513.58	0.0253932		4043.58	-0.01634019
333.8	0.02602809		863.79	0.01998546		1393.79	0.00681008		1923.78	0.00491632		2453.78	-0.00622122		2983.78	0.1969801		3513.78	0.02539295		4043.78	-0.01699181
334	0.02605163		863.99	0.02004883		1393.99	0.00731361		1923.98	0.00496104		2453.98	-0.00647036		2983.98	0.19684378		3513.98	0.02465219		4043.98	-0.01756074
334.2	0.02668081		864.19	0.02131984		1394.19	0.00758204		1924.18	0.00487304		2454.18	-0.00637811		2984.18	0.19752034		3514.18	0.02507283		4044.18	-0.01687146
334.4	0.02718517		864.39	0.02109857		1394.39	0.00767049		1924.38	0.00488747		2454.38	-0.00648441		2984.38	0.19808229		3514.38	0.02433726		4044.38	-0.01609745
334.6	0.02767686		864.59	0.01992133		1394.59	0.00821197		1924.58	0.00492994		2454.58	-0.00673242		2984.58	0.19849866		3514.58	0.02450617		4044.58	-0.0169138
334.8	0.02761722		864.79	0.02070468		1394.79	0.00820435		1924.78	0.0048583		2454.78	-0.00775361		2984.78	0.19836966		3514.78	0.02519237		4044.78	-0.01696982
335	0.02807961		864.99	0.01953028		1394.99	0.00796948		1924.98	0.00475544		2454.98	-0.00783464		2984.98	0.19804201		3514.98	0.02507436		4044.98	-0.01705965
335.2	0.02872824		865.19	0.01860002		1395.19	0.00857446		1925.18	0.00496265		2455.18	-0.00794589		2985.18	0.19768658		3515.18	0.02491313		4045.18	-0.01656755
335.4	0.02968234		865.39	0.01756023		1395.39	0.00885248		1925.38	0.00580757		2455.38	-0.00818844		2985.38	0.19719722		3515.38	0.02509815		4045.38	-0.01623963
335.6	0.03007291		865.59	0.01778681		1395.59	0.00932978		1925.58	0.00597		2455.58	-0.00847199		2985.58	0.19682095		3515.58	0.02507196		4045.58	-0.01661511
335.8	0.03080029		865.79	0.01716344		1395.79	0.00889233		1925.78	0.00646028		2455.78	-0.00780279		2985.78	0.19719471		3515.78	0.02511883		4045.78	-0.0165352
336	0.03049082		865.99	0.01663119		1395.99	0.00861492		1925.98	0.00705552		2455.98	-0.00694512		2985.98	0.19750989		3515.98	0.02510583		4045.98	-0.0169203
336.2	0.02995189		866.19	0.01550939		1396.19	0.00915906		1926.18	0.00684388		2456.18	-0.00755254		2986.18	0.19736729		3516.18	0.02516818		4046.18	-0.01744271
336.4	0.0300738		866.39	0.01546333		1396.39	0.00845341		1926.38	0.00548887		2456.38	-0.0075216		2986.38	0.19757779		3516.38	0.02454143		4046.38	-0.01653844
336.6	0.02987436		866.59	0.01499898		1396.59	0.00707202		1926.58	0.00623874		2456.58	-0.00665045		2986.58	0.19702497		3516.58	0.02392773		4046.58	-0.01661949
336.8	0.03056133		866.79	0.01527184		1396.79	0.00576737		1926.78	0.00635845		2456.78	-0.00622272		2986.78	0.19795564		3516.78	0.02400252		4046.78	-0.01602918
337	0.03064011		866.99	0.01608175		1396.99	0.00516238		1926.98	0.00599284		2456.98	-0.00687605		2986.98	0.19757242		3516.98	0.02360519		4046.98	-0.01503638
337.2	0.03060339		867.19	0.01648805		1397.19	0.00437899		1927.18	0.00458346		2457.18	-0.00722795		2987.18	0.19746093		3517.18	0.02290315		4047.18	-0.01586153
337.4	0.03012054		867.39	0.01701344		1397.39	0.00375749		1927.38	0.00393358		2457.38	-0.0073421		2987.38	0.19954775		3517.38	0.02301248		4047.38	-0.01621883
337.6	0.02984748		867.59	0.01723532		1397.59	0.00376775		1927.58	0.00340514		2457.58	-0.00651253		2987.58	0.20057339		3517.58	0.02388351		4047.58	-0.01611743
337.8	0.02996073		867.79	0.01804633		1397.79	0.00411851		1927.78	0.0037658		2457.78	-0.00649552		2987.78	0.20087968		3517.78	0.02368318		4047.78	-0.0163778
338	0.03034784		867.99	0.0189521		1397.99	0.00502427		1927.98	0.00321858		2457.98	-0.0062566		2987.98	0.20145879		3517.98	0.02426466		4047.98	-0.01674018
338.2	0.03077954		868.19	0.01924647		1398.19	0.0052251		1928.18	0.00188256		2458.18	-0.0065962		2988.18	0.20177857		3518.18	0.02502557		4048.18	-0.01657958
338.4	0.03106578		868.39	0.01927639		1398.39	0.00582347		1928.38	0.00166099		2458.38	-0.00744974		2988.38	0.20226809		3518.38	0.02525031		4048.38	-0.01646244
338.6	0.03085571		868.59	0.01922088		1398.59	0.00647236		1928.58	0.00155412		2458.58	-0.00738071		2988.58	0.20286948		3518.58	0.02533639		4048.58	-0.01711922
338.8	0.03068775		868.79	0.02039047		1398.79	0.00762154		1928.78	0.00258934		2458.78	-0.00739402		2988.78	0.20254103		3518.78	0.02592573		4048.78	-0.01641286
339	0.03061473		868.99	0.0194364		1398.99	0.00762158		1928.98	0.00292961		2458.98	-0.00752025		2988.98	0.20223452		3518.98	0.02475101		4048.98	-0.01609671
339.2	0.03053139		869.19	0.02024502		1399.19	0.00829016		1929.18	0.00417953		2459.18	-0.00833949		2989.18	0.20143622		3519.18	0.02426641		4049.18	-0.01593868
339.4	0.03101653		869.39	0.01975898		1399.39	0.0094757		1929.38	0.00499904		2459.38	-0.00855076		2989.38	0.2013622		3519.38	0.02447041		4049.38	-0.01549929
339.6	0.03079161		869.59	0.01959386		1399.59	0.00967018		1929.58	0.00467148		2459.58	-0.00772739		2989.58	0.20099185		3519.58	0.02396323		4049.58	-0.01475958
339.8	0.03081189		869.79	0.01826278		1399.79	0.01018548		1929.78	0.00555899		2459.78	-0.0077854		2989.78	0.20078241		3519.78	0.02464474		4049.78	-0.01480073
340	0.03056837		869.99	0.01842363		1399.99	0.00954597		1929.98	0.0064314		2459.98	-0.00809554		2989.98	0.20061653		3519.98	0.02473125		4049.98	-0.01542698
340.2	0.03088105		870.19	0.01714869		1400.19	0.00965846		1930.18	0.00699427		2460.18	-0.00874435		2990.18	0.20006842		3520.18	0.02465665		4050.18	-0.01539013
340.4	0.03089611		870.39	0.01700979		1400.39	0.00833694		1930.38	0.00675305		2460.38	-0.00715525		2990.38	0.20008081		3520.38	0.02471715		4050.38	-0.01443464
340.6	0.03134897		870.59	0.0161404		1400.59	0.00743461		1930.58	0.00752327		2460.58	-0.0066091		2990.58	0.19995047		3520.58	0.02456088		4050.58	-0.01436572
340.8	0.03088136		870.79	0.01700577		1400.79	0.00721651		1930.78	0.00659662		2460.78	-0.00744131		2990.78	0.19993942		3520.78	0.02388917		4050.78	-0.01299152
341	0.02977847		870.99	0.01744735		1400.99	0.00732953		1930.98	0.00662654		2460.98	-0.00733412		2990.98	0.1990464		3520.98	0.02349942		4050.98	-0.01232353
341.2	0.02944567		871.19	0.01717124		1401.19	0.00703395		1931.18	0.00572092		2461.18	-0.00647542		2991.18	0.19910851		3521.18	0.02297863		4051.18	-0.01265078
341.4	0.02947042		871.39	0.01708151		1401.39	0.00740604		1931.38	0.00581815		2461.38	-0.00652893		2991.38	0.20060982		3521.38	0.02412918		4051.38	-0.01219621
341.6	0.02966872		871.59	0.01793632		1401.59	0.00792545		1931.58	0.00541492		2461.58	-0.00586783		2991.58	0.20081948		3521.58	0.02560363		4051.58	-0.0125235
341.8	0.03006897		871.79	0.01878883		1401.79	0.00700339		1931.78	0.00496249		2461.78	-0.00578469		2991.78	0.20156853		3521.78	0.0256141		4051.78	-0.01274207
342	0.0301693		871.99	0.01865375		1401.99	0.00724459		1931.98	0.00313892		2461.98	-0.00500093		2991.98	0.20165562		3521.98	0.02602387		4051.98	-0.01351706
342.2	0.03003864		872.19	0.01901508		1402.19	0.00733996		1932.18	0.00300007		2462.18	-0.00498743		2992.18	0.20215206		3522.18	0.0255166		4052.18	-0.01418829
342.4	0.02987321		872.39	0.01957209		1402.39	0.00730658		1932.38	0.00326341		2462.38	-0.00492771		2992.38	0.20329352		3522.38	0.02568495		4052.38	-0.01449497
342.6	0.03046818		872.59	0.01928789		1402.59	0.00729945		1932.58	0.00421857		2462.58	-0.00432095		2992.58	0.20330368		3522.58	0.02552428		4052.58	-0.01455823
342.8	0.03004243		872.79	0.01926828		1402.79	0.00751263		1932.78	0.00489914		2462.78	-0.0048981		2992.78	0.20347177		3522.78	0.02573444		4052.78	-0.01422748
343	0.02994636		872.99	0.01916893		1402.99	0.00676625		1932.98	0.00449085		2462.98	-0.00548638		2992.98	0.20369729		3522.98	0.02531078		4052.98	-0.01448249
343.2	0.02996969		873.19	0.01922934		1403.19	0.00637148		1933.18	0.00540759		2463.18	-0.00533988		2993.18	0.20435996		3523.18	0.0261364		4053.18	-0.0142766
343.4	0.03044293		873.39	0.01849513		1403.39	0.00695516		1933.38	0.00561868		2463.38	-0.00541622		2993.38	0.2054807		3523.38	0.0264857		4053.38	-0.01403718
343.6	0.03007392		873.59	0.01832767		1403.59	0.00721259		1933.58	0.00588262		2463.58	-0.00601552		2993.58	0.20552501		3523.58	0.02664509		4053.58	-0.0147633
343.8	0.03036219		873.79	0.01764263		1403.79	0.00647142		1933.78	0.00675419		2463.78	-0.00718044		2993.78	0.20576046		3523.78	0.02680464		4053.78	-0.01575901
344	0.03056582		873.99	0.01742598		1403.99	0.00564469		1933.98	0.00713876		2463.98	-0.00647596		2993.98	0.20555314		3523.98	0.02622868		4053.98	-0.01493498
344.2	0.03022547		874.19	0.0162459		1404.19	0.00555172		1934.18	0.00696675		2464.18	-0.00671449		2994.18	0.20635937		3524.18	0.02560912		4054.18	-0.01468864
344.4	0.03037038		874.39	0.01585055		1404.39	0.00535484		1934.38	0.00667036		2464.38	-0.00618959		2994.38	0.20593166		3524.38	0.02533506		4054.38	-0.01475203
344.6	0.03116882		874.59	0.01513372		1404.59	0.00540807		1934.58	0.00667531		2464.58	-0.00697993		2994.58	0.20563322		3524.58	0.02464654		4054.58	-0.01454246
344.8	0.03008727		874.79	0.01569952		1404.79	0.00500229		1934.78	0.00591854		2464.78	-0.00745695		2994.78	0.20493017		3524.78	0.02401292		4054.78	-0.01451816
345	0.03014496		874.99	0.01565758		1404.99	0.00510573		1934.98	0.00566191		2464.98	-0.00654369		2994.98	0.20443973		3524.98	0.02440423		4054.98	-0.0146166
345.2	0.03060307		875.19	0.01498408		1405.19	0.00506433		1935.18	0.00491113		2465.18	-0.00725076		2995.18	0.2036696		3525.18	0.02425508		4055.18	-0.01549931
345.4	0.03041754		875.39	0.01521195		1405.39	0.00504636		1935.38	0.00567602		2465.38	-0.00748726		2995.38	0.20427035		3525.38	0.02491877		4055.38	-0.01616185
345.6	0.03031135		875.59	0.01592745		1405.59	0.00515989		1935.58	0.00555914		2465.58	-0.00697289		2995.58	0.20436061		3525.58	0.02574885		4055.58	-0.0167465
345.8	0.02969181		875.79	0.01670668		1405.79	0.00553562		1935.78	0.00468498		2465.78	-0.00749067		2995.78	0.20457368		3525.78	0.02547229		4055.78	-0.01644836
346	0.02927322		875.99	0.01607664		1405.99	0.00650519		1935.98	0.00430034		2465.98	-0.00655588		2995.98	0.20380377		3525.98	0.02553108		4055.98	-0.01713668
346.2	0.02956633		876.19	0.01616001		1406.19	0.00682637		1936.18	0.00415697		2466.18	-0.0067471		2996.18	0.20476435		3526.18	0.02516085		4056.18	-0.01747508
346.4	0.0302807		876.39	0.01623322		1406.39	0.007146		1936.38	0.00398181		2466.38	-0.00685266		2996.38	0.20564534		3526.38	0.02574585		4056.38	-0.01637908
346.6	0.03053693		876.59	0.01641785		1406.59	0.00748937		1936.58	0.00503908		2466.58	-0.00715385		2996.58	0.20591726		3526.58	0.02540038		4056.58	-0.0157755
346.8	0.02951345		876.79	0.01744613		1406.79	0.00777253		1936.78	0.00528467		2466.78	-0.00709519		2996.78	0.20735438		3526.78	0.02635136		4056.78	-0.01595195
347	0.03005474		876.99	0.01716815		1406.99	0.00755221		1936.98	0.00622186		2466.98	-0.0067419		2996.98	0.2077254		3526.98	0.02654212		4056.98	-0.01595107
347.2	0.0302155		877.19	0.01678931		1407.19	0.00751375		1937.18	0.00652664		2467.18	-0.00720086		2997.18	0.20896027		3527.18	0.02692507		4057.18	-0.0153804
347.4	0.02970808		877.39	0.01698627		1407.39	0.00748515		1937.38	0.00635314		2467.38	-0.00816472		2997.38	0.20876782		3527.38	0.02719121		4057.38	-0.0157009
347.6	0.02943338		877.59	0.01762335		1407.59	0.00700883		1937.58	0.00681806		2467.58	-0.00800732		2997.58	0.20869024		3527.58	0.02657046		4057.58	-0.01546756
347.8	0.02997904		877.79	0.01731673		1407.79	0.00566122		1937.78	0.00741581		2467.78	-0.00806976		2997.78	0.20847312		3527.78	0.02637976		4057.78	-0.01537444
348	0.02997796		877.99	0.01727511		1407.99	0.00604817		1937.98	0.00680825		2467.98	-0.00767864		2997.98	0.20848229		3527.98	0.02600244		4057.98	-0.01515705
348.2	0.02946214		878.19	0.01784216		1408.19	0.00559199		1938.18	0.00668888		2468.18	-0.00789266		2998.18	0.2083941		3528.18	0.02517355		4058.18	-0.01587242
348.4	0.02970073		878.39	0.0179477		1408.39	0.00581577		1938.38	0.00675268		2468.38	-0.00773533		2998.38	0.20774359		3528.38	0.0252033		4058.38	-0.01731493
348.6	0.03012723		878.59	0.01813163		1408.59	0.0053116		1938.58	0.00758288		2468.58	-0.00743708		2998.58	0.20772544		3528.58	0.02530537		4058.58	-0.01747325
348.8	0.03085592		878.79	0.01849574		1408.79	0.00457414		1938.78	0.00779842		2468.78	-0.00727134		2998.78	0.20704662		3528.78	0.02548319		4058.78	-0.01817251
349	0.03117869		878.99	0.01837501		1408.99	0.00389247		1938.98	0.00834742		2468.98	-0.0068419		2998.98	0.20761648		3528.98	0.02567668		4058.98	-0.01883118
349.2	0.03035097		879.19	0.01791516		1409.19	0.0030778		1939.18	0.0087362		2469.18	-0.00780184		2999.18	0.20730911		3529.18	0.02527066		4059.18	-0.01907368
349.4	0.0294836		879.39	0.01874625		1409.39	0.0035627		1939.38	0.00921976		2469.38	-0.0079061		2999.38	0.20725352		3529.38	0.02570903		4059.38	-0.01937089
349.6	0.02916676		879.59	0.01890885		1409.59	0.00395507		1939.58	0.00833269		2469.58	-0.00806203		2999.58	0.20660913		3529.58	0.02608845		4059.58	-0.01912934
349.8	0.02851073		879.79	0.01924325		1409.79	0.0036585		1939.78	0.00763302		2469.78	-0.00873619		2999.78	0.20644412		3529.78	0.02597235		4059.78	-0.01875348
350	0.02848584		879.99	0.01888989		1409.99	0.00339901		1939.98	0.00742912		2469.98	-0.00773513		2999.98	0.20683262		3529.98	0.02574891		4059.98	-0.01873943
350.2	0.02885789		880.19	0.02020142		1410.19	0.00422852		1940.18	0.00695714		2470.18	-0.0076997		3000.18	0.20640058		3530.18	0.02583968		4060.18	-0.0175527
350.4	0.02834461		880.39	0.02060695		1410.39	0.00486803		1940.38	0.00770617		2470.38	-0.00756851		3000.38	0.20659333		3530.38	0.02605736		4060.38	-0.01625329
350.6	0.02808178		880.59	0.02065796		1410.59	0.00465873		1940.58	0.00826515		2470.58	-0.00716887		3000.58	0.20735665		3530.58	0.02722639		4060.58	-0.01595025
350.8	0.02796624		880.79	0.02056476		1410.79	0.00460611		1940.78	0.00831008		2470.78	-0.0066738		3000.78	0.20772073		3530.78	0.02778285		4060.78	-0.01606967
351	0.02765133		880.99	0.01948983		1410.99	0.0043419		1940.98	0.00832351		2470.98	-0.00712864		3000.98	0.20739224		3530.98	0.02775458		4060.98	-0.01529865
351.2	0.02779029		881.19	0.01941797		1411.19	0.00378845		1941.18	0.00742429		2471.18	-0.00778875		3001.18	0.20814503		3531.18	0.02858303		4061.18	-0.01425957
351.4	0.0276081		881.39	0.01947277		1411.39	0.00348549		1941.38	0.00830916		2471.38	-0.00830999		3001.38	0.20798784		3531.38	0.02888023		4061.38	-0.01429326
351.6	0.02768672		881.59	0.02008962		1411.59	0.0035014		1941.58	0.00919389		2471.58	-0.00753439		3001.58	0.20762422		3531.58	0.02901332		4061.58	-0.0147337
351.8	0.02844139		881.79	0.01928497		1411.79	0.00400366		1941.78	0.00938108		2471.78	-0.00765726		3001.78	0.20748805		3531.78	0.02960512		4061.78	-0.01493198
352	0.0280278		881.99	0.01989026		1411.99	0.00427206		1941.98	0.00825917		2471.98	-0.0070507		3001.98	0.2072716		3531.98	0.02882506		4061.98	-0.01502239
352.2	0.02820207		882.19	0.02012076		1412.19	0.00394195		1942.18	0.00911986		2472.18	-0.00636841		3002.18	0.20739055		3532.18	0.02843349		4062.18	-0.01595589
352.4	0.0280114		882.39	0.01998252		1412.39	0.00393981		1942.38	0.00934491		2472.38	-0.00650292		3002.38	0.20859976		3532.38	0.02819705		4062.38	-0.01670696
352.6	0.02775316		882.59	0.01992867		1412.59	0.00415067		1942.58	0.00985835		2472.58	-0.00529605		3002.58	0.20941363		3532.58	0.02788593		4062.58	-0.0159399
352.8	0.02810344		882.79	0.02013009		1412.79	0.00325596		1942.78	0.00940597		2472.78	-0.005568		3002.78	0.21051169		3532.78	0.02801383		4062.78	-0.01671485
353	0.02747938		882.99	0.02031758		1412.99	0.00350524		1942.98	0.00885254		2472.98	-0.00525939		3002.98	0.21111737		3532.98	0.02708584		4062.98	-0.01701249
353.2	0.02737405		883.19	0.01955		1413.19	0.00467705		1943.18	0.00875213		2473.18	-0.00619359		3003.18	0.21122568		3533.18	0.02714183		4063.18	-0.01718495
353.4	0.0276721		883.39	0.01956534		1413.39	0.0053149		1943.38	0.00805046		2473.38	-0.0065305		3003.38	0.21172188		3533.38	0.02729093		4063.38	-0.01802106
353.6	0.02776953		883.59	0.01954307		1413.59	0.00530275		1943.58	0.00690847		2473.58	-0.00714562		3003.58	0.21187821		3533.58	0.02685589		4063.58	-0.01771568
353.8	0.02825102		883.79	0.01976592		1413.79	0.00541366		1943.78	0.00629249		2473.78	-0.00746631		3003.78	0.21202663		3533.78	0.02694289		4063.78	-0.01689684
354	0.02874907		883.99	0.01988536		1413.99	0.00499151		1943.98	0.00520137		2473.98	-0.0076379		3003.98	0.21230196		3533.98	0.02733151		4063.98	-0.01615263
354.2	0.02841215		884.19	0.01952702		1414.19	0.00546452		1944.18	0.00504233		2474.18	-0.00739628		3004.18	0.21139653		3534.18	0.02772574		4064.18	-0.01545633
354.4	0.02837766		884.39	0.01834196		1414.39	0.00598652		1944.38	0.00490723		2474.38	-0.00772573		3004.38	0.21232932		3534.38	0.02777123		4064.38	-0.01497389
354.6	0.0298393		884.59	0.0172284		1414.59	0.00576281		1944.58	0.00492139		2474.58	-0.00892535		3004.58	0.21332003		3534.58	0.02948596		4064.58	-0.01456216
354.8	0.02991352		884.79	0.01685004		1414.79	0.00600013		1944.78	0.00534698		2474.78	-0.00923034		3004.78	0.21305496		3534.78	0.02886753		4064.78	-0.01408282
355	0.03084378		884.99	0.0168937		1414.99	0.00601055		1944.98	0.00535418		2474.98	-0.00982336		3004.98	0.21323322		3534.98	0.02877642		4064.98	-0.0134737
355.2	0.03207293		885.19	0.01690045		1415.19	0.00612702		1945.18	0.00619799		2475.18	-0.00996322		3005.18	0.21331353		3535.18	0.02878145		4065.18	-0.01350851
355.4	0.03203791		885.39	0.01732881		1415.39	0.00616548		1945.38	0.00600837		2475.38	-0.00971855		3005.38	0.21336515		3535.38	0.02825619		4065.38	-0.01360846
355.6	0.03207752		885.59	0.0177529		1415.59	0.00687227		1945.58	0.00590971		2475.58	-0.01004633		3005.58	0.21252361		3535.58	0.02865556		4065.58	-0.01385482
355.8	0.03261644		885.79	0.01707		1415.79	0.00671502		1945.78	0.00481831		2475.78	-0.00984427		3005.78	0.21253927		3535.78	0.02807188		4065.78	-0.01359144
356	0.03188442		885.99	0.01738521		1415.99	0.00609058		1945.98	0.00411288		2475.98	-0.00950579		3005.98	0.21252285		3535.98	0.02751126		4065.98	-0.01422657
356.2	0.03185127		886.19	0.01711332		1416.19	0.00618703		1946.18	0.00389722		2476.18	-0.00976756		3006.18	0.21284838		3536.18	0.02746746		4066.18	-0.01458678
356.4	0.02988154		886.39	0.01697138		1416.39	0.006158		1946.38	0.00327096		2476.38	-0.00988114		3006.38	0.21286314		3536.38	0.02671859		4066.38	-0.01411798
356.6	0.02903804		886.59	0.01682144		1416.59	0.00590081		1946.58	0.00259025		2476.58	-0.0087106		3006.58	0.21269856		3536.58	0.02609498		4066.58	-0.01421135
356.8	0.02869302		886.79	0.01709453		1416.79	0.00504464		1946.78	0.00269161		2476.78	-0.0093255		3006.78	0.21268582		3536.78	0.02569225		4066.78	-0.01406072
357	0.02765572		886.99	0.01646331		1416.99	0.00610673		1946.98	0.00307848		2476.98	-0.00909598		3006.98	0.21196171		3536.98	0.02473616		4066.98	-0.01326694
357.2	0.02733321		887.19	0.01619726		1417.19	0.006239		1947.18	0.00429867		2477.18	-0.0090943		3007.18	0.21271337		3537.18	0.02507587		4067.18	-0.01355004
357.4	0.02773756		887.39	0.01773783		1417.39	0.00606598		1947.38	0.00368696		2477.38	-0.00819139		3007.38	0.21310354		3537.38	0.02480699		4067.38	-0.0139345
357.6	0.02836869		887.59	0.01759004		1417.59	0.00500059		1947.58	0.00287855		2477.58	-0.00845899		3007.58	0.21222456		3537.58	0.02498743		4067.58	-0.01345206
357.8	0.02878539		887.79	0.01776903		1417.79	0.00466465		1947.78	0.00275394		2477.78	-0.00831164		3007.78	0.21276231		3537.78	0.02526425		4067.78	-0.01353299
358	0.02892053		887.99	0.01738441		1417.99	0.00448658		1947.98	0.00337972		2477.98	-0.00888525		3007.98	0.21194013		3537.98	0.02543661		4067.98	-0.01337908
358.2	0.02835703		888.19	0.0171757		1418.19	0.00492401		1948.18	0.00373903		2478.18	-0.00770674		3008.18	0.21180637		3538.18	0.02549583		4068.18	-0.0134891
358.4	0.02938535		888.39	0.01720933		1418.39	0.00597682		1948.38	0.00364276		2478.38	-0.00862405		3008.38	0.21198162		3538.38	0.02563152		4068.38	-0.01288749
358.6	0.03053813		888.59	0.01660558		1418.59	0.00540292		1948.58	0.00483989		2478.58	-0.00866435		3008.58	0.21173838		3538.58	0.02657262		4068.58	-0.01327246
358.8	0.03009595		888.79	0.01815934		1418.79	0.00548271		1948.78	0.0056824		2478.78	-0.0076236		3008.78	0.21140442		3538.78	0.02519779		4068.78	-0.01414722
359	0.02986578		888.99	0.01894128		1418.99	0.00507352		1948.98	0.00525364		2478.98	-0.00753518		3008.98	0.210911		3538.98	0.02567957		4068.98	-0.01528196
359.2	0.02917684		889.19	0.01899687		1419.19	0.00494856		1949.18	0.00564915		2479.18	-0.00812306		3009.18	0.2102824		3539.18	0.02636642		4069.18	-0.01569125
359.4	0.02900402		889.39	0.01894247		1419.39	0.00491256		1949.38	0.00490413		2479.38	-0.00820367		3009.38	0.21025272		3539.38	0.02726597		4069.38	-0.01564471
359.6	0.02916306		889.59	0.01837178		1419.59	0.00569616		1949.58	0.00523352		2479.58	-0.00867198		3009.58	0.21001062		3539.58	0.02819802		4069.58	-0.01625784
359.8	0.02924372		889.79	0.01758161		1419.79	0.00487445		1949.78	0.00505456		2479.78	-0.00813146		3009.78	0.21019899		3539.78	0.02828337		4069.78	-0.01647031
360	0.02855283		889.99	0.01776573		1419.99	0.00488045		1949.98	0.00484412		2479.98	-0.00800357		3009.98	0.21015394		3539.98	0.02858574		4069.98	-0.01696227
360.2	0.02789846		890.19	0.01756045		1420.19	0.00560594		1950.18	0.00486202		2480.18	-0.00815267		3010.18	0.2102716		3540.18	0.02865616		4070.18	-0.01766907
360.4	0.02760129		890.39	0.0173926		1420.39	0.00535856		1950.38	0.00508629		2480.38	-0.00803995		3010.38	0.21086721		3540.38	0.02785567		4070.38	-0.01673627
360.6	0.02807757		890.59	0.0167297		1420.59	0.00556133		1950.58	0.00541968		2480.58	-0.00762207		3010.58	0.21149426		3540.58	0.02745864		4070.58	-0.01729554
360.8	0.02757862		890.79	0.01718512		1420.79	0.0056711		1950.78	0.00572674		2480.78	-0.00794359		3010.78	0.21145084		3540.78	0.02727347		4070.78	-0.01738989
361	0.02758059		890.99	0.01764572		1420.99	0.00670872		1950.98	0.00581028		2480.98	-0.00727696		3010.98	0.21195169		3540.98	0.02693132		4070.98	-0.01750395
361.2	0.02890321		891.19	0.01922491		1421.19	0.0074781		1951.18	0.00633092		2481.18	-0.00625918		3011.18	0.21296733		3541.18	0.02724616		4071.18	-0.01769213
361.4	0.02929254		891.39	0.01990688		1421.39	0.00712873		1951.38	0.00649126		2481.38	-0.00523994		3011.38	0.21362575		3541.38	0.02722383		4071.38	-0.01778262
361.6	0.03013442		891.59	0.01942863		1421.59	0.00666051		1951.58	0.00590709		2481.58	-0.00513915		3011.58	0.21408539		3541.58	0.02723843		4071.58	-0.01656331
361.8	0.03021685		891.79	0.01976088		1421.79	0.00742755		1951.78	0.0067154		2481.78	-0.00536605		3011.78	0.21360447		3541.78	0.02673375		4071.78	-0.01592652
362	0.03016854		891.99	0.01935141		1421.99	0.00737829		1951.98	0.00681029		2481.98	-0.00555313		3011.98	0.21290229		3541.98	0.02753251		4071.98	-0.01497822
362.2	0.02971141		892.19	0.01926543		1422.19	0.00707625		1952.18	0.00613904		2482.18	-0.00449664		3012.18	0.21347091		3542.18	0.02745209		4072.18	-0.01488342
362.4	0.03007703		892.39	0.0188343		1422.39	0.0070549		1952.38	0.0062885		2482.38	-0.00463322		3012.38	0.21304366		3542.38	0.02731538		4072.38	-0.01463158
362.6	0.02928403		892.59	0.01865487		1422.59	0.00649492		1952.58	0.00684773		2482.58	-0.00389251		3012.58	0.21275989		3542.58	0.02723161		4072.58	-0.01471219
362.8	0.02818818		892.79	0.01901069		1422.79	0.00615068		1952.78	0.00656066		2482.78	-0.00389389		3012.78	0.21263541		3542.78	0.0266796		4072.78	-0.01488459
363	0.02694145		892.99	0.01776004		1422.99	0.00563244		1952.98	0.00668862		2482.98	-0.00416976		3012.98	0.21250863		3542.98	0.02749688		4072.98	-0.01402063
363.2	0.02652656		893.19	0.01673605		1423.19	0.00552412		1953.18	0.0074412		2483.18	-0.00570832		3013.18	0.21307607		3543.18	0.02704697		4073.18	-0.0133587
363.4	0.02663704		893.39	0.01642702		1423.39	0.00634021		1953.38	0.00809049		2483.38	-0.00548122		3013.38	0.21329404		3543.38	0.02677128		4073.38	-0.01332777
363.6	0.02686157		893.59	0.01653171		1423.59	0.00625947		1953.58	0.00812358		2483.58	-0.00555897		3013.58	0.21388368		3543.58	0.0268854		4073.58	-0.01290399
363.8	0.0261038		893.79	0.01660182		1423.79	0.00572761		1953.78	0.0076642		2483.78	-0.00611086		3013.78	0.21403431		3543.78	0.02675683		4073.78	-0.01312658
364	0.02562714		893.99	0.01697108		1423.99	0.0061621		1953.98	0.00715238		2483.98	-0.00686992		3013.98	0.21409863		3543.98	0.02668123		4073.98	-0.01321362
364.2	0.02538845		894.19	0.01752861		1424.19	0.0068821		1954.18	0.00739796		2484.18	-0.00719777		3014.18	0.21497495		3544.18	0.02629971		4074.18	-0.01330051
364.4	0.02654941		894.39	0.01741686		1424.39	0.00674058		1954.38	0.00697382		2484.38	-0.00752033		3014.38	0.2152916		3544.38	0.02585883		4074.38	-0.01248333
364.6	0.02705053		894.59	0.01723544		1424.59	0.00646496		1954.58	0.0067498		2484.58	-0.00848983		3014.58	0.21524151		3544.58	0.02561944		4074.58	-0.01346628
364.8	0.02730399		894.79	0.01755116		1424.79	0.00589007		1954.78	0.00587076		2484.78	-0.00881108		3014.78	0.21528678		3544.78	0.02552646		4074.78	-0.01395556
365	0.02922182		894.99	0.01777643		1424.99	0.00625683		1954.98	0.0054268		2484.98	-0.00813173		3014.98	0.21576072		3544.98	0.02614984		4074.98	-0.01378901
365.2	0.03037374		895.19	0.01780741		1425.19	0.00624624		1955.18	0.00546949		2485.18	-0.00848576		3015.18	0.21575463		3545.18	0.0262333		4075.18	-0.01405125
365.4	0.03016602		895.39	0.01749234		1425.39	0.00554878		1955.38	0.00533976		2485.38	-0.0086067		3015.38	0.2156356		3545.38	0.02672745		4075.38	-0.01517832
365.6	0.03181253		895.59	0.0167339		1425.59	0.00497726		1955.58	0.00416446		2485.58	-0.00874259		3015.58	0.21533679		3545.58	0.02731938		4075.58	-0.01524415
365.8	0.03235081		895.79	0.01638152		1425.79	0.00494868		1955.78	0.00443954		2485.78	-0.00871989		3015.78	0.21489668		3545.78	0.02705534		4075.78	-0.01598151
366	0.03286304		895.99	0.01622111		1425.99	0.00561246		1955.98	0.00415274		2485.98	-0.00922024		3015.98	0.21491748		3545.98	0.02805108		4075.98	-0.01646957
366.2	0.03312554		896.19	0.01626274		1426.19	0.00590764		1956.18	0.00381234		2486.18	-0.00827974		3016.18	0.21435497		3546.18	0.02778015		4076.18	-0.01664397
366.4	0.03290634		896.39	0.01591901		1426.39	0.00549782		1956.38	0.00314706		2486.38	-0.00728693		3016.38	0.21380535		3546.38	0.02853951		4076.38	-0.01780813
366.6	0.03248175		896.59	0.01615828		1426.59	0.00508543		1956.58	0.00343946		2486.58	-0.00753391		3016.58	0.21453567		3546.58	0.02888502		4076.58	-0.01751856
366.8	0.03194914		896.79	0.01601775		1426.79	0.00495664		1956.78	0.00349592		2486.78	-0.00796504		3016.78	0.21504497		3546.78	0.02859603		4076.78	-0.01823908
367	0.03136029		896.99	0.01577619		1426.99	0.00496368		1956.98	0.00399821		2486.98	-0.00835377		3016.98	0.21602962		3546.98	0.0286656		4076.98	-0.01768605
367.2	0.03068094		897.19	0.01648185		1427.19	0.00520247		1957.18	0.00499599		2487.18	-0.00895158		3017.18	0.21677981		3547.18	0.02824797		4077.18	-0.01788609
367.4	0.0315252		897.39	0.01726956		1427.39	0.00519598		1957.38	0.0059619		2487.38	-0.00825452		3017.38	0.2173952		3547.38	0.02880376		4077.38	-0.01758738
367.6	0.03158961		897.59	0.01794067		1427.59	0.00492933		1957.58	0.00628466		2487.58	-0.00849152		3017.58	0.21706328		3547.58	0.02929241		4077.58	-0.0165016
367.8	0.03067683		897.79	0.01823647		1427.79	0.00503704		1957.78	0.00599301		2487.78	-0.00885214		3017.78	0.21712629		3547.78	0.02911754		4077.78	-0.01601806
368	0.03000238		897.99	0.01909807		1427.99	0.00539683		1957.98	0.00579788		2487.98	-0.00923645		3017.98	0.21667401		3547.98	0.02886091		4077.98	-0.01532953
368.2	0.02907611		898.19	0.01986966		1428.19	0.00529902		1958.18	0.00576818		2488.18	-0.00851036		3018.18	0.2165585		3548.18	0.02881017		4078.18	-0.01448487
368.4	0.02967941		898.39	0.01939647		1428.39	0.00408269		1958.38	0.00527607		2488.38	-0.00846253		3018.38	0.21678886		3548.38	0.02843865		4078.38	-0.01360801
368.6	0.02942656		898.59	0.01884103		1428.59	0.00297533		1958.58	0.00557419		2488.58	-0.0084383		3018.58	0.21657421		3548.58	0.02909181		4078.58	-0.01318145
368.8	0.03012629		898.79	0.01823031		1428.79	0.00306048		1958.78	0.00532057		2488.78	-0.00781939		3018.78	0.21738198		3548.78	0.03003303		4078.78	-0.01349849
369	0.03064602		898.99	0.01846062		1428.99	0.00419167		1958.98	0.00472906		2488.98	-0.00728131		3018.98	0.21682075		3548.98	0.03083193		4078.98	-0.01338797
369.2	0.03049465		899.19	0.01795952		1429.19	0.00421891		1959.18	0.00502204		2489.18	-0.00760186		3019.18	0.2164624		3549.18	0.03033523		4079.18	-0.01323852
369.4	0.03007406		899.39	0.01855832		1429.39	0.00434408		1959.38	0.00515758		2489.38	-0.00691131		3019.38	0.21627987		3549.38	0.03148956		4079.38	-0.01390906
369.6	0.03081529		899.59	0.01783539		1429.59	0.00441557		1959.58	0.00505177		2489.58	-0.00722526		3019.58	0.21671387		3549.58	0.03185571		4079.58	-0.01426036
369.8	0.03019097		899.79	0.01770211		1429.79	0.0045186		1959.78	0.00553195		2489.78	-0.00673718		3019.78	0.21670579		3549.78	0.0310342		4079.78	-0.01509041
370	0.03012856		899.99	0.01780383		1429.99	0.00501812		1959.98	0.00589172		2489.98	-0.00752803		3019.98	0.2164111		3549.98	0.03142329		4079.98	-0.01546919
370.2	0.02989442		900.19	0.01792529		1430.19	0.00454072		1960.18	0.00644492		2490.18	-0.0067628		3020.18	0.21733804		3550.18	0.03155794		4080.18	-0.01643761
370.4	0.0298415		900.39	0.01721769		1430.39	0.00424026		1960.38	0.00719596		2490.38	-0.00732502		3020.38	0.21756556		3550.38	0.03180627		4080.38	-0.01785149
370.6	0.02924173		900.59	0.01750535		1430.59	0.00391219		1960.58	0.00873138		2490.58	-0.00806516		3020.58	0.21937226		3550.58	0.03141944		4080.58	-0.01819289
370.8	0.02878056		900.79	0.0172317		1430.79	0.00419831		1960.78	0.00982145		2490.78	-0.00830726		3020.78	0.21944504		3550.78	0.03069673		4080.78	-0.01889733
371	0.02914596		900.99	0.01758672		1430.99	0.00448397		1960.98	0.0108591		2490.98	-0.00854643		3020.98	0.22050169		3550.98	0.03079431		4080.98	-0.01901185
371.2	0.02977727		901.19	0.0175212		1431.19	0.00343991		1961.18	0.01205159		2491.18	-0.00825394		3021.18	0.22070714		3551.18	0.03133159		4081.18	-0.01959062
371.4	0.03118342		901.39	0.01763545		1431.39	0.00378705		1961.38	0.01227298		2491.38	-0.00809694		3021.38	0.22074297		3551.38	0.03125208		4081.38	-0.02064563
371.6	0.03162257		901.59	0.01828653		1431.59	0.00431889		1961.58	0.01110166		2491.58	-0.00828701		3021.58	0.22000264		3551.58	0.03071369		4081.58	-0.02031182
371.8	0.03133365		901.79	0.01798386		1431.79	0.00425207		1961.78	0.01003191		2491.78	-0.00811538		3021.78	0.22026247		3551.78	0.03010036		4081.78	-0.01972703
372	0.03067241		901.99	0.01839151		1431.99	0.00435396		1961.98	0.00975907		2491.98	-0.00804754		3021.98	0.21958069		3551.98	0.03014634		4081.98	-0.01921144
372.2	0.0301001		902.19	0.01818324		1432.19	0.00392898		1962.18	0.00941903		2492.18	-0.00693226		3022.18	0.21989177		3552.18	0.02999756		4082.18	-0.01882004
372.4	0.030404		902.39	0.01769547		1432.39	0.00364777		1962.38	0.00925164		2492.38	-0.00696645		3022.38	0.21940662		3552.38	0.02998804		4082.38	-0.0181275
372.6	0.03031467		902.59	0.01685618		1432.59	0.00350973		1962.58	0.00949359		2492.58	-0.00689607		3022.58	0.21930453		3552.58	0.03026943		4082.58	-0.01739221
372.8	0.03128909		902.79	0.01650594		1432.79	0.00386499		1962.78	0.00854571		2492.78	-0.007097		3022.78	0.21916817		3552.78	0.0297229		4082.78	-0.01672423
373	0.03106214		902.99	0.01651124		1432.99	0.00460542		1962.98	0.00808098		2492.98	-0.00718709		3022.98	0.2180078		3552.98	0.02949632		4082.98	-0.01611797
373.2	0.03103444		903.19	0.01676674		1433.19	0.00409274		1963.18	0.00803558		2493.18	-0.00748484		3023.18	0.21810333		3553.18	0.02954854		4083.18	-0.01556936
373.4	0.03160795		903.39	0.01675022		1433.39	0.00434288		1963.38	0.00747637		2493.38	-0.0072108		3023.38	0.21880036		3553.38	0.03011572		4083.38	-0.01594597
373.6	0.03145155		903.59	0.0154294		1433.59	0.00459759		1963.58	0.00739109		2493.58	-0.00723953		3023.58	0.21960727		3553.58	0.02918064		4083.58	-0.01551046
373.8	0.03085671		903.79	0.01482093		1433.79	0.00498795		1963.78	0.00794693		2493.78	-0.00683964		3023.78	0.21930314		3553.78	0.02821386		4083.78	-0.01578748
374	0.03123684		903.99	0.01540681		1433.99	0.00578425		1963.98	0.00847602		2493.98	-0.0072654		3023.98	0.21954303		3553.98	0.02866625		4083.98	-0.01494564
374.2	0.03170014		904.19	0.01516834		1434.19	0.00626464		1964.18	0.00929474		2494.18	-0.00786752		3024.18	0.22026355		3554.18	0.02859222		4084.18	-0.01507434
374.4	0.03144897		904.39	0.01564094		1434.39	0.00618431		1964.38	0.00995067		2494.38	-0.00812284		3024.38	0.22047479		3554.38	0.02765902		4084.38	-0.01538233
374.6	0.03100815		904.59	0.01571804		1434.59	0.00647602		1964.58	0.00976226		2494.58	-0.00813683		3024.58	0.22174853		3554.58	0.0272674		4084.58	-0.01547844
374.8	0.03170572		904.79	0.01666349		1434.79	0.0070323		1964.78	0.00982737		2494.78	-0.00773783		3024.78	0.22137874		3554.78	0.02773249		4084.78	-0.01612589
375	0.03183974		904.99	0.01721734		1434.99	0.00733293		1964.98	0.00971174		2494.98	-0.00724752		3024.98	0.22215432		3554.98	0.02842472		4084.98	-0.01660139
375.2	0.03188146		905.19	0.01763844		1435.19	0.00667397		1965.18	0.00988473		2495.18	-0.00724848		3025.18	0.22194744		3555.18	0.02968815		4085.18	-0.01667493
375.4	0.03215121		905.39	0.01875429		1435.39	0.00745806		1965.38	0.00938153		2495.38	-0.00721353		3025.38	0.22266763		3555.38	0.02982257		4085.38	-0.01732846
375.6	0.03202546		905.59	0.0192887		1435.59	0.0061502		1965.58	0.00830465		2495.58	-0.00774745		3025.58	0.22344851		3555.58	0.02997652		4085.58	-0.01700712
375.8	0.03160981		905.79	0.01918032		1435.79	0.00580598		1965.78	0.00879659		2495.78	-0.00719154		3025.78	0.22396969		3555.78	0.03029822		4085.78	-0.01621453
376	0.0316248		905.99	0.02017295		1435.99	0.00567658		1965.98	0.00824147		2495.98	-0.00749567		3025.98	0.22380823		3555.98	0.0313325		4085.98	-0.01620193
376.2	0.03190839		906.19	0.0199178		1436.19	0.0053259		1966.18	0.00785417		2496.18	-0.00743703		3026.18	0.22421569		3556.18	0.03077373		4086.18	-0.01588346
376.4	0.03171333		906.39	0.01933748		1436.39	0.00498879		1966.38	0.00775292		2496.38	-0.00858032		3026.38	0.22320816		3556.38	0.03139912		4086.38	-0.01526722
376.6	0.03174272		906.59	0.01842283		1436.59	0.00434045		1966.58	0.00681482		2496.58	-0.00849995		3026.58	0.22333779		3556.58	0.03104072		4086.58	-0.01530547
376.8	0.03150901		906.79	0.01776419		1436.79	0.00444966		1966.78	0.0062781		2496.78	-0.0090783		3026.78	0.22227496		3556.78	0.03141451		4086.78	-0.01534016
377	0.03111571		906.99	0.01784803		1436.99	0.00463982		1966.98	0.00590639		2496.98	-0.00929194		3026.98	0.22236968		3556.98	0.0323282		4086.98	-0.01549051
377.2	0.03057216		907.19	0.01721201		1437.19	0.00431004		1967.18	0.00639665		2497.18	-0.00927684		3027.18	0.22286045		3557.18	0.03245092		4087.18	-0.0150871
377.4	0.03102955		907.39	0.01609944		1437.39	0.00494039		1967.38	0.00594716		2497.38	-0.00960326		3027.38	0.22306652		3557.38	0.03237316		4087.38	-0.01495282
377.6	0.03015006		907.59	0.01514239		1437.59	0.0059518		1967.58	0.00697245		2497.58	-0.00960424		3027.58	0.2224696		3557.58	0.03196541		4087.58	-0.01528637
377.8	0.03023841		907.79	0.01483075		1437.79	0.00635249		1967.78	0.00709146		2497.78	-0.00998681		3027.78	0.2215537		3557.78	0.03181507		4087.78	-0.01594862
378	0.03054413		907.99	0.01498719		1437.99	0.00645165		1967.98	0.00685126		2497.98	-0.0102636		3027.98	0.22143999		3557.98	0.03143296		4087.98	-0.0157451
378.2	0.03099787		908.19	0.01445931		1438.19	0.00667009		1968.18	0.00687589		2498.18	-0.01064849		3028.18	0.22176259		3558.18	0.03038862		4088.18	-0.01631126
378.4	0.0310929		908.39	0.01476565		1438.39	0.00641568		1968.38	0.00690835		2498.38	-0.01057343		3028.38	0.22177188		3558.38	0.02938429		4088.38	-0.01680543
378.6	0.03151682		908.59	0.01415607		1438.59	0.00664926		1968.58	0.0065038		2498.58	-0.01096254		3028.58	0.22200123		3558.58	0.02955028		4088.58	-0.01695089
378.8	0.03173371		908.79	0.01455661		1438.79	0.00644393		1968.78	0.00692158		2498.78	-0.0107725		3028.78	0.22195149		3558.78	0.02962158		4088.78	-0.01755011
379	0.03163451		908.99	0.01413085		1438.99	0.00606985		1968.98	0.00716369		2498.98	-0.0112108		3028.98	0.22245962		3558.98	0.0296215		4088.98	-0.01738783
379.2	0.03233027		909.19	0.01456201		1439.19	0.00545903		1969.18	0.00722769		2499.18	-0.01215606		3029.18	0.22295549		3559.18	0.02970164		4089.18	-0.0172625
379.4	0.03285512		909.39	0.01470138		1439.39	0.00490717		1969.38	0.0069806		2499.38	-0.01242079		3029.38	0.22383741		3559.38	0.02919009		4089.38	-0.01769072
379.6	0.03321458		909.59	0.01482385		1439.59	0.00399163		1969.58	0.00660336		2499.58	-0.01306543		3029.58	0.22441804		3559.58	0.0287219		4089.58	-0.01775015
379.8	0.03413504		909.79	0.01510774		1439.79	0.00401591		1969.78	0.00647344		2499.78	-0.01300708		3029.78	0.2248373		3559.78	0.0288154		4089.78	-0.01708099
379.99	0.03413504		909.99	0.01510774		1439.99	0.00401591		1969.98	0.00647344		2499.98	-0.01300708		3029.98	0.2248373		3559.98	0.0288154		4089.98	-0.01708099
380.19	0.03510939		910.19	0.01443083		1440.19	0.0038235		1970.18	0.00759697		2500.18	-0.01389442		3030.18	0.22499447		3560.18	0.02824784		4090.18	-0.0173611
380.39	0.03493289		910.39	0.01397069		1440.39	0.00439211		1970.38	0.00828369		2500.38	-0.01395489		3030.38	0.22375295		3560.38	0.02836955		4090.38	-0.01797413
380.59	0.03518409		910.59	0.01342303		1440.59	0.00509188		1970.58	0.00883283		2500.58	-0.01449792		3030.58	0.22302786		3560.58	0.02857738		4090.58	-0.01815813
380.79	0.03476324		910.79	0.01215568		1440.79	0.00534106		1970.78	0.00833974		2500.78	-0.015449		3030.78	0.2216842		3560.78	0.02819224		4090.78	-0.01742658
380.99	0.03423951		910.99	0.01134639		1440.99	0.00525217		1970.98	0.00821403		2500.98	-0.01572942		3030.98	0.22114443		3560.98	0.02838365		4090.98	-0.01700955
381.19	0.03423253		911.19	0.01060885		1441.19	0.00563408		1971.18	0.00885759		2501.18	-0.01661557		3031.18	0.22056716		3561.18	0.02858228		4091.18	-0.01705541
381.39	0.03339549		911.39	0.01068678		1441.39	0.00624694		1971.38	0.00934596		2501.38	-0.01676862		3031.38	0.21967662		3561.38	0.02869339		4091.38	-0.01643415
381.59	0.03261321		911.59	0.01047948		1441.59	0.00722767		1971.58	0.00925676		2501.58	-0.01732387		3031.58	0.21962487		3561.58	0.02940237		4091.58	-0.01583493
381.79	0.03212653		911.79	0.00934989		1441.79	0.00841045		1971.78	0.00912879		2501.78	-0.01677375		3031.78	0.21964845		3561.78	0.02900744		4091.78	-0.01527296
381.99	0.03202612		911.99	0.00859645		1441.99	0.00881115		1971.98	0.00902394		2501.98	-0.01617901		3031.98	0.21941631		3561.98	0.02989661		4091.98	-0.01535115
382.19	0.03151434		912.19	0.00767229		1442.19	0.00907499		1972.18	0.00836567		2502.18	-0.01617048		3032.18	0.21902121		3562.18	0.03009698		4092.18	-0.01453046
382.39	0.03077		912.39	0.00791636		1442.39	0.00932708		1972.38	0.00748568		2502.38	-0.01538995		3032.38	0.21936482		3562.38	0.03080722		4092.38	-0.01440167
382.59	0.03011229		912.59	0.00869683		1442.59	0.00913837		1972.58	0.00778095		2502.58	-0.01585848		3032.58	0.21850163		3562.58	0.03106814		4092.58	-0.01401315
382.79	0.02953748		912.79	0.00898612		1442.79	0.01007227		1972.78	0.00684489		2502.78	-0.01535811		3032.78	0.21865022		3562.78	0.03175389		4092.78	-0.0142229
382.99	0.02954764		912.99	0.01007234		1442.99	0.01061294		1972.98	0.00703884		2502.98	-0.01488726		3032.98	0.21767747		3562.98	0.03118244		4092.98	-0.01512683
383.19	0.02912738		913.19	0.01024398		1443.19	0.01012775		1973.18	0.00662465		2503.18	-0.01457435		3033.18	0.21761569		3563.18	0.03089771		4093.18	-0.01553146
383.39	0.02855409		913.39	0.01061402		1443.39	0.00962326		1973.38	0.00689813		2503.38	-0.01447909		3033.38	0.21721176		3563.38	0.0295255		4093.38	-0.01554915
383.59	0.02763043		913.59	0.00988618		1443.59	0.00949163		1973.58	0.0069636		2503.58	-0.01442932		3033.58	0.2177626		3563.58	0.0285639		4093.58	-0.01600924
383.79	0.02752981		913.79	0.01033721		1443.79	0.0081945		1973.78	0.00614926		2503.78	-0.01482011		3033.78	0.21798279		3563.78	0.02645537		4093.78	-0.01630887
383.99	0.02843692		913.99	0.00886626		1443.99	0.00899234		1973.98	0.00648804		2503.98	-0.01543233		3033.98	0.21765951		3563.98	0.02556524		4093.98	-0.0173217
384.19	0.02844552		914.19	0.0084571		1444.19	0.00954312		1974.18	0.00733417		2504.18	-0.01532223		3034.18	0.21749278		3564.18	0.02533922		4094.18	-0.01767721
384.39	0.02763793		914.39	0.00887187		1444.39	0.01066078		1974.38	0.00648048		2504.38	-0.01547732		3034.38	0.21634879		3564.38	0.02520893		4094.38	-0.01853909
384.59	0.02781514		914.59	0.00889786		1444.59	0.01108743		1974.58	0.00515987		2504.58	-0.01614641		3034.58	0.21626702		3564.58	0.02490982		4094.58	-0.01764737
384.79	0.02697013		914.79	0.00829374		1444.79	0.0103188		1974.78	0.00407462		2504.78	-0.01570286		3034.78	0.21586282		3564.78	0.02449136		4094.78	-0.01747669
384.99	0.02749289		914.99	0.00887484		1444.99	0.00977947		1974.98	0.00424906		2504.98	-0.01470195		3034.98	0.2157199		3564.98	0.02473705		4094.98	-0.0175006
385.19	0.02731356		915.19	0.00872073		1445.19	0.01046068		1975.18	0.00460022		2505.18	-0.01596404		3035.18	0.21559741		3565.18	0.02499816		4095.18	-0.01716589
385.39	0.02654723		915.39	0.00916424		1445.39	0.01106192		1975.38	0.0049416		2505.38	-0.01575669		3035.38	0.21538003		3565.38	0.02582316		4095.38	-0.01643656
385.59	0.02670063		915.59	0.0083722		1445.59	0.01111369		1975.58	0.00463497		2505.58	-0.01612217		3035.58	0.21553585		3565.58	0.02696774		4095.58	-0.01687531
385.79	0.02719859		915.79	0.00705977		1445.79	0.01100909		1975.78	0.00585499		2505.78	-0.01588009		3035.78	0.21466271		3565.78	0.02698878		4095.78	-0.01728784
385.99	0.02758525		915.99	0.00721183		1445.99	0.01071933		1975.98	0.00570918		2505.98	-0.01649113		3035.98	0.21380578		3565.98	0.02821492		4095.98	-0.01742309
386.19	0.02694569		916.19	0.00665867		1446.19	0.01013358		1976.18	0.00559338		2506.18	-0.0176717		3036.18	0.21329707		3566.18	0.0280773		4096.18	-0.01651111
386.39	0.02669428		916.39	0.00743665		1446.39	0.00975363		1976.38	0.00579205		2506.38	-0.01680015		3036.38	0.21322815		3566.38	0.02866965		4096.38	-0.01697908
386.59	0.02627839		916.59	0.00797577		1446.59	0.00965996		1976.58	0.00597512		2506.58	-0.01611438		3036.58	0.21269834		3566.58	0.02938295		4096.58	-0.01657617
386.79	0.02538194		916.79	0.00862		1446.79	0.00848656		1976.78	0.00634419		2506.78	-0.01524939		3036.78	0.21209835		3566.78	0.02937944		4096.78	-0.01732104
386.99	0.02502152		916.99	0.00934574		1446.99	0.00788518		1976.98	0.00738313		2506.98	-0.01502714		3036.98	0.21226573		3566.98	0.02912725		4096.98	-0.01820658
387.19	0.02465433		917.19	0.00888121		1447.19	0.00709696		1977.18	0.00760324		2507.18	-0.01494015		3037.18	0.21235232		3567.18	0.02873143		4097.18	-0.01744063
387.39	0.02430188		917.39	0.00806704		1447.39	0.00725431		1977.38	0.00701218		2507.38	-0.01594078		3037.38	0.21217125		3567.38	0.02816165		4097.38	-0.01763785
387.59	0.02425657		917.59	0.0068777		1447.59	0.00715456		1977.58	0.00678133		2507.58	-0.01607309		3037.58	0.21250816		3567.58	0.02797502		4097.58	-0.01730684
387.79	0.02523564		917.79	0.00643906		1447.79	0.00642194		1977.78	0.00588419		2507.78	-0.01669023		3037.78	0.2132801		3567.78	0.0279356		4097.78	-0.01708677
387.99	0.02516432		917.99	0.00556937		1447.99	0.00696926		1977.98	0.0060473		2507.98	-0.01653739		3037.98	0.21276386		3567.98	0.02799525		4097.98	-0.01688061
388.19	0.0240222		918.19	0.00674658		1448.19	0.00664556		1978.18	0.00625586		2508.18	-0.01711441		3038.18	0.21240267		3568.18	0.02793444		4098.18	-0.01713917
388.39	0.02364294		918.39	0.007077		1448.39	0.00645817		1978.38	0.00507403		2508.38	-0.01648432		3038.38	0.21259955		3568.38	0.02809595		4098.38	-0.01765562
388.59	0.02258837		918.59	0.00636419		1448.59	0.00664712		1978.58	0.00385941		2508.58	-0.0159559		3038.58	0.21256988		3568.58	0.02812692		4098.58	-0.01729969
388.79	0.02227535		918.79	0.00606712		1448.79	0.00628028		1978.78	0.00401664		2508.78	-0.01533067		3038.78	0.21207186		3568.78	0.02795103		4098.78	-0.01754457
388.99	0.02274866		918.99	0.00651205		1448.99	0.00553874		1978.98	0.0041002		2508.98	-0.01616407		3038.98	0.21179025		3568.98	0.02760825		4098.98	-0.01763267
389.19	0.02180035		919.19	0.00653742		1449.19	0.00522678		1979.18	0.00397522		2509.18	-0.01787193		3039.18	0.21158763		3569.18	0.02761044		4099.18	-0.01708211
389.39	0.02178919		919.39	0.00725345		1449.39	0.0054642		1979.38	0.0042038		2509.38	-0.0177285		3039.38	0.21071071		3569.38	0.02759945		4099.38	-0.0186212
389.59	0.02183498		919.59	0.00739502		1449.59	0.00532445		1979.58	0.00461386		2509.58	-0.01816396		3039.58	0.21015633		3569.58	0.02770903		4099.58	-0.01948594
389.79	0.0212673		919.79	0.0070883		1449.79	0.00538991		1979.78	0.00611174		2509.78	-0.01896022		3039.78	0.20941639		3569.78	0.02751236		4099.78	-0.01982017
389.99	0.02119853		919.99	0.00746821		1449.99	0.00594429		1979.98	0.00523761		2509.98	-0.0190044		3039.98	0.20872984		3569.98	0.02706609		4099.98	-0.0191614
390.19	0.02151351		920.19	0.00728095		1450.19	0.00587578		1980.18	0.00625324		2510.18	-0.01870489		3040.18	0.20844053		3570.18	0.02711506		4100.18	-0.0186367
390.39	0.02113946		920.39	0.00772691		1450.39	0.00602515		1980.38	0.00635302		2510.38	-0.01764898		3040.38	0.20811261		3570.38	0.02725302		4100.38	-0.01898311
390.59	0.02019631		920.59	0.00756085		1450.59	0.00586018		1980.58	0.0058188		2510.58	-0.01722176		3040.58	0.20802956		3570.58	0.02673651		4100.58	-0.01901718
390.79	0.0194902		920.79	0.00851006		1450.79	0.00604646		1980.78	0.00677946		2510.78	-0.01741094		3040.78	0.2074611		3570.78	0.02644354		4100.78	-0.01929324
390.99	0.02085483		920.99	0.00809029		1450.99	0.00735527		1980.98	0.00672386		2510.98	-0.0170244		3040.98	0.20808315		3570.98	0.02668699		4100.98	-0.01908187
391.19	0.02162185		921.19	0.00740309		1451.19	0.00790956		1981.18	0.00580289		2511.18	-0.01753327		3041.18	0.20750529		3571.18	0.02657933		4101.18	-0.01792687
391.39	0.0219935		921.39	0.00706407		1451.39	0.00827249		1981.38	0.00445049		2511.38	-0.01829805		3041.38	0.20806542		3571.38	0.0266768		4101.38	-0.01759099
391.59	0.02157937		921.59	0.0065939		1451.59	0.007214		1981.58	0.00362964		2511.58	-0.01747575		3041.58	0.20851807		3571.58	0.02708912		4101.58	-0.01665717
391.79	0.02104609		921.79	0.0063707		1451.79	0.00596418		1981.78	0.0026499		2511.78	-0.01686607		3041.78	0.20924942		3571.78	0.0272891		4101.78	-0.0162506
391.99	0.02059835		921.99	0.00563647		1451.99	0.00612986		1981.98	0.00215108		2511.98	-0.0162503		3041.98	0.20869698		3571.98	0.0266073		4101.98	-0.01613808
392.19	0.0195669		922.19	0.00529453		1452.19	0.00658867		1982.18	0.00214818		2512.18	-0.01684578		3042.18	0.20888489		3572.18	0.02628939		4102.18	-0.01612902
392.39	0.01938067		922.39	0.00425582		1452.39	0.00648675		1982.38	0.00139159		2512.38	-0.01618567		3042.38	0.20937209		3572.38	0.02724088		4102.38	-0.01578546
392.59	0.01902085		922.59	0.0036605		1452.59	0.00678609		1982.58	0.00055748		2512.58	-0.01703213		3042.58	0.20911185		3572.58	0.02679194		4102.58	-0.01584267
392.79	0.02017731		922.79	0.0038478		1452.79	0.0062951		1982.78	0.00060034		2512.78	-0.01732942		3042.78	0.20817486		3572.78	0.02647768		4102.78	-0.01605722
392.99	0.02119733		922.99	0.00393377		1452.99	0.00532241		1982.98	0.00051775		2512.98	-0.01827847		3042.98	0.20791965		3572.98	0.02586266		4102.98	-0.01623256
393.19	0.02176298		923.19	0.00365943		1453.19	0.00508894		1983.18	-0.00013907		2513.18	-0.01850603		3043.18	0.20833685		3573.18	0.02614479		4103.18	-0.0156583
393.39	0.02161476		923.39	0.00335498		1453.39	0.00538694		1983.38	0.00024781		2513.38	-0.01818616		3043.38	0.20849949		3573.38	0.02569094		4103.38	-0.01686444
393.59	0.02185706		923.59	0.00319888		1453.59	0.00537735		1983.58	0.00119992		2513.58	-0.01831552		3043.58	0.20915244		3573.58	0.02623832		4103.58	-0.01603916
393.79	0.02212895		923.79	0.00316566		1453.79	0.00476806		1983.78	0.00174979		2513.78	-0.01855046		3043.78	0.20844803		3573.78	0.02640576		4103.78	-0.01630734
393.99	0.02266697		923.99	0.00298448		1453.99	0.00435621		1983.98	0.00205817		2513.98	-0.01817567		3043.98	0.20779242		3573.98	0.02690739		4103.98	-0.01493665
394.19	0.0230657		924.19	0.00328648		1454.19	0.00456873		1984.18	0.00239691		2514.18	-0.01778402		3044.18	0.2078268		3574.18	0.02668159		4104.18	-0.01501086
394.39	0.02244301		924.39	0.00382342		1454.39	0.00488163		1984.38	0.00267659		2514.38	-0.01691228		3044.38	0.20801711		3574.38	0.02654864		4104.38	-0.01562564
394.59	0.02240034		924.59	0.00439718		1454.59	0.00470043		1984.58	0.00298557		2514.58	-0.01630159		3044.58	0.20819769		3574.58	0.02624387		4104.58	-0.01524135
394.79	0.0220855		924.79	0.00537009		1454.79	0.00484098		1984.78	0.00413663		2514.78	-0.01586542		3044.78	0.20783563		3574.78	0.02708235		4104.78	-0.01543009
394.99	0.02280063		924.99	0.00547174		1454.99	0.00451478		1984.98	0.00406201		2514.98	-0.01559822		3044.98	0.20817553		3574.98	0.02653795		4104.98	-0.01586943
395.19	0.02204947		925.19	0.00640873		1455.19	0.00371764		1985.18	0.00423907		2515.18	-0.01531833		3045.18	0.20707327		3575.18	0.0266523		4105.18	-0.0159683
395.39	0.02007757		925.39	0.00670695		1455.39	0.00230541		1985.38	0.00477746		2515.38	-0.01518377		3045.38	0.20768251		3575.38	0.02665359		4105.38	-0.01603486
395.59	0.01924641		925.59	0.00639819		1455.59	0.00147777		1985.58	0.00457581		2515.58	-0.01474959		3045.58	0.20709325		3575.58	0.02680819		4105.58	-0.01655746
395.79	0.01784622		925.79	0.0064037		1455.79	0.00066136		1985.78	0.00476206		2515.78	-0.01406279		3045.78	0.20738295		3575.78	0.0262759		4105.78	-0.01683333
395.99	0.01713191		925.99	0.00713971		1455.99	0.00146203		1985.98	0.00538634		2515.98	-0.01503698		3045.98	0.20694862		3575.98	0.0252461		4105.98	-0.01712962
396.19	0.01650952		926.19	0.00720546		1456.19	0.00107914		1986.18	0.00547512		2516.18	-0.01503779		3046.18	0.20574108		3576.18	0.02494606		4106.18	-0.01800709
396.39	0.01628894		926.39	0.00735988		1456.39	0.00168735		1986.38	0.00471583		2516.38	-0.01538721		3046.38	0.20544279		3576.38	0.02533391		4106.38	-0.01856998
396.59	0.01704191		926.59	0.0067475		1456.59	0.00255122		1986.58	0.00389158		2516.58	-0.01629163		3046.58	0.20463161		3576.58	0.02464808		4106.58	-0.01911838
396.79	0.01728082		926.79	0.006241		1456.79	0.00352918		1986.78	0.00379354		2516.78	-0.0167712		3046.78	0.20446112		3576.78	0.02410336		4106.78	-0.0190026
396.99	0.01782444		926.99	0.00618505		1456.99	0.00355894		1986.98	0.00388725		2516.98	-0.01780794		3046.98	0.20506965		3576.98	0.02464338		4106.98	-0.0183707
397.19	0.01814536		927.19	0.00553428		1457.19	0.00391721		1987.18	0.00305065		2517.18	-0.01755754		3047.18	0.20650146		3577.18	0.02445902		4107.18	-0.01773172
397.39	0.01820209		927.39	0.00475286		1457.39	0.00469469		1987.38	0.00344448		2517.38	-0.01794708		3047.38	0.20599485		3577.38	0.02394728		4107.38	-0.01841539
397.59	0.01953196		927.59	0.0053244		1457.59	0.00564549		1987.58	0.00372212		2517.58	-0.01823969		3047.58	0.20673846		3577.58	0.02466241		4107.58	-0.01797616
397.79	0.01997088		927.79	0.00445434		1457.79	0.00528037		1987.78	0.00351964		2517.78	-0.01882077		3047.78	0.20684848		3577.78	0.02484051		4107.78	-0.01801998
397.99	0.01978129		927.99	0.00349324		1457.99	0.0055562		1987.98	0.00359182		2517.98	-0.01856961		3047.98	0.20692751		3577.98	0.02520975		4107.98	-0.01709244
398.19	0.02016514		928.19	0.00400934		1458.19	0.00658293		1988.18	0.00320429		2518.18	-0.01802471		3048.18	0.20752809		3578.18	0.02460164		4108.18	-0.01714987
398.39	0.02082211		928.39	0.00378491		1458.39	0.00695458		1988.38	0.00382107		2518.38	-0.01746564		3048.38	0.20789806		3578.38	0.02495678		4108.38	-0.01688293
398.59	0.02082333		928.59	0.00318025		1458.59	0.00590268		1988.58	0.00319513		2518.58	-0.01769076		3048.58	0.20798732		3578.58	0.02513844		4108.58	-0.01689796
398.79	0.02036624		928.79	0.00333551		1458.79	0.00622137		1988.78	0.00311692		2518.78	-0.01756354		3048.78	0.20832885		3578.78	0.02505378		4108.78	-0.01795933
398.99	0.02033593		928.99	0.00392261		1458.99	0.00567445		1988.98	0.00323801		2518.98	-0.01782637		3048.98	0.2080203		3578.98	0.02443421		4108.98	-0.01774453
399.19	0.01925959		929.19	0.00417498		1459.19	0.00528028		1989.18	0.00376876		2519.18	-0.01873153		3049.18	0.20763417		3579.18	0.02495413		4109.18	-0.01770622
399.39	0.01828755		929.39	0.00422464		1459.39	0.00461557		1989.38	0.0041772		2519.38	-0.01907579		3049.38	0.20820646		3579.38	0.0249407		4109.38	-0.01766625
399.59	0.01806569		929.59	0.00514368		1459.59	0.00475854		1989.58	0.00432021		2519.58	-0.01909043		3049.58	0.20724958		3579.58	0.02492436		4109.58	-0.01730824
399.79	0.017635		929.79	0.00613725		1459.79	0.00420082		1989.78	0.00466859		2519.78	-0.01916319		3049.78	0.20711057		3579.78	0.02481672		4109.78	-0.01741118
399.99	0.01783966		929.99	0.00719653		1459.99	0.0042244		1989.98	0.00430048		2519.98	-0.01979193		3049.98	0.20683685		3579.98	0.02432807		4109.98	-0.01744098
400.19	0.01864684		930.19	0.00685646		1460.19	0.00379997		1990.18	0.00358229		2520.18	-0.01967019		3050.18	0.20608093		3580.18	0.02394694		4110.18	-0.01746828
400.39	0.01768522		930.39	0.00669869		1460.39	0.00423509		1990.38	0.00357682		2520.38	-0.01969075		3050.38	0.2060997		3580.38	0.02459152		4110.38	-0.01675643
400.59	0.01872795		930.59	0.00591975		1460.59	0.00367145		1990.58	0.00408018		2520.58	-0.01963955		3050.58	0.2049432		3580.58	0.02435444		4110.58	-0.01649271
400.79	0.01796352		930.79	0.00568974		1460.79	0.00322746		1990.78	0.00491873		2520.78	-0.01955612		3050.78	0.20467688		3580.78	0.02365118		4110.78	-0.0155533
400.99	0.01894084		930.99	0.00576128		1460.99	0.00281885		1990.98	0.00496404		2520.98	-0.01940034		3050.98	0.20443013		3580.98	0.02376197		4110.98	-0.01524292
401.19	0.01995625		931.19	0.00520626		1461.19	0.00347812		1991.18	0.00545653		2521.18	-0.01859163		3051.18	0.20382717		3581.18	0.02248854		4111.18	-0.01528976
401.39	0.02066666		931.39	0.00476523		1461.39	0.0037728		1991.38	0.00620573		2521.38	-0.01857237		3051.38	0.202278		3581.38	0.02257353		4111.38	-0.0157412
401.59	0.02076645		931.59	0.00496968		1461.59	0.00361169		1991.58	0.00645879		2521.58	-0.01859682		3051.58	0.20268665		3581.58	0.02296256		4111.58	-0.01503462
401.79	0.02068346		931.79	0.00354886		1461.79	0.00345926		1991.78	0.00622522		2521.78	-0.01859652		3051.78	0.20282409		3581.78	0.02259873		4111.78	-0.01452019
401.99	0.0208901		931.99	0.00335397		1461.99	0.00395164		1991.98	0.00673887		2521.98	-0.01718296		3051.98	0.20202572		3581.98	0.02267412		4111.98	-0.01392471
402.19	0.02182813		932.19	0.00303163		1462.19	0.00349919		1992.18	0.007134		2522.18	-0.01672374		3052.18	0.20167524		3582.18	0.02269645		4112.18	-0.01401964
402.39	0.02194939		932.39	0.00237684		1462.39	0.00374774		1992.38	0.00697899		2522.38	-0.01668267		3052.38	0.20163922		3582.38	0.02219176		4112.38	-0.01480432
402.59	0.02145479		932.59	0.00203016		1462.59	0.00410209		1992.58	0.00630706		2522.58	-0.01662603		3052.58	0.20220786		3582.58	0.02267175		4112.58	-0.01551612
402.79	0.02115641		932.79	0.0021671		1462.79	0.00418924		1992.78	0.00583149		2522.78	-0.01651984		3052.78	0.20176617		3582.78	0.02211679		4112.78	-0.01565849
402.99	0.02109898		932.99	0.00222435		1462.99	0.00398714		1992.98	0.00532285		2522.98	-0.01746985		3052.98	0.20181975		3582.98	0.02272824		4112.98	-0.01570803
403.19	0.02058805		933.19	0.00280495		1463.19	0.00451763		1993.18	0.0046194		2523.18	-0.01856039		3053.18	0.20232815		3583.18	0.0231238		4113.18	-0.01675756
403.39	0.0202271		933.39	0.00473225		1463.39	0.00526769		1993.38	0.00379438		2523.38	-0.01899034		3053.38	0.20278292		3583.38	0.02343343		4113.38	-0.01670843
403.59	0.01978953		933.59	0.00580147		1463.59	0.00608102		1993.58	0.00321632		2523.58	-0.01961681		3053.58	0.202725		3583.58	0.02378881		4113.58	-0.01713687
403.79	0.02058967		933.79	0.00550093		1463.79	0.00566552		1993.78	0.00189293		2523.78	-0.01926127		3053.78	0.20278858		3583.78	0.0244883		4113.78	-0.01772849
403.99	0.02042314		933.99	0.00552702		1463.99	0.00573147		1993.98	0.00115316		2523.98	-0.01906375		3053.98	0.20295254		3583.98	0.02442644		4113.98	-0.01814181
404.19	0.02024363		934.19	0.00561882		1464.19	0.00559536		1994.18	0.001667		2524.18	-0.01940272		3054.18	0.20234838		3584.18	0.02493626		4114.18	-0.01774182
404.39	0.01895029		934.39	0.00542695		1464.39	0.00513268		1994.38	0.00074234		2524.38	-0.0192422		3054.38	0.20247988		3584.38	0.02571108		4114.38	-0.01828758
404.59	0.01922448		934.59	0.00526671		1464.59	0.00477227		1994.58	0.00104017		2524.58	-0.02027415		3054.58	0.20211043		3584.58	0.0255561		4114.58	-0.01845741
404.79	0.0185011		934.79	0.00550442		1464.79	0.00505787		1994.78	0.00089817		2524.78	-0.02008104		3054.78	0.20226688		3584.78	0.02464545		4114.78	-0.01796086
404.99	0.01867566		934.99	0.0060465		1464.99	0.00571412		1994.98	0.00127347		2524.98	-0.02009833		3054.98	0.20224343		3584.98	0.02525074		4114.98	-0.01802857
405.19	0.01834918		935.19	0.00639683		1465.19	0.00582999		1995.18	0.00215662		2525.18	-0.01978521		3055.18	0.20187315		3585.18	0.02530709		4115.18	-0.01851182
405.39	0.01755832		935.39	0.00610427		1465.39	0.00608446		1995.38	0.00246091		2525.38	-0.02002491		3055.38	0.20172579		3585.38	0.02549641		4115.38	-0.01816068
405.59	0.01661815		935.59	0.00544184		1465.59	0.00635295		1995.58	0.0035262		2525.58	-0.02032982		3055.58	0.20185043		3585.58	0.02559239		4115.58	-0.01761686
405.79	0.01610799		935.79	0.00499277		1465.79	0.00638349		1995.78	0.00427189		2525.78	-0.01908455		3055.78	0.20222067		3585.78	0.02491773		4115.78	-0.01759545
405.99	0.01538181		935.99	0.00552748		1465.99	0.00668337		1995.98	0.00542107		2525.98	-0.01816697		3055.98	0.20109853		3585.98	0.02503898		4115.98	-0.01718761
406.19	0.01544343		936.19	0.00548058		1466.19	0.0059679		1996.18	0.00637944		2526.18	-0.01828514		3056.18	0.20089117		3586.18	0.02460718		4116.18	-0.01780931
406.39	0.01440001		936.39	0.0053396		1466.39	0.00597542		1996.38	0.00665727		2526.38	-0.01841828		3056.38	0.200847		3586.38	0.02386456		4116.38	-0.01771896
406.59	0.01455181		936.59	0.00436923		1466.59	0.00607215		1996.58	0.00738587		2526.58	-0.01733245		3056.58	0.20058252		3586.58	0.02377693		4116.58	-0.01832503
406.79	0.01455879		936.79	0.00394482		1466.79	0.00511208		1996.78	0.0071578		2526.78	-0.01665229		3056.78	0.20034469		3586.78	0.02303311		4116.78	-0.01904642
406.99	0.01428059		936.99	0.00406251		1466.99	0.00515416		1996.98	0.00675083		2526.98	-0.01738997		3056.98	0.20119569		3586.98	0.02346442		4116.98	-0.01996278
407.19	0.01464168		937.19	0.00473298		1467.19	0.00543101		1997.18	0.00747752		2527.18	-0.01802661		3057.18	0.20071773		3587.18	0.02330414		4117.18	-0.02085955
407.39	0.01466159		937.39	0.00463646		1467.39	0.00568831		1997.38	0.00761645		2527.38	-0.01908578		3057.38	0.20067502		3587.38	0.0231392		4117.38	-0.02095297
407.59	0.0147569		937.59	0.00384998		1467.59	0.00568631		1997.58	0.00779874		2527.58	-0.01861266		3057.58	0.20095738		3587.58	0.02338126		4117.58	-0.02143156
407.79	0.01542059		937.79	0.00230539		1467.79	0.00585353		1997.78	0.00717664		2527.78	-0.01797645		3057.78	0.20076665		3587.78	0.02343505		4117.78	-0.020724
407.99	0.0152584		937.99	0.00235939		1467.99	0.0068487		1997.98	0.00702445		2527.98	-0.01848897		3057.98	0.20154883		3587.98	0.02349981		4117.98	-0.02051781
408.19	0.01591606		938.19	0.00311087		1468.19	0.00606613		1998.18	0.00572634		2528.18	-0.01869192		3058.18	0.20193902		3588.18	0.02365308		4118.18	-0.01964035
408.39	0.01620205		938.39	0.003242		1468.39	0.00525256		1998.38	0.0047638		2528.38	-0.01870612		3058.38	0.20273391		3588.38	0.02377801		4118.38	-0.01995047
408.59	0.01721866		938.59	0.00290634		1468.59	0.00477407		1998.58	0.00491212		2528.58	-0.01877698		3058.58	0.20215074		3588.58	0.02486456		4118.58	-0.01923525
408.79	0.01704912		938.79	0.00335413		1468.79	0.00514579		1998.78	0.0046427		2528.78	-0.01843153		3058.78	0.20232854		3588.78	0.02539195		4118.78	-0.01818087
408.99	0.0181844		938.99	0.00377146		1468.99	0.00600826		1998.98	0.00483376		2528.98	-0.01829046		3058.98	0.20250344		3588.98	0.02591701		4118.98	-0.01764677
409.19	0.01869608		939.19	0.00335916		1469.19	0.00584469		1999.18	0.00441387		2529.18	-0.0180135		3059.18	0.20262663		3589.18	0.0255519		4119.18	-0.0180163
409.39	0.01910327		939.39	0.00228965		1469.39	0.0066978		1999.38	0.00401027		2529.38	-0.01857213		3059.38	0.20203873		3589.38	0.02555199		4119.38	-0.01759245
409.59	0.01902965		939.59	0.00199112		1469.59	0.00606315		1999.58	0.00388243		2529.58	-0.01952743		3059.58	0.20165416		3589.58	0.0253404		4119.58	-0.0164751
409.79	0.01872986		939.79	0.00197106		1469.79	0.00539081		1999.78	0.00335024		2529.78	-0.01941988		3059.78	0.20165808		3589.78	0.02575462		4119.78	-0.01649421
409.99	0.01781786		939.99	0.00280262		1469.99	0.00486739		1999.98	0.00339464		2529.98	-0.02020031		3059.98	0.20082734		3589.98	0.02598699		4119.98	-0.01640699
410.19	0.01752191		940.19	0.00228759		1470.19	0.00408621		2000.18	0.00345416		2530.18	-0.02061896		3060.18	0.20071887		3590.18	0.02555046		4120.18	-0.01646902
410.39	0.01736893		940.39	0.00170425		1470.39	0.00411086		2000.38	0.00324663		2530.38	-0.02068505		3060.38	0.20088728		3590.38	0.02506355		4120.38	-0.01724287
410.59	0.01720236		940.59	0.00138842		1470.59	0.00365703		2000.58	0.00305875		2530.58	-0.01977298		3060.58	0.20102133		3590.58	0.02490881		4120.58	-0.01868169
410.79	0.01752328		940.79	0.00203423		1470.79	0.00268903		2000.78	0.00136394		2530.78	-0.02000908		3060.78	0.20188236		3590.78	0.02548552		4120.78	-0.01972631
410.99	0.01736281		940.99	0.00243018		1470.99	0.00312074		2000.98	0.00110286		2530.98	-0.02133991		3060.98	0.20166551		3590.98	0.02594296		4120.98	-0.02038269
411.19	0.01704594		941.19	0.00245516		1471.19	0.00425649		2001.18	0.0015406		2531.18	-0.021935		3061.18	0.20071756		3591.18	0.02520142		4121.18	-0.0206104
411.39	0.01686662		941.39	0.00251191		1471.39	0.00489534		2001.38	0.00113317		2531.38	-0.02244392		3061.38	0.20046584		3591.38	0.02466201		4121.38	-0.02024908
411.59	0.01545185		941.59	0.00337646		1471.59	0.00444087		2001.58	0.00098413		2531.58	-0.02172615		3061.58	0.19991078		3591.58	0.02413259		4121.58	-0.02065969
411.79	0.01509858		941.79	0.00318518		1471.79	0.00479437		2001.78	0.00158926		2531.78	-0.02162769		3061.78	0.19945826		3591.78	0.02348584		4121.78	-0.01995732
411.99	0.01474333		941.99	0.00433683		1471.99	0.00382683		2001.98	0.00153689		2531.98	-0.02133439		3061.98	0.19942042		3591.98	0.0236374		4121.98	-0.01921012
412.19	0.01484663		942.19	0.00512047		1472.19	0.00218439		2002.18	0.00152257		2532.18	-0.02098646		3062.18	0.19908859		3592.18	0.02334503		4122.18	-0.01814088
412.39	0.01526316		942.39	0.00577705		1472.39	0.0017851		2002.38	0.00301994		2532.38	-0.02119851		3062.38	0.19865034		3592.38	0.02392431		4122.38	-0.01767819
412.59	0.01583537		942.59	0.00576937		1472.59	0.00188363		2002.58	0.00376011		2532.58	-0.02097536		3062.58	0.19772112		3592.58	0.02439036		4122.58	-0.01650362
412.79	0.01496298		942.79	0.00624796		1472.79	0.00198967		2002.78	0.00443217		2532.78	-0.02063727		3062.78	0.19714101		3592.78	0.02325572		4122.78	-0.01533079
412.99	0.01589813		942.99	0.00656642		1472.99	0.00233878		2002.98	0.00516738		2532.98	-0.01983874		3062.98	0.19713884		3592.98	0.02265351		4122.98	-0.01471286
413.19	0.01518548		943.19	0.00583929		1473.19	0.00216363		2003.18	0.00559483		2533.18	-0.01963337		3063.18	0.19668462		3593.18	0.02305114		4123.18	-0.01438469
413.39	0.01503333		943.39	0.00545116		1473.39	0.00287411		2003.38	0.00607632		2533.38	-0.02061094		3063.38	0.19653903		3593.38	0.02293746		4123.38	-0.01433493
413.59	0.01442542		943.59	0.00570417		1473.59	0.00218679		2003.58	0.00591898		2533.58	-0.02128265		3063.58	0.19679147		3593.58	0.02329268		4123.58	-0.01416784
413.79	0.01399743		943.79	0.00512812		1473.79	0.00259576		2003.78	0.00541401		2533.78	-0.02065463		3063.78	0.19764816		3593.78	0.02370839		4123.78	-0.01489085
413.99	0.01321961		943.99	0.00506377		1473.99	0.00263342		2003.98	0.00541975		2533.98	-0.02129691		3063.98	0.1980571		3593.98	0.02386559		4123.98	-0.01558454
414.19	0.01366237		944.19	0.00380192		1474.19	0.00330067		2004.18	0.00506288		2534.18	-0.02087234		3064.18	0.19868207		3594.18	0.02314433		4124.18	-0.01549262
414.39	0.01454218		944.39	0.00345806		1474.39	0.00350712		2004.38	0.00444135		2534.38	-0.02077698		3064.38	0.19905494		3594.38	0.0229688		4124.38	-0.01695566
414.59	0.01475796		944.59	0.00318346		1474.59	0.00288215		2004.58	0.00285153		2534.58	-0.02014835		3064.58	0.19915429		3594.58	0.02399818		4124.58	-0.01686483
414.79	0.0150296		944.79	0.00277603		1474.79	0.00381438		2004.78	0.00170944		2534.78	-0.02020841		3064.78	0.19978299		3594.78	0.02488297		4124.78	-0.01707835
414.99	0.01474612		944.99	0.00254092		1474.99	0.00466683		2004.98	0.00181099		2534.98	-0.02068937		3064.98	0.1996679		3594.98	0.0252818		4124.98	-0.01706171
415.19	0.01354445		945.19	0.0024477		1475.19	0.00477096		2005.18	0.00140475		2535.18	-0.02027773		3065.18	0.19920064		3595.18	0.02566068		4125.18	-0.01644899
415.39	0.01316413		945.39	0.00254822		1475.39	0.00424267		2005.38	0.00170626		2535.38	-0.02042942		3065.38	0.19942753		3595.38	0.02615362		4125.38	-0.01681017
415.59	0.01202198		945.59	0.00253791		1475.59	0.00304206		2005.58	0.002271		2535.58	-0.01977308		3065.58	0.19896489		3595.58	0.02574277		4125.58	-0.01797193
415.79	0.01183369		945.79	0.00186321		1475.79	0.00281174		2005.78	0.00292827		2535.78	-0.01934344		3065.78	0.19948029		3595.78	0.02589968		4125.78	-0.01715901
415.99	0.01204849		945.99	0.00212164		1475.99	0.00194216		2005.98	0.00283961		2535.98	-0.01960894		3065.98	0.19899889		3595.98	0.02642257		4125.98	-0.01691025
416.19	0.01221814		946.19	0.00217695		1476.19	0.00140336		2006.18	0.00370366		2536.18	-0.02020687		3066.18	0.19953529		3596.18	0.02577047		4126.18	-0.01714128
416.39	0.0134027		946.39	0.00283275		1476.39	0.00207191		2006.38	0.00426241		2536.38	-0.02054975		3066.38	0.19910375		3596.38	0.02616441		4126.38	-0.01663217
416.59	0.0130038		946.59	0.00236118		1476.59	0.00192892		2006.58	0.00398426		2536.58	-0.02042238		3066.58	0.19816423		3596.58	0.0251598		4126.58	-0.01660744
416.79	0.01281949		946.79	0.00234998		1476.79	0.00100127		2006.78	0.00370849		2536.78	-0.02046689		3066.78	0.19742911		3596.78	0.02489572		4126.78	-0.01638637
416.99	0.01270066		946.99	0.00305499		1476.99	0.00143182		2006.98	0.00373723		2536.98	-0.02044662		3066.98	0.19728121		3596.98	0.02543956		4126.98	-0.01618337
417.19	0.01269793		947.19	0.00289211		1477.19	0.00165766		2007.18	0.00405929		2537.18	-0.02117532		3067.18	0.19673569		3597.18	0.0252337		4127.18	-0.01591129
417.39	0.01311885		947.39	0.0029799		1477.39	0.0023536		2007.38	0.00426667		2537.38	-0.02197041		3067.38	0.19672997		3597.38	0.02454302		4127.38	-0.01744445
417.59	0.01305602		947.59	0.00259964		1477.59	0.00242703		2007.58	0.0033464		2537.58	-0.02172254		3067.58	0.19678777		3597.58	0.02410512		4127.58	-0.01759045
417.79	0.01286353		947.79	0.00274217		1477.79	0.00208941		2007.78	0.00235212		2537.78	-0.02150273		3067.78	0.19768226		3597.78	0.02368898		4127.78	-0.01743547
417.99	0.01249747		947.99	0.00216766		1477.99	0.001353		2007.98	0.00155016		2537.98	-0.02207583		3067.98	0.19746521		3597.98	0.02266449		4127.98	-0.01720553
418.19	0.01224178		948.19	0.00210935		1478.19	0.00101842		2008.18	0.00001859		2538.18	-0.02188582		3068.18	0.19694687		3598.18	0.02142973		4128.18	-0.0175844
418.39	0.01111379		948.39	0.00244869		1478.39	0.00146442		2008.38	-0.00021671		2538.38	-0.02189782		3068.38	0.19626119		3598.38	0.02187258		4128.38	-0.0177348
418.59	0.0102456		948.59	0.00230191		1478.59	0.00161287		2008.58	-0.00013947		2538.58	-0.02051375		3068.58	0.19727876		3598.58	0.02210073		4128.58	-0.01779515
418.79	0.00925355		948.79	0.00163849		1478.79	0.00232779		2008.78	0.00033366		2538.78	-0.02022462		3068.78	0.1970533		3598.78	0.02210147		4128.78	-0.01710349
418.99	0.00918072		948.99	0.00171353		1478.99	0.00191444		2008.98	0.00088646		2538.98	-0.01959653		3068.98	0.19771658		3598.98	0.02243816		4128.98	-0.01747361
419.19	0.00819201		949.19	0.00195652		1479.19	0.00201528		2009.18	0.0010594		2539.18	-0.01911598		3069.18	0.19778454		3599.18	0.02223315		4129.18	-0.01700885
419.39	0.0075842		949.39	0.00205303		1479.39	0.00172858		2009.38	0.00161981		2539.38	-0.01853767		3069.38	0.19857688		3599.38	0.02128347		4129.38	-0.01830676
419.59	0.00816117		949.59	0.00237111		1479.59	0.00171736		2009.58	0.0025156		2539.58	-0.01790613		3069.58	0.19819342		3599.58	0.02158035		4129.58	-0.0184985
419.79	0.00904175		949.79	0.00252397		1479.79	0.00214727		2009.78	0.00281196		2539.78	-0.01886534		3069.78	0.19852658		3599.78	0.02164193		4129.78	-0.01749871
419.99	0.00976301		949.99	0.00223813		1479.99	0.00179177		2009.98	0.00335319		2539.98	-0.01989506		3069.98	0.19786609		3599.98	0.02202656		4129.98	-0.01732676
420.19	0.01041019		950.19	0.00229011		1480.19	0.00144034		2010.18	0.00408509		2540.18	-0.02046599		3070.18	0.19832726		3600.18	0.02191457		4130.18	-0.01708329
420.39	0.01109409		950.39	0.00209337		1480.39	0.00224334		2010.38	0.00349273		2540.38	-0.02106698		3070.38	0.19819966		3600.38	0.02211818		4130.38	-0.01687902
420.59	0.01102395		950.59	0.0015312		1480.59	0.00220168		2010.58	0.00398536		2540.58	-0.02113668		3070.58	0.19753977		3600.58	0.02181817		4130.58	-0.01761741
420.79	0.01183133		950.79	0.0016604		1480.79	0.00131916		2010.78	0.00433595		2540.78	-0.02184378		3070.78	0.19738592		3600.78	0.02243892		4130.78	-0.01685469
420.99	0.0123974		950.99	0.00258114		1480.99	0.00206635		2010.98	0.00495813		2540.98	-0.0214385		3070.98	0.19687639		3600.98	0.02207901		4130.98	-0.01710534
421.19	0.01239909		951.19	0.00258702		1481.19	0.00246977		2011.18	0.00571535		2541.18	-0.02187794		3071.18	0.1958825		3601.18	0.02204931		4131.18	-0.0168157
421.39	0.01170124		951.39	0.00270383		1481.39	0.00316995		2011.38	0.00540134		2541.38	-0.0223088		3071.38	0.19652446		3601.38	0.02260191		4131.38	-0.01817778
421.59	0.01176055		951.59	0.00272701		1481.59	0.0033421		2011.58	0.00463603		2541.58	-0.02198158		3071.58	0.19737871		3601.58	0.02208451		4131.58	-0.01779004
421.79	0.01142869		951.79	0.00273899		1481.79	0.00277783		2011.78	0.0034058		2541.78	-0.02301126		3071.78	0.19743432		3601.78	0.02244543		4131.78	-0.01795764
421.99	0.01094393		951.99	0.00238457		1481.99	0.00244903		2011.98	0.0029177		2541.98	-0.02343212		3071.98	0.19707225		3601.98	0.02195555		4131.98	-0.01819468
422.19	0.01119871		952.19	0.00291116		1482.19	0.00319457		2012.18	0.00294355		2542.18	-0.0234425		3072.18	0.1959677		3602.18	0.02202482		4132.18	-0.0200155
422.39	0.01072609		952.39	0.00248562		1482.39	0.00342826		2012.38	0.00371586		2542.38	-0.02285689		3072.38	0.1955844		3602.38	0.02159629		4132.38	-0.02027317
422.59	0.01127199		952.59	0.00236694		1482.59	0.00369		2012.58	0.00355582		2542.58	-0.02269087		3072.58	0.19556037		3602.58	0.02134788		4132.58	-0.02032024
422.79	0.01159282		952.79	0.0024214		1482.79	0.00340437		2012.78	0.00314198		2542.78	-0.02244592		3072.78	0.1945576		3602.78	0.02206884		4132.78	-0.01940081
422.99	0.01209376		952.99	0.0028143		1482.99	0.00321858		2012.98	0.00248478		2542.98	-0.02214063		3072.98	0.19510097		3602.98	0.02245405		4132.98	-0.01961013
423.19	0.01169261		953.19	0.00257568		1483.19	0.00273742		2013.18	0.00239021		2543.18	-0.02155707		3073.18	0.19491852		3603.18	0.02318447		4133.18	-0.01911755
423.39	0.01132099		953.39	0.00229247		1483.39	0.00251322		2013.38	0.00248119		2543.38	-0.02147405		3073.38	0.19470312		3603.38	0.02419414		4133.38	-0.01977046
423.59	0.01242969		953.59	0.00214651		1483.59	0.00278083		2013.58	0.0024085		2543.58	-0.02215932		3073.58	0.19460484		3603.58	0.0250821		4133.58	-0.01942859
423.79	0.012503		953.79	0.00204731		1483.79	0.00260846		2013.78	0.00156423		2543.78	-0.02324376		3073.78	0.19445467		3603.78	0.02568684		4133.78	-0.01842443
423.99	0.01169067		953.99	0.00199847		1483.99	0.00162261		2013.98	0.00142956		2543.98	-0.02361033		3073.98	0.19443026		3603.98	0.02686743		4133.98	-0.01760569
424.19	0.01151437		954.19	0.002468		1484.19	0.00138224		2014.18	0.00120479		2544.18	-0.02358866		3074.18	0.19513959		3604.18	0.02783847		4134.18	-0.01778181
424.39	0.01179796		954.39	0.00252134		1484.39	0.00162876		2014.38	0.00052828		2544.38	-0.02282501		3074.38	0.19523416		3604.38	0.02845001		4134.38	-0.01776482
424.59	0.01146847		954.59	0.00337228		1484.59	0.00110221		2014.58	0.00086152		2544.58	-0.02272216		3074.58	0.19538344		3604.58	0.029212		4134.58	-0.01737812
424.79	0.01123133		954.79	0.00398833		1484.79	0.00000696		2014.78	0.00079401		2544.78	-0.02258244		3074.78	0.19531512		3604.78	0.0284775		4134.78	-0.01707515
424.99	0.01081769		954.99	0.00471537		1484.99	-0.00035819		2014.98	0.00103041		2544.98	-0.02118342		3074.98	0.19466439		3604.98	0.02807049		4134.98	-0.01734787
425.19	0.00937027		955.19	0.00438243		1485.19	0.00000256		2015.18	0.00135654		2545.18	-0.02087456		3075.18	0.19458294		3605.18	0.02747326		4135.18	-0.01649433
425.39	0.00890452		955.39	0.00425676		1485.39	-0.00070433		2015.38	0.00112429		2545.38	-0.02101849		3075.38	0.19518548		3605.38	0.02706039		4135.38	-0.01676143
425.59	0.00895419		955.59	0.00513942		1485.59	-0.00138097		2015.58	0.00166808		2545.58	-0.02131874		3075.58	0.19508256		3605.58	0.02600113		4135.58	-0.01652779
425.79	0.00894568		955.79	0.00501986		1485.79	-0.00245377		2015.78	0.00147548		2545.78	-0.0223857		3075.78	0.19394172		3605.78	0.02608031		4135.78	-0.01691316
425.99	0.0091788		955.99	0.00590123		1485.99	-0.0025848		2015.98	0.00177974		2545.98	-0.02197295		3075.98	0.19331908		3605.98	0.02490064		4135.98	-0.01786958
426.19	0.01018031		956.19	0.00536115		1486.19	-0.00188871		2016.18	0.00108987		2546.18	-0.02275825		3076.18	0.19305369		3606.18	0.02325471		4136.18	-0.01811342
426.39	0.01035167		956.39	0.00475511		1486.39	-0.00174793		2016.38	0.00134306		2546.38	-0.02381843		3076.38	0.19284887		3606.38	0.02220799		4136.38	-0.01808029
426.59	0.01077834		956.59	0.00558786		1486.59	-0.00077009		2016.58	0.00138067		2546.58	-0.02491404		3076.58	0.1919511		3606.58	0.02198514		4136.58	-0.0175104
426.79	0.01143869		956.79	0.0053995		1486.79	-0.00073826		2016.78	0.00148348		2546.78	-0.02466145		3076.78	0.19176653		3606.78	0.02192598		4136.78	-0.01733621
426.99	0.01121326		956.99	0.00398122		1486.99	-0.00068791		2016.98	0.00104499		2546.98	-0.02429035		3076.98	0.19192082		3606.98	0.02214992		4136.98	-0.01758419
427.19	0.01104028		957.19	0.00293098		1487.19	-0.00058215		2017.18	0.00183795		2547.18	-0.02453099		3077.18	0.19168353		3607.18	0.0225464		4137.18	-0.01798312
427.39	0.01189837		957.39	0.00216486		1487.39	0.00013631		2017.38	0.00199287		2547.38	-0.02647082		3077.38	0.19206421		3607.38	0.02203294		4137.38	-0.01865033
427.59	0.01221506		957.59	0.00068892		1487.59	0.00037998		2017.58	0.00197945		2547.58	-0.0275229		3077.58	0.19278231		3607.58	0.02236726		4137.58	-0.01916727
427.79	0.01131804		957.79	0.00020125		1487.79	0.00047035		2017.78	0.00159421		2547.78	-0.02790812		3077.78	0.1926847		3607.78	0.02349519		4137.78	-0.01832337
427.99	0.01123758		957.99	-0.00010112		1487.99	0.00008997		2017.98	0.00180747		2547.98	-0.02841781		3077.98	0.19287139		3607.98	0.0236107		4137.98	-0.01704143
428.19	0.01161949		958.19	-0.00075804		1488.19	0.00025143		2018.18	0.00143604		2548.18	-0.02783425		3078.18	0.19363053		3608.18	0.02405361		4138.18	-0.01842524
428.39	0.01195531		958.39	-0.00000789		1488.39	-0.00061246		2018.38	0.00135475		2548.38	-0.02773181		3078.38	0.19321741		3608.38	0.0243958		4138.38	-0.01886233
428.59	0.01141375		958.59	0.00016663		1488.59	-0.00117809		2018.58	0.00110976		2548.58	-0.02742131		3078.58	0.19432636		3608.58	0.02402258		4138.58	-0.01899095
428.79	0.01145574		958.79	-0.00016975		1488.79	-0.00187029		2018.78	0.00059515		2548.78	-0.02631038		3078.78	0.19386458		3608.78	0.02291675		4138.78	-0.01981784
428.99	0.01010941		958.99	-0.00016478		1488.99	-0.00172688		2018.98	0.00061031		2548.98	-0.02466947		3078.98	0.19382891		3608.98	0.02320984		4138.98	-0.01960154
429.19	0.00940611		959.19	-0.00087763		1489.19	-0.00055709		2019.18	0.00128176		2549.18	-0.02381732		3079.18	0.19409734		3609.18	0.02268225		4139.18	-0.01987802
429.39	0.00854864		959.39	-0.00079182		1489.39	-0.00189461		2019.38	0.00190677		2549.38	-0.02319803		3079.38	0.19358309		3609.38	0.02283782		4139.38	-0.01966015
429.59	0.00796969		959.59	0.00057417		1489.59	-0.00211607		2019.58	0.00143458		2549.58	-0.02283963		3079.58	0.19297494		3609.58	0.02326237		4139.58	-0.01959347
429.79	0.00763957		959.79	0.00071867		1489.79	-0.00169488		2019.78	0.00109752		2549.78	-0.02198687		3079.78	0.19220619		3609.78	0.02334271		4139.78	-0.01986387
429.99	0.00727546		959.99	0.00031279		1489.99	-0.00027349		2019.98	0.00156309		2549.98	-0.02097235		3079.98	0.19292307		3609.98	0.0224758		4139.98	-0.02027009
430.19	0.00765025		960.19	0.00037435		1490.19	0.00046038		2020.18	0.0013673		2550.18	-0.02047283		3080.18	0.19313863		3610.18	0.02183146		4140.18	-0.02013765
430.39	0.0079091		960.39	0.00075954		1490.39	0.00181493		2020.38	0.00194226		2550.38	-0.02031839		3080.38	0.19169344		3610.38	0.02180323		4140.38	-0.02040727
430.59	0.00890973		960.59	0.00197015		1490.59	0.00240293		2020.58	0.00195725		2550.58	-0.02031176		3080.58	0.19118645		3610.58	0.02164136		4140.58	-0.01962812
430.79	0.00915648		960.79	0.0023131		1490.79	0.00273699		2020.78	0.00208061		2550.78	-0.01934245		3080.78	0.19181038		3610.78	0.02223192		4140.78	-0.01916207
430.99	0.00825607		960.99	0.00280881		1490.99	0.00276867		2020.98	0.00212121		2550.98	-0.0190195		3080.98	0.19148901		3610.98	0.02281235		4140.98	-0.01896642
431.19	0.00867739		961.19	0.00264555		1491.19	0.00367033		2021.18	0.00199725		2551.18	-0.02032738		3081.18	0.19140311		3611.18	0.02297144		4141.18	-0.0186589
431.39	0.00951559		961.39	0.00176488		1491.39	0.00422228		2021.38	0.00185808		2551.38	-0.02095752		3081.38	0.1912872		3611.38	0.02264256		4141.38	-0.01833532
431.59	0.00911169		961.59	0.00132021		1491.59	0.0040976		2021.58	0.00209766		2551.58	-0.02080023		3081.58	0.18970535		3611.58	0.02336972		4141.58	-0.01815445
431.79	0.00993785		961.79	0.00159333		1491.79	0.00365631		2021.78	0.00193255		2551.78	-0.02143026		3081.78	0.18973741		3611.78	0.02374462		4141.78	-0.01742957
431.99	0.01059472		961.99	0.00183217		1491.99	0.00329392		2021.98	0.00177145		2551.98	-0.0220246		3081.98	0.18889734		3611.98	0.02432892		4141.98	-0.01681135
432.19	0.01101883		962.19	0.00155201		1492.19	0.00378758		2022.18	0.00148512		2552.18	-0.02306781		3082.18	0.18979796		3612.18	0.02474859		4142.18	-0.01817649
432.39	0.01109831		962.39	0.00180137		1492.39	0.00255592		2022.38	0.00104129		2552.38	-0.02388499		3082.38	0.18931517		3612.38	0.02449928		4142.38	-0.01845894
432.59	0.01123348		962.59	0.00150093		1492.59	0.00229172		2022.58	0.00035022		2552.58	-0.02372555		3082.58	0.18965732		3612.58	0.02425246		4142.58	-0.01812202
432.79	0.01117505		962.79	0.00087529		1492.79	0.00227728		2022.78	0.00018574		2552.78	-0.02383393		3082.78	0.18911895		3612.78	0.0239145		4142.78	-0.01871307
432.99	0.01005473		962.99	0.00052707		1492.99	0.00267798		2022.98	0.00001131		2552.98	-0.02365663		3082.98	0.1896324		3612.98	0.02461935		4142.98	-0.01891895
433.19	0.01037339		963.19	-0.00046719		1493.19	0.00289183		2023.18	0.00052341		2553.18	-0.02372834		3083.18	0.18941715		3613.18	0.02366901		4143.18	-0.01884564
433.39	0.00994822		963.39	-0.00015787		1493.39	0.00181723		2023.38	0.00025275		2553.38	-0.02407267		3083.38	0.18912484		3613.38	0.0240355		4143.38	-0.01761655
433.59	0.01071003		963.59	0.00019969		1493.59	0.000861		2023.58	-0.0004656		2553.58	-0.02411111		3083.58	0.18880198		3613.58	0.02390623		4143.58	-0.01761254
433.79	0.01034268		963.79	-0.00059297		1493.79	0.00083074		2023.78	0.00034591		2553.78	-0.02432449		3083.78	0.18894359		3613.78	0.02316163		4143.78	-0.01826559
433.99	0.01035536		963.99	-0.00140245		1493.99	0.00101096		2023.98	0.0008778		2553.98	-0.02303463		3083.98	0.18991533		3613.98	0.02322754		4143.98	-0.01872163
434.19	0.0101692		964.19	-0.00036166		1494.19	-0.0001092		2024.18	0.00023046		2554.18	-0.0226194		3084.18	0.18945685		3614.18	0.02259325		4144.18	-0.01850403
434.39	0.01057155		964.39	-0.00000045		1494.39	-0.00011499		2024.38	-0.00053599		2554.38	-0.02240061		3084.38	0.18963265		3614.38	0.02260604		4144.38	-0.01831827
434.59	0.01066848		964.59	0.00143941		1494.59	-0.00104876		2024.58	0.00070642		2554.58	-0.02215913		3084.58	0.19058476		3614.58	0.02224565		4144.58	-0.01826692
434.79	0.00923705		964.79	0.0022182		1494.79	-0.00100661		2024.78	0.00099871		2554.78	-0.02151715		3084.78	0.19152602		3614.78	0.02218282		4144.78	-0.01775242
434.99	0.00923311		964.99	0.00219756		1494.99	-0.00142845		2024.98	0.00117817		2554.98	-0.02165821		3084.98	0.19169817		3614.98	0.02186201		4144.98	-0.01862793
435.19	0.00872982		965.19	0.00192256		1495.19	-0.00219172		2025.18	0.00099404		2555.18	-0.02161935		3085.18	0.19224171		3615.18	0.0215943		4145.18	-0.01945752
435.39	0.00875		965.39	0.00272281		1495.39	-0.00230619		2025.38	0.00125632		2555.38	-0.02189882		3085.38	0.19137466		3615.38	0.02148512		4145.38	-0.01939664
435.59	0.00911616		965.59	0.00332113		1495.59	-0.0028094		2025.58	0.00195016		2555.58	-0.02154189		3085.58	0.19128086		3615.58	0.0210678		4145.58	-0.01996084
435.79	0.00972341		965.79	0.00389076		1495.79	-0.0034836		2025.78	0.00222744		2555.78	-0.02236319		3085.78	0.19189676		3615.78	0.0211746		4145.78	-0.0201907
435.99	0.00927206		965.99	0.00401323		1495.99	-0.00324187		2025.98	0.00173197		2555.98	-0.02280249		3085.98	0.19098627		3615.98	0.02095381		4145.98	-0.02033259
436.19	0.00971313		966.19	0.00442043		1496.19	-0.00274107		2026.18	0.00173666		2556.18	-0.02312046		3086.18	0.19193628		3616.18	0.02096319		4146.18	-0.02085766
436.39	0.01009348		966.39	0.004658		1496.39	-0.00265346		2026.38	0.00170944		2556.38	-0.02271681		3086.38	0.19168199		3616.38	0.02104908		4146.38	-0.02112621
436.59	0.01059696		966.59	0.00456918		1496.59	-0.00208803		2026.58	0.00135794		2556.58	-0.02251517		3086.58	0.19101036		3616.58	0.02113247		4146.58	-0.02092649
436.79	0.01044577		966.79	0.00409139		1496.79	-0.00123514		2026.78	0.00154311		2556.78	-0.02244633		3086.78	0.19040623		3616.78	0.02114837		4146.78	-0.02114996
436.99	0.01069167		966.99	0.00396248		1496.99	-0.00079429		2026.98	0.00022165		2556.98	-0.02351333		3086.98	0.19118715		3616.98	0.02203165		4146.98	-0.02120729
437.19	0.01117484		967.19	0.0036794		1497.19	-0.00065299		2027.18	-0.0000591		2557.18	-0.02350379		3087.18	0.1905692		3617.18	0.02205268		4147.18	-0.0212475
437.39	0.01074786		967.39	0.00363713		1497.39	-0.00072317		2027.38	-0.00071339		2557.38	-0.0238939		3087.38	0.19008332		3617.38	0.02235149		4147.38	-0.02008975
437.59	0.010638		967.59	0.00333038		1497.59	-0.0006566		2027.58	-0.00109261		2557.58	-0.02405689		3087.58	0.18965476		3617.58	0.02229076		4147.58	-0.0207339
437.79	0.00954974		967.79	0.00212363		1497.79	-0.00015672		2027.78	-0.00139571		2557.78	-0.02402748		3087.78	0.18979819		3617.78	0.0229829		4147.78	-0.02111477
437.99	0.00930499		967.99	0.00217567		1497.99	0.00025361		2027.98	-0.00064948		2557.98	-0.02258599		3087.98	0.19086056		3617.98	0.02402378		4147.98	-0.02052548
438.19	0.00911654		968.19	0.00215044		1498.19	-0.00078892		2028.18	-0.00076133		2558.18	-0.02232642		3088.18	0.19111611		3618.18	0.02347188		4148.18	-0.01910503
438.39	0.00884067		968.39	0.00160373		1498.39	0.00009927		2028.38	-0.00063867		2558.38	-0.02228295		3088.38	0.19187433		3618.38	0.02325225		4148.38	-0.0196521
438.59	0.00850651		968.59	0.00124733		1498.59	0.00047119		2028.58	0.00103293		2558.58	-0.02244647		3088.58	0.19180873		3618.58	0.02310093		4148.58	-0.01906429
438.79	0.00820992		968.79	0.00079838		1498.79	0.00068065		2028.78	0.00171379		2558.78	-0.02247349		3088.78	0.1924456		3618.78	0.02305524		4148.78	-0.01857237
438.99	0.00801016		968.99	0.00073009		1498.99	0.00054641		2028.98	0.00216667		2558.98	-0.02274886		3088.98	0.19234793		3618.98	0.02286524		4148.98	-0.01918593
439.19	0.00744538		969.19	0.00095321		1499.19	0.00031609		2029.18	0.002371		2559.18	-0.02250846		3089.18	0.19255284		3619.18	0.0233584		4149.18	-0.01850129
439.39	0.00730479		969.39	0.00155187		1499.39	0.00091187		2029.38	0.00185083		2559.38	-0.02256217		3089.38	0.19202305		3619.38	0.02279297		4149.38	-0.01753079
439.59	0.00776502		969.59	0.00163528		1499.59	0.00040875		2029.58	0.00256453		2559.58	-0.02247135		3089.58	0.19260651		3619.58	0.02208499		4149.58	-0.01754983
439.79	0.0083836		969.79	0.00243927		1499.79	0.0005811		2029.78	0.00270898		2559.78	-0.02286297		3089.78	0.19169717		3619.78	0.02262095		4149.78	-0.01688099
439.99	0.00905541		969.99	0.00269515		1499.99	0.000804		2029.98	0.00291991		2559.98	-0.02306904		3089.98	0.19122604		3619.98	0.02240782		4149.98	-0.01665122
440.19	0.01007983		970.19	0.002985		1500.19	0.00121303		2030.18	0.00277473		2560.18	-0.02296653		3090.18	0.19118646		3620.18	0.02279656		4150.18	-0.01583176
440.39	0.01038677		970.39	0.00209004		1500.39	0.00159685		2030.38	0.00299261		2560.38	-0.02296258		3090.38	0.19022665		3620.38	0.02264622		4150.38	-0.01548916
440.59	0.01009753		970.59	0.00192885		1500.59	0.00177336		2030.58	0.00213535		2560.58	-0.02357453		3090.58	0.18906931		3620.58	0.02228098		4150.58	-0.01672853
440.79	0.00970755		970.79	0.00192193		1500.79	0.00206089		2030.78	0.00197827		2560.78	-0.02421662		3090.78	0.18866064		3620.78	0.02279984		4150.78	-0.01721759
440.99	0.00993769		970.99	0.00141732		1500.99	0.00181246		2030.98	0.00026311		2560.98	-0.0250019		3090.98	0.18911485		3620.98	0.02304167		4150.98	-0.01743118
441.19	0.00962273		971.19	0.00189108		1501.19	0.00106005		2031.18	-0.00036043		2561.18	-0.02444403		3091.18	0.18797933		3621.18	0.02296086		4151.18	-0.01826009
441.39	0.00850827		971.39	0.00209554		1501.39	0.00175041		2031.38	-0.00089442		2561.38	-0.02510518		3091.38	0.18799633		3621.38	0.02273478		4151.38	-0.01851443
441.59	0.00782457		971.59	0.00232258		1501.59	0.00132874		2031.58	-0.0006609		2561.58	-0.02612792		3091.58	0.18747797		3621.58	0.02313242		4151.58	-0.01989279
441.79	0.00840193		971.79	0.00172406		1501.79	0.00110013		2031.78	-0.00087149		2561.78	-0.02643937		3091.78	0.18812532		3621.78	0.02314953		4151.78	-0.01946573
441.99	0.00804288		971.99	0.00150685		1501.99	0.0009097		2031.98	-0.00039046		2561.98	-0.0253615		3091.98	0.18871561		3621.98	0.02300209		4151.98	-0.01905187
442.19	0.00888376		972.19	0.00065896		1502.19	0.00048898		2032.18	-0.00037736		2562.18	-0.02556204		3092.18	0.18878368		3622.18	0.02327712		4152.18	-0.01926572
442.39	0.0082284		972.39	-0.00070082		1502.39	0.00086207		2032.38	-0.00012141		2562.38	-0.02605842		3092.38	0.18936705		3622.38	0.02396197		4152.38	-0.02116918
442.59	0.00852677		972.59	-0.00063292		1502.59	-0.00010643		2032.58	0.00002011		2562.58	-0.02588944		3092.58	0.18893837		3622.58	0.02487362		4152.58	-0.02085424
442.79	0.00713241		972.79	-0.00053049		1502.79	-0.00049016		2032.78	0.00060988		2562.78	-0.02544539		3092.78	0.1890979		3622.78	0.02472943		4152.78	-0.02127277
442.99	0.00674362		972.99	-0.0000138		1502.99	-0.00024149		2032.98	0.00081		2562.98	-0.0253923		3092.98	0.18846355		3622.98	0.02449202		4152.98	-0.02110545
443.19	0.00689438		973.19	-0.0005485		1503.19	-0.00010289		2033.18	0.00133556		2563.18	-0.02519999		3093.18	0.18887463		3623.18	0.02474864		4153.18	-0.02094342
443.39	0.00656125		973.39	0.0002652		1503.39	-0.0002579		2033.38	0.00144055		2563.38	-0.02573834		3093.38	0.18914962		3623.38	0.02400265		4153.38	-0.02123712
443.59	0.00688383		973.59	0.0005398		1503.59	-0.00024205		2033.58	0.00223677		2563.58	-0.02641998		3093.58	0.18949856		3623.58	0.02339938		4153.58	-0.02142046
443.79	0.00761711		973.79	0.00068199		1503.79	-0.0002299		2033.78	0.00311303		2563.78	-0.02623345		3093.78	0.18947078		3623.78	0.02355969		4153.78	-0.02096689
443.99	0.00717305		973.99	0.0016422		1503.99	-0.00009352		2033.98	0.00272936		2563.98	-0.02600874		3093.98	0.18931423		3623.98	0.02296098		4153.98	-0.0199583
444.19	0.00708352		974.19	0.00108164		1504.19	0.00092657		2034.18	0.00148165		2564.18	-0.02581225		3094.18	0.18859336		3624.18	0.02357322		4154.18	-0.0193722
444.39	0.00688362		974.39	0.00115661		1504.39	0.00174437		2034.38	0.00097831		2564.38	-0.02397705		3094.38	0.18935472		3624.38	0.02343783		4154.38	-0.02001592
444.59	0.00647193		974.59	0.00180114		1504.59	0.00174473		2034.58	0.00026756		2564.58	-0.02411117		3094.58	0.189976		3624.58	0.02340825		4154.58	-0.02109339
444.79	0.0062712		974.79	0.00129513		1504.79	0.00184054		2034.78	-0.00012148		2564.78	-0.0237972		3094.78	0.19023403		3624.78	0.02341793		4154.78	-0.02086304
444.99	0.00638492		974.99	0.00146898		1504.99	0.00219015		2034.98	-0.00091249		2564.98	-0.02386739		3094.98	0.19035328		3624.98	0.02297879		4154.98	-0.02031861
445.19	0.00648991		975.19	0.00299714		1505.19	0.00210204		2035.18	-0.0009098		2565.18	-0.0236142		3095.18	0.19023814		3625.18	0.02281455		4155.18	-0.02004239
445.39	0.00624498		975.39	0.00307513		1505.39	0.00292359		2035.38	-0.00124956		2565.38	-0.02381698		3095.38	0.19033988		3625.38	0.02289517		4155.38	-0.01906256
445.59	0.00612353		975.59	0.00307027		1505.59	0.00243943		2035.58	-0.00169527		2565.58	-0.02373653		3095.58	0.18942703		3625.58	0.02243805		4155.58	-0.01815085
445.79	0.00755796		975.79	0.00283817		1505.79	0.00218972		2035.78	-0.00244824		2565.78	-0.02248321		3095.78	0.18983599		3625.78	0.02317308		4155.78	-0.01740107
445.99	0.0072538		975.99	0.00157936		1505.99	0.00084686		2035.98	-0.00194148		2565.98	-0.02073483		3095.98	0.1895572		3625.98	0.0236377		4155.98	-0.01832167
446.19	0.00834399		976.19	0.00068152		1506.19	0.00031148		2036.18	-0.00152063		2566.18	-0.02105276		3096.18	0.19007308		3626.18	0.02466099		4156.18	-0.0188485
446.39	0.00715322		976.39	0.000232		1506.39	-0.00051902		2036.38	-0.00189805		2566.38	-0.02071509		3096.38	0.1898045		3626.38	0.0246693		4156.38	-0.02003051
446.59	0.00806379		976.59	0.00053612		1506.59	-0.00148135		2036.58	-0.00232492		2566.58	-0.02053157		3096.58	0.18856505		3626.58	0.02486091		4156.58	-0.01941085
446.79	0.00731893		976.79	0.00011067		1506.79	-0.0013734		2036.78	-0.00136166		2566.78	-0.02041324		3096.78	0.18825816		3626.78	0.02441749		4156.78	-0.01943292
446.99	0.0078924		976.99	-0.00027981		1506.99	-0.00152655		2036.98	-0.00151588		2566.98	-0.02096606		3096.98	0.18676616		3626.98	0.02428953		4156.98	-0.01945757
447.19	0.00762855		977.19	-0.00069878		1507.19	-0.00196968		2037.18	-0.00176131		2567.18	-0.0214809		3097.18	0.18676362		3627.18	0.02419311		4157.18	-0.01951051
447.39	0.0080683		977.39	-0.00026003		1507.39	-0.00226078		2037.38	-0.00136914		2567.38	-0.02299542		3097.38	0.18736068		3627.38	0.02395169		4157.38	-0.01943042
447.59	0.00827674		977.59	-0.00078733		1507.59	-0.0015412		2037.58	-0.00141272		2567.58	-0.0237441		3097.58	0.18777571		3627.58	0.02360921		4157.58	-0.01909269
447.79	0.00792486		977.79	-0.00158572		1507.79	-0.00216462		2037.78	-0.00140215		2567.78	-0.0239475		3097.78	0.18721292		3627.78	0.02413438		4157.78	-0.01870424
447.99	0.00750259		977.99	-0.00139666		1507.99	-0.00141576		2037.98	-0.00321442		2567.98	-0.02331543		3097.98	0.18672792		3627.98	0.02446267		4157.98	-0.01788941
448.19	0.0065449		978.19	-0.00172375		1508.19	-0.00087083		2038.18	-0.0040223		2568.18	-0.02321152		3098.18	0.18601448		3628.18	0.02507487		4158.18	-0.0191181
448.39	0.00597767		978.39	-0.00179238		1508.39	-0.00114479		2038.38	-0.00454281		2568.38	-0.02219659		3098.38	0.18643133		3628.38	0.02454014		4158.38	-0.02007296
448.59	0.00518535		978.59	-0.00142482		1508.59	-0.00132207		2038.58	-0.00452041		2568.58	-0.02288096		3098.58	0.18626885		3628.58	0.02455745		4158.58	-0.02052101
448.79	0.00519367		978.79	-0.00096198		1508.79	-0.00003646		2038.78	-0.00486309		2568.78	-0.02305235		3098.78	0.18556699		3628.78	0.02455664		4158.78	-0.02012398
448.99	0.00520339		978.99	-0.00025696		1508.99	0.00045535		2038.98	-0.00427218		2568.98	-0.02334925		3098.98	0.18663885		3628.98	0.02385423		4158.98	-0.01919308
449.19	0.00505806		979.19	0.00000563		1509.19	0.00069788		2039.18	-0.00369182		2569.18	-0.02265706		3099.18	0.18666731		3629.18	0.02379939		4159.18	-0.01819054
449.39	0.00491112		979.39	-0.00053941		1509.39	0.00089908		2039.38	-0.00371745		2569.38	-0.02204933		3099.38	0.18680614		3629.38	0.02391037		4159.38	-0.0175558
449.59	0.00516979		979.59	-0.00068248		1509.59	0.00016616		2039.58	-0.00330861		2569.58	-0.02237199		3099.58	0.18685478		3629.58	0.02386932		4159.58	-0.01803766
449.79	0.00503057		979.79	-0.00070571		1509.79	-0.00097897		2039.78	-0.00173454		2569.78	-0.02173716		3099.78	0.18748265		3629.78	0.02451509		4159.78	-0.01886144
449.99	0.00452757		979.99	-0.00112243		1509.99	-0.00207225		2039.98	-0.000849		2569.98	-0.02146106		3099.98	0.18783862		3629.98	0.02377244		4159.98	-0.02003159
450.19	0.00506029		980.19	-0.00028192		1510.19	-0.00214882		2040.18	-0.00039951		2570.18	-0.02200748		3100.18	0.18790189		3630.18	0.02300027		4160.18	-0.01982333
450.39	0.00519305		980.39	0.00035224		1510.39	-0.0018156		2040.38	0.0001066		2570.38	-0.02222571		3100.38	0.18782985		3630.38	0.02268769		4160.38	-0.02064333
450.59	0.00622348		980.59	0.00100516		1510.59	-0.00231222		2040.58	0.00016308		2570.58	-0.02205701		3100.58	0.18746908		3630.58	0.02262499		4160.58	-0.01929999
450.79	0.00557477		980.79	0.00190643		1510.79	-0.00324794		2040.78	0.00066766		2570.78	-0.02259061		3100.78	0.18764544		3630.78	0.02212747		4160.78	-0.01882064
450.99	0.0057826		980.99	0.00224806		1510.99	-0.00346818		2040.98	0.00033984		2570.98	-0.02308721		3100.98	0.18678761		3630.98	0.02228075		4160.98	-0.01923275
451.19	0.00573663		981.19	0.00333551		1511.19	-0.00331284		2041.18	0.00046602		2571.18	-0.02426309		3101.18	0.18650516		3631.18	0.0227515		4161.18	-0.01877433
451.39	0.00654842		981.39	0.00372639		1511.39	-0.00316533		2041.38	0.00100468		2571.38	-0.0254828		3101.38	0.18672882		3631.38	0.02373874		4161.38	-0.01872049
451.59	0.00732863		981.59	0.0030014		1511.59	-0.00356836		2041.58	0.00046437		2571.58	-0.02577169		3101.58	0.18651346		3631.58	0.02394365		4161.58	-0.01863066
451.79	0.00770223		981.79	0.00257448		1511.79	-0.00301948		2041.78	-0.00065404		2571.78	-0.02567825		3101.78	0.18575698		3631.78	0.02389597		4161.78	-0.01908312
451.99	0.00762267		981.99	0.00234283		1511.99	-0.00212945		2041.98	-0.00184523		2571.98	-0.02478255		3101.98	0.18614424		3631.98	0.02441095		4161.98	-0.0192602
452.19	0.00640071		982.19	0.00219564		1512.19	-0.0020351		2042.18	-0.00175746		2572.18	-0.02424801		3102.18	0.18543108		3632.18	0.02383452		4162.18	-0.01921482
452.39	0.00668269		982.39	0.00197343		1512.39	-0.00158336		2042.38	-0.00229681		2572.38	-0.02309821		3102.38	0.18599074		3632.38	0.02358077		4162.38	-0.01874156
452.59	0.00720339		982.59	0.00201934		1512.59	-0.00088866		2042.58	-0.00246004		2572.58	-0.022916		3102.58	0.18674402		3632.58	0.02349186		4162.58	-0.01779605
452.79	0.00703351		982.79	0.00192236		1512.79	-0.00047186		2042.78	-0.00278342		2572.78	-0.02259334		3102.78	0.18703534		3632.78	0.02329412		4162.78	-0.01767769
452.99	0.00683314		982.99	0.00066673		1512.99	0.00026117		2042.98	-0.00175266		2572.98	-0.0232217		3102.98	0.18856849		3632.98	0.02294771		4162.98	-0.01731233
453.19	0.00677728		983.19	0.00013528		1513.19	0.00122509		2043.18	-0.00148844		2573.18	-0.02242259		3103.18	0.18882899		3633.18	0.02325312		4163.18	-0.01726393
453.39	0.00650514		983.39	-0.00061744		1513.39	0.00099935		2043.38	-0.0014042		2573.38	-0.02225727		3103.38	0.18951218		3633.38	0.02314526		4163.38	-0.01750755
453.59	0.00609345		983.59	-0.00115602		1513.59	0.00024583		2043.58	-0.00047819		2573.58	-0.02313335		3103.58	0.18982781		3633.58	0.02337665		4163.58	-0.01860515
453.79	0.00571655		983.79	-0.0011428		1513.79	-0.00023377		2043.78	0.00111987		2573.78	-0.0219953		3103.78	0.18957782		3633.78	0.02312137		4163.78	-0.01974046
453.99	0.00596161		983.99	-0.00090995		1513.99	-0.00092983		2043.98	0.00094329		2573.98	-0.02253151		3103.98	0.18852727		3633.98	0.02252094		4163.98	-0.02049937
454.19	0.00617908		984.19	-0.00040339		1514.19	-0.00071991		2044.18	0.00090169		2574.18	-0.02368305		3104.18	0.18903091		3634.18	0.02230853		4164.18	-0.02043273
454.39	0.00570844		984.39	0.00001215		1514.39	-0.00062538		2044.38	0.00092294		2574.38	-0.02428876		3104.38	0.18953292		3634.38	0.02281394		4164.38	-0.02089929
454.59	0.0059512		984.59	0.00028679		1514.59	-0.00178894		2044.58	0.00052048		2574.58	-0.02457504		3104.58	0.18893051		3634.58	0.0233255		4164.58	-0.02008781
454.79	0.00586647		984.79	0.00023273		1514.79	-0.00218489		2044.78	0.00074945		2574.78	-0.0248964		3104.78	0.18916507		3634.78	0.02374367		4164.78	-0.02004898
454.99	0.00601799		984.99	0.0001373		1514.99	-0.00232148		2044.98	0.00027284		2574.98	-0.02461409		3104.98	0.18817566		3634.98	0.02427344		4164.98	-0.02048346
455.19	0.00536234		985.19	0.00049812		1515.19	-0.00277047		2045.18	-0.00001308		2575.18	-0.0246216		3105.18	0.18745408		3635.18	0.02505501		4165.18	-0.01961149
455.39	0.00562336		985.39	-0.00006915		1515.39	-0.00373051		2045.38	-0.00032263		2575.38	-0.024639		3105.38	0.186859		3635.38	0.02536828		4165.38	-0.01953469
455.59	0.00623931		985.59	-0.00061765		1515.59	-0.00322775		2045.58	-0.00151068		2575.58	-0.02507686		3105.58	0.18726575		3635.58	0.02524338		4165.58	-0.01887858
455.79	0.00691201		985.79	-0.00025794		1515.79	-0.00254231		2045.78	-0.00220137		2575.78	-0.02424501		3105.78	0.18730611		3635.78	0.02523705		4165.78	-0.01932538
455.99	0.00602488		985.99	-0.00080421		1515.99	-0.00244255		2045.98	-0.00271657		2575.98	-0.02445409		3105.98	0.18732322		3635.98	0.02522495		4165.98	-0.01908116
456.19	0.00623871		986.19	-0.0008219		1516.19	-0.00249631		2046.18	-0.0030228		2576.18	-0.02433518		3106.18	0.18672012		3636.18	0.02425434		4166.18	-0.01767962
456.39	0.00726511		986.39	-0.00065553		1516.39	-0.00204669		2046.38	-0.00421089		2576.38	-0.02453615		3106.38	0.18697843		3636.38	0.02389996		4166.38	-0.01828966
456.59	0.00723126		986.59	-0.00048153		1516.59	-0.00226879		2046.58	-0.00435128		2576.58	-0.02558177		3106.58	0.18678487		3636.58	0.023438		4166.58	-0.01856436
456.79	0.00725028		986.79	-0.00015903		1516.79	-0.00186897		2046.78	-0.00353226		2576.78	-0.02539959		3106.78	0.18647435		3636.78	0.02350646		4166.78	-0.01851165
456.99	0.00819306		986.99	-0.00033415		1516.99	-0.00104538		2046.98	-0.0025276		2576.98	-0.02508714		3106.98	0.18679243		3636.98	0.02317115		4166.98	-0.01864606
457.19	0.00817927		987.19	-0.00071198		1517.19	-0.00159705		2047.18	-0.00242913		2577.18	-0.02377914		3107.18	0.18654106		3637.18	0.02249936		4167.18	-0.01903915
457.39	0.00804251		987.39	-0.00148283		1517.39	-0.00213365		2047.38	-0.00210078		2577.38	-0.02411865		3107.38	0.18629773		3637.38	0.02261199		4167.38	-0.0196723
457.59	0.00812241		987.59	-0.00165666		1517.59	-0.00261128		2047.58	-0.00157216		2577.58	-0.02497359		3107.58	0.18544102		3637.58	0.02239288		4167.58	-0.02017724
457.79	0.00802461		987.79	-0.00208652		1517.79	-0.00255103		2047.78	-0.00073297		2577.78	-0.02502665		3107.78	0.18536561		3637.78	0.02237454		4167.78	-0.02132847
457.99	0.00662888		987.99	-0.00231204		1517.99	-0.00262394		2047.98	-0.00142105		2577.98	-0.02604393		3107.98	0.18579223		3637.98	0.02203037		4167.98	-0.02235313
458.19	0.00645568		988.19	-0.00233592		1518.19	-0.00211497		2048.18	-0.00089893		2578.18	-0.02586858		3108.18	0.18689299		3638.18	0.02257173		4168.18	-0.02238793
458.39	0.00648018		988.39	-0.0027927		1518.39	-0.00287301		2048.38	-0.00049292		2578.38	-0.02545975		3108.38	0.18646719		3638.38	0.02213718		4168.38	-0.02248657
458.59	0.00644343		988.59	-0.00324361		1518.59	-0.00313027		2048.58	-0.00027249		2578.58	-0.02466526		3108.58	0.18668546		3638.58	0.02185428		4168.58	-0.02208006
458.79	0.00607329		988.79	-0.0035572		1518.79	-0.00353689		2048.78	0.00003683		2578.78	-0.02383513		3108.78	0.18640847		3638.78	0.02163053		4168.78	-0.02187964
458.99	0.00524807		988.99	-0.00399402		1518.99	-0.00381823		2048.98	-0.00017076		2578.98	-0.02402606		3108.98	0.18492454		3638.98	0.02168217		4168.98	-0.02175717
459.19	0.003707		989.19	-0.0042345		1519.19	-0.00371987		2049.18	-0.00002703		2579.18	-0.02430076		3109.18	0.18505819		3639.18	0.02152113		4169.18	-0.02116609
459.39	0.00337915		989.39	-0.00400915		1519.39	-0.00381519		2049.38	-0.00093362		2579.38	-0.02421027		3109.38	0.184693		3639.38	0.0218848		4169.38	-0.02111539
459.59	0.00380836		989.59	-0.00288653		1519.59	-0.00359839		2049.58	-0.00254131		2579.58	-0.02455778		3109.58	0.18488133		3639.58	0.02174418		4169.58	-0.02102355
459.79	0.00410389		989.79	-0.00264442		1519.79	-0.00381617		2049.78	-0.00201304		2579.78	-0.02538502		3109.78	0.18440877		3639.78	0.02118436		4169.78	-0.02118952
459.99	0.00326121		989.99	-0.00171443		1519.99	-0.0028799		2049.98	-0.00196298		2579.98	-0.02753608		3109.98	0.1843211		3639.98	0.02077051		4169.98	-0.0214266
460.19	0.00354786		990.19	-0.00103204		1520.19	-0.00316421		2050.18	-0.001939		2580.18	-0.02772727		3110.18	0.18387941		3640.18	0.02019338		4170.18	-0.02055597
460.39	0.00332936		990.39	-0.00051351		1520.39	-0.00330573		2050.38	-0.00232362		2580.38	-0.02871627		3110.38	0.18369534		3640.38	0.02041518		4170.38	-0.0211629
460.59	0.00320705		990.59	0.00016282		1520.59	-0.00348671		2050.58	-0.00246079		2580.58	-0.02922236		3110.58	0.18343597		3640.58	0.02074578		4170.58	-0.02067338
460.79	0.00364494		990.79	0.00040298		1520.79	-0.00331167		2050.78	-0.00196364		2580.78	-0.02796269		3110.78	0.18404337		3640.78	0.0206314		4170.78	-0.02016374
460.99	0.00343516		990.99	0.00057864		1520.99	-0.0035436		2050.98	-0.00268409		2580.98	-0.0279366		3110.98	0.18419103		3640.98	0.01952083		4170.98	-0.0208662
461.19	0.00381153		991.19	-0.00011434		1521.19	-0.0034938		2051.18	-0.00366481		2581.18	-0.02831008		3111.18	0.18377623		3641.18	0.01856885		4171.18	-0.02030008
461.39	0.00382		991.39	0.00028451		1521.39	-0.00340796		2051.38	-0.00400693		2581.38	-0.02927148		3111.38	0.18503797		3641.38	0.0186597		4171.38	-0.02040706
461.59	0.00362506		991.59	0.00086143		1521.59	-0.00303742		2051.58	-0.00413204		2581.58	-0.02926318		3111.58	0.18522679		3641.58	0.01724489		4171.58	-0.02092458
461.79	0.00242171		991.79	0.00001174		1521.79	-0.00213185		2051.78	-0.00403113		2581.78	-0.02875422		3111.78	0.18606796		3641.78	0.0169088		4171.78	-0.02076408
461.99	0.00240239		991.99	0.00028293		1521.99	-0.00195403		2051.98	-0.00380673		2581.98	-0.02721923		3111.98	0.18760388		3641.98	0.01635493		4171.98	-0.02093226
462.19	0.00438749		992.19	0.00052835		1522.19	-0.00195217		2052.18	-0.00370481		2582.18	-0.02634837		3112.18	0.18885774		3642.18	0.01638776		4172.18	-0.02038723
462.39	0.00460779		992.39	0.00036394		1522.39	-0.00250636		2052.38	-0.00391356		2582.38	-0.02618441		3112.38	0.18906408		3642.38	0.01544428		4172.38	-0.02063445
462.59	0.00466989		992.59	0.00032814		1522.59	-0.00250838		2052.58	-0.00403375		2582.58	-0.02471716		3112.58	0.18876231		3642.58	0.01622483		4172.58	-0.02155901
462.79	0.00542579		992.79	-0.00043659		1522.79	-0.00303379		2052.78	-0.00398781		2582.78	-0.0247731		3112.78	0.1877167		3642.78	0.01675933		4172.78	-0.02121529
462.99	0.00599677		992.99	-0.00084671		1522.99	-0.00251589		2052.98	-0.00439571		2582.98	-0.02466935		3112.98	0.18772018		3642.98	0.01652917		4172.98	-0.02147334
463.19	0.00592373		993.19	-0.00104003		1523.19	-0.00215059		2053.18	-0.00523411		2583.18	-0.02388073		3113.18	0.18820946		3643.18	0.01689584		4173.18	-0.02130771
463.39	0.00602199		993.39	-0.00080538		1523.39	-0.00228352		2053.38	-0.0058791		2583.38	-0.02355277		3113.38	0.18857958		3643.38	0.01753624		4173.38	-0.02062111
463.59	0.00591647		993.59	0.00017892		1523.59	-0.00296611		2053.58	-0.00568198		2583.58	-0.02433571		3113.58	0.18744459		3643.58	0.01828311		4173.58	-0.02131901
463.79	0.00565063		993.79	0.00047797		1523.79	-0.00266896		2053.78	-0.00398937		2583.78	-0.02544782		3113.78	0.18716126		3643.78	0.0193781		4173.78	-0.02044489
463.99	0.0051191		993.99	0.00091842		1523.99	-0.00316366		2053.98	-0.00329393		2583.98	-0.02626022		3113.98	0.18635915		3643.98	0.02034673		4173.98	-0.02010475
464.19	0.0052704		994.19	0.00096599		1524.19	-0.00305469		2054.18	-0.00286143		2584.18	-0.02603867		3114.18	0.18594778		3644.18	0.02091665		4174.18	-0.01928583
464.39	0.00503313		994.39	0.00106193		1524.39	-0.00344988		2054.38	-0.00251459		2584.38	-0.02667837		3114.38	0.18494094		3644.38	0.02112187		4174.38	-0.01975506
464.59	0.00533922		994.59	0.00066189		1524.59	-0.00318348		2054.58	-0.00249383		2584.58	-0.02621417		3114.58	0.18414548		3644.58	0.02131186		4174.58	-0.01905854
464.79	0.00510536		994.79	0.00112902		1524.79	-0.00326712		2054.78	-0.0016914		2584.78	-0.02551533		3114.78	0.18323315		3644.78	0.02080204		4174.78	-0.0191043
464.99	0.00472378		994.99	0.0013359		1524.99	-0.00368741		2054.98	-0.00171091		2584.98	-0.02624739		3114.98	0.18188329		3644.98	0.02064838		4174.98	-0.01881025
465.19	0.00510321		995.19	0.00125069		1525.19	-0.00407971		2055.18	-0.0012998		2585.18	-0.02715741		3115.18	0.18163352		3645.18	0.02055126		4175.18	-0.01842987
465.39	0.00451033		995.39	0.00137424		1525.39	-0.0040917		2055.38	-0.00171464		2585.38	-0.02667221		3115.38	0.18197647		3645.38	0.02115766		4175.38	-0.01904196
465.59	0.00379284		995.59	0.00123759		1525.59	-0.00335253		2055.58	-0.00148129		2585.58	-0.02616809		3115.58	0.1808842		3645.58	0.02099688		4175.58	-0.01916768
465.79	0.00376568		995.79	0.00024554		1525.79	-0.00361067		2055.78	-0.00063023		2585.78	-0.02582586		3115.78	0.18110793		3645.78	0.02139952		4175.78	-0.01819719
465.99	0.00383549		995.99	0.00030347		1525.99	-0.00383843		2055.98	-0.00028349		2585.98	-0.0250618		3115.98	0.1819462		3645.98	0.02213863		4175.98	-0.01857707
466.19	0.00418017		996.19	0.00043844		1526.19	-0.00389098		2056.18	-0.00047047		2586.18	-0.02505687		3116.18	0.18185699		3646.18	0.02125273		4176.18	-0.01891099
466.39	0.00262296		996.39	0.00014914		1526.39	-0.00412142		2056.38	-0.00067329		2586.38	-0.02483757		3116.38	0.18101914		3646.38	0.02099321		4176.38	-0.01965728
466.59	0.00282015		996.59	-0.00027717		1526.59	-0.00451953		2056.58	-0.00105162		2586.58	-0.02361143		3116.58	0.18152632		3646.58	0.0225456		4176.58	-0.02031557
466.79	0.00322523		996.79	-0.00100194		1526.79	-0.00451529		2056.78	-0.00162948		2586.78	-0.02464787		3116.78	0.18157087		3646.78	0.02303045		4176.78	-0.02002725
466.99	0.00322142		996.99	-0.00149349		1526.99	-0.00392021		2056.98	-0.0032259		2586.98	-0.02449629		3116.98	0.18238996		3646.98	0.02322984		4176.98	-0.02046418
467.19	0.00265285		997.19	-0.00177064		1527.19	-0.0028787		2057.18	-0.00344137		2587.18	-0.02480926		3117.18	0.1831558		3647.18	0.02379072		4177.18	-0.01958813
467.39	0.0029668		997.39	-0.0013898		1527.39	-0.00268698		2057.38	-0.00331476		2587.38	-0.02498618		3117.38	0.18317488		3647.38	0.02337332		4177.38	-0.01907037
467.59	0.00288109		997.59	-0.00099139		1527.59	-0.00284561		2057.58	-0.0034514		2587.58	-0.02565211		3117.58	0.18252002		3647.58	0.02410377		4177.58	-0.01944696
467.79	0.00463667		997.79	-0.0016744		1527.79	-0.00194114		2057.78	-0.00293896		2587.78	-0.02608977		3117.78	0.18351614		3647.78	0.02284436		4177.78	-0.01831943
467.99	0.00519309		997.99	-0.00198828		1527.99	-0.00197462		2057.98	-0.00208283		2587.98	-0.02626029		3117.98	0.1834125		3647.98	0.02235992		4177.98	-0.01788818
468.19	0.00589208		998.19	-0.00180323		1528.19	-0.00132344		2058.18	-0.0013281		2588.18	-0.026537		3118.18	0.18399499		3648.18	0.02137122		4178.18	-0.01764134
468.39	0.00624777		998.39	-0.00231093		1528.39	-0.00169162		2058.38	-0.00108961		2588.38	-0.02731063		3118.38	0.18336991		3648.38	0.02038723		4178.38	-0.01668651
468.59	0.00724918		998.59	-0.00218141		1528.59	-0.00100529		2058.58	-0.00147603		2588.58	-0.02710414		3118.58	0.18316695		3648.58	0.02034159		4178.58	-0.0159106
468.79	0.00769016		998.79	-0.00132104		1528.79	-0.00167489		2058.78	-0.00131389		2588.78	-0.02735216		3118.78	0.18299034		3648.78	0.02013666		4178.78	-0.01646605
468.99	0.00763126		998.99	-0.00077121		1528.99	-0.00120826		2058.98	-0.00105553		2588.98	-0.02734876		3118.98	0.18244942		3648.98	0.01955952		4178.98	-0.01605792
469.19	0.0073979		999.19	-0.00070107		1529.19	-0.00091523		2059.18	-0.0015209		2589.18	-0.02686927		3119.18	0.18241227		3649.18	0.01883644		4179.18	-0.016863
469.39	0.00704048		999.39	-0.00163607		1529.39	-0.00069812		2059.38	-0.00234014		2589.38	-0.02609721		3119.38	0.18220081		3649.38	0.01865609		4179.38	-0.01745029
469.59	0.00624756		999.59	-0.00057008		1529.59	-0.00049182		2059.58	-0.00143087		2589.58	-0.02608043		3119.58	0.18207506		3649.58	0.01786935		4179.58	-0.01777162
469.79	0.00614639		999.79	-0.00064061		1529.79	-0.00146806		2059.78	-0.00159283		2589.78	-0.02483497		3119.78	0.18204997		3649.78	0.01757467		4179.78	-0.01685989
469.99	0.00482528		999.99	-0.00120884		1529.99	-0.00078509		2059.98	-0.00268598		2589.98	-0.02418465		3119.98	0.18231366		3649.98	0.01740402		4179.98	-0.01762353
470.19	0.00443891		1000.19	-0.00016979		1530.19	-0.00138257		2060.18	-0.00255077		2590.18	-0.02421052		3120.18	0.18252687		3650.18	0.01622956		4180.18	-0.01871523
470.39	0.00324852		1000.39	-0.00008123		1530.39	-0.00221344		2060.38	-0.00288038		2590.38	-0.02381147		3120.38	0.18255274		3650.38	0.01685509		4180.38	-0.01994467
470.59	0.00353517		1000.59	-0.00065422		1530.59	-0.0026268		2060.58	-0.00407921		2590.58	-0.02294674		3120.58	0.18275339		3650.58	0.01782107		4180.58	-0.02099936
470.79	0.0030712		1000.79	-0.00086143		1530.79	-0.0029944		2060.78	-0.00439957		2590.78	-0.02333633		3120.78	0.18176043		3650.78	0.01756835		4180.78	-0.02121524
470.99	0.00248877		1000.99	-0.00087796		1530.99	-0.00311322		2060.98	-0.00545555		2590.98	-0.02316284		3120.98	0.18126905		3650.98	0.01744435		4180.98	-0.02246246
471.19	0.00241689		1001.19	-0.00075416		1531.19	-0.00343538		2061.18	-0.00502835		2591.18	-0.02413329		3121.18	0.18138444		3651.18	0.01762816		4181.18	-0.0225446
471.39	0.00287543		1001.39	-0.00069727		1531.39	-0.00432515		2061.38	-0.00599302		2591.38	-0.02429304		3121.38	0.18086396		3651.38	0.01761276		4181.38	-0.02303389
471.59	0.00318934		1001.59	-0.00189062		1531.59	-0.00469583		2061.58	-0.00589064		2591.58	-0.02484071		3121.58	0.18154686		3651.58	0.01735489		4181.58	-0.02282371
471.79	0.00402632		1001.79	-0.00262215		1531.79	-0.00514249		2061.78	-0.00467176		2591.78	-0.02536693		3121.78	0.18147708		3651.78	0.01778084		4181.78	-0.02326838
471.99	0.00352793		1001.99	-0.00295383		1531.99	-0.00594454		2061.98	-0.00414105		2591.98	-0.02578466		3121.98	0.18058894		3651.98	0.01813906		4181.98	-0.02288809
472.19	0.00418341		1002.19	-0.00259071		1532.19	-0.00666143		2062.18	-0.00310526		2592.18	-0.02680477		3122.18	0.17998888		3652.18	0.01829466		4182.18	-0.02243887
472.39	0.00438506		1002.39	-0.0021155		1532.39	-0.00667661		2062.38	-0.00313259		2592.38	-0.02749027		3122.38	0.17928313		3652.38	0.01887842		4182.38	-0.02146549
472.59	0.00453178		1002.59	-0.00190164		1532.59	-0.00682462		2062.58	-0.00238411		2592.58	-0.02775047		3122.58	0.17867507		3652.58	0.01992198		4182.58	-0.02162773
472.79	0.00427956		1002.79	-0.00212923		1532.79	-0.00667243		2062.78	-0.00191282		2592.78	-0.02865846		3122.78	0.17816622		3652.78	0.02050044		4182.78	-0.02142966
472.99	0.00448934		1002.99	-0.00145457		1532.99	-0.00548835		2062.98	-0.00075467		2592.98	-0.02800609		3122.98	0.17771772		3652.98	0.02038643		4182.98	-0.02134199
473.19	0.00417895		1003.19	-0.0018462		1533.19	-0.00497981		2063.18	-0.00097735		2593.18	-0.02729828		3123.18	0.17901652		3653.18	0.02023886		4183.18	-0.02151827
473.39	0.00426605		1003.39	-0.00228114		1533.39	-0.00435792		2063.38	-0.00036086		2593.38	-0.02730554		3123.38	0.17924087		3653.38	0.02085057		4183.38	-0.0207772
473.59	0.00440646		1003.59	-0.00085296		1533.59	-0.00344034		2063.58	-0.00037478		2593.58	-0.0259413		3123.58	0.17939477		3653.58	0.02056279		4183.58	-0.02043365
473.79	0.00498874		1003.79	-0.00155298		1533.79	-0.00366479		2063.78	-0.00070994		2593.78	-0.02528719		3123.78	0.18008005		3653.78	0.02092193		4183.78	-0.01976442
473.99	0.0051452		1003.99	-0.00142029		1533.99	-0.00286078		2063.98	-0.00061725		2593.98	-0.02593484		3123.98	0.18096874		3653.98	0.02072191		4183.98	-0.02066736
474.19	0.0052033		1004.19	-0.00059991		1534.19	-0.00337279		2064.18	0.00045711		2594.18	-0.02590968		3124.18	0.18141149		3654.18	0.02099311		4184.18	-0.02039808
474.39	0.00560969		1004.39	-0.0014185		1534.39	-0.00333946		2064.38	-0.00052496		2594.38	-0.02559022		3124.38	0.18133767		3654.38	0.02099849		4184.38	-0.02041353
474.59	0.00601259		1004.59	-0.0016521		1534.59	-0.00231921		2064.58	-0.00153368		2594.58	-0.02489262		3124.58	0.1816024		3654.58	0.02154607		4184.58	-0.02037651
474.79	0.00523644		1004.79	-0.0012614		1534.79	-0.00242695		2064.78	-0.00150492		2594.78	-0.0247983		3124.78	0.18192532		3654.78	0.02151213		4184.78	-0.0197685
474.99	0.0056972		1004.99	-0.00083236		1534.99	-0.00181611		2064.98	-0.00299878		2594.98	-0.02466397		3124.98	0.18226038		3654.98	0.02107871		4184.98	-0.02054637
475.19	0.00569076		1005.19	-0.00038521		1535.19	-0.00245176		2065.18	-0.00359216		2595.18	-0.02569867		3125.18	0.18255525		3655.18	0.02043121		4185.18	-0.02002032
475.39	0.00511859		1005.39	-0.00049516		1535.39	-0.00237568		2065.38	-0.00461541		2595.38	-0.02669508		3125.38	0.18258608		3655.38	0.01900074		4185.38	-0.02048515
475.59	0.0041767		1005.59	-0.00117084		1535.59	-0.00210146		2065.58	-0.00476798		2595.58	-0.0270116		3125.58	0.18212898		3655.58	0.01804689		4185.58	-0.01971622
475.79	0.00325439		1005.79	-0.00081779		1535.79	-0.00287778		2065.78	-0.00415722		2595.78	-0.02715352		3125.78	0.18169362		3655.78	0.01863109		4185.78	-0.02064416
475.99	0.00326357		1005.99	-0.00005149		1535.99	-0.00312435		2065.98	-0.00476463		2595.98	-0.02711691		3125.98	0.18109544		3655.98	0.01781848		4185.98	-0.01989438
476.19	0.00361786		1006.19	0.00039433		1536.19	-0.00354592		2066.18	-0.00415553		2596.18	-0.02820231		3126.18	0.17966096		3656.18	0.01856801		4186.18	-0.01987934
476.39	0.00216577		1006.39	-0.0001605		1536.39	-0.00482485		2066.38	-0.00426443		2596.38	-0.02868767		3126.38	0.17930353		3656.38	0.01825669		4186.38	-0.0193274
476.59	0.00159173		1006.59	-0.00002437		1536.59	-0.00525657		2066.58	-0.00407939		2596.58	-0.0295169		3126.58	0.17958503		3656.58	0.01870857		4186.58	-0.01948941
476.79	0.00229432		1006.79	0.00052353		1536.79	-0.0052559		2066.78	-0.00439132		2596.78	-0.02967432		3126.78	0.17918251		3656.78	0.01866297		4186.78	-0.01939392
476.99	0.00323757		1006.99	0.00066241		1536.99	-0.00483258		2066.98	-0.00394441		2596.98	-0.02792936		3126.98	0.17951127		3656.98	0.01815743		4186.98	-0.01916546
477.19	0.00392444		1007.19	0.00040697		1537.19	-0.00409429		2067.18	-0.0039724		2597.18	-0.02833863		3127.18	0.17985002		3657.18	0.01778207		4187.18	-0.018866
477.39	0.00483112		1007.39	-0.00003481		1537.39	-0.00373152		2067.38	-0.00321992		2597.38	-0.02807353		3127.38	0.17963184		3657.38	0.01766948		4187.38	-0.01907495
477.59	0.00554509		1007.59	-0.0002339		1537.59	-0.00343676		2067.58	-0.00279556		2597.58	-0.02811111		3127.58	0.17981708		3657.58	0.01744977		4187.58	-0.01890909
477.79	0.00670801		1007.79	-0.00116031		1537.79	-0.00437922		2067.78	-0.00190797		2597.78	-0.02822814		3127.78	0.18073554		3657.78	0.01788888		4187.78	-0.01899611
477.99	0.00756948		1007.99	-0.00142061		1537.99	-0.00461691		2067.98	-0.0016786		2597.98	-0.0285114		3127.98	0.1814335		3657.98	0.01804466		4187.98	-0.01917113
478.19	0.00769544		1008.19	-0.00183351		1538.19	-0.00424729		2068.18	-0.00118231		2598.18	-0.02821733		3128.18	0.18129466		3658.18	0.01854717		4188.18	-0.0189402
478.39	0.00797954		1008.39	-0.00308813		1538.39	-0.00404907		2068.38	-0.00202167		2598.38	-0.02780372		3128.38	0.18051214		3658.38	0.0187823		4188.38	-0.01983143
478.59	0.00787111		1008.59	-0.00282678		1538.59	-0.00356609		2068.58	-0.00163772		2598.58	-0.0266563		3128.58	0.18053138		3658.58	0.01971791		4188.58	-0.0204104
478.79	0.00698923		1008.79	-0.00279015		1538.79	-0.00375832		2068.78	-0.00219288		2598.78	-0.02680364		3128.78	0.18051685		3658.78	0.01894332		4188.78	-0.0208725
478.99	0.00653048		1008.99	-0.00269252		1538.99	-0.00273149		2068.98	-0.002173		2598.98	-0.02664068		3128.98	0.18025486		3658.98	0.01768777		4188.98	-0.0215076
479.19	0.00551517		1009.19	-0.0030137		1539.19	-0.0033289		2069.18	-0.0023833		2599.18	-0.02817553		3129.18	0.17942991		3659.18	0.01738066		4189.18	-0.02264455
479.39	0.00406092		1009.39	-0.00283875		1539.39	-0.00325662		2069.38	-0.0020498		2599.38	-0.02837145		3129.38	0.17937498		3659.38	0.0169171		4189.38	-0.0234579
479.59	0.0037753		1009.59	-0.00325583		1539.59	-0.00315684		2069.58	-0.00241779		2599.58	-0.0272404		3129.58	0.17909587		3659.58	0.01677213		4189.58	-0.02324218
479.79	0.00370679		1009.79	-0.00312112		1539.79	-0.00361459		2069.78	-0.00233754		2599.78	-0.02678656		3129.78	0.17871979		3659.78	0.01750651		4189.78	-0.02396694
479.99	0.0030459		1009.99	-0.00356885		1539.99	-0.00340958		2069.98	-0.00316842		2599.98	-0.026681		3129.98	0.17783674		3659.98	0.01804303		4189.98	-0.02413285
480.19	0.00234438		1010.19	-0.00388887		1540.19	-0.00406211		2070.18	-0.00297267		2600.18	-0.02704852		3130.18	0.17697408		3660.18	0.01876927		4190.18	-0.02490047
480.39	0.00117298		1010.39	-0.00342098		1540.39	-0.00471655		2070.38	-0.00334986		2600.38	-0.02732292		3130.38	0.17761669		3660.38	0.01798694		4190.38	-0.02508789
480.59	0.00133062		1010.59	-0.00238605		1540.59	-0.00379514		2070.58	-0.00359579		2600.58	-0.02757151		3130.58	0.17783338		3660.58	0.01873555		4190.58	-0.02594288
480.79	0.00266942		1010.79	-0.00186299		1540.79	-0.00345759		2070.78	-0.00339963		2600.78	-0.02719043		3130.78	0.17749169		3660.78	0.01851725		4190.78	-0.02525593
480.99	0.00386158		1010.99	-0.00184826		1540.99	-0.00236578		2070.98	-0.00340511		2600.98	-0.02698911		3130.98	0.17725484		3660.98	0.01852183		4190.98	-0.02587706
481.19	0.00381175		1011.19	-0.00097273		1541.19	-0.00163034		2071.18	-0.00389974		2601.18	-0.02720015		3131.18	0.17719412		3661.18	0.01850509		4191.18	-0.02612526
481.39	0.00407664		1011.39	-0.00141555		1541.39	-0.00195917		2071.38	-0.00411631		2601.38	-0.02581645		3131.38	0.17735135		3661.38	0.01871607		4191.38	-0.02508316
481.59	0.0037977		1011.59	-0.00233978		1541.59	-0.00242197		2071.58	-0.00369331		2601.58	-0.02518636		3131.58	0.17744643		3661.58	0.01907988		4191.58	-0.02365145
481.79	0.00468709		1011.79	-0.00277329		1541.79	-0.00263142		2071.78	-0.00319707		2601.78	-0.024896		3131.78	0.17764295		3661.78	0.01975526		4191.78	-0.02330309
481.99	0.00489025		1011.99	-0.00268856		1541.99	-0.00230654		2071.98	-0.00371018		2601.98	-0.0254575		3131.98	0.17720207		3661.98	0.02008362		4191.98	-0.02312361
482.19	0.00429352		1012.19	-0.00282898		1542.19	-0.00156954		2072.18	-0.0038686		2602.18	-0.02567396		3132.18	0.17686093		3662.18	0.01986993		4192.18	-0.02295221
482.39	0.00372412		1012.39	-0.00366754		1542.39	-0.00237457		2072.38	-0.00457937		2602.38	-0.02489482		3132.38	0.17628993		3662.38	0.02025806		4192.38	-0.02284553
482.59	0.00359411		1012.59	-0.00320742		1542.59	-0.00127737		2072.58	-0.00452402		2602.58	-0.02502243		3132.58	0.17727328		3662.58	0.02013341		4192.58	-0.02170011
482.79	0.0032676		1012.79	-0.00341688		1542.79	-0.00104908		2072.78	-0.00347323		2602.78	-0.02492419		3132.78	0.17751954		3662.78	0.02013926		4192.78	-0.02087312
482.99	0.0036983		1012.99	-0.00383444		1542.99	-0.00103701		2072.98	-0.00278155		2602.98	-0.02479981		3132.98	0.1782538		3662.98	0.01946768		4192.98	-0.02005872
483.19	0.00454861		1013.19	-0.00468351		1543.19	-0.00177978		2073.18	-0.0031034		2603.18	-0.02560965		3133.18	0.17891575		3663.18	0.02022212		4193.18	-0.0206296
483.39	0.00449482		1013.39	-0.00473686		1543.39	-0.00193988		2073.38	-0.00235319		2603.38	-0.02514173		3133.38	0.18041764		3663.38	0.01984099		4193.38	-0.02102599
483.59	0.00383269		1013.59	-0.00553682		1543.59	-0.00144262		2073.58	-0.00292278		2603.58	-0.02541421		3133.58	0.18144304		3663.58	0.01975399		4193.58	-0.02070444
483.79	0.00340975		1013.79	-0.0053438		1543.79	-0.00215508		2073.78	-0.00251725		2603.78	-0.02565871		3133.78	0.18191131		3663.78	0.01981648		4193.78	-0.02093148
483.99	0.00330911		1013.99	-0.00534431		1543.99	-0.00276551		2073.98	-0.0027551		2603.98	-0.02544823		3133.98	0.1830524		3663.98	0.02012317		4193.98	-0.02198385
484.19	0.00357636		1014.19	-0.00447551		1544.19	-0.00259705		2074.18	-0.00236072		2604.18	-0.02701258		3134.18	0.18358541		3664.18	0.01949604		4194.18	-0.02288576
484.39	0.00334799		1014.39	-0.00435814		1544.39	-0.00199266		2074.38	-0.00234171		2604.38	-0.02835187		3134.38	0.18450362		3664.38	0.01862079		4194.38	-0.02298901
484.59	0.00344498		1014.59	-0.00346522		1544.59	-0.00208575		2074.58	-0.00211425		2604.58	-0.02776867		3134.58	0.18337514		3664.58	0.01901708		4194.58	-0.02273517
484.79	0.00442336		1014.79	-0.00284415		1544.79	-0.00266662		2074.78	-0.00255288		2604.78	-0.02760087		3134.78	0.18324301		3664.78	0.01841127		4194.78	-0.02183058
484.99	0.00350264		1014.99	-0.0024713		1544.99	-0.00290361		2074.98	-0.00321309		2604.98	-0.02720285		3134.98	0.18255601		3664.98	0.01793481		4194.98	-0.02281259
485.19	0.00213294		1015.19	-0.00238363		1545.19	-0.00371761		2075.18	-0.00434748		2605.18	-0.02581967		3135.18	0.18186218		3665.18	0.01735478		4195.18	-0.02272705
485.39	0.00218629		1015.39	-0.00197091		1545.39	-0.00434136		2075.38	-0.00441918		2605.38	-0.02481377		3135.38	0.18116084		3665.38	0.01764744		4195.38	-0.0222676
485.59	0.00157789		1015.59	-0.00181496		1545.59	-0.00478692		2075.58	-0.00403123		2605.58	-0.02489283		3135.58	0.18078521		3665.58	0.01750227		4195.58	-0.02219185
485.79	0.00261371		1015.79	-0.00169481		1545.79	-0.00448247		2075.78	-0.00377873		2605.78	-0.02539432		3135.78	0.17985212		3665.78	0.01770697		4195.78	-0.02282803
485.99	0.0023764		1015.99	-0.00137154		1545.99	-0.00483933		2075.98	-0.00433207		2605.98	-0.0259879		3135.98	0.17821767		3665.98	0.01693889		4195.98	-0.02322684
486.19	0.00196793		1016.19	-0.00167957		1546.19	-0.00451554		2076.18	-0.00413683		2606.18	-0.02611406		3136.18	0.17851279		3666.18	0.01596551		4196.18	-0.02333879
486.39	0.00238313		1016.39	-0.0018537		1546.39	-0.00511802		2076.38	-0.00401668		2606.38	-0.0255878		3136.38	0.17749085		3666.38	0.01688528		4196.38	-0.02290091
486.59	0.00256196		1016.59	-0.00106205		1546.59	-0.00406854		2076.58	-0.00305155		2606.58	-0.02611504		3136.58	0.17764836		3666.58	0.01760294		4196.58	-0.0224789
486.79	0.00304965		1016.79	-0.00200788		1546.79	-0.00465494		2076.78	-0.0024351		2606.78	-0.02611636		3136.78	0.177469		3666.78	0.0183649		4196.78	-0.0224097
486.99	0.00299649		1016.99	-0.00237827		1546.99	-0.00485795		2076.98	-0.00281427		2606.98	-0.02671962		3136.98	0.17765099		3666.98	0.01821804		4196.98	-0.02233947
487.19	0.00220693		1017.19	-0.00311556		1547.19	-0.00422976		2077.18	-0.00378336		2607.18	-0.02688351		3137.18	0.1777324		3667.18	0.01930847		4197.18	-0.02318848
487.39	0.00181218		1017.39	-0.00291691		1547.39	-0.00435394		2077.38	-0.00330456		2607.38	-0.02722152		3137.38	0.17756751		3667.38	0.01942515		4197.38	-0.02284073
487.59	0.00134346		1017.59	-0.00343551		1547.59	-0.00353198		2077.58	-0.00342695		2607.58	-0.02843103		3137.58	0.17717158		3667.58	0.01973129		4197.58	-0.02212887
487.79	0.00164028		1017.79	-0.00385669		1547.79	-0.00411983		2077.78	-0.00323292		2607.78	-0.02890742		3137.78	0.1779779		3667.78	0.0195146		4197.78	-0.02184085
487.99	0.00164497		1017.99	-0.00342471		1547.99	-0.00403648		2077.98	-0.00298291		2607.98	-0.03006603		3137.98	0.17920816		3667.98	0.01936877		4197.98	-0.02183885
488.19	0.00136466		1018.19	-0.00360434		1548.19	-0.00323016		2078.18	-0.00354592		2608.18	-0.03182762		3138.18	0.17997541		3668.18	0.01859862		4198.18	-0.02183405
488.39	0.00123014		1018.39	-0.00336863		1548.39	-0.00311416		2078.38	-0.00332109		2608.38	-0.03181361		3138.38	0.17995842		3668.38	0.01936862		4198.38	-0.02172594
488.59	0.00138311		1018.59	-0.00307455		1548.59	-0.00455297		2078.58	-0.00277692		2608.58	-0.03131868		3138.58	0.17946687		3668.58	0.01918235		4198.58	-0.02196937
488.79	0.00223757		1018.79	-0.00282363		1548.79	-0.00471953		2078.78	-0.00277703		2608.78	-0.03157133		3138.78	0.18037693		3668.78	0.01829995		4198.78	-0.02248679
488.99	0.00101429		1018.99	-0.00242579		1548.99	-0.00390506		2078.98	-0.00299901		2608.98	-0.03181864		3138.98	0.18035176		3668.98	0.01794936		4198.98	-0.02375239
489.19	0.00124894		1019.19	-0.00263198		1549.19	-0.00394868		2079.18	-0.0035394		2609.18	-0.0309123		3139.18	0.18032164		3669.18	0.0181021		4199.18	-0.02456162
489.39	0.00080699		1019.39	-0.00160764		1549.39	-0.00375285		2079.38	-0.00252066		2609.38	-0.03101041		3139.38	0.18098224		3669.38	0.01847196		4199.38	-0.02435941
489.59	0.00094114		1019.59	-0.00217374		1549.59	-0.00464674		2079.58	-0.00196123		2609.58	-0.03132744		3139.58	0.18196068		3669.58	0.01847384		4199.58	-0.02395245
489.79	0.00232091		1019.79	-0.00323208		1549.79	-0.00474448		2079.78	-0.00158433		2609.78	-0.03139572		3139.78	0.18133493		3669.78	0.01837652		4199.78	-0.02425896
489.99	0.00212859		1019.99	-0.00428		1549.99	-0.00540449		2079.98	-0.00149003		2609.98	-0.03169636		3139.98	0.18169168		3669.98	0.01820272		4199.98	-0.02424367
490.19	0.00254132		1020.19	-0.00429435		1550.19	-0.00522791		2080.18	-0.00136567		2610.18	-0.03092986		3140.18	0.18237708		3670.18	0.0183631		4200.18	-0.02474436
490.39	0.00257551		1020.39	-0.00443336		1550.39	-0.00511598		2080.38	-0.00123688		2610.38	-0.03030133		3140.38	0.18149253		3670.38	0.01943788		4200.38	-0.02491181
490.59	0.00217971		1020.59	-0.00423066		1550.59	-0.00520315		2080.58	-0.00150362		2610.58	-0.0306247		3140.58	0.18134081		3670.58	0.01953602		4200.58	-0.02398252
490.79	0.00314494		1020.79	-0.00582917		1550.79	-0.00565353		2080.78	-0.00189282		2610.78	-0.03001448		3140.78	0.18078409		3670.78	0.01947198		4200.78	-0.02405139
490.99	0.00300968		1020.99	-0.00520647		1550.99	-0.0060243		2080.98	-0.00290352		2610.98	-0.02965224		3140.98	0.17964645		3670.98	0.01910411		4200.98	-0.02373938
491.19	0.00254457		1021.19	-0.00538161		1551.19	-0.00570217		2081.18	-0.00374838		2611.18	-0.03010106		3141.18	0.17930718		3671.18	0.01932004		4201.18	-0.02418195
491.39	0.00333133		1021.39	-0.00501367		1551.39	-0.00583942		2081.38	-0.0036677		2611.38	-0.03024469		3141.38	0.17831835		3671.38	0.0190723		4201.38	-0.02336039
491.59	0.00392858		1021.59	-0.00512049		1551.59	-0.00534152		2081.58	-0.00378031		2611.58	-0.03066024		3141.58	0.17845885		3671.58	0.01845996		4201.58	-0.022747
491.79	0.00297522		1021.79	-0.0040705		1551.79	-0.0059022		2081.78	-0.00375163		2611.78	-0.03110056		3141.78	0.17887379		3671.78	0.01811279		4201.78	-0.02173547
491.99	0.00334995		1021.99	-0.00342848		1551.99	-0.00567979		2081.98	-0.00339036		2611.98	-0.03100739		3141.98	0.17830626		3671.98	0.01819758		4201.98	-0.0222796
492.19	0.00350449		1022.19	-0.00379492		1552.19	-0.00515618		2082.18	-0.0034857		2612.18	-0.03049354		3142.18	0.17777411		3672.18	0.01769504		4202.18	-0.0234308
492.39	0.00368275		1022.39	-0.00310307		1552.39	-0.0045346		2082.38	-0.00217104		2612.38	-0.02979932		3142.38	0.17647975		3672.38	0.01809914		4202.38	-0.02458806
492.59	0.00394633		1022.59	-0.00320582		1552.59	-0.00425963		2082.58	-0.00220168		2612.58	-0.02879269		3142.58	0.17679002		3672.58	0.01711698		4202.58	-0.02451011
492.79	0.0045312		1022.79	-0.00259119		1552.79	-0.00361479		2082.78	-0.00238714		2612.78	-0.0283171		3142.78	0.17615872		3672.78	0.01709681		4202.78	-0.02413593
492.99	0.00446881		1022.99	-0.00331036		1552.99	-0.00296565		2082.98	-0.0027329		2612.98	-0.02835788		3142.98	0.17526167		3672.98	0.01707555		4202.98	-0.02449278
493.19	0.00435158		1023.19	-0.00331589		1553.19	-0.00330094		2083.18	-0.00206142		2613.18	-0.02729066		3143.18	0.1746148		3673.18	0.01711924		4203.18	-0.02445973
493.39	0.00382123		1023.39	-0.00294707		1553.39	-0.00330701		2083.38	-0.00131992		2613.38	-0.02744566		3143.38	0.17386221		3673.38	0.01692371		4203.38	-0.02381002
493.59	0.00473838		1023.59	-0.00363722		1553.59	-0.00358162		2083.58	-0.00088263		2613.58	-0.02744542		3143.58	0.17402857		3673.58	0.01707948		4203.58	-0.02381463
493.79	0.00482782		1023.79	-0.00430181		1553.79	-0.00341182		2083.78	-0.00113769		2613.78	-0.02702008		3143.78	0.17391371		3673.78	0.01727167		4203.78	-0.02403788
493.99	0.00446008		1023.99	-0.00435507		1553.99	-0.00355084		2083.98	-0.00113761		2613.98	-0.02650608		3143.98	0.17369021		3673.98	0.01769036		4203.98	-0.02431359
494.19	0.00358503		1024.19	-0.0037324		1554.19	-0.00314483		2084.18	-0.00096608		2614.18	-0.0268472		3144.18	0.17279041		3674.18	0.01812861		4204.18	-0.02538003
494.39	0.00314452		1024.39	-0.00376777		1554.39	-0.00339427		2084.38	-0.00145285		2614.38	-0.02662633		3144.38	0.17374112		3674.38	0.01795758		4204.38	-0.02467604
494.59	0.00298651		1024.59	-0.00329919		1554.59	-0.00461548		2084.58	-0.00158777		2614.58	-0.0269311		3144.58	0.17388259		3674.58	0.01788191		4204.58	-0.02451655
494.79	0.00368212		1024.79	-0.0035926		1554.79	-0.00485724		2084.78	-0.00144296		2614.78	-0.02734502		3144.78	0.17391554		3674.78	0.0180023		4204.78	-0.02599081
494.99	0.00252863		1024.99	-0.00258575		1554.99	-0.00547577		2084.98	-0.00237386		2614.98	-0.02817289		3144.98	0.17355036		3674.98	0.01770279		4204.98	-0.02599009
495.19	0.00171525		1025.19	-0.00195991		1555.19	-0.00537784		2085.18	-0.00261102		2615.18	-0.02919204		3145.18	0.17415288		3675.18	0.01762632		4205.18	-0.02591454
495.39	0.0019954		1025.39	-0.00121211		1555.39	-0.00499147		2085.38	-0.00305198		2615.38	-0.02852492		3145.38	0.17424005		3675.38	0.01705022		4205.38	-0.02549694
495.59	0.00219802		1025.59	-0.0012764		1555.59	-0.00540776		2085.58	-0.00258435		2615.58	-0.02897709		3145.58	0.17514983		3675.58	0.01678939		4205.58	-0.02468352
495.79	0.00125304		1025.79	-0.00156744		1555.79	-0.00465825		2085.78	-0.00241674		2615.78	-0.02872202		3145.78	0.17523441		3675.78	0.01576506		4205.78	-0.02456448
495.99	0.00087819		1025.99	-0.00252718		1555.99	-0.00357569		2085.98	-0.0023285		2615.98	-0.02804947		3145.98	0.17473788		3675.98	0.01499656		4205.98	-0.02525148
496.19	0.00006671		1026.19	-0.0035264		1556.19	-0.00291772		2086.18	-0.00253493		2616.18	-0.02861448		3146.18	0.17580674		3676.18	0.01362013		4206.18	-0.02598628
496.39	-0.00015722		1026.39	-0.00280079		1556.39	-0.00229049		2086.38	-0.00327887		2616.38	-0.02873953		3146.38	0.17576217		3676.38	0.01366247		4206.38	-0.02547596
496.59	0.00002008		1026.59	-0.00328022		1556.59	-0.00190195		2086.58	-0.00397851		2616.58	-0.0276071		3146.58	0.17654935		3676.58	0.01371503		4206.58	-0.02427656
496.79	0.00022942		1026.79	-0.00300002		1556.79	-0.00194538		2086.78	-0.00404961		2616.78	-0.02774957		3146.78	0.17583607		3676.78	0.01359808		4206.78	-0.02376374
496.99	0.00028681		1026.99	-0.00356223		1556.99	-0.00177139		2086.98	-0.00397561		2616.98	-0.0275344		3146.98	0.17537688		3676.98	0.01348114		4206.98	-0.02320478
497.19	-0.00047604		1027.19	-0.00264385		1557.19	-0.0008636		2087.18	-0.00367777		2617.18	-0.02702866		3147.18	0.17565624		3677.18	0.01365889		4207.18	-0.02259095
497.39	-0.00118512		1027.39	-0.00321939		1557.39	-0.00004911		2087.38	-0.00388648		2617.38	-0.02640946		3147.38	0.17577289		3677.38	0.01527586		4207.38	-0.02267179
497.59	-0.00143865		1027.59	-0.00330471		1557.59	0.00045284		2087.58	-0.00372252		2617.58	-0.02589275		3147.58	0.17595033		3677.58	0.01640867		4207.58	-0.0213115
497.79	-0.00206183		1027.79	-0.00277874		1557.79	0.0006282		2087.78	-0.00418136		2617.78	-0.02558351		3147.78	0.17571276		3677.78	0.01724934		4207.78	-0.02041996
497.99	-0.00167577		1027.99	-0.0020367		1557.99	0.00007818		2087.98	-0.00357935		2617.98	-0.0253373		3147.98	0.17461144		3677.98	0.01832879		4207.98	-0.02011198
498.19	-0.00238063		1028.19	-0.00157684		1558.19	-0.00034949		2088.18	-0.00360314		2618.18	-0.02481678		3148.18	0.17631721		3678.18	0.01891463		4208.18	-0.01971685
498.39	-0.0018151		1028.39	-0.00120825		1558.39	-0.00114902		2088.38	-0.00404256		2618.38	-0.02459177		3148.38	0.17719033		3678.38	0.01853212		4208.38	-0.01847106
498.59	-0.00216415		1028.59	-0.00147555		1558.59	-0.00191633		2088.58	-0.00448848		2618.58	-0.02579781		3148.58	0.17659421		3678.58	0.02050681		4208.58	-0.01910343
498.79	-0.00193155		1028.79	-0.00218317		1558.79	-0.00215319		2088.78	-0.00501697		2618.78	-0.02733305		3148.78	0.17681075		3678.78	0.02167745		4208.78	-0.01936742
498.99	-0.00199576		1028.99	-0.00129257		1558.99	-0.00346474		2088.98	-0.0057744		2618.98	-0.02786174		3148.98	0.17722998		3678.98	0.0219868		4208.98	-0.01892864
499.19	-0.00106275		1029.19	-0.00179968		1559.19	-0.0039991		2089.18	-0.00594828		2619.18	-0.02794706		3149.18	0.17852744		3679.18	0.021667		4209.18	-0.01880015
499.39	-0.0005493		1029.39	-0.00224032		1559.39	-0.00451241		2089.38	-0.005604		2619.38	-0.02799126		3149.38	0.17905685		3679.38	0.02129583		4209.38	-0.02028743
499.59	0.00005144		1029.59	-0.00238694		1559.59	-0.00525601		2089.58	-0.00603849		2619.58	-0.02857198		3149.58	0.17920056		3679.58	0.0210748		4209.58	-0.02028806
499.79	-0.00035965		1029.79	-0.00350577		1559.79	-0.00579496		2089.78	-0.00597429		2619.78	-0.02903831		3149.78	0.17909382		3679.78	0.02003563		4209.78	-0.02122108
499.99	-0.00051521		1029.99	-0.00373548		1559.99	-0.00741427		2089.98	-0.00609952		2619.98	-0.03047026		3149.98	0.17883455		3679.98	0.01969283		4209.98	-0.02049048
500.19	-0.0006168		1030.19	-0.00402132		1560.19	-0.00763355		2090.18	-0.00590441		2620.18	-0.03206369		3150.18	0.17939567		3680.18	0.01939972		4210.18	-0.02101659
500.39	-0.00013607		1030.39	-0.00329648		1560.39	-0.00779357		2090.38	-0.00620164		2620.38	-0.03211836		3150.38	0.17862301		3680.38	0.01950555		4210.38	-0.02082163
500.59	-0.0007763		1030.59	-0.00363091		1560.59	-0.00741589		2090.58	-0.00672788		2620.58	-0.03136952		3150.58	0.17876026		3680.58	0.01923678		4210.58	-0.02052231
500.79	-0.00050223		1030.79	-0.00329852		1560.79	-0.00786851		2090.78	-0.00698494		2620.78	-0.03096131		3150.78	0.17844907		3680.78	0.01854249		4210.78	-0.02105177
500.99	-0.00135532		1030.99	-0.00413808		1560.99	-0.00860185		2090.98	-0.00691179		2620.98	-0.03060367		3150.98	0.17797813		3680.98	0.01845514		4210.98	-0.02115181
501.19	-0.00199518		1031.19	-0.00412298		1561.19	-0.00819563		2091.18	-0.0077551		2621.18	-0.030406		3151.18	0.17730475		3681.18	0.01775625		4211.18	-0.02176994
501.39	-0.00260925		1031.39	-0.00517933		1561.39	-0.0078346		2091.38	-0.00774008		2621.38	-0.02939501		3151.38	0.17652835		3681.38	0.0176483		4211.38	-0.02188337
501.59	-0.00234352		1031.59	-0.00462556		1561.59	-0.00757005		2091.58	-0.00682426		2621.58	-0.02994215		3151.58	0.17571317		3681.58	0.01675037		4211.58	-0.0210147
501.79	-0.00214554		1031.79	-0.00441808		1561.79	-0.00725743		2091.78	-0.0067568		2621.78	-0.02918073		3151.78	0.17590886		3681.78	0.01619939		4211.78	-0.02168225
501.99	-0.0016102		1031.99	-0.00428401		1561.99	-0.00785802		2091.98	-0.00625843		2621.98	-0.02885949		3151.98	0.17630108		3681.98	0.01619887		4211.98	-0.02196694
502.19	-0.00106247		1032.19	-0.00442762		1562.19	-0.00613015		2092.18	-0.00685452		2622.18	-0.02882949		3152.18	0.17676287		3682.18	0.01586308		4212.18	-0.02206061
502.39	-0.00064737		1032.39	-0.00426399		1562.39	-0.00471972		2092.38	-0.00701535		2622.38	-0.03033429		3152.38	0.17613328		3682.38	0.01515163		4212.38	-0.02253576
502.59	-0.00063919		1032.59	-0.00430768		1562.59	-0.0030909		2092.58	-0.00696651		2622.58	-0.03077852		3152.58	0.17605243		3682.58	0.01611233		4212.58	-0.02315944
502.79	0.00037197		1032.79	-0.00451147		1562.79	-0.00201521		2092.78	-0.00593112		2622.78	-0.03070663		3152.78	0.17673135		3682.78	0.01588051		4212.78	-0.02274843
502.99	0.00129382		1032.99	-0.00347232		1562.99	-0.0025233		2092.98	-0.00484964		2622.98	-0.03070219		3152.98	0.17697574		3682.98	0.01595976		4212.98	-0.0233609
503.19	0.00219679		1033.19	-0.00358955		1563.19	-0.00179884		2093.18	-0.00393564		2623.18	-0.03083393		3153.18	0.17724179		3683.18	0.01664579		4213.18	-0.02443257
503.39	0.00269063		1033.39	-0.00269851		1563.39	-0.00176341		2093.38	-0.00418176		2623.38	-0.03061245		3153.38	0.17726878		3683.38	0.01658045		4213.38	-0.02545944
503.59	0.0031051		1033.59	-0.00239052		1563.59	-0.00184447		2093.58	-0.00493165		2623.58	-0.03083758		3153.58	0.17747017		3683.58	0.01702833		4213.58	-0.02509125
503.79	0.00336162		1033.79	-0.00278507		1563.79	-0.00240036		2093.78	-0.00434594		2623.78	-0.03101948		3153.78	0.1772077		3683.78	0.01652639		4213.78	-0.02540057
503.99	0.00327941		1033.99	-0.00255411		1563.99	-0.00279751		2093.98	-0.00423192		2623.98	-0.03124042		3153.98	0.17667652		3683.98	0.01608484		4213.98	-0.02450625
504.19	0.003122		1034.19	-0.00303941		1564.19	-0.00234678		2094.18	-0.0045225		2624.18	-0.03167119		3154.18	0.17623394		3684.18	0.01649451		4214.18	-0.02545332
504.39	0.00332575		1034.39	-0.00292165		1564.39	-0.00293463		2094.38	-0.00502809		2624.38	-0.03115025		3154.38	0.17582855		3684.38	0.01662285		4214.38	-0.0246453
504.59	0.00293803		1034.59	-0.00268266		1564.59	-0.00297464		2094.58	-0.00558264		2624.58	-0.02987791		3154.58	0.17564017		3684.58	0.01603717		4214.58	-0.02376275
504.79	0.0038466		1034.79	-0.00269666		1564.79	-0.00399825		2094.78	-0.00634091		2624.78	-0.03018509		3154.78	0.17398107		3684.78	0.01648356		4214.78	-0.02438824
504.99	0.00259687		1034.99	-0.00318738		1564.99	-0.00527962		2094.98	-0.00667601		2624.98	-0.03024854		3154.98	0.17310737		3684.98	0.01696664		4214.98	-0.02303539
505.19	0.00255941		1035.19	-0.00351757		1565.19	-0.00567985		2095.18	-0.00805723		2625.18	-0.02999387		3155.18	0.17215525		3685.18	0.01645504		4215.18	-0.02306728
505.39	0.00190786		1035.39	-0.0042747		1565.39	-0.00544122		2095.38	-0.00782974		2625.38	-0.02947847		3155.38	0.17251098		3685.38	0.01772583		4215.38	-0.02351635
505.59	0.00135688		1035.59	-0.0039384		1565.59	-0.00569426		2095.58	-0.00747371		2625.58	-0.03078456		3155.58	0.17221709		3685.58	0.01941037		4215.58	-0.024456
505.79	0.00066668		1035.79	-0.00471881		1565.79	-0.00539487		2095.78	-0.00772382		2625.78	-0.03046495		3155.78	0.172046		3685.78	0.01958893		4215.78	-0.02445872
505.99	0.00097018		1035.99	-0.00444393		1565.99	-0.00573714		2095.98	-0.00754439		2625.98	-0.03139062		3155.98	0.17248087		3685.98	0.01995461		4215.98	-0.02451099
506.19	0.00075659		1036.19	-0.00380212		1566.19	-0.00468263		2096.18	-0.00755747		2626.18	-0.03148956		3156.18	0.17254872		3686.18	0.02045411		4216.18	-0.02471902
506.39	0.00010758		1036.39	-0.00320657		1566.39	-0.00370571		2096.38	-0.00635518		2626.38	-0.03133221		3156.38	0.1735713		3686.38	0.02096947		4216.38	-0.02473178
506.59	-0.00034622		1036.59	-0.00360946		1566.59	-0.00388133		2096.58	-0.00543175		2626.58	-0.03075064		3156.58	0.17434459		3686.58	0.02159825		4216.58	-0.02463302
506.79	-0.00041545		1036.79	-0.00380344		1566.79	-0.00461484		2096.78	-0.0055341		2626.78	-0.03041517		3156.78	0.17500469		3686.78	0.02191787		4216.78	-0.02403249
506.99	-0.00094574		1036.99	-0.00392059		1566.99	-0.00459358		2096.98	-0.00452491		2626.98	-0.03099373		3156.98	0.17551009		3686.98	0.02175062		4216.98	-0.02424513
507.19	-0.00065962		1037.19	-0.00423903		1567.19	-0.00441632		2097.18	-0.0041104		2627.18	-0.03101603		3157.18	0.17660852		3687.18	0.0207877		4217.18	-0.02433663
507.39	-0.00050755		1037.39	-0.0044047		1567.39	-0.00522321		2097.38	-0.00445127		2627.38	-0.03041097		3157.38	0.17713746		3687.38	0.01924305		4217.38	-0.02359829
507.59	-0.00037123		1037.59	-0.00464412		1567.59	-0.00532998		2097.58	-0.00464854		2627.58	-0.03161761		3157.58	0.17802368		3687.58	0.01887356		4217.58	-0.02374081
507.79	-0.00017501		1037.79	-0.00583906		1567.79	-0.00534872		2097.78	-0.00448214		2627.78	-0.03149589		3157.78	0.17780326		3687.78	0.01749218		4217.78	-0.02416069
507.99	0.0001036		1037.99	-0.00613722		1567.99	-0.00652532		2097.98	-0.00502999		2627.98	-0.03164715		3157.98	0.17807265		3687.98	0.01639751		4217.98	-0.02420813
508.19	0.00106558		1038.19	-0.00641747		1568.19	-0.00666586		2098.18	-0.00565973		2628.18	-0.03171664		3158.18	0.17842777		3688.18	0.01510834		4218.18	-0.02404754
508.39	0.00175075		1038.39	-0.00592309		1568.39	-0.00649051		2098.38	-0.00534534		2628.38	-0.03085843		3158.38	0.17870399		3688.38	0.0146572		4218.38	-0.02320855
508.59	0.00196686		1038.59	-0.00566325		1568.59	-0.00624001		2098.58	-0.0058838		2628.58	-0.03089718		3158.58	0.17789749		3688.58	0.01445414		4218.58	-0.0229895
508.79	0.00180489		1038.79	-0.00586169		1568.79	-0.00657108		2098.78	-0.00631143		2628.78	-0.03128762		3158.78	0.17605686		3688.78	0.01496006		4218.78	-0.02316123
508.99	0.00133913		1038.99	-0.00581475		1568.99	-0.0062557		2098.98	-0.00662104		2628.98	-0.03053436		3158.98	0.17646271		3688.98	0.01578981		4218.98	-0.0225681
509.19	0.00133118		1039.19	-0.00609025		1569.19	-0.00576553		2099.18	-0.00704277		2629.18	-0.03044151		3159.18	0.176167		3689.18	0.01568921		4219.18	-0.02395051
509.39	0.000713		1039.39	-0.00598229		1569.39	-0.00544387		2099.38	-0.00638375		2629.38	-0.03017951		3159.38	0.17678097		3689.38	0.01690728		4219.38	-0.02483082
509.59	0.00072835		1039.59	-0.00533313		1569.59	-0.00448619		2099.58	-0.00614139		2629.58	-0.03062741		3159.58	0.17620854		3689.58	0.01764884		4219.58	-0.02521241
509.79	0.00031646		1039.79	-0.00556801		1569.79	-0.00415178		2099.78	-0.00549916		2629.78	-0.03062264		3159.78	0.17556729		3689.78	0.01774407		4219.78	-0.02561641
509.99	0.0006436		1039.99	-0.00416015		1569.99	-0.00334607		2099.98	-0.00525417		2629.98	-0.03049597		3159.98	0.17703364		3689.98	0.01837831		4219.98	-0.02668209
510.19	0.00043469		1040.19	-0.00394495		1570.19	-0.0021543		2100.18	-0.00451198		2630.18	-0.02957097		3160.18	0.17693556		3690.18	0.01855549		4220.18	-0.02792068
510.39	-0.00033823		1040.39	-0.00467693		1570.39	-0.00098937		2100.38	-0.00301751		2630.38	-0.02901163		3160.38	0.17692099		3690.38	0.01846766		4220.38	-0.02855127
510.59	-0.00057368		1040.59	-0.00471638		1570.59	-0.00160284		2100.58	-0.00232904		2630.58	-0.02923713		3160.58	0.17698801		3690.58	0.01826286		4220.58	-0.02934053
510.79	-0.00086684		1040.79	-0.00472773		1570.79	-0.00145419		2100.78	-0.00152906		2630.78	-0.0286901		3160.78	0.1763093		3690.78	0.01778742		4220.78	-0.02905593
510.99	-0.00136441		1040.99	-0.00528553		1570.99	-0.00102953		2100.98	0.00019658		2630.98	-0.02915845		3160.98	0.17671397		3690.98	0.01675808		4220.98	-0.02885376
511.19	-0.00081861		1041.19	-0.0049835		1571.19	-0.00188334		2101.18	0.00090166		2631.18	-0.02877586		3161.18	0.17625706		3691.18	0.01581666		4221.18	-0.02847016
511.39	-0.00119103		1041.39	-0.00448785		1571.39	-0.00193276		2101.38	0.00107943		2631.38	-0.02876329		3161.38	0.17571591		3691.38	0.01616102		4221.38	-0.02814176
511.59	-0.00074641		1041.59	-0.00416646		1571.59	-0.00191941		2101.58	0.0008735		2631.58	-0.02998491		3161.58	0.17509782		3691.58	0.0156884		4221.58	-0.02793916
511.79	-0.00054773		1041.79	-0.00524574		1571.79	-0.00244216		2101.78	0.00051836		2631.78	-0.02971557		3161.78	0.17448599		3691.78	0.01533973		4221.78	-0.02780786
511.99	0.00033588		1041.99	-0.00462071		1571.99	-0.00378553		2101.98	-0.00012947		2631.98	-0.03059333		3161.98	0.17433271		3691.98	0.01507905		4221.98	-0.02730255
512.19	0.00010467		1042.19	-0.00427861		1572.19	-0.00358691		2102.18	-0.00048217		2632.18	-0.03102958		3162.18	0.17443564		3692.18	0.01561735		4222.18	-0.02596725
512.39	-0.00014994		1042.39	-0.00388168		1572.39	-0.00379123		2102.38	-0.00033076		2632.38	-0.03170048		3162.38	0.17417731		3692.38	0.01661752		4222.38	-0.02496952
512.59	-0.0005026		1042.59	-0.0043229		1572.59	-0.004984		2102.58	-0.0016976		2632.58	-0.03216953		3162.58	0.17348649		3692.58	0.01688205		4222.58	-0.0246685
512.79	-0.00077299		1042.79	-0.00369016		1572.79	-0.00582268		2102.78	-0.00226883		2632.78	-0.03166763		3162.78	0.17327129		3692.78	0.01765935		4222.78	-0.02413111
512.99	-0.00078337		1042.99	-0.00333334		1572.99	-0.00522029		2102.98	-0.0032266		2632.98	-0.03173553		3162.98	0.1736741		3692.98	0.01796004		4222.98	-0.02356924
513.19	-0.00099323		1043.19	-0.00365066		1573.19	-0.00630613		2103.18	-0.00414543		2633.18	-0.03135786		3163.18	0.17386174		3693.18	0.01751993		4223.18	-0.02339287
513.39	-0.00101769		1043.39	-0.00324289		1573.39	-0.00649729		2103.38	-0.00395646		2633.38	-0.03084335		3163.38	0.17447474		3693.38	0.0180769		4223.38	-0.02269868
513.59	-0.00098168		1043.59	-0.00336844		1573.59	-0.00583793		2103.58	-0.00455915		2633.58	-0.03112879		3163.58	0.17454622		3693.58	0.01895742		4223.58	-0.02243432
513.79	-0.00087598		1043.79	-0.00310869		1573.79	-0.00611944		2103.78	-0.00500074		2633.78	-0.03134561		3163.78	0.17483707		3693.78	0.01901689		4223.78	-0.0229572
513.99	-0.00110595		1043.99	-0.00319916		1573.99	-0.00578883		2103.98	-0.00460756		2633.98	-0.03064047		3163.98	0.17585187		3693.98	0.01912272		4223.98	-0.02372715
514.19	-0.00172605		1044.19	-0.00353082		1574.19	-0.00589287		2104.18	-0.00441426		2634.18	-0.02934765		3164.18	0.17512486		3694.18	0.01824194		4224.18	-0.02407202
514.39	-0.00335779		1044.39	-0.00256149		1574.39	-0.00624919		2104.38	-0.0040101		2634.38	-0.02919736		3164.38	0.17548044		3694.38	0.01896762		4224.38	-0.02475092
514.59	-0.00373039		1044.59	-0.00197997		1574.59	-0.00600763		2104.58	-0.00421182		2634.58	-0.02811319		3164.58	0.17519217		3694.58	0.018527		4224.58	-0.02465046
514.79	-0.00443221		1044.79	-0.00160603		1574.79	-0.00514619		2104.78	-0.00461968		2634.78	-0.02675603		3164.78	0.1748262		3694.78	0.01748536		4224.78	-0.02304788
514.99	-0.00435709		1044.99	-0.00161241		1574.99	-0.00461992		2104.98	-0.00440781		2634.98	-0.02659193		3164.98	0.17509195		3694.98	0.01676664		4224.98	-0.02299877
515.19	-0.00435071		1045.19	-0.00172962		1575.19	-0.00462683		2105.18	-0.00448263		2635.18	-0.02659584		3165.18	0.17477735		3695.18	0.01559742		4225.18	-0.02261554
515.39	-0.004631		1045.39	-0.002672		1575.39	-0.00401512		2105.38	-0.00409045		2635.38	-0.02738443		3165.38	0.17442727		3695.38	0.01531279		4225.38	-0.02251819
515.59	-0.00385829		1045.59	-0.00271271		1575.59	-0.00402674		2105.58	-0.00438719		2635.58	-0.02729799		3165.58	0.17375697		3695.58	0.014781		4225.58	-0.0222365
515.79	-0.00333411		1045.79	-0.00381505		1575.79	-0.00390666		2105.78	-0.00478263		2635.78	-0.02748008		3165.78	0.17397259		3695.78	0.01502476		4225.78	-0.0224802
515.99	-0.00297267		1045.99	-0.00316423		1575.99	-0.00415407		2105.98	-0.00400424		2635.98	-0.02823313		3165.98	0.17391253		3695.98	0.01418466		4225.98	-0.02231371
516.19	-0.00340166		1046.19	-0.00278523		1576.19	-0.0035698		2106.18	-0.00378907		2636.18	-0.02871104		3166.18	0.17394072		3696.18	0.01432578		4226.18	-0.02185811
516.39	-0.00321959		1046.39	-0.0037173		1576.39	-0.00391729		2106.38	-0.0033771		2636.38	-0.02918051		3166.38	0.17389249		3696.38	0.01360636		4226.38	-0.02264011
516.59	-0.00312627		1046.59	-0.00439878		1576.59	-0.00539354		2106.58	-0.00408773		2636.58	-0.02927437		3166.58	0.17356034		3696.58	0.01362618		4226.58	-0.0233071
516.79	-0.00284632		1046.79	-0.00330333		1576.79	-0.00584558		2106.78	-0.00372196		2636.78	-0.02986239		3166.78	0.17359267		3696.78	0.01326831		4226.78	-0.02298731
516.99	-0.00256392		1046.99	-0.00402692		1576.99	-0.00530314		2106.98	-0.00403236		2636.98	-0.03041433		3166.98	0.1728214		3696.98	0.01306753		4226.98	-0.02241554
517.19	-0.00207582		1047.19	-0.00472625		1577.19	-0.00637448		2107.18	-0.0049863		2637.18	-0.03094977		3167.18	0.17333024		3697.18	0.01353779		4227.18	-0.02268609
517.39	-0.00171324		1047.39	-0.00476175		1577.39	-0.00595938		2107.38	-0.00489252		2637.38	-0.03170248		3167.38	0.17380818		3697.38	0.01400816		4227.38	-0.0227366
517.59	-0.00162443		1047.59	-0.00509352		1577.59	-0.00606573		2107.58	-0.00606232		2637.58	-0.03239073		3167.58	0.17348459		3697.58	0.01463163		4227.58	-0.02331518
517.79	-0.00144479		1047.79	-0.00482248		1577.79	-0.0071369		2107.78	-0.00646169		2637.78	-0.03257481		3167.78	0.17321481		3697.78	0.01540542		4227.78	-0.02357588
517.99	-0.00232571		1047.99	-0.00537689		1577.99	-0.00716901		2107.98	-0.00605672		2637.98	-0.03271801		3167.98	0.17386802		3697.98	0.01635811		4227.98	-0.02401474
518.19	-0.00260786		1048.19	-0.00492716		1578.19	-0.00718895		2108.18	-0.0068791		2638.18	-0.03314329		3168.18	0.17400212		3698.18	0.0159622		4228.18	-0.02449397
518.39	-0.00354285		1048.39	-0.00336228		1578.39	-0.00801014		2108.38	-0.00679601		2638.38	-0.03300326		3168.38	0.17406403		3698.38	0.01626287		4228.38	-0.02457071
518.59	-0.00362916		1048.59	-0.00325279		1578.59	-0.00811046		2108.58	-0.00751243		2638.58	-0.03252144		3168.58	0.17353336		3698.58	0.01559508		4228.58	-0.02373155
518.79	-0.00309513		1048.79	-0.00349786		1578.79	-0.00816055		2108.78	-0.00718712		2638.78	-0.03260854		3168.78	0.17385589		3698.78	0.01537584		4228.78	-0.02387096
518.99	-0.003277		1048.99	-0.00396535		1578.99	-0.00817606		2108.98	-0.00709825		2638.98	-0.03217537		3168.98	0.1740895		3698.98	0.01497983		4228.98	-0.02537295
519.19	-0.00350093		1049.19	-0.00475736		1579.19	-0.00801767		2109.18	-0.0069948		2639.18	-0.03250459		3169.18	0.17398163		3699.18	0.01455533		4229.18	-0.02476019
519.39	-0.00351125		1049.39	-0.00525816		1579.39	-0.00733733		2109.38	-0.00539501		2639.38	-0.03201267		3169.38	0.17340548		3699.38	0.01540746		4229.38	-0.02560701
519.59	-0.00347497		1049.59	-0.00477422		1579.59	-0.00767707		2109.58	-0.00513232		2639.58	-0.03056687		3169.58	0.17285009		3699.58	0.01577493		4229.58	-0.02578188
519.79	-0.00380134		1049.79	-0.00502462		1579.79	-0.00794839		2109.78	-0.00450467		2639.78	-0.03037906		3169.78	0.17242068		3699.78	0.0160066		4229.78	-0.02526531
519.99	-0.00385752		1049.99	-0.00492547		1579.99	-0.00851634		2109.98	-0.00292035		2639.98	-0.03084416		3169.98	0.17148526		3699.98	0.01593734		4229.98	-0.02535303
520.19	-0.00419199		1050.19	-0.00533934		1580.19	-0.0080379		2110.18	-0.00235652		2640.18	-0.03067091		3170.18	0.17128784		3700.18	0.0163835		4230.18	-0.02490403
520.39	-0.00398474		1050.39	-0.00662176		1580.39	-0.00824076		2110.38	-0.00227615		2640.38	-0.02992533		3170.38	0.17086534		3700.38	0.01612635		4230.38	-0.02571739
520.59	-0.00281874		1050.59	-0.00697663		1580.59	-0.00866927		2110.58	-0.00234016		2640.58	-0.02924126		3170.58	0.17039805		3700.58	0.01614502		4230.58	-0.02515878
520.79	-0.00217792		1050.79	-0.00722262		1580.79	-0.00838925		2110.78	-0.0013346		2640.78	-0.02912151		3170.78	0.1707726		3700.78	0.01584492		4230.78	-0.02518731
520.99	-0.00205741		1050.99	-0.00811643		1580.99	-0.00722475		2110.98	-0.00148001		2640.98	-0.02927097		3170.98	0.17027409		3700.98	0.01653527		4230.98	-0.02485447
521.19	-0.00239564		1051.19	-0.0087816		1581.19	-0.0070251		2111.18	-0.00161041		2641.18	-0.02929049		3171.18	0.17128679		3701.18	0.01736431		4231.18	-0.02570275
521.39	-0.00275486		1051.39	-0.00903823		1581.39	-0.00623427		2111.38	-0.00164613		2641.38	-0.02938902		3171.38	0.17158978		3701.38	0.01737651		4231.38	-0.02585325
521.59	-0.00287184		1051.59	-0.00880385		1581.59	-0.00692815		2111.58	-0.0023765		2641.58	-0.02976306		3171.58	0.17257606		3701.58	0.01728659		4231.58	-0.02623512
521.79	-0.00335983		1051.79	-0.00894097		1581.79	-0.00736617		2111.78	-0.00287249		2641.78	-0.0304315		3171.78	0.17394633		3701.78	0.01704057		4231.78	-0.02600076
521.99	-0.00369676		1051.99	-0.00828021		1581.99	-0.0071503		2111.98	-0.00360542		2641.98	-0.03138321		3171.98	0.17450541		3701.98	0.0158941		4231.98	-0.02589588
522.19	-0.00312019		1052.19	-0.00705597		1582.19	-0.00746102		2112.18	-0.00447294		2642.18	-0.03161914		3172.18	0.17512073		3702.18	0.01522687		4232.18	-0.02559958
522.39	-0.00281745		1052.39	-0.00483931		1582.39	-0.0075303		2112.38	-0.00451275		2642.38	-0.0314029		3172.38	0.17518158		3702.38	0.01492897		4232.38	-0.02561338
522.59	-0.00255287		1052.59	-0.00512558		1582.59	-0.00657025		2112.58	-0.00470526		2642.58	-0.03090449		3172.58	0.17585902		3702.58	0.01472283		4232.58	-0.02595517
522.79	-0.0026001		1052.79	-0.00538287		1582.79	-0.00556399		2112.78	-0.00462622		2642.78	-0.03031565		3172.78	0.17613762		3702.78	0.01455157		4232.78	-0.02647548
522.99	-0.00317934		1052.99	-0.00477273		1582.99	-0.00527921		2112.98	-0.00540078		2642.98	-0.02972087		3172.98	0.17675936		3702.98	0.01407061		4232.98	-0.02650603
523.19	-0.00344159		1053.19	-0.00442279		1583.19	-0.0051098		2113.18	-0.00575334		2643.18	-0.03013518		3173.18	0.17667667		3703.18	0.01463059		4233.18	-0.02564843
523.39	-0.00341281		1053.39	-0.00436509		1583.39	-0.0055057		2113.38	-0.00517063		2643.38	-0.02984193		3173.38	0.17606804		3703.38	0.01482858		4233.38	-0.02617991
523.59	-0.00328729		1053.59	-0.00473673		1583.59	-0.00568716		2113.58	-0.00630755		2643.58	-0.03000878		3173.58	0.1751684		3703.58	0.01537734		4233.58	-0.02613342
523.79	-0.00303056		1053.79	-0.00432241		1583.79	-0.00539241		2113.78	-0.00672095		2643.78	-0.03060525		3173.78	0.17444543		3703.78	0.01624223		4233.78	-0.02554553
523.99	-0.00210176		1053.99	-0.00511616		1583.99	-0.00448451		2113.98	-0.00599476		2643.98	-0.03068801		3173.98	0.17380008		3703.98	0.01694191		4233.98	-0.02597181
524.19	-0.0008673		1054.19	-0.00595695		1584.19	-0.00416034		2114.18	-0.00577591		2644.18	-0.03004459		3174.18	0.17369424		3704.18	0.01701477		4234.18	-0.02622843
524.39	-0.00080173		1054.39	-0.00722256		1584.39	-0.00456269		2114.38	-0.00574606		2644.38	-0.02967181		3174.38	0.17321301		3704.38	0.01760759		4234.38	-0.02671761
524.59	-0.00090226		1054.59	-0.00755717		1584.59	-0.00534022		2114.58	-0.00447298		2644.58	-0.02971929		3174.58	0.17298078		3704.58	0.01766968		4234.58	-0.02684156
524.79	-0.00241472		1054.79	-0.00786789		1584.79	-0.00445302		2114.78	-0.00329878		2644.78	-0.03045226		3174.78	0.17293423		3704.78	0.01791831		4234.78	-0.02751269
524.99	-0.00245598		1054.99	-0.00817396		1584.99	-0.00475704		2114.98	-0.00371955		2644.98	-0.03079953		3174.98	0.17301399		3704.98	0.01841183		4234.98	-0.02753805
525.19	-0.00340983		1055.19	-0.00820818		1585.19	-0.00494817		2115.18	-0.00385433		2645.18	-0.03084002		3175.18	0.1735107		3705.18	0.01898737		4235.18	-0.0277946
525.39	-0.00355221		1055.39	-0.00713979		1585.39	-0.00544481		2115.38	-0.00390621		2645.38	-0.03079835		3175.38	0.17369047		3705.38	0.01763284		4235.38	-0.0275574
525.59	-0.00322073		1055.59	-0.00633062		1585.59	-0.00611484		2115.58	-0.00394389		2645.58	-0.03084874		3175.58	0.17404461		3705.58	0.01683919		4235.58	-0.02757767
525.79	-0.00350913		1055.79	-0.00698043		1585.79	-0.0060572		2115.78	-0.00408717		2645.78	-0.03090057		3175.78	0.17395923		3705.78	0.01629057		4235.78	-0.02640262
525.99	-0.00300911		1055.99	-0.00615503		1585.99	-0.00552474		2115.98	-0.00403491		2645.98	-0.03088822		3175.98	0.17366408		3705.98	0.01591024		4235.98	-0.02509271
526.19	-0.00201462		1056.19	-0.00543859		1586.19	-0.0051511		2116.18	-0.00375887		2646.18	-0.03076457		3176.18	0.17467566		3706.18	0.01642534		4236.18	-0.0246609
526.39	-0.00195665		1056.39	-0.00467715		1586.39	-0.00526736		2116.38	-0.00341107		2646.38	-0.03077609		3176.38	0.17434793		3706.38	0.01613		4236.38	-0.02395473
526.59	-0.00224377		1056.59	-0.00472681		1586.59	-0.00569669		2116.58	-0.00289461		2646.58	-0.03009304		3176.58	0.17370425		3706.58	0.01553476		4236.58	-0.02400807
526.79	-0.00209729		1056.79	-0.00453457		1586.79	-0.00605026		2116.78	-0.0034004		2646.78	-0.03014445		3176.78	0.17342764		3706.78	0.01603965		4236.78	-0.02371714
526.99	-0.00156741		1056.99	-0.00490455		1586.99	-0.00732022		2116.98	-0.00368193		2646.98	-0.03012405		3176.98	0.17323392		3706.98	0.01539071		4236.98	-0.02357914
527.19	-0.00176778		1057.19	-0.00498621		1587.19	-0.00781687		2117.18	-0.00463115		2647.18	-0.03012647		3177.18	0.17263884		3707.18	0.01620195		4237.18	-0.02295931
527.39	-0.00107336		1057.39	-0.00505443		1587.39	-0.00825896		2117.38	-0.00445791		2647.38	-0.03109891		3177.38	0.17209578		3707.38	0.01710545		4237.38	-0.02278405
527.59	-0.00058278		1057.59	-0.00569692		1587.59	-0.00858865		2117.58	-0.0055832		2647.58	-0.03141475		3177.58	0.17139352		3707.58	0.01793493		4237.58	-0.02336882
527.79	-0.00031955		1057.79	-0.00575496		1587.79	-0.00878231		2117.78	-0.00625855		2647.78	-0.03175943		3177.78	0.17118608		3707.78	0.01888647		4237.78	-0.02329609
527.99	-0.00018275		1057.99	-0.00715286		1587.99	-0.00946976		2117.98	-0.00674344		2647.98	-0.03199488		3177.98	0.17132724		3707.98	0.01956679		4237.98	-0.02407537
528.19	-0.00050434		1058.19	-0.00725913		1588.19	-0.01055872		2118.18	-0.0075199		2648.18	-0.03292657		3178.18	0.17142139		3708.18	0.01925982		4238.18	-0.02509538
528.39	-0.00235504		1058.39	-0.00769249		1588.39	-0.01115506		2118.38	-0.00795471		2648.38	-0.03278005		3178.38	0.1713458		3708.38	0.01907148		4238.38	-0.02582391
528.59	-0.00271897		1058.59	-0.00751842		1588.59	-0.01169528		2118.58	-0.00777757		2648.58	-0.03283166		3178.58	0.17128195		3708.58	0.01824718		4238.58	-0.02663035
528.79	-0.00287436		1058.79	-0.00804319		1588.79	-0.01093356		2118.78	-0.0077387		2648.78	-0.03268588		3178.78	0.17168211		3708.78	0.01778767		4238.78	-0.02696244
528.99	-0.00213765		1058.99	-0.00833939		1588.99	-0.01139638		2118.98	-0.0081668		2648.98	-0.0318811		3178.98	0.17174074		3708.98	0.01727002		4238.98	-0.02725604
529.19	-0.0028451		1059.19	-0.00783048		1589.19	-0.01070709		2119.18	-0.0076995		2649.18	-0.03155659		3179.18	0.17100492		3709.18	0.01704044		4239.18	-0.02816968
529.39	-0.0025316		1059.39	-0.00829783		1589.39	-0.01022835		2119.38	-0.00664011		2649.38	-0.03148505		3179.38	0.17139102		3709.38	0.01611248		4239.38	-0.02829315
529.59	-0.00256198		1059.59	-0.00925435		1589.59	-0.00978081		2119.58	-0.00664712		2649.58	-0.03141509		3179.58	0.17124904		3709.58	0.0153955		4239.58	-0.02790102
529.79	-0.0023575		1059.79	-0.00976057		1589.79	-0.00896959		2119.78	-0.00602998		2649.78	-0.03115856		3179.78	0.17092587		3709.78	0.01510585		4239.78	-0.0272145
529.99	-0.00266351		1059.99	-0.00871855		1589.99	-0.00772958		2119.98	-0.00550995		2649.98	-0.03173478		3179.98	0.17065298		3709.98	0.01457153		4239.98	-0.02691384
530.19	-0.00191282		1060.19	-0.00769665		1590.19	-0.00713985		2120.18	-0.00572432		2650.18	-0.03208277		3180.18	0.17090788		3710.18	0.01467786		4240.18	-0.02783965
530.39	-0.00194259		1060.39	-0.00652091		1590.39	-0.00699072		2120.38	-0.00531536		2650.38	-0.03237908		3180.38	0.17034343		3710.38	0.0143082		4240.38	-0.02740146
530.59	-0.00162224		1060.59	-0.00577215		1590.59	-0.00695857		2120.58	-0.00499794		2650.58	-0.03251857		3180.58	0.16934795		3710.58	0.01426591		4240.58	-0.02776112
530.79	-0.00135821		1060.79	-0.00501878		1590.79	-0.00641691		2120.78	-0.00479339		2650.78	-0.03236709		3180.78	0.16877719		3710.78	0.0147157		4240.78	-0.02719724
530.99	-0.00208598		1060.99	-0.00499205		1590.99	-0.00664647		2120.98	-0.00489032		2650.98	-0.03218887		3180.98	0.16801077		3710.98	0.01449683		4240.98	-0.02736841
531.19	-0.002271		1061.19	-0.00423237		1591.19	-0.00693451		2121.18	-0.00556025		2651.18	-0.03217873		3181.18	0.16825771		3711.18	0.01550324		4241.18	-0.02700981
531.39	-0.00212214		1061.39	-0.00387748		1591.39	-0.00678584		2121.38	-0.00552859		2651.38	-0.03274272		3181.38	0.16843701		3711.38	0.01531779		4241.38	-0.02689129
531.59	-0.00214845		1061.59	-0.0038848		1591.59	-0.00733985		2121.58	-0.0062597		2651.58	-0.03219701		3181.58	0.16827779		3711.58	0.01489239		4241.58	-0.02733722
531.79	-0.00285894		1061.79	-0.0037851		1591.79	-0.00720549		2121.78	-0.0063983		2651.78	-0.03208084		3181.78	0.16819635		3711.78	0.01483691		4241.78	-0.02698446
531.99	-0.00299086		1061.99	-0.00425181		1591.99	-0.00768583		2121.98	-0.00627872		2651.98	-0.03229586		3181.98	0.16878882		3711.98	0.01435524		4241.98	-0.02740026
532.19	-0.00269953		1062.19	-0.00388817		1592.19	-0.00720826		2122.18	-0.0058629		2652.18	-0.03199827		3182.18	0.16936073		3712.18	0.01388753		4242.18	-0.02703874
532.39	-0.00320434		1062.39	-0.00510893		1592.39	-0.00779265		2122.38	-0.00556775		2652.38	-0.03097981		3182.38	0.17020217		3712.38	0.01366345		4242.38	-0.02674962
532.59	-0.00342546		1062.59	-0.00549601		1592.59	-0.00887243		2122.58	-0.00466151		2652.58	-0.03029771		3182.58	0.17110312		3712.58	0.01402835		4242.58	-0.02677635
532.79	-0.00352558		1062.79	-0.00597658		1592.79	-0.00815762		2122.78	-0.00403958		2652.78	-0.02978619		3182.78	0.17167189		3712.78	0.01321069		4242.78	-0.02654728
532.99	-0.00366777		1062.99	-0.00634908		1592.99	-0.00788539		2122.98	-0.00405949		2652.98	-0.03038401		3182.98	0.17189063		3712.98	0.01357277		4242.98	-0.02686779
533.19	-0.00353282		1063.19	-0.00673557		1593.19	-0.00767052		2123.18	-0.00293958		2653.18	-0.03078465		3183.18	0.17201666		3713.18	0.01379894		4243.18	-0.02748818
533.39	-0.00338446		1063.39	-0.00838627		1593.39	-0.00736094		2123.38	-0.00295206		2653.38	-0.03033809		3183.38	0.17251471		3713.38	0.01361783		4243.38	-0.02651299
533.59	-0.00317307		1063.59	-0.00840693		1593.59	-0.00771382		2123.58	-0.00332169		2653.58	-0.03012869		3183.58	0.17229331		3713.58	0.01354527		4243.58	-0.02603928
533.79	-0.00320353		1063.79	-0.00827486		1593.79	-0.00826775		2123.78	-0.00307974		2653.78	-0.02974808		3183.78	0.17237136		3713.78	0.01428176		4243.78	-0.02621727
533.99	-0.00436276		1063.99	-0.00861739		1593.99	-0.00832819		2123.98	-0.00378732		2653.98	-0.03097065		3183.98	0.17257997		3713.98	0.01446903		4243.98	-0.02584741
534.19	-0.00422764		1064.19	-0.00825774		1594.19	-0.00848359		2124.18	-0.00459311		2654.18	-0.03151325		3184.18	0.17343331		3714.18	0.01534009		4244.18	-0.02571306
534.39	-0.00463731		1064.39	-0.00888174		1594.39	-0.0090109		2124.38	-0.00501674		2654.38	-0.03182527		3184.38	0.17349899		3714.38	0.01605737		4244.38	-0.02390983
534.59	-0.00478311		1064.59	-0.00896921		1594.59	-0.0093448		2124.58	-0.0058483		2654.58	-0.03164874		3184.58	0.17257127		3714.58	0.01760831		4244.58	-0.02380758
534.79	-0.00545071		1064.79	-0.00865927		1594.79	-0.00994956		2124.78	-0.00625243		2654.78	-0.03140608		3184.78	0.17149938		3714.78	0.01799601		4244.78	-0.0241729
534.99	-0.00568692		1064.99	-0.00939103		1594.99	-0.01044845		2124.98	-0.00710411		2654.98	-0.03131631		3184.98	0.17178069		3714.98	0.01830007		4244.98	-0.02395233
535.19	-0.00552138		1065.19	-0.00885053		1595.19	-0.01133499		2125.18	-0.00806292		2655.18	-0.03167223		3185.18	0.17135666		3715.18	0.01844495		4245.18	-0.0239016
535.39	-0.00501023		1065.39	-0.00894239		1595.39	-0.01142404		2125.38	-0.00834497		2655.38	-0.03152875		3185.38	0.17118563		3715.38	0.01834008		4245.38	-0.0238595
535.59	-0.00478628		1065.59	-0.00944271		1595.59	-0.01178723		2125.58	-0.00800367		2655.58	-0.03167235		3185.58	0.17068606		3715.58	0.01910411		4245.58	-0.02332714
535.79	-0.00446597		1065.79	-0.00959169		1595.79	-0.01178825		2125.78	-0.00743484		2655.78	-0.03163181		3185.78	0.16936969		3715.78	0.01880015		4245.78	-0.0228838
535.99	-0.00392211		1065.99	-0.01053269		1595.99	-0.01161277		2125.98	-0.00650159		2655.98	-0.03183713		3185.98	0.16938141		3715.98	0.01912071		4245.98	-0.02342123
536.19	-0.00298542		1066.19	-0.01052124		1596.19	-0.0107467		2126.18	-0.00603267		2656.18	-0.03178343		3186.18	0.1694846		3716.18	0.01917663		4246.18	-0.02341941
536.39	-0.00373606		1066.39	-0.01166645		1596.39	-0.01155213		2126.38	-0.00533291		2656.38	-0.03174529		3186.38	0.16960665		3716.38	0.01953333		4246.38	-0.02378734
536.59	-0.00414666		1066.59	-0.01057515		1596.59	-0.01141189		2126.58	-0.00471962		2656.58	-0.0318594		3186.58	0.17011455		3716.58	0.01894123		4246.58	-0.024316
536.79	-0.00471116		1066.79	-0.01021422		1596.79	-0.01026939		2126.78	-0.00473103		2656.78	-0.03194558		3186.78	0.16955475		3716.78	0.01791698		4246.78	-0.02427426
536.99	-0.00387543		1066.99	-0.01016875		1596.99	-0.01072934		2126.98	-0.00438097		2656.98	-0.03246616		3186.98	0.16856738		3716.98	0.01812422		4246.98	-0.02445948
537.19	-0.00342169		1067.19	-0.00944916		1597.19	-0.00973014		2127.18	-0.00356464		2657.18	-0.03177961		3187.18	0.16781613		3717.18	0.01745442		4247.18	-0.02488308
537.39	-0.00386813		1067.39	-0.00831155		1597.39	-0.00992396		2127.38	-0.00419875		2657.38	-0.03086212		3187.38	0.16704818		3717.38	0.0163939		4247.38	-0.02528221
537.59	-0.00392141		1067.59	-0.00685683		1597.59	-0.01001976		2127.58	-0.00406354		2657.58	-0.03037959		3187.58	0.16669029		3717.58	0.01605721		4247.58	-0.02646241
537.79	-0.00407402		1067.79	-0.00594895		1597.79	-0.01057801		2127.78	-0.00475831		2657.78	-0.02953514		3187.78	0.16768559		3717.78	0.01592865		4247.78	-0.02612232
537.99	-0.00465956		1067.99	-0.00632551		1597.99	-0.01001567		2127.98	-0.00530089		2657.98	-0.02972417		3187.98	0.16892358		3717.98	0.01505776		4247.98	-0.02567973
538.19	-0.00404357		1068.19	-0.00589285		1598.19	-0.00946065		2128.18	-0.00603139		2658.18	-0.02953286		3188.18	0.16934154		3718.18	0.01448709		4248.18	-0.0257134
538.39	-0.00360963		1068.39	-0.00631517		1598.39	-0.00952833		2128.38	-0.00638535		2658.38	-0.02945752		3188.38	0.16910834		3718.38	0.01447864		4248.38	-0.02579722
538.59	-0.00394229		1068.59	-0.00500347		1598.59	-0.00915062		2128.58	-0.00661747		2658.58	-0.02874969		3188.58	0.16816987		3718.58	0.01484687		4248.58	-0.02619856
538.79	-0.00330248		1068.79	-0.00427859		1598.79	-0.00956268		2128.78	-0.00726555		2658.78	-0.0284674		3188.78	0.16844444		3718.78	0.01422559		4248.78	-0.02637386
538.99	-0.00212473		1068.99	-0.00415109		1598.99	-0.00943307		2128.98	-0.00783798		2658.98	-0.0281736		3188.98	0.16913933		3718.98	0.01410328		4248.98	-0.02631887
539.19	-0.00200143		1069.19	-0.00405726		1599.19	-0.01026091		2129.18	-0.00855878		2659.18	-0.02933488		3189.18	0.16932078		3719.18	0.01416913		4249.18	-0.02697953
539.39	-0.00085605		1069.39	-0.00450064		1599.39	-0.00958238		2129.38	-0.00907688		2659.38	-0.02953448		3189.38	0.17026956		3719.38	0.01480071		4249.38	-0.02689001
539.59	-0.00118144		1069.59	-0.00480393		1599.59	-0.00966452		2129.58	-0.0086933		2659.58	-0.03046466		3189.58	0.17023956		3719.58	0.0156491		4249.58	-0.02688325
539.79	-0.0009009		1069.79	-0.00513209		1599.79	-0.00946286		2129.78	-0.00904108		2659.78	-0.03051108		3189.78	0.1699917		3719.78	0.01519778		4249.78	-0.02670171
539.99	-0.0006894		1069.99	-0.00679181		1599.99	-0.00862909		2129.98	-0.00785987		2659.98	-0.03090172		3189.98	0.17021183		3719.98	0.01616462		4249.98	-0.02738842
540.19	-0.00040667		1070.19	-0.00763148		1600.19	-0.00824917		2130.18	-0.00782981		2660.18	-0.03219555		3190.18	0.17063527		3720.18	0.01654922		4250.18	-0.02777632
540.39	-0.0010744		1070.39	-0.00767098		1600.39	-0.00846997		2130.38	-0.00768738		2660.38	-0.0330023		3190.38	0.17136925		3720.38	0.01645811		4250.38	-0.02700713
540.59	-0.00259102		1070.59	-0.00761377		1600.59	-0.0082458		2130.58	-0.00701611		2660.58	-0.03352315		3190.58	0.17152931		3720.58	0.01593735		4250.58	-0.02629291
540.79	-0.00356293		1070.79	-0.00789729		1600.79	-0.00830198		2130.78	-0.00623364		2660.78	-0.03360983		3190.78	0.17034286		3720.78	0.0164362		4250.78	-0.02570851
540.99	-0.00311608		1070.99	-0.00749993		1600.99	-0.0084068		2130.98	-0.00525543		2660.98	-0.03414651		3190.98	0.16959533		3720.98	0.01728031		4250.98	-0.02498276
541.19	-0.00432172		1071.19	-0.00622317		1601.19	-0.007715		2131.18	-0.00434253		2661.18	-0.03340517		3191.18	0.16930928		3721.18	0.01664101		4251.18	-0.02454548
541.39	-0.00444478		1071.39	-0.0056333		1601.39	-0.00898686		2131.38	-0.00419985		2661.38	-0.03293803		3191.38	0.16850285		3721.38	0.01675219		4251.38	-0.02487225
541.59	-0.00441978		1071.59	-0.00607796		1601.59	-0.00943887		2131.58	-0.0041318		2661.58	-0.03240641		3191.58	0.16875814		3721.58	0.01727099		4251.58	-0.02456157
541.79	-0.00424254		1071.79	-0.00554127		1601.79	-0.00964576		2131.78	-0.00511667		2661.78	-0.03222138		3191.78	0.16951407		3721.78	0.0170839		4251.78	-0.02319549
541.99	-0.00549429		1071.99	-0.00693175		1601.99	-0.00899632		2131.98	-0.00476657		2661.98	-0.03248068		3191.98	0.16899421		3721.98	0.0159428		4251.98	-0.02324583
542.19	-0.00446415		1072.19	-0.00683527		1602.19	-0.00860207		2132.18	-0.00500217		2662.18	-0.03255048		3192.18	0.16722417		3722.18	0.01559362		4252.18	-0.02361705
542.39	-0.00492274		1072.39	-0.00677041		1602.39	-0.00896954		2132.38	-0.00434478		2662.38	-0.03273447		3192.38	0.16607243		3722.38	0.0153785		4252.38	-0.0243303
542.59	-0.00492602		1072.59	-0.00674743		1602.59	-0.0085882		2132.58	-0.00436917		2662.58	-0.03223013		3192.58	0.16562798		3722.58	0.01585442		4252.58	-0.02449276
542.79	-0.00346692		1072.79	-0.00710788		1602.79	-0.00915778		2132.78	-0.00454832		2662.78	-0.03267801		3192.78	0.16679178		3722.78	0.01520528		4252.78	-0.02532846
542.99	-0.00288591		1072.99	-0.00748708		1602.99	-0.0096038		2132.98	-0.00498518		2662.98	-0.0328418		3192.98	0.16733127		3722.98	0.01485707		4252.98	-0.02575598
543.19	-0.00302154		1073.19	-0.00753245		1603.19	-0.00910108		2133.18	-0.00596419		2663.18	-0.03358984		3193.18	0.16781113		3723.18	0.01433504		4253.18	-0.02696233
543.39	-0.00289349		1073.39	-0.00734394		1603.39	-0.00837573		2133.38	-0.00604364		2663.38	-0.03257951		3193.38	0.16793023		3723.38	0.01574526		4253.38	-0.02784999
543.59	-0.00304382		1073.59	-0.00747789		1603.59	-0.00786989		2133.58	-0.00600824		2663.58	-0.03273622		3193.58	0.16767328		3723.58	0.01602707		4253.58	-0.0288253
543.79	-0.00229937		1073.79	-0.00777267		1603.79	-0.00743837		2133.78	-0.00609169		2663.78	-0.03231836		3193.78	0.16759166		3723.78	0.01467412		4253.78	-0.02890394
543.99	-0.00286585		1073.99	-0.00777827		1603.99	-0.00670554		2133.98	-0.0049108		2663.98	-0.03279234		3193.98	0.16807483		3723.98	0.01486561		4253.98	-0.02969259
544.19	-0.00291392		1074.19	-0.00725231		1604.19	-0.0063947		2134.18	-0.00550532		2664.18	-0.03303074		3194.18	0.16870355		3724.18	0.01450183		4254.18	-0.02961802
544.39	-0.00312708		1074.39	-0.00638331		1604.39	-0.005982		2134.38	-0.00522396		2664.38	-0.03264255		3194.38	0.16937319		3724.38	0.01376054		4254.38	-0.02913127
544.59	-0.00372316		1074.59	-0.0065067		1604.59	-0.00604148		2134.58	-0.0045404		2664.58	-0.03224403		3194.58	0.16926387		3724.58	0.01403973		4254.58	-0.02831516
544.79	-0.00325983		1074.79	-0.00596777		1604.79	-0.00627701		2134.78	-0.00392988		2664.78	-0.03218185		3194.78	0.16942559		3724.78	0.01356611		4254.78	-0.0280961
544.99	-0.00357285		1074.99	-0.00499816		1604.99	-0.00629271		2134.98	-0.00362819		2664.98	-0.03202908		3194.98	0.16880985		3724.98	0.01379255		4254.98	-0.02717551
545.19	-0.00333823		1075.19	-0.00482219		1605.19	-0.00782247		2135.18	-0.00360085		2665.18	-0.03144449		3195.18	0.16786782		3725.18	0.01242724		4255.18	-0.02668231
545.39	-0.00262117		1075.39	-0.00466355		1605.39	-0.00762866		2135.38	-0.00410074		2665.38	-0.0316015		3195.38	0.16720554		3725.38	0.0128836		4255.38	-0.02644765
545.59	-0.00302031		1075.59	-0.00488176		1605.59	-0.00697975		2135.58	-0.00426791		2665.58	-0.03080247		3195.58	0.16686502		3725.58	0.01269471		4255.58	-0.02591239
545.79	-0.00307867		1075.79	-0.00504623		1605.79	-0.00690168		2135.78	-0.00458763		2665.78	-0.03051869		3195.78	0.16609938		3725.78	0.01235628		4255.78	-0.02557836
545.99	-0.00353662		1075.99	-0.00645893		1605.99	-0.00746068		2135.98	-0.00445972		2665.98	-0.03057176		3195.98	0.16544203		3725.98	0.01193472		4255.98	-0.02579042
546.19	-0.00366506		1076.19	-0.00712725		1606.19	-0.00775901		2136.18	-0.00474623		2666.18	-0.03053452		3196.18	0.16503214		3726.18	0.0124344		4256.18	-0.02676306
546.39	-0.00428337		1076.39	-0.00726025		1606.39	-0.00862057		2136.38	-0.00404098		2666.38	-0.03022664		3196.38	0.16527059		3726.38	0.01254899		4256.38	-0.02659615
546.59	-0.00441138		1076.59	-0.00768875		1606.59	-0.00910829		2136.58	-0.00440372		2666.58	-0.03002894		3196.58	0.16630457		3726.58	0.01365037		4256.58	-0.02625027
546.79	-0.00488657		1076.79	-0.00801514		1606.79	-0.00934222		2136.78	-0.00478409		2666.78	-0.03019965		3196.78	0.16781032		3726.78	0.01345525		4256.78	-0.02591624
546.99	-0.00546185		1076.99	-0.00895392		1606.99	-0.00996646		2136.98	-0.0060733		2666.98	-0.03056474		3196.98	0.16796892		3726.98	0.01369497		4256.98	-0.02634124
547.19	-0.00577222		1077.19	-0.00925443		1607.19	-0.01058694		2137.18	-0.00646016		2667.18	-0.03030109		3197.18	0.16704068		3727.18	0.01451838		4257.18	-0.02672076
547.39	-0.00598798		1077.39	-0.00972471		1607.39	-0.01101063		2137.38	-0.00641138		2667.38	-0.03010112		3197.38	0.16687609		3727.38	0.01543348		4257.38	-0.02666096
547.59	-0.006029		1077.59	-0.00931172		1607.59	-0.01066928		2137.58	-0.00714399		2667.58	-0.03115121		3197.58	0.16735364		3727.58	0.01503668		4257.58	-0.02673124
547.79	-0.00631022		1077.79	-0.00916683		1607.79	-0.01098388		2137.78	-0.00664402		2667.78	-0.03104676		3197.78	0.16830285		3727.78	0.0154433		4257.78	-0.02610306
547.99	-0.00672357		1077.99	-0.00862123		1607.99	-0.01119597		2137.98	-0.00739918		2667.98	-0.03115707		3197.98	0.16924036		3727.98	0.01617872		4257.98	-0.02555681
548.19	-0.00494374		1078.19	-0.00861621		1608.19	-0.0116085		2138.18	-0.00790942		2668.18	-0.03164085		3198.18	0.16963519		3728.18	0.01616757		4258.18	-0.02515172
548.39	-0.00417632		1078.39	-0.00781107		1608.39	-0.01256166		2138.38	-0.0077357		2668.38	-0.03191639		3198.38	0.17111639		3728.38	0.01568108		4258.38	-0.02522388
548.59	-0.00365193		1078.59	-0.00770948		1608.59	-0.01300788		2138.58	-0.00825367		2668.58	-0.03152146		3198.58	0.17106191		3728.58	0.01603277		4258.58	-0.02484603
548.79	-0.00255482		1078.79	-0.00721114		1608.79	-0.01273203		2138.78	-0.00759172		2668.78	-0.03241741		3198.78	0.17018675		3728.78	0.01542004		4258.78	-0.02413251
548.99	-0.00276127		1078.99	-0.00721731		1608.99	-0.01228676		2138.98	-0.00770093		2668.98	-0.03198864		3198.98	0.16894758		3728.98	0.01552646		4258.98	-0.02307354
549.19	-0.0018637		1079.19	-0.00767204		1609.19	-0.0124945		2139.18	-0.00750238		2669.18	-0.03230838		3199.18	0.16831684		3729.18	0.01530731		4259.18	-0.02299168
549.39	-0.00115868		1079.39	-0.00802903		1609.39	-0.01063602		2139.38	-0.00775324		2669.38	-0.03211638		3199.38	0.16708265		3729.38	0.01535866		4259.38	-0.02279603
549.59	-0.00091725		1079.59	-0.00764716		1609.59	-0.01088142		2139.58	-0.00747737		2669.58	-0.03167045		3199.58	0.1657507		3729.58	0.01524421		4259.58	-0.02302405
549.79	-0.00041315		1079.79	-0.00819735		1609.79	-0.01047684		2139.78	-0.00720363		2669.78	-0.03146626		3199.78	0.16566875		3729.78	0.01441554		4259.78	-0.02343398
549.99	-0.0007701		1079.99	-0.00884699		1609.99	-0.01023391		2139.98	-0.00724043		2669.98	-0.0319415		3199.98	0.16480707		3729.98	0.01392046		4259.98	-0.0249742
550.19	-0.00149995		1080.19	-0.0081935		1610.19	-0.00956291		2140.18	-0.00733905		2670.18	-0.03132266		3200.18	0.16454282		3730.18	0.01318108		4260.18	-0.02577622
550.39	-0.00141253		1080.39	-0.00789102		1610.39	-0.00999423		2140.38	-0.00775549		2670.38	-0.03088856		3200.38	0.16394017		3730.38	0.01241908		4260.38	-0.02541202
550.59	-0.0025664		1080.59	-0.00808394		1610.59	-0.01041166		2140.58	-0.00800201		2670.58	-0.03162527		3200.58	0.16395313		3730.58	0.01197534		4260.58	-0.02590918
550.79	-0.00362562		1080.79	-0.00862678		1610.79	-0.01064617		2140.78	-0.00869478		2670.78	-0.03201962		3200.78	0.16326625		3730.78	0.01127465		4260.78	-0.02664445
550.99	-0.00314995		1080.99	-0.00890137		1610.99	-0.01102627		2140.98	-0.00866083		2670.98	-0.03233266		3200.98	0.16298489		3730.98	0.01076233		4260.98	-0.02782896
551.19	-0.00327747		1081.19	-0.00797555		1611.19	-0.01104382		2141.18	-0.00803082		2671.18	-0.03212323		3201.18	0.16283744		3731.18	0.01106752		4261.18	-0.02856404
551.39	-0.00431194		1081.39	-0.00773155		1611.39	-0.01018809		2141.38	-0.0073023		2671.38	-0.03271534		3201.38	0.16377483		3731.38	0.0117571		4261.38	-0.02907944
551.59	-0.00451198		1081.59	-0.00727725		1611.59	-0.00933849		2141.58	-0.00759694		2671.58	-0.03361332		3201.58	0.16529455		3731.58	0.01225663		4261.58	-0.02936077
551.79	-0.00480005		1081.79	-0.00724579		1611.79	-0.00906458		2141.78	-0.00696833		2671.78	-0.03339744		3201.78	0.16610842		3731.78	0.01170014		4261.78	-0.02903431
551.99	-0.00449402		1081.99	-0.0067364		1611.99	-0.00945573		2141.98	-0.0073908		2671.98	-0.03441791		3201.98	0.16670204		3731.98	0.0114495		4261.98	-0.0295044
552.19	-0.00376623		1082.19	-0.00652684		1612.19	-0.00979409		2142.18	-0.00632702		2672.18	-0.03479201		3202.18	0.1675028		3732.18	0.01156927		4262.18	-0.02964889
552.39	-0.00451216		1082.39	-0.00620184		1612.39	-0.01105767		2142.38	-0.00632523		2672.38	-0.03449977		3202.38	0.16811106		3732.38	0.01236128		4262.38	-0.03004761
552.59	-0.00391845		1082.59	-0.00618763		1612.59	-0.01079791		2142.58	-0.00602977		2672.58	-0.03517429		3202.58	0.16734344		3732.58	0.0126248		4262.58	-0.02938149
552.79	-0.00344074		1082.79	-0.00616159		1612.79	-0.00978189		2142.78	-0.00470729		2672.78	-0.03590349		3202.78	0.16727737		3732.78	0.01221754		4262.78	-0.02829398
552.99	-0.00418749		1082.99	-0.00688239		1612.99	-0.01019303		2142.98	-0.00489695		2672.98	-0.03524898		3202.98	0.16699201		3732.98	0.01151227		4262.98	-0.02787366
553.19	-0.0041666		1083.19	-0.00671967		1613.19	-0.01045479		2143.18	-0.00482601		2673.18	-0.03580179		3203.18	0.16656369		3733.18	0.01166311		4263.18	-0.02831236
553.39	-0.00406298		1083.39	-0.00668414		1613.39	-0.00963851		2143.38	-0.00530367		2673.38	-0.0355588		3203.38	0.16518619		3733.38	0.01131477		4263.38	-0.02890292
553.59	-0.00460728		1083.59	-0.00576731		1613.59	-0.01021911		2143.58	-0.00520518		2673.58	-0.03482057		3203.58	0.16530959		3733.58	0.01103824		4263.58	-0.0290178
553.79	-0.00451874		1083.79	-0.00591895		1613.79	-0.00894009		2143.78	-0.00582196		2673.78	-0.03461773		3203.78	0.16533153		3733.78	0.01037887		4263.78	-0.0293335
553.99	-0.00450958		1083.99	-0.00521383		1613.99	-0.00894411		2143.98	-0.00633451		2673.98	-0.03396905		3203.98	0.16348744		3733.98	0.01091739		4263.98	-0.02989742
554.19	-0.00492752		1084.19	-0.00433086		1614.19	-0.00910025		2144.18	-0.00724731		2674.18	-0.03278828		3204.18	0.16416076		3734.18	0.01028521		4264.18	-0.02950136
554.39	-0.0050502		1084.39	-0.00546383		1614.39	-0.00914196		2144.38	-0.00747433		2674.38	-0.03207251		3204.38	0.16415504		3734.38	0.01086027		4264.38	-0.02911072
554.59	-0.00550553		1084.59	-0.00462768		1614.59	-0.00901763		2144.58	-0.00689044		2674.58	-0.03101333		3204.58	0.16442873		3734.58	0.01127302		4264.58	-0.02967704
554.79	-0.00539888		1084.79	-0.0045783		1614.79	-0.00929007		2144.78	-0.00758872		2674.78	-0.03003992		3204.78	0.16472471		3734.78	0.01167059		4264.78	-0.03053922
554.99	-0.00516634		1084.99	-0.00430912		1614.99	-0.00792192		2144.98	-0.00760915		2674.98	-0.02996331		3204.98	0.1657254		3734.98	0.01108833		4264.98	-0.03030373
555.19	-0.004573		1085.19	-0.00449982		1615.19	-0.00829578		2145.18	-0.00869659		2675.18	-0.03003139		3205.18	0.16596091		3735.18	0.01175921		4265.18	-0.03060748
555.39	-0.00441139		1085.39	-0.00482903		1615.39	-0.0081245		2145.38	-0.00932616		2675.38	-0.03068727		3205.38	0.16674824		3735.38	0.01192914		4265.38	-0.03071773
555.59	-0.00418215		1085.59	-0.00561429		1615.59	-0.00742447		2145.58	-0.01045285		2675.58	-0.03152393		3205.58	0.16739969		3735.58	0.0113648		4265.58	-0.03134782
555.79	-0.00457405		1085.79	-0.0064807		1615.79	-0.00781234		2145.78	-0.01019804		2675.78	-0.03182824		3205.78	0.16749717		3735.78	0.01173529		4265.78	-0.03156027
555.99	-0.00434869		1085.99	-0.00709337		1615.99	-0.00869409		2145.98	-0.01052855		2675.98	-0.03319093		3205.98	0.16770767		3735.98	0.01219577		4265.98	-0.03123899
556.19	-0.00364964		1086.19	-0.0073743		1616.19	-0.01037812		2146.18	-0.00996154		2676.18	-0.03399173		3206.18	0.16807708		3736.18	0.01221891		4266.18	-0.02977295
556.39	-0.0042224		1086.39	-0.00757196		1616.39	-0.01163661		2146.38	-0.00961319		2676.38	-0.03466129		3206.38	0.16785048		3736.38	0.01204786		4266.38	-0.02914155
556.59	-0.00406028		1086.59	-0.00784113		1616.59	-0.01083692		2146.58	-0.00833926		2676.58	-0.03598639		3206.58	0.16783198		3736.58	0.01167594		4266.58	-0.02813755
556.79	-0.00507358		1086.79	-0.00875839		1616.79	-0.01116509		2146.78	-0.00821181		2676.78	-0.0360064		3206.78	0.16742744		3736.78	0.01110096		4266.78	-0.02710162
556.99	-0.00585298		1086.99	-0.00919046		1616.99	-0.01272909		2146.98	-0.00871998		2676.98	-0.03615923		3206.98	0.16653995		3736.98	0.010668		4266.98	-0.02768707
557.19	-0.00613717		1087.19	-0.00888695		1617.19	-0.01358391		2147.18	-0.00794951		2677.18	-0.03625844		3207.18	0.16608132		3737.18	0.01114067		4267.18	-0.02790045
557.39	-0.00572702		1087.39	-0.00908411		1617.39	-0.01299876		2147.38	-0.00845851		2677.38	-0.03575469		3207.38	0.16582452		3737.38	0.01130096		4267.38	-0.02792139
557.59	-0.00591613		1087.59	-0.00891134		1617.59	-0.01371849		2147.58	-0.00871697		2677.58	-0.03549277		3207.58	0.16655702		3737.58	0.01221632		4267.58	-0.02754491
557.79	-0.00572149		1087.79	-0.00835992		1617.79	-0.01318952		2147.78	-0.00929744		2677.78	-0.03518417		3207.78	0.1656849		3737.78	0.01228446		4267.78	-0.02760007
557.99	-0.0058861		1087.99	-0.00826611		1617.99	-0.01328642		2147.98	-0.00898358		2677.98	-0.03412726		3207.98	0.16521483		3737.98	0.012665		4267.98	-0.02785646
558.19	-0.00636997		1088.19	-0.00852803		1618.19	-0.01312577		2148.18	-0.00887997		2678.18	-0.03368477		3208.18	0.16603073		3738.18	0.01225059		4268.18	-0.02806906
558.39	-0.00621898		1088.39	-0.00861394		1618.39	-0.01255695		2148.38	-0.0083421		2678.38	-0.03283945		3208.38	0.16553594		3738.38	0.01280475		4268.38	-0.02795423
558.59	-0.00626295		1088.59	-0.00780889		1618.59	-0.01214877		2148.58	-0.00812002		2678.58	-0.03233346		3208.58	0.16517717		3738.58	0.01272204		4268.58	-0.02844369
558.79	-0.00603764		1088.79	-0.00814497		1618.79	-0.01188101		2148.78	-0.00851097		2678.78	-0.03240868		3208.78	0.16528636		3738.78	0.01264609		4268.78	-0.02843617
558.99	-0.00578044		1088.99	-0.00822491		1618.99	-0.01058836		2148.98	-0.00842743		2678.98	-0.03262743		3208.98	0.16489609		3738.98	0.012558		4268.98	-0.02810989
559.19	-0.00479364		1089.19	-0.00848643		1619.19	-0.01045143		2149.18	-0.00849424		2679.18	-0.03264706		3209.18	0.16462424		3739.18	0.01349222		4269.18	-0.02858031
559.39	-0.00524254		1089.39	-0.00830798		1619.39	-0.00929738		2149.38	-0.00782623		2679.38	-0.03311228		3209.38	0.16488769		3739.38	0.01387753		4269.38	-0.02868013
559.59	-0.0057718		1089.59	-0.00893834		1619.59	-0.00835688		2149.58	-0.00717007		2679.58	-0.03364907		3209.58	0.16452474		3739.58	0.0147546		4269.58	-0.02848401
559.79	-0.00580997		1089.79	-0.00922267		1619.79	-0.00803294		2149.78	-0.00627835		2679.78	-0.0340877		3209.78	0.16457996		3739.78	0.01539668		4269.78	-0.02742079
