# Supplementary material for: Functional development of a V3/glycan-specific broadly neutralizing antibody isolated from a case of HIV superinfection
Source: eLife journal article supplement (doi:10.7554/elife.68110), 2021-07-15
Supplement: fig2-data2 [file B9.xls]

Vers 3.43 Data Simulation
Conc1	2.5E-07	2.5E-07	2.5E-07	2.5E-07	1E-06	1E-06	1E-06	1E-06
Start1	199.99	729.99	1259.98	1789.99	2319.98	2850.01	3380	3910
Stop1	559.79	1089.79	1619.78	2149.79	2679.78	3209.81	3739.8	4269.8
Time1	Data1	Sim1	Time2	Data2	Sim2	Time3	Data3	Sim3	Time4	Data4	Sim4	Time5	Data5	Sim5	Time6	Data6	Sim6	Time7	Data7	Sim7	Time8	Data8	Sim8
199.99	0.01292413		729.99	0.00683476		1259.98	0.01060322		1789.99	-0.00155248		2319.98	0.01542275		2850.01	-0.00130792		3380	0.00668412		3910	0.00299172
200.19	0.01266981		730.19	0.00645558		1260.18	0.01058564		1790.19	-0.00169562		2320.18	0.01492632		2850.21	-0.00094905		3380.2	0.00705863		3910.2	0.00277881
200.39	0.01264013		730.39	0.006432		1260.38	0.01056151		1790.39	-0.00231038		2320.38	0.0146115		2850.41	0.00004471		3380.4	0.00720515		3910.4	0.00298817
200.59	0.01275979		730.59	0.00654573		1260.58	0.01106008		1790.59	-0.00232573		2320.58	0.01454142		2850.61	0.00007528		3380.6	0.00695345		3910.6	0.00275993
200.79	0.01328502		730.79	0.00718445		1260.78	0.01067515		1790.79	-0.00173541		2320.78	0.01444479		2850.81	0.00112848		3380.8	0.00708789		3910.8	0.00226013
200.99	0.01336819		730.99	0.00684248		1260.98	0.01044669		1790.99	-0.00193753		2320.98	0.01446885		2851.01	0.0017467		3381	0.00800756		3911	0.00189967
201.19	0.01327742		731.19	0.00703007		1261.18	0.00997123		1791.19	-0.00206951		2321.18	0.01508305		2851.21	0.00227911		3381.2	0.00826692		3911.2	0.0013385
201.39	0.01416175		731.39	0.00721116		1261.38	0.01027506		1791.39	-0.0019934		2321.38	0.01528956		2851.41	0.00238312		3381.4	0.00887623		3911.4	0.00112039
201.59	0.01520888		731.59	0.0068748		1261.58	0.0099729		1791.59	-0.00197464		2321.58	0.01628589		2851.61	0.00327655		3381.6	0.00889357		3911.6	0.00149043
201.79	0.01638916		731.79	0.00722274		1261.78	0.00949918		1791.79	-0.00198754		2321.78	0.01692036		2851.81	0.00371042		3381.8	0.00941048		3911.8	0.00154678
201.99	0.01756338		731.99	0.00770825		1261.98	0.00984983		1791.99	-0.0017442		2321.98	0.01809824		2852.01	0.00396173		3382	0.01056249		3912	0.00182835
202.19	0.01855949		732.19	0.00776889		1262.18	0.01066204		1792.19	-0.00142046		2322.18	0.01881519		2852.21	0.00356063		3382.2	0.01109628		3912.2	0.00162602
202.39	0.02079784		732.39	0.00773913		1262.38	0.01018033		1792.39	-0.00148958		2322.38	0.02000179		2852.41	0.00364175		3382.4	0.01179931		3912.4	0.00092989
202.59	0.02215869		732.59	0.00839182		1262.58	0.00956774		1792.59	-0.00181081		2322.58	0.02094983		2852.61	0.0032233		3382.6	0.01323061		3912.6	0.00115357
202.79	0.02335184		732.79	0.0086521		1262.78	0.00900449		1792.79	-0.00226728		2322.78	0.02086843		2852.81	0.00252636		3382.8	0.01284124		3912.8	0.00091423
202.99	0.02538888		732.99	0.0091307		1262.98	0.00909027		1792.99	-0.00269717		2322.98	0.02177299		2853.01	0.00285654		3383	0.01363469		3913	0.00049156
203.19	0.02737075		733.19	0.00970523		1263.18	0.00924217		1793.19	-0.00183679		2323.18	0.02301696		2853.21	0.00409229		3383.2	0.01399457		3913.2	0.00108415
203.39	0.02944843		733.39	0.01032463		1263.38	0.01066423		1793.39	-0.00153912		2323.38	0.02398515		2853.41	0.00370281		3383.4	0.01366191		3913.4	0.0013492
203.59	0.03095343		733.59	0.01054967		1263.58	0.01038586		1793.59	-0.00133771		2323.58	0.02360174		2853.61	0.00319627		3383.6	0.01317433		3913.6	0.00218605
203.79	0.03258549		733.79	0.0107226		1263.78	0.01137718		1793.79	-0.00179496		2323.78	0.02327255		2853.81	0.00342053		3383.8	0.01377393		3913.8	0.00257163
203.99	0.03490711		733.99	0.01165865		1263.98	0.01176879		1793.99	-0.00282917		2323.98	0.02356945		2854.01	0.0038148		3384	0.01395436		3914	0.00331419
204.19	0.03755584		734.19	0.01143454		1264.18	0.01179405		1794.19	-0.002961		2324.18	0.02363325		2854.21	0.00312443		3384.2	0.0140896		3914.2	0.00298778
204.39	0.04003296		734.39	0.01116061		1264.38	0.01332536		1794.39	-0.00278913		2324.38	0.02330999		2854.41	0.00377638		3384.4	0.01365154		3914.4	0.00315353
204.59	0.04230974		734.59	0.01190521		1264.58	0.01402908		1794.59	-0.00238108		2324.58	0.02411955		2854.61	0.00350976		3384.6	0.01357633		3914.6	0.00198321
204.79	0.04461223		734.79	0.01222853		1264.78	0.0136484		1794.79	-0.00283983		2324.78	0.02360614		2854.81	0.00369429		3384.8	0.01376217		3914.8	0.00151201
204.99	0.04580394		734.99	0.01205868		1264.98	0.01555683		1794.99	-0.00299549		2324.98	0.02330313		2855.01	0.00375144		3385	0.01336185		3915	0.00072411
205.19	0.04778015		735.19	0.01253136		1265.18	0.0164157		1795.19	-0.00301717		2325.18	0.02304089		2855.21	0.0033683		3385.2	0.0125376		3915.2	0.00036996
205.39	0.05045305		735.39	0.01307172		1265.38	0.01824463		1795.39	-0.00262623		2325.38	0.02265737		2855.41	0.00284013		3385.4	0.01251654		3915.4	0.00040575
205.59	0.05189084		735.59	0.01208205		1265.58	0.01836946		1795.59	-0.00363998		2325.58	0.02324472		2855.61	0.00366156		3385.6	0.01218634		3915.6	0.00054899
205.79	0.05265293		735.79	0.01229748		1265.78	0.01927644		1795.79	-0.00379961		2325.78	0.02261962		2855.81	0.0037822		3385.8	0.01270652		3915.8	0.00041062
205.99	0.05350762		735.99	0.01257767		1265.98	0.02037129		1795.99	-0.00340601		2325.98	0.0232872		2856.01	0.00345277		3386	0.01204228		3916	0.00044887
206.19	0.05437151		736.19	0.01223692		1266.18	0.02021817		1796.19	-0.00320794		2326.18	0.02304249		2856.21	0.00312273		3386.2	0.01178208		3916.2	-0.00064523
206.39	0.0571103		736.39	0.01208688		1266.38	0.01874443		1796.39	-0.00329865		2326.38	0.02379784		2856.41	0.00292635		3386.4	0.01143277		3916.4	-0.00126786
206.59	0.05816862		736.59	0.01181608		1266.58	0.01791098		1796.59	-0.00297469		2326.58	0.02430672		2856.61	0.00273676		3386.6	0.01112853		3916.6	-0.00136727
206.79	0.06042727		736.79	0.01155472		1266.78	0.01722796		1796.79	-0.00319086		2326.78	0.0244499		2856.81	0.00250561		3386.8	0.00980265		3916.8	-0.00102818
206.99	0.06182485		736.99	0.01183965		1266.98	0.01713991		1796.99	-0.004369		2326.98	0.02394951		2857.01	0.00285917		3387	0.00938604		3917	-0.00066005
207.19	0.06346326		737.19	0.01210102		1267.18	0.01732704		1797.19	-0.0032324		2327.18	0.02407154		2857.21	0.00278333		3387.2	0.00920104		3917.2	-0.00021337
207.39	0.0649612		737.39	0.01190765		1267.38	0.01760705		1797.39	-0.00318679		2327.38	0.0243377		2857.41	0.00155042		3387.4	0.00993738		3917.4	-0.00016845
207.59	0.06606774		737.59	0.01117768		1267.58	0.01708376		1797.59	-0.00360145		2327.58	0.02362806		2857.61	0.00217625		3387.6	0.01004674		3917.6	0.00090549
207.79	0.06858531		737.79	0.01155442		1267.78	0.01762095		1797.79	-0.00462956		2327.78	0.02380139		2857.81	0.00307405		3387.8	0.01087533		3917.8	0.00160997
207.99	0.07085866		737.99	0.01291147		1267.98	0.01767299		1797.99	-0.00465821		2327.98	0.02456307		2858.01	0.00340656		3388	0.01104789		3918	0.00210689
208.19	0.07358789		738.19	0.01247093		1268.18	0.01789568		1798.19	-0.00406393		2328.18	0.02531157		2858.21	0.00367909		3388.2	0.0108666		3918.2	0.00243854
208.39	0.07629846		738.39	0.01270014		1268.38	0.01944143		1798.39	-0.00394411		2328.38	0.02562698		2858.41	0.00460301		3388.4	0.01137473		3918.4	0.00212153
208.59	0.07814115		738.59	0.01447357		1268.58	0.01935264		1798.59	-0.00495951		2328.58	0.02601799		2858.61	0.0049494		3388.6	0.01211842		3918.6	0.00099311
208.79	0.08036014		738.79	0.01494013		1268.78	0.01992038		1798.79	-0.00487842		2328.78	0.0253687		2858.81	0.00500896		3388.8	0.01244633		3918.8	0.00126694
208.99	0.08285421		738.99	0.01524704		1268.98	0.02181316		1798.99	-0.00379844		2328.98	0.02584705		2859.01	0.00600978		3389	0.01307565		3919	0.00035908
209.19	0.08522737		739.19	0.01549021		1269.18	0.02205609		1799.19	-0.00368421		2329.18	0.02611688		2859.21	0.00647267		3389.2	0.01291563		3919.2	-0.00014896
209.39	0.08718492		739.39	0.01503925		1269.38	0.02285241		1799.39	-0.00390978		2329.38	0.02604673		2859.41	0.00686971		3389.4	0.01279289		3919.4	-0.00041918
209.59	0.08810277		739.59	0.01355543		1269.58	0.0229207		1799.59	-0.00468979		2329.58	0.0262632		2859.61	0.00712608		3389.6	0.01212466		3919.6	-0.00127275
209.79	0.08957242		739.79	0.01378262		1269.78	0.02348922		1799.79	-0.00429632		2329.78	0.02719216		2859.81	0.00632228		3389.8	0.01184781		3919.8	-0.00093676
209.99	0.09054856		739.99	0.01368807		1269.98	0.0233186		1799.99	-0.00349068		2329.98	0.02823052		2860.01	0.00553654		3390	0.01152129		3920	-0.00162002
210.19	0.09135313		740.19	0.01361425		1270.18	0.02298261		1800.19	-0.00377998		2330.18	0.02812667		2860.21	0.00550445		3390.2	0.01203927		3920.2	-0.00169846
210.39	0.09294237		740.39	0.01404441		1270.38	0.02271985		1800.39	-0.00404218		2330.38	0.0283748		2860.41	0.00471052		3390.4	0.01067762		3920.4	-0.00104886
210.59	0.09363548		740.59	0.01428656		1270.58	0.02282142		1800.59	-0.00434554		2330.58	0.02879872		2860.61	0.00400539		3390.6	0.01043941		3920.6	-0.0009349
210.79	0.09417279		740.79	0.01429427		1270.78	0.02313232		1800.79	-0.00415174		2330.78	0.02953151		2860.81	0.0030366		3390.8	0.01006153		3920.8	-0.00040563
210.99	0.09424062		740.99	0.0147676		1270.98	0.02316389		1800.99	-0.00513961		2330.98	0.0289779		2861.01	0.0022275		3391	0.00986076		3921	0.00023907
211.19	0.09586391		741.19	0.01433235		1271.18	0.02389906		1801.19	-0.00419449		2331.18	0.03010583		2861.21	0.00221139		3391.2	0.0107129		3921.2	0.00007476
211.39	0.09632513		741.39	0.01431048		1271.38	0.02436069		1801.39	-0.00406088		2331.38	0.02983596		2861.41	0.00212099		3391.4	0.01093595		3921.4	0.00145521
211.59	0.09776321		741.59	0.01439239		1271.58	0.02468121		1801.59	-0.00382773		2331.58	0.02905406		2861.61	0.00247056		3391.6	0.01080162		3921.6	0.00276116
211.79	0.09953978		741.79	0.01526771		1271.78	0.02462017		1801.79	-0.00377785		2331.78	0.03005068		2861.81	0.00350735		3391.8	0.01065742		3921.8	0.00303269
211.99	0.10081053		741.99	0.01550727		1271.98	0.02436433		1801.99	-0.00348923		2331.98	0.03029668		2862.01	0.00341396		3392	0.01106863		3922	0.00310873
212.19	0.10290544		742.19	0.0153251		1272.18	0.02418573		1802.19	-0.00307444		2332.18	0.03135965		2862.21	0.00417113		3392.2	0.0113806		3922.2	0.00340057
212.39	0.10436817		742.39	0.01578945		1272.38	0.02368929		1802.39	-0.00257379		2332.38	0.03151469		2862.41	0.00450552		3392.4	0.01199784		3922.4	0.00290148
212.59	0.1054558		742.59	0.01666472		1272.58	0.02347307		1802.59	-0.00241803		2332.58	0.03091841		2862.61	0.00500571		3392.6	0.01329477		3922.6	0.00229571
212.79	0.10749172		742.79	0.01626304		1272.78	0.02343822		1802.79	-0.00133201		2332.78	0.03150991		2862.81	0.00540771		3392.8	0.01399673		3922.8	0.00225484
212.99	0.10997134		742.99	0.01639376		1272.98	0.02372379		1802.99	-0.00055782		2332.98	0.03145813		2863.01	0.00578628		3393	0.01398732		3923	0.00165392
213.19	0.11187175		743.19	0.01627252		1273.18	0.02366516		1803.19	-0.00036146		2333.18	0.03130708		2863.21	0.0063182		3393.2	0.01341387		3923.2	0.00115644
213.39	0.1138059		743.39	0.01543486		1273.38	0.02279946		1803.39	-0.00093242		2333.38	0.03148605		2863.41	0.00647916		3393.4	0.01383493		3923.4	0.00054906
213.59	0.11505269		743.59	0.01541846		1273.58	0.02223964		1803.59	-0.00123824		2333.58	0.03250772		2863.61	0.00618136		3393.6	0.01423606		3923.6	-0.00053965
213.79	0.11701422		743.79	0.01678621		1273.78	0.02193535		1803.79	-0.00128853		2333.78	0.0329706		2863.81	0.00562426		3393.8	0.01427045		3923.8	-0.00027391
213.99	0.11727753		743.99	0.01737527		1273.98	0.02164789		1803.99	-0.00089228		2333.98	0.03218108		2864.01	0.00664352		3394	0.01404908		3924	-0.0000231
214.19	0.11839664		744.19	0.01858051		1274.18	0.02168212		1804.19	-0.00204982		2334.18	0.03216628		2864.21	0.00710678		3394.2	0.01339911		3924.2	-0.00039429
214.39	0.11967148		744.39	0.02008243		1274.38	0.02143238		1804.39	-0.00253056		2334.38	0.03184211		2864.41	0.00728208		3394.4	0.01315271		3924.4	-0.00077781
214.59	0.12043014		744.59	0.02076021		1274.58	0.02074751		1804.59	-0.00311048		2334.58	0.03266784		2864.61	0.00646559		3394.6	0.01329737		3924.6	-0.00114759
214.79	0.12196015		744.79	0.02059428		1274.78	0.02079953		1804.79	-0.00365865		2334.78	0.03277712		2864.81	0.00610803		3394.8	0.01230151		3924.8	-0.00163731
214.99	0.12413937		744.99	0.02057289		1274.98	0.0203948		1804.99	-0.00482995		2334.98	0.03257545		2865.01	0.00583119		3395	0.01196082		3925	-0.00139282
215.19	0.12554715		745.19	0.02015878		1275.18	0.02169774		1805.19	-0.00479355		2335.18	0.03303562		2865.21	0.00593217		3395.2	0.0121537		3925.2	-0.00157165
215.39	0.12635066		745.39	0.02063234		1275.38	0.0224634		1805.39	-0.00471804		2335.38	0.03324208		2865.41	0.00585445		3395.4	0.0112855		3925.4	-0.00071755
215.59	0.12768101		745.59	0.02082255		1275.58	0.02268672		1805.59	-0.00562146		2335.58	0.03348354		2865.61	0.00629287		3395.6	0.01123522		3925.6	-0.00081679
215.79	0.12830438		745.79	0.02093701		1275.78	0.02314997		1805.79	-0.00550179		2335.78	0.03395718		2865.81	0.00660865		3395.8	0.01063701		3925.8	-0.00039284
215.99	0.1286739		745.99	0.02033415		1275.98	0.02277431		1805.99	-0.00549433		2335.98	0.0343178		2866.01	0.00637406		3396	0.01088501		3926	-0.00001621
216.19	0.12966127		746.19	0.02039983		1276.18	0.0228128		1806.19	-0.00554706		2336.18	0.03581904		2866.21	0.00668969		3396.2	0.0105921		3926.2	0.00070448
216.39	0.12996368		746.39	0.02029642		1276.38	0.02377624		1806.39	-0.00551981		2336.38	0.03499178		2866.41	0.00650201		3396.4	0.01098484		3926.4	0.00098562
216.59	0.1310523		746.59	0.02104398		1276.58	0.02504628		1806.59	-0.00495068		2336.58	0.03449609		2866.61	0.00624546		3396.6	0.0118817		3926.6	0.00108637
216.79	0.13174044		746.79	0.02052886		1276.78	0.02578118		1806.79	-0.00502073		2336.78	0.03394674		2866.81	0.00645152		3396.8	0.01187088		3926.8	0.00225861
216.99	0.13335007		746.99	0.02077095		1276.98	0.02589224		1806.99	-0.00489442		2336.98	0.03388027		2867.01	0.00628452		3397	0.01235767		3927	0.00295413
217.19	0.13454643		747.19	0.02076325		1277.18	0.02544065		1807.19	-0.00573405		2337.18	0.03414242		2867.21	0.007569		3397.2	0.01327441		3927.2	0.00231867
217.39	0.13578499		747.39	0.02181473		1277.38	0.02508122		1807.39	-0.00602624		2337.38	0.03426798		2867.41	0.00775503		3397.4	0.01306766		3927.4	0.00180794
217.59	0.13633693		747.59	0.02241704		1277.58	0.0256155		1807.59	-0.00606055		2337.58	0.03390727		2867.61	0.00745135		3397.6	0.01265038		3927.6	0.00177616
217.79	0.13701004		747.79	0.02396456		1277.78	0.02618487		1807.79	-0.00618733		2337.78	0.03318337		2867.81	0.00784839		3397.8	0.01179686		3927.8	0.00253307
217.99	0.13812913		747.99	0.02423505		1277.98	0.02650415		1807.99	-0.00561402		2337.98	0.03319595		2868.01	0.00800185		3398	0.01157671		3928	0.00279652
218.19	0.14000305		748.19	0.0248397		1278.18	0.02670995		1808.19	-0.00568848		2338.18	0.03308522		2868.21	0.00695582		3398.2	0.01118132		3928.2	0.00211953
218.39	0.14162442		748.39	0.02600702		1278.38	0.02693606		1808.39	-0.00485711		2338.38	0.03248045		2868.41	0.00680618		3398.4	0.01127844		3928.4	0.00243526
218.59	0.14384021		748.59	0.02545346		1278.58	0.02680089		1808.59	-0.00405597		2338.58	0.03294362		2868.61	0.00604654		3398.6	0.01093948		3928.6	0.00218038
218.79	0.14562106		748.79	0.02465278		1278.78	0.02753042		1808.79	-0.00367938		2338.78	0.03238256		2868.81	0.00624094		3398.8	0.01052931		3928.8	0.00128361
218.99	0.14674038		748.99	0.02456668		1278.98	0.02852336		1808.99	-0.0031615		2338.98	0.03343473		2869.01	0.0064348		3399	0.01018297		3929	0.00118579
219.19	0.14721032		749.19	0.02430956		1279.18	0.02922867		1809.19	-0.00308978		2339.18	0.03370011		2869.21	0.00597292		3399.2	0.00961788		3929.2	0.00126995
219.39	0.14841123		749.39	0.02394315		1279.38	0.02968217		1809.39	-0.00329617		2339.38	0.0345777		2869.41	0.00651481		3399.4	0.00834332		3929.4	0.0017387
219.59	0.14926797		749.59	0.02372931		1279.58	0.02946408		1809.59	-0.00325022		2339.58	0.03448765		2869.61	0.00626494		3399.6	0.00826288		3929.6	0.00172498
219.79	0.14963697		749.79	0.02310754		1279.78	0.0294184		1809.79	-0.00227085		2339.78	0.03499444		2869.81	0.00615967		3399.8	0.00855849		3929.8	0.00268792
219.99	0.15065866		749.99	0.02305572		1279.98	0.0284342		1809.99	-0.00251172		2339.98	0.0356122		2870.01	0.00651098		3400	0.00872992		3930	0.00239597
220.19	0.15139259		750.19	0.02313358		1280.18	0.02874516		1810.19	-0.00295022		2340.18	0.03527068		2870.21	0.00574584		3400.2	0.00977913		3930.2	0.00280233
220.39	0.15216927		750.39	0.02317798		1280.38	0.02913179		1810.39	-0.00304482		2340.38	0.03411006		2870.41	0.00567051		3400.4	0.01098543		3930.4	0.0024428
220.59	0.15261255		750.59	0.0228758		1280.58	0.02850555		1810.59	-0.00254699		2340.58	0.03336769		2870.61	0.00565868		3400.6	0.01119765		3930.6	0.0022649
220.79	0.15302139		750.79	0.0225669		1280.78	0.02845434		1810.79	-0.00270449		2340.78	0.03246937		2870.81	0.00603883		3400.8	0.01196846		3930.8	0.00257375
220.99	0.15354485		750.99	0.02267963		1280.98	0.02843883		1810.99	-0.00244685		2340.98	0.03209694		2871.01	0.00619775		3401	0.01208247		3931	0.00210721
221.19	0.15453226		751.19	0.02254177		1281.18	0.02851647		1811.19	-0.00233587		2341.18	0.03097459		2871.21	0.00664833		3401.2	0.01231803		3931.2	0.00084536
221.39	0.15540762		751.39	0.02240535		1281.38	0.0297014		1811.39	-0.00256502		2341.38	0.03073435		2871.41	0.00607997		3401.4	0.01272631		3931.4	0.00076018
221.59	0.1557609		751.59	0.02175178		1281.58	0.03019821		1811.59	-0.00287889		2341.58	0.03036398		2871.61	0.00560786		3401.6	0.0126978		3931.6	0.00097323
221.79	0.15707602		751.79	0.02237725		1281.78	0.03122827		1811.79	-0.00263027		2341.78	0.02986856		2871.81	0.00556193		3401.8	0.01293959		3931.8	0.00149319
221.99	0.15883974		751.99	0.02175202		1281.98	0.03175336		1811.99	-0.00218073		2341.98	0.03052487		2872.01	0.00481566		3402	0.01284412		3932	0.0012199
222.19	0.16037964		752.19	0.02174889		1282.18	0.03281997		1812.19	-0.00206952		2342.18	0.03065479		2872.21	0.00506463		3402.2	0.01279277		3932.2	0.00113296
222.39	0.16112386		752.39	0.02172974		1282.38	0.03374702		1812.39	-0.00086613		2342.38	0.03104473		2872.41	0.00560204		3402.4	0.01244817		3932.4	0.00070383
222.59	0.163121		752.59	0.02147372		1282.58	0.03437324		1812.59	-0.00063183		2342.58	0.03165859		2872.61	0.00617388		3402.6	0.0123836		3932.6	0.00091655
222.79	0.16400006		752.79	0.020967		1282.78	0.03479333		1812.79	-0.00032813		2342.78	0.0323217		2872.81	0.00649618		3402.8	0.01158694		3932.8	0.00152737
222.99	0.16551809		752.99	0.02189829		1282.98	0.03504056		1812.99	-0.0008947		2342.98	0.03372829		2873.01	0.00686857		3403	0.01125903		3933	0.00191874
223.19	0.16693428		753.19	0.02245821		1283.18	0.03473403		1813.19	-0.00121142		2343.18	0.03390228		2873.21	0.00679116		3403.2	0.01040111		3933.2	0.00216002
223.39	0.16893179		753.39	0.02275866		1283.38	0.03527212		1813.39	-0.00081307		2343.38	0.03530527		2873.41	0.00729034		3403.4	0.01014913		3933.4	0.00174985
223.59	0.1702688		753.59	0.02357548		1283.58	0.0347527		1813.59	-0.00087687		2343.58	0.03630952		2873.61	0.00738416		3403.6	0.01105301		3933.6	0.00171019
223.79	0.17145703		753.79	0.02448772		1283.78	0.03420447		1813.79	-0.0010667		2343.78	0.03658046		2873.81	0.00745879		3403.8	0.01152047		3933.8	0.00210664
223.99	0.17282674		753.99	0.02592587		1283.98	0.03386838		1813.99	-0.00248023		2343.98	0.03644697		2874.01	0.00779138		3404	0.01176812		3934	0.00179807
224.19	0.17299394		754.19	0.02609923		1284.18	0.0339452		1814.19	-0.00307925		2344.18	0.03651447		2874.21	0.00768337		3404.2	0.01296164		3934.2	0.00133464
224.39	0.17338444		754.39	0.02749194		1284.38	0.03333965		1814.39	-0.00255602		2344.38	0.03600399		2874.41	0.00875835		3404.4	0.01372398		3934.4	0.001073
224.59	0.17397494		754.59	0.02788014		1284.58	0.03256433		1814.59	-0.00285965		2344.58	0.03462108		2874.61	0.00947183		3404.6	0.01347858		3934.6	0.00116501
224.79	0.17521194		754.79	0.02901465		1284.78	0.03280274		1814.79	-0.00298304		2344.78	0.0340992		2874.81	0.0097383		3404.8	0.01382469		3934.8	0.00162101
224.99	0.17554463		754.99	0.02899396		1284.98	0.0336586		1814.99	-0.00302053		2344.98	0.03311262		2875.01	0.00945194		3405	0.01388562		3935	0.00195634
225.19	0.17619551		755.19	0.02909277		1285.18	0.03366207		1815.19	-0.00380977		2345.18	0.0329781		2875.21	0.00808094		3405.2	0.01520351		3935.2	0.00108622
225.39	0.17643746		755.39	0.02905093		1285.38	0.0344888		1815.39	-0.00466295		2345.38	0.03239803		2875.41	0.00842586		3405.4	0.01595038		3935.4	0.00164182
225.59	0.17713374		755.59	0.02943318		1285.58	0.03487171		1815.59	-0.00481424		2345.58	0.0321928		2875.61	0.00791517		3405.6	0.01559995		3935.6	0.00184248
225.79	0.17750909		755.79	0.0301454		1285.78	0.03622622		1815.79	-0.00519939		2345.78	0.03258504		2875.81	0.00805016		3405.8	0.01591583		3935.8	0.00235354
225.99	0.17812252		755.99	0.02933639		1285.98	0.03617207		1815.99	-0.00590847		2345.98	0.03391222		2876.01	0.00806558		3406	0.01530187		3936	0.00231196
226.19	0.1790075		756.19	0.02894065		1286.18	0.03693095		1816.19	-0.00587147		2346.18	0.03425173		2876.21	0.00796988		3406.2	0.01479828		3936.2	0.00261878
226.39	0.17951809		756.39	0.02813953		1286.38	0.03662047		1816.39	-0.00519319		2346.38	0.03444597		2876.41	0.00667554		3406.4	0.014069		3936.4	0.00320794
226.59	0.18079154		756.59	0.0278361		1286.58	0.03669494		1816.59	-0.0050097		2346.58	0.03477814		2876.61	0.00612561		3406.6	0.01393265		3936.6	0.00367567
226.79	0.1820378		756.79	0.02708114		1286.78	0.03709481		1816.79	-0.00415387		2346.78	0.03576436		2876.81	0.00532858		3406.8	0.0133568		3936.8	0.00315867
226.99	0.18315624		756.99	0.02877061		1286.98	0.03782237		1816.99	-0.00455795		2346.98	0.03603575		2877.01	0.00482276		3407	0.01320308		3937	0.00220149
227.19	0.18447385		757.19	0.02836619		1287.18	0.03854016		1817.19	-0.00465923		2347.18	0.03621469		2877.21	0.00501218		3407.2	0.01228107		3937.2	0.00179453
227.39	0.18585333		757.39	0.02882532		1287.38	0.03919953		1817.39	-0.00435481		2347.38	0.03623252		2877.41	0.00580807		3407.4	0.01183789		3937.4	0.00147594
227.59	0.18668579		757.59	0.02878318		1287.58	0.03937135		1817.59	-0.00429055		2347.58	0.03635036		2877.61	0.0063858		3407.6	0.01210365		3937.6	0.00117982
227.79	0.18718926		757.79	0.02914312		1287.78	0.0401804		1817.79	-0.00413613		2347.78	0.03639712		2877.81	0.00657222		3407.8	0.01195569		3937.8	0.00058927
227.99	0.1889389		757.99	0.02942529		1287.98	0.04096254		1817.99	-0.00476841		2347.98	0.03725259		2878.01	0.00751878		3408	0.01271006		3938	-0.00046702
228.19	0.1894075		758.19	0.02977826		1288.18	0.04073595		1818.19	-0.00398397		2348.18	0.03731536		2878.21	0.00799688		3408.2	0.0131079		3938.2	-0.00080878
228.39	0.19100106		758.39	0.03067734		1288.38	0.04010613		1818.39	-0.00409564		2348.38	0.03675235		2878.41	0.00963131		3408.4	0.01307687		3938.4	-0.00087656
228.59	0.19238344		758.59	0.03150447		1288.58	0.04014718		1818.59	-0.00508062		2348.58	0.03708075		2878.61	0.0098623		3408.6	0.01326724		3938.6	-0.00053432
228.79	0.19378193		758.79	0.03131031		1288.78	0.0404148		1818.79	-0.00427981		2348.78	0.03824689		2878.81	0.00950181		3408.8	0.01347221		3938.8	-0.00033035
228.99	0.19368331		758.99	0.03093507		1288.98	0.04084983		1818.99	-0.0045088		2348.98	0.03797473		2879.01	0.00965579		3409	0.01334071		3939	-0.00072883
229.19	0.19391898		759.19	0.0310732		1289.18	0.04078698		1819.19	-0.00550402		2349.18	0.03850169		2879.21	0.00898306		3409.2	0.01400394		3939.2	-0.00075291
229.39	0.19431613		759.39	0.0309809		1289.38	0.04147594		1819.39	-0.00575988		2349.38	0.03861567		2879.41	0.00989575		3409.4	0.01359112		3939.4	-0.00012197
229.59	0.19547055		759.59	0.03106434		1289.58	0.04215336		1819.59	-0.00589345		2349.58	0.03939234		2879.61	0.00928117		3409.6	0.0131541		3939.6	-0.00020185
229.79	0.19647773		759.79	0.0310928		1289.78	0.04176681		1819.79	-0.00474881		2349.78	0.03930491		2879.81	0.00851972		3409.8	0.01269931		3939.8	0.00053052
229.99	0.19738798		759.99	0.02999926		1289.98	0.04087652		1819.99	-0.00367642		2349.98	0.03891194		2880.01	0.00827722		3410	0.01237975		3940	0.00116962
230.19	0.19807972		760.19	0.02996974		1290.18	0.04090865		1820.19	-0.00363663		2350.18	0.03821409		2880.21	0.00793938		3410.2	0.01259213		3940.2	0.00147387
230.39	0.19859669		760.39	0.02982155		1290.38	0.04042278		1820.39	-0.00313579		2350.38	0.03758927		2880.41	0.00698882		3410.4	0.01260049		3940.4	0.00138098
230.59	0.19908933		760.59	0.02992965		1290.58	0.04106734		1820.59	-0.00280833		2350.58	0.03745539		2880.61	0.00754004		3410.6	0.01222532		3940.6	0.0005819
230.79	0.2003858		760.79	0.03051881		1290.78	0.04153762		1820.79	-0.00288045		2350.78	0.0373704		2880.81	0.00765328		3410.8	0.01260674		3940.8	0.0008772
230.99	0.2005278		760.99	0.0313312		1290.98	0.04142001		1820.99	-0.00333073		2350.98	0.03629145		2881.01	0.0082367		3411	0.01225551		3941	0.00083744
231.19	0.20127963		761.19	0.03112629		1291.18	0.04093819		1821.19	-0.0032851		2351.18	0.03555862		2881.21	0.00941443		3411.2	0.0123801		3941.2	0.00106011
231.39	0.2019336		761.39	0.03127499		1291.38	0.04077516		1821.39	-0.00305625		2351.38	0.03511224		2881.41	0.00985115		3411.4	0.01350883		3941.4	0.00113271
231.59	0.20285214		761.59	0.03090111		1291.58	0.04049654		1821.59	-0.00257668		2351.58	0.03582712		2881.61	0.0093684		3411.6	0.01412681		3941.6	0.00102223
231.79	0.20349296		761.79	0.030706		1291.78	0.04002859		1821.79	-0.00308916		2351.78	0.03625768		2881.81	0.00921014		3411.8	0.01482506		3941.8	0.00043734
231.99	0.20460849		761.99	0.03076756		1291.98	0.03941704		1821.99	-0.00269635		2351.98	0.0364688		2882.01	0.00989703		3412	0.01564764		3942	0.00010918
232.19	0.20442212		762.19	0.03183781		1292.18	0.03886828		1822.19	-0.0032619		2352.18	0.03639157		2882.21	0.01039523		3412.2	0.01545857		3942.2	0.00037417
232.39	0.20502517		762.39	0.03180098		1292.38	0.03785518		1822.39	-0.00440627		2352.38	0.03732816		2882.41	0.01108654		3412.4	0.01653635		3942.4	0.00087334
232.59	0.20505603		762.59	0.03151166		1292.58	0.03775135		1822.59	-0.00453356		2352.58	0.03819307		2882.61	0.00984349		3412.6	0.01730918		3942.6	0.00148047
232.79	0.20551148		762.79	0.03024143		1292.78	0.03796417		1822.79	-0.00464551		2352.78	0.0385407		2882.81	0.01041423		3412.8	0.01742117		3942.8	0.00146653
232.99	0.20584593		762.99	0.03080734		1292.98	0.03873239		1822.99	-0.00528583		2352.98	0.03834477		2883.01	0.01070804		3413	0.01773852		3943	0.00164464
233.19	0.20649428		763.19	0.03139398		1293.18	0.03936595		1823.19	-0.00543232		2353.18	0.03948595		2883.21	0.00959291		3413.2	0.01907362		3943.2	0.00157146
233.39	0.20708647		763.39	0.03158124		1293.38	0.04034485		1823.39	-0.00498778		2353.38	0.03926354		2883.41	0.00942355		3413.4	0.0185551		3943.4	0.0015513
233.59	0.20857879		763.59	0.03194499		1293.58	0.04103337		1823.59	-0.0043757		2353.58	0.03883263		2883.61	0.00903925		3413.6	0.01889028		3943.6	0.00236099
233.79	0.20929288		763.79	0.03275963		1293.78	0.04106236		1823.79	-0.00322278		2353.78	0.0381799		2883.81	0.00813167		3413.8	0.01925244		3943.8	0.00212804
233.99	0.20927053		763.99	0.03346542		1293.98	0.04263131		1823.99	-0.00346068		2353.98	0.03759156		2884.01	0.00834409		3414	0.01929421		3944	0.0027244
234.19	0.21054149		764.19	0.03403255		1294.18	0.04427909		1824.19	-0.0040536		2354.18	0.03747005		2884.21	0.00895036		3414.2	0.01864247		3944.2	0.00197926
234.39	0.21180694		764.39	0.03439862		1294.38	0.04516465		1824.39	-0.00457075		2354.38	0.03775721		2884.41	0.00912167		3414.4	0.01804552		3944.4	0.00138323
234.59	0.21282048		764.59	0.03520376		1294.58	0.04650604		1824.59	-0.00414606		2354.58	0.0377235		2884.61	0.00988199		3414.6	0.01694501		3944.6	0.00102143
234.79	0.2135292		764.79	0.03596993		1294.78	0.04670708		1824.79	-0.00457821		2354.78	0.0381226		2884.81	0.00926419		3414.8	0.01645379		3944.8	0.00129028
234.99	0.21462633		764.99	0.0361449		1294.98	0.04754053		1824.99	-0.0044371		2354.98	0.03825084		2885.01	0.00961618		3415	0.01479906		3945	0.00098813
235.19	0.21542812		765.19	0.03565389		1295.18	0.04812515		1825.19	-0.005268		2355.18	0.0391283		2885.21	0.00967041		3415.2	0.01371368		3945.2	0.00066037
235.39	0.21625357		765.39	0.03500643		1295.38	0.04828636		1825.39	-0.00616736		2355.38	0.03866971		2885.41	0.00872222		3415.4	0.01296964		3945.4	0.0009437
235.59	0.21666048		765.59	0.0355707		1295.58	0.0482641		1825.59	-0.00633671		2355.58	0.0389476		2885.61	0.00907547		3415.6	0.01149952		3945.6	0.00112742
235.79	0.21701814		765.79	0.03591356		1295.78	0.04781962		1825.79	-0.00658462		2355.78	0.0387873		2885.81	0.00889228		3415.8	0.011478		3945.8	0.00013176
235.99	0.21755143		765.99	0.03655746		1295.98	0.04805784		1825.99	-0.00609845		2355.98	0.03923626		2886.01	0.00984778		3416	0.01123028		3946	0.00062698
236.19	0.21776492		766.19	0.03732465		1296.18	0.04793906		1826.19	-0.00695922		2356.18	0.03928184		2886.21	0.0101082		3416.2	0.01187624		3946.2	0.00102626
236.39	0.21841897		766.39	0.03628973		1296.38	0.04739297		1826.39	-0.00676601		2356.38	0.03972412		2886.41	0.01046972		3416.4	0.01301759		3946.4	0.00153807
236.59	0.21891459		766.59	0.03514226		1296.58	0.04700251		1826.59	-0.0056743		2356.58	0.03996584		2886.61	0.01042796		3416.6	0.01346162		3946.6	0.00129406
236.79	0.21941059		766.79	0.03553692		1296.78	0.04689265		1826.79	-0.00486144		2356.78	0.03938823		2886.81	0.01172585		3416.8	0.01432946		3946.8	0.00174673
236.99	0.22063219		766.99	0.03625113		1296.98	0.04677081		1826.99	-0.00395515		2356.98	0.03933247		2887.01	0.01162269		3417	0.01608583		3947	0.00203546
237.19	0.22078017		767.19	0.03625469		1297.18	0.04725286		1827.19	-0.00352126		2357.18	0.03919445		2887.21	0.01083084		3417.2	0.01733675		3947.2	0.00184928
237.39	0.2208591		767.39	0.03530523		1297.38	0.04709144		1827.39	-0.00353424		2357.38	0.03838241		2887.41	0.01072699		3417.4	0.0175784		3947.4	0.00280526
237.59	0.2212509		767.59	0.03593768		1297.58	0.04699394		1827.59	-0.0037155		2357.58	0.03826905		2887.61	0.01124843		3417.6	0.01910217		3947.6	0.00380249
237.79	0.22177765		767.79	0.03561949		1297.78	0.04671482		1827.79	-0.00309104		2357.78	0.03752147		2887.81	0.01071228		3417.8	0.01967887		3947.8	0.00330252
237.99	0.22303766		767.99	0.03536844		1297.98	0.04709158		1827.99	-0.00368011		2357.98	0.03743951		2888.01	0.01142402		3418	0.01975025		3948	0.00399065
238.19	0.22508191		768.19	0.03503791		1298.18	0.04666522		1828.19	-0.00372174		2358.18	0.03794749		2888.21	0.01214073		3418.2	0.0199884		3948.2	0.00426005
238.39	0.22644457		768.39	0.03533765		1298.38	0.04643685		1828.39	-0.00393483		2358.38	0.03868164		2888.41	0.01236152		3418.4	0.02071242		3948.4	0.00517867
238.59	0.22697061		768.59	0.03546043		1298.58	0.04640109		1828.59	-0.00344066		2358.58	0.03874343		2888.61	0.01250959		3418.6	0.01999959		3948.6	0.00513852
238.79	0.22722547		768.79	0.03604746		1298.78	0.04606728		1828.79	-0.00387557		2358.78	0.03932519		2888.81	0.01235231		3418.8	0.01946266		3948.8	0.00490496
238.99	0.2278121		768.99	0.03538333		1298.98	0.04670148		1828.99	-0.00393743		2358.98	0.03976674		2889.01	0.01211538		3419	0.01867313		3949	0.00546288
239.19	0.22756175		769.19	0.0351164		1299.18	0.04655285		1829.19	-0.0052845		2359.18	0.04079348		2889.21	0.01138751		3419.2	0.01784728		3949.2	0.00502694
239.39	0.2279504		769.39	0.0356923		1299.38	0.04676242		1829.39	-0.00476536		2359.38	0.04048599		2889.41	0.01158417		3419.4	0.01780895		3949.4	0.00513321
239.59	0.22809461		769.59	0.03644565		1299.58	0.04790074		1829.59	-0.00495525		2359.58	0.0415245		2889.61	0.01207955		3419.6	0.0177166		3949.6	0.00514357
239.79	0.22844519		769.79	0.03733365		1299.78	0.04860232		1829.79	-0.00481061		2359.78	0.04145018		2889.81	0.01152525		3419.8	0.01809099		3949.8	0.00464898
239.99	0.22862383		769.99	0.03811759		1299.98	0.04912926		1829.99	-0.00427118		2359.98	0.04205783		2890.01	0.01170529		3420	0.01798205		3950	0.00539455
240.19	0.22915808		770.19	0.03938944		1300.18	0.0495124		1830.19	-0.0034819		2360.18	0.04205651		2890.21	0.01159834		3420.2	0.01840881		3950.2	0.00535449
240.39	0.23002857		770.39	0.03927105		1300.38	0.04978462		1830.39	-0.00270425		2360.38	0.04270257		2890.41	0.01136084		3420.4	0.01821243		3950.4	0.00524637
240.59	0.23045819		770.59	0.03898712		1300.58	0.04965546		1830.59	-0.00184707		2360.58	0.0425359		2890.61	0.01134733		3420.6	0.01769881		3950.6	0.00482739
240.79	0.23066598		770.79	0.03960042		1300.78	0.05036356		1830.79	-0.00222824		2360.78	0.0415652		2890.81	0.01120459		3420.8	0.01784455		3950.8	0.00406661
240.99	0.2311216		770.99	0.03995782		1300.98	0.05124385		1830.99	-0.00252998		2360.98	0.04131047		2891.01	0.01041301		3421	0.01763893		3951	0.00330096
241.19	0.2311637		771.19	0.04004159		1301.18	0.05222701		1831.19	-0.00199857		2361.18	0.04091087		2891.21	0.00923476		3421.2	0.01695138		3951.2	0.00291812
241.39	0.23230683		771.39	0.03942266		1301.38	0.05294373		1831.39	-0.00174679		2361.38	0.04088046		2891.41	0.00872808		3421.4	0.01649568		3951.4	0.0027737
241.59	0.23336169		771.59	0.04002675		1301.58	0.05305264		1831.59	-0.00172215		2361.58	0.04007124		2891.61	0.00876887		3421.6	0.01681783		3951.6	0.00296605
241.79	0.23413289		771.79	0.03907065		1301.78	0.05292181		1831.79	-0.00152375		2361.78	0.03944496		2891.81	0.00789032		3421.8	0.01655949		3951.8	0.0022562
241.99	0.23567872		771.99	0.03941515		1301.98	0.0530608		1831.99	-0.00260211		2361.98	0.04028051		2892.01	0.00847604		3422	0.01651712		3952	0.00227869
242.19	0.23684725		772.19	0.03973733		1302.18	0.05280803		1832.19	-0.00267137		2362.18	0.03995182		2892.21	0.00890004		3422.2	0.01586218		3952.2	0.0025195
242.39	0.23730623		772.39	0.03924947		1302.38	0.05294096		1832.39	-0.00291477		2362.38	0.03968456		2892.41	0.0092514		3422.4	0.01556979		3952.4	0.00277999
242.59	0.23743306		772.59	0.03928557		1302.58	0.0531168		1832.59	-0.00317885		2362.58	0.04030326		2892.61	0.00954857		3422.6	0.01461958		3952.6	0.00148006
242.79	0.23817654		772.79	0.03964788		1302.78	0.05283179		1832.79	-0.00267262		2362.78	0.04129014		2892.81	0.00970616		3422.8	0.01473386		3952.8	0.0011219
242.99	0.23891378		772.99	0.03932039		1302.98	0.05291554		1832.99	-0.00335512		2362.98	0.04265072		2893.01	0.01021492		3423	0.01453403		3953	0.00140807
243.19	0.2396449		773.19	0.03993992		1303.18	0.05285096		1833.19	-0.00397681		2363.18	0.04332276		2893.21	0.01146563		3423.2	0.01437421		3953.2	0.00127535
243.39	0.24044229		773.39	0.04016719		1303.38	0.05313648		1833.39	-0.00406067		2363.38	0.04401357		2893.41	0.01325494		3423.4	0.01393155		3953.4	0.00183622
243.59	0.24149151		773.59	0.04096767		1303.58	0.0528414		1833.59	-0.00515833		2363.58	0.04419547		2893.61	0.01369041		3423.6	0.01406043		3953.6	0.0021726
243.79	0.2419232		773.79	0.04226657		1303.78	0.05195524		1833.79	-0.0047671		2363.78	0.04414443		2893.81	0.01356435		3423.8	0.0135502		3953.8	0.00175417
243.99	0.24271876		773.99	0.04348676		1303.98	0.05180602		1833.99	-0.00443162		2363.98	0.04479048		2894.01	0.01353758		3424	0.01332525		3954	0.00249673
244.19	0.24367859		774.19	0.04500985		1304.18	0.05167997		1834.19	-0.00424304		2364.18	0.04563764		2894.21	0.01380454		3424.2	0.01397304		3954.2	0.00209508
244.39	0.24450456		774.39	0.04509447		1304.38	0.0518531		1834.39	-0.00436901		2364.38	0.04617621		2894.41	0.01433212		3424.4	0.01409494		3954.4	0.00154933
244.59	0.24515285		774.59	0.04451011		1304.58	0.0519911		1834.59	-0.00450768		2364.58	0.04540197		2894.61	0.01482841		3424.6	0.01447673		3954.6	0.00124748
244.79	0.24443033		774.79	0.04448478		1304.78	0.05182458		1834.79	-0.0050493		2364.78	0.04444034		2894.81	0.01466307		3424.8	0.0156571		3954.8	0.00057941
244.99	0.24587903		774.99	0.04438634		1304.98	0.05315212		1834.99	-0.00452682		2364.98	0.04377354		2895.01	0.01416125		3425	0.01550317		3955	0.00095918
245.19	0.24705084		775.19	0.04385963		1305.18	0.05354569		1835.19	-0.00353136		2365.18	0.04367024		2895.21	0.01331471		3425.2	0.01613999		3955.2	0.00048283
245.39	0.24782596		775.39	0.04285601		1305.38	0.05441234		1835.39	-0.00361519		2365.38	0.04307901		2895.41	0.01259119		3425.4	0.01657285		3955.4	0.00075334
245.59	0.24799153		775.59	0.04253611		1305.58	0.05384485		1835.59	-0.00428923		2365.58	0.04249135		2895.61	0.01180162		3425.6	0.01719201		3955.6	0.00005924
245.79	0.24850233		775.79	0.04201575		1305.78	0.05387155		1835.79	-0.00426107		2365.78	0.04248011		2895.81	0.01110266		3425.8	0.01695973		3955.8	0.00014934
245.99	0.24852656		775.99	0.04195132		1305.98	0.05411606		1835.99	-0.00420449		2365.98	0.04219315		2896.01	0.01123407		3426	0.01705074		3956	0.0008724
246.19	0.24857836		776.19	0.04114577		1306.18	0.05476359		1836.19	-0.00427081		2366.18	0.04143746		2896.21	0.01124563		3426.2	0.01694838		3956.2	0.00058937
246.39	0.24800334		776.39	0.04081776		1306.38	0.05531685		1836.39	-0.0039968		2366.38	0.04168272		2896.41	0.010679		3426.4	0.01731909		3956.4	0.00071972
246.59	0.24816845		776.59	0.04064035		1306.58	0.05598686		1836.59	-0.00356308		2366.58	0.04289367		2896.61	0.01058739		3426.6	0.01769389		3956.6	-0.00061817
246.79	0.24849565		776.79	0.04074096		1306.78	0.05582272		1836.79	-0.00322467		2366.78	0.0424719		2896.81	0.01023705		3426.8	0.01853779		3956.8	-0.00025096
246.99	0.24813094		776.99	0.04095941		1306.98	0.05570988		1836.99	-0.0047434		2366.98	0.04276265		2897.01	0.01042881		3427	0.018472		3957	0.00077691
247.19	0.2487265		777.19	0.04163314		1307.18	0.05490391		1837.19	-0.00480273		2367.18	0.04280163		2897.21	0.01097772		3427.2	0.0182414		3957.2	0.00148341
247.39	0.24938766		777.39	0.04176756		1307.38	0.05378225		1837.39	-0.00464242		2367.38	0.04251836		2897.41	0.01068588		3427.4	0.01785604		3957.4	0.00110307
247.59	0.24994858		777.59	0.04275851		1307.58	0.05301106		1837.59	-0.00432708		2367.58	0.04270416		2897.61	0.01024232		3427.6	0.01793941		3957.6	0.00024989
247.79	0.25033502		777.79	0.04331345		1307.78	0.0534679		1837.79	-0.00422246		2367.78	0.04369117		2897.81	0.00962021		3427.8	0.01715478		3957.8	-0.00060975
247.99	0.25059307		777.99	0.04345092		1307.98	0.05439515		1837.99	-0.00427728		2367.98	0.0448533		2898.01	0.01034387		3428	0.01804231		3958	-0.0001978
248.19	0.25211173		778.19	0.04439637		1308.18	0.05446299		1838.19	-0.0047665		2368.18	0.04621342		2898.21	0.01054422		3428.2	0.01804449		3958.2	-0.00062644
248.39	0.25362404		778.39	0.04410039		1308.38	0.05522628		1838.39	-0.0040857		2368.38	0.04644334		2898.41	0.01111378		3428.4	0.01833625		3958.4	0.00005147
248.59	0.25489055		778.59	0.04339773		1308.58	0.05518272		1838.59	-0.00495455		2368.58	0.04552358		2898.61	0.01153739		3428.6	0.01877771		3958.6	0.00032526
248.79	0.25558784		778.79	0.04321898		1308.78	0.05483019		1838.79	-0.00563299		2368.78	0.04439893		2898.81	0.01121402		3428.8	0.01871184		3958.8	-0.00088968
248.99	0.2572486		778.99	0.04294274		1308.98	0.05568411		1838.99	-0.00567853		2368.98	0.04425593		2899.01	0.01030452		3429	0.01764171		3959	-0.00079514
249.19	0.25727924		779.19	0.04251003		1309.18	0.05517689		1839.19	-0.0055054		2369.18	0.04382569		2899.21	0.01077145		3429.2	0.01717789		3959.2	-0.00187335
249.39	0.25794475		779.39	0.04226665		1309.38	0.0553344		1839.39	-0.00563216		2369.38	0.04299233		2899.41	0.01066129		3429.4	0.01634558		3959.4	-0.00108259
249.59	0.25839457		779.59	0.04187386		1309.58	0.0558377		1839.59	-0.00566503		2369.58	0.04295546		2899.61	0.01061271		3429.6	0.01594468		3959.6	-0.0018972
249.79	0.25800814		779.79	0.04235263		1309.78	0.05587505		1839.79	-0.00486847		2369.78	0.04191022		2899.81	0.01106726		3429.8	0.01498308		3959.8	-0.00041172
249.99	0.25771204		779.99	0.04253678		1309.98	0.05678405		1839.99	-0.00416032		2369.98	0.04191471		2900.01	0.01126125		3430	0.01447876		3960	-0.00029281
250.19	0.25857882		780.19	0.04227146		1310.18	0.0577091		1840.19	-0.00526781		2370.18	0.04229634		2900.21	0.01194455		3430.2	0.0148042		3960.2	-0.00074265
250.39	0.25860095		780.39	0.0425271		1310.38	0.05822758		1840.39	-0.00453223		2370.38	0.04121233		2900.41	0.0124247		3430.4	0.01420483		3960.4	0.00014959
250.59	0.25908939		780.59	0.04168313		1310.58	0.05868788		1840.59	-0.00470796		2370.58	0.04143279		2900.61	0.01212708		3430.6	0.01474967		3960.6	0.00025731
250.79	0.25941819		780.79	0.04205373		1310.78	0.05856718		1840.79	-0.00484516		2370.78	0.04118236		2900.81	0.01222615		3430.8	0.015087		3960.8	0.00245176
250.99	0.25936011		780.99	0.04174234		1310.98	0.05813194		1840.99	-0.00504503		2370.98	0.04153268		2901.01	0.01235887		3431	0.0144248		3961	0.00250125
251.19	0.25984154		781.19	0.04279343		1311.18	0.05769335		1841.19	-0.00415662		2371.18	0.04188148		2901.21	0.01305663		3431.2	0.01342783		3961.2	0.0022859
251.39	0.26030986		781.39	0.0431925		1311.38	0.05777624		1841.39	-0.00391707		2371.38	0.04246629		2901.41	0.0128206		3431.4	0.01408017		3961.4	0.00112091
251.59	0.25993184		781.59	0.04247358		1311.58	0.05812819		1841.59	-0.00395013		2371.58	0.04429238		2901.61	0.01333764		3431.6	0.01350596		3961.6	0.00097409
251.79	0.26083485		781.79	0.04300688		1311.78	0.05839138		1841.79	-0.00373073		2371.78	0.04471732		2901.81	0.01371771		3431.8	0.01358862		3961.8	0.00146935
251.99	0.26136374		781.99	0.04330141		1311.98	0.05810008		1841.99	-0.0034388		2371.98	0.04530423		2902.01	0.01374054		3432	0.01465912		3962	0.00150465
252.19	0.26277021		782.19	0.04430737		1312.18	0.05862295		1842.19	-0.00320975		2372.18	0.04585177		2902.21	0.0129614		3432.2	0.01460917		3962.2	0.00211346
252.39	0.26350555		782.39	0.04446143		1312.38	0.05869884		1842.39	-0.00296735		2372.38	0.04511096		2902.41	0.01328813		3432.4	0.01571218		3962.4	0.00198418
252.59	0.26404016		782.59	0.04549941		1312.58	0.05830907		1842.59	-0.00389075		2372.58	0.04392291		2902.61	0.01378721		3432.6	0.01639235		3962.6	0.00129682
252.79	0.26378291		782.79	0.04649345		1312.78	0.05800836		1842.79	-0.00334348		2372.78	0.04353813		2902.81	0.01325791		3432.8	0.01724546		3962.8	0.00078661
252.99	0.26356616		782.99	0.04713769		1312.98	0.05818351		1842.99	-0.00307277		2372.98	0.04387061		2903.01	0.01296193		3433	0.01792326		3963	0.00066593
253.19	0.26424865		783.19	0.04678206		1313.18	0.05860007		1843.19	-0.00287571		2373.18	0.04271948		2903.21	0.01357309		3433.2	0.01820847		3963.2	0.00012034
253.39	0.26444991		783.39	0.04699944		1313.38	0.05873487		1843.39	-0.00310018		2373.38	0.04239292		2903.41	0.0124781		3433.4	0.01832028		3963.4	0.00082894
253.59	0.26374673		783.59	0.04751245		1313.58	0.05968393		1843.59	-0.00311859		2373.58	0.04266232		2903.61	0.01211264		3433.6	0.01865076		3963.6	0.00108395
253.79	0.26294		783.79	0.04870476		1313.78	0.05967426		1843.79	-0.00280478		2373.78	0.04263705		2903.81	0.01235571		3433.8	0.0186333		3963.8	0.00155817
253.99	0.26401777		783.99	0.04853602		1313.98	0.06113456		1843.99	-0.00352251		2373.98	0.04326071		2904.01	0.01300018		3434	0.01879119		3964	0.00165861
254.19	0.2652701		784.19	0.04786945		1314.18	0.06137478		1844.19	-0.00491691		2374.18	0.04264986		2904.21	0.01355195		3434.2	0.01959149		3964.2	0.00182814
254.39	0.26557602		784.39	0.0477826		1314.38	0.06247617		1844.39	-0.00515351		2374.38	0.04156076		2904.41	0.01347563		3434.4	0.01882037		3964.4	0.00217474
254.59	0.26665723		784.59	0.04706773		1314.58	0.06344958		1844.59	-0.00563851		2374.58	0.04214497		2904.61	0.01291933		3434.6	0.019635		3964.6	0.00250619
254.79	0.26694659		784.79	0.04747557		1314.78	0.06374544		1844.79	-0.00611552		2374.78	0.04224999		2904.81	0.01298517		3434.8	0.01891716		3964.8	0.00273149
254.99	0.2669575		784.99	0.04691894		1314.98	0.06359261		1844.99	-0.00592411		2374.98	0.04211336		2905.01	0.01311674		3435	0.01818525		3965	0.001688
255.19	0.26690667		785.19	0.04761052		1315.18	0.06338619		1845.19	-0.00566951		2375.18	0.04208788		2905.21	0.01298661		3435.2	0.01748979		3965.2	0.00193307
255.39	0.26747212		785.39	0.04693024		1315.38	0.06352573		1845.39	-0.00599272		2375.38	0.04273258		2905.41	0.01200384		3435.4	0.01762945		3965.4	0.00125598
255.59	0.26753321		785.59	0.04626754		1315.58	0.06315342		1845.59	-0.00628903		2375.58	0.04289893		2905.61	0.01148344		3435.6	0.01714667		3965.6	0.00195826
255.79	0.26790091		785.79	0.04700662		1315.78	0.06262411		1845.79	-0.00646479		2375.78	0.04198775		2905.81	0.01190805		3435.8	0.0172234		3965.8	0.00222474
255.99	0.26788847		785.99	0.04667219		1315.98	0.06237545		1845.99	-0.00678221		2375.98	0.04207955		2906.01	0.01195209		3436	0.01752189		3966	0.0011477
256.19	0.2677829		786.19	0.0466785		1316.18	0.06305171		1846.19	-0.00714194		2376.18	0.04190201		2906.21	0.01197753		3436.2	0.01715015		3966.2	0.0012485
256.39	0.26863555		786.39	0.04745402		1316.38	0.06196198		1846.39	-0.00756849		2376.38	0.04146343		2906.41	0.01262001		3436.4	0.0178487		3966.4	0.0005012
256.59	0.26854768		786.59	0.04793469		1316.58	0.06174104		1846.59	-0.00769094		2376.58	0.04169455		2906.61	0.01288201		3436.6	0.01884034		3966.6	-0.000341
256.79	0.26865807		786.79	0.04775097		1316.78	0.06186467		1846.79	-0.00797518		2376.78	0.04207098		2906.81	0.01231229		3436.8	0.01980226		3966.8	-0.00082082
256.99	0.26874071		786.99	0.0477766		1316.98	0.06145442		1846.99	-0.00796849		2376.98	0.04251547		2907.01	0.01178311		3437	0.01991266		3967	-0.00157222
257.19	0.26873836		787.19	0.04716593		1317.18	0.06287833		1847.19	-0.00821799		2377.18	0.0421422		2907.21	0.0117911		3437.2	0.01919825		3967.2	-0.00165806
257.39	0.26865163		787.39	0.04715092		1317.38	0.06214818		1847.39	-0.0078355		2377.38	0.04288541		2907.41	0.01158731		3437.4	0.01836873		3967.4	-0.00166869
257.59	0.26840699		787.59	0.04833628		1317.58	0.06296754		1847.59	-0.00714276		2377.58	0.04415851		2907.61	0.01222607		3437.6	0.01882273		3967.6	-0.00081712
257.79	0.26866788		787.79	0.04839629		1317.78	0.06402098		1847.79	-0.00708255		2377.78	0.04503708		2907.81	0.01265176		3437.8	0.01786262		3967.8	-0.00054588
257.99	0.2705868		787.99	0.04897581		1317.98	0.06525619		1847.99	-0.00723657		2377.98	0.04490128		2908.01	0.0130525		3438	0.01754765		3968	-0.00008816
258.19	0.27228849		788.19	0.04943253		1318.18	0.06573962		1848.19	-0.00745275		2378.18	0.04505443		2908.21	0.01270837		3438.2	0.01670823		3968.2	0.00006098
258.39	0.27277502		788.39	0.04957766		1318.38	0.06680985		1848.39	-0.00670413		2378.38	0.04509659		2908.41	0.0126567		3438.4	0.01645731		3968.4	0.00113349
258.59	0.27416888		788.59	0.04929592		1318.58	0.06662201		1848.59	-0.00552654		2378.58	0.0452831		2908.61	0.01319096		3438.6	0.01608192		3968.6	0.00186742
258.79	0.2752974		788.79	0.0494395		1318.78	0.06643638		1848.79	-0.00498087		2378.78	0.04618261		2908.81	0.01235488		3438.8	0.01583887		3968.8	0.00209307
258.99	0.2772139		788.99	0.04946033		1318.98	0.06564193		1848.99	-0.00280064		2378.98	0.04547889		2909.01	0.01294548		3439	0.01569958		3969	0.00284876
259.19	0.27823419		789.19	0.04936768		1319.18	0.06556643		1849.19	-0.00140173		2379.18	0.04506491		2909.21	0.01241655		3439.2	0.01563253		3969.2	0.00265882
259.39	0.27948144		789.39	0.04938641		1319.38	0.06495848		1849.39	-0.0018867		2379.38	0.04507812		2909.41	0.01248323		3439.4	0.01620825		3969.4	0.00261886
259.59	0.2801154		789.59	0.05027285		1319.58	0.06466397		1849.59	-0.00214956		2379.58	0.04449606		2909.61	0.01334918		3439.6	0.01682016		3969.6	0.00291085
259.79	0.28046866		789.79	0.05041762		1319.78	0.06390283		1849.79	-0.00205164		2379.78	0.04362788		2909.81	0.0143566		3439.8	0.01702765		3969.8	0.00206023
259.99	0.28119856		789.99	0.05071789		1319.98	0.06430175		1849.99	-0.00208745		2379.98	0.04325962		2910.01	0.01369861		3440	0.01768744		3970	0.00148835
260.19	0.28125465		790.19	0.05157799		1320.18	0.06530223		1850.19	-0.0020614		2380.18	0.04329699		2910.21	0.013846		3440.2	0.01845917		3970.2	0.00147813
260.39	0.28199574		790.39	0.052065		1320.38	0.06498991		1850.39	-0.00240213		2380.38	0.04388726		2910.41	0.01352345		3440.4	0.01956625		3970.4	0.00122574
260.59	0.28105502		790.59	0.05225993		1320.58	0.06574509		1850.59	-0.00370813		2380.58	0.04407879		2910.61	0.01302238		3440.6	0.01968676		3970.6	0.00061087
260.79	0.28111703		790.79	0.05266843		1320.78	0.06584619		1850.79	-0.00477576		2380.78	0.0438216		2910.81	0.01216626		3440.8	0.01976837		3970.8	0.00045055
260.99	0.28040016		790.99	0.05260154		1320.98	0.06593531		1850.99	-0.00540312		2380.98	0.04372296		2911.01	0.0121178		3441	0.01917739		3971	0.00009256
261.19	0.28053559		791.19	0.05205826		1321.18	0.06706322		1851.19	-0.00715287		2381.18	0.04400757		2911.21	0.01181039		3441.2	0.01834179		3971.2	0.00027406
261.39	0.28104063		791.39	0.05191231		1321.38	0.06727921		1851.39	-0.00755703		2381.38	0.04457892		2911.41	0.01111083		3441.4	0.01807987		3971.4	0.00059551
261.59	0.28043625		791.59	0.05334851		1321.58	0.06788596		1851.59	-0.00734776		2381.58	0.04509397		2911.61	0.01091448		3441.6	0.01795628		3971.6	0.00141515
261.79	0.28042296		791.79	0.0528336		1321.78	0.06832281		1851.79	-0.007573		2381.78	0.04528968		2911.81	0.01012862		3441.8	0.01639956		3971.8	0.0014324
261.99	0.28100723		791.99	0.05328553		1321.98	0.06861507		1851.99	-0.00834481		2381.98	0.04474686		2912.01	0.00998983		3442	0.01605068		3972	0.00103204
262.19	0.28070051		792.19	0.05231362		1322.18	0.06833334		1852.19	-0.00874258		2382.18	0.04500537		2912.21	0.01018624		3442.2	0.01561617		3972.2	0.00129329
262.39	0.281113		792.39	0.0520237		1322.38	0.06838788		1852.39	-0.00798816		2382.38	0.04414582		2912.41	0.01065837		3442.4	0.01538538		3972.4	0.00125068
262.59	0.28230278		792.59	0.05163527		1322.58	0.06745241		1852.59	-0.00744805		2382.58	0.04397702		2912.61	0.01067015		3442.6	0.01462242		3972.6	0.00044053
262.79	0.28364483		792.79	0.05235524		1322.78	0.0676798		1852.79	-0.00551062		2382.78	0.04393497		2912.81	0.00988932		3442.8	0.01530456		3972.8	0.00098207
262.99	0.28433113		792.99	0.05277359		1322.98	0.06669782		1852.99	-0.00462927		2382.98	0.04295225		2913.01	0.01113235		3443	0.01556768		3973	0.0008905
263.19	0.28440116		793.19	0.05238059		1323.18	0.06678395		1853.19	-0.00422192		2383.18	0.04280249		2913.21	0.01165107		3443.2	0.01557442		3973.2	0.00070202
263.39	0.28530909		793.39	0.0527431		1323.38	0.06688796		1853.39	-0.00471104		2383.38	0.0423773		2913.41	0.01207436		3443.4	0.01536168		3973.4	0.00079612
263.59	0.28618869		793.59	0.05387081		1323.58	0.06709635		1853.59	-0.00451794		2383.58	0.04222903		2913.61	0.01237676		3443.6	0.01638736		3973.6	0.00065536
263.79	0.28675443		793.79	0.05426777		1323.78	0.06691284		1853.79	-0.00438797		2383.78	0.04241581		2913.81	0.01247054		3443.8	0.0165961		3973.8	0.00032353
263.99	0.28740804		793.99	0.05429834		1323.98	0.06830106		1853.99	-0.00454857		2383.98	0.04229919		2914.01	0.01254094		3444	0.01693242		3974	0.00064064
264.19	0.2877775		794.19	0.05485916		1324.18	0.06876688		1854.19	-0.00411215		2384.18	0.04289839		2914.21	0.0131432		3444.2	0.01740352		3974.2	0.00041212
264.39	0.28775185		794.39	0.05482301		1324.38	0.06807581		1854.39	-0.00564279		2384.38	0.04308946		2914.41	0.01293682		3444.4	0.01718228		3974.4	0.00019669
264.59	0.28732102		794.59	0.05434814		1324.58	0.06838341		1854.59	-0.00700697		2384.58	0.04275335		2914.61	0.01193069		3444.6	0.01638319		3974.6	0.00042904
264.79	0.28786328		794.79	0.05389897		1324.78	0.06926112		1854.79	-0.00781323		2384.78	0.04280235		2914.81	0.01110295		3444.8	0.01625611		3974.8	-0.0001356
264.99	0.28758936		794.99	0.05405462		1324.98	0.06948475		1854.99	-0.00769444		2384.98	0.04300083		2915.01	0.01108235		3445	0.01666308		3975	0.00010908
265.19	0.28814385		795.19	0.05454584		1325.18	0.0695653		1855.19	-0.00887369		2385.18	0.04357028		2915.21	0.01051738		3445.2	0.01677609		3975.2	0.00105487
265.39	0.28857984		795.39	0.05442525		1325.38	0.06948327		1855.39	-0.00867192		2385.38	0.04415446		2915.41	0.01062807		3445.4	0.01712242		3975.4	0.0018648
265.59	0.28828752		795.59	0.05513832		1325.58	0.06816926		1855.59	-0.00825946		2385.58	0.04386688		2915.61	0.01136863		3445.6	0.01654992		3975.6	0.00181156
265.79	0.28847054		795.79	0.05402416		1325.78	0.0678716		1855.79	-0.00868189		2385.78	0.04373734		2915.81	0.01086596		3445.8	0.01630753		3975.8	0.00204575
265.99	0.28950413		795.99	0.05363888		1325.98	0.06765002		1855.99	-0.00825162		2385.98	0.04362929		2916.01	0.01069429		3446	0.0166711		3976	0.00251494
266.19	0.29037535		796.19	0.0535224		1326.18	0.06731732		1856.19	-0.00811647		2386.18	0.04361921		2916.21	0.01185503		3446.2	0.0170934		3976.2	0.00228971
266.39	0.29165997		796.39	0.05444157		1326.38	0.06783227		1856.39	-0.00770939		2386.38	0.04349357		2916.41	0.01154672		3446.4	0.01674668		3976.4	0.00230766
266.59	0.29174901		796.59	0.05506503		1326.58	0.06714321		1856.59	-0.00719038		2386.58	0.04351756		2916.61	0.01067016		3446.6	0.01686048		3976.6	0.00330418
266.79	0.2922915		796.79	0.05603014		1326.78	0.06711334		1856.79	-0.00699006		2386.78	0.04411487		2916.81	0.01074827		3446.8	0.01759966		3976.8	0.00354496
266.99	0.29262239		796.99	0.05610801		1326.98	0.06703429		1856.99	-0.00689077		2386.98	0.04458073		2917.01	0.01123205		3447	0.01799684		3977	0.00402929
267.19	0.29371733		797.19	0.05691588		1327.18	0.06766088		1857.19	-0.00552017		2387.18	0.04517609		2917.21	0.01147748		3447.2	0.01760325		3977.2	0.00443577
267.39	0.29450531		797.39	0.05673049		1327.38	0.06833865		1857.39	-0.00506907		2387.38	0.0453924		2917.41	0.01133901		3447.4	0.01761972		3977.4	0.00446106
267.59	0.29498831		797.59	0.05752697		1327.58	0.06798962		1857.59	-0.00523418		2387.58	0.0459676		2917.61	0.01194591		3447.6	0.01860483		3977.6	0.00472637
267.79	0.29461169		797.79	0.05697183		1327.78	0.06850813		1857.79	-0.00436419		2387.78	0.04585446		2917.81	0.01310974		3447.8	0.01826722		3977.8	0.00434425
267.99	0.2948406		797.99	0.05624036		1327.98	0.06945015		1857.99	-0.00349894		2387.98	0.04528985		2918.01	0.01406534		3448	0.01842632		3978	0.00449077
268.19	0.29478544		798.19	0.05641604		1328.18	0.06977768		1858.19	-0.00263511		2388.18	0.04571422		2918.21	0.01493017		3448.2	0.01814983		3978.2	0.00336312
268.39	0.29490172		798.39	0.05692299		1328.38	0.0707513		1858.39	-0.0038011		2388.38	0.04575911		2918.41	0.01503805		3448.4	0.01842077		3978.4	0.00276145
268.59	0.29483804		798.59	0.05670584		1328.58	0.07201487		1858.59	-0.00350855		2388.58	0.04582293		2918.61	0.01410094		3448.6	0.01711109		3978.6	0.00234124
268.79	0.29487667		798.79	0.0573555		1328.78	0.07352843		1858.79	-0.00309719		2388.78	0.04608705		2918.81	0.01359955		3448.8	0.01740052		3978.8	0.00150026
268.99	0.29436725		798.99	0.05875673		1328.98	0.07301729		1858.99	-0.00316819		2388.98	0.04607634		2919.01	0.0142014		3449	0.01794467		3979	0.00209077
269.19	0.2946475		799.19	0.05855425		1329.18	0.07373103		1859.19	-0.00432289		2389.18	0.04632719		2919.21	0.01369332		3449.2	0.01752042		3979.2	0.00197676
269.39	0.29536626		799.39	0.0582674		1329.38	0.07382592		1859.39	-0.00379974		2389.38	0.04601028		2919.41	0.01350171		3449.4	0.01766847		3979.4	0.00211836
269.59	0.29551729		799.59	0.05935342		1329.58	0.07405242		1859.59	-0.00416791		2389.58	0.04520047		2919.61	0.01354308		3449.6	0.01745777		3979.6	0.0021935
269.79	0.29573984		799.79	0.05883904		1329.78	0.0745148		1859.79	-0.00486746		2389.78	0.0458503		2919.81	0.01240451		3449.8	0.01699859		3979.8	0.00250393
269.99	0.29727503		799.99	0.05924391		1329.98	0.07415672		1859.99	-0.00501025		2389.98	0.04604096		2920.01	0.01191361		3450	0.01775362		3980	0.00192032
270.19	0.298432		800.19	0.05976626		1330.18	0.07421413		1860.19	-0.00639449		2390.18	0.04614826		2920.21	0.01206385		3450.2	0.01723638		3980.2	0.00158279
270.39	0.29885946		800.39	0.0604557		1330.38	0.07399912		1860.39	-0.007194		2390.38	0.04668969		2920.41	0.01099027		3450.4	0.01720915		3980.4	0.00157652
270.59	0.29912526		800.59	0.06028849		1330.58	0.07362122		1860.59	-0.00752906		2390.58	0.04664038		2920.61	0.0102303		3450.6	0.01647042		3980.6	0.00101031
270.79	0.30038414		800.79	0.06123161		1330.78	0.07355826		1860.79	-0.00761363		2390.78	0.04762208		2920.81	0.0107892		3450.8	0.01681502		3980.8	0.00056208
270.99	0.30116284		800.99	0.0608361		1330.98	0.07377562		1860.99	-0.00687789		2390.98	0.04786344		2921.01	0.01075537		3451	0.01608644		3981	0.00167248
271.19	0.30170461		801.19	0.06113068		1331.18	0.07383755		1861.19	-0.00655168		2391.18	0.04796193		2921.21	0.01052277		3451.2	0.0161134		3981.2	0.00146488
271.39	0.30149345		801.39	0.06010808		1331.38	0.07375393		1861.39	-0.00639152		2391.38	0.04794758		2921.41	0.01068942		3451.4	0.01552499		3981.4	0.00154813
271.59	0.30116767		801.59	0.06027819		1331.58	0.07354675		1861.59	-0.00586374		2391.58	0.04849607		2921.61	0.01209714		3451.6	0.01622371		3981.6	0.00118487
271.79	0.30104438		801.79	0.0592405		1331.78	0.07325825		1861.79	-0.0050931		2391.78	0.04884471		2921.81	0.01263693		3451.8	0.01657795		3981.8	-0.00010057
271.99	0.30209486		801.99	0.05909716		1331.98	0.0731909		1861.99	-0.00460681		2391.98	0.04933941		2922.01	0.01314434		3452	0.01613513		3982	-0.00019196
272.19	0.30360129		802.19	0.05921689		1332.18	0.07272606		1862.19	-0.00446667		2392.18	0.04952185		2922.21	0.0135032		3452.2	0.01533736		3982.2	-0.00072537
272.39	0.30386117		802.39	0.05951362		1332.38	0.07267059		1862.39	-0.00516536		2392.38	0.04957653		2922.41	0.01347248		3452.4	0.01574574		3982.4	-0.00149261
272.59	0.30390217		802.59	0.05938872		1332.58	0.07239105		1862.59	-0.00505304		2392.58	0.04968902		2922.61	0.01293992		3452.6	0.01570387		3982.6	-0.00191983
272.79	0.30445373		802.79	0.06008634		1332.78	0.07286355		1862.79	-0.00544139		2392.78	0.049733		2922.81	0.01275116		3452.8	0.01661859		3982.8	-0.0020224
272.99	0.30493777		802.99	0.06016072		1332.98	0.0730443		1862.99	-0.00539382		2392.98	0.04989089		2923.01	0.0127137		3453	0.01648065		3983	-0.00187684
273.19	0.30548164		803.19	0.0595221		1333.18	0.07345798		1863.19	-0.00463795		2393.18	0.04994443		2923.21	0.01168486		3453.2	0.01663841		3983.2	-0.0011909
273.39	0.30601928		803.39	0.05963385		1333.38	0.07385862		1863.39	-0.00458668		2393.38	0.04949495		2923.41	0.01125589		3453.4	0.01721929		3983.4	0.0007109
273.59	0.30656648		803.59	0.06022367		1333.58	0.07324191		1863.59	-0.00520496		2393.58	0.04970634		2923.61	0.01116886		3453.6	0.0167226		3983.6	0.00145396
273.79	0.30699824		803.79	0.05963335		1333.78	0.07377536		1863.79	-0.005417		2393.78	0.05024184		2923.81	0.01085486		3453.8	0.0168144		3983.8	0.00099917
273.99	0.30854827		803.99	0.06057001		1333.98	0.07308239		1863.99	-0.00532141		2393.98	0.04991821		2924.01	0.01027447		3454	0.01734283		3984	0.00095522
274.19	0.30868359		804.19	0.060596		1334.18	0.0727229		1864.19	-0.0058908		2394.18	0.0492495		2924.21	0.01006846		3454.2	0.01660712		3984.2	0.00176059
274.39	0.30815322		804.39	0.06083267		1334.38	0.07295643		1864.39	-0.00624809		2394.38	0.04852895		2924.41	0.01032034		3454.4	0.01639454		3984.4	0.00090512
274.59	0.30790656		804.59	0.06108419		1334.58	0.07300628		1864.59	-0.00574383		2394.58	0.04793358		2924.61	0.01035752		3454.6	0.01513729		3984.6	0.00117057
274.79	0.30823473		804.79	0.06169301		1334.78	0.072639		1864.79	-0.00561129		2394.78	0.04763275		2924.81	0.01061472		3454.8	0.0156523		3984.8	0.00183801
274.99	0.30681851		804.99	0.06096064		1334.98	0.07244823		1864.99	-0.00484673		2394.98	0.04709345		2925.01	0.00997006		3455	0.01551486		3985	0.00215063
275.19	0.30616872		805.19	0.0615246		1335.18	0.07298378		1865.19	-0.0034996		2395.18	0.04702032		2925.21	0.00998091		3455.2	0.01648697		3985.2	0.00124902
275.39	0.30475012		805.39	0.06097214		1335.38	0.0734127		1865.39	-0.00237516		2395.38	0.04751479		2925.41	0.0099849		3455.4	0.01610235		3985.4	0.00126868
275.59	0.30326712		805.59	0.06088049		1335.58	0.07411014		1865.59	-0.00153165		2395.58	0.04822571		2925.61	0.0104145		3455.6	0.01652275		3985.6	0.00117179
275.79	0.30329731		805.79	0.06076085		1335.78	0.07439337		1865.79	-0.00206552		2395.78	0.04828569		2925.81	0.01069213		3455.8	0.01674263		3985.8	0.00026982
275.99	0.30311203		805.99	0.06104894		1335.98	0.07513604		1865.99	-0.00234883		2395.98	0.04780588		2926.01	0.01177801		3456	0.01628325		3986	0.00059689
276.19	0.30398209		806.19	0.06105453		1336.18	0.07573172		1866.19	-0.00373053		2396.18	0.04786073		2926.21	0.01261348		3456.2	0.01616134		3986.2	0.00029612
276.39	0.30423088		806.39	0.06200176		1336.38	0.07634932		1866.39	-0.00457259		2396.38	0.04779802		2926.41	0.01342178		3456.4	0.01722837		3986.4	-0.00046532
276.59	0.30459075		806.59	0.06274001		1336.58	0.07679462		1866.59	-0.00481456		2396.58	0.04800389		2926.61	0.01394942		3456.6	0.01750693		3986.6	-0.000129
276.79	0.30520672		806.79	0.06320186		1336.78	0.07750593		1866.79	-0.00531995		2396.78	0.04877676		2926.81	0.01465184		3456.8	0.01674273		3986.8	0.00012724
276.99	0.30667421		806.99	0.06283652		1336.98	0.0776716		1866.99	-0.00528795		2396.98	0.04909393		2927.01	0.01448318		3457	0.01695077		3987	0.00008891
277.19	0.30796505		807.19	0.06304493		1337.18	0.07754517		1867.19	-0.00553895		2397.18	0.04886212		2927.21	0.01557745		3457.2	0.01707978		3987.2	0.00024523
277.39	0.30858492		807.39	0.06357148		1337.38	0.07776599		1867.39	-0.00573215		2397.38	0.04853206		2927.41	0.0153643		3457.4	0.01755842		3987.4	0.00067829
277.59	0.31091867		807.59	0.0641116		1337.58	0.07751795		1867.59	-0.00536129		2397.58	0.04818389		2927.61	0.01528024		3457.6	0.01782932		3987.6	-0.00066342
277.79	0.31227629		807.79	0.06504077		1337.78	0.07817363		1867.79	-0.00588238		2397.78	0.04797373		2927.81	0.01517315		3457.8	0.01743811		3987.8	-0.00050632
277.99	0.31359104		807.99	0.06613044		1337.98	0.07745398		1867.99	-0.00573419		2397.98	0.04705905		2928.01	0.01473668		3458	0.01735486		3988	0.00014089
278.19	0.31357255		808.19	0.06536744		1338.18	0.07706325		1868.19	-0.00601821		2398.18	0.04650636		2928.21	0.01488907		3458.2	0.01713001		3988.2	0.00023644
278.39	0.31434203		808.39	0.06595982		1338.38	0.07783279		1868.39	-0.0052231		2398.38	0.04700559		2928.41	0.01508281		3458.4	0.0167099		3988.4	-0.0002801
278.59	0.31535205		808.59	0.06572142		1338.58	0.07668597		1868.59	-0.00415767		2398.58	0.04781472		2928.61	0.01434523		3458.6	0.01709334		3988.6	0.000206
278.79	0.31531544		808.79	0.06549088		1338.78	0.07665294		1868.79	-0.00314072		2398.78	0.04870238		2928.81	0.01336918		3458.8	0.01837581		3988.8	0.00041762
278.99	0.31443905		808.99	0.06543795		1338.98	0.07710778		1868.99	-0.00108828		2398.98	0.04838198		2929.01	0.01328735		3459	0.01832168		3989	-0.00029003
279.19	0.31455039		809.19	0.06502392		1339.18	0.07664965		1869.19	-0.0002336		2399.18	0.0487092		2929.21	0.0131873		3459.2	0.0189401		3989.2	0.00011174
279.39	0.31312626		809.39	0.06490691		1339.38	0.07688942		1869.39	0.00012576		2399.38	0.0491566		2929.41	0.01272232		3459.4	0.01894837		3989.4	0.00102064
279.59	0.31248324		809.59	0.06540813		1339.58	0.07734665		1869.59	0.00011847		2399.58	0.04929378		2929.61	0.01330015		3459.6	0.01973679		3989.6	0.00098819
279.79	0.31255122		809.79	0.06548546		1339.78	0.0779897		1869.79	-0.00100276		2399.78	0.04912644		2929.81	0.01363527		3459.8	0.02040966		3989.8	0.00039679
279.99	0.31297633		809.99	0.06584568		1339.98	0.07865928		1869.99	-0.00168879		2399.98	0.04954802		2930.01	0.01346729		3460	0.01996321		3990	0.00076015
280.19	0.31398432		810.19	0.06639029		1340.18	0.07877649		1870.19	-0.00278681		2400.18	0.04943971		2930.21	0.01319642		3460.2	0.01933996		3990.2	0.00033967
280.39	0.31423286		810.39	0.06658678		1340.38	0.07878931		1870.39	-0.00291277		2400.38	0.04925095		2930.41	0.01260144		3460.4	0.01851536		3990.4	0.00062156
280.59	0.31435998		810.59	0.06711582		1340.58	0.07852269		1870.59	-0.00374862		2400.58	0.049615		2930.61	0.01235398		3460.6	0.01821355		3990.6	0.0011531
280.79	0.31439786		810.79	0.06689655		1340.78	0.07836951		1870.79	-0.00464358		2400.78	0.04990539		2930.81	0.01223581		3460.8	0.01798484		3990.8	0.00124736
280.99	0.31465499		810.99	0.06716839		1340.98	0.07747557		1870.99	-0.00568891		2400.98	0.04914188		2931.01	0.01258249		3461	0.01854743		3991	0.00100388
281.19	0.31500938		811.19	0.06696314		1341.18	0.07762347		1871.19	-0.00662148		2401.18	0.04944079		2931.21	0.012711		3461.2	0.01868669		3991.2	0.00093365
281.39	0.31462549		811.39	0.06652156		1341.38	0.07800708		1871.39	-0.00688573		2401.38	0.04903552		2931.41	0.01141028		3461.4	0.01843657		3991.4	0.0015986
281.59	0.31560841		811.59	0.0660565		1341.58	0.07860559		1871.59	-0.00788685		2401.58	0.04875982		2931.61	0.01190946		3461.6	0.0177857		3991.6	0.00121273
281.79	0.3157926		811.79	0.06638626		1341.78	0.07863879		1871.79	-0.00940221		2401.78	0.04924815		2931.81	0.01205659		3461.8	0.01688982		3991.8	0.00275776
281.99	0.3159546		811.99	0.0658625		1341.98	0.07825965		1871.99	-0.00896468		2401.98	0.04866257		2932.01	0.01158991		3462	0.01735926		3992	0.0029178
282.19	0.31651173		812.19	0.06496892		1342.18	0.07871023		1872.19	-0.00961033		2402.18	0.04946705		2932.21	0.01171049		3462.2	0.017547		3992.2	0.0032847
282.39	0.31758105		812.39	0.0653615		1342.38	0.07896791		1872.39	-0.00816209		2402.38	0.04951956		2932.41	0.01165087		3462.4	0.01756786		3992.4	0.00290477
282.59	0.31777391		812.59	0.0648683		1342.58	0.07843073		1872.59	-0.00794123		2402.58	0.04968355		2932.61	0.01116193		3462.6	0.01814447		3992.6	0.00339149
282.79	0.31815775		812.79	0.06534034		1342.78	0.07939795		1872.79	-0.00791689		2402.78	0.04946701		2932.81	0.01194379		3462.8	0.01787747		3992.8	0.00366857
282.99	0.31880549		812.99	0.06523024		1342.98	0.07971878		1872.99	-0.0069169		2402.98	0.04873994		2933.01	0.01270971		3463	0.01720776		3993	0.00260834
283.19	0.31959533		813.19	0.06519378		1343.18	0.07893674		1873.19	-0.00596455		2403.18	0.04904862		2933.21	0.01315435		3463.2	0.01818155		3993.2	0.00377156
283.39	0.32072625		813.39	0.06613288		1343.38	0.07969322		1873.39	-0.00579199		2403.38	0.04960718		2933.41	0.01300814		3463.4	0.0180648		3993.4	0.00338957
283.59	0.32126734		813.59	0.06667765		1343.58	0.08073789		1873.59	-0.00526611		2403.58	0.04893153		2933.61	0.01287916		3463.6	0.01809679		3993.6	0.00241681
283.79	0.32246726		813.79	0.06752305		1343.78	0.0816156		1873.79	-0.00459403		2403.78	0.04857551		2933.81	0.0132164		3463.8	0.01779947		3993.8	0.00191822
283.99	0.32314781		813.99	0.06796662		1343.98	0.08189376		1873.99	-0.0045882		2403.98	0.04861674		2934.01	0.01330504		3464	0.01740722		3994	0.00217045
284.19	0.32308016		814.19	0.06817949		1344.18	0.08118796		1874.19	-0.00415215		2404.18	0.04780006		2934.21	0.01243118		3464.2	0.01696955		3994.2	0.00213078
284.39	0.32298307		814.39	0.06747523		1344.38	0.0815921		1874.39	-0.00444982		2404.38	0.04692779		2934.41	0.01280551		3464.4	0.01680123		3994.4	0.00248553
284.59	0.32261985		814.59	0.06780913		1344.58	0.08191974		1874.59	-0.00462543		2404.58	0.04713902		2934.61	0.01267881		3464.6	0.01769096		3994.6	0.00369036
284.79	0.32136086		814.79	0.06759741		1344.78	0.08172652		1874.79	-0.00473661		2404.78	0.04725851		2934.81	0.0129869		3464.8	0.01781344		3994.8	0.00450361
284.99	0.32100048		814.99	0.06793562		1344.98	0.08189888		1874.99	-0.00570417		2404.98	0.04794081		2935.01	0.01314388		3465	0.01886966		3995	0.00372722
285.19	0.32057748		815.19	0.06715709		1345.18	0.08211367		1875.19	-0.0056909		2405.18	0.04893702		2935.21	0.01315114		3465.2	0.01909318		3995.2	0.00327834
285.39	0.31983955		815.39	0.06703982		1345.38	0.08207209		1875.39	-0.00631414		2405.38	0.04828695		2935.41	0.01302985		3465.4	0.01860367		3995.4	0.00375483
285.59	0.31949505		815.59	0.06674039		1345.58	0.08247769		1875.59	-0.00703429		2405.58	0.04879935		2935.61	0.01245712		3465.6	0.01920892		3995.6	0.00353497
285.79	0.32033239		815.79	0.06657805		1345.78	0.08243573		1875.79	-0.00740301		2405.78	0.04897204		2935.81	0.01171124		3465.8	0.01953503		3995.8	0.00430823
285.99	0.32026656		815.99	0.06569831		1345.98	0.08212902		1875.99	-0.00771038		2405.98	0.04811527		2936.01	0.01159449		3466	0.02005049		3996	0.00405131
286.19	0.32115394		816.19	0.06546234		1346.18	0.08252816		1876.19	-0.00867036		2406.18	0.04766396		2936.21	0.0119303		3466.2	0.01962702		3996.2	0.00371617
286.39	0.32179817		816.39	0.06581728		1346.38	0.08249697		1876.39	-0.00811676		2406.38	0.0471511		2936.41	0.01179558		3466.4	0.0188061		3996.4	0.00261304
286.59	0.32247951		816.59	0.06613433		1346.58	0.08294479		1876.59	-0.00953864		2406.58	0.0470994		2936.61	0.01174405		3466.6	0.01838278		3996.6	0.00315526
286.79	0.32348257		816.79	0.06677672		1346.78	0.08386188		1876.79	-0.00928721		2406.78	0.04712282		2936.81	0.01295706		3466.8	0.01868111		3996.8	0.00277214
286.99	0.32500825		816.99	0.06626134		1346.98	0.08372033		1876.99	-0.00886898		2406.98	0.0469262		2937.01	0.01285588		3467	0.01887837		3997	0.00119367
287.19	0.32703612		817.19	0.06603209		1347.18	0.08309173		1877.19	-0.00865674		2407.18	0.0471382		2937.21	0.01414264		3467.2	0.01961531		3997.2	0.00138363
287.39	0.32873943		817.39	0.06663642		1347.38	0.08315951		1877.39	-0.00855027		2407.38	0.04757487		2937.41	0.01472261		3467.4	0.01854657		3997.4	0.00032003
287.59	0.32900181		817.59	0.06693107		1347.58	0.08267248		1877.59	-0.00788462		2407.58	0.04665887		2937.61	0.01553602		3467.6	0.01847041		3997.6	-0.00039842
287.79	0.33021189		817.79	0.06752996		1347.78	0.082324		1877.79	-0.00806601		2407.78	0.04746464		2937.81	0.01711012		3467.8	0.01795806		3997.8	-0.00120685
287.99	0.33062065		817.99	0.06684639		1347.98	0.08174367		1877.99	-0.00824773		2407.98	0.04778458		2938.01	0.01736528		3468	0.0171947		3998	-0.00114478
288.19	0.33043117		818.19	0.06672062		1348.18	0.08106851		1878.19	-0.00810057		2408.18	0.04757455		2938.21	0.01716806		3468.2	0.01714984		3998.2	-0.00143552
288.39	0.33020787		818.39	0.0666524		1348.38	0.08248567		1878.39	-0.00836857		2408.38	0.04762506		2938.41	0.01765382		3468.4	0.01689006		3998.4	-0.0011983
288.59	0.33016192		818.59	0.06769827		1348.58	0.0829408		1878.59	-0.00840803		2408.58	0.04869165		2938.61	0.01696096		3468.6	0.01609535		3998.6	0.00013214
288.79	0.32981401		818.79	0.06887425		1348.78	0.08300518		1878.79	-0.00854514		2408.78	0.04920817		2938.81	0.01742262		3468.8	0.01672275		3998.8	-0.00044561
288.99	0.32958025		818.99	0.06904933		1348.98	0.0838317		1878.99	-0.00928384		2408.98	0.05034897		2939.01	0.01777793		3469	0.01702494		3999	-0.00113443
289.19	0.32906535		819.19	0.06846981		1349.18	0.08363807		1879.19	-0.01028048		2409.18	0.05072916		2939.21	0.01717562		3469.2	0.0161529		3999.2	-0.00030917
289.39	0.32914901		819.39	0.06923323		1349.38	0.08462297		1879.39	-0.01060117		2409.38	0.05015355		2939.41	0.01609024		3469.4	0.01553081		3999.4	0.00054371
289.59	0.32884052		819.59	0.06882853		1349.58	0.08530586		1879.59	-0.01049957		2409.58	0.05039476		2939.61	0.0159433		3469.6	0.01588794		3999.6	0.00037874
289.79	0.32833546		819.79	0.06892006		1349.78	0.08567052		1879.79	-0.01101067		2409.78	0.05011258		2939.81	0.01668137		3469.8	0.01524875		3999.8	0.00055441
289.99	0.32796852		819.99	0.06888623		1349.98	0.0855469		1879.99	-0.01154451		2409.98	0.04946792		2940.01	0.01615429		3470	0.01460663		4000	0.00060046
290.19	0.32866634		820.19	0.06918805		1350.18	0.085009		1880.19	-0.01117573		2410.18	0.04851725		2940.21	0.01537813		3470.2	0.0144275		4000.2	0.00074108
290.39	0.3287707		820.39	0.06965219		1350.38	0.08537819		1880.39	-0.01027569		2410.38	0.04863573		2940.41	0.01458067		3470.4	0.01472296		4000.4	0.00075548
290.59	0.3286093		820.59	0.06963023		1350.58	0.08613863		1880.59	-0.00976121		2410.58	0.04836509		2940.61	0.01487675		3470.6	0.01567073		4000.6	0.00147225
290.79	0.32876444		820.79	0.0695205		1350.78	0.08676086		1880.79	-0.00907179		2410.78	0.04803772		2940.81	0.01540265		3470.8	0.01694273		4000.8	0.00148863
290.99	0.3303162		820.99	0.06948612		1350.98	0.0859971		1880.99	-0.00960443		2410.98	0.04753448		2941.01	0.01464909		3471	0.01746419		4001	0.00101774
291.19	0.33207037		821.19	0.06954799		1351.18	0.08586979		1881.19	-0.00845753		2411.18	0.04825123		2941.21	0.01449344		3471.2	0.01732936		4001.2	0.00151495
291.39	0.33246895		821.39	0.07000455		1351.38	0.08587191		1881.39	-0.00775769		2411.38	0.04842683		2941.41	0.01497199		3471.4	0.01679145		4001.4	0.00179492
291.59	0.33273093		821.59	0.07022528		1351.58	0.08507716		1881.59	-0.00783555		2411.58	0.04832641		2941.61	0.01520559		3471.6	0.01707393		4001.6	0.00162911
291.79	0.33314808		821.79	0.07070624		1351.78	0.08507441		1881.79	-0.00777526		2411.78	0.04885686		2941.81	0.01549046		3471.8	0.01649549		4001.8	0.00144283
291.99	0.33392473		821.99	0.07011918		1351.98	0.08509125		1881.99	-0.00739547		2411.98	0.04865725		2942.01	0.01495197		3472	0.01694055		4002	0.00127119
292.19	0.33365222		822.19	0.07037258		1352.18	0.08558538		1882.19	-0.00800245		2412.18	0.04877493		2942.21	0.01478925		3472.2	0.01728851		4002.2	0.00145822
292.39	0.33374516		822.39	0.07047165		1352.38	0.08531753		1882.39	-0.0079122		2412.38	0.04887846		2942.41	0.01522938		3472.4	0.01664876		4002.4	0.00109778
292.59	0.33390121		822.59	0.07054018		1352.58	0.08478751		1882.59	-0.00858371		2412.58	0.0488612		2942.61	0.01456192		3472.6	0.01656298		4002.6	0.00147832
292.79	0.33315322		822.79	0.07001555		1352.78	0.08477611		1882.79	-0.00874089		2412.78	0.04963968		2942.81	0.01492985		3472.8	0.01843108		4002.8	0.00113129
292.99	0.33307066		822.99	0.06956796		1352.98	0.08500125		1882.99	-0.00907002		2412.98	0.04977465		2943.01	0.01493148		3473	0.01814405		4003	0.00094044
293.19	0.33354877		823.19	0.06982804		1353.18	0.08543025		1883.19	-0.00859809		2413.18	0.04924426		2943.21	0.01320856		3473.2	0.01839438		4003.2	0.00093643
293.39	0.33377163		823.39	0.07083716		1353.38	0.08621197		1883.39	-0.00750812		2413.38	0.04919019		2943.41	0.0141667		3473.4	0.01838007		4003.4	0.00068718
293.59	0.33359603		823.59	0.07011382		1353.58	0.08653347		1883.59	-0.00674431		2413.58	0.04975918		2943.61	0.01473556		3473.6	0.01908376		4003.6	0.0006498
293.79	0.33353026		823.79	0.0704722		1353.78	0.08673852		1883.79	-0.00617003		2413.78	0.04978727		2943.81	0.01490443		3473.8	0.01878282		4003.8	0.0008559
293.99	0.33378545		823.99	0.07065344		1353.98	0.08678763		1883.99	-0.00579346		2413.98	0.04965511		2944.01	0.01448076		3474	0.0191197		4004	0.00167068
294.19	0.33397374		824.19	0.07076826		1354.18	0.08687965		1884.19	-0.00531053		2414.18	0.04918747		2944.21	0.01471562		3474.2	0.01937609		4004.2	0.00152114
294.39	0.3338018		824.39	0.07111984		1354.38	0.08836467		1884.39	-0.00481662		2414.38	0.04965412		2944.41	0.01543324		3474.4	0.01978112		4004.4	0.00095562
294.59	0.33440745		824.59	0.0710087		1354.58	0.0890134		1884.59	-0.00563976		2414.58	0.04898104		2944.61	0.01623414		3474.6	0.01989981		4004.6	0.00158559
294.79	0.33455777		824.79	0.07174469		1354.78	0.08916541		1884.79	-0.00620065		2414.78	0.04944415		2944.81	0.01642821		3474.8	0.01973677		4004.8	0.00151981
294.99	0.33509323		824.99	0.07184347		1354.98	0.08858691		1884.99	-0.00658414		2414.98	0.04994147		2945.01	0.0160646		3475	0.01967776		4005	0.0019954
295.19	0.33565688		825.19	0.07138153		1355.18	0.08861363		1885.19	-0.00578719		2415.18	0.05046153		2945.21	0.0162722		3475.2	0.01867559		4005.2	0.00241635
295.39	0.33510368		825.39	0.07158171		1355.38	0.08887542		1885.39	-0.00670242		2415.38	0.05105155		2945.41	0.01761423		3475.4	0.01868749		4005.4	0.00266894
295.59	0.33561603		825.59	0.07161602		1355.58	0.08820032		1885.59	-0.0070898		2415.58	0.05054229		2945.61	0.01698286		3475.6	0.01937811		4005.6	0.00175449
295.79	0.3355467		825.79	0.07150132		1355.78	0.08816003		1885.79	-0.0070457		2415.78	0.05123523		2945.81	0.01710437		3475.8	0.01877108		4005.8	0.00135123
295.99	0.33626309		825.99	0.07122814		1355.98	0.0883459		1885.99	-0.00803174		2415.98	0.05101638		2946.01	0.01682957		3476	0.01871158		4006	0.00043768
296.19	0.33691547		826.19	0.07133978		1356.18	0.08811033		1886.19	-0.00893294		2416.18	0.05174671		2946.21	0.01672237		3476.2	0.01776282		4006.2	0.00015833
296.39	0.33664574		826.39	0.07103346		1356.38	0.08689401		1886.39	-0.00946984		2416.38	0.0516305		2946.41	0.01637919		3476.4	0.01700796		4006.4	-0.0001235
296.59	0.33630925		826.59	0.0707545		1356.58	0.08694858		1886.59	-0.00977311		2416.58	0.0514857		2946.61	0.01412674		3476.6	0.01723126		4006.6	0.00035501
296.79	0.33704042		826.79	0.07043852		1356.78	0.08693415		1886.79	-0.00988343		2416.78	0.05162153		2946.81	0.01386375		3476.8	0.01790039		4006.8	0.00027579
296.99	0.33820041		826.99	0.0715622		1356.98	0.08791492		1886.99	-0.01008261		2416.98	0.05151251		2947.01	0.01226165		3477	0.01799743		4007	-0.00075776
297.19	0.33900152		827.19	0.07193037		1357.18	0.08911011		1887.19	-0.00929492		2417.18	0.05119558		2947.21	0.01144975		3477.2	0.01882553		4007.2	-0.00062029
297.39	0.33924161		827.39	0.07158568		1357.38	0.08999555		1887.39	-0.00914741		2417.38	0.05194966		2947.41	0.01239981		3477.4	0.01851638		4007.4	0.00004609
297.59	0.33953234		827.59	0.07143078		1357.58	0.09080695		1887.59	-0.00870557		2417.58	0.05203928		2947.61	0.01204191		3477.6	0.01854996		4007.6	0.00166087
297.79	0.33978357		827.79	0.07221199		1357.78	0.09052493		1887.79	-0.00896566		2417.78	0.0510936		2947.81	0.01258758		3477.8	0.01853972		4007.8	0.00231544
297.99	0.34002417		827.99	0.07232285		1357.98	0.09096286		1887.99	-0.00825279		2417.98	0.05098826		2948.01	0.01284925		3478	0.018488		4008	0.00294275
298.19	0.34139189		828.19	0.0720706		1358.18	0.09126643		1888.19	-0.00817959		2418.18	0.05085355		2948.21	0.01324117		3478.2	0.01833227		4008.2	0.00324088
298.39	0.34196637		828.39	0.07214038		1358.38	0.09179122		1888.39	-0.00839196		2418.38	0.05136057		2948.41	0.01367131		3478.4	0.01840372		4008.4	0.00425853
298.59	0.34269402		828.59	0.07210329		1358.58	0.09187531		1888.59	-0.00822437		2418.58	0.05114555		2948.61	0.01420442		3478.6	0.01865538		4008.6	0.00490055
298.79	0.34253421		828.79	0.07281444		1358.78	0.09177487		1888.79	-0.00774313		2418.78	0.0515259		2948.81	0.01427981		3478.8	0.01884701		4008.8	0.00496432
298.99	0.3429613		828.99	0.07308788		1358.98	0.09166471		1888.99	-0.00738353		2418.98	0.0516848		2949.01	0.01422758		3479	0.0190562		4009	0.00565389
299.19	0.34317145		829.19	0.07407345		1359.18	0.09176692		1889.19	-0.00740343		2419.18	0.05208122		2949.21	0.01412485		3479.2	0.01861139		4009.2	0.00503483
299.39	0.3433598		829.39	0.07410479		1359.38	0.0917401		1889.39	-0.00786173		2419.38	0.05172575		2949.41	0.01457698		3479.4	0.01845843		4009.4	0.00383637
299.59	0.34362936		829.59	0.07430352		1359.58	0.09111773		1889.59	-0.00712843		2419.58	0.05056599		2949.61	0.01494082		3479.6	0.01812861		4009.6	0.00247523
299.79	0.34401315		829.79	0.07473561		1359.78	0.09181081		1889.79	-0.00638558		2419.78	0.05138245		2949.81	0.01525047		3479.8	0.01641649		4009.8	0.00135563
299.99	0.34434788		829.99	0.07568338		1359.98	0.09145882		1889.99	-0.00660711		2419.98	0.05040587		2950.01	0.01467529		3480	0.01585509		4010	0.00074269
300.19	0.34505866		830.19	0.07573037		1360.18	0.09103538		1890.19	-0.00624044		2420.18	0.05080322		2950.21	0.0141285		3480.2	0.01483754		4010.2	-0.00006182
300.39	0.34482847		830.39	0.07647408		1360.38	0.09023907		1890.39	-0.00625618		2420.38	0.05048698		2950.41	0.01375319		3480.4	0.01430994		4010.4	-0.00111829
300.59	0.34493981		830.59	0.07616979		1360.58	0.09013736		1890.59	-0.00621709		2420.58	0.04935467		2950.61	0.01286051		3480.6	0.01410165		4010.6	-0.00115833
300.79	0.34519484		830.79	0.07681247		1360.78	0.09069614		1890.79	-0.00632291		2420.78	0.04933319		2950.81	0.01286287		3480.8	0.01447044		4010.8	-0.00191061
300.99	0.34446567		830.99	0.07700378		1360.98	0.09152568		1890.99	-0.00677284		2420.98	0.04926136		2951.01	0.01264255		3481	0.01532966		4011	-0.00243259
301.19	0.34374052		831.19	0.07616809		1361.18	0.09249762		1891.19	-0.00626558		2421.18	0.04916455		2951.21	0.01362123		3481.2	0.01569333		4011.2	-0.00212886
301.39	0.34374047		831.39	0.07518365		1361.38	0.09283134		1891.39	-0.00702313		2421.38	0.04956767		2951.41	0.01395171		3481.4	0.01539088		4011.4	-0.00105994
301.59	0.34368714		831.59	0.07566033		1361.58	0.0931747		1891.59	-0.00728561		2421.58	0.04914346		2951.61	0.0139236		3481.6	0.01544364		4011.6	-0.00079285
301.79	0.34374908		831.79	0.07411738		1361.78	0.09263388		1891.79	-0.00711334		2421.78	0.04857561		2951.81	0.01427405		3481.8	0.01663461		4011.8	-0.00129797
301.99	0.34416119		831.99	0.0738467		1361.98	0.09303688		1891.99	-0.00714917		2421.98	0.04936701		2952.01	0.01448382		3482	0.01689242		4012	-0.00109034
302.19	0.34456464		832.19	0.07388622		1362.18	0.09372747		1892.19	-0.00790118		2422.18	0.05065842		2952.21	0.01427804		3482.2	0.01774543		4012.2	0.00025737
302.39	0.3450295		832.39	0.07422216		1362.38	0.09356321		1892.39	-0.00857941		2422.38	0.0517713		2952.41	0.01417901		3482.4	0.01814218		4012.4	0.00087384
302.59	0.34575703		832.59	0.0746058		1362.58	0.09365194		1892.59	-0.00853444		2422.58	0.05206309		2952.61	0.01437263		3482.6	0.01897362		4012.6	0.00082645
302.79	0.34553985		832.79	0.07495705		1362.78	0.09339897		1892.79	-0.00936597		2422.78	0.05275629		2952.81	0.01403375		3482.8	0.01922435		4012.8	0.00102716
302.99	0.34537155		832.99	0.07512496		1362.98	0.09350192		1892.99	-0.00975778		2422.98	0.05365856		2953.01	0.01479375		3483	0.01984295		4013	0.00145565
303.19	0.34552705		833.19	0.07491131		1363.18	0.09346375		1893.19	-0.01013065		2423.18	0.05370338		2953.21	0.01537596		3483.2	0.01956464		4013.2	0.00062089
303.39	0.34551061		833.39	0.07486054		1363.38	0.09318582		1893.39	-0.00970392		2423.38	0.05294015		2953.41	0.01531102		3483.4	0.01977894		4013.4	0.00062452
303.59	0.34633182		833.59	0.07574608		1363.58	0.0934141		1893.59	-0.0091944		2423.58	0.05291226		2953.61	0.01507426		3483.6	0.01957031		4013.6	-0.00042483
303.79	0.34707214		833.79	0.07666736		1363.78	0.0935112		1893.79	-0.00984961		2423.78	0.05355492		2953.81	0.01448193		3483.8	0.01963146		4013.8	-0.00038777
303.99	0.34775374		833.99	0.07714928		1363.98	0.09319781		1893.99	-0.00962735		2423.98	0.0535102		2954.01	0.01442404		3484	0.02048294		4014	0.00020643
304.19	0.34868223		834.19	0.07728683		1364.18	0.09288589		1894.19	-0.00925582		2424.18	0.05340084		2954.21	0.01478281		3484.2	0.02035536		4014.2	-0.00043839
304.39	0.34930453		834.39	0.07776583		1364.38	0.09264033		1894.39	-0.00837509		2424.38	0.05366911		2954.41	0.01432751		3484.4	0.02008224		4014.4	-0.00016177
304.59	0.34875045		834.59	0.07742654		1364.58	0.09358316		1894.59	-0.00825592		2424.58	0.05245264		2954.61	0.01521175		3484.6	0.01962373		4014.6	0.00098321
304.79	0.34933815		834.79	0.07759746		1364.78	0.0943331		1894.79	-0.00859104		2424.78	0.05297108		2954.81	0.01558951		3484.8	0.02015228		4014.8	0.00059335
304.99	0.34999878		834.99	0.07639153		1364.98	0.09518557		1894.99	-0.00876356		2424.98	0.05242443		2955.01	0.01604895		3485	0.02042429		4015	0.00096012
305.19	0.35019856		835.19	0.07621771		1365.18	0.09528572		1895.19	-0.0086523		2425.18	0.05271409		2955.21	0.01663856		3485.2	0.01975287		4015.2	0.00099151
305.39	0.35024428		835.39	0.0761293		1365.38	0.09470754		1895.39	-0.00865053		2425.38	0.05263733		2955.41	0.01597714		3485.4	0.01892294		4015.4	0.00024708
305.59	0.35022293		835.59	0.07628844		1365.58	0.09436188		1895.59	-0.00797013		2425.58	0.05259242		2955.61	0.0161179		3485.6	0.0191115		4015.6	-0.00066284
305.79	0.35057425		835.79	0.07554145		1365.78	0.093618		1895.79	-0.00796375		2425.78	0.05207864		2955.81	0.01675142		3485.8	0.01918524		4015.8	0.00010627
305.99	0.35122824		835.99	0.07635065		1365.98	0.09330646		1895.99	-0.00874146		2425.98	0.05233959		2956.01	0.01724167		3486	0.01853593		4016	-0.00030963
306.19	0.35181802		836.19	0.07619332		1366.18	0.09316706		1896.19	-0.00896539		2426.18	0.05283779		2956.21	0.01693224		3486.2	0.01831814		4016.2	0.00063921
306.39	0.35288633		836.39	0.07609591		1366.38	0.0919349		1896.39	-0.00912537		2426.38	0.05291736		2956.41	0.01711468		3486.4	0.01818357		4016.4	-0.00014433
306.59	0.35375998		836.59	0.07646777		1366.58	0.09251279		1896.59	-0.00873507		2426.58	0.05268045		2956.61	0.01785368		3486.6	0.01811831		4016.6	-0.00057924
306.79	0.35357954		836.79	0.07645082		1366.78	0.09271288		1896.79	-0.00863297		2426.78	0.05295201		2956.81	0.01875811		3486.8	0.01820302		4016.8	-0.00085159
306.99	0.35374442		836.99	0.0769686		1366.98	0.09327439		1896.99	-0.00871801		2426.98	0.05251984		2957.01	0.01957441		3487	0.01839612		4017	-0.00083187
307.19	0.35327268		837.19	0.07739345		1367.18	0.09343077		1897.19	-0.00824438		2427.18	0.05174922		2957.21	0.01957391		3487.2	0.01777907		4017.2	-0.00034595
307.39	0.353491		837.39	0.0782223		1367.38	0.09351913		1897.39	-0.00874924		2427.38	0.05181728		2957.41	0.01906927		3487.4	0.0180249		4017.4	0.00020331
307.59	0.35452262		837.59	0.07872923		1367.58	0.0939262		1897.59	-0.0093071		2427.58	0.05174486		2957.61	0.01933964		3487.6	0.01856127		4017.6	-0.00083371
307.79	0.35432316		837.79	0.07949712		1367.78	0.09459069		1897.79	-0.0103618		2427.78	0.05131079		2957.81	0.01938619		3487.8	0.01893596		4017.8	-0.00021909
307.99	0.35445666		837.99	0.08018821		1367.98	0.09599892		1897.99	-0.01009362		2427.98	0.05120413		2958.01	0.0189937		3488	0.01912303		4018	-0.00051916
308.19	0.35402342		838.19	0.08051484		1368.18	0.09610583		1898.19	-0.01041413		2428.18	0.05115818		2958.21	0.01880234		3488.2	0.01934326		4018.2	-0.00018021
308.39	0.35451309		838.39	0.08030875		1368.38	0.09695325		1898.39	-0.01049831		2428.38	0.05101301		2958.41	0.01756954		3488.4	0.01908522		4018.4	0.00085203
308.59	0.35379371		838.59	0.0805729		1368.58	0.09735098		1898.59	-0.01163988		2428.58	0.05086025		2958.61	0.01779018		3488.6	0.01982104		4018.6	0.00110947
308.79	0.35393964		838.79	0.08092648		1368.78	0.09737734		1898.79	-0.0120378		2428.78	0.05115668		2958.81	0.01746716		3488.8	0.02034693		4018.8	0.00121655
308.99	0.35317866		838.99	0.08060008		1368.98	0.0969977		1898.99	-0.01227436		2428.98	0.05134831		2959.01	0.01702646		3489	0.02034793		4019	0.0016973
309.19	0.35286183		839.19	0.08104602		1369.18	0.09622389		1899.19	-0.01218178		2429.18	0.05186665		2959.21	0.01696899		3489.2	0.01981943		4019.2	0.00125994
309.39	0.35228414		839.39	0.08098342		1369.38	0.09580702		1899.39	-0.01211384		2429.38	0.05203225		2959.41	0.01585313		3489.4	0.01971243		4019.4	0.00078338
309.59	0.35276098		839.59	0.08120682		1369.58	0.09580719		1899.59	-0.01263862		2429.58	0.05248868		2959.61	0.01647612		3489.6	0.01995917		4019.6	0.00081469
309.79	0.35291742		839.79	0.0811714		1369.78	0.09610134		1899.79	-0.01311885		2429.78	0.05153548		2959.81	0.01661732		3489.8	0.01951459		4019.8	0.00108757
309.99	0.35342357		839.99	0.0811988		1369.98	0.0954061		1899.99	-0.01197384		2429.98	0.051722		2960.01	0.01666217		3490	0.01922609		4020	0.00058065
310.19	0.35409301		840.19	0.08109773		1370.18	0.09495052		1900.19	-0.01153948		2430.18	0.05168181		2960.21	0.0161572		3490.2	0.01942502		4020.2	0.00095848
310.39	0.35480423		840.39	0.0812161		1370.38	0.09504101		1900.39	-0.0103786		2430.38	0.05189177		2960.41	0.01738527		3490.4	0.01934484		4020.4	0.00024655
310.59	0.3547987		840.59	0.08129339		1370.58	0.09626726		1900.59	-0.00938879		2430.58	0.05281839		2960.61	0.01803401		3490.6	0.01905771		4020.6	0.00030725
310.79	0.35424265		840.79	0.08132411		1370.78	0.09670153		1900.79	-0.0082311		2430.78	0.05373336		2960.81	0.01798046		3490.8	0.01860494		4020.8	0.0008675
310.99	0.3543674		840.99	0.08128534		1370.98	0.09762182		1900.99	-0.00755599		2430.98	0.05447848		2961.01	0.01805865		3491	0.01809762		4021	0.00157688
311.19	0.3544321		841.19	0.08066381		1371.18	0.097817		1901.19	-0.00727227		2431.18	0.05510718		2961.21	0.01880341		3491.2	0.01791169		4021.2	0.00209298
311.39	0.35574203		841.39	0.08027035		1371.38	0.0987982		1901.39	-0.00713978		2431.38	0.05577247		2961.41	0.01922549		3491.4	0.01822285		4021.4	0.00188513
311.59	0.35632921		841.59	0.08015474		1371.58	0.10008747		1901.59	-0.00699747		2431.58	0.05543646		2961.61	0.01921535		3491.6	0.01826956		4021.6	0.00182674
311.79	0.35560701		841.79	0.08047781		1371.78	0.1009786		1901.79	-0.0076909		2431.78	0.05487329		2961.81	0.01852177		3491.8	0.01767694		4021.8	0.00227322
311.99	0.35575347		841.99	0.08043051		1371.98	0.10183824		1901.99	-0.00817971		2431.98	0.05557431		2962.01	0.01794432		3492	0.01742354		4022	0.00267246
312.19	0.35647931		842.19	0.0800852		1372.18	0.1020156		1902.19	-0.00852105		2432.18	0.05578489		2962.21	0.01812747		3492.2	0.01788023		4022.2	0.00455365
312.39	0.35603933		842.39	0.0804389		1372.38	0.10229257		1902.39	-0.00880407		2432.38	0.05494138		2962.41	0.01745521		3492.4	0.01745884		4022.4	0.00505324
312.59	0.35551694		842.59	0.08142337		1372.58	0.10209711		1902.59	-0.00838015		2432.58	0.05524278		2962.61	0.01730723		3492.6	0.01749713		4022.6	0.00540017
312.79	0.35560477		842.79	0.08155373		1372.78	0.10225211		1902.79	-0.00755637		2432.78	0.05457107		2962.81	0.01800901		3492.8	0.01739765		4022.8	0.00492703
312.99	0.35588192		842.99	0.08093754		1372.98	0.10226377		1902.99	-0.00791032		2432.98	0.05501963		2963.01	0.01786721		3493	0.01756131		4023	0.00468873
313.19	0.3571705		843.19	0.08140954		1373.18	0.10256046		1903.19	-0.00784425		2433.18	0.05443344		2963.21	0.01714117		3493.2	0.01707849		4023.2	0.00381599
313.39	0.35723102		843.39	0.08157465		1373.38	0.10312735		1903.39	-0.0081057		2433.38	0.05424446		2963.41	0.01644132		3493.4	0.01734083		4023.4	0.00377824
313.59	0.35726633		843.59	0.08181334		1373.58	0.10332294		1903.59	-0.00783674		2433.58	0.05339448		2963.61	0.01646682		3493.6	0.0179404		4023.6	0.00246618
313.79	0.35699267		843.79	0.08215786		1373.78	0.10246227		1903.79	-0.00607523		2433.78	0.0520313		2963.81	0.0158808		3493.8	0.01834042		4023.8	0.00221211
313.99	0.35722751		843.99	0.08281005		1373.98	0.10128165		1903.99	-0.00498747		2433.98	0.0516822		2964.01	0.01605928		3494	0.01872488		4024	0.00184711
314.19	0.35676637		844.19	0.08270811		1374.18	0.10155148		1904.19	-0.00539116		2434.18	0.05054182		2964.21	0.01534124		3494.2	0.01999353		4024.2	0.00061047
314.39	0.35680744		844.39	0.0826104		1374.38	0.10193586		1904.39	-0.00486515		2434.38	0.05075037		2964.41	0.01596126		3494.4	0.01980147		4024.4	-0.00060411
314.59	0.35679504		844.59	0.08313513		1374.58	0.10194697		1904.59	-0.00467814		2434.58	0.05129662		2964.61	0.01536478		3494.6	0.01983049		4024.6	-0.00090494
314.79	0.3571654		844.79	0.08291062		1374.78	0.10179213		1904.79	-0.00540101		2434.78	0.05127488		2964.81	0.01467468		3494.8	0.01982884		4024.8	-0.0010147
314.99	0.35717843		844.99	0.08302645		1374.98	0.10123952		1904.99	-0.00580855		2434.98	0.0514674		2965.01	0.01516284		3495	0.01965943		4025	-0.00154969
315.19	0.35771128		845.19	0.08194733		1375.18	0.10086181		1905.19	-0.00657636		2435.18	0.05088931		2965.21	0.01541303		3495.2	0.02000009		4025.2	-0.00210347
315.39	0.35797995		845.39	0.08122228		1375.38	0.1008264		1905.39	-0.00648694		2435.38	0.05106912		2965.41	0.01539287		3495.4	0.02001799		4025.4	-0.00174075
315.59	0.35796359		845.59	0.08088103		1375.58	0.10021653		1905.59	-0.00708025		2435.58	0.05067688		2965.61	0.01499558		3495.6	0.01959747		4025.6	-0.00150509
315.79	0.35816681		845.79	0.08102231		1375.78	0.10005238		1905.79	-0.00778875		2435.78	0.05117797		2965.81	0.01482572		3495.8	0.01989873		4025.8	-0.00134923
315.99	0.35863736		845.99	0.08136385		1375.98	0.10010185		1905.99	-0.00725061		2435.98	0.05169188		2966.01	0.01527048		3496	0.01944396		4026	-0.00038872
316.19	0.35870018		846.19	0.08139723		1376.18	0.09994843		1906.19	-0.00757928		2436.18	0.05183478		2966.21	0.01516286		3496.2	0.01960853		4026.2	0.00080375
316.39	0.35906843		846.39	0.08193231		1376.38	0.09985737		1906.39	-0.0071607		2436.38	0.05164723		2966.41	0.01531216		3496.4	0.01900451		4026.4	0.00068756
316.59	0.36066841		846.59	0.0817037		1376.58	0.10004984		1906.59	-0.00723589		2436.58	0.05207592		2966.61	0.01593197		3496.6	0.01868116		4026.6	0.00082016
316.79	0.36183536		846.79	0.08155164		1376.78	0.09998534		1906.79	-0.00739414		2436.78	0.05258226		2966.81	0.01608594		3496.8	0.01922613		4026.8	-0.00010574
316.99	0.36249357		846.99	0.08095177		1376.98	0.09996405		1906.99	-0.00835602		2436.98	0.05336649		2967.01	0.01633347		3497	0.01832249		4027	0.00063727
317.19	0.36333249		847.19	0.08135396		1377.18	0.09994253		1907.19	-0.00824545		2437.18	0.05293016		2967.21	0.01606862		3497.2	0.01828182		4027.2	0.00051951
317.39	0.36343248		847.39	0.0819118		1377.38	0.10014245		1907.39	-0.0083384		2437.38	0.05306491		2967.41	0.01627458		3497.4	0.01833923		4027.4	-0.00002353
317.59	0.36366426		847.59	0.08233691		1377.58	0.10015819		1907.59	-0.00757991		2437.58	0.05266645		2967.61	0.01643914		3497.6	0.01860072		4027.6	-0.00030436
317.79	0.36365283		847.79	0.08307955		1377.78	0.10059764		1907.79	-0.00712331		2437.78	0.05313039		2967.81	0.01613718		3497.8	0.01755081		4027.8	0.00010092
317.99	0.36343067		847.99	0.08351815		1377.98	0.10117491		1907.99	-0.0080376		2437.98	0.05321154		2968.01	0.01675092		3498	0.01749972		4028	0.00017109
318.19	0.36349706		848.19	0.08387428		1378.18	0.10184793		1908.19	-0.00783791		2438.18	0.05297436		2968.21	0.01628102		3498.2	0.01759898		4028.2	0.00007209
318.39	0.36428771		848.39	0.08393125		1378.38	0.10162136		1908.39	-0.00807234		2438.38	0.05346819		2968.41	0.01618752		3498.4	0.01664371		4028.4	-0.00049926
318.59	0.36485025		848.59	0.0840692		1378.58	0.10202535		1908.59	-0.00904849		2438.58	0.05403257		2968.61	0.01611829		3498.6	0.01621578		4028.6	-0.0002724
318.79	0.36420988		848.79	0.08398426		1378.78	0.10201803		1908.79	-0.01026215		2438.78	0.05427906		2968.81	0.01573957		3498.8	0.01642034		4028.8	-0.00041545
318.99	0.36352725		848.99	0.08501208		1378.98	0.10179176		1908.99	-0.00978507		2438.98	0.05440411		2969.01	0.01600425		3499	0.01653106		4029	-0.00009256
319.19	0.36364604		849.19	0.08466198		1379.18	0.10239911		1909.19	-0.01036373		2439.18	0.05513072		2969.21	0.01627593		3499.2	0.01638875		4029.2	0.00021428
319.39	0.36334797		849.39	0.08440349		1379.38	0.10198444		1909.39	-0.01022894		2439.38	0.05630701		2969.41	0.01663691		3499.4	0.01692758		4029.4	0.00038508
319.59	0.36326523		849.59	0.08479891		1379.58	0.10174312		1909.59	-0.01041432		2439.58	0.05570771		2969.61	0.01668251		3499.6	0.017004		4029.6	0.00042185
319.79	0.36404642		849.79	0.08488842		1379.78	0.10248949		1909.79	-0.00999788		2439.78	0.05675241		2969.81	0.01620016		3499.8	0.01803797		4029.8	0.00069095
319.99	0.36334744		849.99	0.0848449		1379.98	0.1031322		1909.99	-0.00939502		2439.98	0.05624217		2970.01	0.01580312		3500	0.01812351		4030	0.00139996
320.19	0.36428509		850.19	0.08478012		1380.18	0.10383179		1910.19	-0.01039668		2440.18	0.0558796		2970.21	0.01509522		3500.2	0.01898662		4030.2	0.00129534
320.39	0.36528247		850.39	0.08537994		1380.38	0.1046848		1910.39	-0.00986577		2440.38	0.05523452		2970.41	0.01621032		3500.4	0.01978389		4030.4	0.00071524
320.59	0.36655662		850.59	0.08538774		1380.58	0.10461677		1910.59	-0.01062401		2440.58	0.0546366		2970.61	0.01685958		3500.6	0.02049038		4030.6	0.00051691
320.79	0.36665768		850.79	0.08539522		1380.78	0.10435548		1910.79	-0.01068099		2440.78	0.05400498		2970.81	0.0169011		3500.8	0.02185259		4030.8	0.00004563
320.99	0.36613131		850.99	0.08412548		1380.98	0.10480366		1910.99	-0.01088992		2440.98	0.05301179		2971.01	0.01791505		3501	0.02131068		4031	0.00002605
321.19	0.36667541		851.19	0.08439716		1381.18	0.10454176		1911.19	-0.01049012		2441.18	0.05272866		2971.21	0.01868098		3501.2	0.02198864		4031.2	0.00019387
321.39	0.36726917		851.39	0.08447118		1381.38	0.10464686		1911.39	-0.01113477		2441.38	0.05214343		2971.41	0.01955088		3501.4	0.02218661		4031.4	0.00074512
321.59	0.36722647		851.59	0.08438943		1381.58	0.10499297		1911.59	-0.01141648		2441.58	0.05181878		2971.61	0.0202557		3501.6	0.02258214		4031.6	0.00129128
321.79	0.36725081		851.79	0.08475356		1381.78	0.1040111		1911.79	-0.01189023		2441.78	0.05215465		2971.81	0.01992751		3501.8	0.02206037		4031.8	0.00234878
321.99	0.36768042		851.99	0.08495695		1381.98	0.10379109		1911.99	-0.01187311		2441.98	0.05156805		2972.01	0.02002257		3502	0.02250676		4032	0.00278733
322.19	0.36896023		852.19	0.08483559		1382.18	0.10382889		1912.19	-0.01069984		2442.18	0.05072914		2972.21	0.02001811		3502.2	0.02233152		4032.2	0.00255543
322.39	0.36901445		852.39	0.08455409		1382.38	0.10269029		1912.39	-0.01069482		2442.38	0.05066412		2972.41	0.01954758		3502.4	0.0211071		4032.4	0.00220315
322.59	0.36871949		852.59	0.08542677		1382.58	0.10309446		1912.59	-0.01055066		2442.58	0.05090062		2972.61	0.01966484		3502.6	0.02111294		4032.6	0.00297178
322.79	0.36818889		852.79	0.08644241		1382.78	0.1022024		1912.79	-0.00962284		2442.78	0.05099384		2972.81	0.0194926		3502.8	0.02087333		4032.8	0.00321865
322.99	0.36762143		852.99	0.08567002		1382.98	0.10244833		1912.99	-0.00838979		2442.98	0.05169981		2973.01	0.01911287		3503	0.02055121		4033	0.00340705
323.19	0.36651718		853.19	0.08518336		1383.18	0.10239453		1913.19	-0.00759619		2443.18	0.05253984		2973.21	0.01896259		3503.2	0.02040763		4033.2	0.002652
323.39	0.36615761		853.39	0.08452582		1383.38	0.10218257		1913.39	-0.00724772		2443.38	0.05255745		2973.41	0.01847605		3503.4	0.02042695		4033.4	0.00200708
323.59	0.36599317		853.59	0.08443161		1383.58	0.10238076		1913.59	-0.00678717		2443.58	0.05205988		2973.61	0.01723131		3503.6	0.0200639		4033.6	0.00150001
323.79	0.36591238		853.79	0.08482085		1383.78	0.10290223		1913.79	-0.0054563		2443.78	0.05221125		2973.81	0.01662951		3503.8	0.02043171		4033.8	0.00151529
323.99	0.36583378		853.99	0.08509305		1383.98	0.10423684		1913.99	-0.00568424		2443.98	0.05192171		2974.01	0.01582222		3504	0.01990564		4034	0.00114631
324.19	0.36678673		854.19	0.08556484		1384.18	0.10499806		1914.19	-0.00627458		2444.18	0.05168633		2974.21	0.01606183		3504.2	0.01995036		4034.2	0.00035938
324.39	0.36663258		854.39	0.08645495		1384.38	0.1052656		1914.39	-0.0062619		2444.38	0.05096119		2974.41	0.01706494		3504.4	0.0203213		4034.4	0.00027327
324.59	0.36725431		854.59	0.08617992		1384.58	0.10524218		1914.59	-0.00683577		2444.58	0.0511637		2974.61	0.01689111		3504.6	0.02047454		4034.6	-0.00004843
324.79	0.36641046		854.79	0.08603587		1384.78	0.1063552		1914.79	-0.00766554		2444.78	0.05141078		2974.81	0.01709151		3504.8	0.02086349		4034.8	0.00013224
324.99	0.36698716		854.99	0.08611207		1384.98	0.10756964		1914.99	-0.00871547		2444.98	0.05167793		2975.01	0.01809167		3505	0.02045677		4035	-0.00052988
325.19	0.36846001		855.19	0.08659478		1385.18	0.10747092		1915.19	-0.00984374		2445.18	0.05156155		2975.21	0.01853634		3505.2	0.02063881		4035.2	-0.0003259
325.39	0.3685851		855.39	0.08675073		1385.38	0.10803405		1915.39	-0.01123422		2445.38	0.05092687		2975.41	0.01842499		3505.4	0.02169315		4035.4	0.00009255
325.59	0.36935487		855.59	0.08713674		1385.58	0.10807591		1915.59	-0.01174857		2445.58	0.05090492		2975.61	0.01816997		3505.6	0.02142016		4035.6	0.00012596
325.79	0.37043304		855.79	0.08759022		1385.78	0.10819663		1915.79	-0.01198719		2445.78	0.05102559		2975.81	0.01732399		3505.8	0.02059669		4035.8	0.00133819
325.99	0.37159864		855.99	0.08792859		1385.98	0.10913446		1915.99	-0.01105175		2445.98	0.05032355		2976.01	0.01665955		3506	0.02028048		4036	0.00149641
326.19	0.37194737		856.19	0.08735514		1386.18	0.10945365		1916.19	-0.01098385		2446.18	0.05049217		2976.21	0.01687995		3506.2	0.02001924		4036.2	0.00093639
326.39	0.37171625		856.39	0.08721991		1386.38	0.10909452		1916.39	-0.01111039		2446.38	0.0513536		2976.41	0.01610269		3506.4	0.01901521		4036.4	0.00114605
326.59	0.37134076		856.59	0.08732341		1386.58	0.10972565		1916.59	-0.0104792		2446.58	0.05187234		2976.61	0.01607881		3506.6	0.01939226		4036.6	0.00219324
326.79	0.37128087		856.79	0.08743348		1386.78	0.10964267		1916.79	-0.01026808		2446.78	0.05218961		2976.81	0.01646388		3506.8	0.0189671		4036.8	0.00159094
326.99	0.37079546		856.99	0.08590465		1386.98	0.10992365		1916.99	-0.00977541		2446.98	0.05327379		2977.01	0.01574586		3507	0.01895853		4037	0.00146062
327.19	0.37016414		857.19	0.08714768		1387.18	0.10911728		1917.19	-0.00908625		2447.18	0.05332046		2977.21	0.01579739		3507.2	0.0193124		4037.2	0.00073685
327.39	0.37069029		857.39	0.08618021		1387.38	0.10806419		1917.39	-0.00915411		2447.38	0.05312028		2977.41	0.01617868		3507.4	0.0188333		4037.4	0.00040619
327.59	0.37128746		857.59	0.08638908		1387.58	0.10694862		1917.59	-0.00853037		2447.58	0.05389867		2977.61	0.01600198		3507.6	0.01846591		4037.6	0.00014439
327.79	0.37060509		857.79	0.08707508		1387.78	0.10667424		1917.79	-0.00811383		2447.78	0.05380642		2977.81	0.01634221		3507.8	0.01829305		4037.8	0.00023619
327.99	0.37222247		857.99	0.0875027		1387.98	0.10616578		1917.99	-0.00833816		2447.98	0.0539015		2978.01	0.01650681		3508	0.0177717		4038	-0.00013187
328.19	0.37257508		858.19	0.08872349		1388.18	0.10544149		1918.19	-0.00884651		2448.18	0.05291406		2978.21	0.01734989		3508.2	0.01755048		4038.2	-0.0012577
328.39	0.37288632		858.39	0.08971936		1388.38	0.10490347		1918.39	-0.00903787		2448.38	0.05314836		2978.41	0.01825095		3508.4	0.01744956		4038.4	-0.00125125
328.59	0.37377932		858.59	0.08979609		1388.58	0.10458665		1918.59	-0.00925047		2448.58	0.0534673		2978.61	0.018867		3508.6	0.01737707		4038.6	-0.00182163
328.79	0.37436886		858.79	0.09076396		1388.78	0.10434686		1918.79	-0.01011335		2448.78	0.05331443		2978.81	0.01962266		3508.8	0.01772846		4038.8	-0.00136579
328.99	0.37557036		858.99	0.09118249		1388.98	0.1048312		1918.99	-0.00973869		2448.98	0.05228784		2979.01	0.02035435		3509	0.01805361		4039	-0.00216471
329.19	0.37625071		859.19	0.09092502		1389.18	0.10487085		1919.19	-0.00974212		2449.18	0.05136924		2979.21	0.01997344		3509.2	0.01864694		4039.2	-0.00187306
329.39	0.37606128		859.39	0.09047064		1389.38	0.1050964		1919.39	-0.00876744		2449.38	0.05117142		2979.41	0.01949527		3509.4	0.0189147		4039.4	-0.00114051
329.59	0.37662787		859.59	0.08957006		1389.58	0.10535205		1919.59	-0.00805605		2449.58	0.05069867		2979.61	0.01948426		3509.6	0.01850948		4039.6	-0.00067659
329.79	0.37706396		859.79	0.08929828		1389.78	0.105725		1919.79	-0.00768645		2449.78	0.05034694		2979.81	0.0192269		3509.8	0.01883885		4039.8	-0.00043151
329.99	0.37738758		859.99	0.08880074		1389.98	0.10651956		1919.99	-0.00737741		2449.98	0.0504155		2980.01	0.01938168		3510	0.01946001		4040	-0.00036413
330.19	0.37687634		860.19	0.08815736		1390.18	0.10654504		1920.19	-0.00781223		2450.18	0.05090675		2980.21	0.01999008		3510.2	0.01986602		4040.2	-0.00031304
330.39	0.37667605		860.39	0.08818318		1390.38	0.10661876		1920.39	-0.00780766		2450.38	0.05112605		2980.41	0.01908566		3510.4	0.01954513		4040.4	0.0001618
330.59	0.37580267		860.59	0.08869115		1390.58	0.1068254		1920.59	-0.00750172		2450.58	0.05202171		2980.61	0.01862274		3510.6	0.02073686		4040.6	0.00155052
330.79	0.37610069		860.79	0.08931046		1390.78	0.10803463		1920.79	-0.00753761		2450.78	0.05288436		2980.81	0.01898189		3510.8	0.02064077		4040.8	0.00119119
330.99	0.37675535		860.99	0.08854593		1390.98	0.10765664		1920.99	-0.00729335		2450.98	0.05418567		2981.01	0.01848265		3511	0.02080891		4041	0.0020343
331.19	0.377292		861.19	0.08867102		1391.18	0.10784515		1921.19	-0.00733926		2451.18	0.05453335		2981.21	0.01794865		3511.2	0.02140584		4041.2	0.00212316
331.39	0.37766031		861.39	0.08777871		1391.38	0.10819819		1921.39	-0.00735148		2451.38	0.05441892		2981.41	0.01747646		3511.4	0.02121534		4041.4	0.00161037
331.59	0.37840942		861.59	0.08882617		1391.58	0.10938264		1921.59	-0.00764888		2451.58	0.05587186		2981.61	0.01704271		3511.6	0.02138887		4041.6	0.00186357
331.79	0.37783573		861.79	0.08956634		1391.78	0.11037862		1921.79	-0.00829892		2451.78	0.05511745		2981.81	0.01683864		3511.8	0.02093222		4041.8	0.00180503
331.99	0.3787451		861.99	0.09062022		1391.98	0.10992883		1921.99	-0.00885322		2451.98	0.05492467		2982.01	0.01752152		3512	0.02048519		4042	0.00116898
332.19	0.37804058		862.19	0.09129297		1392.18	0.11052996		1922.19	-0.00960912		2452.18	0.05415935		2982.21	0.01827788		3512.2	0.01969245		4042.2	0.00084163
332.39	0.37872516		862.39	0.09195665		1392.38	0.11112668		1922.39	-0.00985191		2452.38	0.05456549		2982.41	0.01932793		3512.4	0.01944307		4042.4	0.00137631
332.59	0.37861114		862.59	0.092627		1392.58	0.11119839		1922.59	-0.00991893		2452.58	0.05313454		2982.61	0.01892887		3512.6	0.01953735		4042.6	0.00091952
332.79	0.37894923		862.79	0.09291193		1392.78	0.11107459		1922.79	-0.00929273		2452.78	0.05308807		2982.81	0.01900977		3512.8	0.01927099		4042.8	0.00078625
332.99	0.3788804		862.99	0.09162371		1392.98	0.11184643		1922.99	-0.00846629		2452.98	0.05298971		2983.01	0.0193816		3513	0.01890762		4043	-0.0005196
333.19	0.37902076		863.19	0.09118812		1393.18	0.11149317		1923.19	-0.00827944		2453.18	0.0526069		2983.21	0.01852993		3513.2	0.01882122		4043.2	-0.00072379
333.39	0.37849173		863.39	0.09030044		1393.38	0.11110756		1923.39	-0.00797145		2453.38	0.05257992		2983.41	0.01816217		3513.4	0.01855108		4043.4	-0.00094333
333.59	0.37817778		863.59	0.08988356		1393.58	0.11153527		1923.59	-0.00843238		2453.58	0.052154		2983.61	0.01793642		3513.6	0.01845275		4043.6	-0.00088352
333.79	0.37835178		863.79	0.08977259		1393.78	0.11139134		1923.79	-0.00811093		2453.78	0.05240373		2983.81	0.01830177		3513.8	0.01863127		4043.8	-0.00100785
333.99	0.37799362		863.99	0.09024135		1393.98	0.11249727		1923.99	-0.00831685		2453.98	0.05310863		2984.01	0.01771547		3514	0.01827417		4044	-0.00072821
334.19	0.37810471		864.19	0.09032446		1394.18	0.11211234		1924.19	-0.00751412		2454.18	0.05314119		2984.21	0.01740871		3514.2	0.01809508		4044.2	-0.00080751
334.39	0.37784336		864.39	0.09065026		1394.38	0.11237271		1924.39	-0.00777738		2454.38	0.05467013		2984.41	0.01691406		3514.4	0.01772933		4044.4	-0.00144958
334.59	0.37790863		864.59	0.0901407		1394.58	0.11294337		1924.59	-0.00737127		2454.58	0.05625232		2984.61	0.01701381		3514.6	0.01860228		4044.6	-0.00127268
334.79	0.37877814		864.79	0.09028624		1394.78	0.11361139		1924.79	-0.00745035		2454.78	0.05714227		2984.81	0.01758452		3514.8	0.0175859		4044.8	-0.00119351
334.99	0.37897627		864.99	0.09032172		1394.98	0.1134355		1924.99	-0.00771172		2454.98	0.05756909		2985.01	0.01628615		3515	0.01756651		4045	-0.00042012
335.19	0.37962174		865.19	0.09046392		1395.18	0.11450127		1925.19	-0.00776924		2455.18	0.05748901		2985.21	0.01567255		3515.2	0.01739693		4045.2	0.00002861
335.39	0.37903932		865.39	0.09074596		1395.38	0.11506207		1925.39	-0.00773164		2455.38	0.05735174		2985.41	0.0166421		3515.4	0.01719286		4045.4	-0.00013842
335.59	0.37948046		865.59	0.09138209		1395.58	0.11547535		1925.59	-0.00857224		2455.58	0.05808702		2985.61	0.01723418		3515.6	0.01714128		4045.6	0.00021181
335.79	0.37854078		865.79	0.09198034		1395.78	0.11569539		1925.79	-0.00899867		2455.78	0.05748416		2985.81	0.01704861		3515.8	0.01607108		4045.8	0.00015455
335.99	0.37827191		865.99	0.09280826		1395.98	0.11480167		1925.99	-0.00939522		2455.98	0.05670114		2986.01	0.01751627		3516	0.01607099		4046	0.00000952
336.19	0.37832756		866.19	0.09281624		1396.18	0.11487708		1926.19	-0.00884438		2456.18	0.05570939		2986.21	0.01824544		3516.2	0.01637524		4046.2	0.00053254
336.39	0.37952706		866.39	0.092761		1396.38	0.11406844		1926.39	-0.00875395		2456.38	0.05484883		2986.41	0.01824045		3516.4	0.01651481		4046.4	0.00052181
336.59	0.37984154		866.59	0.09265416		1396.58	0.11363006		1926.59	-0.00854649		2456.58	0.05445849		2986.61	0.01781915		3516.6	0.01639707		4046.6	-0.00088433
336.79	0.38023526		866.79	0.09162529		1396.78	0.11315874		1926.79	-0.00858231		2456.78	0.05546017		2986.81	0.01800744		3516.8	0.01651357		4046.8	-0.00146708
336.99	0.38032761		866.99	0.0905813		1396.98	0.113457		1926.99	-0.0088388		2456.98	0.05530014		2987.01	0.0177073		3517	0.01741294		4047	-0.00193869
337.19	0.38100889		867.19	0.09089289		1397.18	0.11321256		1927.19	-0.00896899		2457.18	0.05450526		2987.21	0.01749993		3517.2	0.0174782		4047.2	-0.00141274
337.39	0.38115616		867.39	0.09086945		1397.38	0.1129636		1927.39	-0.00948652		2457.38	0.05455451		2987.41	0.01789378		3517.4	0.01754897		4047.4	-0.00105342
337.59	0.38161468		867.59	0.09056246		1397.58	0.11351766		1927.59	-0.01012011		2457.58	0.05398024		2987.61	0.01768846		3517.6	0.01730525		4047.6	-0.00168359
337.79	0.38256733		867.79	0.09057253		1397.78	0.11378399		1927.79	-0.00990321		2457.78	0.05415867		2987.81	0.01756638		3517.8	0.01807449		4047.8	-0.00168458
337.99	0.38363783		867.99	0.09164186		1397.98	0.11449716		1927.99	-0.00984163		2457.98	0.05435568		2988.01	0.0173268		3518	0.01815812		4048	-0.00152769
338.19	0.3848796		868.19	0.09164186		1398.18	0.11444714		1928.19	-0.01012557		2458.18	0.05375018		2988.21	0.01789525		3518.2	0.0192206		4048.2	-0.00159604
338.39	0.38509989		868.39	0.09177984		1398.38	0.11459208		1928.39	-0.01091835		2458.38	0.05509435		2988.41	0.01735644		3518.4	0.01975047		4048.4	-0.00116794
338.59	0.38549617		868.59	0.09134557		1398.58	0.11526561		1928.59	-0.01053363		2458.58	0.05502968		2988.61	0.01755602		3518.6	0.02072684		4048.6	-0.00065396
338.79	0.38620533		868.79	0.09198478		1398.78	0.11531712		1928.79	-0.01017594		2458.78	0.05504905		2988.81	0.01695906		3518.8	0.0206102		4048.8	0.00022955
338.99	0.38631944		868.99	0.09178828		1398.98	0.11535783		1928.99	-0.01011404		2458.98	0.05486182		2989.01	0.01625647		3519	0.0208015		4049	0.00024661
339.19	0.38686354		869.19	0.0910837		1399.18	0.1151419		1929.19	-0.0094148		2459.18	0.05514696		2989.21	0.01695865		3519.2	0.02062138		4049.2	0.00119062
339.39	0.38621159		869.39	0.09109274		1399.38	0.11506423		1929.39	-0.00923424		2459.38	0.05524398		2989.41	0.01771196		3519.4	0.0211978		4049.4	0.00084466
339.59	0.38623264		869.59	0.09208505		1399.58	0.11503151		1929.59	-0.00943295		2459.58	0.05486964		2989.61	0.01725207		3519.6	0.02082292		4049.6	0.00010993
339.79	0.38583011		869.79	0.09212374		1399.78	0.11406162		1929.79	-0.00935177		2459.78	0.05463576		2989.81	0.01622782		3519.8	0.02028918		4049.8	-0.00003947
339.99	0.38517188		869.99	0.0918469		1399.98	0.11241408		1929.99	-0.00969513		2459.98	0.05440749		2990.01	0.01577947		3520	0.01999781		4050	-0.00007125
340.19	0.38524826		870.19	0.09148527		1400.18	0.11176777		1930.19	-0.00912101		2460.18	0.05490884		2990.21	0.01595459		3520.2	0.02008546		4050.2	-0.00064288
340.39	0.38611554		870.39	0.09185728		1400.38	0.11085923		1930.39	-0.00928706		2460.38	0.05483015		2990.41	0.01571215		3520.4	0.01956607		4050.4	-0.000939
340.59	0.38573772		870.59	0.09290419		1400.58	0.11126714		1930.59	-0.00886702		2460.58	0.05513924		2990.61	0.01545567		3520.6	0.01998837		4050.6	-0.00215288
340.79	0.38526736		870.79	0.09286855		1400.78	0.11153795		1930.79	-0.00887892		2460.78	0.05469288		2990.81	0.01545394		3520.8	0.0203969		4050.8	-0.00146139
340.99	0.38538037		870.99	0.0928168		1400.98	0.11094503		1930.99	-0.00786772		2460.98	0.05434668		2991.01	0.01522214		3521	0.01981906		4051	-0.00159161
341.19	0.3854826		871.19	0.09364213		1401.18	0.11149464		1931.19	-0.00800377		2461.18	0.05435967		2991.21	0.01535057		3521.2	0.01878393		4051.2	-0.00115638
341.39	0.38518747		871.39	0.09361614		1401.38	0.11173153		1931.39	-0.00834973		2461.38	0.05492561		2991.41	0.01568292		3521.4	0.0187132		4051.4	-0.00123167
341.59	0.38611451		871.59	0.09368668		1401.58	0.11202634		1931.59	-0.00870897		2461.58	0.0547542		2991.61	0.01529087		3521.6	0.01853817		4051.6	-0.00179391
341.79	0.38662409		871.79	0.09433432		1401.78	0.11285972		1931.79	-0.00899449		2461.78	0.05519384		2991.81	0.01534409		3521.8	0.01953552		4051.8	-0.00051328
341.99	0.38776409		871.99	0.09530129		1401.98	0.11348037		1931.99	-0.00924159		2461.98	0.05541428		2992.01	0.01603488		3522	0.01949897		4052	-0.00018988
342.19	0.38776345		872.19	0.09587091		1402.18	0.11421583		1932.19	-0.00992351		2462.18	0.05513564		2992.21	0.01526622		3522.2	0.02008023		4052.2	0.00039526
342.39	0.38745096		872.39	0.09572254		1402.38	0.11558305		1932.39	-0.00984479		2462.38	0.05602077		2992.41	0.01469728		3522.4	0.02015911		4052.4	0.00066189
342.59	0.38718008		872.59	0.09570855		1402.58	0.116505		1932.59	-0.00970244		2462.58	0.05572647		2992.61	0.01549175		3522.6	0.0197904		4052.6	0.00041526
342.79	0.38810795		872.79	0.09429679		1402.78	0.1167694		1932.79	-0.00975648		2462.78	0.05599339		2992.81	0.0161868		3522.8	0.01971206		4052.8	0.00093044
342.99	0.38812803		872.99	0.0941654		1402.98	0.1176245		1932.99	-0.01010346		2462.98	0.05613644		2993.01	0.01690638		3523	0.01932416		4053	0.00087247
343.19	0.38844281		873.19	0.09405501		1403.18	0.11792023		1933.19	-0.00946871		2463.18	0.05634702		2993.21	0.01677854		3523.2	0.01912253		4053.2	0.00220121
343.39	0.38759839		873.39	0.09452466		1403.38	0.1175734		1933.39	-0.01051706		2463.38	0.05537385		2993.41	0.01685741		3523.4	0.0196874		4053.4	0.00167616
343.59	0.38743408		873.59	0.09457743		1403.58	0.117007		1933.59	-0.01098854		2463.58	0.05485765		2993.61	0.01630781		3523.6	0.01895326		4053.6	0.00149769
343.79	0.387205		873.79	0.09420501		1403.78	0.11667354		1933.79	-0.01115484		2463.78	0.05498195		2993.81	0.01558594		3523.8	0.01889069		4053.8	0.00154696
343.99	0.38721076		873.99	0.09391358		1403.98	0.11571207		1933.99	-0.01137005		2463.98	0.05509442		2994.01	0.01602041		3524	0.01881269		4054	0.00159894
344.19	0.38806771		874.19	0.09385187		1404.18	0.11573712		1934.19	-0.01121858		2464.18	0.05486563		2994.21	0.01637919		3524.2	0.01922875		4054.2	0.0013824
344.39	0.3884418		874.39	0.0936398		1404.38	0.11544242		1934.39	-0.0113841		2464.38	0.05415664		2994.41	0.01726446		3524.4	0.01942749		4054.4	0.00200946
344.59	0.38830756		874.59	0.0932266		1404.58	0.11457952		1934.59	-0.01126166		2464.58	0.05349275		2994.61	0.01728153		3524.6	0.02039576		4054.6	0.00146797
344.79	0.3877812		874.79	0.09288752		1404.78	0.11433733		1934.79	-0.01127633		2464.78	0.05325604		2994.81	0.01842766		3524.8	0.02001063		4054.8	0.00198
344.99	0.38781604		874.99	0.09227522		1404.98	0.11356089		1934.99	-0.01136714		2464.98	0.05348982		2995.01	0.01808152		3525	0.01963224		4055	0.00136484
345.19	0.38856762		875.19	0.09315609		1405.18	0.1148202		1935.19	-0.01161338		2465.18	0.05372509		2995.21	0.01872141		3525.2	0.01922098		4055.2	0.00187538
345.39	0.38911799		875.39	0.09252529		1405.38	0.1149342		1935.39	-0.01092224		2465.38	0.05442991		2995.41	0.01905483		3525.4	0.01936217		4055.4	0.00145907
345.59	0.39001462		875.59	0.09277696		1405.58	0.11503307		1935.59	-0.01064197		2465.58	0.05422334		2995.61	0.01885192		3525.6	0.01945613		4055.6	0.00131446
345.79	0.38957115		875.79	0.09364392		1405.78	0.11548169		1935.79	-0.01137163		2465.78	0.05415389		2995.81	0.01874503		3525.8	0.02004194		4055.8	0.00114764
345.99	0.38995753		875.99	0.09470813		1405.98	0.11563493		1935.99	-0.01139134		2465.98	0.05492276		2996.01	0.01860973		3526	0.01862472		4056	0.00084582
346.19	0.38955255		876.19	0.0948874		1406.18	0.11620749		1936.19	-0.01163038		2466.18	0.05553014		2996.21	0.01806926		3526.2	0.01879329		4056.2	0.00109505
346.39	0.38970376		876.39	0.09443611		1406.38	0.11709708		1936.39	-0.01114129		2466.38	0.05654865		2996.41	0.01840496		3526.4	0.01863205		4056.4	0.00132736
346.59	0.38944774		876.59	0.09471282		1406.58	0.11732332		1936.59	-0.01117478		2466.58	0.05700436		2996.61	0.01900399		3526.6	0.01781906		4056.6	0.00111569
346.79	0.39018311		876.79	0.09519062		1406.78	0.11772834		1936.79	-0.01128803		2466.78	0.0566035		2996.81	0.01941087		3526.8	0.01758296		4056.8	0.00136827
346.99	0.39003559		876.99	0.09726632		1406.98	0.11824705		1936.99	-0.01122237		2466.98	0.05684664		2997.01	0.01919295		3527	0.01734452		4057	0.00254018
347.19	0.38939182		877.19	0.09786338		1407.18	0.11761637		1937.19	-0.01019715		2467.18	0.0566147		2997.21	0.01855218		3527.2	0.01750512		4057.2	0.00312408
347.39	0.38846445		877.39	0.09826149		1407.38	0.11732773		1937.39	-0.01033228		2467.38	0.05653089		2997.41	0.01871249		3527.4	0.01778658		4057.4	0.0027262
347.59	0.38855613		877.59	0.09869616		1407.58	0.11756969		1937.59	-0.00978374		2467.58	0.05661458		2997.61	0.01841302		3527.6	0.01776078		4057.6	0.00298339
347.79	0.38836308		877.79	0.09869712		1407.78	0.11768056		1937.79	-0.00980179		2467.78	0.05679504		2997.81	0.01845316		3527.8	0.01872007		4057.8	0.00284864
347.99	0.38977847		877.99	0.09943676		1407.98	0.11730469		1937.99	-0.0098388		2467.98	0.05657228		2998.01	0.01902236		3528	0.01896703		4058	0.0025506
348.19	0.38975996		878.19	0.09960069		1408.18	0.11756338		1938.19	-0.00968387		2468.18	0.05728772		2998.21	0.0189107		3528.2	0.01978881		4058.2	0.00220962
348.39	0.38982978		878.39	0.09991245		1408.38	0.11753748		1938.39	-0.00933309		2468.38	0.0566575		2998.41	0.01930895		3528.4	0.02080233		4058.4	0.00243151
348.59	0.39047254		878.59	0.10025269		1408.58	0.11714109		1938.59	-0.00930392		2468.58	0.05685262		2998.61	0.01875396		3528.6	0.02227447		4058.6	0.00228947
348.79	0.39090853		878.79	0.10128361		1408.78	0.11817221		1938.79	-0.00856925		2468.78	0.05644738		2998.81	0.01898277		3528.8	0.02207911		4058.8	0.00188302
348.99	0.39205899		878.99	0.10182966		1408.98	0.11850579		1938.99	-0.00853301		2468.98	0.05628862		2999.01	0.01843838		3529	0.02183153		4059	0.00152199
349.19	0.39310911		879.19	0.1020294		1409.18	0.11935641		1939.19	-0.0068865		2469.18	0.05646685		2999.21	0.01856907		3529.2	0.02176964		4059.2	0.00100913
349.39	0.39385531		879.39	0.10097665		1409.38	0.11993686		1939.39	-0.00607532		2469.38	0.05708649		2999.41	0.01718129		3529.4	0.02261397		4059.4	0.0003619
349.59	0.39406477		879.59	0.10124972		1409.58	0.1199286		1939.59	-0.00622913		2469.58	0.05699093		2999.61	0.01677679		3529.6	0.02259555		4059.6	-0.00072605
349.79	0.39418354		879.79	0.10102355		1409.78	0.11955614		1939.79	-0.00702387		2469.78	0.05756402		2999.81	0.01655925		3529.8	0.02201564		4059.8	-0.0011871
349.99	0.39457787		879.99	0.10043757		1409.98	0.1197389		1939.99	-0.00748687		2469.98	0.05843549		3000.01	0.01605492		3530	0.02052113		4060	-0.00124277
350.19	0.39517646		880.19	0.0997338		1410.18	0.11976532		1940.19	-0.00815978		2470.18	0.05878154		3000.21	0.01592653		3530.2	0.02119351		4060.2	-0.00140624
350.39	0.39588907		880.39	0.09974857		1410.38	0.11988652		1940.39	-0.00823503		2470.38	0.05921995		3000.41	0.01536725		3530.4	0.02054718		4060.4	-0.00087727
350.59	0.3954518		880.59	0.09944183		1410.58	0.12048143		1940.59	-0.00945532		2470.58	0.05852102		3000.61	0.01533199		3530.6	0.0193715		4060.6	-0.00068614
350.79	0.39639232		880.79	0.09955036		1410.78	0.12080615		1940.79	-0.00984325		2470.78	0.05748362		3000.81	0.01542397		3530.8	0.01906451		4060.8	-0.00120553
350.99	0.39602407		880.99	0.098912		1410.98	0.12071631		1940.99	-0.00959321		2470.98	0.05808933		3001.01	0.01603383		3531	0.0187328		4061	-0.0006769
351.19	0.39563905		881.19	0.09849327		1411.18	0.12057414		1941.19	-0.00933511		2471.18	0.05741793		3001.21	0.01627671		3531.2	0.01902846		4061.2	-0.0017199
351.39	0.39547828		881.39	0.09812806		1411.38	0.11990025		1941.39	-0.00923123		2471.38	0.05746001		3001.41	0.01571504		3531.4	0.01893954		4061.4	-0.00134322
351.59	0.39562189		881.59	0.09804573		1411.58	0.11936338		1941.59	-0.00982133		2471.58	0.05679892		3001.61	0.01540921		3531.6	0.0184612		4061.6	-0.0009396
351.79	0.39588625		881.79	0.09776077		1411.78	0.11901198		1941.79	-0.01032898		2471.78	0.05649291		3001.81	0.01572421		3531.8	0.01905355		4061.8	-0.00123082
351.99	0.39631707		881.99	0.09800192		1411.98	0.11952574		1941.99	-0.01075544		2471.98	0.05607376		3002.01	0.01649085		3532	0.01905565		4062	-0.0014056
352.19	0.39608814		882.19	0.09758901		1412.18	0.11989543		1942.19	-0.01072937		2472.18	0.05603503		3002.21	0.01697788		3532.2	0.01991156		4062.2	-0.0011798
352.39	0.39593578		882.39	0.09753274		1412.38	0.1204482		1942.39	-0.0101764		2472.38	0.05505183		3002.41	0.01762191		3532.4	0.02046256		4062.4	-0.00111358
352.59	0.39602653		882.59	0.09754877		1412.58	0.12121753		1942.59	-0.00996712		2472.58	0.05546972		3002.61	0.0180955		3532.6	0.02072865		4062.6	-0.00107063
352.79	0.39570092		882.79	0.09858365		1412.78	0.12113013		1942.79	-0.00913276		2472.78	0.0550284		3002.81	0.01816536		3532.8	0.02122262		4062.8	-0.00147245
352.99	0.39559863		882.99	0.09871765		1412.98	0.12144777		1942.99	-0.00891254		2472.98	0.05458554		3003.01	0.01953824		3533	0.02128408		4063	-0.00038788
353.19	0.39575436		883.19	0.0979186		1413.18	0.12197613		1943.19	-0.0075434		2473.18	0.05506953		3003.21	0.01914971		3533.2	0.02310472		4063.2	-0.00107286
353.39	0.39587156		883.39	0.09783324		1413.38	0.12169278		1943.39	-0.00772218		2473.38	0.05462837		3003.41	0.01869421		3533.4	0.02431746		4063.4	-0.00064926
353.59	0.39522248		883.59	0.09830298		1413.58	0.12186974		1943.59	-0.00792687		2473.58	0.05429097		3003.61	0.01868821		3533.6	0.02409404		4063.6	-0.00096275
353.79	0.3956808		883.79	0.09868355		1413.78	0.12167437		1943.79	-0.00848747		2473.78	0.05449748		3003.81	0.01906814		3533.8	0.0240841		4063.8	-0.00088154
353.99	0.39611465		883.99	0.09909287		1413.98	0.1229042		1943.99	-0.00910409		2473.98	0.05525463		3004.01	0.01845541		3534	0.02372224		4064	-0.00046318
354.19	0.39668442		884.19	0.09941958		1414.18	0.12317643		1944.19	-0.00849856		2474.18	0.05561426		3004.21	0.01840814		3534.2	0.02402671		4064.2	0.00032899
354.39	0.39795411		884.39	0.10017805		1414.38	0.12376802		1944.39	-0.00852172		2474.38	0.0554892		3004.41	0.01754047		3534.4	0.02329624		4064.4	0.00087976
354.59	0.39867563		884.59	0.10037367		1414.58	0.12439531		1944.59	-0.00857043		2474.58	0.05535595		3004.61	0.01718835		3534.6	0.02293072		4064.6	0.00075772
354.79	0.39957992		884.79	0.10127867		1414.78	0.12363172		1944.79	-0.00774048		2474.78	0.05519886		3004.81	0.01723284		3534.8	0.02267353		4064.8	-0.00005848
354.99	0.3996501		884.99	0.10212579		1414.98	0.12341142		1944.99	-0.00755518		2474.98	0.05512504		3005.01	0.01685077		3535	0.02182737		4065	0.00069794
355.19	0.40072007		885.19	0.1033462		1415.18	0.1230427		1945.19	-0.00798291		2475.18	0.0544392		3005.21	0.01633724		3535.2	0.02189234		4065.2	0.00137771
355.39	0.40036849		885.39	0.10334104		1415.38	0.1218784		1945.39	-0.00778275		2475.38	0.05450788		3005.41	0.01523001		3535.4	0.02126149		4065.4	0.0019491
355.59	0.40075694		885.59	0.10342375		1415.58	0.12189549		1945.59	-0.00918516		2475.58	0.0545707		3005.61	0.01546331		3535.6	0.02079175		4065.6	0.00143503
355.79	0.40082634		885.79	0.10277876		1415.78	0.12157232		1945.79	-0.00979124		2475.78	0.0547544		3005.81	0.01659808		3535.8	0.02116874		4065.8	0.00090888
355.99	0.40164119		885.99	0.10221254		1415.98	0.12207031		1945.99	-0.00995447		2475.98	0.05512358		3006.01	0.01706765		3536	0.02108868		4066	0.00095727
356.19	0.40238667		886.19	0.10201364		1416.18	0.12190781		1946.19	-0.00954242		2476.18	0.05490251		3006.21	0.01809788		3536.2	0.02058964		4066.2	0.00061888
356.39	0.4021513		886.39	0.10167448		1416.38	0.12173178		1946.39	-0.00902466		2476.38	0.05522249		3006.41	0.01812882		3536.4	0.02011524		4066.4	0.00046583
356.59	0.40263311		886.59	0.10182326		1416.58	0.12174465		1946.59	-0.00933779		2476.58	0.05568305		3006.61	0.01819681		3536.6	0.0209306		4066.6	0.00081015
356.79	0.40278502		886.79	0.10199424		1416.78	0.12127155		1946.79	-0.00899838		2476.78	0.05565391		3006.81	0.01880018		3536.8	0.02174504		4066.8	0.00096305
356.99	0.4036003		886.99	0.10120175		1416.98	0.12165296		1946.99	-0.00935885		2476.98	0.0556199		3007.01	0.02071338		3537	0.02277601		4067	0.00167305
357.19	0.40319887		887.19	0.10082379		1417.18	0.12149008		1947.19	-0.00932898		2477.18	0.05656267		3007.21	0.0203992		3537.2	0.02388961		4067.2	0.0015932
357.39	0.40269257		887.39	0.10106914		1417.38	0.12102978		1947.39	-0.00935706		2477.38	0.05674516		3007.41	0.02058668		3537.4	0.02378273		4067.4	0.00156165
357.59	0.40204537		887.59	0.0994296		1417.58	0.12201418		1947.59	-0.00917707		2477.58	0.05782708		3007.61	0.02035879		3537.6	0.02355964		4067.6	0.00070571
357.79	0.40289316		887.79	0.09958867		1417.78	0.12238045		1947.79	-0.00962462		2477.78	0.05826523		3007.81	0.021141		3537.8	0.02377024		4067.8	0.00001689
357.99	0.40321933		887.99	0.0989542		1417.98	0.12423905		1947.99	-0.00927969		2477.98	0.05803965		3008.01	0.02083597		3538	0.02352952		4068	0.00015659
358.19	0.40284529		888.19	0.09928455		1418.18	0.1244799		1948.19	-0.00821379		2478.18	0.05736258		3008.21	0.02104689		3538.2	0.0225662		4068.2	0.00044303
358.39	0.4036388		888.39	0.09977384		1418.38	0.12442101		1948.39	-0.00919831		2478.38	0.05677962		3008.41	0.02012004		3538.4	0.02198783		4068.4	-0.00029373
358.59	0.40363151		888.59	0.10042043		1418.58	0.12468014		1948.59	-0.00900729		2478.58	0.05723261		3008.61	0.01961036		3538.6	0.02191447		4068.6	0.00027761
358.79	0.40315068		888.79	0.10131815		1418.78	0.12403532		1948.79	-0.00855998		2478.78	0.05691885		3008.81	0.01887075		3538.8	0.02161717		4068.8	0.00024168
358.99	0.40321301		888.99	0.10189513		1418.98	0.12474302		1948.99	-0.00918864		2478.98	0.05651445		3009.01	0.01768215		3539	0.02095628		4069	0.00066064
359.19	0.40278955		889.19	0.1022638		1419.18	0.12445425		1949.19	-0.00888607		2479.18	0.05675374		3009.21	0.01745		3539.2	0.02122165		4069.2	0.00021585
359.39	0.40142051		889.39	0.10223474		1419.38	0.12377915		1949.39	-0.00883874		2479.38	0.05688081		3009.41	0.01714244		3539.4	0.02113759		4069.4	-0.00015976
359.59	0.40150206		889.59	0.10197759		1419.58	0.12412083		1949.59	-0.00944079		2479.58	0.05710839		3009.61	0.01688131		3539.6	0.02054111		4069.6	-0.00109266
359.79	0.40143369		889.79	0.10223663		1419.78	0.12430415		1949.79	-0.00919459		2479.78	0.05662594		3009.81	0.01639791		3539.8	0.02122446		4069.8	-0.00106604
359.99	0.40229679		889.99	0.10212419		1419.98	0.12444319		1949.99	-0.00912058		2479.98	0.05628225		3010.01	0.0157445		3540	0.02086668		4070	-0.0014389
360.19	0.40209016		890.19	0.10253243		1420.18	0.12385249		1950.19	-0.00943646		2480.18	0.05604413		3010.21	0.01593664		3540.2	0.02061786		4070.2	-0.00203972
360.39	0.40136516		890.39	0.10276354		1420.38	0.12332671		1950.39	-0.0092612		2480.38	0.05581245		3010.41	0.0151185		3540.4	0.02108558		4070.4	-0.00179222
360.59	0.40153652		890.59	0.10300879		1420.58	0.12294973		1950.59	-0.00938348		2480.58	0.05653465		3010.61	0.01625482		3540.6	0.02219666		4070.6	-0.00272423
360.79	0.40074541		890.79	0.10290925		1420.78	0.12386579		1950.79	-0.01000358		2480.78	0.05615356		3010.81	0.01670189		3540.8	0.02293024		4070.8	-0.00260449
360.99	0.40005177		890.99	0.10325479		1420.98	0.12327192		1950.99	-0.01066771		2480.98	0.05659561		3011.01	0.01781605		3541	0.02325237		4071	-0.00210852
361.19	0.39934159		891.19	0.10377441		1421.18	0.12404216		1951.19	-0.01051106		2481.18	0.05746313		3011.21	0.0178111		3541.2	0.02290781		4071.2	-0.00248024
361.39	0.39977476		891.39	0.10320017		1421.38	0.12344566		1951.39	-0.0106081		2481.38	0.05781303		3011.41	0.01871097		3541.4	0.02273946		4071.4	-0.00318012
361.59	0.39961382		891.59	0.10163634		1421.58	0.12436384		1951.59	-0.01078349		2481.58	0.05683728		3011.61	0.01895338		3541.6	0.0231214		4071.6	-0.0031236
361.79	0.40003834		891.79	0.10310969		1421.78	0.12567428		1951.79	-0.01081171		2481.78	0.05539334		3011.81	0.01898539		3541.8	0.02263589		4071.8	-0.00303348
361.99	0.40044442		891.99	0.10306305		1421.98	0.12647572		1951.99	-0.01070893		2481.98	0.05486089		3012.01	0.01877611		3542	0.02228684		4072	-0.00293995
362.19	0.40065889		892.19	0.10344527		1422.18	0.12673105		1952.19	-0.01028245		2482.18	0.05515119		3012.21	0.01916739		3542.2	0.0210246		4072.2	-0.0025601
362.39	0.40179825		892.39	0.10415702		1422.38	0.12742598		1952.39	-0.0108659		2482.38	0.05522428		3012.41	0.01920759		3542.4	0.02120838		4072.4	-0.00256295
362.59	0.40223445		892.59	0.1041907		1422.58	0.12767212		1952.59	-0.0098496		2482.58	0.05560787		3012.61	0.01908795		3542.6	0.02121279		4072.6	-0.00145696
362.79	0.40266911		892.79	0.10470328		1422.78	0.12715367		1952.79	-0.00898177		2482.78	0.05605575		3012.81	0.01883827		3542.8	0.02043929		4072.8	-0.00054721
362.99	0.40326068		892.99	0.10446492		1422.98	0.12704558		1952.99	-0.00974865		2482.98	0.05608823		3013.01	0.01953473		3543	0.01984408		4073	0.00025286
363.19	0.40392734		893.19	0.10433901		1423.18	0.1269213		1953.19	-0.00885805		2483.18	0.0559111		3013.21	0.01948724		3543.2	0.01984923		4073.2	0.00001588
363.39	0.40378512		893.39	0.1048663		1423.38	0.12638565		1953.39	-0.00897282		2483.38	0.05590498		3013.41	0.01958451		3543.4	0.01887937		4073.4	0.00093695
363.59	0.40504632		893.59	0.10514793		1423.58	0.12691936		1953.59	-0.00851765		2483.58	0.05545313		3013.61	0.01897817		3543.6	0.01855769		4073.6	-0.00012046
363.79	0.40555152		893.79	0.1056607		1423.78	0.12713255		1953.79	-0.00844162		2483.78	0.05554796		3013.81	0.01859602		3543.8	0.01862981		4073.8	0.00007799
363.99	0.40580968		893.99	0.10501115		1423.98	0.12726219		1953.99	-0.00911268		2483.98	0.0561678		3014.01	0.01850959		3544	0.01781253		4074	-0.00004804
364.19	0.40634282		894.19	0.10482961		1424.18	0.12662911		1954.19	-0.00927392		2484.18	0.05655615		3014.21	0.01842777		3544.2	0.01783901		4074.2	-0.00047205
364.39	0.40710776		894.39	0.10465766		1424.38	0.12665587		1954.39	-0.00973975		2484.38	0.0567349		3014.41	0.01832105		3544.4	0.01737203		4074.4	-0.00096369
364.59	0.40774273		894.59	0.10514269		1424.58	0.1271836		1954.59	-0.0103258		2484.58	0.05758272		3014.61	0.01873605		3544.6	0.01691877		4074.6	-0.0016676
364.79	0.40782784		894.79	0.1055217		1424.78	0.12767994		1954.79	-0.01127976		2484.78	0.05843486		3014.81	0.01854286		3544.8	0.01643875		4074.8	-0.00158029
364.99	0.40841626		894.99	0.10559143		1424.98	0.12695641		1954.99	-0.0110614		2484.98	0.05874511		3015.01	0.01937453		3545	0.01603602		4075	-0.00130152
365.19	0.40937269		895.19	0.10530594		1425.18	0.12804111		1955.19	-0.01062622		2485.18	0.05942847		3015.21	0.01969255		3545.2	0.0160354		4075.2	-0.0018865
365.39	0.40974562		895.39	0.10512908		1425.38	0.12775683		1955.39	-0.01122943		2485.38	0.05893786		3015.41	0.01970427		3545.4	0.01586212		4075.4	-0.00171142
365.59	0.40925797		895.59	0.10477819		1425.58	0.12877118		1955.59	-0.01168691		2485.58	0.05832125		3015.61	0.01904786		3545.6	0.01630257		4075.6	-0.0022446
365.79	0.40922352		895.79	0.10522733		1425.78	0.12929283		1955.79	-0.0117244		2485.78	0.05786802		3015.81	0.01843112		3545.8	0.0160996		4075.8	-0.00289856
365.99	0.40932411		895.99	0.10475603		1425.98	0.12945621		1955.99	-0.01238409		2485.98	0.05817522		3016.01	0.01896696		3546	0.01680095		4076	-0.00319081
366.19	0.40895125		896.19	0.10492729		1426.18	0.1297424		1956.19	-0.01158011		2486.18	0.05750183		3016.21	0.01916355		3546.2	0.016522		4076.2	-0.00335647
366.39	0.40871139		896.39	0.10558592		1426.38	0.12993822		1956.39	-0.01129718		2486.38	0.05785197		3016.41	0.01960928		3546.4	0.01756875		4076.4	-0.00262833
366.59	0.40815405		896.59	0.10526359		1426.58	0.12918222		1956.59	-0.01110695		2486.58	0.05782818		3016.61	0.01893337		3546.6	0.0183284		4076.6	-0.00151179
366.79	0.40836233		896.79	0.10613144		1426.78	0.12870979		1956.79	-0.01064858		2486.78	0.05747479		3016.81	0.0193744		3546.8	0.01891199		4076.8	-0.00097021
366.99	0.40706773		896.99	0.1066045		1426.98	0.12858012		1956.99	-0.01126015		2486.98	0.05705815		3017.01	0.01888031		3547	0.01999284		4077	-0.00227505
367.19	0.40651681		897.19	0.10737174		1427.18	0.12932511		1957.19	-0.01006319		2487.18	0.05635158		3017.21	0.01748467		3547.2	0.0201894		4077.2	-0.00275955
367.39	0.40493583		897.39	0.10848665		1427.38	0.12897356		1957.39	-0.00957222		2487.38	0.05649833		3017.41	0.01763228		3547.4	0.0199409		4077.4	-0.00269171
367.59	0.40495058		897.59	0.10847847		1427.58	0.12884922		1957.59	-0.00946825		2487.58	0.05680429		3017.61	0.01690835		3547.6	0.02041428		4077.6	-0.00348149
367.79	0.40456579		897.79	0.10811165		1427.78	0.12894409		1957.79	-0.01027203		2487.78	0.05763589		3017.81	0.01673921		3547.8	0.02050054		4077.8	-0.00262796
367.99	0.40501525		897.99	0.1084076		1427.98	0.12885532		1957.99	-0.01072568		2487.98	0.05819185		3018.01	0.01645509		3548	0.02045919		4078	-0.00237609
368.19	0.40634759		898.19	0.10899268		1428.18	0.12840228		1958.19	-0.01060919		2488.18	0.05826028		3018.21	0.01631081		3548.2	0.02023562		4078.2	-0.00202053
368.39	0.4065858		898.39	0.10976528		1428.38	0.12828604		1958.39	-0.01064038		2488.38	0.05894286		3018.41	0.01570679		3548.4	0.01989436		4078.4	-0.00103017
368.59	0.40608604		898.59	0.10982264		1428.58	0.12754869		1958.59	-0.01035032		2488.58	0.05866465		3018.61	0.01534235		3548.6	0.01886264		4078.6	-0.00104052
368.79	0.40701363		898.79	0.10957581		1428.78	0.12729534		1958.79	-0.00995692		2488.78	0.05931218		3018.81	0.01562975		3548.8	0.0185852		4078.8	-0.000571
368.99	0.40703005		898.99	0.10853886		1428.98	0.12696874		1958.99	-0.00946394		2488.98	0.0578059		3019.01	0.01554865		3549	0.01874478		4079	-0.00024883
369.19	0.40770339		899.19	0.10784728		1429.18	0.12754741		1959.19	-0.00954236		2489.18	0.05821554		3019.21	0.01583588		3549.2	0.01777316		4079.2	-0.00016888
369.39	0.40749863		899.39	0.10763769		1429.38	0.12685601		1959.39	-0.0101592		2489.38	0.05764785		3019.41	0.01571491		3549.4	0.01738978		4079.4	0.00011772
369.59	0.40796766		899.59	0.10739622		1429.58	0.12717633		1959.59	-0.01071189		2489.58	0.05702643		3019.61	0.01635614		3549.6	0.01634406		4079.6	-0.00031641
369.79	0.4083311		899.79	0.10701774		1429.78	0.12632731		1959.79	-0.00992793		2489.78	0.05704008		3019.81	0.01658585		3549.8	0.01536716		4079.8	-0.00017524
369.99	0.40829529		899.99	0.10706455		1429.98	0.12609885		1959.99	-0.01019411		2489.98	0.05766528		3020.01	0.01722952		3550	0.01537439		4080	-0.00012267
370.19	0.40895832		900.19	0.10633967		1430.18	0.12558628		1960.19	-0.01008588		2490.18	0.05711675		3020.21	0.01735858		3550.2	0.0152039		4080.2	-0.00074867
370.39	0.4105469		900.39	0.10648244		1430.38	0.1256178		1960.39	-0.01051608		2490.38	0.0576394		3020.41	0.01785536		3550.4	0.01558979		4080.4	-0.00041836
370.59	0.41031282		900.59	0.10599462		1430.58	0.12554714		1960.59	-0.01163137		2490.58	0.0571214		3020.61	0.0174746		3550.6	0.01617638		4080.6	-0.00075187
370.79	0.41058		900.79	0.10631608		1430.78	0.12625177		1960.79	-0.0111757		2490.78	0.0571941		3020.81	0.01736618		3550.8	0.01571667		4080.8	-0.00155221
370.99	0.40991025		900.99	0.10684537		1430.98	0.12702868		1960.99	-0.01219445		2490.98	0.05716687		3021.01	0.01685764		3551	0.01580245		4081	-0.00224547
371.19	0.41061485		901.19	0.1065138		1431.18	0.12719623		1961.19	-0.0116077		2491.18	0.05671136		3021.21	0.01763364		3551.2	0.01599314		4081.2	-0.00185476
371.39	0.41119643		901.39	0.10671056		1431.38	0.12661578		1961.39	-0.01168099		2491.38	0.05650938		3021.41	0.01821177		3551.4	0.01668522		4081.4	-0.00169
371.59	0.41207622		901.59	0.1071584		1431.58	0.1268441		1961.59	-0.01247338		2491.58	0.05747156		3021.61	0.01821555		3551.6	0.01786617		4081.6	-0.00121536
371.79	0.41246738		901.79	0.1075065		1431.78	0.12820395		1961.79	-0.0128177		2491.78	0.05749583		3021.81	0.01847179		3551.8	0.0190078		4081.8	-0.00056249
371.99	0.41343402		901.99	0.10775688		1431.98	0.12803593		1961.99	-0.01229108		2491.98	0.05853827		3022.01	0.01843646		3552	0.01972591		4082	-0.00047506
372.19	0.41339629		902.19	0.10803673		1432.18	0.12817413		1962.19	-0.01153079		2492.18	0.05891985		3022.21	0.01775983		3552.2	0.02102159		4082.2	0.00046428
372.39	0.41319624		902.39	0.10815977		1432.38	0.12857644		1962.39	-0.01115794		2492.38	0.05817984		3022.41	0.01761206		3552.4	0.02240747		4082.4	0.00038005
372.59	0.41299346		902.59	0.10791058		1432.58	0.12819059		1962.59	-0.01082244		2492.58	0.05745037		3022.61	0.01815588		3552.6	0.02267449		4082.6	-0.00002627
372.79	0.41289552		902.79	0.10840519		1432.78	0.12867092		1962.79	-0.0095123		2492.78	0.05823519		3022.81	0.0181038		3552.8	0.02412097		4082.8	0.00032242
372.99	0.41199934		902.99	0.10823849		1432.98	0.12916255		1962.99	-0.00838383		2492.98	0.05779706		3023.01	0.01717991		3553	0.02431073		4083	0.00026641
373.19	0.41219214		903.19	0.10855839		1433.18	0.13065419		1963.19	-0.00793637		2493.18	0.05837475		3023.21	0.01769583		3553.2	0.02361174		4083.2	0.00031225
373.39	0.41152189		903.39	0.10922842		1433.38	0.13129471		1963.39	-0.00702737		2493.38	0.05756898		3023.41	0.01743957		3553.4	0.02403707		4083.4	0.00046872
373.59	0.41160122		903.59	0.10978446		1433.58	0.13224259		1963.59	-0.00669444		2493.58	0.05746454		3023.61	0.018409		3553.6	0.02373355		4083.6	0.00010553
373.79	0.41082902		903.79	0.11035899		1433.78	0.13168965		1963.79	-0.00646636		2493.78	0.05806145		3023.81	0.01829889		3553.8	0.02340306		4083.8	0.00063113
373.99	0.41043044		903.99	0.11085412		1433.98	0.13243964		1963.99	-0.00700315		2493.98	0.05795149		3024.01	0.01848269		3554	0.02328605		4084	0.00022946
374.19	0.41052068		904.19	0.1094938		1434.18	0.13304673		1964.19	-0.00688064		2494.18	0.0571515		3024.21	0.01856872		3554.2	0.02285751		4084.2	0.00008002
374.39	0.41000817		904.39	0.11001344		1434.38	0.133104		1964.39	-0.00706052		2494.38	0.05748142		3024.41	0.01772553		3554.4	0.02197916		4084.4	0.00108548
374.59	0.40890099		904.59	0.10962824		1434.58	0.13316613		1964.59	-0.00774775		2494.58	0.05706255		3024.61	0.01743552		3554.6	0.02118008		4084.6	0.00107822
374.79	0.40932426		904.79	0.1096761		1434.78	0.13350875		1964.79	-0.00822389		2494.78	0.05689506		3024.81	0.0180247		3554.8	0.01993617		4084.8	0.00096653
374.99	0.40961924		904.99	0.10963022		1434.98	0.13309833		1964.99	-0.00831182		2494.98	0.05687476		3025.01	0.01828171		3555	0.01971253		4085	0.00088906
375.19	0.41024339		905.19	0.1079677		1435.18	0.1330337		1965.19	-0.00762105		2495.18	0.05736709		3025.21	0.01891694		3555.2	0.01978281		4085.2	0.0014803
375.39	0.41115414		905.39	0.10832135		1435.38	0.13290613		1965.39	-0.00830412		2495.38	0.05704406		3025.41	0.01853969		3555.4	0.01963345		4085.4	0.00109577
375.59	0.41155049		905.59	0.10816373		1435.58	0.1335717		1965.59	-0.00915531		2495.58	0.05817385		3025.61	0.01856936		3555.6	0.01820184		4085.6	0.00137624
375.79	0.41192738		905.79	0.10729564		1435.78	0.13317894		1965.79	-0.00916095		2495.78	0.05864648		3025.81	0.01827934		3555.8	0.01720883		4085.8	0.00086689
375.99	0.41290654		905.99	0.10710484		1435.98	0.13226256		1965.99	-0.00980596		2495.98	0.05986944		3026.01	0.01917384		3556	0.01628963		4086	0.00083129
376.19	0.41379088		906.19	0.10716271		1436.18	0.13230347		1966.19	-0.0101988		2496.18	0.05948933		3026.21	0.01931993		3556.2	0.0172742		4086.2	0.00130449
376.39	0.41497086		906.39	0.10671675		1436.38	0.13203421		1966.39	-0.01064994		2496.38	0.05853741		3026.41	0.01956031		3556.4	0.01799327		4086.4	0.00129161
376.59	0.41546576		906.59	0.10673389		1436.58	0.13189546		1966.59	-0.01065787		2496.58	0.0598814		3026.61	0.01947962		3556.6	0.01844759		4086.6	0.00162871
376.79	0.41571506		906.79	0.10750509		1436.78	0.13254465		1966.79	-0.01048319		2496.78	0.06049775		3026.81	0.01880115		3556.8	0.01858232		4086.8	0.0007127
376.99	0.41619636		906.99	0.10736865		1436.98	0.13265489		1966.99	-0.01021672		2496.98	0.06038795		3027.01	0.01838406		3557	0.01837761		4087	0.00038318
377.19	0.41693058		907.19	0.10758192		1437.18	0.13297123		1967.19	-0.01062272		2497.18	0.06012008		3027.21	0.01914442		3557.2	0.01940765		4087.2	0.00010554
377.39	0.41669505		907.39	0.10815658		1437.38	0.13251229		1967.39	-0.01001847		2497.38	0.05959518		3027.41	0.01935639		3557.4	0.02028508		4087.4	0.00038786
377.59	0.41701159		907.59	0.10930472		1437.58	0.13215884		1967.59	-0.01000183		2497.58	0.0596996		3027.61	0.02046644		3557.6	0.02080648		4087.6	0.0004504
377.79	0.41689577		907.79	0.11094218		1437.78	0.13215115		1967.79	-0.01062954		2497.78	0.0597433		3027.81	0.02028156		3557.8	0.02105563		4087.8	0.0004995
377.99	0.41697217		907.99	0.11130157		1437.98	0.13233623		1967.99	-0.01059785		2497.98	0.05961109		3028.01	0.02062902		3558	0.02164871		4088	-0.0000496
378.19	0.41655398		908.19	0.11141099		1438.18	0.13235262		1968.19	-0.01049751		2498.18	0.05940882		3028.21	0.02067731		3558.2	0.02201632		4088.2	-0.00005005
378.39	0.41615015		908.39	0.11238481		1438.38	0.13180343		1968.39	-0.01081034		2498.38	0.05930016		3028.41	0.02068431		3558.4	0.0220186		4088.4	-0.00014522
378.59	0.4161762		908.59	0.11236846		1438.58	0.13161865		1968.59	-0.01105158		2498.58	0.05868082		3028.61	0.02143913		3558.6	0.02215194		4088.6	-0.00098095
378.79	0.41597645		908.79	0.11248789		1438.78	0.13170115		1968.79	-0.01059152		2498.78	0.0585751		3028.81	0.02217543		3558.8	0.02204736		4088.8	-0.00116532
378.99	0.41559167		908.99	0.11219474		1438.98	0.13181623		1968.99	-0.00940301		2498.98	0.05870044		3029.01	0.02226867		3559	0.02176342		4089	-0.00095897
379.19	0.41550662		909.19	0.11131906		1439.18	0.13196014		1969.19	-0.00908831		2499.18	0.05808541		3029.21	0.02306495		3559.2	0.02110065		4089.2	-0.00092047
379.39	0.41526495		909.39	0.11195374		1439.38	0.13146696		1969.39	-0.00911536		2499.38	0.0571097		3029.41	0.02332304		3559.4	0.01972134		4089.4	-0.00150739
379.59	0.41502833		909.59	0.11139556		1439.58	0.13175949		1969.59	-0.00879503		2499.58	0.05705726		3029.61	0.0237078		3559.6	0.01803678		4089.6	-0.00132255
379.79	0.41481133		909.79	0.11084252		1439.78	0.13129702		1969.79	-0.00839727		2499.78	0.05655292		3029.81	0.02416163		3559.8	0.01743515		4089.8	-0.00145891
379.99	0.41481133		909.99	0.11084252		1439.98	0.13129702		1969.99	-0.00839727		2499.98	0.05655292		3030.01	0.02416163		3560	0.01743515		4090	-0.00145891
380.19	0.41514226		910.19	0.11073779		1440.18	0.13118236		1970.19	-0.00783291		2500.18	0.05578756		3030.21	0.02420111		3560.2	0.0176966		4090.2	-0.00210626
380.39	0.41564125		910.39	0.11069384		1440.38	0.13087292		1970.39	-0.00752093		2500.38	0.05457997		3030.41	0.02378832		3560.4	0.01767596		4090.4	-0.00209393
380.59	0.41545771		910.59	0.11066519		1440.58	0.13087921		1970.59	-0.00681517		2500.58	0.0537949		3030.61	0.02353889		3560.6	0.01744025		4090.6	-0.0021531
380.79	0.41532354		910.79	0.11081909		1440.78	0.13022489		1970.79	-0.00652466		2500.78	0.05316676		3030.81	0.02220129		3560.8	0.01754274		4090.8	-0.00229114
380.99	0.41528557		910.99	0.11089377		1440.98	0.13053965		1970.99	-0.00583137		2500.98	0.0525588		3031.01	0.02162242		3561	0.01747767		4091	-0.00240157
381.19	0.41534678		911.19	0.11115726		1441.18	0.13034158		1971.19	-0.00558938		2501.18	0.05148585		3031.21	0.02139783		3561.2	0.01650627		4091.2	-0.00278745
381.39	0.41530781		911.39	0.11113077		1441.38	0.13024664		1971.39	-0.00504617		2501.38	0.05093546		3031.41	0.02154258		3561.4	0.01549924		4091.4	-0.00392666
381.59	0.41520113		911.59	0.11179794		1441.58	0.13006954		1971.59	-0.00571856		2501.58	0.05036169		3031.61	0.02148717		3561.6	0.01422876		4091.6	-0.00410672
381.79	0.4153888		911.79	0.11220419		1441.78	0.13030158		1971.79	-0.00597608		2501.78	0.04923564		3031.81	0.02114594		3561.8	0.01329334		4091.8	-0.00444418
381.99	0.41565966		911.99	0.11259561		1441.98	0.13076991		1971.99	-0.00594955		2501.98	0.04864822		3032.01	0.02164702		3562	0.01188773		4092	-0.00507297
382.19	0.41600966		912.19	0.11287003		1442.18	0.13097537		1972.19	-0.00606107		2502.18	0.04747311		3032.21	0.02127444		3562.2	0.01159189		4092.2	-0.00546973
382.39	0.41586636		912.39	0.11393765		1442.38	0.13025216		1972.39	-0.00702113		2502.38	0.04581023		3032.41	0.02060428		3562.4	0.01123153		4092.4	-0.00592552
382.59	0.41678		912.59	0.11336791		1442.58	0.13075823		1972.59	-0.00697629		2502.58	0.04480597		3032.61	0.01929482		3562.6	0.01099316		4092.6	-0.0062971
382.79	0.4174626		912.79	0.11322108		1442.78	0.13071956		1972.79	-0.00698065		2502.78	0.0436348		3032.81	0.01817836		3562.8	0.01075752		4092.8	-0.00580929
382.99	0.41740084		912.99	0.11386187		1442.98	0.1312256		1972.99	-0.00686027		2502.98	0.04256873		3033.01	0.01771789		3563	0.01035012		4093	-0.00646142
383.19	0.41640265		913.19	0.11413395		1443.18	0.13114426		1973.19	-0.00609905		2503.18	0.04244689		3033.21	0.01705148		3563.2	0.00995402		4093.2	-0.00683558
383.39	0.41611416		913.39	0.11446699		1443.38	0.13137373		1973.39	-0.0052601		2503.38	0.04176985		3033.41	0.01753287		3563.4	0.01045629		4093.4	-0.00694844
383.59	0.41568175		913.59	0.11429427		1443.58	0.13025134		1973.59	-0.00548815		2503.58	0.04149842		3033.61	0.01862277		3563.6	0.0104678		4093.6	-0.00720154
383.79	0.41446741		913.79	0.11426484		1443.78	0.13072049		1973.79	-0.00525844		2503.78	0.04104291		3033.81	0.01883817		3563.8	0.01111833		4093.8	-0.0068789
383.99	0.41425105		913.99	0.11377274		1443.98	0.1304696		1973.99	-0.00598449		2503.98	0.04020003		3034.01	0.01980074		3564	0.01164496		4094	-0.00606612
384.19	0.41397568		914.19	0.11318897		1444.18	0.13062626		1974.19	-0.0058906		2504.18	0.03943941		3034.21	0.02053128		3564.2	0.01182744		4094.2	-0.00633071
384.39	0.41387152		914.39	0.11294722		1444.38	0.13094333		1974.39	-0.00531939		2504.38	0.03947289		3034.41	0.0205005		3564.4	0.01167427		4094.4	-0.00545756
384.59	0.4134834		914.59	0.11260811		1444.58	0.13076255		1974.59	-0.00554815		2504.58	0.0394239		3034.61	0.02053788		3564.6	0.01210026		4094.6	-0.0054036
384.79	0.41409586		914.79	0.11222126		1444.78	0.13006379		1974.79	-0.00604559		2504.78	0.03946723		3034.81	0.01937778		3564.8	0.01281421		4094.8	-0.0053816
384.99	0.41428034		914.99	0.11184973		1444.98	0.1302894		1974.99	-0.0067621		2504.98	0.03937733		3035.01	0.02040419		3565	0.01279381		4095	-0.00541156
385.19	0.41505758		915.19	0.11177813		1445.18	0.1293229		1975.19	-0.00743088		2505.18	0.038908		3035.21	0.02100212		3565.2	0.01173451		4095.2	-0.00563369
385.39	0.41476673		915.39	0.11095401		1445.38	0.12891178		1975.39	-0.00769079		2505.38	0.03925833		3035.41	0.02148583		3565.4	0.01169188		4095.4	-0.0062816
385.59	0.41451472		915.59	0.11146058		1445.58	0.12931438		1975.59	-0.00898044		2505.58	0.03938168		3035.61	0.0212556		3565.6	0.01140898		4095.6	-0.00599744
385.79	0.41537571		915.79	0.111968		1445.78	0.12925848		1975.79	-0.00915285		2505.78	0.03855469		3035.81	0.02106409		3565.8	0.01168325		4095.8	-0.00647474
385.99	0.41628536		915.99	0.11257156		1445.98	0.12975986		1975.99	-0.00940806		2505.98	0.03823936		3036.01	0.02122086		3566	0.01153061		4096	-0.00610109
386.19	0.41666752		916.19	0.11302066		1446.18	0.12888397		1976.19	-0.01073962		2506.18	0.03792313		3036.21	0.01969254		3566.2	0.01163472		4096.2	-0.00530499
386.39	0.41752988		916.39	0.11337512		1446.38	0.12958168		1976.39	-0.01170573		2506.38	0.03722241		3036.41	0.01981998		3566.4	0.01056562		4096.4	-0.00482655
386.59	0.41792445		916.59	0.1134435		1446.58	0.1300009		1976.59	-0.0118311		2506.58	0.03630531		3036.61	0.01911119		3566.6	0.01051601		4096.6	-0.00460185
386.79	0.41763225		916.79	0.11390758		1446.78	0.13017566		1976.79	-0.01219962		2506.78	0.03508499		3036.81	0.01901265		3566.8	0.01017899		4096.8	-0.00492701
386.99	0.41694266		916.99	0.11497648		1446.98	0.12994722		1976.99	-0.01215202		2506.98	0.03474232		3037.01	0.01848765		3567	0.00977756		4097	-0.00475084
387.19	0.41629178		917.19	0.11500406		1447.18	0.13068831		1977.19	-0.01181005		2507.18	0.03454232		3037.21	0.0183559		3567.2	0.01070055		4097.2	-0.0035782
387.39	0.41547862		917.39	0.11459921		1447.38	0.13088792		1977.39	-0.0119411		2507.38	0.0338991		3037.41	0.01879502		3567.4	0.01092659		4097.4	-0.00295401
387.59	0.41501005		917.59	0.11389503		1447.58	0.13108104		1977.59	-0.01159493		2507.58	0.03375351		3037.61	0.01861604		3567.6	0.01142478		4097.6	-0.00294157
387.79	0.41460188		917.79	0.11415999		1447.78	0.13196972		1977.79	-0.01029859		2507.78	0.03282278		3037.81	0.01861215		3567.8	0.01281767		4097.8	-0.00283056
387.99	0.41490547		917.99	0.11323647		1447.98	0.13154658		1977.99	-0.01092567		2507.98	0.03204269		3038.01	0.01902187		3568	0.01311455		4098	-0.00199734
388.19	0.41446866		918.19	0.11297685		1448.18	0.13304704		1978.19	-0.01147709		2508.18	0.03219477		3038.21	0.01852056		3568.2	0.01332641		4098.2	-0.00214477
388.39	0.4153357		918.39	0.11294668		1448.38	0.13371279		1978.39	-0.01066989		2508.38	0.03237056		3038.41	0.01787738		3568.4	0.01405769		4098.4	-0.00259171
388.59	0.41605198		918.59	0.11341631		1448.58	0.13308758		1978.59	-0.01123838		2508.58	0.03243543		3038.61	0.01710119		3568.6	0.01491529		4098.6	-0.00343594
388.79	0.41604344		918.79	0.11204225		1448.78	0.13347531		1978.79	-0.01129882		2508.78	0.03177894		3038.81	0.01654439		3568.8	0.01525999		4098.8	-0.00359116
388.99	0.41594983		918.99	0.11133912		1448.98	0.13335918		1978.99	-0.01098641		2508.98	0.03169667		3039.01	0.0168891		3569	0.01537288		4099	-0.0040209
389.19	0.41603666		919.19	0.11109911		1449.18	0.13297351		1979.19	-0.00942749		2509.18	0.03139415		3039.21	0.01684836		3569.2	0.01539225		4099.2	-0.00423758
389.39	0.41496884		919.39	0.11041805		1449.38	0.13356836		1979.39	-0.00908341		2509.38	0.0318911		3039.41	0.01642219		3569.4	0.01531899		4099.4	-0.00472263
389.59	0.41473615		919.59	0.11045373		1449.58	0.13375597		1979.59	-0.00818826		2509.58	0.0316891		3039.61	0.01646096		3569.6	0.01532317		4099.6	-0.0049497
389.79	0.41587881		919.79	0.11102071		1449.78	0.1326434		1979.79	-0.00709392		2509.78	0.03114439		3039.81	0.01686808		3569.8	0.01491851		4099.8	-0.00579188
389.99	0.41590414		919.99	0.11069506		1449.98	0.13271798		1979.99	-0.00677785		2509.98	0.03088798		3040.01	0.01683416		3570	0.01379061		4100	-0.00555625
390.19	0.41615492		920.19	0.11097041		1450.18	0.13158904		1980.19	-0.00775415		2510.18	0.03077951		3040.21	0.01680461		3570.2	0.01262124		4100.2	-0.00562698
390.39	0.41629871		920.39	0.11055964		1450.38	0.13100073		1980.39	-0.0074242		2510.38	0.03008366		3040.41	0.01826053		3570.4	0.01139324		4100.4	-0.00634413
390.59	0.41580381		920.59	0.1111201		1450.58	0.12957765		1980.59	-0.00716536		2510.58	0.02942985		3040.61	0.01878459		3570.6	0.01099371		4100.6	-0.00798
390.79	0.41509124		920.79	0.11039251		1450.78	0.12909666		1980.79	-0.00657361		2510.78	0.02897413		3040.81	0.01914779		3570.8	0.01070007		4100.8	-0.00842407
390.99	0.41569282		920.99	0.11129314		1450.98	0.12834948		1980.99	-0.00693932		2510.98	0.02914466		3041.01	0.01855479		3571	0.00996331		4101	-0.00764001
391.19	0.41621699		921.19	0.11065645		1451.18	0.12844995		1981.19	-0.00642673		2511.18	0.02868838		3041.21	0.01775191		3571.2	0.01059195		4101.2	-0.00722576
391.39	0.41591461		921.39	0.11096284		1451.38	0.12721936		1981.39	-0.00655604		2511.38	0.02837237		3041.41	0.01799098		3571.4	0.01009668		4101.4	-0.00750428
391.59	0.41613311		921.59	0.1115907		1451.58	0.12696919		1981.59	-0.00709397		2511.58	0.02837323		3041.61	0.01858699		3571.6	0.0103126		4101.6	-0.0083939
391.79	0.41591291		921.79	0.11271727		1451.78	0.12678063		1981.79	-0.00804301		2511.78	0.02825307		3041.81	0.01898822		3571.8	0.01038151		4101.8	-0.00743912
391.99	0.41637421		921.99	0.11247772		1451.98	0.12592151		1981.99	-0.00994797		2511.98	0.02869855		3042.01	0.01868265		3572	0.01020376		4102	-0.00623073
392.19	0.41520432		922.19	0.11305775		1452.18	0.12679148		1982.19	-0.01159168		2512.18	0.02980231		3042.21	0.01805205		3572.2	0.00995062		4102.2	-0.0061382
392.39	0.414705		922.39	0.11362539		1452.38	0.12685378		1982.39	-0.01181757		2512.38	0.03002374		3042.41	0.01783673		3572.4	0.01020148		4102.4	-0.00649595
392.59	0.41329508		922.59	0.11385999		1452.58	0.12682186		1982.59	-0.01230203		2512.58	0.03061145		3042.61	0.01773717		3572.6	0.01041227		4102.6	-0.00582168
392.79	0.41256282		922.79	0.11260648		1452.78	0.12783941		1982.79	-0.01195177		2512.78	0.02995544		3042.81	0.01822404		3572.8	0.01005526		4102.8	-0.00500914
392.99	0.41191069		922.99	0.11272456		1452.98	0.12799773		1982.99	-0.01135374		2512.98	0.03040305		3043.01	0.01772834		3573	0.01041058		4103	-0.00522317
393.19	0.41163706		923.19	0.11320647		1453.18	0.12826155		1983.19	-0.01098035		2513.18	0.03019362		3043.21	0.01721046		3573.2	0.01018689		4103.2	-0.00502035
393.39	0.41101187		923.39	0.11359377		1453.38	0.12904375		1983.39	-0.01099912		2513.38	0.03020443		3043.41	0.01683878		3573.4	0.00986086		4103.4	-0.00521789
393.59	0.41063502		923.59	0.11396214		1453.58	0.12807057		1983.59	-0.01021883		2513.58	0.03001063		3043.61	0.01756178		3573.6	0.00942795		4103.6	-0.00597787
393.79	0.41165444		923.79	0.11495576		1453.78	0.12829563		1983.79	-0.01005258		2513.78	0.02973871		3043.81	0.01744358		3573.8	0.0085177		4103.8	-0.00739059
393.99	0.41150427		923.99	0.11454734		1453.98	0.12882136		1983.99	-0.01024658		2513.98	0.02917486		3044.01	0.01817948		3574	0.0082906		4104	-0.00866708
394.19	0.41270068		924.19	0.11483483		1454.18	0.12781664		1984.19	-0.01013458		2514.18	0.02927235		3044.21	0.01861019		3574.2	0.00745305		4104.2	-0.00946364
394.39	0.41328221		924.39	0.11435109		1454.38	0.12703074		1984.39	-0.00928162		2514.38	0.02899676		3044.41	0.01951399		3574.4	0.00645484		4104.4	-0.01002053
394.59	0.41419976		924.59	0.11472674		1454.58	0.12634679		1984.59	-0.00857825		2514.58	0.02697385		3044.61	0.01885689		3574.6	0.00636319		4104.6	-0.01096697
394.79	0.414722		924.79	0.11455386		1454.78	0.12648602		1984.79	-0.00836655		2514.78	0.0256339		3044.81	0.01851086		3574.8	0.0063666		4104.8	-0.01066287
394.99	0.41583991		924.99	0.11480935		1454.98	0.125397		1984.99	-0.00874799		2514.98	0.02550539		3045.01	0.018018		3575	0.0068478		4105	-0.01062154
395.19	0.41546337		925.19	0.11424991		1455.18	0.12520113		1985.19	-0.00789875		2515.18	0.02502241		3045.21	0.01747814		3575.2	0.00709049		4105.2	-0.01034774
395.39	0.41484635		925.39	0.11452274		1455.38	0.12540061		1985.39	-0.00837537		2515.38	0.02531468		3045.41	0.01793958		3575.4	0.00617985		4105.4	-0.01004846
395.59	0.41529633		925.59	0.11505101		1455.58	0.12571413		1985.59	-0.00829123		2515.58	0.0249695		3045.61	0.01735689		3575.6	0.00581897		4105.6	-0.00994261
395.79	0.41568362		925.79	0.11551378		1455.78	0.12511891		1985.79	-0.00770711		2515.78	0.02496525		3045.81	0.01718185		3575.8	0.00615646		4105.8	-0.00844288
395.99	0.41532426		925.99	0.11494184		1455.98	0.12455676		1985.99	-0.00824677		2515.98	0.02599073		3046.01	0.01719502		3576	0.00674836		4106	-0.00774924
396.19	0.41391275		926.19	0.11455295		1456.18	0.12496563		1986.19	-0.00815301		2516.18	0.02564182		3046.21	0.01708492		3576.2	0.00714672		4106.2	-0.00746516
396.39	0.41344967		926.39	0.11390041		1456.38	0.12547749		1986.39	-0.00766386		2516.38	0.02599249		3046.41	0.01751948		3576.4	0.00754823		4106.4	-0.00677035
396.59	0.41387056		926.59	0.11334268		1456.58	0.12552809		1986.59	-0.00719936		2516.58	0.02663253		3046.61	0.01773685		3576.6	0.00837542		4106.6	-0.00601504
396.79	0.41447259		926.79	0.11322251		1456.78	0.12641377		1986.79	-0.00685132		2516.78	0.02583559		3046.81	0.01835661		3576.8	0.00875822		4106.8	-0.0057946
396.99	0.41437906		926.99	0.11341215		1456.98	0.12692989		1986.99	-0.00684923		2516.98	0.02575434		3047.01	0.01805923		3577	0.00978336		4107	-0.00529397
397.19	0.41497055		927.19	0.11385316		1457.18	0.12829592		1987.19	-0.00654276		2517.18	0.02605024		3047.21	0.01826744		3577.2	0.01052812		4107.2	-0.00552666
397.39	0.41410469		927.39	0.11360944		1457.38	0.1285529		1987.39	-0.00655734		2517.38	0.02591403		3047.41	0.018856		3577.4	0.0108658		4107.4	-0.00543075
397.59	0.41380675		927.59	0.11336941		1457.58	0.12872713		1987.59	-0.0063129		2517.58	0.02621537		3047.61	0.01935323		3577.6	0.01043707		4107.6	-0.00617962
397.79	0.41449472		927.79	0.11234578		1457.78	0.12961274		1987.79	-0.00615143		2517.78	0.02544606		3047.81	0.01881608		3577.8	0.01110996		4107.8	-0.00687073
397.99	0.41390943		927.99	0.11147204		1457.98	0.12974359		1987.99	-0.00608753		2517.98	0.02438853		3048.01	0.01889181		3578	0.01152478		4108	-0.00692424
398.19	0.41438127		928.19	0.1110218		1458.18	0.12926374		1988.19	-0.00632434		2518.18	0.02416234		3048.21	0.01855407		3578.2	0.01098292		4108.2	-0.00683056
398.39	0.41462982		928.39	0.11062101		1458.38	0.12945106		1988.39	-0.00663657		2518.38	0.02286552		3048.41	0.01827815		3578.4	0.01046675		4108.4	-0.00647105
398.59	0.4140856		928.59	0.11064208		1458.58	0.12946809		1988.59	-0.00717276		2518.58	0.02203247		3048.61	0.017364		3578.6	0.01066663		4108.6	-0.00716265
398.79	0.41401557		928.79	0.1101259		1458.78	0.13056049		1988.79	-0.00792329		2518.78	0.0217803		3048.81	0.01674157		3578.8	0.01048225		4108.8	-0.0064695
398.99	0.41468483		928.99	0.10963846		1458.98	0.12995604		1988.99	-0.00842462		2518.98	0.02242764		3049.01	0.01567707		3579	0.0104597		4109	-0.00656778
399.19	0.41456012		929.19	0.10959627		1459.18	0.13145087		1989.19	-0.00825369		2519.18	0.02276897		3049.21	0.01558121		3579.2	0.00933989		4109.2	-0.00633268
399.39	0.41480351		929.39	0.10972318		1459.38	0.13254268		1989.39	-0.00848024		2519.38	0.02299653		3049.41	0.0150488		3579.4	0.00823309		4109.4	-0.00707849
399.59	0.41638101		929.59	0.10971022		1459.58	0.13258719		1989.59	-0.00856092		2519.58	0.02328266		3049.61	0.01453575		3579.6	0.0080228		4109.6	-0.00714017
399.79	0.41659012		929.79	0.10932565		1459.78	0.1329213		1989.79	-0.00843621		2519.78	0.02431654		3049.81	0.01469389		3579.8	0.00861624		4109.8	-0.00699217
399.99	0.41678102		929.99	0.10832415		1459.98	0.13210195		1989.99	-0.00941979		2519.98	0.0251979		3050.01	0.01390841		3580	0.00794317		4110	-0.00746543
400.19	0.41721911		930.19	0.10795931		1460.18	0.13160398		1990.19	-0.00968962		2520.18	0.02499268		3050.21	0.01360844		3580.2	0.00801967		4110.2	-0.00715129
400.39	0.41789467		930.39	0.10784351		1460.38	0.13059905		1990.39	-0.00967707		2520.38	0.02568254		3050.41	0.0132583		3580.4	0.00778637		4110.4	-0.00729255
400.59	0.41844304		930.59	0.10856283		1460.58	0.13083818		1990.59	-0.00963267		2520.58	0.025752		3050.61	0.01390787		3580.6	0.00872898		4110.6	-0.00812845
400.79	0.41882536		930.79	0.10926569		1460.78	0.13148115		1990.79	-0.00987738		2520.78	0.02578561		3050.81	0.01451331		3580.8	0.00984531		4110.8	-0.00764459
400.99	0.41833293		930.99	0.10933564		1460.98	0.13125717		1990.99	-0.00966042		2520.98	0.02608382		3051.01	0.01573487		3581	0.01081099		4111	-0.00817556
401.19	0.41801615		931.19	0.10993262		1461.18	0.13145912		1991.19	-0.00959984		2521.18	0.02654751		3051.21	0.016776		3581.2	0.01076145		4111.2	-0.00966308
401.39	0.41661336		931.39	0.11031129		1461.38	0.13045067		1991.39	-0.00991404		2521.38	0.02644194		3051.41	0.01747784		3581.4	0.01077163		4111.4	-0.00961867
401.59	0.41540787		931.59	0.11127548		1461.58	0.13049175		1991.59	-0.00951616		2521.58	0.02641025		3051.61	0.01792913		3581.6	0.01044632		4111.6	-0.01078965
401.79	0.41457881		931.79	0.11136206		1461.78	0.13027964		1991.79	-0.01020723		2521.78	0.02533352		3051.81	0.01788383		3581.8	0.01032089		4111.8	-0.01090228
401.99	0.41339667		931.99	0.11152891		1461.98	0.12972664		1991.99	-0.01055551		2521.98	0.02447455		3052.01	0.01815466		3582	0.01028465		4112	-0.01105824
402.19	0.41233375		932.19	0.11115365		1462.18	0.12968996		1992.19	-0.010133		2522.18	0.02385406		3052.21	0.01940661		3582.2	0.01008065		4112.2	-0.01141122
402.39	0.41311227		932.39	0.11175535		1462.38	0.12980328		1992.39	-0.00912857		2522.38	0.02254941		3052.41	0.01910667		3582.4	0.00976926		4112.4	-0.01118947
402.59	0.41304051		932.59	0.11190215		1462.58	0.13051376		1992.59	-0.00821541		2522.58	0.0224187		3052.61	0.01974134		3582.6	0.00978089		4112.6	-0.01089974
402.79	0.41362396		932.79	0.11225153		1462.78	0.13126527		1992.79	-0.00776094		2522.78	0.02208381		3052.81	0.0199074		3582.8	0.00915214		4112.8	-0.00977112
402.99	0.41441169		932.99	0.11177477		1462.98	0.13167061		1992.99	-0.00773963		2522.98	0.02270952		3053.01	0.02007546		3583	0.00872984		4113	-0.0095301
403.19	0.41448793		933.19	0.11155664		1463.18	0.13280796		1993.19	-0.00739928		2523.18	0.02270308		3053.21	0.02015687		3583.2	0.00856778		4113.2	-0.00891935
403.39	0.41592159		933.39	0.1110213		1463.38	0.13310087		1993.39	-0.007989		2523.38	0.02299865		3053.41	0.01921042		3583.4	0.00893706		4113.4	-0.00791424
403.59	0.41683811		933.59	0.11067381		1463.58	0.13280008		1993.59	-0.00878095		2523.58	0.02278874		3053.61	0.01870698		3583.6	0.009106		4113.6	-0.00697153
403.79	0.41774375		933.79	0.11015642		1463.78	0.13220058		1993.79	-0.00834143		2523.78	0.02257132		3053.81	0.01787847		3583.8	0.00894319		4113.8	-0.00702811
403.99	0.41756214		933.99	0.10965836		1463.98	0.13064125		1993.99	-0.00895955		2523.98	0.02287014		3054.01	0.01640763		3584	0.00890505		4114	-0.00764545
404.19	0.41735633		934.19	0.10957544		1464.18	0.13038667		1994.19	-0.00813345		2524.18	0.02209531		3054.21	0.01617295		3584.2	0.0084867		4114.2	-0.0074308
404.39	0.41742687		934.39	0.10986601		1464.38	0.12989853		1994.39	-0.00890869		2524.38	0.02166442		3054.41	0.01480761		3584.4	0.00867382		4114.4	-0.0072803
404.59	0.41652542		934.59	0.11010972		1464.58	0.13066987		1994.59	-0.00956197		2524.58	0.02192801		3054.61	0.01575275		3584.6	0.00882022		4114.6	-0.00768454
404.79	0.41688971		934.79	0.11014926		1464.78	0.13012484		1994.79	-0.01027132		2524.78	0.02192132		3054.81	0.01587938		3584.8	0.00946536		4114.8	-0.00804989
404.99	0.41597637		934.99	0.1098918		1464.98	0.12908338		1994.99	-0.01115321		2524.98	0.02117662		3055.01	0.01671732		3585	0.00957485		4115	-0.00892741
405.19	0.41560268		935.19	0.11059673		1465.18	0.12867438		1995.19	-0.01155281		2525.18	0.02153256		3055.21	0.01669868		3585.2	0.00972394		4115.2	-0.0095239
405.39	0.41335338		935.39	0.11029895		1465.38	0.12791354		1995.39	-0.01216888		2525.38	0.02164935		3055.41	0.01572016		3585.4	0.00994269		4115.4	-0.00955545
405.59	0.41175866		935.59	0.10995852		1465.58	0.12798909		1995.59	-0.01182407		2525.58	0.02126973		3055.61	0.01534178		3585.6	0.00899086		4115.6	-0.01024609
405.79	0.41128064		935.79	0.10950316		1465.78	0.12740174		1995.79	-0.01204952		2525.78	0.01968278		3055.81	0.01496955		3585.8	0.00907842		4115.8	-0.01016391
405.99	0.41059394		935.99	0.10885758		1465.98	0.12663912		1995.99	-0.01106085		2525.98	0.0196256		3056.01	0.0156858		3586	0.00952789		4116	-0.01043864
406.19	0.41060438		936.19	0.10860662		1466.18	0.12636612		1996.19	-0.00987624		2526.18	0.01912174		3056.21	0.01627084		3586.2	0.00933553		4116.2	-0.01023404
406.39	0.41136225		936.39	0.10894544		1466.38	0.12606521		1996.39	-0.00875934		2526.38	0.01910734		3056.41	0.01599631		3586.4	0.00934816		4116.4	-0.01040612
406.59	0.41051406		936.59	0.10801084		1466.58	0.1261007		1996.59	-0.00786463		2526.58	0.02001616		3056.61	0.01664382		3586.6	0.00881979		4116.6	-0.01033363
406.79	0.41111229		936.79	0.10812018		1466.78	0.12582059		1996.79	-0.00807571		2526.78	0.02065394		3056.81	0.01628455		3586.8	0.00937105		4116.8	-0.01013424
406.99	0.41221574		936.99	0.10740075		1466.98	0.12486613		1996.99	-0.00798072		2526.98	0.02068199		3057.01	0.01558364		3587	0.00984596		4117	-0.00986593
407.19	0.41343811		937.19	0.10723604		1467.18	0.12425186		1997.19	-0.00730668		2527.18	0.02019565		3057.21	0.01471345		3587.2	0.0108666		4117.2	-0.01011855
407.39	0.41450685		937.39	0.10779639		1467.38	0.12496607		1997.39	-0.00738783		2527.38	0.02107904		3057.41	0.01436054		3587.4	0.01123653		4117.4	-0.00976682
407.59	0.41465839		937.59	0.10776218		1467.58	0.1247172		1997.59	-0.00693133		2527.58	0.02104638		3057.61	0.0145982		3587.6	0.01027299		4117.6	-0.00994316
407.79	0.41489127		937.79	0.10730488		1467.78	0.12534457		1997.79	-0.00637609		2527.78	0.02129786		3057.81	0.01411723		3587.8	0.00993626		4117.8	-0.01005046
407.99	0.41380747		937.99	0.10812715		1467.98	0.12612988		1997.99	-0.00735878		2527.98	0.02246255		3058.01	0.01356907		3588	0.01044311		4118	-0.01050047
408.19	0.41358921		938.19	0.10878705		1468.18	0.12659539		1998.19	-0.00765453		2528.18	0.02179781		3058.21	0.01353277		3588.2	0.009495		4118.2	-0.00995361
408.39	0.41327475		938.39	0.11010211		1468.38	0.12726458		1998.39	-0.0085724		2528.38	0.02257495		3058.41	0.0133209		3588.4	0.00992237		4118.4	-0.00951924
408.59	0.41295075		938.59	0.1102527		1468.58	0.12857517		1998.59	-0.00869836		2528.58	0.0227134		3058.61	0.01404026		3588.6	0.00980675		4118.6	-0.0097799
408.79	0.41308967		938.79	0.11115528		1468.78	0.12931675		1998.79	-0.00995019		2528.78	0.02282851		3058.81	0.01373388		3588.8	0.01021576		4118.8	-0.00998449
408.99	0.41300531		938.99	0.11129281		1468.98	0.12945981		1998.99	-0.01095538		2528.98	0.02257986		3059.01	0.01295087		3589	0.01078722		4119	-0.00948414
409.19	0.41281851		939.19	0.11190201		1469.18	0.12994951		1999.19	-0.01132531		2529.18	0.02265181		3059.21	0.01234391		3589.2	0.01132035		4119.2	-0.00900171
409.39	0.41140367		939.39	0.1120236		1469.38	0.13048443		1999.39	-0.01195895		2529.38	0.0224969		3059.41	0.01167059		3589.4	0.01020375		4119.4	-0.00887673
409.59	0.41200778		939.59	0.11272828		1469.58	0.1317057		1999.59	-0.01166736		2529.58	0.02155553		3059.61	0.01186176		3589.6	0.00988082		4119.6	-0.00925845
409.79	0.4127328		939.79	0.11278784		1469.78	0.13143298		1999.79	-0.01226265		2529.78	0.02060521		3059.81	0.01244526		3589.8	0.00935257		4119.8	-0.00979883
409.99	0.41260287		939.99	0.11270607		1469.98	0.13109447		1999.99	-0.01281162		2529.98	0.0209169		3060.01	0.0132743		3590	0.00872801		4120	-0.01023826
410.19	0.41343567		940.19	0.11208968		1470.18	0.13054447		2000.19	-0.01387631		2530.18	0.02025234		3060.21	0.01229612		3590.2	0.00858739		4120.2	-0.01078629
410.39	0.41323733		940.39	0.1118746		1470.38	0.13046492		2000.39	-0.01378959		2530.38	0.02025453		3060.41	0.01200107		3590.4	0.00807246		4120.4	-0.01085462
410.59	0.41336388		940.59	0.11057713		1470.58	0.13040269		2000.59	-0.01372253		2530.58	0.02023298		3060.61	0.01222405		3590.6	0.00770712		4120.6	-0.01142158
410.79	0.41458511		940.79	0.11048858		1470.78	0.12971047		2000.79	-0.01382316		2530.78	0.01958209		3060.81	0.01234185		3590.8	0.00812875		4120.8	-0.01104556
410.99	0.41493333		940.99	0.10930611		1470.98	0.12910937		2000.99	-0.0135579		2530.98	0.01914205		3061.01	0.01174645		3591	0.00759262		4121	-0.00989844
411.19	0.41554847		941.19	0.10832086		1471.18	0.12885774		2001.19	-0.01308096		2531.18	0.01933226		3061.21	0.01206636		3591.2	0.00737643		4121.2	-0.00995266
411.39	0.41517118		941.39	0.10771686		1471.38	0.12950991		2001.39	-0.01348314		2531.38	0.01985568		3061.41	0.01239518		3591.4	0.00715169		4121.4	-0.00896374
411.59	0.41529218		941.59	0.10697203		1471.58	0.1290466		2001.59	-0.01365233		2531.58	0.02034355		3061.61	0.01244278		3591.6	0.00703493		4121.6	-0.00783388
411.79	0.4149693		941.79	0.10590463		1471.78	0.13000852		2001.79	-0.01336015		2531.78	0.02082481		3061.81	0.01199635		3591.8	0.00766599		4121.8	-0.00721601
411.99	0.41572054		941.99	0.10649845		1471.98	0.13039456		2001.99	-0.01360214		2531.98	0.02173157		3062.01	0.0115585		3592	0.00819506		4122	-0.00739289
412.19	0.4155495		942.19	0.10694986		1472.18	0.13012911		2002.19	-0.01308408		2532.18	0.02142208		3062.21	0.01158955		3592.2	0.00728494		4122.2	-0.00754737
412.39	0.41592666		942.39	0.10725357		1472.38	0.13053988		2002.39	-0.01282041		2532.38	0.02173159		3062.41	0.01142521		3592.4	0.00715757		4122.4	-0.00757235
412.59	0.41593552		942.59	0.10675887		1472.58	0.130966		2002.59	-0.01278962		2532.58	0.02200353		3062.61	0.0108988		3592.6	0.00791019		4122.6	-0.00739726
412.79	0.4148967		942.79	0.10789505		1472.78	0.13095183		2002.79	-0.01297498		2532.78	0.02174954		3062.81	0.0107303		3592.8	0.00780043		4122.8	-0.00716457
412.99	0.41507844		942.99	0.10756367		1472.98	0.13108679		2002.99	-0.01186062		2532.98	0.02091898		3063.01	0.01038669		3593	0.00837084		4123	-0.00696771
413.19	0.41441251		943.19	0.10781576		1473.18	0.13033957		2003.19	-0.01184198		2533.18	0.02116015		3063.21	0.01081754		3593.2	0.00884918		4123.2	-0.00707683
413.39	0.4136525		943.39	0.10904082		1473.38	0.13062878		2003.39	-0.01115692		2533.38	0.02154738		3063.41	0.01119325		3593.4	0.00828559		4123.4	-0.00787697
413.59	0.41368833		943.59	0.10994638		1473.58	0.1304334		2003.59	-0.01129135		2533.58	0.02086413		3063.61	0.01164365		3593.6	0.00831905		4123.6	-0.00846252
413.79	0.41278542		943.79	0.10992398		1473.78	0.12999024		2003.79	-0.0115899		2533.78	0.0203771		3063.81	0.01173981		3593.8	0.00742231		4123.8	-0.0090432
413.99	0.41185401		943.99	0.11044845		1473.98	0.12959768		2003.99	-0.0117319		2533.98	0.02066424		3064.01	0.01112062		3594	0.00838586		4124	-0.00947882
414.19	0.41137355		944.19	0.11041837		1474.18	0.12843778		2004.19	-0.01165503		2534.18	0.02098548		3064.21	0.01096098		3594.2	0.00914993		4124.2	-0.00972817
414.39	0.41052282		944.39	0.11034093		1474.38	0.12836893		2004.39	-0.01122251		2534.38	0.02032015		3064.41	0.01197183		3594.4	0.00931618		4124.4	-0.00931445
414.59	0.41048038		944.59	0.11043821		1474.58	0.12707756		2004.59	-0.01140636		2534.58	0.01984249		3064.61	0.01260345		3594.6	0.0094802		4124.6	-0.00967026
414.79	0.41081445		944.79	0.11121157		1474.78	0.12608822		2004.79	-0.01181034		2534.78	0.01921262		3064.81	0.01321012		3594.8	0.00940625		4124.8	-0.00974613
414.99	0.40968332		944.99	0.11045944		1474.98	0.12577418		2004.99	-0.01210863		2534.98	0.01909297		3065.01	0.01367054		3595	0.00980098		4125	-0.00976571
415.19	0.40947662		945.19	0.11008332		1475.18	0.12456441		2005.19	-0.012395		2535.18	0.02011434		3065.21	0.0145625		3595.2	0.00975405		4125.2	-0.01074293
415.39	0.40932741		945.39	0.10945555		1475.38	0.12503206		2005.39	-0.0129904		2535.38	0.01981989		3065.41	0.01430236		3595.4	0.00941334		4125.4	-0.01078089
415.59	0.40993369		945.59	0.10915272		1475.58	0.12506685		2005.59	-0.01263743		2535.58	0.02039865		3065.61	0.01413769		3595.6	0.00940235		4125.6	-0.01119982
415.79	0.41070873		945.79	0.10805335		1475.78	0.12586446		2005.79	-0.01256336		2535.78	0.02006612		3065.81	0.01382643		3595.8	0.00907556		4125.8	-0.01183608
415.99	0.4118759		945.99	0.10831656		1475.98	0.12561984		2005.99	-0.01296723		2535.98	0.01992664		3066.01	0.01338519		3596	0.00853757		4126	-0.01304825
416.19	0.41145437		946.19	0.10810666		1476.18	0.12484856		2006.19	-0.01322259		2536.18	0.01935601		3066.21	0.01320587		3596.2	0.00786198		4126.2	-0.01446996
416.39	0.41228167		946.39	0.10713083		1476.38	0.12550403		2006.39	-0.01363878		2536.38	0.01838966		3066.41	0.01313538		3596.4	0.00782885		4126.4	-0.01442187
416.59	0.4122261		946.59	0.10675573		1476.58	0.12609115		2006.59	-0.0139178		2536.58	0.0185985		3066.61	0.01292525		3596.6	0.00749103		4126.6	-0.01394915
416.79	0.4125609		946.79	0.10704878		1476.78	0.12721747		2006.79	-0.01355012		2536.78	0.01760795		3066.81	0.01276718		3596.8	0.00728423		4126.8	-0.01348835
416.99	0.41304292		946.99	0.10623478		1476.98	0.12777423		2006.99	-0.01278581		2536.98	0.01733207		3067.01	0.01274778		3597	0.00692337		4127	-0.01370748
417.19	0.41293213		947.19	0.10599546		1477.18	0.12758581		2007.19	-0.01341082		2537.18	0.01823897		3067.21	0.01309007		3597.2	0.00739988		4127.2	-0.01326827
417.39	0.41339844		947.39	0.10723152		1477.38	0.12926069		2007.39	-0.01308721		2537.38	0.0186958		3067.41	0.01314929		3597.4	0.0069773		4127.4	-0.01309555
417.59	0.41292187		947.59	0.10739543		1477.58	0.12931719		2007.59	-0.01390512		2537.58	0.01902751		3067.61	0.01388501		3597.6	0.00727855		4127.6	-0.01244542
417.79	0.41252568		947.79	0.1076567		1477.78	0.12934037		2007.79	-0.0132404		2537.78	0.02011766		3067.81	0.01359516		3597.8	0.00694043		4127.8	-0.01170159
417.99	0.41326788		947.99	0.107665		1477.98	0.1294667		2007.99	-0.01356496		2537.98	0.02041425		3068.01	0.013761		3598	0.00688797		4128	-0.01163112
418.19	0.41349528		948.19	0.1085249		1478.18	0.12858398		2008.19	-0.01365186		2538.18	0.02017852		3068.21	0.01447927		3598.2	0.00700502		4128.2	-0.01100586
418.39	0.41384476		948.39	0.10925969		1478.38	0.12872784		2008.39	-0.01418924		2538.38	0.01943688		3068.41	0.01425679		3598.4	0.00669821		4128.4	-0.01110417
418.59	0.41422411		948.59	0.11032172		1478.58	0.12803126		2008.59	-0.0145115		2538.58	0.02001564		3068.61	0.01474253		3598.6	0.00622306		4128.6	-0.01140954
418.79	0.41370687		948.79	0.11094183		1478.78	0.12828848		2008.79	-0.01514174		2538.78	0.02028636		3068.81	0.01542024		3598.8	0.00610726		4128.8	-0.01150544
418.99	0.41219014		948.99	0.11052081		1478.98	0.12800504		2008.99	-0.01531796		2538.98	0.02065324		3069.01	0.01567003		3599	0.00666274		4129	-0.01134265
419.19	0.41215578		949.19	0.10972089		1479.18	0.12693977		2009.19	-0.01578871		2539.18	0.02192473		3069.21	0.01603505		3599.2	0.0063431		4129.2	-0.01185567
419.39	0.41229585		949.39	0.10962271		1479.38	0.12741477		2009.39	-0.01583748		2539.38	0.02140185		3069.41	0.0159159		3599.4	0.00617062		4129.4	-0.01178306
419.59	0.41295039		949.59	0.10958757		1479.58	0.12740704		2009.59	-0.01552033		2539.58	0.02111359		3069.61	0.01539541		3599.6	0.00669598		4129.6	-0.011984
419.79	0.41291908		949.79	0.10908285		1479.78	0.12735746		2009.79	-0.01587384		2539.78	0.02068138		3069.81	0.01515296		3599.8	0.0066148		4129.8	-0.01231722
419.99	0.4134919		949.99	0.10865944		1479.98	0.12736578		2009.99	-0.01556561		2539.98	0.02054292		3070.01	0.01440506		3600	0.0072893		4130	-0.01265518
420.19	0.41328193		950.19	0.10794004		1480.18	0.12665389		2010.19	-0.01533457		2540.18	0.0192994		3070.21	0.01446092		3600.2	0.00774842		4130.2	-0.01268905
420.39	0.41348731		950.39	0.10776886		1480.38	0.12686225		2010.39	-0.0151622		2540.38	0.01901612		3070.41	0.0143546		3600.4	0.00845664		4130.4	-0.01120519
420.59	0.41355659		950.59	0.10776817		1480.58	0.12640234		2010.59	-0.01489896		2540.58	0.0187839		3070.61	0.01413997		3600.6	0.00872439		4130.6	-0.01060848
420.79	0.4129896		950.79	0.1083859		1480.78	0.12600244		2010.79	-0.01373584		2540.78	0.01837823		3070.81	0.01398048		3600.8	0.00898014		4130.8	-0.01046285
420.99	0.41181163		950.99	0.1078522		1480.98	0.12601312		2010.99	-0.01328572		2540.98	0.01899274		3071.01	0.01463758		3601	0.00897144		4131	-0.01043849
421.19	0.41101037		951.19	0.10816328		1481.18	0.1256151		2011.19	-0.01304222		2541.18	0.01947418		3071.21	0.01438387		3601.2	0.0097744		4131.2	-0.00926687
421.39	0.41166385		951.39	0.10838016		1481.38	0.12640009		2011.39	-0.01239992		2541.38	0.01950154		3071.41	0.01363104		3601.4	0.00986459		4131.4	-0.0086333
421.59	0.41121951		951.59	0.10754103		1481.58	0.12605477		2011.59	-0.01226967		2541.58	0.02049292		3071.61	0.01368705		3601.6	0.00996695		4131.6	-0.00737522
421.79	0.41156885		951.79	0.10732885		1481.78	0.12632472		2011.79	-0.01206687		2541.78	0.02011024		3071.81	0.01236252		3601.8	0.00868945		4131.8	-0.00679273
421.99	0.41162215		951.99	0.10792339		1481.98	0.12696836		2011.99	-0.01229672		2541.98	0.01942988		3072.01	0.0113476		3602	0.00850781		4132	-0.00724364
422.19	0.41101123		952.19	0.10875024		1482.18	0.12633339		2012.19	-0.01282945		2542.18	0.01995242		3072.21	0.01003415		3602.2	0.0083665		4132.2	-0.00702257
422.39	0.41033275		952.39	0.10822379		1482.38	0.12607598		2012.39	-0.01353872		2542.38	0.02066987		3072.41	0.0101301		3602.4	0.00788196		4132.4	-0.0074789
422.59	0.40902007		952.59	0.10745727		1482.58	0.12615911		2012.59	-0.01452182		2542.58	0.02085267		3072.61	0.01049549		3602.6	0.00757531		4132.6	-0.00751404
422.79	0.40828374		952.79	0.10749154		1482.78	0.12615374		2012.79	-0.01526108		2542.78	0.02095977		3072.81	0.01029111		3602.8	0.00696992		4132.8	-0.00821563
422.99	0.40764272		952.99	0.10716953		1482.98	0.12578298		2012.99	-0.0163253		2542.98	0.02075178		3073.01	0.01051075		3603	0.00689289		4133	-0.00886682
423.19	0.40732388		953.19	0.10643855		1483.18	0.12613877		2013.19	-0.01725382		2543.18	0.02066951		3073.21	0.01125561		3603.2	0.00617277		4133.2	-0.00898373
423.39	0.40789229		953.39	0.10682683		1483.38	0.1261527		2013.39	-0.01736832		2543.38	0.02020281		3073.41	0.01138012		3603.4	0.0054562		4133.4	-0.00928566
423.59	0.40819299		953.59	0.10654722		1483.58	0.12605611		2013.59	-0.01752042		2543.58	0.01943601		3073.61	0.01123195		3603.6	0.00522052		4133.6	-0.00929639
423.79	0.40831317		953.79	0.10594041		1483.78	0.12540093		2013.79	-0.01794308		2543.78	0.01865118		3073.81	0.01161923		3603.8	0.0056867		4133.8	-0.01046927
423.99	0.40931951		953.99	0.10564716		1483.98	0.12531635		2013.99	-0.01839043		2543.98	0.01868756		3074.01	0.01155104		3604	0.00655647		4134	-0.01057606
424.19	0.40906093		954.19	0.10637088		1484.18	0.12429781		2014.19	-0.018003		2544.18	0.0181791		3074.21	0.01258042		3604.2	0.00677482		4134.2	-0.01014514
424.39	0.40941319		954.39	0.10692015		1484.38	0.12437063		2014.39	-0.01789637		2544.38	0.0186126		3074.41	0.01318715		3604.4	0.00749628		4134.4	-0.01038934
424.59	0.40943765		954.59	0.10785685		1484.58	0.12466181		2014.59	-0.01778995		2544.58	0.01824885		3074.61	0.01393598		3604.6	0.00757595		4134.6	-0.01158283
424.79	0.40892539		954.79	0.10887562		1484.78	0.1249104		2014.79	-0.01738183		2544.78	0.01783385		3074.81	0.01474684		3604.8	0.0081113		4134.8	-0.0118013
424.99	0.40969446		954.99	0.10935073		1484.98	0.12573427		2014.99	-0.01740955		2544.98	0.01686965		3075.01	0.01551854		3605	0.009084		4135	-0.01179449
425.19	0.41023448		955.19	0.11007923		1485.18	0.12544754		2015.19	-0.01675971		2545.18	0.01629884		3075.21	0.01445134		3605.2	0.0086912		4135.2	-0.01098805
425.39	0.41129538		955.39	0.10955217		1485.38	0.12610193		2015.39	-0.01638946		2545.38	0.01588412		3075.41	0.01509439		3605.4	0.00915432		4135.4	-0.01115367
425.59	0.41173221		955.59	0.10998759		1485.58	0.12730005		2015.59	-0.01585799		2545.58	0.01562022		3075.61	0.01473535		3605.6	0.0087617		4135.6	-0.01129548
425.79	0.41186044		955.79	0.11005072		1485.78	0.12844865		2015.79	-0.0154623		2545.78	0.01484711		3075.81	0.01457112		3605.8	0.0086459		4135.8	-0.01109322
425.99	0.41234596		955.99	0.11071675		1485.98	0.12878385		2015.99	-0.01528033		2545.98	0.0150972		3076.01	0.01459262		3606	0.00841268		4136	-0.01123767
426.19	0.41246161		956.19	0.11102217		1486.18	0.12915094		2016.19	-0.01529919		2546.18	0.01580258		3076.21	0.01469811		3606.2	0.00747024		4136.2	-0.0114585
426.39	0.41220441		956.39	0.10996572		1486.38	0.12951283		2016.39	-0.01495002		2546.38	0.01563483		3076.41	0.01498829		3606.4	0.00714694		4136.4	-0.01145988
426.59	0.41164307		956.59	0.10940083		1486.58	0.12950465		2016.59	-0.01524689		2546.58	0.01582014		3076.61	0.01399688		3606.6	0.00647378		4136.6	-0.0114948
426.79	0.4121364		956.79	0.10973283		1486.78	0.12891066		2016.79	-0.01501646		2546.78	0.01588361		3076.81	0.01380685		3606.8	0.00575834		4136.8	-0.01184464
426.99	0.41206012		956.99	0.10965449		1486.98	0.1287587		2016.99	-0.01495033		2546.98	0.01592847		3077.01	0.01393717		3607	0.00522067		4137	-0.01170996
427.19	0.41185615		957.19	0.10908551		1487.18	0.12858115		2017.19	-0.0149278		2547.18	0.01634777		3077.21	0.01323207		3607.2	0.00515236		4137.2	-0.01131377
427.39	0.41277753		957.39	0.10896173		1487.38	0.12770829		2017.39	-0.0147466		2547.38	0.01691236		3077.41	0.01249298		3607.4	0.00465278		4137.4	-0.01226702
427.59	0.41261281		957.59	0.10822761		1487.58	0.12773838		2017.59	-0.01473776		2547.58	0.01732175		3077.61	0.01167406		3607.6	0.00550658		4137.6	-0.01210262
427.79	0.4132809		957.79	0.10788647		1487.78	0.12730071		2017.79	-0.0144177		2547.78	0.01791112		3077.81	0.01138429		3607.8	0.00537359		4137.8	-0.01347934
427.99	0.41362126		957.99	0.10704326		1487.98	0.12742527		2017.99	-0.01434209		2547.98	0.01839254		3078.01	0.01099296		3608	0.00561106		4138	-0.01274443
428.19	0.41329072		958.19	0.10792787		1488.18	0.12697192		2018.19	-0.01408121		2548.18	0.0187828		3078.21	0.01122995		3608.2	0.00532489		4138.2	-0.01244675
428.39	0.41296222		958.39	0.10768637		1488.38	0.12681427		2018.39	-0.01402502		2548.38	0.01848964		3078.41	0.01182877		3608.4	0.00545727		4138.4	-0.01362665
428.59	0.41236091		958.59	0.10862024		1488.58	0.12649813		2018.59	-0.01433277		2548.58	0.01822929		3078.61	0.01188342		3608.6	0.0052479		4138.6	-0.01442181
428.79	0.4119818		958.79	0.10866427		1488.78	0.12648536		2018.79	-0.01381452		2548.78	0.0174879		3078.81	0.01241186		3608.8	0.00533013		4138.8	-0.01457695
428.99	0.41159262		958.99	0.10953869		1488.98	0.12658589		2018.99	-0.01337848		2548.98	0.0173297		3079.01	0.01201768		3609	0.00534563		4139	-0.01492616
429.19	0.41084661		959.19	0.10904662		1489.18	0.12617825		2019.19	-0.01337897		2549.18	0.01733511		3079.21	0.01188098		3609.2	0.00537357		4139.2	-0.01441896
429.39	0.41002928		959.39	0.10847816		1489.38	0.12640164		2019.39	-0.01287759		2549.38	0.01681674		3079.41	0.01240211		3609.4	0.00519261		4139.4	-0.01485055
429.59	0.41027168		959.59	0.10854487		1489.58	0.12686751		2019.59	-0.01335885		2549.58	0.01627539		3079.61	0.01210015		3609.6	0.00558923		4139.6	-0.014556
429.79	0.4101617		959.79	0.10786144		1489.78	0.12689621		2019.79	-0.01286953		2549.78	0.01730479		3079.81	0.01265244		3609.8	0.00583837		4139.8	-0.01433564
429.99	0.4106904		959.99	0.10820679		1489.98	0.12637253		2019.99	-0.01302535		2549.98	0.01767479		3080.01	0.01306388		3610	0.00542852		4140	-0.01430383
430.19	0.41084392		960.19	0.10810115		1490.18	0.1266587		2020.19	-0.01276747		2550.18	0.01739963		3080.21	0.01311455		3610.2	0.00592311		4140.2	-0.01431251
430.39	0.41189095		960.39	0.10676369		1490.38	0.12724739		2020.39	-0.01328312		2550.38	0.01704668		3080.41	0.0127744		3610.4	0.00628304		4140.4	-0.01410567
430.59	0.41222809		960.59	0.10729194		1490.58	0.12665285		2020.59	-0.01377086		2550.58	0.01763712		3080.61	0.01241369		3610.6	0.00643577		4140.6	-0.01446023
430.79	0.41303454		960.79	0.1077006		1490.78	0.12714924		2020.79	-0.01435618		2550.78	0.01726496		3080.81	0.012307		3610.8	0.00664404		4140.8	-0.01434691
430.99	0.41332397		960.99	0.10849643		1490.98	0.1283556		2020.99	-0.01357898		2550.98	0.01675779		3081.01	0.01116197		3611	0.00740003		4141	-0.0146138
431.19	0.41365412		961.19	0.10789534		1491.18	0.12872786		2021.19	-0.01442485		2551.18	0.0162624		3081.21	0.0100007		3611.2	0.00845575		4141.2	-0.01437493
431.39	0.41420202		961.39	0.10781043		1491.38	0.12911801		2021.39	-0.014384		2551.38	0.01559346		3081.41	0.01008301		3611.4	0.00793417		4141.4	-0.01373043
431.59	0.41411551		961.59	0.10761115		1491.58	0.12982656		2021.59	-0.01436514		2551.58	0.01499375		3081.61	0.01050028		3611.6	0.00895497		4141.6	-0.01381478
431.79	0.41463151		961.79	0.10751547		1491.78	0.13081601		2021.79	-0.01467246		2551.78	0.01392083		3081.81	0.01099012		3611.8	0.00829175		4141.8	-0.01336333
431.99	0.41481071		961.99	0.10732019		1491.98	0.13092947		2021.99	-0.01521225		2551.98	0.01284064		3082.01	0.01102366		3612	0.00755633		4142	-0.01244163
432.19	0.41479326		962.19	0.10795427		1492.18	0.13052661		2022.19	-0.01508584		2552.18	0.01251861		3082.21	0.01161256		3612.2	0.00658756		4142.2	-0.01361439
432.39	0.41426845		962.39	0.10814368		1492.38	0.13094846		2022.39	-0.01513678		2552.38	0.01246964		3082.41	0.0113827		3612.4	0.00628871		4142.4	-0.01412464
432.59	0.41355009		962.59	0.10859701		1492.58	0.13122849		2022.59	-0.01530004		2552.58	0.01258086		3082.61	0.01170727		3612.6	0.00578262		4142.6	-0.01418324
432.79	0.41308649		962.79	0.10770669		1492.78	0.13115363		2022.79	-0.01529852		2552.78	0.01217395		3082.81	0.01158462		3612.8	0.00625546		4142.8	-0.01435107
432.99	0.41287519		962.99	0.10744913		1492.98	0.12965014		2022.99	-0.01585038		2552.98	0.01211748		3083.01	0.01121704		3613	0.00590958		4143	-0.01408923
433.19	0.41244612		963.19	0.10625431		1493.18	0.12844078		2023.19	-0.01651324		2553.18	0.01280755		3083.21	0.01127999		3613.2	0.00520049		4143.2	-0.01387219
433.39	0.41175889		963.39	0.10610993		1493.38	0.12687884		2023.39	-0.01590512		2553.38	0.01355156		3083.41	0.01106766		3613.4	0.00433341		4143.4	-0.01368899
433.59	0.41218582		963.59	0.10607054		1493.58	0.12577315		2023.59	-0.01681943		2553.58	0.0150842		3083.61	0.01155669		3613.6	0.00497197		4143.6	-0.01321776
433.79	0.41183257		963.79	0.10542246		1493.78	0.12506786		2023.79	-0.01606856		2553.78	0.01603168		3083.81	0.01151723		3613.8	0.00422798		4143.8	-0.0132217
433.99	0.41164682		963.99	0.10499268		1493.98	0.12472157		2023.99	-0.01690057		2553.98	0.01624629		3084.01	0.01251649		3614	0.00397977		4144	-0.01259727
434.19	0.41176788		964.19	0.10442842		1494.18	0.12511659		2024.19	-0.01642192		2554.18	0.01642068		3084.21	0.01228004		3614.2	0.00384625		4144.2	-0.01294665
434.39	0.41180536		964.39	0.10431856		1494.38	0.12550462		2024.39	-0.0163258		2554.38	0.01698262		3084.41	0.01256458		3614.4	0.0030542		4144.4	-0.01332192
434.59	0.41119366		964.59	0.10545321		1494.58	0.12560353		2024.59	-0.01597971		2554.58	0.01738137		3084.61	0.01211515		3614.6	0.00266134		4144.6	-0.01280496
434.79	0.41108229		964.79	0.10644566		1494.78	0.12664215		2024.79	-0.01572155		2554.78	0.01713747		3084.81	0.01175534		3614.8	0.00282213		4144.8	-0.01295403
434.99	0.40969071		964.99	0.10771236		1494.98	0.12721046		2024.99	-0.01433891		2554.98	0.016606		3085.01	0.01086352		3615	0.00371013		4145	-0.01326634
435.19	0.40910377		965.19	0.10708991		1495.18	0.12735335		2025.19	-0.01515972		2555.18	0.01661324		3085.21	0.01145076		3615.2	0.00392157		4145.2	-0.01281041
435.39	0.4089813		965.39	0.10826182		1495.38	0.12758105		2025.39	-0.014905		2555.38	0.01661353		3085.41	0.01289128		3615.4	0.00361625		4145.4	-0.01251831
435.59	0.40889574		965.59	0.10811683		1495.58	0.12853169		2025.59	-0.01554293		2555.58	0.01593315		3085.61	0.01366666		3615.6	0.00489956		4145.6	-0.01267832
435.79	0.40864842		965.79	0.10793685		1495.78	0.12854292		2025.79	-0.01574842		2555.78	0.01561146		3085.81	0.01350771		3615.8	0.00396496		4145.8	-0.01236121
435.99	0.40925311		965.99	0.10810701		1495.98	0.12865479		2025.99	-0.01543881		2555.98	0.01605123		3086.01	0.01303038		3616	0.00348394		4146	-0.01337861
436.19	0.40906123		966.19	0.10815379		1496.18	0.12888541		2026.19	-0.01508399		2556.18	0.0160861		3086.21	0.01245033		3616.2	0.00479504		4146.2	-0.01383146
436.39	0.40834966		966.39	0.10904452		1496.38	0.12836668		2026.39	-0.0156251		2556.38	0.01582138		3086.41	0.01120048		3616.4	0.00515306		4146.4	-0.01368886
436.59	0.40827297		966.59	0.10873542		1496.58	0.12764618		2026.59	-0.01602924		2556.58	0.01502443		3086.61	0.01154616		3616.6	0.00572985		4146.6	-0.01399113
436.79	0.40918597		966.79	0.10774354		1496.78	0.12684078		2026.79	-0.01572225		2556.78	0.01519437		3086.81	0.01074924		3616.8	0.00605577		4146.8	-0.01448049
436.99	0.41023007		966.99	0.10824371		1496.98	0.12571841		2026.99	-0.01564148		2556.98	0.01608621		3087.01	0.01089129		3617	0.00496755		4147	-0.01373433
437.19	0.41070068		967.19	0.10811695		1497.18	0.12619798		2027.19	-0.0149492		2557.18	0.0166085		3087.21	0.01116678		3617.2	0.00505079		4147.2	-0.0144734
437.39	0.41085237		967.39	0.10813146		1497.38	0.12570673		2027.39	-0.01569756		2557.38	0.01684302		3087.41	0.01168218		3617.4	0.0058208		4147.4	-0.01425559
437.59	0.4110312		967.59	0.10745014		1497.58	0.12614981		2027.59	-0.015856		2557.58	0.01741772		3087.61	0.01200298		3617.6	0.00591599		4147.6	-0.01397989
437.79	0.41073882		967.79	0.10749022		1497.78	0.12560902		2027.79	-0.0153153		2557.78	0.01727491		3087.81	0.01160233		3617.8	0.0061384		4147.8	-0.01453662
437.99	0.4110176		967.99	0.10748098		1497.98	0.12622029		2027.99	-0.01462943		2557.98	0.01819165		3088.01	0.01251776		3618	0.0064223		4148	-0.0148178
438.19	0.41094541		968.19	0.10702074		1498.18	0.12623854		2028.19	-0.01385887		2558.18	0.01866793		3088.21	0.0122323		3618.2	0.00572654		4148.2	-0.01476836
438.39	0.41125731		968.39	0.10688863		1498.38	0.12652934		2028.39	-0.0142631		2558.38	0.01869759		3088.41	0.01290612		3618.4	0.00542462		4148.4	-0.01483255
438.59	0.41194151		968.59	0.10804832		1498.58	0.12755599		2028.59	-0.01415791		2558.58	0.01855774		3088.61	0.01313379		3618.6	0.00540762		4148.6	-0.01443315
438.79	0.41137009		968.79	0.10834606		1498.78	0.1271324		2028.79	-0.01522405		2558.78	0.018494		3088.81	0.01297341		3618.8	0.00521967		4148.8	-0.01505405
438.99	0.41073223		968.99	0.10845428		1498.98	0.12738053		2028.99	-0.01461322		2558.98	0.01821335		3089.01	0.01272056		3619	0.00648811		4149	-0.01448806
439.19	0.41124047		969.19	0.10769755		1499.18	0.12672287		2029.19	-0.01569665		2559.18	0.01867502		3089.21	0.01313435		3619.2	0.00678371		4149.2	-0.01394543
439.39	0.41105681		969.39	0.10817367		1499.38	0.1263182		2029.39	-0.01562342		2559.38	0.01868565		3089.41	0.01338502		3619.4	0.00725484		4149.4	-0.01377546
439.59	0.4114611		969.59	0.10722109		1499.58	0.1266635		2029.59	-0.01628733		2559.58	0.01752313		3089.61	0.01298006		3619.6	0.00689711		4149.6	-0.01374913
439.79	0.41094487		969.79	0.10819802		1499.78	0.12639872		2029.79	-0.01726808		2559.78	0.01750976		3089.81	0.01151316		3619.8	0.00698792		4149.8	-0.01411942
439.99	0.41138208		969.99	0.10875401		1499.98	0.12685045		2029.99	-0.0171261		2559.98	0.01689617		3090.01	0.01080836		3620	0.0082742		4150	-0.01459253
440.19	0.41043713		970.19	0.10906767		1500.18	0.12571991		2030.19	-0.01717737		2560.18	0.01565517		3090.21	0.01018631		3620.2	0.00962969		4150.2	-0.0141745
440.39	0.40996373		970.39	0.10857673		1500.38	0.12461377		2030.39	-0.01745088		2560.38	0.01478437		3090.41	0.00946845		3620.4	0.00981365		4150.4	-0.01459715
440.59	0.4096308		970.59	0.10775613		1500.58	0.12456745		2030.59	-0.01675739		2560.58	0.01507127		3090.61	0.01008323		3620.6	0.01070766		4150.6	-0.01468982
440.79	0.40938799		970.79	0.10689978		1500.78	0.12466033		2030.79	-0.01627586		2560.78	0.01543879		3090.81	0.01054867		3620.8	0.00940504		4150.8	-0.01474633
440.99	0.40981886		970.99	0.10747066		1500.98	0.1243785		2030.99	-0.0168802		2560.98	0.01514653		3091.01	0.01097091		3621	0.00872546		4151	-0.01406391
441.19	0.40950909		971.19	0.10614275		1501.18	0.12490851		2031.19	-0.01642899		2561.18	0.01420409		3091.21	0.01142483		3621.2	0.00904354		4151.2	-0.01519564
441.39	0.40820873		971.39	0.10582643		1501.38	0.12403353		2031.39	-0.01655299		2561.38	0.01396794		3091.41	0.01210314		3621.4	0.00877104		4151.4	-0.01470367
441.59	0.40764646		971.59	0.10513606		1501.58	0.1236952		2031.59	-0.01569407		2561.58	0.01383725		3091.61	0.01224287		3621.6	0.00776894		4151.6	-0.01435022
441.79	0.40800603		971.79	0.10562693		1501.78	0.12319417		2031.79	-0.0153091		2561.78	0.01401559		3091.81	0.01301808		3621.8	0.0076823		4151.8	-0.01446782
441.99	0.40774159		971.99	0.1057073		1501.98	0.12310029		2031.99	-0.0156122		2561.98	0.01401115		3092.01	0.01390771		3622	0.00706137		4152	-0.01371692
442.19	0.40823288		972.19	0.10500586		1502.18	0.12358219		2032.19	-0.01630002		2562.18	0.01387285		3092.21	0.01368675		3622.2	0.00555344		4152.2	-0.01300972
442.39	0.4086199		972.39	0.104758		1502.38	0.12422248		2032.39	-0.01670939		2562.38	0.01363146		3092.41	0.01415577		3622.4	0.00522226		4152.4	-0.01319855
442.59	0.40859761		972.59	0.10522983		1502.58	0.12461599		2032.59	-0.01691206		2562.58	0.01305954		3092.61	0.01408835		3622.6	0.00504518		4152.6	-0.01282577
442.79	0.40848403		972.79	0.1049807		1502.78	0.12503953		2032.79	-0.01721892		2562.78	0.0138307		3092.81	0.01317762		3622.8	0.00449305		4152.8	-0.01266087
442.99	0.40931618		972.99	0.10514037		1502.98	0.126644		2032.99	-0.01660035		2562.98	0.01372311		3093.01	0.01260063		3623	0.00488474		4153	-0.01259511
443.19	0.40987181		973.19	0.10561924		1503.18	0.12649369		2033.19	-0.01798064		2563.18	0.01396606		3093.21	0.012105		3623.2	0.00425182		4153.2	-0.01241978
443.39	0.41011795		973.39	0.10678063		1503.38	0.12771407		2033.39	-0.01830851		2563.38	0.01331093		3093.41	0.01118409		3623.4	0.00385826		4153.4	-0.01272424
443.59	0.41106491		973.59	0.10713127		1503.58	0.12867354		2033.59	-0.0190653		2563.58	0.01301293		3093.61	0.01021172		3623.6	0.00377505		4153.6	-0.01348092
443.79	0.41053863		973.79	0.10816419		1503.78	0.12814791		2033.79	-0.0193705		2563.78	0.01316224		3093.81	0.00905162		3623.8	0.00572162		4153.8	-0.01372177
443.99	0.41110425		973.99	0.10838927		1503.98	0.12825452		2033.99	-0.01857093		2563.98	0.01374181		3094.01	0.0093989		3624	0.00565802		4154	-0.01438913
444.19	0.41001134		974.19	0.10862488		1504.18	0.12784111		2034.19	-0.01812192		2564.18	0.01403501		3094.21	0.00968008		3624.2	0.00597772		4154.2	-0.0144688
444.39	0.4110211		974.39	0.10704918		1504.38	0.1276483		2034.39	-0.01838261		2564.38	0.01394439		3094.41	0.00929207		3624.4	0.00595155		4154.4	-0.01464395
444.59	0.41055783		974.59	0.10597377		1504.58	0.12755307		2034.59	-0.01779153		2564.58	0.01454054		3094.61	0.00984076		3624.6	0.00529383		4154.6	-0.01543149
444.79	0.41032422		974.79	0.10514619		1504.78	0.1277184		2034.79	-0.01782134		2564.78	0.01459779		3094.81	0.00992013		3624.8	0.00414447		4154.8	-0.01540738
444.99	0.4106651		974.99	0.10506574		1504.98	0.12658034		2034.99	-0.01780549		2564.98	0.01362832		3095.01	0.00998485		3625	0.00486957		4155	-0.0151281
445.19	0.40985841		975.19	0.10416877		1505.18	0.12640932		2035.19	-0.01681765		2565.18	0.01316982		3095.21	0.01025722		3625.2	0.00504415		4155.2	-0.0154206
445.39	0.40989101		975.39	0.10475562		1505.38	0.1254067		2035.39	-0.01635592		2565.38	0.01269502		3095.41	0.00992317		3625.4	0.00528594		4155.4	-0.01535474
445.59	0.41042671		975.59	0.1042079		1505.58	0.12543689		2035.59	-0.01615806		2565.58	0.01266413		3095.61	0.00948151		3625.6	0.00471941		4155.6	-0.01500528
445.79	0.41139794		975.79	0.10443912		1505.78	0.1251419		2035.79	-0.01570239		2565.78	0.01272853		3095.81	0.00983893		3625.8	0.00521767		4155.8	-0.01500728
445.99	0.41195986		975.99	0.10471316		1505.98	0.12491533		2035.99	-0.01561559		2565.98	0.01238605		3096.01	0.00950114		3626	0.0052826		4156	-0.01477944
446.19	0.41315761		976.19	0.10436335		1506.18	0.12505615		2036.19	-0.01444795		2566.18	0.01255133		3096.21	0.00938289		3626.2	0.00475218		4156.2	-0.01385755
446.39	0.41335794		976.39	0.10447306		1506.38	0.12505122		2036.39	-0.01420127		2566.38	0.01283754		3096.41	0.00975795		3626.4	0.00505891		4156.4	-0.01368397
446.59	0.41379442		976.59	0.10438001		1506.58	0.1250593		2036.59	-0.01391736		2566.58	0.01252715		3096.61	0.00938459		3626.6	0.00547048		4156.6	-0.01318927
446.79	0.41453959		976.79	0.10479758		1506.78	0.12587778		2036.79	-0.01390376		2566.78	0.01278633		3096.81	0.00949513		3626.8	0.00525485		4156.8	-0.01343325
446.99	0.41405821		976.99	0.10531374		1506.98	0.12591286		2036.99	-0.01504469		2566.98	0.01199755		3097.01	0.01008366		3627	0.00545276		4157	-0.01345402
447.19	0.41315214		977.19	0.10615104		1507.18	0.12490148		2037.19	-0.01595541		2567.18	0.01232306		3097.21	0.0102135		3627.2	0.00588156		4157.2	-0.01242483
447.39	0.41254723		977.39	0.10673758		1507.38	0.12576112		2037.39	-0.01627492		2567.38	0.01218282		3097.41	0.01050898		3627.4	0.00613172		4157.4	-0.01206676
447.59	0.41201603		977.59	0.10778904		1507.58	0.12554645		2037.59	-0.01628302		2567.58	0.01243376		3097.61	0.0112607		3627.6	0.00786496		4157.6	-0.01246832
447.79	0.410278		977.79	0.10879107		1507.78	0.12589472		2037.79	-0.01719928		2567.78	0.01195494		3097.81	0.0118601		3627.8	0.00810505		4157.8	-0.0135672
447.99	0.41051718		977.99	0.10973766		1507.98	0.12664134		2037.99	-0.01883976		2567.98	0.01266022		3098.01	0.01278346		3628	0.00716674		4158	-0.01402878
448.19	0.40983037		978.19	0.11026581		1508.18	0.12638751		2038.19	-0.01925086		2568.18	0.01179252		3098.21	0.01345172		3628.2	0.00726905		4158.2	-0.01422115
448.39	0.41051581		978.39	0.10869184		1508.38	0.12635837		2038.39	-0.01986059		2568.38	0.01115166		3098.41	0.01351795		3628.4	0.00749514		4158.4	-0.01322102
448.59	0.40983355		978.59	0.10897616		1508.58	0.12613446		2038.59	-0.02008428		2568.58	0.01167609		3098.61	0.01398124		3628.6	0.00762661		4158.6	-0.01418933
448.79	0.40924646		978.79	0.10945863		1508.78	0.12621603		2038.79	-0.01947519		2568.78	0.01106131		3098.81	0.01429126		3628.8	0.00752733		4158.8	-0.01377769
448.99	0.4089333		978.99	0.10990894		1508.98	0.124956		2038.99	-0.02012824		2568.98	0.01060573		3099.01	0.0139494		3629	0.00752957		4159	-0.01376357
449.19	0.40934415		979.19	0.11034171		1509.18	0.12537142		2039.19	-0.01967731		2569.18	0.01130625		3099.21	0.01389509		3629.2	0.00627694		4159.2	-0.01313116
449.39	0.4108296		979.39	0.11062113		1509.38	0.12510941		2039.39	-0.01978827		2569.38	0.01174478		3099.41	0.01309496		3629.4	0.00567987		4159.4	-0.01358839
449.59	0.41044191		979.59	0.10972542		1509.58	0.1248521		2039.59	-0.01961026		2569.58	0.01238386		3099.61	0.01226255		3629.6	0.00489415		4159.6	-0.01311534
449.79	0.41095946		979.79	0.10967171		1509.78	0.12435311		2039.79	-0.01904606		2569.78	0.01304882		3099.81	0.01128566		3629.8	0.00474837		4159.8	-0.01341549
449.99	0.41147786		979.99	0.1096202		1509.98	0.1240279		2039.99	-0.01837183		2569.98	0.01333858		3100.01	0.01046966		3630	0.00424051		4160	-0.01341128
450.19	0.41146707		980.19	0.10933715		1510.18	0.12412386		2040.19	-0.01753397		2570.18	0.0148244		3100.21	0.01033858		3630.2	0.00337443		4160.2	-0.01242902
450.39	0.41185962		980.39	0.10887084		1510.38	0.12467574		2040.39	-0.01731321		2570.38	0.01624699		3100.41	0.00973003		3630.4	0.0027724		4160.4	-0.01272712
450.59	0.41236902		980.59	0.10838184		1510.58	0.12403657		2040.59	-0.01623642		2570.58	0.01627371		3100.61	0.00896092		3630.6	0.00298765		4160.6	-0.01277907
450.79	0.41142876		980.79	0.1088836		1510.78	0.12368008		2040.79	-0.01541558		2570.78	0.01682213		3100.81	0.00921677		3630.8	0.00267173		4160.8	-0.01410698
450.99	0.41114592		980.99	0.10826682		1510.98	0.12316892		2040.99	-0.01537335		2570.98	0.01768126		3101.01	0.00889916		3631	0.00246093		4161	-0.01361668
451.19	0.41061931		981.19	0.1083098		1511.18	0.12317639		2041.19	-0.01494663		2571.18	0.01774905		3101.21	0.00785984		3631.2	0.00267003		4161.2	-0.01291409
451.39	0.41035338		981.39	0.1080619		1511.38	0.12397267		2041.39	-0.01493675		2571.38	0.01593177		3101.41	0.00739002		3631.4	0.00325743		4161.4	-0.01361384
451.59	0.40949665		981.59	0.10855341		1511.58	0.12460557		2041.59	-0.01532882		2571.58	0.0150626		3101.61	0.00753863		3631.6	0.00460701		4161.6	-0.01474636
451.79	0.40882978		981.79	0.10799142		1511.78	0.12495427		2041.79	-0.01609421		2571.78	0.01446736		3101.81	0.00692332		3631.8	0.00527407		4161.8	-0.0165992
451.99	0.40976597		981.99	0.10825722		1511.98	0.12536617		2041.99	-0.01606894		2571.98	0.01456276		3102.01	0.00634625		3632	0.00588508		4162	-0.01632436
452.19	0.40999764		982.19	0.10769825		1512.18	0.12517175		2042.19	-0.01533589		2572.18	0.01341519		3102.21	0.00651789		3632.2	0.00637018		4162.2	-0.0157122
452.39	0.41015183		982.39	0.10654923		1512.38	0.12503239		2042.39	-0.0145575		2572.38	0.01298761		3102.41	0.00670752		3632.4	0.00687758		4162.4	-0.01521908
452.59	0.41019652		982.59	0.10677343		1512.58	0.12446437		2042.59	-0.01493999		2572.58	0.01267766		3102.61	0.00665622		3632.6	0.00701651		4162.6	-0.01644624
452.79	0.40955982		982.79	0.10603572		1512.78	0.12418293		2042.79	-0.01369626		2572.78	0.01122577		3102.81	0.00641383		3632.8	0.00543076		4162.8	-0.01659784
452.99	0.40973839		982.99	0.10613759		1512.98	0.12365403		2042.99	-0.0142669		2572.98	0.0114452		3103.01	0.00706295		3633	0.00524936		4163	-0.01664662
453.19	0.40999857		983.19	0.10590492		1513.18	0.12407273		2043.19	-0.01380479		2573.18	0.01210506		3103.21	0.00777757		3633.2	0.00507322		4163.2	-0.0164441
453.39	0.40939422		983.39	0.10568268		1513.38	0.12429677		2043.39	-0.01359654		2573.38	0.01222325		3103.41	0.00796319		3633.4	0.00607165		4163.4	-0.01698377
453.59	0.40903886		983.59	0.10569542		1513.58	0.12409694		2043.59	-0.01305857		2573.58	0.01222686		3103.61	0.00775281		3633.6	0.0064961		4163.6	-0.01707116
453.79	0.40887474		983.79	0.10631571		1513.78	0.12377122		2043.79	-0.01272344		2573.78	0.01322649		3103.81	0.00732677		3633.8	0.00679345		4163.8	-0.01672248
453.99	0.40915901		983.99	0.10640426		1513.98	0.1239095		2043.99	-0.01284547		2573.98	0.01365805		3104.01	0.00807071		3634	0.00713744		4164	-0.01706059
454.19	0.40991471		984.19	0.10739233		1514.18	0.12503594		2044.19	-0.01266393		2574.18	0.0156344		3104.21	0.00911283		3634.2	0.00662555		4164.2	-0.01600823
454.39	0.41036233		984.39	0.10758653		1514.38	0.12505293		2044.39	-0.01220322		2574.38	0.01565883		3104.41	0.00855403		3634.4	0.00617655		4164.4	-0.01659811
454.59	0.41034486		984.59	0.10812126		1514.58	0.12476086		2044.59	-0.01187347		2574.58	0.0154988		3104.61	0.0081639		3634.6	0.00644013		4164.6	-0.01622697
454.79	0.41043752		984.79	0.10910491		1514.78	0.1243652		2044.79	-0.0126636		2574.78	0.01549043		3104.81	0.00789984		3634.8	0.00629235		4164.8	-0.0161362
454.99	0.41153503		984.99	0.1086405		1514.98	0.12526543		2044.99	-0.01335106		2574.98	0.01576368		3105.01	0.00746878		3635	0.00626435		4165	-0.01513282
455.19	0.41170256		985.19	0.10969257		1515.18	0.12626042		2045.19	-0.01381929		2575.18	0.01496268		3105.21	0.00776585		3635.2	0.00641054		4165.2	-0.01485449
455.39	0.41270492		985.39	0.10991242		1515.38	0.12648915		2045.39	-0.01486648		2575.38	0.01420585		3105.41	0.00799625		3635.4	0.00691946		4165.4	-0.015178
455.59	0.41183951		985.59	0.10973636		1515.58	0.12647444		2045.59	-0.01593789		2575.58	0.01439743		3105.61	0.00808455		3635.6	0.00730285		4165.6	-0.01556803
455.79	0.41170562		985.79	0.10888349		1515.78	0.12650028		2045.79	-0.01629087		2575.78	0.01448478		3105.81	0.0075066		3635.8	0.00760641		4165.8	-0.01564773
455.99	0.41175073		985.99	0.10841867		1515.98	0.12709839		2045.99	-0.01658148		2575.98	0.01327664		3106.01	0.00698464		3636	0.00706632		4166	-0.01489402
456.19	0.41233495		986.19	0.1070891		1516.18	0.12661406		2046.19	-0.01727119		2576.18	0.01276475		3106.21	0.0070945		3636.2	0.00684648		4166.2	-0.01463072
456.39	0.41146857		986.39	0.1068199		1516.38	0.12644676		2046.39	-0.01738142		2576.38	0.01334515		3106.41	0.00738847		3636.4	0.00625624		4166.4	-0.01507323
456.59	0.41068739		986.59	0.10594643		1516.58	0.12636194		2046.59	-0.01785467		2576.58	0.01330599		3106.61	0.00801322		3636.6	0.00636448		4166.6	-0.01590005
456.79	0.4111049		986.79	0.10580062		1516.78	0.12606985		2046.79	-0.01671256		2576.78	0.01300766		3106.81	0.00883572		3636.8	0.00539503		4166.8	-0.01611656
456.99	0.41067868		986.99	0.10581578		1516.98	0.12566462		2046.99	-0.01660905		2576.98	0.01377268		3107.01	0.01033535		3637	0.00663127		4167	-0.01563559
457.19	0.41083053		987.19	0.10632658		1517.18	0.12525533		2047.19	-0.01555152		2577.18	0.01429146		3107.21	0.01133493		3637.2	0.00605103		4167.2	-0.01516448
457.39	0.41052822		987.39	0.10733574		1517.38	0.12498348		2047.39	-0.01459455		2577.38	0.01430641		3107.41	0.01243852		3637.4	0.00628892		4167.4	-0.01476502
457.59	0.41037033		987.59	0.10812207		1517.58	0.12402646		2047.59	-0.01474673		2577.58	0.01432015		3107.61	0.01254957		3637.6	0.0056326		4167.6	-0.01442353
457.79	0.410698		987.79	0.10888996		1517.78	0.12418944		2047.79	-0.0150444		2577.78	0.01478959		3107.81	0.01216799		3637.8	0.00582349		4167.8	-0.013387
457.99	0.41109412		987.99	0.10917557		1517.98	0.12410964		2047.99	-0.01539292		2577.98	0.01375261		3108.01	0.01262513		3638	0.00549237		4168	-0.01420889
458.19	0.41210615		988.19	0.1101493		1518.18	0.12404488		2048.19	-0.01635479		2578.18	0.01405674		3108.21	0.01303141		3638.2	0.00501275		4168.2	-0.01419011
458.39	0.41133644		988.39	0.1103185		1518.38	0.12404327		2048.39	-0.01673579		2578.38	0.01353214		3108.41	0.01223583		3638.4	0.0043043		4168.4	-0.01520841
458.59	0.41181225		988.59	0.11133215		1518.58	0.12393188		2048.59	-0.01629824		2578.58	0.01309412		3108.61	0.01221769		3638.6	0.00430747		4168.6	-0.01443749
458.79	0.41255444		988.79	0.11181604		1518.78	0.12308484		2048.79	-0.01685889		2578.78	0.01264278		3108.81	0.01248868		3638.8	0.00386477		4168.8	-0.01530782
458.99	0.41270713		988.99	0.1115427		1518.98	0.12395977		2048.99	-0.01704004		2578.98	0.01377142		3109.01	0.01222339		3639	0.00439006		4169	-0.01606399
459.19	0.41250005		989.19	0.11194578		1519.18	0.12343078		2049.19	-0.01683258		2579.18	0.0133547		3109.21	0.01279657		3639.2	0.00478689		4169.2	-0.0165126
459.39	0.41293401		989.39	0.11050724		1519.38	0.12277119		2049.39	-0.01744656		2579.38	0.01312703		3109.41	0.01165233		3639.4	0.00439123		4169.4	-0.01685402
459.59	0.4107073		989.59	0.10909806		1519.58	0.12269231		2049.59	-0.01738704		2579.58	0.01296797		3109.61	0.0102707		3639.6	0.00445947		4169.6	-0.01739002
459.79	0.41043212		989.79	0.10836076		1519.78	0.12318829		2049.79	-0.01747951		2579.78	0.01178509		3109.81	0.00950745		3639.8	0.0050557		4169.8	-0.01754832
459.99	0.40985814		989.99	0.10772907		1519.98	0.12385132		2049.99	-0.01813725		2579.98	0.01065163		3110.01	0.00790881		3640	0.00548031		4170	-0.01828622
460.19	0.41002549		990.19	0.10744825		1520.18	0.12380484		2050.19	-0.01770953		2580.18	0.01054984		3110.21	0.0080005		3640.2	0.00557101		4170.2	-0.01896301
460.39	0.409034		990.39	0.10678501		1520.38	0.1242388		2050.39	-0.01777923		2580.38	0.01092468		3110.41	0.00830324		3640.4	0.00586986		4170.4	-0.01935023
460.59	0.40916698		990.59	0.10618562		1520.58	0.12444104		2050.59	-0.01748291		2580.58	0.01074557		3110.61	0.0082213		3640.6	0.00704639		4170.6	-0.01952493
460.79	0.4098521		990.79	0.10616004		1520.78	0.12435016		2050.79	-0.01687572		2580.78	0.01005914		3110.81	0.00746269		3640.8	0.00708119		4170.8	-0.01875914
460.99	0.40915968		990.99	0.1054255		1520.98	0.12420949		2050.99	-0.01624279		2580.98	0.00908018		3111.01	0.0068616		3641	0.00724635		4171	-0.0179282
461.19	0.40930239		991.19	0.10646991		1521.18	0.12452305		2051.19	-0.01558257		2581.18	0.00888761		3111.21	0.00703243		3641.2	0.00652991		4171.2	-0.01712059
461.39	0.40878353		991.39	0.10643506		1521.38	0.1243483		2051.39	-0.01633146		2581.38	0.00901743		3111.41	0.00628147		3641.4	0.00747339		4171.4	-0.01687867
461.59	0.40902882		991.59	0.10606971		1521.58	0.12509543		2051.59	-0.01740109		2581.58	0.00903596		3111.61	0.0061423		3641.6	0.00664343		4171.6	-0.01685456
461.79	0.40980133		991.79	0.10690791		1521.78	0.12573287		2051.79	-0.01761565		2581.78	0.00984691		3111.81	0.00556197		3641.8	0.00690118		4171.8	-0.01696532
461.99	0.40983122		991.99	0.10615561		1521.98	0.12505312		2051.99	-0.01851289		2581.98	0.00928336		3112.01	0.00622946		3642	0.00578399		4172	-0.01774372
462.19	0.41061668		992.19	0.10695046		1522.18	0.12534388		2052.19	-0.01907877		2582.18	0.00982781		3112.21	0.00617498		3642.2	0.00440402		4172.2	-0.01795488
462.39	0.41000674		992.39	0.10785441		1522.38	0.1258138		2052.39	-0.01913258		2582.38	0.0105014		3112.41	0.00616589		3642.4	0.0032486		4172.4	-0.01776281
462.59	0.40990382		992.59	0.10833142		1522.58	0.12639389		2052.59	-0.01841768		2582.58	0.01060394		3112.61	0.00743838		3642.6	0.00318639		4172.6	-0.01747774
462.79	0.40998868		992.79	0.10833354		1522.78	0.1262426		2052.79	-0.01927653		2582.78	0.01122035		3112.81	0.00817366		3642.8	0.00256399		4172.8	-0.01814151
462.99	0.40970533		992.99	0.10812003		1522.98	0.12655878		2052.99	-0.01944865		2582.98	0.01226289		3113.01	0.00813305		3643	0.00242964		4173	-0.01830628
463.19	0.40898222		993.19	0.10748508		1523.18	0.12580216		2053.19	-0.01971465		2583.18	0.01257983		3113.21	0.00875748		3643.2	0.00221393		4173.2	-0.01797329
463.39	0.40902053		993.39	0.10684945		1523.38	0.12542273		2053.39	-0.02052299		2583.38	0.01318543		3113.41	0.00785516		3643.4	0.00205985		4173.4	-0.0180957
463.59	0.40817451		993.59	0.10724387		1523.58	0.1259405		2053.59	-0.02093568		2583.58	0.01301378		3113.61	0.00778049		3643.6	0.00261331		4173.6	-0.01740953
463.79	0.40758508		993.79	0.10670797		1523.78	0.12572843		2053.79	-0.02120187		2583.78	0.01203941		3113.81	0.00834438		3643.8	0.00276331		4173.8	-0.01690613
463.99	0.40701257		993.99	0.10574521		1523.98	0.12585168		2053.99	-0.02066166		2583.98	0.0123814		3114.01	0.00821178		3644	0.00292722		4174	-0.01706296
464.19	0.40732524		994.19	0.10563952		1524.18	0.12500895		2054.19	-0.01935798		2584.18	0.01156076		3114.21	0.00953385		3644.2	0.00326622		4174.2	-0.0172226
464.39	0.4070585		994.39	0.10520922		1524.38	0.12485477		2054.39	-0.01958311		2584.38	0.01206651		3114.41	0.00942108		3644.4	0.00429096		4174.4	-0.01765153
464.59	0.40699675		994.59	0.10519092		1524.58	0.12487665		2054.59	-0.01856756		2584.58	0.01192757		3114.61	0.00858432		3644.6	0.00415387		4174.6	-0.01770587
464.79	0.40742645		994.79	0.1041374		1524.78	0.12472882		2054.79	-0.01739604		2584.78	0.01198648		3114.81	0.00863071		3644.8	0.00435096		4174.8	-0.01765985
464.99	0.40741534		994.99	0.10337029		1524.98	0.12469076		2054.99	-0.01650793		2584.98	0.01197134		3115.01	0.00864788		3645	0.004563		4175	-0.01731045
465.19	0.40747397		995.19	0.10442034		1525.18	0.1249761		2055.19	-0.01595778		2585.18	0.01303626		3115.21	0.00860799		3645.2	0.00542986		4175.2	-0.01783146
465.39	0.40844555		995.39	0.10420783		1525.38	0.12477594		2055.39	-0.01565139		2585.38	0.0141953		3115.41	0.00817058		3645.4	0.005557		4175.4	-0.01795698
465.59	0.40912444		995.59	0.1036871		1525.58	0.12525625		2055.59	-0.01466287		2585.58	0.01410891		3115.61	0.00883803		3645.6	0.00525097		4175.6	-0.01892789
465.79	0.41006098		995.79	0.10430085		1525.78	0.12475939		2055.79	-0.0142463		2585.78	0.01433428		3115.81	0.00822605		3645.8	0.00529665		4175.8	-0.01897012
465.99	0.41064189		995.99	0.10342049		1525.98	0.12520195		2055.99	-0.01439143		2585.98	0.01333889		3116.01	0.00854359		3646	0.00458642		4176	-0.01900079
466.19	0.41057543		996.19	0.10495375		1526.18	0.12574237		2056.19	-0.01431789		2586.18	0.01307678		3116.21	0.00907689		3646.2	0.00426911		4176.2	-0.01908429
466.39	0.41016978		996.39	0.10511442		1526.38	0.12590964		2056.39	-0.01487875		2586.38	0.01275404		3116.41	0.00995769		3646.4	0.0043976		4176.4	-0.0187287
466.59	0.41046574		996.59	0.10510464		1526.58	0.12580363		2056.59	-0.01455817		2586.58	0.01239215		3116.61	0.01101335		3646.6	0.00352023		4176.6	-0.01936779
466.79	0.41081304		996.79	0.10564129		1526.78	0.12479417		2056.79	-0.01535587		2586.78	0.01194123		3116.81	0.0111683		3646.8	0.00325112		4176.8	-0.01940453
466.99	0.41023412		996.99	0.10521172		1526.98	0.12509927		2056.99	-0.01658885		2586.98	0.01163171		3117.01	0.01072441		3647	0.00279622		4177	-0.01936326
467.19	0.40998946		997.19	0.10498969		1527.18	0.12437377		2057.19	-0.01840705		2587.18	0.0113506		3117.21	0.01018099		3647.2	0.0029961		4177.2	-0.01981432
467.39	0.40974943		997.39	0.10550476		1527.38	0.12399313		2057.39	-0.01954869		2587.38	0.01088231		3117.41	0.01088947		3647.4	0.00288121		4177.4	-0.01970516
467.59	0.40946399		997.59	0.10595026		1527.58	0.12368786		2057.59	-0.02042826		2587.58	0.01055489		3117.61	0.01118181		3647.6	0.00347499		4177.6	-0.01895402
467.79	0.40795491		997.79	0.10575677		1527.78	0.12280025		2057.79	-0.02053535		2587.78	0.010169		3117.81	0.01133016		3647.8	0.00319171		4177.8	-0.01989516
467.99	0.40729048		997.99	0.10604105		1527.98	0.12232528		2057.99	-0.02059718		2587.98	0.0101152		3118.01	0.01084102		3648	0.00404549		4178	-0.01956686
468.19	0.40727055		998.19	0.1061284		1528.18	0.12201507		2058.19	-0.02049987		2588.18	0.00955539		3118.21	0.0105691		3648.2	0.00419999		4178.2	-0.02014518
468.39	0.40644966		998.39	0.10603592		1528.38	0.12259124		2058.39	-0.020028		2588.38	0.01031389		3118.41	0.01010944		3648.4	0.00500882		4178.4	-0.01987847
468.59	0.40566748		998.59	0.10558063		1528.58	0.12251275		2058.59	-0.0195678		2588.58	0.01067156		3118.61	0.00930265		3648.6	0.00479954		4178.6	-0.01868872
468.79	0.40643243		998.79	0.10485155		1528.78	0.12300188		2058.79	-0.01828566		2588.78	0.01169828		3118.81	0.01006004		3648.8	0.00538655		4178.8	-0.01798597
468.99	0.4064139		998.99	0.10464237		1528.98	0.12349916		2058.99	-0.0176948		2588.98	0.01211975		3119.01	0.0098871		3649	0.00596316		4179	-0.01704023
469.19	0.40683825		999.19	0.10452111		1529.18	0.12394823		2059.19	-0.0167893		2589.18	0.01283311		3119.21	0.00929904		3649.2	0.00605944		4179.2	-0.01673215
469.39	0.40784656		999.39	0.10380268		1529.38	0.12359753		2059.39	-0.01642328		2589.38	0.01297766		3119.41	0.00888819		3649.4	0.00618811		4179.4	-0.01591422
469.59	0.40813544		999.59	0.10400812		1529.58	0.12348509		2059.59	-0.0160061		2589.58	0.01214403		3119.61	0.00863185		3649.6	0.00640458		4179.6	-0.0157219
469.79	0.40869778		999.79	0.10477585		1529.78	0.12273495		2059.79	-0.01613715		2589.78	0.01155096		3119.81	0.00781629		3649.8	0.00673447		4179.8	-0.01479068
469.99	0.40844134		999.99	0.10463327		1529.98	0.12302647		2059.99	-0.01610463		2589.98	0.01100841		3120.01	0.00795836		3650	0.00675116		4180	-0.01461638
470.19	0.40885791		1000.19	0.10525852		1530.18	0.12290218		2060.19	-0.01621138		2590.18	0.01103224		3120.21	0.00818845		3650.2	0.00616175		4180.2	-0.01373148
470.39	0.40871437		1000.39	0.10530706		1530.38	0.12178436		2060.39	-0.01640183		2590.38	0.01091393		3120.41	0.00796933		3650.4	0.00604606		4180.4	-0.01322132
470.59	0.40951197		1000.59	0.10570271		1530.58	0.12116395		2060.59	-0.01636964		2590.58	0.0117359		3120.61	0.00764555		3650.6	0.00498991		4180.6	-0.01374329
470.79	0.40924238		1000.79	0.10679433		1530.78	0.12189344		2060.79	-0.01705818		2590.78	0.01269146		3120.81	0.00670702		3650.8	0.00502665		4180.8	-0.01351015
470.99	0.40952221		1000.99	0.10676564		1530.98	0.12295849		2060.99	-0.01768357		2590.98	0.01240731		3121.01	0.00632737		3651	0.00457843		4181	-0.01392234
471.19	0.40923145		1001.19	0.10725935		1531.18	0.12268206		2061.19	-0.01868445		2591.18	0.01226462		3121.21	0.00509486		3651.2	0.00479138		4181.2	-0.01536241
471.39	0.40867554		1001.39	0.10756007		1531.38	0.12292255		2061.39	-0.01846098		2591.38	0.01181116		3121.41	0.00567089		3651.4	0.00477329		4181.4	-0.014708
471.59	0.40862948		1001.59	0.10808183		1531.58	0.12318557		2061.59	-0.0189128		2591.58	0.01144971		3121.61	0.00525305		3651.6	0.00510161		4181.6	-0.01564629
471.79	0.40803272		1001.79	0.10787712		1531.78	0.12382177		2061.79	-0.01881591		2591.78	0.01095984		3121.81	0.00492339		3651.8	0.00453641		4181.8	-0.01649105
471.99	0.40760384		1001.99	0.10715568		1531.98	0.1240665		2061.99	-0.01888492		2591.98	0.01074715		3122.01	0.00473823		3652	0.00498126		4182	-0.01571217
472.19	0.40727066		1002.19	0.10592502		1532.18	0.12508845		2062.19	-0.01865788		2592.18	0.01111459		3122.21	0.00487667		3652.2	0.00436756		4182.2	-0.0165536
472.39	0.40673746		1002.39	0.10501356		1532.38	0.12582438		2062.39	-0.01778652		2592.38	0.01179999		3122.41	0.00551136		3652.4	0.00516871		4182.4	-0.01588485
472.59	0.40658765		1002.59	0.10410758		1532.58	0.12616282		2062.59	-0.01781271		2592.58	0.01188968		3122.61	0.00636614		3652.6	0.00527555		4182.6	-0.01573357
472.79	0.40716634		1002.79	0.10283905		1532.78	0.12671237		2062.79	-0.0173299		2592.78	0.01172294		3122.81	0.00790194		3652.8	0.00409658		4182.8	-0.01588986
472.99	0.40746863		1002.99	0.10210321		1532.98	0.12760954		2062.99	-0.01775215		2592.98	0.01122347		3123.01	0.00828018		3653	0.0035926		4183	-0.01567474
473.19	0.4085092		1003.19	0.10230369		1533.18	0.12694435		2063.19	-0.0182007		2593.18	0.01137361		3123.21	0.00814777		3653.2	0.00254999		4183.2	-0.01659678
473.39	0.40877329		1003.39	0.10263743		1533.38	0.126347		2063.39	-0.01797089		2593.38	0.01037999		3123.41	0.00857514		3653.4	0.00186725		4183.4	-0.01717138
473.59	0.40861426		1003.59	0.1030765		1533.58	0.12575666		2063.59	-0.01768348		2593.58	0.00965465		3123.61	0.00834257		3653.6	0.00143331		4183.6	-0.01775059
473.79	0.40877454		1003.79	0.1030959		1533.78	0.12530792		2063.79	-0.01832404		2593.78	0.009101		3123.81	0.00831575		3653.8	0.00159444		4183.8	-0.01773906
473.99	0.40889847		1003.99	0.10336526		1533.98	0.12470294		2063.99	-0.01916643		2593.98	0.00891905		3124.01	0.00828397		3654	0.00161389		4184	-0.01753026
474.19	0.40898025		1004.19	0.1031663		1534.18	0.12438567		2064.19	-0.01891928		2594.18	0.00836265		3124.21	0.00805841		3654.2	0.00179509		4184.2	-0.01604081
474.39	0.40803324		1004.39	0.10410118		1534.38	0.12366095		2064.39	-0.01893091		2594.38	0.0088858		3124.41	0.00796817		3654.4	0.00180195		4184.4	-0.01536593
474.59	0.40839032		1004.59	0.10470574		1534.58	0.12405988		2064.59	-0.01960693		2594.58	0.00954271		3124.61	0.00644634		3654.6	0.00179685		4184.6	-0.01531209
474.79	0.40832683		1004.79	0.10470264		1534.78	0.12448904		2064.79	-0.02030972		2594.78	0.00987079		3124.81	0.00546583		3654.8	0.00260218		4184.8	-0.01425799
474.99	0.40829284		1004.99	0.10439392		1534.98	0.12478649		2064.99	-0.02053359		2594.98	0.00918016		3125.01	0.00524449		3655	0.00245716		4185	-0.01421339
475.19	0.40788583		1005.19	0.10369749		1535.18	0.12495195		2065.19	-0.02069459		2595.18	0.00858045		3125.21	0.00439744		3655.2	0.0025246		4185.2	-0.01513115
475.39	0.40743884		1005.39	0.10364308		1535.38	0.12487949		2065.39	-0.01968221		2595.38	0.00843947		3125.41	0.00465431		3655.4	0.0016776		4185.4	-0.0142475
475.59	0.4076996		1005.59	0.10354531		1535.58	0.12475941		2065.59	-0.02000234		2595.58	0.00829141		3125.61	0.00434415		3655.6	0.00106963		4185.6	-0.01515716
475.79	0.40834657		1005.79	0.10373473		1535.78	0.12393959		2065.79	-0.01941213		2595.78	0.00879139		3125.81	0.00410929		3655.8	0.00119492		4185.8	-0.01529845
475.99	0.40840943		1005.99	0.10304835		1535.98	0.12328885		2065.99	-0.01971768		2595.98	0.00895827		3126.01	0.00444824		3656	0.00131289		4186	-0.01475744
476.19	0.40786552		1006.19	0.10301469		1536.18	0.12370441		2066.19	-0.0189577		2596.18	0.00956403		3126.21	0.00569285		3656.2	0.00190037		4186.2	-0.01440704
476.39	0.408135		1006.39	0.10352325		1536.38	0.12336752		2066.39	-0.01826422		2596.38	0.01013566		3126.41	0.00602823		3656.4	0.00255747		4186.4	-0.01416628
476.59	0.40859725		1006.59	0.10405278		1536.58	0.12349598		2066.59	-0.01847665		2596.58	0.00924004		3126.61	0.00670485		3656.6	0.00242473		4186.6	-0.01411856
476.79	0.40948693		1006.79	0.10419118		1536.78	0.12255711		2066.79	-0.0180863		2596.78	0.0093834		3126.81	0.00772291		3656.8	0.00147204		4186.8	-0.0141349
476.99	0.41038447		1006.99	0.10456562		1536.98	0.12353039		2066.99	-0.01727621		2596.98	0.00996098		3127.01	0.00730841		3657	0.00174004		4187	-0.01505251
477.19	0.41155247		1007.19	0.10517519		1537.18	0.12237754		2067.19	-0.01678631		2597.18	0.01026625		3127.21	0.00767954		3657.2	0.00214364		4187.2	-0.01593385
477.39	0.41080749		1007.39	0.10497599		1537.38	0.1235655		2067.39	-0.01585713		2597.38	0.00961081		3127.41	0.0085884		3657.4	0.00225965		4187.4	-0.01613656
477.59	0.41106393		1007.59	0.10552964		1537.58	0.12361607		2067.59	-0.01636736		2597.58	0.00957311		3127.61	0.00803254		3657.6	0.00299091		4187.6	-0.01622486
477.79	0.41107249		1007.79	0.10625553		1537.78	0.12318883		2067.79	-0.01704811		2597.78	0.0093358		3127.81	0.0088234		3657.8	0.00377679		4187.8	-0.01539798
477.99	0.41082292		1007.99	0.10663794		1537.98	0.12286254		2067.99	-0.01758721		2597.98	0.00845226		3128.01	0.00942473		3658	0.00498392		4188	-0.01493466
478.19	0.41068749		1008.19	0.10687687		1538.18	0.12354046		2068.19	-0.01696001		2598.18	0.00841878		3128.21	0.00918958		3658.2	0.00503217		4188.2	-0.01415334
478.39	0.41006337		1008.39	0.10721366		1538.38	0.1242179		2068.39	-0.01777867		2598.38	0.00866096		3128.41	0.00938525		3658.4	0.00497699		4188.4	-0.01418168
478.59	0.4099695		1008.59	0.10755133		1538.58	0.12406648		2068.59	-0.01855829		2598.58	0.00845311		3128.61	0.00782322		3658.6	0.00504364		4188.6	-0.01453585
478.79	0.40991673		1008.79	0.10708339		1538.78	0.12427597		2068.79	-0.01916771		2598.78	0.00805425		3128.81	0.00767667		3658.8	0.00439381		4188.8	-0.0144925
478.99	0.40968099		1008.99	0.1068106		1538.98	0.12475659		2068.99	-0.01841242		2598.98	0.00796673		3129.01	0.00784159		3659	0.00316271		4189	-0.01555237
479.19	0.40876276		1009.19	0.10585823		1539.18	0.12503555		2069.19	-0.01805076		2599.18	0.00706929		3129.21	0.0076287		3659.2	0.00278471		4189.2	-0.01659644
479.39	0.40810958		1009.39	0.10577913		1539.38	0.12435469		2069.39	-0.01823185		2599.38	0.00757175		3129.41	0.00708295		3659.4	0.00211788		4189.4	-0.01740315
479.59	0.40863955		1009.59	0.10625837		1539.58	0.12418707		2069.59	-0.01872237		2599.58	0.00754537		3129.61	0.00701666		3659.6	0.00246589		4189.6	-0.01777121
479.79	0.40898848		1009.79	0.10651978		1539.78	0.12397775		2069.79	-0.01917878		2599.78	0.00875368		3129.81	0.00690777		3659.8	0.00270636		4189.8	-0.01850913
479.99	0.40834702		1009.99	0.1060575		1539.98	0.12394331		2069.99	-0.0192865		2599.98	0.00926876		3130.01	0.0069833		3660	0.00236255		4190	-0.01806057
480.19	0.40716792		1010.19	0.10613315		1540.18	0.12333937		2070.19	-0.01847465		2600.18	0.01007599		3130.21	0.00781424		3660.2	0.00266684		4190.2	-0.01801019
480.39	0.40721791		1010.39	0.10612491		1540.38	0.12326439		2070.39	-0.01819226		2600.38	0.01177933		3130.41	0.00626561		3660.4	0.00212503		4190.4	-0.01841601
480.59	0.4076575		1010.59	0.10562845		1540.58	0.12333283		2070.59	-0.0183867		2600.58	0.01244725		3130.61	0.0068311		3660.6	0.00294416		4190.6	-0.01861508
480.79	0.4077327		1010.79	0.10497518		1540.78	0.12222915		2070.79	-0.01765325		2600.78	0.01401502		3130.81	0.00684493		3660.8	0.00355051		4190.8	-0.01896939
480.99	0.40758514		1010.99	0.1043518		1540.98	0.12244672		2070.99	-0.01748188		2600.98	0.0147806		3131.01	0.00692053		3661	0.00290725		4191	-0.01907728
481.19	0.4070208		1011.19	0.10455122		1541.18	0.12179131		2071.19	-0.01810835		2601.18	0.01498367		3131.21	0.00702881		3661.2	0.00314132		4191.2	-0.01881133
481.39	0.40592998		1011.39	0.10465972		1541.38	0.12235276		2071.39	-0.01789079		2601.38	0.01539467		3131.41	0.00715562		3661.4	0.00331679		4191.4	-0.01883506
481.59	0.40579342		1011.59	0.10507204		1541.58	0.12213021		2071.59	-0.01831582		2601.58	0.01448173		3131.61	0.00699309		3661.6	0.00353332		4191.6	-0.01853052
481.79	0.40517146		1011.79	0.10572982		1541.78	0.12173086		2071.79	-0.018505		2601.78	0.01433577		3131.81	0.00804061		3661.8	0.00360652		4191.8	-0.01806113
481.99	0.40557371		1011.99	0.10593837		1541.98	0.12179004		2071.99	-0.01811059		2601.98	0.0137598		3132.01	0.00770345		3662	0.00346825		4192	-0.01768778
482.19	0.40564095		1012.19	0.10637931		1542.18	0.12164798		2072.19	-0.01782482		2602.18	0.0134818		3132.21	0.00683511		3662.2	0.00319424		4192.2	-0.01773473
482.39	0.40541848		1012.39	0.10667179		1542.38	0.12252693		2072.39	-0.01814395		2602.38	0.01206149		3132.41	0.00654194		3662.4	0.00261478		4192.4	-0.01847795
482.59	0.40528701		1012.59	0.10692196		1542.58	0.12295809		2072.59	-0.01798053		2602.58	0.01133394		3132.61	0.00598693		3662.6	0.00209829		4192.6	-0.01892864
482.79	0.40523322		1012.79	0.10664602		1542.78	0.12261131		2072.79	-0.0191033		2602.78	0.01005004		3132.81	0.00672497		3662.8	0.0021904		4192.8	-0.01929705
482.99	0.40507933		1012.99	0.10519196		1542.98	0.12306207		2072.99	-0.01865115		2602.98	0.00912947		3133.01	0.00672983		3663	0.00203878		4193	-0.02045333
483.19	0.4058745		1013.19	0.10544526		1543.18	0.12339096		2073.19	-0.01933067		2603.18	0.00733138		3133.21	0.00694834		3663.2	0.00187786		4193.2	-0.02069952
483.39	0.40662624		1013.39	0.10554281		1543.38	0.12310444		2073.39	-0.01958148		2603.38	0.00718548		3133.41	0.00729038		3663.4	0.00291362		4193.4	-0.02044336
483.59	0.40741669		1013.59	0.1053905		1543.58	0.1237601		2073.59	-0.01965494		2603.58	0.00739688		3133.61	0.00714607		3663.6	0.00302454		4193.6	-0.01893164
483.79	0.40834018		1013.79	0.10470425		1543.78	0.12374094		2073.79	-0.01999781		2603.78	0.00820001		3133.81	0.00712578		3663.8	0.00319052		4193.8	-0.01909156
483.99	0.40837969		1013.99	0.10396614		1543.98	0.12457473		2073.99	-0.02010669		2603.98	0.00814524		3134.01	0.00739952		3664	0.003112		4194	-0.01815316
484.19	0.40962282		1014.19	0.10319221		1544.18	0.12409503		2074.19	-0.02016034		2604.18	0.00877296		3134.21	0.00799449		3664.2	0.00399337		4194.2	-0.01723669
484.39	0.41036005		1014.39	0.10257888		1544.38	0.12474808		2074.39	-0.02005841		2604.38	0.00938426		3134.41	0.00726812		3664.4	0.00390105		4194.4	-0.01666916
484.59	0.41147931		1014.59	0.10270984		1544.58	0.12468363		2074.59	-0.02073889		2604.58	0.00918882		3134.61	0.00852661		3664.6	0.00408809		4194.6	-0.01618838
484.79	0.41067308		1014.79	0.10270373		1544.78	0.12395601		2074.79	-0.02058907		2604.78	0.00963601		3134.81	0.00859675		3664.8	0.00350791		4194.8	-0.01617242
484.99	0.41085483		1014.99	0.10295879		1544.98	0.12433318		2074.99	-0.02048748		2604.98	0.00978512		3135.01	0.00953254		3665	0.0032369		4195	-0.01600368
485.19	0.41076448		1015.19	0.10325632		1545.18	0.12496981		2075.19	-0.02070371		2605.18	0.00913835		3135.21	0.00837112		3665.2	0.00339765		4195.2	-0.01618701
485.39	0.41111359		1015.39	0.10304431		1545.38	0.12524643		2075.39	-0.01934533		2605.38	0.009266		3135.41	0.00851937		3665.4	0.00384432		4195.4	-0.01627029
485.59	0.41092654		1015.59	0.10295197		1545.58	0.12563558		2075.59	-0.01909593		2605.58	0.00866459		3135.61	0.00903288		3665.6	0.00349512		4195.6	-0.01632702
485.79	0.4111043		1015.79	0.1032783		1545.78	0.12510802		2075.79	-0.01968489		2605.78	0.00896187		3135.81	0.00850544		3665.8	0.00334762		4195.8	-0.01677474
485.99	0.41168187		1015.99	0.10287195		1545.98	0.12514287		2075.99	-0.01989828		2605.98	0.00883816		3136.01	0.00754325		3666	0.0034631		4196	-0.01693078
486.19	0.41058343		1016.19	0.10320892		1546.18	0.12596266		2076.19	-0.02004213		2606.18	0.00909792		3136.21	0.00755987		3666.2	0.00319296		4196.2	-0.01789877
486.39	0.40993681		1016.39	0.10366434		1546.38	0.12688159		2076.39	-0.02018504		2606.38	0.0093379		3136.41	0.00764056		3666.4	0.00313753		4196.4	-0.01874477
486.59	0.40911797		1016.59	0.10349524		1546.58	0.12679363		2076.59	-0.02053032		2606.58	0.00928875		3136.61	0.00704911		3666.6	0.00354056		4196.6	-0.01938043
486.79	0.40854629		1016.79	0.10385167		1546.78	0.12584161		2076.79	-0.02159884		2606.78	0.01006704		3136.81	0.00656338		3666.8	0.00408632		4196.8	-0.01969749
486.99	0.40826898		1016.99	0.10351657		1546.98	0.12622595		2076.99	-0.02047037		2606.98	0.00999896		3137.01	0.00607118		3667	0.00418791		4197	-0.01972976
487.19	0.40781386		1017.19	0.10397674		1547.18	0.12616646		2077.19	-0.01968807		2607.18	0.00995167		3137.21	0.00604191		3667.2	0.00454285		4197.2	-0.01901289
487.39	0.40735887		1017.39	0.10331972		1547.38	0.12613468		2077.39	-0.01968016		2607.38	0.01121219		3137.41	0.00599482		3667.4	0.00586489		4197.4	-0.01883469
487.59	0.40695921		1017.59	0.10372283		1547.58	0.12581222		2077.59	-0.01993935		2607.58	0.01168233		3137.61	0.00563779		3667.6	0.0060403		4197.6	-0.01831137
487.79	0.4067148		1017.79	0.10375782		1547.78	0.1258803		2077.79	-0.01982523		2607.78	0.01157852		3137.81	0.00588693		3667.8	0.00612832		4197.8	-0.0180017
487.99	0.406017		1017.99	0.10342984		1547.98	0.12664127		2077.99	-0.02023849		2607.98	0.01104499		3138.01	0.00564927		3668	0.00623376		4198	-0.0171917
488.19	0.40650971		1018.19	0.10396504		1548.18	0.12574855		2078.19	-0.02028113		2608.18	0.0115098		3138.21	0.00602837		3668.2	0.00651481		4198.2	-0.01680168
488.39	0.40637962		1018.39	0.10427688		1548.38	0.12590559		2078.39	-0.02071145		2608.38	0.01154197		3138.41	0.005135		3668.4	0.00560094		4198.4	-0.0170389
488.59	0.4062014		1018.59	0.10541556		1548.58	0.12577791		2078.59	-0.02077596		2608.58	0.01168546		3138.61	0.00574396		3668.6	0.00584114		4198.6	-0.0176341
488.79	0.40568582		1018.79	0.10567848		1548.78	0.12534205		2078.79	-0.02118459		2608.78	0.01139673		3138.81	0.00618721		3668.8	0.00552121		4198.8	-0.01812862
488.99	0.40650655		1018.99	0.10564231		1548.98	0.12527261		2078.99	-0.0210128		2608.98	0.01140309		3139.01	0.00703305		3669	0.0061074		4199	-0.01837635
489.19	0.40730671		1019.19	0.10557039		1549.18	0.12463395		2079.19	-0.02138411		2609.18	0.01107438		3139.21	0.00675851		3669.2	0.00583415		4199.2	-0.01852311
489.39	0.4076725		1019.39	0.10507517		1549.38	0.12400111		2079.39	-0.02070504		2609.38	0.01045597		3139.41	0.00744617		3669.4	0.00597525		4199.4	-0.01934443
489.59	0.40816204		1019.59	0.10520713		1549.58	0.1238956		2079.59	-0.021236		2609.58	0.00956777		3139.61	0.00792851		3669.6	0.00555118		4199.6	-0.01950463
489.79	0.40883736		1019.79	0.10556008		1549.78	0.1233386		2079.79	-0.02194329		2609.78	0.00875896		3139.81	0.00817184		3669.8	0.00508001		4199.8	-0.02001833
489.99	0.40876888		1019.99	0.10490239		1549.98	0.1230678		2079.99	-0.02143977		2609.98	0.00879983		3140.01	0.00888787		3670	0.00472012		4200	-0.01998553
490.19	0.40855824		1020.19	0.10592411		1550.18	0.12329666		2080.19	-0.02070457		2610.18	0.00938876		3140.21	0.0094562		3670.2	0.0038714		4200.2	-0.0205034
490.39	0.40963014		1020.39	0.10639201		1550.38	0.12283911		2080.39	-0.02080873		2610.38	0.00893965		3140.41	0.00887785		3670.4	0.00331371		4200.4	-0.02055775
490.59	0.4093716		1020.59	0.10682202		1550.58	0.12280789		2080.59	-0.02054279		2610.58	0.00912385		3140.61	0.00734833		3670.6	0.00280219		4200.6	-0.02112791
490.79	0.40916203		1020.79	0.10681173		1550.78	0.12248259		2080.79	-0.02003888		2610.78	0.00999308		3140.81	0.00696157		3670.8	0.00248466		4200.8	-0.02102981
490.99	0.40867874		1020.99	0.10718311		1550.98	0.12158864		2080.99	-0.01868343		2610.98	0.01027895		3141.01	0.00608281		3671	0.002361		4201	-0.01981063
491.19	0.40724483		1021.19	0.10654636		1551.18	0.12185025		2081.19	-0.01844132		2611.18	0.00970309		3141.21	0.00508558		3671.2	0.00182897		4201.2	-0.01975054
491.39	0.40683055		1021.39	0.1064323		1551.38	0.12128497		2081.39	-0.0175466		2611.38	0.0097535		3141.41	0.00457129		3671.4	0.00198648		4201.4	-0.01954038
491.59	0.40535647		1021.59	0.10687641		1551.58	0.12080062		2081.59	-0.01709873		2611.58	0.00949729		3141.61	0.00450054		3671.6	0.00147316		4201.6	-0.01836895
491.79	0.4049343		1021.79	0.10622087		1551.78	0.12107571		2081.79	-0.01648887		2611.78	0.00943875		3141.81	0.00392233		3671.8	0.00100355		4201.8	-0.01727018
491.99	0.40446462		1021.99	0.10641838		1551.98	0.12139124		2081.99	-0.01710694		2611.98	0.00940568		3142.01	0.00297188		3672	0.00153811		4202	-0.0166633
492.19	0.40463585		1022.19	0.10597916		1552.18	0.12135897		2082.19	-0.0168037		2612.18	0.01031467		3142.21	0.00293251		3672.2	0.00169961		4202.2	-0.0162826
492.39	0.40532808		1022.39	0.10625952		1552.38	0.12154667		2082.39	-0.01729815		2612.38	0.00998002		3142.41	0.00272715		3672.4	0.0018747		4202.4	-0.01565965
492.59	0.40531054		1022.59	0.10633673		1552.58	0.12143594		2082.59	-0.01790488		2612.58	0.01018093		3142.61	0.00342353		3672.6	0.00221628		4202.6	-0.01506647
492.79	0.40596003		1022.79	0.10495597		1552.78	0.12144322		2082.79	-0.01881731		2612.78	0.01048776		3142.81	0.00440407		3672.8	0.00167611		4202.8	-0.01492978
492.99	0.40584551		1022.99	0.10424964		1552.98	0.12111335		2082.99	-0.01939868		2612.98	0.01100825		3143.01	0.00525621		3673	0.00185965		4203	-0.01497957
493.19	0.40665577		1023.19	0.10442055		1553.18	0.12062312		2083.19	-0.01965738		2613.18	0.01004341		3143.21	0.00546559		3673.2	0.00222026		4203.2	-0.01529402
493.39	0.40705674		1023.39	0.10398465		1553.38	0.12106451		2083.39	-0.01938901		2613.38	0.00935004		3143.41	0.00600696		3673.4	0.00175279		4203.4	-0.01529372
493.59	0.40724312		1023.59	0.10347846		1553.58	0.12203244		2083.59	-0.0198658		2613.58	0.00929372		3143.61	0.00711015		3673.6	0.00112844		4203.6	-0.01537358
493.79	0.40750645		1023.79	0.10319038		1553.78	0.12169171		2083.79	-0.01961077		2613.78	0.00920886		3143.81	0.00824956		3673.8	0.0003317		4203.8	-0.0155156
493.99	0.4080307		1023.99	0.10293992		1553.98	0.12209739		2083.99	-0.01913582		2613.98	0.00952094		3144.01	0.00814618		3674	0.00053187		4204	-0.01569204
494.19	0.4092651		1024.19	0.10402934		1554.18	0.12198452		2084.19	-0.01961959		2614.18	0.0100848		3144.21	0.00822567		3674.2	-0.00015435		4204.2	-0.01656085
494.39	0.41000483		1024.39	0.10301665		1554.38	0.12283877		2084.39	-0.01994191		2614.38	0.00985506		3144.41	0.00719426		3674.4	-0.00095114		4204.4	-0.0166391
494.59	0.40946021		1024.59	0.10379506		1554.58	0.1226089		2084.59	-0.02002752		2614.58	0.01075187		3144.61	0.00593138		3674.6	-0.00058098		4204.6	-0.01742632
494.79	0.40923977		1024.79	0.10387033		1554.78	0.12182041		2084.79	-0.01993049		2614.78	0.01029706		3144.81	0.00527292		3674.8	-0.00043044		4204.8	-0.01680311
494.99	0.40843395		1024.99	0.10459176		1554.98	0.12184341		2084.99	-0.0198694		2614.98	0.0096193		3145.01	0.00480612		3675	-0.00002649		4205	-0.01602717
495.19	0.40776781		1025.19	0.10403172		1555.18	0.12249327		2085.19	-0.01954169		2615.18	0.00804398		3145.21	0.00390089		3675.2	-0.00010806		4205.2	-0.01675819
495.39	0.407927		1025.39	0.10391702		1555.38	0.12163696		2085.39	-0.01892867		2615.38	0.00757376		3145.41	0.00362215		3675.4	0.00048679		4205.4	-0.01724851
495.59	0.40773753		1025.59	0.10416852		1555.58	0.12183332		2085.59	-0.01895053		2615.58	0.00765097		3145.61	0.00374431		3675.6	0.00064806		4205.6	-0.01669872
495.79	0.4080849		1025.79	0.1039676		1555.78	0.12176903		2085.79	-0.01872103		2615.78	0.00733291		3145.81	0.00363919		3675.8	0.00046936		4205.8	-0.01684139
495.99	0.40807224		1025.99	0.10402243		1555.98	0.12167324		2085.99	-0.01852882		2615.98	0.00637572		3146.01	0.00387765		3676	0.00115755		4206	-0.01703671
496.19	0.40870502		1026.19	0.10386453		1556.18	0.12185783		2086.19	-0.01844971		2616.18	0.00732349		3146.21	0.00455188		3676.2	0.0018092		4206.2	-0.01741606
496.39	0.40901688		1026.39	0.10437305		1556.38	0.12154091		2086.39	-0.01935516		2616.38	0.00727865		3146.41	0.00600606		3676.4	0.00186416		4206.4	-0.01778024
496.59	0.40837849		1026.59	0.1034797		1556.58	0.12097865		2086.59	-0.02016647		2616.58	0.00827424		3146.61	0.00646325		3676.6	0.00138148		4206.6	-0.01804504
496.79	0.40843617		1026.79	0.10263483		1556.78	0.12032086		2086.79	-0.02002784		2616.78	0.00847566		3146.81	0.00774968		3676.8	0.00134203		4206.8	-0.01860285
496.99	0.40791902		1026.99	0.10301225		1556.98	0.12012518		2086.99	-0.02067241		2616.98	0.00834975		3147.01	0.00907853		3677	0.00090878		4207	-0.01824415
497.19	0.4081991		1027.19	0.10268291		1557.18	0.12016351		2087.19	-0.02043259		2617.18	0.00871229		3147.21	0.01004303		3677.2	0.00119892		4207.2	-0.01824851
497.39	0.40775344		1027.39	0.102009		1557.38	0.1204245		2087.39	-0.02054852		2617.38	0.00854685		3147.41	0.01053169		3677.4	0.00106595		4207.4	-0.01822584
497.59	0.40744144		1027.59	0.10178552		1557.58	0.12097803		2087.59	-0.02082786		2617.58	0.00868421		3147.61	0.01085112		3677.6	0.00095351		4207.6	-0.01772622
497.79	0.40809998		1027.79	0.10182956		1557.78	0.12121669		2087.79	-0.02079792		2617.78	0.00929584		3147.81	0.01000365		3677.8	0.00080317		4207.8	-0.01754371
497.99	0.40812124		1027.99	0.10102896		1557.98	0.12085355		2087.99	-0.02059856		2617.98	0.01020471		3148.01	0.00898905		3678	0.00132384		4208	-0.01798632
498.19	0.40801328		1028.19	0.10043108		1558.18	0.1213012		2088.19	-0.02160465		2618.18	0.0116583		3148.21	0.00852967		3678.2	0.00039887		4208.2	-0.0182322
498.39	0.40700386		1028.39	0.0994832		1558.38	0.12178113		2088.39	-0.02174259		2618.38	0.01144468		3148.41	0.0068522		3678.4	0.00055657		4208.4	-0.01784922
498.59	0.40721108		1028.59	0.10077275		1558.58	0.12140586		2088.59	-0.02174238		2618.58	0.01139861		3148.61	0.00698278		3678.6	0.00131469		4208.6	-0.01823219
498.79	0.40788259		1028.79	0.10106743		1558.78	0.12118706		2088.79	-0.0223419		2618.78	0.0106735		3148.81	0.00689841		3678.8	0.00152127		4208.8	-0.01763942
498.99	0.40796574		1028.99	0.10129769		1558.98	0.1221725		2088.99	-0.02288306		2618.98	0.00960353		3149.01	0.00613371		3679	0.00115741		4209	-0.01845033
499.19	0.40823554		1029.19	0.10145272		1559.18	0.12253239		2089.19	-0.02264401		2619.18	0.00954858		3149.21	0.00403693		3679.2	0.00060041		4209.2	-0.01873298
499.39	0.4079732		1029.39	0.10153139		1559.38	0.12270636		2089.39	-0.02219587		2619.38	0.00934504		3149.41	0.00362438		3679.4	0.00021304		4209.4	-0.01936254
499.59	0.40805262		1029.59	0.10173104		1559.58	0.1233099		2089.59	-0.02185268		2619.58	0.00847399		3149.61	0.00315695		3679.6	-0.00111773		4209.6	-0.01929631
499.79	0.40803716		1029.79	0.102152		1559.78	0.12318001		2089.79	-0.02193131		2619.78	0.00842108		3149.81	0.0020984		3679.8	-0.00097539		4209.8	-0.02005425
499.99	0.40829376		1029.99	0.10291688		1559.98	0.12374481		2089.99	-0.02148164		2619.98	0.00804432		3150.01	0.00209756		3680	-0.00030318		4210	-0.01979768
500.19	0.40868633		1030.19	0.10352778		1560.18	0.12481958		2090.19	-0.02154323		2620.18	0.00909534		3150.21	0.00203099		3680.2	-0.00091188		4210.2	-0.02069141
500.39	0.40774819		1030.39	0.10288659		1560.38	0.1238711		2090.39	-0.0212429		2620.38	0.00904862		3150.41	0.00326396		3680.4	-0.00102509		4210.4	-0.0205564
500.59	0.4075883		1030.59	0.10268562		1560.58	0.12362788		2090.59	-0.02076208		2620.58	0.00852227		3150.61	0.00276523		3680.6	-0.00142582		4210.6	-0.02027422
500.79	0.40813596		1030.79	0.10242871		1560.78	0.12411131		2090.79	-0.02041173		2620.78	0.00887065		3150.81	0.00403897		3680.8	-0.00157478		4210.8	-0.02010593
500.99	0.40786758		1030.99	0.10297993		1560.98	0.12425838		2090.99	-0.02055534		2620.98	0.00929861		3151.01	0.00546885		3681	-0.00182019		4211	-0.01944288
501.19	0.40806418		1031.19	0.10341773		1561.18	0.12387111		2091.19	-0.02078996		2621.18	0.00955332		3151.21	0.00599742		3681.2	-0.00129807		4211.2	-0.01957992
501.39	0.40722596		1031.39	0.10367119		1561.38	0.12292465		2091.39	-0.02158602		2621.38	0.00859342		3151.41	0.00608603		3681.4	-0.00157433		4211.4	-0.01923186
501.59	0.40677753		1031.59	0.10361229		1561.58	0.12312553		2091.59	-0.02168767		2621.58	0.00903406		3151.61	0.00676556		3681.6	-0.00172024		4211.6	-0.01847366
501.79	0.4061867		1031.79	0.10298915		1561.78	0.12309483		2091.79	-0.02194753		2621.78	0.00868645		3151.81	0.0068992		3681.8	-0.00217669		4211.8	-0.01914097
501.99	0.40526417		1031.99	0.1028764		1561.98	0.12223385		2091.99	-0.02250812		2621.98	0.00951283		3152.01	0.00768239		3682	-0.00139885		4212	-0.01961392
502.19	0.40518152		1032.19	0.10251062		1562.18	0.12255429		2092.19	-0.02377634		2622.18	0.009883		3152.21	0.00744685		3682.2	-0.00088363		4212.2	-0.02026785
502.39	0.4049997		1032.39	0.10248902		1562.38	0.12161399		2092.39	-0.02414684		2622.38	0.00971783		3152.41	0.00762534		3682.4	-0.00006866		4212.4	-0.0208845
502.59	0.4061817		1032.59	0.10372413		1562.58	0.1218283		2092.59	-0.02365242		2622.58	0.01009633		3152.61	0.00842526		3682.6	0.0008539		4212.6	-0.02122648
502.79	0.40688361		1032.79	0.10417005		1562.78	0.12148791		2092.79	-0.02399896		2622.78	0.0097797		3152.81	0.00825237		3682.8	0.00056531		4212.8	-0.02130653
502.99	0.40694841		1032.99	0.10446826		1562.98	0.12196907		2092.99	-0.02365437		2622.98	0.00929703		3153.01	0.0074133		3683	0.00026442		4213	-0.0209182
503.19	0.40709033		1033.19	0.10525827		1563.18	0.12237438		2093.19	-0.02298886		2623.18	0.00879187		3153.21	0.00648794		3683.2	0.00081259		4213.2	-0.0210757
503.39	0.40673136		1033.39	0.10616309		1563.38	0.12255945		2093.39	-0.02228614		2623.38	0.0076381		3153.41	0.00660764		3683.4	0.00157054		4213.4	-0.02237353
503.59	0.40775281		1033.59	0.1066479		1563.58	0.12241832		2093.59	-0.0219517		2623.58	0.00624688		3153.61	0.00573382		3683.6	0.00178408		4213.6	-0.02238878
503.79	0.40866267		1033.79	0.10676568		1563.78	0.12273249		2093.79	-0.02127282		2623.78	0.00674088		3153.81	0.00507048		3683.8	0.00238775		4213.8	-0.02165483
503.99	0.40943851		1033.99	0.10805182		1563.98	0.12310389		2093.99	-0.02090592		2623.98	0.00640795		3154.01	0.00502043		3684	0.00242088		4214	-0.02143977
504.19	0.40951781		1034.19	0.10808925		1564.18	0.12275365		2094.19	-0.02009118		2624.18	0.00608493		3154.21	0.00360253		3684.2	0.00241328		4214.2	-0.02169378
504.39	0.40882024		1034.39	0.10774384		1564.38	0.12211648		2094.39	-0.01958186		2624.38	0.005931		3154.41	0.00384824		3684.4	0.00321247		4214.4	-0.02117403
504.59	0.40979605		1034.59	0.10847552		1564.58	0.1229102		2094.59	-0.01888085		2624.58	0.00620542		3154.61	0.00263888		3684.6	0.00313334		4214.6	-0.02064563
504.79	0.40995474		1034.79	0.10876486		1564.78	0.12325831		2094.79	-0.01877455		2624.78	0.00729783		3154.81	0.0030151		3684.8	0.00207738		4214.8	-0.02061684
504.99	0.41026076		1034.99	0.10953366		1564.98	0.12222346		2094.99	-0.01914661		2624.98	0.00692952		3155.01	0.00364438		3685	0.0020323		4215	-0.01988095
505.19	0.40933769		1035.19	0.10948835		1565.18	0.12195156		2095.19	-0.01946599		2625.18	0.00627854		3155.21	0.00297397		3685.2	0.00110269		4215.2	-0.02035273
505.39	0.40775765		1035.39	0.10847209		1565.38	0.1215665		2095.39	-0.01944166		2625.38	0.00637328		3155.41	0.00350789		3685.4	-0.00004037		4215.4	-0.02063901
505.59	0.40710413		1035.59	0.10767944		1565.58	0.12120786		2095.59	-0.01977947		2625.58	0.00645449		3155.61	0.00356117		3685.6	-0.00049783		4215.6	-0.02089791
505.79	0.40725113		1035.79	0.10674426		1565.78	0.12049884		2095.79	-0.02097397		2625.78	0.00572788		3155.81	0.00334693		3685.8	-0.00091177		4215.8	-0.02182164
505.99	0.40668919		1035.99	0.10611857		1565.98	0.11996638		2095.99	-0.02193027		2625.98	0.0062837		3156.01	0.00283014		3686	-0.00107415		4216	-0.02206947
506.19	0.40591512		1036.19	0.10419199		1566.18	0.11958784		2096.19	-0.02209759		2626.18	0.00604124		3156.21	0.00168028		3686.2	-0.00120083		4216.2	-0.02260387
506.39	0.40626691		1036.39	0.10326433		1566.38	0.11970013		2096.39	-0.02205743		2626.38	0.00574869		3156.41	0.00282046		3686.4	-0.0013725		4216.4	-0.02276045
506.59	0.40643825		1036.59	0.1031001		1566.58	0.12011434		2096.59	-0.02163546		2626.58	0.00611887		3156.61	0.00338336		3686.6	-0.0012395		4216.6	-0.02260068
506.79	0.40637585		1036.79	0.10228553		1566.78	0.11954796		2096.79	-0.02224107		2626.78	0.00577327		3156.81	0.00329772		3686.8	-0.00209346		4216.8	-0.02313633
506.99	0.40654404		1036.99	0.10182074		1566.98	0.11920088		2096.99	-0.02243741		2626.98	0.00623893		3157.01	0.00356291		3687	-0.002351		4217	-0.02350743
507.19	0.40741929		1037.19	0.10202217		1567.18	0.11955548		2097.19	-0.02197397		2627.18	0.00539215		3157.21	0.00432507		3687.2	-0.00239522		4217.2	-0.02481914
507.39	0.40757962		1037.39	0.1024601		1567.38	0.11958733		2097.39	-0.02208914		2627.38	0.00564816		3157.41	0.00543285		3687.4	-0.00115991		4217.4	-0.02498806
507.59	0.4091784		1037.59	0.10185648		1567.58	0.11988608		2097.59	-0.02196532		2627.58	0.00653751		3157.61	0.00588646		3687.6	-0.00148432		4217.6	-0.02400395
507.79	0.41040027		1037.79	0.10205618		1567.78	0.12048553		2097.79	-0.02198674		2627.78	0.00695083		3157.81	0.00654506		3687.8	-0.00171144		4217.8	-0.02313151
507.99	0.41019333		1037.99	0.10318422		1567.98	0.12001388		2097.99	-0.02253673		2627.98	0.00766888		3158.01	0.00630924		3688	-0.00076625		4218	-0.02230772
508.19	0.41021466		1038.19	0.1028625		1568.18	0.12007518		2098.19	-0.02237255		2628.18	0.00755018		3158.21	0.00614509		3688.2	-0.00019945		4218.2	-0.02106711
508.39	0.41050957		1038.39	0.10377708		1568.38	0.12091475		2098.39	-0.0222713		2628.38	0.00826226		3158.41	0.00708721		3688.4	0.00048819		4218.4	-0.02030947
508.59	0.41137957		1038.59	0.10479978		1568.58	0.12119249		2098.59	-0.02169075		2628.58	0.00836955		3158.61	0.00697174		3688.6	0.00056237		4218.6	-0.01978258
508.79	0.41069219		1038.79	0.1048922		1568.78	0.12073188		2098.79	-0.02166373		2628.78	0.00761484		3158.81	0.00721378		3688.8	-0.0001084		4218.8	-0.01922285
508.99	0.41048242		1038.99	0.10536078		1568.98	0.12075552		2098.99	-0.02191242		2628.98	0.00691164		3159.01	0.00747168		3689	0.0008488		4219	-0.01919581
509.19	0.40877585		1039.19	0.10537905		1569.18	0.12082272		2099.19	-0.02168517		2629.18	0.00665038		3159.21	0.00711417		3689.2	0.00072347		4219.2	-0.01978879
509.39	0.40901274		1039.39	0.10459621		1569.38	0.12074916		2099.39	-0.02112702		2629.38	0.00704734		3159.41	0.00755071		3689.4	0.00071599		4219.4	-0.01970355
509.59	0.40887838		1039.59	0.10411991		1569.58	0.12021894		2099.59	-0.02161183		2629.58	0.00704689		3159.61	0.00713756		3689.6	0.00062938		4219.6	-0.01940967
509.79	0.40961581		1039.79	0.10308743		1569.78	0.1200848		2099.79	-0.0217666		2629.78	0.00607162		3159.81	0.00710783		3689.8	0.00108568		4219.8	-0.01946736
509.99	0.40878347		1039.99	0.10266532		1569.98	0.12065986		2099.99	-0.02144528		2629.98	0.005586		3160.01	0.0063774		3690	0.00088561		4220	-0.01879084
510.19	0.40868522		1040.19	0.10187697		1570.18	0.12146016		2100.19	-0.02175741		2630.18	0.00597661		3160.21	0.00707289		3690.2	0.00157085		4220.2	-0.01949632
510.39	0.40954356		1040.39	0.10097613		1570.38	0.12276837		2100.39	-0.02176314		2630.38	0.00614943		3160.41	0.00705493		3690.4	0.00146247		4220.4	-0.02019502
510.59	0.40948474		1040.59	0.10142919		1570.58	0.12338118		2100.59	-0.021913		2630.58	0.00708109		3160.61	0.00684544		3690.6	0.00167794		4220.6	-0.02112652
510.79	0.40998646		1040.79	0.10152949		1570.78	0.12311203		2100.79	-0.02172241		2630.78	0.00727711		3160.81	0.00656867		3690.8	0.00137115		4220.8	-0.02197946
510.99	0.41050547		1040.99	0.10138173		1570.98	0.12403665		2100.99	-0.02103211		2630.98	0.00827795		3161.01	0.00682175		3691	0.00099894		4221	-0.02215919
511.19	0.41188896		1041.19	0.10158738		1571.18	0.12418359		2101.19	-0.02059598		2631.18	0.00818869		3161.21	0.00663768		3691.2	0.00108147		4221.2	-0.02195219
511.39	0.41127198		1041.39	0.10187042		1571.38	0.12493329		2101.39	-0.02132438		2631.38	0.00943835		3161.41	0.00644171		3691.4	0.00169531		4221.4	-0.02229558
511.59	0.41175052		1041.59	0.10180921		1571.58	0.12554055		2101.59	-0.02137531		2631.58	0.01048863		3161.61	0.00612383		3691.6	0.00085773		4221.6	-0.02171247
511.79	0.41154887		1041.79	0.10259766		1571.78	0.12555276		2101.79	-0.02144702		2631.78	0.00985984		3161.81	0.00513573		3691.8	0.00077078		4221.8	-0.0216605
511.99	0.41108706		1041.99	0.10275594		1571.98	0.12445785		2101.99	-0.02247691		2631.98	0.00942082		3162.01	0.00495108		3692	0.00057253		4222	-0.02087559
512.19	0.41039146		1042.19	0.10329448		1572.18	0.12460458		2102.19	-0.02312723		2632.18	0.00895367		3162.21	0.00397467		3692.2	0.00050303		4222.2	-0.02041704
512.39	0.4095133		1042.39	0.10432128		1572.38	0.12470456		2102.39	-0.02334623		2632.38	0.00864799		3162.41	0.00351612		3692.4	0.00060901		4222.4	-0.02055826
512.59	0.40871433		1042.59	0.10418173		1572.58	0.12339366		2102.59	-0.02344293		2632.58	0.007998		3162.61	0.00365643		3692.6	0.00042969		4222.6	-0.02049901
512.79	0.40744684		1042.79	0.10450047		1572.78	0.12267898		2102.79	-0.02394819		2632.78	0.00783566		3162.81	0.00350206		3692.8	0.00016424		4222.8	-0.02026272
512.99	0.40682137		1042.99	0.1051871		1572.98	0.12218786		2102.99	-0.02444429		2632.98	0.00805661		3163.01	0.0029112		3693	0.00061528		4223	-0.0212897
513.19	0.40629791		1043.19	0.10576621		1573.18	0.12139276		2103.19	-0.02422511		2633.18	0.0078566		3163.21	0.00319649		3693.2	0.00114663		4223.2	-0.02145557
513.39	0.40656192		1043.39	0.10576065		1573.38	0.12088116		2103.39	-0.02439803		2633.38	0.00835571		3163.41	0.00328623		3693.4	0.00101885		4223.4	-0.02145052
513.59	0.40624259		1043.59	0.1060879		1573.58	0.11958776		2103.59	-0.02463143		2633.58	0.00814336		3163.61	0.00310934		3693.6	0.0015561		4223.6	-0.02128712
513.79	0.40680134		1043.79	0.1055702		1573.78	0.11834724		2103.79	-0.02510357		2633.78	0.00752637		3163.81	0.00301387		3693.8	0.00179058		4223.8	-0.02124288
513.99	0.40586238		1043.99	0.10529717		1573.98	0.11824182		2103.99	-0.02519263		2633.98	0.00763812		3164.01	0.00353615		3694	0.00186746		4224	-0.02199028
514.19	0.40649421		1044.19	0.10520832		1574.18	0.1185328		2104.19	-0.02498249		2634.18	0.00858553		3164.21	0.00437231		3694.2	0.00217061		4224.2	-0.02278601
514.39	0.40586354		1044.39	0.10452911		1574.38	0.1192534		2104.39	-0.02441847		2634.38	0.00859208		3164.41	0.00438964		3694.4	0.00209306		4224.4	-0.02240844
514.59	0.40581579		1044.59	0.10505639		1574.58	0.11852939		2104.59	-0.02344784		2634.58	0.00898865		3164.61	0.00507468		3694.6	0.00217417		4224.6	-0.02241301
514.79	0.40645609		1044.79	0.10477138		1574.78	0.11885849		2104.79	-0.02260734		2634.78	0.00882461		3164.81	0.00520359		3694.8	0.00197334		4224.8	-0.02127407
514.99	0.40666452		1044.99	0.10405159		1574.98	0.11952825		2104.99	-0.02211645		2634.98	0.00892445		3165.01	0.00473456		3695	0.00137244		4225	-0.02026435
515.19	0.40683724		1045.19	0.10375775		1575.18	0.12051509		2105.19	-0.0224647		2635.18	0.0084263		3165.21	0.00440216		3695.2	0.00114448		4225.2	-0.01997714
515.39	0.40680907		1045.39	0.10328989		1575.38	0.12180187		2105.39	-0.02329383		2635.38	0.00852664		3165.41	0.0042718		3695.4	0.00073437		4225.4	-0.02025262
515.59	0.40755014		1045.59	0.10283454		1575.58	0.12225148		2105.59	-0.0231206		2635.58	0.00767106		3165.61	0.00367045		3695.6	0.00022131		4225.6	-0.01940832
515.79	0.40738947		1045.79	0.10257698		1575.78	0.12190495		2105.79	-0.02310022		2635.78	0.00624716		3165.81	0.00282725		3695.8	-0.00035931		4225.8	-0.02012435
515.99	0.4079985		1045.99	0.10151885		1575.98	0.12208695		2105.99	-0.02328632		2635.98	0.00545979		3166.01	0.00329809		3696	-0.00123863		4226	-0.01962627
516.19	0.40822286		1046.19	0.10080203		1576.18	0.12331857		2106.19	-0.02361151		2636.18	0.00547239		3166.21	0.00246793		3696.2	-0.00094736		4226.2	-0.01855648
516.39	0.4087625		1046.39	0.10048159		1576.38	0.1229421		2106.39	-0.02329986		2636.38	0.00488405		3166.41	0.00284234		3696.4	-0.00117586		4226.4	-0.01855546
516.59	0.40909376		1046.59	0.09990072		1576.58	0.12216336		2106.59	-0.02301413		2636.58	0.00561561		3166.61	0.00367826		3696.6	-0.00151625		4226.6	-0.01807831
516.79	0.40879041		1046.79	0.10050245		1576.78	0.12257846		2106.79	-0.02312748		2636.78	0.00513596		3166.81	0.0039619		3696.8	-0.00154862		4226.8	-0.01853612
516.99	0.40856785		1046.99	0.10109887		1576.98	0.1224611		2106.99	-0.02289682		2636.98	0.00450941		3167.01	0.00362488		3697	-0.00124499		4227	-0.0191462
517.19	0.40917464		1047.19	0.10154053		1577.18	0.12188104		2107.19	-0.02309518		2637.18	0.00449393		3167.21	0.00469812		3697.2	0.00032463		4227.2	-0.01944361
517.39	0.40876381		1047.39	0.10072905		1577.38	0.12087258		2107.39	-0.0233237		2637.38	0.00487862		3167.41	0.00462045		3697.4	0.00002337		4227.4	-0.0198087
517.59	0.40903441		1047.59	0.10063912		1577.58	0.1200889		2107.59	-0.02319262		2637.58	0.00447983		3167.61	0.00441951		3697.6	-0.00017253		4227.6	-0.0201781
517.79	0.40846019		1047.79	0.09957405		1577.78	0.11902349		2107.79	-0.02316985		2637.78	0.00529162		3167.81	0.00436903		3697.8	-0.00001459		4227.8	-0.02056851
517.99	0.40812074		1047.99	0.0993907		1577.98	0.12002145		2107.99	-0.02285195		2637.98	0.006063		3168.01	0.00480685		3698	-0.00031268		4228	-0.02108039
518.19	0.40790943		1048.19	0.1002623		1578.18	0.11994851		2108.19	-0.02228625		2638.18	0.00640677		3168.21	0.00493679		3698.2	-0.00049321		4228.2	-0.02078605
518.39	0.40696654		1048.39	0.10053324		1578.38	0.1197911		2108.39	-0.02217144		2638.38	0.00757125		3168.41	0.00512035		3698.4	-0.00011624		4228.4	-0.02067045
518.59	0.4075343		1048.59	0.10100338		1578.58	0.11991773		2108.59	-0.02123959		2638.58	0.00695854		3168.61	0.00516537		3698.6	-0.00000598		4228.6	-0.02046735
518.79	0.40789493		1048.79	0.10169222		1578.78	0.1212524		2108.79	-0.02181877		2638.78	0.00663003		3168.81	0.00515303		3698.8	-0.00031765		4228.8	-0.02019841
518.99	0.40782812		1048.99	0.10098198		1578.98	0.1221354		2108.99	-0.02248944		2638.98	0.00682602		3169.01	0.0045322		3699	-0.00178952		4229	-0.02020324
519.19	0.40667118		1049.19	0.10144419		1579.18	0.12256851		2109.19	-0.02333076		2639.18	0.00668238		3169.21	0.00449514		3699.2	-0.00188673		4229.2	-0.02126899
519.39	0.40707515		1049.39	0.10170279		1579.38	0.12228294		2109.39	-0.02337349		2639.38	0.00617163		3169.41	0.00415565		3699.4	-0.00177289		4229.4	-0.02144529
519.59	0.40774271		1049.59	0.1021548		1579.58	0.12290537		2109.59	-0.02306379		2639.58	0.00535162		3169.61	0.0034935		3699.6	-0.00223536		4229.6	-0.02146235
519.79	0.4077098		1049.79	0.1025445		1579.78	0.12324776		2109.79	-0.02343688		2639.78	0.00545371		3169.81	0.00322714		3699.8	-0.00218449		4229.8	-0.02222156
519.99	0.40821839		1049.99	0.10244976		1579.98	0.12344311		2109.99	-0.02301956		2639.98	0.00578721		3170.01	0.00278971		3700	-0.00133716		4230	-0.02143081
520.19	0.408416		1050.19	0.10304593		1580.18	0.12334106		2110.19	-0.02322695		2640.18	0.00627236		3170.21	0.00264696		3700.2	-0.00091535		4230.2	-0.02066263
520.39	0.40807095		1050.39	0.10255425		1580.38	0.12266742		2110.39	-0.02315652		2640.38	0.00668163		3170.41	0.00358654		3700.4	-0.00127644		4230.4	-0.02067046
520.59	0.40777669		1050.59	0.10172568		1580.58	0.12236734		2110.59	-0.02261036		2640.58	0.00707118		3170.61	0.0042251		3700.6	-0.00139052		4230.6	-0.02086725
520.79	0.40711517		1050.79	0.10096977		1580.78	0.12175892		2110.79	-0.02304905		2640.78	0.0056422		3170.81	0.00461235		3700.8	-0.0013527		4230.8	-0.0211791
520.99	0.4070252		1050.99	0.10104139		1580.98	0.12078202		2110.99	-0.02312608		2640.98	0.00563307		3171.01	0.0052428		3701	-0.00131145		4231	-0.02104467
521.19	0.40707227		1051.19	0.1000054		1581.18	0.11962132		2111.19	-0.02296524		2641.18	0.00629906		3171.21	0.00568993		3701.2	-0.00034678		4231.2	-0.02154189
521.39	0.40704287		1051.39	0.09930835		1581.38	0.11966365		2111.39	-0.02299626		2641.38	0.00628933		3171.41	0.00494502		3701.4	-0.00154778		4231.4	-0.022307
521.59	0.40734333		1051.59	0.09930888		1581.58	0.11934031		2111.59	-0.02321581		2641.58	0.00625346		3171.61	0.00478111		3701.6	-0.00151323		4231.6	-0.0221097
521.79	0.40689188		1051.79	0.09911173		1581.78	0.11895636		2111.79	-0.02326838		2641.78	0.007138		3171.81	0.00444216		3701.8	-0.00053273		4231.8	-0.02184902
521.99	0.40674934		1051.99	0.10002321		1581.98	0.11984551		2111.99	-0.02323285		2641.98	0.00741295		3172.01	0.00470659		3702	-0.00059954		4232	-0.02269949
522.19	0.40641081		1052.19	0.10085147		1582.18	0.1191761		2112.19	-0.02327909		2642.18	0.00673885		3172.21	0.00494684		3702.2	0.00043873		4232.2	-0.02322812
522.39	0.40653881		1052.39	0.10085119		1582.38	0.11953378		2112.39	-0.02383471		2642.38	0.00736482		3172.41	0.00500471		3702.4	0.00036859		4232.4	-0.02240837
522.59	0.40725097		1052.59	0.1016398		1582.58	0.11959349		2112.59	-0.02402146		2642.58	0.00671715		3172.61	0.00598238		3702.6	-0.0002162		4232.6	-0.02174305
522.79	0.40739654		1052.79	0.10233624		1582.78	0.12002998		2112.79	-0.02491829		2642.78	0.00690661		3172.81	0.00587368		3702.8	-0.00055059		4232.8	-0.02119882
522.99	0.40715134		1052.99	0.10198289		1582.98	0.12078756		2112.99	-0.02553149		2642.98	0.00714312		3173.01	0.00564237		3703	-0.00073504		4233	-0.02113893
523.19	0.40714565		1053.19	0.10383783		1583.18	0.12064318		2113.19	-0.02524875		2643.18	0.00693872		3173.21	0.00558275		3703.2	0.00045061		4233.2	-0.02156141
523.39	0.40781021		1053.39	0.10375766		1583.38	0.12110319		2113.39	-0.02564613		2643.38	0.00689182		3173.41	0.00426181		3703.4	0.00087624		4233.4	-0.02075094
523.59	0.40827918		1053.59	0.10441544		1583.58	0.12263708		2113.59	-0.02573799		2643.58	0.00717766		3173.61	0.00368269		3703.6	0.00016944		4233.6	-0.02106945
523.79	0.4070274		1053.79	0.1055642		1583.78	0.12204446		2113.79	-0.02582494		2643.78	0.00733369		3173.81	0.00277597		3703.8	0.00074978		4233.8	-0.02070783
523.99	0.40668777		1053.99	0.10649659		1583.98	0.12192594		2113.99	-0.02550418		2643.98	0.00692043		3174.01	0.0019892		3704	0.00111258		4234	-0.01996606
524.19	0.40577716		1054.19	0.10635127		1584.18	0.12175202		2114.19	-0.02549699		2644.18	0.00661385		3174.21	0.00181236		3704.2	0.00053294		4234.2	-0.01973517
524.39	0.40561653		1054.39	0.10580217		1584.38	0.12216163		2114.39	-0.02531113		2644.38	0.00639967		3174.41	0.00284634		3704.4	-0.00023916		4234.4	-0.02017794
524.59	0.40532353		1054.59	0.10499662		1584.58	0.12118171		2114.59	-0.02464168		2644.58	0.00532468		3174.61	0.00258122		3704.6	-0.00039963		4234.6	-0.02062615
524.79	0.40477389		1054.79	0.10405141		1584.78	0.12063024		2114.79	-0.02474704		2644.78	0.0038452		3174.81	0.00319424		3704.8	-0.00008048		4234.8	-0.02066047
524.99	0.4043062		1054.99	0.10391354		1584.98	0.12013296		2114.99	-0.02384955		2644.98	0.00408826		3175.01	0.00306796		3705	-0.00014228		4235	-0.02100635
525.19	0.40450745		1055.19	0.10288449		1585.18	0.12011991		2115.19	-0.02276022		2645.18	0.00444729		3175.21	0.00303578		3705.2	0.00080582		4235.2	-0.02173416
525.39	0.4052064		1055.39	0.10287232		1585.38	0.11934959		2115.39	-0.02299527		2645.38	0.00487846		3175.41	0.00275445		3705.4	0.00055856		4235.4	-0.02176497
525.59	0.40439244		1055.59	0.10186757		1585.58	0.11902189		2115.59	-0.02263179		2645.58	0.00524675		3175.61	0.0033389		3705.6	0.00144003		4235.6	-0.02143093
525.79	0.40394704		1055.79	0.10139757		1585.78	0.1189059		2115.79	-0.02248138		2645.78	0.005452		3175.81	0.00326105		3705.8	0.00108931		4235.8	-0.02224455
525.99	0.40398347		1055.99	0.100894		1585.98	0.11836494		2115.99	-0.02166001		2645.98	0.00593387		3176.01	0.00347963		3706	0.00117993		4236	-0.02220515
526.19	0.40473898		1056.19	0.10086129		1586.18	0.11841846		2116.19	-0.02159569		2646.18	0.00599195		3176.21	0.0034558		3706.2	0.00069074		4236.2	-0.02143376
526.39	0.40542689		1056.39	0.10075792		1586.38	0.11912113		2116.39	-0.02117956		2646.38	0.00743124		3176.41	0.00414944		3706.4	0.00019277		4236.4	-0.02067857
526.59	0.40572819		1056.59	0.10100997		1586.58	0.11916649		2116.59	-0.0207671		2646.58	0.00775243		3176.61	0.00494381		3706.6	-0.00013749		4236.6	-0.02071105
526.79	0.4056458		1056.79	0.10042094		1586.78	0.12024215		2116.79	-0.02044561		2646.78	0.00862462		3176.81	0.00407912		3706.8	-0.00016845		4236.8	-0.01960363
526.99	0.4061241		1056.99	0.10032422		1586.98	0.12088834		2116.99	-0.01998863		2646.98	0.00957299		3177.01	0.00367936		3707	-0.00027785		4237	-0.02058948
527.19	0.40645033		1057.19	0.10027163		1587.18	0.12173686		2117.19	-0.02005344		2647.18	0.00989699		3177.21	0.0036092		3707.2	-0.00047451		4237.2	-0.02043978
527.39	0.40575316		1057.39	0.0996703		1587.38	0.12158673		2117.39	-0.02028329		2647.38	0.01077037		3177.41	0.00320583		3707.4	-0.00072995		4237.4	-0.02055813
527.59	0.40525525		1057.59	0.10043036		1587.58	0.12167014		2117.59	-0.01974287		2647.58	0.01093635		3177.61	0.00321021		3707.6	-0.00123744		4237.6	-0.02142555
527.79	0.40468092		1057.79	0.10113576		1587.78	0.12115753		2117.79	-0.02035159		2647.78	0.00977339		3177.81	0.00249191		3707.8	-0.00118778		4237.8	-0.02168056
527.99	0.40429612		1057.99	0.1014121		1587.98	0.12204174		2117.99	-0.02093517		2647.98	0.00892767		3178.01	0.00232792		3708	-0.00143527		4238	-0.02151126
528.19	0.40420325		1058.19	0.1005725		1588.18	0.12128988		2118.19	-0.0215243		2648.18	0.00910114		3178.21	0.0017778		3708.2	-0.00142325		4238.2	-0.0214476
528.39	0.40489918		1058.39	0.10053699		1588.38	0.12174294		2118.39	-0.02186343		2648.38	0.00861038		3178.41	0.0024746		3708.4	-0.0011923		4238.4	-0.02148147
528.59	0.40499887		1058.59	0.09935414		1588.58	0.12122261		2118.59	-0.02249667		2648.58	0.00815857		3178.61	0.00226831		3708.6	-0.0004087		4238.6	-0.02146872
528.79	0.40496005		1058.79	0.09942596		1588.78	0.12121712		2118.79	-0.02255158		2648.78	0.00720305		3178.81	0.00289876		3708.8	0.00000772		4238.8	-0.02164463
528.99	0.40532987		1058.99	0.10003446		1588.98	0.12020772		2118.99	-0.0226559		2648.98	0.0075542		3179.01	0.00283005		3709	-0.00021347		4239	-0.02142262
529.19	0.40554111		1059.19	0.10025141		1589.18	0.11925281		2119.19	-0.02386999		2649.18	0.00676164		3179.21	0.00402575		3709.2	0.00057772		4239.2	-0.02130534
529.39	0.40597189		1059.39	0.10021282		1589.38	0.11871539		2119.39	-0.02474448		2649.38	0.00566678		3179.41	0.0041217		3709.4	0.00077978		4239.4	-0.0206832
529.59	0.40552109		1059.59	0.09984754		1589.58	0.11891501		2119.59	-0.02493552		2649.58	0.00475224		3179.61	0.00415562		3709.6	0.00067167		4239.6	-0.02088272
529.79	0.4058579		1059.79	0.10030815		1589.78	0.11803617		2119.79	-0.02511134		2649.78	0.0040781		3179.81	0.00424405		3709.8	-0.0003154		4239.8	-0.02073259
529.99	0.406041		1059.99	0.10070692		1589.98	0.11753788		2119.99	-0.02445583		2649.98	0.0042627		3180.01	0.00483713		3710	-0.00024057		4240	-0.01969915
530.19	0.40632129		1060.19	0.10113962		1590.18	0.11901494		2120.19	-0.02472928		2650.18	0.00394018		3180.21	0.00463547		3710.2	0.00002488		4240.2	-0.0194545
530.39	0.40620172		1060.39	0.10137592		1590.38	0.11937913		2120.39	-0.02476409		2650.38	0.00450093		3180.41	0.00539392		3710.4	-0.00059266		4240.4	-0.01960136
530.59	0.40606627		1060.59	0.10141748		1590.58	0.11992568		2120.59	-0.02448865		2650.58	0.0041246		3180.61	0.00525327		3710.6	-0.00141119		4240.6	-0.01957292
530.79	0.40606897		1060.79	0.10169896		1590.78	0.12085436		2120.79	-0.02433798		2650.78	0.00438319		3180.81	0.00460077		3710.8	-0.00130555		4240.8	-0.01957788
530.99	0.40610309		1060.99	0.10176349		1590.98	0.12225005		2120.99	-0.02363918		2650.98	0.00423666		3181.01	0.00461322		3711	-0.00086388		4241	-0.02015341
531.19	0.40530081		1061.19	0.1008717		1591.18	0.12275104		2121.19	-0.02356314		2651.18	0.00405133		3181.21	0.00483406		3711.2	-0.00118044		4241.2	-0.0201047
531.39	0.40537508		1061.39	0.10141		1591.38	0.12242027		2121.39	-0.02327485		2651.38	0.00385015		3181.41	0.00473616		3711.4	-0.00092627		4241.4	-0.02045451
531.59	0.40580474		1061.59	0.10174996		1591.58	0.122497		2121.59	-0.02336967		2651.58	0.00349956		3181.61	0.00438243		3711.6	-0.00119041		4241.6	-0.0207441
531.79	0.40601719		1061.79	0.10158071		1591.78	0.12303017		2121.79	-0.02339733		2651.78	0.0026021		3181.81	0.00434137		3711.8	-0.00122631		4241.8	-0.01995857
531.99	0.40540157		1061.99	0.10111399		1591.98	0.12236034		2121.99	-0.02322367		2651.98	0.00244418		3182.01	0.00390851		3712	-0.00126232		4242	-0.01902928
532.19	0.40583632		1062.19	0.10060277		1592.18	0.12175283		2122.19	-0.02328582		2652.18	0.00224798		3182.21	0.0035075		3712.2	-0.0017344		4242.2	-0.01922459
532.39	0.40560999		1062.39	0.10018704		1592.38	0.12253383		2122.39	-0.02336446		2652.38	0.00193374		3182.41	0.00469944		3712.4	-0.00265975		4242.4	-0.01981938
532.59	0.40533235		1062.59	0.10024369		1592.58	0.12154373		2122.59	-0.02324974		2652.58	0.00202384		3182.61	0.00504547		3712.6	-0.00366196		4242.6	-0.02066652
532.79	0.40507755		1062.79	0.10023956		1592.78	0.12154004		2122.79	-0.02269455		2652.78	0.00157855		3182.81	0.00481761		3712.8	-0.00335589		4242.8	-0.02138092
532.99	0.40466606		1062.99	0.10069136		1592.98	0.12021509		2122.99	-0.02352436		2652.98	0.00096272		3183.01	0.00456901		3713	-0.00297345		4243	-0.02207201
533.19	0.4039438		1063.19	0.10053791		1593.18	0.11887917		2123.19	-0.02426816		2653.18	0.00016374		3183.21	0.00448994		3713.2	-0.00240233		4243.2	-0.02214141
533.39	0.40384794		1063.39	0.10040576		1593.38	0.11887126		2123.39	-0.02467377		2653.38	0.00022269		3183.41	0.00425601		3713.4	-0.00227811		4243.4	-0.02241024
533.59	0.40322136		1063.59	0.10059475		1593.58	0.11675029		2123.59	-0.02491332		2653.58	0.0010839		3183.61	0.00462511		3713.6	-0.00278081		4243.6	-0.02322959
533.79	0.40289135		1063.79	0.10025221		1593.78	0.11584468		2123.79	-0.0254097		2653.78	0.00117647		3183.81	0.00541405		3713.8	-0.00339091		4243.8	-0.02333567
533.99	0.40276927		1063.99	0.10092513		1593.98	0.11539605		2123.99	-0.0251442		2653.98	0.00159674		3184.01	0.0058257		3714	-0.00340065		4244	-0.0233994
534.19	0.40331473		1064.19	0.10078494		1594.18	0.11574009		2124.19	-0.02522667		2654.18	0.00225729		3184.21	0.00565358		3714.2	-0.00293015		4244.2	-0.02400561
534.39	0.40305548		1064.39	0.10014606		1594.38	0.11563234		2124.39	-0.02539951		2654.38	0.00298614		3184.41	0.00571274		3714.4	-0.00363524		4244.4	-0.02374679
534.59	0.40435998		1064.59	0.09986526		1594.58	0.11627951		2124.59	-0.02516142		2654.58	0.00330861		3184.61	0.00521648		3714.6	-0.00324739		4244.6	-0.02386405
534.79	0.40515493		1064.79	0.09984264		1594.78	0.11695805		2124.79	-0.02484603		2654.78	0.00385747		3184.81	0.00459785		3714.8	-0.00240727		4244.8	-0.02369583
534.99	0.40607263		1064.99	0.09957193		1594.98	0.11783954		2124.99	-0.02451102		2654.98	0.00345936		3185.01	0.00437758		3715	-0.00144044		4245	-0.0229721
535.19	0.40701038		1065.19	0.09936685		1595.18	0.11779773		2125.19	-0.02522172		2655.18	0.00398265		3185.21	0.00462365		3715.2	-0.00115606		4245.2	-0.02210078
535.39	0.40820928		1065.39	0.09932654		1595.38	0.11852596		2125.39	-0.02545196		2655.38	0.00431969		3185.41	0.00450222		3715.4	-0.00045941		4245.4	-0.02151963
535.59	0.40845373		1065.59	0.09866104		1595.58	0.11854604		2125.59	-0.02532366		2655.58	0.00455115		3185.61	0.00376137		3715.6	-0.00093222		4245.6	-0.02145187
535.79	0.40879272		1065.79	0.09780171		1595.78	0.11976284		2125.79	-0.02487073		2655.78	0.00462734		3185.81	0.00365504		3715.8	-0.00085917		4245.8	-0.02062487
535.99	0.40870049		1065.99	0.09721624		1595.98	0.12001492		2125.99	-0.024647		2655.98	0.00417748		3186.01	0.00341453		3716	-0.00167012		4246	-0.02072183
536.19	0.40881606		1066.19	0.09771733		1596.18	0.12013138		2126.19	-0.02392667		2656.18	0.00366686		3186.21	0.00415955		3716.2	-0.00158697		4246.2	-0.02093623
536.39	0.40862383		1066.39	0.09842002		1596.38	0.12101679		2126.39	-0.02310137		2656.38	0.00483809		3186.41	0.00411467		3716.4	-0.00206963		4246.4	-0.02097343
536.59	0.40829076		1066.59	0.09851389		1596.58	0.12063373		2126.59	-0.02304929		2656.58	0.00476957		3186.61	0.00285688		3716.6	-0.00132697		4246.6	-0.02062887
536.79	0.40744752		1066.79	0.0981164		1596.78	0.12125639		2126.79	-0.02391634		2656.78	0.00481		3186.81	0.00128394		3716.8	-0.00107841		4246.8	-0.02099498
536.99	0.40671324		1066.99	0.09910231		1596.98	0.11999607		2126.99	-0.02414614		2656.98	0.00427036		3187.01	0.00144369		3717	-0.00088078		4247	-0.02110998
537.19	0.40564212		1067.19	0.09970225		1597.18	0.11930232		2127.19	-0.02434069		2657.18	0.00449413		3187.21	0.00106122		3717.2	-0.0006225		4247.2	-0.02079821
537.39	0.40424617		1067.39	0.09944905		1597.38	0.11987634		2127.39	-0.02531612		2657.38	0.00448618		3187.41	0.00052734		3717.4	-0.00077291		4247.4	-0.02158785
537.59	0.40345582		1067.59	0.09966957		1597.58	0.11889942		2127.59	-0.02565279		2657.58	0.0049561		3187.61	0.00098272		3717.6	-0.00199444		4247.6	-0.0225371
537.79	0.40301735		1067.79	0.10006561		1597.78	0.119527		2127.79	-0.02596889		2657.78	0.00523481		3187.81	0.00117227		3717.8	-0.0029291		4247.8	-0.02274951
537.99	0.40274287		1067.99	0.09997893		1597.98	0.11994332		2127.99	-0.02562702		2657.98	0.00586737		3188.01	0.00096659		3718	-0.0021557		4248	-0.02300736
538.19	0.40273802		1068.19	0.09904756		1598.18	0.11973582		2128.19	-0.02609928		2658.18	0.0065914		3188.21	0.00092547		3718.2	-0.0007851		4248.2	-0.02291961
538.39	0.4025769		1068.39	0.09851777		1598.38	0.11991722		2128.39	-0.02683988		2658.38	0.00669022		3188.41	0.00074268		3718.4	-0.00124338		4248.4	-0.02200603
538.59	0.40372214		1068.59	0.09879673		1598.58	0.11983527		2128.59	-0.02686119		2658.58	0.00714254		3188.61	0.00076295		3718.6	-0.00094108		4248.6	-0.02277453
538.79	0.40386578		1068.79	0.09910862		1598.78	0.12008813		2128.79	-0.02656806		2658.78	0.00703194		3188.81	0.00085514		3718.8	-0.00039761		4248.8	-0.02276628
538.99	0.40430421		1068.99	0.09872349		1598.98	0.11997554		2128.99	-0.02703526		2658.98	0.00680892		3189.01	0.00021617		3719	-0.00033058		4249	-0.02273782
539.19	0.40434071		1069.19	0.09776229		1599.18	0.11963139		2129.19	-0.02655664		2659.18	0.00725045		3189.21	0.00048402		3719.2	-0.00020611		4249.2	-0.02302428
539.39	0.40431923		1069.39	0.09727915		1599.38	0.11870316		2129.39	-0.02602696		2659.38	0.00610933		3189.41	0.0005829		3719.4	-0.00009409		4249.4	-0.02389679
539.59	0.40444861		1069.59	0.09710766		1599.58	0.11854756		2129.59	-0.02538046		2659.58	0.00485075		3189.61	0.00084596		3719.6	0.00025665		4249.6	-0.02403203
539.79	0.40480109		1069.79	0.09762426		1599.78	0.11912684		2129.79	-0.02435859		2659.78	0.00497999		3189.81	0.00153209		3719.8	0.00056013		4249.8	-0.02365108
539.99	0.40500441		1069.99	0.09808962		1599.98	0.11888803		2129.99	-0.02332116		2659.98	0.0038929		3190.01	0.00208083		3720	0.00053706		4250	-0.02403516
540.19	0.40489481		1070.19	0.09894588		1600.18	0.11805457		2130.19	-0.02244681		2660.18	0.00389707		3190.21	0.00221646		3720.2	0.00118739		4250.2	-0.02379591
540.39	0.40477129		1070.39	0.0995855		1600.38	0.11827364		2130.39	-0.02207205		2660.38	0.00462938		3190.41	0.00153252		3720.4	0.00087047		4250.4	-0.02367782
540.59	0.40464601		1070.59	0.09893501		1600.58	0.11706756		2130.59	-0.0226386		2660.58	0.0034055		3190.61	0.00140158		3720.6	0.00124658		4250.6	-0.02413484
540.79	0.40429988		1070.79	0.09945572		1600.78	0.11708439		2130.79	-0.02236374		2660.78	0.0032164		3190.81	0.00221082		3720.8	0.00091018		4250.8	-0.02488707
540.99	0.4046337		1070.99	0.09978296		1600.98	0.11746862		2130.99	-0.02131331		2660.98	0.00298299		3191.01	0.00305279		3721	0.00102082		4251	-0.02537945
541.19	0.40437608		1071.19	0.09952872		1601.18	0.1175645		2131.19	-0.02146607		2661.18	0.0024823		3191.21	0.00267139		3721.2	0.00026561		4251.2	-0.02558139
541.39	0.40444987		1071.39	0.09900176		1601.38	0.11795542		2131.39	-0.0214508		2661.38	0.00242198		3191.41	0.00310035		3721.4	-0.00027153		4251.4	-0.0253974
541.59	0.40469237		1071.59	0.09886989		1601.58	0.11775596		2131.59	-0.02178235		2661.58	0.00327213		3191.61	0.0046796		3721.6	-0.00147921		4251.6	-0.0253511
541.79	0.4053054		1071.79	0.09867153		1601.78	0.11823244		2131.79	-0.02132253		2661.78	0.00343404		3191.81	0.00443433		3721.8	-0.00091812		4251.8	-0.0254425
541.99	0.40612567		1071.99	0.09788057		1601.98	0.11851228		2131.99	-0.02135778		2661.98	0.0042315		3192.01	0.00510805		3722	0.00018719		4252	-0.02524751
542.19	0.40657257		1072.19	0.09854709		1602.18	0.1180782		2132.19	-0.0212933		2662.18	0.00443731		3192.21	0.00515403		3722.2	0.00076481		4252.2	-0.02445979
542.39	0.40632152		1072.39	0.09861966		1602.38	0.11887762		2132.39	-0.02140836		2662.38	0.00446777		3192.41	0.00483083		3722.4	-0.0004421		4252.4	-0.02459678
542.59	0.40669918		1072.59	0.0984582		1602.58	0.11883193		2132.59	-0.02188324		2662.58	0.00492266		3192.61	0.00446019		3722.6	-0.00009493		4252.6	-0.02490814
542.79	0.40696013		1072.79	0.09852907		1602.78	0.11904587		2132.79	-0.02297374		2662.78	0.00449924		3192.81	0.00399808		3722.8	-0.00070229		4252.8	-0.02483572
542.99	0.40692983		1072.99	0.09852896		1602.98	0.11882778		2132.99	-0.02315741		2662.98	0.00453726		3193.01	0.00353853		3723	-0.00091169		4253	-0.02444832
543.19	0.4070595		1073.19	0.09903447		1603.18	0.11863012		2133.19	-0.02324899		2663.18	0.00330828		3193.21	0.00366145		3723.2	-0.00078855		4253.2	-0.02378326
543.39	0.40693025		1073.39	0.09993841		1603.38	0.11797581		2133.39	-0.02392839		2663.38	0.00180833		3193.41	0.00379657		3723.4	-0.00086831		4253.4	-0.02341375
543.59	0.40770649		1073.59	0.09998195		1603.58	0.11801666		2133.59	-0.02404992		2663.58	0.00223308		3193.61	0.00410458		3723.6	-0.00113595		4253.6	-0.02267871
543.79	0.40712985		1073.79	0.10081119		1603.78	0.11854799		2133.79	-0.02466597		2663.78	0.00329916		3193.81	0.00324315		3723.8	-0.00210335		4253.8	-0.02230338
543.99	0.40648101		1073.99	0.10138384		1603.98	0.11886276		2133.99	-0.02557636		2663.98	0.00239241		3194.01	0.0040265		3724	-0.00178157		4254	-0.02228455
544.19	0.40581589		1074.19	0.10149316		1604.18	0.11802775		2134.19	-0.02592361		2664.18	0.00355449		3194.21	0.0035709		3724.2	-0.00202021		4254.2	-0.02226576
544.39	0.40518439		1074.39	0.10217669		1604.38	0.11759619		2134.39	-0.02613678		2664.38	0.0039616		3194.41	0.00403054		3724.4	-0.00204175		4254.4	-0.02211409
544.59	0.40507185		1074.59	0.10160499		1604.58	0.11750291		2134.59	-0.02652696		2664.58	0.00352647		3194.61	0.00412392		3724.6	-0.0020599		4254.6	-0.02268075
544.79	0.40431679		1074.79	0.10122737		1604.78	0.11796419		2134.79	-0.02639867		2664.78	0.0036095		3194.81	0.00426471		3724.8	-0.00194325		4254.8	-0.02252497
544.99	0.40398153		1074.99	0.10028581		1604.98	0.11714448		2134.99	-0.02610782		2664.98	0.00401372		3195.01	0.00342589		3725	-0.00263026		4255	-0.02260925
545.19	0.40420776		1075.19	0.10049524		1605.18	0.11683132		2135.19	-0.02617172		2665.18	0.00378308		3195.21	0.00271115		3725.2	-0.00349869		4255.2	-0.02231725
545.39	0.40374652		1075.39	0.09976767		1605.38	0.11638319		2135.39	-0.02616407		2665.38	0.00363796		3195.41	0.00287742		3725.4	-0.00294554		4255.4	-0.02153141
545.59	0.40364909		1075.59	0.09894728		1605.58	0.11658401		2135.59	-0.02600872		2665.58	0.0034454		3195.61	0.00247079		3725.6	-0.00222261		4255.6	-0.02205489
545.79	0.40364114		1075.79	0.09856299		1605.78	0.11790722		2135.79	-0.02529636		2665.78	0.00271434		3195.81	0.00267371		3725.8	-0.00118287		4255.8	-0.02238881
545.99	0.40359616		1075.99	0.09790988		1605.98	0.11898733		2135.99	-0.02509414		2665.98	0.00350782		3196.01	0.00296647		3726	-0.00105534		4256	-0.02249993
546.19	0.40308972		1076.19	0.09765541		1606.18	0.1184936		2136.19	-0.02414242		2666.18	0.00313566		3196.21	0.00196653		3726.2	-0.00054291		4256.2	-0.02239492
546.39	0.40250336		1076.39	0.09757902		1606.38	0.11953332		2136.39	-0.02456534		2666.38	0.00213722		3196.41	0.00233839		3726.4	-0.00111692		4256.4	-0.02274245
546.59	0.40252186		1076.59	0.09723705		1606.58	0.1198055		2136.59	-0.02517754		2666.58	0.00199727		3196.61	0.00222666		3726.6	-0.0005821		4256.6	-0.02332359
546.79	0.4023779		1076.79	0.09704896		1606.78	0.12069947		2136.79	-0.02558283		2666.78	0.00121791		3196.81	0.00213301		3726.8	-0.00116955		4256.8	-0.02367499
546.99	0.40290088		1076.99	0.09768096		1606.98	0.12105205		2136.99	-0.02525869		2666.98	0.00089999		3197.01	0.00249805		3727	-0.0009401		4257	-0.02315686
547.19	0.40405933		1077.19	0.0984115		1607.18	0.12141974		2137.19	-0.0259714		2667.18	0.0004043		3197.21	0.00268887		3727.2	-0.00117669		4257.2	-0.0237383
547.39	0.40362333		1077.39	0.09919796		1607.38	0.12013793		2137.39	-0.02586109		2667.38	0.00054237		3197.41	0.00296651		3727.4	-0.00190704		4257.4	-0.02501259
547.59	0.40450606		1077.59	0.09870084		1607.58	0.12057535		2137.59	-0.02602909		2667.58	0.00213043		3197.61	0.00303111		3727.6	-0.00235175		4257.6	-0.02506379
547.79	0.40415854		1077.79	0.09886482		1607.78	0.12064888		2137.79	-0.02661631		2667.78	0.00219296		3197.81	0.00279292		3727.8	-0.00224139		4257.8	-0.02587248
547.99	0.4041817		1077.99	0.09897579		1607.98	0.12049373		2137.99	-0.02671388		2667.98	0.00202274		3198.01	0.00332138		3728	-0.00256848		4258	-0.02636847
548.19	0.40487334		1078.19	0.09824333		1608.18	0.12016637		2138.19	-0.02655072		2668.18	0.00319613		3198.21	0.00188526		3728.2	-0.00277711		4258.2	-0.0264272
548.39	0.40420365		1078.39	0.09888283		1608.38	0.11987256		2138.39	-0.02645717		2668.38	0.00269628		3198.41	0.00123594		3728.4	-0.00239915		4258.4	-0.02598294
548.59	0.40456234		1078.59	0.09804189		1608.58	0.11966929		2138.59	-0.02640647		2668.58	0.00217551		3198.61	0.00040274		3728.6	-0.00186894		4258.6	-0.02573611
548.79	0.40387021		1078.79	0.09777023		1608.78	0.11905659		2138.79	-0.026552		2668.78	0.00212463		3198.81	0.00002554		3728.8	-0.00215246		4258.8	-0.02559497
548.99	0.40429754		1078.99	0.09774577		1608.98	0.1190385		2138.99	-0.02631866		2668.98	0.00327201		3199.01	-0.00043671		3729	-0.00230468		4259	-0.02581957
549.19	0.40456446		1079.19	0.0982844		1609.18	0.11947602		2139.19	-0.02629927		2669.18	0.00331112		3199.21	-0.00073044		3729.2	-0.00244709		4259.2	-0.02508242
549.39	0.40372775		1079.39	0.09751366		1609.38	0.11940319		2139.39	-0.02628435		2669.38	0.00367474		3199.41	-0.00109132		3729.4	-0.00142656		4259.4	-0.02389292
549.59	0.40406345		1079.59	0.09717154		1609.58	0.1197136		2139.59	-0.02515749		2669.58	0.00428242		3199.61	-0.00103749		3729.6	-0.00088439		4259.6	-0.02306128
549.79	0.4039125		1079.79	0.0967223		1609.78	0.12070333		2139.79	-0.02533816		2669.78	0.0048499		3199.81	-0.00057764		3729.8	-0.00088891		4259.8	-0.02289598
549.99	0.40318289		1079.99	0.09620003		1609.98	0.12038234		2139.99	-0.02535241		2669.98	0.00539468		3200.01	-0.00088334		3730	-0.00105254		4260	-0.02238082
550.19	0.4026866		1080.19	0.09633172		1610.18	0.11988975		2140.19	-0.02497024		2670.18	0.00544765		3200.21	-0.0004227		3730.2	-0.00074328		4260.2	-0.02090255
550.39	0.40246205		1080.39	0.09646037		1610.38	0.12064806		2140.39	-0.02470766		2670.38	0.00490176		3200.41	0.00010146		3730.4	-0.00065242		4260.4	-0.02044538
550.59	0.40255679		1080.59	0.09702948		1610.58	0.12035009		2140.59	-0.02435569		2670.58	0.00493345		3200.61	0.00002354		3730.6	-0.00019528		4260.6	-0.02009915
550.79	0.40329796		1080.79	0.09817717		1610.78	0.12012238		2140.79	-0.02404546		2670.78	0.00529473		3200.81	0.00064251		3730.8	-0.00083607		4260.8	-0.02014328
550.99	0.40387941		1080.99	0.09901897		1610.98	0.11984383		2140.99	-0.02443312		2670.98	0.00528807		3201.01	0.00094248		3731	-0.00056451		4261	-0.01971792
551.19	0.40404484		1081.19	0.0996451		1611.18	0.11868756		2141.19	-0.0247576		2671.18	0.00569022		3201.21	0.00109761		3731.2	-0.00164532		4261.2	-0.01969863
551.39	0.40341451		1081.39	0.09912845		1611.38	0.11819215		2141.39	-0.02431797		2671.38	0.00579889		3201.41	0.00026581		3731.4	-0.00185495		4261.4	-0.01976182
551.59	0.40421488		1081.59	0.09898864		1611.58	0.11909267		2141.59	-0.02385846		2671.58	0.00498636		3201.61	-0.00001875		3731.6	-0.00253245		4261.6	-0.01984851
551.79	0.4039061		1081.79	0.0985459		1611.78	0.11826204		2141.79	-0.02348141		2671.78	0.00373854		3201.81	-0.00047019		3731.8	-0.00293558		4261.8	-0.0204977
551.99	0.4038002		1081.99	0.09890085		1611.98	0.11823387		2141.99	-0.02327997		2671.98	0.00312801		3202.01	-0.00079607		3732	-0.0035737		4262	-0.02027538
552.19	0.40353229		1082.19	0.0986637		1612.18	0.11854432		2142.19	-0.02340935		2672.18	0.00237847		3202.21	0.00010396		3732.2	-0.0036364		4262.2	-0.02087304
552.39	0.40290706		1082.39	0.09975201		1612.38	0.11830141		2142.39	-0.02364983		2672.38	0.00103496		3202.41	0.0012962		3732.4	-0.0044895		4262.4	-0.02141432
552.59	0.40375942		1082.59	0.0993551		1612.58	0.11802919		2142.59	-0.02450139		2672.58	0.00009633		3202.61	0.00176387		3732.6	-0.00454439		4262.6	-0.02188255
552.79	0.40258297		1082.79	0.09933954		1612.78	0.11793203		2142.79	-0.02463011		2672.78	0.0005158		3202.81	0.00223498		3732.8	-0.00534253		4262.8	-0.02286753
552.99	0.40305876		1082.99	0.09975942		1612.98	0.11747699		2142.99	-0.02400531		2672.98	0.0008311		3203.01	0.00223659		3733	-0.00492718		4263	-0.02303046
553.19	0.4030296		1083.19	0.09973085		1613.18	0.11681045		2143.19	-0.0241931		2673.18	0.00067942		3203.21	0.00246596		3733.2	-0.00518372		4263.2	-0.02293442
553.39	0.40300964		1083.39	0.09888067		1613.38	0.11690925		2143.39	-0.02539739		2673.38	0.00155285		3203.41	0.0019052		3733.4	-0.00550797		4263.4	-0.02272509
553.59	0.40458431		1083.59	0.09853604		1613.58	0.11600845		2143.59	-0.02591866		2673.58	0.00143557		3203.61	0.0017755		3733.6	-0.00519865		4263.6	-0.02346492
553.79	0.40419323		1083.79	0.09898829		1613.78	0.11663453		2143.79	-0.0273443		2673.78	0.0020104		3203.81	0.00203017		3733.8	-0.00472813		4263.8	-0.02426465
553.99	0.4041795		1083.99	0.09895937		1613.98	0.11722921		2143.99	-0.02797727		2673.98	0.00192448		3204.01	0.00280468		3734	-0.00460931		4264	-0.02379552
554.19	0.40440203		1084.19	0.09942332		1614.18	0.11733571		2144.19	-0.02785877		2674.18	0.00180129		3204.21	0.00298612		3734.2	-0.00416397		4264.2	-0.02317994
554.39	0.40544991		1084.39	0.09989598		1614.38	0.11720238		2144.39	-0.02714816		2674.38	0.00129954		3204.41	0.00301027		3734.4	-0.00385655		4264.4	-0.02327057
554.59	0.40587823		1084.59	0.10182246		1614.58	0.11777984		2144.59	-0.02708486		2674.58	0.0010137		3204.61	0.00327516		3734.6	-0.00378679		4264.6	-0.02307452
554.79	0.40655943		1084.79	0.1021162		1614.78	0.11812293		2144.79	-0.02694819		2674.78	0.00154876		3204.81	0.00306568		3734.8	-0.00311436		4264.8	-0.02327568
554.99	0.40705346		1084.99	0.10099314		1614.98	0.11857791		2144.99	-0.02691128		2674.98	0.00142082		3205.01	0.0027005		3735	-0.00285635		4265	-0.02232417
555.19	0.40657508		1085.19	0.10132607		1615.18	0.11904924		2145.19	-0.02591953		2675.18	0.00106273		3205.21	0.00229473		3735.2	-0.00324072		4265.2	-0.02204548
555.39	0.40562414		1085.39	0.10135935		1615.38	0.11966992		2145.39	-0.02525269		2675.38	0.00102537		3205.41	0.00191919		3735.4	-0.00238123		4265.4	-0.02206066
555.59	0.40507661		1085.59	0.10211272		1615.58	0.12047584		2145.59	-0.02414469		2675.58	0.00083987		3205.61	0.00246728		3735.6	-0.00244744		4265.6	-0.02219604
555.79	0.40425118		1085.79	0.10074391		1615.78	0.12015608		2145.79	-0.02375254		2675.78	0.00096259		3205.81	0.00267737		3735.8	-0.00220771		4265.8	-0.02258456
555.99	0.40403188		1085.99	0.1010365		1615.98	0.12035813		2145.99	-0.02375373		2675.98	0.00149521		3206.01	0.00265076		3736	-0.00175183		4266	-0.02321766
556.19	0.40333949		1086.19	0.10114621		1616.18	0.12019341		2146.19	-0.02395388		2676.18	0.00179596		3206.21	0.00289957		3736.2	-0.00145984		4266.2	-0.02433174
556.39	0.40381313		1086.39	0.10131792		1616.38	0.11968476		2146.39	-0.02425386		2676.38	0.00259437		3206.41	0.00289359		3736.4	-0.00134369		4266.4	-0.02417757
556.59	0.40400926		1086.59	0.10126875		1616.58	0.11880222		2146.59	-0.02404754		2676.58	0.00279369		3206.61	0.00218985		3736.6	-0.00125231		4266.6	-0.02414957
556.79	0.40375176		1086.79	0.10094621		1616.78	0.11796042		2146.79	-0.02361569		2676.78	0.00368429		3206.81	0.00236319		3736.8	-0.00165498		4266.8	-0.02378222
556.99	0.40481235		1086.99	0.10048809		1616.98	0.11791815		2146.99	-0.02367231		2676.98	0.00428554		3207.01	0.00208423		3737	-0.00184567		4267	-0.0235664
557.19	0.4051074		1087.19	0.09974759		1617.18	0.11742959		2147.19	-0.02438946		2677.18	0.00490698		3207.21	0.00203708		3737.2	-0.00263762		4267.2	-0.02381738
557.39	0.40579081		1087.39	0.09939087		1617.38	0.11702757		2147.39	-0.02552245		2677.38	0.0056878		3207.41	0.00183351		3737.4	-0.00308635		4267.4	-0.02300782
557.59	0.40705334		1087.59	0.09913396		1617.58	0.11632046		2147.59	-0.02566991		2677.58	0.00536576		3207.61	0.00177255		3737.6	-0.00235074		4267.6	-0.02333525
557.79	0.40606467		1087.79	0.09918532		1617.78	0.11672067		2147.79	-0.02580049		2677.78	0.00600655		3207.81	0.00212172		3737.8	-0.00258782		4267.8	-0.02331727
557.99	0.4061625		1087.99	0.09857149		1617.98	0.11696706		2147.99	-0.02604896		2677.98	0.00553164		3208.01	0.00203287		3738	-0.00296822		4268	-0.02330443
558.19	0.40584629		1088.19	0.09836011		1618.18	0.11660783		2148.19	-0.02590966		2678.18	0.00520144		3208.21	0.00175936		3738.2	-0.00324589		4268.2	-0.02307839
558.39	0.40626091		1088.39	0.09813672		1618.38	0.11684319		2148.39	-0.02575561		2678.38	0.00508104		3208.41	0.00167811		3738.4	-0.00372805		4268.4	-0.02331428
558.59	0.40610195		1088.59	0.09809657		1618.58	0.11728015		2148.59	-0.02593123		2678.58	0.00513712		3208.61	0.00156011		3738.6	-0.00396761		4268.6	-0.02343643
558.79	0.40636961		1088.79	0.0970686		1618.78	0.11713589		2148.79	-0.02596217		2678.78	0.00523088		3208.81	0.00130888		3738.8	-0.00402103		4268.8	-0.02322237
558.99	0.40640025		1088.99	0.09630924		1618.98	0.11727852		2148.99	-0.02610057		2678.98	0.005187		3209.01	0.00136606		3739	-0.00478539		4269	-0.02310391
559.19	0.40569889		1089.19	0.09668428		1619.18	0.11758983		2149.19	-0.02616359		2679.18	0.00489745		3209.21	0.00121404		3739.2	-0.00513085		4269.2	-0.02315748
559.39	0.40533753		1089.39	0.0964865		1619.38	0.1175319		2149.39	-0.0267589		2679.38	0.00537687		3209.41	0.00145775		3739.4	-0.00497616		4269.4	-0.02290212
559.59	0.40547055		1089.59	0.09602932		1619.58	0.11821236		2149.59	-0.02672363		2679.58	0.00540601		3209.61	0.00142276		3739.6	-0.0052437		4269.6	-0.02300003
559.79	0.40574114		1089.79	0.09546517		1619.78	0.11784099		2149.79	-0.02720012		2679.78	0.00529311		3209.81	0.00084281		3739.8	-0.00554065		4269.8	-0.02340903
