# Supplementary material for: Functional development of a V3/glycan-specific broadly neutralizing antibody isolated from a case of HIV superinfection
Source: eLife journal article supplement (doi:10.7554/elife.68110), 2021-07-15
Supplement: fig2-data2 [file B9.xls]

Vers 3.43 Data Simulation
Conc1	2.5E-07	2.5E-07	2.5E-07	2.5E-07	2.5E-07	2.5E-07	2.5E-07
Start1	199.99	729.99	1259.98	1789.98	2319.97	2849.97	3380
Stop1	559.79	1089.79	1619.78	2149.78	2679.77	3209.77	3739.8
Time1	Data1	Sim1	Time2	Data2	Sim2	Time3	Data3	Sim3	Time4	Data4	Sim4	Time5	Data5	Sim5	Time6	Data6	Sim6	Time7	Data7	Sim7
199.99	0.0064694		729.99	-0.00295353		1259.98	0.00859862		1789.98	0.00259382		2319.97	-0.00176828		2849.97	0.00531631		3380	-0.00048967
200.19	0.00676865		730.19	-0.00228034		1260.18	0.0080871		1790.18	0.00184024		2320.17	-0.0022249		2850.17	0.00487147		3380.2	-0.00017622
200.39	0.00756573		730.39	-0.00121739		1260.38	0.00722835		1790.38	0.00144748		2320.37	-0.00271404		2850.37	0.00480456		3380.4	-0.00006362
200.59	0.00851289		730.59	-0.00057248		1260.58	0.00660482		1790.58	0.00036552		2320.57	-0.00213012		2850.57	0.00404845		3380.6	0.0000367
200.79	0.00924195		730.79	-0.00006864		1260.78	0.00651537		1790.78	-0.00048404		2320.77	-0.00272396		2850.77	0.00336663		3380.8	-0.00063447
200.99	0.0093074		730.99	0.000319		1260.98	0.00553727		1790.98	-0.00128844		2320.97	-0.00274784		2850.97	0.00245185		3381	-0.00027055
201.19	0.00991111		731.19	0.0001538		1261.18	0.00558381		1791.18	-0.00202819		2321.17	-0.00324381		2851.17	0.00170214		3381.2	0.00017481
201.39	0.01094603		731.39	0.00002953		1261.38	0.0063893		1791.38	-0.00235582		2321.37	-0.00404197		2851.37	0.00158036		3381.4	0.00081643
201.59	0.01199801		731.59	-0.0001199		1261.58	0.00641471		1791.58	-0.0022511		2321.57	-0.00420244		2851.57	0.00205208		3381.6	0.00079809
201.79	0.01331305		731.79	-0.000504		1261.78	0.00739712		1791.78	-0.00207252		2321.77	-0.00429803		2851.77	0.00251599		3381.8	0.00033424
201.99	0.01440246		731.99	-0.00066192		1261.98	0.00839146		1791.98	-0.00169623		2321.97	-0.00473065		2851.97	0.00320503		3382	-0.00003952
202.19	0.01587455		732.19	-0.00180051		1262.18	0.00954668		1792.18	-0.00037274		2322.17	-0.00505567		2852.17	0.00434047		3382.2	-0.00019687
202.39	0.0172109		732.39	-0.00151523		1262.38	0.01026687		1792.38	0.0001702		2322.37	-0.00533694		2852.37	0.00516409		3382.4	-0.00072681
202.59	0.01799819		732.59	-0.00305869		1262.58	0.01079028		1792.58	-0.0001431		2322.57	-0.00535333		2852.57	0.00583986		3382.6	-0.00108303
202.79	0.01855356		732.79	-0.0044998		1262.78	0.01065337		1792.78	0.00000477		2322.77	-0.00433946		2852.77	0.00576078		3382.8	-0.00147293
202.99	0.01918253		732.99	-0.00593654		1262.98	0.01067547		1792.98	-0.00012682		2322.97	-0.00379236		2852.97	0.00583147		3383	-0.00208222
203.19	0.0198602		733.19	-0.00718989		1263.18	0.01054454		1793.18	-0.00007587		2323.17	-0.00325311		2853.17	0.00556054		3383.2	-0.00215792
203.39	0.02103278		733.39	-0.00713073		1263.38	0.00986329		1793.38	-0.00056641		2323.37	-0.00182703		2853.37	0.00615154		3383.4	-0.002401
203.59	0.02165733		733.59	-0.00798868		1263.58	0.00989406		1793.58	-0.00104267		2323.57	-0.00146722		2853.57	0.00648504		3383.6	-0.00187379
203.79	0.02327807		733.79	-0.00762706		1263.78	0.00910791		1793.78	-0.00095077		2323.77	-0.00167406		2853.77	0.00720611		3383.8	-0.00146249
203.99	0.02516349		733.99	-0.00686256		1263.98	0.00958321		1793.98	-0.00071937		2323.97	-0.00168656		2853.97	0.00756654		3384	-0.00182944
204.19	0.02750079		734.19	-0.00710245		1264.18	0.00834276		1794.18	-0.00048032		2324.17	-0.00111599		2854.17	0.00754759		3384.2	-0.0020095
204.39	0.03048042		734.39	-0.00729873		1264.38	0.0077856		1794.38	-0.00005719		2324.37	0.00031567		2854.37	0.00762316		3384.4	-0.00186967
204.59	0.03261335		734.59	-0.00747263		1264.58	0.00807166		1794.58	-0.00072957		2324.57	0.00136106		2854.57	0.0073519		3384.6	-0.00111528
204.79	0.03383717		734.79	-0.00745322		1264.78	0.00808094		1794.78	-0.00058661		2324.77	0.00074063		2854.77	0.00741642		3384.8	-0.00122472
204.99	0.03514229		734.99	-0.00739496		1264.98	0.00753227		1794.98	-0.00095608		2324.97	0.00105831		2854.97	0.00699502		3385	-0.00021184
205.19	0.03785224		735.19	-0.00737392		1265.18	0.00836641		1795.18	-0.00195223		2325.17	0.00085746		2855.17	0.00675852		3385.2	0.00016545
205.39	0.03921492		735.39	-0.00636051		1265.38	0.00937659		1795.38	-0.00281232		2325.37	0.0010445		2855.37	0.00758649		3385.4	0.00061449
205.59	0.04070425		735.59	-0.00665894		1265.58	0.00971602		1795.58	-0.00320417		2325.57	0.00108213		2855.57	0.00882858		3385.6	0.00030595
205.79	0.04179839		735.79	-0.0062954		1265.78	0.01144956		1795.78	-0.00389485		2325.77	0.00042823		2855.77	0.00954579		3385.8	0.00023246
205.99	0.04335308		735.99	-0.00618318		1265.98	0.01147801		1795.98	-0.00397884		2325.97	-0.0001423		2855.97	0.01013776		3386	0.00016531
206.19	0.04487213		736.19	-0.00687637		1266.18	0.01208136		1796.18	-0.00355262		2326.17	-0.00070857		2856.17	0.01098769		3386.2	-0.00012376
206.39	0.04541168		736.39	-0.00689591		1266.38	0.01203099		1796.38	-0.00406189		2326.37	-0.00018597		2856.37	0.01124951		3386.4	-0.00122764
206.59	0.04553379		736.59	-0.00762323		1266.58	0.01270918		1796.58	-0.00468159		2326.57	0.00100205		2856.57	0.01225223		3386.6	-0.00167127
206.79	0.0473554		736.79	-0.00724518		1266.78	0.01281447		1796.78	-0.00494088		2326.77	0.00203247		2856.77	0.01255135		3386.8	-0.00224854
206.99	0.04766844		736.99	-0.00830222		1266.98	0.01302592		1796.98	-0.0053648		2326.97	0.00231001		2856.97	0.01306022		3387	-0.00319374
207.19	0.0487802		737.19	-0.00856379		1267.18	0.01294282		1797.18	-0.00592441		2327.17	0.00314064		2857.17	0.01344529		3387.2	-0.00354385
207.39	0.04978838		737.39	-0.00835631		1267.38	0.01265703		1797.38	-0.00612669		2327.37	0.00389204		2857.37	0.0126622		3387.4	-0.00351237
207.59	0.05125752		737.59	-0.00732174		1267.58	0.01327342		1797.58	-0.00572263		2327.57	0.00367753		2857.57	0.01270679		3387.6	-0.00312824
207.79	0.05342314		737.79	-0.00636826		1267.78	0.01293095		1797.78	-0.00534636		2327.77	0.00442284		2857.77	0.01296908		3387.8	-0.00266265
207.99	0.05553185		737.99	-0.00545932		1267.98	0.01270478		1797.98	-0.0049016		2327.97	0.00496978		2857.97	0.01294378		3388	-0.00332579
208.19	0.05765607		738.19	-0.00515155		1268.18	0.01259532		1798.18	-0.00381071		2328.17	0.00539116		2858.17	0.01274831		3388.2	-0.00251467
208.39	0.05878698		738.39	-0.00464852		1268.38	0.01252011		1798.38	-0.00313834		2328.37	0.00612623		2858.37	0.01311371		3388.4	-0.00218709
208.59	0.06015874		738.59	-0.00410774		1268.58	0.01270021		1798.58	-0.00232449		2328.57	0.00564338		2858.57	0.01285617		3388.6	-0.00145547
208.79	0.06165083		738.79	-0.00307402		1268.78	0.01318238		1798.78	-0.00173016		2328.77	0.00482248		2858.77	0.01220326		3388.8	-0.00162365
208.99	0.06316676		738.99	-0.00259537		1268.98	0.01281709		1798.98	-0.00236046		2328.97	0.0047059		2858.97	0.01150631		3389	-0.0012276
209.19	0.06437515		739.19	-0.00183076		1269.18	0.01287954		1799.18	-0.00287701		2329.17	0.00433356		2859.17	0.0108245		3389.2	-0.00099813
209.39	0.06408737		739.39	-0.00156851		1269.38	0.01309364		1799.38	-0.00301559		2329.37	0.00386829		2859.37	0.01083653		3389.4	-0.00045684
209.59	0.06488388		739.59	-0.00256387		1269.58	0.01338547		1799.58	-0.0031833		2329.57	0.00276533		2859.57	0.01111126		3389.6	-0.00074436
209.79	0.06575624		739.79	-0.00248908		1269.78	0.01346859		1799.78	-0.00347207		2329.77	0.00192634		2859.77	0.01167708		3389.8	-0.0014089
209.99	0.06680615		739.99	-0.00272602		1269.98	0.01305542		1799.98	-0.00393263		2329.97	0.0007619		2859.97	0.01121171		3390	-0.00175928
210.19	0.06741672		740.19	-0.00307527		1270.18	0.01311152		1800.18	-0.00447863		2330.17	0.0000616		2860.17	0.01185184		3390.2	-0.00232167
210.39	0.06789671		740.39	-0.00328305		1270.38	0.01322043		1800.38	-0.00463558		2330.37	0.00069237		2860.37	0.01265033		3390.4	-0.00303808
210.59	0.06844627		740.59	-0.00319935		1270.58	0.01351019		1800.58	-0.00484871		2330.57	0.00068457		2860.57	0.01316243		3390.6	-0.00379647
210.79	0.06938249		740.79	-0.00353638		1270.78	0.01368269		1800.78	-0.00479496		2330.77	0.00046643		2860.77	0.01326079		3390.8	-0.00458583
210.99	0.06907938		740.99	-0.00413049		1270.98	0.01319802		1800.98	-0.00513584		2330.97	0.00068987		2860.97	0.01390829		3391	-0.00573684
211.19	0.0692675		741.19	-0.0034999		1271.18	0.01326151		1801.18	-0.0050393		2331.17	0.00100478		2861.17	0.01340462		3391.2	-0.00517641
211.39	0.07046316		741.39	-0.00417491		1271.38	0.0129109		1801.38	-0.00506476		2331.37	0.00137243		2861.37	0.01334083		3391.4	-0.00501976
211.59	0.07190557		741.59	-0.00376499		1271.58	0.01271274		1801.58	-0.00455231		2331.57	0.00190149		2861.57	0.01430744		3391.6	-0.00449566
211.79	0.07342281		741.79	-0.00493818		1271.78	0.01172873		1801.78	-0.00468451		2331.77	0.00218113		2861.77	0.01384765		3391.8	-0.00423139
211.99	0.07476411		741.99	-0.00527422		1271.98	0.01125415		1801.98	-0.00454052		2331.97	0.00253162		2861.97	0.01416065		3392	-0.00476809
212.19	0.07570371		742.19	-0.00481292		1272.18	0.01081662		1802.18	-0.00407328		2332.17	0.00314396		2862.17	0.01383565		3392.2	-0.00410926
212.39	0.07678339		742.39	-0.00494106		1272.38	0.01014965		1802.38	-0.00382412		2332.37	0.00326394		2862.37	0.01365234		3392.4	-0.00461041
212.59	0.07830741		742.59	-0.00541312		1272.58	0.01119006		1802.58	-0.00345704		2332.57	0.00367782		2862.57	0.01262449		3392.6	-0.00358689
212.79	0.07998157		742.79	-0.00437992		1272.78	0.01154517		1802.78	-0.00395126		2332.77	0.00328562		2862.77	0.01235035		3392.8	-0.00315065
212.99	0.08129131		742.99	-0.00454003		1272.98	0.01089092		1802.98	-0.00373525		2332.97	0.0036802		2862.97	0.01244822		3393	-0.00277842
213.19	0.08212663		743.19	-0.00485986		1273.18	0.01165602		1803.18	-0.00347312		2333.17	0.00336443		2863.17	0.0124665		3393.2	-0.00271944
213.39	0.08314642		743.39	-0.00536908		1273.38	0.01218725		1803.38	-0.0035525		2333.37	0.00434949		2863.37	0.0125822		3393.4	-0.0025785
213.59	0.0841739		743.59	-0.00509477		1273.58	0.01328995		1803.58	-0.00442497		2333.57	0.004284		2863.57	0.01363118		3393.6	-0.00310276
213.79	0.08538288		743.79	-0.00473514		1273.78	0.01377375		1803.78	-0.00506486		2333.77	0.0044033		2863.77	0.01407224		3393.8	-0.00379399
213.99	0.08608246		743.99	-0.00470824		1273.98	0.01459015		1803.98	-0.00620299		2333.97	0.0041616		2863.97	0.01415293		3394	-0.00317523
214.19	0.0869824		744.19	-0.00431323		1274.18	0.01498292		1804.18	-0.00578101		2334.17	0.00507694		2864.17	0.01497968		3394.2	-0.00403324
214.39	0.08798248		744.39	-0.00371983		1274.38	0.01586792		1804.38	-0.00529043		2334.37	0.00548162		2864.37	0.01548525		3394.4	-0.00534534
214.59	0.08803608		744.59	-0.00354033		1274.58	0.01658342		1804.58	-0.00572577		2334.57	0.00587188		2864.57	0.0153894		3394.6	-0.00544715
214.79	0.08864104		744.79	-0.00359359		1274.78	0.01703079		1804.78	-0.00496826		2334.77	0.00660045		2864.77	0.01614162		3394.8	-0.00548876
214.99	0.08919533		744.99	-0.0028148		1274.98	0.01656424		1804.98	-0.00430375		2334.97	0.00723587		2864.97	0.01729719		3395	-0.00576633
215.19	0.08993486		745.19	-0.00305028		1275.18	0.01687053		1805.18	-0.00288961		2335.17	0.0068125		2865.17	0.01724462		3395.2	-0.0054252
215.39	0.09109639		745.39	-0.00428119		1275.38	0.01591039		1805.38	-0.00199884		2335.37	0.0067622		2865.37	0.01807556		3395.4	-0.00584633
215.59	0.09184956		745.59	-0.00424971		1275.58	0.01527857		1805.58	-0.00185402		2335.57	0.00666362		2865.57	0.01819797		3395.6	-0.00568
215.79	0.09338816		745.79	-0.00449825		1275.78	0.01510161		1805.78	-0.00223785		2335.77	0.00693323		2865.77	0.0187704		3395.8	-0.00556003
215.99	0.0942941		745.99	-0.00450678		1275.98	0.01489745		1805.98	-0.00259929		2335.97	0.00731382		2865.97	0.01962581		3396	-0.00490204
216.19	0.09475065		746.19	-0.00341288		1276.18	0.01458867		1806.18	-0.00316683		2336.17	0.00732076		2866.17	0.01929964		3396.2	-0.00444978
216.39	0.09582234		746.39	-0.00418299		1276.38	0.01430328		1806.38	-0.00305573		2336.37	0.00707423		2866.37	0.01912067		3396.4	-0.0038053
216.59	0.09662165		746.59	-0.00406197		1276.58	0.01435436		1806.58	-0.00336974		2336.57	0.00743383		2866.57	0.01878313		3396.6	-0.00214758
216.79	0.09817325		746.79	-0.00291195		1276.78	0.01376899		1806.78	-0.00332173		2336.77	0.0068679		2866.77	0.01939005		3396.8	-0.0020915
216.99	0.09918587		746.99	-0.00274658		1276.98	0.01334512		1806.98	-0.00358214		2336.97	0.00635736		2866.97	0.01962551		3397	-0.00197675
217.19	0.10012343		747.19	-0.00315356		1277.18	0.01371177		1807.18	-0.00466034		2337.17	0.00656934		2867.17	0.01954004		3397.2	-0.00077046
217.39	0.10040251		747.39	-0.00209085		1277.38	0.01371743		1807.38	-0.00503181		2337.37	0.00763954		2867.37	0.01979255		3397.4	-0.00035103
217.59	0.1006094		747.59	-0.0008122		1277.58	0.0137193		1807.58	-0.00646336		2337.57	0.00775624		2867.57	0.02027591		3397.6	-0.00016166
217.79	0.10147564		747.79	-0.00087336		1277.78	0.01385832		1807.78	-0.00727304		2337.77	0.0084896		2867.77	0.02011454		3397.8	-0.0001748
217.99	0.10253911		747.99	-0.00123632		1277.98	0.01455658		1807.98	-0.00753004		2337.97	0.0083798		2867.97	0.0207825		3398	-0.00001264
218.19	0.10303655		748.19	-0.00063598		1278.18	0.015298		1808.18	-0.00697676		2338.17	0.00901438		2868.17	0.02018653		3398.2	-0.00115158
218.39	0.1036555		748.39	-0.0009794		1278.38	0.01608147		1808.38	-0.00763443		2338.37	0.00886777		2868.37	0.01993879		3398.4	-0.00199745
218.59	0.10456819		748.59	-0.00100718		1278.58	0.0167898		1808.58	-0.00744301		2338.57	0.01014198		2868.57	0.01928484		3398.6	-0.00232347
218.79	0.10592743		748.79	-0.00129084		1278.78	0.01674539		1808.78	-0.00612437		2338.77	0.01058133		2868.77	0.01972844		3398.8	-0.00328606
218.99	0.10660331		748.99	-0.00106169		1278.98	0.01691817		1808.98	-0.00521567		2338.97	0.01055116		2868.97	0.02044615		3399	-0.00421291
219.19	0.10785129		749.19	-0.00188045		1279.18	0.01659336		1809.18	-0.00425304		2339.17	0.0097204		2869.17	0.02097179		3399.2	-0.00457616
219.39	0.10825925		749.39	-0.00302471		1279.38	0.01638028		1809.38	-0.00432587		2339.37	0.00998661		2869.37	0.02117802		3399.4	-0.00520496
219.59	0.10911067		749.59	-0.0035587		1279.58	0.0171609		1809.58	-0.0044574		2339.57	0.01033615		2869.57	0.02171474		3399.6	-0.00477457
219.79	0.11028827		749.79	-0.00387646		1279.78	0.01751892		1809.78	-0.00375695		2339.77	0.01067262		2869.77	0.02220012		3399.8	-0.00475144
219.99	0.11093435		749.99	-0.00442096		1279.98	0.01699699		1809.98	-0.00435239		2339.97	0.01089236		2869.97	0.02170698		3400	-0.00418083
220.19	0.112615		750.19	-0.00422346		1280.18	0.01596631		1810.18	-0.00403255		2340.17	0.01106963		2870.17	0.02167566		3400.2	-0.00433917
220.39	0.1134435		750.39	-0.00459231		1280.38	0.01621904		1810.38	-0.00312168		2340.37	0.01167311		2870.37	0.02088182		3400.4	-0.00422856
220.59	0.11425582		750.59	-0.00375663		1280.58	0.01589483		1810.58	-0.00327515		2340.57	0.01158695		2870.57	0.01996455		3400.6	-0.00397286
220.79	0.1148146		750.79	-0.00301404		1280.78	0.01565573		1810.78	-0.0037121		2340.77	0.01158877		2870.77	0.02071688		3400.8	-0.00424586
220.99	0.11624906		750.99	-0.00239596		1280.98	0.01485561		1810.98	-0.00407823		2340.97	0.0114202		2870.97	0.02074156		3401	-0.00430699
221.19	0.11769781		751.19	-0.00188925		1281.18	0.0160349		1811.18	-0.00482894		2341.17	0.01276694		2871.17	0.02133579		3401.2	-0.00442202
221.39	0.11814716		751.39	-0.00118338		1281.38	0.0153859		1811.38	-0.00498991		2341.37	0.01315757		2871.37	0.02159376		3401.4	-0.00487934
221.59	0.11950102		751.59	-0.00109314		1281.58	0.01545526		1811.58	-0.0054523		2341.57	0.01353319		2871.57	0.02229847		3401.6	-0.00477874
221.79	0.12065275		751.79	-0.00223154		1281.78	0.01625614		1811.78	-0.00521139		2341.77	0.01353829		2871.77	0.02276169		3401.8	-0.00489789
221.99	0.1209627		751.99	-0.00245919		1281.98	0.01690589		1811.98	-0.00588423		2341.97	0.01306574		2871.97	0.02339648		3402	-0.00507072
222.19	0.12012628		752.19	-0.00202726		1282.18	0.01780809		1812.18	-0.00658145		2342.17	0.01337602		2872.17	0.02329959		3402.2	-0.00577032
222.39	0.12014294		752.39	-0.0022729		1282.38	0.01794961		1812.38	-0.00620084		2342.37	0.01308191		2872.37	0.02399771		3402.4	-0.00675833
222.59	0.12147949		752.59	-0.00226122		1282.58	0.01767444		1812.58	-0.00528342		2342.57	0.01357281		2872.57	0.02511676		3402.6	-0.00711035
222.79	0.12152697		752.79	-0.00193331		1282.78	0.01758715		1812.78	-0.00466296		2342.77	0.01362833		2872.77	0.02562487		3402.8	-0.00695791
222.99	0.12142112		752.99	-0.00234233		1282.98	0.01685755		1812.98	-0.00427082		2342.97	0.01368551		2872.97	0.02608673		3403	-0.00723272
223.19	0.12233897		753.19	-0.00391029		1283.18	0.01655176		1813.18	-0.00443809		2343.17	0.01407972		2873.17	0.02610437		3403.2	-0.0075662
223.39	0.12243329		753.39	-0.00522183		1283.38	0.01694624		1813.38	-0.0039522		2343.37	0.01410241		2873.37	0.02576915		3403.4	-0.00682834
223.59	0.12247481		753.59	-0.00579955		1283.58	0.01723256		1813.58	-0.00264975		2343.57	0.01475293		2873.57	0.02564122		3403.6	-0.00590992
223.79	0.1238991		753.79	-0.00579358		1283.78	0.01663461		1813.78	-0.00234264		2343.77	0.01509814		2873.77	0.02506999		3403.8	-0.00551791
223.99	0.12503531		753.99	-0.00616687		1283.98	0.01603721		1813.98	-0.00295071		2343.97	0.01545495		2873.97	0.02418845		3404	-0.00567098
224.19	0.12640142		754.19	-0.00538096		1284.18	0.01601732		1814.18	-0.00269401		2344.17	0.01593385		2874.17	0.02390177		3404.2	-0.00545182
224.39	0.126613		754.39	-0.00490187		1284.38	0.01658591		1814.38	-0.00231185		2344.37	0.01573496		2874.37	0.02307585		3404.4	-0.0051492
224.59	0.12769255		754.59	-0.00414427		1284.58	0.01615809		1814.58	-0.00250656		2344.57	0.01579577		2874.57	0.02250893		3404.6	-0.00511977
224.79	0.12919323		754.79	-0.00361169		1284.78	0.01619328		1814.78	-0.00279109		2344.77	0.01594046		2874.77	0.02329993		3404.8	-0.00586452
224.99	0.13061922		754.99	-0.00317657		1284.98	0.01648455		1814.98	-0.00344126		2344.97	0.01617349		2874.97	0.02353715		3405	-0.00628539
225.19	0.13181192		755.19	-0.00247098		1285.18	0.01778617		1815.18	-0.0036912		2345.17	0.01707064		2875.17	0.02387363		3405.2	-0.00657995
225.39	0.13248867		755.39	-0.00262529		1285.38	0.01770844		1815.38	-0.00281896		2345.37	0.01679571		2875.37	0.02421715		3405.4	-0.00578932
225.59	0.13326973		755.59	-0.00270049		1285.58	0.01822294		1815.58	-0.00319271		2345.57	0.01703383		2875.57	0.02525011		3405.6	-0.00572194
225.79	0.13373921		755.79	-0.0020694		1285.78	0.01868614		1815.78	-0.00359256		2345.77	0.01660089		2875.77	0.02672584		3405.8	-0.00561592
225.99	0.13386295		755.99	-0.0011313		1285.98	0.01867286		1815.98	-0.00477833		2345.97	0.01628775		2875.97	0.02732152		3406	-0.00568408
226.19	0.13409313		756.19	-0.0011118		1286.18	0.01928712		1816.18	-0.0044798		2346.17	0.01639731		2876.17	0.0278165		3406.2	-0.00630535
226.39	0.13496084		756.39	-0.00172672		1286.38	0.01949353		1816.38	-0.00311982		2346.37	0.01605653		2876.37	0.02853891		3406.4	-0.00660567
226.59	0.13653038		756.59	-0.00188256		1286.58	0.01999851		1816.58	-0.00330076		2346.57	0.01646699		2876.57	0.02862741		3406.6	-0.00639827
226.79	0.1367362		756.79	-0.00160847		1286.78	0.02074501		1816.78	-0.00248877		2346.77	0.01697153		2876.77	0.02724964		3406.8	-0.0069396
226.99	0.13748817		756.99	-0.00252071		1286.98	0.02131541		1816.98	-0.00280815		2346.97	0.01680372		2876.97	0.0271926		3407	-0.0063224
227.19	0.13799912		757.19	-0.003885		1287.18	0.02200106		1817.18	-0.0031608		2347.17	0.01716929		2877.17	0.02674063		3407.2	-0.0059398
227.39	0.13852579		757.39	-0.00351715		1287.38	0.02237393		1817.38	-0.00271834		2347.37	0.01684183		2877.37	0.02675884		3407.4	-0.0046966
227.59	0.13956011		757.59	-0.00363328		1287.58	0.02211072		1817.58	-0.00304915		2347.57	0.01741815		2877.57	0.02697484		3407.6	-0.00418906
227.79	0.14240352		757.79	-0.00269513		1287.78	0.02134491		1817.78	-0.00329385		2347.77	0.01677065		2877.77	0.02595702		3407.8	-0.00414642
227.99	0.1430199		757.99	-0.00264402		1287.98	0.02048724		1817.98	-0.00409659		2347.97	0.01653963		2877.97	0.02559884		3408	-0.00465278
228.19	0.14369015		758.19	-0.00156149		1288.18	0.02026412		1818.18	-0.00420507		2348.17	0.01629784		2878.17	0.02502817		3408.2	-0.00408328
228.39	0.14349612		758.39	-0.00118602		1288.38	0.01971461		1818.38	-0.00445884		2348.37	0.01581139		2878.37	0.02457019		3408.4	-0.00435998
228.59	0.14366655		758.59	-0.00028303		1288.58	0.01998837		1818.58	-0.00421239		2348.57	0.01600354		2878.57	0.02418682		3408.6	-0.00431587
228.79	0.14391704		758.79	0.00033698		1288.78	0.01968767		1818.78	-0.00492525		2348.77	0.01626663		2878.77	0.02509974		3408.8	-0.00388396
228.99	0.14308155		758.99	0.00085396		1288.98	0.02033787		1818.98	-0.00554401		2348.97	0.01698254		2878.97	0.02566151		3409	-0.00295229
229.19	0.14325483		759.19	0.00131085		1289.18	0.02024047		1819.18	-0.00510506		2349.17	0.01747294		2879.17	0.02560887		3409.2	-0.00345914
229.39	0.14309194		759.39	0.0007635		1289.38	0.01984616		1819.38	-0.00527478		2349.37	0.01685849		2879.37	0.02602629		3409.4	-0.00361805
229.59	0.14386645		759.59	0.00122966		1289.58	0.01872248		1819.58	-0.00573412		2349.57	0.01705745		2879.57	0.02679378		3409.6	-0.0048046
229.79	0.14427797		759.79	0.00205571		1289.78	0.01873249		1819.78	-0.00545287		2349.77	0.01706441		2879.77	0.02771256		3409.8	-0.00570852
229.99	0.14508318		759.99	0.00134484		1289.98	0.01845632		1819.98	-0.00558128		2349.97	0.01774117		2879.97	0.02813473		3410	-0.00676596
230.19	0.14554006		760.19	0.00023512		1290.18	0.01924195		1820.18	-0.00474698		2350.17	0.01822829		2880.17	0.02899843		3410.2	-0.00773006
230.39	0.14609547		760.39	-0.00082984		1290.38	0.02022038		1820.38	-0.0040929		2350.37	0.01884511		2880.37	0.02928623		3410.4	-0.00891999
230.59	0.14680187		760.59	-0.00061936		1290.58	0.02094767		1820.58	-0.00405071		2350.57	0.0194177		2880.57	0.02961091		3410.6	-0.00910516
230.79	0.14697103		760.79	-0.00100946		1290.78	0.02154078		1820.78	-0.0030754		2350.77	0.01946631		2880.77	0.02941189		3410.8	-0.00913907
230.99	0.14807006		760.99	-0.00094389		1290.98	0.02210732		1820.98	-0.00313665		2350.97	0.01957882		2880.97	0.02969945		3411	-0.00859745
231.19	0.14787004		761.19	-0.0010214		1291.18	0.02244393		1821.18	-0.00284398		2351.17	0.01986872		2881.17	0.03000465		3411.2	-0.00857017
231.39	0.14921014		761.39	-0.00058133		1291.38	0.02242007		1821.38	-0.00291618		2351.37	0.01975451		2881.37	0.03023954		3411.4	-0.00806109
231.59	0.15093857		761.59	-0.00104358		1291.58	0.02213452		1821.58	-0.00266701		2351.57	0.01954998		2881.57	0.03046828		3411.6	-0.0084401
231.79	0.15238135		761.79	-0.00065272		1291.78	0.02223262		1821.78	-0.00238694		2351.77	0.01937628		2881.77	0.0298558		3411.8	-0.00872336
231.99	0.1527468		761.99	-0.0009269		1291.98	0.02134174		1821.98	-0.0029064		2351.97	0.02070513		2881.97	0.03023282		3412	-0.00770286
232.19	0.15348534		762.19	0.00010685		1292.18	0.02206098		1822.18	-0.00241182		2352.17	0.02003087		2882.17	0.02941384		3412.2	-0.00647797
232.39	0.1536214		762.39	0.00030868		1292.38	0.02271297		1822.38	-0.00204635		2352.37	0.01974191		2882.37	0.02884759		3412.4	-0.00526257
232.59	0.1536701		762.59	0.00107512		1292.58	0.02310467		1822.58	-0.00180859		2352.57	0.02006027		2882.57	0.02888808		3412.6	-0.00445213
232.79	0.15401838		762.79	0.0010282		1292.78	0.02294623		1822.78	-0.00298363		2352.77	0.02066899		2882.77	0.02882555		3412.8	-0.00354207
232.99	0.15375869		762.99	0.0001079		1292.98	0.02323363		1822.98	-0.0033565		2352.97	0.02041135		2882.97	0.02796342		3413	-0.00255852
233.19	0.15486597		763.19	-0.0003091		1293.18	0.02233307		1823.18	-0.00352399		2353.17	0.02047438		2883.17	0.02806776		3413.2	-0.00278212
233.39	0.15551114		763.39	-0.00097417		1293.38	0.02238072		1823.38	-0.0039259		2353.37	0.01982826		2883.37	0.02824533		3413.4	-0.00300489
233.59	0.15700365		763.59	-0.00057438		1293.58	0.0228242		1823.58	-0.00436445		2353.57	0.02110981		2883.57	0.02900083		3413.6	-0.0039206
233.79	0.15705536		763.79	-0.00062854		1293.78	0.02318331		1823.78	-0.00471536		2353.77	0.02175145		2883.77	0.02955609		3413.8	-0.00416559
233.99	0.1576009		763.99	-0.00195263		1293.98	0.0230175		1823.98	-0.00473043		2353.97	0.02208756		2883.97	0.03082619		3414	-0.00440748
234.19	0.15789641		764.19	-0.00262448		1294.18	0.02401009		1824.18	-0.00426788		2354.17	0.02236426		2884.17	0.03108924		3414.2	-0.00471964
234.39	0.15744399		764.39	-0.00284706		1294.38	0.02475865		1824.38	-0.0041834		2354.37	0.02245055		2884.37	0.0318318		3414.4	-0.00482333
234.59	0.15804207		764.59	-0.00313159		1294.58	0.02494743		1824.58	-0.0043556		2354.57	0.02230095		2884.57	0.03316887		3414.6	-0.00461831
234.79	0.15764753		764.79	-0.00291007		1294.78	0.02539778		1824.78	-0.00457718		2354.77	0.02268139		2884.77	0.03338034		3414.8	-0.0046449
234.99	0.15794851		764.99	-0.00241261		1294.98	0.02540086		1824.98	-0.0046137		2354.97	0.02359583		2884.97	0.03425763		3415	-0.00485657
235.19	0.15759475		765.19	-0.00241108		1295.18	0.02544482		1825.18	-0.00508063		2355.17	0.0238892		2885.17	0.03473036		3415.2	-0.00492123
235.39	0.158271		765.39	-0.00188886		1295.38	0.02523683		1825.38	-0.00514181		2355.37	0.02437566		2885.37	0.0346669		3415.4	-0.00550163
235.59	0.15902134		765.59	-0.00110142		1295.58	0.0246069		1825.58	-0.00463433		2355.57	0.02484145		2885.57	0.03492994		3415.6	-0.0058626
235.79	0.16040455		765.79	-0.00075398		1295.78	0.02427454		1825.78	-0.00496484		2355.77	0.02521049		2885.77	0.034838		3415.8	-0.00603719
235.99	0.16146303		765.99	0.00008156		1295.98	0.02351094		1825.98	-0.00479515		2355.97	0.02577981		2885.97	0.03431617		3416	-0.00549625
236.19	0.16174461		766.19	0.00056732		1296.18	0.02387332		1826.18	-0.00396012		2356.17	0.02464528		2886.17	0.03336246		3416.2	-0.00558954
236.39	0.16251371		766.39	0.0006109		1296.38	0.02371529		1826.38	-0.00376076		2356.37	0.02398261		2886.37	0.0327787		3416.4	-0.00578212
236.59	0.16357414		766.59	0.00012198		1296.58	0.02294075		1826.58	-0.00409801		2356.57	0.02405543		2886.57	0.03229235		3416.6	-0.00607629
236.79	0.16491027		766.79	-0.00075293		1296.78	0.02271984		1826.78	-0.00479991		2356.77	0.02383745		2886.77	0.03182133		3416.8	-0.00493885
236.99	0.16519425		766.99	-0.00145753		1296.98	0.02274869		1826.98	-0.00516248		2356.97	0.02258794		2886.97	0.03207853		3417	-0.00533577
237.19	0.16669735		767.19	-0.0008536		1297.18	0.02235867		1827.18	-0.00546006		2357.17	0.02291514		2887.17	0.0321847		3417.2	-0.00557656
237.39	0.16725274		767.39	-0.0006507		1297.38	0.02277987		1827.38	-0.00535388		2357.37	0.02292118		2887.37	0.03262099		3417.4	-0.00647296
237.59	0.1679875		767.59	0.00023343		1297.58	0.0233434		1827.58	-0.00599899		2357.57	0.02347292		2887.57	0.03343508		3417.6	-0.00694498
237.79	0.1689891		767.79	0.00001788		1297.78	0.02381273		1827.78	-0.00497392		2357.77	0.02326429		2887.77	0.03408199		3417.8	-0.00714498
237.99	0.16933568		767.99	-0.00095013		1297.98	0.02469876		1827.98	-0.00541968		2357.97	0.02378666		2887.97	0.03489234		3418	-0.00757256
238.19	0.17050446		768.19	-0.00075126		1298.18	0.02587331		1828.18	-0.00525754		2358.17	0.02414014		2888.17	0.03495464		3418.2	-0.0078014
238.39	0.17065086		768.39	-0.00055309		1298.38	0.02587678		1828.38	-0.00592772		2358.37	0.02478108		2888.37	0.03546954		3418.4	-0.00860188
238.59	0.17176153		768.59	0.00040846		1298.58	0.02561824		1828.58	-0.00673829		2358.57	0.02534602		2888.57	0.03596573		3418.6	-0.00963067
238.79	0.17136994		768.79	0.00185495		1298.78	0.02589641		1828.78	-0.00727349		2358.77	0.02713799		2888.77	0.03577505		3418.8	-0.00947202
238.99	0.17199457		768.99	0.00230848		1298.98	0.02574373		1828.98	-0.00703111		2358.97	0.02802594		2888.97	0.03535082		3419	-0.0091681
239.19	0.17202563		769.19	0.00273543		1299.18	0.02576837		1829.18	-0.00703578		2359.17	0.02833729		2889.17	0.03515856		3419.2	-0.00938578
239.39	0.17270361		769.39	0.00375564		1299.38	0.02564931		1829.38	-0.00733396		2359.37	0.02861743		2889.37	0.03471065		3419.4	-0.00930418
239.59	0.17356488		769.59	0.00405551		1299.58	0.02513476		1829.58	-0.00702201		2359.57	0.02885802		2889.57	0.0352937		3419.6	-0.00911361
239.79	0.17457649		769.79	0.00441592		1299.78	0.02503018		1829.78	-0.00713492		2359.77	0.02880819		2889.77	0.03516223		3419.8	-0.00915714
239.99	0.17447732		769.99	0.0043931		1299.98	0.02512042		1829.98	-0.00675245		2359.97	0.02842547		2889.97	0.03544086		3420	-0.00827848
240.19	0.17486479		770.19	0.00329374		1300.18	0.02416019		1830.18	-0.00582786		2360.17	0.02765204		2890.17	0.03534932		3420.2	-0.0076045
240.39	0.17565661		770.39	0.00313893		1300.38	0.02435703		1830.38	-0.00532028		2360.37	0.02683756		2890.37	0.03510972		3420.4	-0.00702358
240.59	0.1756829		770.59	0.0027259		1300.58	0.02333096		1830.58	-0.00505822		2360.57	0.02734687		2890.57	0.03580291		3420.6	-0.00626574
240.79	0.17597152		770.79	0.00338669		1300.78	0.02409605		1830.78	-0.00515365		2360.77	0.02753962		2890.77	0.03644193		3420.8	-0.00583178
240.99	0.17612948		770.99	0.00298097		1300.98	0.02422876		1830.98	-0.00391258		2360.97	0.02695811		2890.97	0.03784863		3421	-0.00593203
241.19	0.17652964		771.19	0.00303995		1301.18	0.02430138		1831.18	-0.00282116		2361.17	0.02796242		2891.17	0.03907528		3421.2	-0.00539853
241.39	0.17639487		771.39	0.00309283		1301.38	0.02463181		1831.38	-0.00271917		2361.37	0.02809497		2891.37	0.04068228		3421.4	-0.00525016
241.59	0.17661398		771.59	0.003102		1301.58	0.02623717		1831.58	-0.00232218		2361.57	0.02857251		2891.57	0.04101786		3421.6	-0.00517539
241.79	0.17706154		771.79	0.00223719		1301.78	0.02756128		1831.78	-0.00197631		2361.77	0.02963229		2891.77	0.04093747		3421.8	-0.00530275
241.99	0.17692238		771.99	0.0026635		1301.98	0.02799996		1831.98	-0.00271308		2361.97	0.03017766		2891.97	0.04093694		3422	-0.0053347
242.19	0.17747586		772.19	0.00274822		1302.18	0.02732802		1832.18	-0.0020043		2362.17	0.03097726		2892.17	0.04031514		3422.2	-0.00575874
242.39	0.17798085		772.39	0.00371825		1302.38	0.02697113		1832.38	-0.00246085		2362.37	0.03171872		2892.37	0.03980275		3422.4	-0.00731136
242.59	0.17874474		772.59	0.00458351		1302.58	0.02682262		1832.58	-0.00196355		2362.57	0.03191918		2892.57	0.03986128		3422.6	-0.00770902
242.79	0.17880247		772.79	0.00439954		1302.78	0.02644969		1832.78	-0.00248155		2362.77	0.03307253		2892.77	0.03947856		3422.8	-0.00758052
242.99	0.17973475		772.99	0.00463858		1302.98	0.02629879		1832.98	-0.00269841		2362.97	0.03350497		2892.97	0.03942302		3423	-0.00729161
243.19	0.18033965		773.19	0.00413257		1303.18	0.02571846		1833.18	-0.00295602		2363.17	0.03418532		2893.17	0.0401971		3423.2	-0.00806936
243.39	0.18158399		773.39	0.00407515		1303.38	0.0252427		1833.38	-0.00374209		2363.37	0.03457937		2893.37	0.04000507		3423.4	-0.00868767
243.59	0.1819649		773.59	0.00404616		1303.58	0.02430528		1833.58	-0.00374434		2363.57	0.03413189		2893.57	0.04070632		3423.6	-0.00884055
243.79	0.18306014		773.79	0.004117		1303.78	0.02352541		1833.78	-0.00452425		2363.77	0.03330753		2893.77	0.0403965		3423.8	-0.0096576
243.99	0.18377345		773.99	0.00374989		1303.98	0.02361894		1833.98	-0.00495331		2363.97	0.03233007		2893.97	0.04059646		3424	-0.009252
244.19	0.18401094		774.19	0.0028079		1304.18	0.02295236		1834.18	-0.00457426		2364.17	0.03203543		2894.17	0.04041893		3424.2	-0.00889099
244.39	0.18417918		774.39	0.00309116		1304.38	0.02376998		1834.38	-0.00491387		2364.37	0.03126639		2894.37	0.04051005		3424.4	-0.00896757
244.59	0.18434367		774.59	0.00350855		1304.58	0.02409182		1834.58	-0.00505625		2364.57	0.03122392		2894.57	0.0415426		3424.6	-0.00910677
244.79	0.18477998		774.79	0.00343006		1304.78	0.0250688		1834.78	-0.00574898		2364.77	0.03022892		2894.77	0.04137535		3424.8	-0.00875446
244.99	0.18478086		774.99	0.00191372		1304.98	0.02475663		1834.98	-0.00542868		2364.97	0.02962976		2894.97	0.04255482		3425	-0.00793311
245.19	0.18512542		775.19	0.00222519		1305.18	0.02522597		1835.18	-0.00596368		2365.17	0.02987238		2895.17	0.04309652		3425.2	-0.00737137
245.39	0.18601604		775.39	0.00282209		1305.38	0.02625426		1835.38	-0.00621226		2365.37	0.03005437		2895.37	0.04219083		3425.4	-0.00728119
245.59	0.18639208		775.59	0.00271462		1305.58	0.02736649		1835.58	-0.00640496		2365.57	0.03016768		2895.57	0.04212844		3425.6	-0.00747208
245.79	0.18723329		775.79	0.00265269		1305.78	0.02809457		1835.78	-0.00766471		2365.77	0.03066828		2895.77	0.04196325		3425.8	-0.00682502
245.99	0.1873328		775.99	0.00276369		1305.98	0.02768421		1835.98	-0.00692285		2365.97	0.03080251		2895.97	0.0421703		3426	-0.00650511
246.19	0.18729432		776.19	0.00244549		1306.18	0.02750094		1836.18	-0.00633223		2366.17	0.03158555		2896.17	0.04208104		3426.2	-0.00653244
246.39	0.18809791		776.39	0.00267899		1306.38	0.02807337		1836.38	-0.00606166		2366.37	0.03168273		2896.37	0.04148267		3426.4	-0.00755484
246.59	0.18855549		776.59	0.0020694		1306.58	0.02767909		1836.58	-0.00527181		2366.57	0.03243955		2896.57	0.04146982		3426.6	-0.00698418
246.79	0.18905521		776.79	0.00257679		1306.78	0.02745592		1836.78	-0.00563572		2366.77	0.03289399		2896.77	0.04162143		3426.8	-0.00700811
246.99	0.1905424		776.99	0.00323158		1306.98	0.02747932		1836.98	-0.00521946		2366.97	0.03368179		2896.97	0.04163051		3427	-0.0074695
247.19	0.19147516		777.19	0.00290416		1307.18	0.02668359		1837.18	-0.00504923		2367.17	0.03492426		2897.17	0.04214981		3427.2	-0.00858434
247.39	0.19265522		777.39	0.0024728		1307.38	0.02626923		1837.38	-0.00531154		2367.37	0.03591401		2897.37	0.04189636		3427.4	-0.00882383
247.59	0.19357272		777.59	0.00372249		1307.58	0.02655403		1837.58	-0.00474104		2367.57	0.03524348		2897.57	0.04247224		3427.6	-0.00971757
247.79	0.19470425		777.79	0.00423707		1307.78	0.02741889		1837.78	-0.00423069		2367.77	0.03478531		2897.77	0.04205642		3427.8	-0.01062246
247.99	0.19493144		777.99	0.00479213		1307.98	0.02798658		1837.98	-0.00409948		2367.97	0.03473812		2897.97	0.04252548		3428	-0.00994567
248.19	0.19449223		778.19	0.0045198		1308.18	0.02848327		1838.18	-0.00415462		2368.17	0.03511242		2898.17	0.04294332		3428.2	-0.00976062
248.39	0.19398729		778.39	0.00460355		1308.38	0.02898754		1838.38	-0.00439592		2368.37	0.03517932		2898.37	0.04325882		3428.4	-0.01047288
248.59	0.19377999		778.59	0.00492417		1308.58	0.02892629		1838.58	-0.00443138		2368.57	0.03581673		2898.57	0.04369133		3428.6	-0.01110049
248.79	0.19342632		778.79	0.00488478		1308.78	0.02923774		1838.78	-0.00454247		2368.77	0.03565001		2898.77	0.04379709		3428.8	-0.01057678
248.99	0.19332624		778.99	0.00423657		1308.98	0.02931919		1838.98	-0.00433391		2368.97	0.03651185		2898.97	0.0445562		3429	-0.00957818
249.19	0.19346095		779.19	0.00466673		1309.18	0.03017783		1839.18	-0.00476888		2369.17	0.03673161		2899.17	0.04449699		3429.2	-0.00834247
249.39	0.19332163		779.39	0.00493596		1309.38	0.03122565		1839.38	-0.0050759		2369.37	0.03699024		2899.37	0.04442837		3429.4	-0.00800631
249.59	0.19313283		779.59	0.00480637		1309.58	0.03140719		1839.58	-0.00597602		2369.57	0.03714522		2899.57	0.04525676		3429.6	-0.00731846
249.79	0.19352269		779.79	0.00506677		1309.78	0.03192672		1839.78	-0.00637638		2369.77	0.03811296		2899.77	0.04531648		3429.8	-0.0063599
249.99	0.19287101		779.99	0.00516961		1309.98	0.03178065		1839.98	-0.00542978		2369.97	0.03877822		2899.97	0.04550474		3430	-0.00630678
250.19	0.19218285		780.19	0.00429864		1310.18	0.03181105		1840.18	-0.00570671		2370.17	0.03880806		2900.17	0.0448284		3430.2	-0.00634695
250.39	0.19244112		780.39	0.00360192		1310.38	0.03201036		1840.38	-0.0048142		2370.37	0.038695		2900.37	0.04454576		3430.4	-0.007091
250.59	0.19288461		780.59	0.00321075		1310.58	0.03227104		1840.58	-0.00447876		2370.57	0.03907583		2900.57	0.04497542		3430.6	-0.00650455
250.79	0.19401128		780.79	0.00427246		1310.78	0.03210817		1840.78	-0.00467902		2370.77	0.03895606		2900.77	0.04525756		3430.8	-0.00650215
250.99	0.19514914		780.99	0.00311428		1310.98	0.03142025		1840.98	-0.00456251		2370.97	0.03967581		2900.97	0.04529293		3431	-0.00679149
251.19	0.1966669		781.19	0.00273702		1311.18	0.03132079		1841.18	-0.00482194		2371.17	0.04010879		2901.17	0.04495305		3431.2	-0.00684409
251.39	0.19747738		781.39	0.00239648		1311.38	0.03120362		1841.38	-0.00394973		2371.37	0.0400383		2901.37	0.04417093		3431.4	-0.00676342
251.59	0.19918461		781.59	0.00371328		1311.58	0.03098053		1841.58	-0.00339516		2371.57	0.039573		2901.57	0.0443488		3431.6	-0.00814227
251.79	0.19993795		781.79	0.00297207		1311.78	0.03041138		1841.78	-0.00422818		2371.77	0.0389314		2901.77	0.0436623		3431.8	-0.00818218
251.99	0.20088117		781.99	0.00348389		1311.98	0.0302288		1841.98	-0.00503837		2371.97	0.03928293		2901.97	0.04349413		3432	-0.00836777
252.19	0.20129749		782.19	0.00268961		1312.18	0.0295011		1842.18	-0.00543727		2372.17	0.03977308		2902.17	0.04426828		3432.2	-0.00856073
252.39	0.20074999		782.39	0.00219012		1312.38	0.02958982		1842.38	-0.00545126		2372.37	0.04047361		2902.37	0.04397138		3432.4	-0.00870835
252.59	0.20116546		782.59	0.00216994		1312.58	0.03003977		1842.58	-0.00528942		2372.57	0.04040237		2902.57	0.04523246		3432.6	-0.00844787
252.79	0.20089342		782.79	0.00264775		1312.78	0.0310188		1842.78	-0.00535945		2372.77	0.04030277		2902.77	0.04560387		3432.8	-0.0075271
252.99	0.20166808		782.99	0.0032884		1312.98	0.03062967		1842.98	-0.00522525		2372.97	0.04042435		2902.97	0.04648403		3433	-0.00629531
253.19	0.20228659		783.19	0.00425877		1313.18	0.031582		1843.18	-0.00588742		2373.17	0.04036711		2903.17	0.04659878		3433.2	-0.00552772
253.39	0.20338886		783.39	0.00544872		1313.38	0.03281984		1843.38	-0.00556267		2373.37	0.04014541		2903.37	0.0465129		3433.4	-0.00510387
253.59	0.20403607		783.59	0.00682623		1313.58	0.03293241		1843.58	-0.00569072		2373.57	0.03989732		2903.57	0.04688345		3433.6	-0.00511736
253.79	0.20485411		783.79	0.00765822		1313.78	0.0336314		1843.78	-0.00502191		2373.77	0.03978559		2903.77	0.04681296		3433.8	-0.00511062
253.99	0.20480483		783.99	0.00806252		1313.98	0.03370647		1843.98	-0.0037986		2373.97	0.0393421		2903.97	0.04740673		3434	-0.00523367
254.19	0.20447124		784.19	0.0074171		1314.18	0.03341917		1844.18	-0.00422894		2374.17	0.03833522		2904.17	0.04675348		3434.2	-0.00476154
254.39	0.20495514		784.39	0.00824883		1314.38	0.03358522		1844.38	-0.00401691		2374.37	0.03752691		2904.37	0.04765332		3434.4	-0.00496612
254.59	0.2044007		784.59	0.00851827		1314.58	0.03369515		1844.58	-0.004351		2374.57	0.03693066		2904.57	0.04814753		3434.6	-0.00431665
254.79	0.20502539		784.79	0.0091054		1314.78	0.03334213		1844.78	-0.00434945		2374.77	0.03661873		2904.77	0.04805981		3434.8	-0.00470598
254.99	0.20499123		784.99	0.00757903		1314.98	0.03254563		1844.98	-0.00433604		2374.97	0.03610236		2904.97	0.04873755		3435	-0.00602073
255.19	0.20532936		785.19	0.00842247		1315.18	0.03235209		1845.18	-0.00426065		2375.17	0.03593959		2905.17	0.04872055		3435.2	-0.00649097
255.39	0.20541468		785.39	0.00829503		1315.38	0.0306636		1845.38	-0.00389746		2375.37	0.03643933		2905.37	0.04923325		3435.4	-0.00720155
255.59	0.2061538		785.59	0.00875918		1315.58	0.02984518		1845.58	-0.00450523		2375.57	0.03701659		2905.57	0.04951642		3435.6	-0.00848113
255.79	0.20600074		785.79	0.00734568		1315.78	0.02956209		1845.78	-0.00501025		2375.77	0.0372198		2905.77	0.04956107		3435.8	-0.00876727
255.99	0.20638635		785.99	0.00656864		1315.98	0.02982925		1845.98	-0.00453484		2375.97	0.03767939		2905.97	0.04949134		3436	-0.00894774
256.19	0.20647423		786.19	0.00567377		1316.18	0.0293073		1846.18	-0.00495384		2376.17	0.03844712		2906.17	0.04964553		3436.2	-0.00926951
256.39	0.20632808		786.39	0.00575353		1316.38	0.03044867		1846.38	-0.00546723		2376.37	0.03934529		2906.37	0.04907887		3436.4	-0.00938133
256.59	0.20699649		786.59	0.00536643		1316.58	0.03098296		1846.58	-0.00497215		2376.57	0.03951819		2906.57	0.04971926		3436.6	-0.00978172
256.79	0.20797298		786.79	0.00560131		1316.78	0.03105014		1846.78	-0.00571988		2376.77	0.04041677		2906.77	0.04948914		3436.8	-0.01018509
256.99	0.2085535		786.99	0.00576725		1316.98	0.03112226		1846.98	-0.00591464		2376.97	0.0409646		2906.97	0.04893893		3437	-0.00962367
257.19	0.2091249		787.19	0.00466848		1317.18	0.03304409		1847.18	-0.0063565		2377.17	0.04078536		2907.17	0.04809139		3437.2	-0.00904038
257.39	0.20961501		787.39	0.00439073		1317.38	0.03411562		1847.38	-0.00593599		2377.37	0.04096442		2907.37	0.04786588		3437.4	-0.00905487
257.59	0.21008842		787.59	0.00423408		1317.58	0.03517211		1847.58	-0.00606143		2377.57	0.04167839		2907.57	0.04845702		3437.6	-0.0092498
257.79	0.21075241		787.79	0.00297057		1317.78	0.0359839		1847.78	-0.00652991		2377.77	0.04256692		2907.77	0.04873211		3437.8	-0.00920937
257.99	0.21006384		787.99	0.00257589		1317.98	0.03590395		1847.98	-0.0070817		2377.97	0.04302729		2907.97	0.04892455		3438	-0.00811452
258.19	0.20976142		788.19	0.00297276		1318.18	0.03666878		1848.18	-0.00775162		2378.17	0.04353105		2908.17	0.04924724		3438.2	-0.00781278
258.39	0.20902786		788.39	0.0029294		1318.38	0.03702961		1848.38	-0.00798896		2378.37	0.04355171		2908.37	0.04981737		3438.4	-0.00812438
258.59	0.20978832		788.59	0.00380195		1318.58	0.03751046		1848.58	-0.00740026		2378.57	0.04491923		2908.57	0.05070656		3438.6	-0.0080731
258.79	0.21009755		788.79	0.00447565		1318.78	0.03719548		1848.78	-0.00676488		2378.77	0.04547447		2908.77	0.05101421		3438.8	-0.00857902
258.99	0.21044466		788.99	0.0049342		1318.98	0.03608808		1848.98	-0.0067284		2378.97	0.04621845		2908.97	0.05149952		3439	-0.00892974
259.19	0.21063353		789.19	0.00653326		1319.18	0.03653363		1849.18	-0.00596813		2379.17	0.04685664		2909.17	0.05262976		3439.2	-0.00895826
259.39	0.21126384		789.39	0.00700065		1319.38	0.03611773		1849.38	-0.00539216		2379.37	0.04731435		2909.37	0.05270141		3439.4	-0.01023082
259.59	0.21142758		789.59	0.00752717		1319.58	0.03654496		1849.58	-0.00463465		2379.57	0.04806006		2909.57	0.05240035		3439.6	-0.01027545
259.79	0.2118162		789.79	0.00628124		1319.78	0.03660583		1849.78	-0.0042539		2379.77	0.04847897		2909.77	0.05226086		3439.8	-0.00974439
259.99	0.21226423		789.99	0.00739041		1319.98	0.03611207		1849.98	-0.00429803		2379.97	0.04790106		2909.97	0.05187262		3440	-0.00869778
260.19	0.21256072		790.19	0.00942469		1320.18	0.03525332		1850.18	-0.00449117		2380.17	0.04763986		2910.17	0.05137651		3440.2	-0.00833896
260.39	0.21308336		790.39	0.01040167		1320.38	0.03554314		1850.38	-0.00412766		2380.37	0.04656509		2910.37	0.050861		3440.4	-0.00819449
260.59	0.21341652		790.59	0.01063784		1320.58	0.03549848		1850.58	-0.00342594		2380.57	0.04595523		2910.57	0.05065731		3440.6	-0.00756042
260.79	0.21388936		790.79	0.01035774		1320.78	0.03492389		1850.78	-0.00405879		2380.77	0.04533018		2910.77	0.05097301		3440.8	-0.00747364
260.99	0.21417096		790.99	0.01010875		1320.98	0.0351642		1850.98	-0.00376368		2380.97	0.04489816		2910.97	0.04974968		3441	-0.00655768
261.19	0.21531331		791.19	0.00890265		1321.18	0.0370732		1851.18	-0.00353097		2381.17	0.04349126		2911.17	0.04993718		3441.2	-0.00585831
261.39	0.21528099		791.39	0.00927547		1321.38	0.03760017		1851.38	-0.00420012		2381.37	0.04402079		2911.37	0.04975669		3441.4	-0.00553435
261.59	0.2166357		791.59	0.00832549		1321.58	0.03788961		1851.58	-0.00459183		2381.57	0.04443812		2911.57	0.05047528		3441.6	-0.00500224
261.79	0.21629171		791.79	0.00794261		1321.78	0.03744863		1851.78	-0.00530164		2381.77	0.0447398		2911.77	0.05129726		3441.8	-0.00502724
261.99	0.21656567		791.99	0.00827098		1321.98	0.03741722		1851.98	-0.00435207		2381.97	0.04397856		2911.97	0.05141006		3442	-0.00436301
262.19	0.21754361		792.19	0.00766458		1322.18	0.03772512		1852.18	-0.0042969		2382.17	0.04385621		2912.17	0.05205897		3442.2	-0.00430741
262.39	0.21777388		792.39	0.00703084		1322.38	0.03685888		1852.38	-0.00478985		2382.37	0.04354327		2912.37	0.05223245		3442.4	-0.0050776
262.59	0.21966559		792.59	0.00730138		1322.58	0.03731207		1852.58	-0.00426759		2382.57	0.043897		2912.57	0.05255256		3442.6	-0.00542697
262.79	0.21891418		792.79	0.00752413		1322.78	0.03642468		1852.78	-0.00434516		2382.77	0.04406384		2912.77	0.05215556		3442.8	-0.00620039
262.99	0.22038491		792.99	0.00759474		1322.98	0.0355778		1852.98	-0.00412776		2382.97	0.04558911		2912.97	0.05314714		3443	-0.00631894
263.19	0.22095206		793.19	0.00763676		1323.18	0.03656714		1853.18	-0.00409494		2383.17	0.04636212		2913.17	0.05447055		3443.2	-0.00710287
263.39	0.22120772		793.39	0.00728144		1323.38	0.03598218		1853.38	-0.0040486		2383.37	0.04781619		2913.37	0.05375044		3443.4	-0.00796566
263.59	0.22161627		793.59	0.00769944		1323.58	0.03567094		1853.58	-0.00411079		2383.57	0.04850848		2913.57	0.05363686		3443.6	-0.00730391
263.79	0.2218901		793.79	0.00704699		1323.78	0.03535422		1853.78	-0.00521395		2383.77	0.04899974		2913.77	0.05460027		3443.8	-0.00655436
263.99	0.22285802		793.99	0.00867509		1323.98	0.0338509		1853.98	-0.00556477		2383.97	0.04938353		2913.97	0.0549799		3444	-0.006141
264.19	0.22297833		794.19	0.00922932		1324.18	0.03335231		1854.18	-0.00593299		2384.17	0.04917954		2914.17	0.05454724		3444.2	-0.00685996
264.39	0.22385688		794.39	0.00927959		1324.38	0.03443699		1854.38	-0.00647452		2384.37	0.04923434		2914.37	0.05370146		3444.4	-0.00606759
264.59	0.22482663		794.59	0.0094542		1324.58	0.03523973		1854.58	-0.00655515		2384.57	0.04969666		2914.57	0.05364262		3444.6	-0.0051152
264.79	0.22508658		794.79	0.00908655		1324.78	0.03552971		1854.78	-0.00685779		2384.77	0.04947385		2914.77	0.05316298		3444.8	-0.00587691
264.99	0.22582077		794.99	0.00998667		1324.98	0.0363256		1854.98	-0.00686651		2384.97	0.04993046		2914.97	0.05272113		3445	-0.00535752
265.19	0.22661913		795.19	0.01091216		1325.18	0.03765567		1855.18	-0.00697092		2385.17	0.04991924		2915.17	0.05250257		3445.2	-0.00494556
265.39	0.22597015		795.39	0.01165107		1325.38	0.03833119		1855.38	-0.00694676		2385.37	0.04997497		2915.37	0.05237783		3445.4	-0.00525651
265.59	0.22715014		795.59	0.01174166		1325.58	0.03827493		1855.58	-0.00579735		2385.57	0.04965881		2915.57	0.05360979		3445.6	-0.00604499
265.79	0.22596742		795.79	0.01196708		1325.78	0.03861466		1855.78	-0.00591024		2385.77	0.04938134		2915.77	0.0539718		3445.8	-0.00659685
265.99	0.22535095		795.99	0.01178932		1325.98	0.03931943		1855.98	-0.00549616		2385.97	0.0481225		2915.97	0.05358291		3446	-0.00725051
266.19	0.22484615		796.19	0.01134597		1326.18	0.04025439		1856.18	-0.00469094		2386.17	0.0481128		2916.17	0.05420143		3446.2	-0.00722926
266.39	0.22453535		796.39	0.01031808		1326.38	0.04099334		1856.38	-0.00349407		2386.37	0.04759605		2916.37	0.05493359		3446.4	-0.00865621
266.59	0.2244388		796.59	0.01028284		1326.58	0.04154871		1856.58	-0.00276761		2386.57	0.048502		2916.57	0.05423968		3446.6	-0.00874457
266.79	0.22405212		796.79	0.01055431		1326.78	0.04066825		1856.78	-0.00215021		2386.77	0.04920809		2916.77	0.05500962		3446.8	-0.00945913
266.99	0.22453953		796.99	0.01112846		1326.98	0.04090344		1856.98	-0.00119851		2386.97	0.04976423		2916.97	0.05637877		3447	-0.00850204
267.19	0.22399247		797.19	0.01154538		1327.18	0.04105429		1857.18	-0.00105219		2387.17	0.04994305		2917.17	0.05680769		3447.2	-0.00893805
267.39	0.22345999		797.39	0.01125901		1327.38	0.03976401		1857.38	-0.00121323		2387.37	0.04976512		2917.37	0.05696829		3447.4	-0.00896497
267.59	0.2241846		797.59	0.0114595		1327.58	0.03977737		1857.58	-0.00121987		2387.57	0.04957936		2917.57	0.05815475		3447.6	-0.00798286
267.79	0.22410459		797.79	0.01074662		1327.78	0.03969584		1857.78	-0.00132303		2387.77	0.05049191		2917.77	0.05905328		3447.8	-0.0076201
267.99	0.22459482		797.99	0.01108044		1327.98	0.03827172		1857.98	-0.0013472		2387.97	0.051329		2917.97	0.05875168		3448	-0.00737416
268.19	0.22511548		798.19	0.01074675		1328.18	0.03876891		1858.18	-0.00191991		2388.17	0.05073939		2918.17	0.05805954		3448.2	-0.00784526
268.39	0.22594563		798.39	0.01116763		1328.38	0.0391653		1858.38	-0.00245973		2388.37	0.05125985		2918.37	0.05764568		3448.4	-0.00702825
268.59	0.22645213		798.59	0.01114386		1328.58	0.03904839		1858.58	-0.00282841		2388.57	0.0504573		2918.57	0.05778043		3448.6	-0.00738446
268.79	0.22665116		798.79	0.0099947		1328.78	0.03888441		1858.78	-0.00308114		2388.77	0.05021992		2918.77	0.05738815		3448.8	-0.00793731
268.99	0.22854872		798.99	0.01060519		1328.98	0.03955958		1858.98	-0.00355785		2388.97	0.05048084		2918.97	0.05764414		3449	-0.00741404
269.19	0.23030273		799.19	0.01141838		1329.18	0.03951873		1859.18	-0.00373989		2389.17	0.05025947		2919.17	0.05703218		3449.2	-0.00745206
269.39	0.23037933		799.39	0.0109014		1329.38	0.04033215		1859.38	-0.00420805		2389.37	0.04905386		2919.37	0.05737228		3449.4	-0.00822241
269.59	0.23165714		799.59	0.01120943		1329.58	0.03996952		1859.58	-0.00469123		2389.57	0.04906361		2919.57	0.05746894		3449.6	-0.00931302
269.79	0.23135217		799.79	0.01067497		1329.78	0.04038209		1859.78	-0.00561828		2389.77	0.04935057		2919.77	0.05738514		3449.8	-0.009957
269.99	0.23136661		799.99	0.01020696		1329.98	0.04116657		1859.98	-0.00593028		2389.97	0.04977044		2919.97	0.05713287		3450	-0.01053613
270.19	0.23209244		800.19	0.00875214		1330.18	0.04082201		1860.18	-0.00493623		2390.17	0.05020451		2920.17	0.05794046		3450.2	-0.01049291
270.39	0.23244299		800.39	0.00773201		1330.38	0.04084569		1860.38	-0.00508209		2390.37	0.05034953		2920.37	0.05852434		3450.4	-0.01230318
270.59	0.23233747		800.59	0.0080556		1330.58	0.04109094		1860.58	-0.00582117		2390.57	0.05161476		2920.57	0.05919768		3450.6	-0.01292485
270.79	0.23322503		800.79	0.00837215		1330.78	0.04157537		1860.78	-0.00575557		2390.77	0.05141501		2920.77	0.06023998		3450.8	-0.01339807
270.99	0.23298354		800.99	0.00906744		1330.98	0.04118731		1860.98	-0.00606022		2390.97	0.05229948		2920.97	0.05966795		3451	-0.01270348
271.19	0.23354025		801.19	0.00864184		1331.18	0.0398703		1861.18	-0.0061893		2391.17	0.05279143		2921.17	0.05946381		3451.2	-0.01265284
271.39	0.23367875		801.39	0.00825354		1331.38	0.03918359		1861.38	-0.00635845		2391.37	0.05277125		2921.37	0.05941381		3451.4	-0.01227415
271.59	0.23459094		801.59	0.00818407		1331.58	0.03941121		1861.58	-0.00533667		2391.57	0.05300294		2921.57	0.05955657		3451.6	-0.01161692
271.79	0.23460289		801.79	0.00769153		1331.78	0.03946494		1861.78	-0.00506554		2391.77	0.05301468		2921.77	0.05917426		3451.8	-0.01154347
271.99	0.23469979		801.99	0.00811676		1331.98	0.03915423		1861.98	-0.0057377		2391.97	0.05215411		2921.97	0.05845843		3452	-0.01110763
272.19	0.23547974		802.19	0.00844499		1332.18	0.03937193		1862.18	-0.00563998		2392.17	0.05159849		2922.17	0.05759332		3452.2	-0.01165596
272.39	0.2359133		802.39	0.00883393		1332.38	0.03942195		1862.38	-0.00608046		2392.37	0.05150563		2922.37	0.05713234		3452.4	-0.01145548
272.59	0.23612944		802.59	0.00803825		1332.58	0.04020119		1862.58	-0.00582104		2392.57	0.04947887		2922.57	0.05642452		3452.6	-0.01078125
272.79	0.23663713		802.79	0.00799772		1332.78	0.04062462		1862.78	-0.00675042		2392.77	0.04911097		2922.77	0.05631236		3452.8	-0.01145082
272.99	0.23780764		802.99	0.00882796		1332.98	0.04061814		1862.98	-0.0074173		2392.97	0.0481067		2922.97	0.05695065		3453	-0.01126996
273.19	0.23836796		803.19	0.01008517		1333.18	0.04049315		1863.18	-0.00776518		2393.17	0.04815235		2923.17	0.05764427		3453.2	-0.01149579
273.39	0.23770795		803.39	0.00989219		1333.38	0.04174163		1863.38	-0.00897467		2393.37	0.0477257		2923.37	0.05809268		3453.4	-0.0125042
273.59	0.23791028		803.59	0.00958548		1333.58	0.04215505		1863.58	-0.00921894		2393.57	0.04847325		2923.57	0.05864733		3453.6	-0.01347908
273.79	0.23742185		803.79	0.0104426		1333.78	0.04291387		1863.78	-0.00900574		2393.77	0.04856919		2923.77	0.05933283		3453.8	-0.01360609
273.99	0.23710116		803.99	0.01074431		1333.98	0.0428776		1863.98	-0.00979707		2393.97	0.04926079		2923.97	0.05985789		3454	-0.01391788
274.19	0.237266		804.19	0.0107387		1334.18	0.04336851		1864.18	-0.00875324		2394.17	0.04990237		2924.17	0.06059989		3454.2	-0.01443519
274.39	0.23748228		804.39	0.01061811		1334.38	0.04409734		1864.38	-0.0084538		2394.37	0.05020539		2924.37	0.06183699		3454.4	-0.01503084
274.59	0.23770864		804.59	0.01040092		1334.58	0.04495662		1864.58	-0.0090737		2394.57	0.05165431		2924.57	0.06188514		3454.6	-0.01496287
274.79	0.23781417		804.79	0.01107839		1334.78	0.04386217		1864.78	-0.0085052		2394.77	0.05193716		2924.77	0.06173356		3454.8	-0.01494845
274.99	0.23805835		804.99	0.0107146		1334.98	0.04254632		1864.98	-0.00762679		2394.97	0.05326367		2924.97	0.06100859		3455	-0.01406553
275.19	0.23801192		805.19	0.01077029		1335.18	0.0423008		1865.18	-0.00650854		2395.17	0.05407155		2925.17	0.06149182		3455.2	-0.01400741
275.39	0.23776129		805.39	0.01041428		1335.38	0.04260927		1865.38	-0.00598148		2395.37	0.05434357		2925.37	0.06202752		3455.4	-0.01388025
275.59	0.23833479		805.59	0.00945976		1335.58	0.04278517		1865.58	-0.00469924		2395.57	0.05532619		2925.57	0.06168997		3455.6	-0.01363688
275.79	0.23848856		805.79	0.00942673		1335.78	0.04269644		1865.78	-0.00444114		2395.77	0.05623418		2925.77	0.06176224		3455.8	-0.01341832
275.99	0.23936084		805.99	0.00945794		1335.98	0.04353808		1865.98	-0.0041061		2395.97	0.05666159		2925.97	0.06091135		3456	-0.0135074
276.19	0.23990758		806.19	0.00983372		1336.18	0.04348726		1866.18	-0.00307866		2396.17	0.0563053		2926.17	0.06145229		3456.2	-0.01338933
276.39	0.24057685		806.39	0.00870545		1336.38	0.04363716		1866.38	-0.00292702		2396.37	0.05575426		2926.37	0.0617979		3456.4	-0.01363162
276.59	0.24003644		806.59	0.00792324		1336.58	0.04323379		1866.58	-0.00291861		2396.57	0.05555426		2926.57	0.06186306		3456.6	-0.01356452
276.79	0.24030468		806.79	0.0082079		1336.78	0.04363462		1866.78	-0.0037914		2396.77	0.05527776		2926.77	0.0632627		3456.8	-0.01382694
276.99	0.24074561		806.99	0.00817244		1336.98	0.04398448		1866.98	-0.00413049		2396.97	0.05543846		2926.97	0.06460642		3457	-0.01248044
277.19	0.24053035		807.19	0.00890538		1337.18	0.04514064		1867.18	-0.0045917		2397.17	0.05589179		2927.17	0.064998		3457.2	-0.01314285
277.39	0.24090834		807.39	0.00814266		1337.38	0.0461918		1867.38	-0.00591778		2397.37	0.05592138		2927.37	0.06456987		3457.4	-0.01294752
277.59	0.24177125		807.59	0.00788444		1337.58	0.04676022		1867.58	-0.00646974		2397.57	0.05602566		2927.57	0.0646409		3457.6	-0.01230391
277.79	0.24208787		807.79	0.0093323		1337.78	0.04717894		1867.78	-0.00705329		2397.77	0.05565108		2927.77	0.06465633		3457.8	-0.01220038
277.99	0.24253645		807.99	0.00893864		1337.98	0.0477795		1867.98	-0.00811356		2397.97	0.05569618		2927.97	0.06524844		3458	-0.01139324
278.19	0.24422414		808.19	0.00926055		1338.18	0.04851388		1868.18	-0.00757759		2398.17	0.05517521		2928.17	0.06602678		3458.2	-0.01185172
278.39	0.2443204		808.39	0.00947986		1338.38	0.04766248		1868.38	-0.00806548		2398.37	0.05489536		2928.37	0.0667332		3458.4	-0.01209506
278.59	0.24483428		808.59	0.0103975		1338.58	0.04732018		1868.58	-0.00883211		2398.57	0.05584044		2928.57	0.06657584		3458.6	-0.01227511
278.79	0.24450896		808.79	0.01092321		1338.78	0.04665313		1868.78	-0.00835676		2398.77	0.0557028		2928.77	0.06787536		3458.8	-0.01189225
278.99	0.24462297		808.99	0.01073736		1338.98	0.04591244		1868.98	-0.00775278		2398.97	0.0565074		2928.97	0.06777016		3459	-0.01073581
279.19	0.2437911		809.19	0.01131364		1339.18	0.04547524		1869.18	-0.00755698		2399.17	0.05696441		2929.17	0.06666479		3459.2	-0.01073665
279.39	0.24418825		809.39	0.01132191		1339.38	0.04417012		1869.38	-0.00700619		2399.37	0.05811653		2929.37	0.06626189		3459.4	-0.01082313
279.59	0.24568428		809.59	0.01138893		1339.58	0.04307374		1869.58	-0.00578742		2399.57	0.05854948		2929.57	0.06633931		3459.6	-0.01121953
279.79	0.24647401		809.79	0.01214651		1339.78	0.04288075		1869.78	-0.0058039		2399.77	0.05854818		2929.77	0.06590906		3459.8	-0.01164634
279.99	0.24708905		809.99	0.01208144		1339.98	0.04392948		1869.98	-0.0060061		2399.97	0.05836513		2929.97	0.0658939		3460	-0.01218685
280.19	0.24734031		810.19	0.01256368		1340.18	0.04283448		1870.18	-0.00574768		2400.17	0.05780244		2930.17	0.0667602		3460.2	-0.01258592
280.39	0.24748367		810.39	0.01222117		1340.38	0.04092852		1870.38	-0.00566962		2400.37	0.05874421		2930.37	0.06623103		3460.4	-0.01303937
280.59	0.24791087		810.59	0.01270576		1340.58	0.0399044		1870.58	-0.00607503		2400.57	0.0598034		2930.57	0.0662161		3460.6	-0.01241996
280.79	0.24895517		810.79	0.01260819		1340.78	0.04050889		1870.78	-0.00637481		2400.77	0.05954309		2930.77	0.0669985		3460.8	-0.01234773
280.99	0.249374		810.99	0.01262731		1340.98	0.04060909		1870.98	-0.00702364		2400.97	0.06109122		2930.97	0.06712464		3461	-0.01225045
281.19	0.24968929		811.19	0.01138056		1341.18	0.04113893		1871.18	-0.00802417		2401.17	0.06067663		2931.17	0.06634913		3461.2	-0.01235462
281.39	0.25083522		811.39	0.0106439		1341.38	0.04147463		1871.38	-0.00810603		2401.37	0.06171534		2931.37	0.0663655		3461.4	-0.01191616
281.59	0.25142569		811.59	0.01038617		1341.58	0.04209087		1871.58	-0.00841235		2401.57	0.06238388		2931.57	0.06654863		3461.6	-0.01188941
281.79	0.2514407		811.79	0.01041711		1341.78	0.04265346		1871.78	-0.00831989		2401.77	0.06274445		2931.77	0.06732117		3461.8	-0.01255084
281.99	0.25177238		811.99	0.01077435		1341.98	0.04362076		1871.98	-0.00745306		2401.97	0.06312649		2931.97	0.06777375		3462	-0.01186958
282.19	0.2530513		812.19	0.01111957		1342.18	0.04434015		1872.18	-0.00771882		2402.17	0.06302046		2932.17	0.06747201		3462.2	-0.01285248
282.39	0.2523226		812.39	0.01054292		1342.38	0.04459714		1872.38	-0.00767035		2402.37	0.06385803		2932.37	0.06649437		3462.4	-0.01248302
282.59	0.25289472		812.59	0.00961669		1342.58	0.04508719		1872.58	-0.00738899		2402.57	0.06402207		2932.57	0.0662318		3462.6	-0.01188272
282.79	0.25226899		812.79	0.00930081		1342.78	0.04549721		1872.78	-0.00670146		2402.77	0.06324951		2932.77	0.06609452		3462.8	-0.01077115
282.99	0.25294234		812.99	0.00982124		1342.98	0.04437507		1872.98	-0.00617524		2402.97	0.06295783		2932.97	0.06473008		3463	-0.01047937
283.19	0.25395369		813.19	0.01001707		1343.18	0.04443377		1873.18	-0.00588367		2403.17	0.06286337		2933.17	0.06295792		3463.2	-0.01061468
283.39	0.25411065		813.39	0.00959174		1343.38	0.04445737		1873.38	-0.00492809		2403.37	0.06252544		2933.37	0.06422674		3463.4	-0.01107363
283.59	0.2551494		813.59	0.00974001		1343.58	0.04546343		1873.58	-0.0043315		2403.57	0.06156262		2933.57	0.06503109		3463.6	-0.01185705
283.79	0.25528486		813.79	0.00961766		1343.78	0.04565828		1873.78	-0.00431856		2403.77	0.06163314		2933.77	0.06459486		3463.8	-0.01171609
283.99	0.25498703		813.99	0.01049583		1343.98	0.04629051		1873.98	-0.0043236		2403.97	0.0611867		2933.97	0.06580544		3464	-0.0121384
284.19	0.25551675		814.19	0.01120183		1344.18	0.04505848		1874.18	-0.00376844		2404.17	0.06051317		2934.17	0.06619057		3464.2	-0.01177355
284.39	0.25521731		814.39	0.01224339		1344.38	0.04431704		1874.38	-0.00366963		2404.37	0.0609408		2934.37	0.06647824		3464.4	-0.01073869
284.59	0.25593417		814.59	0.01267083		1344.58	0.04434427		1874.58	-0.00373115		2404.57	0.06088991		2934.57	0.06773165		3464.6	-0.00978522
284.79	0.25618816		814.79	0.01329404		1344.78	0.04554249		1874.78	-0.00330344		2404.77	0.06113472		2934.77	0.06881575		3464.8	-0.00984915
284.99	0.25632834		814.99	0.01362795		1344.98	0.04602267		1874.98	-0.00440759		2404.97	0.06159766		2934.97	0.06893878		3465	-0.01025995
285.19	0.25595605		815.19	0.01392603		1345.18	0.04691159		1875.18	-0.00543186		2405.17	0.06130732		2935.17	0.06980715		3465.2	-0.01014681
285.39	0.25552806		815.39	0.01543106		1345.38	0.04733029		1875.38	-0.00550291		2405.37	0.06221032		2935.37	0.07130182		3465.4	-0.01066962
285.59	0.25482091		815.59	0.01579401		1345.58	0.04840961		1875.58	-0.00636739		2405.57	0.06270368		2935.57	0.07253221		3465.6	-0.01051321
285.79	0.25438752		815.79	0.01675223		1345.78	0.04864612		1875.78	-0.00658984		2405.77	0.06295344		2935.77	0.07326585		3465.8	-0.010833
285.99	0.25443516		815.99	0.01711507		1345.98	0.04934452		1875.98	-0.00633777		2405.97	0.06313816		2935.97	0.07357658		3466	-0.0110403
286.19	0.25441554		816.19	0.01651249		1346.18	0.049507		1876.18	-0.00775775		2406.17	0.06362395		2936.17	0.07307702		3466.2	-0.01167637
286.39	0.25328755		816.39	0.01630877		1346.38	0.0491987		1876.38	-0.00695526		2406.37	0.06459269		2936.37	0.07266107		3466.4	-0.01220517
286.59	0.25381288		816.59	0.01630691		1346.58	0.0489476		1876.58	-0.00719044		2406.57	0.06519255		2936.57	0.07274828		3466.6	-0.01288782
286.79	0.2548738		816.79	0.01615239		1346.78	0.04765972		1876.78	-0.00755598		2406.77	0.06568627		2936.77	0.07159684		3466.8	-0.01383006
286.99	0.25605561		816.99	0.01678198		1346.98	0.04726219		1876.98	-0.00747031		2406.97	0.06653802		2936.97	0.07104496		3467	-0.01463051
287.19	0.25703462		817.19	0.01616844		1347.18	0.04736981		1877.18	-0.00656416		2407.17	0.0671577		2937.17	0.07005777		3467.2	-0.014593
287.39	0.25666642		817.39	0.01572544		1347.38	0.04704222		1877.38	-0.00619031		2407.37	0.0676429		2937.37	0.07060826		3467.4	-0.01450451
287.59	0.2579574		817.59	0.0161974		1347.58	0.04683077		1877.58	-0.00554502		2407.57	0.06843831		2937.57	0.06932019		3467.6	-0.01447142
287.79	0.2584001		817.79	0.01557405		1347.78	0.04607609		1877.78	-0.00547567		2407.77	0.06802148		2937.77	0.06854277		3467.8	-0.01464692
287.99	0.25869829		817.99	0.01647211		1347.98	0.04623651		1877.98	-0.00500844		2407.97	0.06723663		2937.97	0.06834566		3468	-0.01468691
288.19	0.25904671		818.19	0.01623505		1348.18	0.04696064		1878.18	-0.00456669		2408.17	0.06743482		2938.17	0.06735347		3468.2	-0.01380073
288.39	0.26000512		818.39	0.01594311		1348.38	0.04678508		1878.38	-0.00460499		2408.37	0.06777625		2938.37	0.06802955		3468.4	-0.01391727
288.59	0.2601263		818.59	0.0156481		1348.58	0.04684102		1878.58	-0.00410475		2408.57	0.06725764		2938.57	0.06803591		3468.6	-0.01372699
288.79	0.2602022		818.79	0.01560947		1348.78	0.04790774		1878.78	-0.00443569		2408.77	0.06750802		2938.77	0.06781096		3468.8	-0.01427117
288.99	0.26048948		818.99	0.01493921		1348.98	0.04823237		1878.98	-0.00573662		2408.97	0.0665661		2938.97	0.0680394		3469	-0.01485045
289.19	0.25955786		819.19	0.01487648		1349.18	0.04931176		1879.18	-0.0054852		2409.17	0.06614958		2939.17	0.06841605		3469.2	-0.01441278
289.39	0.2589649		819.39	0.01461676		1349.38	0.04985304		1879.38	-0.00598918		2409.37	0.06570351		2939.37	0.06920761		3469.4	-0.01442617
289.59	0.25893722		819.59	0.01339046		1349.58	0.0508986		1879.58	-0.00619258		2409.57	0.06579191		2939.57	0.06995281		3469.6	-0.01471168
289.79	0.25867496		819.79	0.01346263		1349.78	0.05051975		1879.78	-0.0062797		2409.77	0.06568709		2939.77	0.07117745		3469.8	-0.01514383
289.99	0.2582664		819.99	0.01270794		1349.98	0.04986246		1879.98	-0.00683379		2409.97	0.06590532		2939.97	0.07179056		3470	-0.0150907
290.19	0.2577946		820.19	0.01251442		1350.18	0.04929268		1880.18	-0.00786967		2410.17	0.06662441		2940.17	0.07184968		3470.2	-0.01494651
290.39	0.25748059		820.39	0.01206258		1350.38	0.04952132		1880.38	-0.00713344		2410.37	0.06667717		2940.37	0.07255136		3470.4	-0.01479919
290.59	0.25862777		820.59	0.01151339		1350.58	0.04937861		1880.58	-0.00760927		2410.57	0.0666282		2940.57	0.07290101		3470.6	-0.01440558
290.79	0.25969048		820.79	0.01090778		1350.78	0.0486441		1880.78	-0.00742564		2410.77	0.06763364		2940.77	0.07208973		3470.8	-0.01427339
290.99	0.25964872		820.99	0.01212737		1350.98	0.0487725		1880.98	-0.00698148		2410.97	0.06732606		2940.97	0.07218014		3471	-0.01379847
291.19	0.26032609		821.19	0.01130037		1351.18	0.04849016		1881.18	-0.00624038		2411.17	0.06800246		2941.17	0.07267639		3471.2	-0.01279786
291.39	0.26070051		821.39	0.01169189		1351.38	0.04856934		1881.38	-0.00701366		2411.37	0.06829624		2941.37	0.07258432		3471.4	-0.01297399
291.59	0.2616562		821.59	0.01282498		1351.58	0.04838897		1881.58	-0.0061013		2411.57	0.06808169		2941.57	0.07177309		3471.6	-0.01259019
291.79	0.26229307		821.79	0.01283881		1351.78	0.04834182		1881.78	-0.00574798		2411.77	0.06758937		2941.77	0.07186121		3471.8	-0.01155808
291.99	0.26343528		821.99	0.01353499		1351.98	0.04838586		1881.98	-0.00605652		2411.97	0.06751566		2941.97	0.07277535		3472	-0.01098759
292.19	0.26418692		822.19	0.01315904		1352.18	0.04988977		1882.18	-0.00618431		2412.17	0.06742163		2942.17	0.07274826		3472.2	-0.00996317
292.39	0.2649402		822.39	0.01310032		1352.38	0.04843901		1882.38	-0.00594697		2412.37	0.06744102		2942.37	0.07325505		3472.4	-0.01005553
292.59	0.26436618		822.59	0.01417476		1352.58	0.04951873		1882.58	-0.00570485		2412.57	0.06690551		2942.57	0.07241228		3472.6	-0.00986698
292.79	0.26461438		822.79	0.01493829		1352.78	0.04966372		1882.78	-0.00623495		2412.77	0.06774578		2942.77	0.07322068		3472.8	-0.00990148
292.99	0.26453922		822.99	0.01480703		1352.98	0.04970962		1882.98	-0.00633507		2412.97	0.06720705		2942.97	0.07428205		3473	-0.01031385
293.19	0.26429048		823.19	0.01524134		1353.18	0.04979962		1883.18	-0.00568501		2413.17	0.06746569		2943.17	0.07437838		3473.2	-0.00992514
293.39	0.26425488		823.39	0.01581828		1353.38	0.05103414		1883.38	-0.00612169		2413.37	0.06723525		2943.37	0.07506828		3473.4	-0.01072252
293.59	0.26459769		823.59	0.01586178		1353.58	0.05214684		1883.58	-0.00667592		2413.57	0.06762374		2943.57	0.0754668		3473.6	-0.01177929
293.79	0.26443989		823.79	0.01643985		1353.78	0.05219012		1883.78	-0.00695118		2413.77	0.06732414		2943.77	0.07594314		3473.8	-0.0125765
293.99	0.26461841		823.99	0.01611146		1353.98	0.05201365		1883.98	-0.00735526		2413.97	0.06688772		2943.97	0.0750808		3474	-0.01336337
294.19	0.26444415		824.19	0.01694647		1354.18	0.05244568		1884.18	-0.00710793		2414.17	0.06636215		2944.17	0.07496782		3474.2	-0.01391575
294.39	0.26469228		824.39	0.01587735		1354.38	0.05351009		1884.38	-0.00625763		2414.37	0.06649555		2944.37	0.07502187		3474.4	-0.01382812
294.59	0.26509677		824.59	0.01657917		1354.58	0.0543844		1884.58	-0.00634553		2414.57	0.06684735		2944.57	0.07516696		3474.6	-0.01470963
294.79	0.26638269		824.79	0.01614656		1354.78	0.05438062		1884.78	-0.00497912		2414.77	0.06780365		2944.77	0.07482769		3474.8	-0.0152318
294.99	0.2668204		824.99	0.01628045		1354.98	0.05519635		1884.98	-0.00482551		2414.97	0.06837183		2944.97	0.07571951		3475	-0.0155999
295.19	0.26780344		825.19	0.01597772		1355.18	0.05595942		1885.18	-0.00362433		2415.17	0.06938751		2945.17	0.07644875		3475.2	-0.01515273
295.39	0.26781965		825.39	0.01584014		1355.38	0.05534369		1885.38	-0.00381323		2415.37	0.06974932		2945.37	0.07527957		3475.4	-0.01597917
295.59	0.26806886		825.59	0.01589732		1355.58	0.05517635		1885.58	-0.00315321		2415.57	0.07028188		2945.57	0.07495772		3475.6	-0.01480997
295.79	0.26876686		825.79	0.01527463		1355.78	0.05506324		1885.78	-0.00384454		2415.77	0.07053469		2945.77	0.07547558		3475.8	-0.01398531
295.99	0.26921931		825.99	0.01478661		1355.98	0.05467316		1885.98	-0.00412724		2415.97	0.07093793		2945.97	0.07623433		3476	-0.01408639
296.19	0.26912744		826.19	0.01468315		1356.18	0.0547293		1886.18	-0.00430035		2416.17	0.07080314		2946.17	0.07617196		3476.2	-0.01256632
296.39	0.26873417		826.39	0.01519549		1356.38	0.05336797		1886.38	-0.00409923		2416.37	0.0708078		2946.37	0.07639202		3476.4	-0.01232597
296.59	0.26890225		826.59	0.0156339		1356.58	0.05385942		1886.58	-0.00436147		2416.57	0.07054886		2946.57	0.07714439		3476.6	-0.01166196
296.79	0.26879639		826.79	0.01599371		1356.78	0.0523931		1886.78	-0.00458148		2416.77	0.07063991		2946.77	0.07819891		3476.8	-0.01017009
296.99	0.26873108		826.99	0.01651484		1356.98	0.05182348		1886.98	-0.00429739		2416.97	0.06984859		2946.97	0.07774363		3477	-0.00942441
297.19	0.26905596		827.19	0.01664682		1357.18	0.05237108		1887.18	-0.00406196		2417.17	0.06919686		2947.17	0.07688954		3477.2	-0.00870721
297.39	0.26900112		827.39	0.01709002		1357.38	0.05413258		1887.38	-0.00478973		2417.37	0.06825387		2947.37	0.07642433		3477.4	-0.00888765
297.59	0.26976797		827.59	0.01611873		1357.58	0.05392662		1887.58	-0.00517118		2417.57	0.06870072		2947.57	0.07650806		3477.6	-0.00906308
297.79	0.26989653		827.79	0.01588059		1357.78	0.05291206		1887.78	-0.00528864		2417.77	0.0675948		2947.77	0.07669872		3477.8	-0.0092409
297.99	0.26978252		827.99	0.01556774		1357.98	0.05192514		1887.98	-0.00574001		2417.97	0.06772988		2947.97	0.07706973		3478	-0.0093993
298.19	0.2699798		828.19	0.01589268		1358.18	0.05259202		1888.18	-0.00528685		2418.17	0.06834385		2948.17	0.07627623		3478.2	-0.00948325
298.39	0.27154295		828.39	0.01532315		1358.38	0.05315963		1888.38	-0.00487511		2418.37	0.06962865		2948.37	0.07617052		3478.4	-0.01013063
298.59	0.27227498		828.59	0.01625621		1358.58	0.0529619		1888.58	-0.00318374		2418.57	0.06999693		2948.57	0.07676262		3478.6	-0.01086647
298.79	0.27311492		828.79	0.01563044		1358.78	0.05235987		1888.78	-0.00197018		2418.77	0.07088249		2948.77	0.07683673		3478.8	-0.01162303
298.99	0.27355707		828.99	0.01539862		1358.98	0.05318396		1888.98	-0.00155626		2418.97	0.07155861		2948.97	0.07703493		3479	-0.01194306
299.19	0.27390805		829.19	0.01578339		1359.18	0.05244598		1889.18	-0.00047299		2419.17	0.07160069		2949.17	0.0768081		3479.2	-0.01282968
299.39	0.2736305		829.39	0.01496268		1359.38	0.05126826		1889.38	-0.00083898		2419.37	0.07196877		2949.37	0.07630419		3479.4	-0.01426796
299.59	0.27455798		829.59	0.01606096		1359.58	0.05226456		1889.58	-0.00115339		2419.57	0.07218234		2949.57	0.0763712		3479.6	-0.01405207
299.79	0.27494068		829.79	0.0163144		1359.78	0.05199696		1889.78	-0.00136774		2419.77	0.07247213		2949.77	0.0770015		3479.8	-0.01382793
299.99	0.2747147		829.99	0.01659553		1359.98	0.05218653		1889.98	-0.00129248		2419.97	0.07221726		2949.97	0.07701562		3480	-0.01369019
300.19	0.27547556		830.19	0.01724354		1360.18	0.0517163		1890.18	-0.00144139		2420.17	0.07158558		2950.17	0.07674916		3480.2	-0.01344481
300.39	0.27553376		830.39	0.01804764		1360.38	0.05171305		1890.38	-0.00137178		2420.37	0.07130364		2950.37	0.07675037		3480.4	-0.01350266
300.59	0.27519334		830.59	0.01849618		1360.58	0.05189595		1890.58	-0.0019838		2420.57	0.07155824		2950.57	0.07637602		3480.6	-0.01319909
300.79	0.27480994		830.79	0.01968468		1360.78	0.05187935		1890.78	-0.00277915		2420.77	0.07121867		2950.77	0.07620898		3480.8	-0.01303196
300.99	0.27446424		830.99	0.02025695		1360.98	0.05259749		1890.98	-0.00393649		2420.97	0.07128889		2950.97	0.07669005		3481	-0.01358418
301.19	0.27402895		831.19	0.02006394		1361.18	0.0535783		1891.18	-0.00446249		2421.17	0.07041942		2951.17	0.07736234		3481.2	-0.01438541
301.39	0.27430871		831.39	0.02074195		1361.38	0.05413808		1891.38	-0.0056589		2421.37	0.07146128		2951.37	0.07839736		3481.4	-0.0144671
301.59	0.27488441		831.59	0.01984325		1361.58	0.05452489		1891.58	-0.00600602		2421.57	0.07220688		2951.57	0.07891219		3481.6	-0.01551553
301.79	0.2751935		831.79	0.01967725		1361.78	0.05477715		1891.78	-0.00648313		2421.77	0.07277666		2951.77	0.0793944		3481.8	-0.0154835
301.99	0.27619512		831.99	0.01951288		1361.98	0.05542538		1891.98	-0.00633541		2421.97	0.07438838		2951.97	0.07953173		3482	-0.01681055
302.19	0.27652145		832.19	0.01882831		1362.18	0.0567903		1892.18	-0.00549699		2422.17	0.07553596		2952.17	0.07829008		3482.2	-0.01755015
302.39	0.27742203		832.39	0.01868137		1362.38	0.05648106		1892.38	-0.00504607		2422.37	0.07600459		2952.37	0.07936313		3482.4	-0.01755038
302.59	0.27737486		832.59	0.01863738		1362.58	0.05701377		1892.58	-0.00429942		2422.57	0.07632482		2952.57	0.07963443		3482.6	-0.01712676
302.79	0.27764378		832.79	0.01803935		1362.78	0.05746946		1892.78	-0.00364202		2422.77	0.07732426		2952.77	0.07899728		3482.8	-0.01717659
302.99	0.27853796		832.99	0.01802315		1362.98	0.05758989		1892.98	-0.00266433		2422.97	0.07852868		2952.97	0.07877119		3483	-0.01591259
303.19	0.27895556		833.19	0.01786833		1363.18	0.05789381		1893.18	-0.0029028		2423.17	0.07908462		2953.17	0.07819919		3483.2	-0.01517487
303.39	0.27954339		833.39	0.01727465		1363.38	0.057878		1893.38	-0.0034995		2423.37	0.07897851		2953.37	0.07764473		3483.4	-0.01431164
303.59	0.27995537		833.59	0.01769616		1363.58	0.0578743		1893.58	-0.00376204		2423.57	0.07930749		2953.57	0.07749743		3483.6	-0.01256899
303.79	0.2807595		833.79	0.0176005		1363.78	0.05756742		1893.78	-0.0031217		2423.77	0.07922957		2953.77	0.07739018		3483.8	-0.01131902
303.99	0.28105161		833.99	0.01724954		1363.98	0.0576614		1893.98	-0.00327082		2423.97	0.07859646		2953.97	0.07715226		3484	-0.01104193
304.19	0.28138824		834.19	0.017462		1364.18	0.05721452		1894.18	-0.00306143		2424.17	0.0781207		2954.17	0.07724931		3484.2	-0.0109127
304.39	0.28009794		834.39	0.01774608		1364.38	0.05762679		1894.38	-0.00447822		2424.37	0.07743281		2954.37	0.07767878		3484.4	-0.01049511
304.59	0.27924092		834.59	0.01861022		1364.58	0.05660165		1894.58	-0.00630426		2424.57	0.07713497		2954.57	0.07812603		3484.6	-0.01022265
304.79	0.27875203		834.79	0.01914388		1364.78	0.05665874		1894.78	-0.00661856		2424.77	0.07545296		2954.77	0.07932175		3484.8	-0.01082928
304.99	0.27820853		834.99	0.01942992		1364.98	0.05606998		1894.98	-0.00685469		2424.97	0.07531881		2954.97	0.08018428		3485	-0.01083333
305.19	0.27822228		835.19	0.02032868		1365.18	0.05624491		1895.18	-0.00669541		2425.17	0.07473811		2955.17	0.08058915		3485.2	-0.01109753
305.39	0.27771557		835.39	0.02094763		1365.38	0.0565908		1895.38	-0.00755407		2425.37	0.07537693		2955.37	0.0806342		3485.4	-0.01150334
305.59	0.27823807		835.59	0.0200245		1365.58	0.05746824		1895.58	-0.00665349		2425.57	0.07525973		2955.57	0.08078737		3485.6	-0.01211255
305.79	0.27832407		835.79	0.02014862		1365.78	0.05790309		1895.78	-0.00614957		2425.77	0.07623985		2955.77	0.08189976		3485.8	-0.01177124
305.99	0.27775724		835.99	0.020424		1365.98	0.05807828		1895.98	-0.00617334		2425.97	0.07649972		2955.97	0.08225861		3486	-0.01227989
306.19	0.27695918		836.19	0.01986505		1366.18	0.05779749		1896.18	-0.00500652		2426.17	0.07669378		2956.17	0.0825241		3486.2	-0.01162047
306.39	0.27738931		836.39	0.01914098		1366.38	0.05748825		1896.38	-0.00402241		2426.37	0.07712947		2956.37	0.08363304		3486.4	-0.01120866
306.59	0.27885994		836.59	0.01909689		1366.58	0.05774837		1896.58	-0.00393361		2426.57	0.07784622		2956.57	0.0830512		3486.6	-0.01113379
306.79	0.27997045		836.79	0.0188112		1366.78	0.05741681		1896.78	-0.00318864		2426.77	0.07905139		2956.77	0.08318707		3486.8	-0.01076413
306.99	0.2813		836.99	0.01830884		1366.98	0.05716936		1896.98	-0.00257705		2426.97	0.08034059		2956.97	0.08431387		3487	-0.01010503
307.19	0.28172119		837.19	0.01738811		1367.18	0.05753827		1897.18	-0.00283565		2427.17	0.07982675		2957.17	0.08379315		3487.2	-0.010144
307.39	0.28245207		837.39	0.01770921		1367.38	0.057497		1897.38	-0.0025628		2427.37	0.0793492		2957.37	0.08382469		3487.4	-0.01085071
307.59	0.28295466		837.59	0.01721583		1367.58	0.05724482		1897.58	-0.00181693		2427.57	0.08018866		2957.57	0.08366301		3487.6	-0.01069065
307.79	0.28396605		837.79	0.01765516		1367.78	0.05800258		1897.78	-0.00173925		2427.77	0.07956404		2957.77	0.08333507		3487.8	-0.01096909
307.99	0.28343843		837.99	0.0172912		1367.98	0.05854095		1897.98	-0.00278043		2427.97	0.0787787		2957.97	0.08240243		3488	-0.01161162
308.19	0.28354233		838.19	0.01751355		1368.18	0.05868163		1898.18	-0.00386261		2428.17	0.07774665		2958.17	0.0821468		3488.2	-0.01184674
308.39	0.28401188		838.39	0.01796685		1368.38	0.05835398		1898.38	-0.00531998		2428.37	0.07650398		2958.37	0.08203574		3488.4	-0.01180568
308.59	0.28439609		838.59	0.01828474		1368.58	0.05762769		1898.58	-0.00588488		2428.57	0.07579847		2958.57	0.08198433		3488.6	-0.01252471
308.79	0.28410723		838.79	0.01803854		1368.78	0.0589858		1898.78	-0.00497879		2428.77	0.07404089		2958.77	0.08117027		3488.8	-0.01296632
308.99	0.28377891		838.99	0.01875364		1368.98	0.05835384		1898.98	-0.00521818		2428.97	0.07429565		2958.97	0.08014438		3489	-0.01317756
309.19	0.28393003		839.19	0.01971915		1369.18	0.05914019		1899.18	-0.00557846		2429.17	0.07405556		2959.17	0.07986572		3489.2	-0.01327554
309.39	0.28375307		839.39	0.02086978		1369.38	0.05968536		1899.38	-0.00556753		2429.37	0.07360427		2959.37	0.07901496		3489.4	-0.01420654
309.59	0.28392513		839.59	0.02078862		1369.58	0.06023131		1899.58	-0.005385		2429.57	0.07381521		2959.57	0.07945878		3489.6	-0.01427618
309.79	0.28339312		839.79	0.02149683		1369.78	0.05937274		1899.78	-0.00515748		2429.77	0.07397996		2959.77	0.08021424		3489.8	-0.01410653
309.99	0.28289334		839.99	0.02148678		1369.98	0.0584141		1899.98	-0.0051963		2429.97	0.07389955		2959.97	0.08071573		3490	-0.01440284
310.19	0.28320163		840.19	0.021685		1370.18	0.05729929		1900.18	-0.00314612		2430.17	0.0742723		2960.17	0.08191613		3490.2	-0.01504207
310.39	0.28373832		840.39	0.02166378		1370.38	0.05717565		1900.38	-0.00331261		2430.37	0.07490441		2960.37	0.08320511		3490.4	-0.0151371
310.59	0.2848478		840.59	0.02255766		1370.58	0.05673267		1900.58	-0.00396289		2430.57	0.07615075		2960.57	0.08405901		3490.6	-0.01491705
310.79	0.2853431		840.79	0.02222843		1370.78	0.05734562		1900.78	-0.00304032		2430.77	0.07785553		2960.77	0.08569036		3490.8	-0.01469803
310.99	0.28545895		840.99	0.02237001		1370.98	0.05712662		1900.98	-0.00269106		2430.97	0.07797177		2960.97	0.08676669		3491	-0.01485053
311.19	0.28537455		841.19	0.02271683		1371.18	0.05778054		1901.18	-0.00302946		2431.17	0.07793235		2961.17	0.08603576		3491.2	-0.01433677
311.39	0.28563834		841.39	0.0229728		1371.38	0.05863545		1901.38	-0.00297506		2431.37	0.0790425		2961.37	0.08673696		3491.4	-0.01487455
311.59	0.28566454		841.59	0.02171665		1371.58	0.05910045		1901.58	-0.00342972		2431.57	0.07941206		2961.57	0.08684066		3491.6	-0.01455579
311.79	0.28625576		841.79	0.02208794		1371.78	0.05932148		1901.78	-0.00477518		2431.77	0.07892099		2961.77	0.08645349		3491.8	-0.01397326
311.99	0.28561516		841.99	0.02191379		1371.98	0.05935911		1901.98	-0.00591802		2431.97	0.07914672		2961.97	0.08588041		3492	-0.01315085
312.19	0.28637325		842.19	0.02152523		1372.18	0.05927277		1902.18	-0.00686156		2432.17	0.07985345		2962.17	0.0859193		3492.2	-0.01236189
312.39	0.28692739		842.39	0.02175488		1372.38	0.0587579		1902.38	-0.00677397		2432.37	0.07979379		2962.37	0.08611956		3492.4	-0.01203331
312.59	0.28714369		842.59	0.02141624		1372.58	0.05948796		1902.58	-0.00651419		2432.57	0.08028822		2962.57	0.08542356		3492.6	-0.01161005
312.79	0.28683945		842.79	0.02144872		1372.78	0.06007216		1902.78	-0.00632365		2432.77	0.08001111		2962.77	0.08415771		3492.8	-0.01160166
312.99	0.28735817		842.99	0.02145575		1372.98	0.06011903		1902.98	-0.0073815		2432.97	0.08014386		2962.97	0.08381569		3493	-0.01242307
313.19	0.28811927		843.19	0.02189402		1373.18	0.06117043		1903.18	-0.00765853		2433.17	0.07938661		2963.17	0.08360059		3493.2	-0.01236241
313.39	0.28793783		843.39	0.02277149		1373.38	0.06101769		1903.38	-0.00751982		2433.37	0.07823331		2963.37	0.08358065		3493.4	-0.01401772
313.59	0.28753147		843.59	0.0215444		1373.58	0.06118969		1903.58	-0.0070132		2433.57	0.07869375		2963.57	0.08412508		3493.6	-0.01452246
313.79	0.28718226		843.79	0.02156258		1373.78	0.06134184		1903.78	-0.0065201		2433.77	0.07842193		2963.77	0.08503096		3493.8	-0.01594124
313.99	0.28699818		843.99	0.02143858		1373.98	0.06200748		1903.98	-0.00568168		2433.97	0.07856459		2963.97	0.0853671		3494	-0.01712411
314.19	0.28750235		844.19	0.02146788		1374.18	0.06201169		1904.18	-0.00448935		2434.17	0.07924511		2964.17	0.08606256		3494.2	-0.0186859
314.39	0.28664862		844.39	0.0205612		1374.38	0.06253326		1904.38	-0.00392411		2434.37	0.07997175		2964.37	0.08597424		3494.4	-0.01932335
314.59	0.28728115		844.59	0.02000345		1374.58	0.06241089		1904.58	-0.00353925		2434.57	0.08011923		2964.57	0.08624381		3494.6	-0.02000407
314.79	0.28718843		844.79	0.01929481		1374.78	0.06271894		1904.78	-0.00315714		2434.77	0.08034366		2964.77	0.0862703		3494.8	-0.02045687
314.99	0.2871087		844.99	0.01935783		1374.98	0.06268826		1904.98	-0.00368172		2434.97	0.08032172		2964.97	0.08648941		3495	-0.02076265
315.19	0.28703884		845.19	0.01908706		1375.18	0.06275752		1905.18	-0.00352345		2435.17	0.08140418		2965.17	0.08612954		3495.2	-0.02033521
315.39	0.2867063		845.39	0.01859541		1375.38	0.06331427		1905.38	-0.00333877		2435.37	0.08170907		2965.37	0.08657332		3495.4	-0.02081995
315.59	0.28653961		845.59	0.01803846		1375.58	0.06296068		1905.58	-0.00389346		2435.57	0.08128382		2965.57	0.08551918		3495.6	-0.02000008
315.79	0.28687774		845.79	0.01857275		1375.78	0.06189568		1905.78	-0.0039118		2435.77	0.08141779		2965.77	0.0857024		3495.8	-0.01862366
315.99	0.28703539		845.99	0.0196648		1375.98	0.06094083		1905.98	-0.00383943		2435.97	0.08254946		2965.97	0.08540411		3496	-0.01750364
316.19	0.28808554		846.19	0.01935025		1376.18	0.06081481		1906.18	-0.00405463		2436.17	0.08326709		2966.17	0.08560329		3496.2	-0.01684202
316.39	0.28818914		846.39	0.0199395		1376.38	0.06075421		1906.38	-0.0038252		2436.37	0.08341049		2966.37	0.08520686		3496.4	-0.01681103
316.59	0.28884025		846.59	0.02023599		1376.58	0.06090602		1906.58	-0.00409215		2436.57	0.08412269		2966.57	0.08505809		3496.6	-0.01641484
316.79	0.28858335		846.79	0.02078239		1376.78	0.06090719		1906.78	-0.00433868		2436.77	0.0841797		2966.77	0.0854934		3496.8	-0.0170675
316.99	0.28903973		846.99	0.02050466		1376.98	0.06124986		1906.98	-0.00482088		2436.97	0.08350972		2966.97	0.08611169		3497	-0.01663235
317.19	0.28969506		847.19	0.02107646		1377.18	0.06142487		1907.18	-0.00514861		2437.17	0.08289838		2967.17	0.08541541		3497.2	-0.01595465
317.39	0.28985307		847.39	0.02186518		1377.38	0.06180739		1907.38	-0.00493394		2437.37	0.08270099		2967.37	0.08561638		3497.4	-0.01628954
317.59	0.29053919		847.59	0.0217729		1377.58	0.06287808		1907.58	-0.00466644		2437.57	0.0829306		2967.57	0.08658608		3497.6	-0.01688245
317.79	0.29119231		847.79	0.02244295		1377.78	0.06268889		1907.78	-0.00484501		2437.77	0.08281157		2967.77	0.08695592		3497.8	-0.01813103
317.99	0.29191808		847.99	0.02277491		1377.98	0.06207864		1907.98	-0.00461442		2437.97	0.08355834		2967.97	0.08677231		3498	-0.01847857
318.19	0.29190688		848.19	0.02184328		1378.18	0.06203187		1908.18	-0.00472149		2438.17	0.08401843		2968.17	0.08693354		3498.2	-0.01876551
318.39	0.29099659		848.39	0.02129266		1378.38	0.06260583		1908.38	-0.00483111		2438.37	0.0834372		2968.37	0.08621083		3498.4	-0.01852804
318.59	0.29122803		848.59	0.02124704		1378.58	0.06142462		1908.58	-0.0051156		2438.57	0.08227454		2968.57	0.0870793		3498.6	-0.01819777
318.79	0.2910869		848.79	0.02182895		1378.78	0.06245731		1908.78	-0.00480758		2438.77	0.0825946		2968.77	0.08762267		3498.8	-0.01806529
318.99	0.29142302		848.99	0.02191755		1378.98	0.06322488		1908.98	-0.0040169		2438.97	0.08291393		2968.97	0.08780589		3499	-0.01750699
319.19	0.29115062		849.19	0.02244134		1379.18	0.06328728		1909.18	-0.00436696		2439.17	0.082833		2969.17	0.08781865		3499.2	-0.01647293
319.39	0.29063079		849.39	0.02314666		1379.38	0.06405031		1909.38	-0.00429482		2439.37	0.0817004		2969.37	0.08795314		3499.4	-0.01587254
319.59	0.29159248		849.59	0.02379623		1379.58	0.06355394		1909.58	-0.00433307		2439.57	0.08178742		2969.57	0.08768931		3499.6	-0.01552092
319.79	0.29218386		849.79	0.02385776		1379.78	0.06347111		1909.78	-0.00391121		2439.77	0.08068654		2969.77	0.08775161		3499.8	-0.01433808
319.99	0.29258299		849.99	0.02412505		1379.98	0.06382896		1909.98	-0.00382964		2439.97	0.08131		2969.97	0.08722394		3500	-0.0134766
320.19	0.29256368		850.19	0.02381331		1380.18	0.06429111		1910.18	-0.0041131		2440.17	0.08051528		2970.17	0.0869044		3500.2	-0.01315542
320.39	0.29291351		850.39	0.02399458		1380.38	0.064189		1910.38	-0.0031744		2440.37	0.08084115		2970.37	0.08660545		3500.4	-0.01274919
320.59	0.2936498		850.59	0.02390318		1380.58	0.06405437		1910.58	-0.00296126		2440.57	0.0817101		2970.57	0.08717243		3500.6	-0.01247717
320.79	0.29360189		850.79	0.02319365		1380.78	0.06404876		1910.78	-0.00327657		2440.77	0.08167443		2970.77	0.08649908		3500.8	-0.012768
320.99	0.29372233		850.99	0.02271335		1380.98	0.06360515		1910.98	-0.00314074		2440.97	0.08138272		2970.97	0.08644231		3501	-0.01223785
321.19	0.29386181		851.19	0.02390295		1381.18	0.06365798		1911.18	-0.00394039		2441.17	0.08209733		2971.17	0.08635023		3501.2	-0.01212998
321.39	0.29399935		851.39	0.02448543		1381.38	0.06364831		1911.38	-0.00431736		2441.37	0.08349904		2971.37	0.08682723		3501.4	-0.01193457
321.59	0.29389521		851.59	0.02488542		1381.58	0.06335648		1911.58	-0.00498437		2441.57	0.08385807		2971.57	0.08751553		3501.6	-0.01266245
321.79	0.29437026		851.79	0.02447978		1381.78	0.06260068		1911.78	-0.00533093		2441.77	0.08566253		2971.77	0.08695845		3501.8	-0.01334127
321.99	0.29409352		851.99	0.02430347		1381.98	0.06204056		1911.98	-0.0063052		2441.97	0.08636745		2971.97	0.08800589		3502	-0.01359967
322.19	0.29401978		852.19	0.0230188		1382.18	0.06263386		1912.18	-0.00681549		2442.17	0.08632232		2972.17	0.08850646		3502.2	-0.01393678
322.39	0.29460818		852.39	0.02284798		1382.38	0.06279602		1912.38	-0.006349		2442.37	0.0866389		2972.37	0.08933255		3502.4	-0.0140383
322.59	0.29484385		852.59	0.02319081		1382.58	0.06189403		1912.58	-0.00566753		2442.57	0.08709126		2972.57	0.09033937		3502.6	-0.01439481
322.79	0.2959953		852.79	0.02358337		1382.78	0.06315229		1912.78	-0.00432722		2442.77	0.0877247		2972.77	0.09128108		3502.8	-0.0153442
322.99	0.29634563		852.99	0.02396493		1382.98	0.06307042		1912.98	-0.0034362		2442.97	0.08904939		2972.97	0.09201891		3503	-0.01531161
323.19	0.29621888		853.19	0.02444541		1383.18	0.06299557		1913.18	-0.00319814		2443.17	0.08936196		2973.17	0.0935889		3503.2	-0.01605682
323.39	0.29639522		853.39	0.02502393		1383.38	0.06332355		1913.38	-0.00250378		2443.37	0.08875492		2973.37	0.09434153		3503.4	-0.01630884
323.59	0.29751469		853.59	0.02448721		1383.58	0.0639974		1913.58	-0.00103437		2443.57	0.08826793		2973.57	0.09419496		3503.6	-0.01652358
323.79	0.29730942		853.79	0.02392749		1383.78	0.06422254		1913.78	-0.00068815		2443.77	0.08689742		2973.77	0.09371545		3503.8	-0.01557156
323.99	0.29751815		853.99	0.02444694		1383.98	0.0648373		1913.98	-0.00047049		2443.97	0.0863238		2973.97	0.09403226		3504	-0.01549742
324.19	0.29829554		854.19	0.02506613		1384.18	0.06469753		1914.18	-0.00042926		2444.17	0.08565017		2974.17	0.09421076		3504.2	-0.01575496
324.39	0.2991442		854.39	0.02482485		1384.38	0.06538377		1914.38	0.00002262		2444.37	0.08537179		2974.37	0.09437167		3504.4	-0.01567504
324.59	0.29825599		854.59	0.02455676		1384.58	0.06656843		1914.58	-0.00084103		2444.57	0.08536877		2974.57	0.09347774		3504.6	-0.01659895
324.79	0.29779762		854.79	0.02451355		1384.78	0.06677123		1914.78	-0.0016273		2444.77	0.08539972		2974.77	0.09304915		3504.8	-0.01649037
324.99	0.29718772		854.99	0.0253836		1384.98	0.06773129		1914.98	-0.00186921		2444.97	0.08535747		2974.97	0.0931459		3505	-0.01594255
325.19	0.29715873		855.19	0.02586321		1385.18	0.06844763		1915.18	-0.00375784		2445.17	0.08576932		2975.17	0.09364629		3505.2	-0.01519062
325.39	0.29717013		855.39	0.02554256		1385.38	0.06899482		1915.38	-0.00578437		2445.37	0.08591719		2975.37	0.09292062		3505.4	-0.01437924
325.59	0.29647436		855.59	0.02543346		1385.58	0.06920503		1915.58	-0.00732621		2445.57	0.08509321		2975.57	0.09295502		3505.6	-0.01439859
325.79	0.29629194		855.79	0.02515172		1385.78	0.06895136		1915.78	-0.00812721		2445.77	0.08617192		2975.77	0.09348666		3505.8	-0.01470054
325.99	0.29647934		855.99	0.02538314		1385.98	0.06907223		1915.98	-0.00943604		2445.97	0.0856944		2975.97	0.09400112		3506	-0.01483892
326.19	0.29643254		856.19	0.02460101		1386.18	0.06903038		1916.18	-0.00983459		2446.17	0.08592234		2976.17	0.09376846		3506.2	-0.01504695
326.39	0.29688551		856.39	0.02384202		1386.38	0.06806254		1916.38	-0.00964705		2446.37	0.08643188		2976.37	0.09380413		3506.4	-0.01457059
326.59	0.29711978		856.59	0.02494873		1386.58	0.06750798		1916.58	-0.00979993		2446.57	0.08636987		2976.57	0.09397788		3506.6	-0.01478093
326.79	0.2975503		856.79	0.0241845		1386.78	0.06709706		1916.78	-0.00912583		2446.77	0.08584921		2976.77	0.09502313		3506.8	-0.01493248
326.99	0.29766257		856.99	0.02383132		1386.98	0.06697564		1916.98	-0.0084608		2446.97	0.08539223		2976.97	0.09543755		3507	-0.01443902
327.19	0.29716216		857.19	0.02343518		1387.18	0.06614207		1917.18	-0.0082721		2447.17	0.08538965		2977.17	0.09560197		3507.2	-0.01494503
327.39	0.29764247		857.39	0.02302666		1387.38	0.0656788		1917.38	-0.00730102		2447.37	0.0852533		2977.37	0.09522753		3507.4	-0.01414144
327.59	0.29881916		857.59	0.02300765		1387.58	0.06523196		1917.58	-0.00639055		2447.57	0.08467084		2977.57	0.09446488		3507.6	-0.01442781
327.79	0.29938123		857.79	0.02320076		1387.78	0.06423893		1917.78	-0.00668835		2447.77	0.08401979		2977.77	0.09403501		3507.8	-0.01453051
327.99	0.29992589		857.99	0.02494741		1387.98	0.06359861		1917.98	-0.00609824		2447.97	0.08390475		2977.97	0.09422841		3508	-0.01548516
328.19	0.30048135		858.19	0.02567625		1388.18	0.06304634		1918.18	-0.00640558		2448.17	0.08390236		2978.17	0.09404652		3508.2	-0.01565098
328.39	0.30068128		858.39	0.02545554		1388.38	0.06348658		1918.38	-0.00613303		2448.37	0.08394965		2978.37	0.09275874		3508.4	-0.01476001
328.59	0.3008419		858.59	0.02610889		1388.58	0.06380701		1918.58	-0.00707217		2448.57	0.08437954		2978.57	0.09262514		3508.6	-0.01492713
328.79	0.30168794		858.79	0.02677025		1388.78	0.06402842		1918.78	-0.00687135		2448.77	0.08523001		2978.77	0.09256322		3508.8	-0.01441563
328.99	0.30230435		858.99	0.0274062		1388.98	0.06468045		1918.98	-0.00670196		2448.97	0.08603622		2978.97	0.0925909		3509	-0.01450514
329.19	0.30309538		859.19	0.02792593		1389.18	0.06401714		1919.18	-0.0066333		2449.17	0.08624459		2979.17	0.09350975		3509.2	-0.01402543
329.39	0.30321817		859.39	0.02810577		1389.38	0.06488274		1919.38	-0.00645974		2449.37	0.08707882		2979.37	0.09286803		3509.4	-0.01356821
329.59	0.3030205		859.59	0.02851284		1389.58	0.06548362		1919.58	-0.00602529		2449.57	0.08844795		2979.57	0.09417639		3509.6	-0.01447717
329.79	0.30328175		859.79	0.0295967		1389.78	0.06550198		1919.78	-0.00561696		2449.77	0.09004594		2979.77	0.09475324		3509.8	-0.0151415
329.99	0.30393231		859.99	0.0289344		1389.98	0.06546514		1919.98	-0.00596286		2449.97	0.09069387		2979.97	0.09483182		3510	-0.01498353
330.19	0.30341337		860.19	0.02823969		1390.18	0.06547967		1920.18	-0.00606136		2450.17	0.0910115		2980.17	0.09523428		3510.2	-0.01580869
330.39	0.30331794		860.39	0.02767703		1390.38	0.06566876		1920.38	-0.00553382		2450.37	0.09140323		2980.37	0.0961561		3510.4	-0.01553764
330.59	0.30328641		860.59	0.02727835		1390.58	0.06677041		1920.58	-0.00546789		2450.57	0.09176366		2980.57	0.09688428		3510.6	-0.015189
330.79	0.3027651		860.79	0.02596449		1390.78	0.06693607		1920.78	-0.00473026		2450.77	0.09131867		2980.77	0.09726797		3510.8	-0.01498563
330.99	0.30202522		860.99	0.02562482		1390.98	0.06718259		1920.98	-0.00373425		2450.97	0.0910185		2980.97	0.09679739		3511	-0.01498388
331.19	0.3012787		861.19	0.02536918		1391.18	0.06647121		1921.18	-0.00325101		2451.17	0.09150988		2981.17	0.09710505		3511.2	-0.01575692
331.39	0.30198281		861.39	0.02507548		1391.38	0.0668056		1921.38	-0.00216979		2451.37	0.09126038		2981.37	0.09655235		3511.4	-0.01527706
331.59	0.30153557		861.59	0.02579981		1391.58	0.06739223		1921.58	-0.00279977		2451.57	0.09020243		2981.57	0.09596319		3511.6	-0.01587384
331.79	0.30132302		861.79	0.02662695		1391.78	0.06716114		1921.78	-0.00293013		2451.77	0.08876144		2981.77	0.09608925		3511.8	-0.01606166
331.99	0.30092249		861.99	0.02778757		1391.98	0.0678035		1921.98	-0.00281779		2451.97	0.08843037		2981.97	0.09507942		3512	-0.01650081
332.19	0.30099027		862.19	0.02815158		1392.18	0.06855482		1922.18	-0.00410905		2452.17	0.08727918		2982.17	0.09421135		3512.2	-0.01575695
332.39	0.30137723		862.39	0.02798132		1392.38	0.06917075		1922.38	-0.00430363		2452.37	0.08592155		2982.37	0.0937315		3512.4	-0.01419189
332.59	0.30222086		862.59	0.02819116		1392.58	0.07018798		1922.58	-0.00605471		2452.57	0.08483822		2982.57	0.09427993		3512.6	-0.01513755
332.79	0.30226353		862.79	0.02808518		1392.78	0.07038082		1922.78	-0.00587161		2452.77	0.08421517		2982.77	0.09317303		3512.8	-0.01434631
332.99	0.30416663		862.99	0.02868745		1392.98	0.07063384		1922.98	-0.00641657		2452.97	0.08423636		2982.97	0.09294144		3513	-0.01470637
333.19	0.30550516		863.19	0.02882599		1393.18	0.07045857		1923.18	-0.00703387		2453.17	0.08364344		2983.17	0.09262985		3513.2	-0.01384708
333.39	0.30602781		863.39	0.02861728		1393.38	0.07095613		1923.38	-0.00746472		2453.37	0.08473881		2983.37	0.09311966		3513.4	-0.01402005
333.59	0.30659381		863.59	0.02920971		1393.58	0.07005582		1923.58	-0.00779552		2453.57	0.08561836		2983.57	0.09418752		3513.6	-0.01455046
333.79	0.30700213		863.79	0.02943199		1393.78	0.06886727		1923.78	-0.0085428		2453.77	0.08592975		2983.77	0.09402162		3513.8	-0.01437968
333.99	0.30819668		863.99	0.02802638		1393.98	0.06818346		1923.98	-0.00891262		2453.97	0.08610658		2983.97	0.09470102		3514	-0.01339256
334.19	0.30815549		864.19	0.02665396		1394.18	0.06844268		1924.18	-0.00897424		2454.17	0.08681033		2984.17	0.09499117		3514.2	-0.01345447
334.39	0.30851256		864.39	0.02635834		1394.38	0.0682799		1924.38	-0.00807236		2454.37	0.08814281		2984.37	0.09623809		3514.4	-0.01272403
334.59	0.30909743		864.59	0.02517215		1394.58	0.06784739		1924.58	-0.00834347		2454.57	0.08862132		2984.57	0.09704015		3514.6	-0.01221858
334.79	0.30859975		864.79	0.02569067		1394.78	0.06740705		1924.78	-0.00765471		2454.77	0.08923663		2984.77	0.0974682		3514.8	-0.01180947
334.99	0.30850443		864.99	0.02481013		1394.98	0.06743883		1924.98	-0.00646008		2454.97	0.08966355		2984.97	0.09723112		3515	-0.01133428
335.19	0.30885126		865.19	0.02441106		1395.18	0.06776771		1925.18	-0.00625261		2455.17	0.09091623		2985.17	0.09778012		3515.2	-0.0111987
335.39	0.30903018		865.39	0.02501268		1395.38	0.06853449		1925.38	-0.00561538		2455.37	0.09179022		2985.37	0.09764045		3515.4	-0.01082967
335.59	0.30867874		865.59	0.02518755		1395.58	0.06938285		1925.58	-0.00531675		2455.57	0.09244971		2985.57	0.09822635		3515.6	-0.0113523
335.79	0.30898778		865.79	0.02551869		1395.78	0.06985933		1925.78	-0.00444837		2455.77	0.09188375		2985.77	0.09933176		3515.8	-0.01088342
335.99	0.30809712		865.99	0.02511894		1395.98	0.0706158		1925.98	-0.0036733		2455.97	0.09273891		2985.97	0.0986611		3516	-0.01158614
336.19	0.30762862		866.19	0.02522405		1396.18	0.07148612		1926.18	-0.00459186		2456.17	0.09218531		2986.17	0.0991524		3516.2	-0.01099803
336.39	0.30728922		866.39	0.02570597		1396.38	0.07188666		1926.38	-0.00516299		2456.37	0.0910427		2986.37	0.09919311		3516.4	-0.01023906
336.59	0.30764724		866.59	0.0265842		1396.58	0.0720501		1926.58	-0.00593967		2456.57	0.09115769		2986.57	0.09897764		3516.6	-0.01089735
336.79	0.30768306		866.79	0.02706624		1396.78	0.0723459		1926.78	-0.00569679		2456.77	0.09119355		2986.77	0.09717687		3516.8	-0.01059186
336.99	0.30798191		866.99	0.02834471		1396.98	0.07297072		1926.98	-0.00630444		2456.97	0.09112123		2986.97	0.09678717		3517	-0.01102871
337.19	0.30756609		867.19	0.02881292		1397.18	0.07362613		1927.18	-0.00615543		2457.17	0.09111224		2987.17	0.09635057		3517.2	-0.01113073
337.39	0.30702016		867.39	0.02906551		1397.38	0.07403495		1927.38	-0.0058418		2457.37	0.09176016		2987.37	0.0960474		3517.4	-0.01220967
337.59	0.30700087		867.59	0.02989604		1397.58	0.07410543		1927.58	-0.00552321		2457.57	0.09139292		2987.57	0.09546958		3517.6	-0.01291363
337.79	0.30683764		867.79	0.03011669		1397.78	0.07437936		1927.78	-0.00620207		2457.77	0.09102579		2987.77	0.09511662		3517.8	-0.01366006
337.99	0.30817684		867.99	0.02966544		1397.98	0.0738417		1927.98	-0.00632845		2457.97	0.0913134		2987.97	0.09495874		3518	-0.01351346
338.19	0.30736346		868.19	0.02917782		1398.18	0.07369075		1928.18	-0.00597202		2458.17	0.09176222		2988.17	0.09529209		3518.2	-0.01332764
338.39	0.30813422		868.39	0.02937018		1398.38	0.07342671		1928.38	-0.00563669		2458.37	0.09191857		2988.37	0.09559312		3518.4	-0.01346878
338.59	0.30877722		868.59	0.02813918		1398.58	0.07259267		1928.58	-0.00537659		2458.57	0.09188568		2988.57	0.09580374		3518.6	-0.01397865
338.79	0.30965646		868.79	0.02702021		1398.78	0.07273689		1928.78	-0.00483878		2458.77	0.0930984		2988.77	0.09516045		3518.8	-0.01350014
338.99	0.31078232		868.99	0.02558169		1398.98	0.07264554		1928.98	-0.00357365		2458.97	0.09387154		2988.97	0.09479458		3519	-0.013998
339.19	0.312086		869.19	0.02495902		1399.18	0.07245072		1929.18	-0.00348842		2459.17	0.09391161		2989.17	0.09621017		3519.2	-0.01452893
339.39	0.31228196		869.39	0.02480296		1399.38	0.0723491		1929.38	-0.00267537		2459.37	0.09392539		2989.37	0.09630905		3519.4	-0.01426633
339.59	0.31314923		869.59	0.02386335		1399.58	0.0715368		1929.58	-0.00213084		2459.57	0.09404508		2989.57	0.09675239		3519.6	-0.01389579
339.79	0.31254165		869.79	0.02365555		1399.78	0.07123129		1929.78	-0.00131141		2459.77	0.09352602		2989.77	0.09756225		3519.8	-0.01381024
339.99	0.31244849		869.99	0.02416181		1399.98	0.07078011		1929.98	-0.00163141		2459.97	0.09317939		2989.97	0.09701418		3520	-0.01445092
340.19	0.31298803		870.19	0.02509692		1400.18	0.0709106		1930.18	-0.00246789		2460.17	0.09301227		2990.17	0.09701554		3520.2	-0.0139377
340.39	0.3128938		870.39	0.02534712		1400.38	0.07076841		1930.38	-0.00327136		2460.37	0.09238605		2990.37	0.09670035		3520.4	-0.01396107
340.59	0.31307325		870.59	0.02520376		1400.58	0.07062592		1930.58	-0.00335536		2460.57	0.09278737		2990.57	0.0968951		3520.6	-0.01414179
340.79	0.3125881		870.79	0.02507599		1400.78	0.07117862		1930.78	-0.00398345		2460.77	0.09310493		2990.77	0.09591781		3520.8	-0.01443986
340.99	0.31226966		870.99	0.02623761		1400.98	0.07206463		1930.98	-0.00387065		2460.97	0.0931026		2990.97	0.09619839		3521	-0.01419154
341.19	0.31270175		871.19	0.02647799		1401.18	0.07333628		1931.18	-0.00391111		2461.17	0.09347927		2991.17	0.09599279		3521.2	-0.01404677
341.39	0.31197574		871.39	0.02711246		1401.38	0.07378435		1931.38	-0.00499916		2461.37	0.09398256		2991.37	0.09605828		3521.4	-0.0148859
341.59	0.31140319		871.59	0.02779498		1401.58	0.07364501		1931.58	-0.00566932		2461.57	0.09354559		2991.57	0.09622474		3521.6	-0.01481328
341.79	0.31174599		871.79	0.02797333		1401.78	0.07401153		1931.78	-0.00714629		2461.77	0.09370195		2991.77	0.09670909		3521.8	-0.01456823
341.99	0.31239314		871.99	0.02764227		1401.98	0.07337006		1931.98	-0.00697958		2461.97	0.09403381		2991.97	0.09717831		3522	-0.01388832
342.19	0.31152399		872.19	0.02747604		1402.18	0.07307419		1932.18	-0.00635317		2462.17	0.09424832		2992.17	0.09864364		3522.2	-0.01316413
342.39	0.31239425		872.39	0.02697445		1402.38	0.07272073		1932.38	-0.00735019		2462.37	0.0951214		2992.37	0.09868797		3522.4	-0.01278185
342.59	0.3125978		872.59	0.02582264		1402.58	0.07211744		1932.58	-0.00710814		2462.57	0.09658806		2992.57	0.09847926		3522.6	-0.01294662
342.79	0.31333526		872.79	0.0251462		1402.78	0.07202646		1932.78	-0.00692161		2462.77	0.09846114		2992.77	0.09852074		3522.8	-0.01200848
342.99	0.31343292		872.99	0.02526773		1402.98	0.07137163		1932.98	-0.00641792		2462.97	0.09899415		2992.97	0.09854112		3523	-0.01198645
343.19	0.31366314		873.19	0.02507136		1403.18	0.07091058		1933.18	-0.00624816		2463.17	0.09801489		2993.17	0.09843488		3523.2	-0.01188336
343.39	0.31285881		873.39	0.02438199		1403.38	0.07026889		1933.38	-0.00644484		2463.37	0.09798213		2993.37	0.09776901		3523.4	-0.01193911
343.59	0.31216356		873.59	0.02439508		1403.58	0.06898202		1933.58	-0.00582504		2463.57	0.09823758		2993.57	0.09838574		3523.6	-0.01226387
343.79	0.31080601		873.79	0.02505904		1403.78	0.06969386		1933.78	-0.00506473		2463.77	0.09748867		2993.77	0.0979338		3523.8	-0.01295439
343.99	0.31223083		873.99	0.0262036		1403.98	0.06989118		1933.98	-0.00530429		2463.97	0.09653302		2993.97	0.09843754		3524	-0.01369777
344.19	0.31212823		874.19	0.02600202		1404.18	0.07075041		1934.18	-0.00457664		2464.17	0.09666711		2994.17	0.09817864		3524.2	-0.01377831
344.39	0.31209933		874.39	0.02599224		1404.38	0.07168548		1934.38	-0.00460854		2464.37	0.09617114		2994.37	0.09900417		3524.4	-0.01430591
344.59	0.31290436		874.59	0.02648616		1404.58	0.0728002		1934.58	-0.0046028		2464.57	0.09708311		2994.57	0.09885864		3524.6	-0.01474061
344.79	0.31370894		874.79	0.02791518		1404.78	0.07333803		1934.78	-0.00389732		2464.77	0.09775889		2994.77	0.09855499		3524.8	-0.01567162
344.99	0.31450965		874.99	0.02867259		1404.98	0.07530434		1934.98	-0.00370045		2464.97	0.09702838		2994.97	0.0994263		3525	-0.01577132
345.19	0.31530808		875.19	0.02966739		1405.18	0.07693284		1935.18	-0.00465635		2465.17	0.0964384		2995.17	0.09976779		3525.2	-0.01562643
345.39	0.31527398		875.39	0.030561		1405.38	0.07723106		1935.38	-0.00563859		2465.37	0.09625959		2995.37	0.10060079		3525.4	-0.01725453
345.59	0.31602313		875.59	0.0308022		1405.58	0.07679361		1935.58	-0.00578243		2465.57	0.09532885		2995.57	0.10052784		3525.6	-0.01681136
345.79	0.31693505		875.79	0.03084864		1405.78	0.07700283		1935.78	-0.00570057		2465.77	0.09585562		2995.77	0.10105706		3525.8	-0.01681492
345.99	0.31664159		875.99	0.03107437		1405.98	0.07608716		1935.98	-0.00560599		2465.97	0.09629829		2995.97	0.10182882		3526	-0.01669109
346.19	0.31651437		876.19	0.0309824		1406.18	0.07601377		1936.18	-0.00536562		2466.17	0.09688301		2996.17	0.10300615		3526.2	-0.01588042
346.39	0.31696244		876.39	0.03049482		1406.38	0.07469223		1936.38	-0.00530862		2466.37	0.09790588		2996.37	0.10249837		3526.4	-0.01511678
346.59	0.31694354		876.59	0.02932378		1406.58	0.07432591		1936.58	-0.00467852		2466.57	0.09884117		2996.57	0.10239424		3526.6	-0.01496512
346.79	0.31747456		876.79	0.02910019		1406.78	0.07406897		1936.78	-0.00475365		2466.77	0.09940869		2996.77	0.10263701		3526.8	-0.01421286
346.99	0.31729652		876.99	0.0286652		1406.98	0.07306856		1936.98	-0.00470745		2466.97	0.09911471		2996.97	0.10164469		3527	-0.01438677
347.19	0.31693233		877.19	0.02825863		1407.18	0.07282611		1937.18	-0.00478582		2467.17	0.09916971		2997.17	0.10151845		3527.2	-0.01448895
347.39	0.31594531		877.39	0.02708304		1407.38	0.07276162		1937.38	-0.00509434		2467.37	0.0996184		2997.37	0.10249646		3527.4	-0.01417163
347.59	0.31480691		877.59	0.02800003		1407.58	0.07265046		1937.58	-0.00389393		2467.57	0.10062448		2997.57	0.10299742		3527.6	-0.01317588
347.79	0.31513519		877.79	0.02902762		1407.78	0.07295977		1937.78	-0.00364626		2467.77	0.09982757		2997.77	0.1033785		3527.8	-0.0122298
347.99	0.31695543		877.99	0.02972127		1407.98	0.07360635		1937.98	-0.00317158		2467.97	0.09925247		2997.97	0.10402385		3528	-0.012665
348.19	0.31639977		878.19	0.03115656		1408.18	0.07578234		1938.18	-0.00270211		2468.17	0.09936874		2998.17	0.10410115		3528.2	-0.01144255
348.39	0.31738102		878.39	0.03181416		1408.38	0.07692385		1938.38	-0.00377941		2468.37	0.10019588		2998.37	0.1046845		3528.4	-0.01191137
348.59	0.31804514		878.59	0.03207018		1408.58	0.07880018		1938.58	-0.00438793		2468.57	0.10047454		2998.57	0.10440103		3528.6	-0.0120597
348.79	0.31852977		878.79	0.03336532		1408.78	0.07864375		1938.78	-0.0039348		2468.77	0.09985579		2998.77	0.10487198		3528.8	-0.01157103
348.99	0.31878744		878.99	0.03389921		1408.98	0.08038034		1938.98	-0.0050898		2468.97	0.09887421		2998.97	0.10518385		3529	-0.01137351
349.19	0.31852825		879.19	0.03535154		1409.18	0.08141234		1939.18	-0.00608494		2469.17	0.09814467		2999.17	0.10416261		3529.2	-0.01170598
349.39	0.31819373		879.39	0.03621315		1409.38	0.08011507		1939.38	-0.0065784		2469.37	0.09817963		2999.37	0.10401872		3529.4	-0.0123755
349.59	0.31788077		879.59	0.03602331		1409.58	0.08023695		1939.58	-0.00692715		2469.57	0.09778084		2999.57	0.10365486		3529.6	-0.01311185
349.79	0.31733983		879.79	0.03595334		1409.78	0.08065666		1939.78	-0.00724371		2469.77	0.09857632		2999.77	0.10318837		3529.8	-0.01357684
349.99	0.31812444		879.99	0.03523387		1409.98	0.08015443		1939.98	-0.00764299		2469.97	0.09829362		2999.97	0.10310479		3530	-0.01424832
350.19	0.31813766		880.19	0.03439927		1410.18	0.07975624		1940.18	-0.00682463		2470.17	0.09814771		3000.17	0.10307855		3530.2	-0.01379545
350.39	0.31810226		880.39	0.03370083		1410.38	0.07816057		1940.38	-0.00608598		2470.37	0.09789245		3000.37	0.1013161		3530.4	-0.01470938
350.59	0.31840281		880.59	0.03297327		1410.58	0.07947354		1940.58	-0.0060282		2470.57	0.09839384		3000.57	0.10105958		3530.6	-0.01433762
350.79	0.31859031		880.79	0.03216949		1410.78	0.0792243		1940.78	-0.00533389		2470.77	0.09866398		3000.77	0.10021428		3530.8	-0.01426493
350.99	0.31828912		880.99	0.03210415		1410.98	0.0786583		1940.98	-0.00398436		2470.97	0.09950274		3000.97	0.09965796		3531	-0.01408255
351.19	0.31846864		881.19	0.03146931		1411.18	0.07810818		1941.18	-0.00364404		2471.17	0.10063293		3001.17	0.10003199		3531.2	-0.01376469
351.39	0.3178982		881.39	0.03115165		1411.38	0.07809727		1941.38	-0.00336069		2471.37	0.10067901		3001.37	0.10058183		3531.4	-0.01344339
351.59	0.31788488		881.59	0.03155858		1411.58	0.07709838		1941.58	-0.00286563		2471.57	0.10086806		3001.57	0.10165022		3531.6	-0.01226123
351.79	0.31916805		881.79	0.03232585		1411.78	0.07700635		1941.78	-0.00302978		2471.77	0.10006259		3001.77	0.10220101		3531.8	-0.01176221
351.99	0.32023737		881.99	0.03296069		1411.98	0.07772862		1941.98	-0.00241139		2471.97	0.09944193		3001.97	0.10282639		3532	-0.01280466
352.19	0.32048516		882.19	0.0335162		1412.18	0.07809761		1942.18	-0.00303481		2472.17	0.09995008		3002.17	0.10374808		3532.2	-0.01194633
352.39	0.32111752		882.39	0.03337478		1412.38	0.07723015		1942.38	-0.00383017		2472.37	0.10036637		3002.37	0.10385426		3532.4	-0.01203929
352.59	0.32146957		882.59	0.03376894		1412.58	0.07726015		1942.58	-0.00434306		2472.57	0.10047464		3002.57	0.10458911		3532.6	-0.0117169
352.79	0.32195972		882.79	0.03430987		1412.78	0.07618016		1942.78	-0.00402887		2472.77	0.10027683		3002.77	0.10454785		3532.8	-0.01111311
352.99	0.32192623		882.99	0.03501551		1412.98	0.07725127		1942.98	-0.00529538		2472.97	0.1013096		3002.97	0.1051497		3533	-0.0123475
353.19	0.32179761		883.19	0.03614011		1413.18	0.07752072		1943.18	-0.00601156		2473.17	0.10125125		3003.17	0.10525561		3533.2	-0.01343898
353.39	0.32187874		883.39	0.03686587		1413.38	0.07703854		1943.38	-0.00605668		2473.37	0.10182599		3003.37	0.1061174		3533.4	-0.01389131
353.59	0.32178036		883.59	0.03652422		1413.58	0.07808691		1943.58	-0.00626304		2473.57	0.1013348		3003.57	0.10670915		3533.6	-0.01521998
353.79	0.32230973		883.79	0.0363397		1413.78	0.07793701		1943.78	-0.00670869		2473.77	0.10179235		3003.77	0.10663827		3533.8	-0.01543947
353.99	0.32318408		883.99	0.03520527		1413.98	0.07696105		1943.98	-0.00658956		2473.97	0.10153649		3003.97	0.10736129		3534	-0.016287
354.19	0.32295458		884.19	0.03479825		1414.18	0.07699528		1944.18	-0.00680374		2474.17	0.10158068		3004.17	0.10807206		3534.2	-0.01641628
354.39	0.32313989		884.39	0.03355829		1414.38	0.07766262		1944.38	-0.00659002		2474.37	0.10163822		3004.37	0.10742235		3534.4	-0.01721898
354.59	0.32326478		884.59	0.0326331		1414.58	0.07945928		1944.58	-0.00723246		2474.57	0.10219535		3004.57	0.10827511		3534.6	-0.01714029
354.79	0.3237155		884.79	0.03156618		1414.78	0.07957349		1944.78	-0.00744096		2474.77	0.1024646		3004.77	0.1083558		3534.8	-0.01762867
354.99	0.32386955		884.99	0.0313583		1414.98	0.07986467		1944.98	-0.00688919		2474.97	0.10234582		3004.97	0.10873352		3535	-0.01764829
355.19	0.32456422		885.19	0.03048554		1415.18	0.07984946		1945.18	-0.00683386		2475.17	0.10164433		3005.17	0.10941973		3535.2	-0.01776114
355.39	0.3244001		885.39	0.03003166		1415.38	0.08077449		1945.38	-0.00687023		2475.37	0.10099285		3005.37	0.10992965		3535.4	-0.01762446
355.59	0.32495555		885.59	0.02983936		1415.58	0.08036744		1945.58	-0.00677831		2475.57	0.10089368		3005.57	0.11022823		3535.6	-0.0173832
355.79	0.32539618		885.79	0.02994313		1415.78	0.08098842		1945.78	-0.00722411		2475.77	0.10037814		3005.77	0.11023577		3535.8	-0.01762003
355.99	0.32575392		885.99	0.02996482		1415.98	0.08075517		1945.98	-0.00782808		2475.97	0.10056415		3005.97	0.11047809		3536	-0.01744555
356.19	0.3257172		886.19	0.02943132		1416.18	0.08126266		1946.18	-0.00914002		2476.17	0.10105259		3006.17	0.10951808		3536.2	-0.01632616
356.39	0.32573342		886.39	0.03036593		1416.38	0.08147807		1946.38	-0.00968097		2476.37	0.10053967		3006.37	0.10922185		3536.4	-0.01556949
356.59	0.32540572		886.59	0.03112831		1416.58	0.08169062		1946.58	-0.00948304		2476.57	0.10108053		3006.57	0.10893775		3536.6	-0.01526125
356.79	0.32407761		886.79	0.03150637		1416.78	0.08217354		1946.78	-0.008413		2476.77	0.10185592		3006.77	0.10838391		3536.8	-0.0147873
356.99	0.3231189		886.99	0.03262261		1416.98	0.08269755		1946.98	-0.00937831		2476.97	0.10282566		3006.97	0.10899532		3537	-0.01601075
357.19	0.32233634		887.19	0.0341927		1417.18	0.0825218		1947.18	-0.00930446		2477.17	0.10251133		3007.17	0.10848792		3537.2	-0.01614603
357.39	0.32218211		887.39	0.03498383		1417.38	0.08223061		1947.38	-0.00857393		2477.37	0.10267862		3007.37	0.10795436		3537.4	-0.01583911
357.59	0.32227728		887.59	0.03466632		1417.58	0.08225047		1947.58	-0.00789413		2477.57	0.10311017		3007.57	0.10838843		3537.6	-0.01603525
357.79	0.3220598		887.79	0.03450764		1417.78	0.08189659		1947.78	-0.00791042		2477.77	0.10340633		3007.77	0.10828354		3537.8	-0.01654918
357.99	0.32188456		887.99	0.03371474		1417.98	0.08208175		1947.98	-0.00720898		2477.97	0.10363186		3007.97	0.10860713		3538	-0.01667334
358.19	0.32209002		888.19	0.03340794		1418.18	0.08283282		1948.18	-0.00702367		2478.17	0.10422165		3008.17	0.10846386		3538.2	-0.01763989
358.39	0.32249596		888.39	0.03263722		1418.38	0.08283506		1948.38	-0.00630799		2478.37	0.10439953		3008.37	0.10778541		3538.4	-0.01779159
358.59	0.32342862		888.59	0.03263162		1418.58	0.08262463		1948.58	-0.00609354		2478.57	0.10424841		3008.57	0.1086559		3538.6	-0.01871603
358.79	0.32522114		888.79	0.03211652		1418.78	0.08199267		1948.78	-0.00482252		2478.77	0.10441664		3008.77	0.10901435		3538.8	-0.01827339
358.99	0.32583287		888.99	0.03193792		1418.98	0.08144047		1948.98	-0.00326039		2478.97	0.10402766		3008.97	0.10940951		3539	-0.01825956
359.19	0.32734895		889.19	0.03098059		1419.18	0.0809993		1949.18	-0.00135096		2479.17	0.10460922		3009.17	0.11004221		3539.2	-0.01701209
359.39	0.32736452		889.39	0.03176917		1419.38	0.08005436		1949.38	-0.00085589		2479.37	0.10519595		3009.37	0.10976048		3539.4	-0.01660128
359.59	0.32849244		889.59	0.03247764		1419.58	0.07946717		1949.58	-0.00037339		2479.57	0.10592663		3009.57	0.11030015		3539.6	-0.01671689
359.79	0.32897207		889.79	0.03235431		1419.78	0.08009996		1949.78	-0.00117662		2479.77	0.10556089		3009.77	0.11022759		3539.8	-0.01608047
359.99	0.32955535		889.99	0.03267168		1419.98	0.08016865		1949.98	-0.00134189		2479.97	0.10583538		3009.97	0.11039139		3540	-0.01467003
360.19	0.32960505		890.19	0.033732		1420.18	0.08099381		1950.18	-0.00151692		2480.17	0.10541703		3010.17	0.10883231		3540.2	-0.01434041
360.39	0.32921833		890.39	0.03438453		1420.38	0.08127754		1950.38	-0.00174561		2480.37	0.10554099		3010.37	0.10952464		3540.4	-0.01439571
360.59	0.327587		890.59	0.03514871		1420.58	0.08194845		1950.58	-0.0022233		2480.57	0.1058786		3010.57	0.10906336		3540.6	-0.01453481
360.79	0.32705444		890.79	0.03518001		1420.78	0.08270456		1950.78	-0.00341656		2480.77	0.10639893		3010.77	0.10907179		3540.8	-0.01499321
360.99	0.32797654		890.99	0.03582674		1420.98	0.08326941		1950.98	-0.00435166		2480.97	0.10700184		3010.97	0.109261		3541	-0.01517435
361.19	0.32780872		891.19	0.03648644		1421.18	0.08359824		1951.18	-0.00511442		2481.17	0.10691701		3011.17	0.10854956		3541.2	-0.01483195
361.39	0.32817681		891.39	0.03657886		1421.38	0.08386467		1951.38	-0.00529447		2481.37	0.10651953		3011.37	0.10809222		3541.4	-0.01504169
361.59	0.32787139		891.59	0.03573108		1421.58	0.08345283		1951.58	-0.00606854		2481.57	0.1061726		3011.57	0.10805513		3541.6	-0.01567977
361.79	0.32718808		891.79	0.03535165		1421.78	0.08354573		1951.78	-0.00577473		2481.77	0.10550915		3011.77	0.10798154		3541.8	-0.01662279
361.99	0.32766371		891.99	0.03473191		1421.98	0.08390188		1951.98	-0.00533536		2481.97	0.10486464		3011.97	0.10755589		3542	-0.01674607
362.19	0.32831122		892.19	0.03463538		1422.18	0.08362148		1952.18	-0.00470893		2482.17	0.10528824		3012.17	0.10756312		3542.2	-0.01735776
362.39	0.32918861		892.39	0.03398828		1422.38	0.08245417		1952.38	-0.00545101		2482.37	0.10530667		3012.37	0.10785455		3542.4	-0.01771964
362.59	0.32991318		892.59	0.03367102		1422.58	0.08133805		1952.58	-0.00510177		2482.57	0.1045289		3012.57	0.10854634		3542.6	-0.01823601
362.79	0.33072596		892.79	0.03379511		1422.78	0.08153838		1952.78	-0.00435153		2482.77	0.10480556		3012.77	0.10834557		3542.8	-0.01788848
362.99	0.33040291		892.99	0.03426079		1422.98	0.08067709		1952.98	-0.00321304		2482.97	0.10476646		3012.97	0.10801596		3543	-0.01799947
363.19	0.33060026		893.19	0.03461785		1423.18	0.07874617		1953.18	-0.00297341		2483.17	0.10537896		3013.17	0.1088299		3543.2	-0.01718276
363.39	0.33043454		893.39	0.03638176		1423.38	0.07739769		1953.38	-0.00295349		2483.37	0.10562632		3013.37	0.10887347		3543.4	-0.01714605
363.59	0.33042104		893.59	0.03630821		1423.58	0.0772152		1953.58	-0.00345758		2483.57	0.10597968		3013.57	0.10952055		3543.6	-0.01728208
363.79	0.33010116		893.79	0.03651272		1423.78	0.0774906		1953.78	-0.00391497		2483.77	0.10555884		3013.77	0.10935961		3543.8	-0.016121
363.99	0.32988396		893.99	0.03611435		1423.98	0.0776955		1953.98	-0.00400547		2483.97	0.10598994		3013.97	0.10977373		3544	-0.01562213
364.19	0.32953063		894.19	0.03690185		1424.18	0.07875062		1954.18	-0.00421424		2484.17	0.10654008		3014.17	0.10955024		3544.2	-0.01605377
364.39	0.32837631		894.39	0.03564222		1424.38	0.07920949		1954.38	-0.00516328		2484.37	0.10673243		3014.37	0.11094483		3544.4	-0.01552457
364.59	0.32714013		894.59	0.03619174		1424.58	0.07995751		1954.58	-0.00572244		2484.57	0.10682721		3014.57	0.10980933		3544.6	-0.01517505
364.79	0.32704849		894.79	0.03680632		1424.78	0.0801808		1954.78	-0.00613836		2484.77	0.10780295		3014.77	0.11040077		3544.8	-0.01412727
364.99	0.32663935		894.99	0.0365324		1424.98	0.0809237		1954.98	-0.00591835		2484.97	0.10782038		3014.97	0.10988064		3545	-0.01354757
365.19	0.3257299		895.19	0.03595155		1425.18	0.07994693		1955.18	-0.00664354		2485.17	0.10616919		3015.17	0.10985116		3545.2	-0.01359273
365.39	0.32551251		895.39	0.03569567		1425.38	0.07968641		1955.38	-0.00718851		2485.37	0.105647		3015.37	0.11013907		3545.4	-0.01447251
365.59	0.32599527		895.59	0.03444568		1425.58	0.08036479		1955.58	-0.00663549		2485.57	0.1050223		3015.57	0.11071447		3545.6	-0.01449904
365.79	0.32596204		895.79	0.03523514		1425.78	0.08131369		1955.78	-0.00591495		2485.77	0.10473951		3015.77	0.11083729		3545.8	-0.01484606
365.99	0.32646717		895.99	0.03501551		1425.98	0.08153003		1955.98	-0.0064288		2485.97	0.10513339		3015.97	0.11062346		3546	-0.01523643
366.19	0.32681932		896.19	0.03477216		1426.18	0.08219546		1956.18	-0.00605185		2486.17	0.1062069		3016.17	0.11085604		3546.2	-0.01632419
366.39	0.32712564		896.39	0.03452494		1426.38	0.08269329		1956.38	-0.0060792		2486.37	0.10615468		3016.37	0.10990326		3546.4	-0.01796396
366.59	0.327453		896.59	0.03494263		1426.58	0.08296311		1956.58	-0.00478412		2486.57	0.1057952		3016.57	0.10994317		3546.6	-0.01814088
366.79	0.32814365		896.79	0.03584412		1426.78	0.08304545		1956.78	-0.00443574		2486.77	0.10593287		3016.77	0.11024513		3546.8	-0.01869833
366.99	0.32868572		896.99	0.03611612		1426.98	0.08230225		1956.98	-0.00464684		2486.97	0.10600716		3016.97	0.10989988		3547	-0.01892078
367.19	0.32927434		897.19	0.03614976		1427.18	0.08202227		1957.18	-0.00545926		2487.17	0.10696457		3017.17	0.11100346		3547.2	-0.01896133
367.39	0.33001395		897.39	0.03635227		1427.38	0.08258244		1957.38	-0.00515571		2487.37	0.10769824		3017.37	0.11140958		3547.4	-0.01829435
367.59	0.32954485		897.59	0.03623245		1427.58	0.08342749		1957.58	-0.00605223		2487.57	0.10778075		3017.57	0.11264611		3547.6	-0.01835308
367.79	0.3307949		897.79	0.03661306		1427.78	0.08449379		1957.78	-0.0060943		2487.77	0.10730491		3017.77	0.11408814		3547.8	-0.01842664
367.99	0.33124857		897.99	0.03652393		1427.98	0.08522018		1957.98	-0.00639779		2487.97	0.1078835		3017.97	0.11416466		3548	-0.01854662
368.19	0.33112882		898.19	0.03746122		1428.18	0.08608732		1958.18	-0.00669603		2488.17	0.1087553		3018.17	0.11496333		3548.2	-0.01787141
368.39	0.33031473		898.39	0.03758114		1428.38	0.08566162		1958.38	-0.00732649		2488.37	0.10827294		3018.37	0.11534796		3548.4	-0.01632142
368.59	0.33043021		898.59	0.03841665		1428.58	0.08622424		1958.58	-0.00777315		2488.57	0.10826102		3018.57	0.11506273		3548.6	-0.01558383
368.79	0.33044742		898.79	0.03936235		1428.78	0.08555153		1958.78	-0.00809683		2488.77	0.10754601		3018.77	0.11565153		3548.8	-0.01435164
368.99	0.33021024		898.99	0.03858564		1428.98	0.0850401		1958.98	-0.00784164		2488.97	0.10699685		3018.97	0.11500156		3549	-0.01466759
369.19	0.33001365		899.19	0.03836868		1429.18	0.08457849		1959.18	-0.00827334		2489.17	0.10637101		3019.17	0.11554138		3549.2	-0.01346764
369.39	0.32987335		899.39	0.03812166		1429.38	0.08498778		1959.38	-0.00850512		2489.37	0.10653155		3019.37	0.11620199		3549.4	-0.01372723
369.59	0.33020094		899.59	0.03753112		1429.58	0.08601395		1959.58	-0.00814387		2489.57	0.10638884		3019.57	0.11583684		3549.6	-0.0132289
369.79	0.3292368		899.79	0.03805947		1429.78	0.08498747		1959.78	-0.00893606		2489.77	0.10662498		3019.77	0.11540005		3549.8	-0.01391164
369.99	0.3294043		899.99	0.03674415		1429.98	0.08455344		1959.98	-0.00847319		2489.97	0.10759266		3019.97	0.11476642		3550	-0.0135656
370.19	0.32985589		900.19	0.03621532		1430.18	0.08476503		1960.18	-0.00697123		2490.17	0.10766868		3020.17	0.11364781		3550.2	-0.01438371
370.39	0.33029726		900.39	0.0361498		1430.38	0.08462801		1960.38	-0.00593296		2490.37	0.1082659		3020.37	0.11302359		3550.4	-0.01415106
370.59	0.330773		900.59	0.03497538		1430.58	0.08435245		1960.58	-0.00565212		2490.57	0.1091608		3020.57	0.11321872		3550.6	-0.01406865
370.79	0.33200129		900.79	0.03441076		1430.78	0.08379656		1960.78	-0.00507851		2490.77	0.10999168		3020.77	0.11303407		3550.8	-0.01448146
370.99	0.33256519		900.99	0.03420916		1430.98	0.08388458		1960.98	-0.00519131		2490.97	0.1116912		3020.97	0.11265041		3551	-0.01375084
371.19	0.33320637		901.19	0.03369499		1431.18	0.08402962		1961.18	-0.00431962		2491.17	0.11289058		3021.17	0.11256264		3551.2	-0.01320001
371.39	0.33358218		901.39	0.03396129		1431.38	0.0836599		1961.38	-0.00351343		2491.37	0.11400401		3021.37	0.11308066		3551.4	-0.01324609
371.59	0.33361759		901.59	0.03451819		1431.58	0.08393157		1961.58	-0.002504		2491.57	0.11316634		3021.57	0.11299138		3551.6	-0.01343978
371.79	0.33499432		901.79	0.03536756		1431.78	0.08369256		1961.78	-0.00179683		2491.77	0.11332682		3021.77	0.11309838		3551.8	-0.01425407
371.99	0.33509511		901.99	0.0365492		1431.98	0.08345989		1961.98	-0.00171967		2491.97	0.1135894		3021.97	0.11334882		3552	-0.01369807
372.19	0.33424061		902.19	0.03673849		1432.18	0.08322212		1962.18	-0.0013833		2492.17	0.11282096		3022.17	0.11369798		3552.2	-0.01293687
372.39	0.33443554		902.39	0.03750241		1432.38	0.08351102		1962.38	-0.00214932		2492.37	0.11113539		3022.37	0.11373027		3552.4	-0.01180711
372.59	0.33453015		902.59	0.03684944		1432.58	0.08428679		1962.58	-0.00286703		2492.57	0.1105448		3022.57	0.11332974		3552.6	-0.01255383
372.79	0.33342434		902.79	0.03749131		1432.78	0.08396976		1962.78	-0.00276989		2492.77	0.11007		3022.77	0.11377757		3552.8	-0.01289858
372.99	0.33279673		902.99	0.03671372		1432.98	0.08492295		1962.98	-0.00372364		2492.97	0.11006566		3022.97	0.11340324		3553	-0.01371015
373.19	0.3327108		903.19	0.03682838		1433.18	0.08514407		1963.18	-0.005094		2493.17	0.10910092		3023.17	0.1138284		3553.2	-0.01324879
373.39	0.33246667		903.39	0.03609658		1433.38	0.08525526		1963.38	-0.00543813		2493.37	0.10836361		3023.37	0.11523583		3553.4	-0.01420519
373.59	0.33180702		903.59	0.0360786		1433.58	0.08570323		1963.58	-0.00677276		2493.57	0.10722313		3023.57	0.11574211		3553.6	-0.01451798
373.79	0.33197555		903.79	0.03639888		1433.78	0.08521488		1963.78	-0.00728212		2493.77	0.10724244		3023.77	0.11599408		3553.8	-0.0143737
373.99	0.33269733		903.99	0.03569763		1433.98	0.08544513		1963.98	-0.00718641		2493.97	0.10746789		3023.97	0.11527678		3554	-0.01384619
374.19	0.33275577		904.19	0.03501491		1434.18	0.08527169		1964.18	-0.00721561		2494.17	0.10829164		3024.17	0.11530658		3554.2	-0.01445241
374.39	0.33280662		904.39	0.03456737		1434.38	0.08541874		1964.38	-0.00783136		2494.37	0.10959093		3024.37	0.11510725		3554.4	-0.01420399
374.59	0.33308539		904.59	0.03327477		1434.58	0.08516171		1964.58	-0.00760937		2494.57	0.11044998		3024.57	0.1146697		3554.6	-0.01459076
374.79	0.33367922		904.79	0.0341512		1434.78	0.08445043		1964.78	-0.00803704		2494.77	0.11125107		3024.77	0.11501213		3554.8	-0.01403631
374.99	0.33399316		904.99	0.03502139		1434.98	0.08432784		1964.98	-0.00796145		2494.97	0.11156653		3024.97	0.11489307		3555	-0.0126001
375.19	0.33483998		905.19	0.03565186		1435.18	0.08472921		1965.18	-0.00625033		2495.17	0.11108854		3025.17	0.1141136		3555.2	-0.01252988
375.39	0.33511675		905.39	0.03635639		1435.38	0.08375434		1965.38	-0.00558159		2495.37	0.11157445		3025.37	0.11459686		3555.4	-0.0132403
375.59	0.33569497		905.59	0.03702383		1435.58	0.08366094		1965.58	-0.003995		2495.57	0.11116817		3025.57	0.11449807		3555.6	-0.01317645
375.79	0.33555177		905.79	0.03726398		1435.78	0.08372724		1965.78	-0.00368812		2495.77	0.11175126		3025.77	0.11584692		3555.8	-0.01340393
375.99	0.33490485		905.99	0.03750526		1435.98	0.08395127		1965.98	-0.00331545		2495.97	0.11170187		3025.97	0.11658914		3556	-0.01289576
376.19	0.33489483		906.19	0.03790997		1436.18	0.08474313		1966.18	-0.00366774		2496.17	0.11107546		3026.17	0.11627586		3556.2	-0.01269008
376.39	0.33542563		906.39	0.03801675		1436.38	0.08544237		1966.38	-0.00387918		2496.37	0.11077731		3026.37	0.1171742		3556.4	-0.01343475
376.59	0.33540498		906.59	0.0375091		1436.58	0.08642253		1966.58	-0.00385678		2496.57	0.11060679		3026.57	0.11751756		3556.6	-0.01466504
376.79	0.33508994		906.79	0.03917498		1436.78	0.08592092		1966.78	-0.0033374		2496.77	0.11067582		3026.77	0.1181618		3556.8	-0.01454975
376.99	0.33558282		906.99	0.03837414		1436.98	0.08642724		1966.98	-0.00399468		2496.97	0.11035764		3026.97	0.11842582		3557	-0.01509488
377.19	0.3353466		907.19	0.03825357		1437.18	0.0867011		1967.18	-0.00438025		2497.17	0.10974242		3027.17	0.11986871		3557.2	-0.01513454
377.39	0.33475206		907.39	0.03824658		1437.38	0.08711246		1967.38	-0.00415197		2497.37	0.10939897		3027.37	0.12085973		3557.4	-0.01527822
377.59	0.33438475		907.59	0.03790896		1437.58	0.08765275		1967.58	-0.0046031		2497.57	0.10976596		3027.57	0.12035465		3557.6	-0.01551877
377.79	0.33519737		907.79	0.03711882		1437.78	0.08724073		1967.78	-0.00438199		2497.77	0.11108479		3027.77	0.11984819		3557.8	-0.01585658
377.99	0.33500541		907.99	0.03597688		1437.98	0.08672006		1967.98	-0.00472528		2497.97	0.1116589		3027.97	0.11940365		3558	-0.01652202
378.19	0.33484468		908.19	0.0355345		1438.18	0.08611542		1968.18	-0.00497322		2498.17	0.11266607		3028.17	0.11904039		3558.2	-0.01711291
378.39	0.3350182		908.39	0.03554428		1438.38	0.08577129		1968.38	-0.00525618		2498.37	0.11284617		3028.37	0.11824179		3558.4	-0.01748764
378.59	0.33533531		908.59	0.0355933		1438.58	0.0852251		1968.58	-0.00507017		2498.57	0.1127799		3028.57	0.11773719		3558.6	-0.01772413
378.79	0.33571873		908.79	0.03642701		1438.78	0.08510877		1968.78	-0.00575541		2498.77	0.11285822		3028.77	0.11727732		3558.8	-0.0174332
378.99	0.33628601		908.99	0.0369492		1438.98	0.08516588		1968.98	-0.00498569		2498.97	0.11284336		3028.97	0.11638276		3559	-0.01721235
379.19	0.33674758		909.19	0.03744174		1439.18	0.08506493		1969.18	-0.00452981		2499.17	0.11305238		3029.17	0.11570418		3559.2	-0.01745338
379.39	0.33696663		909.39	0.03760035		1439.38	0.08448285		1969.38	-0.00472212		2499.37	0.11401941		3029.37	0.1154007		3559.4	-0.01768311
379.59	0.33706675		909.59	0.03816694		1439.58	0.08498316		1969.58	-0.0040499		2499.57	0.1146585		3029.57	0.11501082		3559.6	-0.01739706
379.79	0.33678904		909.79	0.0387414		1439.78	0.08540659		1969.78	-0.00436113		2499.77	0.11486264		3029.77	0.11491967		3559.8	-0.01708043
379.99	0.33678904		909.99	0.0387414		1439.98	0.08540659		1969.98	-0.00436113		2499.97	0.11486264		3029.97	0.11491967		3560	-0.01708043
380.19	0.33684997		910.19	0.03972305		1440.18	0.08542939		1970.18	-0.00415782		2500.17	0.11581104		3030.17	0.11459915		3560.2	-0.01640084
380.39	0.3368093		910.39	0.04117468		1440.38	0.0847625		1970.38	-0.00327425		2500.37	0.11630022		3030.37	0.11445287		3560.4	-0.01670438
380.59	0.33648836		910.59	0.04295256		1440.58	0.0845522		1970.58	-0.00313967		2500.57	0.1168318		3030.57	0.11373102		3560.6	-0.01639631
380.79	0.33647857		910.79	0.04322711		1440.78	0.08479777		1970.78	-0.00278021		2500.77	0.11774599		3030.77	0.11374136		3560.8	-0.01671202
380.99	0.33641117		910.99	0.04452466		1440.98	0.08390388		1970.98	-0.00230676		2500.97	0.11861991		3030.97	0.11356615		3561	-0.01713743
381.19	0.33609324		911.19	0.0441947		1441.18	0.0839045		1971.18	-0.00181241		2501.17	0.11837872		3031.17	0.11367161		3561.2	-0.01614923
381.39	0.33614798		911.39	0.04461721		1441.38	0.08381992		1971.38	-0.00180557		2501.37	0.11808861		3031.37	0.11363491		3561.4	-0.01599378
381.59	0.33672485		911.59	0.04515924		1441.58	0.08405316		1971.58	-0.00175389		2501.57	0.11868123		3031.57	0.11412127		3561.6	-0.0160796
381.79	0.33593288		911.79	0.04616586		1441.78	0.08392158		1971.78	-0.00230491		2501.77	0.11951105		3031.77	0.1140014		3561.8	-0.01612684
381.99	0.33645091		911.99	0.04575407		1441.98	0.08421451		1971.98	-0.0029248		2501.97	0.11995527		3031.97	0.11375301		3562	-0.01615392
382.19	0.33641682		912.19	0.04490348		1442.18	0.08434027		1972.18	-0.00350488		2502.17	0.12052035		3032.17	0.11437567		3562.2	-0.01586151
382.39	0.33585073		912.39	0.04565956		1442.38	0.08460031		1972.38	-0.00390601		2502.37	0.12097149		3032.37	0.11463469		3562.4	-0.01506643
382.59	0.33673825		912.59	0.04584635		1442.58	0.08551889		1972.58	-0.00412813		2502.57	0.12211261		3032.57	0.11555355		3562.6	-0.01379576
382.79	0.33730623		912.79	0.04575941		1442.78	0.08672709		1972.78	-0.00442587		2502.77	0.12217057		3032.77	0.1160124		3562.8	-0.01304752
382.99	0.33726425		912.99	0.04614224		1442.98	0.08734085		1972.98	-0.00355061		2502.97	0.12244262		3032.97	0.11578851		3563	-0.01292679
383.19	0.33765385		913.19	0.04576937		1443.18	0.08835723		1973.18	-0.00294243		2503.17	0.12235825		3033.17	0.11545608		3563.2	-0.01314818
383.39	0.33750886		913.39	0.0461056		1443.38	0.08866246		1973.38	-0.00304041		2503.37	0.12311282		3033.37	0.11611721		3563.4	-0.01210947
383.59	0.33696482		913.59	0.04492335		1443.58	0.08769997		1973.58	-0.00169795		2503.57	0.12364734		3033.57	0.11611413		3563.6	-0.01119571
383.79	0.33676473		913.79	0.04439318		1443.78	0.08793621		1973.78	-0.00148647		2503.77	0.12391333		3033.77	0.117434		3563.8	-0.00978316
383.99	0.33681258		913.99	0.0439921		1443.98	0.08737407		1973.98	-0.00086409		2503.97	0.12440855		3033.97	0.11818425		3564	-0.00905746
384.19	0.33782584		914.19	0.04390279		1444.18	0.08747765		1974.18	-0.00061684		2504.17	0.12421751		3034.17	0.11810321		3564.2	-0.00964332
384.39	0.3375886		914.39	0.04401409		1444.38	0.08693576		1974.38	-0.00057657		2504.37	0.12421695		3034.37	0.11812813		3564.4	-0.0103316
384.59	0.33778539		914.59	0.04445247		1444.58	0.08664033		1974.58	0.00003349		2504.57	0.12411838		3034.57	0.11724314		3564.6	-0.01077663
384.79	0.33820655		914.79	0.04314378		1444.78	0.08609847		1974.78	0.00049218		2504.77	0.12455352		3034.77	0.11752214		3564.8	-0.01217497
384.99	0.33862061		914.99	0.04370703		1444.98	0.08463694		1974.98	0.0005709		2504.97	0.12371209		3034.97	0.11746301		3565	-0.01260512
385.19	0.33903594		915.19	0.04311617		1445.18	0.08466426		1975.18	0.0009927		2505.17	0.12235351		3035.17	0.1170098		3565.2	-0.01272291
385.39	0.33921604		915.39	0.04394262		1445.38	0.08421672		1975.38	0.00043265		2505.37	0.12278568		3035.37	0.11604887		3565.4	-0.01323711
385.59	0.33946676		915.59	0.04513068		1445.58	0.08370959		1975.58	0.00015986		2505.57	0.1236608		3035.57	0.11589836		3565.6	-0.01429233
385.79	0.33867657		915.79	0.04547265		1445.78	0.08344642		1975.78	-0.00085959		2505.77	0.12429681		3035.77	0.11455794		3565.8	-0.01458533
385.99	0.33987086		915.99	0.04524998		1445.98	0.08406068		1975.98	-0.00147164		2505.97	0.12475257		3035.97	0.11427905		3566	-0.01504536
386.19	0.33911036		916.19	0.04513134		1446.18	0.08397583		1976.18	-0.00123087		2506.17	0.12472611		3036.17	0.11478471		3566.2	-0.01498515
386.39	0.33819408		916.39	0.04650024		1446.38	0.08491012		1976.38	-0.00198681		2506.37	0.12379595		3036.37	0.11434079		3566.4	-0.01464825
386.59	0.33881991		916.59	0.04633785		1446.58	0.08500138		1976.58	-0.00125117		2506.57	0.12340128		3036.57	0.11448525		3566.6	-0.01487597
386.79	0.3389225		916.79	0.04652291		1446.78	0.08544498		1976.78	-0.00139788		2506.77	0.1230824		3036.77	0.11440606		3566.8	-0.01542345
386.99	0.33786622		916.99	0.04656174		1446.98	0.08519182		1976.98	-0.00012418		2506.97	0.12309988		3036.97	0.11509298		3567	-0.01621099
387.19	0.33716598		917.19	0.04700821		1447.18	0.08432614		1977.18	0.00073541		2507.17	0.12357219		3037.17	0.11501486		3567.2	-0.01537314
387.39	0.33646864		917.39	0.0471527		1447.38	0.08482417		1977.38	0.00135958		2507.37	0.12404322		3037.37	0.11615797		3567.4	-0.01416789
387.59	0.33622413		917.59	0.04537061		1447.58	0.08479313		1977.58	0.00181032		2507.57	0.12347973		3037.57	0.11689321		3567.6	-0.01369176
387.79	0.33595556		917.79	0.04568951		1447.78	0.08553876		1977.78	0.00238052		2507.77	0.12338232		3037.77	0.1176406		3567.8	-0.01312917
387.99	0.33583358		917.99	0.04548273		1447.98	0.0856732		1977.98	0.00252517		2507.97	0.12322631		3037.97	0.11827011		3568	-0.0130165
388.19	0.33637864		918.19	0.045389		1448.18	0.08545779		1978.18	0.00290442		2508.17	0.12296074		3038.17	0.11895736		3568.2	-0.0129695
388.39	0.33680943		918.39	0.04559445		1448.38	0.08589136		1978.38	0.00347087		2508.37	0.12326609		3038.37	0.11918281		3568.4	-0.0130777
388.59	0.33689036		918.59	0.0456993		1448.58	0.08543683		1978.58	0.00531413		2508.57	0.12303627		3038.57	0.11933046		3568.6	-0.01339927
388.79	0.33788051		918.79	0.04502221		1448.78	0.08495771		1978.78	0.00455297		2508.77	0.12343265		3038.77	0.11962714		3568.8	-0.01329388
388.99	0.33804819		918.99	0.04476932		1448.98	0.08469723		1978.98	0.00517209		2508.97	0.12250864		3038.97	0.11963711		3569	-0.01311342
389.19	0.33823143		919.19	0.04428229		1449.18	0.08477911		1979.18	0.00576856		2509.17	0.12289399		3039.17	0.11900346		3569.2	-0.01323611
389.39	0.33835873		919.39	0.04395783		1449.38	0.08477631		1979.38	0.00508722		2509.37	0.12304045		3039.37	0.11970628		3569.4	-0.01314181
389.59	0.33931518		919.59	0.04477181		1449.58	0.08534841		1979.58	0.00459908		2509.57	0.12245956		3039.57	0.12019626		3569.6	-0.01370887
389.79	0.3396617		919.79	0.04472594		1449.78	0.08608384		1979.78	0.00480531		2509.77	0.12271289		3039.77	0.11987157		3569.8	-0.0135219
389.99	0.3401907		919.99	0.04592851		1449.98	0.08666576		1979.98	0.00372453		2509.97	0.12223416		3039.97	0.11982496		3570	-0.01338934
390.19	0.3396828		920.19	0.04563076		1450.18	0.08662144		1980.18	0.00271892		2510.17	0.12140302		3040.17	0.11975275		3570.2	-0.01269412
390.39	0.34006107		920.39	0.04689402		1450.38	0.0868754		1980.38	0.00045232		2510.37	0.12105049		3040.37	0.12020294		3570.4	-0.01308629
390.59	0.34103848		920.59	0.04658557		1450.58	0.0861062		1980.58	0.00052012		2510.57	0.12167271		3040.57	0.12073025		3570.6	-0.01298384
390.79	0.34079506		920.79	0.04724003		1450.78	0.08627651		1980.78	-0.00002723		2510.77	0.12203606		3040.77	0.12017274		3570.8	-0.01309658
390.99	0.34014554		920.99	0.04789552		1450.98	0.0854742		1980.98	-0.00026365		2510.97	0.12219925		3040.97	0.11937478		3571	-0.01385634
391.19	0.33962451		921.19	0.04901752		1451.18	0.08541987		1981.18	0.00007361		2511.17	0.12229492		3041.17	0.11865541		3571.2	-0.01306835
391.39	0.33955914		921.39	0.04875764		1451.38	0.08495933		1981.38	-0.00002786		2511.37	0.1222415		3041.37	0.11899545		3571.4	-0.01339159
391.59	0.33884873		921.59	0.04810872		1451.58	0.08522747		1981.58	0.00008793		2511.57	0.12224689		3041.57	0.11913409		3571.6	-0.01320844
391.79	0.3383877		921.79	0.04922345		1451.78	0.08501453		1981.78	0.00126079		2511.77	0.12199567		3041.77	0.11888843		3571.8	-0.01249425
391.99	0.3386802		921.99	0.04880689		1451.98	0.0846109		1981.98	0.00221906		2511.97	0.1216897		3041.97	0.1182865		3572	-0.01276379
392.19	0.34007191		922.19	0.04825544		1452.18	0.08371817		1982.18	0.00344985		2512.17	0.1221192		3042.17	0.1172572		3572.2	-0.01259756
392.39	0.34022009		922.39	0.0486872		1452.38	0.08430648		1982.38	0.00414263		2512.37	0.12195531		3042.37	0.11667961		3572.4	-0.01233073
392.59	0.33997818		922.59	0.04789374		1452.58	0.08327429		1982.58	0.00629109		2512.57	0.12215198		3042.57	0.11639869		3572.6	-0.01197791
392.79	0.34101479		922.79	0.04719281		1452.78	0.08312841		1982.78	0.00611954		2512.77	0.1217416		3042.77	0.1149398		3572.8	-0.01259021
392.99	0.34042301		922.99	0.04603859		1452.98	0.08360711		1982.98	0.00737958		2512.97	0.12078504		3042.97	0.11480905		3573	-0.01294019
393.19	0.34050912		923.19	0.04553773		1453.18	0.08437752		1983.18	0.00813096		2513.17	0.12078266		3043.17	0.11508195		3573.2	-0.013096
393.39	0.34081628		923.39	0.04548392		1453.38	0.0846992		1983.38	0.00810407		2513.37	0.11972168		3043.37	0.11634354		3573.4	-0.0125297
393.59	0.3408751		923.59	0.04585344		1453.58	0.08484491		1983.58	0.00835337		2513.57	0.11972121		3043.57	0.11583375		3573.6	-0.01139643
393.79	0.34034128		923.79	0.04603748		1453.78	0.08492729		1983.78	0.00789457		2513.77	0.11986521		3043.77	0.11578009		3573.8	-0.01089597
393.99	0.33991193		923.99	0.04625238		1453.98	0.08555753		1983.98	0.00683772		2513.97	0.11934522		3043.97	0.11522392		3574	-0.0108094
394.19	0.33959362		924.19	0.04562229		1454.18	0.08583027		1984.18	0.00600355		2514.17	0.11963682		3044.17	0.11575299		3574.2	-0.01058093
394.39	0.33965587		924.39	0.04524976		1454.38	0.08652959		1984.38	0.0048381		2514.37	0.12010465		3044.37	0.11642862		3574.4	-0.01115348
394.59	0.33983717		924.59	0.04567105		1454.58	0.08623085		1984.58	0.00473337		2514.57	0.12052838		3044.57	0.11543016		3574.6	-0.01082159
394.79	0.33884685		924.79	0.04622159		1454.78	0.08683216		1984.78	0.004157		2514.77	0.12101038		3044.77	0.11507677		3574.8	-0.01112321
394.99	0.33876516		924.99	0.04629755		1454.98	0.08667248		1984.98	0.00419353		2514.97	0.12119383		3044.97	0.1157881		3575	-0.01178572
395.19	0.33858798		925.19	0.04606464		1455.18	0.08673079		1985.18	0.00371798		2515.17	0.12139417		3045.17	0.11582047		3575.2	-0.01143779
395.39	0.33827568		925.39	0.04597676		1455.38	0.08644793		1985.38	0.00379774		2515.37	0.12183677		3045.37	0.11616196		3575.4	-0.01115004
395.59	0.33822086		925.59	0.04566973		1455.58	0.08791715		1985.58	0.00390735		2515.57	0.12220231		3045.57	0.11698295		3575.6	-0.01055013
395.79	0.33766471		925.79	0.04550018		1455.78	0.08684766		1985.78	0.00488514		2515.77	0.12204191		3045.77	0.11665592		3575.8	-0.01040914
395.99	0.3381223		925.99	0.04547199		1455.98	0.08642689		1985.98	0.00667701		2515.97	0.1225979		3045.97	0.11574205		3576	-0.01086308
396.19	0.33883389		926.19	0.04553869		1456.18	0.08644974		1986.18	0.0070975		2516.17	0.12341573		3046.17	0.11529436		3576.2	-0.01143134
396.39	0.33931765		926.39	0.04614386		1456.38	0.08706581		1986.38	0.00723171		2516.37	0.12298225		3046.37	0.11548348		3576.4	-0.01182546
396.59	0.33993921		926.59	0.04551163		1456.58	0.08627779		1986.58	0.00867635		2516.57	0.12333845		3046.57	0.11493897		3576.6	-0.01222724
396.79	0.3403392		926.79	0.04493564		1456.78	0.08600637		1986.78	0.00849849		2516.77	0.12342017		3046.77	0.11422681		3576.8	-0.01280175
396.99	0.33998478		926.99	0.04548784		1456.98	0.08590635		1986.98	0.00930031		2516.97	0.12344065		3046.97	0.11436718		3577	-0.01255273
397.19	0.34044758		927.19	0.04593327		1457.18	0.0857525		1987.18	0.00993028		2517.17	0.12321414		3047.17	0.11513712		3577.2	-0.01270299
397.39	0.34067884		927.39	0.04585118		1457.38	0.08518638		1987.38	0.00950036		2517.37	0.12275112		3047.37	0.1152784		3577.4	-0.01213069
397.59	0.34081074		927.59	0.04627967		1457.58	0.08499217		1987.58	0.00975641		2517.57	0.12302196		3047.57	0.11495182		3577.6	-0.01232321
397.79	0.3402603		927.79	0.04638086		1457.78	0.08596545		1987.78	0.0096062		2517.77	0.12176652		3047.77	0.11484875		3577.8	-0.01242856
397.99	0.34010411		927.99	0.04568169		1457.98	0.08593719		1987.98	0.00960415		2517.97	0.12151731		3047.97	0.11527402		3578	-0.01253815
398.19	0.34045858		928.19	0.04563752		1458.18	0.08561266		1988.18	0.00772568		2518.17	0.12107839		3048.17	0.11606963		3578.2	-0.01161205
398.39	0.34034247		928.39	0.0453246		1458.38	0.08519704		1988.38	0.00635858		2518.37	0.12062996		3048.37	0.11596029		3578.4	-0.01182814
398.59	0.33976341		928.59	0.04606803		1458.58	0.08482284		1988.58	0.0044614		2518.57	0.12041342		3048.57	0.11597819		3578.6	-0.01196117
398.79	0.3386547		928.79	0.0461172		1458.78	0.08467358		1988.78	0.00291775		2518.77	0.1197372		3048.77	0.1174234		3578.8	-0.0116227
398.99	0.33807982		928.99	0.04578353		1458.98	0.08418149		1988.98	0.00234755		2518.97	0.11940047		3048.97	0.11771197		3579	-0.01228363
399.19	0.33744438		929.19	0.04520172		1459.18	0.08421114		1989.18	0.00126052		2519.17	0.11913493		3049.17	0.11787725		3579.2	-0.01216174
399.39	0.33678719		929.39	0.0457873		1459.38	0.08421221		1989.38	0.00186284		2519.37	0.11915775		3049.37	0.1187223		3579.4	-0.01166084
399.59	0.33687027		929.59	0.04569962		1459.58	0.08383669		1989.58	0.00280423		2519.57	0.11894489		3049.57	0.11896825		3579.6	-0.011717
399.79	0.33646882		929.79	0.04679391		1459.78	0.08389526		1989.78	0.00447653		2519.77	0.11924874		3049.77	0.11821885		3579.8	-0.01238256
399.99	0.3375481		929.99	0.0474985		1459.98	0.08404458		1989.98	0.00620724		2519.97	0.12015132		3049.97	0.11702021		3580	-0.01271443
400.19	0.33802144		930.19	0.04728821		1460.18	0.08425353		1990.18	0.00691284		2520.17	0.12029107		3050.17	0.11540717		3580.2	-0.01338776
400.39	0.33869809		930.39	0.04777319		1460.38	0.08383225		1990.38	0.00854655		2520.37	0.12068242		3050.37	0.11463682		3580.4	-0.0137979
400.59	0.33837702		930.59	0.04741526		1460.58	0.08316738		1990.58	0.01020763		2520.57	0.12137723		3050.57	0.113316		3580.6	-0.01437168
400.79	0.33892215		930.79	0.04766239		1460.78	0.08283502		1990.78	0.01199933		2520.77	0.12179495		3050.77	0.11271997		3580.8	-0.01455319
400.99	0.33886974		930.99	0.04882071		1460.98	0.08366651		1990.98	0.01356795		2520.97	0.12172255		3050.97	0.11213819		3581	-0.0150497
401.19	0.33918506		931.19	0.04848125		1461.18	0.08356997		1991.18	0.01439515		2521.17	0.121521		3051.17	0.1121614		3581.2	-0.01490079
401.39	0.338883		931.39	0.0480337		1461.38	0.08387593		1991.38	0.0144978		2521.37	0.12172099		3051.37	0.11120596		3581.4	-0.01483523
401.59	0.33853113		931.59	0.04755769		1461.58	0.08403163		1991.58	0.01500558		2521.57	0.12147212		3051.57	0.11152073		3581.6	-0.01411176
401.79	0.33819294		931.79	0.04679006		1461.78	0.0848403		1991.78	0.0146265		2521.77	0.12065336		3051.77	0.11164566		3581.8	-0.01255956
401.99	0.33778704		931.99	0.0463937		1461.98	0.084018		1991.98	0.01321877		2521.97	0.1209033		3051.97	0.1132298		3582	-0.01149888
402.19	0.33776142		932.19	0.04626481		1462.18	0.08360483		1992.18	0.01169322		2522.17	0.1199597		3052.17	0.11311659		3582.2	-0.01069576
402.39	0.33638937		932.39	0.04523869		1462.38	0.08320368		1992.38	0.00987118		2522.37	0.11936294		3052.37	0.11355533		3582.4	-0.01089386
402.59	0.33622311		932.59	0.04540324		1462.58	0.08310701		1992.58	0.0077472		2522.57	0.11896436		3052.57	0.1144017		3582.6	-0.01082458
402.79	0.33664925		932.79	0.04578808		1462.78	0.08212693		1992.78	0.00684053		2522.77	0.118837		3052.77	0.11644385		3582.8	-0.0108913
402.99	0.33659119		932.99	0.04523786		1462.98	0.08134633		1992.98	0.00589362		2522.97	0.11901702		3052.97	0.11727914		3583	-0.01129792
403.19	0.33745859		933.19	0.04499306		1463.18	0.08138201		1993.18	0.0047048		2523.17	0.11944826		3053.17	0.11870779		3583.2	-0.01098948
403.39	0.3386344		933.39	0.04558052		1463.38	0.08128229		1993.38	0.00520675		2523.37	0.1201653		3053.37	0.119885		3583.4	-0.01094178
403.59	0.33935597		933.59	0.04585095		1463.58	0.08103539		1993.58	0.0061708		2523.57	0.1198402		3053.57	0.11988118		3583.6	-0.01084503
403.79	0.3394208		933.79	0.04622047		1463.78	0.08156155		1993.78	0.00653767		2523.77	0.12052104		3053.77	0.12034846		3583.8	-0.01127439
403.99	0.34023165		933.99	0.04632871		1463.98	0.08139151		1993.98	0.00729408		2523.97	0.12109356		3053.97	0.11959001		3584	-0.0108754
404.19	0.33975854		934.19	0.0463373		1464.18	0.0814349		1994.18	0.00889074		2524.17	0.1204102		3054.17	0.11875886		3584.2	-0.01183361
404.39	0.33979894		934.39	0.04675408		1464.38	0.08098326		1994.38	0.00981727		2524.37	0.12098757		3054.37	0.11855482		3584.4	-0.01283828
404.59	0.33915866		934.59	0.04614921		1464.58	0.08139155		1994.58	0.01084632		2524.57	0.12079113		3054.57	0.11835876		3584.6	-0.01374825
404.79	0.33900905		934.79	0.04638711		1464.78	0.08184428		1994.78	0.0114614		2524.77	0.12191473		3054.77	0.11778002		3584.8	-0.01342964
404.99	0.33860601		934.99	0.04726085		1464.98	0.08256222		1994.98	0.01204011		2524.97	0.12177037		3054.97	0.11655837		3585	-0.01385846
405.19	0.33793549		935.19	0.0474746		1465.18	0.08185357		1995.18	0.01228062		2525.17	0.12248155		3055.17	0.11564562		3585.2	-0.01389878
405.39	0.33806477		935.39	0.04750623		1465.38	0.08234624		1995.38	0.01215461		2525.37	0.12220476		3055.37	0.11526164		3585.4	-0.01417615
405.59	0.33680703		935.59	0.04721329		1465.58	0.08312929		1995.58	0.01232787		2525.57	0.12164603		3055.57	0.11458252		3585.6	-0.01382902
405.79	0.33647692		935.79	0.04821096		1465.78	0.08399164		1995.78	0.01222294		2525.77	0.12178869		3055.77	0.1139869		3585.8	-0.01349493
405.99	0.33607689		935.99	0.04805318		1465.98	0.08379741		1995.98	0.01093137		2525.97	0.12127309		3055.97	0.11370495		3586	-0.01348803
406.19	0.3364939		936.19	0.04708429		1466.18	0.08402999		1996.18	0.00940107		2526.17	0.12028124		3056.17	0.11267969		3586.2	-0.01384226
406.39	0.33662228		936.39	0.04711627		1466.38	0.08475483		1996.38	0.00826125		2526.37	0.11964394		3056.37	0.1130821		3586.4	-0.01421489
406.59	0.33817865		936.59	0.0479371		1466.58	0.08450487		1996.58	0.00786328		2526.57	0.11996854		3056.57	0.11282504		3586.6	-0.01496606
406.79	0.33813805		936.79	0.04781967		1466.78	0.08449231		1996.78	0.00774368		2526.77	0.1198679		3056.77	0.11427298		3586.8	-0.01547941
406.99	0.33827203		936.99	0.04762774		1466.98	0.08421279		1996.98	0.00733597		2526.97	0.11895284		3056.97	0.11429206		3587	-0.01596529
407.19	0.33854274		937.19	0.04777483		1467.18	0.08461232		1997.18	0.00775608		2527.17	0.11879019		3057.17	0.11505207		3587.2	-0.015252
407.39	0.33850175		937.39	0.04719055		1467.38	0.08544296		1997.38	0.00961097		2527.37	0.11855768		3057.37	0.11619021		3587.4	-0.01509411
407.59	0.33867966		937.59	0.04655593		1467.58	0.08483647		1997.58	0.01066244		2527.57	0.11827705		3057.57	0.11568243		3587.6	-0.01429744
407.79	0.33906048		937.79	0.04614362		1467.78	0.0849638		1997.78	0.01060827		2527.77	0.11861305		3057.77	0.11518973		3587.8	-0.01371785
407.99	0.33960376		937.99	0.0454404		1467.98	0.08501907		1997.98	0.01106871		2527.97	0.1178246		3057.97	0.11450699		3588	-0.01331539
408.19	0.33923121		938.19	0.04492397		1468.18	0.08443394		1998.18	0.01176049		2528.17	0.11737647		3058.17	0.11417018		3588.2	-0.01409117
408.39	0.33927551		938.39	0.04426539		1468.38	0.08465412		1998.38	0.01115922		2528.37	0.11796048		3058.37	0.11468922		3588.4	-0.0135892
408.59	0.33940988		938.59	0.043529		1468.58	0.08512211		1998.58	0.01193249		2528.57	0.1178602		3058.57	0.11506253		3588.6	-0.01276883
408.79	0.33987771		938.79	0.04401243		1468.78	0.08484652		1998.78	0.01122564		2528.77	0.11810268		3058.77	0.11493449		3588.8	-0.01268293
408.99	0.34008985		938.99	0.04492798		1468.98	0.08484289		1998.98	0.01235028		2528.97	0.11805161		3058.97	0.11524384		3589	-0.01314377
409.19	0.33927084		939.19	0.04518544		1469.18	0.08474827		1999.18	0.01254658		2529.17	0.1176273		3059.17	0.11596939		3589.2	-0.01292715
409.39	0.33929123		939.39	0.04499067		1469.38	0.0852795		1999.38	0.01158322		2529.37	0.11710724		3059.37	0.1156382		3589.4	-0.01313511
409.59	0.33802196		939.59	0.04513552		1469.58	0.08507844		1999.58	0.01062087		2529.57	0.11708078		3059.57	0.11561025		3589.6	-0.01266127
409.79	0.33799616		939.79	0.04593128		1469.78	0.08483312		1999.78	0.0093886		2529.77	0.11744641		3059.77	0.11599563		3589.8	-0.01197111
409.99	0.33784392		939.99	0.04584078		1469.98	0.08415832		1999.98	0.00795429		2529.97	0.1171462		3059.97	0.11568987		3590	-0.01135051
410.19	0.33828134		940.19	0.0460484		1470.18	0.08460002		2000.18	0.00673685		2530.17	0.11713288		3060.17	0.11640275		3590.2	-0.01137033
410.39	0.33819596		940.39	0.04677131		1470.38	0.08439966		2000.38	0.00598554		2530.37	0.11806199		3060.37	0.11738654		3590.4	-0.01133256
410.59	0.33872246		940.59	0.04685201		1470.58	0.08341459		2000.58	0.00557348		2530.57	0.11813021		3060.57	0.11718345		3590.6	-0.01176682
410.79	0.3379798		940.79	0.0464105		1470.78	0.08283073		2000.78	0.00582196		2530.77	0.11784721		3060.77	0.11784753		3590.8	-0.01177074
410.99	0.33794514		940.99	0.04634129		1470.98	0.08178732		2000.98	0.00637498		2530.97	0.11796476		3060.97	0.11837305		3591	-0.01164321
411.19	0.33806415		941.19	0.0460312		1471.18	0.08109696		2001.18	0.00670348		2531.17	0.11837256		3061.17	0.1180228		3591.2	-0.01137846
411.39	0.33846576		941.39	0.04470634		1471.38	0.08152668		2001.38	0.00745169		2531.37	0.11904722		3061.37	0.11759395		3591.4	-0.01183017
411.59	0.33889225		941.59	0.0447347		1471.58	0.08121032		2001.58	0.00755431		2531.57	0.11972949		3061.57	0.11609611		3591.6	-0.01184705
411.79	0.33940908		941.79	0.04470239		1471.78	0.08151991		2001.78	0.00711653		2531.77	0.11956516		3061.77	0.11533394		3591.8	-0.01148528
411.99	0.33986647		941.99	0.04426134		1471.98	0.08142049		2001.98	0.00685145		2531.97	0.11995775		3061.97	0.11578433		3592	-0.01206723
412.19	0.34063741		942.19	0.04478834		1472.18	0.08165575		2002.18	0.00706718		2532.17	0.12138608		3062.17	0.11597289		3592.2	-0.01232926
412.39	0.3404444		942.39	0.04501696		1472.38	0.08232533		2002.38	0.00767939		2532.37	0.1215366		3062.37	0.11590229		3592.4	-0.01191798
412.59	0.34064833		942.59	0.04498917		1472.58	0.08275193		2002.58	0.00818683		2532.57	0.12174713		3062.57	0.11544343		3592.6	-0.01318223
412.79	0.34083647		942.79	0.04577693		1472.78	0.08262898		2002.78	0.00738214		2532.77	0.12177033		3062.77	0.11550056		3592.8	-0.01404978
412.99	0.34049268		942.99	0.04640163		1472.98	0.08349451		2002.98	0.00800925		2532.97	0.12158546		3062.97	0.1157781		3593	-0.01398214
413.19	0.33956111		943.19	0.04582798		1473.18	0.08382192		2003.18	0.00729681		2533.17	0.11980233		3063.17	0.1157963		3593.2	-0.01384018
413.39	0.33890467		943.39	0.04509271		1473.38	0.08355896		2003.38	0.00731249		2533.37	0.11981834		3063.37	0.11520721		3593.4	-0.01404112
413.59	0.33860312		943.59	0.0448904		1473.58	0.08351033		2003.58	0.00678901		2533.57	0.11992244		3063.57	0.11539909		3593.6	-0.01412115
413.79	0.33804446		943.79	0.04538083		1473.78	0.08398041		2003.78	0.00611314		2533.77	0.12012509		3063.77	0.11521074		3593.8	-0.01424655
413.99	0.33733395		943.99	0.04503579		1473.98	0.08397966		2003.98	0.00557629		2533.97	0.11970921		3063.97	0.11582088		3594	-0.01359597
414.19	0.33742987		944.19	0.04444968		1474.18	0.08409448		2004.18	0.00461796		2534.17	0.11924205		3064.17	0.11600457		3594.2	-0.01384321
414.39	0.33643562		944.39	0.04398947		1474.38	0.08351101		2004.38	0.00366115		2534.37	0.11888675		3064.37	0.11651773		3594.4	-0.01359998
414.59	0.33662965		944.59	0.04319475		1474.58	0.08261592		2004.58	0.00337125		2534.57	0.11814381		3064.57	0.11694932		3594.6	-0.01323411
414.79	0.33640859		944.79	0.04278014		1474.78	0.08188801		2004.78	0.00309707		2534.77	0.11829934		3064.77	0.11678078		3594.8	-0.01343124
414.99	0.33629694		944.99	0.04323787		1474.98	0.08111361		2004.98	0.00287672		2534.97	0.11786363		3064.97	0.11696392		3595	-0.01315777
415.19	0.33542527		945.19	0.04347129		1475.18	0.08124212		2005.18	0.00246494		2535.17	0.11761945		3065.17	0.11593118		3595.2	-0.01340211
415.39	0.33489284		945.39	0.04315673		1475.38	0.08201019		2005.38	0.00308877		2535.37	0.11792529		3065.37	0.11619453		3595.4	-0.0134369
415.59	0.33503933		945.59	0.0439867		1475.58	0.08264022		2005.58	0.00300453		2535.57	0.11891451		3065.57	0.1158427		3595.6	-0.01310113
415.79	0.3352947		945.79	0.04421487		1475.78	0.0824761		2005.78	0.00286942		2535.77	0.11980444		3065.77	0.11584933		3595.8	-0.01280942
415.99	0.33624242		945.99	0.04530383		1475.98	0.0823541		2005.98	0.00248819		2535.97	0.12057554		3065.97	0.11647545		3596	-0.01340927
416.19	0.33632493		946.19	0.04548968		1476.18	0.08211946		2006.18	0.00277054		2536.17	0.12116867		3066.17	0.11563854		3596.2	-0.01376577
416.39	0.3368079		946.39	0.0454321		1476.38	0.08247649		2006.38	0.00248087		2536.37	0.12066554		3066.37	0.11514943		3596.4	-0.01386714
416.59	0.33724222		946.59	0.04538604		1476.58	0.08266297		2006.58	0.00238876		2536.57	0.12079645		3066.57	0.11521594		3596.6	-0.0147569
416.79	0.33755143		946.79	0.04608703		1476.78	0.08231997		2006.78	0.00225564		2536.77	0.12032885		3066.77	0.11535614		3596.8	-0.01406547
416.99	0.33774128		946.99	0.04550607		1476.98	0.08248976		2006.98	0.00269331		2536.97	0.11979464		3066.97	0.11494851		3597	-0.01449794
417.19	0.33744404		947.19	0.04463909		1477.18	0.08204703		2007.18	0.00293627		2537.17	0.11935881		3067.17	0.11462713		3597.2	-0.01524866
417.39	0.33713628		947.39	0.04476173		1477.38	0.08217519		2007.38	0.00369441		2537.37	0.11929307		3067.37	0.11407297		3597.4	-0.01535389
417.59	0.33725453		947.59	0.04413755		1477.58	0.08284677		2007.58	0.00293056		2537.57	0.12021465		3067.57	0.11416261		3597.6	-0.01599831
417.79	0.33700568		947.79	0.0441891		1477.78	0.08299093		2007.78	0.00355609		2537.77	0.11950087		3067.77	0.11511721		3597.8	-0.01515669
417.99	0.33718628		947.99	0.0435198		1477.98	0.08318854		2007.98	0.00389396		2537.97	0.11863192		3067.97	0.11517789		3598	-0.01502773
418.19	0.33693847		948.19	0.04420659		1478.18	0.08343507		2008.18	0.00365525		2538.17	0.11794254		3068.17	0.11429204		3598.2	-0.01536228
418.39	0.337019		948.39	0.04381527		1478.38	0.08441003		2008.38	0.0026805		2538.37	0.11712931		3068.37	0.11489733		3598.4	-0.01487544
418.59	0.3381733		948.59	0.04321531		1478.58	0.0840599		2008.58	0.00236238		2538.57	0.11807166		3068.57	0.11468167		3598.6	-0.01468739
418.79	0.33849208		948.79	0.04331505		1478.78	0.08355114		2008.78	0.00191143		2538.77	0.11813876		3068.77	0.11392923		3598.8	-0.01452795
418.99	0.33883693		948.99	0.04338923		1478.98	0.0836247		2008.98	0.00176972		2538.97	0.11803278		3068.97	0.11363493		3599	-0.01384212
419.19	0.33820975		949.19	0.04329782		1479.18	0.0840121		2009.18	0.00188874		2539.17	0.11846631		3069.17	0.11351686		3599.2	-0.01410337
419.39	0.33917933		949.39	0.04337565		1479.38	0.08365535		2009.38	0.00214615		2539.37	0.11894457		3069.37	0.11438932		3599.4	-0.01446798
419.59	0.34012959		949.59	0.04338257		1479.58	0.0834512		2009.58	0.00212078		2539.57	0.11967629		3069.57	0.11489949		3599.6	-0.01412118
419.79	0.34042435		949.79	0.04377083		1479.78	0.08413461		2009.78	0.00292571		2539.77	0.11950334		3069.77	0.11581198		3599.8	-0.01413611
419.99	0.34062898		949.99	0.04493649		1479.98	0.08393506		2009.98	0.00340881		2539.97	0.11889151		3069.97	0.11593681		3600	-0.01428524
420.19	0.3403257		950.19	0.04392978		1480.18	0.08346372		2010.18	0.00351995		2540.17	0.11829587		3070.17	0.11544071		3600.2	-0.015314
420.39	0.34127709		950.39	0.04449385		1480.38	0.08361802		2010.38	0.00359641		2540.37	0.11826774		3070.37	0.11674336		3600.4	-0.01516589
420.59	0.34120096		950.59	0.04513136		1480.58	0.08354013		2010.58	0.0042139		2540.57	0.11831565		3070.57	0.11735056		3600.6	-0.01539698
420.79	0.34027658		950.79	0.04524489		1480.78	0.0832178		2010.78	0.00342098		2540.77	0.11862901		3070.77	0.11688292		3600.8	-0.0146481
420.99	0.33983509		950.99	0.04484138		1480.98	0.08272773		2010.98	0.00329337		2540.97	0.11891819		3070.97	0.11738292		3601	-0.01479162
421.19	0.33913217		951.19	0.04519024		1481.18	0.08253277		2011.18	0.00275213		2541.17	0.11930336		3071.17	0.11877852		3601.2	-0.01424246
421.39	0.33730969		951.39	0.04545919		1481.38	0.08224817		2011.38	0.00290789		2541.37	0.11943008		3071.37	0.11908237		3601.4	-0.01490707
421.59	0.33677533		951.59	0.04434388		1481.58	0.08247111		2011.58	0.00217237		2541.57	0.11945105		3071.57	0.11910625		3601.6	-0.01498526
421.79	0.33645456		951.79	0.0441906		1481.78	0.0821565		2011.78	0.00285646		2541.77	0.1186126		3071.77	0.11884618		3601.8	-0.01461245
421.99	0.33640924		951.99	0.04411873		1481.98	0.08231864		2011.98	0.00241697		2541.97	0.11845985		3071.97	0.11795053		3602	-0.01536596
422.19	0.33594772		952.19	0.04471355		1482.18	0.08265329		2012.18	0.00077418		2542.17	0.1181016		3072.17	0.11692		3602.2	-0.01517284
422.39	0.33561536		952.39	0.04420606		1482.38	0.08259531		2012.38	-0.00032823		2542.37	0.11769246		3072.37	0.11625161		3602.4	-0.01510787
422.59	0.33660348		952.59	0.04413508		1482.58	0.08160808		2012.58	-0.00183294		2542.57	0.1184352		3072.57	0.1162199		3602.6	-0.01561615
422.79	0.33567404		952.79	0.04359297		1482.78	0.08113352		2012.78	-0.00301416		2542.77	0.11736249		3072.77	0.11578671		3602.8	-0.01450047
422.99	0.33586337		952.99	0.04364905		1482.98	0.08226305		2012.98	-0.00338738		2542.97	0.1174849		3072.97	0.11483987		3603	-0.01533559
423.19	0.33537953		953.19	0.04371985		1483.18	0.08214427		2013.18	-0.00286498		2543.17	0.11814699		3073.17	0.11471891		3603.2	-0.01569807
423.39	0.33635455		953.39	0.0439495		1483.38	0.08269176		2013.38	-0.00236956		2543.37	0.11795305		3073.37	0.11522704		3603.4	-0.01593827
423.59	0.33697157		953.59	0.04397544		1483.58	0.0839902		2013.58	-0.00192837		2543.57	0.11828822		3073.57	0.1158725		3603.6	-0.01575959
423.79	0.33691217		953.79	0.04394948		1483.78	0.08577089		2013.78	-0.00068466		2543.77	0.1180223		3073.77	0.11650737		3603.8	-0.01634312
423.99	0.33653977		953.99	0.04393507		1483.98	0.08514456		2013.98	-0.00048787		2543.97	0.11810298		3073.97	0.11622355		3604	-0.01681438
424.19	0.33720731		954.19	0.04400186		1484.18	0.08565643		2014.18	-0.00077613		2544.17	0.11879531		3074.17	0.11727477		3604.2	-0.01673544
424.39	0.3376329		954.39	0.04403341		1484.38	0.08545124		2014.38	-0.00036286		2544.37	0.11971769		3074.37	0.1176834		3604.4	-0.01630941
424.59	0.33773046		954.59	0.04362367		1484.58	0.08503228		2014.58	-0.00043203		2544.57	0.12066554		3074.57	0.11774959		3604.6	-0.01538416
424.79	0.33706503		954.79	0.04387701		1484.78	0.08484955		2014.78	-0.00030875		2544.77	0.12130008		3074.77	0.11784967		3604.8	-0.01440241
424.99	0.33722554		954.99	0.04465641		1484.98	0.08374407		2014.98	-0.00003067		2544.97	0.12099709		3074.97	0.11928464		3605	-0.01349104
425.19	0.33694758		955.19	0.04508727		1485.18	0.0827259		2015.18	0.0000953		2545.17	0.12144881		3075.17	0.11951791		3605.2	-0.01337822
425.39	0.33600557		955.39	0.04461026		1485.38	0.08196619		2015.38	0.0001759		2545.37	0.12054569		3075.37	0.11930225		3605.4	-0.01410821
425.59	0.33577763		955.59	0.04447458		1485.58	0.08108324		2015.58	0.00044031		2545.57	0.11993984		3075.57	0.11860932		3605.6	-0.01379321
425.79	0.33545311		955.79	0.04506505		1485.78	0.08046087		2015.78	0.00133632		2545.77	0.11941108		3075.77	0.11754887		3605.8	-0.01394823
425.99	0.33573179		955.99	0.04589327		1485.98	0.08045649		2015.98	0.00054595		2545.97	0.11898925		3075.97	0.11662599		3606	-0.01424192
426.19	0.3347373		956.19	0.04650348		1486.18	0.08012739		2016.18	-0.00109239		2546.17	0.11860432		3076.17	0.11607517		3606.2	-0.01459939
426.39	0.33391245		956.39	0.04630575		1486.38	0.07948593		2016.38	-0.00117797		2546.37	0.11792718		3076.37	0.11621583		3606.4	-0.01548192
426.59	0.3340502		956.59	0.04602785		1486.58	0.07865552		2016.58	-0.00233798		2546.57	0.11777702		3076.57	0.11657408		3606.6	-0.01621308
426.79	0.33299771		956.79	0.04533325		1486.78	0.07916851		2016.78	-0.00168141		2546.77	0.11735478		3076.77	0.11595123		3606.8	-0.01724756
426.99	0.33311116		956.99	0.04559542		1486.98	0.0799975		2016.98	-0.00127012		2546.97	0.11760488		3076.97	0.11526657		3607	-0.01920814
427.19	0.33393026		957.19	0.04534711		1487.18	0.08009038		2017.18	-0.00158034		2547.17	0.11758257		3077.17	0.11492613		3607.2	-0.01986362
427.39	0.33348932		957.39	0.04505172		1487.38	0.08074516		2017.38	-0.00143898		2547.37	0.11782627		3077.37	0.11544971		3607.4	-0.02023663
427.59	0.33358887		957.59	0.04376917		1487.58	0.08103557		2017.58	-0.00181907		2547.57	0.11798889		3077.57	0.11553645		3607.6	-0.0205998
427.79	0.33322812		957.79	0.04288341		1487.78	0.08104599		2017.78	-0.00106334		2547.77	0.11855351		3077.77	0.11524479		3607.8	-0.02055834
427.99	0.334136		957.99	0.04228347		1487.98	0.08019181		2017.98	-0.00150517		2547.97	0.11940352		3077.97	0.11470047		3608	-0.02086071
428.19	0.33404782		958.19	0.04229806		1488.18	0.08085023		2018.18	-0.00158201		2548.17	0.11952248		3078.17	0.11482208		3608.2	-0.02011293
428.39	0.33422512		958.39	0.04121887		1488.38	0.07945488		2018.38	-0.0016934		2548.37	0.11941456		3078.37	0.11355117		3608.4	-0.02010568
428.59	0.33434301		958.59	0.04197593		1488.58	0.07942879		2018.58	-0.00177121		2548.57	0.11970065		3078.57	0.11369168		3608.6	-0.01831046
428.79	0.33474238		958.79	0.04292599		1488.78	0.07879809		2018.78	-0.00124011		2548.77	0.11802302		3078.77	0.11483651		3608.8	-0.01714863
428.99	0.33453679		958.99	0.0431684		1488.98	0.07813541		2018.98	-0.00127279		2548.97	0.11774875		3078.97	0.11514293		3609	-0.01588449
429.19	0.3344131		959.19	0.04289701		1489.18	0.07800925		2019.18	-0.00207412		2549.17	0.11837859		3079.17	0.11525732		3609.2	-0.01584843
429.39	0.33477694		959.39	0.04255263		1489.38	0.07849945		2019.38	-0.00208636		2549.37	0.11794868		3079.37	0.11528259		3609.4	-0.01562929
429.59	0.33479256		959.59	0.043349		1489.58	0.07868368		2019.58	-0.0016878		2549.57	0.11816296		3079.57	0.11421305		3609.6	-0.01526081
429.79	0.33524057		959.79	0.04332674		1489.78	0.07912697		2019.78	-0.00208197		2549.77	0.11775999		3079.77	0.11347378		3609.8	-0.0144146
429.99	0.33612739		959.99	0.0436483		1489.98	0.08020431		2019.98	-0.0027469		2549.97	0.11836409		3079.97	0.11312643		3610	-0.01420201
430.19	0.33664723		960.19	0.04353308		1490.18	0.08040116		2020.18	-0.00317764		2550.17	0.11857084		3080.17	0.11367085		3610.2	-0.01446943
430.39	0.33773595		960.39	0.04355964		1490.38	0.08041968		2020.38	-0.00253345		2550.37	0.11872259		3080.37	0.11380632		3610.4	-0.01469059
430.59	0.33790557		960.59	0.04433671		1490.58	0.08001251		2020.58	-0.00233629		2550.57	0.11905823		3080.57	0.11436917		3610.6	-0.0153418
430.79	0.3381605		960.79	0.04419711		1490.78	0.081641		2020.78	-0.00230319		2550.77	0.11881039		3080.77	0.11444542		3610.8	-0.01670498
430.99	0.33831559		960.99	0.04429742		1490.98	0.08202659		2020.98	-0.00262422		2550.97	0.11831653		3080.97	0.11390421		3611	-0.01708323
431.19	0.33939251		961.19	0.04351677		1491.18	0.08201452		2021.18	-0.00300122		2551.17	0.11915159		3081.17	0.11410601		3611.2	-0.01783518
431.39	0.3382648		961.39	0.04311689		1491.38	0.08226658		2021.38	-0.0026396		2551.37	0.11959249		3081.37	0.11377499		3611.4	-0.01684889
431.59	0.33864322		961.59	0.04255448		1491.58	0.08238873		2021.58	-0.00307514		2551.57	0.11940035		3081.57	0.11388059		3611.6	-0.01727476
431.79	0.33823296		961.79	0.04279258		1491.78	0.08264737		2021.78	-0.00241403		2551.77	0.119546		3081.77	0.11363601		3611.8	-0.01743007
431.99	0.33847151		961.99	0.04268282		1491.98	0.08271026		2021.98	-0.00250801		2551.97	0.11887765		3081.97	0.11392269		3612	-0.01757476
432.19	0.3369289		962.19	0.04295503		1492.18	0.08321474		2022.18	-0.00197155		2552.17	0.11793031		3082.17	0.11439051		3612.2	-0.01692787
432.39	0.33664295		962.39	0.0431385		1492.38	0.08196677		2022.38	-0.00111538		2552.37	0.11720579		3082.37	0.11436341		3612.4	-0.0167867
432.59	0.33653659		962.59	0.04407217		1492.58	0.08272575		2022.58	-0.00138515		2552.57	0.11698216		3082.57	0.11430801		3612.6	-0.01572545
432.79	0.33626476		962.79	0.04309676		1492.78	0.08231211		2022.78	-0.00054862		2552.77	0.11636867		3082.77	0.11530518		3612.8	-0.01590424
432.99	0.33533209		962.99	0.04382275		1492.98	0.08269923		2022.98	-0.0005578		2552.97	0.11719388		3082.97	0.11512785		3613	-0.01631363
433.19	0.33455722		963.19	0.04391899		1493.18	0.08181575		2023.18	-0.0005885		2553.17	0.11718212		3083.17	0.11613152		3613.2	-0.01605376
433.39	0.33447743		963.39	0.04383871		1493.38	0.08123459		2023.38	-0.00014581		2553.37	0.1170443		3083.37	0.11612252		3613.4	-0.01624926
433.59	0.33393603		963.59	0.04367689		1493.58	0.08151128		2023.58	-0.00057447		2553.57	0.1171631		3083.57	0.1168807		3613.6	-0.01607317
433.79	0.33409356		963.79	0.04336458		1493.78	0.08152527		2023.78	-0.00053756		2553.77	0.11669978		3083.77	0.11684338		3613.8	-0.01548376
433.99	0.33401096		963.99	0.04318959		1493.98	0.08133951		2023.98	-0.00051315		2553.97	0.11746745		3083.97	0.11610148		3614	-0.01573214
434.19	0.33481545		964.19	0.0436578		1494.18	0.08004101		2024.18	-0.00140331		2554.17	0.11774259		3084.17	0.1163729		3614.2	-0.01625202
434.39	0.33482129		964.39	0.04395724		1494.38	0.07941057		2024.38	-0.00124163		2554.37	0.1177313		3084.37	0.11660167		3614.4	-0.01690226
434.59	0.33399907		964.59	0.04412913		1494.58	0.07938752		2024.58	-0.00249554		2554.57	0.11695234		3084.57	0.11687771		3614.6	-0.01804542
434.79	0.33474042		964.79	0.04372977		1494.78	0.08016628		2024.78	-0.00324982		2554.77	0.11658292		3084.77	0.11566284		3614.8	-0.01841293
434.99	0.33506511		964.99	0.04341568		1494.98	0.07959934		2024.98	-0.00345133		2554.97	0.11650905		3084.97	0.11568037		3615	-0.0188097
435.19	0.33519391		965.19	0.04373483		1495.18	0.08035688		2025.18	-0.00416012		2555.17	0.11732896		3085.17	0.11621882		3615.2	-0.01883001
435.39	0.33457102		965.39	0.04423161		1495.38	0.08035063		2025.38	-0.0043403		2555.37	0.11642553		3085.37	0.11559058		3615.4	-0.01793823
435.59	0.33446711		965.59	0.04409159		1495.58	0.08020653		2025.58	-0.00420524		2555.57	0.1162566		3085.57	0.11606321		3615.6	-0.01769205
435.79	0.33519064		965.79	0.04438952		1495.78	0.08021908		2025.78	-0.00374276		2555.77	0.11560407		3085.77	0.11571707		3615.8	-0.01764691
435.99	0.33474852		965.99	0.04436892		1495.98	0.07998188		2025.98	-0.00394287		2555.97	0.11478195		3085.97	0.11569298		3616	-0.01727409
436.19	0.33446768		966.19	0.04454142		1496.18	0.08036892		2026.18	-0.00379139		2556.17	0.11460552		3086.17	0.11566762		3616.2	-0.01748289
436.39	0.33480367		966.39	0.04453081		1496.38	0.08049306		2026.38	-0.00348754		2556.37	0.1141722		3086.37	0.11530219		3616.4	-0.0174672
436.59	0.33520288		966.59	0.04499543		1496.58	0.08085018		2026.58	-0.00433501		2556.57	0.11396937		3086.57	0.11461391		3616.6	-0.01763447
436.79	0.33451425		966.79	0.0439754		1496.78	0.08045052		2026.78	-0.0033741		2556.77	0.11360819		3086.77	0.11493709		3616.8	-0.01795364
436.99	0.33443398		966.99	0.04446899		1496.98	0.08071679		2026.98	-0.00280645		2556.97	0.11376999		3086.97	0.11497544		3617	-0.01705054
437.19	0.33387042		967.19	0.0429941		1497.18	0.08009782		2027.18	-0.00295253		2557.17	0.11375598		3087.17	0.11477459		3617.2	-0.0153979
437.39	0.33417127		967.39	0.04262911		1497.38	0.08041163		2027.38	-0.00285416		2557.37	0.11378888		3087.37	0.1143904		3617.4	-0.01533063
437.59	0.33395831		967.59	0.04186216		1497.58	0.08078811		2027.58	-0.00289523		2557.57	0.11442575		3087.57	0.11407041		3617.6	-0.01514889
437.79	0.33312733		967.79	0.04189039		1497.78	0.08073137		2027.78	-0.00218833		2557.77	0.11433191		3087.77	0.11295115		3617.8	-0.01532287
437.99	0.33255211		967.99	0.04189867		1497.98	0.08002463		2027.98	-0.00232628		2557.97	0.11562164		3087.97	0.11271791		3618	-0.01531687
438.19	0.33351378		968.19	0.04176172		1498.18	0.08023024		2028.18	-0.00256457		2558.17	0.11608267		3088.17	0.1130209		3618.2	-0.0155342
438.39	0.33355444		968.39	0.04180119		1498.38	0.08059797		2028.38	-0.00203414		2558.37	0.11610783		3088.37	0.11209136		3618.4	-0.0160285
438.59	0.33277349		968.59	0.04122467		1498.58	0.08121828		2028.58	-0.00291399		2558.57	0.11624182		3088.57	0.11202799		3618.6	-0.01688962
438.79	0.33340558		968.79	0.0417745		1498.78	0.08185322		2028.78	-0.00225121		2558.77	0.11669226		3088.77	0.1116101		3618.8	-0.01742763
438.99	0.33279076		968.99	0.04183191		1498.98	0.08297458		2028.98	-0.00147708		2558.97	0.11735891		3088.97	0.11281341		3619	-0.01769442
439.19	0.3332698		969.19	0.04268734		1499.18	0.08396678		2029.18	-0.00159765		2559.17	0.11814672		3089.17	0.11252265		3619.2	-0.01829471
439.39	0.33347473		969.39	0.04239201		1499.38	0.08314618		2029.38	-0.00106643		2559.37	0.11777092		3089.37	0.11173546		3619.4	-0.0180522
439.59	0.33362991		969.59	0.0430019		1499.58	0.08302794		2029.58	-0.00102594		2559.57	0.11832412		3089.57	0.11170255		3619.6	-0.01755881
439.79	0.3338105		969.79	0.04284997		1499.78	0.08271656		2029.78	-0.00135576		2559.77	0.11809786		3089.77	0.11196293		3619.8	-0.0182313
439.99	0.33258178		969.99	0.0430935		1499.98	0.08248099		2029.98	-0.00154177		2559.97	0.11759286		3089.97	0.11244099		3620	-0.0181053
440.19	0.33294651		970.19	0.04353292		1500.18	0.08274753		2030.18	-0.00196863		2560.17	0.11695972		3090.17	0.11335117		3620.2	-0.01894824
440.39	0.33386314		970.39	0.04336797		1500.38	0.08278744		2030.38	-0.00315934		2560.37	0.11604047		3090.37	0.11402177		3620.4	-0.01962968
440.59	0.33352327		970.59	0.04295449		1500.58	0.0825323		2030.58	-0.00335678		2560.57	0.11440544		3090.57	0.1140831		3620.6	-0.01972734
440.79	0.33346011		970.79	0.04240525		1500.78	0.08272037		2030.78	-0.00269656		2560.77	0.11462465		3090.77	0.11376624		3620.8	-0.01878458
440.99	0.33312813		970.99	0.0423156		1500.98	0.08255743		2030.98	-0.00220147		2560.97	0.11397968		3090.97	0.11383624		3621	-0.01732823
441.19	0.33270951		971.19	0.04152419		1501.18	0.08180176		2031.18	-0.0023035		2561.17	0.11352342		3091.17	0.11305373		3621.2	-0.01625748
441.39	0.33252219		971.39	0.04156139		1501.38	0.08135533		2031.38	-0.00217921		2561.37	0.1132542		3091.37	0.11322379		3621.4	-0.01678733
441.59	0.33257534		971.59	0.04109404		1501.58	0.08085274		2031.58	-0.00237679		2561.57	0.11395331		3091.57	0.11349039		3621.6	-0.01673935
441.79	0.33215608		971.79	0.04069512		1501.78	0.08112477		2031.78	-0.00183298		2561.77	0.11429413		3091.77	0.11359202		3621.8	-0.0174001
441.99	0.33243169		971.99	0.0408156		1501.98	0.08150178		2031.98	-0.00174245		2561.97	0.11481974		3091.97	0.11332286		3622	-0.01697818
442.19	0.33284432		972.19	0.04014667		1502.18	0.08133587		2032.18	-0.00108594		2562.17	0.11520223		3092.17	0.11347691		3622.2	-0.0176029
442.39	0.3329767		972.39	0.04084891		1502.38	0.08189852		2032.38	-0.00100897		2562.37	0.11531648		3092.37	0.11288301		3622.4	-0.01790592
442.59	0.33273342		972.59	0.04064655		1502.58	0.08313223		2032.58	-0.00082085		2562.57	0.11528148		3092.57	0.11348373		3622.6	-0.0182982
442.79	0.33330212		972.79	0.04160729		1502.78	0.08391647		2032.78	0.00005779		2562.77	0.11546002		3092.77	0.11307357		3622.8	-0.01884353
442.99	0.33360604		972.99	0.04079451		1502.98	0.08469928		2032.98	0.00085235		2562.97	0.11528825		3092.97	0.11322467		3623	-0.01867394
443.19	0.3343775		973.19	0.04080995		1503.18	0.08404131		2033.18	0.0003936		2563.17	0.11603152		3093.17	0.11260761		3623.2	-0.01893036
443.39	0.33421469		973.39	0.04081763		1503.38	0.0838736		2033.38	0.00037979		2563.37	0.11631418		3093.37	0.11210104		3623.4	-0.01846187
443.59	0.33458226		973.59	0.04099828		1503.58	0.08437718		2033.58	0.00059063		2563.57	0.1166655		3093.57	0.1127324		3623.6	-0.01848467
443.79	0.33489524		973.79	0.04011965		1503.78	0.08348451		2033.78	0.00019059		2563.77	0.11642249		3093.77	0.11261593		3623.8	-0.01846879
443.99	0.33476179		973.99	0.04093094		1503.98	0.08357118		2033.98	0.00034154		2563.97	0.11662066		3093.97	0.11394759		3624	-0.01949702
444.19	0.3349999		974.19	0.04092642		1504.18	0.08368823		2034.18	-0.00051137		2564.17	0.11627673		3094.17	0.11414791		3624.2	-0.02006235
444.39	0.33454455		974.39	0.0408568		1504.38	0.08369054		2034.38	-0.00107915		2564.37	0.11620506		3094.37	0.11380425		3624.4	-0.02067823
444.59	0.33338622		974.59	0.04071378		1504.58	0.08270567		2034.58	-0.00049823		2564.57	0.11516243		3094.57	0.11329781		3624.6	-0.02017403
444.79	0.3327666		974.79	0.04116453		1504.78	0.08216935		2034.78	-0.0002145		2564.77	0.11615629		3094.77	0.11335982		3624.8	-0.01895543
444.99	0.33162682		974.99	0.04080145		1504.98	0.08190137		2034.98	-0.00029903		2564.97	0.11517984		3094.97	0.11339721		3625	-0.01834201
445.19	0.33145226		975.19	0.04042617		1505.18	0.08119259		2035.18	-0.00128864		2565.17	0.11497822		3095.17	0.11288247		3625.2	-0.01780497
445.39	0.33174173		975.39	0.04041918		1505.38	0.08095488		2035.38	-0.00207648		2565.37	0.11545457		3095.37	0.11222251		3625.4	-0.0178561
445.59	0.33206512		975.59	0.04043172		1505.58	0.07972676		2035.58	-0.00229007		2565.57	0.11545833		3095.57	0.11158227		3625.6	-0.01744953
445.79	0.33181921		975.79	0.04055762		1505.78	0.07925094		2035.78	-0.00254853		2565.77	0.11545965		3095.77	0.11104338		3625.8	-0.01743949
445.99	0.33188443		975.99	0.04138717		1505.98	0.07881454		2035.98	-0.00322604		2565.97	0.11507647		3095.97	0.11138907		3626	-0.01601199
446.19	0.33239212		976.19	0.04141482		1506.18	0.07844143		2036.18	-0.0031781		2566.17	0.11524785		3096.17	0.11263952		3626.2	-0.01562335
446.39	0.33293215		976.39	0.04222057		1506.38	0.0790173		2036.38	-0.00442741		2566.37	0.11488424		3096.37	0.11240976		3626.4	-0.01579097
446.59	0.3327577		976.59	0.04230314		1506.58	0.07911057		2036.58	-0.00449108		2566.57	0.1148634		3096.57	0.11308614		3626.6	-0.0162377
446.79	0.33295831		976.79	0.0424978		1506.78	0.07907599		2036.78	-0.00454407		2566.77	0.11466306		3096.77	0.11275061		3626.8	-0.01634171
446.99	0.3332209		976.99	0.04107667		1506.98	0.07847802		2036.98	-0.00383735		2566.97	0.11439134		3096.97	0.11377341		3627	-0.01564029
447.19	0.33355538		977.19	0.04152867		1507.18	0.07835568		2037.18	-0.00393688		2567.17	0.11557939		3097.17	0.11409234		3627.2	-0.01650205
447.39	0.33418532		977.39	0.04135446		1507.38	0.07880686		2037.38	-0.00396548		2567.37	0.11478842		3097.37	0.11447463		3627.4	-0.01700267
447.59	0.33420732		977.59	0.04064408		1507.58	0.07939485		2037.58	-0.00366281		2567.57	0.11439393		3097.57	0.11482847		3627.6	-0.01712898
447.79	0.33414869		977.79	0.04024792		1507.78	0.07862754		2037.78	-0.003598		2567.77	0.11338792		3097.77	0.11450664		3627.8	-0.01763471
447.99	0.33401513		977.99	0.04085027		1507.98	0.07960276		2037.98	-0.00360198		2567.97	0.11349033		3097.97	0.11551086		3628	-0.01834098
448.19	0.33335007		978.19	0.04088554		1508.18	0.07938417		2038.18	-0.00286596		2568.17	0.11344142		3098.17	0.11461936		3628.2	-0.01808317
448.39	0.33264137		978.39	0.04064001		1508.38	0.07953343		2038.38	-0.00227851		2568.37	0.11313385		3098.37	0.11444477		3628.4	-0.0190381
448.59	0.33266695		978.59	0.04023151		1508.58	0.07966205		2038.58	-0.00210262		2568.57	0.11365914		3098.57	0.11451228		3628.6	-0.01797463
448.79	0.33273319		978.79	0.03983719		1508.78	0.08082317		2038.78	-0.00188108		2568.77	0.11454273		3098.77	0.11439347		3628.8	-0.01832638
448.99	0.33316005		978.99	0.03942021		1508.98	0.08151142		2038.98	-0.0022347		2568.97	0.11441865		3098.97	0.11345095		3629	-0.01873324
449.19	0.33319602		979.19	0.03938499		1509.18	0.08204121		2039.18	-0.00273446		2569.17	0.11459205		3099.17	0.11252001		3629.2	-0.01935688
449.39	0.33388558		979.39	0.03926978		1509.38	0.08230856		2039.38	-0.00271805		2569.37	0.11526903		3099.37	0.11143365		3629.4	-0.01972195
449.59	0.33401726		979.59	0.03892872		1509.58	0.08163598		2039.58	-0.00326369		2569.57	0.11568505		3099.57	0.11167988		3629.6	-0.01979828
449.79	0.33447834		979.79	0.0388705		1509.78	0.08214765		2039.78	-0.0039295		2569.77	0.11649285		3099.77	0.11166909		3629.8	-0.01917683
449.99	0.33377619		979.99	0.0382888		1509.98	0.08224782		2039.98	-0.00465245		2569.97	0.11658024		3099.97	0.11195123		3630	-0.02036527
450.19	0.33364358		980.19	0.03875275		1510.18	0.08234683		2040.18	-0.00503815		2570.17	0.11698205		3100.17	0.11172599		3630.2	-0.02139484
450.39	0.33284555		980.39	0.03842115		1510.38	0.08181205		2040.38	-0.00563967		2570.37	0.11720266		3100.37	0.11146362		3630.4	-0.02176266
450.59	0.33227522		980.59	0.03812353		1510.58	0.08228869		2040.58	-0.0048865		2570.57	0.11727279		3100.57	0.11209617		3630.6	-0.02145426
450.79	0.33200553		980.79	0.03826432		1510.78	0.08207841		2040.78	-0.00422679		2570.77	0.11715933		3100.77	0.11189416		3630.8	-0.0212669
450.99	0.33211924		980.99	0.03799325		1510.98	0.0807861		2040.98	-0.00394139		2570.97	0.11655332		3100.97	0.11236318		3631	-0.02116514
451.19	0.3313328		981.19	0.0380166		1511.18	0.08100596		2041.18	-0.00454674		2571.17	0.11631289		3101.17	0.112203		3631.2	-0.02229296
451.39	0.3310384		981.39	0.03804683		1511.38	0.08004002		2041.38	-0.004467		2571.37	0.11559148		3101.37	0.11174816		3631.4	-0.02188453
451.59	0.32961025		981.59	0.03830407		1511.58	0.07970642		2041.58	-0.00459466		2571.57	0.11480094		3101.57	0.11125679		3631.6	-0.02145442
451.79	0.33015468		981.79	0.0385803		1511.78	0.07944292		2041.78	-0.00483662		2571.77	0.11414512		3101.77	0.11124281		3631.8	-0.0220169
451.99	0.33050691		981.99	0.03936451		1511.98	0.07895855		2041.98	-0.00527305		2571.97	0.11464195		3101.97	0.11154928		3632	-0.02132679
452.19	0.32963813		982.19	0.0399366		1512.18	0.07843288		2042.18	-0.00508016		2572.17	0.1147113		3102.17	0.11149522		3632.2	-0.02041303
452.39	0.32992322		982.39	0.03935748		1512.38	0.07853846		2042.38	-0.00566061		2572.37	0.1144032		3102.37	0.1115885		3632.4	-0.02052378
452.59	0.32977359		982.59	0.03891654		1512.58	0.07938126		2042.58	-0.00652522		2572.57	0.11469292		3102.57	0.11176754		3632.6	-0.01987871
452.79	0.32996373		982.79	0.03910827		1512.78	0.07982974		2042.78	-0.00739814		2572.77	0.11483814		3102.77	0.11209263		3632.8	-0.02055281
452.99	0.32938416		982.99	0.03889853		1512.98	0.07987833		2042.98	-0.00777492		2572.97	0.11426917		3102.97	0.11241488		3633	-0.02005542
453.19	0.32947076		983.19	0.03936162		1513.18	0.08023534		2043.18	-0.00787763		2573.17	0.11338613		3103.17	0.11291944		3633.2	-0.01962471
453.39	0.3293304		983.39	0.03969398		1513.38	0.08073647		2043.38	-0.00808367		2573.37	0.11261693		3103.37	0.11363893		3633.4	-0.01904573
453.59	0.32906888		983.59	0.03980911		1513.58	0.08121124		2043.58	-0.0081517		2573.57	0.11312304		3103.57	0.11479372		3633.6	-0.01883199
453.79	0.32874816		983.79	0.04033358		1513.78	0.08132034		2043.78	-0.00773062		2573.77	0.11297579		3103.77	0.11413947		3633.8	-0.01848797
453.99	0.32775922		983.99	0.0398938		1513.98	0.08138669		2043.98	-0.00814566		2573.97	0.11255782		3103.97	0.11487479		3634	-0.01903726
454.19	0.32787721		984.19	0.04030864		1514.18	0.08178439		2044.18	-0.00799145		2574.17	0.11198944		3104.17	0.11553707		3634.2	-0.01779543
454.39	0.32773747		984.39	0.03995965		1514.38	0.08175487		2044.38	-0.00733547		2574.37	0.11221386		3104.37	0.11666195		3634.4	-0.01769549
454.59	0.328627		984.59	0.0406092		1514.58	0.08233907		2044.58	-0.00677638		2574.57	0.11144742		3104.57	0.11663839		3634.6	-0.01761702
454.79	0.3291294		984.79	0.04094843		1514.78	0.08173981		2044.78	-0.00583593		2574.77	0.11090424		3104.77	0.11639033		3634.8	-0.01820943
454.99	0.32968231		984.99	0.04188552		1514.98	0.08121488		2044.98	-0.00562553		2574.97	0.11082059		3104.97	0.11576162		3635	-0.01835367
455.19	0.32960376		985.19	0.04161478		1515.18	0.08089807		2045.18	-0.00499329		2575.17	0.11126083		3105.17	0.11598907		3635.2	-0.0188385
455.39	0.32999948		985.39	0.04239405		1515.38	0.08037523		2045.38	-0.00394848		2575.37	0.11145702		3105.37	0.11544172		3635.4	-0.0192078
455.59	0.33010241		985.59	0.04259783		1515.58	0.08073424		2045.58	-0.00380087		2575.57	0.11122033		3105.57	0.11520444		3635.6	-0.01907692
455.79	0.33149959		985.79	0.04198581		1515.78	0.08051664		2045.78	-0.00435162		2575.77	0.11183675		3105.77	0.11486318		3635.8	-0.01989042
455.99	0.33170273		985.99	0.04239771		1515.98	0.07998528		2045.98	-0.00314704		2575.97	0.11214385		3105.97	0.11468517		3636	-0.01979145
456.19	0.33147363		986.19	0.0419355		1516.18	0.07954241		2046.18	-0.00312876		2576.17	0.1127044		3106.17	0.11348618		3636.2	-0.01969743
456.39	0.33102074		986.39	0.04119686		1516.38	0.07947399		2046.38	-0.00330345		2576.37	0.11304869		3106.37	0.11328199		3636.4	-0.02107719
456.59	0.32996977		986.59	0.0411876		1516.58	0.0795639		2046.58	-0.00404311		2576.57	0.11380633		3106.57	0.11339407		3636.6	-0.0209673
456.79	0.32995061		986.79	0.04032087		1516.78	0.07929087		2046.78	-0.0041758		2576.77	0.11429898		3106.77	0.11347863		3636.8	-0.02070504
456.99	0.32966922		986.99	0.03976236		1516.98	0.07930372		2046.98	-0.00427411		2576.97	0.11357189		3106.97	0.11385414		3637	-0.01985779
457.19	0.32913038		987.19	0.03992752		1517.18	0.07931426		2047.18	-0.00461704		2577.17	0.11303152		3107.17	0.11411751		3637.2	-0.0192607
457.39	0.32771906		987.39	0.03989059		1517.38	0.07938424		2047.38	-0.00529336		2577.37	0.11256493		3107.37	0.11404506		3637.4	-0.0195302
457.59	0.32713261		987.59	0.03992484		1517.58	0.07897188		2047.58	-0.00580246		2577.57	0.11355733		3107.57	0.11475135		3637.6	-0.01879284
457.79	0.3271265		987.79	0.03906828		1517.78	0.07843278		2047.78	-0.0061996		2577.77	0.11359393		3107.77	0.11433143		3637.8	-0.01797293
457.99	0.32587163		987.99	0.03848206		1517.98	0.07842714		2047.98	-0.00703732		2577.97	0.11339392		3107.97	0.11510139		3638	-0.01742186
458.19	0.3255443		988.19	0.03774974		1518.18	0.07891562		2048.18	-0.00765807		2578.17	0.11236965		3108.17	0.11458291		3638.2	-0.01687429
458.39	0.32585877		988.39	0.03744859		1518.38	0.07877478		2048.38	-0.00779745		2578.37	0.11226998		3108.37	0.11446705		3638.4	-0.01757021
458.59	0.32614318		988.59	0.03788847		1518.58	0.07828673		2048.58	-0.00677764		2578.57	0.1115051		3108.57	0.11436123		3638.6	-0.01873317
458.79	0.32618628		988.79	0.03833903		1518.78	0.07858914		2048.78	-0.00682384		2578.77	0.11098608		3108.77	0.11473212		3638.8	-0.01880681
458.99	0.32576074		988.99	0.03829199		1518.98	0.0785844		2048.98	-0.00761541		2578.97	0.11173739		3108.97	0.1131714		3639	-0.01984751
459.19	0.32621408		989.19	0.03725689		1519.18	0.0778593		2049.18	-0.00782374		2579.17	0.11163207		3109.17	0.11323302		3639.2	-0.02053938
459.39	0.32614689		989.39	0.03710922		1519.38	0.07811295		2049.38	-0.00722545		2579.37	0.11135814		3109.37	0.1127004		3639.4	-0.02093631
459.59	0.3263888		989.59	0.03703065		1519.58	0.07835385		2049.58	-0.00727183		2579.57	0.11210915		3109.57	0.11241705		3639.6	-0.02127822
459.79	0.3270407		989.79	0.03690872		1519.78	0.07800288		2049.78	-0.00651078		2579.77	0.11292853		3109.77	0.11125301		3639.8	-0.02138189
459.99	0.32639085		989.99	0.0375864		1519.98	0.07792045		2049.98	-0.00536747		2579.97	0.11334482		3109.97	0.11044365		3640	-0.02153809
460.19	0.32646658		990.19	0.03701516		1520.18	0.0780029		2050.18	-0.00572261		2580.17	0.11398628		3110.17	0.11039276		3640.2	-0.02134034
460.39	0.32585447		990.39	0.03707589		1520.38	0.0789293		2050.38	-0.00564049		2580.37	0.11463978		3110.37	0.11055169		3640.4	-0.02199011
460.59	0.32604438		990.59	0.03708811		1520.58	0.07919471		2050.58	-0.00606864		2580.57	0.11453429		3110.57	0.11059716		3640.6	-0.02128788
460.79	0.32685276		990.79	0.03717171		1520.78	0.08013085		2050.78	-0.00579743		2580.77	0.11436074		3110.77	0.11096069		3640.8	-0.02139112
460.99	0.32679585		990.99	0.03812875		1520.98	0.08010918		2050.98	-0.00707192		2580.97	0.11380368		3110.97	0.1118089		3641	-0.02057254
461.19	0.32645185		991.19	0.03925971		1521.18	0.07977406		2051.18	-0.0075127		2581.17	0.11298893		3111.17	0.11188032		3641.2	-0.02028032
461.39	0.32631459		991.39	0.03890813		1521.38	0.0791495		2051.38	-0.00745614		2581.37	0.11265526		3111.37	0.11167274		3641.4	-0.01989829
461.59	0.3262582		991.59	0.03824731		1521.58	0.07885665		2051.58	-0.00749875		2581.57	0.11282331		3111.57	0.11222107		3641.6	-0.01943452
461.79	0.32724409		991.79	0.03782509		1521.78	0.07849479		2051.78	-0.0072605		2581.77	0.11280381		3111.77	0.11138893		3641.8	-0.01947393
461.99	0.32643701		991.99	0.03793615		1521.98	0.07866173		2051.98	-0.00780324		2581.97	0.11277561		3111.97	0.11212097		3642	-0.01929794
462.19	0.32715649		992.19	0.03710434		1522.18	0.0791074		2052.18	-0.00797316		2582.17	0.11208804		3112.17	0.11161421		3642.2	-0.02082197
462.39	0.32761022		992.39	0.03731085		1522.38	0.07892646		2052.38	-0.00712541		2582.37	0.11098822		3112.37	0.11238612		3642.4	-0.02220348
462.59	0.32807406		992.59	0.03780423		1522.58	0.0779266		2052.58	-0.00657223		2582.57	0.11043558		3112.57	0.11208447		3642.6	-0.02286996
462.79	0.32828139		992.79	0.03756612		1522.78	0.07893546		2052.78	-0.00728837		2582.77	0.11050678		3112.77	0.11147595		3642.8	-0.02360339
462.99	0.32820622		992.99	0.03669105		1522.98	0.07897703		2052.98	-0.0075861		2582.97	0.11045765		3112.97	0.11123033		3643	-0.0248489
463.19	0.3284125		993.19	0.03632863		1523.18	0.07951114		2053.18	-0.00761356		2583.17	0.11007673		3113.17	0.11209061		3643.2	-0.02465769
463.39	0.32869068		993.39	0.03669796		1523.38	0.08091528		2053.38	-0.00686583		2583.37	0.1101458		3113.37	0.11293956		3643.4	-0.02357416
463.59	0.32875895		993.59	0.03687176		1523.58	0.08182038		2053.58	-0.00625626		2583.57	0.11050054		3113.57	0.1134268		3643.6	-0.02305908
463.79	0.32928828		993.79	0.0367854		1523.78	0.08239783		2053.78	-0.0054415		2583.77	0.11067537		3113.77	0.11260928		3643.8	-0.02202839
463.99	0.32922336		993.99	0.03648717		1523.98	0.08257709		2053.98	-0.00495472		2583.97	0.11094061		3113.97	0.11266329		3644	-0.02257002
464.19	0.33026242		994.19	0.03669144		1524.18	0.0834802		2054.18	-0.00494331		2584.17	0.11141162		3114.17	0.1131541		3644.2	-0.02309352
464.39	0.33011925		994.39	0.03693522		1524.38	0.0838704		2054.38	-0.00478467		2584.37	0.11251437		3114.37	0.11254633		3644.4	-0.02375903
464.59	0.33024475		994.59	0.03734395		1524.58	0.08360713		2054.58	-0.00495862		2584.57	0.11304663		3114.57	0.11301606		3644.6	-0.02317325
464.79	0.33043807		994.79	0.03802511		1524.78	0.08305816		2054.78	-0.00560197		2584.77	0.11421891		3114.77	0.11352771		3644.8	-0.02286899
464.99	0.33050816		994.99	0.03841469		1524.98	0.08265968		2054.98	-0.00652247		2584.97	0.11449227		3114.97	0.11393778		3645	-0.02214702
465.19	0.33058285		995.19	0.03936608		1525.18	0.0819491		2055.18	-0.0060935		2585.17	0.11459165		3115.17	0.11323108		3645.2	-0.0223022
465.39	0.33099003		995.39	0.03839004		1525.38	0.08124186		2055.38	-0.00537422		2585.37	0.11519207		3115.37	0.11274217		3645.4	-0.02178782
465.59	0.33041063		995.59	0.03901631		1525.58	0.08064589		2055.58	-0.0059234		2585.57	0.1157829		3115.57	0.11204001		3645.6	-0.02219144
465.79	0.33055724		995.79	0.03909633		1525.78	0.08028735		2055.78	-0.00550246		2585.77	0.1166199		3115.77	0.11151071		3645.8	-0.02140859
465.99	0.33027334		995.99	0.03864472		1525.98	0.07926449		2055.98	-0.00585167		2585.97	0.11650793		3115.97	0.11231208		3646	-0.02240252
466.19	0.33074675		996.19	0.03825749		1526.18	0.07804822		2056.18	-0.00559327		2586.17	0.11562913		3116.17	0.11182889		3646.2	-0.02378979
466.39	0.33128175		996.39	0.03806569		1526.38	0.07707715		2056.38	-0.00515371		2586.37	0.11488167		3116.37	0.11172706		3646.4	-0.02402923
466.59	0.33194685		996.59	0.03813134		1526.58	0.07701355		2056.58	-0.00578672		2586.57	0.11507386		3116.57	0.11139526		3646.6	-0.02420322
466.79	0.33141317		996.79	0.03725711		1526.78	0.07739524		2056.78	-0.00617029		2586.77	0.11492397		3116.77	0.11147935		3646.8	-0.02447013
466.99	0.33064182		996.99	0.03779521		1526.98	0.07762423		2056.98	-0.00612848		2586.97	0.11391092		3116.97	0.11176542		3647	-0.02338903
467.19	0.32959857		997.19	0.03724897		1527.18	0.07837984		2057.18	-0.00660257		2587.17	0.11391961		3117.17	0.11092658		3647.2	-0.02297945
467.39	0.32953087		997.39	0.03705795		1527.38	0.07767786		2057.38	-0.00708056		2587.37	0.1146465		3117.37	0.11101387		3647.4	-0.02168635
467.59	0.32884359		997.59	0.03646091		1527.58	0.07785991		2057.58	-0.00675469		2587.57	0.11375623		3117.57	0.11047392		3647.6	-0.02185775
467.79	0.32898364		997.79	0.03607431		1527.78	0.07701427		2057.78	-0.00714185		2587.77	0.11430376		3117.77	0.10910606		3647.8	-0.02160468
467.99	0.3282504		997.99	0.03541013		1527.98	0.07632109		2057.98	-0.0073268		2587.97	0.11470339		3117.97	0.10898147		3648	-0.02217993
468.19	0.32841792		998.19	0.03531047		1528.18	0.07605195		2058.18	-0.00809975		2588.17	0.11410369		3118.17	0.10874957		3648.2	-0.0220357
468.39	0.32719466		998.39	0.03514197		1528.38	0.07605811		2058.38	-0.00821651		2588.37	0.11505725		3118.37	0.10855118		3648.4	-0.0217781
468.59	0.32724515		998.59	0.03509128		1528.58	0.07547044		2058.58	-0.00753735		2588.57	0.11562085		3118.57	0.10907054		3648.6	-0.0209752
468.79	0.32709999		998.79	0.03502376		1528.78	0.07549905		2058.78	-0.00759872		2588.77	0.11516791		3118.77	0.10949014		3648.8	-0.02017081
468.99	0.32761492		998.99	0.03499852		1528.98	0.0762289		2058.98	-0.0067017		2588.97	0.1145213		3118.97	0.10955416		3649	-0.02050615
469.19	0.32709933		999.19	0.03569793		1529.18	0.07595293		2059.18	-0.00583536		2589.17	0.11415206		3119.17	0.10865492		3649.2	-0.02097149
469.39	0.32669037		999.39	0.0353118		1529.38	0.07696728		2059.38	-0.00500063		2589.37	0.11396473		3119.37	0.10927148		3649.4	-0.02034168
469.59	0.32623508		999.59	0.03547083		1529.58	0.07756915		2059.58	-0.00571634		2589.57	0.11368228		3119.57	0.10947349		3649.6	-0.02088811
469.79	0.32711066		999.79	0.03506285		1529.78	0.07805085		2059.78	-0.0053699		2589.77	0.11250035		3119.77	0.11032711		3649.8	-0.02097459
469.99	0.32800306		999.99	0.03566603		1529.98	0.0779873		2059.98	-0.00495277		2589.97	0.11107328		3119.97	0.11133594		3650	-0.02255963
470.19	0.32865715		1000.19	0.0363799		1530.18	0.07793399		2060.18	-0.00484689		2590.17	0.11005519		3120.17	0.11154395		3650.2	-0.02255964
470.39	0.32981104		1000.39	0.03722125		1530.38	0.0789167		2060.38	-0.00503113		2590.37	0.10955345		3120.37	0.11167664		3650.4	-0.02260048
470.59	0.33013716		1000.59	0.03787778		1530.58	0.07940221		2060.58	-0.00503939		2590.57	0.10833528		3120.57	0.11182709		3650.6	-0.02232708
470.79	0.33031864		1000.79	0.03883086		1530.78	0.07995976		2060.78	-0.00503626		2590.77	0.1081109		3120.77	0.11151877		3650.8	-0.02188026
470.99	0.33005279		1000.99	0.0403124		1530.98	0.08104327		2060.98	-0.00551032		2590.97	0.10800774		3120.97	0.11125191		3651	-0.02237465
471.19	0.33009291		1001.19	0.03920734		1531.18	0.08109103		2061.18	-0.00691385		2591.17	0.10899495		3121.17	0.11001655		3651.2	-0.0223406
471.39	0.32973563		1001.39	0.03906054		1531.38	0.08083859		2061.38	-0.00734957		2591.37	0.10914926		3121.37	0.1101734		3651.4	-0.02153777
471.59	0.33020243		1001.59	0.03963308		1531.58	0.08096731		2061.58	-0.0077043		2591.57	0.10853237		3121.57	0.10947016		3651.6	-0.02151845
471.79	0.33030382		1001.79	0.03973918		1531.78	0.07956535		2061.78	-0.0082052		2591.77	0.10972921		3121.77	0.10909375		3651.8	-0.02032514
471.99	0.33070013		1001.99	0.03991089		1531.98	0.0797224		2061.98	-0.00806229		2591.97	0.11020557		3121.97	0.10904562		3652	-0.02057369
472.19	0.33063956		1002.19	0.04037864		1532.18	0.07923742		2062.18	-0.00750803		2592.17	0.11059661		3122.17	0.10838149		3652.2	-0.02083197
472.39	0.33014304		1002.39	0.04018483		1532.38	0.07857116		2062.38	-0.00730773		2592.37	0.11216823		3122.37	0.10812867		3652.4	-0.02107206
472.59	0.32947135		1002.59	0.03950456		1532.58	0.07833419		2062.58	-0.00667105		2592.57	0.11329363		3122.57	0.10798275		3652.6	-0.02100455
472.79	0.32842152		1002.79	0.03942782		1532.78	0.0779804		2062.78	-0.0067406		2592.77	0.1130365		3122.77	0.10758381		3652.8	-0.02112768
472.99	0.32846366		1002.99	0.03833752		1532.98	0.07740156		2062.98	-0.00682993		2592.97	0.11310934		3122.97	0.10749204		3653	-0.02207954
473.19	0.32785505		1003.19	0.03786245		1533.18	0.07745457		2063.18	-0.00659719		2593.17	0.11359091		3123.17	0.10743125		3653.2	-0.02190562
473.39	0.32765806		1003.39	0.03761478		1533.38	0.07909368		2063.38	-0.00686339		2593.37	0.11321452		3123.37	0.10832182		3653.4	-0.02126096
473.59	0.32738837		1003.59	0.03764128		1533.58	0.07904461		2063.58	-0.0076947		2593.57	0.11300925		3123.57	0.10875199		3653.6	-0.02068424
473.79	0.32701403		1003.79	0.03734306		1533.78	0.07861746		2063.78	-0.00766948		2593.77	0.11159276		3123.77	0.10944676		3653.8	-0.02075684
473.99	0.3268245		1003.99	0.03777041		1533.98	0.07869266		2063.98	-0.00762172		2593.97	0.11176207		3123.97	0.10996829		3654	-0.02026282
474.19	0.3264172		1004.19	0.03785709		1534.18	0.07801518		2064.18	-0.00826256		2594.17	0.11134233		3124.17	0.10946057		3654.2	-0.02026888
474.39	0.32694781		1004.39	0.03813457		1534.38	0.07811922		2064.38	-0.00826303		2594.37	0.11156464		3124.37	0.10969947		3654.4	-0.02028771
474.59	0.32759384		1004.59	0.03764291		1534.58	0.07796046		2064.58	-0.00754243		2594.57	0.11085433		3124.57	0.10999232		3654.6	-0.02032355
474.79	0.32840123		1004.79	0.03835257		1534.78	0.07897661		2064.78	-0.00798304		2594.77	0.1110574		3124.77	0.11009415		3654.8	-0.02021959
474.99	0.32778104		1004.99	0.03725519		1534.98	0.07962182		2064.98	-0.0088341		2594.97	0.11127397		3124.97	0.111227		3655	-0.02017246
475.19	0.32820029		1005.19	0.03668811		1535.18	0.079903		2065.18	-0.00897005		2595.17	0.11066071		3125.17	0.11162314		3655.2	-0.0194675
475.39	0.32800807		1005.39	0.03673276		1535.38	0.08037051		2065.38	-0.00840627		2595.37	0.11008089		3125.37	0.11215797		3655.4	-0.01901713
475.59	0.32845918		1005.59	0.03711986		1535.58	0.07967172		2065.58	-0.00842408		2595.57	0.10992475		3125.57	0.11191799		3655.6	-0.01834558
475.79	0.32877039		1005.79	0.03731692		1535.78	0.0799784		2065.78	-0.00772791		2595.77	0.10990972		3125.77	0.11236541		3655.8	-0.01851444
475.99	0.32909839		1005.99	0.03705357		1535.98	0.08026699		2065.98	-0.00758456		2595.97	0.11045464		3125.97	0.11224422		3656	-0.01911836
476.19	0.32877751		1006.19	0.03682643		1536.18	0.07971721		2066.18	-0.00769318		2596.17	0.11106754		3126.17	0.11267103		3656.2	-0.01968107
476.39	0.32869768		1006.39	0.03630023		1536.38	0.07982837		2066.38	-0.00729034		2596.37	0.11131573		3126.37	0.11263829		3656.4	-0.01964205
476.59	0.32837246		1006.59	0.03674713		1536.58	0.08069726		2066.58	-0.00695818		2596.57	0.1120635		3126.57	0.11294885		3656.6	-0.02004638
476.79	0.32887535		1006.79	0.03682115		1536.78	0.08054811		2066.78	-0.00694058		2596.77	0.11199097		3126.77	0.11279547		3656.8	-0.02029334
476.99	0.3285457		1006.99	0.03621184		1536.98	0.08073137		2066.98	-0.00706975		2596.97	0.11262795		3126.97	0.11267505		3657	-0.02047819
477.19	0.32843674		1007.19	0.0369901		1537.18	0.08200918		2067.18	-0.00642703		2597.17	0.11300299		3127.17	0.11183155		3657.2	-0.01975381
477.39	0.32788379		1007.39	0.03744491		1537.38	0.0826999		2067.38	-0.00687484		2597.37	0.11335507		3127.37	0.11149912		3657.4	-0.02027134
477.59	0.32712151		1007.59	0.03731265		1537.58	0.08208341		2067.58	-0.00771638		2597.57	0.11307094		3127.57	0.11141186		3657.6	-0.02015202
477.79	0.32736662		1007.79	0.03684687		1537.78	0.08159712		2067.78	-0.00843178		2597.77	0.1125695		3127.77	0.11057988		3657.8	-0.02046759
477.99	0.32758247		1007.99	0.03783541		1537.98	0.08115509		2067.98	-0.00806408		2597.97	0.11308656		3127.97	0.109809		3658	-0.0215381
478.19	0.32691231		1008.19	0.03751253		1538.18	0.08029006		2068.18	-0.00826894		2598.17	0.1118306		3128.17	0.10942135		3658.2	-0.02219461
478.39	0.32719926		1008.39	0.03761278		1538.38	0.07993338		2068.38	-0.00824201		2598.37	0.11186891		3128.37	0.11003425		3658.4	-0.02263929
478.59	0.32728051		1008.59	0.03731599		1538.58	0.07993663		2068.58	-0.00776938		2598.57	0.11066402		3128.57	0.11046351		3658.6	-0.02300135
478.79	0.32669351		1008.79	0.03732416		1538.78	0.07985446		2068.78	-0.00787948		2598.77	0.11050734		3128.77	0.11092179		3658.8	-0.02301324
478.99	0.32588369		1008.99	0.0366541		1538.98	0.0795642		2068.98	-0.00856774		2598.97	0.10932058		3128.97	0.11058787		3659	-0.02265292
479.19	0.32667115		1009.19	0.03699096		1539.18	0.07940702		2069.18	-0.0077706		2599.17	0.107815		3129.17	0.11006602		3659.2	-0.02308698
479.39	0.32585183		1009.39	0.03749675		1539.38	0.07905102		2069.38	-0.00766286		2599.37	0.10736424		3129.37	0.10950229		3659.4	-0.02286969
479.59	0.32548194		1009.59	0.03822623		1539.58	0.07861827		2069.58	-0.00767308		2599.57	0.1065769		3129.57	0.10985293		3659.6	-0.02241037
479.79	0.32594296		1009.79	0.03833051		1539.78	0.07893956		2069.78	-0.00778119		2599.77	0.10697982		3129.77	0.10998089		3659.8	-0.0227083
479.99	0.32541914		1009.99	0.03834783		1539.98	0.07872887		2069.98	-0.00816834		2599.97	0.10787038		3129.97	0.10999168		3660	-0.02197372
480.19	0.325452		1010.19	0.03802112		1540.18	0.0789083		2070.18	-0.00715085		2600.17	0.10883617		3130.17	0.10980346		3660.2	-0.0223055
480.39	0.32528417		1010.39	0.03782546		1540.38	0.07979291		2070.38	-0.00678511		2600.37	0.10882585		3130.37	0.10855956		3660.4	-0.02159162
480.59	0.32605703		1010.59	0.0373509		1540.58	0.08007339		2070.58	-0.00712428		2600.57	0.11027974		3130.57	0.10813571		3660.6	-0.02217884
480.79	0.32592009		1010.79	0.03743335		1540.78	0.07988785		2070.78	-0.00775056		2600.77	0.11140756		3130.77	0.10747828		3660.8	-0.0215368
480.99	0.32541076		1010.99	0.03779979		1540.98	0.08047033		2070.98	-0.00811813		2600.97	0.11199627		3130.97	0.10707574		3661	-0.02151395
481.19	0.32599287		1011.19	0.03726848		1541.18	0.08053934		2071.18	-0.00787259		2601.17	0.11230692		3131.17	0.10596706		3661.2	-0.0207431
481.39	0.32637914		1011.39	0.03743503		1541.38	0.08036935		2071.38	-0.00846964		2601.37	0.11326344		3131.37	0.10588062		3661.4	-0.02120244
481.59	0.32691663		1011.59	0.03708585		1541.58	0.08056746		2071.58	-0.00960473		2601.57	0.11228421		3131.57	0.10512142		3661.6	-0.02143752
481.79	0.32695904		1011.79	0.03648804		1541.78	0.08067695		2071.78	-0.00958132		2601.77	0.11274194		3131.77	0.10537267		3661.8	-0.02132523
481.99	0.32705668		1011.99	0.03781208		1541.98	0.08035292		2071.98	-0.0094176		2601.97	0.11239253		3131.97	0.10649307		3662	-0.02181782
482.19	0.32713657		1012.19	0.03707363		1542.18	0.08112143		2072.18	-0.01040006		2602.17	0.11157596		3132.17	0.10704035		3662.2	-0.02161182
482.39	0.32712498		1012.39	0.0381591		1542.38	0.08125186		2072.38	-0.00966054		2602.37	0.11201899		3132.37	0.10711232		3662.4	-0.02225511
482.59	0.32722066		1012.59	0.03766561		1542.58	0.08121478		2072.58	-0.00893465		2602.57	0.11169462		3132.57	0.1065996		3662.6	-0.02175208
482.79	0.3269827		1012.79	0.03723378		1542.78	0.08111815		2072.78	-0.00900327		2602.77	0.11063533		3132.77	0.10645956		3662.8	-0.0216346
482.99	0.32694374		1012.99	0.03756587		1542.98	0.08115023		2072.98	-0.0086948		2602.97	0.10921522		3132.97	0.10613612		3663	-0.0217537
483.19	0.32617914		1013.19	0.03784057		1543.18	0.08085409		2073.18	-0.00814232		2603.17	0.10851221		3133.17	0.10676361		3663.2	-0.02248471
483.39	0.32523349		1013.39	0.03823998		1543.38	0.08128021		2073.38	-0.00761331		2603.37	0.10792122		3133.37	0.10636076		3663.4	-0.02133883
483.59	0.32478749		1013.59	0.03845743		1543.58	0.08126798		2073.58	-0.00711312		2603.57	0.10822534		3133.57	0.10690373		3663.6	-0.02157982
483.79	0.324767		1013.79	0.03813337		1543.78	0.08125594		2073.78	-0.00685019		2603.77	0.10843238		3133.77	0.10711491		3663.8	-0.02164051
483.99	0.3251494		1013.99	0.0378145		1543.98	0.08104996		2073.98	-0.00654957		2603.97	0.10918853		3133.97	0.10691049		3664	-0.02222453
484.19	0.32503288		1014.19	0.03693266		1544.18	0.08095264		2074.18	-0.00536528		2604.17	0.10933618		3134.17	0.10710961		3664.2	-0.02262524
484.39	0.32520967		1014.39	0.0370192		1544.38	0.0802679		2074.38	-0.00571361		2604.37	0.10891464		3134.37	0.10698529		3664.4	-0.02308731
484.59	0.3258519		1014.59	0.03676409		1544.58	0.07982683		2074.58	-0.00574524		2604.57	0.11013421		3134.57	0.10820341		3664.6	-0.02361059
484.79	0.32562958		1014.79	0.0376909		1544.78	0.07915144		2074.78	-0.00596576		2604.77	0.11079264		3134.77	0.10881163		3664.8	-0.02289992
484.99	0.32570014		1014.99	0.03820507		1544.98	0.07898901		2074.98	-0.00605709		2604.97	0.11038913		3134.97	0.10927656		3665	-0.0225613
485.19	0.32710946		1015.19	0.03780558		1545.18	0.07770073		2075.18	-0.00639529		2605.17	0.11096625		3135.17	0.10890197		3665.2	-0.02200837
485.39	0.32732674		1015.39	0.03803639		1545.38	0.0772649		2075.38	-0.00784502		2605.37	0.11086506		3135.37	0.10921935		3665.4	-0.02275558
485.59	0.32681707		1015.59	0.03800616		1545.58	0.07739779		2075.58	-0.00926881		2605.57	0.11059742		3135.57	0.10934894		3665.6	-0.02185352
485.79	0.32664213		1015.79	0.03832381		1545.78	0.07766215		2075.78	-0.00954921		2605.77	0.11102939		3135.77	0.11029549		3665.8	-0.02149897
485.99	0.32731968		1015.99	0.03928454		1545.98	0.07743429		2075.98	-0.01083901		2605.97	0.11067909		3135.97	0.11135681		3666	-0.02127761
486.19	0.32822257		1016.19	0.03912314		1546.18	0.07739305		2076.18	-0.01192163		2606.17	0.11106814		3136.17	0.11070521		3666.2	-0.02160001
486.39	0.32797422		1016.39	0.03832097		1546.38	0.07707439		2076.38	-0.01262681		2606.37	0.11130389		3136.37	0.11125833		3666.4	-0.0213457
486.59	0.32776511		1016.59	0.0373202		1546.58	0.07721908		2076.58	-0.01353578		2606.57	0.11078165		3136.57	0.11131767		3666.6	-0.02071858
486.79	0.32761537		1016.79	0.03668278		1546.78	0.07744875		2076.78	-0.01449942		2606.77	0.11019287		3136.77	0.11151074		3666.8	-0.02130293
486.99	0.32702018		1016.99	0.03578865		1546.98	0.07825307		2076.98	-0.0151623		2606.97	0.11059098		3136.97	0.11260622		3667	-0.02267364
487.19	0.32594707		1017.19	0.03602254		1547.18	0.07891837		2077.18	-0.01535944		2607.17	0.11040078		3137.17	0.1123157		3667.2	-0.022434
487.39	0.3260869		1017.39	0.03626675		1547.38	0.0798043		2077.38	-0.01488632		2607.37	0.11049006		3137.37	0.11258099		3667.4	-0.02248831
487.59	0.32618182		1017.59	0.03609403		1547.58	0.07990542		2077.58	-0.01461904		2607.57	0.11191477		3137.57	0.11239039		3667.6	-0.02327403
487.79	0.32689007		1017.79	0.03598988		1547.78	0.07997709		2077.78	-0.01408604		2607.77	0.11150366		3137.77	0.1122211		3667.8	-0.02402039
487.99	0.32688871		1017.99	0.03589498		1547.98	0.07984357		2077.98	-0.01271021		2607.97	0.11136817		3137.97	0.11190461		3668	-0.02488367
488.19	0.32610781		1018.19	0.03635211		1548.18	0.07982295		2078.18	-0.01143469		2608.17	0.11040713		3138.17	0.11173016		3668.2	-0.02481773
488.39	0.32612693		1018.39	0.03575185		1548.38	0.07947771		2078.38	-0.01115385		2608.37	0.11016982		3138.37	0.11065647		3668.4	-0.02531271
488.59	0.32603008		1018.59	0.03618158		1548.58	0.07961761		2078.58	-0.01094325		2608.57	0.11016091		3138.57	0.11091202		3668.6	-0.0244017
488.79	0.32519305		1018.79	0.03689556		1548.78	0.0789538		2078.78	-0.01058676		2608.77	0.10929546		3138.77	0.10985905		3668.8	-0.02425126
488.99	0.32550683		1018.99	0.03752036		1548.98	0.07848622		2078.98	-0.0105496		2608.97	0.10909192		3138.97	0.10874129		3669	-0.02313498
489.19	0.32556182		1019.19	0.03681216		1549.18	0.07813288		2079.18	-0.01080938		2609.17	0.10870744		3139.17	0.1079529		3669.2	-0.02331835
489.39	0.32416795		1019.39	0.03753847		1549.38	0.07807989		2079.38	-0.01105336		2609.37	0.10792708		3139.37	0.10694442		3669.4	-0.02303751
489.59	0.32417628		1019.59	0.03823733		1549.58	0.07875999		2079.58	-0.01138034		2609.57	0.10772903		3139.57	0.10690555		3669.6	-0.02167177
489.79	0.32437156		1019.79	0.03783306		1549.78	0.07907817		2079.78	-0.01134826		2609.77	0.10743408		3139.77	0.10695175		3669.8	-0.02231617
489.99	0.32441224		1019.99	0.03812429		1549.98	0.07880132		2079.98	-0.01230634		2609.97	0.10758548		3139.97	0.10704631		3670	-0.02189598
490.19	0.32482236		1020.19	0.03823279		1550.18	0.07830725		2080.18	-0.01283982		2610.17	0.10827388		3140.17	0.10596458		3670.2	-0.02159781
490.39	0.32444589		1020.39	0.03717072		1550.38	0.07940801		2080.38	-0.01441882		2610.37	0.10785877		3140.37	0.10685938		3670.4	-0.02109765
490.59	0.3243303		1020.59	0.0378643		1550.58	0.08002783		2080.58	-0.01461346		2610.57	0.10789706		3140.57	0.10693664		3670.6	-0.02140761
490.79	0.32535064		1020.79	0.03709755		1550.78	0.08062454		2080.78	-0.01471433		2610.77	0.10861953		3140.77	0.10761777		3670.8	-0.02191631
490.99	0.32507347		1020.99	0.03750242		1550.98	0.08077896		2080.98	-0.01425091		2610.97	0.10982249		3140.97	0.10925104		3671	-0.0218526
491.19	0.32512592		1021.19	0.0376888		1551.18	0.08080003		2081.18	-0.01452199		2611.17	0.11025074		3141.17	0.10954819		3671.2	-0.02119311
491.39	0.32562895		1021.39	0.03638616		1551.38	0.08005976		2081.38	-0.01387285		2611.37	0.11017618		3141.37	0.1099557		3671.4	-0.02076339
491.59	0.32592388		1021.59	0.03547003		1551.58	0.07977217		2081.58	-0.01346379		2611.57	0.1109981		3141.57	0.1094335		3671.6	-0.02092898
491.79	0.32598476		1021.79	0.03496725		1551.78	0.07970435		2081.78	-0.01268467		2611.77	0.10968059		3141.77	0.11028335		3671.8	-0.02231416
491.99	0.32555481		1021.99	0.0344174		1551.98	0.07905224		2081.98	-0.01190818		2611.97	0.10960673		3141.97	0.11096552		3672	-0.02250812
492.19	0.32517179		1022.19	0.03365228		1552.18	0.07888596		2082.18	-0.01175021		2612.17	0.108765		3142.17	0.11069683		3672.2	-0.02280401
492.39	0.32535404		1022.39	0.03297709		1552.38	0.07763238		2082.38	-0.01217284		2612.37	0.10804181		3142.37	0.11071353		3672.4	-0.02339634
492.59	0.32513608		1022.59	0.03312273		1552.58	0.07597102		2082.58	-0.01193873		2612.57	0.10768076		3142.57	0.11147772		3672.6	-0.02349843
492.79	0.32534514		1022.79	0.03320837		1552.78	0.07588336		2082.78	-0.01202553		2612.77	0.10709217		3142.77	0.11140038		3672.8	-0.02352324
492.99	0.32576937		1022.99	0.03263821		1552.98	0.07532305		2082.98	-0.01172935		2612.97	0.10716736		3142.97	0.11143196		3673	-0.02255124
493.19	0.32536138		1023.19	0.0319678		1553.18	0.07627615		2083.18	-0.01157588		2613.17	0.10630538		3143.17	0.11139676		3673.2	-0.02308931
493.39	0.32506571		1023.39	0.03228981		1553.38	0.07593764		2083.38	-0.01201436		2613.37	0.10623764		3143.37	0.11099343		3673.4	-0.02212745
493.59	0.32426307		1023.59	0.03163728		1553.58	0.07623036		2083.58	-0.01209564		2613.57	0.10582101		3143.57	0.11158111		3673.6	-0.02225487
493.79	0.32323646		1023.79	0.03173354		1553.78	0.07611761		2083.78	-0.01149743		2613.77	0.10608995		3143.77	0.11062503		3673.8	-0.02230304
493.99	0.32381254		1023.99	0.03241386		1553.98	0.07683947		2083.98	-0.01229354		2613.97	0.10608479		3143.97	0.10966905		3674	-0.02214665
494.19	0.32438873		1024.19	0.03202463		1554.18	0.07778931		2084.18	-0.01236603		2614.17	0.10601339		3144.17	0.10886913		3674.2	-0.02131654
494.39	0.32447452		1024.39	0.03199338		1554.38	0.07903033		2084.38	-0.01243942		2614.37	0.10603175		3144.37	0.10871961		3674.4	-0.02097387
494.59	0.3242707		1024.59	0.03241893		1554.58	0.07897658		2084.58	-0.01224723		2614.57	0.10569923		3144.57	0.10805251		3674.6	-0.02122308
494.79	0.32432151		1024.79	0.03271664		1554.78	0.07916587		2084.78	-0.01182984		2614.77	0.10619997		3144.77	0.10718769		3674.8	-0.02060917
494.99	0.32314105		1024.99	0.03319393		1554.98	0.07860275		2084.98	-0.01196583		2614.97	0.10671624		3144.97	0.10687506		3675	-0.01956819
495.19	0.32341444		1025.19	0.03192574		1555.18	0.07827899		2085.18	-0.01165224		2615.17	0.1060551		3145.17	0.1062988		3675.2	-0.02002627
495.39	0.32341826		1025.39	0.03130985		1555.38	0.07863996		2085.38	-0.01071033		2615.37	0.10527353		3145.37	0.1059016		3675.4	-0.01960466
495.59	0.32329534		1025.59	0.03135528		1555.58	0.07926274		2085.58	-0.01122607		2615.57	0.10637233		3145.57	0.10552089		3675.6	-0.02125295
495.79	0.32314149		1025.79	0.03161387		1555.78	0.07960029		2085.78	-0.01029097		2615.77	0.10550836		3145.77	0.10536121		3675.8	-0.0223453
495.99	0.32275592		1025.99	0.0318733		1555.98	0.07915608		2085.98	-0.0101817		2615.97	0.10510187		3145.97	0.10457061		3676	-0.02257754
496.19	0.32274708		1026.19	0.03199848		1556.18	0.07955723		2086.18	-0.0102724		2616.17	0.10409295		3146.17	0.10435805		3676.2	-0.02373484
496.39	0.32333736		1026.39	0.03250133		1556.38	0.07807366		2086.38	-0.01000641		2616.37	0.10400404		3146.37	0.10437049		3676.4	-0.02414256
496.59	0.32437905		1026.59	0.03334179		1556.58	0.07779092		2086.58	-0.0095059		2616.57	0.1040695		3146.57	0.10562739		3676.6	-0.02401259
496.79	0.32510705		1026.79	0.03397718		1556.78	0.07860097		2086.78	-0.00947635		2616.77	0.10449418		3146.77	0.10600748		3676.8	-0.02496916
496.99	0.32544938		1026.99	0.03435054		1556.98	0.07825085		2086.98	-0.00873958		2616.97	0.10510418		3146.97	0.10642311		3677	-0.02504971
497.19	0.32544666		1027.19	0.03451119		1557.18	0.07806313		2087.18	-0.00882224		2617.17	0.105319		3147.17	0.10688764		3677.2	-0.0256539
497.39	0.32528837		1027.39	0.03503493		1557.38	0.07723239		2087.38	-0.00940489		2617.37	0.1054411		3147.37	0.10834175		3677.4	-0.02583502
497.59	0.32532343		1027.59	0.03481203		1557.58	0.07715243		2087.58	-0.00954335		2617.57	0.10537851		3147.57	0.10905769		3677.6	-0.02656705
497.79	0.3254515		1027.79	0.03540739		1557.78	0.07655646		2087.78	-0.01006234		2617.77	0.10589195		3147.77	0.10863143		3677.8	-0.02650757
497.99	0.32627964		1027.99	0.03560125		1557.98	0.07661918		2087.98	-0.01037394		2617.97	0.1061933		3147.97	0.10905648		3678	-0.02589623
498.19	0.32612299		1028.19	0.03583334		1558.18	0.07645439		2088.18	-0.00987179		2618.17	0.1058282		3148.17	0.10887925		3678.2	-0.02553726
498.39	0.32555482		1028.39	0.03617689		1558.38	0.07654921		2088.38	-0.01043868		2618.37	0.10586176		3148.37	0.10947022		3678.4	-0.02542097
498.59	0.32566993		1028.59	0.03681614		1558.58	0.07592552		2088.58	-0.01145638		2618.57	0.10530286		3148.57	0.10983069		3678.6	-0.02550242
498.79	0.3255625		1028.79	0.03720689		1558.78	0.07556822		2088.78	-0.01175252		2618.77	0.10551725		3148.77	0.10946769		3678.8	-0.02466033
498.99	0.32561263		1028.99	0.03562054		1558.98	0.0756633		2088.98	-0.01235335		2618.97	0.10597262		3148.97	0.1100528		3679	-0.02412662
499.19	0.32579713		1029.19	0.03536355		1559.18	0.07536334		2089.18	-0.011955		2619.17	0.10603871		3149.17	0.11005763		3679.2	-0.02480495
499.39	0.32550803		1029.39	0.03445677		1559.38	0.07580668		2089.38	-0.01188324		2619.37	0.10587432		3149.37	0.10984928		3679.4	-0.02406582
499.59	0.32521027		1029.59	0.03474849		1559.58	0.07632429		2089.58	-0.01186199		2619.57	0.10606213		3149.57	0.10982991		3679.6	-0.02457568
499.79	0.32478068		1029.79	0.03512662		1559.78	0.07648901		2089.78	-0.01189968		2619.77	0.10446594		3149.77	0.10946456		3679.8	-0.02428133
499.99	0.32499722		1029.99	0.03481699		1559.98	0.07711885		2089.98	-0.01191406		2619.97	0.10426085		3149.97	0.10880524		3680	-0.02383269
500.19	0.32554019		1030.19	0.03503114		1560.18	0.07769893		2090.18	-0.01215199		2620.17	0.10430767		3150.17	0.10818524		3680.2	-0.02384198
500.39	0.3256615		1030.39	0.03525331		1560.38	0.07758745		2090.38	-0.01115605		2620.37	0.1047276		3150.37	0.10741677		3680.4	-0.02342289
500.59	0.32614942		1030.59	0.03533797		1560.58	0.07825495		2090.58	-0.01079606		2620.57	0.10532828		3150.57	0.10743547		3680.6	-0.02384325
500.79	0.32587736		1030.79	0.03510914		1560.78	0.07892609		2090.78	-0.0106803		2620.77	0.10567927		3150.77	0.10690294		3680.8	-0.02412875
500.99	0.32571229		1030.99	0.03503722		1560.98	0.07851123		2090.98	-0.01081548		2620.97	0.10609962		3150.97	0.10698873		3681	-0.02279194
501.19	0.32571719		1031.19	0.03429043		1561.18	0.07825392		2091.18	-0.01106361		2621.17	0.10602917		3151.17	0.1068526		3681.2	-0.02264031
501.39	0.32529515		1031.39	0.03412343		1561.38	0.07883206		2091.38	-0.01112342		2621.37	0.10627429		3151.37	0.10687462		3681.4	-0.02261687
501.59	0.32530794		1031.59	0.0339099		1561.58	0.07823535		2091.58	-0.01096477		2621.57	0.10576997		3151.57	0.10610718		3681.6	-0.02221578
501.79	0.32422507		1031.79	0.03435609		1561.78	0.07771973		2091.78	-0.01079383		2621.77	0.10568398		3151.77	0.10544359		3681.8	-0.02218754
501.99	0.32390408		1031.99	0.03475951		1561.98	0.07711185		2091.98	-0.010391		2621.97	0.10580506		3151.97	0.1053653		3682	-0.02198632
502.19	0.32423977		1032.19	0.03411759		1562.18	0.07721868		2092.18	-0.00977821		2622.17	0.10560572		3152.17	0.1051693		3682.2	-0.02264597
502.39	0.32408268		1032.39	0.03301008		1562.38	0.07734113		2092.38	-0.01033113		2622.37	0.10585607		3152.37	0.10666095		3682.4	-0.02209787
502.59	0.32453448		1032.59	0.0326601		1562.58	0.07714545		2092.58	-0.01053732		2622.57	0.10654069		3152.57	0.10712904		3682.6	-0.02247605
502.79	0.32419988		1032.79	0.03237149		1562.78	0.07779932		2092.78	-0.01090863		2622.77	0.10722576		3152.77	0.10715199		3682.8	-0.02210271
502.99	0.32409352		1032.99	0.03130507		1562.98	0.07808249		2092.98	-0.01161144		2622.97	0.10675394		3152.97	0.10687724		3683	-0.0228295
503.19	0.32399005		1033.19	0.03167097		1563.18	0.07788639		2093.18	-0.01110945		2623.17	0.10686442		3153.17	0.10680307		3683.2	-0.02300297
503.39	0.32431085		1033.39	0.03187578		1563.38	0.07784222		2093.38	-0.01037422		2623.37	0.10669099		3153.37	0.10739565		3683.4	-0.02289375
503.59	0.32361528		1033.59	0.03280334		1563.58	0.07880489		2093.58	-0.0104652		2623.57	0.10654021		3153.57	0.10784344		3683.6	-0.02324308
503.79	0.32403316		1033.79	0.03234969		1563.78	0.07869915		2093.78	-0.01081406		2623.77	0.10676994		3153.77	0.10737245		3683.8	-0.02357665
503.99	0.32434861		1033.99	0.03186966		1563.98	0.07898139		2093.98	-0.01016839		2623.97	0.10722652		3153.97	0.10700963		3684	-0.02365437
504.19	0.32407011		1034.19	0.03083765		1564.18	0.07971427		2094.18	-0.00979882		2624.17	0.107356		3154.17	0.10662786		3684.2	-0.02407574
504.39	0.32294093		1034.39	0.03106523		1564.38	0.0792156		2094.38	-0.00931504		2624.37	0.10705875		3154.37	0.10696394		3684.4	-0.02448093
504.59	0.32249623		1034.59	0.03059795		1564.58	0.07848666		2094.58	-0.00923039		2624.57	0.1075377		3154.57	0.10743938		3684.6	-0.02422123
504.79	0.32203548		1034.79	0.03137862		1564.78	0.07800729		2094.78	-0.00936728		2624.77	0.10687663		3154.77	0.10723944		3684.8	-0.02325829
504.99	0.32098708		1034.99	0.03174012		1564.98	0.07725629		2094.98	-0.00990853		2624.97	0.10671234		3154.97	0.10726616		3685	-0.02292487
505.19	0.3216992		1035.19	0.03232762		1565.18	0.0776416		2095.18	-0.0100188		2625.17	0.10608101		3155.17	0.1071948		3685.2	-0.02312675
505.39	0.32095401		1035.39	0.03249039		1565.38	0.07771821		2095.38	-0.01057759		2625.37	0.10534344		3155.37	0.10690312		3685.4	-0.02286586
505.59	0.32100279		1035.59	0.03350753		1565.58	0.0760939		2095.58	-0.01071636		2625.57	0.10388557		3155.57	0.10647889		3685.6	-0.02280735
505.79	0.32052783		1035.79	0.03334833		1565.78	0.07593311		2095.78	-0.01098429		2625.77	0.10402496		3155.77	0.10670408		3685.8	-0.02284309
505.99	0.32039797		1035.99	0.03340504		1565.98	0.07581925		2095.98	-0.01127565		2625.97	0.10412768		3155.97	0.10684381		3686	-0.02252227
506.19	0.32087279		1036.19	0.03268939		1566.18	0.07633139		2096.18	-0.01095184		2626.17	0.10428388		3156.17	0.10673497		3686.2	-0.02264749
506.39	0.32036578		1036.39	0.03265341		1566.38	0.07654238		2096.38	-0.01141796		2626.37	0.1041024		3156.37	0.10678974		3686.4	-0.02139386
506.59	0.32081831		1036.59	0.03226309		1566.58	0.07727075		2096.58	-0.01210368		2626.57	0.10389137		3156.57	0.10642417		3686.6	-0.02167533
506.79	0.32132893		1036.79	0.03273009		1566.78	0.07780763		2096.78	-0.01238698		2626.77	0.10334346		3156.77	0.10537437		3686.8	-0.02146116
506.99	0.32181633		1036.99	0.03290653		1566.98	0.0772736		2096.98	-0.01236576		2626.97	0.10234903		3156.97	0.10510904		3687	-0.02165326
507.19	0.32193327		1037.19	0.03354534		1567.18	0.07782689		2097.18	-0.01159779		2627.17	0.1041966		3157.17	0.10572814		3687.2	-0.02164296
507.39	0.32207861		1037.39	0.03354019		1567.38	0.07835183		2097.38	-0.01087733		2627.37	0.10422902		3157.37	0.10589825		3687.4	-0.02224455
507.59	0.32253028		1037.59	0.03221045		1567.58	0.07875548		2097.58	-0.01112395		2627.57	0.10447048		3157.57	0.10512992		3687.6	-0.02251225
507.79	0.32330894		1037.79	0.03129553		1567.78	0.07848846		2097.78	-0.0103725		2627.77	0.10460144		3157.77	0.10490957		3687.8	-0.02426817
507.99	0.32323086		1037.99	0.03105562		1567.98	0.07874752		2097.98	-0.01006895		2627.97	0.10411972		3157.97	0.10537689		3688	-0.02548372
508.19	0.32349086		1038.19	0.03076548		1568.18	0.07928726		2098.18	-0.00971318		2628.17	0.10440521		3158.17	0.10589052		3688.2	-0.02584197
508.39	0.32327879		1038.39	0.03161844		1568.38	0.07766331		2098.38	-0.00960253		2628.37	0.10450871		3158.37	0.10632142		3688.4	-0.02591477
508.59	0.32319897		1038.59	0.03106154		1568.58	0.07736469		2098.58	-0.00966534		2628.57	0.10496944		3158.57	0.10686336		3688.6	-0.02483719
508.79	0.32329931		1038.79	0.03185489		1568.78	0.07721327		2098.78	-0.00975279		2628.77	0.10430266		3158.77	0.10656543		3688.8	-0.02514862
508.99	0.32373657		1038.99	0.03187446		1568.98	0.07730004		2098.98	-0.01023554		2628.97	0.10427655		3158.97	0.10702329		3689	-0.02483356
509.19	0.32454592		1039.19	0.03218553		1569.18	0.07633674		2099.18	-0.01092678		2629.17	0.10431729		3159.17	0.10699568		3689.2	-0.02452688
509.39	0.32443996		1039.39	0.03234028		1569.38	0.07569786		2099.38	-0.01196975		2629.37	0.1036853		3159.37	0.10662375		3689.4	-0.02417237
509.59	0.32401945		1039.59	0.03345219		1569.58	0.07537978		2099.58	-0.01237865		2629.57	0.1034335		3159.57	0.10630109		3689.6	-0.02320899
509.79	0.32377667		1039.79	0.03359261		1569.78	0.0762316		2099.78	-0.01312856		2629.77	0.10309136		3159.77	0.10645239		3689.8	-0.02366822
509.99	0.32349177		1039.99	0.03472767		1569.98	0.07573268		2099.98	-0.0135617		2629.97	0.10243452		3159.97	0.10578164		3690	-0.02374888
510.19	0.32298629		1040.19	0.03479946		1570.18	0.07555264		2100.18	-0.01317806		2630.17	0.10295326		3160.17	0.10498759		3690.2	-0.02408898
510.39	0.32280203		1040.39	0.03542189		1570.38	0.07508574		2100.38	-0.01346779		2630.37	0.10219432		3160.37	0.10488156		3690.4	-0.02227513
510.59	0.32281591		1040.59	0.03556724		1570.58	0.0754916		2100.58	-0.01322298		2630.57	0.10145738		3160.57	0.10517439		3690.6	-0.02284998
510.79	0.32307859		1040.79	0.03632397		1570.78	0.07547758		2100.78	-0.01290649		2630.77	0.10117419		3160.77	0.10511198		3690.8	-0.02214334
510.99	0.322144		1040.99	0.03620914		1570.98	0.07532437		2100.98	-0.01236923		2630.97	0.10131513		3160.97	0.10533806		3691	-0.02173704
511.19	0.32173886		1041.19	0.03584521		1571.18	0.07598259		2101.18	-0.01225679		2631.17	0.10201933		3161.17	0.10522735		3691.2	-0.02177786
511.39	0.32204782		1041.39	0.03443245		1571.38	0.07631241		2101.38	-0.01202837		2631.37	0.10155327		3161.37	0.10443576		3691.4	-0.02188688
511.59	0.32174588		1041.59	0.03433742		1571.58	0.07605933		2101.58	-0.01207208		2631.57	0.10099611		3161.57	0.10393041		3691.6	-0.02241751
511.79	0.32183794		1041.79	0.03433737		1571.78	0.07649521		2101.78	-0.01152019		2631.77	0.10080398		3161.77	0.10356735		3691.8	-0.02357768
511.99	0.32196132		1041.99	0.03371435		1571.98	0.07695372		2101.98	-0.01211042		2631.97	0.10020037		3161.97	0.10440325		3692	-0.02328166
512.19	0.32197336		1042.19	0.03244772		1572.18	0.07749419		2102.18	-0.01208897		2632.17	0.10092814		3162.17	0.10418447		3692.2	-0.02170386
512.39	0.32143696		1042.39	0.0317833		1572.38	0.07661247		2102.38	-0.01200516		2632.37	0.1005586		3162.37	0.10481396		3692.4	-0.0209171
512.59	0.32127539		1042.59	0.03073919		1572.58	0.0765826		2102.58	-0.01232216		2632.57	0.10062104		3162.57	0.10460351		3692.6	-0.02073502
512.79	0.32143657		1042.79	0.0296927		1572.78	0.07640856		2102.78	-0.01255956		2632.77	0.10063889		3162.77	0.10457391		3692.8	-0.02192615
512.99	0.32210419		1042.99	0.02928721		1572.98	0.07619134		2102.98	-0.01363129		2632.97	0.10065078		3162.97	0.10479094		3693	-0.02124189
513.19	0.32220229		1043.19	0.02960941		1573.18	0.07601908		2103.18	-0.01446432		2633.17	0.10095071		3163.17	0.10527385		3693.2	-0.02137897
513.39	0.32223071		1043.39	0.02969575		1573.38	0.07689384		2103.38	-0.01506378		2633.37	0.10071628		3163.37	0.10600215		3693.4	-0.02172612
513.59	0.32214381		1043.59	0.02943546		1573.58	0.07766213		2103.58	-0.01545524		2633.57	0.10085113		3163.57	0.10612702		3693.6	-0.02158081
513.79	0.32269689		1043.79	0.02921114		1573.78	0.07686783		2103.78	-0.01570984		2633.77	0.10127316		3163.77	0.10683577		3693.8	-0.02259671
513.99	0.32370287		1043.99	0.0300236		1573.98	0.07624526		2103.98	-0.01570944		2633.97	0.1021216		3163.97	0.10774323		3694	-0.02268098
514.19	0.32417964		1044.19	0.02949051		1574.18	0.07657387		2104.18	-0.01493861		2634.17	0.10331473		3164.17	0.10808584		3694.2	-0.0224874
514.39	0.32526163		1044.39	0.02865203		1574.38	0.07645577		2104.38	-0.01500136		2634.37	0.10331189		3164.37	0.10883561		3694.4	-0.02199625
514.59	0.32525446		1044.59	0.02850574		1574.58	0.07650805		2104.58	-0.01460039		2634.57	0.10343342		3164.57	0.10907928		3694.6	-0.02305233
514.79	0.32495284		1044.79	0.02858705		1574.78	0.07621833		2104.78	-0.01500325		2634.77	0.10377086		3164.77	0.1090299		3694.8	-0.02369016
514.99	0.32419034		1044.99	0.02898022		1574.98	0.07537474		2104.98	-0.01485352		2634.97	0.10363119		3164.97	0.10907648		3695	-0.02364934
515.19	0.32473161		1045.19	0.02958176		1575.18	0.07546143		2105.18	-0.01410712		2635.17	0.10382981		3165.17	0.10913919		3695.2	-0.02430426
515.39	0.32536559		1045.39	0.02994116		1575.38	0.0753909		2105.38	-0.01399247		2635.37	0.1038755		3165.37	0.10865156		3695.4	-0.0238548
515.59	0.32558889		1045.59	0.03020848		1575.58	0.07489918		2105.58	-0.01421924		2635.57	0.10331827		3165.57	0.10906822		3695.6	-0.02505325
515.79	0.32640126		1045.79	0.03013809		1575.78	0.07526134		2105.78	-0.0144978		2635.77	0.10273043		3165.77	0.10911711		3695.8	-0.0251502
515.99	0.3266645		1045.99	0.02872708		1575.98	0.07433637		2105.98	-0.01497041		2635.97	0.10177292		3165.97	0.11013274		3696	-0.02466624
516.19	0.32677566		1046.19	0.02799578		1576.18	0.07415023		2106.18	-0.01428066		2636.17	0.10147085		3166.17	0.11029724		3696.2	-0.02496317
516.39	0.3259745		1046.39	0.0287388		1576.38	0.07379389		2106.38	-0.01410332		2636.37	0.10142343		3166.37	0.11103991		3696.4	-0.02513773
516.59	0.32609907		1046.59	0.02850368		1576.58	0.07367822		2106.58	-0.01443745		2636.57	0.10112308		3166.57	0.11031		3696.6	-0.02622266
516.79	0.32542889		1046.79	0.02908176		1576.78	0.07424451		2106.78	-0.01482304		2636.77	0.10055911		3166.77	0.11056956		3696.8	-0.02653597
516.99	0.32545387		1046.99	0.03022147		1576.98	0.07433407		2106.98	-0.01513477		2636.97	0.09993284		3166.97	0.11035205		3697	-0.02609058
517.19	0.32445822		1047.19	0.03052766		1577.18	0.07469813		2107.18	-0.01465136		2637.17	0.10064619		3167.17	0.11063455		3697.2	-0.02625711
517.39	0.32415729		1047.39	0.03031841		1577.38	0.07489868		2107.38	-0.01494592		2637.37	0.10078771		3167.37	0.11047837		3697.4	-0.02596105
517.59	0.32395357		1047.59	0.03048258		1577.58	0.07461164		2107.58	-0.01569546		2637.57	0.10130071		3167.57	0.10968613		3697.6	-0.02474394
517.79	0.32362794		1047.79	0.03124345		1577.78	0.0735874		2107.78	-0.0152383		2637.77	0.102291		3167.77	0.10943946		3697.8	-0.02417638
517.99	0.32363365		1047.99	0.03215819		1577.98	0.07376588		2107.98	-0.01519654		2637.97	0.10291598		3167.97	0.10873277		3698	-0.02440645
518.19	0.32237599		1048.19	0.03171259		1578.18	0.07401817		2108.18	-0.01477586		2638.17	0.10329273		3168.17	0.10675559		3698.2	-0.02407436
518.39	0.32192881		1048.39	0.0312126		1578.38	0.07399347		2108.38	-0.01482614		2638.37	0.10352182		3168.37	0.10562409		3698.4	-0.02460601
518.59	0.32093946		1048.59	0.03225951		1578.58	0.07349115		2108.58	-0.01474662		2638.57	0.10470836		3168.57	0.10451939		3698.6	-0.02455904
518.79	0.32104241		1048.79	0.03224517		1578.78	0.07296435		2108.78	-0.01439472		2638.77	0.10576947		3168.77	0.10354532		3698.8	-0.02475455
518.99	0.32120956		1048.99	0.03249397		1578.98	0.07206834		2108.98	-0.0142357		2638.97	0.105471		3168.97	0.10304614		3699	-0.02320008
519.19	0.32119521		1049.19	0.03258582		1579.18	0.07277624		2109.18	-0.01272327		2639.17	0.10631879		3169.17	0.10240134		3699.2	-0.02371864
519.39	0.32174131		1049.39	0.0329892		1579.38	0.07318643		2109.38	-0.0129379		2639.37	0.10624045		3169.37	0.10154615		3699.4	-0.02262383
519.59	0.32210831		1049.59	0.03200016		1579.58	0.07346587		2109.58	-0.01251471		2639.57	0.10588668		3169.57	0.10113786		3699.6	-0.0229374
519.79	0.32279332		1049.79	0.0313812		1579.78	0.07450197		2109.78	-0.01235359		2639.77	0.10499799		3169.77	0.10126337		3699.8	-0.02125803
519.99	0.3229494		1049.99	0.03010385		1579.98	0.07467717		2109.98	-0.01181923		2639.97	0.10475608		3169.97	0.10152462		3700	-0.02112878
520.19	0.32261798		1050.19	0.02964007		1580.18	0.07540603		2110.18	-0.01093249		2640.17	0.10479792		3170.17	0.10233824		3700.2	-0.02103152
520.39	0.32199895		1050.39	0.0298779		1580.38	0.07605057		2110.38	-0.01054205		2640.37	0.10427899		3170.37	0.10240596		3700.4	-0.02036789
520.59	0.32241667		1050.59	0.03007061		1580.58	0.0762116		2110.58	-0.01139237		2640.57	0.10330295		3170.57	0.10280879		3700.6	-0.02062166
520.79	0.32237369		1050.79	0.03032556		1580.78	0.07646409		2110.78	-0.01167268		2640.77	0.10253143		3170.77	0.10381107		3700.8	-0.02008762
520.99	0.32225487		1050.99	0.02944714		1580.98	0.07577385		2110.98	-0.01255943		2640.97	0.10153428		3170.97	0.104187		3701	-0.02063415
521.19	0.32091999		1051.19	0.02879625		1581.18	0.07589106		2111.18	-0.01254023		2641.17	0.10108186		3171.17	0.10533657		3701.2	-0.02051683
521.39	0.32166081		1051.39	0.02876286		1581.38	0.07602288		2111.38	-0.01356409		2641.37	0.10049163		3171.37	0.10514982		3701.4	-0.02024722
521.59	0.32079924		1051.59	0.02936656		1581.58	0.07549967		2111.58	-0.01453512		2641.57	0.09900673		3171.57	0.1051642		3701.6	-0.01932991
521.79	0.32039226		1051.79	0.02936486		1581.78	0.07559267		2111.78	-0.01444462		2641.77	0.09858786		3171.77	0.10582663		3701.8	-0.02036394
521.99	0.31907527		1051.99	0.02934637		1581.98	0.07612074		2111.98	-0.01546163		2641.97	0.09884487		3171.97	0.10593043		3702	-0.02070298
522.19	0.31912067		1052.19	0.02919303		1582.18	0.07634486		2112.18	-0.01493105		2642.17	0.098125		3172.17	0.10648972		3702.2	-0.02074903
522.39	0.31919232		1052.39	0.02867826		1582.38	0.07640244		2112.38	-0.01414242		2642.37	0.09898213		3172.37	0.10771689		3702.4	-0.02143513
522.59	0.31894035		1052.59	0.02840865		1582.58	0.07530203		2112.58	-0.01392099		2642.57	0.09957085		3172.57	0.1082852		3702.6	-0.02163212
522.79	0.31916268		1052.79	0.02889726		1582.78	0.07498416		2112.78	-0.01384135		2642.77	0.09867545		3172.77	0.10830176		3702.8	-0.02249744
522.99	0.31899089		1052.99	0.03018692		1582.98	0.07392914		2112.98	-0.01429553		2642.97	0.09850235		3172.97	0.10802026		3703	-0.02182805
523.19	0.31879202		1053.19	0.03086006		1583.18	0.0739417		2113.18	-0.01362284		2643.17	0.09879951		3173.17	0.10808814		3703.2	-0.02288669
523.39	0.3188443		1053.39	0.03105424		1583.38	0.07443404		2113.38	-0.01418454		2643.37	0.09907638		3173.37	0.1068089		3703.4	-0.02227185
523.59	0.31965916		1053.59	0.03031529		1583.58	0.07490776		2113.58	-0.01376793		2643.57	0.09895843		3173.57	0.10675248		3703.6	-0.02193167
523.79	0.32040453		1053.79	0.03073899		1583.78	0.07501653		2113.78	-0.01393977		2643.77	0.0987984		3173.77	0.10715684		3703.8	-0.02230285
523.99	0.31958296		1053.99	0.03038023		1583.98	0.0746834		2113.98	-0.01396835		2643.97	0.09961327		3173.97	0.10689474		3704	-0.0230775
524.19	0.32041045		1054.19	0.02979907		1584.18	0.07514383		2114.18	-0.01417668		2644.17	0.10058038		3174.17	0.10761627		3704.2	-0.0226309
524.39	0.32089754		1054.39	0.03070625		1584.38	0.07529309		2114.38	-0.01416048		2644.37	0.09964653		3174.37	0.10711323		3704.4	-0.02183437
524.59	0.32134325		1054.59	0.03133475		1584.58	0.0756252		2114.58	-0.01431557		2644.57	0.09989102		3174.57	0.10703141		3704.6	-0.02150851
524.79	0.32148657		1054.79	0.03100215		1584.78	0.07479842		2114.78	-0.01465535		2644.77	0.09921685		3174.77	0.10738973		3704.8	-0.02108266
524.99	0.32071564		1054.99	0.03044119		1584.98	0.07467956		2114.98	-0.01525115		2644.97	0.09915861		3174.97	0.10682411		3705	-0.02195468
525.19	0.3203932		1055.19	0.03113391		1585.18	0.07532822		2115.18	-0.01559774		2645.17	0.09860138		3175.17	0.10664558		3705.2	-0.02126303
525.39	0.32071416		1055.39	0.03164307		1585.38	0.0755825		2115.38	-0.01604118		2645.37	0.09876192		3175.37	0.10531011		3705.4	-0.02109312
525.59	0.32068125		1055.59	0.03191685		1585.58	0.07576139		2115.58	-0.01583227		2645.57	0.09721123		3175.57	0.10421257		3705.6	-0.02006085
525.79	0.32070762		1055.79	0.03164311		1585.78	0.07628879		2115.78	-0.01577772		2645.77	0.09772994		3175.77	0.10394806		3705.8	-0.02082934
525.99	0.32044656		1055.99	0.03193316		1585.98	0.07598934		2115.98	-0.01602009		2645.97	0.09809393		3175.97	0.10265175		3706	-0.02026635
526.19	0.32179256		1056.19	0.03261967		1586.18	0.07634117		2116.18	-0.01512084		2646.17	0.09772279		3176.17	0.10314223		3706.2	-0.02057585
526.39	0.3215937		1056.39	0.03217241		1586.38	0.07648992		2116.38	-0.01487882		2646.37	0.09821796		3176.37	0.10256291		3706.4	-0.02104367
526.59	0.32191644		1056.59	0.0322055		1586.58	0.076084		2116.58	-0.01509947		2646.57	0.09757911		3176.57	0.10171191		3706.6	-0.02177157
526.79	0.32204731		1056.79	0.03241747		1586.78	0.0754907		2116.78	-0.01513078		2646.77	0.09740845		3176.77	0.10092135		3706.8	-0.02258138
526.99	0.32206205		1056.99	0.03185428		1586.98	0.07486571		2116.98	-0.01530678		2646.97	0.09807001		3176.97	0.10047181		3707	-0.02293879
527.19	0.32163416		1057.19	0.03103243		1587.18	0.07527967		2117.18	-0.01402454		2647.17	0.09770167		3177.17	0.10103133		3707.2	-0.02382864
527.39	0.3212724		1057.39	0.03061894		1587.38	0.07585768		2117.38	-0.01443622		2647.37	0.09842332		3177.37	0.10018558		3707.4	-0.02444963
527.59	0.32157185		1057.59	0.03095496		1587.58	0.07627603		2117.58	-0.01419397		2647.57	0.09876715		3177.57	0.1008613		3707.6	-0.02515675
527.79	0.32129242		1057.79	0.03020141		1587.78	0.0752968		2117.78	-0.01472682		2647.77	0.09937502		3177.77	0.10040744		3707.8	-0.02532902
527.99	0.32064369		1057.99	0.02946648		1587.98	0.07544466		2117.98	-0.01439524		2647.97	0.09999517		3177.97	0.10063618		3708	-0.02490252
528.19	0.32014479		1058.19	0.02925229		1588.18	0.07607641		2118.18	-0.01338966		2648.17	0.09945592		3178.17	0.10119005		3708.2	-0.02429916
528.39	0.31967884		1058.39	0.02959521		1588.38	0.07540016		2118.38	-0.0134921		2648.37	0.09875144		3178.37	0.10198202		3708.4	-0.02450258
528.59	0.31986576		1058.59	0.02947121		1588.58	0.07545284		2118.58	-0.01409157		2648.57	0.09871621		3178.57	0.1023597		3708.6	-0.02513566
528.79	0.31926486		1058.79	0.0301749		1588.78	0.07451986		2118.78	-0.01491643		2648.77	0.09837348		3178.77	0.10310132		3708.8	-0.02590356
528.99	0.31877672		1058.99	0.03085827		1588.98	0.07546824		2118.98	-0.0154803		2648.97	0.09824175		3178.97	0.10342808		3709	-0.02630341
529.19	0.31844438		1059.19	0.0322928		1589.18	0.07554063		2119.18	-0.0160394		2649.17	0.09819886		3179.17	0.10338221		3709.2	-0.02544981
529.39	0.31846009		1059.39	0.03281264		1589.38	0.07497739		2119.38	-0.016396		2649.37	0.09836697		3179.37	0.1026429		3709.4	-0.02552252
529.59	0.31940416		1059.59	0.03337294		1589.58	0.07526295		2119.58	-0.01719915		2649.57	0.09746747		3179.57	0.10240019		3709.6	-0.02469639
529.79	0.31933874		1059.79	0.03376045		1589.78	0.0746063		2119.78	-0.01836768		2649.77	0.09820031		3179.77	0.10291771		3709.8	-0.02494571
529.99	0.3194123		1059.99	0.03325535		1589.98	0.0742718		2119.98	-0.01847573		2649.97	0.09774596		3179.97	0.10239258		3710	-0.02445765
530.19	0.32030681		1060.19	0.03307511		1590.18	0.07490905		2120.18	-0.01874801		2650.17	0.09706365		3180.17	0.10246557		3710.2	-0.0242621
530.39	0.32056737		1060.39	0.03213035		1590.38	0.07512716		2120.38	-0.01842615		2650.37	0.09755416		3180.37	0.10157033		3710.4	-0.02330967
530.59	0.3209139		1060.59	0.03205919		1590.58	0.07498062		2120.58	-0.01891502		2650.57	0.09707807		3180.57	0.10131412		3710.6	-0.02334007
530.79	0.32064307		1060.79	0.03130401		1590.78	0.07440336		2120.78	-0.01833407		2650.77	0.09723881		3180.77	0.10191156		3710.8	-0.02293742
530.99	0.32078634		1060.99	0.03118313		1590.98	0.07539171		2120.98	-0.01830336		2650.97	0.09738071		3180.97	0.10261987		3711	-0.02340663
531.19	0.32057685		1061.19	0.03204772		1591.18	0.07581031		2121.18	-0.01759161		2651.17	0.09693138		3181.17	0.10340458		3711.2	-0.02294863
531.39	0.32069705		1061.39	0.03150842		1591.38	0.07667148		2121.38	-0.01767719		2651.37	0.09710154		3181.37	0.10368543		3711.4	-0.02380616
531.59	0.32033608		1061.59	0.03129345		1591.58	0.07665005		2121.58	-0.01610968		2651.57	0.09781688		3181.57	0.10389617		3711.6	-0.02407752
531.79	0.3198671		1061.79	0.02959154		1591.78	0.07539486		2121.78	-0.01566391		2651.77	0.09746114		3181.77	0.10367033		3711.8	-0.02392215
531.99	0.31958261		1061.99	0.02970317		1591.98	0.0767134		2121.98	-0.01436776		2651.97	0.09679729		3181.97	0.10454354		3712	-0.02488127
532.19	0.3187982		1062.19	0.02930269		1592.18	0.07681304		2122.18	-0.01364365		2652.17	0.09663244		3182.17	0.10430603		3712.2	-0.02539346
532.39	0.31958789		1062.39	0.02907261		1592.38	0.07739599		2122.38	-0.01414293		2652.37	0.0971305		3182.37	0.10436943		3712.4	-0.02645008
532.59	0.32002787		1062.59	0.02863796		1592.58	0.07796581		2122.58	-0.01384997		2652.57	0.09691283		3182.57	0.10388751		3712.6	-0.02753465
532.79	0.31947631		1062.79	0.02887269		1592.78	0.07789145		2122.78	-0.01345855		2652.77	0.09707747		3182.77	0.10432946		3712.8	-0.02800156
532.99	0.31980561		1062.99	0.02888912		1592.98	0.07807668		2122.98	-0.01415649		2652.97	0.09700979		3182.97	0.10511808		3713	-0.02750954
533.19	0.31985441		1063.19	0.02980231		1593.18	0.07762865		2123.18	-0.01430384		2653.17	0.09835125		3183.17	0.10485171		3713.2	-0.02767582
533.39	0.31966851		1063.39	0.02892712		1593.38	0.07761446		2123.38	-0.01511144		2653.37	0.09875703		3183.37	0.10489345		3713.4	-0.02782781
533.59	0.31946859		1063.59	0.02853742		1593.58	0.07756893		2123.58	-0.0147021		2653.57	0.09840577		3183.57	0.1052731		3713.6	-0.02702637
533.79	0.31924037		1063.79	0.02726067		1593.78	0.07666802		2123.78	-0.01454122		2653.77	0.09929167		3183.77	0.10497575		3713.8	-0.02698375
533.99	0.31920133		1063.99	0.02622468		1593.98	0.076748		2123.98	-0.01447754		2653.97	0.09815356		3183.97	0.10366597		3714	-0.02693534
534.19	0.31971969		1064.19	0.02644902		1594.18	0.07649388		2124.18	-0.01456854		2654.17	0.0985766		3184.17	0.10285043		3714.2	-0.02620328
534.39	0.32000448		1064.39	0.02642229		1594.38	0.07549477		2124.38	-0.01467781		2654.37	0.09900144		3184.37	0.10333021		3714.4	-0.02518316
534.59	0.31992183		1064.59	0.0269913		1594.58	0.07557487		2124.58	-0.01562451		2654.57	0.09856239		3184.57	0.10354871		3714.6	-0.02452416
534.79	0.31969623		1064.79	0.02714368		1594.78	0.07473408		2124.78	-0.0154764		2654.77	0.09848289		3184.77	0.1047413		3714.8	-0.02442974
534.99	0.31986019		1064.99	0.02763011		1594.98	0.07490687		2124.98	-0.0159752		2654.97	0.0979729		3184.97	0.10469399		3715	-0.02399314
535.19	0.3196943		1065.19	0.02831191		1595.18	0.07439898		2125.18	-0.01506073		2655.17	0.09769485		3185.17	0.10441143		3715.2	-0.02330339
535.39	0.31939354		1065.39	0.0280025		1595.38	0.07471661		2125.38	-0.01414577		2655.37	0.09727543		3185.37	0.10453631		3715.4	-0.02351925
535.59	0.31862099		1065.59	0.02838662		1595.58	0.07401072		2125.58	-0.01337573		2655.57	0.09784703		3185.57	0.10399249		3715.6	-0.02429629
535.79	0.31824213		1065.79	0.02816274		1595.78	0.0732633		2125.78	-0.01338867		2655.77	0.09712953		3185.77	0.10448575		3715.8	-0.02364839
535.99	0.31792168		1065.99	0.02936745		1595.98	0.07425945		2125.98	-0.01270349		2655.97	0.0975615		3185.97	0.10455097		3716	-0.02356823
536.19	0.31778595		1066.19	0.0290235		1596.18	0.07361265		2126.18	-0.01234322		2656.17	0.09693834		3186.17	0.10381055		3716.2	-0.02328685
536.39	0.31838988		1066.39	0.02955794		1596.38	0.07286174		2126.38	-0.01248804		2656.37	0.09704346		3186.37	0.10441424		3716.4	-0.02365956
536.59	0.31890121		1066.59	0.02958046		1596.58	0.0713416		2126.58	-0.01227048		2656.57	0.09783365		3186.57	0.10459669		3716.6	-0.0243952
536.79	0.31887972		1066.79	0.03039982		1596.78	0.0707955		2126.78	-0.01269231		2656.77	0.09834911		3186.77	0.10440887		3716.8	-0.02392094
536.99	0.31896919		1066.99	0.03101559		1596.98	0.07067423		2126.98	-0.01304668		2656.97	0.09797203		3186.97	0.10464796		3717	-0.02347765
537.19	0.31822135		1067.19	0.03126995		1597.18	0.07139603		2127.18	-0.01337856		2657.17	0.09882708		3187.17	0.10454755		3717.2	-0.02363775
537.39	0.31791217		1067.39	0.03082441		1597.38	0.07170388		2127.38	-0.01363192		2657.37	0.09849461		3187.37	0.10455716		3717.4	-0.02327559
537.59	0.31819011		1067.59	0.03010772		1597.58	0.07148622		2127.58	-0.01317509		2657.57	0.09782853		3187.57	0.1044135		3717.6	-0.02365728
537.79	0.31863786		1067.79	0.02889093		1597.78	0.07168199		2127.78	-0.0138049		2657.77	0.09824645		3187.77	0.10429674		3717.8	-0.02401022
537.99	0.3180905		1067.99	0.02853097		1597.98	0.07261667		2127.98	-0.01548768		2657.97	0.09814933		3187.97	0.10407725		3718	-0.02445147
538.19	0.31862024		1068.19	0.02806771		1598.18	0.07236259		2128.18	-0.0158738		2658.17	0.09832165		3188.17	0.10439744		3718.2	-0.02459742
538.39	0.31799449		1068.39	0.02775871		1598.38	0.07232011		2128.38	-0.0175018		2658.37	0.09754886		3188.37	0.10476645		3718.4	-0.02457513
538.59	0.31789423		1068.59	0.02852064		1598.58	0.07316366		2128.58	-0.01793257		2658.57	0.09835448		3188.57	0.10411209		3718.6	-0.02501147
538.79	0.31796744		1068.79	0.027907		1598.78	0.07269931		2128.78	-0.01869075		2658.77	0.09717809		3188.77	0.1043442		3718.8	-0.02540521
538.99	0.31827727		1068.99	0.0278666		1598.98	0.07229346		2128.98	-0.01794159		2658.97	0.0977095		3188.97	0.10322756		3719	-0.02552063
539.19	0.3178408		1069.19	0.02827751		1599.18	0.07241604		2129.18	-0.01765889		2659.17	0.09731198		3189.17	0.1027522		3719.2	-0.02601775
539.39	0.31757699		1069.39	0.02819706		1599.38	0.07280053		2129.38	-0.01786327		2659.37	0.09699752		3189.37	0.10312759		3719.4	-0.0263509
539.59	0.31760699		1069.59	0.02791207		1599.58	0.07219065		2129.58	-0.01775881		2659.57	0.09680438		3189.57	0.1023695		3719.6	-0.02738974
539.79	0.31747253		1069.79	0.0282787		1599.78	0.07222818		2129.78	-0.01794121		2659.77	0.09653571		3189.77	0.10268788		3719.8	-0.02634412
539.99	0.31758811		1069.99	0.02918577		1599.98	0.07269601		2129.98	-0.01684404		2659.97	0.09670511		3189.97	0.10241723		3720	-0.02676854
540.19	0.31846275		1070.19	0.02875107		1600.18	0.07227841		2130.18	-0.01580274		2660.17	0.09534808		3190.17	0.10172536		3720.2	-0.02721343
540.39	0.31929973		1070.39	0.02958848		1600.38	0.07183092		2130.38	-0.01579629		2660.37	0.09585629		3190.37	0.10207517		3720.4	-0.02708789
540.59	0.31909348		1070.59	0.03011597		1600.58	0.07191546		2130.58	-0.01533335		2660.57	0.0967743		3190.57	0.10124871		3720.6	-0.02639652
540.79	0.31874826		1070.79	0.03028894		1600.78	0.07197477		2130.78	-0.01476349		2660.77	0.09627586		3190.77	0.10122749		3720.8	-0.02669531
540.99	0.31822789		1070.99	0.03033056		1600.98	0.07195998		2130.98	-0.01509444		2660.97	0.09578605		3190.97	0.10198719		3721	-0.0266677
541.19	0.3180756		1071.19	0.03051011		1601.18	0.07221916		2131.18	-0.01478418		2661.17	0.09625577		3191.17	0.10267255		3721.2	-0.02615758
541.39	0.31817743		1071.39	0.03057669		1601.38	0.07287931		2131.38	-0.01469482		2661.37	0.09626061		3191.37	0.10188263		3721.4	-0.02581711
541.59	0.31802593		1071.59	0.03023849		1601.58	0.07273469		2131.58	-0.01516408		2661.57	0.09637396		3191.57	0.10151454		3721.6	-0.02606454
541.79	0.31768204		1071.79	0.02982793		1601.78	0.07269577		2131.78	-0.01690345		2661.77	0.09735176		3191.77	0.10166879		3721.8	-0.02558134
541.99	0.31743079		1071.99	0.03051611		1601.98	0.0737661		2131.98	-0.01732536		2661.97	0.09800482		3191.97	0.10205103		3722	-0.02631142
542.19	0.31808717		1072.19	0.0306657		1602.18	0.07381602		2132.18	-0.01767431		2662.17	0.09799614		3192.17	0.10258843		3722.2	-0.0266881
542.39	0.31778173		1072.39	0.03182891		1602.38	0.07427908		2132.38	-0.01770355		2662.37	0.0976666		3192.37	0.10269715		3722.4	-0.0262148
542.59	0.31820183		1072.59	0.03159264		1602.58	0.0735229		2132.58	-0.01707675		2662.57	0.09805339		3192.57	0.10267303		3722.6	-0.02621964
542.79	0.31812536		1072.79	0.03008688		1602.78	0.07290938		2132.78	-0.01747185		2662.77	0.09782582		3192.77	0.10319993		3722.8	-0.02571245
542.99	0.31797007		1072.99	0.02947288		1602.98	0.07192865		2132.98	-0.01717116		2662.97	0.09863442		3192.97	0.10254096		3723	-0.02667331
543.19	0.31757857		1073.19	0.02879735		1603.18	0.07200953		2133.18	-0.01793853		2663.17	0.09808552		3193.17	0.10265859		3723.2	-0.02587151
543.39	0.31785022		1073.39	0.02764695		1603.38	0.07211156		2133.38	-0.01761199		2663.37	0.09860616		3193.37	0.10272908		3723.4	-0.02689102
543.59	0.31830869		1073.59	0.02705247		1603.58	0.07081413		2133.58	-0.01708223		2663.57	0.09805817		3193.57	0.10253863		3723.6	-0.02737368
543.79	0.31800097		1073.79	0.02648803		1603.78	0.07185239		2133.78	-0.0162211		2663.77	0.0983344		3193.77	0.10314162		3723.8	-0.02728614
543.99	0.31821155		1073.99	0.02498313		1603.98	0.07183773		2133.98	-0.01541642		2663.97	0.09819435		3193.97	0.10227603		3724	-0.02734841
544.19	0.31849517		1074.19	0.0233502		1604.18	0.07202205		2134.18	-0.01500735		2664.17	0.09800023		3194.17	0.10170144		3724.2	-0.02761579
544.39	0.31844665		1074.39	0.02277138		1604.38	0.07169642		2134.38	-0.0148886		2664.37	0.09792671		3194.37	0.10246769		3724.4	-0.02689512
544.59	0.31766023		1074.59	0.0219021		1604.58	0.07118782		2134.58	-0.01445318		2664.57	0.09891596		3194.57	0.10211114		3724.6	-0.02668535
544.79	0.31743622		1074.79	0.02156245		1604.78	0.07119022		2134.78	-0.01501864		2664.77	0.09887023		3194.77	0.10235227		3724.8	-0.02750551
544.99	0.31777719		1074.99	0.02115289		1604.98	0.07138052		2134.98	-0.01490682		2664.97	0.09812594		3194.97	0.10322111		3725	-0.0272514
545.19	0.31837786		1075.19	0.0213569		1605.18	0.07186845		2135.18	-0.01509639		2665.17	0.09824991		3195.17	0.10323346		3725.2	-0.02612071
545.39	0.31819064		1075.39	0.02225228		1605.38	0.07208622		2135.38	-0.01556434		2665.37	0.09791896		3195.37	0.10245957		3725.4	-0.02567847
545.59	0.31795487		1075.59	0.02449351		1605.58	0.07135929		2135.58	-0.01627707		2665.57	0.09779636		3195.57	0.10215628		3725.6	-0.0248712
545.79	0.31840481		1075.79	0.02569384		1605.78	0.07200908		2135.78	-0.01646113		2665.77	0.09816678		3195.77	0.10277843		3725.8	-0.02379098
545.99	0.31876749		1075.99	0.02763275		1605.98	0.07232163		2135.98	-0.01583687		2665.97	0.09703673		3195.97	0.10353928		3726	-0.02447064
546.19	0.31886835		1076.19	0.02848782		1606.18	0.0724355		2136.18	-0.0170328		2666.17	0.09628315		3196.17	0.10383814		3726.2	-0.02329763
546.39	0.318548		1076.39	0.02949876		1606.38	0.07225719		2136.38	-0.01709774		2666.37	0.09530662		3196.37	0.10375694		3726.4	-0.02221613
546.59	0.3177969		1076.59	0.02931067		1606.58	0.07193137		2136.58	-0.0171341		2666.57	0.09549403		3196.57	0.10326735		3726.6	-0.02196522
546.79	0.31793357		1076.79	0.02961638		1606.78	0.07240792		2136.78	-0.01673345		2666.77	0.09547904		3196.77	0.10312903		3726.8	-0.02188226
546.99	0.31762029		1076.99	0.03004265		1606.98	0.07234902		2136.98	-0.01634691		2666.97	0.09496464		3196.97	0.10215098		3727	-0.0219308
547.19	0.31768495		1077.19	0.02968985		1607.18	0.07202204		2137.18	-0.01585724		2667.17	0.09443593		3197.17	0.10211506		3727.2	-0.0210333
547.39	0.31789142		1077.39	0.0301864		1607.38	0.07116133		2137.38	-0.01561278		2667.37	0.09455837		3197.37	0.10221005		3727.4	-0.02222252
547.59	0.31812716		1077.59	0.02996365		1607.58	0.06991004		2137.58	-0.01591973		2667.57	0.09451314		3197.57	0.10154632		3727.6	-0.02225043
547.79	0.31716815		1077.79	0.02968549		1607.78	0.07141785		2137.78	-0.0154104		2667.77	0.0949989		3197.77	0.10077332		3727.8	-0.02319645
547.99	0.31673336		1077.99	0.02913156		1607.98	0.07140545		2137.98	-0.01591798		2667.97	0.09492143		3197.97	0.10045129		3728	-0.02374806
548.19	0.31700441		1078.19	0.02901125		1608.18	0.07202795		2138.18	-0.01524813		2668.17	0.09579189		3198.17	0.10007649		3728.2	-0.02374354
548.39	0.31670267		1078.39	0.02936788		1608.38	0.07220095		2138.38	-0.01524357		2668.37	0.09491183		3198.37	0.10000961		3728.4	-0.02385378
548.59	0.31663235		1078.59	0.02864854		1608.58	0.07241729		2138.58	-0.01553754		2668.57	0.09607004		3198.57	0.09904224		3728.6	-0.02422293
548.79	0.31736546		1078.79	0.02916975		1608.78	0.07257624		2138.78	-0.01627391		2668.77	0.09557388		3198.77	0.09951842		3728.8	-0.02570693
548.99	0.31802893		1078.99	0.0289405		1608.98	0.07166334		2138.98	-0.01610071		2668.97	0.09542757		3198.97	0.10007309		3729	-0.02664823
549.19	0.3183925		1079.19	0.02966792		1609.18	0.07169276		2139.18	-0.01691318		2669.17	0.09639748		3199.17	0.10031361		3729.2	-0.02644266
549.39	0.31870205		1079.39	0.02998612		1609.38	0.07116111		2139.38	-0.01617978		2669.37	0.09678005		3199.37	0.10043017		3729.4	-0.02714629
549.59	0.31842511		1079.59	0.03039465		1609.58	0.07140517		2139.58	-0.01705327		2669.57	0.09695191		3199.57	0.1007724		3729.6	-0.02730222
549.79	0.31893925		1079.79	0.02960355		1609.78	0.07139775		2139.78	-0.01707783		2669.77	0.09604119		3199.77	0.10094507		3729.8	-0.02807422
549.99	0.31826445		1079.99	0.02934393		1609.98	0.07014631		2139.98	-0.01698219		2669.97	0.09582054		3199.97	0.10085018		3730	-0.02880135
550.19	0.31850915		1080.19	0.0283671		1610.18	0.07112255		2140.18	-0.01737021		2670.17	0.09521361		3200.17	0.10087098		3730.2	-0.02826115
550.39	0.3178269		1080.39	0.02759301		1610.38	0.07172808		2140.38	-0.01702306		2670.37	0.09500822		3200.37	0.10106964		3730.4	-0.02832614
550.59	0.31787377		1080.59	0.02685344		1610.58	0.07108849		2140.58	-0.01643035		2670.57	0.09515668		3200.57	0.10030557		3730.6	-0.02815792
550.79	0.31901671		1080.79	0.02627331		1610.78	0.07106747		2140.78	-0.01660261		2670.77	0.09462861		3200.77	0.09979733		3730.8	-0.02750935
550.99	0.31911605		1080.99	0.02509211		1610.98	0.0708203		2140.98	-0.01716188		2670.97	0.09430849		3200.97	0.09978378		3731	-0.02697924
551.19	0.3191448		1081.19	0.02379443		1611.18	0.07009255		2141.18	-0.01754349		2671.17	0.09362109		3201.17	0.10017321		3731.2	-0.02730367
551.39	0.31885514		1081.39	0.02402477		1611.38	0.07001391		2141.38	-0.01722416		2671.37	0.09389791		3201.37	0.1004909		3731.4	-0.0277517
551.59	0.31824116		1081.59	0.02350789		1611.58	0.0705442		2141.58	-0.01700649		2671.57	0.09471282		3201.57	0.1008403		3731.6	-0.02728213
551.79	0.31742448		1081.79	0.0236133		1611.78	0.07211278		2141.78	-0.01626051		2671.77	0.094535		3201.77	0.10219658		3731.8	-0.02773934
551.99	0.31712171		1081.99	0.02414967		1611.98	0.07138834		2141.98	-0.01666936		2671.97	0.09485313		3201.97	0.10357574		3732	-0.02725879
552.19	0.31702164		1082.19	0.02430282		1612.18	0.07219776		2142.18	-0.01646759		2672.17	0.09491202		3202.17	0.10393726		3732.2	-0.02618886
552.39	0.3167813		1082.39	0.02514933		1612.38	0.07212687		2142.38	-0.016495		2672.37	0.09489975		3202.37	0.10514058		3732.4	-0.02680026
552.59	0.31749925		1082.59	0.02541493		1612.58	0.07187505		2142.58	-0.01589938		2672.57	0.09582069		3202.57	0.10602696		3732.6	-0.02718271
552.79	0.31710569		1082.79	0.02634192		1612.78	0.07116785		2142.78	-0.01607086		2672.77	0.09630444		3202.77	0.10703722		3732.8	-0.02725416
552.99	0.31650853		1082.99	0.02713561		1612.98	0.07113465		2142.98	-0.01590507		2672.97	0.09694035		3202.97	0.10732871		3733	-0.0274834
553.19	0.31582542		1083.19	0.02793434		1613.18	0.07180021		2143.18	-0.01581634		2673.17	0.09717422		3203.17	0.10773492		3733.2	-0.02732532
553.39	0.31581252		1083.39	0.02827885		1613.38	0.07220378		2143.38	-0.01543546		2673.37	0.09678893		3203.37	0.10801767		3733.4	-0.02778977
553.59	0.31471798		1083.59	0.02884997		1613.58	0.07229791		2143.58	-0.01615572		2673.57	0.09624717		3203.57	0.10795747		3733.6	-0.02781174
553.79	0.31490444		1083.79	0.02874946		1613.78	0.07079209		2143.78	-0.01589252		2673.77	0.09482877		3203.77	0.1066244		3733.8	-0.02729636
553.99	0.31489336		1083.99	0.0291781		1613.98	0.07061742		2143.98	-0.01502018		2673.97	0.09513231		3203.97	0.10616399		3734	-0.02690946
554.19	0.31559493		1084.19	0.02875395		1614.18	0.0713457		2144.18	-0.01540056		2674.17	0.09379371		3204.17	0.10549099		3734.2	-0.02655175
554.39	0.31613221		1084.39	0.02858227		1614.38	0.07104381		2144.38	-0.01579685		2674.37	0.09394277		3204.37	0.10429922		3734.4	-0.02595287
554.59	0.31676755		1084.59	0.02854232		1614.58	0.0702919		2144.58	-0.01690711		2674.57	0.09390886		3204.57	0.10227436		3734.6	-0.02583308
554.79	0.31733478		1084.79	0.02813454		1614.78	0.07015267		2144.78	-0.01709667		2674.77	0.09328316		3204.77	0.10145418		3734.8	-0.0255347
554.99	0.31653246		1084.99	0.02747708		1614.98	0.06994024		2144.98	-0.01652946		2674.97	0.09322657		3204.97	0.10114955		3735	-0.02573235
555.19	0.31586021		1085.19	0.02703101		1615.18	0.06964667		2145.18	-0.01680217		2675.17	0.09320286		3205.17	0.10065772		3735.2	-0.02578179
555.39	0.31530399		1085.39	0.02757224		1615.38	0.06979347		2145.38	-0.01572751		2675.37	0.0932376		3205.37	0.10091551		3735.4	-0.02578646
555.59	0.31490789		1085.59	0.02797403		1615.58	0.06998977		2145.58	-0.01593949		2675.57	0.09359785		3205.57	0.10113276		3735.6	-0.02587937
555.79	0.31446936		1085.79	0.02802277		1615.78	0.07070699		2145.78	-0.01699745		2675.77	0.09321617		3205.77	0.10139417		3735.8	-0.02671621
555.99	0.3147148		1085.99	0.02850727		1615.98	0.07075831		2145.98	-0.01809289		2675.97	0.09322196		3205.97	0.10154113		3736	-0.02655951
556.19	0.31407357		1086.19	0.02763366		1616.18	0.07188897		2146.18	-0.01795707		2676.17	0.09404554		3206.17	0.10114842		3736.2	-0.02680168
556.39	0.31465388		1086.39	0.02779506		1616.38	0.0717071		2146.38	-0.0181509		2676.37	0.09553849		3206.37	0.10064585		3736.4	-0.0277011
556.59	0.31515288		1086.59	0.0274612		1616.58	0.07196119		2146.58	-0.017988		2676.57	0.09599287		3206.57	0.10023141		3736.6	-0.02877361
556.79	0.31376878		1086.79	0.02736364		1616.78	0.07282285		2146.78	-0.01844838		2676.77	0.09700974		3206.77	0.09998361		3736.8	-0.02827417
556.99	0.31334709		1086.99	0.02758949		1616.98	0.07396022		2146.98	-0.0185638		2676.97	0.09614921		3206.97	0.10042603		3737	-0.02906883
557.19	0.31273169		1087.19	0.02769877		1617.18	0.07396823		2147.18	-0.01903713		2677.17	0.09596645		3207.17	0.10112097		3737.2	-0.02938079
557.39	0.31336908		1087.39	0.02732959		1617.38	0.07392106		2147.38	-0.01912364		2677.37	0.09608543		3207.37	0.1015818		3737.4	-0.0297454
557.59	0.31316812		1087.59	0.02642409		1617.58	0.07320743		2147.58	-0.01945064		2677.57	0.09556096		3207.57	0.10162766		3737.6	-0.02983492
557.79	0.31464791		1087.79	0.02608103		1617.78	0.07225498		2147.78	-0.01907819		2677.77	0.09456986		3207.77	0.10150807		3737.8	-0.02933226
557.99	0.31580238		1087.99	0.02614139		1617.98	0.07275695		2147.98	-0.01833086		2677.97	0.09453427		3207.97	0.1019265		3738	-0.02941209
558.19	0.31693824		1088.19	0.02591292		1618.18	0.07245173		2148.18	-0.01818122		2678.17	0.09388453		3208.17	0.10199291		3738.2	-0.02901546
558.39	0.31776968		1088.39	0.02575059		1618.38	0.07200633		2148.38	-0.01793165		2678.37	0.09363793		3208.37	0.10211223		3738.4	-0.02892829
558.59	0.3177967		1088.59	0.02597255		1618.58	0.07154819		2148.58	-0.01771642		2678.57	0.09311338		3208.57	0.10244516		3738.6	-0.02888424
558.79	0.318019		1088.79	0.02600083		1618.78	0.07092082		2148.78	-0.01687057		2678.77	0.09262614		3208.77	0.1031255		3738.8	-0.02852169
558.99	0.31771173		1088.99	0.02648447		1618.98	0.07110742		2148.98	-0.01638052		2678.97	0.09230141		3208.97	0.1035281		3739	-0.02831679
559.19	0.31769415		1089.19	0.02683384		1619.18	0.07106919		2149.18	-0.01659562		2679.17	0.09154031		3209.17	0.10395653		3739.2	-0.02804866
559.39	0.31749254		1089.39	0.02770236		1619.38	0.07122277		2149.38	-0.01585044		2679.37	0.09090594		3209.37	0.10426163		3739.4	-0.02825201
559.59	0.31736962		1089.59	0.02800183		1619.58	0.07188726		2149.58	-0.01647124		2679.57	0.09077955		3209.57	0.10403052		3739.6	-0.02795792
559.79	0.31710717		1089.79	0.02815929		1619.78	0.07259048		2149.78	-0.01727381		2679.77	0.09073662		3209.77	0.1039374		3739.8	-0.0277898
