# Supplementary material for: Functional development of a V3/glycan-specific broadly neutralizing antibody isolated from a case of HIV superinfection
Source: eLife journal article supplement (doi:10.7554/elife.68110), 2021-07-15
Supplement: fig2-data2 [file C1.xls]

Vers 3.43 Data Simulation
Conc1	1.25E-07	1.25E-07	1.25E-07	1.25E-07	1.25E-07
Start1	200	729.99	1260	1790	2320
Stop1	559.8	1089.79	1619.8	2149.8	2679.8
Time1	Data1	Sim1	Time2	Data2	Sim2	Time3	Data3	Sim3	Time4	Data4	Sim4	Time5	Data5	Sim5
200	0.01288327		729.99	0.00026853		1260	0.00233157		1790	0.00010043		2320	-0.00591677
200.2	0.01249156		730.19	0.0000972		1260.2	0.00243534		1790.2	-0.00057518		2320.2	-0.00571767
200.4	0.01190198		730.39	0.00068963		1260.4	0.00245846		1790.4	-0.00169382		2320.4	-0.00478469
200.6	0.0117297		730.59	0.00130077		1260.6	0.00243988		1790.6	-0.00251296		2320.6	-0.0035344
200.8	0.01140912		730.79	0.00172438		1260.8	0.00190307		1790.8	-0.00381106		2320.8	-0.00277573
201	0.0113488		730.99	0.00187297		1261	0.00155246		1791	-0.00454607		2321	-0.00237365
201.2	0.01124618		731.19	0.00192421		1261.2	0.00191078		1791.2	-0.00503812		2321.2	-0.00219881
201.4	0.01103323		731.39	0.0019745		1261.4	0.00198668		1791.4	-0.00559724		2321.4	-0.00163456
201.6	0.01124862		731.59	0.00222157		1261.6	0.00214584		1791.6	-0.00563333		2321.6	-0.00080601
201.8	0.01138312		731.79	0.00232893		1261.8	0.00204591		1791.8	-0.00580097		2321.8	-0.00043502
202	0.0117863		731.99	0.00260669		1262	0.00206634		1792	-0.00585108		2322	0.00006909
202.2	0.01248682		732.19	0.00263096		1262.2	0.00225916		1792.2	-0.00531502		2322.2	0.00010883
202.4	0.01221499		732.39	0.00266921		1262.4	0.00227368		1792.4	-0.00546828		2322.4	-0.0004225
202.6	0.01217655		732.59	0.00256709		1262.6	0.00184228		1792.6	-0.00461746		2322.6	-0.00086315
202.8	0.01118441		732.79	0.00302176		1262.8	0.00209183		1792.8	-0.00448144		2322.8	-0.00245079
203	0.01202204		732.99	0.00336867		1263	0.0019546		1793	-0.00359987		2323	-0.00235636
203.2	0.01269806		733.19	0.00228476		1263.2	0.00172591		1793.2	-0.00355735		2323.2	-0.00269349
203.4	0.0133665		733.39	0.00220926		1263.4	0.00198909		1793.4	-0.00300116		2323.4	-0.00358514
203.6	0.0139257		733.59	0.00118693		1263.6	0.00162654		1793.6	-0.00302329		2323.6	-0.00404638
203.8	0.01527814		733.79	0.0012169		1263.8	0.00126317		1793.8	-0.0030256		2323.8	-0.00458822
204	0.01568824		733.99	0.00055684		1264	0.00189772		1794	-0.00260867		2324	-0.00398322
204.2	0.01549834		734.19	0.00038342		1264.2	0.00259144		1794.2	-0.00265916		2324.2	-0.0041418
204.4	0.01560116		734.39	0.0006844		1264.4	0.00310025		1794.4	-0.00317891		2324.4	-0.00305393
204.6	0.0158879		734.59	0.00083538		1264.6	0.00352627		1794.6	-0.00263734		2324.6	-0.00195178
204.8	0.01638024		734.79	0.00034597		1264.8	0.00349224		1794.8	-0.0033371		2324.8	-0.00224889
205	0.01640328		734.99	0.00002869		1265	0.00381706		1795	-0.00230006		2325	-0.0020996
205.2	0.01585278		735.19	-0.00023107		1265.2	0.00424575		1795.2	-0.00228168		2325.2	-0.00143193
205.4	0.01575104		735.39	-0.00024601		1265.4	0.00310326		1795.4	-0.00227369		2325.4	-0.00073673
205.6	0.01617305		735.59	0.00012394		1265.6	0.0028905		1795.6	-0.00195903		2325.6	-0.00007618
205.8	0.01630861		735.79	-0.00014171		1265.8	0.00193293		1795.8	-0.00186018		2325.8	0.00042492
206	0.0160546		735.99	0.00080988		1266	0.0010921		1796	-0.00170742		2326	0.00114929
206.2	0.01564664		736.19	0.0014496		1266.2	0.00022251		1796.2	-0.00156804		2326.2	0.00123722
206.4	0.01540571		736.39	0.00217633		1266.4	-0.00040844		1796.4	-0.0012343		2326.4	0.00070523
206.6	0.01561691		736.59	0.00228388		1266.6	-0.00091494		1796.6	-0.00129899		2326.6	0.00050885
206.8	0.01519187		736.79	0.00277708		1266.8	-0.00173184		1796.8	-0.00112261		2326.8	-0.00000648
207	0.01636073		736.99	0.00280122		1267	-0.00202403		1797	-0.00106806		2327	-0.00030051
207.2	0.0165647		737.19	0.00281029		1267.2	-0.0019285		1797.2	-0.00150796		2327.2	-0.00143794
207.4	0.01698766		737.39	0.00331525		1267.4	-0.00207635		1797.4	-0.00154394		2327.4	-0.00219405
207.6	0.0179475		737.59	0.00299343		1267.6	-0.00218133		1797.6	-0.00141031		2327.6	-0.00209831
207.8	0.01848021		737.79	0.00419341		1267.8	-0.00209459		1797.8	-0.00126504		2327.8	-0.0023616
208	0.01911369		737.99	0.00372205		1268	-0.00111775		1798	-0.00094721		2328	-0.00202557
208.2	0.01949296		738.19	0.00333008		1268.2	-0.00066939		1798.2	-0.00114919		2328.2	-0.00230919
208.4	0.01986756		738.39	0.00345415		1268.4	0.00035145		1798.4	-0.00171865		2328.4	-0.00282173
208.6	0.02053863		738.59	0.00381592		1268.6	0.0006462		1798.6	-0.00190481		2328.6	-0.00274465
208.8	0.02106545		738.79	0.00371938		1268.8	0.00066375		1798.8	-0.00278115		2328.8	-0.00407074
209	0.0209346		738.99	0.00383344		1269	0.00025742		1799	-0.00234842		2329	-0.00371075
209.2	0.01981087		739.19	0.00315035		1269.2	0.00015573		1799.2	-0.00296714		2329.2	-0.00402379
209.4	0.01919545		739.39	0.00259752		1269.4	-0.00048779		1799.4	-0.00242981		2329.4	-0.00384627
209.6	0.01871162		739.59	0.00306998		1269.6	-0.00010411		1799.6	-0.00237663		2329.6	-0.00357655
209.8	0.01767454		739.79	0.00260737		1269.8	-0.00067165		1799.8	-0.00212673		2329.8	-0.00373208
210	0.01676368		739.99	0.00299968		1270	-0.0005059		1800	-0.00243203		2330	-0.00390711
210.2	0.01640363		740.19	0.00298234		1270.2	-0.00101262		1800.2	-0.00237777		2330.2	-0.00297811
210.4	0.01688122		740.39	0.00309206		1270.4	-0.00069387		1800.4	-0.00205422		2330.4	-0.00218186
210.6	0.01680554		740.59	0.00276677		1270.6	-0.00083731		1800.6	-0.00242947		2330.6	-0.00170133
210.8	0.0170986		740.79	0.00267414		1270.8	-0.00060077		1800.8	-0.00185213		2330.8	-0.00172406
211	0.01747124		740.99	0.00312176		1271	0.00012622		1801	-0.00124403		2331	-0.00203741
211.2	0.01735984		741.19	0.00392461		1271.2	0.000594		1801.2	-0.00095546		2331.2	-0.00239607
211.4	0.01817939		741.39	0.00468757		1271.4	0.00078593		1801.4	0.00008462		2331.4	-0.0029337
211.6	0.01895858		741.59	0.00486402		1271.6	0.00071255		1801.6	0.00018214		2331.6	-0.00270452
211.8	0.01982371		741.79	0.00503644		1271.8	0.00070864		1801.8	-0.00035567		2331.8	-0.00263813
212	0.02146747		741.99	0.00446609		1272	0.00165284		1802	-0.00045554		2332	-0.00165894
212.2	0.02151892		742.19	0.0050846		1272.2	0.0022636		1802.2	-0.00055178		2332.2	-0.0018404
212.4	0.02271528		742.39	0.00466695		1272.4	0.00263392		1802.4	-0.00099057		2332.4	-0.00297404
212.6	0.02351414		742.59	0.00458411		1272.6	0.00240952		1802.6	-0.00131696		2332.6	-0.00266343
212.8	0.0242146		742.79	0.00367474		1272.8	0.00247485		1802.8	-0.00173699		2332.8	-0.00321813
213	0.02411644		742.99	0.0027194		1273	0.00217569		1803	-0.00175441		2333	-0.00291104
213.2	0.02304103		743.19	0.00190912		1273.2	0.00195995		1803.2	-0.00148619		2333.2	-0.00346057
213.4	0.02280749		743.39	0.00226534		1273.4	0.00136521		1803.4	-0.00096528		2333.4	-0.00385325
213.6	0.02267677		743.59	0.00273616		1273.6	0.00093291		1803.6	-0.0017487		2333.6	-0.00479085
213.8	0.0226271		743.79	0.0018803		1273.8	0.00025182		1803.8	-0.00207328		2333.8	-0.00466008
214	0.02275695		743.99	0.00182273		1274	0.00011864		1804	-0.00305257		2334	-0.00357979
214.2	0.0229796		744.19	0.00198895		1274.2	-0.00059317		1804.2	-0.00320104		2334.2	-0.00271424
214.4	0.02356841		744.39	0.0021985		1274.4	-0.00115352		1804.4	-0.00293788		2334.4	-0.00296363
214.6	0.02301886		744.59	0.00232279		1274.6	-0.00093655		1804.6	-0.00258491		2334.6	-0.00340498
214.8	0.02331192		744.79	0.00237534		1274.8	-0.00008154		1804.8	-0.00243965		2334.8	-0.00374071
215	0.02288639		744.99	0.00273863		1275	0.00013936		1805	-0.00241906		2335	-0.0042058
215.2	0.02354382		745.19	0.00247206		1275.2	0.00028663		1805.2	-0.00238252		2335.2	-0.00402936
215.4	0.02441536		745.39	0.00263444		1275.4	-0.00001987		1805.4	-0.00271541		2335.4	-0.00414959
215.6	0.02523701		745.59	0.00189707		1275.6	-0.00118713		1805.6	-0.00308294		2335.6	-0.00360074
215.8	0.02537748		745.79	0.00195972		1275.8	-0.00082566		1805.8	-0.00393871		2335.8	-0.00358025
216	0.02552542		745.99	0.00162592		1276	-0.00043874		1806	-0.00364773		2336	-0.0034752
216.2	0.02557047		746.19	0.00103075		1276.2	-0.00022379		1806.2	-0.00446722		2336.2	-0.00386038
216.4	0.02626491		746.39	0.0001013		1276.4	-0.00051972		1806.4	-0.00548709		2336.4	-0.00418751
216.6	0.02600915		746.59	-0.00050802		1276.6	-0.00079774		1806.6	-0.0055687		2336.6	-0.00432104
216.8	0.02656279		746.79	-0.00074898		1276.8	-0.00119997		1806.8	-0.00621935		2336.8	-0.00451705
217	0.02576368		746.99	-0.00042533		1277	-0.00201856		1807	-0.00608656		2337	-0.00537183
217.2	0.02511605		747.19	0.00059487		1277.2	-0.00249044		1807.2	-0.00582727		2337.2	-0.0055329
217.4	0.02430887		747.39	0.00103749		1277.4	-0.0025989		1807.4	-0.00568153		2337.4	-0.00632512
217.6	0.02414291		747.59	0.00143724		1277.6	-0.00313747		1807.6	-0.00622526		2337.6	-0.00565912
217.8	0.02505071		747.79	0.00132241		1277.8	-0.00277274		1807.8	-0.00602004		2337.8	-0.00484813
218	0.02541969		747.99	0.00202125		1278	-0.00278847		1808	-0.00546226		2338	-0.00524599
218.2	0.02557503		748.19	0.00239247		1278.2	-0.00254227		1808.2	-0.00428502		2338.2	-0.00549693
218.4	0.02588365		748.39	0.00303758		1278.4	-0.00253168		1808.4	-0.00299269		2338.4	-0.00547206
218.6	0.02658336		748.59	0.00291568		1278.6	-0.00066932		1808.6	-0.00225666		2338.6	-0.0050067
218.8	0.0278342		748.79	0.00262088		1278.8	-0.00044493		1808.8	-0.00168163		2338.8	-0.00480999
219	0.02876698		748.99	0.00188683		1279	-0.00073767		1809	-0.00125519		2339	-0.00424358
219.2	0.03042762		749.19	0.00061027		1279.2	-0.00063683		1809.2	-0.00064063		2339.2	-0.00410961
219.4	0.03212291		749.39	0.00068271		1279.4	-0.00096495		1809.4	-0.00088244		2339.4	-0.00425014
219.6	0.03266966		749.59	-0.0002265		1279.6	-0.00117847		1809.6	-0.00063039		2339.6	-0.0042288
219.8	0.03208634		749.79	0.00024492		1279.8	-0.00096249		1809.8	-0.00160507		2339.8	-0.00333185
220	0.03244996		749.99	-0.00004952		1280	-0.00078061		1810	-0.00164019		2340	-0.00300528
220.2	0.03251299		750.19	-0.00027353		1280.2	-0.00069678		1810.2	-0.00258975		2340.2	-0.00304536
220.4	0.03242891		750.39	-0.0006852		1280.4	-0.00090852		1810.4	-0.0032967		2340.4	-0.00302462
220.6	0.03113267		750.59	-0.0012822		1280.6	-0.00083566		1810.6	-0.00380142		2340.6	-0.00339816
220.8	0.02978646		750.79	-0.0012237		1280.8	-0.00118785		1810.8	-0.00515222		2340.8	-0.00324065
221	0.02849944		750.99	-0.00154138		1281	-0.00079323		1811	-0.00603767		2341	-0.00362874
221.2	0.02812493		751.19	-0.00110325		1281.2	-0.00041901		1811.2	-0.00618067		2341.2	-0.00339262
221.4	0.02744814		751.39	-0.00070294		1281.4	-0.00009633		1811.4	-0.00629517		2341.4	-0.00445763
221.6	0.02773439		751.59	0.00007396		1281.6	0.00042459		1811.6	-0.00691966		2341.6	-0.00420298
221.8	0.02862205		751.79	-0.00039078		1281.8	0.00148953		1811.8	-0.00608714		2341.8	-0.00442857
222	0.02828576		751.99	-0.00028208		1282	0.00102466		1812	-0.00484484		2342	-0.00547
222.2	0.02817765		752.19	-0.0003973		1282.2	0.00075564		1812.2	-0.00373852		2342.2	-0.00516456
222.4	0.02878772		752.39	-0.00040593		1282.4	0.00067362		1812.4	-0.0031292		2342.4	-0.00606592
222.6	0.02992246		752.59	-0.00057801		1282.6	0.0009799		1812.6	-0.00261953		2342.6	-0.00659999
222.8	0.03015593		752.79	-0.00039796		1282.8	0.00015978		1812.8	-0.00137391		2342.8	-0.00646397
223	0.03125545		752.99	-0.00121175		1283	0.00020641		1813	-0.00089013		2343	-0.00635984
223.2	0.03208874		753.19	-0.00101878		1283.2	0.00041106		1813.2	-0.00074485		2343.2	-0.00634482
223.4	0.0325311		753.39	-0.00056641		1283.4	0.00007414		1813.4	0.0000726		2343.4	-0.00592218
223.6	0.03238016		753.59	-0.00085248		1283.6	-0.00016256		1813.6	0.00004027		2343.6	-0.00519928
223.8	0.03177224		753.79	-0.00003192		1283.8	-0.00068864		1813.8	-0.00047347		2343.8	-0.00418439
224	0.03152978		753.99	-0.00009172		1284	-0.00015503		1814	-0.00035576		2344	-0.00415142
224.2	0.03082218		754.19	-0.00004227		1284.2	-0.00051308		1814.2	-0.00062085		2344.2	-0.00421067
224.4	0.03027498		754.39	-0.00071931		1284.4	-0.00131473		1814.4	-0.00178483		2344.4	-0.00446314
224.6	0.02974388		754.59	-0.00114204		1284.6	-0.00145725		1814.6	-0.00300165		2344.6	-0.00390805
224.8	0.02972107		754.79	-0.00055707		1284.8	-0.001856		1814.8	-0.00380986		2344.8	-0.00338155
225	0.03032584		754.99	0.00025428		1285	-0.00155034		1815	-0.00427255		2345	-0.00339469
225.2	0.03061418		755.19	0.00065517		1285.2	-0.00081936		1815.2	-0.00405318		2345.2	-0.00406969
225.4	0.02959402		755.39	0.0012091		1285.4	-0.00031244		1815.4	-0.00537258		2345.4	-0.00430862
225.6	0.02930955		755.59	0.00163267		1285.6	0.00019042		1815.6	-0.00649766		2345.6	-0.00482638
225.8	0.03022522		755.79	0.00116759		1285.8	0.00003819		1815.8	-0.00612275		2345.8	-0.00601728
226	0.02980085		755.99	0.00147026		1286	-0.00066857		1816	-0.00595838		2346	-0.00713001
226.2	0.0297006		756.19	0.00146245		1286.2	-0.00112578		1816.2	-0.00560184		2346.2	-0.00723376
226.4	0.02978114		756.39	0.00192396		1286.4	-0.00032273		1816.4	-0.00573323		2346.4	-0.00789139
226.6	0.03065711		756.59	0.00269051		1286.6	-0.00035599		1816.6	-0.00558227		2346.6	-0.00646624
226.8	0.03130104		756.79	0.00297086		1286.8	-0.00121956		1816.8	-0.00482115		2346.8	-0.00569208
227	0.0323202		756.99	0.00314181		1287	-0.00172576		1817	-0.00478859		2347	-0.00561614
227.2	0.03268432		757.19	0.00384935		1287.2	-0.0009594		1817.2	-0.0046588		2347.2	-0.00510554
227.4	0.03290972		757.39	0.00355564		1287.4	-0.00068795		1817.4	-0.00350551		2347.4	-0.00525432
227.6	0.03305322		757.59	0.00327806		1287.6	-0.0005785		1817.6	-0.00371692		2347.6	-0.00504543
227.8	0.03322394		757.79	0.00409451		1287.8	-0.00081723		1817.8	-0.00284987		2347.8	-0.00493829
228	0.03349287		757.99	0.00386878		1288	-0.0003071		1818	-0.00132287		2348	-0.00469069
228.2	0.03404789		758.19	0.00334818		1288.2	-0.00083367		1818.2	-0.00109724		2348.2	-0.00523888
228.4	0.03467818		758.39	0.00263846		1288.4	-0.00100474		1818.4	-0.00148643		2348.4	-0.00538725
228.6	0.03534071		758.59	0.00157001		1288.6	-0.00070036		1818.6	-0.00135895		2348.6	-0.00511541
228.8	0.0355331		758.79	0.0012421		1288.8	-0.00115379		1818.8	-0.00102419		2348.8	-0.00595398
229	0.0355701		758.99	0.00019151		1289	-0.00059071		1819	-0.00080245		2349	-0.00614842
229.2	0.03454283		759.19	-0.00026427		1289.2	-0.00004876		1819.2	-0.00087381		2349.2	-0.00668541
229.4	0.03420357		759.39	0.00009804		1289.4	-0.0005407		1819.4	-0.00145996		2349.4	-0.00641701
229.6	0.03457361		759.59	0.00014731		1289.6	-0.00051835		1819.6	-0.0009383		2349.6	-0.00737275
229.8	0.03499313		759.79	-0.00061306		1289.8	-0.00048978		1819.8	-0.00058264		2349.8	-0.00800999
230	0.03468313		759.99	-0.00141264		1290	-0.00113497		1820	-0.00065246		2350	-0.00763931
230.2	0.03395299		760.19	-0.00228868		1290.2	-0.00137723		1820.2	-0.00051331		2350.2	-0.00608445
230.4	0.03517025		760.39	-0.00167079		1290.4	-0.00127797		1820.4	-0.00110957		2350.4	-0.00482692
230.6	0.03636693		760.59	-0.0010084		1290.6	-0.00196878		1820.6	-0.00104999		2350.6	-0.00381938
230.8	0.03734679		760.79	-0.00091566		1290.8	-0.00230092		1820.8	-0.00030904		2350.8	-0.00480865
231	0.03823459		760.99	0.00047594		1291	-0.00195705		1821	-0.00070722		2351	-0.00481545
231.2	0.03867388		761.19	0.00074164		1291.2	-0.00117737		1821.2	-0.00145218		2351.2	-0.00555525
231.4	0.03904922		761.39	0.00136686		1291.4	-0.00163061		1821.4	-0.00106042		2351.4	-0.0063454
231.6	0.03871978		761.59	0.00205682		1291.6	-0.00156314		1821.6	-0.001458		2351.6	-0.00677729
231.8	0.03947979		761.79	0.00298373		1291.8	-0.00105253		1821.8	-0.00161146		2351.8	-0.00657408
232	0.04046005		761.99	0.00257011		1292	-0.00078478		1822	-0.00221233		2352	-0.00592783
232.2	0.04000843		762.19	0.00209336		1292.2	-0.00090706		1822.2	-0.00340069		2352.2	-0.00682732
232.4	0.03967331		762.39	0.00183512		1292.4	-0.00063423		1822.4	-0.00360407		2352.4	-0.00675772
232.6	0.03975407		762.59	0.00116304		1292.6	-0.00075398		1822.6	-0.00415057		2352.6	-0.00751622
232.8	0.03904876		762.79	0.00125232		1292.8	-0.00083433		1822.8	-0.00453823		2352.8	-0.0075038
233	0.03803821		762.99	0.00078056		1293	0.00007213		1823	-0.00481189		2353	-0.00642493
233.2	0.03750861		763.19	0.00146723		1293.2	0.00002139		1823.2	-0.00460886		2353.2	-0.00692364
233.4	0.03802963		763.39	0.00123909		1293.4	0.00038643		1823.4	-0.00407516		2353.4	-0.00729447
233.6	0.03752592		763.59	0.00049322		1293.6	0.00023501		1823.6	-0.00408156		2353.6	-0.00782964
233.8	0.03665176		763.79	-0.00039123		1293.8	0.00037358		1823.8	-0.00504904		2353.8	-0.007636
234	0.03697233		763.99	-0.00147256		1294	0.00048285		1824	-0.00531322		2354	-0.00703764
234.2	0.03637551		764.19	-0.00157797		1294.2	0.00151852		1824.2	-0.00499976		2354.2	-0.00610099
234.4	0.0380504		764.39	-0.00172637		1294.4	0.00196622		1824.4	-0.00518226		2354.4	-0.00638753
234.6	0.03796066		764.59	-0.00216511		1294.6	0.00253224		1824.6	-0.00468194		2354.6	-0.0070247
234.8	0.03834483		764.79	-0.0023997		1294.8	0.00231594		1824.8	-0.00410725		2354.8	-0.00768411
235	0.03877622		764.99	-0.0016273		1295	0.00272256		1825	-0.00446993		2355	-0.00743742
235.2	0.03878792		765.19	-0.00209329		1295.2	0.00257829		1825.2	-0.00468379		2355.2	-0.007858
235.4	0.03928598		765.39	-0.00192275		1295.4	0.00227373		1825.4	-0.00440792		2355.4	-0.00778677
235.6	0.03866719		765.59	-0.00271518		1295.6	0.00221956		1825.6	-0.00482732		2355.6	-0.00736857
235.8	0.03937244		765.79	-0.00251764		1295.8	0.00217235		1825.8	-0.00453211		2355.8	-0.00652513
236	0.03998411		765.99	-0.00316977		1296	0.00079687		1826	-0.00466437		2356	-0.00590696
236.2	0.0388517		766.19	-0.00350412		1296.2	0.00045864		1826.2	-0.0046061		2356.2	-0.00623663
236.4	0.038996		766.39	-0.00284161		1296.4	-0.00011311		1826.4	-0.00423101		2356.4	-0.00640161
236.6	0.03912157		766.59	-0.00204361		1296.6	-0.00133115		1826.6	-0.00451193		2356.6	-0.00645509
236.8	0.03862872		766.79	-0.00136397		1296.8	-0.00126217		1826.8	-0.00394475		2356.8	-0.00630648
237	0.03887166		766.99	-0.00122677		1297	-0.00121479		1827	-0.00275821		2357	-0.00598363
237.2	0.03981213		767.19	-0.00023744		1297.2	-0.00190365		1827.2	-0.0018487		2357.2	-0.00744357
237.4	0.04024976		767.39	0.0000322		1297.4	-0.00196511		1827.4	-0.00095061		2357.4	-0.00833991
237.6	0.04077952		767.59	0.00023676		1297.6	-0.00183772		1827.6	-0.00092244		2357.6	-0.00873349
237.8	0.04095525		767.79	-0.00002866		1297.8	-0.00112114		1827.8	-0.00082289		2357.8	-0.00870092
238	0.04185593		767.99	-0.00066896		1298	-0.00061975		1828	-0.00004051		2358	-0.00910286
238.2	0.04246577		768.19	-0.00046348		1298.2	0.00006324		1828.2	0.00076314		2358.2	-0.00924913
238.4	0.04355246		768.39	-0.00073429		1298.4	-0.00024577		1828.4	0.00038549		2358.4	-0.00949501
238.6	0.0437231		768.59	-0.00044553		1298.6	0.00034163		1828.6	-0.00008377		2358.6	-0.00955375
238.8	0.04436701		768.79	-0.00033964		1298.8	0.00018798		1828.8	0.00021837		2358.8	-0.00998668
239	0.04511498		768.99	-0.00071935		1299	0.00096491		1829	-0.00075657		2359	-0.00938223
239.2	0.04495444		769.19	-0.00072721		1299.2	0.00067529		1829.2	-0.00121102		2359.2	-0.00895959
239.4	0.04494587		769.39	-0.00071523		1299.4	0.0001522		1829.4	-0.00237827		2359.4	-0.00817647
239.6	0.04429352		769.59	-0.00113447		1299.6	-0.00042544		1829.6	-0.00326349		2359.6	-0.00755285
239.8	0.04387039		769.79	-0.00169759		1299.8	-0.00051514		1829.8	-0.00423172		2359.8	-0.00644924
240	0.04377606		769.99	-0.00204665		1300	-0.00167775		1830	-0.00544701		2360	-0.00570944
240.2	0.0422888		770.19	-0.00237889		1300.2	-0.00266652		1830.2	-0.0058299		2360.2	-0.00502307
240.4	0.04168449		770.39	-0.00159949		1300.4	-0.00274668		1830.4	-0.00607696		2360.4	-0.00503568
240.6	0.0416734		770.59	-0.00178359		1300.6	-0.00340225		1830.6	-0.00656867		2360.6	-0.0046272
240.8	0.04061378		770.79	-0.00192715		1300.8	-0.00268581		1830.8	-0.00570469		2360.8	-0.00472404
241	0.04077076		770.99	-0.0017237		1301	-0.00308841		1831	-0.00507969		2361	-0.00482586
241.2	0.04135788		771.19	-0.00148513		1301.2	-0.00303763		1831.2	-0.00491546		2361.2	-0.00639154
241.4	0.04128273		771.39	-0.00167935		1301.4	-0.00311562		1831.4	-0.00386178		2361.4	-0.00701451
241.6	0.04137847		771.59	-0.00177178		1301.6	-0.00280304		1831.6	-0.00369118		2361.6	-0.00746371
241.8	0.0406543		771.79	-0.00213938		1301.8	-0.00256586		1831.8	-0.00325248		2361.8	-0.00819617
242	0.04092409		771.99	-0.00224737		1302	-0.00203376		1832	-0.0031596		2362	-0.00860303
242.2	0.04118052		772.19	-0.0009831		1302.2	-0.00154888		1832.2	-0.00252841		2362.2	-0.00936449
242.4	0.04178081		772.39	-0.0007663		1302.4	-0.00148794		1832.4	-0.00248478		2362.4	-0.01007159
242.6	0.04189308		772.59	-0.00104158		1302.6	-0.00062045		1832.6	-0.00303896		2362.6	-0.01000938
242.8	0.0420824		772.79	-0.00155984		1302.8	-0.00011214		1832.8	-0.00242922		2362.8	-0.01118743
243	0.04202225		772.99	-0.00126886		1303	0.00034888		1833	-0.00246157		2363	-0.01126413
243.2	0.04220229		773.19	-0.00025704		1303.2	0.00065302		1833.2	-0.00242517		2363.2	-0.01095078
243.4	0.04229145		773.39	0.00051948		1303.4	0.00051109		1833.4	-0.00348573		2363.4	-0.0107525
243.6	0.04239429		773.59	0.00028819		1303.6	0.0010843		1833.6	-0.00414401		2363.6	-0.01081684
243.8	0.04204456		773.79	0.00052915		1303.8	0.00125613		1833.8	-0.0046673		2363.8	-0.00999729
244	0.04182605		773.99	0.00176169		1304	0.00077472		1834	-0.00460292		2364	-0.00978459
244.2	0.04115421		774.19	0.00211706		1304.2	0.00082301		1834.2	-0.00386249		2364.2	-0.00994674
244.4	0.04198932		774.39	0.0022441		1304.4	0.00164469		1834.4	-0.00461092		2364.4	-0.01113651
244.6	0.04209554		774.59	0.00203443		1304.6	0.00128809		1834.6	-0.00404082		2364.6	-0.0106313
244.8	0.0421032		774.79	0.00203866		1304.8	0.0013217		1834.8	-0.00327368		2364.8	-0.01036598
245	0.04342258		774.99	0.00210294		1305	0.00127864		1835	-0.00330842		2365	-0.01050608
245.2	0.04425064		775.19	0.00121974		1305.2	0.00123711		1835.2	-0.0028142		2365.2	-0.01017812
245.4	0.04444175		775.39	0.00123598		1305.4	0.00127049		1835.4	-0.00206643		2365.4	-0.01012546
245.6	0.04495897		775.59	0.00119785		1305.6	0.0008631		1835.6	-0.00213649		2365.6	-0.01011204
245.8	0.0454092		775.79	0.00102716		1305.8	0.00113733		1835.8	-0.00136367		2365.8	-0.01007354
246	0.04685963		775.99	0.00118055		1306	0.00177289		1836	-0.00093508		2366	-0.00990921
246.2	0.04792216		776.19	0.00138798		1306.2	0.00130431		1836.2	-0.0003886		2366.2	-0.00905231
246.4	0.04820956		776.39	0.00034924		1306.4	0.00098904		1836.4	-0.00032209		2366.4	-0.00865299
246.6	0.0479274		776.59	-0.00099935		1306.6	0.00100808		1836.6	-0.0006285		2366.6	-0.00853407
246.8	0.04759367		776.79	-0.00110401		1306.8	0.00169635		1836.8	-0.00049934		2366.8	-0.00872095
247	0.04822048		776.99	-0.00061725		1307	0.00121962		1837	-0.00167047		2367	-0.00792844
247.2	0.04838059		777.19	-0.0000686		1307.2	0.00024252		1837.2	-0.00252093		2367.2	-0.00725904
247.4	0.04763515		777.39	-0.00002492		1307.4	-0.00057353		1837.4	-0.00315813		2367.4	-0.00722518
247.6	0.04672149		777.59	-0.0009109		1307.6	-0.00014776		1837.6	-0.00305646		2367.6	-0.00696731
247.8	0.04576361		777.79	-0.00061602		1307.8	-0.00176227		1837.8	-0.0026097		2367.8	-0.00666743
248	0.04501381		777.99	-0.00059275		1308	-0.00262415		1838	-0.00194481		2368	-0.0081463
248.2	0.04402716		778.19	-0.00096455		1308.2	-0.00256868		1838.2	-0.00085455		2368.2	-0.00902011
248.4	0.0437717		778.39	-0.00147858		1308.4	-0.00323173		1838.4	-0.00103225		2368.4	-0.00991231
248.6	0.04287849		778.59	-0.00148989		1308.6	-0.00364075		1838.6	-0.00074538		2368.6	-0.00940316
248.8	0.04288836		778.79	-0.00166588		1308.8	-0.00455061		1838.8	-0.00062299		2368.8	-0.00956073
249	0.04277367		778.99	-0.00120864		1309	-0.00467496		1839	-0.00028304		2369	-0.00930493
249.2	0.04268347		779.19	-0.0013683		1309.2	-0.00522766		1839.2	-0.00038916		2369.2	-0.00890434
249.4	0.04310995		779.39	-0.00082463		1309.4	-0.00529074		1839.4	-0.00028569		2369.4	-0.00917774
249.6	0.04415957		779.59	-0.00152483		1309.6	-0.00539153		1839.6	-0.00092635		2369.6	-0.00888123
249.8	0.04540665		779.79	-0.00067617		1309.8	-0.00434926		1839.8	-0.00017199		2369.8	-0.00909672
250	0.04683206		779.99	-0.00060829		1310	-0.00330979		1840	-0.00100749		2370	-0.00906106
250.2	0.04761027		780.19	-0.00119747		1310.2	-0.0029443		1840.2	-0.00199859		2370.2	-0.00812497
250.4	0.04773299		780.39	-0.00178841		1310.4	-0.00209085		1840.4	-0.00244509		2370.4	-0.0079039
250.6	0.04818254		780.59	-0.00221339		1310.6	-0.00126232		1840.6	-0.00372408		2370.6	-0.00695824
250.8	0.04782894		780.79	-0.00160342		1310.8	-0.00046654		1840.8	-0.00531974		2370.8	-0.00557206
251	0.04805824		780.99	-0.00166712		1311	-0.0011266		1841	-0.00617633		2371	-0.00537652
251.2	0.04735156		781.19	-0.00212815		1311.2	-0.00135807		1841.2	-0.00616414		2371.2	-0.00485754
251.4	0.04666058		781.39	-0.00317968		1311.4	-0.00086991		1841.4	-0.00635622		2371.4	-0.00470191
251.6	0.04607583		781.59	-0.0033093		1311.6	-0.00040665		1841.6	-0.00572526		2371.6	-0.00523305
251.8	0.04565552		781.79	-0.00292462		1311.8	-0.00109759		1841.8	-0.00484009		2371.8	-0.00572702
252	0.04456269		781.99	-0.00224346		1312	-0.00043568		1842	-0.00395979		2372	-0.00679147
252.2	0.04368306		782.19	-0.00142785		1312.2	-0.00008799		1842.2	-0.00364456		2372.2	-0.0068782
252.4	0.04387111		782.39	-0.00090497		1312.4	-0.00073169		1842.4	-0.00370856		2372.4	-0.00769514
252.6	0.04386954		782.59	-0.00081449		1312.6	-0.00043653		1842.6	-0.00347165		2372.6	-0.00802874
252.8	0.0434312		782.79	-0.00018249		1312.8	-0.00118347		1842.8	-0.00238403		2372.8	-0.00809221
253	0.04332333		782.99	-0.00035432		1313	-0.00087385		1843	-0.00221847		2373	-0.00774564
253.2	0.04438682		783.19	-0.00088516		1313.2	-0.00144315		1843.2	-0.00266664		2373.2	-0.00788267
253.4	0.04555362		783.39	-0.0007842		1313.4	-0.00139019		1843.4	-0.00243758		2373.4	-0.00907003
253.6	0.04724146		783.59	-0.00072208		1313.6	-0.00033127		1843.6	-0.00249418		2373.6	-0.00927795
253.8	0.04822232		783.79	-0.00038097		1313.8	0.00041798		1843.8	-0.00176191		2373.8	-0.00974896
254	0.04965477		783.99	-0.00133306		1314	0.00076728		1844	-0.00227494		2374	-0.00974163
254.2	0.05092767		784.19	-0.00198394		1314.2	0.00104418		1844.2	-0.00196968		2374.2	-0.00922377
254.4	0.05143005		784.39	-0.001888		1314.4	0.00042197		1844.4	-0.00226175		2374.4	-0.00880108
254.6	0.0511924		784.59	-0.00185135		1314.6	0.00045117		1844.6	-0.00338218		2374.6	-0.00900174
254.8	0.05186576		784.79	-0.00131171		1314.8	-0.00099149		1844.8	-0.00353546		2374.8	-0.00884513
255	0.05168815		784.99	-0.00162696		1315	-0.00188088		1845	-0.00359125		2375	-0.00911377
255.2	0.05168269		785.19	-0.00148104		1315.2	-0.00228685		1845.2	-0.00353912		2375.2	-0.00867704
255.4	0.05119645		785.39	-0.00142041		1315.4	-0.00205888		1845.4	-0.00349102		2375.4	-0.00893189
255.6	0.05086092		785.59	-0.00079746		1315.6	-0.00228049		1845.6	-0.00272462		2375.6	-0.00915853
255.8	0.04941689		785.79	-0.00056866		1315.8	-0.00258745		1845.8	-0.00247039		2375.8	-0.00859958
256	0.04873792		785.99	-0.00033138		1316	-0.00280842		1846	-0.00277833		2376	-0.00820865
256.2	0.04924531		786.19	0.00052099		1316.2	-0.00262233		1846.2	-0.00292529		2376.2	-0.00818048
256.4	0.04960091		786.39	0.00007397		1316.4	-0.0022143		1846.4	-0.00242722		2376.4	-0.00839223
256.6	0.04940069		786.59	-0.00044296		1316.6	-0.0019046		1846.6	-0.00221826		2376.6	-0.00943901
256.8	0.04841907		786.79	-0.00083349		1316.8	-0.00229224		1846.8	-0.00161275		2376.8	-0.00959673
257	0.04835145		786.99	-0.00106266		1317	-0.00172466		1847	-0.00178972		2377	-0.00916998
257.2	0.04871193		787.19	-0.00167501		1317.2	-0.002568		1847.2	-0.0017231		2377.2	-0.00952584
257.4	0.04780457		787.39	-0.00196996		1317.4	-0.00168433		1847.4	-0.00134832		2377.4	-0.01038831
257.6	0.04844009		787.59	-0.00203838		1317.6	-0.00126484		1847.6	-0.00169166		2377.6	-0.01023616
257.8	0.04821713		787.79	-0.00219356		1317.8	-0.00133311		1847.8	-0.00084969		2377.8	-0.01094162
258	0.04888589		787.99	-0.00212656		1318	-0.00184795		1848	-0.00115854		2378	-0.01122805
258.2	0.04892037		788.19	-0.00166674		1318.2	-0.00197516		1848.2	-0.00085446		2378.2	-0.01186653
258.4	0.04886587		788.39	-0.00072278		1318.4	-0.00231765		1848.4	-0.00117625		2378.4	-0.01236838
258.6	0.04867952		788.59	0.00000658		1318.6	-0.00254462		1848.6	-0.00135715		2378.6	-0.01166678
258.8	0.04902597		788.79	0.0008328		1318.8	-0.00377884		1848.8	-0.00164717		2378.8	-0.01135843
259	0.04747809		788.99	0.00147488		1319	-0.00361426		1849	-0.00157341		2379	-0.01145622
259.2	0.04739743		789.19	0.00130639		1319.2	-0.00317923		1849.2	-0.00156294		2379.2	-0.01144187
259.4	0.04691072		789.39	0.00166808		1319.4	-0.00234846		1849.4	-0.00177189		2379.4	-0.01058701
259.6	0.04677195		789.59	0.00199957		1319.6	-0.00222127		1849.6	-0.00152204		2379.6	-0.01021597
259.8	0.04661036		789.79	0.00205837		1319.8	-0.00137253		1849.8	-0.00182563		2379.8	-0.00985849
260	0.04737927		789.99	0.00231713		1320	-0.00112994		1850	-0.00117562		2380	-0.00946847
260.2	0.04856277		790.19	0.00279584		1320.2	0.00005023		1850.2	-0.00080065		2380.2	-0.00913926
260.4	0.04892312		790.39	0.0016408		1320.4	0.00109496		1850.4	-0.00048032		2380.4	-0.00955931
260.6	0.04962932		790.59	0.00118146		1320.6	0.00021657		1850.6	-0.00056832		2380.6	-0.01014038
260.8	0.04969673		790.79	0.00012334		1320.8	0.00071248		1850.8	-0.00014781		2380.8	-0.00945119
261	0.05042718		790.99	-0.00053535		1321	0.00109972		1851	-0.00066426		2381	-0.00930353
261.2	0.05090098		791.19	-0.00118176		1321.2	0.00034413		1851.2	-0.00126747		2381.2	-0.00958037
261.4	0.05111485		791.39	-0.00121185		1321.4	0.00083785		1851.4	-0.0017599		2381.4	-0.01017189
261.6	0.05254433		791.59	-0.00121625		1321.6	0.00018324		1851.6	-0.00208674		2381.6	-0.00979029
261.8	0.05317445		791.79	-0.00145112		1321.8	-0.00023915		1851.8	-0.00204236		2381.8	-0.010144
262	0.05387345		791.99	-0.00138439		1322	-0.00014206		1852	-0.00260202		2382	-0.00961097
262.2	0.05397163		792.19	-0.00129186		1322.2	0.00022881		1852.2	-0.00213692		2382.2	-0.00939712
262.4	0.0542638		792.39	-0.0011419		1322.4	-0.00039342		1852.4	-0.00252332		2382.4	-0.00866046
262.6	0.05451014		792.59	-0.001048		1322.6	-0.00112218		1852.6	-0.00262843		2382.6	-0.00759131
262.8	0.05414675		792.79	-0.0011783		1322.8	-0.00191593		1852.8	-0.00343506		2382.8	-0.00823762
263	0.05289364		792.99	-0.00153249		1323	-0.00296063		1853	-0.00428316		2383	-0.00839493
263.2	0.05284586		793.19	-0.00212449		1323.2	-0.00266322		1853.2	-0.00417436		2383.2	-0.00873197
263.4	0.05223793		793.39	-0.00240301		1323.4	-0.00266816		1853.4	-0.00363339		2383.4	-0.00892627
263.6	0.05180463		793.59	-0.00264376		1323.6	-0.00227193		1853.6	-0.00317718		2383.6	-0.00917642
263.8	0.05179435		793.79	-0.00294509		1323.8	-0.00189179		1853.8	-0.00208574		2383.8	-0.00973565
264	0.05254066		793.99	-0.00324606		1324	-0.00229616		1854	-0.00077676		2384	-0.00995193
264.2	0.05361155		794.19	-0.00406339		1324.2	-0.00168288		1854.2	0.00011031		2384.2	-0.01027959
264.4	0.05402573		794.39	-0.00416052		1324.4	-0.00153815		1854.4	0.00051237		2384.4	-0.01165884
264.6	0.05470305		794.59	-0.00435887		1324.6	-0.00246072		1854.6	0.00108037		2384.6	-0.01281487
264.8	0.05428255		794.79	-0.00530331		1324.8	-0.00194521		1854.8	0.0008975		2384.8	-0.01385636
265	0.05504634		794.99	-0.00531677		1325	-0.00212158		1855	0.00037378		2385	-0.01481522
265.2	0.05515712		795.19	-0.0052768		1325.2	-0.00231848		1855.2	0.00052736		2385.2	-0.0147688
265.4	0.05543513		795.39	-0.00478292		1325.4	-0.00192596		1855.4	0.0010539		2385.4	-0.01479264
265.6	0.05609599		795.59	-0.00420986		1325.6	-0.00206783		1855.6	0.00173026		2385.6	-0.0142182
265.8	0.05602763		795.79	-0.00393687		1325.8	-0.00223285		1855.8	0.00132103		2385.8	-0.01468002
266	0.05594282		795.99	-0.00276487		1326	-0.00162782		1856	0.00081734		2386	-0.0145361
266.2	0.05571808		796.19	-0.001583		1326.2	-0.00203948		1856.2	0.00054857		2386.2	-0.01398115
266.4	0.0552954		796.39	-0.00051786		1326.4	-0.00277015		1856.4	-0.00010988		2386.4	-0.01328954
266.6	0.05493941		796.59	0.00097066		1326.6	-0.00356166		1856.6	-0.00050435		2386.6	-0.01317694
266.8	0.05381601		796.79	0.0014358		1326.8	-0.00463615		1856.8	-0.00121251		2386.8	-0.01260896
267	0.05287784		796.99	0.0018153		1327	-0.00482854		1857	-0.00199355		2387	-0.01255276
267.2	0.05297399		797.19	0.00207891		1327.2	-0.00425409		1857.2	-0.0014255		2387.2	-0.01255639
267.4	0.05171026		797.39	0.00156093		1327.4	-0.00430397		1857.4	-0.00098058		2387.4	-0.01220351
267.6	0.05082364		797.59	0.00220635		1327.6	-0.004		1857.6	-0.00091367		2387.6	-0.01154744
267.8	0.05132331		797.79	0.0021395		1327.8	-0.00360675		1857.8	-0.0006663		2387.8	-0.01203251
268	0.05248162		797.99	0.00165911		1328	-0.00328821		1858	-0.00095434		2388	-0.01201438
268.2	0.05295742		798.19	0.00101681		1328.2	-0.00366129		1858.2	-0.00103403		2388.2	-0.01252697
268.4	0.0534312		798.39	0.00029067		1328.4	-0.00364224		1858.4	-0.00136361		2388.4	-0.01346424
268.6	0.05410016		798.59	-0.00141174		1328.6	-0.0038718		1858.6	-0.00088971		2388.6	-0.01345895
268.8	0.05476337		798.79	-0.00233368		1328.8	-0.00365948		1858.8	-0.0014513		2388.8	-0.0134826
269	0.05675111		798.99	-0.00271113		1329	-0.00339499		1859	-0.00068601		2389	-0.01344839
269.2	0.05748163		799.19	-0.00362301		1329.2	-0.00327674		1859.2	-0.00073275		2389.2	-0.01277977
269.4	0.05763031		799.39	-0.00374556		1329.4	-0.00284311		1859.4	-0.00137076		2389.4	-0.01266503
269.6	0.05786198		799.59	-0.00497229		1329.6	-0.00310207		1859.6	-0.00177717		2389.6	-0.01281421
269.8	0.05785709		799.79	-0.00515881		1329.8	-0.002411		1859.8	-0.00245989		2389.8	-0.01319307
270	0.05768228		799.99	-0.00446256		1330	-0.00154395		1860	-0.00304567		2390	-0.01277383
270.2	0.0573265		800.19	-0.00391302		1330.2	-0.00141426		1860.2	-0.0026354		2390.2	-0.01236681
270.4	0.05700885		800.39	-0.00342433		1330.4	-0.00086252		1860.4	-0.002225		2390.4	-0.01190158
270.6	0.05680538		800.59	-0.00345736		1330.6	-0.00153907		1860.6	-0.00269907		2390.6	-0.01179712
270.8	0.05622698		800.79	-0.00351213		1330.8	-0.00153308		1860.8	-0.00252959		2390.8	-0.01081688
271	0.05527448		800.99	-0.00299807		1331	-0.00129433		1861	-0.00251003		2391	-0.01142817
271.2	0.05440682		801.19	-0.00355333		1331.2	-0.00164789		1861.2	-0.00215061		2391.2	-0.01130229
271.4	0.05272196		801.39	-0.00346555		1331.4	-0.00219585		1861.4	-0.00168869		2391.4	-0.01089233
271.6	0.05274038		801.59	-0.00310659		1331.6	-0.00276029		1861.6	-0.00171568		2391.6	-0.01105523
271.8	0.05315616		801.79	-0.00290277		1331.8	-0.00277768		1861.8	-0.00094124		2391.8	-0.01180776
272	0.05380074		801.99	-0.00226869		1332	-0.00378678		1862	-0.00043353		2392	-0.01162298
272.2	0.05440039		802.19	-0.0021167		1332.2	-0.00431803		1862.2	-0.00021889		2392.2	-0.01217311
272.4	0.05501614		802.39	-0.00202914		1332.4	-0.00437		1862.4	0.00009993		2392.4	-0.01322112
272.6	0.05620016		802.59	-0.00149281		1332.6	-0.00486639		1862.6	0.00013078		2392.6	-0.01275451
272.8	0.05750858		802.79	-0.00053791		1332.8	-0.00458973		1862.8	0.00005394		2392.8	-0.01273123
273	0.05936599		802.99	-0.00016577		1333	-0.00431995		1863	-0.00040912		2393	-0.01267193
273.2	0.05935022		803.19	-0.00109112		1333.2	-0.0040485		1863.2	-0.00155263		2393.2	-0.01243486
273.4	0.05996189		803.39	-0.00114765		1333.4	-0.00484267		1863.4	-0.00179437		2393.4	-0.01271845
273.6	0.06033218		803.59	-0.00134333		1333.6	-0.0048825		1863.6	-0.00218632		2393.6	-0.01270354
273.8	0.06049804		803.79	-0.00058761		1333.8	-0.00388103		1863.8	-0.00215253		2393.8	-0.01268291
274	0.05999488		803.99	-0.00067863		1334	-0.00362443		1864	-0.00268348		2394	-0.01252196
274.2	0.0597607		804.19	-0.00032735		1334.2	-0.00346257		1864.2	-0.00307516		2394.2	-0.01241662
274.4	0.05954793		804.39	-0.00015496		1334.4	-0.00324047		1864.4	-0.00397912		2394.4	-0.01107754
274.6	0.05884795		804.59	-0.0004969		1334.6	-0.00350819		1864.6	-0.00493526		2394.6	-0.01070749
274.8	0.05823093		804.79	-0.0003022		1334.8	-0.00349281		1864.8	-0.00508757		2394.8	-0.01082684
275	0.056979		804.99	-0.00019224		1335	-0.00310861		1865	-0.00490737		2395	-0.01088846
275.2	0.05660269		805.19	-0.00128114		1335.2	-0.00345847		1865.2	-0.00474684		2395.2	-0.01057587
275.4	0.05596908		805.39	-0.00136187		1335.4	-0.00354765		1865.4	-0.00411178		2395.4	-0.01107531
275.6	0.05641116		805.59	-0.00084056		1335.6	-0.00318792		1865.6	-0.00301103		2395.6	-0.01180048
275.8	0.05586058		805.79	-0.00019626		1335.8	-0.00301903		1865.8	-0.00228859		2395.8	-0.01224366
276	0.05685421		805.99	0.00062063		1336	-0.00326997		1866	-0.00225152		2396	-0.01193054
276.2	0.05687139		806.19	0.0002153		1336.2	-0.00282655		1866.2	-0.00195247		2396.2	-0.01281721
276.4	0.05706897		806.39	0.0005333		1336.4	-0.00279712		1866.4	-0.00169482		2396.4	-0.01309976
276.6	0.05814084		806.59	0.00073614		1336.6	-0.00238297		1866.6	-0.00184127		2396.6	-0.01240199
276.8	0.05944633		806.79	0.000571		1336.8	-0.00137729		1866.8	-0.00185738		2396.8	-0.01272827
277	0.05980705		806.99	0.00095822		1337	-0.00190797		1867	-0.00238043		2397	-0.01285624
277.2	0.06102889		807.19	0.00073394		1337.2	-0.00243654		1867.2	-0.00281169		2397.2	-0.01288008
277.4	0.06190656		807.39	0.0005877		1337.4	-0.00363647		1867.4	-0.00310253		2397.4	-0.01302087
277.6	0.0616406		807.59	0.00103375		1337.6	-0.00214453		1867.6	-0.00331856		2397.6	-0.01264034
277.8	0.06122351		807.79	0.0008209		1337.8	-0.00133503		1867.8	-0.00378422		2397.8	-0.01237286
278	0.06117885		807.99	-0.00016759		1338	-0.00132647		1868	-0.00546278		2398	-0.01203672
278.2	0.06095678		808.19	0.00023184		1338.2	-0.00064353		1868.2	-0.00613011		2398.2	-0.01115541
278.4	0.06044137		808.39	-0.00011391		1338.4	-0.00035943		1868.4	-0.00703825		2398.4	-0.01111324
278.6	0.05931981		808.59	-0.00046913		1338.6	-0.00038992		1868.6	-0.00724546		2398.6	-0.01076745
278.8	0.05918456		808.79	-0.00063202		1338.8	-0.00040944		1868.8	-0.00837373		2398.8	-0.0099045
279	0.05872364		808.99	0.00004685		1339	0.00031483		1869	-0.00755566		2399	-0.00954522
279.2	0.05864253		809.19	-0.00115436		1339.2	0.00019623		1869.2	-0.00750113		2399.2	-0.00958409
279.4	0.05902051		809.39	-0.00137433		1339.4	0.00029937		1869.4	-0.00736251		2399.4	-0.01015293
279.6	0.05893896		809.59	-0.00061474		1339.6	0.00036793		1869.6	-0.00699824		2399.6	-0.00993964
279.8	0.05895177		809.79	-0.00144631		1339.8	0.00027933		1869.8	-0.00656099		2399.8	-0.01029453
280	0.05932571		809.99	-0.00097956		1340	0.00060464		1870	-0.00588561		2400	-0.01046981
280.2	0.05899056		810.19	-0.00155569		1340.2	0.00009703		1870.2	-0.0047939		2400.2	-0.01129453
280.4	0.05924793		810.39	-0.00121996		1340.4	0.00002597		1870.4	-0.00422841		2400.4	-0.0117749
280.6	0.05954213		810.59	-0.00147484		1340.6	-0.00029115		1870.6	-0.00398255		2400.6	-0.01282479
280.8	0.06006871		810.79	-0.00183539		1340.8	-0.00095328		1870.8	-0.00344728		2400.8	-0.01362656
281	0.05997327		810.99	-0.00157769		1341	-0.00200398		1871	-0.00362191		2401	-0.01425045
281.2	0.06132097		811.19	-0.00229847		1341.2	-0.00202254		1871.2	-0.00358433		2401.2	-0.01442796
281.4	0.06071911		811.39	-0.00245884		1341.4	-0.00188338		1871.4	-0.00349593		2401.4	-0.01541239
281.6	0.06052246		811.59	-0.00141345		1341.6	-0.00063219		1871.6	-0.0034586		2401.6	-0.0155285
281.8	0.06025475		811.79	-0.00186793		1341.8	-0.00076621		1871.8	-0.00409196		2401.8	-0.01578665
282	0.05995639		811.99	-0.00224874		1342	-0.00114933		1872	-0.00499899		2402	-0.01639811
282.2	0.05928216		812.19	-0.00186187		1342.2	-0.00122126		1872.2	-0.00474125		2402.2	-0.01735793
282.4	0.05889095		812.39	-0.00273705		1342.4	-0.00183904		1872.4	-0.00531882		2402.4	-0.01761565
282.6	0.05793104		812.59	-0.0023972		1342.6	-0.00227083		1872.6	-0.00532064		2402.6	-0.01642249
282.8	0.05829843		812.79	-0.00241326		1342.8	-0.00195099		1872.8	-0.00530994		2402.8	-0.01593966
283	0.05834611		812.99	-0.00170661		1343	-0.00221274		1873	-0.00463129		2403	-0.01571237
283.2	0.05859695		813.19	-0.00199939		1343.2	-0.00216189		1873.2	-0.00496153		2403.2	-0.01591707
283.4	0.05879499		813.39	-0.00171607		1343.4	-0.002652		1873.4	-0.00428452		2403.4	-0.01519883
283.6	0.05853144		813.59	-0.00119622		1343.6	-0.00303088		1873.6	-0.00353562		2403.6	-0.01481469
283.8	0.0594369		813.79	-0.00129912		1343.8	-0.00265927		1873.8	-0.0024511		2403.8	-0.01565915
284	0.05915644		813.99	-0.00100428		1344	-0.00256611		1874	-0.00178433		2404	-0.01592521
284.2	0.06018374		814.19	-0.00134785		1344.2	-0.00304582		1874.2	-0.00033829		2404.2	-0.0156859
284.4	0.06093242		814.39	-0.0009691		1344.4	-0.00299772		1874.4	0.00048831		2404.4	-0.01552336
284.6	0.06175118		814.59	-0.00159142		1344.6	-0.00295639		1874.6	0.00016421		2404.6	-0.01553648
284.8	0.06200731		814.79	-0.00153814		1344.8	-0.00316964		1874.8	0.00008116		2404.8	-0.01484472
285	0.06267084		814.99	-0.00134883		1345	-0.00231747		1875	-0.00054715		2405	-0.01486495
285.2	0.06340533		815.19	-0.0013129		1345.2	-0.00188385		1875.2	-0.00042902		2405.2	-0.01406547
285.4	0.06381348		815.39	-0.00018878		1345.4	-0.00169714		1875.4	-0.00088997		2405.4	-0.01434836
285.6	0.06365003		815.59	0.00035533		1345.6	-0.00135007		1875.6	-0.00183061		2405.6	-0.01395649
285.8	0.06396758		815.79	-0.00023016		1345.8	-0.0010693		1875.8	-0.00232655		2405.8	-0.01359295
286	0.06371636		815.99	-0.00119285		1346	-0.0010626		1876	-0.00372273		2406	-0.01396236
286.2	0.0636106		816.19	-0.00234226		1346.2	-0.00168127		1876.2	-0.0043056		2406.2	-0.01483422
286.4	0.06300682		816.39	-0.00237963		1346.4	-0.00280369		1876.4	-0.00493428		2406.4	-0.01423706
286.6	0.06215748		816.59	-0.00173877		1346.6	-0.00296623		1876.6	-0.00541157		2406.6	-0.01434564
286.8	0.06285369		816.79	-0.00111486		1346.8	-0.00342136		1876.8	-0.00603454		2406.8	-0.01383996
287	0.06335455		816.99	-0.00081385		1347	-0.00436225		1877	-0.00665924		2407	-0.01356992
287.2	0.06320141		817.19	-0.00137523		1347.2	-0.00491967		1877.2	-0.00628021		2407.2	-0.01410668
287.4	0.06326929		817.39	-0.00179054		1347.4	-0.00577416		1877.4	-0.00538669		2407.4	-0.01383883
287.6	0.06388724		817.59	-0.00164555		1347.6	-0.00597765		1877.6	-0.00553935		2407.6	-0.01518505
287.8	0.06496186		817.79	-0.00171886		1347.8	-0.00610616		1877.8	-0.00468921		2407.8	-0.0163815
288	0.06506424		817.99	-0.00216205		1348	-0.0062523		1878	-0.00438612		2408	-0.01651166
288.2	0.0664411		818.19	-0.00211526		1348.2	-0.00648439		1878.2	-0.00326499		2408.2	-0.01609753
288.4	0.06677022		818.39	-0.00167061		1348.4	-0.00632944		1878.4	-0.00289893		2408.4	-0.01615346
288.6	0.06658787		818.59	-0.00180694		1348.6	-0.00550886		1878.6	-0.00306487		2408.6	-0.01573299
288.8	0.06646168		818.79	-0.00167446		1348.8	-0.0053164		1878.8	-0.00245525		2408.8	-0.01508292
289	0.06731965		818.99	-0.00180609		1349	-0.00472508		1879	-0.00193169		2409	-0.01468923
289.2	0.06744881		819.19	-0.00182955		1349.2	-0.0040359		1879.2	-0.00161608		2409.2	-0.01391236
289.4	0.06742269		819.39	-0.00133164		1349.4	-0.00374745		1879.4	-0.00169067		2409.4	-0.01309499
289.6	0.06656284		819.59	-0.00142559		1349.6	-0.00321801		1879.6	-0.00252079		2409.6	-0.01147318
289.8	0.06625528		819.79	-0.00171339		1349.8	-0.00202471		1879.8	-0.00240414		2409.8	-0.01063407
290	0.06572954		819.99	-0.00230971		1350	-0.0022374		1880	-0.00307384		2410	-0.01052134
290.2	0.06458616		820.19	-0.00260844		1350.2	-0.00274091		1880.2	-0.00302779		2410.2	-0.01067442
290.4	0.06439739		820.39	-0.0018048		1350.4	-0.00246921		1880.4	-0.00365641		2410.4	-0.01043529
290.6	0.06450513		820.59	-0.00157232		1350.6	-0.00139171		1880.6	-0.00431589		2410.6	-0.01089765
290.8	0.0656638		820.79	-0.00171617		1350.8	-0.00165151		1880.8	-0.00451408		2410.8	-0.01092522
291	0.06590444		820.99	-0.0025474		1351	-0.00164553		1881	-0.00401351		2411	-0.01216232
291.2	0.06564948		821.19	-0.00253467		1351.2	-0.00170439		1881.2	-0.0033126		2411.2	-0.01259657
291.4	0.06712006		821.39	-0.00223714		1351.4	-0.00185111		1881.4	-0.00297595		2411.4	-0.01334598
291.6	0.06770718		821.59	-0.00312642		1351.6	-0.00204014		1881.6	-0.00372587		2411.6	-0.01489927
291.8	0.06829482		821.79	-0.00267254		1351.8	-0.00279923		1881.8	-0.00317483		2411.8	-0.01574169
292	0.06847789		821.99	-0.00257645		1352	-0.0022564		1882	-0.0026872		2412	-0.01688082
292.2	0.06824585		822.19	-0.00302211		1352.2	-0.00244968		1882.2	-0.00280132		2412.2	-0.01751124
292.4	0.06749275		822.39	-0.00260379		1352.4	-0.00255791		1882.4	-0.00307715		2412.4	-0.01743264
292.6	0.06712643		822.59	-0.00233942		1352.6	-0.00240809		1882.6	-0.00278371		2412.6	-0.01748016
292.8	0.067131		822.79	-0.00249658		1352.8	-0.00312501		1882.8	-0.00263852		2412.8	-0.01757544
293	0.06724156		822.99	-0.00149668		1353	-0.00319951		1883	-0.0029046		2413	-0.01673111
293.2	0.06645714		823.19	-0.00207506		1353.2	-0.00237464		1883.2	-0.00329112		2413.2	-0.01630993
293.4	0.06548303		823.39	-0.00133475		1353.4	-0.00291969		1883.4	-0.0031757		2413.4	-0.01529461
293.6	0.06446842		823.59	-0.00101753		1353.6	-0.00320969		1883.6	-0.00301679		2413.6	-0.01412329
293.8	0.06442778		823.79	-0.0009723		1353.8	-0.00378347		1883.8	-0.00229132		2413.8	-0.01380603
294	0.06374656		823.99	-0.00066288		1354	-0.00438114		1884	-0.00173541		2414	-0.0130853
294.2	0.0631403		824.19	-0.00045324		1354.2	-0.00441527		1884.2	-0.00143582		2414.2	-0.01346811
294.4	0.06446417		824.39	0.00025011		1354.4	-0.00399517		1884.4	-0.00124846		2414.4	-0.01333459
294.6	0.06458184		824.59	0.00018413		1354.6	-0.00486575		1884.6	-0.00054804		2414.6	-0.01271087
294.8	0.06537479		824.79	0.00011662		1354.8	-0.00526827		1884.8	-0.00008589		2414.8	-0.01281254
295	0.06566367		824.99	0.00002013		1355	-0.00490359		1885	0.00022821		2415	-0.0126092
295.2	0.06758379		825.19	0.00008052		1355.2	-0.00532965		1885.2	0.00040263		2415.2	-0.01238601
295.4	0.06838542		825.39	-0.00022245		1355.4	-0.00480492		1885.4	0.00038268		2415.4	-0.01262973
295.6	0.06832118		825.59	-0.00101856		1355.6	-0.00468098		1885.6	-0.00001685		2415.6	-0.0139586
295.8	0.06894965		825.79	-0.00049607		1355.8	-0.00427305		1885.8	0.00011916		2415.8	-0.01423594
296	0.06948045		825.99	-0.00110021		1356	-0.00392917		1886	-0.00058698		2416	-0.01519081
296.2	0.06940622		826.19	-0.00165049		1356.2	-0.00415091		1886.2	-0.00201115		2416.2	-0.01573505
296.4	0.07027458		826.39	-0.00213879		1356.4	-0.00340577		1886.4	-0.00280251		2416.4	-0.01667284
296.6	0.0706838		826.59	-0.00240119		1356.6	-0.00276399		1886.6	-0.00321246		2416.6	-0.01785071
296.8	0.07060941		826.79	-0.00292309		1356.8	-0.00257845		1886.8	-0.00426466		2416.8	-0.01846815
297	0.07040529		826.99	-0.0029714		1357	-0.00241708		1887	-0.004981		2417	-0.01827855
297.2	0.0694704		827.19	-0.00282853		1357.2	-0.00204317		1887.2	-0.00502003		2417.2	-0.01882745
297.4	0.0681717		827.39	-0.00170451		1357.4	-0.0024359		1887.4	-0.00442481		2417.4	-0.01936899
297.6	0.06770205		827.59	-0.00154305		1357.6	-0.00328403		1887.6	-0.00418915		2417.6	-0.0188588
297.8	0.06721616		827.79	-0.00117597		1357.8	-0.00392268		1887.8	-0.00396515		2417.8	-0.01856096
298	0.06580385		827.99	-0.00090877		1358	-0.00309252		1888	-0.00378245		2418	-0.0181678
298.2	0.06576427		828.19	-0.00068569		1358.2	-0.00332795		1888.2	-0.0033424		2418.2	-0.01778045
298.4	0.06630758		828.39	-0.00081604		1358.4	-0.0031609		1888.4	-0.00220785		2418.4	-0.01704635
298.6	0.06588542		828.59	-0.00162113		1358.6	-0.00343161		1888.6	-0.00093616		2418.6	-0.01596489
298.8	0.06620303		828.79	-0.00202205		1358.8	-0.00275096		1888.8	-0.00023428		2418.8	-0.01578771
299	0.06702756		828.99	-0.00193734		1359	-0.00242389		1889	0.00074019		2419	-0.01556496
299.2	0.06838198		829.19	-0.00165544		1359.2	-0.00291991		1889.2	0.00241441		2419.2	-0.01555088
299.4	0.06833937		829.39	-0.00163124		1359.4	-0.00220619		1889.4	0.00365485		2419.4	-0.01556909
299.6	0.06933305		829.59	-0.00219637		1359.6	-0.00327996		1889.6	0.00388793		2419.6	-0.01649131
299.8	0.06983765		829.79	-0.00246243		1359.8	-0.00300285		1889.8	0.00366382		2419.8	-0.01556976
300	0.07031983		829.99	-0.002129		1360	-0.00348612		1890	0.00359796		2420	-0.0154634
300.2	0.07052674		830.19	-0.00195925		1360.2	-0.00331306		1890.2	0.00324707		2420.2	-0.01608527
300.4	0.07096003		830.39	-0.00290945		1360.4	-0.0030445		1890.4	0.00273228		2420.4	-0.01657793
300.6	0.07058199		830.59	-0.00246303		1360.6	-0.00362256		1890.6	0.00178872		2420.6	-0.01654899
300.8	0.06936408		830.79	-0.00252441		1360.8	-0.0036499		1890.8	0.0008073		2420.8	-0.01656863
301	0.06922906		830.99	-0.00212416		1361	-0.00483602		1891	0.00016449		2421	-0.0165385
301.2	0.06786999		831.19	-0.00111586		1361.2	-0.00513668		1891.2	-0.00111927		2421.2	-0.01684391
301.4	0.06720112		831.39	-0.00123629		1361.4	-0.00555169		1891.4	-0.00200162		2421.4	-0.01680474
301.6	0.06706778		831.59	-0.00091068		1361.6	-0.00570193		1891.6	-0.00320474		2421.6	-0.01546208
301.8	0.06698655		831.79	-0.00080392		1361.8	-0.00537971		1891.8	-0.00376005		2421.8	-0.01455962
302	0.06678911		831.99	-0.00130994		1362	-0.00516475		1892	-0.0034311		2422	-0.01387452
302.2	0.06659184		832.19	-0.00138356		1362.2	-0.00562364		1892.2	-0.00227209		2422.2	-0.01399296
302.4	0.06689252		832.39	-0.00254772		1362.4	-0.00502863		1892.4	-0.00157302		2422.4	-0.01370896
302.6	0.06773045		832.59	-0.00264423		1362.6	-0.00483926		1892.6	-0.0010102		2422.6	-0.01389168
302.8	0.06834803		832.79	-0.00304319		1362.8	-0.00494541		1892.8	-0.00026796		2422.8	-0.01448617
303	0.06944177		832.99	-0.00327125		1363	-0.00529944		1893	0.00051364		2423	-0.01536583
303.2	0.07001298		833.19	-0.00348232		1363.2	-0.00463555		1893.2	0.00108496		2423.2	-0.01574187
303.4	0.07101936		833.39	-0.00388814		1363.4	-0.00385346		1893.4	0.00199185		2423.4	-0.01604451
303.6	0.07158622		833.59	-0.00436864		1363.6	-0.00381875		1893.6	0.00186543		2423.6	-0.01687628
303.8	0.07145346		833.79	-0.00384152		1363.8	-0.00308965		1893.8	0.00179532		2423.8	-0.016713
304	0.07193034		833.99	-0.00409147		1364	-0.00274781		1894	0.00116256		2424	-0.0172314
304.2	0.07222928		834.19	-0.00396888		1364.2	-0.00277905		1894.2	0.00076363		2424.2	-0.01742153
304.4	0.07252622		834.39	-0.00518216		1364.4	-0.00231704		1894.4	-0.000195		2424.4	-0.01781472
304.6	0.07241559		834.59	-0.0046568		1364.6	-0.00189505		1894.6	-0.00124721		2424.6	-0.01802721
304.8	0.07231539		834.79	-0.00419624		1364.8	-0.00117601		1894.8	-0.00248469		2424.8	-0.01794184
305	0.07299845		834.99	-0.00262354		1365	-0.0023289		1895	-0.00401156		2425	-0.01760807
305.2	0.07267585		835.19	-0.00247826		1365.2	-0.00236805		1895.2	-0.0050724		2425.2	-0.01662444
305.4	0.07331546		835.39	-0.00265355		1365.4	-0.0030248		1895.4	-0.0051109		2425.4	-0.0157956
305.6	0.07319117		835.59	-0.00187758		1365.6	-0.00317849		1895.6	-0.00522426		2425.6	-0.01492484
305.8	0.07285766		835.79	-0.0014387		1365.8	-0.00344779		1895.8	-0.00513437		2425.8	-0.01486293
306	0.0717865		835.99	-0.00146869		1366	-0.00429649		1896	-0.00474287		2426	-0.01445744
306.2	0.07106647		836.19	-0.00152166		1366.2	-0.00469976		1896.2	-0.00413424		2426.2	-0.01436878
306.4	0.071163		836.39	-0.00202126		1366.4	-0.00435131		1896.4	-0.00349007		2426.4	-0.01416408
306.6	0.07099359		836.59	-0.001845		1366.6	-0.0046503		1896.6	-0.00306575		2426.6	-0.01455704
306.8	0.07033541		836.79	-0.00158704		1366.8	-0.0055511		1896.8	-0.00281967		2426.8	-0.01479562
307	0.07011211		836.99	-0.00181422		1367	-0.00544012		1897	-0.00250013		2427	-0.01517639
307.2	0.06881325		837.19	-0.0015711		1367.2	-0.00438472		1897.2	-0.00157729		2427.2	-0.01572956
307.4	0.06935071		837.39	-0.00119667		1367.4	-0.00466217		1897.4	-0.00086942		2427.4	-0.01644205
307.6	0.06909836		837.59	-0.00152268		1367.6	-0.00447516		1897.6	-0.00105965		2427.6	-0.01730114
307.8	0.06945627		837.79	-0.00098123		1367.8	-0.00449852		1897.8	-0.00147191		2427.8	-0.0170219
308	0.06928036		837.99	-0.00070687		1368	-0.00485311		1898	-0.0011476		2428	-0.01701393
308.2	0.06938658		838.19	0.00080681		1368.2	-0.00471285		1898.2	-0.00091947		2428.2	-0.01654337
308.4	0.06881294		838.39	0.00086168		1368.4	-0.00343992		1898.4	-0.00197873		2428.4	-0.0172135
308.6	0.06812814		838.59	0.00197585		1368.6	-0.00324871		1898.6	-0.00252844		2428.6	-0.0164018
308.8	0.06823588		838.79	0.00234914		1368.8	-0.00396178		1898.8	-0.00253031		2428.8	-0.01582854
309	0.06799443		838.99	0.00204053		1369	-0.00518877		1899	-0.00231153		2429	-0.01538363
309.2	0.06860569		839.19	0.00111228		1369.2	-0.00486903		1899.2	-0.00174335		2429.2	-0.01513457
309.4	0.06885403		839.39	0.00078358		1369.4	-0.00531821		1899.4	-0.00125152		2429.4	-0.01581696
309.6	0.06825787		839.59	0.00100196		1369.6	-0.00482979		1899.6	-0.00248444		2429.6	-0.01588353
309.8	0.06811005		839.79	0.00019325		1369.8	-0.00474476		1899.8	-0.00322729		2429.8	-0.01608001
310	0.06881075		839.99	-0.00108803		1370	-0.00517389		1900	-0.0031872		2430	-0.01506557
310.2	0.06992166		840.19	-0.0019306		1370.2	-0.00560755		1900.2	-0.00356166		2430.2	-0.01515972
310.4	0.07068523		840.39	-0.00257217		1370.4	-0.00595716		1900.4	-0.00287454		2430.4	-0.01578647
310.6	0.07169713		840.59	-0.0027196		1370.6	-0.00560856		1900.6	-0.00365877		2430.6	-0.01564121
310.8	0.07271287		840.79	-0.00249651		1370.8	-0.00572327		1900.8	-0.00359423		2430.8	-0.01651713
311	0.07349987		840.99	-0.00345651		1371	-0.00543643		1901	-0.00212467		2431	-0.01662151
311.2	0.07444788		841.19	-0.00451762		1371.2	-0.00446743		1901.2	-0.00136557		2431.2	-0.01746827
311.4	0.07605766		841.39	-0.00445601		1371.4	-0.00435887		1901.4	-0.00189151		2431.4	-0.01765631
311.6	0.07587876		841.59	-0.00494709		1371.6	-0.00397666		1901.6	-0.00231874		2431.6	-0.01750737
311.8	0.07640861		841.79	-0.00434905		1371.8	-0.0039831		1901.8	-0.00253819		2431.8	-0.01737737
312	0.07550785		841.99	-0.00391412		1372	-0.00411492		1902	-0.00288086		2432	-0.01747967
312.2	0.07555786		842.19	-0.00371556		1372.2	-0.0036519		1902.2	-0.00366744		2432.2	-0.01791671
312.4	0.0747946		842.39	-0.00377474		1372.4	-0.00387464		1902.4	-0.00375447		2432.4	-0.01883873
312.6	0.073984		842.59	-0.00416272		1372.6	-0.00449143		1902.6	-0.00351138		2432.6	-0.01772292
312.8	0.07397221		842.79	-0.00412998		1372.8	-0.00493636		1902.8	-0.0029208		2432.8	-0.01782857
313	0.07336754		842.99	-0.0037241		1373	-0.00570403		1903	-0.00284692		2433	-0.01742812
313.2	0.07325329		843.19	-0.00318861		1373.2	-0.00577976		1903.2	-0.00351928		2433.2	-0.01673053
313.4	0.07240049		843.39	-0.00306329		1373.4	-0.00554152		1903.4	-0.00431361		2433.4	-0.01644257
313.6	0.07146128		843.59	-0.00206756		1373.6	-0.00543619		1903.6	-0.0054714		2433.6	-0.01610396
313.8	0.07139392		843.79	-0.00198525		1373.8	-0.00594682		1903.8	-0.00562511		2433.8	-0.01549831
314	0.0715126		843.99	-0.00115554		1374	-0.00612935		1904	-0.00507008		2434	-0.01493498
314.2	0.07167914		844.19	-0.00097538		1374.2	-0.00618081		1904.2	-0.00468801		2434.2	-0.01537836
314.4	0.07198564		844.39	-0.00041429		1374.4	-0.00487923		1904.4	-0.00316132		2434.4	-0.01587259
314.6	0.0735698		844.59	-0.00017005		1374.6	-0.00343439		1904.6	-0.00298343		2434.6	-0.01601478
314.8	0.07378218		844.79	0.0005852		1374.8	-0.00324262		1904.8	-0.0016965		2434.8	-0.01631718
315	0.07415504		844.99	0.0003578		1375	-0.00318843		1905	-0.00093828		2435	-0.01618312
315.2	0.0753236		845.19	-0.00005239		1375.2	-0.00182406		1905.2	-0.00075297		2435.2	-0.0164149
315.4	0.07520766		845.39	0.00104788		1375.4	-0.00240007		1905.4	-0.00085553		2435.4	-0.01591439
315.6	0.07453316		845.59	0.00055903		1375.6	-0.00255443		1905.6	-0.00120379		2435.6	-0.01606825
315.8	0.07556004		845.79	0.00070304		1375.8	-0.00273286		1905.8	-0.00146338		2435.8	-0.01641442
316	0.07589285		845.99	-0.00001708		1376	-0.00265897		1906	-0.00200886		2436	-0.01728565
316.2	0.07596582		846.19	-0.00076511		1376.2	-0.00190758		1906.2	-0.0021015		2436.2	-0.01803197
316.4	0.07564651		846.39	-0.00062613		1376.4	-0.00197303		1906.4	-0.00244019		2436.4	-0.01732787
316.6	0.07551758		846.59	-0.00178759		1376.6	-0.00175476		1906.6	-0.0025888		2436.6	-0.01656859
316.8	0.07500861		846.79	-0.00169717		1376.8	-0.00230526		1906.8	-0.00280382		2436.8	-0.01653951
317	0.07463052		846.99	-0.00206798		1377	-0.00344382		1907	-0.00292903		2437	-0.01639303
317.2	0.07415946		847.19	-0.00210769		1377.2	-0.00360466		1907.2	-0.00392134		2437.2	-0.01612926
317.4	0.07373753		847.39	-0.00190103		1377.4	-0.00312216		1907.4	-0.00408267		2437.4	-0.01687158
317.6	0.07336393		847.59	-0.00134202		1377.6	-0.00404756		1907.6	-0.00429796		2437.6	-0.01674921
317.8	0.07386361		847.79	-0.00198483		1377.8	-0.00504901		1907.8	-0.00420444		2437.8	-0.01706571
318	0.07423371		847.99	-0.00130812		1378	-0.00508929		1908	-0.00281829		2438	-0.01823157
318.2	0.07490496		848.19	-0.00183264		1378.2	-0.00554857		1908.2	-0.00229804		2438.2	-0.01922167
318.4	0.07617236		848.39	-0.00142927		1378.4	-0.00571197		1908.4	-0.00212263		2438.4	-0.02014892
318.6	0.07671439		848.59	-0.00161593		1378.6	-0.00580101		1908.6	-0.0022876		2438.6	-0.02047429
318.8	0.07653377		848.79	-0.00137631		1378.8	-0.00601224		1908.8	-0.00222761		2438.8	-0.02074109
319	0.0765296		848.99	-0.00140576		1379	-0.00669766		1909	-0.00205247		2439	-0.02125225
319.2	0.07698029		849.19	-0.00100976		1379.2	-0.00609718		1909.2	-0.00103084		2439.2	-0.02063026
319.4	0.0767298		849.39	-0.00042821		1379.4	-0.00608336		1909.4	-0.00103648		2439.4	-0.02023792
319.6	0.07609916		849.59	-0.00068811		1379.6	-0.00531809		1909.6	-0.0019924		2439.6	-0.02090874
319.8	0.0761352		849.79	0.00006362		1379.8	-0.00456126		1909.8	-0.00269442		2439.8	-0.0211658
320	0.07559088		849.99	-0.0002541		1380	-0.00323412		1910	-0.00294793		2440	-0.02083446
320.2	0.07467726		850.19	0.00048845		1380.2	-0.0022971		1910.2	-0.00297568		2440.2	-0.01949626
320.4	0.07404457		850.39	0.0002438		1380.4	-0.0022452		1910.4	-0.00278938		2440.4	-0.01817458
320.6	0.07357989		850.59	-0.00017257		1380.6	-0.00201658		1910.6	-0.0024856		2440.6	-0.01791995
320.8	0.07345613		850.79	0.00073504		1380.8	-0.00250293		1910.8	-0.00252124		2440.8	-0.01741152
321	0.07395968		850.99	0.00049082		1381	-0.00339074		1911	-0.00299764		2441	-0.01728665
321.2	0.07352614		851.19	0.00063913		1381.2	-0.00434234		1911.2	-0.0024707		2441.2	-0.01640424
321.4	0.07397599		851.39	0.00048223		1381.4	-0.00469095		1911.4	-0.00165156		2441.4	-0.01617461
321.6	0.07506795		851.59	-0.0000282		1381.6	-0.00577836		1911.6	-0.0013183		2441.6	-0.01529321
321.8	0.07575991		851.79	-0.00039203		1381.8	-0.00699549		1911.8	-0.00044614		2441.8	-0.01618863
322	0.0765272		851.99	0.00007702		1382	-0.0077879		1912	0.00027447		2442	-0.01684572
322.2	0.07653618		852.19	-0.00112402		1382.2	-0.00910956		1912.2	0.00020326		2442.2	-0.01727257
322.4	0.07701247		852.39	-0.00142129		1382.4	-0.00926852		1912.4	0.00017046		2442.4	-0.01828312
322.6	0.07666443		852.59	-0.00156895		1382.6	-0.00896937		1912.6	0.0002277		2442.6	-0.01837445
322.8	0.0770517		852.79	-0.0016436		1382.8	-0.00926159		1912.8	0.00032909		2442.8	-0.01926047
323	0.07688785		852.99	-0.00192333		1383	-0.00922575		1913	0.00075776		2443	-0.01884862
323.2	0.0766523		853.19	-0.0017971		1383.2	-0.00766095		1913.2	0.00018612		2443.2	-0.01840416
323.4	0.07657835		853.39	-0.00221117		1383.4	-0.00720404		1913.4	-0.00064057		2443.4	-0.01882389
323.6	0.07654835		853.59	-0.00187508		1383.6	-0.00668561		1913.6	-0.00182747		2443.6	-0.01901169
323.8	0.07689916		853.79	-0.00182461		1383.8	-0.00612214		1913.8	-0.00221276		2443.8	-0.01816964
324	0.07649195		853.99	-0.00108098		1384	-0.00542843		1914	-0.00276101		2444	-0.01752969
324.2	0.0764939		854.19	-0.00080238		1384.2	-0.00460012		1914.2	-0.00298432		2444.2	-0.01626083
324.4	0.07734163		854.39	-0.00132754		1384.4	-0.00418294		1914.4	-0.00371519		2444.4	-0.01584278
324.6	0.07792562		854.59	-0.00079182		1384.6	-0.00445573		1914.6	-0.00392836		2444.6	-0.01583912
324.8	0.07876886		854.79	-0.00076395		1384.8	-0.00439027		1914.8	-0.00326296		2444.8	-0.01507326
325	0.07924396		854.99	-0.00255803		1385	-0.00464081		1915	-0.00315279		2445	-0.01497671
325.2	0.07927255		855.19	-0.00273503		1385.2	-0.00426053		1915.2	-0.00168734		2445.2	-0.01452905
325.4	0.07939897		855.39	-0.00337236		1385.4	-0.0035057		1915.4	-0.00145014		2445.4	-0.01526148
325.6	0.07977033		855.59	-0.00488149		1385.6	-0.00297295		1915.6	-0.00151796		2445.6	-0.01590822
325.8	0.07961929		855.79	-0.00548455		1385.8	-0.00287943		1915.8	-0.00115296		2445.8	-0.01780962
326	0.07998716		855.99	-0.00520165		1386	-0.00298429		1916	-0.00116043		2446	-0.01853613
326.2	0.07957298		856.19	-0.00603075		1386.2	-0.00280454		1916.2	-0.00089797		2446.2	-0.01975798
326.4	0.07988829		856.39	-0.00566434		1386.4	-0.00239001		1916.4	-0.00053375		2446.4	-0.02083782
326.6	0.07943836		856.59	-0.00559612		1386.6	-0.00162976		1916.6	0.00005217		2446.6	-0.02121449
326.8	0.08006589		856.79	-0.00555385		1386.8	-0.00227632		1916.8	-0.0005164		2446.8	-0.02207204
327	0.07954414		856.99	-0.00613065		1387	-0.00301801		1917	-0.00122551		2447	-0.02205172
327.2	0.079347		857.19	-0.00520407		1387.2	-0.00302745		1917.2	-0.00102109		2447.2	-0.0219602
327.4	0.07973559		857.39	-0.0050179		1387.4	-0.00377037		1917.4	-0.00079053		2447.4	-0.02165842
327.6	0.0792845		857.59	-0.00423719		1387.6	-0.00377432		1917.6	-0.00137134		2447.6	-0.02057272
327.8	0.07818092		857.79	-0.00354103		1387.8	-0.00456117		1917.8	-0.00164562		2447.8	-0.01953697
328	0.07725477		857.99	-0.00210071		1388	-0.00510492		1918	-0.00225765		2448	-0.01908865
328.2	0.07799056		858.19	-0.00213092		1388.2	-0.0053722		1918.2	-0.00232208		2448.2	-0.01759659
328.4	0.07836911		858.39	-0.00227898		1388.4	-0.00598774		1918.4	-0.00314658		2448.4	-0.01761863
328.6	0.07782295		858.59	-0.00225356		1388.6	-0.00614642		1918.6	-0.00326909		2448.6	-0.01703853
328.8	0.07796034		858.79	-0.00241427		1388.8	-0.00677632		1918.8	-0.00276968		2448.8	-0.01626863
329	0.07758796		858.99	-0.00293589		1389	-0.00679004		1919	-0.00275832		2449	-0.0164261
329.2	0.07775875		859.19	-0.00222021		1389.2	-0.00612675		1919.2	-0.00327483		2449.2	-0.01693036
329.4	0.0778678		859.39	-0.00331984		1389.4	-0.00581532		1919.4	-0.00414219		2449.4	-0.01749859
329.6	0.07881658		859.59	-0.00443655		1389.6	-0.00612648		1919.6	-0.00434167		2449.6	-0.01766441
329.8	0.07964142		859.79	-0.00415508		1389.8	-0.00523612		1919.8	-0.00437465		2449.8	-0.01865685
330	0.07996187		859.99	-0.00408869		1390	-0.00532868		1920	-0.00479253		2450	-0.01860026
330.2	0.08088767		860.19	-0.00429214		1390.2	-0.00447419		1920.2	-0.00433867		2450.2	-0.01947419
330.4	0.0815669		860.39	-0.00447041		1390.4	-0.00366756		1920.4	-0.00393786		2450.4	-0.01987873
330.6	0.081781		860.59	-0.00471075		1390.6	-0.00320664		1920.6	-0.00315062		2450.6	-0.0210027
330.8	0.08351909		860.79	-0.0046288		1390.8	-0.00420745		1920.8	-0.00328726		2450.8	-0.02137086
331	0.08307044		860.99	-0.00504899		1391	-0.00489707		1921	-0.00271961		2451	-0.02128992
331.2	0.08316067		861.19	-0.00464163		1391.2	-0.00400677		1921.2	-0.00185948		2451.2	-0.02024792
331.4	0.08301371		861.39	-0.00454296		1391.4	-0.00468971		1921.4	-0.00218162		2451.4	-0.02025956
331.6	0.0817534		861.59	-0.00367242		1391.6	-0.00472733		1921.6	-0.00248077		2451.6	-0.01938444
331.8	0.08055378		861.79	-0.00335684		1391.8	-0.00502848		1921.8	-0.00153814		2451.8	-0.01894689
332	0.07976371		861.99	-0.00331122		1392	-0.00542052		1922	-0.00132603		2452	-0.01873705
332.2	0.0795297		862.19	-0.00380959		1392.2	-0.00575052		1922.2	-0.00216585		2452.2	-0.01803591
332.4	0.07891999		862.39	-0.00430921		1392.4	-0.00584482		1922.4	-0.00271803		2452.4	-0.01820855
332.6	0.07853182		862.59	-0.00311031		1392.6	-0.00573766		1922.6	-0.00250145		2452.6	-0.01839921
332.8	0.07845371		862.79	-0.00208359		1392.8	-0.00630452		1922.8	-0.00259612		2452.8	-0.01865297
333	0.0781476		862.99	-0.0017513		1393	-0.00568521		1923	-0.0027333		2453	-0.01849151
333.2	0.0795946		863.19	-0.00169378		1393.2	-0.00568506		1923.2	-0.00368686		2453.2	-0.01867684
333.4	0.08005655		863.39	-0.00181283		1393.4	-0.00516263		1923.4	-0.00305409		2453.4	-0.01857124
333.6	0.08133278		863.59	-0.00162147		1393.6	-0.00473892		1923.6	-0.00205372		2453.6	-0.01847684
333.8	0.08202397		863.79	-0.00118122		1393.8	-0.00401632		1923.8	-0.0011072		2453.8	-0.01879618
334	0.08190638		863.99	-0.00161411		1394	-0.00392059		1924	-0.00115645		2454	-0.01891164
334.2	0.08289757		864.19	-0.00113469		1394.2	-0.00255814		1924.2	0.00041439		2454.2	-0.01955872
334.4	0.08365169		864.39	-0.00144544		1394.4	-0.00236902		1924.4	0.00157037		2454.4	-0.02008765
334.6	0.0837924		864.59	-0.00126927		1394.6	-0.00312487		1924.6	0.00246791		2454.6	-0.02017633
334.8	0.08397856		864.79	-0.00148084		1394.8	-0.00371935		1924.8	0.00193344		2454.8	-0.01963806
335	0.08377819		864.99	-0.00127053		1395	-0.00363638		1925	0.00132237		2455	-0.01946345
335.2	0.08339033		865.19	-0.00079682		1395.2	-0.00286032		1925.2	0.00121173		2455.2	-0.01964567
335.4	0.08297495		865.39	-0.00052255		1395.4	-0.00355176		1925.4	0.00091701		2455.4	-0.0194088
335.6	0.08221215		865.59	-0.00076681		1395.6	-0.00326498		1925.6	0.00058661		2455.6	-0.0193322
335.8	0.08189486		865.79	-0.00128192		1395.8	-0.00363628		1925.8	0.00077272		2455.8	-0.01850185
336	0.08112706		865.99	-0.00168021		1396	-0.00432969		1926	-0.00072132		2456	-0.01800451
336.2	0.08190175		866.19	-0.00172183		1396.2	-0.00436937		1926.2	-0.00199599		2456.2	-0.01834215
336.4	0.08142898		866.39	-0.00190075		1396.4	-0.00440862		1926.4	-0.00252873		2456.4	-0.01874714
336.6	0.08151558		866.59	-0.00060365		1396.6	-0.00441073		1926.6	-0.0031461		2456.6	-0.01920559
336.8	0.08102279		866.79	-0.00088774		1396.8	-0.00485088		1926.8	-0.00411884		2456.8	-0.01907606
337	0.080881		866.99	-0.00193118		1397	-0.00515098		1927	-0.00357805		2457	-0.01870596
337.2	0.08167011		867.19	-0.00213648		1397.2	-0.00550882		1927.2	-0.00291245		2457.2	-0.01871325
337.4	0.0816758		867.39	-0.00200539		1397.4	-0.00491882		1927.4	-0.00189897		2457.4	-0.01873904
337.6	0.08191056		867.59	-0.00207072		1397.6	-0.00510198		1927.6	-0.00065682		2457.6	-0.01854658
337.8	0.08165885		867.79	-0.00145687		1397.8	-0.00564176		1927.8	-0.0006295		2457.8	-0.01823672
338	0.08174455		867.99	-0.00101729		1398	-0.00575798		1928	-0.00029026		2458	-0.01862077
338.2	0.08226949		868.19	-0.00000527		1398.2	-0.00579838		1928.2	0.00056384		2458.2	-0.01897272
338.4	0.08215328		868.39	0.00032093		1398.4	-0.00527887		1928.4	0.00062566		2458.4	-0.01846646
338.6	0.08196915		868.59	-0.00023132		1398.6	-0.00502182		1928.6	-0.00003654		2458.6	-0.01858632
338.8	0.08125524		868.79	-0.00060475		1398.8	-0.00417939		1928.8	-0.00002217		2458.8	-0.01908217
339	0.08131487		868.99	-0.00020353		1399	-0.00358372		1929	0.00019706		2459	-0.01980448
339.2	0.08130037		869.19	0.00000158		1399.2	-0.00330774		1929.2	0.00075795		2459.2	-0.01953314
339.4	0.08160074		869.39	-0.00028066		1399.4	-0.00378608		1929.4	0.00055358		2459.4	-0.01856509
339.6	0.08298815		869.59	-0.00012353		1399.6	-0.00423889		1929.6	0.00057273		2459.6	-0.01762573
339.8	0.08352545		869.79	0.00027592		1399.8	-0.00405528		1929.8	-0.000366		2459.8	-0.01654656
340	0.08360788		869.99	-0.00009425		1400	-0.0036964		1930	-0.00128115		2460	-0.01703903
340.2	0.08438075		870.19	0.00026743		1400.2	-0.00352304		1930.2	-0.001113		2460.2	-0.01785389
340.4	0.08351663		870.39	-0.00063461		1400.4	-0.004243		1930.4	-0.00165046		2460.4	-0.01784982
340.6	0.08343833		870.59	-0.00040833		1400.6	-0.00481619		1930.6	-0.00236031		2460.6	-0.0176306
340.8	0.08309559		870.79	-0.00057458		1400.8	-0.00543068		1930.8	-0.00314944		2460.8	-0.01705167
341	0.08331147		870.99	-0.00127345		1401	-0.00509196		1931	-0.00258373		2461	-0.01730819
341.2	0.08351948		871.19	-0.00100621		1401.2	-0.00552151		1931.2	-0.00257808		2461.2	-0.01670379
341.4	0.08394149		871.39	-0.00091009		1401.4	-0.00562014		1931.4	-0.00249752		2461.4	-0.01699761
341.6	0.08357181		871.59	-0.00064942		1401.6	-0.00585568		1931.6	-0.00235392		2461.6	-0.0176983
341.8	0.08397033		871.79	-0.00100515		1401.8	-0.0058037		1931.8	-0.00276329		2461.8	-0.01884917
342	0.08380338		871.99	-0.00172277		1402	-0.00527616		1932	-0.00218471		2462	-0.01993564
342.2	0.08419697		872.19	-0.00215715		1402.2	-0.00454358		1932.2	-0.00204905		2462.2	-0.02049493
342.4	0.08429435		872.39	-0.00331311		1402.4	-0.0038684		1932.4	-0.00174562		2462.4	-0.02084809
342.6	0.08452747		872.59	-0.00394737		1402.6	-0.00416198		1932.6	-0.00202006		2462.6	-0.02150115
342.8	0.08440644		872.79	-0.00397773		1402.8	-0.00423379		1932.8	-0.0011026		2462.8	-0.02092033
343	0.08486553		872.99	-0.00408257		1403	-0.00495519		1933	-0.00104226		2463	-0.02100525
343.2	0.08523376		873.19	-0.00413919		1403.2	-0.00625411		1933.2	-0.00084966		2463.2	-0.01938583
343.4	0.08522053		873.39	-0.00395948		1403.4	-0.00727382		1933.4	-0.0009522		2463.4	-0.0183417
343.6	0.0857429		873.59	-0.00348389		1403.6	-0.00698316		1933.6	-0.00136204		2463.6	-0.01685708
343.8	0.08534218		873.79	-0.00288019		1403.8	-0.00681328		1933.8	-0.00165374		2463.8	-0.01721298
344	0.08498589		873.99	-0.00324675		1404	-0.0068406		1934	-0.00156172		2464	-0.016802
344.2	0.08478401		874.19	-0.00272111		1404.2	-0.00657021		1934.2	-0.00138557		2464.2	-0.01692059
344.4	0.08406872		874.39	-0.00348861		1404.4	-0.00705896		1934.4	-0.0024841		2464.4	-0.01596533
344.6	0.0838139		874.59	-0.00269649		1404.6	-0.00720847		1934.6	-0.00316088		2464.6	-0.0150491
344.8	0.08410476		874.79	-0.0027386		1404.8	-0.0068022		1934.8	-0.00299352		2464.8	-0.01444331
345	0.08414268		874.99	-0.00329347		1405	-0.00659018		1935	-0.0027425		2465	-0.01496948
345.2	0.08381509		875.19	-0.00278058		1405.2	-0.00653687		1935.2	-0.00302687		2465.2	-0.0154532
345.4	0.08418328		875.39	-0.00281662		1405.4	-0.00569769		1935.4	-0.00237726		2465.4	-0.01749972
345.6	0.08373607		875.59	-0.00355612		1405.6	-0.00475077		1935.6	-0.00222249		2465.6	-0.01944959
345.8	0.08430127		875.79	-0.00471994		1405.8	-0.00389126		1935.8	-0.00166949		2465.8	-0.02110871
346	0.0838352		875.99	-0.00491067		1406	-0.00329259		1936	-0.00045343		2466	-0.0209408
346.2	0.08408275		876.19	-0.00511731		1406.2	-0.00324208		1936.2	0.00000532		2466.2	-0.02179586
346.4	0.08346247		876.39	-0.00562549		1406.4	-0.00256647		1936.4	-0.00009054		2466.4	-0.0227332
346.6	0.08316137		876.59	-0.00520957		1406.6	-0.00220859		1936.6	-0.00059322		2466.6	-0.02248878
346.8	0.08237719		876.79	-0.00518549		1406.8	-0.00264382		1936.8	-0.00077933		2466.8	-0.02266252
347	0.08189628		876.99	-0.00539315		1407	-0.003449		1937	-0.00132459		2467	-0.02268471
347.2	0.08143804		877.19	-0.00548674		1407.2	-0.00448466		1937.2	-0.00192597		2467.2	-0.02178
347.4	0.08157266		877.39	-0.00505828		1407.4	-0.00513397		1937.4	-0.00282623		2467.4	-0.02159612
347.6	0.08170778		877.59	-0.00518875		1407.6	-0.00502082		1937.6	-0.00318597		2467.6	-0.02019948
347.8	0.08211917		877.79	-0.00549808		1407.8	-0.00573535		1937.8	-0.00300479		2467.8	-0.01974925
348	0.08182921		877.99	-0.00631622		1408	-0.00608086		1938	-0.00280257		2468	-0.01863874
348.2	0.08202995		878.19	-0.0049654		1408.2	-0.00574098		1938.2	-0.00230583		2468.2	-0.01809149
348.4	0.08268314		878.39	-0.005006		1408.4	-0.00651699		1938.4	-0.00152285		2468.4	-0.01717994
348.6	0.08285934		878.59	-0.00382478		1408.6	-0.00689406		1938.6	-0.00101359		2468.6	-0.01687058
348.8	0.08311291		878.79	-0.00363368		1408.8	-0.00630398		1938.8	-0.00026309		2468.8	-0.01624534
349	0.08351162		878.99	-0.00243044		1409	-0.00622279		1939	-0.0002278		2469	-0.01726409
349.2	0.08412514		879.19	-0.00208929		1409.2	-0.00564917		1939.2	0.00030559		2469.2	-0.01827998
349.4	0.08581729		879.39	-0.00251413		1409.4	-0.00573306		1939.4	0.00080009		2469.4	-0.01913977
349.6	0.08639405		879.59	-0.00282936		1409.6	-0.0059988		1939.6	0.00086665		2469.6	-0.01972576
349.8	0.08685242		879.79	-0.00272799		1409.8	-0.00540773		1939.8	0.00154905		2469.8	-0.01963516
350	0.08657405		879.99	-0.0022797		1410	-0.00487327		1940	0.00211433		2470	-0.01921852
350.2	0.08652945		880.19	-0.00271643		1410.2	-0.00409175		1940.2	0.00222597		2470.2	-0.01981311
350.4	0.08625746		880.39	-0.00268876		1410.4	-0.00350172		1940.4	0.00206747		2470.4	-0.02000312
350.6	0.08552876		880.59	-0.002393		1410.6	-0.00391504		1940.6	0.0007925		2470.6	-0.02006562
350.8	0.08465303		880.79	-0.00247176		1410.8	-0.00430524		1940.8	-0.00015695		2470.8	-0.02020252
351	0.08463734		880.99	-0.00299379		1411	-0.00509694		1941	-0.0011516		2471	-0.02023016
351.2	0.08458949		881.19	-0.00329754		1411.2	-0.00557948		1941.2	-0.00245781		2471.2	-0.02037972
351.4	0.08420255		881.39	-0.0038967		1411.4	-0.005731		1941.4	-0.00348612		2471.4	-0.02034782
351.6	0.0840291		881.59	-0.0045895		1411.6	-0.00523534		1941.6	-0.00306569		2471.6	-0.01946877
351.8	0.0835667		881.79	-0.00410079		1411.8	-0.00493211		1941.8	-0.00301938		2471.8	-0.01966
352	0.08362872		881.99	-0.00378205		1412	-0.00487317		1942	-0.00212451		2472	-0.01986332
352.2	0.08371931		882.19	-0.00238751		1412.2	-0.00421185		1942.2	-0.00122959		2472.2	-0.02136868
352.4	0.08437905		882.39	-0.00279805		1412.4	-0.00423804		1942.4	-0.0004368		2472.4	-0.02160282
352.6	0.08397798		882.59	-0.00311143		1412.6	-0.00374903		1942.6	-0.00039506		2472.6	-0.02193542
352.8	0.08525074		882.79	-0.0034176		1412.8	-0.00379997		1942.8	0.00068359		2472.8	-0.02245138
353	0.08602956		882.99	-0.00272355		1413	-0.00449678		1943	0.00116486		2473	-0.02310704
353.2	0.08661625		883.19	-0.00366421		1413.2	-0.00518334		1943.2	0.00209258		2473.2	-0.02259616
353.4	0.0880156		883.39	-0.00378855		1413.4	-0.00545239		1943.4	0.00179566		2473.4	-0.02235373
353.6	0.08880348		883.59	-0.00366418		1413.6	-0.00513155		1943.6	0.00211029		2473.6	-0.02257406
353.8	0.08942403		883.79	-0.00342914		1413.8	-0.00524233		1943.8	0.00273042		2473.8	-0.02223436
354	0.0901327		883.99	-0.00291333		1414	-0.00501361		1944	0.00258024		2474	-0.0216714
354.2	0.08956339		884.19	-0.0028364		1414.2	-0.0049361		1944.2	0.00275651		2474.2	-0.02128302
354.4	0.08903644		884.39	-0.00231599		1414.4	-0.0056279		1944.4	0.0023975		2474.4	-0.02117531
354.6	0.08785538		884.59	-0.00212923		1414.6	-0.00634132		1944.6	0.00124489		2474.6	-0.02019148
354.8	0.0878369		884.79	-0.00133732		1414.8	-0.00665142		1944.8	0.00085697		2474.8	-0.01912286
355	0.08767832		884.99	-0.00069537		1415	-0.00707082		1945	0.00057468		2475	-0.01838709
355.2	0.08723359		885.19	-0.00069151		1415.2	-0.0062194		1945.2	-0.00009449		2475.2	-0.01757471
355.4	0.08738802		885.39	-0.00063884		1415.4	-0.00583173		1945.4	-0.0002095		2475.4	-0.01695716
355.6	0.08692746		885.59	-0.00073403		1415.6	-0.00598352		1945.6	0.0007693		2475.6	-0.01693769
355.8	0.08703398		885.79	-0.00070214		1415.8	-0.00584815		1945.8	0.00036262		2475.8	-0.01713521
356	0.0882844		885.99	-0.00116453		1416	-0.00638223		1946	0.00031941		2476	-0.01760794
356.2	0.08765406		886.19	-0.00104792		1416.2	-0.00574037		1946.2	0.00108844		2476.2	-0.01847065
356.4	0.08831683		886.39	-0.00238183		1416.4	-0.00544388		1946.4	0.00058777		2476.4	-0.01797761
356.6	0.08853156		886.59	-0.00304579		1416.6	-0.00516854		1946.6	0.0006255		2476.6	-0.01817948
356.8	0.08931759		886.79	-0.00302618		1416.8	-0.00531163		1946.8	0.00122862		2476.8	-0.0186878
357	0.08876041		886.99	-0.00311782		1417	-0.00530388		1947	0.00114515		2477	-0.01871236
357.2	0.08887914		887.19	-0.0036555		1417.2	-0.00530476		1947.2	0.00126781		2477.2	-0.01943719
357.4	0.08974007		887.39	-0.00380533		1417.4	-0.00525033		1947.4	0.00069139		2477.4	-0.02056527
357.6	0.0900074		887.59	-0.00343328		1417.6	-0.00495374		1947.6	0.00082795		2477.6	-0.02211804
357.8	0.0899288		887.79	-0.00328664		1417.8	-0.00529898		1947.8	0.0010143		2477.8	-0.02237063
358	0.08979555		887.99	-0.00350239		1418	-0.00461539		1948	0.00047156		2478	-0.02249184
358.2	0.08856537		888.19	-0.00397614		1418.2	-0.00477166		1948.2	0.00038159		2478.2	-0.02167007
358.4	0.08796903		888.39	-0.00401377		1418.4	-0.00498045		1948.4	0.00026378		2478.4	-0.02133087
358.6	0.08749159		888.59	-0.00446269		1418.6	-0.00475688		1948.6	0.00004264		2478.6	-0.02033927
358.8	0.08759494		888.79	-0.00417618		1418.8	-0.00456946		1948.8	0.00021036		2478.8	-0.02065268
359	0.08744129		888.99	-0.00451386		1419	-0.00454131		1949	0.00097772		2479	-0.01988374
359.2	0.08712692		889.19	-0.00423879		1419.2	-0.00421617		1949.2	0.0009135		2479.2	-0.01949002
359.4	0.08705079		889.39	-0.00438557		1419.4	-0.00425806		1949.4	0.00074407		2479.4	-0.01870145
359.6	0.08691404		889.59	-0.00489348		1419.6	-0.00485534		1949.6	0.00096071		2479.6	-0.01882956
359.8	0.08794408		889.79	-0.0051729		1419.8	-0.0048374		1949.8	-0.00010064		2479.8	-0.01841795
360	0.08812605		889.99	-0.00529311		1420	-0.00478504		1950	-0.00042043		2480	-0.0177083
360.2	0.08804801		890.19	-0.00486703		1420.2	-0.00426549		1950.2	0.00080163		2480.2	-0.01766886
360.4	0.08936055		890.39	-0.00510883		1420.4	-0.00434649		1950.4	0.0001962		2480.4	-0.01767188
360.6	0.08959277		890.59	-0.00438197		1420.6	-0.00379134		1950.6	0.00087651		2480.6	-0.01762494
360.8	0.0900379		890.79	-0.00463631		1420.8	-0.00393358		1950.8	0.00066964		2480.8	-0.01833239
361	0.09090765		890.99	-0.00473821		1421	-0.0041327		1951	0.00042598		2481	-0.01950521
361.2	0.09137211		891.19	-0.00399967		1421.2	-0.00463609		1951.2	0.00063418		2481.2	-0.02017632
361.4	0.09266319		891.39	-0.0042946		1421.4	-0.0048975		1951.4	0.00145327		2481.4	-0.0202574
361.6	0.0924067		891.59	-0.00345903		1421.6	-0.00492886		1951.6	0.00155722		2481.6	-0.02118619
361.8	0.09201813		891.79	-0.00370423		1421.8	-0.00511412		1951.8	0.00151954		2481.8	-0.02153127
362	0.09134599		891.99	-0.0043066		1422	-0.00534421		1952	0.00118597		2482	-0.02151739
362.2	0.09115038		892.19	-0.00450509		1422.2	-0.00615722		1952.2	0.00113708		2482.2	-0.02128017
362.4	0.09047346		892.39	-0.00414175		1422.4	-0.00651089		1952.4	0.00095444		2482.4	-0.02165487
362.6	0.08960711		892.59	-0.00361401		1422.6	-0.00708894		1952.6	0.00054165		2482.6	-0.02151439
362.8	0.08861502		892.79	-0.00308952		1422.8	-0.00631208		1952.8	0.00093177		2482.8	-0.02141033
363	0.08800387		892.99	-0.00209697		1423	-0.00608068		1953	0.00163811		2483	-0.02100609
363.2	0.08751913		893.19	-0.00201698		1423.2	-0.00621432		1953.2	0.00049625		2483.2	-0.02052107
363.4	0.08715265		893.39	-0.00169044		1423.4	-0.00546923		1953.4	-0.00076582		2483.4	-0.02000648
363.6	0.08755473		893.59	-0.0019403		1423.6	-0.00551511		1953.6	-0.0012791		2483.6	-0.02048469
363.8	0.08800844		893.79	-0.00200854		1423.8	-0.00451944		1953.8	-0.00136814		2483.8	-0.02011497
364	0.08801485		893.99	-0.00176604		1424	-0.0039006		1954	-0.00109413		2484	-0.0197766
364.2	0.08887971		894.19	-0.00104411		1424.2	-0.00366937		1954.2	-0.00075317		2484.2	-0.02035655
364.4	0.08973379		894.39	-0.00085162		1424.4	-0.00218685		1954.4	-0.00198244		2484.4	-0.01996699
364.6	0.09056331		894.59	-0.00068278		1424.6	-0.00188335		1954.6	-0.00160772		2484.6	-0.01996512
364.8	0.09192132		894.79	-0.00137787		1424.8	-0.00124477		1954.8	-0.00270571		2484.8	-0.02083745
365	0.09199624		894.99	-0.00157464		1425	-0.00108922		1955	-0.00322211		2485	-0.02129861
365.2	0.09144306		895.19	-0.00118576		1425.2	-0.00096751		1955.2	-0.00288019		2485.2	-0.02035948
365.4	0.09116219		895.39	-0.0023445		1425.4	-0.00139049		1955.4	-0.00269845		2485.4	-0.02091942
365.6	0.08975001		895.59	-0.00245582		1425.6	-0.00221512		1955.6	-0.00219507		2485.6	-0.0215178
365.8	0.0890972		895.79	-0.00245289		1425.8	-0.0023218		1955.8	-0.0020442		2485.8	-0.02146701
366	0.08851502		895.99	-0.00321794		1426	-0.00393629		1956	-0.00181382		2486	-0.02117888
366.2	0.08762281		896.19	-0.00368982		1426.2	-0.00484742		1956.2	-0.00154911		2486.2	-0.02114074
366.4	0.08649796		896.39	-0.0031621		1426.4	-0.00445961		1956.4	-0.00146983		2486.4	-0.02040396
366.6	0.08583659		896.59	-0.00238857		1426.6	-0.00492588		1956.6	-0.00018274		2486.6	-0.0205596
366.8	0.08616199		896.79	-0.00264152		1426.8	-0.00459821		1956.8	0.00087517		2486.8	-0.02045409
367	0.08671462		896.99	-0.00188709		1427	-0.00508952		1957	0.00079505		2487	-0.02066886
367.2	0.08753771		897.19	-0.00231346		1427.2	-0.00626721		1957.2	0.00083249		2487.2	-0.0202541
367.4	0.0882975		897.39	-0.001582		1427.4	-0.0055702		1957.4	0.00156214		2487.4	-0.0206483
367.6	0.08927727		897.59	-0.00259231		1427.6	-0.00609161		1957.6	0.0028578		2487.6	-0.02093756
367.8	0.0902538		897.79	-0.00185207		1427.8	-0.00567497		1957.8	0.00333123		2487.8	-0.02051165
368	0.0905787		897.99	-0.00201032		1428	-0.00575592		1958	0.00344577		2488	-0.02087177
368.2	0.09110237		898.19	-0.00199627		1428.2	-0.00513016		1958.2	0.00340536		2488.2	-0.0209099
368.4	0.09239875		898.39	-0.00192314		1428.4	-0.00398697		1958.4	0.00284875		2488.4	-0.02090979
368.6	0.09306356		898.59	-0.00213744		1428.6	-0.00383698		1958.6	0.0034945		2488.6	-0.0207091
368.8	0.09287927		898.79	-0.00269404		1428.8	-0.00240064		1958.8	0.00267783		2488.8	-0.02125813
369	0.0923784		898.99	-0.00307857		1429	-0.00208133		1959	0.00231224		2489	-0.02125214
369.2	0.09267673		899.19	-0.00377903		1429.2	-0.0014876		1959.2	0.00255089		2489.2	-0.02155523
369.4	0.09189605		899.39	-0.00453665		1429.4	-0.00193423		1959.4	0.00166334		2489.4	-0.02340279
369.6	0.09079877		899.59	-0.00412132		1429.6	-0.00132532		1959.6	0.0014144		2489.6	-0.0227326
369.8	0.09047682		899.79	-0.00394797		1429.8	-0.00059568		1959.8	0.00040982		2489.8	-0.02271909
370	0.08915451		899.99	-0.00423819		1430	-0.0013481		1960	-0.00052954		2490	-0.02259333
370.2	0.08862416		900.19	-0.0042751		1430.2	-0.00074493		1960.2	-0.00117257		2490.2	-0.02233032
370.4	0.08867385		900.39	-0.00307132		1430.4	-0.00107429		1960.4	-0.00161932		2490.4	-0.02233318
370.6	0.08875016		900.59	-0.00214529		1430.6	-0.00250372		1960.6	-0.00106131		2490.6	-0.02231497
370.8	0.08959591		900.79	-0.00215727		1430.8	-0.00351117		1960.8	-0.00211607		2490.8	-0.02163415
371	0.09031889		900.99	-0.00057829		1431	-0.00406638		1961	-0.00265806		2491	-0.02115571
371.2	0.09196088		901.19	-0.00034469		1431.2	-0.00568367		1961.2	-0.00245012		2491.2	-0.02125746
371.4	0.09305542		901.39	0.00028252		1431.4	-0.00605789		1961.4	-0.00219989		2491.4	-0.02101304
371.6	0.09317526		901.59	-0.00012524		1431.6	-0.0072333		1961.6	-0.00184051		2491.6	-0.02078482
371.8	0.09351543		901.79	0.00025413		1431.8	-0.00695656		1961.8	-0.00123949		2491.8	-0.0206845
372	0.09431059		901.99	-0.00070083		1432	-0.00682141		1962	-0.00058244		2492	-0.02131401
372.2	0.09513636		902.19	-0.00015992		1432.2	-0.00614059		1962.2	0.00034294		2492.2	-0.02154733
372.4	0.09596705		902.39	-0.00005691		1432.4	-0.00553454		1962.4	0.00107466		2492.4	-0.02231775
372.6	0.09576609		902.59	-0.00044915		1432.6	-0.0047039		1962.6	0.00202517		2492.6	-0.02197588
372.8	0.09556417		902.79	-0.00111092		1432.8	-0.00350423		1962.8	0.00197233		2492.8	-0.02326956
373	0.09535054		902.99	-0.00115888		1433	-0.00270259		1963	0.00231798		2493	-0.02409356
373.2	0.0945222		903.19	-0.00175214		1433.2	-0.00201366		1963.2	0.00208799		2493.2	-0.0246994
373.4	0.09343785		903.39	-0.00119347		1433.4	-0.00120385		1963.4	0.001606		2493.4	-0.02491111
373.6	0.09213678		903.59	-0.00173297		1433.6	0.00021301		1963.6	0.00064825		2493.6	-0.02358354
373.8	0.09099733		903.79	-0.00261284		1433.8	0.00039844		1963.8	0.00048465		2493.8	-0.02372501
374	0.0891349		903.99	-0.0029733		1434	0.00048028		1964	0.00018639		2494	-0.02282768
374.2	0.089154		904.19	-0.00259932		1434.2	0.00023641		1964.2	0.0008203		2494.2	-0.0227052
374.4	0.0887058		904.39	-0.00283301		1434.4	-0.0004416		1964.4	0.00039682		2494.4	-0.02222886
374.6	0.08909934		904.59	-0.0031189		1434.6	-0.00123345		1964.6	-0.00008591		2494.6	-0.02055382
374.8	0.08935618		904.79	-0.00364502		1434.8	-0.00202015		1964.8	-0.0011373		2494.8	-0.02042997
375	0.08963929		904.99	-0.00248092		1435	-0.00296225		1965	-0.00215465		2495	-0.02010195
375.2	0.09064506		905.19	-0.00351032		1435.2	-0.00325198		1965.2	-0.00227988		2495.2	-0.02030522
375.4	0.09034244		905.39	-0.00466857		1435.4	-0.0036324		1965.4	-0.00187845		2495.4	-0.01995482
375.6	0.09085534		905.59	-0.00618198		1435.6	-0.0034669		1965.6	-0.00130375		2495.6	-0.02011566
375.8	0.09236106		905.79	-0.00668361		1435.8	-0.00329801		1965.8	-0.00088946		2495.8	-0.02016739
376	0.09311628		905.99	-0.00715365		1436	-0.00391528		1966	-0.00122208		2496	-0.01992673
376.2	0.09418495		906.19	-0.00692969		1436.2	-0.00390111		1966.2	-0.00113079		2496.2	-0.02035577
376.4	0.09381678		906.39	-0.00704036		1436.4	-0.00335103		1966.4	-0.00167141		2496.4	-0.0203517
376.6	0.09393693		906.59	-0.00735655		1436.6	-0.00310922		1966.6	-0.00175183		2496.6	-0.01947027
376.8	0.09430886		906.79	-0.00699676		1436.8	-0.00240584		1966.8	-0.00134285		2496.8	-0.0203413
377	0.09408186		906.99	-0.00657895		1437	-0.00308178		1967	-0.00100148		2497	-0.02051721
377.2	0.09433341		907.19	-0.00558524		1437.2	-0.00275308		1967.2	-0.00138794		2497.2	-0.02041141
377.4	0.09430667		907.39	-0.00469622		1437.4	-0.00229507		1967.4	-0.00133408		2497.4	-0.02059123
377.6	0.09394016		907.59	-0.00460081		1437.6	-0.00195299		1967.6	-0.00139339		2497.6	-0.02078433
377.8	0.09418544		907.79	-0.00349347		1437.8	-0.00213405		1967.8	-0.00022024		2497.8	-0.02148259
378	0.09472824		907.99	-0.00239542		1438	-0.00206859		1968	0.00064473		2498	-0.02145788
378.2	0.09565232		908.19	-0.00119118		1438.2	-0.0027735		1968.2	0.00107701		2498.2	-0.02209011
378.4	0.09569854		908.39	-0.00139076		1438.4	-0.00323441		1968.4	0.00038395		2498.4	-0.02189929
378.6	0.09569465		908.59	-0.00082816		1438.6	-0.00416963		1968.6	0.00005635		2498.6	-0.02195134
378.8	0.09512231		908.79	-0.00067558		1438.8	-0.00487277		1968.8	-0.00022549		2498.8	-0.02283968
379	0.0947766		908.99	-0.00075055		1439	-0.00544791		1969	-0.00060268		2499	-0.02277854
379.2	0.09470617		909.19	-0.00230074		1439.2	-0.00541494		1969.2	-0.00067474		2499.2	-0.02282033
379.4	0.09430965		909.39	-0.00357475		1439.4	-0.00630323		1969.4	-0.00108324		2499.4	-0.02243922
379.6	0.09463374		909.59	-0.00455876		1439.6	-0.00673221		1969.6	-0.0018634		2499.6	-0.0220274
379.8	0.0945056		909.79	-0.00524443		1439.8	-0.00769791		1969.8	-0.00287825		2499.8	-0.02137941
380	0.0945056		909.99	-0.00524443		1440	-0.00769791		1970	-0.00287825		2500	-0.02137941
380.2	0.09337083		910.19	-0.00582254		1440.2	-0.00742053		1970.2	-0.00209461		2500.2	-0.02070837
380.4	0.09224239		910.39	-0.00549009		1440.4	-0.0067808		1970.4	-0.00153943		2500.4	-0.01934922
380.6	0.09101434		910.59	-0.00565668		1440.6	-0.00724484		1970.6	-0.00083607		2500.6	-0.01898891
380.8	0.09031517		910.79	-0.00632234		1440.8	-0.00674737		1970.8	0.000354		2500.8	-0.01839926
381	0.08926716		910.99	-0.00648506		1441	-0.00653047		1971	0.00127489		2501	-0.01759991
381.2	0.08850174		911.19	-0.00616711		1441.2	-0.00598295		1971.2	0.00195694		2501.2	-0.01668347
381.4	0.0876382		911.39	-0.0058733		1441.4	-0.00568517		1971.4	0.00231315		2501.4	-0.01597894
381.6	0.08695964		911.59	-0.00613276		1441.6	-0.00614437		1971.6	0.00197993		2501.6	-0.01522131
381.8	0.08652327		911.79	-0.00572486		1441.8	-0.00537266		1971.8	0.00181343		2501.8	-0.01595906
382	0.08607343		911.99	-0.00558881		1442	-0.0055913		1972	0.00141		2502	-0.01719549
382.2	0.08691112		912.19	-0.00582122		1442.2	-0.00622974		1972.2	0.00078265		2502.2	-0.01804055
382.4	0.08684106		912.39	-0.00613747		1442.4	-0.00744375		1972.4	-0.00038054		2502.4	-0.01758013
382.6	0.08692578		912.59	-0.00567263		1442.6	-0.0080427		1972.6	-0.00132691		2502.6	-0.01777154
382.8	0.08786268		912.79	-0.00629161		1442.8	-0.00835314		1972.8	-0.00178283		2502.8	-0.01724319
383	0.08812268		912.99	-0.00665788		1443	-0.00952964		1973	-0.00206738		2503	-0.0176045
383.2	0.08938579		913.19	-0.00614263		1443.2	-0.01012266		1973.2	-0.0022053		2503.2	-0.01757083
383.4	0.08926432		913.39	-0.00556841		1443.4	-0.00979064		1973.4	-0.00272183		2503.4	-0.01810313
383.6	0.08913509		913.59	-0.00493171		1443.6	-0.01001802		1973.6	-0.00188297		2503.6	-0.0178174
383.8	0.08913337		913.79	-0.00481692		1443.8	-0.01036442		1973.8	-0.00187934		2503.8	-0.01751756
384	0.08931665		913.99	-0.00506554		1444	-0.01026941		1974	-0.00255126		2504	-0.0171208
384.2	0.08863232		914.19	-0.00566432		1444.2	-0.00957508		1974.2	-0.00182634		2504.2	-0.01765497
384.4	0.08897074		914.39	-0.00538727		1444.4	-0.00912932		1974.4	-0.00135109		2504.4	-0.0171178
384.6	0.08871754		914.59	-0.00587974		1444.6	-0.00902232		1974.6	-0.00058117		2504.6	-0.01706066
384.8	0.08878504		914.79	-0.00660223		1444.8	-0.00843985		1974.8	0.00039085		2504.8	-0.01674135
385	0.08789129		914.99	-0.00627226		1445	-0.00788796		1975	0.00019832		2505	-0.01675275
385.2	0.08756125		915.19	-0.00546546		1445.2	-0.00741104		1975.2	0.00009246		2505.2	-0.01683168
385.4	0.08775034		915.39	-0.00537643		1445.4	-0.00777606		1975.4	-0.0002765		2505.4	-0.01759734
385.6	0.08806803		915.59	-0.00490071		1445.6	-0.00811058		1975.6	-0.00096263		2505.6	-0.01753134
385.8	0.08777583		915.79	-0.0042636		1445.8	-0.00746864		1975.8	-0.00117356		2505.8	-0.0187474
386	0.0875741		915.99	-0.00462666		1446	-0.00863466		1976	-0.00225073		2506	-0.01917351
386.2	0.08810179		916.19	-0.00525623		1446.2	-0.00972517		1976.2	-0.00309919		2506.2	-0.01898459
386.4	0.08696431		916.39	-0.00526915		1446.4	-0.01077983		1976.4	-0.00391997		2506.4	-0.01851618
386.6	0.08710116		916.59	-0.00497988		1446.6	-0.01117219		1976.6	-0.00469794		2506.6	-0.01911891
386.8	0.08730413		916.79	-0.00670124		1446.8	-0.01101812		1976.8	-0.00433434		2506.8	-0.01844385
387	0.0871426		916.99	-0.00680498		1447	-0.01180424		1977	-0.00419199		2507	-0.01868659
387.2	0.08605327		917.19	-0.00626209		1447.2	-0.01160944		1977.2	-0.00357777		2507.2	-0.01865977
387.4	0.08532007		917.39	-0.00573326		1447.4	-0.01132145		1977.4	-0.00338253		2507.4	-0.01821114
387.6	0.08451203		917.59	-0.00551513		1447.6	-0.01132588		1977.6	-0.00272715		2507.6	-0.01654491
387.8	0.08310708		917.79	-0.00537365		1447.8	-0.01115994		1977.8	-0.00213679		2507.8	-0.01575374
388	0.08282867		917.99	-0.00574956		1448	-0.0097164		1978	-0.00203064		2508	-0.01527368
388.2	0.08312165		918.19	-0.00553316		1448.2	-0.00923477		1978.2	-0.00144408		2508.2	-0.01512308
388.4	0.08266352		918.39	-0.00561821		1448.4	-0.00814748		1978.4	-0.00087231		2508.4	-0.0148879
388.6	0.08185921		918.59	-0.00492737		1448.6	-0.00770964		1978.6	0.00002894		2508.6	-0.0139742
388.8	0.08144654		918.79	-0.0048275		1448.8	-0.00721296		1978.8	-0.00004475		2508.8	-0.01432996
389	0.08088207		918.99	-0.00450222		1449	-0.00640668		1979	0.00032186		2509	-0.01487796
389.2	0.08136298		919.19	-0.00394184		1449.2	-0.00673384		1979.2	0.00071899		2509.2	-0.01545947
389.4	0.0819194		919.39	-0.00365119		1449.4	-0.00744468		1979.4	0.0007364		2509.4	-0.01625543
389.6	0.08223103		919.59	-0.00296289		1449.6	-0.007161		1979.6	0.00056403		2509.6	-0.01643605
389.8	0.08217581		919.79	-0.00287644		1449.8	-0.00686122		1979.8	-0.00019176		2509.8	-0.01790384
390	0.0827323		919.99	-0.00275112		1450	-0.00730611		1980	-0.00090432		2510	-0.01955374
390.2	0.08358318		920.19	-0.00306857		1450.2	-0.00820783		1980.2	-0.00124814		2510.2	-0.02045888
390.4	0.08436253		920.39	-0.00316382		1450.4	-0.00874114		1980.4	-0.00177374		2510.4	-0.02119525
390.6	0.08543598		920.59	-0.00356805		1450.6	-0.0080612		1980.6	-0.00157991		2510.6	-0.02230311
390.8	0.08493861		920.79	-0.00490757		1450.8	-0.00757731		1980.8	-0.00146552		2510.8	-0.02187931
391	0.08494403		920.99	-0.00530364		1451	-0.00785383		1981	-0.00118779		2511	-0.02183488
391.2	0.08402298		921.19	-0.0054397		1451.2	-0.00748084		1981.2	-0.00042005		2511.2	-0.02131908
391.4	0.08415403		921.39	-0.00582185		1451.4	-0.00719788		1981.4	-0.0006714		2511.4	-0.02020547
391.6	0.08402388		921.59	-0.00623558		1451.6	-0.0067674		1981.6	-0.00043827		2511.6	-0.02008269
391.8	0.08364683		921.79	-0.00584523		1451.8	-0.0062844		1981.8	-0.00056982		2511.8	-0.02027043
392	0.08491476		921.99	-0.00609007		1452	-0.00639365		1982	-0.00092695		2512	-0.02127934
392.2	0.08496992		922.19	-0.00632723		1452.2	-0.00699479		1982.2	-0.00081337		2512.2	-0.0213589
392.4	0.08283616		922.39	-0.00563597		1452.4	-0.0067308		1982.4	-0.00021045		2512.4	-0.02034809
392.6	0.08239038		922.59	-0.00540593		1452.6	-0.00728881		1982.6	0.00037179		2512.6	-0.0192347
392.8	0.0816619		922.79	-0.00559405		1452.8	-0.00760701		1982.8	0.0002092		2512.8	-0.01862029
393	0.08130309		922.99	-0.00576454		1453	-0.00875844		1983	0.00135994		2513	-0.01903694
393.2	0.08137874		923.19	-0.00508152		1453.2	-0.00925495		1983.2	0.00130632		2513.2	-0.0190746
393.4	0.08172326		923.39	-0.00479229		1453.4	-0.00907406		1983.4	0.00027648		2513.4	-0.01876096
393.6	0.08208329		923.59	-0.00427051		1453.6	-0.00864121		1983.6	-0.00023918		2513.6	-0.01849765
393.8	0.08222374		923.79	-0.00357312		1453.8	-0.00847076		1983.8	-0.0005437		2513.8	-0.01828207
394	0.08286612		923.99	-0.003358		1454	-0.00863727		1984	-0.00026666		2514	-0.01861138
394.2	0.08313863		924.19	-0.003104		1454.2	-0.00913328		1984.2	0.00003315		2514.2	-0.01814169
394.4	0.08304568		924.39	-0.00318021		1454.4	-0.00862409		1984.4	0.00022433		2514.4	-0.01772083
394.6	0.08259722		924.59	-0.00244948		1454.6	-0.00778264		1984.6	0.00041043		2514.6	-0.01749366
394.8	0.08220477		924.79	-0.00328569		1454.8	-0.00749409		1984.8	-0.0004024		2514.8	-0.01700639
395	0.08293338		924.99	-0.00375805		1455	-0.00764205		1985	-0.00056069		2515	-0.0169905
395.2	0.0823544		925.19	-0.00328124		1455.2	-0.00791289		1985.2	-0.00043628		2515.2	-0.01655648
395.4	0.08221958		925.39	-0.00387481		1455.4	-0.00793888		1985.4	-0.00110929		2515.4	-0.01683312
395.6	0.08203693		925.59	-0.00372815		1455.6	-0.0076202		1985.6	-0.00163918		2515.6	-0.0177211
395.8	0.08127266		925.79	-0.00371735		1455.8	-0.00743074		1985.8	-0.00178515		2515.8	-0.01801433
396	0.08218357		925.99	-0.00444957		1456	-0.00821999		1986	-0.00200707		2516	-0.01861858
396.2	0.08180414		926.19	-0.00476925		1456.2	-0.0083708		1986.2	-0.00165721		2516.2	-0.01824248
396.4	0.08101231		926.39	-0.00425963		1456.4	-0.00858003		1986.4	-0.00138023		2516.4	-0.01770524
396.6	0.08115313		926.59	-0.00546244		1456.6	-0.00838557		1986.6	-0.00147374		2516.6	-0.01868125
396.8	0.08132694		926.79	-0.00532721		1456.8	-0.00856405		1986.8	-0.00098484		2516.8	-0.01895392
397	0.0823187		926.99	-0.00581492		1457	-0.00940694		1987	-0.00107438		2517	-0.01941136
397.2	0.08250383		927.19	-0.00571974		1457.2	-0.00894099		1987.2	-0.00144887		2517.2	-0.01889278
397.4	0.08258909		927.39	-0.00609919		1457.4	-0.00906499		1987.4	-0.00256861		2517.4	-0.01909309
397.6	0.08242337		927.59	-0.00628377		1457.6	-0.0101242		1987.6	-0.00182662		2517.6	-0.01897033
397.8	0.08282044		927.79	-0.0061719		1457.8	-0.00983642		1987.8	-0.00124759		2517.8	-0.01951539
398	0.08319396		927.99	-0.00617201		1458	-0.0094339		1988	-0.0010169		2518	-0.02012105
398.2	0.08410394		928.19	-0.00611608		1458.2	-0.00968621		1988.2	-0.00079435		2518.2	-0.01958462
398.4	0.08449234		928.39	-0.00604524		1458.4	-0.00955858		1988.4	-0.0010628		2518.4	-0.01949132
398.6	0.08517329		928.59	-0.00539285		1458.6	-0.00947304		1988.6	-0.00176831		2518.6	-0.01974796
398.8	0.08497702		928.79	-0.00616019		1458.8	-0.00950447		1988.8	-0.0018535		2518.8	-0.02032555
399	0.08524507		928.99	-0.00576947		1459	-0.00981677		1989	-0.00136954		2519	-0.02078234
399.2	0.08446534		929.19	-0.00563548		1459.2	-0.00969255		1989.2	-0.00127636		2519.2	-0.02035977
399.4	0.08354998		929.39	-0.00638372		1459.4	-0.00939002		1989.4	-0.00126766		2519.4	-0.02031074
399.6	0.08300215		929.59	-0.00563249		1459.6	-0.0082161		1989.6	-0.00188498		2519.6	-0.02095285
399.8	0.08288067		929.79	-0.00545948		1459.8	-0.00791393		1989.8	-0.0015113		2519.8	-0.02091706
400	0.08280196		929.99	-0.00522971		1460	-0.00777018		1990	-0.00110124		2520	-0.02101352
400.2	0.08202546		930.19	-0.00473231		1460.2	-0.00771788		1990.2	-0.00079753		2520.2	-0.02130284
400.4	0.08095832		930.39	-0.00420799		1460.4	-0.0076227		1990.4	-0.00046748		2520.4	-0.0209337
400.6	0.08049092		930.59	-0.00521654		1460.6	-0.00732299		1990.6	-0.00053151		2520.6	-0.02079113
400.8	0.07951608		930.79	-0.00487498		1460.8	-0.0077281		1990.8	-0.0006132		2520.8	-0.02018358
401	0.07960896		930.99	-0.00541523		1461	-0.00810979		1991	-0.00130167		2521	-0.01932412
401.2	0.07903491		931.19	-0.00513821		1461.2	-0.00780779		1991.2	-0.0011233		2521.2	-0.01931119
401.4	0.07947598		931.39	-0.00531117		1461.4	-0.00763211		1991.4	-0.00208046		2521.4	-0.01983262
401.6	0.08009307		931.59	-0.00519492		1461.6	-0.00769874		1991.6	-0.00198458		2521.6	-0.01956203
401.8	0.0804397		931.79	-0.00547533		1461.8	-0.00719245		1991.8	-0.0022764		2521.8	-0.01964132
402	0.08107359		931.99	-0.00544078		1462	-0.00724286		1992	-0.00261153		2522	-0.01872897
402.2	0.08165078		932.19	-0.00549292		1462.2	-0.00782269		1992.2	-0.00300064		2522.2	-0.01816603
402.4	0.08186149		932.39	-0.00525841		1462.4	-0.00764647		1992.4	-0.00285328		2522.4	-0.01887036
402.6	0.08174027		932.59	-0.00469371		1462.6	-0.00727301		1992.6	-0.00353776		2522.6	-0.01993928
402.8	0.08174929		932.79	-0.0037494		1462.8	-0.00728207		1992.8	-0.00280096		2522.8	-0.0210362
403	0.08177816		932.99	-0.00311038		1463	-0.0066831		1993	-0.00230572		2523	-0.02064874
403.2	0.08159779		933.19	-0.0033151		1463.2	-0.0065422		1993.2	-0.00198139		2523.2	-0.02069427
403.4	0.08085626		933.39	-0.00369533		1463.4	-0.00677433		1993.4	-0.00088834		2523.4	-0.02118693
403.6	0.08044074		933.59	-0.00360983		1463.6	-0.0072249		1993.6	0.00021826		2523.6	-0.02210962
403.8	0.08067896		933.79	-0.00374616		1463.8	-0.0079161		1993.8	0.0010224		2523.8	-0.02235183
404	0.07973548		933.99	-0.00426133		1464	-0.00822208		1994	0.00221775		2524	-0.02214523
404.2	0.07975599		934.19	-0.0041221		1464.2	-0.00938319		1994.2	0.00288109		2524.2	-0.02182538
404.4	0.07966923		934.39	-0.00475028		1464.4	-0.00939197		1994.4	0.00400866		2524.4	-0.02062735
404.6	0.07943509		934.59	-0.00576014		1464.6	-0.00975625		1994.6	0.00324057		2524.6	-0.01970784
404.8	0.07938824		934.79	-0.00583717		1464.8	-0.00984786		1994.8	0.00318011		2524.8	-0.01973191
405	0.08049071		934.99	-0.00583413		1465	-0.01010303		1995	0.00250029		2525	-0.01954387
405.2	0.080655		935.19	-0.00586132		1465.2	-0.01041525		1995.2	0.00155876		2525.2	-0.02001958
405.4	0.08118703		935.39	-0.00554221		1465.4	-0.01023551		1995.4	0.00005761		2525.4	-0.02028914
405.6	0.08129119		935.59	-0.00536431		1465.6	-0.01122379		1995.6	-0.00104158		2525.6	-0.01986963
405.8	0.0814892		935.79	-0.00587723		1465.8	-0.01187325		1995.8	-0.00169094		2525.8	-0.01999037
406	0.08120812		935.99	-0.00508758		1466	-0.01195355		1996	-0.00318724		2526	-0.01991529
406.2	0.08104076		936.19	-0.00562851		1466.2	-0.01187658		1996.2	-0.0040071		2526.2	-0.02039843
406.4	0.08109759		936.39	-0.00549033		1466.4	-0.0117044		1996.4	-0.0047307		2526.4	-0.0206995
406.6	0.08014465		936.59	-0.00477427		1466.6	-0.01200842		1996.6	-0.00524919		2526.6	-0.02156008
406.8	0.08019861		936.79	-0.00501983		1466.8	-0.01228176		1996.8	-0.00483713		2526.8	-0.02077741
407	0.07939527		936.99	-0.00584371		1467	-0.01181872		1997	-0.00447529		2527	-0.0201035
407.2	0.07916681		937.19	-0.00646412		1467.2	-0.01121644		1997.2	-0.00412116		2527.2	-0.02056286
407.4	0.07795768		937.39	-0.00682581		1467.4	-0.01064465		1997.4	-0.00316761		2527.4	-0.02089859
407.6	0.07752195		937.59	-0.00660123		1467.6	-0.0108273		1997.6	-0.00235938		2527.6	-0.02132617
407.8	0.07700531		937.79	-0.00652203		1467.8	-0.00979666		1997.8	-0.00187085		2527.8	-0.02043293
408	0.07657453		937.99	-0.00676492		1468	-0.00851468		1998	-0.00044119		2528	-0.01935368
408.2	0.07670648		938.19	-0.00674336		1468.2	-0.00822764		1998.2	0.00070644		2528.2	-0.01988044
408.4	0.0770729		938.39	-0.00671434		1468.4	-0.00689874		1998.4	0.00136312		2528.4	-0.01953431
408.6	0.07670814		938.59	-0.00613281		1468.6	-0.00641901		1998.6	0.00142889		2528.6	-0.01930702
408.8	0.07699488		938.79	-0.00607495		1468.8	-0.00585022		1998.8	0.00169096		2528.8	-0.01908398
409	0.07744832		938.99	-0.00529081		1469	-0.00584036		1999	0.00125326		2529	-0.01983862
409.2	0.07843713		939.19	-0.00461913		1469.2	-0.00579416		1999.2	0.00138426		2529.2	-0.01966021
409.4	0.07936094		939.39	-0.00396646		1469.4	-0.00572794		1999.4	0.00158404		2529.4	-0.01918612
409.6	0.08011104		939.59	-0.00385324		1469.6	-0.00617368		1999.6	0.00174991		2529.6	-0.01961216
409.8	0.08000674		939.79	-0.00398448		1469.8	-0.00654633		1999.8	0.0020425		2529.8	-0.01940944
410	0.07893516		939.99	-0.0033719		1470	-0.0066581		2000	0.00142767		2530	-0.01894387
410.2	0.0786695		940.19	-0.00387822		1470.2	-0.00744026		2000.2	0.00107872		2530.2	-0.01912202
410.4	0.07833279		940.39	-0.00320345		1470.4	-0.00828073		2000.4	0.00056532		2530.4	-0.01823854
410.6	0.07803456		940.59	-0.00394411		1470.6	-0.00904803		2000.6	0.00086829		2530.6	-0.01861073
410.8	0.07756559		940.79	-0.00442031		1470.8	-0.00959294		2000.8	0.00035486		2530.8	-0.01806048
411	0.07742253		940.99	-0.00449085		1471	-0.00953128		2001	0.0004088		2531	-0.01777247
411.2	0.07661789		941.19	-0.00466992		1471.2	-0.00869237		2001.2	-0.00038623		2531.2	-0.01776106
411.4	0.07503277		941.39	-0.0045024		1471.4	-0.008331		2001.4	-0.00039421		2531.4	-0.01780282
411.6	0.07479754		941.59	-0.00495901		1471.6	-0.00870489		2001.6	-0.0007706		2531.6	-0.01834642
411.8	0.07397149		941.79	-0.00574321		1471.8	-0.00777513		2001.8	-0.00080134		2531.8	-0.01817389
412	0.07406905		941.99	-0.00568398		1472	-0.00750695		2002	-0.00059258		2532	-0.0189731
412.2	0.07435074		942.19	-0.00592895		1472.2	-0.00773147		2002.2	-0.00054692		2532.2	-0.01999933
412.4	0.07451208		942.39	-0.0052999		1472.4	-0.0075124		2002.4	-0.00097473		2532.4	-0.02056876
412.6	0.0744957		942.59	-0.00551262		1472.6	-0.00784626		2002.6	-0.00085986		2532.6	-0.02050995
412.8	0.07612418		942.79	-0.00603108		1472.8	-0.00748574		2002.8	-0.00136729		2532.8	-0.0205886
413	0.07705062		942.99	-0.00578128		1473	-0.0075616		2003	-0.00094415		2533	-0.02138552
413.2	0.07734332		943.19	-0.00520208		1473.2	-0.00791973		2003.2	-0.00044113		2533.2	-0.02104336
413.4	0.07731733		943.39	-0.00534762		1473.4	-0.00810842		2003.4	0.0007149		2533.4	-0.02130779
413.6	0.07785097		943.59	-0.00477963		1473.6	-0.00825958		2003.6	0.00053625		2533.6	-0.02122606
413.8	0.07683629		943.79	-0.00493392		1473.8	-0.0082814		2003.8	0.0005903		2533.8	-0.02045217
414	0.07619316		943.99	-0.00404155		1474	-0.00839611		2004	0.00027679		2534	-0.02035389
414.2	0.07608915		944.19	-0.00435043		1474.2	-0.0090143		2004.2	-0.00003408		2534.2	-0.01975658
414.4	0.07579314		944.39	-0.00475715		1474.4	-0.00969995		2004.4	-0.0001022		2534.4	-0.01897055
414.6	0.07577974		944.59	-0.0055705		1474.6	-0.00976534		2004.6	0.00048192		2534.6	-0.01850093
414.8	0.0755313		944.79	-0.00515118		1474.8	-0.01023085		2004.8	0.00071043		2534.8	-0.01781913
415	0.07569445		944.99	-0.00489214		1475	-0.01023869		2005	0.00139265		2535	-0.01636072
415.2	0.07461245		945.19	-0.00538081		1475.2	-0.00961269		2005.2	0.00143132		2535.2	-0.01594816
415.4	0.07452395		945.39	-0.00579451		1475.4	-0.00969841		2005.4	0.00198183		2535.4	-0.01601438
415.6	0.0748399		945.59	-0.00689147		1475.6	-0.00996741		2005.6	0.00210474		2535.6	-0.01615399
415.8	0.07503169		945.79	-0.00714228		1475.8	-0.00934541		2005.8	0.00215516		2535.8	-0.01606525
416	0.07561561		945.99	-0.00684177		1476	-0.00951823		2006	0.0020117		2536	-0.01626008
416.2	0.07587547		946.19	-0.00706524		1476.2	-0.00910798		2006.2	0.00133482		2536.2	-0.01637915
416.4	0.07669521		946.39	-0.00698793		1476.4	-0.00861996		2006.4	0.0011959		2536.4	-0.01706679
416.6	0.07750425		946.59	-0.00779729		1476.6	-0.00815108		2006.6	0.00135324		2536.6	-0.01712847
416.8	0.07802791		946.79	-0.00771581		1476.8	-0.00702008		2006.8	0.00046278		2536.8	-0.01784412
417	0.07730229		946.99	-0.00691942		1477	-0.00678151		2007	-0.00010766		2537	-0.01831537
417.2	0.07730519		947.19	-0.00615045		1477.2	-0.00724392		2007.2	-0.00009942		2537.2	-0.0194923
417.4	0.07749128		947.39	-0.00564973		1477.4	-0.0077589		2007.4	-0.00054885		2537.4	-0.01972457
417.6	0.07763894		947.59	-0.00511367		1477.6	-0.00735229		2007.6	-0.00204462		2537.6	-0.01961719
417.8	0.07675799		947.79	-0.00527346		1477.8	-0.00778957		2007.8	-0.0016193		2537.8	-0.02056692
418	0.07682502		947.99	-0.00395296		1478	-0.00786437		2008	-0.00163727		2538	-0.02112491
418.2	0.0766632		948.19	-0.00350507		1478.2	-0.00802866		2008.2	-0.00148518		2538.2	-0.02140295
418.4	0.07592351		948.39	-0.00391073		1478.4	-0.00816758		2008.4	-0.00118901		2538.4	-0.02208546
418.6	0.07642399		948.59	-0.00394434		1478.6	-0.00792686		2008.6	-0.00045341		2538.6	-0.02183252
418.8	0.07621706		948.79	-0.00416157		1478.8	-0.00752825		2008.8	0.00003165		2538.8	-0.02128614
419	0.07589006		948.99	-0.00484876		1479	-0.00738045		2009	0.00067588		2539	-0.02084724
419.2	0.07525005		949.19	-0.00542816		1479.2	-0.00736516		2009.2	0.00180218		2539.2	-0.02071303
419.4	0.07609418		949.39	-0.00527657		1479.4	-0.00726794		2009.4	0.00168546		2539.4	-0.020523
419.6	0.0755531		949.59	-0.00610866		1479.6	-0.00677792		2009.6	0.00213748		2539.6	-0.01942949
419.8	0.07595783		949.79	-0.00617614		1479.8	-0.00678054		2009.8	0.00190169		2539.8	-0.01934824
420	0.07614203		949.99	-0.00624625		1480	-0.00709843		2010	0.001959		2540	-0.01887703
420.2	0.07661533		950.19	-0.00675083		1480.2	-0.00638181		2010.2	0.00220149		2540.2	-0.01871308
420.4	0.07748419		950.39	-0.00681034		1480.4	-0.00630071		2010.4	0.00289283		2540.4	-0.01894918
420.6	0.07697996		950.59	-0.00711022		1480.6	-0.00608127		2010.6	0.0020187		2540.6	-0.01924301
420.8	0.0766328		950.79	-0.00659507		1480.8	-0.00598917		2010.8	0.00075641		2540.8	-0.01941617
421	0.07704816		950.99	-0.00615282		1481	-0.00688003		2011	0.00031665		2541	-0.01973858
421.2	0.07737278		951.19	-0.00590902		1481.2	-0.00838877		2011.2	-0.0001747		2541.2	-0.02100354
421.4	0.07678231		951.39	-0.00491189		1481.4	-0.0088567		2011.4	-0.00080939		2541.4	-0.02154236
421.6	0.07701461		951.59	-0.00493111		1481.6	-0.00962033		2011.6	-0.00098292		2541.6	-0.0218899
421.8	0.0764455		951.79	-0.00391409		1481.8	-0.00940976		2011.8	-0.00045084		2541.8	-0.02208267
422	0.07638613		951.99	-0.00334784		1482	-0.00820403		2012	-0.00070026		2542	-0.02273372
422.2	0.07630062		952.19	-0.00383535		1482.2	-0.00838208		2012.2	-0.00086969		2542.2	-0.02258421
422.4	0.07526454		952.39	-0.00462555		1482.4	-0.00836286		2012.4	-0.00067749		2542.4	-0.02231468
422.6	0.07572233		952.59	-0.00504449		1482.6	-0.00827394		2012.6	-0.00055593		2542.6	-0.0209653
422.8	0.07564847		952.79	-0.00550404		1482.8	-0.00781755		2012.8	-0.00012417		2542.8	-0.02019809
423	0.07564237		952.99	-0.00518112		1483	-0.00811105		2013	0.00016113		2543	-0.02003703
423.2	0.07540097		953.19	-0.00428567		1483.2	-0.00806182		2013.2	0.00080876		2543.2	-0.01927601
423.4	0.07570066		953.39	-0.00434003		1483.4	-0.00792197		2013.4	0.00147803		2543.4	-0.01908841
423.6	0.07411983		953.59	-0.0056274		1483.6	-0.00789609		2013.6	0.00278384		2543.6	-0.01818394
423.8	0.07459156		953.79	-0.00625958		1483.8	-0.00824173		2013.8	0.00284028		2543.8	-0.01841944
424	0.07477053		953.99	-0.00616249		1484	-0.00850576		2014	0.00332685		2544	-0.01826584
424.2	0.07473521		954.19	-0.00661195		1484.2	-0.00825468		2014.2	0.00413498		2544.2	-0.01839488
424.4	0.07440412		954.39	-0.00693794		1484.4	-0.00819505		2014.4	0.00406929		2544.4	-0.01840521
424.6	0.07458838		954.59	-0.00787518		1484.6	-0.00790451		2014.6	0.00365539		2544.6	-0.01828882
424.8	0.07544345		954.79	-0.00784737		1484.8	-0.0078813		2014.8	0.00364985		2544.8	-0.01868063
425	0.07593909		954.99	-0.00773273		1485	-0.00768057		2015	0.00426616		2545	-0.01932177
425.2	0.07601602		955.19	-0.0072738		1485.2	-0.00774827		2015.2	0.00351485		2545.2	-0.02057764
425.4	0.07551382		955.39	-0.00659523		1485.4	-0.00733133		2015.4	0.0032602		2545.4	-0.02107469
425.6	0.07538839		955.59	-0.00675565		1485.6	-0.00763582		2015.6	0.00237004		2545.6	-0.02058254
425.8	0.07563682		955.79	-0.00650265		1485.8	-0.00644142		2015.8	0.00217141		2545.8	-0.02046593
426	0.07602082		955.99	-0.0072351		1486	-0.00594446		2016	0.00150134		2546	-0.02052803
426.2	0.07617663		956.19	-0.00748113		1486.2	-0.00676489		2016.2	0.00076025		2546.2	-0.01973592
426.4	0.07541356		956.39	-0.00709658		1486.4	-0.00679171		2016.4	0.00095097		2546.4	-0.01873205
426.6	0.0767582		956.59	-0.00702155		1486.6	-0.00641174		2016.6	0.00113284		2546.6	-0.01846545
426.8	0.07625696		956.79	-0.00693504		1486.8	-0.00600095		2016.8	0.00119895		2546.8	-0.01860676
427	0.07516705		956.99	-0.00617117		1487	-0.00630651		2017	0.00073936		2547	-0.01920169
427.2	0.07460743		957.19	-0.00654967		1487.2	-0.00585301		2017.2	0.0012572		2547.2	-0.01987626
427.4	0.07351774		957.39	-0.00682872		1487.4	-0.00633489		2017.4	0.00163209		2547.4	-0.02067694
427.6	0.07307797		957.59	-0.00723242		1487.6	-0.00674643		2017.6	0.00180276		2547.6	-0.01987788
427.8	0.07366121		957.79	-0.00683393		1487.8	-0.00747626		2017.8	0.0013584		2547.8	-0.0204479
428	0.07324077		957.99	-0.00569421		1488	-0.00790127		2018	0.00129098		2548	-0.02033199
428.2	0.07328546		958.19	-0.00630372		1488.2	-0.00759613		2018.2	0.00180977		2548.2	-0.02023088
428.4	0.07383727		958.39	-0.00612045		1488.4	-0.00688349		2018.4	0.00128977		2548.4	-0.02129216
428.6	0.07461102		958.59	-0.00592865		1488.6	-0.00680503		2018.6	0.00094957		2548.6	-0.02187397
428.8	0.07410949		958.79	-0.00521914		1488.8	-0.00696978		2018.8	0.00070962		2548.8	-0.02182503
429	0.07424034		958.99	-0.00523152		1489	-0.00704125		2019	0.00065559		2549	-0.0220673
429.2	0.07502194		959.19	-0.00527845		1489.2	-0.00795028		2019.2	-0.00026637		2549.2	-0.02201899
429.4	0.07497961		959.39	-0.00561213		1489.4	-0.00861505		2019.4	-0.00051545		2549.4	-0.02203754
429.6	0.07468215		959.59	-0.00635784		1489.6	-0.00897262		2019.6	-0.00072442		2549.6	-0.02149588
429.8	0.07529342		959.79	-0.00684706		1489.8	-0.00955152		2019.8	-0.0004649		2549.8	-0.02113182
430	0.07546038		959.99	-0.00732422		1490	-0.00975334		2020	-0.00049134		2550	-0.02019609
430.2	0.07543743		960.19	-0.00815639		1490.2	-0.0097545		2020.2	0.00017577		2550.2	-0.01974003
430.4	0.07520205		960.39	-0.00750251		1490.4	-0.00889537		2020.4	0.00036414		2550.4	-0.01916416
430.6	0.07555455		960.59	-0.00788618		1490.6	-0.00844203		2020.6	0.00018585		2550.6	-0.01886036
430.8	0.07472861		960.79	-0.00933048		1490.8	-0.00839055		2020.8	0.00056722		2550.8	-0.01876303
431	0.0755137		960.99	-0.0093465		1491	-0.00880309		2021	0.00028589		2551	-0.01882951
431.2	0.07647638		961.19	-0.01032616		1491.2	-0.00841391		2021.2	0.00107133		2551.2	-0.01784042
431.4	0.0762353		961.39	-0.00970754		1491.4	-0.00890082		2021.4	0.00076479		2551.4	-0.01727151
431.6	0.07662661		961.59	-0.00951346		1491.6	-0.00856761		2021.6	0.00224077		2551.6	-0.01607221
431.8	0.07629339		961.79	-0.00948382		1491.8	-0.00852539		2021.8	0.00178132		2551.8	-0.01665205
432	0.07581772		961.99	-0.00880474		1492	-0.00800119		2022	0.00121022		2552	-0.0170471
432.2	0.07555668		962.19	-0.00864867		1492.2	-0.00785437		2022.2	0.00085268		2552.2	-0.0190233
432.4	0.07530756		962.39	-0.00739125		1492.4	-0.00753631		2022.4	0.00026084		2552.4	-0.02019697
432.6	0.0752684		962.59	-0.0066396		1492.6	-0.00835561		2022.6	-0.00064272		2552.6	-0.01946671
432.8	0.07472313		962.79	-0.00579036		1492.8	-0.00820988		2022.8	-0.00158333		2552.8	-0.01884397
433	0.07546517		962.99	-0.00650055		1493	-0.00862448		2023	-0.00177195		2553	-0.01868812
433.2	0.07572222		963.19	-0.00669378		1493.2	-0.00953067		2023.2	-0.00191598		2553.2	-0.01854177
433.4	0.07440883		963.39	-0.00613156		1493.4	-0.01006961		2023.4	-0.00169293		2553.4	-0.01902705
433.6	0.07367963		963.59	-0.00648083		1493.6	-0.0102476		2023.6	-0.00098052		2553.6	-0.01929555
433.8	0.07391329		963.79	-0.00623354		1493.8	-0.01066489		2023.8	-0.00073429		2553.8	-0.01924178
434	0.07382075		963.99	-0.00623597		1494	-0.01050436		2024	-0.0005659		2554	-0.02002617
434.2	0.07399215		964.19	-0.00682982		1494.2	-0.00984074		2024.2	-0.00007938		2554.2	-0.02030397
434.4	0.07452209		964.39	-0.00578354		1494.4	-0.00982485		2024.4	-0.00085987		2554.4	-0.0201836
434.6	0.07515845		964.59	-0.00645493		1494.6	-0.00958317		2024.6	0.00026278		2554.6	-0.02047199
434.8	0.07609428		964.79	-0.00697989		1494.8	-0.00968398		2024.8	0.00168408		2554.8	-0.02044634
435	0.07669194		964.99	-0.00639386		1495	-0.00970809		2025	0.00220483		2555	-0.01994545
435.2	0.07612339		965.19	-0.0072808		1495.2	-0.00940184		2025.2	0.00332942		2555.2	-0.01955493
435.4	0.07560413		965.39	-0.00716239		1495.4	-0.00908975		2025.4	0.00384009		2555.4	-0.01998354
435.6	0.07560128		965.59	-0.00719327		1495.6	-0.00881305		2025.6	0.00436841		2555.6	-0.0204862
435.8	0.07539506		965.79	-0.00732428		1495.8	-0.00943078		2025.8	0.00385969		2555.8	-0.02104775
436	0.0745645		965.99	-0.00680371		1496	-0.00892697		2026	0.00298316		2556	-0.0214115
436.2	0.07436871		966.19	-0.00631252		1496.2	-0.00937589		2026.2	0.00197165		2556.2	-0.0221543
436.4	0.07452824		966.39	-0.00609316		1496.4	-0.0087607		2026.4	0.00127426		2556.4	-0.021249
436.6	0.07483549		966.59	-0.00612899		1496.6	-0.00880453		2026.6	-0.00006958		2556.6	-0.02085759
436.8	0.07467384		966.79	-0.00618066		1496.8	-0.00846068		2026.8	-0.00008023		2556.8	-0.021377
437	0.07462746		966.99	-0.0066052		1497	-0.00899855		2027	-0.00021877		2557	-0.02121054
437.2	0.07460939		967.19	-0.00703452		1497.2	-0.00937549		2027.2	-0.00019554		2557.2	-0.02092564
437.4	0.07362013		967.39	-0.00698996		1497.4	-0.0087299		2027.4	-0.00029195		2557.4	-0.0208967
437.6	0.07321996		967.59	-0.00780181		1497.6	-0.00873764		2027.6	-0.00014127		2557.6	-0.02099082
437.8	0.07267145		967.79	-0.00790424		1497.8	-0.00804881		2027.8	-0.00018121		2557.8	-0.02092088
438	0.07297274		967.99	-0.00780882		1498	-0.00805047		2028	-0.00047933		2558	-0.02122256
438.2	0.07332072		968.19	-0.00779689		1498.2	-0.00833766		2028.2	0.00142307		2558.2	-0.02015322
438.4	0.07337363		968.39	-0.00682142		1498.4	-0.00771173		2028.4	0.00169363		2558.4	-0.01965545
438.6	0.07315392		968.59	-0.00742103		1498.6	-0.00699217		2028.6	0.0034292		2558.6	-0.0192845
438.8	0.07261241		968.79	-0.00720342		1498.8	-0.00654526		2028.8	0.00419292		2558.8	-0.01908164
439	0.07224932		968.99	-0.00785213		1499	-0.00611336		2029	0.00489598		2559	-0.0198525
439.2	0.07219052		969.19	-0.0085011		1499.2	-0.00578573		2029.2	0.00658487		2559.2	-0.01939151
439.4	0.07280382		969.39	-0.00822319		1499.4	-0.00634801		2029.4	0.00644548		2559.4	-0.01912471
439.6	0.07345888		969.59	-0.00782049		1499.6	-0.00650921		2029.6	0.00562787		2559.6	-0.01871351
439.8	0.07335763		969.79	-0.00797887		1499.8	-0.00678413		2029.8	0.00534429		2559.8	-0.01806963
440	0.0734621		969.99	-0.00777188		1500	-0.00674662		2030	0.00435641		2560	-0.01837262
440.2	0.07371259		970.19	-0.00745073		1500.2	-0.0075264		2030.2	0.00353502		2560.2	-0.01866634
440.4	0.07422758		970.39	-0.00772174		1500.4	-0.00773874		2030.4	0.00301907		2560.4	-0.01944655
440.6	0.07414279		970.59	-0.00701788		1500.6	-0.00861191		2030.6	0.00269587		2560.6	-0.02011439
440.8	0.07377719		970.79	-0.00681552		1500.8	-0.00937099		2030.8	0.00287673		2560.8	-0.02109014
441	0.07312335		970.99	-0.00726948		1501	-0.00967065		2031	0.00220164		2561	-0.0207148
441.2	0.07346423		971.19	-0.0080906		1501.2	-0.00978861		2031.2	0.00199759		2561.2	-0.02083969
441.4	0.07252858		971.39	-0.00793117		1501.4	-0.00956586		2031.4	0.00153481		2561.4	-0.02219626
441.6	0.07164024		971.59	-0.00781444		1501.6	-0.01003458		2031.6	0.00118888		2561.6	-0.02266701
441.8	0.0711304		971.79	-0.00779535		1501.8	-0.00969346		2031.8	0.00146802		2561.8	-0.02265253
442	0.07179708		971.99	-0.00733562		1502	-0.0093619		2032	0.0017341		2562	-0.02282294
442.2	0.07174143		972.19	-0.00729387		1502.2	-0.00892519		2032.2	0.00311483		2562.2	-0.02185425
442.4	0.07172672		972.39	-0.00722657		1502.4	-0.00724746		2032.4	0.00254123		2562.4	-0.02219088
442.6	0.07147596		972.59	-0.0074906		1502.6	-0.00656542		2032.6	0.00357478		2562.6	-0.02228717
442.8	0.07175745		972.79	-0.00828701		1502.8	-0.00585074		2032.8	0.00286449		2562.8	-0.02253495
443	0.07155492		972.99	-0.00855593		1503	-0.00609188		2033	0.00322921		2563	-0.02262951
443.2	0.07203036		973.19	-0.00889541		1503.2	-0.00596965		2033.2	0.00397565		2563.2	-0.02143361
443.4	0.072102		973.39	-0.00878053		1503.4	-0.00645634		2033.4	0.00207575		2563.4	-0.02065303
443.6	0.07251268		973.59	-0.00879798		1503.6	-0.006615		2033.6	0.00173057		2563.6	-0.02004583
443.8	0.07361019		973.79	-0.00913434		1503.8	-0.00743698		2033.8	0.00111069		2563.8	-0.02037181
444	0.0745533		973.99	-0.00894142		1504	-0.00745329		2034	0.00106031		2564	-0.02033453
444.2	0.07443872		974.19	-0.00872625		1504.2	-0.00858779		2034.2	0.00102642		2564.2	-0.02055378
444.4	0.07534958		974.39	-0.0081226		1504.4	-0.00930986		2034.4	0.0011737		2564.4	-0.02047835
444.6	0.07460281		974.59	-0.00810629		1504.6	-0.00994272		2034.6	0.00049138		2564.6	-0.02045118
444.8	0.07466218		974.79	-0.00902027		1504.8	-0.0108246		2034.8	0.00011596		2564.8	-0.0211524
445	0.07470394		974.99	-0.00934347		1505	-0.01135725		2035	-0.00032762		2565	-0.02135251
445.2	0.07589932		975.19	-0.00962967		1505.2	-0.0116755		2035.2	-0.00011613		2565.2	-0.02196198
445.4	0.07499651		975.39	-0.00979444		1505.4	-0.01203024		2035.4	0.00040073		2565.4	-0.02163236
445.6	0.07430177		975.59	-0.00981346		1505.6	-0.01126996		2035.6	0.00065007		2565.6	-0.0206957
445.8	0.0746922		975.79	-0.00974197		1505.8	-0.01102606		2035.8	0.00208623		2565.8	-0.02057647
446	0.07542049		975.99	-0.0101182		1506	-0.00955856		2036	0.00220764		2566	-0.02014977
446.2	0.07595342		976.19	-0.01051442		1506.2	-0.00798433		2036.2	0.00237296		2566.2	-0.01980038
446.4	0.07565005		976.39	-0.01134		1506.4	-0.00693211		2036.4	0.00228707		2566.4	-0.01939881
446.6	0.07529611		976.59	-0.01162482		1506.6	-0.00671252		2036.6	0.00292811		2566.6	-0.01879289
446.8	0.07481418		976.79	-0.01234378		1506.8	-0.00616464		2036.8	0.00234174		2566.8	-0.01899468
447	0.07439019		976.99	-0.0123729		1507	-0.00599122		2037	0.00295114		2567	-0.01963614
447.2	0.07526557		977.19	-0.01295842		1507.2	-0.005467		2037.2	0.00318575		2567.2	-0.01911647
447.4	0.07521241		977.39	-0.01258863		1507.4	-0.00586816		2037.4	0.00227748		2567.4	-0.01948971
447.6	0.07636993		977.59	-0.01258059		1507.6	-0.00590629		2037.6	0.00178292		2567.6	-0.0199144
447.8	0.07678065		977.79	-0.01245754		1507.8	-0.00604487		2037.8	0.00122043		2567.8	-0.02077712
448	0.07644366		977.99	-0.01118268		1508	-0.00450988		2038	0.00137823		2568	-0.02117406
448.2	0.07599246		978.19	-0.01036315		1508.2	-0.00535307		2038.2	0.00072813		2568.2	-0.02186875
448.4	0.07543888		978.39	-0.00982018		1508.4	-0.00646984		2038.4	-0.00005692		2568.4	-0.02160313
448.6	0.07493712		978.59	-0.0091082		1508.6	-0.00732363		2038.6	-0.00145072		2568.6	-0.02259438
448.8	0.07524851		978.79	-0.00818595		1508.8	-0.0085173		2038.8	-0.00143851		2568.8	-0.02355757
449	0.07475575		978.99	-0.00847363		1509	-0.00897121		2039	-0.00138891		2569	-0.02306503
449.2	0.07476622		979.19	-0.00905021		1509.2	-0.00910745		2039.2	-0.00112207		2569.2	-0.02273258
449.4	0.07344531		979.39	-0.00904485		1509.4	-0.00947027		2039.4	-0.00132354		2569.4	-0.02184887
449.6	0.07296838		979.59	-0.00834321		1509.6	-0.00873142		2039.6	-0.00098784		2569.6	-0.02228303
449.8	0.07350346		979.79	-0.00801808		1509.8	-0.00848406		2039.8	-0.00071671		2569.8	-0.02233819
450	0.07273527		979.99	-0.00766426		1510	-0.00741281		2040	-0.00118603		2570	-0.02173243
450.2	0.07244192		980.19	-0.00798473		1510.2	-0.0075073		2040.2	-0.00134644		2570.2	-0.02194476
450.4	0.07179977		980.39	-0.00811757		1510.4	-0.00811499		2040.4	-0.00053722		2570.4	-0.02127089
450.6	0.07169052		980.59	-0.00695098		1510.6	-0.00826575		2040.6	-0.00052625		2570.6	-0.02094762
450.8	0.07159515		980.79	-0.00721758		1510.8	-0.00870084		2040.8	0.00027826		2570.8	-0.02181388
451	0.07191161		980.99	-0.00792481		1511	-0.00892059		2041	0.00133193		2571	-0.02204457
451.2	0.07264894		981.19	-0.00782532		1511.2	-0.00919562		2041.2	0.00157707		2571.2	-0.02179484
451.4	0.07280065		981.39	-0.00846377		1511.4	-0.00904371		2041.4	0.00155295		2571.4	-0.02188931
451.6	0.07296061		981.59	-0.00884693		1511.6	-0.00828362		2041.6	0.00108779		2571.6	-0.02165906
451.8	0.07275215		981.79	-0.00929426		1511.8	-0.00867058		2041.8	0.0014623		2571.8	-0.02250316
452	0.07292281		981.99	-0.00944503		1512	-0.00797288		2042	0.00146089		2572	-0.02249922
452.2	0.07242942		982.19	-0.0089293		1512.2	-0.0094998		2042.2	0.00143341		2572.2	-0.0227178
452.4	0.07205523		982.39	-0.00852249		1512.4	-0.01002612		2042.4	0.00201983		2572.4	-0.02307196
452.6	0.07195613		982.59	-0.00881951		1512.6	-0.01036437		2042.6	0.00214931		2572.6	-0.02342927
452.8	0.07206935		982.79	-0.00935636		1512.8	-0.01029168		2042.8	0.00267907		2572.8	-0.02320648
453	0.07165096		982.99	-0.01046581		1513	-0.00930611		2043	0.00294591		2573	-0.02230105
453.2	0.07123413		983.19	-0.01049888		1513.2	-0.00913595		2043.2	0.00332943		2573.2	-0.02190773
453.4	0.0706667		983.39	-0.00986466		1513.4	-0.00952665		2043.4	0.00355234		2573.4	-0.02074253
453.6	0.07048774		983.59	-0.00939614		1513.6	-0.00919641		2043.6	0.00391134		2573.6	-0.02046773
453.8	0.06946271		983.79	-0.00845908		1513.8	-0.00925556		2043.8	0.00359681		2573.8	-0.02027853
454	0.06810343		983.99	-0.0076318		1514	-0.00906766		2044	0.00348677		2574	-0.01988087
454.2	0.06790106		984.19	-0.00789748		1514.2	-0.00905867		2044.2	0.0035669		2574.2	-0.01944076
454.4	0.06771277		984.39	-0.0076028		1514.4	-0.00838465		2044.4	0.00396495		2574.4	-0.01844063
454.6	0.06797909		984.59	-0.006587		1514.6	-0.00795345		2044.6	0.00360839		2574.6	-0.01770277
454.8	0.06845081		984.79	-0.00688284		1514.8	-0.00782054		2044.8	0.00441036		2574.8	-0.01826304
455	0.0690371		984.99	-0.00713386		1515	-0.00705819		2045	0.00426832		2575	-0.01852692
455.2	0.07025444		985.19	-0.00682003		1515.2	-0.0070827		2045.2	0.0034917		2575.2	-0.01901021
455.4	0.07094438		985.39	-0.00674017		1515.4	-0.00685783		2045.4	0.00271001		2575.4	-0.01913754
455.6	0.07154838		985.59	-0.00671608		1515.6	-0.00739265		2045.6	0.00195249		2575.6	-0.01987127
455.8	0.07180572		985.79	-0.00690684		1515.8	-0.00788779		2045.8	0.00123915		2575.8	-0.02113422
456	0.07224411		985.99	-0.00762441		1516	-0.00777485		2046	0.00108738		2576	-0.02151151
456.2	0.07158573		986.19	-0.00700797		1516.2	-0.00851035		2046.2	0.00068663		2576.2	-0.0218938
456.4	0.07237214		986.39	-0.00751559		1516.4	-0.00804086		2046.4	0.00010531		2576.4	-0.02249793
456.6	0.07259047		986.59	-0.0078437		1516.6	-0.00909861		2046.6	0.00002013		2576.6	-0.02212062
456.8	0.07327562		986.79	-0.00789541		1516.8	-0.0081012		2046.8	-0.00047732		2576.8	-0.02189263
457	0.07246896		986.99	-0.00841154		1517	-0.00768822		2047	-0.00013224		2577	-0.02168566
457.2	0.07217692		987.19	-0.00911975		1517.2	-0.00824296		2047.2	0.00003486		2577.2	-0.02130926
457.4	0.07211844		987.39	-0.00950437		1517.4	-0.00895204		2047.4	0.00036471		2577.4	-0.0212399
457.6	0.07175923		987.59	-0.01020957		1517.6	-0.0089045		2047.6	0.00056274		2577.6	-0.02108405
457.8	0.07110996		987.79	-0.01004571		1517.8	-0.00843715		2047.8	0.00123561		2577.8	-0.02108322
458	0.07138943		987.99	-0.01110713		1518	-0.00741934		2048	0.00137193		2578	-0.02022337
458.2	0.07143907		988.19	-0.01120429		1518.2	-0.0073739		2048.2	0.00125903		2578.2	-0.01929869
458.4	0.0715184		988.39	-0.01154231		1518.4	-0.00708555		2048.4	0.0013581		2578.4	-0.01905989
458.6	0.07142985		988.59	-0.0103761		1518.6	-0.00691288		2048.6	0.00138975		2578.6	-0.01897197
458.8	0.07203747		988.79	-0.0093029		1518.8	-0.00670958		2048.8	0.00067436		2578.8	-0.01853148
459	0.0723728		988.99	-0.00983851		1519	-0.00735464		2049	0.00067163		2579	-0.01910512
459.2	0.0723751		989.19	-0.00962861		1519.2	-0.00767787		2049.2	0.00054838		2579.2	-0.01964206
459.4	0.07258711		989.39	-0.00964523		1519.4	-0.00779167		2049.4	0.00037535		2579.4	-0.01919672
459.6	0.07266471		989.59	-0.00993084		1519.6	-0.0082164		2049.6	0.00107371		2579.6	-0.01946588
459.8	0.07189617		989.79	-0.0100665		1519.8	-0.00829107		2049.8	0.00144988		2579.8	-0.01958807
460	0.07175147		989.99	-0.01096781		1520	-0.00869139		2050	0.00242548		2580	-0.01964252
460.2	0.07110433		990.19	-0.0107634		1520.2	-0.00906316		2050.2	0.00243627		2580.2	-0.01893848
460.4	0.07141042		990.39	-0.01081557		1520.4	-0.00884648		2050.4	0.00301402		2580.4	-0.01880043
460.6	0.07088156		990.59	-0.01106344		1520.6	-0.00892306		2050.6	0.00328116		2580.6	-0.01904943
460.8	0.07038787		990.79	-0.0117872		1520.8	-0.00828343		2050.8	0.00311746		2580.8	-0.01927236
461	0.06953447		990.99	-0.01190289		1521	-0.00841843		2051	0.00415669		2581	-0.01868366
461.2	0.06983943		991.19	-0.01178607		1521.2	-0.00868911		2051.2	0.00443501		2581.2	-0.01848025
461.4	0.06977065		991.39	-0.01128548		1521.4	-0.00874953		2051.4	0.00475976		2581.4	-0.01835923
461.6	0.06999719		991.59	-0.01067938		1521.6	-0.00859834		2051.6	0.00389555		2581.6	-0.01767412
461.8	0.07064389		991.79	-0.01105134		1521.8	-0.00859077		2051.8	0.00285838		2581.8	-0.01827701
462	0.07094337		991.99	-0.01086722		1522	-0.00882485		2052	0.00196424		2582	-0.01816061
462.2	0.07070699		992.19	-0.0097168		1522.2	-0.00976436		2052.2	0.00172664		2582.2	-0.01856528
462.4	0.07001475		992.39	-0.00944006		1522.4	-0.00998179		2052.4	0.0007289		2582.4	-0.01996068
462.6	0.0705452		992.59	-0.00775949		1522.6	-0.01036439		2052.6	-0.00079374		2582.6	-0.02038356
462.8	0.07085027		992.79	-0.00778325		1522.8	-0.01089271		2052.8	-0.00216641		2582.8	-0.02089548
463	0.07133504		992.99	-0.00834593		1523	-0.01137313		2053	-0.00282039		2583	-0.0219581
463.2	0.0720556		993.19	-0.00791448		1523.2	-0.0110326		2053.2	-0.00333539		2583.2	-0.02284267
463.4	0.0729267		993.39	-0.00719177		1523.4	-0.01089008		2053.4	-0.00311716		2583.4	-0.02320173
463.6	0.07315653		993.59	-0.00667817		1523.6	-0.01136245		2053.6	-0.00252289		2583.6	-0.0237341
463.8	0.07241232		993.79	-0.00664232		1523.8	-0.01150629		2053.8	-0.00234382		2583.8	-0.02322521
464	0.07246925		993.99	-0.00719077		1524	-0.0117079		2054	-0.00113532		2584	-0.02310119
464.2	0.07185543		994.19	-0.00728962		1524.2	-0.01197008		2054.2	-0.00101112		2584.2	-0.02258914
464.4	0.07104115		994.39	-0.0067662		1524.4	-0.01195487		2054.4	-0.00025741		2584.4	-0.02219125
464.6	0.07069653		994.59	-0.0068082		1524.6	-0.01182739		2054.6	0.00056124		2584.6	-0.02186641
464.8	0.07035552		994.79	-0.00687905		1524.8	-0.01220034		2054.8	0.00190388		2584.8	-0.02078416
465	0.06971488		994.99	-0.0062819		1525	-0.01208621		2055	0.00286036		2585	-0.01962276
465.2	0.0703175		995.19	-0.00626297		1525.2	-0.01114699		2055.2	0.00356998		2585.2	-0.0193199
465.4	0.07025131		995.39	-0.00619382		1525.4	-0.01037967		2055.4	0.00399316		2585.4	-0.01900448
465.6	0.07066085		995.59	-0.00630091		1525.6	-0.00974137		2055.6	0.00380765		2585.6	-0.01858394
465.8	0.07073409		995.79	-0.0068299		1525.8	-0.00941533		2055.8	0.00363552		2585.8	-0.01878574
466	0.07031769		995.99	-0.00713309		1526	-0.00894755		2056	0.00435583		2586	-0.01835815
466.2	0.07039979		996.19	-0.0076034		1526.2	-0.00887794		2056.2	0.00471426		2586.2	-0.0196846
466.4	0.07047717		996.39	-0.00763424		1526.4	-0.00892804		2056.4	0.00301766		2586.4	-0.02080093
466.6	0.07119047		996.59	-0.0072843		1526.6	-0.00852214		2056.6	0.00185289		2586.6	-0.02155581
466.8	0.07114988		996.79	-0.00748611		1526.8	-0.00874352		2056.8	0.00089722		2586.8	-0.02218801
467	0.07195568		996.99	-0.00735441		1527	-0.00834713		2057	-0.00003492		2587	-0.02308034
467.2	0.07238053		997.19	-0.00779446		1527.2	-0.00800529		2057.2	-0.00057902		2587.2	-0.02334411
467.4	0.07200472		997.39	-0.00824642		1527.4	-0.00769032		2057.4	-0.00081877		2587.4	-0.02389764
467.6	0.07102414		997.59	-0.00830427		1527.6	-0.00836411		2057.6	-0.00145942		2587.6	-0.02352102
467.8	0.07037518		997.79	-0.00836595		1527.8	-0.00933575		2057.8	-0.00216732		2587.8	-0.02358449
468	0.07016701		997.99	-0.00850036		1528	-0.0100585		2058	-0.00150412		2588	-0.02368213
468.2	0.06929801		998.19	-0.00810265		1528.2	-0.01031306		2058.2	-0.00175082		2588.2	-0.02352928
468.4	0.06851354		998.39	-0.00774391		1528.4	-0.01064885		2058.4	-0.00139686		2588.4	-0.02319
468.6	0.06795297		998.59	-0.0076982		1528.6	-0.01096178		2058.6	-0.00053741		2588.6	-0.02269115
468.8	0.06771763		998.79	-0.00790197		1528.8	-0.01152794		2058.8	0.00087433		2588.8	-0.02253897
469	0.06726874		998.99	-0.0077046		1529	-0.01083468		2059	0.00128888		2589	-0.02156037
469.2	0.06766901		999.19	-0.00813554		1529.2	-0.01028998		2059.2	0.0019093		2589.2	-0.0214339
469.4	0.06713433		999.39	-0.00789074		1529.4	-0.01037147		2059.4	0.00187749		2589.4	-0.02105166
469.6	0.06756217		999.59	-0.00794856		1529.6	-0.01007151		2059.6	0.0019309		2589.6	-0.02055889
469.8	0.06727736		999.79	-0.00853302		1529.8	-0.0103538		2059.8	0.00209579		2589.8	-0.02106937
470	0.06804871		999.99	-0.00888991		1530	-0.01061774		2060	0.00198785		2590	-0.02162308
470.2	0.06893172		1000.19	-0.00928828		1530.2	-0.01104004		2060.2	0.00151317		2590.2	-0.02276414
470.4	0.06890097		1000.39	-0.00850376		1530.4	-0.0109281		2060.4	0.00111881		2590.4	-0.02287202
470.6	0.07009451		1000.59	-0.00894034		1530.6	-0.0108958		2060.6	0.00086784		2590.6	-0.02363096
470.8	0.07025823		1000.79	-0.00867021		1530.8	-0.01114462		2060.8	0.00032014		2590.8	-0.02399072
471	0.07083914		1000.99	-0.00943221		1531	-0.01116429		2061	0.00012173		2591	-0.02391897
471.2	0.07038271		1001.19	-0.01019948		1531.2	-0.01112633		2061.2	-0.00042132		2591.2	-0.02336374
471.4	0.0704062		1001.39	-0.01041004		1531.4	-0.01100471		2061.4	-0.00082674		2591.4	-0.02352924
471.6	0.07034079		1001.59	-0.00905968		1531.6	-0.0113898		2061.6	-0.0011407		2591.6	-0.02295252
471.8	0.07043562		1001.79	-0.00831992		1531.8	-0.0115023		2061.8	-0.00137522		2591.8	-0.02369595
472	0.07055041		1001.99	-0.00804448		1532	-0.01119295		2062	-0.0008418		2592	-0.02328587
472.2	0.06991687		1002.19	-0.00758103		1532.2	-0.01036502		2062.2	-0.00128731		2592.2	-0.02406256
472.4	0.06892375		1002.39	-0.00765116		1532.4	-0.01010177		2062.4	-0.00142115		2592.4	-0.02432173
472.6	0.06883052		1002.59	-0.00775992		1532.6	-0.0097601		2062.6	-0.00103874		2592.6	-0.02443198
472.8	0.06972515		1002.79	-0.0086239		1532.8	-0.00911146		2062.8	-0.00049252		2592.8	-0.02383721
473	0.06919937		1002.99	-0.00904155		1533	-0.00865624		2063	-0.00019597		2593	-0.02310783
473.2	0.06930728		1003.19	-0.00924257		1533.2	-0.00910408		2063.2	-0.00005891		2593.2	-0.02358303
473.4	0.06915449		1003.39	-0.00905031		1533.4	-0.00836182		2063.4	0.00039952		2593.4	-0.02405793
473.6	0.06964515		1003.59	-0.00998398		1533.6	-0.00797497		2063.6	0.00063807		2593.6	-0.02504733
473.8	0.06917641		1003.79	-0.01003606		1533.8	-0.00856762		2063.8	-0.00003663		2593.8	-0.02582102
474	0.06956478		1003.99	-0.01038942		1534	-0.00844305		2064	0.00042777		2594	-0.02604684
474.2	0.07039956		1004.19	-0.0105032		1534.2	-0.00880081		2064.2	0.00053333		2594.2	-0.02596399
474.4	0.07041791		1004.39	-0.00976838		1534.4	-0.0093664		2064.4	0.00178237		2594.4	-0.02552948
474.6	0.07173834		1004.59	-0.00974742		1534.6	-0.01006951		2064.6	0.00180819		2594.6	-0.02591747
474.8	0.07108305		1004.79	-0.0088794		1534.8	-0.01043827		2064.8	0.00168386		2594.8	-0.02557276
475	0.07129188		1004.99	-0.00882231		1535	-0.01117359		2065	0.00152476		2595	-0.02529738
475.2	0.07078355		1005.19	-0.00820893		1535.2	-0.01171598		2065.2	0.00085014		2595.2	-0.02504188
475.4	0.07101638		1005.39	-0.00733608		1535.4	-0.01257717		2065.4	0.00073715		2595.4	-0.02389381
475.6	0.07099431		1005.59	-0.00703122		1535.6	-0.01257182		2065.6	0.00069492		2595.6	-0.02345491
475.8	0.07003472		1005.79	-0.00753176		1535.8	-0.01248698		2065.8	0.00074177		2595.8	-0.02288595
476	0.06941959		1005.99	-0.00779459		1536	-0.01233089		2066	0.00053541		2596	-0.02215871
476.2	0.06848982		1006.19	-0.00836062		1536.2	-0.01166033		2066.2	-0.00080738		2596.2	-0.02196677
476.4	0.06841315		1006.39	-0.00949171		1536.4	-0.01152222		2066.4	-0.00083841		2596.4	-0.02093523
476.6	0.0685415		1006.59	-0.01047285		1536.6	-0.01128081		2066.6	-0.001621		2596.6	-0.02042598
476.8	0.06895364		1006.79	-0.01139855		1536.8	-0.01120443		2066.8	-0.00163937		2596.8	-0.01906281
477	0.06908723		1006.99	-0.01217122		1537	-0.01044219		2067	-0.00148065		2597	-0.0188337
477.2	0.06890019		1007.19	-0.0123525		1537.2	-0.01047876		2067.2	-0.00255523		2597.2	-0.01893104
477.4	0.06844974		1007.39	-0.0128196		1537.4	-0.00987254		2067.4	-0.00173454		2597.4	-0.01937102
477.6	0.06879861		1007.59	-0.01342013		1537.6	-0.00962437		2067.6	-0.00202874		2597.6	-0.01990041
477.8	0.0687539		1007.79	-0.01333083		1537.8	-0.0102405		2067.8	-0.00181682		2597.8	-0.0197078
478	0.06974495		1007.99	-0.01271974		1538	-0.01033222		2068	0.00010184		2598	-0.01945704
478.2	0.07053158		1008.19	-0.01197071		1538.2	-0.01060017		2068.2	-0.00029728		2598.2	-0.0197626
478.4	0.07092606		1008.39	-0.01178854		1538.4	-0.01106539		2068.4	0.00071684		2598.4	-0.02038977
478.6	0.07200269		1008.59	-0.01165322		1538.6	-0.0108072		2068.6	0.00036409		2598.6	-0.02152207
478.8	0.07174437		1008.79	-0.01137888		1538.8	-0.01046106		2068.8	-0.00023279		2598.8	-0.02215351
479	0.07175		1008.99	-0.01103067		1539	-0.01107354		2069	-0.00069562		2599	-0.02247466
479.2	0.07249547		1009.19	-0.0104125		1539.2	-0.01142672		2069.2	-0.00042756		2599.2	-0.02244535
479.4	0.07214758		1009.39	-0.01083197		1539.4	-0.01136799		2069.4	0.00054552		2599.4	-0.02190307
479.6	0.07194179		1009.59	-0.01107923		1539.6	-0.0107698		2069.6	0.00120869		2599.6	-0.02186596
479.8	0.07056436		1009.79	-0.01097467		1539.8	-0.01040466		2069.8	0.00085055		2599.8	-0.02098166
480	0.07071946		1009.99	-0.01098364		1540	-0.01002668		2070	0.00095772		2600	-0.02111462
480.2	0.07084568		1010.19	-0.01112172		1540.2	-0.01001296		2070.2	0.0008483		2600.2	-0.02115701
480.4	0.07072468		1010.39	-0.01103761		1540.4	-0.0105644		2070.4	0.00113553		2600.4	-0.02141303
480.6	0.07060364		1010.59	-0.01080139		1540.6	-0.01042959		2070.6	0.00092824		2600.6	-0.0213703
480.8	0.0707292		1010.79	-0.01061797		1540.8	-0.01024598		2070.8	0.00132213		2600.8	-0.02087955
481	0.07120637		1010.99	-0.01035914		1541	-0.00940988		2071	0.00155705		2601	-0.02068579
481.2	0.07023193		1011.19	-0.01066383		1541.2	-0.00975498		2071.2	0.00102561		2601.2	-0.02087283
481.4	0.06958236		1011.39	-0.01110815		1541.4	-0.00905208		2071.4	0.00104398		2601.4	-0.02098113
481.6	0.06987148		1011.59	-0.01101907		1541.6	-0.00876718		2071.6	0.00066153		2601.6	-0.02111604
481.8	0.06985852		1011.79	-0.01108429		1541.8	-0.00926659		2071.8	0.0000905		2601.8	-0.02159974
482	0.07018663		1011.99	-0.01073604		1542	-0.00914088		2072	0.00004475		2602	-0.02128473
482.2	0.06989817		1012.19	-0.01127309		1542.2	-0.00936842		2072.2	-0.00110376		2602.2	-0.02189601
482.4	0.07030014		1012.39	-0.01131398		1542.4	-0.01034049		2072.4	-0.00118978		2602.4	-0.02272115
482.6	0.07021068		1012.59	-0.01151914		1542.6	-0.01026766		2072.6	-0.00268088		2602.6	-0.02290179
482.8	0.06957972		1012.79	-0.0113054		1542.8	-0.01065394		2072.8	-0.00375026		2602.8	-0.02312187
483	0.06983217		1012.99	-0.01167498		1543	-0.01139225		2073	-0.00377027		2603	-0.02239365
483.2	0.0700469		1013.19	-0.01181437		1543.2	-0.01183261		2073.2	-0.00367129		2603.2	-0.02246649
483.4	0.06979097		1013.39	-0.01187297		1543.4	-0.01224661		2073.4	-0.002996		2603.4	-0.02222658
483.6	0.07002268		1013.59	-0.01233082		1543.6	-0.01247862		2073.6	-0.00245385		2603.6	-0.02189439
483.8	0.06987142		1013.79	-0.01210572		1543.8	-0.0128157		2073.8	-0.00228518		2603.8	-0.02134466
484	0.06948808		1013.99	-0.01184482		1544	-0.01318628		2074	-0.00097327		2604	-0.02191856
484.2	0.06864707		1014.19	-0.01078865		1544.2	-0.01417629		2074.2	-0.00091287		2604.2	-0.02189934
484.4	0.06835353		1014.39	-0.01037224		1544.4	-0.01438962		2074.4	-0.0009589		2604.4	-0.02211481
484.6	0.06862567		1014.59	-0.00974139		1544.6	-0.01395118		2074.6	0.00057396		2604.6	-0.02249116
484.8	0.06811674		1014.79	-0.01019949		1544.8	-0.01351175		2074.8	0.00141194		2604.8	-0.02211774
485	0.06795428		1014.99	-0.01054814		1545	-0.0119935		2075	0.00158049		2605	-0.02215688
485.2	0.06647976		1015.19	-0.0115774		1545.2	-0.01182072		2075.2	0.00057813		2605.2	-0.02251896
485.4	0.06613377		1015.39	-0.0113736		1545.4	-0.01120058		2075.4	0.00095527		2605.4	-0.02189662
485.6	0.06573501		1015.59	-0.01119792		1545.6	-0.01067427		2075.6	0.00119977		2605.6	-0.02174351
485.8	0.06568322		1015.79	-0.01081213		1545.8	-0.00985834		2075.8	0.00109904		2605.8	-0.02234636
486	0.06533979		1015.99	-0.01065066		1546	-0.01018523		2076	0.00106928		2606	-0.02208203
486.2	0.06574309		1016.19	-0.00992241		1546.2	-0.01040509		2076.2	0.00085713		2606.2	-0.02305186
486.4	0.06591237		1016.39	-0.00987731		1546.4	-0.01046177		2076.4	-0.00007262		2606.4	-0.02385774
486.6	0.06584541		1016.59	-0.0096164		1546.6	-0.01035746		2076.6	-0.00092754		2606.6	-0.02432782
486.8	0.06686855		1016.79	-0.0099755		1546.8	-0.0103824		2076.8	-0.00162194		2606.8	-0.02457148
487	0.06854216		1016.99	-0.01054819		1547	-0.01015921		2077	-0.00153054		2607	-0.02416858
487.2	0.06879629		1017.19	-0.01037008		1547.2	-0.01076989		2077.2	-0.00104596		2607.2	-0.02477283
487.4	0.06976359		1017.39	-0.01037582		1547.4	-0.01089496		2077.4	-0.0013027		2607.4	-0.02554413
487.6	0.06979343		1017.59	-0.01087516		1547.6	-0.01131635		2077.6	-0.00153443		2607.6	-0.02565937
487.8	0.06888512		1017.79	-0.01036133		1547.8	-0.0115414		2077.8	-0.00153206		2607.8	-0.02504434
488	0.06813577		1017.99	-0.00954356		1548	-0.01116965		2078	-0.00110468		2608	-0.02511905
488.2	0.06792864		1018.19	-0.00878346		1548.2	-0.01194696		2078.2	-0.00085098		2608.2	-0.02500693
488.4	0.0679195		1018.39	-0.00851494		1548.4	-0.01191697		2078.4	-0.00008213		2608.4	-0.0246039
488.6	0.06753542		1018.59	-0.0083159		1548.6	-0.01197596		2078.6	0.00103364		2608.6	-0.02407388
488.8	0.06640661		1018.79	-0.00881502		1548.8	-0.01195674		2078.8	0.00142418		2608.8	-0.02256669
489	0.06595835		1018.99	-0.00863993		1549	-0.01146467		2079	0.00114546		2609	-0.02136034
489.2	0.06466856		1019.19	-0.00815109		1549.2	-0.01182362		2079.2	0.00135124		2609.2	-0.01988798
489.4	0.06478399		1019.39	-0.00763816		1549.4	-0.01128809		2079.4	0.00186243		2609.4	-0.01873284
489.6	0.0639006		1019.59	-0.00774056		1549.6	-0.01159976		2079.6	0.00165305		2609.6	-0.01825582
489.8	0.0648662		1019.79	-0.00757146		1549.8	-0.01185794		2079.8	0.00173023		2609.8	-0.01855516
490	0.06518366		1019.99	-0.00714129		1550	-0.01224431		2080	0.00083221		2610	-0.01787659
490.2	0.06550688		1020.19	-0.00741035		1550.2	-0.01170623		2080.2	0.00083827		2610.2	-0.01837412
490.4	0.06507795		1020.39	-0.00766957		1550.4	-0.0117421		2080.4	-0.00019755		2610.4	-0.01929277
490.6	0.06487111		1020.59	-0.0080016		1550.6	-0.01199958		2080.6	-0.00073861		2610.6	-0.02028666
490.8	0.0659805		1020.79	-0.00896173		1550.8	-0.01177211		2080.8	-0.00167761		2610.8	-0.02003444
491	0.06691468		1020.99	-0.00895403		1551	-0.01185937		2081	-0.00194348		2611	-0.0205349
491.2	0.06637979		1021.19	-0.00894827		1551.2	-0.01159627		2081.2	-0.00191157		2611.2	-0.02133167
491.4	0.06761508		1021.39	-0.0091209		1551.4	-0.01136086		2081.4	-0.00260619		2611.4	-0.02221381
491.6	0.06730131		1021.59	-0.00923761		1551.6	-0.01120594		2081.6	-0.00216342		2611.6	-0.02124724
491.8	0.06672787		1021.79	-0.00895575		1551.8	-0.0107971		2081.8	-0.00100615		2611.8	-0.02047047
492	0.06717037		1021.99	-0.00911016		1552	-0.01108979		2082	-0.00080888		2612	-0.02103042
492.2	0.06661384		1022.19	-0.00939048		1552.2	-0.01245678		2082.2	-0.00015602		2612.2	-0.02120704
492.4	0.06658248		1022.39	-0.00934448		1552.4	-0.01246814		2082.4	-0.00039638		2612.4	-0.02054988
492.6	0.06704056		1022.59	-0.00974593		1552.6	-0.01334063		2082.6	-0.00069025		2612.6	-0.02082532
492.8	0.06724861		1022.79	-0.01048396		1552.8	-0.0132988		2082.8	-0.0010083		2612.8	-0.02091707
493	0.06756783		1022.99	-0.01100548		1553	-0.01387914		2083	-0.00119352		2613	-0.02059823
493.2	0.06732176		1023.19	-0.01090784		1553.2	-0.01377814		2083.2	-0.00079965		2613.2	-0.02169839
493.4	0.06854725		1023.39	-0.01106604		1553.4	-0.01459593		2083.4	-0.00115347		2613.4	-0.02258916
493.6	0.06903787		1023.59	-0.010851		1553.6	-0.01491759		2083.6	-0.00106688		2613.6	-0.02325594
493.8	0.06971619		1023.79	-0.01102937		1553.8	-0.01429121		2083.8	-0.0009714		2613.8	-0.02405233
494	0.06907201		1023.99	-0.01136293		1554	-0.01375647		2084	-0.0013095		2614	-0.02493717
494.2	0.06888225		1024.19	-0.0119337		1554.2	-0.0133703		2084.2	-0.00195651		2614.2	-0.02658516
494.4	0.06843496		1024.39	-0.01225148		1554.4	-0.01340921		2084.4	-0.00229298		2614.4	-0.0282959
494.6	0.06766593		1024.59	-0.01169627		1554.6	-0.01349786		2084.6	-0.00268516		2614.6	-0.0285552
494.8	0.06721445		1024.79	-0.01155425		1554.8	-0.01324246		2084.8	-0.00264415		2614.8	-0.0278278
495	0.06712019		1024.99	-0.01088664		1555	-0.0121846		2085	-0.002714		2615	-0.02736737
495.2	0.06678775		1025.19	-0.01082369		1555.2	-0.01119319		2085.2	-0.00176204		2615.2	-0.02642836
495.4	0.06745239		1025.39	-0.01187604		1555.4	-0.01146713		2085.4	-0.00138623		2615.4	-0.02583645
495.6	0.06659958		1025.59	-0.01245164		1555.6	-0.01081077		2085.6	-0.00063719		2615.6	-0.0245441
495.8	0.06606894		1025.79	-0.01299907		1555.8	-0.01064135		2085.8	0.00049707		2615.8	-0.02418236
496	0.0667274		1025.99	-0.01405435		1556	-0.01135136		2086	0.00012266		2616	-0.02421934
496.2	0.06699564		1026.19	-0.01413		1556.2	-0.01145075		2086.2	0.00048269		2616.2	-0.02337001
496.4	0.06766956		1026.39	-0.01388312		1556.4	-0.01072826		2086.4	0.00008487		2616.4	-0.02242439
496.6	0.06822253		1026.59	-0.01416549		1556.6	-0.01092169		2086.6	-0.00008137		2616.6	-0.02238869
496.8	0.06874404		1026.79	-0.01439833		1556.8	-0.01061162		2086.8	-0.00021681		2616.8	-0.02226187
497	0.06926374		1026.99	-0.0138848		1557	-0.01095345		2087	0.00017687		2617	-0.02238331
497.2	0.07014887		1027.19	-0.01229095		1557.2	-0.01038454		2087.2	0.00027004		2617.2	-0.02374913
497.4	0.07050736		1027.39	-0.01142362		1557.4	-0.01112726		2087.4	0.00043871		2617.4	-0.02379404
497.6	0.07010181		1027.59	-0.01056649		1557.6	-0.01167832		2087.6	0.00096171		2617.6	-0.0235299
497.8	0.07004813		1027.79	-0.01067881		1557.8	-0.01149495		2087.8	0.000359		2617.8	-0.02415914
498	0.06971595		1027.99	-0.01045889		1558	-0.0118764		2088	0.00004063		2618	-0.02478612
498.2	0.06991064		1028.19	-0.00987532		1558.2	-0.01222206		2088.2	-0.00067527		2618.2	-0.02549035
498.4	0.0691559		1028.39	-0.00925008		1558.4	-0.01264776		2088.4	-0.00035132		2618.4	-0.02598601
498.6	0.06836701		1028.59	-0.00781884		1558.6	-0.01246734		2088.6	-0.00040265		2618.6	-0.02514005
498.8	0.06736524		1028.79	-0.00810732		1558.8	-0.01239762		2088.8	-0.00054843		2618.8	-0.02372376
499	0.06717861		1028.99	-0.00839298		1559	-0.01219999		2089	-0.00042135		2619	-0.0226945
499.2	0.06716783		1029.19	-0.00960528		1559.2	-0.012279		2089.2	-0.00023962		2619.2	-0.02301102
499.4	0.06675435		1029.39	-0.01137602		1559.4	-0.01275121		2089.4	0.00013497		2619.4	-0.02292663
499.6	0.06580143		1029.59	-0.01200778		1559.6	-0.01195863		2089.6	0.00039143		2619.6	-0.02226917
499.8	0.06570731		1029.79	-0.01281028		1559.8	-0.01175588		2089.8	0.0006033		2619.8	-0.02084643
500	0.06614285		1029.99	-0.0135557		1560	-0.01169161		2090	-0.00049385		2620	-0.01983296
500.2	0.06587229		1030.19	-0.01347519		1560.2	-0.01084342		2090.2	-0.00113944		2620.2	-0.01919575
500.4	0.06613113		1030.39	-0.01364228		1560.4	-0.01017205		2090.4	-0.00082222		2620.4	-0.01857363
500.6	0.06680027		1030.59	-0.01346386		1560.6	-0.01065228		2090.6	-0.00189995		2620.6	-0.01924592
500.8	0.06699391		1030.79	-0.01352008		1560.8	-0.01072276		2090.8	-0.00256301		2620.8	-0.01994391
501	0.06704726		1030.99	-0.01291541		1561	-0.01094377		2091	-0.00300616		2621	-0.02068179
501.2	0.06740964		1031.19	-0.01193744		1561.2	-0.01161334		2091.2	-0.00415897		2621.2	-0.02179537
501.4	0.0664854		1031.39	-0.01207446		1561.4	-0.01170256		2091.4	-0.00472437		2621.4	-0.02192431
501.6	0.0664941		1031.59	-0.01146421		1561.6	-0.0117295		2091.6	-0.00533217		2621.6	-0.02215119
501.8	0.06649856		1031.79	-0.01093374		1561.8	-0.01074231		2091.8	-0.00566792		2621.8	-0.02427843
502	0.06612151		1031.99	-0.01111631		1562	-0.01123517		2092	-0.00552896		2622	-0.02454388
502.2	0.06656691		1032.19	-0.00996307		1562.2	-0.01156242		2092.2	-0.0056056		2622.2	-0.02512854
502.4	0.06667903		1032.39	-0.00941028		1562.4	-0.01221415		2092.4	-0.00551299		2622.4	-0.02541522
502.6	0.06680805		1032.59	-0.00902109		1562.6	-0.0127672		2092.6	-0.00508244		2622.6	-0.02539044
502.8	0.06644942		1032.79	-0.00911757		1562.8	-0.01265541		2092.8	-0.00469246		2622.8	-0.02549483
503	0.06609675		1032.99	-0.00947275		1563	-0.01271628		2093	-0.00414275		2623	-0.02601677
503.2	0.06580207		1033.19	-0.00959736		1563.2	-0.01288949		2093.2	-0.00399234		2623.2	-0.02718395
503.4	0.06482815		1033.39	-0.00998293		1563.4	-0.01273488		2093.4	-0.00303544		2623.4	-0.02653581
503.6	0.06438604		1033.59	-0.00984795		1563.6	-0.01218992		2093.6	-0.00227701		2623.6	-0.02586779
503.8	0.06452652		1033.79	-0.00994949		1563.8	-0.01215202		2093.8	-0.00204025		2623.8	-0.02493404
504	0.06409568		1033.99	-0.01009484		1564	-0.01207942		2094	-0.00220001		2624	-0.02503992
504.2	0.06401174		1034.19	-0.00999901		1564.2	-0.01193848		2094.2	-0.00126558		2624.2	-0.02529155
504.4	0.06465475		1034.39	-0.00974298		1564.4	-0.01226544		2094.4	-0.00029077		2624.4	-0.02525361
504.6	0.06498232		1034.59	-0.01053258		1564.6	-0.01287454		2094.6	-0.00149594		2624.6	-0.02586199
504.8	0.06423435		1034.79	-0.01048028		1564.8	-0.0134609		2094.8	-0.00131903		2624.8	-0.02568505
505	0.06448524		1034.99	-0.01069912		1565	-0.01358373		2095	-0.00110962		2625	-0.02552617
505.2	0.06499868		1035.19	-0.01077533		1565.2	-0.01375158		2095.2	-0.00139051		2625.2	-0.02594464
505.4	0.064478		1035.39	-0.01091591		1565.4	-0.01368308		2095.4	-0.00118324		2625.4	-0.02498823
505.6	0.06506571		1035.59	-0.01114095		1565.6	-0.01342571		2095.6	-0.00123511		2625.6	-0.02472172
505.8	0.06493485		1035.79	-0.01073771		1565.8	-0.01349597		2095.8	-0.00172726		2625.8	-0.02455218
506	0.0654391		1035.99	-0.0107083		1566	-0.01413709		2096	-0.00241673		2626	-0.02362755
506.2	0.0660177		1036.19	-0.0096531		1566.2	-0.01408377		2096.2	-0.00337788		2626.2	-0.02364944
506.4	0.06645074		1036.39	-0.01104278		1566.4	-0.01427075		2096.4	-0.00447642		2626.4	-0.02412481
506.6	0.06629645		1036.59	-0.01064046		1566.6	-0.01386742		2096.6	-0.00469036		2626.6	-0.02433161
506.8	0.06596029		1036.79	-0.01116386		1566.8	-0.01308886		2096.8	-0.00412244		2626.8	-0.02454729
507	0.06563863		1036.99	-0.01203409		1567	-0.01348155		2097	-0.00425924		2627	-0.02498036
507.2	0.06508484		1037.19	-0.01276278		1567.2	-0.01359717		2097.2	-0.00408922		2627.2	-0.02523972
507.4	0.06441694		1037.39	-0.01295886		1567.4	-0.01283392		2097.4	-0.00424903		2627.4	-0.02518917
507.6	0.06446777		1037.59	-0.01283528		1567.6	-0.01243958		2097.6	-0.00344808		2627.6	-0.02550008
507.8	0.06456756		1037.79	-0.01288695		1567.8	-0.01285709		2097.8	-0.00328731		2627.8	-0.0262087
508	0.06399705		1037.99	-0.01252432		1568	-0.0131686		2098	-0.00244706		2628	-0.02640143
508.2	0.06438016		1038.19	-0.01188216		1568.2	-0.01297771		2098.2	-0.00114665		2628.2	-0.02673853
508.4	0.06469125		1038.39	-0.01182558		1568.4	-0.01345		2098.4	-0.00091086		2628.4	-0.02714037
508.6	0.06508851		1038.59	-0.01236722		1568.6	-0.01374801		2098.6	-0.00099678		2628.6	-0.02803409
508.8	0.06536207		1038.79	-0.01104125		1568.8	-0.01410035		2098.8	0.00034459		2628.8	-0.02733464
509	0.065878		1038.99	-0.01045275		1569	-0.01362046		2099	0.00081014		2629	-0.02750735
509.2	0.06632458		1039.19	-0.00988744		1569.2	-0.01349955		2099.2	0.00057816		2629.2	-0.027473
509.4	0.06623431		1039.39	-0.00918533		1569.4	-0.01331212		2099.4	0.0001403		2629.4	-0.02620147
509.6	0.06642012		1039.59	-0.0087056		1569.6	-0.01244904		2099.6	0.00002871		2629.6	-0.02682574
509.8	0.06624818		1039.79	-0.00746255		1569.8	-0.01182285		2099.8	-0.00036251		2629.8	-0.02637299
510	0.06580486		1039.99	-0.00655624		1570	-0.01076714		2100	-0.00050418		2630	-0.02660784
510.2	0.06526994		1040.19	-0.00698633		1570.2	-0.00976437		2100.2	-0.00119643		2630.2	-0.02623546
510.4	0.06466282		1040.39	-0.00754051		1570.4	-0.00955781		2100.4	-0.00168718		2630.4	-0.02641157
510.6	0.06409172		1040.59	-0.00731037		1570.6	-0.0090687		2100.6	-0.00166866		2630.6	-0.0260549
510.8	0.06327598		1040.79	-0.00844825		1570.8	-0.00852282		2100.8	-0.00132269		2630.8	-0.02600878
511	0.06245001		1040.99	-0.00920502		1571	-0.00816218		2101	-0.00168731		2631	-0.02528892
511.2	0.06230834		1041.19	-0.00974545		1571.2	-0.00838172		2101.2	-0.00208662		2631.2	-0.02506201
511.4	0.06225009		1041.39	-0.01025235		1571.4	-0.0084461		2101.4	-0.00269138		2631.4	-0.02510088
511.6	0.06235033		1041.59	-0.01149437		1571.6	-0.00886813		2101.6	-0.0024209		2631.6	-0.02567676
511.8	0.06289311		1041.79	-0.01192021		1571.8	-0.009764		2101.8	-0.00211462		2631.8	-0.02520023
512	0.06282325		1041.99	-0.01188623		1572	-0.00949017		2102	-0.00252912		2632	-0.02494764
512.2	0.06376787		1042.19	-0.01193406		1572.2	-0.00984826		2102.2	-0.00192421		2632.2	-0.02527203
512.4	0.06416387		1042.39	-0.01287221		1572.4	-0.01092313		2102.4	-0.002779		2632.4	-0.02536502
512.6	0.06449164		1042.59	-0.01244759		1572.6	-0.01210213		2102.6	-0.00273102		2632.6	-0.02533217
512.8	0.06522175		1042.79	-0.01301637		1572.8	-0.01313969		2102.8	-0.00252077		2632.8	-0.02452589
513	0.06564243		1042.99	-0.01285292		1573	-0.01342733		2103	-0.00277798		2633	-0.02498782
513.2	0.06609385		1043.19	-0.01316639		1573.2	-0.01428521		2103.2	-0.00283816		2633.2	-0.02530902
513.4	0.06623087		1043.39	-0.01288258		1573.4	-0.01505092		2103.4	-0.00277179		2633.4	-0.0250372
513.6	0.06642579		1043.59	-0.01244349		1573.6	-0.01534508		2103.6	-0.00232523		2633.6	-0.02600625
513.8	0.06604829		1043.79	-0.01220202		1573.8	-0.01580608		2103.8	-0.00265193		2633.8	-0.02520219
514	0.06541841		1043.99	-0.01210418		1574	-0.01584774		2104	-0.00256803		2634	-0.0252706
514.2	0.06518529		1044.19	-0.01197471		1574.2	-0.01577084		2104.2	-0.00255287		2634.2	-0.02544618
514.4	0.06490669		1044.39	-0.01159467		1574.4	-0.01599729		2104.4	-0.00259374		2634.4	-0.0254705
514.6	0.06468464		1044.59	-0.01208397		1574.6	-0.01580282		2104.6	-0.00310691		2634.6	-0.02516679
514.8	0.0642214		1044.79	-0.01176857		1574.8	-0.01539784		2104.8	-0.00307584		2634.8	-0.0250275
515	0.06475728		1044.99	-0.01142643		1575	-0.01469119		2105	-0.0027351		2635	-0.02454813
515.2	0.0654135		1045.19	-0.01202285		1575.2	-0.01512807		2105.2	-0.00331047		2635.2	-0.02523741
515.4	0.06618884		1045.39	-0.01249636		1575.4	-0.01418743		2105.4	-0.00385127		2635.4	-0.02474758
515.6	0.06548098		1045.59	-0.01259136		1575.6	-0.01325756		2105.6	-0.00371806		2635.6	-0.0248402
515.8	0.06574912		1045.79	-0.01216479		1575.8	-0.01219934		2105.8	-0.00313812		2635.8	-0.024096
516	0.06540121		1045.99	-0.01216293		1576	-0.01202703		2106	-0.00305596		2636	-0.02448999
516.2	0.0653787		1046.19	-0.01235236		1576.2	-0.01238826		2106.2	-0.00254373		2636.2	-0.02405352
516.4	0.06510532		1046.39	-0.01249519		1576.4	-0.01257097		2106.4	-0.00322582		2636.4	-0.02399479
516.6	0.0645529		1046.59	-0.01183147		1576.6	-0.01240112		2106.6	-0.0026119		2636.6	-0.023666
516.8	0.06455255		1046.79	-0.01263184		1576.8	-0.0127349		2106.8	-0.00186508		2636.8	-0.02370208
517	0.06479966		1046.99	-0.01271918		1577	-0.01253504		2107	-0.00182666		2637	-0.0243451
517.2	0.06449705		1047.19	-0.01241078		1577.2	-0.01320272		2107.2	-0.00201838		2637.2	-0.02466208
517.4	0.06442438		1047.39	-0.01181791		1577.4	-0.01301248		2107.4	-0.00254702		2637.4	-0.02534443
517.6	0.06370167		1047.59	-0.01122148		1577.6	-0.01313866		2107.6	-0.00257143		2637.6	-0.02600986
517.8	0.06382876		1047.79	-0.01105586		1577.8	-0.01394306		2107.8	-0.0016987		2637.8	-0.02594356
518	0.06468922		1047.99	-0.01122877		1578	-0.01364786		2108	-0.00111895		2638	-0.02579005
518.2	0.06437395		1048.19	-0.01127648		1578.2	-0.01298835		2108.2	-0.00100632		2638.2	-0.0254158
518.4	0.06467283		1048.39	-0.01184636		1578.4	-0.01308727		2108.4	-0.00107819		2638.4	-0.02508552
518.6	0.06444796		1048.59	-0.01220212		1578.6	-0.0129033		2108.6	-0.00114044		2638.6	-0.02453187
518.8	0.0646992		1048.79	-0.01119806		1578.8	-0.01210061		2108.8	-0.00001579		2638.8	-0.02405078
519	0.0652834		1048.99	-0.01148818		1579	-0.01146989		2109	0.00089064		2639	-0.02465491
519.2	0.06502175		1049.19	-0.01168971		1579.2	-0.01180376		2109.2	0.00034568		2639.2	-0.02457775
519.4	0.06511112		1049.39	-0.01215754		1579.4	-0.01177515		2109.4	0.00057632		2639.4	-0.02390446
519.6	0.06369931		1049.59	-0.01237288		1579.6	-0.01154515		2109.6	0.00049208		2639.6	-0.0238648
519.8	0.06442194		1049.79	-0.01267546		1579.8	-0.01162707		2109.8	-0.00014919		2639.8	-0.02372679
520	0.06482186		1049.99	-0.01334552		1580	-0.01176466		2110	-0.0014997		2640	-0.02402471
520.2	0.06482182		1050.19	-0.0128596		1580.2	-0.01147883		2110.2	-0.00209344		2640.2	-0.02373562
520.4	0.06447089		1050.39	-0.01251006		1580.4	-0.01176194		2110.4	-0.00222356		2640.4	-0.02446814
520.6	0.06475266		1050.59	-0.01230031		1580.6	-0.01156142		2110.6	-0.00237643		2640.6	-0.02457185
520.8	0.06467561		1050.79	-0.01267656		1580.8	-0.01199987		2110.8	-0.00247992		2640.8	-0.02575251
521	0.06449715		1050.99	-0.01254279		1581	-0.01132956		2111	-0.00304521		2641	-0.02627025
521.2	0.06414648		1051.19	-0.01189504		1581.2	-0.01195329		2111.2	-0.00259829		2641.2	-0.02654615
521.4	0.06429099		1051.39	-0.01129881		1581.4	-0.01171365		2111.4	-0.00337341		2641.4	-0.02738575
521.6	0.06371759		1051.59	-0.01093979		1581.6	-0.01156053		2111.6	-0.002549		2641.6	-0.02692119
521.8	0.06534575		1051.79	-0.01082744		1581.8	-0.01272469		2111.8	-0.00163832		2641.8	-0.02684445
522	0.06503836		1051.99	-0.01064279		1582	-0.01256393		2112	-0.00184725		2642	-0.02646249
522.2	0.0649424		1052.19	-0.01106362		1582.2	-0.01214633		2112.2	-0.00168562		2642.2	-0.02609766
522.4	0.0649089		1052.39	-0.01096872		1582.4	-0.01235423		2112.4	-0.00082822		2642.4	-0.02645395
522.6	0.06449503		1052.59	-0.01129598		1582.6	-0.01225077		2112.6	0.0002619		2642.6	-0.02577585
522.8	0.06473403		1052.79	-0.01170238		1582.8	-0.01222314		2112.8	0.00107857		2642.8	-0.02560626
523	0.06445427		1052.99	-0.01314734		1583	-0.01256968		2113	0.00192666		2643	-0.02625187
523.2	0.06446753		1053.19	-0.01364135		1583.2	-0.01311025		2113.2	0.00185665		2643.2	-0.02533487
523.4	0.06435061		1053.39	-0.01482279		1583.4	-0.01269323		2113.4	0.0019486		2643.4	-0.02501083
523.6	0.0649027		1053.59	-0.01472861		1583.6	-0.01228005		2113.6	0.00138769		2643.6	-0.02535301
523.8	0.06534818		1053.79	-0.01546164		1583.8	-0.01194831		2113.8	0.00075162		2643.8	-0.02501558
524	0.06511087		1053.99	-0.01591052		1584	-0.01141868		2114	0.00027163		2644	-0.02497521
524.2	0.06499851		1054.19	-0.01497754		1584.2	-0.01188719		2114.2	0.00050429		2644.2	-0.02573819
524.4	0.06500367		1054.39	-0.01483002		1584.4	-0.01162444		2114.4	0.00055923		2644.4	-0.02634126
524.6	0.0647346		1054.59	-0.01448815		1584.6	-0.01143798		2114.6	0.00016175		2644.6	-0.02609667
524.8	0.06332669		1054.79	-0.01435704		1584.8	-0.01121061		2114.8	0.00042748		2644.8	-0.02646706
525	0.0625755		1054.99	-0.01397699		1585	-0.0112731		2115	0.00076196		2645	-0.02579126
525.2	0.06227794		1055.19	-0.01314823		1585.2	-0.01241572		2115.2	0.00082231		2645.2	-0.02614328
525.4	0.06200879		1055.39	-0.01243079		1585.4	-0.0126197		2115.4	-0.0004052		2645.4	-0.02561292
525.6	0.0618482		1055.59	-0.01147151		1585.6	-0.01315993		2115.6	0.00002229		2645.6	-0.02491087
525.8	0.06237534		1055.79	-0.01058065		1585.8	-0.01454079		2115.8	-0.00017681		2645.8	-0.02501446
526	0.06200502		1055.99	-0.01049973		1586	-0.01491189		2116	-0.00035933		2646	-0.02421697
526.2	0.06265963		1056.19	-0.01030502		1586.2	-0.01479086		2116.2	-0.00072986		2646.2	-0.02335008
526.4	0.06277745		1056.39	-0.01027787		1586.4	-0.01481028		2116.4	-0.00087436		2646.4	-0.02345073
526.6	0.06327306		1056.59	-0.01116171		1586.6	-0.01564263		2116.6	-0.0011797		2646.6	-0.02247008
526.8	0.06320857		1056.79	-0.01205599		1586.8	-0.01584777		2116.8	-0.00102979		2646.8	-0.0223144
527	0.0629037		1056.99	-0.01291728		1587	-0.01548714		2117	-0.00034488		2647	-0.02233314
527.2	0.06259035		1057.19	-0.01292387		1587.2	-0.01525426		2117.2	-0.00131802		2647.2	-0.02213726
527.4	0.06235354		1057.39	-0.01274473		1587.4	-0.01359233		2117.4	-0.0007668		2647.4	-0.02253444
527.6	0.06281434		1057.59	-0.01208081		1587.6	-0.01255545		2117.6	-0.0005324		2647.6	-0.02299819
527.8	0.06289001		1057.79	-0.01221413		1587.8	-0.01165445		2117.8	-0.00119535		2647.8	-0.02302146
528	0.06244921		1057.99	-0.01270893		1588	-0.01086896		2118	-0.00125209		2648	-0.02382341
528.2	0.06212022		1058.19	-0.01189465		1588.2	-0.01122184		2118.2	-0.00117764		2648.2	-0.02510257
528.4	0.0616199		1058.39	-0.01164664		1588.4	-0.01111066		2118.4	-0.00130179		2648.4	-0.02541663
528.6	0.0604226		1058.59	-0.01196023		1588.6	-0.01054665		2118.6	-0.00151956		2648.6	-0.02582838
528.8	0.06016543		1058.79	-0.01204334		1588.8	-0.01053031		2118.8	-0.0024942		2648.8	-0.0265576
529	0.06004088		1058.99	-0.01218261		1589	-0.01063529		2119	-0.0033677		2649	-0.02653267
529.2	0.05989356		1059.19	-0.01175304		1589.2	-0.01138327		2119.2	-0.00389475		2649.2	-0.02699583
529.4	0.06064601		1059.39	-0.01235072		1589.4	-0.01177659		2119.4	-0.00423793		2649.4	-0.02639391
529.6	0.06022713		1059.59	-0.01235872		1589.6	-0.01179244		2119.6	-0.0042501		2649.6	-0.02635402
529.8	0.05994467		1059.79	-0.01245358		1589.8	-0.01202203		2119.8	-0.00483656		2649.8	-0.02610069
530	0.0594131		1059.99	-0.01287933		1590	-0.01136731		2120	-0.00556632		2650	-0.02499155
530.2	0.0595286		1060.19	-0.01242592		1590.2	-0.01088256		2120.2	-0.00632921		2650.2	-0.02412639
530.4	0.05997332		1060.39	-0.01332098		1590.4	-0.01136124		2120.4	-0.00653162		2650.4	-0.02374429
530.6	0.05929154		1060.59	-0.01348539		1590.6	-0.01172797		2120.6	-0.00619862		2650.6	-0.02249302
530.8	0.05898062		1060.79	-0.01353847		1590.8	-0.01174546		2120.8	-0.00587647		2650.8	-0.0215438
531	0.0590716		1060.99	-0.01333755		1591	-0.01180054		2121	-0.00530146		2651	-0.0210811
531.2	0.0595989		1061.19	-0.01304583		1591.2	-0.01178968		2121.2	-0.00528953		2651.2	-0.02021314
531.4	0.06072979		1061.39	-0.0127812		1591.4	-0.01106831		2121.4	-0.00355642		2651.4	-0.02013495
531.6	0.06100429		1061.59	-0.01330513		1591.6	-0.01133333		2121.6	-0.00286965		2651.6	-0.02051821
531.8	0.06066703		1061.79	-0.01334472		1591.8	-0.01275291		2121.8	-0.00152111		2651.8	-0.02072175
532	0.05994236		1061.99	-0.01315529		1592	-0.01367359		2122	-0.00063902		2652	-0.02118791
532.2	0.06024088		1062.19	-0.01241238		1592.2	-0.01489183		2122.2	0.00031368		2652.2	-0.02174375
532.4	0.06066158		1062.39	-0.01248061		1592.4	-0.0151295		2122.4	0.00035774		2652.4	-0.02291437
532.6	0.06094368		1062.59	-0.01251898		1592.6	-0.0150677		2122.6	0.00036775		2652.6	-0.0235193
532.8	0.0610705		1062.79	-0.01226115		1592.8	-0.01598024		2122.8	-0.00016443		2652.8	-0.02393502
533	0.06132315		1062.99	-0.01255299		1593	-0.0162284		2123	0.00048021		2653	-0.0242199
533.2	0.06158047		1063.19	-0.01270852		1593.2	-0.01686836		2123.2	0.00059148		2653.2	-0.02519152
533.4	0.06182995		1063.39	-0.01278995		1593.4	-0.01680526		2123.4	0.00020758		2653.4	-0.02603177
533.6	0.06044761		1063.59	-0.01209024		1593.6	-0.01617395		2123.6	-0.00081164		2653.6	-0.02612569
533.8	0.0600447		1063.79	-0.01156537		1593.8	-0.01536331		2123.8	-0.00148209		2653.8	-0.02602463
534	0.0598751		1063.99	-0.01213302		1594	-0.0143948		2124	-0.00263092		2654	-0.02560796
534.2	0.06022884		1064.19	-0.01236258		1594.2	-0.01453948		2124.2	-0.00335842		2654.2	-0.02553375
534.4	0.06037886		1064.39	-0.01208891		1594.4	-0.01436131		2124.4	-0.00357691		2654.4	-0.02612087
534.6	0.0602029		1064.59	-0.01205834		1594.6	-0.01413677		2124.6	-0.00353342		2654.6	-0.02542244
534.8	0.06144951		1064.79	-0.01254058		1594.8	-0.01420169		2124.8	-0.00299384		2654.8	-0.02549687
535	0.06195851		1064.99	-0.01272401		1595	-0.01329802		2125	-0.00247758		2655	-0.02545207
535.2	0.06227269		1065.19	-0.01299314		1595.2	-0.01333688		2125.2	-0.00216073		2655.2	-0.025439
535.4	0.0620161		1065.39	-0.0131698		1595.4	-0.01311585		2125.4	-0.00175996		2655.4	-0.02652034
535.6	0.06152931		1065.59	-0.0125232		1595.6	-0.01356038		2125.6	-0.00115909		2655.6	-0.02636262
535.8	0.06147317		1065.79	-0.01153297		1595.8	-0.01392154		2125.8	-0.00093512		2655.8	-0.02661506
536	0.06155612		1065.99	-0.0111944		1596	-0.01364165		2126	-0.00112084		2656	-0.02722856
536.2	0.06227619		1066.19	-0.01082573		1596.2	-0.01344326		2126.2	-0.00102482		2656.2	-0.0271297
536.4	0.06233484		1066.39	-0.01019096		1596.4	-0.01368253		2126.4	-0.0012208		2656.4	-0.02785416
536.6	0.06251325		1066.59	-0.0105473		1596.6	-0.01390178		2126.6	-0.00122932		2656.6	-0.02761293
536.8	0.06304559		1066.79	-0.01067564		1596.8	-0.01375042		2126.8	-0.00091548		2656.8	-0.02641998
537	0.06393705		1066.99	-0.01021738		1597	-0.01400865		2127	-0.00037792		2657	-0.02646759
537.2	0.06385873		1067.19	-0.0111086		1597.2	-0.01420028		2127.2	-0.00082351		2657.2	-0.02617954
537.4	0.0638005		1067.39	-0.01045141		1597.4	-0.01419552		2127.4	-0.00104569		2657.4	-0.02582781
537.6	0.06374626		1067.59	-0.01013371		1597.6	-0.01372207		2127.6	-0.00121473		2657.6	-0.02466639
537.8	0.06291869		1067.79	-0.01031625		1597.8	-0.0129991		2127.8	-0.00155978		2657.8	-0.02524851
538	0.06293711		1067.99	-0.01132609		1598	-0.01352458		2128	-0.00181655		2658	-0.02537741
538.2	0.06235852		1068.19	-0.01133042		1598.2	-0.01325429		2128.2	-0.00102599		2658.2	-0.02520052
538.4	0.06219173		1068.39	-0.01168854		1598.4	-0.01302017		2128.4	-0.00084621		2658.4	-0.02513824
538.6	0.06186952		1068.59	-0.01282005		1598.6	-0.01270522		2128.6	-0.0004837		2658.6	-0.0252457
538.8	0.06236357		1068.79	-0.01296168		1598.8	-0.01247705		2128.8	-0.00046857		2658.8	-0.02578113
539	0.06250891		1068.99	-0.01269746		1599	-0.01205662		2129	-0.00031903		2659	-0.02559217
539.2	0.06204357		1069.19	-0.01264223		1599.2	-0.01254293		2129.2	-0.00088028		2659.2	-0.02594893
539.4	0.06185443		1069.39	-0.01229137		1599.4	-0.01196426		2129.4	-0.00114992		2659.4	-0.02600206
539.6	0.06175018		1069.59	-0.01201178		1599.6	-0.01240397		2129.6	-0.00149151		2659.6	-0.02609408
539.8	0.06132073		1069.79	-0.01254248		1599.8	-0.01289009		2129.8	-0.00216743		2659.8	-0.02705773
540	0.06108767		1069.99	-0.01261142		1600	-0.01269835		2130	-0.00250995		2660	-0.0273664
540.2	0.0617504		1070.19	-0.01223958		1600.2	-0.01337504		2130.2	-0.00267595		2660.2	-0.02791999
540.4	0.06134153		1070.39	-0.01253012		1600.4	-0.01350627		2130.4	-0.00280069		2660.4	-0.02893081
540.6	0.06168018		1070.59	-0.01329028		1600.6	-0.01406486		2130.6	-0.00240268		2660.6	-0.02883601
540.8	0.0629159		1070.79	-0.01300629		1600.8	-0.01414478		2130.8	-0.00161913		2660.8	-0.0282846
541	0.06272691		1070.99	-0.01176797		1601	-0.01406208		2131	-0.00052842		2661	-0.02831674
541.2	0.062682		1071.19	-0.0118263		1601.2	-0.0138766		2131.2	-0.00006504		2661.2	-0.02774866
541.4	0.06242117		1071.39	-0.01105209		1601.4	-0.01399503		2131.4	-0.00027783		2661.4	-0.02778418
541.6	0.06236078		1071.59	-0.01062329		1601.6	-0.01364673		2131.6	-0.00042339		2661.6	-0.02742699
541.8	0.06138736		1071.79	-0.00980766		1601.8	-0.01355304		2131.8	-0.00048523		2661.8	-0.02772432
542	0.06167703		1071.99	-0.01003047		1602	-0.01412782		2132	-0.0002484		2662	-0.02688383
542.2	0.0603073		1072.19	-0.00977891		1602.2	-0.01363391		2132.2	-0.00052155		2662.2	-0.02567532
542.4	0.06044834		1072.39	-0.01026576		1602.4	-0.01399156		2132.4	-0.00116788		2662.4	-0.02558919
542.6	0.06088711		1072.59	-0.01069151		1602.6	-0.01413505		2132.6	-0.0023219		2662.6	-0.02578046
542.8	0.06137384		1072.79	-0.01043861		1602.8	-0.01504872		2132.8	-0.00283014		2662.8	-0.02561562
543	0.06195333		1072.99	-0.01055358		1603	-0.01442028		2133	-0.00340116		2663	-0.02530406
543.2	0.06160026		1073.19	-0.01105918		1603.2	-0.01438868		2133.2	-0.00444021		2663.2	-0.02577323
543.4	0.0619378		1073.39	-0.01145511		1603.4	-0.01372823		2133.4	-0.00459917		2663.4	-0.02640324
543.6	0.06276098		1073.59	-0.01222313		1603.6	-0.01472014		2133.6	-0.00553385		2663.6	-0.02647059
543.8	0.06282227		1073.79	-0.01258721		1603.8	-0.01508335		2133.8	-0.00596027		2663.8	-0.02715792
544	0.06344086		1073.99	-0.01294123		1604	-0.01443564		2134	-0.00654987		2664	-0.02790346
544.2	0.06321784		1074.19	-0.01317491		1604.2	-0.01456865		2134.2	-0.00621742		2664.2	-0.02825578
544.4	0.0629721		1074.39	-0.01302721		1604.4	-0.01375655		2134.4	-0.00568559		2664.4	-0.0280082
544.6	0.06310034		1074.59	-0.01321966		1604.6	-0.0135677		2134.6	-0.00433584		2664.6	-0.02860512
544.8	0.06377468		1074.79	-0.0127206		1604.8	-0.01267365		2134.8	-0.00291571		2664.8	-0.02829676
545	0.06346349		1074.99	-0.01268952		1605	-0.01234861		2135	-0.00198582		2665	-0.02788804
545.2	0.06293069		1075.19	-0.01330339		1605.2	-0.01190954		2135.2	-0.00202604		2665.2	-0.0277811
545.4	0.06285616		1075.39	-0.0138762		1605.4	-0.01182476		2135.4	-0.00159995		2665.4	-0.02839757
545.6	0.06329367		1075.59	-0.01354333		1605.6	-0.01178773		2135.6	-0.00063798		2665.6	-0.02824683
545.8	0.06240726		1075.79	-0.01303562		1605.8	-0.01205636		2135.8	-0.00017042		2665.8	-0.02791737
546	0.0616867		1075.99	-0.01317655		1606	-0.01181837		2136	-0.00017462		2666	-0.02778035
546.2	0.06119962		1076.19	-0.01275466		1606.2	-0.01208963		2136.2	0.00012479		2666.2	-0.02787148
546.4	0.06171991		1076.39	-0.01323321		1606.4	-0.0123502		2136.4	0.00018117		2666.4	-0.02835124
546.6	0.0611031		1076.59	-0.01328918		1606.6	-0.01325435		2136.6	-0.00066138		2666.6	-0.02848349
546.8	0.06045883		1076.79	-0.01293082		1606.8	-0.01381227		2136.8	-0.00037414		2666.8	-0.02876978
547	0.06003255		1076.99	-0.01322256		1607	-0.01334959		2137	-0.0013459		2667	-0.02806383
547.2	0.05952828		1077.19	-0.0128452		1607.2	-0.01358133		2137.2	-0.00229299		2667.2	-0.02856792
547.4	0.06020197		1077.39	-0.01292423		1607.4	-0.01362265		2137.4	-0.00293962		2667.4	-0.02805466
547.6	0.06082407		1077.59	-0.01282765		1607.6	-0.01501205		2137.6	-0.00360315		2667.6	-0.02765087
547.8	0.05987107		1077.79	-0.01231197		1607.8	-0.01482611		2137.8	-0.00367354		2667.8	-0.02849242
548	0.05923861		1077.99	-0.01194407		1608	-0.01420993		2138	-0.00422717		2668	-0.02829709
548.2	0.05861794		1078.19	-0.01183395		1608.2	-0.01321432		2138.2	-0.00465631		2668.2	-0.02808078
548.4	0.05821561		1078.39	-0.01160068		1608.4	-0.01247351		2138.4	-0.00459001		2668.4	-0.02875696
548.6	0.05717955		1078.59	-0.01134941		1608.6	-0.01245032		2138.6	-0.00450826		2668.6	-0.02932955
548.8	0.05763605		1078.79	-0.01095625		1608.8	-0.01265461		2138.8	-0.00465904		2668.8	-0.02847504
549	0.05798551		1078.99	-0.01166823		1609	-0.01293056		2139	-0.00442736		2669	-0.02840273
549.2	0.05749126		1079.19	-0.01155045		1609.2	-0.01258884		2139.2	-0.00413345		2669.2	-0.02826193
549.4	0.05802366		1079.39	-0.01140076		1609.4	-0.01235279		2139.4	-0.0026342		2669.4	-0.02864959
549.6	0.05871791		1079.59	-0.01175611		1609.6	-0.01226591		2139.6	-0.00235533		2669.6	-0.02817483
549.8	0.05800104		1079.79	-0.01210036		1609.8	-0.01177315		2139.8	-0.00200463		2669.8	-0.02751283
550	0.05885719		1079.99	-0.01286		1610	-0.0108457		2140	-0.00075742		2670	-0.02750855
550.2	0.05986435		1080.19	-0.01228621		1610.2	-0.01127151		2140.2	0.00012134		2670.2	-0.02708845
550.4	0.05946964		1080.39	-0.01304475		1610.4	-0.01175499		2140.4	0.0003186		2670.4	-0.02632427
550.6	0.05934799		1080.59	-0.01343792		1610.6	-0.01223496		2140.6	0.00003734		2670.6	-0.02575762
550.8	0.05914027		1080.79	-0.01378371		1610.8	-0.01220746		2140.8	-0.00016957		2670.8	-0.02505131
551	0.05901583		1080.99	-0.01463593		1611	-0.01188538		2141	-0.00106801		2671	-0.02434602
551.2	0.06034018		1081.19	-0.01436909		1611.2	-0.01220457		2141.2	-0.00159581		2671.2	-0.0252917
551.4	0.06130217		1081.39	-0.0148433		1611.4	-0.01294105		2141.4	-0.00153375		2671.4	-0.02554023
551.6	0.06163231		1081.59	-0.01447936		1611.6	-0.01409264		2141.6	-0.00231542		2671.6	-0.0262524
551.8	0.06110875		1081.79	-0.01403353		1611.8	-0.01349017		2141.8	-0.00256643		2671.8	-0.0272323
552	0.06069113		1081.99	-0.01447605		1612	-0.01298667		2142	-0.00347133		2672	-0.02694128
552.2	0.05992811		1082.19	-0.01496137		1612.2	-0.01289277		2142.2	-0.00333961		2672.2	-0.02737676
552.4	0.05886209		1082.39	-0.01485949		1612.4	-0.01282471		2142.4	-0.00304017		2672.4	-0.02734145
552.6	0.05867482		1082.59	-0.01391888		1612.6	-0.01285506		2142.6	-0.00346067		2672.6	-0.02670994
552.8	0.05908745		1082.79	-0.0138914		1612.8	-0.01327966		2142.8	-0.00386299		2672.8	-0.02641275
553	0.05903114		1082.99	-0.01462748		1613	-0.01330738		2143	-0.0031535		2673	-0.02582083
553.2	0.05777497		1083.19	-0.0145119		1613.2	-0.01335753		2143.2	-0.00312365		2673.2	-0.02490193
553.4	0.05737015		1083.39	-0.01423463		1613.4	-0.01296604		2143.4	-0.00315416		2673.4	-0.0244544
553.6	0.0578302		1083.59	-0.01487973		1613.6	-0.01358632		2143.6	-0.00299839		2673.6	-0.024242
553.8	0.05677707		1083.79	-0.014222		1613.8	-0.01279502		2143.8	-0.00219763		2673.8	-0.02412693
554	0.05760584		1083.99	-0.01436984		1614	-0.01239771		2144	-0.00127512		2674	-0.02427584
554.2	0.05784623		1084.19	-0.0138891		1614.2	-0.01320765		2144.2	-0.00149197		2674.2	-0.02435299
554.4	0.05774948		1084.39	-0.01524494		1614.4	-0.01392118		2144.4	-0.00190149		2674.4	-0.02433033
554.6	0.05750023		1084.59	-0.01538188		1614.6	-0.01406717		2144.6	-0.00178676		2674.6	-0.02431079
554.8	0.05761139		1084.79	-0.01620489		1614.8	-0.0141864		2144.8	-0.00150342		2674.8	-0.02464676
555	0.05804345		1084.99	-0.01619811		1615	-0.01502078		2145	-0.00171814		2675	-0.02575784
555.2	0.05879133		1085.19	-0.01537392		1615.2	-0.01576975		2145.2	-0.00178237		2675.2	-0.02624946
555.4	0.05861327		1085.39	-0.01577907		1615.4	-0.01614063		2145.4	-0.00196947		2675.4	-0.02741626
555.6	0.0579969		1085.59	-0.01547901		1615.6	-0.0161385		2145.6	-0.0019173		2675.6	-0.02711434
555.8	0.05767733		1085.79	-0.01580991		1615.8	-0.01567169		2145.8	-0.00102745		2675.8	-0.02803346
556	0.05692524		1085.99	-0.01568128		1616	-0.01571114		2146	-0.00072459		2676	-0.02827793
556.2	0.05718802		1086.19	-0.01641049		1616.2	-0.01561431		2146.2	-0.00022009		2676.2	-0.02855461
556.4	0.05746315		1086.39	-0.01590265		1616.4	-0.0139676		2146.4	-0.0001479		2676.4	-0.0280081
556.6	0.05784318		1086.59	-0.01568932		1616.6	-0.01430267		2146.6	-0.00044951		2676.6	-0.02796997
556.8	0.05833101		1086.79	-0.01605154		1616.8	-0.01467353		2146.8	-0.00035978		2676.8	-0.02823676
557	0.05827085		1086.99	-0.01583293		1617	-0.01459368		2147	-0.00092397		2677	-0.02774267
557.2	0.05786039		1087.19	-0.01551948		1617.2	-0.01492843		2147.2	-0.0011226		2677.2	-0.02738555
557.4	0.05835057		1087.39	-0.015453		1617.4	-0.01500149		2147.4	-0.00139951		2677.4	-0.02677158
557.6	0.05843321		1087.59	-0.01566581		1617.6	-0.01527529		2147.6	-0.00128209		2677.6	-0.02683197
557.8	0.05818223		1087.79	-0.01487134		1617.8	-0.0141746		2147.8	-0.00195422		2677.8	-0.02737663
558	0.05880015		1087.99	-0.01532118		1618	-0.01428902		2148	-0.00251225		2678	-0.02748734
558.2	0.05914056		1088.19	-0.01536652		1618.2	-0.0146079		2148.2	-0.00310883		2678.2	-0.02745651
558.4	0.05948772		1088.39	-0.01555897		1618.4	-0.01466255		2148.4	-0.0033163		2678.4	-0.02696662
558.6	0.05950813		1088.59	-0.01526457		1618.6	-0.01439297		2148.6	-0.0030537		2678.6	-0.02666342
558.8	0.06023423		1088.79	-0.01563224		1618.8	-0.01435577		2148.8	-0.00321273		2678.8	-0.02661875
559	0.06039876		1088.99	-0.01499705		1619	-0.01478518		2149	-0.00354188		2679	-0.02629924
559.2	0.06068042		1089.19	-0.01498853		1619.2	-0.0144917		2149.2	-0.00328289		2679.2	-0.02556368
559.4	0.06101251		1089.39	-0.01557764		1619.4	-0.01454786		2149.4	-0.00296069		2679.4	-0.02571957
559.6	0.06106594		1089.59	-0.01524552		1619.6	-0.01463159		2149.6	-0.00249826		2679.6	-0.02462409
559.8	0.06203145		1089.79	-0.01530299		1619.8	-0.01492816		2149.8	-0.00221344		2679.8	-0.02512153
