# Supplementary material for: Functional development of a V3/glycan-specific broadly neutralizing antibody isolated from a case of HIV superinfection
Source: eLife journal article supplement (doi:10.7554/elife.68110), 2021-07-15
Supplement: fig2-data2 [file C1.xls]

Vers 3.43 Data Simulation
Conc1	5E-07	5E-07	5E-07	5E-07	5E-07
Start1	199.99	730	1259.99	1790	2320
Stop1	559.79	1089.8	1619.79	2149.8	2679.8
Time1	Data1	Sim1	Time2	Data2	Sim2	Time3	Data3	Sim3	Time4	Data4	Sim4	Time5	Data5	Sim5
199.99	0.00782628		730	-0.00860032		1259.99	-0.00269404		1790	-0.00299273		2320	0.00026889
200.19	0.00825495		730.2	-0.00956712		1260.19	-0.0034232		1790.2	-0.00442427		2320.2	0.00077243
200.39	0.00944195		730.4	-0.01100385		1260.39	-0.00411545		1790.4	-0.00442033		2320.4	0.00149696
200.59	0.00976146		730.6	-0.01098486		1260.59	-0.00497187		1790.6	-0.00444539		2320.6	0.00224701
200.79	0.01044288		730.8	-0.01112696		1260.79	-0.00543228		1790.8	-0.00491594		2320.8	0.00236939
200.99	0.01176138		731	-0.0105584		1260.99	-0.00581739		1791	-0.0054769		2321	0.00303372
201.19	0.01369572		731.2	-0.01008414		1261.19	-0.00616505		1791.2	-0.00479594		2321.2	0.00400358
201.39	0.01505185		731.4	-0.0097149		1261.39	-0.00712227		1791.4	-0.00431554		2321.4	0.00437805
201.59	0.01686874		731.6	-0.00922981		1261.59	-0.0077125		1791.6	-0.00456327		2321.6	0.00479357
201.79	0.01807034		731.8	-0.00857485		1261.79	-0.00742571		1791.8	-0.003679		2321.8	0.00493796
201.99	0.01956983		732	-0.00840366		1261.99	-0.00682894		1792	-0.00319013		2322	0.00528961
202.19	0.02067707		732.2	-0.00767805		1262.19	-0.0069828		1792.2	-0.00243978		2322.2	0.00525185
202.39	0.02216667		732.4	-0.00791608		1262.39	-0.00688713		1792.4	-0.00227693		2322.4	0.00553228
202.59	0.02355885		732.6	-0.00821303		1262.59	-0.00641238		1792.6	-0.00202863		2322.6	0.00507343
202.79	0.02543552		732.8	-0.00871208		1262.79	-0.00521474		1792.8	-0.00210932		2322.8	0.00398093
202.99	0.02780823		733	-0.00886454		1262.99	-0.00561103		1793	-0.00116234		2323	0.00381395
203.19	0.02891344		733.2	-0.0096587		1263.19	-0.00533828		1793.2	-0.0009529		2323.2	0.00472178
203.39	0.02956669		733.4	-0.00975833		1263.39	-0.00532005		1793.4	-0.00017883		2323.4	0.00466355
203.59	0.03031574		733.6	-0.01105905		1263.59	-0.00588334		1793.6	0.00021552		2323.6	0.00401071
203.79	0.03156742		733.8	-0.0116183		1263.79	-0.00585103		1793.8	0.00031806		2323.8	0.00316311
203.99	0.0323373		734	-0.01188159		1263.99	-0.00604583		1794	0.00040721		2324	0.00289759
204.19	0.03209405		734.2	-0.01188657		1264.19	-0.00624798		1794.2	0.00063535		2324.2	0.00234437
204.39	0.03247538		734.4	-0.01229792		1264.39	-0.00666157		1794.4	0.00206327		2324.4	0.00219905
204.59	0.03215803		734.6	-0.01113321		1264.59	-0.00726782		1794.6	0.00204963		2324.6	0.00216439
204.79	0.03277252		734.8	-0.01113123		1264.79	-0.00682639		1794.8	0.00195692		2324.8	0.00095086
204.99	0.03309492		735	-0.01002257		1264.99	-0.00728679		1795	0.00230528		2325	0.00179718
205.19	0.03385921		735.2	-0.0100424		1265.19	-0.00693323		1795.2	0.00338401		2325.2	0.00217993
205.39	0.03372363		735.4	-0.00993899		1265.39	-0.00714874		1795.4	0.00333826		2325.4	0.00205601
205.59	0.03422967		735.6	-0.00900866		1265.59	-0.00648899		1795.6	0.00376381		2325.6	0.00354571
205.79	0.03400475		735.8	-0.00852178		1265.79	-0.00551063		1795.8	0.00490194		2325.8	0.00450881
205.99	0.03398503		736	-0.0085757		1265.99	-0.00509833		1796	0.00439141		2326	0.00482256
206.19	0.03489354		736.2	-0.00802078		1266.19	-0.00501982		1796.2	0.00400995		2326.2	0.00548779
206.39	0.0362741		736.4	-0.00786569		1266.39	-0.00446452		1796.4	0.00329769		2326.4	0.00552358
206.59	0.03771355		736.6	-0.00720624		1266.59	-0.00292435		1796.6	0.00396801		2326.6	0.00554911
206.79	0.03850397		736.8	-0.00622032		1266.79	-0.00252524		1796.8	0.00453852		2326.8	0.00536734
206.99	0.03985907		737	-0.00606835		1266.99	-0.00336407		1797	0.00523189		2327	0.00592307
207.19	0.03985665		737.2	-0.00617307		1267.19	-0.00373828		1797.2	0.00633622		2327.2	0.0062297
207.39	0.0406836		737.4	-0.00659412		1267.39	-0.00365626		1797.4	0.00673381		2327.4	0.00525886
207.59	0.04149815		737.6	-0.00688497		1267.59	-0.00377868		1797.6	0.00640924		2327.6	0.00407923
207.79	0.04207173		737.8	-0.00644083		1267.79	-0.00360427		1797.8	0.00570808		2327.8	0.00212114
207.99	0.0426567		738	-0.00592436		1267.99	-0.00446602		1798	0.00562254		2328	0.00204447
208.19	0.04190327		738.2	-0.00563224		1268.19	-0.0047856		1798.2	0.00473117		2328.2	0.00219096
208.39	0.04215658		738.4	-0.00670978		1268.39	-0.00495048		1798.4	0.00468031		2328.4	0.00152181
208.59	0.04238199		738.6	-0.00689019		1268.59	-0.00522903		1798.6	0.00429305		2328.6	0.00153352
208.79	0.04170382		738.8	-0.00744512		1268.79	-0.00474665		1798.8	0.00388486		2328.8	0.00118752
208.99	0.04156329		739	-0.00726287		1268.99	-0.00455465		1799	0.00298411		2329	0.00209494
209.19	0.04134805		739.2	-0.00847252		1269.19	-0.00455717		1799.2	0.00286769		2329.2	0.0019636
209.39	0.04168256		739.4	-0.00871624		1269.39	-0.00509119		1799.4	0.00255716		2329.4	0.00249597
209.59	0.04165878		739.6	-0.00826608		1269.59	-0.00483537		1799.6	0.00306414		2329.6	0.00393903
209.79	0.04168061		739.8	-0.00849099		1269.79	-0.00507256		1799.8	0.00299061		2329.8	0.00323859
209.99	0.04225666		740	-0.00856452		1269.99	-0.00518637		1800	0.00285935		2330	0.00271848
210.19	0.04329429		740.2	-0.00845193		1270.19	-0.00537303		1800.2	0.00279874		2330.2	0.00340061
210.39	0.04388942		740.4	-0.00843114		1270.39	-0.00536319		1800.4	0.0026259		2330.4	0.00313949
210.59	0.04436173		740.6	-0.00738351		1270.59	-0.00506952		1800.6	0.00305636		2330.6	0.00269731
210.79	0.04479271		740.8	-0.00659154		1270.79	-0.00542416		1800.8	0.00286665		2330.8	0.0025562
210.99	0.0453018		741	-0.00682864		1270.99	-0.00616503		1801	0.0035262		2331	0.00319274
211.19	0.04603915		741.2	-0.00645373		1271.19	-0.00583032		1801.2	0.00325309		2331.2	0.00310307
211.39	0.04762725		741.4	-0.00683013		1271.39	-0.00570429		1801.4	0.00308467		2331.4	0.00305761
211.59	0.04746832		741.6	-0.0059669		1271.59	-0.00619786		1801.6	0.00225215		2331.6	0.00246335
211.79	0.04823246		741.8	-0.00651982		1271.79	-0.00574835		1801.8	0.00184455		2331.8	0.0023515
211.99	0.04826815		742	-0.00604575		1271.99	-0.00568368		1802	0.00254243		2332	0.00342524
212.19	0.04851645		742.2	-0.00631998		1272.19	-0.00530673		1802.2	0.00151862		2332.2	0.00369113
212.39	0.0491304		742.4	-0.00690631		1272.39	-0.00440671		1802.4	0.00163896		2332.4	0.00390931
212.59	0.05005007		742.6	-0.00651529		1272.59	-0.00388983		1802.6	0.00124991		2332.6	0.00454528
212.79	0.04986972		742.8	-0.00656747		1272.79	-0.00282904		1802.8	0.00093499		2332.8	0.00459295
212.99	0.05034416		743	-0.00632199		1272.99	-0.00244945		1803	0.00119743		2333	0.00400282
213.19	0.05055151		743.2	-0.0075239		1273.19	-0.0032897		1803.2	0.00225667		2333.2	0.00330115
213.39	0.0513442		743.4	-0.00763513		1273.39	-0.00268126		1803.4	0.00266212		2333.4	0.00339852
213.59	0.05164678		743.6	-0.00708665		1273.59	-0.002669		1803.6	0.00360291		2333.6	0.00309579
213.79	0.05216349		743.8	-0.0074469		1273.79	-0.00306884		1803.8	0.00395321		2333.8	0.00189913
213.99	0.05278563		744	-0.00701162		1273.99	-0.00316983		1804	0.00485581		2334	0.00171157
214.19	0.05277777		744.2	-0.00703538		1274.19	-0.0036376		1804.2	0.00544611		2334.2	0.00167713
214.39	0.05294135		744.4	-0.00743233		1274.39	-0.00353604		1804.4	0.00588335		2334.4	0.00127252
214.59	0.05327703		744.6	-0.0068974		1274.59	-0.00386283		1804.6	0.00612126		2334.6	0.00048266
214.79	0.05329605		744.8	-0.0066925		1274.79	-0.00349705		1804.8	0.00570232		2334.8	0.00038162
214.99	0.05302817		745	-0.00685037		1274.99	-0.00508939		1805	0.00632333		2335	0.00051101
215.19	0.0542372		745.2	-0.00687241		1275.19	-0.00532392		1805.2	0.00527335		2335.2	0.00120521
215.39	0.05417953		745.4	-0.00764169		1275.39	-0.00588426		1805.4	0.00595404		2335.4	0.00128627
215.59	0.0534696		745.6	-0.00763236		1275.59	-0.00573092		1805.6	0.0051733		2335.6	0.00171512
215.79	0.05483419		745.8	-0.00846989		1275.79	-0.00553669		1805.8	0.00480876		2335.8	0.00219263
215.99	0.05566574		746	-0.00820124		1275.99	-0.00534689		1806	0.00457899		2336	0.00276872
216.19	0.05669022		746.2	-0.00847643		1276.19	-0.00507354		1806.2	0.00345624		2336.2	0.0030531
216.39	0.05691067		746.4	-0.00849496		1276.39	-0.00386525		1806.4	0.00339563		2336.4	0.00380558
216.59	0.05767561		746.6	-0.00836384		1276.59	-0.00362758		1806.6	0.003346		2336.6	0.00384818
216.79	0.05777135		746.8	-0.0084816		1276.79	-0.0029526		1806.8	0.00332997		2336.8	0.00347279
216.99	0.05863317		747	-0.00867954		1276.99	-0.00320364		1807	0.00383298		2337	0.00288515
217.19	0.05944756		747.2	-0.00926962		1277.19	-0.00333612		1807.2	0.00348662		2337.2	0.00231223
217.39	0.05967915		747.4	-0.00873604		1277.39	-0.00254989		1807.4	0.00359656		2337.4	0.00262061
217.59	0.06044913		747.6	-0.00825351		1277.59	-0.00194904		1807.6	0.00287578		2337.6	0.00244929
217.79	0.06039956		747.8	-0.00825759		1277.79	-0.00228047		1807.8	0.00322857		2337.8	0.00200127
217.99	0.05990971		748	-0.00753579		1277.99	-0.00193135		1808	0.00358052		2338	0.00241289
218.19	0.06032345		748.2	-0.00729618		1278.19	-0.00231239		1808.2	0.00362157		2338.2	0.00230191
218.39	0.0612536		748.4	-0.00770036		1278.39	-0.00216214		1808.4	0.00382171		2338.4	0.00252648
218.59	0.0618202		748.6	-0.0065012		1278.59	-0.00212551		1808.6	0.00343456		2338.6	0.00238371
218.79	0.0618046		748.8	-0.00601881		1278.79	-0.00249441		1808.8	0.00266972		2338.8	0.00210653
218.99	0.06233012		749	-0.00615814		1278.99	-0.00351993		1809	0.00292441		2339	0.00282536
219.19	0.06285053		749.2	-0.00607492		1279.19	-0.00373293		1809.2	0.00278669		2339.2	0.00404454
219.39	0.06230085		749.4	-0.00629363		1279.39	-0.00355284		1809.4	0.00299637		2339.4	0.00421682
219.59	0.0630135		749.6	-0.00722952		1279.59	-0.00416728		1809.6	0.00222753		2339.6	0.00407034
219.79	0.06318474		749.8	-0.00763351		1279.79	-0.00451612		1809.8	0.00161615		2339.8	0.00436554
219.99	0.06282179		750	-0.00761177		1279.99	-0.00350959		1810	0.00152819		2340	0.00381464
220.19	0.06153579		750.2	-0.00790787		1280.19	-0.00422352		1810.2	0.00162914		2340.2	0.00355349
220.39	0.06103974		750.4	-0.00834593		1280.39	-0.00430629		1810.4	0.00147683		2340.4	0.00454282
220.59	0.06142339		750.6	-0.00848861		1280.59	-0.0047359		1810.6	0.00166377		2340.6	0.00391651
220.79	0.06162571		750.8	-0.00878124		1280.79	-0.0038406		1810.8	0.0012614		2340.8	0.00354156
220.99	0.06138264		751	-0.00897606		1280.99	-0.00449055		1811	0.00212865		2341	0.00351773
221.19	0.06159648		751.2	-0.00860127		1281.19	-0.0041553		1811.2	0.00217493		2341.2	0.00288325
221.39	0.06122366		751.4	-0.00858906		1281.39	-0.00310772		1811.4	0.00294508		2341.4	0.0023393
221.59	0.06039174		751.6	-0.00903698		1281.59	-0.00242944		1811.6	0.00271563		2341.6	0.00240425
221.79	0.06020307		751.8	-0.00885144		1281.79	-0.00305676		1811.8	0.00385239		2341.8	0.00201022
221.99	0.06026772		752	-0.00802144		1281.99	-0.0022304		1812	0.00400718		2342	0.00280331
222.19	0.06119698		752.2	-0.00740561		1282.19	-0.00239551		1812.2	0.00411434		2342.2	0.00295918
222.39	0.06267818		752.4	-0.00760664		1282.39	-0.00208183		1812.4	0.00484839		2342.4	0.00324086
222.59	0.06308971		752.6	-0.00682572		1282.59	-0.00158431		1812.6	0.00485645		2342.6	0.0034623
222.79	0.06319703		752.8	-0.00692798		1282.79	-0.00244015		1812.8	0.00430602		2342.8	0.00294385
222.99	0.06464299		753	-0.00727584		1282.99	-0.00259894		1813	0.00441021		2343	0.0034238
223.19	0.06457481		753.2	-0.0068286		1283.19	-0.00286733		1813.2	0.00518639		2343.2	0.00363004
223.39	0.0649615		753.4	-0.00756874		1283.39	-0.00289599		1813.4	0.00434062		2343.4	0.00326446
223.59	0.06525417		753.6	-0.00822394		1283.59	-0.00343376		1813.6	0.00419049		2343.6	0.00253112
223.79	0.06428647		753.8	-0.00881501		1283.79	-0.0024515		1813.8	0.00482815		2343.8	0.00262225
223.99	0.06454472		754	-0.00911055		1283.99	-0.00269805		1814	0.00508471		2344	0.00273241
224.19	0.06436148		754.2	-0.00815927		1284.19	-0.00352303		1814.2	0.00557797		2344.2	0.002755
224.39	0.06520343		754.4	-0.00825149		1284.39	-0.00382259		1814.4	0.00582828		2344.4	0.00354422
224.59	0.06544455		754.6	-0.00791837		1284.59	-0.00302611		1814.6	0.00610219		2344.6	0.00309903
224.79	0.06563093		754.8	-0.00780158		1284.79	-0.00295329		1814.8	0.00603931		2344.8	0.0031387
224.99	0.06561031		755	-0.00712165		1284.99	-0.00369551		1815	0.00669154		2345	0.0032218
225.19	0.06632724		755.2	-0.00732463		1285.19	-0.00338598		1815.2	0.00629396		2345.2	0.00255795
225.39	0.06578772		755.4	-0.00804547		1285.39	-0.00255874		1815.4	0.00628204		2345.4	0.00148287
225.59	0.06604624		755.6	-0.00857861		1285.59	-0.00259012		1815.6	0.00592589		2345.6	0.00224161
225.79	0.06697831		755.8	-0.00854106		1285.79	-0.00265711		1815.8	0.00612391		2345.8	0.0016033
225.99	0.06654169		756	-0.00804657		1285.99	-0.00197353		1816	0.00591319		2346	0.0018446
226.19	0.06680345		756.2	-0.00786489		1286.19	-0.00207093		1816.2	0.00560353		2346.2	0.00147034
226.39	0.06791568		756.4	-0.00779545		1286.39	-0.00203573		1816.4	0.00578736		2346.4	0.00094952
226.59	0.06806846		756.6	-0.00790128		1286.59	-0.00186144		1816.6	0.00538815		2346.6	0.00117837
226.79	0.06827991		756.8	-0.00822118		1286.79	-0.00154655		1816.8	0.00448957		2346.8	0.00126465
226.99	0.06957931		757	-0.00828452		1286.99	-0.00147894		1817	0.00493639		2347	0.00179
227.19	0.06901066		757.2	-0.00834823		1287.19	-0.00126005		1817.2	0.00541466		2347.2	0.00139153
227.39	0.06903084		757.4	-0.00891127		1287.39	-0.00119993		1817.4	0.00418994		2347.4	0.00175229
227.59	0.06785267		757.6	-0.00920373		1287.59	-0.00071064		1817.6	0.00444308		2347.6	0.00122609
227.79	0.06738964		757.8	-0.00889127		1287.79	-0.00068882		1817.8	0.00426259		2347.8	0.00160224
227.99	0.06783248		758	-0.00780729		1287.99	-0.00179456		1818	0.00387935		2348	0.00247566
228.19	0.06759379		758.2	-0.00730215		1288.19	-0.00219021		1818.2	0.00385573		2348.2	0.00193852
228.39	0.06726509		758.4	-0.00702998		1288.39	-0.00272417		1818.4	0.00391758		2348.4	0.00264935
228.59	0.06696198		758.6	-0.00640892		1288.59	-0.00232214		1818.6	0.00423613		2348.6	0.00290103
228.79	0.06718698		758.8	-0.00557851		1288.79	-0.00265441		1818.8	0.00399659		2348.8	0.00246886
228.99	0.06712194		759	-0.00544344		1288.99	-0.00291492		1819	0.00373651		2349	0.00251
229.19	0.06716264		759.2	-0.00583794		1289.19	-0.00263756		1819.2	0.00313711		2349.2	0.00221169
229.39	0.06696222		759.4	-0.00537692		1289.39	-0.0027623		1819.4	0.00335089		2349.4	0.0017307
229.59	0.0674169		759.6	-0.00510657		1289.59	-0.00290187		1819.6	0.0040536		2349.6	0.00244532
229.79	0.0662738		759.8	-0.00461787		1289.79	-0.00258298		1819.8	0.00421802		2349.8	0.00219888
229.99	0.06609547		760	-0.00482109		1289.99	-0.00222143		1820	0.00418594		2350	0.00254328
230.19	0.0673917		760.2	-0.00525978		1290.19	-0.00215683		1820.2	0.00432322		2350.2	0.00302373
230.39	0.06794269		760.4	-0.00591573		1290.39	-0.00156009		1820.4	0.00425084		2350.4	0.00273498
230.59	0.06844968		760.6	-0.0061749		1290.59	-0.00090867		1820.6	0.00454719		2350.6	0.00284098
230.79	0.06901894		760.8	-0.00664182		1290.79	-0.00100861		1820.8	0.00480927		2350.8	0.00329982
230.99	0.06999405		761	-0.00660788		1290.99	-0.00124688		1821	0.00527688		2351	0.00294549
231.19	0.06977257		761.2	-0.00685929		1291.19	-0.00199785		1821.2	0.00517839		2351.2	0.00292798
231.39	0.06998039		761.4	-0.00652637		1291.39	-0.00226924		1821.4	0.00549882		2351.4	0.00229475
231.59	0.06998052		761.6	-0.00677393		1291.59	-0.00274648		1821.6	0.0060154		2351.6	0.00168695
231.79	0.07076186		761.8	-0.00613917		1291.79	-0.00298254		1821.8	0.00648458		2351.8	0.00146225
231.99	0.07149767		762	-0.00672246		1291.99	-0.00405269		1822	0.00612865		2352	0.00186276
232.19	0.07182959		762.2	-0.00745615		1292.19	-0.00399749		1822.2	0.00599139		2352.2	0.00169852
232.39	0.07193806		762.4	-0.00667348		1292.39	-0.00340762		1822.4	0.00673248		2352.4	0.00189582
232.59	0.07301352		762.6	-0.00621621		1292.59	-0.00307624		1822.6	0.00652791		2352.6	0.00199645
232.79	0.07286477		762.8	-0.00577934		1292.79	-0.00265579		1822.8	0.00555694		2352.8	0.0021308
232.99	0.07304687		763	-0.00628967		1292.99	-0.00292056		1823	0.00463415		2353	0.00321915
233.19	0.07272107		763.2	-0.00580435		1293.19	-0.00244291		1823.2	0.00435184		2353.2	0.00386446
233.39	0.07299009		763.4	-0.00528363		1293.39	-0.00224385		1823.4	0.0046892		2353.4	0.00504639
233.59	0.07246848		763.6	-0.00542345		1293.59	-0.00198627		1823.6	0.00430114		2353.6	0.00577817
233.79	0.07184671		763.8	-0.00602818		1293.79	-0.00085933		1823.8	0.00315507		2353.8	0.00649198
233.99	0.07229719		764	-0.00608659		1293.99	0.00029457		1824	0.00250976		2354	0.00728503
234.19	0.07244443		764.2	-0.00573838		1294.19	0.00080748		1824.2	0.00164979		2354.2	0.00741378
234.39	0.07188569		764.4	-0.00552419		1294.39	0.00108435		1824.4	0.00161897		2354.4	0.00703469
234.59	0.07140645		764.6	-0.00499903		1294.59	0.00060827		1824.6	0.00146909		2354.6	0.00632617
234.79	0.07156927		764.8	-0.00550377		1294.79	0.00050816		1824.8	0.00202836		2354.8	0.00581222
234.99	0.07103419		765	-0.00484956		1294.99	0.00016143		1825	0.00279728		2355	0.0047692
235.19	0.07036546		765.2	-0.00475217		1295.19	-0.00125873		1825.2	0.0032324		2355.2	0.00350724
235.39	0.07112627		765.4	-0.00431491		1295.39	-0.00097686		1825.4	0.00342165		2355.4	0.00250147
235.59	0.07163485		765.6	-0.00434971		1295.59	-0.00131497		1825.6	0.00377671		2355.6	0.0015792
235.79	0.07202941		765.8	-0.00449938		1295.79	-0.00073182		1825.8	0.0041215		2355.8	0.00034448
235.99	0.07211301		766	-0.00559722		1295.99	-0.00132867		1826	0.00445447		2356	-0.00029174
236.19	0.07216508		766.2	-0.00574307		1296.19	-0.0009299		1826.2	0.00456346		2356.2	-0.00102602
236.39	0.0724356		766.4	-0.00614185		1296.39	-0.00068894		1826.4	0.00485456		2356.4	-0.00140318
236.59	0.07263088		766.6	-0.00614553		1296.59	-0.00087183		1826.6	0.00457728		2356.6	-0.00073919
236.79	0.07293829		766.8	-0.00582999		1296.79	-0.00100804		1826.8	0.00459976		2356.8	-0.00003667
236.99	0.0736786		767	-0.0057526		1296.99	-0.00134848		1827	0.0044611		2357	0.00025809
237.19	0.07426357		767.2	-0.00629421		1297.19	-0.00053608		1827.2	0.00508545		2357.2	0.00100708
237.39	0.07476951		767.4	-0.00667067		1297.39	-0.00085291		1827.4	0.00491267		2357.4	0.00234379
237.59	0.07476076		767.6	-0.00691096		1297.59	-0.00136876		1827.6	0.00411755		2357.6	0.00274217
237.79	0.07450287		767.8	-0.00708325		1297.79	-0.00035526		1827.8	0.00427719		2357.8	0.00330428
237.99	0.07431028		768	-0.00701583		1297.99	-0.00054335		1828	0.00379219		2358	0.00393025
238.19	0.07333821		768.2	-0.00745293		1298.19	-0.00128262		1828.2	0.00349627		2358.2	0.00351933
238.39	0.07322126		768.4	-0.00758516		1298.39	-0.00141267		1828.4	0.00432546		2358.4	0.00265351
238.59	0.0722803		768.6	-0.00723845		1298.59	-0.00140809		1828.6	0.00413328		2358.6	0.00132255
238.79	0.07247425		768.8	-0.00726072		1298.79	-0.00130133		1828.8	0.00505927		2358.8	0.00097696
238.99	0.07235713		769	-0.0065525		1298.99	-0.00145058		1829	0.00492316		2359	0.00060171
239.19	0.07354541		769.2	-0.00681696		1299.19	-0.0013372		1829.2	0.00451341		2359.2	0.00009296
239.39	0.07455724		769.4	-0.00673054		1299.39	-0.00182565		1829.4	0.00483377		2359.4	0.00073021
239.59	0.07472088		769.6	-0.00687158		1299.59	-0.00255199		1829.6	0.00504405		2359.6	-0.00023847
239.79	0.07458409		769.8	-0.00766125		1299.79	-0.00196781		1829.8	0.0049859		2359.8	-0.0011558
239.99	0.07411076		770	-0.00760006		1299.99	-0.00262882		1830	0.00509197		2360	-0.00170868
240.19	0.07464396		770.2	-0.00763015		1300.19	-0.00297532		1830.2	0.00418898		2360.2	-0.00161656
240.39	0.07523899		770.4	-0.00705152		1300.39	-0.00345682		1830.4	0.00382165		2360.4	-0.00092151
240.59	0.07561766		770.6	-0.00563787		1300.59	-0.00361099		1830.6	0.0032158		2360.6	0.00026084
240.79	0.07661959		770.8	-0.00428157		1300.79	-0.00404978		1830.8	0.00214823		2360.8	0.00058762
240.99	0.07650985		771	-0.00370719		1300.99	-0.00411749		1831	0.00069489		2361	0.00097421
241.19	0.07754059		771.2	-0.00373573		1301.19	-0.00440549		1831.2	0.00027609		2361.2	0.00150177
241.39	0.07745988		771.4	-0.00318109		1301.39	-0.00494379		1831.4	-0.00045787		2361.4	0.00167931
241.59	0.07745338		771.6	-0.00320814		1301.59	-0.0051574		1831.6	-0.00008122		2361.6	0.0017192
241.79	0.07770278		771.8	-0.00361451		1301.79	-0.00473676		1831.8	0.00058107		2361.8	0.00163297
241.99	0.07779171		772	-0.00402101		1301.99	-0.00498524		1832	0.00017277		2362	0.00082556
242.19	0.07766606		772.2	-0.00475989		1302.19	-0.00415645		1832.2	0.00050141		2362.2	-0.000246
242.39	0.07768421		772.4	-0.00457548		1302.39	-0.00323249		1832.4	0.00144206		2362.4	-0.00048437
242.59	0.07751088		772.6	-0.00537038		1302.59	-0.0027096		1832.6	0.00112478		2362.6	-0.00048712
242.79	0.07812001		772.8	-0.00580751		1302.79	-0.00175359		1832.8	0.00202304		2362.8	-0.00041521
242.99	0.07800363		773	-0.00647028		1302.99	-0.00053775		1833	0.0022492		2363	0.00013782
243.19	0.07759537		773.2	-0.00663434		1303.19	-0.00005321		1833.2	0.00241318		2363.2	0.00050678
243.39	0.07787076		773.4	-0.00734879		1303.39	-0.00027833		1833.4	0.00293617		2363.4	0.00069457
243.59	0.07738451		773.6	-0.00703033		1303.59	-0.0001413		1833.6	0.00255417		2363.6	0.00034295
243.79	0.07694829		773.8	-0.00654226		1303.79	0.00069324		1833.8	0.00243491		2363.8	0.00062062
243.99	0.07670819		774	-0.00592488		1303.99	0.000706		1834	0.00313953		2364	0.00133807
244.19	0.0769497		774.2	-0.00555757		1304.19	0.00107487		1834.2	0.00295081		2364.2	0.00183769
244.39	0.07626084		774.4	-0.00466553		1304.39	0.00077256		1834.4	0.00236424		2364.4	0.00205597
244.59	0.0754519		774.6	-0.00372726		1304.59	0.00106488		1834.6	0.00226047		2364.6	0.00268834
244.79	0.07532846		774.8	-0.00278614		1304.79	0.00021855		1834.8	0.00186435		2364.8	0.00225535
244.99	0.07567566		775	-0.00287951		1304.99	-0.00067841		1835	0.00181706		2365	0.00201104
245.19	0.07625403		775.2	-0.00272559		1305.19	-0.00071159		1835.2	0.00218293		2365.2	0.00112513
245.39	0.07706051		775.4	-0.0032429		1305.39	-0.00185106		1835.4	0.00290192		2365.4	0.00132951
245.59	0.07761475		775.6	-0.00274605		1305.59	-0.00289445		1835.6	0.00414582		2365.6	0.00112846
245.79	0.07918046		775.8	-0.00267502		1305.79	-0.00293204		1835.8	0.00523107		2365.8	0.00056208
245.99	0.08014165		776	-0.00250206		1305.99	-0.00302578		1836	0.00593443		2366	-0.00015655
246.19	0.08129303		776.2	-0.00346804		1306.19	-0.00300641		1836.2	0.00642922		2366.2	0.00003834
246.39	0.08153418		776.4	-0.00347882		1306.39	-0.00365972		1836.4	0.00695226		2366.4	-0.00029192
246.59	0.08206115		776.6	-0.00398733		1306.59	-0.00313393		1836.6	0.00732574		2366.6	-0.00104451
246.79	0.08160316		776.8	-0.00472527		1306.79	-0.00260556		1836.8	0.00747721		2366.8	-0.00095783
246.99	0.08191883		777	-0.00471002		1306.99	-0.00209802		1837	0.00657807		2367	-0.00042517
247.19	0.08156854		777.2	-0.00463325		1307.19	-0.00228415		1837.2	0.00592943		2367.2	-0.00085928
247.39	0.08254596		777.4	-0.00419402		1307.39	-0.00260595		1837.4	0.00603786		2367.4	-0.00153907
247.59	0.0819204		777.6	-0.00398169		1307.59	-0.00216077		1837.6	0.00596179		2367.6	-0.00170567
247.79	0.08195149		777.8	-0.00388638		1307.79	-0.00170966		1837.8	0.00611938		2367.8	-0.00168185
247.99	0.08200612		778	-0.00440059		1307.99	-0.0012834		1838	0.00591553		2368	-0.00150668
248.19	0.08219053		778.2	-0.00461448		1308.19	-0.00121808		1838.2	0.00489154		2368.2	-0.00106298
248.39	0.08118359		778.4	-0.00495629		1308.39	-0.00075315		1838.4	0.00445827		2368.4	-0.00108743
248.59	0.08129001		778.6	-0.00501236		1308.59	-0.00101572		1838.6	0.00445284		2368.6	0.00006606
248.79	0.0817911		778.8	-0.00544981		1308.79	-0.00102173		1838.8	0.00415506		2368.8	-0.00018052
248.99	0.08241961		779	-0.0065151		1308.99	0.00029345		1839	0.00406947		2369	0.00001243
249.19	0.08273		779.2	-0.0060673		1309.19	0.00141831		1839.2	0.00389034		2369.2	0.00035189
249.39	0.08327441		779.4	-0.00508873		1309.39	0.00118002		1839.4	0.00472286		2369.4	0.00108699
249.59	0.08334148		779.6	-0.0043674		1309.59	0.00190805		1839.6	0.00533759		2369.6	0.00113372
249.79	0.08411384		779.8	-0.00378923		1309.79	0.00239394		1839.8	0.00614739		2369.8	0.00141489
249.99	0.08380068		780	-0.00330556		1309.99	0.0025198		1840	0.00588875		2370	0.00171479
250.19	0.08299304		780.2	-0.00350694		1310.19	0.00299061		1840.2	0.00566496		2370.2	0.00151638
250.39	0.082456		780.4	-0.00292498		1310.39	0.00259014		1840.4	0.00609543		2370.4	0.00069113
250.59	0.08170762		780.6	-0.00287059		1310.59	0.00285953		1840.6	0.00616491		2370.6	0.00121826
250.79	0.08115678		780.8	-0.00376152		1310.79	0.00283616		1840.8	0.00532286		2370.8	0.00123078
250.99	0.081544		781	-0.00334797		1310.99	0.0029082		1841	0.00533785		2371	0.00041737
251.19	0.0812541		781.2	-0.00332452		1311.19	0.00190767		1841.2	0.00538059		2371.2	-0.00055016
251.39	0.08231661		781.4	-0.00256447		1311.39	0.00209767		1841.4	0.00565715		2371.4	-0.00110083
251.59	0.08231436		781.6	-0.00330544		1311.59	0.00179475		1841.6	0.00547159		2371.6	-0.0015703
251.79	0.082872		781.8	-0.00312648		1311.79	0.00134051		1841.8	0.00471116		2371.8	-0.0018744
251.99	0.0836267		782	-0.00337661		1311.99	0.00055351		1842	0.00340285		2372	-0.00181186
252.19	0.0835221		782.2	-0.00339936		1312.19	0.00027834		1842.2	0.00310918		2372.2	-0.00083589
252.39	0.08251707		782.4	-0.0044399		1312.39	0.00002746		1842.4	0.00292427		2372.4	-0.00057609
252.59	0.08201862		782.6	-0.00515535		1312.59	-0.00101999		1842.6	0.00263159		2372.6	0.00021205
252.79	0.08224109		782.8	-0.00543188		1312.79	-0.00051317		1842.8	0.00269669		2372.8	0.00068389
252.99	0.08237593		783	-0.00594144		1312.99	-0.0003047		1843	0.00248616		2373	0.00115099
253.19	0.08212818		783.2	-0.00559586		1313.19	-0.00104263		1843.2	0.00225493		2373.2	0.00265912
253.39	0.08175063		783.4	-0.00471879		1313.39	-0.00171427		1843.4	0.00253881		2373.4	0.0027651
253.59	0.08219831		783.6	-0.00469771		1313.59	-0.00215982		1843.6	0.00318952		2373.6	0.00330488
253.79	0.08186823		783.8	-0.00433558		1313.79	-0.00220241		1843.8	0.00400179		2373.8	0.0038002
253.99	0.08132518		784	-0.00406464		1313.99	-0.00147823		1844	0.00417413		2374	0.00439744
254.19	0.08216416		784.2	-0.00389343		1314.19	-0.00160481		1844.2	0.00444964		2374.2	0.00380199
254.39	0.08267075		784.4	-0.00272886		1314.39	-0.00156166		1844.4	0.00447733		2374.4	0.00347007
254.59	0.08311215		784.6	-0.00270287		1314.59	-0.00191397		1844.6	0.00435882		2374.6	0.00438927
254.79	0.08381533		784.8	-0.0024401		1314.79	-0.00143969		1844.8	0.00424747		2374.8	0.00372427
254.99	0.08472842		785	-0.00194134		1314.99	-0.00133011		1845	0.0033718		2375	0.0033606
255.19	0.08542619		785.2	-0.00159451		1315.19	-0.00119778		1845.2	0.00270742		2375.2	0.0032641
255.39	0.08669591		785.4	-0.0013939		1315.39	-0.0009015		1845.4	0.00247609		2375.4	0.00282268
255.59	0.0868791		785.6	-0.00208066		1315.59	-0.00039184		1845.6	0.00120199		2375.6	0.00224458
255.79	0.08729698		785.8	-0.00279437		1315.79	-0.00020537		1845.8	0.00087044		2375.8	0.00120631
255.99	0.08691698		786	-0.00331248		1315.99	-0.00049367		1846	0.00041378		2376	0.00117212
256.19	0.08603845		786.2	-0.00379477		1316.19	-0.00009804		1846.2	0.00096264		2376.2	0.00200976
256.39	0.08508169		786.4	-0.0050311		1316.39	-0.00072462		1846.4	0.00022771		2376.4	0.0015606
256.59	0.08494818		786.6	-0.00596923		1316.59	-0.00084954		1846.6	0.00025384		2376.6	0.00194459
256.79	0.08469417		786.8	-0.00573292		1316.79	-0.00062827		1846.8	0.00082281		2376.8	0.00288434
256.99	0.08402118		787	-0.00701575		1316.99	-0.00066291		1847	0.00101541		2377	0.00265922
257.19	0.08411918		787.2	-0.00758779		1317.19	-0.00097135		1847.2	0.00110198		2377.2	0.00323911
257.39	0.08396157		787.4	-0.00768714		1317.39	-0.00078027		1847.4	0.00246614		2377.4	0.00315846
257.59	0.08397682		787.6	-0.0069716		1317.59	-0.00107435		1847.6	0.00300287		2377.6	0.0034644
257.79	0.08381256		787.8	-0.00725603		1317.79	-0.0012754		1847.8	0.00231403		2377.8	0.00353188
257.99	0.0840959		788	-0.00655289		1317.99	-0.00138192		1848	0.00235901		2378	0.00349789
258.19	0.08438525		788.2	-0.0061423		1318.19	-0.00210934		1848.2	0.0020912		2378.2	0.00278659
258.39	0.08414091		788.4	-0.00480606		1318.39	-0.00160362		1848.4	0.00218846		2378.4	0.00270501
258.59	0.08541767		788.6	-0.004617		1318.59	-0.00256329		1848.6	0.00123309		2378.6	0.00283424
258.79	0.08550589		788.8	-0.00473138		1318.79	-0.00194401		1848.8	0.00051433		2378.8	0.00216719
258.99	0.08595148		789	-0.00384783		1318.99	-0.00107603		1849	0.00001998		2379	0.00252663
259.19	0.08611872		789.2	-0.00344135		1319.19	-0.0008435		1849.2	0.0008347		2379.2	0.0018368
259.39	0.08657972		789.4	-0.00295947		1319.39	0.00000588		1849.4	0.00080753		2379.4	0.00216562
259.59	0.0863595		789.6	-0.00386346		1319.59	0.00175218		1849.6	0.00034832		2379.6	0.00280069
259.79	0.08627821		789.8	-0.00389126		1319.79	0.00216266		1849.8	0.00051367		2379.8	0.00237817
259.99	0.08673841		790	-0.00307833		1319.99	0.00274684		1850	0.00100507		2380	0.00251986
260.19	0.08675766		790.2	-0.00276353		1320.19	0.00389984		1850.2	0.00152444		2380.2	0.0027061
260.39	0.08616233		790.4	-0.00369832		1320.39	0.00465289		1850.4	0.00142218		2380.4	0.00324583
260.59	0.08581484		790.6	-0.00460129		1320.59	0.00476042		1850.6	0.0013183		2380.6	0.00405634
260.79	0.08514056		790.8	-0.00410404		1320.79	0.00523171		1850.8	0.00132825		2380.8	0.00478135
260.99	0.08536698		791	-0.00528149		1320.99	0.00478429		1851	0.00157174		2381	0.00415377
261.19	0.08517452		791.2	-0.00536842		1321.19	0.00390379		1851.2	0.00138143		2381.2	0.00432171
261.39	0.08518864		791.4	-0.00510069		1321.39	0.00312408		1851.4	0.00198046		2381.4	0.00414767
261.59	0.08538863		791.6	-0.00489083		1321.59	0.00130464		1851.6	0.00109028		2381.6	0.00412901
261.79	0.0852455		791.8	-0.00558761		1321.79	0.0000146		1851.8	0.00112812		2381.8	0.00404557
261.99	0.08447902		792	-0.00604217		1321.99	-0.00066327		1852	0.00262054		2382	0.00385288
262.19	0.08470392		792.2	-0.00580649		1322.19	-0.00120096		1852.2	0.00275478		2382.2	0.00346448
262.39	0.08472418		792.4	-0.0055122		1322.39	-0.00152081		1852.4	0.00252515		2382.4	0.00333182
262.59	0.08490952		792.6	-0.00538844		1322.59	-0.00236919		1852.6	0.00234216		2382.6	0.00300765
262.79	0.08476715		792.8	-0.00564581		1322.79	-0.00291934		1852.8	0.00261205		2382.8	0.00321404
262.99	0.08480706		793	-0.00457119		1322.99	-0.00238752		1853	0.00298953		2383	0.00325245
263.19	0.08485013		793.2	-0.00403413		1323.19	-0.00130109		1853.2	0.0034852		2383.2	0.00255566
263.39	0.08513699		793.4	-0.00328321		1323.39	0.00031257		1853.4	0.00355806		2383.4	0.00367097
263.59	0.08584832		793.6	-0.00338375		1323.59	0.00078816		1853.6	0.0033738		2383.6	0.00359392
263.79	0.08652728		793.8	-0.00243073		1323.79	0.00037611		1853.8	0.00278919		2383.8	0.00287978
263.99	0.08701809		794	-0.0016601		1323.99	0.00176366		1854	0.00299641		2384	0.0022414
264.19	0.08647818		794.2	-0.0023225		1324.19	0.00224278		1854.2	0.00312876		2384.2	0.0023322
264.39	0.0869922		794.4	-0.00274691		1324.39	0.0028722		1854.4	0.00259854		2384.4	0.0026749
264.59	0.08817092		794.6	-0.00293474		1324.59	0.00227594		1854.6	0.00144739		2384.6	0.00211977
264.79	0.08913554		794.8	-0.00274745		1324.79	0.00294502		1854.8	0.00168721		2384.8	0.00186986
264.99	0.08958472		795	-0.00318889		1324.99	0.00258607		1855	0.00212634		2385	0.0012959
265.19	0.09050426		795.2	-0.0039829		1325.19	0.00255694		1855.2	0.00187958		2385.2	0.00108602
265.39	0.09198577		795.4	-0.00447855		1325.39	0.00194851		1855.4	0.00152283		2385.4	0.00111691
265.59	0.09209359		795.6	-0.00483405		1325.59	0.00172948		1855.6	0.00171456		2385.6	0.00185007
265.79	0.09094991		795.8	-0.00491288		1325.79	0.00145177		1855.8	0.00283951		2385.8	0.00203734
265.99	0.09025547		796	-0.00486909		1325.99	0.00109144		1856	0.00343112		2386	0.00223415
266.19	0.09019979		796.2	-0.00508164		1326.19	0.00088909		1856.2	0.00320182		2386.2	0.00244916
266.39	0.089638		796.4	-0.00524093		1326.39	0.00054696		1856.4	0.00322494		2386.4	0.00292309
266.59	0.08945671		796.6	-0.00595427		1326.59	-0.00050761		1856.6	0.00422708		2386.6	0.00267752
266.79	0.08903488		796.8	-0.00624296		1326.79	-0.00069797		1856.8	0.00491912		2386.8	0.00304872
266.99	0.08798635		797	-0.00548172		1326.99	0.0001777		1857	0.00502044		2387	0.00269548
267.19	0.08820303		797.2	-0.0049864		1327.19	0.00073842		1857.2	0.00532516		2387.2	0.00304114
267.39	0.0880324		797.4	-0.00434382		1327.39	0.00063997		1857.4	0.00622717		2387.4	0.0031673
267.59	0.08773402		797.6	-0.00459398		1327.59	-0.0006825		1857.6	0.00617746		2387.6	0.00244379
267.79	0.0874935		797.8	-0.00420189		1327.79	-0.00010905		1857.8	0.00597457		2387.8	0.00277703
267.99	0.08714886		798	-0.00451351		1327.99	0.00067613		1858	0.00626984		2388	0.00217836
268.19	0.08780542		798.2	-0.00438834		1328.19	0.0004303		1858.2	0.00638774		2388.2	0.00206171
268.39	0.08918113		798.4	-0.00353921		1328.39	0.00062435		1858.4	0.00556249		2388.4	0.00200324
268.59	0.08936102		798.6	-0.00370724		1328.59	0.00083908		1858.6	0.00490056		2388.6	0.00211658
268.79	0.08932532		798.8	-0.00306599		1328.79	0.00142162		1858.8	0.00474204		2388.8	0.00196397
268.99	0.0905112		799	-0.00262391		1328.99	0.00182623		1859	0.00429244		2389	0.00184055
269.19	0.09135506		799.2	-0.00298748		1329.19	0.00264072		1859.2	0.00388635		2389.2	0.00184929
269.39	0.09154335		799.4	-0.00238634		1329.39	0.00250134		1859.4	0.0030966		2389.4	0.00232886
269.59	0.09081891		799.6	-0.00143925		1329.59	0.00267636		1859.6	0.00330015		2389.6	0.00251625
269.79	0.08977622		799.8	-0.00178548		1329.79	0.00287137		1859.8	0.00309564		2389.8	0.00182172
269.99	0.08973242		800	-0.00155513		1329.99	0.00291246		1860	0.00286371		2390	0.00148118
270.19	0.08983415		800.2	-0.00286187		1330.19	0.00289077		1860.2	0.00205187		2390.2	0.00141166
270.39	0.08973737		800.4	-0.00374918		1330.39	0.00294515		1860.4	0.00200348		2390.4	0.00138781
270.59	0.08947876		800.6	-0.0045164		1330.59	0.00260413		1860.6	0.00207289		2390.6	0.00073557
270.79	0.08872486		800.8	-0.0040799		1330.79	0.00215141		1860.8	0.00225812		2390.8	0.00033128
270.99	0.08852735		801	-0.00445317		1330.99	0.00227682		1861	0.00178654		2391	-0.00023751
271.19	0.08933694		801.2	-0.00498237		1331.19	0.00155144		1861.2	0.00238396		2391.2	-0.00045259
271.39	0.08924668		801.4	-0.00516677		1331.39	0.0015563		1861.4	0.00333656		2391.4	-0.00118
271.59	0.08948273		801.6	-0.00617307		1331.59	0.00145294		1861.6	0.00297482		2391.6	-0.00090259
271.79	0.08973766		801.8	-0.00615856		1331.79	0.00225114		1861.8	0.00333179		2391.8	-0.00030732
271.99	0.0901519		802	-0.0070382		1331.99	0.00181463		1862	0.00319344		2392	-0.00046563
272.19	0.09000595		802.2	-0.00686207		1332.19	0.00150679		1862.2	0.00314216		2392.2	-0.00002831
272.39	0.09005568		802.4	-0.00659351		1332.39	0.00123261		1862.4	0.00338037		2392.4	0.00074005
272.59	0.09032473		802.6	-0.00727055		1332.59	0.00159109		1862.6	0.00321626		2392.6	0.00102604
272.79	0.09125351		802.8	-0.00694039		1332.79	0.00094332		1862.8	0.00401499		2392.8	0.00067918
272.99	0.09253782		803	-0.00697308		1332.99	0.00052233		1863	0.00470725		2393	0.00136724
273.19	0.09266011		803.2	-0.00627534		1333.19	0.00043396		1863.2	0.00535771		2393.2	0.00148999
273.39	0.09282913		803.4	-0.00550032		1333.39	-0.00061337		1863.4	0.0049775		2393.4	0.00159759
273.59	0.09200041		803.6	-0.00444761		1333.59	-0.00072976		1863.6	0.00523693		2393.6	0.00129293
273.79	0.09172312		803.8	-0.0045394		1333.79	0.0002524		1863.8	0.00539975		2393.8	0.00062832
273.99	0.09186		804	-0.00355135		1333.99	-0.00049257		1864	0.00555056		2394	0.00101186
274.19	0.09105108		804.2	-0.00341524		1334.19	-0.00102287		1864.2	0.00522916		2394.2	0.00097433
274.39	0.09051811		804.4	-0.00278379		1334.39	-0.00155948		1864.4	0.00522561		2394.4	0.00054565
274.59	0.08975421		804.6	-0.00152652		1334.59	-0.00218299		1864.6	0.00477267		2394.6	-0.00000228
274.79	0.08928454		804.8	-0.00092928		1334.79	-0.0025693		1864.8	0.00533246		2394.8	-0.00015672
274.99	0.08852367		805	-0.00138462		1334.99	-0.00200442		1865	0.00577641		2395	-0.00076817
275.19	0.08877923		805.2	-0.00046726		1335.19	-0.00154446		1865.2	0.00592652		2395.2	-0.00028853
275.39	0.08791047		805.4	-0.0004659		1335.39	-0.00063799		1865.4	0.00687788		2395.4	0.00010522
275.59	0.08789801		805.6	-0.00066733		1335.59	-0.00017959		1865.6	0.00722047		2395.6	0.0009261
275.79	0.08783395		805.8	-0.00066893		1335.79	0.00019052		1865.8	0.00752731		2395.8	0.00102031
275.99	0.08810838		806	-0.00104098		1335.99	0.00088896		1866	0.00754224		2396	0.00155572
276.19	0.08811637		806.2	-0.0010156		1336.19	0.00118571		1866.2	0.00736806		2396.2	0.00261472
276.39	0.08955144		806.4	-0.00162276		1336.39	0.00201619		1866.4	0.0076934		2396.4	0.00367665
276.59	0.09062661		806.6	-0.0026875		1336.59	0.00162653		1866.6	0.00827671		2396.6	0.00390382
276.79	0.09172807		806.8	-0.00269398		1336.79	0.00184529		1866.8	0.00903382		2396.8	0.00413419
276.99	0.09285697		807	-0.00305623		1336.99	0.00206958		1867	0.00894725		2397	0.00337358
277.19	0.09394448		807.2	-0.0031313		1337.19	0.0030736		1867.2	0.00847603		2397.2	0.00269558
277.39	0.09478847		807.4	-0.00431427		1337.39	0.00355324		1867.4	0.00793444		2397.4	0.00247708
277.59	0.09585794		807.6	-0.00445514		1337.59	0.00391272		1867.6	0.0080533		2397.6	0.00186457
277.79	0.0972901		807.8	-0.00582453		1337.79	0.00373709		1867.8	0.00756563		2397.8	0.00114544
277.99	0.09761136		808	-0.00561814		1337.99	0.00236017		1868	0.00720759		2398	0.00089306
278.19	0.09722798		808.2	-0.00593059		1338.19	0.00216677		1868.2	0.0065075		2398.2	0.00023541
278.39	0.09745053		808.4	-0.00629709		1338.39	0.00240347		1868.4	0.00565952		2398.4	-0.00023733
278.59	0.09667023		808.6	-0.00653578		1338.59	0.00283664		1868.6	0.00431853		2398.6	-0.00054688
278.79	0.09700517		808.8	-0.00749998		1338.79	0.00332182		1868.8	0.00400681		2398.8	-0.00105249
278.99	0.09651127		809	-0.00749786		1338.99	0.00403499		1869	0.00364181		2399	-0.00202102
279.19	0.09637672		809.2	-0.00726378		1339.19	0.00460546		1869.2	0.002971		2399.2	-0.0016189
279.39	0.09572748		809.4	-0.00747365		1339.39	0.0039524		1869.4	0.00339651		2399.4	-0.00174759
279.59	0.09482641		809.6	-0.00726193		1339.59	0.00468323		1869.6	0.0030661		2399.6	-0.00118714
279.79	0.09383849		809.8	-0.00700389		1339.79	0.00498707		1869.8	0.00327569		2399.8	-0.00061396
279.99	0.09342791		810	-0.00665285		1339.99	0.00492717		1870	0.00330274		2400	0.00020047
280.19	0.09273758		810.2	-0.00632891		1340.19	0.00506958		1870.2	0.00270228		2400.2	0.0016971
280.39	0.09182499		810.4	-0.00588194		1340.39	0.00493519		1870.4	0.00384929		2400.4	0.00214829
280.59	0.09130468		810.6	-0.00500854		1340.59	0.00479779		1870.6	0.00415542		2400.6	0.00207395
280.79	0.09113495		810.8	-0.00414944		1340.79	0.00463981		1870.8	0.00368171		2400.8	0.00147439
280.99	0.09118444		811	-0.00384974		1340.99	0.00463856		1871	0.00383901		2401	0.00055625
281.19	0.09062867		811.2	-0.00415032		1341.19	0.00455866		1871.2	0.00419242		2401.2	0.00114165
281.39	0.09047796		811.4	-0.00388081		1341.39	0.00376393		1871.4	0.00483568		2401.4	0.0007769
281.59	0.09077126		811.6	-0.00325587		1341.59	0.00275864		1871.6	0.00514235		2401.6	0.00032286
281.79	0.09043691		811.8	-0.00289211		1341.79	0.00191906		1871.8	0.00518799		2401.8	-0.0000046
281.99	0.09011419		812	-0.0022891		1341.99	0.00188824		1872	0.00543367		2402	-0.00024299
282.19	0.08993563		812.2	-0.00197904		1342.19	0.0020739		1872.2	0.00514513		2402.2	-0.00014351
282.39	0.09065447		812.4	-0.00186801		1342.39	0.00232197		1872.4	0.00497498		2402.4	-0.00035669
282.59	0.0915252		812.6	-0.00225181		1342.59	0.00280647		1872.6	0.00366515		2402.6	-0.00012476
282.79	0.09277928		812.8	-0.00241758		1342.79	0.00363671		1872.8	0.00413177		2402.8	0.0004593
282.99	0.09265084		813	-0.00204016		1342.99	0.00438534		1873	0.00421047		2403	0.00003831
283.19	0.09342619		813.2	-0.00209601		1343.19	0.00411244		1873.2	0.00429177		2403.2	0.0012598
283.39	0.09329003		813.4	-0.00258736		1343.39	0.00345598		1873.4	0.00432586		2403.4	0.00188686
283.59	0.09348076		813.6	-0.0024195		1343.59	0.00506216		1873.6	0.00451763		2403.6	0.00212284
283.79	0.09422844		813.8	-0.00258717		1343.79	0.00463179		1873.8	0.00454814		2403.8	0.00238927
283.99	0.09551113		814	-0.00253931		1343.99	0.0048047		1874	0.00389324		2404	0.00250954
284.19	0.09547483		814.2	-0.00272283		1344.19	0.00509997		1874.2	0.00323182		2404.2	0.00297592
284.39	0.09536632		814.4	-0.00265853		1344.39	0.00436753		1874.4	0.00404714		2404.4	0.00374822
284.59	0.09622795		814.6	-0.00184171		1344.59	0.00397413		1874.6	0.00359605		2404.6	0.00365472
284.79	0.09643875		814.8	-0.00176374		1344.79	0.00385165		1874.8	0.00358167		2404.8	0.00324397
284.99	0.09697431		815	-0.00166952		1344.99	0.00383825		1875	0.00420112		2405	0.00269401
285.19	0.09669462		815.2	-0.00225957		1345.19	0.0038428		1875.2	0.00385206		2405.2	0.00324689
285.39	0.09705382		815.4	-0.00185173		1345.39	0.00340259		1875.4	0.00310777		2405.4	0.00262717
285.59	0.09650245		815.6	-0.00237193		1345.59	0.00315293		1875.6	0.0034513		2405.6	0.00231592
285.79	0.09614914		815.8	-0.00244611		1345.79	0.003076		1875.8	0.0038069		2405.8	0.00202174
285.99	0.09672601		816	-0.00250954		1345.99	0.00338547		1876	0.00340335		2406	0.00169816
286.19	0.09636486		816.2	-0.00285345		1346.19	0.00252977		1876.2	0.00374913		2406.2	0.00138259
286.39	0.09675904		816.4	-0.00311596		1346.39	0.0025609		1876.4	0.00435312		2406.4	0.00099559
286.59	0.09660043		816.6	-0.00332923		1346.59	0.00381264		1876.6	0.00502936		2406.6	0.00119838
286.79	0.09593036		816.8	-0.00314473		1346.79	0.00338863		1876.8	0.00641266		2406.8	0.00127515
286.99	0.09526461		817	-0.00354693		1346.99	0.00287087		1877	0.00631621		2407	0.00030109
287.19	0.0955438		817.2	-0.00348183		1347.19	0.00249143		1877.2	0.00618056		2407.2	0.00046852
287.39	0.09507727		817.4	-0.00371147		1347.39	0.00244632		1877.4	0.00596232		2407.4	0.00014979
287.59	0.09605921		817.6	-0.00373884		1347.59	0.00343159		1877.6	0.00568716		2407.6	0.00005505
287.79	0.0959119		817.8	-0.00444266		1347.79	0.00280168		1877.8	0.00503384		2407.8	0.00072033
287.99	0.0960512		818	-0.00456558		1347.99	0.00201839		1878	0.00507807		2408	0.00060186
288.19	0.09573973		818.2	-0.00497919		1348.19	0.00184848		1878.2	0.00497422		2408.2	0.00128337
288.39	0.0956625		818.4	-0.00447017		1348.39	0.0015085		1878.4	0.00595299		2408.4	0.00150712
288.59	0.0961678		818.6	-0.00456489		1348.59	0.00194401		1878.6	0.0061894		2408.6	0.001112
288.79	0.0969913		818.8	-0.00491142		1348.79	0.00247645		1878.8	0.0051613		2408.8	0.00064626
288.99	0.09688949		819	-0.00448553		1348.99	0.0020139		1879	0.00504858		2409	0.00077216
289.19	0.09604077		819.2	-0.00491058		1349.19	0.0023536		1879.2	0.00392367		2409.2	0.00098583
289.39	0.09559405		819.4	-0.00441339		1349.39	0.00181697		1879.4	0.0035851		2409.4	0.00063225
289.59	0.09510285		819.6	-0.00394683		1349.59	0.00162919		1879.6	0.00452437		2409.6	0.0005847
289.79	0.09456553		819.8	-0.00302923		1349.79	0.00226625		1879.8	0.00434315		2409.8	0.00070521
289.99	0.09452133		820	-0.00233905		1349.99	0.00201254		1880	0.00411875		2410	0.00036808
290.19	0.09377492		820.2	-0.0031622		1350.19	0.00176992		1880.2	0.00545028		2410.2	0.00064818
290.39	0.0933332		820.4	-0.00264491		1350.39	0.00252104		1880.4	0.00615005		2410.4	0.00032077
290.59	0.09251138		820.6	-0.00274422		1350.59	0.00355293		1880.6	0.00687422		2410.6	-0.00006866
290.79	0.09230412		820.8	-0.00244402		1350.79	0.00337628		1880.8	0.00765673		2410.8	0.00004987
290.99	0.0929062		821	-0.0020476		1350.99	0.00379063		1881	0.00794542		2411	-0.00067124
291.19	0.0930415		821.2	-0.00154364		1351.19	0.00361008		1881.2	0.0080157		2411.2	-0.00046114
291.39	0.09368958		821.4	-0.00146386		1351.39	0.00351566		1881.4	0.00788438		2411.4	0.00043529
291.59	0.09431417		821.6	-0.00177055		1351.59	0.00302099		1881.6	0.00704641		2411.6	0.00064331
291.79	0.0945645		821.8	-0.00172193		1351.79	0.00374183		1881.8	0.00741742		2411.8	0.00113556
291.99	0.09592554		822	-0.00211132		1351.99	0.00288684		1882	0.00821358		2412	0.00112703
292.19	0.09642352		822.2	-0.00240421		1352.19	0.00229043		1882.2	0.00844519		2412.2	0.00149581
292.39	0.09738356		822.4	-0.00271957		1352.39	0.00149509		1882.4	0.00875122		2412.4	0.00127989
292.59	0.09817725		822.6	-0.00252758		1352.59	0.00131757		1882.6	0.00786641		2412.6	0.00126672
292.79	0.09848922		822.8	-0.00202299		1352.79	0.00091847		1882.8	0.00644199		2412.8	0.00033329
292.99	0.09777567		823	-0.00186777		1352.99	0.00064675		1883	0.00634231		2413	0.00042575
293.19	0.09828206		823.2	-0.0020412		1353.19	0.00074204		1883.2	0.00595997		2413.2	-0.00072459
293.39	0.09943735		823.4	-0.00173669		1353.39	0.00090015		1883.4	0.00558818		2413.4	-0.00075666
293.59	0.09935461		823.6	-0.0010488		1353.59	0.00076331		1883.6	0.00558496		2413.6	-0.00067124
293.79	0.09835481		823.8	-0.00188537		1353.79	0.00133079		1883.8	0.00556236		2413.8	-0.00030938
293.99	0.09845621		824	-0.00117599		1353.99	0.00119413		1884	0.00535891		2414	0.00011841
294.19	0.09791435		824.2	-0.00137665		1354.19	0.00198642		1884.2	0.00608461		2414.2	0.0005327
294.39	0.09779687		824.4	-0.00082748		1354.39	0.00268147		1884.4	0.00620372		2414.4	0.00030487
294.59	0.09799412		824.6	-0.00082959		1354.59	0.00334383		1884.6	0.00716596		2414.6	0.00068303
294.79	0.0986352		824.8	-0.00053754		1354.79	0.0043922		1884.8	0.00889319		2414.8	0.00132092
294.99	0.0985114		825	-0.00054783		1354.99	0.00470513		1885	0.0087343		2415	0.00062413
295.19	0.09746749		825.2	-0.00112886		1355.19	0.00486427		1885.2	0.00879387		2415.2	0.00069653
295.39	0.09778713		825.4	-0.00062907		1355.39	0.00503056		1885.4	0.00855732		2415.4	0.00097504
295.59	0.09679941		825.6	-0.00047429		1355.59	0.00482237		1885.6	0.00873928		2415.6	0.00080241
295.79	0.09660871		825.8	-0.00114488		1355.79	0.00534222		1885.8	0.00934174		2415.8	0.00095677
295.99	0.09689693		826	-0.00084924		1355.99	0.00344515		1886	0.00973286		2416	0.00091217
296.19	0.09748516		826.2	-0.00036312		1356.19	0.00279121		1886.2	0.00891395		2416.2	0.00010192
296.39	0.09806333		826.4	0.00032118		1356.39	0.00317539		1886.4	0.008713		2416.4	-0.00040667
296.59	0.0982652		826.6	0.00148968		1356.59	0.00298479		1886.6	0.00812091		2416.6	-0.00159706
296.79	0.09728399		826.8	0.00108295		1356.79	0.00266621		1886.8	0.00775479		2416.8	-0.00254912
296.99	0.09676401		827	0.00086995		1356.99	0.00254564		1887	0.00709756		2417	-0.00314809
297.19	0.09787417		827.2	0.00032121		1357.19	0.00262389		1887.2	0.00687428		2417.2	-0.00386001
297.39	0.09771613		827.4	-0.00005717		1357.39	0.00285217		1887.4	0.00641921		2417.4	-0.00395955
297.59	0.09735384		827.6	-0.00027652		1357.59	0.00265503		1887.6	0.00569999		2417.6	-0.00351973
297.79	0.09720366		827.8	-0.00081772		1357.79	0.00323223		1887.8	0.00517216		2417.8	-0.00296097
297.99	0.0974025		828	-0.00024495		1357.99	0.0032525		1888	0.00444342		2418	-0.00239777
298.19	0.0983645		828.2	-0.00111125		1358.19	0.00359187		1888.2	0.00447443		2418.2	-0.00135528
298.39	0.09903465		828.4	-0.0013586		1358.39	0.00391245		1888.4	0.00484575		2418.4	-0.00020896
298.59	0.0989695		828.6	-0.00200904		1358.59	0.0042628		1888.6	0.00499721		2418.6	-0.00031504
298.79	0.09850753		828.8	-0.00259913		1358.79	0.00478966		1888.8	0.00538594		2418.8	-0.00083453
298.99	0.098282		829	-0.00372787		1358.99	0.00423982		1889	0.004397		2419	-0.00134256
299.19	0.09805429		829.2	-0.00466366		1359.19	0.00380159		1889.2	0.0050187		2419.2	-0.00132498
299.39	0.09867724		829.4	-0.00388194		1359.39	0.00245117		1889.4	0.00461747		2419.4	-0.00084756
299.59	0.09800756		829.6	-0.00412264		1359.59	0.00175833		1889.6	0.00511086		2419.6	-0.00079365
299.79	0.098347		829.8	-0.0040269		1359.79	0.00125061		1889.8	0.00489429		2419.8	-0.0008916
299.99	0.09854303		830	-0.00283512		1359.99	0.00116861		1890	0.00553665		2420	-0.00076098
300.19	0.09914063		830.2	-0.00264673		1360.19	0.00108678		1890.2	0.00613301		2420.2	-0.00172711
300.39	0.09951713		830.4	-0.00157844		1360.39	0.00110076		1890.4	0.00779846		2420.4	-0.00141832
300.59	0.09919433		830.6	-0.00133776		1360.59	0.00047375		1890.6	0.00771918		2420.6	-0.00219048
300.79	0.0982866		830.8	-0.00121748		1360.79	0.00081837		1890.8	0.00725508		2420.8	-0.00173709
300.99	0.09786394		831	-0.00096344		1360.99	0.00154891		1891	0.00691731		2421	-0.00181254
301.19	0.09766531		831.2	-0.00114807		1361.19	0.00205107		1891.2	0.00701489		2421.2	-0.00179085
301.39	0.09687353		831.4	-0.00066872		1361.39	0.00240655		1891.4	0.00753824		2421.4	-0.0019479
301.59	0.09711333		831.6	-0.00020197		1361.59	0.00313303		1891.6	0.00706381		2421.6	-0.00192136
301.79	0.09707164		831.8	-0.00003249		1361.79	0.00456518		1891.8	0.00779758		2421.8	-0.00170167
301.99	0.09785826		832	0.00012138		1361.99	0.00422235		1892	0.00832167		2422	-0.00105583
302.19	0.09797272		832.2	0.00019973		1362.19	0.00444788		1892.2	0.00946114		2422.2	-0.00024142
302.39	0.09771879		832.4	0.00009281		1362.39	0.00446175		1892.4	0.00971603		2422.4	0.00006679
302.59	0.09744072		832.6	0.00065212		1362.59	0.00441342		1892.6	0.00955446		2422.6	-0.00064635
302.79	0.09754519		832.8	-0.00041844		1362.79	0.00429164		1892.8	0.0084999		2422.8	-0.00101127
302.99	0.09730833		833	-0.0015198		1362.99	0.00383503		1893	0.00783182		2423	-0.00097742
303.19	0.0972407		833.2	-0.00170748		1363.19	0.00305476		1893.2	0.00854368		2423.2	-0.00124074
303.39	0.09723828		833.4	-0.00100132		1363.39	0.00214209		1893.4	0.00755402		2423.4	-0.00070629
303.59	0.09699792		833.6	-0.00108337		1363.59	0.00233336		1893.6	0.00737247		2423.6	-0.0000658
303.79	0.09690445		833.8	-0.00108016		1363.79	0.00217719		1893.8	0.00663987		2423.8	0.00009784
303.99	0.09695576		834	-0.00117083		1363.99	0.00230523		1894	0.00808277		2424	0.00027185
304.19	0.09790189		834.2	-0.00137361		1364.19	0.00239037		1894.2	0.00768028		2424.2	0.0002716
304.39	0.09874575		834.4	-0.00143774		1364.39	0.00200522		1894.4	0.00725477		2424.4	0.00000013
304.59	0.0976574		834.6	-0.00161601		1364.59	0.00236416		1894.6	0.00617403		2424.6	-0.00072773
304.79	0.09749703		834.8	-0.0011308		1364.79	0.00254555		1894.8	0.00607408		2424.8	-0.0009207
304.99	0.09703004		835	-0.00070478		1364.99	0.00299867		1895	0.00643325		2425	-0.00143947
305.19	0.09758844		835.2	-0.00017282		1365.19	0.00328948		1895.2	0.00685926		2425.2	-0.00215434
305.39	0.09860931		835.4	0.00036114		1365.39	0.00395575		1895.4	0.00756501		2425.4	-0.00179661
305.59	0.09863903		835.6	-0.00014298		1365.59	0.00502052		1895.6	0.00803952		2425.6	-0.00184692
305.79	0.09963612		835.8	0.00051191		1365.79	0.00556397		1895.8	0.00866552		2425.8	-0.00065279
305.99	0.10048428		836	0.00141572		1365.99	0.0049752		1896	0.00931434		2426	-0.00049641
306.19	0.09929924		836.2	0.00097613		1366.19	0.00565342		1896.2	0.00982037		2426.2	0.00021849
306.39	0.09961839		836.4	0.0005942		1366.39	0.00582423		1896.4	0.00924452		2426.4	0.00045355
306.59	0.09920877		836.6	0.00057132		1366.59	0.00608711		1896.6	0.00826921		2426.6	-0.00039646
306.79	0.09898345		836.8	-0.00078069		1366.79	0.00549323		1896.8	0.00707509		2426.8	0.00003615
306.99	0.09828946		837	-0.0012052		1366.99	0.00520384		1897	0.00786257		2427	0.0000976
307.19	0.09824312		837.2	-0.00145108		1367.19	0.00444205		1897.2	0.0077958		2427.2	0.00022352
307.39	0.09773405		837.4	-0.00234398		1367.39	0.00399585		1897.4	0.00680315		2427.4	0.0013195
307.59	0.09838268		837.6	-0.00290982		1367.59	0.00360203		1897.6	0.00584517		2427.6	0.0020986
307.79	0.09800849		837.8	-0.00371012		1367.79	0.00331194		1897.8	0.00569794		2427.8	0.00142379
307.99	0.09812766		838	-0.00463327		1367.99	0.00329594		1898	0.00589001		2428	0.00108705
308.19	0.09885884		838.2	-0.00519026		1368.19	0.00299772		1898.2	0.00409483		2428.2	0.00061717
308.39	0.09899028		838.4	-0.00522546		1368.39	0.00218292		1898.4	0.00443817		2428.4	-0.00101863
308.59	0.09892786		838.6	-0.00487673		1368.59	0.00269408		1898.6	0.00434798		2428.6	-0.00096663
308.79	0.09923859		838.8	-0.00482469		1368.79	0.00209418		1898.8	0.00478715		2428.8	-0.00179625
308.99	0.09974554		839	-0.00519194		1368.99	0.00245593		1899	0.00531469		2429	-0.00157953
309.19	0.10043142		839.2	-0.00500356		1369.19	0.00286804		1899.2	0.00504295		2429.2	-0.00248089
309.39	0.1006904		839.4	-0.00531994		1369.39	0.00281003		1899.4	0.00566234		2429.4	-0.00146888
309.59	0.10099099		839.6	-0.00536037		1369.59	0.00362992		1899.6	0.00618304		2429.6	-0.00179248
309.79	0.10124785		839.8	-0.00388825		1369.79	0.00365045		1899.8	0.00675591		2429.8	-0.00161115
309.99	0.10066325		840	-0.00386803		1369.99	0.00431051		1900	0.00770294		2430	-0.00216087
310.19	0.10026518		840.2	-0.00402049		1370.19	0.00464367		1900.2	0.00798903		2430.2	-0.0016621
310.39	0.1007252		840.4	-0.00326738		1370.39	0.00386629		1900.4	0.00820704		2430.4	-0.00159451
310.59	0.1008899		840.6	-0.0026445		1370.59	0.00323687		1900.6	0.00894613		2430.6	-0.00138214
310.79	0.10115267		840.8	-0.00196385		1370.79	0.00276955		1900.8	0.00994132		2430.8	-0.00025799
310.99	0.10147817		841	-0.00206234		1370.99	0.00255524		1901	0.01058123		2431	-0.00119152
311.19	0.10161989		841.2	-0.0015705		1371.19	0.00286208		1901.2	0.01027445		2431.2	-0.00119531
311.39	0.10189153		841.4	-0.00136742		1371.39	0.00251946		1901.4	0.01049203		2431.4	-0.00047337
311.59	0.10220295		841.6	-0.00053594		1371.59	0.00283371		1901.6	0.00993631		2431.6	-0.00035934
311.79	0.10150328		841.8	-0.00069758		1371.79	0.00276345		1901.8	0.00971023		2431.8	-0.00072398
311.99	0.10218715		842	0.00024155		1371.99	0.00262905		1902	0.00894964		2432	-0.00116484
312.19	0.10265944		842.2	-0.00024229		1372.19	0.00289383		1902.2	0.00815829		2432.2	-0.001301
312.39	0.10238311		842.4	0.00020894		1372.39	0.00246426		1902.4	0.00770907		2432.4	-0.00158893
312.59	0.10211508		842.6	0.00005668		1372.59	0.00173564		1902.6	0.00669285		2432.6	-0.00045063
312.79	0.10219028		842.8	-0.00010428		1372.79	0.00158544		1902.8	0.00595115		2432.8	-0.00083682
312.99	0.1020211		843	-0.00098254		1372.99	0.00232845		1903	0.00511899		2433	-0.00074508
313.19	0.1018533		843.2	-0.00070894		1373.19	0.00276155		1903.2	0.00402088		2433.2	-0.00088708
313.39	0.10239741		843.4	-0.00122644		1373.39	0.00214032		1903.4	0.00403179		2433.4	-0.00022293
313.59	0.10217655		843.6	-0.00129807		1373.59	0.00249121		1903.6	0.00385424		2433.6	0.00014676
313.79	0.10209665		843.8	-0.00060632		1373.79	0.00262058		1903.8	0.00441543		2433.8	0.00026084
313.99	0.10207053		844	-0.00104325		1373.99	0.00343431		1904	0.00507623		2434	0.00011236
314.19	0.10227727		844.2	-0.00070948		1374.19	0.00361783		1904.2	0.00528933		2434.2	0.00065163
314.39	0.10245568		844.4	0.00023871		1374.39	0.0025469		1904.4	0.00581375		2434.4	0.0016092
314.59	0.10266847		844.6	0.00016507		1374.59	0.00289089		1904.6	0.00638883		2434.6	0.00142844
314.79	0.10272567		844.8	0.00080952		1374.79	0.00296958		1904.8	0.00722544		2434.8	0.00108866
314.99	0.1026468		845	0.00044993		1374.99	0.00258213		1905	0.00790554		2435	0.0006261
315.19	0.10204847		845.2	0.00124838		1375.19	0.00276579		1905.2	0.00921124		2435.2	0.00091512
315.39	0.10200381		845.4	0.00136046		1375.39	0.00205115		1905.4	0.01047691		2435.4	0.00087251
315.59	0.10157398		845.6	0.00137636		1375.59	0.0020328		1905.6	0.01042763		2435.6	0.00077528
315.79	0.1010608		845.8	0.00114278		1375.79	0.0014461		1905.8	0.00986028		2435.8	0.00054666
315.99	0.10106618		846	0.00138412		1375.99	0.0014135		1906	0.01019886		2436	0.00035454
316.19	0.10030852		846.2	0.00037322		1376.19	0.00174447		1906.2	0.00961923		2436.2	0.00136307
316.39	0.09997226		846.4	0.00101328		1376.39	0.00073204		1906.4	0.00900674		2436.4	0.00144756
316.59	0.09929975		846.6	0.00084395		1376.59	0.00085666		1906.6	0.0078955		2436.6	0.00096418
316.79	0.09925304		846.8	0.00044935		1376.79	0.00213912		1906.8	0.00723951		2436.8	0.00034838
316.99	0.09924539		847	-0.00010231		1376.99	0.00302635		1907	0.00664426		2437	0.00017296
317.19	0.09961172		847.2	-0.0009635		1377.19	0.00334245		1907.2	0.00646803		2437.2	-0.0005335
317.39	0.09996416		847.4	-0.00146486		1377.39	0.00300568		1907.4	0.00635288		2437.4	-0.00152797
317.59	0.10029109		847.6	-0.00085976		1377.59	0.00426505		1907.6	0.00667972		2437.6	-0.00131528
317.79	0.10156043		847.8	-0.0005576		1377.79	0.00552185		1907.8	0.00671031		2437.8	-0.00212097
317.99	0.10164586		848	-0.00020911		1377.99	0.00612414		1908	0.00690804		2438	-0.00220534
318.19	0.10268548		848.2	-0.00024024		1378.19	0.00664693		1908.2	0.00668882		2438.2	-0.00183081
318.39	0.10329807		848.4	0.00042443		1378.39	0.00594119		1908.4	0.00685194		2438.4	-0.00095115
318.59	0.1033768		848.6	0.00049715		1378.59	0.0056372		1908.6	0.00732151		2438.6	-0.00112488
318.79	0.10296407		848.8	0.0004919		1378.79	0.00526733		1908.8	0.00789277		2438.8	-0.00146799
318.99	0.10286702		849	0.00019372		1378.99	0.00516		1909	0.00900212		2439	-0.00113939
319.19	0.1027938		849.2	0.00103688		1379.19	0.00539907		1909.2	0.00948069		2439.2	-0.0006245
319.39	0.10335477		849.4	0.00113152		1379.39	0.00504425		1909.4	0.00956268		2439.4	-0.00006316
319.59	0.10293911		849.6	0.00085741		1379.59	0.00527816		1909.6	0.00895922		2439.6	0.00070354
319.79	0.1024948		849.8	0.00106043		1379.79	0.00539556		1909.8	0.00840462		2439.8	0.00185309
319.99	0.1024872		850	0.00102717		1379.99	0.00457216		1910	0.00848141		2440	0.00221924
320.19	0.10217611		850.2	0.00146869		1380.19	0.00448108		1910.2	0.00800357		2440.2	0.0029968
320.39	0.10171734		850.4	0.00147105		1380.39	0.00374159		1910.4	0.00788959		2440.4	0.00229866
320.59	0.10038106		850.6	0.00140186		1380.59	0.00411338		1910.6	0.00734604		2440.6	0.00183583
320.79	0.10052878		850.8	0.00131982		1380.79	0.00438524		1910.8	0.00866842		2440.8	0.00219268
320.99	0.10088611		851	0.0005995		1380.99	0.00351621		1911	0.00805518		2441	0.00193787
321.19	0.10001361		851.2	-0.00002383		1381.19	0.00307792		1911.2	0.00830418		2441.2	0.00065845
321.39	0.10027488		851.4	0.00123813		1381.39	0.00194303		1911.4	0.008033		2441.4	0.00063412
321.59	0.10057918		851.6	0.00174436		1381.59	0.00231798		1911.6	0.0081257		2441.6	0.00070463
321.79	0.09988578		851.8	0.00206786		1381.79	0.00208908		1911.8	0.0081728		2441.8	0.00045978
321.99	0.10030746		852	0.00233901		1381.99	0.00200001		1912	0.00874177		2442	0.00091617
322.19	0.10105212		852.2	0.00169858		1382.19	0.00194404		1912.2	0.00864699		2442.2	0.00121113
322.39	0.10066318		852.4	0.00230805		1382.39	0.00159193		1912.4	0.00923454		2442.4	0.00113002
322.59	0.10055879		852.6	0.00142744		1382.59	0.0012935		1912.6	0.00927034		2442.6	0.00028836
322.79	0.10039091		852.8	0.00086101		1382.79	0.00209253		1912.8	0.00857818		2442.8	-0.00006269
322.99	0.10093114		853	0.00055755		1382.99	0.00270055		1913	0.00922344		2443	-0.000195
323.19	0.10157508		853.2	0.00043296		1383.19	0.00390453		1913.2	0.00839898		2443.2	-0.00031552
323.39	0.10216658		853.4	-0.0000205		1383.39	0.00428753		1913.4	0.00808832		2443.4	-0.00001083
323.59	0.10224878		853.6	-0.00049122		1383.59	0.00459275		1913.6	0.00756823		2443.6	0.00044646
323.79	0.10231749		853.8	-0.00046906		1383.79	0.00405096		1913.8	0.00692677		2443.8	0.00122597
323.99	0.10269952		854	-0.00091755		1383.99	0.00336526		1914	0.0062948		2444	0.00090814
324.19	0.1030893		854.2	-0.00186507		1384.19	0.003669		1914.2	0.00595939		2444.2	0.00104843
324.39	0.10284635		854.4	-0.00285156		1384.39	0.00341191		1914.4	0.00566988		2444.4	0.00160079
324.59	0.10282292		854.6	-0.00324354		1384.59	0.00392615		1914.6	0.00540506		2444.6	0.00131141
324.79	0.10286072		854.8	-0.00296951		1384.79	0.00361215		1914.8	0.00663352		2444.8	0.00160792
324.99	0.10272699		855	-0.00351855		1384.99	0.0031124		1915	0.00538167		2445	0.00179122
325.19	0.10249435		855.2	-0.00252427		1385.19	0.00324071		1915.2	0.00620235		2445.2	0.00099834
325.39	0.10280966		855.4	-0.00184883		1385.39	0.00340854		1915.4	0.00608084		2445.4	0.0014772
325.59	0.10228118		855.6	-0.00244806		1385.59	0.00359907		1915.6	0.00656989		2445.6	0.00160477
325.79	0.10190487		855.8	-0.00166096		1385.79	0.00345695		1915.8	0.00700088		2445.8	0.00155725
325.99	0.10262187		856	-0.00124086		1385.99	0.00301218		1916	0.00695987		2446	0.00147276
326.19	0.1025098		856.2	-0.00096139		1386.19	0.00314463		1916.2	0.00730681		2446.2	0.00067414
326.39	0.10258795		856.4	-0.00091775		1386.39	0.00318572		1916.4	0.00783692		2446.4	-0.00125699
326.59	0.10332115		856.6	-0.00066086		1386.59	0.00329982		1916.6	0.00778274		2446.6	-0.00134919
326.79	0.10368395		856.8	0.00056401		1386.79	0.00400108		1916.8	0.00820115		2446.8	-0.00171059
326.99	0.10399799		857	0.0009223		1386.99	0.00518774		1917	0.00885637		2447	-0.00192469
327.19	0.10406451		857.2	0.00171661		1387.19	0.00553093		1917.2	0.00856495		2447.2	-0.00182318
327.39	0.10431571		857.4	0.00254455		1387.39	0.00525575		1917.4	0.00806639		2447.4	-0.00031865
327.59	0.10393463		857.6	0.00266712		1387.59	0.00445983		1917.6	0.00816328		2447.6	-0.00076535
327.79	0.10376034		857.8	0.0031629		1387.79	0.00444183		1917.8	0.0075971		2447.8	-0.00032555
327.99	0.10380978		858	0.00305601		1387.99	0.00500362		1918	0.00720612		2448	-0.00048379
328.19	0.10428856		858.2	0.00231691		1388.19	0.00535578		1918.2	0.00625709		2448.2	0.00001714
328.39	0.10439912		858.4	0.00201755		1388.39	0.00505205		1918.4	0.00641669		2448.4	0.00051992
328.59	0.1036024		858.6	0.00189897		1388.59	0.00579887		1918.6	0.00694589		2448.6	-0.00008759
328.79	0.1028398		858.8	0.00248313		1388.79	0.00597326		1918.8	0.00748973		2448.8	0.00096627
328.99	0.10288288		859	0.00151654		1388.99	0.00655931		1919	0.00696267		2449	0.00094666
329.19	0.1029002		859.2	0.00163331		1389.19	0.006397		1919.2	0.00662672		2449.2	0.00046591
329.39	0.10208861		859.4	0.00003503		1389.39	0.00639888		1919.4	0.00670671		2449.4	0.00080362
329.59	0.10111805		859.6	-0.00191764		1389.59	0.00582136		1919.6	0.00676681		2449.6	0.00077981
329.79	0.10090239		859.8	-0.00240801		1389.79	0.00590065		1919.8	0.00646722		2449.8	-0.00017082
329.99	0.10101122		860	-0.00219412		1389.99	0.00607642		1920	0.0066197		2450	-0.00097548
330.19	0.10104635		860.2	-0.0028883		1390.19	0.0062428		1920.2	0.00776026		2450.2	-0.00221956
330.39	0.10167847		860.4	-0.00293528		1390.39	0.00665473		1920.4	0.0079206		2450.4	-0.00301703
330.59	0.10214526		860.6	-0.002133		1390.59	0.00692849		1920.6	0.00804153		2450.6	-0.00277616
330.79	0.10228573		860.8	-0.0024013		1390.79	0.00729452		1920.8	0.00862059		2450.8	-0.00242087
330.99	0.10290365		861	-0.00264973		1390.99	0.00779151		1921	0.00823517		2451	-0.00198212
331.19	0.10281151		861.2	-0.00230723		1391.19	0.00727366		1921.2	0.00782712		2451.2	-0.00141711
331.39	0.10317327		861.4	-0.00209792		1391.39	0.00812447		1921.4	0.00808683		2451.4	-0.00093519
331.59	0.10310701		861.6	-0.00182782		1391.59	0.00869355		1921.6	0.00860329		2451.6	-0.00216276
331.79	0.10323177		861.8	-0.00115002		1391.79	0.00846049		1921.8	0.00784544		2451.8	-0.00132828
331.99	0.10338703		862	-0.00082814		1391.99	0.00930542		1922	0.00709797		2452	-0.0008573
332.19	0.10418405		862.2	-0.00076494		1392.19	0.009328		1922.2	0.0072242		2452.2	0.00010449
332.39	0.10442538		862.4	-0.00010755		1392.39	0.00962802		1922.4	0.00806672		2452.4	0.0003353
332.59	0.10415014		862.6	0.00100266		1392.59	0.01000304		1922.6	0.00790156		2452.6	0.00088314
332.79	0.10487861		862.8	0.0025645		1392.79	0.00974425		1922.8	0.00735698		2452.8	0.00163314
332.99	0.10480748		863	0.00288782		1392.99	0.00875603		1923	0.00727379		2453	0.00087129
333.19	0.10456476		863.2	0.00353453		1393.19	0.00839413		1923.2	0.0063028		2453.2	0.00113631
333.39	0.10391906		863.4	0.0032091		1393.39	0.00823442		1923.4	0.00696433		2453.4	0.00150984
333.59	0.10373251		863.6	0.00373968		1393.59	0.00885777		1923.6	0.00763643		2453.6	0.00205886
333.79	0.10480371		863.8	0.00525877		1393.79	0.00864683		1923.8	0.00807709		2453.8	0.00174863
333.99	0.10508348		864	0.00596473		1393.99	0.00794713		1924	0.00826531		2454	0.0013283
334.19	0.10455849		864.2	0.00650244		1394.19	0.00743656		1924.2	0.00841196		2454.2	0.00158105
334.39	0.10506386		864.4	0.00626913		1394.39	0.00670704		1924.4	0.00831564		2454.4	0.00206457
334.59	0.10556193		864.6	0.00575291		1394.59	0.00652954		1924.6	0.00757109		2454.6	0.00205407
334.79	0.10552911		864.8	0.00482735		1394.79	0.00594249		1924.8	0.0077248		2454.8	0.00257885
334.99	0.10619769		865	0.00407666		1394.99	0.00533175		1925	0.00677402		2455	0.00238735
335.19	0.10515275		865.2	0.00276159		1395.19	0.00512139		1925.2	0.00755408		2455.2	0.00287996
335.39	0.10537952		865.4	0.0018889		1395.39	0.0056377		1925.4	0.00755674		2455.4	0.00165992
335.59	0.10490475		865.6	0.00097624		1395.59	0.00541314		1925.6	0.00754261		2455.6	0.00125365
335.79	0.10495761		865.8	-0.00006396		1395.79	0.00534795		1925.8	0.00755115		2455.8	0.00226305
335.99	0.10496369		866	-0.00022964		1395.99	0.00525159		1926	0.00722188		2456	0.0024774
336.19	0.10516186		866.2	-0.00105691		1396.19	0.00526468		1926.2	0.00701479		2456.2	0.00241487
336.39	0.10441467		866.4	-0.00055851		1396.39	0.00493866		1926.4	0.00615407		2456.4	0.00199874
336.59	0.10432535		866.6	-0.00054409		1396.59	0.00432234		1926.6	0.00585098		2456.6	0.00193841
336.79	0.10413618		866.8	-0.00057551		1396.79	0.00380773		1926.8	0.00548346		2456.8	0.00163465
336.99	0.10381355		867	-0.00027983		1396.99	0.00390801		1927	0.00610002		2457	0.00061388
337.19	0.10310156		867.2	0.00042841		1397.19	0.00545283		1927.2	0.00628635		2457.2	0.00146104
337.39	0.10291465		867.4	0.00091302		1397.39	0.00556629		1927.4	0.00773768		2457.4	0.00065328
337.59	0.10321572		867.6	0.0019352		1397.59	0.00624923		1927.6	0.00862628		2457.6	0.00048405
337.79	0.10328269		867.8	0.00234126		1397.79	0.00543002		1927.8	0.00853768		2457.8	0.00036354
337.99	0.10353572		868	0.00295899		1397.99	0.00527933		1928	0.00840819		2458	0.00018077
338.19	0.1030687		868.2	0.00377754		1398.19	0.00502999		1928.2	0.0086825		2458.2	0.00046658
338.39	0.10357203		868.4	0.00319846		1398.39	0.00429503		1928.4	0.00928939		2458.4	0.00063785
338.59	0.10361301		868.6	0.00332483		1398.59	0.00448782		1928.6	0.0081138		2458.6	0.00046093
338.79	0.10350374		868.8	0.00341608		1398.79	0.00373336		1928.8	0.00862851		2458.8	0.00059184
338.99	0.10339861		869	0.00338185		1398.99	0.00331057		1929	0.0086345		2459	0.00067629
339.19	0.10269151		869.2	0.00346777		1399.19	0.00429192		1929.2	0.00911624		2459.2	0.00024978
339.39	0.10402226		869.4	0.00387617		1399.39	0.00503597		1929.4	0.00897401		2459.4	-0.00034591
339.59	0.10362996		869.6	0.00348896		1399.59	0.00574945		1929.6	0.00900426		2459.6	0.00003892
339.79	0.10467649		869.8	0.0029744		1399.79	0.00682659		1929.8	0.0083481		2459.8	0.00067566
339.99	0.104804		870	0.0028046		1399.99	0.00739535		1930	0.00789633		2460	0.00023029
340.19	0.10524471		870.2	0.00182652		1400.19	0.00823317		1930.2	0.00724003		2460.2	-0.00034642
340.39	0.10525938		870.4	0.00147757		1400.39	0.00847201		1930.4	0.00763777		2460.4	-0.00041105
340.59	0.10630571		870.6	0.0005666		1400.59	0.00887963		1930.6	0.0075098		2460.6	-0.0009706
340.79	0.10648026		870.8	0.00064477		1400.79	0.00941262		1930.8	0.00826443		2460.8	-0.0014649
340.99	0.10747356		871	0.00072579		1400.99	0.01028261		1931	0.00905375		2461	-0.00150214
341.19	0.107783		871.2	0.00079508		1401.19	0.01056078		1931.2	0.00892247		2461.2	-0.0016192
341.39	0.10918532		871.4	0.00101317		1401.39	0.01004806		1931.4	0.00909874		2461.4	-0.00249473
341.59	0.10967686		871.6	0.00123003		1401.59	0.00970761		1931.6	0.00915573		2461.6	-0.00154286
341.79	0.10931927		871.8	0.00099423		1401.79	0.0097896		1931.8	0.0095757		2461.8	-0.0011585
341.99	0.10940998		872	0.00049063		1401.99	0.0089367		1932	0.00943318		2462	-0.00219909
342.19	0.10822584		872.2	0.00001975		1402.19	0.00717948		1932.2	0.01024062		2462.2	-0.00167232
342.39	0.10793696		872.4	-0.00023698		1402.39	0.00646503		1932.4	0.01025301		2462.4	-0.00076699
342.59	0.1069205		872.6	-0.0000731		1402.59	0.00559022		1932.6	0.00988109		2462.6	-0.00067647
342.79	0.1062121		872.8	0.00100219		1402.79	0.00556839		1932.8	0.01017668		2462.8	-0.00040548
342.99	0.10594599		873	0.00187562		1402.99	0.00517794		1933	0.01037111		2463	-0.00045976
343.19	0.1059979		873.2	0.00303155		1403.19	0.00547168		1933.2	0.0100363		2463.2	-0.00004068
343.39	0.10572203		873.4	0.00281667		1403.39	0.00529728		1933.4	0.00989101		2463.4	0.00056943
343.59	0.10582157		873.6	0.00298843		1403.59	0.00575665		1933.6	0.00969442		2463.6	0.00027721
343.79	0.10676744		873.8	0.00240819		1403.79	0.00580883		1933.8	0.00972238		2463.8	0.00095811
343.99	0.10697146		874	0.00194432		1403.99	0.00630272		1934	0.01044924		2464	0.00015506
344.19	0.10704431		874.2	0.00173244		1404.19	0.00652521		1934.2	0.01022812		2464.2	-0.00016511
344.39	0.10701272		874.4	0.00150947		1404.39	0.00756325		1934.4	0.01001132		2464.4	0.00066068
344.59	0.10680196		874.6	0.00117432		1404.59	0.00818878		1934.6	0.00939025		2464.6	0.00002511
344.79	0.10635516		874.8	0.00059694		1404.79	0.00870864		1934.8	0.00918749		2464.8	0.00036997
344.99	0.10711446		875	0.00051835		1404.99	0.00955585		1935	0.00859507		2465	0.00039379
345.19	0.10750034		875.2	0.0009742		1405.19	0.01018872		1935.2	0.0079467		2465.2	-0.00081963
345.39	0.10732683		875.4	0.0007119		1405.39	0.01096491		1935.4	0.00784847		2465.4	-0.00041341
345.59	0.10696811		875.6	-0.00018284		1405.59	0.01070817		1935.6	0.00774097		2465.6	-0.0009168
345.79	0.10692999		875.8	-0.00101664		1405.79	0.01024341		1935.8	0.00814932		2465.8	-0.0012494
345.99	0.10678346		876	-0.00253999		1405.99	0.00884617		1936	0.00796419		2466	-0.00188609
346.19	0.10618054		876.2	-0.00226532		1406.19	0.00793394		1936.2	0.00864409		2466.2	0.00008159
346.39	0.10625636		876.4	-0.00238622		1406.39	0.00782257		1936.4	0.00758811		2466.4	0.00071454
346.59	0.10600403		876.6	-0.00174877		1406.59	0.00783223		1936.6	0.00797276		2466.6	0.00071094
346.79	0.10626685		876.8	-0.00088594		1406.79	0.00797215		1936.8	0.00813367		2466.8	0.00077427
346.99	0.10682956		877	-0.00065406		1406.99	0.00659785		1937	0.00861655		2467	0.00138098
347.19	0.10691333		877.2	-0.00056527		1407.19	0.00536659		1937.2	0.00864387		2467.2	0.00169317
347.39	0.10689007		877.4	0.00004431		1407.39	0.00462304		1937.4	0.0088106		2467.4	0.00172168
347.59	0.10829518		877.6	0.00122764		1407.59	0.00427583		1937.6	0.01010503		2467.6	0.00080131
347.79	0.10798165		877.8	0.00105915		1407.79	0.00405325		1937.8	0.00974891		2467.8	0.00144233
347.99	0.10820126		878	0.00124698		1407.99	0.00466614		1938	0.0106272		2468	0.00063217
348.19	0.10805836		878.2	0.00196466		1408.19	0.00561833		1938.2	0.01031467		2468.2	0.00116788
348.39	0.10769288		878.4	0.00179668		1408.39	0.00538395		1938.4	0.01027625		2468.4	0.00098345
348.59	0.10686597		878.6	0.00133918		1408.59	0.00528725		1938.6	0.00989755		2468.6	-0.00029605
348.79	0.107282		878.8	0.0012398		1408.79	0.00559519		1938.8	0.00908116		2468.8	-0.00095107
348.99	0.1077248		879	0.00230578		1408.99	0.00631397		1939	0.00883519		2469	-0.00130207
349.19	0.10826622		879.2	0.00283612		1409.19	0.00655053		1939.2	0.00815611		2469.2	-0.00219076
349.39	0.10757005		879.4	0.00252206		1409.39	0.00605397		1939.4	0.00770566		2469.4	-0.00216764
349.59	0.10814759		879.6	0.00222005		1409.59	0.00468607		1939.6	0.00662037		2469.6	-0.00240285
349.79	0.10841387		879.8	0.00220922		1409.79	0.00401361		1939.8	0.00664629		2469.8	-0.00120863
349.99	0.1071362		880	0.0017688		1409.99	0.00487765		1940	0.00646216		2470	-0.00113066
350.19	0.10672963		880.2	0.00208881		1410.19	0.00478765		1940.2	0.00610122		2470.2	0.00025954
350.39	0.1065294		880.4	0.00188121		1410.39	0.00529399		1940.4	0.00574049		2470.4	0.0005174
350.59	0.10691889		880.6	0.00148074		1410.59	0.00567205		1940.6	0.0058158		2470.6	0.00122197
350.79	0.10673273		880.8	0.00112436		1410.79	0.00563237		1940.8	0.00619076		2470.8	0.00134646
350.99	0.10644055		881	0.00092398		1410.99	0.00641889		1941	0.00629973		2471	0.00185282
351.19	0.10601901		881.2	0.00103317		1411.19	0.00671004		1941.2	0.00643896		2471.2	0.00121509
351.39	0.10589773		881.4	0.0017203		1411.39	0.00745761		1941.4	0.00666226		2471.4	0.00156035
351.59	0.10621474		881.6	0.00221617		1411.59	0.00799567		1941.6	0.00731667		2471.6	0.00104154
351.79	0.10580969		881.8	0.00124494		1411.79	0.00865078		1941.8	0.00652387		2471.8	0.00141271
351.99	0.1062425		882	0.00099696		1411.99	0.00899595		1942	0.00647416		2472	0.0009022
352.19	0.10548126		882.2	0.00027821		1412.19	0.00981619		1942.2	0.00570328		2472.2	0.00055738
352.39	0.1054815		882.4	-0.00028544		1412.39	0.01032369		1942.4	0.00603045		2472.4	0.00001013
352.59	0.10598624		882.6	-0.00004396		1412.59	0.0116153		1942.6	0.00566116		2472.6	-0.00038028
352.79	0.10650187		882.8	0.00045462		1412.79	0.01171459		1942.8	0.00562582		2472.8	-0.00069065
352.99	0.10693777		883	0.00010831		1412.99	0.0115339		1943	0.0053705		2473	-0.00043964
353.19	0.10644258		883.2	0.00033478		1413.19	0.01116327		1943.2	0.00592846		2473.2	-0.0013374
353.39	0.10607248		883.4	0.00063841		1413.39	0.01019231		1943.4	0.00605022		2473.4	-0.00102045
353.59	0.10668109		883.6	0.00069096		1413.59	0.0092507		1943.6	0.00658855		2473.6	-0.00074273
353.79	0.10640542		883.8	0.00093231		1413.79	0.00948756		1943.8	0.00807717		2473.8	-0.00028433
353.99	0.10598148		884	0.00061176		1413.99	0.00976522		1944	0.00911683		2474	0.00018586
354.19	0.10656696		884.2	0.00088942		1414.19	0.00882895		1944.2	0.0094225		2474.2	0.00092153
354.39	0.10548094		884.4	0.00047745		1414.39	0.00855037		1944.4	0.00993195		2474.4	0.00129225
354.59	0.10606552		884.6	0.00033599		1414.59	0.00783773		1944.6	0.00993233		2474.6	0.0010781
354.79	0.10509209		884.8	0.00049298		1414.79	0.00830256		1944.8	0.01098542		2474.8	0.00041838
354.99	0.10504645		885	0.00049925		1414.99	0.00896452		1945	0.01102237		2475	0.00076339
355.19	0.1049709		885.2	0.00096123		1415.19	0.00767736		1945.2	0.01041183		2475.2	0.00034816
355.39	0.10515927		885.4	0.00094861		1415.39	0.00691316		1945.4	0.010488		2475.4	0.00032804
355.59	0.10582558		885.6	0.00089872		1415.59	0.00618105		1945.6	0.00952703		2475.6	-0.00041468
355.79	0.10552607		885.8	0.00048335		1415.79	0.00600031		1945.8	0.0086606		2475.8	-0.00100095
355.99	0.10584961		886	0.0014747		1415.99	0.005876		1946	0.00802577		2476	-0.00172368
356.19	0.10571593		886.2	0.00081932		1416.19	0.00623795		1946.2	0.00759208		2476.2	-0.00201788
356.39	0.10586815		886.4	0.00151098		1416.39	0.00574223		1946.4	0.00747143		2476.4	-0.00199342
356.59	0.10588887		886.6	0.00168507		1416.59	0.00566684		1946.6	0.00659593		2476.6	-0.00265903
356.79	0.10549152		886.8	0.00159113		1416.79	0.00526495		1946.8	0.00676556		2476.8	-0.00337576
356.99	0.10616693		887	0.00054235		1416.99	0.00490739		1947	0.0065977		2477	-0.00370126
357.19	0.105635		887.2	0.00078864		1417.19	0.00416998		1947.2	0.00798419		2477.2	-0.00374518
357.39	0.10589428		887.4	0.00141392		1417.39	0.00372005		1947.4	0.00841738		2477.4	-0.00276999
357.59	0.10586722		887.6	0.00128766		1417.59	0.00433858		1947.6	0.00892592		2477.6	-0.00282937
357.79	0.10617221		887.8	0.0016639		1417.79	0.00507481		1947.8	0.00889502		2477.8	-0.00131704
357.99	0.10561674		888	0.00136987		1417.99	0.00556633		1948	0.00928927		2478	-0.00078571
358.19	0.10589962		888.2	0.00154391		1418.19	0.00656554		1948.2	0.00921505		2478.2	-0.00068569
358.39	0.10510124		888.4	0.00118562		1418.39	0.00784237		1948.4	0.00904073		2478.4	-0.00025482
358.59	0.10545825		888.6	0.00204675		1418.59	0.00834345		1948.6	0.00891469		2478.6	-0.00067986
358.79	0.10473073		888.8	0.00203722		1418.79	0.00942394		1948.8	0.00881836		2478.8	-0.00005343
358.99	0.10538273		889	0.00230158		1418.99	0.00959605		1949	0.00853837		2479	0.00051679
359.19	0.10540817		889.2	0.00226196		1419.19	0.00971148		1949.2	0.00877126		2479.2	-0.00003091
359.39	0.10599884		889.4	0.00176603		1419.39	0.0105388		1949.4	0.00926295		2479.4	-0.00034298
359.59	0.10666177		889.6	0.00226381		1419.59	0.0108357		1949.6	0.00859705		2479.6	-0.00074962
359.79	0.10652745		889.8	0.00340807		1419.79	0.01079654		1949.8	0.00919177		2479.8	-0.00069567
359.99	0.10707326		890	0.00355708		1419.99	0.01073329		1950	0.00840949		2480	-0.00095013
360.19	0.10706588		890.2	0.00171742		1420.19	0.01089258		1950.2	0.00806357		2480.2	-0.00094116
360.39	0.10701812		890.4	0.00177835		1420.39	0.01051335		1950.4	0.00786211		2480.4	-0.00131316
360.59	0.10789651		890.6	0.00045839		1420.59	0.01053451		1950.6	0.00765631		2480.6	-0.00125826
360.79	0.10801319		890.8	0.00008113		1420.79	0.0103836		1950.8	0.00823888		2480.8	-0.00119046
360.99	0.10884352		891	-0.00097221		1420.99	0.00965138		1951	0.00800611		2481	-0.00127825
361.19	0.10907618		891.2	-0.00077057		1421.19	0.00919803		1951.2	0.00855342		2481.2	-0.00026517
361.39	0.10904882		891.4	0.00027997		1421.39	0.00915789		1951.4	0.00817421		2481.4	0.00048497
361.59	0.10949564		891.6	-0.00041516		1421.59	0.00933767		1951.6	0.00857996		2481.6	0.00037774
361.79	0.11073234		891.8	-0.0007667		1421.79	0.00876704		1951.8	0.00853465		2481.8	0.00122456
361.99	0.1099354		892	-0.00080123		1421.99	0.00933916		1952	0.00860547		2482	0.00061615
362.19	0.11065222		892.2	-0.00070578		1422.19	0.0092086		1952.2	0.00863435		2482.2	0.0007666
362.39	0.10955309		892.4	-0.00061193		1422.39	0.00931632		1952.4	0.00837895		2482.4	0.00080597
362.59	0.10932286		892.6	0.00006412		1422.59	0.00875077		1952.6	0.00847018		2482.6	0.00069691
362.79	0.10966457		892.8	0.0001535		1422.79	0.00921579		1952.8	0.00869671		2482.8	0.0008639
362.99	0.11051366		893	0.00087493		1422.99	0.00890755		1953	0.00958688		2483	0.00003366
363.19	0.11024934		893.2	0.00110477		1423.19	0.00849814		1953.2	0.01076645		2483.2	-0.0005908
363.39	0.1103605		893.4	0.00160445		1423.39	0.00846564		1953.4	0.0102751		2483.4	-0.00074696
363.59	0.11031098		893.6	0.00224986		1423.59	0.00692014		1953.6	0.00992079		2483.6	-0.00069487
363.79	0.11024933		893.8	0.00227805		1423.79	0.0063651		1953.8	0.01039564		2483.8	-0.00046953
363.99	0.10993056		894	0.00163304		1423.99	0.00687732		1954	0.01020676		2484	-0.00021368
364.19	0.10979408		894.2	0.00159606		1424.19	0.00707068		1954.2	0.00989637		2484.2	-0.00032676
364.39	0.10989712		894.4	0.00198365		1424.39	0.00723268		1954.4	0.00890281		2484.4	0.00032995
364.59	0.10978445		894.6	0.00190427		1424.59	0.00639771		1954.6	0.00868002		2484.6	0.00113973
364.79	0.10980491		894.8	0.00198005		1424.79	0.00669293		1954.8	0.00801658		2484.8	0.0000945
364.99	0.11013324		895	0.00154692		1424.99	0.00621583		1955	0.00746196		2485	0.00023637
365.19	0.11019024		895.2	0.0021705		1425.19	0.00613357		1955.2	0.00755093		2485.2	0.00108219
365.39	0.10947318		895.4	0.00182205		1425.39	0.00635169		1955.4	0.0073423		2485.4	0.00060202
365.59	0.10993062		895.6	0.00089073		1425.59	0.00667939		1955.6	0.00806318		2485.6	0.000643
365.79	0.11010306		895.8	0.00136452		1425.79	0.00801183		1955.8	0.00764507		2485.8	0.00036068
365.99	0.10874455		896	0.0015948		1425.99	0.00786049		1956	0.00779695		2486	-0.00009835
366.19	0.10804546		896.2	0.00123148		1426.19	0.0085726		1956.2	0.00799691		2486.2	-0.0003058
366.39	0.10786506		896.4	0.00067389		1426.39	0.0093166		1956.4	0.00795678		2486.4	-0.00000418
366.59	0.10779819		896.6	0.00061082		1426.59	0.00962422		1956.6	0.00887432		2486.6	-0.000111
366.79	0.10819251		896.8	0.00102703		1426.79	0.00935598		1956.8	0.00927904		2486.8	-0.00105397
366.99	0.10879584		897	0.00119357		1426.99	0.00887411		1957	0.01024795		2487	-0.00176181
367.19	0.10826577		897.2	0.00102146		1427.19	0.0088069		1957.2	0.01097259		2487.2	-0.00177876
367.39	0.1083527		897.4	0.000471		1427.39	0.00839252		1957.4	0.01052843		2487.4	-0.00236726
367.59	0.10909423		897.6	0.00082651		1427.59	0.00807565		1957.6	0.0113755		2487.6	-0.0019839
367.79	0.10910942		897.8	0.00116695		1427.79	0.00841684		1957.8	0.01162024		2487.8	-0.00261243
367.99	0.10967955		898	0.00122941		1427.99	0.0081446		1958	0.01108343		2488	-0.00243632
368.19	0.11027594		898.2	0.00177857		1428.19	0.00812337		1958.2	0.01025907		2488.2	-0.00238961
368.39	0.11105591		898.4	0.00153498		1428.39	0.00811413		1958.4	0.00996634		2488.4	-0.00203234
368.59	0.11085002		898.6	0.00117494		1428.59	0.00761882		1958.6	0.01043169		2488.6	-0.00213736
368.79	0.11060522		898.8	0.0007638		1428.79	0.00767572		1958.8	0.01008518		2488.8	-0.00293367
368.99	0.11019083		899	0.00108494		1428.99	0.00749267		1959	0.01011359		2489	-0.00273891
369.19	0.10950694		899.2	0.00135159		1429.19	0.00817566		1959.2	0.00985168		2489.2	-0.00201821
369.39	0.10943133		899.4	0.0016395		1429.39	0.00885794		1959.4	0.0093683		2489.4	-0.00195259
369.59	0.10978111		899.6	0.00210868		1429.59	0.00908867		1959.6	0.00926514		2489.6	-0.00168648
369.79	0.10960687		899.8	0.00305155		1429.79	0.00971993		1959.8	0.00841988		2489.8	-0.00232034
369.99	0.10922893		900	0.00299261		1429.99	0.00940115		1960	0.0079873		2490	-0.00194345
370.19	0.10912999		900.2	0.0032331		1430.19	0.01062915		1960.2	0.00761685		2490.2	-0.00190557
370.39	0.11005923		900.4	0.00248034		1430.39	0.01058201		1960.4	0.00784363		2490.4	-0.00134396
370.59	0.10999874		900.6	0.00317855		1430.59	0.01058654		1960.6	0.00830039		2490.6	-0.00169301
370.79	0.11056585		900.8	0.00310735		1430.79	0.01060723		1960.8	0.00829166		2490.8	-0.00210585
370.99	0.11108039		901	0.00338359		1430.99	0.01122608		1961	0.00889278		2491	-0.00165598
371.19	0.11089602		901.2	0.00349701		1431.19	0.01042629		1961.2	0.00808275		2491.2	-0.00054887
371.39	0.11132789		901.4	0.00329132		1431.39	0.00964264		1961.4	0.00787377		2491.4	-0.0006224
371.59	0.11175196		901.6	0.00378629		1431.59	0.00914718		1961.6	0.00835633		2491.6	0.00033201
371.79	0.11146212		901.8	0.00379859		1431.79	0.00835529		1961.8	0.00786573		2491.8	0.00048814
371.99	0.11211469		902	0.00342327		1431.99	0.00691836		1962	0.0078077		2492	0.00170615
372.19	0.11126918		902.2	0.00265283		1432.19	0.00706016		1962.2	0.00777517		2492.2	0.00219927
372.39	0.1107848		902.4	0.0021607		1432.39	0.00676239		1962.4	0.00831426		2492.4	0.00316199
372.59	0.10919201		902.6	0.00212411		1432.59	0.00640694		1962.6	0.00801452		2492.6	0.00328838
372.79	0.10829868		902.8	0.0032418		1432.79	0.00586279		1962.8	0.00792721		2492.8	0.00342278
372.99	0.10784892		903	0.00355875		1432.99	0.0054587		1963	0.00805754		2493	0.00370719
373.19	0.10732521		903.2	0.00356642		1433.19	0.00604789		1963.2	0.00872065		2493.2	0.00466282
373.39	0.10876023		903.4	0.00392969		1433.39	0.0064397		1963.4	0.00850319		2493.4	0.00367519
373.59	0.10909419		903.6	0.00398257		1433.59	0.00668479		1963.6	0.00858293		2493.6	0.00326394
373.79	0.1097438		903.8	0.00432669		1433.79	0.00723181		1963.8	0.0089845		2493.8	0.00273625
373.99	0.10986914		904	0.00396619		1433.99	0.00733622		1964	0.00977784		2494	0.00276128
374.19	0.11085569		904.2	0.00361704		1434.19	0.00753216		1964.2	0.01065841		2494.2	0.0005063
374.39	0.11173048		904.4	0.00339534		1434.39	0.00791153		1964.4	0.01095565		2494.4	-0.00042077
374.59	0.1125349		904.6	0.00403109		1434.59	0.00751548		1964.6	0.01152051		2494.6	-0.00099488
374.79	0.11338318		904.8	0.0042655		1434.79	0.00867152		1964.8	0.01229863		2494.8	-0.00041048
374.99	0.11352457		905	0.00491882		1434.99	0.00898847		1965	0.01259889		2495	-0.00004805
375.19	0.11373503		905.2	0.00397428		1435.19	0.00832158		1965.2	0.01175246		2495.2	0.00027378
375.39	0.11368338		905.4	0.003689		1435.39	0.00879128		1965.4	0.01194431		2495.4	-0.00061895
375.59	0.11373271		905.6	0.00349975		1435.59	0.00813694		1965.6	0.01121856		2495.6	0.00024364
375.79	0.11374333		905.8	0.00311099		1435.79	0.00783963		1965.8	0.01063722		2495.8	0.00120589
375.99	0.11333303		906	0.00185033		1435.99	0.00726166		1966	0.01013504		2496	0.00191826
376.19	0.11180411		906.2	0.00092545		1436.19	0.00765485		1966.2	0.00952596		2496.2	0.00266082
376.39	0.1110968		906.4	0.00134132		1436.39	0.0073464		1966.4	0.00901211		2496.4	0.00388526
376.59	0.11057794		906.6	0.00115203		1436.59	0.00713665		1966.6	0.00803478		2496.6	0.00377053
376.79	0.11054415		906.8	0.00217453		1436.79	0.0063364		1966.8	0.00858699		2496.8	0.00427653
376.99	0.11036546		907	0.0020404		1436.99	0.00680193		1967	0.00928186		2497	0.00350488
377.19	0.11091756		907.2	0.0019784		1437.19	0.00695864		1967.2	0.00933575		2497.2	0.00359807
377.39	0.11178993		907.4	0.00146346		1437.39	0.00650883		1967.4	0.0090188		2497.4	0.00268805
377.59	0.11137616		907.6	0.00188082		1437.59	0.00599394		1967.6	0.00950195		2497.6	0.00242622
377.79	0.11140264		907.8	0.00196916		1437.79	0.00527365		1967.8	0.01085808		2497.8	0.00148839
377.99	0.11149401		908	0.0023914		1437.99	0.00470743		1968	0.01172405		2498	0.00049289
378.19	0.11238646		908.2	0.0028578		1438.19	0.0048478		1968.2	0.01236382		2498.2	-0.00141874
378.39	0.11287465		908.4	0.0038627		1438.39	0.00498938		1968.4	0.01265818		2498.4	-0.00137314
378.59	0.11347185		908.6	0.00459839		1438.59	0.00506932		1968.6	0.01321612		2498.6	-0.00163487
378.79	0.11356895		908.8	0.00546751		1438.79	0.00620841		1968.8	0.01360026		2498.8	-0.00183124
378.99	0.11337858		909	0.00557013		1438.99	0.00638581		1969	0.01315704		2499	-0.00277747
379.19	0.11371368		909.2	0.00573125		1439.19	0.0065449		1969.2	0.01237794		2499.2	-0.00302517
379.39	0.11366743		909.4	0.00646238		1439.39	0.00723199		1969.4	0.01177474		2499.4	-0.00321231
379.59	0.11365331		909.6	0.00648694		1439.59	0.00744013		1969.6	0.01092698		2499.6	-0.00235646
379.79	0.11340933		909.8	0.00639317		1439.79	0.00793457		1969.8	0.01057423		2499.8	-0.002056
379.99	0.11340933		910	0.00639317		1439.99	0.00793457		1970	0.01057423		2500	-0.002056
380.19	0.11242558		910.2	0.00703006		1440.19	0.00774454		1970.2	0.0106477		2500.2	-0.00225666
380.39	0.11090765		910.4	0.00735128		1440.39	0.00851399		1970.4	0.01044691		2500.4	-0.00257894
380.59	0.10953926		910.6	0.00785153		1440.59	0.0087549		1970.6	0.01111519		2500.6	-0.0032503
380.79	0.10801792		910.8	0.00866104		1440.79	0.00882856		1970.8	0.01108491		2500.8	-0.00398099
380.99	0.10562344		911	0.00929614		1440.99	0.0089163		1971	0.0117308		2501	-0.00404004
381.19	0.10428709		911.2	0.009809		1441.19	0.0096425		1971.2	0.01258266		2501.2	-0.00481687
381.39	0.10228166		911.4	0.01119077		1441.39	0.01009476		1971.4	0.01360617		2501.4	-0.00490682
381.59	0.1014136		911.6	0.01218197		1441.59	0.00994723		1971.6	0.01409244		2501.6	-0.00468539
381.79	0.10017406		911.8	0.01267007		1441.79	0.01067192		1971.8	0.01476362		2501.8	-0.00458307
381.99	0.09867556		912	0.01362773		1441.99	0.01097259		1972	0.01552687		2502	-0.0048799
382.19	0.09797774		912.2	0.01321428		1442.19	0.01181234		1972.2	0.01570625		2502.2	-0.00504641
382.39	0.0959052		912.4	0.01349536		1442.39	0.01216247		1972.4	0.01693593		2502.4	-0.00524788
382.59	0.09550497		912.6	0.01414865		1442.59	0.01227534		1972.6	0.01765218		2502.6	-0.00404107
382.79	0.09570126		912.8	0.01395097		1442.79	0.01206899		1972.8	0.01724883		2502.8	-0.0045447
382.99	0.09532377		913	0.01411391		1442.99	0.01219955		1973	0.01635291		2503	-0.0041631
383.19	0.09535089		913.2	0.0139194		1443.19	0.01205919		1973.2	0.01587613		2503.2	-0.00302081
383.39	0.09468979		913.4	0.01324754		1443.39	0.01254181		1973.4	0.01471169		2503.4	-0.00238243
383.59	0.09426531		913.6	0.01333857		1443.59	0.01327904		1973.6	0.01473923		2503.6	-0.00149124
383.79	0.09426076		913.8	0.01346873		1443.79	0.01352335		1973.8	0.01369354		2503.8	-0.00046777
383.99	0.09431328		914	0.01328017		1443.99	0.01388308		1974	0.01203708		2504	-0.00042041
384.19	0.09321207		914.2	0.01264737		1444.19	0.01310162		1974.2	0.01134856		2504.2	-0.00017734
384.39	0.09287586		914.4	0.01239909		1444.39	0.01326781		1974.4	0.01084276		2504.4	-0.00053027
384.59	0.0922836		914.6	0.01215467		1444.59	0.01272307		1974.6	0.01061486		2504.6	-0.00022613
384.79	0.0914692		914.8	0.01207589		1444.79	0.01245329		1974.8	0.00969281		2504.8	-0.00017523
384.99	0.09061616		915	0.01177336		1444.99	0.01227356		1975	0.00984747		2505	-0.00018802
385.19	0.09117131		915.2	0.01219138		1445.19	0.0123093		1975.2	0.0098782		2505.2	-0.00056728
385.39	0.09050678		915.4	0.01232837		1445.39	0.01160557		1975.4	0.00964458		2505.4	-0.00009729
385.59	0.09093259		915.6	0.01232829		1445.59	0.01059603		1975.6	0.00943553		2505.6	0.00020077
385.79	0.09022109		915.8	0.01184026		1445.79	0.01122004		1975.8	0.01004292		2505.8	-0.00041959
385.99	0.08965114		916	0.0113094		1445.99	0.01129481		1976	0.01067304		2506	-0.00123596
386.19	0.08917054		916.2	0.01008534		1446.19	0.01186403		1976.2	0.01108175		2506.2	-0.00142337
386.39	0.08888711		916.4	0.01019388		1446.39	0.0115687		1976.4	0.01216		2506.4	-0.00146793
386.59	0.08906498		916.6	0.01065313		1446.59	0.01107556		1976.6	0.01291303		2506.6	-0.00101897
386.79	0.08805944		916.8	0.01052068		1446.79	0.01109315		1976.8	0.01425487		2506.8	-0.00157003
386.99	0.08812373		917	0.0110204		1446.99	0.01071559		1977	0.01461091		2507	-0.00148406
387.19	0.08722611		917.2	0.01119383		1447.19	0.01053591		1977.2	0.01512118		2507.2	-0.0015478
387.39	0.08719825		917.4	0.01126524		1447.39	0.01030995		1977.4	0.0163718		2507.4	-0.00139037
387.59	0.08665455		917.6	0.0116697		1447.59	0.01094132		1977.6	0.01717466		2507.6	-0.00181258
387.79	0.08636277		917.8	0.01158278		1447.79	0.01095457		1977.8	0.0166375		2507.8	-0.00240265
387.99	0.0860191		918	0.01138501		1447.99	0.01153393		1978	0.01696131		2508	-0.00310395
388.19	0.08459676		918.2	0.01192791		1448.19	0.01151129		1978.2	0.0171418		2508.2	-0.00298961
388.39	0.08460697		918.4	0.01235097		1448.39	0.0122105		1978.4	0.01650679		2508.4	-0.00230652
388.59	0.08398849		918.6	0.01246284		1448.59	0.0117281		1978.6	0.0162729		2508.6	-0.00204953
388.79	0.08402374		918.8	0.01317773		1448.79	0.01294989		1978.8	0.01539646		2508.8	-0.00301036
388.99	0.08363101		919	0.0130761		1448.99	0.01257597		1979	0.01502046		2509	-0.00318438
389.19	0.08343607		919.2	0.01353049		1449.19	0.01254763		1979.2	0.0142014		2509.2	-0.00288039
389.39	0.08263101		919.4	0.01316527		1449.39	0.01260753		1979.4	0.01355657		2509.4	-0.00251892
389.59	0.08284141		919.6	0.01340378		1449.59	0.01235388		1979.6	0.01291215		2509.6	-0.00146147
389.79	0.08257393		919.8	0.0124491		1449.79	0.01334046		1979.8	0.01285233		2509.8	-0.00064857
389.99	0.08274893		920	0.01189733		1449.99	0.01453937		1980	0.0121963		2510	-0.00037952
390.19	0.08240667		920.2	0.01205588		1450.19	0.01549067		1980.2	0.0118789		2510.2	0.00064395
390.39	0.08246591		920.4	0.01237681		1450.39	0.01514314		1980.4	0.01217317		2510.4	0.00125268
390.59	0.08211359		920.6	0.0132208		1450.59	0.014124		1980.6	0.01283812		2510.6	0.00230732
390.79	0.08220015		920.8	0.01282161		1450.79	0.01394243		1980.8	0.01377323		2510.8	0.00225511
390.99	0.08199219		921	0.01309079		1450.99	0.01312902		1981	0.01346298		2511	0.00281948
391.19	0.08132374		921.2	0.01319003		1451.19	0.01305553		1981.2	0.01375977		2511.2	0.00310943
391.39	0.08207767		921.4	0.01371293		1451.39	0.01317318		1981.4	0.01435733		2511.4	0.00351936
391.59	0.08140054		921.6	0.01333105		1451.59	0.01330339		1981.6	0.01424285		2511.6	0.00344487
391.79	0.08173475		921.8	0.01338449		1451.79	0.01304712		1981.8	0.01356137		2511.8	0.00307788
391.99	0.08143459		922	0.01394227		1451.99	0.01291229		1982	0.0138743		2512	0.00255411
392.19	0.0806748		922.2	0.01412234		1452.19	0.0131436		1982.2	0.01419389		2512.2	0.00201334
392.39	0.08017501		922.4	0.01467455		1452.39	0.01274829		1982.4	0.01418083		2512.4	0.00185524
392.59	0.07990952		922.6	0.01534619		1452.59	0.01251844		1982.6	0.01487263		2512.6	-0.00013445
392.79	0.07940918		922.8	0.01593949		1452.79	0.0144795		1982.8	0.01450467		2512.8	-0.00190949
392.99	0.07818168		923	0.0155111		1452.99	0.01377076		1983	0.01525105		2513	-0.00249715
393.19	0.07767038		923.2	0.01514837		1453.19	0.01412363		1983.2	0.01469837		2513.2	-0.00325803
393.39	0.07739614		923.4	0.01475552		1453.39	0.01449458		1983.4	0.01494664		2513.4	-0.00372607
393.59	0.07821339		923.6	0.01477093		1453.59	0.01389897		1983.6	0.01450457		2513.6	-0.00364824
393.79	0.07769628		923.8	0.0151859		1453.79	0.01515166		1983.8	0.01411398		2513.8	-0.00427568
393.99	0.07812429		924	0.01504477		1453.99	0.01645163		1984	0.01310696		2514	-0.00483641
394.19	0.07745823		924.2	0.01531194		1454.19	0.0160475		1984.2	0.01303725		2514.2	-0.00511513
394.39	0.0781193		924.4	0.0150338		1454.39	0.01579602		1984.4	0.01278782		2514.4	-0.00525618
394.59	0.07853941		924.6	0.01567829		1454.59	0.01584499		1984.6	0.01330036		2514.6	-0.00478331
394.79	0.07813062		924.8	0.015169		1454.79	0.0164834		1984.8	0.0135634		2514.8	-0.00499191
394.99	0.07820885		925	0.01520862		1454.99	0.01589806		1985	0.0137295		2515	-0.00449068
395.19	0.07952485		925.2	0.01556733		1455.19	0.01527616		1985.2	0.01410408		2515.2	-0.00478774
395.39	0.08095323		925.4	0.01585901		1455.39	0.01488852		1985.4	0.01406568		2515.4	-0.00419966
395.59	0.08136056		925.6	0.01574441		1455.59	0.01375961		1985.6	0.01400772		2515.6	-0.00342193
395.79	0.08155045		925.8	0.0158076		1455.79	0.01310465		1985.8	0.01427179		2515.8	-0.0032099
395.99	0.08101876		926	0.01619936		1455.99	0.0126542		1986	0.01529539		2516	-0.00285844
396.19	0.08118693		926.2	0.01633349		1456.19	0.0127002		1986.2	0.01525107		2516.2	-0.00291658
396.39	0.08109932		926.4	0.01671289		1456.39	0.01185459		1986.4	0.01579427		2516.4	-0.00212753
396.59	0.08136469		926.6	0.0162697		1456.59	0.01173057		1986.6	0.01602108		2516.6	-0.00171875
396.79	0.08028579		926.8	0.01552844		1456.79	0.01196079		1986.8	0.01644143		2516.8	-0.00210772
396.99	0.07950585		927	0.01473093		1456.99	0.01133361		1987	0.01631795		2517	-0.00130798
397.19	0.0788831		927.2	0.01327109		1457.19	0.01135169		1987.2	0.0154026		2517.2	-0.00081547
397.39	0.07831138		927.4	0.01289546		1457.39	0.01112787		1987.4	0.01539553		2517.4	-0.0006726
397.59	0.0782101		927.6	0.01296002		1457.59	0.01014829		1987.6	0.0142986		2517.6	-0.00046546
397.79	0.07676065		927.8	0.01306531		1457.79	0.01146156		1987.8	0.01316024		2517.8	-0.00046374
397.99	0.07663437		928	0.01195041		1457.99	0.01181564		1988	0.01221218		2518	-0.00105565
398.19	0.07652124		928.2	0.01166966		1458.19	0.01148632		1988.2	0.01217323		2518.2	-0.0010838
398.39	0.07695654		928.4	0.01179147		1458.39	0.01277354		1988.4	0.01292611		2518.4	-0.00042251
398.59	0.07628507		928.6	0.01319648		1458.59	0.0134834		1988.6	0.01285783		2518.6	-0.00027335
398.79	0.0756642		928.8	0.01286411		1458.79	0.01351942		1988.8	0.01273191		2518.8	-0.00065853
398.99	0.07627346		929	0.01360759		1458.99	0.0125671		1989	0.01286884		2519	-0.00100069
399.19	0.07653202		929.2	0.01384235		1459.19	0.0124112		1989.2	0.01285946		2519.2	-0.00051293
399.39	0.07634613		929.4	0.01384723		1459.39	0.01250971		1989.4	0.01309891		2519.4	-0.00037422
399.59	0.07569629		929.6	0.01326261		1459.59	0.01317229		1989.6	0.014187		2519.6	0.00003585
399.79	0.07555031		929.8	0.01310504		1459.79	0.01372944		1989.8	0.01463761		2519.8	-0.00051581
399.99	0.07513852		930	0.01375779		1459.99	0.01386153		1990	0.0145741		2520	-0.00098622
400.19	0.07604037		930.2	0.01446388		1460.19	0.01447286		1990.2	0.01446884		2520.2	-0.00107944
400.39	0.07607391		930.4	0.01460015		1460.39	0.01470286		1990.4	0.01526151		2520.4	-0.00059112
400.59	0.0757299		930.6	0.01471389		1460.59	0.01407117		1990.6	0.01554221		2520.6	-0.00138336
400.79	0.07473733		930.8	0.01525803		1460.79	0.01404483		1990.8	0.01635271		2520.8	-0.00214176
400.99	0.07483744		931	0.01545971		1460.99	0.0136718		1991	0.01536271		2521	-0.00162153
401.19	0.07483054		931.2	0.01434125		1461.19	0.01285383		1991.2	0.01545808		2521.2	-0.00216263
401.39	0.07455175		931.4	0.01472094		1461.39	0.0117487		1991.4	0.01497782		2521.4	-0.00182311
401.59	0.0742863		931.6	0.01504558		1461.59	0.01061322		1991.6	0.01404447		2521.6	-0.00206237
401.79	0.07370434		931.8	0.0150186		1461.79	0.01045336		1991.8	0.01369202		2521.8	-0.00245239
401.99	0.07400108		932	0.0143111		1461.99	0.0105938		1992	0.01383603		2522	-0.00331904
402.19	0.07390197		932.2	0.01403297		1462.19	0.01053837		1992.2	0.0138858		2522.2	-0.00293423
402.39	0.07370638		932.4	0.01447045		1462.39	0.01107553		1992.4	0.01378377		2522.4	-0.00299441
402.59	0.07365278		932.6	0.01413276		1462.59	0.01084886		1992.6	0.01247115		2522.6	-0.00300071
402.79	0.07292194		932.8	0.0136156		1462.79	0.01048515		1992.8	0.01304851		2522.8	-0.00383983
402.99	0.07224806		933	0.01407896		1462.99	0.01062592		1993	0.01339684		2523	-0.00429863
403.19	0.07202581		933.2	0.01274746		1463.19	0.01167614		1993.2	0.01448734		2523.2	-0.0037228
403.39	0.07167652		933.4	0.01236666		1463.39	0.01168004		1993.4	0.01463038		2523.4	-0.00443199
403.59	0.07195726		933.6	0.01110027		1463.59	0.01232691		1993.6	0.01494797		2523.6	-0.00489875
403.79	0.07249267		933.8	0.01153133		1463.79	0.01313682		1993.8	0.01436148		2523.8	-0.00518601
403.99	0.07188177		934	0.01182775		1463.99	0.01454113		1994	0.01422936		2524	-0.00450415
404.19	0.07177768		934.2	0.0128311		1464.19	0.01537794		1994.2	0.01381628		2524.2	-0.00380808
404.39	0.07190067		934.4	0.01310064		1464.39	0.01590013		1994.4	0.01433307		2524.4	-0.00362541
404.59	0.07193981		934.6	0.01320158		1464.59	0.01590332		1994.6	0.01511348		2524.6	-0.00398713
404.79	0.07215754		934.8	0.01428066		1464.79	0.01606736		1994.8	0.01486853		2524.8	-0.00379501
404.99	0.07255155		935	0.01480745		1464.99	0.01627007		1995	0.0138989		2525	-0.00329689
405.19	0.07199556		935.2	0.01427178		1465.19	0.01588863		1995.2	0.01378436		2525.2	-0.00287665
405.39	0.07082361		935.4	0.01553942		1465.39	0.01600236		1995.4	0.01332635		2525.4	-0.0020744
405.59	0.07069856		935.6	0.01532165		1465.59	0.0150496		1995.6	0.013645		2525.6	-0.00183075
405.79	0.07042474		935.8	0.01578035		1465.79	0.01528705		1995.8	0.01432614		2525.8	-0.00191993
405.99	0.06996003		936	0.01589229		1465.99	0.01559639		1996	0.01429063		2526	-0.0021652
406.19	0.07003872		936.2	0.01595851		1466.19	0.01493813		1996.2	0.01365512		2526.2	-0.00268494
406.39	0.07048417		936.4	0.01583007		1466.39	0.01433324		1996.4	0.01353302		2526.4	-0.00292168
406.59	0.07035441		936.6	0.01561845		1466.59	0.014307		1996.6	0.01330482		2526.6	-0.00289547
406.79	0.07069699		936.8	0.01580626		1466.79	0.01444591		1996.8	0.01409232		2526.8	-0.00333467
406.99	0.07065457		937	0.01520237		1466.99	0.01484457		1997	0.01399392		2527	-0.00314402
407.19	0.07082063		937.2	0.01436255		1467.19	0.0143974		1997.2	0.01362848		2527.2	-0.00339955
407.39	0.07039288		937.4	0.01377433		1467.39	0.01269146		1997.4	0.01327155		2527.4	-0.0041581
407.59	0.07029235		937.6	0.01274456		1467.59	0.01279005		1997.6	0.01387294		2527.6	-0.00437164
407.79	0.07028797		937.8	0.01313103		1467.79	0.01319851		1997.8	0.01315429		2527.8	-0.0033806
407.99	0.06968557		938	0.01371664		1467.99	0.01353307		1998	0.01369272		2528	-0.0036019
408.19	0.06920945		938.2	0.01406949		1468.19	0.01339242		1998.2	0.014042		2528.2	-0.00334774
408.39	0.07020936		938.4	0.01439427		1468.39	0.0139121		1998.4	0.01528965		2528.4	-0.00253706
408.59	0.07045686		938.6	0.01517285		1468.59	0.01405036		1998.6	0.01559469		2528.6	-0.00242699
408.79	0.07096956		938.8	0.01609314		1468.79	0.01341511		1998.8	0.01506128		2528.8	-0.00134979
408.99	0.0706325		939	0.01593101		1468.99	0.01371862		1999	0.0146398		2529	-0.00066234
409.19	0.06998527		939.2	0.01582116		1469.19	0.01357815		1999.2	0.01517521		2529.2	-0.00016082
409.39	0.07003658		939.4	0.0169423		1469.39	0.01347423		1999.4	0.01526835		2529.4	-0.00012604
409.59	0.07009494		939.6	0.01603369		1469.59	0.01338391		1999.6	0.01592464		2529.6	0.00054081
409.79	0.07002389		939.8	0.01687125		1469.79	0.01410364		1999.8	0.01529117		2529.8	-0.00036243
409.99	0.0701911		940	0.01731029		1469.99	0.01336638		2000	0.01520982		2530	-0.00056425
410.19	0.07052209		940.2	0.01734594		1470.19	0.0134455		2000.2	0.01452936		2530.2	-0.00027726
410.39	0.07141136		940.4	0.01656098		1470.39	0.01261444		2000.4	0.01403668		2530.4	-0.00001447
410.59	0.07191675		940.6	0.01633386		1470.59	0.01273612		2000.6	0.01294117		2530.6	0.00012421
410.79	0.07180172		940.8	0.0162629		1470.79	0.01287797		2000.8	0.01254108		2530.8	-0.00077706
410.99	0.07078357		941	0.01598753		1470.99	0.0127755		2001	0.01174794		2531	-0.00156972
411.19	0.07063557		941.2	0.01575606		1471.19	0.01216786		2001.2	0.01168693		2531.2	-0.00243598
411.39	0.06928319		941.4	0.01510179		1471.39	0.01121402		2001.4	0.0125902		2531.4	-0.00228731
411.59	0.06842764		941.6	0.01562044		1471.59	0.01180302		2001.6	0.01300986		2531.6	-0.00293501
411.79	0.06792667		941.8	0.01613027		1471.79	0.01269163		2001.8	0.01251943		2531.8	-0.00337834
411.99	0.06785656		942	0.01693054		1471.99	0.01255225		2002	0.01370941		2532	-0.0036523
412.19	0.06661121		942.2	0.01716351		1472.19	0.01224936		2002.2	0.0139798		2532.2	-0.002268
412.39	0.06698441		942.4	0.01801968		1472.39	0.01265712		2002.4	0.01475541		2532.4	-0.00158944
412.59	0.06770929		942.6	0.01774397		1472.59	0.01288037		2002.6	0.01410078		2532.6	-0.00131515
412.79	0.06776184		942.8	0.01729668		1472.79	0.01282923		2002.8	0.01423014		2532.8	-0.00100669
412.99	0.06698505		943	0.01667337		1472.99	0.01307686		2003	0.01409514		2533	-0.00120209
413.19	0.06673747		943.2	0.01571672		1473.19	0.01343961		2003.2	0.0145561		2533.2	-0.0007552
413.39	0.06679492		943.4	0.01539966		1473.39	0.01392964		2003.4	0.01372769		2533.4	-0.00087734
413.59	0.06702406		943.6	0.0140194		1473.59	0.0143504		2003.6	0.01333354		2533.6	-0.00101182
413.79	0.06737905		943.8	0.01440333		1473.79	0.01391111		2003.8	0.012489		2533.8	-0.00104587
413.99	0.0675466		944	0.01378848		1473.99	0.01308759		2004	0.01268414		2534	-0.00094918
414.19	0.06763804		944.2	0.01308446		1474.19	0.01306584		2004.2	0.01178102		2534.2	0.00042745
414.39	0.06827142		944.4	0.01221177		1474.39	0.01232111		2004.4	0.01177563		2534.4	0.00016722
414.59	0.06813855		944.6	0.01279539		1474.59	0.01255525		2004.6	0.01119496		2534.6	0.00039367
414.79	0.06734821		944.8	0.01353306		1474.79	0.01266083		2004.8	0.01143812		2534.8	0.00000325
414.99	0.06783924		945	0.01324437		1474.99	0.01278889		2005	0.01181686		2535	0.0002055
415.19	0.06805283		945.2	0.0129383		1475.19	0.01363973		2005.2	0.01167915		2535.2	-0.00040855
415.39	0.06645101		945.4	0.01310392		1475.39	0.0140071		2005.4	0.01188324		2535.4	-0.00005811
415.59	0.0664781		945.6	0.0132088		1475.59	0.01488769		2005.6	0.01176693		2535.6	-0.00023085
415.79	0.06694567		945.8	0.01319116		1475.79	0.01514135		2005.8	0.01149834		2535.8	-0.00013071
415.99	0.06695484		946	0.01372177		1475.99	0.01457584		2006	0.01238038		2536	0.00022226
416.19	0.06591071		946.2	0.01372203		1476.19	0.01457862		2006.2	0.01292318		2536.2	0.00013298
416.39	0.06739995		946.4	0.01344189		1476.39	0.01416949		2006.4	0.0131478		2536.4	0.00043807
416.59	0.06788544		946.6	0.01334366		1476.59	0.01436782		2006.6	0.01281761		2536.6	0.00038083
416.79	0.0676944		946.8	0.0131326		1476.79	0.0152125		2006.8	0.013445		2536.8	-0.0005185
416.99	0.06695385		947	0.01347451		1476.99	0.01511616		2007	0.01291665		2537	-0.00089414
417.19	0.06703358		947.2	0.01347469		1477.19	0.01526905		2007.2	0.01231427		2537.2	-0.00095697
417.39	0.06734591		947.4	0.01442468		1477.39	0.01508366		2007.4	0.01149686		2537.4	-0.0014809
417.59	0.06767691		947.6	0.0142713		1477.59	0.01500237		2007.6	0.0111124		2537.6	-0.00144476
417.79	0.06745501		947.8	0.01465496		1477.79	0.01451965		2007.8	0.01116778		2537.8	-0.00153461
417.99	0.067571		948	0.01469377		1477.99	0.01411026		2008	0.01114869		2538	-0.00143995
418.19	0.06745291		948.2	0.01548371		1478.19	0.01439736		2008.2	0.0107625		2538.2	-0.00085137
418.39	0.06718185		948.4	0.0161165		1478.39	0.01395294		2008.4	0.01089803		2538.4	-0.00167909
418.59	0.06760196		948.6	0.01688646		1478.59	0.01396512		2008.6	0.01121579		2538.6	-0.00134437
418.79	0.06725576		948.8	0.01650911		1478.79	0.01414438		2008.8	0.01132782		2538.8	-0.00189522
418.99	0.06851618		949	0.01659949		1478.99	0.01466371		2009	0.01193265		2539	-0.00180193
419.19	0.06838979		949.2	0.01656537		1479.19	0.0149597		2009.2	0.01304294		2539.2	-0.00190823
419.39	0.06792575		949.4	0.01695063		1479.39	0.01489105		2009.4	0.01452798		2539.4	-0.00006755
419.59	0.06800184		949.6	0.01611497		1479.59	0.01459114		2009.6	0.01464134		2539.6	0.00035734
419.79	0.067499		949.8	0.01655168		1479.79	0.01418551		2009.8	0.01538721		2539.8	-0.00002498
419.99	0.06648408		950	0.01657757		1479.99	0.0135423		2010	0.01574993		2540	0.00030218
420.19	0.06608723		950.2	0.01647708		1480.19	0.01294652		2010.2	0.01646176		2540.2	0.00079363
420.39	0.06635119		950.4	0.01665645		1480.39	0.01250735		2010.4	0.0168798		2540.4	0.00073211
420.59	0.06591164		950.6	0.01688367		1480.59	0.01385183		2010.6	0.01715207		2540.6	-0.00002683
420.79	0.06487578		950.8	0.01721581		1480.79	0.01393076		2010.8	0.01715497		2540.8	-0.00090481
420.99	0.06397428		951	0.01801279		1480.99	0.01299432		2011	0.01655171		2541	-0.00116116
421.19	0.06346759		951.2	0.01787508		1481.19	0.01341408		2011.2	0.01637108		2541.2	-0.00085217
421.39	0.06343197		951.4	0.01702591		1481.39	0.01348032		2011.4	0.01637188		2541.4	-0.00037835
421.59	0.06260548		951.6	0.01630693		1481.59	0.01399141		2011.6	0.01582225		2541.6	-0.00044804
421.79	0.06218839		951.8	0.01633218		1481.79	0.01353104		2011.8	0.01506753		2541.8	-0.0006944
421.99	0.06203907		952	0.01653079		1481.99	0.01383909		2012	0.01416684		2542	-0.00105603
422.19	0.06146719		952.2	0.01619523		1482.19	0.01388387		2012.2	0.0135353		2542.2	-0.00200683
422.39	0.06181244		952.4	0.01612381		1482.39	0.01345473		2012.4	0.01360826		2542.4	-0.00239711
422.59	0.06214993		952.6	0.01530831		1482.59	0.01361225		2012.6	0.01380205		2542.6	-0.00209068
422.79	0.06310909		952.8	0.01528984		1482.79	0.01279886		2012.8	0.01341092		2542.8	-0.00273771
422.99	0.06400439		953	0.01583055		1482.99	0.01293724		2013	0.01374236		2543	-0.00127328
423.19	0.06406001		953.2	0.01561184		1483.19	0.01235061		2013.2	0.01448204		2543.2	-0.00053421
423.39	0.06459624		953.4	0.015779		1483.39	0.01248682		2013.4	0.01439749		2543.4	0.00045556
423.59	0.06447666		953.6	0.01505358		1483.59	0.01245508		2013.6	0.01345817		2543.6	0.00021477
423.79	0.06513306		953.8	0.01534004		1483.79	0.01283982		2013.8	0.01431612		2543.8	0.00004452
423.99	0.06526023		954	0.01531861		1483.99	0.0124605		2014	0.01450512		2544	0.00013967
424.19	0.06603684		954.2	0.01535582		1484.19	0.01291638		2014.2	0.0149882		2544.2	-0.00014938
424.39	0.06554054		954.4	0.01566504		1484.39	0.01341868		2014.4	0.01528758		2544.4	-0.00044189
424.59	0.0661104		954.6	0.0150117		1484.59	0.01350107		2014.6	0.01504129		2544.6	-0.00125208
424.79	0.06571904		954.8	0.01549819		1484.79	0.01350689		2014.8	0.01533599		2544.8	-0.00209573
424.99	0.06532742		955	0.01554204		1484.99	0.01422019		2015	0.01527193		2545	-0.00200664
425.19	0.06502016		955.2	0.01455467		1485.19	0.01576334		2015.2	0.01477739		2545.2	-0.00171601
425.39	0.06539622		955.4	0.01488167		1485.39	0.01598361		2015.4	0.01425858		2545.4	-0.00214317
425.59	0.06420466		955.6	0.01512733		1485.59	0.0164143		2015.6	0.01312062		2545.6	-0.00318527
425.79	0.0647419		955.8	0.01582573		1485.79	0.01667705		2015.8	0.01365238		2545.8	-0.00392683
425.99	0.06446625		956	0.0160698		1485.99	0.01695174		2016	0.0126849		2546	-0.00487825
426.19	0.06344193		956.2	0.01647537		1486.19	0.01640044		2016.2	0.01348206		2546.2	-0.00541608
426.39	0.06360644		956.4	0.01723237		1486.39	0.01608437		2016.4	0.0138874		2546.4	-0.00509345
426.59	0.06313829		956.6	0.01787339		1486.59	0.01550723		2016.6	0.01366469		2546.6	-0.00480738
426.79	0.06356642		956.8	0.01799122		1486.79	0.01559994		2016.8	0.0132192		2546.8	-0.00414403
426.99	0.06320549		957	0.01786801		1486.99	0.01637676		2017	0.01345538		2547	-0.00284656
427.19	0.06371711		957.2	0.0175215		1487.19	0.01518756		2017.2	0.0136805		2547.2	-0.00326524
427.39	0.06316609		957.4	0.01772569		1487.39	0.01574981		2017.4	0.01309467		2547.4	-0.00299778
427.59	0.06306463		957.6	0.01682016		1487.59	0.01573461		2017.6	0.01308458		2547.6	-0.00274136
427.79	0.06305499		957.8	0.01641737		1487.79	0.01582482		2017.8	0.01392042		2547.8	-0.00244636
427.99	0.06347413		958	0.0159625		1487.99	0.01529329		2018	0.01296763		2548	-0.00204772
428.19	0.06363185		958.2	0.01479317		1488.19	0.01519621		2018.2	0.01235271		2548.2	-0.00229737
428.39	0.0632818		958.4	0.01464828		1488.39	0.01483563		2018.4	0.01297602		2548.4	-0.00162428
428.59	0.0640536		958.6	0.01350646		1488.59	0.01467715		2018.6	0.0129094		2548.6	-0.00254325
428.79	0.06424602		958.8	0.01368589		1488.79	0.01503684		2018.8	0.01356798		2548.8	-0.00233534
428.99	0.06365289		959	0.01354154		1488.99	0.01514294		2019	0.01331922		2549	-0.00180418
429.19	0.06416538		959.2	0.01368254		1489.19	0.01453084		2019.2	0.01278672		2549.2	-0.00205905
429.39	0.06429703		959.4	0.01515285		1489.39	0.01316901		2019.4	0.01257377		2549.4	-0.00302549
429.59	0.06416967		959.6	0.01501		1489.59	0.01320491		2019.6	0.01251436		2549.6	-0.00307152
429.79	0.06458396		959.8	0.01551975		1489.79	0.01349204		2019.8	0.0132871		2549.8	-0.0031606
429.99	0.06343241		960	0.01627155		1489.99	0.01311972		2020	0.01300335		2550	-0.0028618
430.19	0.06273066		960.2	0.01660146		1490.19	0.01279616		2020.2	0.01521271		2550.2	-0.00261301
430.39	0.06284157		960.4	0.01711206		1490.39	0.01353374		2020.4	0.01523673		2550.4	-0.00230986
430.59	0.06233939		960.6	0.01721015		1490.59	0.01398764		2020.6	0.01457711		2550.6	-0.00244607
430.79	0.06153918		960.8	0.01675		1490.79	0.01496167		2020.8	0.01431883		2550.8	-0.00262768
430.99	0.06207288		961	0.0178066		1490.99	0.0146726		2021	0.0141359		2551	-0.00395208
431.19	0.06214739		961.2	0.01753243		1491.19	0.01368292		2021.2	0.01360552		2551.2	-0.00386982
431.39	0.06201317		961.4	0.01699656		1491.39	0.01441782		2021.4	0.01280364		2551.4	-0.003386
431.59	0.06256098		961.6	0.0159048		1491.59	0.01421303		2021.6	0.01253262		2551.6	-0.00290201
431.79	0.06261516		961.8	0.01559863		1491.79	0.01465715		2021.8	0.01215232		2551.8	-0.00264953
431.99	0.06384033		962	0.01425144		1491.99	0.01491753		2022	0.01133834		2552	-0.0023629
432.19	0.06348106		962.2	0.01334805		1492.19	0.01462988		2022.2	0.01170466		2552.2	-0.00235012
432.39	0.06352225		962.4	0.01320235		1492.39	0.01526756		2022.4	0.01207204		2552.4	-0.00159291
432.59	0.06357336		962.6	0.01217324		1492.59	0.01590172		2022.6	0.01284761		2552.6	-0.00096686
432.79	0.064275		962.8	0.01241148		1492.79	0.01615588		2022.8	0.01254654		2552.8	-0.00094708
432.99	0.06398317		963	0.01223689		1492.99	0.01562962		2023	0.01171284		2553	-0.00022481
433.19	0.06373982		963.2	0.01329289		1493.19	0.01527159		2023.2	0.01119094		2553.2	0.00054342
433.39	0.06403793		963.4	0.01432637		1493.39	0.0153592		2023.4	0.01034537		2553.4	0.00030766
433.59	0.0640429		963.6	0.01424692		1493.59	0.01643615		2023.6	0.01029488		2553.6	0.00069014
433.79	0.06313297		963.8	0.01507083		1493.79	0.01623326		2023.8	0.01048877		2553.8	0.00073046
433.99	0.06237929		964	0.01587715		1493.99	0.01614154		2024	0.01070974		2554	0.00041841
434.19	0.06264158		964.2	0.01613211		1494.19	0.01666817		2024.2	0.01139179		2554.2	0.00015815
434.39	0.06161062		964.4	0.01705867		1494.39	0.0172064		2024.4	0.01090857		2554.4	-0.0005215
434.59	0.06107425		964.6	0.01740598		1494.59	0.01629223		2024.6	0.01151086		2554.6	-0.00042431
434.79	0.06109573		964.8	0.01787773		1494.79	0.01583679		2024.8	0.01122624		2554.8	-0.00132254
434.99	0.06129775		965	0.01809847		1494.99	0.01487717		2025	0.01147792		2555	-0.001341
435.19	0.06111343		965.2	0.01741113		1495.19	0.01449465		2025.2	0.01194408		2555.2	-0.00068428
435.39	0.06106773		965.4	0.01748816		1495.39	0.01371686		2025.4	0.01121919		2555.4	-0.0007949
435.59	0.06145419		965.6	0.0175609		1495.59	0.01382604		2025.6	0.01104932		2555.6	-0.00134439
435.79	0.06181795		965.8	0.0175646		1495.79	0.01415325		2025.8	0.01188275		2555.8	-0.00067664
435.99	0.06238431		966	0.01677292		1495.99	0.01418723		2026	0.01178166		2556	-0.0002727
436.19	0.06202321		966.2	0.01651885		1496.19	0.01373935		2026.2	0.01283771		2556.2	-0.00045079
436.39	0.06212173		966.4	0.01625785		1496.39	0.01421974		2026.4	0.01294443		2556.4	-0.00025905
436.59	0.06274393		966.6	0.01541172		1496.59	0.01443735		2026.6	0.01317933		2556.6	0.0005834
436.79	0.06362671		966.8	0.01495562		1496.79	0.0149467		2026.8	0.01265316		2556.8	-0.00042462
436.99	0.06343042		967	0.01444127		1496.99	0.01491981		2027	0.0123877		2557	0.00000851
437.19	0.06366395		967.2	0.01474372		1497.19	0.01539353		2027.2	0.01347042		2557.2	-0.00037505
437.39	0.06479105		967.4	0.01443186		1497.39	0.01586091		2027.4	0.0134136		2557.4	-0.00157646
437.59	0.06472667		967.6	0.0143071		1497.59	0.01665592		2027.6	0.01373482		2557.6	-0.00199078
437.79	0.06512197		967.8	0.0140193		1497.79	0.0172197		2027.8	0.01428425		2557.8	-0.00247248
437.99	0.06572665		968	0.01373082		1497.99	0.01765673		2028	0.01469821		2558	-0.00283939
438.19	0.06570581		968.2	0.01414784		1498.19	0.01741182		2028.2	0.01538749		2558.2	-0.00310637
438.39	0.06520811		968.4	0.01446279		1498.39	0.01679488		2028.4	0.01595922		2558.4	-0.00308252
438.59	0.0646937		968.6	0.01484556		1498.59	0.01578934		2028.6	0.01579626		2558.6	-0.0028614
438.79	0.06469687		968.8	0.01422594		1498.79	0.01549998		2028.8	0.01496877		2558.8	-0.00281886
438.99	0.06376983		969	0.01428534		1498.99	0.01549793		2029	0.01517499		2559	-0.00261404
439.19	0.06365324		969.2	0.01424423		1499.19	0.01487143		2029.2	0.01462289		2559.2	-0.00272483
439.39	0.06344125		969.4	0.01487063		1499.39	0.01483309		2029.4	0.01364859		2559.4	-0.00257518
439.59	0.06287652		969.6	0.0147791		1499.59	0.01550202		2029.6	0.01281262		2559.6	-0.00228282
439.79	0.06207969		969.8	0.01516933		1499.79	0.01548568		2029.8	0.01265916		2559.8	-0.00061694
439.99	0.06107489		970	0.01463746		1499.99	0.01613154		2030	0.01208543		2560	-0.00111237
440.19	0.05990185		970.2	0.01473524		1500.19	0.01579582		2030.2	0.0121126		2560.2	-0.00068991
440.39	0.05900803		970.4	0.01481439		1500.39	0.01614392		2030.4	0.01152039		2560.4	-0.00082712
440.59	0.05812268		970.6	0.01457982		1500.59	0.01677374		2030.6	0.01159871		2560.6	-0.00021894
440.79	0.05775399		970.8	0.01479936		1500.79	0.01664105		2030.8	0.01285297		2560.8	0.00034822
440.99	0.05705883		971	0.01507445		1500.99	0.01682868		2031	0.01328049		2561	-0.00014187
441.19	0.05779558		971.2	0.01476094		1501.19	0.0169722		2031.2	0.01423465		2561.2	-0.00017713
441.39	0.05797286		971.4	0.01456797		1501.39	0.01715308		2031.4	0.01465853		2561.4	-0.00034839
441.59	0.05808575		971.6	0.01480441		1501.59	0.01722431		2031.6	0.01526785		2561.6	-0.0004204
441.79	0.05962749		971.8	0.01433629		1501.79	0.01690654		2031.8	0.01576837		2561.8	-0.00104829
441.99	0.06026054		972	0.01475164		1501.99	0.01564569		2032	0.01615143		2562	-0.00119911
442.19	0.06001187		972.2	0.01554751		1502.19	0.01494887		2032.2	0.01605983		2562.2	-0.00145954
442.39	0.060624		972.4	0.01504386		1502.39	0.01440897		2032.4	0.01610475		2562.4	-0.00097765
442.59	0.06076917		972.6	0.01569884		1502.59	0.01413872		2032.6	0.01560362		2562.6	-0.00210348
442.79	0.06231645		972.8	0.01510519		1502.79	0.01404353		2032.8	0.01541318		2562.8	-0.00271221
442.99	0.06221835		973	0.01523408		1502.99	0.01413197		2033	0.01513564		2563	-0.00376862
443.19	0.06236672		973.2	0.0147214		1503.19	0.01340649		2033.2	0.01448979		2563.2	-0.003823
443.39	0.06190182		973.4	0.01507217		1503.39	0.0141172		2033.4	0.01365454		2563.4	-0.00394597
443.59	0.06150192		973.6	0.01551603		1503.59	0.01374826		2033.6	0.01271279		2563.6	-0.00426499
443.79	0.06048056		973.8	0.01563225		1503.79	0.01491147		2033.8	0.01274681		2563.8	-0.00365398
443.99	0.06001997		974	0.01492606		1503.99	0.01551969		2034	0.01290865		2564	-0.00364151
444.19	0.0596821		974.2	0.01505504		1504.19	0.01533197		2034.2	0.01286934		2564.2	-0.0030564
444.39	0.05928595		974.4	0.01511002		1504.39	0.01637463		2034.4	0.01383027		2564.4	-0.00232879
444.59	0.05891074		974.6	0.01577651		1504.59	0.01642649		2034.6	0.01450701		2564.6	-0.00062803
444.79	0.0582413		974.8	0.01492936		1504.79	0.01602228		2034.8	0.01566241		2564.8	0.00004617
444.99	0.0579314		975	0.01477835		1504.99	0.01756995		2035	0.01537833		2565	0.00029265
445.19	0.05844965		975.2	0.01472295		1505.19	0.01754751		2035.2	0.01503158		2565.2	0.00071557
445.39	0.05840135		975.4	0.01530259		1505.39	0.01813535		2035.4	0.01557324		2565.4	0.00086953
445.59	0.05890809		975.6	0.01508841		1505.59	0.01805779		2035.6	0.01625639		2565.6	0.00087885
445.79	0.05954812		975.8	0.01524277		1505.79	0.01760073		2035.8	0.01690182		2565.8	0.00039652
445.99	0.05897406		976	0.01526128		1505.99	0.0178958		2036	0.01703553		2566	0.00066634
446.19	0.05905234		976.2	0.01554606		1506.19	0.0187898		2036.2	0.01720401		2566.2	0.00073662
446.39	0.05919535		976.4	0.01528016		1506.39	0.0190312		2036.4	0.01701281		2566.4	0.00031446
446.59	0.05953098		976.6	0.01558352		1506.59	0.01884341		2036.6	0.01656725		2566.6	-0.00106561
446.79	0.05979996		976.8	0.01514078		1506.79	0.01870869		2036.8	0.01609972		2566.8	-0.00209645
446.99	0.0594694		977	0.01472883		1506.99	0.0182793		2037	0.01574171		2567	-0.00270846
447.19	0.05915526		977.2	0.01417422		1507.19	0.01836668		2037.2	0.01514516		2567.2	-0.00297363
447.39	0.05854024		977.4	0.01462291		1507.39	0.01849001		2037.4	0.01431739		2567.4	-0.00329234
447.59	0.05837521		977.6	0.01499388		1507.59	0.01862145		2037.6	0.01381675		2567.6	-0.00348316
447.79	0.05696991		977.8	0.01446631		1507.79	0.01886607		2037.8	0.01364125		2567.8	-0.00291189
447.99	0.0573968		978	0.013359		1507.99	0.0187026		2038	0.0138086		2568	-0.00245041
448.19	0.05716851		978.2	0.01337048		1508.19	0.01829343		2038.2	0.01351008		2568.2	-0.00204768
448.39	0.05640786		978.4	0.0132219		1508.39	0.0190746		2038.4	0.01409355		2568.4	-0.0008237
448.59	0.05581449		978.6	0.01328656		1508.59	0.01782766		2038.6	0.01453298		2568.6	-0.00088794
448.79	0.05558164		978.8	0.01303418		1508.79	0.01786157		2038.8	0.01492987		2568.8	-0.00054998
448.99	0.05545165		979	0.01389559		1508.99	0.01882028		2039	0.01531375		2569	-0.00032177
449.19	0.0559469		979.2	0.01432711		1509.19	0.01813078		2039.2	0.01478398		2569.2	-0.00062404
449.39	0.05634967		979.4	0.01448732		1509.39	0.01794086		2039.4	0.01584742		2569.4	-0.00040419
449.59	0.05700282		979.6	0.01464421		1509.59	0.01748783		2039.6	0.01583318		2569.6	-0.00100757
449.79	0.05743094		979.8	0.01575864		1509.79	0.01821718		2039.8	0.01598995		2569.8	-0.00070137
449.99	0.05776536		980	0.01568423		1509.99	0.01887004		2040	0.01518975		2570	-0.00062204
450.19	0.05880205		980.2	0.01518384		1510.19	0.01876919		2040.2	0.0154665		2570.2	-0.00067936
450.39	0.05899205		980.4	0.01506071		1510.39	0.01790686		2040.4	0.0148445		2570.4	-0.00109953
450.59	0.05999496		980.6	0.01548833		1510.59	0.01793233		2040.6	0.01460578		2570.6	-0.00145374
450.79	0.0605008		980.8	0.01531155		1510.79	0.01774717		2040.8	0.01421365		2570.8	-0.00198736
450.99	0.06094721		981	0.01489595		1510.99	0.0176933		2041	0.01382667		2571	-0.00294417
451.19	0.06077004		981.2	0.0150285		1511.19	0.01823976		2041.2	0.01339431		2571.2	-0.00333204
451.39	0.06062047		981.4	0.0155667		1511.39	0.01840597		2041.4	0.0134807		2571.4	-0.00440608
451.59	0.05997927		981.6	0.01590812		1511.59	0.0185799		2041.6	0.01348488		2571.6	-0.00457085
451.79	0.05862432		981.8	0.01591852		1511.79	0.01728622		2041.8	0.01323208		2571.8	-0.00480653
451.99	0.05759246		982	0.01484413		1511.99	0.01704553		2042	0.01331411		2572	-0.00465422
452.19	0.05752542		982.2	0.01533723		1512.19	0.01646064		2042.2	0.01340307		2572.2	-0.00478952
452.39	0.0569275		982.4	0.01554672		1512.39	0.01651413		2042.4	0.01412536		2572.4	-0.00422658
452.59	0.05734207		982.6	0.01629823		1512.59	0.01566039		2042.6	0.01539533		2572.6	-0.00512826
452.79	0.05768161		982.8	0.01636275		1512.79	0.01666451		2042.8	0.01657846		2572.8	-0.00531943
452.99	0.05711256		983	0.01600171		1512.99	0.01670485		2043	0.01667405		2573	-0.00581211
453.19	0.05777513		983.2	0.01655151		1513.19	0.01635821		2043.2	0.01632059		2573.2	-0.00512959
453.39	0.05826337		983.4	0.01658865		1513.39	0.01583624		2043.4	0.01603355		2573.4	-0.00505402
453.59	0.05834365		983.6	0.01647882		1513.59	0.01576385		2043.6	0.0154091		2573.6	-0.00417008
453.79	0.0578784		983.8	0.01551559		1513.79	0.01593459		2043.8	0.0157941		2573.8	-0.00275109
453.99	0.05805931		984	0.01418281		1513.99	0.01558921		2044	0.01515372		2574	-0.00222356
454.19	0.05874838		984.2	0.01317727		1514.19	0.01531444		2044.2	0.01509848		2574.2	-0.00092858
454.39	0.05822563		984.4	0.01352861		1514.39	0.01581277		2044.4	0.01396116		2574.4	-0.00018321
454.59	0.0580503		984.6	0.01329342		1514.59	0.01602998		2044.6	0.01372629		2574.6	0.00066487
454.79	0.05720736		984.8	0.01333246		1514.79	0.01600701		2044.8	0.01349949		2574.8	0.00067623
454.99	0.05670413		985	0.01339965		1514.99	0.01533314		2045	0.01340505		2575	-0.00028909
455.19	0.05662684		985.2	0.01405937		1515.19	0.01560581		2045.2	0.0139331		2575.2	0.00017622
455.39	0.05669195		985.4	0.01418999		1515.39	0.01544733		2045.4	0.01400616		2575.4	0.00006313
455.59	0.05609009		985.6	0.01477488		1515.59	0.01429994		2045.6	0.01326437		2575.6	0.00096363
455.79	0.05529704		985.8	0.01477289		1515.79	0.01336057		2045.8	0.01284845		2575.8	0.00037963
455.99	0.05437813		986	0.01481856		1515.99	0.01410552		2046	0.01298869		2576	0.00002039
456.19	0.05533504		986.2	0.01600561		1516.19	0.01436606		2046.2	0.013724		2576.2	-0.00037127
456.39	0.05590186		986.4	0.01697053		1516.39	0.01398964		2046.4	0.0133914		2576.4	-0.00108471
456.59	0.05649681		986.6	0.01764049		1516.59	0.0144304		2046.6	0.01383964		2576.6	-0.00195197
456.79	0.05699078		986.8	0.01763964		1516.79	0.01516555		2046.8	0.01347568		2576.8	-0.00267921
456.99	0.05705267		987	0.01817681		1516.99	0.01469169		2047	0.01233852		2577	-0.00252969
457.19	0.05756712		987.2	0.01891386		1517.19	0.01542722		2047.2	0.01258221		2577.2	-0.00248406
457.39	0.05804246		987.4	0.01833799		1517.39	0.01629274		2047.4	0.01178086		2577.4	-0.00338222
457.59	0.05771387		987.6	0.01730532		1517.59	0.01601444		2047.6	0.01200739		2577.6	-0.00319142
457.79	0.05748064		987.8	0.01711537		1517.79	0.01638219		2047.8	0.01270098		2577.8	-0.00300348
457.99	0.05774184		988	0.01703472		1517.99	0.01651074		2048	0.01252178		2578	-0.00261407
458.19	0.05774085		988.2	0.01677213		1518.19	0.0168355		2048.2	0.0120576		2578.2	-0.0025853
458.39	0.05753294		988.4	0.0171821		1518.39	0.01738005		2048.4	0.01201395		2578.4	-0.00225612
458.59	0.05749149		988.6	0.017241		1518.59	0.01736229		2048.6	0.01253652		2578.6	-0.00211346
458.79	0.05720815		988.8	0.01784396		1518.79	0.01688659		2048.8	0.01236662		2578.8	-0.00222598
458.99	0.05692321		989	0.01757742		1518.99	0.01520542		2049	0.0132661		2579	-0.00247759
459.19	0.05807136		989.2	0.01807185		1519.19	0.01583556		2049.2	0.01421107		2579.2	-0.00216975
459.39	0.05851839		989.4	0.01757136		1519.39	0.01576642		2049.4	0.01374205		2579.4	-0.00229681
459.59	0.05892444		989.6	0.01753945		1519.59	0.01540302		2049.6	0.01498101		2579.6	-0.00199659
459.79	0.05882913		989.8	0.01744389		1519.79	0.01634224		2049.8	0.01549089		2579.8	-0.00253223
459.99	0.05820384		990	0.01746486		1519.99	0.01635926		2050	0.01587994		2580	-0.00160189
460.19	0.05865591		990.2	0.01727467		1520.19	0.01523112		2050.2	0.01615552		2580.2	-0.00058954
460.39	0.05892369		990.4	0.01720972		1520.39	0.01479475		2050.4	0.01572684		2580.4	-0.00081655
460.59	0.05871603		990.6	0.01728432		1520.59	0.01513011		2050.6	0.01599696		2580.6	0.00008942
460.79	0.05879129		990.8	0.01703669		1520.79	0.01576604		2050.8	0.01610936		2580.8	0.00056818
460.99	0.05874341		991	0.01652843		1520.99	0.01559859		2051	0.01573624		2581	0.00125075
461.19	0.05830103		991.2	0.01736548		1521.19	0.01683996		2051.2	0.01597741		2581.2	0.00023959
461.39	0.05833612		991.4	0.01707164		1521.39	0.01677349		2051.4	0.01660177		2581.4	-0.00019491
461.59	0.0579808		991.6	0.01648824		1521.59	0.01575538		2051.6	0.0165311		2581.6	-0.00010812
461.79	0.05747388		991.8	0.01685606		1521.79	0.01598587		2051.8	0.01703623		2581.8	-0.00022845
461.99	0.05710087		992	0.01673788		1521.99	0.01629828		2052	0.01661897		2582	-0.0003746
462.19	0.05703568		992.2	0.01655598		1522.19	0.01708255		2052.2	0.01660008		2582.2	-0.00038339
462.39	0.05655909		992.4	0.01737845		1522.39	0.01764327		2052.4	0.0165346		2582.4	-0.00057617
462.59	0.05542025		992.6	0.0173219		1522.59	0.01753055		2052.6	0.01545766		2582.6	-0.00133582
462.79	0.0548446		992.8	0.01704376		1522.79	0.01848107		2052.8	0.01531924		2582.8	-0.00201169
462.99	0.05498263		993	0.01687977		1522.99	0.01831434		2053	0.01572362		2583	-0.00272998
463.19	0.05592001		993.2	0.01696394		1523.19	0.01834881		2053.2	0.01530567		2583.2	-0.00321868
463.39	0.05626241		993.4	0.01656341		1523.39	0.01851181		2053.4	0.01474113		2583.4	-0.00370874
463.59	0.05640271		993.6	0.01633098		1523.59	0.01866074		2053.6	0.01516677		2583.6	-0.00346605
463.79	0.05608629		993.8	0.01626937		1523.79	0.01916176		2053.8	0.0135325		2583.8	-0.00347332
463.99	0.05501854		994	0.01581275		1523.99	0.01882862		2054	0.01334064		2584	-0.00200514
464.19	0.05480301		994.2	0.0158215		1524.19	0.01841956		2054.2	0.01263045		2584.2	-0.00237028
464.39	0.05466852		994.4	0.01600487		1524.39	0.01871225		2054.4	0.01180508		2584.4	-0.0024999
464.59	0.05423184		994.6	0.01556729		1524.59	0.01801806		2054.6	0.01103368		2584.6	-0.00127529
464.79	0.05327853		994.8	0.01482835		1524.79	0.01795865		2054.8	0.01060198		2584.8	-0.00123174
464.99	0.05355046		995	0.01442494		1524.99	0.01754072		2055	0.0101978		2585	-0.00157662
465.19	0.05292413		995.2	0.01480308		1525.19	0.01754762		2055.2	0.01043701		2585.2	-0.00221852
465.39	0.0537879		995.4	0.01378367		1525.39	0.01659565		2055.4	0.01119903		2585.4	-0.0017596
465.59	0.05375564		995.6	0.01350511		1525.59	0.01602747		2055.6	0.01150167		2585.6	-0.00119916
465.79	0.0533032		995.8	0.01394125		1525.79	0.0155173		2055.8	0.01233279		2585.8	-0.00043367
465.99	0.05299356		996	0.0147201		1525.99	0.01461042		2056	0.01247589		2586	0.00054453
466.19	0.0531892		996.2	0.0147526		1526.19	0.01479231		2056.2	0.01295404		2586.2	0.00072793
466.39	0.05321188		996.4	0.01510263		1526.39	0.01439125		2056.4	0.01287643		2586.4	0.00003648
466.59	0.05411197		996.6	0.01415476		1526.59	0.01386228		2056.6	0.01204941		2586.6	0.00059274
466.79	0.05461587		996.8	0.0138205		1526.79	0.01441545		2056.8	0.01220913		2586.8	0.00114027
466.99	0.05633902		997	0.01384879		1526.99	0.01280429		2057	0.01216657		2587	0.00088493
467.19	0.0570678		997.2	0.0134163		1527.19	0.01182497		2057.2	0.01165946		2587.2	0.00080955
467.39	0.05742557		997.4	0.0135151		1527.39	0.01226992		2057.4	0.01124504		2587.4	0.00012768
467.59	0.05794919		997.6	0.01344806		1527.59	0.01256214		2057.6	0.01071942		2587.6	0.00059856
467.79	0.05830839		997.8	0.01324411		1527.79	0.01277349		2057.8	0.01015086		2587.8	0.00082986
467.99	0.05775035		998	0.01340385		1527.99	0.01332961		2058	0.01023111		2588	0.00051063
468.19	0.05681001		998.2	0.0132438		1528.19	0.01355579		2058.2	0.01031578		2588.2	-0.00003066
468.39	0.05599997		998.4	0.01278826		1528.39	0.01387819		2058.4	0.0106222		2588.4	0.0000066
468.59	0.05568407		998.6	0.01240352		1528.59	0.01370267		2058.6	0.01073916		2588.6	-0.00013088
468.79	0.05536017		998.8	0.01260327		1528.79	0.01437185		2058.8	0.01104074		2588.8	-0.00104611
468.99	0.05575669		999	0.01255377		1528.99	0.01496562		2059	0.0112343		2589	-0.00178909
469.19	0.05557582		999.2	0.01247399		1529.19	0.0153514		2059.2	0.01174058		2589.2	-0.00226013
469.39	0.05583911		999.4	0.01298029		1529.39	0.0154667		2059.4	0.01256042		2589.4	-0.00269122
469.59	0.0548174		999.6	0.0141246		1529.59	0.01552582		2059.6	0.01336357		2589.6	-0.0030773
469.79	0.05408431		999.8	0.01515924		1529.79	0.01547315		2059.8	0.01330088		2589.8	-0.00294607
469.99	0.05357365		1000	0.01585509		1529.99	0.01574089		2060	0.01327486		2590	-0.00368531
470.19	0.05430097		1000.2	0.01557757		1530.19	0.01621457		2060.2	0.01431488		2590.2	-0.00392794
470.39	0.05459536		1000.4	0.0156681		1530.39	0.01619848		2060.4	0.01392381		2590.4	-0.00371013
470.59	0.05584052		1000.6	0.01472154		1530.59	0.01620292		2060.6	0.01388239		2590.6	-0.00289506
470.79	0.05570953		1000.8	0.01436177		1530.79	0.0162739		2060.8	0.01376985		2590.8	-0.00264693
470.99	0.0566662		1001	0.01438037		1530.99	0.01579385		2061	0.0142625		2591	-0.00201061
471.19	0.05597218		1001.2	0.01407811		1531.19	0.01528365		2061.2	0.01394261		2591.2	-0.00202041
471.39	0.05597718		1001.4	0.0147571		1531.39	0.01556475		2061.4	0.01435617		2591.4	-0.00229238
471.59	0.05641555		1001.6	0.01458739		1531.59	0.01567138		2061.6	0.01453258		2591.6	-0.00132149
471.79	0.05592525		1001.8	0.01427225		1531.79	0.01570814		2061.8	0.01530029		2591.8	-0.00175599
471.99	0.05567896		1002	0.01436478		1531.99	0.01577738		2062	0.01522716		2592	-0.00180201
472.19	0.05506107		1002.2	0.01409096		1532.19	0.01607252		2062.2	0.01606285		2592.2	-0.00038272
472.39	0.05513633		1002.4	0.01474352		1532.39	0.01581793		2062.4	0.01582543		2592.4	0.00004253
472.59	0.05608386		1002.6	0.01532563		1532.59	0.01582148		2062.6	0.01550394		2592.6	0.00006752
472.79	0.05592369		1002.8	0.01546379		1532.79	0.01586435		2062.8	0.01544526		2592.8	-0.00046631
472.99	0.05606791		1003	0.0146921		1532.99	0.01720438		2063	0.0152145		2593	-0.00165806
473.19	0.05647431		1003.2	0.01548671		1533.19	0.01675124		2063.2	0.01586152		2593.2	-0.00163277
473.39	0.0561121		1003.4	0.01652551		1533.39	0.01556675		2063.4	0.01625289		2593.4	-0.00257507
473.59	0.05582396		1003.6	0.01664355		1533.59	0.01581713		2063.6	0.01583189		2593.6	-0.0032294
473.79	0.05543344		1003.8	0.0173263		1533.79	0.01554883		2063.8	0.01561574		2593.8	-0.00333589
473.99	0.05603545		1004	0.01715242		1533.99	0.01545846		2064	0.01595038		2594	-0.00436361
474.19	0.05712263		1004.2	0.01739146		1534.19	0.01502869		2064.2	0.01609652		2594.2	-0.00417709
474.39	0.05690343		1004.4	0.01759238		1534.39	0.01557661		2064.4	0.01553052		2594.4	-0.0042507
474.59	0.05746823		1004.6	0.01732312		1534.59	0.01478876		2064.6	0.01566499		2594.6	-0.00474452
474.79	0.05708786		1004.8	0.01786341		1534.79	0.01369789		2064.8	0.01514766		2594.8	-0.00513081
474.99	0.05700745		1005	0.01819391		1534.99	0.01328148		2065	0.01521956		2595	-0.00532914
475.19	0.05648262		1005.2	0.01829622		1535.19	0.01325057		2065.2	0.01380602		2595.2	-0.00635229
475.39	0.05663432		1005.4	0.01856415		1535.39	0.01353526		2065.4	0.01369971		2595.4	-0.00617707
475.59	0.05647255		1005.6	0.01827122		1535.59	0.01410296		2065.6	0.01308543		2595.6	-0.00613277
475.79	0.0566601		1005.8	0.01794606		1535.79	0.01484122		2065.8	0.01277665		2595.8	-0.00642016
475.99	0.05718591		1006	0.01776881		1535.99	0.01505877		2066	0.01211607		2596	-0.00574272
476.19	0.05774822		1006.2	0.01767018		1536.19	0.01582586		2066.2	0.01230956		2596.2	-0.00404622
476.39	0.05769657		1006.4	0.01741446		1536.39	0.01559078		2066.4	0.0117774		2596.4	-0.00329956
476.59	0.05858392		1006.6	0.01633247		1536.59	0.01602201		2066.6	0.01153564		2596.6	-0.00346747
476.79	0.05789551		1006.8	0.01595676		1536.79	0.01598453		2066.8	0.01167116		2596.8	-0.00276274
476.99	0.05817875		1007	0.01542477		1536.99	0.01601105		2067	0.01163186		2597	-0.00229382
477.19	0.05887181		1007.2	0.01571208		1537.19	0.01515285		2067.2	0.01247829		2597.2	-0.00080745
477.39	0.05893808		1007.4	0.01496305		1537.39	0.01494003		2067.4	0.01291101		2597.4	-0.00051525
477.59	0.05928623		1007.6	0.01441715		1537.59	0.01549592		2067.6	0.01237563		2597.6	-0.00044416
477.79	0.0585221		1007.8	0.0140833		1537.79	0.01459086		2067.8	0.01291987		2597.8	-0.00053041
477.99	0.05906515		1008	0.0134313		1537.99	0.01546832		2068	0.01391973		2598	-0.00005755
478.19	0.05876777		1008.2	0.01425739		1538.19	0.01624034		2068.2	0.01373428		2598.2	-0.00023954
478.39	0.05773222		1008.4	0.01451499		1538.39	0.01584454		2068.4	0.01361502		2598.4	-0.00082261
478.59	0.05679771		1008.6	0.0142298		1538.59	0.01482008		2068.6	0.01361882		2598.6	-0.00144071
478.79	0.0563081		1008.8	0.0144089		1538.79	0.01440577		2068.8	0.01372645		2598.8	-0.00253046
478.99	0.05482732		1009	0.01484597		1538.99	0.01522816		2069	0.01319408		2599	-0.00329986
479.19	0.05385889		1009.2	0.01514777		1539.19	0.01558155		2069.2	0.01295499		2599.2	-0.00346484
479.39	0.05268485		1009.4	0.01597947		1539.39	0.01657908		2069.4	0.01279855		2599.4	-0.00389959
479.59	0.05238475		1009.6	0.01627237		1539.59	0.01776558		2069.6	0.01267089		2599.6	-0.00471144
479.79	0.05199098		1009.8	0.01633495		1539.79	0.01882559		2069.8	0.01328271		2599.8	-0.00465377
479.99	0.05179017		1010	0.01593196		1539.99	0.01822925		2070	0.01317128		2600	-0.00417503
480.19	0.05222512		1010.2	0.0157228		1540.19	0.01848375		2070.2	0.01321928		2600.2	-0.00310111
480.39	0.05168867		1010.4	0.01465899		1540.39	0.01846285		2070.4	0.01321626		2600.4	-0.00347087
480.59	0.05137105		1010.6	0.01428291		1540.59	0.01785082		2070.6	0.01302511		2600.6	-0.00382955
480.79	0.05115078		1010.8	0.0143226		1540.79	0.0172815		2070.8	0.01298927		2600.8	-0.00355142
480.99	0.05129355		1011	0.01465582		1540.99	0.01685128		2071	0.01254007		2601	-0.00345534
481.19	0.05160453		1011.2	0.01459707		1541.19	0.01689687		2071.2	0.01278027		2601.2	-0.0026437
481.39	0.05180963		1011.4	0.01423599		1541.39	0.01627829		2071.4	0.01217455		2601.4	-0.0029928
481.59	0.05199112		1011.6	0.01381286		1541.59	0.01567902		2071.6	0.01154144		2601.6	-0.00286768
481.79	0.05221677		1011.8	0.01276203		1541.79	0.01524227		2071.8	0.011384		2601.8	-0.00288172
481.99	0.05309361		1012	0.01295313		1541.99	0.01595316		2072	0.0111954		2602	-0.00241518
482.19	0.05293826		1012.2	0.01328709		1542.19	0.01464027		2072.2	0.01061111		2602.2	-0.00341635
482.39	0.05297172		1012.4	0.01304289		1542.39	0.01351541		2072.4	0.01041852		2602.4	-0.00342628
482.59	0.05277632		1012.6	0.01294543		1542.59	0.01341649		2072.6	0.01047233		2602.6	-0.00384651
482.79	0.05360541		1012.8	0.01369016		1542.79	0.01334782		2072.8	0.01009858		2602.8	-0.00417072
482.99	0.05277669		1013	0.01370658		1542.99	0.0136368		2073	0.01000775		2603	-0.00468765
483.19	0.05354308		1013.2	0.01367592		1543.19	0.01369145		2073.2	0.01028715		2603.2	-0.00393226
483.39	0.05401564		1013.4	0.01386212		1543.39	0.01439001		2073.4	0.01022176		2603.4	-0.0031272
483.59	0.05430506		1013.6	0.01286048		1543.59	0.01502986		2073.6	0.01108611		2603.6	-0.00227165
483.79	0.05423678		1013.8	0.01328491		1543.79	0.01499151		2073.8	0.01157246		2603.8	-0.00075861
483.99	0.05515718		1014	0.01321035		1543.99	0.01475019		2074	0.01252032		2604	-0.00019819
484.19	0.05584834		1014.2	0.01274796		1544.19	0.01523378		2074.2	0.01377605		2604.2	0.00053701
484.39	0.05528433		1014.4	0.01210874		1544.39	0.01556219		2074.4	0.01399352		2604.4	0.00110994
484.59	0.05499676		1014.6	0.012323		1544.59	0.01524606		2074.6	0.01377119		2604.6	0.00062805
484.79	0.05491908		1014.8	0.01311417		1544.79	0.01576674		2074.8	0.0140375		2604.8	0.00000311
484.99	0.05495671		1015	0.01332989		1544.99	0.01608172		2075	0.01462609		2605	-0.0000536
485.19	0.05457805		1015.2	0.01379147		1545.19	0.01556396		2075.2	0.01503786		2605.2	-0.00028765
485.39	0.05447355		1015.4	0.01435073		1545.39	0.01529101		2075.4	0.01433234		2605.4	-0.00130442
485.59	0.05519764		1015.6	0.01507693		1545.59	0.01530235		2075.6	0.01432724		2605.6	-0.00118553
485.79	0.05508621		1015.8	0.01527136		1545.79	0.01536776		2075.8	0.01409053		2605.8	-0.00100019
485.99	0.05491576		1016	0.01610096		1545.99	0.01530785		2076	0.01382879		2606	-0.00148519
486.19	0.05530521		1016.2	0.01651494		1546.19	0.01510095		2076.2	0.01410119		2606.2	-0.00208743
486.39	0.05499888		1016.4	0.01716667		1546.39	0.01490791		2076.4	0.01369686		2606.4	-0.00266124
486.59	0.05459601		1016.6	0.01735151		1546.59	0.0151705		2076.6	0.01423332		2606.6	-0.00328599
486.79	0.05461611		1016.8	0.01704299		1546.79	0.01506409		2076.8	0.01408226		2606.8	-0.00385111
486.99	0.05421507		1017	0.01604595		1546.99	0.01450262		2077	0.01463762		2607	-0.00499874
487.19	0.05415186		1017.2	0.01539565		1547.19	0.01475506		2077.2	0.01427243		2607.2	-0.00470455
487.39	0.05403051		1017.4	0.01555955		1547.39	0.01521462		2077.4	0.01392137		2607.4	-0.00442861
487.59	0.05320253		1017.6	0.01593263		1547.59	0.01547231		2077.6	0.01351217		2607.6	-0.0038821
487.79	0.0527457		1017.8	0.01707949		1547.79	0.01492475		2077.8	0.01392162		2607.8	-0.00356902
487.99	0.05411647		1018	0.01647568		1547.99	0.01499296		2078	0.01515432		2608	-0.00310516
488.19	0.05440644		1018.2	0.01653008		1548.19	0.01498676		2078.2	0.01505543		2608.2	-0.00236887
488.39	0.05472753		1018.4	0.0166358		1548.39	0.01550638		2078.4	0.01443349		2608.4	-0.00168892
488.59	0.05540782		1018.6	0.01658173		1548.59	0.01534423		2078.6	0.01425493		2608.6	-0.0029604
488.79	0.05606119		1018.8	0.01716624		1548.79	0.01531823		2078.8	0.01473956		2608.8	-0.00258401
488.99	0.05632861		1019	0.01751544		1548.99	0.01478019		2079	0.01474721		2609	-0.00269137
489.19	0.05639183		1019.2	0.01860072		1549.19	0.01452751		2079.2	0.0138952		2609.2	-0.00295212
489.39	0.05710604		1019.4	0.01963091		1549.39	0.01416677		2079.4	0.01347521		2609.4	-0.00236324
489.59	0.05834185		1019.6	0.02008956		1549.59	0.01404908		2079.6	0.01410871		2609.6	-0.00231519
489.79	0.05813238		1019.8	0.02018211		1549.79	0.0138263		2079.8	0.01429728		2609.8	-0.00145431
489.99	0.05830495		1020	0.02056821		1549.99	0.01435624		2080	0.01400053		2610	-0.00188084
490.19	0.05824485		1020.2	0.01999603		1550.19	0.0138306		2080.2	0.01391954		2610.2	-0.00174892
490.39	0.05740085		1020.4	0.01983243		1550.39	0.01357268		2080.4	0.01395152		2610.4	-0.00186422
490.59	0.05749786		1020.6	0.01900055		1550.59	0.01428215		2080.6	0.01495886		2610.6	-0.00197391
490.79	0.05733479		1020.8	0.01781125		1550.79	0.01480135		2080.8	0.01518173		2610.8	-0.00297372
490.99	0.05706791		1021	0.01726429		1550.99	0.01480649		2081	0.01542065		2611	-0.0035254
491.19	0.05530232		1021.2	0.01708087		1551.19	0.01588144		2081.2	0.01487357		2611.2	-0.00335013
491.39	0.0548717		1021.4	0.01707425		1551.39	0.01575197		2081.4	0.01516951		2611.4	-0.00305988
491.59	0.0534759		1021.6	0.01651417		1551.59	0.01597817		2081.6	0.01480081		2611.6	-0.00330379
491.79	0.05307386		1021.8	0.0158074		1551.79	0.01577097		2081.8	0.01490576		2611.8	-0.003567
491.99	0.05340141		1022	0.01553053		1551.99	0.01578871		2082	0.0153799		2612	-0.00330655
492.19	0.05248854		1022.2	0.01613591		1552.19	0.01573618		2082.2	0.01499702		2612.2	-0.00360815
492.39	0.05208817		1022.4	0.01580606		1552.39	0.01608895		2082.4	0.01468686		2612.4	-0.00343122
492.59	0.05084388		1022.6	0.01625949		1552.59	0.01494432		2082.6	0.01495473		2612.6	-0.00432888
492.79	0.05061942		1022.8	0.0167373		1552.79	0.0149052		2082.8	0.0150428		2612.8	-0.00402484
492.99	0.05067665		1023	0.01669166		1552.99	0.01451107		2083	0.01477277		2613	-0.00482899
493.19	0.05123046		1023.2	0.01636809		1553.19	0.01425709		2083.2	0.01479613		2613.2	-0.0041128
493.39	0.05196028		1023.4	0.0163692		1553.39	0.01304009		2083.4	0.01607532		2613.4	-0.00382736
493.59	0.05259795		1023.6	0.01646617		1553.59	0.01288812		2083.6	0.01662545		2613.6	-0.0040308
493.79	0.0523428		1023.8	0.01722483		1553.79	0.0132647		2083.8	0.01669703		2613.8	-0.00253214
493.99	0.05258942		1024	0.01699919		1553.99	0.01410642		2084	0.01751539		2614	-0.00240955
494.19	0.05330122		1024.2	0.01685624		1554.19	0.01358492		2084.2	0.01782571		2614.2	-0.00219883
494.39	0.05398968		1024.4	0.01694454		1554.39	0.01461781		2084.4	0.01789898		2614.4	-0.00144819
494.59	0.05433916		1024.6	0.01641649		1554.59	0.01525196		2084.6	0.01812917		2614.6	-0.00162466
494.79	0.05386874		1024.8	0.01548022		1554.79	0.01521879		2084.8	0.01747763		2614.8	-0.00194839
494.99	0.05401613		1025	0.01594149		1554.99	0.01535415		2085	0.01720573		2615	-0.00237247
495.19	0.05385901		1025.2	0.01589255		1555.19	0.01507022		2085.2	0.01642208		2615.2	-0.00194292
495.39	0.0544777		1025.4	0.01560363		1555.39	0.01502051		2085.4	0.01540925		2615.4	-0.00189757
495.59	0.0544336		1025.6	0.01571075		1555.59	0.01515903		2085.6	0.01442012		2615.6	-0.00341312
495.79	0.05422348		1025.8	0.01583254		1555.79	0.01480799		2085.8	0.01343386		2615.8	-0.00327949
495.99	0.05391737		1026	0.01577208		1555.99	0.01426442		2086	0.01346788		2616	-0.00328713
496.19	0.05335252		1026.2	0.01585755		1556.19	0.0140517		2086.2	0.01282809		2616.2	-0.00386209
496.39	0.05296841		1026.4	0.01568279		1556.39	0.01403512		2086.4	0.01258628		2616.4	-0.00435339
496.59	0.05254035		1026.6	0.0158372		1556.59	0.01344197		2086.6	0.01200064		2616.6	-0.00580606
496.79	0.05304211		1026.8	0.01559963		1556.79	0.0139549		2086.8	0.01135863		2616.8	-0.00610634
496.99	0.05382268		1027	0.01460114		1556.99	0.01332766		2087	0.01106119		2617	-0.00672426
497.19	0.05381804		1027.2	0.01434944		1557.19	0.01293934		2087.2	0.01132215		2617.2	-0.0069717
497.39	0.05439351		1027.4	0.01475671		1557.39	0.01359824		2087.4	0.01207541		2617.4	-0.00671208
497.59	0.05410975		1027.6	0.01556613		1557.59	0.01364088		2087.6	0.01231373		2617.6	-0.00609029
497.79	0.05427758		1027.8	0.01610841		1557.79	0.01354284		2087.8	0.01301152		2617.8	-0.00527225
497.99	0.05473368		1028	0.01636979		1557.99	0.01404459		2088	0.01442762		2618	-0.00578587
498.19	0.05394405		1028.2	0.01761619		1558.19	0.01417088		2088.2	0.01422136		2618.2	-0.00545298
498.39	0.05295274		1028.4	0.01809567		1558.39	0.01443726		2088.4	0.01411266		2618.4	-0.00476981
498.59	0.05186864		1028.6	0.01828083		1558.59	0.01496273		2088.6	0.01472169		2618.6	-0.00461174
498.79	0.05111768		1028.8	0.0186874		1558.79	0.01534991		2088.8	0.01396449		2618.8	-0.00419928
498.99	0.05175221		1029	0.01880026		1558.99	0.01637403		2089	0.01422023		2619	-0.00393183
499.19	0.05238463		1029.2	0.01893523		1559.19	0.0169928		2089.2	0.01423724		2619.2	-0.00284413
499.39	0.05217323		1029.4	0.01889805		1559.39	0.01787645		2089.4	0.01344991		2619.4	-0.00233909
499.59	0.05203805		1029.6	0.01848816		1559.59	0.01809377		2089.6	0.01380727		2619.6	-0.00300422
499.79	0.05184876		1029.8	0.01842021		1559.79	0.01881877		2089.8	0.01297303		2619.8	-0.00194798
499.99	0.05166075		1030	0.01739404		1559.99	0.01928333		2090	0.01273964		2620	-0.00187525
500.19	0.05158634		1030.2	0.0164941		1560.19	0.01941971		2090.2	0.01224328		2620.2	-0.00259912
500.39	0.05142651		1030.4	0.01621009		1560.39	0.0190915		2090.4	0.0121673		2620.4	-0.00287706
500.59	0.05125121		1030.6	0.01610002		1560.59	0.0185529		2090.6	0.01195904		2620.6	-0.00429765
500.79	0.05118302		1030.8	0.01548553		1560.79	0.017916		2090.8	0.01252098		2620.8	-0.00420436
500.99	0.0520246		1031	0.01451868		1560.99	0.0171101		2091	0.01252288		2621	-0.00481504
501.19	0.0521305		1031.2	0.01459797		1561.19	0.01638211		2091.2	0.01300105		2621.2	-0.00510771
501.39	0.05308864		1031.4	0.01510626		1561.39	0.01533588		2091.4	0.01264715		2621.4	-0.00486249
501.59	0.05348211		1031.6	0.01558766		1561.59	0.01319365		2091.6	0.01260416		2621.6	-0.00524884
501.79	0.05407352		1031.8	0.01576537		1561.79	0.01291182		2091.8	0.01354888		2621.8	-0.00547348
501.99	0.05399133		1032	0.01661929		1561.99	0.01305494		2092	0.01480844		2622	-0.00618522
502.19	0.05428342		1032.2	0.01634134		1562.19	0.01299705		2092.2	0.01487348		2622.2	-0.00529345
502.39	0.05411898		1032.4	0.01581525		1562.39	0.0130264		2092.4	0.01453711		2622.4	-0.00494252
502.59	0.0545487		1032.6	0.01557956		1562.59	0.01284449		2092.6	0.01382708		2622.6	-0.0047162
502.79	0.05479598		1032.8	0.01539017		1562.79	0.01314053		2092.8	0.01343809		2622.8	-0.00437452
502.99	0.05480665		1033	0.01403602		1562.99	0.01382826		2093	0.01351072		2623	-0.00372565
503.19	0.05489196		1033.2	0.0148508		1563.19	0.01474801		2093.2	0.01329321		2623.2	-0.00337619
503.39	0.05433818		1033.4	0.01491946		1563.39	0.0150932		2093.4	0.01264425		2623.4	-0.00243068
503.59	0.0547977		1033.6	0.01457261		1563.59	0.01525614		2093.6	0.01266019		2623.6	-0.0019517
503.79	0.05466988		1033.8	0.01504204		1563.79	0.01622585		2093.8	0.01175905		2623.8	-0.0015582
503.99	0.05355841		1034	0.01476003		1563.99	0.01613314		2094	0.01136807		2624	-0.00122042
504.19	0.05314335		1034.2	0.01492319		1564.19	0.01610913		2094.2	0.0125887		2624.2	-0.00153793
504.39	0.05208489		1034.4	0.01535532		1564.39	0.01615078		2094.4	0.01321501		2624.4	-0.0014414
504.59	0.05092643		1034.6	0.01538513		1564.59	0.01659637		2094.6	0.01351186		2624.6	-0.00209875
504.79	0.05036596		1034.8	0.01570762		1564.79	0.01703671		2094.8	0.01337162		2624.8	-0.00212922
504.99	0.05042056		1035	0.01594104		1564.99	0.0168214		2095	0.0141116		2625	-0.00282555
505.19	0.04963411		1035.2	0.01631096		1565.19	0.01571676		2095.2	0.0149467		2625.2	-0.00370928
505.39	0.05002774		1035.4	0.01699633		1565.39	0.01593159		2095.4	0.01488877		2625.4	-0.00387249
505.59	0.04952564		1035.6	0.01761127		1565.59	0.01694703		2095.6	0.0151998		2625.6	-0.0039063
505.79	0.04904592		1035.8	0.01769503		1565.79	0.01674226		2095.8	0.01604062		2625.8	-0.00412081
505.99	0.04952741		1036	0.01822442		1565.99	0.01628264		2096	0.01571846		2626	-0.00418913
506.19	0.0502337		1036.2	0.01793853		1566.19	0.01585889		2096.2	0.01507497		2626.2	-0.00361837
506.39	0.04896671		1036.4	0.01794009		1566.39	0.01539634		2096.4	0.01398843		2626.4	-0.00455364
506.59	0.04938833		1036.6	0.01873033		1566.59	0.01455292		2096.6	0.01392008		2626.6	-0.00470982
506.79	0.0491195		1036.8	0.01811858		1566.79	0.01420531		2096.8	0.01403934		2626.8	-0.0045135
506.99	0.04896835		1037	0.01798088		1566.99	0.01347559		2097	0.01422265		2627	-0.00435678
507.19	0.0494101		1037.2	0.01828337		1567.19	0.01311332		2097.2	0.01439834		2627.2	-0.00409923
507.39	0.05061876		1037.4	0.01764143		1567.39	0.01316031		2097.4	0.0140244		2627.4	-0.00325996
507.59	0.05223057		1037.6	0.0168809		1567.59	0.01199425		2097.6	0.01391305		2627.6	-0.00331312
507.79	0.05253733		1037.8	0.01634823		1567.79	0.01186995		2097.8	0.01411132		2627.8	-0.00350084
507.99	0.05272001		1038	0.01586434		1567.99	0.0114912		2098	0.0146186		2628	-0.0037816
508.19	0.05319742		1038.2	0.01538871		1568.19	0.01212805		2098.2	0.01523308		2628.2	-0.00431013
508.39	0.05336418		1038.4	0.01504989		1568.39	0.01277785		2098.4	0.01503642		2628.4	-0.00477905
508.59	0.05338206		1038.6	0.01431805		1568.59	0.01418386		2098.6	0.01518761		2628.6	-0.00451848
508.79	0.05415689		1038.8	0.01526157		1568.79	0.01493218		2098.8	0.0158649		2628.8	-0.00562497
508.99	0.05466925		1039	0.01437343		1568.99	0.01510201		2099	0.01684957		2629	-0.00644461
509.19	0.05480918		1039.2	0.01462871		1569.19	0.0156707		2099.2	0.01626513		2629.2	-0.00622099
509.39	0.05507928		1039.4	0.01548783		1569.39	0.01671497		2099.4	0.01478321		2629.4	-0.00580025
509.59	0.05366239		1039.6	0.0158449		1569.59	0.01654365		2099.6	0.01388106		2629.6	-0.00577286
509.79	0.0532594		1039.8	0.01590706		1569.79	0.01522228		2099.8	0.01377161		2629.8	-0.00503652
509.99	0.05356142		1040	0.01613761		1569.99	0.01570299		2100	0.0126262		2630	-0.00452068
510.19	0.05360674		1040.2	0.01594729		1570.19	0.01496893		2100.2	0.01305685		2630.2	-0.00473613
510.39	0.05314521		1040.4	0.01536791		1570.39	0.0147469		2100.4	0.01246489		2630.4	-0.00538146
510.59	0.05313619		1040.6	0.01545443		1570.59	0.01451735		2100.6	0.01245881		2630.6	-0.0053223
510.79	0.05297223		1040.8	0.01449073		1570.79	0.01406019		2100.8	0.01263369		2630.8	-0.00520305
510.99	0.0528095		1041	0.01424825		1570.99	0.01494431		2101	0.01221837		2631	-0.00546461
511.19	0.05286918		1041.2	0.01391962		1571.19	0.01544904		2101.2	0.01195994		2631.2	-0.00520501
511.39	0.05280506		1041.4	0.0128398		1571.39	0.01505384		2101.4	0.01175414		2631.4	-0.00594085
511.59	0.05313937		1041.6	0.01250645		1571.59	0.01394935		2101.6	0.01257024		2631.6	-0.00632074
511.79	0.05262778		1041.8	0.01226687		1571.79	0.01429335		2101.8	0.0127378		2631.8	-0.00659677
511.99	0.05169526		1042	0.01265731		1571.99	0.01487509		2102	0.01326567		2632	-0.00688048
512.19	0.05162072		1042.2	0.01227862		1572.19	0.01555031		2102.2	0.01435828		2632.2	-0.00690523
512.39	0.05116805		1042.4	0.01208716		1572.39	0.01607202		2102.4	0.01584446		2632.4	-0.00720189
512.59	0.05061229		1042.6	0.01234584		1572.59	0.01679775		2102.6	0.01674442		2632.6	-0.00688553
512.79	0.05034727		1042.8	0.01318693		1572.79	0.01646961		2102.8	0.01726556		2632.8	-0.00690473
512.99	0.04991786		1043	0.01370203		1572.99	0.01693674		2103	0.01707571		2633	-0.00622436
513.19	0.04916793		1043.2	0.01471325		1573.19	0.01725932		2103.2	0.0167518		2633.2	-0.00510601
513.39	0.04844532		1043.4	0.01564149		1573.39	0.01726015		2103.4	0.01658028		2633.4	-0.00437429
513.59	0.04806435		1043.6	0.01592326		1573.59	0.01662151		2103.6	0.01682287		2633.6	-0.00384267
513.79	0.0496982		1043.8	0.01645322		1573.79	0.01609242		2103.8	0.01664614		2633.8	-0.00357107
513.99	0.05060686		1044	0.01732264		1573.99	0.01636498		2104	0.01696308		2634	-0.00334781
514.19	0.05141551		1044.2	0.01732084		1574.19	0.01550535		2104.2	0.01797325		2634.2	-0.00411911
514.39	0.051842		1044.4	0.01718342		1574.39	0.01614504		2104.4	0.01645572		2634.4	-0.00415092
514.59	0.05187532		1044.6	0.01727978		1574.59	0.01622127		2104.6	0.01529		2634.6	-0.00430001
514.79	0.05240433		1044.8	0.01780559		1574.79	0.01585448		2104.8	0.01431763		2634.8	-0.0040684
514.99	0.05208987		1045	0.01735152		1574.99	0.01591654		2105	0.01207399		2635	-0.00465169
515.19	0.05196391		1045.2	0.01834256		1575.19	0.01548558		2105.2	0.01146947		2635.2	-0.00463165
515.39	0.05153289		1045.4	0.01822199		1575.39	0.01476611		2105.4	0.01128632		2635.4	-0.00518336
515.59	0.05219637		1045.6	0.01934748		1575.59	0.01419302		2105.6	0.01004984		2635.6	-0.00514814
515.79	0.05228766		1045.8	0.01882099		1575.79	0.01356481		2105.8	0.00942768		2635.8	-0.00537296
515.99	0.05194218		1046	0.01885993		1575.99	0.01376304		2106	0.01029424		2636	-0.00555234
516.19	0.05223526		1046.2	0.01854058		1576.19	0.01315657		2106.2	0.01071259		2636.2	-0.00555881
516.39	0.05235676		1046.4	0.01822458		1576.39	0.01250688		2106.4	0.01046848		2636.4	-0.00587095
516.59	0.0526162		1046.6	0.01835021		1576.59	0.01293874		2106.6	0.01092515		2636.6	-0.00569649
516.79	0.05275501		1046.8	0.01793465		1576.79	0.01271924		2106.8	0.01168576		2636.8	-0.005308
516.99	0.05268722		1047	0.01831382		1576.99	0.01288798		2107	0.0116314		2637	-0.00545876
517.19	0.05208117		1047.2	0.01772278		1577.19	0.01250466		2107.2	0.01170537		2637.2	-0.00526612
517.39	0.05273309		1047.4	0.01688395		1577.39	0.01249011		2107.4	0.01181131		2637.4	-0.00469221
517.59	0.0527127		1047.6	0.01680496		1577.59	0.01286341		2107.6	0.01258173		2637.6	-0.00468483
517.79	0.05301522		1047.8	0.01616581		1577.79	0.01317823		2107.8	0.01264542		2637.8	-0.0041417
517.99	0.05223431		1048	0.01548348		1577.99	0.01392361		2108	0.01370821		2638	-0.00408154
518.19	0.05188373		1048.2	0.01427699		1578.19	0.01427417		2108.2	0.01356475		2638.2	-0.00482254
518.39	0.05187526		1048.4	0.01309346		1578.39	0.01561531		2108.4	0.01240384		2638.4	-0.00430069
518.59	0.05172644		1048.6	0.01306334		1578.59	0.0158563		2108.6	0.01163261		2638.6	-0.00459266
518.79	0.05111598		1048.8	0.01321485		1578.79	0.01620858		2108.8	0.01158042		2638.8	-0.00414208
518.99	0.05120073		1049	0.01254486		1578.99	0.01757801		2109	0.0117026		2639	-0.00388917
519.19	0.05110245		1049.2	0.01400022		1579.19	0.01810736		2109.2	0.01196281		2639.2	-0.00373431
519.39	0.05028712		1049.4	0.01444064		1579.39	0.01850623		2109.4	0.01256587		2639.4	-0.00453357
519.59	0.05109587		1049.6	0.01495351		1579.59	0.0191459		2109.6	0.01269753		2639.6	-0.00430462
519.79	0.05178625		1049.8	0.01400991		1579.79	0.01868955		2109.8	0.0135735		2639.8	-0.00424044
519.99	0.05193793		1050	0.01502419		1579.99	0.0194819		2110	0.01362133		2640	-0.00471781
520.19	0.05292068		1050.2	0.01578238		1580.19	0.01872747		2110.2	0.01286266		2640.2	-0.00501902
520.39	0.05444631		1050.4	0.01554154		1580.39	0.01820681		2110.4	0.0123599		2640.4	-0.00543682
520.59	0.05483344		1050.6	0.01541492		1580.59	0.01811358		2110.6	0.01341908		2640.6	-0.00579598
520.79	0.05548958		1050.8	0.01547105		1580.79	0.01685595		2110.8	0.01373357		2640.8	-0.00578928
520.99	0.05456547		1051	0.01608963		1580.99	0.01607395		2111	0.01354117		2641	-0.00488204
521.19	0.05439221		1051.2	0.01604421		1581.19	0.01544492		2111.2	0.01356085		2641.2	-0.00446044
521.39	0.05445991		1051.4	0.01579418		1581.39	0.01613075		2111.4	0.01400129		2641.4	-0.00326655
521.59	0.05341554		1051.6	0.01613764		1581.59	0.01626093		2111.6	0.01446111		2641.6	-0.00334319
521.79	0.05286177		1051.8	0.01544114		1581.79	0.01556934		2111.8	0.0137083		2641.8	-0.00384409
521.99	0.05275125		1052	0.01496407		1581.99	0.01456823		2112	0.01405228		2642	-0.00460991
522.19	0.05280502		1052.2	0.01466807		1582.19	0.01445429		2112.2	0.01418354		2642.2	-0.00464163
522.39	0.05226408		1052.4	0.01459236		1582.39	0.01562056		2112.4	0.01332874		2642.4	-0.00408931
522.59	0.05170909		1052.6	0.01547705		1582.59	0.01607179		2112.6	0.01434827		2642.6	-0.00424582
522.79	0.05135658		1052.8	0.01564764		1582.79	0.01599353		2112.8	0.01505415		2642.8	-0.00331392
522.99	0.05102763		1053	0.01528298		1582.99	0.01700878		2113	0.01537073		2643	-0.00337149
523.19	0.04961489		1053.2	0.01528257		1583.19	0.01637336		2113.2	0.01593859		2643.2	-0.00352934
523.39	0.04858583		1053.4	0.01487365		1583.39	0.01671749		2113.4	0.01611431		2643.4	-0.00385326
523.59	0.04928833		1053.6	0.01448044		1583.59	0.016449		2113.6	0.01625187		2643.6	-0.00287979
523.79	0.04910019		1053.8	0.01420814		1583.79	0.01611644		2113.8	0.0158191		2643.8	-0.00349919
523.99	0.04854179		1054	0.01525443		1583.99	0.016333		2114	0.01529237		2644	-0.00362688
524.19	0.04933516		1054.2	0.01603592		1584.19	0.01657818		2114.2	0.01473838		2644.2	-0.00362809
524.39	0.05005996		1054.4	0.01582327		1584.39	0.01604248		2114.4	0.01463438		2644.4	-0.00398475
524.59	0.04994519		1054.6	0.01525471		1584.59	0.01604282		2114.6	0.01592273		2644.6	-0.00345663
524.79	0.05019463		1054.8	0.01490593		1584.79	0.01621966		2114.8	0.01541652		2644.8	-0.00353144
524.99	0.04993558		1055	0.01529035		1584.99	0.01694348		2115	0.01468912		2645	-0.00299014
525.19	0.05123925		1055.2	0.01527092		1585.19	0.01734376		2115.2	0.01414412		2645.2	-0.00273521
525.39	0.05137694		1055.4	0.01513587		1585.39	0.0179524		2115.4	0.01399983		2645.4	-0.00307815
525.59	0.05115025		1055.6	0.0147007		1585.59	0.01726264		2115.6	0.01397257		2645.6	-0.00388822
525.79	0.05175753		1055.8	0.01463072		1585.79	0.01717741		2115.8	0.01355152		2645.8	-0.00441074
525.99	0.0519294		1056	0.01454214		1585.99	0.01630589		2116	0.01302672		2646	-0.00450271
526.19	0.05183747		1056.2	0.01568984		1586.19	0.0171031		2116.2	0.01312992		2646.2	-0.00432085
526.39	0.05115608		1056.4	0.01607411		1586.39	0.0181853		2116.4	0.01285121		2646.4	-0.00432578
526.59	0.05174167		1056.6	0.01696796		1586.59	0.01759727		2116.6	0.01437568		2646.6	-0.00465076
526.79	0.05146267		1056.8	0.01707701		1586.79	0.01759335		2116.8	0.01368414		2646.8	-0.00511399
526.99	0.05092113		1057	0.01661294		1586.99	0.01788434		2117	0.01332351		2647	-0.00609156
527.19	0.05007588		1057.2	0.01627747		1587.19	0.01643239		2117.2	0.01306696		2647.2	-0.00649581
527.39	0.04985431		1057.4	0.01692188		1587.39	0.01675474		2117.4	0.01216258		2647.4	-0.00615485
527.59	0.04996722		1057.6	0.01724022		1587.59	0.01651475		2117.6	0.01201251		2647.6	-0.00568233
527.79	0.04992207		1057.8	0.01800637		1587.79	0.01666486		2117.8	0.01193994		2647.8	-0.00592143
527.99	0.05015956		1058	0.0187526		1587.99	0.01630499		2118	0.01195844		2648	-0.00529112
528.19	0.05138977		1058.2	0.01928304		1588.19	0.01625574		2118.2	0.01195839		2648.2	-0.00566814
528.39	0.05126036		1058.4	0.0191888		1588.39	0.01564043		2118.4	0.0122904		2648.4	-0.00559587
528.59	0.05133407		1058.6	0.01812344		1588.59	0.01530462		2118.6	0.0125806		2648.6	-0.00537414
528.79	0.05141891		1058.8	0.01824757		1588.79	0.0158994		2118.8	0.01158531		2648.8	-0.00572296
528.99	0.0530416		1059	0.01845623		1588.99	0.01594994		2119	0.01249331		2649	-0.00461986
529.19	0.05311725		1059.2	0.01824709		1589.19	0.01520646		2119.2	0.01346882		2649.2	-0.00451642
529.39	0.05268166		1059.4	0.0179593		1589.39	0.0150946		2119.4	0.01451577		2649.4	-0.00482736
529.59	0.05229436		1059.6	0.01725078		1589.59	0.01526597		2119.6	0.01514592		2649.6	-0.00427222
529.79	0.05215323		1059.8	0.01747168		1589.79	0.01545705		2119.8	0.01536506		2649.8	-0.00463039
529.99	0.05211099		1060	0.01804664		1589.99	0.01475459		2120	0.01489249		2650	-0.00438507
530.19	0.05214518		1060.2	0.01866257		1590.19	0.01484827		2120.2	0.01499977		2650.2	-0.00465412
530.39	0.05140546		1060.4	0.01847499		1590.39	0.01469366		2120.4	0.01482737		2650.4	-0.0055614
530.59	0.05141759		1060.6	0.01894895		1590.59	0.01371271		2120.6	0.01528487		2650.6	-0.00533703
530.79	0.05052752		1060.8	0.01824772		1590.79	0.01452365		2120.8	0.01460067		2650.8	-0.0058619
530.99	0.05059132		1061	0.01849044		1590.99	0.01426874		2121	0.01360647		2651	-0.0053487
531.19	0.04997932		1061.2	0.01816686		1591.19	0.01429584		2121.2	0.01271593		2651.2	-0.004817
531.39	0.05035089		1061.4	0.01905573		1591.39	0.01515949		2121.4	0.01252907		2651.4	-0.00437621
531.59	0.05053616		1061.6	0.01874781		1591.59	0.01538553		2121.6	0.01236296		2651.6	-0.00464016
531.79	0.05092392		1061.8	0.01947174		1591.79	0.01462911		2121.8	0.0120443		2651.8	-0.00495379
531.99	0.05173587		1062	0.01920135		1591.99	0.01487843		2122	0.01239234		2652	-0.00515155
532.19	0.05128378		1062.2	0.01784345		1592.19	0.01444397		2122.2	0.01192529		2652.2	-0.00551821
532.39	0.05114681		1062.4	0.01679396		1592.39	0.01503381		2122.4	0.01196797		2652.4	-0.00541998
532.59	0.05148233		1062.6	0.0162416		1592.59	0.0145573		2122.6	0.0119828		2652.6	-0.00517227
532.79	0.05191119		1062.8	0.01600264		1592.79	0.01475424		2122.8	0.01266061		2652.8	-0.00458665
532.99	0.05289234		1063	0.01531047		1592.99	0.01460808		2123	0.01380924		2653	-0.00468632
533.19	0.05176586		1063.2	0.01462847		1593.19	0.015196		2123.2	0.01400265		2653.2	-0.00429063
533.39	0.05119851		1063.4	0.0140707		1593.39	0.01568778		2123.4	0.01457109		2653.4	-0.00362394
533.59	0.05043461		1063.6	0.01377527		1593.59	0.01621404		2123.6	0.01437023		2653.6	-0.00377602
533.79	0.05007838		1063.8	0.01429935		1593.79	0.01657197		2123.8	0.01400482		2653.8	-0.0034301
533.99	0.0500562		1064	0.01387415		1593.99	0.01612072		2124	0.01343835		2654	-0.00247004
534.19	0.04914957		1064.2	0.01333127		1594.19	0.01577472		2124.2	0.0131567		2654.2	-0.00235387
534.39	0.04846037		1064.4	0.01373076		1594.39	0.01622633		2124.4	0.01371702		2654.4	-0.00269468
534.59	0.04877497		1064.6	0.0142714		1594.59	0.01616781		2124.6	0.014154		2654.6	-0.00194113
534.79	0.04900806		1064.8	0.01534556		1594.79	0.01651048		2124.8	0.0140167		2654.8	-0.00266407
534.99	0.04914197		1065	0.01636424		1594.99	0.01659109		2125	0.01419861		2655	-0.00241652
535.19	0.0484922		1065.2	0.01673178		1595.19	0.01724409		2125.2	0.01448132		2655.2	-0.00306282
535.39	0.04824934		1065.4	0.01753742		1595.39	0.01625293		2125.4	0.01473878		2655.4	-0.00381518
535.59	0.04746659		1065.6	0.01738786		1595.59	0.01621668		2125.6	0.01492985		2655.6	-0.00365558
535.79	0.04724606		1065.8	0.01670398		1595.79	0.0155756		2125.8	0.01471192		2655.8	-0.00401823
535.99	0.04744896		1066	0.01513873		1595.99	0.01603593		2126	0.01496358		2656	-0.00494614
536.19	0.04671561		1066.2	0.01442181		1596.19	0.01575194		2126.2	0.01474345		2656.2	-0.00553444
536.39	0.04759736		1066.4	0.01424581		1596.39	0.01533253		2126.4	0.01495752		2656.4	-0.00569777
536.59	0.04712438		1066.6	0.0147337		1596.59	0.01480247		2126.6	0.01507953		2656.6	-0.00539164
536.79	0.04753671		1066.8	0.0138897		1596.79	0.01505209		2126.8	0.0154603		2656.8	-0.00640416
536.99	0.04694828		1067	0.01337296		1596.99	0.01549856		2127	0.01579257		2657	-0.00633304
537.19	0.04700224		1067.2	0.01350844		1597.19	0.01594624		2127.2	0.01529863		2657.2	-0.0057366
537.39	0.04761129		1067.4	0.0131269		1597.39	0.01617891		2127.4	0.01521924		2657.4	-0.00611284
537.59	0.04747199		1067.6	0.01304999		1597.59	0.01653901		2127.6	0.01376265		2657.6	-0.00593708
537.79	0.04781569		1067.8	0.01236047		1597.79	0.01648392		2127.8	0.01281751		2657.8	-0.00441275
537.99	0.04899581		1068	0.01179408		1597.99	0.01595998		2128	0.01248793		2658	-0.00430194
538.19	0.04934128		1068.2	0.01220477		1598.19	0.01573727		2128.2	0.01238908		2658.2	-0.00445089
538.39	0.04993802		1068.4	0.01355931		1598.39	0.01607223		2128.4	0.01250926		2658.4	-0.00533371
538.59	0.05045902		1068.6	0.01405595		1598.59	0.01569175		2128.6	0.01238028		2658.6	-0.00460949
538.79	0.05048239		1068.8	0.01518623		1598.79	0.01526698		2128.8	0.01256071		2658.8	-0.00442365
538.99	0.04965844		1069	0.01565552		1598.99	0.01539876		2129	0.01266457		2659	-0.00366244
539.19	0.04830853		1069.2	0.01590671		1599.19	0.01522772		2129.2	0.01237951		2659.2	-0.00318125
539.39	0.04806336		1069.4	0.01642023		1599.39	0.01447673		2129.4	0.01207225		2659.4	-0.00213238
539.59	0.04794376		1069.6	0.01559418		1599.59	0.01503071		2129.6	0.01206449		2659.6	-0.00219693
539.79	0.04790076		1069.8	0.0146505		1599.79	0.01552498		2129.8	0.01248655		2659.8	-0.00226448
539.99	0.04830421		1070	0.0153115		1599.99	0.01520417		2130	0.01300863		2660	-0.00242386
540.19	0.04829398		1070.2	0.01614173		1600.19	0.01547429		2130.2	0.01347674		2660.2	-0.00158697
540.39	0.04815833		1070.4	0.01568436		1600.39	0.01465715		2130.4	0.01325432		2660.4	-0.00140164
540.59	0.04824462		1070.6	0.01633084		1600.59	0.01544277		2130.6	0.01419129		2660.6	-0.00095107
540.79	0.04827519		1070.8	0.01641441		1600.79	0.01568721		2130.8	0.0148661		2660.8	-0.00155139
540.99	0.04850887		1071	0.01645397		1600.99	0.01552975		2131	0.01547475		2661	-0.00165372
541.19	0.05002475		1071.2	0.01692719		1601.19	0.01549851		2131.2	0.01521563		2661.2	-0.00200423
541.39	0.0507696		1071.4	0.01639337		1601.39	0.01563779		2131.4	0.01542695		2661.4	-0.00226362
541.59	0.0507531		1071.6	0.01569722		1601.59	0.01485505		2131.6	0.01460269		2661.6	-0.00254749
541.79	0.05162071		1071.8	0.01484548		1601.79	0.01495798		2131.8	0.01483184		2661.8	-0.00294128
541.99	0.05172861		1072	0.01505532		1601.99	0.01531594		2132	0.01495317		2662	-0.00415483
542.19	0.05124832		1072.2	0.01516237		1602.19	0.0151977		2132.2	0.01525405		2662.2	-0.00380503
542.39	0.05129854		1072.4	0.01483077		1602.39	0.01576669		2132.4	0.01506081		2662.4	-0.00492954
542.59	0.0501884		1072.6	0.01441394		1602.59	0.01574671		2132.6	0.01504397		2662.6	-0.00424546
542.79	0.04911665		1072.8	0.01442796		1602.79	0.01539495		2132.8	0.01465425		2662.8	-0.00456353
542.99	0.04829238		1073	0.0142606		1602.99	0.01503139		2133	0.01412637		2663	-0.00408018
543.19	0.04799344		1073.2	0.01418777		1603.19	0.01443557		2133.2	0.01325014		2663.2	-0.00434367
543.39	0.04797201		1073.4	0.01405511		1603.39	0.01387883		2133.4	0.013246		2663.4	-0.00403193
543.59	0.04832566		1073.6	0.01371069		1603.59	0.01387542		2133.6	0.01319355		2663.6	-0.00429034
543.79	0.04767936		1073.8	0.01422284		1603.79	0.01437066		2133.8	0.01341376		2663.8	-0.00436878
543.99	0.04662313		1074	0.01446291		1603.99	0.01475828		2134	0.01286671		2664	-0.00438021
544.19	0.04599922		1074.2	0.01435433		1604.19	0.01540245		2134.2	0.01316297		2664.2	-0.00379651
544.39	0.04584362		1074.4	0.01427277		1604.39	0.0151091		2134.4	0.01281218		2664.4	-0.0039127
544.59	0.04620161		1074.6	0.0149897		1604.59	0.015361		2134.6	0.0135228		2664.6	-0.0032007
544.79	0.04614922		1074.8	0.01495608		1604.79	0.01473426		2134.8	0.01352227		2664.8	-0.00370353
544.99	0.04639024		1075	0.01476255		1604.99	0.01511524		2135	0.01362271		2665	-0.00363111
545.19	0.0467837		1075.2	0.0156681		1605.19	0.0153896		2135.2	0.01321418		2665.2	-0.00311108
545.39	0.04587479		1075.4	0.01450539		1605.39	0.01581989		2135.4	0.01311135		2665.4	-0.00272606
545.59	0.0459656		1075.6	0.01401052		1605.59	0.01612253		2135.6	0.01262283		2665.6	-0.00379021
545.79	0.04630609		1075.8	0.01419565		1605.79	0.01681709		2135.8	0.01305674		2665.8	-0.00369302
545.99	0.04671109		1076	0.01409813		1605.99	0.01729796		2136	0.01316972		2666	-0.00417199
546.19	0.04744874		1076.2	0.01404872		1606.19	0.01672213		2136.2	0.01332722		2666.2	-0.00400044
546.39	0.04735538		1076.4	0.01426871		1606.39	0.01635366		2136.4	0.01305732		2666.4	-0.00487205
546.59	0.047369		1076.6	0.01497299		1606.59	0.01576966		2136.6	0.01215905		2666.6	-0.00432546
546.79	0.04795917		1076.8	0.01503997		1606.79	0.01570415		2136.8	0.01123748		2666.8	-0.00395879
546.99	0.04928244		1077	0.01504309		1606.99	0.01510271		2137	0.01151861		2667	-0.00310014
547.19	0.04980193		1077.2	0.0153941		1607.19	0.01437788		2137.2	0.01188549		2667.2	-0.00350727
547.39	0.05054345		1077.4	0.0151623		1607.39	0.01433163		2137.4	0.01275731		2667.4	-0.00355935
547.59	0.051472		1077.6	0.01571713		1607.59	0.01500079		2137.6	0.01305796		2667.6	-0.00338844
547.79	0.05094466		1077.8	0.01572531		1607.79	0.01468244		2137.8	0.01306712		2667.8	-0.00338038
547.99	0.050326		1078	0.01590239		1607.99	0.01450929		2138	0.01379919		2668	-0.00245711
548.19	0.05047766		1078.2	0.01649832		1608.19	0.01449053		2138.2	0.01405988		2668.2	-0.00180743
548.39	0.05059288		1078.4	0.01683668		1608.39	0.01353247		2138.4	0.01368762		2668.4	-0.00211013
548.59	0.04977217		1078.6	0.01721854		1608.59	0.01292711		2138.6	0.01498815		2668.6	-0.00220517
548.79	0.0489401		1078.8	0.01723592		1608.79	0.01251496		2138.8	0.01523001		2668.8	-0.00337435
548.99	0.04762478		1079	0.01763838		1608.99	0.01318081		2139	0.01545519		2669	-0.00306147
549.19	0.04656191		1079.2	0.01872977		1609.19	0.01311796		2139.2	0.01638954		2669.2	-0.00364046
549.39	0.04553108		1079.4	0.01773925		1609.39	0.01376208		2139.4	0.01676346		2669.4	-0.00447109
549.59	0.04614781		1079.6	0.01831438		1609.59	0.0142557		2139.6	0.01719155		2669.6	-0.00547843
549.79	0.04657094		1079.8	0.01833333		1609.79	0.01437119		2139.8	0.01792047		2669.8	-0.00558015
549.99	0.04752515		1080	0.01780843		1609.99	0.01488175		2140	0.01690505		2670	-0.00617876
550.19	0.04710898		1080.2	0.01949079		1610.19	0.01433532		2140.2	0.01618897		2670.2	-0.00634505
550.39	0.04730516		1080.4	0.01957957		1610.39	0.01450835		2140.4	0.01495272		2670.4	-0.00652804
550.59	0.0486412		1080.6	0.02004444		1610.59	0.01543507		2140.6	0.01382895		2670.6	-0.00587965
550.79	0.04917696		1080.8	0.0198107		1610.79	0.01561981		2140.8	0.01297756		2670.8	-0.00530841
550.99	0.04972596		1081	0.01934552		1610.99	0.01556353		2141	0.01317306		2671	-0.00537745
551.19	0.05043861		1081.2	0.01930484		1611.19	0.01598034		2141.2	0.01223295		2671.2	-0.00517533
551.39	0.0512937		1081.4	0.01856305		1611.39	0.01626072		2141.4	0.01084721		2671.4	-0.00482263
551.59	0.05153061		1081.6	0.01770827		1611.59	0.01592531		2141.6	0.01007502		2671.6	-0.00372564
551.79	0.05171774		1081.8	0.01681446		1611.79	0.01532693		2141.8	0.00938862		2671.8	-0.00299445
551.99	0.05186339		1082	0.01714501		1611.99	0.01591089		2142	0.00969728		2672	-0.00292169
552.19	0.0517083		1082.2	0.01735263		1612.19	0.01662797		2142.2	0.00893109		2672.2	-0.00317923
552.39	0.05160232		1082.4	0.01697463		1612.39	0.01633896		2142.4	0.00917346		2672.4	-0.00372689
552.59	0.05142203		1082.6	0.01670567		1612.59	0.01676393		2142.6	0.00982325		2672.6	-0.00384174
552.79	0.051437		1082.8	0.01657309		1612.79	0.01644469		2142.8	0.01004393		2672.8	-0.00441759
552.99	0.051096		1083	0.01637313		1612.99	0.01626693		2143	0.01038932		2673	-0.00405362
553.19	0.05014108		1083.2	0.01640183		1613.19	0.01654192		2143.2	0.01151048		2673.2	-0.00396698
553.39	0.04984374		1083.4	0.0152203		1613.39	0.0166313		2143.4	0.01138567		2673.4	-0.00346638
553.59	0.05004852		1083.6	0.01485721		1613.59	0.01659444		2143.6	0.01147305		2673.6	-0.00255341
553.79	0.05052817		1083.8	0.01405674		1613.79	0.01571693		2143.8	0.01180442		2673.8	-0.00237993
553.99	0.0497353		1084	0.01468193		1613.99	0.01607297		2144	0.01111302		2674	-0.00178723
554.19	0.04926722		1084.2	0.01557066		1614.19	0.01573765		2144.2	0.01189749		2674.2	-0.00162758
554.39	0.04965355		1084.4	0.01544164		1614.39	0.01559965		2144.4	0.01234952		2674.4	-0.00203167
554.59	0.04884444		1084.6	0.01578098		1614.59	0.01553924		2144.6	0.01296614		2674.6	-0.00130176
554.79	0.04819814		1084.8	0.01562155		1614.79	0.01556296		2144.8	0.01259453		2674.8	-0.00185196
554.99	0.04781053		1085	0.01571888		1614.99	0.0153474		2145	0.01280831		2675	-0.00110155
555.19	0.04773645		1085.2	0.01525252		1615.19	0.01599687		2145.2	0.01232128		2675.2	-0.00103532
555.39	0.04739186		1085.4	0.0149945		1615.39	0.01597062		2145.4	0.01249282		2675.4	-0.00177221
555.59	0.04793208		1085.6	0.01537398		1615.59	0.01598869		2145.6	0.01308722		2675.6	-0.00220099
555.79	0.04829744		1085.8	0.01584243		1615.79	0.01663013		2145.8	0.01387852		2675.8	-0.00366474
555.99	0.04867338		1086	0.01703257		1615.99	0.01766541		2146	0.01425331		2676	-0.00384451
556.19	0.04928322		1086.2	0.01679428		1616.19	0.01822526		2146.2	0.01421707		2676.2	-0.00368218
556.39	0.04961673		1086.4	0.01696467		1616.39	0.01748347		2146.4	0.01421523		2676.4	-0.00422935
556.59	0.05009392		1086.6	0.01717105		1616.59	0.01734247		2146.6	0.01405111		2676.6	-0.00419744
556.79	0.04987966		1086.8	0.01773716		1616.79	0.01675897		2146.8	0.01419858		2676.8	-0.00467128
556.99	0.04916175		1087	0.01776545		1616.99	0.01621828		2147	0.01416646		2677	-0.00432561
557.19	0.04895759		1087.2	0.01772857		1617.19	0.0166103		2147.2	0.01414224		2677.2	-0.00388143
557.39	0.04851118		1087.4	0.01763		1617.39	0.0165439		2147.4	0.0132469		2677.4	-0.00376304
557.59	0.04802033		1087.6	0.01814894		1617.59	0.01721898		2147.6	0.01336813		2677.6	-0.00382736
557.79	0.04787636		1087.8	0.01809943		1617.79	0.01719539		2147.8	0.01259118		2677.8	-0.00388099
557.99	0.04736157		1088	0.01881305		1617.99	0.0176772		2148	0.01159421		2678	-0.00373971
558.19	0.04826754		1088.2	0.01815371		1618.19	0.01722431		2148.2	0.01154019		2678.2	-0.00385816
558.39	0.04835066		1088.4	0.01786342		1618.39	0.01648921		2148.4	0.0111752		2678.4	-0.0040475
558.59	0.04804153		1088.6	0.01713609		1618.59	0.01603416		2148.6	0.01097531		2678.6	-0.00323111
558.79	0.04896664		1088.8	0.01687203		1618.79	0.01572747		2148.8	0.01041333		2678.8	-0.00319386
558.99	0.04935303		1089	0.01631615		1618.99	0.0147279		2149	0.01049421		2679	-0.00232281
559.19	0.04990612		1089.2	0.0155189		1619.19	0.01450514		2149.2	0.0108791		2679.2	-0.00284586
559.39	0.05098833		1089.4	0.01539759		1619.39	0.01339976		2149.4	0.01166636		2679.4	-0.00296475
559.59	0.05224118		1089.6	0.01471663		1619.59	0.01246666		2149.6	0.01229945		2679.6	-0.00264506
559.79	0.05300103		1089.8	0.01355775		1619.79	0.01162222		2149.8	0.01320942		2679.8	-0.00251848
