# Supplementary material for: Functional development of a V3/glycan-specific broadly neutralizing antibody isolated from a case of HIV superinfection
Source: eLife journal article supplement (doi:10.7554/elife.68110), 2021-07-15
Supplement: fig2-data2 [file C1.xls]

Vers 3.43 Data Simulation
Conc1	1.25E-07	1.25E-07	1.25E-07	1.25E-07
Start1	200.03	730.02	1260.02	1790.01
Stop1	559.82	1089.82	1619.82	2149.81
Time1	Data1	Sim1	Time2	Data2	Sim2	Time3	Data3	Sim3	Time4	Data4	Sim4
200.03	0.01299307		730.02	-0.0038139		1260.02	0.00431025		1790.01	0.00081247
200.23	0.01226885		730.22	-0.00408262		1260.22	0.004863		1790.21	0.0008675
200.43	0.01155533		730.42	-0.00395746		1260.42	0.00482509		1790.41	0.00114991
200.63	0.01087165		730.62	-0.00357135		1260.62	0.00527142		1790.61	0.00248903
200.83	0.0103039		730.82	-0.00396446		1260.82	0.00569976		1790.81	0.00390596
201.03	0.0103242		731.02	-0.00422028		1261.02	0.00602819		1791.01	0.00434764
201.23	0.01092772		731.22	-0.0036676		1261.22	0.0060646		1791.21	0.00475489
201.43	0.01077113		731.42	-0.00331925		1261.42	0.00594106		1791.41	0.00518624
201.63	0.01103012		731.62	-0.00310837		1261.62	0.00493944		1791.61	0.00490391
201.83	0.01192215		731.82	-0.00342144		1261.82	0.00492089		1791.81	0.00546131
202.03	0.01296814		732.02	-0.00379845		1262.02	0.00471219		1792.01	0.00556481
202.23	0.01443118		732.22	-0.003389		1262.22	0.0042556		1792.21	0.0053912
202.43	0.01545997		732.42	-0.00400798		1262.42	0.00529087		1792.41	0.00493302
202.63	0.01684253		732.62	-0.00367743		1262.62	0.00517822		1792.61	0.00455402
202.83	0.01766677		732.82	-0.00387653		1262.82	0.00501582		1792.81	0.00349859
203.03	0.01831307		733.02	-0.00404328		1263.02	0.00555022		1793.01	0.00294678
203.23	0.01978948		733.22	-0.00424334		1263.22	0.00549297		1793.21	0.00191353
203.43	0.02012785		733.42	-0.0046269		1263.42	0.00468987		1793.41	0.00105502
203.63	0.02093637		733.62	-0.00488873		1263.62	0.00458098		1793.61	0.00083592
203.83	0.02302202		733.82	-0.00486242		1263.82	0.00530175		1793.81	0.0006453
204.03	0.0241396		734.02	-0.00441854		1264.02	0.00601246		1794.01	0.0001582
204.23	0.02520784		734.22	-0.00415878		1264.22	0.0053791		1794.21	-0.00016792
204.43	0.02655213		734.42	-0.00333105		1264.42	0.00391443		1794.41	0.0009371
204.63	0.02790187		734.62	-0.00218431		1264.62	0.00360813		1794.61	0.00188633
204.83	0.02957356		734.82	-0.00165		1264.82	0.00255854		1794.81	0.0020287
205.03	0.03074099		735.02	-0.00090916		1265.02	0.00156309		1795.01	0.00158247
205.23	0.03172618		735.22	-0.00014701		1265.22	0.0010821		1795.21	0.00173673
205.43	0.03231523		735.42	0.00022028		1265.42	0.00045836		1795.41	0.0020343
205.63	0.03328144		735.62	0.0000421		1265.62	0.00008327		1795.61	0.00168818
205.83	0.03456911		735.82	-0.00033303		1265.82	0.00073385		1795.81	0.00125995
206.03	0.03632925		736.02	-0.00009997		1266.02	0.00058636		1796.01	0.00092049
206.23	0.03778011		736.22	0.00073374		1266.22	0.00038031		1796.21	0.00026143
206.43	0.03898668		736.42	0.00046461		1266.42	0.00043744		1796.41	-0.000226
206.63	0.04034555		736.62	0.00062646		1266.62	0.00000445		1796.61	-0.00019044
206.83	0.04156573		736.82	0.00060931		1266.82	0.00101212		1796.81	-0.00079994
207.03	0.04236324		737.02	0.00073095		1267.02	0.00134834		1797.01	-0.00085894
207.23	0.04348718		737.22	0.00083582		1267.22	0.00345965		1797.21	-0.00071909
207.43	0.04411183		737.42	0.00020353		1267.42	0.00458173		1797.41	-0.00056041
207.63	0.04524144		737.62	0.00038635		1267.62	0.00611993		1797.61	0.00060286
207.83	0.0460088		737.82	0.0000307		1267.82	0.00680423		1797.81	0.00130183
208.03	0.04661298		738.02	0.00095717		1268.02	0.00721092		1798.01	0.00172301
208.23	0.04755936		738.22	0.00055848		1268.22	0.00584035		1798.21	0.00251281
208.43	0.04808899		738.42	0.00102215		1268.42	0.00456164		1798.41	0.00401113
208.63	0.04821894		738.62	0.00143376		1268.62	0.0041346		1798.61	0.00495306
208.83	0.04963577		738.82	0.0008172		1268.82	0.00365051		1798.81	0.00577374
209.03	0.05007767		739.02	0.00006279		1269.02	0.00380686		1799.01	0.00600293
209.23	0.05083523		739.22	-0.0006833		1269.22	0.00421297		1799.21	0.00624087
209.43	0.0524667		739.42	-0.00091607		1269.42	0.00397844		1799.41	0.00634377
209.63	0.05272768		739.62	-0.00179135		1269.62	0.00403188		1799.61	0.00506591
209.83	0.05435972		739.82	-0.00202202		1269.82	0.00344081		1799.81	0.00468946
210.03	0.05629316		740.02	-0.00245647		1270.02	0.00344467		1800.01	0.00477955
210.23	0.05779391		740.22	-0.00298779		1270.22	0.00273824		1800.21	0.00324041
210.43	0.05831162		740.42	-0.0033434		1270.42	0.00285844		1800.41	0.00215624
210.63	0.05902964		740.62	-0.00270724		1270.62	0.00362671		1800.61	0.00134569
210.83	0.06059363		740.82	-0.00198845		1270.82	0.00363327		1800.81	0.0009007
211.03	0.06092838		741.02	-0.00150845		1271.02	0.00367288		1801.01	0.00127317
211.23	0.06236906		741.22	-0.00081324		1271.22	0.00504487		1801.21	0.0016396
211.43	0.06288685		741.42	-0.00070786		1271.42	0.00496675		1801.41	0.00240217
211.63	0.06339135		741.62	0.00014016		1271.62	0.00580604		1801.61	0.0022495
211.83	0.06370313		741.82	0.00094407		1271.82	0.00555095		1801.81	0.00244025
212.03	0.06533385		742.02	0.00160649		1272.02	0.00582977		1802.01	0.00305709
212.23	0.06680598		742.22	0.00132585		1272.22	0.00428482		1802.21	0.00348599
212.43	0.06757133		742.42	0.00178866		1272.42	0.0034642		1802.41	0.00374186
212.63	0.06865546		742.62	0.00130797		1272.62	0.00297237		1802.61	0.00399221
212.83	0.07075896		742.82	0.00102112		1272.82	0.00283836		1802.81	0.0038464
213.03	0.07121443		743.02	0.00182119		1273.02	0.00268066		1803.01	0.00398737
213.23	0.07178372		743.22	0.00177861		1273.22	0.00285185		1803.21	0.00451897
213.43	0.07245866		743.42	0.00194066		1273.42	0.00295496		1803.41	0.0042942
213.63	0.07222732		743.62	0.0015756		1273.62	0.00302672		1803.61	0.0046224
213.83	0.07491985		743.82	0.00087958		1273.82	0.00306198		1803.81	0.00428446
214.03	0.0756483		744.02	0.00001505		1274.02	0.00369108		1804.01	0.00330321
214.23	0.07641767		744.22	0.0001031		1274.22	0.00355929		1804.21	0.00236425
214.43	0.07653788		744.42	-0.00021757		1274.42	0.00440602		1804.41	0.00170485
214.63	0.07806314		744.62	0.00016165		1274.62	0.00456198		1804.61	0.0017878
214.83	0.0803653		744.82	0.00022394		1274.82	0.00418926		1804.81	0.0024175
215.03	0.08058707		745.02	0.0009091		1275.02	0.00425884		1805.01	0.00223922
215.23	0.08166253		745.22	0.00122234		1275.22	0.00403478		1805.21	0.00290776
215.43	0.08200585		745.42	0.00178683		1275.42	0.00400099		1805.41	0.00279237
215.63	0.08296041		745.62	0.00185726		1275.62	0.00349905		1805.61	0.00184054
215.83	0.08476484		745.82	0.00196434		1275.82	0.00326927		1805.81	0.00181482
216.03	0.08703359		746.02	0.00114794		1276.02	0.00300704		1806.01	0.00183839
216.23	0.08851333		746.22	0.00071384		1276.22	0.00134848		1806.21	0.00118237
216.43	0.08855552		746.42	-0.00023205		1276.42	0.00076767		1806.41	0.00057713
216.63	0.08929849		746.62	-0.00064526		1276.62	0.00054633		1806.61	0.0002716
216.83	0.08994717		746.82	-0.00059134		1276.82	0.00072422		1806.81	0.00056746
217.03	0.09027675		747.02	-0.00013698		1277.02	0.00114568		1807.01	0.00099842
217.23	0.08959785		747.22	-0.00126466		1277.22	0.00177245		1807.21	0.00114863
217.43	0.08957416		747.42	-0.0011409		1277.42	0.00221986		1807.41	0.00055579
217.63	0.09048944		747.62	-0.00092719		1277.62	0.00270959		1807.61	0.00151226
217.83	0.09151285		747.82	-0.00095007		1277.82	0.00482743		1807.81	0.00029974
218.03	0.0905777		748.02	-0.00115699		1278.02	0.00594768		1808.01	0.0004689
218.23	0.09142685		748.22	-0.00135083		1278.22	0.00648149		1808.21	0.00131774
218.43	0.09253642		748.42	-0.00147341		1278.42	0.00710362		1808.41	0.00117476
218.63	0.0942112		748.62	-0.00131027		1278.62	0.0067141		1808.61	0.00191038
218.83	0.09556791		748.82	-0.00132768		1278.82	0.00654506		1808.81	0.00233688
219.03	0.09511263		749.02	-0.00068291		1279.02	0.00598311		1809.01	0.00235274
219.23	0.0965252		749.22	-0.00020461		1279.22	0.00566924		1809.21	0.0021598
219.43	0.0977206		749.42	-0.00023102		1279.42	0.00557265		1809.41	0.00076994
219.63	0.09933132		749.62	-0.00091407		1279.62	0.00522084		1809.61	0.00083512
219.83	0.10075001		749.82	-0.00013298		1279.82	0.0057349		1809.81	0.00157062
220.03	0.10233292		750.02	-0.00032499		1280.02	0.00585931		1810.01	0.00186328
220.23	0.10281905		750.22	-0.00049902		1280.22	0.00500455		1810.21	0.00151108
220.43	0.10238405		750.42	-0.00079251		1280.42	0.00449348		1810.41	0.00118359
220.63	0.10334996		750.62	-0.00005649		1280.62	0.00404844		1810.61	0.00169755
220.83	0.10294095		750.82	0.00001378		1280.82	0.00317884		1810.81	0.00145567
221.03	0.10362202		751.02	-0.00004891		1281.02	0.0027387		1811.01	0.00159928
221.23	0.10365469		751.22	-0.00036532		1281.22	0.00244084		1811.21	0.00121778
221.43	0.10398735		751.42	-0.00004019		1281.42	0.00271732		1811.41	0.00123882
221.63	0.10380985		751.62	-0.00000462		1281.62	0.00311027		1811.61	0.00250528
221.83	0.10400959		751.82	-0.00045951		1281.82	0.00343969		1811.81	0.00220075
222.03	0.10479875		752.02	-0.00076153		1282.02	0.00318405		1812.01	0.00267688
222.23	0.10529349		752.22	-0.00073578		1282.22	0.00341808		1812.21	0.00287707
222.43	0.10568553		752.42	-0.00003507		1282.42	0.00295759		1812.41	0.00249303
222.63	0.10598432		752.62	0.00053446		1282.62	0.00262597		1812.61	0.00259705
222.83	0.10648389		752.82	0.00125907		1282.82	0.00253886		1812.81	0.00211344
223.03	0.10676669		753.02	0.00147667		1283.02	0.001913		1813.01	0.00187944
223.23	0.10812454		753.22	0.00204231		1283.22	0.00229188		1813.21	0.00150401
223.43	0.10932215		753.42	0.00198731		1283.42	0.00305899		1813.41	0.00175925
223.63	0.11019009		753.62	0.00256444		1283.62	0.00333175		1813.61	0.00215341
223.83	0.1107953		753.82	0.00279964		1283.82	0.00383538		1813.81	0.00279653
224.03	0.1116366		754.02	0.00311133		1284.02	0.00351299		1814.01	0.00280841
224.23	0.11170681		754.22	0.00313366		1284.22	0.00215598		1814.21	0.00367577
224.43	0.1128064		754.42	0.00354855		1284.42	0.00149178		1814.41	0.00384837
224.63	0.11493466		754.62	0.00368297		1284.62	0.00111152		1814.61	0.00389415
224.83	0.11638384		754.82	0.00274914		1284.82	0.00053074		1814.81	0.00359677
225.03	0.11750055		755.02	0.00180976		1285.02	0.0006559		1815.01	0.00421232
225.23	0.11887038		755.22	0.00095064		1285.22	0.00103432		1815.21	0.00372283
225.43	0.11944785		755.42	0.00027239		1285.42	0.001786		1815.41	0.00342083
225.63	0.12083273		755.62	0.00026594		1285.62	0.00164381		1815.61	0.00298329
225.83	0.12309955		755.82	0.00067749		1285.82	0.00134326		1815.81	0.00211501
226.03	0.12395987		756.02	0.00095604		1286.02	0.00203782		1816.01	0.00069389
226.23	0.12466622		756.22	0.00206437		1286.22	0.00222792		1816.21	-0.0003703
226.43	0.12581175		756.42	0.00251575		1286.42	0.00260527		1816.41	-0.00135183
226.63	0.12687572		756.62	0.00331887		1286.62	0.00312119		1816.61	-0.00285628
226.83	0.12712351		756.82	0.00263917		1286.82	0.00320589		1816.81	-0.00299393
227.03	0.12697588		757.02	0.00180158		1287.02	0.00374107		1817.01	-0.00286521
227.23	0.12727943		757.22	0.00250658		1287.22	0.00461666		1817.21	-0.00275775
227.43	0.12771546		757.42	0.00313154		1287.42	0.00555291		1817.41	-0.00346275
227.63	0.12773061		757.62	0.0036403		1287.62	0.00565608		1817.61	-0.00338532
227.83	0.12782108		757.82	0.00342151		1287.82	0.00575129		1817.81	-0.002209
228.03	0.12794246		758.02	0.00462156		1288.02	0.00586786		1818.01	-0.00098542
228.23	0.12845244		758.22	0.00376364		1288.22	0.00524562		1818.21	-0.00047226
228.43	0.12999931		758.42	0.00382981		1288.42	0.00495977		1818.41	0.00019504
228.63	0.13123366		758.62	0.00368945		1288.62	0.00515611		1818.61	0.00104581
228.83	0.13112582		758.82	0.0037119		1288.82	0.00423284		1818.81	0.00133912
229.03	0.13104573		759.02	0.00391766		1289.02	0.0037917		1819.01	0.00252324
229.23	0.1327507		759.22	0.00334191		1289.22	0.00290672		1819.21	0.00235697
229.43	0.13361216		759.42	0.00377031		1289.42	0.00232507		1819.41	0.00262329
229.63	0.13505497		759.62	0.00366898		1289.62	0.00121531		1819.61	0.00285697
229.83	0.13688221		759.82	0.00361335		1289.82	0.0017133		1819.81	0.00347888
230.03	0.13780857		760.02	0.00422957		1290.02	0.00179821		1820.01	0.00274139
230.23	0.13936997		760.22	0.00442547		1290.22	0.00292105		1820.21	0.00286402
230.43	0.14043036		760.42	0.00296335		1290.42	0.00361058		1820.41	0.00244097
230.63	0.14198943		760.62	0.00257244		1290.62	0.00401871		1820.61	0.00240815
230.83	0.14125027		760.82	0.00152162		1290.82	0.00428663		1820.81	0.00256301
231.03	0.14137992		761.02	0.00186491		1291.02	0.00506224		1821.01	0.00201378
231.23	0.14156723		761.22	0.00301214		1291.22	0.00524832		1821.21	0.00168981
231.43	0.14134375		761.42	0.0028867		1291.42	0.0058795		1821.41	0.00149754
231.63	0.1422363		761.62	0.00258433		1291.62	0.0057942		1821.61	0.00113779
231.83	0.14212733		761.82	0.0018145		1291.82	0.00664292		1821.81	0.00083134
232.03	0.14206989		762.02	0.0018592		1292.02	0.00687459		1822.01	0.00113967
232.23	0.1422004		762.22	0.00101197		1292.22	0.00625496		1822.21	0.00117063
232.43	0.14316331		762.42	0.00149207		1292.42	0.0062946		1822.41	0.00125796
232.63	0.14381109		762.62	0.00117028		1292.62	0.00523541		1822.61	0.00108781
232.83	0.14304052		762.82	0.00153217		1292.82	0.00351549		1822.81	0.00094298
233.03	0.14376657		763.02	0.00129649		1293.02	0.00357599		1823.01	0.00155291
233.23	0.14470471		763.22	0.00042727		1293.22	0.00340543		1823.21	0.00068696
233.43	0.14594229		763.42	0.00112038		1293.42	0.00440985		1823.41	0.00004529
233.63	0.14765821		763.62	0.00121408		1293.62	0.00534618		1823.61	0.00012843
233.83	0.14894152		763.82	0.00220685		1293.82	0.0069452		1823.81	0.00038702
234.03	0.14948279		764.02	0.00263596		1294.02	0.00671415		1824.01	-0.00064649
234.23	0.15015085		764.22	0.00219768		1294.22	0.00817739		1824.21	-0.00101674
234.43	0.15143068		764.42	0.0021771		1294.42	0.00794302		1824.41	-0.00111124
234.63	0.15335175		764.62	0.00297927		1294.62	0.00833711		1824.61	-0.00171509
234.83	0.15278417		764.82	0.00373052		1294.82	0.00759603		1824.81	-0.00262185
235.03	0.15368329		765.02	0.00389908		1295.02	0.00716018		1825.01	-0.00266052
235.23	0.15436719		765.22	0.00399664		1295.22	0.00644309		1825.21	-0.00332789
235.43	0.15488811		765.42	0.0035864		1295.42	0.00552659		1825.41	-0.00279139
235.63	0.15562745		765.62	0.0039434		1295.62	0.00513433		1825.61	-0.00317701
235.83	0.15631926		765.82	0.00345964		1295.82	0.00554463		1825.81	-0.00220955
236.03	0.15683772		766.02	0.00370504		1296.02	0.00467738		1826.01	-0.00126924
236.23	0.15759109		766.22	0.00385635		1296.22	0.00355617		1826.21	-0.00080056
236.43	0.15812388		766.42	0.00441149		1296.42	0.00307562		1826.41	-0.00069269
236.63	0.15872115		766.62	0.00413369		1296.62	0.00237548		1826.61	-0.00039056
236.83	0.15887296		766.82	0.00371564		1296.82	0.0017641		1826.81	0.00052066
237.03	0.15918675		767.02	0.00363471		1297.02	0.00282921		1827.01	-0.00009247
237.23	0.15945605		767.22	0.00342966		1297.22	0.00392327		1827.21	-0.00093649
237.43	0.16025882		767.42	0.0039278		1297.42	0.00492721		1827.41	-0.00160497
237.63	0.15995411		767.62	0.00423702		1297.62	0.00578691		1827.61	-0.00184519
237.83	0.15982666		767.82	0.00516102		1297.82	0.00622437		1827.81	-0.00174972
238.03	0.15934842		768.02	0.00471891		1298.02	0.00585958		1828.01	-0.00151572
238.23	0.15978245		768.22	0.00580842		1298.22	0.00552892		1828.21	-0.00095094
238.43	0.15997463		768.42	0.00614743		1298.42	0.00470083		1828.41	-0.00031961
238.63	0.16081344		768.62	0.00602551		1298.62	0.00505583		1828.61	-0.00015886
238.83	0.1594807		768.82	0.00648237		1298.82	0.00563115		1828.81	0.00048972
239.03	0.15997829		769.02	0.00612459		1299.02	0.00559414		1829.01	0.00035298
239.23	0.15992786		769.22	0.00624764		1299.22	0.00540384		1829.21	-0.00004756
239.43	0.1599098		769.42	0.00645128		1299.42	0.00448765		1829.41	0.00158718
239.63	0.15999692		769.62	0.0064181		1299.62	0.00430752		1829.61	0.00133025
239.83	0.16095899		769.82	0.00609813		1299.82	0.00549499		1829.81	0.00225549
240.03	0.16146512		770.02	0.00579732		1300.02	0.00546562		1830.01	0.00248918
240.23	0.16212995		770.22	0.00520442		1300.22	0.00578435		1830.21	0.00224834
240.43	0.16231336		770.42	0.00427055		1300.42	0.0058535		1830.41	0.00254743
240.63	0.16340601		770.62	0.00305122		1300.62	0.00631567		1830.61	0.00269242
240.83	0.16410328		770.82	0.00158798		1300.82	0.0055176		1830.81	0.00334557
241.03	0.16468713		771.02	0.00209781		1301.02	0.00690905		1831.01	0.00235752
241.23	0.16608169		771.22	0.0015884		1301.22	0.00787396		1831.21	0.00190812
241.43	0.16711908		771.42	0.00189719		1301.42	0.00764777		1831.41	0.00171502
241.63	0.16778912		771.62	0.00213862		1301.62	0.00810446		1831.61	0.0015326
241.83	0.16873198		771.82	0.00263505		1301.82	0.00784561		1831.81	0.00269909
242.03	0.16859132		772.02	0.00269621		1302.02	0.00710264		1832.01	0.00328412
242.23	0.16914199		772.22	0.00378758		1302.22	0.00717033		1832.21	0.00319614
242.43	0.17001406		772.42	0.00461543		1302.42	0.00709872		1832.41	0.00254405
242.63	0.1708684		772.62	0.00585678		1302.62	0.00734479		1832.61	0.00183691
242.83	0.17063689		772.82	0.00759945		1302.82	0.00795467		1832.81	0.00198751
243.03	0.1714166		773.02	0.00813288		1303.02	0.00710275		1833.01	0.0005034
243.23	0.17105503		773.22	0.00847187		1303.22	0.0062915		1833.21	0.00013567
243.43	0.1715522		773.42	0.00992963		1303.42	0.00611055		1833.41	-0.00010233
243.63	0.17229773		773.62	0.00998197		1303.62	0.00641679		1833.61	-0.00073645
243.83	0.17277232		773.82	0.01010571		1303.82	0.00676169		1833.81	-0.00032201
244.03	0.17326261		774.02	0.00925496		1304.02	0.00552069		1834.01	-0.00055193
244.23	0.17344295		774.22	0.00909657		1304.22	0.00489278		1834.21	-0.00119861
244.43	0.1730165		774.42	0.00876502		1304.42	0.00422764		1834.41	-0.00112
244.63	0.1742806		774.62	0.0089384		1304.62	0.00456515		1834.61	-0.00101179
244.83	0.17477468		774.82	0.00781106		1304.82	0.00392061		1834.81	-0.00067833
245.03	0.17664236		775.02	0.00804817		1305.02	0.00461554		1835.01	-0.00088251
245.23	0.17699081		775.22	0.00743437		1305.22	0.00489001		1835.21	-0.00070829
245.43	0.17794211		775.42	0.00730469		1305.42	0.00519874		1835.41	-0.00075686
245.63	0.17960886		775.62	0.00706485		1305.62	0.00659374		1835.61	-0.00071091
245.83	0.18023033		775.82	0.00714833		1305.82	0.00624963		1835.81	0.00028434
246.03	0.1808223		776.02	0.00711802		1306.02	0.00645529		1836.01	0.00042207
246.23	0.18154541		776.22	0.00791038		1306.22	0.00756407		1836.21	0.00058997
246.43	0.18310929		776.42	0.00881688		1306.42	0.00641213		1836.41	0.00054352
246.63	0.18309425		776.62	0.00946162		1306.62	0.00621874		1836.61	0.00050928
246.83	0.18383031		776.82	0.00966665		1306.82	0.0064864		1836.81	0.00118431
247.03	0.18484859		777.02	0.00962053		1307.02	0.00657165		1837.01	0.00055609
247.23	0.18596214		777.22	0.00981116		1307.22	0.00685925		1837.21	0.00128776
247.43	0.1867082		777.42	0.01025655		1307.42	0.00715454		1837.41	0.00181486
247.63	0.18708381		777.62	0.00988075		1307.62	0.00615059		1837.61	0.00197362
247.83	0.18683709		777.82	0.01042045		1307.82	0.00495483		1837.81	0.00274111
248.03	0.18658986		778.02	0.00964554		1308.02	0.0039348		1838.01	0.00206735
248.23	0.18673437		778.22	0.00982181		1308.22	0.00384826		1838.21	0.00154428
248.43	0.18657254		778.42	0.00922286		1308.42	0.00358329		1838.41	0.0018018
248.63	0.18719183		778.62	0.00845063		1308.62	0.00368055		1838.61	0.00179418
248.83	0.18667337		778.82	0.00741066		1308.82	0.00390419		1838.81	0.00172066
249.03	0.1874677		779.02	0.00703165		1309.02	0.00436648		1839.01	0.00222792
249.23	0.18702723		779.22	0.00696729		1309.22	0.00473656		1839.21	0.00225447
249.43	0.18754921		779.42	0.00683743		1309.42	0.00434239		1839.41	0.00187015
249.63	0.18806027		779.62	0.00678588		1309.62	0.00497604		1839.61	0.00154359
249.83	0.18764085		779.82	0.00591428		1309.82	0.00461222		1839.81	0.00221479
250.03	0.18660376		780.02	0.00548409		1310.02	0.00495243		1840.01	0.00148726
250.23	0.18612003		780.22	0.00642686		1310.22	0.00500963		1840.21	0.00241307
250.43	0.18645333		780.42	0.00686919		1310.42	0.00381779		1840.41	0.00221349
250.63	0.18599115		780.62	0.0071463		1310.62	0.00331296		1840.61	0.00146219
250.83	0.18702749		780.82	0.00803728		1310.82	0.00386743		1840.81	0.00121528
251.03	0.18836583		781.02	0.00847091		1311.02	0.00477886		1841.01	0.00056342
251.23	0.18907596		781.22	0.00940081		1311.22	0.00454159		1841.21	0.00005146
251.43	0.18915767		781.42	0.01003641		1311.42	0.00405525		1841.41	0.00042359
251.63	0.19037531		781.62	0.00992797		1311.62	0.00408821		1841.61	0.00014612
251.83	0.19143676		781.82	0.00998623		1311.82	0.00403571		1841.81	-0.00006733
252.03	0.19279412		782.02	0.01011876		1312.02	0.00344929		1842.01	-0.00038455
252.23	0.19379015		782.22	0.0102277		1312.22	0.00410316		1842.21	-0.00030486
252.43	0.19483039		782.42	0.00925389		1312.42	0.00409555		1842.41	-0.00021031
252.63	0.19603886		782.62	0.00936774		1312.62	0.00487399		1842.61	-0.00039447
252.83	0.19723517		782.82	0.0097116		1312.82	0.00514661		1842.81	-0.00068454
253.03	0.19854628		783.02	0.0099771		1313.02	0.00503761		1843.01	-0.00010109
253.23	0.19980589		783.22	0.00990967		1313.22	0.00516957		1843.21	-0.00006529
253.43	0.19943746		783.42	0.00879087		1313.42	0.00537778		1843.41	-0.00043625
253.63	0.20007644		783.62	0.00824949		1313.62	0.00605459		1843.61	-0.00018066
253.83	0.19930163		783.82	0.00717615		1313.82	0.00589578		1843.81	0.00056251
254.03	0.19797136		784.02	0.00657754		1314.02	0.00526421		1844.01	0.00078004
254.23	0.19758509		784.22	0.00672174		1314.22	0.0047234		1844.21	0.00194823
254.43	0.19822515		784.42	0.00576252		1314.42	0.00437276		1844.41	0.00086658
254.63	0.19828924		784.62	0.00562751		1314.62	0.00356071		1844.61	-0.00032664
254.83	0.19866941		784.82	0.00594968		1314.82	0.00368608		1844.81	-0.00044844
255.03	0.19930814		785.02	0.0052006		1315.02	0.00280477		1845.01	-0.00066594
255.23	0.19909374		785.22	0.0051394		1315.22	0.00184719		1845.21	-0.00059972
255.43	0.19959355		785.42	0.00413461		1315.42	0.00172704		1845.41	0.00055366
255.63	0.20047288		785.62	0.00280663		1315.62	0.00129991		1845.61	0.00068607
255.83	0.20107315		785.82	0.00296723		1315.82	0.00053187		1845.81	-0.0000945
256.03	0.2011698		786.02	0.00322933		1316.02	0.00067621		1846.01	0.00083684
256.23	0.20185329		786.22	0.00320929		1316.22	0.00082618		1846.21	0.00067701
256.43	0.20366358		786.42	0.00341846		1316.42	0.00121492		1846.41	0.00146056
256.63	0.20464777		786.62	0.00465539		1316.62	0.00184887		1846.61	0.0019228
256.83	0.20501192		786.82	0.00617239		1316.82	0.00248054		1846.81	0.00140179
257.03	0.20641996		787.02	0.00802921		1317.02	0.00329173		1847.01	0.001874
257.23	0.20779415		787.22	0.00875957		1317.22	0.00396758		1847.21	0.00124715
257.43	0.20813873		787.42	0.00947995		1317.42	0.00512745		1847.41	0.00056702
257.63	0.20850664		787.62	0.0101273		1317.62	0.00547257		1847.61	0.00078753
257.83	0.20789211		787.82	0.0112513		1317.82	0.00544958		1847.81	0.00065011
258.03	0.20808954		788.02	0.01148449		1318.02	0.00602346		1848.01	0.00139377
258.23	0.20824101		788.22	0.01277865		1318.22	0.00646446		1848.21	0.00068945
258.43	0.20850003		788.42	0.01304535		1318.42	0.00661188		1848.41	-0.00046767
258.63	0.20731709		788.62	0.01374066		1318.62	0.00520117		1848.61	-0.00041612
258.83	0.2076852		788.82	0.01434833		1318.82	0.00413627		1848.81	0.00029961
259.03	0.2077765		789.02	0.01342433		1319.02	0.00355661		1849.01	0.00042865
259.23	0.20731245		789.22	0.01319625		1319.22	0.00340684		1849.21	0.00101355
259.43	0.20807479		789.42	0.01231006		1319.42	0.00298507		1849.41	0.00148747
259.63	0.20840596		789.62	0.01106646		1319.62	0.0028095		1849.61	0.00134121
259.83	0.208392		789.82	0.01045222		1319.82	0.00313559		1849.81	0.00071331
260.03	0.20924177		790.02	0.00944663		1320.02	0.0030831		1850.01	0.00150531
260.23	0.21027034		790.22	0.00902491		1320.22	0.00244316		1850.21	0.00169177
260.43	0.21060859		790.42	0.0082188		1320.42	0.0031178		1850.41	0.00126593
260.63	0.21116502		790.62	0.007949		1320.62	0.00354182		1850.61	0.00061287
260.83	0.21212344		790.82	0.00879757		1320.82	0.0040187		1850.81	0.0000259
261.03	0.21434486		791.02	0.00873981		1321.02	0.00447099		1851.01	-0.00034349
261.23	0.21510004		791.22	0.00741085		1321.22	0.00456261		1851.21	-0.00113702
261.43	0.21540623		791.42	0.00677823		1321.42	0.00542684		1851.41	-0.00154933
261.63	0.21525786		791.62	0.00674719		1321.62	0.00481274		1851.61	-0.00139253
261.83	0.21530229		791.82	0.00823719		1321.82	0.00400151		1851.81	-0.0019
262.03	0.21565978		792.02	0.00821307		1322.02	0.00429831		1852.01	-0.00134506
262.23	0.21511242		792.22	0.00967445		1322.22	0.003147		1852.21	-0.00194149
262.43	0.21554185		792.42	0.0104049		1322.42	0.00158565		1852.41	-0.00171635
262.63	0.21600725		792.62	0.01131266		1322.62	0.00029864		1852.61	-0.00178018
262.83	0.21717277		792.82	0.01271401		1322.82	0.00079241		1852.81	-0.00130191
263.03	0.21712911		793.02	0.01230548		1323.02	0.00107502		1853.01	-0.00113964
263.23	0.21763844		793.22	0.01238457		1323.22	0.00108975		1853.21	-0.00055185
263.43	0.21820372		793.42	0.01226782		1323.42	0.00113094		1853.41	-0.00059634
263.63	0.21854306		793.62	0.01186342		1323.62	0.00076954		1853.61	-0.00089713
263.83	0.21851326		793.82	0.01190286		1323.82	0.00066858		1853.81	-0.00088331
264.03	0.21959108		794.02	0.01241331		1324.02	0.000849		1854.01	-0.00087434
264.23	0.2191328		794.22	0.01238556		1324.22	0.00181627		1854.21	-0.00145627
264.43	0.21940092		794.42	0.0122147		1324.42	0.0025374		1854.41	-0.00147899
264.63	0.22005078		794.62	0.0122563		1324.62	0.00301721		1854.61	-0.00043039
264.83	0.21939309		794.82	0.01172674		1324.82	0.00338567		1854.81	-0.00019781
265.03	0.21870521		795.02	0.01084401		1325.02	0.00338591		1855.01	-0.00032644
265.23	0.21862915		795.22	0.00987122		1325.22	0.00361929		1855.21	-0.00015006
265.43	0.21896069		795.42	0.01027488		1325.42	0.00332195		1855.41	-0.00016543
265.63	0.21915738		795.62	0.00988212		1325.62	0.00249803		1855.61	-0.00008381
265.83	0.21887051		795.82	0.01075161		1325.82	0.00229208		1855.81	-0.0005386
266.03	0.21958385		796.02	0.01074644		1326.02	0.00163956		1856.01	0.00000189
266.23	0.22005175		796.22	0.01078014		1326.22	0.00079153		1856.21	0.00003094
266.43	0.22044286		796.42	0.01055675		1326.42	-0.00014271		1856.41	-0.00014909
266.63	0.22019909		796.62	0.01058242		1326.62	-0.00011509		1856.61	-0.00055864
266.83	0.2200107		796.82	0.01053461		1326.82	0.00038867		1856.81	0.00047297
267.03	0.22088393		797.02	0.00993152		1327.02	0.00008036		1857.01	0.00061225
267.23	0.22123511		797.22	0.00914283		1327.22	-0.00038378		1857.21	0.00138297
267.43	0.22159631		797.42	0.00974139		1327.42	0.00017862		1857.41	0.00151865
267.63	0.22246628		797.62	0.00956769		1327.62	0.00026476		1857.61	0.00148443
267.83	0.22288385		797.82	0.00992752		1327.82	0.00229048		1857.81	0.00200298
268.03	0.22352273		798.02	0.00998034		1328.02	0.00289085		1858.01	0.00191586
268.23	0.22329601		798.22	0.00940173		1328.22	0.00282972		1858.21	0.00279628
268.43	0.22419502		798.42	0.00937714		1328.42	0.00301268		1858.41	0.00303576
268.63	0.22400617		798.62	0.00924807		1328.62	0.00357133		1858.61	0.0031881
268.83	0.2236578		798.82	0.00972814		1328.82	0.00394314		1858.81	0.00245155
269.03	0.22442635		799.02	0.01040634		1329.02	0.00458746		1859.01	0.00205238
269.23	0.22582534		799.22	0.01080113		1329.22	0.00500569		1859.21	0.00127822
269.43	0.22606933		799.42	0.01145507		1329.42	0.00471958		1859.41	0.00157179
269.63	0.22625262		799.62	0.0111249		1329.62	0.0046027		1859.61	0.00099941
269.83	0.22725945		799.82	0.01144867		1329.82	0.00417573		1859.81	0.00121519
270.03	0.22834349		800.02	0.01166388		1330.02	0.00300367		1860.01	0.0006293
270.23	0.2283068		800.22	0.01147393		1330.22	0.00218313		1860.21	0.00072129
270.43	0.22758439		800.42	0.01207063		1330.42	0.00175675		1860.41	0.00104512
270.63	0.22723308		800.62	0.01267912		1330.62	0.00151804		1860.61	0.00137254
270.83	0.22787592		800.82	0.0138862		1330.82	0.00083219		1860.81	0.00160536
271.03	0.22841977		801.02	0.01452561		1331.02	0.00018432		1861.01	0.00190227
271.23	0.22891414		801.22	0.01423868		1331.22	-0.00065873		1861.21	0.00197962
271.43	0.22961711		801.42	0.01469059		1331.42	-0.00034295		1861.41	0.00233617
271.63	0.22969867		801.62	0.01377096		1331.62	-0.00075759		1861.61	0.00177741
271.83	0.22939878		801.82	0.01402624		1331.82	-0.00042844		1861.81	0.00182644
272.03	0.23002944		802.02	0.01300796		1332.02	-0.00167955		1862.01	0.00166333
272.23	0.23038556		802.22	0.01340942		1332.22	-0.00204273		1862.21	0.00092466
272.43	0.23151176		802.42	0.01320021		1332.42	-0.00152559		1862.41	0.00010958
272.63	0.2316707		802.62	0.01369769		1332.62	-0.00122888		1862.61	0.00009331
272.83	0.23197052		802.82	0.01481806		1332.82	-0.00191617		1862.81	-0.00020469
273.03	0.23259955		803.02	0.01415537		1333.02	-0.0011624		1863.01	-0.00097467
273.23	0.23224006		803.22	0.01351231		1333.22	-0.0010736		1863.21	-0.0015871
273.43	0.23243068		803.42	0.01307997		1333.42	-0.00109202		1863.41	-0.00088018
273.63	0.23328475		803.62	0.01235794		1333.62	-0.0009829		1863.61	-0.00126483
273.83	0.23406675		803.82	0.01205453		1333.82	-0.00073043		1863.81	-0.0017972
274.03	0.23396466		804.02	0.0125453		1334.02	-0.00036321		1864.01	-0.00184886
274.23	0.23384853		804.22	0.01334699		1334.22	0.00016815		1864.21	-0.00127657
274.43	0.23379278		804.42	0.01306994		1334.42	0.00079874		1864.41	-0.00071419
274.63	0.23438596		804.62	0.01334131		1334.62	0.00050146		1864.61	-0.00016501
274.83	0.23532137		804.82	0.01412154		1334.82	-0.00009672		1864.81	0.00017321
275.03	0.23546449		805.02	0.01377549		1335.02	-0.00015458		1865.01	0.00085746
275.23	0.23681051		805.22	0.01348907		1335.22	-0.00011427		1865.21	0.00000378
275.43	0.23713561		805.42	0.01348052		1335.42	-0.00002481		1865.41	0.00015999
275.63	0.23704063		805.62	0.01315846		1335.62	0.00011468		1865.61	-0.0002538
275.83	0.23794937		805.82	0.01356006		1335.82	-0.00018155		1865.81	-0.00025089
276.03	0.23909025		806.02	0.01429457		1336.02	-0.00040737		1866.01	-0.00004962
276.23	0.23953305		806.22	0.01513584		1336.22	-0.00021625		1866.21	0.00010284
276.43	0.2404966		806.42	0.0151325		1336.42	0.0004304		1866.41	0.00114316
276.63	0.24054067		806.62	0.015474		1336.62	0.00035829		1866.61	0.00150276
276.83	0.24023847		806.82	0.01607691		1336.82	-0.00042471		1866.81	0.00171951
277.03	0.23986748		807.02	0.01563195		1337.02	0.00085157		1867.01	0.00059574
277.23	0.2393646		807.22	0.01545328		1337.22	0.0012318		1867.21	0.00102627
277.43	0.23923007		807.42	0.01595732		1337.42	0.00151876		1867.41	0.0015397
277.63	0.23942129		807.62	0.01611554		1337.62	0.00204322		1867.61	0.00270291
277.83	0.2386427		807.82	0.01600637		1337.82	0.00197135		1867.81	0.00205243
278.03	0.23825608		808.02	0.01625242		1338.02	0.00168732		1868.01	0.00273794
278.23	0.23814448		808.22	0.01600819		1338.22	0.00156315		1868.21	0.0031699
278.43	0.23846446		808.42	0.01507983		1338.42	0.0019314		1868.41	0.00398231
278.63	0.23879276		808.62	0.01512815		1338.62	0.00194104		1868.61	0.00444527
278.83	0.23964936		808.82	0.01502028		1338.82	0.00192718		1868.81	0.00400277
279.03	0.23982926		809.02	0.01503728		1339.02	0.00244512		1869.01	0.00298111
279.23	0.2406977		809.22	0.01517421		1339.22	0.00297448		1869.21	0.00234889
279.43	0.24142592		809.42	0.01521455		1339.42	0.00298466		1869.41	0.00193632
279.63	0.24198673		809.62	0.01528068		1339.62	0.00197442		1869.61	0.00180133
279.83	0.24268132		809.82	0.01581342		1339.82	0.00148498		1869.81	0.00013671
280.03	0.24334032		810.02	0.01672133		1340.02	0.00116313		1870.01	0.000042
280.23	0.24433933		810.22	0.01591334		1340.22	0.00154701		1870.21	-0.00038456
280.43	0.24478453		810.42	0.0163993		1340.42	0.00157634		1870.41	-0.00130482
280.63	0.24481864		810.62	0.01621771		1340.62	0.00129566		1870.61	-0.00223616
280.83	0.24489789		810.82	0.01681014		1340.82	0.00153843		1870.81	-0.00217955
281.03	0.24529805		811.02	0.016649		1341.02	0.00204357		1871.01	-0.0031204
281.23	0.24590196		811.22	0.0166213		1341.22	0.00196297		1871.21	-0.002309
281.43	0.24627197		811.42	0.01680012		1341.42	0.00145156		1871.41	-0.00195035
281.63	0.24714378		811.62	0.01699324		1341.62	0.00054521		1871.61	-0.00141382
281.83	0.24753717		811.82	0.01635301		1341.82	-0.00065968		1871.81	-0.00192694
282.03	0.24773036		812.02	0.01616193		1342.02	-0.0007217		1872.01	-0.0003134
282.23	0.2479069		812.22	0.01602574		1342.22	-0.00091958		1872.21	0.0005976
282.43	0.2487483		812.42	0.01595115		1342.42	0.00051677		1872.41	0.00123236
282.63	0.24875794		812.62	0.01541771		1342.62	0.00072584		1872.61	0.00190423
282.83	0.24939056		812.82	0.01532878		1342.82	0.00172213		1872.81	0.00188045
283.03	0.24931505		813.02	0.01533632		1343.02	0.00228218		1873.01	0.00226474
283.23	0.2494871		813.22	0.01509953		1343.22	0.00263826		1873.21	0.00342635
283.43	0.24967715		813.42	0.01434815		1343.42	0.00213304		1873.41	0.00245736
283.63	0.25004744		813.62	0.01373118		1343.62	0.00123799		1873.61	0.00267506
283.83	0.25004923		813.82	0.01355181		1343.82	0.00083687		1873.81	0.00200933
284.03	0.25038375		814.02	0.01349654		1344.02	0.00098521		1874.01	0.00157262
284.23	0.25013946		814.22	0.01350051		1344.22	0.00166473		1874.21	0.00095745
284.43	0.2498422		814.42	0.01457047		1344.42	0.00159795		1874.41	0.00035361
284.63	0.25024936		814.62	0.01474579		1344.62	0.0014927		1874.61	-0.00061328
284.83	0.25070023		814.82	0.01526912		1344.82	0.00176559		1874.81	-0.00027803
285.03	0.25159696		815.02	0.01572384		1345.02	0.00098427		1875.01	-0.00096673
285.23	0.25225835		815.22	0.01691863		1345.22	0.00077072		1875.21	-0.00130046
285.43	0.25295135		815.42	0.01746511		1345.42	0.00008838		1875.41	-0.0013957
285.63	0.25348434		815.62	0.01900054		1345.62	-0.0001437		1875.61	-0.00142937
285.83	0.25396386		815.82	0.0189826		1345.82	-0.00054222		1875.81	-0.00161559
286.03	0.25323331		816.02	0.01986189		1346.02	-0.000736		1876.01	-0.00094744
286.23	0.25380882		816.22	0.02091345		1346.22	-0.00160821		1876.21	-0.00089926
286.43	0.25483481		816.42	0.02052239		1346.42	-0.00101953		1876.41	-0.00002048
286.63	0.25507211		816.62	0.02047232		1346.62	-0.00110114		1876.61	0.00059569
286.83	0.25618302		816.82	0.01997347		1346.82	-0.00069823		1876.81	0.00045593
287.03	0.2566859		817.02	0.01906707		1347.02	-0.00025277		1877.01	0.00030654
287.23	0.25759878		817.22	0.0177605		1347.22	0.00006601		1877.21	0.00096175
287.43	0.25865025		817.42	0.01761409		1347.42	-0.00031207		1877.41	-0.0000719
287.63	0.25927628		817.62	0.0168424		1347.62	-0.00070901		1877.61	0.00004174
287.83	0.25895739		817.82	0.01668057		1347.82	-0.00123932		1877.81	-0.00081292
288.03	0.25881921		818.02	0.017087		1348.02	-0.00072359		1878.01	-0.00082993
288.23	0.25807001		818.22	0.01711418		1348.22	-0.00001007		1878.21	-0.00057817
288.43	0.25825537		818.42	0.0164678		1348.42	0.00060123		1878.41	-0.00086828
288.63	0.25812983		818.62	0.01625518		1348.62	0.00044001		1878.61	-0.00145892
288.83	0.25759231		818.82	0.01578037		1348.82	0.00144197		1878.81	-0.00113564
289.03	0.25716044		819.02	0.01582014		1349.02	0.00123999		1879.01	-0.0010592
289.23	0.25642619		819.22	0.01731209		1349.22	0.00117653		1879.21	-0.00135054
289.43	0.25605594		819.42	0.0167332		1349.42	0.00141298		1879.41	-0.00131362
289.63	0.25546368		819.62	0.01779967		1349.62	0.00141529		1879.61	-0.00071477
289.83	0.25496106		819.82	0.01797134		1349.82	0.00077109		1879.81	-0.00039739
290.03	0.2551768		820.02	0.01854833		1350.02	0.00050185		1880.01	0.00111131
290.23	0.25680702		820.22	0.0184294		1350.22	0.00010261		1880.21	0.00204367
290.43	0.25755158		820.42	0.0174738		1350.42	0.00090672		1880.41	0.00227859
290.63	0.25854568		820.62	0.01818897		1350.62	0.00064981		1880.61	0.00266278
290.83	0.26035254		820.82	0.01812879		1350.82	0.00014348		1880.81	0.0019233
291.03	0.26142317		821.02	0.01791698		1351.02	0.00073719		1881.01	0.00103756
291.23	0.26243882		821.22	0.01809163		1351.22	0.00086116		1881.21	0.00090255
291.43	0.26294444		821.42	0.01861669		1351.42	0.00075962		1881.41	-0.00039379
291.63	0.26355732		821.62	0.01773992		1351.62	0.00128817		1881.61	-0.00089297
291.83	0.26371775		821.82	0.0183413		1351.82	0.00139279		1881.81	-0.00121563
292.03	0.26413048		822.02	0.01924872		1352.02	0.00194655		1882.01	-0.00084143
292.23	0.26473671		822.22	0.01979137		1352.22	0.00283651		1882.21	-0.00117807
292.43	0.26527587		822.42	0.02101575		1352.42	0.00294731		1882.41	-0.00143141
292.63	0.26460052		822.62	0.02198164		1352.62	0.00283234		1882.61	-0.00117432
292.83	0.26409037		822.82	0.02153222		1352.82	0.00292564		1882.81	-0.00121387
293.03	0.26369466		823.02	0.02201241		1353.02	0.00269051		1883.01	-0.0008498
293.23	0.26302785		823.22	0.02216309		1353.22	0.00200099		1883.21	-0.00096434
293.43	0.26291894		823.42	0.0209284		1353.42	0.00272412		1883.41	-0.00012798
293.63	0.26233883		823.62	0.02119983		1353.62	0.00254515		1883.61	0.00145144
293.83	0.26270921		823.82	0.02116231		1353.82	0.0016766		1883.81	0.00206599
294.03	0.26339489		824.02	0.01968734		1354.02	0.00108244		1884.01	0.00284947
294.23	0.26427037		824.22	0.01866223		1354.22	0.00050132		1884.21	0.00256819
294.43	0.26395281		824.42	0.01843731		1354.42	-0.00028424		1884.41	0.00245884
294.63	0.26517873		824.62	0.01847135		1354.62	-0.00151747		1884.61	0.00271183
294.83	0.26513313		824.82	0.01807905		1354.82	-0.00118934		1884.81	0.00155336
295.03	0.26445286		825.02	0.01769577		1355.02	-0.00118099		1885.01	0.00045847
295.23	0.26469038		825.22	0.01786458		1355.22	-0.00108665		1885.21	0.00061848
295.43	0.26509772		825.42	0.01771533		1355.42	-0.00030252		1885.41	0.00037683
295.63	0.26592939		825.62	0.01810599		1355.62	0.00041749		1885.61	0.00058374
295.83	0.26584573		825.82	0.01921114		1355.82	-0.00001143		1885.81	0.00005947
296.03	0.26648617		826.02	0.02015066		1356.02	0.00075726		1886.01	-0.00038018
296.23	0.26709621		826.22	0.02107305		1356.22	0.00061197		1886.21	-0.00071867
296.43	0.26720034		826.42	0.02156113		1356.42	0.00098677		1886.41	-0.00132564
296.63	0.26653346		826.62	0.02092344		1356.62	0.00055701		1886.61	-0.00033503
296.83	0.26740756		826.82	0.01933319		1356.82	0.00066697		1886.81	-0.00069989
297.03	0.26744907		827.02	0.019395		1357.02	0.00100357		1887.01	0.00047317
297.23	0.26764896		827.22	0.01927574		1357.22	0.00066147		1887.21	0.00088061
297.43	0.26834701		827.42	0.01870465		1357.42	0.0009229		1887.41	0.0016872
297.63	0.2677304		827.62	0.01862197		1357.62	0.00031064		1887.61	0.00171576
297.83	0.26849142		827.82	0.0189209		1357.82	-0.00055761		1887.81	0.00187588
298.03	0.26905157		828.02	0.01762618		1358.02	0.00025191		1888.01	0.00184291
298.23	0.26986628		828.22	0.01778221		1358.22	0.00064867		1888.21	0.00079441
298.43	0.26955903		828.42	0.01836267		1358.42	0.00039971		1888.41	0.00056424
298.63	0.27037342		828.62	0.01892742		1358.62	0.0003903		1888.61	-0.00053901
298.83	0.26964009		828.82	0.01999669		1358.82	0.00060717		1888.81	-0.00140401
299.03	0.27025037		829.02	0.02008607		1359.02	-0.00002198		1889.01	-0.00174467
299.23	0.27113755		829.22	0.0203812		1359.22	0.00044336		1889.21	-0.00182555
299.43	0.27171796		829.42	0.02005195		1359.42	0.00142691		1889.41	-0.00236484
299.63	0.27264021		829.62	0.02001646		1359.62	0.00137802		1889.61	-0.00240441
299.83	0.27274193		829.82	0.01958196		1359.82	0.00147217		1889.81	-0.00373591
300.03	0.27304089		830.02	0.01932343		1360.02	0.00143145		1890.01	-0.0041562
300.23	0.27386396		830.22	0.01967502		1360.22	0.00106933		1890.21	-0.00371
300.43	0.27440132		830.42	0.0201584		1360.42	0.00044821		1890.41	-0.00305255
300.63	0.27430046		830.62	0.02040109		1360.62	-0.00007277		1890.61	-0.0013437
300.83	0.27544241		830.82	0.0201761		1360.82	-0.00014434		1890.81	-0.00110786
301.03	0.27523524		831.02	0.02164808		1361.02	-0.00107663		1891.01	0.00015303
301.23	0.2753375		831.22	0.02264199		1361.22	-0.00237757		1891.21	0.00003578
301.43	0.27595292		831.42	0.02244776		1361.42	-0.00260653		1891.41	0.00113549
301.63	0.27545143		831.62	0.02268917		1361.62	-0.00235793		1891.61	0.00195135
301.83	0.27622667		831.82	0.02296869		1361.82	-0.00104312		1891.81	0.00228295
302.03	0.27631602		832.02	0.02266796		1362.02	0.00049369		1892.01	0.00238708
302.23	0.27610297		832.22	0.02333439		1362.22	0.00012129		1892.21	0.00158985
302.43	0.27623001		832.42	0.02433516		1362.42	-0.00065847		1892.41	0.00114098
302.63	0.2761353		832.62	0.02472357		1362.62	-0.00051174		1892.61	0.00097976
302.83	0.27594741		832.82	0.02467045		1362.82	-0.00065701		1892.81	0.00145942
303.03	0.27715335		833.02	0.02338381		1363.02	-0.00085412		1893.01	0.00130147
303.23	0.27708707		833.22	0.02308823		1363.22	-0.00049507		1893.21	0.00109477
303.43	0.2773702		833.42	0.02230088		1363.42	-0.00013801		1893.41	0.00096741
303.63	0.27675129		833.62	0.02200391		1363.62	-0.00032733		1893.61	0.00012806
303.83	0.27697928		833.82	0.02115876		1363.82	0.0002581		1893.81	-0.00047827
304.03	0.27677874		834.02	0.02069934		1364.02	-0.00051486		1894.01	-0.00044461
304.23	0.27735183		834.22	0.02074248		1364.22	-0.00155522		1894.21	-0.00029195
304.43	0.27698383		834.42	0.02077734		1364.42	-0.00260165		1894.41	-0.00027443
304.63	0.2774988		834.62	0.02003556		1364.62	-0.00228045		1894.61	-0.00020946
304.83	0.27818683		834.82	0.01966021		1364.82	-0.003226		1894.81	-0.0008202
305.03	0.27882656		835.02	0.01952678		1365.02	-0.00417844		1895.01	-0.0002746
305.23	0.27948356		835.22	0.01935069		1365.22	-0.00390383		1895.21	0.00046675
305.43	0.28039437		835.42	0.01882259		1365.42	-0.00298925		1895.41	0.00094847
305.63	0.28031049		835.62	0.0178766		1365.62	-0.00196091		1895.61	0.001795
305.83	0.28115527		835.82	0.01849233		1365.82	-0.00091988		1895.81	0.00220634
306.03	0.28198677		836.02	0.01903563		1366.02	-0.00121701		1896.01	0.00279988
306.23	0.28252515		836.22	0.01998358		1366.22	-0.00186424		1896.21	0.00216157
306.43	0.28297163		836.42	0.02074407		1366.42	-0.00195979		1896.41	0.00266426
306.63	0.28328387		836.62	0.02196139		1366.62	-0.00114968		1896.61	0.00292325
306.83	0.28347555		836.82	0.02271065		1366.82	-0.00083673		1896.81	0.00239571
307.03	0.28401404		837.02	0.02291327		1367.02	-0.00020379		1897.01	0.00145767
307.23	0.28400206		837.22	0.02425305		1367.22	-0.00025309		1897.21	0.00126662
307.43	0.28377847		837.42	0.02519576		1367.42	-0.00006549		1897.41	0.000515
307.63	0.28371149		837.62	0.02540629		1367.62	0.00045353		1897.61	-0.00024259
307.83	0.28333955		837.82	0.02526463		1367.82	0.00056867		1897.81	-0.00087385
308.03	0.283295		838.02	0.02502644		1368.02	-0.00128905		1898.01	-0.00162743
308.23	0.28357516		838.22	0.02452218		1368.22	-0.00141084		1898.21	-0.00226924
308.43	0.28398933		838.42	0.02420361		1368.42	-0.00110507		1898.41	-0.0022826
308.63	0.28461963		838.62	0.0237674		1368.62	-0.00126977		1898.61	-0.0024838
308.83	0.28417404		838.82	0.02310497		1368.82	-0.00155578		1898.81	-0.00245737
309.03	0.28455055		839.02	0.02227155		1369.02	-0.00193522		1899.01	-0.00205847
309.23	0.28454262		839.22	0.02158779		1369.22	-0.00190237		1899.21	-0.00127147
309.43	0.28522513		839.42	0.0210677		1369.42	-0.002659		1899.41	-0.00157785
309.63	0.28592216		839.62	0.02109137		1369.62	-0.00223973		1899.61	-0.00043974
309.83	0.28703728		839.82	0.0213694		1369.82	-0.00249874		1899.81	-0.00006694
310.03	0.28740001		840.02	0.02157984		1370.02	-0.00306999		1900.01	0.00027648
310.23	0.28828183		840.22	0.02183443		1370.22	-0.00356039		1900.21	0.00026351
310.43	0.28870457		840.42	0.02252084		1370.42	-0.00333846		1900.41	0.00081129
310.63	0.28976189		840.62	0.02338291		1370.62	-0.00305116		1900.61	0.00055952
310.83	0.28997552		840.82	0.02358595		1370.82	-0.00230533		1900.81	0.00015337
311.03	0.29013647		841.02	0.0231594		1371.02	-0.00223006		1901.01	-0.00035484
311.23	0.29003664		841.22	0.0244929		1371.22	-0.00228531		1901.21	-0.00096446
311.43	0.28976203		841.42	0.02567029		1371.42	-0.00132122		1901.41	-0.00120751
311.63	0.28951456		841.62	0.02584985		1371.62	-0.00031393		1901.61	-0.00127462
311.83	0.28854294		841.82	0.02567368		1371.82	-0.000366		1901.81	-0.00202232
312.03	0.28992772		842.02	0.02603791		1372.02	-0.00091928		1902.01	-0.0013163
312.23	0.28927324		842.22	0.02565765		1372.22	-0.00030421		1902.21	-0.0010724
312.43	0.28928892		842.42	0.02578665		1372.42	-0.00052261		1902.41	-0.00047668
312.63	0.2891061		842.62	0.02585463		1372.62	-0.00041317		1902.61	-0.00009303
312.83	0.28900344		842.82	0.02532789		1372.82	-0.00039459		1902.81	0.00009258
313.03	0.28946598		843.02	0.02547793		1373.02	-0.00044337		1903.01	0.00024996
313.23	0.29038555		843.22	0.02523653		1373.22	-0.00067458		1903.21	0.00076999
313.43	0.29096329		843.42	0.02569558		1373.42	-0.00056003		1903.41	0.00119291
313.63	0.29107475		843.62	0.02597585		1373.62	-0.00069146		1903.61	0.00166851
313.83	0.29168102		843.82	0.02588828		1373.82	-0.0019445		1903.81	0.00244784
314.03	0.29201854		844.02	0.02544446		1374.02	-0.00289009		1904.01	0.00174055
314.23	0.29307255		844.22	0.0248729		1374.22	-0.00360431		1904.21	0.00178629
314.43	0.29358314		844.42	0.02498486		1374.42	-0.00361743		1904.41	0.00086434
314.63	0.29363291		844.62	0.02464783		1374.62	-0.0039494		1904.61	0.0006778
314.83	0.29301519		844.82	0.02397096		1374.82	-0.00337514		1904.81	-0.00060546
315.03	0.29307761		845.02	0.02423251		1375.02	-0.00294751		1905.01	-0.00182072
315.23	0.2938653		845.22	0.02549458		1375.22	-0.00307521		1905.21	-0.00200883
315.43	0.29458093		845.42	0.0260569		1375.42	-0.00207913		1905.41	-0.00136414
315.63	0.29444412		845.62	0.02542581		1375.62	-0.00173845		1905.61	-0.0014221
315.83	0.29406806		845.82	0.02544577		1375.82	-0.00227646		1905.81	-0.00183162
316.03	0.29393359		846.02	0.02604451		1376.02	-0.00281706		1906.01	-0.00091403
316.23	0.29315616		846.22	0.02505725		1376.22	-0.00307525		1906.21	-0.0018133
316.43	0.2935622		846.42	0.02544285		1376.42	-0.0018484		1906.41	-0.00118377
316.63	0.29413868		846.62	0.02612898		1376.62	-0.00102134		1906.61	-0.00037517
316.83	0.29436286		846.82	0.02683954		1376.82	-0.00092575		1906.81	0.00014035
317.03	0.29430169		847.02	0.02753713		1377.02	-0.00055355		1907.01	0.00089671
317.23	0.29526774		847.22	0.02784896		1377.22	-0.00070711		1907.21	0.00217089
317.43	0.29543524		847.42	0.02841783		1377.42	-0.0007576		1907.41	0.00269762
317.63	0.2954546		847.62	0.02877132		1377.62	-0.00114644		1907.61	0.00237794
317.83	0.29622845		847.82	0.02907658		1377.82	-0.00168665		1907.81	0.00189488
318.03	0.29662607		848.02	0.02891423		1378.02	-0.00162334		1908.01	0.00161495
318.23	0.29684059		848.22	0.02929013		1378.22	-0.0019725		1908.21	0.00176661
318.43	0.29733596		848.42	0.02999649		1378.42	-0.00205371		1908.41	0.00100527
318.63	0.29796432		848.62	0.02919282		1378.62	-0.00171118		1908.61	0.00075996
318.83	0.29797746		848.82	0.02835815		1378.82	-0.00094097		1908.81	-0.00059596
319.03	0.29884688		849.02	0.02923476		1379.02	-0.00032045		1909.01	-0.00170721
319.23	0.29914729		849.22	0.0294746		1379.22	-0.00171604		1909.21	-0.00199851
319.43	0.29892097		849.42	0.02906368		1379.42	-0.0011866		1909.41	-0.0021941
319.63	0.29847258		849.62	0.02942931		1379.62	-0.00269826		1909.61	-0.00278516
319.83	0.29795639		849.82	0.02943092		1379.82	-0.00265123		1909.81	-0.00403953
320.03	0.29815048		850.02	0.02949076		1380.02	-0.0029623		1910.01	-0.00389082
320.23	0.29791921		850.22	0.02815785		1380.22	-0.00246102		1910.21	-0.00383802
320.43	0.29758294		850.42	0.02900284		1380.42	-0.00130836		1910.41	-0.00219819
320.63	0.29875636		850.62	0.029061		1380.62	-0.00244549		1910.61	-0.00153708
320.83	0.29879951		850.82	0.02899284		1380.82	-0.00403757		1910.81	-0.00171637
321.03	0.29910087		851.02	0.02876655		1381.02	-0.00348383		1911.01	-0.00103963
321.23	0.29985355		851.22	0.02914888		1381.22	-0.00340585		1911.21	-0.00105752
321.43	0.30036226		851.42	0.02929538		1381.42	-0.00330977		1911.41	-0.00126872
321.63	0.30040386		851.62	0.02897933		1381.62	-0.00379327		1911.61	-0.00115161
321.83	0.30087561		851.82	0.02881974		1381.82	-0.00387137		1911.81	-0.0013204
322.03	0.3004351		852.02	0.02932191		1382.02	-0.00346214		1912.01	-0.00080249
322.23	0.30099046		852.22	0.02803571		1382.22	-0.00358607		1912.21	-0.00120166
322.43	0.30080608		852.42	0.02762795		1382.42	-0.00415101		1912.41	-0.00153882
322.63	0.30153052		852.62	0.02641269		1382.62	-0.00297129		1912.61	-0.00088775
322.83	0.30033028		852.82	0.0263103		1382.82	-0.00309271		1912.81	-0.00101061
323.03	0.30121349		853.02	0.02671103		1383.02	-0.00357137		1913.01	-0.00116732
323.23	0.30105422		853.22	0.02724789		1383.22	-0.00515166		1913.21	-0.00070889
323.43	0.30092657		853.42	0.02753013		1383.42	-0.00446243		1913.41	-0.00064983
323.63	0.30128178		853.62	0.02811626		1383.62	-0.00474775		1913.61	-0.00075242
323.83	0.30181381		853.82	0.02792748		1383.82	-0.00357885		1913.81	-0.00079822
324.03	0.30276526		854.02	0.0280446		1384.02	-0.00356797		1914.01	0.00032619
324.23	0.30358395		854.22	0.02779425		1384.22	-0.00245473		1914.21	0.00080045
324.43	0.30485963		854.42	0.02902144		1384.42	-0.00185938		1914.41	0.00080184
324.63	0.30590032		854.62	0.02868427		1384.62	-0.00324031		1914.61	0.00091352
324.83	0.3058312		854.82	0.02872664		1384.82	-0.00319219		1914.81	0.00024022
325.03	0.30625507		855.02	0.02942517		1385.02	-0.0023669		1915.01	0.000314
325.23	0.30668412		855.22	0.02989248		1385.22	-0.00353209		1915.21	0.00001161
325.43	0.30637063		855.42	0.03057532		1385.42	-0.00428082		1915.41	0.00002555
325.63	0.30655187		855.62	0.02968547		1385.62	-0.00497239		1915.61	0.00012449
325.83	0.30606248		855.82	0.02972048		1385.82	-0.00495803		1915.81	0.00044184
326.03	0.30607748		856.02	0.03036209		1386.02	-0.00486132		1916.01	0.00060963
326.23	0.30580159		856.22	0.02954502		1386.22	-0.00490364		1916.21	0.00015698
326.43	0.30451603		856.42	0.0288402		1386.42	-0.00567354		1916.41	-0.00105429
326.63	0.30512407		856.62	0.02864504		1386.62	-0.00455857		1916.61	-0.0005052
326.83	0.3044062		856.82	0.02834054		1386.82	-0.00444901		1916.81	-0.00217429
327.03	0.30428515		857.02	0.02870751		1387.02	-0.00399645		1917.01	-0.00300587
327.23	0.30314222		857.22	0.02928081		1387.22	-0.00419377		1917.21	-0.00336075
327.43	0.30244226		857.42	0.02966792		1387.42	-0.0029304		1917.41	-0.00385305
327.63	0.30239624		857.62	0.02939806		1387.62	-0.00252286		1917.61	-0.00418917
327.83	0.30294177		857.82	0.02934429		1387.82	-0.0016711		1917.81	-0.00422376
328.03	0.30379466		858.02	0.02927061		1388.02	-0.00095973		1918.01	-0.0043343
328.23	0.30470581		858.22	0.03009076		1388.22	-0.00011904		1918.21	-0.00381351
328.43	0.30571457		858.42	0.03033267		1388.42	-0.00013883		1918.41	-0.00308723
328.63	0.30589076		858.62	0.02996491		1388.62	-0.0011509		1918.61	-0.00271982
328.83	0.30646762		858.82	0.02967448		1388.82	-0.00124286		1918.81	-0.00149625
329.03	0.30740353		859.02	0.03045877		1389.02	-0.00100562		1919.01	0.00009262
329.23	0.30902987		859.22	0.03121364		1389.22	-0.00186843		1919.21	0.00079665
329.43	0.31040428		859.42	0.03210252		1389.42	-0.00187205		1919.41	0.00141028
329.63	0.3114986		859.62	0.03072439		1389.62	-0.00206485		1919.61	0.00263261
329.83	0.31130616		859.82	0.03100035		1389.82	-0.00228408		1919.81	0.00312274
330.03	0.3118023		860.02	0.03169903		1390.02	-0.00206244		1920.01	0.00228366
330.23	0.3119181		860.22	0.03078377		1390.22	-0.00256212		1920.21	0.00112507
330.43	0.31258166		860.42	0.03037215		1390.42	-0.00306498		1920.41	0.000982
330.63	0.31327698		860.62	0.03130878		1390.62	-0.00225923		1920.61	0.00086671
330.83	0.31319945		860.82	0.0309494		1390.82	-0.00170306		1920.81	0.00006171
331.03	0.31216436		861.02	0.03128759		1391.02	-0.00143857		1921.01	0.00005937
331.23	0.31255066		861.22	0.03091633		1391.22	-0.00235484		1921.21	-0.00045117
331.43	0.31253667		861.42	0.0313602		1391.42	-0.00284001		1921.41	-0.00110732
331.63	0.31291381		861.62	0.02995116		1391.62	-0.00340322		1921.61	-0.00147197
331.83	0.31306012		861.82	0.02953514		1391.82	-0.00393647		1921.81	-0.00106027
332.03	0.31342625		862.02	0.0296761		1392.02	-0.00518809		1922.01	-0.00155339
332.23	0.31347491		862.22	0.03014985		1392.22	-0.00644431		1922.21	-0.00184445
332.43	0.31360274		862.42	0.02991837		1392.42	-0.00681412		1922.41	-0.0016954
332.63	0.31346432		862.62	0.02945921		1392.62	-0.00667032		1922.61	-0.00209547
332.83	0.31330909		862.82	0.02899214		1392.82	-0.0062466		1922.81	-0.00131311
333.03	0.31379606		863.02	0.0297998		1393.02	-0.00536801		1923.01	-0.00242746
333.23	0.31432729		863.22	0.02969035		1393.22	-0.00528952		1923.21	-0.0024449
333.43	0.31436018		863.42	0.02976409		1393.42	-0.00441641		1923.41	-0.00228884
333.63	0.31299775		863.62	0.02894024		1393.62	-0.00469859		1923.61	-0.00214709
333.83	0.3132379		863.82	0.03014077		1393.82	-0.00441862		1923.81	-0.00205763
334.03	0.31288616		864.02	0.03174042		1394.02	-0.00363678		1924.01	-0.00213467
334.23	0.31240758		864.22	0.03210837		1394.22	-0.00326443		1924.21	-0.00130252
334.43	0.31201392		864.42	0.03380902		1394.42	-0.00278838		1924.41	-0.0002652
334.63	0.31225194		864.62	0.03459115		1394.62	-0.00200878		1924.61	-0.00092588
334.83	0.31199123		864.82	0.03444717		1394.82	-0.00106506		1924.81	-0.00031927
335.03	0.31293288		865.02	0.03453926		1395.02	-0.00140751		1925.01	-0.00008544
335.23	0.31406877		865.22	0.03418143		1395.22	-0.00165608		1925.21	0.00043751
335.43	0.31438874		865.42	0.03462179		1395.42	-0.00284501		1925.41	0.00127207
335.63	0.31484065		865.62	0.03361299		1395.62	-0.00391591		1925.61	0.00173757
335.83	0.31521065		865.82	0.0339885		1395.82	-0.00530311		1925.81	0.00203633
336.03	0.31588408		866.02	0.0339371		1396.02	-0.00650715		1926.01	0.001548
336.23	0.31640584		866.22	0.03356338		1396.22	-0.0067259		1926.21	0.00156757
336.43	0.31727736		866.42	0.03237746		1396.42	-0.0069643		1926.41	0.00218788
336.63	0.31752108		866.62	0.031054		1396.62	-0.00674571		1926.61	0.00189824
336.83	0.3177976		866.82	0.03012883		1396.82	-0.00682388		1926.81	0.00179418
337.03	0.3179645		867.02	0.02932751		1397.02	-0.00682465		1927.01	0.00103751
337.23	0.31796821		867.22	0.02909361		1397.22	-0.00636665		1927.21	0.00160909
337.43	0.31806683		867.42	0.02901656		1397.42	-0.00605285		1927.41	0.00127198
337.63	0.3174365		867.62	0.02815476		1397.62	-0.0065599		1927.61	0.00126447
337.83	0.31741313		867.82	0.02935574		1397.82	-0.00655979		1927.81	0.00028188
338.03	0.31641307		868.02	0.029799		1398.02	-0.00675926		1928.01	-0.0002119
338.23	0.31652279		868.22	0.0295411		1398.22	-0.00643394		1928.21	-0.00053531
338.43	0.31706185		868.42	0.03021119		1398.42	-0.00603703		1928.41	-0.00018416
338.63	0.31790568		868.62	0.03024558		1398.62	-0.00567902		1928.61	-0.00104887
338.83	0.31638866		868.82	0.02958828		1398.82	-0.00431787		1928.81	-0.0009555
339.03	0.31708292		869.02	0.03109179		1399.02	-0.00507561		1929.01	-0.00103189
339.23	0.31673007		869.22	0.03176518		1399.22	-0.00405117		1929.21	0.00000303
339.43	0.31716915		869.42	0.03223324		1399.42	-0.00516077		1929.41	0.00043659
339.63	0.31779116		869.62	0.03275563		1399.62	-0.00513336		1929.61	-0.00001213
339.83	0.31716682		869.82	0.03339787		1399.82	-0.0050595		1929.81	0.00050871
340.03	0.31713767		870.02	0.03388274		1400.02	-0.00437749		1930.01	0.00049276
340.23	0.31828094		870.22	0.03342467		1400.22	-0.00445975		1930.21	0.00189582
340.43	0.31844496		870.42	0.03354214		1400.42	-0.00510008		1930.41	0.00340317
340.63	0.31878471		870.62	0.03326981		1400.62	-0.00480573		1930.61	0.00370321
340.83	0.31990414		870.82	0.03365866		1400.82	-0.00489959		1930.81	0.00408656
341.03	0.32033685		871.02	0.0340784		1401.02	-0.00479006		1931.01	0.00413965
341.23	0.31973241		871.22	0.03402195		1401.22	-0.00406921		1931.21	0.00350891
341.43	0.3201792		871.42	0.03309235		1401.42	-0.00381771		1931.41	0.00312488
341.63	0.32030179		871.62	0.03299343		1401.62	-0.00350246		1931.61	0.00271479
341.83	0.32105706		871.82	0.03293606		1401.82	-0.00347312		1931.81	0.00179858
342.03	0.32179749		872.02	0.03211889		1402.02	-0.00262256		1932.01	0.00169684
342.23	0.32212397		872.22	0.03163532		1402.22	-0.00148259		1932.21	0.00086729
342.43	0.32209379		872.42	0.03165673		1402.42	-0.00091359		1932.41	0.00068087
342.63	0.32188713		872.62	0.03147891		1402.62	-0.00094717		1932.61	-0.00083331
342.83	0.32026681		872.82	0.0314939		1402.82	-0.00049507		1932.81	-0.00187705
343.03	0.32144345		873.02	0.03342308		1403.02	-0.00109795		1933.01	-0.00229266
343.23	0.32196848		873.22	0.03294075		1403.22	-0.00130294		1933.21	-0.00214875
343.43	0.32196176		873.42	0.0328768		1403.42	-0.00178097		1933.41	-0.00309698
343.63	0.32240166		873.62	0.03390538		1403.62	-0.00167351		1933.61	-0.00348801
343.83	0.32199985		873.82	0.03457462		1403.82	-0.00215883		1933.81	-0.00275517
344.03	0.32243322		874.02	0.03526633		1404.02	-0.00268913		1934.01	-0.00257881
344.23	0.32369348		874.22	0.03553976		1404.22	-0.00391896		1934.21	-0.00167279
344.43	0.32399886		874.42	0.03573393		1404.42	-0.00449855		1934.41	-0.00102163
344.63	0.32459719		874.62	0.03545981		1404.62	-0.00482447		1934.61	-0.00115541
344.83	0.32517688		874.82	0.03599463		1404.82	-0.00456675		1934.81	-0.00063299
345.03	0.32507328		875.02	0.03650691		1405.02	-0.00519859		1935.01	-0.00058374
345.23	0.32503992		875.22	0.03607509		1405.22	-0.00446825		1935.21	-0.0008456
345.43	0.32571241		875.42	0.03538803		1405.42	-0.00386662		1935.41	-0.00010204
345.63	0.32623145		875.62	0.03604359		1405.62	-0.00435114		1935.61	0.00021368
345.83	0.32664578		875.82	0.03564973		1405.82	-0.0045347		1935.81	0.00111974
346.03	0.32628579		876.02	0.03611805		1406.02	-0.00421016		1936.01	0.00050471
346.23	0.32623831		876.22	0.0359932		1406.22	-0.00356956		1936.21	-0.00007205
346.43	0.32631994		876.42	0.03631516		1406.42	-0.00375489		1936.41	0.00050146
346.63	0.32590383		876.62	0.03627341		1406.62	-0.00424797		1936.61	0.00007623
346.83	0.32647575		876.82	0.03687639		1406.82	-0.00465399		1936.81	-0.00025712
347.03	0.32790379		877.02	0.03724822		1407.02	-0.00459295		1937.01	-0.00066212
347.23	0.3288953		877.22	0.03685977		1407.22	-0.00572338		1937.21	-0.00108208
347.43	0.32912835		877.42	0.03663343		1407.42	-0.0057992		1937.41	-0.00118251
347.63	0.32953705		877.62	0.03686914		1407.62	-0.00518664		1937.61	-0.00069944
347.83	0.32922926		877.82	0.03690609		1407.82	-0.00530905		1937.81	-0.00084017
348.03	0.32906741		878.02	0.03722426		1408.02	-0.00544796		1938.01	-0.00117296
348.23	0.32944348		878.22	0.0363924		1408.22	-0.00423125		1938.21	-0.00140808
348.43	0.32952103		878.42	0.03658768		1408.42	-0.00347034		1938.41	-0.00106547
348.63	0.32936809		878.62	0.03643041		1408.62	-0.0031121		1938.61	-0.00070328
348.83	0.32980757		878.82	0.03651552		1408.82	-0.00233248		1938.81	-0.00090375
349.03	0.33009096		879.02	0.03698182		1409.02	-0.00231458		1939.01	-0.00042047
349.23	0.33026778		879.22	0.03663482		1409.22	-0.00049718		1939.21	-0.00079737
349.43	0.33072545		879.42	0.03655079		1409.42	0.00033406		1939.41	-0.00032476
349.63	0.32989447		879.62	0.03727393		1409.62	-0.00121421		1939.61	-0.00012132
349.83	0.33018709		879.82	0.03700242		1409.82	-0.00080353		1939.81	0.0006947
350.03	0.32988971		880.02	0.03759084		1410.02	-0.00047114		1940.01	0.00028384
350.23	0.33074634		880.22	0.03745421		1410.22	-0.00079407		1940.21	0.00045691
350.43	0.33156155		880.42	0.03741156		1410.42	-0.00155997		1940.41	0.00123408
350.63	0.3319376		880.62	0.0365764		1410.62	-0.00192976		1940.61	0.00122539
350.83	0.33291475		880.82	0.03606742		1410.82	-0.00281054		1940.81	0.00114761
351.03	0.33346124		881.02	0.03559958		1411.02	-0.00352598		1941.01	0.00092047
351.23	0.33418144		881.22	0.03542906		1411.22	-0.00412426		1941.21	0.00130547
351.43	0.3342379		881.42	0.03475968		1411.42	-0.00398821		1941.41	0.00120817
351.63	0.3338061		881.62	0.0350028		1411.62	-0.00379393		1941.61	0.00164997
351.83	0.33418635		881.82	0.0349138		1411.82	-0.00455738		1941.81	0.00174912
352.03	0.33370242		882.02	0.03524286		1412.02	-0.00463559		1942.01	0.001831
352.23	0.3331058		882.22	0.03504624		1412.22	-0.00407756		1942.21	0.00215903
352.43	0.33261877		882.42	0.03616797		1412.42	-0.00431116		1942.41	0.00281835
352.63	0.33171589		882.62	0.03564139		1412.62	-0.0042573		1942.61	0.00289764
352.83	0.33157819		882.82	0.03579753		1412.82	-0.00377491		1942.81	0.00263484
353.03	0.33119999		883.02	0.0359759		1413.02	-0.00341365		1943.01	0.00277732
353.23	0.33045737		883.22	0.03562273		1413.22	-0.00247943		1943.21	0.00234907
353.43	0.33059878		883.42	0.03606604		1413.42	-0.00259621		1943.41	0.00268845
353.63	0.32997787		883.62	0.03671301		1413.62	-0.00385899		1943.61	0.00295487
353.83	0.33155351		883.82	0.03711094		1413.82	-0.0038415		1943.81	0.00296367
354.03	0.33224537		884.02	0.03719982		1414.02	-0.00358475		1944.01	0.00278243
354.23	0.33359712		884.22	0.03610538		1414.22	-0.00482022		1944.21	0.00256967
354.43	0.33420788		884.42	0.03512058		1414.42	-0.00490276		1944.41	0.00300488
354.63	0.33477691		884.62	0.0341671		1414.62	-0.00587005		1944.61	0.00289974
354.83	0.33563479		884.82	0.03431476		1414.82	-0.00632566		1944.81	0.00199669
355.03	0.33692402		885.02	0.03447261		1415.02	-0.00569017		1945.01	0.00213397
355.23	0.33743394		885.22	0.0348837		1415.22	-0.0050013		1945.21	0.00219576
355.43	0.33787217		885.42	0.03586289		1415.42	-0.00463753		1945.41	0.00163517
355.63	0.33827784		885.62	0.03548319		1415.62	-0.00502284		1945.61	0.00228819
355.83	0.33871099		885.82	0.03558278		1415.82	-0.00480351		1945.81	0.00197746
356.03	0.33763806		886.02	0.03685456		1416.02	-0.00404644		1946.01	0.00168004
356.23	0.33748956		886.22	0.03724302		1416.22	-0.0031404		1946.21	0.0025677
356.43	0.33770017		886.42	0.03799484		1416.42	-0.00282204		1946.41	0.00254468
356.63	0.33760444		886.62	0.03819526		1416.62	-0.00284764		1946.61	0.0023846
356.83	0.3378711		886.82	0.03841119		1416.82	-0.00260239		1946.81	0.00279901
357.03	0.33767268		887.02	0.0381447		1417.02	-0.00227867		1947.01	0.00252024
357.23	0.33777945		887.22	0.03861758		1417.22	-0.00130305		1947.21	0.00272927
357.43	0.33857007		887.42	0.03891433		1417.42	-0.00160774		1947.41	0.00241983
357.63	0.3390597		887.62	0.03868119		1417.62	-0.00184416		1947.61	0.0028486
357.83	0.33922281		887.82	0.03833236		1417.82	-0.00223183		1947.81	0.00239223
358.03	0.33958082		888.02	0.03717299		1418.02	-0.00256195		1948.01	0.00204369
358.23	0.33921857		888.22	0.0361409		1418.22	-0.00359645		1948.21	0.00156862
358.43	0.33922441		888.42	0.03603973		1418.42	-0.00395237		1948.41	0.00194036
358.63	0.33940669		888.62	0.03631531		1418.62	-0.0050328		1948.61	0.00121968
358.83	0.33956961		888.82	0.03662049		1418.82	-0.00511927		1948.81	0.00138397
359.03	0.33868317		889.02	0.0368602		1419.02	-0.00498523		1949.01	0.00250506
359.23	0.33824532		889.22	0.0376855		1419.22	-0.00446882		1949.21	0.00206121
359.43	0.33875166		889.42	0.03843912		1419.42	-0.00354632		1949.41	0.00165716
359.63	0.33885735		889.62	0.03797171		1419.62	-0.00329626		1949.61	0.00184901
359.83	0.33836381		889.82	0.03919413		1419.82	-0.00248398		1949.81	0.0015422
360.03	0.33822511		890.02	0.04003902		1420.02	-0.00164934		1950.01	0.00085996
360.23	0.33892945		890.22	0.03911385		1420.22	-0.00147888		1950.21	0.00074122
360.43	0.3387762		890.42	0.03953796		1420.42	-0.00150802		1950.41	-0.00050087
360.63	0.33833689		890.62	0.0396183		1420.62	-0.00140047		1950.61	-0.00053314
360.83	0.33834481		890.82	0.04003761		1420.82	-0.00142477		1950.81	-0.00023438
361.03	0.33893645		891.02	0.03960579		1421.02	-0.00163257		1951.01	-0.00063934
361.23	0.33851523		891.22	0.04013633		1421.22	-0.00132302		1951.21	-0.00080176
361.43	0.33849986		891.42	0.03967766		1421.42	-0.00191114		1951.41	-0.0009877
361.63	0.33845073		891.62	0.03918547		1421.62	-0.00236747		1951.61	-0.00045794
361.83	0.33882981		891.82	0.03933276		1421.82	-0.00253554		1951.81	-0.00109051
362.03	0.33895343		892.02	0.03806677		1422.02	-0.00276164		1952.01	-0.00063911
362.23	0.33928484		892.22	0.03807336		1422.22	-0.0038728		1952.21	-0.00060081
362.43	0.33949374		892.42	0.03893281		1422.42	-0.00415067		1952.41	0.00035032
362.63	0.34036035		892.62	0.03970985		1422.62	-0.0050158		1952.61	0.00075498
362.83	0.34152297		892.82	0.03933571		1422.82	-0.00520241		1952.81	0.00178025
363.03	0.34144998		893.02	0.03935874		1423.02	-0.00474202		1953.01	0.00252062
363.23	0.34159979		893.22	0.03963193		1423.22	-0.0042338		1953.21	0.00273203
363.43	0.34200116		893.42	0.04028891		1423.42	-0.00349656		1953.41	0.00413647
363.63	0.3416537		893.62	0.0404466		1423.62	-0.00277556		1953.61	0.00428266
363.83	0.34153518		893.82	0.04109761		1423.82	-0.00208735		1953.81	0.00358657
364.03	0.342023		894.02	0.04105917		1424.02	-0.00139529		1954.01	0.00233705
364.23	0.34227183		894.22	0.04007352		1424.22	-0.00021234		1954.21	0.00185071
364.43	0.34244804		894.42	0.04048752		1424.42	0.00082428		1954.41	0.00132016
364.63	0.34315165		894.62	0.04145363		1424.62	0.00141829		1954.61	0.00121438
364.83	0.3432074		894.82	0.04233956		1424.82	0.00158693		1954.81	0.00131518
365.03	0.34385923		895.02	0.04212715		1425.02	0.00145534		1955.01	0.00094587
365.23	0.34320794		895.22	0.04201143		1425.22	0.0014499		1955.21	0.00085345
365.43	0.34434031		895.42	0.0414595		1425.42	0.00148903		1955.41	0.00082919
365.63	0.34439447		895.62	0.04093752		1425.62	0.00068906		1955.61	0.00123739
365.83	0.34461662		895.82	0.04031669		1425.82	0.00115986		1955.81	0.00023972
366.03	0.34497008		896.02	0.03961124		1426.02	0.00017474		1956.01	0.00064275
366.23	0.34533709		896.22	0.04023632		1426.22	-0.00064749		1956.21	0.00018595
366.43	0.34486947		896.42	0.04023729		1426.42	-0.00048958		1956.41	0.00077191
366.63	0.34575478		896.62	0.03943156		1426.62	-0.00140411		1956.61	0.00125295
366.83	0.34558227		896.82	0.03899132		1426.82	-0.00168569		1956.81	0.00197512
367.03	0.34541249		897.02	0.03911464		1427.02	-0.0021987		1957.01	0.00331162
367.23	0.34497076		897.22	0.03994662		1427.22	-0.00280906		1957.21	0.00378425
367.43	0.3449949		897.42	0.04088775		1427.42	-0.00217512		1957.41	0.00451184
367.63	0.34382291		897.62	0.04064558		1427.62	-0.00262392		1957.61	0.00377857
367.83	0.34405294		897.82	0.04144106		1427.82	-0.00261555		1957.81	0.00361684
368.03	0.34507619		898.02	0.04100001		1428.02	-0.00232311		1958.01	0.00381468
368.23	0.34505286		898.22	0.04194506		1428.22	-0.00154229		1958.21	0.00372346
368.43	0.34632676		898.42	0.04265031		1428.42	-0.00164984		1958.41	0.00313854
368.63	0.34683487		898.62	0.04357143		1428.62	-0.00095581		1958.61	0.00348648
368.83	0.34645967		898.82	0.04406262		1428.82	-0.00148886		1958.81	0.00379612
369.03	0.34769759		899.02	0.04393923		1429.02	-0.00131378		1959.01	0.0035253
369.23	0.34708473		899.22	0.04406892		1429.22	-0.00143508		1959.21	0.00324656
369.43	0.34749194		899.42	0.04422286		1429.42	-0.00129107		1959.41	0.00215049
369.63	0.346991		899.62	0.04408168		1429.62	-0.0014566		1959.61	0.0009202
369.83	0.34636897		899.82	0.04364		1429.82	-0.00163446		1959.81	-0.00058445
370.03	0.34643872		900.02	0.04390926		1430.02	-0.00203556		1960.01	-0.00034782
370.23	0.34596663		900.22	0.04339767		1430.22	-0.00173744		1960.21	-0.00068551
370.43	0.34454301		900.42	0.0431167		1430.42	-0.00209058		1960.41	-0.0004583
370.63	0.34451918		900.62	0.04315984		1430.62	-0.00195046		1960.61	-0.0004245
370.83	0.34495717		900.82	0.04382948		1430.82	-0.00218991		1960.81	0.00019415
371.03	0.34554898		901.02	0.04432143		1431.02	-0.00268073		1961.01	0.00017186
371.23	0.34508099		901.22	0.04438613		1431.22	-0.00263711		1961.21	0.00023927
371.43	0.3446285		901.42	0.04398512		1431.42	-0.00273746		1961.41	0.00122089
371.63	0.3453065		901.62	0.04318346		1431.62	-0.004109		1961.61	0.00099616
371.83	0.34636232		901.82	0.04343892		1431.82	-0.00392923		1961.81	0.00184824
372.03	0.34712127		902.02	0.04355192		1432.02	-0.0039493		1962.01	0.00294964
372.23	0.34737667		902.22	0.04369287		1432.22	-0.00392479		1962.21	0.00269351
372.43	0.34869571		902.42	0.04316952		1432.42	-0.00364915		1962.41	0.00337329
372.63	0.34907109		902.62	0.04391678		1432.62	-0.00325445		1962.61	0.00460447
372.83	0.34923946		902.82	0.04388058		1432.82	-0.00334621		1962.81	0.00412616
373.03	0.34956795		903.02	0.04381844		1433.02	-0.0033903		1963.01	0.00439781
373.23	0.34898268		903.22	0.04418305		1433.22	-0.00358103		1963.21	0.00405399
373.43	0.34963199		903.42	0.04353027		1433.42	-0.00419475		1963.41	0.00324259
373.63	0.3490029		903.62	0.04377553		1433.62	-0.00368843		1963.61	0.00229491
373.83	0.34932368		903.82	0.04343313		1433.82	-0.00368882		1963.81	0.00287944
374.03	0.34958991		904.02	0.04371534		1434.02	-0.00338975		1964.01	0.00218382
374.23	0.3499988		904.22	0.04325096		1434.22	-0.00336133		1964.21	0.00074201
374.43	0.34892194		904.42	0.04443627		1434.42	-0.00336955		1964.41	0.0004048
374.63	0.34944065		904.62	0.04510261		1434.62	-0.00294797		1964.61	-0.00065603
374.83	0.35006375		904.82	0.04602359		1434.82	-0.00226222		1964.81	-0.00103186
375.03	0.35044081		905.02	0.04619852		1435.02	-0.00190195		1965.01	-0.00146944
375.23	0.34998413		905.22	0.04661751		1435.22	-0.00160322		1965.21	-0.00078995
375.43	0.35013396		905.42	0.04652405		1435.42	-0.00167547		1965.41	-0.00044399
375.63	0.35041228		905.62	0.04692097		1435.62	-0.00150045		1965.61	-0.00152516
375.83	0.35002273		905.82	0.04664587		1435.82	-0.00030245		1965.81	-0.0010115
376.03	0.35002776		906.02	0.04694224		1436.02	-0.00031032		1966.01	-0.00092499
376.23	0.35023866		906.22	0.04610306		1436.22	-0.00039817		1966.21	-0.00071157
376.43	0.35062745		906.42	0.04539382		1436.42	-0.00000238		1966.41	0.00041125
376.63	0.35123253		906.62	0.04539542		1436.62	-0.00076792		1966.61	0.00190974
376.83	0.35136243		906.82	0.04404687		1436.82	-0.00065599		1966.81	0.00231087
377.03	0.35203899		907.02	0.04296201		1437.02	-0.00127553		1967.01	0.00314944
377.23	0.35258056		907.22	0.04223885		1437.22	-0.00107136		1967.21	0.00269063
377.43	0.35301298		907.42	0.04107469		1437.42	-0.00186845		1967.41	0.00299067
377.63	0.35375094		907.62	0.0411369		1437.62	-0.00154411		1967.61	0.00239756
377.83	0.35466054		907.82	0.04059435		1437.82	-0.00243805		1967.81	0.00267987
378.03	0.35436137		908.02	0.04091138		1438.02	-0.0034721		1968.01	0.00163319
378.23	0.35474379		908.22	0.04125834		1438.22	-0.00416207		1968.21	0.00131789
378.43	0.35409302		908.42	0.04252033		1438.42	-0.00459607		1968.41	0.00139162
378.63	0.35406452		908.62	0.04337153		1438.62	-0.00493782		1968.61	0.00077021
378.83	0.35392497		908.82	0.04452993		1438.82	-0.00504387		1968.81	0.00074633
379.03	0.3533697		909.02	0.04548916		1439.02	-0.00584678		1969.01	0.00081699
379.23	0.3522059		909.22	0.04716485		1439.22	-0.0062771		1969.21	0.00093417
379.43	0.35154757		909.42	0.04789311		1439.42	-0.0065249		1969.41	0.0002729
379.63	0.35086757		909.62	0.04901143		1439.62	-0.00649466		1969.61	-0.00064273
379.83	0.35056093		909.82	0.04931621		1439.82	-0.00673582		1969.81	-0.00063369
380.02	0.35056093		910.02	0.04931621		1440.02	-0.00673582		1970.01	-0.00063369
380.22	0.35264412		910.22	0.05079781		1440.22	-0.00603147		1970.21	-0.00007663
380.42	0.35463866		910.42	0.0520024		1440.42	-0.00573855		1970.41	0.00057464
380.62	0.35559217		910.62	0.05350904		1440.62	-0.00512959		1970.61	0.00072113
380.82	0.35647324		910.82	0.05522553		1440.82	-0.0044742		1970.81	0.00218753
381.02	0.35751604		911.02	0.0565555		1441.02	-0.00329077		1971.01	0.00240175
381.22	0.35863948		911.22	0.05783625		1441.22	-0.00289317		1971.21	0.00316076
381.42	0.36009118		911.42	0.05808997		1441.42	-0.0025202		1971.41	0.00346669
381.62	0.36023529		911.62	0.05850949		1441.62	-0.00153809		1971.61	0.0028972
381.82	0.35960929		911.82	0.05865398		1441.82	-0.00149169		1971.81	0.00357443
382.02	0.3588903		912.02	0.0581149		1442.02	-0.00193956		1972.01	0.00357133
382.22	0.3571664		912.22	0.05734453		1442.22	-0.00141427		1972.21	0.00406402
382.42	0.35655434		912.42	0.05669809		1442.42	-0.00126392		1972.41	0.00405145
382.62	0.35701599		912.62	0.05679975		1442.62	-0.00191975		1972.61	0.00353294
382.82	0.35799668		912.82	0.05585067		1442.82	-0.00162579		1972.81	0.00376421
383.02	0.35926446		913.02	0.05510576		1443.02	-0.00141721		1973.01	0.00439236
383.22	0.36025871		913.22	0.05332868		1443.22	-0.0023686		1973.21	0.00472763
383.42	0.36023852		913.42	0.05314277		1443.42	-0.00302543		1973.41	0.00488209
383.62	0.36121986		913.62	0.05336318		1443.62	-0.00276808		1973.61	0.00459573
383.82	0.36176074		913.82	0.05366016		1443.82	-0.00391922		1973.81	0.00453731
384.02	0.36101009		914.02	0.05381568		1444.02	-0.00452593		1974.01	0.00450822
384.22	0.36139193		914.22	0.05487364		1444.22	-0.00398254		1974.21	0.00435368
384.42	0.36081088		914.42	0.05524512		1444.42	-0.00376771		1974.41	0.00432305
384.62	0.35940011		914.62	0.05657429		1444.62	-0.00327719		1974.61	0.00338278
384.82	0.35999177		914.82	0.0570259		1444.82	-0.00355213		1974.81	0.00424868
385.02	0.36024092		915.02	0.05788959		1445.02	-0.00355285		1975.01	0.00371778
385.22	0.36060243		915.22	0.05811322		1445.22	-0.00441079		1975.21	0.00447824
385.42	0.36088108		915.42	0.05794779		1445.42	-0.00430464		1975.41	0.00342501
385.62	0.35958692		915.62	0.05910704		1445.62	-0.00424056		1975.61	0.00259088
385.82	0.35932066		915.82	0.05969199		1445.82	-0.0049126		1975.81	0.00312729
386.02	0.35908918		916.02	0.05949976		1446.02	-0.00514428		1976.01	0.00347538
386.22	0.35825181		916.22	0.05972699		1446.22	-0.00415791		1976.21	0.00441983
386.42	0.35681767		916.42	0.05948579		1446.42	-0.0044702		1976.41	0.00435789
386.62	0.35688655		916.62	0.05910961		1446.62	-0.00505764		1976.61	0.00428225
386.82	0.35618932		916.82	0.058081		1446.82	-0.00356599		1976.81	0.00422091
387.02	0.35530468		917.02	0.05736697		1447.02	-0.00359824		1977.01	0.00441324
387.22	0.3545303		917.22	0.0574426		1447.22	-0.00439098		1977.21	0.00459574
387.42	0.35364001		917.42	0.05803761		1447.42	-0.00446278		1977.41	0.00414919
387.62	0.35371949		917.62	0.05870716		1447.62	-0.00412077		1977.61	0.00300697
387.82	0.35393335		917.82	0.05814117		1447.82	-0.00440748		1977.81	0.00200072
388.02	0.35373672		918.02	0.05909708		1448.02	-0.00346424		1978.01	0.00055611
388.22	0.35398227		918.22	0.06004278		1448.22	-0.00279103		1978.21	0.00029926
388.42	0.35413716		918.42	0.06043796		1448.42	-0.00215167		1978.41	-0.00021866
388.62	0.3551793		918.62	0.06085333		1448.62	-0.00197296		1978.61	-0.00086204
388.82	0.35658637		918.82	0.06027259		1448.82	-0.00288601		1978.81	-0.00032094
389.02	0.35659083		919.02	0.06063957		1449.02	-0.00269813		1979.01	-0.00003684
389.22	0.35673491		919.22	0.05989393		1449.22	-0.00210733		1979.21	-0.00094897
389.42	0.35746864		919.42	0.0604135		1449.42	-0.00185109		1979.41	-0.00176264
389.62	0.35720844		919.62	0.0606948		1449.62	-0.00155409		1979.61	-0.00131487
389.82	0.35813339		919.82	0.05996786		1449.82	-0.00079021		1979.81	-0.00104849
390.02	0.35736743		920.02	0.05845915		1450.02	-0.00125443		1980.01	0.00066673
390.22	0.35671207		920.22	0.05724293		1450.22	-0.00250152		1980.21	0.00180778
390.42	0.35641907		920.42	0.05571351		1450.42	-0.00290638		1980.41	0.00264341
390.62	0.35657846		920.62	0.05521461		1450.62	-0.00277675		1980.61	0.00252873
390.82	0.35641938		920.82	0.05414041		1450.82	-0.00246015		1980.81	0.00338802
391.02	0.35683253		921.02	0.05304159		1451.02	-0.00360383		1981.01	0.00376708
391.22	0.35680689		921.22	0.05299953		1451.22	-0.00413433		1981.21	0.00392377
391.42	0.35800409		921.42	0.05343525		1451.42	-0.00439194		1981.41	0.00372218
391.62	0.35863643		921.62	0.05369367		1451.62	-0.00408469		1981.61	0.00293999
391.82	0.36009649		921.82	0.05344027		1451.82	-0.00408121		1981.81	0.0016908
392.02	0.36040763		922.02	0.0552658		1452.02	-0.00413741		1982.01	0.00138618
392.22	0.36027264		922.22	0.05654344		1452.22	-0.00409676		1982.21	0.00190107
392.42	0.3606503		922.42	0.05728641		1452.42	-0.00387625		1982.41	0.00137519
392.62	0.36040699		922.62	0.05721572		1452.62	-0.00365857		1982.61	0.0010962
392.82	0.35962717		922.82	0.056969		1452.82	-0.00403595		1982.81	0.00025789
393.02	0.35931857		923.02	0.05703902		1453.02	-0.00301931		1983.01	0.00016629
393.22	0.35888243		923.22	0.0575957		1453.22	-0.00278741		1983.21	-0.00025664
393.42	0.3588927		923.42	0.05841303		1453.42	-0.00356193		1983.41	0.0002168
393.62	0.35741637		923.62	0.05845805		1453.62	-0.00354924		1983.61	0.00048064
393.82	0.35683685		923.82	0.05813663		1453.82	-0.00387887		1983.81	0.00078589
394.02	0.35666414		924.02	0.05775586		1454.02	-0.00510025		1984.01	0.00195213
394.22	0.35669806		924.22	0.05698758		1454.22	-0.00610738		1984.21	0.00245326
394.42	0.35761043		924.42	0.05732762		1454.42	-0.0057073		1984.41	0.00244267
394.62	0.35758839		924.62	0.05754857		1454.62	-0.00574981		1984.61	0.0016994
394.82	0.35831588		924.82	0.0564235		1454.82	-0.00607632		1984.81	0.00211014
395.02	0.35893095		925.02	0.05593465		1455.02	-0.00617137		1985.01	0.00195325
395.22	0.35778153		925.22	0.05619945		1455.22	-0.00627337		1985.21	0.0027002
395.42	0.35835199		925.42	0.05642274		1455.42	-0.00676446		1985.41	0.002314
395.62	0.35814513		925.62	0.05603153		1455.62	-0.00615513		1985.61	0.00237829
395.82	0.35861284		925.82	0.0567531		1455.82	-0.00552792		1985.81	0.00171269
396.02	0.35814123		926.02	0.05710416		1456.02	-0.00513966		1986.01	0.00269958
396.22	0.35797676		926.22	0.05675073		1456.22	-0.00460084		1986.21	0.00316218
396.42	0.3572793		926.42	0.05575158		1456.42	-0.00383999		1986.41	0.0034399
396.62	0.35705531		926.62	0.05470247		1456.62	-0.00248509		1986.61	0.00364927
396.82	0.35719395		926.82	0.05407301		1456.82	-0.00195317		1986.81	0.00423666
397.02	0.35660884		927.02	0.05447632		1457.02	-0.00153952		1987.01	0.00649094
397.22	0.35680839		927.22	0.05489311		1457.22	-0.00255619		1987.21	0.00708052
397.42	0.35676414		927.42	0.05518334		1457.42	-0.00302771		1987.41	0.00726761
397.62	0.35574933		927.62	0.05520599		1457.62	-0.00231035		1987.61	0.00791456
397.82	0.35622506		927.82	0.05548936		1457.82	-0.00275315		1987.81	0.00817818
398.02	0.35737697		928.02	0.05520206		1458.02	-0.00268221		1988.01	0.00859404
398.22	0.35778614		928.22	0.05462718		1458.22	-0.00286954		1988.21	0.00901324
398.42	0.35843696		928.42	0.05494666		1458.42	-0.00346179		1988.41	0.00802225
398.62	0.35897675		928.62	0.0552925		1458.62	-0.00408771		1988.61	0.00722868
398.82	0.35883067		928.82	0.05553474		1458.82	-0.0047285		1988.81	0.00589538
399.02	0.35883449		929.02	0.05569643		1459.02	-0.00420139		1989.01	0.0049683
399.22	0.35821886		929.22	0.05640686		1459.22	-0.00386987		1989.21	0.00363651
399.42	0.35822433		929.42	0.05665626		1459.42	-0.00373166		1989.41	0.00181543
399.62	0.35908025		929.62	0.05641474		1459.62	-0.00282714		1989.61	0.00141318
399.82	0.36043354		929.82	0.05729018		1459.82	-0.00251005		1989.81	0.00055718
400.02	0.35984683		930.02	0.05701018		1460.02	-0.0019524		1990.01	0.0008348
400.22	0.36025796		930.22	0.05646976		1460.22	-0.00160529		1990.21	0.00051578
400.42	0.3595009		930.42	0.05674378		1460.42	-0.00097578		1990.41	0.00056508
400.62	0.35940795		930.62	0.05662046		1460.62	-0.00021211		1990.61	0.00000843
400.82	0.35860032		930.82	0.05673305		1460.82	-0.00048706		1990.81	0.00029914
401.02	0.35741966		931.02	0.056986		1461.02	-0.00140407		1991.01	0.00070927
401.22	0.35792496		931.22	0.05732983		1461.22	-0.00268145		1991.21	0.00064658
401.42	0.3570712		931.42	0.056616		1461.42	-0.00288649		1991.41	0.00140549
401.62	0.35579315		931.62	0.05655129		1461.62	-0.00308788		1991.61	0.00269281
401.82	0.35638624		931.82	0.05652987		1461.82	-0.00380049		1991.81	0.0039054
402.02	0.35644388		932.02	0.05631943		1462.02	-0.00377923		1992.01	0.00547604
402.22	0.35593405		932.22	0.05648419		1462.22	-0.00440294		1992.21	0.00688413
402.42	0.35546276		932.42	0.05710721		1462.42	-0.00522079		1992.41	0.00683536
402.62	0.35614875		932.62	0.0583651		1462.62	-0.0056587		1992.61	0.00745461
402.82	0.35626074		932.82	0.05856257		1462.82	-0.00505809		1992.81	0.00635496
403.02	0.35753409		933.02	0.05821359		1463.02	-0.00423054		1993.01	0.00717633
403.22	0.35780111		933.22	0.05856585		1463.22	-0.00394341		1993.21	0.00726319
403.42	0.35803249		933.42	0.05890317		1463.42	-0.00370229		1993.41	0.00717659
403.62	0.35894384		933.62	0.05922421		1463.62	-0.00232462		1993.61	0.00653595
403.82	0.35946779		933.82	0.05980328		1463.82	-0.00184784		1993.81	0.00616605
404.02	0.35949189		934.02	0.05949556		1464.02	-0.00167348		1994.01	0.00528799
404.22	0.36078588		934.22	0.05987155		1464.22	-0.00209942		1994.21	0.00452631
404.42	0.35987643		934.42	0.06005269		1464.42	-0.00261686		1994.41	0.00371621
404.62	0.36039353		934.62	0.05895597		1464.62	-0.00306084		1994.61	0.00249804
404.82	0.36039815		934.82	0.05839552		1464.82	-0.00321153		1994.81	0.00231833
405.02	0.35995391		935.02	0.0577258		1465.02	-0.00446494		1995.01	0.00211585
405.22	0.36000337		935.22	0.05728115		1465.22	-0.00455729		1995.21	0.00249699
405.42	0.35978118		935.42	0.05589048		1465.42	-0.00496529		1995.41	0.00209154
405.62	0.36023324		935.62	0.05568943		1465.62	-0.00501336		1995.61	0.00221503
405.82	0.36073227		935.82	0.05426584		1465.82	-0.00522249		1995.81	0.002588
406.02	0.35969628		936.02	0.05459461		1466.02	-0.00565411		1996.01	0.00332986
406.22	0.35900588		936.22	0.05489517		1466.22	-0.00704837		1996.21	0.00367192
406.42	0.35874507		936.42	0.05536849		1466.42	-0.00726917		1996.41	0.00320867
406.62	0.35928857		936.62	0.05521432		1466.62	-0.00820518		1996.61	0.00376914
406.82	0.35907015		936.82	0.0544813		1466.82	-0.0080192		1996.81	0.00346043
407.02	0.35893132		937.02	0.05480499		1467.02	-0.00836018		1997.01	0.00457057
407.22	0.35873142		937.22	0.05560284		1467.22	-0.00819742		1997.21	0.00424096
407.42	0.35829911		937.42	0.05638142		1467.42	-0.00732394		1997.41	0.00324551
407.62	0.35837107		937.62	0.05662705		1467.62	-0.00626144		1997.61	0.00248414
407.82	0.35841843		937.82	0.05659483		1467.82	-0.00638871		1997.81	0.00204471
408.02	0.35892884		938.02	0.05626967		1468.02	-0.00641441		1998.01	0.00203542
408.22	0.35916323		938.22	0.05676267		1468.22	-0.00706604		1998.21	0.00237459
408.42	0.35851201		938.42	0.0568195		1468.42	-0.0074863		1998.41	0.00337974
408.62	0.35896624		938.62	0.05660022		1468.62	-0.00661379		1998.61	0.00374682
408.82	0.35826443		938.82	0.05662198		1468.82	-0.00639451		1998.81	0.00422832
409.02	0.35824881		939.02	0.05597701		1469.02	-0.0080567		1999.01	0.0036535
409.22	0.3590914		939.22	0.05652224		1469.22	-0.0086023		1999.21	0.00387727
409.42	0.35938945		939.42	0.05692537		1469.42	-0.00920943		1999.41	0.00357352
409.62	0.35965167		939.62	0.05716223		1469.62	-0.00823308		1999.61	0.00397316
409.82	0.35890002		939.82	0.05751627		1469.82	-0.00825152		1999.81	0.00450762
410.02	0.3582746		940.02	0.05856636		1470.02	-0.00764497		2000.01	0.00457084
410.22	0.35793687		940.22	0.05871509		1470.22	-0.00857063		2000.21	0.0039109
410.42	0.35716905		940.42	0.05889028		1470.42	-0.00784724		2000.41	0.00362735
410.62	0.35778544		940.62	0.05881034		1470.62	-0.00832666		2000.61	0.00338351
410.82	0.35841734		940.82	0.05840495		1470.82	-0.00732832		2000.81	0.00339512
411.02	0.35852186		941.02	0.05893995		1471.02	-0.00729975		2001.01	0.00332256
411.22	0.35879565		941.22	0.05926556		1471.22	-0.00672841		2001.21	0.00201437
411.42	0.3598896		941.42	0.05865933		1471.42	-0.00496287		2001.41	0.00142678
411.62	0.36013154		941.62	0.0585547		1471.62	-0.00474281		2001.61	0.00139225
411.82	0.36056517		941.82	0.0579917		1471.82	-0.00495389		2001.81	0.00182632
412.02	0.36054859		942.02	0.05743193		1472.02	-0.00489921		2002.01	0.00195841
412.22	0.36099323		942.22	0.05763384		1472.22	-0.00597714		2002.21	0.00150104
412.42	0.36085969		942.42	0.05748672		1472.42	-0.00609252		2002.41	0.00164438
412.62	0.36148474		942.62	0.05669211		1472.62	-0.00613443		2002.61	0.00186212
412.82	0.36166538		942.82	0.05590034		1472.82	-0.00820285		2002.81	0.00191348
413.02	0.36249718		943.02	0.05485963		1473.02	-0.0096631		2003.01	0.0017096
413.22	0.3621509		943.22	0.05524329		1473.22	-0.00960709		2003.21	0.00167939
413.42	0.36155837		943.42	0.05528026		1473.42	-0.00888404		2003.41	0.00239731
413.62	0.36169566		943.62	0.05590233		1473.62	-0.00820776		2003.61	0.00269758
413.82	0.36081415		943.82	0.05623817		1473.82	-0.00817762		2003.81	0.00255246
414.02	0.36011787		944.02	0.05643545		1474.02	-0.00835583		2004.01	0.00231971
414.22	0.35947699		944.22	0.0563465		1474.22	-0.00988538		2004.21	0.00269944
414.42	0.35795543		944.42	0.05706511		1474.42	-0.00943475		2004.41	0.00253422
414.62	0.35846279		944.62	0.05726611		1474.62	-0.00974632		2004.61	0.00230061
414.82	0.35845028		944.82	0.05784686		1474.82	-0.00958385		2004.81	0.0029479
415.02	0.35703367		945.02	0.05848348		1475.02	-0.00945899		2005.01	0.00286616
415.22	0.35688682		945.22	0.05898541		1475.22	-0.00923761		2005.21	0.00254208
415.42	0.35746623		945.42	0.05904723		1475.42	-0.00823154		2005.41	0.00304812
415.62	0.35630506		945.62	0.06008136		1475.62	-0.00929923		2005.61	0.00271706
415.82	0.35606685		945.82	0.06006628		1475.82	-0.00906206		2005.81	0.00293786
416.02	0.35594044		946.02	0.05975724		1476.02	-0.00843649		2006.01	0.00206406
416.22	0.35656281		946.22	0.05902826		1476.22	-0.00739001		2006.21	0.00220235
416.42	0.35658894		946.42	0.05822227		1476.42	-0.00664807		2006.41	0.00270686
416.62	0.35768837		946.62	0.05748966		1476.62	-0.00647816		2006.61	0.00348202
416.82	0.35756653		946.82	0.0572466		1476.82	-0.00668449		2006.81	0.00332029
417.02	0.35771602		947.02	0.05629427		1477.02	-0.00650205		2007.01	0.00318839
417.22	0.35743828		947.22	0.05623907		1477.22	-0.00589004		2007.21	0.00261726
417.42	0.35785472		947.42	0.05588425		1477.42	-0.00557839		2007.41	0.00324476
417.62	0.3585801		947.62	0.05608234		1477.62	-0.00537644		2007.61	0.00276685
417.82	0.35853651		947.82	0.05541836		1477.82	-0.00610782		2007.81	0.00218911
418.02	0.35758279		948.02	0.05563612		1478.02	-0.0067075		2008.01	0.00236853
418.22	0.35739367		948.22	0.05556222		1478.22	-0.00758743		2008.21	0.00240845
418.42	0.35705251		948.42	0.05602795		1478.42	-0.00751116		2008.41	0.00211512
418.62	0.35744888		948.62	0.05593739		1478.62	-0.00799141		2008.61	0.00246922
418.82	0.35794035		948.82	0.05749304		1478.82	-0.00806141		2008.81	0.0023778
419.02	0.35705721		949.02	0.05744184		1479.02	-0.008014		2009.01	0.00310202
419.22	0.35773686		949.22	0.05818279		1479.22	-0.00811345		2009.21	0.00285364
419.42	0.35744961		949.42	0.05916209		1479.42	-0.00864785		2009.41	0.00280926
419.62	0.35700666		949.62	0.05949218		1479.62	-0.00933463		2009.61	0.00267761
419.82	0.3576732		949.82	0.05907051		1479.82	-0.00827458		2009.81	0.00375394
420.02	0.35718945		950.02	0.05860552		1480.02	-0.00801237		2010.01	0.00371861
420.22	0.35720811		950.22	0.05864142		1480.22	-0.00732432		2010.21	0.00510815
420.42	0.3574338		950.42	0.058708		1480.42	-0.00802683		2010.41	0.00615407
420.62	0.35769718		950.62	0.05882691		1480.62	-0.00842105		2010.61	0.00634486
420.82	0.35726732		950.82	0.05831125		1480.82	-0.00824567		2010.81	0.00655378
421.02	0.35701899		951.02	0.05763468		1481.02	-0.00803773		2011.01	0.00588838
421.22	0.35708419		951.22	0.05765908		1481.22	-0.00758255		2011.21	0.00584461
421.42	0.35766375		951.42	0.05743384		1481.42	-0.00748773		2011.41	0.00549859
421.62	0.3583065		951.62	0.05703851		1481.62	-0.00742191		2011.61	0.00521219
421.82	0.35767847		951.82	0.05694311		1481.82	-0.00762636		2011.81	0.00484083
422.02	0.35712527		952.02	0.05767887		1482.02	-0.00746797		2012.01	0.00446765
422.22	0.35769346		952.22	0.05741745		1482.22	-0.00745437		2012.21	0.00377104
422.42	0.35790867		952.42	0.05693983		1482.42	-0.0070673		2012.41	0.00379028
422.62	0.35804122		952.62	0.05665212		1482.62	-0.00724208		2012.61	0.00370626
422.82	0.35879196		952.82	0.05769252		1482.82	-0.00748516		2012.81	0.00310318
423.02	0.35774804		953.02	0.05719782		1483.02	-0.0074382		2013.01	0.00323637
423.22	0.35833672		953.22	0.05696782		1483.22	-0.0076462		2013.21	0.00212903
423.42	0.35711325		953.42	0.05731557		1483.42	-0.00832507		2013.41	0.00155372
423.62	0.35651392		953.62	0.05710227		1483.62	-0.00804239		2013.61	0.00153455
423.82	0.35660675		953.82	0.05657955		1483.82	-0.00792208		2013.81	0.00119388
424.02	0.35553028		954.02	0.05762426		1484.02	-0.00864563		2014.01	0.00081937
424.22	0.35513606		954.22	0.05779043		1484.22	-0.00878708		2014.21	0.00107708
424.42	0.3545488		954.42	0.05801968		1484.42	-0.00913164		2014.41	0.00046585
424.62	0.35420698		954.62	0.05828766		1484.62	-0.00926227		2014.61	0.0004922
424.82	0.35447328		954.82	0.05865605		1484.82	-0.00913172		2014.81	0.00099702
425.02	0.35467074		955.02	0.05885894		1485.02	-0.00877656		2015.01	0.00068808
425.22	0.35556513		955.22	0.05887766		1485.22	-0.00944973		2015.21	0.00168656
425.42	0.35626863		955.42	0.05902981		1485.42	-0.00891052		2015.41	0.00072973
425.62	0.35714336		955.62	0.05933001		1485.62	-0.00838121		2015.61	0.00114137
425.82	0.35780417		955.82	0.05995229		1485.82	-0.00755323		2015.81	0.00093718
426.02	0.3587219		956.02	0.05977829		1486.02	-0.00706059		2016.01	0.0006089
426.22	0.35850606		956.22	0.05899887		1486.22	-0.00665014		2016.21	0.00174864
426.42	0.35934435		956.42	0.05898731		1486.42	-0.00644429		2016.41	0.00246447
426.62	0.3600645		956.62	0.05925304		1486.62	-0.00633645		2016.61	0.00275804
426.82	0.35974586		956.82	0.05923914		1486.82	-0.00564546		2016.81	0.00278785
427.02	0.35945048		957.02	0.0595834		1487.02	-0.00493123		2017.01	0.00222445
427.22	0.35957518		957.22	0.05869731		1487.22	-0.00450248		2017.21	0.00215143
427.42	0.3586607		957.42	0.05962173		1487.42	-0.00424307		2017.41	0.00163144
427.62	0.35839017		957.62	0.0588101		1487.62	-0.00349056		2017.61	0.00190568
427.82	0.35878343		957.82	0.0584528		1487.82	-0.00394152		2017.81	0.00100811
428.02	0.35806059		958.02	0.05876179		1488.02	-0.00470108		2018.01	0.00122852
428.22	0.35694427		958.22	0.05797311		1488.22	-0.00517381		2018.21	0.00123604
428.42	0.35692285		958.42	0.05825941		1488.42	-0.00554195		2018.41	0.00184168
428.62	0.35724722		958.62	0.05785377		1488.62	-0.006348		2018.61	0.0030641
428.82	0.35755705		958.82	0.05677328		1488.82	-0.00711207		2018.81	0.00369005
429.02	0.35689168		959.02	0.0557754		1489.02	-0.00788674		2019.01	0.00416994
429.22	0.35781109		959.22	0.05554861		1489.22	-0.00991416		2019.21	0.00337708
429.42	0.35871348		959.42	0.05525938		1489.42	-0.0097672		2019.41	0.00166108
429.62	0.35970226		959.62	0.05508974		1489.62	-0.00990391		2019.61	0.00150422
429.82	0.36072719		959.82	0.05369537		1489.82	-0.00978046		2019.81	0.00045276
430.02	0.3608436		960.02	0.05396513		1490.02	-0.01047085		2020.01	0.0007694
430.22	0.36134021		960.22	0.05443827		1490.22	-0.01044702		2020.21	0.0013902
430.42	0.3625678		960.42	0.0556978		1490.42	-0.00990651		2020.41	0.00060798
430.62	0.3625768		960.62	0.05668055		1490.62	-0.00926653		2020.61	0.00099876
430.82	0.36236606		960.82	0.05760905		1490.82	-0.00918789		2020.81	0.00100209
431.02	0.36248883		961.02	0.05868301		1491.02	-0.00907643		2021.01	0.0008533
431.22	0.36123862		961.22	0.0588237		1491.22	-0.00877615		2021.21	0.00136909
431.42	0.36048042		961.42	0.05955799		1491.42	-0.00773393		2021.41	0.00093796
431.62	0.35961202		961.62	0.0586033		1491.62	-0.00759606		2021.61	0.00225951
431.82	0.35955671		961.82	0.05809975		1491.82	-0.00852688		2021.81	0.00248454
432.02	0.35839472		962.02	0.05732964		1492.02	-0.00916435		2022.01	0.00301657
432.22	0.35762462		962.22	0.05699296		1492.22	-0.00970176		2022.21	0.00307621
432.42	0.35807371		962.42	0.05711721		1492.42	-0.0099557		2022.41	0.00393832
432.62	0.35759232		962.62	0.05639477		1492.62	-0.01008552		2022.61	0.00508017
432.82	0.35672381		962.82	0.0555679		1492.82	-0.01062186		2022.81	0.00539615
433.02	0.35622169		963.02	0.0551215		1493.02	-0.01155489		2023.01	0.00531815
433.22	0.35768219		963.22	0.05463652		1493.22	-0.01303875		2023.21	0.0037577
433.42	0.35869797		963.42	0.05339279		1493.42	-0.01166136		2023.41	0.00343069
433.62	0.35962963		963.62	0.05369864		1493.62	-0.01143463		2023.61	0.00349728
433.82	0.35939276		963.82	0.05364266		1493.82	-0.01118383		2023.81	0.00349712
434.02	0.35886054		964.02	0.05482889		1494.02	-0.01121003		2024.01	0.00412895
434.22	0.3602303		964.22	0.05527674		1494.22	-0.01074078		2024.21	0.00403669
434.42	0.36060365		964.42	0.0557679		1494.42	-0.0099353		2024.41	0.0039813
434.62	0.36031273		964.62	0.05676428		1494.62	-0.0100456		2024.61	0.00414381
434.82	0.35967184		964.82	0.05771426		1494.82	-0.00936138		2024.81	0.00378863
435.02	0.35801592		965.02	0.05794961		1495.02	-0.00868899		2025.01	0.00431237
435.22	0.35710967		965.22	0.05799209		1495.22	-0.0080451		2025.21	0.00452579
435.42	0.35703106		965.42	0.05731661		1495.42	-0.00734231		2025.41	0.00442815
435.62	0.35671005		965.62	0.05676026		1495.62	-0.00778202		2025.61	0.00528485
435.82	0.35681076		965.82	0.0564334		1495.82	-0.00814353		2025.81	0.00368025
436.02	0.3566329		966.02	0.05640619		1496.02	-0.00867321		2026.01	0.00327869
436.22	0.35612425		966.22	0.05741375		1496.22	-0.00942514		2026.21	0.0031839
436.42	0.35562574		966.42	0.05780053		1496.42	-0.00920667		2026.41	0.00367303
436.62	0.35614224		966.62	0.05773177		1496.62	-0.00964681		2026.61	0.003527
436.82	0.35588662		966.82	0.05724991		1496.82	-0.01081785		2026.81	0.00350721
437.02	0.3567805		967.02	0.05688111		1497.02	-0.0112741		2027.01	0.00332682
437.22	0.35802464		967.22	0.05695221		1497.22	-0.01224017		2027.21	0.00317308
437.42	0.35875239		967.42	0.05710676		1497.42	-0.01087516		2027.41	0.00401645
437.62	0.35902808		967.62	0.05781572		1497.62	-0.01139983		2027.61	0.00460099
437.82	0.35876484		967.82	0.05791926		1497.82	-0.0105432		2027.81	0.00512696
438.02	0.35964819		968.02	0.05795568		1498.02	-0.01029697		2028.01	0.00489334
438.22	0.36109675		968.22	0.05823341		1498.22	-0.01017736		2028.21	0.00558963
438.42	0.36122151		968.42	0.0580853		1498.42	-0.00915697		2028.41	0.00577964
438.62	0.36136289		968.62	0.05867346		1498.62	-0.00824151		2028.61	0.00550886
438.82	0.36108659		968.82	0.0583021		1498.82	-0.00753138		2028.81	0.00546902
439.02	0.36096349		969.02	0.05881748		1499.02	-0.00808167		2029.01	0.00580711
439.22	0.36183046		969.22	0.05798965		1499.22	-0.00748551		2029.21	0.00512677
439.42	0.36102182		969.42	0.0577013		1499.42	-0.00789699		2029.41	0.00454432
439.62	0.36095167		969.62	0.0571018		1499.62	-0.00730825		2029.61	0.00398798
439.82	0.36039109		969.82	0.05628557		1499.82	-0.0083666		2029.81	0.00324978
440.02	0.36000893		970.02	0.05605906		1500.02	-0.00955373		2030.01	0.00318035
440.22	0.35835363		970.22	0.05651299		1500.22	-0.01036619		2030.21	0.00203905
440.42	0.35813289		970.42	0.05558609		1500.42	-0.01108439		2030.41	0.00157322
440.62	0.35883305		970.62	0.055325		1500.62	-0.01217843		2030.61	0.0016005
440.82	0.3580244		970.82	0.05459964		1500.82	-0.01208138		2030.81	0.00180293
441.02	0.35755187		971.02	0.05475476		1501.02	-0.01217971		2031.01	0.00150418
441.22	0.35740314		971.22	0.05500096		1501.22	-0.01216921		2031.21	0.00241935
441.42	0.35714685		971.42	0.05499494		1501.42	-0.01077283		2031.41	0.00291027
441.62	0.35720538		971.62	0.05519647		1501.62	-0.01007252		2031.61	0.00310047
441.82	0.35766738		971.82	0.05568503		1501.82	-0.00927381		2031.81	0.00314508
442.02	0.35711848		972.02	0.05611657		1502.02	-0.00920743		2032.01	0.00338061
442.22	0.35769169		972.22	0.05671895		1502.22	-0.00863152		2032.21	0.00408887
442.42	0.35747317		972.42	0.05765407		1502.42	-0.0084054		2032.41	0.00398193
442.62	0.35716135		972.62	0.05824149		1502.62	-0.00865911		2032.61	0.00319662
442.82	0.35721678		972.82	0.05905738		1502.82	-0.01026086		2032.81	0.00298774
443.02	0.3572036		973.02	0.05931099		1503.02	-0.01087859		2033.01	0.00348226
443.22	0.35717449		973.22	0.05901729		1503.22	-0.01031722		2033.21	0.00348595
443.42	0.35654467		973.42	0.05885829		1503.42	-0.01129676		2033.41	0.00386955
443.62	0.35710325		973.62	0.05881012		1503.62	-0.01025176		2033.61	0.00454143
443.82	0.35682192		973.82	0.05821164		1503.82	-0.0120626		2033.81	0.00505199
444.02	0.3563478		974.02	0.05817578		1504.02	-0.01209279		2034.01	0.00415606
444.22	0.35569575		974.22	0.05770547		1504.22	-0.0120672		2034.21	0.00463518
444.42	0.35676096		974.42	0.05624965		1504.42	-0.01211201		2034.41	0.00561688
444.62	0.35717308		974.62	0.05600609		1504.62	-0.01140683		2034.61	0.00617044
444.82	0.35697241		974.82	0.05517329		1504.82	-0.00976341		2034.81	0.00622559
445.02	0.35577744		975.02	0.05510568		1505.02	-0.00901097		2035.01	0.00600332
445.22	0.35523322		975.22	0.05464214		1505.22	-0.00886014		2035.21	0.00680407
445.42	0.35563521		975.42	0.05381028		1505.42	-0.00820359		2035.41	0.00691271
445.62	0.35642655		975.62	0.05415202		1505.62	-0.00757117		2035.61	0.00592241
445.82	0.35615098		975.82	0.0545719		1505.82	-0.00773113		2035.81	0.0055495
446.02	0.35592374		976.02	0.05460226		1506.02	-0.00792018		2036.01	0.00617603
446.22	0.35681943		976.22	0.05495351		1506.22	-0.0087202		2036.21	0.00517442
446.42	0.35630074		976.42	0.05513647		1506.42	-0.01020602		2036.41	0.00461315
446.62	0.35632911		976.62	0.05493975		1506.62	-0.01124482		2036.61	0.00285116
446.82	0.35615292		976.82	0.05590892		1506.82	-0.01182415		2036.81	0.00302373
447.02	0.35536061		977.02	0.05530053		1507.02	-0.01237226		2037.01	0.00308395
447.22	0.35498401		977.22	0.05530202		1507.22	-0.01182947		2037.21	0.00178125
447.42	0.35463084		977.42	0.05451836		1507.42	-0.01227065		2037.41	0.00159254
447.62	0.3547041		977.62	0.05445833		1507.62	-0.01139712		2037.61	0.0014656
447.82	0.35507868		977.82	0.05374857		1507.82	-0.01194933		2037.81	0.0009595
448.02	0.35432951		978.02	0.05256405		1508.02	-0.01148111		2038.01	0.0003141
448.22	0.35378544		978.22	0.05205544		1508.22	-0.01170167		2038.21	0.00085277
448.42	0.35386432		978.42	0.0517512		1508.42	-0.01069824		2038.41	0.00060022
448.62	0.35358087		978.62	0.05197593		1508.62	-0.01016216		2038.61	0.00046415
448.82	0.35345018		978.82	0.05165815		1508.82	-0.00946628		2038.81	0.00048181
449.02	0.35310635		979.02	0.05210413		1509.02	-0.00950734		2039.01	0.00134949
449.22	0.35374823		979.22	0.05175037		1509.22	-0.00973124		2039.21	0.00239375
449.42	0.35428941		979.42	0.05235666		1509.42	-0.00862402		2039.41	0.00216656
449.62	0.3549878		979.62	0.05379173		1509.62	-0.00879295		2039.61	0.00172324
449.82	0.35500502		979.82	0.05481661		1509.82	-0.00916808		2039.81	0.0025641
450.02	0.35565661		980.02	0.05523822		1510.02	-0.00941806		2040.01	0.00311892
450.22	0.35625417		980.22	0.05604143		1510.22	-0.00913984		2040.21	0.00258282
450.42	0.35611203		980.42	0.05622608		1510.42	-0.00888757		2040.41	0.00301407
450.62	0.35568805		980.62	0.05699142		1510.62	-0.00811562		2040.61	0.00281629
450.82	0.35509901		980.82	0.05747961		1510.82	-0.0071953		2040.81	0.00336356
451.02	0.35542321		981.02	0.0567701		1511.02	-0.00669099		2041.01	0.00315725
451.22	0.35500772		981.22	0.05667632		1511.22	-0.00531593		2041.21	0.00251176
451.42	0.3549313		981.42	0.05611869		1511.42	-0.00465512		2041.41	0.00341184
451.62	0.35537723		981.62	0.05553452		1511.62	-0.00411874		2041.61	0.00324065
451.82	0.35563914		981.82	0.05547738		1511.82	-0.0043113		2041.81	0.00259456
452.02	0.35399573		982.02	0.05459959		1512.02	-0.00523136		2042.01	0.00212524
452.22	0.35424195		982.22	0.05470921		1512.22	-0.00526207		2042.21	0.00229785
452.42	0.35472006		982.42	0.05402999		1512.42	-0.00599051		2042.41	0.00202801
452.62	0.35590224		982.62	0.05350867		1512.62	-0.00656165		2042.61	0.00228234
452.82	0.35636096		982.82	0.05327896		1512.82	-0.00674279		2042.81	0.00203831
453.02	0.35705531		983.02	0.05260897		1513.02	-0.00731984		2043.01	0.0025759
453.22	0.35777628		983.22	0.05291695		1513.22	-0.00786636		2043.21	0.00212451
453.42	0.35811338		983.42	0.05352039		1513.42	-0.00814484		2043.41	0.00141247
453.62	0.35900968		983.62	0.0538511		1513.62	-0.00875044		2043.61	0.00196051
453.82	0.35863914		983.82	0.05432582		1513.82	-0.00882189		2043.81	0.00193118
454.02	0.35919577		984.02	0.05511537		1514.02	-0.00900451		2044.01	0.00267828
454.22	0.3598363		984.22	0.05531368		1514.22	-0.0084167		2044.21	0.00301193
454.42	0.36001915		984.42	0.05549911		1514.42	-0.009268		2044.41	0.00381929
454.62	0.35988578		984.62	0.05591955		1514.62	-0.00805719		2044.61	0.00414049
454.82	0.36050239		984.82	0.05587761		1514.82	-0.00801354		2044.81	0.00413364
455.02	0.36064933		985.02	0.05583076		1515.02	-0.00847291		2045.01	0.00476191
455.22	0.36011842		985.22	0.05504234		1515.22	-0.00763241		2045.21	0.00454095
455.42	0.36008912		985.42	0.05436484		1515.42	-0.00811891		2045.41	0.00472382
455.62	0.35980437		985.62	0.05439225		1515.62	-0.00917215		2045.61	0.00399913
455.82	0.35928331		985.82	0.05405585		1515.82	-0.00957792		2045.81	0.00346229
456.02	0.35855256		986.02	0.05334497		1516.02	-0.01088603		2046.01	0.00352413
456.22	0.358943		986.22	0.0531728		1516.22	-0.0105565		2046.21	0.00335474
456.42	0.35837315		986.42	0.05316772		1516.42	-0.01038089		2046.41	0.00278396
456.62	0.35876602		986.62	0.05311044		1516.62	-0.00991472		2046.61	0.00272242
456.82	0.3588674		986.82	0.05380605		1516.82	-0.00982093		2046.81	0.00222499
457.02	0.35929783		987.02	0.05320866		1517.02	-0.00944527		2047.01	0.00134117
457.22	0.35985498		987.22	0.05379995		1517.22	-0.0091565		2047.21	0.00089072
457.42	0.35884968		987.42	0.05398329		1517.42	-0.00846579		2047.41	0.00041655
457.62	0.35815952		987.62	0.05450901		1517.62	-0.00829802		2047.61	0.00127303
457.82	0.35653964		987.82	0.05527603		1517.82	-0.00833192		2047.81	0.00235297
458.02	0.3570411		988.02	0.05645089		1518.02	-0.008405		2048.01	0.00302178
458.22	0.35598484		988.22	0.05656793		1518.22	-0.0079087		2048.21	0.00344991
458.42	0.3562751		988.42	0.05643861		1518.42	-0.00901046		2048.41	0.0041952
458.62	0.35622034		988.62	0.05611251		1518.62	-0.00828351		2048.61	0.00462867
458.82	0.35633945		988.82	0.05571298		1518.82	-0.00901371		2048.81	0.00519133
459.02	0.35533519		989.02	0.05533287		1519.02	-0.00933274		2049.01	0.0058728
459.22	0.3553805		989.22	0.05462364		1519.22	-0.00915748		2049.21	0.00633276
459.42	0.35493672		989.42	0.05381438		1519.42	-0.0104003		2049.41	0.00624005
459.62	0.35506483		989.62	0.05351074		1519.62	-0.01113609		2049.61	0.00598879
459.82	0.35571323		989.82	0.05367812		1519.82	-0.01105753		2049.81	0.00599506
460.02	0.3560927		990.02	0.05338123		1520.02	-0.01164242		2050.01	0.00569287
460.22	0.35664234		990.22	0.05349834		1520.22	-0.01145544		2050.21	0.00488052
460.42	0.35665497		990.42	0.05355234		1520.42	-0.01085893		2050.41	0.00427835
460.62	0.35776519		990.62	0.05419316		1520.62	-0.01147014		2050.61	0.00448275
460.82	0.35813356		990.82	0.05449291		1520.82	-0.01087439		2050.81	0.00434582
461.02	0.35844944		991.02	0.05438493		1521.02	-0.01081225		2051.01	0.00373715
461.22	0.35911052		991.22	0.05508295		1521.22	-0.01115869		2051.21	0.00463795
461.42	0.35807664		991.42	0.05509036		1521.42	-0.01024369		2051.41	0.00422219
461.62	0.35911969		991.62	0.05488398		1521.62	-0.00977787		2051.61	0.0044448
461.82	0.35881991		991.82	0.05544667		1521.82	-0.0100382		2051.81	0.00406934
462.02	0.36007086		992.02	0.05584052		1522.02	-0.01050199		2052.01	0.00240331
462.22	0.35979559		992.22	0.05505092		1522.22	-0.01086743		2052.21	0.00110516
462.42	0.36024654		992.42	0.05356463		1522.42	-0.01160781		2052.41	0.00041582
462.62	0.35972067		992.62	0.05377032		1522.62	-0.01146793		2052.61	0.00036427
462.82	0.35910983		992.82	0.0535803		1522.82	-0.01130525		2052.81	0.00044796
463.02	0.35867104		993.02	0.0535885		1523.02	-0.01125528		2053.01	0.00085884
463.22	0.3591444		993.22	0.05325446		1523.22	-0.0120189		2053.21	0.00102997
463.42	0.35840597		993.42	0.05275153		1523.42	-0.01235738		2053.41	0.00139252
463.62	0.35909048		993.62	0.05383892		1523.62	-0.01228769		2053.61	0.00210855
463.82	0.35900504		993.82	0.05446817		1523.82	-0.01221871		2053.81	0.00232887
464.02	0.35895756		994.02	0.0533185		1524.02	-0.01248869		2054.01	0.00226311
464.22	0.35893667		994.22	0.05344092		1524.22	-0.01245654		2054.21	0.00254514
464.42	0.3587305		994.42	0.05382736		1524.42	-0.0113139		2054.41	0.00374014
464.62	0.35948234		994.62	0.05379527		1524.62	-0.01116547		2054.61	0.00548059
464.82	0.35894717		994.82	0.05289449		1524.82	-0.01129679		2054.81	0.00601731
465.02	0.35891297		995.02	0.05292503		1525.02	-0.01101999		2055.01	0.00656342
465.22	0.35827592		995.22	0.05290164		1525.22	-0.0109585		2055.21	0.00675568
465.42	0.35872819		995.42	0.05327298		1525.42	-0.00980126		2055.41	0.00605441
465.62	0.35913664		995.62	0.05294057		1525.62	-0.00962195		2055.61	0.00536879
465.82	0.3584724		995.82	0.05359061		1525.82	-0.01005964		2055.81	0.00438866
466.02	0.3575032		996.02	0.05395997		1526.02	-0.01033534		2056.01	0.00361703
466.22	0.35658758		996.22	0.05357398		1526.22	-0.01041799		2056.21	0.00333361
466.42	0.35573118		996.42	0.05332148		1526.42	-0.0102889		2056.41	0.00383282
466.62	0.35496347		996.62	0.05385276		1526.62	-0.01035739		2056.61	0.00438212
466.82	0.35418924		996.82	0.05437784		1526.82	-0.00961029		2056.81	0.0048111
467.02	0.35417237		997.02	0.05504676		1527.02	-0.01067681		2057.01	0.00505987
467.22	0.35426229		997.22	0.056299		1527.22	-0.01116269		2057.21	0.0054979
467.42	0.35427839		997.42	0.05691752		1527.42	-0.01054227		2057.41	0.00620157
467.62	0.35557511		997.62	0.05715278		1527.62	-0.01095524		2057.61	0.00583141
467.82	0.35508325		997.82	0.05675794		1527.82	-0.01163258		2057.81	0.00626228
468.02	0.35553939		998.02	0.05657768		1528.02	-0.01163069		2058.01	0.00610357
468.22	0.3563336		998.22	0.0564327		1528.22	-0.01255791		2058.21	0.00594508
468.42	0.3571809		998.42	0.05604796		1528.42	-0.01198805		2058.41	0.00615115
468.62	0.35766669		998.62	0.05529233		1528.62	-0.01272659		2058.61	0.00560758
468.82	0.35720145		998.82	0.05431685		1528.82	-0.01278689		2058.81	0.00533992
469.02	0.35694413		999.02	0.05483243		1529.02	-0.0115304		2059.01	0.00479299
469.22	0.35660989		999.22	0.05544768		1529.22	-0.01076478		2059.21	0.00472113
469.42	0.35737924		999.42	0.05596662		1529.42	-0.00973009		2059.41	0.00382876
469.62	0.35720265		999.62	0.05614288		1529.62	-0.00919202		2059.61	0.00318441
469.82	0.35706634		999.82	0.05686832		1529.82	-0.00858553		2059.81	0.00349367
470.02	0.35674536		1000.02	0.05651287		1530.02	-0.00817457		2060.01	0.00386285
470.22	0.35625533		1000.22	0.05615587		1530.22	-0.0082333		2060.21	0.00400211
470.42	0.35591755		1000.42	0.05556595		1530.42	-0.00786777		2060.41	0.00400223
470.62	0.35520042		1000.62	0.05653363		1530.62	-0.00740637		2060.61	0.00395169
470.82	0.35584753		1000.82	0.05714023		1530.82	-0.00754632		2060.81	0.00348277
471.02	0.35665971		1001.02	0.05713361		1531.02	-0.00895039		2061.01	0.00388732
471.22	0.35744936		1001.22	0.05740316		1531.22	-0.00961568		2061.21	0.00444835
471.42	0.35787711		1001.42	0.05622203		1531.42	-0.01078351		2061.41	0.00365709
471.62	0.35785809		1001.62	0.05519822		1531.62	-0.01277237		2061.61	0.00312212
471.82	0.35803793		1001.82	0.05516241		1531.82	-0.01305781		2061.81	0.00357209
472.02	0.36002373		1002.02	0.05486044		1532.02	-0.0132271		2062.01	0.0024614
472.22	0.36165286		1002.22	0.05379201		1532.22	-0.01432783		2062.21	0.00187841
472.42	0.36201521		1002.42	0.05251441		1532.42	-0.01383896		2062.41	0.00154656
472.62	0.36173572		1002.62	0.0516843		1532.62	-0.0143592		2062.61	0.00080614
472.82	0.3617873		1002.82	0.05166573		1532.82	-0.01271012		2062.81	0.00103002
473.02	0.36133719		1003.02	0.05272023		1533.02	-0.01189462		2063.01	0.00054718
473.22	0.36059109		1003.22	0.05300321		1533.22	-0.0115513		2063.21	0.00065846
473.42	0.3601781		1003.42	0.05360176		1533.42	-0.01084804		2063.41	-0.00080154
473.62	0.35957596		1003.62	0.05377461		1533.62	-0.0106868		2063.61	-0.00020468
473.82	0.35853251		1003.82	0.05314713		1533.82	-0.01046744		2063.81	0.00009093
474.02	0.35722451		1004.02	0.05262283		1534.02	-0.00986687		2064.01	0.00039237
474.22	0.35577459		1004.22	0.05332499		1534.22	-0.01054279		2064.21	0.00009104
474.42	0.35534392		1004.42	0.05367632		1534.42	-0.00980208		2064.41	0.00004719
474.62	0.35544829		1004.62	0.0545426		1534.62	-0.01059035		2064.61	0.00060811
474.82	0.3567594		1004.82	0.05409163		1534.82	-0.01056339		2064.81	0.00064051
475.02	0.3561738		1005.02	0.05425305		1535.02	-0.01062017		2065.01	0.00136765
475.22	0.35608307		1005.22	0.05373858		1535.22	-0.01095591		2065.21	0.00138643
475.42	0.35565808		1005.42	0.05274807		1535.42	-0.0113017		2065.41	0.00095816
475.62	0.35669479		1005.62	0.05286357		1535.62	-0.01161321		2065.61	0.00160862
475.82	0.35835356		1005.82	0.05246347		1535.82	-0.01145198		2065.81	0.00272281
476.02	0.36021787		1006.02	0.05147834		1536.02	-0.01207085		2066.01	0.0034454
476.22	0.36003402		1006.22	0.05095748		1536.22	-0.01257167		2066.21	0.00334124
476.42	0.35948598		1006.42	0.05027276		1536.42	-0.01301108		2066.41	0.00354184
476.62	0.36048756		1006.62	0.05104243		1536.62	-0.01314237		2066.61	0.0034679
476.82	0.36166738		1006.82	0.05206805		1536.82	-0.01277071		2066.81	0.00411161
477.02	0.36084367		1007.02	0.05205577		1537.02	-0.01259421		2067.01	0.00438194
477.22	0.36038507		1007.22	0.05247255		1537.22	-0.01289552		2067.21	0.00404554
477.42	0.36011144		1007.42	0.05242437		1537.42	-0.01290028		2067.41	0.00402531
477.62	0.35957163		1007.62	0.05253667		1537.62	-0.01337338		2067.61	0.00446395
477.82	0.35842867		1007.82	0.0528734		1537.82	-0.01330571		2067.81	0.00427982
478.02	0.35843356		1008.02	0.05353733		1538.02	-0.01229929		2068.01	0.00448877
478.22	0.35813763		1008.22	0.05435893		1538.22	-0.01294227		2068.21	0.0038641
478.42	0.35819117		1008.42	0.05452701		1538.42	-0.01310968		2068.41	0.00371608
478.62	0.3583427		1008.62	0.05415816		1538.62	-0.01320039		2068.61	0.00378594
478.82	0.35781783		1008.82	0.05443997		1538.82	-0.01241494		2068.81	0.00315226
479.02	0.35657254		1009.02	0.05483484		1539.02	-0.01267257		2069.01	0.00280179
479.22	0.35584446		1009.22	0.05464399		1539.22	-0.01289183		2069.21	0.0031917
479.42	0.35670862		1009.42	0.05425165		1539.42	-0.01277775		2069.41	0.00283771
479.62	0.35686528		1009.62	0.05499537		1539.62	-0.01350962		2069.61	0.00275372
479.82	0.35689412		1009.82	0.05504146		1539.82	-0.01371493		2069.81	0.00278466
480.02	0.35665804		1010.02	0.05468375		1540.02	-0.01449976		2070.01	0.00247204
480.22	0.35655601		1010.22	0.05369419		1540.22	-0.01483633		2070.21	0.00118505
480.42	0.35677555		1010.42	0.0531468		1540.42	-0.0153529		2070.41	0.00181111
480.62	0.35799399		1010.62	0.05339006		1540.62	-0.01497294		2070.61	0.00184769
480.82	0.35806779		1010.82	0.05360684		1540.82	-0.01477414		2070.81	0.00206298
481.02	0.3569748		1011.02	0.05298895		1541.02	-0.01390914		2071.01	0.00219063
481.22	0.35681183		1011.22	0.05359385		1541.22	-0.01363175		2071.21	0.00236017
481.42	0.35653746		1011.42	0.05326099		1541.42	-0.01310966		2071.41	0.00258874
481.62	0.35532774		1011.62	0.0534914		1541.62	-0.01262816		2071.61	0.00237749
481.82	0.35423331		1011.82	0.05304296		1541.82	-0.01247954		2071.81	0.0034651
482.02	0.35474169		1012.02	0.05292466		1542.02	-0.01176291		2072.01	0.00347585
482.22	0.35346803		1012.22	0.05246592		1542.22	-0.01191979		2072.21	0.00396924
482.42	0.3525561		1012.42	0.0519348		1542.42	-0.01210241		2072.41	0.00406482
482.62	0.35256156		1012.62	0.05214242		1542.62	-0.01166849		2072.61	0.00374827
482.82	0.35285325		1012.82	0.05298675		1542.82	-0.01200463		2072.81	0.00375359
483.02	0.35331284		1013.02	0.05352212		1543.02	-0.01267757		2073.01	0.00307701
483.22	0.35384407		1013.22	0.05287758		1543.22	-0.01212713		2073.21	0.00282898
483.42	0.35509241		1013.42	0.0525621		1543.42	-0.01254912		2073.41	0.0017063
483.62	0.35405149		1013.62	0.05309551		1543.62	-0.01355456		2073.61	0.00069449
483.82	0.3557417		1013.82	0.05284869		1543.82	-0.0135676		2073.81	0.00110474
484.02	0.35635958		1014.02	0.05137418		1544.02	-0.01342447		2074.01	0.00023138
484.22	0.35743513		1014.22	0.0516085		1544.22	-0.01245163		2074.21	-0.00009717
484.42	0.35806115		1014.42	0.05211446		1544.42	-0.01192757		2074.41	-0.00022704
484.62	0.35890518		1014.62	0.05217599		1544.62	-0.01139751		2074.61	-0.00070632
484.82	0.35939249		1014.82	0.05215232		1544.82	-0.01087473		2074.81	-0.00119606
485.02	0.35864095		1015.02	0.05186682		1545.02	-0.0103682		2075.01	-0.00062421
485.22	0.35871853		1015.22	0.05264871		1545.22	-0.00970783		2075.21	-0.00032168
485.42	0.35830791		1015.42	0.05230722		1545.42	-0.00907683		2075.41	-0.00075764
485.62	0.3566163		1015.62	0.05178848		1545.62	-0.0090946		2075.61	-0.00068459
485.82	0.35560828		1015.82	0.05177564		1545.82	-0.00861802		2075.81	-0.00013462
486.02	0.35488681		1016.02	0.05224315		1546.02	-0.00799903		2076.01	-0.00003892
486.22	0.35367872		1016.22	0.05262932		1546.22	-0.0083121		2076.21	0.00051889
486.42	0.35349999		1016.42	0.05324628		1546.42	-0.00859997		2076.41	0.00052751
486.62	0.35379482		1016.62	0.05388983		1546.62	-0.00958739		2076.61	0.00035179
486.82	0.35341658		1016.82	0.05356155		1546.82	-0.01123212		2076.81	0.00081117
487.02	0.35295614		1017.02	0.05287773		1547.02	-0.01280151		2077.01	0.00114736
487.22	0.35271533		1017.22	0.0517634		1547.22	-0.01324292		2077.21	0.00154473
487.42	0.35170587		1017.42	0.05186767		1547.42	-0.014509		2077.41	0.00159018
487.62	0.35235895		1017.62	0.05129027		1547.62	-0.01525248		2077.61	0.0016537
487.82	0.35362695		1017.82	0.05079423		1547.82	-0.01534616		2077.81	0.00288839
488.02	0.35420685		1018.02	0.050518		1548.02	-0.01460449		2078.01	0.0027789
488.22	0.35520617		1018.22	0.0519733		1548.22	-0.01506053		2078.21	0.00312493
488.42	0.35553976		1018.42	0.0516491		1548.42	-0.01532519		2078.41	0.00225915
488.62	0.35525382		1018.62	0.05138446		1548.62	-0.01619712		2078.61	0.00268908
488.82	0.35524774		1018.82	0.05222478		1548.82	-0.01633207		2078.81	0.00290481
489.02	0.35423094		1019.02	0.05282469		1549.02	-0.01568551		2079.01	0.00389892
489.22	0.35437197		1019.22	0.05294522		1549.22	-0.01497968		2079.21	0.00340116
489.42	0.35396811		1019.42	0.0538397		1549.42	-0.01444021		2079.41	0.00279786
489.62	0.35333551		1019.62	0.05424533		1549.62	-0.0155346		2079.61	0.00312926
489.82	0.35287011		1019.82	0.05473983		1549.82	-0.01558892		2079.81	0.00275625
490.02	0.35324513		1020.02	0.05504092		1550.02	-0.01579149		2080.01	0.00237911
490.22	0.35365428		1020.22	0.0550818		1550.22	-0.01626256		2080.21	0.00204434
490.42	0.35361518		1020.42	0.05502706		1550.42	-0.01611494		2080.41	0.00191239
490.62	0.35319288		1020.62	0.05385026		1550.62	-0.01729906		2080.61	0.00136807
490.82	0.35276357		1020.82	0.05308235		1550.82	-0.01790917		2080.81	0.00179362
491.02	0.35312393		1021.02	0.05181563		1551.02	-0.01793436		2081.01	0.00186674
491.22	0.35298783		1021.22	0.05062868		1551.22	-0.01795316		2081.21	0.0022752
491.42	0.35368778		1021.42	0.05006545		1551.42	-0.01770419		2081.41	0.00232191
491.62	0.3553572		1021.62	0.04930146		1551.62	-0.01733931		2081.61	0.00217263
491.82	0.3561094		1021.82	0.04962613		1551.82	-0.01643795		2081.81	0.00242322
492.02	0.35681477		1022.02	0.05031757		1552.02	-0.01555293		2082.01	0.0024676
492.22	0.35665793		1022.22	0.05074732		1552.22	-0.01511627		2082.21	0.0021449
492.42	0.35645611		1022.42	0.05080538		1552.42	-0.014744		2082.41	0.00168719
492.62	0.35546804		1022.62	0.05062183		1552.62	-0.01502023		2082.61	0.00312922
492.82	0.35541625		1022.82	0.05196317		1552.82	-0.01421033		2082.81	0.0029724
493.02	0.35504557		1023.02	0.05217365		1553.02	-0.01352457		2083.01	0.00291481
493.22	0.35417395		1023.22	0.05165603		1553.22	-0.01325137		2083.21	0.00274964
493.42	0.35403229		1023.42	0.05284558		1553.42	-0.01339998		2083.41	0.0032094
493.62	0.35388142		1023.62	0.05220614		1553.62	-0.0145576		2083.61	0.00346852
493.82	0.35399301		1023.82	0.05154735		1553.82	-0.01440105		2083.81	0.00279207
494.02	0.3546966		1024.02	0.05177409		1554.02	-0.01492951		2084.01	0.00317766
494.22	0.3547689		1024.22	0.0515234		1554.22	-0.01537707		2084.21	0.00271032
494.42	0.35489598		1024.42	0.05110755		1554.42	-0.01511494		2084.41	0.00203989
494.62	0.35418477		1024.62	0.05038611		1554.62	-0.01551534		2084.61	0.00145203
494.82	0.35436164		1024.82	0.05019847		1554.82	-0.01527843		2084.81	0.00220831
495.02	0.35500012		1025.02	0.0498065		1555.02	-0.01513102		2085.01	0.0018007
495.22	0.3547318		1025.22	0.04970243		1555.22	-0.01507089		2085.21	0.00197934
495.42	0.35574583		1025.42	0.04997951		1555.42	-0.01448821		2085.41	0.00212711
495.62	0.35638619		1025.62	0.05021198		1555.62	-0.01443972		2085.61	0.00161366
495.82	0.35671909		1025.82	0.05049835		1555.82	-0.01388594		2085.81	0.00115337
496.02	0.35627443		1026.02	0.05092102		1556.02	-0.01407938		2086.01	0.00206617
496.22	0.35608778		1026.22	0.05185168		1556.22	-0.01349693		2086.21	0.00229794
496.42	0.35612947		1026.42	0.05304521		1556.42	-0.01338892		2086.41	0.00278723
496.62	0.35512245		1026.62	0.05306471		1556.62	-0.0135251		2086.61	0.00284792
496.82	0.35489497		1026.82	0.05376479		1556.82	-0.01330976		2086.81	0.00202343
497.02	0.35398516		1027.02	0.053523		1557.02	-0.01341633		2087.01	0.0020647
497.22	0.35263739		1027.22	0.05285571		1557.22	-0.01357233		2087.21	0.00293925
497.42	0.35232765		1027.42	0.05423424		1557.42	-0.01372446		2087.41	0.00349156
497.62	0.3522321		1027.62	0.05342804		1557.62	-0.01424979		2087.61	0.00344571
497.82	0.351948		1027.82	0.05292563		1557.82	-0.01463421		2087.81	0.00365591
498.02	0.35157055		1028.02	0.05232694		1558.02	-0.01533049		2088.01	0.004129
498.22	0.35200278		1028.22	0.05183089		1558.22	-0.01519017		2088.21	0.00353586
498.42	0.35205554		1028.42	0.05114233		1558.42	-0.01492128		2088.41	0.0037927
498.62	0.35133528		1028.62	0.05104144		1558.62	-0.01469661		2088.61	0.00396328
498.82	0.35284602		1028.82	0.05022945		1558.82	-0.01527273		2088.81	0.00416768
499.02	0.35325414		1029.02	0.04978279		1559.02	-0.01638785		2089.01	0.00282642
499.22	0.35341575		1029.22	0.04891487		1559.22	-0.01659476		2089.21	0.002773
499.42	0.35418043		1029.42	0.04865525		1559.42	-0.01587145		2089.41	0.00211298
499.62	0.35551216		1029.62	0.04822211		1559.62	-0.01506817		2089.61	0.00173892
499.82	0.3560276		1029.82	0.04874983		1559.82	-0.01421599		2089.81	0.001665
500.02	0.35698872		1030.02	0.04954367		1560.02	-0.01470931		2090.01	0.00234655
500.22	0.35778669		1030.22	0.05062265		1560.22	-0.01437888		2090.21	0.00134504
500.42	0.3582837		1030.42	0.05117134		1560.42	-0.01425844		2090.41	0.00153939
500.62	0.35790005		1030.62	0.05067354		1560.62	-0.01366292		2090.61	0.00140128
500.82	0.35749451		1030.82	0.0510834		1560.82	-0.01390719		2090.81	0.0020573
501.02	0.35673965		1031.02	0.05096945		1561.02	-0.01298013		2091.01	0.00214867
501.22	0.35594015		1031.22	0.051019		1561.22	-0.01289338		2091.21	0.00231898
501.42	0.35528465		1031.42	0.05224503		1561.42	-0.01166303		2091.41	0.00310327
501.62	0.35498591		1031.62	0.05110809		1561.62	-0.01203632		2091.61	0.00377749
501.82	0.35475188		1031.82	0.05023232		1561.82	-0.01242885		2091.81	0.00458686
502.02	0.35431977		1032.02	0.05042643		1562.02	-0.01218258		2092.01	0.00435999
502.22	0.35455499		1032.22	0.05106136		1562.22	-0.01160064		2092.21	0.00434661
502.42	0.35346193		1032.42	0.0510311		1562.42	-0.01146695		2092.41	0.00430183
502.62	0.35350463		1032.62	0.05120576		1562.62	-0.01181938		2092.61	0.00451771
502.82	0.35430147		1032.82	0.05063		1562.82	-0.01255634		2092.81	0.00373283
503.02	0.35396764		1033.02	0.05068295		1563.02	-0.01333619		2093.01	0.00360551
503.22	0.35419244		1033.22	0.05105619		1563.22	-0.01268634		2093.21	0.00366029
503.42	0.35447624		1033.42	0.05083584		1563.42	-0.01251161		2093.41	0.00371534
503.62	0.35554845		1033.62	0.05086656		1563.62	-0.01195165		2093.61	0.004355
503.82	0.35558102		1033.82	0.05083614		1563.82	-0.0127283		2093.81	0.00407704
504.02	0.35552797		1034.02	0.05120628		1564.02	-0.01323906		2094.01	0.00435626
504.22	0.35508981		1034.22	0.05198388		1564.22	-0.01278239		2094.21	0.0037446
504.42	0.35497045		1034.42	0.05225211		1564.42	-0.01199624		2094.41	0.00566673
504.62	0.35472735		1034.62	0.05221001		1564.62	-0.01184838		2094.61	0.00601705
504.82	0.35414408		1034.82	0.05248578		1564.82	-0.01320451		2094.81	0.00587837
505.02	0.35346536		1035.02	0.05196254		1565.02	-0.01233944		2095.01	0.00560122
505.22	0.35312472		1035.22	0.05230532		1565.22	-0.01279134		2095.21	0.00556875
505.42	0.35264167		1035.42	0.05211943		1565.42	-0.0118452		2095.41	0.00589925
505.62	0.35163112		1035.62	0.0513359		1565.62	-0.01274341		2095.61	0.00508146
505.82	0.35172717		1035.82	0.0516298		1565.82	-0.01197206		2095.81	0.00442408
506.02	0.35177075		1036.02	0.05311293		1566.02	-0.01112546		2096.01	0.00436486
506.22	0.35166683		1036.22	0.05307886		1566.22	-0.00992002		2096.21	0.00438568
506.42	0.351325		1036.42	0.05236318		1566.42	-0.00958368		2096.41	0.00489197
506.62	0.35273874		1036.62	0.05178611		1566.62	-0.0099825		2096.61	0.00463028
506.82	0.35355138		1036.82	0.05217091		1566.82	-0.01016309		2096.81	0.00435496
507.02	0.35445468		1037.02	0.05257148		1567.02	-0.01122588		2097.01	0.00506465
507.22	0.35413912		1037.22	0.0527835		1567.22	-0.01160594		2097.21	0.00527915
507.42	0.35355657		1037.42	0.05178117		1567.42	-0.01151467		2097.41	0.00491483
507.62	0.35413936		1037.62	0.05171561		1567.62	-0.01141657		2097.61	0.00469179
507.82	0.35340461		1037.82	0.05085305		1567.82	-0.01193645		2097.81	0.00439002
508.02	0.35301082		1038.02	0.05141899		1568.02	-0.01226277		2098.01	0.00332254
508.22	0.35309237		1038.22	0.05153266		1568.22	-0.01288774		2098.21	0.00245401
508.42	0.35297587		1038.42	0.05182485		1568.42	-0.01391725		2098.41	0.00212881
508.62	0.35275831		1038.62	0.05197976		1568.62	-0.01489728		2098.61	0.00123968
508.82	0.35199874		1038.82	0.05095693		1568.82	-0.0146861		2098.81	-0.00021657
509.02	0.35220905		1039.02	0.05093967		1569.02	-0.01437233		2099.01	-0.00011297
509.22	0.35211991		1039.22	0.05138396		1569.22	-0.01424451		2099.21	-0.00086013
509.42	0.35228342		1039.42	0.05144319		1569.42	-0.01410748		2099.41	-0.00086771
509.62	0.35233215		1039.62	0.05216622		1569.62	-0.01424775		2099.61	-0.00088007
509.82	0.35323253		1039.82	0.05218355		1569.82	-0.01320702		2099.81	-0.00039495
510.02	0.35435799		1040.02	0.05230407		1570.02	-0.0136483		2100.01	0.00070212
510.22	0.3544165		1040.22	0.0515694		1570.22	-0.01340945		2100.21	0.00133302
510.42	0.35442026		1040.42	0.05071296		1570.42	-0.01380944		2100.41	0.00228703
510.62	0.35582386		1040.62	0.05015607		1570.62	-0.01532057		2100.61	0.00388049
510.82	0.35601685		1040.82	0.0509879		1570.82	-0.01622211		2100.81	0.00477765
511.02	0.35544841		1041.02	0.05076458		1571.02	-0.01638165		2101.01	0.00559797
511.22	0.35367058		1041.22	0.05083759		1571.22	-0.01599836		2101.21	0.00675385
511.42	0.35340647		1041.42	0.05031639		1571.42	-0.01479915		2101.41	0.00732268
511.62	0.35364394		1041.62	0.04961076		1571.62	-0.01448376		2101.61	0.00832923
511.82	0.35265662		1041.82	0.04948444		1571.82	-0.0152145		2101.81	0.00762198
512.02	0.35253802		1042.02	0.04979423		1572.02	-0.01514169		2102.01	0.00620746
512.22	0.35192908		1042.22	0.05018322		1572.22	-0.01450669		2102.21	0.00581326
512.42	0.35166575		1042.42	0.05045017		1572.42	-0.01379229		2102.41	0.00463395
512.62	0.35116589		1042.62	0.05040134		1572.62	-0.01237174		2102.61	0.00447544
512.82	0.35132403		1042.82	0.05079478		1572.82	-0.01177465		2102.81	0.00260184
513.02	0.35211696		1043.02	0.05224518		1573.02	-0.01227184		2103.01	0.00236581
513.22	0.35231302		1043.22	0.05319659		1573.22	-0.01242993		2103.21	0.00114684
513.42	0.35218232		1043.42	0.05308652		1573.42	-0.0123328		2103.41	0.00129288
513.62	0.35177083		1043.62	0.05292531		1573.62	-0.01306092		2103.61	0.00112416
513.82	0.35215039		1043.82	0.05246185		1573.82	-0.01313076		2103.81	-0.0001166
514.02	0.35211795		1044.02	0.05247326		1574.02	-0.01481651		2104.01	0.00075602
514.22	0.35230012		1044.22	0.05134084		1574.22	-0.01556202		2104.21	0.00135591
514.42	0.3520671		1044.42	0.05085515		1574.42	-0.01622072		2104.41	0.00144985
514.62	0.35305373		1044.62	0.04986549		1574.62	-0.01679782		2104.61	0.00292163
514.82	0.35213123		1044.82	0.04975497		1574.82	-0.01633186		2104.81	0.00206642
515.02	0.35200785		1045.02	0.04976289		1575.02	-0.01580321		2105.01	0.00314952
515.22	0.35193679		1045.22	0.04989422		1575.22	-0.01525679		2105.21	0.00387347
515.42	0.35229708		1045.42	0.04991087		1575.42	-0.01510465		2105.41	0.00433768
515.62	0.35219624		1045.62	0.04887813		1575.62	-0.01468409		2105.61	0.00445597
515.82	0.35182602		1045.82	0.0494069		1575.82	-0.01493594		2105.81	0.00341817
516.02	0.35233259		1046.02	0.04977286		1576.02	-0.01417352		2106.01	0.0024777
516.22	0.35169016		1046.22	0.05088202		1576.22	-0.01430838		2106.21	0.0020223
516.42	0.35211129		1046.42	0.05089525		1576.42	-0.01428324		2106.41	0.00114282
516.62	0.35224053		1046.62	0.05156128		1576.62	-0.01290041		2106.61	0.0007987
516.82	0.35288311		1046.82	0.05248656		1576.82	-0.01337359		2106.81	-0.00029807
517.02	0.35316558		1047.02	0.05289655		1577.02	-0.01338476		2107.01	-0.00021835
517.22	0.3526275		1047.22	0.05294232		1577.22	-0.01328955		2107.21	-0.00010275
517.42	0.35065066		1047.42	0.05227322		1577.42	-0.01369245		2107.41	0.00054521
517.62	0.35018916		1047.62	0.05185802		1577.62	-0.01510911		2107.61	0.0005633
517.82	0.35070236		1047.82	0.05161291		1577.82	-0.01538741		2107.81	0.00081192
518.02	0.35128973		1048.02	0.05057376		1578.02	-0.01639602		2108.01	0.00208051
518.22	0.35302282		1048.22	0.05055451		1578.22	-0.01646574		2108.21	0.00316605
518.42	0.35308387		1048.42	0.04992233		1578.42	-0.01703076		2108.41	0.00301869
518.62	0.35361359		1048.62	0.0494973		1578.62	-0.01671797		2108.61	0.00345725
518.82	0.35356578		1048.82	0.04920934		1578.82	-0.01581948		2108.81	0.00382749
519.02	0.35534253		1049.02	0.04977565		1579.02	-0.01492721		2109.01	0.00438003
519.22	0.35606043		1049.22	0.04971174		1579.22	-0.01498119		2109.21	0.00482017
519.42	0.35585875		1049.42	0.05041462		1579.42	-0.01463407		2109.41	0.00356466
519.62	0.355846		1049.62	0.05017943		1579.62	-0.0134575		2109.61	0.00347089
519.82	0.35630089		1049.82	0.05122437		1579.82	-0.01337586		2109.81	0.00283841
520.02	0.35723735		1050.02	0.05267355		1580.02	-0.01317891		2110.01	0.00203745
520.22	0.35693788		1050.22	0.05272741		1580.22	-0.01291395		2110.21	0.00121191
520.42	0.35699552		1050.42	0.05213148		1580.42	-0.01261822		2110.41	0.00029317
520.62	0.35746227		1050.62	0.05199491		1580.62	-0.01145796		2110.61	0.00037405
520.82	0.35670308		1050.82	0.05220389		1580.82	-0.01221959		2110.81	0.00011266
521.02	0.35548446		1051.02	0.05274164		1581.02	-0.01233249		2111.01	0.00016419
521.22	0.35429654		1051.22	0.05194918		1581.22	-0.01334027		2111.21	0.00067774
521.42	0.35245861		1051.42	0.05116689		1581.42	-0.01432917		2111.41	0.00178635
521.62	0.35258613		1051.62	0.05135655		1581.62	-0.01543025		2111.61	0.00289407
521.82	0.35323177		1051.82	0.05191545		1581.82	-0.0157724		2111.81	0.0035676
522.02	0.35295308		1052.02	0.05080836		1582.02	-0.01526277		2112.01	0.00414797
522.22	0.35295903		1052.22	0.05102971		1582.22	-0.0157095		2112.21	0.00499736
522.42	0.3524475		1052.42	0.05079505		1582.42	-0.01611068		2112.41	0.00437873
522.62	0.35252635		1052.62	0.05107674		1582.62	-0.01477751		2112.61	0.00459827
522.82	0.35303143		1052.82	0.05066421		1582.82	-0.01323552		2112.81	0.00460808
523.02	0.353991		1053.02	0.05091662		1583.02	-0.01290301		2113.01	0.00401251
523.22	0.35433284		1053.22	0.05131418		1583.22	-0.01288225		2113.21	0.00363853
523.42	0.35404862		1053.42	0.05141359		1583.42	-0.01207768		2113.41	0.00145564
523.62	0.35411672		1053.62	0.05099303		1583.62	-0.01166219		2113.61	0.00149721
523.82	0.3543827		1053.82	0.05114195		1583.82	-0.01175132		2113.81	0.00052302
524.02	0.35384965		1054.02	0.05115156		1584.02	-0.0116133		2114.01	-0.00075635
524.22	0.35270707		1054.22	0.05037174		1584.22	-0.01098039		2114.21	-0.00199201
524.42	0.35240756		1054.42	0.05086082		1584.42	-0.01231169		2114.41	-0.00303618
524.62	0.35168453		1054.62	0.05083684		1584.62	-0.01317979		2114.61	-0.00356464
524.82	0.35130172		1054.82	0.05171287		1584.82	-0.01425325		2114.81	-0.0046806
525.02	0.3508105		1055.02	0.05257494		1585.02	-0.01513723		2115.01	-0.00408926
525.22	0.35133762		1055.22	0.05233566		1585.22	-0.01605289		2115.21	-0.00252917
525.42	0.35068271		1055.42	0.05207786		1585.42	-0.01598313		2115.41	-0.0013127
525.62	0.34993816		1055.62	0.05304145		1585.62	-0.01731245		2115.61	0.00000143
525.82	0.34995988		1055.82	0.05299505		1585.82	-0.01704769		2115.81	0.00088582
526.02	0.34902343		1056.02	0.05146555		1586.02	-0.01648522		2116.01	0.00232711
526.22	0.34981383		1056.22	0.05157438		1586.22	-0.01682432		2116.21	0.00292041
526.42	0.35033959		1056.42	0.05183992		1586.42	-0.01639129		2116.41	0.00367016
526.62	0.35101167		1056.62	0.05185652		1586.62	-0.01495287		2116.61	0.00445617
526.82	0.35200404		1056.82	0.05155967		1586.82	-0.01491595		2116.81	0.0040578
527.02	0.35312598		1057.02	0.05105208		1587.02	-0.01447324		2117.01	0.00473165
527.22	0.35344413		1057.22	0.05098261		1587.22	-0.01406907		2117.21	0.00410234
527.42	0.35347273		1057.42	0.05006428		1587.42	-0.01443686		2117.41	0.00310913
527.62	0.35329542		1057.62	0.05017604		1587.62	-0.01435103		2117.61	0.00289741
527.82	0.35250486		1057.82	0.05066605		1587.82	-0.01424499		2117.81	0.0026403
528.02	0.35114078		1058.02	0.05076929		1588.02	-0.01416897		2118.01	0.00143143
528.22	0.35060422		1058.22	0.05100957		1588.22	-0.013704		2118.21	-0.00033828
528.42	0.35024398		1058.42	0.05170539		1588.42	-0.0157236		2118.41	-0.00127727
528.62	0.34985539		1058.62	0.05222963		1588.62	-0.01643464		2118.61	-0.00226015
528.82	0.35067126		1058.82	0.05260479		1588.82	-0.01702888		2118.81	-0.00336655
529.02	0.35045558		1059.02	0.05235253		1589.02	-0.0177236		2119.01	-0.0025456
529.22	0.35053364		1059.22	0.05176957		1589.22	-0.01778154		2119.21	-0.0030194
529.42	0.34982483		1059.42	0.05067925		1589.42	-0.01848227		2119.41	-0.0032157
529.62	0.349339		1059.62	0.05077937		1589.62	-0.0192065		2119.61	-0.00322419
529.82	0.34978076		1059.82	0.05001165		1589.82	-0.01823128		2119.81	-0.00287423
530.02	0.35020279		1060.02	0.04841361		1590.02	-0.01774711		2120.01	-0.00300835
530.22	0.35101008		1060.22	0.04859224		1590.22	-0.01687286		2120.21	-0.00345588
530.42	0.35141218		1060.42	0.04883457		1590.42	-0.01649636		2120.41	-0.00338053
530.62	0.35207728		1060.62	0.04890324		1590.62	-0.01605682		2120.61	-0.00289272
530.82	0.35289236		1060.82	0.04804309		1590.82	-0.01622992		2120.81	-0.00324975
531.02	0.35300074		1061.02	0.04877189		1591.02	-0.01506388		2121.01	-0.0021019
531.22	0.35336252		1061.22	0.04831585		1591.22	-0.01520725		2121.21	-0.00257976
531.42	0.35375011		1061.42	0.04875585		1591.42	-0.0158888		2121.41	-0.00244409
531.62	0.35322904		1061.62	0.04939966		1591.62	-0.01545521		2121.61	-0.00192835
531.82	0.3515642		1061.82	0.04951		1591.82	-0.01596518		2121.81	-0.00150294
532.02	0.35056948		1062.02	0.04990257		1592.02	-0.01601364		2122.01	-0.0018486
532.22	0.35068513		1062.22	0.05073151		1592.22	-0.0164418		2122.21	-0.00132471
532.42	0.35128704		1062.42	0.05117115		1592.42	-0.01727701		2122.41	-0.00044918
532.62	0.35070057		1062.62	0.05197179		1592.62	-0.01738193		2122.61	-0.00009994
532.82	0.35107582		1062.82	0.05164918		1592.82	-0.01802547		2122.81	-0.00017474
533.02	0.35163096		1063.02	0.05130731		1593.02	-0.01812078		2123.01	0.00093521
533.22	0.35234123		1063.22	0.05100282		1593.22	-0.01839452		2123.21	0.00033692
533.42	0.35229741		1063.42	0.0507181		1593.42	-0.01894459		2123.41	0.00099286
533.62	0.35225244		1063.62	0.05036482		1593.62	-0.01914209		2123.61	0.00084773
533.82	0.35195622		1063.82	0.04981183		1593.82	-0.01857622		2123.81	0.00141705
534.02	0.35157718		1064.02	0.04948036		1594.02	-0.01827518		2124.01	0.00076744
534.22	0.35181368		1064.22	0.04904909		1594.22	-0.01793749		2124.21	0.00106482
534.42	0.35213618		1064.42	0.04882035		1594.42	-0.01753626		2124.41	0.0017549
534.62	0.3523638		1064.62	0.04899991		1594.62	-0.01664338		2124.61	0.00221494
534.82	0.35241312		1064.82	0.04872498		1594.82	-0.01573742		2124.81	0.00191688
535.02	0.35191951		1065.02	0.04883206		1595.02	-0.01477613		2125.01	0.00188107
535.22	0.35264832		1065.22	0.04810042		1595.22	-0.01487816		2125.21	0.00073107
535.42	0.35189295		1065.42	0.04921835		1595.42	-0.01417151		2125.41	0.00035355
535.62	0.35132559		1065.62	0.04906239		1595.62	-0.01293749		2125.61	0.00086359
535.82	0.35056		1065.82	0.04972848		1595.82	-0.01351721		2125.81	0.00093778
536.02	0.35037732		1066.02	0.05027144		1596.02	-0.01282181		2126.01	0.00009208
536.22	0.35070363		1066.22	0.05102781		1596.22	-0.01328914		2126.21	0.00015368
536.42	0.35052032		1066.42	0.05087236		1596.42	-0.01321975		2126.41	0.00002605
536.62	0.3504235		1066.62	0.05152374		1596.62	-0.01345786		2126.61	-0.00028783
536.82	0.35119024		1066.82	0.05078893		1596.82	-0.01330702		2126.81	-0.00012544
537.02	0.3513206		1067.02	0.04971758		1597.02	-0.01417723		2127.01	-0.000006
537.22	0.35157839		1067.22	0.05002961		1597.22	-0.0149631		2127.21	-0.00001071
537.42	0.35141743		1067.42	0.04991001		1597.42	-0.01629318		2127.41	0.00118938
537.62	0.35112892		1067.62	0.04964518		1597.62	-0.01734798		2127.61	0.00129782
537.82	0.35113339		1067.82	0.0495548		1597.82	-0.01791892		2127.81	0.00224001
538.02	0.35139619		1068.02	0.04870977		1598.02	-0.01802336		2128.01	0.00244775
538.22	0.35213952		1068.22	0.048902		1598.22	-0.01819934		2128.21	0.00341958
538.42	0.35148609		1068.42	0.04985629		1598.42	-0.01832036		2128.41	0.00413667
538.62	0.3512681		1068.62	0.04941401		1598.62	-0.01891704		2128.61	0.00425727
538.82	0.35154367		1068.82	0.04857865		1598.82	-0.01878132		2128.81	0.00477364
539.02	0.35085711		1069.02	0.04847637		1599.02	-0.01873156		2129.01	0.00441634
539.22	0.35090011		1069.22	0.0490224		1599.22	-0.01827138		2129.21	0.00380077
539.42	0.35012276		1069.42	0.05023578		1599.42	-0.01697199		2129.41	0.00329891
539.62	0.3500864		1069.62	0.05067182		1599.62	-0.01695116		2129.61	0.00273122
539.82	0.34943819		1069.82	0.05052992		1599.82	-0.01808899		2129.81	0.00104721
540.02	0.34888114		1070.02	0.05003445		1600.02	-0.01754696		2130.01	-0.00011614
540.22	0.34912172		1070.22	0.05005667		1600.22	-0.01756739		2130.21	0.00016295
540.42	0.34937121		1070.42	0.04912081		1600.42	-0.01719409		2130.41	-0.0002957
540.62	0.349483		1070.62	0.04900721		1600.62	-0.0171166		2130.61	-0.00075033
540.82	0.34898639		1070.82	0.04820062		1600.82	-0.01726811		2130.81	-0.0010043
541.02	0.34962211		1071.02	0.04766878		1601.02	-0.01847846		2131.01	-0.00171339
541.22	0.35044316		1071.22	0.04820082		1601.22	-0.01854457		2131.21	-0.00166555
541.42	0.351497		1071.42	0.04743149		1601.42	-0.01921544		2131.41	-0.0013338
541.62	0.35202952		1071.62	0.04735284		1601.62	-0.0189632		2131.61	-0.00159109
541.82	0.35228461		1071.82	0.04823191		1601.82	-0.01913309		2131.81	-0.00158754
542.02	0.35206175		1072.02	0.04804947		1602.02	-0.01855988		2132.01	-0.00206224
542.22	0.35158987		1072.22	0.04945717		1602.22	-0.01932243		2132.21	-0.00142202
542.42	0.35164204		1072.42	0.04911096		1602.42	-0.02078766		2132.41	-0.00066409
542.62	0.35227947		1072.62	0.04800652		1602.62	-0.02097127		2132.61	-0.00129257
542.82	0.35215653		1072.82	0.04861977		1602.82	-0.02098735		2132.81	-0.00098212
543.02	0.35093389		1073.02	0.04971786		1603.02	-0.02069914		2133.01	-0.00151735
543.22	0.35060731		1073.22	0.05077904		1603.22	-0.01998503		2133.21	-0.00214941
543.42	0.3502104		1073.42	0.0516159		1603.42	-0.01981235		2133.41	-0.00307415
543.62	0.35046562		1073.62	0.05173592		1603.62	-0.02059179		2133.61	-0.00332613
543.82	0.35051407		1073.82	0.0514547		1603.82	-0.0204282		2133.81	-0.0031204
544.02	0.35047546		1074.02	0.05179688		1604.02	-0.01962038		2134.01	-0.00164852
544.22	0.35083398		1074.22	0.05149285		1604.22	-0.01995364		2134.21	-0.00089772
544.42	0.35110088		1074.42	0.05041488		1604.42	-0.0201843		2134.41	-0.00079132
544.62	0.35141707		1074.62	0.05059448		1604.62	-0.02033886		2134.61	-0.00098459
544.82	0.35286265		1074.82	0.04931695		1604.82	-0.02063292		2134.81	-0.00134638
545.02	0.35376457		1075.02	0.0479778		1605.02	-0.02077128		2135.01	-0.00020046
545.22	0.3546705		1075.22	0.04853514		1605.22	-0.02063423		2135.21	-0.0003627
545.42	0.35530852		1075.42	0.04857357		1605.42	-0.02000669		2135.41	-0.00001959
545.62	0.35523034		1075.62	0.04939996		1605.62	-0.0207089		2135.61	-0.00045053
545.82	0.35513757		1075.82	0.05041089		1605.82	-0.02055589		2135.81	-0.00152514
546.02	0.35507598		1076.02	0.05030516		1606.02	-0.02050676		2136.01	-0.00267382
546.22	0.3551281		1076.22	0.05103971		1606.22	-0.02090756		2136.21	-0.00236875
546.42	0.35494914		1076.42	0.05054091		1606.42	-0.02041562		2136.41	-0.00268855
546.62	0.35421675		1076.62	0.05086647		1606.62	-0.01959559		2136.61	-0.00361029
546.82	0.35305318		1076.82	0.05114182		1606.82	-0.01933022		2136.81	-0.00346529
547.02	0.35170993		1077.02	0.0512611		1607.02	-0.01864759		2137.01	-0.00358062
547.22	0.35005412		1077.22	0.0514807		1607.22	-0.01783727		2137.21	-0.00404948
547.42	0.34875559		1077.42	0.05115788		1607.42	-0.0170077		2137.41	-0.00434787
547.62	0.34833712		1077.62	0.05128525		1607.62	-0.01651685		2137.61	-0.00324474
547.82	0.34824478		1077.82	0.05090197		1607.82	-0.01619886		2137.81	-0.00224296
548.02	0.34734348		1078.02	0.04992671		1608.02	-0.01638292		2138.01	-0.00194625
548.22	0.3469721		1078.22	0.04870503		1608.22	-0.01683117		2138.21	-0.00192149
548.42	0.34686631		1078.42	0.04819574		1608.42	-0.01626877		2138.41	-0.00147321
548.62	0.34752983		1078.62	0.04828704		1608.62	-0.01525312		2138.61	-0.00057928
548.82	0.34847615		1078.82	0.04735815		1608.82	-0.01588356		2138.81	0.00090176
549.02	0.34843076		1079.02	0.04807833		1609.02	-0.01652439		2139.01	0.00147175
549.22	0.34888741		1079.22	0.04877406		1609.22	-0.01647038		2139.21	0.00085191
549.42	0.35001304		1079.42	0.04805604		1609.42	-0.01652306		2139.41	0.00120218
549.62	0.35073613		1079.62	0.04756069		1609.62	-0.01694734		2139.61	0.00019
549.82	0.3516599		1079.82	0.04762526		1609.82	-0.01663087		2139.81	-0.00057734
550.02	0.35186531		1080.02	0.04750554		1610.02	-0.01659653		2140.01	-0.00093952
550.22	0.35201676		1080.22	0.04771603		1610.22	-0.01667814		2140.21	-0.00005351
550.42	0.35213006		1080.42	0.04765951		1610.42	-0.01658118		2140.41	-0.00038367
550.62	0.3522975		1080.62	0.04815129		1610.62	-0.01671119		2140.61	-0.00027216
550.82	0.35222978		1080.82	0.047997		1610.82	-0.0162513		2140.81	0.0004471
551.02	0.3515957		1081.02	0.04893429		1611.02	-0.01580602		2141.01	0.00038817
551.22	0.35099286		1081.22	0.04938128		1611.22	-0.01574539		2141.21	-0.0003803
551.42	0.3506384		1081.42	0.04881778		1611.42	-0.01612795		2141.41	-0.00018152
551.62	0.35069793		1081.62	0.04840417		1611.62	-0.01652852		2141.61	0.00052508
551.82	0.35080803		1081.82	0.04745191		1611.82	-0.01719286		2141.81	0.00074382
552.02	0.34952835		1082.02	0.04753631		1612.02	-0.01666293		2142.01	0.00051232
552.22	0.34937559		1082.22	0.04763756		1612.22	-0.01710562		2142.21	0.00115879
552.42	0.34959056		1082.42	0.04815409		1612.42	-0.01693379		2142.41	0.00209532
552.62	0.35057743		1082.62	0.04805745		1612.62	-0.01730766		2142.61	0.00313676
552.82	0.35018296		1082.82	0.04755924		1612.82	-0.01851288		2142.81	0.00342736
553.02	0.3502205		1083.02	0.04765438		1613.02	-0.01894048		2143.01	0.00325653
553.22	0.3506377		1083.22	0.04602326		1613.22	-0.01897169		2143.21	0.00421667
553.42	0.35137937		1083.42	0.04496742		1613.42	-0.01915307		2143.41	0.0048271
553.62	0.35088193		1083.62	0.04436653		1613.62	-0.0193432		2143.61	0.0043226
553.82	0.35074382		1083.82	0.04420224		1613.82	-0.01958143		2143.81	0.00518302
554.02	0.35092678		1084.02	0.04332931		1614.02	-0.01873994		2144.01	0.00532368
554.22	0.35069084		1084.22	0.04382687		1614.22	-0.01891675		2144.21	0.00624022
554.42	0.35076173		1084.42	0.04411082		1614.42	-0.01787152		2144.41	0.00673964
554.62	0.35134169		1084.62	0.04453067		1614.62	-0.01628761		2144.61	0.00707772
554.82	0.35153791		1084.82	0.0454023		1614.82	-0.01507882		2144.81	0.00629387
555.02	0.35114506		1085.02	0.04557814		1615.02	-0.0146185		2145.01	0.00534125
555.22	0.35060572		1085.22	0.04608162		1615.22	-0.01471371		2145.21	0.00472705
555.42	0.350304		1085.42	0.04551188		1615.42	-0.01409358		2145.41	0.00488293
555.62	0.34948358		1085.62	0.04543804		1615.62	-0.01290812		2145.61	0.00455657
555.82	0.34970497		1085.82	0.04524813		1615.82	-0.01304449		2145.81	0.00398225
556.02	0.34899273		1086.02	0.04636665		1616.02	-0.01265627		2146.01	0.00282248
556.22	0.34994088		1086.22	0.04724933		1616.22	-0.01307387		2146.21	0.00258426
556.42	0.35040639		1086.42	0.04763889		1616.42	-0.0138771		2146.41	0.00198
556.62	0.35054127		1086.62	0.04807992		1616.62	-0.01399313		2146.61	0.00121718
556.82	0.35013239		1086.82	0.04879071		1616.82	-0.01435246		2146.81	0.00098194
557.02	0.35098349		1087.02	0.04904747		1617.02	-0.01589779		2147.01	0.00148089
557.22	0.35169303		1087.22	0.04893821		1617.22	-0.01689835		2147.21	0.00126376
557.42	0.35196031		1087.42	0.04796125		1617.42	-0.01775857		2147.41	0.00089408
557.62	0.35222078		1087.62	0.04753711		1617.62	-0.01884704		2147.61	0.00004792
557.82	0.35210022		1087.82	0.04686507		1617.82	-0.01842372		2147.81	0.00006387
558.02	0.35226623		1088.02	0.04647834		1618.02	-0.01819053		2148.01	-0.00046008
558.22	0.35192639		1088.22	0.04712334		1618.22	-0.01817918		2148.21	-0.00023943
558.42	0.35194174		1088.42	0.04734754		1618.42	-0.01717566		2148.41	-0.00039549
558.62	0.35236168		1088.62	0.04771105		1618.62	-0.0164779		2148.61	-0.00091884
558.82	0.35177803		1088.82	0.04797586		1618.82	-0.01608477		2148.81	-0.00142927
559.02	0.35107638		1089.02	0.04823773		1619.02	-0.01596076		2149.01	-0.00128568
559.22	0.35057509		1089.22	0.04895183		1619.22	-0.01577074		2149.21	-0.00157477
559.42	0.35028718		1089.42	0.04882305		1619.42	-0.01517554		2149.41	-0.00166695
559.62	0.34935987		1089.62	0.04953499		1619.62	-0.01460084		2149.61	-0.00186344
559.82	0.34965583		1089.82	0.04987596		1619.82	-0.01471765		2149.81	-0.00206249
