# Supplementary material for: Functional development of a V3/glycan-specific broadly neutralizing antibody isolated from a case of HIV superinfection
Source: eLife journal article supplement (doi:10.7554/elife.68110), 2021-07-15
Supplement: fig2-data2 [file C3.xls]

Vers 3.43 Data Simulation
Conc1	1.25E-07	1.25E-07	1.25E-07	1.25E-07	1.25E-07
Start1	200	729.99	1259.99	1789.98	2320.01
Stop1	559.8	1089.79	1619.78	2149.78	2679.81
Time1	Data1	Sim1	Time2	Data2	Sim2	Time3	Data3	Sim3	Time4	Data4	Sim4	Time5	Data5	Sim5
200	0.00531281		729.99	0.0109458		1259.99	-0.00140866		1789.98	0.00863449		2320.01	-0.00433034
200.2	0.00409717		730.19	0.01131205		1260.19	-0.00074538		1790.18	0.00801124		2320.21	-0.00353674
200.4	0.00274923		730.39	0.01178607		1260.39	-0.00067702		1790.38	0.00720356		2320.41	-0.0024113
200.6	0.00174733		730.59	0.01240854		1260.59	0.0000493		1790.58	0.00591623		2320.61	-0.00157986
200.8	0.00123515		730.79	0.01352732		1260.79	0.00008352		1790.78	0.00498629		2320.81	-0.00100793
201	0.00069532		730.99	0.01384305		1260.99	0.00054506		1790.98	0.00504302		2321.01	-0.00029259
201.2	-0.00016112		731.19	0.01397573		1261.19	0.00028361		1791.18	0.00488901		2321.21	0.00028271
201.4	0.00006855		731.39	0.01464509		1261.39	0.00061254		1791.38	0.00434804		2321.41	0.00052643
201.6	-0.00036047		731.59	0.01474367		1261.59	0.00055342		1791.58	0.00446909		2321.61	0.00067499
201.8	0.00073258		731.79	0.01448603		1261.79	0.00040148		1791.78	0.0046352		2321.81	0.00101814
202	0.00253872		731.99	0.01466265		1261.99	0.00044669		1791.98	0.00496878		2322.01	0.00080408
202.2	0.00480457		732.19	0.01395409		1262.19	-0.0000338		1792.18	0.00526249		2322.21	0.00032319
202.4	0.00661741		732.39	0.01410785		1262.39	-0.00076946		1792.38	0.00515699		2322.41	0.00013473
202.6	0.0077139		732.59	0.01430893		1262.59	-0.00136815		1792.58	0.00440707		2322.61	0.00000776
202.8	0.00918836		732.79	0.01417051		1262.79	-0.00111109		1792.78	0.00430568		2322.81	-0.00054584
203	0.00991936		732.99	0.01531024		1262.99	-0.00042721		1792.98	0.00452546		2323.01	-0.00151006
203.2	0.01184177		733.19	0.0158585		1263.19	-0.0004964		1793.18	0.00364194		2323.21	-0.0022062
203.4	0.01355218		733.39	0.01640307		1263.39	0.00024362		1793.38	0.00284652		2323.41	-0.00250593
203.6	0.01499186		733.59	0.01717606		1263.59	-0.0000324		1793.58	0.00232153		2323.61	-0.00214676
203.8	0.01508209		733.79	0.01714595		1263.79	0.00032453		1793.78	0.00249429		2323.81	-0.00289718
204	0.01631785		733.99	0.01704064		1263.99	-0.0001197		1793.98	0.00213138		2324.01	-0.00163786
204.2	0.01833436		734.19	0.01716193		1264.19	-0.00063256		1794.18	0.00240456		2324.21	-0.00107724
204.4	0.01997569		734.39	0.01764237		1264.39	-0.00118999		1794.38	0.00209238		2324.41	-0.00018868
204.6	0.021375		734.59	0.01754503		1264.59	-0.00084081		1794.58	0.00140849		2324.61	-0.00079725
204.8	0.02312843		734.79	0.01767426		1264.79	-0.00146937		1794.78	0.00145193		2324.81	0.00010593
205	0.0237086		734.99	0.0170022		1264.99	-0.00103703		1794.98	0.0015084		2325.01	0.0000851
205.2	0.02449783		735.19	0.01705524		1265.19	-0.00118959		1795.18	0.00219286		2325.21	-0.00002116
205.4	0.02608425		735.39	0.01772095		1265.39	-0.0007149		1795.38	0.00236098		2325.41	0.00029861
205.6	0.02696836		735.59	0.01731005		1265.59	-0.00080903		1795.58	0.00293443		2325.61	0.00038718
205.8	0.028855		735.79	0.01676323		1265.79	-0.00069911		1795.78	0.00330962		2325.81	0.00014365
206	0.03021844		735.99	0.01715031		1265.99	-0.00106496		1795.98	0.0033791		2326.01	0.00024736
206.2	0.03124034		736.19	0.01657404		1266.19	-0.00163286		1796.18	0.00333328		2326.21	0.0000637
206.4	0.03166304		736.39	0.01706869		1266.39	-0.00190383		1796.38	0.00277215		2326.41	-0.00027449
206.6	0.03278184		736.59	0.01813896		1266.59	-0.00101774		1796.58	0.00265772		2326.61	-0.00011362
206.8	0.03348853		736.79	0.01826322		1266.79	-0.00076879		1796.78	0.00359141		2326.81	-0.00090957
207	0.03478869		736.99	0.01928707		1266.99	0.00005696		1796.98	0.00438372		2327.01	-0.00130011
207.2	0.03666766		737.19	0.01998576		1267.19	0.00029654		1797.18	0.0040755		2327.21	-0.00177626
207.4	0.03767624		737.39	0.02045921		1267.39	0.00112025		1797.38	0.00429528		2327.41	-0.00226719
207.6	0.03816404		737.59	0.02042015		1267.59	0.00063728		1797.58	0.00579361		2327.61	-0.00243883
207.8	0.03861062		737.79	0.02047328		1267.79	0.00128332		1797.78	0.00614948		2327.81	-0.00297254
208	0.04004972		737.99	0.02049952		1267.99	0.00068062		1797.98	0.00561345		2328.01	-0.00196222
208.2	0.04096012		738.19	0.02094003		1268.19	0.00032657		1798.18	0.00572412		2328.21	-0.00193293
208.4	0.04160467		738.39	0.02101584		1268.39	0.00025727		1798.38	0.00566903		2328.41	-0.00219869
208.6	0.04295139		738.59	0.02005974		1268.59	-0.00008879		1798.58	0.00530325		2328.61	-0.00311955
208.8	0.04453276		738.79	0.02093284		1268.79	-0.00023459		1798.78	0.00439317		2328.81	-0.00205612
209	0.04575179		738.99	0.02091205		1268.99	0.00003539		1798.98	0.00428286		2329.01	-0.0023731
209.2	0.04689885		739.19	0.02104528		1269.19	-0.00072568		1799.18	0.00475192		2329.21	-0.00167249
209.4	0.04819383		739.39	0.02070464		1269.39	-0.00078851		1799.38	0.00335276		2329.41	-0.0014451
209.6	0.0495468		739.59	0.02024511		1269.59	-0.00097977		1799.58	0.00262149		2329.61	-0.00191337
209.8	0.05058885		739.79	0.02069425		1269.79	-0.00158265		1799.78	0.00223434		2329.81	-0.00143542
210	0.05250249		739.99	0.02149871		1269.99	-0.00198768		1799.98	0.00216571		2330.01	-0.0013464
210.2	0.05302569		740.19	0.02181572		1270.19	-0.00232245		1800.18	0.00183162		2330.21	-0.00174698
210.4	0.05383592		740.39	0.02277679		1270.39	-0.0018478		1800.38	0.00205521		2330.41	-0.00254991
210.6	0.0549086		740.59	0.02335902		1270.59	-0.00096541		1800.58	0.00229775		2330.61	-0.00248603
210.8	0.05591031		740.79	0.0238342		1270.79	-0.00107377		1800.78	0.00264075		2330.81	-0.00340751
211	0.05754019		740.99	0.02466462		1270.99	-0.00005411		1800.98	0.00221489		2331.01	-0.00341508
211.2	0.05910777		741.19	0.02490753		1271.19	-0.00067225		1801.18	0.00204855		2331.21	-0.00351905
211.4	0.059627		741.39	0.02448132		1271.39	-0.00044111		1801.38	0.00156661		2331.41	-0.00482632
211.6	0.06043586		741.59	0.02463471		1271.59	-0.00037251		1801.58	0.00208259		2331.61	-0.00562466
211.8	0.06045912		741.79	0.02461453		1271.79	-0.00006441		1801.78	0.00232367		2331.81	-0.00599961
212	0.06020141		741.99	0.02464613		1271.99	-0.00080757		1801.98	0.00191938		2332.01	-0.00529591
212.2	0.0601404		742.19	0.02524612		1272.19	-0.00117491		1802.18	0.00310282		2332.21	-0.00623635
212.4	0.06209434		742.39	0.02520045		1272.39	-0.00184851		1802.38	0.00360696		2332.41	-0.00746853
212.6	0.0636448		742.59	0.02554316		1272.59	-0.0012487		1802.58	0.00365666		2332.61	-0.00707744
212.8	0.06520446		742.79	0.02658262		1272.79	-0.0004001		1802.78	0.00325944		2332.81	-0.00661628
213	0.06692942		742.99	0.02688703		1272.99	-0.00016723		1802.98	0.00380112		2333.01	-0.00709288
213.2	0.06796765		743.19	0.02704356		1273.19	-0.00053424		1803.18	0.00470186		2333.21	-0.00715231
213.4	0.06946344		743.39	0.02654212		1273.39	-0.00023649		1803.38	0.0046539		2333.41	-0.00786071
213.6	0.07139309		743.59	0.02687533		1273.59	-0.00102022		1803.58	0.00540753		2333.61	-0.00806543
213.8	0.07254147		743.79	0.02753456		1273.79	-0.00111667		1803.78	0.00587446		2333.81	-0.0075015
214	0.07401385		743.99	0.02763108		1273.99	-0.00063466		1803.98	0.00685559		2334.01	-0.00811064
214.2	0.07436081		744.19	0.02827805		1274.19	-0.00064852		1804.18	0.00741858		2334.21	-0.00739766
214.4	0.07605595		744.39	0.02900141		1274.39	0.00010012		1804.38	0.00763615		2334.41	-0.00750506
214.6	0.07725595		744.59	0.02949075		1274.59	0.00006179		1804.58	0.00763255		2334.61	-0.00645416
214.8	0.07860513		744.79	0.03054557		1274.79	-0.00031927		1804.78	0.00781673		2334.81	-0.00633579
215	0.07938895		744.99	0.03064767		1274.99	-0.00017481		1804.98	0.00697824		2335.01	-0.006224
215.2	0.08004067		745.19	0.03090066		1275.19	-0.00086054		1805.18	0.00652926		2335.21	-0.00601713
215.4	0.08022027		745.39	0.03065211		1275.39	-0.0005146		1805.38	0.00585186		2335.41	-0.00626898
215.6	0.08072903		745.59	0.03093878		1275.59	-0.00069401		1805.58	0.00618127		2335.61	-0.00559615
215.8	0.08089889		745.79	0.03065017		1275.79	-0.00061696		1805.78	0.0059503		2335.81	-0.00498824
216	0.08124771		745.99	0.03156954		1275.99	-0.00064873		1805.98	0.00416423		2336.01	-0.00438015
216.2	0.08259189		746.19	0.03224344		1276.19	-0.00089328		1806.18	0.00396995		2336.21	-0.0041812
216.4	0.08453541		746.39	0.03271517		1276.39	0.00030158		1806.38	0.00328425		2336.41	-0.00460647
216.6	0.08525903		746.59	0.03378378		1276.59	0.00094489		1806.58	0.00258936		2336.61	-0.00388955
216.8	0.08706262		746.79	0.03439877		1276.79	0.00054205		1806.78	0.00214341		2336.81	-0.00447049
217	0.08853026		746.99	0.03478483		1276.99	0.00044991		1806.98	0.00172156		2337.01	-0.00461797
217.2	0.08949187		747.19	0.03497953		1277.19	0.00031754		1807.18	0.0023154		2337.21	-0.00464847
217.4	0.09064363		747.39	0.03530953		1277.39	0.00030647		1807.38	0.00191114		2337.41	-0.00523696
217.6	0.09194304		747.59	0.03531696		1277.59	-0.00023551		1807.58	0.00184789		2337.61	-0.00484873
217.8	0.09269614		747.79	0.03628814		1277.79	0.00070313		1807.78	0.00188589		2337.81	-0.00438404
218	0.09381114		747.99	0.03616759		1277.99	0.00090514		1807.98	0.00235525		2338.01	-0.00571093
218.2	0.09508957		748.19	0.03635527		1278.19	0.00055343		1808.18	0.00225541		2338.21	-0.00575966
218.4	0.09603514		748.39	0.03611758		1278.39	0.00007848		1808.38	0.00187285		2338.41	-0.00570665
218.6	0.0968312		748.59	0.03621486		1278.59	-0.00071323		1808.58	0.00308285		2338.61	-0.00494018
218.8	0.09765278		748.79	0.03595356		1278.79	-0.00126442		1808.78	0.00373806		2338.81	-0.0053832
219	0.09784864		748.99	0.03503178		1278.99	-0.00115874		1808.98	0.00341908		2339.01	-0.00516732
219.2	0.09781693		749.19	0.03530456		1279.19	-0.0015284		1809.18	0.00372811		2339.21	-0.00528067
219.4	0.09834162		749.39	0.03499892		1279.39	-0.00149269		1809.38	0.00382561		2339.41	-0.00520219
219.6	0.09920994		749.59	0.03536205		1279.59	-0.00197196		1809.58	0.00435531		2339.61	-0.0049871
219.8	0.0996912		749.79	0.03540064		1279.79	-0.00157751		1809.78	0.00423399		2339.81	-0.00496472
220	0.10015806		749.99	0.03647666		1279.99	-0.00198726		1809.98	0.00378668		2340.01	-0.00469884
220.2	0.10128414		750.19	0.03664555		1280.19	-0.00186754		1810.18	0.00404601		2340.21	-0.00467778
220.4	0.10202295		750.39	0.03674676		1280.39	-0.00178616		1810.38	0.00419002		2340.41	-0.00535485
220.6	0.10307842		750.59	0.03726036		1280.59	-0.00313639		1810.58	0.00355497		2340.61	-0.00535141
220.8	0.10502182		750.79	0.03757228		1280.79	-0.00329107		1810.78	0.00402778		2340.81	-0.00552612
221	0.10626425		750.99	0.03809105		1280.99	-0.00298088		1810.98	0.00387147		2341.01	-0.00577295
221.2	0.10753414		751.19	0.038384		1281.19	-0.00264471		1811.18	0.00521722		2341.21	-0.00593912
221.4	0.10921798		751.39	0.0389516		1281.39	-0.00229428		1811.38	0.00515742		2341.41	-0.00607174
221.6	0.10968618		751.59	0.03830255		1281.59	-0.00192416		1811.58	0.00543203		2341.61	-0.00662768
221.8	0.11010318		751.79	0.03898825		1281.79	-0.00017374		1811.78	0.00526634		2341.81	-0.00747291
222	0.11053249		751.99	0.03861		1281.99	0.00009191		1811.98	0.00501187		2342.01	-0.00906643
222.2	0.11150705		752.19	0.03857544		1282.19	0.00039803		1812.18	0.00488642		2342.21	-0.00891676
222.4	0.11187155		752.39	0.03840191		1282.39	0.00106876		1812.38	0.00521328		2342.41	-0.00862316
222.6	0.11301275		752.59	0.03755645		1282.59	0.00100934		1812.58	0.00638924		2342.61	-0.00851353
222.8	0.11430041		752.79	0.03692946		1282.79	0.00162865		1812.78	0.0070488		2342.81	-0.00895374
223	0.11401994		752.99	0.03716857		1282.99	0.00163177		1812.98	0.00724826		2343.01	-0.00864966
223.2	0.11428065		753.19	0.03797659		1283.19	0.00201503		1813.18	0.0077955		2343.21	-0.00928781
223.4	0.1144621		753.39	0.03781219		1283.39	0.00174941		1813.38	0.00786054		2343.41	-0.00906944
223.6	0.11519918		753.59	0.0387047		1283.59	0.00147205		1813.58	0.00797363		2343.61	-0.00887032
223.8	0.11580454		753.79	0.03878607		1283.79	0.00179843		1813.78	0.00688593		2343.81	-0.00827669
224	0.1165851		753.99	0.03950295		1283.99	0.00115158		1813.98	0.00594161		2344.01	-0.00748468
224.2	0.11785704		754.19	0.03942093		1284.19	0.00102277		1814.18	0.00456485		2344.21	-0.00657961
224.4	0.11844034		754.39	0.03986857		1284.39	-0.00038589		1814.38	0.00361603		2344.41	-0.00567891
224.6	0.11905618		754.59	0.03996272		1284.59	-0.00138196		1814.58	0.00218587		2344.61	-0.00441466
224.8	0.1199117		754.79	0.04047593		1284.79	-0.0009795		1814.78	0.00244016		2344.81	-0.00380391
225	0.12072708		754.99	0.04048571		1284.99	-0.00165925		1814.98	0.00186728		2345.01	-0.00348828
225.2	0.12125985		755.19	0.040616		1285.19	-0.0009682		1815.18	0.00184208		2345.21	-0.00319442
225.4	0.12120394		755.39	0.04109898		1285.39	-0.00068013		1815.38	0.0010251		2345.41	-0.00348647
225.6	0.12028758		755.59	0.04086546		1285.59	-0.00034154		1815.58	0.00027997		2345.61	-0.00401206
225.8	0.12066552		755.79	0.04197881		1285.79	0.00016402		1815.78	-0.00063155		2345.81	-0.00399357
226	0.12070657		755.99	0.0426919		1285.99	-0.00017374		1815.98	-0.00045994		2346.01	-0.00411451
226.2	0.12136759		756.19	0.04303926		1286.19	0.00024891		1816.18	-0.00041714		2346.21	-0.00413487
226.4	0.12167033		756.39	0.04379885		1286.39	-0.00003576		1816.38	0.00004028		2346.41	-0.00430167
226.6	0.1224035		756.59	0.04384764		1286.59	-0.00041301		1816.58	0.001426		2346.61	-0.00446221
226.8	0.1221101		756.79	0.04517332		1286.79	-0.00056846		1816.78	0.00206718		2346.81	-0.00565977
227	0.12152501		756.99	0.04530558		1286.99	-0.00100378		1816.98	0.00233449		2347.01	-0.00593645
227.2	0.12154117		757.19	0.04588067		1287.19	-0.00039913		1817.18	0.00236406		2347.21	-0.00654952
227.4	0.12182903		757.39	0.04608674		1287.39	-0.00101378		1817.38	0.00235273		2347.41	-0.00657518
227.6	0.12291528		757.59	0.0470405		1287.59	-0.0011278		1817.58	0.00220037		2347.61	-0.00626391
227.8	0.12387928		757.79	0.04700811		1287.79	-0.00158276		1817.78	0.00114011		2347.81	-0.00596388
228	0.12494761		757.99	0.04717591		1287.99	-0.00114877		1817.98	0.00064421		2348.01	-0.0059509
228.2	0.1264243		758.19	0.04719324		1288.19	-0.00133863		1818.18	0.0008806		2348.21	-0.00551667
228.4	0.1277098		758.39	0.04791657		1288.39	-0.00143299		1818.38	0.00094743		2348.41	-0.00584467
228.6	0.12944204		758.59	0.0468329		1288.59	-0.0012138		1818.58	0.00168401		2348.61	-0.00588181
228.8	0.13117646		758.79	0.04742241		1288.79	-0.00036389		1818.78	0.00307007		2348.81	-0.00716712
229	0.13374191		758.99	0.04731465		1288.99	-0.0011648		1818.98	0.00374254		2349.01	-0.00775289
229.2	0.13520391		759.19	0.04658015		1289.19	-0.00035		1819.18	0.00397386		2349.21	-0.00868341
229.4	0.13652391		759.39	0.04577039		1289.39	-0.00144569		1819.38	0.00419493		2349.41	-0.00955272
229.6	0.13856029		759.59	0.04561542		1289.59	-0.00172726		1819.58	0.00419844		2349.61	-0.00962202
229.8	0.14001136		759.79	0.04555937		1289.79	-0.00203212		1819.78	0.00518099		2349.81	-0.00989166
230	0.14069308		759.99	0.04561675		1289.99	-0.00244196		1819.98	0.00578134		2350.01	-0.00972801
230.2	0.14180235		760.19	0.04610472		1290.19	-0.00252381		1820.18	0.00554654		2350.21	-0.00947091
230.4	0.14265585		760.39	0.04666659		1290.39	-0.00307817		1820.38	0.00628006		2350.41	-0.00990478
230.6	0.14297065		760.59	0.04619863		1290.59	-0.00290043		1820.58	0.00670088		2350.61	-0.00945513
230.8	0.14222783		760.79	0.04721328		1290.79	-0.00321343		1820.78	0.00608581		2350.81	-0.00947396
231	0.14166969		760.99	0.04685689		1290.99	-0.00270348		1820.98	0.00533164		2351.01	-0.00891345
231.2	0.14147852		761.19	0.0469165		1291.19	-0.00285125		1821.18	0.0046318		2351.21	-0.00905764
231.4	0.14157621		761.39	0.04769519		1291.39	-0.00294024		1821.38	0.0044199		2351.41	-0.00829336
231.6	0.14232413		761.59	0.04752479		1291.59	-0.00245867		1821.58	0.00338482		2351.61	-0.00752982
231.8	0.14197003		761.79	0.04851947		1291.79	-0.00191097		1821.78	0.00179848		2351.81	-0.00700658
232	0.14226257		761.99	0.04857401		1291.99	-0.00054677		1821.98	0.00140509		2352.01	-0.00709432
232.2	0.14294841		762.19	0.04908723		1292.19	-0.00041328		1822.18	0.0020259		2352.21	-0.00728108
232.4	0.14353638		762.39	0.04987093		1292.39	-0.00009132		1822.38	0.00190369		2352.41	-0.00784521
232.6	0.1439857		762.59	0.05011675		1292.59	0.00065603		1822.58	0.00217179		2352.61	-0.00804029
232.8	0.14402835		762.79	0.05062713		1292.79	0.00169819		1822.78	0.00205744		2352.81	-0.00833919
233	0.14523328		762.99	0.05046071		1292.99	0.00147357		1822.98	0.00171797		2353.01	-0.00845487
233.2	0.14607535		763.19	0.05045714		1293.19	0.00200784		1823.18	0.00139523		2353.21	-0.00837123
233.4	0.1462587		763.39	0.05175647		1293.39	0.00123933		1823.38	0.0021626		2353.41	-0.0083254
233.6	0.14741448		763.59	0.05216381		1293.59	0.00174482		1823.58	0.00231583		2353.61	-0.00800122
233.8	0.14748162		763.79	0.05214839		1293.79	0.00118247		1823.78	0.0029715		2353.81	-0.00755031
234	0.14817151		763.99	0.0530545		1293.99	0.00115907		1823.98	0.00288721		2354.01	-0.0074052
234.2	0.1491573		764.19	0.05381692		1294.19	0.00155499		1824.18	0.00293928		2354.21	-0.0066237
234.4	0.15011009		764.39	0.0545396		1294.39	0.00075049		1824.38	0.00417071		2354.41	-0.00679135
234.6	0.15108489		764.59	0.05434296		1294.59	-0.00007573		1824.58	0.00459947		2354.61	-0.0065407
234.8	0.15168869		764.79	0.05524082		1294.79	-0.00064831		1824.78	0.00473197		2354.81	-0.00688203
235	0.15179441		764.99	0.05446562		1294.99	-0.00119764		1824.98	0.0039879		2355.01	-0.00762802
235.2	0.15305944		765.19	0.05417291		1295.19	-0.0011589		1825.18	0.00354031		2355.21	-0.00747724
235.4	0.15348793		765.39	0.05485579		1295.39	-0.0014428		1825.38	0.00283196		2355.41	-0.00612923
235.6	0.15456681		765.59	0.05429151		1295.59	-0.00145905		1825.58	0.00168591		2355.61	-0.00581833
235.8	0.15457921		765.79	0.05466167		1295.79	-0.0013968		1825.78	0.00162977		2355.81	-0.00607738
236	0.15458275		765.99	0.05475619		1295.99	-0.00173305		1825.98	0.0024668		2356.01	-0.00682433
236.2	0.1553859		766.19	0.05493503		1296.19	-0.00200897		1826.18	0.0026842		2356.21	-0.00692337
236.4	0.15531255		766.39	0.05521607		1296.39	-0.00226544		1826.38	0.00255663		2356.41	-0.00752952
236.6	0.15572572		766.59	0.05562318		1296.59	-0.0012052		1826.58	0.00296066		2356.61	-0.00756343
236.8	0.15628378		766.79	0.0552896		1296.79	-0.00006027		1826.78	0.00322633		2356.81	-0.00742102
237	0.15809233		766.99	0.0559839		1296.99	0.00005869		1826.98	0.00333493		2357.01	-0.00744173
237.2	0.15850175		767.19	0.05685959		1297.19	0.00043028		1827.18	0.0039018		2357.21	-0.00690168
237.4	0.15896626		767.39	0.05687532		1297.39	0.00044315		1827.38	0.00512258		2357.41	-0.00738764
237.6	0.16011107		767.59	0.05603494		1297.59	0.00123435		1827.58	0.00587659		2357.61	-0.00788561
237.8	0.16011974		767.79	0.05549743		1297.79	0.00091207		1827.78	0.00681825		2357.81	-0.00816947
238	0.16140538		767.99	0.05599412		1297.99	0.00164655		1827.98	0.00668961		2358.01	-0.00831639
238.2	0.16273249		768.19	0.05683572		1298.19	0.00216785		1828.18	0.0079847		2358.21	-0.00841878
238.4	0.16463835		768.39	0.05751179		1298.39	0.00165505		1828.38	0.00906491		2358.41	-0.00951145
238.6	0.16619012		768.59	0.05704659		1298.59	0.00222985		1828.58	0.00883615		2358.61	-0.00989781
238.8	0.16647692		768.79	0.0575585		1298.79	0.00258985		1828.78	0.00820656		2358.81	-0.01027582
239	0.16678802		768.99	0.05782746		1298.99	0.00248796		1828.98	0.00646077		2359.01	-0.01093863
239.2	0.16704833		769.19	0.05895883		1299.19	0.00263011		1829.18	0.00520632		2359.21	-0.01026993
239.4	0.16714892		769.39	0.06035089		1299.39	0.00130469		1829.38	0.0041396		2359.41	-0.00961254
239.6	0.16777612		769.59	0.06096349		1299.59	0.00100542		1829.58	0.00410838		2359.61	-0.01011297
239.8	0.16744403		769.79	0.06197523		1299.79	-0.00007421		1829.78	0.0043651		2359.81	-0.01054121
240	0.16686106		769.99	0.06274676		1299.99	-0.00081111		1829.98	0.00376638		2360.01	-0.01106544
240.2	0.16778237		770.19	0.06327846		1300.19	-0.00089		1830.18	0.00294129		2360.21	-0.01094172
240.4	0.1678288		770.39	0.06382763		1300.39	-0.00108997		1830.38	0.00276779		2360.41	-0.01087522
240.6	0.16857524		770.59	0.06324368		1300.59	-0.00107702		1830.58	0.00315552		2360.61	-0.01066751
240.8	0.16909602		770.79	0.06262699		1300.79	-0.00050409		1830.78	0.00289626		2360.81	-0.01014085
241	0.169655		770.99	0.06219142		1300.99	-0.00108398		1830.98	0.0028199		2361.01	-0.00995356
241.2	0.16947427		771.19	0.0612418		1301.19	-0.00193212		1831.18	0.00355609		2361.21	-0.00950024
241.4	0.16944681		771.39	0.05994479		1301.39	-0.00199296		1831.38	0.00460428		2361.41	-0.00940234
241.6	0.16906118		771.59	0.05892497		1301.59	-0.00156468		1831.58	0.005218		2361.61	-0.00942876
241.8	0.16894404		771.79	0.05827315		1301.79	-0.00154133		1831.78	0.00476859		2361.81	-0.00943948
242	0.16969408		771.99	0.05838034		1301.99	-0.00029076		1831.98	0.0047915		2362.01	-0.00885169
242.2	0.16993725		772.19	0.05837202		1302.19	0.00007109		1832.18	0.00593911		2362.21	-0.00993228
242.4	0.17076571		772.39	0.05806811		1302.39	-0.00030216		1832.38	0.00599846		2362.41	-0.0099513
242.6	0.1707807		772.59	0.05815481		1302.59	0.00012353		1832.58	0.00513898		2362.61	-0.00937359
242.8	0.17062403		772.79	0.05947271		1302.79	-0.00004556		1832.78	0.00483719		2362.81	-0.00985254
243	0.17091507		772.99	0.06074664		1302.99	-0.00029161		1832.98	0.00433969		2363.01	-0.01032098
243.2	0.17071171		773.19	0.06205923		1303.19	-0.00054441		1833.18	0.00425343		2363.21	-0.0100697
243.4	0.17098276		773.39	0.06345281		1303.39	-0.00118012		1833.38	0.00418701		2363.41	-0.00967671
243.6	0.17200104		773.59	0.06348066		1303.59	-0.00195399		1833.58	0.004355		2363.61	-0.01004899
243.8	0.17206044		773.79	0.06378547		1303.79	-0.00268478		1833.78	0.00456083		2363.81	-0.01060407
244	0.17302086		773.99	0.06413723		1303.99	-0.00233477		1833.98	0.00461014		2364.01	-0.01027836
244.2	0.17429989		774.19	0.06455894		1304.19	-0.00289111		1834.18	0.00460398		2364.21	-0.01026528
244.4	0.17558858		774.39	0.0643975		1304.39	-0.00367901		1834.38	0.00464465		2364.41	-0.01047788
244.6	0.17678467		774.59	0.06378019		1304.59	-0.00386406		1834.58	0.00512125		2364.61	-0.01080228
244.8	0.17787972		774.79	0.06397811		1304.79	-0.00342522		1834.78	0.00518003		2364.81	-0.0103868
245	0.17880693		774.99	0.06397897		1304.99	-0.00415752		1834.98	0.00543624		2365.01	-0.01045647
245.2	0.17964036		775.19	0.06386003		1305.19	-0.0043688		1835.18	0.00525527		2365.21	-0.01073351
245.4	0.18001155		775.39	0.06358484		1305.39	-0.00342865		1835.38	0.00473089		2365.41	-0.01019328
245.6	0.18122088		775.59	0.06396472		1305.59	-0.00320583		1835.58	0.00454332		2365.61	-0.01090537
245.8	0.1819047		775.79	0.06451471		1305.79	-0.00266948		1835.78	0.0039109		2365.81	-0.01059187
246	0.18165406		775.99	0.0646306		1305.99	-0.00220934		1835.98	0.00362394		2366.01	-0.01042411
246.2	0.18209308		776.19	0.06485326		1306.19	-0.00225193		1836.18	0.00317335		2366.21	-0.01095813
246.4	0.18236628		776.39	0.06522727		1306.39	-0.00194443		1836.38	0.00279471		2366.41	-0.01007983
246.6	0.18191051		776.59	0.06563438		1306.59	-0.00064714		1836.58	0.00225796		2366.61	-0.01006166
246.8	0.18206712		776.79	0.06648597		1306.79	-0.00030106		1836.78	0.00181639		2366.81	-0.01046434
247	0.18260387		776.99	0.06655364		1306.99	-0.00052266		1836.98	0.00192036		2367.01	-0.01036159
247.2	0.18275335		777.19	0.06671902		1307.19	-0.00073706		1837.18	0.00172022		2367.21	-0.00950963
247.4	0.18346089		777.39	0.06642576		1307.39	-0.00132544		1837.38	0.00171184		2367.41	-0.00921327
247.6	0.18393298		777.59	0.06581131		1307.59	-0.00213083		1837.58	0.00235322		2367.61	-0.00898453
247.8	0.18387734		777.79	0.06576947		1307.79	-0.00174392		1837.78	0.00321878		2367.81	-0.009189
248	0.18405353		777.99	0.0660779		1307.99	-0.00070033		1837.98	0.00301852		2368.01	-0.00932648
248.2	0.18493734		778.19	0.06626895		1308.19	-0.00083661		1838.18	0.00247248		2368.21	-0.00976269
248.4	0.18630861		778.39	0.0661451		1308.39	-0.00019773		1838.38	0.00199364		2368.41	-0.00939175
248.6	0.18682762		778.59	0.06630015		1308.59	0.00010466		1838.58	0.00254162		2368.61	-0.00938947
248.8	0.18715425		778.79	0.06681741		1308.79	0.00066685		1838.78	0.00298413		2368.81	-0.00930786
249	0.18780319		778.99	0.066466		1308.99	0.00071788		1838.98	0.00288275		2369.01	-0.00911345
249.2	0.18856616		779.19	0.06721894		1309.19	0.00055975		1839.18	0.00268103		2369.21	-0.00953723
249.4	0.18865115		779.39	0.06695808		1309.39	0.00105777		1839.38	0.00317669		2369.41	-0.00911053
249.6	0.18849649		779.59	0.06836234		1309.59	0.0014588		1839.58	0.00323925		2369.61	-0.00970591
249.8	0.18820631		779.79	0.06822253		1309.79	0.00160001		1839.78	0.00246039		2369.81	-0.00979123
250	0.18824469		779.99	0.0682704		1309.99	0.00185169		1839.98	0.00217218		2370.01	-0.01028753
250.2	0.18822092		780.19	0.06796993		1310.19	0.00242064		1840.18	0.00198412		2370.21	-0.011143
250.4	0.18845051		780.39	0.06840565		1310.39	0.00227376		1840.38	0.00196576		2370.41	-0.01090237
250.6	0.18868251		780.59	0.06878674		1310.59	0.00237863		1840.58	0.00230296		2370.61	-0.01138497
250.8	0.18970769		780.79	0.06965687		1310.79	0.00151141		1840.78	0.00183784		2370.81	-0.0116574
251	0.1898989		780.99	0.06944441		1310.99	0.00079698		1840.98	0.00212813		2371.01	-0.01114016
251.2	0.19034529		781.19	0.06979661		1311.19	-0.00018234		1841.18	0.00215281		2371.21	-0.0108565
251.4	0.19133422		781.39	0.06966597		1311.39	-0.0005408		1841.38	0.00276173		2371.41	-0.01126562
251.6	0.19215574		781.59	0.06999796		1311.59	-0.0005888		1841.58	0.00315753		2371.61	-0.01086147
251.8	0.19282939		781.79	0.06998844		1311.79	0.00041912		1841.78	0.00297912		2371.81	-0.01130197
252	0.19339399		781.99	0.07086617		1311.99	0.00147114		1841.98	0.00279243		2372.01	-0.01112157
252.2	0.19496883		782.19	0.07151053		1312.19	0.00070012		1842.18	0.00281684		2372.21	-0.01002833
252.4	0.19644117		782.39	0.07157799		1312.39	0.0006808		1842.38	0.00389397		2372.41	-0.00865255
252.6	0.19664819		782.59	0.07227023		1312.59	0.0000439		1842.58	0.00449132		2372.61	-0.00821502
252.8	0.19734561		782.79	0.07280221		1312.79	0.00085585		1842.78	0.00447817		2372.81	-0.00752192
253	0.19820513		782.99	0.07250778		1312.99	0.00073109		1842.98	0.0041595		2373.01	-0.00780677
253.2	0.19810802		783.19	0.07251989		1313.19	0.00039271		1843.18	0.00471477		2373.21	-0.00780625
253.4	0.1980694		783.39	0.07315744		1313.39	0.00047624		1843.38	0.00484579		2373.41	-0.00754867
253.6	0.19820427		783.59	0.07423764		1313.59	0.00026206		1843.58	0.00442171		2373.61	-0.00776859
253.8	0.19879453		783.79	0.0738983		1313.79	-0.00020295		1843.78	0.00476281		2373.81	-0.00863545
254	0.19891497		783.99	0.0746595		1313.99	-0.00072706		1843.98	0.00480582		2374.01	-0.00924872
254.2	0.19914912		784.19	0.07418672		1314.19	-0.00082278		1844.18	0.00431224		2374.21	-0.00953804
254.4	0.19968353		784.39	0.07549622		1314.39	-0.00139868		1844.38	0.00439993		2374.41	-0.00952855
254.6	0.19925466		784.59	0.07594035		1314.59	-0.00257863		1844.58	0.00472355		2374.61	-0.00980626
254.8	0.19925566		784.79	0.07562573		1314.79	-0.00364834		1844.78	0.00394762		2374.81	-0.01027797
255	0.19938852		784.99	0.07490489		1314.99	-0.00419144		1844.98	0.00388639		2375.01	-0.00991323
255.2	0.19981914		785.19	0.07522224		1315.19	-0.00441728		1845.18	0.00458634		2375.21	-0.01044228
255.4	0.20011728		785.39	0.07513625		1315.39	-0.00392532		1845.38	0.00516959		2375.41	-0.01014968
255.6	0.201155		785.59	0.07440903		1315.59	-0.00392544		1845.58	0.00540201		2375.61	-0.0102905
255.8	0.20077425		785.79	0.07444693		1315.79	-0.00383642		1845.78	0.00476232		2375.81	-0.0106266
256	0.20118016		785.99	0.07533467		1315.99	-0.00359404		1845.98	0.00594494		2376.01	-0.01048527
256.2	0.20194386		786.19	0.07507481		1316.19	-0.00432604		1846.18	0.00595592		2376.21	-0.00978974
256.4	0.20238257		786.39	0.07530385		1316.39	-0.00401645		1846.38	0.00556565		2376.41	-0.00917174
256.6	0.20261088		786.59	0.07475658		1316.59	-0.00338217		1846.58	0.0036347		2376.61	-0.00885836
256.8	0.20339323		786.79	0.07485195		1316.79	-0.00217817		1846.78	0.00277904		2376.81	-0.00818871
257	0.20403625		786.99	0.07494634		1316.99	-0.00163697		1846.98	0.00260398		2377.01	-0.00851212
257.2	0.2048961		787.19	0.07572084		1317.19	-0.00141592		1847.18	0.00270464		2377.21	-0.0074776
257.4	0.20523974		787.39	0.07693408		1317.39	-0.00095252		1847.38	0.00254789		2377.41	-0.00768758
257.6	0.2054312		787.59	0.07679363		1317.59	-0.00053054		1847.58	0.00279512		2377.61	-0.00824945
257.8	0.20594274		787.79	0.07661033		1317.79	-0.00025878		1847.78	0.00287429		2377.81	-0.00887196
258	0.20692151		787.99	0.07709356		1317.99	0.00000667		1847.98	0.00128741		2378.01	-0.00967347
258.2	0.20829479		788.19	0.07699279		1318.19	0.00015538		1848.18	0.00153523		2378.21	-0.00952761
258.4	0.2079452		788.39	0.07714657		1318.39	-0.0006279		1848.38	0.00193628		2378.41	-0.01064045
258.6	0.2086084		788.59	0.07636334		1318.59	-0.00135494		1848.58	0.00239727		2378.61	-0.011271
258.8	0.20917741		788.79	0.07634463		1318.79	-0.00060037		1848.78	0.00235551		2378.81	-0.01153467
259	0.21003813		788.99	0.07646085		1318.99	0.00001058		1848.98	0.00316888		2379.01	-0.01174487
259.2	0.21043173		789.19	0.07715873		1319.19	0.00023464		1849.18	0.00348233		2379.21	-0.01169032
259.4	0.21152132		789.39	0.0773715		1319.39	0.00032149		1849.38	0.00430585		2379.41	-0.01147585
259.6	0.21215483		789.59	0.0770016		1319.59	-0.00007161		1849.58	0.00448284		2379.61	-0.01215687
259.8	0.21150324		789.79	0.07808385		1319.79	-0.00112705		1849.78	0.00434301		2379.81	-0.01270866
260	0.21213455		789.99	0.07818958		1319.99	-0.00108252		1849.98	0.00479133		2380.01	-0.01284087
260.2	0.2120896		790.19	0.07834799		1320.19	-0.00139135		1850.18	0.00372218		2380.21	-0.01257875
260.4	0.21219797		790.39	0.07852523		1320.39	-0.00116599		1850.38	0.00344789		2380.41	-0.01279327
260.6	0.21270709		790.59	0.07835062		1320.59	-0.00020882		1850.58	0.00281974		2380.61	-0.01245062
260.8	0.21349148		790.79	0.07926985		1320.79	0.00022628		1850.78	0.00210549		2380.81	-0.01240962
261	0.21364942		790.99	0.07974828		1320.99	0.00074304		1850.98	0.00208337		2381.01	-0.01257787
261.2	0.21353919		791.19	0.08072996		1321.19	0.00115093		1851.18	0.00178399		2381.21	-0.01249371
261.4	0.21376301		791.39	0.08043767		1321.39	0.00110466		1851.38	0.00153569		2381.41	-0.01273866
261.6	0.21387075		791.59	0.08053088		1321.59	0.00037383		1851.58	0.00102182		2381.61	-0.01318898
261.8	0.21395299		791.79	0.08044986		1321.79	-0.00002752		1851.78	0.00012669		2381.81	-0.01442513
262	0.21446569		791.99	0.08040398		1321.99	-0.00089408		1851.98	-0.00078034		2382.01	-0.01517428
262.2	0.21425799		792.19	0.08043293		1322.19	-0.00157072		1852.18	0.00053567		2382.21	-0.01494296
262.4	0.21400042		792.39	0.08044877		1322.39	-0.00175462		1852.38	0.00073409		2382.41	-0.01502789
262.6	0.21488257		792.59	0.08083478		1322.59	-0.00139643		1852.58	0.00083964		2382.61	-0.01467071
262.8	0.21480371		792.79	0.0811503		1322.79	-0.00108566		1852.78	0.00060519		2382.81	-0.01418206
263	0.21526282		792.99	0.08105981		1322.99	-0.00112551		1852.98	0.00103391		2383.01	-0.01299561
263.2	0.21585563		793.19	0.08185451		1323.19	-0.00093042		1853.18	0.00165712		2383.21	-0.01140583
263.4	0.21655528		793.39	0.08240873		1323.39	-0.00079992		1853.38	0.0025051		2383.41	-0.01119393
263.6	0.21620584		793.59	0.08208445		1323.59	-0.00063818		1853.58	0.00223721		2383.61	-0.01062132
263.8	0.21709489		793.79	0.08293153		1323.79	-0.00035785		1853.78	0.00304135		2383.81	-0.01059397
264	0.21805784		793.99	0.08203002		1323.99	0.00062579		1853.98	0.00304316		2384.01	-0.01150012
264.2	0.21775017		794.19	0.08276863		1324.19	0.00145701		1854.18	0.0038115		2384.21	-0.01093142
264.4	0.21826164		794.39	0.08195404		1324.39	0.00227334		1854.38	0.00361393		2384.41	-0.01089366
264.6	0.21890595		794.59	0.08239654		1324.59	0.00277156		1854.58	0.0032442		2384.61	-0.01059707
264.8	0.21996277		794.79	0.08144963		1324.79	0.00194403		1854.78	0.00242808		2384.81	-0.01064562
265	0.21968018		794.99	0.08099845		1324.99	0.00202496		1854.98	0.00317136		2385.01	-0.01028765
265.2	0.22003335		795.19	0.08131454		1325.19	0.00156051		1855.18	0.00254058		2385.21	-0.01125216
265.4	0.2210867		795.39	0.0808694		1325.39	0.00076383		1855.38	0.00137879		2385.41	-0.01156943
265.6	0.22101115		795.59	0.07996244		1325.59	-0.00010703		1855.58	0.00003075		2385.61	-0.01303963
265.8	0.22079895		795.79	0.07928608		1325.79	-0.00095304		1855.78	-0.00074472		2385.81	-0.01345729
266	0.22093143		795.99	0.07935582		1325.99	-0.00192452		1855.98	-0.0007155		2386.01	-0.01325584
266.2	0.22079555		796.19	0.07983309		1326.19	-0.00220043		1856.18	-0.00047863		2386.21	-0.01324042
266.4	0.22079633		796.39	0.08014029		1326.39	-0.00292486		1856.38	-0.00056105		2386.41	-0.01349669
266.6	0.22053974		796.59	0.08120436		1326.59	-0.0033316		1856.58	-0.00084178		2386.61	-0.01431679
266.8	0.2203311		796.79	0.08235208		1326.79	-0.00333557		1856.78	-0.00081569		2386.81	-0.0142886
267	0.22082733		796.99	0.08391608		1326.99	-0.00366007		1856.98	-0.0004445		2387.01	-0.01319057
267.2	0.22174296		797.19	0.08542379		1327.19	-0.00436045		1857.18	0.00028656		2387.21	-0.01325542
267.4	0.22247599		797.39	0.08629062		1327.39	-0.00465107		1857.38	0.0004496		2387.41	-0.0137521
267.6	0.22307854		797.59	0.08762388		1327.59	-0.00429233		1857.58	0.001212		2387.61	-0.01386179
267.8	0.22411689		797.79	0.08826672		1327.79	-0.00363415		1857.78	0.00198066		2387.81	-0.01382432
268	0.22386388		797.99	0.08844615		1327.99	-0.00329354		1857.98	0.00303809		2388.01	-0.01375558
268.2	0.22319838		798.19	0.08977324		1328.19	-0.00275843		1858.18	0.00331918		2388.21	-0.01281177
268.4	0.22372653		798.39	0.0895076		1328.39	-0.00285924		1858.38	0.00330289		2388.41	-0.01282864
268.6	0.22456836		798.59	0.09021482		1328.59	-0.00259268		1858.58	0.00484666		2388.61	-0.01320511
268.8	0.22475862		798.79	0.0897067		1328.79	-0.00227551		1858.78	0.00500018		2388.81	-0.01298346
269	0.22422114		798.99	0.09044115		1328.99	-0.0013479		1858.98	0.00503188		2389.01	-0.0119612
269.2	0.22466078		799.19	0.09001493		1329.19	-0.00106978		1859.18	0.00446219		2389.21	-0.01254865
269.4	0.22501701		799.39	0.08860523		1329.39	-0.00055078		1859.38	0.00378294		2389.41	-0.0121774
269.6	0.22524233		799.59	0.08752174		1329.59	-0.00124148		1859.58	0.00311314		2389.61	-0.01257228
269.8	0.22453072		799.79	0.08715231		1329.79	-0.00078853		1859.78	0.00314602		2389.81	-0.01206201
270	0.2250126		799.99	0.08719896		1329.99	0.00077928		1859.98	0.00322019		2390.01	-0.01225261
270.2	0.22463558		800.19	0.08707329		1330.19	0.00043339		1860.18	0.00303482		2390.21	-0.01221633
270.4	0.22487146		800.39	0.08845847		1330.39	0.00109206		1860.38	0.00319419		2390.41	-0.01236765
270.6	0.22530479		800.59	0.08981747		1330.59	0.00092179		1860.58	0.00258053		2390.61	-0.0125567
270.8	0.22704835		800.79	0.08955243		1330.79	0.00123039		1860.78	0.00247036		2390.81	-0.0116258
271	0.22865764		800.99	0.08888619		1330.99	0.00102753		1860.98	0.0031293		2391.01	-0.01096857
271.2	0.22994543		801.19	0.08949619		1331.19	0.00057003		1861.18	0.00313622		2391.21	-0.01038943
271.4	0.23117226		801.39	0.08909106		1331.39	0.00034624		1861.38	0.00364232		2391.41	-0.01022738
271.6	0.23165625		801.59	0.08956891		1331.59	0.00048221		1861.58	0.00359713		2391.61	-0.01038956
271.8	0.23296544		801.79	0.0893615		1331.79	0.00038663		1861.78	0.00402555		2391.81	-0.00953898
272	0.23292052		801.99	0.09020415		1331.99	-0.00045599		1861.98	0.00486509		2392.01	-0.00983313
272.2	0.23281775		802.19	0.09099663		1332.19	-0.00124597		1862.18	0.00315597		2392.21	-0.01131466
272.4	0.23320603		802.39	0.0906345		1332.39	-0.00108114		1862.38	0.00332339		2392.41	-0.01163649
272.6	0.23298759		802.59	0.09106088		1332.59	-0.0016354		1862.58	0.00393789		2392.61	-0.01239629
272.8	0.23265195		802.79	0.0908383		1332.79	-0.00285822		1862.78	0.00365405		2392.81	-0.01250259
273	0.23262245		802.99	0.09019682		1332.99	-0.00328488		1862.98	0.00367681		2393.01	-0.01298835
273.2	0.23255804		803.19	0.08969548		1333.19	-0.00421591		1863.18	0.00368436		2393.21	-0.01407607
273.4	0.23215379		803.39	0.08936303		1333.39	-0.00475274		1863.38	0.0031724		2393.41	-0.01480039
273.6	0.23210279		803.59	0.08927802		1333.59	-0.00459429		1863.58	0.00324545		2393.61	-0.01553252
273.8	0.23151243		803.79	0.0889754		1333.79	-0.00345456		1863.78	0.0036904		2393.81	-0.01557633
274	0.2314092		803.99	0.08945397		1333.99	-0.00273574		1863.98	0.00415749		2394.01	-0.0154968
274.2	0.23136864		804.19	0.09006301		1334.19	-0.00328981		1864.18	0.00466317		2394.21	-0.01461624
274.4	0.23245352		804.39	0.0912503		1334.39	-0.0024717		1864.38	0.00436562		2394.41	-0.01447455
274.6	0.23339898		804.59	0.09103388		1334.59	-0.00185252		1864.58	0.00401888		2394.61	-0.01409096
274.8	0.23453317		804.79	0.09089068		1334.79	-0.00073437		1864.78	0.00380968		2394.81	-0.01343357
275	0.23524907		804.99	0.09146716		1334.99	0.00013779		1864.98	0.00420351		2395.01	-0.01309449
275.2	0.23541532		805.19	0.09327663		1335.19	-0.00001059		1865.18	0.00365346		2395.21	-0.01188732
275.4	0.23596904		805.39	0.09363548		1335.39	0.00022321		1865.38	0.00336712		2395.41	-0.01147141
275.6	0.23668367		805.59	0.0947496		1335.59	0.00046033		1865.58	0.00227438		2395.61	-0.01131169
275.8	0.23754326		805.79	0.09548643		1335.79	0.0001059		1865.78	0.00137907		2395.81	-0.01065486
276	0.23696683		805.99	0.09603452		1335.99	-0.00022021		1865.98	0.00034279		2396.01	-0.01129632
276.2	0.23724433		806.19	0.09671033		1336.19	-0.00136856		1866.18	-0.00049955		2396.21	-0.01224432
276.4	0.23748273		806.39	0.09578386		1336.39	-0.00146106		1866.38	-0.00039026		2396.41	-0.01175092
276.6	0.23770993		806.59	0.09641824		1336.59	-0.0020604		1866.58	-0.00054081		2396.61	-0.01167644
276.8	0.23805193		806.79	0.09530038		1336.79	-0.00223405		1866.78	-0.00069892		2396.81	-0.01167163
277	0.2381591		806.99	0.09443574		1336.99	-0.00229006		1866.98	-0.00030992		2397.01	-0.01139395
277.2	0.23788162		807.19	0.0944572		1337.19	-0.00237338		1867.18	-0.00028225		2397.21	-0.01199426
277.4	0.23838095		807.39	0.09402106		1337.39	-0.0025134		1867.38	-0.00019399		2397.41	-0.01298324
277.6	0.23851383		807.59	0.09358387		1337.59	-0.00278718		1867.58	0.00050875		2397.61	-0.01334883
277.8	0.23841593		807.79	0.09374727		1337.79	-0.00298034		1867.78	0.00101638		2397.81	-0.01335012
278	0.23850962		807.99	0.09444266		1337.99	-0.00301329		1867.98	0.00100188		2398.01	-0.01332109
278.2	0.23977836		808.19	0.09600781		1338.19	-0.00249585		1868.18	0.00097769		2398.21	-0.01323325
278.4	0.24074255		808.39	0.09612199		1338.39	-0.00234468		1868.38	0.00050464		2398.41	-0.01384182
278.6	0.240604		808.59	0.09600911		1338.59	-0.00201639		1868.58	0.00061244		2398.61	-0.01342124
278.8	0.24018645		808.79	0.09683313		1338.79	-0.00166808		1868.78	0.00025469		2398.81	-0.01295715
279	0.24021941		808.99	0.09783902		1338.99	-0.00109817		1868.98	0.0010929		2399.01	-0.01221131
279.2	0.24048252		809.19	0.09889335		1339.19	-0.00126285		1869.18	0.00097278		2399.21	-0.01157614
279.4	0.2407015		809.39	0.09979188		1339.39	-0.00142217		1869.38	0.00114655		2399.41	-0.01124519
279.6	0.24115592		809.59	0.10061167		1339.59	-0.00157551		1869.58	0.00138221		2399.61	-0.01135299
279.8	0.24129591		809.79	0.10115732		1339.79	-0.00230624		1869.78	0.00120571		2399.81	-0.01167862
280	0.24247648		809.99	0.10101941		1339.99	-0.00326158		1869.98	0.00211424		2400.01	-0.01213349
280.2	0.24244323		810.19	0.10124419		1340.19	-0.00450079		1870.18	0.003354		2400.21	-0.01208044
280.4	0.24217471		810.39	0.10090696		1340.39	-0.00380255		1870.38	0.00305755		2400.41	-0.01233314
280.6	0.24196713		810.59	0.10100176		1340.59	-0.0035406		1870.58	0.00353719		2400.61	-0.01316789
280.8	0.24173701		810.79	0.09951892		1340.79	-0.00341611		1870.78	0.00403902		2400.81	-0.0131053
281	0.2414109		810.99	0.09982741		1340.99	-0.00367845		1870.98	0.00419013		2401.01	-0.01374755
281.2	0.2420074		811.19	0.10048495		1341.19	-0.00332383		1871.18	0.00386909		2401.21	-0.01535359
281.4	0.24220579		811.39	0.10029812		1341.39	-0.00404983		1871.38	0.00429334		2401.41	-0.01611334
281.6	0.24228454		811.59	0.10062417		1341.59	-0.00411887		1871.58	0.00459079		2401.61	-0.01572201
281.8	0.24204658		811.79	0.10060861		1341.79	-0.00454083		1871.78	0.00528303		2401.81	-0.01543636
282	0.24285364		811.99	0.10105273		1341.99	-0.00442166		1871.98	0.00457803		2402.01	-0.0147629
282.2	0.24413809		812.19	0.10159729		1342.19	-0.00355361		1872.18	0.00468364		2402.21	-0.01352999
282.4	0.24482699		812.39	0.10047294		1342.39	-0.00346313		1872.38	0.00476452		2402.41	-0.0123241
282.6	0.24507533		812.59	0.10017644		1342.59	-0.00312175		1872.58	0.00443413		2402.61	-0.01069423
282.8	0.24583538		812.79	0.10133708		1342.79	-0.00195217		1872.78	0.00463708		2402.81	-0.00954986
283	0.24658839		812.99	0.10160035		1342.99	-0.00165341		1872.98	0.0047244		2403.01	-0.00809305
283.2	0.24767093		813.19	0.10179142		1343.19	-0.00123725		1873.18	0.00446135		2403.21	-0.0074643
283.4	0.24850206		813.39	0.10211724		1343.39	-0.00119333		1873.38	0.00419615		2403.41	-0.00633548
283.6	0.24982441		813.59	0.10175336		1343.59	-0.00125254		1873.58	0.00299608		2403.61	-0.00639777
283.8	0.2499129		813.79	0.10168501		1343.79	-0.00204279		1873.78	0.00255467		2403.81	-0.00678635
284	0.25004064		813.99	0.10211736		1343.99	-0.00235158		1873.98	0.00212503		2404.01	-0.00651659
284.2	0.24925977		814.19	0.10314885		1344.19	-0.00250976		1874.18	0.00218637		2404.21	-0.0075045
284.4	0.24902886		814.39	0.10347711		1344.39	-0.00178717		1874.38	0.00142834		2404.41	-0.00956577
284.6	0.24973115		814.59	0.10376229		1344.59	-0.00234051		1874.58	0.00131266		2404.61	-0.01096519
284.8	0.2496422		814.79	0.10392176		1344.79	-0.00189508		1874.78	0.00090088		2404.81	-0.01163234
285	0.24937332		814.99	0.1047799		1344.99	-0.00283716		1874.98	0.00119973		2405.01	-0.01317439
285.2	0.24997437		815.19	0.10484354		1345.19	-0.00283214		1875.18	0.00197314		2405.21	-0.01467513
285.4	0.24957414		815.39	0.10406809		1345.39	-0.00378878		1875.38	0.00285994		2405.41	-0.01584503
285.6	0.24956181		815.59	0.10414302		1345.59	-0.00474323		1875.58	0.00283449		2405.61	-0.01598741
285.8	0.24909888		815.79	0.1034149		1345.79	-0.00489477		1875.78	0.00358292		2405.81	-0.01620835
286	0.25070663		815.99	0.10355102		1345.99	-0.00405743		1875.98	0.00306963		2406.01	-0.01632892
286.2	0.25079314		816.19	0.10339995		1346.19	-0.00340558		1876.18	0.00414806		2406.21	-0.01581914
286.4	0.25091235		816.39	0.10356276		1346.39	-0.00366025		1876.38	0.00410995		2406.41	-0.01601298
286.6	0.25130836		816.59	0.10262864		1346.59	-0.00336663		1876.58	0.00445997		2406.61	-0.01522093
286.8	0.25143815		816.79	0.10327309		1346.79	-0.00275202		1876.78	0.00491581		2406.81	-0.01412238
287	0.25172656		816.99	0.10270652		1346.99	-0.0022323		1876.98	0.00398589		2407.01	-0.01357921
287.2	0.25234213		817.19	0.10252201		1347.19	-0.00218779		1877.18	0.00356874		2407.21	-0.01327747
287.4	0.25256033		817.39	0.10227235		1347.39	-0.00243949		1877.38	0.00243937		2407.41	-0.01320992
287.6	0.25246549		817.59	0.10234715		1347.59	-0.00300596		1877.58	0.00153758		2407.61	-0.01350252
287.8	0.25162597		817.79	0.10329084		1347.79	-0.00304642		1877.78	0.00145782		2407.81	-0.01401698
288	0.25180304		817.99	0.10401689		1347.99	-0.00318237		1877.98	0.00093137		2408.01	-0.01488725
288.2	0.25228686		818.19	0.10407884		1348.19	-0.00311785		1878.18	0.00151407		2408.21	-0.0160086
288.4	0.25276205		818.39	0.10419157		1348.39	-0.00263438		1878.38	0.00130713		2408.41	-0.01610708
288.6	0.25454008		818.59	0.10459278		1348.59	-0.00289137		1878.58	0.00191981		2408.61	-0.01630915
288.8	0.25516672		818.79	0.10510392		1348.79	-0.00268971		1878.78	0.00218369		2408.81	-0.01638462
289	0.25554511		818.99	0.10521357		1348.99	-0.00322306		1878.98	0.00274061		2409.01	-0.01633203
289.2	0.25649256		819.19	0.10507162		1349.19	-0.00342574		1879.18	0.00306667		2409.21	-0.01701191
289.4	0.25672757		819.39	0.10532005		1349.39	-0.00425715		1879.38	0.00284673		2409.41	-0.01694422
289.6	0.25678655		819.59	0.10549983		1349.59	-0.00360885		1879.58	0.00260745		2409.61	-0.01653369
289.8	0.25728245		819.79	0.10507607		1349.79	-0.00324419		1879.78	0.00303079		2409.81	-0.01762864
290	0.25848201		819.99	0.10570433		1349.99	-0.00255679		1879.98	0.00270463		2410.01	-0.01795663
290.2	0.25798321		820.19	0.10587016		1350.19	-0.00214108		1880.18	0.00287737		2410.21	-0.01781527
290.4	0.25844437		820.39	0.10653298		1350.39	-0.00271921		1880.38	0.00271698		2410.41	-0.01744777
290.6	0.25916342		820.59	0.10627156		1350.59	-0.00201274		1880.58	0.00322639		2410.61	-0.01676319
290.8	0.25928579		820.79	0.10742836		1350.79	-0.00123242		1880.78	0.00349326		2410.81	-0.0159488
291	0.25974043		820.99	0.10783434		1350.99	-0.0004812		1880.98	0.00279465		2411.01	-0.01517552
291.2	0.260084		821.19	0.10808355		1351.19	-0.00030546		1881.18	0.00249188		2411.21	-0.01474928
291.4	0.25982082		821.39	0.10787762		1351.39	-0.00018484		1881.38	0.00270268		2411.41	-0.01515181
291.6	0.25994952		821.59	0.10748435		1351.59	0.0001092		1881.58	0.0028282		2411.61	-0.01386582
291.8	0.25915052		821.79	0.10796764		1351.79	0.00013289		1881.78	0.00309322		2411.81	-0.01482007
292	0.25886173		821.99	0.10784657		1351.99	-0.00014019		1881.98	0.00268186		2412.01	-0.01493332
292.2	0.25853333		822.19	0.10808222		1352.19	-0.00017733		1882.18	0.0027091		2412.21	-0.01393594
292.4	0.25813255		822.39	0.10818301		1352.39	-0.00002995		1882.38	0.00279868		2412.41	-0.01317911
292.6	0.25889891		822.59	0.1082692		1352.59	-0.00095451		1882.58	0.00272617		2412.61	-0.01307522
292.8	0.25861593		822.79	0.10789582		1352.79	-0.0024604		1882.78	0.00222684		2412.81	-0.01335
293	0.25853701		822.99	0.10801244		1352.99	-0.0031189		1882.98	0.00192755		2413.01	-0.01351524
293.2	0.25917944		823.19	0.10819234		1353.19	-0.00335878		1883.18	0.00082374		2413.21	-0.01393696
293.4	0.25951763		823.39	0.10831209		1353.39	-0.00337907		1883.38	0.00006439		2413.41	-0.01381946
293.6	0.26031186		823.59	0.10794779		1353.59	-0.002895		1883.58	-0.00059025		2413.61	-0.01446053
293.8	0.26149552		823.79	0.10738667		1353.79	-0.00332953		1883.78	-0.00028487		2413.81	-0.01513311
294	0.26185966		823.99	0.10840608		1353.99	-0.00268406		1883.98	-0.00039099		2414.01	-0.01496776
294.2	0.26252633		824.19	0.10909459		1354.19	-0.0029519		1884.18	-0.0005044		2414.21	-0.01435484
294.4	0.26346524		824.39	0.1097749		1354.39	-0.00273048		1884.38	0.00014208		2414.41	-0.0135017
294.6	0.2643252		824.59	0.11000025		1354.59	-0.00173755		1884.58	-0.00005386		2414.61	-0.01313637
294.8	0.26440242		824.79	0.1102173		1354.79	-0.00122681		1884.78	0.00052352		2414.81	-0.01325048
295	0.2655969		824.99	0.11081597		1354.99	-0.00071881		1884.98	0.00032917		2415.01	-0.01359593
295.2	0.26597888		825.19	0.11038729		1355.19	-0.00068287		1885.18	0.00082804		2415.21	-0.01424927
295.4	0.26632904		825.39	0.10956832		1355.39	-0.00087871		1885.38	0.0010099		2415.41	-0.01470637
295.6	0.26555697		825.59	0.1092194		1355.59	0.00002858		1885.58	0.00142711		2415.61	-0.01449505
295.8	0.26499455		825.79	0.10960115		1355.79	-0.0000339		1885.78	0.00145636		2415.81	-0.01608961
296	0.26443233		825.99	0.10906815		1355.99	-0.00047591		1885.98	0.00111929		2416.01	-0.01592527
296.2	0.26339141		826.19	0.10942966		1356.19	-0.00129816		1886.18	0.00231335		2416.21	-0.01598845
296.4	0.26208242		826.39	0.10866131		1356.39	-0.00167815		1886.38	0.00302536		2416.41	-0.01635696
296.6	0.26285833		826.59	0.10898126		1356.59	-0.00233266		1886.58	0.00281439		2416.61	-0.01709287
296.8	0.262899		826.79	0.10864662		1356.79	-0.00290465		1886.78	0.00314987		2416.81	-0.01776872
297	0.26342139		826.99	0.10910074		1356.99	-0.0026565		1886.98	0.00253862		2417.01	-0.01699803
297.2	0.26419935		827.19	0.10845841		1357.19	-0.00292172		1887.18	0.00224837		2417.21	-0.01655381
297.4	0.26438763		827.39	0.10910315		1357.39	-0.00277336		1887.38	0.00263841		2417.41	-0.01561718
297.6	0.26488145		827.59	0.10978777		1357.59	-0.00257716		1887.58	0.003073		2417.61	-0.01575327
297.8	0.26529031		827.79	0.10997333		1357.79	-0.0027184		1887.78	0.00367491		2417.81	-0.0155212
298	0.26500388		827.99	0.11078008		1357.99	-0.00246921		1887.98	0.00364894		2418.01	-0.01521731
298.2	0.26581312		828.19	0.11142679		1358.19	-0.00280042		1888.18	0.00258095		2418.21	-0.0140102
298.4	0.26584376		828.39	0.11141465		1358.39	-0.00305332		1888.38	0.00266361		2418.41	-0.01386143
298.6	0.26540475		828.59	0.11209009		1358.59	-0.00308721		1888.58	0.00183961		2418.61	-0.01398446
298.8	0.26574922		828.79	0.11295072		1358.79	-0.00336267		1888.78	0.0024423		2418.81	-0.01440017
299	0.26693389		828.99	0.11306674		1358.99	-0.00292354		1888.98	0.00288385		2419.01	-0.01456644
299.2	0.26686643		829.19	0.11263432		1359.19	-0.0032808		1889.18	0.002276		2419.21	-0.01403372
299.4	0.26781218		829.39	0.11223161		1359.39	-0.0031911		1889.38	0.00152356		2419.41	-0.01415945
299.6	0.26803378		829.59	0.11199512		1359.59	-0.00224657		1889.58	0.00262861		2419.61	-0.01440973
299.8	0.26918985		829.79	0.112459		1359.79	-0.00278127		1889.78	0.00181551		2419.81	-0.01444926
300	0.26980854		829.99	0.11206977		1359.99	-0.00314193		1889.98	0.00196575		2420.01	-0.01436826
300.2	0.26992107		830.19	0.11253303		1360.19	-0.00278333		1890.18	0.00201615		2420.21	-0.01430447
300.4	0.2707596		830.39	0.11224919		1360.39	-0.00191507		1890.38	0.00100489		2420.41	-0.01416131
300.6	0.27277101		830.59	0.1128671		1360.59	-0.00181206		1890.58	0.00052194		2420.61	-0.01376903
300.8	0.27368632		830.79	0.11335261		1360.79	-0.00265177		1890.78	0.0008209		2420.81	-0.01283244
301	0.27470157		830.99	0.11367666		1360.99	-0.00319731		1890.98	0.00075671		2421.01	-0.01225127
301.2	0.27556763		831.19	0.1136307		1361.19	-0.00303675		1891.18	0.00192501		2421.21	-0.01272419
301.4	0.2756852		831.39	0.11456056		1361.39	-0.00195345		1891.38	0.00271575		2421.41	-0.01267665
301.6	0.27504111		831.59	0.11444152		1361.59	-0.00145602		1891.58	0.0024489		2421.61	-0.01312864
301.8	0.27451312		831.79	0.11400638		1361.79	-0.00177763		1891.78	0.00257942		2421.81	-0.01250981
302	0.27366233		831.99	0.11394468		1361.99	-0.00160321		1891.98	0.00283426		2422.01	-0.01300598
302.2	0.27280826		832.19	0.11431789		1362.19	-0.00170668		1892.18	0.00252739		2422.21	-0.01365652
302.4	0.27265629		832.39	0.11444302		1362.39	-0.00154314		1892.38	0.00379024		2422.41	-0.01411524
302.6	0.27168768		832.59	0.1157961		1362.59	-0.00158759		1892.58	0.00411706		2422.61	-0.01503804
302.8	0.2721718		832.79	0.11610639		1362.79	-0.00278629		1892.78	0.00543107		2422.81	-0.01550745
303	0.27160833		832.99	0.11512145		1362.99	-0.00273811		1892.98	0.00526448		2423.01	-0.01627391
303.2	0.27186341		833.19	0.11597698		1363.19	-0.00379834		1893.18	0.00436693		2423.21	-0.01607347
303.4	0.27215203		833.39	0.11641784		1363.39	-0.00354306		1893.38	0.00423284		2423.41	-0.01734323
303.6	0.27315471		833.59	0.11627404		1363.59	-0.00355133		1893.58	0.00437213		2423.61	-0.01806634
303.8	0.27371394		833.79	0.11679992		1363.79	-0.00380683		1893.78	0.00344871		2423.81	-0.01843341
304	0.27447233		833.99	0.11689484		1363.99	-0.00368665		1893.98	0.00326616		2424.01	-0.01837643
304.2	0.27462765		834.19	0.11696891		1364.19	-0.00336433		1894.18	0.00260043		2424.21	-0.01853794
304.4	0.27509163		834.39	0.1172628		1364.39	-0.00368433		1894.38	0.00242293		2424.41	-0.01789971
304.6	0.27495803		834.59	0.11782011		1364.59	-0.00387802		1894.58	0.00251747		2424.61	-0.0171914
304.8	0.27527533		834.79	0.11831147		1364.79	-0.00388905		1894.78	0.00306875		2424.81	-0.01679378
305	0.27506577		834.99	0.11810696		1364.99	-0.00259317		1894.98	0.00325298		2425.01	-0.01627997
305.2	0.2748785		835.19	0.11786067		1365.19	-0.00223647		1895.18	0.003489		2425.21	-0.01554396
305.4	0.27450714		835.39	0.1182072		1365.39	-0.00125384		1895.38	0.00340372		2425.41	-0.01506335
305.6	0.27420739		835.59	0.11787268		1365.59	-0.00101802		1895.58	0.00211022		2425.61	-0.01414946
305.8	0.27511456		835.79	0.11796548		1365.79	-0.00103205		1895.78	0.00296709		2425.81	-0.0136564
306	0.27521357		835.99	0.11843963		1365.99	-0.00086759		1895.98	0.00332697		2426.01	-0.01528561
306.2	0.27588495		836.19	0.11847712		1366.19	-0.00133209		1896.18	0.00394753		2426.21	-0.01516964
306.4	0.27747015		836.39	0.11906386		1366.39	-0.00193903		1896.38	0.0044155		2426.41	-0.01559915
306.6	0.27761077		836.59	0.11925443		1366.59	-0.00313021		1896.58	0.00439502		2426.61	-0.01643157
306.8	0.27794193		836.79	0.11860934		1366.79	-0.00417994		1896.78	0.00431973		2426.81	-0.01646825
307	0.27784439		836.99	0.11855317		1366.99	-0.00318083		1896.98	0.0036985		2427.01	-0.01675611
307.2	0.27881545		837.19	0.11918803		1367.19	-0.00395431		1897.18	0.0032886		2427.21	-0.01735283
307.4	0.27829279		837.39	0.11940521		1367.39	-0.00337523		1897.38	0.00266928		2427.41	-0.01890459
307.6	0.27855493		837.59	0.1188906		1367.59	-0.00431716		1897.58	0.00195615		2427.61	-0.01905889
307.8	0.27850949		837.79	0.11983505		1367.79	-0.00369909		1897.78	0.00185916		2427.81	-0.01919652
308	0.27875764		837.99	0.11966883		1367.99	-0.00370751		1897.98	0.00197209		2428.01	-0.01951038
308.2	0.27784544		838.19	0.11999176		1368.19	-0.00325142		1898.18	0.00119757		2428.21	-0.01932144
308.4	0.27767351		838.39	0.1213381		1368.39	-0.002207		1898.38	0.00049872		2428.41	-0.0182261
308.6	0.27738903		838.59	0.12197278		1368.59	-0.00152753		1898.58	-0.00028251		2428.61	-0.01729421
308.8	0.27807319		838.79	0.12172843		1368.79	-0.00077306		1898.78	-0.00027752		2428.81	-0.01714796
309	0.27808736		838.99	0.12243889		1368.99	0.00051613		1898.98	-0.00005654		2429.01	-0.01582551
309.2	0.27829226		839.19	0.12253679		1369.19	-0.00019573		1899.18	-0.00017531		2429.21	-0.01535856
309.4	0.27852954		839.39	0.12325021		1369.39	0.00074045		1899.38	-0.00035235		2429.41	-0.01532851
309.6	0.27909734		839.59	0.12331435		1369.59	0.00100537		1899.58	-0.00065972		2429.61	-0.01497588
309.8	0.27971146		839.79	0.12332257		1369.79	0.00073478		1899.78	0.0003306		2429.81	-0.01459233
310	0.2795096		839.99	0.12325535		1369.99	-0.00116755		1899.98	0.00126118		2430.01	-0.01528727
310.2	0.28068043		840.19	0.12277747		1370.19	-0.00172166		1900.18	0.00195703		2430.21	-0.01560107
310.4	0.28124258		840.39	0.12293996		1370.39	-0.00236471		1900.38	0.00189646		2430.41	-0.0158961
310.6	0.28104346		840.59	0.12221719		1370.59	-0.00269292		1900.58	0.00273262		2430.61	-0.01553096
310.8	0.28112183		840.79	0.12178056		1370.79	-0.00302297		1900.78	0.00326003		2430.81	-0.01563821
311	0.28064215		840.99	0.12154503		1370.99	-0.00279422		1900.98	0.00318895		2431.01	-0.01570442
311.2	0.2811043		841.19	0.12152342		1371.19	-0.0036655		1901.18	0.00275409		2431.21	-0.01594128
311.4	0.28116979		841.39	0.12164493		1371.39	-0.00345108		1901.38	0.0024562		2431.41	-0.01561104
311.6	0.281329		841.59	0.12146934		1371.59	-0.00381364		1901.58	0.00289246		2431.61	-0.01473437
311.8	0.28227885		841.79	0.12185415		1371.79	-0.00339533		1901.78	0.00342387		2431.81	-0.0144614
312	0.28310877		841.99	0.12200827		1371.99	-0.00358208		1901.98	0.003472		2432.01	-0.01538732
312.2	0.28353252		842.19	0.12294816		1372.19	-0.00296549		1902.18	0.00233728		2432.21	-0.01528753
312.4	0.28530329		842.39	0.1235037		1372.39	-0.00214529		1902.38	0.00232144		2432.41	-0.01435274
312.6	0.28511558		842.59	0.12343256		1372.59	-0.00277035		1902.58	0.00224339		2432.61	-0.01439567
312.8	0.28583593		842.79	0.12362126		1372.79	-0.00205387		1902.78	0.00207681		2432.81	-0.01490458
313	0.28632298		842.99	0.12394208		1372.99	-0.00144044		1902.98	0.0021731		2433.01	-0.01503328
313.2	0.28612051		843.19	0.12400216		1373.19	-0.00172682		1903.18	0.00116875		2433.21	-0.01630461
313.4	0.28667477		843.39	0.12463395		1373.39	-0.00142413		1903.38	0.00046865		2433.41	-0.01690113
313.6	0.28652753		843.59	0.12428707		1373.59	-0.00138086		1903.58	0.00058496		2433.61	-0.01787528
313.8	0.28640865		843.79	0.12374557		1373.79	-0.00218079		1903.78	0.00028138		2433.81	-0.01837441
314	0.28596419		843.99	0.12348193		1373.99	-0.00346816		1903.98	0.00037949		2434.01	-0.01965938
314.2	0.28693039		844.19	0.1232371		1374.19	-0.00255644		1904.18	-0.00018932		2434.21	-0.0204585
314.4	0.28677638		844.39	0.12268473		1374.39	-0.00297537		1904.38	0.00009924		2434.41	-0.02002714
314.6	0.28698471		844.59	0.12254658		1374.59	-0.00304218		1904.58	0.00065654		2434.61	-0.02033553
314.8	0.28655325		844.79	0.12262562		1374.79	-0.00386598		1904.78	0.00091335		2434.81	-0.02076023
315	0.28550229		844.99	0.12223689		1374.99	-0.00406508		1904.98	0.00140949		2435.01	-0.02026124
315.2	0.2858013		845.19	0.12193398		1375.19	-0.00389719		1905.18	0.00181279		2435.21	-0.01950163
315.4	0.28615584		845.39	0.12211066		1375.39	-0.00372181		1905.38	0.00260652		2435.41	-0.01882815
315.6	0.28656525		845.59	0.12267444		1375.59	-0.00296464		1905.58	0.0034179		2435.61	-0.01844041
315.8	0.28744669		845.79	0.1226692		1375.79	-0.00278915		1905.78	0.00355928		2435.81	-0.0188029
316	0.28831445		845.99	0.12348133		1375.99	-0.0025157		1905.98	0.00383983		2436.01	-0.01892082
316.2	0.28835155		846.19	0.12387721		1376.19	-0.00156844		1906.18	0.00342768		2436.21	-0.01837979
316.4	0.28862709		846.39	0.1239414		1376.39	-0.00083708		1906.38	0.00403398		2436.41	-0.01755568
316.6	0.28901171		846.59	0.12405221		1376.59	-0.0003133		1906.58	0.0034473		2436.61	-0.01781775
316.8	0.28969583		846.79	0.12467746		1376.79	0.00121032		1906.78	0.00332927		2436.81	-0.01714831
317	0.29059991		846.99	0.12494066		1376.99	0.0012383		1906.98	0.00297799		2437.01	-0.01736583
317.2	0.29065057		847.19	0.12636588		1377.19	0.00134896		1907.18	0.00310227		2437.21	-0.01773204
317.4	0.29033416		847.39	0.12653501		1377.39	0.00152497		1907.38	0.00267607		2437.41	-0.01807546
317.6	0.29017461		847.59	0.12637453		1377.59	0.00145156		1907.58	0.00240992		2437.61	-0.01847599
317.8	0.28999366		847.79	0.12555849		1377.79	0.00036036		1907.78	0.00312652		2437.81	-0.01843822
318	0.29065766		847.99	0.12492793		1377.99	-0.00097757		1907.98	0.00293102		2438.01	-0.0183011
318.2	0.29114191		848.19	0.12475958		1378.19	-0.00093507		1908.18	0.00303729		2438.21	-0.01777058
318.4	0.2910001		848.39	0.12469164		1378.39	-0.00275906		1908.38	0.00343336		2438.41	-0.01840533
318.6	0.29077652		848.59	0.12597776		1378.59	-0.00422235		1908.58	0.00362454		2438.61	-0.0185067
318.8	0.29012081		848.79	0.12551971		1378.79	-0.00495361		1908.78	0.00411835		2438.81	-0.01854335
319	0.2897267		848.99	0.12510672		1378.99	-0.00576449		1908.98	0.00446849		2439.01	-0.01819288
319.2	0.29008072		849.19	0.1251755		1379.19	-0.00630261		1909.18	0.00361615		2439.21	-0.01804266
319.4	0.29032681		849.39	0.12585693		1379.39	-0.00650084		1909.38	0.00343169		2439.41	-0.01812048
319.6	0.29115632		849.59	0.12645418		1379.59	-0.00642984		1909.58	0.00383502		2439.61	-0.0181885
319.8	0.29146734		849.79	0.12671038		1379.79	-0.00663177		1909.78	0.00323083		2439.81	-0.01871289
320	0.29220362		849.99	0.12654071		1379.99	-0.00633795		1909.98	0.00292197		2440.01	-0.01839304
320.2	0.29199671		850.19	0.12693117		1380.19	-0.00573513		1910.18	0.00270843		2440.21	-0.01879668
320.4	0.2925135		850.39	0.12702897		1380.39	-0.00479432		1910.38	0.00221491		2440.41	-0.01831592
320.6	0.29329883		850.59	0.12771707		1380.59	-0.00398509		1910.58	0.00161969		2440.61	-0.01779624
320.8	0.29334374		850.79	0.12903312		1380.79	-0.00345739		1910.78	0.00138247		2440.81	-0.01751888
321	0.29425469		850.99	0.12991378		1380.99	-0.00307242		1910.98	0.00081899		2441.01	-0.01842432
321.2	0.29387596		851.19	0.13080381		1381.19	-0.00279314		1911.18	0.00083918		2441.21	-0.0185711
321.4	0.29345789		851.39	0.1300796		1381.39	-0.00252391		1911.38	0.00039037		2441.41	-0.01838253
321.6	0.29355301		851.59	0.13053768		1381.59	-0.00293477		1911.58	0.00070098		2441.61	-0.01795263
321.8	0.29357404		851.79	0.13030688		1381.79	-0.00340569		1911.78	0.00118162		2441.81	-0.01789009
322	0.29401023		851.99	0.1304566		1381.99	-0.00328364		1911.98	0.00022975		2442.01	-0.01865995
322.2	0.29378453		852.19	0.13122836		1382.19	-0.00353219		1912.18	0.00049118		2442.21	-0.01847721
322.4	0.29429127		852.39	0.13206989		1382.39	-0.00422648		1912.38	0.00042226		2442.41	-0.01914455
322.6	0.29384449		852.59	0.13247367		1382.59	-0.00422916		1912.58	0.00097512		2442.61	-0.01910256
322.8	0.29405514		852.79	0.13154521		1382.79	-0.00493786		1912.78	0.00132945		2442.81	-0.01967864
323	0.29371527		852.99	0.13171034		1382.99	-0.00543002		1912.98	0.00190558		2443.01	-0.01945617
323.2	0.29342044		853.19	0.13234759		1383.19	-0.00529409		1913.18	0.00205792		2443.21	-0.01918779
323.4	0.29407929		853.39	0.1328443		1383.39	-0.00529068		1913.38	0.00323421		2443.41	-0.0190065
323.6	0.29477101		853.59	0.13337812		1383.59	-0.00550312		1913.58	0.00428082		2443.61	-0.01852654
323.8	0.29556487		853.79	0.13313766		1383.79	-0.00501296		1913.78	0.00372584		2443.81	-0.01859316
324	0.2961182		853.99	0.13216191		1383.99	-0.00490825		1913.98	0.00491366		2444.01	-0.01785576
324.2	0.29541337		854.19	0.13270742		1384.19	-0.0053581		1914.18	0.00510352		2444.21	-0.01759089
324.4	0.29555446		854.39	0.1335658		1384.39	-0.00555269		1914.38	0.00444233		2444.41	-0.01682265
324.6	0.29558156		854.59	0.13331667		1384.59	-0.00495488		1914.58	0.00440813		2444.61	-0.01678607
324.8	0.29604337		854.79	0.13313182		1384.79	-0.00456079		1914.78	0.00344114		2444.81	-0.01651538
325	0.2960975		854.99	0.13304051		1384.99	-0.00458466		1914.98	0.0026322		2445.01	-0.0164708
325.2	0.29513916		855.19	0.1323506		1385.19	-0.00551909		1915.18	0.00190284		2445.21	-0.01579646
325.4	0.29426528		855.39	0.13219541		1385.39	-0.00481865		1915.38	0.00144787		2445.41	-0.01603148
325.6	0.29462235		855.59	0.13333117		1385.59	-0.00454259		1915.58	0.00036458		2445.61	-0.01637818
325.8	0.29525638		855.79	0.13281839		1385.79	-0.00457097		1915.78	-0.00002926		2445.81	-0.01645727
326	0.29492984		855.99	0.13275494		1385.99	-0.00482455		1915.98	-0.00047222		2446.01	-0.0169903
326.2	0.29451191		856.19	0.13299676		1386.19	-0.00543717		1916.18	-0.00060727		2446.21	-0.01608136
326.4	0.29501668		856.39	0.13309275		1386.39	-0.0052248		1916.38	-0.00055124		2446.41	-0.01660994
326.6	0.29454403		856.59	0.13275724		1386.59	-0.00538425		1916.58	-0.00024756		2446.61	-0.01705992
326.8	0.29550629		856.79	0.13283227		1386.79	-0.00568705		1916.78	0.00006355		2446.81	-0.01711083
327	0.29532236		856.99	0.13283344		1386.99	-0.00487713		1916.98	0.00079492		2447.01	-0.01682112
327.2	0.29621353		857.19	0.13308519		1387.19	-0.00525831		1917.18	0.00118174		2447.21	-0.01636404
327.4	0.29807452		857.39	0.1336576		1387.39	-0.00542435		1917.38	0.00142739		2447.41	-0.01656659
327.6	0.29781989		857.59	0.13333517		1387.59	-0.00537654		1917.58	0.00208646		2447.61	-0.01639443
327.8	0.29838876		857.79	0.13376963		1387.79	-0.00473685		1917.78	0.00191434		2447.81	-0.01674454
328	0.29853571		857.99	0.13412319		1387.99	-0.00496343		1917.98	0.00318615		2448.01	-0.01695771
328.2	0.29803624		858.19	0.13431677		1388.19	-0.00557175		1918.18	0.00268566		2448.21	-0.01738736
328.4	0.29839909		858.39	0.13472922		1388.39	-0.00609671		1918.38	0.00317007		2448.41	-0.016946
328.6	0.29957895		858.59	0.13394623		1388.59	-0.00496618		1918.58	0.00341532		2448.61	-0.01712955
328.8	0.30057243		858.79	0.13311843		1388.79	-0.00524203		1918.78	0.00303396		2448.81	-0.01734324
329	0.30064377		858.99	0.13313818		1388.99	-0.0056966		1918.98	0.00330832		2449.01	-0.01721882
329.2	0.30046125		859.19	0.13253814		1389.19	-0.00563581		1919.18	0.00303553		2449.21	-0.01748446
329.4	0.30039029		859.39	0.13282345		1389.39	-0.00514376		1919.38	0.00323372		2449.41	-0.01720425
329.6	0.30162566		859.59	0.13308891		1389.59	-0.00500859		1919.58	0.00373643		2449.61	-0.01708737
329.8	0.30099742		859.79	0.13169195		1389.79	-0.00571365		1919.78	0.00377075		2449.81	-0.01690943
330	0.3010346		859.99	0.13146114		1389.99	-0.00560985		1919.98	0.00426856		2450.01	-0.01682421
330.2	0.30153196		860.19	0.13126811		1390.19	-0.00485486		1920.18	0.00459735		2450.21	-0.01706473
330.4	0.30205279		860.39	0.13114781		1390.39	-0.00447803		1920.38	0.0050896		2450.41	-0.0177735
330.6	0.30209283		860.59	0.13128029		1390.59	-0.00428685		1920.58	0.00481328		2450.61	-0.01719921
330.8	0.30254498		860.79	0.13166053		1390.79	-0.00386785		1920.78	0.00493975		2450.81	-0.0168612
331	0.30234118		860.99	0.13178019		1390.99	-0.00434651		1920.98	0.00487922		2451.01	-0.01671828
331.2	0.30294372		861.19	0.132269		1391.19	-0.00443094		1921.18	0.0050469		2451.21	-0.01611455
331.4	0.30264809		861.39	0.13351884		1391.39	-0.0046032		1921.38	0.00459949		2451.41	-0.01624902
331.6	0.30149872		861.59	0.13288254		1391.59	-0.00471537		1921.58	0.00531943		2451.61	-0.01611443
331.8	0.30145234		861.79	0.13450947		1391.79	-0.00455916		1921.78	0.00523821		2451.81	-0.01630189
332	0.30105657		861.99	0.13527365		1391.99	-0.00506278		1921.98	0.00490339		2452.01	-0.01715202
332.2	0.30089282		862.19	0.13546552		1392.19	-0.00480068		1922.18	0.00364435		2452.21	-0.01657491
332.4	0.30144151		862.39	0.13616925		1392.39	-0.00486656		1922.38	0.00336412		2452.41	-0.01650104
332.6	0.30202845		862.59	0.13655258		1392.59	-0.00398957		1922.58	0.00233518		2452.61	-0.01665817
332.8	0.30161943		862.79	0.13655292		1392.79	-0.0041651		1922.78	0.00158848		2452.81	-0.01683402
333	0.30149231		862.99	0.13710633		1392.99	-0.00382566		1922.98	0.00152827		2453.01	-0.01570801
333.2	0.30120454		863.19	0.13721099		1393.19	-0.00352735		1923.18	0.00092132		2453.21	-0.01585874
333.4	0.30074814		863.39	0.13726034		1393.39	-0.00287361		1923.38	0.00105739		2453.41	-0.01591307
333.6	0.30162693		863.59	0.13765438		1393.59	-0.00239981		1923.58	0.00104167		2453.61	-0.01697105
333.8	0.3017078		863.79	0.13733776		1393.79	-0.00277288		1923.78	0.00012443		2453.81	-0.01684311
334	0.30252196		863.99	0.13701814		1393.99	-0.00241692		1923.98	0.00062405		2454.01	-0.01689721
334.2	0.3026687		864.19	0.13715206		1394.19	-0.00223729		1924.18	0.00052877		2454.21	-0.01739369
334.4	0.30283387		864.39	0.13750229		1394.39	-0.00301011		1924.38	0.00066585		2454.41	-0.01727775
334.6	0.30331368		864.59	0.13761398		1394.59	-0.00315385		1924.58	0.00038936		2454.61	-0.01665437
334.8	0.30335855		864.79	0.13741873		1394.79	-0.00330725		1924.78	0.00069214		2454.81	-0.01691856
335	0.30450236		864.99	0.13722048		1394.99	-0.00436673		1924.98	0.00079036		2455.01	-0.01692989
335.2	0.30460637		865.19	0.1363117		1395.19	-0.00446558		1925.18	0.00192904		2455.21	-0.01683332
335.4	0.30488948		865.39	0.13622426		1395.39	-0.00577901		1925.38	0.00258626		2455.41	-0.01671598
335.6	0.3052577		865.59	0.13572643		1395.59	-0.0057259		1925.58	0.00342842		2455.61	-0.01760104
335.8	0.30566318		865.79	0.13659165		1395.79	-0.00605556		1925.78	0.00388792		2455.81	-0.01814367
336	0.30556258		865.99	0.13630904		1395.99	-0.00584246		1925.98	0.0037915		2456.01	-0.01954028
336.2	0.30616647		866.19	0.13574084		1396.19	-0.00485271		1926.18	0.00449272		2456.21	-0.01950188
336.4	0.30670197		866.39	0.13567856		1396.39	-0.00513647		1926.38	0.00516194		2456.41	-0.02006582
336.6	0.30663192		866.59	0.13549008		1396.59	-0.00411585		1926.58	0.00512583		2456.61	-0.019342
336.8	0.30666707		866.79	0.13542757		1396.79	-0.00327327		1926.78	0.00585844		2456.81	-0.01905692
337	0.30627674		866.99	0.13559403		1396.99	-0.00237431		1926.98	0.00618734		2457.01	-0.01855609
337.2	0.30581609		867.19	0.13620455		1397.19	-0.00207869		1927.18	0.00561649		2457.21	-0.018709
337.4	0.30545881		867.39	0.13676362		1397.39	-0.00142882		1927.38	0.00580754		2457.41	-0.01868302
337.6	0.30561202		867.59	0.13805244		1397.59	-0.00238819		1927.58	0.00490197		2457.61	-0.01808282
337.8	0.30521716		867.79	0.13820952		1397.79	-0.00315256		1927.78	0.00453889		2457.81	-0.0172275
338	0.30528868		867.99	0.13894499		1397.99	-0.00356344		1927.98	0.00447238		2458.01	-0.01752172
338.2	0.30591626		868.19	0.1398214		1398.19	-0.00380159		1928.18	0.00360146		2458.21	-0.01827265
338.4	0.30610786		868.39	0.14104102		1398.39	-0.00433141		1928.38	0.00266015		2458.41	-0.01824202
338.6	0.30672839		868.59	0.14098016		1398.59	-0.00414725		1928.58	0.00217196		2458.61	-0.01821823
338.8	0.30823675		868.79	0.14146787		1398.79	-0.00472865		1928.78	0.00201807		2458.81	-0.01913098
339	0.30906364		868.99	0.14166099		1398.99	-0.00568015		1928.98	0.00156463		2459.01	-0.01859773
339.2	0.30879433		869.19	0.14175941		1399.19	-0.00600884		1929.18	0.00126967		2459.21	-0.01845387
339.4	0.30897986		869.39	0.14286834		1399.39	-0.00696464		1929.38	0.00164957		2459.41	-0.0188332
339.6	0.30901179		869.59	0.14323696		1399.59	-0.00715341		1929.58	0.00062871		2459.61	-0.01972807
339.8	0.30893419		869.79	0.14340566		1399.79	-0.00705562		1929.78	0.00069171		2459.81	-0.01927928
340	0.30873671		869.99	0.14275049		1399.99	-0.00697845		1929.98	0.00048639		2460.01	-0.01923003
340.2	0.30963735		870.19	0.14222222		1400.19	-0.00687713		1930.18	0.00013708		2460.21	-0.01844985
340.4	0.31025744		870.39	0.14101725		1400.39	-0.00655135		1930.38	0.00001095		2460.41	-0.01796642
340.6	0.30987968		870.59	0.14074338		1400.59	-0.00507793		1930.58	-0.00043875		2460.61	-0.01757082
340.8	0.31025241		870.79	0.14040657		1400.79	-0.00502696		1930.78	-0.00033557		2460.81	-0.01697364
341	0.30996886		870.99	0.14011571		1400.99	-0.0046124		1930.98	-0.00143099		2461.01	-0.01689134
341.2	0.31018385		871.19	0.14050417		1401.19	-0.00419		1931.18	-0.00197905		2461.21	-0.01604579
341.4	0.30973086		871.39	0.14040142		1401.39	-0.00325266		1931.38	-0.00144161		2461.41	-0.01626064
341.6	0.31011256		871.59	0.14049709		1401.59	-0.00363984		1931.58	-0.0013372		2461.61	-0.01669871
341.8	0.31060375		871.79	0.14005634		1401.79	-0.00267509		1931.78	-0.00102		2461.81	-0.0173406
342	0.311599		871.99	0.14051805		1401.99	-0.00239217		1931.98	-0.00090609		2462.01	-0.01817651
342.2	0.31167836		872.19	0.14035294		1402.19	-0.00324086		1932.18	-0.00137268		2462.21	-0.01896719
342.4	0.31191256		872.39	0.14087918		1402.39	-0.00305945		1932.38	-0.000539		2462.41	-0.01937437
342.6	0.31286776		872.59	0.14025369		1402.59	-0.00292813		1932.58	0.00060242		2462.61	-0.02021418
342.8	0.31371445		872.79	0.14093102		1402.79	-0.00296049		1932.78	0.00140481		2462.81	-0.02010786
343	0.31330878		872.99	0.14151156		1402.99	-0.00302516		1932.98	0.0015611		2463.01	-0.0195012
343.2	0.31294714		873.19	0.14149098		1403.19	-0.00350877		1933.18	0.00122995		2463.21	-0.01938599
343.4	0.31236458		873.39	0.14203646		1403.39	-0.00379838		1933.38	0.00191785		2463.41	-0.01897285
343.6	0.31234049		873.59	0.14191674		1403.59	-0.00391765		1933.58	0.00135572		2463.61	-0.01788965
343.8	0.31218914		873.79	0.14161397		1403.79	-0.00386272		1933.78	0.00092298		2463.81	-0.01680258
344	0.31255892		873.99	0.14130269		1403.99	-0.00425967		1933.98	0.00085864		2464.01	-0.01672078
344.2	0.31252876		874.19	0.14099105		1404.19	-0.00384609		1934.18	0.00031376		2464.21	-0.01747129
344.4	0.31261841		874.39	0.14021725		1404.39	-0.00435721		1934.38	0.00082		2464.41	-0.01770192
344.6	0.31152947		874.59	0.14072948		1404.59	-0.00428773		1934.58	0.00023339		2464.61	-0.01803106
344.8	0.31162203		874.79	0.14122826		1404.79	-0.00508979		1934.78	0.00066033		2464.81	-0.01788973
345	0.31167904		874.99	0.14159545		1404.99	-0.00431568		1934.98	-0.00002867		2465.01	-0.018501
345.2	0.3115972		875.19	0.14177951		1405.19	-0.00411522		1935.18	0.00119029		2465.21	-0.01881872
345.4	0.31153923		875.39	0.14160067		1405.39	-0.00410041		1935.38	0.00282774		2465.41	-0.01952301
345.6	0.3125534		875.59	0.14148964		1405.59	-0.00464654		1935.58	0.00290319		2465.61	-0.02030342
345.8	0.31367853		875.79	0.14149805		1405.79	-0.00447058		1935.78	0.00325252		2465.81	-0.02075172
346	0.31400868		875.99	0.14195874		1405.99	-0.00545485		1935.98	0.00363376		2466.01	-0.02152
346.2	0.31369668		876.19	0.14217364		1406.19	-0.0057912		1936.18	0.0033972		2466.21	-0.0217268
346.4	0.3147762		876.39	0.14341842		1406.39	-0.00454604		1936.38	0.00384054		2466.41	-0.022228
346.6	0.31532249		876.59	0.14382154		1406.59	-0.00471329		1936.58	0.00319908		2466.61	-0.02205791
346.8	0.31546103		876.79	0.14404623		1406.79	-0.0042382		1936.78	0.0034528		2466.81	-0.02097229
347	0.31596619		876.99	0.14366445		1406.99	-0.0041481		1936.98	0.00313048		2467.01	-0.02107911
347.2	0.31572612		877.19	0.14239377		1407.19	-0.00405974		1937.18	0.00286099		2467.21	-0.01981156
347.4	0.31585049		877.39	0.14295022		1407.39	-0.0032954		1937.38	0.00271313		2467.41	-0.01918576
347.6	0.31616153		877.59	0.14225268		1407.59	-0.0032722		1937.58	0.00275894		2467.61	-0.01879781
347.8	0.31597101		877.79	0.14214545		1407.79	-0.00338835		1937.78	0.00096737		2467.81	-0.01850912
348	0.31584719		877.99	0.1422239		1407.99	-0.0029364		1937.98	0.00108132		2468.01	-0.01937947
348.2	0.31491266		878.19	0.14186022		1408.19	-0.00338013		1938.18	0.00077249		2468.21	-0.01947516
348.4	0.31475785		878.39	0.14200257		1408.39	-0.00432333		1938.38	0.00085088		2468.41	-0.0189445
348.6	0.31408364		878.59	0.1419526		1408.59	-0.00395252		1938.58	0.00137907		2468.61	-0.01885786
348.8	0.31550706		878.79	0.14199345		1408.79	-0.00394559		1938.78	0.00218869		2468.81	-0.01880169
349	0.31695534		878.99	0.14160279		1408.99	-0.00400994		1938.98	0.00280418		2469.01	-0.01860752
349.2	0.31683126		879.19	0.14129065		1409.19	-0.0042491		1939.18	0.00360796		2469.21	-0.01881162
349.4	0.31722803		879.39	0.14122886		1409.39	-0.0043664		1939.38	0.00401823		2469.41	-0.0189508
349.6	0.31792307		879.59	0.14158032		1409.59	-0.00446581		1939.58	0.0024602		2469.61	-0.01972579
349.8	0.31838196		879.79	0.14246865		1409.79	-0.00421131		1939.78	0.00214572		2469.81	-0.0200062
350	0.31787058		879.99	0.14366324		1409.99	-0.00429278		1939.98	0.00116498		2470.01	-0.0202334
350.2	0.31792567		880.19	0.14523295		1410.19	-0.00389459		1940.18	-0.00001779		2470.21	-0.01972455
350.4	0.31859877		880.39	0.14659239		1410.39	-0.00396904		1940.38	-0.00086721		2470.41	-0.02007695
350.6	0.31838913		880.59	0.14646825		1410.59	-0.00408962		1940.58	-0.00127372		2470.61	-0.01996481
350.8	0.31867292		880.79	0.14639035		1410.79	-0.00393405		1940.78	-0.0007336		2470.81	-0.01962077
351	0.31895827		880.99	0.1463766		1410.99	-0.00345804		1940.98	-0.00086665		2471.01	-0.01946536
351.2	0.31853723		881.19	0.14643233		1411.19	-0.00294076		1941.18	-0.00007503		2471.21	-0.01916508
351.4	0.31882171		881.39	0.14674642		1411.39	-0.00271828		1941.38	0.00022576		2471.41	-0.01890442
351.6	0.31881779		881.59	0.14665226		1411.59	-0.00249652		1941.58	0.00088923		2471.61	-0.01830501
351.8	0.31876615		881.79	0.14741419		1411.79	-0.00242975		1941.78	0.00125465		2471.81	-0.01869473
352	0.31868298		881.99	0.14759511		1411.99	-0.00169983		1941.98	0.00206677		2472.01	-0.0196603
352.2	0.31852451		882.19	0.14760341		1412.19	-0.0019654		1942.18	0.00269326		2472.21	-0.01926628
352.4	0.31877075		882.39	0.14742813		1412.39	-0.00199075		1942.38	0.00328759		2472.41	-0.01859292
352.6	0.3196781		882.59	0.14670161		1412.59	-0.00194089		1942.58	0.00432522		2472.61	-0.01874448
352.8	0.32087892		882.79	0.14696864		1412.79	-0.00187879		1942.78	0.00509259		2472.81	-0.01918944
353	0.32096101		882.99	0.14661153		1412.99	-0.00206368		1942.98	0.00555663		2473.01	-0.01858457
353.2	0.3204934		883.19	0.14648849		1413.19	-0.00265188		1943.18	0.00393275		2473.21	-0.0191926
353.4	0.32120784		883.39	0.14621666		1413.39	-0.00260073		1943.38	0.00335133		2473.41	-0.0191314
353.6	0.32073656		883.59	0.14639643		1413.59	-0.00328544		1943.58	0.0020546		2473.61	-0.01923149
353.8	0.32146594		883.79	0.14651736		1413.79	-0.00288016		1943.78	0.0016787		2473.81	-0.01914109
354	0.32148255		883.99	0.14627315		1413.99	-0.0035334		1943.98	0.00072559		2474.01	-0.01856333
354.2	0.32148558		884.19	0.14673716		1414.19	-0.00416257		1944.18	0.00000666		2474.21	-0.01836372
354.4	0.32123235		884.39	0.14647215		1414.39	-0.00424659		1944.38	-0.00047989		2474.41	-0.01779097
354.6	0.3210604		884.59	0.14687527		1414.59	-0.0037306		1944.58	-0.00117256		2474.61	-0.01718264
354.8	0.32170119		884.79	0.14691825		1414.79	-0.00406976		1944.78	-0.00077008		2474.81	-0.01743917
355	0.32078943		884.99	0.14639909		1414.99	-0.00354468		1944.98	-0.000603		2475.01	-0.01715048
355.2	0.32107285		885.19	0.14658392		1415.19	-0.00252572		1945.18	-0.00005056		2475.21	-0.01697424
355.4	0.32132181		885.39	0.14727299		1415.39	-0.0028202		1945.38	0.00024393		2475.41	-0.01619015
355.6	0.32128891		885.59	0.14778288		1415.59	-0.00267348		1945.58	0.0008728		2475.61	-0.01609887
355.8	0.32139605		885.79	0.14821828		1415.79	-0.00230025		1945.78	0.00112702		2475.81	-0.01641505
356	0.32108378		885.99	0.14793789		1415.99	-0.00186594		1945.98	0.00047689		2476.01	-0.01649932
356.2	0.32157016		886.19	0.14836746		1416.19	-0.00236893		1946.18	0.00152239		2476.21	-0.0165434
356.4	0.321782		886.39	0.14873985		1416.39	-0.00283524		1946.38	0.0023536		2476.41	-0.01690022
356.6	0.32179329		886.59	0.14934797		1416.59	-0.00313486		1946.58	0.00299368		2476.61	-0.01719403
356.8	0.3215344		886.79	0.14957142		1416.79	-0.00317482		1946.78	0.00411524		2476.81	-0.01754188
357	0.32186113		886.99	0.14828888		1416.99	-0.00390411		1946.98	0.00360946		2477.01	-0.01801006
357.2	0.32205255		887.19	0.1479257		1417.19	-0.00435157		1947.18	0.00395511		2477.21	-0.01855266
357.4	0.3225426		887.39	0.14784857		1417.39	-0.00409105		1947.38	0.00492092		2477.41	-0.0184251
357.6	0.3224929		887.59	0.14844208		1417.59	-0.00477584		1947.58	0.00495206		2477.61	-0.01903845
357.8	0.32326866		887.79	0.14871472		1417.79	-0.00505769		1947.78	0.00466508		2477.81	-0.01854244
358	0.32285181		887.99	0.1490522		1417.99	-0.0063269		1947.98	0.00462799		2478.01	-0.01802859
358.2	0.32203065		888.19	0.15069374		1418.19	-0.00676241		1948.18	0.00451042		2478.21	-0.01777913
358.4	0.32227124		888.39	0.15049306		1418.39	-0.00633628		1948.38	0.00317203		2478.41	-0.01754602
358.6	0.32287411		888.59	0.15142997		1418.59	-0.00569347		1948.58	0.00331745		2478.61	-0.01757847
358.8	0.32336988		888.79	0.15219167		1418.79	-0.00597279		1948.78	0.00347087		2478.81	-0.01831227
359	0.32352184		888.99	0.15259154		1418.99	-0.00523467		1948.98	0.00299772		2479.01	-0.01699037
359.2	0.32448469		889.19	0.15310703		1419.19	-0.00443437		1949.18	0.00267911		2479.21	-0.01668008
359.4	0.32500859		889.39	0.15387983		1419.39	-0.0047738		1949.38	0.00179693		2479.41	-0.01679156
359.6	0.32546079		889.59	0.1539302		1419.59	-0.00375073		1949.58	0.00109878		2479.61	-0.01690251
359.8	0.32564208		889.79	0.15410474		1419.79	-0.00335513		1949.78	0.00022947		2479.81	-0.01699237
360	0.32562979		889.99	0.15360818		1419.99	-0.0031895		1949.98	0.00081833		2480.01	-0.01763474
360.2	0.32611966		890.19	0.15410865		1420.19	-0.00320601		1950.18	0.00159876		2480.21	-0.01874746
360.4	0.32579704		890.39	0.15342925		1420.39	-0.00315904		1950.38	0.00111034		2480.41	-0.01912591
360.6	0.32533577		890.59	0.15334544		1420.59	-0.00296146		1950.58	0.0011274		2480.61	-0.01938271
360.8	0.32548576		890.79	0.15222184		1420.79	-0.00314369		1950.78	0.00057382		2480.81	-0.01985595
361	0.32602779		890.99	0.15146056		1420.99	-0.00377656		1950.98	0.00059556		2481.01	-0.02014333
361.2	0.32578515		891.19	0.15173694		1421.19	-0.00351572		1951.18	0.00106647		2481.21	-0.01999366
361.4	0.32585472		891.39	0.15170798		1421.39	-0.00437899		1951.38	0.00082651		2481.41	-0.01982667
361.6	0.32606328		891.59	0.15135826		1421.59	-0.00515679		1951.58	-0.00005542		2481.61	-0.01989323
361.8	0.32590341		891.79	0.15108132		1421.79	-0.00575397		1951.78	-0.00024764		2481.81	-0.01914166
362	0.32602846		891.99	0.15156431		1421.99	-0.00537829		1951.98	-0.0000814		2482.01	-0.01867636
362.2	0.3263519		892.19	0.15086991		1422.19	-0.00486465		1952.18	-0.00058286		2482.21	-0.01904317
362.4	0.32733555		892.39	0.15044923		1422.39	-0.00415748		1952.38	-0.00054012		2482.41	-0.01878064
362.6	0.3275286		892.59	0.15173604		1422.59	-0.00337521		1952.58	0.00032861		2482.61	-0.01792384
362.8	0.32812323		892.79	0.15196761		1422.79	-0.00289166		1952.78	-0.00093435		2482.81	-0.01790835
363	0.32974986		892.99	0.15181113		1422.99	-0.00282384		1952.98	-0.00100746		2483.01	-0.01704103
363.2	0.33039261		893.19	0.15196024		1423.19	-0.00230862		1953.18	-0.00133635		2483.21	-0.01745956
363.4	0.33042057		893.39	0.15248985		1423.39	-0.00167548		1953.38	-0.00062142		2483.41	-0.01828871
363.6	0.33034541		893.59	0.15285759		1423.59	-0.00121153		1953.58	0.00050803		2483.61	-0.01832189
363.8	0.33055247		893.79	0.15334597		1423.79	-0.00130656		1953.78	0.0019317		2483.81	-0.01830884
364	0.32992974		893.99	0.15344433		1423.99	-0.00093496		1953.98	0.00333538		2484.01	-0.01906596
364.2	0.32979497		894.19	0.15350319		1424.19	-0.0008816		1954.18	0.00319339		2484.21	-0.02010079
364.4	0.32927778		894.39	0.1533041		1424.39	-0.00133442		1954.38	0.00339112		2484.41	-0.02081908
364.6	0.32872102		894.59	0.15392769		1424.59	-0.00087866		1954.58	0.00437265		2484.61	-0.02104301
364.8	0.32814375		894.79	0.15437351		1424.79	-0.00181307		1954.78	0.00466286		2484.81	-0.02045418
365	0.32720045		894.99	0.1546068		1424.99	-0.00183587		1954.98	0.00494425		2485.01	-0.02049977
365.2	0.3268406		895.19	0.15570096		1425.19	-0.00227437		1955.18	0.00394351		2485.21	-0.02033512
365.4	0.32628601		895.39	0.15540318		1425.39	-0.00355356		1955.38	0.00431828		2485.41	-0.01970996
365.6	0.32694061		895.59	0.15493553		1425.59	-0.00420682		1955.58	0.00404458		2485.61	-0.01958365
365.8	0.326522		895.79	0.15501905		1425.79	-0.00361875		1955.78	0.00392242		2485.81	-0.0187708
366	0.32671381		895.99	0.15518623		1425.99	-0.00351687		1955.98	0.00382384		2486.01	-0.01859039
366.2	0.32701612		896.19	0.15405722		1426.19	-0.00387221		1956.18	0.00355687		2486.21	-0.01806702
366.4	0.32706628		896.39	0.1550565		1426.39	-0.00435917		1956.38	0.00333297		2486.41	-0.01714893
366.6	0.3269767		896.59	0.15448345		1426.59	-0.00428114		1956.58	0.00212269		2486.61	-0.01694313
366.8	0.32837319		896.79	0.15405519		1426.79	-0.00473428		1956.78	0.00094141		2486.81	-0.01688818
367	0.32991527		896.99	0.15377305		1426.99	-0.00526625		1956.98	0.00138759		2487.01	-0.01686702
367.2	0.32922834		897.19	0.1541227		1427.19	-0.00445107		1957.18	0.00259987		2487.21	-0.01721352
367.4	0.3293107		897.39	0.15413651		1427.39	-0.00492332		1957.38	0.00388116		2487.41	-0.01764402
367.6	0.33019277		897.59	0.15470068		1427.59	-0.00464781		1957.58	0.00407158		2487.61	-0.01747687
367.8	0.33071755		897.79	0.15426012		1427.79	-0.00420518		1957.78	0.00388504		2487.81	-0.0175136
368	0.33056714		897.99	0.1539283		1427.99	-0.00407008		1957.98	0.0041227		2488.01	-0.01862635
368.2	0.33109812		898.19	0.15358654		1428.19	-0.00401427		1958.18	0.0036754		2488.21	-0.0195272
368.4	0.33104941		898.39	0.15437313		1428.39	-0.00407984		1958.38	0.00300811		2488.41	-0.02026137
368.6	0.33098174		898.59	0.15472531		1428.59	-0.00352928		1958.58	0.00237637		2488.61	-0.0206175
368.8	0.33157977		898.79	0.15620458		1428.79	-0.00438928		1958.78	0.00143935		2488.81	-0.02138557
369	0.33149795		898.99	0.15575033		1428.99	-0.00350932		1958.98	0.00110656		2489.01	-0.02137014
369.2	0.33161508		899.19	0.15656929		1429.19	-0.00392218		1959.18	0.0004212		2489.21	-0.02124049
369.4	0.33106281		899.39	0.15625886		1429.39	-0.00425002		1959.38	0.00110823		2489.41	-0.0212365
369.6	0.33131214		899.59	0.15635289		1429.59	-0.00386967		1959.58	0.00048996		2489.61	-0.02119304
369.8	0.33065108		899.79	0.15607992		1429.79	-0.00294885		1959.78	-0.00018007		2489.81	-0.02045833
370	0.33079983		899.99	0.15585921		1429.99	-0.00350328		1959.98	-0.00064734		2490.01	-0.0198964
370.2	0.33081237		900.19	0.15580099		1430.19	-0.00319734		1960.18	-0.00140991		2490.21	-0.01955942
370.4	0.33081797		900.39	0.15690291		1430.39	-0.00291749		1960.38	-0.00210753		2490.41	-0.01999959
370.6	0.3312083		900.59	0.15635986		1430.59	-0.00258483		1960.58	-0.00218147		2490.61	-0.02023664
370.8	0.33259764		900.79	0.15638885		1430.79	-0.00223263		1960.78	-0.00182548		2490.81	-0.02079284
371	0.33339809		900.99	0.15634588		1430.99	-0.00227892		1960.98	-0.00093603		2491.01	-0.0213622
371.2	0.33305089		901.19	0.15671332		1431.19	-0.0024615		1961.18	0.00035413		2491.21	-0.02151909
371.4	0.33365941		901.39	0.157012		1431.39	-0.00310549		1961.38	0.00050974		2491.41	-0.02118272
371.6	0.3346928		901.59	0.15661416		1431.59	-0.00253775		1961.58	0.00007222		2491.61	-0.02060113
371.8	0.33467222		901.79	0.15579459		1431.79	-0.00277086		1961.78	0.00053128		2491.81	-0.01991303
372	0.33414793		901.99	0.15671016		1431.99	-0.00387561		1961.98	0.00070768		2492.01	-0.02060043
372.2	0.33422529		902.19	0.15756564		1432.19	-0.00473783		1962.18	-0.00005809		2492.21	-0.02073023
372.4	0.33445016		902.39	0.15830651		1432.39	-0.00550414		1962.38	-0.00047528		2492.41	-0.02140135
372.6	0.33375549		902.59	0.15780716		1432.59	-0.00615987		1962.58	0.00013992		2492.61	-0.0216167
372.8	0.33408962		902.79	0.15850709		1432.79	-0.00681298		1962.78	0.00106662		2492.81	-0.02113437
373	0.33302563		902.99	0.15786602		1432.99	-0.0064414		1962.98	0.00212991		2493.01	-0.02120799
373.2	0.33251154		903.19	0.15811325		1433.19	-0.00673337		1963.18	0.00197006		2493.21	-0.02126771
373.4	0.33236605		903.39	0.15732727		1433.39	-0.00665366		1963.38	0.0025807		2493.41	-0.02134109
373.6	0.332348		903.59	0.15719573		1433.59	-0.00667468		1963.58	0.00253988		2493.61	-0.02038326
373.8	0.33241462		903.79	0.15685879		1433.79	-0.00613911		1963.78	0.00223703		2493.81	-0.01920944
374	0.33310302		903.99	0.15726272		1433.99	-0.0069376		1963.98	0.00238284		2494.01	-0.01891534
374.2	0.33320731		904.19	0.15849079		1434.19	-0.00638095		1964.18	0.00227252		2494.21	-0.02000554
374.4	0.33362225		904.39	0.15869187		1434.39	-0.006102		1964.38	0.00265023		2494.41	-0.02076731
374.6	0.33490558		904.59	0.15783643		1434.59	-0.00571844		1964.58	0.00356054		2494.61	-0.02081061
374.8	0.3359449		904.79	0.15832124		1434.79	-0.00522148		1964.78	0.00391581		2494.81	-0.02133649
375	0.33650583		904.99	0.15864954		1434.99	-0.0044658		1964.98	0.00403836		2495.01	-0.02138114
375.2	0.33633013		905.19	0.15885655		1435.19	-0.00431836		1965.18	0.00435866		2495.21	-0.02095403
375.4	0.33612598		905.39	0.15931561		1435.39	-0.00363044		1965.38	0.00429094		2495.41	-0.02049211
375.6	0.33639766		905.59	0.15890824		1435.59	-0.00355417		1965.58	0.00419103		2495.61	-0.02038396
375.8	0.3354638		905.79	0.15937591		1435.79	-0.00333201		1965.78	0.00499878		2495.81	-0.02026832
376	0.33539164		905.99	0.15982333		1435.99	-0.00362748		1965.98	0.00361482		2496.01	-0.02066457
376.2	0.33564645		906.19	0.15940633		1436.19	-0.00345332		1966.18	0.00360433		2496.21	-0.02033949
376.4	0.33509432		906.39	0.15971785		1436.39	-0.00389972		1966.38	0.00259877		2496.41	-0.0202099
376.6	0.33423255		906.59	0.15980278		1436.59	-0.00462554		1966.58	0.00207621		2496.61	-0.01980361
376.8	0.33515947		906.79	0.15999698		1436.79	-0.00403		1966.78	0.00176937		2496.81	-0.01996742
377	0.33507972		906.99	0.15965078		1436.99	-0.00394216		1966.98	0.00077227		2497.01	-0.02082087
377.2	0.33520562		907.19	0.15858331		1437.19	-0.00402612		1967.18	0.00023144		2497.21	-0.02027131
377.4	0.33532908		907.39	0.15857662		1437.39	-0.00363869		1967.38	-0.00045719		2497.41	-0.01992767
377.6	0.33564403		907.59	0.15936792		1437.59	-0.00459423		1967.58	-0.00151982		2497.61	-0.01904304
377.8	0.3364832		907.79	0.15956863		1437.79	-0.00478361		1967.78	-0.0022608		2497.81	-0.01946178
378	0.33749487		907.99	0.15957878		1437.99	-0.0055866		1967.98	-0.00235948		2498.01	-0.02026262
378.2	0.33774459		908.19	0.15976409		1438.19	-0.00517253		1968.18	-0.00280527		2498.21	-0.02105362
378.4	0.33873629		908.39	0.15942488		1438.39	-0.00502782		1968.38	-0.00296529		2498.41	-0.02128007
378.6	0.33990482		908.59	0.15958546		1438.59	-0.00473175		1968.58	-0.00309363		2498.61	-0.02080968
378.8	0.34046655		908.79	0.16033745		1438.79	-0.00441125		1968.78	-0.00327766		2498.81	-0.02117054
379	0.34088244		908.99	0.16031376		1438.99	-0.00383603		1968.98	-0.00356762		2499.01	-0.02104738
379.2	0.34116798		909.19	0.16045527		1439.19	-0.00439705		1969.18	-0.00320842		2499.21	-0.02088587
379.4	0.34127769		909.39	0.16051902		1439.39	-0.00389258		1969.38	-0.00284591		2499.41	-0.02097358
379.6	0.3417519		909.59	0.16049156		1439.59	-0.00404193		1969.58	-0.00252358		2499.61	-0.02083423
379.8	0.34190633		909.79	0.16042087		1439.79	-0.00371152		1969.78	-0.00236895		2499.81	-0.02026478
380	0.34190633		909.99	0.16042087		1439.98	-0.00371152		1969.98	-0.00236895		2500.01	-0.02026478
380.2	0.34245944		910.19	0.15993393		1440.18	-0.00379961		1970.18	-0.00267164		2500.21	-0.01896863
380.4	0.34253932		910.39	0.15947467		1440.38	-0.00371185		1970.38	-0.00341886		2500.41	-0.01841863
380.6	0.34261172		910.59	0.15846019		1440.58	-0.00368479		1970.58	-0.0040108		2500.61	-0.017629
380.8	0.34313762		910.79	0.15850519		1440.78	-0.00316453		1970.78	-0.00394779		2500.81	-0.01719707
381	0.34298888		910.99	0.15798212		1440.98	-0.00299555		1970.98	-0.00405445		2501.01	-0.01616824
381.2	0.34269339		911.19	0.15857557		1441.18	-0.00289007		1971.18	-0.00464115		2501.21	-0.01601901
381.4	0.34287821		911.39	0.15887225		1441.38	-0.00230205		1971.38	-0.00515183		2501.41	-0.01607633
381.6	0.34231114		911.59	0.15883253		1441.58	-0.00204144		1971.58	-0.00590765		2501.61	-0.01601909
381.8	0.34202621		911.79	0.15911281		1441.78	-0.00250636		1971.78	-0.00601933		2501.81	-0.0161357
382	0.34184597		911.99	0.15903692		1441.98	-0.00193733		1971.98	-0.00618989		2502.01	-0.01650508
382.2	0.34188077		912.19	0.15938379		1442.18	-0.00238186		1972.18	-0.00709854		2502.21	-0.01769749
382.4	0.34257844		912.39	0.15854468		1442.38	-0.00226883		1972.38	-0.00747059		2502.41	-0.01774544
382.6	0.34367258		912.59	0.1588425		1442.58	-0.00242792		1972.58	-0.00705423		2502.61	-0.0171345
382.8	0.3444701		912.79	0.15907666		1442.78	-0.0018209		1972.78	-0.00651986		2502.81	-0.01728347
383	0.34531127		912.99	0.15891986		1442.98	-0.00114008		1972.98	-0.0065315		2503.01	-0.01747289
383.2	0.34551926		913.19	0.15855269		1443.18	-0.00095434		1973.18	-0.0060128		2503.21	-0.01742879
383.4	0.34490537		913.39	0.15815406		1443.38	-0.00089784		1973.38	-0.00612636		2503.41	-0.01724279
383.6	0.34477613		913.59	0.15783768		1443.58	-0.00061601		1973.58	-0.00555732		2503.61	-0.01627816
383.8	0.3445227		913.79	0.15804379		1443.78	-0.0013898		1973.78	-0.00388561		2503.81	-0.01688394
384	0.34415957		913.99	0.15870532		1443.98	-0.00153451		1973.98	-0.00331081		2504.01	-0.01634167
384.2	0.34486865		914.19	0.15924569		1444.18	-0.00215369		1974.18	-0.00294218		2504.21	-0.01679662
384.4	0.34456412		914.39	0.15931313		1444.38	-0.00271094		1974.38	-0.00324615		2504.41	-0.0179233
384.6	0.34516232		914.59	0.15948269		1444.58	-0.00297388		1974.58	-0.00260692		2504.61	-0.01860558
384.8	0.34550247		914.79	0.16026828		1444.78	-0.00245316		1974.78	-0.00205595		2504.81	-0.0185694
385	0.34413609		914.99	0.16041129		1444.98	-0.00314051		1974.98	-0.00202202		2505.01	-0.01848238
385.2	0.34408232		915.19	0.1606994		1445.18	-0.00295649		1975.18	-0.00272078		2505.21	-0.01827921
385.4	0.34429392		915.39	0.15972763		1445.38	-0.00242068		1975.38	-0.00291799		2505.41	-0.01752374
385.6	0.34364079		915.59	0.15882666		1445.58	-0.00184812		1975.58	-0.00301701		2505.61	-0.01658382
385.8	0.34344892		915.79	0.15842739		1445.78	-0.00177527		1975.78	-0.0032245		2505.81	-0.01546814
386	0.34353766		915.99	0.1579788		1445.98	-0.0010325		1975.98	-0.00405459		2506.01	-0.01449723
386.2	0.34449196		916.19	0.15839859		1446.18	-0.00146348		1976.18	-0.00526009		2506.21	-0.0135778
386.4	0.34469283		916.39	0.15825736		1446.38	-0.00064547		1976.38	-0.00465346		2506.41	-0.01343029
386.6	0.34560254		916.59	0.1581868		1446.58	-0.00028705		1976.58	-0.00469238		2506.61	-0.01338334
386.8	0.3453696		916.79	0.15815593		1446.78	-0.00004736		1976.78	-0.00551198		2506.81	-0.01398606
387	0.34617335		916.99	0.15800867		1446.98	0.00001189		1976.98	-0.00683116		2507.01	-0.01469451
387.2	0.34626021		917.19	0.15792968		1447.18	-0.00037974		1977.18	-0.00702566		2507.21	-0.01438073
387.4	0.34610762		917.39	0.15854315		1447.38	-0.00102468		1977.38	-0.00683809		2507.41	-0.01537738
387.6	0.34608644		917.59	0.15959368		1447.58	-0.0015959		1977.58	-0.00627426		2507.61	-0.01485461
387.8	0.34675119		917.79	0.16042437		1447.78	-0.00194212		1977.78	-0.00563013		2507.81	-0.01482615
388	0.34687614		917.99	0.16184273		1447.98	-0.00336011		1977.98	-0.0065033		2508.01	-0.01506951
388.2	0.34686166		918.19	0.16226606		1448.18	-0.00415072		1978.18	-0.0071074		2508.21	-0.01643865
388.4	0.34742863		918.39	0.16195639		1448.38	-0.00478873		1978.38	-0.00737033		2508.41	-0.01710226
388.6	0.34757512		918.59	0.1625875		1448.58	-0.00454547		1978.58	-0.00713677		2508.61	-0.01745484
388.8	0.34672913		918.79	0.16207381		1448.78	-0.00400843		1978.78	-0.00665878		2508.81	-0.01766012
389	0.34632472		918.99	0.16138949		1448.98	-0.00404756		1978.98	-0.00642087		2509.01	-0.01766769
389.2	0.3466232		919.19	0.1606161		1449.18	-0.00328527		1979.18	-0.00642992		2509.21	-0.01689202
389.4	0.34598312		919.39	0.15941743		1449.38	-0.00201906		1979.38	-0.00590593		2509.41	-0.01691689
389.6	0.34528819		919.59	0.15933453		1449.58	-0.00106754		1979.58	-0.00567761		2509.61	-0.0164704
389.8	0.34466181		919.79	0.15959436		1449.78	-0.00079472		1979.78	-0.00539549		2509.81	-0.01591165
390	0.34453314		919.99	0.15949089		1449.98	-0.00094247		1979.98	-0.00489921		2510.01	-0.01524516
390.2	0.34481935		920.19	0.15948237		1450.18	-0.00100825		1980.18	-0.00529603		2510.21	-0.01477775
390.4	0.34404444		920.39	0.1590967		1450.38	-0.00102444		1980.38	-0.00503643		2510.41	-0.01502805
390.6	0.34373976		920.59	0.15828711		1450.58	-0.00120104		1980.58	-0.00532288		2510.61	-0.01500305
390.8	0.34332192		920.79	0.15819328		1450.78	-0.00083549		1980.78	-0.00526384		2510.81	-0.01520638
391	0.3446246		920.99	0.15821637		1450.98	-0.00075473		1980.98	-0.00567884		2511.01	-0.01508209
391.2	0.34516403		921.19	0.15851723		1451.18	-0.00130907		1981.18	-0.00606039		2511.21	-0.01530239
391.4	0.34527074		921.39	0.15931072		1451.38	-0.00217933		1981.38	-0.00657867		2511.41	-0.01598948
391.6	0.34596105		921.59	0.16021055		1451.58	-0.00301063		1981.58	-0.00685199		2511.61	-0.0159239
391.8	0.34666613		921.79	0.16126805		1451.78	-0.00324206		1981.78	-0.00727816		2511.81	-0.01553623
392	0.34689499		921.99	0.16213587		1451.98	-0.00388929		1981.98	-0.00828208		2512.01	-0.01582772
392.2	0.34658144		922.19	0.16234653		1452.18	-0.00347201		1982.18	-0.00917764		2512.21	-0.01566854
392.4	0.3472763		922.39	0.16170022		1452.38	-0.00335101		1982.38	-0.00929826		2512.41	-0.01537653
392.6	0.34712141		922.59	0.16242558		1452.58	-0.00262001		1982.58	-0.00970208		2512.61	-0.0155076
392.8	0.34747097		922.79	0.16168284		1452.78	-0.00149305		1982.78	-0.01034249		2512.81	-0.01560993
393	0.34747796		922.99	0.16148063		1452.98	-0.0011504		1982.98	-0.0110849		2513.01	-0.01499409
393.2	0.3475371		923.19	0.16154084		1453.18	-0.00017233		1983.18	-0.01155507		2513.21	-0.01494098
393.4	0.34703608		923.39	0.16162		1453.38	0.00062226		1983.38	-0.01217104		2513.41	-0.01539591
393.6	0.34658626		923.59	0.16211668		1453.58	0.0010558		1983.58	-0.01172593		2513.61	-0.0155336
393.8	0.34624833		923.79	0.1625009		1453.78	0.00073654		1983.78	-0.01143714		2513.81	-0.01547616
394	0.34593025		923.99	0.16157438		1453.98	0.00039745		1983.98	-0.0112116		2514.01	-0.01504106
394.2	0.34598868		924.19	0.16135053		1454.18	0.00059509		1984.18	-0.01163603		2514.21	-0.01534277
394.4	0.34553626		924.39	0.16190916		1454.38	0.00098638		1984.38	-0.01045106		2514.41	-0.01501281
394.6	0.34539964		924.59	0.16153223		1454.58	0.0017508		1984.58	-0.01016377		2514.61	-0.0157475
394.8	0.34583387		924.79	0.16217467		1454.78	0.00221939		1984.78	-0.00942801		2514.81	-0.01556057
395	0.34641155		924.99	0.16241602		1454.98	0.001614		1984.98	-0.0092151		2515.01	-0.01608671
395.2	0.34568544		925.19	0.16231614		1455.18	0.00115954		1985.18	-0.00939563		2515.21	-0.0166068
395.4	0.3450206		925.39	0.16310941		1455.38	0.00138529		1985.38	-0.00845467		2515.41	-0.01682096
395.6	0.3451083		925.59	0.16439277		1455.58	0.0009917		1985.58	-0.00772822		2515.61	-0.01717073
395.8	0.34579852		925.79	0.16431371		1455.78	0.001185		1985.78	-0.00760453		2515.81	-0.01726111
396	0.34499824		925.99	0.16387239		1455.98	0.0011923		1985.98	-0.00766912		2516.01	-0.01747898
396.2	0.34477557		926.19	0.16358771		1456.18	0.00197579		1986.18	-0.00728718		2516.21	-0.01709834
396.4	0.34438157		926.39	0.16364762		1456.38	0.00179276		1986.38	-0.00710568		2516.41	-0.01646022
396.6	0.34400115		926.59	0.16392844		1456.58	0.00215602		1986.58	-0.00771457		2516.61	-0.01551018
396.8	0.34380134		926.79	0.16366113		1456.78	0.00188003		1986.78	-0.00832176		2516.81	-0.01465055
397	0.34318817		926.99	0.16396448		1456.98	0.00139383		1986.98	-0.00848669		2517.01	-0.01460773
397.2	0.34376824		927.19	0.1643912		1457.18	0.00162799		1987.18	-0.00932499		2517.21	-0.01538897
397.4	0.34337452		927.39	0.16461942		1457.38	0.00064611		1987.38	-0.00961599		2517.41	-0.01560728
397.6	0.3441936		927.59	0.16403036		1457.58	0.00055935		1987.58	-0.00896547		2517.61	-0.01585526
397.8	0.34470685		927.79	0.16392229		1457.78	-0.00072375		1987.78	-0.009794		2517.81	-0.01579154
398	0.34437897		927.99	0.16258827		1457.98	-0.00083097		1987.98	-0.0092639		2518.01	-0.01579363
398.2	0.34531031		928.19	0.16304129		1458.18	-0.00185669		1988.18	-0.01010593		2518.21	-0.01603403
398.4	0.34595269		928.39	0.16235222		1458.38	-0.00216827		1988.38	-0.00983651		2518.41	-0.01566649
398.6	0.34609643		928.59	0.16171937		1458.58	-0.00236145		1988.58	-0.01140878		2518.61	-0.01656729
398.8	0.3468516		928.79	0.16149312		1458.78	-0.00217663		1988.78	-0.01106119		2518.81	-0.01657014
399	0.34667328		928.99	0.1608121		1458.98	-0.00209363		1988.98	-0.0116042		2519.01	-0.01694529
399.2	0.34725185		929.19	0.16056684		1459.18	-0.00174774		1989.18	-0.01091758		2519.21	-0.01701045
399.4	0.34761703		929.39	0.16086225		1459.38	-0.00043844		1989.38	-0.01044563		2519.41	-0.01723101
399.6	0.34850461		929.59	0.16095301		1459.58	-0.00051968		1989.58	-0.01004996		2519.61	-0.01738285
399.8	0.348724		929.79	0.16022833		1459.78	-0.00016146		1989.78	-0.0106098		2519.81	-0.01709006
400	0.34775117		929.99	0.16004274		1459.98	0.00028158		1989.98	-0.0101144		2520.01	-0.01610164
400.2	0.34833413		930.19	0.16072743		1460.18	0.00134707		1990.18	-0.00949221		2520.21	-0.01538159
400.4	0.3471502		930.39	0.16137011		1460.38	0.00052177		1990.38	-0.00916927		2520.41	-0.01504037
400.6	0.34668675		930.59	0.16108998		1460.58	0.00030951		1990.58	-0.00862281		2520.61	-0.01444686
400.8	0.34628348		930.79	0.1610398		1460.78	-0.00009028		1990.78	-0.00811365		2520.81	-0.01488296
401	0.34494226		930.99	0.16112232		1460.98	0.00009665		1990.98	-0.00787338		2521.01	-0.01554245
401.2	0.34443289		931.19	0.16143921		1461.18	0.00008763		1991.18	-0.00811959		2521.21	-0.01569474
401.4	0.34366838		931.39	0.16090448		1461.38	0.00000739		1991.38	-0.00721386		2521.41	-0.01524624
401.6	0.34384301		931.59	0.16100501		1461.58	0.00020371		1991.58	-0.00690279		2521.61	-0.01661784
401.8	0.34296979		931.79	0.16058977		1461.78	-0.00050458		1991.78	-0.00682727		2521.81	-0.01660436
402	0.34246607		931.99	0.16090612		1461.98	-0.00075043		1991.98	-0.00643011		2522.01	-0.01651468
402.2	0.34307173		932.19	0.16034363		1462.18	-0.00130537		1992.18	-0.00736772		2522.21	-0.01711375
402.4	0.34332166		932.39	0.15934062		1462.38	-0.001627		1992.38	-0.00764091		2522.41	-0.01734911
402.6	0.34358503		932.59	0.16004316		1462.58	-0.0019723		1992.58	-0.00854536		2522.61	-0.01796096
402.8	0.34426403		932.79	0.16004826		1462.78	-0.00179302		1992.78	-0.00795312		2522.81	-0.01825405
403	0.34431399		932.99	0.16025123		1462.98	-0.00191516		1992.98	-0.00815741		2523.01	-0.017733
403.2	0.34582721		933.19	0.16037876		1463.18	-0.00253902		1993.18	-0.00767584		2523.21	-0.01727397
403.4	0.34541841		933.39	0.16025263		1463.38	-0.00258311		1993.38	-0.00882544		2523.41	-0.01698013
403.6	0.34575224		933.59	0.16066198		1463.58	-0.00361102		1993.58	-0.00928422		2523.61	-0.01608868
403.8	0.34558105		933.79	0.16017492		1463.78	-0.00377935		1993.78	-0.00927111		2523.81	-0.0155928
404	0.34628157		933.99	0.15958949		1463.98	-0.00306757		1993.98	-0.00903385		2524.01	-0.01502869
404.2	0.34732536		934.19	0.15998319		1464.18	-0.0037691		1994.18	-0.00916618		2524.21	-0.0156753
404.4	0.34765871		934.39	0.1595169		1464.38	-0.00409989		1994.38	-0.00930601		2524.41	-0.01565489
404.6	0.34803065		934.59	0.15901357		1464.58	-0.00429752		1994.58	-0.00875349		2524.61	-0.01527116
404.8	0.34783855		934.79	0.15881056		1464.78	-0.00416343		1994.78	-0.00848935		2524.81	-0.01551329
405	0.34734706		934.99	0.15926952		1464.98	-0.00426609		1994.98	-0.00804731		2525.01	-0.01556242
405.2	0.34765097		935.19	0.16039505		1465.18	-0.00310367		1995.18	-0.00767174		2525.21	-0.01612358
405.4	0.34755033		935.39	0.16029715		1465.38	-0.00243061		1995.38	-0.00624758		2525.41	-0.01772983
405.6	0.34753577		935.59	0.16122911		1465.58	-0.00190738		1995.58	-0.0062818		2525.61	-0.01877722
405.8	0.34706819		935.79	0.16159744		1465.78	-0.00170143		1995.78	-0.00614231		2525.81	-0.01828285
406	0.34649714		935.99	0.1624316		1465.98	-0.00091224		1995.98	-0.00608442		2526.01	-0.01858958
406.2	0.34639845		936.19	0.1625381		1466.18	-0.00067871		1996.18	-0.00619923		2526.21	-0.0190052
406.4	0.34635291		936.39	0.16306731		1466.38	-0.00016951		1996.38	-0.00566023		2526.41	-0.01917915
406.6	0.34681329		936.59	0.16374435		1466.58	-0.00003919		1996.58	-0.0051302		2526.61	-0.0194334
406.8	0.34660161		936.79	0.16395558		1466.78	0.00005374		1996.78	-0.00451423		2526.81	-0.01962814
407	0.34682419		936.99	0.16418625		1466.98	-0.00041115		1996.98	-0.00511456		2527.01	-0.01888516
407.2	0.34654043		937.19	0.16338647		1467.18	-0.0007671		1997.18	-0.00525548		2527.21	-0.01829678
407.4	0.34608329		937.39	0.16282161		1467.38	-0.00047241		1997.38	-0.00589291		2527.41	-0.01782691
407.6	0.34597091		937.59	0.16235886		1467.58	-0.00020649		1997.58	-0.00574206		2527.61	-0.01713754
407.8	0.3456462		937.79	0.16144713		1467.78	0.00053044		1997.78	-0.00639513		2527.81	-0.01658221
408	0.34645455		937.99	0.16184566		1467.98	0.00099015		1997.98	-0.00708844		2528.01	-0.01577109
408.2	0.34724279		938.19	0.1619592		1468.18	-0.00059925		1998.18	-0.00671448		2528.21	-0.0157472
408.4	0.3465693		938.39	0.1620973		1468.38	-0.00025137		1998.38	-0.00663136		2528.41	-0.01554037
408.6	0.34574126		938.59	0.16241262		1468.58	-0.00080312		1998.58	-0.00584084		2528.61	-0.01467318
408.8	0.34522201		938.79	0.16222728		1468.78	-0.000443		1998.78	-0.00582874		2528.81	-0.01472423
409	0.34469951		938.99	0.16344866		1468.98	-0.0009232		1998.98	-0.00526733		2529.01	-0.01537704
409.2	0.3441104		939.19	0.16323093		1469.18	-0.00120679		1999.18	-0.00456667		2529.21	-0.01578051
409.4	0.34415229		939.39	0.16280131		1469.38	-0.00229837		1999.38	-0.00457454		2529.41	-0.01606944
409.6	0.34345535		939.59	0.16318635		1469.58	-0.00176518		1999.58	-0.00599076		2529.61	-0.01572847
409.8	0.3434232		939.79	0.16338074		1469.78	-0.00156992		1999.78	-0.00554746		2529.81	-0.01650276
410	0.34361677		939.99	0.16377759		1469.98	-0.00140554		1999.98	-0.0053598		2530.01	-0.01714047
410.2	0.34364836		940.19	0.16400504		1470.18	-0.00164416		2000.18	-0.00589822		2530.21	-0.0176784
410.4	0.34368381		940.39	0.16388178		1470.38	-0.00099172		2000.38	-0.00554069		2530.41	-0.01823337
410.6	0.34388254		940.59	0.16429945		1470.58	-0.00190432		2000.58	-0.00551552		2530.61	-0.01894595
410.8	0.34433576		940.79	0.16451835		1470.78	-0.00267456		2000.78	-0.00621265		2530.81	-0.01959914
411	0.34525039		940.99	0.1645278		1470.98	-0.00177018		2000.98	-0.0073609		2531.01	-0.01879155
411.2	0.34489761		941.19	0.1634977		1471.18	-0.00127996		2001.18	-0.00727616		2531.21	-0.01830586
411.4	0.34557166		941.39	0.16345049		1471.38	-0.00005017		2001.38	-0.00760309		2531.41	-0.01905772
411.6	0.3456319		941.59	0.16325262		1471.58	0.00115655		2001.58	-0.00804692		2531.61	-0.01909831
411.8	0.34528519		941.79	0.16369405		1471.78	0.00180379		2001.78	-0.00871112		2531.81	-0.01850844
412	0.34531541		941.99	0.1636938		1471.98	0.00219466		2001.98	-0.00819029		2532.01	-0.01817258
412.2	0.34557354		942.19	0.16350024		1472.18	0.00224504		2002.18	-0.00820084		2532.21	-0.01853454
412.4	0.3456133		942.39	0.16322151		1472.38	0.00267639		2002.38	-0.00789714		2532.41	-0.0184394
412.6	0.34511635		942.59	0.16279741		1472.58	0.00242271		2002.58	-0.00741206		2532.61	-0.01729845
412.8	0.34543664		942.79	0.16212242		1472.78	0.00249948		2002.78	-0.0065196		2532.81	-0.01787386
413	0.34514835		942.99	0.16242417		1472.98	0.00116298		2002.98	-0.00605417		2533.01	-0.01764554
413.2	0.34519621		943.19	0.16158737		1473.18	0.00021202		2003.18	-0.0055365		2533.21	-0.01734586
413.4	0.3460155		943.39	0.16197856		1473.38	0.00007389		2003.38	-0.00616617		2533.41	-0.01667192
413.6	0.34544		943.59	0.16231433		1473.58	-0.00003222		2003.58	-0.00670221		2533.61	-0.01637625
413.8	0.34656303		943.79	0.16248784		1473.78	-0.00114591		2003.78	-0.00584465		2533.81	-0.0165457
414	0.34640535		943.99	0.16295727		1473.98	-0.00179476		2003.98	-0.00618245		2534.01	-0.01563652
414.2	0.34581459		944.19	0.16289827		1474.18	-0.00231139		2004.18	-0.00615696		2534.21	-0.01534776
414.4	0.34594836		944.39	0.16331707		1474.38	-0.00247625		2004.38	-0.00582399		2534.41	-0.0151369
414.6	0.34627749		944.59	0.1636706		1474.58	-0.0035488		2004.58	-0.00625418		2534.61	-0.01544037
414.8	0.3474665		944.79	0.16426224		1474.78	-0.00422222		2004.78	-0.00743297		2534.81	-0.01521332
415	0.34825976		944.99	0.16406738		1474.98	-0.00237746		2004.98	-0.0076488		2535.01	-0.01507364
415.2	0.34780107		945.19	0.16365541		1475.18	-0.00243452		2005.18	-0.0079066		2535.21	-0.01597233
415.4	0.34822901		945.39	0.16389562		1475.38	-0.00177869		2005.38	-0.00820629		2535.41	-0.01633162
415.6	0.34835672		945.59	0.16304088		1475.58	-0.00088962		2005.58	-0.00892621		2535.61	-0.01606169
415.8	0.34754968		945.79	0.16278953		1475.78	-0.00082918		2005.78	-0.00952487		2535.81	-0.01576625
416	0.3478887		945.99	0.16177586		1475.98	-0.00078836		2005.98	-0.01019699		2536.01	-0.01572901
416.2	0.34891299		946.19	0.16237864		1476.18	-0.0000681		2006.18	-0.0104128		2536.21	-0.01673911
416.4	0.34912707		946.39	0.16164827		1476.38	-0.00001094		2006.38	-0.00979525		2536.41	-0.0167859
416.6	0.34884123		946.59	0.16189409		1476.58	0.00006392		2006.58	-0.00996263		2536.61	-0.01679205
416.8	0.34965001		946.79	0.16205701		1476.78	0.00093042		2006.78	-0.00952684		2536.81	-0.01777201
417	0.34953479		946.99	0.1621724		1476.98	0.00060968		2006.98	-0.00976179		2537.01	-0.01796236
417.2	0.34958858		947.19	0.16171737		1477.18	0.00056		2007.18	-0.00894599		2537.21	-0.01778239
417.4	0.34966234		947.39	0.1612977		1477.38	0.00045503		2007.38	-0.00902051		2537.41	-0.0169972
417.6	0.34885314		947.59	0.16129605		1477.58	-0.0000314		2007.58	-0.0093687		2537.61	-0.01655944
417.8	0.34958791		947.79	0.16041934		1477.78	0.00030997		2007.78	-0.0085994		2537.81	-0.01658136
418	0.34839753		947.99	0.1609552		1477.98	0.00064902		2007.98	-0.00774125		2538.01	-0.01659775
418.2	0.34800703		948.19	0.16115801		1478.18	0.00032032		2008.18	-0.00733308		2538.21	-0.01682145
418.4	0.34738633		948.39	0.16131689		1478.38	0.00039728		2008.38	-0.00749394		2538.41	-0.01673403
418.6	0.3474018		948.59	0.16190628		1478.58	0.00012876		2008.58	-0.00682048		2538.61	-0.01693725
418.8	0.34678801		948.79	0.16227354		1478.78	-0.00025739		2008.78	-0.00632101		2538.81	-0.01698515
419	0.34663362		948.99	0.16264022		1478.98	0.00047542		2008.98	-0.00584412		2539.01	-0.01718012
419.2	0.34600157		949.19	0.16221029		1479.18	-0.00010166		2009.18	-0.00557924		2539.21	-0.0171872
419.4	0.34584011		949.39	0.16220678		1479.38	-0.00079942		2009.38	-0.00544509		2539.41	-0.01697994
419.6	0.34533731		949.59	0.16085875		1479.58	-0.0004972		2009.58	-0.00629446		2539.61	-0.01642884
419.8	0.34458348		949.79	0.16135447		1479.78	-0.00072555		2009.78	-0.00648902		2539.81	-0.01636169
420	0.34475379		949.99	0.16154375		1479.98	-0.00015267		2009.98	-0.00625		2540.01	-0.0164894
420.2	0.34447822		950.19	0.1623052		1480.18	0.00040869		2010.18	-0.00570998		2540.21	-0.01661906
420.4	0.34375316		950.39	0.1624908		1480.38	0.00027855		2010.38	-0.00567936		2540.41	-0.01666574
420.6	0.34436085		950.59	0.16323211		1480.58	0.00055882		2010.58	-0.00604821		2540.61	-0.01657766
420.8	0.34470097		950.79	0.16275549		1480.78	0.00083503		2010.78	-0.00570876		2540.81	-0.01597222
421	0.34509068		950.99	0.1620124		1480.98	0.00033304		2010.98	-0.00570801		2541.01	-0.01628952
421.2	0.34518702		951.19	0.16205861		1481.18	0.00008442		2011.18	-0.00604147		2541.21	-0.01541376
421.4	0.34554383		951.39	0.16201098		1481.38	-0.00015118		2011.38	-0.00650544		2541.41	-0.01493742
421.6	0.34541417		951.59	0.16287591		1481.58	-0.00072691		2011.58	-0.00713763		2541.61	-0.01461311
421.8	0.34604815		951.79	0.1625657		1481.78	-0.00104936		2011.78	-0.00700639		2541.81	-0.01464231
422	0.34515344		951.99	0.16388249		1481.98	-0.00137349		2011.98	-0.00658782		2542.01	-0.01465207
422.2	0.34511412		952.19	0.16321697		1482.18	-0.00167442		2012.18	-0.0072243		2542.21	-0.01422654
422.4	0.34520192		952.39	0.16323237		1482.38	-0.00143119		2012.38	-0.007317		2542.41	-0.01402826
422.6	0.34511574		952.59	0.16289222		1482.58	-0.00110107		2012.58	-0.00636462		2542.61	-0.01464286
422.8	0.34508737		952.79	0.16263792		1482.78	-0.00139148		2012.78	-0.00671111		2542.81	-0.01436559
423	0.34573211		952.99	0.16223772		1482.98	-0.0009562		2012.98	-0.0075811		2543.01	-0.0147285
423.2	0.34569821		953.19	0.16094923		1483.18	-0.00104304		2013.18	-0.0077149		2543.21	-0.01525991
423.4	0.34579226		953.39	0.16089687		1483.38	-0.00102673		2013.38	-0.00887683		2543.41	-0.01631445
423.6	0.34618571		953.59	0.16086953		1483.58	0.00039764		2013.58	-0.00967712		2543.61	-0.01592734
423.8	0.34597529		953.79	0.16134152		1483.78	0.00123535		2013.78	-0.00926078		2543.81	-0.0170785
424	0.34513697		953.99	0.16177066		1483.98	0.00183517		2013.98	-0.00975096		2544.01	-0.01757628
424.2	0.34362955		954.19	0.16148644		1484.18	0.00206391		2014.18	-0.01033211		2544.21	-0.01785175
424.4	0.34330794		954.39	0.1616118		1484.38	0.00257534		2014.38	-0.0105523		2544.41	-0.01808095
424.6	0.34360287		954.59	0.16181094		1484.58	0.00325672		2014.58	-0.01075314		2544.61	-0.01786555
424.8	0.3436911		954.79	0.1621377		1484.78	0.00374869		2014.78	-0.01106359		2544.81	-0.01842411
425	0.34362764		954.99	0.16278007		1484.98	0.0041068		2014.98	-0.01117518		2545.01	-0.01965095
425.2	0.34353761		955.19	0.16383291		1485.18	0.00419139		2015.18	-0.01134543		2545.21	-0.01914483
425.4	0.34404914		955.39	0.16394618		1485.38	0.00437638		2015.38	-0.01141125		2545.41	-0.01900902
425.6	0.34472661		955.59	0.16487285		1485.58	0.00346623		2015.58	-0.01118969		2545.61	-0.01882171
425.8	0.34457916		955.79	0.16467692		1485.78	0.00277072		2015.78	-0.01085749		2545.81	-0.01845679
426	0.34477217		955.99	0.16434523		1485.98	0.00182511		2015.98	-0.01080169		2546.01	-0.01801164
426.2	0.34571393		956.19	0.16318601		1486.18	0.00180278		2016.18	-0.01023072		2546.21	-0.01761756
426.4	0.34633841		956.39	0.16323174		1486.38	0.0012211		2016.38	-0.00930033		2546.41	-0.0175177
426.6	0.3461708		956.59	0.16220181		1486.58	0.00107639		2016.58	-0.00837756		2546.61	-0.01826632
426.8	0.34699793		956.79	0.16203659		1486.78	-0.00022741		2016.78	-0.00807938		2546.81	-0.0167871
427	0.3477964		956.99	0.16158747		1486.98	-0.00086136		2016.98	-0.00844643		2547.01	-0.01697186
427.2	0.34794222		957.19	0.16109504		1487.18	-0.000692		2017.18	-0.00760003		2547.21	-0.01657592
427.4	0.34923183		957.39	0.16079365		1487.38	-0.00068807		2017.38	-0.00785279		2547.41	-0.01728327
427.6	0.35088512		957.59	0.16091598		1487.58	-0.00088553		2017.58	-0.00734689		2547.61	-0.01686997
427.8	0.35050006		957.79	0.16097462		1487.78	-0.00126524		2017.78	-0.0072257		2547.81	-0.01722667
428	0.34923827		957.99	0.1615066		1487.98	-0.00165131		2017.98	-0.00700026		2548.01	-0.01699473
428.2	0.3484975		958.19	0.16143258		1488.18	-0.00202999		2018.18	-0.00626421		2548.21	-0.01663861
428.4	0.34846207		958.39	0.16186412		1488.38	-0.00208517		2018.38	-0.00600609		2548.41	-0.01624946
428.6	0.34779111		958.59	0.16292007		1488.58	-0.00193618		2018.58	-0.00641063		2548.61	-0.0164663
428.8	0.34690847		958.79	0.16398933		1488.78	-0.0013979		2018.78	-0.00680923		2548.81	-0.01725533
429	0.34665504		958.99	0.16471837		1488.98	-0.00148247		2018.98	-0.00621334		2549.01	-0.01730095
429.2	0.34622585		959.19	0.16438096		1489.18	-0.00112986		2019.18	-0.00690929		2549.21	-0.01717707
429.4	0.34611963		959.39	0.16432388		1489.38	-0.00036761		2019.38	-0.00756394		2549.41	-0.01701167
429.6	0.34576721		959.59	0.16468243		1489.58	-0.00094905		2019.58	-0.00740122		2549.61	-0.01722333
429.8	0.34419106		959.79	0.16413939		1489.78	-0.00111408		2019.78	-0.00843398		2549.81	-0.0169767
430	0.34438753		959.99	0.16293218		1489.98	-0.00142738		2019.98	-0.00919123		2550.01	-0.01711888
430.2	0.3441726		960.19	0.16257072		1490.18	-0.00078273		2020.18	-0.00905545		2550.21	-0.01727654
430.4	0.34410525		960.39	0.16159802		1490.38	-0.00034086		2020.38	-0.00961016		2550.41	-0.01736313
430.6	0.34346042		960.59	0.16116272		1490.58	-0.00012545		2020.58	-0.00981752		2550.61	-0.01796259
430.8	0.3429134		960.79	0.16108906		1490.78	-0.00045653		2020.78	-0.00999381		2550.81	-0.01726102
431	0.34255283		960.99	0.15999079		1490.98	-0.000184		2020.98	-0.01042113		2551.01	-0.01756945
431.2	0.34189168		961.19	0.15913311		1491.18	-0.00016487		2021.18	-0.00960849		2551.21	-0.01762613
431.4	0.34290049		961.39	0.15860295		1491.38	-0.00071307		2021.38	-0.00960529		2551.41	-0.01767095
431.6	0.34311507		961.59	0.15897589		1491.58	-0.00106554		2021.58	-0.00942108		2551.61	-0.01764754
431.8	0.34239459		961.79	0.15929746		1491.78	-0.00113269		2021.78	-0.00953961		2551.81	-0.01777925
432	0.34253522		961.99	0.15962277		1491.98	-0.0020873		2021.98	-0.00848938		2552.01	-0.01766969
432.2	0.34316491		962.19	0.15971004		1492.18	-0.00203466		2022.18	-0.00798963		2552.21	-0.01787089
432.4	0.3438388		962.39	0.15987584		1492.38	-0.00221425		2022.38	-0.00809146		2552.41	-0.01815462
432.6	0.34447075		962.59	0.16111705		1492.58	-0.00278557		2022.58	-0.00764733		2552.61	-0.01829566
432.8	0.34481268		962.79	0.16158045		1492.78	-0.0020815		2022.78	-0.0074075		2552.81	-0.018347
433	0.34553356		962.99	0.16202384		1492.98	-0.00147968		2022.98	-0.0074466		2553.01	-0.01800686
433.2	0.34616077		963.19	0.16142433		1493.18	-0.00014349		2023.18	-0.00783101		2553.21	-0.01799456
433.4	0.34677671		963.39	0.16195128		1493.38	0.00054086		2023.38	-0.00816073		2553.41	-0.0182164
433.6	0.34713158		963.59	0.16227865		1493.58	0.00006503		2023.58	-0.00786414		2553.61	-0.01855075
433.8	0.34751018		963.79	0.16177501		1493.78	-0.00028368		2023.78	-0.00862031		2553.81	-0.01771009
434	0.34808584		963.99	0.16123463		1493.98	0.00024964		2023.98	-0.00900565		2554.01	-0.0177239
434.2	0.34818541		964.19	0.16220424		1494.18	0.00121595		2024.18	-0.00945379		2554.21	-0.01754223
434.4	0.34861391		964.39	0.16212562		1494.38	0.00151055		2024.38	-0.00953692		2554.41	-0.01796261
434.6	0.34739587		964.59	0.16299098		1494.58	0.0002294		2024.58	-0.00922143		2554.61	-0.01843479
434.8	0.34650356		964.79	0.16269853		1494.78	0.00043189		2024.78	-0.00918635		2554.81	-0.01881906
435	0.34576068		964.99	0.16157503		1494.98	-0.0000363		2024.98	-0.00947729		2555.01	-0.01872993
435.2	0.34550324		965.19	0.16173249		1495.18	-0.00055064		2025.18	-0.00974788		2555.21	-0.01864701
435.4	0.34555867		965.39	0.16150577		1495.38	-0.00081244		2025.38	-0.01017397		2555.41	-0.01793122
435.6	0.34489424		965.59	0.16112001		1495.58	-0.0009359		2025.58	-0.01020416		2555.61	-0.01825603
435.8	0.34517318		965.79	0.16079264		1495.78	-0.00069037		2025.78	-0.01068713		2555.81	-0.01900311
436	0.34563911		965.99	0.16061951		1495.98	-0.00129845		2025.98	-0.00938481		2556.01	-0.01981365
436.2	0.34538717		966.19	0.16064039		1496.18	-0.00080481		2026.18	-0.00988969		2556.21	-0.02067262
436.4	0.34476381		966.39	0.16119329		1496.38	-0.00171707		2026.38	-0.00954391		2556.41	-0.02037664
436.6	0.34534841		966.59	0.16155742		1496.58	-0.00230791		2026.58	-0.00870991		2556.61	-0.01946395
436.8	0.34476719		966.79	0.16110203		1496.78	-0.00245842		2026.78	-0.00833629		2556.81	-0.01917879
437	0.34522848		966.99	0.16133735		1496.98	-0.00233795		2026.98	-0.00810264		2557.01	-0.01900752
437.2	0.34593241		967.19	0.16132327		1497.18	-0.00228803		2027.18	-0.00748293		2557.21	-0.01924493
437.4	0.34548527		967.39	0.16166813		1497.38	-0.00313116		2027.38	-0.00760503		2557.41	-0.01933315
437.6	0.34520606		967.59	0.1613515		1497.58	-0.00465944		2027.58	-0.00697038		2557.61	-0.0179811
437.8	0.34492276		967.79	0.16198287		1497.78	-0.00458207		2027.78	-0.0077995		2557.81	-0.01774289
438	0.34480467		967.99	0.16222573		1497.98	-0.00404627		2027.98	-0.00825921		2558.01	-0.01772685
438.2	0.34468113		968.19	0.16285298		1498.18	-0.00440252		2028.18	-0.00823094		2558.21	-0.01752562
438.4	0.3447866		968.39	0.16179612		1498.38	-0.00453088		2028.38	-0.00757595		2558.41	-0.01778868
438.6	0.34505203		968.59	0.16100473		1498.58	-0.00476516		2028.58	-0.00780891		2558.61	-0.01795253
438.8	0.34491386		968.79	0.1608509		1498.78	-0.00421631		2028.78	-0.00811207		2558.81	-0.01724239
439	0.34478774		968.99	0.16074342		1498.98	-0.00405085		2028.98	-0.00843396		2559.01	-0.01652691
439.2	0.34468358		969.19	0.16069137		1499.18	-0.00370597		2029.18	-0.00938934		2559.21	-0.01583759
439.4	0.34475826		969.39	0.15995436		1499.38	-0.0030528		2029.38	-0.00988005		2559.41	-0.01628383
439.6	0.34490212		969.59	0.16021557		1499.58	-0.00241869		2029.58	-0.01053561		2559.61	-0.01690064
439.8	0.34504695		969.79	0.16059733		1499.78	-0.00166252		2029.78	-0.01126572		2559.81	-0.01788466
440	0.34508648		969.99	0.16067574		1499.98	-0.00206944		2029.98	-0.01104939		2560.01	-0.01820082
440.2	0.34522641		970.19	0.16124288		1500.18	-0.00139576		2030.18	-0.012479		2560.21	-0.01810105
440.4	0.34560643		970.39	0.16100818		1500.38	-0.00190602		2030.38	-0.01186895		2560.41	-0.01804215
440.6	0.34630199		970.59	0.16109722		1500.58	-0.00122657		2030.58	-0.01128467		2560.61	-0.01828533
440.8	0.34599655		970.79	0.16099724		1500.78	-0.00139463		2030.78	-0.01212636		2560.81	-0.01816614
441	0.34705565		970.99	0.16007006		1500.98	-0.00132838		2030.98	-0.01266209		2561.01	-0.01807772
441.2	0.34667548		971.19	0.15969221		1501.18	-0.00133286		2031.18	-0.01281918		2561.21	-0.01792808
441.4	0.34559857		971.39	0.15955547		1501.38	-0.00134159		2031.38	-0.01360775		2561.41	-0.01710399
441.6	0.34590035		971.59	0.15991567		1501.58	-0.00171929		2031.58	-0.01441148		2561.61	-0.01682251
441.8	0.34501733		971.79	0.16058893		1501.78	-0.00048861		2031.78	-0.01553115		2561.81	-0.01768607
442	0.34551668		971.99	0.15971		1501.98	-0.00118334		2031.98	-0.01486112		2562.01	-0.01767506
442.2	0.34542328		972.19	0.16026663		1502.18	-0.00096585		2032.18	-0.01380527		2562.21	-0.01684354
442.4	0.34622306		972.39	0.16000346		1502.38	-0.00084982		2032.38	-0.01297645		2562.41	-0.01685517
442.6	0.34639009		972.59	0.16027842		1502.58	-0.00066201		2032.58	-0.01278347		2562.61	-0.01714332
442.8	0.34587587		972.79	0.16176537		1502.78	-0.00081956		2032.78	-0.01205417		2562.81	-0.01701327
443	0.34574576		972.99	0.16184806		1502.98	-0.0008336		2032.98	-0.0121096		2563.01	-0.01740006
443.2	0.34565065		973.19	0.16222388		1503.18	-0.00081154		2033.18	-0.01148253		2563.21	-0.01760615
443.4	0.34607778		973.39	0.1625084		1503.38	-0.00164422		2033.38	-0.01106035		2563.41	-0.0180783
443.6	0.34542242		973.59	0.16340216		1503.58	-0.00149971		2033.58	-0.01055122		2563.61	-0.01851322
443.8	0.34506249		973.79	0.16350737		1503.78	-0.00105917		2033.78	-0.01068249		2563.81	-0.01851378
444	0.34580828		973.99	0.16368059		1503.98	-0.00104655		2033.98	-0.01116482		2564.01	-0.01826921
444.2	0.34625549		974.19	0.1637176		1504.18	-0.00081821		2034.18	-0.01176275		2564.21	-0.01806452
444.4	0.34498087		974.39	0.16344376		1504.38	-0.00193489		2034.38	-0.01117434		2564.41	-0.01802475
444.6	0.3440749		974.59	0.16336599		1504.58	-0.00202932		2034.58	-0.01133606		2564.61	-0.01695513
444.8	0.34369106		974.79	0.16193535		1504.78	-0.003327		2034.78	-0.01185216		2564.81	-0.016105
445	0.34337062		974.99	0.16115195		1504.98	-0.00326381		2034.98	-0.01128584		2565.01	-0.01621342
445.2	0.34250575		975.19	0.1614301		1505.18	-0.00279376		2035.18	-0.01163225		2565.21	-0.01580993
445.4	0.34222778		975.39	0.16169251		1505.38	-0.00287636		2035.38	-0.01218317		2565.41	-0.01566799
445.6	0.34296005		975.59	0.1622998		1505.58	-0.00317733		2035.58	-0.01230496		2565.61	-0.01634411
445.8	0.34182609		975.79	0.16230355		1505.78	-0.00310585		2035.78	-0.0123849		2565.81	-0.0160823
446	0.34212611		975.99	0.16233398		1505.98	-0.00357737		2035.98	-0.01150963		2566.01	-0.01621622
446.2	0.34190452		976.19	0.16253576		1506.18	-0.00270044		2036.18	-0.01063787		2566.21	-0.01545414
446.4	0.34201065		976.39	0.16141216		1506.38	-0.00206435		2036.38	-0.0100309		2566.41	-0.01633719
446.6	0.34196222		976.59	0.16150089		1506.58	-0.00125169		2036.58	-0.00931663		2566.61	-0.01769517
446.8	0.34243246		976.79	0.16137528		1506.78	-0.00137424		2036.78	-0.00910002		2566.81	-0.01827596
447	0.34205045		976.99	0.16108661		1506.98	-0.00106416		2036.98	-0.00900403		2567.01	-0.01830185
447.2	0.34257685		977.19	0.1608385		1507.18	-0.00135037		2037.18	-0.00794555		2567.21	-0.01827675
447.4	0.34290899		977.39	0.16029919		1507.38	-0.00123432		2037.38	-0.00805208		2567.41	-0.01817352
447.6	0.34291366		977.59	0.15952237		1507.58	-0.00042041		2037.58	-0.00769203		2567.61	-0.01868773
447.8	0.34373707		977.79	0.15931491		1507.78	-0.00071369		2037.78	-0.00845899		2567.81	-0.01880699
448	0.34343643		977.99	0.15960164		1507.98	-0.00111103		2037.98	-0.00884856		2568.01	-0.01867172
448.2	0.3427609		978.19	0.16000675		1508.18	-0.00189667		2038.18	-0.00918717		2568.21	-0.01764807
448.4	0.34203499		978.39	0.15947778		1508.38	-0.00214509		2038.38	-0.00885445		2568.41	-0.0176129
448.6	0.34242694		978.59	0.15886825		1508.58	-0.00103631		2038.58	-0.00900002		2568.61	-0.01715433
448.8	0.34257534		978.79	0.15879353		1508.78	-0.00136844		2038.78	-0.00912267		2568.81	-0.01737026
449	0.34333241		978.99	0.15894344		1508.98	-0.00104075		2038.98	-0.00958424		2569.01	-0.01680627
449.2	0.34331894		979.19	0.15860114		1509.18	-0.00082771		2039.18	-0.01076796		2569.21	-0.01663214
449.4	0.34379658		979.39	0.15888879		1509.38	0.0000831		2039.38	-0.01141885		2569.41	-0.01642174
449.6	0.3447245		979.59	0.15957462		1509.58	0.00055613		2039.58	-0.0123223		2569.61	-0.01574663
449.8	0.3450399		979.79	0.15948131		1509.78	0.00169654		2039.78	-0.01235715		2569.81	-0.01532538
450	0.34468577		979.99	0.15928655		1509.98	0.00283603		2039.98	-0.01188681		2570.01	-0.01506952
450.2	0.34494145		980.19	0.1590441		1510.18	0.00399422		2040.18	-0.01182436		2570.21	-0.01534067
450.4	0.3449418		980.39	0.15944344		1510.38	0.00461882		2040.38	-0.01214619		2570.41	-0.0165434
450.6	0.34518314		980.59	0.16082275		1510.58	0.005057		2040.58	-0.01232666		2570.61	-0.01727265
450.8	0.34502286		980.79	0.16137445		1510.78	0.00515796		2040.78	-0.01277658		2570.81	-0.01741771
451	0.34515811		980.99	0.16208618		1510.98	0.00388764		2040.98	-0.01288464		2571.01	-0.01729181
451.2	0.34562336		981.19	0.16176141		1511.18	0.00336615		2041.18	-0.01218475		2571.21	-0.01750485
451.4	0.34567354		981.39	0.16162214		1511.38	0.00292197		2041.38	-0.0109255		2571.41	-0.01752834
451.6	0.3441875		981.59	0.1619445		1511.58	0.00241952		2041.58	-0.00986683		2571.61	-0.01855557
451.8	0.34388234		981.79	0.16286173		1511.78	0.00177437		2041.78	-0.00963842		2571.81	-0.01896012
452	0.3437716		981.99	0.1641255		1511.98	0.00151916		2041.98	-0.0089492		2572.01	-0.01918942
452.2	0.34353125		982.19	0.16458089		1512.18	0.00114014		2042.18	-0.00767135		2572.21	-0.01898621
452.4	0.34375003		982.39	0.16342307		1512.38	0.00055041		2042.38	-0.00660524		2572.41	-0.01879822
452.6	0.34417249		982.59	0.16291406		1512.58	-0.00003587		2042.58	-0.00578158		2572.61	-0.01869679
452.8	0.34402509		982.79	0.16338444		1512.78	-0.00107036		2042.78	-0.00673577		2572.81	-0.01831781
453	0.34404622		982.99	0.16269531		1512.98	-0.00175792		2042.98	-0.00655933		2573.01	-0.01689728
453.2	0.34415217		983.19	0.1626915		1513.18	-0.00159855		2043.18	-0.00669466		2573.21	-0.01698672
453.4	0.34502036		983.39	0.16340788		1513.38	-0.00060445		2043.38	-0.00677174		2573.41	-0.01611067
453.6	0.34549661		983.59	0.16317778		1513.58	-0.00086988		2043.58	-0.00700709		2573.61	-0.0149727
453.8	0.34566301		983.79	0.16280536		1513.78	-0.00027152		2043.78	-0.0065074		2573.81	-0.01490035
454	0.34484719		983.99	0.1620141		1513.98	-0.00068604		2043.98	-0.00734453		2574.01	-0.01461801
454.2	0.34507781		984.19	0.16210233		1514.18	-0.00022487		2044.18	-0.00843853		2574.21	-0.01578835
454.4	0.34494664		984.39	0.16183098		1514.38	-0.00024551		2044.38	-0.00927844		2574.41	-0.01634995
454.6	0.34519525		984.59	0.16317695		1514.58	-0.00028018		2044.58	-0.00956598		2574.61	-0.01581684
454.8	0.34423326		984.79	0.16297081		1514.78	-0.00088996		2044.78	-0.01063203		2574.81	-0.01595473
455	0.34412251		984.99	0.16213937		1514.98	-0.00147355		2044.98	-0.01201332		2575.01	-0.01578816
455.2	0.34347666		985.19	0.16181332		1515.18	-0.00039367		2045.18	-0.01275031		2575.21	-0.01689023
455.4	0.34382918		985.39	0.16145306		1515.38	-0.00088555		2045.38	-0.01292972		2575.41	-0.01724081
455.6	0.34196158		985.59	0.16155258		1515.58	-0.00059691		2045.58	-0.01382324		2575.61	-0.01867745
455.8	0.34303461		985.79	0.16068872		1515.78	-0.00126938		2045.78	-0.01444528		2575.81	-0.01852679
456	0.34359813		985.99	0.1611171		1515.98	-0.00191466		2045.98	-0.01388426		2576.01	-0.01909784
456.2	0.34279786		986.19	0.16020973		1516.18	-0.00232625		2046.18	-0.01427479		2576.21	-0.01894058
456.4	0.34335224		986.39	0.15891641		1516.38	-0.00335788		2046.38	-0.01470806		2576.41	-0.01916944
456.6	0.34358038		986.59	0.15886303		1516.58	-0.00370547		2046.58	-0.014626		2576.61	-0.01965594
456.8	0.34321073		986.79	0.15967927		1516.78	-0.00380195		2046.78	-0.01560768		2576.81	-0.01938079
457	0.3435521		986.99	0.16017929		1516.98	-0.00394846		2046.98	-0.01443275		2577.01	-0.01912079
457.2	0.34417163		987.19	0.16082743		1517.18	-0.0036084		2047.18	-0.01397479		2577.21	-0.01923231
457.4	0.34411714		987.39	0.16185566		1517.38	-0.00254386		2047.38	-0.01354666		2577.41	-0.01923874
457.6	0.34443098		987.59	0.16157144		1517.58	-0.00285279		2047.58	-0.01316069		2577.61	-0.01920803
457.8	0.34474122		987.79	0.16139798		1517.78	-0.00336996		2047.78	-0.0125736		2577.81	-0.01962207
458	0.344722		987.99	0.161409		1517.98	-0.00313808		2047.98	-0.01186595		2578.01	-0.01959215
458.2	0.34447811		988.19	0.16211372		1518.18	-0.00255977		2048.18	-0.01103178		2578.21	-0.01968123
458.4	0.34464201		988.39	0.1626408		1518.38	-0.00217587		2048.38	-0.01067809		2578.41	-0.01937623
458.6	0.34376097		988.59	0.16416015		1518.58	-0.00160037		2048.58	-0.00974542		2578.61	-0.01876518
458.8	0.34201206		988.79	0.16339817		1518.78	-0.0010942		2048.78	-0.00956		2578.81	-0.01815937
459	0.34157798		988.99	0.16354812		1518.98	-0.00007023		2048.98	-0.00998628		2579.01	-0.01754554
459.2	0.34180352		989.19	0.16462956		1519.18	0.00048395		2049.18	-0.00993097		2579.21	-0.01828705
459.4	0.34167114		989.39	0.16405709		1519.38	0.00036812		2049.38	-0.00963204		2579.41	-0.01796987
459.6	0.33990142		989.59	0.16350482		1519.58	0.00013848		2049.58	-0.00957591		2579.61	-0.017919
459.8	0.34107084		989.79	0.16398747		1519.78	-0.00000161		2049.78	-0.00924232		2579.81	-0.01796884
460	0.34101812		989.99	0.16387757		1519.98	-0.00013749		2049.98	-0.00906249		2580.01	-0.01828884
460.2	0.34068736		990.19	0.16270612		1520.18	0.00045477		2050.18	-0.00961967		2580.21	-0.0182701
460.4	0.34080372		990.39	0.1627242		1520.38	0.00028731		2050.38	-0.01029151		2580.41	-0.01843262
460.6	0.34112531		990.59	0.16294192		1520.58	0.00047977		2050.58	-0.01079314		2580.61	-0.0177372
460.8	0.34086728		990.79	0.16316649		1520.78	0.00085372		2050.78	-0.01187097		2580.81	-0.01747019
461	0.34098653		990.99	0.16384144		1520.98	0.00117638		2050.98	-0.01190707		2581.01	-0.01719434
461.2	0.3413124		991.19	0.16328137		1521.18	0.00067068		2051.18	-0.01206121		2581.21	-0.01635046
461.4	0.34187985		991.39	0.16279287		1521.38	0.00063158		2051.38	-0.01176463		2581.41	-0.01667719
461.6	0.3423214		991.59	0.16160595		1521.58	-0.0000817		2051.58	-0.01198155		2581.61	-0.01647927
461.8	0.34200426		991.79	0.16055073		1521.78	-0.00074215		2051.78	-0.01255463		2581.81	-0.01642723
462	0.34242771		991.99	0.16011698		1521.98	-0.00069144		2051.98	-0.01246671		2582.01	-0.01652993
462.2	0.34204462		992.19	0.15933108		1522.18	-0.00122015		2052.18	-0.01227609		2582.21	-0.01631131
462.4	0.34171447		992.39	0.15941475		1522.38	-0.00147166		2052.38	-0.01151067		2582.41	-0.01614223
462.6	0.3413095		992.59	0.15873715		1522.58	-0.00177538		2052.58	-0.01047955		2582.61	-0.01577019
462.8	0.34150032		992.79	0.15826617		1522.78	-0.00201714		2052.78	-0.01025341		2582.81	-0.01554556
463	0.3417796		992.99	0.15908173		1522.98	-0.00138998		2052.98	-0.01084231		2583.01	-0.01629279
463.2	0.34205767		993.19	0.16025608		1523.18	-0.00145476		2053.18	-0.01092499		2583.21	-0.01685582
463.4	0.34138689		993.39	0.16056978		1523.38	-0.00120522		2053.38	-0.01029274		2583.41	-0.0169217
463.6	0.34114795		993.59	0.16113676		1523.58	-0.00129235		2053.58	-0.01001093		2583.61	-0.01739419
463.8	0.34219154		993.79	0.16264282		1523.78	-0.00120696		2053.78	-0.01058829		2583.81	-0.01767721
464	0.34171674		993.99	0.16192018		1523.98	-0.00126791		2053.98	-0.0106813		2584.01	-0.01711138
464.2	0.34186819		994.19	0.16234938		1524.18	-0.00068073		2054.18	-0.01118336		2584.21	-0.01708833
464.4	0.34160097		994.39	0.16283575		1524.38	-0.00078352		2054.38	-0.01171299		2584.41	-0.01697086
464.6	0.34204147		994.59	0.16220878		1524.58	-0.00038353		2054.58	-0.01134072		2584.61	-0.01679142
464.8	0.34236252		994.79	0.1625018		1524.78	-0.00029204		2054.78	-0.01169882		2584.81	-0.01629326
465	0.34302136		994.99	0.16334318		1524.98	0.00032866		2054.98	-0.01121708		2585.01	-0.01651006
465.2	0.34344208		995.19	0.16220807		1525.18	0.00033176		2055.18	-0.01140292		2585.21	-0.01611945
465.4	0.34332063		995.39	0.16177514		1525.38	0.0004849		2055.38	-0.01198006		2585.41	-0.01682588
465.6	0.34338004		995.59	0.1621254		1525.58	0.00016955		2055.58	-0.01206544		2585.61	-0.01723357
465.8	0.34432388		995.79	0.16126283		1525.78	0.00005779		2055.78	-0.01242941		2585.81	-0.0168442
466	0.3449252		995.99	0.16076101		1525.98	-0.00074055		2055.98	-0.0125695		2586.01	-0.01705266
466.2	0.34485221		996.19	0.16045949		1526.18	-0.00136695		2056.18	-0.01181496		2586.21	-0.01704758
466.4	0.34508193		996.39	0.16085588		1526.38	-0.00134659		2056.38	-0.01151222		2586.41	-0.01763391
466.6	0.34536459		996.59	0.16078854		1526.58	-0.00106834		2056.58	-0.0114984		2586.61	-0.01813822
466.8	0.3450329		996.79	0.16107974		1526.78	-0.00017782		2056.78	-0.01220721		2586.81	-0.0183603
467	0.34463458		996.99	0.16196278		1526.98	0.00052246		2056.98	-0.01243379		2587.01	-0.01880652
467.2	0.34431227		997.19	0.16215928		1527.18	-0.00003207		2057.18	-0.01188491		2587.21	-0.01848443
467.4	0.34400357		997.39	0.16209437		1527.38	0.00006759		2057.38	-0.01165501		2587.41	-0.01823952
467.6	0.34381533		997.59	0.16206129		1527.58	0.00003011		2057.58	-0.01232109		2587.61	-0.01821284
467.8	0.34412093		997.79	0.16195775		1527.78	-0.00007195		2057.78	-0.01301626		2587.81	-0.01823195
468	0.34301509		997.99	0.16132795		1527.98	-0.00010522		2057.98	-0.01227547		2588.01	-0.01820532
468.2	0.34283331		998.19	0.16097218		1528.18	-0.00022361		2058.18	-0.01222592		2588.21	-0.0184505
468.4	0.34207913		998.39	0.1609585		1528.38	-0.00056562		2058.38	-0.01235625		2588.41	-0.01814095
468.6	0.34248001		998.59	0.16025127		1528.58	-0.00016216		2058.58	-0.01224162		2588.61	-0.0182442
468.8	0.34335756		998.79	0.16179082		1528.78	-0.00059484		2058.78	-0.0131525		2588.81	-0.01745202
469	0.34307241		998.99	0.16232313		1528.98	-0.00046213		2058.98	-0.01329232		2589.01	-0.01845959
469.2	0.3428492		999.19	0.16200034		1529.18	-0.00026809		2059.18	-0.01393706		2589.21	-0.01761493
469.4	0.3435251		999.39	0.16198287		1529.38	-0.00062456		2059.38	-0.01428136		2589.41	-0.0176725
469.6	0.34466557		999.59	0.16186673		1529.58	-0.00087993		2059.58	-0.01409161		2589.61	-0.018047
469.8	0.34547598		999.79	0.16136103		1529.78	-0.00097523		2059.78	-0.01364178		2589.81	-0.01748368
470	0.34571009		999.99	0.16117214		1529.98	-0.0015969		2059.98	-0.01410341		2590.01	-0.0180006
470.2	0.34630546		1000.19	0.16113526		1530.18	-0.00192082		2060.18	-0.01397147		2590.21	-0.01820984
470.4	0.34572669		1000.39	0.16161904		1530.38	-0.00165892		2060.38	-0.01358463		2590.41	-0.01859192
470.6	0.34515744		1000.59	0.16199277		1530.58	-0.00188676		2060.58	-0.01250343		2590.61	-0.01757713
470.8	0.34461133		1000.79	0.16130779		1530.78	-0.00158979		2060.78	-0.01235205		2590.81	-0.01685344
471	0.34422546		1000.99	0.16090603		1530.98	-0.00257356		2060.98	-0.01089688		2591.01	-0.01682127
471.2	0.34389419		1001.19	0.16009797		1531.18	-0.00276083		2061.18	-0.01046313		2591.21	-0.0162804
471.4	0.34267979		1001.39	0.15980308		1531.38	-0.00303879		2061.38	-0.01087225		2591.41	-0.01623604
471.6	0.34215014		1001.59	0.15956915		1531.58	-0.00265912		2061.58	-0.01073409		2591.61	-0.01643181
471.8	0.34150802		1001.79	0.1592139		1531.78	-0.00287587		2061.78	-0.01064023		2591.81	-0.01645592
472	0.34029149		1001.99	0.15930702		1531.98	-0.0034605		2061.98	-0.00985119		2592.01	-0.01637379
472.2	0.33966934		1002.19	0.1594937		1532.18	-0.00353069		2062.18	-0.01067867		2592.21	-0.01629547
472.4	0.33887217		1002.39	0.16048437		1532.38	-0.00318321		2062.38	-0.01126468		2592.41	-0.01677578
472.6	0.3393514		1002.59	0.1606177		1532.58	-0.00238581		2062.58	-0.01023565		2592.61	-0.01665837
472.8	0.33939745		1002.79	0.16173022		1532.78	-0.00148967		2062.78	-0.01110214		2592.81	-0.01608032
473	0.3389847		1002.99	0.16201243		1532.98	0.00008435		2062.98	-0.01119717		2593.01	-0.01711938
473.2	0.33930927		1003.19	0.16214414		1533.18	0.00131113		2063.18	-0.01149102		2593.21	-0.01670056
473.4	0.34015501		1003.39	0.16229139		1533.38	0.00136717		2063.38	-0.01204337		2593.41	-0.01737997
473.6	0.34096798		1003.59	0.16213187		1533.58	0.00130939		2063.58	-0.01225322		2593.61	-0.0183286
473.8	0.34229879		1003.79	0.16192869		1533.78	0.00166954		2063.78	-0.01184772		2593.81	-0.01831632
474	0.34261934		1003.99	0.16147813		1533.98	0.00161713		2063.98	-0.01224028		2594.01	-0.01862827
474.2	0.34240364		1004.19	0.16167162		1534.18	0.00169392		2064.18	-0.01178219		2594.21	-0.0193979
474.4	0.3412747		1004.39	0.16245258		1534.38	0.00179502		2064.38	-0.01069514		2594.41	-0.01927404
474.6	0.3410557		1004.59	0.16265783		1534.58	0.00120809		2064.58	-0.01005556		2594.61	-0.01909575
474.8	0.34101276		1004.79	0.16286312		1534.78	0.00103817		2064.78	-0.00997024		2594.81	-0.01948791
475	0.3406879		1004.99	0.16268584		1534.98	-0.00005801		2064.98	-0.01028898		2595.01	-0.01995479
475.2	0.34147861		1005.19	0.16281144		1535.18	-0.00048436		2065.18	-0.01103587		2595.21	-0.02036306
475.4	0.34128027		1005.39	0.16258476		1535.38	-0.00118005		2065.38	-0.01085662		2595.41	-0.0205933
475.6	0.34152366		1005.59	0.16189012		1535.58	-0.00187408		2065.58	-0.01079571		2595.61	-0.02102373
475.8	0.34168048		1005.79	0.16232985		1535.78	-0.00322672		2065.78	-0.01035853		2595.81	-0.02063723
476	0.34149165		1005.99	0.16213398		1535.98	-0.00456632		2065.98	-0.00972121		2596.01	-0.02138548
476.2	0.34117589		1006.19	0.16191446		1536.18	-0.00447867		2066.18	-0.01061025		2596.21	-0.02064817
476.4	0.34160932		1006.39	0.16180424		1536.38	-0.00399028		2066.38	-0.01109234		2596.41	-0.02052198
476.6	0.34219727		1006.59	0.16137538		1536.58	-0.00339149		2066.58	-0.01089471		2596.61	-0.01993208
476.8	0.34149014		1006.79	0.16174087		1536.78	-0.00273465		2066.78	-0.01166597		2596.81	-0.01993412
477	0.34164417		1006.99	0.16168981		1536.98	-0.0021423		2066.98	-0.01126247		2597.01	-0.02005333
477.2	0.34263353		1007.19	0.16134734		1537.18	-0.00234226		2067.18	-0.0114161		2597.21	-0.01943853
477.4	0.34334781		1007.39	0.16075821		1537.38	-0.00179372		2067.38	-0.01087248		2597.41	-0.01950893
477.6	0.34446333		1007.59	0.15944908		1537.58	-0.00117716		2067.58	-0.01041692		2597.61	-0.02020157
477.8	0.34453988		1007.79	0.15906288		1537.78	-0.00035974		2067.78	-0.01047481		2597.81	-0.02023575
478	0.34362094		1007.99	0.15962324		1537.98	-0.00033303		2067.98	-0.00999935		2598.01	-0.02051843
478.2	0.34351828		1008.19	0.16016207		1538.18	-0.00001487		2068.18	-0.00979726		2598.21	-0.02066798
478.4	0.3432646		1008.39	0.16031873		1538.38	0.00001296		2068.38	-0.00969339		2598.41	-0.0199299
478.6	0.34354679		1008.59	0.16098564		1538.58	0.00014429		2068.58	-0.01017529		2598.61	-0.01976695
478.8	0.34305807		1008.79	0.16191385		1538.78	0.00047449		2068.78	-0.01029752		2598.81	-0.01953443
479	0.342956		1008.99	0.16188914		1538.98	0.00022155		2068.98	-0.0109972		2599.01	-0.01939734
479.2	0.34347773		1009.19	0.16286396		1539.18	0.0004612		2069.18	-0.01023395		2599.21	-0.01944962
479.4	0.34345004		1009.39	0.16300435		1539.38	0.00001561		2069.38	-0.01019585		2599.41	-0.01960082
479.6	0.34277622		1009.59	0.16231974		1539.58	-0.0008991		2069.58	-0.0104418		2599.61	-0.01967627
479.8	0.34317493		1009.79	0.16252292		1539.78	-0.00140806		2069.78	-0.01074114		2599.81	-0.0187776
480	0.34248651		1009.99	0.1615264		1539.98	-0.00121983		2069.98	-0.01225212		2600.01	-0.0192243
480.2	0.34218566		1010.19	0.16206045		1540.18	-0.00112294		2070.18	-0.01295878		2600.21	-0.0185962
480.4	0.34118534		1010.39	0.16238615		1540.38	-0.00026128		2070.38	-0.01341282		2600.41	-0.01924643
480.6	0.34016767		1010.59	0.16298479		1540.58	-0.00101308		2070.58	-0.01366397		2600.61	-0.02009094
480.8	0.3396876		1010.79	0.16249842		1540.78	-0.00081318		2070.78	-0.01335521		2600.81	-0.01989589
481	0.34032125		1010.99	0.16171962		1540.98	-0.00035126		2070.98	-0.01284515		2601.01	-0.01967967
481.2	0.34103252		1011.19	0.16168205		1541.18	0.00004142		2071.18	-0.01239519		2601.21	-0.01991349
481.4	0.34024146		1011.39	0.16074686		1541.38	0.00085439		2071.38	-0.012143		2601.41	-0.02119442
481.6	0.34067302		1011.59	0.16066076		1541.58	0.00132446		2071.58	-0.01245453		2601.61	-0.02130599
481.8	0.33968737		1011.79	0.16141628		1541.78	0.00115396		2071.78	-0.01189966		2601.81	-0.02133334
482	0.3393042		1011.99	0.16217343		1541.98	0.00076066		2071.98	-0.01093416		2602.01	-0.02067987
482.2	0.33925426		1012.19	0.16152977		1542.18	0.00057278		2072.18	-0.01076235		2602.21	-0.01945397
482.4	0.33933481		1012.39	0.1610087		1542.38	-0.00001165		2072.38	-0.00992547		2602.41	-0.01850742
482.6	0.33891224		1012.59	0.161286		1542.58	-0.00047783		2072.58	-0.01011713		2602.61	-0.01750893
482.8	0.33812246		1012.79	0.1616581		1542.78	-0.00033443		2072.78	-0.00935264		2602.81	-0.01750953
483	0.33959897		1012.99	0.16141956		1542.98	-0.00014809		2072.98	-0.00928327		2603.01	-0.01762986
483.2	0.34015602		1013.19	0.16113535		1543.18	0.00042419		2073.18	-0.00864777		2603.21	-0.01710221
483.4	0.34093006		1013.39	0.16118831		1543.38	-0.00000146		2073.38	-0.00912127		2603.41	-0.01723628
483.6	0.34066306		1013.59	0.16065805		1543.58	-0.00025886		2073.58	-0.00963653		2603.61	-0.01749785
483.8	0.34143346		1013.79	0.16039317		1543.78	-0.00034384		2073.78	-0.01056932		2603.81	-0.01759829
484	0.34111293		1013.99	0.16059248		1543.98	-0.00028481		2073.98	-0.01138211		2604.01	-0.01776395
484.2	0.3406536		1014.19	0.1614711		1544.18	-0.00065402		2074.18	-0.0118632		2604.21	-0.01830969
484.4	0.34037707		1014.39	0.16099724		1544.38	-0.00022504		2074.38	-0.0127194		2604.41	-0.01881529
484.6	0.34095806		1014.59	0.16089028		1544.58	-0.00160741		2074.58	-0.01354924		2604.61	-0.01950908
484.8	0.34176159		1014.79	0.16056982		1544.78	-0.00115006		2074.78	-0.01354295		2604.81	-0.02035539
485	0.342574		1014.99	0.16088781		1544.98	-0.00093814		2074.98	-0.01342594		2605.01	-0.02153856
485.2	0.34264115		1015.19	0.16076557		1545.18	-0.00120665		2075.18	-0.01358648		2605.21	-0.02180861
485.4	0.34307917		1015.39	0.1608085		1545.38	-0.00155232		2075.38	-0.0144725		2605.41	-0.02295436
485.6	0.34370292		1015.59	0.16071866		1545.58	-0.00156318		2075.58	-0.01386192		2605.61	-0.02297999
485.8	0.34446968		1015.79	0.16173304		1545.78	-0.00235685		2075.78	-0.01289738		2605.81	-0.02279207
486	0.34491208		1015.99	0.16153684		1545.98	-0.00255743		2075.98	-0.0130021		2606.01	-0.02170539
486.2	0.34515217		1016.19	0.16115028		1546.18	-0.00286611		2076.18	-0.01263502		2606.21	-0.02102345
486.4	0.34534043		1016.39	0.16164197		1546.38	-0.00378925		2076.38	-0.01224932		2606.41	-0.02102939
486.6	0.34508582		1016.59	0.16185268		1546.58	-0.00361901		2076.58	-0.0119629		2606.61	-0.02044485
486.8	0.3452071		1016.79	0.16249881		1546.78	-0.00314986		2076.78	-0.01067858		2606.81	-0.02013037
487	0.34498961		1016.99	0.16315488		1546.98	-0.00270627		2076.98	-0.01048797		2607.01	-0.01894337
487.2	0.34414517		1017.19	0.1636351		1547.18	-0.00230963		2077.18	-0.01020717		2607.21	-0.0177976
487.4	0.3434964		1017.39	0.16462718		1547.38	-0.00305491		2077.38	-0.0102715		2607.41	-0.01748931
487.6	0.34225524		1017.59	0.16423365		1547.58	-0.00309003		2077.58	-0.01051366		2607.61	-0.01748897
487.8	0.34149793		1017.79	0.16381697		1547.78	-0.00270495		2077.78	-0.010731		2607.81	-0.01688562
488	0.34064935		1017.99	0.16413328		1547.98	-0.00272902		2077.98	-0.01093304		2608.01	-0.01674177
488.2	0.34016222		1018.19	0.16408978		1548.18	-0.00226111		2078.18	-0.01157708		2608.21	-0.01665007
488.4	0.33984006		1018.39	0.1639003		1548.38	-0.00264801		2078.38	-0.01131567		2608.41	-0.01694555
488.6	0.33952447		1018.59	0.16438738		1548.58	-0.00266591		2078.58	-0.01154527		2608.61	-0.01786437
488.8	0.33946453		1018.79	0.16504741		1548.78	-0.00190568		2078.78	-0.01137841		2608.81	-0.01795523
489	0.34003013		1018.99	0.1648351		1548.98	-0.00220869		2078.98	-0.01188678		2609.01	-0.01835113
489.2	0.34015571		1019.19	0.16423897		1549.18	-0.00207367		2079.18	-0.01171611		2609.21	-0.01837334
489.4	0.34113373		1019.39	0.16337874		1549.38	-0.00257877		2079.38	-0.01235014		2609.41	-0.01919662
489.6	0.3416483		1019.59	0.1629397		1549.58	-0.00249545		2079.58	-0.01190527		2609.61	-0.02007016
489.8	0.3426786		1019.79	0.16270644		1549.78	-0.00202109		2079.78	-0.01124167		2609.81	-0.02022679
490	0.34283061		1019.99	0.16150344		1549.98	-0.00182264		2079.98	-0.01147139		2610.01	-0.02027572
490.2	0.3430999		1020.19	0.16087517		1550.18	-0.00242753		2080.18	-0.01043352		2610.21	-0.02053792
490.4	0.34293231		1020.39	0.1600411		1550.38	-0.00342827		2080.38	-0.0100136		2610.41	-0.0200695
490.6	0.34304689		1020.59	0.15898348		1550.58	-0.00391422		2080.58	-0.00929739		2610.61	-0.01930419
490.8	0.34245888		1020.79	0.15957589		1550.78	-0.00435572		2080.78	-0.00944729		2610.81	-0.01835744
491	0.34167238		1020.99	0.15986485		1550.98	-0.00335114		2080.98	-0.01024342		2611.01	-0.01772085
491.2	0.34220212		1021.19	0.15916146		1551.18	-0.00350799		2081.18	-0.01047148		2611.21	-0.01732143
491.4	0.34182627		1021.39	0.15872499		1551.38	-0.00319041		2081.38	-0.01028592		2611.41	-0.01718097
491.6	0.34202639		1021.59	0.15843123		1551.58	-0.00221186		2081.58	-0.01042345		2611.61	-0.01769294
491.8	0.3416689		1021.79	0.15849621		1551.78	-0.00208397		2081.78	-0.01077141		2611.81	-0.01821083
492	0.34180445		1021.99	0.15923884		1551.98	-0.00163711		2081.98	-0.01015764		2612.01	-0.01825228
492.2	0.34230473		1022.19	0.15975324		1552.18	-0.00137435		2082.18	-0.01106213		2612.21	-0.01803341
492.4	0.34176028		1022.39	0.16099984		1552.38	-0.00126838		2082.38	-0.01109583		2612.41	-0.01882193
492.6	0.34191785		1022.59	0.16172684		1552.58	-0.00133126		2082.58	-0.01146959		2612.61	-0.0185381
492.8	0.34136042		1022.79	0.16196938		1552.78	-0.00206339		2082.78	-0.0114659		2612.81	-0.01849268
493	0.34088134		1022.99	0.16201288		1552.98	-0.00263458		2082.98	-0.0117463		2613.01	-0.01906081
493.2	0.34075495		1023.19	0.16154742		1553.18	-0.00251095		2083.18	-0.01162977		2613.21	-0.01900369
493.4	0.3403418		1023.39	0.16162938		1553.38	-0.00403183		2083.38	-0.01216033		2613.41	-0.01949541
493.6	0.34036054		1023.59	0.16149088		1553.58	-0.00399925		2083.58	-0.01182001		2613.61	-0.01987974
493.8	0.34043244		1023.79	0.16058587		1553.78	-0.00416475		2083.78	-0.0111953		2613.81	-0.01885911
494	0.3405848		1023.99	0.16064525		1553.98	-0.00423838		2083.98	-0.01189928		2614.01	-0.01879617
494.2	0.3398754		1024.19	0.16108833		1554.18	-0.00392396		2084.18	-0.0111378		2614.21	-0.01827672
494.4	0.33974543		1024.39	0.16141878		1554.38	-0.00431218		2084.38	-0.01057488		2614.41	-0.01735441
494.6	0.34054472		1024.59	0.16175372		1554.58	-0.0039861		2084.58	-0.01129934		2614.61	-0.01808133
494.8	0.34028007		1024.79	0.16224041		1554.78	-0.00319825		2084.78	-0.01141044		2614.81	-0.01752969
495	0.34056466		1024.99	0.16185926		1554.98	-0.0015438		2084.98	-0.01169011		2615.01	-0.01694039
495.2	0.34085037		1025.19	0.16101979		1555.18	-0.00099386		2085.18	-0.01082442		2615.21	-0.01630169
495.4	0.34096586		1025.39	0.16009146		1555.38	-0.00044192		2085.38	-0.01126536		2615.41	-0.01683976
495.6	0.34120325		1025.59	0.16017206		1555.58	0.00006044		2085.58	-0.01201067		2615.61	-0.01773103
495.8	0.34127893		1025.79	0.16071449		1555.78	-0.00017612		2085.78	-0.01236564		2615.81	-0.01854262
496	0.34254925		1025.99	0.1608671		1555.98	-0.00040023		2085.98	-0.01202195		2616.01	-0.01875622
496.2	0.34305994		1026.19	0.16062855		1556.18	-0.00118594		2086.18	-0.01354561		2616.21	-0.01892284
496.4	0.3427359		1026.39	0.16053024		1556.38	-0.00100282		2086.38	-0.01406521		2616.41	-0.01894064
496.6	0.34261593		1026.59	0.15941431		1556.58	-0.00173609		2086.58	-0.01352702		2616.61	-0.01906419
496.8	0.34269858		1026.79	0.15915819		1556.78	-0.00261421		2086.78	-0.01320309		2616.81	-0.01958716
497	0.34230095		1026.99	0.1589039		1556.98	-0.00332079		2086.98	-0.01317094		2617.01	-0.01977421
497.2	0.34278177		1027.19	0.15818575		1557.18	-0.00413014		2087.18	-0.01393872		2617.21	-0.01999467
497.4	0.34285978		1027.39	0.15738272		1557.38	-0.00549105		2087.38	-0.01344162		2617.41	-0.02028988
497.6	0.34309638		1027.59	0.15753795		1557.58	-0.00563653		2087.58	-0.01346829		2617.61	-0.02019522
497.8	0.34341511		1027.79	0.15792811		1557.78	-0.00538122		2087.78	-0.01325837		2617.81	-0.01991088
498	0.34314952		1027.99	0.15889251		1557.98	-0.00441538		2087.98	-0.01337216		2618.01	-0.02080157
498.2	0.34300363		1028.19	0.15961403		1558.18	-0.00410311		2088.18	-0.01313959		2618.21	-0.02017034
498.4	0.34427184		1028.39	0.15999426		1558.38	-0.00390134		2088.38	-0.01252032		2618.41	-0.01965463
498.6	0.34413758		1028.59	0.1599903		1558.58	-0.00350436		2088.58	-0.01316942		2618.61	-0.02001255
498.8	0.34351125		1028.79	0.15971519		1558.78	-0.00371748		2088.78	-0.01237212		2618.81	-0.01834234
499	0.34324721		1028.99	0.16024885		1558.98	-0.00311085		2088.98	-0.01296807		2619.01	-0.01810874
499.2	0.34352971		1029.19	0.16041476		1559.18	-0.00311498		2089.18	-0.01177715		2619.21	-0.0178418
499.4	0.34357409		1029.39	0.16055647		1559.38	-0.00296365		2089.38	-0.01308011		2619.41	-0.01800097
499.6	0.34379871		1029.59	0.16168016		1559.58	-0.00318589		2089.58	-0.01294478		2619.61	-0.0181935
499.8	0.34403737		1029.79	0.16224909		1559.78	-0.00369668		2089.78	-0.01306643		2619.81	-0.01772133
500	0.34259144		1029.99	0.16212119		1559.98	-0.00352559		2089.98	-0.01375749		2620.01	-0.01719189
500.2	0.34117831		1030.19	0.16199596		1560.18	-0.00352599		2090.18	-0.01487178		2620.21	-0.01677605
500.4	0.34017291		1030.39	0.16155324		1560.38	-0.00248772		2090.38	-0.01510357		2620.41	-0.016432
500.6	0.33950183		1030.59	0.16151644		1560.58	-0.00289811		2090.58	-0.01410203		2620.61	-0.01751186
500.8	0.33871988		1030.79	0.16208606		1560.78	-0.0032118		2090.78	-0.01387167		2620.81	-0.01751417
501	0.33741273		1030.99	0.16221262		1560.98	-0.00323835		2090.98	-0.01381342		2621.01	-0.01758198
501.2	0.33801849		1031.19	0.16151529		1561.18	-0.00370765		2091.18	-0.0142925		2621.21	-0.01696348
501.4	0.33801291		1031.39	0.16163744		1561.38	-0.00405565		2091.38	-0.01446363		2621.41	-0.01749665
501.6	0.33761393		1031.59	0.16258399		1561.58	-0.00335049		2091.58	-0.01483123		2621.61	-0.01784196
501.8	0.33851873		1031.79	0.16280321		1561.78	-0.00324396		2091.78	-0.01466573		2621.81	-0.01827445
502	0.33923745		1031.99	0.16320315		1561.98	-0.00266442		2091.98	-0.01424948		2622.01	-0.01955736
502.2	0.340275		1032.19	0.16280036		1562.18	-0.00244237		2092.18	-0.01432146		2622.21	-0.01992958
502.4	0.34139982		1032.39	0.16314806		1562.38	-0.00242781		2092.38	-0.0142568		2622.41	-0.02013314
502.6	0.34125205		1032.59	0.16210204		1562.58	-0.00252976		2092.58	-0.01430484		2622.61	-0.02042921
502.8	0.34196443		1032.79	0.16173152		1562.78	-0.00188886		2092.78	-0.01443533		2622.81	-0.02038317
503	0.34251483		1032.99	0.16133865		1562.98	-0.00063849		2092.98	-0.01457293		2623.01	-0.02078158
503.2	0.34297486		1033.19	0.16053225		1563.18	0.00030803		2093.18	-0.01348815		2623.21	-0.02061473
503.4	0.34317078		1033.39	0.15965258		1563.38	0.00088326		2093.38	-0.01387775		2623.41	-0.01968418
503.6	0.34303804		1033.59	0.15960704		1563.58	0.00019845		2093.58	-0.01336699		2623.61	-0.01982908
503.8	0.34156375		1033.79	0.15939086		1563.78	0.00064859		2093.78	-0.01458539		2623.81	-0.01987912
504	0.34055535		1033.99	0.15815143		1563.98	0.00129575		2093.98	-0.01485708		2624.01	-0.01990902
504.2	0.34037722		1034.19	0.15808997		1564.18	0.00104665		2094.18	-0.01478598		2624.21	-0.02043412
504.4	0.33962555		1034.39	0.15762723		1564.38	0.00129131		2094.38	-0.01410795		2624.41	-0.02035054
504.6	0.33904845		1034.59	0.15804893		1564.58	0.00094679		2094.58	-0.01303736		2624.61	-0.02092932
504.8	0.33900058		1034.79	0.15830955		1564.78	0.00013395		2094.78	-0.01260862		2624.81	-0.02048838
505	0.33893169		1034.99	0.15894434		1564.98	-0.0008916		2094.98	-0.01212918		2625.01	-0.02071473
505.2	0.34015334		1035.19	0.15824874		1565.18	-0.00193545		2095.18	-0.0129814		2625.21	-0.02022732
505.4	0.34015882		1035.39	0.15877337		1565.38	-0.00294042		2095.38	-0.01262921		2625.41	-0.02090203
505.6	0.34076439		1035.59	0.15941961		1565.58	-0.00338872		2095.58	-0.01216416		2625.61	-0.02112292
505.8	0.34163775		1035.79	0.1604969		1565.78	-0.0045837		2095.78	-0.01158759		2625.81	-0.02111511
506	0.34127453		1035.99	0.16043702		1565.98	-0.00449428		2095.98	-0.01089501		2626.01	-0.02135351
506.2	0.34142718		1036.19	0.16033561		1566.18	-0.00559169		2096.18	-0.01104304		2626.21	-0.0211417
506.4	0.34154844		1036.39	0.16052756		1566.38	-0.00571043		2096.38	-0.01157009		2626.41	-0.02059684
506.6	0.3420013		1036.59	0.15943286		1566.58	-0.00494448		2096.58	-0.01216798		2626.61	-0.02035621
506.8	0.34281698		1036.79	0.15939587		1566.78	-0.00471402		2096.78	-0.01242847		2626.81	-0.02043486
507	0.34214203		1036.99	0.15936146		1566.98	-0.00438173		2096.98	-0.01228338		2627.01	-0.02013828
507.2	0.34210755		1037.19	0.15936632		1567.18	-0.00439395		2097.18	-0.01273952		2627.21	-0.02053449
507.4	0.34274407		1037.39	0.15931228		1567.38	-0.00417587		2097.38	-0.01371308		2627.41	-0.01990366
507.6	0.34248743		1037.59	0.16033215		1567.58	-0.00386413		2097.58	-0.01461938		2627.61	-0.02011255
507.8	0.34183727		1037.79	0.16044891		1567.78	-0.00275626		2097.78	-0.0154816		2627.81	-0.02009907
508	0.34289912		1037.99	0.16044739		1567.98	-0.00221364		2097.98	-0.01490155		2628.01	-0.02034245
508.2	0.34193844		1038.19	0.16116498		1568.18	-0.00228512		2098.18	-0.01525412		2628.21	-0.02070448
508.4	0.34120311		1038.39	0.16061824		1568.38	-0.00189511		2098.38	-0.01527746		2628.41	-0.02049766
508.6	0.34110762		1038.59	0.16074579		1568.58	-0.00251053		2098.58	-0.01535289		2628.61	-0.02030429
508.8	0.34075852		1038.79	0.16032461		1568.78	-0.00333538		2098.78	-0.01549972		2628.81	-0.02080086
509	0.33960475		1038.99	0.16105276		1568.98	-0.00316157		2098.98	-0.01524389		2629.01	-0.02056806
509.2	0.33965752		1039.19	0.16017066		1569.18	-0.00351447		2099.18	-0.01588427		2629.21	-0.02105517
509.4	0.33881198		1039.39	0.16085537		1569.38	-0.00360481		2099.38	-0.01540963		2629.41	-0.02099546
509.6	0.33797514		1039.59	0.16181579		1569.58	-0.00335234		2099.58	-0.01592595		2629.61	-0.02092154
509.8	0.3371933		1039.79	0.1621179		1569.78	-0.00340806		2099.78	-0.01563934		2629.81	-0.02124734
510	0.335968		1039.99	0.16167505		1569.98	-0.00331469		2099.98	-0.01533184		2630.01	-0.02146353
510.2	0.33684085		1040.19	0.16197597		1570.18	-0.00345406		2100.18	-0.01507697		2630.21	-0.02236589
510.4	0.33762441		1040.39	0.16217189		1570.38	-0.00280037		2100.38	-0.01544592		2630.41	-0.02241405
510.6	0.3383624		1040.59	0.16233681		1570.58	-0.00273105		2100.58	-0.01527484		2630.61	-0.02309462
510.8	0.33894575		1040.79	0.16270714		1570.78	-0.00294627		2100.78	-0.01508289		2630.81	-0.02396018
511	0.33825931		1040.99	0.16302433		1570.98	-0.00165034		2100.98	-0.0155167		2631.01	-0.02431104
511.2	0.33875008		1041.19	0.16286773		1571.18	-0.00181309		2101.18	-0.01529045		2631.21	-0.02435796
511.4	0.33910112		1041.39	0.16285316		1571.38	-0.00183525		2101.38	-0.01596574		2631.41	-0.02355614
511.6	0.33949124		1041.59	0.16399246		1571.58	-0.00210086		2101.58	-0.01453112		2631.61	-0.0231617
511.8	0.33977585		1041.79	0.16383809		1571.78	-0.00157492		2101.78	-0.0141344		2631.81	-0.02297025
512	0.34010691		1041.99	0.16376548		1571.98	-0.00171399		2101.98	-0.01376471		2632.01	-0.02248089
512.2	0.338624		1042.19	0.16294838		1572.18	-0.00192698		2102.18	-0.01364839		2632.21	-0.02151318
512.4	0.33855356		1042.39	0.16285564		1572.38	-0.0016745		2102.38	-0.01265529		2632.41	-0.02047899
512.6	0.33817643		1042.59	0.16233799		1572.58	-0.00226214		2102.58	-0.01184781		2632.61	-0.02013068
512.8	0.33802503		1042.79	0.16115961		1572.78	-0.0020764		2102.78	-0.01142249		2632.81	-0.02041919
513	0.33762903		1042.99	0.1615652		1572.98	-0.00281573		2102.98	-0.01108431		2633.01	-0.01977085
513.2	0.337609		1043.19	0.16085327		1573.18	-0.00393402		2103.18	-0.01144758		2633.21	-0.02026289
513.4	0.33779728		1043.39	0.16111861		1573.38	-0.00333794		2103.38	-0.01189844		2633.41	-0.01927354
513.6	0.33778718		1043.59	0.16062765		1573.58	-0.00357431		2103.58	-0.01184582		2633.61	-0.01988217
513.8	0.33811204		1043.79	0.1603614		1573.78	-0.00374598		2103.78	-0.01145428		2633.81	-0.01993763
514	0.33849785		1043.99	0.16046726		1573.98	-0.00397851		2103.98	-0.01207375		2634.01	-0.02007355
514.2	0.33948902		1044.19	0.16058221		1574.18	-0.00319119		2104.18	-0.01212234		2634.21	-0.02047619
514.4	0.33996484		1044.39	0.16011772		1574.38	-0.00293525		2104.38	-0.01281052		2634.41	-0.02049271
514.6	0.34063309		1044.59	0.16055283		1574.58	-0.0025429		2104.58	-0.01310557		2634.61	-0.02107205
514.8	0.34124097		1044.79	0.16021383		1574.78	-0.00191099		2104.78	-0.01348571		2634.81	-0.02123883
515	0.34117445		1044.99	0.15959293		1574.98	-0.00183128		2104.98	-0.01337846		2635.01	-0.02150115
515.2	0.34155052		1045.19	0.15956717		1575.18	-0.00267254		2105.18	-0.01339219		2635.21	-0.02204324
515.4	0.34224361		1045.39	0.15917443		1575.38	-0.00307017		2105.38	-0.01307298		2635.41	-0.02249815
515.6	0.34248605		1045.59	0.16005147		1575.58	-0.00296316		2105.58	-0.01215688		2635.61	-0.02248545
515.8	0.34250901		1045.79	0.16030041		1575.78	-0.00257223		2105.78	-0.01321556		2635.81	-0.02202391
516	0.34159889		1045.99	0.15993959		1575.98	-0.00316035		2105.98	-0.01301043		2636.01	-0.02237716
516.2	0.34093077		1046.19	0.15984582		1576.18	-0.00362809		2106.18	-0.01268593		2636.21	-0.02236558
516.4	0.34082514		1046.39	0.15998405		1576.38	-0.00364111		2106.38	-0.01228102		2636.41	-0.02222382
516.6	0.34006617		1046.59	0.15927397		1576.58	-0.0042157		2106.58	-0.01274926		2636.61	-0.02225435
516.8	0.33984491		1046.79	0.15909243		1576.78	-0.00448381		2106.78	-0.01286684		2636.81	-0.02193569
517	0.33843257		1046.99	0.15954182		1576.98	-0.0056911		2106.98	-0.01307883		2637.01	-0.02095925
517.2	0.33817623		1047.19	0.15885319		1577.18	-0.00618958		2107.18	-0.01329546		2637.21	-0.02093627
517.4	0.3385973		1047.39	0.15842701		1577.38	-0.00508001		2107.38	-0.01337232		2637.41	-0.02083027
517.6	0.33789349		1047.59	0.15852179		1577.58	-0.00508564		2107.58	-0.01326855		2637.61	-0.02027162
517.8	0.33804099		1047.79	0.15897534		1577.78	-0.00475642		2107.78	-0.01348444		2637.81	-0.01950187
518	0.33821581		1047.99	0.15932932		1577.98	-0.00420593		2107.98	-0.01399821		2638.01	-0.01952333
518.2	0.33847433		1048.19	0.1588918		1578.18	-0.00308928		2108.18	-0.0139597		2638.21	-0.01896828
518.4	0.33855734		1048.39	0.15870603		1578.38	-0.0029635		2108.38	-0.01430985		2638.41	-0.01917974
518.6	0.33889234		1048.59	0.15864392		1578.58	-0.0024046		2108.58	-0.01383717		2638.61	-0.01941069
518.8	0.33876992		1048.79	0.15853631		1578.78	-0.00249796		2108.78	-0.01377203		2638.81	-0.01936154
519	0.33895536		1048.99	0.1578681		1578.98	-0.00245675		2108.98	-0.0137648		2639.01	-0.02016782
519.2	0.33897089		1049.19	0.15862784		1579.18	-0.00221765		2109.18	-0.01438313		2639.21	-0.02047431
519.4	0.33895558		1049.39	0.15803428		1579.38	-0.00237038		2109.38	-0.01415869		2639.41	-0.02010609
519.6	0.33849001		1049.59	0.15859005		1579.58	-0.00250201		2109.58	-0.0145741		2639.61	-0.02084696
519.8	0.33903846		1049.79	0.15838523		1579.78	-0.00279842		2109.78	-0.01509243		2639.81	-0.02128115
520	0.33865812		1049.99	0.15759375		1579.98	-0.00312019		2109.98	-0.01495074		2640.01	-0.02192072
520.2	0.33800157		1050.19	0.15737903		1580.18	-0.00277951		2110.18	-0.01458376		2640.21	-0.02136865
520.4	0.33773767		1050.39	0.15790437		1580.38	-0.0023688		2110.38	-0.01457369		2640.41	-0.02121608
520.6	0.3369311		1050.59	0.15827539		1580.58	-0.00227309		2110.58	-0.01531292		2640.61	-0.02039525
520.8	0.33657653		1050.79	0.15859886		1580.78	-0.00189242		2110.78	-0.01492671		2640.81	-0.01996393
521	0.33610101		1050.99	0.15853449		1580.98	-0.00176659		2110.98	-0.01478348		2641.01	-0.01978016
521.2	0.3368039		1051.19	0.15881652		1581.18	-0.00085139		2111.18	-0.01516595		2641.21	-0.02035777
521.4	0.33654622		1051.39	0.16012829		1581.38	0.00049599		2111.38	-0.01542437		2641.41	-0.02025528
521.6	0.33668697		1051.59	0.16078881		1581.58	0.00055489		2111.58	-0.015219		2641.61	-0.02024973
521.8	0.33766533		1051.79	0.16139731		1581.78	0.00139487		2111.78	-0.01508639		2641.81	-0.02052354
522	0.33791322		1051.99	0.16218221		1581.98	0.00088416		2111.98	-0.01554733		2642.01	-0.02070571
522.2	0.33855635		1052.19	0.16146067		1582.18	0.00070936		2112.18	-0.01523642		2642.21	-0.02110183
522.4	0.33799249		1052.39	0.1617457		1582.38	-0.00010122		2112.38	-0.01445469		2642.41	-0.02099405
522.6	0.33769221		1052.59	0.16190221		1582.58	0.00009559		2112.58	-0.01396085		2642.61	-0.02097052
522.8	0.33819328		1052.79	0.16226338		1582.78	-0.00124687		2112.78	-0.01428297		2642.81	-0.0207444
523	0.33906152		1052.99	0.16080835		1582.98	-0.00143934		2112.98	-0.01378741		2643.01	-0.02081586
523.2	0.33919748		1053.19	0.1611443		1583.18	-0.00211783		2113.18	-0.01384619		2643.21	-0.02018692
523.4	0.33934215		1053.39	0.16027974		1583.38	-0.00286955		2113.38	-0.01286961		2643.41	-0.01990959
523.6	0.33967397		1053.59	0.16018251		1583.58	-0.00366105		2113.58	-0.0122963		2643.61	-0.02073429
523.8	0.34039606		1053.79	0.15942161		1583.78	-0.00412867		2113.78	-0.01238013		2643.81	-0.01953098
524	0.34010615		1053.99	0.15940094		1583.98	-0.0036496		2113.98	-0.01230933		2644.01	-0.01960975
524.2	0.33972527		1054.19	0.15928109		1584.18	-0.00401845		2114.18	-0.0118087		2644.21	-0.01903904
524.4	0.3399639		1054.39	0.16033468		1584.38	-0.00445545		2114.38	-0.01242713		2644.41	-0.01900637
524.6	0.33972087		1054.59	0.16060999		1584.58	-0.00532428		2114.58	-0.01355423		2644.61	-0.0185284
524.8	0.33965169		1054.79	0.16024013		1584.78	-0.00531923		2114.78	-0.01376201		2644.81	-0.01917317
525	0.33950054		1054.99	0.16017363		1584.98	-0.00473819		2114.98	-0.01386296		2645.01	-0.02021444
525.2	0.33975413		1055.19	0.16083142		1585.18	-0.00411813		2115.18	-0.01526893		2645.21	-0.02111283
525.4	0.3396533		1055.39	0.16084355		1585.38	-0.00395891		2115.38	-0.01623548		2645.41	-0.02176108
525.6	0.34036737		1055.59	0.16101916		1585.58	-0.0042878		2115.58	-0.0171056		2645.61	-0.0222102
525.8	0.34074345		1055.79	0.16147747		1585.78	-0.00446624		2115.78	-0.01757294		2645.81	-0.02238993
526	0.34104066		1055.99	0.16102912		1585.98	-0.00516106		2115.98	-0.01850978		2646.01	-0.02282769
526.2	0.34085969		1056.19	0.1608227		1586.18	-0.0051387		2116.18	-0.01817394		2646.21	-0.02293823
526.4	0.33990377		1056.39	0.16117531		1586.38	-0.00497904		2116.38	-0.01899719		2646.41	-0.02289531
526.6	0.3397503		1056.59	0.16062663		1586.58	-0.00427058		2116.58	-0.01974458		2646.61	-0.02325989
526.8	0.34005002		1056.79	0.15970538		1586.78	-0.00412795		2116.78	-0.01985246		2646.81	-0.02374334
527	0.33991054		1056.99	0.15891462		1586.98	-0.0034477		2116.98	-0.01976486		2647.01	-0.02326555
527.2	0.33913122		1057.19	0.15922018		1587.18	-0.00285971		2117.18	-0.01917606		2647.21	-0.02232163
527.4	0.33888797		1057.39	0.15912907		1587.38	-0.00228427		2117.38	-0.01896548		2647.41	-0.0226605
527.6	0.33827296		1057.59	0.15833837		1587.58	-0.00227257		2117.58	-0.01814325		2647.61	-0.02272188
527.8	0.33869595		1057.79	0.15766444		1587.78	-0.00206391		2117.78	-0.01711268		2647.81	-0.02219657
528	0.33797928		1057.99	0.15865675		1587.98	-0.00111215		2117.98	-0.01566818		2648.01	-0.02270647
528.2	0.33801679		1058.19	0.15814415		1588.18	-0.00181574		2118.18	-0.01462642		2648.21	-0.02253443
528.4	0.33804844		1058.39	0.15936073		1588.38	-0.00257437		2118.38	-0.01398558		2648.41	-0.02316656
528.6	0.33747463		1058.59	0.15912979		1588.58	-0.00345873		2118.58	-0.01317177		2648.61	-0.02355945
528.8	0.33714189		1058.79	0.15868634		1588.78	-0.00326985		2118.78	-0.01166351		2648.81	-0.0237156
529	0.3371235		1058.99	0.15892436		1588.98	-0.00312399		2118.98	-0.01097721		2649.01	-0.02419789
529.2	0.33792119		1059.19	0.15976944		1589.18	-0.00353143		2119.18	-0.01182275		2649.21	-0.02408743
529.4	0.33832073		1059.39	0.15914689		1589.38	-0.0039738		2119.38	-0.01257163		2649.41	-0.02342353
529.6	0.33902399		1059.59	0.15896846		1589.58	-0.00458184		2119.58	-0.01195118		2649.61	-0.02289688
529.8	0.3399548		1059.79	0.1595079		1589.78	-0.0047071		2119.78	-0.01196333		2649.81	-0.0231377
530	0.3404167		1059.99	0.15892242		1589.98	-0.0051101		2119.98	-0.01377084		2650.01	-0.02279433
530.2	0.34049087		1060.19	0.15953382		1590.18	-0.00520492		2120.18	-0.0144187		2650.21	-0.0232359
530.4	0.3413578		1060.39	0.15882792		1590.38	-0.00457389		2120.38	-0.01539488		2650.41	-0.02305594
530.6	0.34162485		1060.59	0.15859321		1590.58	-0.00377618		2120.58	-0.01580477		2650.61	-0.02249379
530.8	0.34136957		1060.79	0.15836724		1590.78	-0.00348684		2120.78	-0.01680474		2650.81	-0.02166673
531	0.34174013		1060.99	0.15841418		1590.98	-0.0033879		2120.98	-0.01666055		2651.01	-0.02118999
531.2	0.34155401		1061.19	0.15882341		1591.18	-0.00323223		2121.18	-0.01702754		2651.21	-0.02155015
531.4	0.34139503		1061.39	0.15928896		1591.38	-0.00337939		2121.38	-0.01696043		2651.41	-0.02186881
531.6	0.34088944		1061.59	0.15902862		1591.58	-0.00394943		2121.58	-0.01600537		2651.61	-0.02161089
531.8	0.3406885		1061.79	0.15947837		1591.78	-0.00432637		2121.78	-0.01560693		2651.81	-0.02187509
532	0.33957808		1061.99	0.16088234		1591.98	-0.00438108		2121.98	-0.01456286		2652.01	-0.02178357
532.2	0.33930621		1062.19	0.16080953		1592.18	-0.00465476		2122.18	-0.01535007		2652.21	-0.0219582
532.4	0.33880805		1062.39	0.16177496		1592.38	-0.00527126		2122.38	-0.01438527		2652.41	-0.02209022
532.6	0.33836767		1062.59	0.16162192		1592.58	-0.00546151		2122.58	-0.01395176		2652.61	-0.02167141
532.8	0.33783071		1062.79	0.16117676		1592.78	-0.00518415		2122.78	-0.01358987		2652.81	-0.02119235
533	0.33884767		1062.99	0.16093638		1592.98	-0.00507888		2122.98	-0.01416432		2653.01	-0.0215651
533.2	0.33873546		1063.19	0.16078919		1593.18	-0.00495879		2123.18	-0.01392601		2653.21	-0.02029472
533.4	0.33896116		1063.39	0.15921897		1593.38	-0.00458193		2123.38	-0.01398207		2653.41	-0.01978246
533.6	0.33989225		1063.59	0.15865228		1593.58	-0.00423194		2123.58	-0.01369181		2653.61	-0.02084764
533.8	0.34090562		1063.79	0.15850673		1593.78	-0.00351387		2123.78	-0.01418082		2653.81	-0.02102492
534	0.34136788		1063.99	0.15739227		1593.98	-0.00354751		2123.98	-0.01513526		2654.01	-0.02086271
534.2	0.34166733		1064.19	0.15695079		1594.18	-0.00325218		2124.18	-0.01513088		2654.21	-0.02110118
534.4	0.3418453		1064.39	0.15557981		1594.38	-0.00292125		2124.38	-0.01495963		2654.41	-0.02067015
534.6	0.34143683		1064.59	0.15527004		1594.58	-0.0031101		2124.58	-0.01522638		2654.61	-0.02071952
534.8	0.34108249		1064.79	0.15483265		1594.78	-0.00366598		2124.78	-0.01648868		2654.81	-0.02138613
535	0.34178631		1064.99	0.15464257		1594.98	-0.00292379		2124.98	-0.01590089		2655.01	-0.02289938
535.2	0.34180976		1065.19	0.15513573		1595.18	-0.00340651		2125.18	-0.01586533		2655.21	-0.02327786
535.4	0.34097754		1065.39	0.15629848		1595.38	-0.00325102		2125.38	-0.01523127		2655.41	-0.0230505
535.6	0.34036307		1065.59	0.15603064		1595.58	-0.0035194		2125.58	-0.01552923		2655.61	-0.02316939
535.8	0.33946509		1065.79	0.15727263		1595.78	-0.00413768		2125.78	-0.01569607		2655.81	-0.02348895
536	0.33908611		1065.99	0.15808021		1595.98	-0.00412869		2125.98	-0.01571408		2656.01	-0.02360781
536.2	0.33824639		1066.19	0.15941967		1596.18	-0.00401148		2126.18	-0.01682772		2656.21	-0.02395402
536.4	0.33864712		1066.39	0.16023426		1596.38	-0.00517952		2126.38	-0.01608291		2656.41	-0.02326192
536.6	0.33786515		1066.59	0.1603923		1596.58	-0.00573419		2126.58	-0.01622848		2656.61	-0.02300066
536.8	0.33725604		1066.79	0.16054288		1596.78	-0.00525452		2126.78	-0.01534567		2656.81	-0.02251943
537	0.33779069		1066.99	0.16128591		1596.98	-0.00557332		2126.98	-0.01616268		2657.01	-0.02234623
537.2	0.33635677		1067.19	0.16120011		1597.18	-0.00524529		2127.18	-0.01635925		2657.21	-0.02191316
537.4	0.33606545		1067.39	0.16062577		1597.38	-0.0055581		2127.38	-0.01718815		2657.41	-0.02219648
537.6	0.33678814		1067.59	0.16071171		1597.58	-0.00495992		2127.58	-0.01733462		2657.61	-0.02226346
537.8	0.33763122		1067.79	0.16051104		1597.78	-0.0049449		2127.78	-0.01704003		2657.81	-0.02144024
538	0.33769301		1067.99	0.1604276		1597.98	-0.00498455		2127.98	-0.01684436		2658.01	-0.021381
538.2	0.33677128		1068.19	0.1601607		1598.18	-0.00488025		2128.18	-0.01709265		2658.21	-0.02153105
538.4	0.33757425		1068.39	0.15982223		1598.38	-0.00429745		2128.38	-0.01744293		2658.41	-0.0216296
538.6	0.33855211		1068.59	0.15964872		1598.58	-0.00465859		2128.58	-0.01758986		2658.61	-0.02145715
538.8	0.33897886		1068.79	0.15906504		1598.78	-0.00470309		2128.78	-0.01773513		2658.81	-0.02175964
539	0.3400788		1068.99	0.15919951		1598.98	-0.00416184		2128.98	-0.01691768		2659.01	-0.02186237
539.2	0.34040274		1069.19	0.15948659		1599.18	-0.00413449		2129.18	-0.01677484		2659.21	-0.02140928
539.4	0.33985602		1069.39	0.16011083		1599.38	-0.00348742		2129.38	-0.01683446		2659.41	-0.02206821
539.6	0.33916173		1069.59	0.15981548		1599.58	-0.00373568		2129.58	-0.01694813		2659.61	-0.02233476
539.8	0.33895811		1069.79	0.16094246		1599.78	-0.00400084		2129.78	-0.01740295		2659.81	-0.02369635
540	0.3390007		1069.99	0.16060395		1599.98	-0.0042145		2129.98	-0.01741631		2660.01	-0.02495193
540.2	0.33851044		1070.19	0.16066347		1600.18	-0.00445355		2130.18	-0.01712144		2660.21	-0.02547454
540.4	0.33828624		1070.39	0.15937835		1600.38	-0.00443784		2130.38	-0.01671577		2660.41	-0.02530517
540.6	0.33774379		1070.59	0.15857636		1600.58	-0.00442518		2130.58	-0.01666876		2660.61	-0.02523472
540.8	0.33849585		1070.79	0.15782375		1600.78	-0.00384169		2130.78	-0.01615803		2660.81	-0.025682
541	0.33844449		1070.99	0.15653776		1600.98	-0.00461974		2130.98	-0.0179916		2661.01	-0.02604411
541.2	0.33848677		1071.19	0.15532254		1601.18	-0.00485915		2131.18	-0.0171536		2661.21	-0.02608942
541.4	0.33902656		1071.39	0.15438801		1601.38	-0.00531509		2131.38	-0.01646033		2661.41	-0.02501467
541.6	0.33988178		1071.59	0.1537417		1601.58	-0.00502853		2131.58	-0.01635199		2661.61	-0.02403911
541.8	0.3392929		1071.79	0.15293068		1601.78	-0.00516162		2131.78	-0.0167896		2661.81	-0.02361119
542	0.33834256		1071.99	0.15210777		1601.98	-0.00517737		2131.98	-0.01631788		2662.01	-0.02283886
542.2	0.33858712		1072.19	0.15272506		1602.18	-0.00569115		2132.18	-0.01649469		2662.21	-0.02165196
542.4	0.33969821		1072.39	0.15281457		1602.38	-0.00545653		2132.38	-0.01607273		2662.41	-0.02060136
542.6	0.33995156		1072.59	0.15341508		1602.58	-0.00649227		2132.58	-0.01501169		2662.61	-0.0203378
542.8	0.34026675		1072.79	0.15394972		1602.78	-0.00649129		2132.78	-0.01513202		2662.81	-0.02056744
543	0.34053882		1072.99	0.15522411		1602.98	-0.00559643		2132.98	-0.0155214		2663.01	-0.02085115
543.2	0.34098456		1073.19	0.15616347		1603.18	-0.00521197		2133.18	-0.01525518		2663.21	-0.02122185
543.4	0.34074337		1073.39	0.15831411		1603.38	-0.00492183		2133.38	-0.01496905		2663.41	-0.02200449
543.6	0.3401772		1073.59	0.15941126		1603.58	-0.00533219		2133.58	-0.01566854		2663.61	-0.0214962
543.8	0.34051618		1073.79	0.16039094		1603.78	-0.00504919		2133.78	-0.0159859		2663.81	-0.0220993
544	0.34004739		1073.99	0.16043386		1603.98	-0.00462028		2133.98	-0.01522351		2664.01	-0.02240215
544.2	0.33982369		1074.19	0.1606677		1604.18	-0.00419307		2134.18	-0.01539274		2664.21	-0.02270833
544.4	0.33918608		1074.39	0.16092043		1604.38	-0.00431366		2134.38	-0.01520038		2664.41	-0.02258405
544.6	0.33996626		1074.59	0.16070224		1604.58	-0.00379819		2134.58	-0.01516425		2664.61	-0.02271133
544.8	0.34067431		1074.79	0.160711		1604.78	-0.00334232		2134.78	-0.0150427		2664.81	-0.02338054
545	0.33984126		1074.99	0.15972214		1604.98	-0.00385236		2134.98	-0.01574423		2665.01	-0.02245496
545.2	0.34001312		1075.19	0.15947575		1605.18	-0.00415254		2135.18	-0.01586571		2665.21	-0.02186659
545.4	0.33954226		1075.39	0.15856659		1605.38	-0.00389946		2135.38	-0.01676615		2665.41	-0.02166886
545.6	0.33846484		1075.59	0.15845838		1605.58	-0.00397874		2135.58	-0.01759938		2665.61	-0.0215497
545.8	0.3375707		1075.79	0.15736293		1605.78	-0.00434963		2135.78	-0.01797466		2665.81	-0.0213314
546	0.33783023		1075.99	0.15717505		1605.98	-0.00477479		2135.98	-0.01680075		2666.01	-0.02104638
546.2	0.3383163		1076.19	0.15713684		1606.18	-0.00463028		2136.18	-0.01606003		2666.21	-0.02100461
546.4	0.3378619		1076.39	0.15732715		1606.38	-0.00471512		2136.38	-0.0153514		2666.41	-0.02124892
546.6	0.33803225		1076.59	0.15742411		1606.58	-0.00512975		2136.58	-0.01539627		2666.61	-0.02194521
546.8	0.33775085		1076.79	0.15752924		1606.78	-0.0048946		2136.78	-0.01550338		2666.81	-0.0219807
547	0.33787778		1076.99	0.15734895		1606.98	-0.00482065		2136.98	-0.01514859		2667.01	-0.02165539
547.2	0.33890803		1077.19	0.15776561		1607.18	-0.00529452		2137.18	-0.01454269		2667.21	-0.02172605
547.4	0.33875674		1077.39	0.15857525		1607.38	-0.00571654		2137.38	-0.01480764		2667.41	-0.02187607
547.6	0.33869781		1077.59	0.15829548		1607.58	-0.00674642		2137.58	-0.01419766		2667.61	-0.02182346
547.8	0.33846321		1077.79	0.15860531		1607.78	-0.00715299		2137.78	-0.01363813		2667.81	-0.02231986
548	0.33774238		1077.99	0.15851201		1607.98	-0.00746321		2137.98	-0.01326871		2668.01	-0.02316177
548.2	0.3379449		1078.19	0.15912651		1608.18	-0.00808912		2138.18	-0.01362831		2668.21	-0.02389708
548.4	0.33699085		1078.39	0.15897127		1608.38	-0.00787383		2138.38	-0.01331599		2668.41	-0.02379272
548.6	0.33820348		1078.59	0.15915113		1608.58	-0.00670247		2138.58	-0.01359685		2668.61	-0.02403359
548.8	0.33834987		1078.79	0.15899862		1608.78	-0.00710887		2138.78	-0.01413358		2668.81	-0.02401312
549	0.33795902		1078.99	0.1586144		1608.98	-0.00793406		2138.98	-0.0153468		2669.01	-0.02331733
549.2	0.3387487		1079.19	0.15838589		1609.18	-0.00741746		2139.18	-0.01664197		2669.21	-0.02387376
549.4	0.33849934		1079.39	0.15857355		1609.38	-0.00694884		2139.38	-0.01711423		2669.41	-0.02399721
549.6	0.33758556		1079.59	0.15851107		1609.58	-0.00723989		2139.58	-0.0173591		2669.61	-0.02403658
549.8	0.3376285		1079.79	0.1577249		1609.78	-0.00712305		2139.78	-0.01765178		2669.81	-0.02390527
550	0.33794758		1079.99	0.15772778		1609.98	-0.00698899		2139.98	-0.01726799		2670.01	-0.02387392
550.2	0.33702574		1080.19	0.15668924		1610.18	-0.00730692		2140.18	-0.01764224		2670.21	-0.02295361
550.4	0.33722434		1080.39	0.15717064		1610.38	-0.00845202		2140.38	-0.01780447		2670.41	-0.0224306
550.6	0.33690184		1080.59	0.15636279		1610.58	-0.00769872		2140.58	-0.0183033		2670.61	-0.02265868
550.8	0.33666311		1080.79	0.15688872		1610.78	-0.0074887		2140.78	-0.01834369		2670.81	-0.02190883
551	0.33696185		1080.99	0.15658836		1610.98	-0.00748336		2140.98	-0.01785822		2671.01	-0.02204216
551.2	0.33655454		1081.19	0.1563065		1611.18	-0.00750741		2141.18	-0.01818914		2671.21	-0.02299068
551.4	0.33602281		1081.39	0.15669764		1611.38	-0.00793942		2141.38	-0.01776459		2671.41	-0.02344089
551.6	0.33526941		1081.59	0.15688432		1611.58	-0.00805621		2141.58	-0.01735896		2671.61	-0.02389842
551.8	0.33521839		1081.79	0.15735396		1611.78	-0.00834802		2141.78	-0.01784158		2671.81	-0.02470619
552	0.33524844		1081.99	0.15746438		1611.98	-0.00719833		2141.98	-0.01745542		2672.01	-0.02577351
552.2	0.33562823		1082.19	0.15795659		1612.18	-0.00701327		2142.18	-0.01717994		2672.21	-0.02638673
552.4	0.3358146		1082.39	0.15810228		1612.38	-0.00552643		2142.38	-0.0175107		2672.41	-0.02637884
552.6	0.33801935		1082.59	0.15818641		1612.58	-0.00495289		2142.58	-0.01833025		2672.61	-0.02680334
552.8	0.33776075		1082.79	0.15833135		1612.78	-0.0051757		2142.78	-0.019466		2672.81	-0.02739862
553	0.33804888		1082.99	0.15860425		1612.98	-0.0048978		2142.98	-0.02014735		2673.01	-0.02749414
553.2	0.33794963		1083.19	0.15751527		1613.18	-0.00449143		2143.18	-0.02021287		2673.21	-0.02793269
553.4	0.33757425		1083.39	0.15753497		1613.38	-0.00446084		2143.38	-0.02022291		2673.41	-0.02751658
553.6	0.337035		1083.59	0.15704168		1613.58	-0.004625		2143.58	-0.01951152		2673.61	-0.02739144
553.8	0.3389427		1083.79	0.15636963		1613.78	-0.00440577		2143.78	-0.01880643		2673.81	-0.02655054
554	0.33851745		1083.99	0.15584282		1613.98	-0.0051685		2143.98	-0.01878203		2674.01	-0.02531507
554.2	0.33837083		1084.19	0.15535924		1614.18	-0.00589052		2144.18	-0.01872511		2674.21	-0.024129
554.4	0.33913929		1084.39	0.15572148		1614.38	-0.00652557		2144.38	-0.01807584		2674.41	-0.023698
554.6	0.33808182		1084.59	0.15509052		1614.58	-0.00652033		2144.58	-0.01734948		2674.61	-0.0226177
554.8	0.3376845		1084.79	0.15638416		1614.78	-0.00666983		2144.78	-0.01676447		2674.81	-0.02171006
555	0.33697285		1084.99	0.15555952		1614.98	-0.00648302		2144.98	-0.01592259		2675.01	-0.02141364
555.2	0.33616816		1085.19	0.15568963		1615.18	-0.00582212		2145.18	-0.01569382		2675.21	-0.02050992
555.4	0.33597719		1085.39	0.15678803		1615.38	-0.00546186		2145.38	-0.0149629		2675.41	-0.01983455
555.6	0.33595365		1085.59	0.15680726		1615.58	-0.00504142		2145.58	-0.01546211		2675.61	-0.0199176
555.8	0.33627397		1085.79	0.15716205		1615.78	-0.00486754		2145.78	-0.01531108		2675.81	-0.02072838
556	0.33535567		1085.99	0.15677511		1615.98	-0.00423549		2145.98	-0.01493876		2676.01	-0.02076416
556.2	0.3356091		1086.19	0.1569508		1616.18	-0.00424516		2146.18	-0.0145358		2676.21	-0.02096192
556.4	0.33568946		1086.39	0.1571221		1616.38	-0.00399334		2146.38	-0.01546554		2676.41	-0.02096536
556.6	0.33603311		1086.59	0.15717423		1616.58	-0.00451351		2146.58	-0.01635468		2676.61	-0.02170751
556.8	0.33507642		1086.79	0.15766709		1616.78	-0.00501728		2146.78	-0.01681802		2676.81	-0.02284382
557	0.33517894		1086.99	0.1570984		1616.98	-0.00492589		2146.98	-0.01588136		2677.01	-0.02301301
557.2	0.33474374		1087.19	0.15575687		1617.18	-0.00555475		2147.18	-0.01514499		2677.21	-0.02324831
557.4	0.33492432		1087.39	0.15570499		1617.38	-0.00520518		2147.38	-0.01464874		2677.41	-0.02288976
557.6	0.3342366		1087.59	0.15550319		1617.58	-0.00587982		2147.58	-0.01357038		2677.61	-0.0230284
557.8	0.33504519		1087.79	0.15598001		1617.78	-0.00641395		2147.78	-0.01380739		2677.81	-0.02302792
558	0.3341959		1087.99	0.15673561		1617.98	-0.00721361		2147.98	-0.01430774		2678.01	-0.02296263
558.2	0.33490844		1088.19	0.1571504		1618.18	-0.00766946		2148.18	-0.01397087		2678.21	-0.0230792
558.4	0.33506634		1088.39	0.15745839		1618.38	-0.00799316		2148.38	-0.01371915		2678.41	-0.02316974
558.6	0.33491307		1088.59	0.15761349		1618.58	-0.00814901		2148.58	-0.01343941		2678.61	-0.02311691
558.8	0.33569371		1088.79	0.15820287		1618.78	-0.00739614		2148.78	-0.01355054		2678.81	-0.02357245
559	0.33623337		1088.99	0.15754979		1618.98	-0.0068914		2148.98	-0.01346264		2679.01	-0.02356625
559.2	0.33668236		1089.19	0.15792233		1619.18	-0.00636328		2149.18	-0.01343456		2679.21	-0.0234344
559.4	0.33719374		1089.39	0.15745943		1619.38	-0.00621727		2149.38	-0.01362558		2679.41	-0.02395878
559.6	0.33795637		1089.59	0.15668353		1619.58	-0.00607889		2149.58	-0.01376023		2679.61	-0.02435433
559.8	0.33796501		1089.79	0.15619988		1619.78	-0.00596738		2149.78	-0.01342739		2679.81	-0.0248102
