# Supplementary material for: Functional development of a V3/glycan-specific broadly neutralizing antibody isolated from a case of HIV superinfection
Source: eLife journal article supplement (doi:10.7554/elife.68110), 2021-07-15
Supplement: fig2-data2 [file C3.xls]

Vers 3.43 Data Simulation
Conc1	1.25E-07	1.25E-07	1.25E-07	1.25E-07	1.25E-07	1.25E-07	1.25E-07
Start1	290	879.99	1469.99	2059.99	2650	3240	3830
Stop1	649.8	1239.79	1829.8	2419.79	3009.8	3599.8	4189.8
Time1	Data1	Sim1	Time2	Data2	Sim2	Time3	Data3	Sim3	Time4	Data4	Sim4	Time5	Data5	Sim5	Time6	Data6	Sim6	Time7	Data7	Sim7
290	-0.00011234		879.99	0.01134057		1469.99	-0.00216116		2059.99	0.00302726		2650	-0.00020511		3240	0.00247845		3830	-0.00900462
290.2	-0.00040093		880.19	0.01125797		1470.19	-0.00200835		2060.19	0.00284504		2650.2	-0.00151322		3240.2	0.00244359		3830.2	-0.0079985
290.4	-0.00046542		880.39	0.01048162		1470.39	-0.00217317		2060.39	0.00225749		2650.4	-0.0022806		3240.4	0.00236788		3830.4	-0.00788574
290.6	-0.00033079		880.59	0.00995884		1470.59	-0.00203983		2060.59	0.00287		2650.6	-0.00324637		3240.6	0.00258437		3830.6	-0.00819694
290.8	-0.00027833		880.79	0.00929524		1470.79	-0.00269718		2060.79	0.00293172		2650.8	-0.00448524		3240.8	0.00242165		3830.8	-0.00814923
291	0.0002496		880.99	0.00957988		1470.99	-0.00304349		2060.99	0.00280443		2651	-0.00536208		3241	0.00318316		3831	-0.00753571
291.2	0.00058158		881.19	0.00900467		1471.19	-0.00241111		2061.19	0.0023354		2651.2	-0.00572005		3241.2	0.00325181		3831.2	-0.00751951
291.4	0.00092812		881.39	0.00885369		1471.39	-0.00185491		2061.39	0.00228963		2651.4	-0.0060141		3241.4	0.00376732		3831.4	-0.00746553
291.6	0.00286675		881.59	0.00917334		1471.59	-0.00134003		2061.59	0.00175929		2651.6	-0.00718315		3241.6	0.00331787		3831.6	-0.00720184
291.8	0.00430796		881.79	0.00930558		1471.79	-0.00031021		2061.79	0.00229295		2651.8	-0.0076795		3241.8	0.00432046		3831.8	-0.0070414
292	0.00617617		881.99	0.01063335		1471.99	0.00029272		2061.99	0.00176796		2652	-0.00744946		3242	0.00488633		3832	-0.00711435
292.2	0.00793394		882.19	0.01145241		1472.19	0.00113123		2062.19	0.00183196		2652.2	-0.0070498		3242.2	0.0059206		3832.2	-0.00758419
292.4	0.00932382		882.39	0.01149539		1472.39	0.00076147		2062.39	0.0012985		2652.4	-0.00670691		3242.4	0.00728856		3832.4	-0.00870715
292.6	0.01144936		882.59	0.01246831		1472.59	0.00144365		2062.59	0.00051463		2652.6	-0.00615117		3242.6	0.00758972		3832.6	-0.00898084
292.8	0.01257875		882.79	0.01389236		1472.79	0.00169935		2062.79	0.0008475		2652.8	-0.00516368		3242.8	0.00804851		3832.8	-0.00852117
293	0.01366999		882.99	0.01438937		1472.99	0.00202852		2062.99	0.00014673		2653	-0.00517875		3243	0.00903482		3833	-0.00790504
293.2	0.01528161		883.19	0.01551534		1473.19	0.00263359		2063.19	0.00028446		2653.2	-0.00468698		3243.2	0.00926399		3833.2	-0.00867357
293.4	0.01737152		883.39	0.01617373		1473.39	0.00237124		2063.39	-0.00034367		2653.4	-0.00471596		3243.4	0.00836974		3833.4	-0.00875225
293.6	0.01932382		883.59	0.01652468		1473.59	0.00283169		2063.59	-0.00025872		2653.6	-0.00478205		3243.6	0.00798082		3833.6	-0.00814895
293.8	0.02127625		883.79	0.01717653		1473.79	0.0030206		2063.79	0.00014246		2653.8	-0.00463535		3243.8	0.00873485		3833.8	-0.00930113
294	0.02255886		883.99	0.01718682		1473.99	0.00337121		2063.99	-0.0003961		2654	-0.00456667		3244	0.0095922		3834	-0.00994599
294.2	0.02470005		884.19	0.01788392		1474.19	0.00397521		2064.19	-0.00086907		2654.2	-0.00381202		3244.2	0.01036776		3834.2	-0.0104593
294.4	0.02674116		884.39	0.01739645		1474.39	0.0038942		2064.39	-0.00060437		2654.4	-0.00276865		3244.4	0.01042231		3834.4	-0.01175155
294.6	0.02796801		884.59	0.01731934		1474.59	0.0036633		2064.59	0.00010774		2654.6	-0.0031032		3244.6	0.01014822		3834.6	-0.0122731
294.8	0.0298648		884.79	0.01764764		1474.79	0.00321384		2064.79	-0.00014428		2654.8	-0.00288569		3244.8	0.00952345		3834.8	-0.01210333
295	0.03141106		884.99	0.01741773		1474.99	0.00334437		2064.99	-0.000147		2655	-0.0027081		3245	0.00985161		3835	-0.01136473
295.2	0.03353629		885.19	0.01665276		1475.19	0.00436039		2065.19	-0.0001866		2655.2	-0.00235012		3245.2	0.00932576		3835.2	-0.01101875
295.4	0.03520234		885.39	0.01755043		1475.39	0.00379795		2065.39	0.00041099		2655.4	-0.00310955		3245.4	0.00928895		3835.4	-0.01060161
295.6	0.03720686		885.59	0.01836491		1475.59	0.00479457		2065.59	-0.00018973		2655.6	-0.00451967		3245.6	0.00804194		3835.6	-0.00977102
295.8	0.03895925		885.79	0.01973448		1475.79	0.00490126		2065.79	0.00056421		2655.8	-0.00445052		3245.8	0.00889373		3835.8	-0.00897435
296	0.04038167		885.99	0.02101527		1475.99	0.00514618		2065.99	-0.00003073		2656	-0.00404212		3246	0.00867247		3836	-0.00907062
296.2	0.04217724		886.19	0.02099149		1476.19	0.00505936		2066.19	-0.00002719		2656.2	-0.00316036		3246.2	0.00825255		3836.2	-0.00840828
296.4	0.04417265		886.39	0.02101737		1476.39	0.00474346		2066.39	0.0002141		2656.4	-0.00315745		3246.4	0.0085808		3836.4	-0.0091002
296.6	0.04604465		886.59	0.02178859		1476.59	0.00530094		2066.59	-0.00013198		2656.6	-0.0025262		3246.6	0.00780261		3836.6	-0.00792662
296.8	0.04714786		886.79	0.02175368		1476.79	0.00524982		2066.79	0.00040014		2656.8	-0.00233046		3246.8	0.00785316		3836.8	-0.00703766
297	0.04812655		886.99	0.02108401		1476.99	0.00577405		2066.99	-0.00001251		2657	-0.00182715		3247	0.00779597		3837	-0.00659365
297.2	0.04950725		887.19	0.02171618		1477.19	0.00589126		2067.19	0.00040826		2657.2	-0.00107702		3247.2	0.0075544		3837.2	-0.00666195
297.4	0.05147753		887.39	0.02191118		1477.39	0.00632183		2067.39	0.00017859		2657.4	-0.00105685		3247.4	0.00737169		3837.4	-0.00685271
297.6	0.0530322		887.59	0.02208958		1477.59	0.00691753		2067.59	0.00079723		2657.6	-0.00030311		3247.6	0.00770168		3837.6	-0.00671805
297.8	0.0549047		887.79	0.02211655		1477.79	0.00730788		2067.79	0.00133993		2657.8	-0.00078378		3247.8	0.0079229		3837.8	-0.00744052
298	0.0569329		887.99	0.02158036		1477.99	0.00645989		2067.99	0.0018939		2658	-0.00049401		3248	0.00754967		3838	-0.00747799
298.2	0.05901214		888.19	0.02229441		1478.19	0.00737272		2068.19	0.00258425		2658.2	0.00006265		3248.2	0.00698991		3838.2	-0.0073824
298.4	0.06088684		888.39	0.02165778		1478.39	0.00665831		2068.39	0.00330503		2658.4	0.00005066		3248.4	0.00704926		3838.4	-0.00697894
298.6	0.06209842		888.59	0.02181906		1478.59	0.00687062		2068.59	0.00414615		2658.6	-0.00084642		3248.6	0.00671019		3838.6	-0.00591726
298.8	0.06316639		888.79	0.02164783		1478.79	0.00694383		2068.79	0.00350986		2658.8	-0.0001316		3248.8	0.00740716		3838.8	-0.00603475
299	0.06481508		888.99	0.02146178		1478.99	0.00643597		2068.99	0.00453423		2659	0.00006151		3249	0.00782929		3839	-0.00585132
299.2	0.06664414		889.19	0.02287711		1479.19	0.00695842		2069.19	0.00391692		2659.2	0.00087811		3249.2	0.00787913		3839.2	-0.00527251
299.4	0.06657413		889.39	0.02431908		1479.39	0.00732472		2069.39	0.00440221		2659.4	0.00093566		3249.4	0.00857324		3839.4	-0.00520137
299.6	0.06746415		889.59	0.0249085		1479.59	0.00811501		2069.59	0.00431958		2659.6	0.00056934		3249.6	0.00820559		3839.6	-0.00458233
299.8	0.06961953		889.79	0.02645156		1479.79	0.00845225		2069.79	0.00495587		2659.8	0.00130048		3249.8	0.00850891		3839.8	-0.00436655
300	0.07084457		889.99	0.02569572		1479.99	0.009237		2069.99	0.00462181		2660	0.00231578		3250	0.00860453		3840	-0.00497363
300.2	0.07210797		890.19	0.02528121		1480.19	0.00928485		2070.19	0.00529973		2660.2	0.00286472		3250.2	0.00775439		3840.2	-0.00512836
300.4	0.07368718		890.39	0.02601537		1480.39	0.00916567		2070.39	0.00517874		2660.4	0.0018722		3250.4	0.00928278		3840.4	-0.00647457
300.6	0.07442903		890.59	0.02690044		1480.59	0.00964982		2070.59	0.00481071		2660.6	0.00255317		3250.6	0.00832252		3840.6	-0.00591099
300.8	0.07518473		890.79	0.02685987		1480.79	0.01022913		2070.79	0.00498267		2660.8	0.00268782		3250.8	0.00927619		3840.8	-0.00606528
301	0.07516299		890.99	0.02643543		1480.99	0.01092205		2070.99	0.00443819		2661	0.00254341		3251	0.00980717		3841	-0.005757
301.2	0.07671019		891.19	0.02684672		1481.19	0.01107347		2071.19	0.00358251		2661.2	0.00269241		3251.2	0.01024087		3841.2	-0.00631819
301.4	0.07828482		891.39	0.02711409		1481.39	0.01163445		2071.39	0.00399891		2661.4	0.0022747		3251.4	0.0109202		3841.4	-0.00683196
301.6	0.07923771		891.59	0.02765854		1481.59	0.01208376		2071.59	0.0046035		2661.6	0.00218423		3251.6	0.01138019		3841.6	-0.00698428
301.8	0.08100531		891.79	0.02864725		1481.79	0.01219297		2071.79	0.00436035		2661.8	0.00205685		3251.8	0.01163023		3841.8	-0.0076933
302	0.08220509		891.99	0.02974885		1481.99	0.01186062		2071.99	0.00453843		2662	0.00121244		3252	0.01186037		3842	-0.00668793
302.2	0.08302383		892.19	0.03083384		1482.19	0.01206664		2072.19	0.00387706		2662.2	0.00077556		3252.2	0.01193131		3842.2	-0.00648934
302.4	0.08457085		892.39	0.03075544		1482.39	0.01135477		2072.39	0.00393385		2662.4	0.00075482		3252.4	0.01193693		3842.4	-0.00635984
302.6	0.0854209		892.59	0.03126146		1482.59	0.01210115		2072.59	0.00305979		2662.6	0.0004696		3252.6	0.01133021		3842.6	-0.00605139
302.8	0.08565036		892.79	0.03168263		1482.79	0.01243634		2072.79	0.00176854		2662.8	0.00170042		3252.8	0.01127966		3842.8	-0.00735497
303	0.08724692		892.99	0.03191374		1482.99	0.0125929		2072.99	0.00313747		2663	0.00198297		3253	0.01131833		3843	-0.00716244
303.2	0.08800924		893.19	0.03279244		1483.19	0.01368593		2073.19	0.00239306		2663.2	0.0026107		3253.2	0.01124982		3843.2	-0.00697911
303.4	0.08878656		893.39	0.03343765		1483.39	0.01365268		2073.39	0.00324605		2663.4	0.00217918		3253.4	0.01138837		3843.4	-0.00692221
303.6	0.09025738		893.59	0.0335452		1483.59	0.0130681		2073.59	0.00253943		2663.6	0.00235428		3253.6	0.01087773		3843.6	-0.00684624
303.8	0.09120228		893.79	0.03430578		1483.79	0.01351106		2073.79	0.00241562		2663.8	0.00340632		3253.8	0.01107216		3843.8	-0.00734822
304	0.09210533		893.99	0.03327556		1483.99	0.0131184		2073.99	0.00188379		2664	0.00342443		3254	0.01163893		3844	-0.00842451
304.2	0.09329284		894.19	0.03350871		1484.19	0.01295859		2074.19	0.00175367		2664.2	0.00289191		3254.2	0.01179967		3844.2	-0.0093344
304.4	0.09456869		894.39	0.03460998		1484.39	0.01245877		2074.39	0.00085878		2664.4	0.00276762		3254.4	0.01279677		3844.4	-0.00955319
304.6	0.09565363		894.59	0.03500096		1484.59	0.01249592		2074.59	0.00112816		2664.6	0.00299688		3254.6	0.01166595		3844.6	-0.00903261
304.8	0.09595736		894.79	0.03461271		1484.79	0.01342572		2074.79	0.00143728		2664.8	0.00253192		3254.8	0.01289383		3844.8	-0.00918371
305	0.09651997		894.99	0.0345201		1484.99	0.01356471		2074.99	0.00132691		2665	0.00154115		3255	0.0137349		3845	-0.00956467
305.2	0.0981295		895.19	0.03426201		1485.19	0.01362245		2075.19	0.00125339		2665.2	0.00181241		3255.2	0.0138216		3845.2	-0.00942245
305.4	0.09967587		895.39	0.03465292		1485.39	0.01391718		2075.39	0.00219935		2665.4	0.00152638		3255.4	0.01428462		3845.4	-0.0091272
305.6	0.1011764		895.59	0.03523091		1485.59	0.01449229		2075.59	0.00213788		2665.6	0.00219193		3255.6	0.01454811		3845.6	-0.00953392
305.8	0.1026617		895.79	0.03683475		1485.79	0.01464925		2075.79	0.00222896		2665.8	0.00209218		3255.8	0.01483779		3845.8	-0.00854349
306	0.10340584		895.99	0.03720689		1485.99	0.01447411		2075.99	0.00242027		2666	0.00132597		3256	0.01429845		3846	-0.00730554
306.2	0.1048186		896.19	0.03684222		1486.19	0.01455533		2076.19	0.0031303		2666.2	0.00201506		3256.2	0.01408989		3846.2	-0.00713072
306.4	0.10654717		896.39	0.03709302		1486.39	0.01509873		2076.39	0.00310989		2666.4	0.0017901		3256.4	0.0137545		3846.4	-0.0065508
306.6	0.10721908		896.59	0.03714401		1486.59	0.01585021		2076.59	0.00287665		2666.6	0.00149386		3256.6	0.01360315		3846.6	-0.00591538
306.8	0.10769367		896.79	0.03795452		1486.79	0.0159365		2076.79	0.00322983		2666.8	0.00216786		3256.8	0.01409292		3846.8	-0.00579507
307	0.10863247		896.99	0.03784221		1486.99	0.01581699		2076.99	0.00372102		2667	0.00297365		3257	0.01514532		3847	-0.00567234
307.2	0.1103111		897.19	0.03979737		1487.19	0.01641158		2077.19	0.00419301		2667.2	0.00406334		3257.2	0.01472776		3847.2	-0.00598099
307.4	0.11176831		897.39	0.04100027		1487.39	0.01578373		2077.39	0.00322819		2667.4	0.00436636		3257.4	0.01532412		3847.4	-0.00534894
307.6	0.11226029		897.59	0.04182007		1487.59	0.01592191		2077.59	0.00288936		2667.6	0.00511295		3257.6	0.01555717		3847.6	-0.00506343
307.8	0.11353901		897.79	0.04295255		1487.79	0.01616388		2077.79	0.00250949		2667.8	0.00539502		3257.8	0.01578161		3847.8	-0.00598967
308	0.1151782		897.99	0.04337397		1487.99	0.01653093		2077.99	0.00219733		2668	0.00449673		3258	0.01634121		3848	-0.00622639
308.2	0.11653522		898.19	0.04421471		1488.19	0.01667332		2078.19	0.0024108		2668.2	0.00492958		3258.2	0.01652396		3848.2	-0.00635611
308.4	0.11627983		898.39	0.04506496		1488.39	0.01661383		2078.39	0.00244885		2668.4	0.0054077		3258.4	0.01610297		3848.4	-0.00625903
308.6	0.11739941		898.59	0.0446509		1488.59	0.01740336		2078.59	0.00234952		2668.6	0.00519785		3258.6	0.0154529		3848.6	-0.00676204
308.8	0.11686789		898.79	0.04387951		1488.79	0.0176109		2078.79	0.00268502		2668.8	0.00453665		3258.8	0.01615623		3848.8	-0.0071984
309	0.11784974		898.99	0.04341641		1488.99	0.01822002		2078.99	0.00261008		2669	0.00456101		3259	0.01599679		3849	-0.00774993
309.2	0.11909776		899.19	0.04289801		1489.19	0.0191019		2079.19	0.00265532		2669.2	0.00511549		3259.2	0.0149907		3849.2	-0.00726531
309.4	0.12092969		899.39	0.04288358		1489.39	0.01894576		2079.39	0.00302312		2669.4	0.00464358		3259.4	0.01465268		3849.4	-0.00827474
309.6	0.12198483		899.59	0.0428379		1489.59	0.01969773		2079.59	0.00339904		2669.6	0.00411507		3259.6	0.01384284		3849.6	-0.00823778
309.8	0.12290493		899.79	0.04329188		1489.79	0.01982906		2079.79	0.00386021		2669.8	0.00337568		3259.8	0.01346432		3849.8	-0.00820889
310	0.12359376		899.99	0.04268574		1489.99	0.02009054		2079.99	0.00414426		2670	0.00253346		3260	0.0129437		3850	-0.0081409
310.2	0.12495865		900.19	0.04221772		1490.19	0.02026188		2080.19	0.00491764		2670.2	0.00254507		3260.2	0.01360664		3850.2	-0.00846656
310.4	0.12560951		900.39	0.04218562		1490.39	0.02043062		2080.39	0.00430279		2670.4	0.00135081		3260.4	0.01394845		3850.4	-0.00844697
310.6	0.12592027		900.59	0.04262125		1490.59	0.01998927		2080.59	0.0042543		2670.6	0.00133905		3260.6	0.01464571		3850.6	-0.00834256
310.8	0.12697416		900.79	0.04253287		1490.79	0.01968766		2080.79	0.00419852		2670.8	0.00185874		3260.8	0.01584629		3850.8	-0.00916408
311	0.12804546		900.99	0.04311892		1490.99	0.01996224		2080.99	0.0040649		2671	0.00285656		3261	0.01625232		3851	-0.01014771
311.2	0.12932041		901.19	0.04419001		1491.19	0.01953585		2081.19	0.00386542		2671.2	0.00247784		3261.2	0.01624416		3851.2	-0.0099058
311.4	0.1303934		901.39	0.04449394		1491.39	0.01884773		2081.39	0.00200237		2671.4	0.00242553		3261.4	0.01648532		3851.4	-0.00960019
311.6	0.13142984		901.59	0.0455981		1491.59	0.01827468		2081.59	0.00221882		2671.6	0.00294484		3261.6	0.0152822		3851.6	-0.00904574
311.8	0.13357519		901.79	0.04630087		1491.79	0.01843281		2081.79	0.0015911		2671.8	0.00289306		3261.8	0.01552025		3851.8	-0.00886353
312	0.13433563		901.99	0.04692197		1491.99	0.01889319		2081.99	0.00147108		2672	0.00244917		3262	0.01616557		3852	-0.00894149
312.2	0.13531534		902.19	0.04771247		1492.19	0.0193881		2082.19	0.00116935		2672.2	0.00333236		3262.2	0.01578711		3852.2	-0.00902293
312.4	0.13594321		902.39	0.04732029		1492.39	0.02051711		2082.39	0.00072334		2672.4	0.00428056		3262.4	0.0149643		3852.4	-0.00968685
312.6	0.13764039		902.59	0.04765217		1492.59	0.02113759		2082.59	0.00048257		2672.6	0.00426889		3262.6	0.01484044		3852.6	-0.00881489
312.8	0.13771394		902.79	0.04794257		1492.79	0.02091981		2082.79	0.00059031		2672.8	0.00415851		3262.8	0.01504057		3852.8	-0.00865929
313	0.13830669		902.99	0.04873858		1492.99	0.02165558		2082.99	0.00072183		2673	0.00403303		3263	0.01380746		3853	-0.0093113
313.2	0.13938414		903.19	0.04911341		1493.19	0.02149212		2083.19	0.00106785		2673.2	0.00384997		3263.2	0.01309803		3853.2	-0.00924088
313.4	0.14028123		903.39	0.04936359		1493.39	0.02097927		2083.39	0.00222158		2673.4	0.00291823		3263.4	0.01299025		3853.4	-0.0103325
313.6	0.1405155		903.59	0.04998299		1493.59	0.02167451		2083.59	0.00383554		2673.6	0.00313583		3263.6	0.01290166		3853.6	-0.01006418
313.8	0.14080127		903.79	0.05036521		1493.79	0.0216378		2083.79	0.00464679		2673.8	0.00274025		3263.8	0.013412		3853.8	-0.01081307
314	0.14192453		903.99	0.05075254		1493.99	0.02242197		2083.99	0.00487027		2674	0.00205942		3264	0.01412221		3854	-0.01075467
314.2	0.14275216		904.19	0.05146904		1494.19	0.02280364		2084.19	0.00595595		2674.2	0.00190864		3264.2	0.01569693		3854.2	-0.01132566
314.4	0.14365802		904.39	0.05177296		1494.39	0.02313557		2084.39	0.00598372		2674.4	0.00091596		3264.4	0.01658686		3854.4	-0.0107155
314.6	0.14423127		904.59	0.0521082		1494.59	0.0227751		2084.59	0.00573635		2674.6	0.00091567		3264.6	0.01725125		3854.6	-0.01080243
314.8	0.14487352		904.79	0.0521914		1494.79	0.02284065		2084.79	0.00630454		2674.8	0.00138366		3264.8	0.01796595		3854.8	-0.01078509
315	0.14586138		904.99	0.05305363		1494.99	0.02219013		2084.99	0.00550106		2675	0.00151259		3265	0.01749593		3855	-0.01059521
315.2	0.14679186		905.19	0.05344495		1495.19	0.02193717		2085.19	0.00504739		2675.2	0.00115132		3265.2	0.01856627		3855.2	-0.00970006
315.4	0.14808263		905.39	0.05368671		1495.39	0.02219797		2085.39	0.00484963		2675.4	0.00196316		3265.4	0.01894854		3855.4	-0.00949966
315.6	0.149348		905.59	0.05421397		1495.59	0.02226583		2085.59	0.00477393		2675.6	0.00236935		3265.6	0.01878509		3855.6	-0.0086241
315.8	0.1506465		905.79	0.05512583		1495.79	0.02354996		2085.79	0.00439176		2675.8	0.00167331		3265.8	0.02012425		3855.8	-0.00823088
316	0.15159632		905.99	0.0554197		1495.99	0.02536413		2085.99	0.00356223		2676	0.00171954		3266	0.02043403		3856	-0.00846904
316.2	0.15287543		906.19	0.05448072		1496.19	0.02600173		2086.19	0.00320136		2676.2	0.00252202		3266.2	0.0201068		3856.2	-0.00741795
316.4	0.15383098		906.39	0.05402521		1496.39	0.02692474		2086.39	0.00325832		2676.4	0.00379924		3266.4	0.01987406		3856.4	-0.00664326
316.6	0.15469308		906.59	0.05456005		1496.59	0.02625024		2086.59	0.00244389		2676.6	0.00337073		3266.6	0.01971783		3856.6	-0.00585965
316.8	0.15504731		906.79	0.05373589		1496.79	0.02616405		2086.79	0.00231172		2676.8	0.00330504		3266.8	0.0195598		3856.8	-0.00640725
317	0.1552462		906.99	0.05456461		1496.99	0.02636422		2086.99	0.00221589		2677	0.00281145		3267	0.02006951		3857	-0.006236
317.2	0.15597733		907.19	0.05450803		1497.19	0.02690224		2087.19	0.00257351		2677.2	0.00276716		3267.2	0.02090136		3857.2	-0.00683005
317.4	0.15594725		907.39	0.05443442		1497.39	0.026961		2087.39	0.00360091		2677.4	0.00250586		3267.4	0.02069156		3857.4	-0.00761407
317.6	0.15647806		907.59	0.05429505		1497.59	0.02727535		2087.59	0.00458379		2677.6	0.00268813		3267.6	0.02008966		3857.6	-0.00792325
317.8	0.15713891		907.79	0.05456634		1497.79	0.02781174		2087.79	0.00416038		2677.8	0.0024446		3267.8	0.01959401		3857.8	-0.00844174
318	0.15881		907.99	0.05499071		1497.99	0.02827552		2087.99	0.00458951		2678	0.00277378		3268	0.02010986		3858	-0.00818172
318.2	0.15794144		908.19	0.05569631		1498.19	0.02878859		2088.19	0.006052		2678.2	0.00346966		3268.2	0.01998808		3858.2	-0.00805552
318.4	0.15834848		908.39	0.05582441		1498.39	0.02880592		2088.39	0.00636716		2678.4	0.00384996		3268.4	0.02010934		3858.4	-0.00777591
318.6	0.15827252		908.59	0.05647529		1498.59	0.02846965		2088.59	0.00626795		2678.6	0.0037845		3268.6	0.0195698		3858.6	-0.0078806
318.8	0.15888828		908.79	0.05773835		1498.79	0.02809496		2088.79	0.00634652		2678.8	0.00381837		3268.8	0.02007461		3858.8	-0.00889884
319	0.15971539		908.99	0.05790089		1498.99	0.0277483		2088.99	0.00648514		2679	0.00475859		3269	0.02038401		3859	-0.00966895
319.2	0.16067697		909.19	0.05928077		1499.19	0.02797573		2089.19	0.0067518		2679.2	0.00487714		3269.2	0.02202051		3859.2	-0.00943902
319.4	0.16098152		909.39	0.06003718		1499.39	0.02854757		2089.39	0.00744717		2679.4	0.00495937		3269.4	0.0222141		3859.4	-0.01019796
319.6	0.16167255		909.59	0.06122454		1499.59	0.02932178		2089.59	0.00682803		2679.6	0.00483209		3269.6	0.02261856		3859.6	-0.01057391
319.8	0.16244821		909.79	0.06214964		1499.79	0.03038143		2089.79	0.00627362		2679.8	0.00364435		3269.8	0.02311446		3859.8	-0.01063852
320	0.16346272		909.99	0.06213407		1499.99	0.03107293		2089.99	0.00673578		2680	0.00377447		3270	0.02232227		3860	-0.01135524
320.2	0.16523635		910.19	0.06284961		1500.19	0.0300938		2090.19	0.00698079		2680.2	0.00402202		3270.2	0.02196973		3860.2	-0.01164121
320.4	0.16601		910.39	0.06354688		1500.39	0.03047016		2090.39	0.00695867		2680.4	0.00388849		3270.4	0.02145103		3860.4	-0.01296296
320.6	0.16820004		910.59	0.06425624		1500.59	0.0304318		2090.59	0.00678868		2680.6	0.00377885		3270.6	0.02101146		3860.6	-0.01346927
320.8	0.16971608		910.79	0.06450379		1500.79	0.031011		2090.79	0.00666946		2680.8	0.003753		3270.8	0.02132693		3860.8	-0.01303122
321	0.17054164		910.99	0.06512178		1500.99	0.03115097		2090.99	0.00639305		2681	0.0039088		3271	0.02218646		3861	-0.01234542
321.2	0.17144373		911.19	0.06528532		1501.19	0.03166093		2091.19	0.00659446		2681.2	0.00429524		3271.2	0.02177196		3861.2	-0.0126781
321.4	0.17161038		911.39	0.06532308		1501.39	0.0321098		2091.39	0.00679979		2681.4	0.00524907		3271.4	0.02070726		3861.4	-0.01244129
321.6	0.17316941		911.59	0.06529797		1501.59	0.03293068		2091.59	0.00666259		2681.6	0.00549148		3271.6	0.0206823		3861.6	-0.01234726
321.8	0.17410404		911.79	0.06580789		1501.79	0.03349154		2091.79	0.00641522		2681.8	0.00615999		3271.8	0.02113852		3861.8	-0.01094336
322	0.17468765		911.99	0.06575237		1501.99	0.03429912		2091.99	0.00618727		2682	0.00637776		3272	0.02119716		3862	-0.01005873
322.2	0.17440457		912.19	0.06594947		1502.19	0.03404164		2092.19	0.00622588		2682.2	0.00776702		3272.2	0.02130213		3862.2	-0.00886436
322.4	0.17494952		912.39	0.06568049		1502.39	0.0339146		2092.39	0.0054209		2682.4	0.00794992		3272.4	0.02137327		3862.4	-0.00858326
322.6	0.1754554		912.59	0.06607064		1502.59	0.03415466		2092.59	0.00426878		2682.6	0.00792069		3272.6	0.02040379		3862.6	-0.00793252
322.8	0.17594036		912.79	0.065872		1502.79	0.03309928		2092.79	0.00332069		2682.8	0.00805504		3272.8	0.02109722		3862.8	-0.00778379
323	0.17599109		912.99	0.06588023		1502.99	0.03284415		2092.99	0.00370172		2683	0.00950837		3273	0.02157409		3863	-0.00696909
323.2	0.17612088		913.19	0.06650582		1503.19	0.03304318		2093.19	0.00303664		2683.2	0.00977339		3273.2	0.02171846		3863.2	-0.00705099
323.4	0.17621559		913.39	0.06604062		1503.39	0.03355239		2093.39	0.00327135		2683.4	0.01006402		3273.4	0.02113474		3863.4	-0.00681542
323.6	0.1766771		913.59	0.06589754		1503.59	0.03381164		2093.59	0.00223887		2683.6	0.00955718		3273.6	0.02107671		3863.6	-0.00701073
323.8	0.17639081		913.79	0.06601394		1503.79	0.0335277		2093.79	0.00300272		2683.8	0.00894124		3273.8	0.02149999		3863.8	-0.00648851
324	0.17687806		913.99	0.06663192		1503.99	0.03269907		2093.99	0.00431462		2684	0.00951643		3274	0.02121041		3864	-0.00705674
324.2	0.17799646		914.19	0.06709034		1504.19	0.03225368		2094.19	0.00338986		2684.2	0.0093413		3274.2	0.02197327		3864.2	-0.00745679
324.4	0.17840378		914.39	0.06689276		1504.39	0.0327477		2094.39	0.00458622		2684.4	0.00859724		3274.4	0.0223448		3864.4	-0.00732423
324.6	0.18033213		914.59	0.06776627		1504.59	0.03297317		2094.59	0.0053268		2684.6	0.00997325		3274.6	0.02310897		3864.6	-0.00581791
324.8	0.18093508		914.79	0.06758398		1504.79	0.03233273		2094.79	0.00594225		2684.8	0.0090738		3274.8	0.02374889		3864.8	-0.00587958
325	0.18107274		914.99	0.06802769		1504.99	0.03229979		2094.99	0.0065776		2685	0.00871169		3275	0.02388722		3865	-0.00625133
325.2	0.18156487		915.19	0.06887155		1505.19	0.03361196		2095.19	0.0074658		2685.2	0.0079995		3275.2	0.02445947		3865.2	-0.00748605
325.4	0.18234567		915.39	0.06887089		1505.39	0.03459763		2095.39	0.00742257		2685.4	0.00781018		3275.4	0.02506545		3865.4	-0.00831821
325.6	0.18428191		915.59	0.06933331		1505.59	0.03542175		2095.59	0.00705879		2685.6	0.00723503		3275.6	0.02583631		3865.6	-0.00821089
325.8	0.18534433		915.79	0.0700545		1505.79	0.03659576		2095.79	0.00669742		2685.8	0.00701537		3275.8	0.02615687		3865.8	-0.00803106
326	0.18574403		915.99	0.07040563		1505.99	0.0374113		2095.99	0.00636233		2686	0.00643597		3276	0.02616337		3866	-0.00855307
326.2	0.18689649		916.19	0.07105946		1506.19	0.03800665		2096.19	0.006274		2686.2	0.00680063		3276.2	0.02610652		3866.2	-0.00830459
326.4	0.18743019		916.39	0.07182984		1506.39	0.03835744		2096.39	0.00583284		2686.4	0.00682123		3276.4	0.02503902		3866.4	-0.00947116
326.6	0.18794638		916.59	0.07289956		1506.59	0.03880266		2096.59	0.00528579		2686.6	0.00600363		3276.6	0.0242053		3866.6	-0.00932385
326.8	0.18823194		916.79	0.07346758		1506.79	0.03904884		2096.79	0.00560251		2686.8	0.00563917		3276.8	0.02479619		3866.8	-0.00938355
327	0.18885306		916.99	0.07515654		1506.99	0.0399396		2096.99	0.00574032		2687	0.00681279		3277	0.02406086		3867	-0.00996961
327.2	0.18958697		917.19	0.07520873		1507.19	0.04031929		2097.19	0.0048469		2687.2	0.00795837		3277.2	0.02348667		3867.2	-0.01003482
327.4	0.19002601		917.39	0.07553409		1507.39	0.04035937		2097.39	0.00531825		2687.4	0.00803771		3277.4	0.02246122		3867.4	-0.00885272
327.6	0.18959354		917.59	0.07629236		1507.59	0.03983419		2097.59	0.00537726		2687.6	0.00712986		3277.6	0.02306145		3867.6	-0.00908669
327.8	0.18942735		917.79	0.07691966		1507.79	0.03994777		2097.79	0.0058227		2687.8	0.00808407		3277.8	0.02292327		3867.8	-0.00875767
328	0.190079		917.99	0.0772987		1507.99	0.03950227		2097.99	0.00557308		2688	0.00807027		3278	0.02245813		3868	-0.00912638
328.2	0.19040793		918.19	0.07625986		1508.19	0.03909327		2098.19	0.00523903		2688.2	0.0080433		3278.2	0.02328857		3868.2	-0.00838727
328.4	0.19031188		918.39	0.07584562		1508.39	0.03822238		2098.39	0.00633164		2688.4	0.0078547		3278.4	0.02318618		3868.4	-0.00720854
328.6	0.19052936		918.59	0.07532676		1508.59	0.03730547		2098.59	0.00644081		2688.6	0.00884035		3278.6	0.0232238		3868.6	-0.00718652
328.8	0.19028856		918.79	0.07451149		1508.79	0.03609458		2098.79	0.00715028		2688.8	0.00803669		3278.8	0.02275477		3868.8	-0.00848578
329	0.18959636		918.99	0.07413679		1508.99	0.03662841		2098.99	0.006899		2689	0.0083132		3279	0.02250888		3869	-0.00799038
329.2	0.18985243		919.19	0.07348264		1509.19	0.03699575		2099.19	0.00687993		2689.2	0.00857905		3279.2	0.02345082		3869.2	-0.00758257
329.4	0.19055317		919.39	0.07279251		1509.39	0.03778492		2099.39	0.00644324		2689.4	0.0090164		3279.4	0.02365794		3869.4	-0.00761127
329.6	0.19133428		919.59	0.07248103		1509.59	0.03824663		2099.59	0.00680976		2689.6	0.00853816		3279.6	0.02436026		3869.6	-0.00739588
329.8	0.19173629		919.79	0.07227964		1509.79	0.03848965		2099.79	0.006618		2689.8	0.00877668		3279.8	0.0253202		3869.8	-0.00734945
330	0.19250343		919.99	0.07309796		1509.99	0.03923832		2099.99	0.00770994		2690	0.00908277		3280	0.02600229		3870	-0.00724703
330.2	0.19400604		920.19	0.07358055		1510.19	0.03978581		2100.19	0.00807475		2690.2	0.00952588		3280.2	0.02621846		3870.2	-0.00691671
330.4	0.19465587		920.39	0.07492461		1510.39	0.03952609		2100.39	0.00835433		2690.4	0.00989956		3280.4	0.02636232		3870.4	-0.00661958
330.6	0.19559712		920.59	0.07555653		1510.59	0.04133113		2100.59	0.00898282		2690.6	0.00929158		3280.6	0.025864		3870.6	-0.006147
330.8	0.19651895		920.79	0.07667078		1510.79	0.04218176		2100.79	0.00923372		2690.8	0.00987054		3280.8	0.02622711		3870.8	-0.00608285
331	0.19782808		920.99	0.07680126		1510.99	0.04218728		2100.99	0.00788579		2691	0.01075094		3281	0.02601874		3871	-0.00605287
331.2	0.19884289		921.19	0.07689738		1511.19	0.04168147		2101.19	0.00702997		2691.2	0.01093945		3281.2	0.02616596		3871.2	-0.00602406
331.4	0.19952796		921.39	0.07815636		1511.39	0.04146941		2101.39	0.0071496		2691.4	0.01116913		3281.4	0.02560466		3871.4	-0.00610932
331.6	0.20011454		921.59	0.0786413		1511.59	0.04135346		2101.59	0.00638828		2691.6	0.01125345		3281.6	0.02549228		3871.6	-0.00612274
331.8	0.20041894		921.79	0.07879739		1511.79	0.04169137		2101.79	0.00519833		2691.8	0.01207525		3281.8	0.02448168		3871.8	-0.00651051
332	0.20105562		921.99	0.07865702		1511.99	0.04075373		2101.99	0.00419264		2692	0.01217512		3282	0.02445298		3872	-0.00601351
332.2	0.20089164		922.19	0.07715515		1512.19	0.04045803		2102.19	0.00411378		2692.2	0.01303889		3282.2	0.02451028		3872.2	-0.0067095
332.4	0.20090095		922.39	0.07830147		1512.39	0.03968103		2102.39	0.00345551		2692.4	0.01314961		3282.4	0.02412418		3872.4	-0.0075698
332.6	0.20169762		922.59	0.07802637		1512.59	0.04016905		2102.59	0.00266732		2692.6	0.01236996		3282.6	0.02399529		3872.6	-0.00766548
332.8	0.20215387		922.79	0.07858877		1512.79	0.03986951		2102.79	0.002637		2692.8	0.01258233		3282.8	0.0247624		3872.8	-0.00836243
333	0.20273426		922.99	0.07893015		1512.99	0.03996279		2102.99	0.00190426		2693	0.01296668		3283	0.02546937		3873	-0.00806746
333.2	0.20356773		923.19	0.07920849		1513.19	0.03978178		2103.19	0.00199769		2693.2	0.01282419		3283.2	0.02689113		3873.2	-0.0091347
333.4	0.20450375		923.39	0.07942856		1513.39	0.04106644		2103.39	0.00203216		2693.4	0.01242632		3283.4	0.02777195		3873.4	-0.00987353
333.6	0.20473506		923.59	0.08035582		1513.59	0.04056987		2103.59	0.00388961		2693.6	0.01125717		3283.6	0.02925705		3873.6	-0.01007675
333.8	0.20489085		923.79	0.08118345		1513.79	0.04130399		2103.79	0.0048971		2693.8	0.01187118		3283.8	0.03011194		3873.8	-0.00968072
334	0.20615235		923.99	0.08169049		1513.99	0.04224745		2103.99	0.00607732		2694	0.01161747		3284	0.03000154		3874	-0.00925512
334.2	0.20631494		924.19	0.08166195		1514.19	0.04244933		2104.19	0.00659435		2694.2	0.01124188		3284.2	0.0302568		3874.2	-0.0088517
334.4	0.2068875		924.39	0.08232307		1514.39	0.0423969		2104.39	0.00734839		2694.4	0.01043525		3284.4	0.03022613		3874.4	-0.00846608
334.6	0.20710685		924.59	0.08199247		1514.59	0.04352272		2104.59	0.00830827		2694.6	0.01018233		3284.6	0.03028226		3874.6	-0.00883148
334.8	0.20706014		924.79	0.08294425		1514.79	0.04340496		2104.79	0.00794673		2694.8	0.00961732		3284.8	0.03073984		3874.8	-0.00787485
335	0.20757997		924.99	0.08245142		1514.99	0.04325688		2104.99	0.00733992		2695	0.00973287		3285	0.03115046		3875	-0.00757899
335.2	0.20820788		925.19	0.08387272		1515.19	0.04362829		2105.19	0.00755184		2695.2	0.00982174		3285.2	0.03144658		3875.2	-0.00702919
335.4	0.20833133		925.39	0.0842247		1515.39	0.04383387		2105.39	0.0076336		2695.4	0.01027111		3285.4	0.03153284		3875.4	-0.00705131
335.6	0.20841864		925.59	0.08411645		1515.59	0.04411918		2105.59	0.00733998		2695.6	0.01099483		3285.6	0.03063855		3875.6	-0.00690606
335.8	0.20889008		925.79	0.08417973		1515.79	0.04343655		2105.79	0.00687252		2695.8	0.0115277		3285.8	0.02975789		3875.8	-0.00728054
336	0.20949224		925.99	0.08442434		1515.99	0.0437113		2105.99	0.00665265		2696	0.01211698		3286	0.02907501		3876	-0.00783205
336.2	0.20997372		926.19	0.08452144		1516.19	0.04365339		2106.19	0.00663616		2696.2	0.01247926		3286.2	0.02943374		3876.2	-0.00896262
336.4	0.21096418		926.39	0.08592969		1516.39	0.04367831		2106.39	0.00559483		2696.4	0.01116647		3286.4	0.02894976		3876.4	-0.00812452
336.6	0.21262246		926.59	0.08566668		1516.59	0.04432914		2106.59	0.00465027		2696.6	0.01086047		3286.6	0.02858852		3876.6	-0.00775245
336.8	0.21288196		926.79	0.08618948		1516.79	0.04341575		2106.79	0.0048765		2696.8	0.01232186		3286.8	0.0288315		3876.8	-0.00867481
337	0.21322275		926.99	0.08566871		1516.99	0.04388311		2106.99	0.00388142		2697	0.01241682		3287	0.02894815		3877	-0.0091386
337.2	0.21407081		927.19	0.08564585		1517.19	0.04457783		2107.19	0.00477809		2697.2	0.01194461		3287.2	0.0289964		3877.2	-0.00953654
337.4	0.21505519		927.39	0.0860144		1517.39	0.04552597		2107.39	0.00487483		2697.4	0.01135354		3287.4	0.02848478		3877.4	-0.00901107
337.6	0.21545142		927.59	0.08620755		1517.59	0.04606212		2107.59	0.00624248		2697.6	0.01147356		3287.6	0.02855466		3877.6	-0.00917591
337.8	0.21586737		927.79	0.08626435		1517.79	0.04743251		2107.79	0.00570387		2697.8	0.01206355		3287.8	0.02871989		3877.8	-0.00838891
338	0.21690573		927.99	0.08548233		1517.99	0.04758798		2107.99	0.00557814		2698	0.01229123		3288	0.02834467		3878	-0.00738127
338.2	0.21713026		928.19	0.08542841		1518.19	0.04830325		2108.19	0.00575617		2698.2	0.01227188		3288.2	0.0292874		3878.2	-0.00667265
338.4	0.2171163		928.39	0.085292		1518.39	0.04768428		2108.39	0.00578671		2698.4	0.01215673		3288.4	0.02941278		3878.4	-0.00644153
338.6	0.2176991		928.59	0.08557434		1518.59	0.04808715		2108.59	0.00648812		2698.6	0.01260147		3288.6	0.02942589		3878.6	-0.0056023
338.8	0.2183982		928.79	0.08625333		1518.79	0.04865554		2108.79	0.00639905		2698.8	0.01235932		3288.8	0.03011339		3878.8	-0.00483142
339	0.21914879		928.99	0.08595234		1518.99	0.04856339		2108.99	0.00584128		2699	0.01311371		3289	0.03074351		3879	-0.00526434
339.2	0.21995733		929.19	0.08632495		1519.19	0.04879706		2109.19	0.00580171		2699.2	0.01402341		3289.2	0.03149818		3879.2	-0.00489553
339.4	0.22043058		929.39	0.08654852		1519.39	0.04853943		2109.39	0.00651613		2699.4	0.01516772		3289.4	0.03172141		3879.4	-0.00596097
339.6	0.22078225		929.59	0.08591485		1519.59	0.04772163		2109.59	0.0070823		2699.6	0.01614568		3289.6	0.03224986		3879.6	-0.00592466
339.8	0.22092042		929.79	0.08647061		1519.79	0.04637785		2109.79	0.00681033		2699.8	0.01604134		3289.8	0.0328787		3879.8	-0.00613046
340	0.22048688		929.99	0.08697449		1519.99	0.04591154		2109.99	0.00689182		2700	0.01603411		3290	0.03276953		3880	-0.00684684
340.2	0.22091655		930.19	0.08721798		1520.19	0.04524877		2110.19	0.00715157		2700.2	0.01573585		3290.2	0.03245234		3880.2	-0.00716844
340.4	0.22096327		930.39	0.08781124		1520.39	0.04563489		2110.39	0.00736895		2700.4	0.01570478		3290.4	0.03176159		3880.4	-0.00654982
340.6	0.22079085		930.59	0.08763223		1520.59	0.04458566		2110.59	0.00737034		2700.6	0.01631577		3290.6	0.03167089		3880.6	-0.00783592
340.8	0.22089449		930.79	0.08748919		1520.79	0.04416049		2110.79	0.00734993		2700.8	0.01664602		3290.8	0.03207243		3880.8	-0.00809299
341	0.22114888		930.99	0.08781613		1520.99	0.04466652		2110.99	0.00769927		2701	0.01612082		3291	0.03243542		3881	-0.00829308
341.2	0.22106513		931.19	0.08930971		1521.19	0.04462841		2111.19	0.00809157		2701.2	0.01614139		3291.2	0.03142897		3881.2	-0.00864412
341.4	0.22141789		931.39	0.09063236		1521.39	0.04549506		2111.39	0.00825536		2701.4	0.01583073		3291.4	0.03120764		3881.4	-0.0077435
341.6	0.22144378		931.59	0.09154736		1521.59	0.0466063		2111.59	0.00874201		2701.6	0.01667942		3291.6	0.03120532		3881.6	-0.00784463
341.8	0.22199027		931.79	0.09240139		1521.79	0.04656521		2111.79	0.00836718		2701.8	0.0162438		3291.8	0.03101391		3881.8	-0.00752073
342	0.22195886		931.99	0.09307848		1521.99	0.04610677		2111.99	0.00915532		2702	0.01669429		3292	0.03087948		3882	-0.00677606
342.2	0.22274488		932.19	0.09345493		1522.19	0.04615448		2112.19	0.00862432		2702.2	0.01609916		3292.2	0.03059038		3882.2	-0.00717075
342.4	0.22321023		932.39	0.09428393		1522.39	0.04595669		2112.39	0.00914676		2702.4	0.01468668		3292.4	0.03020141		3882.4	-0.00715383
342.6	0.22482505		932.59	0.09575228		1522.59	0.04655615		2112.59	0.00949579		2702.6	0.01438573		3292.6	0.03043201		3882.6	-0.0068188
342.8	0.22559349		932.79	0.09614137		1522.79	0.04757644		2112.79	0.00850034		2702.8	0.01376242		3292.8	0.0306739		3882.8	-0.00628827
343	0.22733762		932.99	0.09619135		1522.99	0.04863623		2112.99	0.00819706		2703	0.01308758		3293	0.03053535		3883	-0.00615629
343.2	0.22870147		933.19	0.09623756		1523.19	0.04905424		2113.19	0.00832598		2703.2	0.01367123		3293.2	0.03103218		3883.2	-0.00564514
343.4	0.22940627		933.39	0.0963014		1523.39	0.04964817		2113.39	0.00913817		2703.4	0.0143369		3293.4	0.03139095		3883.4	-0.00570254
343.6	0.22974567		933.59	0.09523062		1523.59	0.04987118		2113.59	0.00861732		2703.6	0.01343924		3293.6	0.03181963		3883.6	-0.00510799
343.8	0.2307275		933.79	0.0961472		1523.79	0.05023259		2113.79	0.00753123		2703.8	0.01419713		3293.8	0.03220821		3883.8	-0.00584727
344	0.23180701		933.99	0.09572848		1523.99	0.05110903		2113.99	0.00669924		2704	0.01477366		3294	0.03123738		3884	-0.00664692
344.2	0.23281233		934.19	0.09632502		1524.19	0.05192447		2114.19	0.00588197		2704.2	0.01501136		3294.2	0.03140285		3884.2	-0.00735217
344.4	0.23356626		934.39	0.09629836		1524.39	0.0521624		2114.39	0.00519082		2704.4	0.0156788		3294.4	0.03179074		3884.4	-0.00692646
344.6	0.2341458		934.59	0.09552362		1524.59	0.05200102		2114.59	0.00505804		2704.6	0.01611758		3294.6	0.03198799		3884.6	-0.00775492
344.8	0.23539652		934.79	0.09538754		1524.79	0.0530991		2114.79	0.00454613		2704.8	0.01672669		3294.8	0.03200238		3884.8	-0.00797211
345	0.23493139		934.99	0.09555972		1524.99	0.05341761		2114.99	0.00493805		2705	0.01781101		3295	0.03195214		3885	-0.00795615
345.2	0.23494862		935.19	0.09614385		1525.19	0.05423089		2115.19	0.00495063		2705.2	0.01790305		3295.2	0.03138386		3885.2	-0.00817496
345.4	0.23555163		935.39	0.09642564		1525.39	0.05459851		2115.39	0.00596014		2705.4	0.01775596		3295.4	0.03181887		3885.4	-0.00762188
345.6	0.23578302		935.59	0.09667694		1525.59	0.05414643		2115.59	0.00633576		2705.6	0.01783602		3295.6	0.03292961		3885.6	-0.00775383
345.8	0.23638404		935.79	0.0976301		1525.79	0.05316841		2115.79	0.00602719		2705.8	0.01731977		3295.8	0.03328173		3885.8	-0.00860331
346	0.23682735		935.99	0.09875798		1525.99	0.05331235		2115.99	0.00644589		2706	0.01703098		3296	0.03428585		3886	-0.00851442
346.2	0.23776958		936.19	0.09885778		1526.19	0.05319088		2116.19	0.00597889		2706.2	0.01532671		3296.2	0.03461354		3886.2	-0.00941938
346.4	0.23729121		936.39	0.09856495		1526.39	0.05309056		2116.39	0.00678413		2706.4	0.0141571		3296.4	0.03530214		3886.4	-0.00855994
346.6	0.23750373		936.59	0.09919414		1526.59	0.052943		2116.59	0.00626273		2706.6	0.01495096		3296.6	0.03562049		3886.6	-0.00815415
346.8	0.23776673		936.79	0.09817257		1526.79	0.05297086		2116.79	0.00596251		2706.8	0.01424557		3296.8	0.03577913		3886.8	-0.00700543
347	0.23899957		936.99	0.0982712		1526.99	0.05371281		2116.99	0.00653317		2707	0.01456402		3297	0.03528858		3887	-0.00689234
347.2	0.23910988		937.19	0.09831951		1527.19	0.05349005		2117.19	0.00619723		2707.2	0.0157942		3297.2	0.03595741		3887.2	-0.00586095
347.4	0.23946572		937.39	0.09803335		1527.39	0.05326098		2117.39	0.00607862		2707.4	0.01646043		3297.4	0.03674287		3887.4	-0.00594704
347.6	0.23985788		937.59	0.09837505		1527.59	0.05337394		2117.59	0.00569169		2707.6	0.01652563		3297.6	0.03683288		3887.6	-0.0057956
347.8	0.24009601		937.79	0.09874684		1527.79	0.05380115		2117.79	0.00536432		2707.8	0.0179303		3297.8	0.03665692		3887.8	-0.00613134
348	0.23968808		937.99	0.09861185		1527.99	0.05489816		2117.99	0.00517923		2708	0.01761128		3298	0.03560817		3888	-0.00629113
348.2	0.24008113		938.19	0.09924181		1528.19	0.05486969		2118.19	0.00454931		2708.2	0.01801799		3298.2	0.03527513		3888.2	-0.00646312
348.4	0.24055537		938.39	0.0990838		1528.39	0.05480244		2118.39	0.00556659		2708.4	0.01870619		3298.4	0.03541408		3888.4	-0.00641963
348.6	0.24031931		938.59	0.09929777		1528.59	0.05543435		2118.59	0.0057068		2708.6	0.01934708		3298.6	0.0359652		3888.6	-0.00652511
348.8	0.24083597		938.79	0.10054682		1528.79	0.05561217		2118.79	0.00563659		2708.8	0.01845508		3298.8	0.03557446		3888.8	-0.00739263
349	0.24033626		938.99	0.10052401		1528.99	0.05573308		2118.99	0.00601673		2709	0.01914296		3299	0.03564255		3889	-0.00678969
349.2	0.24073522		939.19	0.100628		1529.19	0.05694141		2119.19	0.0058648		2709.2	0.01810624		3299.2	0.03504605		3889.2	-0.00713545
349.4	0.24110651		939.39	0.10127321		1529.39	0.05633999		2119.39	0.00587988		2709.4	0.01779111		3299.4	0.03523424		3889.4	-0.00678897
349.6	0.24165282		939.59	0.10198416		1529.59	0.05664869		2119.59	0.00651904		2709.6	0.01775026		3299.6	0.03521938		3889.6	-0.00755341
349.8	0.2426032		939.79	0.10245366		1529.79	0.05733119		2119.79	0.00557318		2709.8	0.01791307		3299.8	0.03478167		3889.8	-0.00833136
350	0.24269982		939.99	0.10285273		1529.99	0.05791237		2119.99	0.00582937		2710	0.01708028		3300	0.03556704		3890	-0.00948424
350.2	0.24252732		940.19	0.10353989		1530.19	0.05768008		2120.19	0.00693434		2710.2	0.01649832		3300.2	0.03503061		3890.2	-0.0090491
350.4	0.24213227		940.39	0.10258897		1530.39	0.05771361		2120.39	0.00783529		2710.4	0.01730983		3300.4	0.03461489		3890.4	-0.0084459
350.6	0.2433771		940.59	0.10334847		1530.59	0.05767756		2120.59	0.0081977		2710.6	0.01805608		3300.6	0.0340306		3890.6	-0.00851723
350.8	0.24438139		940.79	0.10270746		1530.79	0.05759136		2120.79	0.00836914		2710.8	0.01836541		3300.8	0.03404696		3890.8	-0.00760605
351	0.24525055		940.99	0.10219709		1530.99	0.05803246		2120.99	0.00860401		2711	0.01840948		3301	0.03400161		3891	-0.00705153
351.2	0.24532046		941.19	0.10258285		1531.19	0.05808578		2121.19	0.00842418		2711.2	0.01839066		3301.2	0.03523011		3891.2	-0.00637408
351.4	0.24590778		941.39	0.10237273		1531.39	0.05739188		2121.39	0.00895201		2711.4	0.01823741		3301.4	0.03526885		3891.4	-0.00659548
351.6	0.24624942		941.59	0.10219546		1531.59	0.05790436		2121.59	0.00972975		2711.6	0.01889721		3301.6	0.03494928		3891.6	-0.00592429
351.8	0.24586889		941.79	0.10204992		1531.79	0.05894535		2121.79	0.01030887		2711.8	0.01817068		3301.8	0.03466788		3891.8	-0.00549566
352	0.246357		941.99	0.10241231		1531.99	0.05852152		2121.99	0.0104396		2712	0.01661914		3302	0.03484263		3892	-0.00574468
352.2	0.24725896		942.19	0.10303865		1532.19	0.05808575		2122.19	0.01001492		2712.2	0.01597169		3302.2	0.03441826		3892.2	-0.00560352
352.4	0.24845785		942.39	0.10417073		1532.39	0.05773023		2122.39	0.01036618		2712.4	0.01505125		3302.4	0.03524509		3892.4	-0.00529887
352.6	0.2489534		942.59	0.10508543		1532.59	0.05798422		2122.59	0.01003181		2712.6	0.0139042		3302.6	0.03563704		3892.6	-0.00558641
352.8	0.249591		942.79	0.10538722		1532.79	0.05714759		2122.79	0.00958828		2712.8	0.01353768		3302.8	0.03603071		3892.8	-0.00620257
353	0.24976179		942.99	0.10511427		1532.99	0.05679909		2122.99	0.00895465		2713	0.01378598		3303	0.036188		3893	-0.00558864
353.2	0.25072556		943.19	0.10519211		1533.19	0.05666878		2123.19	0.00780498		2713.2	0.01321828		3303.2	0.0357119		3893.2	-0.0056427
353.4	0.250988		943.39	0.10628858		1533.39	0.05570488		2123.39	0.00720624		2713.4	0.01364665		3303.4	0.03563213		3893.4	-0.00535468
353.6	0.25064709		943.59	0.10750043		1533.59	0.05574441		2123.59	0.0072765		2713.6	0.01437762		3303.6	0.03561969		3893.6	-0.00657912
353.8	0.25055419		943.79	0.10815201		1533.79	0.05560057		2123.79	0.00616191		2713.8	0.01568653		3303.8	0.03605617		3893.8	-0.00692456
354	0.25051258		943.99	0.10971727		1533.99	0.05530374		2123.99	0.00624233		2714	0.01538694		3304	0.03660274		3894	-0.00771576
354.2	0.25119407		944.19	0.11066762		1534.19	0.05622737		2124.19	0.00671507		2714.2	0.01646555		3304.2	0.0364112		3894.2	-0.00674885
354.4	0.25123756		944.39	0.11067384		1534.39	0.05638268		2124.39	0.00609871		2714.4	0.0180331		3304.4	0.03664603		3894.4	-0.00723115
354.6	0.2516239		944.59	0.11108951		1534.59	0.0563129		2124.59	0.00463662		2714.6	0.01959316		3304.6	0.03679347		3894.6	-0.00645144
354.8	0.25138374		944.79	0.11131048		1534.79	0.05672372		2124.79	0.00404132		2714.8	0.01957806		3304.8	0.03719304		3894.8	-0.00494771
355	0.25043078		944.99	0.11053085		1534.99	0.05760625		2124.99	0.00432324		2715	0.02053766		3305	0.03754505		3895	-0.00510754
355.2	0.25070224		945.19	0.11121012		1535.19	0.05814912		2125.19	0.00392196		2715.2	0.02116019		3305.2	0.03742439		3895.2	-0.00550971
355.4	0.25124302		945.39	0.11018776		1535.39	0.05799159		2125.39	0.00437943		2715.4	0.02099305		3305.4	0.03754862		3895.4	-0.00514903
355.6	0.25161887		945.59	0.10975588		1535.59	0.05871181		2125.59	0.00430618		2715.6	0.02095268		3305.6	0.03752343		3895.6	-0.00467978
355.8	0.25207594		945.79	0.11077564		1535.79	0.0592666		2125.79	0.00470015		2715.8	0.01919652		3305.8	0.03732799		3895.8	-0.00473263
356	0.25283243		945.99	0.11147258		1535.99	0.05925319		2125.99	0.00529079		2716	0.01816525		3306	0.03689712		3896	-0.00461851
356.2	0.25395879		946.19	0.11168898		1536.19	0.06056677		2126.19	0.00518954		2716.2	0.01822694		3306.2	0.03663826		3896.2	-0.00394541
356.4	0.25486952		946.39	0.11190913		1536.39	0.06127504		2126.39	0.00604783		2716.4	0.01787446		3306.4	0.03725664		3896.4	-0.00432099
356.6	0.2549695		946.59	0.11157977		1536.59	0.06217741		2126.59	0.00677464		2716.6	0.01736691		3306.6	0.037185		3896.6	-0.00395326
356.8	0.25486826		946.79	0.11151946		1536.79	0.06223386		2126.79	0.00683576		2716.8	0.01683083		3306.8	0.03816653		3896.8	-0.00401356
357	0.25530651		946.99	0.11199683		1536.99	0.06287043		2126.99	0.00697861		2717	0.01605095		3307	0.0377585		3897	-0.00398757
357.2	0.2554636		947.19	0.11215711		1537.19	0.06341142		2127.19	0.00708549		2717.2	0.01601665		3307.2	0.03756206		3897.2	-0.00446295
357.4	0.25541221		947.39	0.11207622		1537.39	0.06349591		2127.39	0.0070046		2717.4	0.01721581		3307.4	0.03769781		3897.4	-0.00462458
357.6	0.25510372		947.59	0.11187824		1537.59	0.0632771		2127.59	0.00708807		2717.6	0.01777449		3307.6	0.03856211		3897.6	-0.00540648
357.8	0.25546817		947.79	0.11165351		1537.79	0.06319554		2127.79	0.00720139		2717.8	0.01821766		3307.8	0.03911461		3897.8	-0.00566655
358	0.25613054		947.99	0.11187573		1537.99	0.06362946		2127.99	0.00766352		2718	0.01784531		3308	0.04000274		3898	-0.00623489
358.2	0.25677948		948.19	0.11188537		1538.19	0.06480618		2128.19	0.00801839		2718.2	0.01849029		3308.2	0.04058147		3898.2	-0.00601711
358.4	0.25678936		948.39	0.1119541		1538.39	0.0649082		2128.39	0.00717131		2718.4	0.01843077		3308.4	0.04055078		3898.4	-0.00627338
358.6	0.25736366		948.59	0.11163301		1538.59	0.06509256		2128.59	0.00645204		2718.6	0.01894731		3308.6	0.04132519		3898.6	-0.00583424
358.8	0.25757991		948.79	0.1120549		1538.79	0.06497549		2128.79	0.00770146		2718.8	0.01852201		3308.8	0.04174909		3898.8	-0.00589279
359	0.25810896		948.99	0.11160928		1538.99	0.06448113		2128.99	0.00765555		2719	0.02004373		3309	0.04213743		3899	-0.00695191
359.2	0.25944002		949.19	0.11216318		1539.19	0.06394221		2129.19	0.00726784		2719.2	0.01952744		3309.2	0.04196829		3899.2	-0.00706526
359.4	0.26010563		949.39	0.1126829		1539.39	0.0637651		2129.39	0.00700688		2719.4	0.0189063		3309.4	0.04239103		3899.4	-0.00706926
359.6	0.26055773		949.59	0.11375169		1539.59	0.06422585		2129.59	0.00701562		2719.6	0.01828653		3309.6	0.04145732		3899.6	-0.00741771
359.8	0.26165637		949.79	0.11541417		1539.79	0.0648046		2129.79	0.00786617		2719.8	0.01856535		3309.8	0.04128843		3899.8	-0.0073625
360	0.26161371		949.99	0.11628186		1539.99	0.0654632		2129.99	0.00760404		2720	0.01925569		3310	0.04095613		3900	-0.00709328
360.2	0.26258227		950.19	0.11679117		1540.19	0.06613712		2130.19	0.00828619		2720.2	0.01928066		3310.2	0.03999541		3900.2	-0.00695203
360.4	0.26271405		950.39	0.11741882		1540.39	0.06714116		2130.39	0.00950675		2720.4	0.01880606		3310.4	0.03945616		3900.4	-0.00738297
360.6	0.26363452		950.59	0.11836402		1540.59	0.0673597		2130.59	0.01006561		2720.6	0.01858053		3310.6	0.03884915		3900.6	-0.00749667
360.8	0.26339191		950.79	0.1195836		1540.79	0.06736935		2130.79	0.01038507		2720.8	0.01916491		3310.8	0.03869585		3900.8	-0.00847297
361	0.26333616		950.99	0.11957687		1540.99	0.06687071		2130.99	0.00969791		2721	0.01997534		3311	0.03727482		3901	-0.00851329
361.2	0.26302125		951.19	0.11955851		1541.19	0.06592588		2131.19	0.00960765		2721.2	0.02025066		3311.2	0.03684119		3901.2	-0.00862288
361.4	0.26304127		951.39	0.11887235		1541.39	0.06543408		2131.39	0.00969686		2721.4	0.02156342		3311.4	0.03630246		3901.4	-0.00781747
361.6	0.26313644		951.59	0.11976794		1541.59	0.06560152		2131.59	0.01034661		2721.6	0.02103045		3311.6	0.03663444		3901.6	-0.0078221
361.8	0.26348225		951.79	0.11935181		1541.79	0.0659107		2131.79	0.01117867		2721.8	0.02059677		3311.8	0.03743529		3901.8	-0.00758725
362	0.26372671		951.99	0.11996055		1541.99	0.06692834		2131.99	0.01107584		2722	0.02039434		3312	0.03816508		3902	-0.00640634
362.2	0.26423644		952.19	0.11960923		1542.19	0.06724216		2132.19	0.0110633		2722.2	0.0197105		3312.2	0.03839182		3902.2	-0.00571587
362.4	0.26485195		952.39	0.11942897		1542.39	0.06739032		2132.39	0.01043657		2722.4	0.01893047		3312.4	0.03920359		3902.4	-0.00582877
362.6	0.26558699		952.59	0.11957718		1542.59	0.06731292		2132.59	0.00949989		2722.6	0.02021826		3312.6	0.04031078		3902.6	-0.00572007
362.8	0.26600771		952.79	0.11949968		1542.79	0.06702234		2132.79	0.00955426		2722.8	0.0206722		3312.8	0.04125042		3902.8	-0.0056413
363	0.26639231		952.99	0.1187358		1542.99	0.06736104		2132.99	0.0084386		2723	0.02076879		3313	0.04190828		3903	-0.00581728
363.2	0.26633971		953.19	0.11922162		1543.19	0.06879358		2133.19	0.00759023		2723.2	0.01979338		3313.2	0.04306114		3903.2	-0.00529029
363.4	0.26658885		953.39	0.11967632		1543.39	0.07015492		2133.39	0.00692152		2723.4	0.01950969		3313.4	0.04432293		3903.4	-0.00643501
363.6	0.26722527		953.59	0.11990448		1543.59	0.07041075		2133.59	0.00614956		2723.6	0.01933712		3313.6	0.04445424		3903.6	-0.0068164
363.8	0.26802057		953.79	0.119983		1543.79	0.07108913		2133.79	0.00604948		2723.8	0.02026673		3313.8	0.04496761		3903.8	-0.00719401
364	0.26841152		953.99	0.12064125		1543.99	0.07162662		2133.99	0.00568989		2724	0.02017595		3314	0.04550538		3904	-0.00750543
364.2	0.26956233		954.19	0.11958574		1544.19	0.07216862		2134.19	0.00658138		2724.2	0.02019707		3314.2	0.04584974		3904.2	-0.00728316
364.4	0.26975942		954.39	0.11948496		1544.39	0.07227622		2134.39	0.0065774		2724.4	0.02079668		3314.4	0.04605138		3904.4	-0.00821917
364.6	0.26919331		954.59	0.12008687		1544.59	0.07272374		2134.59	0.00595057		2724.6	0.0210929		3314.6	0.04608971		3904.6	-0.00908719
364.8	0.26935272		954.79	0.12044406		1544.79	0.07249079		2134.79	0.00549782		2724.8	0.02144172		3314.8	0.04463254		3904.8	-0.00899322
365	0.27041483		954.99	0.12090739		1544.99	0.07204703		2134.99	0.00490717		2725	0.02138484		3315	0.04326828		3905	-0.00864925
365.2	0.27069136		955.19	0.12209323		1545.19	0.0721616		2135.19	0.0053051		2725.2	0.02133372		3315.2	0.04324055		3905.2	-0.00886793
365.4	0.27098108		955.39	0.1229375		1545.39	0.07251842		2135.39	0.00581956		2725.4	0.02168967		3315.4	0.04240426		3905.4	-0.00825473
365.6	0.27105764		955.59	0.12367675		1545.59	0.07232408		2135.59	0.00635124		2725.6	0.02070564		3315.6	0.0424178		3905.6	-0.00846214
365.8	0.27159054		955.79	0.12333563		1545.79	0.07312121		2135.79	0.00615088		2725.8	0.02025061		3315.8	0.04255173		3905.8	-0.00794354
366	0.27152995		955.99	0.12429084		1545.99	0.07269298		2135.99	0.00639759		2726	0.0202393		3316	0.04100573		3906	-0.00724843
366.2	0.27201674		956.19	0.12325834		1546.19	0.07196272		2136.19	0.00775722		2726.2	0.01997441		3316.2	0.0403283		3906.2	-0.0072141
366.4	0.27234997		956.39	0.12359301		1546.39	0.07148608		2136.39	0.00803034		2726.4	0.0194675		3316.4	0.04014024		3906.4	-0.00712742
366.6	0.27211734		956.59	0.12346494		1546.59	0.07137397		2136.59	0.00755379		2726.6	0.01999765		3316.6	0.03934328		3906.6	-0.00704268
366.8	0.27204422		956.79	0.12343424		1546.79	0.07091885		2136.79	0.00895403		2726.8	0.01958957		3316.8	0.0399243		3906.8	-0.00665985
367	0.27160999		956.99	0.12336833		1546.99	0.0700899		2136.99	0.00908764		2727	0.01937126		3317	0.04073181		3907	-0.00668045
367.2	0.27167639		957.19	0.12422155		1547.19	0.07042366		2137.19	0.00912919		2727.2	0.01925092		3317.2	0.04175627		3907.2	-0.00685703
367.4	0.2725302		957.39	0.12495756		1547.39	0.0695002		2137.39	0.00970211		2727.4	0.0194979		3317.4	0.0419515		3907.4	-0.00739335
367.6	0.27363377		957.59	0.12484842		1547.59	0.06836386		2137.59	0.00963589		2727.6	0.01984196		3317.6	0.04270089		3907.6	-0.00694291
367.8	0.27333925		957.79	0.1243769		1547.79	0.06939945		2137.79	0.01037509		2727.8	0.02039866		3317.8	0.04371693		3907.8	-0.00681347
368	0.27293858		957.99	0.12467032		1547.99	0.06938146		2137.99	0.01036854		2728	0.0209353		3318	0.04499505		3908	-0.00634014
368.2	0.2725896		958.19	0.12411872		1548.19	0.06945381		2138.19	0.01048009		2728.2	0.02145352		3318.2	0.04557764		3908.2	-0.0062336
368.4	0.27273262		958.39	0.12504744		1548.39	0.06886115		2138.39	0.01084843		2728.4	0.02147267		3318.4	0.0459965		3908.4	-0.00719864
368.6	0.27252852		958.59	0.12598597		1548.59	0.06953046		2138.59	0.01047078		2728.6	0.02132361		3318.6	0.04658573		3908.6	-0.00696029
368.8	0.27447247		958.79	0.12665097		1548.79	0.06908395		2138.79	0.01021925		2728.8	0.02205309		3318.8	0.04550292		3908.8	-0.00663051
369	0.27514346		958.99	0.12742904		1548.99	0.06938231		2138.99	0.00952719		2729	0.02328757		3319	0.0464264		3909	-0.00704476
369.2	0.2749962		959.19	0.12765912		1549.19	0.06941065		2139.19	0.00930105		2729.2	0.02374277		3319.2	0.04644893		3909.2	-0.00772367
369.4	0.27515941		959.39	0.12821776		1549.39	0.06900892		2139.39	0.00952471		2729.4	0.0236264		3319.4	0.04645671		3909.4	-0.00759499
369.6	0.27573844		959.59	0.12801012		1549.59	0.06979134		2139.59	0.00932941		2729.6	0.02265783		3319.6	0.04643983		3909.6	-0.00801476
369.8	0.27689736		959.79	0.12806053		1549.79	0.07124862		2139.79	0.00821572		2729.8	0.02231595		3319.8	0.04608532		3909.8	-0.00750356
370	0.27732027		959.99	0.12790831		1549.99	0.07109183		2139.99	0.00941662		2730	0.02279043		3320	0.04488716		3910	-0.00600626
370.2	0.27747523		960.19	0.12733425		1550.19	0.07170974		2140.19	0.00985459		2730.2	0.0227679		3320.2	0.04483518		3910.2	-0.00601224
370.4	0.27732077		960.39	0.12803109		1550.39	0.07178106		2140.39	0.00916985		2730.4	0.0226702		3320.4	0.04322673		3910.4	-0.00596541
370.6	0.2770896		960.59	0.12748196		1550.59	0.07257467		2140.59	0.0091344		2730.6	0.02248647		3320.6	0.04274359		3910.6	-0.00611972
370.8	0.27763115		960.79	0.1275627		1550.79	0.07257646		2140.79	0.00910573		2730.8	0.02335468		3320.8	0.04322963		3910.8	-0.00595874
371	0.27803518		960.99	0.12767241		1550.99	0.07250984		2140.99	0.00819107		2731	0.02305062		3321	0.04279786		3911	-0.00561612
371.2	0.2786155		961.19	0.12801546		1551.19	0.07341464		2141.19	0.00711889		2731.2	0.02239785		3321.2	0.04215198		3911.2	-0.00547604
371.4	0.28000025		961.39	0.12789593		1551.39	0.07374594		2141.39	0.00676289		2731.4	0.02188072		3321.4	0.04240131		3911.4	-0.0051419
371.6	0.27981323		961.59	0.12750625		1551.59	0.07406022		2141.59	0.00623971		2731.6	0.02203827		3321.6	0.04254098		3911.6	-0.00535489
371.8	0.27880289		961.79	0.12794753		1551.79	0.07509302		2141.79	0.00580174		2731.8	0.02168537		3321.8	0.04170179		3911.8	-0.00565539
372	0.27874615		961.99	0.12767463		1551.99	0.07439343		2141.99	0.00512638		2732	0.02135653		3322	0.04036058		3912	-0.00527467
372.2	0.27934638		962.19	0.12775562		1552.19	0.0743189		2142.19	0.00515773		2732.2	0.02064736		3322.2	0.04063882		3912.2	-0.00510372
372.4	0.27988271		962.39	0.12794208		1552.39	0.07378924		2142.39	0.00553539		2732.4	0.02102306		3322.4	0.04100029		3912.4	-0.00476087
372.6	0.28028638		962.59	0.12900743		1552.59	0.07439356		2142.59	0.00611763		2732.6	0.02170052		3322.6	0.04100585		3912.6	-0.00441711
372.8	0.28136846		962.79	0.12936301		1552.79	0.07482442		2142.79	0.00620843		2732.8	0.0223806		3322.8	0.04106935		3912.8	-0.00525672
373	0.28075469		962.99	0.13025795		1552.99	0.0755333		2142.99	0.00705649		2733	0.02351061		3323	0.04195249		3913	-0.00537492
373.2	0.2810854		963.19	0.13131215		1553.19	0.07554987		2143.19	0.00727945		2733.2	0.0234281		3323.2	0.0420305		3913.2	-0.00513892
373.4	0.28112937		963.39	0.13217168		1553.39	0.07576803		2143.39	0.00818852		2733.4	0.02351965		3323.4	0.04340538		3913.4	-0.00397276
373.6	0.2820259		963.59	0.13216098		1553.59	0.07694552		2143.59	0.00867466		2733.6	0.02383198		3323.6	0.04506153		3913.6	-0.00441659
373.8	0.28223284		963.79	0.13276815		1553.79	0.07793632		2143.79	0.00889869		2733.8	0.0246682		3323.8	0.04644464		3913.8	-0.00403562
374	0.28234806		963.99	0.13293792		1553.99	0.07849549		2143.99	0.01076553		2734	0.0257502		3324	0.04653111		3914	-0.00427336
374.2	0.28204077		964.19	0.13350862		1554.19	0.07809998		2144.19	0.01030404		2734.2	0.02649381		3324.2	0.04739392		3914.2	-0.00594299
374.4	0.2818069		964.39	0.13414487		1554.39	0.07792102		2144.39	0.01102707		2734.4	0.02723938		3324.4	0.04791451		3914.4	-0.00566763
374.6	0.28182439		964.59	0.1339284		1554.59	0.07819403		2144.59	0.01182268		2734.6	0.02739368		3324.6	0.04852461		3914.6	-0.00626095
374.8	0.28251359		964.79	0.13427554		1554.79	0.07745497		2144.79	0.01148399		2734.8	0.02773198		3324.8	0.04863246		3914.8	-0.00566093
375	0.28277643		964.99	0.13418396		1554.99	0.07706918		2144.99	0.01129223		2735	0.02673163		3325	0.048455		3915	-0.00539452
375.2	0.28340467		965.19	0.13371302		1555.19	0.07702132		2145.19	0.01066262		2735.2	0.02610676		3325.2	0.04821018		3915.2	-0.00465147
375.4	0.28396802		965.39	0.13354571		1555.39	0.07647756		2145.39	0.01054687		2735.4	0.02575519		3325.4	0.0481466		3915.4	-0.00405953
375.6	0.28323629		965.59	0.13421893		1555.59	0.07516471		2145.59	0.01085986		2735.6	0.02513225		3325.6	0.04668541		3915.6	-0.0039548
375.8	0.28363896		965.79	0.13372652		1555.79	0.07503317		2145.79	0.01027614		2735.8	0.0242484		3325.8	0.04635323		3915.8	-0.00330168
376	0.28471135		965.99	0.1334373		1555.99	0.07374729		2145.99	0.0092699		2736	0.02276182		3326	0.0469418		3916	-0.0026049
376.2	0.28540826		966.19	0.13375904		1556.19	0.07353336		2146.19	0.00939777		2736.2	0.02237204		3326.2	0.04772351		3916.2	-0.00250847
376.4	0.28566627		966.39	0.13295		1556.39	0.07332911		2146.39	0.00931601		2736.4	0.0224253		3326.4	0.04737195		3916.4	-0.00221528
376.6	0.28713856		966.59	0.13266051		1556.59	0.07409396		2146.59	0.00998351		2736.6	0.02260841		3326.6	0.04731499		3916.6	-0.00207865
376.8	0.28740608		966.79	0.13300224		1556.79	0.07445336		2146.79	0.00950316		2736.8	0.02270771		3326.8	0.04735658		3916.8	-0.00185087
377	0.28767436		966.99	0.13316236		1556.99	0.07510626		2146.99	0.00920227		2737	0.02261695		3327	0.04776332		3917	-0.0004507
377.2	0.28974817		967.19	0.13302429		1557.19	0.07571442		2147.19	0.00876199		2737.2	0.02244601		3327.2	0.04881396		3917.2	-0.0005591
377.4	0.29056845		967.39	0.13262407		1557.39	0.07679453		2147.39	0.00890573		2737.4	0.02330398		3327.4	0.0496082		3917.4	-0.00021902
377.6	0.29102794		967.59	0.13270648		1557.59	0.07694563		2147.59	0.00900499		2737.6	0.02379232		3327.6	0.05037228		3917.6	-0.00204019
377.8	0.29107644		967.79	0.13254807		1557.79	0.07827249		2147.79	0.009203		2737.8	0.0241855		3327.8	0.05003475		3917.8	-0.00290549
378	0.29144998		967.99	0.13173151		1557.99	0.07796941		2147.99	0.00974579		2738	0.02548187		3328	0.04992887		3918	-0.00400784
378.2	0.29161763		968.19	0.13196604		1558.19	0.07760386		2148.19	0.01018389		2738.2	0.02622411		3328.2	0.05067583		3918.2	-0.00488457
378.4	0.29115733		968.39	0.13191103		1558.39	0.07790126		2148.39	0.01111778		2738.4	0.02696991		3328.4	0.05096407		3918.4	-0.00519363
378.6	0.29099806		968.59	0.13161413		1558.59	0.07843975		2148.59	0.01112045		2738.6	0.02763509		3328.6	0.05012202		3918.6	-0.0059976
378.8	0.29124968		968.79	0.13181132		1558.79	0.07796697		2148.79	0.01115582		2738.8	0.02796573		3328.8	0.04931177		3918.8	-0.00623193
379	0.29101853		968.99	0.13206568		1558.99	0.07886738		2148.99	0.01098835		2739	0.02862364		3329	0.04863946		3919	-0.00671955
379.2	0.29066591		969.19	0.13315751		1559.19	0.07829518		2149.19	0.01108363		2739.2	0.02900641		3329.2	0.04806253		3919.2	-0.00657738
379.4	0.28988203		969.39	0.13443398		1559.39	0.07750119		2149.39	0.01160676		2739.4	0.0289949		3329.4	0.04719572		3919.4	-0.00771824
379.6	0.28869684		969.59	0.13610455		1559.59	0.07756774		2149.59	0.01162525		2739.6	0.02918827		3329.6	0.04777185		3919.6	-0.0082275
379.8	0.28844058		969.79	0.1364295		1559.79	0.07716048		2149.79	0.0103445		2739.8	0.02870203		3329.8	0.04888772		3919.8	-0.00915065
380	0.28856928		969.99	0.13690684		1559.99	0.07725786		2149.99	0.0097949		2740	0.02883725		3330	0.04942627		3920	-0.00941467
380.2	0.28788266		970.19	0.13707305		1560.19	0.07806429		2150.19	0.00917216		2740.2	0.02925008		3330.2	0.04999226		3920.2	-0.01022937
380.4	0.28792888		970.39	0.13750854		1560.39	0.07884051		2150.39	0.00864433		2740.4	0.02866813		3330.4	0.05050917		3920.4	-0.00963124
380.6	0.28882183		970.59	0.13890933		1560.59	0.07940979		2150.59	0.00963962		2740.6	0.02803783		3330.6	0.0502971		3920.6	-0.00891167
380.8	0.28954847		970.79	0.14010019		1560.79	0.0797738		2150.79	0.00925388		2740.8	0.02730579		3330.8	0.04996656		3920.8	-0.00827543
381	0.29064944		970.99	0.14038694		1560.99	0.08086074		2150.99	0.00868848		2741	0.02660998		3331	0.05005411		3921	-0.00659851
381.2	0.29197338		971.19	0.1401435		1561.19	0.0813746		2151.19	0.00829132		2741.2	0.02655565		3331.2	0.05002961		3921.2	-0.00619851
381.4	0.29138564		971.39	0.14074873		1561.39	0.0819397		2151.39	0.00846517		2741.4	0.0264805		3331.4	0.04946864		3921.4	-0.00537717
381.6	0.2915673		971.59	0.1410284		1561.59	0.08101966		2151.59	0.00883143		2741.6	0.02611125		3331.6	0.04934883		3921.6	-0.00468408
381.8	0.29170245		971.79	0.14011782		1561.79	0.08205653		2151.79	0.00878275		2741.8	0.02602556		3331.8	0.04935354		3921.8	-0.00449603
382	0.29243341		971.99	0.13995648		1561.99	0.08170625		2151.99	0.00945445		2742	0.02647179		3332	0.04940802		3922	-0.00376767
382.2	0.29290161		972.19	0.13980827		1562.19	0.08115927		2152.19	0.01058136		2742.2	0.02615511		3332.2	0.04937372		3922.2	-0.00388921
382.4	0.29305151		972.39	0.13931257		1562.39	0.08099291		2152.39	0.01058128		2742.4	0.02645811		3332.4	0.04943125		3922.4	-0.0041687
382.6	0.29381601		972.59	0.13899563		1562.59	0.08133508		2152.59	0.01078324		2742.6	0.0274006		3332.6	0.04848467		3922.6	-0.00475125
382.8	0.29432944		972.79	0.13893791		1562.79	0.08067163		2152.79	0.01073848		2742.8	0.02737639		3332.8	0.04804811		3922.8	-0.0054639
383	0.29463377		972.99	0.13950013		1562.99	0.0803075		2152.99	0.01054636		2743	0.02750023		3333	0.04800118		3923	-0.00585442
383.2	0.29460991		973.19	0.13973599		1563.19	0.0787148		2153.19	0.01105237		2743.2	0.02736318		3333.2	0.04818078		3923.2	-0.00619332
383.4	0.29437213		973.39	0.13965584		1563.39	0.07908905		2153.39	0.01127318		2743.4	0.02685243		3333.4	0.04813465		3923.4	-0.00631386
383.6	0.29385268		973.59	0.14025578		1563.59	0.07987915		2153.59	0.01094261		2743.6	0.0275669		3333.6	0.0484532		3923.6	-0.00642707
383.8	0.29406993		973.79	0.14000082		1563.79	0.07952825		2153.79	0.01099103		2743.8	0.02710082		3333.8	0.04862724		3923.8	-0.00685442
384	0.2945523		973.99	0.13991031		1563.99	0.08087293		2153.99	0.010564		2744	0.027737		3334	0.04978436		3924	-0.00691932
384.2	0.29439491		974.19	0.14020627		1564.19	0.08104019		2154.19	0.01009314		2744.2	0.02743253		3334.2	0.04980751		3924.2	-0.00674059
384.4	0.2946925		974.39	0.1406856		1564.39	0.08110557		2154.39	0.01019161		2744.4	0.02713903		3334.4	0.04887732		3924.4	-0.0055693
384.6	0.29523939		974.59	0.1407389		1564.59	0.08089023		2154.59	0.00994006		2744.6	0.02702064		3334.6	0.04838479		3924.6	-0.00559671
384.8	0.29564853		974.79	0.14083712		1564.79	0.08185996		2154.79	0.00901856		2744.8	0.02784516		3334.8	0.04829644		3924.8	-0.005251
385	0.2960076		974.99	0.14049622		1564.99	0.0832727		2154.99	0.00785029		2745	0.02836207		3335	0.04854531		3925	-0.00380157
385.2	0.29578313		975.19	0.1400293		1565.19	0.08350598		2155.19	0.00721965		2745.2	0.0277695		3335.2	0.04890219		3925.2	-0.00376568
385.4	0.295611		975.39	0.14109004		1565.39	0.08341446		2155.39	0.00694922		2745.4	0.0275681		3335.4	0.0492391		3925.4	-0.00373153
385.6	0.29657559		975.59	0.14057423		1565.59	0.08314474		2155.59	0.00575375		2745.6	0.02816877		3335.6	0.04931303		3925.6	-0.00370251
385.8	0.29611826		975.79	0.14026097		1565.79	0.08386339		2155.79	0.00568437		2745.8	0.02875328		3335.8	0.04930952		3925.8	-0.00438233
386	0.29699606		975.99	0.14124831		1565.99	0.08383939		2155.99	0.00621924		2746	0.02877474		3336	0.04947185		3926	-0.00417772
386.2	0.29755058		976.19	0.1411243		1566.19	0.0839385		2156.19	0.00677965		2746.2	0.02872085		3336.2	0.04990417		3926.2	-0.0046856
386.4	0.29849018		976.39	0.14166278		1566.39	0.0843458		2156.39	0.00675378		2746.4	0.02915301		3336.4	0.05065658		3926.4	-0.00491018
386.6	0.29963176		976.59	0.14214995		1566.59	0.08478844		2156.59	0.00670447		2746.6	0.02925034		3336.6	0.05087678		3926.6	-0.00554651
386.8	0.30053204		976.79	0.14266016		1566.79	0.08482819		2156.79	0.00631489		2746.8	0.02841952		3336.8	0.05160971		3926.8	-0.00645133
387	0.30120959		976.99	0.14295684		1566.99	0.08411384		2156.99	0.00661638		2747	0.02822526		3337	0.05178357		3927	-0.00734852
387.2	0.30118109		977.19	0.14340343		1567.19	0.08467903		2157.19	0.00675066		2747.2	0.02798024		3337.2	0.05184222		3927.2	-0.00733085
387.4	0.30191886		977.39	0.14471817		1567.39	0.08555391		2157.39	0.00782674		2747.4	0.02800475		3337.4	0.05241565		3927.4	-0.00738203
387.6	0.3021593		977.59	0.1450014		1567.59	0.0858074		2157.59	0.00841127		2747.6	0.02835345		3337.6	0.05278896		3927.6	-0.00772225
387.8	0.30229128		977.79	0.1450882		1567.79	0.08574085		2157.79	0.00884909		2747.8	0.02834903		3337.8	0.05354175		3927.8	-0.00834129
388	0.30259717		977.99	0.14544649		1567.99	0.08569334		2157.99	0.00869127		2748	0.02891595		3338	0.05418966		3928	-0.00877535
388.2	0.3028657		978.19	0.14625229		1568.19	0.08566793		2158.19	0.00909076		2748.2	0.02878946		3338.2	0.0537739		3928.2	-0.00905068
388.4	0.30309504		978.39	0.14682236		1568.39	0.08620947		2158.39	0.00848605		2748.4	0.02844847		3338.4	0.05465822		3928.4	-0.0097451
388.6	0.303738		978.59	0.14709993		1568.59	0.08612904		2158.59	0.00799245		2748.6	0.02868011		3338.6	0.05467168		3928.6	-0.01062559
388.8	0.30418242		978.79	0.14709002		1568.79	0.08693068		2158.79	0.00797906		2748.8	0.02839199		3338.8	0.05495214		3928.8	-0.01029159
389	0.3045559		978.99	0.14653144		1568.99	0.08727347		2158.99	0.00810837		2749	0.02839278		3339	0.05491067		3929	-0.00957439
389.2	0.30436758		979.19	0.1472519		1569.19	0.08621403		2159.19	0.00807941		2749.2	0.0283902		3339.2	0.05479288		3929.2	-0.00970352
389.4	0.30374163		979.39	0.1478487		1569.39	0.0853609		2159.39	0.00818749		2749.4	0.02916739		3339.4	0.05505912		3929.4	-0.00941377
389.6	0.30346016		979.59	0.14809041		1569.59	0.08519682		2159.59	0.00808103		2749.6	0.02887919		3339.6	0.05515838		3929.6	-0.00886343
389.8	0.30342932		979.79	0.14909871		1569.79	0.08511344		2159.79	0.00858419		2749.8	0.02888033		3339.8	0.05500877		3929.8	-0.00818947
390	0.3046957		979.99	0.14981647		1569.99	0.08510678		2159.99	0.00859902		2750	0.02814281		3340	0.0550779		3930	-0.00685289
390.2	0.30520419		980.19	0.14994864		1570.19	0.08567512		2160.19	0.00932888		2750.2	0.0279465		3340.2	0.05498157		3930.2	-0.00615037
390.4	0.30631289		980.39	0.1495939		1570.39	0.0854451		2160.39	0.00866947		2750.4	0.02849363		3340.4	0.05521551		3930.4	-0.00619099
390.6	0.30604804		980.59	0.14983627		1570.59	0.08529956		2160.59	0.00851403		2750.6	0.02826503		3340.6	0.05522601		3930.6	-0.00661294
390.8	0.30628135		980.79	0.15010429		1570.79	0.08498384		2160.79	0.00755212		2750.8	0.02816037		3340.8	0.05527238		3930.8	-0.00658071
391	0.30544458		980.99	0.14974663		1570.99	0.08465139		2160.99	0.00750495		2751	0.02848655		3341	0.0549339		3931	-0.00727859
391.2	0.30563101		981.19	0.15037659		1571.19	0.08514863		2161.19	0.00742317		2751.2	0.02872528		3341.2	0.05463276		3931.2	-0.00670556
391.4	0.30642693		981.39	0.15141648		1571.39	0.08518596		2161.39	0.00820376		2751.4	0.02862864		3341.4	0.0544093		3931.4	-0.00683714
391.6	0.30534023		981.59	0.15051052		1571.59	0.08517446		2161.59	0.00825155		2751.6	0.02904403		3341.6	0.05461146		3931.6	-0.00641439
391.8	0.30586247		981.79	0.15072137		1571.79	0.08520289		2161.79	0.00842782		2751.8	0.02939682		3341.8	0.05445812		3931.8	-0.00672726
392	0.30639552		981.99	0.15104609		1571.99	0.08545701		2161.99	0.00831015		2752	0.03030606		3342	0.05389718		3932	-0.0064819
392.2	0.30693208		982.19	0.15140761		1572.19	0.08606629		2162.19	0.00838459		2752.2	0.03026211		3342.2	0.05386448		3932.2	-0.00751448
392.4	0.30797436		982.39	0.15103321		1572.39	0.08619196		2162.39	0.00764936		2752.4	0.03059289		3342.4	0.05376823		3932.4	-0.00700626
392.6	0.30802737		982.59	0.15080573		1572.59	0.08547177		2162.59	0.00852385		2752.6	0.0305722		3342.6	0.05283963		3932.6	-0.00652218
392.8	0.30847316		982.79	0.15000853		1572.79	0.08601513		2162.79	0.00978189		2752.8	0.02979329		3342.8	0.05263122		3932.8	-0.0060633
393	0.30810141		982.99	0.15049211		1572.99	0.08629828		2162.99	0.01094265		2753	0.03142089		3343	0.05253617		3933	-0.00595523
393.2	0.30762525		983.19	0.1507429		1573.19	0.08598883		2163.19	0.01192238		2753.2	0.03126273		3343.2	0.05299913		3933.2	-0.00512655
393.4	0.3067477		983.39	0.1509908		1573.39	0.08596498		2163.39	0.01250512		2753.4	0.03093534		3343.4	0.0547124		3933.4	-0.00449551
393.6	0.30720376		983.59	0.15084499		1573.59	0.0860917		2163.59	0.01285951		2753.6	0.03034258		3343.6	0.05619113		3933.6	-0.00419961
393.8	0.30737827		983.79	0.15063961		1573.79	0.08632031		2163.79	0.01319645		2753.8	0.03066352		3343.8	0.05677764		3933.8	-0.00390274
394	0.3076931		983.99	0.15072055		1573.99	0.08754626		2163.99	0.0140292		2754	0.02997396		3344	0.0578588		3934	-0.00344366
394.2	0.30765918		984.19	0.15077792		1574.19	0.0881966		2164.19	0.01428123		2754.2	0.03015345		3344.2	0.05830654		3934.2	-0.00456738
394.4	0.30820584		984.39	0.1503339		1574.39	0.08924203		2164.39	0.01388158		2754.4	0.03003264		3344.4	0.05877251		3934.4	-0.00477781
394.6	0.30793981		984.59	0.15100073		1574.59	0.08955427		2164.59	0.01463417		2754.6	0.03032513		3344.6	0.05958147		3934.6	-0.00508512
394.8	0.30871681		984.79	0.1512161		1574.79	0.0899346		2164.79	0.01425678		2754.8	0.02980511		3344.8	0.05918845		3934.8	-0.00613725
395	0.30903848		984.99	0.1520967		1574.99	0.09012384		2164.99	0.01442799		2755	0.02955441		3345	0.05838034		3935	-0.00778238
395.2	0.30981826		985.19	0.15294904		1575.19	0.09090226		2165.19	0.01424222		2755.2	0.02912517		3345.2	0.05861792		3935.2	-0.00733112
395.4	0.31064767		985.39	0.15360722		1575.39	0.09176515		2165.39	0.01393596		2755.4	0.02943181		3345.4	0.05815411		3935.4	-0.00784572
395.6	0.31071019		985.59	0.15354398		1575.59	0.09151181		2165.59	0.01311848		2755.6	0.03057057		3345.6	0.05923254		3935.6	-0.00811763
395.8	0.31220099		985.79	0.15407704		1575.79	0.09180592		2165.79	0.01246216		2755.8	0.03090709		3345.8	0.05855083		3935.8	-0.00848227
396	0.31239149		985.99	0.15510009		1575.99	0.09298825		2165.99	0.01129426		2756	0.03154281		3346	0.0580943		3936	-0.00880241
396.2	0.31289804		986.19	0.15494963		1576.19	0.09224717		2166.19	0.01101815		2756.2	0.03119812		3346.2	0.05737909		3936.2	-0.01034017
396.4	0.31295558		986.39	0.15525223		1576.39	0.09177581		2166.39	0.01016978		2756.4	0.03131236		3346.4	0.05690515		3936.4	-0.00958348
396.6	0.3132558		986.59	0.15446797		1576.59	0.09210635		2166.59	0.010121		2756.6	0.03117928		3346.6	0.05565329		3936.6	-0.00952174
396.8	0.31447489		986.79	0.15519212		1576.79	0.09203618		2166.79	0.0104669		2756.8	0.03133787		3346.8	0.05479836		3936.8	-0.00988109
397	0.31383653		986.99	0.15566706		1576.99	0.09229926		2166.99	0.00995724		2757	0.03216023		3347	0.05485171		3937	-0.0103012
397.2	0.3135997		987.19	0.15530767		1577.19	0.09181316		2167.19	0.00966193		2757.2	0.03054636		3347.2	0.05515098		3937.2	-0.00923143
397.4	0.31322088		987.39	0.15546629		1577.39	0.09186177		2167.39	0.00905594		2757.4	0.03096663		3347.4	0.05548018		3937.4	-0.00949111
397.6	0.31247666		987.59	0.15548965		1577.59	0.09175673		2167.59	0.0086992		2757.6	0.0305656		3347.6	0.05570965		3937.6	-0.00930577
397.8	0.31155407		987.79	0.1554581		1577.79	0.09181307		2167.79	0.00801224		2757.8	0.03053342		3347.8	0.05542441		3937.8	-0.00912081
398	0.31134215		987.99	0.15642344		1577.99	0.09225107		2167.99	0.00836523		2758	0.0301075		3348	0.05567831		3938	-0.00846277
398.2	0.31167654		988.19	0.1569692		1578.19	0.09237759		2168.19	0.00842718		2758.2	0.02980833		3348.2	0.05524795		3938.2	-0.00864193
398.4	0.31140404		988.39	0.15691534		1578.39	0.09350908		2168.39	0.00970298		2758.4	0.02923328		3348.4	0.05509795		3938.4	-0.00801987
398.6	0.31174148		988.59	0.15735032		1578.59	0.09272138		2168.59	0.00959105		2758.6	0.02982169		3348.6	0.05555077		3938.6	-0.00857309
398.8	0.31136645		988.79	0.15802445		1578.79	0.09265699		2168.79	0.00883711		2758.8	0.02851509		3348.8	0.05560069		3938.8	-0.00952514
399	0.31126293		988.99	0.15854339		1578.99	0.0934902		2168.99	0.00874023		2759	0.02845834		3349	0.05515415		3939	-0.00838016
399.2	0.31105466		989.19	0.15792719		1579.19	0.0941593		2169.19	0.00871836		2759.2	0.02927868		3349.2	0.05602845		3939.2	-0.00781223
399.4	0.31170451		989.39	0.15787658		1579.39	0.09476703		2169.39	0.00919433		2759.4	0.03048423		3349.4	0.05638148		3939.4	-0.00860519
399.6	0.31198466		989.59	0.15787658		1579.59	0.09421368		2169.59	0.00923965		2759.6	0.03162388		3349.6	0.0574811		3939.6	-0.00801295
399.8	0.31189156		989.79	0.15845017		1579.79	0.09451326		2169.79	0.00958923		2759.8	0.03141723		3349.8	0.05771721		3939.8	-0.00791327
400	0.31193487		989.99	0.15852016		1579.99	0.09503562		2169.99	0.00918497		2760	0.03171902		3350	0.05799496		3940	-0.0082359
400.2	0.31244841		990.19	0.1585237		1580.19	0.09458994		2170.19	0.01010191		2760.2	0.03164147		3350.2	0.05710391		3940.2	-0.00869078
400.4	0.31263297		990.39	0.15861483		1580.39	0.09473979		2170.39	0.01001649		2760.4	0.03160276		3350.4	0.05738446		3940.4	-0.00790013
400.6	0.31418378		990.59	0.15825626		1580.59	0.09544054		2170.59	0.01000874		2760.6	0.03254846		3350.6	0.05610084		3940.6	-0.008127
400.8	0.31475118		990.79	0.15876718		1580.79	0.0954582		2170.79	0.01017902		2760.8	0.03263521		3350.8	0.05621134		3940.8	-0.00838359
401	0.31530677		990.99	0.15795636		1580.99	0.09601326		2170.99	0.00986911		2761	0.03191349		3351	0.05591701		3941	-0.00863237
401.2	0.31605093		991.19	0.15775777		1581.19	0.09617092		2171.19	0.01034325		2761.2	0.03117145		3351.2	0.0563281		3941.2	-0.00763549
401.4	0.31641612		991.39	0.15738756		1581.39	0.09680595		2171.39	0.01039778		2761.4	0.03167835		3351.4	0.05663717		3941.4	-0.00772378
401.6	0.31735198		991.59	0.15722851		1581.59	0.09687736		2171.59	0.01016928		2761.6	0.03157094		3351.6	0.05723229		3941.6	-0.0082897
401.8	0.31745034		991.79	0.15688562		1581.79	0.09719637		2171.79	0.01053549		2761.8	0.03150116		3351.8	0.05732613		3941.8	-0.00736486
402	0.31748617		991.99	0.15722793		1581.99	0.09800803		2171.99	0.01153612		2762	0.03083447		3352	0.05845475		3942	-0.00657194
402.2	0.31789812		992.19	0.15745176		1582.19	0.09847696		2172.19	0.01173835		2762.2	0.0302432		3352.2	0.05859302		3942.2	-0.00633161
402.4	0.31762334		992.39	0.1572466		1582.39	0.09882594		2172.39	0.01197912		2762.4	0.03076734		3352.4	0.05875376		3942.4	-0.00533529
402.6	0.31831129		992.59	0.15684393		1582.59	0.09829911		2172.59	0.01051494		2762.6	0.03094422		3352.6	0.05953601		3942.6	-0.00511306
402.8	0.31820535		992.79	0.15702758		1582.79	0.09852948		2172.79	0.01046922		2762.8	0.0303687		3352.8	0.05948447		3942.8	-0.0046563
403	0.31867447		992.99	0.15646512		1582.99	0.09954441		2172.99	0.0109144		2763	0.03170927		3353	0.0590688		3943	-0.00386654
403.2	0.31880012		993.19	0.15691468		1583.19	0.09872342		2173.19	0.0107973		2763.2	0.03150213		3353.2	0.05935141		3943.2	-0.00443566
403.4	0.3188667		993.39	0.15812073		1583.39	0.09888165		2173.39	0.01153524		2763.4	0.03098873		3353.4	0.05991809		3943.4	-0.00481548
403.6	0.31826533		993.59	0.15878825		1583.59	0.09787749		2173.59	0.01104916		2763.6	0.03130755		3353.6	0.06069918		3943.6	-0.00512036
403.8	0.31751545		993.79	0.16024406		1583.79	0.09713547		2173.79	0.00967226		2763.8	0.03085655		3353.8	0.06076862		3943.8	-0.00579986
404	0.31806385		993.99	0.1608232		1583.99	0.09693202		2173.99	0.0093906		2764	0.03102124		3354	0.06052048		3944	-0.00587786
404.2	0.31789864		994.19	0.16205244		1584.19	0.09726794		2174.19	0.00967961		2764.2	0.03027901		3354.2	0.060638		3944.2	-0.00616435
404.4	0.31806537		994.39	0.16213576		1584.39	0.09698434		2174.39	0.00773851		2764.4	0.03048108		3354.4	0.06021477		3944.4	-0.0062939
404.6	0.31902758		994.59	0.16262981		1584.59	0.09761334		2174.59	0.00686161		2764.6	0.03092968		3354.6	0.0591847		3944.6	-0.00662605
404.8	0.31946336		994.79	0.16311814		1584.79	0.09734715		2174.79	0.00625269		2764.8	0.02990745		3354.8	0.05896801		3944.8	-0.00662487
405	0.31999278		994.99	0.16365381		1584.99	0.09803786		2174.99	0.00578573		2765	0.02978747		3355	0.05868863		3945	-0.00664997
405.2	0.32047317		995.19	0.16375535		1585.19	0.09818942		2175.19	0.00666446		2765.2	0.02970165		3355.2	0.0586205		3945.2	-0.0061516
405.4	0.32115914		995.39	0.16430359		1585.39	0.09782039		2175.39	0.00700416		2765.4	0.03036416		3355.4	0.05823312		3945.4	-0.00651666
405.6	0.32151483		995.59	0.16412608		1585.59	0.09820159		2175.59	0.00786252		2765.6	0.03102777		3355.6	0.05836405		3945.6	-0.00723314
405.8	0.32024573		995.79	0.16381812		1585.79	0.09844061		2175.79	0.00866691		2765.8	0.03072042		3355.8	0.05897394		3945.8	-0.00633286
406	0.32036846		995.99	0.16364552		1585.99	0.09922825		2175.99	0.00875711		2766	0.03153092		3356	0.05923404		3946	-0.00732947
406.2	0.32041579		996.19	0.16342052		1586.19	0.09967607		2176.19	0.00895723		2766.2	0.03184158		3356.2	0.05929059		3946.2	-0.00752141
406.4	0.32062031		996.39	0.16238967		1586.39	0.10025993		2176.39	0.00987802		2766.4	0.03275793		3356.4	0.0592215		3946.4	-0.00709364
406.6	0.32066392		996.59	0.16184428		1586.59	0.10028227		2176.59	0.01018617		2766.6	0.03302866		3356.6	0.05949455		3946.6	-0.00836389
406.8	0.32070925		996.79	0.16228854		1586.79	0.10042055		2176.79	0.01103127		2766.8	0.0337141		3356.8	0.05913839		3946.8	-0.00841452
407	0.3206536		996.99	0.16239642		1586.99	0.10119999		2176.99	0.01147772		2767	0.03421495		3357	0.05951928		3947	-0.00836202
407.2	0.32088373		997.19	0.1633963		1587.19	0.10056331		2177.19	0.01038761		2767.2	0.03400791		3357.2	0.05982738		3947.2	-0.00869826
407.4	0.32113549		997.39	0.16358961		1587.39	0.10084724		2177.39	0.00996653		2767.4	0.03440071		3357.4	0.06059915		3947.4	-0.00962196
407.6	0.32098749		997.59	0.16284706		1587.59	0.10072272		2177.59	0.00867814		2767.6	0.03520766		3357.6	0.06082139		3947.6	-0.01013142
407.8	0.32143329		997.79	0.16287403		1587.79	0.10063485		2177.79	0.00788296		2767.8	0.03592293		3357.8	0.0607164		3947.8	-0.00944725
408	0.32242815		997.99	0.16226291		1587.99	0.10082678		2177.99	0.00785961		2768	0.03565791		3358	0.06104562		3948	-0.00923343
408.2	0.32226464		998.19	0.16229904		1588.19	0.10165946		2178.19	0.00665757		2768.2	0.03477059		3358.2	0.06074895		3948.2	-0.00902032
408.4	0.32366909		998.39	0.1621101		1588.39	0.10138333		2178.39	0.00564915		2768.4	0.0346665		3358.4	0.06009506		3948.4	-0.00872245
408.6	0.32414419		998.59	0.16287293		1588.59	0.10167999		2178.59	0.00598914		2768.6	0.0335004		3358.6	0.06030776		3948.6	-0.00862707
408.8	0.32351732		998.79	0.16335067		1588.79	0.10092765		2178.79	0.00625704		2768.8	0.03268798		3358.8	0.06053906		3948.8	-0.00762322
409	0.32373322		998.99	0.16406483		1588.99	0.101043		2178.99	0.00718347		2769	0.03287422		3359	0.06104587		3949	-0.00658171
409.2	0.32491793		999.19	0.16443334		1589.19	0.09966759		2179.19	0.00916305		2769.2	0.03226469		3359.2	0.06139798		3949.2	-0.00579089
409.4	0.32539654		999.39	0.16511018		1589.39	0.09938787		2179.39	0.01008644		2769.4	0.03270197		3359.4	0.06207019		3949.4	-0.00563882
409.6	0.32565551		999.59	0.16445569		1589.59	0.09898586		2179.59	0.01173654		2769.6	0.03235241		3359.6	0.06319961		3949.6	-0.0056579
409.8	0.32565669		999.79	0.16447		1589.79	0.09907265		2179.79	0.0131195		2769.8	0.03226354		3359.8	0.06339408		3949.8	-0.00561603
410	0.32680418		999.99	0.16485107		1589.99	0.10036085		2179.99	0.01381839		2770	0.03314317		3360	0.06292274		3950	-0.00629378
410.2	0.32686639		1000.19	0.16508599		1590.19	0.10113997		2180.19	0.01442577		2770.2	0.03305165		3360.2	0.06355842		3950.2	-0.00627682
410.4	0.32718581		1000.39	0.16564642		1590.39	0.10101456		2180.39	0.01532757		2770.4	0.03384019		3360.4	0.06266077		3950.4	-0.00604599
410.6	0.32752945		1000.59	0.16608422		1590.59	0.10104331		2180.59	0.01539999		2770.6	0.03471123		3360.6	0.0620012		3950.6	-0.00699006
410.8	0.32873577		1000.79	0.16670088		1590.79	0.10107495		2180.79	0.014722		2770.8	0.03490608		3360.8	0.06170602		3950.8	-0.00650279
411	0.32977753		1000.99	0.16730332		1590.99	0.10177849		2180.99	0.01382739		2771	0.03486725		3361	0.06115173		3951	-0.00615651
411.2	0.33034308		1001.19	0.16725794		1591.19	0.10209414		2181.19	0.01336093		2771.2	0.03508322		3361.2	0.06119016		3951.2	-0.00682074
411.4	0.33028795		1001.39	0.16730273		1591.39	0.1026245		2181.39	0.01358131		2771.4	0.03437952		3361.4	0.06064754		3951.4	-0.0074889
411.6	0.3296487		1001.59	0.16744897		1591.59	0.10325398		2181.59	0.01287422		2771.6	0.03513092		3361.6	0.0604007		3951.6	-0.00686158
411.8	0.33001129		1001.79	0.16843381		1591.79	0.10338157		2181.79	0.01274159		2771.8	0.03525071		3361.8	0.0605406		3951.8	-0.00732334
412	0.33047087		1001.99	0.16744533		1591.99	0.10313914		2181.99	0.01170699		2772	0.0342447		3362	0.06036736		3952	-0.00774494
412.2	0.33057917		1002.19	0.16824742		1592.19	0.10264569		2182.19	0.010771		2772.2	0.03359105		3362.2	0.05939605		3952.2	-0.0082454
412.4	0.33111554		1002.39	0.16848393		1592.39	0.10276872		2182.39	0.01039893		2772.4	0.03425212		3362.4	0.05945367		3952.4	-0.00895282
412.6	0.33053891		1002.59	0.16923611		1592.59	0.10250654		2182.59	0.00949968		2772.6	0.03360701		3362.6	0.06024105		3952.6	-0.00864854
412.8	0.33045101		1002.79	0.16896782		1592.79	0.10236477		2182.79	0.00939109		2772.8	0.03351072		3362.8	0.0602789		3952.8	-0.00869904
413	0.33100594		1002.99	0.17015175		1592.99	0.10209949		2182.99	0.0094778		2773	0.0343715		3363	0.06090568		3953	-0.00892963
413.2	0.33122202		1003.19	0.16916048		1593.19	0.10218999		2183.19	0.0101038		2773.2	0.03397006		3363.2	0.06097493		3953.2	-0.00952868
413.4	0.33111946		1003.39	0.16880948		1593.39	0.10307322		2183.39	0.01036892		2773.4	0.03441356		3363.4	0.06112088		3953.4	-0.00949384
413.6	0.33115781		1003.59	0.16826443		1593.59	0.10299266		2183.59	0.01192607		2773.6	0.03439448		3363.6	0.06124295		3953.6	-0.00915465
413.8	0.33087591		1003.79	0.16859344		1593.79	0.10413443		2183.79	0.01121668		2773.8	0.03484782		3363.8	0.06123999		3953.8	-0.00904515
414	0.33047797		1003.99	0.16922226		1593.99	0.10502888		2183.99	0.01075506		2774	0.03527907		3364	0.06171914		3954	-0.00924321
414.2	0.33002807		1004.19	0.16988993		1594.19	0.10565304		2184.19	0.01050666		2774.2	0.0350482		3364.2	0.06164968		3954.2	-0.00804774
414.4	0.33029268		1004.39	0.16969156		1594.39	0.10620218		2184.39	0.010466		2774.4	0.03527472		3364.4	0.06108099		3954.4	-0.00737304
414.6	0.33075365		1004.59	0.16983454		1594.59	0.10643306		2184.59	0.00997078		2774.6	0.03484902		3364.6	0.06090865		3954.6	-0.00698563
414.8	0.33137257		1004.79	0.16986379		1594.79	0.10665004		2184.79	0.00970571		2774.8	0.03388975		3364.8	0.06087261		3954.8	-0.00585611
415	0.33088476		1004.99	0.17015976		1594.99	0.10735557		2184.99	0.01030617		2775	0.03409117		3365	0.06067466		3955	-0.00532476
415.2	0.33011266		1005.19	0.16990319		1595.19	0.10763227		2185.19	0.01172827		2775.2	0.03344953		3365.2	0.06165476		3955.2	-0.0049234
415.4	0.32963961		1005.39	0.17094585		1595.39	0.10774181		2185.39	0.01177575		2775.4	0.03377553		3365.4	0.06184049		3955.4	-0.00440175
415.6	0.33001515		1005.59	0.17183572		1595.59	0.10773563		2185.59	0.01137869		2775.6	0.03427869		3365.6	0.06260162		3955.6	-0.00436568
415.8	0.33077743		1005.79	0.17285557		1595.79	0.10654813		2185.79	0.01182126		2775.8	0.03371889		3365.8	0.0625446		3955.8	-0.005095
416	0.33126716		1005.99	0.17210751		1595.99	0.10551924		2185.99	0.01188454		2776	0.03393669		3366	0.06291141		3956	-0.00548094
416.2	0.3313418		1006.19	0.17254158		1596.19	0.10499464		2186.19	0.01223576		2776.2	0.03377511		3366.2	0.06312752		3956.2	-0.00644734
416.4	0.33058484		1006.39	0.17280722		1596.39	0.1055958		2186.39	0.01221022		2776.4	0.03362699		3366.4	0.06419063		3956.4	-0.00734179
416.6	0.33063351		1006.59	0.17362463		1596.59	0.10473952		2186.59	0.01211837		2776.6	0.03307135		3366.6	0.06533402		3956.6	-0.00774487
416.8	0.33034104		1006.79	0.17319301		1596.79	0.10473979		2186.79	0.01251037		2776.8	0.03230542		3366.8	0.0659617		3956.8	-0.00922529
417	0.33047788		1006.99	0.17257703		1596.99	0.1047887		2186.99	0.01255435		2777	0.03193411		3367	0.06590938		3957	-0.01031326
417.2	0.33031303		1007.19	0.17139424		1597.19	0.10527577		2187.19	0.0129778		2777.2	0.03122799		3367.2	0.06520284		3957.2	-0.01151081
417.4	0.32987045		1007.39	0.17168655		1597.39	0.10579964		2187.39	0.0126109		2777.4	0.03139689		3367.4	0.06566849		3957.4	-0.01151083
417.6	0.33000601		1007.59	0.17180242		1597.59	0.10527964		2187.59	0.01314138		2777.6	0.03102804		3367.6	0.06576137		3957.6	-0.01096606
417.8	0.32900666		1007.79	0.17206155		1597.79	0.10507239		2187.79	0.01238347		2777.8	0.03096196		3367.8	0.06604253		3957.8	-0.01097525
418	0.32905655		1007.99	0.1727176		1597.99	0.10486895		2187.99	0.01262805		2778	0.03156589		3368	0.06629406		3958	-0.01054324
418.2	0.32981738		1008.19	0.17294451		1598.19	0.10539318		2188.19	0.01229288		2778.2	0.03202232		3368.2	0.06562228		3958.2	-0.00917207
418.4	0.33070705		1008.39	0.1728683		1598.39	0.105472		2188.39	0.01197384		2778.4	0.03252734		3368.4	0.0655177		3958.4	-0.00980565
418.6	0.33051157		1008.59	0.17284353		1598.59	0.1063415		2188.59	0.01154655		2778.6	0.03290626		3368.6	0.06514568		3958.6	-0.00971562
418.8	0.33090026		1008.79	0.17221222		1598.79	0.10773873		2188.79	0.01150734		2778.8	0.03395528		3368.8	0.065324		3958.8	-0.00942696
419	0.33157309		1008.99	0.17264538		1598.99	0.10802925		2188.99	0.01158048		2779	0.03575872		3369	0.06530522		3959	-0.00885544
419.2	0.33216424		1009.19	0.17265549		1599.19	0.10786827		2189.19	0.01158595		2779.2	0.03567378		3369.2	0.06534752		3959.2	-0.00860215
419.4	0.33332372		1009.39	0.17421174		1599.39	0.10781566		2189.39	0.01135261		2779.4	0.03693174		3369.4	0.06555278		3959.4	-0.00795967
419.6	0.33449544		1009.59	0.17469147		1599.59	0.10738578		2189.59	0.01162956		2779.6	0.03756235		3369.6	0.06559426		3959.6	-0.00862724
419.8	0.33511188		1009.79	0.17451459		1599.79	0.10710704		2189.79	0.011209		2779.8	0.03798357		3369.8	0.06655246		3959.8	-0.0086092
420	0.33580081		1009.99	0.17386006		1599.99	0.10709384		2189.99	0.01112925		2780	0.03805393		3370	0.06797126		3960	-0.00890656
420.2	0.33651181		1010.19	0.17404746		1600.19	0.10684087		2190.19	0.01117329		2780.2	0.037609		3370.2	0.06819099		3960.2	-0.00890534
420.4	0.33658144		1010.39	0.17520103		1600.39	0.10643053		2190.39	0.01087516		2780.4	0.03718392		3370.4	0.06915034		3960.4	-0.00938432
420.6	0.33737654		1010.59	0.17471875		1600.59	0.10690907		2190.59	0.01051565		2780.6	0.03729334		3370.6	0.06926464		3960.6	-0.00857236
420.8	0.33777727		1010.79	0.17401613		1600.79	0.10675293		2190.79	0.01041469		2780.8	0.03587352		3370.8	0.06880348		3960.8	-0.00889522
421	0.33845415		1010.99	0.17405028		1600.99	0.10723512		2190.99	0.01036476		2781	0.0359969		3371	0.06774519		3961	-0.00941144
421.2	0.33762692		1011.19	0.17490725		1601.19	0.10717959		2191.19	0.01102422		2781.2	0.0358371		3371.2	0.06769159		3961.2	-0.01013308
421.4	0.3374656		1011.39	0.17487974		1601.39	0.10739187		2191.39	0.01125274		2781.4	0.03541707		3371.4	0.06800549		3961.4	-0.00931913
421.6	0.33786707		1011.59	0.17572019		1601.59	0.1065794		2191.59	0.01128632		2781.6	0.03428406		3371.6	0.06753903		3961.6	-0.00867371
421.8	0.33685377		1011.79	0.17554932		1601.79	0.10697824		2191.79	0.01173965		2781.8	0.03460065		3371.8	0.0674129		3961.8	-0.0090809
422	0.33740425		1011.99	0.17545788		1601.99	0.107875		2191.99	0.01133917		2782	0.03576311		3372	0.06794915		3962	-0.00887835
422.2	0.33757058		1012.19	0.17463769		1602.19	0.10947947		2192.19	0.01129559		2782.2	0.03540735		3372.2	0.06738489		3962.2	-0.00803302
422.4	0.33752648		1012.39	0.17483155		1602.39	0.10991234		2192.39	0.01145098		2782.4	0.03537772		3372.4	0.06772165		3962.4	-0.00830165
422.6	0.3368225		1012.59	0.17468534		1602.59	0.11186404		2192.59	0.01154553		2782.6	0.036425		3372.6	0.06731475		3962.6	-0.00774421
422.8	0.33694232		1012.79	0.17510207		1602.79	0.1122515		2192.79	0.01137211		2782.8	0.03710575		3372.8	0.06712606		3962.8	-0.00762972
423	0.33737353		1012.99	0.17591255		1602.99	0.11203052		2192.99	0.01150308		2783	0.03760908		3373	0.06630425		3963	-0.00740349
423.2	0.33728861		1013.19	0.17609119		1603.19	0.11242371		2193.19	0.01129552		2783.2	0.03765506		3373.2	0.06687107		3963.2	-0.00787479
423.4	0.33756475		1013.39	0.17677105		1603.39	0.11256281		2193.39	0.01178986		2783.4	0.03900659		3373.4	0.0667637		3963.4	-0.00747834
423.6	0.33716148		1013.59	0.17660016		1603.59	0.11275213		2193.59	0.01155104		2783.6	0.03964		3373.6	0.06737583		3963.6	-0.00776252
423.8	0.3376762		1013.79	0.1764077		1603.79	0.11210045		2193.79	0.01095294		2783.8	0.03947538		3373.8	0.06826797		3963.8	-0.00763342
424	0.33892837		1013.99	0.17726342		1603.99	0.11177388		2193.99	0.01161714		2784	0.03859171		3374	0.06807691		3964	-0.0073581
424.2	0.33941192		1014.19	0.17742279		1604.19	0.11116729		2194.19	0.01144487		2784.2	0.03795283		3374.2	0.06789578		3964.2	-0.00684311
424.4	0.34001484		1014.39	0.17781253		1604.39	0.11082642		2194.39	0.01133599		2784.4	0.03664371		3374.4	0.06868754		3964.4	-0.00732516
424.6	0.34026233		1014.59	0.17751906		1604.59	0.11098958		2194.59	0.01080969		2784.6	0.03629023		3374.6	0.06951434		3964.6	-0.00742657
424.8	0.34092554		1014.79	0.17830905		1604.79	0.11005717		2194.79	0.0105959		2784.8	0.03574372		3374.8	0.06963442		3964.8	-0.00812832
425	0.34114665		1014.99	0.17824736		1604.99	0.11022752		2194.99	0.01093166		2785	0.03578231		3375	0.07014607		3965	-0.00907503
425.2	0.34199365		1015.19	0.17895623		1605.19	0.11032481		2195.19	0.01092745		2785.2	0.03533351		3375.2	0.07070444		3965.2	-0.00959124
425.4	0.34351193		1015.39	0.17809361		1605.39	0.10975229		2195.39	0.01005827		2785.4	0.03480567		3375.4	0.07079537		3965.4	-0.00856873
425.6	0.34315879		1015.59	0.17899054		1605.59	0.10931322		2195.59	0.00984299		2785.6	0.03459783		3375.6	0.07064199		3965.6	-0.00869615
425.8	0.34302152		1015.79	0.17774014		1605.79	0.11042934		2195.79	0.01043609		2785.8	0.03569102		3375.8	0.07150423		3965.8	-0.00938198
426	0.3439022		1015.99	0.17752544		1605.99	0.11068084		2195.99	0.00950088		2786	0.03568638		3376	0.07193937		3966	-0.00934347
426.2	0.34385365		1016.19	0.1775225		1606.19	0.11141405		2196.19	0.0087577		2786.2	0.03476949		3376.2	0.07182949		3966.2	-0.00892287
426.4	0.34346368		1016.39	0.17795331		1606.39	0.11151947		2196.39	0.00839771		2786.4	0.03499492		3376.4	0.07198314		3966.4	-0.00900859
426.6	0.34279642		1016.59	0.17769253		1606.59	0.11263251		2196.59	0.00797526		2786.6	0.03567621		3376.6	0.07097186		3966.6	-0.00852152
426.8	0.34284324		1016.79	0.17770871		1606.79	0.11227239		2196.79	0.00767258		2786.8	0.03643693		3376.8	0.0708331		3966.8	-0.0088012
427	0.3430802		1016.99	0.17742755		1606.99	0.11244711		2196.99	0.00819754		2787	0.03680121		3377	0.07051844		3967	-0.00930869
427.2	0.34242661		1017.19	0.17725832		1607.19	0.11254392		2197.19	0.00785511		2787.2	0.03767116		3377.2	0.07030071		3967.2	-0.00934345
427.4	0.34240149		1017.39	0.17759034		1607.39	0.11236467		2197.39	0.0076501		2787.4	0.03872777		3377.4	0.06866017		3967.4	-0.00881771
427.6	0.34218717		1017.59	0.17853583		1607.59	0.11210722		2197.59	0.00767972		2787.6	0.03829119		3377.6	0.06880501		3967.6	-0.00825896
427.8	0.34301284		1017.79	0.17863761		1607.79	0.11172011		2197.79	0.00769771		2787.8	0.03801717		3377.8	0.0680627		3967.8	-0.00805685
428	0.34358487		1017.99	0.17890389		1607.99	0.11201842		2197.99	0.00801011		2788	0.03823768		3378	0.06769013		3968	-0.00811451
428.2	0.34355703		1018.19	0.17840731		1608.19	0.11137359		2198.19	0.00793521		2788.2	0.03861206		3378.2	0.06783887		3968.2	-0.00776229
428.4	0.34411805		1018.39	0.17911293		1608.39	0.11034313		2198.39	0.00816526		2788.4	0.03850126		3378.4	0.06845965		3968.4	-0.00806954
428.6	0.34372841		1018.59	0.17964517		1608.59	0.11030399		2198.59	0.00805286		2788.6	0.03928348		3378.6	0.06936666		3968.6	-0.00867759
428.8	0.3444114		1018.79	0.17940402		1608.79	0.11049341		2198.79	0.00858278		2788.8	0.03975734		3378.8	0.06921532		3968.8	-0.00807374
429	0.34475264		1018.99	0.17890618		1608.99	0.11084378		2198.99	0.00909905		2789	0.04005365		3379	0.06936149		3969	-0.00794715
429.2	0.34547678		1019.19	0.17955083		1609.19	0.11094038		2199.19	0.00923749		2789.2	0.04065614		3379.2	0.06914591		3969.2	-0.00750393
429.4	0.34462218		1019.39	0.17920297		1609.39	0.11058145		2199.39	0.00966693		2789.4	0.04045501		3379.4	0.06993206		3969.4	-0.00650006
429.6	0.34326986		1019.59	0.18019668		1609.59	0.11102638		2199.59	0.01049705		2789.6	0.04034446		3379.6	0.07064718		3969.6	-0.00701405
429.8	0.34240797		1019.79	0.18113859		1609.79	0.11209861		2199.79	0.01074891		2789.8	0.04024976		3379.8	0.07169705		3969.8	-0.00723076
430	0.34256131		1019.99	0.18171462		1609.99	0.11283791		2199.99	0.01052426		2790	0.04005399		3380	0.07223592		3970	-0.00759998
430.2	0.34261591		1020.19	0.18204157		1610.19	0.11438222		2200.19	0.01050483		2790.2	0.03943363		3380.2	0.07376408		3970.2	-0.00712158
430.4	0.34218933		1020.39	0.18193699		1610.39	0.11497369		2200.39	0.01007		2790.4	0.03868564		3380.4	0.07424383		3970.4	-0.00720291
430.6	0.34172075		1020.59	0.18187959		1610.59	0.11482764		2200.59	0.01025024		2790.6	0.03915269		3380.6	0.07454573		3970.6	-0.0069547
430.8	0.34234122		1020.79	0.18180762		1610.79	0.11476207		2200.79	0.00998793		2790.8	0.03928097		3380.8	0.07480344		3970.8	-0.0077923
431	0.34259726		1020.99	0.18204349		1610.99	0.11449791		2200.99	0.00949662		2791	0.03931507		3381	0.07351655		3971	-0.00815278
431.2	0.3423099		1021.19	0.18227885		1611.19	0.11478906		2201.19	0.00874102		2791.2	0.03959156		3381.2	0.07240752		3971.2	-0.00816832
431.4	0.34367519		1021.39	0.18210277		1611.39	0.11472604		2201.39	0.0089224		2791.4	0.03955014		3381.4	0.07227164		3971.4	-0.00844901
431.6	0.34446919		1021.59	0.18220582		1611.59	0.11495685		2201.59	0.00889756		2791.6	0.03879922		3381.6	0.07224781		3971.6	-0.00881785
431.8	0.34471392		1021.79	0.18180383		1611.79	0.11405264		2201.79	0.00820763		2791.8	0.04009123		3381.8	0.07129535		3971.8	-0.00887048
432	0.34488849		1021.99	0.18148753		1611.99	0.11358535		2201.99	0.00855874		2792	0.04063838		3382	0.07094215		3972	-0.0092078
432.2	0.34548886		1022.19	0.18081156		1612.19	0.11282608		2202.19	0.00812639		2792.2	0.04076496		3382.2	0.07067941		3972.2	-0.00972171
432.4	0.34608752		1022.39	0.18133349		1612.39	0.11180204		2202.39	0.0084356		2792.4	0.04094219		3382.4	0.07082856		3972.4	-0.01119361
432.6	0.34671117		1022.59	0.18135283		1612.59	0.11239723		2202.59	0.00940163		2792.6	0.04155403		3382.6	0.07082306		3972.6	-0.01233834
432.8	0.34684184		1022.79	0.18041823		1612.79	0.11186508		2202.79	0.01042389		2792.8	0.04189998		3382.8	0.07077295		3972.8	-0.01151686
433	0.3468343		1022.99	0.1809618		1612.99	0.11128181		2202.99	0.01067159		2793	0.04253347		3383	0.07076987		3973	-0.01172447
433.2	0.34747424		1023.19	0.18151157		1613.19	0.11119254		2203.19	0.01086682		2793.2	0.04257521		3383.2	0.07107323		3973.2	-0.01235968
433.4	0.3470138		1023.39	0.1823757		1613.39	0.11166071		2203.39	0.01159607		2793.4	0.04262625		3383.4	0.07193843		3973.4	-0.01190611
433.6	0.34737136		1023.59	0.18315661		1613.59	0.11218121		2203.59	0.01269433		2793.6	0.04252845		3383.6	0.07216942		3973.6	-0.01258494
433.8	0.34777627		1023.79	0.18479119		1613.79	0.11287218		2203.79	0.01212356		2793.8	0.04230488		3383.8	0.07247161		3973.8	-0.0123019
434	0.3485224		1023.99	0.18453746		1613.99	0.11345378		2203.99	0.01260112		2794	0.04249328		3384	0.07242633		3974	-0.01199068
434.2	0.34931072		1024.19	0.18589834		1614.19	0.11477241		2204.19	0.01157684		2794.2	0.04164655		3384.2	0.07329546		3974.2	-0.01079358
434.4	0.34904887		1024.39	0.18654206		1614.39	0.11497172		2204.39	0.0106984		2794.4	0.04200064		3384.4	0.0731497		3974.4	-0.01080651
434.6	0.35014569		1024.59	0.18666091		1614.59	0.11467784		2204.59	0.011361		2794.6	0.04195284		3384.6	0.07243918		3974.6	-0.01022603
434.8	0.3511993		1024.79	0.18668864		1614.79	0.11512261		2204.79	0.01168139		2794.8	0.04133934		3384.8	0.07184841		3974.8	-0.01020104
435	0.35179972		1024.99	0.18708587		1614.99	0.11443306		2204.99	0.01154569		2795	0.04103121		3385	0.07174343		3975	-0.00957783
435.2	0.35179143		1025.19	0.18645603		1615.19	0.11515708		2205.19	0.01152543		2795.2	0.03998051		3385.2	0.07283982		3975.2	-0.00921097
435.4	0.35299018		1025.39	0.18610249		1615.39	0.11492321		2205.39	0.01148317		2795.4	0.03895624		3385.4	0.07352348		3975.4	-0.00920375
435.6	0.35256726		1025.59	0.18647899		1615.59	0.11439951		2205.59	0.01078249		2795.6	0.03893333		3385.6	0.07362866		3975.6	-0.009488
435.8	0.35178391		1025.79	0.18655189		1615.79	0.11345528		2205.79	0.01007091		2795.8	0.03872593		3385.8	0.07427851		3975.8	-0.00941499
436	0.35194986		1025.99	0.18592331		1615.99	0.11432729		2205.99	0.01005047		2796	0.03839657		3386	0.07499071		3976	-0.00932716
436.2	0.35176072		1026.19	0.18580407		1616.19	0.11420272		2206.19	0.0094441		2796.2	0.03859769		3386.2	0.07561274		3976.2	-0.01017819
436.4	0.35133768		1026.39	0.1858321		1616.39	0.11437597		2206.39	0.01108526		2796.4	0.0388695		3386.4	0.07654297		3976.4	-0.01035672
436.6	0.35097306		1026.59	0.18504055		1616.59	0.11465176		2206.59	0.01131258		2796.6	0.03777366		3386.6	0.07690258		3976.6	-0.0096535
436.8	0.35044091		1026.79	0.18417364		1616.79	0.11361216		2206.79	0.01118145		2796.8	0.0378474		3386.8	0.0767148		3976.8	-0.00879078
437	0.35050822		1026.99	0.18408929		1616.99	0.11386567		2206.99	0.01098496		2797	0.03861059		3387	0.07718748		3977	-0.00974362
437.2	0.34999639		1027.19	0.18413495		1617.19	0.11416391		2207.19	0.01040158		2797.2	0.03889693		3387.2	0.07739208		3977.2	-0.01027785
437.4	0.35032728		1027.39	0.18481939		1617.39	0.11525233		2207.39	0.00984539		2797.4	0.03959939		3387.4	0.07750287		3977.4	-0.01012019
437.6	0.35054624		1027.59	0.1851546		1617.59	0.11587175		2207.59	0.00900888		2797.6	0.04010996		3387.6	0.07761519		3977.6	-0.01058018
437.8	0.35005032		1027.79	0.18549142		1617.79	0.11611931		2207.79	0.00696121		2797.8	0.03995091		3387.8	0.07674104		3977.8	-0.00985223
438	0.34956092		1027.99	0.18616128		1617.99	0.1168761		2207.99	0.0072819		2798	0.04098268		3388	0.07589718		3978	-0.00938854
438.2	0.35097852		1028.19	0.18752586		1618.19	0.11789061		2208.19	0.00558982		2798.2	0.04097825		3388.2	0.07572118		3978.2	-0.00918709
438.4	0.35182924		1028.39	0.1876036		1618.39	0.11809587		2208.39	0.00619199		2798.4	0.04152896		3388.4	0.07603967		3978.4	-0.00916743
438.6	0.35330539		1028.59	0.18828028		1618.59	0.11804892		2208.59	0.00694932		2798.6	0.04155379		3388.6	0.07560902		3978.6	-0.00895683
438.8	0.35407365		1028.79	0.18809715		1618.79	0.11816663		2208.79	0.00612096		2798.8	0.04201607		3388.8	0.07508085		3978.8	-0.00859791
439	0.35465902		1028.99	0.18850118		1618.99	0.11860674		2208.99	0.00614507		2799	0.04289767		3389	0.07517107		3979	-0.00856539
439.2	0.35531386		1029.19	0.18844462		1619.19	0.1192548		2209.19	0.00623079		2799.2	0.04330278		3389.2	0.07561666		3979.2	-0.00850446
439.4	0.35572834		1029.39	0.18919145		1619.39	0.11904985		2209.39	0.00647407		2799.4	0.04253257		3389.4	0.07533998		3979.4	-0.00940341
439.6	0.35511365		1029.59	0.18960255		1619.59	0.11940603		2209.59	0.00667937		2799.6	0.04290175		3389.6	0.07567965		3979.6	-0.00925085
439.8	0.35595929		1029.79	0.18963835		1619.79	0.1200527		2209.79	0.00736304		2799.8	0.04275644		3389.8	0.07611225		3979.8	-0.0088144
440	0.35609988		1029.99	0.18973199		1619.99	0.1204634		2209.99	0.00739659		2800	0.04299095		3390	0.0760282		3980	-0.00845501
440.2	0.3559229		1030.19	0.18989643		1620.19	0.12101237		2210.19	0.00758949		2800.2	0.04224974		3390.2	0.07673476		3980.2	-0.00862524
440.4	0.35504112		1030.39	0.18941258		1620.39	0.1215463		2210.39	0.00854375		2800.4	0.04127737		3390.4	0.07644343		3980.4	-0.0073501
440.6	0.35534252		1030.59	0.18934558		1620.59	0.12129782		2210.59	0.0084254		2800.6	0.04076977		3390.6	0.0758395		3980.6	-0.00638803
440.8	0.35511814		1030.79	0.1893793		1620.79	0.12118282		2210.79	0.00942516		2800.8	0.0415156		3390.8	0.0753837		3980.8	-0.00638413
441	0.35523001		1030.99	0.18975006		1620.99	0.12142707		2210.99	0.00951484		2801	0.04269569		3391	0.07650076		3981	-0.00713834
441.2	0.35424245		1031.19	0.19049226		1621.19	0.12172732		2211.19	0.00886884		2801.2	0.04295478		3391.2	0.07660842		3981.2	-0.00696177
441.4	0.35469255		1031.39	0.19085515		1621.39	0.12154817		2211.39	0.0085564		2801.4	0.04308943		3391.4	0.07639784		3981.4	-0.00737838
441.6	0.35325432		1031.59	0.19068022		1621.59	0.1216427		2211.59	0.008778		2801.6	0.0429364		3391.6	0.07724813		3981.6	-0.00767493
441.8	0.35251369		1031.79	0.19132348		1621.79	0.12131822		2211.79	0.00871719		2801.8	0.04264339		3391.8	0.07763622		3981.8	-0.00758769
442	0.35289286		1031.99	0.19201711		1621.99	0.12179523		2211.99	0.00945697		2802	0.04278843		3392	0.0776871		3982	-0.00815326
442.2	0.35331807		1032.19	0.19245266		1622.19	0.12166393		2212.19	0.00940048		2802.2	0.04230951		3392.2	0.07838787		3982.2	-0.00774097
442.4	0.353882		1032.39	0.19250455		1622.39	0.12115864		2212.39	0.00959263		2802.4	0.04228334		3392.4	0.07872666		3982.4	-0.00801716
442.6	0.35472863		1032.59	0.19349071		1622.59	0.12055666		2212.59	0.00904438		2802.6	0.04358668		3392.6	0.07797976		3982.6	-0.00858161
442.8	0.35555791		1032.79	0.19315298		1622.79	0.12076531		2212.79	0.00857331		2802.8	0.04389993		3392.8	0.07748965		3982.8	-0.00869976
443	0.35574967		1032.99	0.19395866		1622.99	0.12164533		2212.99	0.01004379		2803	0.04460286		3393	0.07769809		3983	-0.00895853
443.2	0.35679443		1033.19	0.19403511		1623.19	0.12161225		2213.19	0.00997477		2803.2	0.04399726		3393.2	0.07814221		3983.2	-0.00946404
443.4	0.35673151		1033.39	0.19421599		1623.39	0.12152473		2213.39	0.01035779		2803.4	0.04356854		3393.4	0.07810331		3983.4	-0.01018089
443.6	0.35778091		1033.59	0.19400666		1623.59	0.1223449		2213.59	0.01049449		2803.6	0.04432947		3393.6	0.07790623		3983.6	-0.01003548
443.8	0.35888578		1033.79	0.19372566		1623.79	0.12205775		2213.79	0.01093926		2803.8	0.04455599		3393.8	0.07806214		3983.8	-0.01046832
444	0.35964039		1033.99	0.19322838		1623.99	0.12225112		2213.99	0.00990508		2804	0.04455916		3394	0.07830781		3984	-0.00977702
444.2	0.35950817		1034.19	0.19281529		1624.19	0.12258831		2214.19	0.01022443		2804.2	0.0438417		3394.2	0.07874073		3984.2	-0.00916437
444.4	0.35956927		1034.39	0.19271791		1624.39	0.12315374		2214.39	0.0100975		2804.4	0.04391629		3394.4	0.07858504		3984.4	-0.00885297
444.6	0.36004947		1034.59	0.19199409		1624.59	0.12263461		2214.59	0.01060608		2804.6	0.04479211		3394.6	0.07836913		3984.6	-0.00864541
444.8	0.35903112		1034.79	0.19145204		1624.79	0.12262029		2214.79	0.01028352		2804.8	0.04532809		3394.8	0.07806519		3984.8	-0.00857895
445	0.35926321		1034.99	0.19063274		1624.99	0.12296201		2214.99	0.00928224		2805	0.04575099		3395	0.07847255		3985	-0.00860356
445.2	0.35804174		1035.19	0.18993386		1625.19	0.12291127		2215.19	0.00899513		2805.2	0.04499826		3395.2	0.07809582		3985.2	-0.00855925
445.4	0.35780179		1035.39	0.18885877		1625.39	0.1224686		2215.39	0.00873591		2805.4	0.04529803		3395.4	0.07834538		3985.4	-0.0084656
445.6	0.35739581		1035.59	0.18894534		1625.59	0.12291539		2215.59	0.00799958		2805.6	0.04545511		3395.6	0.07906963		3985.6	-0.00824383
445.8	0.35692128		1035.79	0.19016053		1625.79	0.12287838		2215.79	0.00770838		2805.8	0.04555772		3395.8	0.07982132		3985.8	-0.00843049
446	0.35650715		1035.99	0.18911693		1625.99	0.12296859		2215.99	0.00799062		2806	0.04544453		3396	0.08036144		3986	-0.00900771
446.2	0.35530164		1036.19	0.19036707		1626.19	0.12270315		2216.19	0.00768348		2806.2	0.04556355		3396.2	0.08019642		3986.2	-0.00801097
446.4	0.35626713		1036.39	0.19116634		1626.39	0.12204062		2216.39	0.00725664		2806.4	0.04566302		3396.4	0.08048527		3986.4	-0.00851306
446.6	0.35737506		1036.59	0.19197712		1626.59	0.12272762		2216.59	0.00751896		2806.6	0.04625683		3396.6	0.08043288		3986.6	-0.00884342
446.8	0.35769797		1036.79	0.19251924		1626.79	0.12272081		2216.79	0.00815535		2806.8	0.04555863		3396.8	0.08046847		3986.8	-0.00813494
447	0.35800593		1036.99	0.19298117		1626.99	0.12262533		2216.99	0.00895674		2807	0.04533112		3397	0.08065608		3987	-0.00792865
447.2	0.35859751		1037.19	0.19344585		1627.19	0.12239529		2217.19	0.00920219		2807.2	0.04489923		3397.2	0.08095594		3987.2	-0.00826916
447.4	0.35877486		1037.39	0.1934451		1627.39	0.12213531		2217.39	0.0094053		2807.4	0.04547515		3397.4	0.08075757		3987.4	-0.00830578
447.6	0.35959915		1037.59	0.19377729		1627.59	0.12258787		2217.59	0.01007695		2807.6	0.04534193		3397.6	0.08004623		3987.6	-0.00791875
447.8	0.35948949		1037.79	0.19327392		1627.79	0.1215376		2217.79	0.01012866		2807.8	0.04500668		3397.8	0.07991908		3987.8	-0.00769971
448	0.35925772		1037.99	0.19378105		1627.99	0.12213476		2217.99	0.0098784		2808	0.04491096		3398	0.07966347		3988	-0.00840712
448.2	0.35891274		1038.19	0.19373834		1628.19	0.12221195		2218.19	0.01055946		2808.2	0.0447451		3398.2	0.07908829		3988.2	-0.00935087
448.4	0.35933527		1038.39	0.19434899		1628.39	0.12279242		2218.39	0.01097892		2808.4	0.04557799		3398.4	0.07840698		3988.4	-0.00971948
448.6	0.35930223		1038.59	0.19414273		1628.59	0.12263655		2218.59	0.01161938		2808.6	0.04628737		3398.6	0.07777591		3988.6	-0.01011048
448.8	0.35847621		1038.79	0.19368597		1628.79	0.12343019		2218.79	0.01146759		2808.8	0.04632833		3398.8	0.07789481		3988.8	-0.01002418
449	0.35858484		1038.99	0.19311041		1628.99	0.12479463		2218.99	0.01166899		2809	0.04649793		3399	0.07783817		3989	-0.01070279
449.2	0.35870249		1039.19	0.19282168		1629.19	0.12552347		2219.19	0.01124935		2809.2	0.04725616		3399.2	0.07769854		3989.2	-0.0115281
449.4	0.35960239		1039.39	0.19324357		1629.39	0.12592152		2219.39	0.01151213		2809.4	0.04710061		3399.4	0.07827601		3989.4	-0.01108734
449.6	0.35992729		1039.59	0.19408632		1629.59	0.126289		2219.59	0.01106564		2809.6	0.04689887		3399.6	0.07902897		3989.6	-0.01078056
449.8	0.36017278		1039.79	0.19385742		1629.79	0.12744979		2219.79	0.01126371		2809.8	0.046577		3399.8	0.0808555		3989.8	-0.01084144
450	0.36058541		1039.99	0.19316019		1629.99	0.12803674		2219.99	0.01119675		2810	0.04646915		3400	0.08155026		3990	-0.01090546
450.2	0.36127428		1040.19	0.19420491		1630.19	0.12848928		2220.19	0.0108043		2810.2	0.04633855		3400.2	0.08126839		3990.2	-0.00998608
450.4	0.36342442		1040.39	0.19381059		1630.39	0.12796888		2220.39	0.0108233		2810.4	0.04601792		3400.4	0.08230717		3990.4	-0.01017623
450.6	0.36382382		1040.59	0.19377136		1630.59	0.12806882		2220.59	0.01081598		2810.6	0.04584393		3400.6	0.08203175		3990.6	-0.00987408
450.8	0.3638268		1040.79	0.1941533		1630.79	0.1276679		2220.79	0.01084259		2810.8	0.04566021		3400.8	0.08240653		3990.8	-0.00976789
451	0.36465815		1040.99	0.19430937		1630.99	0.12758922		2220.99	0.01088986		2811	0.04524239		3401	0.08306534		3991	-0.00925275
451.2	0.36561666		1041.19	0.19432605		1631.19	0.12746487		2221.19	0.01080026		2811.2	0.04467343		3401.2	0.08284283		3991.2	-0.00913991
451.4	0.36633933		1041.39	0.19428248		1631.39	0.12722514		2221.39	0.01027291		2811.4	0.04510913		3401.4	0.08241742		3991.4	-0.00880199
451.6	0.36534788		1041.59	0.19468678		1631.59	0.12658298		2221.59	0.00985329		2811.6	0.04409926		3401.6	0.08192501		3991.6	-0.00818728
451.8	0.36421243		1041.79	0.19437211		1631.79	0.12593616		2221.79	0.00937712		2811.8	0.04507051		3401.8	0.08209252		3991.8	-0.0082097
452	0.36429097		1041.99	0.19481746		1631.99	0.12604602		2221.99	0.01026055		2812	0.04571687		3402	0.08135851		3992	-0.00971024
452.2	0.36463176		1042.19	0.19468155		1632.19	0.12587377		2222.19	0.01051722		2812.2	0.04631806		3402.2	0.08126325		3992.2	-0.00883517
452.4	0.36518469		1042.39	0.19606923		1632.39	0.12565378		2222.39	0.01070922		2812.4	0.04687777		3402.4	0.0818447		3992.4	-0.00863578
452.6	0.36530272		1042.59	0.19597218		1632.59	0.12586602		2222.59	0.0105052		2812.6	0.04739297		3402.6	0.08171547		3992.6	-0.009061
452.8	0.36492747		1042.79	0.19509423		1632.79	0.12696289		2222.79	0.01089847		2812.8	0.04730177		3402.8	0.08071526		3992.8	-0.00866355
453	0.36450785		1042.99	0.19556521		1632.99	0.12774929		2222.99	0.01104104		2813	0.04761377		3403	0.08015566		3993	-0.00897156
453.2	0.36523009		1043.19	0.19579666		1633.19	0.12746926		2223.19	0.01109934		2813.2	0.04783718		3403.2	0.08027936		3993.2	-0.00904702
453.4	0.36549097		1043.39	0.196799		1633.39	0.12665341		2223.39	0.01123371		2813.4	0.04703728		3403.4	0.08047116		3993.4	-0.00836549
453.6	0.36513022		1043.59	0.19663513		1633.59	0.12614108		2223.59	0.01082625		2813.6	0.04639779		3403.6	0.08032797		3993.6	-0.00786004
453.8	0.3656047		1043.79	0.19717961		1633.79	0.12637545		2223.79	0.01095516		2813.8	0.04586892		3403.8	0.08058902		3993.8	-0.00805635
454	0.36550756		1043.99	0.19839557		1633.99	0.12554194		2223.99	0.01034847		2814	0.04519425		3404	0.07969454		3994	-0.008736
454.2	0.36591423		1044.19	0.19873694		1634.19	0.12510497		2224.19	0.01072517		2814.2	0.04571398		3404.2	0.07920573		3994.2	-0.0090568
454.4	0.36627161		1044.39	0.19849365		1634.39	0.12521303		2224.39	0.01095511		2814.4	0.04538882		3404.4	0.07922072		3994.4	-0.00956508
454.6	0.36592316		1044.59	0.19955121		1634.59	0.12448725		2224.59	0.01118706		2814.6	0.04563948		3404.6	0.07925379		3994.6	-0.01001796
454.8	0.36669538		1044.79	0.1997805		1634.79	0.12457505		2224.79	0.01128291		2814.8	0.04623747		3404.8	0.07932894		3994.8	-0.01041092
455	0.36760637		1044.99	0.20042744		1634.99	0.12450872		2224.99	0.01135363		2815	0.04550988		3405	0.08003901		3995	-0.01020169
455.2	0.36874775		1045.19	0.2006408		1635.19	0.12410983		2225.19	0.01122949		2815.2	0.04556059		3405.2	0.08050611		3995.2	-0.01042422
455.4	0.36830589		1045.39	0.20161641		1635.39	0.1247324		2225.39	0.01061347		2815.4	0.04590555		3405.4	0.08080199		3995.4	-0.01062159
455.6	0.36763778		1045.59	0.20200789		1635.59	0.12510432		2225.59	0.0098442		2815.6	0.04581964		3405.6	0.08150207		3995.6	-0.01081915
455.8	0.36812161		1045.79	0.20194006		1635.79	0.12632603		2225.79	0.00990269		2815.8	0.04587548		3405.8	0.08260291		3995.8	-0.01106927
456	0.36951798		1045.99	0.20272022		1635.99	0.12751242		2225.99	0.01036383		2816	0.04542269		3406	0.08219457		3996	-0.01125187
456.2	0.36964318		1046.19	0.20250497		1636.19	0.12851705		2226.19	0.0092048		2816.2	0.04535216		3406.2	0.08220747		3996.2	-0.01027656
456.4	0.37028063		1046.39	0.20237434		1636.39	0.12903487		2226.39	0.00967804		2816.4	0.04589354		3406.4	0.08275213		3996.4	-0.01035062
456.6	0.37057887		1046.59	0.20086897		1636.59	0.13008807		2226.59	0.00997999		2816.6	0.04616348		3406.6	0.08195125		3996.6	-0.01003779
456.8	0.37038677		1046.79	0.20025675		1636.79	0.13165342		2226.79	0.01135585		2816.8	0.04618042		3406.8	0.08196551		3996.8	-0.00992432
457	0.3691785		1046.99	0.20098238		1636.99	0.13199667		2226.99	0.01122864		2817	0.04691257		3407	0.08251794		3997	-0.00991036
457.2	0.37014545		1047.19	0.20066699		1637.19	0.13222717		2227.19	0.01059411		2817.2	0.04788314		3407.2	0.08202473		3997.2	-0.01028427
457.4	0.36946294		1047.39	0.2008427		1637.39	0.1320418		2227.39	0.01052529		2817.4	0.04782159		3407.4	0.08129914		3997.4	-0.01030465
457.6	0.36824874		1047.59	0.20132024		1637.59	0.13232516		2227.59	0.01152877		2817.6	0.0478178		3407.6	0.08181986		3997.6	-0.01024416
457.8	0.36803428		1047.79	0.20171188		1637.79	0.13235432		2227.79	0.01183472		2817.8	0.04877187		3407.8	0.08183156		3997.8	-0.01180854
458	0.36734999		1047.99	0.2023833		1637.99	0.13186997		2227.99	0.01112324		2818	0.05028829		3408	0.08125558		3998	-0.01190959
458.2	0.36764301		1048.19	0.20164161		1638.19	0.13222658		2228.19	0.01204793		2818.2	0.05162025		3408.2	0.0811066		3998.2	-0.01178715
458.4	0.36803266		1048.39	0.20106042		1638.39	0.132199		2228.39	0.0118884		2818.4	0.05205416		3408.4	0.08073175		3998.4	-0.01135033
458.6	0.36831488		1048.59	0.20154509		1638.59	0.12994707		2228.59	0.01205858		2818.6	0.05356105		3408.6	0.08057032		3998.6	-0.01143401
458.8	0.36848192		1048.79	0.20086588		1638.79	0.13018944		2228.79	0.01285949		2818.8	0.05458391		3408.8	0.0802257		3998.8	-0.01077254
459	0.36856154		1048.99	0.20116435		1638.99	0.13023325		2228.99	0.01256942		2819	0.0536364		3409	0.08066175		3999	-0.01112149
459.2	0.36897016		1049.19	0.20124199		1639.19	0.12993138		2229.19	0.01187457		2819.2	0.05381972		3409.2	0.08045195		3999.2	-0.01132847
459.4	0.36860173		1049.39	0.20126897		1639.39	0.12966721		2229.39	0.01067976		2819.4	0.05357862		3409.4	0.08017509		3999.4	-0.01099706
459.6	0.3692592		1049.59	0.20132203		1639.59	0.12988003		2229.59	0.01022561		2819.6	0.05232586		3409.6	0.0801102		3999.6	-0.0104537
459.8	0.3696676		1049.79	0.20183101		1639.79	0.12994324		2229.79	0.00947125		2819.8	0.05083304		3409.8	0.08062056		3999.8	-0.0097864
460	0.36992159		1049.99	0.20211974		1639.99	0.1295184		2229.99	0.00911983		2820	0.04997578		3410	0.0802559		4000	-0.00970865
460.2	0.37047438		1050.19	0.20146347		1640.19	0.12913722		2230.19	0.00843886		2820.2	0.04930099		3410.2	0.08027868		4000.2	-0.01016103
460.4	0.37121889		1050.39	0.20151474		1640.39	0.12906213		2230.39	0.00926312		2820.4	0.04874677		3410.4	0.08176743		4000.4	-0.01004237
460.6	0.37092922		1050.59	0.20211371		1640.59	0.12952955		2230.59	0.00804431		2820.6	0.04813922		3410.6	0.08237675		4000.6	-0.00978499
460.8	0.37043199		1050.79	0.20349474		1640.79	0.13002232		2230.79	0.00767636		2820.8	0.04832936		3410.8	0.08348614		4000.8	-0.01006576
461	0.36996302		1050.99	0.20396304		1640.99	0.13081658		2230.99	0.00675397		2821	0.04817771		3411	0.08385963		4001	-0.01077827
461.2	0.37031734		1051.19	0.20375988		1641.19	0.13171767		2231.19	0.00614977		2821.2	0.04717396		3411.2	0.08364391		4001.2	-0.01085926
461.4	0.36968196		1051.39	0.20460881		1641.39	0.13194207		2231.39	0.0065909		2821.4	0.04672408		3411.4	0.0848424		4001.4	-0.01086824
461.6	0.36926072		1051.59	0.20533606		1641.59	0.13225802		2231.59	0.00799584		2821.6	0.04631967		3411.6	0.08696181		4001.6	-0.01172165
461.8	0.3693253		1051.79	0.20534126		1641.79	0.13218424		2231.79	0.00787144		2821.8	0.04624626		3411.8	0.08661275		4001.8	-0.0127492
462	0.36960497		1051.99	0.20558976		1641.99	0.13235436		2231.99	0.00792391		2822	0.04628939		3412	0.08628988		4002	-0.0114568
462.2	0.37037915		1052.19	0.20532269		1642.19	0.1327223		2232.19	0.00864029		2822.2	0.04616268		3412.2	0.08594724		4002.2	-0.01123787
462.4	0.37025596		1052.39	0.20521678		1642.39	0.13201647		2232.39	0.00938919		2822.4	0.04660117		3412.4	0.08553892		4002.4	-0.01157652
462.6	0.37044435		1052.59	0.20489101		1642.59	0.13160896		2232.59	0.00986199		2822.6	0.04717683		3412.6	0.08477426		4002.6	-0.01120305
462.8	0.37021851		1052.79	0.20372485		1642.79	0.13166564		2232.79	0.0110105		2822.8	0.04701132		3412.8	0.08393518		4002.8	-0.0104689
463	0.37025145		1052.99	0.20337365		1642.99	0.13107012		2232.99	0.01034407		2823	0.04663929		3413	0.08327717		4003	-0.01049312
463.2	0.37037129		1053.19	0.20259541		1643.19	0.13009698		2233.19	0.01038892		2823.2	0.04778345		3413.2	0.08291451		4003.2	-0.00965438
463.4	0.37018686		1053.39	0.20264514		1643.39	0.12877768		2233.39	0.01083947		2823.4	0.04759883		3413.4	0.08226306		4003.4	-0.00834153
463.6	0.37048357		1053.59	0.20370533		1643.59	0.1288161		2233.59	0.01196791		2823.6	0.04695501		3413.6	0.08195529		4003.6	-0.00801113
463.8	0.37095288		1053.79	0.20461882		1643.79	0.12818564		2233.79	0.01160772		2823.8	0.04675268		3413.8	0.08222585		4003.8	-0.00787303
464	0.37066152		1053.99	0.20553602		1643.99	0.12794508		2233.99	0.01171187		2824	0.04706752		3414	0.08281376		4004	-0.00847051
464.2	0.37179993		1054.19	0.20591936		1644.19	0.12799007		2234.19	0.01130904		2824.2	0.04817175		3414.2	0.0828765		4004.2	-0.0083503
464.4	0.37225779		1054.39	0.20683881		1644.39	0.12804907		2234.39	0.01089218		2824.4	0.04854145		3414.4	0.08309104		4004.4	-0.00818722
464.6	0.37192768		1054.59	0.20799691		1644.59	0.12886992		2234.59	0.00968145		2824.6	0.0495072		3414.6	0.08284638		4004.6	-0.00898208
464.8	0.37229518		1054.79	0.20759737		1644.79	0.13015556		2234.79	0.01011968		2824.8	0.04947348		3414.8	0.08283925		4004.8	-0.00927824
465	0.3726179		1054.99	0.20685811		1644.99	0.13130253		2234.99	0.01043939		2825	0.04850122		3415	0.08295471		4005	-0.00960913
465.2	0.37291032		1055.19	0.2066595		1645.19	0.13140179		2235.19	0.01000982		2825.2	0.0481287		3415.2	0.08283542		4005.2	-0.00997649
465.4	0.37308739		1055.39	0.20688311		1645.39	0.13143568		2235.39	0.01046801		2825.4	0.04789386		3415.4	0.0845735		4005.4	-0.01022373
465.6	0.37309658		1055.59	0.20659041		1645.59	0.13177206		2235.59	0.01111919		2825.6	0.04684475		3415.6	0.08505381		4005.6	-0.01137821
465.8	0.37403125		1055.79	0.20608702		1645.79	0.1327347		2235.79	0.00999896		2825.8	0.04715209		3415.8	0.08429391		4005.8	-0.01165011
466	0.37482746		1055.99	0.20580201		1645.99	0.13248665		2235.99	0.00972248		2826	0.04703923		3416	0.08476894		4006	-0.01136814
466.2	0.37455255		1056.19	0.20584553		1646.19	0.13292278		2236.19	0.0099055		2826.2	0.04697276		3416.2	0.08444754		4006.2	-0.01125518
466.4	0.37437291		1056.39	0.20528668		1646.39	0.13277888		2236.39	0.01008571		2826.4	0.04738374		3416.4	0.08423905		4006.4	-0.01143191
466.6	0.37478905		1056.59	0.20492102		1646.59	0.13323143		2236.59	0.00961435		2826.6	0.04734566		3416.6	0.08352508		4006.6	-0.00992225
466.8	0.37388813		1056.79	0.20416526		1646.79	0.13213352		2236.79	0.01022559		2826.8	0.04726407		3416.8	0.0833965		4006.8	-0.00928772
467	0.37330314		1056.99	0.2039		1646.99	0.13278442		2236.99	0.01079448		2827	0.04870613		3417	0.08393017		4007	-0.00890242
467.2	0.37339944		1057.19	0.20429479		1647.19	0.13289609		2237.19	0.01176498		2827.2	0.04896707		3417.2	0.08457673		4007.2	-0.00756723
467.4	0.37363843		1057.39	0.20541178		1647.39	0.13272875		2237.39	0.01284641		2827.4	0.0485559		3417.4	0.08459658		4007.4	-0.00744793
467.6	0.37370658		1057.59	0.20578288		1647.59	0.13329318		2237.59	0.01287054		2827.6	0.04891903		3417.6	0.08578515		4007.6	-0.00684788
467.8	0.37388721		1057.79	0.2061927		1647.79	0.13348072		2237.79	0.01226968		2827.8	0.04926504		3417.8	0.08662295		4007.8	-0.0070072
468	0.37379957		1057.99	0.20667393		1647.99	0.13365248		2237.99	0.01157558		2828	0.05027259		3418	0.0874725		4008	-0.0071731
468.2	0.37465237		1058.19	0.20643606		1648.19	0.13398311		2238.19	0.01088532		2828.2	0.05083542		3418.2	0.08719679		4008.2	-0.00706413
468.4	0.37491713		1058.39	0.20688376		1648.39	0.13462536		2238.39	0.01048905		2828.4	0.05085669		3418.4	0.08706754		4008.4	-0.00755098
468.6	0.37477648		1058.59	0.20676172		1648.59	0.13543038		2238.59	0.01019501		2828.6	0.05105633		3418.6	0.08711738		4008.6	-0.00812867
468.8	0.37464074		1058.79	0.20586061		1648.79	0.13596961		2238.79	0.00983272		2828.8	0.0504037		3418.8	0.08743718		4008.8	-0.00778063
469	0.37449299		1058.99	0.20569848		1648.99	0.13565624		2238.99	0.0091356		2829	0.05025598		3419	0.08762218		4009	-0.00802261
469.2	0.37423438		1059.19	0.20553906		1649.19	0.1356503		2239.19	0.00823936		2829.2	0.05025268		3419.2	0.08744802		4009.2	-0.00838022
469.4	0.37438694		1059.39	0.20538255		1649.39	0.1360907		2239.39	0.00777603		2829.4	0.04940849		3419.4	0.08771016		4009.4	-0.00825499
469.6	0.37491983		1059.59	0.20512834		1649.59	0.13647804		2239.59	0.0070359		2829.6	0.04890599		3419.6	0.0871392		4009.6	-0.00894195
469.8	0.37526142		1059.79	0.20492671		1649.79	0.13678208		2239.79	0.00628741		2829.8	0.04893728		3419.8	0.08682075		4009.8	-0.00851168
470	0.37526142		1059.99	0.20492671		1650	0.13678208		2239.99	0.00628741		2830	0.04893728		3420	0.08682075		4010	-0.00851168
470.2	0.37560885		1060.19	0.20502043		1650.2	0.13750877		2240.19	0.00542309		2830.2	0.04891941		3420.2	0.08576328		4010.2	-0.00798297
470.4	0.37657954		1060.39	0.20495525		1650.4	0.13786335		2240.39	0.00482751		2830.4	0.04939677		3420.4	0.08464939		4010.4	-0.00705481
470.6	0.37685132		1060.59	0.2047874		1650.6	0.13828564		2240.59	0.00470727		2830.6	0.04898481		3420.6	0.08343291		4010.6	-0.00690377
470.8	0.37727525		1060.79	0.20436541		1650.8	0.13874213		2240.79	0.00481853		2830.8	0.04896119		3420.8	0.08206316		4010.8	-0.00614794
471	0.37792061		1060.99	0.20421321		1651	0.13988217		2240.99	0.00507231		2831	0.04890633		3421	0.08129804		4011	-0.00491494
471.2	0.37855354		1061.19	0.2044939		1651.2	0.14022197		2241.19	0.00495057		2831.2	0.04885188		3421.2	0.08099415		4011.2	-0.00468229
471.4	0.37959395		1061.39	0.20497051		1651.4	0.14033918		2241.39	0.00482287		2831.4	0.04882423		3421.4	0.08153774		4011.4	-0.00452245
471.6	0.37990887		1061.59	0.20537082		1651.6	0.14122894		2241.59	0.00511011		2831.6	0.04971634		3421.6	0.08156655		4011.6	-0.00400789
471.8	0.37977845		1061.79	0.2053068		1651.8	0.14123596		2241.79	0.00499604		2831.8	0.05016961		3421.8	0.0819567		4011.8	-0.00425025
472	0.38051238		1061.99	0.20544426		1652	0.1413286		2241.99	0.00491437		2832	0.05075804		3422	0.08273513		4012	-0.00504969
472.2	0.38074206		1062.19	0.20615653		1652.2	0.14152117		2242.19	0.0052427		2832.2	0.05088058		3422.2	0.08352131		4012.2	-0.00591022
472.4	0.38057401		1062.39	0.20573875		1652.4	0.14116082		2242.39	0.00592251		2832.4	0.05066714		3422.4	0.08374836		4012.4	-0.00509678
472.6	0.38040691		1062.59	0.20558772		1652.6	0.14158082		2242.59	0.00533083		2832.6	0.05072863		3422.6	0.08479216		4012.6	-0.00576127
472.8	0.38038843		1062.79	0.20601479		1652.8	0.1416904		2242.79	0.00534616		2832.8	0.05040436		3422.8	0.08507098		4012.8	-0.0045983
473	0.38012823		1062.99	0.20691659		1653	0.14173602		2242.99	0.00483313		2833	0.0509186		3423	0.08491465		4013	-0.00341433
473.2	0.38039035		1063.19	0.20594525		1653.2	0.14165144		2243.19	0.00453936		2833.2	0.05055969		3423.2	0.08507628		4013.2	-0.00322671
473.4	0.37977994		1063.39	0.20609167		1653.4	0.14181651		2243.39	0.00525275		2833.4	0.05091041		3423.4	0.0850417		4013.4	-0.00321909
473.6	0.37989102		1063.59	0.20625711		1653.6	0.14105025		2243.59	0.00534864		2833.6	0.05109103		3423.6	0.08433956		4013.6	-0.00337851
473.8	0.37994692		1063.79	0.20586064		1653.8	0.14089289		2243.79	0.0055164		2833.8	0.05203562		3423.8	0.08402349		4013.8	-0.00362401
474	0.38058317		1063.99	0.20588758		1654	0.14068837		2243.99	0.00410233		2834	0.05170102		3424	0.08312971		4014	-0.00416583
474.2	0.38093997		1064.19	0.20544395		1654.2	0.13970133		2244.19	0.00302453		2834.2	0.05208284		3424.2	0.08349015		4014.2	-0.00391127
474.4	0.38130225		1064.39	0.20514856		1654.4	0.13849668		2244.39	0.0036641		2834.4	0.05280142		3424.4	0.08270011		4014.4	-0.0035461
474.6	0.38105582		1064.59	0.20478847		1654.6	0.13803824		2244.59	0.00467722		2834.6	0.05168179		3424.6	0.08298985		4014.6	-0.00347977
474.8	0.38124052		1064.79	0.20462928		1654.8	0.13715694		2244.79	0.00489124		2834.8	0.05168662		3424.8	0.082704		4014.8	-0.00255839
475	0.38125861		1064.99	0.20503621		1655	0.13694737		2244.99	0.00492546		2835	0.05144626		3425	0.08297574		4015	-0.00167802
475.2	0.38104874		1065.19	0.20461775		1655.2	0.13566634		2245.19	0.00460321		2835.2	0.05192452		3425.2	0.08329916		4015.2	-0.0015277
475.4	0.38075567		1065.39	0.20453616		1655.4	0.13547878		2245.39	0.00421531		2835.4	0.05186183		3425.4	0.08338568		4015.4	-0.00189527
475.6	0.38050256		1065.59	0.2042177		1655.6	0.13634175		2245.59	0.00413699		2835.6	0.0520085		3425.6	0.08298667		4015.6	-0.00173963
475.8	0.38075624		1065.79	0.20429188		1655.8	0.13662373		2245.79	0.00368839		2835.8	0.05104305		3425.8	0.08379983		4015.8	-0.00262683
476	0.38083019		1065.99	0.20464192		1656	0.1373768		2245.99	0.00357911		2836	0.05049992		3426	0.08338322		4016	-0.00322394
476.2	0.38033255		1066.19	0.20501978		1656.2	0.13785545		2246.19	0.00295666		2836.2	0.04986731		3426.2	0.08315567		4016.2	-0.00336118
476.4	0.3801306		1066.39	0.20498391		1656.4	0.13741754		2246.39	0.00225001		2836.4	0.04946974		3426.4	0.0828902		4016.4	-0.00315708
476.6	0.37999255		1066.59	0.20460617		1656.6	0.13792367		2246.59	0.00134884		2836.6	0.04885026		3426.6	0.08323981		4016.6	-0.00272985
476.8	0.37959378		1066.79	0.20578624		1656.8	0.13879388		2246.79	0.0005734		2836.8	0.04826181		3426.8	0.08265499		4016.8	-0.00191193
477	0.37941994		1066.99	0.20551001		1657	0.1383726		2246.99	0.00118164		2837	0.04822171		3427	0.08245089		4017	-0.0022592
477.2	0.37836912		1067.19	0.20439706		1657.2	0.13871436		2247.19	0.00107274		2837.2	0.04738389		3427.2	0.08198306		4017.2	-0.0031477
477.4	0.37764045		1067.39	0.20508739		1657.4	0.13867735		2247.39	0.00140452		2837.4	0.04754065		3427.4	0.08201208		4017.4	-0.00385766
477.6	0.37776839		1067.59	0.20519085		1657.6	0.13933112		2247.59	0.00116749		2837.6	0.04707639		3427.6	0.08223629		4017.6	-0.00427243
477.8	0.37820302		1067.79	0.20463282		1657.8	0.13997352		2247.79	0.00104499		2837.8	0.04810941		3427.8	0.08190873		4017.8	-0.00550383
478	0.37843223		1067.99	0.20420829		1658	0.1408583		2247.99	0.00023831		2838	0.04664555		3428	0.08126125		4018	-0.00573134
478.2	0.37890746		1068.19	0.203417		1658.2	0.14079338		2248.19	0.0012817		2838.2	0.04685719		3428.2	0.08182364		4018.2	-0.0058726
478.4	0.37898114		1068.39	0.20385992		1658.4	0.14083435		2248.39	0.00234377		2838.4	0.04744757		3428.4	0.08113095		4018.4	-0.00517098
478.6	0.37915805		1068.59	0.20340707		1658.6	0.14069965		2248.59	0.00279726		2838.6	0.04729345		3428.6	0.08174668		4018.6	-0.00558715
478.8	0.37867004		1068.79	0.20372736		1658.8	0.1391948		2248.79	0.00251473		2838.8	0.04783796		3428.8	0.08090294		4018.8	-0.00552437
479	0.37889847		1068.99	0.20347177		1659	0.13865715		2248.99	0.00290903		2839	0.04756074		3429	0.08109639		4019	-0.00517131
479.2	0.3797393		1069.19	0.20280414		1659.2	0.13808534		2249.19	0.00311606		2839.2	0.04802652		3429.2	0.082043		4019.2	-0.00521345
479.4	0.37980505		1069.39	0.20387025		1659.4	0.1382984		2249.39	0.00324026		2839.4	0.04757136		3429.4	0.08176418		4019.4	-0.00548927
479.6	0.38101325		1069.59	0.2042799		1659.6	0.13778864		2249.59	0.00333002		2839.6	0.04748561		3429.6	0.0825622		4019.6	-0.00502087
479.8	0.38068116		1069.79	0.20435215		1659.8	0.1370239		2249.79	0.0029861		2839.8	0.04798996		3429.8	0.08145712		4019.8	-0.0052546
480	0.38030566		1069.99	0.20530208		1660	0.13627564		2249.99	0.00315592		2840	0.04851757		3430	0.07984017		4020	-0.0057594
480.2	0.38008331		1070.19	0.20522455		1660.2	0.13572697		2250.19	0.00310275		2840.2	0.04866807		3430.2	0.07944733		4020.2	-0.0054064
480.4	0.37948704		1070.39	0.20540115		1660.4	0.13512528		2250.39	0.00299272		2840.4	0.04873401		3430.4	0.07856676		4020.4	-0.00459302
480.6	0.37894162		1070.59	0.20550519		1660.6	0.13519474		2250.59	0.00299851		2840.6	0.04966405		3430.6	0.07858002		4020.6	-0.00427834
480.8	0.37853118		1070.79	0.20634314		1660.8	0.13468334		2250.79	0.00335525		2840.8	0.05044538		3430.8	0.0784992		4020.8	-0.00507202
481	0.37755743		1070.99	0.20516371		1661	0.1342048		2250.99	0.00327318		2841	0.05037468		3431	0.07842524		4021	-0.00634306
481.2	0.37612272		1071.19	0.20503752		1661.2	0.13450355		2251.19	0.00274509		2841.2	0.05090664		3431.2	0.07832065		4021.2	-0.00673333
481.4	0.37615619		1071.39	0.20462412		1661.4	0.13504066		2251.39	0.00189296		2841.4	0.05119497		3431.4	0.07846902		4021.4	-0.0063386
481.6	0.37609942		1071.59	0.20283347		1661.6	0.13602715		2251.59	0.00224355		2841.6	0.05095263		3431.6	0.07814567		4021.6	-0.00608928
481.8	0.37679734		1071.79	0.20187445		1661.8	0.13658225		2251.79	0.00211811		2841.8	0.05181697		3431.8	0.07879637		4021.8	-0.00602253
482	0.3765818		1071.99	0.20169886		1662	0.13770091		2251.99	0.00240727		2842	0.0503761		3432	0.0784481		4022	-0.00602114
482.2	0.37690788		1072.19	0.20125116		1662.2	0.13776374		2252.19	0.00259057		2842.2	0.05069497		3432.2	0.07850212		4022.2	-0.00564211
482.4	0.37782241		1072.39	0.20128956		1662.4	0.13816953		2252.39	0.00276791		2842.4	0.05085303		3432.4	0.07770602		4022.4	-0.00490499
482.6	0.37788098		1072.59	0.20050655		1662.6	0.13791918		2252.59	0.00205703		2842.6	0.05008552		3432.6	0.07880211		4022.6	-0.0056733
482.8	0.37779136		1072.79	0.20121105		1662.8	0.13768493		2252.79	0.00188855		2842.8	0.04846259		3432.8	0.07809518		4022.8	-0.00517375
483	0.37888231		1072.99	0.20092872		1663	0.13776898		2252.99	0.00175681		2843	0.04762519		3433	0.07941644		4023	-0.00519647
483.2	0.37940614		1073.19	0.20142839		1663.2	0.13710905		2253.19	0.00204829		2843.2	0.04803973		3433.2	0.07970875		4023.2	-0.00487403
483.4	0.37913124		1073.39	0.20246983		1663.4	0.13691306		2253.39	0.00154537		2843.4	0.0472822		3433.4	0.0783117		4023.4	-0.00427533
483.6	0.38041666		1073.59	0.20257501		1663.6	0.13557458		2253.59	0.00144663		2843.6	0.04684547		3433.6	0.07914734		4023.6	-0.00428842
483.8	0.38032433		1073.79	0.20333063		1663.8	0.13548706		2253.79	0.00124699		2843.8	0.04698418		3433.8	0.0781612		4023.8	-0.00510178
484	0.38095563		1073.99	0.20525288		1664	0.13540735		2253.99	0.00148991		2844	0.04714224		3434	0.07824621		4024	-0.00570992
484.2	0.38005406		1074.19	0.20486949		1664.2	0.13539216		2254.19	0.00134742		2844.2	0.04743291		3434.2	0.07859929		4024.2	-0.00504363
484.4	0.37959302		1074.39	0.20495253		1664.4	0.13614141		2254.39	0.00073053		2844.4	0.04823624		3434.4	0.07878605		4024.4	-0.00545129
484.6	0.37930465		1074.59	0.20507771		1664.6	0.13658381		2254.59	0.00083912		2844.6	0.04880074		3434.6	0.07896948		4024.6	-0.00634348
484.8	0.37962607		1074.79	0.20420108		1664.8	0.13727295		2254.79	0.00092965		2844.8	0.04929025		3434.8	0.07940004		4024.8	-0.00619587
485	0.37899631		1074.99	0.2028432		1665	0.13779707		2254.99	0.00001301		2845	0.04988324		3435	0.07960348		4025	-0.00713633
485.2	0.37851829		1075.19	0.20229693		1665.2	0.13716415		2255.19	-0.00041495		2845.2	0.05015287		3435.2	0.07976409		4025.2	-0.00664297
485.4	0.37832278		1075.39	0.20179654		1665.4	0.13722922		2255.39	-0.00031076		2845.4	0.05038273		3435.4	0.0799746		4025.4	-0.00726585
485.6	0.37825491		1075.59	0.20197055		1665.6	0.13729556		2255.59	0.00015412		2845.6	0.05024616		3435.6	0.08098009		4025.6	-0.00795137
485.8	0.3783104		1075.79	0.20243323		1665.8	0.13837184		2255.79	0.00022971		2845.8	0.05072169		3435.8	0.08127004		4025.8	-0.00924555
486	0.37820092		1075.99	0.20253725		1666	0.13877669		2255.99	-0.00014072		2846	0.05049566		3436	0.08074822		4026	-0.01008523
486.2	0.37845281		1076.19	0.20258133		1666.2	0.13855664		2256.19	-0.00042644		2846.2	0.04982089		3436.2	0.0813332		4026.2	-0.01014975
486.4	0.37899236		1076.39	0.20321047		1666.4	0.13897844		2256.39	-0.00016497		2846.4	0.04891045		3436.4	0.08118024		4026.4	-0.01013212
486.6	0.37806254		1076.59	0.20379762		1666.6	0.13920962		2256.59	-0.0006366		2846.6	0.04812992		3436.6	0.08158256		4026.6	-0.01079715
486.8	0.37866412		1076.79	0.20476522		1666.8	0.1388582		2256.79	-0.00033916		2846.8	0.04767409		3436.8	0.08103382		4026.8	-0.01006523
487	0.37922176		1076.99	0.20496785		1667	0.13791677		2256.99	-0.0003099		2847	0.04803433		3437	0.08202192		4027	-0.00925482
487.2	0.37942818		1077.19	0.20645348		1667.2	0.13647285		2257.19	0.0001411		2847.2	0.04771431		3437.2	0.08159745		4027.2	-0.00876171
487.4	0.37983998		1077.39	0.20758964		1667.4	0.13612329		2257.39	0.00013586		2847.4	0.04689673		3437.4	0.08149781		4027.4	-0.00814164
487.6	0.38026626		1077.59	0.2078443		1667.6	0.13518301		2257.59	0.00097468		2847.6	0.04651062		3437.6	0.08266647		4027.6	-0.00731772
487.8	0.37986652		1077.79	0.20833847		1667.8	0.13509243		2257.79	0.00024711		2847.8	0.04660776		3437.8	0.08255988		4027.8	-0.00713209
488	0.37972437		1077.99	0.2083867		1668	0.13509808		2257.99	0.00085662		2848	0.04727325		3438	0.08186482		4028	-0.0063812
488.2	0.37926201		1078.19	0.20690552		1668.2	0.13602996		2258.19	0.0013761		2848.2	0.04751859		3438.2	0.08186605		4028.2	-0.00616294
488.4	0.37946366		1078.39	0.2062294		1668.4	0.13698993		2258.39	0.00121137		2848.4	0.04819107		3438.4	0.0818842		4028.4	-0.0056857
488.6	0.37940713		1078.59	0.20651382		1668.6	0.13750868		2258.59	0.00067393		2848.6	0.04817761		3438.6	0.0812543		4028.6	-0.00550687
488.8	0.37953034		1078.79	0.2053675		1668.8	0.1370941		2258.79	0.00086001		2848.8	0.04958328		3438.8	0.0813599		4028.8	-0.00539454
489	0.37932475		1078.99	0.20421402		1669	0.13737019		2258.99	0.00028205		2849	0.04946949		3439	0.08144018		4029	-0.0063345
489.2	0.37853155		1079.19	0.2035805		1669.2	0.13668345		2259.19	0.00032384		2849.2	0.0500883		3439.2	0.08165897		4029.2	-0.00582256
489.4	0.37830666		1079.39	0.20307643		1669.4	0.13772358		2259.39	0.00071471		2849.4	0.05043729		3439.4	0.08155688		4029.4	-0.00683176
489.6	0.37823727		1079.59	0.20274309		1669.6	0.13781189		2259.59	0.00072411		2849.6	0.0507389		3439.6	0.0820469		4029.6	-0.00729224
489.8	0.37812299		1079.79	0.202141		1669.8	0.13796652		2259.79	0.00067836		2849.8	0.05074074		3439.8	0.08176219		4029.8	-0.00853897
490	0.37775316		1079.99	0.20145533		1670	0.13683534		2259.99	-0.00012437		2850	0.05065269		3440	0.0828383		4030	-0.00847959
490.2	0.37737026		1080.19	0.20164731		1670.2	0.13692083		2260.19	0.00092898		2850.2	0.04928448		3440.2	0.08384615		4030.2	-0.00802567
490.4	0.37774965		1080.39	0.20227464		1670.4	0.13758135		2260.39	0.00062469		2850.4	0.0488864		3440.4	0.08386184		4030.4	-0.00810803
490.6	0.37723212		1080.59	0.20195772		1670.6	0.13690038		2260.59	0.00056592		2850.6	0.04813229		3440.6	0.08467181		4030.6	-0.00807799
490.8	0.37741966		1080.79	0.20190091		1670.8	0.13570603		2260.79	0.00016876		2850.8	0.04780104		3440.8	0.08522917		4030.8	-0.00759775
491	0.37708832		1080.99	0.2022491		1671	0.13458067		2260.99	0.00029456		2851	0.04695081		3441	0.08554455		4031	-0.00749741
491.2	0.37711908		1081.19	0.20318947		1671.2	0.13380395		2261.19	0.00043365		2851.2	0.04610092		3441.2	0.0857991		4031.2	-0.00746293
491.4	0.37747693		1081.39	0.20374583		1671.4	0.1341009		2261.39	0.00047593		2851.4	0.04534527		3441.4	0.08522235		4031.4	-0.00651572
491.6	0.37675462		1081.59	0.20350166		1671.6	0.13438279		2261.59	-0.00028059		2851.6	0.0445253		3441.6	0.08541913		4031.6	-0.0059807
491.8	0.37676956		1081.79	0.20387062		1671.8	0.13534135		2261.79	-0.00137674		2851.8	0.04554829		3441.8	0.08552425		4031.8	-0.00610234
492	0.37674144		1081.99	0.20447297		1672	0.13629137		2261.99	-0.00042577		2852	0.0456486		3442	0.08508257		4032	-0.00557155
492.2	0.37614453		1082.19	0.20366452		1672.2	0.13797775		2262.19	-0.00026619		2852.2	0.0457633		3442.2	0.08533133		4032.2	-0.00659736
492.4	0.37632		1082.39	0.20506956		1672.4	0.13867605		2262.39	-0.00043221		2852.4	0.04546104		3442.4	0.08516342		4032.4	-0.00652049
492.6	0.37553373		1082.59	0.20505379		1672.6	0.13977726		2262.59	-0.00111844		2852.6	0.04546903		3442.6	0.08462796		4032.6	-0.00706505
492.8	0.37514568		1082.79	0.20360424		1672.8	0.1401649		2262.79	-0.00049497		2852.8	0.04603999		3442.8	0.08484911		4032.8	-0.00695317
493	0.37487544		1082.99	0.20328929		1673	0.14123086		2262.99	-0.00077063		2853	0.04674165		3443	0.08518038		4033	-0.00678372
493.2	0.37572561		1083.19	0.20322571		1673.2	0.14050853		2263.19	-0.00013508		2853.2	0.04700596		3443.2	0.08480607		4033.2	-0.00701629
493.4	0.37605972		1083.39	0.20336117		1673.4	0.14067522		2263.39	0.00015988		2853.4	0.04752712		3443.4	0.08442956		4033.4	-0.0073055
493.6	0.37617934		1083.59	0.20420353		1673.6	0.13950653		2263.59	0.0012219		2853.6	0.04822837		3443.6	0.085066		4033.6	-0.0074072
493.8	0.3760438		1083.79	0.20387751		1673.8	0.1393747		2263.79	0.00115849		2853.8	0.04764893		3443.8	0.08547408		4033.8	-0.00752566
494	0.37613941		1083.99	0.20349734		1674	0.13855578		2263.99	0.00141258		2854	0.047732		3444	0.08533781		4034	-0.00729784
494.2	0.37610407		1084.19	0.20406033		1674.2	0.13849825		2264.19	0.00282152		2854.2	0.04716825		3444.2	0.08611385		4034.2	-0.00762243
494.4	0.37616072		1084.39	0.20422212		1674.4	0.13742176		2264.39	0.0026849		2854.4	0.04717716		3444.4	0.08475909		4034.4	-0.00762058
494.6	0.37571268		1084.59	0.20319989		1674.6	0.13602003		2264.59	0.00297338		2854.6	0.04640476		3444.6	0.08477649		4034.6	-0.00675969
494.8	0.37604155		1084.79	0.20356329		1674.8	0.13488643		2264.79	0.0032489		2854.8	0.04645557		3444.8	0.08395588		4034.8	-0.00626912
495	0.37646098		1084.99	0.20359523		1675	0.1341761		2264.99	0.00348469		2855	0.04548667		3445	0.08339554		4035	-0.005988
495.2	0.37672533		1085.19	0.20345907		1675.2	0.13402902		2265.19	0.00359005		2855.2	0.04478377		3445.2	0.08276831		4035.2	-0.00594207
495.4	0.37702174		1085.39	0.20397954		1675.4	0.13425584		2265.39	0.00315291		2855.4	0.04541873		3445.4	0.08126301		4035.4	-0.0055511
495.6	0.37659389		1085.59	0.20425829		1675.6	0.13426138		2265.59	0.00221229		2855.6	0.04511135		3445.6	0.08091918		4035.6	-0.00518853
495.8	0.37717282		1085.79	0.20396838		1675.8	0.13441967		2265.79	0.00207679		2855.8	0.04573706		3445.8	0.08089921		4035.8	-0.00497866
496	0.37743809		1085.99	0.20417249		1676	0.13453967		2265.99	0.00249272		2856	0.04499031		3446	0.08055365		4036	-0.0056237
496.2	0.37821451		1086.19	0.20369076		1676.2	0.13522113		2266.19	0.00269029		2856.2	0.04477911		3446.2	0.08024705		4036.2	-0.00729482
496.4	0.37899885		1086.39	0.20425591		1676.4	0.13518504		2266.39	0.00180386		2856.4	0.04480712		3446.4	0.08055769		4036.4	-0.00746442
496.6	0.37825053		1086.59	0.20340526		1676.6	0.13654706		2266.59	0.00093501		2856.6	0.0455845		3446.6	0.08066147		4036.6	-0.00857996
496.8	0.37862205		1086.79	0.20264661		1676.8	0.13613529		2266.79	0.00089319		2856.8	0.04622069		3446.8	0.08092003		4036.8	-0.0088257
497	0.38019136		1086.99	0.20279009		1677	0.13627369		2266.99	0.00063321		2857	0.04779059		3447	0.08137074		4037	-0.01034036
497.2	0.38120614		1087.19	0.20273247		1677.2	0.13655484		2267.19	0.00018747		2857.2	0.0486853		3447.2	0.08171541		4037.2	-0.01114888
497.4	0.3816983		1087.39	0.20268993		1677.4	0.1370185		2267.39	-0.00033038		2857.4	0.05006708		3447.4	0.08255272		4037.4	-0.01145005
497.6	0.38151658		1087.59	0.20299692		1677.6	0.13739477		2267.59	0.00015477		2857.6	0.04978481		3447.6	0.08283796		4037.6	-0.01213309
497.8	0.38120133		1087.79	0.20295675		1677.8	0.13786151		2267.79	0.00008376		2857.8	0.05029884		3447.8	0.08333444		4037.8	-0.01253572
498	0.38076611		1087.99	0.2027768		1678	0.13770155		2267.99	0.00059474		2858	0.05065542		3448	0.0830522		4038	-0.01328677
498.2	0.38039746		1088.19	0.20290374		1678.2	0.13786937		2268.19	0.00112277		2858.2	0.04996517		3448.2	0.08389755		4038.2	-0.01252264
498.4	0.37983652		1088.39	0.20240383		1678.4	0.13748634		2268.39	0.00123962		2858.4	0.04991729		3448.4	0.08289165		4038.4	-0.01124789
498.6	0.37929467		1088.59	0.20158335		1678.6	0.13759353		2268.59	0.0013855		2858.6	0.04866907		3448.6	0.08339251		4038.6	-0.01046028
498.8	0.37875177		1088.79	0.20196017		1678.8	0.13741641		2268.79	0.00185775		2858.8	0.04850579		3448.8	0.08246612		4038.8	-0.01004569
499	0.37833776		1088.99	0.20141084		1679	0.13714681		2268.99	0.002181		2859	0.04797359		3449	0.08211187		4039	-0.00887585
499.2	0.37740185		1089.19	0.20143377		1679.2	0.13741849		2269.19	0.00250647		2859.2	0.04783741		3449.2	0.08136775		4039.2	-0.00843446
499.4	0.37670586		1089.39	0.20183964		1679.4	0.13688554		2269.39	0.00151316		2859.4	0.04820128		3449.4	0.08083901		4039.4	-0.00754338
499.6	0.37662741		1089.59	0.20145204		1679.6	0.13615497		2269.59	0.00053262		2859.6	0.04705976		3449.6	0.08047279		4039.6	-0.00694367
499.8	0.37675497		1089.79	0.20131452		1679.8	0.13530893		2269.79	0.0006971		2859.8	0.04710744		3449.8	0.08044754		4039.8	-0.00705707
500	0.37643223		1089.99	0.201929		1680	0.1350721		2269.99	0.00087005		2860	0.04624845		3450	0.07968874		4040	-0.00740593
500.2	0.37731006		1090.19	0.20148759		1680.2	0.13528644		2270.19	0.0003865		2860.2	0.04584917		3450.2	0.07927399		4040.2	-0.00766675
500.4	0.37711611		1090.39	0.2018312		1680.4	0.1352601		2270.39	-0.00059845		2860.4	0.04634766		3450.4	0.07996218		4040.4	-0.00729043
500.6	0.37624485		1090.59	0.20106192		1680.6	0.13570472		2270.59	-0.00080498		2860.6	0.04654784		3450.6	0.07901765		4040.6	-0.00803525
500.8	0.37681935		1090.79	0.20102321		1680.8	0.13440559		2270.79	-0.00144696		2860.8	0.0470063		3450.8	0.07922255		4040.8	-0.00798902
501	0.37727105		1090.99	0.20182485		1681	0.13539226		2270.99	-0.00144142		2861	0.0472455		3451	0.07940564		4041	-0.00849202
501.2	0.3772842		1091.19	0.2022248		1681.2	0.13589225		2271.19	-0.0023024		2861.2	0.04824127		3451.2	0.07920063		4041.2	-0.0090116
501.4	0.37711017		1091.39	0.2026894		1681.4	0.13655648		2271.39	-0.0020812		2861.4	0.04820357		3451.4	0.07906509		4041.4	-0.0090173
501.6	0.37571294		1091.59	0.20350874		1681.6	0.13790215		2271.59	-0.00223233		2861.6	0.04875377		3451.6	0.07925579		4041.6	-0.0095954
501.8	0.37554681		1091.79	0.20378953		1681.8	0.13840365		2271.79	-0.00275749		2861.8	0.04943918		3451.8	0.08037736		4041.8	-0.00986458
502	0.37480885		1091.99	0.20371672		1682	0.13886599		2271.99	-0.0021795		2862	0.04931194		3452	0.08073243		4042	-0.00998272
502.2	0.37466271		1092.19	0.20410378		1682.2	0.13891695		2272.19	-0.00247735		2862.2	0.0490189		3452.2	0.08107818		4042.2	-0.00936139
502.4	0.37411154		1092.39	0.20444341		1682.4	0.13869081		2272.39	-0.00218134		2862.4	0.04890006		3452.4	0.08094324		4042.4	-0.00958581
502.6	0.37346573		1092.59	0.20400743		1682.6	0.13935458		2272.59	-0.0023038		2862.6	0.04931748		3452.6	0.0813227		4042.6	-0.00962489
502.8	0.37315094		1092.79	0.20425916		1682.8	0.13922849		2272.79	-0.00191294		2862.8	0.050082		3452.8	0.08142073		4042.8	-0.00869753
503	0.37367002		1092.99	0.2042392		1683	0.13865167		2272.99	-0.00139145		2863	0.05011683		3453	0.0825712		4043	-0.00828686
503.2	0.37361952		1093.19	0.20448258		1683.2	0.13815266		2273.19	-0.00117325		2863.2	0.05012839		3453.2	0.08269907		4043.2	-0.00861574
503.4	0.37357558		1093.39	0.20473808		1683.4	0.13738547		2273.39	-0.00151835		2863.4	0.04954199		3453.4	0.08306762		4043.4	-0.00864552
503.6	0.37462937		1093.59	0.20518639		1683.6	0.13721969		2273.59	-0.00094919		2863.6	0.04857486		3453.6	0.08331015		4043.6	-0.00770239
503.8	0.37440563		1093.79	0.20549246		1683.8	0.13725264		2273.79	0.00006488		2863.8	0.04752425		3453.8	0.08390826		4043.8	-0.00777565
504	0.37493797		1093.99	0.20568471		1684	0.13735691		2273.99	0.00021561		2864	0.04608453		3454	0.08369261		4044	-0.00781584
504.2	0.37614396		1094.19	0.20546776		1684.2	0.13706874		2274.19	-0.00046438		2864.2	0.04553383		3454.2	0.08426397		4044.2	-0.00761487
504.4	0.3761995		1094.39	0.20551123		1684.4	0.13559604		2274.39	-0.00119262		2864.4	0.04472019		3454.4	0.0845912		4044.4	-0.00702455
504.6	0.37588949		1094.59	0.20447195		1684.6	0.13560509		2274.59	-0.00100328		2864.6	0.04308891		3454.6	0.08356166		4044.6	-0.00712401
504.8	0.3760612		1094.79	0.20533832		1684.8	0.13501862		2274.79	-0.0012159		2864.8	0.04256676		3454.8	0.08404798		4044.8	-0.00669721
505	0.3762681		1094.99	0.20584001		1685	0.1354306		2274.99	-0.00127468		2865	0.04249877		3455	0.08352261		4045	-0.00649639
505.2	0.37706144		1095.19	0.20550736		1685.2	0.13521173		2275.19	-0.00171941		2865.2	0.04333034		3455.2	0.08336217		4045.2	-0.00740349
505.4	0.37685811		1095.39	0.20585779		1685.4	0.13597712		2275.39	-0.00180593		2865.4	0.04339381		3455.4	0.08289212		4045.4	-0.00684901
505.6	0.37722701		1095.59	0.20538348		1685.6	0.13612641		2275.59	-0.00197662		2865.6	0.04333295		3455.6	0.083343		4045.6	-0.00744399
505.8	0.37794847		1095.79	0.20519132		1685.8	0.13606116		2275.79	-0.00192925		2865.8	0.0433297		3455.8	0.08281446		4045.8	-0.00771663
506	0.3770886		1095.99	0.2050532		1686	0.13553041		2275.99	-0.00146076		2866	0.04346397		3456	0.08219481		4046	-0.00785078
506.2	0.37714679		1096.19	0.20546594		1686.2	0.13564492		2276.19	-0.00227236		2866.2	0.04420755		3456.2	0.08171663		4046.2	-0.00794578
506.4	0.37658257		1096.39	0.2049544		1686.4	0.13526039		2276.39	-0.0020935		2866.4	0.04409099		3456.4	0.08162096		4046.4	-0.00910235
506.6	0.37672092		1096.59	0.20378009		1686.6	0.13570579		2276.59	-0.00215398		2866.6	0.04504281		3456.6	0.08132097		4046.6	-0.00881867
506.8	0.37686135		1096.79	0.20414696		1686.8	0.1358312		2276.79	-0.00128916		2866.8	0.04485346		3456.8	0.08144984		4046.8	-0.009361
507	0.37721719		1096.99	0.20394475		1687	0.13579045		2276.99	-0.00030602		2867	0.04539934		3457	0.08106069		4047	-0.00968816
507.2	0.37691225		1097.19	0.20455452		1687.2	0.13627437		2277.19	0.0000657		2867.2	0.04504042		3457.2	0.08075908		4047.2	-0.0104093
507.4	0.37718597		1097.39	0.20532595		1687.4	0.13720567		2277.39	0.00024762		2867.4	0.04448278		3457.4	0.08094678		4047.4	-0.0111787
507.6	0.37756271		1097.59	0.20487163		1687.6	0.13769907		2277.59	0.00067977		2867.6	0.0440404		3457.6	0.08139278		4047.6	-0.01162557
507.8	0.37723964		1097.79	0.20447267		1687.8	0.13744798		2277.79	-0.0002661		2867.8	0.04314836		3457.8	0.08179448		4047.8	-0.01179546
508	0.37772771		1097.99	0.20504988		1688	0.13756719		2277.99	-0.00094559		2868	0.04303133		3458	0.08151843		4048	-0.01165364
508.2	0.3775681		1098.19	0.20464713		1688.2	0.13737295		2278.19	-0.00211307		2868.2	0.0427739		3458.2	0.08184633		4048.2	-0.01075428
508.4	0.37776974		1098.39	0.20337802		1688.4	0.13694758		2278.39	-0.00226294		2868.4	0.04189888		3458.4	0.08169585		4048.4	-0.01074896
508.6	0.37779455		1098.59	0.20300442		1688.6	0.13803889		2278.59	-0.00179161		2868.6	0.04137626		3458.6	0.08105301		4048.6	-0.01069918
508.8	0.37734222		1098.79	0.20331942		1688.8	0.13794122		2278.79	-0.00260107		2868.8	0.04214047		3458.8	0.08077372		4048.8	-0.01034982
509	0.37765515		1098.99	0.20343253		1689	0.13750859		2278.99	-0.00292962		2869	0.04233839		3459	0.0804329		4049	-0.01081585
509.2	0.37780586		1099.19	0.20297795		1689.2	0.13684813		2279.19	-0.00323386		2869.2	0.0425455		3459.2	0.08056744		4049.2	-0.01086635
509.4	0.37802184		1099.39	0.20343989		1689.4	0.13759459		2279.39	-0.0032757		2869.4	0.0425321		3459.4	0.08050191		4049.4	-0.01008485
509.6	0.37819099		1099.59	0.20258614		1689.6	0.13759021		2279.59	-0.00348964		2869.6	0.04282851		3459.6	0.08054032		4049.6	-0.00956913
509.8	0.37688652		1099.79	0.20246731		1689.8	0.13775911		2279.79	-0.00370418		2869.8	0.04407215		3459.8	0.08007217		4049.8	-0.00850851
510	0.3761654		1099.99	0.20237522		1690	0.13687445		2279.99	-0.00348152		2870	0.04541563		3460	0.0806168		4050	-0.00764712
510.2	0.37594882		1100.19	0.20207436		1690.2	0.13780278		2280.19	-0.00326309		2870.2	0.04536665		3460.2	0.08042016		4050.2	-0.00750011
510.4	0.37571798		1100.39	0.20166848		1690.4	0.13768944		2280.39	-0.00291139		2870.4	0.04494522		3460.4	0.07949877		4050.4	-0.00827764
510.6	0.37654343		1100.59	0.20154937		1690.6	0.13808296		2280.59	-0.0027957		2870.6	0.04567192		3460.6	0.07886566		4050.6	-0.00810273
510.8	0.37510593		1100.79	0.20219876		1690.8	0.13816722		2280.79	-0.00153495		2870.8	0.04601997		3460.8	0.07933109		4050.8	-0.00907043
511	0.37502742		1100.99	0.2020342		1691	0.13794532		2280.99	-0.00109522		2871	0.04587042		3461	0.07900889		4051	-0.00841677
511.2	0.37475978		1101.19	0.20331075		1691.2	0.138486		2281.19	-0.00080858		2871.2	0.04588898		3461.2	0.07841887		4051.2	-0.0091326
511.4	0.37507299		1101.39	0.20325537		1691.4	0.13832933		2281.39	-0.00094441		2871.4	0.04607726		3461.4	0.07893477		4051.4	-0.00907406
511.6	0.37497886		1101.59	0.20288803		1691.6	0.13775059		2281.59	-0.00079239		2871.6	0.04566229		3461.6	0.07872399		4051.6	-0.00820484
511.8	0.37507743		1101.79	0.20352539		1691.8	0.1373121		2281.79	-0.00094008		2871.8	0.04569135		3461.8	0.07813775		4051.8	-0.00780009
512	0.37546515		1101.99	0.20343433		1692	0.13742638		2281.99	-0.00072353		2872	0.04656469		3462	0.07771586		4052	-0.00864317
512.2	0.37569877		1102.19	0.20265615		1692.2	0.136744		2282.19	-0.00088673		2872.2	0.04567742		3462.2	0.07772068		4052.2	-0.00866871
512.4	0.37658096		1102.39	0.20274215		1692.4	0.1359527		2282.39	-0.00025257		2872.4	0.04573703		3462.4	0.07779793		4052.4	-0.0097158
512.6	0.37683393		1102.59	0.20364664		1692.6	0.13613804		2282.59	-0.00072359		2872.6	0.04681561		3462.6	0.07650909		4052.6	-0.0105724
512.8	0.37605049		1102.79	0.20402575		1692.8	0.13560381		2282.79	-0.00212395		2872.8	0.04706026		3462.8	0.07636954		4052.8	-0.01099932
513	0.37563202		1102.99	0.20386321		1693	0.13464719		2282.99	-0.00193263		2873	0.04742144		3463	0.07632241		4053	-0.01184702
513.2	0.37577525		1103.19	0.20344978		1693.2	0.13381923		2283.19	-0.00326472		2873.2	0.0467428		3463.2	0.07701643		4053.2	-0.01210929
513.4	0.37566814		1103.39	0.20307437		1693.4	0.13463016		2283.39	-0.00370555		2873.4	0.04630365		3463.4	0.07697397		4053.4	-0.01148314
513.6	0.37596859		1103.59	0.20324274		1693.6	0.13477974		2283.59	-0.00430102		2873.6	0.04698173		3463.6	0.07712562		4053.6	-0.01094108
513.8	0.37627567		1103.79	0.20438863		1693.8	0.13517208		2283.79	-0.0036527		2873.8	0.04636084		3463.8	0.07704041		4053.8	-0.01129921
514	0.37773403		1103.99	0.2041736		1694	0.1348296		2283.99	-0.00422829		2874	0.04590322		3464	0.07768788		4054	-0.01106425
514.2	0.37837758		1104.19	0.20385006		1694.2	0.13580855		2284.19	-0.00408416		2874.2	0.04508143		3464.2	0.07751319		4054.2	-0.01120657
514.4	0.37898433		1104.39	0.20402919		1694.4	0.13649327		2284.39	-0.0045017		2874.4	0.04606205		3464.4	0.07724908		4054.4	-0.01137841
514.6	0.378359		1104.59	0.20418043		1694.6	0.13678013		2284.59	-0.00385339		2874.6	0.04574702		3464.6	0.07801398		4054.6	-0.01110084
514.8	0.37733449		1104.79	0.20377058		1694.8	0.1370005		2284.79	-0.00319501		2874.8	0.04513034		3464.8	0.07786065		4054.8	-0.01026489
515	0.37746373		1104.99	0.20371686		1695	0.13763092		2284.99	-0.00291777		2875	0.04439407		3465	0.07787446		4055	-0.00986477
515.2	0.3774183		1105.19	0.20380029		1695.2	0.13827107		2285.19	-0.00236885		2875.2	0.04431071		3465.2	0.07797949		4055.2	-0.00933581
515.4	0.37777975		1105.39	0.20293494		1695.4	0.1372646		2285.39	-0.00296377		2875.4	0.04310376		3465.4	0.07909144		4055.4	-0.00869274
515.6	0.37737158		1105.59	0.20182505		1695.6	0.13681293		2285.59	-0.0024219		2875.6	0.04212475		3465.6	0.07829038		4055.6	-0.00851654
515.8	0.37704802		1105.79	0.20080185		1695.8	0.13645691		2285.79	-0.00239835		2875.8	0.04238568		3465.8	0.0784277		4055.8	-0.0089336
516	0.37662892		1105.99	0.19935117		1696	0.13567168		2285.99	-0.00305288		2876	0.04184944		3466	0.0788433		4056	-0.008849
516.2	0.37652704		1106.19	0.19874724		1696.2	0.13506875		2286.19	-0.00251508		2876.2	0.0418489		3466.2	0.0792411		4056.2	-0.00839379
516.4	0.37614208		1106.39	0.19880686		1696.4	0.13505574		2286.39	-0.00173184		2876.4	0.04294242		3466.4	0.07922821		4056.4	-0.00864403
516.6	0.37541145		1106.59	0.1985749		1696.6	0.1352732		2286.59	-0.00246028		2876.6	0.04366955		3466.6	0.07842377		4056.6	-0.0089556
516.8	0.37443583		1106.79	0.19819541		1696.8	0.13491623		2286.79	-0.00304524		2876.8	0.04388547		3466.8	0.07808424		4056.8	-0.00914868
517	0.37481284		1106.99	0.19759077		1697	0.13462409		2286.99	-0.00252936		2877	0.04355707		3467	0.07786333		4057	-0.0097676
517.2	0.37603234		1107.19	0.19752207		1697.2	0.13457123		2287.19	-0.00271746		2877.2	0.04250075		3467.2	0.07852676		4057.2	-0.01002651
517.4	0.37635909		1107.39	0.19762988		1697.4	0.13578071		2287.39	-0.00228809		2877.4	0.04236789		3467.4	0.07812557		4057.4	-0.00956735
517.6	0.37799795		1107.59	0.19814748		1697.6	0.13571088		2287.59	-0.00158658		2877.6	0.04261655		3467.6	0.07849995		4057.6	-0.00955512
517.8	0.37865641		1107.79	0.19829157		1697.8	0.1365015		2287.79	-0.00160095		2877.8	0.04229956		3467.8	0.07829768		4057.8	-0.00964072
518	0.37895382		1107.99	0.19805059		1698	0.13630355		2287.99	-0.00273434		2878	0.04340659		3468	0.07900196		4058	-0.00881931
518.2	0.37880193		1108.19	0.19776892		1698.2	0.13787084		2288.19	-0.0024178		2878.2	0.04449361		3468.2	0.07915712		4058.2	-0.00897965
518.4	0.37742811		1108.39	0.19804457		1698.4	0.13859762		2288.39	-0.00235311		2878.4	0.04511354		3468.4	0.07847381		4058.4	-0.00893426
518.6	0.37599856		1108.59	0.19837846		1698.6	0.13857073		2288.59	-0.0021368		2878.6	0.04435294		3468.6	0.0787212		4058.6	-0.00862277
518.8	0.37642779		1108.79	0.19833145		1698.8	0.13897529		2288.79	-0.00338391		2878.8	0.04388628		3468.8	0.07814095		4058.8	-0.00900267
519	0.37655067		1108.99	0.19966862		1699	0.13830408		2288.99	-0.00355181		2879	0.04330066		3469	0.07834715		4059	-0.00980848
519.2	0.37606331		1109.19	0.20075151		1699.2	0.1374232		2289.19	-0.00449753		2879.2	0.04259462		3469.2	0.07896598		4059.2	-0.00967635
519.4	0.3762208		1109.39	0.20021909		1699.4	0.13663773		2289.39	-0.00461128		2879.4	0.0418868		3469.4	0.07937988		4059.4	-0.00949537
519.6	0.37561137		1109.59	0.20022376		1699.6	0.13583226		2289.59	-0.00480788		2879.6	0.04178427		3469.6	0.08010833		4059.6	-0.00989891
519.8	0.37522531		1109.79	0.20073351		1699.8	0.13492451		2289.79	-0.006002		2879.8	0.04207806		3469.8	0.08031991		4059.8	-0.00888481
520	0.37491985		1109.99	0.20098243		1700	0.134548		2289.99	-0.00529061		2880	0.0417996		3470	0.08008835		4060	-0.00963798
520.2	0.37468488		1110.19	0.20189723		1700.2	0.1343415		2290.19	-0.0048239		2880.2	0.04247283		3470.2	0.08076479		4060.2	-0.00935248
520.4	0.37439609		1110.39	0.20285096		1700.4	0.1352708		2290.39	-0.00498919		2880.4	0.04236603		3470.4	0.08030761		4060.4	-0.01001398
520.6	0.37498192		1110.59	0.20323452		1700.6	0.13580022		2290.59	-0.00591948		2880.6	0.04216699		3470.6	0.08039744		4060.6	-0.01026638
520.8	0.37602979		1110.79	0.20334247		1700.8	0.135853		2290.79	-0.00531358		2880.8	0.0423934		3470.8	0.08020547		4060.8	-0.01073994
521	0.37675638		1110.99	0.20328714		1701	0.13668438		2290.99	-0.00419313		2881	0.04197265		3471	0.08051328		4061	-0.01095983
521.2	0.37655516		1111.19	0.20354204		1701.2	0.1379718		2291.19	-0.00384566		2881.2	0.04187491		3471.2	0.08031745		4061.2	-0.00991075
521.4	0.37658183		1111.39	0.20291844		1701.4	0.1388342		2291.39	-0.00306479		2881.4	0.04249338		3471.4	0.0802655		4061.4	-0.00935853
521.6	0.37748222		1111.59	0.20223034		1701.6	0.13926879		2291.59	-0.00231761		2881.6	0.04279327		3471.6	0.08021944		4061.6	-0.00864949
521.8	0.37713799		1111.79	0.20191121		1701.8	0.13994057		2291.79	-0.00204702		2881.8	0.04334686		3471.8	0.07966605		4061.8	-0.00808429
522	0.37608446		1111.99	0.2015633		1702	0.13964272		2291.99	-0.00150348		2882	0.04323741		3472	0.07917229		4062	-0.0083399
522.2	0.37555385		1112.19	0.20028305		1702.2	0.14040961		2292.19	-0.00174385		2882.2	0.0438731		3472.2	0.07910285		4062.2	-0.00808682
522.4	0.37458862		1112.39	0.20058791		1702.4	0.14021007		2292.39	-0.00180775		2882.4	0.04313318		3472.4	0.07851942		4062.4	-0.00814461
522.6	0.37483312		1112.59	0.20083357		1702.6	0.14043358		2292.59	-0.00225876		2882.6	0.04248658		3472.6	0.07911147		4062.6	-0.00837865
522.8	0.37530112		1112.79	0.20093764		1702.8	0.14027556		2292.79	-0.00270481		2882.8	0.04184397		3472.8	0.07873753		4062.8	-0.00849627
523	0.37527596		1112.99	0.20055421		1703	0.13821458		2292.99	-0.00242929		2883	0.04174803		3473	0.07910238		4063	-0.00821824
523.2	0.37471606		1113.19	0.20044308		1703.2	0.13739913		2293.19	-0.00264062		2883.2	0.04210919		3473.2	0.07985545		4063.2	-0.00783164
523.4	0.37554182		1113.39	0.2002097		1703.4	0.13644799		2293.39	-0.00191941		2883.4	0.04205777		3473.4	0.08050656		4063.4	-0.00742523
523.6	0.37604913		1113.59	0.20047485		1703.6	0.13514085		2293.59	-0.0024795		2883.6	0.04240495		3473.6	0.08072503		4063.6	-0.00808979
523.8	0.37565665		1113.79	0.20071373		1703.8	0.13484072		2293.79	-0.00255761		2883.8	0.04261663		3473.8	0.08004463		4063.8	-0.00803801
524	0.37598012		1113.99	0.20126034		1704	0.13507419		2293.99	-0.00253107		2884	0.04277466		3474	0.08049025		4064	-0.0089576
524.2	0.37605222		1114.19	0.20174671		1704.2	0.13493211		2294.19	-0.00309152		2884.2	0.04253635		3474.2	0.08033668		4064.2	-0.0086083
524.4	0.37577592		1114.39	0.20191131		1704.4	0.13566716		2294.39	-0.00342296		2884.4	0.04203421		3474.4	0.07986045		4064.4	-0.00997452
524.6	0.37542713		1114.59	0.20161017		1704.6	0.13572536		2294.59	-0.0044428		2884.6	0.04142142		3474.6	0.08017532		4064.6	-0.00982468
524.8	0.37547619		1114.79	0.20186525		1704.8	0.13579262		2294.79	-0.00425153		2884.8	0.04123622		3474.8	0.07989243		4064.8	-0.00952277
525	0.37491794		1114.99	0.20149763		1705	0.13635625		2294.99	-0.00412642		2885	0.04177573		3475	0.08026203		4065	-0.00962189
525.2	0.37431724		1115.19	0.20138653		1705.2	0.13723692		2295.19	-0.00433524		2885.2	0.04205252		3475.2	0.08025211		4065.2	-0.00895614
525.4	0.37496348		1115.39	0.20183862		1705.4	0.13683494		2295.39	-0.00368761		2885.4	0.04256751		3475.4	0.08050117		4065.4	-0.00943842
525.6	0.37503134		1115.59	0.20134695		1705.6	0.13680769		2295.59	-0.00393649		2885.6	0.04217124		3475.6	0.08015246		4065.6	-0.01036889
525.8	0.3751813		1115.79	0.20141681		1705.8	0.13653991		2295.79	-0.00322632		2885.8	0.04230349		3475.8	0.0806747		4065.8	-0.01102394
526	0.37438867		1115.99	0.20104772		1706	0.13645781		2295.99	-0.0034672		2886	0.04217168		3476	0.08077683		4066	-0.01149385
526.2	0.37521548		1116.19	0.20171702		1706.2	0.13660509		2296.19	-0.00473626		2886.2	0.04231226		3476.2	0.08060723		4066.2	-0.0114349
526.4	0.37496727		1116.39	0.20213518		1706.4	0.13719265		2296.39	-0.00553065		2886.4	0.04088273		3476.4	0.0812635		4066.4	-0.01178253
526.6	0.37497976		1116.59	0.20231256		1706.6	0.13691342		2296.59	-0.00558045		2886.6	0.04146168		3476.6	0.08058518		4066.6	-0.01135131
526.8	0.37529357		1116.79	0.20131983		1706.8	0.1361216		2296.79	-0.00537854		2886.8	0.04112995		3476.8	0.07999462		4066.8	-0.01174651
527	0.37540215		1116.99	0.20106921		1707	0.13581133		2296.99	-0.00547279		2887	0.04152502		3477	0.07997605		4067	-0.01176965
527.2	0.3757563		1117.19	0.20093677		1707.2	0.13640349		2297.19	-0.00462927		2887.2	0.04203985		3477.2	0.07967346		4067.2	-0.01229285
527.4	0.37688444		1117.39	0.20151763		1707.4	0.13638618		2297.39	-0.00374137		2887.4	0.04259669		3477.4	0.07980973		4067.4	-0.01243811
527.6	0.37737356		1117.59	0.20054119		1707.6	0.13630733		2297.59	-0.00415541		2887.6	0.04292184		3477.6	0.07928936		4067.6	-0.01287709
527.8	0.37649439		1117.79	0.20068971		1707.8	0.13640203		2297.79	-0.00439832		2887.8	0.04345982		3477.8	0.07872536		4067.8	-0.01252326
528	0.37715211		1117.99	0.20070047		1708	0.13670479		2297.99	-0.0048342		2888	0.04402877		3478	0.07885092		4068	-0.01209957
528.2	0.37618645		1118.19	0.20047593		1708.2	0.13679853		2298.19	-0.00419546		2888.2	0.04376462		3478.2	0.07811378		4068.2	-0.01144583
528.4	0.37581193		1118.39	0.20072781		1708.4	0.13761499		2298.39	-0.0045212		2888.4	0.04332617		3478.4	0.07819113		4068.4	-0.01125359
528.6	0.37535791		1118.59	0.20104498		1708.6	0.13722205		2298.59	-0.00475024		2888.6	0.04314305		3478.6	0.07858706		4068.6	-0.0096903
528.8	0.37569769		1118.79	0.2010829		1708.8	0.13684674		2298.79	-0.00435215		2888.8	0.04332714		3478.8	0.07908562		4068.8	-0.00900691
529	0.37618646		1118.99	0.20126387		1709	0.13632924		2298.99	-0.00435689		2889	0.04453182		3479	0.08018753		4069	-0.00948886
529.2	0.37614616		1119.19	0.20122325		1709.2	0.13642685		2299.19	-0.00435417		2889.2	0.04528218		3479.2	0.0807251		4069.2	-0.00903649
529.4	0.37679858		1119.39	0.20178889		1709.4	0.1358698		2299.39	-0.00397097		2889.4	0.04528233		3479.4	0.08089803		4069.4	-0.00872513
529.6	0.37675935		1119.59	0.2010651		1709.6	0.13585776		2299.59	-0.00359918		2889.6	0.04596216		3479.6	0.08046424		4069.6	-0.00873329
529.8	0.37712411		1119.79	0.20162266		1709.8	0.13627598		2299.79	-0.0030514		2889.8	0.04600316		3479.8	0.08072398		4069.8	-0.0079333
530	0.37666768		1119.99	0.20107044		1710	0.13520709		2299.99	-0.00406113		2890	0.0461425		3480	0.0807334		4070	-0.00717289
530.2	0.37743496		1120.19	0.2013465		1710.2	0.13485271		2300.19	-0.00439767		2890.2	0.04605393		3480.2	0.08052265		4070.2	-0.00741071
530.4	0.37727871		1120.39	0.20112867		1710.4	0.1343185		2300.39	-0.00466512		2890.4	0.04504736		3480.4	0.08045693		4070.4	-0.00771515
530.6	0.37792478		1120.59	0.20149192		1710.6	0.1331671		2300.59	-0.0048366		2890.6	0.04514842		3480.6	0.07914427		4070.6	-0.00838483
530.8	0.37929287		1120.79	0.20121216		1710.8	0.13351896		2300.79	-0.00403836		2890.8	0.04376177		3480.8	0.07885383		4070.8	-0.00919328
531	0.37904886		1120.99	0.2008035		1711	0.13421822		2300.99	-0.00381492		2891	0.04369106		3481	0.07879592		4071	-0.00950177
531.2	0.37890922		1121.19	0.20094851		1711.2	0.13403864		2301.19	-0.00290612		2891.2	0.04296084		3481.2	0.07837468		4071.2	-0.01074714
531.4	0.37885212		1121.39	0.20065037		1711.4	0.13386929		2301.39	-0.00297607		2891.4	0.04225478		3481.4	0.07836182		4071.4	-0.01172942
531.6	0.37731376		1121.59	0.19947434		1711.6	0.13453952		2301.59	-0.0030633		2891.6	0.04099808		3481.6	0.07819602		4071.6	-0.01257378
531.8	0.37679506		1121.79	0.1995271		1711.8	0.13577357		2301.79	-0.00279185		2891.8	0.04119018		3481.8	0.07768796		4071.8	-0.01282444
532	0.37650224		1121.99	0.19966964		1712	0.13642375		2301.99	-0.00246045		2892	0.04116645		3482	0.07762997		4072	-0.01309223
532.2	0.37530806		1122.19	0.20015749		1712.2	0.13664725		2302.19	-0.00223691		2892.2	0.0409439		3482.2	0.07733959		4072.2	-0.0130733
532.4	0.37613462		1122.39	0.20077909		1712.4	0.13658973		2302.39	-0.00260406		2892.4	0.04074909		3482.4	0.07742383		4072.4	-0.01362627
532.6	0.37525825		1122.59	0.20118252		1712.6	0.13580165		2302.59	-0.00271761		2892.6	0.04091264		3482.6	0.07714597		4072.6	-0.01380573
532.8	0.37515206		1122.79	0.20090219		1712.8	0.13624933		2302.79	-0.00323682		2892.8	0.04131451		3482.8	0.07746403		4072.8	-0.01436039
533	0.37530759		1122.99	0.20050664		1713	0.1356053		2302.99	-0.00368049		2893	0.04267633		3483	0.07764103		4073	-0.01540179
533.2	0.37553668		1123.19	0.20034823		1713.2	0.13537489		2303.19	-0.00423699		2893.2	0.04340073		3483.2	0.07715805		4073.2	-0.0147416
533.4	0.3759265		1123.39	0.20094933		1713.4	0.13566451		2303.39	-0.0046826		2893.4	0.04265013		3483.4	0.0760929		4073.4	-0.01389852
533.6	0.37591736		1123.59	0.20123505		1713.6	0.13524318		2303.59	-0.00441258		2893.6	0.04384183		3483.6	0.07529803		4073.6	-0.01433602
533.8	0.37639702		1123.79	0.20115249		1713.8	0.1354145		2303.79	-0.00481981		2893.8	0.04414639		3483.8	0.07590266		4073.8	-0.0135226
534	0.37639995		1123.99	0.20014903		1714	0.13456309		2303.99	-0.00452816		2894	0.0443131		3484	0.07671532		4074	-0.01294613
534.2	0.37718787		1124.19	0.19974868		1714.2	0.13428493		2304.19	-0.0045409		2894.2	0.04353099		3484.2	0.07664107		4074.2	-0.01256018
534.4	0.37748961		1124.39	0.19936682		1714.4	0.1336519		2304.39	-0.00543596		2894.4	0.04343723		3484.4	0.07657614		4074.4	-0.01271679
534.6	0.37828759		1124.59	0.19929306		1714.6	0.13328001		2304.59	-0.00614953		2894.6	0.04277727		3484.6	0.07680433		4074.6	-0.01284487
534.8	0.37919228		1124.79	0.1990094		1714.8	0.13458902		2304.79	-0.00614105		2894.8	0.04188627		3484.8	0.0774101		4074.8	-0.01277016
535	0.37827235		1124.99	0.1983691		1715	0.13405271		2304.99	-0.00576966		2895	0.04066895		3485	0.07753558		4075	-0.01312432
535.2	0.37794197		1125.19	0.19886963		1715.2	0.13405891		2305.19	-0.00571009		2895.2	0.03961511		3485.2	0.07732449		4075.2	-0.01385921
535.4	0.3785413		1125.39	0.19783687		1715.4	0.13550948		2305.39	-0.00625582		2895.4	0.03959457		3485.4	0.07666394		4075.4	-0.0143502
535.6	0.3784946		1125.59	0.19688767		1715.6	0.13642317		2305.59	-0.00624087		2895.6	0.03988125		3485.6	0.07685207		4075.6	-0.01400781
535.8	0.37872413		1125.79	0.19670117		1715.8	0.13681951		2305.79	-0.00635008		2895.8	0.04024897		3485.8	0.07674595		4075.8	-0.01331822
536	0.37763995		1125.99	0.19718051		1716	0.13632805		2305.99	-0.00695153		2896	0.04003362		3486	0.07627059		4076	-0.01290018
536.2	0.37798573		1126.19	0.19744181		1716.2	0.13613819		2306.19	-0.00704919		2896.2	0.04005384		3486.2	0.07673413		4076.2	-0.01262969
536.4	0.37778648		1126.39	0.19696768		1716.4	0.13569843		2306.39	-0.00740084		2896.4	0.04034289		3486.4	0.07687097		4076.4	-0.01343664
536.6	0.37598086		1126.59	0.19694374		1716.6	0.13633032		2306.59	-0.00742529		2896.6	0.04122953		3486.6	0.07635801		4076.6	-0.01292894
536.8	0.37624226		1126.79	0.19696942		1716.8	0.13627561		2306.79	-0.00847042		2896.8	0.04183424		3486.8	0.0762488		4076.8	-0.01278356
537	0.37649506		1126.99	0.19733585		1717	0.13505586		2306.99	-0.00907259		2897	0.04253156		3487	0.0756012		4077	-0.01271712
537.2	0.37663263		1127.19	0.19811956		1717.2	0.13451315		2307.19	-0.00930463		2897.2	0.04238417		3487.2	0.07491619		4077.2	-0.01165295
537.4	0.37702689		1127.39	0.19838287		1717.4	0.13455392		2307.39	-0.0085957		2897.4	0.04268598		3487.4	0.07479738		4077.4	-0.01128173
537.6	0.37615004		1127.59	0.19857034		1717.6	0.13466082		2307.59	-0.00823628		2897.6	0.04390612		3487.6	0.07545859		4077.6	-0.01079889
537.8	0.37557513		1127.79	0.19847616		1717.8	0.13514146		2307.79	-0.00832581		2897.8	0.04374989		3487.8	0.0764778		4077.8	-0.00948398
538	0.3754108		1127.99	0.19710923		1718	0.13483464		2307.99	-0.00734197		2898	0.04332765		3488	0.07706588		4078	-0.00930831
538.2	0.37601418		1128.19	0.19711347		1718.2	0.13444568		2308.19	-0.0080293		2898.2	0.04313675		3488.2	0.07764703		4078.2	-0.00906973
538.4	0.37599022		1128.39	0.19722053		1718.4	0.13494931		2308.39	-0.00754959		2898.4	0.04364685		3488.4	0.07819151		4078.4	-0.0091673
538.6	0.37581167		1128.59	0.19688035		1718.6	0.13508466		2308.59	-0.00825051		2898.6	0.04215707		3488.6	0.07852898		4078.6	-0.00942243
538.8	0.37655435		1128.79	0.19668263		1718.8	0.13579396		2308.79	-0.00849464		2898.8	0.04152145		3488.8	0.07896659		4078.8	-0.00949049
539	0.37640182		1128.99	0.19576463		1719	0.13524627		2308.99	-0.00775917		2899	0.04051672		3489	0.07799471		4079	-0.01003534
539.2	0.37664666		1129.19	0.19525674		1719.2	0.13568279		2309.19	-0.00768881		2899.2	0.04097603		3489.2	0.07759722		4079.2	-0.01066866
539.4	0.37756967		1129.39	0.19436648		1719.4	0.13617354		2309.39	-0.00702667		2899.4	0.04165976		3489.4	0.07785934		4079.4	-0.01128016
539.6	0.3775515		1129.59	0.19397459		1719.6	0.13616676		2309.59	-0.00668953		2899.6	0.04131897		3489.6	0.07807603		4079.6	-0.01103393
539.8	0.37683011		1129.79	0.19469725		1719.8	0.13595296		2309.79	-0.0060291		2899.8	0.04137764		3489.8	0.07841864		4079.8	-0.01186034
540	0.37628212		1129.99	0.19570324		1720	0.13582249		2309.99	-0.00629358		2900	0.04042859		3490	0.07873417		4080	-0.01337034
540.2	0.37658787		1130.19	0.19552425		1720.2	0.13571017		2310.19	-0.00521151		2900.2	0.04010582		3490.2	0.07950231		4080.2	-0.01433225
540.4	0.37561772		1130.39	0.19533763		1720.4	0.13586346		2310.39	-0.00529123		2900.4	0.04021101		3490.4	0.07954956		4080.4	-0.01558902
540.6	0.37538698		1130.59	0.19591886		1720.6	0.13598312		2310.59	-0.00530722		2900.6	0.04035754		3490.6	0.07895931		4080.6	-0.01493647
540.8	0.37633013		1130.79	0.19651468		1720.8	0.13510711		2310.79	-0.00619726		2900.8	0.03975674		3490.8	0.07871135		4080.8	-0.01596951
541	0.37618092		1130.99	0.19788765		1721	0.13434145		2310.99	-0.00618104		2901	0.03934235		3491	0.07884254		4081	-0.01610886
541.2	0.37601816		1131.19	0.19842175		1721.2	0.13368307		2311.19	-0.00580921		2901.2	0.03880827		3491.2	0.07832845		4081.2	-0.01556381
541.4	0.37631295		1131.39	0.19947445		1721.4	0.1336515		2311.39	-0.00583738		2901.4	0.03857914		3491.4	0.07856341		4081.4	-0.01537406
541.6	0.37610276		1131.59	0.20016206		1721.6	0.13318618		2311.59	-0.00677598		2901.6	0.0383439		3491.6	0.0781971		4081.6	-0.01491197
541.8	0.37670321		1131.79	0.20023148		1721.8	0.13273524		2311.79	-0.00711329		2901.8	0.03767858		3491.8	0.07809858		4081.8	-0.01529532
542	0.37697436		1131.99	0.20009478		1722	0.13225664		2311.99	-0.00669285		2902	0.03750377		3492	0.07731571		4082	-0.01455729
542.2	0.37679375		1132.19	0.2015175		1722.2	0.13194474		2312.19	-0.00702671		2902.2	0.03746646		3492.2	0.07627712		4082.2	-0.01394976
542.4	0.37602119		1132.39	0.20121038		1722.4	0.1315516		2312.39	-0.00718395		2902.4	0.03792198		3492.4	0.07536075		4082.4	-0.01378107
542.6	0.37606447		1132.59	0.20002386		1722.6	0.13081275		2312.59	-0.00801087		2902.6	0.03756395		3492.6	0.0747547		4082.6	-0.01417759
542.8	0.37662551		1132.79	0.19964013		1722.8	0.13136658		2312.79	-0.00780889		2902.8	0.03774377		3492.8	0.07384		4082.8	-0.01365889
543	0.37548326		1132.99	0.1986563		1723	0.13104184		2312.99	-0.00766986		2903	0.03828384		3493	0.07285339		4083	-0.01395764
543.2	0.37518683		1133.19	0.19841606		1723.2	0.13092127		2313.19	-0.00705673		2903.2	0.0391778		3493.2	0.07306574		4083.2	-0.01329326
543.4	0.3748309		1133.39	0.19795156		1723.4	0.13078584		2313.39	-0.00663939		2903.4	0.04027285		3493.4	0.07361334		4083.4	-0.01279502
543.6	0.37497449		1133.59	0.19746807		1723.6	0.13072527		2313.59	-0.00702433		2903.6	0.04066157		3493.6	0.07349711		4083.6	-0.01260367
543.8	0.3746027		1133.79	0.19686782		1723.8	0.13073041		2313.79	-0.00639309		2903.8	0.0409582		3493.8	0.07460724		4083.8	-0.01331002
544	0.37457705		1133.99	0.19639893		1724	0.13152314		2313.99	-0.00717722		2904	0.04094547		3494	0.07553568		4084	-0.01445107
544.2	0.37523624		1134.19	0.19477956		1724.2	0.13090561		2314.19	-0.00675481		2904.2	0.04140827		3494.2	0.07626235		4084.2	-0.01436709
544.4	0.37471468		1134.39	0.19392176		1724.4	0.13142867		2314.39	-0.00706445		2904.4	0.04148002		3494.4	0.07733126		4084.4	-0.01518146
544.6	0.37501506		1134.59	0.19433728		1724.6	0.13146912		2314.59	-0.00648181		2904.6	0.04138544		3494.6	0.07826716		4084.6	-0.01523333
544.8	0.37570366		1134.79	0.19454959		1724.8	0.13205343		2314.79	-0.00573403		2904.8	0.04146806		3494.8	0.07882831		4084.8	-0.0155462
545	0.3757987		1134.99	0.19538844		1725	0.13151946		2314.99	-0.00529605		2905	0.0419539		3495	0.07868491		4085	-0.01476082
545.2	0.37657362		1135.19	0.19505745		1725.2	0.13168725		2315.19	-0.00530562		2905.2	0.04175453		3495.2	0.07851382		4085.2	-0.01425909
545.4	0.37648911		1135.39	0.19604962		1725.4	0.1317423		2315.39	-0.00505251		2905.4	0.04194941		3495.4	0.07838625		4085.4	-0.01516264
545.6	0.3766818		1135.59	0.19570091		1725.6	0.13193826		2315.59	-0.00498263		2905.6	0.04172053		3495.6	0.07802751		4085.6	-0.01546136
545.8	0.37621753		1135.79	0.19542052		1725.8	0.13281815		2315.79	-0.0043101		2905.8	0.04184279		3495.8	0.07840358		4085.8	-0.01560409
546	0.37545273		1135.99	0.19623702		1726	0.1324822		2315.99	-0.00327768		2906	0.0422642		3496	0.07782016		4086	-0.01568692
546.2	0.37523659		1136.19	0.19630238		1726.2	0.13294282		2316.19	-0.00333587		2906.2	0.04261906		3496.2	0.07728499		4086.2	-0.01555102
546.4	0.37552721		1136.39	0.19658081		1726.4	0.13316511		2316.39	-0.00349131		2906.4	0.04320321		3496.4	0.07754617		4086.4	-0.0160568
546.6	0.37526928		1136.59	0.19700324		1726.6	0.13390177		2316.59	-0.00364515		2906.6	0.04255739		3496.6	0.0779262		4086.6	-0.01657244
546.8	0.37435767		1136.79	0.19811027		1726.8	0.1347618		2316.79	-0.00348544		2906.8	0.04287601		3496.8	0.07776591		4086.8	-0.01648455
547	0.37334159		1136.99	0.19885205		1727	0.13444775		2316.99	-0.00357206		2907	0.04254241		3497	0.0782459		4087	-0.01628467
547.2	0.37354215		1137.19	0.19888285		1727.2	0.13482531		2317.19	-0.00408639		2907.2	0.04272998		3497.2	0.07918775		4087.2	-0.0157089
547.4	0.37258413		1137.39	0.19895198		1727.4	0.13418406		2317.39	-0.00500656		2907.4	0.04306712		3497.4	0.07897964		4087.4	-0.01524893
547.6	0.37248795		1137.59	0.19909489		1727.6	0.1336905		2317.59	-0.0057214		2907.6	0.04372002		3497.6	0.07905653		4087.6	-0.0151427
547.8	0.37167102		1137.79	0.19941337		1727.8	0.1341312		2317.79	-0.00569303		2907.8	0.04355764		3497.8	0.07949374		4087.8	-0.01586302
548	0.3714237		1137.99	0.19918792		1728	0.13387439		2317.99	-0.00652071		2908	0.04387452		3498	0.07984192		4088	-0.01680571
548.2	0.37184351		1138.19	0.19909831		1728.2	0.13345013		2318.19	-0.00712048		2908.2	0.04370906		3498.2	0.07975406		4088.2	-0.01629344
548.4	0.37123544		1138.39	0.19984986		1728.4	0.13410702		2318.39	-0.00695883		2908.4	0.04285815		3498.4	0.07952048		4088.4	-0.01658105
548.6	0.37176766		1138.59	0.20024133		1728.6	0.1347742		2318.59	-0.00686256		2908.6	0.04279374		3498.6	0.07841729		4088.6	-0.01477204
548.8	0.3722443		1138.79	0.19963179		1728.8	0.13512663		2318.79	-0.00706134		2908.8	0.04226124		3498.8	0.07674146		4088.8	-0.01436444
549	0.37199997		1138.99	0.19963208		1729	0.13479176		2318.99	-0.00709894		2909	0.04220833		3499	0.07549447		4089	-0.01449521
549.2	0.37309882		1139.19	0.19887671		1729.2	0.13572019		2319.19	-0.00761899		2909.2	0.04072735		3499.2	0.07500709		4089.2	-0.01454674
549.4	0.37236046		1139.39	0.19857914		1729.4	0.13538117		2319.39	-0.00742548		2909.4	0.04001565		3499.4	0.07437416		4089.4	-0.01494469
549.6	0.3717625		1139.59	0.19756972		1729.6	0.13467979		2319.59	-0.00719974		2909.6	0.03902395		3499.6	0.07422835		4089.6	-0.01444363
549.8	0.37172945		1139.79	0.19780951		1729.8	0.13414218		2319.79	-0.0071287		2909.8	0.03833213		3499.8	0.07356925		4089.8	-0.01393499
550	0.37171622		1139.99	0.19820031		1730	0.13334308		2319.99	-0.00728408		2910	0.03830026		3500	0.07379496		4090	-0.01369679
550.2	0.3724509		1140.19	0.19832611		1730.2	0.1333232		2320.19	-0.00699066		2910.2	0.03779093		3500.2	0.07385121		4090.2	-0.01346513
550.4	0.37301959		1140.39	0.1993253		1730.4	0.13253664		2320.39	-0.00701093		2910.4	0.0376167		3500.4	0.07527261		4090.4	-0.01431598
550.6	0.37276822		1140.59	0.19894233		1730.6	0.13164927		2320.59	-0.00664893		2910.6	0.03769356		3500.6	0.075976		4090.6	-0.01476667
550.8	0.37362666		1140.79	0.19934113		1730.8	0.13088127		2320.79	-0.00640317		2910.8	0.03848292		3500.8	0.07641199		4090.8	-0.01436665
551	0.37402063		1140.99	0.19902994		1731	0.13052869		2320.99	-0.0064084		2911	0.03786638		3501	0.0771158		4091	-0.01409759
551.2	0.37396819		1141.19	0.19839898		1731.2	0.13052695		2321.19	-0.00627345		2911.2	0.0388653		3501.2	0.07776902		4091.2	-0.01409603
551.4	0.37277749		1141.39	0.19867264		1731.4	0.1294336		2321.39	-0.00592823		2911.4	0.04000791		3501.4	0.07807634		4091.4	-0.01410036
551.6	0.37252616		1141.59	0.19777077		1731.6	0.12940366		2321.59	-0.00584701		2911.6	0.04074641		3501.6	0.07909359		4091.6	-0.01427134
551.8	0.37239821		1141.79	0.19745739		1731.8	0.13036503		2321.79	-0.00620179		2911.8	0.04129505		3501.8	0.07888416		4091.8	-0.0153968
552	0.37302982		1141.99	0.19677447		1732	0.13068285		2321.99	-0.00623196		2912	0.04217627		3502	0.07867289		4092	-0.01487338
552.2	0.37345608		1142.19	0.197128		1732.2	0.13077957		2322.19	-0.00658594		2912.2	0.04247838		3502.2	0.07777399		4092.2	-0.01490442
552.4	0.3735349		1142.39	0.19637309		1732.4	0.13128756		2322.39	-0.00546312		2912.4	0.04182657		3502.4	0.07780409		4092.4	-0.01472165
552.6	0.3733461		1142.59	0.19529531		1732.6	0.13259299		2322.59	-0.00556784		2912.6	0.04200884		3502.6	0.07688691		4092.6	-0.01367802
552.8	0.3737381		1142.79	0.19525014		1732.8	0.13334334		2322.79	-0.00546142		2912.8	0.04130076		3502.8	0.07630623		4092.8	-0.01462875
553	0.37339355		1142.99	0.19461614		1733	0.13453851		2322.99	-0.00527365		2913	0.04161179		3503	0.07588481		4093	-0.01408838
553.2	0.37346638		1143.19	0.19350943		1733.2	0.13510229		2323.19	-0.0062778		2913.2	0.04105586		3503.2	0.07654314		4093.2	-0.01384349
553.4	0.37229691		1143.39	0.1934444		1733.4	0.13485266		2323.39	-0.00664996		2913.4	0.04123926		3503.4	0.07676798		4093.4	-0.01415544
553.6	0.3712783		1143.59	0.19464524		1733.6	0.13475378		2323.59	-0.00627628		2913.6	0.04039389		3503.6	0.07594543		4093.6	-0.01406817
553.8	0.37207867		1143.79	0.19524558		1733.8	0.13513239		2323.79	-0.00678944		2913.8	0.04027792		3503.8	0.07522835		4093.8	-0.01443463
554	0.37221499		1143.99	0.19589491		1734	0.13518724		2323.99	-0.00659812		2914	0.04061939		3504	0.07505187		4094	-0.0152067
554.2	0.37309957		1144.19	0.19603166		1734.2	0.13412672		2324.19	-0.00575535		2914.2	0.03993826		3504.2	0.07527305		4094.2	-0.01657617
554.4	0.37376017		1144.39	0.19703906		1734.4	0.13334288		2324.39	-0.00657841		2914.4	0.04062956		3504.4	0.07645678		4094.4	-0.01733314
554.6	0.37391398		1144.59	0.1968341		1734.6	0.13261558		2324.59	-0.00664806		2914.6	0.0400315		3504.6	0.07634628		4094.6	-0.01774765
554.8	0.37401792		1144.79	0.19726815		1734.8	0.13301139		2324.79	-0.00626443		2914.8	0.03967498		3504.8	0.07689132		4094.8	-0.01804733
555	0.37360957		1144.99	0.19720102		1735	0.13313403		2324.99	-0.00510709		2915	0.03830367		3505	0.07663039		4095	-0.01834895
555.2	0.37321042		1145.19	0.19719721		1735.2	0.13325397		2325.19	-0.00487755		2915.2	0.03883531		3505.2	0.0764713		4095.2	-0.01844436
555.4	0.37236236		1145.39	0.19813565		1735.4	0.13244339		2325.39	-0.00476111		2915.4	0.04008044		3505.4	0.07692571		4095.4	-0.01896082
555.6	0.37243759		1145.59	0.19743737		1735.6	0.13260976		2325.59	-0.005927		2915.6	0.040939		3505.6	0.07683126		4095.6	-0.01826856
555.8	0.37194105		1145.79	0.19752047		1735.8	0.1322696		2325.79	-0.00595498		2915.8	0.04135243		3505.8	0.07601873		4095.8	-0.01799036
556	0.37166737		1145.99	0.19788689		1736	0.13103616		2325.99	-0.00542127		2916	0.04111738		3506	0.07665767		4096	-0.01663401
556.2	0.37091069		1146.19	0.19854095		1736.2	0.13074332		2326.19	-0.00545265		2916.2	0.0407677		3506.2	0.07682123		4096.2	-0.01603266
556.4	0.37107896		1146.39	0.19801659		1736.4	0.13080337		2326.39	-0.00476269		2916.4	0.04023991		3506.4	0.07759331		4096.4	-0.0151611
556.6	0.37085009		1146.59	0.19848465		1736.6	0.13143625		2326.59	-0.00535582		2916.6	0.04026757		3506.6	0.0768259		4096.6	-0.01383816
556.8	0.37088444		1146.79	0.19804846		1736.8	0.13173598		2326.79	-0.00563168		2916.8	0.03958636		3506.8	0.07735696		4096.8	-0.01285037
557	0.37024547		1146.99	0.19698978		1737	0.13315114		2326.99	-0.0050388		2917	0.03964493		3507	0.07771625		4097	-0.01208004
557.2	0.37067032		1147.19	0.19736303		1737.2	0.13349645		2327.19	-0.00539749		2917.2	0.03988328		3507.2	0.07786319		4097.2	-0.01180175
557.4	0.37099743		1147.39	0.19797675		1737.4	0.13417766		2327.39	-0.00544033		2917.4	0.03988242		3507.4	0.07766253		4097.4	-0.01163011
557.6	0.37189919		1147.59	0.19860944		1737.6	0.1349722		2327.59	-0.00542311		2917.6	0.03948722		3507.6	0.07725189		4097.6	-0.01173267
557.8	0.37277561		1147.79	0.19745531		1737.8	0.13469525		2327.79	-0.00569059		2917.8	0.03930957		3507.8	0.07718424		4097.8	-0.01246195
558	0.37313853		1147.99	0.19646672		1738	0.13484642		2327.99	-0.00562156		2918	0.03890906		3508	0.07633801		4098	-0.01277793
558.2	0.37336329		1148.19	0.19526656		1738.2	0.13424429		2328.19	-0.00598805		2918.2	0.03913291		3508.2	0.07644045		4098.2	-0.01364991
558.4	0.37427958		1148.39	0.19531753		1738.4	0.13465974		2328.39	-0.00698665		2918.4	0.03899119		3508.4	0.07636971		4098.4	-0.01435163
558.6	0.37423649		1148.59	0.19389982		1738.6	0.13462848		2328.59	-0.00670892		2918.6	0.03804776		3508.6	0.07621689		4098.6	-0.01458234
558.8	0.37426968		1148.79	0.19297736		1738.8	0.13511881		2328.79	-0.00638777		2918.8	0.03878112		3508.8	0.07620874		4098.8	-0.01489384
559	0.37444277		1148.99	0.19263518		1739	0.13494263		2328.99	-0.00606141		2919	0.03933609		3509	0.07608883		4099	-0.01525629
559.2	0.374183		1149.19	0.19187626		1739.2	0.13478123		2329.19	-0.0065039		2919.2	0.040961		3509.2	0.07590498		4099.2	-0.01476377
559.4	0.37318902		1149.39	0.19228437		1739.4	0.13435705		2329.39	-0.00716293		2919.4	0.04148153		3509.4	0.07677484		4099.4	-0.01533141
559.6	0.37371899		1149.59	0.19212281		1739.6	0.13361845		2329.59	-0.00842596		2919.6	0.04184172		3509.6	0.07633768		4099.6	-0.01466223
559.8	0.37298451		1149.79	0.19245076		1739.8	0.13226763		2329.79	-0.00819243		2919.8	0.04105565		3509.8	0.07645784		4099.8	-0.01408758
560	0.37251639		1149.99	0.1936196		1740	0.13229639		2329.99	-0.00772523		2920	0.04064656		3510	0.07692687		4100	-0.01314876
560.2	0.37295912		1150.19	0.19394919		1740.2	0.13210361		2330.19	-0.00774876		2920.2	0.04022661		3510.2	0.0764466		4100.2	-0.01286065
560.4	0.37348595		1150.39	0.19426282		1740.4	0.13108621		2330.39	-0.00701414		2920.4	0.03980229		3510.4	0.07623536		4100.4	-0.01255969
560.6	0.37378828		1150.59	0.19473596		1740.6	0.13170308		2330.59	-0.00736884		2920.6	0.03952036		3510.6	0.07620539		4100.6	-0.01054297
560.8	0.37288761		1150.79	0.19490618		1740.8	0.13215727		2330.79	-0.00730687		2920.8	0.03858674		3510.8	0.07677034		4100.8	-0.01007355
561	0.37250003		1150.99	0.1955918		1741	0.13313631		2330.99	-0.00683544		2921	0.03795542		3511	0.07630093		4101	-0.00975254
561.2	0.37306296		1151.19	0.19674098		1741.2	0.13251391		2331.19	-0.00721667		2921.2	0.03819624		3511.2	0.07591868		4101.2	-0.00967514
561.4	0.37322194		1151.39	0.19683596		1741.4	0.13224372		2331.39	-0.00655767		2921.4	0.03735428		3511.4	0.07667433		4101.4	-0.01011323
561.6	0.37322486		1151.59	0.19612319		1741.6	0.13271933		2331.59	-0.00687195		2921.6	0.03711476		3511.6	0.07662205		4101.6	-0.01081697
561.8	0.37246277		1151.79	0.19467413		1741.8	0.13219396		2331.79	-0.0068526		2921.8	0.03750303		3511.8	0.07560781		4101.8	-0.01193648
562	0.37182632		1151.99	0.19403853		1742	0.1326643		2331.99	-0.00621333		2922	0.03792292		3512	0.07452149		4102	-0.01275245
562.2	0.37162016		1152.19	0.19384632		1742.2	0.13204135		2332.19	-0.00586223		2922.2	0.03894139		3512.2	0.07507466		4102.2	-0.0136337
562.4	0.37184883		1152.39	0.19361611		1742.4	0.13167978		2332.39	-0.00579105		2922.4	0.03909055		3512.4	0.07489428		4102.4	-0.0144844
562.6	0.37109915		1152.59	0.19281795		1742.6	0.13164614		2332.59	-0.00488767		2922.6	0.03935019		3512.6	0.07482719		4102.6	-0.015215
562.8	0.37152298		1152.79	0.19236043		1742.8	0.13112528		2332.79	-0.00513322		2922.8	0.04032536		3512.8	0.07534567		4102.8	-0.01505631
563	0.37156551		1152.99	0.1924824		1743	0.13056001		2332.99	-0.00541704		2923	0.04094015		3513	0.07504819		4103	-0.01525758
563.2	0.37130742		1153.19	0.19187022		1743.2	0.13004072		2333.19	-0.00640427		2923.2	0.04086478		3513.2	0.07489623		4103.2	-0.0150462
563.4	0.37114081		1153.39	0.19240757		1743.4	0.12997261		2333.39	-0.00638595		2923.4	0.04028567		3513.4	0.07523288		4103.4	-0.01552563
563.6	0.37170142		1153.59	0.1931539		1743.6	0.12900948		2333.59	-0.00641583		2923.6	0.04075141		3513.6	0.0746317		4103.6	-0.01493654
563.8	0.37122272		1153.79	0.1922721		1743.8	0.12911212		2333.79	-0.00673623		2923.8	0.04024911		3513.8	0.07454758		4103.8	-0.01481429
564	0.37134921		1153.99	0.19217563		1744	0.12987845		2333.99	-0.0068901		2924	0.03950323		3514	0.07435882		4104	-0.01414031
564.2	0.37182184		1154.19	0.19198663		1744.2	0.12968789		2334.19	-0.00719722		2924.2	0.03902992		3514.2	0.07473742		4104.2	-0.01426249
564.4	0.37186808		1154.39	0.19273669		1744.4	0.13065495		2334.39	-0.00784133		2924.4	0.03798198		3514.4	0.07492845		4104.4	-0.01317136
564.6	0.37109745		1154.59	0.19252394		1744.6	0.13208188		2334.59	-0.00972504		2924.6	0.03733058		3514.6	0.07544159		4104.6	-0.01174584
564.8	0.37019973		1154.79	0.19280824		1744.8	0.1320317		2334.79	-0.01069694		2924.8	0.03651967		3514.8	0.0749086		4104.8	-0.01194646
565	0.37056204		1154.99	0.19273344		1745	0.13235021		2334.99	-0.01066914		2925	0.03555682		3515	0.07520571		4105	-0.01232431
565.2	0.37222747		1155.19	0.19281657		1745.2	0.13241169		2335.19	-0.01021193		2925.2	0.03604045		3515.2	0.07544233		4105.2	-0.01290346
565.4	0.37295056		1155.39	0.1924218		1745.4	0.13287035		2335.39	-0.01035452		2925.4	0.03489496		3515.4	0.07508605		4105.4	-0.01257035
565.6	0.37283756		1155.59	0.19258283		1745.6	0.13311283		2335.59	-0.01106199		2925.6	0.03555376		3515.6	0.07515318		4105.6	-0.01354365
565.8	0.37292344		1155.79	0.19255066		1745.8	0.13293712		2335.79	-0.01091624		2925.8	0.03594074		3515.8	0.07454147		4105.8	-0.01474003
566	0.37273677		1155.99	0.19420469		1746	0.13373619		2335.99	-0.00990031		2926	0.03576042		3516	0.07448069		4106	-0.01499101
566.2	0.37340716		1156.19	0.19510606		1746.2	0.13346878		2336.19	-0.00957241		2926.2	0.03645764		3516.2	0.07485742		4106.2	-0.01554525
566.4	0.37417735		1156.39	0.19512652		1746.4	0.13316332		2336.39	-0.00842821		2926.4	0.03598706		3516.4	0.0740004		4106.4	-0.01584581
566.6	0.37370685		1156.59	0.19549626		1746.6	0.13277388		2336.59	-0.00799585		2926.6	0.0358736		3516.6	0.07468047		4106.6	-0.0158682
566.8	0.37418827		1156.79	0.19585081		1746.8	0.13196299		2336.79	-0.00832163		2926.8	0.03654499		3516.8	0.07468052		4106.8	-0.01542061
567	0.37366631		1156.99	0.19624705		1747	0.13118206		2336.99	-0.00819664		2927	0.03616311		3517	0.07342872		4107	-0.01561493
567.2	0.37395424		1157.19	0.19657857		1747.2	0.12940843		2337.19	-0.00771369		2927.2	0.03655988		3517.2	0.07413493		4107.2	-0.01568359
567.4	0.37445525		1157.39	0.19695638		1747.4	0.12887738		2337.39	-0.0067128		2927.4	0.03723571		3517.4	0.07382692		4107.4	-0.01564381
567.6	0.3747461		1157.59	0.19720336		1747.6	0.12783013		2337.59	-0.00747037		2927.6	0.03865451		3517.6	0.07340477		4107.6	-0.01588651
567.8	0.37513119		1157.79	0.19548049		1747.8	0.12799413		2337.79	-0.00774278		2927.8	0.03819447		3517.8	0.0744972		4107.8	-0.01559628
568	0.37450957		1157.99	0.19576034		1748	0.12710809		2337.99	-0.00772479		2928	0.0375635		3518	0.07523081		4108	-0.01525517
568.2	0.37451273		1158.19	0.19603126		1748.2	0.12768068		2338.19	-0.00696768		2928.2	0.03726148		3518.2	0.07559337		4108.2	-0.0163614
568.4	0.37364666		1158.39	0.19499769		1748.4	0.12770903		2338.39	-0.00876563		2928.4	0.03712856		3518.4	0.07589187		4108.4	-0.01597112
568.6	0.37260768		1158.59	0.19388821		1748.6	0.1269787		2338.59	-0.00912215		2928.6	0.037315		3518.6	0.07667559		4108.6	-0.01592898
568.8	0.37250257		1158.79	0.19335201		1748.8	0.12699612		2338.79	-0.0088983		2928.8	0.03711127		3518.8	0.07627685		4108.8	-0.01589956
569	0.37234847		1158.99	0.19207676		1749	0.12810589		2338.99	-0.00876554		2929	0.03677892		3519	0.07696654		4109	-0.01620831
569.2	0.37321699		1159.19	0.19113947		1749.2	0.12792167		2339.19	-0.0087611		2929.2	0.03689474		3519.2	0.07676638		4109.2	-0.01520621
569.4	0.37259107		1159.39	0.19108409		1749.4	0.12794385		2339.39	-0.00972715		2929.4	0.03601621		3519.4	0.07641278		4109.4	-0.01460649
569.6	0.37141874		1159.59	0.1913678		1749.6	0.12826452		2339.59	-0.00974297		2929.6	0.03659861		3519.6	0.07675536		4109.6	-0.01562137
569.8	0.3711912		1159.79	0.19146242		1749.8	0.1289226		2339.79	-0.00912423		2929.8	0.03662256		3519.8	0.07655627		4109.8	-0.01575619
570	0.37035776		1159.99	0.19249999		1750	0.12979773		2339.99	-0.0079728		2930	0.03746467		3520	0.07636116		4110	-0.01474467
570.2	0.37023087		1160.19	0.1925442		1750.2	0.13002398		2340.19	-0.00754779		2930.2	0.03800883		3520.2	0.07608054		4110.2	-0.01449477
570.4	0.37064383		1160.39	0.19189435		1750.4	0.13056935		2340.39	-0.00758266		2930.4	0.03863866		3520.4	0.0757262		4110.4	-0.01363187
570.6	0.37006257		1160.59	0.19219942		1750.6	0.1310925		2340.59	-0.00771387		2930.6	0.03908796		3520.6	0.07540192		4110.6	-0.01380604
570.8	0.37044169		1160.79	0.19268659		1750.8	0.13164222		2340.79	-0.00712264		2930.8	0.03953718		3520.8	0.07381773		4110.8	-0.01347581
571	0.37092472		1160.99	0.19331792		1751	0.13089171		2340.99	-0.00692304		2931	0.04010495		3521	0.07294952		4111	-0.01285446
571.2	0.37163238		1161.19	0.19404983		1751.2	0.13008562		2341.19	-0.00713339		2931.2	0.04126724		3521.2	0.07382545		4111.2	-0.01259456
571.4	0.37204934		1161.39	0.19312986		1751.4	0.13112757		2341.39	-0.00706269		2931.4	0.04129563		3521.4	0.07301387		4111.4	-0.01219553
571.6	0.37177249		1161.59	0.19305526		1751.6	0.13116803		2341.59	-0.00745037		2931.6	0.04194474		3521.6	0.07213182		4111.6	-0.01249468
571.8	0.37229321		1161.79	0.19273789		1751.8	0.1318202		2341.79	-0.00741553		2931.8	0.04044784		3521.8	0.07301329		4111.8	-0.01201995
572	0.37195687		1161.99	0.19379867		1752	0.1313756		2341.99	-0.0080848		2932	0.04093999		3522	0.07232858		4112	-0.01221763
572.2	0.37278458		1162.19	0.19318722		1752.2	0.13163961		2342.19	-0.00913402		2932.2	0.04079043		3522.2	0.07207344		4112.2	-0.01321546
572.4	0.371814		1162.39	0.19329353		1752.4	0.13180926		2342.39	-0.01129577		2932.4	0.04060299		3522.4	0.07204024		4112.4	-0.01270496
572.6	0.37222104		1162.59	0.19404373		1752.6	0.13220937		2342.59	-0.01183146		2932.6	0.03991049		3522.6	0.07187292		4112.6	-0.01297354
572.8	0.37281107		1162.79	0.19364931		1752.8	0.13325192		2342.79	-0.01236709		2932.8	0.04001912		3522.8	0.07120626		4112.8	-0.01237603
573	0.37269668		1162.99	0.1926112		1753	0.13300704		2342.99	-0.01222286		2933	0.0399977		3523	0.07167691		4113	-0.01210274
573.2	0.37260043		1163.19	0.19305583		1753.2	0.13195661		2343.19	-0.01232272		2933.2	0.03942315		3523.2	0.07195871		4113.2	-0.01246542
573.4	0.37176569		1163.39	0.1944792		1753.4	0.13199775		2343.39	-0.01211453		2933.4	0.0391191		3523.4	0.07219822		4113.4	-0.01295299
573.6	0.37086815		1163.59	0.19424448		1753.6	0.13132662		2343.59	-0.0110198		2933.6	0.03968009		3523.6	0.07276878		4113.6	-0.01315311
573.8	0.37115158		1163.79	0.19464139		1753.8	0.12997608		2343.79	-0.00977751		2933.8	0.04010705		3523.8	0.07299028		4113.8	-0.01334429
574	0.37067938		1163.99	0.19550628		1754	0.12984055		2343.99	-0.0099293		2934	0.04133976		3524	0.07235186		4114	-0.01299966
574.2	0.37131116		1164.19	0.19506265		1754.2	0.13018983		2344.19	-0.01021816		2934.2	0.04206932		3524.2	0.07232785		4114.2	-0.01330777
574.4	0.37168922		1164.39	0.19464789		1754.4	0.13044518		2344.39	-0.01008314		2934.4	0.04349069		3524.4	0.07313929		4114.4	-0.01348554
574.6	0.37117923		1164.59	0.19485852		1754.6	0.13037893		2344.59	-0.00793295		2934.6	0.04354405		3524.6	0.07310845		4114.6	-0.01410794
574.8	0.37090685		1164.79	0.19510127		1754.8	0.13031527		2344.79	-0.00768491		2934.8	0.0436607		3524.8	0.07306922		4114.8	-0.01329756
575	0.37144906		1164.99	0.19469402		1755	0.12975765		2344.99	-0.00701362		2935	0.04313106		3525	0.07291294		4115	-0.01301168
575.2	0.37181952		1165.19	0.19385144		1755.2	0.1298464		2345.19	-0.00641406		2935.2	0.04297799		3525.2	0.07275492		4115.2	-0.01214659
575.4	0.37146996		1165.39	0.19324757		1755.4	0.13023883		2345.39	-0.00625291		2935.4	0.04238347		3525.4	0.07176314		4115.4	-0.01176823
575.6	0.37061647		1165.59	0.19395775		1755.6	0.13022482		2345.59	-0.00628204		2935.6	0.04301221		3525.6	0.07204887		4115.6	-0.01188335
575.8	0.37133872		1165.79	0.1944247		1755.8	0.13049117		2345.79	-0.00717883		2935.8	0.04266602		3525.8	0.07195775		4115.8	-0.01150502
576	0.37144856		1165.99	0.19475336		1756	0.13073727		2345.99	-0.00815871		2936	0.04353066		3526	0.07181709		4116	-0.01197719
576.2	0.37209773		1166.19	0.19449969		1756.2	0.13098588		2346.19	-0.00992158		2936.2	0.04281579		3526.2	0.07213065		4116.2	-0.01341196
576.4	0.3720966		1166.39	0.19503141		1756.4	0.13166861		2346.39	-0.01099281		2936.4	0.04228082		3526.4	0.07186335		4116.4	-0.01346761
576.6	0.37280322		1166.59	0.19467949		1756.6	0.13250234		2346.59	-0.01145609		2936.6	0.04109168		3526.6	0.07124318		4116.6	-0.01431973
576.8	0.37255911		1166.79	0.19372443		1756.8	0.13187046		2346.79	-0.0109224		2936.8	0.04021063		3526.8	0.07113729		4116.8	-0.01484298
577	0.37173477		1166.99	0.19352579		1757	0.13025172		2346.99	-0.01119697		2937	0.03925207		3527	0.07086014		4117	-0.01617879
577.2	0.37155854		1167.19	0.19410614		1757.2	0.12922433		2347.19	-0.01220345		2937.2	0.03844906		3527.2	0.07114031		4117.2	-0.01721946
577.4	0.37087179		1167.39	0.19457957		1757.4	0.1282793		2347.39	-0.01236731		2937.4	0.03783277		3527.4	0.07135547		4117.4	-0.01711835
577.6	0.3711198		1167.59	0.19352313		1757.6	0.12680187		2347.59	-0.01180397		2937.6	0.03782086		3527.6	0.07232938		4117.6	-0.01752789
577.8	0.37156903		1167.79	0.19406536		1757.8	0.12605282		2347.79	-0.01152171		2937.8	0.03793833		3527.8	0.07210712		4117.8	-0.01834327
578	0.37117431		1167.99	0.19342614		1758	0.12628909		2347.99	-0.01176834		2938	0.03797722		3528	0.07233809		4118	-0.01804632
578.2	0.37079493		1168.19	0.19257355		1758.2	0.12633413		2348.19	-0.01112607		2938.2	0.03733917		3528.2	0.07294944		4118.2	-0.01785248
578.4	0.37066202		1168.39	0.1925102		1758.4	0.12653733		2348.39	-0.01016349		2938.4	0.03734188		3528.4	0.07358502		4118.4	-0.01690556
578.6	0.37040603		1168.59	0.19238487		1758.6	0.12582028		2348.59	-0.00926674		2938.6	0.03710942		3528.6	0.07318188		4118.6	-0.01624139
578.8	0.37002698		1168.79	0.19201039		1758.8	0.12570528		2348.79	-0.00976519		2938.8	0.03707775		3528.8	0.07335688		4118.8	-0.01453341
579	0.3702826		1168.99	0.19246837		1759	0.12655217		2348.99	-0.00900715		2939	0.03704738		3529	0.07394057		4119	-0.01359941
579.2	0.3701544		1169.19	0.19268204		1759.2	0.12672098		2349.19	-0.00937492		2939.2	0.03767815		3529.2	0.07393163		4119.2	-0.01204191
579.4	0.3685873		1169.39	0.19377154		1759.4	0.12689324		2349.39	-0.01044931		2939.4	0.037122		3529.4	0.07441384		4119.4	-0.01182965
579.6	0.36752936		1169.59	0.19442392		1759.6	0.12722756		2349.59	-0.0099407		2939.6	0.03708748		3529.6	0.0749864		4119.6	-0.01161306
579.8	0.36778863		1169.79	0.19416876		1759.8	0.12768296		2349.79	-0.00987033		2939.8	0.03578013		3529.8	0.07433063		4119.8	-0.01181209
580	0.36741483		1169.99	0.19409227		1760	0.12810269		2349.99	-0.01003646		2940	0.03562811		3530	0.07465298		4120	-0.01189539
580.2	0.36752442		1170.19	0.19386418		1760.2	0.1285283		2350.19	-0.01067548		2940.2	0.03519703		3530.2	0.07439948		4120.2	-0.01194775
580.4	0.36741869		1170.39	0.19386668		1760.4	0.12853335		2350.39	-0.01060955		2940.4	0.03516589		3530.4	0.07360757		4120.4	-0.01170987
580.6	0.36732063		1170.59	0.19319942		1760.6	0.12833144		2350.59	-0.01011166		2940.6	0.03485283		3530.6	0.07329402		4120.6	-0.01203501
580.8	0.36818834		1170.79	0.19253548		1760.8	0.12767574		2350.79	-0.01058994		2940.8	0.03451423		3530.8	0.07270974		4120.8	-0.01295428
581	0.36906183		1170.99	0.19283136		1761	0.12761396		2350.99	-0.01076449		2941	0.0345903		3531	0.07225606		4121	-0.01361611
581.2	0.36973738		1171.19	0.1926969		1761.2	0.1280045		2351.19	-0.01084644		2941.2	0.03527997		3531.2	0.07299355		4121.2	-0.01340396
581.4	0.36942705		1171.39	0.19206944		1761.4	0.12791513		2351.39	-0.00981658		2941.4	0.03513608		3531.4	0.07414151		4121.4	-0.01374846
581.6	0.37037776		1171.59	0.19099683		1761.6	0.12783981		2351.59	-0.00884684		2941.6	0.03465665		3531.6	0.07497703		4121.6	-0.01483058
581.8	0.37000021		1171.79	0.190198		1761.8	0.1283056		2351.79	-0.00907913		2941.8	0.0343101		3531.8	0.07438089		4121.8	-0.01576195
582	0.37035532		1171.99	0.1890268		1762	0.1287337		2351.99	-0.00848763		2942	0.03392704		3532	0.07417687		4122	-0.01530049
582.2	0.37098635		1172.19	0.1893242		1762.2	0.12931854		2352.19	-0.00840542		2942.2	0.03439706		3532.2	0.07379198		4122.2	-0.01416985
582.4	0.37120819		1172.39	0.18917972		1762.4	0.12940895		2352.39	-0.00850056		2942.4	0.03589063		3532.4	0.07305392		4122.4	-0.01387758
582.6	0.37029898		1172.59	0.18924466		1762.6	0.12949535		2352.59	-0.00843696		2942.6	0.03680297		3532.6	0.07313532		4122.6	-0.01413613
582.8	0.36986379		1172.79	0.18967144		1762.8	0.13027495		2352.79	-0.00889727		2942.8	0.03733899		3532.8	0.07223925		4122.8	-0.01380713
583	0.37035641		1172.99	0.19059366		1763	0.13084458		2352.99	-0.0086523		2943	0.03781905		3533	0.07242401		4123	-0.01366268
583.2	0.36963284		1173.19	0.19055715		1763.2	0.13097393		2353.19	-0.00922951		2943.2	0.03797032		3533.2	0.07160923		4123.2	-0.01311633
583.4	0.36821499		1173.39	0.19085813		1763.4	0.13101757		2353.39	-0.00888789		2943.4	0.03719763		3533.4	0.07161547		4123.4	-0.01278355
583.6	0.3671835		1173.59	0.19064511		1763.6	0.13027762		2353.59	-0.00782157		2943.6	0.03698844		3533.6	0.07200906		4123.6	-0.01240923
583.8	0.36727237		1173.79	0.19054097		1763.8	0.1302293		2353.79	-0.00820815		2943.8	0.03696193		3533.8	0.07114277		4123.8	-0.01183452
584	0.36702802		1173.99	0.1912155		1764	0.12965034		2353.99	-0.00950571		2944	0.03855264		3534	0.07148319		4124	-0.01141193
584.2	0.36731751		1174.19	0.19108815		1764.2	0.12953999		2354.19	-0.01053992		2944.2	0.03905009		3534.2	0.07192299		4124.2	-0.01138745
584.4	0.36717807		1174.39	0.19124123		1764.4	0.12882065		2354.39	-0.01107593		2944.4	0.03991355		3534.4	0.07226932		4124.4	-0.01164987
584.6	0.36750886		1174.59	0.19047252		1764.6	0.12871372		2354.59	-0.01159158		2944.6	0.04037805		3534.6	0.07222355		4124.6	-0.01226772
584.8	0.36866144		1174.79	0.19042154		1764.8	0.12965638		2354.79	-0.01224865		2944.8	0.03996092		3534.8	0.07192252		4124.8	-0.01363904
585	0.36839864		1174.99	0.18962615		1765	0.1299215		2354.99	-0.01227537		2945	0.03955679		3535	0.07326461		4125	-0.01416708
585.2	0.36831738		1175.19	0.18828654		1765.2	0.13000332		2355.19	-0.01262184		2945.2	0.03954623		3535.2	0.07446404		4125.2	-0.01439992
585.4	0.368368		1175.39	0.18677794		1765.4	0.12938757		2355.39	-0.01210696		2945.4	0.03944893		3535.4	0.07509089		4125.4	-0.01497489
585.6	0.36932466		1175.59	0.18637598		1765.6	0.12979203		2355.59	-0.01227755		2945.6	0.0393015		3535.6	0.07485241		4125.6	-0.01609406
585.8	0.36895297		1175.79	0.18598178		1765.8	0.13054481		2355.79	-0.01242284		2945.8	0.03966545		3535.8	0.07440882		4125.8	-0.01650175
586	0.36945212		1175.99	0.18634605		1766	0.13061999		2355.99	-0.01207348		2946	0.04007566		3536	0.07399158		4126	-0.01622125
586.2	0.36925714		1176.19	0.18732587		1766.2	0.13084602		2356.19	-0.01104213		2946.2	0.04044779		3536.2	0.07435105		4126.2	-0.01576142
586.4	0.36836778		1176.39	0.18750297		1766.4	0.13098284		2356.39	-0.0101681		2946.4	0.04021468		3536.4	0.07406041		4126.4	-0.01659641
586.6	0.36761623		1176.59	0.18770134		1766.6	0.13159322		2356.59	-0.00963713		2946.6	0.03965815		3536.6	0.07411214		4126.6	-0.01671184
586.8	0.36729816		1176.79	0.18803711		1766.8	0.13153618		2356.79	-0.00929316		2946.8	0.03947497		3536.8	0.07297848		4126.8	-0.01598428
587	0.36705714		1176.99	0.18945733		1767	0.13173272		2356.99	-0.00826649		2947	0.03927904		3537	0.07338017		4127	-0.01558411
587.2	0.36580288		1177.19	0.18961454		1767.2	0.13157918		2357.19	-0.00759056		2947.2	0.03883062		3537.2	0.0734476		4127.2	-0.01528039
587.4	0.36487998		1177.39	0.19049218		1767.4	0.13045144		2357.39	-0.00716147		2947.4	0.03791772		3537.4	0.07312121		4127.4	-0.01505745
587.6	0.36497311		1177.59	0.19159281		1767.6	0.12925854		2357.59	-0.00759518		2947.6	0.03731609		3537.6	0.07341966		4127.6	-0.01474429
587.8	0.36534403		1177.79	0.19244617		1767.8	0.12859538		2357.79	-0.00851725		2947.8	0.03690534		3537.8	0.07330019		4127.8	-0.01459172
588	0.3652558		1177.99	0.19297796		1768	0.12737357		2357.99	-0.00932485		2948	0.03624851		3538	0.07427223		4128	-0.01445666
588.2	0.36540661		1178.19	0.19288064		1768.2	0.12738636		2358.19	-0.0092658		2948.2	0.03628725		3538.2	0.07464483		4128.2	-0.01517283
588.4	0.3659762		1178.39	0.19309911		1768.4	0.12765899		2358.39	-0.00955168		2948.4	0.03612882		3538.4	0.07391656		4128.4	-0.01580361
588.6	0.36754195		1178.59	0.1924454		1768.6	0.12753488		2358.59	-0.0096436		2948.6	0.03583794		3538.6	0.07444124		4128.6	-0.01667085
588.8	0.36817164		1178.79	0.19224048		1768.8	0.12721315		2358.79	-0.00961002		2948.8	0.03560133		3538.8	0.07444478		4128.8	-0.01750961
589	0.3685691		1178.99	0.19135491		1769	0.12696385		2358.99	-0.0097823		2949	0.03509495		3539	0.07494645		4129	-0.017654
589.2	0.36872983		1179.19	0.19092787		1769.2	0.12705835		2359.19	-0.00952219		2949.2	0.03634746		3539.2	0.07474429		4129.2	-0.01775899
589.4	0.36909979		1179.39	0.19070578		1769.4	0.1267432		2359.39	-0.00858547		2949.4	0.03729289		3539.4	0.07485122		4129.4	-0.01807196
589.6	0.369433		1179.59	0.19068239		1769.6	0.1268436		2359.59	-0.00841407		2949.6	0.03743132		3539.6	0.07476921		4129.6	-0.01889256
589.8	0.36866847		1179.79	0.1910244		1769.8	0.12683642		2359.79	-0.0080925		2949.8	0.03749003		3539.8	0.07420557		4129.8	-0.01856883
590	0.36865078		1179.99	0.19142737		1770	0.12670529		2359.99	-0.00855788		2950	0.03816772		3540	0.0748636		4130	-0.01861935
590.2	0.36875858		1180.19	0.19113695		1770.2	0.12667996		2360.19	-0.00744728		2950.2	0.03759659		3540.2	0.07537102		4130.2	-0.01724064
590.4	0.36976846		1180.39	0.1902785		1770.4	0.1268235		2360.39	-0.00833829		2950.4	0.03796072		3540.4	0.07450439		4130.4	-0.01745526
590.6	0.36937051		1180.59	0.19064097		1770.6	0.12666093		2360.59	-0.00904204		2950.6	0.03829655		3540.6	0.07422031		4130.6	-0.01782583
590.8	0.37014167		1180.79	0.19042886		1770.8	0.12680135		2360.79	-0.00948471		2950.8	0.03885612		3540.8	0.07362339		4130.8	-0.01689401
591	0.36985266		1180.99	0.19099234		1771	0.12719505		2360.99	-0.01021891		2951	0.03834119		3541	0.07246408		4131	-0.01725908
591.2	0.37007078		1181.19	0.19040356		1771.2	0.12642794		2361.19	-0.01077611		2951.2	0.03840094		3541.2	0.07278805		4131.2	-0.01651073
591.4	0.37008911		1181.39	0.19051048		1771.4	0.126301		2361.39	-0.01172119		2951.4	0.03840936		3541.4	0.07185214		4131.4	-0.01563003
591.6	0.37062366		1181.59	0.19036441		1771.6	0.12598903		2361.59	-0.01256845		2951.6	0.03836068		3541.6	0.07280848		4131.6	-0.01507511
591.8	0.37022842		1181.79	0.19009095		1771.8	0.12599007		2361.79	-0.01293722		2951.8	0.03756203		3541.8	0.07306296		4131.8	-0.01431912
592	0.37100126		1181.99	0.18957236		1772	0.12642121		2361.99	-0.01270457		2952	0.03697923		3542	0.07300276		4132	-0.01390044
592.2	0.37121755		1182.19	0.18926786		1772.2	0.12729395		2362.19	-0.01282844		2952.2	0.03754429		3542.2	0.07361713		4132.2	-0.01541775
592.4	0.37166699		1182.39	0.18997296		1772.4	0.12699914		2362.39	-0.01352385		2952.4	0.0364696		3542.4	0.07441053		4132.4	-0.01579743
592.6	0.37126185		1182.59	0.18990984		1772.6	0.12678715		2362.59	-0.01363087		2952.6	0.03691019		3542.6	0.07617229		4132.6	-0.01627315
592.8	0.37039705		1182.79	0.18996722		1772.8	0.12655672		2362.79	-0.01336084		2952.8	0.03698477		3542.8	0.07643395		4132.8	-0.01649637
593	0.36949477		1182.99	0.18981533		1773	0.12691852		2362.99	-0.01345163		2953	0.03667941		3543	0.07723188		4133	-0.01639013
593.2	0.36880609		1183.19	0.18956883		1773.2	0.12758168		2363.19	-0.01347674		2953.2	0.03715325		3543.2	0.07697378		4133.2	-0.01618522
593.4	0.36813771		1183.39	0.18951496		1773.4	0.12697023		2363.39	-0.01227641		2953.4	0.0374412		3543.4	0.07746723		4133.4	-0.01548755
593.6	0.36789188		1183.59	0.18997909		1773.6	0.12625631		2363.59	-0.01240679		2953.6	0.03671318		3543.6	0.07676586		4133.6	-0.01463727
593.8	0.36822599		1183.79	0.19046039		1773.8	0.12632532		2363.79	-0.0120154		2953.8	0.03640555		3543.8	0.07617133		4133.8	-0.01360651
594	0.36800942		1183.99	0.19028852		1774	0.12596947		2363.99	-0.01183574		2954	0.03702536		3544	0.07679297		4134	-0.01361362
594.2	0.36878558		1184.19	0.18958684		1774.2	0.12574409		2364.19	-0.01093266		2954.2	0.0368029		3544.2	0.07635704		4134.2	-0.01244272
594.4	0.36970827		1184.39	0.18973005		1774.4	0.12596307		2364.39	-0.01125947		2954.4	0.03768019		3544.4	0.07586415		4134.4	-0.01302907
594.6	0.36976584		1184.59	0.18931419		1774.6	0.12639056		2364.59	-0.01082585		2954.6	0.03741088		3544.6	0.07577797		4134.6	-0.01329399
594.8	0.37038833		1184.79	0.18854049		1774.8	0.1267898		2364.79	-0.01090531		2954.8	0.03823998		3544.8	0.07546907		4134.8	-0.01288926
595	0.37110523		1184.99	0.18842977		1775	0.12700704		2364.99	-0.01072681		2955	0.03844495		3545	0.07441846		4135	-0.01281768
595.2	0.37165221		1185.19	0.18898244		1775.2	0.12695202		2365.19	-0.01135799		2955.2	0.03944507		3545.2	0.07493744		4135.2	-0.01212277
595.4	0.37214524		1185.39	0.18869995		1775.4	0.1275341		2365.39	-0.01200652		2955.4	0.04000996		3545.4	0.07403879		4135.4	-0.01248206
595.6	0.37227047		1185.59	0.18817643		1775.6	0.12790115		2365.59	-0.01221807		2955.6	0.04034346		3545.6	0.07388683		4135.6	-0.01312718
595.8	0.37231097		1185.79	0.18764172		1775.8	0.12901686		2365.79	-0.01194045		2955.8	0.03923428		3545.8	0.07292995		4135.8	-0.01322681
596	0.37251318		1185.99	0.18768		1776	0.12993461		2365.99	-0.01222884		2956	0.03931151		3546	0.07297298		4136	-0.01472284
596.2	0.37218651		1186.19	0.18788653		1776.2	0.12995408		2366.19	-0.01389395		2956.2	0.03965676		3546.2	0.07328708		4136.2	-0.01617637
596.4	0.37145117		1186.39	0.18806314		1776.4	0.13008851		2366.39	-0.01445065		2956.4	0.04013404		3546.4	0.07321394		4136.4	-0.01716116
596.6	0.37079566		1186.59	0.18745011		1776.6	0.13105171		2366.59	-0.01483183		2956.6	0.04058456		3546.6	0.07339999		4136.6	-0.01847753
596.8	0.37096425		1186.79	0.18719547		1776.8	0.13128525		2366.79	-0.01434616		2956.8	0.04033745		3546.8	0.07278346		4136.8	-0.01845138
597	0.36962667		1186.99	0.18702929		1777	0.13229478		2366.99	-0.01492867		2957	0.04082077		3547	0.07213013		4137	-0.01793605
597.2	0.36929673		1187.19	0.18672457		1777.2	0.13200086		2367.19	-0.01437949		2957.2	0.04055489		3547.2	0.0717623		4137.2	-0.01629933
597.4	0.36859502		1187.39	0.18688381		1777.4	0.13101425		2367.39	-0.01333669		2957.4	0.04069278		3547.4	0.07235247		4137.4	-0.01600642
597.6	0.36890932		1187.59	0.18727454		1777.6	0.12974589		2367.59	-0.01314947		2957.6	0.03940438		3547.6	0.07247607		4137.6	-0.01484068
597.8	0.36838554		1187.79	0.18763163		1777.8	0.12901895		2367.79	-0.01194717		2957.8	0.03900452		3547.8	0.07242534		4137.8	-0.01421748
598	0.36656394		1187.99	0.18796815		1778	0.12801597		2367.99	-0.01098068		2958	0.03940165		3548	0.07275702		4138	-0.01397487
598.2	0.36610565		1188.19	0.18892902		1778.2	0.12776063		2368.19	-0.01101954		2958.2	0.03943856		3548.2	0.0725827		4138.2	-0.01347839
598.4	0.36571641		1188.39	0.18886372		1778.4	0.12716426		2368.39	-0.00992657		2958.4	0.0396647		3548.4	0.07256049		4138.4	-0.013203
598.6	0.36582181		1188.59	0.18957936		1778.6	0.12674439		2368.59	-0.00864997		2958.6	0.03916973		3548.6	0.07315238		4138.6	-0.01397469
598.8	0.3650804		1188.79	0.19021787		1778.8	0.12559019		2368.79	-0.0084637		2958.8	0.03915158		3548.8	0.07283269		4138.8	-0.01390239
599	0.36536703		1188.99	0.19055135		1779	0.12589164		2368.99	-0.00826503		2959	0.03823943		3549	0.07213732		4139	-0.01371246
599.2	0.36487055		1189.19	0.19121099		1779.2	0.12519138		2369.19	-0.00862565		2959.2	0.0381172		3549.2	0.07204087		4139.2	-0.01449188
599.4	0.36568965		1189.39	0.19029433		1779.4	0.12507901		2369.39	-0.0086586		2959.4	0.03748307		3549.4	0.07146525		4139.4	-0.01567821
599.6	0.36488413		1189.59	0.18961535		1779.6	0.12570139		2369.59	-0.00866744		2959.6	0.03690318		3549.6	0.0710794		4139.6	-0.01611719
599.8	0.36532839		1189.79	0.18968915		1779.8	0.12675063		2369.79	-0.00923378		2959.8	0.03536052		3549.8	0.07054525		4139.8	-0.01688236
600	0.3648573		1189.99	0.19007084		1780	0.12751315		2369.99	-0.01076452		2960	0.03573712		3550	0.07033896		4140	-0.01815055
600.2	0.36559048		1190.19	0.1895989		1780.2	0.12738265		2370.19	-0.01212514		2960.2	0.03610994		3550.2	0.06984251		4140.2	-0.01857
600.4	0.36519081		1190.39	0.18999369		1780.4	0.12851288		2370.39	-0.01227173		2960.4	0.03578293		3550.4	0.07013667		4140.4	-0.01898332
600.6	0.3657933		1190.59	0.19016829		1780.6	0.12847324		2370.59	-0.0127224		2960.6	0.03581515		3550.6	0.07052862		4140.6	-0.01879097
600.8	0.3662217		1190.79	0.19006163		1780.8	0.12821362		2370.79	-0.01268187		2960.8	0.03558217		3550.8	0.07121191		4140.8	-0.01777112
601	0.36572089		1190.99	0.18973888		1781	0.12856835		2370.99	-0.0137343		2961	0.03588807		3551	0.07156228		4141	-0.01758299
601.2	0.36580061		1191.19	0.1895896		1781.2	0.1278666		2371.19	-0.01371582		2961.2	0.0346603		3551.2	0.07233324		4141.2	-0.01757316
601.4	0.36604235		1191.39	0.18992675		1781.4	0.12731342		2371.39	-0.01386003		2961.4	0.03487727		3551.4	0.07275464		4141.4	-0.01811209
601.6	0.36586634		1191.59	0.19006713		1781.6	0.12743944		2371.59	-0.01400668		2961.6	0.03521718		3551.6	0.07334028		4141.6	-0.01674428
601.8	0.3655547		1191.79	0.19053744		1781.8	0.12738002		2371.79	-0.01370786		2961.8	0.03577122		3551.8	0.07307336		4141.8	-0.01604503
602	0.36540825		1191.99	0.19127782		1782	0.12660053		2371.99	-0.01393374		2962	0.03709293		3552	0.0737403		4142	-0.01586172
602.2	0.36563022		1192.19	0.19180043		1782.2	0.12635311		2372.19	-0.01465019		2962.2	0.03771319		3552.2	0.07443416		4142.2	-0.01553784
602.4	0.36591875		1192.39	0.19109723		1782.4	0.12663677		2372.39	-0.01384026		2962.4	0.03813874		3552.4	0.07458831		4142.4	-0.01638115
602.6	0.36676127		1192.59	0.19156967		1782.6	0.12648926		2372.59	-0.01400602		2962.6	0.03777895		3552.6	0.07528871		4142.6	-0.01692493
602.8	0.36695683		1192.79	0.19114334		1782.8	0.12629815		2372.79	-0.01464292		2962.8	0.03756303		3552.8	0.07427914		4142.8	-0.01667776
603	0.36795589		1192.99	0.19078987		1783	0.12696225		2372.99	-0.0152532		2963	0.03714277		3553	0.07423		4143	-0.01734641
603.2	0.36903513		1193.19	0.19033354		1783.2	0.12570887		2373.19	-0.0152604		2963.2	0.03712813		3553.2	0.07360584		4143.2	-0.01779317
603.4	0.37041036		1193.39	0.18989705		1783.4	0.12632136		2373.39	-0.01616903		2963.4	0.03630425		3553.4	0.07285807		4143.4	-0.01781832
603.6	0.37038065		1193.59	0.1903817		1783.6	0.12676524		2373.59	-0.01619164		2963.6	0.03615999		3553.6	0.07261311		4143.6	-0.01813742
603.8	0.37047971		1193.79	0.18982013		1783.8	0.12697575		2373.79	-0.01665779		2963.8	0.03608643		3553.8	0.07272681		4143.8	-0.01825574
604	0.36951722		1193.99	0.18946363		1784	0.12696765		2373.99	-0.01639426		2964	0.03623964		3554	0.07311359		4144	-0.01807125
604.2	0.36951717		1194.19	0.18915452		1784.2	0.12627461		2374.19	-0.01589977		2964.2	0.03510418		3554.2	0.07326207		4144.2	-0.01716943
604.4	0.36949978		1194.39	0.18916137		1784.4	0.12601031		2374.39	-0.01526823		2964.4	0.03426788		3554.4	0.07377765		4144.4	-0.01646918
604.6	0.36890612		1194.59	0.18845581		1784.6	0.12529532		2374.59	-0.01501745		2964.6	0.03433866		3554.6	0.07412005		4144.6	-0.01652383
604.8	0.36775579		1194.79	0.18756766		1784.8	0.12479906		2374.79	-0.01419175		2964.8	0.03336723		3554.8	0.07453623		4144.8	-0.01668895
605	0.36633888		1194.99	0.18704537		1785	0.12498766		2374.99	-0.01462937		2965	0.03342943		3555	0.07378179		4145	-0.01649411
605.2	0.36572911		1195.19	0.18678078		1785.2	0.12514045		2375.19	-0.01398121		2965.2	0.03288491		3555.2	0.07375981		4145.2	-0.01680543
605.4	0.36518777		1195.39	0.18645404		1785.4	0.12511397		2375.39	-0.01351822		2965.4	0.03323643		3555.4	0.07355091		4145.4	-0.01630288
605.6	0.36466267		1195.59	0.18623227		1785.6	0.12558392		2375.59	-0.01252422		2965.6	0.03426406		3555.6	0.07412993		4145.6	-0.01529168
605.8	0.36418405		1195.79	0.18662596		1785.8	0.12504169		2375.79	-0.01171455		2965.8	0.03492895		3555.8	0.07435863		4145.8	-0.01518976
606	0.36361833		1195.99	0.18730055		1786	0.12519304		2375.99	-0.01162826		2966	0.03531279		3556	0.07513438		4146	-0.01582137
606.2	0.36380246		1196.19	0.18807145		1786.2	0.12622442		2376.19	-0.01157037		2966.2	0.03538757		3556.2	0.07567284		4146.2	-0.01636633
606.4	0.3640108		1196.39	0.18912878		1786.4	0.12787873		2376.39	-0.01174228		2966.4	0.03577201		3556.4	0.07578613		4146.4	-0.01733356
606.6	0.36504821		1196.59	0.18977487		1786.6	0.12821898		2376.59	-0.01236273		2966.6	0.03570803		3556.6	0.07596614		4146.6	-0.0170215
606.8	0.36548571		1196.79	0.18987096		1786.8	0.12938763		2376.79	-0.0132306		2966.8	0.03532636		3556.8	0.07483331		4146.8	-0.0171479
607	0.3667403		1196.99	0.19052469		1787	0.12950363		2376.99	-0.01337982		2967	0.03517496		3557	0.07417681		4147	-0.01835786
607.2	0.36816309		1197.19	0.19084255		1787.2	0.12916633		2377.19	-0.01349972		2967.2	0.03421537		3557.2	0.07400464		4147.2	-0.01785792
607.4	0.36942643		1197.39	0.19100785		1787.4	0.12950049		2377.39	-0.0136379		2967.4	0.03441756		3557.4	0.07398703		4147.4	-0.0181739
607.6	0.3690758		1197.59	0.19066787		1787.6	0.12891302		2377.59	-0.01310031		2967.6	0.03415384		3557.6	0.07389857		4147.6	-0.01847579
607.8	0.36884631		1197.79	0.18969706		1787.8	0.12795993		2377.79	-0.01327778		2967.8	0.03426591		3557.8	0.07363026		4147.8	-0.01750725
608	0.36934026		1197.99	0.18930265		1788	0.12715515		2377.99	-0.01269559		2968	0.03367977		3558	0.07338114		4148	-0.0173208
608.2	0.3689654		1198.19	0.18920552		1788.2	0.12690337		2378.19	-0.01214355		2968.2	0.03301697		3558.2	0.07290121		4148.2	-0.01705334
608.4	0.36873641		1198.39	0.18832343		1788.4	0.12635695		2378.39	-0.01228374		2968.4	0.03358711		3558.4	0.07248844		4148.4	-0.0171712
608.6	0.36763376		1198.59	0.18754674		1788.6	0.12567058		2378.59	-0.01231575		2968.6	0.0334671		3558.6	0.07189952		4148.6	-0.01686809
608.8	0.36735105		1198.79	0.18741559		1788.8	0.12518571		2378.79	-0.01169706		2968.8	0.03413566		3558.8	0.07042622		4148.8	-0.01639033
609	0.36737157		1198.99	0.18798801		1789	0.12547425		2378.99	-0.01196147		2969	0.03509178		3559	0.07019927		4149	-0.0160566
609.2	0.36738101		1199.19	0.18717448		1789.2	0.1257433		2379.19	-0.0124684		2969.2	0.03590836		3559.2	0.07017872		4149.2	-0.01627654
609.4	0.36705943		1199.39	0.18669585		1789.4	0.12575155		2379.39	-0.0125477		2969.4	0.03633513		3559.4	0.06997567		4149.4	-0.01552083
609.6	0.36704038		1199.59	0.18729369		1789.6	0.12581571		2379.59	-0.01268721		2969.6	0.03735772		3559.6	0.07032537		4149.6	-0.01477038
609.8	0.36622557		1199.79	0.18791393		1789.8	0.12644249		2379.79	-0.01287471		2969.8	0.03783246		3559.8	0.07029742		4149.8	-0.01496744
610	0.36550391		1199.99	0.18859517		1790	0.12690277		2379.99	-0.01358139		2970	0.038523		3560	0.07091089		4150	-0.01477537
610.2	0.3659244		1200.19	0.18936303		1790.2	0.12772304		2380.19	-0.01395292		2970.2	0.03869107		3560.2	0.07238913		4150.2	-0.01498273
610.4	0.36579798		1200.39	0.18942882		1790.4	0.12906522		2380.39	-0.01462427		2970.4	0.03818125		3560.4	0.07238847		4150.4	-0.01536942
610.6	0.36611993		1200.59	0.18903512		1790.6	0.12845621		2380.59	-0.01492321		2970.6	0.03727041		3560.6	0.07231977		4150.6	-0.01628547
610.8	0.36669543		1200.79	0.18909276		1790.8	0.12884001		2380.79	-0.01533781		2970.8	0.03699193		3560.8	0.07217787		4150.8	-0.01674487
611	0.36737552		1200.99	0.18979844		1791	0.12796056		2380.99	-0.01492489		2971	0.03655358		3561	0.07240262		4151	-0.01702248
611.2	0.368067		1201.19	0.1895292		1791.2	0.12791661		2381.19	-0.0154528		2971.2	0.03586985		3561.2	0.07348499		4151.2	-0.01706596
611.4	0.36865074		1201.39	0.18901218		1791.4	0.12731849		2381.39	-0.01420787		2971.4	0.03581611		3561.4	0.07245173		4151.4	-0.01702776
611.6	0.36811152		1201.59	0.18923732		1791.6	0.12669788		2381.59	-0.01407999		2971.6	0.03523852		3561.6	0.07201698		4151.6	-0.01746173
611.8	0.36859432		1201.79	0.18892824		1791.8	0.12560169		2381.79	-0.01409448		2971.8	0.03539484		3561.8	0.07214956		4151.8	-0.01740637
612	0.36925458		1201.99	0.1878461		1792	0.12636208		2381.99	-0.0138963		2972	0.03546583		3562	0.07297021		4152	-0.01849691
612.2	0.36743953		1202.19	0.18792795		1792.2	0.12656987		2382.19	-0.01315138		2972.2	0.034642		3562.2	0.0726528		4152.2	-0.01873942
612.4	0.36782864		1202.39	0.18687098		1792.4	0.12623916		2382.39	-0.01286592		2972.4	0.0349809		3562.4	0.07249142		4152.4	-0.01906331
612.6	0.36805181		1202.59	0.18738841		1792.6	0.1262048		2382.59	-0.01161484		2972.6	0.03503236		3562.6	0.07236426		4152.6	-0.01851753
612.8	0.36767901		1202.79	0.1879378		1792.8	0.12649154		2382.79	-0.01064586		2972.8	0.03526309		3562.8	0.07223923		4152.8	-0.01887087
613	0.36768881		1202.99	0.18691198		1793	0.127122		2382.99	-0.01112683		2973	0.03524378		3563	0.07232064		4153	-0.01904973
613.2	0.36770446		1203.19	0.18569966		1793.2	0.1270539		2383.19	-0.01220086		2973.2	0.03581392		3563.2	0.07275894		4153.2	-0.0182031
613.4	0.36777002		1203.39	0.18526602		1793.4	0.12670937		2383.39	-0.0127686		2973.4	0.03560743		3563.4	0.07312505		4153.4	-0.01706264
613.6	0.36769312		1203.59	0.18504787		1793.6	0.12537713		2383.59	-0.01258117		2973.6	0.03574783		3563.6	0.07383801		4153.6	-0.01643002
613.8	0.3668175		1203.79	0.18473282		1793.8	0.12534618		2383.79	-0.01316646		2973.8	0.03557829		3563.8	0.07389754		4153.8	-0.01546342
614	0.36663617		1203.99	0.18513144		1794	0.12482586		2383.99	-0.01356666		2974	0.03563781		3564	0.07468248		4154	-0.01485914
614.2	0.36691607		1204.19	0.18475434		1794.2	0.12515495		2384.19	-0.01440651		2974.2	0.03479516		3564.2	0.07563646		4154.2	-0.01507297
614.4	0.3665349		1204.39	0.18541698		1794.4	0.12501875		2384.39	-0.01505613		2974.4	0.0335634		3564.4	0.07509576		4154.4	-0.01561629
614.6	0.36653698		1204.59	0.18564964		1794.6	0.12403869		2384.59	-0.01539829		2974.6	0.03325402		3564.6	0.07481562		4154.6	-0.01599329
614.8	0.36704021		1204.79	0.18659522		1794.8	0.12416465		2384.79	-0.01592938		2974.8	0.03372134		3564.8	0.07447262		4154.8	-0.01587668
615	0.36686433		1204.99	0.18727408		1795	0.12423092		2384.99	-0.01581661		2975	0.03320623		3565	0.07468996		4155	-0.01634485
615.2	0.36667592		1205.19	0.18783057		1795.2	0.12440189		2385.19	-0.0151768		2975.2	0.03265617		3565.2	0.07498468		4155.2	-0.01729757
615.4	0.36599057		1205.39	0.18835193		1795.4	0.12406131		2385.39	-0.01469074		2975.4	0.03239773		3565.4	0.07400165		4155.4	-0.01739072
615.6	0.36517149		1205.59	0.18874564		1795.6	0.12323471		2385.59	-0.01536374		2975.6	0.03226216		3565.6	0.07475447		4155.6	-0.01773514
615.8	0.36589206		1205.79	0.1889995		1795.8	0.12331036		2385.79	-0.01562125		2975.8	0.03294308		3565.8	0.0749948		4155.8	-0.01880999
616	0.36615968		1205.99	0.18882589		1796	0.12391702		2385.99	-0.01542007		2976	0.03316023		3566	0.07469098		4156	-0.01948887
616.2	0.36521808		1206.19	0.18941851		1796.2	0.12367334		2386.19	-0.01375241		2976.2	0.03311018		3566.2	0.07414296		4156.2	-0.01963943
616.4	0.36541176		1206.39	0.1891125		1796.4	0.12369053		2386.39	-0.01288043		2976.4	0.03375159		3566.4	0.07368529		4156.4	-0.02006318
616.6	0.36453771		1206.59	0.18982222		1796.6	0.12379945		2386.59	-0.01096055		2976.6	0.03453672		3566.6	0.07309221		4156.6	-0.0197575
616.8	0.36363088		1206.79	0.18959409		1796.8	0.12436255		2386.79	-0.01128437		2976.8	0.03475896		3566.8	0.07284369		4156.8	-0.01910272
617	0.3639343		1206.99	0.18890708		1797	0.12437968		2386.99	-0.01139588		2977	0.03515047		3567	0.07280202		4157	-0.01821412
617.2	0.36426611		1207.19	0.18865405		1797.2	0.1245349		2387.19	-0.01125232		2977.2	0.03619523		3567.2	0.07416328		4157.2	-0.01647881
617.4	0.36493264		1207.39	0.18831671		1797.4	0.12423857		2387.39	-0.01181383		2977.4	0.03722904		3567.4	0.07429339		4157.4	-0.01498078
617.6	0.36617849		1207.59	0.18779917		1797.6	0.12369921		2387.59	-0.0116138		2977.6	0.03772106		3567.6	0.07444967		4157.6	-0.01429002
617.8	0.36636566		1207.79	0.18808143		1797.8	0.12507761		2387.79	-0.01378108		2977.8	0.03761992		3567.8	0.07445194		4157.8	-0.01408085
618	0.36660789		1207.99	0.18857595		1798	0.12564501		2387.99	-0.01368289		2978	0.03801961		3568	0.07489015		4158	-0.01437955
618.2	0.36599063		1208.19	0.187489		1798.2	0.12676213		2388.19	-0.01518241		2978.2	0.03797707		3568.2	0.07526337		4158.2	-0.01427309
618.4	0.36608236		1208.39	0.18829456		1798.4	0.12595008		2388.39	-0.0148392		2978.4	0.03898038		3568.4	0.0751313		4158.4	-0.01480218
618.6	0.36658676		1208.59	0.18815312		1798.6	0.12669626		2388.59	-0.01491817		2978.6	0.03902031		3568.6	0.07506479		4158.6	-0.01532708
618.8	0.36655788		1208.79	0.18823094		1798.8	0.12714907		2388.79	-0.01530945		2978.8	0.03938236		3568.8	0.07480579		4158.8	-0.01678715
619	0.36689411		1208.99	0.18883351		1799	0.12702193		2388.99	-0.01567677		2979	0.03873538		3569	0.07423098		4159	-0.01737085
619.2	0.36634136		1209.19	0.18947105		1799.2	0.12728349		2389.19	-0.01502181		2979.2	0.03821506		3569.2	0.07325747		4159.2	-0.01794187
619.4	0.36581659		1209.39	0.18965522		1799.4	0.12729342		2389.39	-0.01578441		2979.4	0.03893356		3569.4	0.0723096		4159.4	-0.01803632
619.6	0.36640633		1209.59	0.18949176		1799.6	0.1270307		2389.59	-0.01558859		2979.6	0.03837204		3569.6	0.07158039		4159.6	-0.01833839
619.8	0.36775479		1209.79	0.19026019		1799.8	0.12760426		2389.79	-0.01454026		2979.8	0.03871101		3569.8	0.07156258		4159.8	-0.01945739
620	0.36822564		1209.99	0.18879136		1800	0.12779516		2389.99	-0.01346676		2980	0.03785493		3570	0.07067528		4160	-0.01938431
620.2	0.36794746		1210.19	0.18901268		1800.2	0.12813445		2390.19	-0.01277441		2980.2	0.03740934		3570.2	0.06974877		4160.2	-0.01983738
620.4	0.36785831		1210.39	0.18896458		1800.4	0.12850495		2390.39	-0.01220076		2980.4	0.0368084		3570.4	0.06892351		4160.4	-0.01933759
620.6	0.36811537		1210.59	0.18923147		1800.6	0.12955473		2390.59	-0.01124975		2980.6	0.03685939		3570.6	0.06895096		4160.6	-0.01867555
620.8	0.36827119		1210.79	0.18831542		1800.8	0.13015298		2390.79	-0.01211764		2980.8	0.03626333		3570.8	0.0685922		4160.8	-0.01807135
621	0.36911407		1210.99	0.18821315		1801	0.12989149		2390.99	-0.01209259		2981	0.03558178		3571	0.06866672		4161	-0.01804651
621.2	0.37021701		1211.19	0.18779295		1801.2	0.13089085		2391.19	-0.01255953		2981.2	0.0355927		3571.2	0.06907915		4161.2	-0.01798012
621.4	0.37081627		1211.39	0.18777588		1801.4	0.13050897		2391.39	-0.01355806		2981.4	0.03592325		3571.4	0.06944581		4161.4	-0.01817662
621.6	0.37078741		1211.59	0.18721544		1801.6	0.13037954		2391.59	-0.01398328		2981.6	0.03567861		3571.6	0.06983808		4161.6	-0.01850427
621.8	0.36977359		1211.79	0.18743624		1801.8	0.13075174		2391.79	-0.01433876		2981.8	0.03507011		3571.8	0.07007505		4161.8	-0.0186943
622	0.3684453		1211.99	0.18644403		1802	0.13013648		2391.99	-0.01395196		2982	0.03563572		3572	0.07084149		4162	-0.01793642
622.2	0.36768898		1212.19	0.18522931		1802.2	0.12948481		2392.19	-0.01515688		2982.2	0.03641436		3572.2	0.07124031		4162.2	-0.01836946
622.4	0.3676476		1212.39	0.18583959		1802.4	0.12724083		2392.39	-0.01456037		2982.4	0.03784921		3572.4	0.07187962		4162.4	-0.0195045
622.6	0.36742777		1212.59	0.18474336		1802.6	0.12817963		2392.59	-0.01576596		2982.6	0.03784406		3572.6	0.07225112		4162.6	-0.02053359
622.8	0.3675147		1212.79	0.18408314		1802.8	0.12686167		2392.79	-0.01635441		2982.8	0.03891488		3572.8	0.07157454		4162.8	-0.0209869
623	0.36779815		1212.99	0.18546769		1803	0.12640698		2392.99	-0.01666409		2983	0.03888273		3573	0.07113164		4163	-0.02054913
623.2	0.36639492		1213.19	0.1854512		1803.2	0.12614025		2393.19	-0.01679321		2983.2	0.03936564		3573.2	0.07019207		4163.2	-0.02018558
623.4	0.36580306		1213.39	0.18541781		1803.4	0.12519075		2393.39	-0.01743158		2983.4	0.04006601		3573.4	0.07067685		4163.4	-0.02009856
623.6	0.36569319		1213.59	0.18537373		1803.6	0.12431422		2393.59	-0.01766041		2983.6	0.03974611		3573.6	0.07116602		4163.6	-0.02002003
623.8	0.36511447		1213.79	0.18548084		1803.8	0.12401244		2393.79	-0.01680151		2983.8	0.04006689		3573.8	0.07203126		4163.8	-0.01935374
624	0.36484957		1213.99	0.18439011		1804	0.12421441		2393.99	-0.01716615		2984	0.03910622		3574	0.07213454		4164	-0.01958176
624.2	0.36506943		1214.19	0.18493373		1804.2	0.12453445		2394.19	-0.01680401		2984.2	0.03865362		3574.2	0.0719801		4164.2	-0.01859971
624.4	0.36460303		1214.39	0.18498224		1804.4	0.12463203		2394.39	-0.01608201		2984.4	0.03828684		3574.4	0.0724872		4164.4	-0.01809872
624.6	0.3647383		1214.59	0.18527179		1804.6	0.12481424		2394.59	-0.01606768		2984.6	0.03770654		3574.6	0.07307764		4164.6	-0.0181249
624.8	0.36439339		1214.79	0.1848614		1804.8	0.12438811		2394.79	-0.01607694		2984.8	0.0372638		3574.8	0.07251017		4164.8	-0.01750407
625	0.36456071		1214.99	0.18534789		1805	0.1242222		2394.99	-0.0163609		2985	0.03614091		3575	0.07263059		4165	-0.01714922
625.2	0.3643295		1215.19	0.18514794		1805.2	0.12422295		2395.19	-0.01576598		2985.2	0.0357926		3575.2	0.07317722		4165.2	-0.01746078
625.4	0.3642557		1215.39	0.18448412		1805.4	0.12377114		2395.39	-0.01572366		2985.4	0.03591556		3575.4	0.07329186		4165.4	-0.01703269
625.6	0.36430558		1215.59	0.18487293		1805.6	0.12426938		2395.59	-0.01475356		2985.6	0.0357997		3575.6	0.07293368		4165.6	-0.01687418
625.8	0.36425079		1215.79	0.1851206		1805.8	0.12460531		2395.79	-0.01544207		2985.8	0.03603965		3575.8	0.0727201		4165.8	-0.01732173
626	0.36449058		1215.99	0.18492948		1806	0.12374769		2395.99	-0.01524014		2986	0.03613337		3576	0.07301523		4166	-0.0171833
626.2	0.36595657		1216.19	0.18482481		1806.2	0.12376846		2396.19	-0.01514808		2986.2	0.03603736		3576.2	0.0723524		4166.2	-0.01886392
626.4	0.36603388		1216.39	0.18516506		1806.4	0.12380509		2396.39	-0.01492719		2986.4	0.03660805		3576.4	0.07261575		4166.4	-0.01991872
626.6	0.36674012		1216.59	0.18444676		1806.6	0.12462132		2396.59	-0.01540389		2986.6	0.03673455		3576.6	0.07169709		4166.6	-0.02065578
626.8	0.3671652		1216.79	0.18466517		1806.8	0.12348377		2396.79	-0.01495313		2986.8	0.03688422		3576.8	0.07121976		4166.8	-0.02058478
627	0.3663309		1216.99	0.18534163		1807	0.12336387		2396.99	-0.01463525		2987	0.03704052		3577	0.07108945		4167	-0.01991435
627.2	0.36596207		1217.19	0.18467704		1807.2	0.12292443		2397.19	-0.01510075		2987.2	0.03707716		3577.2	0.0706707		4167.2	-0.01937119
627.4	0.36536256		1217.39	0.18444587		1807.4	0.12349967		2397.39	-0.01506826		2987.4	0.0371181		3577.4	0.07092184		4167.4	-0.02002443
627.6	0.3654071		1217.59	0.18446255		1807.6	0.12384241		2397.59	-0.01494687		2987.6	0.03735795		3577.6	0.07116006		4167.6	-0.01970251
627.8	0.36573583		1217.79	0.18448583		1807.8	0.12477175		2397.79	-0.01484734		2987.8	0.03722727		3577.8	0.0713877		4167.8	-0.019242
628	0.36572411		1217.99	0.18425623		1808	0.12572965		2397.99	-0.01498439		2988	0.03601327		3578	0.07156844		4168	-0.01910192
628.2	0.36529668		1218.19	0.18445919		1808.2	0.12650177		2398.19	-0.015023		2988.2	0.03597059		3578.2	0.07181071		4168.2	-0.01876574
628.4	0.36523748		1218.39	0.18450269		1808.4	0.12539182		2398.39	-0.01545997		2988.4	0.03495887		3578.4	0.07213105		4168.4	-0.018662
628.6	0.3657466		1218.59	0.18435558		1808.6	0.12528062		2398.59	-0.0160817		2988.6	0.03457759		3578.6	0.07299224		4168.6	-0.01802104
628.8	0.3659368		1218.79	0.18426299		1808.8	0.12566156		2398.79	-0.01671808		2988.8	0.03402377		3578.8	0.07271667		4168.8	-0.01696056
629	0.36632889		1218.99	0.18442422		1809	0.1255001		2398.99	-0.01781115		2989	0.0331308		3579	0.07260135		4169	-0.01743648
629.2	0.36631653		1219.19	0.1847891		1809.2	0.12501799		2399.19	-0.01855833		2989.2	0.0331112		3579.2	0.07268313		4169.2	-0.01820464
629.4	0.36712986		1219.39	0.18505359		1809.4	0.12550065		2399.39	-0.01956015		2989.4	0.03278683		3579.4	0.07280401		4169.4	-0.01839903
629.6	0.36746594		1219.59	0.18596755		1809.6	0.12568954		2399.59	-0.02026016		2989.6	0.03318771		3579.6	0.07246496		4169.6	-0.01917022
629.8	0.36771154		1219.79	0.18632446		1809.8	0.12480785		2399.79	-0.02144708		2989.8	0.03307305		3579.8	0.0721877		4169.8	-0.01968415
630	0.36770266		1219.99	0.18685636		1810	0.12360769		2399.99	-0.01998066		2990	0.03237383		3580	0.07143643		4170	-0.0191747
630.2	0.36817907		1220.19	0.18713143		1810.2	0.12361708		2400.19	-0.02096506		2990.2	0.0319762		3580.2	0.0715811		4170.2	-0.01982106
630.4	0.36707538		1220.39	0.18785506		1810.4	0.12316226		2400.39	-0.0210136		2990.4	0.03316647		3580.4	0.07102494		4170.4	-0.01934471
630.6	0.3671627		1220.59	0.188443		1810.6	0.12277099		2400.59	-0.02044008		2990.6	0.03344774		3580.6	0.07011452		4170.6	-0.01897627
630.8	0.36604992		1220.79	0.18815253		1810.8	0.12240905		2400.79	-0.01939825		2990.8	0.03424704		3580.8	0.07075951		4170.8	-0.01816009
631	0.36594304		1220.99	0.18787577		1811	0.12232431		2400.99	-0.01865484		2991	0.03499362		3581	0.07098481		4171	-0.01755989
631.2	0.36621061		1221.19	0.18773576		1811.2	0.12276978		2401.19	-0.01868083		2991.2	0.035675		3581.2	0.07019583		4171.2	-0.01798105
631.4	0.36517086		1221.39	0.18768556		1811.4	0.1230566		2401.39	-0.01771204		2991.4	0.03586261		3581.4	0.06962473		4171.4	-0.01890024
631.6	0.36578121		1221.59	0.18803655		1811.6	0.12311585		2401.59	-0.01736126		2991.6	0.03641154		3581.6	0.06959057		4171.6	-0.01896289
631.8	0.36475912		1221.79	0.18839527		1811.8	0.12299578		2401.79	-0.01664104		2991.8	0.03657438		3581.8	0.06986534		4171.8	-0.0190292
632	0.36404652		1221.99	0.18779974		1812	0.12233743		2401.99	-0.01586377		2992	0.03725701		3582	0.06975645		4172	-0.01879007
632.2	0.3634255		1222.19	0.18760313		1812.2	0.12221545		2402.19	-0.0156055		2992.2	0.0382369		3582.2	0.07049834		4172.2	-0.01888543
632.4	0.36380855		1222.39	0.18672434		1812.4	0.12143818		2402.39	-0.01535172		2992.4	0.03783555		3582.4	0.07117562		4172.4	-0.01773058
632.6	0.36327195		1222.59	0.18615805		1812.6	0.12195868		2402.59	-0.01509708		2992.6	0.03866894		3582.6	0.07145547		4172.6	-0.01736212
632.8	0.36312625		1222.79	0.18597549		1812.8	0.12229461		2402.79	-0.01535605		2992.8	0.03823485		3582.8	0.07165406		4172.8	-0.0173652
633	0.3633843		1222.99	0.18541669		1813	0.1215486		2402.99	-0.0155496		2993	0.03849838		3583	0.07212873		4173	-0.01811436
633.2	0.36338503		1223.19	0.18471422		1813.2	0.12204334		2403.19	-0.01539276		2993.2	0.03842389		3583.2	0.07241776		4173.2	-0.01773648
633.4	0.3645703		1223.39	0.18401811		1813.4	0.12302047		2403.39	-0.01578877		2993.4	0.03732728		3583.4	0.07238921		4173.4	-0.01784931
633.6	0.36471667		1223.59	0.18361055		1813.6	0.12326851		2403.59	-0.01603557		2993.6	0.03802538		3583.6	0.07178505		4173.6	-0.01762479
633.8	0.36469785		1223.79	0.1841729		1813.8	0.12276008		2403.79	-0.01504358		2993.8	0.03716025		3583.8	0.07194821		4173.8	-0.0177136
634	0.36453777		1223.99	0.18500052		1814	0.12294002		2403.99	-0.01508678		2994	0.03636347		3584	0.07154575		4174	-0.01736307
634.2	0.36446928		1224.19	0.18590242		1814.2	0.12422975		2404.19	-0.01587215		2994.2	0.03585852		3584.2	0.07175103		4174.2	-0.01718188
634.4	0.36431865		1224.39	0.18596788		1814.4	0.12456555		2404.39	-0.01491402		2994.4	0.03590261		3584.4	0.0707549		4174.4	-0.01724095
634.6	0.36386547		1224.59	0.18605178		1814.6	0.12551308		2404.59	-0.01481536		2994.6	0.03628783		3584.6	0.07104852		4174.6	-0.01727659
634.8	0.36391954		1224.79	0.18564727		1814.8	0.12596024		2404.79	-0.0144574		2994.8	0.03624289		3584.8	0.07168277		4174.8	-0.01767972
635	0.36442883		1224.99	0.18478262		1815	0.12606406		2404.99	-0.01464619		2995	0.03528371		3585	0.07156137		4175	-0.01907824
635.2	0.36375781		1225.19	0.18508919		1815.2	0.12658413		2405.19	-0.01499971		2995.2	0.03504836		3585.2	0.0704803		4175.2	-0.01931416
635.4	0.36322336		1225.39	0.18540404		1815.4	0.12730219		2405.39	-0.01423334		2995.4	0.03383		3585.4	0.07049233		4175.4	-0.01917439
635.6	0.36367251		1225.59	0.18539792		1815.6	0.12733244		2405.59	-0.01373172		2995.6	0.03398035		3585.6	0.06971323		4175.6	-0.01877453
635.8	0.3626117		1225.79	0.18557515		1815.8	0.12722061		2405.79	-0.01326602		2995.8	0.0346005		3585.8	0.06968069		4175.8	-0.01901162
636	0.36272603		1225.99	0.18465879		1816	0.12677104		2405.99	-0.01301084		2996	0.03534643		3586	0.06933389		4176	-0.01888694
636.2	0.36226201		1226.19	0.18391685		1816.2	0.12753432		2406.19	-0.01303463		2996.2	0.03501992		3586.2	0.06943996		4176.2	-0.01794768
636.4	0.36295396		1226.39	0.18383889		1816.4	0.12702835		2406.39	-0.01381954		2996.4	0.03430641		3586.4	0.06924235		4176.4	-0.01747705
636.6	0.36311393		1226.59	0.18397298		1816.6	0.12647852		2406.59	-0.01432789		2996.6	0.03452212		3586.6	0.06971672		4176.6	-0.01789175
636.8	0.36428831		1226.79	0.18445572		1816.8	0.12593717		2406.79	-0.01501038		2996.8	0.03420079		3586.8	0.07025064		4176.8	-0.01749295
637	0.36509667		1226.99	0.18435326		1817	0.12531789		2406.99	-0.0154		2997	0.03466609		3587	0.07058222		4177	-0.01734792
637.2	0.36512557		1227.19	0.18468566		1817.2	0.12503033		2407.19	-0.01598757		2997.2	0.03410933		3587.2	0.06986187		4177.2	-0.01660959
637.4	0.36554257		1227.39	0.18553461		1817.4	0.12463492		2407.39	-0.01753051		2997.4	0.03409985		3587.4	0.06958023		4177.4	-0.0175201
637.6	0.36560115		1227.59	0.18586986		1817.6	0.12410967		2407.59	-0.01757303		2997.6	0.03461126		3587.6	0.06962714		4177.6	-0.0182839
637.8	0.36654901		1227.79	0.1869848		1817.8	0.12311588		2407.79	-0.01798408		2997.8	0.03426301		3587.8	0.0691899		4177.8	-0.01929933
638	0.36684431		1227.99	0.18725359		1818	0.12347521		2407.99	-0.01871692		2998	0.03420537		3588	0.06895334		4178	-0.01963215
638.2	0.36607466		1228.19	0.18758507		1818.2	0.12400038		2408.19	-0.01854093		2998.2	0.0351345		3588.2	0.0688388		4178.2	-0.02024677
638.4	0.36664626		1228.39	0.18708012		1818.4	0.12374048		2408.39	-0.01829264		2998.4	0.03621799		3588.4	0.06884772		4178.4	-0.02085215
638.6	0.36560802		1228.59	0.18667655		1818.6	0.12387059		2408.59	-0.01799231		2998.6	0.03789451		3588.6	0.06934646		4178.6	-0.02039068
638.8	0.36574779		1228.79	0.18540017		1818.8	0.12358521		2408.79	-0.01778186		2998.8	0.0380365		3588.8	0.06879236		4178.8	-0.02083782
639	0.36540387		1228.99	0.18453755		1819	0.12290125		2408.99	-0.01794978		2999	0.03803322		3589	0.06856581		4179	-0.02125971
639.2	0.3653256		1229.19	0.18421688		1819.2	0.12326369		2409.19	-0.01747766		2999.2	0.03856896		3589.2	0.06804856		4179.2	-0.01976073
639.4	0.36532793		1229.39	0.18313623		1819.4	0.12413174		2409.39	-0.01571195		2999.4	0.03901487		3589.4	0.06904694		4179.4	-0.01980693
639.6	0.36478333		1229.59	0.18234839		1819.6	0.12424006		2409.59	-0.01445592		2999.6	0.03986786		3589.6	0.06892087		4179.6	-0.0201294
639.8	0.36437288		1229.79	0.18167335		1819.8	0.12489738		2409.79	-0.01343649		2999.8	0.04065556		3589.8	0.06930268		4179.8	-0.02016783
640	0.36404378		1229.99	0.18189091		1820	0.1245306		2409.99	-0.01167929		3000	0.04077193		3590	0.06961631		4180	-0.01997159
640.2	0.36422768		1230.19	0.1824182		1820.2	0.12530251		2410.19	-0.0123132		3000.2	0.03992949		3590.2	0.07012435		4180.2	-0.01877666
640.4	0.36451034		1230.39	0.18400681		1820.4	0.12476726		2410.39	-0.01247433		3000.4	0.03925308		3590.4	0.07021343		4180.4	-0.01929609
640.6	0.36385974		1230.59	0.18433138		1820.6	0.12477591		2410.59	-0.01271104		3000.6	0.03922291		3590.6	0.07168199		4180.6	-0.01901573
640.8	0.36471574		1230.79	0.18493541		1820.8	0.12378529		2410.79	-0.01321206		3000.8	0.0392803		3590.8	0.07170135		4180.8	-0.01834117
641	0.36474205		1230.99	0.18549783		1821	0.12366087		2410.99	-0.01453298		3001	0.0396657		3591	0.07167139		4181	-0.01855338
641.2	0.36446034		1231.19	0.18742246		1821.2	0.12380322		2411.19	-0.01618706		3001.2	0.03899739		3591.2	0.07105217		4181.2	-0.01836458
641.4	0.36454733		1231.39	0.18769963		1821.4	0.12404751		2411.39	-0.01699092		3001.4	0.0386026		3591.4	0.07072481		4181.4	-0.018951
641.6	0.36503371		1231.59	0.18806081		1821.6	0.12398776		2411.59	-0.01759042		3001.6	0.0376841		3591.6	0.07055617		4181.6	-0.01984461
641.8	0.36508612		1231.79	0.1885986		1821.8	0.12402209		2411.79	-0.01775826		3001.8	0.03708333		3591.8	0.06973772		4181.8	-0.01994533
642	0.3648005		1231.99	0.18880308		1822	0.12416499		2411.99	-0.01698847		3002	0.03641876		3592	0.07001633		4182	-0.01995831
642.2	0.36421631		1232.19	0.18918829		1822.2	0.12410196		2412.19	-0.01655679		3002.2	0.03588773		3592.2	0.06887034		4182.2	-0.02046069
642.4	0.36484033		1232.39	0.1885941		1822.4	0.12422206		2412.39	-0.01622905		3002.4	0.03546308		3592.4	0.06858275		4182.4	-0.02027915
642.6	0.36394256		1232.59	0.18831848		1822.6	0.12278237		2412.59	-0.0161742		3002.6	0.03504034		3592.6	0.06864064		4182.6	-0.01972113
642.8	0.36433977		1232.79	0.18681299		1822.8	0.12211843		2412.79	-0.01613962		3002.8	0.03462333		3592.8	0.0682957		4182.8	-0.01987894
643	0.36406605		1232.99	0.18742349		1823	0.12119381		2412.99	-0.01544529		3003	0.03418262		3593	0.0683846		4183	-0.02078158
643.2	0.36390359		1233.19	0.18676609		1823.2	0.12164028		2413.19	-0.01452187		3003.2	0.03395523		3593.2	0.06891263		4183.2	-0.01998607
643.4	0.36318459		1233.39	0.18677942		1823.4	0.12256309		2413.39	-0.01440971		3003.4	0.03383566		3593.4	0.06990809		4183.4	-0.02132864
643.6	0.36320426		1233.59	0.18649517		1823.6	0.12298532		2413.59	-0.01409929		3003.6	0.03287199		3593.6	0.06933299		4183.6	-0.02097854
643.8	0.36360078		1233.79	0.18648337		1823.8	0.123692		2413.79	-0.01366172		3003.8	0.03293527		3593.8	0.06939753		4183.8	-0.02018126
644	0.36305401		1233.99	0.18780565		1824	0.12449153		2413.99	-0.01398068		3004	0.03249479		3594	0.06948803		4184	-0.02025968
644.2	0.36277297		1234.19	0.18811726		1824.2	0.12556165		2414.19	-0.01529696		3004.2	0.03246827		3594.2	0.06955177		4184.2	-0.01985348
644.4	0.36169491		1234.39	0.18747128		1824.4	0.12562956		2414.39	-0.01580855		3004.4	0.03220928		3594.4	0.07039551		4184.4	-0.02088316
644.6	0.36144045		1234.59	0.18693849		1824.6	0.12646627		2414.59	-0.01733409		3004.6	0.03214601		3594.6	0.07157438		4184.6	-0.02055413
644.8	0.36238664		1234.79	0.18646735		1824.8	0.12633987		2414.79	-0.0184032		3004.8	0.03233233		3594.8	0.07118552		4184.8	-0.02027653
645	0.36263176		1234.99	0.18538763		1825	0.12694118		2414.99	-0.01851435		3005	0.0324072		3595	0.0705699		4185	-0.01969719
645.2	0.36140022		1235.19	0.18517594		1825.2	0.12718898		2415.19	-0.01858828		3005.2	0.0324402		3595.2	0.07055259		4185.2	-0.01887292
645.4	0.36161446		1235.39	0.1838375		1825.4	0.12709235		2415.39	-0.01858872		3005.4	0.03227783		3595.4	0.07011115		4185.4	-0.01946357
645.6	0.36166683		1235.59	0.18371172		1825.6	0.1265355		2415.59	-0.01851883		3005.6	0.03246736		3595.6	0.06947951		4185.6	-0.01954284
645.8	0.36124124		1235.79	0.18336626		1825.8	0.1260396		2415.79	-0.01707406		3005.8	0.03301961		3595.8	0.06879303		4185.8	-0.01961019
646	0.36137676		1235.99	0.18344449		1826	0.12560683		2415.99	-0.01542164		3006	0.03301448		3596	0.06857059		4186	-0.01907815
646.2	0.3612747		1236.19	0.18291399		1826.2	0.12560226		2416.19	-0.01505602		3006.2	0.03327604		3596.2	0.06822365		4186.2	-0.0194237
646.4	0.36231268		1236.39	0.18208188		1826.4	0.12585135		2416.39	-0.01468402		3006.4	0.03429515		3596.4	0.06883871		4186.4	-0.01918706
646.6	0.36274089		1236.59	0.18203742		1826.6	0.12433071		2416.59	-0.01450918		3006.6	0.03454046		3596.6	0.06899755		4186.6	-0.01924448
646.8	0.36316		1236.79	0.18157708		1826.8	0.12402696		2416.79	-0.01435442		3006.8	0.0351735		3596.8	0.06898561		4186.8	-0.01900189
647	0.3633164		1236.99	0.18318678		1827	0.12296271		2416.99	-0.01425783		3007	0.03610886		3597	0.06903312		4187	-0.0190836
647.2	0.36370987		1237.19	0.18321919		1827.2	0.12322736		2417.19	-0.01526538		3007.2	0.03607703		3597.2	0.06910463		4187.2	-0.01851233
647.4	0.3641209		1237.39	0.18419555		1827.4	0.12372022		2417.39	-0.0170927		3007.4	0.03590701		3597.4	0.06854245		4187.4	-0.01873049
647.6	0.3655852		1237.59	0.18453869		1827.6	0.12398299		2417.59	-0.01763529		3007.6	0.03661348		3597.6	0.06840659		4187.6	-0.01774763
647.8	0.36581725		1237.79	0.18568987		1827.8	0.12428404		2417.79	-0.01803297		3007.8	0.03759272		3597.8	0.06895363		4187.8	-0.01770186
648	0.36550822		1237.99	0.18681161		1828	0.12457631		2417.99	-0.01833665		3008	0.03777748		3598	0.06924612		4188	-0.01845568
648.2	0.36527862		1238.19	0.18687731		1828.2	0.12440275		2418.19	-0.01848835		3008.2	0.03798064		3598.2	0.06982169		4188.2	-0.01872719
648.4	0.36519442		1238.39	0.18657113		1828.4	0.12408958		2418.39	-0.01866406		3008.4	0.03711258		3598.4	0.07091028		4188.4	-0.01949916
648.6	0.36590426		1238.59	0.18697333		1828.6	0.12394487		2418.59	-0.01869973		3008.6	0.03660426		3598.6	0.07075889		4188.6	-0.01917335
648.8	0.3661666		1238.79	0.18684789		1828.8	0.1231381		2418.79	-0.01793071		3008.8	0.03636776		3598.8	0.07031767		4188.8	-0.01924712
649	0.36606861		1238.99	0.18672058		1829	0.12258495		2418.99	-0.01703761		3009	0.03618382		3599	0.07011608		4189	-0.01935673
649.2	0.36527253		1239.19	0.18762136		1829.2	0.12236653		2419.19	-0.01699775		3009.2	0.03619244		3599.2	0.06998624		4189.2	-0.01984189
649.4	0.36562091		1239.39	0.18805038		1829.4	0.12181871		2419.39	-0.01682039		3009.4	0.03588652		3599.4	0.0693627		4189.4	-0.02075634
649.6	0.36491698		1239.59	0.18842109		1829.6	0.12087601		2419.59	-0.01569811		3009.6	0.03596515		3599.6	0.06875138		4189.6	-0.02077665
649.8	0.364238		1239.79	0.18872025		1829.8	0.12061373		2419.79	-0.01445292		3009.8	0.03591033		3599.8	0.06881707		4189.8	-0.02140021
