# Supplementary material for: Functional development of a V3/glycan-specific broadly neutralizing antibody isolated from a case of HIV superinfection
Source: eLife journal article supplement (doi:10.7554/elife.68110), 2021-07-15
Supplement: fig2-data2 [file C3.xls]

Vers 3.43 Data Simulation
Conc1	2.5E-07	2.5E-07	2.5E-07	2.5E-07	2.5E-07	2.5E-07
Start1	290	879.99	1469.99	2059.98	2649.98	3239.98
Stop1	649.8	1239.79	1829.79	2419.78	3009.78	3599.78
Time1	Data1	Sim1	Time2	Data2	Sim2	Time3	Data3	Sim3	Time4	Data4	Sim4	Time5	Data5	Sim5	Time6	Data6	Sim6
290	0.00302256		879.99	0.00102756		1469.99	-0.00140488		2059.98	-0.00429645		2649.98	0.00524111		3239.98	-0.004601
290.2	0.0036426		880.19	0.00122062		1470.19	-0.00064367		2060.18	-0.00372208		2650.18	0.00515691		3240.18	-0.00359273
290.4	0.00362605		880.39	0.00124453		1470.39	-0.00004707		2060.38	-0.00295137		2650.38	0.00468568		3240.38	-0.00306634
290.6	0.00421847		880.59	0.00106273		1470.59	0.00087801		2060.58	-0.00324346		2650.58	0.00412194		3240.58	-0.00292191
290.8	0.00491868		880.79	0.00099343		1470.79	0.00228562		2060.78	-0.00298695		2650.78	0.00400677		3240.78	-0.00276865
291	0.0057239		880.99	0.00129331		1470.99	0.00259778		2060.98	-0.00275552		2650.98	0.0035701		3240.98	-0.00254936
291.2	0.0062733		881.19	0.00144688		1471.19	0.0030229		2061.18	-0.00295674		2651.18	0.00379693		3241.18	-0.00283514
291.4	0.00669623		881.39	0.00124282		1471.39	0.00380569		2061.38	-0.00267457		2651.38	0.00391973		3241.38	-0.0031927
291.6	0.00666641		881.59	0.00121727		1471.59	0.00366592		2061.58	-0.002515		2651.58	0.00406493		3241.58	-0.00318095
291.8	0.0065436		881.79	0.00178888		1471.79	0.00385795		2061.78	-0.00250011		2651.78	0.00413408		3241.78	-0.0032434
292	0.00612811		881.99	0.00198151		1471.99	0.00354478		2061.98	-0.00230157		2651.98	0.00455815		3241.98	-0.00273735
292.2	0.00527058		882.19	0.00207767		1472.19	0.00306617		2062.18	-0.00254887		2652.18	0.00488791		3242.18	-0.00269488
292.4	0.00578871		882.39	0.00246053		1472.39	0.00288355		2062.38	-0.00244836		2652.38	0.0046093		3242.38	-0.00335714
292.6	0.00431156		882.59	0.00271927		1472.59	0.0030163		2062.58	-0.00194342		2652.58	0.00451417		3242.58	-0.00381097
292.8	0.00361712		882.79	0.00251118		1472.79	0.00192618		2062.78	-0.0013098		2652.78	0.00423636		3242.78	-0.00307529
293	0.00331286		882.99	0.0018043		1472.99	0.00169918		2062.98	-0.00173483		2652.98	0.00381597		3242.98	-0.0026922
293.2	0.00309049		883.19	0.00127667		1473.19	0.00116231		2063.18	-0.00183011		2653.18	0.00400837		3243.18	-0.00263458
293.4	0.00289928		883.39	0.00058509		1473.39	0.00183		2063.38	-0.00098625		2653.38	0.00401754		3243.38	-0.00211487
293.6	0.0031845		883.59	-0.00013931		1473.59	0.00118946		2063.58	-0.00097067		2653.58	0.00419727		3243.58	-0.00193503
293.8	0.00346769		883.79	-0.0005055		1473.79	0.00159744		2063.78	-0.00026581		2653.78	0.00387242		3243.78	-0.0016212
294	0.00442697		883.99	-0.00045295		1473.99	0.00174372		2063.98	-0.00024218		2653.98	0.00420587		3243.98	-0.00121293
294.2	0.00427848		884.19	-0.00035733		1474.19	0.00255936		2064.18	-0.00067185		2654.18	0.00471614		3244.18	-0.00080616
294.4	0.00435646		884.39	-0.00015427		1474.39	0.00316277		2064.38	-0.00061982		2654.38	0.00419006		3244.38	-0.00118212
294.6	0.00489682		884.59	0.00007288		1474.59	0.00406504		2064.58	-0.00116665		2654.58	0.00416169		3244.58	-0.00214561
294.8	0.0053273		884.79	0.00049071		1474.79	0.00444774		2064.78	-0.00093402		2654.78	0.00391048		3244.78	-0.00261956
295	0.00673428		884.99	0.00166197		1474.99	0.00427218		2064.98	-0.000653		2654.98	0.00330767		3244.98	-0.00337431
295.2	0.007671		885.19	0.00227001		1475.19	0.00481276		2065.18	-0.00054251		2655.18	0.00371656		3245.18	-0.00441162
295.4	0.00808436		885.39	0.00272531		1475.39	0.0054076		2065.38	0.00023632		2655.38	0.00310748		3245.38	-0.00481005
295.6	0.00829524		885.59	0.00395379		1475.59	0.00526257		2065.58	-0.00007817		2655.58	0.00282074		3245.58	-0.00472682
295.8	0.00842805		885.79	0.00436808		1475.79	0.0051405		2065.78	-0.00093481		2655.78	0.00237507		3245.78	-0.00487476
296	0.008463		885.99	0.00462891		1475.99	0.00485933		2065.98	-0.00084388		2655.98	0.00242514		3245.98	-0.0051405
296.2	0.00749092		886.19	0.00440066		1476.19	0.00509041		2066.18	-0.00122727		2656.18	0.00264595		3246.18	-0.00554744
296.4	0.008466		886.39	0.00314129		1476.39	0.00534551		2066.38	-0.00101943		2656.38	0.0028842		3246.38	-0.00565182
296.6	0.00732315		886.59	0.00196599		1476.59	0.0058736		2066.58	-0.00065648		2656.58	0.00360647		3246.58	-0.00558302
296.8	0.00753883		886.79	0.00107945		1476.79	0.00558832		2066.78	0.00000051		2656.78	0.00460444		3246.78	-0.00514833
297	0.00726581		886.99	0.00002612		1476.99	0.0057972		2066.98	0.00049774		2656.98	0.00496875		3246.98	-0.00535714
297.2	0.0069795		887.19	-0.00032505		1477.19	0.00540814		2067.18	0.00048357		2657.18	0.00596888		3247.18	-0.00544149
297.4	0.00732842		887.39	-0.00077441		1477.39	0.00526085		2067.38	0.0009032		2657.38	0.00703285		3247.38	-0.00487451
297.6	0.00682354		887.59	-0.00131101		1477.59	0.00525649		2067.58	0.00093739		2657.58	0.00750999		3247.58	-0.00489773
297.8	0.00696394		887.79	-0.00158231		1477.79	0.00590874		2067.78	0.00017757		2657.78	0.00769103		3247.78	-0.00423201
298	0.00679206		887.99	-0.00169461		1477.99	0.00600185		2067.98	-0.00027879		2657.98	0.00786847		3247.98	-0.00420536
298.2	0.00649606		888.19	-0.00162939		1478.19	0.0057075		2068.18	-0.00092158		2658.18	0.00775103		3248.18	-0.00431989
298.4	0.00599399		888.39	-0.00087092		1478.39	0.00517007		2068.38	-0.00014884		2658.38	0.0077791		3248.38	-0.00420075
298.6	0.00566181		888.59	-0.00029595		1478.59	0.00415688		2068.58	0.00026027		2658.58	0.0076437		3248.58	-0.00476025
298.8	0.00592166		888.79	0.00104296		1478.79	0.00357338		2068.78	0.00104514		2658.78	0.00607251		3248.78	-0.00426305
299	0.00706835		888.99	0.00237463		1478.99	0.00339624		2068.98	0.00219433		2658.98	0.00572149		3248.98	-0.00361594
299.2	0.00726179		889.19	0.0034305		1479.19	0.00257559		2069.18	0.00175352		2659.18	0.00496359		3249.18	-0.0035847
299.4	0.0071323		889.39	0.00393501		1479.39	0.00276717		2069.38	0.00164744		2659.38	0.00464149		3249.38	-0.00385894
299.6	0.00767885		889.59	0.00481994		1479.59	0.00277394		2069.58	0.00105254		2659.58	0.00503331		3249.58	-0.00410604
299.8	0.0081029		889.79	0.00498715		1479.79	0.00236551		2069.78	0.0010693		2659.78	0.00492599		3249.78	-0.00440066
300	0.00807607		889.99	0.00539521		1479.99	0.00261847		2069.98	0.00205253		2659.98	0.00533576		3249.98	-0.00426838
300.2	0.00877363		890.19	0.00540618		1480.19	0.00301236		2070.18	0.00186049		2660.18	0.00596636		3250.18	-0.00376157
300.4	0.01038316		890.39	0.00415814		1480.39	0.00321717		2070.38	0.00206324		2660.38	0.00657548		3250.38	-0.00411478
300.6	0.01080622		890.59	0.00338197		1480.59	0.00409741		2070.58	0.00225137		2660.58	0.00683654		3250.58	-0.00415259
300.8	0.01154713		890.79	0.00306022		1480.79	0.00440395		2070.78	0.00260536		2660.78	0.00708495		3250.78	-0.00493493
301	0.01258007		890.99	0.00253278		1480.99	0.00423355		2070.98	0.00227462		2660.98	0.00715127		3250.98	-0.00476471
301.2	0.01362941		891.19	0.00272202		1481.19	0.00437668		2071.18	0.00066591		2661.18	0.00685387		3251.18	-0.00481378
301.4	0.01389176		891.39	0.00185482		1481.39	0.00498022		2071.38	-0.0003118		2661.38	0.00682692		3251.38	-0.00442675
301.6	0.01350632		891.59	0.00065432		1481.59	0.00556591		2071.58	-0.00142126		2661.58	0.00594831		3251.58	-0.00439818
301.8	0.01379757		891.79	-0.00009454		1481.79	0.00520938		2071.78	-0.00279594		2661.78	0.00556181		3251.78	-0.00376417
302	0.01355019		891.99	-0.00063937		1481.99	0.00551249		2071.98	-0.00343866		2661.98	0.00537645		3251.98	-0.00393263
302.2	0.01340307		892.19	-0.00037777		1482.19	0.00472482		2072.18	-0.00393888		2662.18	0.00601522		3252.18	-0.00307822
302.4	0.01338278		892.39	0.00003098		1482.39	0.00400847		2072.38	-0.0032318		2662.38	0.00611022		3252.38	-0.00307791
302.6	0.01313696		892.59	0.00034534		1482.59	0.00331408		2072.58	-0.00337185		2662.58	0.00576068		3252.58	-0.00296065
302.8	0.01297916		892.79	0.00096781		1482.79	0.00363322		2072.78	-0.0033463		2662.78	0.00587582		3252.78	-0.00191124
303	0.01364228		892.99	0.00087926		1482.99	0.00293334		2072.98	-0.00410911		2662.98	0.0066964		3252.98	-0.00184048
303.2	0.01280545		893.19	0.00127108		1483.19	0.00273177		2073.18	-0.00461969		2663.18	0.00719929		3253.18	-0.00214387
303.4	0.01255394		893.39	0.00149265		1483.39	0.00357959		2073.38	-0.00343829		2663.38	0.00796546		3253.38	-0.00289612
303.6	0.01209093		893.59	0.00250263		1483.59	0.00390936		2073.58	-0.0027026		2663.58	0.00782845		3253.58	-0.00311446
303.8	0.0117989		893.79	0.00296355		1483.79	0.00389161		2073.78	-0.00237867		2663.78	0.00685092		3253.78	-0.00366697
304	0.01123204		893.99	0.00322076		1483.99	0.00427656		2073.98	-0.00168878		2663.98	0.00658569		3253.98	-0.00360362
304.2	0.01168686		894.19	0.00395443		1484.19	0.00499185		2074.18	-0.0017234		2664.18	0.00654267		3254.18	-0.004893
304.4	0.01261598		894.39	0.0032594		1484.39	0.00568079		2074.38	-0.00124572		2664.38	0.00689068		3254.38	-0.00497485
304.6	0.01350191		894.59	0.00296594		1484.59	0.00603801		2074.58	-0.0007686		2664.58	0.00631429		3254.58	-0.00468794
304.8	0.01312246		894.79	0.00309455		1484.79	0.00649684		2074.78	-0.00044115		2664.78	0.00640636		3254.78	-0.00476988
305	0.01287809		894.99	0.00263855		1484.99	0.00561201		2074.98	-0.00114688		2664.98	0.00649988		3254.98	-0.00353914
305.2	0.01204074		895.19	0.00193385		1485.19	0.00550351		2075.18	-0.00146536		2665.18	0.00597358		3255.18	-0.00346861
305.4	0.01140429		895.39	0.00080253		1485.39	0.00553642		2075.38	-0.00171643		2665.38	0.00617924		3255.38	-0.00314469
305.6	0.01192181		895.59	-0.00051048		1485.59	0.00495342		2075.58	-0.00177449		2665.58	0.00606514		3255.58	-0.00362466
305.8	0.01215384		895.79	-0.00018729		1485.79	0.00438455		2075.78	-0.0017148		2665.78	0.00637135		3255.78	-0.00283298
306	0.01277087		895.99	0.00000818		1485.99	0.00489516		2075.98	-0.00207095		2665.98	0.00689938		3255.98	-0.00260335
306.2	0.01262999		896.19	0.00019765		1486.19	0.00424749		2076.18	-0.00198376		2666.18	0.00760337		3256.18	-0.00256233
306.4	0.01302992		896.39	-0.00091203		1486.39	0.00378747		2076.38	-0.00171589		2666.38	0.00793928		3256.38	-0.00214591
306.6	0.01310774		896.59	-0.00139663		1486.59	0.00449425		2076.58	-0.00231739		2666.58	0.00896022		3256.58	-0.00187191
306.8	0.01348703		896.79	-0.00125486		1486.79	0.00472416		2076.78	-0.00155684		2666.78	0.00992705		3256.78	-0.00220294
307	0.0134553		896.99	-0.00192498		1486.99	0.00459445		2076.98	-0.00142522		2666.98	0.00955		3256.98	-0.00212091
307.2	0.01284037		897.19	-0.0007614		1487.19	0.0056794		2077.18	-0.00066341		2667.18	0.00921096		3257.18	-0.00178099
307.4	0.01297177		897.39	0.00001933		1487.39	0.00594082		2077.38	-0.00054121		2667.38	0.00873889		3257.38	-0.00267519
307.6	0.01259785		897.59	0.00021966		1487.59	0.00724622		2077.58	-0.00058045		2667.58	0.00787597		3257.58	-0.00367639
307.8	0.01329248		897.79	0.00039978		1487.79	0.00763201		2077.78	-0.00030248		2667.78	0.00771012		3257.78	-0.0036853
308	0.01412904		897.99	0.00031335		1487.99	0.00790963		2077.98	0.00083209		2667.98	0.00788301		3257.98	-0.00351033
308.2	0.01505473		898.19	0.00044389		1488.19	0.00784691		2078.18	0.00110952		2668.18	0.00766965		3258.18	-0.00336207
308.4	0.01619876		898.39	-0.00006111		1488.39	0.00791973		2078.38	0.00148333		2668.38	0.00756208		3258.38	-0.00266212
308.6	0.0161899		898.59	0.0002899		1488.59	0.00768161		2078.58	0.00195478		2668.58	0.00777186		3258.58	-0.00250194
308.8	0.01569627		898.79	0.00043486		1488.79	0.00815157		2078.78	0.00252893		2668.78	0.00848346		3258.78	-0.002427
309	0.01542772		898.99	0.00036038		1488.99	0.00775416		2078.98	0.0021396		2668.98	0.00843766		3258.98	-0.00234045
309.2	0.01511757		899.19	-0.00050699		1489.19	0.00764352		2079.18	0.002504		2669.18	0.00829198		3259.18	-0.00300814
309.4	0.01557177		899.39	-0.00008266		1489.39	0.00772485		2079.38	0.00133001		2669.38	0.00823768		3259.38	-0.00364654
309.6	0.0158586		899.59	0.00082355		1489.59	0.00751678		2079.58	0.00135924		2669.58	0.00853231		3259.58	-0.00387163
309.8	0.01547645		899.79	0.00230419		1489.79	0.00805186		2079.78	0.00043964		2669.78	0.00850305		3259.78	-0.00355364
310	0.01528262		899.99	0.00233407		1489.99	0.0084265		2079.98	0.00003791		2669.98	0.00847619		3259.98	-0.00478993
310.2	0.01457483		900.19	0.00259427		1490.19	0.00771118		2080.18	-0.00003091		2670.18	0.00847704		3260.18	-0.00488097
310.4	0.01473513		900.39	0.00268248		1490.39	0.00820016		2080.38	0.00040204		2670.38	0.00847562		3260.38	-0.00477145
310.6	0.01466563		900.59	0.00395564		1490.59	0.00878257		2080.58	-0.00028521		2670.58	0.00837554		3260.58	-0.00620591
310.8	0.01388351		900.79	0.00531063		1490.79	0.00848909		2080.78	0.00037502		2670.78	0.00768861		3260.78	-0.00574633
311	0.01408741		900.99	0.00506571		1490.99	0.00803075		2080.98	-0.0007025		2670.98	0.00705044		3260.98	-0.0047464
311.2	0.01402236		901.19	0.00667922		1491.19	0.00812953		2081.18	-0.00094433		2671.18	0.00711677		3261.18	-0.00472939
311.4	0.01364759		901.39	0.00631255		1491.39	0.00677614		2081.38	-0.00098204		2671.38	0.00719968		3261.38	-0.0047649
311.6	0.01358288		901.59	0.00543943		1491.59	0.00683101		2081.58	0.00048984		2671.58	0.00700445		3261.58	-0.00550461
311.8	0.01413476		901.79	0.00454738		1491.79	0.00574809		2081.78	0.00066364		2671.78	0.00744446		3261.78	-0.00454661
312	0.01487003		901.99	0.0040206		1491.99	0.0042991		2081.98	0.00097701		2671.98	0.00680374		3261.98	-0.00405982
312.2	0.01490192		902.19	0.0035344		1492.19	0.00266669		2082.18	0.00095039		2672.18	0.0065409		3262.18	-0.00347406
312.4	0.01522398		902.39	0.00208182		1492.39	0.00214812		2082.38	0.00037341		2672.38	0.0068948		3262.38	-0.00338838
312.6	0.01555823		902.59	0.00177815		1492.59	0.00161226		2082.58	0.00128282		2672.58	0.0072556		3262.58	-0.00302028
312.8	0.01649234		902.79	0.00091402		1492.79	0.00111401		2082.78	0.00224773		2672.78	0.00741013		3262.78	-0.00355286
313	0.01682632		902.99	0.00062904		1492.99	0.00121852		2082.98	0.00212082		2672.98	0.00757357		3262.98	-0.00270885
313.2	0.01687183		903.19	0.00042212		1493.19	0.00125439		2083.18	0.00194214		2673.18	0.00758597		3263.18	-0.00326894
313.4	0.0166914		903.39	0.00110221		1493.39	0.00188158		2083.38	0.00148598		2673.38	0.00817792		3263.38	-0.00357328
313.6	0.01590619		903.59	0.00181623		1493.59	0.00334169		2083.58	0.00167699		2673.58	0.0088637		3263.58	-0.00386517
313.8	0.01502524		903.79	0.00232861		1493.79	0.00458115		2083.78	0.00111548		2673.78	0.00885616		3263.78	-0.00430605
314	0.01571553		903.99	0.00310085		1493.99	0.00509219		2083.98	0.00188869		2673.98	0.00944685		3263.98	-0.00528563
314.2	0.01658045		904.19	0.00411951		1494.19	0.00514964		2084.18	0.00126079		2674.18	0.00893315		3264.18	-0.00481145
314.4	0.01698615		904.39	0.00456579		1494.39	0.0065672		2084.38	0.00118149		2674.38	0.00856786		3264.38	-0.0048115
314.6	0.01712638		904.59	0.00534645		1494.59	0.00713878		2084.58	0.00104464		2674.58	0.00751153		3264.58	-0.00486552
314.8	0.01664707		904.79	0.00615681		1494.79	0.0076069		2084.78	0.00152011		2674.78	0.00730944		3264.78	-0.004626
315	0.01675168		904.99	0.00548467		1494.99	0.00755264		2084.98	0.0014561		2674.98	0.00709205		3264.98	-0.00523247
315.2	0.01613057		905.19	0.00671261		1495.19	0.00791365		2085.18	0.00185635		2675.18	0.00690051		3265.18	-0.00464071
315.4	0.0162617		905.39	0.00633084		1495.39	0.00814377		2085.38	0.00212162		2675.38	0.00591895		3265.38	-0.00507407
315.6	0.01621692		905.59	0.00561985		1495.59	0.00871191		2085.58	0.00213551		2675.58	0.00620453		3265.58	-0.00595455
315.8	0.01710205		905.79	0.0055489		1495.79	0.00828247		2085.78	0.00049015		2675.78	0.0057413		3265.78	-0.00542564
316	0.01702637		905.99	0.00532696		1495.99	0.0069924		2085.98	0.00108862		2675.98	0.00533817		3265.98	-0.0051428
316.2	0.01736351		906.19	0.00461684		1496.19	0.00674306		2086.18	0.00112971		2676.18	0.0054923		3266.18	-0.0048661
316.4	0.01844913		906.39	0.00299859		1496.39	0.00689111		2086.38	0.00070564		2676.38	0.00563867		3266.38	-0.00493085
316.6	0.01938768		906.59	0.00316513		1496.59	0.00644446		2086.58	0.00125348		2676.58	0.00597634		3266.58	-0.00483521
316.8	0.0212909		906.79	0.00344758		1496.79	0.00604279		2086.78	0.00114782		2676.78	0.00647972		3266.78	-0.00472708
317	0.02146915		906.99	0.00361655		1496.99	0.00704914		2086.98	-0.00010955		2676.98	0.00750935		3266.98	-0.00321193
317.2	0.02133416		907.19	0.00422903		1497.19	0.00720342		2087.18	-0.00039228		2677.18	0.00805306		3267.18	-0.00411293
317.4	0.02044472		907.39	0.0036841		1497.39	0.00743299		2087.38	-0.00091789		2677.38	0.00918363		3267.38	-0.00395711
317.6	0.02008176		907.59	0.00358358		1497.59	0.00844708		2087.58	-0.001415		2677.58	0.00941171		3267.58	-0.0042807
317.8	0.02094979		907.79	0.00400369		1497.79	0.00820437		2087.78	-0.0012414		2677.78	0.00976175		3267.78	-0.0037889
318	0.02194933		907.99	0.00383847		1497.99	0.00724165		2087.98	-0.00050777		2677.98	0.01049979		3267.98	-0.00400481
318.2	0.021288		908.19	0.00336378		1498.19	0.00735307		2088.18	-0.00093054		2678.18	0.01045168		3268.18	-0.00378769
318.4	0.02045622		908.39	0.00247138		1498.39	0.00831269		2088.38	-0.00013963		2678.38	0.00996866		3268.38	-0.00333405
318.6	0.02076603		908.59	0.00252953		1498.59	0.00824354		2088.58	0.00024444		2678.58	0.00918905		3268.58	-0.00404828
318.8	0.02023956		908.79	0.0020613		1498.79	0.00881358		2088.78	0.00057954		2678.78	0.00978009		3268.78	-0.00442145
319	0.01950291		908.99	0.00129403		1498.99	0.00927244		2088.98	0.00105538		2678.98	0.00949913		3268.98	-0.00424047
319.2	0.02001767		909.19	0.00088603		1499.19	0.00929875		2089.18	0.00156259		2679.18	0.00941106		3269.18	-0.00397188
319.4	0.02004342		909.39	-0.00036379		1499.39	0.0087938		2089.38	0.00119504		2679.38	0.00895264		3269.38	-0.00486537
319.6	0.01937039		909.59	-0.00079808		1499.59	0.00818647		2089.58	0.00124176		2679.58	0.00919456		3269.58	-0.00510949
319.8	0.01976751		909.79	-0.00106657		1499.79	0.00786346		2089.78	0.00172114		2679.78	0.0087626		3269.78	-0.00548943
320	0.01904769		909.99	-0.00134563		1499.99	0.00653721		2089.98	0.00254621		2679.98	0.00807622		3269.98	-0.0046519
320.2	0.01923677		910.19	-0.00103797		1500.19	0.0068054		2090.18	0.00227055		2680.18	0.00780323		3270.18	-0.00407619
320.4	0.01960206		910.39	-0.00176681		1500.39	0.0063187		2090.38	0.00181744		2680.38	0.00827323		3270.38	-0.00374067
320.6	0.01984039		910.59	-0.00061589		1500.59	0.00585425		2090.58	0.00222878		2680.58	0.00803109		3270.58	-0.00299471
320.8	0.02043355		910.79	0.00002306		1500.79	0.00614655		2090.78	0.00258439		2680.78	0.00807395		3270.78	-0.00264788
321	0.02034173		910.99	0.00094048		1500.99	0.00707065		2090.98	0.0025632		2680.98	0.00960992		3270.98	-0.00162567
321.2	0.01877877		911.19	0.00210394		1501.19	0.00706916		2091.18	0.00354487		2681.18	0.01009788		3271.18	-0.00275207
321.4	0.0183026		911.39	0.00238281		1501.39	0.00753761		2091.38	0.00371979		2681.38	0.01026468		3271.38	-0.0026828
321.6	0.01860711		911.59	0.00353043		1501.59	0.00739024		2091.58	0.00424431		2681.58	0.00986143		3271.58	-0.00280539
321.8	0.01825606		911.79	0.00449386		1501.79	0.00680303		2091.78	0.00398694		2681.78	0.01059585		3271.78	-0.00238976
322	0.01744724		911.99	0.00405942		1501.99	0.00676915		2091.98	0.00388265		2681.98	0.01084939		3271.98	-0.00292625
322.2	0.01696416		912.19	0.00370085		1502.19	0.00774328		2092.18	0.00284413		2682.18	0.01120419		3272.18	-0.00290818
322.4	0.01769571		912.39	0.004392		1502.39	0.00828388		2092.38	0.00310759		2682.38	0.01111769		3272.38	-0.00258924
322.6	0.01849551		912.59	0.00444577		1502.59	0.00762837		2092.58	0.00302579		2682.58	0.01164539		3272.58	-0.00279274
322.8	0.01823693		912.79	0.00376316		1502.79	0.00863298		2092.78	0.00315623		2682.78	0.01183865		3272.78	-0.00246396
323	0.01767975		912.99	0.00331532		1502.99	0.00820177		2092.98	0.00312482		2682.98	0.01170798		3272.98	-0.0022601
323.2	0.01897608		913.19	0.00381031		1503.19	0.00819033		2093.18	0.0022758		2683.18	0.01129301		3273.18	-0.00328151
323.4	0.01934423		913.39	0.00386966		1503.39	0.00814122		2093.38	0.00123411		2683.38	0.01101717		3273.38	-0.00375321
323.6	0.01988791		913.59	0.00466039		1503.59	0.00934827		2093.58	0.00134456		2683.58	0.01020702		3273.58	-0.00449397
323.8	0.02080483		913.79	0.00502257		1503.79	0.00878039		2093.78	0.00053931		2683.78	0.00880398		3273.78	-0.00457924
324	0.02002633		913.99	0.00548409		1503.99	0.00779899		2093.98	0.00043931		2683.98	0.00745441		3273.98	-0.00341038
324.2	0.02098048		914.19	0.00604782		1504.19	0.00866247		2094.18	0.00071771		2684.18	0.00711194		3274.18	-0.0035357
324.4	0.02159298		914.39	0.00524946		1504.39	0.00782924		2094.38	0.00072795		2684.38	0.0065714		3274.38	-0.00324135
324.6	0.02181744		914.59	0.0047191		1504.59	0.00821995		2094.58	0.0016586		2684.58	0.00599376		3274.58	-0.00345664
324.8	0.02146295		914.79	0.00501902		1504.79	0.00883027		2094.78	0.00119206		2684.78	0.00661505		3274.78	-0.00376106
325	0.02124286		914.99	0.00583385		1504.99	0.00938602		2094.98	0.00174344		2684.98	0.00744906		3274.98	-0.00400469
325.2	0.02036017		915.19	0.00668373		1505.19	0.00944753		2095.18	0.00154522		2685.18	0.00742591		3275.18	-0.00520936
325.4	0.02076178		915.39	0.00728941		1505.39	0.00999249		2095.38	0.00114626		2685.38	0.00683708		3275.38	-0.00487746
325.6	0.02125845		915.59	0.00764552		1505.59	0.0094134		2095.58	0.00114816		2685.58	0.00665623		3275.58	-0.00512696
325.8	0.02132717		915.79	0.00760431		1505.79	0.00835959		2095.78	0.00110251		2685.78	0.00722116		3275.78	-0.00545327
326	0.0211426		915.99	0.00680074		1505.99	0.00786431		2095.98	0.00203388		2685.98	0.00736003		3275.98	-0.00562971
326.2	0.02099698		916.19	0.00707716		1506.19	0.00777213		2096.18	0.00200687		2686.18	0.00777447		3276.18	-0.00541018
326.4	0.02135194		916.39	0.00684561		1506.39	0.00720359		2096.38	0.00359414		2686.38	0.00801966		3276.38	-0.00448034
326.6	0.02104999		916.59	0.00505513		1506.59	0.00671409		2096.58	0.0031895		2686.58	0.00785093		3276.58	-0.00420456
326.8	0.02075352		916.79	0.00450151		1506.79	0.00650546		2096.78	0.00297877		2686.78	0.00753752		3276.78	-0.00411526
327	0.02077858		916.99	0.00443869		1506.99	0.00617015		2096.98	0.00200409		2686.98	0.00796244		3276.98	-0.00466084
327.2	0.02138768		917.19	0.00463348		1507.19	0.00600451		2097.18	0.00171106		2687.18	0.00843954		3277.18	-0.00602955
327.4	0.02220535		917.39	0.00453047		1507.39	0.00633671		2097.38	0.00264776		2687.38	0.00867944		3277.38	-0.00577748
327.6	0.02260489		917.59	0.0048201		1507.59	0.0067179		2097.58	0.0027898		2687.58	0.00759313		3277.58	-0.00525915
327.8	0.02294242		917.79	0.00436311		1507.79	0.00563482		2097.78	0.00241035		2687.78	0.00772458		3277.78	-0.00466614
328	0.02344331		917.99	0.00448614		1507.99	0.00565975		2097.98	0.00245728		2687.98	0.00793736		3277.98	-0.00483659
328.2	0.02493197		918.19	0.00456713		1508.19	0.0047164		2098.18	0.00185724		2688.18	0.008225		3278.18	-0.00414415
328.4	0.02455846		918.39	0.00322373		1508.39	0.00441392		2098.38	0.00169358		2688.38	0.00903839		3278.38	-0.00470135
328.6	0.02397081		918.59	0.00235827		1508.59	0.0055321		2098.58	0.00139367		2688.58	0.01002627		3278.58	-0.00590657
328.8	0.02402696		918.79	0.00348563		1508.79	0.00596662		2098.78	-0.0002953		2688.78	0.01110468		3278.78	-0.00636555
329	0.02489109		918.99	0.00393087		1508.99	0.00676986		2098.98	0.00031006		2688.98	0.01168604		3278.98	-0.00637343
329.2	0.02537897		919.19	0.00475147		1509.19	0.0070089		2099.18	0.00048161		2689.18	0.01187885		3279.18	-0.0062391
329.4	0.0257224		919.39	0.00431953		1509.39	0.00812044		2099.38	0.00079713		2689.38	0.01157225		3279.38	-0.00620345
329.6	0.0261035		919.59	0.0048457		1509.59	0.00737668		2099.58	0.0013123		2689.58	0.01175133		3279.58	-0.00580259
329.8	0.0254965		919.79	0.00507713		1509.79	0.00716368		2099.78	0.00188626		2689.78	0.01157628		3279.78	-0.00562528
330	0.02502717		919.99	0.00501559		1509.99	0.00809732		2099.98	0.00181333		2689.98	0.01089395		3279.98	-0.00498475
330.2	0.02530792		920.19	0.00499394		1510.19	0.00894003		2100.18	0.0020593		2690.18	0.01031159		3280.18	-0.00388431
330.4	0.02492011		920.39	0.00454569		1510.39	0.00885748		2100.38	0.00202639		2690.38	0.00961447		3280.38	-0.00385747
330.6	0.0239542		920.59	0.00475193		1510.59	0.00923437		2100.58	0.00070083		2690.58	0.00911484		3280.58	-0.00403113
330.8	0.02292883		920.79	0.00567683		1510.79	0.00874658		2100.78	0.0007021		2690.78	0.00866769		3280.78	-0.00367255
331	0.02296799		920.99	0.00621382		1510.99	0.00885593		2100.98	0.00107433		2690.98	0.00893176		3280.98	-0.00367645
331.2	0.02356128		921.19	0.00662067		1511.19	0.00827205		2101.18	0.00241828		2691.18	0.00861439		3281.18	-0.00362315
331.4	0.02382468		921.39	0.00742489		1511.39	0.00899034		2101.38	0.00289582		2691.38	0.00797759		3281.38	-0.00350522
331.6	0.02442607		921.59	0.00738339		1511.59	0.0093032		2101.58	0.00236005		2691.58	0.00708236		3281.58	-0.00381807
331.8	0.02426508		921.79	0.00763304		1511.79	0.00900431		2101.78	0.00168481		2691.78	0.00742917		3281.78	-0.00427269
332	0.02432487		921.99	0.00794823		1511.99	0.00892283		2101.98	0.00157655		2691.98	0.00715406		3281.98	-0.00478137
332.2	0.02512023		922.19	0.00739046		1512.19	0.00856487		2102.18	0.00184016		2692.18	0.00759277		3282.18	-0.00415245
332.4	0.02556322		922.39	0.00654998		1512.39	0.0101026		2102.38	0.00231134		2692.38	0.00790742		3282.38	-0.00575946
332.6	0.02553589		922.59	0.00627575		1512.59	0.01084937		2102.58	0.00170365		2692.58	0.00798752		3282.58	-0.00595465
332.8	0.02601434		922.79	0.00664232		1512.79	0.01165763		2102.78	0.00120378		2692.78	0.00867739		3282.78	-0.00538627
333	0.02673868		922.99	0.00688062		1512.99	0.01136379		2102.98	0.00288882		2692.98	0.00859215		3282.98	-0.0055945
333.2	0.02705656		923.19	0.00642185		1513.19	0.01154348		2103.18	0.00349263		2693.18	0.00949252		3283.18	-0.00644721
333.4	0.0269076		923.39	0.00578364		1513.39	0.0119914		2103.38	0.00364515		2693.38	0.00953735		3283.38	-0.00620436
333.6	0.02669669		923.59	0.00664609		1513.59	0.01163568		2103.58	0.00334284		2693.58	0.00932109		3283.58	-0.0059572
333.8	0.02647989		923.79	0.00702923		1513.79	0.01224452		2103.78	0.00401106		2693.78	0.00956443		3283.78	-0.00633228
334	0.02585791		923.99	0.00722922		1513.99	0.01181482		2103.98	0.00408039		2693.98	0.00911722		3283.98	-0.00607684
334.2	0.02480707		924.19	0.00681458		1514.19	0.0108307		2104.18	0.00363768		2694.18	0.00863169		3284.18	-0.00647366
334.4	0.02333058		924.39	0.00701297		1514.39	0.0105139		2104.38	0.00289406		2694.38	0.00733398		3284.38	-0.0071373
334.6	0.02301492		924.59	0.00714061		1514.59	0.01022868		2104.58	0.00272474		2694.58	0.0073469		3284.58	-0.00730377
334.8	0.02207681		924.79	0.00709539		1514.79	0.00916557		2104.78	0.00344307		2694.78	0.00674852		3284.78	-0.0072026
335	0.02238708		924.99	0.00698175		1514.99	0.00845455		2104.98	0.00352853		2694.98	0.00722467		3284.98	-0.00710883
335.2	0.022364		925.19	0.00623199		1515.19	0.0089114		2105.18	0.0035787		2695.18	0.00718813		3285.18	-0.00684142
335.4	0.02164145		925.39	0.00689057		1515.39	0.0098547		2105.38	0.0025789		2695.38	0.00670289		3285.38	-0.00753022
335.6	0.02190887		925.59	0.00647775		1515.59	0.01067218		2105.58	0.00178165		2695.58	0.00604743		3285.58	-0.00721316
335.8	0.02152529		925.79	0.0065808		1515.79	0.01072671		2105.78	0.00156207		2695.78	0.00621545		3285.78	-0.00614186
336	0.02305282		925.99	0.00589083		1515.99	0.0101361		2105.98	0.00147829		2695.98	0.00624358		3285.98	-0.0058825
336.2	0.02437037		926.19	0.00610981		1516.19	0.01089425		2106.18	0.00073059		2696.18	0.00710274		3286.18	-0.00604975
336.4	0.02532426		926.39	0.00623424		1516.39	0.01143349		2106.38	0.00014796		2696.38	0.00781676		3286.38	-0.00610519
336.6	0.02469129		926.59	0.00639532		1516.59	0.01173551		2106.58	-0.00046324		2696.58	0.00853381		3286.58	-0.00557363
336.8	0.02489314		926.79	0.00672979		1516.79	0.01186363		2106.78	-0.00025293		2696.78	0.00857208		3286.78	-0.005127
337	0.02511574		926.99	0.00680418		1516.99	0.01223084		2106.98	0.00015725		2696.98	0.00872736		3286.98	-0.0051074
337.2	0.02549434		927.19	0.00675509		1517.19	0.01262694		2107.18	0.00029205		2697.18	0.00978396		3287.18	-0.00522682
337.4	0.02555371		927.39	0.00789556		1517.39	0.01236758		2107.38	0.00062391		2697.38	0.00927767		3287.38	-0.00430561
337.6	0.0255558		927.59	0.00838037		1517.59	0.01199681		2107.58	0.0004632		2697.58	0.00897233		3287.58	-0.00478474
337.8	0.02465419		927.79	0.00899859		1517.79	0.01204267		2107.78	0.00112207		2697.78	0.00878557		3287.78	-0.00468624
338	0.02430359		927.99	0.00817042		1517.99	0.01077305		2107.98	0.00164224		2697.98	0.0083781		3287.98	-0.00468993
338.2	0.02387149		928.19	0.00723245		1518.19	0.00974843		2108.18	0.00122905		2698.18	0.00790336		3288.18	-0.00479001
338.4	0.02377295		928.39	0.00743171		1518.39	0.0087046		2108.38	0.00192977		2698.38	0.00737871		3288.38	-0.00435442
338.6	0.0239831		928.59	0.007557		1518.59	0.00795872		2108.58	0.00254674		2698.58	0.00824768		3288.58	-0.00483938
338.8	0.02316228		928.79	0.00773132		1518.79	0.00739571		2108.78	0.00311216		2698.78	0.00821926		3288.78	-0.00504336
339	0.02373818		928.99	0.00798112		1518.99	0.0074996		2108.98	0.00285847		2698.98	0.00892472		3288.98	-0.0047943
339.2	0.02401484		929.19	0.00780469		1519.19	0.00822057		2109.18	0.0035412		2699.18	0.0085016		3289.18	-0.00594284
339.4	0.02421889		929.39	0.00895239		1519.39	0.00842416		2109.38	0.00332292		2699.38	0.00845988		3289.38	-0.00631923
339.6	0.02393824		929.59	0.00848674		1519.59	0.00869096		2109.58	0.00345796		2699.58	0.00914106		3289.58	-0.00636057
339.8	0.02394168		929.79	0.00776512		1519.79	0.00830319		2109.78	0.00399895		2699.78	0.00943897		3289.78	-0.00665081
340	0.02425411		929.99	0.00778489		1519.99	0.00748402		2109.98	0.00329658		2699.98	0.00988926		3289.98	-0.00676446
340.2	0.02364777		930.19	0.00771797		1520.19	0.00798261		2110.18	0.00263679		2700.18	0.0109077		3290.18	-0.00658947
340.4	0.02419295		930.39	0.00715292		1520.39	0.00791343		2110.38	0.00314045		2700.38	0.0111566		3290.38	-0.00636665
340.6	0.02333788		930.59	0.00663872		1520.59	0.00838004		2110.58	0.00361054		2700.58	0.01105418		3290.58	-0.00579149
340.8	0.02444238		930.79	0.00627388		1520.79	0.00877531		2110.78	0.00384438		2700.78	0.01021285		3290.78	-0.00469477
341	0.02476449		930.99	0.00590045		1520.99	0.00982715		2110.98	0.00375003		2700.98	0.01118451		3290.98	-0.0037922
341.2	0.02567441		931.19	0.00629894		1521.19	0.00998494		2111.18	0.00437855		2701.18	0.01142477		3291.18	-0.00394707
341.4	0.02592083		931.39	0.00622856		1521.39	0.01019893		2111.38	0.00425691		2701.38	0.01086268		3291.38	-0.00353718
341.6	0.02682227		931.59	0.00579034		1521.59	0.01044359		2111.58	0.00387131		2701.58	0.010528		3291.58	-0.00314024
341.8	0.02705742		931.79	0.00496751		1521.79	0.0105598		2111.78	0.00336847		2701.78	0.00999031		3291.78	-0.00316446
342	0.02793273		931.99	0.00371011		1521.99	0.00942747		2111.98	0.0036394		2701.98	0.00923194		3291.98	-0.00280916
342.2	0.02736719		932.19	0.00353395		1522.19	0.00852087		2112.18	0.00257313		2702.18	0.00854156		3292.18	-0.00183949
342.4	0.02866516		932.39	0.00383217		1522.39	0.00810811		2112.38	0.00222316		2702.38	0.00806461		3292.38	-0.00202362
342.6	0.02916964		932.59	0.00323147		1522.59	0.00850968		2112.58	0.00162813		2702.58	0.00789485		3292.58	-0.00312721
342.8	0.02962591		932.79	0.00326342		1522.79	0.00860549		2112.78	0.00083705		2702.78	0.00754688		3292.78	-0.00375634
343	0.02976221		932.99	0.00353002		1522.99	0.00857955		2112.98	0.00087297		2702.98	0.00736537		3292.98	-0.00363414
343.2	0.02935767		933.19	0.0040002		1523.19	0.00955363		2113.18	0.00155561		2703.18	0.00774072		3293.18	-0.00434239
343.4	0.02867337		933.39	0.00439761		1523.39	0.00948996		2113.38	0.00158718		2703.38	0.00910363		3293.38	-0.00457362
343.6	0.02749089		933.59	0.00391075		1523.59	0.00951713		2113.58	0.00163115		2703.58	0.0099217		3293.58	-0.0049425
343.8	0.02753534		933.79	0.00368891		1523.79	0.00951958		2113.78	0.00209763		2703.78	0.01027388		3293.78	-0.00458549
344	0.02792463		933.99	0.00486823		1523.99	0.00899436		2113.98	0.0018095		2703.98	0.0106871		3293.98	-0.00375571
344.2	0.02796144		934.19	0.00453095		1524.19	0.00937906		2114.18	0.00240044		2704.18	0.01087711		3294.18	-0.00352051
344.4	0.02830163		934.39	0.00533428		1524.39	0.00971904		2114.38	0.00384114		2704.38	0.01132057		3294.38	-0.00359998
344.6	0.02810639		934.59	0.00639073		1524.59	0.00987671		2114.58	0.00442844		2704.58	0.01108164		3294.58	-0.00325929
344.8	0.02874568		934.79	0.00701947		1524.79	0.01073509		2114.78	0.00496988		2704.78	0.01206853		3294.78	-0.00249947
345	0.02735897		934.99	0.00721318		1524.99	0.01168265		2114.98	0.00480509		2704.98	0.0130857		3294.98	-0.00195297
345.2	0.02730307		935.19	0.00700028		1525.19	0.01275824		2115.18	0.00497987		2705.18	0.01326045		3295.18	-0.0028787
345.4	0.02733703		935.39	0.0064064		1525.39	0.01294441		2115.38	0.0041421		2705.38	0.01302923		3295.38	-0.00242535
345.6	0.02760276		935.59	0.00700619		1525.59	0.01236608		2115.58	0.00360341		2705.58	0.01318997		3295.58	-0.00189904
345.8	0.02734298		935.79	0.00699521		1525.79	0.01184434		2115.78	0.00310955		2705.78	0.01191652		3295.78	-0.00241929
346	0.02686941		935.99	0.00790813		1525.99	0.0112901		2115.98	0.00316788		2705.98	0.01113033		3295.98	-0.00202979
346.2	0.02720741		936.19	0.00825803		1526.19	0.01171091		2116.18	0.00256658		2706.18	0.01117822		3296.18	-0.001707
346.4	0.02903073		936.39	0.0078805		1526.39	0.01204529		2116.38	0.00223275		2706.38	0.01042661		3296.38	-0.00263813
346.6	0.0294377		936.59	0.00747049		1526.59	0.01214005		2116.58	0.00245681		2706.58	0.00959591		3296.58	-0.00361421
346.8	0.02891639		936.79	0.00795624		1526.79	0.01208651		2116.78	0.00270656		2706.78	0.00977888		3296.78	-0.00405433
347	0.02900531		936.99	0.00791057		1526.99	0.01228905		2116.98	0.00418496		2706.98	0.00948781		3296.98	-0.00458129
347.2	0.02864998		937.19	0.00785752		1527.19	0.01196209		2117.18	0.00437379		2707.18	0.0101111		3297.18	-0.00520729
347.4	0.02888555		937.39	0.00743478		1527.39	0.0108078		2117.38	0.00444755		2707.38	0.01118705		3297.38	-0.00568585
347.6	0.02960864		937.59	0.00730777		1527.59	0.01020141		2117.58	0.00414689		2707.58	0.01044281		3297.58	-0.00572339
347.8	0.03120824		937.79	0.00759862		1527.79	0.01000853		2117.78	0.00419745		2707.78	0.00986404		3297.78	-0.00519747
348	0.03146866		937.99	0.00771846		1527.99	0.00955361		2117.98	0.00393563		2707.98	0.00943201		3297.98	-0.00498081
348.2	0.03175746		938.19	0.00720289		1528.19	0.00981556		2118.18	0.00466746		2708.18	0.00933954		3298.18	-0.00435025
348.4	0.03136743		938.39	0.00736923		1528.39	0.01012903		2118.38	0.00487871		2708.38	0.01021848		3298.38	-0.00449787
348.6	0.03176154		938.59	0.00736545		1528.59	0.01042255		2118.58	0.00405353		2708.58	0.01016619		3298.58	-0.00381716
348.8	0.03135178		938.79	0.00730589		1528.79	0.01086513		2118.78	0.00355582		2708.78	0.01090847		3298.78	-0.00314327
349	0.03040313		938.99	0.00679782		1528.99	0.01141112		2118.98	0.00308419		2708.98	0.0098457		3298.98	-0.00259448
349.2	0.03065195		939.19	0.00642697		1529.19	0.01200346		2119.18	0.00336708		2709.18	0.01016906		3299.18	-0.00275834
349.4	0.0302516		939.39	0.00600231		1529.39	0.01140073		2119.38	0.0023378		2709.38	0.01029517		3299.38	-0.00249742
349.6	0.02949828		939.59	0.00673978		1529.59	0.01067165		2119.58	0.00171257		2709.58	0.01088869		3299.58	-0.00241546
349.8	0.02940616		939.79	0.00746097		1529.79	0.01084594		2119.78	0.00137904		2709.78	0.01087671		3299.78	-0.00318973
350	0.02913868		939.99	0.0071479		1529.99	0.0105998		2119.98	0.00149521		2709.98	0.01179754		3299.98	-0.00309777
350.2	0.03012212		940.19	0.00718946		1530.19	0.01065127		2120.18	0.00136181		2710.18	0.01192705		3300.18	-0.00370453
350.4	0.03000657		940.39	0.00709324		1530.39	0.01029656		2120.38	0.00133826		2710.38	0.01174636		3300.38	-0.0039044
350.6	0.0289924		940.59	0.00708877		1530.59	0.01033273		2120.58	0.00271195		2710.58	0.01101345		3300.58	-0.00450031
350.8	0.02837736		940.79	0.00698397		1530.79	0.00982011		2120.78	0.00299929		2710.78	0.01123559		3300.78	-0.00534447
351	0.02879711		940.99	0.00716107		1530.99	0.00963998		2120.98	0.0030699		2710.98	0.01067386		3300.98	-0.00537052
351.2	0.02816941		941.19	0.00746643		1531.19	0.00934428		2121.18	0.00276205		2711.18	0.01106077		3301.18	-0.0053029
351.4	0.02884871		941.39	0.00773511		1531.39	0.00913196		2121.38	0.00307968		2711.38	0.01061841		3301.38	-0.00514742
351.6	0.0295287		941.59	0.00939763		1531.59	0.00958277		2121.58	0.0030687		2711.58	0.00993521		3301.58	-0.00486868
351.8	0.03038445		941.79	0.00952859		1531.79	0.00998659		2121.78	0.00386943		2711.78	0.00998421		3301.78	-0.00427965
352	0.02992591		941.99	0.00958309		1531.99	0.01000446		2121.98	0.00391251		2711.98	0.01080922		3301.98	-0.00378373
352.2	0.03058693		942.19	0.00951377		1532.19	0.01065057		2122.18	0.00409836		2712.18	0.0114191		3302.18	-0.004192
352.4	0.03041221		942.39	0.00928723		1532.39	0.01069408		2122.38	0.00418194		2712.38	0.01200584		3302.38	-0.00420541
352.6	0.03114354		942.59	0.00945681		1532.59	0.01063455		2122.58	0.00430984		2712.58	0.01083392		3302.58	-0.00370145
352.8	0.03063622		942.79	0.00962308		1532.79	0.00993609		2122.78	0.00567138		2712.78	0.01023297		3302.78	-0.00505053
353	0.03099157		942.99	0.00929842		1532.99	0.01003051		2122.98	0.00683285		2712.98	0.00945597		3302.98	-0.00531326
353.2	0.03077833		943.19	0.00893429		1533.19	0.00907319		2123.18	0.00677821		2713.18	0.01042698		3303.18	-0.00573184
353.4	0.0308135		943.39	0.00872798		1533.39	0.00843195		2123.38	0.0066432		2713.38	0.01076279		3303.38	-0.00621273
353.6	0.03033811		943.59	0.00907251		1533.59	0.00787784		2123.58	0.00636349		2713.58	0.01069172		3303.58	-0.00605642
353.8	0.02978993		943.79	0.00882194		1533.79	0.00720612		2123.78	0.00613908		2713.78	0.01137926		3303.78	-0.00689483
354	0.0299774		943.99	0.00771167		1533.99	0.00581713		2123.98	0.0060113		2713.98	0.01168438		3303.98	-0.00663694
354.2	0.02977684		944.19	0.00791096		1534.19	0.00536782		2124.18	0.00597017		2714.18	0.0111992		3304.18	-0.00731329
354.4	0.02860617		944.39	0.00725085		1534.39	0.00537472		2124.38	0.00593623		2714.38	0.01108176		3304.38	-0.00639855
354.6	0.02884673		944.59	0.00733268		1534.59	0.00672968		2124.58	0.00633315		2714.58	0.01078682		3304.58	-0.00666295
354.8	0.0299617		944.79	0.0077822		1534.79	0.00752497		2124.78	0.00554694		2714.78	0.01155542		3304.78	-0.00693413
355	0.02995255		944.99	0.00797886		1534.99	0.00892485		2124.98	0.00443708		2714.98	0.01169655		3304.98	-0.00709942
355.2	0.02983		945.19	0.00773228		1535.19	0.00985216		2125.18	0.00400698		2715.18	0.01206499		3305.18	-0.00670113
355.4	0.03002477		945.39	0.00820851		1535.39	0.01060701		2125.38	0.00367795		2715.38	0.01262288		3305.38	-0.00595022
355.6	0.03053796		945.59	0.00961171		1535.59	0.01097281		2125.58	0.00384875		2715.58	0.01319353		3305.58	-0.00563696
355.8	0.03110077		945.79	0.00957144		1535.79	0.01040475		2125.78	0.00334589		2715.78	0.01315774		3305.78	-0.00583177
356	0.03137131		945.99	0.01002416		1535.99	0.00993355		2125.98	0.00279176		2715.98	0.01371311		3305.98	-0.00517691
356.2	0.03260421		946.19	0.00956626		1536.19	0.01026338		2126.18	0.00177487		2716.18	0.01363278		3306.18	-0.0053343
356.4	0.03239623		946.39	0.00955686		1536.39	0.01082361		2126.38	0.00239275		2716.38	0.01362145		3306.38	-0.00503891
356.6	0.0319254		946.59	0.01004432		1536.59	0.01105663		2126.58	0.00215289		2716.58	0.01299999		3306.58	-0.0054993
356.8	0.03180224		946.79	0.00995733		1536.79	0.01060885		2126.78	0.00244699		2716.78	0.01222762		3306.78	-0.00634748
357	0.03105942		946.99	0.00967828		1536.99	0.0101968		2126.98	0.00301693		2716.98	0.01165971		3306.98	-0.00570981
357.2	0.03042439		947.19	0.00936522		1537.19	0.00985074		2127.18	0.00228685		2717.18	0.01109013		3307.18	-0.00569533
357.4	0.0299551		947.39	0.00800254		1537.39	0.00994674		2127.38	0.00300345		2717.38	0.0095054		3307.38	-0.00583217
357.6	0.02898292		947.59	0.00720877		1537.59	0.00934347		2127.58	0.00208904		2717.58	0.00874781		3307.58	-0.00645938
357.8	0.02892624		947.79	0.00575043		1537.79	0.00874424		2127.78	0.00218432		2717.78	0.00911412		3307.78	-0.00696785
358	0.02910856		947.99	0.00542031		1537.99	0.00786711		2127.98	0.00197883		2717.98	0.00883915		3307.98	-0.00701197
358.2	0.02835914		948.19	0.00529875		1538.19	0.00810342		2128.18	0.00227473		2718.18	0.00855358		3308.18	-0.00841852
358.4	0.02862088		948.39	0.00496152		1538.39	0.00801685		2128.38	0.00243593		2718.38	0.00870459		3308.38	-0.00840291
358.6	0.02907751		948.59	0.00532986		1538.59	0.0078623		2128.58	0.0027969		2718.58	0.00909892		3308.58	-0.00932637
358.8	0.0290682		948.79	0.00509149		1538.79	0.0074128		2128.78	0.00206541		2718.78	0.01039347		3308.78	-0.00936044
359	0.02822064		948.99	0.0049661		1538.99	0.00701797		2128.98	0.00166505		2718.98	0.01057353		3308.98	-0.00963647
359.2	0.02874387		949.19	0.0050844		1539.19	0.00660655		2129.18	0.00195417		2719.18	0.01117987		3309.18	-0.00886349
359.4	0.02968463		949.39	0.00560875		1539.39	0.00665178		2129.38	0.00224347		2719.38	0.01223116		3309.38	-0.00805011
359.6	0.03047627		949.59	0.00681506		1539.59	0.00662472		2129.58	0.00331217		2719.58	0.01210512		3309.58	-0.00745899
359.8	0.03152558		949.79	0.00763924		1539.79	0.00712993		2129.78	0.00253927		2719.78	0.01239957		3309.78	-0.00674006
360	0.03276042		949.99	0.00763937		1539.99	0.00749895		2129.98	0.00296666		2719.98	0.01269222		3309.98	-0.00538567
360.2	0.03337285		950.19	0.00749732		1540.19	0.00899627		2130.18	0.00178085		2720.18	0.01353963		3310.18	-0.00469642
360.4	0.0336038		950.39	0.008317		1540.39	0.01012526		2130.38	0.00145505		2720.38	0.01412007		3310.38	-0.00445531
360.6	0.03448727		950.59	0.00837692		1540.59	0.01077766		2130.58	0.00092106		2720.58	0.01430417		3310.58	-0.00417233
360.8	0.03509749		950.79	0.00810285		1540.79	0.01135854		2130.78	0.00124027		2720.78	0.01443678		3310.78	-0.0036639
361	0.03437822		950.99	0.00707004		1540.99	0.01193944		2130.98	0.0015067		2720.98	0.0143729		3310.98	-0.00350273
361.2	0.03510536		951.19	0.00685418		1541.19	0.01236812		2131.18	0.00091657		2721.18	0.01351361		3311.18	-0.00330391
361.4	0.03524754		951.39	0.00635294		1541.39	0.01211619		2131.38	0.00123358		2721.38	0.01310967		3311.38	-0.00317568
361.6	0.03603832		951.59	0.00638773		1541.59	0.01187054		2131.58	0.00098069		2721.58	0.01364307		3311.58	-0.00364028
361.8	0.0368087		951.79	0.00719519		1541.79	0.01055394		2131.78	0.00196632		2721.78	0.01330957		3311.78	-0.0034554
362	0.03675015		951.99	0.00894761		1541.99	0.0097533		2131.98	0.00259014		2721.98	0.01343924		3311.98	-0.00382909
362.2	0.03632394		952.19	0.0090493		1542.19	0.00904062		2132.18	0.00328622		2722.18	0.0133509		3312.18	-0.00480521
362.4	0.03609176		952.39	0.00932897		1542.39	0.00805348		2132.38	0.0033304		2722.38	0.01300257		3312.38	-0.00459111
362.6	0.03499167		952.59	0.00953114		1542.59	0.0072382		2132.58	0.00358353		2722.58	0.01335363		3312.58	-0.00572848
362.8	0.03428912		952.79	0.00937634		1542.79	0.00762169		2132.78	0.00320343		2722.78	0.01335377		3312.78	-0.00554367
363	0.03396857		952.99	0.00963049		1542.99	0.00773712		2132.98	0.00370781		2722.98	0.01291203		3312.98	-0.00679119
363.2	0.03414736		953.19	0.00890794		1543.19	0.00796492		2133.18	0.00411862		2723.18	0.01304866		3313.18	-0.00698488
363.4	0.03328745		953.39	0.00908641		1543.39	0.00904807		2133.38	0.00466552		2723.38	0.01243005		3313.38	-0.00684451
363.6	0.03248699		953.59	0.00959812		1543.59	0.01013333		2133.58	0.00508043		2723.58	0.01168192		3313.58	-0.00710214
363.8	0.0313294		953.79	0.00996055		1543.79	0.01060024		2133.78	0.00478067		2723.78	0.01207712		3313.78	-0.00753144
364	0.03096993		953.99	0.00992082		1543.99	0.01086928		2133.98	0.00455901		2723.98	0.01225541		3313.98	-0.00711691
364.2	0.0306354		954.19	0.0099817		1544.19	0.01174158		2134.18	0.00315321		2724.18	0.0131841		3314.18	-0.0076166
364.4	0.03021974		954.39	0.01011157		1544.39	0.01185133		2134.38	0.00288103		2724.38	0.01322251		3314.38	-0.00807874
364.6	0.03026376		954.59	0.01028379		1544.59	0.01277245		2134.58	0.00298302		2724.58	0.01355435		3314.58	-0.00797113
364.8	0.0296819		954.79	0.01047883		1544.79	0.01251002		2134.78	0.00285618		2724.78	0.01293588		3314.78	-0.00767367
365	0.02889567		954.99	0.00963261		1544.99	0.01267629		2134.98	0.00271166		2724.98	0.01226982		3314.98	-0.00772521
365.2	0.02954476		955.19	0.01025744		1545.19	0.01202438		2135.18	0.00350241		2725.18	0.01214804		3315.18	-0.00728145
365.4	0.02941717		955.39	0.01070127		1545.39	0.01114862		2135.38	0.00514915		2725.38	0.01223476		3315.38	-0.00769415
365.6	0.03055216		955.59	0.01079614		1545.59	0.01103153		2135.58	0.00655035		2725.58	0.01248281		3315.58	-0.00686031
365.8	0.03076403		955.79	0.01206044		1545.79	0.01050436		2135.78	0.00831637		2725.78	0.01250322		3315.78	-0.00649257
366	0.03059229		955.99	0.01185572		1545.99	0.01024316		2135.98	0.00866858		2725.98	0.01358688		3315.98	-0.00618909
366.2	0.03007678		956.19	0.01049343		1546.19	0.00940547		2136.18	0.00865296		2726.18	0.0139358		3316.18	-0.00690404
366.4	0.02982838		956.39	0.00943711		1546.39	0.00942024		2136.38	0.00868336		2726.38	0.0142534		3316.38	-0.00700535
366.6	0.02979046		956.59	0.00916892		1546.59	0.00933911		2136.58	0.00911192		2726.58	0.01428608		3316.58	-0.00750373
366.8	0.02958418		956.79	0.00886689		1546.79	0.00943333		2136.78	0.00832238		2726.78	0.01362037		3316.78	-0.00744677
367	0.03006582		956.99	0.00832174		1546.99	0.01006798		2136.98	0.00839471		2726.98	0.01359345		3316.98	-0.00716095
367.2	0.03038278		957.19	0.00841037		1547.19	0.00985616		2137.18	0.00818271		2727.18	0.0130165		3317.18	-0.00647695
367.4	0.0302907		957.39	0.00933756		1547.39	0.01089245		2137.38	0.00843236		2727.38	0.01171975		3317.38	-0.00597749
367.6	0.03053529		957.59	0.00860818		1547.59	0.0111641		2137.58	0.00801603		2727.58	0.01187693		3317.58	-0.00702081
367.8	0.03030339		957.79	0.00861679		1547.79	0.01059866		2137.78	0.00747974		2727.78	0.01254679		3317.78	-0.00679275
368	0.03105937		957.99	0.00882056		1547.99	0.01057369		2137.98	0.00630488		2727.98	0.01271599		3317.98	-0.00678677
368.2	0.03161611		958.19	0.00883166		1548.19	0.0110104		2138.18	0.00576709		2728.18	0.01306902		3318.18	-0.00742772
368.4	0.03179268		958.39	0.00879032		1548.39	0.01126471		2138.38	0.00570568		2728.38	0.01234794		3318.38	-0.00717027
368.6	0.03243121		958.59	0.00871648		1548.59	0.011678		2138.58	0.00510793		2728.58	0.01244864		3318.58	-0.00684383
368.8	0.03248981		958.79	0.00832274		1548.79	0.01128791		2138.78	0.00495703		2728.78	0.01145183		3318.78	-0.0064924
369	0.03236068		958.99	0.0083844		1548.99	0.01206289		2138.98	0.00503498		2728.98	0.01138978		3318.98	-0.00720327
369.2	0.03309835		959.19	0.00846107		1549.19	0.01197796		2139.18	0.00569548		2729.18	0.01137123		3319.18	-0.00823118
369.4	0.03333812		959.39	0.00836978		1549.39	0.01168003		2139.38	0.00610089		2729.38	0.0118446		3319.38	-0.00844465
369.6	0.03426707		959.59	0.00808712		1549.59	0.01153489		2139.58	0.00581635		2729.58	0.01213857		3319.58	-0.0077939
369.8	0.03397995		959.79	0.00753627		1549.79	0.01082586		2139.78	0.00535905		2729.78	0.01274513		3319.78	-0.00829236
370	0.0339355		959.99	0.00754845		1549.99	0.01021004		2139.98	0.00423016		2729.98	0.01333154		3319.98	-0.00801887
370.2	0.03376732		960.19	0.00757131		1550.19	0.01095854		2140.18	0.0034111		2730.18	0.01433194		3320.18	-0.00763272
370.4	0.03344372		960.39	0.00793506		1550.39	0.011977		2140.38	0.0025526		2730.38	0.01475068		3320.38	-0.00702929
370.6	0.03248868		960.59	0.00763774		1550.59	0.01192429		2140.58	0.00129835		2730.58	0.01445669		3320.58	-0.00722841
370.8	0.03246934		960.79	0.00748884		1550.79	0.01212401		2140.78	0.00041182		2730.78	0.01462115		3320.78	-0.00682242
371	0.03281493		960.99	0.00829713		1550.99	0.0115489		2140.98	-0.00019319		2730.98	0.01455802		3320.98	-0.00622731
371.2	0.03358107		961.19	0.00937228		1551.19	0.01102186		2141.18	-0.00011799		2731.18	0.01450053		3321.18	-0.00646876
371.4	0.03341037		961.39	0.0090683		1551.39	0.01101572		2141.38	0.00047676		2731.38	0.01408193		3321.38	-0.00686452
371.6	0.03356274		961.59	0.00837187		1551.59	0.01055997		2141.58	0.00003548		2731.58	0.01458352		3321.58	-0.0073296
371.8	0.03369828		961.79	0.00942313		1551.79	0.0105929		2141.78	0.00018388		2731.78	0.01474444		3321.78	-0.00663278
372	0.03352035		961.99	0.0103205		1551.99	0.01169744		2141.98	0.0008385		2731.98	0.01516743		3321.98	-0.00742718
372.2	0.0337488		962.19	0.01040295		1552.19	0.01205697		2142.18	0.0012257		2732.18	0.01502694		3322.18	-0.0071557
372.4	0.03289273		962.39	0.01069027		1552.39	0.01235314		2142.38	0.00268847		2732.38	0.01527676		3322.38	-0.00701904
372.6	0.03331213		962.59	0.01029604		1552.59	0.01274804		2142.58	0.00344753		2732.58	0.01500523		3322.58	-0.00691728
372.8	0.03433295		962.79	0.01024467		1552.79	0.01321767		2142.78	0.00435551		2732.78	0.01376951		3322.78	-0.0073943
373	0.03503872		962.99	0.01075346		1552.99	0.01358716		2142.98	0.00402844		2732.98	0.01238704		3322.98	-0.00851098
373.2	0.03519319		963.19	0.0106392		1553.19	0.01316179		2143.18	0.00489352		2733.18	0.01194848		3323.18	-0.00876403
373.4	0.03552688		963.39	0.01013486		1553.39	0.01276556		2143.38	0.00523299		2733.38	0.0116322		3323.38	-0.00829951
373.6	0.03630585		963.59	0.00956303		1553.59	0.0129272		2143.58	0.00568416		2733.58	0.01101824		3323.58	-0.00775344
373.8	0.03623348		963.79	0.00927618		1553.79	0.01212619		2143.78	0.00534441		2733.78	0.0115206		3323.78	-0.00776777
374	0.03658883		963.99	0.00958119		1553.99	0.01244135		2143.98	0.00481497		2733.98	0.01110917		3323.98	-0.00720276
374.2	0.03636066		964.19	0.00931433		1554.19	0.01249991		2144.18	0.00437527		2734.18	0.01124112		3324.18	-0.00652105
374.4	0.03639162		964.39	0.00891989		1554.39	0.01156295		2144.38	0.00413501		2734.38	0.01154682		3324.38	-0.00633069
374.6	0.03554653		964.59	0.00832511		1554.59	0.01054964		2144.58	0.00385365		2734.58	0.01194031		3324.58	-0.00675127
374.8	0.03595695		964.79	0.00841793		1554.79	0.00965184		2144.78	0.00394768		2734.78	0.01248804		3324.78	-0.00617878
375	0.03481998		964.99	0.00933079		1554.99	0.00832708		2144.98	0.00281567		2734.98	0.01221411		3324.98	-0.00661092
375.2	0.0345821		965.19	0.00940934		1555.19	0.00800978		2145.18	0.00277885		2735.18	0.01255201		3325.18	-0.00648682
375.4	0.03356006		965.39	0.00835476		1555.39	0.00819873		2145.38	0.00270289		2735.38	0.01279353		3325.38	-0.00641964
375.6	0.03343953		965.59	0.0080117		1555.59	0.00818097		2145.58	0.00228776		2735.58	0.01293452		3325.58	-0.00613527
375.8	0.03297158		965.79	0.0083186		1555.79	0.0082316		2145.78	0.00242001		2735.78	0.0129401		3325.78	-0.00669101
376	0.0324146		965.99	0.00836032		1555.99	0.00769864		2145.98	0.00261273		2735.98	0.0134971		3325.98	-0.00792394
376.2	0.03226748		966.19	0.0078677		1556.19	0.0079734		2146.18	0.00351923		2736.18	0.01318634		3326.18	-0.00761596
376.4	0.03235394		966.39	0.00785659		1556.39	0.00859366		2146.38	0.00427778		2736.38	0.01380433		3326.38	-0.00778813
376.6	0.03218843		966.59	0.00771855		1556.59	0.0094058		2146.58	0.00454381		2736.58	0.01301356		3326.58	-0.00837834
376.8	0.03307278		966.79	0.00769764		1556.79	0.01047337		2146.78	0.0046131		2736.78	0.01226625		3326.78	-0.00939077
377	0.0327365		966.99	0.00819247		1556.99	0.01096144		2146.98	0.00452235		2736.98	0.01133153		3326.98	-0.00930076
377.2	0.03274214		967.19	0.00883451		1557.19	0.01174115		2147.18	0.00532248		2737.18	0.01100509		3327.18	-0.0095227
377.4	0.03356902		967.39	0.0083981		1557.39	0.01190807		2147.38	0.00530819		2737.38	0.01096127		3327.38	-0.00919402
377.6	0.03402571		967.59	0.00922081		1557.59	0.01177941		2147.58	0.00566103		2737.58	0.0101273		3327.58	-0.00856249
377.8	0.03428143		967.79	0.00951988		1557.79	0.01139453		2147.78	0.00558432		2737.78	0.00946641		3327.78	-0.00866636
378	0.03515082		967.99	0.01001026		1557.99	0.01225237		2147.98	0.00576987		2737.98	0.00896251		3327.98	-0.00751933
378.2	0.03494705		968.19	0.01037585		1558.19	0.01256762		2148.18	0.00682136		2738.18	0.00936529		3328.18	-0.0069965
378.4	0.03513529		968.39	0.01088126		1558.39	0.01207726		2148.38	0.00687736		2738.38	0.01007894		3328.38	-0.0065818
378.6	0.03436887		968.59	0.01137389		1558.59	0.01162439		2148.58	0.00657809		2738.58	0.01049662		3328.58	-0.00669175
378.8	0.03365773		968.79	0.01162479		1558.79	0.0114895		2148.78	0.00554039		2738.78	0.01021271		3328.78	-0.00658707
379	0.03289293		968.99	0.01242561		1558.99	0.01081442		2148.98	0.00510075		2738.98	0.01006532		3328.98	-0.00688802
379.2	0.03310705		969.19	0.01170463		1559.19	0.01004666		2149.18	0.0055594		2739.18	0.01124372		3329.18	-0.00631082
379.4	0.03301103		969.39	0.01057099		1559.39	0.01028997		2149.38	0.00573461		2739.38	0.01140753		3329.38	-0.00626773
379.6	0.03346516		969.59	0.00934022		1559.59	0.00930523		2149.58	0.00530113		2739.58	0.01216879		3329.58	-0.00651272
379.8	0.03307064		969.79	0.00870312		1559.79	0.00933983		2149.78	0.00544286		2739.78	0.01216935		3329.78	-0.00671541
380	0.03357257		969.99	0.00784878		1559.99	0.00887943		2149.98	0.00609797		2739.98	0.01295954		3329.98	-0.00744158
380.2	0.03413105		970.19	0.00743617		1560.19	0.00906862		2150.18	0.00628008		2740.18	0.01355579		3330.18	-0.00751076
380.4	0.03349636		970.39	0.00716685		1560.39	0.00931387		2150.38	0.00543952		2740.38	0.01491834		3330.38	-0.00743995
380.6	0.03291392		970.59	0.00707228		1560.59	0.00946931		2150.58	0.00507824		2740.58	0.01504635		3330.58	-0.00809145
380.8	0.03357336		970.79	0.00677591		1560.79	0.00960538		2150.78	0.0050039		2740.78	0.01523002		3330.78	-0.00793973
381	0.03334365		970.99	0.00770631		1560.99	0.0092581		2150.98	0.00536195		2740.98	0.01489252		3330.98	-0.00765067
381.2	0.03299896		971.19	0.00844676		1561.19	0.00896168		2151.18	0.0051121		2741.18	0.01505987		3331.18	-0.00753408
381.4	0.03351169		971.39	0.00811428		1561.39	0.00898791		2151.38	0.00489953		2741.38	0.01452341		3331.38	-0.00723266
381.6	0.03299109		971.59	0.00868572		1561.59	0.00954381		2151.58	0.00552524		2741.58	0.01364197		3331.58	-0.00645776
381.8	0.0332717		971.79	0.00850243		1561.79	0.01051348		2151.78	0.00579672		2741.78	0.01313669		3331.78	-0.00659886
382	0.03313045		971.99	0.00937498		1561.99	0.01123127		2151.98	0.00566889		2741.98	0.01355097		3331.98	-0.00568719
382.2	0.03231729		972.19	0.0095821		1562.19	0.01141406		2152.18	0.00586494		2742.18	0.01283142		3332.18	-0.0058672
382.4	0.03234081		972.39	0.01011609		1562.39	0.01164116		2152.38	0.00400875		2742.38	0.0129263		3332.38	-0.00609228
382.6	0.03145411		972.59	0.01049871		1562.59	0.01214436		2152.58	0.00316826		2742.58	0.01271122		3332.58	-0.00676409
382.8	0.03105761		972.79	0.0108042		1562.79	0.01272265		2152.78	0.0030509		2742.78	0.01257593		3332.78	-0.00748183
383	0.03151115		972.99	0.01041178		1562.99	0.01261807		2152.98	0.00357009		2742.98	0.01301409		3332.98	-0.00698576
383.2	0.03144798		973.19	0.01036691		1563.19	0.0122469		2153.18	0.00402142		2743.18	0.01330491		3333.18	-0.0066242
383.4	0.03184707		973.39	0.01046775		1563.39	0.01280784		2153.38	0.00381309		2743.38	0.01216783		3333.38	-0.00659799
383.6	0.03329378		973.59	0.00961447		1563.59	0.01259769		2153.58	0.00366625		2743.58	0.0129121		3333.58	-0.00671711
383.8	0.0342217		973.79	0.01024792		1563.79	0.01288805		2153.78	0.00455621		2743.78	0.01236409		3333.78	-0.00692046
384	0.03524566		973.99	0.01039368		1563.99	0.01258013		2153.98	0.00455587		2743.98	0.01284727		3333.98	-0.00781333
384.2	0.03514567		974.19	0.01114981		1564.19	0.01281436		2154.18	0.0044275		2744.18	0.01285749		3334.18	-0.00733936
384.4	0.03469343		974.39	0.01070811		1564.39	0.01266733		2154.38	0.00381061		2744.38	0.01318442		3334.38	-0.00743263
384.6	0.0347804		974.59	0.01107594		1564.59	0.01174618		2154.58	0.00399063		2744.58	0.01300045		3334.58	-0.007837
384.8	0.03510187		974.79	0.01108291		1564.79	0.01076447		2154.78	0.00467655		2744.78	0.01329372		3334.78	-0.00765311
385	0.03496332		974.99	0.01157547		1564.99	0.0102939		2154.98	0.00521238		2744.98	0.01327872		3334.98	-0.0081535
385.2	0.03524608		975.19	0.01128924		1565.19	0.00991148		2155.18	0.00549039		2745.18	0.01347292		3335.18	-0.00755157
385.4	0.035532		975.39	0.01144345		1565.39	0.01020639		2155.38	0.00618929		2745.38	0.01317431		3335.38	-0.00725064
385.6	0.03537014		975.59	0.01169203		1565.59	0.01040689		2155.58	0.00680376		2745.58	0.01319397		3335.58	-0.00593624
385.8	0.03513968		975.79	0.01184705		1565.79	0.01061567		2155.78	0.0066814		2745.78	0.01266365		3335.78	-0.00619707
386	0.03464498		975.99	0.01244902		1565.99	0.01109761		2155.98	0.00620522		2745.98	0.01327341		3335.98	-0.00584939
386.2	0.03443911		976.19	0.01202893		1566.19	0.01044399		2156.18	0.00664152		2746.18	0.01361518		3336.18	-0.00643097
386.4	0.03425753		976.39	0.01179136		1566.39	0.01156493		2156.38	0.00628239		2746.38	0.01418166		3336.38	-0.00621197
386.6	0.03378276		976.59	0.01152072		1566.59	0.01163656		2156.58	0.00655796		2746.58	0.01398429		3336.58	-0.00640322
386.8	0.03382193		976.79	0.01201274		1566.79	0.01206998		2156.78	0.00652885		2746.78	0.01396309		3336.78	-0.00606489
387	0.03347493		976.99	0.01262975		1566.99	0.01225299		2156.98	0.00642469		2746.98	0.01323647		3336.98	-0.00526644
387.2	0.0338583		977.19	0.0129458		1567.19	0.01292064		2157.18	0.00610225		2747.18	0.01313945		3337.18	-0.00551291
387.4	0.03468247		977.39	0.01317785		1567.39	0.01405271		2157.38	0.00602843		2747.38	0.01269823		3337.38	-0.00599604
387.6	0.03566757		977.59	0.0128828		1567.59	0.01430991		2157.58	0.00568128		2747.58	0.0130757		3337.58	-0.00599457
387.8	0.03547763		977.79	0.01299188		1567.79	0.01499315		2157.78	0.0058221		2747.78	0.01274207		3337.78	-0.00640069
388	0.03497966		977.99	0.01282262		1567.99	0.01522958		2157.98	0.00507512		2747.98	0.01251434		3337.98	-0.00670079
388.2	0.03456192		978.19	0.01283945		1568.19	0.01524201		2158.18	0.00506385		2748.18	0.01216511		3338.18	-0.00581132
388.4	0.03487541		978.39	0.01193411		1568.39	0.01432993		2158.38	0.00428981		2748.38	0.01252156		3338.38	-0.00726666
388.6	0.03513993		978.59	0.01175584		1568.59	0.014175		2158.58	0.00518576		2748.58	0.01321326		3338.58	-0.00673006
388.8	0.03522879		978.79	0.01124211		1568.79	0.01438501		2158.78	0.00636479		2748.78	0.01342382		3338.78	-0.00700208
389	0.03496983		978.99	0.01130587		1568.99	0.01410844		2158.98	0.00653761		2748.98	0.01313676		3338.98	-0.0064664
389.2	0.03514193		979.19	0.01145062		1569.19	0.0133855		2159.18	0.00664872		2749.18	0.01319997		3339.18	-0.00623501
389.4	0.03507218		979.39	0.01117626		1569.39	0.0128529		2159.38	0.00738593		2749.38	0.01353012		3339.38	-0.00611521
389.6	0.03513378		979.59	0.0111851		1569.59	0.01319233		2159.58	0.00657107		2749.58	0.01378301		3339.58	-0.00507973
389.8	0.03526209		979.79	0.01063709		1569.79	0.01265777		2159.78	0.00653839		2749.78	0.0143497		3339.78	-0.00488977
390	0.03609027		979.99	0.01041422		1569.99	0.01277767		2159.98	0.00656139		2749.98	0.01469003		3339.98	-0.00427153
390.2	0.03686107		980.19	0.00996196		1570.19	0.012016		2160.18	0.00723338		2750.18	0.01434035		3340.18	-0.00384406
390.4	0.03708217		980.39	0.00924583		1570.39	0.0121244		2160.38	0.00671386		2750.38	0.01434053		3340.38	-0.00371629
390.6	0.03736432		980.59	0.00960421		1570.59	0.01109222		2160.58	0.00593889		2750.58	0.01400595		3340.58	-0.00347404
390.8	0.03670773		980.79	0.01013007		1570.79	0.01043648		2160.78	0.00558938		2750.78	0.01383988		3340.78	-0.00369398
391	0.03753348		980.99	0.01021814		1570.99	0.01044664		2160.98	0.00565319		2750.98	0.01341409		3340.98	-0.00339661
391.2	0.03880359		981.19	0.01029928		1571.19	0.01021851		2161.18	0.0053397		2751.18	0.01347864		3341.18	-0.00414167
391.4	0.03909879		981.39	0.01047425		1571.39	0.00953672		2161.38	0.00474551		2751.38	0.01286192		3341.38	-0.00458095
391.6	0.03917002		981.59	0.01029605		1571.59	0.00890236		2161.58	0.00461031		2751.58	0.01239225		3341.58	-0.00413776
391.8	0.03893481		981.79	0.01004415		1571.79	0.00856543		2161.78	0.00426319		2751.78	0.01173203		3341.78	-0.00416558
392	0.03847246		981.99	0.0103252		1571.99	0.00819624		2161.98	0.00504438		2751.98	0.01139004		3341.98	-0.0045348
392.2	0.03896651		982.19	0.01006785		1572.19	0.00833739		2162.18	0.0053265		2752.18	0.01173198		3342.18	-0.00423886
392.4	0.03932472		982.39	0.01001906		1572.39	0.00850941		2162.38	0.00503466		2752.38	0.01184634		3342.38	-0.00494936
392.6	0.03873318		982.59	0.01076372		1572.59	0.00943313		2162.58	0.00627165		2752.58	0.01198163		3342.58	-0.0050423
392.8	0.03794162		982.79	0.01158574		1572.79	0.00944434		2162.78	0.00603219		2752.78	0.01168391		3342.78	-0.00573793
393	0.03769659		982.99	0.01205082		1572.99	0.00877247		2162.98	0.00493201		2752.98	0.01101761		3342.98	-0.00514639
393.2	0.03749893		983.19	0.0122899		1573.19	0.00923085		2163.18	0.00438659		2753.18	0.01222677		3343.18	-0.00539565
393.4	0.03789438		983.39	0.01117139		1573.39	0.00924322		2163.38	0.00402491		2753.38	0.01291485		3343.38	-0.00490565
393.6	0.03740132		983.59	0.01105971		1573.59	0.01087411		2163.58	0.00292783		2753.58	0.01366634		3343.58	-0.00457944
393.8	0.03757073		983.79	0.01049071		1573.79	0.01105563		2163.78	0.0031876		2753.78	0.01418791		3343.78	-0.00483843
394	0.03773499		983.99	0.01028111		1573.99	0.01207185		2163.98	0.00340565		2753.98	0.01430494		3343.98	-0.00512673
394.2	0.03772553		984.19	0.01121846		1574.19	0.01127802		2164.18	0.00330488		2754.18	0.01423756		3344.18	-0.00573789
394.4	0.0369332		984.39	0.01083732		1574.39	0.01144077		2164.38	0.00351866		2754.38	0.01461473		3344.38	-0.00682129
394.6	0.03619444		984.59	0.01182916		1574.59	0.0111012		2164.58	0.00425538		2754.58	0.01447332		3344.58	-0.00595196
394.8	0.03644326		984.79	0.01194782		1574.79	0.01079964		2164.78	0.00488229		2754.78	0.01456627		3344.78	-0.00654561
395	0.03791464		984.99	0.01238838		1574.99	0.0114476		2164.98	0.00620421		2754.98	0.01492913		3344.98	-0.00625206
395.2	0.03749302		985.19	0.01264503		1575.19	0.01143775		2165.18	0.00628301		2755.18	0.01571144		3345.18	-0.00694237
395.4	0.0369389		985.39	0.01319656		1575.39	0.01173859		2165.38	0.00688519		2755.38	0.01581787		3345.38	-0.00725673
395.6	0.03652582		985.59	0.01296977		1575.59	0.01151154		2165.58	0.00773525		2755.58	0.01555689		3345.58	-0.00765243
395.8	0.03683496		985.79	0.01230536		1575.79	0.01107415		2165.78	0.00800886		2755.78	0.01508801		3345.78	-0.00735685
396	0.03709276		985.99	0.01195768		1575.99	0.01100434		2165.98	0.00903412		2755.98	0.01609076		3345.98	-0.00741853
396.2	0.03767208		986.19	0.01247054		1576.19	0.01094647		2166.18	0.00868505		2756.18	0.01603409		3346.18	-0.00775978
396.4	0.03771912		986.39	0.01334305		1576.39	0.01063535		2166.38	0.00817456		2756.38	0.01549969		3346.38	-0.00796113
396.6	0.0370794		986.59	0.01309036		1576.59	0.01060431		2166.58	0.00823533		2756.58	0.01594585		3346.58	-0.00802789
396.8	0.03758613		986.79	0.01278497		1576.79	0.01073684		2166.78	0.00824752		2756.78	0.01576444		3346.78	-0.00752048
397	0.03731506		986.99	0.01193722		1576.99	0.01132148		2166.98	0.00721402		2756.98	0.01642006		3346.98	-0.00671855
397.2	0.03723238		987.19	0.01142973		1577.19	0.01146423		2167.18	0.00686076		2757.18	0.0167952		3347.18	-0.0060752
397.4	0.03730006		987.39	0.01059643		1577.39	0.01164204		2167.38	0.00580238		2757.38	0.01645144		3347.38	-0.00567775
397.6	0.03718333		987.59	0.01037709		1577.59	0.01230468		2167.58	0.00581518		2757.58	0.01629835		3347.58	-0.00496179
397.8	0.03766913		987.79	0.01033748		1577.79	0.01263855		2167.78	0.00589374		2757.78	0.01596896		3347.78	-0.00420002
398	0.03748455		987.99	0.00999819		1577.99	0.0131562		2167.98	0.00581264		2757.98	0.01597047		3347.98	-0.00392434
398.2	0.03703057		988.19	0.01023954		1578.19	0.01298731		2168.18	0.00564829		2758.18	0.01444492		3348.18	-0.0029142
398.4	0.03623316		988.39	0.00968658		1578.39	0.01368825		2168.38	0.00601509		2758.38	0.01391799		3348.38	-0.00242471
398.6	0.03606102		988.59	0.01014017		1578.59	0.01364196		2168.58	0.00604135		2758.58	0.01367139		3348.58	-0.00167941
398.8	0.03680282		988.79	0.00903247		1578.79	0.01392088		2168.78	0.00646966		2758.78	0.01362449		3348.78	-0.00213004
399	0.03640496		988.99	0.00815271		1578.99	0.01464331		2168.98	0.00653141		2758.98	0.01378602		3348.98	-0.00216474
399.2	0.03583958		989.19	0.00837628		1579.19	0.01407417		2169.18	0.0050129		2759.18	0.01405784		3349.18	-0.00297297
399.4	0.03550355		989.39	0.00925866		1579.39	0.01362983		2169.38	0.00437908		2759.38	0.01327446		3349.38	-0.00326179
399.6	0.03542566		989.59	0.00913455		1579.59	0.01210353		2169.58	0.00408047		2759.58	0.01356411		3349.58	-0.00378263
399.8	0.03614573		989.79	0.00967583		1579.79	0.01102902		2169.78	0.00443177		2759.78	0.01366773		3349.78	-0.00335087
400	0.03652763		989.99	0.01025879		1579.99	0.00982844		2169.98	0.00379859		2759.98	0.01468481		3349.98	-0.0044456
400.2	0.03612957		990.19	0.01145371		1580.19	0.0092402		2170.18	0.00377186		2760.18	0.01435922		3350.18	-0.0059802
400.4	0.03677327		990.39	0.01126906		1580.39	0.00891092		2170.38	0.00340762		2760.38	0.01526851		3350.38	-0.00612416
400.6	0.0369074		990.59	0.01077152		1580.59	0.00911924		2170.58	0.00381231		2760.58	0.01641701		3350.58	-0.00640629
400.8	0.03733516		990.79	0.01084972		1580.79	0.00887907		2170.78	0.00375591		2760.78	0.01627902		3350.78	-0.00734635
401	0.03713401		990.99	0.01153091		1580.99	0.00882241		2170.98	0.00274662		2760.98	0.01714053		3350.98	-0.00798285
401.2	0.03797588		991.19	0.01218423		1581.19	0.00881142		2171.18	0.00348782		2761.18	0.01625278		3351.18	-0.00809867
401.4	0.03949256		991.39	0.01260216		1581.39	0.00936617		2171.38	0.00307594		2761.38	0.0165295		3351.38	-0.00838201
401.6	0.04002215		991.59	0.01262586		1581.59	0.00913134		2171.58	0.00410411		2761.58	0.01670102		3351.58	-0.00908182
401.8	0.04014205		991.79	0.01251417		1581.79	0.00949882		2171.78	0.00467243		2761.78	0.01694355		3351.78	-0.00929476
402	0.03952457		991.99	0.01235575		1581.99	0.00901534		2171.98	0.00496584		2761.98	0.01686696		3351.98	-0.00870985
402.2	0.03990307		992.19	0.01208006		1582.19	0.0087183		2172.18	0.00518265		2762.18	0.01598629		3352.18	-0.00811731
402.4	0.03944315		992.39	0.01210807		1582.39	0.00952293		2172.38	0.00547792		2762.38	0.01616798		3352.38	-0.00833452
402.6	0.03934493		992.59	0.01103896		1582.59	0.00961166		2172.58	0.00625993		2762.58	0.01621589		3352.58	-0.00815777
402.8	0.03916664		992.79	0.01045218		1582.79	0.01052816		2172.78	0.00602413		2762.78	0.01573341		3352.78	-0.00824586
403	0.03832861		992.99	0.01110584		1582.99	0.01163341		2172.98	0.00475163		2762.98	0.01511904		3352.98	-0.00811845
403.2	0.03817602		993.19	0.01233143		1583.19	0.01172064		2173.18	0.00427092		2763.18	0.01511543		3353.18	-0.00773285
403.4	0.03736165		993.39	0.01275357		1583.39	0.0119452		2173.38	0.00510325		2763.38	0.01492304		3353.38	-0.00694263
403.6	0.03737775		993.59	0.01295483		1583.59	0.0121739		2173.58	0.00538151		2763.58	0.01533066		3353.58	-0.00749417
403.8	0.03705314		993.79	0.01307276		1583.79	0.01259333		2173.78	0.00500673		2763.78	0.01476993		3353.78	-0.0067953
404	0.03686362		993.99	0.01311139		1583.99	0.01326013		2173.98	0.00533046		2763.98	0.01463333		3353.98	-0.00685262
404.2	0.0366932		994.19	0.01269397		1584.19	0.01418405		2174.18	0.00625025		2764.18	0.01435974		3354.18	-0.00587493
404.4	0.03680266		994.39	0.01198347		1584.39	0.01397328		2174.38	0.00612278		2764.38	0.01432575		3354.38	-0.00556913
404.6	0.0363857		994.59	0.01167604		1584.59	0.01485444		2174.58	0.00623376		2764.58	0.01403527		3354.58	-0.00571813
404.8	0.03679585		994.79	0.01150414		1584.79	0.01534393		2174.78	0.00581288		2764.78	0.01355186		3354.78	-0.00624733
405	0.03761238		994.99	0.01203781		1584.99	0.01525981		2174.98	0.00597861		2764.98	0.01317738		3354.98	-0.00588026
405.2	0.03827785		995.19	0.01219973		1585.19	0.01503619		2175.18	0.00620371		2765.18	0.01307001		3355.18	-0.00644877
405.4	0.03911261		995.39	0.01194303		1585.39	0.01457649		2175.38	0.006079		2765.38	0.01324631		3355.38	-0.00652763
405.6	0.03859614		995.59	0.01136744		1585.59	0.01358018		2175.58	0.00587518		2765.58	0.01355143		3355.58	-0.00747812
405.8	0.03915378		995.79	0.01121837		1585.79	0.01277112		2175.78	0.00510484		2765.78	0.01400823		3355.78	-0.00661669
406	0.03933114		995.99	0.01130989		1585.99	0.0122231		2175.98	0.00496377		2765.98	0.01380798		3355.98	-0.0058143
406.2	0.03996292		996.19	0.01083705		1586.19	0.01212276		2176.18	0.00465975		2766.18	0.01406133		3356.18	-0.00623123
406.4	0.03928834		996.39	0.01046871		1586.39	0.01285323		2176.38	0.0048627		2766.38	0.01390883		3356.38	-0.00615878
406.6	0.03951792		996.59	0.01081685		1586.59	0.01198764		2176.58	0.00543097		2766.58	0.01384178		3356.58	-0.00624003
406.8	0.03941017		996.79	0.01174759		1586.79	0.01263604		2176.78	0.00465135		2766.78	0.0129517		3356.78	-0.00652731
407	0.03937754		996.99	0.01159286		1586.99	0.01296946		2176.98	0.00440746		2766.98	0.0118621		3356.98	-0.00686502
407.2	0.03973897		997.19	0.01146032		1587.19	0.0122364		2177.18	0.00456736		2767.18	0.01223836		3357.18	-0.00701936
407.4	0.03929719		997.39	0.01236253		1587.39	0.01296828		2177.38	0.00440222		2767.38	0.01199433		3357.38	-0.00738189
407.6	0.03913751		997.59	0.01267308		1587.59	0.01397439		2177.58	0.0040931		2767.58	0.01137349		3357.58	-0.00845032
407.8	0.03865757		997.79	0.01306465		1587.79	0.01415797		2177.78	0.0050563		2767.78	0.01152323		3357.78	-0.00791046
408	0.03827853		997.99	0.01342219		1587.99	0.01468145		2177.98	0.00545592		2767.98	0.01175478		3357.98	-0.00804859
408.2	0.03780065		998.19	0.0132189		1588.19	0.01473676		2178.18	0.00537305		2768.18	0.011477		3358.18	-0.00853382
408.4	0.03747327		998.39	0.01291702		1588.39	0.01468107		2178.38	0.00553262		2768.38	0.01123422		3358.38	-0.00896766
408.6	0.03725897		998.59	0.01274209		1588.59	0.01517037		2178.58	0.00625959		2768.58	0.0117985		3358.58	-0.00910475
408.8	0.03736509		998.79	0.01208884		1588.79	0.01484615		2178.78	0.00643668		2768.78	0.01214499		3358.78	-0.00927579
409	0.037503		998.99	0.01175214		1588.99	0.01417346		2178.98	0.00695582		2768.98	0.01163427		3358.98	-0.00929909
409.2	0.03681577		999.19	0.01181888		1589.19	0.01391536		2179.18	0.00696341		2769.18	0.01214545		3359.18	-0.00979229
409.4	0.0372125		999.39	0.01188391		1589.39	0.0131104		2179.38	0.00616003		2769.38	0.01306577		3359.38	-0.00953639
409.6	0.0368992		999.59	0.01227361		1589.59	0.01230793		2179.58	0.0057356		2769.58	0.01339179		3359.58	-0.00930709
409.8	0.03794054		999.79	0.01264977		1589.79	0.01160697		2179.78	0.00564138		2769.78	0.01423996		3359.78	-0.00857346
410	0.03826295		999.99	0.01204172		1589.99	0.01214024		2179.98	0.00622103		2769.98	0.01471675		3359.98	-0.00885828
410.2	0.03807465		1000.19	0.01209244		1590.19	0.0115532		2180.18	0.00664955		2770.18	0.01475457		3360.18	-0.0089822
410.4	0.03800178		1000.39	0.01260069		1590.39	0.01069569		2180.38	0.00750801		2770.38	0.01482283		3360.38	-0.00930834
410.6	0.03900223		1000.59	0.01283085		1590.59	0.01043417		2180.58	0.00771214		2770.58	0.01445837		3360.58	-0.00940119
410.8	0.03969693		1000.79	0.0126393		1590.79	0.01111046		2180.78	0.00780797		2770.78	0.01415753		3360.78	-0.00983793
411	0.04059071		1000.99	0.01226268		1590.99	0.01131779		2180.98	0.00794217		2770.98	0.0134816		3360.98	-0.0110411
411.2	0.04130216		1001.19	0.01269711		1591.19	0.01144253		2181.18	0.00767608		2771.18	0.01411168		3361.18	-0.01107747
411.4	0.04161426		1001.39	0.01307016		1591.39	0.01289927		2181.38	0.0084319		2771.38	0.01388872		3361.38	-0.01168406
411.6	0.04148564		1001.59	0.01216896		1591.59	0.01318087		2181.58	0.00891697		2771.58	0.01460034		3361.58	-0.01231938
411.8	0.04138112		1001.79	0.01292674		1591.79	0.01305032		2181.78	0.0096622		2771.78	0.01507652		3361.78	-0.01254854
412	0.04104425		1001.99	0.0131373		1591.99	0.01415793		2181.98	0.00925868		2771.98	0.01493475		3361.98	-0.01217205
412.2	0.04091146		1002.19	0.01282458		1592.19	0.01458706		2182.18	0.00953084		2772.18	0.01452632		3362.18	-0.01186808
412.4	0.04155211		1002.39	0.01196589		1592.39	0.0149188		2182.38	0.009031		2772.38	0.01422444		3362.38	-0.01136561
412.6	0.04124023		1002.59	0.01216661		1592.59	0.0145814		2182.58	0.00885576		2772.58	0.01477297		3362.58	-0.01147957
412.8	0.04123316		1002.79	0.01151663		1592.79	0.01522567		2182.78	0.00847085		2772.78	0.01473823		3362.78	-0.01158173
413	0.04059515		1002.99	0.01178067		1592.99	0.01475662		2182.98	0.00773417		2772.98	0.01493303		3362.98	-0.01091313
413.2	0.03905797		1003.19	0.01205574		1593.19	0.0138082		2183.18	0.007031		2773.18	0.01514536		3363.18	-0.01069038
413.4	0.03873425		1003.39	0.01211559		1593.39	0.01342704		2183.38	0.00600298		2773.38	0.01539091		3363.38	-0.01028782
413.6	0.03787722		1003.59	0.01207148		1593.59	0.01313436		2183.58	0.00588455		2773.58	0.01487539		3363.58	-0.00921531
413.8	0.03753174		1003.79	0.01230673		1593.79	0.01270292		2183.78	0.00502622		2773.78	0.01634041		3363.78	-0.010055
414	0.03675078		1003.99	0.01231387		1593.99	0.01256025		2183.98	0.00476994		2773.98	0.01676116		3363.98	-0.00993907
414.2	0.03631177		1004.19	0.01296223		1594.19	0.01211479		2184.18	0.00560996		2774.18	0.01628367		3364.18	-0.00945558
414.4	0.03660744		1004.39	0.01241867		1594.39	0.0113463		2184.38	0.00500652		2774.38	0.01659927		3364.38	-0.00962895
414.6	0.0373656		1004.59	0.01182167		1594.59	0.0116972		2184.58	0.00455323		2774.58	0.01633402		3364.58	-0.00949145
414.8	0.03806161		1004.79	0.01120373		1594.79	0.01172452		2184.78	0.00506749		2774.78	0.01649694		3364.78	-0.01004137
415	0.03877969		1004.99	0.01108793		1594.99	0.01226549		2184.98	0.00545178		2774.98	0.01617995		3364.98	-0.00991402
415.2	0.03932065		1005.19	0.01209517		1595.19	0.01248577		2185.18	0.00552501		2775.18	0.01600894		3365.18	-0.00989409
415.4	0.03940158		1005.39	0.01188401		1595.39	0.01315882		2185.38	0.00566675		2775.38	0.0160051		3365.38	-0.01044139
415.6	0.03969859		1005.59	0.01183997		1595.59	0.01344932		2185.58	0.00606254		2775.58	0.01604137		3365.58	-0.01021084
415.8	0.03964943		1005.79	0.01263819		1595.79	0.01359139		2185.78	0.00616806		2775.78	0.01502483		3365.78	-0.00956436
416	0.04012911		1005.99	0.0121558		1595.99	0.01520721		2185.98	0.00598993		2775.98	0.01503503		3365.98	-0.00857112
416.2	0.04069098		1006.19	0.01233343		1596.19	0.01545559		2186.18	0.00686693		2776.18	0.01499544		3366.18	-0.00842699
416.4	0.0414054		1006.39	0.01262958		1596.39	0.01534339		2186.38	0.0065513		2776.38	0.01449625		3366.38	-0.00862049
416.6	0.04147333		1006.59	0.01349087		1596.59	0.0155915		2186.58	0.00744388		2776.58	0.01537141		3366.58	-0.00868398
416.8	0.04172267		1006.79	0.01255552		1596.79	0.0160877		2186.78	0.00721305		2776.78	0.01574045		3366.78	-0.00809689
417	0.04128141		1006.99	0.01237409		1596.99	0.01565648		2186.98	0.00707057		2776.98	0.0163903		3366.98	-0.00752231
417.2	0.04029577		1007.19	0.01210116		1597.19	0.01530032		2187.18	0.0074417		2777.18	0.01610802		3367.18	-0.00802192
417.4	0.04059699		1007.39	0.01263451		1597.39	0.01491495		2187.38	0.00703076		2777.38	0.01666103		3367.38	-0.00738419
417.6	0.04083553		1007.59	0.01210964		1597.59	0.0134068		2187.58	0.00682903		2777.58	0.01695686		3367.58	-0.00626689
417.8	0.04070867		1007.79	0.01287548		1597.79	0.01210272		2187.78	0.00664566		2777.78	0.01810865		3367.78	-0.00585475
418	0.04104174		1007.99	0.01332185		1597.99	0.01131457		2187.98	0.00684413		2777.98	0.01810424		3367.98	-0.0055469
418.2	0.04146474		1008.19	0.01294776		1598.19	0.01114682		2188.18	0.00692664		2778.18	0.01786607		3368.18	-0.00487325
418.4	0.04132259		1008.39	0.01272619		1598.39	0.01041507		2188.38	0.00582655		2778.38	0.01781409		3368.38	-0.00499079
418.6	0.04197064		1008.59	0.01287617		1598.59	0.00995945		2188.58	0.00577125		2778.58	0.01787264		3368.58	-0.00495318
418.8	0.04262889		1008.79	0.0126873		1598.79	0.00983976		2188.78	0.00690278		2778.78	0.01787912		3368.78	-0.0049218
419	0.04239885		1008.99	0.01308771		1598.99	0.01027245		2188.98	0.00720608		2778.98	0.01736845		3368.98	-0.00507772
419.2	0.04304208		1009.19	0.01343202		1599.19	0.01016317		2189.18	0.00602078		2779.18	0.01703073		3369.18	-0.00630273
419.4	0.0424901		1009.39	0.01242719		1599.39	0.01084914		2189.38	0.00561716		2779.38	0.01707662		3369.38	-0.00583633
419.6	0.04240527		1009.59	0.01228477		1599.59	0.01149534		2189.58	0.00640812		2779.58	0.01611568		3369.58	-0.00606904
419.8	0.0410038		1009.79	0.01208482		1599.79	0.01223502		2189.78	0.0073457		2779.78	0.01466189		3369.78	-0.00592672
420	0.04141479		1009.99	0.01176406		1599.99	0.0134783		2189.98	0.00852378		2779.98	0.01495143		3369.98	-0.00644228
420.2	0.04082223		1010.19	0.01154527		1600.19	0.01447524		2190.18	0.00896689		2780.18	0.01495077		3370.18	-0.00699199
420.4	0.04061202		1010.39	0.01111822		1600.39	0.01426635		2190.38	0.0089389		2780.38	0.01452263		3370.38	-0.0072731
420.6	0.04096822		1010.59	0.01030424		1600.59	0.01523607		2190.58	0.0092082		2780.58	0.01502255		3370.58	-0.00708675
420.8	0.04161683		1010.79	0.00931636		1600.79	0.01556097		2190.78	0.00810987		2780.78	0.01555731		3370.78	-0.00649297
421	0.04180807		1010.99	0.00920744		1600.99	0.01594611		2190.98	0.00764136		2780.98	0.01607149		3370.98	-0.00619025
421.2	0.04236547		1011.19	0.00987275		1601.19	0.01526149		2191.18	0.00704542		2781.18	0.01600484		3371.18	-0.00623136
421.4	0.04395897		1011.39	0.01011824		1601.39	0.0153924		2191.38	0.00653125		2781.38	0.01574343		3371.38	-0.00532914
421.6	0.04453864		1011.59	0.00982493		1601.59	0.01497766		2191.58	0.00606391		2781.58	0.01608053		3371.58	-0.00495888
421.8	0.04476217		1011.79	0.01198069		1601.79	0.01520183		2191.78	0.00650049		2781.78	0.01581012		3371.78	-0.00550453
422	0.04477427		1011.99	0.01273705		1601.99	0.01546216		2191.98	0.00607159		2781.98	0.01537129		3371.98	-0.00588083
422.2	0.04443904		1012.19	0.01271977		1602.19	0.01543375		2192.18	0.0061697		2782.18	0.01517127		3372.18	-0.00550741
422.4	0.04478717		1012.39	0.01279627		1602.39	0.01461875		2192.38	0.00713553		2782.38	0.0150461		3372.38	-0.00577278
422.6	0.04499755		1012.59	0.01333925		1602.59	0.01360807		2192.58	0.00751492		2782.58	0.01558701		3372.58	-0.00562352
422.8	0.04550087		1012.79	0.01302996		1602.79	0.01316993		2192.78	0.00812037		2782.78	0.01591108		3372.78	-0.00628072
423	0.04492911		1012.99	0.01308538		1602.99	0.01281843		2192.98	0.00787066		2782.98	0.01534127		3372.98	-0.0073368
423.2	0.04466196		1013.19	0.01324149		1603.19	0.01234803		2193.18	0.00713284		2783.18	0.01540645		3373.18	-0.00739712
423.4	0.0435081		1013.39	0.0132693		1603.39	0.01286153		2193.38	0.00733663		2783.38	0.01555784		3373.38	-0.00689928
423.6	0.04265406		1013.59	0.01321142		1603.59	0.01323441		2193.58	0.00834395		2783.58	0.0148693		3373.58	-0.0072725
423.8	0.04116424		1013.79	0.01352034		1603.79	0.01332565		2193.78	0.0084081		2783.78	0.01488089		3373.78	-0.00738909
424	0.0412466		1013.99	0.01352535		1603.99	0.01292725		2193.98	0.00798111		2783.98	0.01579373		3373.98	-0.00735269
424.2	0.04008624		1014.19	0.01247293		1604.19	0.01205035		2194.18	0.00715378		2784.18	0.01512421		3374.18	-0.0070538
424.4	0.0398698		1014.39	0.0113069		1604.39	0.01151965		2194.38	0.00726891		2784.38	0.01457029		3374.38	-0.00645987
424.6	0.04007023		1014.59	0.01086713		1604.59	0.01192284		2194.58	0.00675115		2784.58	0.01481759		3374.58	-0.00597838
424.8	0.04038371		1014.79	0.0109416		1604.79	0.01140358		2194.78	0.00582867		2784.78	0.01523388		3374.78	-0.00549795
425	0.04144397		1014.99	0.01110598		1604.99	0.01092878		2194.98	0.00496602		2784.98	0.01485441		3374.98	-0.00479316
425.2	0.04195618		1015.19	0.01241433		1605.19	0.01036603		2195.18	0.00506973		2785.18	0.01469708		3375.18	-0.00454639
425.4	0.04255329		1015.39	0.0126635		1605.39	0.01177284		2195.38	0.0056505		2785.38	0.01473256		3375.38	-0.00491206
425.6	0.04298243		1015.59	0.01297601		1605.59	0.01099898		2195.58	0.00594611		2785.58	0.01507095		3375.58	-0.00521274
425.8	0.04351962		1015.79	0.0141125		1605.79	0.01137016		2195.78	0.00635285		2785.78	0.01355407		3375.78	-0.00593631
426	0.04337236		1015.99	0.01383839		1605.99	0.01142592		2195.98	0.00662202		2785.98	0.01308995		3375.98	-0.00564988
426.2	0.04425492		1016.19	0.01389306		1606.19	0.01158649		2196.18	0.0071448		2786.18	0.01241011		3376.18	-0.00670744
426.4	0.04440984		1016.39	0.01393334		1606.39	0.0121301		2196.38	0.00776838		2786.38	0.01282049		3376.38	-0.00745171
426.6	0.04496285		1016.59	0.01466858		1606.59	0.01195279		2196.58	0.00708579		2786.58	0.01263947		3376.58	-0.00798279
426.8	0.0458361		1016.79	0.01392537		1606.79	0.01196329		2196.78	0.00727537		2786.78	0.01279601		3376.78	-0.00893828
427	0.0452008		1016.99	0.01361211		1606.99	0.01190656		2196.98	0.00730302		2786.98	0.01275819		3376.98	-0.00889726
427.2	0.04519021		1017.19	0.01391368		1607.19	0.01270897		2197.18	0.00719264		2787.18	0.01301159		3377.18	-0.00878653
427.4	0.04446324		1017.39	0.01424719		1607.39	0.01384618		2197.38	0.00769901		2787.38	0.01421338		3377.38	-0.00855237
427.6	0.04380464		1017.59	0.01401569		1607.59	0.01405578		2197.58	0.00778262		2787.58	0.01436348		3377.58	-0.00944062
427.8	0.04328983		1017.79	0.01445376		1607.79	0.01409969		2197.78	0.00699195		2787.78	0.01513271		3377.78	-0.00980663
428	0.04341501		1017.99	0.01373912		1607.99	0.01381744		2197.98	0.00711418		2787.98	0.01569557		3377.98	-0.01005041
428.2	0.04237296		1018.19	0.01305442		1608.19	0.01320526		2198.18	0.00627584		2788.18	0.01601659		3378.18	-0.01001759
428.4	0.04160941		1018.39	0.0128305		1608.39	0.01317717		2198.38	0.00576396		2788.38	0.01645279		3378.38	-0.00965348
428.6	0.04132707		1018.59	0.01344972		1608.59	0.01216035		2198.58	0.00585589		2788.58	0.01709711		3378.58	-0.00936811
428.8	0.04166829		1018.79	0.01378526		1608.79	0.01220521		2198.78	0.00520777		2788.78	0.01727443		3378.78	-0.0085862
429	0.04168128		1018.99	0.01351821		1608.99	0.01191286		2198.98	0.00481549		2788.98	0.0165655		3378.98	-0.00848271
429.2	0.0416247		1019.19	0.01371566		1609.19	0.01206749		2199.18	0.00478904		2789.18	0.01658031		3379.18	-0.00802567
429.4	0.04191148		1019.39	0.01320961		1609.39	0.01251906		2199.38	0.00417122		2789.38	0.01656992		3379.38	-0.00799476
429.6	0.04249843		1019.59	0.01277695		1609.59	0.01232624		2199.58	0.00355872		2789.58	0.01548002		3379.58	-0.00751962
429.8	0.04212539		1019.79	0.01261716		1609.79	0.01338544		2199.78	0.00291663		2789.78	0.01517378		3379.78	-0.00756044
430	0.04202747		1019.99	0.01201145		1609.99	0.01358366		2199.98	0.00342705		2789.98	0.01474912		3379.98	-0.00715428
430.2	0.04264957		1020.19	0.01201928		1610.19	0.01437212		2200.18	0.00304442		2790.18	0.01364934		3380.18	-0.00830855
430.4	0.04224522		1020.39	0.01246439		1610.39	0.0142205		2200.38	0.00310579		2790.38	0.01354328		3380.38	-0.00829132
430.6	0.04252174		1020.59	0.01271128		1610.59	0.01345082		2200.58	0.00265753		2790.58	0.01314678		3380.58	-0.00872733
430.8	0.04227534		1020.79	0.01259196		1610.79	0.01383926		2200.78	0.00385844		2790.78	0.012881		3380.78	-0.00882089
431	0.04160043		1020.99	0.01278176		1610.99	0.01357499		2200.98	0.00458524		2790.98	0.01255654		3380.98	-0.00847116
431.2	0.04142807		1021.19	0.0133298		1611.19	0.01443164		2201.18	0.00595626		2791.18	0.01234345		3381.18	-0.00921027
431.4	0.04056539		1021.39	0.01372671		1611.39	0.01483485		2201.38	0.00640429		2791.38	0.01277643		3381.38	-0.0091442
431.6	0.04143002		1021.59	0.01388617		1611.59	0.01444552		2201.58	0.00627108		2791.58	0.01288107		3381.58	-0.01002685
431.8	0.04184888		1021.79	0.01392979		1611.79	0.01404697		2201.78	0.00640791		2791.78	0.01400754		3381.78	-0.00962393
432	0.04177224		1021.99	0.01425179		1611.99	0.01375754		2201.98	0.006472		2791.98	0.01471326		3381.98	-0.01068315
432.2	0.04133816		1022.19	0.01370366		1612.19	0.0135379		2202.18	0.00647733		2792.18	0.01476834		3382.18	-0.00976414
432.4	0.04207197		1022.39	0.01350959		1612.39	0.01380713		2202.38	0.00585204		2792.38	0.01469074		3382.38	-0.00894116
432.6	0.04265058		1022.59	0.01352038		1612.59	0.01351231		2202.58	0.00653518		2792.58	0.01535672		3382.58	-0.00846474
432.8	0.04361287		1022.79	0.01317008		1612.79	0.01439329		2202.78	0.00642756		2792.78	0.01535119		3382.78	-0.00821805
433	0.04398879		1022.99	0.01251607		1612.99	0.01340512		2202.98	0.00586591		2792.98	0.01520966		3382.98	-0.00887756
433.2	0.04439834		1023.19	0.01192792		1613.19	0.0135466		2203.18	0.00541726		2793.18	0.01612686		3383.18	-0.00832037
433.4	0.04433712		1023.39	0.01141643		1613.39	0.0133345		2203.38	0.00432466		2793.38	0.01612502		3383.38	-0.00846593
433.6	0.04527337		1023.59	0.01132874		1613.59	0.01402642		2203.58	0.00419004		2793.58	0.01660671		3383.58	-0.00859409
433.8	0.04541511		1023.79	0.01056512		1613.79	0.01374757		2203.78	0.0039129		2793.78	0.0174867		3383.78	-0.0081845
434	0.04580137		1023.99	0.00989965		1613.99	0.01321659		2203.98	0.00461722		2793.98	0.01732024		3383.98	-0.00857666
434.2	0.04563503		1024.19	0.01027165		1614.19	0.01339031		2204.18	0.00369815		2794.18	0.01707694		3384.18	-0.0096048
434.4	0.04503657		1024.39	0.01045697		1614.39	0.01287206		2204.38	0.00409792		2794.38	0.01685052		3384.38	-0.01028793
434.6	0.04363065		1024.59	0.0104699		1614.59	0.0134312		2204.58	0.00467739		2794.58	0.01708782		3384.58	-0.01012448
434.8	0.04328334		1024.79	0.01089749		1614.79	0.01288657		2204.78	0.00613686		2794.78	0.0162952		3384.78	-0.00890206
435	0.04295356		1024.99	0.01091308		1614.99	0.01198195		2204.98	0.00597448		2794.98	0.01595954		3384.98	-0.00927774
435.2	0.04282197		1025.19	0.01091007		1615.19	0.01148768		2205.18	0.00576375		2795.18	0.01618056		3385.18	-0.00955746
435.4	0.04306585		1025.39	0.0120497		1615.39	0.01040923		2205.38	0.00509503		2795.38	0.01644308		3385.38	-0.00943967
435.6	0.04337253		1025.59	0.01183572		1615.59	0.00972935		2205.58	0.00551109		2795.58	0.01669277		3385.58	-0.00913839
435.8	0.04290989		1025.79	0.01166744		1615.79	0.00954815		2205.78	0.00616642		2795.78	0.0167538		3385.78	-0.00931106
436	0.0425242		1025.99	0.01160567		1615.99	0.00960832		2205.98	0.00617018		2795.98	0.01714115		3385.98	-0.00955982
436.2	0.0435029		1026.19	0.01137379		1616.19	0.01014763		2206.18	0.00720425		2796.18	0.0172421		3386.18	-0.00833436
436.4	0.04482363		1026.39	0.01254859		1616.39	0.00988535		2206.38	0.00667481		2796.38	0.0171244		3386.38	-0.00766351
436.6	0.04480162		1026.59	0.01310858		1616.59	0.0094905		2206.58	0.00746889		2796.58	0.0174287		3386.58	-0.00717462
436.8	0.04534866		1026.79	0.01391792		1616.79	0.00986696		2206.78	0.00715868		2796.78	0.01706484		3386.78	-0.00770213
437	0.04581581		1026.99	0.01479709		1616.99	0.00923797		2206.98	0.00653037		2796.98	0.01651446		3386.98	-0.00826731
437.2	0.04589132		1027.19	0.01417546		1617.19	0.01002396		2207.18	0.00675264		2797.18	0.01611352		3387.18	-0.00837856
437.4	0.04592718		1027.39	0.01420027		1617.39	0.01070573		2207.38	0.00703186		2797.38	0.01531647		3387.38	-0.00891071
437.6	0.04686223		1027.59	0.01409041		1617.59	0.0119021		2207.58	0.00743193		2797.58	0.01566299		3387.58	-0.00822057
437.8	0.04666115		1027.79	0.01358809		1617.79	0.01230321		2207.78	0.00792688		2797.78	0.01496435		3387.78	-0.00787558
438	0.04582772		1027.99	0.01282196		1617.99	0.01277862		2207.98	0.00803867		2797.98	0.01481575		3387.98	-0.00781978
438.2	0.0463564		1028.19	0.01273401		1618.19	0.01398337		2208.18	0.00751312		2798.18	0.01443806		3388.18	-0.00857925
438.4	0.04580731		1028.39	0.0118759		1618.39	0.01444705		2208.38	0.00881392		2798.38	0.01360552		3388.38	-0.00815645
438.6	0.04499739		1028.59	0.01258696		1618.59	0.01484457		2208.58	0.00962212		2798.58	0.01387655		3388.58	-0.00770174
438.8	0.0453239		1028.79	0.01224788		1618.79	0.01402884		2208.78	0.00954558		2798.78	0.01394367		3388.78	-0.00774045
439	0.04489083		1028.99	0.01164234		1618.99	0.01410609		2208.98	0.00926553		2798.98	0.01397097		3388.98	-0.00821445
439.2	0.04473473		1029.19	0.01220317		1619.19	0.01428498		2209.18	0.00875486		2799.18	0.01410414		3389.18	-0.00852927
439.4	0.0435142		1029.39	0.01248829		1619.39	0.01508574		2209.38	0.00817122		2799.38	0.01389559		3389.38	-0.00925366
439.6	0.04313769		1029.59	0.01196876		1619.59	0.01555387		2209.58	0.00923396		2799.58	0.01354942		3389.58	-0.00947883
439.8	0.04371615		1029.79	0.01209304		1619.79	0.01605317		2209.78	0.00942077		2799.78	0.01383838		3389.78	-0.00916963
440	0.04351357		1029.99	0.01246937		1619.99	0.01576571		2209.98	0.00853		2799.98	0.01450784		3389.98	-0.0088444
440.2	0.04383119		1030.19	0.01314209		1620.19	0.01606891		2210.18	0.00850496		2800.18	0.01493955		3390.18	-0.00864832
440.4	0.04406999		1030.39	0.01354632		1620.39	0.01620324		2210.38	0.00783753		2800.38	0.01481735		3390.38	-0.00775124
440.6	0.04350785		1030.59	0.01378342		1620.59	0.01620043		2210.58	0.00725303		2800.58	0.01524767		3390.58	-0.00740771
440.8	0.04389418		1030.79	0.01480077		1620.79	0.01577833		2210.78	0.00644703		2800.78	0.01490136		3390.78	-0.00733585
441	0.04340783		1030.99	0.01482243		1620.99	0.0150844		2210.98	0.00641853		2800.98	0.01422107		3390.98	-0.00761805
441.2	0.04352352		1031.19	0.01445181		1621.19	0.0163355		2211.18	0.00601065		2801.18	0.01396097		3391.18	-0.00777754
441.4	0.0431202		1031.39	0.01499656		1621.39	0.01543053		2211.38	0.00559599		2801.38	0.01401953		3391.38	-0.00840971
441.6	0.043939		1031.59	0.01471817		1621.59	0.01503058		2211.58	0.00414479		2801.58	0.01370476		3391.58	-0.00818671
441.8	0.0445789		1031.79	0.01421749		1621.79	0.01452213		2211.78	0.00427245		2801.78	0.01348813		3391.78	-0.0086411
442	0.04578271		1031.99	0.01415781		1621.99	0.01404091		2211.98	0.00391267		2801.98	0.01386759		3391.98	-0.00945062
442.2	0.04620201		1032.19	0.01421466		1622.19	0.01346499		2212.18	0.00420171		2802.18	0.01372589		3392.18	-0.011161
442.4	0.04576737		1032.39	0.01369507		1622.39	0.01234819		2212.38	0.00474549		2802.38	0.01341317		3392.38	-0.01127816
442.6	0.04692667		1032.59	0.01413141		1622.59	0.01185632		2212.58	0.00428568		2802.58	0.01360093		3392.58	-0.01228329
442.8	0.04735715		1032.79	0.01367409		1622.79	0.0116685		2212.78	0.00443895		2802.78	0.01313078		3392.78	-0.01277026
443	0.04751272		1032.99	0.01449543		1622.99	0.0117984		2212.98	0.00449114		2802.98	0.01286954		3392.98	-0.01359997
443.2	0.04787385		1033.19	0.0148329		1623.19	0.01160675		2213.18	0.00427611		2803.18	0.01231217		3393.18	-0.01414998
443.4	0.0474111		1033.39	0.01446284		1623.39	0.01123226		2213.38	0.00500649		2803.38	0.01260681		3393.38	-0.0145986
443.6	0.04839303		1033.59	0.01466793		1623.59	0.0111194		2213.58	0.00559451		2803.58	0.01302965		3393.58	-0.0146838
443.8	0.04861895		1033.79	0.01437114		1623.79	0.01142118		2213.78	0.00581022		2803.78	0.01422888		3393.78	-0.01329044
444	0.0478686		1033.99	0.01398616		1623.99	0.01098608		2213.98	0.00631004		2803.98	0.01421263		3393.98	-0.01290409
444.2	0.04737641		1034.19	0.01398656		1624.19	0.01188838		2214.18	0.00629879		2804.18	0.01438024		3394.18	-0.01216701
444.4	0.04750379		1034.39	0.01429966		1624.39	0.01270382		2214.38	0.00666373		2804.38	0.01460338		3394.38	-0.01082582
444.6	0.04681148		1034.59	0.01461201		1624.59	0.01316209		2214.58	0.00678309		2804.58	0.01473121		3394.58	-0.01026604
444.8	0.04661403		1034.79	0.01523778		1624.79	0.0140509		2214.78	0.00651803		2804.78	0.0144499		3394.78	-0.00988941
445	0.04576288		1034.99	0.01434459		1624.99	0.01464218		2214.98	0.00659029		2804.98	0.01400584		3394.98	-0.00948301
445.2	0.0463152		1035.19	0.01474378		1625.19	0.01560349		2215.18	0.00620718		2805.18	0.01402918		3395.18	-0.00913228
445.4	0.04601702		1035.39	0.01442867		1625.39	0.01439062		2215.38	0.0061446		2805.38	0.0136655		3395.38	-0.008962
445.6	0.04571927		1035.59	0.01357652		1625.59	0.01521736		2215.58	0.00637538		2805.58	0.01317627		3395.58	-0.00766763
445.8	0.0458227		1035.79	0.01357897		1625.79	0.0156426		2215.78	0.00701645		2805.78	0.01395327		3395.78	-0.00755286
446	0.0449771		1035.99	0.01417222		1625.99	0.01591574		2215.98	0.00640066		2805.98	0.01343403		3395.98	-0.00712977
446.2	0.04379672		1036.19	0.01361313		1626.19	0.01501118		2216.18	0.0066575		2806.18	0.01316274		3396.18	-0.00704967
446.4	0.04428063		1036.39	0.01277349		1626.39	0.01505432		2216.38	0.00684437		2806.38	0.01421159		3396.38	-0.00647609
446.6	0.045877		1036.59	0.01323998		1626.59	0.01582		2216.58	0.00660333		2806.58	0.01457977		3396.58	-0.00729334
446.8	0.04540009		1036.79	0.01393596		1626.79	0.01503051		2216.78	0.00735268		2806.78	0.01480779		3396.78	-0.00768552
447	0.04621758		1036.99	0.01416174		1626.99	0.01476659		2216.98	0.00761483		2806.98	0.01487639		3396.98	-0.00786169
447.2	0.04602109		1037.19	0.013828		1627.19	0.01410908		2217.18	0.00746793		2807.18	0.01465563		3397.18	-0.00776522
447.4	0.0463654		1037.39	0.01475907		1627.39	0.01356443		2217.38	0.00738234		2807.38	0.01576573		3397.38	-0.00767449
447.6	0.0464368		1037.59	0.01478062		1627.59	0.013278		2217.58	0.00682576		2807.58	0.01572217		3397.58	-0.00803826
447.8	0.04699758		1037.79	0.01344317		1627.79	0.01287813		2217.78	0.00738352		2807.78	0.01565948		3397.78	-0.00774128
448	0.0468027		1037.99	0.01399098		1627.99	0.01229794		2217.98	0.00835029		2807.98	0.01585759		3397.98	-0.00847378
448.2	0.04737828		1038.19	0.01470997		1628.19	0.01236351		2218.18	0.00686632		2808.18	0.01636156		3398.18	-0.0090228
448.4	0.04797858		1038.39	0.01482123		1628.39	0.01267222		2218.38	0.00669179		2808.38	0.01716575		3398.38	-0.00925369
448.6	0.04794689		1038.59	0.01484135		1628.59	0.01266869		2218.58	0.00693446		2808.58	0.01688591		3398.58	-0.00967666
448.8	0.04805677		1038.79	0.01420296		1628.79	0.01200057		2218.78	0.00590603		2808.78	0.01677773		3398.78	-0.00947856
449	0.04844208		1038.99	0.01386427		1628.99	0.01175645		2218.98	0.00607878		2808.98	0.0170035		3398.98	-0.00890523
449.2	0.04885255		1039.19	0.01407004		1629.19	0.01115273		2219.18	0.00517965		2809.18	0.0170809		3399.18	-0.00866915
449.4	0.04899104		1039.39	0.01399734		1629.39	0.01102273		2219.38	0.00460542		2809.38	0.01689561		3399.38	-0.00867393
449.6	0.04872278		1039.59	0.01435283		1629.59	0.01123281		2219.58	0.00503275		2809.58	0.01643221		3399.58	-0.00846839
449.8	0.04871651		1039.79	0.0147012		1629.79	0.01107463		2219.78	0.00503538		2809.78	0.01699367		3399.78	-0.00844423
450	0.04813194		1039.99	0.01443139		1629.99	0.01099639		2219.98	0.00551497		2809.98	0.01666316		3399.98	-0.00840334
450.2	0.04798591		1040.19	0.01394193		1630.19	0.01049725		2220.18	0.00621536		2810.18	0.01666426		3400.18	-0.00893434
450.4	0.04841971		1040.39	0.0136492		1630.39	0.01121064		2220.38	0.00637247		2810.38	0.01667273		3400.38	-0.0086719
450.6	0.04890987		1040.59	0.0140835		1630.59	0.01220049		2220.58	0.0064392		2810.58	0.01601692		3400.58	-0.00972419
450.8	0.04772252		1040.79	0.01467809		1630.79	0.01206222		2220.78	0.00735119		2810.78	0.01462822		3400.78	-0.01026989
451	0.04765131		1040.99	0.0145932		1630.99	0.01326098		2220.98	0.00801137		2810.98	0.01380296		3400.98	-0.01041971
451.2	0.04635045		1041.19	0.01523674		1631.19	0.01357488		2221.18	0.00767858		2811.18	0.01390886		3401.18	-0.01093182
451.4	0.04632765		1041.39	0.01499015		1631.39	0.01384378		2221.38	0.00751648		2811.38	0.01411294		3401.38	-0.01107689
451.6	0.04604412		1041.59	0.01464545		1631.59	0.01407862		2221.58	0.00756857		2811.58	0.01351755		3401.58	-0.0119121
451.8	0.04584776		1041.79	0.01458085		1631.79	0.01416788		2221.78	0.00795206		2811.78	0.0137497		3401.78	-0.01213993
452	0.04458215		1041.99	0.01546955		1631.99	0.01416137		2221.98	0.008161		2811.98	0.01501871		3401.98	-0.01226845
452.2	0.04395981		1042.19	0.01583857		1632.19	0.01445207		2222.18	0.00681319		2812.18	0.01517798		3402.18	-0.01171691
452.4	0.04353293		1042.39	0.01562079		1632.39	0.0138384		2222.38	0.00703079		2812.38	0.01543617		3402.38	-0.01082196
452.6	0.04356763		1042.59	0.01504955		1632.59	0.01355039		2222.58	0.00711728		2812.58	0.01601287		3402.58	-0.01038249
452.8	0.04378826		1042.79	0.01386863		1632.79	0.01366392		2222.78	0.00663635		2812.78	0.01701201		3402.78	-0.01046401
453	0.04448457		1042.99	0.01404713		1632.99	0.01412304		2222.98	0.00674679		2812.98	0.01741811		3402.98	-0.01040229
453.2	0.04539787		1043.19	0.01345243		1633.19	0.01346562		2223.18	0.00634079		2813.18	0.01730652		3403.18	-0.01069855
453.4	0.04654638		1043.39	0.01338364		1633.39	0.01398618		2223.38	0.00677547		2813.38	0.01728133		3403.38	-0.01077943
453.6	0.04669177		1043.59	0.01315428		1633.59	0.01377361		2223.58	0.00696581		2813.58	0.01692756		3403.58	-0.01024546
453.8	0.04682296		1043.79	0.0118171		1633.79	0.01339562		2223.78	0.00715427		2813.78	0.01700782		3403.78	-0.00954123
454	0.04634831		1043.99	0.01149748		1633.99	0.01332375		2223.98	0.00747829		2813.98	0.01716631		3403.98	-0.01013389
454.2	0.04631906		1044.19	0.01069831		1634.19	0.01261252		2224.18	0.00715158		2814.18	0.0163622		3404.18	-0.00949158
454.4	0.04642668		1044.39	0.01050851		1634.39	0.01250011		2224.38	0.00711709		2814.38	0.01647705		3404.38	-0.00869043
454.6	0.04642181		1044.59	0.00963408		1634.59	0.01304825		2224.58	0.00785997		2814.58	0.01670345		3404.58	-0.00911459
454.8	0.04623536		1044.79	0.00953642		1634.79	0.01265749		2224.78	0.00794676		2814.78	0.01648963		3404.78	-0.00958099
455	0.04687772		1044.99	0.0089806		1634.99	0.01318351		2224.98	0.00739909		2814.98	0.01737577		3404.98	-0.00860669
455.2	0.04651862		1045.19	0.00971298		1635.19	0.01317289		2225.18	0.00677683		2815.18	0.01704289		3405.18	-0.00913099
455.4	0.0467775		1045.39	0.00929075		1635.39	0.01282105		2225.38	0.00575073		2815.38	0.01757824		3405.38	-0.00856556
455.6	0.04686416		1045.59	0.01071238		1635.59	0.01297344		2225.58	0.00527243		2815.58	0.01799626		3405.58	-0.00819271
455.8	0.04561172		1045.79	0.01188576		1635.79	0.01252097		2225.78	0.00635704		2815.78	0.01752962		3405.78	-0.00821621
456	0.04530158		1045.99	0.01271804		1635.99	0.01210833		2225.98	0.00657892		2815.98	0.0172008		3405.98	-0.00779474
456.2	0.04572358		1046.19	0.01297628		1636.19	0.0121269		2226.18	0.00679571		2816.18	0.01619989		3406.18	-0.0073894
456.4	0.04673218		1046.39	0.01256599		1636.39	0.0114395		2226.38	0.00642507		2816.38	0.01583783		3406.38	-0.00687787
456.6	0.04726459		1046.59	0.01308243		1636.59	0.01217933		2226.58	0.00655436		2816.58	0.0160847		3406.58	-0.00771772
456.8	0.0477981		1046.79	0.01400268		1636.79	0.01245252		2226.78	0.00722655		2816.78	0.01604373		3406.78	-0.00826314
457	0.04858632		1046.99	0.01460948		1636.99	0.01197808		2226.98	0.00764745		2816.98	0.01572742		3406.98	-0.00813116
457.2	0.04840899		1047.19	0.01495842		1637.19	0.01214063		2227.18	0.00701173		2817.18	0.01511155		3407.18	-0.00796492
457.4	0.04875855		1047.39	0.01555076		1637.39	0.01286369		2227.38	0.00702308		2817.38	0.01530228		3407.38	-0.00786172
457.6	0.04888426		1047.59	0.01578105		1637.59	0.01301064		2227.58	0.00659367		2817.58	0.01543934		3407.58	-0.00790043
457.8	0.04863991		1047.79	0.0149407		1637.79	0.01249247		2227.78	0.00734481		2817.78	0.01535673		3407.78	-0.00835099
458	0.04846944		1047.99	0.01571588		1637.99	0.01187786		2227.98	0.00723201		2817.98	0.01592722		3407.98	-0.00835139
458.2	0.04884367		1048.19	0.0149523		1638.19	0.01111847		2228.18	0.00670742		2818.18	0.01561301		3408.18	-0.0080262
458.4	0.04912538		1048.39	0.01471269		1638.39	0.01101032		2228.38	0.00618576		2818.38	0.01611863		3408.38	-0.00747653
458.6	0.04953022		1048.59	0.01349044		1638.59	0.01164564		2228.58	0.00632679		2818.58	0.01631534		3408.58	-0.00808662
458.8	0.04920909		1048.79	0.01376483		1638.79	0.01136808		2228.78	0.00569291		2818.78	0.01626526		3408.78	-0.00823544
459	0.04942942		1048.99	0.01403679		1638.99	0.01274295		2228.98	0.00510533		2818.98	0.01639888		3408.98	-0.0072903
459.2	0.04879393		1049.19	0.01461893		1639.19	0.01297561		2229.18	0.0051087		2819.18	0.01687495		3409.18	-0.00836136
459.4	0.0486523		1049.39	0.01413286		1639.39	0.01353883		2229.38	0.00546439		2819.38	0.01745434		3409.38	-0.00797294
459.6	0.04858231		1049.59	0.01417918		1639.59	0.01373725		2229.58	0.00616881		2819.58	0.01703735		3409.58	-0.00735399
459.8	0.04841678		1049.79	0.01375873		1639.79	0.01357953		2229.78	0.00722877		2819.78	0.01568539		3409.78	-0.00755958
460	0.04854943		1049.99	0.01404889		1639.99	0.013946		2229.98	0.00704371		2819.98	0.01530795		3409.98	-0.00703815
460.2	0.0485491		1050.19	0.01381495		1640.19	0.01414159		2230.18	0.0065633		2820.18	0.01422922		3410.18	-0.00766197
460.4	0.04803978		1050.39	0.01450307		1640.39	0.01370622		2230.38	0.00629608		2820.38	0.01456823		3410.38	-0.00759069
460.6	0.04815972		1050.59	0.01519148		1640.59	0.01418089		2230.58	0.00673141		2820.58	0.01450609		3410.58	-0.00833918
460.8	0.0484056		1050.79	0.01551471		1640.79	0.01429929		2230.78	0.00730879		2820.78	0.01553643		3410.78	-0.00870253
461	0.04805239		1050.99	0.01539008		1640.99	0.01426229		2230.98	0.00698184		2820.98	0.01550383		3410.98	-0.0089457
461.2	0.04777794		1051.19	0.0160563		1641.19	0.01493649		2231.18	0.0074104		2821.18	0.01573331		3411.18	-0.00911753
461.4	0.04777369		1051.39	0.01646286		1641.39	0.01512824		2231.38	0.00728115		2821.38	0.01567656		3411.38	-0.00976871
461.6	0.0481201		1051.59	0.01670383		1641.59	0.01514851		2231.58	0.00694054		2821.58	0.01592811		3411.58	-0.01013591
461.8	0.04852688		1051.79	0.01637771		1641.79	0.01445632		2231.78	0.00739478		2821.78	0.01590915		3411.78	-0.01017418
462	0.04802425		1051.99	0.0166859		1641.99	0.01361152		2231.98	0.0070548		2821.98	0.01639175		3411.98	-0.01041961
462.2	0.04730442		1052.19	0.01655778		1642.19	0.01366814		2232.18	0.00713556		2822.18	0.01597633		3412.18	-0.0107688
462.4	0.04783419		1052.39	0.01651328		1642.39	0.01412385		2232.38	0.00719963		2822.38	0.01640009		3412.38	-0.01033447
462.6	0.0475699		1052.59	0.0163277		1642.59	0.01453373		2232.58	0.00823118		2822.58	0.0165683		3412.58	-0.01099686
462.8	0.04731629		1052.79	0.01615971		1642.79	0.01424886		2232.78	0.0085567		2822.78	0.01649233		3412.78	-0.01021375
463	0.04784446		1052.99	0.01574686		1642.99	0.01395718		2232.98	0.00923109		2822.98	0.01720879		3412.98	-0.00983126
463.2	0.04785512		1053.19	0.01562235		1643.19	0.01380735		2233.18	0.0103177		2823.18	0.01750524		3413.18	-0.00993539
463.4	0.04802134		1053.39	0.01549303		1643.39	0.01333171		2233.38	0.01103484		2823.38	0.01760982		3413.38	-0.00915991
463.6	0.04777917		1053.59	0.01460525		1643.59	0.01282962		2233.58	0.01076317		2823.58	0.01859514		3413.58	-0.00889183
463.8	0.0479451		1053.79	0.01429699		1643.79	0.01319599		2233.78	0.01090742		2823.78	0.01821687		3413.78	-0.0096346
464	0.04738931		1053.99	0.01512122		1643.99	0.01333254		2233.98	0.01135774		2823.98	0.01832053		3413.98	-0.00952814
464.2	0.04718033		1054.19	0.01418724		1644.19	0.01291102		2234.18	0.01089786		2824.18	0.01828776		3414.18	-0.01020952
464.4	0.04691194		1054.39	0.01359108		1644.39	0.01330059		2234.38	0.01082234		2824.38	0.01888375		3414.38	-0.01021222
464.6	0.04768435		1054.59	0.01300359		1644.59	0.01396714		2234.58	0.01043219		2824.58	0.01877522		3414.58	-0.00999959
464.8	0.04754813		1054.79	0.01311832		1644.79	0.01329335		2234.78	0.01027035		2824.78	0.01879037		3414.78	-0.00995134
465	0.04769711		1054.99	0.01238033		1644.99	0.01308974		2234.98	0.00988777		2824.98	0.01764896		3414.98	-0.0092415
465.2	0.04832261		1055.19	0.01154331		1645.19	0.0134439		2235.18	0.00971113		2825.18	0.0172428		3415.18	-0.00955561
465.4	0.04805218		1055.39	0.01233372		1645.39	0.01325682		2235.38	0.00814332		2825.38	0.01593927		3415.38	-0.00965464
465.6	0.04867792		1055.59	0.01202065		1645.59	0.01231509		2235.58	0.0079323		2825.58	0.01606328		3415.58	-0.01026147
465.8	0.04866803		1055.79	0.01269158		1645.79	0.0118654		2235.78	0.00788261		2825.78	0.01585668		3415.78	-0.01034672
466	0.04765		1055.99	0.0132594		1645.99	0.01229057		2235.98	0.00746705		2825.98	0.01616448		3415.98	-0.01094492
466.2	0.04817755		1056.19	0.01426188		1646.19	0.0125223		2236.18	0.00814511		2826.18	0.01552047		3416.18	-0.01068237
466.4	0.04907985		1056.39	0.01395412		1646.39	0.01257884		2236.38	0.00755802		2826.38	0.01591222		3416.38	-0.01137481
466.6	0.04940268		1056.59	0.01443792		1646.59	0.01199995		2236.58	0.00733249		2826.58	0.01591186		3416.58	-0.01207721
466.8	0.04964775		1056.79	0.01457078		1646.79	0.01129529		2236.78	0.0073865		2826.78	0.01516102		3416.78	-0.01162036
467	0.05058147		1056.99	0.01504113		1646.99	0.01139408		2236.98	0.00737887		2826.98	0.01575076		3416.98	-0.01207547
467.2	0.05031083		1057.19	0.01562639		1647.19	0.01270335		2237.18	0.00697803		2827.18	0.01622478		3417.18	-0.01221053
467.4	0.0500288		1057.39	0.01615824		1647.39	0.01256073		2237.38	0.00627717		2827.38	0.01652285		3417.38	-0.0130891
467.6	0.05035321		1057.59	0.01547416		1647.59	0.01311813		2237.58	0.00543077		2827.58	0.01742605		3417.58	-0.0132435
467.8	0.05121696		1057.79	0.01519663		1647.79	0.01374373		2237.78	0.00542319		2827.78	0.01782064		3417.78	-0.01347412
468	0.0513934		1057.99	0.01515829		1647.99	0.01406488		2237.98	0.0052833		2827.98	0.01860536		3417.98	-0.01333212
468.2	0.05163572		1058.19	0.01450671		1648.19	0.01447879		2238.18	0.00460117		2828.18	0.01905602		3418.18	-0.01312576
468.4	0.05198354		1058.39	0.0145784		1648.39	0.01502466		2238.38	0.00444532		2828.38	0.01879568		3418.38	-0.0126687
468.6	0.0523435		1058.59	0.01454538		1648.59	0.01516325		2238.58	0.00439307		2828.58	0.01804722		3418.58	-0.01130483
468.8	0.05211038		1058.79	0.01459901		1648.79	0.01479192		2238.78	0.00453227		2828.78	0.01705216		3418.78	-0.01043465
469	0.05251613		1058.99	0.01416349		1648.99	0.01540854		2238.98	0.00473511		2828.98	0.016212		3418.98	-0.0094353
469.2	0.05240278		1059.19	0.01470612		1649.19	0.0158264		2239.18	0.00480137		2829.18	0.0152116		3419.18	-0.00917166
469.4	0.05184395		1059.39	0.01624141		1649.39	0.01548135		2239.38	0.00492801		2829.38	0.0139268		3419.38	-0.008423
469.6	0.0512898		1059.59	0.01646287		1649.59	0.01513704		2239.58	0.00533689		2829.58	0.0132289		3419.58	-0.00801103
469.8	0.05083332		1059.79	0.01813451		1649.79	0.01584815		2239.78	0.00582644		2829.78	0.01249474		3419.78	-0.0071709
470	0.05083332		1059.99	0.01813451		1649.99	0.01584815		2239.98	0.00582644		2829.98	0.01249474		3419.98	-0.0071709
470.2	0.05044888		1060.19	0.01679083		1650.19	0.01556386		2240.18	0.00636419		2830.18	0.0125611		3420.18	-0.00751641
470.4	0.04956183		1060.39	0.01565109		1650.39	0.01558924		2240.38	0.00749421		2830.38	0.01309039		3420.38	-0.00708866
470.6	0.04930195		1060.59	0.01467546		1650.59	0.01518088		2240.58	0.00811318		2830.58	0.01234646		3420.58	-0.00793482
470.8	0.04863611		1060.79	0.01422198		1650.79	0.01416447		2240.78	0.00892718		2830.78	0.01161244		3420.78	-0.00823335
471	0.0483174		1060.99	0.01295793		1650.99	0.01385878		2240.98	0.00909942		2830.98	0.01188609		3420.98	-0.00846532
471.2	0.0475508		1061.19	0.01229739		1651.19	0.01407546		2241.18	0.00973579		2831.18	0.01129989		3421.18	-0.00867859
471.4	0.04706667		1061.39	0.01195687		1651.39	0.01391079		2241.38	0.00970478		2831.38	0.01138998		3421.38	-0.00874264
471.6	0.04655917		1061.59	0.01145776		1651.59	0.01345223		2241.58	0.01020041		2831.58	0.01083031		3421.58	-0.00820776
471.8	0.04591946		1061.79	0.01135595		1651.79	0.0132941		2241.78	0.009908		2831.78	0.01063203		3421.78	-0.00896812
472	0.04540608		1061.99	0.01158893		1651.99	0.01365381		2241.98	0.00958402		2831.98	0.01027345		3421.98	-0.0094029
472.2	0.04520294		1062.19	0.01176203		1652.19	0.0141667		2242.18	0.01024601		2832.18	0.01059233		3422.18	-0.00878458
472.4	0.04556289		1062.39	0.01109604		1652.39	0.01405434		2242.38	0.01069949		2832.38	0.01062089		3422.38	-0.00783847
472.6	0.04564874		1062.59	0.00979307		1652.59	0.01398564		2242.58	0.01045911		2832.58	0.00958109		3422.58	-0.00679529
472.8	0.04581109		1062.79	0.0096097		1652.79	0.01388671		2242.78	0.01039847		2832.78	0.0092834		3422.78	-0.00622448
473	0.04565308		1062.99	0.00974981		1652.99	0.01353269		2242.98	0.00933374		2832.98	0.00898391		3422.98	-0.00539072
473.2	0.04659552		1063.19	0.01069334		1653.19	0.01327717		2243.18	0.0088583		2833.18	0.00853947		3423.18	-0.00552679
473.4	0.04645265		1063.39	0.00997632		1653.39	0.01361504		2243.38	0.00848326		2833.38	0.00896656		3423.38	-0.00578646
473.6	0.04667562		1063.59	0.01099609		1653.59	0.01298683		2243.58	0.00779402		2833.58	0.00857413		3423.58	-0.00567783
473.8	0.04636021		1063.79	0.01066945		1653.79	0.01298895		2243.78	0.00762231		2833.78	0.00897331		3423.78	-0.00485297
474	0.04744869		1063.99	0.01139294		1653.99	0.01288541		2243.98	0.00800143		2833.98	0.00855309		3423.98	-0.00450372
474.2	0.04818182		1064.19	0.01166157		1654.19	0.01210595		2244.18	0.00763084		2834.18	0.00888079		3424.18	-0.00521469
474.4	0.04785255		1064.39	0.0124732		1654.39	0.01163899		2244.38	0.00734635		2834.38	0.00862548		3424.38	-0.00561142
474.6	0.04852259		1064.59	0.01279542		1654.59	0.01088784		2244.58	0.00637157		2834.58	0.00761677		3424.58	-0.00602674
474.8	0.0483365		1064.79	0.01298077		1654.79	0.01089447		2244.78	0.00647045		2834.78	0.00742622		3424.78	-0.00565152
475	0.04834702		1064.99	0.01245602		1654.99	0.01076956		2244.98	0.00611122		2834.98	0.007914		3424.98	-0.00627482
475.2	0.0479904		1065.19	0.01290223		1655.19	0.01069664		2245.18	0.00636741		2835.18	0.00772251		3425.18	-0.00654858
475.4	0.04759947		1065.39	0.0127232		1655.39	0.01039987		2245.38	0.00629779		2835.38	0.00848884		3425.38	-0.00683077
475.6	0.04736267		1065.59	0.01219971		1655.59	0.01063541		2245.58	0.00683243		2835.58	0.00861608		3425.58	-0.0065461
475.8	0.04684759		1065.79	0.0128057		1655.79	0.01081882		2245.78	0.00752485		2835.78	0.00919639		3425.78	-0.00727455
476	0.04664542		1065.99	0.01248979		1655.99	0.01149394		2245.98	0.00806016		2835.98	0.00904022		3425.98	-0.00635441
476.2	0.04639997		1066.19	0.01161161		1656.19	0.0118243		2246.18	0.00925998		2836.18	0.00957312		3426.18	-0.00553121
476.4	0.04628212		1066.39	0.01122037		1656.39	0.01197047		2246.38	0.00942321		2836.38	0.0094466		3426.38	-0.004992
476.6	0.04499506		1066.59	0.0101806		1656.59	0.01196703		2246.58	0.01012637		2836.58	0.00991448		3426.58	-0.00425551
476.8	0.04458526		1066.79	0.009936		1656.79	0.01136167		2246.78	0.01074597		2836.78	0.00975324		3426.78	-0.00344757
477	0.04363306		1066.99	0.00925497		1656.99	0.0109342		2246.98	0.00995902		2836.98	0.00998568		3426.98	-0.00311693
477.2	0.04389545		1067.19	0.0092412		1657.19	0.01145023		2247.18	0.01006125		2837.18	0.01033147		3427.18	-0.00318926
477.4	0.04361849		1067.39	0.00902689		1657.39	0.01163884		2247.38	0.00997101		2837.38	0.01070658		3427.38	-0.00447064
477.6	0.04350504		1067.59	0.00902551		1657.59	0.01133657		2247.58	0.00991056		2837.58	0.01035876		3427.58	-0.00438323
477.8	0.04369448		1067.79	0.00854545		1657.79	0.01283838		2247.78	0.01037789		2837.78	0.01093265		3427.78	-0.00461364
478	0.0447206		1067.99	0.0099301		1657.99	0.0130287		2247.98	0.01115192		2837.98	0.01030419		3427.98	-0.00540679
478.2	0.04439944		1068.19	0.00963292		1658.19	0.01260302		2248.18	0.01026018		2838.18	0.00990883		3428.18	-0.00686166
478.4	0.04373258		1068.39	0.01054526		1658.39	0.01278911		2248.38	0.01014969		2838.38	0.01013344		3428.38	-0.00717936
478.6	0.04392586		1068.59	0.01048792		1658.59	0.01321028		2248.58	0.01047315		2838.58	0.00995653		3428.58	-0.00742255
478.8	0.0435833		1068.79	0.01120313		1658.79	0.01255072		2248.78	0.01064161		2838.78	0.00988768		3428.78	-0.00881376
479	0.04359505		1068.99	0.01217602		1658.99	0.01219374		2248.98	0.0101853		2838.98	0.00952444		3428.98	-0.00929667
479.2	0.04281844		1069.19	0.01338506		1659.19	0.01265326		2249.18	0.00963817		2839.18	0.01011964		3429.18	-0.00889861
479.4	0.04320821		1069.39	0.01431583		1659.39	0.01258125		2249.38	0.00888227		2839.38	0.01057005		3429.38	-0.00900591
479.6	0.04276779		1069.59	0.01517328		1659.59	0.01264663		2249.58	0.00891886		2839.58	0.0103396		3429.58	-0.00819216
479.8	0.04250972		1069.79	0.01643371		1659.79	0.01243204		2249.78	0.0088688		2839.78	0.01022038		3429.78	-0.00745127
480	0.04223165		1069.99	0.01672375		1659.99	0.01213188		2249.98	0.00816015		2839.98	0.00919476		3429.98	-0.00703913
480.2	0.04210034		1070.19	0.01681563		1660.19	0.01180119		2250.18	0.00838235		2840.18	0.00862663		3430.18	-0.00718503
480.4	0.04214069		1070.39	0.01695239		1660.39	0.01146311		2250.38	0.00814177		2840.38	0.00853676		3430.38	-0.00681394
480.6	0.0416956		1070.59	0.01642743		1660.59	0.0114678		2250.58	0.00774151		2840.58	0.00755653		3430.58	-0.00748711
480.8	0.04238711		1070.79	0.01568024		1660.79	0.01090604		2250.78	0.00783889		2840.78	0.00710089		3430.78	-0.0076335
481	0.04242159		1070.99	0.01482824		1660.99	0.01116781		2250.98	0.00668012		2840.98	0.00716383		3430.98	-0.00812242
481.2	0.04272105		1071.19	0.01381686		1661.19	0.01160272		2251.18	0.00678511		2841.18	0.00733972		3431.18	-0.00821513
481.4	0.04307996		1071.39	0.01252896		1661.39	0.01153055		2251.38	0.00688906		2841.38	0.00696514		3431.38	-0.00748863
481.6	0.043312		1071.59	0.01177543		1661.59	0.01244413		2251.58	0.00709239		2841.58	0.00735954		3431.58	-0.00584779
481.8	0.04357292		1071.79	0.01172065		1661.79	0.01314328		2251.78	0.00703766		2841.78	0.00796145		3431.78	-0.00523685
482	0.04334281		1071.99	0.01160539		1661.99	0.01288345		2251.98	0.0065486		2841.98	0.00792084		3431.98	-0.00566161
482.2	0.04282376		1072.19	0.01084282		1662.19	0.0126271		2252.18	0.0067124		2842.18	0.00829626		3432.18	-0.00579305
482.4	0.04271105		1072.39	0.01147377		1662.39	0.01336309		2252.38	0.00713537		2842.38	0.00956045		3432.38	-0.00504911
482.6	0.04181742		1072.59	0.01095464		1662.59	0.0133612		2252.58	0.00782459		2842.58	0.00971728		3432.58	-0.00557416
482.8	0.04138		1072.79	0.01131519		1662.79	0.01282504		2252.78	0.00686395		2842.78	0.01017291		3432.78	-0.00560336
483	0.04001805		1072.99	0.01142339		1662.99	0.01317842		2252.98	0.00652867		2842.98	0.01159431		3432.98	-0.00510353
483.2	0.03847782		1073.19	0.01162096		1663.19	0.01308529		2253.18	0.00571152		2843.18	0.01253871		3433.18	-0.00556996
483.4	0.0383917		1073.39	0.01177496		1663.39	0.01320785		2253.38	0.00544429		2843.38	0.01248929		3433.38	-0.00592863
483.6	0.03690208		1073.59	0.01199666		1663.59	0.01328966		2253.58	0.00612778		2843.58	0.01179133		3433.58	-0.00496447
483.8	0.03708965		1073.79	0.01214454		1663.79	0.01319064		2253.78	0.0061567		2843.78	0.01214097		3433.78	-0.0051017
484	0.03714671		1073.99	0.01227228		1663.99	0.01233414		2253.98	0.00600831		2843.98	0.01073826		3433.98	-0.00520292
484.2	0.03715549		1074.19	0.0126034		1664.19	0.01293913		2254.18	0.00647286		2844.18	0.01065141		3434.18	-0.00540821
484.4	0.03752223		1074.39	0.01246505		1664.39	0.0125521		2254.38	0.00694434		2844.38	0.01048738		3434.38	-0.00548045
484.6	0.03747902		1074.59	0.0125405		1664.59	0.01237221		2254.58	0.00739877		2844.58	0.01044134		3434.58	-0.00655181
484.8	0.03759964		1074.79	0.01230417		1664.79	0.01192191		2254.78	0.00780216		2844.78	0.01035522		3434.78	-0.00671359
485	0.03729201		1074.99	0.01156858		1664.99	0.01175607		2254.98	0.0079342		2844.98	0.01012557		3434.98	-0.00627458
485.2	0.03739849		1075.19	0.01068128		1665.19	0.01178884		2255.18	0.00835179		2845.18	0.00992732		3435.18	-0.0052802
485.4	0.03799302		1075.39	0.01129175		1665.39	0.01164633		2255.38	0.00800528		2845.38	0.00907016		3435.38	-0.0047482
485.6	0.03848462		1075.59	0.01131914		1665.59	0.01177792		2255.58	0.00800486		2845.58	0.00915901		3435.58	-0.00497298
485.8	0.03897533		1075.79	0.01167341		1665.79	0.0119012		2255.78	0.0076065		2845.78	0.00895169		3435.78	-0.00533662
486	0.03882034		1075.99	0.0116006		1665.99	0.01231899		2255.98	0.00783785		2845.98	0.00945592		3435.98	-0.00556288
486.2	0.03926411		1076.19	0.01162051		1666.19	0.01235159		2256.18	0.00818226		2846.18	0.00914911		3436.18	-0.0051993
486.4	0.03948909		1076.39	0.01173879		1666.39	0.0130054		2256.38	0.00758518		2846.38	0.00915537		3436.38	-0.00601352
486.6	0.03888084		1076.59	0.01176703		1666.59	0.01238877		2256.58	0.00712609		2846.58	0.00903496		3436.58	-0.00714352
486.8	0.03825815		1076.79	0.01142358		1666.79	0.01245607		2256.78	0.00523423		2846.78	0.00960982		3436.78	-0.00796966
487	0.03741457		1076.99	0.01171638		1666.99	0.012636		2256.98	0.00497602		2846.98	0.00971453		3436.98	-0.00818942
487.2	0.03808845		1077.19	0.01196422		1667.19	0.01248408		2257.18	0.00453323		2847.18	0.00868461		3437.18	-0.00883823
487.4	0.03851596		1077.39	0.01170028		1667.39	0.01213486		2257.38	0.00407986		2847.38	0.00805011		3437.38	-0.00881144
487.6	0.03818809		1077.59	0.01159655		1667.59	0.0119167		2257.58	0.00398551		2847.58	0.00816858		3437.58	-0.00900136
487.8	0.03874078		1077.79	0.0108582		1667.79	0.01197581		2257.78	0.00357574		2847.78	0.0083563		3437.78	-0.0090279
488	0.03904017		1077.99	0.0109471		1667.99	0.01254896		2257.98	0.00420727		2847.98	0.00823351		3437.98	-0.00867602
488.2	0.03925523		1078.19	0.01154094		1668.19	0.01271163		2258.18	0.00473369		2848.18	0.009811		3438.18	-0.0083636
488.4	0.03969139		1078.39	0.01116895		1668.39	0.01253002		2258.38	0.00458873		2848.38	0.01044887		3438.38	-0.00812189
488.6	0.03909309		1078.59	0.01051831		1668.59	0.01249124		2258.58	0.00480261		2848.58	0.01074767		3438.58	-0.00864262
488.8	0.03919978		1078.79	0.00996103		1668.79	0.01320637		2258.78	0.00468967		2848.78	0.01051779		3438.78	-0.00860956
489	0.03886471		1078.99	0.00883872		1668.99	0.01348242		2258.98	0.00517931		2848.98	0.00994761		3438.98	-0.0077326
489.2	0.03879529		1079.19	0.00852867		1669.19	0.01369718		2259.18	0.00501096		2849.18	0.01004457		3439.18	-0.00798079
489.4	0.03865076		1079.39	0.00846745		1669.39	0.01394652		2259.38	0.00548766		2849.38	0.00995143		3439.38	-0.00881952
489.6	0.03911972		1079.59	0.00811369		1669.59	0.01437065		2259.58	0.00623424		2849.58	0.01009641		3439.58	-0.00834796
489.8	0.03897669		1079.79	0.00831845		1669.79	0.01509424		2259.78	0.00651508		2849.78	0.01063821		3439.78	-0.0077659
490	0.03897241		1079.99	0.00787708		1669.99	0.01455596		2259.98	0.00724091		2849.98	0.01101791		3439.98	-0.00799912
490.2	0.03900246		1080.19	0.00776403		1670.19	0.01464793		2260.18	0.00678634		2850.18	0.01101164		3440.18	-0.0086384
490.4	0.03913593		1080.39	0.00868896		1670.39	0.01465443		2260.38	0.00707926		2850.38	0.01080264		3440.38	-0.00942501
490.6	0.0388449		1080.59	0.00923551		1670.59	0.01371856		2260.58	0.00678873		2850.58	0.01036021		3440.58	-0.00974968
490.8	0.03823968		1080.79	0.008769		1670.79	0.01331637		2260.78	0.00709343		2850.78	0.01069862		3440.78	-0.00999753
491	0.03892731		1080.99	0.00975892		1670.99	0.0126521		2260.98	0.00801421		2850.98	0.00985045		3440.98	-0.00955595
491.2	0.03906004		1081.19	0.01025604		1671.19	0.01126869		2261.18	0.00820311		2851.18	0.00999718		3441.18	-0.01019025
491.4	0.03894537		1081.39	0.00991987		1671.39	0.01080418		2261.38	0.00818556		2851.38	0.00976035		3441.38	-0.01013492
491.6	0.03928949		1081.59	0.00949315		1671.59	0.01002532		2261.58	0.00874221		2851.58	0.01039835		3441.58	-0.01016259
491.8	0.0399111		1081.79	0.00925451		1671.79	0.00980619		2261.78	0.00878774		2851.78	0.01049617		3441.78	-0.00972476
492	0.03938154		1081.99	0.00975983		1671.99	0.00908288		2261.98	0.00978949		2851.98	0.0109156		3441.98	-0.01036056
492.2	0.03973678		1082.19	0.00967864		1672.19	0.00857436		2262.18	0.00850114		2852.18	0.01087763		3442.18	-0.00977758
492.4	0.03919213		1082.39	0.00885992		1672.39	0.00854759		2262.38	0.00874388		2852.38	0.01035107		3442.38	-0.01053537
492.6	0.03935405		1082.59	0.00829956		1672.59	0.00796539		2262.58	0.00931086		2852.58	0.00900328		3442.58	-0.01136918
492.8	0.03936352		1082.79	0.00882246		1672.79	0.00762993		2262.78	0.0092282		2852.78	0.00757449		3442.78	-0.01130479
493	0.03869188		1082.99	0.00821727		1672.99	0.00650189		2262.98	0.00888337		2852.98	0.00651728		3442.98	-0.01044655
493.2	0.03862405		1083.19	0.00888378		1673.19	0.00640455		2263.18	0.00820305		2853.18	0.0068533		3443.18	-0.01027021
493.4	0.03907562		1083.39	0.00859352		1673.39	0.00692364		2263.38	0.00733431		2853.38	0.00636561		3443.38	-0.01005276
493.6	0.03976376		1083.59	0.00951084		1673.59	0.00687433		2263.58	0.00716268		2853.58	0.00691145		3443.58	-0.00929574
493.8	0.04002671		1083.79	0.00957179		1673.79	0.00727081		2263.78	0.00673813		2853.78	0.00742681		3443.78	-0.00872901
494	0.03982031		1083.99	0.00982404		1673.99	0.00708785		2263.98	0.00663761		2853.98	0.00667932		3443.98	-0.00873749
494.2	0.03941491		1084.19	0.01072959		1674.19	0.0077227		2264.18	0.00595216		2854.18	0.00598185		3444.18	-0.00948904
494.4	0.0396907		1084.39	0.0115336		1674.39	0.00747409		2264.38	0.00638584		2854.38	0.00584376		3444.38	-0.00992499
494.6	0.03900355		1084.59	0.01114242		1674.59	0.00807274		2264.58	0.00686832		2854.58	0.00552641		3444.58	-0.008657
494.8	0.03801789		1084.79	0.01041089		1674.79	0.00809439		2264.78	0.00705109		2854.78	0.00556587		3444.78	-0.0078717
495	0.03735374		1084.99	0.01106836		1674.99	0.00832709		2264.98	0.00716323		2854.98	0.00585942		3444.98	-0.00731023
495.2	0.03719919		1085.19	0.0104976		1675.19	0.00837948		2265.18	0.00776628		2855.18	0.00690082		3445.18	-0.00646442
495.4	0.03722961		1085.39	0.00931192		1675.39	0.00839345		2265.38	0.00815021		2855.38	0.00726615		3445.38	-0.00616453
495.6	0.03702986		1085.59	0.00831664		1675.59	0.00837463		2265.58	0.00820305		2855.58	0.00726602		3445.58	-0.00621023
495.8	0.03606436		1085.79	0.00832356		1675.79	0.00947593		2265.78	0.00812015		2855.78	0.00691261		3445.78	-0.00604455
496	0.03480332		1085.99	0.00791998		1675.99	0.00959623		2265.98	0.00858216		2855.98	0.00607816		3445.98	-0.00661977
496.2	0.03531525		1086.19	0.00676007		1676.19	0.0101869		2266.18	0.00826213		2856.18	0.00607562		3446.18	-0.00751766
496.4	0.03512726		1086.39	0.00640014		1676.39	0.01005655		2266.38	0.00849362		2856.38	0.00606551		3446.38	-0.00922932
496.6	0.03486176		1086.59	0.00678894		1676.59	0.00938741		2266.58	0.00873504		2856.58	0.00638894		3446.58	-0.00945593
496.8	0.03446006		1086.79	0.00673566		1676.79	0.008798		2266.78	0.00821974		2856.78	0.00726383		3446.78	-0.00945353
497	0.03411426		1086.99	0.00695959		1676.99	0.00879054		2266.98	0.00740387		2856.98	0.00869967		3446.98	-0.00963921
497.2	0.03498356		1087.19	0.00764378		1677.19	0.00915785		2267.18	0.00710216		2857.18	0.00903073		3447.18	-0.01078505
497.4	0.03523811		1087.39	0.00774054		1677.39	0.00954125		2267.38	0.00732504		2857.38	0.00925404		3447.38	-0.01127541
497.6	0.03544545		1087.59	0.00846818		1677.59	0.00975551		2267.58	0.0074319		2857.58	0.009443		3447.58	-0.01136203
497.8	0.03473832		1087.79	0.00903473		1677.79	0.00996593		2267.78	0.00715697		2857.78	0.00855281		3447.78	-0.01147315
498	0.0347591		1087.99	0.01013933		1677.99	0.01019552		2267.98	0.00673331		2857.98	0.00781281		3447.98	-0.01197268
498.2	0.03575082		1088.19	0.01086436		1678.19	0.01017788		2268.18	0.00664334		2858.18	0.00784732		3448.18	-0.01297344
498.4	0.03575728		1088.39	0.01114087		1678.39	0.01008065		2268.38	0.00710682		2858.38	0.00866561		3448.38	-0.012833
498.6	0.03591989		1088.59	0.01013963		1678.59	0.01008415		2268.58	0.00804853		2858.58	0.00819635		3448.58	-0.01200881
498.8	0.03627561		1088.79	0.01099395		1678.79	0.0089435		2268.78	0.00751859		2858.78	0.00761894		3448.78	-0.0123543
499	0.03711575		1088.99	0.01159428		1678.99	0.00871378		2268.98	0.00687051		2858.98	0.00851308		3448.98	-0.01264811
499.2	0.03757985		1089.19	0.01126378		1679.19	0.00863528		2269.18	0.00764851		2859.18	0.008394		3449.18	-0.01206423
499.4	0.03767558		1089.39	0.01121891		1679.39	0.00790223		2269.38	0.00624829		2859.38	0.00770735		3449.38	-0.01194664
499.6	0.03799499		1089.59	0.01049305		1679.59	0.00768797		2269.58	0.00565731		2859.58	0.00657134		3449.58	-0.01184737
499.8	0.03775309		1089.79	0.009795		1679.79	0.00827059		2269.78	0.00573529		2859.78	0.00610502		3449.78	-0.01145014
500	0.0377367		1089.99	0.00960711		1679.99	0.00803353		2269.98	0.00594399		2859.98	0.00556988		3449.98	-0.01161612
500.2	0.03841977		1090.19	0.00920738		1680.19	0.00792286		2270.18	0.00605733		2860.18	0.00617659		3450.18	-0.01171587
500.4	0.03888481		1090.39	0.009642		1680.39	0.00759521		2270.38	0.00541613		2860.38	0.00636249		3450.38	-0.01180585
500.6	0.03933698		1090.59	0.00903886		1680.59	0.00714977		2270.58	0.00609089		2860.58	0.00766554		3450.58	-0.01117973
500.8	0.03962897		1090.79	0.00792464		1680.79	0.0072502		2270.78	0.00606961		2860.78	0.00828789		3450.78	-0.01156534
501	0.03948842		1090.99	0.00763944		1680.99	0.00801146		2270.98	0.00601407		2860.98	0.00764406		3450.98	-0.01176957
501.2	0.03944565		1091.19	0.0074372		1681.19	0.00818258		2271.18	0.00636574		2861.18	0.00761417		3451.18	-0.01155769
501.4	0.03819581		1091.39	0.00748721		1681.39	0.00890356		2271.38	0.00648204		2861.38	0.00757938		3451.38	-0.01141221
501.6	0.03803198		1091.59	0.00643725		1681.59	0.00870222		2271.58	0.00566045		2861.58	0.00715446		3451.58	-0.01134895
501.8	0.03686385		1091.79	0.00650585		1681.79	0.0092616		2271.78	0.00513475		2861.78	0.00722266		3451.78	-0.01118978
502	0.03642581		1091.99	0.00614936		1681.99	0.00962395		2271.98	0.00453172		2861.98	0.00720315		3451.98	-0.01059765
502.2	0.03592024		1092.19	0.00564617		1682.19	0.00936704		2272.18	0.00431369		2862.18	0.0073172		3452.18	-0.01100621
502.4	0.03484383		1092.39	0.00527877		1682.39	0.00943128		2272.38	0.00420858		2862.38	0.00760999		3452.38	-0.01071842
502.6	0.03469565		1092.59	0.00499575		1682.59	0.00899695		2272.58	0.00387604		2862.58	0.00650032		3452.58	-0.01085105
502.8	0.03452153		1092.79	0.00653782		1682.79	0.00837219		2272.78	0.00322987		2862.78	0.00634389		3452.78	-0.0111668
503	0.03463114		1092.99	0.00604061		1682.99	0.00800604		2272.98	0.00263877		2862.98	0.00722433		3452.98	-0.01126193
503.2	0.03452767		1093.19	0.00573987		1683.19	0.00789786		2273.18	0.00262324		2863.18	0.00807843		3453.18	-0.0115269
503.4	0.03461466		1093.39	0.00547395		1683.39	0.00760075		2273.38	0.00166391		2863.38	0.00799297		3453.38	-0.01109908
503.6	0.03476755		1093.59	0.00525215		1683.59	0.00734124		2273.58	0.00182898		2863.58	0.00771039		3453.58	-0.01169817
503.8	0.03523798		1093.79	0.00520856		1683.79	0.00781535		2273.78	0.00225196		2863.78	0.00808738		3453.78	-0.01113214
504	0.03627019		1093.99	0.00601972		1683.99	0.00717293		2273.98	0.00220037		2863.98	0.0079648		3453.98	-0.01065964
504.2	0.03776404		1094.19	0.00570386		1684.19	0.00626255		2274.18	0.00287033		2864.18	0.00776401		3454.18	-0.0101958
504.4	0.0388145		1094.39	0.0054367		1684.39	0.00550368		2274.38	0.00262932		2864.38	0.00720632		3454.38	-0.01073623
504.6	0.03960434		1094.59	0.00486216		1684.59	0.00517183		2274.58	0.0032662		2864.58	0.00679436		3454.58	-0.01056069
504.8	0.03883391		1094.79	0.00459126		1684.79	0.0049233		2274.78	0.00369649		2864.78	0.00644115		3454.78	-0.01130557
505	0.03862883		1094.99	0.00509471		1684.99	0.00530764		2274.98	0.00313988		2864.98	0.00594937		3454.98	-0.0119316
505.2	0.03794236		1095.19	0.0062961		1685.19	0.00575837		2275.18	0.00346797		2865.18	0.00607145		3455.18	-0.01188206
505.4	0.03691799		1095.39	0.00636468		1685.39	0.00654519		2275.38	0.00337176		2865.38	0.00579105		3455.38	-0.01256406
505.6	0.03658521		1095.59	0.00677134		1685.59	0.00656587		2275.58	0.00307756		2865.58	0.00514489		3455.58	-0.01318066
505.8	0.0352794		1095.79	0.00733805		1685.79	0.00713377		2275.78	0.00359777		2865.78	0.00510247		3455.78	-0.01340185
506	0.03432452		1095.99	0.00773494		1685.99	0.00705643		2275.98	0.00323009		2865.98	0.0048357		3455.98	-0.01322893
506.2	0.03315219		1096.19	0.00825121		1686.19	0.00765254		2276.18	0.00311469		2866.18	0.00555902		3456.18	-0.01392802
506.4	0.03233042		1096.39	0.00858189		1686.39	0.00804315		2276.38	0.00339937		2866.38	0.0057871		3456.38	-0.01357488
506.6	0.0310124		1096.59	0.0082813		1686.59	0.00774915		2276.58	0.00336012		2866.58	0.00633378		3456.58	-0.01372541
506.8	0.0310999		1096.79	0.00856055		1686.79	0.00765804		2276.78	0.00356508		2866.78	0.00724484		3456.78	-0.01376559
507	0.03120936		1096.99	0.00790782		1686.99	0.00799759		2276.98	0.00260947		2866.98	0.00782458		3456.98	-0.0134776
507.2	0.03169712		1097.19	0.00734559		1687.19	0.00883487		2277.18	0.00258647		2867.18	0.00799074		3457.18	-0.01322863
507.4	0.03096524		1097.39	0.00677174		1687.39	0.00868853		2277.38	0.00242157		2867.38	0.0071203		3457.38	-0.01256064
507.6	0.03189751		1097.59	0.00568825		1687.59	0.0081821		2277.58	0.00214947		2867.58	0.00758086		3457.58	-0.01257557
507.8	0.03316744		1097.79	0.00439462		1687.79	0.00695935		2277.78	0.00290924		2867.78	0.00708477		3457.78	-0.01141797
508	0.03368163		1097.99	0.00410216		1687.99	0.00534115		2277.98	0.00325001		2867.98	0.00721206		3457.98	-0.01064325
508.2	0.03420991		1098.19	0.00290965		1688.19	0.00425093		2278.18	0.00489366		2868.18	0.00678255		3458.18	-0.01066027
508.4	0.03393166		1098.39	0.00318666		1688.39	0.00403169		2278.38	0.00513604		2868.38	0.00693916		3458.38	-0.01153017
508.6	0.03365827		1098.59	0.00350374		1688.59	0.003781		2278.58	0.00564616		2868.58	0.00668493		3458.58	-0.01162299
508.8	0.0340736		1098.79	0.00376975		1688.79	0.00390077		2278.78	0.00653244		2868.78	0.0061636		3458.78	-0.0117433
509	0.03469462		1098.99	0.00517038		1688.99	0.00408452		2278.98	0.00628887		2868.98	0.00556414		3458.98	-0.01184558
509.2	0.03516127		1099.19	0.00671364		1689.19	0.0048229		2279.18	0.00704993		2869.18	0.00479434		3459.18	-0.01116334
509.4	0.03615224		1099.39	0.00784911		1689.39	0.0043331		2279.38	0.00731984		2869.38	0.00499055		3459.38	-0.01160327
509.6	0.03672011		1099.59	0.00955075		1689.59	0.00425123		2279.58	0.00768932		2869.58	0.00420169		3459.58	-0.01172677
509.8	0.03653774		1099.79	0.00952628		1689.79	0.00476737		2279.78	0.00766237		2869.78	0.00509226		3459.78	-0.01180717
510	0.03563499		1099.99	0.00966317		1689.99	0.00560036		2279.98	0.0073115		2869.98	0.005626		3459.98	-0.01131292
510.2	0.03487951		1100.19	0.00990668		1690.19	0.00619925		2280.18	0.00727995		2870.18	0.00584111		3460.18	-0.01166801
510.4	0.03476604		1100.39	0.00971917		1690.39	0.0066485		2280.38	0.00737945		2870.38	0.00589634		3460.38	-0.01110025
510.6	0.03424843		1100.59	0.00923517		1690.59	0.00648792		2280.58	0.00719995		2870.58	0.00617771		3460.58	-0.01114958
510.8	0.03461115		1100.79	0.00905933		1690.79	0.00785236		2280.78	0.00732877		2870.78	0.00536444		3460.78	-0.01001403
511	0.03401169		1100.99	0.00790336		1690.99	0.00855479		2280.98	0.0069601		2870.98	0.00551787		3460.98	-0.00981339
511.2	0.03379885		1101.19	0.00648255		1691.19	0.00950837		2281.18	0.0070807		2871.18	0.00586903		3461.18	-0.00984651
511.4	0.03274839		1101.39	0.00518104		1691.39	0.01019176		2281.38	0.00527478		2871.38	0.00618986		3461.38	-0.0100877
511.6	0.03306301		1101.59	0.00471612		1691.59	0.0101738		2281.58	0.00525059		2871.58	0.00680821		3461.58	-0.01040667
511.8	0.03308424		1101.79	0.00509783		1691.79	0.00828511		2281.78	0.00517094		2871.78	0.00691726		3461.78	-0.01115185
512	0.03200211		1101.99	0.00496877		1691.99	0.00874854		2281.98	0.00511703		2871.98	0.00771554		3461.98	-0.01179731
512.2	0.0320568		1102.19	0.00407745		1692.19	0.00894456		2282.18	0.00554317		2872.18	0.00773036		3462.18	-0.01307378
512.4	0.03242816		1102.39	0.0047025		1692.39	0.00871422		2282.38	0.0054		2872.38	0.00849897		3462.38	-0.01416334
512.6	0.03248138		1102.59	0.004482		1692.59	0.00848273		2282.58	0.00500463		2872.58	0.00768505		3462.58	-0.01406217
512.8	0.03329085		1102.79	0.00442242		1692.79	0.0078636		2282.78	0.00533989		2872.78	0.00723884		3462.78	-0.01318586
513	0.03405008		1102.99	0.0044875		1692.99	0.00717275		2282.98	0.00440158		2872.98	0.00676041		3462.98	-0.01295303
513.2	0.03470378		1103.19	0.00449734		1693.19	0.00678739		2283.18	0.00483884		2873.18	0.00623337		3463.18	-0.01273097
513.4	0.0351821		1103.39	0.00495733		1693.39	0.0056921		2283.38	0.00454332		2873.38	0.00622474		3463.38	-0.01240782
513.6	0.03482696		1103.59	0.00457337		1693.59	0.00526512		2283.58	0.00388901		2873.58	0.00561293		3463.58	-0.01205695
513.8	0.03495287		1103.79	0.00443132		1693.79	0.00561552		2283.78	0.0039561		2873.78	0.00607587		3463.78	-0.01216731
514	0.03482373		1103.99	0.00398052		1693.99	0.00545639		2283.98	0.00383315		2873.98	0.0048925		3463.98	-0.01173281
514.2	0.0349267		1104.19	0.00427594		1694.19	0.00486315		2284.18	0.0030955		2874.18	0.0045566		3464.18	-0.01208537
514.4	0.03514574		1104.39	0.00411077		1694.39	0.00520975		2284.38	0.00323903		2874.38	0.00429962		3464.38	-0.01228848
514.6	0.03534061		1104.59	0.00395022		1694.59	0.00458841		2284.58	0.00302408		2874.58	0.00397163		3464.58	-0.01225129
514.8	0.03520516		1104.79	0.00388461		1694.79	0.00466291		2284.78	0.00330499		2874.78	0.00361077		3464.78	-0.01109712
515	0.03498302		1104.99	0.00373497		1694.99	0.00488675		2284.98	0.00294345		2874.98	0.00465419		3464.98	-0.01129009
515.2	0.03479294		1105.19	0.00396881		1695.19	0.00589847		2285.18	0.00220919		2875.18	0.00518059		3465.18	-0.01123906
515.4	0.03410148		1105.39	0.00417163		1695.39	0.00696046		2285.38	0.00190537		2875.38	0.00558417		3465.38	-0.01081815
515.6	0.03356527		1105.59	0.00549381		1695.59	0.00685179		2285.58	0.00283727		2875.58	0.00581113		3465.58	-0.01092157
515.8	0.03366733		1105.79	0.00586052		1695.79	0.00687515		2285.78	0.00250703		2875.78	0.00573079		3465.78	-0.01149219
516	0.03344719		1105.99	0.00496438		1695.99	0.00878528		2285.98	0.0025412		2875.98	0.00626437		3465.98	-0.01135427
516.2	0.03423212		1106.19	0.00478818		1696.19	0.00904931		2286.18	0.00303212		2876.18	0.00659331		3466.18	-0.01175972
516.4	0.03408546		1106.39	0.00560403		1696.39	0.00927472		2286.38	0.0030611		2876.38	0.00638458		3466.38	-0.01247841
516.6	0.03347658		1106.59	0.00532326		1696.59	0.00904499		2286.58	0.00283747		2876.58	0.00558688		3466.58	-0.01145984
516.8	0.03316184		1106.79	0.00471214		1696.79	0.00931615		2286.78	0.00361385		2876.78	0.00537412		3466.78	-0.01133409
517	0.03394805		1106.99	0.00395811		1696.99	0.00923116		2286.98	0.0037021		2876.98	0.00466683		3466.98	-0.01195354
517.2	0.03344642		1107.19	0.0035995		1697.19	0.00877662		2287.18	0.00492382		2877.18	0.00489834		3467.18	-0.01246478
517.4	0.03327781		1107.39	0.00330968		1697.39	0.00782821		2287.38	0.00560898		2877.38	0.00470458		3467.38	-0.01175097
517.6	0.03336381		1107.59	0.00310867		1697.59	0.00779387		2287.58	0.00511343		2877.58	0.00476151		3467.58	-0.01228015
517.8	0.03230009		1107.79	0.00317022		1697.79	0.00804617		2287.78	0.00580409		2877.78	0.00478705		3467.78	-0.01253949
518	0.03190294		1107.99	0.00279159		1697.99	0.00742787		2287.98	0.00500239		2877.98	0.00460089		3467.98	-0.01316221
518.2	0.03134246		1108.19	0.00284909		1698.19	0.00684577		2288.18	0.00409848		2878.18	0.00464581		3468.18	-0.01353664
518.4	0.03163466		1108.39	0.00249746		1698.39	0.00695879		2288.38	0.003627		2878.38	0.00453629		3468.38	-0.01369262
518.6	0.03148566		1108.59	0.00335057		1698.59	0.00586139		2288.58	0.00225699		2878.58	0.00465646		3468.58	-0.01399455
518.8	0.0313613		1108.79	0.00395078		1698.79	0.00578485		2288.78	0.0014861		2878.78	0.00588137		3468.78	-0.0131646
519	0.03179842		1108.99	0.0041748		1698.99	0.00644375		2288.98	0.0011836		2878.98	0.00672754		3468.98	-0.01246889
519.2	0.03144527		1109.19	0.00390874		1699.19	0.00648338		2289.18	0.00102581		2879.18	0.00733518		3469.18	-0.01250455
519.4	0.03176567		1109.39	0.00356577		1699.39	0.0071216		2289.38	0.00078674		2879.38	0.00814327		3469.38	-0.01273968
519.6	0.03211454		1109.59	0.00333399		1699.59	0.00743237		2289.58	0.00029968		2879.58	0.00808301		3469.58	-0.01253964
519.8	0.03301282		1109.79	0.00303108		1699.79	0.00778938		2289.78	0.00009636		2879.78	0.00778574		3469.78	-0.01302299
520	0.03270558		1109.99	0.00248708		1699.99	0.00819882		2289.98	-0.00020751		2879.98	0.00804826		3469.98	-0.0134863
520.2	0.0328003		1110.19	0.00242161		1700.19	0.00725826		2290.18	0.00031238		2880.18	0.00707902		3470.18	-0.01336023
520.4	0.03314097		1110.39	0.00279696		1700.39	0.00722682		2290.38	0.00052745		2880.38	0.00627912		3470.38	-0.01329887
520.6	0.03294695		1110.59	0.00218428		1700.59	0.00715041		2290.58	0.00154963		2880.58	0.00548496		3470.58	-0.01302366
520.8	0.0326253		1110.79	0.00209357		1700.79	0.00751216		2290.78	0.00241449		2880.78	0.00535111		3470.78	-0.01367201
521	0.03308687		1110.99	0.00141378		1700.99	0.0073868		2290.98	0.00249353		2880.98	0.00491662		3470.98	-0.01393748
521.2	0.03270183		1111.19	0.00127176		1701.19	0.00688493		2291.18	0.00371004		2881.18	0.00459001		3471.18	-0.01365977
521.4	0.03185464		1111.39	0.00165957		1701.39	0.00699789		2291.38	0.00376112		2881.38	0.00438712		3471.38	-0.01337394
521.6	0.03156798		1111.59	0.0029918		1701.59	0.00720957		2291.58	0.00318244		2881.58	0.00444628		3471.58	-0.0135321
521.8	0.03126428		1111.79	0.00304888		1701.79	0.00758418		2291.78	0.00383723		2881.78	0.00435113		3471.78	-0.01339227
522	0.03172055		1111.99	0.00335574		1701.99	0.00781968		2291.98	0.00293885		2881.98	0.00424954		3471.98	-0.01286078
522.2	0.03216338		1112.19	0.00330707		1702.19	0.00811373		2292.18	0.00195899		2882.18	0.003351		3472.18	-0.01213841
522.4	0.03230855		1112.39	0.0041532		1702.39	0.00837227		2292.38	0.00129879		2882.38	0.00372734		3472.38	-0.01182436
522.6	0.0323393		1112.59	0.00616497		1702.59	0.00816906		2292.58	0.00093406		2882.58	0.00407345		3472.58	-0.0125102
522.8	0.03350922		1112.79	0.00701069		1702.79	0.00811246		2292.78	0.0011074		2882.78	0.00475449		3472.78	-0.01145567
523	0.03468316		1112.99	0.00802704		1702.99	0.00833963		2292.98	0.00122031		2882.98	0.00412761		3472.98	-0.01136834
523.2	0.03452421		1113.19	0.00800192		1703.19	0.00832614		2293.18	0.00031358		2883.18	0.00460449		3473.18	-0.01202064
523.4	0.03500947		1113.39	0.00805511		1703.39	0.00909381		2293.38	0.00055622		2883.38	0.00475744		3473.38	-0.01239873
523.6	0.035338		1113.59	0.00779124		1703.59	0.00944788		2293.58	0.00075559		2883.58	0.00393644		3473.58	-0.01198842
523.8	0.03459447		1113.79	0.00729514		1703.79	0.00857085		2293.78	0.00110736		2883.78	0.00403962		3473.78	-0.01291863
524	0.03299074		1113.99	0.00684984		1703.99	0.00847821		2293.98	0.0007244		2883.98	0.00484282		3473.98	-0.0137281
524.2	0.03290408		1114.19	0.00722656		1704.19	0.00727486		2294.18	0.00159139		2884.18	0.00488184		3474.18	-0.01284782
524.4	0.03323197		1114.39	0.00721706		1704.39	0.0073676		2294.38	0.00250782		2884.38	0.00528666		3474.38	-0.01339494
524.6	0.03177652		1114.59	0.00684717		1704.59	0.00689819		2294.58	0.00286896		2884.58	0.00523892		3474.58	-0.01461386
524.8	0.03162352		1114.79	0.00729938		1704.79	0.00586422		2294.78	0.00303255		2884.78	0.00569326		3474.78	-0.01531777
525	0.03075693		1114.99	0.00670067		1704.99	0.00514972		2294.98	0.00307782		2884.98	0.00603717		3474.98	-0.01595034
525.2	0.03076187		1115.19	0.00596222		1705.19	0.00391675		2295.18	0.0038638		2885.18	0.00607831		3475.18	-0.01697306
525.4	0.03018383		1115.39	0.00617036		1705.39	0.00363197		2295.38	0.00398274		2885.38	0.00706971		3475.38	-0.01748292
525.6	0.02998564		1115.59	0.00607201		1705.59	0.00330872		2295.58	0.00349851		2885.58	0.00723917		3475.58	-0.01699482
525.8	0.03040604		1115.79	0.00521549		1705.79	0.00333608		2295.78	0.00338705		2885.78	0.00737448		3475.78	-0.01789454
526	0.03067112		1115.99	0.00506218		1705.99	0.00309911		2295.98	0.00343798		2885.98	0.00697494		3475.98	-0.01698984
526.2	0.0311466		1116.19	0.00561223		1706.19	0.00387184		2296.18	0.00379924		2886.18	0.00663434		3476.18	-0.01655072
526.4	0.03142505		1116.39	0.0059273		1706.39	0.00466737		2296.38	0.00405431		2886.38	0.00772231		3476.38	-0.01607805
526.6	0.03152075		1116.59	0.00693736		1706.59	0.00481192		2296.58	0.00422431		2886.58	0.00819484		3476.58	-0.01600569
526.8	0.03251727		1116.79	0.0066724		1706.79	0.00469415		2296.78	0.00383169		2886.78	0.00752145		3476.78	-0.01482224
527	0.03248288		1116.99	0.00669912		1706.99	0.00505808		2296.98	0.00314954		2886.98	0.0066373		3476.98	-0.01441414
527.2	0.03198275		1117.19	0.00640331		1707.19	0.00531522		2297.18	0.00207078		2887.18	0.00601518		3477.18	-0.01366612
527.4	0.03225622		1117.39	0.00660332		1707.39	0.00552642		2297.38	0.00252579		2887.38	0.00541124		3477.38	-0.01361162
527.6	0.03223151		1117.59	0.00602155		1707.59	0.00572201		2297.58	0.00165459		2887.58	0.00471945		3477.58	-0.01265513
527.8	0.0313783		1117.79	0.00637642		1707.79	0.00472849		2297.78	0.0012352		2887.78	0.00504241		3477.78	-0.0134913
528	0.0310078		1117.99	0.00648164		1707.99	0.00473297		2297.98	0.00089945		2887.98	0.00517093		3477.98	-0.01283319
528.2	0.03164761		1118.19	0.00587879		1708.19	0.00443435		2298.18	0.00112795		2888.18	0.00460729		3478.18	-0.01197626
528.4	0.03202052		1118.39	0.00487425		1708.39	0.00436804		2298.38	0.0012476		2888.38	0.00467752		3478.38	-0.01285523
528.6	0.03151885		1118.59	0.00519658		1708.59	0.00346353		2298.58	0.00085331		2888.58	0.00447267		3478.58	-0.0129455
528.8	0.03203512		1118.79	0.0051008		1708.79	0.00275609		2298.78	0.00060955		2888.78	0.00500517		3478.78	-0.01296681
529	0.03098786		1118.99	0.00520175		1708.99	0.00238745		2298.98	0.00046764		2888.98	0.00499674		3478.98	-0.01334067
529.2	0.03176618		1119.19	0.00494628		1709.19	0.00195835		2299.18	0.00052942		2889.18	0.00506589		3479.18	-0.01429503
529.4	0.03120019		1119.39	0.00582372		1709.39	0.0019673		2299.38	0.00061892		2889.38	0.00588556		3479.38	-0.01386263
529.6	0.03098307		1119.59	0.00518312		1709.59	0.00203707		2299.58	0.00033619		2889.58	0.00556815		3479.58	-0.01426736
529.8	0.03213243		1119.79	0.00558173		1709.79	0.00271742		2299.78	0.0000998		2889.78	0.00593867		3479.78	-0.01497586
530	0.03266537		1119.99	0.00553826		1709.99	0.00365312		2299.98	0.00018322		2889.98	0.00577271		3479.98	-0.0141607
530.2	0.03287116		1120.19	0.00603343		1710.19	0.00416967		2300.18	0.00063519		2890.18	0.00611178		3480.18	-0.01409306
530.4	0.03299088		1120.39	0.00563737		1710.39	0.00486226		2300.38	0.00120918		2890.38	0.00679706		3480.38	-0.01340668
530.6	0.03218802		1120.59	0.00538865		1710.59	0.00455614		2300.58	0.00121665		2890.58	0.0075293		3480.58	-0.0140482
530.8	0.03219624		1120.79	0.00482958		1710.79	0.00454724		2300.78	0.00116334		2890.78	0.00734047		3480.78	-0.01379547
531	0.03135802		1120.99	0.00475594		1710.99	0.0044883		2300.98	0.00164521		2890.98	0.00743659		3480.98	-0.01367125
531.2	0.03139483		1121.19	0.00558537		1711.19	0.00473957		2301.18	0.00226798		2891.18	0.00743149		3481.18	-0.01390129
531.4	0.03139056		1121.39	0.00550014		1711.39	0.00454502		2301.38	0.00328694		2891.38	0.00746056		3481.38	-0.01457974
531.6	0.03127001		1121.59	0.0054083		1711.59	0.00549782		2301.58	0.00318891		2891.58	0.00691206		3481.58	-0.01458356
531.8	0.03121918		1121.79	0.00574644		1711.79	0.00443642		2301.78	0.00361982		2891.78	0.00641562		3481.78	-0.01527154
532	0.0314097		1121.99	0.00468581		1711.99	0.00528561		2301.98	0.00315591		2891.98	0.00588281		3481.98	-0.01457989
532.2	0.03134665		1122.19	0.00405591		1712.19	0.0058702		2302.18	0.002965		2892.18	0.00601305		3482.18	-0.01437677
532.4	0.03161206		1122.39	0.00373855		1712.39	0.00573831		2302.38	0.00352207		2892.38	0.00581938		3482.38	-0.01433472
532.6	0.0319365		1122.59	0.00421268		1712.59	0.00548998		2302.58	0.00289818		2892.58	0.00604867		3482.58	-0.01405493
532.8	0.03231517		1122.79	0.00389535		1712.79	0.005828		2302.78	0.00302285		2892.78	0.00584076		3482.78	-0.01406949
533	0.03213891		1122.99	0.00447319		1712.99	0.00535787		2302.98	0.00302747		2892.98	0.00498816		3482.98	-0.01485256
533.2	0.03350798		1123.19	0.00440915		1713.19	0.00522426		2303.18	0.00264211		2893.18	0.00515358		3483.18	-0.01507206
533.4	0.03334047		1123.39	0.00388291		1713.39	0.00532227		2303.38	0.00253733		2893.38	0.00481913		3483.38	-0.01446595
533.6	0.03356659		1123.59	0.00355697		1713.59	0.00525635		2303.58	0.0022706		2893.58	0.00472633		3483.58	-0.01481594
533.8	0.03406369		1123.79	0.00387867		1713.79	0.00545366		2303.78	0.00096968		2893.78	0.00397604		3483.78	-0.0147683
534	0.03398672		1123.99	0.00328745		1713.99	0.00524301		2303.98	0.00195123		2893.98	0.00365209		3483.98	-0.01526401
534.2	0.03333371		1124.19	0.00340589		1714.19	0.00496179		2304.18	0.00284382		2894.18	0.00335545		3484.18	-0.01556366
534.4	0.03246098		1124.39	0.00330785		1714.39	0.00529975		2304.38	0.00296266		2894.38	0.0041729		3484.38	-0.01497497
534.6	0.0315825		1124.59	0.0034957		1714.59	0.00470678		2304.58	0.00280164		2894.58	0.00503363		3484.58	-0.01544883
534.8	0.03068443		1124.79	0.00339694		1714.79	0.00441318		2304.78	0.00254345		2894.78	0.00477514		3484.78	-0.01463668
535	0.03019161		1124.99	0.00357944		1714.99	0.0039388		2304.98	0.00360235		2894.98	0.00484081		3484.98	-0.01483185
535.2	0.02976162		1125.19	0.00428852		1715.19	0.00432175		2305.18	0.00403701		2895.18	0.00496315		3485.18	-0.01512927
535.4	0.02885067		1125.39	0.0036533		1715.39	0.00367249		2305.38	0.00410854		2895.38	0.00493838		3485.38	-0.01546812
535.6	0.02808286		1125.59	0.00465862		1715.59	0.00340558		2305.58	0.00346526		2895.58	0.00491649		3485.58	-0.01488187
535.8	0.02813601		1125.79	0.00441124		1715.79	0.00303975		2305.78	0.00366403		2895.78	0.00574223		3485.78	-0.01398741
536	0.02829194		1125.99	0.00503049		1715.99	0.00340004		2305.98	0.00343673		2895.98	0.00527608		3485.98	-0.01315222
536.2	0.02868336		1126.19	0.00458126		1716.19	0.0040233		2306.18	0.00386189		2896.18	0.00615005		3486.18	-0.01189674
536.4	0.02859039		1126.39	0.0037627		1716.39	0.00443221		2306.38	0.00429459		2896.38	0.00604217		3486.38	-0.01200773
536.6	0.02902372		1126.59	0.00439176		1716.59	0.00423338		2306.58	0.00343049		2896.58	0.00581983		3486.58	-0.01180023
536.8	0.02952964		1126.79	0.00418274		1716.79	0.00404074		2306.78	0.00306933		2896.78	0.00552825		3486.78	-0.01176443
537	0.02900885		1126.99	0.0044767		1716.99	0.00403839		2306.98	0.00273625		2896.98	0.00589956		3486.98	-0.01119318
537.2	0.02959577		1127.19	0.00428969		1717.19	0.00385208		2307.18	0.00246385		2897.18	0.00644748		3487.18	-0.01018833
537.4	0.02951235		1127.39	0.00376654		1717.39	0.00403849		2307.38	0.00225327		2897.38	0.00616736		3487.38	-0.00934107
537.6	0.02973519		1127.59	0.0038416		1717.59	0.00382853		2307.58	0.00218197		2897.58	0.00563537		3487.58	-0.00912013
537.8	0.0296046		1127.79	0.00379336		1717.79	0.00339303		2307.78	0.00205048		2897.78	0.00426513		3487.78	-0.00922945
538	0.02965171		1127.99	0.00316002		1717.99	0.00297452		2307.98	0.00313982		2897.98	0.0044099		3487.98	-0.00956558
538.2	0.02993785		1128.19	0.00317989		1718.19	0.00279596		2308.18	0.00282146		2898.18	0.00376109		3488.18	-0.0094109
538.4	0.02996823		1128.39	0.00345975		1718.39	0.00260106		2308.38	0.00237083		2898.38	0.00413875		3488.38	-0.00909649
538.6	0.03011484		1128.59	0.00360782		1718.59	0.00282116		2308.58	0.00281707		2898.58	0.00484807		3488.58	-0.00962938
538.8	0.02968738		1128.79	0.00265629		1718.79	0.00264848		2308.78	0.00232524		2898.78	0.0050813		3488.78	-0.01005449
539	0.02976791		1128.99	0.00238759		1718.99	0.00325462		2308.98	0.00301294		2898.98	0.00551183		3488.98	-0.01136751
539.2	0.02917401		1129.19	0.00210493		1719.19	0.00375118		2309.18	0.00315439		2899.18	0.00607275		3489.18	-0.01179193
539.4	0.02964097		1129.39	0.00241544		1719.39	0.00302718		2309.38	0.00306124		2899.38	0.00681797		3489.38	-0.01265742
539.6	0.02953915		1129.59	0.00285825		1719.59	0.00315949		2309.58	0.00276468		2899.58	0.00690944		3489.58	-0.01270736
539.8	0.03065305		1129.79	0.00250384		1719.79	0.00392957		2309.78	0.00253162		2899.78	0.00726873		3489.78	-0.01317632
540	0.0316082		1129.99	0.00297517		1719.99	0.00394356		2309.98	0.00223535		2899.98	0.00664021		3489.98	-0.01310168
540.2	0.03200131		1130.19	0.00258629		1720.19	0.00519674		2310.18	0.00173921		2900.18	0.0071814		3490.18	-0.01351094
540.4	0.03146942		1130.39	0.00280799		1720.39	0.00531666		2310.38	0.00124003		2900.38	0.00644986		3490.38	-0.01425809
540.6	0.0314788		1130.59	0.00381084		1720.59	0.0054038		2310.58	0.00080825		2900.58	0.00598883		3490.58	-0.01431296
540.8	0.03110032		1130.79	0.00330341		1720.79	0.00500042		2310.78	0.00034107		2900.78	0.00641478		3490.78	-0.01419584
541	0.02996867		1130.99	0.00295226		1720.99	0.00522991		2310.98	-0.0002057		2900.98	0.00612372		3490.98	-0.01269032
541.2	0.0304354		1131.19	0.00312697		1721.19	0.00550011		2311.18	-0.0006704		2901.18	0.00565206		3491.18	-0.01307136
541.4	0.03040957		1131.39	0.00275491		1721.39	0.00502112		2311.38	-0.00114442		2901.38	0.00456443		3491.38	-0.01278213
541.6	0.02977541		1131.59	0.00227205		1721.59	0.00441596		2311.58	-0.00118721		2901.58	0.00367729		3491.58	-0.01266626
541.8	0.02855671		1131.79	0.00290528		1721.79	0.00361479		2311.78	-0.00080251		2901.78	0.00333228		3491.78	-0.01247404
542	0.02796723		1131.99	0.0019015		1721.99	0.0033755		2311.98	-0.00048066		2901.98	0.00325621		3491.98	-0.01252739
542.2	0.02764001		1132.19	0.00173118		1722.19	0.00390943		2312.18	-0.00095938		2902.18	0.00292381		3492.18	-0.01286315
542.4	0.0272061		1132.39	0.00160141		1722.39	0.00360546		2312.38	-0.00085418		2902.38	0.00321053		3492.38	-0.01293411
542.6	0.02680141		1132.59	0.00114		1722.59	0.00434624		2312.58	-0.00025638		2902.58	0.00380625		3492.58	-0.01276512
542.8	0.02669867		1132.79	-0.00007585		1722.79	0.00445733		2312.78	-0.00048371		2902.78	0.00442589		3492.78	-0.01215907
543	0.02664394		1132.99	-0.00014534		1722.99	0.00492704		2312.98	0.00001594		2902.98	0.00445677		3492.98	-0.01282242
543.2	0.02717607		1133.19	-0.00026306		1723.19	0.00444911		2313.18	-0.00019111		2903.18	0.00423373		3493.18	-0.01268029
543.4	0.02789439		1133.39	-0.00006137		1723.39	0.00346487		2313.38	-0.00009472		2903.38	0.00427512		3493.38	-0.01353557
543.6	0.02798223		1133.59	-0.00045384		1723.59	0.00325252		2313.58	0.00014313		2903.58	0.00363647		3493.58	-0.01359518
543.8	0.02930944		1133.79	0.0001978		1723.79	0.00332028		2313.78	0.00038264		2903.78	0.0033348		3493.78	-0.01390366
544	0.02981167		1133.99	0.00042583		1723.99	0.00384692		2313.98	0.00084405		2903.98	0.00353789		3493.98	-0.01332096
544.2	0.0300127		1134.19	0.00090621		1724.19	0.00402098		2314.18	0.00168303		2904.18	0.00368572		3494.18	-0.01359038
544.4	0.03004368		1134.39	0.00102875		1724.39	0.00362215		2314.38	0.00225589		2904.38	0.00381083		3494.38	-0.01304306
544.6	0.03019903		1134.59	0.00168511		1724.59	0.0035303		2314.58	0.00274804		2904.58	0.00451219		3494.58	-0.01310049
544.8	0.03007433		1134.79	0.00162545		1724.79	0.00322694		2314.78	0.00230935		2904.78	0.00448764		3494.78	-0.01275478
545	0.02979091		1134.99	0.00185228		1724.99	0.00328207		2314.98	0.00239679		2904.98	0.00412144		3494.98	-0.01253936
545.2	0.03013418		1135.19	0.00236712		1725.19	0.00296003		2315.18	0.00319696		2905.18	0.00450776		3495.18	-0.01336284
545.4	0.0298577		1135.39	0.00195396		1725.39	0.00170925		2315.38	0.00326533		2905.38	0.003597		3495.38	-0.01383041
545.6	0.02909418		1135.59	0.00260457		1725.59	0.00170352		2315.58	0.00318583		2905.58	0.00360635		3495.58	-0.01444574
545.8	0.02857409		1135.79	0.00361644		1725.79	0.00150287		2315.78	0.00381235		2905.78	0.00337223		3495.78	-0.01437464
546	0.02892527		1135.99	0.00359082		1725.99	0.00184173		2315.98	0.00324637		2905.98	0.00394504		3495.98	-0.0153257
546.2	0.02869111		1136.19	0.00500204		1726.19	0.00240232		2316.18	0.00143342		2906.18	0.00377073		3496.18	-0.01589847
546.4	0.02881186		1136.39	0.00504149		1726.39	0.00249083		2316.38	0.001198		2906.38	0.00439425		3496.38	-0.01622799
546.6	0.02952838		1136.59	0.00505663		1726.59	0.00333036		2316.58	-0.00013459		2906.58	0.00512314		3496.58	-0.01672904
546.8	0.03056967		1136.79	0.00506667		1726.79	0.00293224		2316.78	-0.00083919		2906.78	0.00529349		3496.78	-0.01685386
547	0.03098745		1136.99	0.00519319		1726.99	0.002292		2316.98	-0.00202765		2906.98	0.00495305		3496.98	-0.01671897
547.2	0.0315886		1137.19	0.00424183		1727.19	0.00245001		2317.18	-0.00286192		2907.18	0.0041493		3497.18	-0.01719584
547.4	0.03116834		1137.39	0.00435829		1727.39	0.00273024		2317.38	-0.00291947		2907.38	0.00427939		3497.38	-0.01693186
547.6	0.03149386		1137.59	0.00355683		1727.59	0.00333915		2317.58	-0.00341862		2907.58	0.00430809		3497.58	-0.01646085
547.8	0.03178255		1137.79	0.0026846		1727.79	0.00384633		2317.78	-0.00349839		2907.78	0.00448353		3497.78	-0.01573544
548	0.0318859		1137.99	0.0009168		1727.99	0.0048728		2317.98	-0.00362481		2907.98	0.00531522		3497.98	-0.01517404
548.2	0.03188966		1138.19	-0.00007081		1728.19	0.00440104		2318.18	-0.00304402		2908.18	0.00569738		3498.18	-0.01386459
548.4	0.03234655		1138.39	-0.00127707		1728.39	0.00410568		2318.38	-0.00297167		2908.38	0.00632387		3498.38	-0.0133612
548.6	0.03149134		1138.59	-0.0016188		1728.59	0.00376974		2318.58	-0.00303893		2908.58	0.00673822		3498.58	-0.01325299
548.8	0.03062969		1138.79	-0.00295756		1728.79	0.00305954		2318.78	-0.00300256		2908.78	0.00627865		3498.78	-0.01260504
549	0.0301857		1138.99	-0.0036395		1728.99	0.00212075		2318.98	-0.00162168		2908.98	0.00580935		3498.98	-0.01275623
549.2	0.02986226		1139.19	-0.00416624		1729.19	0.00186849		2319.18	-0.00147382		2909.18	0.00634448		3499.18	-0.01282956
549.4	0.02875364		1139.39	-0.0033497		1729.39	0.0021105		2319.38	-0.00081753		2909.38	0.00529978		3499.38	-0.01367762
549.6	0.02817464		1139.59	-0.00298461		1729.59	0.00171737		2319.58	-0.00041291		2909.58	0.00568944		3499.58	-0.01381758
549.8	0.02901554		1139.79	-0.00160675		1729.79	0.00145427		2319.78	0.00030937		2909.78	0.00553601		3499.78	-0.01344902
550	0.02877492		1139.99	-0.00022849		1729.99	0.00121898		2319.98	-0.0002384		2909.98	0.00676887		3499.98	-0.0134898
550.2	0.02863838		1140.19	0.00125362		1730.19	0.00105565		2320.18	-0.00027896		2910.18	0.00590615		3500.18	-0.01308987
550.4	0.02916225		1140.39	0.00175503		1730.39	0.0011237		2320.38	0.00027626		2910.38	0.00616541		3500.38	-0.01278925
550.6	0.02993607		1140.59	0.00233554		1730.59	0.00120127		2320.58	-0.00063508		2910.58	0.00613624		3500.58	-0.01286986
550.8	0.03040122		1140.79	0.00274639		1730.79	0.00088218		2320.78	0.00005464		2910.78	0.00589199		3500.78	-0.01291998
551	0.0305067		1140.99	0.00267701		1730.99	0.00099756		2320.98	0.00000014		2910.98	0.00549457		3500.98	-0.01256671
551.2	0.03029556		1141.19	0.00275595		1731.19	0.00207626		2321.18	0.00073767		2911.18	0.00527584		3501.18	-0.0137671
551.4	0.02984738		1141.39	0.00334831		1731.39	0.00197481		2321.38	0.00172193		2911.38	0.00578745		3501.38	-0.01310696
551.6	0.03022213		1141.59	0.00275253		1731.59	0.00246275		2321.58	0.0010132		2911.58	0.00642494		3501.58	-0.01369037
551.8	0.0297749		1141.79	0.00231586		1731.79	0.00311044		2321.78	0.00124467		2911.78	0.00630854		3501.78	-0.01397579
552	0.02984853		1141.99	0.00214374		1731.99	0.00331957		2321.98	0.00150362		2911.98	0.00633929		3501.98	-0.01380201
552.2	0.02932466		1142.19	0.00160668		1732.19	0.00252565		2322.18	0.00108992		2912.18	0.00730694		3502.18	-0.01369983
552.4	0.02887131		1142.39	0.0017267		1732.39	0.00256733		2322.38	0.00057764		2912.38	0.00745125		3502.38	-0.01515859
552.6	0.02757692		1142.59	0.00221642		1732.59	0.00226143		2322.58	0.00023046		2912.58	0.00724529		3502.58	-0.01492612
552.8	0.02742667		1142.79	0.00170509		1732.79	0.00211194		2322.78	-0.00025721		2912.78	0.00636064		3502.78	-0.01515478
553	0.0269		1142.99	0.00139187		1732.99	0.0020008		2322.98	0.00002122		2912.98	0.0061898		3502.98	-0.01523414
553.2	0.02688367		1143.19	0.00108233		1733.19	0.00268715		2323.18	-0.00019575		2913.18	0.00626861		3503.18	-0.01497074
553.4	0.0260759		1143.39	0.00110577		1733.39	0.00311164		2323.38	0.0004308		2913.38	0.00544409		3503.38	-0.01421719
553.6	0.02664652		1143.59	0.00069866		1733.59	0.00319975		2323.58	0.00012686		2913.58	0.00501696		3503.58	-0.01378357
553.8	0.02776605		1143.79	0.00143914		1733.79	0.00353091		2323.78	0.0000419		2913.78	0.00444778		3503.78	-0.01328251
554	0.02809702		1143.99	0.00165514		1733.99	0.00355167		2323.98	0.00030688		2913.98	0.00441517		3503.98	-0.01287
554.2	0.02866054		1144.19	0.00164523		1734.19	0.00392612		2324.18	0.00091934		2914.18	0.00318199		3504.18	-0.01260733
554.4	0.02869419		1144.39	0.00160553		1734.39	0.0047225		2324.38	0.00034416		2914.38	0.00343088		3504.38	-0.01291598
554.6	0.02954097		1144.59	0.00097479		1734.59	0.00497332		2324.58	0.00056715		2914.58	0.00345651		3504.58	-0.01350973
554.8	0.0295475		1144.79	0.00092874		1734.79	0.00493057		2324.78	0.00191029		2914.78	0.00364115		3504.78	-0.01395036
555	0.02979682		1144.99	0.00084188		1734.99	0.00456879		2324.98	0.00232872		2914.98	0.00333629		3504.98	-0.01357692
555.2	0.02925967		1145.19	0.00092341		1735.19	0.00479631		2325.18	0.00282152		2915.18	0.0043214		3505.18	-0.01436134
555.4	0.02864618		1145.39	0.00095228		1735.39	0.0046895		2325.38	0.00286923		2915.38	0.00502756		3505.38	-0.01404364
555.6	0.02905088		1145.59	0.00123622		1735.59	0.00502879		2325.58	0.00192752		2915.58	0.0054316		3505.58	-0.01434206
555.8	0.02869324		1145.79	0.00077062		1735.79	0.00455867		2325.78	0.00230746		2915.78	0.0053268		3505.78	-0.01508553
556	0.02783114		1145.99	0.00182488		1735.99	0.00384379		2325.98	0.00133677		2915.98	0.0065591		3505.98	-0.01521891
556.2	0.02734237		1146.19	0.00112413		1736.19	0.00340688		2326.18	0.00059682		2916.18	0.00693369		3506.18	-0.01573236
556.4	0.02691839		1146.39	0.00144887		1736.39	0.00362104		2326.38	-0.00011226		2916.38	0.00669702		3506.38	-0.0156466
556.6	0.02718923		1146.59	0.0016083		1736.59	0.00362494		2326.58	-0.00050651		2916.58	0.00687904		3506.58	-0.01522273
556.8	0.02769859		1146.79	0.00119917		1736.79	0.00381831		2326.78	-0.00124225		2916.78	0.00583504		3506.78	-0.01478492
557	0.02843567		1146.99	0.00121379		1736.99	0.00437863		2326.98	-0.00156871		2916.98	0.00594618		3506.98	-0.01340534
557.2	0.02913969		1147.19	0.00119126		1737.19	0.0052728		2327.18	-0.00209938		2917.18	0.005508		3507.18	-0.01324182
557.4	0.02864043		1147.39	0.00087297		1737.39	0.0053671		2327.38	-0.00185662		2917.38	0.00543597		3507.38	-0.0126609
557.6	0.02922569		1147.59	0.0012927		1737.59	0.00567828		2327.58	-0.00137701		2917.58	0.00412323		3507.58	-0.01355496
557.8	0.02946358		1147.79	0.0010523		1737.79	0.00565521		2327.78	-0.00145418		2917.78	0.00349566		3507.78	-0.01375256
558	0.0298197		1147.99	0.0009368		1737.99	0.00551805		2327.98	-0.00092824		2917.98	0.00264003		3507.98	-0.01353401
558.2	0.03030352		1148.19	0.00061564		1738.19	0.00596348		2328.18	-0.00167975		2918.18	0.0017727		3508.18	-0.01343377
558.4	0.02983919		1148.39	0.00084529		1738.39	0.00559694		2328.38	-0.00167813		2918.38	0.00151568		3508.38	-0.0138266
558.6	0.02964231		1148.59	0.00099929		1738.59	0.00523916		2328.58	-0.00167574		2918.58	0.00144348		3508.58	-0.01370784
558.8	0.02822163		1148.79	0.00087784		1738.79	0.00493596		2328.78	-0.00169534		2918.78	0.00133668		3508.78	-0.01395668
559	0.0277274		1148.99	0.00100242		1738.99	0.00414498		2328.98	-0.00171502		2918.98	0.00136141		3508.98	-0.0148023
559.2	0.02703414		1149.19	0.0007854		1739.19	0.00407745		2329.18	-0.00176431		2919.18	0.00169317		3509.18	-0.01580707
559.4	0.02690633		1149.39	0.00046766		1739.39	0.00373317		2329.38	-0.00166856		2919.38	0.00188369		3509.38	-0.01578221
559.6	0.02687826		1149.59	0.00051567		1739.59	0.00357997		2329.58	-0.00193072		2919.58	0.00266214		3509.58	-0.01662514
559.8	0.02659648		1149.79	0.00003043		1739.79	0.0027109		2329.78	-0.00194415		2919.78	0.00295026		3509.78	-0.01746945
560	0.02586362		1149.99	0.00078417		1739.99	0.00182428		2329.98	-0.00213418		2919.98	0.0038651		3509.98	-0.01815005
560.2	0.02601676		1150.19	-0.00000765		1740.19	0.0014598		2330.18	-0.00238794		2920.18	0.00342208		3510.18	-0.01835502
560.4	0.02692424		1150.39	0.00009085		1740.39	0.00173577		2330.38	-0.00281397		2920.38	0.00350108		3510.38	-0.01832939
560.6	0.02805712		1150.59	0.00143195		1740.59	0.00148728		2330.58	-0.00314922		2920.58	0.00429129		3510.58	-0.01771501
560.8	0.0294722		1150.79	0.00118685		1740.79	0.00138723		2330.78	-0.00339521		2920.78	0.00460248		3510.78	-0.01720474
561	0.02993876		1150.99	0.00098919		1740.99	0.00153546		2330.98	-0.00310907		2920.98	0.00551734		3510.98	-0.01695035
561.2	0.03033122		1151.19	0.00085883		1741.19	0.00110715		2331.18	-0.00223697		2921.18	0.00529828		3511.18	-0.01721199
561.4	0.03037776		1151.39	0.00161307		1741.39	0.00060962		2331.38	-0.00024817		2921.38	0.00641428		3511.38	-0.017139
561.6	0.03042542		1151.59	0.0015817		1741.59	0.00098504		2331.58	0.00040915		2921.58	0.00543238		3511.58	-0.01675797
561.8	0.03053293		1151.79	0.00113764		1741.79	0.00147464		2331.78	-0.00018603		2921.78	0.00532131		3511.78	-0.01676879
562	0.0311213		1151.99	0.00095265		1741.99	0.00194578		2331.98	-0.00057017		2921.98	0.00490663		3511.98	-0.01650304
562.2	0.0313822		1152.19	0.0012025		1742.19	0.00205911		2332.18	-0.00189131		2922.18	0.00482246		3512.18	-0.016454
562.4	0.03002693		1152.39	0.00126832		1742.39	0.00095804		2332.38	-0.00199621		2922.38	0.00476613		3512.38	-0.01750195
562.6	0.02951757		1152.59	0.00097681		1742.59	0.00108833		2332.58	-0.00285687		2922.58	0.00489052		3512.58	-0.01756912
562.8	0.02846331		1152.79	0.0004411		1742.79	0.00152668		2332.78	-0.00269603		2922.78	0.00435774		3512.78	-0.01742129
563	0.02845094		1152.99	-0.00001321		1742.99	0.00125689		2332.98	-0.00268025		2922.98	0.00441316		3512.98	-0.01834957
563.2	0.02836786		1153.19	-0.00060015		1743.19	0.00144683		2333.18	-0.00307045		2923.18	0.00350496		3513.18	-0.01785188
563.4	0.02808368		1153.39	-0.00040549		1743.39	0.00160073		2333.38	-0.00304821		2923.38	0.00330255		3513.38	-0.01741862
563.6	0.02794959		1153.59	-0.00046764		1743.59	0.00168664		2333.58	-0.0037676		2923.58	0.00312559		3513.58	-0.01786576
563.8	0.02782382		1153.79	-0.00036422		1743.79	0.00072195		2333.78	-0.00385275		2923.78	0.00236553		3513.78	-0.01788362
564	0.02710428		1153.99	-0.00063101		1743.99	0.00031633		2333.98	-0.00416723		2923.98	0.00243312		3513.98	-0.01832973
564.2	0.02720359		1154.19	-0.00087427		1744.19	0.00101903		2334.18	-0.004577		2924.18	0.00186717		3514.18	-0.01727838
564.4	0.02811674		1154.39	-0.00091366		1744.39	0.00121296		2334.38	-0.00433639		2924.38	0.00241866		3514.38	-0.01633247
564.6	0.02867706		1154.59	-0.00121439		1744.59	0.00153619		2334.58	-0.00440425		2924.58	0.00364792		3514.58	-0.0160257
564.8	0.02914892		1154.79	-0.00151202		1744.79	0.00182312		2334.78	-0.00467426		2924.78	0.00422853		3514.78	-0.01605161
565	0.0289705		1154.99	-0.00111821		1744.99	0.00185335		2334.98	-0.00314787		2924.98	0.00425159		3514.98	-0.01585703
565.2	0.02961172		1155.19	-0.0009188		1745.19	0.00154204		2335.18	-0.00120454		2925.18	0.00452817		3515.18	-0.01575399
565.4	0.02941823		1155.39	-0.00015819		1745.39	0.00186859		2335.38	-0.00030058		2925.38	0.00556899		3515.38	-0.01572919
565.6	0.02854425		1155.59	-0.00076223		1745.59	0.00247336		2335.58	-0.00098562		2925.58	0.00507861		3515.58	-0.01586736
565.8	0.02876741		1155.79	-0.00016874		1745.79	0.00210507		2335.78	-0.00166669		2925.78	0.00524213		3515.78	-0.01581128
566	0.02810455		1155.99	-0.00000678		1745.99	0.00167958		2335.98	-0.00199795		2925.98	0.00568475		3515.98	-0.01576805
566.2	0.02720287		1156.19	0.0008198		1746.19	0.00098364		2336.18	-0.00207266		2926.18	0.00586091		3516.18	-0.01537735
566.4	0.02599834		1156.39	0.00064887		1746.39	0.0006106		2336.38	-0.00211349		2926.38	0.00582242		3516.38	-0.01575167
566.6	0.02589524		1156.59	0.00040841		1746.59	0.00128852		2336.58	-0.00167638		2926.58	0.00534672		3516.58	-0.01552914
566.8	0.02569385		1156.79	0.00029463		1746.79	0.00242233		2336.78	-0.00148905		2926.78	0.00450781		3516.78	-0.01513152
567	0.02651424		1156.99	0.00075219		1746.99	0.00196822		2336.98	-0.00158989		2926.98	0.00435725		3516.98	-0.01553567
567.2	0.02566326		1157.19	0.00089546		1747.19	0.00206483		2337.18	-0.00158808		2927.18	0.00343095		3517.18	-0.01551385
567.4	0.02589366		1157.39	0.00198355		1747.39	0.00219772		2337.38	-0.00063237		2927.38	0.00380018		3517.38	-0.01602563
567.6	0.02620864		1157.59	0.00147447		1747.59	0.00293846		2337.58	-0.00106601		2927.58	0.00344584		3517.58	-0.01700209
567.8	0.02548703		1157.79	0.00183211		1747.79	0.00317909		2337.78	-0.00124593		2927.78	0.00372983		3517.78	-0.01773016
568	0.02528191		1157.99	0.00089649		1747.99	0.00358893		2337.98	-0.00141694		2927.98	0.0034066		3517.98	-0.01743368
568.2	0.02512433		1158.19	0.00061607		1748.19	0.00436391		2338.18	-0.00098084		2928.18	0.00363908		3518.18	-0.01727917
568.4	0.0257139		1158.39	0.0007359		1748.39	0.00439351		2338.38	-0.00053933		2928.38	0.00402131		3518.38	-0.01790153
568.6	0.02616645		1158.59	0.00031398		1748.59	0.00370652		2338.58	-0.00064054		2928.58	0.00466773		3518.58	-0.01870879
568.8	0.02630527		1158.79	0.00030787		1748.79	0.002866		2338.78	-0.00067188		2928.78	0.00566551		3518.78	-0.01890844
569	0.02599707		1158.99	-0.00072461		1748.99	0.00200065		2338.98	0.00100749		2928.98	0.00595898		3518.98	-0.02017772
569.2	0.02613973		1159.19	-0.00183389		1749.19	0.00148251		2339.18	0.00108804		2929.18	0.00647711		3519.18	-0.02058314
569.4	0.02597996		1159.39	-0.00163973		1749.39	0.0012339		2339.38	0.00023513		2929.38	0.00631638		3519.38	-0.02048669
569.6	0.02477484		1159.59	-0.00249112		1749.59	0.0008499		2339.58	-0.00002478		2929.58	0.0057881		3519.58	-0.02035637
569.8	0.02477777		1159.79	-0.00265201		1749.79	0.00012508		2339.78	0.00015938		2929.78	0.00557277		3519.78	-0.01952639
570	0.02459046		1159.99	-0.00303866		1749.99	0.00028244		2339.98	-0.00020696		2929.98	0.00642875		3519.98	-0.0196144
570.2	0.02473022		1160.19	-0.00290828		1750.19	0.00086415		2340.18	-0.00065815		2930.18	0.00652175		3520.18	-0.0191431
570.4	0.02502011		1160.39	-0.00289731		1750.39	0.00055227		2340.38	-0.00082262		2930.38	0.00620061		3520.38	-0.01881381
570.6	0.02557832		1160.59	-0.00293642		1750.59	0.00080687		2340.58	-0.00057421		2930.58	0.00551508		3520.58	-0.01843439
570.8	0.02611124		1160.79	-0.00312725		1750.79	0.00044436		2340.78	-0.00099808		2930.78	0.00535778		3520.78	-0.01792304
571	0.02654064		1160.99	-0.00249194		1750.99	-0.00030416		2340.98	-0.00102283		2930.98	0.00450182		3520.98	-0.01729645
571.2	0.02658478		1161.19	-0.00194815		1751.19	-0.0005941		2341.18	-0.00191645		2931.18	0.00391359		3521.18	-0.01751041
571.4	0.02736917		1161.39	-0.00126779		1751.39	-0.00053462		2341.38	-0.00182208		2931.38	0.00376066		3521.38	-0.01761856
571.6	0.02824294		1161.59	-0.0012134		1751.59	-0.0002709		2341.58	-0.00281792		2931.58	0.00280868		3521.58	-0.01755743
571.8	0.02712208		1161.79	-0.00057931		1751.79	-0.00084021		2341.78	-0.00311618		2931.78	0.001479		3521.78	-0.0168569
572	0.02643626		1161.99	-0.00072233		1751.99	-0.00142083		2341.98	-0.0031173		2931.98	0.00098116		3521.98	-0.01602717
572.2	0.02637916		1162.19	0.00016195		1752.19	-0.0015469		2342.18	-0.00286494		2932.18	0.00154877		3522.18	-0.01610033
572.4	0.02677464		1162.39	0.00046999		1752.39	-0.00244663		2342.38	-0.00283975		2932.38	0.00088724		3522.38	-0.01600555
572.6	0.02690542		1162.59	0.00038688		1752.59	-0.00245365		2342.58	-0.00322359		2932.58	0.00097097		3522.58	-0.01615892
572.8	0.02710573		1162.79	-0.00062681		1752.79	-0.00159219		2342.78	-0.00261326		2932.78	0.001189		3522.78	-0.01607959
573	0.02726151		1162.99	-0.00095749		1752.99	-0.00114675		2342.98	-0.00229244		2932.98	0.00097098		3522.98	-0.01608246
573.2	0.02737548		1163.19	-0.00092306		1753.19	-0.00014398		2343.18	-0.00230317		2933.18	0.00110676		3523.18	-0.01610199
573.4	0.02669933		1163.39	-0.00112954		1753.39	0.00079798		2343.38	-0.00169528		2933.38	0.00063022		3523.38	-0.01632546
573.6	0.02592712		1163.59	-0.00151317		1753.59	0.00176667		2343.58	-0.0012032		2933.58	0.00036615		3523.58	-0.01616131
573.8	0.02588004		1163.79	-0.00056244		1753.79	0.00222445		2343.78	-0.00165091		2933.78	0.00107192		3523.78	-0.01635056
574	0.02544011		1163.99	0.00040849		1753.99	0.0030019		2343.98	-0.00247948		2933.98	0.00182438		3523.98	-0.01611303
574.2	0.02414462		1164.19	0.00066		1754.19	0.00284355		2344.18	-0.002668		2934.18	0.00161647		3524.18	-0.01678615
574.4	0.02412662		1164.39	0.00145069		1754.39	0.001918		2344.38	-0.00227259		2934.38	0.00083886		3524.38	-0.0168563
574.6	0.02434665		1164.59	0.00108277		1754.59	0.00190979		2344.58	-0.00196739		2934.58	0.00058859		3524.58	-0.0172752
574.8	0.0246427		1164.79	0.00042153		1754.79	0.00137651		2344.78	-0.0023581		2934.78	0.00065876		3524.78	-0.01761611
575	0.02457832		1164.99	0.00113489		1754.99	0.00163889		2344.98	-0.0021535		2934.98	0.0003317		3524.98	-0.01762703
575.2	0.02507255		1165.19	0.00149107		1755.19	0.00097178		2345.18	-0.0022559		2935.18	0.00009457		3525.18	-0.01809617
575.4	0.0258039		1165.39	0.00079412		1755.39	0.00080613		2345.38	-0.0021383		2935.38	-0.00046203		3525.38	-0.01824852
575.6	0.02627312		1165.59	0.00102553		1755.59	0.00031074		2345.58	-0.0020138		2935.58	-0.00094806		3525.58	-0.01797154
575.8	0.02531697		1165.79	0.00067882		1755.79	0.00001124		2345.78	-0.00212956		2935.78	-0.00123423		3525.78	-0.0179048
576	0.02486994		1165.99	0.00084005		1755.99	-0.00048112		2345.98	-0.0029543		2935.98	-0.00030918		3525.98	-0.01841719
576.2	0.02513825		1166.19	0.00065489		1756.19	-0.00059025		2346.18	-0.00327551		2936.18	0.0002903		3526.18	-0.01777447
576.4	0.02554554		1166.39	-0.00032054		1756.39	-0.0006815		2346.38	-0.00354258		2936.38	0.00021038		3526.38	-0.01794662
576.6	0.02679428		1166.59	-0.00048904		1756.59	-0.00000146		2346.58	-0.0032683		2936.58	0.00156098		3526.58	-0.01842987
576.8	0.0270734		1166.79	-0.00092659		1756.79	-0.00014666		2346.78	-0.00266134		2936.78	0.00188726		3526.78	-0.01844332
577	0.02646934		1166.99	-0.00020038		1756.99	-0.00003483		2346.98	-0.00306998		2936.98	0.00241972		3526.98	-0.01878094
577.2	0.02627236		1167.19	0.00029938		1757.19	0.00081463		2347.18	-0.00359228		2937.18	0.00266692		3527.18	-0.01947454
577.4	0.02571462		1167.39	0.00008101		1757.39	0.00073701		2347.38	-0.00450862		2937.38	0.00319463		3527.38	-0.01935732
577.6	0.02545162		1167.59	0.00072622		1757.59	0.00073041		2347.58	-0.00485902		2937.58	0.00371251		3527.58	-0.01921453
577.8	0.02512622		1167.79	0.00120996		1757.79	0.00082274		2347.78	-0.0059088		2937.78	0.00385411		3527.78	-0.01915654
578	0.02490391		1167.99	0.00142822		1757.99	0.00030519		2347.98	-0.00668491		2937.98	0.00429262		3527.98	-0.01927113
578.2	0.02551479		1168.19	0.00155299		1758.19	-0.00072156		2348.18	-0.00588858		2938.18	0.00401276		3528.18	-0.02038413
578.4	0.02624632		1168.39	0.00186917		1758.39	-0.0005872		2348.38	-0.00476565		2938.38	0.00388691		3528.38	-0.02058692
578.6	0.02633496		1168.59	0.00146018		1758.59	-0.00056217		2348.58	-0.00405032		2938.58	0.00408609		3528.58	-0.02042468
578.8	0.02592243		1168.79	0.00162818		1758.79	-0.00082687		2348.78	-0.0033115		2938.78	0.00425919		3528.78	-0.01972623
579	0.02599553		1168.99	0.00236901		1758.99	-0.00114584		2348.98	-0.00202048		2938.98	0.00330815		3528.98	-0.01951275
579.2	0.02572163		1169.19	0.00209411		1759.19	-0.00158959		2349.18	-0.00145762		2939.18	0.00193986		3529.18	-0.01887005
579.4	0.02573567		1169.39	0.00176466		1759.39	-0.00155926		2349.38	-0.00182294		2939.38	0.00191968		3529.38	-0.01847268
579.6	0.02534483		1169.59	0.00185563		1759.59	-0.00165672		2349.58	-0.00115536		2939.58	0.00212151		3529.58	-0.01755963
579.8	0.024937		1169.79	0.00138806		1759.79	-0.00179674		2349.78	-0.00133705		2939.78	0.00267644		3529.78	-0.01703984
580	0.02501052		1169.99	0.00195612		1759.99	-0.00179745		2349.98	-0.00194149		2939.98	0.00272243		3529.98	-0.0173807
580.2	0.02523177		1170.19	0.00115024		1760.19	-0.00171395		2350.18	-0.00210827		2940.18	0.00344358		3530.18	-0.01723716
580.4	0.02597671		1170.39	0.00191762		1760.39	-0.00148441		2350.38	-0.00217777		2940.38	0.00416976		3530.38	-0.01808528
580.6	0.02602524		1170.59	0.00219344		1760.59	-0.00096909		2350.58	-0.00197254		2940.58	0.00464661		3530.58	-0.01856011
580.8	0.02524936		1170.79	0.00240453		1760.79	-0.00128411		2350.78	-0.0024503		2940.78	0.00377679		3530.78	-0.01811385
581	0.02485134		1170.99	0.00250899		1760.99	-0.00101095		2350.98	-0.00421774		2940.98	0.00434573		3530.98	-0.01864737
581.2	0.0251079		1171.19	0.00252856		1761.19	-0.00002463		2351.18	-0.00440236		2941.18	0.00483063		3531.18	-0.01891238
581.4	0.02561935		1171.39	0.00193245		1761.39	-0.0006065		2351.38	-0.00463752		2941.38	0.00510093		3531.38	-0.01857463
581.6	0.02564062		1171.59	0.00155369		1761.59	-0.00083229		2351.58	-0.00381985		2941.58	0.00547345		3531.58	-0.01878813
581.8	0.02564084		1171.79	0.00157235		1761.79	-0.00119572		2351.78	-0.00411537		2941.78	0.00489704		3531.78	-0.01935177
582	0.02594714		1171.99	0.00168554		1761.99	-0.00181588		2351.98	-0.00297077		2941.98	0.00484814		3531.98	-0.02020586
582.2	0.02605166		1172.19	0.00107368		1762.19	-0.00165032		2352.18	-0.00167415		2942.18	0.00449592		3532.18	-0.02084914
582.4	0.02527948		1172.39	0.00046161		1762.39	-0.00233061		2352.38	-0.00109135		2942.38	0.00400363		3532.38	-0.02043576
582.6	0.02538166		1172.59	-0.00022127		1762.59	-0.00279715		2352.58	-0.00015649		2942.58	0.00261927		3532.58	-0.01997129
582.8	0.02426769		1172.79	-0.00057635		1762.79	-0.00319625		2352.78	0.00099448		2942.78	0.00211308		3532.78	-0.01933393
583	0.02419596		1172.99	-0.00096395		1762.99	-0.00376601		2352.98	0.00088846		2942.98	0.00052738		3532.98	-0.01923082
583.2	0.02248004		1173.19	-0.00101907		1763.19	-0.00288616		2353.18	0.00088296		2943.18	0.00081168		3533.18	-0.01766939
583.4	0.02253398		1173.39	-0.00114452		1763.39	-0.00337765		2353.38	0.00113921		2943.38	0.00080134		3533.38	-0.01737375
583.6	0.02284132		1173.59	-0.00205967		1763.59	-0.00384504		2353.58	0.00101945		2943.58	0.00042726		3533.58	-0.01677068
583.8	0.02301706		1173.79	-0.00209838		1763.79	-0.00360166		2353.78	0.00017584		2943.78	0.00093744		3533.78	-0.01725105
584	0.02372292		1173.99	-0.00148405		1763.99	-0.00303182		2353.98	-0.00129266		2943.98	0.00059998		3533.98	-0.01776926
584.2	0.02358942		1174.19	-0.00129802		1764.19	-0.0030139		2354.18	-0.00140939		2944.18	0.00143942		3534.18	-0.01754565
584.4	0.0233483		1174.39	-0.00035372		1764.39	-0.00208381		2354.38	-0.00196104		2944.38	0.00210177		3534.38	-0.0171388
584.6	0.02322333		1174.59	-0.00163743		1764.59	-0.00148284		2354.58	-0.00176884		2944.58	0.00209048		3534.58	-0.01710847
584.8	0.02402553		1174.79	-0.00079088		1764.79	-0.00138764		2354.78	-0.00231555		2944.78	0.00264242		3534.78	-0.0169359
585	0.02443624		1174.99	-0.00043262		1764.99	-0.00003171		2354.98	-0.00254266		2944.98	0.00327011		3534.98	-0.01778685
585.2	0.02487491		1175.19	-0.00036638		1765.19	0.00020208		2355.18	-0.00187977		2945.18	0.00401705		3535.18	-0.01802693
585.4	0.02597068		1175.39	-0.00120424		1765.39	-0.00051167		2355.38	-0.00285261		2945.38	0.00378109		3535.38	-0.01803425
585.6	0.02577007		1175.59	-0.00131778		1765.59	-0.00032229		2355.58	-0.0034111		2945.58	0.00425181		3535.58	-0.01879165
585.8	0.02602274		1175.79	-0.0010713		1765.79	-0.00032465		2355.78	-0.00329482		2945.78	0.00366573		3535.78	-0.01919447
586	0.02561154		1175.99	-0.00131538		1765.99	-0.0007701		2355.98	-0.0031462		2945.98	0.00356342		3535.98	-0.01880072
586.2	0.02547848		1176.19	-0.00219824		1766.19	-0.00063297		2356.18	-0.00345983		2946.18	0.00334299		3536.18	-0.01810296
586.4	0.02519579		1176.39	-0.00230825		1766.39	-0.00113869		2356.38	-0.00289645		2946.38	0.00209934		3536.38	-0.0178593
586.6	0.02518494		1176.59	-0.00249859		1766.59	-0.00142216		2356.58	-0.00262788		2946.58	0.00064535		3536.58	-0.01759614
586.8	0.02464554		1176.79	-0.00318894		1766.79	-0.00178273		2356.78	-0.00217012		2946.78	0.00051294		3536.78	-0.01730758
587	0.0239378		1176.99	-0.00249759		1766.99	-0.00185537		2356.98	-0.00243699		2946.98	-0.00021966		3536.98	-0.01697107
587.2	0.02342731		1177.19	-0.00239182		1767.19	-0.00154463		2357.18	-0.00174079		2947.18	0.00093353		3537.18	-0.01616442
587.4	0.02483462		1177.39	-0.00315071		1767.39	-0.00260469		2357.38	-0.0012545		2947.38	0.00076094		3537.38	-0.01644759
587.6	0.02457598		1177.59	-0.00321267		1767.59	-0.00222392		2357.58	-0.00287106		2947.58	0.00026029		3537.58	-0.01651531
587.8	0.02559903		1177.79	-0.00192704		1767.79	-0.00179912		2357.78	-0.00315276		2947.78	0.00045154		3537.78	-0.01720465
588	0.02619026		1177.99	-0.00158571		1767.99	-0.00172837		2357.98	-0.00364961		2947.98	-0.00003178		3537.98	-0.01638914
588.2	0.02649754		1178.19	-0.00163559		1768.19	-0.00111274		2358.18	-0.00358327		2948.18	0.00024414		3538.18	-0.01689192
588.4	0.02584917		1178.39	-0.00201033		1768.39	-0.00038096		2358.38	-0.00410351		2948.38	0.00001336		3538.38	-0.01681574
588.6	0.02683545		1178.59	-0.0022355		1768.59	-0.00058597		2358.58	-0.00308699		2948.58	-0.00090779		3538.58	-0.01698949
588.8	0.02704539		1178.79	-0.001614		1768.79	-0.00006025		2358.78	-0.00323147		2948.78	-0.00070177		3538.78	-0.0167861
589	0.02694893		1178.99	-0.00171838		1768.99	-0.00057886		2358.98	-0.00400586		2948.98	-0.00122135		3538.98	-0.01727967
589.2	0.02629985		1179.19	-0.00146519		1769.19	-0.00161606		2359.18	-0.00477525		2949.18	-0.00092888		3539.18	-0.01666293
589.4	0.02621313		1179.39	-0.00147023		1769.39	-0.00164816		2359.38	-0.00519764		2949.38	-0.00122807		3539.38	-0.01625439
589.6	0.02479634		1179.59	-0.00160355		1769.59	-0.00112536		2359.58	-0.00519906		2949.58	-0.00108454		3539.58	-0.01565122
589.8	0.02433004		1179.79	-0.00220115		1769.79	-0.00140191		2359.78	-0.00459229		2949.78	-0.0013816		3539.78	-0.01482537
590	0.02358017		1179.99	-0.002353		1769.99	-0.00209708		2359.98	-0.00421474		2949.98	-0.00128203		3539.98	-0.0136298
590.2	0.02402828		1180.19	-0.00190629		1770.19	-0.00201965		2360.18	-0.00386234		2950.18	-0.00118198		3540.18	-0.01322326
590.4	0.02333167		1180.39	-0.00112569		1770.39	-0.00315463		2360.38	-0.00318415		2950.38	-0.00090447		3540.38	-0.01366294
590.6	0.0232619		1180.59	-0.00179162		1770.59	-0.00353401		2360.58	-0.00279673		2950.58	-0.00074522		3540.58	-0.01365248
590.8	0.02325848		1180.79	-0.00281196		1770.79	-0.00286057		2360.78	-0.0016129		2950.78	0.00019623		3540.78	-0.01388467
591	0.0228621		1180.99	-0.00257779		1770.99	-0.00245649		2360.98	-0.00146817		2950.98	0.00073468		3540.98	-0.0149577
591.2	0.02414638		1181.19	-0.00330444		1771.19	-0.00235518		2361.18	-0.00180533		2951.18	0.00266997		3541.18	-0.01536063
591.4	0.02489715		1181.39	-0.003211		1771.39	-0.00217441		2361.38	-0.00225228		2951.38	0.00279884		3541.38	-0.01592085
591.6	0.02504295		1181.59	-0.00273292		1771.59	-0.00119487		2361.58	-0.00336326		2951.58	0.00315139		3541.58	-0.01712985
591.8	0.02558264		1181.79	-0.0020519		1771.79	-0.0012666		2361.78	-0.00334418		2951.78	0.0038214		3541.78	-0.01836486
592	0.0250282		1181.99	-0.00298333		1771.99	-0.00085379		2361.98	-0.00389026		2951.98	0.00386434		3541.98	-0.01859944
592.2	0.02406949		1182.19	-0.00325057		1772.19	-0.00077898		2362.18	-0.00444544		2952.18	0.0037803		3542.18	-0.0196529
592.4	0.02318068		1182.39	-0.00307345		1772.39	-0.00196046		2362.38	-0.00368201		2952.38	0.00297749		3542.38	-0.0194017
592.6	0.02393988		1182.59	-0.00343251		1772.59	-0.0015836		2362.58	-0.00325926		2952.58	0.00296814		3542.58	-0.01941851
592.8	0.02297312		1182.79	-0.00274774		1772.79	-0.00110329		2362.78	-0.00318244		2952.78	0.00358961		3542.78	-0.01883756
593	0.02275836		1182.99	-0.00182871		1772.99	-0.0012996		2362.98	-0.00366482		2952.98	0.00313953		3542.98	-0.01895557
593.2	0.02156534		1183.19	-0.00184189		1773.19	-0.00096435		2363.18	-0.00337893		2953.18	0.00331263		3543.18	-0.01839874
593.4	0.02103557		1183.39	-0.0016295		1773.39	0.00006808		2363.38	-0.00330881		2953.38	0.00259808		3543.38	-0.01945043
593.6	0.01985121		1183.59	-0.00231453		1773.59	0.00015673		2363.58	-0.0034526		2953.58	0.00212962		3543.58	-0.01947766
593.8	0.02024329		1183.79	-0.00179789		1773.79	-0.00072296		2363.78	-0.00329825		2953.78	0.00184397		3543.78	-0.01921274
594	0.02058991		1183.99	-0.0001236		1773.99	-0.0009647		2363.98	-0.00342436		2953.98	0.00164417		3543.98	-0.01916147
594.2	0.02031485		1184.19	0.00013163		1774.19	-0.00122232		2364.18	-0.00363902		2954.18	0.00067618		3544.18	-0.01946165
594.4	0.0205622		1184.39	-0.00032522		1774.39	-0.00105873		2364.38	-0.00312931		2954.38	0.00105289		3544.38	-0.01974579
594.6	0.02116993		1184.59	-0.00166587		1774.59	0.00011822		2364.58	-0.00265478		2954.58	0.00051146		3544.58	-0.01959977
594.8	0.02230493		1184.79	-0.00224784		1774.79	0.00067963		2364.78	-0.00304558		2954.78	0.00053373		3544.78	-0.01976591
595	0.02331618		1184.99	-0.00215939		1774.99	0.00110237		2364.98	-0.00382929		2954.98	0.00038408		3544.98	-0.02036114
595.2	0.02339674		1185.19	-0.00188677		1775.19	0.00169963		2365.18	-0.00447762		2955.18	0.00058936		3545.18	-0.02022452
595.4	0.02425285		1185.39	-0.00150033		1775.39	0.00210673		2365.38	-0.00418607		2955.38	0.00023176		3545.38	-0.02106424
595.6	0.02449013		1185.59	-0.00105689		1775.59	0.00252824		2365.58	-0.00490464		2955.58	0.00006144		3545.58	-0.0222508
595.8	0.02410216		1185.79	-0.00087247		1775.79	0.00244777		2365.78	-0.00539999		2955.78	-0.00055091		3545.78	-0.02294143
596	0.02461029		1185.99	-0.00162009		1775.99	0.00188519		2365.98	-0.00477135		2955.98	-0.00086807		3545.98	-0.02260377
596.2	0.02505672		1186.19	-0.00170094		1776.19	0.00160449		2366.18	-0.00430688		2956.18	-0.00077947		3546.18	-0.02257498
596.4	0.02575845		1186.39	-0.00227621		1776.39	0.00116391		2366.38	-0.00311875		2956.38	-0.00130125		3546.38	-0.02262082
596.6	0.02609282		1186.59	-0.00303117		1776.59	0.00124136		2366.58	-0.00280849		2956.58	-0.00035152		3546.58	-0.02243544
596.8	0.02609079		1186.79	-0.00300191		1776.79	0.00070806		2366.78	-0.00156704		2956.78	0.00013649		3546.78	-0.0215777
597	0.02594021		1186.99	-0.00299673		1776.99	0.00038388		2366.98	-0.00120587		2956.98	0.00042793		3546.98	-0.02145518
597.2	0.02484515		1187.19	-0.00391586		1777.19	-0.0006898		2367.18	-0.00051641		2957.18	0.00104964		3547.18	-0.02090329
597.4	0.02489435		1187.39	-0.00367095		1777.39	-0.00092489		2367.38	0.00021118		2957.38	0.00144335		3547.38	-0.02057943
597.6	0.02426806		1187.59	-0.00454422		1777.59	-0.00202488		2367.58	-0.00016614		2957.58	0.0020154		3547.58	-0.0203984
597.8	0.02463765		1187.79	-0.00360506		1777.79	-0.00253477		2367.78	-0.000155		2957.78	0.00154104		3547.78	-0.01992573
598	0.02433758		1187.99	-0.00304063		1777.99	-0.00278842		2367.98	-0.00040449		2957.98	0.00170114		3547.98	-0.01951727
598.2	0.02423835		1188.19	-0.0039747		1778.19	-0.00283518		2368.18	0.00021304		2958.18	0.00144295		3548.18	-0.018416
598.4	0.02398843		1188.39	-0.00392156		1778.39	-0.00239667		2368.38	0.00024434		2958.38	0.00270025		3548.38	-0.01818005
598.6	0.02393604		1188.59	-0.00420193		1778.59	-0.00165472		2368.58	0.00009178		2958.58	0.00267626		3548.58	-0.01809239
598.8	0.02390636		1188.79	-0.0037938		1778.79	-0.00109682		2368.78	-0.00025231		2958.78	0.00269891		3548.78	-0.01757092
599	0.02317468		1188.99	-0.00265926		1778.99	-0.00065817		2368.98	-0.00077896		2958.98	0.00241183		3548.98	-0.01786557
599.2	0.02259827		1189.19	-0.00179765		1779.19	-0.00024078		2369.18	-0.00117071		2959.18	0.00165173		3549.18	-0.01871006
599.4	0.02303718		1189.39	-0.00117318		1779.39	-0.00059795		2369.38	-0.00144514		2959.38	0.00141469		3549.38	-0.01908328
599.6	0.02263775		1189.59	-0.00065649		1779.59	-0.00070027		2369.58	-0.00273894		2959.58	0.00134514		3549.58	-0.01957797
599.8	0.02227755		1189.79	-0.00060142		1779.79	-0.00054688		2369.78	-0.00285402		2959.78	0.00140538		3549.78	-0.02032507
600	0.02227324		1189.99	-0.00078584		1779.99	-0.00145176		2369.98	-0.00280899		2959.98	0.00082309		3549.98	-0.0207131
600.2	0.02260182		1190.19	-0.00121976		1780.19	-0.00149358		2370.18	-0.00320696		2960.18	0.00089213		3550.18	-0.0210737
600.4	0.0220549		1190.39	-0.00201971		1780.39	-0.00161533		2370.38	-0.00372028		2960.38	0.00117813		3550.38	-0.02131445
600.6	0.02210382		1190.59	-0.00213854		1780.59	-0.00211873		2370.58	-0.00432203		2960.58	0.00208775		3550.58	-0.0218144
600.8	0.02225347		1190.79	-0.00226738		1780.79	-0.00223152		2370.78	-0.0039863		2960.78	0.0024103		3550.78	-0.02039253
601	0.02187494		1190.99	-0.00207167		1780.99	-0.0023527		2370.98	-0.00470189		2960.98	0.00236238		3550.98	-0.02018227
601.2	0.02166524		1191.19	-0.00314387		1781.19	-0.0027265		2371.18	-0.00473639		2961.18	0.00182077		3551.18	-0.02026679
601.4	0.02212546		1191.39	-0.00221529		1781.39	-0.00287347		2371.38	-0.00535743		2961.38	0.00160569		3551.38	-0.02030168
601.6	0.02255644		1191.59	-0.00230068		1781.59	-0.00299307		2371.58	-0.00650644		2961.58	0.00154203		3551.58	-0.02107169
601.8	0.02335887		1191.79	-0.00152036		1781.79	-0.0035275		2371.78	-0.00603818		2961.78	0.00121197		3551.78	-0.02047226
602	0.02382447		1191.99	-0.00225518		1781.99	-0.00363337		2371.98	-0.00632089		2961.98	0.00240489		3551.98	-0.02026713
602.2	0.02438374		1192.19	-0.002622		1782.19	-0.0026711		2372.18	-0.00615122		2962.18	0.0020048		3552.18	-0.02005336
602.4	0.02343158		1192.39	-0.00229844		1782.39	-0.00195679		2372.38	-0.00574639		2962.38	0.00221085		3552.38	-0.02064942
602.6	0.02467569		1192.59	-0.00262364		1782.59	-0.00147921		2372.58	-0.00578596		2962.58	0.00199776		3552.58	-0.02088804
602.8	0.02488497		1192.79	-0.00203378		1782.79	-0.00190715		2372.78	-0.00539341		2962.78	0.00128055		3552.78	-0.02016024
603	0.02504187		1192.99	-0.00171149		1782.99	-0.00167909		2372.98	-0.00569698		2962.98	0.00057115		3552.98	-0.02040609
603.2	0.02465327		1193.19	-0.00154169		1783.19	-0.0016377		2373.18	-0.00550256		2963.18	0.00063776		3553.18	-0.02021332
603.4	0.02394532		1193.39	-0.00165785		1783.39	-0.00224376		2373.38	-0.00524961		2963.38	0.00079651		3553.38	-0.02034046
603.6	0.02329477		1193.59	-0.00182091		1783.59	-0.0018971		2373.58	-0.00465571		2963.58	0.0007134		3553.58	-0.02080101
603.8	0.02255211		1193.79	-0.00179131		1783.79	-0.00247802		2373.78	-0.00451247		2963.78	0.0005988		3553.78	-0.0210597
604	0.0225452		1193.99	-0.0022577		1783.99	-0.00282525		2373.98	-0.00537804		2963.98	0.00039999		3553.98	-0.02052823
604.2	0.0231142		1194.19	-0.00293949		1784.19	-0.0024398		2374.18	-0.00585907		2964.18	0.00166289		3554.18	-0.01953457
604.4	0.02235619		1194.39	-0.00313261		1784.39	-0.0023335		2374.38	-0.00652088		2964.38	0.00177978		3554.38	-0.01935113
604.6	0.02329245		1194.59	-0.00252432		1784.59	-0.00252751		2374.58	-0.00598928		2964.58	0.00117209		3554.58	-0.01921572
604.8	0.02334342		1194.79	-0.00259572		1784.79	-0.00378764		2374.78	-0.0051682		2964.78	0.00058071		3554.78	-0.01717348
605	0.02351378		1194.99	-0.00256595		1784.99	-0.00404407		2374.98	-0.00450822		2964.98	0.00026577		3554.98	-0.01800027
605.2	0.02326996		1195.19	-0.00219215		1785.19	-0.00513388		2375.18	-0.00379255		2965.18	0.00056905		3555.18	-0.01790635
605.4	0.0236845		1195.39	-0.00161954		1785.39	-0.00540827		2375.38	-0.00354525		2965.38	0.00099583		3555.38	-0.01760665
605.6	0.02434861		1195.59	-0.00213971		1785.59	-0.00576132		2375.58	-0.00339565		2965.58	0.00134673		3555.58	-0.01741892
605.8	0.02403613		1195.79	-0.00244697		1785.79	-0.00558031		2375.78	-0.0032758		2965.78	0.00210133		3555.78	-0.01767563
606	0.02391056		1195.99	-0.00284695		1785.99	-0.0051018		2375.98	-0.00300527		2965.98	0.00329788		3555.98	-0.01805075
606.2	0.02335335		1196.19	-0.00255096		1786.19	-0.00433946		2376.18	-0.00301892		2966.18	0.00296928		3556.18	-0.01882852
606.4	0.0233815		1196.39	-0.0022938		1786.39	-0.0039919		2376.38	-0.00295187		2966.38	0.003094		3556.38	-0.01964197
606.6	0.0236866		1196.59	-0.00229056		1786.59	-0.00398254		2376.58	-0.00313468		2966.58	0.00357671		3556.58	-0.02028269
606.8	0.02325661		1196.79	-0.00199472		1786.79	-0.00396178		2376.78	-0.00264825		2966.78	0.00295736		3556.78	-0.02002559
607	0.02235175		1196.99	-0.00261641		1786.99	-0.00301932		2376.98	-0.00203642		2966.98	0.00278506		3556.98	-0.02057263
607.2	0.02165637		1197.19	-0.00284248		1787.19	-0.00248322		2377.18	-0.00198818		2967.18	0.00323478		3557.18	-0.02137597
607.4	0.02107033		1197.39	-0.00261369		1787.39	-0.0016211		2377.38	-0.00195092		2967.38	0.00313467		3557.38	-0.02144588
607.6	0.02036237		1197.59	-0.00364636		1787.59	-0.00171398		2377.58	-0.00243764		2967.58	0.00265336		3557.58	-0.02132818
607.8	0.02036282		1197.79	-0.00436175		1787.79	-0.00132193		2377.78	-0.0034135		2967.78	0.00266575		3557.78	-0.02120435
608	0.02103039		1197.99	-0.0049196		1787.99	-0.00040979		2377.98	-0.00341655		2967.98	0.00264563		3557.98	-0.02153718
608.2	0.02122108		1198.19	-0.00561723		1788.19	-0.00042274		2378.18	-0.00275435		2968.18	0.00241281		3558.18	-0.02135766
608.4	0.02075591		1198.39	-0.00562276		1788.39	0.00015495		2378.38	-0.00266997		2968.38	0.00071039		3558.38	-0.0216292
608.6	0.02154097		1198.59	-0.00596623		1788.59	0.00039268		2378.58	-0.00248756		2968.58	0.00015839		3558.58	-0.02178656
608.8	0.02140257		1198.79	-0.00635168		1788.79	-0.00090091		2378.78	-0.00209058		2968.78	0.00005365		3558.78	-0.02144954
609	0.02147738		1198.99	-0.00618259		1788.99	-0.00103078		2378.98	-0.00161473		2968.98	0.00017551		3558.98	-0.02247884
609.2	0.02148579		1199.19	-0.00615277		1789.19	-0.00167073		2379.18	-0.00182985		2969.18	0.00004121		3559.18	-0.0220497
609.4	0.02108092		1199.39	-0.00661438		1789.39	-0.00109021		2379.38	-0.0018138		2969.38	-0.00104292		3559.38	-0.02263475
609.6	0.02096964		1199.59	-0.00621494		1789.59	-0.00087259		2379.58	-0.00181777		2969.58	-0.00181202		3559.58	-0.0220983
609.8	0.01985192		1199.79	-0.0059432		1789.79	-0.00063604		2379.78	-0.00182878		2969.78	-0.00063972		3559.78	-0.02245062
610	0.01960468		1199.99	-0.00586676		1789.99	-0.00162739		2379.98	-0.00136016		2969.98	-0.00085755		3559.98	-0.02190379
610.2	0.020105		1200.19	-0.00549271		1790.19	-0.00144789		2380.18	-0.00203296		2970.18	-0.00084611		3560.18	-0.02199143
610.4	0.01977702		1200.39	-0.00513281		1790.39	-0.00246587		2380.38	-0.00172663		2970.38	-0.00130994		3560.38	-0.02196425
610.6	0.01964448		1200.59	-0.00448964		1790.59	-0.00278703		2380.58	-0.00123334		2970.58	-0.00079233		3560.58	-0.0210323
610.8	0.0202491		1200.79	-0.00509392		1790.79	-0.00306426		2380.78	-0.00071718		2970.78	-0.00115942		3560.78	-0.01999815
611	0.01966546		1200.99	-0.00508466		1790.99	-0.00302528		2380.98	-0.00028183		2970.98	-0.00098232		3560.98	-0.01911443
611.2	0.01973119		1201.19	-0.00446982		1791.19	-0.00265381		2381.18	-0.0007366		2971.18	-0.00005655		3561.18	-0.01811745
611.4	0.01940191		1201.39	-0.00405042		1791.39	-0.00289894		2381.38	-0.00110977		2971.38	0.00008824		3561.38	-0.01721007
611.6	0.01879083		1201.59	-0.00425713		1791.59	-0.00333254		2381.58	-0.00198762		2971.58	-0.00008322		3561.58	-0.01729926
611.8	0.01877201		1201.79	-0.00428436		1791.79	-0.00272964		2381.78	-0.00188492		2971.78	-0.00019592		3561.78	-0.01707641
612	0.0189705		1201.99	-0.00403436		1791.99	-0.00291473		2381.98	-0.00081375		2971.98	-0.00021288		3561.98	-0.0172895
612.2	0.01875513		1202.19	-0.00374684		1792.19	-0.00279946		2382.18	-0.00144923		2972.18	-0.00058085		3562.18	-0.01752111
612.4	0.01834702		1202.39	-0.00412671		1792.39	-0.0017477		2382.38	-0.00220317		2972.38	-0.00068845		3562.38	-0.01811711
612.6	0.01925886		1202.59	-0.00528246		1792.59	-0.00195497		2382.58	-0.00239021		2972.58	0.00010186		3562.58	-0.01805415
612.8	0.01899101		1202.79	-0.00486648		1792.79	-0.0017286		2382.78	-0.00232732		2972.78	0.00040949		3562.78	-0.01843907
613	0.01892583		1202.99	-0.00512074		1792.99	-0.00104522		2382.98	-0.0024811		2972.98	-0.00011128		3562.98	-0.01909698
613.2	0.01852575		1203.19	-0.00549067		1793.19	-0.00039941		2383.18	-0.00289086		2973.18	-0.00159423		3563.18	-0.01902207
613.4	0.01858843		1203.39	-0.00510111		1793.39	0.00051377		2383.38	-0.00302347		2973.38	-0.00219716		3563.38	-0.02015766
613.6	0.01904861		1203.59	-0.00512722		1793.59	0.00080963		2383.58	-0.00359461		2973.58	-0.00178434		3563.58	-0.02086274
613.8	0.01875576		1203.79	-0.00579838		1793.79	0.00065951		2383.78	-0.00384675		2973.78	-0.00069232		3563.78	-0.02096953
614	0.0187548		1203.99	-0.00647236		1793.99	0.00044187		2383.98	-0.00428285		2973.98	-0.00124478		3563.98	-0.02130948
614.2	0.01879392		1204.19	-0.00661648		1794.19	0.00036368		2384.18	-0.00501083		2974.18	-0.00103164		3564.18	-0.02171059
614.4	0.01804212		1204.39	-0.00616244		1794.39	-0.00055441		2384.38	-0.0046129		2974.38	-0.00202479		3564.38	-0.02219663
614.6	0.01931686		1204.59	-0.00555255		1794.59	-0.00064418		2384.58	-0.00454508		2974.58	-0.00093138		3564.58	-0.02166657
614.8	0.02010185		1204.79	-0.0053306		1794.79	-0.00185862		2384.78	-0.00461408		2974.78	-0.00070547		3564.78	-0.02190765
615	0.02079767		1204.99	-0.00453026		1794.99	-0.00244764		2384.98	-0.00474011		2974.98	-0.00040732		3564.98	-0.02154565
615.2	0.02169482		1205.19	-0.00346947		1795.19	-0.00267889		2385.18	-0.00559853		2975.18	-0.00034385		3565.18	-0.02164678
615.4	0.02210954		1205.39	-0.00313556		1795.39	-0.00280464		2385.38	-0.00639382		2975.38	-0.00027004		3565.38	-0.02154743
615.6	0.02193986		1205.59	-0.00233025		1795.59	-0.00245567		2385.58	-0.00674813		2975.58	-0.00041322		3565.58	-0.02126687
615.8	0.02183003		1205.79	-0.00283026		1795.79	-0.00300915		2385.78	-0.00626145		2975.78	-0.00030269		3565.78	-0.02044736
616	0.0220544		1205.99	-0.00193507		1795.99	-0.00276047		2385.98	-0.00571475		2975.98	-0.00010905		3565.98	-0.02018943
616.2	0.02155669		1206.19	-0.00211233		1796.19	-0.00265506		2386.18	-0.00565117		2976.18	0.00002511		3566.18	-0.01974415
616.4	0.02160675		1206.39	-0.00328505		1796.39	-0.00253706		2386.38	-0.0056013		2976.38	0.00035119		3566.38	-0.01910179
616.6	0.02160306		1206.59	-0.00355041		1796.59	-0.00213946		2386.58	-0.00564722		2976.58	-0.00040757		3566.58	-0.0183609
616.8	0.02110195		1206.79	-0.00333973		1796.79	-0.00199793		2386.78	-0.00559771		2976.78	-0.00076892		3566.78	-0.01947914
617	0.02100105		1206.99	-0.00427998		1796.99	-0.00171776		2386.98	-0.00573272		2976.98	-0.00157781		3566.98	-0.02002191
617.2	0.02140668		1207.19	-0.00460509		1797.19	-0.0009832		2387.18	-0.00592523		2977.18	-0.00192345		3567.18	-0.02051528
617.4	0.02214344		1207.39	-0.0049326		1797.39	-0.00080639		2387.38	-0.00592352		2977.38	-0.00108773		3567.38	-0.02088518
617.6	0.02180314		1207.59	-0.00574566		1797.59	-0.00087147		2387.58	-0.00572664		2977.58	-0.00066744		3567.58	-0.02170825
617.8	0.02092451		1207.79	-0.00662587		1797.79	-0.00034285		2387.78	-0.00555789		2977.78	-0.00151047		3567.78	-0.02089044
618	0.01971239		1207.99	-0.00680299		1797.99	-0.00047737		2387.98	-0.00632764		2977.98	-0.002558		3567.98	-0.02200007
618.2	0.01851837		1208.19	-0.00649899		1798.19	-0.00075715		2388.18	-0.00632981		2978.18	-0.00272868		3568.18	-0.0222257
618.4	0.01886244		1208.39	-0.00573527		1798.39	-0.00132375		2388.38	-0.00627778		2978.38	-0.00258944		3568.38	-0.02179694
618.6	0.02025068		1208.59	-0.0057877		1798.59	-0.0014275		2388.58	-0.00604229		2978.58	-0.00176693		3568.58	-0.02135059
618.8	0.02035958		1208.79	-0.00467248		1798.79	-0.0020243		2388.78	-0.00598237		2978.78	-0.00196974		3568.78	-0.02110152
619	0.02086019		1208.99	-0.00463547		1798.99	-0.00163776		2388.98	-0.00571862		2978.98	-0.00210213		3568.98	-0.02062204
619.2	0.02078643		1209.19	-0.00474942		1799.19	-0.00139366		2389.18	-0.00622278		2979.18	-0.00205262		3569.18	-0.02047496
619.4	0.02104774		1209.39	-0.00507714		1799.39	-0.00189765		2389.38	-0.00498977		2979.38	-0.00149175		3569.38	-0.01974068
619.6	0.02105524		1209.59	-0.00488733		1799.59	-0.00194174		2389.58	-0.004575		2979.58	-0.00143636		3569.58	-0.0190192
619.8	0.02055915		1209.79	-0.00545452		1799.79	-0.00231344		2389.78	-0.00386045		2979.78	-0.00076204		3569.78	-0.01848538
620	0.02123599		1209.99	-0.00543362		1799.99	-0.00277848		2389.98	-0.00318646		2979.98	-0.00101796		3569.98	-0.0188952
620.2	0.02130563		1210.19	-0.00574974		1800.19	-0.00389003		2390.18	-0.00175678		2980.18	-0.00114561		3570.18	-0.01831224
620.4	0.02135955		1210.39	-0.00533564		1800.39	-0.00425442		2390.38	-0.00204598		2980.38	-0.00040304		3570.38	-0.01846426
620.6	0.0207433		1210.59	-0.00512275		1800.59	-0.00405185		2390.58	-0.00212245		2980.58	-0.00084793		3570.58	-0.01912288
620.8	0.02100788		1210.79	-0.00557345		1800.79	-0.0042266		2390.78	-0.00180769		2980.78	-0.00038308		3570.78	-0.01968937
621	0.02080477		1210.99	-0.00546646		1800.99	-0.00341511		2390.98	-0.00182337		2980.98	0.00063065		3570.98	-0.02030795
621.2	0.02076711		1211.19	-0.00570831		1801.19	-0.00338251		2391.18	-0.00184891		2981.18	0.00134852		3571.18	-0.0203455
621.4	0.0207705		1211.39	-0.00569398		1801.39	-0.00334955		2391.38	-0.00326386		2981.38	0.00199458		3571.38	-0.01985737
621.6	0.02035466		1211.59	-0.00541982		1801.59	-0.0028838		2391.58	-0.00344807		2981.58	0.00218039		3571.58	-0.02114811
621.8	0.01928981		1211.79	-0.00497402		1801.79	-0.00212689		2391.78	-0.0048562		2981.78	0.00199171		3571.78	-0.02093473
622	0.01874262		1211.99	-0.00488997		1801.99	-0.00139894		2391.98	-0.00499632		2981.98	0.00279852		3571.98	-0.02184189
622.2	0.01797819		1212.19	-0.00504752		1802.19	-0.00059509		2392.18	-0.00562125		2982.18	0.00381235		3572.18	-0.02192312
622.4	0.01839016		1212.39	-0.00442413		1802.39	-0.00077555		2392.38	-0.00645073		2982.38	0.00390674		3572.38	-0.02176198
622.6	0.0180796		1212.59	-0.00421607		1802.59	-0.00008561		2392.58	-0.00633392		2982.58	0.00418924		3572.58	-0.02160974
622.8	0.01714121		1212.79	-0.00335077		1802.79	-0.00025468		2392.78	-0.00703255		2982.78	0.00446629		3572.78	-0.02189076
623	0.01767584		1212.99	-0.00382254		1802.99	0.00054282		2392.98	-0.00703955		2982.98	0.00408794		3572.98	-0.0214932
623.2	0.01824342		1213.19	-0.00406672		1803.19	0.00032272		2393.18	-0.00704		2983.18	0.00414769		3573.18	-0.02074598
623.4	0.01889604		1213.39	-0.00431829		1803.39	-0.00072883		2393.38	-0.00587857		2983.38	0.00393881		3573.38	-0.02046013
623.6	0.01875212		1213.59	-0.00412598		1803.59	-0.00061176		2393.58	-0.00632758		2983.58	0.00345607		3573.58	-0.01993313
623.8	0.01869301		1213.79	-0.00459793		1803.79	-0.00169524		2393.78	-0.00572499		2983.78	0.00298749		3573.78	-0.01952404
624	0.0190571		1213.99	-0.00524426		1803.99	-0.0025237		2393.98	-0.00518309		2983.98	0.00159019		3573.98	-0.01993333
624.2	0.01883864		1214.19	-0.00477435		1804.19	-0.00256893		2394.18	-0.0042066		2984.18	0.00047707		3574.18	-0.01948114
624.4	0.01887473		1214.39	-0.00449209		1804.39	-0.00198905		2394.38	-0.00408674		2984.38	0.00058921		3574.38	-0.01963792
624.6	0.01893761		1214.59	-0.00494833		1804.59	-0.0018397		2394.58	-0.00433548		2984.58	-0.00021583		3574.58	-0.01882278
624.8	0.0185333		1214.79	-0.00528994		1804.79	-0.00225778		2394.78	-0.0044644		2984.78	0.00029319		3574.78	-0.0184919
625	0.01805595		1214.99	-0.00503209		1804.99	-0.00231651		2394.98	-0.00463858		2984.98	0.00111362		3574.98	-0.01913432
625.2	0.01794832		1215.19	-0.00547238		1805.19	-0.00232102		2395.18	-0.00497981		2985.18	0.0002663		3575.18	-0.0189917
625.4	0.0180172		1215.39	-0.00497254		1805.39	-0.00200558		2395.38	-0.00580993		2985.38	0.00046834		3575.38	-0.01867097
625.6	0.01843984		1215.59	-0.00449094		1805.59	-0.001816		2395.58	-0.0051519		2985.58	-0.00078391		3575.58	-0.01942504
625.8	0.01885552		1215.79	-0.00457135		1805.79	-0.00149311		2395.78	-0.00551391		2985.78	-0.00082638		3575.78	-0.01979236
626	0.01967525		1215.99	-0.00475625		1805.99	-0.00071688		2395.98	-0.00551695		2985.98	-0.00113152		3575.98	-0.02052596
626.2	0.01895502		1216.19	-0.00473975		1806.19	-0.00029529		2396.18	-0.00607638		2986.18	-0.00159969		3576.18	-0.02169465
626.4	0.01858139		1216.39	-0.00448281		1806.39	-0.0005814		2396.38	-0.00612322		2986.38	-0.00172662		3576.38	-0.02100154
626.6	0.0179745		1216.59	-0.00460009		1806.59	-0.00038991		2396.58	-0.00662374		2986.58	-0.0011032		3576.58	-0.0205306
626.8	0.01774779		1216.79	-0.00471364		1806.79	-0.00080306		2396.78	-0.00581686		2986.78	-0.00113862		3576.78	-0.02053585
627	0.01859416		1216.99	-0.00505478		1806.99	-0.00073938		2396.98	-0.00480525		2986.98	-0.00115242		3576.98	-0.0197975
627.2	0.01927849		1217.19	-0.0049273		1807.19	-0.00163751		2397.18	-0.00440348		2987.18	-0.0003107		3577.18	-0.0198469
627.4	0.01922268		1217.39	-0.00505281		1807.39	-0.00173496		2397.38	-0.00374477		2987.38	-0.00071469		3577.38	-0.02026258
627.6	0.01932457		1217.59	-0.00493586		1807.59	-0.00198457		2397.58	-0.00445593		2987.58	-0.00094012		3577.58	-0.02008993
627.8	0.01931413		1217.79	-0.00510391		1807.79	-0.00236089		2397.78	-0.00449332		2987.78	-0.00131263		3577.78	-0.02065466
628	0.01978444		1217.99	-0.00547851		1807.99	-0.00291979		2397.98	-0.00416393		2987.98	-0.00214791		3577.98	-0.02162147
628.2	0.02077794		1218.19	-0.0054228		1808.19	-0.0024995		2398.18	-0.00355569		2988.18	-0.00143425		3578.18	-0.02164001
628.4	0.02115644		1218.39	-0.00529864		1808.39	-0.00216776		2398.38	-0.00404765		2988.38	-0.00043287		3578.38	-0.02145896
628.6	0.02081753		1218.59	-0.00552009		1808.59	-0.00288262		2398.58	-0.00497044		2988.58	0.00015746		3578.58	-0.02143672
628.8	0.02066379		1218.79	-0.00559752		1808.79	-0.00345384		2398.78	-0.00463357		2988.78	0.00065564		3578.78	-0.0225153
629	0.02122107		1218.99	-0.00588037		1808.99	-0.0033812		2398.98	-0.00389541		2988.98	0.00004917		3578.98	-0.02297509
629.2	0.02145297		1219.19	-0.00577469		1809.19	-0.00302849		2399.18	-0.00345206		2989.18	-0.00035496		3579.18	-0.02269196
629.4	0.02190039		1219.39	-0.00578737		1809.39	-0.00313188		2399.38	-0.00368102		2989.38	0.00013068		3579.38	-0.02266981
629.6	0.02258929		1219.59	-0.00573012		1809.59	-0.00279037		2399.58	-0.00293647		2989.58	-0.00024353		3579.58	-0.02363156
629.8	0.02219017		1219.79	-0.00596921		1809.79	-0.00250548		2399.78	-0.00271955		2989.78	-0.00025388		3579.78	-0.02308303
630	0.02269553		1219.99	-0.00604036		1809.99	-0.00170251		2399.98	-0.00274714		2989.98	-0.00143965		3579.98	-0.02242034
630.2	0.02141751		1220.19	-0.0069981		1810.19	-0.00165673		2400.18	-0.00238042		2990.18	-0.00096378		3580.18	-0.02270686
630.4	0.02078522		1220.39	-0.00721561		1810.39	-0.001947		2400.38	-0.00258401		2990.38	-0.00062732		3580.38	-0.0218581
630.6	0.02023456		1220.59	-0.00676693		1810.59	-0.00238414		2400.58	-0.00237564		2990.58	-0.00017768		3580.58	-0.02170676
630.8	0.02033218		1220.79	-0.0069188		1810.79	-0.00254003		2400.78	-0.00140627		2990.78	-0.00028361		3580.78	-0.02153916
631	0.02085402		1220.99	-0.00643609		1810.99	-0.00251581		2400.98	-0.0010881		2990.98	0.00071251		3580.98	-0.0212651
631.2	0.02107194		1221.19	-0.00570186		1811.19	-0.00216306		2401.18	-0.00163073		2991.18	0.0009945		3581.18	-0.02103703
631.4	0.02023488		1221.39	-0.00566638		1811.39	-0.00135935		2401.38	-0.00212484		2991.38	0.0003835		3581.38	-0.02045209
631.6	0.01957052		1221.59	-0.00573248		1811.59	-0.00191732		2401.58	-0.00398949		2991.58	0.00095457		3581.58	-0.02095062
631.8	0.0185138		1221.79	-0.00515885		1811.79	-0.00175029		2401.78	-0.00486685		2991.78	0.00170408		3581.78	-0.02082689
632	0.01949546		1221.99	-0.00565649		1811.99	-0.0026096		2401.98	-0.00573593		2991.98	0.0016918		3581.98	-0.02114821
632.2	0.01951072		1222.19	-0.00524057		1812.19	-0.00222141		2402.18	-0.00648651		2992.18	0.00172057		3582.18	-0.02067876
632.4	0.01857725		1222.39	-0.00523654		1812.39	-0.00280123		2402.38	-0.0076257		2992.38	0.00075347		3582.38	-0.0209637
632.6	0.01739162		1222.59	-0.0046168		1812.59	-0.00367176		2402.58	-0.00819624		2992.58	0.00048101		3582.58	-0.02137766
632.8	0.01781212		1222.79	-0.0050422		1812.79	-0.00392054		2402.78	-0.00860588		2992.78	-0.00007368		3582.78	-0.02253906
633	0.01725858		1222.99	-0.00538689		1812.99	-0.00432944		2402.98	-0.00858528		2992.98	-0.00094672		3582.98	-0.02233356
633.2	0.01708459		1223.19	-0.00610231		1813.19	-0.00417481		2403.18	-0.00900686		2993.18	-0.00047748		3583.18	-0.02213086
633.4	0.01758012		1223.39	-0.00628277		1813.39	-0.00461548		2403.38	-0.00871198		2993.38	-0.00083939		3583.38	-0.02249598
633.6	0.01780719		1223.59	-0.00610624		1813.59	-0.00431192		2403.58	-0.00769552		2993.58	-0.0013816		3583.58	-0.02239913
633.8	0.01753313		1223.79	-0.00661337		1813.79	-0.00426552		2403.78	-0.00861449		2993.78	-0.00259615		3583.78	-0.02097469
634	0.01899769		1223.99	-0.00661293		1813.99	-0.00433926		2403.98	-0.00872118		2993.98	-0.00285322		3583.98	-0.02094587
634.2	0.01753614		1224.19	-0.00609582		1814.19	-0.00431098		2404.18	-0.00817052		2994.18	-0.00194702		3584.18	-0.02173444
634.4	0.01705778		1224.39	-0.00550227		1814.39	-0.00444333		2404.38	-0.0077553		2994.38	-0.00217225		3584.38	-0.02151638
634.6	0.0173663		1224.59	-0.00575336		1814.59	-0.0039484		2404.58	-0.00717906		2994.58	-0.00220095		3584.58	-0.02097557
634.8	0.01750617		1224.79	-0.00578434		1814.79	-0.00438499		2404.78	-0.0065074		2994.78	-0.00207353		3584.78	-0.02038312
635	0.01844189		1224.99	-0.00487662		1814.99	-0.00413488		2404.98	-0.00575491		2994.98	-0.00147162		3584.98	-0.0200543
635.2	0.01846252		1225.19	-0.0050235		1815.19	-0.00339856		2405.18	-0.00550434		2995.18	-0.00099923		3585.18	-0.02041057
635.4	0.01821591		1225.39	-0.00394229		1815.39	-0.00351041		2405.38	-0.00550224		2995.38	0.00003125		3585.38	-0.0209103
635.6	0.01806642		1225.59	-0.00357653		1815.59	-0.00363032		2405.58	-0.00518978		2995.58	0.00145995		3585.58	-0.02155082
635.8	0.01846235		1225.79	-0.00367151		1815.79	-0.00373455		2405.78	-0.00504226		2995.78	0.00105596		3585.78	-0.02115758
636	0.01877654		1225.99	-0.00386571		1815.99	-0.00424543		2405.98	-0.00471266		2995.98	0.00051027		3585.98	-0.02185655
636.2	0.01753776		1226.19	-0.00343374		1816.19	-0.00395808		2406.18	-0.00489857		2996.18	-0.00016771		3586.18	-0.0211366
636.4	0.01689889		1226.39	-0.00374599		1816.39	-0.00387024		2406.38	-0.00526981		2996.38	-0.00061369		3586.38	-0.02135841
636.6	0.01711843		1226.59	-0.00355887		1816.59	-0.00409566		2406.58	-0.00490779		2996.58	-0.00080589		3586.58	-0.02191012
636.8	0.01812476		1226.79	-0.00489786		1816.79	-0.00409437		2406.78	-0.00481153		2996.78	-0.00060726		3586.78	-0.02221398
637	0.01872164		1226.99	-0.00517454		1816.99	-0.00396405		2406.98	-0.00459971		2996.98	-0.00117344		3586.98	-0.0213908
637.2	0.01966456		1227.19	-0.00591177		1817.19	-0.00325579		2407.18	-0.00512701		2997.18	-0.00066496		3587.18	-0.02150209
637.4	0.0205601		1227.39	-0.00562739		1817.39	-0.00327135		2407.38	-0.00483992		2997.38	-0.00098509		3587.38	-0.02176954
637.6	0.02055312		1227.59	-0.00586707		1817.59	-0.00283205		2407.58	-0.00502738		2997.58	-0.00104853		3587.58	-0.02249363
637.8	0.02014668		1227.79	-0.00623442		1817.79	-0.00271158		2407.78	-0.00526924		2997.78	-0.00116462		3587.78	-0.02225264
638	0.02059625		1227.99	-0.00582097		1817.99	-0.00291337		2407.98	-0.00519098		2997.98	-0.0011513		3587.98	-0.02278558
638.2	0.02023723		1228.19	-0.00621418		1818.19	-0.00269909		2408.18	-0.00520214		2998.18	-0.00112902		3588.18	-0.02328315
638.4	0.02065141		1228.39	-0.00658445		1818.39	-0.00279318		2408.38	-0.00552497		2998.38	-0.00112361		3588.38	-0.02257476
638.6	0.02099929		1228.59	-0.00675223		1818.59	-0.00240174		2408.58	-0.00523271		2998.58	-0.00149305		3588.58	-0.02298698
638.8	0.02139328		1228.79	-0.00622519		1818.79	-0.00314453		2408.78	-0.00514242		2998.78	-0.00158393		3588.78	-0.02289676
639	0.02091435		1228.99	-0.00594981		1818.99	-0.00265465		2408.98	-0.00460701		2998.98	-0.00169225		3588.98	-0.02310096
639.2	0.02093483		1229.19	-0.00582311		1819.19	-0.00282005		2409.18	-0.00387444		2999.18	-0.00136433		3589.18	-0.02308554
639.4	0.02075266		1229.39	-0.00444707		1819.39	-0.00314091		2409.38	-0.00399268		2999.38	-0.00115513		3589.38	-0.0228922
639.6	0.02036823		1229.59	-0.00516644		1819.59	-0.00274965		2409.58	-0.00408832		2999.58	-0.00127765		3589.58	-0.02238689
639.8	0.01963386		1229.79	-0.00593477		1819.79	-0.0032584		2409.78	-0.00440298		2999.78	-0.00203438		3589.78	-0.0224642
640	0.01875375		1229.99	-0.0059581		1819.99	-0.00306538		2409.98	-0.00406728		2999.98	-0.00220411		3589.98	-0.02252242
640.2	0.01814484		1230.19	-0.00610603		1820.19	-0.00250322		2410.18	-0.004155		3000.18	-0.00220808		3590.18	-0.02189006
640.4	0.01769024		1230.39	-0.00626851		1820.39	-0.00206484		2410.38	-0.00426289		3000.38	-0.00262403		3590.38	-0.02209435
640.6	0.01736968		1230.59	-0.00624089		1820.59	-0.00166391		2410.58	-0.00407982		3000.58	-0.00279324		3590.58	-0.02258172
640.8	0.01694021		1230.79	-0.00685023		1820.79	-0.00179254		2410.78	-0.00406282		3000.78	-0.00258435		3590.78	-0.02205371
641	0.01784697		1230.99	-0.00663883		1820.99	-0.00144324		2410.98	-0.00355279		3000.98	-0.0025342		3590.98	-0.02244282
641.2	0.01746937		1231.19	-0.00689476		1821.19	-0.00281348		2411.18	-0.00370945		3001.18	-0.00193999		3591.18	-0.02266697
641.4	0.01704643		1231.39	-0.00667293		1821.39	-0.00347483		2411.38	-0.00393544		3001.38	-0.00165977		3591.38	-0.02245192
641.6	0.01666716		1231.59	-0.00593666		1821.59	-0.00362758		2411.58	-0.0042956		3001.58	-0.00216201		3591.58	-0.02279286
641.8	0.01706442		1231.79	-0.00597461		1821.79	-0.00373665		2411.78	-0.00466736		3001.78	-0.00197134		3591.78	-0.02187993
642	0.01712176		1231.99	-0.00541324		1821.99	-0.0041184		2411.98	-0.00595159		3001.98	-0.00200969		3591.98	-0.02216947
642.2	0.01774284		1232.19	-0.00523431		1822.19	-0.00448296		2412.18	-0.00640795		3002.18	-0.00188308		3592.18	-0.02189863
642.4	0.01730979		1232.39	-0.004551		1822.39	-0.0045386		2412.38	-0.00599577		3002.38	-0.00201675		3592.38	-0.02163245
642.6	0.01640874		1232.59	-0.00432064		1822.59	-0.0049547		2412.58	-0.00606783		3002.58	-0.00201086		3592.58	-0.02238031
642.8	0.01653071		1232.79	-0.00468236		1822.79	-0.00493129		2412.78	-0.00631934		3002.78	-0.00267635		3592.78	-0.02136918
643	0.01630144		1232.99	-0.00458264		1822.99	-0.0050608		2412.98	-0.00641187		3002.98	-0.00279224		3592.98	-0.02090668
643.2	0.01740363		1233.19	-0.00343855		1823.19	-0.00510597		2413.18	-0.00681663		3003.18	-0.00239591		3593.18	-0.02093748
643.4	0.01678608		1233.39	-0.00305866		1823.39	-0.0054032		2413.38	-0.00714999		3003.38	-0.00191028		3593.38	-0.02118587
643.6	0.01683635		1233.59	-0.00427513		1823.59	-0.00591511		2413.58	-0.00769604		3003.58	-0.002031		3593.58	-0.02095668
643.8	0.01597992		1233.79	-0.00542117		1823.79	-0.00602364		2413.78	-0.00722338		3003.78	-0.00149868		3593.78	-0.02130392
644	0.01571983		1233.99	-0.0055941		1823.99	-0.00509887		2413.98	-0.00778806		3003.98	-0.001771		3593.98	-0.02078697
644.2	0.01539928		1234.19	-0.00594953		1824.19	-0.00414437		2414.18	-0.00814188		3004.18	-0.00119196		3594.18	-0.02096375
644.4	0.01530295		1234.39	-0.00551043		1824.39	-0.00426758		2414.38	-0.00800252		3004.38	-0.00148637		3594.38	-0.02080575
644.6	0.01521723		1234.59	-0.0059111		1824.59	-0.0044753		2414.58	-0.007282		3004.58	-0.00161205		3594.58	-0.02081468
644.8	0.01565887		1234.79	-0.00650923		1824.79	-0.00572597		2414.78	-0.00652353		3004.78	-0.00116304		3594.78	-0.0202849
645	0.01705871		1234.99	-0.00660837		1824.99	-0.00564345		2414.98	-0.00618026		3004.98	-0.00016251		3594.98	-0.02052488
645.2	0.01712058		1235.19	-0.0060246		1825.19	-0.00623621		2415.18	-0.00675465		3005.18	-0.00006399		3595.18	-0.01994122
645.4	0.01729556		1235.39	-0.00563188		1825.39	-0.00521147		2415.38	-0.00649772		3005.38	-0.00067135		3595.38	-0.02013249
645.6	0.01766749		1235.59	-0.00553065		1825.59	-0.00490445		2415.58	-0.00624962		3005.58	-0.00142917		3595.58	-0.02092004
645.8	0.01793937		1235.79	-0.00623149		1825.79	-0.00436244		2415.78	-0.00648255		3005.78	-0.00138844		3595.78	-0.02099837
646	0.0178635		1235.99	-0.00546442		1825.99	-0.00396042		2415.98	-0.00582657		3005.98	-0.00165371		3595.98	-0.02135214
646.2	0.01827479		1236.19	-0.005304		1826.19	-0.00472803		2416.18	-0.00531328		3006.18	-0.00163065		3596.18	-0.02164781
646.4	0.01821255		1236.39	-0.00537954		1826.39	-0.00451255		2416.38	-0.0043282		3006.38	-0.00176896		3596.38	-0.02109598
646.6	0.01797813		1236.59	-0.00534479		1826.59	-0.00444682		2416.58	-0.00493873		3006.58	-0.00187519		3596.58	-0.02116726
646.8	0.01863556		1236.79	-0.00497312		1826.79	-0.004342		2416.78	-0.00491355		3006.78	-0.00298874		3596.78	-0.02068511
647	0.01916121		1236.99	-0.00378665		1826.99	-0.00544115		2416.98	-0.00524932		3006.98	-0.00257545		3596.98	-0.02145429
647.2	0.01852548		1237.19	-0.00277745		1827.19	-0.00563828		2417.18	-0.00505489		3007.18	-0.00176554		3597.18	-0.02135092
647.4	0.01769161		1237.39	-0.00302806		1827.39	-0.00644502		2417.38	-0.00525579		3007.38	-0.00195629		3597.38	-0.02220398
647.6	0.01716921		1237.59	-0.00375301		1827.59	-0.00646522		2417.58	-0.00596722		3007.58	-0.0023489		3597.58	-0.02184482
647.8	0.01649063		1237.79	-0.0040116		1827.79	-0.00597181		2417.78	-0.00640267		3007.78	-0.00196284		3597.78	-0.02218639
648	0.01650266		1237.99	-0.00396399		1827.99	-0.00564228		2417.98	-0.00718536		3007.98	-0.00249995		3597.98	-0.02191657
648.2	0.01667065		1238.19	-0.00448382		1828.19	-0.00574653		2418.18	-0.00730032		3008.18	-0.00240992		3598.18	-0.02203843
648.4	0.01672231		1238.39	-0.00472285		1828.39	-0.00628222		2418.38	-0.00716773		3008.38	-0.00227623		3598.38	-0.02171409
648.6	0.01680762		1238.59	-0.0059231		1828.59	-0.00618471		2418.58	-0.00724705		3008.58	-0.00235068		3598.58	-0.02188267
648.8	0.01750678		1238.79	-0.00647017		1828.79	-0.00619922		2418.78	-0.00726586		3008.78	-0.00179707		3598.78	-0.02164155
649	0.01835486		1238.99	-0.00727031		1828.99	-0.00561453		2418.98	-0.00707235		3008.98	-0.00153764		3598.98	-0.02175533
649.2	0.01864023		1239.19	-0.00755333		1829.19	-0.00530958		2419.18	-0.00666919		3009.18	-0.00175648		3599.18	-0.02154285
649.4	0.01895883		1239.39	-0.0086725		1829.39	-0.00512109		2419.38	-0.00627523		3009.38	-0.00214963		3599.38	-0.02184136
649.6	0.01920672		1239.59	-0.00954944		1829.59	-0.00501359		2419.58	-0.00604335		3009.58	-0.0019367		3599.58	-0.02147778
649.8	0.01980588		1239.79	-0.01035984		1829.79	-0.00474382		2419.78	-0.00572388		3009.78	-0.00178906		3599.78	-0.02069657
