# Supplementary material for: Functional development of a V3/glycan-specific broadly neutralizing antibody isolated from a case of HIV superinfection
Source: eLife journal article supplement (doi:10.7554/elife.68110), 2021-07-15
Supplement: fig2-data2 [file C5.xls]

Vers 3.43 Data Simulation
Conc1	5E-07	5E-07	5E-07	5E-07	5E-07	5E-07	5E-07
Start1	290	880	1470	2060	2649.99	3239.99	3829.98
Stop1	649.8	1239.79	1829.8	2419.8	3009.79	3599.78	4189.78
Time1	Data1	Sim1	Time2	Data2	Sim2	Time3	Data3	Sim3	Time4	Data4	Sim4	Time5	Data5	Sim5	Time6	Data6	Sim6	Time7	Data7	Sim7
290	0.00894		880	-0.00316778		1470	0.005871		2060	-0.00022115		2649.99	-0.00290345		3239.99	-0.0015234		3829.98	-0.00500407
290.2	0.00920605		880.2	-0.00404387		1470.2	0.00634936		2060.2	0.00045408		2650.19	-0.00372247		3240.19	-0.00040772		3830.18	-0.00536916
290.4	0.009877		880.4	-0.00464608		1470.4	0.00578322		2060.4	0.00155038		2650.39	-0.00415307		3240.39	0.00010468		3830.38	-0.00597258
290.6	0.00955833		880.6	-0.00548754		1470.6	0.00574961		2060.6	0.0027452		2650.59	-0.00433789		3240.59	0.00061284		3830.58	-0.00543731
290.8	0.00979297		880.8	-0.00584452		1470.8	0.00553809		2060.8	0.003838		2650.79	-0.00453451		3240.79	0.00143334		3830.78	-0.00483588
291	0.01020928		881	-0.00620794		1471	0.00571225		2061	0.00454392		2650.99	-0.00536014		3240.99	0.00146769		3830.98	-0.00467009
291.2	0.01129005		881.2	-0.00609152		1471.2	0.00698427		2061.2	0.0052863		2651.19	-0.00604474		3241.19	0.00162938		3831.18	-0.00433461
291.4	0.01208388		881.4	-0.00521433		1471.4	0.00734521		2061.4	0.00549868		2651.39	-0.00594649		3241.39	0.00169712		3831.38	-0.00420057
291.6	0.01254126		881.6	-0.0044194		1471.6	0.00749511		2061.6	0.00521341		2651.59	-0.0059436		3241.59	0.00099872		3831.58	-0.00405474
291.8	0.01336421		881.8	-0.00407211		1471.8	0.00739009		2061.8	0.00502595		2651.79	-0.00601108		3241.79	0.00093442		3831.78	-0.00401585
292	0.01399588		882	-0.00345261		1472	0.00730284		2062	0.00494531		2651.99	-0.00630524		3241.99	0.00049603		3831.98	-0.00398512
292.2	0.01488025		882.2	-0.0027819		1472.2	0.00685908		2062.2	0.00502182		2652.19	-0.00677653		3242.19	-0.00032263		3832.18	-0.00428223
292.4	0.0165581		882.4	-0.00237248		1472.4	0.00707346		2062.4	0.00474451		2652.39	-0.00630273		3242.39	0.00011285		3832.38	-0.00465889
292.6	0.01702324		882.6	-0.00114622		1472.6	0.00654566		2062.6	0.00505101		2652.59	-0.00659315		3242.59	0.00014672		3832.58	-0.00451772
292.8	0.01858165		882.8	0.00007609		1472.8	0.0079519		2062.8	0.00443978		2652.79	-0.00601496		3242.79	0.00012154		3832.78	-0.0049641
293	0.02033027		883	0.00104344		1473	0.00900307		2063	0.0051809		2652.99	-0.00601049		3242.99	0.00088122		3832.98	-0.00449804
293.2	0.02069929		883.2	0.00084448		1473.2	0.01024394		2063.2	0.00519051		2653.19	-0.00580955		3243.19	0.00158848		3833.18	-0.00483731
293.4	0.02214181		883.4	0.0013701		1473.4	0.0100598		2063.4	0.00517926		2653.39	-0.00581753		3243.39	0.00171688		3833.38	-0.00549115
293.6	0.02402684		883.6	0.00091969		1473.6	0.0094739		2063.6	0.00551272		2653.59	-0.00579138		3243.59	0.00209813		3833.58	-0.00585886
293.8	0.02517854		883.8	0.00190875		1473.8	0.0094221		2063.8	0.0058464		2653.79	-0.00556767		3243.79	0.00291094		3833.78	-0.00542223
294	0.02661279		884	0.00153931		1474	0.01009645		2064	0.00596309		2653.99	-0.00575807		3243.99	0.00316642		3833.98	-0.00587732
294.2	0.02692522		884.2	0.00163136		1474.2	0.0103474		2064.2	0.00611439		2654.19	-0.00528436		3244.19	0.00359275		3834.18	-0.00587132
294.4	0.02819368		884.4	0.00083955		1474.4	0.00981119		2064.4	0.00578703		2654.39	-0.00497809		3244.39	0.00357903		3834.38	-0.0053057
294.6	0.02829768		884.6	0.00036861		1474.6	0.01040678		2064.6	0.00610391		2654.59	-0.00463114		3244.59	0.00310024		3834.58	-0.00432339
294.8	0.02913051		884.8	-0.00029314		1474.8	0.0108758		2064.8	0.00605568		2654.79	-0.00419299		3244.79	0.00318688		3834.78	-0.00404635
295	0.03016085		885	-0.0006496		1475	0.01163519		2065	0.00605648		2654.99	-0.00498144		3244.99	0.00294756		3834.98	-0.00438196
295.2	0.0314907		885.2	0.00016095		1475.2	0.01217516		2065.2	0.00588975		2655.19	-0.00495713		3245.19	0.00282581		3835.18	-0.00345046
295.4	0.0324704		885.4	-0.00044048		1475.4	0.01117894		2065.4	0.00498634		2655.39	-0.00411085		3245.39	0.00320282		3835.38	-0.00281807
295.6	0.03312202		885.6	-0.00222953		1475.6	0.01149099		2065.6	0.00481447		2655.59	-0.0042763		3245.59	0.00306179		3835.58	-0.00245967
295.8	0.03373318		885.8	-0.00299453		1475.8	0.0110588		2065.8	0.00474904		2655.79	-0.00409306		3245.79	0.00370994		3835.78	-0.00198376
296	0.03402503		886	-0.0032294		1476	0.01111469		2066	0.00499334		2655.99	-0.00447483		3245.99	0.00446365		3835.98	-0.00159218
296.2	0.0351613		886.2	-0.00367524		1476.2	0.01065048		2066.2	0.00478369		2656.19	-0.00391525		3246.19	0.00486496		3836.18	-0.00168593
296.4	0.036331		886.4	-0.00325623		1476.4	0.01111239		2066.4	0.00393637		2656.39	-0.00280404		3246.39	0.00555291		3836.38	-0.00158264
296.6	0.03686101		886.6	-0.00323082		1476.6	0.01181345		2066.6	0.00427697		2656.59	-0.00251383		3246.59	0.00582701		3836.58	-0.00122747
296.8	0.03802717		886.8	-0.00256251		1476.8	0.01274289		2066.8	0.0049737		2656.79	-0.00272386		3246.79	0.00660314		3836.78	-0.00115934
297	0.03889908		887	-0.00211132		1477	0.01292717		2067	0.00714218		2656.99	-0.00350021		3246.99	0.00692807		3836.98	-0.00074627
297.2	0.03917206		887.2	-0.00150321		1477.2	0.01270586		2067.2	0.0071911		2657.19	-0.00377364		3247.19	0.0073857		3837.18	-0.00084951
297.4	0.04027467		887.4	-0.00058005		1477.4	0.01120523		2067.4	0.00736729		2657.39	-0.003134		3247.39	0.00647122		3837.38	0.00032629
297.6	0.04115654		887.6	-0.00004487		1477.6	0.01077743		2067.6	0.00804686		2657.59	-0.00336461		3247.59	0.00604914		3837.58	0.00018521
297.8	0.04224108		887.8	0.00104914		1477.8	0.01038901		2067.8	0.00813608		2657.79	-0.00322986		3247.79	0.00619944		3837.78	0.00019876
298	0.04335954		888	0.00122293		1478	0.01140366		2068	0.00860068		2657.99	-0.00322882		3247.99	0.00606971		3837.98	0.00044628
298.2	0.04341802		888.2	0.00212939		1478.2	0.0106949		2068.2	0.00882226		2658.19	-0.00267387		3248.19	0.00588376		3838.18	0.00132407
298.4	0.04507103		888.4	0.00141325		1478.4	0.01073156		2068.4	0.00893373		2658.39	-0.0035719		3248.39	0.00489803		3838.38	0.00128943
298.6	0.04559363		888.6	0.00249682		1478.6	0.01118645		2068.6	0.00899754		2658.59	-0.0035855		3248.59	0.00357318		3838.58	0.00077967
298.8	0.04701361		888.8	0.00266013		1478.8	0.01160414		2068.8	0.00917752		2658.79	-0.00395212		3248.79	0.00350529		3838.78	0.00129973
299	0.0480526		889	0.00377726		1479	0.01142394		2069	0.00929877		2658.99	-0.005272		3248.99	0.00294716		3838.98	0.00183933
299.2	0.04929555		889.2	0.00362781		1479.2	0.01161694		2069.2	0.00927249		2659.19	-0.00477949		3249.19	0.00201705		3839.18	0.00267088
299.4	0.05047807		889.4	0.00264205		1479.4	0.01169536		2069.4	0.00856872		2659.39	-0.00446329		3249.39	0.0023503		3839.38	0.00265525
299.6	0.05108866		889.6	0.00300882		1479.6	0.01239847		2069.6	0.00855019		2659.59	-0.00491687		3249.59	0.00156787		3839.58	0.00303387
299.8	0.05253273		889.8	0.00397902		1479.8	0.01218906		2069.8	0.00788926		2659.79	-0.00468515		3249.79	0.0019476		3839.78	0.00299896
300	0.05310789		890	0.00383758		1480	0.01164182		2070	0.00780281		2659.99	-0.00435737		3249.99	0.00266092		3839.98	0.00215745
300.2	0.05368662		890.2	0.00377922		1480.2	0.01173406		2070.2	0.00806889		2660.19	-0.00396998		3250.19	0.00251436		3840.18	0.00202944
300.4	0.0541289		890.4	0.00435388		1480.4	0.01218492		2070.4	0.00802347		2660.39	-0.00416758		3250.39	0.00329276		3840.38	0.00147536
300.6	0.05450474		890.6	0.00480043		1480.6	0.01254695		2070.6	0.00810471		2660.59	-0.00439452		3250.59	0.00370184		3840.58	0.00121109
300.8	0.05482525		890.8	0.00479206		1480.8	0.01231439		2070.8	0.00841291		2660.79	-0.00511099		3250.79	0.0043133		3840.78	0.00124665
301	0.05539618		891	0.00556847		1481	0.01275883		2071	0.00980491		2660.99	-0.0046949		3250.99	0.00479732		3840.98	0.00071797
301.2	0.0555301		891.2	0.00526726		1481.2	0.0122069		2071.2	0.00856088		2661.19	-0.00432914		3251.19	0.00522527		3841.18	-0.00054353
301.4	0.05643779		891.4	0.00512739		1481.4	0.01093281		2071.4	0.00831244		2661.39	-0.00383865		3251.39	0.00487739		3841.38	-0.00109116
301.6	0.05745024		891.6	0.00508748		1481.6	0.01074805		2071.6	0.00876891		2661.59	-0.0040797		3251.59	0.00519031		3841.58	-0.00197931
301.8	0.05801428		891.8	0.00544602		1481.8	0.01034178		2071.8	0.00887216		2661.79	-0.00385154		3251.79	0.0057943		3841.78	-0.00224241
302	0.05864322		892	0.00560954		1482	0.01127141		2072	0.00916032		2661.99	-0.00303831		3251.99	0.00609893		3841.98	-0.00225667
302.2	0.05991411		892.2	0.00611409		1482.2	0.0114887		2072.2	0.00851402		2662.19	-0.00313353		3252.19	0.00593654		3842.18	-0.00206383
302.4	0.06167887		892.4	0.00616815		1482.4	0.01219012		2072.4	0.00880851		2662.39	-0.00343826		3252.39	0.00533398		3842.38	-0.00215174
302.6	0.06324247		892.6	0.00659154		1482.6	0.01222047		2072.6	0.00807109		2662.59	-0.00323045		3252.59	0.00475983		3842.58	-0.00198803
302.8	0.06473495		892.8	0.00612009		1482.8	0.01289887		2072.8	0.00796463		2662.79	-0.00348107		3252.79	0.00447948		3842.78	-0.00113653
303	0.06578747		893	0.00585158		1483	0.01357154		2073	0.00756787		2662.99	-0.00361098		3252.99	0.00410884		3842.98	-0.00097683
303.2	0.06733094		893.2	0.00534868		1483.2	0.01382616		2073.2	0.00699963		2663.19	-0.0032498		3253.19	0.00330924		3843.18	-0.00078201
303.4	0.06865506		893.4	0.00576343		1483.4	0.01397428		2073.4	0.00624379		2663.39	-0.00354757		3253.39	0.00321421		3843.38	-0.00052349
303.6	0.06986043		893.6	0.00601716		1483.6	0.01427977		2073.6	0.00589924		2663.59	-0.00346957		3253.59	0.00301786		3843.58	0.00047934
303.8	0.07126616		893.8	0.00565335		1483.8	0.01485854		2073.8	0.00498543		2663.79	-0.00337621		3253.79	0.00270644		3843.78	-0.00014892
304	0.07057168		894	0.00443255		1484	0.01493978		2074	0.00524436		2663.99	-0.00328283		3253.99	0.00222781		3843.98	-0.00000021
304.2	0.07038448		894.2	0.00518907		1484.2	0.01593998		2074.2	0.00551794		2664.19	-0.00402128		3254.19	0.0018674		3844.18	0.00013669
304.4	0.07025969		894.4	0.00545321		1484.4	0.01640038		2074.4	0.00532398		2664.39	-0.00422205		3254.39	0.00138071		3844.38	0.00059112
304.6	0.06970851		894.6	0.00582244		1484.6	0.01682487		2074.6	0.00608082		2664.59	-0.00472231		3254.59	0.00169565		3844.58	0.00104784
304.8	0.06912252		894.8	0.00481252		1484.8	0.01706132		2074.8	0.00704284		2664.79	-0.00544951		3254.79	0.00281485		3844.78	0.00101842
305	0.06892969		895	0.00502202		1485	0.01712543		2075	0.0074992		2664.99	-0.00418924		3254.99	0.00371804		3844.98	0.00064523
305.2	0.06841996		895.2	0.00424437		1485.2	0.01656571		2075.2	0.00699758		2665.19	-0.00448794		3255.19	0.00442392		3845.18	0.00050551
305.4	0.06898061		895.4	0.0044565		1485.4	0.01657245		2075.4	0.00808157		2665.39	-0.00436596		3255.39	0.00407427		3845.38	0.00129573
305.6	0.06881996		895.6	0.00458423		1485.6	0.0162937		2075.6	0.00889308		2665.59	-0.00436003		3255.59	0.00459185		3845.58	0.00180246
305.8	0.0686414		895.8	0.00456489		1485.8	0.01591174		2075.8	0.00882398		2665.79	-0.0042923		3255.79	0.00434439		3845.78	0.00216197
306	0.06938117		896	0.00426294		1486	0.01628847		2076	0.00958271		2665.99	-0.00388029		3255.99	0.00525641		3845.98	0.00223742
306.2	0.06981146		896.2	0.00384324		1486.2	0.01590924		2076.2	0.01020344		2666.19	-0.00381555		3256.19	0.00519194		3846.18	0.00152049
306.4	0.07034577		896.4	0.00334312		1486.4	0.0151396		2076.4	0.01095558		2666.39	-0.00366506		3256.39	0.00476706		3846.38	0.00193645
306.6	0.07090127		896.6	0.00225814		1486.6	0.01434177		2076.6	0.01103163		2666.59	-0.00379551		3256.59	0.00377138		3846.58	0.00104941
306.8	0.07127778		896.8	0.00199071		1486.8	0.01531699		2076.8	0.01031717		2666.79	-0.00349694		3256.79	0.00402186		3846.78	0.00107412
307	0.07214825		897	0.00168936		1487	0.01456404		2077	0.01044403		2666.99	-0.00306874		3256.99	0.00400178		3846.98	0.00122846
307.2	0.07288353		897.2	0.0020027		1487.2	0.01393958		2077.2	0.01052916		2667.19	-0.00320769		3257.19	0.00382496		3847.18	0.00135223
307.4	0.07432978		897.4	0.00236018		1487.4	0.01348608		2077.4	0.01002912		2667.39	-0.0029005		3257.39	0.00364753		3847.38	0.00152552
307.6	0.07610258		897.6	0.00311045		1487.6	0.0139127		2077.6	0.01014191		2667.59	-0.00226896		3257.59	0.00392877		3847.58	0.00163945
307.8	0.07730454		897.8	0.00240454		1487.8	0.01412264		2077.8	0.00953956		2667.79	-0.00268459		3257.79	0.00327907		3847.78	0.00119175
308	0.07790115		898	0.00251226		1488	0.01399967		2078	0.00997668		2667.99	-0.00281895		3257.99	0.00348748		3847.98	0.00115632
308.2	0.07887369		898.2	0.00415106		1488.2	0.01407449		2078.2	0.01009939		2668.19	-0.00339107		3258.19	0.00315577		3848.18	0.00116765
308.4	0.07929071		898.4	0.00420518		1488.4	0.01446727		2078.4	0.01041814		2668.39	-0.00383427		3258.39	0.00295955		3848.38	0.0021792
308.6	0.08017832		898.6	0.00457843		1488.6	0.01455324		2078.6	0.0102728		2668.59	-0.0043168		3258.59	0.0036636		3848.58	0.00210186
308.8	0.08065752		898.8	0.0043007		1488.8	0.01518639		2078.8	0.01038001		2668.79	-0.00411442		3258.79	0.00467721		3848.78	0.00126505
309	0.08227132		899	0.00546323		1489	0.01453453		2079	0.00997314		2668.99	-0.00384972		3258.99	0.00528999		3848.98	0.00093299
309.2	0.08295703		899.2	0.00623016		1489.2	0.01518428		2079.2	0.0107454		2669.19	-0.00512078		3259.19	0.00555302		3849.18	0.00152421
309.4	0.08412833		899.4	0.00681297		1489.4	0.01592789		2079.4	0.01063599		2669.39	-0.00480209		3259.39	0.00570369		3849.38	0.00127437
309.6	0.08431653		899.6	0.00675049		1489.6	0.0163989		2079.6	0.01084804		2669.59	-0.00500866		3259.59	0.00640089		3849.58	0.00143552
309.8	0.08442816		899.8	0.00650271		1489.8	0.01660027		2079.8	0.01147256		2669.79	-0.00522676		3259.79	0.00605041		3849.78	0.00138236
310	0.08486914		900	0.00618546		1490	0.01701077		2080	0.01132119		2669.99	-0.00453166		3259.99	0.00715244		3849.98	0.00019729
310.2	0.08507425		900.2	0.00573095		1490.2	0.01731805		2080.2	0.01140861		2670.19	-0.0049111		3260.19	0.0065533		3850.18	-0.00097489
310.4	0.08458842		900.4	0.00633412		1490.4	0.01828636		2080.4	0.01094899		2670.39	-0.00491319		3260.39	0.00652176		3850.38	-0.00074706
310.6	0.08402968		900.6	0.00588424		1490.6	0.01858056		2080.6	0.01121669		2670.59	-0.00465492		3260.59	0.00640708		3850.58	-0.00087279
310.8	0.08410173		900.8	0.00586528		1490.8	0.01948993		2080.8	0.0105265		2670.79	-0.00425673		3260.79	0.0065437		3850.78	-0.00072338
311	0.08445167		901	0.00569275		1491	0.0187561		2081	0.01087842		2670.99	-0.00366791		3260.99	0.00665215		3850.98	-0.00020871
311.2	0.08553706		901.2	0.00569173		1491.2	0.01933624		2081.2	0.01101194		2671.19	-0.00327493		3261.19	0.00654077		3851.18	0.0003715
311.4	0.08635619		901.4	0.00633432		1491.4	0.01875078		2081.4	0.01112869		2671.39	-0.00272069		3261.39	0.0059343		3851.38	0.0009626
311.6	0.0865606		901.6	0.00583653		1491.6	0.01920104		2081.6	0.01235478		2671.59	-0.00236777		3261.59	0.00639787		3851.58	0.0006573
311.8	0.08696444		901.8	0.00500282		1491.8	0.01848399		2081.8	0.01189429		2671.79	-0.00284295		3261.79	0.00563359		3851.78	0.00084497
312	0.08759772		902	0.0047311		1492	0.01813635		2082	0.01259696		2671.99	-0.00346659		3261.99	0.005297		3851.98	0.00094345
312.2	0.08822854		902.2	0.00440923		1492.2	0.01757551		2082.2	0.01302636		2672.19	-0.00389509		3262.19	0.00516851		3852.18	0.00148867
312.4	0.08874376		902.4	0.00405836		1492.4	0.01758054		2082.4	0.01387388		2672.39	-0.0045617		3262.39	0.00516686		3852.38	0.00162848
312.6	0.08977389		902.6	0.00371207		1492.6	0.01745125		2082.6	0.01388729		2672.59	-0.00438679		3262.59	0.00454268		3852.58	0.00086534
312.8	0.09043916		902.8	0.00425585		1492.8	0.01663717		2082.8	0.01467293		2672.79	-0.00484087		3262.79	0.00598623		3852.78	-0.00039089
313	0.09134303		903	0.00369127		1493	0.01602838		2083	0.01480614		2672.99	-0.00491303		3262.99	0.00568179		3852.98	-0.00073071
313.2	0.0914759		903.2	0.00365228		1493.2	0.01668291		2083.2	0.01518872		2673.19	-0.00521061		3263.19	0.00589926		3853.18	-0.00044073
313.4	0.09188938		903.4	0.00426437		1493.4	0.01714713		2083.4	0.01558354		2673.39	-0.00448729		3263.39	0.00634949		3853.38	-0.0010996
313.6	0.09199535		903.6	0.00427756		1493.6	0.01663239		2083.6	0.01547483		2673.59	-0.00402952		3263.59	0.00625693		3853.58	-0.00086794
313.8	0.09221647		903.8	0.00458607		1493.8	0.01611639		2083.8	0.01529186		2673.79	-0.00418996		3263.79	0.00574012		3853.78	-0.00071806
314	0.09385676		904	0.00469773		1494	0.01600966		2084	0.0141493		2673.99	-0.00375324		3263.99	0.00555475		3853.98	-0.00055245
314.2	0.09479548		904.2	0.00545649		1494.2	0.01606453		2084.2	0.01470588		2674.19	-0.00400711		3264.19	0.0049306		3854.18	-0.0006845
314.4	0.09427855		904.4	0.00649288		1494.4	0.01654051		2084.4	0.01383878		2674.39	-0.00324367		3264.39	0.00554677		3854.38	-0.00012909
314.6	0.09525236		904.6	0.00630277		1494.6	0.01657876		2084.6	0.01403381		2674.59	-0.00269828		3264.59	0.00507326		3854.58	0.00046868
314.8	0.09595904		904.8	0.00646443		1494.8	0.0167242		2084.8	0.01338375		2674.79	-0.00297837		3264.79	0.00424607		3854.78	0.00027563
315	0.09637471		905	0.0069809		1495	0.01665981		2085	0.01337814		2674.99	-0.00305868		3264.99	0.00414846		3854.98	0.00092254
315.2	0.09690738		905.2	0.00759865		1495.2	0.01646782		2085.2	0.01363029		2675.19	-0.00309145		3265.19	0.00431386		3855.18	0.00100775
315.4	0.09734817		905.4	0.00906337		1495.4	0.01694567		2085.4	0.01435951		2675.39	-0.00339044		3265.39	0.004106		3855.38	0.00092504
315.6	0.09804775		905.6	0.00929898		1495.6	0.01750381		2085.6	0.01438657		2675.59	-0.00401111		3265.59	0.00474016		3855.58	0.00115997
315.8	0.09920476		905.8	0.00914394		1495.8	0.01713879		2085.8	0.01366973		2675.79	-0.00431945		3265.79	0.00479095		3855.78	0.00181972
316	0.09973896		906	0.0092805		1496	0.01687847		2086	0.01360258		2675.99	-0.00535913		3265.99	0.00511244		3855.98	0.00169699
316.2	0.1002473		906.2	0.00899361		1496.2	0.01698523		2086.2	0.01273872		2676.19	-0.00589596		3266.19	0.00585205		3856.18	0.00173292
316.4	0.10083078		906.4	0.00876491		1496.4	0.01688662		2086.4	0.01247999		2676.39	-0.00588572		3266.39	0.0056203		3856.38	0.00123146
316.6	0.10143934		906.6	0.00778302		1496.6	0.017043		2086.6	0.01213049		2676.59	-0.0059769		3266.59	0.00531929		3856.58	0.0007466
316.8	0.10144325		906.8	0.00802547		1496.8	0.01697954		2086.8	0.01182773		2676.79	-0.00600374		3266.79	0.00642753		3856.78	0.00062725
317	0.10119816		907	0.00696224		1497	0.01692556		2087	0.01207121		2676.99	-0.00511676		3266.99	0.00675442		3856.98	0.00056127
317.2	0.10183008		907.2	0.00746566		1497.2	0.01667682		2087.2	0.01195803		2677.19	-0.00482826		3267.19	0.0072396		3857.18	0.00089996
317.4	0.10255954		907.4	0.0087518		1497.4	0.01655134		2087.4	0.01246734		2677.39	-0.0039683		3267.39	0.00683474		3857.38	0.00038605
317.6	0.10271544		907.6	0.0080144		1497.6	0.01519987		2087.6	0.01249601		2677.59	-0.00360611		3267.59	0.00622987		3857.58	0.00103285
317.8	0.10286852		907.8	0.00791816		1497.8	0.01533652		2087.8	0.01292309		2677.79	-0.00311575		3267.79	0.00495376		3857.78	0.00185334
318	0.10436778		908	0.00704726		1498	0.01466558		2088	0.01348837		2677.99	-0.00287238		3267.99	0.00411842		3857.98	0.0014856
318.2	0.10590846		908.2	0.00722754		1498.2	0.01476559		2088.2	0.01426391		2678.19	-0.00290904		3268.19	0.00418642		3858.18	0.00200048
318.4	0.10632179		908.4	0.00700117		1498.4	0.01556157		2088.4	0.01454775		2678.39	-0.00285807		3268.39	0.00453614		3858.38	0.00177047
318.6	0.10761203		908.6	0.00597049		1498.6	0.01650631		2088.6	0.01513396		2678.59	-0.0025473		3268.59	0.00410889		3858.58	0.00158615
318.8	0.1079218		908.8	0.00707539		1498.8	0.01721825		2088.8	0.0153653		2678.79	-0.0033761		3268.79	0.00377503		3858.78	0.00125863
319	0.10888356		909	0.00768112		1499	0.01798235		2089	0.01549755		2678.99	-0.00353607		3268.99	0.00444061		3858.98	0.00081902
319.2	0.10986725		909.2	0.00882169		1499.2	0.01831255		2089.2	0.01625679		2679.19	-0.00324585		3269.19	0.00467756		3859.18	0.00127111
319.4	0.11022782		909.4	0.00951921		1499.4	0.02007106		2089.4	0.01705901		2679.39	-0.00288973		3269.39	0.0044917		3859.38	0.0017402
319.6	0.11126402		909.6	0.00949055		1499.6	0.01982524		2089.6	0.0165283		2679.59	-0.00325765		3269.59	0.00486556		3859.58	0.00229108
319.8	0.11104168		909.8	0.00903688		1499.8	0.01980614		2089.8	0.01583874		2679.79	-0.00324139		3269.79	0.00405261		3859.78	0.00201729
320	0.11186453		910	0.00959407		1500	0.02070339		2090	0.01576357		2679.99	-0.00377789		3269.99	0.00348591		3859.98	0.00153536
320.2	0.11244382		910.2	0.00830787		1500.2	0.02075166		2090.2	0.01519454		2680.19	-0.00413328		3270.19	0.00317054		3860.18	0.00139271
320.4	0.1124614		910.4	0.00875609		1500.4	0.01947137		2090.4	0.01552981		2680.39	-0.00414804		3270.39	0.00205008		3860.38	0.0021712
320.6	0.11259424		910.6	0.00848739		1500.6	0.0204222		2090.6	0.01599836		2680.59	-0.00452672		3270.59	0.00273146		3860.58	0.00213722
320.8	0.11237706		910.8	0.00868969		1500.8	0.01998729		2090.8	0.01519454		2680.79	-0.00431168		3270.79	0.00399367		3860.78	0.00149473
321	0.11232728		911	0.00844558		1501	0.01917729		2091	0.01581091		2680.99	-0.0041495		3270.99	0.00491491		3860.98	0.00085334
321.2	0.11202467		911.2	0.00781397		1501.2	0.01834841		2091.2	0.01571347		2681.19	-0.00469809		3271.19	0.00451908		3861.18	0.00068162
321.4	0.11164858		911.4	0.00814689		1501.4	0.01807179		2091.4	0.01618884		2681.39	-0.00556711		3271.39	0.00379591		3861.38	0.00099751
321.6	0.11038981		911.6	0.00690867		1501.6	0.01800166		2091.6	0.01709947		2681.59	-0.00608746		3271.59	0.00431998		3861.58	0.00092359
321.8	0.1101329		911.8	0.00701387		1501.8	0.01798865		2091.8	0.017181		2681.79	-0.00586452		3271.79	0.00416659		3861.78	0.00128991
322	0.11046501		912	0.00563568		1502	0.01814129		2092	0.01715306		2681.99	-0.00696054		3271.99	0.00494319		3861.98	0.00122147
322.2	0.11125703		912.2	0.0058694		1502.2	0.01958029		2092.2	0.01713985		2682.19	-0.00692151		3272.19	0.00598253		3862.18	0.00259974
322.4	0.11044954		912.4	0.00663898		1502.4	0.02015146		2092.4	0.01670788		2682.39	-0.00677032		3272.39	0.0057837		3862.38	0.00221212
322.6	0.11064415		912.6	0.00739697		1502.6	0.02040602		2092.6	0.01571703		2682.59	-0.0055133		3272.59	0.00597822		3862.58	0.00232882
322.8	0.11126247		912.8	0.00839595		1502.8	0.02038216		2092.8	0.01521211		2682.79	-0.00562204		3272.79	0.00662038		3862.78	0.00203118
323	0.11166909		913	0.00938401		1503	0.02093786		2093	0.01496839		2682.99	-0.00510359		3272.99	0.00650975		3862.98	0.00176406
323.2	0.11167224		913.2	0.01046324		1503.2	0.02111955		2093.2	0.01428644		2683.19	-0.00431364		3273.19	0.00612089		3863.18	0.00205291
323.4	0.11144302		913.4	0.01123588		1503.4	0.02225375		2093.4	0.01416313		2683.39	-0.00397809		3273.39	0.00619373		3863.38	0.00243729
323.6	0.11272439		913.6	0.01181055		1503.6	0.02189359		2093.6	0.01400592		2683.59	-0.00414986		3273.59	0.00616331		3863.58	0.00262095
323.8	0.1129383		913.8	0.01242624		1503.8	0.02205208		2093.8	0.01429216		2683.79	-0.00394563		3273.79	0.0050191		3863.78	0.00267936
324	0.1149976		914	0.01365683		1504	0.02167889		2094	0.01460889		2683.99	-0.00332219		3273.99	0.00506106		3863.98	0.00232531
324.2	0.11609561		914.2	0.01376224		1504.2	0.02086007		2094.2	0.01400944		2684.19	-0.00328953		3274.19	0.00480455		3864.18	0.00195526
324.4	0.11710972		914.4	0.01413217		1504.4	0.02045777		2094.4	0.0135953		2684.39	-0.00246255		3274.39	0.00520372		3864.38	0.00204907
324.6	0.11826894		914.6	0.01349042		1504.6	0.02125021		2094.6	0.01406145		2684.59	-0.00241139		3274.59	0.00644645		3864.58	0.00092494
324.8	0.11882563		914.8	0.01242386		1504.8	0.02115074		2094.8	0.01425671		2684.79	-0.00301523		3274.79	0.00767716		3864.78	-0.00019812
325	0.11919311		915	0.01213834		1505	0.02093211		2095	0.01529289		2684.99	-0.0028246		3274.99	0.00815624		3864.98	-0.00026423
325.2	0.1193986		915.2	0.01156899		1505.2	0.02070692		2095.2	0.01521776		2685.19	-0.00328003		3275.19	0.00743631		3865.18	-0.0002829
325.4	0.12005573		915.4	0.01124338		1505.4	0.02109255		2095.4	0.01650385		2685.39	-0.00366572		3275.39	0.00735511		3865.38	-0.00026271
325.6	0.12051533		915.6	0.01054709		1505.6	0.02142771		2095.6	0.01724854		2685.59	-0.00377777		3275.59	0.0079692		3865.58	-0.00144455
325.8	0.12087355		915.8	0.00950923		1505.8	0.02145573		2095.8	0.01760862		2685.79	-0.00331512		3275.79	0.00779141		3865.78	-0.00084407
326	0.12107643		916	0.00779617		1506	0.02170149		2096	0.01890251		2685.99	-0.00377625		3275.99	0.00782007		3865.98	-0.00022372
326.2	0.12145626		916.2	0.00756394		1506.2	0.02138631		2096.2	0.01927312		2686.19	-0.00363518		3276.19	0.00647549		3866.18	0.00035019
326.4	0.12144149		916.4	0.00704677		1506.4	0.02114548		2096.4	0.01946753		2686.39	-0.00420331		3276.39	0.00612524		3866.38	-0.00017472
326.6	0.12215093		916.6	0.00596493		1506.6	0.02081627		2096.6	0.01943177		2686.59	-0.00338184		3276.59	0.00629605		3866.58	-0.00026573
326.8	0.12283051		916.8	0.00545138		1506.8	0.02107443		2096.8	0.01885521		2686.79	-0.00403101		3276.79	0.00628865		3866.78	0.00010416
327	0.12269228		917	0.00591933		1507	0.02107502		2097	0.01876818		2686.99	-0.00406963		3276.99	0.00581374		3866.98	0.00063628
327.2	0.1219035		917.2	0.00635074		1507.2	0.02074109		2097.2	0.01769954		2687.19	-0.00399755		3277.19	0.00528392		3867.18	0.00107594
327.4	0.12204693		917.4	0.00668375		1507.4	0.02053625		2097.4	0.01798612		2687.39	-0.00456691		3277.39	0.00487325		3867.38	0.00221519
327.6	0.12252393		917.6	0.00639742		1507.6	0.01895018		2097.6	0.0181275		2687.59	-0.00498614		3277.59	0.00385718		3867.58	0.00245419
327.8	0.12264613		917.8	0.0071079		1507.8	0.01880375		2097.8	0.01765173		2687.79	-0.00436015		3277.79	0.0030998		3867.78	0.0019931
328	0.12316002		918	0.00746074		1508	0.01842894		2098	0.01639379		2687.99	-0.00360903		3277.99	0.00348132		3867.98	0.0019073
328.2	0.12282714		918.2	0.00680807		1508.2	0.01852311		2098.2	0.01577921		2688.19	-0.00331604		3278.19	0.00370548		3868.18	0.00282737
328.4	0.12316714		918.4	0.00669878		1508.4	0.01888036		2098.4	0.01513097		2688.39	-0.00279317		3278.39	0.00352151		3868.38	0.00361378
328.6	0.12266587		918.6	0.00692561		1508.6	0.0193359		2098.6	0.01553478		2688.59	-0.00361376		3278.59	0.00367654		3868.58	0.00403738
328.8	0.12322135		918.8	0.00724492		1508.8	0.01943421		2098.8	0.01552517		2688.79	-0.00367044		3278.79	0.00392522		3868.78	0.00286452
329	0.12355046		919	0.00846892		1509	0.01957007		2099	0.01597616		2688.99	-0.00344954		3278.99	0.00309941		3868.98	0.00295344
329.2	0.12396862		919.2	0.00879699		1509.2	0.0197405		2099.2	0.01598124		2689.19	-0.00386128		3279.19	0.00245577		3869.18	0.00303444
329.4	0.12455707		919.4	0.00836564		1509.4	0.01981313		2099.4	0.01717832		2689.39	-0.00417394		3279.39	0.0020602		3869.38	0.00280253
329.6	0.12556432		919.6	0.00827146		1509.6	0.02044066		2099.6	0.01688279		2689.59	-0.0037469		3279.59	0.0018372		3869.58	0.00199378
329.8	0.12626214		919.8	0.00827322		1509.8	0.02020087		2099.8	0.01848419		2689.79	-0.00274141		3279.79	0.00171086		3869.78	0.00218272
330	0.12746484		920	0.00824348		1510	0.02058931		2100	0.01931534		2689.99	-0.00293864		3279.99	0.00183641		3869.98	0.00245945
330.2	0.12775474		920.2	0.00897626		1510.2	0.02100514		2100.2	0.01945667		2690.19	-0.00341301		3280.19	0.0018694		3870.18	0.00229768
330.4	0.12834533		920.4	0.00951049		1510.4	0.02179469		2100.4	0.01985616		2690.39	-0.00323848		3280.39	0.0018894		3870.38	0.00170386
330.6	0.12916347		920.6	0.01007407		1510.6	0.02180449		2100.6	0.01948039		2690.59	-0.00195585		3280.59	0.00179005		3870.58	0.00179607
330.8	0.12936676		920.8	0.00989354		1510.8	0.02096258		2100.8	0.01911178		2690.79	-0.0011447		3280.79	0.00154061		3870.78	0.00232313
331	0.12871346		921	0.01033249		1511	0.01996138		2101	0.01939486		2690.99	-0.00037729		3280.99	0.00176092		3870.98	0.00214161
331.2	0.12945315		921.2	0.01086902		1511.2	0.01908132		2101.2	0.01886307		2691.19	0.00007611		3281.19	0.00070843		3871.18	0.00189429
331.4	0.13028531		921.4	0.01068976		1511.4	0.01890032		2101.4	0.01941647		2691.39	0.00033234		3281.39	0.0010474		3871.38	0.00169065
331.6	0.13080453		921.6	0.01044395		1511.6	0.01840809		2101.6	0.01942473		2691.59	0.00106483		3281.59	0.00186596		3871.58	0.00131669
331.8	0.13103015		921.8	0.01069909		1511.8	0.01904861		2101.8	0.01910409		2691.79	0.0015897		3281.79	0.00335666		3871.78	0.00080752
332	0.13115142		922	0.00998476		1512	0.01843814		2102	0.01846301		2691.99	0.00112222		3281.99	0.0040393		3871.98	0.00236842
332.2	0.13067378		922.2	0.00951252		1512.2	0.0184024		2102.2	0.01906031		2692.19	0.00090651		3282.19	0.00440428		3872.18	0.00261703
332.4	0.13119341		922.4	0.00928005		1512.4	0.01860311		2102.4	0.01857956		2692.39	0.00007058		3282.39	0.00390417		3872.38	0.00298308
332.6	0.13114167		922.6	0.0089929		1512.6	0.0189398		2102.6	0.0188259		2692.59	-0.00061336		3282.59	0.00417217		3872.58	0.00206279
332.8	0.13166774		922.8	0.00877056		1512.8	0.01865282		2102.8	0.01987159		2692.79	-0.00158667		3282.79	0.00435098		3872.78	0.00174536
333	0.13139642		923	0.00879089		1513	0.01902559		2103	0.02025444		2692.99	-0.00229761		3282.99	0.00425819		3872.98	0.00239566
333.2	0.13182369		923.2	0.00915252		1513.2	0.01878056		2103.2	0.01966135		2693.19	-0.00280167		3283.19	0.00405238		3873.18	0.00207287
333.4	0.13269882		923.4	0.00893525		1513.4	0.0191016		2103.4	0.0191659		2693.39	-0.00264426		3283.39	0.00285081		3873.38	0.00162863
333.6	0.13440174		923.6	0.00944073		1513.6	0.01995982		2103.6	0.0190778		2693.59	-0.00203616		3283.59	0.00290493		3873.58	0.00118673
333.8	0.13517215		923.8	0.01043		1513.8	0.02050337		2103.8	0.01977991		2693.79	-0.00220358		3283.79	0.00324917		3873.78	0.00128449
334	0.13600753		924	0.01066895		1514	0.02154434		2104	0.01902185		2693.99	-0.00266861		3283.99	0.00391353		3873.98	0.00136714
334.2	0.13545579		924.2	0.01169306		1514.2	0.02120301		2104.2	0.01878389		2694.19	-0.0024809		3284.19	0.00353484		3874.18	0.00109921
334.4	0.13687706		924.4	0.01222289		1514.4	0.02107749		2104.4	0.01818248		2694.39	-0.00194515		3284.39	0.00236795		3874.38	0.00036398
334.6	0.13753189		924.6	0.01264478		1514.6	0.02079691		2104.6	0.01864531		2694.59	-0.00137849		3284.59	0.00227624		3874.58	0.00108019
334.8	0.13799441		924.8	0.01204111		1514.8	0.02022735		2104.8	0.01850875		2694.79	-0.00098222		3284.79	0.00188701		3874.78	0.00084277
335	0.13891277		925	0.0132864		1515	0.02025231		2105	0.018828		2694.99	-0.00138966		3284.99	0.00227349		3874.98	0.00086096
335.2	0.14022405		925.2	0.01374488		1515.2	0.02059249		2105.2	0.0185551		2695.19	-0.00136378		3285.19	0.00193469		3875.18	0.00073278
335.4	0.14074977		925.4	0.01395786		1515.4	0.02141493		2105.4	0.01892893		2695.39	-0.00125264		3285.39	0.00317791		3875.38	0.00055388
335.6	0.14079629		925.6	0.01476606		1515.6	0.02087029		2105.6	0.01893776		2695.59	-0.00103152		3285.59	0.00426864		3875.58	-0.00004845
335.8	0.14025216		925.8	0.01457657		1515.8	0.0210031		2105.8	0.01916517		2695.79	-0.00141744		3285.79	0.00476881		3875.78	0.000677
336	0.1391251		926	0.01449254		1516	0.01971087		2106	0.01957035		2695.99	-0.00195948		3285.99	0.00528755		3875.98	0.00109898
336.2	0.13841213		926.2	0.01462171		1516.2	0.02042289		2106.2	0.02024786		2696.19	-0.0022722		3286.19	0.00517139		3876.18	0.00136163
336.4	0.13813575		926.4	0.0140579		1516.4	0.02064564		2106.4	0.02068936		2696.39	-0.00300392		3286.39	0.00526222		3876.38	0.00237253
336.6	0.1382125		926.6	0.01432175		1516.6	0.02068728		2106.6	0.02156818		2696.59	-0.00378503		3286.59	0.00572171		3876.58	0.0027561
336.8	0.13795609		926.8	0.01425594		1516.8	0.02009619		2106.8	0.02210067		2696.79	-0.00482289		3286.79	0.00521535		3876.78	0.00498428
337	0.13796219		927	0.01383322		1517	0.02048236		2107	0.02166547		2696.99	-0.00535129		3286.99	0.00441222		3876.98	0.0050367
337.2	0.13847142		927.2	0.0136961		1517.2	0.0203599		2107.2	0.02148278		2697.19	-0.00556416		3287.19	0.00319181		3877.18	0.0045347
337.4	0.13941587		927.4	0.01293153		1517.4	0.02113675		2107.4	0.02138099		2697.39	-0.00571828		3287.39	0.00229178		3877.38	0.0045623
337.6	0.13984549		927.6	0.01222865		1517.6	0.02192274		2107.6	0.02151822		2697.59	-0.00511035		3287.59	0.00238282		3877.58	0.00374094
337.8	0.13971365		927.8	0.01277723		1517.8	0.02264733		2107.8	0.02120782		2697.79	-0.00509954		3287.79	0.0022612		3877.78	0.00416711
338	0.13996179		928	0.01264457		1518	0.02282216		2108	0.02053186		2697.99	-0.00490891		3287.99	0.00179973		3877.98	0.00463201
338.2	0.14038688		928.2	0.01317319		1518.2	0.0221608		2108.2	0.02001993		2698.19	-0.00469829		3288.19	0.00015527		3878.18	0.00469159
338.4	0.14176301		928.4	0.01366229		1518.4	0.02200074		2108.4	0.02036742		2698.39	-0.00402176		3288.39	-0.00097333		3878.38	0.00451859
338.6	0.14201228		928.6	0.01380483		1518.6	0.02150067		2108.6	0.02026328		2698.59	-0.00330035		3288.59	-0.00170863		3878.58	0.0055606
338.8	0.14237966		928.8	0.01357165		1518.8	0.02238778		2108.8	0.01954946		2698.79	-0.00279611		3288.79	-0.00167363		3878.78	0.00533252
339	0.14198295		929	0.01447747		1519	0.0219739		2109	0.01889089		2698.99	-0.00257623		3288.99	-0.0015051		3878.98	0.00552917
339.2	0.14170585		929.2	0.01476798		1519.2	0.02215136		2109.2	0.01817383		2699.19	-0.00188242		3289.19	-0.00170001		3879.18	0.0046039
339.4	0.141575		929.4	0.01562353		1519.4	0.02199395		2109.4	0.01833152		2699.39	-0.00152065		3289.39	-0.00038872		3879.38	0.00409563
339.6	0.1405036		929.6	0.01635405		1519.6	0.02172843		2109.6	0.0184441		2699.59	-0.00074966		3289.59	-0.00009057		3879.58	0.00351158
339.8	0.14039567		929.8	0.01626259		1519.8	0.02256691		2109.8	0.01846629		2699.79	-0.00095246		3289.79	0.00053908		3879.78	0.00485632
340	0.14001857		930	0.01626357		1520	0.02290631		2110	0.01867058		2699.99	-0.00140105		3289.99	0.00087291		3879.98	0.0049692
340.2	0.14086543		930.2	0.01627012		1520.2	0.02408874		2110.2	0.01865409		2700.19	-0.00230537		3290.19	0.00143118		3880.18	0.00530695
340.4	0.14117658		930.4	0.01522836		1520.4	0.02379442		2110.4	0.01857947		2700.39	-0.00267519		3290.39	0.00119226		3880.38	0.00507481
340.6	0.1421026		930.6	0.01506819		1520.6	0.02286733		2110.6	0.01911529		2700.59	-0.00335093		3290.59	0.00073359		3880.58	0.00551984
340.8	0.14222765		930.8	0.01429952		1520.8	0.02315519		2110.8	0.0190364		2700.79	-0.00393273		3290.79	0.00054711		3880.78	0.00570147
341	0.14330757		931	0.01329562		1521	0.0237216		2111	0.01853862		2700.99	-0.00431828		3290.99	0.00066896		3880.98	0.00341143
341.2	0.14461052		931.2	0.01329063		1521.2	0.02359693		2111.2	0.01883833		2701.19	-0.00360259		3291.19	0.00016011		3881.18	0.00223535
341.4	0.14644272		931.4	0.01272238		1521.4	0.0239005		2111.4	0.01894665		2701.39	-0.00351318		3291.39	0.00005794		3881.38	0.00137814
341.6	0.14725022		931.6	0.01146253		1521.6	0.024159		2111.6	0.01910028		2701.59	-0.00271472		3291.59	-0.00031512		3881.58	0.0012826
341.8	0.14849594		931.8	0.01274075		1521.8	0.02440513		2111.8	0.01929806		2701.79	-0.00268087		3291.79	-0.00152032		3881.78	0.00182586
342	0.14939269		932	0.01215842		1522	0.02328744		2112	0.01937765		2701.99	-0.00266033		3291.99	-0.00126027		3881.98	0.00223028
342.2	0.14943501		932.2	0.01179987		1522.2	0.02161001		2112.2	0.01928751		2702.19	-0.00159943		3292.19	-0.00110574		3882.18	0.00142327
342.4	0.15014322		932.4	0.01193504		1522.4	0.02061805		2112.4	0.01946806		2702.39	-0.00060954		3292.39	-0.00011424		3882.38	0.00133395
342.6	0.1500565		932.6	0.01220148		1522.6	0.0203289		2112.6	0.01844482		2702.59	-0.00023334		3292.59	0.00063869		3882.58	0.00082659
342.8	0.15023418		932.8	0.01279021		1522.8	0.0203801		2112.8	0.01849457		2702.79	0.00052479		3292.79	0.00116941		3882.78	-0.00001465
343	0.14950855		933	0.01331171		1523	0.01995189		2113	0.01813715		2702.99	0.00063258		3292.99	0.00137676		3882.98	-0.0009444
343.2	0.14937091		933.2	0.01420276		1523.2	0.02036522		2113.2	0.01765786		2703.19	0.00124834		3293.19	0.00236001		3883.18	-0.00114148
343.4	0.15022899		933.4	0.01495891		1523.4	0.0206509		2113.4	0.01851046		2703.39	0.00131135		3293.39	0.00382482		3883.38	-0.00074609
343.6	0.15000039		933.6	0.01584126		1523.6	0.02093878		2113.6	0.01847636		2703.59	0.00169594		3293.59	0.00284084		3883.58	-0.00098993
343.8	0.15037767		933.8	0.01679707		1523.8	0.02247183		2113.8	0.01883037		2703.79	0.00059575		3293.79	0.00225812		3883.78	-0.00090986
344	0.15023416		934	0.0168584		1524	0.02230275		2114	0.01919781		2703.99	0.00104746		3293.99	0.00234628		3883.98	-0.00094218
344.2	0.15022292		934.2	0.0176913		1524.2	0.02224701		2114.2	0.01938875		2704.19	0.00087625		3294.19	0.0026131		3884.18	-0.00184224
344.4	0.1500131		934.4	0.01813648		1524.4	0.02210002		2114.4	0.0200474		2704.39	0.00077399		3294.39	0.0019552		3884.38	-0.00174802
344.6	0.15051642		934.6	0.01845415		1524.6	0.02193604		2114.6	0.02171529		2704.59	0.00045814		3294.59	0.00242772		3884.58	-0.0015616
344.8	0.15009571		934.8	0.01848166		1524.8	0.02242753		2114.8	0.02252748		2704.79	-0.00044355		3294.79	0.00283949		3884.78	-0.00086483
345	0.15102167		935	0.01751892		1525	0.02231625		2115	0.02252069		2704.99	-0.00026937		3294.99	0.00195629		3884.98	-0.00127141
345.2	0.15162873		935.2	0.01679662		1525.2	0.02217475		2115.2	0.02352003		2705.19	-0.00038836		3295.19	0.00147474		3885.18	-0.00061766
345.4	0.15208271		935.4	0.01622309		1525.4	0.02181474		2115.4	0.02405082		2705.39	-0.00198579		3295.39	0.0010543		3885.38	-0.00034688
345.6	0.15196298		935.6	0.01524773		1525.6	0.02175569		2115.6	0.02392069		2705.59	-0.00287827		3295.59	0.00094035		3885.58	-0.00014695
345.8	0.15169472		935.8	0.01593946		1525.8	0.02165723		2115.8	0.02395806		2705.79	-0.00353692		3295.79	0.00100965		3885.78	-0.00071047
346	0.15086158		936	0.01483978		1526	0.02107773		2116	0.02352012		2705.99	-0.00386102		3295.99	0.00196688		3885.98	-0.0001684
346.2	0.1497017		936.2	0.0142353		1526.2	0.02081455		2116.2	0.02360785		2706.19	-0.00353014		3296.19	0.00247052		3886.18	-0.00095567
346.4	0.14989695		936.4	0.01479309		1526.4	0.02146643		2116.4	0.0236393		2706.39	-0.00373353		3296.39	0.00240771		3886.38	-0.00099234
346.6	0.14980152		936.6	0.01541811		1526.6	0.02124164		2116.6	0.02276775		2706.59	-0.00349424		3296.59	0.00254136		3886.58	-0.00092515
346.8	0.15039709		936.8	0.01576829		1526.8	0.02105828		2116.8	0.0225352		2706.79	-0.00356655		3296.79	0.0031505		3886.78	-0.00050504
347	0.14981676		937	0.01626955		1527	0.02200679		2117	0.02163303		2706.99	-0.00332984		3296.99	0.00383409		3886.98	-0.00087638
347.2	0.14991752		937.2	0.01646727		1527.2	0.02209936		2117.2	0.0217266		2707.19	-0.00283289		3297.19	0.00435167		3887.18	-0.00061545
347.4	0.15056135		937.4	0.01612846		1527.4	0.02207017		2117.4	0.02185806		2707.39	-0.00239228		3297.39	0.00382079		3887.38	-0.00077
347.6	0.15026926		937.6	0.01736531		1527.6	0.02207091		2117.6	0.02079486		2707.59	-0.00136801		3297.59	0.00282672		3887.58	-0.00152426
347.8	0.15158423		937.8	0.01849892		1527.8	0.02259439		2117.8	0.02082397		2707.79	-0.00085227		3297.79	0.00320885		3887.78	-0.00164004
348	0.1515819		938	0.01760615		1528	0.02249962		2118	0.02068421		2707.99	0.00026689		3297.99	0.00391426		3887.98	-0.00043964
348.2	0.15165804		938.2	0.01756517		1528.2	0.02291154		2118.2	0.0206065		2708.19	0.00039307		3298.19	0.00478647		3888.18	-0.00021149
348.4	0.15219058		938.4	0.0168624		1528.4	0.02340766		2118.4	0.02041616		2708.39	0.00163176		3298.39	0.00554488		3888.38	0.00071239
348.6	0.15244934		938.6	0.01593515		1528.6	0.02318883		2118.6	0.02100575		2708.59	0.00254991		3298.59	0.00565554		3888.58	0.00185083
348.8	0.1522133		938.8	0.01580867		1528.8	0.02331273		2118.8	0.02086804		2708.79	0.00263874		3298.79	0.00570202		3888.78	0.00274844
349	0.15292774		939	0.01497004		1529	0.02354045		2119	0.0211058		2708.99	0.00311937		3298.99	0.00592391		3888.98	0.00300872
349.2	0.15369248		939.2	0.01524962		1529.2	0.02344402		2119.2	0.02120775		2709.19	0.00229763		3299.19	0.00630764		3889.18	0.00282639
349.4	0.15383409		939.4	0.01524147		1529.4	0.02308183		2119.4	0.02163936		2709.39	0.00142505		3299.39	0.00518726		3889.38	0.00285856
349.6	0.15443301		939.6	0.01430463		1529.6	0.0239299		2119.6	0.02189876		2709.59	0.00141453		3299.59	0.00493476		3889.58	0.00309695
349.8	0.15501306		939.8	0.01454471		1529.8	0.02412747		2119.8	0.02239819		2709.79	0.00117841		3299.79	0.00446334		3889.78	0.00367287
350	0.15559789		940	0.01404465		1530	0.02400447		2120	0.02258763		2709.99	0.00074163		3299.99	0.00396316		3889.98	0.0048472
350.2	0.15619727		940.2	0.01406053		1530.2	0.02488063		2120.2	0.02315629		2710.19	-0.00007591		3300.19	0.00422697		3890.18	0.00383912
350.4	0.15664977		940.4	0.01501771		1530.4	0.02438674		2120.4	0.02358001		2710.39	-0.00112059		3300.39	0.00419049		3890.38	0.00360397
350.6	0.15752801		940.6	0.01602926		1530.6	0.02343658		2120.6	0.02330798		2710.59	-0.00160842		3300.59	0.00496758		3890.58	0.00349663
350.8	0.15754824		940.8	0.01662541		1530.8	0.02353595		2120.8	0.02381764		2710.79	-0.00162373		3300.79	0.00562		3890.78	0.0034987
351	0.15676513		941	0.01684502		1531	0.02346738		2121	0.02410211		2710.99	-0.00242846		3300.99	0.00469749		3890.98	0.00211182
351.2	0.15678541		941.2	0.01715893		1531.2	0.02308127		2121.2	0.02481878		2711.19	-0.00323731		3301.19	0.00394182		3891.18	0.00218134
351.4	0.15716294		941.4	0.01728745		1531.4	0.02279105		2121.4	0.02302775		2711.39	-0.00331186		3301.39	0.00334369		3891.38	0.00167208
351.6	0.1583252		941.6	0.01866916		1531.6	0.02258542		2121.6	0.02255939		2711.59	-0.00328301		3301.59	0.00308323		3891.58	0.00061631
351.8	0.15881199		941.8	0.01952702		1531.8	0.02229268		2121.8	0.02254979		2711.79	-0.00344797		3301.79	0.00263343		3891.78	0.00019998
352	0.15871073		942	0.01816821		1532	0.02243341		2122	0.02233538		2711.99	-0.00379807		3301.99	0.00291008		3891.98	0.00049077
352.2	0.15914938		942.2	0.01809161		1532.2	0.02241822		2122.2	0.0221696		2712.19	-0.00400543		3302.19	0.00306814		3892.18	0.00026099
352.4	0.15898465		942.4	0.0184176		1532.4	0.02339939		2122.4	0.02177733		2712.39	-0.00303204		3302.39	0.00299473		3892.38	0.00028936
352.6	0.15941015		942.6	0.01932236		1532.6	0.02288999		2122.6	0.0212012		2712.59	-0.00342841		3302.59	0.00251448		3892.58	0.00083173
352.8	0.16023915		942.8	0.02001492		1532.8	0.02388595		2122.8	0.02138976		2712.79	-0.00280074		3302.79	0.00256413		3892.78	0.00091066
353	0.16116578		943	0.01964543		1533	0.0240324		2123	0.02260072		2712.99	-0.00291989		3302.99	0.00257704		3892.98	0.00131902
353.2	0.16134363		943.2	0.02042834		1533.2	0.0239199		2123.2	0.02256379		2713.19	-0.0034187		3303.19	0.00170759		3893.18	0.00175294
353.4	0.1617142		943.4	0.01883874		1533.4	0.02384491		2123.4	0.02359623		2713.39	-0.00208324		3303.39	0.00035		3893.38	0.00280871
353.6	0.16273942		943.6	0.01768287		1533.6	0.02413024		2123.6	0.02306099		2713.59	-0.00157904		3303.59	0.00065401		3893.58	0.00327098
353.8	0.16450404		943.8	0.01757506		1533.8	0.0238498		2123.8	0.02325701		2713.79	-0.00185821		3303.79	0.000812		3893.78	0.00443487
354	0.16523088		944	0.01686208		1534	0.02405009		2124	0.02319766		2713.99	-0.00133546		3303.99	0.0010442		3893.98	0.00410896
354.2	0.16571724		944.2	0.01632607		1534.2	0.02426275		2124.2	0.02301059		2714.19	-0.00155657		3304.19	0.00145129		3894.18	0.00284187
354.4	0.16533351		944.4	0.01692251		1534.4	0.0234673		2124.4	0.0233804		2714.39	-0.00088349		3304.39	0.00205086		3894.38	0.00334779
354.6	0.16499109		944.6	0.01694811		1534.6	0.02367656		2124.6	0.02300408		2714.59	-0.00036797		3304.59	0.00279643		3894.58	0.00372723
354.8	0.16523677		944.8	0.01647404		1534.8	0.02398672		2124.8	0.0228315		2714.79	-0.00017182		3304.79	0.00280619		3894.78	0.00489694
355	0.16516709		945	0.01635212		1535	0.02435371		2125	0.02256129		2714.99	-0.00137453		3304.99	0.00202319		3894.98	0.00469941
355.2	0.1649091		945.2	0.01682633		1535.2	0.023882		2125.2	0.02273102		2715.19	-0.00085856		3305.19	0.00268746		3895.18	0.00505575
355.4	0.16377112		945.4	0.01646062		1535.4	0.02364415		2125.4	0.02224334		2715.39	-0.00033372		3305.39	0.00233224		3895.38	0.00442414
355.6	0.16347221		945.6	0.0156238		1535.6	0.02339926		2125.6	0.02338278		2715.59	-0.00035235		3305.59	0.00254742		3895.58	0.00368752
355.8	0.16320573		945.8	0.01569687		1535.8	0.02315525		2125.8	0.02389936		2715.79	-0.00018352		3305.79	0.00294876		3895.78	0.00385427
356	0.16306786		946	0.01506674		1536	0.02323897		2126	0.02365318		2715.99	-0.00100579		3305.99	0.00369022		3895.98	0.00307013
356.2	0.16269356		946.2	0.01505388		1536.2	0.02475719		2126.2	0.02375982		2716.19	-0.00121405		3306.19	0.00370913		3896.18	0.00204438
356.4	0.16191549		946.4	0.01549346		1536.4	0.02608906		2126.4	0.0236782		2716.39	-0.00102179		3306.39	0.00372569		3896.38	0.00183349
356.6	0.16345751		946.6	0.01473368		1536.6	0.02589094		2126.6	0.02367901		2716.59	-0.00111422		3306.59	0.00379018		3896.58	0.00223261
356.8	0.16345642		946.8	0.01444714		1536.8	0.02627445		2126.8	0.02403984		2716.79	-0.001139		3306.79	0.00416376		3896.78	0.00208059
357	0.16362423		947	0.01384085		1537	0.02599984		2127	0.02392796		2716.99	-0.00169685		3306.99	0.00444562		3896.98	0.00137167
357.2	0.16383781		947.2	0.0137969		1537.2	0.02518229		2127.2	0.02408243		2717.19	-0.00185901		3307.19	0.00473602		3897.18	0.00193427
357.4	0.16455422		947.4	0.01182258		1537.4	0.02412891		2127.4	0.02401532		2717.39	-0.00123517		3307.39	0.0045		3897.38	0.00231806
357.6	0.16564895		947.6	0.01125001		1537.6	0.02417439		2127.6	0.0232741		2717.59	-0.00215283		3307.59	0.00445809		3897.58	0.0029294
357.8	0.16677081		947.8	0.01082823		1537.8	0.024311		2127.8	0.02400435		2717.79	-0.00180968		3307.79	0.00428083		3897.78	0.00372881
358	0.16730039		948	0.01056802		1538	0.02400978		2128	0.02355428		2717.99	-0.00105693		3307.99	0.00395622		3897.98	0.00333264
358.2	0.16797459		948.2	0.01125		1538.2	0.02384395		2128.2	0.02335513		2718.19	-0.00153843		3308.19	0.003439		3898.18	0.00404574
358.4	0.16834434		948.4	0.01243805		1538.4	0.02335042		2128.4	0.02267737		2718.39	-0.0012449		3308.39	0.00331732		3898.38	0.00440535
358.6	0.16899247		948.6	0.01262131		1538.6	0.02218431		2128.6	0.02188257		2718.59	-0.00194952		3308.59	0.0034787		3898.58	0.00438871
358.8	0.17008805		948.8	0.01240262		1538.8	0.0216828		2128.8	0.02135144		2718.79	-0.00218605		3308.79	0.00255419		3898.78	0.00487785
359	0.16951644		949	0.01389889		1539	0.02129624		2129	0.02111652		2718.99	-0.00332376		3308.99	0.00177197		3898.98	0.00466314
359.2	0.16882632		949.2	0.01469336		1539.2	0.01971251		2129.2	0.02140484		2719.19	-0.00273222		3309.19	0.00224376		3899.18	0.00309395
359.4	0.16811215		949.4	0.01474544		1539.4	0.01978125		2129.4	0.0208682		2719.39	-0.00221096		3309.39	0.00194865		3899.38	0.0022416
359.6	0.16892348		949.6	0.01467919		1539.6	0.01996818		2129.6	0.02136692		2719.59	-0.00227185		3309.59	0.00255246		3899.58	0.00155925
359.8	0.16983608		949.8	0.0162528		1539.8	0.01999969		2129.8	0.02170066		2719.79	-0.00201121		3309.79	0.00331077		3899.78	0.00140123
360	0.16946599		950	0.01744852		1540	0.02059188		2130	0.02161383		2719.99	-0.00156842		3309.99	0.00341763		3899.98	0.00018527
360.2	0.16938281		950.2	0.01859778		1540.2	0.02209094		2130.2	0.02228148		2720.19	-0.00161743		3310.19	0.00328329		3900.18	-0.00037473
360.4	0.16972787		950.4	0.0195016		1540.4	0.02191858		2130.4	0.02236998		2720.39	-0.00175422		3310.39	0.00326451		3900.38	-0.00019705
360.6	0.17027327		950.6	0.02019554		1540.6	0.02227995		2130.6	0.02212287		2720.59	-0.00167276		3310.59	0.00378559		3900.58	-0.00005832
360.8	0.16962166		950.8	0.02111547		1540.8	0.02209204		2130.8	0.0219017		2720.79	-0.00136898		3310.79	0.00440371		3900.78	-0.00000824
361	0.17022695		951	0.02137223		1541	0.02268449		2131	0.0232092		2720.99	-0.00081002		3310.99	0.00470205		3900.98	-0.00042149
361.2	0.17052777		951.2	0.02105563		1541.2	0.02277225		2131.2	0.02413027		2721.19	-0.00022955		3311.19	0.0051374		3901.18	-0.00050699
361.4	0.17090277		951.4	0.02048113		1541.4	0.02306857		2131.4	0.02491982		2721.39	-0.00014456		3311.39	0.00441087		3901.38	0.00035964
361.6	0.17124082		951.6	0.02028723		1541.6	0.02422939		2131.6	0.02527367		2721.59	-0.00018075		3311.59	0.00431686		3901.58	0.00122458
361.8	0.17156174		951.8	0.02004959		1541.8	0.02459702		2131.8	0.02573543		2721.79	0.0004306		3311.79	0.00439944		3901.78	0.00148391
362	0.17189336		952	0.02010767		1542	0.02502632		2132	0.02618071		2721.99	0.00069037		3311.99	0.00406933		3901.98	0.00173553
362.2	0.1722248		952.2	0.02048283		1542.2	0.02544482		2132.2	0.02585851		2722.19	-0.00045383		3312.19	0.00375397		3902.18	0.00180022
362.4	0.17285838		952.4	0.0196128		1542.4	0.02532393		2132.4	0.02533061		2722.39	-0.00088809		3312.39	0.00419178		3902.38	0.00104127
362.6	0.17327239		952.6	0.01934928		1542.6	0.02506377		2132.6	0.02577639		2722.59	-0.00147807		3312.59	0.00471044		3902.58	0.00119969
362.8	0.17369767		952.8	0.01893527		1542.8	0.02587615		2132.8	0.02545716		2722.79	-0.00226777		3312.79	0.00433504		3902.78	0.00091187
363	0.17339218		953	0.01932476		1543	0.0256589		2133	0.0247815		2722.99	-0.00264711		3312.99	0.00416833		3902.98	-0.00002022
363.2	0.17327083		953.2	0.01853835		1543.2	0.02511978		2133.2	0.02550677		2723.19	-0.00205474		3313.19	0.0045973		3903.18	-0.00167356
363.4	0.17333635		953.4	0.01850157		1543.4	0.02531022		2133.4	0.02497405		2723.39	-0.00210365		3313.39	0.00516632		3903.38	-0.0016072
363.6	0.17349714		953.6	0.01820488		1543.6	0.02550544		2133.6	0.0256233		2723.59	-0.00252173		3313.59	0.00510193		3903.58	-0.00105465
363.8	0.1740746		953.8	0.01900062		1543.8	0.02455791		2133.8	0.02602148		2723.79	-0.00254477		3313.79	0.0051167		3903.78	-0.0009419
364	0.17267815		954	0.02007977		1544	0.02460482		2134	0.02507498		2723.99	-0.00195572		3313.99	0.00414285		3903.98	-0.00020559
364.2	0.17262891		954.2	0.02041267		1544.2	0.02509083		2134.2	0.02497772		2724.19	-0.00242494		3314.19	0.00319912		3904.18	-0.00007708
364.4	0.17330497		954.4	0.02038482		1544.4	0.02481928		2134.4	0.02437573		2724.39	-0.00228805		3314.39	0.00356771		3904.38	0.00012704
364.6	0.17289579		954.6	0.02028803		1544.6	0.02497869		2134.6	0.02516435		2724.59	-0.00135329		3314.59	0.00325449		3904.58	0.00043038
364.8	0.1735814		954.8	0.02012152		1544.8	0.02459183		2134.8	0.02560227		2724.79	-0.00102444		3314.79	0.00317422		3904.78	0.00089968
365	0.17361121		955	0.02014797		1545	0.02478423		2135	0.02681017		2724.99	-0.00145899		3314.99	0.0023815		3904.98	0.00085909
365.2	0.17400716		955.2	0.02004657		1545.2	0.02436334		2135.2	0.02688828		2725.19	-0.00114707		3315.19	0.00236849		3905.18	0.00067863
365.4	0.17501081		955.4	0.02014426		1545.4	0.0249335		2135.4	0.02738133		2725.39	-0.00218356		3315.39	0.0019364		3905.38	0.00203225
365.6	0.17524127		955.6	0.0194319		1545.6	0.0255134		2135.6	0.02760621		2725.59	-0.00232541		3315.59	0.00230103		3905.58	0.00294469
365.8	0.17539378		955.8	0.01897083		1545.8	0.026121		2135.8	0.02866632		2725.79	-0.00178597		3315.79	0.00269598		3905.78	0.00220412
366	0.17576999		956	0.01825594		1546	0.02631924		2136	0.02974981		2725.99	-0.00107805		3315.99	0.00266324		3905.98	0.00238096
366.2	0.17708604		956.2	0.01788422		1546.2	0.02659814		2136.2	0.02920824		2726.19	-0.00151919		3316.19	0.00282403		3906.18	0.00260012
366.4	0.17831078		956.4	0.01775317		1546.4	0.0265018		2136.4	0.02976925		2726.39	-0.00112707		3316.39	0.00321003		3906.38	0.00326223
366.6	0.17870327		956.6	0.01812611		1546.6	0.02677469		2136.6	0.03011653		2726.59	-0.00074288		3316.59	0.00311072		3906.58	0.00357165
366.8	0.17887813		956.8	0.01803366		1546.8	0.02708128		2136.8	0.02950055		2726.79	-0.00027222		3316.79	0.00249628		3906.78	0.00359081
367	0.17856624		957	0.01820481		1547	0.02663689		2137	0.02874646		2726.99	0.00109725		3316.99	0.00249038		3906.98	0.00364596
367.2	0.17849343		957.2	0.01804939		1547.2	0.02653333		2137.2	0.02909285		2727.19	0.00178167		3317.19	0.00284043		3907.18	0.00347868
367.4	0.17838277		957.4	0.01899459		1547.4	0.02681462		2137.4	0.02809747		2727.39	0.00128945		3317.39	0.00314492		3907.38	0.0037075
367.6	0.17850619		957.6	0.01892204		1547.6	0.02703528		2137.6	0.02836484		2727.59	0.00241818		3317.59	0.0023373		3907.58	0.00398814
367.8	0.17877529		957.8	0.01995703		1547.8	0.02685119		2137.8	0.02844242		2727.79	0.00298796		3317.79	0.0021884		3907.78	0.00287368
368	0.17832467		958	0.02064256		1548	0.02711179		2138	0.02672493		2727.99	0.00344849		3317.99	0.00204612		3907.98	0.00348688
368.2	0.17885828		958.2	0.02030001		1548.2	0.0267511		2138.2	0.02679562		2728.19	0.0032821		3318.19	0.00166784		3908.18	0.00304206
368.4	0.17902339		958.4	0.02059805		1548.4	0.02643738		2138.4	0.02661546		2728.39	0.00263557		3318.39	0.00247113		3908.38	0.00259376
368.6	0.17835133		958.6	0.02055882		1548.6	0.02474669		2138.6	0.02755029		2728.59	0.0023363		3318.59	0.00223705		3908.58	0.00239828
368.8	0.17917025		958.8	0.02120353		1548.8	0.02447289		2138.8	0.0276918		2728.79	0.00144419		3318.79	0.0020413		3908.78	0.00196332
369	0.17929733		959	0.0219506		1549	0.02425723		2139	0.0293273		2728.99	0.00061765		3318.99	0.00135403		3908.98	0.00180975
369.2	0.17942612		959.2	0.02245986		1549.2	0.0242257		2139.2	0.0296306		2729.19	0.00027266		3319.19	0.00149876		3909.18	0.00148034
369.4	0.18021132		959.4	0.02273741		1549.4	0.02530085		2139.4	0.02955503		2729.39	-0.00031174		3319.39	0.00147474		3909.38	0.00071165
369.6	0.18008791		959.6	0.02264917		1549.6	0.0250866		2139.6	0.03000302		2729.59	-0.00034732		3319.59	0.00165465		3909.58	-0.00009116
369.8	0.17949163		959.8	0.02308205		1549.8	0.02557016		2139.8	0.03041238		2729.79	0.0000845		3319.79	0.00212269		3909.78	-0.00164267
370	0.18026396		960	0.0227594		1550	0.02546819		2140	0.02976181		2729.99	-0.00073022		3319.99	0.00162601		3909.98	-0.00141284
370.2	0.18071448		960.2	0.0235663		1550.2	0.02614713		2140.2	0.02914691		2730.19	-0.00096515		3320.19	0.001629		3910.18	-0.00081367
370.4	0.18051213		960.4	0.02409083		1550.4	0.02644701		2140.4	0.02888391		2730.39	-0.00102802		3320.39	0.00245053		3910.38	-0.00071763
370.6	0.18035417		960.6	0.02323049		1550.6	0.02762847		2140.6	0.02840401		2730.59	-0.00103589		3320.59	0.00244763		3910.58	0.00015301
370.8	0.18033797		960.8	0.02335274		1550.8	0.02795262		2140.8	0.02771194		2730.79	-0.00114193		3320.79	0.00259276		3910.78	0.00044206
371	0.17999411		961	0.02263719		1551	0.0282508		2141	0.02676698		2730.99	-0.00087025		3320.99	0.00285556		3910.98	0.00115322
371.2	0.17988547		961.2	0.02164233		1551.2	0.02915422		2141.2	0.02667907		2731.19	-0.00085389		3321.19	0.00186853		3911.18	0.00098441
371.4	0.18027664		961.4	0.02157004		1551.4	0.02969312		2141.4	0.02635683		2731.39	-0.00168398		3321.39	0.00264712		3911.38	0.00100066
371.6	0.18080644		961.6	0.02074866		1551.6	0.02980422		2141.6	0.02618302		2731.59	-0.00173436		3321.59	0.00245774		3911.58	0.00102541
371.8	0.18116987		961.8	0.02097685		1551.8	0.03000738		2141.8	0.0252748		2731.79	-0.00224787		3321.79	0.00348806		3911.78	0.00026821
372	0.18147851		962	0.02091192		1552	0.02943826		2142	0.02461146		2731.99	-0.00297252		3321.99	0.00399516		3911.98	0.00184476
372.2	0.18176794		962.2	0.02006094		1552.2	0.02957468		2142.2	0.02568555		2732.19	-0.00396759		3322.19	0.00383605		3912.18	0.00199507
372.4	0.18139493		962.4	0.02040095		1552.4	0.02917145		2142.4	0.02623981		2732.39	-0.0045646		3322.39	0.00502989		3912.38	0.00208899
372.6	0.18134984		962.6	0.01947041		1552.6	0.02836984		2142.6	0.02724062		2732.59	-0.00513658		3322.59	0.00432971		3912.58	0.0028143
372.8	0.18237895		962.8	0.01988438		1552.8	0.02872528		2142.8	0.02766871		2732.79	-0.0047425		3322.79	0.00391392		3912.78	0.00250935
373	0.18217755		963	0.02066427		1553	0.02922365		2143	0.02758412		2732.99	-0.00407754		3322.99	0.00346782		3912.98	0.00289525
373.2	0.18252857		963.2	0.02084027		1553.2	0.02896285		2143.2	0.02709567		2733.19	-0.00435496		3323.19	0.00378399		3913.18	0.00306858
373.4	0.18303968		963.4	0.02193319		1553.4	0.0290093		2143.4	0.02688214		2733.39	-0.00415941		3323.39	0.00350729		3913.38	0.00262211
373.6	0.18267832		963.6	0.02176733		1553.6	0.02785654		2143.6	0.0265091		2733.59	-0.00449846		3323.59	0.00381838		3913.58	0.00263451
373.8	0.1825426		963.8	0.02203973		1553.8	0.02751167		2143.8	0.02692847		2733.79	-0.00402302		3323.79	0.00315353		3913.78	0.00273483
374	0.18260734		964	0.02207521		1554	0.02693553		2144	0.02629323		2733.99	-0.00439849		3323.99	0.0023496		3913.98	0.00329553
374.2	0.18241051		964.2	0.02248227		1554.2	0.02742004		2144.2	0.02740292		2734.19	-0.00397936		3324.19	0.00229497		3914.18	0.00399857
374.4	0.18293946		964.4	0.02144869		1554.4	0.02615217		2144.4	0.02708761		2734.39	-0.00378765		3324.39	0.00177545		3914.38	0.00414509
374.6	0.18361354		964.6	0.02106524		1554.6	0.0264791		2144.6	0.02627465		2734.59	-0.00397866		3324.59	0.0000436		3914.58	0.00432185
374.8	0.18382936		964.8	0.02086812		1554.8	0.02611679		2144.8	0.02614508		2734.79	-0.00329369		3324.79	-0.00062682		3914.78	0.00325036
375	0.18402645		965	0.02120113		1555	0.02574952		2145	0.02599301		2734.99	-0.00255944		3324.99	-0.00171368		3914.98	0.00333709
375.2	0.18440502		965.2	0.02162478		1555.2	0.02526648		2145.2	0.02555363		2735.19	-0.00229493		3325.19	-0.00289931		3915.18	0.00202506
375.4	0.18478471		965.4	0.02221898		1555.4	0.02431381		2145.4	0.02514788		2735.39	-0.0018914		3325.39	-0.00208589		3915.38	0.00167789
375.6	0.18520598		965.6	0.02173086		1555.6	0.02381637		2145.6	0.02555502		2735.59	-0.00189711		3325.59	-0.00263613		3915.58	0.00126879
375.8	0.18552741		965.8	0.02209836		1555.8	0.02370202		2145.8	0.02590587		2735.79	-0.00159531		3325.79	-0.00154548		3915.78	0.00071639
376	0.18588553		966	0.0224817		1556	0.02406338		2146	0.02630954		2735.99	-0.00192625		3325.99	-0.00140586		3915.98	0.00109702
376.2	0.18610136		966.2	0.02191222		1556.2	0.02445449		2146.2	0.02660174		2736.19	-0.00223864		3326.19	-0.001451		3916.18	0.00066866
376.4	0.18603867		966.4	0.02216185		1556.4	0.0244618		2146.4	0.02644696		2736.39	-0.00210566		3326.39	-0.00130605		3916.38	0.00041799
376.6	0.18596452		966.6	0.02175484		1556.6	0.02509694		2146.6	0.02685559		2736.59	-0.00229602		3326.59	-0.00189766		3916.58	0.0008742
376.8	0.18714416		966.8	0.02189825		1556.8	0.02526219		2146.8	0.02669484		2736.79	-0.00102134		3326.79	-0.00139689		3916.78	-0.00007699
377	0.18755683		967	0.02187982		1557	0.02627131		2147	0.02670006		2736.99	0.00020531		3326.99	-0.00070404		3916.98	0.00088759
377.2	0.1881988		967.2	0.021745		1557.2	0.02638266		2147.2	0.02764458		2737.19	0.0001711		3327.19	0.00104714		3917.18	0.00112841
377.4	0.188721		967.4	0.02227277		1557.4	0.02601215		2147.4	0.0286257		2737.39	0.00112036		3327.39	0.00103032		3917.38	0.00201209
377.6	0.18811813		967.6	0.02181618		1557.6	0.02629721		2147.6	0.02927718		2737.59	0.00113106		3327.59	0.00093055		3917.58	0.00284404
377.8	0.1874762		967.8	0.02191493		1557.8	0.02724777		2147.8	0.03045447		2737.79	0.00116005		3327.79	0.00067367		3917.78	0.00405151
378	0.18708002		968	0.02188097		1558	0.02805325		2148	0.03062119		2737.99	0.00086153		3327.99	0.00090227		3917.98	0.00490531
378.2	0.18733817		968.2	0.02115753		1558.2	0.02872691		2148.2	0.03138425		2738.19	0.00001087		3328.19	0.00074333		3918.18	0.00547334
378.4	0.18789203		968.4	0.02142018		1558.4	0.02836637		2148.4	0.03084886		2738.39	0.00035394		3328.39	0.0006968		3918.38	0.00548738
378.6	0.18730098		968.6	0.022222		1558.6	0.02956609		2148.6	0.03018477		2738.59	0.00064244		3328.59	0.00048843		3918.58	0.00493248
378.8	0.1866957		968.8	0.02303061		1558.8	0.02896658		2148.8	0.02998136		2738.79	0.00078249		3328.79	0.0000642		3918.78	0.00476668
379	0.18622059		969	0.02412716		1559	0.02914787		2149	0.02922265		2738.99	0.00066054		3328.99	0.00025185		3918.98	0.00534241
379.2	0.18622893		969.2	0.02374937		1559.2	0.02807338		2149.2	0.0286162		2739.19	0.00046075		3329.19	-0.00048245		3919.18	0.00519055
379.4	0.18710727		969.4	0.02348423		1559.4	0.02717348		2149.4	0.02892811		2739.39	0.00022499		3329.39	-0.00004474		3919.38	0.0057263
379.6	0.1875073		969.6	0.02355587		1559.6	0.02699136		2149.6	0.02940643		2739.59	-0.00133644		3329.59	0.00030588		3919.58	0.00536435
379.8	0.18822924		969.8	0.02416478		1559.8	0.02764529		2149.8	0.02838356		2739.79	-0.00199529		3329.79	0.00095161		3919.78	0.00434671
380	0.1893645		970	0.02350152		1560	0.0272728		2150	0.02699567		2739.99	-0.00297084		3329.99	0.00109973		3919.98	0.00420586
380.2	0.18994067		970.2	0.02265953		1560.2	0.02680948		2150.2	0.02667617		2740.19	-0.0033093		3330.19	0.00015413		3920.18	0.00390472
380.4	0.19104114		970.4	0.02271979		1560.4	0.02656063		2150.4	0.02617275		2740.39	-0.00288607		3330.39	-0.00032792		3920.38	0.00358706
380.6	0.19090192		970.6	0.02207128		1560.6	0.02607659		2150.6	0.02623686		2740.59	-0.00240921		3330.59	-0.00093603		3920.58	0.00325774
380.8	0.1925583		970.8	0.02212948		1560.8	0.02564199		2150.8	0.02609313		2740.79	-0.00146748		3330.79	-0.00120952		3920.78	0.0024236
381	0.19310862		971	0.02233285		1561	0.02586044		2151	0.02648715		2740.99	-0.00066236		3330.99	-0.0006534		3920.98	0.00268681
381.2	0.19266087		971.2	0.02337115		1561.2	0.02610185		2151.2	0.02727452		2741.19	-0.00032532		3331.19	0.00011475		3921.18	0.00247919
381.4	0.19260683		971.4	0.02386254		1561.4	0.02576066		2151.4	0.02802323		2741.39	0.00053863		3331.39	-0.00010731		3921.38	0.00304703
381.6	0.191027		971.6	0.02418389		1561.6	0.0264968		2151.6	0.02921678		2741.59	-0.0000123		3331.59	-0.00012961		3921.58	0.00402156
381.8	0.19057626		971.8	0.02426732		1561.8	0.02714781		2151.8	0.02920818		2741.79	-0.00004923		3331.79	0.00064768		3921.78	0.00384434
382	0.19030042		972	0.02404422		1562	0.02683961		2152	0.02961371		2741.99	-0.00032936		3331.99	0.00066354		3921.98	0.00329007
382.2	0.1896314		972.2	0.02384285		1562.2	0.02714916		2152.2	0.02959756		2742.19	-0.00075206		3332.19	0.00075809		3922.18	0.00332929
382.4	0.18912546		972.4	0.02366942		1562.4	0.02774066		2152.4	0.02979571		2742.39	0.00014596		3332.39	0.00132224		3922.38	0.00335011
382.6	0.18847122		972.6	0.02371752		1562.6	0.02793798		2152.6	0.02946851		2742.59	0.00045023		3332.59	0.0011013		3922.58	0.00324634
382.8	0.18800956		972.8	0.02316792		1562.8	0.02770887		2152.8	0.02899309		2742.79	-0.00000381		3332.79	0.00066666		3922.78	0.00373923
383	0.18888688		973	0.02272645		1563	0.02758831		2153	0.02886359		2742.99	-0.0004996		3332.99	0.00172599		3922.98	0.00404551
383.2	0.18989215		973.2	0.0232767		1563.2	0.02680426		2153.2	0.02943144		2743.19	-0.0010514		3333.19	0.00181952		3923.18	0.00394522
383.4	0.18998121		973.4	0.02314426		1563.4	0.0274727		2153.4	0.02905786		2743.39	-0.00113315		3333.39	0.00184629		3923.38	0.00362971
383.6	0.19075533		973.6	0.02361556		1563.6	0.02826826		2153.6	0.02820651		2743.59	-0.0001688		3333.59	0.00285511		3923.58	0.00335147
383.8	0.19198519		973.8	0.02309618		1563.8	0.02807707		2153.8	0.02778767		2743.79	0.00031468		3333.79	0.00285808		3923.78	0.00258931
384	0.19247152		974	0.02179476		1564	0.02728517		2154	0.02776542		2743.99	0.00015948		3333.99	0.00325499		3923.98	0.00339449
384.2	0.19241051		974.2	0.02156789		1564.2	0.02721859		2154.2	0.0275594		2744.19	0.00054796		3334.19	0.00280702		3924.18	0.0025201
384.4	0.19327594		974.4	0.0211094		1564.4	0.02651733		2154.4	0.02687793		2744.39	0.00134027		3334.39	0.00248365		3924.38	0.00238858
384.6	0.19252969		974.6	0.02161701		1564.6	0.02641172		2154.6	0.02679943		2744.59	0.00089579		3334.59	0.00197237		3924.58	0.00167015
384.8	0.19301018		974.8	0.02263604		1564.8	0.02653572		2154.8	0.02635466		2744.79	0.00116429		3334.79	0.00177619		3924.78	0.00164063
385	0.1926278		975	0.02347042		1565	0.02663496		2155	0.02685305		2744.99	0.0016946		3334.99	0.0024179		3924.98	0.0013888
385.2	0.1915695		975.2	0.0242816		1565.2	0.02673412		2155.2	0.02813691		2745.19	0.0021921		3335.19	0.0022131		3925.18	0.0019617
385.4	0.19152358		975.4	0.02389864		1565.4	0.02705603		2155.4	0.02940038		2745.39	0.00283025		3335.39	0.00215433		3925.38	0.00227378
385.6	0.19116966		975.6	0.02390516		1565.6	0.02778431		2155.6	0.03090576		2745.59	0.00187588		3335.59	0.00151726		3925.58	0.00290516
385.8	0.19081717		975.8	0.02409508		1565.8	0.02828587		2155.8	0.03120674		2745.79	0.00144096		3335.79	0.00072991		3925.78	0.00250786
386	0.19063341		976	0.02401431		1566	0.02817342		2156	0.03181817		2745.99	0.00166168		3335.99	0.0007502		3925.98	0.0032827
386.2	0.19048734		976.2	0.02418259		1566.2	0.02932173		2156.2	0.03153536		2746.19	0.00139359		3336.19	0.00060942		3926.18	0.00356714
386.4	0.1906233		976.4	0.02366067		1566.4	0.02931521		2156.4	0.03154362		2746.39	0.00108228		3336.39	0.00017721		3926.38	0.00395335
386.6	0.19106619		976.6	0.02474246		1566.6	0.0287432		2156.6	0.03100125		2746.59	0.00014697		3336.59	-0.00005996		3926.58	0.00380613
386.8	0.1914661		976.8	0.0245579		1566.8	0.02798418		2156.8	0.03031717		2746.79	-0.00059623		3336.79	-0.00039594		3926.78	0.00396279
387	0.19355821		977	0.02590926		1567	0.02709282		2157	0.03000709		2746.99	-0.00133501		3336.99	-0.00020552		3926.98	0.0038414
387.2	0.19396472		977.2	0.02698193		1567.2	0.02730732		2157.2	0.02941426		2747.19	-0.00117144		3337.19	-0.00058094		3927.18	0.00451642
387.4	0.19421082		977.4	0.02645267		1567.4	0.02764593		2157.4	0.02814282		2747.39	-0.00136169		3337.39	-0.00043126		3927.38	0.00418366
387.6	0.19651129		977.6	0.02688526		1567.6	0.02753423		2157.6	0.02797877		2747.59	-0.00122015		3337.59	0.00068587		3927.58	0.00424633
387.8	0.19697746		977.8	0.02658475		1567.8	0.02695996		2157.8	0.02741475		2747.79	-0.00248358		3337.79	-0.00033902		3927.78	0.00327317
388	0.19750454		978	0.02532125		1568	0.02659939		2158	0.02698723		2747.99	-0.00267801		3337.99	0.00081884		3927.98	0.00390313
388.2	0.19826678		978.2	0.02445845		1568.2	0.02634428		2158.2	0.0254703		2748.19	-0.00307121		3338.19	0.00153884		3928.18	0.00307999
388.4	0.19893666		978.4	0.02357609		1568.4	0.02632603		2158.4	0.02477997		2748.39	-0.00307181		3338.39	0.00078566		3928.38	0.00338404
388.6	0.19860797		978.6	0.02408382		1568.6	0.02619448		2158.6	0.02383013		2748.59	-0.00347575		3338.59	0.00115912		3928.58	0.00369507
388.8	0.19902062		978.8	0.02379073		1568.8	0.02632982		2158.8	0.02377348		2748.79	-0.00283654		3338.79	0.00151784		3928.78	0.00375371
389	0.19914761		979	0.02352584		1569	0.02540929		2159	0.02503556		2748.99	-0.00293508		3338.99	0.00149251		3928.98	0.00366529
389.2	0.19843127		979.2	0.02320941		1569.2	0.02581184		2159.2	0.02604532		2749.19	-0.00272896		3339.19	0.00123365		3929.18	0.0045437
389.4	0.19809601		979.4	0.02278034		1569.4	0.02654129		2159.4	0.02643903		2749.39	-0.00219235		3339.39	0.00094215		3929.38	0.00390705
389.6	0.19774309		979.6	0.02305592		1569.6	0.02624818		2159.6	0.0268281		2749.59	-0.00232274		3339.59	0.00005009		3929.58	0.00399685
389.8	0.19702999		979.8	0.02355972		1569.8	0.02645836		2159.8	0.02705155		2749.79	-0.00191962		3339.79	0.00000203		3929.78	0.00430676
390	0.19742365		980	0.02406944		1570	0.02659352		2160	0.02790442		2749.99	-0.00077249		3339.99	0.0003414		3929.98	0.00482863
390.2	0.19716505		980.2	0.02489168		1570.2	0.02700017		2160.2	0.02773301		2750.19	-0.00156006		3340.19	0.00054097		3930.18	0.00470475
390.4	0.19643349		980.4	0.02486992		1570.4	0.02671875		2160.4	0.02850352		2750.39	-0.00146944		3340.39	0.00064848		3930.38	0.0050379
390.6	0.19672485		980.6	0.0252421		1570.6	0.02573127		2160.6	0.02875469		2750.59	-0.00116094		3340.59	0.00094381		3930.58	0.00500321
390.8	0.19710755		980.8	0.02535227		1570.8	0.02555948		2160.8	0.02929068		2750.79	-0.00029355		3340.79	0.00081845		3930.78	0.00444413
391	0.19806025		981	0.02620204		1571	0.02563829		2161	0.02968263		2750.99	-0.00005572		3340.99	0.00014322		3930.98	0.00478602
391.2	0.19849413		981.2	0.02587114		1571.2	0.02602244		2161.2	0.02963766		2751.19	-0.00028809		3341.19	-0.0008203		3931.18	0.00430846
391.4	0.19881882		981.4	0.02551163		1571.4	0.02706183		2161.4	0.03025897		2751.39	-0.00053272		3341.39	-0.0003181		3931.38	0.00384163
391.6	0.2003904		981.6	0.02585668		1571.6	0.02718539		2161.6	0.03111933		2751.59	-0.00039858		3341.59	-0.00146556		3931.58	0.00355596
391.8	0.20036412		981.8	0.02565171		1571.8	0.02735868		2161.8	0.03098461		2751.79	-0.00057633		3341.79	-0.00219652		3931.78	0.00336417
392	0.20047222		982	0.02454077		1572	0.02818455		2162	0.03204228		2751.99	-0.0008834		3341.99	-0.00160138		3931.98	0.00365972
392.2	0.20142692		982.2	0.02380477		1572.2	0.02909995		2162.2	0.03143216		2752.19	-0.00115449		3342.19	-0.00198232		3932.18	0.00371945
392.4	0.20169056		982.4	0.02375195		1572.4	0.02934317		2162.4	0.03154359		2752.39	-0.00091314		3342.39	-0.00212581		3932.38	0.00350177
392.6	0.20099898		982.6	0.02397909		1572.6	0.02875752		2162.6	0.03160904		2752.59	-0.00053635		3342.59	-0.00145727		3932.58	0.00370184
392.8	0.20145017		982.8	0.02331711		1572.8	0.02919368		2162.8	0.03201266		2752.79	-0.00093954		3342.79	-0.00142883		3932.78	0.00388266
393	0.20092728		983	0.02247684		1573	0.02912038		2163	0.03163828		2752.99	-0.00131169		3342.99	-0.00158855		3932.98	0.00389424
393.2	0.2002698		983.2	0.02273581		1573.2	0.02977137		2163.2	0.03066152		2753.19	-0.00066393		3343.19	-0.00138313		3933.18	0.00351458
393.4	0.20075139		983.4	0.02305814		1573.4	0.02894379		2163.4	0.02960999		2753.39	-0.0002617		3343.39	-0.00188529		3933.38	0.00357685
393.6	0.20079767		983.6	0.02379506		1573.6	0.02898404		2163.6	0.02909928		2753.59	-0.0008144		3343.59	-0.00089119		3933.58	0.00411215
393.8	0.20092125		983.8	0.02449983		1573.8	0.0294991		2163.8	0.02870299		2753.79	-0.00133595		3343.79	-0.00036953		3933.78	0.00431982
394	0.201066		984	0.02471721		1574	0.02942077		2164	0.02859334		2753.99	-0.00171629		3343.99	-0.0003964		3933.98	0.00457931
394.2	0.20035777		984.2	0.02580451		1574.2	0.02976024		2164.2	0.02780521		2754.19	-0.00212555		3344.19	0.00074845		3934.18	0.00485359
394.4	0.19989746		984.4	0.02456339		1574.4	0.02886178		2164.4	0.02806122		2754.39	-0.00128298		3344.39	0.00066243		3934.38	0.00443459
394.6	0.20072253		984.6	0.02454292		1574.6	0.02784503		2164.6	0.0269077		2754.59	-0.00073642		3344.59	0.00097901		3934.58	0.00374961
394.8	0.2007098		984.8	0.02530533		1574.8	0.02778265		2164.8	0.02677449		2754.79	-0.00055971		3344.79	0.00100861		3934.78	0.00318593
395	0.20077581		985	0.02471855		1575	0.0277014		2165	0.02675838		2754.99	-0.00062781		3344.99	0.00074909		3934.98	0.00287428
395.2	0.20103047		985.2	0.02486872		1575.2	0.02801505		2165.2	0.02665308		2755.19	-0.00133772		3345.19	0.00047625		3935.18	0.0031714
395.4	0.20052843		985.4	0.02514831		1575.4	0.0284026		2165.4	0.02726996		2755.39	-0.00150764		3345.39	0.00113135		3935.38	0.0040716
395.6	0.20051097		985.6	0.02536338		1575.6	0.02775137		2165.6	0.02833949		2755.59	-0.00146836		3345.59	0.00013364		3935.58	0.0033977
395.8	0.20113866		985.8	0.02503572		1575.8	0.02845039		2165.8	0.02848497		2755.79	-0.00184393		3345.79	-0.00014025		3935.78	0.00352537
396	0.20185971		986	0.02418518		1576	0.02896616		2166	0.02952991		2755.99	-0.00201115		3345.99	-0.00093159		3935.98	0.00320288
396.2	0.20325988		986.2	0.02450603		1576.2	0.02862383		2166.2	0.0296577		2756.19	-0.00188979		3346.19	-0.00090649		3936.18	0.00269656
396.4	0.20388514		986.4	0.02465825		1576.4	0.02833062		2166.4	0.03080528		2756.39	-0.00159132		3346.39	-0.00016672		3936.38	0.00265798
396.6	0.20414129		986.6	0.02463087		1576.6	0.02798434		2166.6	0.03130841		2756.59	-0.00176686		3346.59	0.0002965		3936.58	0.00276797
396.8	0.20562676		986.8	0.02353023		1576.8	0.02792516		2166.8	0.03063571		2756.79	-0.00179998		3346.79	0.00098993		3936.78	0.00304702
397	0.20553564		987	0.02298341		1577	0.02786681		2167	0.03046721		2756.99	-0.00127542		3346.99	0.00165111		3936.98	0.0026327
397.2	0.20639067		987.2	0.0235128		1577.2	0.02844779		2167.2	0.03024136		2757.19	-0.00088468		3347.19	0.00226669		3937.18	0.00330778
397.4	0.20722901		987.4	0.02377338		1577.4	0.0281583		2167.4	0.03009943		2757.39	-0.00135884		3347.39	0.00325684		3937.38	0.00433345
397.6	0.20681743		987.6	0.02449595		1577.6	0.02926068		2167.6	0.03038138		2757.59	-0.00186942		3347.59	0.00370229		3937.58	0.00361743
397.8	0.20700819		987.8	0.02434137		1577.8	0.02955018		2167.8	0.03009178		2757.79	-0.00203618		3347.79	0.00343651		3937.78	0.00343097
398	0.20645231		988	0.02472216		1578	0.02944367		2168	0.02977815		2757.99	-0.00165849		3347.99	0.00374559		3937.98	0.00329678
398.2	0.20633126		988.2	0.02540483		1578.2	0.02965604		2168.2	0.02970719		2758.19	-0.0006363		3348.19	0.00448668		3938.18	0.00316608
398.4	0.20647884		988.4	0.02471206		1578.4	0.02929314		2168.4	0.02918154		2758.39	-0.00052773		3348.39	0.00453567		3938.38	0.00278114
398.6	0.20636094		988.6	0.02506159		1578.6	0.02881565		2168.6	0.02882622		2758.59	-0.00020439		3348.59	0.0053793		3938.58	0.00312129
398.8	0.20544895		988.8	0.02580301		1578.8	0.02862365		2168.8	0.02890383		2758.79	0.00011564		3348.79	0.00536925		3938.78	0.00377909
399	0.20467301		989	0.0250716		1579	0.02938614		2169	0.02911392		2758.99	0.0002377		3348.99	0.00577637		3938.98	0.00392784
399.2	0.20448648		989.2	0.02528579		1579.2	0.02877559		2169.2	0.02913368		2759.19	-0.00066824		3349.19	0.00451386		3939.18	0.00505011
399.4	0.20405815		989.4	0.02475705		1579.4	0.0290246		2169.4	0.02957815		2759.39	-0.00071084		3349.39	0.00396104		3939.38	0.00516576
399.6	0.20470934		989.6	0.02545013		1579.6	0.02884957		2169.6	0.03049633		2759.59	-0.00060776		3349.59	0.00257743		3939.58	0.00428608
399.8	0.20690398		989.8	0.02593202		1579.8	0.0295633		2169.8	0.02976308		2759.79	-0.00070812		3349.79	0.00168776		3939.78	0.00426785
400	0.20745874		990	0.02629348		1580	0.02952199		2170	0.03021318		2759.99	-0.00087024		3349.99	0.00164708		3939.98	0.00340443
400.2	0.20855446		990.2	0.02773966		1580.2	0.02914868		2170.2	0.03081515		2760.19	-0.00193693		3350.19	0.00172999		3940.18	0.00328085
400.4	0.20948516		990.4	0.02749343		1580.4	0.02908752		2170.4	0.0306192		2760.39	-0.00204345		3350.39	0.0028516		3940.38	0.00343552
400.6	0.20991616		990.6	0.02756023		1580.6	0.02899012		2170.6	0.03145407		2760.59	-0.00157641		3350.59	0.00247282		3940.58	0.00283912
400.8	0.20976883		990.8	0.02699582		1580.8	0.0287744		2170.8	0.03144091		2760.79	-0.00126195		3350.79	0.00264419		3940.78	0.00344695
401	0.20913977		991	0.02703549		1581	0.02893737		2171	0.03252122		2760.99	-0.00162542		3350.99	0.00232681		3940.98	0.00383092
401.2	0.20846997		991.2	0.0274753		1581.2	0.02984991		2171.2	0.0328631		2761.19	-0.00191558		3351.19	0.00181271		3941.18	0.00406692
401.4	0.2076494		991.4	0.0280159		1581.4	0.02936874		2171.4	0.03359883		2761.39	-0.00256378		3351.39	0.00175086		3941.38	0.00404075
401.6	0.20692225		991.6	0.02814736		1581.6	0.0290897		2171.6	0.03434015		2761.59	-0.00268124		3351.59	0.00084086		3941.58	0.00345493
401.8	0.20642362		991.8	0.02785005		1581.8	0.02931151		2171.8	0.03399907		2761.79	-0.00273016		3351.79	0.00110861		3941.78	0.0030407
402	0.20615725		992	0.02825787		1582	0.02905933		2172	0.03391176		2761.99	-0.00276897		3351.99	0.00124089		3941.98	0.0033928
402.2	0.20582845		992.2	0.02719469		1582.2	0.02893567		2172.2	0.0346118		2762.19	-0.00268301		3352.19	0.00162574		3942.18	0.00317968
402.4	0.20563501		992.4	0.02637463		1582.4	0.02772804		2172.4	0.03478929		2762.39	-0.00281155		3352.39	0.00120459		3942.38	0.00280796
402.6	0.20452034		992.6	0.02612875		1582.6	0.02698815		2172.6	0.03538065		2762.59	-0.00227733		3352.59	0.00119489		3942.58	0.00300839
402.8	0.20481459		992.8	0.02597319		1582.8	0.02708084		2172.8	0.03465863		2762.79	-0.0015895		3352.79	0.00103637		3942.78	0.00307972
403	0.20445969		993	0.02558538		1583	0.02706876		2173	0.03491313		2762.99	-0.00191907		3352.99	0.00124027		3942.98	0.00298051
403.2	0.20498945		993.2	0.02458951		1583.2	0.02670276		2173.2	0.03444604		2763.19	-0.00227571		3353.19	0.00071846		3943.18	0.00339691
403.4	0.20552527		993.4	0.02459427		1583.4	0.02753114		2173.4	0.03469712		2763.39	-0.00146002		3353.39	0.00103072		3943.38	0.00389073
403.6	0.20639192		993.6	0.02497397		1583.6	0.02736966		2173.6	0.03392418		2763.59	-0.00101227		3353.59	0.00091757		3943.58	0.00346135
403.8	0.20756396		993.8	0.02468594		1583.8	0.02805598		2173.8	0.03278267		2763.79	-0.0010277		3353.79	0.001602		3943.78	0.0040976
404	0.20826009		994	0.02485175		1584	0.02834131		2174	0.03266011		2763.99	-0.0007927		3353.99	0.00201481		3943.98	0.00439216
404.2	0.20928212		994.2	0.02567209		1584.2	0.02881291		2174.2	0.03201218		2764.19	-0.00087285		3354.19	0.00208774		3944.18	0.00463559
404.4	0.20955938		994.4	0.02516107		1584.4	0.02915407		2174.4	0.03127435		2764.39	-0.00026027		3354.39	0.00318669		3944.38	0.00376793
404.6	0.21009243		994.6	0.02575718		1584.6	0.02952333		2174.6	0.03254371		2764.59	0.00042216		3354.59	0.00243952		3944.58	0.00364539
404.8	0.20965333		994.8	0.02566103		1584.8	0.02927035		2174.8	0.03188387		2764.79	0.00034167		3354.79	0.00282825		3944.78	0.00427246
405	0.21016757		995	0.02635227		1585	0.02966177		2175	0.03171026		2764.99	-0.0002752		3354.99	0.00205535		3944.98	0.00421493
405.2	0.21037563		995.2	0.02654864		1585.2	0.03014803		2175.2	0.03229018		2765.19	-0.00048607		3355.19	0.00126494		3945.18	0.00428903
405.4	0.21073845		995.4	0.02679717		1585.4	0.03051227		2175.4	0.0328016		2765.39	-0.00140071		3355.39	0.00197591		3945.38	0.00360223
405.6	0.21118098		995.6	0.0263845		1585.6	0.03074073		2175.6	0.03244739		2765.59	-0.0020992		3355.59	0.00138503		3945.58	0.00292703
405.8	0.21140586		995.8	0.02648483		1585.8	0.03128156		2175.8	0.03193153		2765.79	-0.00283903		3355.79	0.00082479		3945.78	0.00293618
406	0.21176961		996	0.02624376		1586	0.03152633		2176	0.03142529		2765.99	-0.0028586		3355.99	0.00035102		3945.98	0.00348357
406.2	0.21190278		996.2	0.02627444		1586.2	0.03124925		2176.2	0.03168186		2766.19	-0.00311334		3356.19	0.00001764		3946.18	0.00265936
406.4	0.21151255		996.4	0.02698676		1586.4	0.03133053		2176.4	0.03135461		2766.39	-0.00386797		3356.39	-0.00012577		3946.38	0.00225896
406.6	0.21087436		996.6	0.02739152		1586.6	0.03189986		2176.6	0.03149827		2766.59	-0.00410356		3356.59	-0.00028543		3946.58	0.0024374
406.8	0.21125977		996.8	0.02647821		1586.8	0.03172496		2176.8	0.03136212		2766.79	-0.00434272		3356.79	-0.00076366		3946.78	0.00246992
407	0.21103432		997	0.02623146		1587	0.0309798		2177	0.03191372		2766.99	-0.00494178		3356.99	-0.00107915		3946.98	0.00313364
407.2	0.21125992		997.2	0.02525897		1587.2	0.03066734		2177.2	0.03260212		2767.19	-0.00503261		3357.19	-0.00121809		3947.18	0.0040911
407.4	0.21124588		997.4	0.02539299		1587.4	0.02995521		2177.4	0.03324056		2767.39	-0.00401359		3357.39	-0.00167004		3947.38	0.00409762
407.6	0.21196535		997.6	0.02572182		1587.6	0.02956992		2177.6	0.03279571		2767.59	-0.00390222		3357.59	-0.00187621		3947.58	0.00444122
407.8	0.21247537		997.8	0.02617067		1587.8	0.03019095		2177.8	0.03316608		2767.79	-0.00342655		3357.79	-0.00122417		3947.78	0.00478201
408	0.21325627		998	0.02718592		1588	0.03030285		2178	0.03377539		2767.99	-0.00218476		3357.99	-0.00120172		3947.98	0.00476204
408.2	0.21342245		998.2	0.02786327		1588.2	0.02988323		2178.2	0.03374226		2768.19	-0.00086227		3358.19	-0.00071089		3948.18	0.0039915
408.4	0.21384456		998.4	0.02761904		1588.4	0.02922447		2178.4	0.03393334		2768.39	-0.00049953		3358.39	0.00009152		3948.38	0.00271048
408.6	0.21395276		998.6	0.02745808		1588.6	0.02898033		2178.6	0.0341319		2768.59	0.00033232		3358.59	0.00012091		3948.58	0.00299145
408.8	0.21429227		998.8	0.02779868		1588.8	0.0286477		2178.8	0.03297599		2768.79	0.00102426		3358.79	0.00033521		3948.78	0.00297741
409	0.21553484		999	0.02842689		1589	0.02904061		2179	0.03280931		2768.99	0.00023255		3358.99	0.00108552		3948.98	0.00275315
409.2	0.21644016		999.2	0.02796671		1589.2	0.02959424		2179.2	0.03311685		2769.19	0.00018712		3359.19	0.00119956		3949.18	0.00259224
409.4	0.21696197		999.4	0.02775126		1589.4	0.03019801		2179.4	0.03301945		2769.39	-0.00001142		3359.39	0.00211379		3949.38	0.00163511
409.6	0.21702756		999.6	0.02779888		1589.6	0.03101246		2179.6	0.03285281		2769.59	0.00005521		3359.59	0.00117097		3949.58	0.00135693
409.8	0.21658203		999.8	0.02805992		1589.8	0.03049107		2179.8	0.03274092		2769.79	-0.00004429		3359.79	0.00076479		3949.78	0.00193121
410	0.21587215		1000	0.02875549		1590	0.03133312		2180	0.03233002		2769.99	0.00007036		3359.99	0.00089799		3949.98	0.00165236
410.2	0.2148749		1000.2	0.02932119		1590.2	0.03114313		2180.2	0.03312487		2770.19	-0.00098434		3360.19	0.00115435		3950.18	0.00178219
410.4	0.21369978		1000.4	0.02909346		1590.4	0.03151291		2180.4	0.03280512		2770.39	-0.00191873		3360.39	0.00140643		3950.38	0.00215259
410.6	0.21290895		1000.6	0.02789922		1590.6	0.03100524		2180.6	0.0326033		2770.59	-0.00315148		3360.59	0.00031147		3950.58	0.00303703
410.8	0.21267223		1000.8	0.02748072		1590.8	0.03067937		2180.8	0.03233896		2770.79	-0.00395221		3360.79	-0.00062827		3950.78	0.00422338
411	0.21338689		1001	0.02739665		1591	0.02954035		2181	0.03228366		2770.99	-0.00409855		3360.99	-0.00136479		3950.98	0.00445601
411.2	0.21309		1001.2	0.02763706		1591.2	0.02864829		2181.2	0.03280582		2771.19	-0.00400011		3361.19	-0.00180267		3951.18	0.00545745
411.4	0.21371194		1001.4	0.02800267		1591.4	0.02849068		2181.4	0.03297471		2771.39	-0.00345446		3361.39	-0.00228007		3951.38	0.00552224
411.6	0.21384435		1001.6	0.02903792		1591.6	0.02840783		2181.6	0.03309916		2771.59	-0.00357966		3361.59	-0.00256454		3951.58	0.00589085
411.8	0.21306313		1001.8	0.02926928		1591.8	0.02862532		2181.8	0.03333279		2771.79	-0.00260096		3361.79	-0.00236386		3951.78	0.00541263
412	0.21244956		1002	0.02947806		1592	0.02832332		2182	0.03421914		2771.99	-0.00205313		3361.99	-0.00294656		3951.98	0.00594395
412.2	0.21200236		1002.2	0.02939712		1592.2	0.02765083		2182.2	0.03325778		2772.19	-0.00114088		3362.19	-0.00305706		3952.18	0.00539207
412.4	0.21244592		1002.4	0.02909641		1592.4	0.02821732		2182.4	0.03266973		2772.39	-0.00226667		3362.39	-0.00274673		3952.38	0.00532901
412.6	0.21237594		1002.6	0.02931205		1592.6	0.02758746		2182.6	0.0316775		2772.59	-0.00149699		3362.59	-0.00226082		3952.58	0.00613132
412.8	0.21288302		1002.8	0.03001734		1592.8	0.02810309		2182.8	0.03134417		2772.79	-0.00154643		3362.79	-0.00137757		3952.78	0.00554896
413	0.21351712		1003	0.03001728		1593	0.02903465		2183	0.03173954		2772.99	-0.00088065		3362.99	-0.00021897		3952.98	0.00594769
413.2	0.21369922		1003.2	0.02965883		1593.2	0.02946705		2183.2	0.03112456		2773.19	0.00039144		3363.19	-0.00052479		3953.18	0.00497573
413.4	0.21322627		1003.4	0.02929973		1593.4	0.02965853		2183.4	0.03184301		2773.39	0.00079793		3363.39	0.00046625		3953.38	0.00431457
413.6	0.21290641		1003.6	0.02960453		1593.6	0.02983722		2183.6	0.031641		2773.59	0.00057708		3363.59	0.00085196		3953.58	0.00358024
413.8	0.21293062		1003.8	0.02970505		1593.8	0.02904771		2183.8	0.03178714		2773.79	0.00068665		3363.79	0.00132054		3953.78	0.00425292
414	0.21336969		1004	0.02982743		1594	0.03030697		2184	0.03198633		2773.99	0.00071631		3363.99	0.00194998		3953.98	0.00414951
414.2	0.21378026		1004.2	0.02859011		1594.2	0.02900552		2184.2	0.03233156		2774.19	0.00092506		3364.19	0.00341238		3954.18	0.00455543
414.4	0.21512404		1004.4	0.02836199		1594.4	0.02860528		2184.4	0.03179021		2774.39	0.00082176		3364.39	0.00392688		3954.38	0.00468274
414.6	0.21616438		1004.6	0.02820549		1594.6	0.0279232		2184.6	0.03161309		2774.59	-0.00005109		3364.59	0.00332114		3954.58	0.0050677
414.8	0.21802992		1004.8	0.02870543		1594.8	0.02743324		2184.8	0.03048743		2774.79	0.00048078		3364.79	0.00296706		3954.78	0.00488588
415	0.21835009		1005	0.02924326		1595	0.0263359		2185	0.03140471		2774.99	0.00062571		3364.99	0.00319982		3954.98	0.00378058
415.2	0.21850991		1005.2	0.02955611		1595.2	0.02646432		2185.2	0.03237684		2775.19	0.00056546		3365.19	0.00322632		3955.18	0.00451608
415.4	0.21879938		1005.4	0.02963431		1595.4	0.02684539		2185.4	0.03377595		2775.39	0.00007207		3365.39	0.00296482		3955.38	0.00401217
415.6	0.21776176		1005.6	0.02973482		1595.6	0.02689349		2185.6	0.03459271		2775.59	-0.00032475		3365.59	0.00248416		3955.58	0.00298771
415.8	0.21687975		1005.8	0.02935509		1595.8	0.02703846		2185.8	0.03600344		2775.79	-0.00098902		3365.79	0.00201982		3955.78	0.00285345
416	0.21650451		1006	0.02931838		1596	0.02702253		2186	0.03736378		2775.99	-0.00153184		3365.99	0.00134125		3955.98	0.00375563
416.2	0.21705539		1006.2	0.02987771		1596.2	0.02707082		2186.2	0.03698154		2776.19	-0.00230256		3366.19	0.00099061		3956.18	0.00354514
416.4	0.21711077		1006.4	0.0296746		1596.4	0.02740727		2186.4	0.03736576		2776.39	-0.00298313		3366.39	0.00114623		3956.38	0.00461829
416.6	0.21653284		1006.6	0.03021383		1596.6	0.02633202		2186.6	0.0370338		2776.59	-0.00311567		3366.59	0.00144443		3956.58	0.00412693
416.8	0.21608347		1006.8	0.03032303		1596.8	0.02636934		2186.8	0.03728069		2776.79	-0.00326698		3366.79	0.00112571		3956.78	0.00394572
417	0.21599959		1007	0.03060224		1597	0.02689928		2187	0.0369239		2776.99	-0.00260081		3366.99	0.00088943		3956.98	0.00365841
417.2	0.21564431		1007.2	0.03089615		1597.2	0.02633486		2187.2	0.03655437		2777.19	-0.00332934		3367.19	0.00070258		3957.18	0.00277475
417.4	0.21594664		1007.4	0.0306671		1597.4	0.02665978		2187.4	0.0370427		2777.39	-0.0043722		3367.39	0.00091011		3957.38	0.00399292
417.6	0.21633738		1007.6	0.03020038		1597.6	0.02687077		2187.6	0.0365568		2777.59	-0.00358178		3367.59	0.00041726		3957.58	0.00398268
417.8	0.21738802		1007.8	0.02990546		1597.8	0.02711919		2187.8	0.03658089		2777.79	-0.00325646		3367.79	0.00067735		3957.78	0.00419701
418	0.21799134		1008	0.02941018		1598	0.02783005		2188	0.03581295		2777.99	-0.0029158		3367.99	0.00140909		3957.98	0.00352844
418.2	0.21866469		1008.2	0.02851466		1598.2	0.02743973		2188.2	0.03541505		2778.19	-0.00130414		3368.19	0.0020608		3958.18	0.0037465
418.4	0.21950568		1008.4	0.02925514		1598.4	0.02766705		2188.4	0.03445012		2778.39	-0.00138043		3368.39	0.0008121		3958.38	0.00394003
418.6	0.22022202		1008.6	0.02946309		1598.6	0.02828317		2188.6	0.03372331		2778.59	-0.00095566		3368.59	-0.00038235		3958.58	0.00429797
418.8	0.21989516		1008.8	0.02964223		1598.8	0.02844443		2188.8	0.03326251		2778.79	-0.00043197		3368.79	0.00046978		3958.78	0.00401192
419	0.21902153		1009	0.02978228		1599	0.02959176		2189	0.03466416		2778.99	0.00013021		3368.99	0.00042176		3958.98	0.00402662
419.2	0.21959796		1009.2	0.02966202		1599.2	0.03063353		2189.2	0.03514097		2779.19	-0.00041625		3369.19	0.00035599		3959.18	0.00483026
419.4	0.21932415		1009.4	0.02932165		1599.4	0.03141496		2189.4	0.03595359		2779.39	-0.0010021		3369.39	-0.00038788		3959.38	0.00510826
419.6	0.21927118		1009.6	0.0289649		1599.6	0.03163964		2189.6	0.03644562		2779.59	-0.00083047		3369.59	-0.00054277		3959.58	0.00502984
419.8	0.21881712		1009.8	0.02928451		1599.8	0.03143681		2189.8	0.03694496		2779.79	-0.00227294		3369.79	-0.00122758		3959.78	0.00536122
420	0.21924353		1010	0.02956243		1600	0.03160367		2190	0.03697962		2779.99	-0.00252429		3369.99	-0.00079675		3959.98	0.00582008
420.2	0.21912209		1010.2	0.03091577		1600.2	0.03184473		2190.2	0.03616276		2780.19	-0.00312128		3370.19	-0.00065656		3960.18	0.00567531
420.4	0.2192365		1010.4	0.0309339		1600.4	0.03028989		2190.4	0.03609869		2780.39	-0.00317192		3370.39	-0.00052769		3960.38	0.0057037
420.6	0.21952887		1010.6	0.0323428		1600.6	0.02903221		2190.6	0.03635231		2780.59	-0.00279603		3370.59	-0.00077389		3960.58	0.00497735
420.8	0.21926672		1010.8	0.03222964		1600.8	0.02808288		2190.8	0.03662178		2780.79	-0.00230118		3370.79	-0.00100115		3960.78	0.00471705
421	0.21924072		1011	0.03266398		1601	0.02868558		2191	0.0362933		2780.99	-0.00213952		3370.99	-0.00066029		3960.98	0.0049411
421.2	0.21948542		1011.2	0.03262497		1601.2	0.0285442		2191.2	0.03720407		2781.19	-0.00322554		3371.19	0.00018767		3961.18	0.00540236
421.4	0.21988106		1011.4	0.0323554		1601.4	0.02917998		2191.4	0.03710978		2781.39	-0.00292998		3371.39	0.00056326		3961.38	0.00600314
421.6	0.21947142		1011.6	0.03235729		1601.6	0.02955164		2191.6	0.0366169		2781.59	-0.0026645		3371.59	0.00141031		3961.58	0.00551873
421.8	0.22039584		1011.8	0.03255575		1601.8	0.02993537		2191.8	0.03670135		2781.79	-0.0032182		3371.79	0.00238718		3961.78	0.00466935
422	0.21995926		1012	0.0318369		1602	0.03076421		2192	0.03610785		2781.99	-0.00306255		3371.99	0.00230351		3961.98	0.00472673
422.2	0.2202969		1012.2	0.03078746		1602.2	0.03116379		2192.2	0.03585351		2782.19	-0.0023966		3372.19	0.0017718		3962.18	0.00558487
422.4	0.22054833		1012.4	0.03046026		1602.4	0.03126541		2192.4	0.03515845		2782.39	-0.00237489		3372.39	0.00098365		3962.38	0.00550207
422.6	0.22111986		1012.6	0.02971739		1602.6	0.0322118		2192.6	0.03490714		2782.59	-0.00148319		3372.59	0.00091895		3962.58	0.00563174
422.8	0.22058058		1012.8	0.02994091		1602.8	0.03242971		2192.8	0.03486049		2782.79	-0.00143057		3372.79	0.00196185		3962.78	0.00496135
423	0.22147019		1013	0.0297822		1603	0.03309363		2193	0.03446203		2782.99	-0.00042968		3372.99	0.00096327		3962.98	0.00505397
423.2	0.22172209		1013.2	0.02973596		1603.2	0.03324767		2193.2	0.0343691		2783.19	-0.00085748		3373.19	0.00107844		3963.18	0.0055028
423.4	0.22232311		1013.4	0.02878503		1603.4	0.03378539		2193.4	0.03406092		2783.39	-0.00060014		3373.39	0.0004904		3963.38	0.00571906
423.6	0.2230045		1013.6	0.02803982		1603.6	0.03347307		2193.6	0.03402621		2783.59	-0.00011007		3373.59	0.00052543		3963.58	0.00527779
423.8	0.22274906		1013.8	0.02814617		1603.8	0.03289029		2193.8	0.03333466		2783.79	-0.00048084		3373.79	0.00049702		3963.78	0.00475273
424	0.22361535		1014	0.02837526		1604	0.03290032		2194	0.03277115		2783.99	-0.00058713		3373.99	0.00149493		3963.98	0.00457972
424.2	0.22390468		1014.2	0.0292396		1604.2	0.03207453		2194.2	0.03240988		2784.19	-0.00047603		3374.19	0.00159055		3964.18	0.00477777
424.4	0.22475188		1014.4	0.0294319		1604.4	0.03024915		2194.4	0.03248469		2784.39	-0.00006048		3374.39	0.00157314		3964.38	0.00469207
424.6	0.22516912		1014.6	0.02953469		1604.6	0.02979358		2194.6	0.03194981		2784.59	0.00031117		3374.59	0.00127755		3964.58	0.00517343
424.8	0.22583666		1014.8	0.02942354		1604.8	0.02952741		2194.8	0.0310137		2784.79	0.00004473		3374.79	0.00106999		3964.78	0.00521981
425	0.22606757		1015	0.03003851		1605	0.02964489		2195	0.03078797		2784.99	-0.0002027		3374.99	0.00129123		3964.98	0.0063722
425.2	0.22587954		1015.2	0.0301492		1605.2	0.02962398		2195.2	0.03246642		2785.19	-0.00064268		3375.19	0.00191147		3965.18	0.00531375
425.4	0.22574777		1015.4	0.03098542		1605.4	0.02906481		2195.4	0.03265067		2785.39	-0.00080891		3375.39	0.00173207		3965.38	0.00572153
425.6	0.22495322		1015.6	0.03126528		1605.6	0.02913913		2195.6	0.03312582		2785.59	-0.0017429		3375.59	0.00139419		3965.58	0.00582262
425.8	0.22514261		1015.8	0.03230108		1605.8	0.02848896		2195.8	0.03349348		2785.79	-0.00196484		3375.79	0.00024384		3965.78	0.00564369
426	0.22568062		1016	0.03213329		1606	0.02866993		2196	0.03362217		2785.99	-0.00194463		3375.99	-0.00024986		3965.98	0.00588776
426.2	0.22616288		1016.2	0.03229234		1606.2	0.02914905		2196.2	0.03345287		2786.19	-0.00217392		3376.19	-0.00050955		3966.18	0.00567513
426.4	0.22596748		1016.4	0.03299612		1606.4	0.03004942		2196.4	0.03316214		2786.39	-0.00183626		3376.39	-0.00126191		3966.38	0.00525328
426.6	0.22644718		1016.6	0.03354491		1606.6	0.02988791		2196.6	0.03451589		2786.59	-0.00217309		3376.59	-0.00099696		3966.58	0.00414035
426.8	0.22693212		1016.8	0.03474238		1606.8	0.03013028		2196.8	0.03493075		2786.79	-0.00219625		3376.79	-0.00119719		3966.78	0.00330639
427	0.22712911		1017	0.03457769		1607	0.03040316		2197	0.03447148		2786.99	-0.00104147		3376.99	-0.00128152		3966.98	0.00350381
427.2	0.22661033		1017.2	0.0345163		1607.2	0.03034662		2197.2	0.03402204		2787.19	-0.00104904		3377.19	-0.00108342		3967.18	0.00380653
427.4	0.22716532		1017.4	0.03410025		1607.4	0.03088739		2197.4	0.03386256		2787.39	-0.00064286		3377.39	-0.00042933		3967.38	0.00353879
427.6	0.22646487		1017.6	0.03461937		1607.6	0.03054818		2197.6	0.03480823		2787.59	-0.00011305		3377.59	-0.00007244		3967.58	0.00321552
427.8	0.22574576		1017.8	0.03438656		1607.8	0.02993045		2197.8	0.03471282		2787.79	-0.00022837		3377.79	0.00087288		3967.78	0.00419044
428	0.22629575		1018	0.0346299		1608	0.03074295		2198	0.03497185		2787.99	-0.0014456		3377.99	0.00070777		3967.98	0.00423884
428.2	0.22565815		1018.2	0.03532755		1608.2	0.0303387		2198.2	0.03493561		2788.19	-0.00154814		3378.19	0.00096467		3968.18	0.00523087
428.4	0.22591319		1018.4	0.03587722		1608.4	0.03025278		2198.4	0.03500362		2788.39	-0.00206624		3378.39	0.00059659		3968.38	0.00522522
428.6	0.22550092		1018.6	0.03561573		1608.6	0.03083424		2198.6	0.03449348		2788.59	-0.00211059		3378.59	0.0005461		3968.58	0.00550606
428.8	0.22530201		1018.8	0.03574196		1608.8	0.03149175		2198.8	0.03500418		2788.79	-0.00146651		3378.79	0.00133599		3968.78	0.0052933
429	0.22415502		1019	0.03569501		1609	0.03136442		2199	0.03598324		2788.99	-0.00140785		3378.99	0.00140803		3968.98	0.00560814
429.2	0.22365876		1019.2	0.03524888		1609.2	0.03161314		2199.2	0.03652571		2789.19	-0.00189781		3379.19	0.00172931		3969.18	0.004929
429.4	0.22337752		1019.4	0.03531291		1609.4	0.03110866		2199.4	0.03666696		2789.39	-0.00204906		3379.39	0.00052661		3969.38	0.0059254
429.6	0.2226463		1019.6	0.03506555		1609.6	0.0318365		2199.6	0.03713905		2789.59	-0.00231659		3379.59	0.00011601		3969.58	0.00607246
429.8	0.22291925		1019.8	0.03507144		1609.8	0.03158028		2199.8	0.03798274		2789.79	-0.00246486		3379.79	0.00006404		3969.78	0.00632248
430	0.22389625		1020	0.03407184		1610	0.03198869		2200	0.0382606		2789.99	-0.00222324		3379.99	0.0008062		3969.98	0.00603123
430.2	0.22306068		1020.2	0.03338807		1610.2	0.03239591		2200.2	0.03762563		2790.19	-0.00289121		3380.19	0.00085993		3970.18	0.00622946
430.4	0.22377105		1020.4	0.03349768		1610.4	0.03205113		2200.4	0.03752177		2790.39	-0.00258163		3380.39	0.00037235		3970.38	0.00620696
430.6	0.22549342		1020.6	0.03320819		1610.6	0.03107952		2200.6	0.037857		2790.59	-0.00297543		3380.59	0.00044813		3970.58	0.00551366
430.8	0.22670105		1020.8	0.03318183		1610.8	0.0309837		2200.8	0.03596665		2790.79	-0.00261453		3380.79	0.00073426		3970.78	0.00553318
431	0.22628278		1021	0.03304217		1611	0.03079923		2201	0.03476228		2790.99	-0.00205797		3380.99	0.00087896		3970.98	0.00594363
431.2	0.22695165		1021.2	0.03273482		1611.2	0.02913867		2201.2	0.03401296		2791.19	-0.00206392		3381.19	0.00028432		3971.18	0.00519412
431.4	0.22764		1021.4	0.03322893		1611.4	0.02912429		2201.4	0.03426942		2791.39	-0.00140752		3381.39	0.00138742		3971.38	0.00492222
431.6	0.22754767		1021.6	0.03390676		1611.6	0.02855064		2201.6	0.03484512		2791.59	-0.00067365		3381.59	0.00108489		3971.58	0.0050386
431.8	0.2273407		1021.8	0.03338728		1611.8	0.02870421		2201.8	0.0352133		2791.79	-0.00077794		3381.79	0.00132701		3971.78	0.00472566
432	0.22833087		1022	0.03356599		1612	0.02916557		2202	0.03512662		2791.99	-0.00195038		3381.99	0.00038377		3971.98	0.00351544
432.2	0.22760753		1022.2	0.03393678		1612.2	0.02887453		2202.2	0.03569565		2792.19	-0.00224942		3382.19	0.00092279		3972.18	0.00326649
432.4	0.22734671		1022.4	0.03408802		1612.4	0.02958388		2202.4	0.03627394		2792.39	-0.00212108		3382.39	0.00093649		3972.38	0.00304201
432.6	0.22687134		1022.6	0.03412531		1612.6	0.03005238		2202.6	0.03596402		2792.59	-0.0020766		3382.59	0.0009374		3972.58	0.00292433
432.8	0.22667755		1022.8	0.03390606		1612.8	0.03089748		2202.8	0.03730267		2792.79	-0.00148769		3382.79	0.00135158		3972.78	0.00199607
433	0.22654475		1023	0.03394764		1613	0.03066543		2203	0.03720441		2792.99	-0.00176311		3382.99	0.00014917		3972.98	0.0011553
433.2	0.22592891		1023.2	0.03323446		1613.2	0.03116522		2203.2	0.03784776		2793.19	-0.0021544		3383.19	-0.00068434		3973.18	0.00076886
433.4	0.22532831		1023.4	0.03244858		1613.4	0.03165984		2203.4	0.03859558		2793.39	-0.00206167		3383.39	-0.00142204		3973.38	0.00193128
433.6	0.22462313		1023.6	0.03194696		1613.6	0.03229689		2203.6	0.039487		2793.59	-0.00263068		3383.59	-0.00131581		3973.58	0.00241019
433.8	0.22538965		1023.8	0.03252664		1613.8	0.03139279		2203.8	0.03974459		2793.79	-0.00259491		3383.79	-0.00107644		3973.78	0.00279393
434	0.2258095		1024	0.03269951		1614	0.03093512		2204	0.03896381		2793.99	-0.00275526		3383.99	-0.00116472		3973.98	0.00343922
434.2	0.22598255		1024.2	0.03313574		1614.2	0.0307625		2204.2	0.03846655		2794.19	-0.00323075		3384.19	-0.00129616		3974.18	0.00444772
434.4	0.22790028		1024.4	0.03356031		1614.4	0.0308218		2204.4	0.03851011		2794.39	-0.00329896		3384.39	-0.00160931		3974.38	0.00472806
434.6	0.2292346		1024.6	0.03353935		1614.6	0.03192022		2204.6	0.03771992		2794.59	-0.00442548		3384.59	-0.00190031		3974.58	0.00509097
434.8	0.22980694		1024.8	0.03396204		1614.8	0.03198867		2204.8	0.03716895		2794.79	-0.00478693		3384.79	-0.00134273		3974.78	0.00463554
435	0.23017638		1025	0.03351894		1615	0.03222661		2205	0.0364102		2794.99	-0.00425467		3384.99	-0.00151763		3974.98	0.00457949
435.2	0.23102213		1025.2	0.03347022		1615.2	0.031445		2205.2	0.03644862		2795.19	-0.00396453		3385.19	-0.00133207		3975.18	0.00328241
435.4	0.23116557		1025.4	0.03366421		1615.4	0.03223365		2205.4	0.03675915		2795.39	-0.0028535		3385.39	-0.00026536		3975.38	0.00353455
435.6	0.23137743		1025.6	0.033855		1615.6	0.03242545		2205.6	0.03718227		2795.59	-0.00247827		3385.59	-0.00048453		3975.58	0.00336021
435.8	0.23043207		1025.8	0.03368655		1615.8	0.03253921		2205.8	0.03716252		2795.79	-0.00326763		3385.79	-0.00043576		3975.78	0.00341488
436	0.23098867		1026	0.03265265		1616	0.03260218		2206	0.03649222		2795.99	-0.00294747		3385.99	-0.00065902		3975.98	0.00314449
436.2	0.23009421		1026.2	0.033217		1616.2	0.03226557		2206.2	0.03689134		2796.19	-0.00282047		3386.19	-0.0006814		3976.18	0.0032868
436.4	0.22978502		1026.4	0.03332127		1616.4	0.0327953		2206.4	0.03585025		2796.39	-0.00262173		3386.39	-0.00012765		3976.38	0.00321295
436.6	0.22964253		1026.6	0.03328714		1616.6	0.0334516		2206.6	0.03632153		2796.59	-0.00212698		3386.59	0.00020968		3976.58	0.00290099
436.8	0.22939817		1026.8	0.03310293		1616.8	0.0336355		2206.8	0.0366721		2796.79	-0.00118923		3386.79	0.00136128		3976.78	0.00306138
437	0.22984563		1027	0.03303738		1617	0.03277804		2207	0.03563768		2796.99	-0.00160421		3386.99	0.00175946		3976.98	0.00306312
437.2	0.2294423		1027.2	0.03214861		1617.2	0.03347896		2207.2	0.03636275		2797.19	-0.00224128		3387.19	0.00223647		3977.18	0.00465888
437.4	0.2295441		1027.4	0.03176021		1617.4	0.03365799		2207.4	0.03577813		2797.39	-0.00225286		3387.39	0.00308094		3977.38	0.00573073
437.6	0.22994267		1027.6	0.03292311		1617.6	0.03271416		2207.6	0.03582952		2797.59	-0.00224615		3387.59	0.00305456		3977.58	0.00535385
437.8	0.23072954		1027.8	0.03343372		1617.8	0.03158851		2207.8	0.03523807		2797.79	-0.00211467		3387.79	0.00378055		3977.78	0.00539185
438	0.23073536		1028	0.03356918		1618	0.03126838		2208	0.03583228		2797.99	-0.00279006		3387.99	0.00375714		3977.98	0.00561501
438.2	0.23097817		1028.2	0.03416228		1618.2	0.03115971		2208.2	0.03616797		2798.19	-0.00328475		3388.19	0.0040958		3978.18	0.00501105
438.4	0.23130965		1028.4	0.03442927		1618.4	0.03168164		2208.4	0.03654638		2798.39	-0.00360671		3388.39	0.00309605		3978.38	0.00357399
438.6	0.23159624		1028.6	0.03513802		1618.6	0.03238215		2208.6	0.03670511		2798.59	-0.00426937		3388.59	0.00297299		3978.58	0.00288767
438.8	0.23151237		1028.8	0.03502805		1618.8	0.03211332		2208.8	0.03730055		2798.79	-0.00322632		3388.79	0.00327408		3978.78	0.00160412
439	0.23132948		1029	0.03427557		1619	0.0315028		2209	0.03766162		2798.99	-0.00238817		3388.99	0.00273942		3978.98	0.00122431
439.2	0.23083889		1029.2	0.03494022		1619.2	0.03106914		2209.2	0.03846763		2799.19	-0.0014616		3389.19	0.00253886		3979.18	0.00077684
439.4	0.23139823		1029.4	0.03498092		1619.4	0.03130876		2209.4	0.03828817		2799.39	-0.0012653		3389.39	0.00212071		3979.38	0.00129295
439.6	0.23135095		1029.6	0.03551777		1619.6	0.03048591		2209.6	0.03878762		2799.59	-0.00152663		3389.59	0.00140238		3979.58	0.00075738
439.8	0.23097517		1029.8	0.03522414		1619.8	0.03030798		2209.8	0.03928614		2799.79	-0.00149622		3389.79	0.00035575		3979.78	0.00110986
440	0.23137414		1030	0.03499483		1620	0.03002326		2210	0.03936987		2799.99	-0.00133993		3389.99	-0.00074814		3979.98	0.00063
440.2	0.2304202		1030.2	0.03591119		1620.2	0.02947511		2210.2	0.03893285		2800.19	-0.00266909		3390.19	-0.00205318		3980.18	0.00074156
440.4	0.23042123		1030.4	0.03529876		1620.4	0.0293188		2210.4	0.03864171		2800.39	-0.00248065		3390.39	-0.00171548		3980.38	0.00166577
440.6	0.23057221		1030.6	0.03567669		1620.6	0.02909789		2210.6	0.03927548		2800.59	-0.00205848		3390.59	-0.00120719		3980.58	0.00330403
440.8	0.23105516		1030.8	0.03502749		1620.8	0.02808961		2210.8	0.03899976		2800.79	-0.00227388		3390.79	-0.00158381		3980.78	0.00419859
441	0.2317286		1031	0.03442238		1621	0.0292863		2211	0.03928753		2800.99	-0.00317379		3390.99	-0.00195456		3980.98	0.00389227
441.2	0.23128666		1031.2	0.03429713		1621.2	0.03017917		2211.2	0.03987329		2801.19	-0.00359984		3391.19	-0.00270932		3981.18	0.00439931
441.4	0.23100623		1031.4	0.03484591		1621.4	0.03079744		2211.4	0.03945812		2801.39	-0.00326936		3391.39	-0.00312447		3981.38	0.00443307
441.6	0.23143786		1031.6	0.03520047		1621.6	0.03067893		2211.6	0.03954621		2801.59	-0.00382371		3391.59	-0.00376759		3981.58	0.00416144
441.8	0.23084077		1031.8	0.03509858		1621.8	0.03108306		2211.8	0.03917412		2801.79	-0.00373511		3391.79	-0.00340826		3981.78	0.00450412
442	0.23102036		1032	0.03555933		1622	0.03217408		2212	0.04000234		2801.99	-0.00503864		3391.99	-0.00353172		3981.98	0.0039251
442.2	0.2311409		1032.2	0.03551667		1622.2	0.03272786		2212.2	0.03999721		2802.19	-0.00554187		3392.19	-0.00318079		3982.18	0.00388199
442.4	0.23110151		1032.4	0.03626794		1622.4	0.03360452		2212.4	0.04038428		2802.39	-0.00492815		3392.39	-0.00380538		3982.38	0.00299494
442.6	0.23177729		1032.6	0.03573985		1622.6	0.03469217		2212.6	0.04019943		2802.59	-0.00389769		3392.59	-0.00284806		3982.58	0.00326648
442.8	0.23163655		1032.8	0.03486917		1622.8	0.03467078		2212.8	0.03954762		2802.79	-0.00276575		3392.79	-0.00223507		3982.78	0.00380097
443	0.23255667		1033	0.03531665		1623	0.03416626		2213	0.03952759		2802.99	-0.00230767		3392.99	-0.00226591		3982.98	0.00390302
443.2	0.23290688		1033.2	0.03499018		1623.2	0.03486647		2213.2	0.03897948		2803.19	-0.00177123		3393.19	-0.00125864		3983.18	0.00390936
443.4	0.23402852		1033.4	0.03571982		1623.4	0.03481508		2213.4	0.03912498		2803.39	-0.00183665		3393.39	-0.00082558		3983.38	0.0033774
443.6	0.23453919		1033.6	0.03562157		1623.6	0.03420619		2213.6	0.03976297		2803.59	-0.00180929		3393.59	0.00042515		3983.58	0.0035873
443.8	0.23507206		1033.8	0.03573505		1623.8	0.03461799		2213.8	0.03922761		2803.79	-0.00223002		3393.79	0.00096132		3983.78	0.00413179
444	0.23489334		1034	0.03587063		1624	0.03366176		2214	0.03815251		2803.99	-0.00326035		3393.99	0.00107675		3983.98	0.00428913
444.2	0.2343517		1034.2	0.03560114		1624.2	0.03236732		2214.2	0.03768408		2804.19	-0.00359407		3394.19	0.00132692		3984.18	0.00470896
444.4	0.23445018		1034.4	0.0351321		1624.4	0.03142228		2214.4	0.03735515		2804.39	-0.00250505		3394.39	0.00137523		3984.38	0.00522293
444.6	0.2347916		1034.6	0.03482791		1624.6	0.0315805		2214.6	0.03744161		2804.59	-0.0031962		3394.59	0.00155189		3984.58	0.00588125
444.8	0.23448044		1034.8	0.03411886		1624.8	0.03138376		2214.8	0.03805247		2804.79	-0.00280988		3394.79	0.00062185		3984.78	0.0053432
445	0.23464666		1035	0.03402886		1625	0.03231692		2215	0.03819412		2804.99	-0.0037388		3394.99	0.0004927		3984.98	0.00500931
445.2	0.2340412		1035.2	0.03419137		1625.2	0.03257031		2215.2	0.03841869		2805.19	-0.00371294		3395.19	0.00037606		3985.18	0.00481533
445.4	0.23394951		1035.4	0.03393259		1625.4	0.03321449		2215.4	0.03847506		2805.39	-0.00388105		3395.39	0.00014378		3985.38	0.0055757
445.6	0.2339348		1035.6	0.03383738		1625.6	0.03354037		2215.6	0.03849351		2805.59	-0.00420356		3395.59	-0.00013512		3985.58	0.00541522
445.8	0.23347195		1035.8	0.03365466		1625.8	0.03422435		2215.8	0.03882521		2805.79	-0.00441363		3395.79	-0.00069529		3985.78	0.00557353
446	0.23329519		1036	0.03296887		1626	0.03453876		2216	0.03926452		2805.99	-0.00465959		3395.99	-0.00154737		3985.98	0.0060713
446.2	0.23358808		1036.2	0.03270717		1626.2	0.03383894		2216.2	0.04009561		2806.19	-0.00417188		3396.19	-0.002731		3986.18	0.00656701
446.4	0.2338183		1036.4	0.03334049		1626.4	0.03487562		2216.4	0.04079418		2806.39	-0.00295289		3396.39	-0.00449841		3986.38	0.0054377
446.6	0.23408219		1036.6	0.03245416		1626.6	0.03589603		2216.6	0.0405544		2806.59	-0.0018847		3396.59	-0.00505592		3986.58	0.00554413
446.8	0.23466175		1036.8	0.03300554		1626.8	0.03575212		2216.8	0.04049629		2806.79	-0.00144085		3396.79	-0.00488493		3986.78	0.00586381
447	0.23559125		1037	0.03385879		1627	0.03600601		2217	0.04082291		2806.99	-0.0006553		3396.99	-0.00461034		3986.98	0.00474384
447.2	0.23577194		1037.2	0.03393809		1627.2	0.0360011		2217.2	0.04027097		2807.19	0.00000504		3397.19	-0.0039355		3987.18	0.00437286
447.4	0.2360743		1037.4	0.03516797		1627.4	0.03584558		2217.4	0.04058556		2807.39	0.00009536		3397.39	-0.00262481		3987.38	0.00421136
447.6	0.23578985		1037.6	0.03498465		1627.6	0.03514152		2217.6	0.03961891		2807.59	-0.00061444		3397.59	-0.00166851		3987.58	0.00477908
447.8	0.2360591		1037.8	0.03454347		1627.8	0.03478661		2217.8	0.03853398		2807.79	-0.0004914		3397.79	-0.0012879		3987.78	0.00440998
448	0.2350829		1038	0.03504594		1628	0.03372668		2218	0.03793734		2807.99	-0.00001425		3397.99	-0.00099927		3987.98	0.00318207
448.2	0.23485249		1038.2	0.03500529		1628.2	0.03232069		2218.2	0.0374129		2808.19	0.00091147		3398.19	-0.00093813		3988.18	0.00271661
448.4	0.23436758		1038.4	0.03469139		1628.4	0.03169367		2218.4	0.03670019		2808.39	0.00101786		3398.39	-0.00113235		3988.38	0.00302278
448.6	0.23458502		1038.6	0.03394256		1628.6	0.03172922		2218.6	0.03684318		2808.59	-0.00023399		3398.59	-0.0012261		3988.58	0.00344915
448.8	0.23465143		1038.8	0.03364156		1628.8	0.03092654		2218.8	0.0365423		2808.79	0.00022347		3398.79	-0.00075719		3988.78	0.00298616
449	0.23563829		1039	0.03339583		1629	0.0315164		2219	0.0365893		2808.99	-0.00039883		3398.99	-0.00079894		3988.98	0.00272382
449.2	0.23565912		1039.2	0.03321949		1629.2	0.03146141		2219.2	0.03633781		2809.19	-0.00064247		3399.19	-0.0001578		3989.18	0.00285529
449.4	0.23601086		1039.4	0.03318343		1629.4	0.03164527		2219.4	0.03613229		2809.39	-0.00138775		3399.39	-0.00018061		3989.38	0.00336831
449.6	0.23616658		1039.6	0.03334265		1629.6	0.03255877		2219.6	0.03643375		2809.59	-0.00134617		3399.59	-0.00092454		3989.58	0.0035729
449.8	0.23697037		1039.8	0.03357468		1629.8	0.03347435		2219.8	0.03629779		2809.79	-0.00130491		3399.79	-0.00150582		3989.78	0.00471666
450	0.23737491		1040	0.03433322		1630	0.03336886		2220	0.03650229		2809.99	-0.00093448		3399.99	-0.00174112		3989.98	0.00609625
450.2	0.23807856		1040.2	0.03490059		1630.2	0.0336985		2220.2	0.03721205		2810.19	-0.00170293		3400.19	-0.0023423		3990.18	0.00557195
450.4	0.23849769		1040.4	0.0360756		1630.4	0.0346964		2220.4	0.03789491		2810.39	-0.00118943		3400.39	-0.00283993		3990.38	0.00541988
450.6	0.23900783		1040.6	0.0361643		1630.6	0.03509668		2220.6	0.03823822		2810.59	-0.00085107		3400.59	-0.00305314		3990.58	0.00624245
450.8	0.23914044		1040.8	0.03682854		1630.8	0.03474195		2220.8	0.03857961		2810.79	-0.00068339		3400.79	-0.00254135		3990.78	0.00668037
451	0.23895499		1041	0.03709858		1631	0.0348812		2221	0.03924582		2810.99	-0.00060015		3400.99	-0.00253263		3990.98	0.00707029
451.2	0.23921309		1041.2	0.03702653		1631.2	0.03463572		2221.2	0.03866485		2811.19	-0.00109533		3401.19	-0.00249741		3991.18	0.00668696
451.4	0.23846253		1041.4	0.03756533		1631.4	0.0342049		2221.4	0.03898284		2811.39	-0.00104495		3401.39	-0.00208728		3991.38	0.00664338
451.6	0.23764526		1041.6	0.03712173		1631.6	0.03327429		2221.6	0.03826727		2811.59	-0.00156056		3401.59	-0.0022889		3991.58	0.00665125
451.8	0.23788649		1041.8	0.03641976		1631.8	0.03288595		2221.8	0.03841325		2811.79	-0.00172665		3401.79	-0.00204224		3991.78	0.00485865
452	0.23710931		1042	0.03730534		1632	0.03242278		2222	0.03867317		2811.99	-0.00179861		3401.99	-0.00177685		3991.98	0.00407447
452.2	0.23690765		1042.2	0.03679685		1632.2	0.03188544		2222.2	0.03885899		2812.19	-0.00180098		3402.19	-0.00241328		3992.18	0.00430834
452.4	0.23645242		1042.4	0.03639858		1632.4	0.03246167		2222.4	0.03916824		2812.39	-0.00260319		3402.39	-0.00281721		3992.38	0.0047094
452.6	0.23684432		1042.6	0.03729616		1632.6	0.03324775		2222.6	0.03937735		2812.59	-0.00232165		3402.59	-0.00369603		3992.58	0.00424128
452.8	0.23660816		1042.8	0.03770862		1632.8	0.03300907		2222.8	0.03906568		2812.79	-0.00261301		3402.79	-0.00369911		3992.78	0.00420845
453	0.23684771		1043	0.03778708		1633	0.03327922		2223	0.03882005		2812.99	-0.00287009		3402.99	-0.00425618		3992.98	0.00370361
453.2	0.23631435		1043.2	0.03823782		1633.2	0.0333566		2223.2	0.03946873		2813.19	-0.00401234		3403.19	-0.00366655		3993.18	0.00417891
453.4	0.23640791		1043.4	0.03818099		1633.4	0.03384365		2223.4	0.03895376		2813.39	-0.00416873		3403.39	-0.00373531		3993.38	0.00428096
453.6	0.23674525		1043.6	0.0391373		1633.6	0.0342825		2223.6	0.03862865		2813.59	-0.00379169		3403.59	-0.00361939		3993.58	0.00448086
453.8	0.2373222		1043.8	0.03996923		1633.8	0.03488068		2223.8	0.03797186		2813.79	-0.00376998		3403.79	-0.00260482		3993.78	0.00536046
454	0.23759112		1044	0.04035736		1634	0.03439861		2224	0.03756194		2813.99	-0.00373404		3403.99	-0.00149956		3993.98	0.0061325
454.2	0.23759277		1044.2	0.03999457		1634.2	0.03494878		2224.2	0.0377381		2814.19	-0.00437956		3404.19	-0.00078196		3994.18	0.00636036
454.4	0.23829316		1044.4	0.04053303		1634.4	0.03485245		2224.4	0.03840382		2814.39	-0.00346135		3404.39	-0.00143222		3994.38	0.00682219
454.6	0.23891347		1044.6	0.03994127		1634.6	0.03479528		2224.6	0.03872161		2814.59	-0.0034232		3404.59	-0.00173852		3994.58	0.00836254
454.8	0.23893073		1044.8	0.03946448		1634.8	0.03436315		2224.8	0.03831437		2814.79	-0.00324068		3404.79	-0.00170207		3994.78	0.00843857
455	0.23923088		1045	0.03922173		1635	0.03452686		2225	0.03813008		2814.99	-0.00331777		3404.99	-0.00178485		3994.98	0.00896174
455.2	0.24026023		1045.2	0.03877922		1635.2	0.03403923		2225.2	0.03723976		2815.19	-0.00324286		3405.19	-0.0014015		3995.18	0.00752365
455.4	0.24090495		1045.4	0.03915627		1635.4	0.03398009		2225.4	0.0375327		2815.39	-0.00275001		3405.39	-0.0011441		3995.38	0.00753396
455.6	0.24148936		1045.6	0.03847831		1635.6	0.0340269		2225.6	0.03842708		2815.59	-0.00354185		3405.59	-0.00088952		3995.58	0.0070948
455.8	0.24216087		1045.8	0.03835131		1635.8	0.03448268		2225.8	0.03953076		2815.79	-0.00359081		3405.79	-0.00063239		3995.78	0.00571054
456	0.2424268		1046	0.03897918		1636	0.03393816		2226	0.04066513		2815.99	-0.00319468		3405.99	-0.00045692		3995.98	0.00569532
456.2	0.24246182		1046.2	0.03951322		1636.2	0.03322493		2226.2	0.04080519		2816.19	-0.00282248		3406.19	-0.0009465		3996.18	0.00489734
456.4	0.24288642		1046.4	0.04023388		1636.4	0.0330265		2226.4	0.04141546		2816.39	-0.00253089		3406.39	-0.00062593		3996.38	0.00473876
456.6	0.24332218		1046.6	0.04062311		1636.6	0.03317112		2226.6	0.04184787		2816.59	-0.00173243		3406.59	-0.00108169		3996.58	0.00442936
456.8	0.24307293		1046.8	0.04018576		1636.8	0.03314365		2226.8	0.04319314		2816.79	-0.00203493		3406.79	-0.00177069		3996.78	0.00458008
457	0.24352427		1047	0.03954316		1637	0.03308265		2227	0.04445713		2816.99	-0.0017295		3406.99	-0.00144698		3996.98	0.00370403
457.2	0.242962		1047.2	0.03955235		1637.2	0.0326261		2227.2	0.04580792		2817.19	-0.0021309		3407.19	-0.0016407		3997.18	0.00393697
457.4	0.24309756		1047.4	0.0389915		1637.4	0.03213577		2227.4	0.04506074		2817.39	-0.00196815		3407.39	-0.0017484		3997.38	0.00355154
457.6	0.24361125		1047.6	0.03957314		1637.6	0.03229527		2227.6	0.04548089		2817.59	-0.001531		3407.59	-0.00170216		3997.58	0.00265301
457.8	0.24341447		1047.8	0.03915975		1637.8	0.03269292		2227.8	0.04602335		2817.79	-0.00122685		3407.79	-0.00102887		3997.78	0.00263484
458	0.24360635		1048	0.03884301		1638	0.03276834		2228	0.04584089		2817.99	-0.00136818		3407.99	-0.00091975		3997.98	0.00246183
458.2	0.24353408		1048.2	0.03901227		1638.2	0.0332124		2228.2	0.04613045		2818.19	-0.00155247		3408.19	-0.00153169		3998.18	0.00231375
458.4	0.24379715		1048.4	0.03906639		1638.4	0.03289896		2228.4	0.04555107		2818.39	-0.00091353		3408.39	-0.00328974		3998.38	0.00274018
458.6	0.24340095		1048.6	0.03844817		1638.6	0.03311432		2228.6	0.0443937		2818.59	-0.00175653		3408.59	-0.00297373		3998.58	0.00370391
458.8	0.24288877		1048.8	0.0383009		1638.8	0.0341737		2228.8	0.04369022		2818.79	-0.00154858		3408.79	-0.00320072		3998.78	0.00257899
459	0.24288274		1049	0.03811479		1639	0.03477759		2229	0.04321926		2818.99	-0.00132146		3408.99	-0.00290991		3998.98	0.0032204
459.2	0.24320556		1049.2	0.03812002		1639.2	0.03517759		2229.2	0.04217259		2819.19	-0.0015137		3409.19	-0.00305393		3999.18	0.00291757
459.4	0.24294722		1049.4	0.03839781		1639.4	0.03537467		2229.4	0.04215969		2819.39	-0.00122971		3409.39	-0.00367353		3999.38	0.00389351
459.6	0.24201588		1049.6	0.03772091		1639.6	0.03486517		2229.6	0.04186743		2819.59	-0.00187525		3409.59	-0.00334198		3999.58	0.00442605
459.8	0.24176281		1049.8	0.03769781		1639.8	0.03473283		2229.8	0.04114639		2819.79	-0.00198819		3409.79	-0.0034606		3999.78	0.00457655
460	0.24145982		1050	0.03747102		1640	0.03395865		2230	0.0402968		2819.99	-0.00188941		3409.99	-0.00380237		3999.98	0.00487887
460.2	0.24141246		1050.2	0.037377		1640.2	0.03394134		2230.2	0.03934668		2820.19	-0.00143133		3410.19	-0.00395724		4000.18	0.00567701
460.4	0.24132013		1050.4	0.03689507		1640.4	0.03395883		2230.4	0.03906166		2820.39	-0.001088		3410.39	-0.00374176		4000.38	0.0066867
460.6	0.24141002		1050.6	0.0359755		1640.6	0.03510203		2230.6	0.03921688		2820.59	-0.00089075		3410.59	-0.00361358		4000.58	0.0078154
460.8	0.24119322		1050.8	0.03568369		1640.8	0.03536166		2230.8	0.03988258		2820.79	-0.00071592		3410.79	-0.00274372		4000.78	0.00828589
461	0.24085371		1051	0.03562174		1641	0.03459151		2231	0.03925403		2820.99	-0.00052589		3410.99	-0.00218795		4000.98	0.00835132
461.2	0.24011865		1051.2	0.0365047		1641.2	0.03423597		2231.2	0.03960273		2821.19	-0.00093283		3411.19	-0.00259852		4001.18	0.00784761
461.4	0.24018056		1051.4	0.03692535		1641.4	0.03388444		2231.4	0.03987682		2821.39	-0.00072009		3411.39	-0.00201429		4001.38	0.00705267
461.6	0.2407645		1051.6	0.03716875		1641.6	0.03391919		2231.6	0.04088749		2821.59	0.00041144		3411.59	-0.00164721		4001.58	0.00575379
461.8	0.24072361		1051.8	0.03711105		1641.8	0.03390466		2231.8	0.04146185		2821.79	0.00037984		3411.79	-0.00121265		4001.78	0.00529759
462	0.24175363		1052	0.03831279		1642	0.03405981		2232	0.042017		2821.99	0.00022421		3411.99	-0.00122433		4001.98	0.00493618
462.2	0.24205004		1052.2	0.03937652		1642.2	0.03385864		2232.2	0.04216771		2822.19	0.00006119		3412.19	-0.00067923		4002.18	0.00430709
462.4	0.24218612		1052.4	0.03915422		1642.4	0.03331714		2232.4	0.0425599		2822.39	-0.00013586		3412.39	-0.00140105		4002.38	0.00376657
462.6	0.24188713		1052.6	0.0397343		1642.6	0.0334687		2232.6	0.0425388		2822.59	-0.00094788		3412.59	0.00015496		4002.58	0.00309053
462.8	0.24215996		1052.8	0.04044458		1642.8	0.03297665		2232.8	0.04370107		2822.79	-0.00062527		3412.79	0.00039891		4002.78	0.00224736
463	0.24256644		1053	0.0408498		1643	0.03248171		2233	0.04325179		2822.99	-0.00135814		3412.99	0.00020042		4002.98	0.00238371
463.2	0.24287417		1053.2	0.04206069		1643.2	0.03229544		2233.2	0.04305723		2823.19	-0.00149688		3413.19	-0.00041562		4003.18	0.00247657
463.4	0.24301182		1053.4	0.04283616		1643.4	0.03185621		2233.4	0.04379435		2823.39	-0.00146118		3413.39	-0.00074592		4003.38	0.00354104
463.6	0.24295292		1053.6	0.04268682		1643.6	0.03147227		2233.6	0.04320517		2823.59	-0.00169311		3413.59	-0.00091145		4003.58	0.00374689
463.8	0.24377525		1053.8	0.04383927		1643.8	0.03207516		2233.8	0.04317079		2823.79	-0.00183175		3413.79	-0.001349		4003.78	0.00379156
464	0.24351667		1054	0.04347212		1644	0.03222139		2234	0.04302656		2823.99	-0.00247353		3413.99	-0.00203261		4003.98	0.00426472
464.2	0.24405186		1054.2	0.04279793		1644.2	0.03154097		2234.2	0.04324695		2824.19	-0.00241617		3414.19	-0.00222797		4004.18	0.00495046
464.4	0.24474825		1054.4	0.04248823		1644.4	0.03126929		2234.4	0.04312646		2824.39	-0.00301782		3414.39	-0.0020165		4004.38	0.00546528
464.6	0.24494454		1054.6	0.04199334		1644.6	0.03193761		2234.6	0.04282152		2824.59	-0.00368331		3414.59	-0.00124895		4004.58	0.00581904
464.8	0.2448107		1054.8	0.04196683		1644.8	0.03255202		2234.8	0.04252448		2824.79	-0.00371071		3414.79	-0.00091548		4004.78	0.00603754
465	0.2439544		1055	0.04217222		1645	0.03287209		2235	0.04180636		2824.99	-0.00360078		3414.99	-0.00158796		4004.98	0.00593722
465.2	0.2433178		1055.2	0.04201162		1645.2	0.03355849		2235.2	0.04198731		2825.19	-0.00359553		3415.19	-0.00163405		4005.18	0.00557798
465.4	0.24398537		1055.4	0.04108167		1645.4	0.03381781		2235.4	0.04140904		2825.39	-0.0023236		3415.39	-0.00082038		4005.38	0.00606896
465.6	0.24440049		1055.6	0.0409706		1645.6	0.03460217		2235.6	0.04191568		2825.59	-0.00191031		3415.59	-0.00127444		4005.58	0.00603241
465.8	0.24427833		1055.8	0.0407776		1645.8	0.03504473		2235.8	0.04186745		2825.79	-0.00219403		3415.79	-0.00210189		4005.78	0.0060234
466	0.24482968		1056	0.0413409		1646	0.03599349		2236	0.04161094		2825.99	-0.00178063		3415.99	-0.0022143		4005.98	0.00545708
466.2	0.24463763		1056.2	0.04054278		1646.2	0.03640397		2236.2	0.04163483		2826.19	-0.00220637		3416.19	-0.00247703		4006.18	0.00561811
466.4	0.24469793		1056.4	0.03981396		1646.4	0.03582202		2236.4	0.0422491		2826.39	-0.00200423		3416.39	-0.00294963		4006.38	0.00536712
466.6	0.24478556		1056.6	0.04028789		1646.6	0.03588133		2236.6	0.04198731		2826.59	-0.0013821		3416.59	-0.00229664		4006.58	0.00506746
466.8	0.24521133		1056.8	0.04068362		1646.8	0.03532654		2236.8	0.04235944		2826.79	-0.00102296		3416.79	-0.00261069		4006.78	0.00447351
467	0.246394		1057	0.04070611		1647	0.03524392		2237	0.04227953		2826.99	-0.00087365		3416.99	-0.00295117		4006.98	0.00462593
467.2	0.24726073		1057.2	0.04105621		1647.2	0.03530966		2237.2	0.04247147		2827.19	0.0000967		3417.19	-0.00260031		4007.18	0.00530868
467.4	0.2470114		1057.4	0.04065015		1647.4	0.0347679		2237.4	0.04286983		2827.39	-0.00058134		3417.39	-0.00234796		4007.38	0.00494844
467.6	0.24730705		1057.6	0.03985376		1647.6	0.03446757		2237.6	0.04279432		2827.59	-0.00079383		3417.59	-0.00228718		4007.58	0.00459646
467.8	0.24776966		1057.8	0.04005663		1647.8	0.03441829		2237.8	0.04347724		2827.79	-0.0011302		3417.79	-0.00216684		4007.78	0.00395342
468	0.24784549		1058	0.03910204		1648	0.03344049		2238	0.04408603		2827.99	-0.00134643		3417.99	-0.00239068		4007.98	0.00395546
468.2	0.24848333		1058.2	0.03843258		1648.2	0.03255702		2238.2	0.044794		2828.19	-0.00115049		3418.19	-0.00216378		4008.18	0.00394983
468.4	0.24859905		1058.4	0.0384564		1648.4	0.03215499		2238.4	0.04498189		2828.39	-0.0014739		3418.39	-0.00189126		4008.38	0.00410784
468.6	0.24800499		1058.6	0.0381942		1648.6	0.03180468		2238.6	0.04490014		2828.59	-0.0017306		3418.59	-0.00141465		4008.58	0.00450738
468.8	0.24735042		1058.8	0.03799244		1648.8	0.03202429		2238.8	0.04498543		2828.79	-0.00156504		3418.79	-0.00124493		4008.78	0.00522321
469	0.24650453		1059	0.03767837		1649	0.03143914		2239	0.04481444		2828.99	-0.00130922		3418.99	-0.00092708		4008.98	0.00582704
469.2	0.24631647		1059.2	0.03747609		1649.2	0.03106052		2239.2	0.04503776		2829.19	-0.00144691		3419.19	-0.00052426		4009.18	0.0069317
469.4	0.24629404		1059.4	0.03749468		1649.4	0.03086543		2239.4	0.04522109		2829.39	-0.001276		3419.39	-0.00021236		4009.38	0.00779635
469.6	0.24552851		1059.6	0.03777903		1649.6	0.03076378		2239.6	0.04561947		2829.59	-0.00184231		3419.59	-0.00090469		4009.58	0.00857336
469.8	0.24515081		1059.8	0.03751379		1649.8	0.03102365		2239.8	0.0454891		2829.79	-0.0019089		3419.79	-0.00118851		4009.78	0.00946705
470	0.24515081		1059.99	0.03751379		1650	0.03102365		2240	0.0454891		2829.99	-0.0019089		3419.98	-0.00118851		4009.98	0.00946705
470.2	0.2443806		1060.19	0.03796879		1650.2	0.03097697		2240.2	0.04480889		2830.19	-0.00185367		3420.18	-0.00220214		4010.18	0.00989256
470.4	0.24426812		1060.39	0.03807631		1650.4	0.03096008		2240.4	0.04446917		2830.39	-0.00195343		3420.38	-0.00274063		4010.38	0.00989543
470.6	0.24375007		1060.59	0.038102		1650.6	0.03042659		2240.6	0.04433671		2830.59	-0.00211056		3420.58	-0.00325678		4010.58	0.00897827
470.8	0.2431385		1060.79	0.0382286		1650.8	0.03083904		2240.8	0.04405851		2830.79	-0.00221215		3420.78	-0.00327143		4010.78	0.00820713
471	0.2432137		1060.99	0.03813666		1651	0.03126559		2241	0.04331959		2830.99	-0.00192932		3420.98	-0.0035287		4010.98	0.00808216
471.2	0.24251046		1061.19	0.03867409		1651.2	0.03089704		2241.2	0.04229544		2831.19	-0.00181238		3421.18	-0.00435813		4011.18	0.00754917
471.4	0.24157629		1061.39	0.03863513		1651.4	0.03067384		2241.4	0.04257311		2831.39	-0.00185075		3421.38	-0.00482948		4011.38	0.00774872
471.6	0.24149634		1061.59	0.03865204		1651.6	0.03062122		2241.6	0.04247955		2831.59	-0.00145089		3421.58	-0.00477004		4011.58	0.00762646
471.8	0.24140667		1061.79	0.03892879		1651.8	0.03018602		2241.8	0.04231829		2831.79	-0.00078154		3421.78	-0.00495387		4011.78	0.00769411
472	0.24113545		1061.99	0.0388951		1652	0.02872143		2242	0.04283257		2831.99	-0.00038873		3421.98	-0.00500455		4011.98	0.0079148
472.2	0.24113996		1062.19	0.03866038		1652.2	0.02720906		2242.2	0.04287388		2832.19	0.00011645		3422.18	-0.00463056		4012.18	0.00790931
472.4	0.24056001		1062.39	0.03754229		1652.4	0.02719055		2242.4	0.04284992		2832.39	-0.00073441		3422.38	-0.0045816		4012.38	0.00726208
472.6	0.23987769		1062.59	0.03748296		1652.6	0.02697039		2242.6	0.04271872		2832.59	0.00010174		3422.58	-0.00407113		4012.58	0.00734951
472.8	0.23978817		1062.79	0.03697171		1652.8	0.02738129		2242.8	0.04261564		2832.79	0.00013362		3422.78	-0.00429311		4012.78	0.00649107
473	0.23905801		1062.99	0.03753054		1653	0.0271253		2243	0.04207485		2832.99	0.00028211		3422.98	-0.00453374		4012.98	0.00696291
473.2	0.23987036		1063.19	0.03763732		1653.2	0.02610669		2243.2	0.04192472		2833.19	0.00017305		3423.18	-0.00502949		4013.18	0.0078029
473.4	0.24049047		1063.39	0.03732999		1653.4	0.02535531		2243.4	0.041745		2833.39	-0.00075769		3423.38	-0.00475893		4013.38	0.0081579
473.6	0.2402174		1063.59	0.03813871		1653.6	0.02471996		2243.6	0.04170767		2833.59	-0.00027653		3423.58	-0.00479279		4013.58	0.00859204
473.8	0.24069364		1063.79	0.03909754		1653.8	0.02468999		2243.8	0.04105922		2833.79	0.00013474		3423.78	-0.00477392		4013.78	0.00913588
474	0.24015465		1063.99	0.0401426		1654	0.02442307		2244	0.04006659		2833.99	0.00072387		3423.98	-0.00386689		4013.98	0.0085645
474.2	0.24038806		1064.19	0.04045865		1654.2	0.02408757		2244.2	0.04019916		2834.19	0.00073319		3424.18	-0.00425838		4014.18	0.00881984
474.4	0.23999413		1064.39	0.04031701		1654.4	0.02375828		2244.4	0.03950627		2834.39	0.0002681		3424.38	-0.00382754		4014.38	0.00793849
474.6	0.23964947		1064.59	0.03994904		1654.6	0.02392179		2244.6	0.03862635		2834.59	0.0000205		3424.58	-0.00312941		4014.58	0.00762994
474.8	0.23936716		1064.79	0.03992024		1654.8	0.02484517		2244.8	0.03742942		2834.79	0.00009931		3424.78	-0.0021237		4014.78	0.00723139
475	0.23961837		1064.99	0.04016458		1655	0.02528472		2245	0.03647057		2834.99	0.00001231		3424.98	-0.00284686		4014.98	0.0076086
475.2	0.2389153		1065.19	0.04114532		1655.2	0.02427107		2245.2	0.03596142		2835.19	-0.00080766		3425.18	-0.00319636		4015.18	0.00722534
475.4	0.23856007		1065.39	0.04029727		1655.4	0.02446272		2245.4	0.03741918		2835.39	-0.0010135		3425.38	-0.003375		4015.38	0.00771902
475.6	0.23919897		1065.59	0.04006661		1655.6	0.0239561		2245.6	0.03686346		2835.59	-0.00058563		3425.58	-0.0031987		4015.58	0.00690265
475.8	0.23901885		1065.79	0.04002046		1655.8	0.02328101		2245.8	0.03761133		2835.79	-0.00124871		3425.78	-0.00374171		4015.78	0.00706207
476	0.23897939		1065.99	0.03907698		1656	0.02190836		2246	0.03871135		2835.99	-0.00209002		3425.98	-0.00437163		4015.98	0.00687404
476.2	0.23867635		1066.19	0.03805158		1656.2	0.02184073		2246.2	0.03884913		2836.19	-0.00226251		3426.18	-0.00456897		4016.18	0.00649726
476.4	0.23830491		1066.39	0.03742063		1656.4	0.02204194		2246.4	0.03943562		2836.39	-0.0027306		3426.38	-0.0046663		4016.38	0.00569524
476.6	0.23817804		1066.59	0.03751799		1656.6	0.0221633		2246.6	0.03999045		2836.59	-0.00242063		3426.58	-0.00414823		4016.58	0.00614322
476.8	0.23770247		1066.79	0.03706595		1656.8	0.02250282		2246.8	0.03912695		2836.79	-0.00294493		3426.78	-0.00325505		4016.78	0.00670281
477	0.237876		1066.99	0.03652092		1657	0.02259412		2247	0.04020327		2836.99	-0.00281953		3426.98	-0.00235455		4016.98	0.00671084
477.2	0.23885402		1067.19	0.03616247		1657.2	0.0225217		2247.2	0.03972281		2837.19	-0.00284294		3427.18	-0.00194633		4017.18	0.00671324
477.4	0.23892344		1067.39	0.03651069		1657.4	0.0228557		2247.4	0.04020483		2837.39	-0.00300498		3427.38	-0.00185706		4017.38	0.00616223
477.6	0.23840977		1067.59	0.03668982		1657.6	0.02267508		2247.6	0.04015495		2837.59	-0.00263202		3427.58	-0.00272131		4017.58	0.00554625
477.8	0.23778563		1067.79	0.03685713		1657.8	0.0232055		2247.8	0.04029056		2837.79	-0.00285324		3427.78	-0.0024651		4017.78	0.00516573
478	0.23689551		1067.99	0.03691187		1658	0.0231851		2248	0.04056038		2837.99	-0.00327041		3427.98	-0.00228724		4017.98	0.00546994
478.2	0.23622937		1068.19	0.03638185		1658.2	0.02387206		2248.2	0.04086468		2838.19	-0.00311876		3428.18	-0.002145		4018.18	0.00650443
478.4	0.23532642		1068.39	0.03623529		1658.4	0.02406546		2248.4	0.03948692		2838.39	-0.00335743		3428.38	-0.00223222		4018.38	0.00659511
478.6	0.23625476		1068.59	0.03631268		1658.6	0.02472986		2248.6	0.03893965		2838.59	-0.00280434		3428.58	-0.00113417		4018.58	0.00707365
478.8	0.23613249		1068.79	0.03618348		1658.8	0.0253406		2248.8	0.03838559		2838.79	-0.00192433		3428.78	-0.00158176		4018.78	0.00597966
479	0.23638791		1068.99	0.03734416		1659	0.0248716		2249	0.03836111		2838.99	-0.00236839		3428.98	-0.00278352		4018.98	0.00595805
479.2	0.23608933		1069.19	0.03712168		1659.2	0.02388135		2249.2	0.0387534		2839.19	-0.00155111		3429.18	-0.00280903		4019.18	0.00602183
479.4	0.23544806		1069.39	0.03715486		1659.4	0.02428335		2249.4	0.03912898		2839.39	-0.00004726		3429.38	-0.00290067		4019.38	0.00605971
479.6	0.23582002		1069.59	0.03759234		1659.6	0.02389284		2249.6	0.0384324		2839.59	0.00054		3429.58	-0.00326752		4019.58	0.00617583
479.8	0.23563783		1069.79	0.03730112		1659.8	0.02427963		2249.8	0.03962656		2839.79	0.0011836		3429.78	-0.00370443		4019.78	0.00631298
480	0.23600957		1069.99	0.0371979		1660	0.02415776		2250	0.04018176		2839.99	0.00130316		3429.98	-0.00382517		4019.98	0.00634456
480.2	0.23503936		1070.19	0.03751041		1660.2	0.02446248		2250.2	0.04055856		2840.19	0.00140695		3430.18	-0.00353608		4020.18	0.00576554
480.4	0.2347992		1070.39	0.03809933		1660.4	0.02447189		2250.4	0.04076164		2840.39	0.00101269		3430.38	-0.0030036		4020.38	0.00498557
480.6	0.2356679		1070.59	0.03810785		1660.6	0.02512671		2250.6	0.04054628		2840.59	0.00118671		3430.58	-0.002669		4020.58	0.00553685
480.8	0.23576077		1070.79	0.03796679		1660.8	0.02626039		2250.8	0.03936669		2840.79	0.00097189		3430.78	-0.00235824		4020.78	0.00592178
481	0.23589171		1070.99	0.03798621		1661	0.02675771		2251	0.03954917		2840.99	0.0007473		3430.98	-0.00343191		4020.98	0.00494483
481.2	0.23524139		1071.19	0.03859094		1661.2	0.02726622		2251.2	0.03870432		2841.19	0.00074482		3431.18	-0.00418458		4021.18	0.00535905
481.4	0.23439368		1071.39	0.03939376		1661.4	0.02790854		2251.4	0.03973546		2841.39	0.00099293		3431.38	-0.00554723		4021.38	0.00482419
481.6	0.2334328		1071.59	0.04015148		1661.6	0.02745436		2251.6	0.03981833		2841.59	0.00079849		3431.58	-0.00604494		4021.58	0.00482121
481.8	0.23273029		1071.79	0.0406698		1661.8	0.02762912		2251.8	0.04009197		2841.79	-0.00016699		3431.78	-0.00545892		4021.78	0.00545027
482	0.23277921		1071.99	0.04080842		1662	0.02779745		2252	0.03959824		2841.99	-0.00221458		3431.98	-0.00597065		4021.98	0.00607398
482.2	0.23283076		1072.19	0.04116377		1662.2	0.02813244		2252.2	0.03901953		2842.19	-0.00288806		3432.18	-0.00618657		4022.18	0.00612962
482.4	0.23260204		1072.39	0.04122636		1662.4	0.02751675		2252.4	0.03807066		2842.39	-0.00323901		3432.38	-0.00682058		4022.38	0.00501857
482.6	0.23266262		1072.59	0.04106611		1662.6	0.02737593		2252.6	0.03793415		2842.59	-0.00361855		3432.58	-0.00626638		4022.58	0.00482412
482.8	0.23201656		1072.79	0.04085378		1662.8	0.02636413		2252.8	0.03816391		2842.79	-0.00431442		3432.78	-0.00689697		4022.78	0.00524315
483	0.23116267		1072.99	0.04140467		1663	0.02429602		2253	0.03859553		2842.99	-0.00545194		3432.98	-0.00683667		4022.98	0.00612836
483.2	0.23017796		1073.19	0.04021304		1663.2	0.02303582		2253.2	0.03856972		2843.19	-0.0046579		3433.18	-0.00614631		4023.18	0.00752936
483.4	0.22990669		1073.39	0.04094314		1663.4	0.02246826		2253.4	0.03778198		2843.39	-0.00403074		3433.38	-0.00566425		4023.38	0.00812863
483.6	0.22931693		1073.59	0.03988973		1663.6	0.02172787		2253.6	0.03790174		2843.59	-0.00434116		3433.58	-0.00600404		4023.58	0.00898655
483.8	0.22877728		1073.79	0.0388684		1663.8	0.02076817		2253.8	0.03795122		2843.79	-0.00456044		3433.78	-0.00562073		4023.78	0.00869118
484	0.22852715		1073.99	0.03848911		1664	0.02009999		2254	0.03767349		2843.99	-0.00521786		3433.98	-0.00516128		4023.98	0.00975486
484.2	0.22805983		1074.19	0.03743844		1664.2	0.01942033		2254.2	0.03803148		2844.19	-0.00454377		3434.18	-0.00509125		4024.18	0.00932
484.4	0.22928735		1074.39	0.03717073		1664.4	0.01933259		2254.4	0.0378614		2844.39	-0.00477471		3434.38	-0.00481288		4024.38	0.00940899
484.6	0.22964621		1074.59	0.03642149		1664.6	0.02026191		2254.6	0.03740732		2844.59	-0.00511099		3434.58	-0.00483133		4024.58	0.00949229
484.8	0.22852999		1074.79	0.03686409		1664.8	0.02086818		2254.8	0.03642455		2844.79	-0.00447353		3434.78	-0.00457697		4024.78	0.00916862
485	0.22851272		1074.99	0.03794116		1665	0.02021276		2255	0.037166		2844.99	-0.00424298		3434.98	-0.00471344		4024.98	0.00894684
485.2	0.22806716		1075.19	0.03873656		1665.2	0.02031904		2255.2	0.03769867		2845.19	-0.00319333		3435.18	-0.00437035		4025.18	0.00835571
485.4	0.22859982		1075.39	0.03976978		1665.4	0.02016177		2255.4	0.03875028		2845.39	-0.00296642		3435.38	-0.00455762		4025.38	0.00821561
485.6	0.22844948		1075.59	0.04075251		1665.6	0.02022133		2255.6	0.03856453		2845.59	-0.0034391		3435.58	-0.00383627		4025.58	0.00808252
485.8	0.22924249		1075.79	0.04008606		1665.8	0.02051692		2255.8	0.03805168		2845.79	-0.00407439		3435.78	-0.00365471		4025.78	0.00711861
486	0.22926496		1075.99	0.04061127		1666	0.0211727		2256	0.03750605		2845.99	-0.00448399		3435.98	-0.00423129		4025.98	0.00623672
486.2	0.22887968		1076.19	0.04153152		1666.2	0.0218316		2256.2	0.03723887		2846.19	-0.00426326		3436.18	-0.00378687		4026.18	0.0051088
486.4	0.22847741		1076.39	0.0410083		1666.4	0.02243214		2256.4	0.03707359		2846.39	-0.00482259		3436.38	-0.00470442		4026.38	0.00527535
486.6	0.22889518		1076.59	0.04190343		1666.6	0.02273247		2256.6	0.03741298		2846.59	-0.00506703		3436.58	-0.00426364		4026.58	0.00643714
486.8	0.22908437		1076.79	0.04184912		1666.8	0.02317051		2256.8	0.03812234		2846.79	-0.00521142		3436.78	-0.00422931		4026.78	0.00677582
487	0.22857928		1076.99	0.04117589		1667	0.02317588		2257	0.03724767		2846.99	-0.00495119		3436.98	-0.00449682		4026.98	0.00667035
487.2	0.2286487		1077.19	0.03975811		1667.2	0.02267132		2257.2	0.03681675		2847.19	-0.00489623		3437.18	-0.00422195		4027.18	0.00684952
487.4	0.22827242		1077.39	0.03944561		1667.4	0.02283677		2257.4	0.03597378		2847.39	-0.00483159		3437.38	-0.00509853		4027.38	0.00706957
487.6	0.22692667		1077.59	0.03875685		1667.6	0.02260419		2257.6	0.03615772		2847.59	-0.00551856		3437.58	-0.00551562		4027.58	0.00669088
487.8	0.22751232		1077.79	0.03791116		1667.8	0.02163885		2257.8	0.03539289		2847.79	-0.00587621		3437.78	-0.00611187		4027.78	0.0061613
488	0.22768254		1077.99	0.03653406		1668	0.02132959		2258	0.0351481		2847.99	-0.00537798		3437.98	-0.00624406		4027.98	0.00696418
488.2	0.22715571		1078.19	0.03573821		1668.2	0.02078819		2258.2	0.03508203		2848.19	-0.00437398		3438.18	-0.00642441		4028.18	0.00612653
488.4	0.22729156		1078.39	0.03548479		1668.4	0.02128076		2258.4	0.03470981		2848.39	-0.00440522		3438.38	-0.0065997		4028.38	0.00606109
488.6	0.22707438		1078.59	0.0354939		1668.6	0.02115749		2258.6	0.03422011		2848.59	-0.00443387		3438.58	-0.00685163		4028.58	0.00508114
488.8	0.22674042		1078.79	0.03594076		1668.8	0.0204809		2258.8	0.0340138		2848.79	-0.00352288		3438.78	-0.00697747		4028.78	0.00472038
489	0.22732357		1078.99	0.03619477		1669	0.01979484		2259	0.03457879		2848.99	-0.00380844		3438.98	-0.00753313		4028.98	0.00460524
489.2	0.22686136		1079.19	0.03632307		1669.2	0.02002611		2259.2	0.03488694		2849.19	-0.00348557		3439.18	-0.00808326		4029.18	0.00391924
489.4	0.22588526		1079.39	0.03621791		1669.4	0.0198535		2259.4	0.03485138		2849.39	-0.00335498		3439.38	-0.00897291		4029.38	0.00331746
489.6	0.22503581		1079.59	0.03599202		1669.6	0.01972176		2259.6	0.03482773		2849.59	-0.00311319		3439.58	-0.00914342		4029.58	0.00265935
489.8	0.22573952		1079.79	0.03629805		1669.8	0.0197537		2259.8	0.03498089		2849.79	-0.00300577		3439.78	-0.00800017		4029.78	0.00185817
490	0.22535904		1079.99	0.03698959		1670	0.02063127		2260	0.03486276		2849.99	-0.0036239		3439.98	-0.0080843		4029.98	0.00217779
490.2	0.22497814		1080.19	0.03710015		1670.2	0.02146952		2260.2	0.03545045		2850.19	-0.00386621		3440.18	-0.00762982		4030.18	0.00203638
490.4	0.22536289		1080.39	0.03593132		1670.4	0.02194558		2260.4	0.03475112		2850.39	-0.0039325		3440.38	-0.00662486		4030.38	0.00327642
490.6	0.22511839		1080.59	0.03641757		1670.6	0.02196336		2260.6	0.03499337		2850.59	-0.00392978		3440.58	-0.00495341		4030.58	0.00349578
490.8	0.22491349		1080.79	0.03498715		1670.8	0.02268327		2260.8	0.03538708		2850.79	-0.0047634		3440.78	-0.00449851		4030.78	0.0035245
491	0.22429049		1080.99	0.03478456		1671	0.02209068		2261	0.03466595		2850.99	-0.00518633		3440.98	-0.00400242		4030.98	0.00401976
491.2	0.22345341		1081.19	0.03439527		1671.2	0.02080114		2261.2	0.03586889		2851.19	-0.00661625		3441.18	-0.00340376		4031.18	0.0042084
491.4	0.2229132		1081.39	0.03518841		1671.4	0.02072276		2261.4	0.03570203		2851.39	-0.0073204		3441.38	-0.00337508		4031.38	0.00483029
491.6	0.22182478		1081.59	0.03552366		1671.6	0.02000336		2261.6	0.03623461		2851.59	-0.00745102		3441.58	-0.00240282		4031.58	0.00426185
491.8	0.22218168		1081.79	0.03493578		1671.8	0.01954995		2261.8	0.03567569		2851.79	-0.00757394		3441.78	-0.00265732		4031.78	0.00443076
492	0.22189652		1081.99	0.03493153		1672	0.01955671		2262	0.03581386		2851.99	-0.00694767		3441.98	-0.00217466		4031.98	0.00447607
492.2	0.22175656		1082.19	0.03546285		1672.2	0.01955458		2262.2	0.0357748		2852.19	-0.0064814		3442.18	-0.00264335		4032.18	0.00406709
492.4	0.22320901		1082.39	0.03567285		1672.4	0.02037665		2262.4	0.03587796		2852.39	-0.00656884		3442.38	-0.00386846		4032.38	0.00394683
492.6	0.2241324		1082.59	0.03610152		1672.6	0.01995468		2262.6	0.03535763		2852.59	-0.00709966		3442.58	-0.00522548		4032.58	0.0030024
492.8	0.22445485		1082.79	0.03587657		1672.8	0.01925122		2262.8	0.03519899		2852.79	-0.00584725		3442.78	-0.00606162		4032.78	0.00376484
493	0.22522847		1082.99	0.03650237		1673	0.01865308		2263	0.03524438		2852.99	-0.00527518		3442.98	-0.00695621		4032.98	0.00339971
493.2	0.22550442		1083.19	0.03685724		1673.2	0.01908778		2263.2	0.03515686		2853.19	-0.00405102		3443.18	-0.00770655		4033.18	0.00376959
493.4	0.22572883		1083.39	0.03737754		1673.4	0.01904361		2263.4	0.03470089		2853.39	-0.00385495		3443.38	-0.00894364		4033.38	0.00367542
493.6	0.22654413		1083.59	0.0372348		1673.6	0.01920646		2263.6	0.03482909		2853.59	-0.00356949		3443.58	-0.00860741		4033.58	0.00464246
493.8	0.22767207		1083.79	0.03773116		1673.8	0.01984626		2263.8	0.03407732		2853.79	-0.00391867		3443.78	-0.00795388		4033.78	0.00435322
494	0.22802808		1083.99	0.0371425		1674	0.01985687		2264	0.0343811		2853.99	-0.00350017		3443.98	-0.00872061		4033.98	0.00474832
494.2	0.22848366		1084.19	0.03660096		1674.2	0.02044208		2264.2	0.03487945		2854.19	-0.00247029		3444.18	-0.00770636		4034.18	0.00475971
494.4	0.22854534		1084.39	0.03556259		1674.4	0.01970117		2264.4	0.03459077		2854.39	-0.00338672		3444.38	-0.00699826		4034.38	0.00516396
494.6	0.22839526		1084.59	0.03551361		1674.6	0.01964397		2264.6	0.03524916		2854.59	-0.00444601		3444.58	-0.00735436		4034.58	0.00542412
494.8	0.22823492		1084.79	0.03460169		1674.8	0.0197884		2264.8	0.03559746		2854.79	-0.004895		3444.78	-0.00764879		4034.78	0.00536588
495	0.22708496		1084.99	0.03460213		1675	0.01993441		2265	0.03647182		2854.99	-0.00510395		3444.98	-0.00709188		4034.98	0.00510123
495.2	0.22575753		1085.19	0.03434246		1675.2	0.01984898		2265.2	0.036769		2855.19	-0.00590988		3445.18	-0.00719315		4035.18	0.00455618
495.4	0.22536139		1085.39	0.03424122		1675.4	0.02001416		2265.4	0.03647156		2855.39	-0.00569216		3445.38	-0.00665909		4035.38	0.00446375
495.6	0.22461447		1085.59	0.03337666		1675.6	0.02067447		2265.6	0.03796345		2855.59	-0.00453905		3445.58	-0.00625501		4035.58	0.00397091
495.8	0.22464476		1085.79	0.03316706		1675.8	0.02115008		2265.8	0.0376078		2855.79	-0.00474514		3445.78	-0.00691518		4035.78	0.0041163
496	0.22438567		1085.99	0.03300145		1676	0.020676		2266	0.03803041		2855.99	-0.00412706		3445.98	-0.00674329		4035.98	0.00439349
496.2	0.22487064		1086.19	0.03261688		1676.2	0.02007014		2266.2	0.0376015		2856.19	-0.00367595		3446.18	-0.00723781		4036.18	0.00445164
496.4	0.22529531		1086.39	0.03279649		1676.4	0.02028418		2266.4	0.03703893		2856.39	-0.00275239		3446.38	-0.0072395		4036.38	0.00496963
496.6	0.22558806		1086.59	0.03246419		1676.6	0.01957604		2266.6	0.03645181		2856.59	-0.00193639		3446.58	-0.00667518		4036.58	0.00475069
496.8	0.22618517		1086.79	0.03332213		1676.8	0.01885478		2266.8	0.03573318		2856.79	-0.00124278		3446.78	-0.00618655		4036.78	0.00589192
497	0.22519683		1086.99	0.03457005		1677	0.01902492		2267	0.03511312		2856.99	-0.00150315		3446.98	-0.00536431		4036.98	0.00631116
497.2	0.2243823		1087.19	0.03528699		1677.2	0.01983769		2267.2	0.03456705		2857.19	-0.00128488		3447.18	-0.00533502		4037.18	0.00762552
497.4	0.22386199		1087.39	0.03635414		1677.4	0.01962806		2267.4	0.03343731		2857.39	-0.00119109		3447.38	-0.00547906		4037.38	0.00855558
497.6	0.22393534		1087.59	0.03642297		1677.6	0.02004204		2267.6	0.0335396		2857.59	-0.00095313		3447.58	-0.00510559		4037.58	0.00897931
497.8	0.22352505		1087.79	0.03743861		1677.8	0.02015602		2267.8	0.03338095		2857.79	-0.00233055		3447.78	-0.00448065		4037.78	0.00804374
498	0.22338984		1087.99	0.03768105		1678	0.02001322		2268	0.03362772		2857.99	-0.0022533		3447.98	-0.00372635		4037.98	0.00809142
498.2	0.22347658		1088.19	0.03780844		1678.2	0.0214708		2268.2	0.03393996		2858.19	-0.00339279		3448.18	-0.00261366		4038.18	0.00808335
498.4	0.22330749		1088.39	0.03750221		1678.4	0.02173949		2268.4	0.03441121		2858.39	-0.00538732		3448.38	-0.00338234		4038.38	0.00784405
498.6	0.22317071		1088.59	0.03672373		1678.6	0.02290794		2268.6	0.03450555		2858.59	-0.00621465		3448.58	-0.0035777		4038.58	0.00795049
498.8	0.22204878		1088.79	0.0362861		1678.8	0.02344313		2268.8	0.03427747		2858.79	-0.00648676		3448.78	-0.00371066		4038.78	0.00781173
499	0.22169294		1088.99	0.0366058		1679	0.02410571		2269	0.03451588		2858.99	-0.00716046		3448.98	-0.00388197		4038.98	0.00722699
499.2	0.22172262		1089.19	0.03649408		1679.2	0.0249634		2269.2	0.03430805		2859.19	-0.00753994		3449.18	-0.0050092		4039.18	0.00663273
499.4	0.2221738		1089.39	0.03545136		1679.4	0.02474849		2269.4	0.03499037		2859.39	-0.00735946		3449.38	-0.0060039		4039.38	0.00699507
499.6	0.2216347		1089.59	0.03417335		1679.6	0.02521052		2269.6	0.03645472		2859.59	-0.0067321		3449.58	-0.00749845		4039.58	0.00641244
499.8	0.22055647		1089.79	0.03397946		1679.8	0.02414786		2269.8	0.03610812		2859.79	-0.00645172		3449.78	-0.00787795		4039.78	0.00685459
500	0.2204698		1089.99	0.0332112		1680	0.02254115		2270	0.03668072		2859.99	-0.00609021		3449.98	-0.00799054		4039.98	0.00640525
500.2	0.22062678		1090.19	0.03324819		1680.2	0.02241437		2270.2	0.03711267		2860.19	-0.00545012		3450.18	-0.00820749		4040.18	0.00608751
500.4	0.21998424		1090.39	0.03290257		1680.4	0.02212887		2270.4	0.03736982		2860.39	-0.00529941		3450.38	-0.0079755		4040.38	0.00580936
500.6	0.22012581		1090.59	0.0322981		1680.6	0.02090001		2270.6	0.03738388		2860.59	-0.00467863		3450.58	-0.0077957		4040.58	0.00517635
500.8	0.21941711		1090.79	0.03320839		1680.8	0.02022161		2270.8	0.03694097		2860.79	-0.00429743		3450.78	-0.00837442		4040.78	0.00541073
501	0.21817836		1090.99	0.03322519		1681	0.01888585		2271	0.0369337		2860.99	-0.00371999		3450.98	-0.00822479		4040.98	0.00455584
501.2	0.2179885		1091.19	0.03348719		1681.2	0.01841203		2271.2	0.03690578		2861.19	-0.00256836		3451.18	-0.00738758		4041.18	0.00395003
501.4	0.2186379		1091.39	0.03262229		1681.4	0.01762252		2271.4	0.03605149		2861.39	-0.00211986		3451.38	-0.00724282		4041.38	0.00360759
501.6	0.21873948		1091.59	0.03213909		1681.6	0.01755788		2271.6	0.03596568		2861.59	-0.00295574		3451.58	-0.00649564		4041.58	0.00211171
501.8	0.2184824		1091.79	0.03223292		1681.8	0.01680902		2271.8	0.03555775		2861.79	-0.00388802		3451.78	-0.00564891		4041.78	0.00128396
502	0.21920117		1091.99	0.03251505		1682	0.0170454		2272	0.03486028		2861.99	-0.00333162		3451.98	-0.00462528		4041.98	0.00140131
502.2	0.2189828		1092.19	0.03217415		1682.2	0.01753352		2272.2	0.03537883		2862.19	-0.00387734		3452.18	-0.00381466		4042.18	0.00145619
502.4	0.21908988		1092.39	0.0308363		1682.4	0.01770136		2272.4	0.0351911		2862.39	-0.00483211		3452.38	-0.00383264		4042.38	0.00094573
502.6	0.21859241		1092.59	0.03104462		1682.6	0.01771212		2272.6	0.03472699		2862.59	-0.00494521		3452.58	-0.00358642		4042.58	0.00094718
502.8	0.21922926		1092.79	0.03161662		1682.8	0.01859408		2272.8	0.03376023		2862.79	-0.00509824		3452.78	-0.00378189		4042.78	0.00050961
503	0.2204047		1092.99	0.03263243		1683	0.01889191		2273	0.03353364		2862.99	-0.0049824		3452.98	-0.00355804		4042.98	0.00064253
503.2	0.22062917		1093.19	0.03274408		1683.2	0.01941331		2273.2	0.03320472		2863.19	-0.0053182		3453.18	-0.00363838		4043.18	0.00113733
503.4	0.22102681		1093.39	0.03303379		1683.4	0.01919432		2273.4	0.03344149		2863.39	-0.00540371		3453.38	-0.00447368		4043.38	0.00195824
503.6	0.22061439		1093.59	0.03384072		1683.6	0.01947414		2273.6	0.03329794		2863.59	-0.00546473		3453.58	-0.00483812		4043.58	0.00167571
503.8	0.2205333		1093.79	0.03463865		1683.8	0.01964592		2273.8	0.03324667		2863.79	-0.00562806		3453.78	-0.00460369		4043.78	0.00297421
504	0.22032094		1093.99	0.03489999		1684	0.01949807		2274	0.03318931		2863.99	-0.00604922		3453.98	-0.00473418		4043.98	0.0031154
504.2	0.22008233		1094.19	0.03593693		1684.2	0.02031164		2274.2	0.03438913		2864.19	-0.00573203		3454.18	-0.00530587		4044.18	0.0045563
504.4	0.2198042		1094.39	0.03522859		1684.4	0.02056469		2274.4	0.034429		2864.39	-0.00594418		3454.38	-0.00530909		4044.38	0.00519972
504.6	0.22035705		1094.59	0.03568916		1684.6	0.0205481		2274.6	0.03450074		2864.59	-0.00513926		3454.58	-0.00575392		4044.58	0.00586139
504.8	0.2201004		1094.79	0.03617785		1684.8	0.02060465		2274.8	0.03459836		2864.79	-0.00467029		3454.78	-0.00639813		4044.78	0.00512576
505	0.2199736		1094.99	0.03650174		1685	0.0196923		2275	0.03513111		2864.99	-0.00524789		3454.98	-0.00600558		4044.98	0.0049205
505.2	0.21994674		1095.19	0.03592931		1685.2	0.01980416		2275.2	0.03562497		2865.19	-0.00456617		3455.18	-0.00461585		4045.18	0.00501216
505.4	0.22024384		1095.39	0.03499258		1685.4	0.01888672		2275.4	0.03462417		2865.39	-0.00466371		3455.38	-0.00510966		4045.38	0.00455953
505.6	0.2195083		1095.59	0.03511043		1685.6	0.01875362		2275.6	0.03485636		2865.59	-0.00516167		3455.58	-0.00500764		4045.58	0.00424972
505.8	0.21862392		1095.79	0.03575858		1685.8	0.01793924		2275.8	0.03518581		2865.79	-0.00515699		3455.78	-0.00515085		4045.78	0.00405238
506	0.2181233		1095.99	0.0353813		1686	0.01787637		2276	0.0338828		2865.99	-0.00509512		3455.98	-0.00381983		4045.98	0.00401572
506.2	0.21715954		1096.19	0.03416745		1686.2	0.01763693		2276.2	0.03428779		2866.19	-0.00522436		3456.18	-0.00376839		4046.18	0.00363649
506.4	0.21738641		1096.39	0.03367057		1686.4	0.01755472		2276.4	0.03419858		2866.39	-0.00607832		3456.38	-0.00423484		4046.38	0.00368624
506.6	0.21703071		1096.59	0.03438603		1686.6	0.01729154		2276.6	0.03357078		2866.59	-0.0053532		3456.58	-0.00445835		4046.58	0.00370814
506.8	0.21696119		1096.79	0.03441755		1686.8	0.01729522		2276.8	0.03304703		2866.79	-0.00542236		3456.78	-0.00436866		4046.78	0.00366206
507	0.21702778		1096.99	0.03544006		1687	0.01644641		2277	0.03223535		2866.99	-0.00573396		3456.98	-0.00448749		4046.98	0.0046051
507.2	0.21652575		1097.19	0.03551442		1687.2	0.01643911		2277.2	0.03165021		2867.19	-0.00622946		3457.18	-0.00505571		4047.18	0.0047752
507.4	0.21642213		1097.39	0.03547597		1687.4	0.01604849		2277.4	0.03197314		2867.39	-0.00632966		3457.38	-0.00618543		4047.38	0.00453548
507.6	0.21635564		1097.59	0.03542159		1687.6	0.01623807		2277.6	0.03133612		2867.59	-0.00617334		3457.58	-0.00691521		4047.58	0.00459027
507.8	0.21612772		1097.79	0.03493253		1687.8	0.01656574		2277.8	0.03245905		2867.79	-0.0057628		3457.78	-0.00773579		4047.78	0.00573178
508	0.21627757		1097.99	0.03473326		1688	0.01632526		2278	0.03285669		2867.99	-0.00537566		3457.98	-0.00792174		4047.98	0.00592307
508.2	0.2165259		1098.19	0.03444682		1688.2	0.01776595		2278.2	0.03400886		2868.19	-0.00591652		3458.18	-0.00862583		4048.18	0.00636157
508.4	0.21737169		1098.39	0.03352662		1688.4	0.01849283		2278.4	0.0342787		2868.39	-0.005355		3458.38	-0.00800084		4048.38	0.00655299
508.6	0.21735277		1098.59	0.03338204		1688.6	0.0190392		2278.6	0.03456226		2868.59	-0.00490741		3458.58	-0.00865632		4048.58	0.00590074
508.8	0.21659909		1098.79	0.03320509		1688.8	0.01850262		2278.8	0.03471038		2868.79	-0.00450013		3458.78	-0.008179		4048.78	0.00544434
509	0.21600698		1098.99	0.03348089		1689	0.01945051		2279	0.0356509		2868.99	-0.00490774		3458.98	-0.00835971		4048.98	0.00583452
509.2	0.21593009		1099.19	0.03292126		1689.2	0.01991091		2279.2	0.03650228		2869.19	-0.00429189		3459.18	-0.00787463		4049.18	0.00517124
509.4	0.21566813		1099.39	0.0328326		1689.4	0.01987123		2279.4	0.03620448		2869.39	-0.0041721		3459.38	-0.00768624		4049.38	0.0045575
509.6	0.21509571		1099.59	0.03280358		1689.6	0.0202636		2279.6	0.03586855		2869.59	-0.00467197		3459.58	-0.00766584		4049.58	0.00463741
509.8	0.21444619		1099.79	0.03320717		1689.8	0.01977624		2279.8	0.03492587		2869.79	-0.0049308		3459.78	-0.0073171		4049.78	0.00394602
510	0.21417856		1099.99	0.03218357		1690	0.01978883		2280	0.03456192		2869.99	-0.00454548		3459.98	-0.00639275		4049.98	0.00332196
510.2	0.21367661		1100.19	0.03149391		1690.2	0.02071758		2280.2	0.03547165		2870.19	-0.00371295		3460.18	-0.00605959		4050.18	0.0025892
510.4	0.21309464		1100.39	0.03258767		1690.4	0.02051363		2280.4	0.03475437		2870.39	-0.00457028		3460.38	-0.00556632		4050.38	0.0026791
510.6	0.21244254		1100.59	0.03234962		1690.6	0.02115774		2280.6	0.03407757		2870.59	-0.00430235		3460.58	-0.00536312		4050.58	0.00157157
510.8	0.21195109		1100.79	0.03272247		1690.8	0.02156505		2280.8	0.03345345		2870.79	-0.00423443		3460.78	-0.00558649		4050.78	0.00141543
511	0.21237345		1100.99	0.03360444		1691	0.02137378		2281	0.03293135		2870.99	-0.00465003		3460.98	-0.00605946		4050.98	0.00120933
511.2	0.21256697		1101.19	0.03358859		1691.2	0.02057629		2281.2	0.03288898		2871.19	-0.00429812		3461.18	-0.0058746		4051.18	0.00147071
511.4	0.21299945		1101.39	0.03381808		1691.4	0.02019735		2281.4	0.03273831		2871.39	-0.00436148		3461.38	-0.00605155		4051.38	0.00164666
511.6	0.21414395		1101.59	0.03452537		1691.6	0.02082015		2281.6	0.03293847		2871.59	-0.00414113		3461.58	-0.00619179		4051.58	0.00232224
511.8	0.21445426		1101.79	0.03500758		1691.8	0.02088674		2281.8	0.03320693		2871.79	-0.00470491		3461.78	-0.00590971		4051.78	0.00300774
512	0.21458532		1101.99	0.03533867		1692	0.02043918		2282	0.03222143		2871.99	-0.00509484		3461.98	-0.00571622		4051.98	0.00334388
512.2	0.21514498		1102.19	0.03508183		1692.2	0.02089324		2282.2	0.03199786		2872.19	-0.00596803		3462.18	-0.00591622		4052.18	0.00392052
512.4	0.21596799		1102.39	0.03564082		1692.4	0.01975137		2282.4	0.03183984		2872.39	-0.00547405		3462.38	-0.00670676		4052.38	0.00413608
512.6	0.21462645		1102.59	0.03528378		1692.6	0.01946694		2282.6	0.0317157		2872.59	-0.00549988		3462.58	-0.00789026		4052.58	0.00364079
512.8	0.21413172		1102.79	0.03561352		1692.8	0.01833635		2282.8	0.03251862		2872.79	-0.00637168		3462.78	-0.00837859		4052.78	0.00391506
513	0.21423881		1102.99	0.03549962		1693	0.0186158		2283	0.03331988		2872.99	-0.00696194		3462.98	-0.00955736		4052.98	0.00420316
513.2	0.21453894		1103.19	0.03558331		1693.2	0.01736704		2283.2	0.03300859		2873.19	-0.00705121		3463.18	-0.00919565		4053.18	0.00420985
513.4	0.21471935		1103.39	0.03489416		1693.4	0.01671534		2283.4	0.03223301		2873.39	-0.00748422		3463.38	-0.00888046		4053.38	0.00409711
513.6	0.21453639		1103.59	0.03538002		1693.6	0.01560237		2283.6	0.0321544		2873.59	-0.00742254		3463.58	-0.00932661		4053.58	0.00357187
513.8	0.2137844		1103.79	0.03501413		1693.8	0.01480647		2283.8	0.03215806		2873.79	-0.00708315		3463.78	-0.00897766		4053.78	0.00241207
514	0.21441689		1103.99	0.03419354		1694	0.01476686		2284	0.03243083		2873.99	-0.00615047		3463.98	-0.0086269		4053.98	0.00106693
514.2	0.21473739		1104.19	0.03387758		1694.2	0.01576062		2284.2	0.03213983		2874.19	-0.00603385		3464.18	-0.0082068		4054.18	0.00097493
514.4	0.21477688		1104.39	0.03451092		1694.4	0.01533591		2284.4	0.03114738		2874.39	-0.00593764		3464.38	-0.00849045		4054.38	0.00068646
514.6	0.21468126		1104.59	0.03345202		1694.6	0.01656785		2284.6	0.03090318		2874.59	-0.00521743		3464.58	-0.00913968		4054.58	0.0004932
514.8	0.21424918		1104.79	0.03386855		1694.8	0.01608553		2284.8	0.03083726		2874.79	-0.00458678		3464.78	-0.00845214		4054.78	0.00090839
515	0.21450145		1104.99	0.03383911		1695	0.01524494		2285	0.03181867		2874.99	-0.00445288		3464.98	-0.0073782		4054.98	0.00073395
515.2	0.214872		1105.19	0.03289328		1695.2	0.01495279		2285.2	0.03238611		2875.19	-0.00474783		3465.18	-0.0068212		4055.18	0.00130737
515.4	0.21467333		1105.39	0.03289741		1695.4	0.01503942		2285.4	0.03292605		2875.39	-0.0043882		3465.38	-0.00612458		4055.38	0.0015779
515.6	0.21476249		1105.59	0.03309905		1695.6	0.01568677		2285.6	0.03335757		2875.59	-0.0048044		3465.58	-0.00560441		4055.58	0.00222088
515.8	0.21432353		1105.79	0.03256224		1695.8	0.01542072		2285.8	0.03242805		2875.79	-0.00481003		3465.78	-0.0052446		4055.78	0.00267642
516	0.21436037		1105.99	0.03148573		1696	0.01516102		2286	0.03224358		2875.99	-0.00484504		3465.98	-0.00581762		4055.98	0.00258911
516.2	0.21467178		1106.19	0.03179091		1696.2	0.01570738		2286.2	0.03275676		2876.19	-0.00538213		3466.18	-0.00619659		4056.18	0.00288287
516.4	0.21422393		1106.39	0.03191865		1696.4	0.0160353		2286.4	0.03388833		2876.39	-0.00529008		3466.38	-0.00635579		4056.38	0.00320001
516.6	0.21304713		1106.59	0.03154108		1696.6	0.01627266		2286.6	0.03423767		2876.59	-0.00504772		3466.58	-0.0065361		4056.58	0.00344268
516.8	0.21311029		1106.79	0.03191736		1696.8	0.01621278		2286.8	0.03482007		2876.79	-0.00634628		3466.78	-0.00716431		4056.78	0.00395052
517	0.21267449		1106.99	0.03218153		1697	0.01643526		2287	0.03415262		2876.99	-0.0060434		3466.98	-0.00758236		4056.98	0.00439899
517.2	0.21227046		1107.19	0.03336155		1697.2	0.01683952		2287.2	0.03345883		2877.19	-0.00664388		3467.18	-0.00799297		4057.18	0.00500964
517.4	0.2127875		1107.39	0.03366763		1697.4	0.01703178		2287.4	0.03380357		2877.39	-0.00682624		3467.38	-0.0074493		4057.38	0.00508968
517.6	0.21212896		1107.59	0.0350957		1697.6	0.01626443		2287.6	0.03414806		2877.59	-0.00662069		3467.58	-0.00784519		4057.58	0.00538078
517.8	0.21218008		1107.79	0.03555272		1697.8	0.01642606		2287.8	0.03262145		2877.79	-0.00620994		3467.78	-0.00863863		4057.78	0.00584271
518	0.21304538		1107.99	0.03542491		1698	0.01696653		2288	0.03259927		2877.99	-0.00532085		3467.98	-0.00968615		4057.98	0.00616983
518.2	0.21257135		1108.19	0.03578734		1698.2	0.01770838		2288.2	0.03243069		2878.19	-0.00531457		3468.18	-0.01023622		4058.18	0.00600753
518.4	0.21223406		1108.39	0.0363319		1698.4	0.01764451		2288.4	0.0320694		2878.39	-0.00473167		3468.38	-0.01070805		4058.38	0.00623258
518.6	0.21171305		1108.59	0.03624204		1698.6	0.01754328		2288.6	0.0319542		2878.59	-0.00510573		3468.58	-0.01062472		4058.58	0.00573415
518.8	0.21166983		1108.79	0.0362714		1698.8	0.01721801		2288.8	0.03280366		2878.79	-0.00575956		3468.78	-0.00993641		4058.78	0.00490943
519	0.21261782		1108.99	0.03549222		1699	0.01677328		2289	0.03319983		2878.99	-0.00553272		3468.98	-0.00932488		4058.98	0.00427995
519.2	0.2125808		1109.19	0.03524509		1699.2	0.01659057		2289.2	0.03318944		2879.19	-0.00620427		3469.18	-0.00915052		4059.18	0.00398088
519.4	0.21254081		1109.39	0.0353944		1699.4	0.01673418		2289.4	0.03308958		2879.39	-0.00611924		3469.38	-0.0090739		4059.38	0.00419253
519.6	0.21270493		1109.59	0.03534492		1699.6	0.01731602		2289.6	0.032712		2879.59	-0.00659057		3469.58	-0.00924538		4059.58	0.00408159
519.8	0.2129848		1109.79	0.0348388		1699.8	0.01677383		2289.8	0.03267706		2879.79	-0.00621341		3469.78	-0.00911167		4059.78	0.00352007
520	0.21248638		1109.99	0.033834		1700	0.01722875		2290	0.03353227		2879.99	-0.00668441		3469.98	-0.00949775		4059.98	0.00331069
520.2	0.21228609		1110.19	0.0339621		1700.2	0.01821252		2290.2	0.03401853		2880.19	-0.00676228		3470.18	-0.0095082		4060.18	0.00418055
520.4	0.21167554		1110.39	0.0329445		1700.4	0.01832779		2290.4	0.03389295		2880.39	-0.00707805		3470.38	-0.00964701		4060.38	0.00432396
520.6	0.21073271		1110.59	0.03258041		1700.6	0.01798207		2290.6	0.03323127		2880.59	-0.00652449		3470.58	-0.00991642		4060.58	0.00324223
520.8	0.21092234		1110.79	0.0321751		1700.8	0.01862679		2290.8	0.03314068		2880.79	-0.00726407		3470.78	-0.01029174		4060.78	0.00346676
521	0.21086316		1110.99	0.03222298		1701	0.01919788		2291	0.03243161		2880.99	-0.00727816		3470.98	-0.00985793		4060.98	0.00388749
521.2	0.21156744		1111.19	0.03233518		1701.2	0.01930722		2291.2	0.03259682		2881.19	-0.00768227		3471.18	-0.00928007		4061.18	0.00466494
521.4	0.21241061		1111.39	0.03276321		1701.4	0.0185428		2291.4	0.03226286		2881.39	-0.00697267		3471.38	-0.00817214		4061.38	0.00494626
521.6	0.21207853		1111.59	0.03275817		1701.6	0.01893177		2291.6	0.03192499		2881.59	-0.00671391		3471.58	-0.00797758		4061.58	0.00569573
521.8	0.21294947		1111.79	0.03131924		1701.8	0.0194518		2291.8	0.031459		2881.79	-0.00596934		3471.78	-0.00827807		4061.78	0.0054989
522	0.2133947		1111.99	0.03140977		1702	0.01974274		2292	0.03256862		2881.99	-0.00561807		3471.98	-0.00781789		4061.98	0.00534514
522.2	0.21410888		1112.19	0.03116791		1702.2	0.01925709		2292.2	0.03308579		2882.19	-0.00628829		3472.18	-0.00721485		4062.18	0.00483577
522.4	0.21435442		1112.39	0.03176447		1702.4	0.01910566		2292.4	0.03324572		2882.39	-0.00681771		3472.38	-0.0062709		4062.38	0.00449732
522.6	0.21527208		1112.59	0.03232983		1702.6	0.01909792		2292.6	0.03417662		2882.59	-0.00761853		3472.58	-0.00592133		4062.58	0.00323481
522.8	0.21566938		1112.79	0.03256908		1702.8	0.01963721		2292.8	0.0342957		2882.79	-0.00813688		3472.78	-0.0057961		4062.78	0.00239391
523	0.2160862		1112.99	0.0329911		1703	0.01976973		2293	0.03428297		2882.99	-0.00772586		3472.98	-0.00595171		4062.98	0.00132362
523.2	0.21549217		1113.19	0.0332801		1703.2	0.01964361		2293.2	0.03419376		2883.19	-0.00824347		3473.18	-0.00596293		4063.18	0.00026401
523.4	0.21569632		1113.39	0.03384463		1703.4	0.01999693		2293.4	0.03466212		2883.39	-0.00889547		3473.38	-0.00605602		4063.38	0.00028527
523.6	0.21536773		1113.59	0.03428976		1703.6	0.01962723		2293.6	0.03462274		2883.59	-0.00901509		3473.58	-0.00663169		4063.58	-0.00016965
523.8	0.21486862		1113.79	0.03438502		1703.8	0.01991177		2293.8	0.03486442		2883.79	-0.00926788		3473.78	-0.00684024		4063.78	-0.00106296
524	0.21425275		1113.99	0.03388197		1704	0.02002693		2294	0.03492112		2883.99	-0.00961896		3473.98	-0.00745679		4063.98	-0.00077289
524.2	0.21324238		1114.19	0.03437156		1704.2	0.0206597		2294.2	0.03490072		2884.19	-0.0101296		3474.18	-0.00829491		4064.18	-0.00067797
524.4	0.21193425		1114.39	0.0342696		1704.4	0.02119078		2294.4	0.03408355		2884.39	-0.0102243		3474.38	-0.00898269		4064.38	-0.00075507
524.6	0.21123357		1114.59	0.03365218		1704.6	0.02108854		2294.6	0.03392851		2884.59	-0.0098691		3474.58	-0.00901205		4064.58	-0.00129217
524.8	0.21108318		1114.79	0.03354833		1704.8	0.02119331		2294.8	0.03396307		2884.79	-0.01047035		3474.78	-0.00900391		4064.78	-0.00057906
525	0.21095196		1114.99	0.03394669		1705	0.02093379		2295	0.03354443		2884.99	-0.01019263		3474.98	-0.00819312		4064.98	0.00031714
525.2	0.21051715		1115.19	0.03446497		1705.2	0.0201623		2295.2	0.03256043		2885.19	-0.00944727		3475.18	-0.00796557		4065.18	0.00174462
525.4	0.20987651		1115.39	0.03493336		1705.4	0.01994083		2295.4	0.03204483		2885.39	-0.00849966		3475.38	-0.0078712		4065.38	0.00240014
525.6	0.2097754		1115.59	0.03378652		1705.6	0.01949112		2295.6	0.03168409		2885.59	-0.00858403		3475.58	-0.00779961		4065.58	0.0032842
525.8	0.20976478		1115.79	0.03326264		1705.8	0.01887204		2295.8	0.03219489		2885.79	-0.00839521		3475.78	-0.00796276		4065.78	0.00409801
526	0.20949502		1115.99	0.03313171		1706	0.0182527		2296	0.03211422		2885.99	-0.00751833		3475.98	-0.00788246		4065.98	0.00513791
526.2	0.20925147		1116.19	0.03217441		1706.2	0.01808371		2296.2	0.03247747		2886.19	-0.00773898		3476.18	-0.00761627		4066.18	0.00615544
526.4	0.20857827		1116.39	0.03245984		1706.4	0.01789141		2296.4	0.03275246		2886.39	-0.00747469		3476.38	-0.00784851		4066.38	0.00658855
526.6	0.20873969		1116.59	0.03155507		1706.6	0.0176543		2296.6	0.03331376		2886.59	-0.00704569		3476.58	-0.00794454		4066.58	0.00650624
526.8	0.2085283		1116.79	0.03045317		1706.8	0.01709497		2296.8	0.03291016		2886.79	-0.00638407		3476.78	-0.00821234		4066.78	0.00613175
527	0.20838477		1116.99	0.02913151		1707	0.01674853		2297	0.03263006		2886.99	-0.00628658		3476.98	-0.00762905		4066.98	0.00532602
527.2	0.20830264		1117.19	0.02938152		1707.2	0.01617093		2297.2	0.03261809		2887.19	-0.00659141		3477.18	-0.00702381		4067.18	0.00461007
527.4	0.20904089		1117.39	0.02969495		1707.4	0.01571693		2297.4	0.03272278		2887.39	-0.00636503		3477.38	-0.00676656		4067.38	0.00472864
527.6	0.20947747		1117.59	0.02953006		1707.6	0.01535364		2297.6	0.0325588		2887.59	-0.00630615		3477.58	-0.00668377		4067.58	0.00452742
527.8	0.20934224		1117.79	0.02991251		1707.8	0.01468019		2297.8	0.03271166		2887.79	-0.00665179		3477.78	-0.00619204		4067.78	0.00417105
528	0.20986288		1117.99	0.02949006		1708	0.01513474		2298	0.0320879		2887.99	-0.00663168		3477.98	-0.00608912		4067.98	0.00413445
528.2	0.20877414		1118.19	0.02972909		1708.2	0.01628161		2298.2	0.03181509		2888.19	-0.00652646		3478.18	-0.00589194		4068.18	0.00413567
528.4	0.20894249		1118.39	0.02932488		1708.4	0.0167809		2298.4	0.03167545		2888.39	-0.00589999		3478.38	-0.00537983		4068.38	0.00355796
528.6	0.20852324		1118.59	0.02900771		1708.6	0.01567922		2298.6	0.03202305		2888.59	-0.00651109		3478.58	-0.00523525		4068.58	0.00292498
528.8	0.20906832		1118.79	0.02957249		1708.8	0.01553736		2298.8	0.03236231		2888.79	-0.00668407		3478.78	-0.00556737		4068.78	0.00251294
529	0.20936699		1118.99	0.0296261		1709	0.01656193		2299	0.03205503		2888.99	-0.00679003		3478.98	-0.00614379		4068.98	0.0035901
529.2	0.20947197		1119.19	0.03055239		1709.2	0.01637146		2299.2	0.03150905		2889.19	-0.00652164		3479.18	-0.00737522		4069.18	0.00415656
529.4	0.20986991		1119.39	0.03002929		1709.4	0.01694617		2299.4	0.03164688		2889.39	-0.00652517		3479.38	-0.00772755		4069.38	0.00342982
529.6	0.20956374		1119.59	0.03066173		1709.6	0.01652023		2299.6	0.03066004		2889.59	-0.00665057		3479.58	-0.00841565		4069.58	0.00358536
529.8	0.20918532		1119.79	0.03132614		1709.8	0.01692466		2299.8	0.02986603		2889.79	-0.00608465		3479.78	-0.00879622		4069.78	0.00445848
530	0.20876831		1119.99	0.03108484		1710	0.01724375		2300	0.02940826		2889.99	-0.0057129		3479.98	-0.00947709		4069.98	0.00465531
530.2	0.20784161		1120.19	0.03156275		1710.2	0.01745401		2300.2	0.02986348		2890.19	-0.00537034		3480.18	-0.00954459		4070.18	0.00513679
530.4	0.2070272		1120.39	0.03168818		1710.4	0.01765301		2300.4	0.02987707		2890.39	-0.0050993		3480.38	-0.00957447		4070.38	0.00464223
530.6	0.20752643		1120.59	0.03161068		1710.6	0.01776205		2300.6	0.0300711		2890.59	-0.00507941		3480.58	-0.00961755		4070.58	0.00407089
530.8	0.20723978		1120.79	0.0323459		1710.8	0.01743348		2300.8	0.03028117		2890.79	-0.00602639		3480.78	-0.00966309		4070.78	0.00374889
531	0.20703015		1120.99	0.03220711		1711	0.01743295		2301	0.03012545		2890.99	-0.00716215		3480.98	-0.00963672		4070.98	0.00330122
531.2	0.20724657		1121.19	0.03326322		1711.2	0.01718378		2301.2	0.03040991		2891.19	-0.00683683		3481.18	-0.01055642		4071.18	0.0024679
531.4	0.20788708		1121.39	0.03354779		1711.4	0.01619552		2301.4	0.03048212		2891.39	-0.00657717		3481.38	-0.01013787		4071.38	0.00314666
531.6	0.20761223		1121.59	0.03374206		1711.6	0.01612711		2301.6	0.03081094		2891.59	-0.00809233		3481.58	-0.00921915		4071.58	0.0029458
531.8	0.20741882		1121.79	0.03396154		1711.8	0.01522338		2301.8	0.03055959		2891.79	-0.00876061		3481.78	-0.00890617		4071.78	0.00240292
532	0.20767369		1121.99	0.03367407		1712	0.01624229		2302	0.03108179		2891.99	-0.00839925		3481.98	-0.00830637		4071.98	0.00194121
532.2	0.20710766		1122.19	0.03334588		1712.2	0.0163119		2302.2	0.03228578		2892.19	-0.00745832		3482.18	-0.0078635		4072.18	0.00225295
532.4	0.20708819		1122.39	0.03259578		1712.4	0.01583068		2302.4	0.03358451		2892.39	-0.00720097		3482.38	-0.00779845		4072.38	0.0015485
532.6	0.20703437		1122.59	0.03194148		1712.6	0.01566904		2302.6	0.03419345		2892.59	-0.00721216		3482.58	-0.00849982		4072.58	0.00244463
532.8	0.20743848		1122.79	0.03142419		1712.8	0.01636596		2302.8	0.03452529		2892.79	-0.00757563		3482.78	-0.00861585		4072.78	0.00202009
533	0.20647924		1122.99	0.03011235		1713	0.01674588		2303	0.03475112		2892.99	-0.0073206		3482.98	-0.00856808		4072.98	0.0024137
533.2	0.20635706		1123.19	0.03086993		1713.2	0.01633221		2303.2	0.03372132		2893.19	-0.00707801		3483.18	-0.00862001		4073.18	0.00216329
533.4	0.20566577		1123.39	0.02992515		1713.4	0.01596448		2303.4	0.03321395		2893.39	-0.00698064		3483.38	-0.00818228		4073.38	0.00174996
533.6	0.20387737		1123.59	0.03025333		1713.6	0.01550503		2303.6	0.03294728		2893.59	-0.00666706		3483.58	-0.00767497		4073.58	0.00212364
533.8	0.20300266		1123.79	0.0298938		1713.8	0.01496662		2303.8	0.03289129		2893.79	-0.00635532		3483.78	-0.00729098		4073.78	0.00254491
534	0.2024091		1123.99	0.02959165		1714	0.01438702		2304	0.03396555		2893.99	-0.00622303		3483.98	-0.00773117		4073.98	0.0025573
534.2	0.20207415		1124.19	0.02905868		1714.2	0.01434		2304.2	0.03379518		2894.19	-0.00569444		3484.18	-0.00752755		4074.18	0.00293699
534.4	0.20179341		1124.39	0.02887342		1714.4	0.01432219		2304.4	0.03389512		2894.39	-0.0061056		3484.38	-0.00791619		4074.38	0.00297519
534.6	0.20246753		1124.59	0.02860849		1714.6	0.01401311		2304.6	0.03433294		2894.59	-0.0051069		3484.58	-0.00843686		4074.58	0.00330652
534.8	0.20178707		1124.79	0.02869196		1714.8	0.01381264		2304.8	0.03492433		2894.79	-0.005273		3484.78	-0.00896855		4074.78	0.00305359
535	0.20217702		1124.99	0.02748137		1715	0.01429587		2305	0.03525563		2894.99	-0.00547098		3484.98	-0.01034655		4074.98	0.00330425
535.2	0.20226034		1125.19	0.02750102		1715.2	0.01399248		2305.2	0.03420372		2895.19	-0.00552914		3485.18	-0.01011379		4075.18	0.00319376
535.4	0.20259416		1125.39	0.02773738		1715.4	0.01359109		2305.4	0.03468702		2895.39	-0.00602115		3485.38	-0.00988513		4075.38	0.00351234
535.6	0.20296961		1125.59	0.02773091		1715.6	0.01419465		2305.6	0.03491252		2895.59	-0.00692901		3485.58	-0.00934438		4075.58	0.00327694
535.8	0.20397892		1125.79	0.0283431		1715.8	0.01434066		2305.8	0.03495689		2895.79	-0.00624082		3485.78	-0.00984622		4075.78	0.00351892
536	0.20503347		1125.99	0.02883783		1716	0.01510532		2306	0.03563676		2895.99	-0.00532488		3485.98	-0.0099719		4075.98	0.00302774
536.2	0.20536671		1126.19	0.02935385		1716.2	0.01567868		2306.2	0.03523083		2896.19	-0.00427882		3486.18	-0.00934282		4076.18	0.00308861
536.4	0.20596597		1126.39	0.02930097		1716.4	0.01641292		2306.4	0.03472771		2896.39	-0.0043713		3486.38	-0.00928965		4076.38	0.0028561
536.6	0.20709895		1126.59	0.03024207		1716.6	0.01751703		2306.6	0.03295059		2896.59	-0.00464645		3486.58	-0.00980147		4076.58	0.00343678
536.8	0.20711433		1126.79	0.03107447		1716.8	0.01823956		2306.8	0.03159038		2896.79	-0.00591376		3486.78	-0.00971891		4076.78	0.00232777
537	0.20718148		1126.99	0.03176304		1717	0.0189021		2307	0.03079046		2896.99	-0.00626335		3486.98	-0.0094735		4076.98	0.00256166
537.2	0.2076047		1127.19	0.03294351		1717.2	0.01982758		2307.2	0.02956234		2897.19	-0.00705924		3487.18	-0.0098877		4077.18	0.00323282
537.4	0.20794507		1127.39	0.03245003		1717.4	0.01948957		2307.4	0.02925402		2897.39	-0.00730642		3487.38	-0.00952025		4077.38	0.00387676
537.6	0.20722867		1127.59	0.03313784		1717.6	0.01906817		2307.6	0.02934005		2897.59	-0.00773908		3487.58	-0.00933455		4077.58	0.0027889
537.8	0.20715798		1127.79	0.03366597		1717.8	0.01855814		2307.8	0.02861624		2897.79	-0.00749494		3487.78	-0.00954279		4077.78	0.00255185
538	0.20775672		1127.99	0.03365384		1718	0.01759439		2308	0.029025		2897.99	-0.00741914		3487.98	-0.00989142		4077.98	0.00281915
538.2	0.20768845		1128.19	0.03339403		1718.2	0.01733741		2308.2	0.02882548		2898.19	-0.00685093		3488.18	-0.00985161		4078.18	0.00335265
538.4	0.20718962		1128.39	0.03280555		1718.4	0.01653711		2308.4	0.02892743		2898.39	-0.00624983		3488.38	-0.01055565		4078.38	0.00270718
538.6	0.20629579		1128.59	0.03219751		1718.6	0.01585119		2308.6	0.02933691		2898.59	-0.0049158		3488.58	-0.01030964		4078.58	0.00255082
538.8	0.20559228		1128.79	0.03220286		1718.8	0.01507828		2308.8	0.02968409		2898.79	-0.00516551		3488.78	-0.01041193		4078.78	0.00235613
539	0.20548623		1128.99	0.03168735		1719	0.01443747		2309	0.03001721		2898.99	-0.00527257		3488.98	-0.01063669		4078.98	0.00200604
539.2	0.20556743		1129.19	0.03083965		1719.2	0.01392053		2309.2	0.03000966		2899.19	-0.00513644		3489.18	-0.01005508		4079.18	0.00212697
539.4	0.20612926		1129.39	0.03065716		1719.4	0.01347196		2309.4	0.0306479		2899.39	-0.00487665		3489.38	-0.01039245		4079.38	0.00227708
539.6	0.20668484		1129.59	0.03018803		1719.6	0.0133352		2309.6	0.03069928		2899.59	-0.00500851		3489.58	-0.01034239		4079.58	0.00330244
539.8	0.20705165		1129.79	0.02995444		1719.8	0.01264283		2309.8	0.03112484		2899.79	-0.00511363		3489.78	-0.01036403		4079.78	0.00280238
540	0.20722688		1129.99	0.03007889		1720	0.01262922		2310	0.03136157		2899.99	-0.00542682		3489.98	-0.01028095		4079.98	0.00258225
540.2	0.20716978		1130.19	0.03047784		1720.2	0.01253958		2310.2	0.03136937		2900.19	-0.00595104		3490.18	-0.00936134		4080.18	0.00277643
540.4	0.20789553		1130.39	0.03039433		1720.4	0.01379982		2310.4	0.03114658		2900.39	-0.00712818		3490.38	-0.00964421		4080.38	0.00267706
540.6	0.20838434		1130.59	0.03045961		1720.6	0.01399868		2310.6	0.02970736		2900.59	-0.00821326		3490.58	-0.01048035		4080.58	0.00304536
540.8	0.20755737		1130.79	0.03003066		1720.8	0.01508047		2310.8	0.02932905		2900.79	-0.00910877		3490.78	-0.00956917		4080.78	0.00309825
541	0.20703382		1130.99	0.029666		1721	0.01612945		2311	0.02975992		2900.99	-0.00954078		3490.98	-0.00860847		4080.98	0.00405669
541.2	0.20624131		1131.19	0.02948286		1721.2	0.01640379		2311.2	0.0297144		2901.19	-0.01036415		3491.18	-0.00844838		4081.18	0.00419913
541.4	0.20575257		1131.39	0.029537		1721.4	0.01662272		2311.4	0.02934873		2901.39	-0.00956682		3491.38	-0.00828715		4081.38	0.00376246
541.6	0.20421266		1131.59	0.0298322		1721.6	0.01647753		2311.6	0.03003417		2901.59	-0.00995021		3491.58	-0.008307		4081.58	0.00272684
541.8	0.20288505		1131.79	0.03016996		1721.8	0.01692614		2311.8	0.03020184		2901.79	-0.00930662		3491.78	-0.00790195		4081.78	0.00345255
542	0.20251271		1131.99	0.02999974		1722	0.01683752		2312	0.0307477		2901.99	-0.00866681		3491.98	-0.00843895		4081.98	0.0039334
542.2	0.20229211		1132.19	0.02972242		1722.2	0.01644734		2312.2	0.03102039		2902.19	-0.00802091		3492.18	-0.00873849		4082.18	0.00388088
542.4	0.20182298		1132.39	0.02947928		1722.4	0.01625084		2312.4	0.03116988		2902.39	-0.00699884		3492.38	-0.00893597		4082.38	0.00307985
542.6	0.20184724		1132.59	0.03006325		1722.6	0.01556566		2312.6	0.03132763		2902.59	-0.00606036		3492.58	-0.00877694		4082.58	0.00350511
542.8	0.20182942		1132.79	0.03108503		1722.8	0.01523997		2312.8	0.03161299		2902.79	-0.00556375		3492.78	-0.00834965		4082.78	0.00311343
543	0.20152238		1132.99	0.03067471		1723	0.01478096		2313	0.03190245		2902.99	-0.00461269		3492.98	-0.00917109		4082.98	0.00259014
543.2	0.20281799		1133.19	0.03026465		1723.2	0.01526242		2313.2	0.03154397		2903.19	-0.004433		3493.18	-0.00934246		4083.18	0.00332063
543.4	0.20332313		1133.39	0.03121111		1723.4	0.01503087		2313.4	0.03132358		2903.39	-0.00528056		3493.38	-0.0098051		4083.38	0.0041443
543.6	0.20326113		1133.59	0.03088909		1723.6	0.01457932		2313.6	0.03260784		2903.59	-0.00489599		3493.58	-0.01009292		4083.58	0.00424212
543.8	0.20397239		1133.79	0.03158064		1723.8	0.01459987		2313.8	0.03256263		2903.79	-0.00534024		3493.78	-0.01018845		4083.78	0.00286423
544	0.20511711		1133.99	0.03234493		1724	0.01474073		2314	0.0326381		2903.99	-0.00519704		3493.98	-0.01045232		4083.98	0.00323996
544.2	0.20542975		1134.19	0.0326563		1724.2	0.01404507		2314.2	0.03250481		2904.19	-0.00540991		3494.18	-0.01063922		4084.18	0.00283869
544.4	0.2060525		1134.39	0.03201861		1724.4	0.014096		2314.4	0.03170985		2904.39	-0.00543229		3494.38	-0.01191338		4084.38	0.00219134
544.6	0.20629666		1134.59	0.03051597		1724.6	0.01306614		2314.6	0.03064195		2904.59	-0.00568889		3494.58	-0.01178175		4084.58	0.00211335
544.8	0.20526926		1134.79	0.03004414		1724.8	0.01351972		2314.8	0.03113925		2904.79	-0.00666971		3494.78	-0.0108004		4084.78	0.00181745
545	0.20492074		1134.99	0.0296733		1725	0.01365941		2315	0.03112052		2904.99	-0.00756268		3494.98	-0.0105767		4084.98	0.00160854
545.2	0.20376771		1135.19	0.02976192		1725.2	0.01368432		2315.2	0.03050358		2905.19	-0.00809974		3495.18	-0.0109556		4085.18	0.00136371
545.4	0.20334643		1135.39	0.02934494		1725.4	0.01329719		2315.4	0.0304341		2905.39	-0.00723817		3495.38	-0.01152717		4085.38	0.00087312
545.6	0.20250502		1135.59	0.02897573		1725.6	0.01303844		2315.6	0.03064695		2905.59	-0.00842244		3495.58	-0.01151326		4085.58	0.00124308
545.8	0.20175656		1135.79	0.0291505		1725.8	0.01336568		2315.8	0.03046557		2905.79	-0.0078267		3495.78	-0.01112058		4085.78	0.00129061
546	0.20200639		1135.99	0.02913572		1726	0.01385011		2316	0.02985388		2905.99	-0.00793156		3495.98	-0.01084456		4085.98	0.00155933
546.2	0.20271372		1136.19	0.02853699		1726.2	0.01389217		2316.2	0.03053635		2906.19	-0.00830227		3496.18	-0.01048159		4086.18	0.00116252
546.4	0.20190185		1136.39	0.02891722		1726.4	0.01417446		2316.4	0.03030254		2906.39	-0.00834593		3496.38	-0.01040607		4086.38	0.00157604
546.6	0.20200074		1136.59	0.0288158		1726.6	0.01361543		2316.6	0.03040511		2906.59	-0.00846237		3496.58	-0.01005527		4086.58	0.00227401
546.8	0.20143646		1136.79	0.02910112		1726.8	0.0136415		2316.8	0.031139		2906.79	-0.00867802		3496.78	-0.00940363		4086.78	0.00274765
547	0.20110589		1136.99	0.02930702		1727	0.01416003		2317	0.03176819		2906.99	-0.00865017		3496.98	-0.00962249		4086.98	0.0030855
547.2	0.20247055		1137.19	0.02995667		1727.2	0.01508798		2317.2	0.03158618		2907.19	-0.0087197		3497.18	-0.00973139		4087.18	0.00434959
547.4	0.20213583		1137.39	0.03083409		1727.4	0.01488716		2317.4	0.03222876		2907.39	-0.00938706		3497.38	-0.00920275		4087.38	0.0046605
547.6	0.2023219		1137.59	0.0301845		1727.6	0.01453129		2317.6	0.03285704		2907.59	-0.00842144		3497.58	-0.0100261		4087.58	0.00466065
547.8	0.20290851		1137.79	0.03086288		1727.8	0.01434859		2317.8	0.0319423		2907.79	-0.00845955		3497.78	-0.01012853		4087.78	0.00569832
548	0.20328158		1137.99	0.03078411		1728	0.01368283		2318	0.03279562		2907.99	-0.00803226		3497.98	-0.00991263		4087.98	0.0063491
548.2	0.20312855		1138.19	0.02988885		1728.2	0.01343814		2318.2	0.03237326		2908.19	-0.00812239		3498.18	-0.010051		4088.18	0.00605144
548.4	0.20394673		1138.39	0.02925301		1728.4	0.01339007		2318.4	0.03156897		2908.39	-0.00875345		3498.38	-0.01001427		4088.38	0.00623217
548.6	0.20371311		1138.59	0.02796618		1728.6	0.01377597		2318.6	0.0311302		2908.59	-0.00944736		3498.58	-0.00992044		4088.58	0.00607224
548.8	0.20316806		1138.79	0.02784205		1728.8	0.01412054		2318.8	0.03117599		2908.79	-0.01019235		3498.78	-0.01034492		4088.78	0.00532618
549	0.20263319		1138.99	0.02760583		1729	0.01393508		2319	0.03002852		2908.99	-0.01001031		3498.98	-0.01047717		4088.98	0.00477082
549.2	0.20152085		1139.19	0.02772293		1729.2	0.01367825		2319.2	0.02962684		2909.19	-0.00927082		3499.18	-0.01043361		4089.18	0.00427696
549.4	0.20220688		1139.39	0.02690515		1729.4	0.0133892		2319.4	0.02951656		2909.39	-0.00907431		3499.38	-0.01003492		4089.38	0.00326742
549.6	0.20183402		1139.59	0.02634941		1729.6	0.01383885		2319.6	0.02891524		2909.59	-0.00916031		3499.58	-0.0096427		4089.58	0.00288894
549.8	0.20189336		1139.79	0.02678791		1729.8	0.01369566		2319.8	0.02874566		2909.79	-0.00838113		3499.78	-0.00844699		4089.78	0.00211137
550	0.20237015		1139.99	0.02738455		1730	0.01433658		2320	0.02835896		2909.99	-0.00815125		3499.98	-0.00872408		4089.98	0.00132809
550.2	0.20309683		1140.19	0.02722069		1730.2	0.01411531		2320.2	0.02873925		2910.19	-0.00690574		3500.18	-0.00967594		4090.18	0.0007385
550.4	0.20321569		1140.39	0.02760158		1730.4	0.01387315		2320.4	0.02877714		2910.39	-0.0061944		3500.38	-0.00954158		4090.38	0.0005063
550.6	0.20377788		1140.59	0.02731586		1730.6	0.01379501		2320.6	0.02910061		2910.59	-0.00588524		3500.58	-0.00905345		4090.58	0.00056408
550.8	0.20444904		1140.79	0.02816737		1730.8	0.01413086		2320.8	0.02966269		2910.79	-0.00513577		3500.78	-0.00900515		4090.78	0.00076691
551	0.20483749		1140.99	0.02881562		1731	0.01450421		2321	0.02985259		2910.99	-0.00396712		3500.98	-0.00941182		4090.98	0.00065178
551.2	0.20520198		1141.19	0.02943869		1731.2	0.01410731		2321.2	0.02986441		2911.19	-0.00320767		3501.18	-0.00932065		4091.18	0.00103308
551.4	0.20557172		1141.39	0.02997798		1731.4	0.01397758		2321.4	0.03043076		2911.39	-0.00274718		3501.38	-0.00912035		4091.38	0.00136257
551.6	0.20509668		1141.59	0.02986171		1731.6	0.01443627		2321.6	0.03084217		2911.59	-0.00277175		3501.58	-0.01010446		4091.58	0.00166794
551.8	0.20504507		1141.79	0.03073809		1731.8	0.01436891		2321.8	0.03038941		2911.79	-0.00320772		3501.78	-0.00993781		4091.78	0.00264432
552	0.20489739		1141.99	0.03019487		1732	0.01508561		2322	0.03097976		2911.99	-0.00391396		3501.98	-0.01003998		4091.98	0.00270383
552.2	0.20431872		1142.19	0.02995799		1732.2	0.01584941		2322.2	0.03063736		2912.19	-0.00492494		3502.18	-0.00991279		4092.18	0.00266633
552.4	0.20407836		1142.39	0.03046712		1732.4	0.01595767		2322.4	0.03024929		2912.39	-0.00551269		3502.38	-0.01053259		4092.38	0.00304601
552.6	0.20337141		1142.59	0.02977829		1732.6	0.01549344		2322.6	0.03014151		2912.59	-0.00595479		3502.58	-0.01133032		4092.58	0.00283381
552.8	0.20202028		1142.79	0.02974085		1732.8	0.01519884		2322.8	0.03050567		2912.79	-0.00697103		3502.78	-0.01128614		4092.78	0.00306536
553	0.20043029		1142.99	0.02972613		1733	0.01490823		2323	0.03068459		2912.99	-0.00753079		3502.98	-0.01168623		4092.98	0.00338681
553.2	0.19911877		1143.19	0.02919865		1733.2	0.01458087		2323.2	0.03046594		2913.19	-0.00772377		3503.18	-0.01120292		4093.18	0.00296558
553.4	0.19915927		1143.39	0.0290186		1733.4	0.01443085		2323.4	0.03036747		2913.39	-0.00837386		3503.38	-0.01135806		4093.38	0.0034389
553.6	0.19842416		1143.59	0.02879106		1733.6	0.01421827		2323.6	0.03010662		2913.59	-0.00831614		3503.58	-0.0116197		4093.58	0.00332314
553.8	0.19837042		1143.79	0.02965457		1733.8	0.01403415		2323.8	0.03071935		2913.79	-0.00843307		3503.78	-0.01212757		4093.78	0.00347607
554	0.19960775		1143.99	0.02978579		1734	0.01421274		2324	0.03051406		2913.99	-0.00822924		3503.98	-0.01332732		4093.98	0.00297014
554.2	0.19978821		1144.19	0.02868264		1734.2	0.01377539		2324.2	0.03037625		2914.19	-0.00859601		3504.18	-0.01410255		4094.18	0.00258621
554.4	0.2003699		1144.39	0.02779077		1734.4	0.01389407		2324.4	0.03102047		2914.39	-0.00776016		3504.38	-0.01391538		4094.38	0.00265425
554.6	0.20104844		1144.59	0.02751845		1734.6	0.01366454		2324.6	0.03205592		2914.59	-0.00788743		3504.58	-0.01422704		4094.58	0.00330185
554.8	0.20095022		1144.79	0.02812183		1734.8	0.013292		2324.8	0.03236413		2914.79	-0.00677224		3504.78	-0.01466067		4094.78	0.0028576
555	0.20200894		1144.99	0.02797457		1735	0.01391846		2325	0.0324235		2914.99	-0.00674986		3504.98	-0.01554674		4094.98	0.00275526
555.2	0.20190285		1145.19	0.02816662		1735.2	0.01334289		2325.2	0.03268177		2915.19	-0.00618771		3505.18	-0.01588718		4095.18	0.00288708
555.4	0.20229876		1145.39	0.02827395		1735.4	0.01383836		2325.4	0.03239305		2915.39	-0.00576318		3505.38	-0.01655854		4095.38	0.00208024
555.6	0.20139781		1145.59	0.02767859		1735.6	0.01338103		2325.6	0.03225166		2915.59	-0.00672268		3505.58	-0.01652636		4095.58	0.00158995
555.8	0.20199085		1145.79	0.02786722		1735.8	0.01304261		2325.8	0.031793		2915.79	-0.00686316		3505.78	-0.01637122		4095.78	0.00197049
556	0.20159577		1145.99	0.02713349		1736	0.01322611		2326	0.0313573		2915.99	-0.00693469		3505.98	-0.01585332		4095.98	0.00164302
556.2	0.20081596		1146.19	0.02680951		1736.2	0.01252063		2326.2	0.03108726		2916.19	-0.00690733		3506.18	-0.01557513		4096.18	0.00127204
556.4	0.20078045		1146.39	0.0265936		1736.4	0.01206425		2326.4	0.03068349		2916.39	-0.00745873		3506.38	-0.01504771		4096.38	0.00134546
556.6	0.19978009		1146.59	0.025404		1736.6	0.01149147		2326.6	0.03103884		2916.59	-0.00820473		3506.58	-0.01462562		4096.58	0.00213584
556.8	0.19866036		1146.79	0.02495843		1736.8	0.01171511		2326.8	0.03089535		2916.79	-0.00876426		3506.78	-0.01430014		4096.78	0.00283981
557	0.19821037		1146.99	0.02507538		1737	0.0110337		2327	0.0304316		2916.99	-0.00903038		3506.98	-0.01379859		4096.98	0.00262188
557.2	0.19768925		1147.19	0.02526002		1737.2	0.01073271		2327.2	0.02951799		2917.19	-0.00863324		3507.18	-0.01300117		4097.18	0.00282535
557.4	0.19840256		1147.39	0.02605699		1737.4	0.01074065		2327.4	0.02911565		2917.39	-0.00896412		3507.38	-0.01241777		4097.38	0.00362248
557.6	0.19806469		1147.59	0.02589123		1737.6	0.01105314		2327.6	0.02948008		2917.59	-0.00918405		3507.58	-0.01201864		4097.58	0.00366227
557.8	0.19889924		1147.79	0.02703337		1737.8	0.01068665		2327.8	0.03007781		2917.79	-0.01020248		3507.78	-0.01157061		4097.78	0.00476596
558	0.19924079		1147.99	0.02698685		1738	0.01072669		2328	0.03025254		2917.99	-0.00989251		3507.98	-0.01097052		4097.98	0.0040918
558.2	0.1990582		1148.19	0.02670579		1738.2	0.01098952		2328.2	0.0304158		2918.19	-0.00935922		3508.18	-0.01106709		4098.18	0.00434215
558.4	0.20001195		1148.39	0.0274189		1738.4	0.01109077		2328.4	0.03099426		2918.39	-0.00794932		3508.38	-0.01063319		4098.38	0.00577692
558.6	0.19999537		1148.59	0.02914489		1738.6	0.01254823		2328.6	0.03100047		2918.59	-0.00832435		3508.58	-0.01006749		4098.58	0.00634228
558.8	0.19995749		1148.79	0.03004478		1738.8	0.01294324		2328.8	0.03063972		2918.79	-0.00881162		3508.78	-0.0105509		4098.78	0.00583402
559	0.20062642		1148.99	0.02985023		1739	0.01379978		2329	0.03036569		2918.99	-0.00835977		3508.98	-0.01180648		4098.98	0.00638582
559.2	0.20034575		1149.19	0.03053006		1739.2	0.01375521		2329.2	0.03054107		2919.19	-0.00730917		3509.18	-0.0118897		4099.18	0.00611354
559.4	0.20013017		1149.39	0.03084889		1739.4	0.01422416		2329.4	0.03050296		2919.39	-0.00783748		3509.38	-0.01119333		4099.38	0.00565855
559.6	0.19959442		1149.59	0.03048572		1739.6	0.01464991		2329.6	0.03024958		2919.59	-0.008484		3509.58	-0.01099318		4099.58	0.0056675
559.8	0.2001666		1149.79	0.0305687		1739.8	0.01522326		2329.8	0.02962495		2919.79	-0.00800317		3509.78	-0.01122904		4099.78	0.00535242
560	0.19942917		1149.99	0.03025908		1740	0.01518551		2330	0.02957553		2919.99	-0.00708789		3509.98	-0.01081333		4099.98	0.00419578
560.2	0.19889861		1150.19	0.02930606		1740.2	0.01547088		2330.2	0.02891428		2920.19	-0.00764237		3510.18	-0.01064438		4100.18	0.0038144
560.4	0.1993067		1150.39	0.02894566		1740.4	0.01639311		2330.4	0.02927961		2920.39	-0.00791545		3510.38	-0.01003599		4100.38	0.00276348
560.6	0.19880869		1150.59	0.02763255		1740.6	0.01616163		2330.6	0.02926443		2920.59	-0.00785226		3510.58	-0.01116791		4100.58	0.00268159
560.8	0.19863425		1150.79	0.02742902		1740.8	0.01586968		2330.8	0.02836047		2920.79	-0.00767898		3510.78	-0.01159274		4100.78	0.00193132
561	0.19885771		1150.99	0.02805667		1741	0.01485207		2331	0.02803172		2920.99	-0.00713886		3510.98	-0.01143373		4100.98	0.00017844
561.2	0.19896242		1151.19	0.02867301		1741.2	0.01496094		2331.2	0.02753096		2921.19	-0.00729836		3511.18	-0.01128475		4101.18	0.00012155
561.4	0.198987		1151.39	0.02942758		1741.4	0.014364		2331.4	0.02730585		2921.39	-0.00798745		3511.38	-0.01097291		4101.38	-0.00046305
561.6	0.19823281		1151.59	0.02958389		1741.6	0.0137673		2331.6	0.02901881		2921.59	-0.00808655		3511.58	-0.01100415		4101.58	-0.00042801
561.8	0.19823856		1151.79	0.02944021		1741.8	0.01328847		2331.8	0.03003674		2921.79	-0.00766904		3511.78	-0.0109086		4101.78	-0.0001305
562	0.19759795		1151.99	0.02852334		1742	0.01298878		2332	0.03143572		2921.99	-0.00632102		3511.98	-0.01121125		4101.98	-0.00036635
562.2	0.19793161		1152.19	0.02873487		1742.2	0.01193602		2332.2	0.03087914		2922.19	-0.00600245		3512.18	-0.01158997		4102.18	0.00055136
562.4	0.19704593		1152.39	0.02896514		1742.4	0.01136451		2332.4	0.03077107		2922.39	-0.00583456		3512.38	-0.01142664		4102.38	0.00164506
562.6	0.19603741		1152.59	0.03007431		1742.6	0.01184521		2332.6	0.03063493		2922.59	-0.00571757		3512.58	-0.01145698		4102.58	0.00235843
562.8	0.1958005		1152.79	0.02965048		1742.8	0.01057428		2332.8	0.03057628		2922.79	-0.00619218		3512.78	-0.01226401		4102.78	0.00258436
563	0.19545598		1152.99	0.02899073		1743	0.01135274		2333	0.03023132		2922.99	-0.00578135		3512.98	-0.01287636		4102.98	0.00341725
563.2	0.19557083		1153.19	0.02912394		1743.2	0.01128957		2333.2	0.02995563		2923.19	-0.00525625		3513.18	-0.01245863		4103.18	0.00329708
563.4	0.1950331		1153.39	0.02902622		1743.4	0.01143381		2333.4	0.02974535		2923.39	-0.00568972		3513.38	-0.01178307		4103.38	0.00325024
563.6	0.19524616		1153.59	0.02840523		1743.6	0.01158824		2333.6	0.02903027		2923.59	-0.00589559		3513.58	-0.01171114		4103.58	0.0026723
563.8	0.19573876		1153.79	0.02779405		1743.8	0.01130647		2333.8	0.02908194		2923.79	-0.00567356		3513.78	-0.01143684		4103.78	0.00314916
564	0.19528667		1153.99	0.02695525		1744	0.01135084		2334	0.0290555		2923.99	-0.00603457		3513.98	-0.00990054		4103.98	0.00255064
564.2	0.19522548		1154.19	0.02614695		1744.2	0.01156781		2334.2	0.02862975		2924.19	-0.00699456		3514.18	-0.00995434		4104.18	0.00266533
564.4	0.19558046		1154.39	0.02567437		1744.4	0.01231956		2334.4	0.02921952		2924.39	-0.0070875		3514.38	-0.01061888		4104.38	0.00245758
564.6	0.1958886		1154.59	0.02563906		1744.6	0.01232692		2334.6	0.02857204		2924.59	-0.00763541		3514.58	-0.01150112		4104.58	0.0023092
564.8	0.19660889		1154.79	0.02578677		1744.8	0.01229217		2334.8	0.02808043		2924.79	-0.00720042		3514.78	-0.01073931		4104.78	0.00124566
565	0.19732674		1154.99	0.02624418		1745	0.01184653		2335	0.0273739		2924.99	-0.00709196		3514.98	-0.00982862		4104.98	0.00012948
565.2	0.19821893		1155.19	0.02659736		1745.2	0.01244893		2335.2	0.02739854		2925.19	-0.00814774		3515.18	-0.00976895		4105.18	0.00084715
565.4	0.19924684		1155.39	0.02651379		1745.4	0.01248396		2335.4	0.02765574		2925.39	-0.00807601		3515.38	-0.01009161		4105.38	0.00107994
565.6	0.20016249		1155.59	0.02569668		1745.6	0.01225137		2335.6	0.02865158		2925.59	-0.00756882		3515.58	-0.01100883		4105.58	0.00196182
565.8	0.20030704		1155.79	0.02528375		1745.8	0.01308402		2335.8	0.02888453		2925.79	-0.00748111		3515.78	-0.01127248		4105.78	0.00229748
566	0.2015127		1155.99	0.02571877		1746	0.01239959		2336	0.02899633		2925.99	-0.00748407		3515.98	-0.01099998		4105.98	0.00278804
566.2	0.20257153		1156.19	0.02663189		1746.2	0.01196		2336.2	0.02861667		2926.19	-0.00756158		3516.18	-0.01143519		4106.18	0.00293455
566.4	0.2022519		1156.39	0.02673767		1746.4	0.01218556		2336.4	0.02873253		2926.39	-0.00683717		3516.38	-0.01161893		4106.38	0.00352812
566.6	0.20259118		1156.59	0.0270659		1746.6	0.01255679		2336.6	0.02870537		2926.59	-0.00669131		3516.58	-0.01194649		4106.58	0.00391131
566.8	0.20306796		1156.79	0.02716768		1746.8	0.01328962		2336.8	0.029143		2926.79	-0.00636924		3516.78	-0.01289034		4106.78	0.00380636
567	0.20326298		1156.99	0.02691914		1747	0.01369059		2337	0.0292065		2926.99	-0.00579112		3516.98	-0.01364563		4106.98	0.00307638
567.2	0.20302991		1157.19	0.02745505		1747.2	0.01287128		2337.2	0.02839393		2927.19	-0.00462722		3517.18	-0.01398258		4107.18	0.00304035
567.4	0.20152232		1157.39	0.02742298		1747.4	0.01291435		2337.4	0.02833322		2927.39	-0.00490847		3517.38	-0.0137548		4107.38	0.00328623
567.6	0.20069941		1157.59	0.02675178		1747.6	0.01275551		2337.6	0.02772609		2927.59	-0.00617627		3517.58	-0.01323332		4107.58	0.00305217
567.8	0.19904656		1157.79	0.02698718		1747.8	0.01255794		2337.8	0.02827011		2927.79	-0.00577188		3517.78	-0.01252202		4107.78	0.0035896
568	0.19842568		1157.99	0.02770428		1748	0.01227563		2338	0.02809497		2927.99	-0.00569236		3517.98	-0.01221477		4107.98	0.00339129
568.2	0.19724851		1158.19	0.02805516		1748.2	0.011998		2338.2	0.02844511		2928.19	-0.00594939		3518.18	-0.01232978		4108.18	0.00365011
568.4	0.19612245		1158.39	0.02770885		1748.4	0.01216848		2338.4	0.02833209		2928.39	-0.00577371		3518.38	-0.01301944		4108.38	0.00435388
568.6	0.1953498		1158.59	0.02803973		1748.6	0.01165531		2338.6	0.02812145		2928.59	-0.0063207		3518.58	-0.01305984		4108.58	0.00396009
568.8	0.19446072		1158.79	0.02779934		1748.8	0.01084455		2338.8	0.02788709		2928.79	-0.00569484		3518.78	-0.01222393		4108.78	0.003866
569	0.19455736		1158.99	0.02766768		1749	0.01051826		2339	0.02738329		2928.99	-0.00606772		3518.98	-0.01228874		4108.98	0.00443891
569.2	0.19513131		1159.19	0.02795831		1749.2	0.01085574		2339.2	0.02781296		2929.19	-0.00657987		3519.18	-0.01279792		4109.18	0.0051541
569.4	0.19544164		1159.39	0.0274811		1749.4	0.01104435		2339.4	0.02781013		2929.39	-0.00617072		3519.38	-0.01328306		4109.38	0.00526666
569.6	0.19455693		1159.59	0.02814887		1749.6	0.01095979		2339.6	0.02868475		2929.59	-0.00661951		3519.58	-0.01316901		4109.58	0.00507485
569.8	0.19424419		1159.79	0.02958418		1749.8	0.01143329		2339.8	0.02951089		2929.79	-0.00671675		3519.78	-0.0129214		4109.78	0.00509853
570	0.19530561		1159.99	0.03083437		1750	0.01057		2340	0.03008325		2929.99	-0.00660524		3519.98	-0.01286042		4109.98	0.00460415
570.2	0.19623546		1160.19	0.03134261		1750.2	0.01036713		2340.2	0.0307101		2930.19	-0.00635408		3520.18	-0.01352686		4110.18	0.00440224
570.4	0.1955784		1160.39	0.03144799		1750.4	0.01047411		2340.4	0.03050591		2930.39	-0.00606803		3520.38	-0.01396775		4110.38	0.00392535
570.6	0.19557165		1160.59	0.03205296		1750.6	0.01088484		2340.6	0.03011275		2930.59	-0.00565011		3520.58	-0.01445048		4110.58	0.00377051
570.8	0.1956973		1160.79	0.03236769		1750.8	0.01104054		2340.8	0.03005897		2930.79	-0.00550519		3520.78	-0.01485174		4110.78	0.00312256
571	0.1965312		1160.99	0.03266325		1751	0.01049191		2341	0.03022011		2930.99	-0.00586153		3520.98	-0.01426207		4110.98	0.00287625
571.2	0.19627356		1161.19	0.033046		1751.2	0.01064125		2341.2	0.03052302		2931.19	-0.00544962		3521.18	-0.01325777		4111.18	0.00311114
571.4	0.19562057		1161.39	0.03259405		1751.4	0.01055544		2341.4	0.03070047		2931.39	-0.00718892		3521.38	-0.01210542		4111.38	0.00309522
571.6	0.1966678		1161.59	0.03240064		1751.6	0.01036962		2341.6	0.03056357		2931.59	-0.00795315		3521.58	-0.01087612		4111.58	0.00295947
571.8	0.19708581		1161.79	0.03284404		1751.8	0.01049975		2341.8	0.03011717		2931.79	-0.00756836		3521.78	-0.00984462		4111.78	0.00240653
572	0.19815486		1161.99	0.03275599		1752	0.01037547		2342	0.02941972		2931.99	-0.0079616		3521.98	-0.00956112		4111.98	0.00185221
572.2	0.19747435		1162.19	0.03110695		1752.2	0.01124628		2342.2	0.02884592		2932.19	-0.00875228		3522.18	-0.00867305		4112.18	0.0018287
572.4	0.19706205		1162.39	0.03045273		1752.4	0.01214962		2342.4	0.02804308		2932.39	-0.00898643		3522.38	-0.00872545		4112.38	0.00133753
572.6	0.19740666		1162.59	0.03004346		1752.6	0.01186966		2342.6	0.0274432		2932.59	-0.00954654		3522.58	-0.0082466		4112.58	0.0006367
572.8	0.19788431		1162.79	0.02856804		1752.8	0.01192376		2342.8	0.02692546		2932.79	-0.00881804		3522.78	-0.00746028		4112.78	0.00055224
573	0.19844033		1162.99	0.02706676		1753	0.01234726		2343	0.02660415		2932.99	-0.00911889		3522.98	-0.0079679		4112.98	0.000216
573.2	0.19794936		1163.19	0.02650255		1753.2	0.01274962		2343.2	0.02686191		2933.19	-0.00890965		3523.18	-0.00829125		4113.18	0.00057596
573.4	0.1972183		1163.39	0.02643809		1753.4	0.01234787		2343.4	0.02669379		2933.39	-0.00828993		3523.38	-0.00934501		4113.38	0.00086054
573.6	0.19679389		1163.59	0.02646517		1753.6	0.01259008		2343.6	0.02731132		2933.59	-0.00884377		3523.58	-0.00995966		4113.58	0.00127561
573.8	0.19677336		1163.79	0.02679175		1753.8	0.01192252		2343.8	0.02701119		2933.79	-0.00812539		3523.78	-0.01148593		4113.78	0.00168467
574	0.19612374		1163.99	0.02709958		1754	0.01067405		2344	0.02678814		2933.99	-0.00785449		3523.98	-0.01198101		4113.98	0.00136807
574.2	0.19581477		1164.19	0.02719248		1754.2	0.01037684		2344.2	0.02686148		2934.19	-0.00670987		3524.18	-0.0121728		4114.18	0.00184324
574.4	0.19420453		1164.39	0.02644166		1754.4	0.01072046		2344.4	0.02696745		2934.39	-0.00604781		3524.38	-0.01275712		4114.38	0.0021982
574.6	0.19407958		1164.59	0.02668511		1754.6	0.01034196		2344.6	0.02727665		2934.59	-0.00529897		3524.58	-0.01350404		4114.58	0.00290712
574.8	0.19457113		1164.79	0.02696191		1754.8	0.00971419		2344.8	0.02835528		2934.79	-0.0053842		3524.78	-0.01311741		4114.78	0.00284886
575	0.19527137		1164.99	0.02738216		1755	0.0093029		2345	0.02897693		2934.99	-0.00495901		3524.98	-0.01302948		4114.98	0.00276132
575.2	0.194244		1165.19	0.02745518		1755.2	0.00901356		2345.2	0.02941348		2935.19	-0.00526403		3525.18	-0.01248772		4115.18	0.00231535
575.4	0.19464835		1165.39	0.02669374		1755.4	0.00866801		2345.4	0.02973671		2935.39	-0.00670392		3525.38	-0.01265708		4115.38	0.00234762
575.6	0.19521116		1165.59	0.02728717		1755.6	0.00871107		2345.6	0.02872377		2935.59	-0.0065299		3525.58	-0.0122849		4115.58	0.00144096
575.8	0.1950735		1165.79	0.0275414		1755.8	0.00906022		2345.8	0.02882219		2935.79	-0.00607991		3525.78	-0.0118038		4115.78	-0.000063
576	0.19532346		1165.99	0.0281088		1756	0.00873283		2346	0.02952986		2935.99	-0.00625205		3525.98	-0.0117356		4115.98	-0.00094498
576.2	0.19479215		1166.19	0.02759863		1756.2	0.00966887		2346.2	0.02908868		2936.19	-0.00697044		3526.18	-0.01150352		4116.18	-0.0010674
576.4	0.19505803		1166.39	0.02763683		1756.4	0.0098507		2346.4	0.0288386		2936.39	-0.00716326		3526.38	-0.01074572		4116.38	-0.00174512
576.6	0.19545253		1166.59	0.02756925		1756.6	0.00968068		2346.6	0.02918019		2936.59	-0.00765091		3526.58	-0.01072232		4116.58	-0.00138783
576.8	0.19576467		1166.79	0.02696567		1756.8	0.01030895		2346.8	0.02847248		2936.79	-0.00793458		3526.78	-0.01081515		4116.78	-0.00154421
577	0.19562064		1166.99	0.02664766		1757	0.0113451		2347	0.02852494		2936.99	-0.00873269		3526.98	-0.0116974		4116.98	-0.00205525
577.2	0.1952229		1167.19	0.02715069		1757.2	0.01150481		2347.2	0.02850392		2937.19	-0.00905306		3527.18	-0.01240615		4117.18	-0.00099862
577.4	0.19547238		1167.39	0.02793156		1757.4	0.01124882		2347.4	0.02803079		2937.39	-0.00898566		3527.38	-0.01379416		4117.38	-0.00047917
577.6	0.1954788		1167.59	0.0277206		1757.6	0.0115131		2347.6	0.02841827		2937.59	-0.00939769		3527.58	-0.01338843		4117.58	0.00063845
577.8	0.19557178		1167.79	0.02825677		1757.8	0.01040809		2347.8	0.02848		2937.79	-0.0081264		3527.78	-0.01366862		4117.78	0.0010368
578	0.19523443		1167.99	0.02815211		1758	0.01052711		2348	0.02813394		2937.99	-0.00716853		3527.98	-0.01343173		4117.98	0.00206522
578.2	0.19539411		1168.19	0.02831568		1758.2	0.01093074		2348.2	0.02763578		2938.19	-0.00622143		3528.18	-0.01358483		4118.18	0.00291177
578.4	0.19554362		1168.39	0.02788576		1758.4	0.01130089		2348.4	0.02702343		2938.39	-0.00576939		3528.38	-0.01428217		4118.38	0.00349002
578.6	0.19630526		1168.59	0.02791332		1758.6	0.01093314		2348.6	0.02581908		2938.59	-0.00494447		3528.58	-0.01466631		4118.58	0.00392679
578.8	0.19654293		1168.79	0.0280911		1758.8	0.01103651		2348.8	0.02518671		2938.79	-0.00490923		3528.78	-0.01414527		4118.78	0.00336854
579	0.19531552		1168.99	0.0274034		1759	0.01116087		2349	0.02487446		2938.99	-0.00465698		3528.98	-0.01493184		4118.98	0.00295588
579.2	0.19543724		1169.19	0.02693216		1759.2	0.01191841		2349.2	0.02493065		2939.19	-0.00495961		3529.18	-0.01509727		4119.18	0.00365454
579.4	0.19604436		1169.39	0.02611617		1759.4	0.01270448		2349.4	0.02409684		2939.39	-0.00466112		3529.38	-0.01517264		4119.38	0.00361944
579.6	0.19604947		1169.59	0.0264103		1759.6	0.01278511		2349.6	0.02337185		2939.59	-0.00502085		3529.58	-0.01505103		4119.58	0.00315094
579.8	0.19546524		1169.79	0.02572845		1759.8	0.01332037		2349.8	0.02369949		2939.79	-0.00449358		3529.78	-0.01420889		4119.78	0.00293235
580	0.1951297		1169.99	0.02557702		1760	0.01360983		2350	0.0241351		2939.99	-0.00507313		3529.98	-0.01358397		4119.98	0.00196471
580.2	0.19437433		1170.19	0.02504248		1760.2	0.01448648		2350.2	0.02330951		2940.19	-0.00569769		3530.18	-0.01243747		4120.18	0.00208712
580.4	0.19458034		1170.39	0.02515585		1760.4	0.01482561		2350.4	0.02342876		2940.39	-0.00597779		3530.38	-0.01126841		4120.38	0.00095984
580.6	0.19409316		1170.59	0.02498783		1760.6	0.01484284		2350.6	0.02390384		2940.59	-0.00609992		3530.58	-0.01061358		4120.58	0.00082645
580.8	0.19345269		1170.79	0.0248165		1760.8	0.01467877		2350.8	0.023976		2940.79	-0.00632188		3530.78	-0.01035673		4120.78	-0.00040114
581	0.19254737		1170.99	0.02485139		1761	0.01472086		2351	0.02468422		2940.99	-0.00667736		3530.98	-0.01086927		4120.98	-0.00099442
581.2	0.19134146		1171.19	0.02560108		1761.2	0.01401121		2351.2	0.02556741		2941.19	-0.00613262		3531.18	-0.01092931		4121.18	-0.00011444
581.4	0.19129036		1171.39	0.02567539		1761.4	0.01318104		2351.4	0.02645562		2941.39	-0.00606349		3531.38	-0.01113683		4121.38	0.00029079
581.6	0.19141981		1171.59	0.02608497		1761.6	0.01251383		2351.6	0.02777725		2941.59	-0.00662651		3531.58	-0.01104822		4121.58	0.00023573
581.8	0.19188399		1171.79	0.02623044		1761.8	0.01291015		2351.8	0.02806637		2941.79	-0.00658136		3531.78	-0.01120377		4121.78	0.00025118
582	0.19171027		1171.99	0.02600349		1762	0.01329503		2352	0.02793957		2941.99	-0.0064273		3531.98	-0.01180559		4121.98	0.00058685
582.2	0.19218624		1172.19	0.02622616		1762.2	0.01305703		2352.2	0.02817591		2942.19	-0.00670051		3532.18	-0.01233132		4122.18	0.00102536
582.4	0.19229049		1172.39	0.02607215		1762.4	0.01256985		2352.4	0.02835121		2942.39	-0.00693137		3532.38	-0.01267888		4122.38	0.00123921
582.6	0.19220373		1172.59	0.02593575		1762.6	0.01215569		2352.6	0.02794203		2942.59	-0.007226		3532.58	-0.01310841		4122.58	0.00012814
582.8	0.19237112		1172.79	0.02663408		1762.8	0.01270756		2352.8	0.02925213		2942.79	-0.00765627		3532.78	-0.01327088		4122.78	-0.00052319
583	0.19189898		1172.99	0.02641234		1763	0.01283632		2353	0.02971756		2942.99	-0.00827143		3532.98	-0.01413208		4122.98	-0.00056567
583.2	0.19327909		1173.19	0.02675901		1763.2	0.01314645		2353.2	0.02903091		2943.19	-0.00820567		3533.18	-0.01444675		4123.18	-0.00026217
583.4	0.19345413		1173.39	0.02658192		1763.4	0.01347974		2353.4	0.02788896		2943.39	-0.00838187		3533.38	-0.01411546		4123.38	-0.00068068
583.6	0.19316053		1173.59	0.02679953		1763.6	0.01342665		2353.6	0.02782716		2943.59	-0.00907879		3533.58	-0.01428317		4123.58	-0.00101233
583.8	0.19269588		1173.79	0.026284		1763.8	0.01416706		2353.8	0.02754062		2943.79	-0.00892037		3533.78	-0.01335893		4123.78	-0.00135689
584	0.19267805		1173.99	0.02676402		1764	0.01442386		2354	0.02858585		2943.99	-0.00924362		3533.98	-0.01314382		4123.98	-0.0017797
584.2	0.19309526		1174.19	0.02711844		1764.2	0.01447862		2354.2	0.02842013		2944.19	-0.0091499		3534.18	-0.0121691		4124.18	-0.00177947
584.4	0.19361078		1174.39	0.02758796		1764.4	0.01452493		2354.4	0.02818485		2944.39	-0.00948812		3534.38	-0.01161916		4124.38	-0.00186144
584.6	0.19341754		1174.59	0.0273911		1764.6	0.01418482		2354.6	0.02828886		2944.59	-0.00945374		3534.58	-0.01145555		4124.58	-0.00220676
584.8	0.19300405		1174.79	0.02786804		1764.8	0.01367221		2354.8	0.028427		2944.79	-0.00908644		3534.78	-0.01120685		4124.78	-0.00214772
585	0.19208153		1174.99	0.02784202		1765	0.01317626		2355	0.0291855		2944.99	-0.00865366		3534.98	-0.01098404		4124.98	-0.00180412
585.2	0.19089094		1175.19	0.02763592		1765.2	0.01255287		2355.2	0.03030653		2945.19	-0.00787372		3535.18	-0.01049805		4125.18	-0.00103811
585.4	0.19120055		1175.39	0.02809596		1765.4	0.0120571		2355.4	0.03094171		2945.39	-0.00813983		3535.38	-0.01056173		4125.38	-0.00061171
585.6	0.19134941		1175.59	0.02919932		1765.6	0.01212007		2355.6	0.03117242		2945.59	-0.00825826		3535.58	-0.01023392		4125.58	-0.00093655
585.8	0.19129321		1175.79	0.02790032		1765.8	0.01267779		2355.8	0.03055623		2945.79	-0.00785926		3535.78	-0.00943017		4125.78	-0.0002063
586	0.1914153		1175.99	0.02727398		1766	0.01187366		2356	0.03045139		2945.99	-0.00726687		3535.98	-0.01014752		4125.98	0.00044928
586.2	0.19088334		1176.19	0.02683635		1766.2	0.01228543		2356.2	0.03030909		2946.19	-0.00669941		3536.18	-0.01020401		4126.18	0.00089371
586.4	0.19067437		1176.39	0.02786057		1766.4	0.01194061		2356.4	0.02999141		2946.39	-0.00714777		3536.38	-0.0108302		4126.38	0.00078547
586.6	0.19065353		1176.59	0.02745772		1766.6	0.01221979		2356.6	0.02952889		2946.59	-0.00723974		3536.58	-0.01140386		4126.58	0.00024084
586.8	0.19116012		1176.79	0.02711472		1766.8	0.01209908		2356.8	0.03002095		2946.79	-0.00748408		3536.78	-0.01115134		4126.78	0.00047738
587	0.19062591		1176.99	0.02687205		1767	0.01160136		2357	0.02927865		2946.99	-0.00671045		3536.98	-0.01100485		4126.98	-0.00018652
587.2	0.19086251		1177.19	0.0265997		1767.2	0.01128646		2357.2	0.02912235		2947.19	-0.00579816		3537.18	-0.01083081		4127.18	0.00028315
587.4	0.19077393		1177.39	0.02606111		1767.4	0.01142546		2357.4	0.02849016		2947.39	-0.00577647		3537.38	-0.01095209		4127.38	0.00017021
587.6	0.19012171		1177.59	0.02538685		1767.6	0.01148285		2357.6	0.02853924		2947.59	-0.0064918		3537.58	-0.01086125		4127.58	0.00028542
587.8	0.18983738		1177.79	0.0245954		1767.8	0.01291824		2357.8	0.02908298		2947.79	-0.00652574		3537.78	-0.01011287		4127.78	0.0006348
588	0.19005512		1177.99	0.02495535		1768	0.01363533		2358	0.02885889		2947.99	-0.00716904		3537.98	-0.01006719		4127.98	0.00066214
588.2	0.19086126		1178.19	0.02492679		1768.2	0.01407671		2358.2	0.02813362		2948.19	-0.00713729		3538.18	-0.00948687		4128.18	0.00006559
588.4	0.19115022		1178.39	0.02484326		1768.4	0.01414687		2358.4	0.02712061		2948.39	-0.00743582		3538.38	-0.00965711		4128.38	0.00045429
588.6	0.19156759		1178.59	0.02441432		1768.6	0.01359199		2358.6	0.02676432		2948.59	-0.00699663		3538.58	-0.01010081		4128.58	0.00008746
588.8	0.19119623		1178.79	0.0245249		1768.8	0.01227144		2358.8	0.02685859		2948.79	-0.00666962		3538.78	-0.0093673		4128.78	0.00042331
589	0.19151816		1178.99	0.02456649		1769	0.01128263		2359	0.02667939		2948.99	-0.00675542		3538.98	-0.00911998		4128.98	0.00050198
589.2	0.192037		1179.19	0.02441581		1769.2	0.01038932		2359.2	0.02633452		2949.19	-0.00702784		3539.18	-0.00973385		4129.18	0.00037011
589.4	0.19271928		1179.39	0.02580874		1769.4	0.01006016		2359.4	0.0260758		2949.39	-0.00766552		3539.38	-0.00970998		4129.38	0.00040109
589.6	0.19256531		1179.59	0.0254993		1769.6	0.00979539		2359.6	0.02549945		2949.59	-0.00788167		3539.58	-0.00987601		4129.58	0.00022166
589.8	0.19290055		1179.79	0.02411059		1769.8	0.00945515		2359.8	0.02480262		2949.79	-0.00834844		3539.78	-0.01059787		4129.78	0.00033113
590	0.1928952		1179.99	0.02516274		1770	0.00923916		2360	0.0244816		2949.99	-0.0081118		3539.98	-0.01160282		4129.98	0.00077175
590.2	0.19268163		1180.19	0.02559408		1770.2	0.00858541		2360.2	0.02471726		2950.19	-0.00894567		3540.18	-0.01212515		4130.18	0.00075868
590.4	0.1934929		1180.39	0.02683469		1770.4	0.00758415		2360.4	0.02484708		2950.39	-0.01020376		3540.38	-0.01278982		4130.38	0.00112665
590.6	0.19458678		1180.59	0.02594544		1770.6	0.00660536		2360.6	0.02483473		2950.59	-0.01001937		3540.58	-0.01311522		4130.58	0.00072448
590.8	0.19471746		1180.79	0.02512846		1770.8	0.00604739		2360.8	0.02506893		2950.79	-0.01005611		3540.78	-0.01280099		4130.78	-0.00047256
591	0.19366502		1180.99	0.02555607		1771	0.00567635		2361	0.02536313		2950.99	-0.00946699		3540.98	-0.01313208		4130.98	-0.00102321
591.2	0.19241556		1181.19	0.02491772		1771.2	0.00576882		2361.2	0.02654579		2951.19	-0.01037524		3541.18	-0.01321101		4131.18	-0.00014087
591.4	0.19164213		1181.39	0.02437032		1771.4	0.00583752		2361.4	0.02652982		2951.39	-0.01081233		3541.38	-0.01324076		4131.38	0.00013696
591.6	0.19026393		1181.59	0.02421135		1771.6	0.00661322		2361.6	0.02634572		2951.59	-0.01099707		3541.58	-0.01270751		4131.58	0.00083663
591.8	0.18899168		1181.79	0.02460515		1771.8	0.00798482		2361.8	0.02628726		2951.79	-0.01139422		3541.78	-0.0119418		4131.78	0.00134955
592	0.18888845		1181.99	0.02457125		1772	0.0082939		2362	0.025731		2951.99	-0.01083014		3541.98	-0.01126096		4131.98	0.0008491
592.2	0.18922304		1182.19	0.02467998		1772.2	0.00861459		2362.2	0.02555607		2952.19	-0.01027793		3542.18	-0.01072532		4132.18	0.00145548
592.4	0.18902658		1182.39	0.02471529		1772.4	0.00831311		2362.4	0.02548323		2952.39	-0.00935399		3542.38	-0.0118438		4132.38	0.00188151
592.6	0.18939323		1182.59	0.02453359		1772.6	0.00754955		2362.6	0.02506878		2952.59	-0.00978661		3542.58	-0.01192635		4132.58	0.00164355
592.8	0.1902104		1182.79	0.02502648		1772.8	0.007998		2362.8	0.02492804		2952.79	-0.00975773		3542.78	-0.01160831		4132.78	0.00181724
593	0.19067002		1182.99	0.02495998		1773	0.00893896		2363	0.02412375		2952.99	-0.0094052		3542.98	-0.01152695		4132.98	0.0021979
593.2	0.18991736		1183.19	0.02422532		1773.2	0.00951046		2363.2	0.02330352		2953.19	-0.00910441		3543.18	-0.01131701		4133.18	0.00161524
593.4	0.19001244		1183.39	0.02409942		1773.4	0.00991693		2363.4	0.02369902		2953.39	-0.00984009		3543.38	-0.01095475		4133.38	0.0018121
593.6	0.18975472		1183.59	0.02229994		1773.6	0.00963076		2363.6	0.0236065		2953.59	-0.00991603		3543.58	-0.01178661		4133.58	0.00118019
593.8	0.19074883		1183.79	0.02244292		1773.8	0.00967663		2363.8	0.02368178		2953.79	-0.01028676		3543.78	-0.01182028		4133.78	0.00130503
594	0.19159304		1183.99	0.02335991		1774	0.00940991		2364	0.02383157		2953.99	-0.00998031		3543.98	-0.0116084		4133.98	0.00141386
594.2	0.192901		1184.19	0.02269301		1774.2	0.00921245		2364.2	0.02437041		2954.19	-0.01047191		3544.18	-0.01172003		4134.18	0.00089981
594.4	0.19370101		1184.39	0.0223306		1774.4	0.00960012		2364.4	0.02433792		2954.39	-0.01004639		3544.38	-0.01213186		4134.38	0.00063135
594.6	0.19479118		1184.59	0.02137816		1774.6	0.0098736		2364.6	0.02516494		2954.59	-0.00914107		3544.58	-0.01260588		4134.58	-0.00031429
594.8	0.19396041		1184.79	0.0205726		1774.8	0.00985015		2364.8	0.02493665		2954.79	-0.00891868		3544.78	-0.01329366		4134.78	-0.00118826
595	0.1931507		1184.99	0.02091167		1775	0.00918151		2365	0.02582949		2954.99	-0.00944523		3544.98	-0.01370763		4134.98	-0.00114727
595.2	0.19221731		1185.19	0.02037681		1775.2	0.01000778		2365.2	0.02664475		2955.19	-0.00940647		3545.18	-0.01299334		4135.18	-0.00047166
595.4	0.1927569		1185.39	0.02056272		1775.4	0.00899548		2365.4	0.02648725		2955.39	-0.00932724		3545.38	-0.01228422		4135.38	-0.00048776
595.6	0.19236364		1185.59	0.02150138		1775.6	0.00917052		2365.6	0.02586181		2955.59	-0.0089818		3545.58	-0.01151808		4135.58	-0.00004395
595.8	0.1921603		1185.79	0.0212449		1775.8	0.00968675		2365.8	0.02592347		2955.79	-0.0098325		3545.78	-0.01157249		4135.78	0.00070179
596	0.19240399		1185.99	0.02117948		1776	0.00959495		2366	0.02557475		2955.99	-0.00881273		3545.98	-0.01112411		4135.98	0.000524
596.2	0.1927705		1186.19	0.02128672		1776.2	0.00926898		2366.2	0.02535009		2956.19	-0.00840066		3546.18	-0.01180922		4136.18	0.00082734
596.4	0.1923601		1186.39	0.0215862		1776.4	0.00946229		2366.4	0.02479906		2956.39	-0.00793993		3546.38	-0.01194549		4136.38	0.00037536
596.6	0.19292438		1186.59	0.02202402		1776.6	0.00959344		2366.6	0.02452003		2956.59	-0.00878597		3546.58	-0.01171848		4136.58	-0.00027338
596.8	0.19285063		1186.79	0.02302365		1776.8	0.01135125		2366.8	0.02333495		2956.79	-0.00807805		3546.78	-0.01157678		4136.78	-0.00005913
597	0.19158255		1186.99	0.02299651		1777	0.01170087		2367	0.02324027		2956.99	-0.00822939		3546.98	-0.0115974		4136.98	-0.00067118
597.2	0.19110407		1187.19	0.0235198		1777.2	0.01101028		2367.2	0.02277928		2957.19	-0.00937127		3547.18	-0.01140545		4137.18	-0.00145281
597.4	0.19140344		1187.39	0.02362427		1777.4	0.01097838		2367.4	0.0238704		2957.39	-0.01000374		3547.38	-0.01213807		4137.38	-0.00139819
597.6	0.19056469		1187.59	0.02423		1777.6	0.01129695		2367.6	0.02392712		2957.59	-0.00935247		3547.58	-0.01293844		4137.58	-0.00184095
597.8	0.19034041		1187.79	0.02600691		1777.8	0.01141721		2367.8	0.02399689		2957.79	-0.00990779		3547.78	-0.01270546		4137.78	-0.00138203
598	0.19035089		1187.99	0.02729918		1778	0.01197112		2368	0.02403694		2957.99	-0.00993337		3547.98	-0.01270202		4137.98	-0.00217823
598.2	0.19018238		1188.19	0.0271589		1778.2	0.01281714		2368.2	0.02432854		2958.19	-0.01021144		3548.18	-0.01328689		4138.18	-0.00255715
598.4	0.18895163		1188.39	0.02724862		1778.4	0.01256742		2368.4	0.02433523		2958.39	-0.01001963		3548.38	-0.01348544		4138.38	-0.00287564
598.6	0.18895942		1188.59	0.02742192		1778.6	0.01235546		2368.6	0.02454845		2958.59	-0.00974378		3548.58	-0.01389282		4138.58	-0.00343921
598.8	0.18787263		1188.79	0.02742719		1778.8	0.01202457		2368.8	0.02410807		2958.79	-0.01048327		3548.78	-0.01355503		4138.78	-0.0038763
599	0.18824433		1188.99	0.02798028		1779	0.01172058		2369	0.02498489		2958.99	-0.01126097		3548.98	-0.01406941		4138.98	-0.00353389
599.2	0.18835669		1189.19	0.02790342		1779.2	0.01217976		2369.2	0.02487556		2959.19	-0.01075968		3549.18	-0.0140677		4139.18	-0.00312647
599.4	0.18920193		1189.39	0.02774002		1779.4	0.01045171		2369.4	0.02504171		2959.39	-0.01163399		3549.38	-0.01364214		4139.38	-0.00247993
599.6	0.18935062		1189.59	0.02690721		1779.6	0.01028571		2369.6	0.02449002		2959.59	-0.01199105		3549.58	-0.01376095		4139.58	-0.00064148
599.8	0.1897089		1189.79	0.02596123		1779.8	0.00945114		2369.8	0.02440897		2959.79	-0.01229256		3549.78	-0.01366165		4139.78	-0.00007197
600	0.19076489		1189.99	0.02590926		1780	0.00888356		2370	0.02385114		2959.99	-0.01074344		3549.98	-0.01317465		4139.98	0.00018885
600.2	0.19172755		1190.19	0.02546402		1780.2	0.00858155		2370.2	0.02369039		2960.19	-0.0100508		3550.18	-0.01382748		4140.18	0.00072354
600.4	0.19180424		1190.39	0.02512961		1780.4	0.00921515		2370.4	0.02415168		2960.39	-0.00979091		3550.38	-0.01369369		4140.38	0.00091358
600.6	0.19311214		1190.59	0.02548539		1780.6	0.00877873		2370.6	0.02391884		2960.59	-0.009061		3550.58	-0.01486745		4140.58	0.00097682
600.8	0.19329882		1190.79	0.02486755		1780.8	0.00907328		2370.8	0.02339822		2960.79	-0.00823733		3550.78	-0.01546103		4140.78	0.00185001
601	0.19373055		1190.99	0.02423019		1781	0.0088442		2371	0.02353019		2960.99	-0.00847329		3550.98	-0.01515552		4140.98	0.00173927
601.2	0.19399474		1191.19	0.02436001		1781.2	0.00820506		2371.2	0.02356633		2961.19	-0.00794008		3551.18	-0.01456593		4141.18	0.00262941
601.4	0.19321809		1191.39	0.02387331		1781.4	0.00885595		2371.4	0.0236859		2961.39	-0.00690865		3551.38	-0.01562737		4141.38	0.00316195
601.6	0.1924974		1191.59	0.02411436		1781.6	0.0095566		2371.6	0.0237322		2961.59	-0.0066968		3551.58	-0.01588842		4141.58	0.00297054
601.8	0.19294396		1191.79	0.02475534		1781.8	0.0097257		2371.8	0.02308721		2961.79	-0.00738571		3551.78	-0.01562082		4141.78	0.00322325
602	0.19306247		1191.99	0.02460571		1782	0.01101322		2372	0.02301501		2961.99	-0.00816393		3551.98	-0.01535109		4141.98	0.00281051
602.2	0.19193922		1192.19	0.02372523		1782.2	0.01115024		2372.2	0.02384778		2962.19	-0.00912771		3552.18	-0.01522424		4142.18	0.00224411
602.4	0.19080072		1192.39	0.02409718		1782.4	0.01190301		2372.4	0.02352395		2962.39	-0.00893403		3552.38	-0.0151221		4142.38	0.00067108
602.6	0.19029964		1192.59	0.02449203		1782.6	0.01234271		2372.6	0.02320794		2962.59	-0.00949189		3552.58	-0.01508234		4142.58	-0.00045311
602.8	0.18991209		1192.79	0.0248045		1782.8	0.01343682		2372.8	0.02359738		2962.79	-0.01029293		3552.78	-0.01502289		4142.78	-0.0011375
603	0.1902527		1192.99	0.02518618		1783	0.01318665		2373	0.02318171		2962.99	-0.01025199		3552.98	-0.01492339		4142.98	-0.00201905
603.2	0.19007721		1193.19	0.02551836		1783.2	0.01303395		2373.2	0.02245675		2963.19	-0.01104838		3553.18	-0.01417833		4143.18	-0.00204439
603.4	0.19006534		1193.39	0.02590044		1783.4	0.01181568		2373.4	0.0224779		2963.39	-0.01221162		3553.38	-0.01300786		4143.38	-0.00203153
603.6	0.18959632		1193.59	0.02557698		1783.6	0.01177301		2373.6	0.02300333		2963.59	-0.01146525		3553.58	-0.01236218		4143.58	-0.00202874
603.8	0.18893679		1193.79	0.02546997		1783.8	0.01170535		2373.8	0.0235885		2963.79	-0.0106234		3553.78	-0.0121663		4143.78	-0.00257825
604	0.18912828		1193.99	0.02519175		1784	0.01229409		2374	0.02361294		2963.99	-0.00956985		3553.98	-0.01242652		4143.98	-0.00217785
604.2	0.18889249		1194.19	0.02410375		1784.2	0.01249444		2374.2	0.02439418		2964.19	-0.00968952		3554.18	-0.01218274		4144.18	-0.00110297
604.4	0.18859061		1194.39	0.0237532		1784.4	0.01260402		2374.4	0.02532854		2964.39	-0.00916726		3554.38	-0.01243606		4144.38	-0.00066308
604.6	0.18921847		1194.59	0.02380841		1784.6	0.01156304		2374.6	0.02497697		2964.59	-0.00868756		3554.58	-0.01284802		4144.58	-0.00059313
604.8	0.18883938		1194.79	0.02251009		1784.8	0.01067803		2374.8	0.02541204		2964.79	-0.00898034		3554.78	-0.01281829		4144.78	0.00019452
605	0.1890902		1194.99	0.02193634		1785	0.00972561		2375	0.02513799		2964.99	-0.00882877		3554.98	-0.01130917		4144.98	0.00118825
605.2	0.18852499		1195.19	0.02188832		1785.2	0.00868422		2375.2	0.02578965		2965.19	-0.00833872		3555.18	-0.01165883		4145.18	0.00168872
605.4	0.1888073		1195.39	0.02166878		1785.4	0.0088598		2375.4	0.02613283		2965.39	-0.00833248		3555.38	-0.0123559		4145.38	0.00208976
605.6	0.18929971		1195.59	0.02224583		1785.6	0.00858719		2375.6	0.02641728		2965.59	-0.0078504		3555.58	-0.01216792		4145.58	0.00263919
605.8	0.19073919		1195.79	0.02266764		1785.8	0.00918482		2375.8	0.02545497		2965.79	-0.00784965		3555.78	-0.01244428		4145.78	0.00260453
606	0.18989399		1195.99	0.02307828		1786	0.00924939		2376	0.02669762		2965.99	-0.00856925		3555.98	-0.01290096		4145.98	0.00272134
606.2	0.18928337		1196.19	0.02299354		1786.2	0.00905546		2376.2	0.02700436		2966.19	-0.00875559		3556.18	-0.01277406		4146.18	0.00191118
606.4	0.18903435		1196.39	0.02338254		1786.4	0.01007319		2376.4	0.02615465		2966.39	-0.00844809		3556.38	-0.01296833		4146.38	0.00097867
606.6	0.18870982		1196.59	0.02254177		1786.6	0.00890306		2376.6	0.02621919		2966.59	-0.00837922		3556.58	-0.01274639		4146.58	0.00052744
606.8	0.18878794		1196.79	0.02203054		1786.8	0.00922378		2376.8	0.02617028		2966.79	-0.00881826		3556.78	-0.01311246		4146.78	0.00048088
607	0.1888944		1196.99	0.02185243		1787	0.00796718		2377	0.02532048		2966.99	-0.00875032		3556.98	-0.01255749		4146.98	-0.00048182
607.2	0.18876723		1197.19	0.02210983		1787.2	0.0075546		2377.2	0.02537436		2967.19	-0.00923726		3557.18	-0.01402199		4147.18	-0.00021394
607.4	0.18775449		1197.39	0.02178495		1787.4	0.00750559		2377.4	0.0260868		2967.39	-0.00891846		3557.38	-0.0140043		4147.38	-0.00026743
607.6	0.18683886		1197.59	0.02138773		1787.6	0.00827867		2377.6	0.02645358		2967.59	-0.0075177		3557.58	-0.01457781		4147.58	-0.00055291
607.8	0.18604575		1197.79	0.02008626		1787.8	0.00861788		2377.8	0.02583406		2967.79	-0.00705209		3557.78	-0.01491012		4147.78	-0.00042916
608	0.18662419		1197.99	0.01993473		1788	0.0081255		2378	0.02607003		2967.99	-0.00737873		3557.98	-0.01445602		4147.98	-0.00044094
608.2	0.18677635		1198.19	0.01947113		1788.2	0.00861503		2378.2	0.02603106		2968.19	-0.00758118		3558.18	-0.01434761		4148.18	-0.00027085
608.4	0.18703702		1198.39	0.0199303		1788.4	0.00833784		2378.4	0.0262082		2968.39	-0.00756036		3558.38	-0.01480228		4148.38	-0.00101743
608.6	0.18713283		1198.59	0.01985118		1788.6	0.00761192		2378.6	0.02608518		2968.59	-0.00770231		3558.58	-0.01415231		4148.58	-0.00091868
608.8	0.18712414		1198.79	0.01990353		1788.8	0.00680835		2378.8	0.02638962		2968.79	-0.00762963		3558.78	-0.01453297		4148.78	0.00019544
609	0.18773242		1198.99	0.02014269		1789	0.00679776		2379	0.0265218		2968.99	-0.00728901		3558.98	-0.01360479		4148.98	-0.00008099
609.2	0.18808901		1199.19	0.02026005		1789.2	0.00651062		2379.2	0.02621235		2969.19	-0.00725484		3559.18	-0.01467206		4149.18	-0.0002215
609.4	0.18854283		1199.39	0.02023439		1789.4	0.00675649		2379.4	0.02640772		2969.39	-0.007403		3559.38	-0.01433542		4149.38	0.00011801
609.6	0.18821064		1199.59	0.02109561		1789.6	0.00778434		2379.6	0.0259665		2969.59	-0.0073067		3559.58	-0.01422132		4149.58	-0.00040319
609.8	0.18861385		1199.79	0.02135779		1789.8	0.00985332		2379.8	0.02559218		2969.79	-0.00716847		3559.78	-0.01415284		4149.78	-0.00067277
610	0.18791306		1199.99	0.02186564		1790	0.01012353		2380	0.02556462		2969.99	-0.00748986		3559.98	-0.01397459		4149.98	-0.00017714
610.2	0.18766405		1200.19	0.02122052		1790.2	0.0108698		2380.2	0.02507559		2970.19	-0.00797306		3560.18	-0.01298433		4150.18	-0.00072912
610.4	0.1871629		1200.39	0.02158194		1790.4	0.01202336		2380.4	0.02520898		2970.39	-0.00850992		3560.38	-0.01239792		4150.38	-0.00086413
610.6	0.18714628		1200.59	0.02118965		1790.6	0.01144891		2380.6	0.02555957		2970.59	-0.00841271		3560.58	-0.01236122		4150.58	-0.0009353
610.8	0.18790678		1200.79	0.02101641		1790.8	0.01195748		2380.8	0.02535757		2970.79	-0.00833578		3560.78	-0.01352852		4150.78	-0.00081596
611	0.18750481		1200.99	0.0206558		1791	0.01146802		2381	0.02515499		2970.99	-0.00862698		3560.98	-0.01428755		4150.98	-0.00090898
611.2	0.18669986		1201.19	0.02208601		1791.2	0.01176933		2381.2	0.0245207		2971.19	-0.00844778		3561.18	-0.01511841		4151.18	-0.00032965
611.4	0.18634915		1201.39	0.02239852		1791.4	0.01196082		2381.4	0.02394957		2971.39	-0.00817076		3561.38	-0.01454093		4151.38	-0.00038475
611.6	0.18597669		1201.59	0.02274572		1791.6	0.01170031		2381.6	0.02327597		2971.59	-0.00805115		3561.58	-0.0141745		4151.58	-0.00093793
611.8	0.18631365		1201.79	0.02233506		1791.8	0.01094779		2381.8	0.02344375		2971.79	-0.00795607		3561.78	-0.01376853		4151.78	-0.00046537
612	0.18687009		1201.99	0.02367826		1792	0.01086649		2382	0.0236386		2971.99	-0.00860581		3561.98	-0.01342558		4151.98	-0.00076625
612.2	0.18733352		1202.19	0.02407234		1792.2	0.01074842		2382.2	0.02333255		2972.19	-0.00866138		3562.18	-0.01351351		4152.18	-0.0003773
612.4	0.18837427		1202.39	0.0251227		1792.4	0.00916105		2382.4	0.02402231		2972.39	-0.00876663		3562.38	-0.0129274		4152.38	0.00094449
612.6	0.18856612		1202.59	0.02510847		1792.6	0.00852316		2382.6	0.02410676		2972.59	-0.00859585		3562.58	-0.01317328		4152.58	0.00202646
612.8	0.1885913		1202.79	0.02561997		1792.8	0.00801458		2382.8	0.02451946		2972.79	-0.00839273		3562.78	-0.01395648		4152.78	0.00209371
613	0.18937094		1202.99	0.02476669		1793	0.00792483		2383	0.02427301		2972.99	-0.00822747		3562.98	-0.01478335		4152.98	0.00139125
613.2	0.18966064		1203.19	0.02358332		1793.2	0.00730265		2383.2	0.02439579		2973.19	-0.00847462		3563.18	-0.0154478		4153.18	0.00134002
613.4	0.18966808		1203.39	0.02302239		1793.4	0.00723217		2383.4	0.02535905		2973.39	-0.00928855		3563.38	-0.01475176		4153.38	0.00034598
613.6	0.19034832		1203.59	0.02265628		1793.6	0.00757062		2383.6	0.02568729		2973.59	-0.00902089		3563.58	-0.0149243		4153.58	-0.0002155
613.8	0.19001463		1203.79	0.02226778		1793.8	0.00748483		2383.8	0.0263426		2973.79	-0.00865706		3563.78	-0.01449117		4153.78	-0.00024106
614	0.18986487		1203.99	0.0218		1794	0.00713982		2384	0.02551098		2973.99	-0.00864652		3563.98	-0.01468137		4153.98	-0.00051671
614.2	0.18919686		1204.19	0.0214545		1794.2	0.00706824		2384.2	0.02654284		2974.19	-0.0090825		3564.18	-0.01387234		4154.18	-0.00127002
614.4	0.18921394		1204.39	0.02131121		1794.4	0.00744122		2384.4	0.02646784		2974.39	-0.0088997		3564.38	-0.01339117		4154.38	-0.00166465
614.6	0.18891694		1204.59	0.02066444		1794.6	0.00672632		2384.6	0.02629332		2974.59	-0.008375		3564.58	-0.01399303		4154.58	-0.00210272
614.8	0.18832408		1204.79	0.01962071		1794.8	0.00645884		2384.8	0.0258405		2974.79	-0.00803372		3564.78	-0.01470808		4154.78	-0.00329835
615	0.18652564		1204.99	0.01936365		1795	0.00676129		2385	0.02612878		2974.99	-0.00828807		3564.98	-0.0147207		4154.98	-0.00377714
615.2	0.18553869		1205.19	0.01948302		1795.2	0.00703217		2385.2	0.02591384		2975.19	-0.00869729		3565.18	-0.01459549		4155.18	-0.00348721
615.4	0.1859941		1205.39	0.01830324		1795.4	0.0073178		2385.4	0.02559595		2975.39	-0.00930063		3565.38	-0.01429246		4155.38	-0.00298722
615.6	0.18571615		1205.59	0.01903071		1795.6	0.00682048		2385.6	0.02561747		2975.59	-0.00945526		3565.58	-0.0144133		4155.58	-0.00224294
615.8	0.18580596		1205.79	0.0188844		1795.8	0.00690671		2385.8	0.02551047		2975.79	-0.0097231		3565.78	-0.01437154		4155.78	-0.00148691
616	0.18595476		1205.99	0.01989599		1796	0.00647552		2386	0.02551302		2975.99	-0.01006526		3565.98	-0.01419748		4155.98	-0.00118596
616.2	0.18678799		1206.19	0.02037683		1796.2	0.00581372		2386.2	0.02535213		2976.19	-0.00947043		3566.18	-0.01339267		4156.18	0.00008936
616.4	0.18642602		1206.39	0.02095238		1796.4	0.00547587		2386.4	0.0246824		2976.39	-0.00922729		3566.38	-0.01254527		4156.38	0.00107658
616.6	0.18598212		1206.59	0.02054027		1796.6	0.00603602		2386.6	0.0246172		2976.59	-0.00904793		3566.58	-0.01307599		4156.58	0.00089134
616.8	0.18577574		1206.79	0.02132065		1796.8	0.00598537		2386.8	0.02465674		2976.79	-0.00854231		3566.78	-0.013204		4156.78	0.00157842
617	0.18651898		1206.99	0.02126768		1797	0.00626565		2387	0.02487751		2976.99	-0.00814163		3566.98	-0.01367319		4156.98	0.00148921
617.2	0.18637195		1207.19	0.02159799		1797.2	0.00695778		2387.2	0.02540265		2977.19	-0.00819344		3567.18	-0.0133505		4157.18	0.00152939
617.4	0.18689523		1207.39	0.02178877		1797.4	0.00662819		2387.4	0.02565851		2977.39	-0.0085836		3567.38	-0.01329379		4157.38	0.00118896
617.6	0.18715353		1207.59	0.02207597		1797.6	0.00717494		2387.6	0.0258269		2977.59	-0.00820224		3567.58	-0.01340834		4157.58	0.00149376
617.8	0.18691894		1207.79	0.02182479		1797.8	0.00756214		2387.8	0.02548266		2977.79	-0.00807575		3567.78	-0.01347834		4157.78	0.00094848
618	0.18673202		1207.99	0.02249736		1798	0.00871793		2388	0.02469123		2977.99	-0.0080905		3567.98	-0.01420058		4157.98	0.00076409
618.2	0.18706916		1208.19	0.02329916		1798.2	0.00945806		2388.2	0.02519237		2978.19	-0.00807949		3568.18	-0.01389266		4158.18	0.0002602
618.4	0.18729415		1208.39	0.0231584		1798.4	0.00963737		2388.4	0.02529772		2978.39	-0.00765825		3568.38	-0.01402326		4158.38	-0.00000574
618.6	0.18668325		1208.59	0.0221797		1798.6	0.00964309		2388.6	0.02518645		2978.59	-0.00754891		3568.58	-0.01506742		4158.58	-0.00027783
618.8	0.18699064		1208.79	0.02053966		1798.8	0.01035288		2388.8	0.02509105		2978.79	-0.00774655		3568.78	-0.01584855		4158.78	-0.00169982
619	0.18689793		1208.99	0.01977157		1799	0.01124385		2389	0.02574712		2978.99	-0.00788259		3568.98	-0.01612268		4158.98	-0.00145322
619.2	0.18646158		1209.19	0.01876807		1799.2	0.01150169		2389.2	0.02446557		2979.19	-0.0086455		3569.18	-0.01631489		4159.18	-0.00046646
619.4	0.18661251		1209.39	0.01868288		1799.4	0.0113944		2389.4	0.02465171		2979.39	-0.0090243		3569.38	-0.01553478		4159.38	-0.00035246
619.6	0.18623663		1209.59	0.01818427		1799.6	0.01095198		2389.6	0.02526714		2979.59	-0.00848851		3569.58	-0.01524638		4159.58	-0.0009028
619.8	0.18689173		1209.79	0.01809704		1799.8	0.01042489		2389.8	0.02506032		2979.79	-0.00842911		3569.78	-0.01404741		4159.78	-0.00126382
620	0.18749338		1209.99	0.01806828		1800	0.01000578		2390	0.02545196		2979.99	-0.00735955		3569.98	-0.01333308		4159.98	-0.00057845
620.2	0.18749183		1210.19	0.01796983		1800.2	0.01088542		2390.2	0.02499206		2980.19	-0.00689988		3570.18	-0.01260586		4160.18	-0.00003851
620.4	0.18720542		1210.39	0.0180267		1800.4	0.01014514		2390.4	0.02439071		2980.39	-0.00775023		3570.38	-0.01255787		4160.38	-0.00002357
620.6	0.18765311		1210.59	0.0183243		1800.6	0.00991026		2390.6	0.02445715		2980.59	-0.00782767		3570.58	-0.01253458		4160.58	-0.0003304
620.8	0.18775059		1210.79	0.01971091		1800.8	0.00970285		2390.8	0.02476695		2980.79	-0.00780709		3570.78	-0.01211322		4160.78	0.00085574
621	0.18769651		1210.99	0.02031404		1801	0.01023572		2391	0.02505696		2980.99	-0.00867576		3570.98	-0.01208961		4160.98	0.00069834
621.2	0.18722007		1211.19	0.02084561		1801.2	0.01065494		2391.2	0.02424991		2981.19	-0.00945524		3571.18	-0.01203103		4161.18	0.0009395
621.4	0.18732473		1211.39	0.02102361		1801.4	0.01021276		2391.4	0.02460355		2981.39	-0.01015795		3571.38	-0.01189693		4161.38	0.00048216
621.6	0.18797968		1211.59	0.02158792		1801.6	0.01040725		2391.6	0.02464825		2981.59	-0.00997838		3571.58	-0.0126512		4161.58	0.00106874
621.8	0.18812788		1211.79	0.02218096		1801.8	0.01051235		2391.8	0.02442065		2981.79	-0.01078833		3571.78	-0.01353928		4161.78	0.00085011
622	0.18718376		1211.99	0.02355133		1802	0.01085929		2392	0.02537599		2981.99	-0.011005		3571.98	-0.01373296		4161.98	0.00055153
622.2	0.18811375		1212.19	0.02319271		1802.2	0.01010713		2392.2	0.02574316		2982.19	-0.01084131		3572.18	-0.01452968		4162.18	0.00051606
622.4	0.18759786		1212.39	0.02303704		1802.4	0.00964493		2392.4	0.02575788		2982.39	-0.011122		3572.38	-0.01573075		4162.38	0.00117753
622.6	0.18794977		1212.59	0.02247898		1802.6	0.00923284		2392.6	0.02525459		2982.59	-0.01125676		3572.58	-0.0170338		4162.58	0.00094645
622.8	0.18787926		1212.79	0.0222766		1802.8	0.00911644		2392.8	0.02540332		2982.79	-0.01142971		3572.78	-0.01682321		4162.78	-0.00001171
623	0.18682211		1212.99	0.02189247		1803	0.00919107		2393	0.02593425		2982.99	-0.0110958		3572.98	-0.01652527		4162.98	0.00053881
623.2	0.18588537		1213.19	0.02135001		1803.2	0.00922991		2393.2	0.02589887		2983.19	-0.01134647		3573.18	-0.01668575		4163.18	0.00038618
623.4	0.18593305		1213.39	0.02151551		1803.4	0.00868443		2393.4	0.02713923		2983.39	-0.01126548		3573.38	-0.01656337		4163.38	-0.00018924
623.6	0.1869687		1213.59	0.02065034		1803.6	0.00851652		2393.6	0.02684883		2983.59	-0.0100795		3573.58	-0.01662307		4163.58	-0.00026472
623.8	0.18781112		1213.79	0.02136143		1803.8	0.00831949		2393.8	0.02717297		2983.79	-0.00995243		3573.78	-0.01731466		4163.78	-0.00008805
624	0.18753619		1213.99	0.02089948		1804	0.00846697		2394	0.02760429		2983.99	-0.0096618		3573.98	-0.01753536		4163.98	0.00054137
624.2	0.18781149		1214.19	0.02070641		1804.2	0.00810432		2394.2	0.02702099		2984.19	-0.01039845		3574.18	-0.01777288		4164.18	0.00045497
624.4	0.18772645		1214.39	0.02119366		1804.4	0.00749676		2394.4	0.0267997		2984.39	-0.01084571		3574.38	-0.01755359		4164.38	0.00026594
624.6	0.18728833		1214.59	0.02180596		1804.6	0.00698791		2394.6	0.02695699		2984.59	-0.01100671		3574.58	-0.01739103		4164.58	0.00099015
624.8	0.18660998		1214.79	0.02257022		1804.8	0.00654362		2394.8	0.02708582		2984.79	-0.01146008		3574.78	-0.01687929		4164.78	0.00104489
625	0.18657407		1214.99	0.02282403		1805	0.00725988		2395	0.02689813		2984.99	-0.01180615		3574.98	-0.01667024		4164.98	0.0007861
625.2	0.18534868		1215.19	0.02362867		1805.2	0.00747639		2395.2	0.02606775		2985.19	-0.01107839		3575.18	-0.01634856		4165.18	0.00143604
625.4	0.18560716		1215.39	0.02364466		1805.4	0.00687327		2395.4	0.02705235		2985.39	-0.01058617		3575.38	-0.01691199		4165.38	0.00065846
625.6	0.18520201		1215.59	0.02348312		1805.6	0.00701673		2395.6	0.02663286		2985.59	-0.01124797		3575.58	-0.01689491		4165.58	0.00088952
625.8	0.1839787		1215.79	0.02347005		1805.8	0.00765108		2395.8	0.02636105		2985.79	-0.01189097		3575.78	-0.01676686		4165.78	0.00081355
626	0.18305814		1215.99	0.02351278		1806	0.00789829		2396	0.02608451		2985.99	-0.01112492		3575.98	-0.01668545		4165.98	0.00009886
626.2	0.18331239		1216.19	0.02286596		1806.2	0.00756411		2396.2	0.02535584		2986.19	-0.01089604		3576.18	-0.0167978		4166.18	0.00083176
626.4	0.18385561		1216.39	0.02325693		1806.4	0.00815075		2396.4	0.02473933		2986.39	-0.01136209		3576.38	-0.01736788		4166.38	0.00110007
626.6	0.18391247		1216.59	0.02281685		1806.6	0.00821637		2396.6	0.02467898		2986.59	-0.01090959		3576.58	-0.01681639		4166.58	-0.00015269
626.8	0.18334395		1216.79	0.02259094		1806.8	0.00786305		2396.8	0.02519974		2986.79	-0.01092733		3576.78	-0.01592606		4166.78	-0.00003934
627	0.18360431		1216.99	0.02211718		1807	0.00798543		2397	0.02550473		2986.99	-0.01075268		3576.98	-0.01541492		4166.98	0.00017708
627.2	0.18371795		1217.19	0.02174023		1807.2	0.00711104		2397.2	0.02517518		2987.19	-0.01080731		3577.18	-0.01517389		4167.18	-0.00067862
627.4	0.18396078		1217.39	0.0222876		1807.4	0.00709826		2397.4	0.02472785		2987.39	-0.01073639		3577.38	-0.01481516		4167.38	-0.00057643
627.6	0.18390102		1217.59	0.02174054		1807.6	0.00709492		2397.6	0.02423907		2987.59	-0.01014933		3577.58	-0.01439432		4167.58	-0.00016167
627.8	0.18391148		1217.79	0.02242273		1807.8	0.00618413		2397.8	0.02362603		2987.79	-0.00985105		3577.78	-0.01421402		4167.78	-0.00022761
628	0.18401735		1217.99	0.02238727		1808	0.00539601		2398	0.02272237		2987.99	-0.00874289		3577.98	-0.01316538		4167.98	-0.00042416
628.2	0.1843021		1218.19	0.02229135		1808.2	0.00483614		2398.2	0.02223947		2988.19	-0.00946399		3578.18	-0.01259797		4168.18	-0.00053261
628.4	0.18440578		1218.39	0.02265833		1808.4	0.0044541		2398.4	0.02244775		2988.39	-0.00935983		3578.38	-0.01248851		4168.38	0.00000808
628.6	0.18467235		1218.59	0.02271713		1808.6	0.00346432		2398.6	0.02273264		2988.59	-0.00951337		3578.58	-0.01281245		4168.58	0.00006091
628.8	0.18502914		1218.79	0.02319872		1808.8	0.00374793		2398.8	0.02225085		2988.79	-0.00934293		3578.78	-0.01269344		4168.78	-0.00081583
629	0.18527508		1218.99	0.02382357		1809	0.00350271		2399	0.02298799		2988.99	-0.00873975		3578.98	-0.01289207		4168.98	-0.00054944
629.2	0.18410159		1219.19	0.02429921		1809.2	0.00261866		2399.2	0.02328736		2989.19	-0.0084063		3579.18	-0.01449337		4169.18	0.00019394
629.4	0.1848053		1219.39	0.02282272		1809.4	0.00270915		2399.4	0.0239712		2989.39	-0.00856017		3579.38	-0.0142056		4169.38	-0.00098209
629.6	0.18372997		1219.59	0.02280733		1809.6	0.00342345		2399.6	0.0228383		2989.59	-0.00914432		3579.58	-0.01445718		4169.58	-0.00054262
629.8	0.18412549		1219.79	0.0221999		1809.8	0.00416194		2399.8	0.02288305		2989.79	-0.0081883		3579.78	-0.01468776		4169.78	-0.00090785
630	0.18410005		1219.99	0.02275222		1810	0.00402686		2400	0.02270637		2989.99	-0.00794151		3579.98	-0.01556373		4169.98	-0.00109008
630.2	0.1849994		1220.19	0.02217987		1810.2	0.00437343		2400.2	0.02264701		2990.19	-0.00876514		3580.18	-0.01580919		4170.18	-0.00028784
630.4	0.18652923		1220.39	0.02203994		1810.4	0.00549069		2400.4	0.02293323		2990.39	-0.00916548		3580.38	-0.01658117		4170.38	-0.00097295
630.6	0.18626822		1220.59	0.02223302		1810.6	0.00577239		2400.6	0.02354936		2990.59	-0.00915247		3580.58	-0.01599554		4170.58	-0.00147087
630.8	0.18654119		1220.79	0.02163362		1810.8	0.00569289		2400.8	0.02397516		2990.79	-0.00971919		3580.78	-0.01583798		4170.78	-0.0005804
631	0.18683869		1220.99	0.0205658		1811	0.00639416		2401	0.02398509		2990.99	-0.00972968		3580.98	-0.01565718		4170.98	-0.00071465
631.2	0.18607843		1221.19	0.02015152		1811.2	0.00615865		2401.2	0.02362207		2991.19	-0.00957533		3581.18	-0.01611749		4171.18	-0.00099258
631.4	0.18518915		1221.39	0.01993383		1811.4	0.00645558		2401.4	0.02326857		2991.39	-0.00976743		3581.38	-0.01676085		4171.38	-0.00030185
631.6	0.18486278		1221.59	0.019874		1811.6	0.00678705		2401.6	0.02243295		2991.59	-0.00938625		3581.58	-0.01681448		4171.58	-0.00068399
631.8	0.18477048		1221.79	0.01998541		1811.8	0.00637384		2401.8	0.02226157		2991.79	-0.00914345		3581.78	-0.01659475		4171.78	-0.00055843
632	0.18516585		1221.99	0.01944258		1812	0.00658247		2402	0.02191639		2991.99	-0.00955486		3581.98	-0.01613995		4171.98	-0.00030376
632.2	0.18543651		1222.19	0.01977774		1812.2	0.00712126		2402.2	0.02151108		2992.19	-0.01096734		3582.18	-0.01531619		4172.18	-0.00064299
632.4	0.18528895		1222.39	0.01937636		1812.4	0.00653607		2402.4	0.02227367		2992.39	-0.01082624		3582.38	-0.01492168		4172.38	-0.00037058
632.6	0.18444419		1222.59	0.02050321		1812.6	0.00670056		2402.6	0.02293272		2992.59	-0.01059938		3582.58	-0.01416153		4172.58	-0.00133848
632.8	0.18329497		1222.79	0.02190158		1812.8	0.00727917		2402.8	0.02341925		2992.79	-0.0107162		3582.78	-0.01355651		4172.78	-0.00095202
633	0.18236138		1222.99	0.02337257		1813	0.00675328		2403	0.02438659		2992.99	-0.01005466		3582.98	-0.01387824		4172.98	-0.0006621
633.2	0.18184922		1223.19	0.0241395		1813.2	0.00739941		2403.2	0.02435269		2993.19	-0.00982236		3583.18	-0.01395591		4173.18	-0.00036492
633.4	0.18243991		1223.39	0.0237836		1813.4	0.0086737		2403.4	0.02442478		2993.39	-0.00985985		3583.38	-0.01273523		4173.38	-0.00087503
633.6	0.18212623		1223.59	0.02445739		1813.6	0.00890355		2403.6	0.0244191		2993.59	-0.01043359		3583.58	-0.01294931		4173.58	-0.00091876
633.8	0.18238914		1223.79	0.02447685		1813.8	0.00902833		2403.8	0.02516341		2993.79	-0.01073388		3583.78	-0.01254301		4173.78	-0.00125712
634	0.18221617		1223.99	0.02538711		1814	0.00907322		2404	0.0257591		2993.99	-0.01121345		3583.98	-0.01332867		4173.98	-0.00101686
634.2	0.18328299		1224.19	0.02549954		1814.2	0.01014747		2404.2	0.02546711		2994.19	-0.01141621		3584.18	-0.01370931		4174.18	-0.00133728
634.4	0.18369822		1224.39	0.02535826		1814.4	0.00997015		2404.4	0.0254546		2994.39	-0.01172142		3584.38	-0.01459788		4174.38	-0.00174481
634.6	0.1833955		1224.59	0.02561761		1814.6	0.00950977		2404.6	0.02542089		2994.59	-0.01171904		3584.58	-0.01474832		4174.58	-0.00175397
634.8	0.18272806		1224.79	0.02501386		1814.8	0.00873874		2404.8	0.02495464		2994.79	-0.01252197		3584.78	-0.01566983		4174.78	-0.00075368
635	0.1824351		1224.99	0.02494161		1815	0.00806908		2405	0.0236552		2994.99	-0.01242332		3584.98	-0.01638614		4174.98	-0.00019911
635.2	0.18176228		1225.19	0.025193		1815.2	0.00724138		2405.2	0.0228919		2995.19	-0.01264833		3585.18	-0.01727155		4175.18	-0.00024157
635.4	0.1818996		1225.39	0.0243844		1815.4	0.00690804		2405.4	0.02285371		2995.39	-0.01338527		3585.38	-0.01848256		4175.38	0.00028841
635.6	0.18193422		1225.59	0.0242566		1815.6	0.00717283		2405.6	0.02238482		2995.59	-0.01361572		3585.58	-0.01829557		4175.58	-0.00007704
635.8	0.18151886		1225.79	0.02374676		1815.8	0.00624375		2405.8	0.02228197		2995.79	-0.01403036		3585.78	-0.01782098		4175.78	0.00002413
636	0.18136488		1225.99	0.02279774		1816	0.00588067		2406	0.02147892		2995.99	-0.01391887		3585.98	-0.01719181		4175.98	-0.00013438
636.2	0.18163568		1226.19	0.0233478		1816.2	0.00549131		2406.2	0.02135783		2996.19	-0.01294222		3586.18	-0.0160506		4176.18	-0.00077957
636.4	0.18100644		1226.39	0.02289042		1816.4	0.00481847		2406.4	0.02281686		2996.39	-0.01205205		3586.38	-0.01563612		4176.38	-0.00044331
636.6	0.18043271		1226.59	0.02405714		1816.6	0.00556492		2406.6	0.02316724		2996.59	-0.01112587		3586.58	-0.01486022		4176.58	-0.0002897
636.8	0.18022899		1226.79	0.02412007		1816.8	0.00636296		2406.8	0.02330867		2996.79	-0.01067846		3586.78	-0.01502463		4176.78	0.00113964
637	0.18208054		1226.99	0.02457809		1817	0.00658876		2407	0.0237471		2996.99	-0.00965838		3586.98	-0.01537735		4176.98	0.00157694
637.2	0.18244459		1227.19	0.02401396		1817.2	0.00715774		2407.2	0.0246188		2997.19	-0.00934719		3587.18	-0.01449929		4177.18	0.00189466
637.4	0.1838309		1227.39	0.02268186		1817.4	0.00724806		2407.4	0.02568316		2997.39	-0.0093711		3587.38	-0.01513776		4177.38	0.00179757
637.6	0.18453358		1227.59	0.02209701		1817.6	0.00705283		2407.6	0.0258121		2997.59	-0.00918849		3587.58	-0.01473402		4177.58	0.00213073
637.8	0.18525217		1227.79	0.02206647		1817.8	0.00734809		2407.8	0.02544127		2997.79	-0.00892215		3587.78	-0.01576676		4177.78	0.00272049
638	0.18548903		1227.99	0.02183868		1818	0.00802523		2408	0.02572935		2997.99	-0.00857213		3587.98	-0.01637191		4177.98	0.0029768
638.2	0.18599585		1228.19	0.02148144		1818.2	0.00766489		2408.2	0.02518121		2998.19	-0.00852315		3588.18	-0.01667601		4178.18	0.00360186
638.4	0.18552587		1228.39	0.02123631		1818.4	0.00731257		2408.4	0.02407912		2998.39	-0.0094476		3588.38	-0.01727302		4178.38	0.00368978
638.6	0.18536419		1228.59	0.02187774		1818.6	0.00694814		2408.6	0.02383309		2998.59	-0.00924649		3588.58	-0.01641311		4178.58	0.00334623
638.8	0.184873		1228.79	0.02289205		1818.8	0.00658528		2408.8	0.02336902		2998.79	-0.01007432		3588.78	-0.01601446		4178.78	0.00357771
639	0.18517011		1228.99	0.0229628		1819	0.00670354		2409	0.02243821		2998.99	-0.01053848		3588.98	-0.01609419		4178.98	0.0029267
639.2	0.18511137		1229.19	0.02279815		1819.2	0.00619909		2409.2	0.02221604		2999.19	-0.01110639		3589.18	-0.01630487		4179.18	0.00251254
639.4	0.18498417		1229.39	0.02238555		1819.4	0.00573254		2409.4	0.02294528		2999.39	-0.01174952		3589.38	-0.01600164		4179.38	0.00226217
639.6	0.18438818		1229.59	0.02292989		1819.6	0.00538324		2409.6	0.02329933		2999.59	-0.01262156		3589.58	-0.0153079		4179.58	0.00117934
639.8	0.18391885		1229.79	0.0226464		1819.8	0.0053229		2409.8	0.02310152		2999.79	-0.01272872		3589.78	-0.01610077		4179.78	0.00005583
640	0.18303839		1229.99	0.02191491		1820	0.00489498		2410	0.02354974		2999.99	-0.01166533		3589.98	-0.01649417		4179.98	-0.00066606
640.2	0.18316987		1230.19	0.02272676		1820.2	0.00368372		2410.2	0.02367142		3000.19	-0.01170613		3590.18	-0.01702499		4180.18	-0.00133379
640.4	0.18227497		1230.39	0.02292728		1820.4	0.00416242		2410.4	0.02500903		3000.39	-0.01227198		3590.38	-0.01782254		4180.38	-0.00140123
640.6	0.18198901		1230.59	0.02306931		1820.6	0.00456173		2410.6	0.02544619		3000.59	-0.01248742		3590.58	-0.01758326		4180.58	-0.0012688
640.8	0.18178733		1230.79	0.02315659		1820.8	0.00582272		2410.8	0.02447626		3000.79	-0.01272449		3590.78	-0.01808048		4180.78	-0.0007222
641	0.18261657		1230.99	0.0234101		1821	0.00581184		2411	0.02550309		3000.99	-0.01181463		3590.98	-0.01801723		4180.98	-0.00053637
641.2	0.18159422		1231.19	0.0226022		1821.2	0.00585572		2411.2	0.02526464		3001.19	-0.01137886		3591.18	-0.01815353		4181.18	-0.00050013
641.4	0.18154687		1231.39	0.02170824		1821.4	0.00629535		2411.4	0.02509567		3001.39	-0.0118672		3591.38	-0.01867496		4181.38	-0.00079819
641.6	0.18097297		1231.59	0.02130493		1821.6	0.00688317		2411.6	0.02506025		3001.59	-0.0115738		3591.58	-0.01803677		4181.58	-0.000026
641.8	0.18107212		1231.79	0.02115622		1821.8	0.0067702		2411.8	0.02504769		3001.79	-0.01188032		3591.78	-0.01794193		4181.78	0.00012717
642	0.18025684		1231.99	0.02112413		1822	0.0071159		2412	0.02512373		3001.99	-0.01114654		3591.98	-0.0172002		4181.98	0.00016487
642.2	0.18038793		1232.19	0.02082746		1822.2	0.00759281		2412.2	0.02406759		3002.19	-0.01133208		3592.18	-0.01690679		4182.18	0.00037002
642.4	0.18017537		1232.39	0.02090338		1822.4	0.00866573		2412.4	0.02378112		3002.39	-0.01140576		3592.38	-0.01638115		4182.38	0.00008922
642.6	0.18062744		1232.59	0.02146942		1822.6	0.00852925		2412.6	0.02441511		3002.59	-0.01130946		3592.58	-0.01528955		4182.58	0.00002755
642.8	0.18050549		1232.79	0.02127051		1822.8	0.00846575		2412.8	0.02421967		3002.79	-0.01152732		3592.78	-0.01492707		4182.78	-0.00129984
643	0.18096226		1232.99	0.02062807		1823	0.00874469		2413	0.02424293		3002.99	-0.01183589		3592.98	-0.01420651		4182.98	-0.00117567
643.2	0.18066115		1233.19	0.02085556		1823.2	0.00813309		2413.2	0.02397126		3003.19	-0.01144761		3593.18	-0.01402769		4183.18	-0.00072448
643.4	0.18074818		1233.39	0.02076565		1823.4	0.00832043		2413.4	0.02379393		3003.39	-0.01263539		3593.38	-0.01345316		4183.38	-0.00144047
643.6	0.18078085		1233.59	0.02094615		1823.6	0.00785068		2413.6	0.02335766		3003.59	-0.01242484		3593.58	-0.01391025		4183.58	-0.00208766
643.8	0.1804583		1233.79	0.01986428		1823.8	0.00775837		2413.8	0.02217768		3003.79	-0.01207282		3593.78	-0.01544862		4183.78	-0.00248727
644	0.18077198		1233.99	0.01999538		1824	0.00674825		2414	0.02171025		3003.99	-0.01176091		3593.98	-0.01548517		4183.98	-0.00286353
644.2	0.18086466		1234.19	0.01947828		1824.2	0.00651063		2414.2	0.02080119		3004.19	-0.01276455		3594.18	-0.01656222		4184.18	-0.00285237
644.4	0.1809003		1234.39	0.01958254		1824.4	0.00713067		2414.4	0.02020085		3004.39	-0.01221377		3594.38	-0.01756163		4184.38	-0.00178411
644.6	0.18100517		1234.59	0.01988521		1824.6	0.00683531		2414.6	0.01985492		3004.59	-0.01235415		3594.58	-0.01744333		4184.58	-0.00138949
644.8	0.18097398		1234.79	0.01984749		1824.8	0.00706387		2414.8	0.01953706		3004.79	-0.01266129		3594.78	-0.01849783		4184.78	-0.00047341
645	0.18083846		1234.99	0.01954814		1825	0.00622442		2415	0.02054367		3004.99	-0.01250848		3594.98	-0.01887069		4184.98	0.00025664
645.2	0.18079283		1235.19	0.01909816		1825.2	0.00611931		2415.2	0.02040868		3005.19	-0.01325313		3595.18	-0.01917615		4185.18	-0.00041963
645.4	0.17986684		1235.39	0.01926767		1825.4	0.00617691		2415.4	0.02144417		3005.39	-0.01408679		3595.38	-0.01952823		4185.38	-0.00087805
645.6	0.18026711		1235.59	0.01954408		1825.6	0.00583449		2415.6	0.02192349		3005.59	-0.01349077		3595.58	-0.01929103		4185.58	0.00009051
645.8	0.18044654		1235.79	0.01974031		1825.8	0.00506906		2415.8	0.02191185		3005.79	-0.01338264		3595.78	-0.01948294		4185.78	-0.0001783
646	0.18051569		1235.99	0.0195415		1826	0.00611628		2416	0.02175708		3005.99	-0.01243054		3595.98	-0.01945947		4185.98	0.000712
646.2	0.18027154		1236.19	0.01949773		1826.2	0.00658404		2416.2	0.02181044		3006.19	-0.01270752		3596.18	-0.01896669		4186.18	0.00087014
646.4	0.18017519		1236.39	0.01966093		1826.4	0.00746234		2416.4	0.02302252		3006.39	-0.01244119		3596.38	-0.01786352		4186.38	0.00028678
646.6	0.1797454		1236.59	0.0198883		1826.6	0.00681875		2416.6	0.02320407		3006.59	-0.01190585		3596.58	-0.01797774		4186.58	0.00031908
646.8	0.17916608		1236.79	0.02009803		1826.8	0.00642514		2416.8	0.02389038		3006.79	-0.01195502		3596.78	-0.0163726		4186.78	-0.000757
647	0.17884781		1236.99	0.01953368		1827	0.00620675		2417	0.02514525		3006.99	-0.01208698		3596.98	-0.01518343		4186.98	0.00001078
647.2	0.17847603		1237.19	0.01975727		1827.2	0.00586238		2417.2	0.02518375		3007.19	-0.01181881		3597.18	-0.01454963		4187.18	-0.00124111
647.4	0.17895267		1237.39	0.01960336		1827.4	0.00547616		2417.4	0.02547095		3007.39	-0.01218097		3597.38	-0.01368579		4187.38	-0.00159522
647.6	0.17903432		1237.59	0.01947747		1827.6	0.00550005		2417.6	0.025247		3007.59	-0.01082961		3597.58	-0.01296402		4187.58	-0.00164661
647.8	0.1795998		1237.79	0.01952567		1827.8	0.00643251		2417.8	0.02536153		3007.79	-0.01072472		3597.78	-0.01263023		4187.78	-0.00191854
648	0.18015274		1237.99	0.01989777		1828	0.00670938		2418	0.02535776		3007.99	-0.01027347		3597.98	-0.01196244		4187.98	-0.00243557
648.2	0.17988639		1238.19	0.01938222		1828.2	0.00718222		2418.2	0.02515506		3008.19	-0.01048406		3598.18	-0.01240809		4188.18	-0.00241086
648.4	0.18006621		1238.39	0.01995538		1828.4	0.00681228		2418.4	0.02509595		3008.39	-0.01026681		3598.38	-0.01287771		4188.38	-0.00188862
648.6	0.18011351		1238.59	0.01999297		1828.6	0.0064473		2418.6	0.02561823		3008.59	-0.01138266		3598.58	-0.01260283		4188.58	-0.00222179
648.8	0.18003171		1238.79	0.0191673		1828.8	0.00625314		2418.8	0.02538618		3008.79	-0.01218504		3598.78	-0.01328966		4188.78	-0.0021419
649	0.17978753		1238.99	0.01894962		1829	0.0057981		2419	0.02452566		3008.99	-0.01250948		3598.98	-0.01339192		4188.98	-0.00239066
649.2	0.18004459		1239.19	0.01863124		1829.2	0.00531586		2419.2	0.02381141		3009.19	-0.01290559		3599.18	-0.01390402		4189.18	-0.00317707
649.4	0.17927104		1239.39	0.01842		1829.4	0.00488337		2419.4	0.02306896		3009.39	-0.01322645		3599.38	-0.01471546		4189.38	-0.00299571
649.6	0.1796128		1239.59	0.01776171		1829.6	0.00412767		2419.6	0.02194116		3009.59	-0.01301101		3599.58	-0.01505498		4189.58	-0.00218574
649.8	0.17936754		1239.79	0.01701289		1829.8	0.00338998		2419.8	0.02085015		3009.79	-0.0132097		3599.78	-0.01579469		4189.78	-0.00240061
