# Supplementary material for: Functional development of a V3/glycan-specific broadly neutralizing antibody isolated from a case of HIV superinfection
Source: eLife journal article supplement (doi:10.7554/elife.68110), 2021-07-15
Supplement: fig2-data2 [file C5.xls]

Vers 3.43 Data Simulation
Conc1	5E-07	5E-07	5E-07	5E-07	5E-07
Start1	290.01	880.01	1470	2060	2650
Stop1	649.81	1239.81	1829.8	2419.8	3009.8
Time1	Data1	Sim1	Time2	Data2	Sim2	Time3	Data3	Sim3	Time4	Data4	Sim4	Time5	Data5	Sim5
290.01	-0.01485996		880.01	0.00278249		1470	0.0004067		2060	-0.00296341		2650	0.01096092
290.21	-0.01430369		880.21	0.00289435		1470.2	0.00061176		2060.2	-0.00177488		2650.2	0.01243198
290.41	-0.01340979		880.41	0.00306224		1470.4	0.00083813		2060.4	-0.00096497		2650.4	0.01418874
290.61	-0.0130468		880.61	0.00333568		1470.6	0.00282602		2060.6	-0.00042305		2650.6	0.0154929
290.81	-0.01146264		880.81	0.00349311		1470.8	0.00336761		2060.8	0.00068109		2650.8	0.01736373
291.01	-0.01032166		881.01	0.00432157		1471	0.00393186		2061	0.00176726		2651	0.0193282
291.21	-0.00858755		881.21	0.00481676		1471.2	0.00465957		2061.2	0.00248708		2651.2	0.02123825
291.41	-0.00700867		881.41	0.0054899		1471.4	0.00511774		2061.4	0.00298007		2651.4	0.02329849
291.61	-0.00573947		881.61	0.00601646		1471.6	0.00626558		2061.6	0.00347161		2651.6	0.02530025
291.81	-0.00392339		881.81	0.00677249		1471.8	0.00741422		2061.8	0.00400906		2651.8	0.02655595
292.01	-0.00232672		882.01	0.0076215		1472	0.00832151		2062	0.00424216		2652	0.02822234
292.21	-0.00035001		882.21	0.00804632		1472.2	0.00958725		2062.2	0.00389588		2652.2	0.02887015
292.41	0.00093754		882.41	0.00888351		1472.4	0.01001492		2062.4	0.00357844		2652.4	0.02970649
292.61	0.00235529		882.61	0.00857872		1472.6	0.01062654		2062.6	0.00354145		2652.6	0.03029471
292.81	0.0033517		882.81	0.0083805		1472.8	0.01168502		2062.8	0.0043584		2652.8	0.03168811
293.01	0.00510261		883.01	0.00873117		1473	0.011801		2063	0.00408934		2653	0.03319258
293.21	0.00574043		883.21	0.00824355		1473.2	0.01242784		2063.2	0.00506418		2653.2	0.03422221
293.41	0.00556163		883.41	0.00890405		1473.4	0.01288238		2063.4	0.006073		2653.4	0.03503756
293.61	0.00635061		883.61	0.00970667		1473.6	0.01311205		2063.6	0.00651788		2653.6	0.03605161
293.81	0.00653189		883.81	0.00993985		1473.8	0.01349095		2063.8	0.0067735		2653.8	0.03643301
294.01	0.00540499		884.01	0.01005166		1474	0.01363156		2064	0.00767056		2654	0.03647475
294.21	0.00473774		884.21	0.01079088		1474.2	0.01425448		2064.2	0.00755799		2654.2	0.03662064
294.41	0.00396878		884.41	0.0110252		1474.4	0.01487969		2064.4	0.00777831		2654.4	0.03732628
294.61	0.00386105		884.61	0.01199226		1474.6	0.01513764		2064.6	0.00879094		2654.6	0.03670752
294.81	0.00455611		884.81	0.01275555		1474.8	0.01411633		2064.8	0.00940844		2654.8	0.03791134
295.01	0.00421026		885.01	0.01336641		1475	0.01387579		2065	0.00979754		2655	0.03858808
295.21	0.00450723		885.21	0.01354209		1475.2	0.01341187		2065.2	0.01038052		2655.2	0.03903072
295.41	0.00413948		885.41	0.01314931		1475.4	0.01270997		2065.4	0.01062868		2655.4	0.03968357
295.61	0.00487136		885.61	0.01317279		1475.6	0.01353253		2065.6	0.01177498		2655.6	0.03990637
295.81	0.00557548		885.81	0.01345389		1475.8	0.01352911		2065.8	0.0124992		2655.8	0.03980972
296.01	0.00592983		886.01	0.01278317		1476	0.01412577		2066	0.01298595		2656	0.0397364
296.21	0.00679164		886.21	0.01279087		1476.2	0.01486657		2066.2	0.01251783		2656.2	0.03948586
296.41	0.00772713		886.41	0.01317608		1476.4	0.01519663		2066.4	0.01261524		2656.4	0.03932846
296.61	0.00783804		886.61	0.01276745		1476.6	0.01571332		2066.6	0.01278354		2656.6	0.03973386
296.81	0.00798581		886.81	0.01261891		1476.8	0.01647733		2066.8	0.01359311		2656.8	0.03912258
297.01	0.00878358		887.01	0.01236516		1477	0.0167559		2067	0.01309669		2657	0.03871679
297.21	0.00902211		887.21	0.01038854		1477.2	0.01675634		2067.2	0.01409949		2657.2	0.03791842
297.41	0.00877516		887.41	0.01077958		1477.4	0.01730754		2067.4	0.01394691		2657.4	0.03784222
297.61	0.0089697		887.61	0.01181417		1477.6	0.01713598		2067.6	0.01329619		2657.6	0.03813638
297.81	0.0085871		887.81	0.01186709		1477.8	0.01725405		2067.8	0.01358851		2657.8	0.03861326
298.01	0.00775087		888.01	0.0120975		1478	0.01670119		2068	0.01305478		2658	0.03828415
298.21	0.00748335		888.21	0.01198588		1478.2	0.01706526		2068.2	0.01191798		2658.2	0.0377198
298.41	0.00809748		888.41	0.01171565		1478.4	0.01660426		2068.4	0.01181734		2658.4	0.03884829
298.61	0.00851339		888.61	0.01191227		1478.6	0.01560497		2068.6	0.01155961		2658.6	0.03866471
298.81	0.00867771		888.81	0.01209711		1478.8	0.01676393		2068.8	0.01126008		2658.8	0.03992109
299.01	0.00843691		889.01	0.0121027		1479	0.01695456		2069	0.01136981		2659	0.04067378
299.21	0.00817679		889.21	0.01139704		1479.2	0.0164075		2069.2	0.01173724		2659.2	0.04132535
299.41	0.0085464		889.41	0.01084627		1479.4	0.0164313		2069.4	0.01148477		2659.4	0.04160051
299.61	0.0093562		889.61	0.01144232		1479.6	0.01792102		2069.6	0.01238519		2659.6	0.04195229
299.81	0.00842296		889.81	0.0114937		1479.8	0.01845463		2069.8	0.01174404		2659.8	0.04179846
300.01	0.00803656		890.01	0.01082282		1480	0.01885952		2070	0.01197349		2660	0.04173388
300.21	0.00744378		890.21	0.01115616		1480.2	0.01853694		2070.2	0.01144346		2660.2	0.04189577
300.41	0.00756075		890.41	0.01068952		1480.4	0.0184352		2070.4	0.01142338		2660.4	0.0420318
300.61	0.00701465		890.61	0.01062233		1480.6	0.01884987		2070.6	0.0115613		2660.6	0.04173998
300.81	0.00659169		890.81	0.01072927		1480.8	0.01955103		2070.8	0.01168425		2660.8	0.0418183
301.01	0.0071818		891.01	0.00983151		1481	0.01831539		2071	0.01191005		2661	0.04217231
301.21	0.00723733		891.21	0.00935427		1481.2	0.01762463		2071.2	0.01283933		2661.2	0.04264743
301.41	0.00629899		891.41	0.00971769		1481.4	0.01701886		2071.4	0.01307842		2661.4	0.04326693
301.61	0.00592386		891.61	0.01068119		1481.6	0.01653319		2071.6	0.01254689		2661.6	0.04368642
301.81	0.00634457		891.81	0.0101997		1481.8	0.0159912		2071.8	0.01340481		2661.8	0.04408003
302.01	0.00635893		892.01	0.00927079		1482	0.0153139		2072	0.01301207		2662	0.0440301
302.21	0.00622712		892.21	0.00866634		1482.2	0.01502793		2072.2	0.01303295		2662.2	0.04382012
302.41	0.00654212		892.41	0.00794974		1482.4	0.01473726		2072.4	0.01393093		2662.4	0.04392566
302.61	0.00612468		892.61	0.00815942		1482.6	0.01463239		2072.6	0.01391816		2662.6	0.04360648
302.81	0.00640952		892.81	0.00833423		1482.8	0.01492482		2072.8	0.01429615		2662.8	0.04348262
303.01	0.00611318		893.01	0.00818924		1483	0.0147884		2073	0.01482845		2663	0.04278562
303.21	0.00708005		893.21	0.00770226		1483.2	0.01456382		2073.2	0.01471465		2663.2	0.04210371
303.41	0.00717555		893.41	0.00895104		1483.4	0.01453869		2073.4	0.01436838		2663.4	0.04179797
303.61	0.00676078		893.61	0.00920661		1483.6	0.01514494		2073.6	0.01385026		2663.6	0.04206342
303.81	0.00597689		893.81	0.00933954		1483.8	0.01497925		2073.8	0.01263946		2663.8	0.04103178
304.01	0.00536388		894.01	0.01007502		1484	0.0146225		2074	0.01177374		2664	0.0410175
304.21	0.00468429		894.21	0.01032627		1484.2	0.01432198		2074.2	0.01065491		2664.2	0.04055155
304.41	0.00458968		894.41	0.01069308		1484.4	0.01469692		2074.4	0.00968815		2664.4	0.04038631
304.61	0.00430802		894.61	0.01083364		1484.6	0.01552321		2074.6	0.00921114		2664.6	0.0406459
304.81	0.0038914		894.81	0.01121603		1484.8	0.01605444		2074.8	0.00886233		2664.8	0.04166349
305.01	0.00439264		895.01	0.01035207		1485	0.01570193		2075	0.00946229		2665	0.0416296
305.21	0.00467193		895.21	0.01037579		1485.2	0.01619386		2075.2	0.00910383		2665.2	0.04233053
305.41	0.00457969		895.41	0.00995637		1485.4	0.01645368		2075.4	0.00876612		2665.4	0.04319874
305.61	0.00519056		895.61	0.00964946		1485.6	0.01611553		2075.6	0.00875951		2665.6	0.04393577
305.81	0.00489961		895.81	0.00849182		1485.8	0.01597865		2075.8	0.00880393		2665.8	0.04397042
306.01	0.00527896		896.01	0.00814187		1486	0.01609718		2076	0.00971685		2666	0.04511228
306.21	0.00457198		896.21	0.00822331		1486.2	0.01611643		2076.2	0.01009268		2666.2	0.04625892
306.41	0.00497988		896.41	0.00813393		1486.4	0.01601984		2076.4	0.01034894		2666.4	0.04691362
306.61	0.00462845		896.61	0.00824351		1486.6	0.01596381		2076.6	0.01048398		2666.6	0.04694552
306.81	0.00442559		896.81	0.00880884		1486.8	0.01531255		2076.8	0.01138302		2666.8	0.04694389
307.01	0.00407225		897.01	0.0097371		1487	0.015405		2077	0.01235305		2667	0.04677234
307.21	0.00444644		897.21	0.01004901		1487.2	0.01514159		2077.2	0.0124767		2667.2	0.04736573
307.41	0.00375182		897.41	0.01042057		1487.4	0.01457613		2077.4	0.01277421		2667.4	0.04786098
307.61	0.00357159		897.61	0.01053289		1487.6	0.01565281		2077.6	0.01285854		2667.6	0.04743914
307.81	0.00319656		897.81	0.01109645		1487.8	0.0148009		2077.8	0.01362222		2667.8	0.04676817
308.01	0.00254181		898.01	0.01149659		1488	0.0139001		2078	0.01312852		2668	0.04678908
308.21	0.0025181		898.21	0.01107365		1488.2	0.01367525		2078.2	0.01334259		2668.2	0.04601017
308.41	0.0027285		898.41	0.01066762		1488.4	0.01406883		2078.4	0.01291459		2668.4	0.04493889
308.61	0.0029201		898.61	0.01005344		1488.6	0.01452407		2078.6	0.01326731		2668.6	0.04466981
308.81	0.00292757		898.81	0.01002725		1488.8	0.01403684		2078.8	0.01418812		2668.8	0.04438805
309.01	0.00404165		899.01	0.00913574		1489	0.01436585		2079	0.01470457		2669	0.04284935
309.21	0.00474648		899.21	0.00912965		1489.2	0.01441236		2079.2	0.0139541		2669.2	0.04235913
309.41	0.00466644		899.41	0.00881779		1489.4	0.01373653		2079.4	0.01384502		2669.4	0.04256054
309.61	0.00509028		899.61	0.00877422		1489.6	0.01291718		2079.6	0.01316333		2669.6	0.04241088
309.81	0.00444057		899.81	0.00963377		1489.8	0.01317613		2079.8	0.01254878		2669.8	0.04279716
310.01	0.00453499		900.01	0.01006714		1490	0.0136163		2080	0.01265035		2670	0.04325021
310.21	0.00441829		900.21	0.01057165		1490.2	0.01404794		2080.2	0.01247789		2670.2	0.04355802
310.41	0.00490358		900.41	0.01078481		1490.4	0.01389496		2080.4	0.01167581		2670.4	0.04369048
310.61	0.00434154		900.61	0.01105439		1490.6	0.01424716		2080.6	0.01214369		2670.6	0.04437576
310.81	0.00478521		900.81	0.01141592		1490.8	0.01450981		2080.8	0.01206066		2670.8	0.04538029
311.01	0.00475689		901.01	0.01117714		1491	0.01444541		2081	0.01242761		2671	0.04587532
311.21	0.00491599		901.21	0.01091769		1491.2	0.0151896		2081.2	0.01181637		2671.2	0.04655559
311.41	0.00454699		901.41	0.01056698		1491.4	0.0151738		2081.4	0.01215473		2671.4	0.04710323
311.61	0.00383902		901.61	0.01060589		1491.6	0.01505468		2081.6	0.01282135		2671.6	0.0466469
311.81	0.00389096		901.81	0.00986249		1491.8	0.01399309		2081.8	0.01309841		2671.8	0.04731753
312.01	0.0040065		902.01	0.00975702		1492	0.01402375		2082	0.01241245		2672	0.0469699
312.21	0.00465164		902.21	0.00964115		1492.2	0.01483718		2082.2	0.01316945		2672.2	0.04599673
312.41	0.00518051		902.41	0.00858136		1492.4	0.0150125		2082.4	0.01288003		2672.4	0.0451949
312.61	0.0058304		902.61	0.00845891		1492.6	0.01544456		2082.6	0.01327942		2672.6	0.04417567
312.81	0.00715211		902.81	0.00853778		1492.8	0.01527031		2082.8	0.01323371		2672.8	0.04408641
313.01	0.00792486		903.01	0.00825143		1493	0.01573093		2083	0.01297083		2673	0.04309513
313.21	0.00719018		903.21	0.0085214		1493.2	0.01544844		2083.2	0.01223218		2673.2	0.0431694
313.41	0.00613809		903.41	0.00863817		1493.4	0.01492656		2083.4	0.01233459		2673.4	0.04337776
313.61	0.00679041		903.61	0.00861231		1493.6	0.01496378		2083.6	0.01153128		2673.6	0.04341168
313.81	0.00564288		903.81	0.00917118		1493.8	0.01586959		2083.8	0.01161177		2673.8	0.04354178
314.01	0.00589829		904.01	0.00965082		1494	0.01597021		2084	0.01124887		2674	0.04331598
314.21	0.00599637		904.21	0.01020548		1494.2	0.01641441		2084.2	0.01164366		2674.2	0.04425429
314.41	0.00552661		904.41	0.01022527		1494.4	0.01573428		2084.4	0.01118083		2674.4	0.04456449
314.61	0.00498567		904.61	0.01009683		1494.6	0.01519077		2084.6	0.01166942		2674.6	0.04515222
314.81	0.00494487		904.81	0.009955		1494.8	0.01468416		2084.8	0.01068785		2674.8	0.04578919
315.01	0.00350244		905.01	0.01033539		1495	0.01447702		2085	0.01033466		2675	0.04526541
315.21	0.00243013		905.21	0.00997267		1495.2	0.0143886		2085.2	0.00939138		2675.2	0.04537868
315.41	0.00245955		905.41	0.00924859		1495.4	0.01390774		2085.4	0.01032057		2675.4	0.04504201
315.61	0.00196436		905.61	0.00910646		1495.6	0.01324803		2085.6	0.01021197		2675.6	0.0447743
315.81	0.00267934		905.81	0.00926267		1495.8	0.01326683		2085.8	0.00978635		2675.8	0.04535471
316.01	0.00275503		906.01	0.00960241		1496	0.01307476		2086	0.00984471		2676	0.04439458
316.21	0.00319514		906.21	0.00962195		1496.2	0.01321042		2086.2	0.01004427		2676.2	0.04388719
316.41	0.00414149		906.41	0.00909509		1496.4	0.01336638		2086.4	0.00942171		2676.4	0.04290362
316.61	0.00494288		906.61	0.00909476		1496.6	0.01303244		2086.6	0.0099348		2676.6	0.0422913
316.81	0.00508915		906.81	0.00937819		1496.8	0.01290924		2086.8	0.01018643		2676.8	0.04268555
317.01	0.00477751		907.01	0.00902099		1497	0.01265193		2087	0.01065243		2677	0.04251658
317.21	0.00386663		907.21	0.00868059		1497.2	0.01322561		2087.2	0.01094616		2677.2	0.04190426
317.41	0.00334134		907.41	0.00843082		1497.4	0.01315283		2087.4	0.01105206		2677.4	0.04265739
317.61	0.00324112		907.61	0.00931062		1497.6	0.01358832		2087.6	0.01058401		2677.6	0.04326522
317.81	0.0026002		907.81	0.00952991		1497.8	0.01338116		2087.8	0.01161749		2677.8	0.04429395
318.01	0.00334944		908.01	0.01027813		1498	0.01282435		2088	0.01258711		2678	0.04486077
318.21	0.00343667		908.21	0.00970708		1498.2	0.0131855		2088.2	0.01298263		2678.2	0.0453901
318.41	0.00380989		908.41	0.00948426		1498.4	0.01245135		2088.4	0.0132981		2678.4	0.04536961
318.61	0.00413702		908.61	0.00870121		1498.6	0.01295887		2088.6	0.01335697		2678.6	0.0460189
318.81	0.00438917		908.81	0.00887067		1498.8	0.01335578		2088.8	0.01271088		2678.8	0.04663413
319.01	0.00379081		909.01	0.00885083		1499	0.01449429		2089	0.01304477		2679	0.04609148
319.21	0.00399236		909.21	0.00826349		1499.2	0.01444379		2089.2	0.01308047		2679.2	0.04625611
319.41	0.0046117		909.41	0.00805145		1499.4	0.01431707		2089.4	0.01336546		2679.4	0.04596618
319.61	0.00432435		909.61	0.00779007		1499.6	0.01383544		2089.6	0.01311462		2679.6	0.0463025
319.81	0.00438157		909.81	0.00786725		1499.8	0.01308225		2089.8	0.01263747		2679.8	0.04565403
320.01	0.00382853		910.01	0.00751753		1500	0.01297208		2090	0.01237621		2680	0.04459245
320.21	0.00437927		910.21	0.007042		1500.2	0.0131856		2090.2	0.01206095		2680.2	0.04432909
320.41	0.00494306		910.41	0.00622046		1500.4	0.0130853		2090.4	0.01214448		2680.4	0.04397818
320.61	0.00458614		910.61	0.0062194		1500.6	0.01285032		2090.6	0.01240656		2680.6	0.04442402
320.81	0.00445601		910.81	0.00677894		1500.8	0.01375459		2090.8	0.01198648		2680.8	0.0437835
321.01	0.0049939		911.01	0.00648149		1501	0.01365851		2091	0.01199971		2681	0.04374646
321.21	0.00413064		911.21	0.00693305		1501.2	0.01367835		2091.2	0.01150656		2681.2	0.04362875
321.41	0.00389867		911.41	0.00748342		1501.4	0.01289121		2091.4	0.01160272		2681.4	0.04407523
321.61	0.00343656		911.61	0.00801247		1501.6	0.01281297		2091.6	0.01139949		2681.6	0.04411771
321.81	0.00405113		911.81	0.00722211		1501.8	0.01204648		2091.8	0.01262331		2681.8	0.04453652
322.01	0.00439655		912.01	0.00771279		1502	0.01218149		2092	0.01258314		2682	0.04406168
322.21	0.00485279		912.21	0.00704617		1502.2	0.01162594		2092.2	0.01212186		2682.2	0.04449792
322.41	0.00512774		912.41	0.00648343		1502.4	0.01181204		2092.4	0.01275235		2682.4	0.04442007
322.61	0.00478227		912.61	0.00644613		1502.6	0.0122307		2092.6	0.01369232		2682.6	0.04482849
322.81	0.00498499		912.81	0.00732267		1502.8	0.01244574		2092.8	0.01372378		2682.8	0.04477364
323.01	0.00445588		913.01	0.00771996		1503	0.01325914		2093	0.01417468		2683	0.0439255
323.21	0.0042658		913.21	0.00749755		1503.2	0.01319001		2093.2	0.01474798		2683.2	0.04332453
323.41	0.00375944		913.41	0.00739831		1503.4	0.01316346		2093.4	0.01508691		2683.4	0.0433295
323.61	0.00303578		913.61	0.00795074		1503.6	0.01350216		2093.6	0.01465262		2683.6	0.04349572
323.81	0.00295797		913.81	0.00798264		1503.8	0.01370823		2093.8	0.01349211		2683.8	0.0426048
324.01	0.00324422		914.01	0.00785521		1504	0.01519622		2094	0.01324761		2684	0.04269564
324.21	0.00386738		914.21	0.00766717		1504.2	0.01571301		2094.2	0.0135686		2684.2	0.0433323
324.41	0.00364087		914.41	0.00791902		1504.4	0.01649292		2094.4	0.01425548		2684.4	0.04290125
324.61	0.00398038		914.61	0.00786778		1504.6	0.01739408		2094.6	0.01485136		2684.6	0.04261443
324.81	0.00516327		914.81	0.00742078		1504.8	0.01727096		2094.8	0.01420119		2684.8	0.0425961
325.01	0.00543533		915.01	0.00717622		1505	0.01681382		2095	0.01408877		2685	0.04269361
325.21	0.00537303		915.21	0.00771342		1505.2	0.01604907		2095.2	0.01349868		2685.2	0.04249627
325.41	0.00543493		915.41	0.0068482		1505.4	0.015635		2095.4	0.01346568		2685.4	0.04249265
325.61	0.00530935		915.61	0.00651327		1505.6	0.01535971		2095.6	0.01223275		2685.6	0.04197532
325.81	0.00553597		915.81	0.00608493		1505.8	0.01475676		2095.8	0.0118211		2685.8	0.04259632
326.01	0.00588403		916.01	0.00603889		1506	0.01365992		2096	0.01059918		2686	0.04291236
326.21	0.00558139		916.21	0.00570303		1506.2	0.01292954		2096.2	0.00999268		2686.2	0.04388667
326.41	0.00577485		916.41	0.00541621		1506.4	0.01260378		2096.4	0.00967623		2686.4	0.04435862
326.61	0.00509717		916.61	0.00543653		1506.6	0.01185861		2096.6	0.00932043		2686.6	0.04452061
326.81	0.00553402		916.81	0.00569597		1506.8	0.01220537		2096.8	0.00872288		2686.8	0.045007
327.01	0.00435102		917.01	0.00547618		1507	0.01234075		2097	0.00846227		2687	0.04489349
327.21	0.00365283		917.21	0.00522234		1507.2	0.01209013		2097.2	0.00826676		2687.2	0.04543857
327.41	0.0030012		917.41	0.00611164		1507.4	0.01217352		2097.4	0.00805285		2687.4	0.04602903
327.61	0.00277117		917.61	0.0063437		1507.6	0.01279467		2097.6	0.00774117		2687.6	0.04625805
327.81	0.00292591		917.81	0.00523767		1507.8	0.01335604		2097.8	0.00811339		2687.8	0.0460035
328.01	0.0019693		918.01	0.00505642		1508	0.01421505		2098	0.00925103		2688	0.04594271
328.21	0.00100563		918.21	0.00588789		1508.2	0.0142169		2098.2	0.01108052		2688.2	0.04558845
328.41	0.00055788		918.41	0.00638121		1508.4	0.01433313		2098.4	0.011695		2688.4	0.04553928
328.61	0.00000918		918.61	0.00634984		1508.6	0.0144028		2098.6	0.01236437		2688.6	0.04590424
328.81	-0.000144		918.81	0.00623626		1508.8	0.01423838		2098.8	0.01210882		2688.8	0.0468731
329.01	-0.0006095		919.01	0.00622896		1509	0.01417659		2099	0.01267147		2689	0.04688843
329.21	-0.00047085		919.21	0.00600777		1509.2	0.01361897		2099.2	0.0132296		2689.2	0.04665153
329.41	-0.00029546		919.41	0.00569577		1509.4	0.01395308		2099.4	0.01340243		2689.4	0.04623665
329.61	-0.0008502		919.61	0.0059255		1509.6	0.01325075		2099.6	0.0126508		2689.6	0.0454207
329.81	-0.0004914		919.81	0.00638632		1509.8	0.01346746		2099.8	0.01266103		2689.8	0.04580938
330.01	0.0000206		920.01	0.00751695		1510	0.01319769		2100	0.01243181		2690	0.04471513
330.21	-0.00015159		920.21	0.00820629		1510.2	0.01328575		2100.2	0.01252947		2690.2	0.04451035
330.41	0.00046636		920.41	0.00759399		1510.4	0.01270642		2100.4	0.0120549		2690.4	0.04446694
330.61	0.00026323		920.61	0.00693292		1510.6	0.01248036		2100.6	0.01113739		2690.6	0.04404659
330.81	0.00032855		920.81	0.00643866		1510.8	0.01265833		2100.8	0.01027678		2690.8	0.04464367
331.01	0.00041202		921.01	0.00575464		1511	0.01239058		2101	0.0097882		2691	0.04343163
331.21	0.00054823		921.21	0.00551618		1511.2	0.01102336		2101.2	0.0097892		2691.2	0.04375274
331.41	0.00046485		921.41	0.00517798		1511.4	0.01164513		2101.4	0.01009031		2691.4	0.04387716
331.61	0.00012188		921.61	0.00432102		1511.6	0.01277723		2101.6	0.00937968		2691.6	0.04304824
331.81	-0.00004494		921.81	0.00340782		1511.8	0.01307064		2101.8	0.00939781		2691.8	0.04253607
332.01	-0.00031973		922.01	0.00306823		1512	0.01386432		2102	0.00928224		2692	0.04174099
332.21	-0.00008413		922.21	0.00432844		1512.2	0.01353692		2102.2	0.00928769		2692.2	0.04246243
332.41	-0.00065188		922.41	0.00476277		1512.4	0.01392555		2102.4	0.00849942		2692.4	0.04268009
332.61	-0.00067971		922.61	0.00484525		1512.6	0.01465377		2102.6	0.00883648		2692.6	0.04239565
332.81	0.00022364		922.81	0.00431853		1512.8	0.01469306		2102.8	0.00844527		2692.8	0.04357067
333.01	0.00046718		923.01	0.00402767		1513	0.01470476		2103	0.00849926		2693	0.04389317
333.21	0.00100014		923.21	0.00480402		1513.2	0.01497722		2103.2	0.00868404		2693.2	0.04351147
333.41	0.00092805		923.41	0.00534279		1513.4	0.01491522		2103.4	0.00960467		2693.4	0.04386417
333.61	0.00067004		923.61	0.00563786		1513.6	0.01484383		2103.6	0.00946667		2693.6	0.0441518
333.81	0.00116602		923.81	0.00631562		1513.8	0.01650798		2103.8	0.011304		2693.8	0.04474938
334.01	0.00152489		924.01	0.00738863		1514	0.01699151		2104	0.01189401		2694	0.04455636
334.21	0.0014722		924.21	0.00734402		1514.2	0.01638214		2104.2	0.01276152		2694.2	0.04445792
334.41	0.00134006		924.41	0.00673172		1514.4	0.01546441		2104.4	0.01221056		2694.4	0.04478072
334.61	0.0012769		924.61	0.00729226		1514.6	0.01376403		2104.6	0.01169548		2694.6	0.04458144
334.81	0.00087025		924.81	0.00716861		1514.8	0.01294672		2104.8	0.01181842		2694.8	0.04382975
335.01	0.00086723		925.01	0.00743778		1515	0.01252752		2105	0.0116745		2695	0.04300576
335.21	-0.00005276		925.21	0.00809253		1515.2	0.01170857		2105.2	0.01120681		2695.2	0.04278104
335.41	-0.0000346		925.41	0.00808915		1515.4	0.01288019		2105.4	0.01065692		2695.4	0.04215563
335.61	-0.00047175		925.61	0.00794632		1515.6	0.01270682		2105.6	0.01012856		2695.6	0.04124143
335.81	-0.00000768		925.81	0.00748513		1515.8	0.01186252		2105.8	0.00972303		2695.8	0.04086496
336.01	0.00042099		926.01	0.00701068		1516	0.01257076		2106	0.0092867		2696	0.04070333
336.21	0.00035993		926.21	0.00800187		1516.2	0.01215925		2106.2	0.00855114		2696.2	0.04056474
336.41	-0.0002405		926.41	0.00765123		1516.4	0.01237715		2106.4	0.0088246		2696.4	0.04004658
336.61	0.0008818		926.61	0.00691901		1516.6	0.01215114		2106.6	0.00878412		2696.6	0.03999611
336.81	0.00083196		926.81	0.00675577		1516.8	0.01175539		2106.8	0.00860504		2696.8	0.04107022
337.01	0.00086689		927.01	0.00648821		1517	0.0116072		2107	0.00825367		2697	0.04160945
337.21	0.00149838		927.21	0.00685161		1517.2	0.01188683		2107.2	0.00886976		2697.2	0.04204805
337.41	0.00078346		927.41	0.005883		1517.4	0.01218613		2107.4	0.00989014		2697.4	0.04335003
337.61	0.00111766		927.61	0.0056775		1517.6	0.01304918		2107.6	0.01043686		2697.6	0.0441416
337.81	0.00100553		927.81	0.00601975		1517.8	0.01360338		2107.8	0.0113409		2697.8	0.04407119
338.01	0.00099695		928.01	0.0066324		1518	0.01388365		2108	0.01147709		2698	0.04478388
338.21	0.00022082		928.21	0.00660054		1518.2	0.01288669		2108.2	0.01156902		2698.2	0.04464711
338.41	-0.00027984		928.41	0.00664319		1518.4	0.01229939		2108.4	0.01101351		2698.4	0.04482197
338.61	-0.00026038		928.61	0.00692906		1518.6	0.01194918		2108.6	0.01084305		2698.6	0.04454431
338.81	-0.00116936		928.81	0.00739991		1518.8	0.01247947		2108.8	0.01044042		2698.8	0.04383377
339.01	-0.00157261		929.01	0.0078546		1519	0.01324384		2109	0.00976429		2699	0.04404726
339.21	-0.00165111		929.21	0.00815658		1519.2	0.01330895		2109.2	0.0095055		2699.2	0.04336592
339.41	-0.0009447		929.41	0.00718323		1519.4	0.01408277		2109.4	0.00997291		2699.4	0.04335228
339.61	-0.00141493		929.61	0.00636073		1519.6	0.01433814		2109.6	0.01010522		2699.6	0.04274397
339.81	-0.00100265		929.81	0.00602703		1519.8	0.01456213		2109.8	0.00998491		2699.8	0.04296748
340.01	-0.00088562		930.01	0.00549712		1520	0.01507201		2110	0.01029806		2700	0.04310225
340.21	-0.00159851		930.21	0.00563575		1520.2	0.01495517		2110.2	0.01028677		2700.2	0.04299757
340.41	-0.00105581		930.41	0.0048813		1520.4	0.01446294		2110.4	0.01135201		2700.4	0.04299807
340.61	-0.00027247		930.61	0.00495919		1520.6	0.0143025		2110.6	0.01157441		2700.6	0.04318695
340.81	-0.00018726		930.81	0.00566654		1520.8	0.01335773		2110.8	0.01218617		2700.8	0.04414219
341.01	-0.00035305		931.01	0.00483862		1521	0.01319556		2111	0.01196593		2701	0.04469771
341.21	-0.00041057		931.21	0.00472942		1521.2	0.01357589		2111.2	0.01249771		2701.2	0.04506041
341.41	-0.00070252		931.41	0.00473135		1521.4	0.01354706		2111.4	0.0125683		2701.4	0.0462459
341.61	-0.00092091		931.61	0.00511101		1521.6	0.013951		2111.6	0.01276504		2701.6	0.04647749
341.81	-0.00117247		931.81	0.00555885		1521.8	0.01403552		2111.8	0.01203562		2701.8	0.04684905
342.01	-0.00136107		932.01	0.00546335		1522	0.01428069		2112	0.01170593		2702	0.04758781
342.21	-0.0011312		932.21	0.00548248		1522.2	0.0129862		2112.2	0.01156858		2702.2	0.04672625
342.41	-0.00073841		932.41	0.00487924		1522.4	0.01304585		2112.4	0.01121877		2702.4	0.04647433
342.61	-0.00023113		932.61	0.00468269		1522.6	0.01237622		2112.6	0.010334		2702.6	0.04607762
342.81	-0.00053064		932.81	0.0048164		1522.8	0.01219662		2112.8	0.01000861		2702.8	0.04535887
343.01	-0.00053792		933.01	0.00420454		1523	0.01228866		2113	0.00990919		2703	0.04486337
343.21	-0.00005776		933.21	0.00327193		1523.2	0.01232631		2113.2	0.00947344		2703.2	0.0439693
343.41	0.0005029		933.41	0.00258434		1523.4	0.01222154		2113.4	0.0096014		2703.4	0.04306295
343.61	-0.00004433		933.61	0.00220804		1523.6	0.01281338		2113.6	0.00952577		2703.6	0.04231988
343.81	0.00023847		933.81	0.00175698		1523.8	0.01298115		2113.8	0.0092464		2703.8	0.04245996
344.01	0.00015814		934.01	0.00194685		1524	0.0132686		2114	0.00875571		2704	0.04140232
344.21	0.00048059		934.21	0.00251062		1524.2	0.01413702		2114.2	0.00917329		2704.2	0.04123105
344.41	0.0013913		934.41	0.00322474		1524.4	0.01366101		2114.4	0.0093439		2704.4	0.04070218
344.61	0.0014129		934.61	0.00430059		1524.6	0.01352995		2114.6	0.00934888		2704.6	0.04102325
344.81	0.00084823		934.81	0.00525774		1524.8	0.01280292		2114.8	0.01040189		2704.8	0.04166988
345.01	0.00044106		935.01	0.00511884		1525	0.01270162		2115	0.01002143		2705	0.0420657
345.21	0.00027565		935.21	0.00489558		1525.2	0.01248879		2115.2	0.01008562		2705.2	0.04277289
345.41	0.00007391		935.41	0.00556459		1525.4	0.01229896		2115.4	0.00914297		2705.4	0.04353242
345.61	-0.00086028		935.61	0.00591391		1525.6	0.01194604		2115.6	0.00911532		2705.6	0.04358269
345.81	-0.00119427		935.81	0.00627621		1525.8	0.01114703		2115.8	0.00958866		2705.8	0.04440243
346.01	-0.00157049		936.01	0.00619086		1526	0.01071278		2116	0.01004372		2706	0.04412388
346.21	-0.00112003		936.21	0.00612774		1526.2	0.00960322		2116.2	0.01026593		2706.2	0.04481325
346.41	-0.00097343		936.41	0.00587096		1526.4	0.0099163		2116.4	0.01020843		2706.4	0.04567018
346.61	-0.00116879		936.61	0.00642		1526.6	0.00946168		2116.6	0.00937327		2706.6	0.04662327
346.81	-0.0012145		936.81	0.00606237		1526.8	0.00922077		2116.8	0.00907833		2706.8	0.0468926
347.01	-0.00087395		937.01	0.00596884		1527	0.00942462		2117	0.00853733		2707	0.04717812
347.21	-0.00089065		937.21	0.00626859		1527.2	0.00981094		2117.2	0.00798973		2707.2	0.04692912
347.41	-0.00073111		937.41	0.00619632		1527.4	0.01018256		2117.4	0.00725506		2707.4	0.04588172
347.61	-0.0010143		937.61	0.00501427		1527.6	0.01157482		2117.6	0.00664941		2707.6	0.0452792
347.81	-0.00145025		937.81	0.00482401		1527.8	0.01213125		2117.8	0.00577206		2707.8	0.04476655
348.01	-0.00156015		938.01	0.00503303		1528	0.01327298		2118	0.00534617		2708	0.04382198
348.21	-0.00104469		938.21	0.00447717		1528.2	0.01408504		2118.2	0.00572159		2708.2	0.04367663
348.41	-0.00061414		938.41	0.00442104		1528.4	0.01424804		2118.4	0.00524444		2708.4	0.043399
348.61	0.00031697		938.61	0.00478916		1528.6	0.01423914		2118.6	0.00601715		2708.6	0.04320674
348.81	-0.00004608		938.81	0.00449014		1528.8	0.01411937		2118.8	0.00712951		2708.8	0.04376896
349.01	-0.0000916		939.01	0.00357978		1529	0.01397901		2119	0.00682471		2709	0.04335645
349.21	-0.00015858		939.21	0.00291274		1529.2	0.01390827		2119.2	0.00743261		2709.2	0.04252101
349.41	-0.0010627		939.41	0.00347772		1529.4	0.01396563		2119.4	0.00699427		2709.4	0.04209667
349.61	-0.00118664		939.61	0.00339381		1529.6	0.01325169		2119.6	0.00802224		2709.6	0.04220387
349.81	-0.0019465		939.81	0.00302711		1529.8	0.01277137		2119.8	0.00907738		2709.8	0.04188975
350.01	-0.00222673		940.01	0.00246375		1530	0.0121319		2120	0.00888575		2710	0.04114151
350.21	-0.00149275		940.21	0.0026077		1530.2	0.01161572		2120.2	0.00817251		2710.2	0.04189783
350.41	-0.00178751		940.41	0.0030043		1530.4	0.01201547		2120.4	0.00798197		2710.4	0.04255209
350.61	-0.00199097		940.61	0.00334041		1530.6	0.01189918		2120.6	0.00801158		2710.6	0.04309246
350.81	-0.00173664		940.81	0.00346795		1530.8	0.01149787		2120.8	0.00845175		2710.8	0.04306398
351.01	-0.00151428		941.01	0.00427734		1531	0.01236131		2121	0.0082692		2711	0.0435776
351.21	-0.00233136		941.21	0.00563187		1531.2	0.01325792		2121.2	0.00897671		2711.2	0.04391186
351.41	-0.00276696		941.41	0.00657514		1531.4	0.01376396		2121.4	0.00911743		2711.4	0.04402577
351.61	-0.0038005		941.61	0.0066889		1531.6	0.01422374		2121.6	0.00969632		2711.6	0.04420128
351.81	-0.00389798		941.81	0.00760874		1531.8	0.01492697		2121.8	0.01013872		2711.8	0.04465465
352.01	-0.00315742		942.01	0.00716794		1532	0.01552394		2122	0.01067941		2712	0.04474765
352.21	-0.00310027		942.21	0.00733116		1532.2	0.01567631		2122.2	0.01108408		2712.2	0.04568581
352.41	-0.00256645		942.41	0.00789267		1532.4	0.01606843		2122.4	0.01121978		2712.4	0.04607551
352.61	-0.00186303		942.61	0.00793965		1532.6	0.01645664		2122.6	0.0127219		2712.6	0.04602568
352.81	-0.00200659		942.81	0.00723933		1532.8	0.01608791		2122.8	0.01302847		2712.8	0.04672715
353.01	-0.00120081		943.01	0.00762048		1533	0.01617201		2123	0.0135642		2713	0.0462721
353.21	-0.00122748		943.21	0.00773861		1533.2	0.01613777		2123.2	0.01328324		2713.2	0.04533774
353.41	-0.00225809		943.41	0.00720248		1533.4	0.01577254		2123.4	0.01248349		2713.4	0.04490499
353.61	-0.00121719		943.61	0.0060241		1533.6	0.01450968		2123.6	0.01215336		2713.6	0.04377565
353.81	-0.00149111		943.81	0.00460873		1533.8	0.01319512		2123.8	0.01224198		2713.8	0.04250443
354.01	-0.00133841		944.01	0.00413123		1534	0.01227992		2124	0.01110306		2714	0.04213994
354.21	-0.00111633		944.21	0.0035839		1534.2	0.01237467		2124.2	0.01179829		2714.2	0.04208341
354.41	-0.00156953		944.41	0.00354591		1534.4	0.01229773		2124.4	0.01248038		2714.4	0.04233233
354.61	-0.00165348		944.61	0.00317036		1534.6	0.01203238		2124.6	0.01281545		2714.6	0.04241965
354.81	-0.00105872		944.81	0.00310034		1534.8	0.01243111		2124.8	0.0121638		2714.8	0.04248655
355.01	-0.00031739		945.01	0.0031738		1535	0.01271802		2125	0.01157805		2715	0.04279076
355.21	-0.00117747		945.21	0.00323385		1535.2	0.01329898		2125.2	0.01192882		2715.2	0.04215173
355.41	-0.00177415		945.41	0.00306952		1535.4	0.01269847		2125.4	0.01147671		2715.4	0.04202473
355.61	-0.00223392		945.61	0.0028179		1535.6	0.01261012		2125.6	0.01068641		2715.6	0.04179174
355.81	-0.00224454		945.81	0.00330074		1535.8	0.01227686		2125.8	0.00973152		2715.8	0.04209455
356.01	-0.00313611		946.01	0.00265465		1536	0.01224781		2126	0.00903838		2716	0.04287633
356.21	-0.00384656		946.21	0.00261795		1536.2	0.0123462		2126.2	0.00844299		2716.2	0.04338881
356.41	-0.00394701		946.41	0.00246986		1536.4	0.01188168		2126.4	0.00833282		2716.4	0.04320861
356.61	-0.0036174		946.61	0.00281371		1536.6	0.012093		2126.6	0.00880144		2716.6	0.04283694
356.81	-0.00283649		946.81	0.00327405		1536.8	0.01149255		2126.8	0.00741744		2716.8	0.04338475
357.01	-0.00218489		947.01	0.00435792		1537	0.01220464		2127	0.00710451		2717	0.04290127
357.21	-0.00191305		947.21	0.00457144		1537.2	0.01191721		2127.2	0.00608083		2717.2	0.04259959
357.41	-0.00229706		947.41	0.00365761		1537.4	0.01199965		2127.4	0.00626133		2717.4	0.04279529
357.61	-0.0008234		947.61	0.00327149		1537.6	0.0120191		2127.6	0.00680005		2717.6	0.04254977
357.81	-0.00088972		947.81	0.00301363		1537.8	0.01165467		2127.8	0.00777515		2717.8	0.04254371
358.01	-0.00033033		948.01	0.00306959		1538	0.01195619		2128	0.00867736		2718	0.04307278
358.21	-0.00005074		948.21	0.00339663		1538.2	0.01199532		2128.2	0.00998927		2718.2	0.04282948
358.41	-0.00078371		948.41	0.00404273		1538.4	0.01182878		2128.4	0.01013613		2718.4	0.04320815
358.61	-0.0002728		948.61	0.00364614		1538.6	0.01153931		2128.6	0.00984206		2718.6	0.04258046
358.81	0.00053641		948.81	0.00310179		1538.8	0.01202853		2128.8	0.00995841		2718.8	0.04218056
359.01	0.0003597		949.01	0.00257322		1539	0.01225534		2129	0.010097		2719	0.04225607
359.21	-0.00031253		949.21	0.00224168		1539.2	0.01212219		2129.2	0.01067039		2719.2	0.04195993
359.41	-0.00086049		949.41	0.00248885		1539.4	0.01232225		2129.4	0.01043333		2719.4	0.04197302
359.61	-0.00178951		949.61	0.00319817		1539.6	0.0120451		2129.6	0.01057166		2719.6	0.04217287
359.81	-0.00283904		949.81	0.00322749		1539.8	0.01210791		2129.8	0.01058064		2719.8	0.04215766
360.01	-0.00368519		950.01	0.0029132		1540	0.01159207		2130	0.01082967		2720	0.0423742
360.21	-0.00342175		950.21	0.00248217		1540.2	0.01098086		2130.2	0.01121501		2720.2	0.04225111
360.41	-0.00356605		950.41	0.00305107		1540.4	0.0104285		2130.4	0.01094245		2720.4	0.04237152
360.61	-0.00278832		950.61	0.00342483		1540.6	0.01051555		2130.6	0.01139616		2720.6	0.04226631
360.81	-0.00193643		950.81	0.00345288		1540.8	0.01020096		2130.8	0.01056288		2720.8	0.04270253
361.01	-0.00173778		951.01	0.0031212		1541	0.01066736		2131	0.01082409		2721	0.04246599
361.21	-0.00243223		951.21	0.00289055		1541.2	0.00976945		2131.2	0.01075025		2721.2	0.04278609
361.41	-0.00326241		951.41	0.00160466		1541.4	0.01080432		2131.4	0.01113589		2721.4	0.04356194
361.61	-0.00303103		951.61	0.00157376		1541.6	0.01129882		2131.6	0.01066427		2721.6	0.04343976
361.81	-0.00290863		951.81	0.00087226		1541.8	0.01084554		2131.8	0.01045552		2721.8	0.04328056
362.01	-0.00242111		952.01	0.00123158		1542	0.01045491		2132	0.0106681		2722	0.0430376
362.21	-0.00285811		952.21	0.00267585		1542.2	0.00958508		2132.2	0.00947159		2722.2	0.04265577
362.41	-0.0039198		952.41	0.00285615		1542.4	0.01031125		2132.4	0.00907587		2722.4	0.04317564
362.61	-0.00363777		952.61	0.00206286		1542.6	0.00997687		2132.6	0.0082497		2722.6	0.04201303
362.81	-0.0038413		952.81	0.00236292		1542.8	0.01076395		2132.8	0.00738473		2722.8	0.04227479
363.01	-0.0041653		953.01	0.00300984		1543	0.01078602		2133	0.00684896		2723	0.04264882
363.21	-0.00400481		953.21	0.00360729		1543.2	0.01155382		2133.2	0.00768827		2723.2	0.04268192
363.41	-0.0042389		953.41	0.00411909		1543.4	0.01281506		2133.4	0.00776898		2723.4	0.04248095
363.61	-0.00467372		953.61	0.00431093		1543.6	0.01306303		2133.6	0.00792746		2723.6	0.04307738
363.81	-0.00514734		953.81	0.00456743		1543.8	0.01332481		2133.8	0.00821966		2723.8	0.04298654
364.01	-0.00495109		954.01	0.00451174		1544	0.01271281		2134	0.00912805		2724	0.04357342
364.21	-0.00435115		954.21	0.00455649		1544.2	0.01286695		2134.2	0.00926021		2724.2	0.04380699
364.41	-0.004907		954.41	0.00505649		1544.4	0.01220208		2134.4	0.00940199		2724.4	0.04352015
364.61	-0.0054436		954.61	0.0053737		1544.6	0.0113491		2134.6	0.0094198		2724.6	0.04284443
364.81	-0.00593194		954.81	0.00558068		1544.8	0.01160982		2134.8	0.00949178		2724.8	0.0422282
365.01	-0.00685037		955.01	0.00405231		1545	0.0112589		2135	0.01010033		2725	0.0417069
365.21	-0.00758098		955.21	0.00402753		1545.2	0.01101724		2135.2	0.00992867		2725.2	0.04208688
365.41	-0.00714621		955.41	0.00357245		1545.4	0.01143435		2135.4	0.00960009		2725.4	0.0421417
365.61	-0.00670065		955.61	0.00353101		1545.6	0.01128806		2135.6	0.00903336		2725.6	0.04199925
365.81	-0.00571818		955.81	0.00288011		1545.8	0.01090501		2135.8	0.00891014		2725.8	0.04140579
366.01	-0.00533684		956.01	0.00397402		1546	0.01084635		2136	0.00861912		2726	0.04115591
366.21	-0.00522239		956.21	0.00339112		1546.2	0.01035296		2136.2	0.00794352		2726.2	0.04183396
366.41	-0.00547902		956.41	0.00263651		1546.4	0.01098556		2136.4	0.00739577		2726.4	0.04168704
366.61	-0.00456063		956.61	0.00240101		1546.6	0.01115664		2136.6	0.00677273		2726.6	0.04168502
366.81	-0.0039118		956.81	0.00196473		1546.8	0.01214649		2136.8	0.00634537		2726.8	0.04205158
367.01	-0.00290612		957.01	0.00132925		1547	0.01300733		2137	0.00721638		2727	0.04174419
367.21	-0.00203853		957.21	0.00097538		1547.2	0.01418219		2137.2	0.00803917		2727.2	0.04190829
367.41	-0.00163814		957.41	0.00044042		1547.4	0.01426671		2137.4	0.00834946		2727.4	0.04234087
367.61	-0.00122125		957.61	0.00039751		1547.6	0.0141219		2137.6	0.00822508		2727.6	0.04215089
367.81	-0.00097585		957.81	0.00077704		1547.8	0.01394748		2137.8	0.00946111		2727.8	0.04313657
368.01	-0.0006414		958.01	0.00048184		1548	0.01390523		2138	0.00992305		2728	0.04366822
368.21	-0.00029612		958.21	0.00035926		1548.2	0.01341172		2138.2	0.00994071		2728.2	0.04291269
368.41	-0.00125232		958.41	0.00035296		1548.4	0.01319755		2138.4	0.01002951		2728.4	0.04306716
368.61	-0.00154229		958.61	0.00109408		1548.6	0.01301219		2138.6	0.00990645		2728.6	0.04233847
368.81	-0.00138961		958.81	0.00064138		1548.8	0.01321115		2138.8	0.00994519		2728.8	0.04191146
369.01	-0.00248833		959.01	-0.00035229		1549	0.01281993		2139	0.00960482		2729	0.04182756
369.21	-0.0027336		959.21	0.00057947		1549.2	0.01248279		2139.2	0.00914371		2729.2	0.04245493
369.41	-0.00271491		959.41	0.0009528		1549.4	0.01230767		2139.4	0.00903845		2729.4	0.04267567
369.61	-0.00319135		959.61	0.00201233		1549.6	0.01234557		2139.6	0.00925969		2729.6	0.04304499
369.81	-0.00344522		959.81	0.00232354		1549.8	0.01192553		2139.8	0.00919852		2729.8	0.04311042
370.01	-0.00415		960.01	0.00355334		1550	0.0125993		2140	0.00970799		2730	0.04302575
370.21	-0.0049443		960.21	0.00343075		1550.2	0.01288851		2140.2	0.00993278		2730.2	0.04320584
370.41	-0.00551526		960.41	0.0045125		1550.4	0.0135779		2140.4	0.00903742		2730.4	0.04280337
370.61	-0.00545468		960.61	0.00482672		1550.6	0.01436585		2140.6	0.0094358		2730.6	0.04289613
370.81	-0.00560659		960.81	0.00418602		1550.8	0.01461988		2140.8	0.00950213		2730.8	0.04211987
371.01	-0.00589937		961.01	0.00511388		1551	0.0144532		2141	0.00971515		2731	0.04100632
371.21	-0.00642336		961.21	0.00521575		1551.2	0.01428982		2141.2	0.0095296		2731.2	0.04132642
371.41	-0.00662257		961.41	0.00431353		1551.4	0.01384477		2141.4	0.00976291		2731.4	0.04197007
371.61	-0.00663669		961.61	0.00417056		1551.6	0.01362691		2141.6	0.00977386		2731.6	0.04132921
371.81	-0.00615619		961.81	0.00347637		1551.8	0.01320582		2141.8	0.01049503		2731.8	0.04246866
372.01	-0.0053998		962.01	0.00307885		1552	0.01273015		2142	0.00956118		2732	0.04240484
372.21	-0.00512841		962.21	0.00237414		1552.2	0.01161977		2142.2	0.00926508		2732.2	0.04153516
372.41	-0.00512728		962.41	0.00239693		1552.4	0.01204033		2142.4	0.00884634		2732.4	0.04216136
372.61	-0.00365202		962.61	0.00149277		1552.6	0.01146539		2142.6	0.00822364		2732.6	0.04222078
372.81	-0.00392387		962.81	0.00025894		1552.8	0.01079817		2142.8	0.00700009		2732.8	0.04245182
373.01	-0.00402649		963.01	-0.0003481		1553	0.01003387		2143	0.00682157		2733	0.04296065
373.21	-0.00396316		963.21	-0.00078635		1553.2	0.00948586		2143.2	0.00693528		2733.2	0.04321618
373.41	-0.00336075		963.41	-0.00066229		1553.4	0.00894732		2143.4	0.00748808		2733.4	0.04290717
373.61	-0.00309811		963.61	-0.00001358		1553.6	0.00848438		2143.6	0.00786319		2733.6	0.0426238
373.81	-0.00230529		963.81	-0.00053415		1553.8	0.00899739		2143.8	0.00895611		2733.8	0.04306533
374.01	-0.00261759		964.01	-0.00002115		1554	0.00965664		2144	0.00960989		2734	0.04278385
374.21	-0.00269928		964.21	0.00087044		1554.2	0.01008468		2144.2	0.00906179		2734.2	0.04234891
374.41	-0.00275618		964.41	0.0007252		1554.4	0.01021664		2144.4	0.00866168		2734.4	0.04256115
374.61	-0.00312021		964.61	0.00113628		1554.6	0.01110569		2144.6	0.00971501		2734.6	0.04248155
374.81	-0.00367112		964.81	0.00177186		1554.8	0.01177845		2144.8	0.01007313		2734.8	0.04243173
375.01	-0.00380552		965.01	0.00210809		1555	0.01226061		2145	0.01045793		2735	0.04168619
375.21	-0.00419968		965.21	0.00179547		1555.2	0.01327961		2145.2	0.01071618		2735.2	0.04154174
375.41	-0.00455819		965.41	0.001716		1555.4	0.0132243		2145.4	0.011234		2735.4	0.04163122
375.61	-0.00480683		965.61	0.00154111		1555.6	0.01400158		2145.6	0.01112163		2735.6	0.04177313
375.81	-0.00448698		965.81	0.00179211		1555.8	0.01384775		2145.8	0.01138708		2735.8	0.04275238
376.01	-0.0041316		966.01	0.00252511		1556	0.01335251		2146	0.01072341		2736	0.04259994
376.21	-0.00441017		966.21	0.00239798		1556.2	0.0131758		2146.2	0.01139906		2736.2	0.04278459
376.41	-0.00414866		966.41	0.00235018		1556.4	0.01390985		2146.4	0.01107722		2736.4	0.04377889
376.61	-0.00437432		966.61	0.00175858		1556.6	0.01309517		2146.6	0.01083156		2736.6	0.04436176
376.81	-0.00609034		966.81	0.00227397		1556.8	0.01262939		2146.8	0.01114649		2736.8	0.0441552
377.01	-0.00611157		967.01	0.00281883		1557	0.01181916		2147	0.01150691		2737	0.04462575
377.21	-0.00708089		967.21	0.0022709		1557.2	0.01129037		2147.2	0.01133846		2737.2	0.04485755
377.41	-0.00652406		967.41	0.00300771		1557.4	0.01032436		2147.4	0.01157295		2737.4	0.04515177
377.61	-0.00679902		967.61	0.00278037		1557.6	0.01081402		2147.6	0.01101		2737.6	0.04529352
377.81	-0.00693409		967.81	0.00261144		1557.8	0.01121085		2147.8	0.01113256		2737.8	0.04534017
378.01	-0.00658467		968.01	0.00292446		1558	0.01088524		2148	0.01094186		2738	0.04419089
378.21	-0.00657009		968.21	0.00313952		1558.2	0.01107037		2148.2	0.01015313		2738.2	0.04301122
378.41	-0.00652878		968.41	0.00234175		1558.4	0.0109309		2148.4	0.01039218		2738.4	0.04320667
378.61	-0.00610719		968.61	0.00288931		1558.6	0.01118837		2148.6	0.01105731		2738.6	0.04253078
378.81	-0.00576324		968.81	0.00304314		1558.8	0.01183067		2148.8	0.01115768		2738.8	0.04171406
379.01	-0.00467498		969.01	0.0034697		1559	0.01179973		2149	0.01057035		2739	0.04139083
379.21	-0.0040474		969.21	0.00382091		1559.2	0.01151686		2149.2	0.01020604		2739.2	0.04100606
379.41	-0.00352142		969.41	0.0046194		1559.4	0.01168945		2149.4	0.00996425		2739.4	0.0413064
379.61	-0.00312385		969.61	0.00443767		1559.6	0.01216153		2149.6	0.00967252		2739.6	0.04101381
379.81	-0.00241924		969.81	0.00479547		1559.8	0.01167275		2149.8	0.00938707		2739.8	0.04043079
380.01	-0.00186067		970.01	0.00502236		1560	0.01095646		2150	0.00875719		2740	0.03996529
380.21	-0.00237132		970.21	0.00445309		1560.2	0.01086919		2150.2	0.00870287		2740.2	0.04023048
380.41	-0.00274894		970.41	0.00377155		1560.4	0.01041736		2150.4	0.0085367		2740.4	0.04009285
380.61	-0.00357252		970.61	0.00423303		1560.6	0.01020088		2150.6	0.00851799		2740.6	0.04068699
380.81	-0.00408301		970.81	0.00457381		1560.8	0.0101524		2150.8	0.008985		2740.8	0.04089245
381.01	-0.00375306		971.01	0.00432534		1561	0.00935249		2151	0.0082464		2741	0.04262497
381.21	-0.00397064		971.21	0.00350737		1561.2	0.00931055		2151.2	0.0077229		2741.2	0.04220703
381.41	-0.00445912		971.41	0.00344894		1561.4	0.00846283		2151.4	0.00759605		2741.4	0.0417791
381.61	-0.00475301		971.61	0.00284139		1561.6	0.00885163		2151.6	0.00769387		2741.6	0.0409469
381.81	-0.00446868		971.81	0.00268846		1561.8	0.00839006		2151.8	0.00830376		2741.8	0.04014491
382.01	-0.00374291		972.01	0.00229227		1562	0.00747104		2152	0.00894754		2742	0.03970719
382.21	-0.00394916		972.21	0.0024295		1562.2	0.00742969		2152.2	0.00882238		2742.2	0.03929192
382.41	-0.00411996		972.41	0.00180938		1562.4	0.00745099		2152.4	0.00910839		2742.4	0.03985523
382.61	-0.00319073		972.61	0.00172986		1562.6	0.00758137		2152.6	0.00979568		2742.6	0.03959399
382.81	-0.00278049		972.81	0.00181625		1562.8	0.00796991		2152.8	0.00986485		2742.8	0.03989498
383.01	-0.0017518		973.01	0.00282039		1563	0.00834194		2153	0.00979792		2743	0.0408469
383.21	-0.00124236		973.21	0.00286685		1563.2	0.00830696		2153.2	0.01056225		2743.2	0.04060319
383.41	-0.00072736		973.41	0.00272858		1563.4	0.00904369		2153.4	0.01080083		2743.4	0.04064396
383.61	-0.00047095		973.61	0.00159901		1563.6	0.00944819		2153.6	0.01134815		2743.6	0.04090344
383.81	-0.00058715		973.81	0.00099608		1563.8	0.00938412		2153.8	0.01094311		2743.8	0.04156696
384.01	-0.00100107		974.01	-0.00026182		1564	0.00949068		2154	0.0110836		2744	0.04162276
384.21	-0.00126127		974.21	-0.00069975		1564.2	0.01019316		2154.2	0.01174795		2744.2	0.04178957
384.41	-0.00177108		974.41	-0.00074258		1564.4	0.01100579		2154.4	0.01253444		2744.4	0.04286091
384.61	-0.0022318		974.61	-0.00041761		1564.6	0.0121437		2154.6	0.01334912		2744.6	0.04378727
384.81	-0.00232216		974.81	-0.00054283		1564.8	0.01235555		2154.8	0.0140882		2744.8	0.0443578
385.01	-0.00279106		975.01	-0.00046363		1565	0.01233317		2155	0.01361785		2745	0.04511325
385.21	-0.00377164		975.21	-0.00073911		1565.2	0.01324664		2155.2	0.01366432		2745.2	0.04333081
385.41	-0.00517064		975.41	-0.00015328		1565.4	0.01256464		2155.4	0.01375125		2745.4	0.0431049
385.61	-0.00511075		975.61	-0.00051058		1565.6	0.01220289		2155.6	0.0136392		2745.6	0.04318475
385.81	-0.00527812		975.81	-0.0004271		1565.8	0.01213663		2155.8	0.01300233		2745.8	0.04262342
386.01	-0.00512735		976.01	-0.00019913		1566	0.01208814		2156	0.01305566		2746	0.04240412
386.21	-0.00554077		976.21	-0.0002751		1566.2	0.01240078		2156.2	0.01254563		2746.2	0.04139888
386.41	-0.00605182		976.41	-0.0009308		1566.4	0.0123252		2156.4	0.0120557		2746.4	0.04083271
386.61	-0.00570626		976.61	-0.00080746		1566.6	0.01162765		2156.6	0.01127439		2746.6	0.04005214
386.81	-0.00597062		976.81	-0.00054326		1566.8	0.01144762		2156.8	0.01091465		2746.8	0.03999517
387.01	-0.00634092		977.01	-0.00001995		1567	0.01149269		2157	0.01029903		2747	0.04014683
387.21	-0.00606078		977.21	-0.00008249		1567.2	0.01011621		2157.2	0.01015898		2747.2	0.0397811
387.41	-0.00551274		977.41	-0.00040837		1567.4	0.00950093		2157.4	0.0091818		2747.4	0.04026445
387.61	-0.00580019		977.61	-0.00063215		1567.6	0.00919732		2157.6	0.00923736		2747.6	0.04079845
387.81	-0.005499		977.81	-0.00093672		1567.8	0.00882166		2157.8	0.00822669		2747.8	0.04113224
388.01	-0.00508002		978.01	-0.00146618		1568	0.0091635		2158	0.0088665		2748	0.04176656
388.21	-0.00502056		978.21	-0.00121068		1568.2	0.00969845		2158.2	0.01000336		2748.2	0.04280609
388.41	-0.00640379		978.41	-0.00171115		1568.4	0.0100477		2158.4	0.0108367		2748.4	0.04396171
388.61	-0.00662492		978.61	-0.00108611		1568.6	0.0110599		2158.6	0.01137459		2748.6	0.04415463
388.81	-0.00705213		978.81	-0.00087811		1568.8	0.01085183		2158.8	0.01093821		2748.8	0.04464148
389.01	-0.00732458		979.01	-0.00077492		1569	0.01196013		2159	0.01113366		2749	0.04491221
389.21	-0.00797467		979.21	-0.0005681		1569.2	0.0121101		2159.2	0.01119986		2749.2	0.04451089
389.41	-0.00866745		979.41	0.00054742		1569.4	0.01139276		2159.4	0.01188878		2749.4	0.045137
389.61	-0.00775981		979.61	0.00010231		1569.6	0.01040842		2159.6	0.01236119		2749.6	0.04496125
389.81	-0.00746155		979.81	0.00071831		1569.8	0.0116266		2159.8	0.01312574		2749.8	0.04443124
390.01	-0.00657813		980.01	0.00071512		1570	0.01158572		2160	0.01303654		2750	0.04448794
390.21	-0.00651776		980.21	0.0009387		1570.2	0.01208694		2160.2	0.01270516		2750.2	0.04358472
390.41	-0.00700195		980.41	0.00168354		1570.4	0.0123167		2160.4	0.01202988		2750.4	0.04298554
390.61	-0.00689038		980.61	0.00252671		1570.6	0.01192115		2160.6	0.01141835		2750.6	0.04297042
390.81	-0.00677878		980.81	0.00316027		1570.8	0.01191		2160.8	0.01188163		2750.8	0.04218401
391.01	-0.00606663		981.01	0.00326754		1571	0.0116228		2161	0.01076987		2751	0.04239022
391.21	-0.00523902		981.21	0.00351039		1571.2	0.01104802		2161.2	0.01043214		2751.2	0.04205158
391.41	-0.00510313		981.41	0.00289247		1571.4	0.01078096		2161.4	0.00950367		2751.4	0.04231035
391.61	-0.00555117		981.61	0.00242469		1571.6	0.01030332		2161.6	0.00952025		2751.6	0.04204069
391.81	-0.00558567		981.81	0.001772		1571.8	0.01011969		2161.8	0.0088266		2751.8	0.04185768
392.01	-0.00588512		982.01	0.0008295		1572	0.01006298		2162	0.00852274		2752	0.04186879
392.21	-0.00713159		982.21	0.0003339		1572.2	0.01039121		2162.2	0.00796633		2752.2	0.04119918
392.41	-0.00835225		982.41	0.00012189		1572.4	0.0102102		2162.4	0.00729712		2752.4	0.04120955
392.61	-0.00829969		982.61	0.00035466		1572.6	0.01033256		2162.6	0.00617053		2752.6	0.04096732
392.81	-0.00758673		982.81	-0.00018455		1572.8	0.01004863		2162.8	0.00521864		2752.8	0.04121275
393.01	-0.0076282		983.01	-0.00021206		1573	0.00980196		2163	0.00529793		2753	0.04181131
393.21	-0.00841569		983.21	-0.00093183		1573.2	0.00881821		2163.2	0.00472579		2753.2	0.04184669
393.41	-0.00903009		983.41	-0.00081134		1573.4	0.00864732		2163.4	0.00481474		2753.4	0.04160055
393.61	-0.00762302		983.61	-0.00211633		1573.6	0.00803101		2163.6	0.0055012		2753.6	0.04177141
393.81	-0.00735576		983.81	-0.00219459		1573.8	0.00890517		2163.8	0.00623258		2753.8	0.04251478
394.01	-0.00707955		984.01	-0.0014279		1574	0.00898329		2164	0.00638955		2754	0.0421877
394.21	-0.00706494		984.21	-0.00091502		1574.2	0.01032927		2164.2	0.00742763		2754.2	0.04219565
394.41	-0.00731731		984.41	-0.00092491		1574.4	0.01054707		2164.4	0.0078301		2754.4	0.04245125
394.61	-0.00680431		984.61	-0.00073347		1574.6	0.0105164		2164.6	0.00883609		2754.6	0.04240436
394.81	-0.00671477		984.81	-0.00079465		1574.8	0.00995562		2164.8	0.00971823		2754.8	0.04209056
395.01	-0.00621642		985.01	-0.00059086		1575	0.00972237		2165	0.01033381		2755	0.04227984
395.21	-0.00667295		985.21	-0.00038353		1575.2	0.00959512		2165.2	0.01103499		2755.2	0.04181183
395.41	-0.00765375		985.41	-0.00136336		1575.4	0.00964342		2165.4	0.01166621		2755.4	0.0416343
395.61	-0.00811499		985.61	-0.0012371		1575.6	0.00960031		2165.6	0.01249479		2755.6	0.04107708
395.81	-0.00873972		985.81	-0.00129099		1575.8	0.01054842		2165.8	0.01239819		2755.8	0.041078
396.01	-0.00939142		986.01	-0.0014561		1576	0.010602		2166	0.01187891		2756	0.0410587
396.21	-0.01024576		986.21	-0.001586		1576.2	0.01075194		2166.2	0.01128693		2756.2	0.04018157
396.41	-0.01082391		986.41	-0.00174744		1576.4	0.01080455		2166.4	0.01096021		2756.4	0.04027396
396.61	-0.01081974		986.61	-0.0013523		1576.6	0.01169469		2166.6	0.01062575		2756.6	0.0409407
396.81	-0.01019034		986.81	-0.0015348		1576.8	0.01210787		2166.8	0.0099632		2756.8	0.04209732
397.01	-0.01093		987.01	-0.0019221		1577	0.01185041		2167	0.0097733		2757	0.04260781
397.21	-0.01129376		987.21	-0.00250582		1577.2	0.01267807		2167.2	0.00895058		2757.2	0.04258788
397.41	-0.0122857		987.41	-0.00232585		1577.4	0.01317658		2167.4	0.00903314		2757.4	0.04235606
397.61	-0.01095307		987.61	-0.00230769		1577.6	0.01307766		2167.6	0.00964193		2757.6	0.04346094
397.81	-0.01173084		987.81	-0.00063636		1577.8	0.01415448		2167.8	0.00915445		2757.8	0.04300599
398.01	-0.01157198		988.01	0.00007111		1578	0.01427866		2168	0.00892826		2758	0.04297385
398.21	-0.01088429		988.21	-0.00020209		1578.2	0.01443553		2168.2	0.00853367		2758.2	0.04327375
398.41	-0.01058743		988.41	-0.00035976		1578.4	0.01365124		2168.4	0.00790302		2758.4	0.04243997
398.61	-0.00993595		988.61	0.00039215		1578.6	0.013214		2168.6	0.00778631		2758.6	0.04183683
398.81	-0.00899768		988.81	0.00034795		1578.8	0.01152405		2168.8	0.00786327		2758.8	0.04134751
399.01	-0.00756069		989.01	0.00038071		1579	0.01143017		2169	0.00830976		2759	0.04091139
399.21	-0.00686598		989.21	0.00006986		1579.2	0.01057163		2169.2	0.00737542		2759.2	0.04147634
399.41	-0.00619605		989.41	-0.00003933		1579.4	0.01012601		2169.4	0.00739111		2759.4	0.04119842
399.61	-0.00520068		989.61	0.00082959		1579.6	0.00978008		2169.6	0.00741173		2759.6	0.04083068
399.81	-0.00536151		989.81	0.00119522		1579.8	0.00927285		2169.8	0.00710487		2759.8	0.04108969
400.01	-0.00470317		990.01	0.00054053		1580	0.00835131		2170	0.00693524		2760	0.04073918
400.21	-0.00476672		990.21	0.00015729		1580.2	0.00866961		2170.2	0.00638329		2760.2	0.0403628
400.41	-0.00535372		990.41	0.0001473		1580.4	0.00926661		2170.4	0.00663822		2760.4	0.04104998
400.61	-0.00510865		990.61	0.0000896		1580.6	0.00952395		2170.6	0.00667418		2760.6	0.04209085
400.81	-0.00559699		990.81	-0.00008627		1580.8	0.00954339		2170.8	0.00677568		2760.8	0.0426328
401.01	-0.00640315		991.01	-0.00050504		1581	0.0093136		2171	0.00762828		2761	0.04292422
401.21	-0.00696285		991.21	-0.00091428		1581.2	0.00996952		2171.2	0.00787326		2761.2	0.04297717
401.41	-0.00787142		991.41	-0.00096061		1581.4	0.01005332		2171.4	0.00804234		2761.4	0.04268153
401.61	-0.00729697		991.61	-0.00034634		1581.6	0.00994392		2171.6	0.00747201		2761.6	0.04281002
401.81	-0.00848971		991.81	0.00003955		1581.8	0.01113283		2171.8	0.00697647		2761.8	0.04226704
402.01	-0.00747678		992.01	-0.00151869		1582	0.01106773		2172	0.00720217		2762	0.04225743
402.21	-0.00816167		992.21	-0.00161304		1582.2	0.01114329		2172.2	0.00659949		2762.2	0.04224398
402.41	-0.00945598		992.41	-0.00176472		1582.4	0.01150558		2172.4	0.0061372		2762.4	0.04118311
402.61	-0.00961262		992.61	-0.00191433		1582.6	0.01203093		2172.6	0.00689917		2762.6	0.04086495
402.81	-0.00939184		992.81	-0.00247396		1582.8	0.01132876		2172.8	0.00755587		2762.8	0.04067549
403.01	-0.00850444		993.01	-0.00225326		1583	0.01263253		2173	0.00758378		2763	0.04131086
403.21	-0.00861385		993.21	-0.00166621		1583.2	0.01162245		2173.2	0.00756373		2763.2	0.04143098
403.41	-0.00834878		993.41	-0.00104605		1583.4	0.01111316		2173.4	0.00840806		2763.4	0.04130647
403.61	-0.00836467		993.61	-0.00118939		1583.6	0.01134323		2173.6	0.00854301		2763.6	0.04101585
403.81	-0.00853278		993.81	-0.00112338		1583.8	0.01114076		2173.8	0.00808807		2763.8	0.04154208
404.01	-0.00824348		994.01	-0.00195721		1584	0.0104366		2174	0.00858642		2764	0.04129926
404.21	-0.00909341		994.21	-0.00165925		1584.2	0.0106252		2174.2	0.00853223		2764.2	0.04079654
404.41	-0.00934033		994.41	-0.00223934		1584.4	0.00991488		2174.4	0.00904488		2764.4	0.04110697
404.61	-0.00883756		994.61	-0.002573		1584.6	0.00955177		2174.6	0.0093557		2764.6	0.04132915
404.81	-0.00866277		994.81	-0.0018423		1584.8	0.00974609		2174.8	0.00977108		2764.8	0.04160605
405.01	-0.00805856		995.01	-0.00251285		1585	0.0089404		2175	0.00984761		2765	0.04188222
405.21	-0.00761324		995.21	-0.00318086		1585.2	0.00894601		2175.2	0.0093983		2765.2	0.04110152
405.41	-0.00788903		995.41	-0.00322265		1585.4	0.00840953		2175.4	0.00933983		2765.4	0.04062248
405.61	-0.00792888		995.61	-0.00352173		1585.6	0.00795017		2175.6	0.00866432		2765.6	0.04093879
405.81	-0.00721167		995.81	-0.00288664		1585.8	0.00855946		2175.8	0.00812913		2765.8	0.04096406
406.01	-0.00624829		996.01	-0.00332654		1586	0.00863731		2176	0.00805176		2766	0.04067838
406.21	-0.00721524		996.21	-0.00208342		1586.2	0.00899651		2176.2	0.00788443		2766.2	0.04012097
406.41	-0.00786755		996.41	-0.00223104		1586.4	0.00934428		2176.4	0.00767571		2766.4	0.03978991
406.61	-0.00754392		996.61	-0.00265853		1586.6	0.00984154		2176.6	0.00810508		2766.6	0.04000086
406.81	-0.00734885		996.81	-0.00334286		1586.8	0.01015964		2176.8	0.00798282		2766.8	0.04034816
407.01	-0.00721214		997.01	-0.00300022		1587	0.01042959		2177	0.00717253		2767	0.04087134
407.21	-0.00735201		997.21	-0.0036456		1587.2	0.00955041		2177.2	0.00713653		2767.2	0.04090652
407.41	-0.00671735		997.41	-0.00311344		1587.4	0.00942689		2177.4	0.00697417		2767.4	0.04124979
407.61	-0.00681201		997.61	-0.00314754		1587.6	0.01020881		2177.6	0.00663796		2767.6	0.0410282
407.81	-0.00694844		997.81	-0.00324514		1587.8	0.00947383		2177.8	0.00628305		2767.8	0.0413844
408.01	-0.00702943		998.01	-0.00304336		1588	0.00849551		2178	0.00673021		2768	0.04175108
408.21	-0.00738681		998.21	-0.00228599		1588.2	0.00827236		2178.2	0.00569151		2768.2	0.0419085
408.41	-0.00731236		998.41	-0.00295718		1588.4	0.00866272		2178.4	0.0059447		2768.4	0.0429784
408.61	-0.00711019		998.61	-0.00302234		1588.6	0.00954711		2178.6	0.00551589		2768.6	0.04355584
408.81	-0.00745735		998.81	-0.00190081		1588.8	0.00950617		2178.8	0.00565927		2768.8	0.04439006
409.01	-0.00818093		999.01	-0.00234138		1589	0.00865389		2179	0.00599873		2769	0.04399595
409.21	-0.00910092		999.21	-0.00254458		1589.2	0.00880878		2179.2	0.00621784		2769.2	0.04323326
409.41	-0.00991676		999.41	-0.0016211		1589.4	0.00832164		2179.4	0.00659276		2769.4	0.04367105
409.61	-0.01005179		999.61	-0.00095642		1589.6	0.00887999		2179.6	0.0067377		2769.6	0.04377553
409.81	-0.00958223		999.81	0.00012641		1589.8	0.00961149		2179.8	0.00698648		2769.8	0.04309079
410.01	-0.00958753		1000.01	-0.00023441		1590	0.01026014		2180	0.00796418		2770	0.04260166
410.21	-0.0103468		1000.21	0.00050461		1590.2	0.01087048		2180.2	0.00842678		2770.2	0.04235734
410.41	-0.01076136		1000.41	-0.00006961		1590.4	0.01131671		2180.4	0.00856494		2770.4	0.0429591
410.61	-0.01098792		1000.61	-0.00048531		1590.6	0.01188809		2180.6	0.00841285		2770.6	0.0420974
410.81	-0.0107207		1000.81	-0.0014552		1590.8	0.01201419		2180.8	0.00826206		2770.8	0.04193221
411.01	-0.01095944		1001.01	-0.00130877		1591	0.01166304		2181	0.00776744		2771	0.04134135
411.21	-0.00957272		1001.21	-0.00175912		1591.2	0.0123828		2181.2	0.00747042		2771.2	0.04167236
411.41	-0.00846133		1001.41	-0.00122956		1591.4	0.01262736		2181.4	0.00748803		2771.4	0.04138656
411.61	-0.0079146		1001.61	-0.0015934		1591.6	0.01245		2181.6	0.00719179		2771.6	0.04119937
411.81	-0.0079241		1001.81	-0.00226654		1591.8	0.01162594		2181.8	0.00688608		2771.8	0.04126809
412.01	-0.00754616		1002.01	-0.00225601		1592	0.01094091		2182	0.00723179		2772	0.04138396
412.21	-0.00719609		1002.21	-0.00283929		1592.2	0.01077888		2182.2	0.00715941		2772.2	0.04203384
412.41	-0.00688966		1002.41	-0.00392618		1592.4	0.0111313		2182.4	0.00778897		2772.4	0.0427456
412.61	-0.00702756		1002.61	-0.00336528		1592.6	0.01022143		2182.6	0.00781168		2772.6	0.0429593
412.81	-0.00782358		1002.81	-0.00360358		1592.8	0.01005304		2182.8	0.00798783		2772.8	0.0429216
413.01	-0.00878451		1003.01	-0.00460085		1593	0.01031269		2183	0.00844403		2773	0.04262587
413.21	-0.00951377		1003.21	-0.0042942		1593.2	0.01059758		2183.2	0.00886948		2773.2	0.04332687
413.41	-0.00982688		1003.41	-0.0046515		1593.4	0.01023644		2183.4	0.00928286		2773.4	0.04372236
413.61	-0.00990495		1003.61	-0.00452548		1593.6	0.0103514		2183.6	0.01014998		2773.6	0.04287883
413.81	-0.00979086		1003.81	-0.00495448		1593.8	0.01094703		2183.8	0.01067371		2773.8	0.04195217
414.01	-0.00874439		1004.01	-0.00553796		1594	0.01120685		2184	0.0112337		2774	0.04156683
414.21	-0.00919331		1004.21	-0.00548763		1594.2	0.01155456		2184.2	0.01129523		2774.2	0.04207433
414.41	-0.00930204		1004.41	-0.00631107		1594.4	0.01196371		2184.4	0.01179994		2774.4	0.04185178
414.61	-0.0098488		1004.61	-0.0065268		1594.6	0.01202786		2184.6	0.01157242		2774.6	0.04101323
414.81	-0.00982375		1004.81	-0.00637996		1594.8	0.01196645		2184.8	0.01199987		2774.8	0.0412471
415.01	-0.01041095		1005.01	-0.00571793		1595	0.01243713		2185	0.01160822		2775	0.04016897
415.21	-0.00874261		1005.21	-0.00514524		1595.2	0.01319678		2185.2	0.01034411		2775.2	0.03992253
415.41	-0.00814074		1005.41	-0.00452154		1595.4	0.01316267		2185.4	0.01044292		2775.4	0.03985863
415.61	-0.00823819		1005.61	-0.00376702		1595.6	0.01339588		2185.6	0.01000131		2775.6	0.04039977
415.81	-0.00872042		1005.81	-0.00318108		1595.8	0.01267417		2185.8	0.00973387		2775.8	0.04114861
416.01	-0.00854018		1006.01	-0.00214869		1596	0.01219807		2186	0.00991767		2776	0.04117874
416.21	-0.00828945		1006.21	-0.00211073		1596.2	0.01185007		2186.2	0.01027778		2776.2	0.04220085
416.41	-0.00849307		1006.41	-0.00219223		1596.4	0.01179538		2186.4	0.00959023		2776.4	0.04205318
416.61	-0.00905957		1006.61	-0.00147316		1596.6	0.01154195		2186.6	0.00917932		2776.6	0.04162646
416.81	-0.01007788		1006.81	-0.00257255		1596.8	0.01178924		2186.8	0.00891816		2776.8	0.04223298
417.01	-0.00991749		1007.01	-0.00204878		1597	0.01146878		2187	0.00871781		2777	0.04260642
417.21	-0.0095412		1007.21	-0.001827		1597.2	0.01078754		2187.2	0.00866252		2777.2	0.04248313
417.41	-0.00908853		1007.41	-0.00248076		1597.4	0.01027602		2187.4	0.00845901		2777.4	0.04210261
417.61	-0.00922432		1007.61	-0.00150399		1597.6	0.01071696		2187.6	0.00902318		2777.6	0.04146789
417.81	-0.00855888		1007.81	-0.00280719		1597.8	0.01080324		2187.8	0.00881928		2777.8	0.04127084
418.01	-0.00817476		1008.01	-0.00343231		1598	0.01010438		2188	0.00832602		2778	0.04199823
418.21	-0.00917584		1008.21	-0.00304287		1598.2	0.01035466		2188.2	0.00801446		2778.2	0.04310905
418.41	-0.00921777		1008.41	-0.0021234		1598.4	0.00994398		2188.4	0.00842628		2778.4	0.04286287
418.61	-0.00965419		1008.61	-0.00207696		1598.6	0.01007461		2188.6	0.00866555		2778.6	0.04259399
418.81	-0.00969925		1008.81	-0.00141205		1598.8	0.010103		2188.8	0.00875378		2778.8	0.04319734
419.01	-0.01023064		1009.01	-0.00117792		1599	0.0103983		2189	0.00784048		2779	0.04299986
419.21	-0.00918814		1009.21	-0.00104601		1599.2	0.01091642		2189.2	0.00680045		2779.2	0.04317568
419.41	-0.00932801		1009.41	-0.00085093		1599.4	0.01136093		2189.4	0.00696238		2779.4	0.04443117
419.61	-0.00929328		1009.61	-0.00065352		1599.6	0.01140707		2189.6	0.00720276		2779.6	0.04479621
419.81	-0.00973858		1009.81	-0.00098488		1599.8	0.01065517		2189.8	0.00743763		2779.8	0.04443054
420.01	-0.0094598		1010.01	-0.00114791		1600	0.01022903		2190	0.00868955		2780	0.04346963
420.21	-0.00972136		1010.21	-0.00251829		1600.2	0.01002907		2190.2	0.00916123		2780.2	0.04313295
420.41	-0.01013662		1010.41	-0.00279936		1600.4	0.01027499		2190.4	0.00829747		2780.4	0.04265898
420.61	-0.01039891		1010.61	-0.00307991		1600.6	0.01062047		2190.6	0.00854865		2780.6	0.04264234
420.81	-0.01034106		1010.81	-0.00373581		1600.8	0.01034512		2190.8	0.00924717		2780.8	0.04314129
421.01	-0.01008257		1011.01	-0.00385005		1601	0.00979953		2191	0.00927452		2781	0.04279099
421.21	-0.01020314		1011.21	-0.00413021		1601.2	0.00996691		2191.2	0.00990064		2781.2	0.04263215
421.41	-0.01057503		1011.41	-0.00392275		1601.4	0.01077773		2191.4	0.00947202		2781.4	0.04138493
421.61	-0.01133135		1011.61	-0.00317873		1601.6	0.01129709		2191.6	0.00935654		2781.6	0.04059522
421.81	-0.01114414		1011.81	-0.0035333		1601.8	0.01082308		2191.8	0.00860199		2781.8	0.03986116
422.01	-0.01199927		1012.01	-0.0031316		1602	0.01113458		2192	0.00775267		2782	0.04025172
422.21	-0.01201625		1012.21	-0.00249946		1602.2	0.01082445		2192.2	0.0082842		2782.2	0.04012369
422.41	-0.01202143		1012.41	-0.00139406		1602.4	0.0096925		2192.4	0.00921622		2782.4	0.03908437
422.61	-0.0131931		1012.61	-0.00217835		1602.6	0.00963753		2192.6	0.01015395		2782.6	0.03914796
422.81	-0.01346363		1012.81	-0.00201364		1602.8	0.00945466		2192.8	0.01054543		2782.8	0.03971139
423.01	-0.01358334		1013.01	-0.00261673		1603	0.00970717		2193	0.01010744		2783	0.03970976
423.21	-0.01335306		1013.21	-0.00294721		1603.2	0.00964552		2193.2	0.00983251		2783.2	0.03867524
423.41	-0.01336103		1013.41	-0.00317576		1603.4	0.00927226		2193.4	0.00957382		2783.4	0.03959479
423.61	-0.01263445		1013.61	-0.00353477		1603.6	0.00875353		2193.6	0.00991507		2783.6	0.03998297
423.81	-0.01255424		1013.81	-0.00331874		1603.8	0.00841885		2193.8	0.00976107		2783.8	0.03972909
424.01	-0.01199019		1014.01	-0.00317615		1604	0.00795693		2194	0.01017209		2784	0.03984393
424.21	-0.01195311		1014.21	-0.00314439		1604.2	0.00825966		2194.2	0.00969703		2784.2	0.04048411
424.41	-0.01104693		1014.41	-0.00261443		1604.4	0.00835174		2194.4	0.00997179		2784.4	0.04125933
424.61	-0.01084318		1014.61	-0.0023498		1604.6	0.00907251		2194.6	0.01043917		2784.6	0.0425785
424.81	-0.0101596		1014.81	-0.00241232		1604.8	0.00860822		2194.8	0.01085233		2784.8	0.04289665
425.01	-0.01029735		1015.01	-0.00216203		1605	0.00909853		2195	0.00998062		2785	0.04313138
425.21	-0.00985557		1015.21	-0.0018386		1605.2	0.00986501		2195.2	0.01014159		2785.2	0.04310854
425.41	-0.00981741		1015.41	-0.00174875		1605.4	0.0113052		2195.4	0.0088972		2785.4	0.04211379
425.61	-0.00970487		1015.61	-0.00203233		1605.6	0.01164573		2195.6	0.00872756		2785.6	0.04248256
425.81	-0.00941095		1015.81	-0.00314939		1605.8	0.01164947		2195.8	0.00869331		2785.8	0.04246789
426.01	-0.00926913		1016.01	-0.00361309		1606	0.01147626		2196	0.00929821		2786	0.04261237
426.21	-0.00922423		1016.21	-0.00324935		1606.2	0.01013893		2196.2	0.01051191		2786.2	0.04222966
426.41	-0.00914351		1016.41	-0.00345228		1606.4	0.00931813		2196.4	0.01099959		2786.4	0.04218829
426.61	-0.01012675		1016.61	-0.00436577		1606.6	0.00874131		2196.6	0.01206528		2786.6	0.04275064
426.81	-0.01057837		1016.81	-0.00412096		1606.8	0.00791999		2196.8	0.01241918		2786.8	0.04297421
427.01	-0.01053546		1017.01	-0.00490336		1607	0.00742287		2197	0.0123101		2787	0.0427969
427.21	-0.01085414		1017.21	-0.00504965		1607.2	0.00708603		2197.2	0.01126485		2787.2	0.04294327
427.41	-0.01076771		1017.41	-0.00493806		1607.4	0.006752		2197.4	0.01117783		2787.4	0.04347091
427.61	-0.01067638		1017.61	-0.00490489		1607.6	0.00659597		2197.6	0.01087642		2787.6	0.04269531
427.81	-0.01115328		1017.81	-0.00393121		1607.8	0.00648405		2197.8	0.01086624		2787.8	0.04260205
428.01	-0.01104845		1018.01	-0.00393398		1608	0.00678831		2198	0.01121131		2788	0.04303958
428.21	-0.01067041		1018.21	-0.00352843		1608.2	0.00672211		2198.2	0.01110916		2788.2	0.04320255
428.41	-0.01065709		1018.41	-0.00306531		1608.4	0.00682473		2198.4	0.01106561		2788.4	0.0433312
428.61	-0.01127689		1018.61	-0.00271622		1608.6	0.00685601		2198.6	0.01009923		2788.6	0.04378616
428.81	-0.01117868		1018.81	-0.00297313		1608.8	0.00698637		2198.8	0.00964716		2788.8	0.04322376
429.01	-0.01151193		1019.01	-0.00252911		1609	0.0071708		2199	0.00894756		2789	0.04315071
429.21	-0.01050819		1019.21	-0.00352389		1609.2	0.00760777		2199.2	0.00857928		2789.2	0.04289494
429.41	-0.01095642		1019.41	-0.00390982		1609.4	0.00912443		2199.4	0.00738298		2789.4	0.04107718
429.61	-0.01037702		1019.61	-0.0054209		1609.6	0.0090381		2199.6	0.00741379		2789.6	0.04127303
429.81	-0.00995225		1019.81	-0.00581886		1609.8	0.00956198		2199.8	0.00690884		2789.8	0.04091901
430.01	-0.00974516		1020.01	-0.00542636		1610	0.01020756		2200	0.00782723		2790	0.04034023
430.21	-0.00964984		1020.21	-0.00523713		1610.2	0.00981665		2200.2	0.00801163		2790.2	0.04008017
430.41	-0.00948241		1020.41	-0.00571285		1610.4	0.01022728		2200.4	0.00862708		2790.4	0.03982559
430.61	-0.00968184		1020.61	-0.00550244		1610.6	0.01038985		2200.6	0.00962014		2790.6	0.04025665
430.81	-0.01019922		1020.81	-0.00502503		1610.8	0.0107214		2200.8	0.01013064		2790.8	0.03993583
431.01	-0.01021265		1021.01	-0.00595987		1611	0.01163523		2201	0.0099638		2791	0.04000201
431.21	-0.01088573		1021.21	-0.00599263		1611.2	0.01244198		2201.2	0.00956547		2791.2	0.04030721
431.41	-0.01101905		1021.41	-0.00615483		1611.4	0.01225025		2201.4	0.01111966		2791.4	0.04016845
431.61	-0.01160576		1021.61	-0.00545329		1611.6	0.01269514		2201.6	0.01126944		2791.6	0.04040844
431.81	-0.01129797		1021.81	-0.00457001		1611.8	0.01334281		2201.8	0.01199271		2791.8	0.04149569
432.01	-0.01052152		1022.01	-0.00440006		1612	0.01389856		2202	0.01202728		2792	0.04158505
432.21	-0.01042929		1022.21	-0.00394018		1612.2	0.01356221		2202.2	0.01179786		2792.2	0.0419182
432.41	-0.01099775		1022.41	-0.0027893		1612.4	0.01295784		2202.4	0.01174056		2792.4	0.04221714
432.61	-0.01139227		1022.61	-0.00211224		1612.6	0.01267219		2202.6	0.01135802		2792.6	0.04202753
432.81	-0.01134102		1022.81	-0.00214274		1612.8	0.01328894		2202.8	0.01090711		2792.8	0.04185634
433.01	-0.01156441		1023.01	-0.00201168		1613	0.01354403		2203	0.0103534		2793	0.04181738
433.21	-0.0115837		1023.21	-0.00250138		1613.2	0.01351443		2203.2	0.00960532		2793.2	0.04143887
433.41	-0.0125544		1023.41	-0.00207832		1613.4	0.01366379		2203.4	0.00960014		2793.4	0.04008808
433.61	-0.01216413		1023.61	-0.00227708		1613.6	0.01243744		2203.6	0.00967322		2793.6	0.04113365
433.81	-0.01249916		1023.81	-0.00210641		1613.8	0.01263576		2203.8	0.00899408		2793.8	0.04080771
434.01	-0.01212404		1024.01	-0.00234869		1614	0.01310904		2204	0.00972751		2794	0.04064104
434.21	-0.01140832		1024.21	-0.00273194		1614.2	0.01286884		2204.2	0.00866987		2794.2	0.04039218
434.41	-0.01197731		1024.41	-0.00325322		1614.4	0.01264767		2204.4	0.00824054		2794.4	0.0397518
434.61	-0.01093535		1024.61	-0.00414586		1614.6	0.01231281		2204.6	0.00834582		2794.6	0.04013404
434.81	-0.0115213		1024.81	-0.00431798		1614.8	0.0124891		2204.8	0.00867077		2794.8	0.03935753
435.01	-0.0115203		1025.01	-0.00539679		1615	0.01209426		2205	0.00887848		2795	0.03935971
435.21	-0.0114743		1025.21	-0.00585342		1615.2	0.01152824		2205.2	0.00909821		2795.2	0.03969761
435.41	-0.01112011		1025.41	-0.00647944		1615.4	0.01078034		2205.4	0.00923394		2795.4	0.04030905
435.61	-0.01125715		1025.61	-0.00671601		1615.6	0.01029882		2205.6	0.00838903		2795.6	0.04018115
435.81	-0.0113784		1025.81	-0.00715712		1615.8	0.01001141		2205.8	0.00857543		2795.8	0.04074028
436.01	-0.01153178		1026.01	-0.00756805		1616	0.00892794		2206	0.00800449		2796	0.04083474
436.21	-0.01194184		1026.21	-0.00785483		1616.2	0.00850832		2206.2	0.00878622		2796.2	0.04136964
436.41	-0.01238471		1026.41	-0.00665545		1616.4	0.0083484		2206.4	0.00822503		2796.4	0.04164947
436.61	-0.01240479		1026.61	-0.00662081		1616.6	0.00969959		2206.6	0.00846235		2796.6	0.04187354
436.81	-0.0122747		1026.81	-0.00636723		1616.8	0.00979482		2206.8	0.0081841		2796.8	0.04203151
437.01	-0.01314549		1027.01	-0.00588709		1617	0.00997266		2207	0.00848528		2797	0.04135087
437.21	-0.01324816		1027.21	-0.00526336		1617.2	0.0090161		2207.2	0.00886303		2797.2	0.04154296
437.41	-0.01321018		1027.41	-0.00464957		1617.4	0.00941486		2207.4	0.01017938		2797.4	0.04140975
437.61	-0.01278884		1027.61	-0.00479849		1617.6	0.00916975		2207.6	0.00991149		2797.6	0.04173708
437.81	-0.01222271		1027.81	-0.00489879		1617.8	0.01000833		2207.8	0.00970421		2797.8	0.04124167
438.01	-0.01172362		1028.01	-0.00471749		1618	0.01076664		2208	0.00981014		2798	0.04071204
438.21	-0.01105889		1028.21	-0.00441922		1618.2	0.01039239		2208.2	0.00934436		2798.2	0.04061346
438.41	-0.01166929		1028.41	-0.00420589		1618.4	0.01088804		2208.4	0.00950662		2798.4	0.04040199
438.61	-0.01101584		1028.61	-0.00446952		1618.6	0.01137987		2208.6	0.00945677		2798.6	0.04097288
438.81	-0.01186902		1028.81	-0.00447951		1618.8	0.01211143		2208.8	0.00924713		2798.8	0.04042017
439.01	-0.01149631		1029.01	-0.00517728		1619	0.01195769		2209	0.00896105		2799	0.04035565
439.21	-0.01172645		1029.21	-0.00526658		1619.2	0.01107445		2209.2	0.00862897		2799.2	0.04069648
439.41	-0.01205299		1029.41	-0.00649225		1619.4	0.01095439		2209.4	0.00795522		2799.4	0.04130323
439.61	-0.01270419		1029.61	-0.00694725		1619.6	0.01057175		2209.6	0.00820512		2799.6	0.04135316
439.81	-0.01333162		1029.81	-0.00640404		1619.8	0.00977094		2209.8	0.00900415		2799.8	0.04225614
440.01	-0.01352056		1030.01	-0.00586168		1620	0.00900055		2210	0.00881721		2800	0.04190256
440.21	-0.01338922		1030.21	-0.0058122		1620.2	0.00920081		2210.2	0.0090065		2800.2	0.0423493
440.41	-0.01279395		1030.41	-0.00423683		1620.4	0.0089915		2210.4	0.00891819		2800.4	0.04234547
440.61	-0.01319433		1030.61	-0.00451337		1620.6	0.0096815		2210.6	0.00911841		2800.6	0.04232804
440.81	-0.0131535		1030.81	-0.00381573		1620.8	0.00859227		2210.8	0.00873974		2800.8	0.04095765
441.01	-0.01324164		1031.01	-0.00427373		1621	0.00852572		2211	0.00874465		2801	0.04042307
441.21	-0.01238679		1031.21	-0.00410139		1621.2	0.00850087		2211.2	0.00940784		2801.2	0.0404765
441.41	-0.01198068		1031.41	-0.00480784		1621.4	0.00860522		2211.4	0.00948748		2801.4	0.03916682
441.61	-0.01109189		1031.61	-0.00504442		1621.6	0.00906177		2211.6	0.0090697		2801.6	0.03752711
441.81	-0.0112801		1031.81	-0.0052678		1621.8	0.00902063		2211.8	0.0089449		2801.8	0.03610873
442.01	-0.01160399		1032.01	-0.00556002		1622	0.00897967		2212	0.00891804		2802	0.03596043
442.21	-0.01097728		1032.21	-0.00550486		1622.2	0.00898252		2212.2	0.00819978		2802.2	0.03628588
442.41	-0.01224856		1032.41	-0.00589467		1622.4	0.01076445		2212.4	0.00745516		2802.4	0.03592777
442.61	-0.01269609		1032.61	-0.00684306		1622.6	0.00950467		2212.6	0.00696586		2802.6	0.03676099
442.81	-0.01378889		1032.81	-0.0076017		1622.8	0.00992388		2212.8	0.0075536		2802.8	0.03691193
443.01	-0.01389679		1033.01	-0.00803512		1623	0.00964995		2213	0.00779982		2803	0.03749024
443.21	-0.01459794		1033.21	-0.00842348		1623.2	0.00903373		2213.2	0.00760135		2803.2	0.03826111
443.41	-0.01530627		1033.41	-0.00852126		1623.4	0.00965073		2213.4	0.00713035		2803.4	0.039324
443.61	-0.015789		1033.61	-0.00808693		1623.6	0.00980123		2213.6	0.00773758		2803.6	0.03968673
443.81	-0.01589711		1033.81	-0.0073824		1623.8	0.00917065		2213.8	0.00808705		2803.8	0.04023366
444.01	-0.01545166		1034.01	-0.00619606		1624	0.00973482		2214	0.00822127		2804	0.04049416
444.21	-0.01442705		1034.21	-0.00698531		1624.2	0.00977886		2214.2	0.00826921		2804.2	0.04136836
444.41	-0.0138294		1034.41	-0.00688916		1624.4	0.0102139		2214.4	0.00849261		2804.4	0.04153064
444.61	-0.01359422		1034.61	-0.0075895		1624.6	0.0110668		2214.6	0.00773373		2804.6	0.04213557
444.81	-0.01271915		1034.81	-0.00770269		1624.8	0.01091809		2214.8	0.00778013		2804.8	0.04205465
445.01	-0.01143229		1035.01	-0.00740562		1625	0.01191283		2215	0.00786078		2805	0.04262261
445.21	-0.01054627		1035.21	-0.00720743		1625.2	0.01249508		2215.2	0.00777631		2805.2	0.04245339
445.41	-0.00952057		1035.41	-0.00679836		1625.4	0.0118878		2215.4	0.00745206		2805.4	0.04173878
445.61	-0.00890339		1035.61	-0.00540494		1625.6	0.01199757		2215.6	0.00839471		2805.6	0.04067265
445.81	-0.00898221		1035.81	-0.005477		1625.8	0.01158736		2215.8	0.00832002		2805.8	0.04068542
446.01	-0.00854469		1036.01	-0.00542547		1626	0.01083887		2216	0.00816687		2806	0.04136293
446.21	-0.00827363		1036.21	-0.00395167		1626.2	0.01073266		2216.2	0.00836921		2806.2	0.04117558
446.41	-0.00880675		1036.41	-0.0036833		1626.4	0.01108934		2216.4	0.00840819		2806.4	0.04104788
446.61	-0.00875969		1036.61	-0.00339656		1626.6	0.00912943		2216.6	0.00939021		2806.6	0.04198077
446.81	-0.00926959		1036.81	-0.00413255		1626.8	0.01029792		2216.8	0.0098596		2806.8	0.04117735
447.01	-0.00904713		1037.01	-0.00353771		1627	0.00932115		2217	0.00880384		2807	0.04053146
447.21	-0.00905789		1037.21	-0.00388343		1627.2	0.00948806		2217.2	0.00847521		2807.2	0.04052781
447.41	-0.00987784		1037.41	-0.00359548		1627.4	0.00955363		2217.4	0.00909651		2807.4	0.04012663
447.61	-0.01022625		1037.61	-0.0036259		1627.6	0.00952747		2217.6	0.00924006		2807.6	0.03943053
447.81	-0.01071683		1037.81	-0.00356778		1627.8	0.00912963		2217.8	0.00963506		2807.8	0.03863172
448.01	-0.01037527		1038.01	-0.00419843		1628	0.00887298		2218	0.00965292		2808	0.03838094
448.21	-0.01055651		1038.21	-0.00587488		1628.2	0.00878817		2218.2	0.00929919		2808.2	0.03830751
448.41	-0.01109909		1038.41	-0.00643126		1628.4	0.00903524		2218.4	0.0085647		2808.4	0.03812712
448.61	-0.01189586		1038.61	-0.00686542		1628.6	0.00908315		2218.6	0.00848931		2808.6	0.03832194
448.81	-0.01241515		1038.81	-0.00638307		1628.8	0.00860426		2218.8	0.0079819		2808.8	0.03875208
449.01	-0.01241778		1039.01	-0.0066379		1629	0.00850099		2219	0.00776533		2809	0.03958715
449.21	-0.01244148		1039.21	-0.00759551		1629.2	0.00771968		2219.2	0.00744105		2809.2	0.04016347
449.41	-0.01259129		1039.41	-0.00733437		1629.4	0.00713005		2219.4	0.00821133		2809.4	0.03974488
449.61	-0.01347949		1039.61	-0.00766573		1629.6	0.0068914		2219.6	0.00771667		2809.6	0.03985529
449.81	-0.01382087		1039.81	-0.00808254		1629.8	0.0074127		2219.8	0.00717722		2809.8	0.04061858
450.01	-0.01353056		1040.01	-0.00778729		1630	0.00763708		2220	0.00696671		2810	0.0411086
450.21	-0.01304034		1040.21	-0.00641141		1630.2	0.00865004		2220.2	0.00730857		2810.2	0.04144943
450.41	-0.01288437		1040.41	-0.00696047		1630.4	0.00921136		2220.4	0.00664154		2810.4	0.043236
450.61	-0.01270175		1040.61	-0.00675193		1630.6	0.00927842		2220.6	0.0068974		2810.6	0.04460394
450.81	-0.01254722		1040.81	-0.00689142		1630.8	0.00988069		2220.8	0.00608326		2810.8	0.04427491
451.01	-0.01242395		1041.01	-0.0063489		1631	0.00932487		2221	0.00532368		2811	0.04501741
451.21	-0.01259967		1041.21	-0.00663153		1631.2	0.01032927		2221.2	0.00559088		2811.2	0.04608003
451.41	-0.01348328		1041.41	-0.00609728		1631.4	0.01010022		2221.4	0.00589708		2811.4	0.0455932
451.61	-0.01337973		1041.61	-0.00575287		1631.6	0.01031898		2221.6	0.00542627		2811.6	0.04490323
451.81	-0.01356938		1041.81	-0.00558044		1631.8	0.01019156		2221.8	0.00640838		2811.8	0.04441206
452.01	-0.01336285		1042.01	-0.00552571		1632	0.01008405		2222	0.0063172		2812	0.04421881
452.21	-0.01428442		1042.21	-0.00525344		1632.2	0.00999503		2222.2	0.00645482		2812.2	0.04350315
452.41	-0.01514453		1042.41	-0.00535403		1632.4	0.00943487		2222.4	0.00638094		2812.4	0.0428551
452.61	-0.01525772		1042.61	-0.00504658		1632.6	0.00980306		2222.6	0.00757598		2812.6	0.04184471
452.81	-0.0145095		1042.81	-0.00488651		1632.8	0.00937374		2222.8	0.00828237		2812.8	0.04145726
453.01	-0.01431674		1043.01	-0.00615461		1633	0.00990219		2223	0.00918396		2813	0.04115465
453.21	-0.01410236		1043.21	-0.00616523		1633.2	0.00970253		2223.2	0.0093193		2813.2	0.04033006
453.41	-0.01437364		1043.41	-0.00646547		1633.4	0.00951053		2223.4	0.00972578		2813.4	0.03931189
453.61	-0.01460385		1043.61	-0.00701763		1633.6	0.00946282		2223.6	0.00902205		2813.6	0.03955371
453.81	-0.01465259		1043.81	-0.00709108		1633.8	0.0106235		2223.8	0.00921197		2813.8	0.03949211
454.01	-0.01452455		1044.01	-0.00661597		1634	0.01053713		2224	0.00962917		2814	0.03920199
454.21	-0.01464632		1044.21	-0.00661277		1634.2	0.01055693		2224.2	0.00916919		2814.2	0.04016762
454.41	-0.01476584		1044.41	-0.00662533		1634.4	0.00998676		2224.4	0.00930663		2814.4	0.04221721
454.61	-0.01430995		1044.61	-0.00632399		1634.6	0.00923014		2224.6	0.00896858		2814.6	0.04264239
454.81	-0.01478382		1044.81	-0.00597814		1634.8	0.00894006		2224.8	0.00914689		2814.8	0.04202835
455.01	-0.01444277		1045.01	-0.00595495		1635	0.00809895		2225	0.00901567		2815	0.04255525
455.21	-0.01424886		1045.21	-0.00529689		1635.2	0.00815795		2225.2	0.00861642		2815.2	0.04279056
455.41	-0.01406282		1045.41	-0.00519017		1635.4	0.00803485		2225.4	0.00848531		2815.4	0.04258592
455.61	-0.01312411		1045.61	-0.00502399		1635.6	0.00786561		2225.6	0.00824208		2815.6	0.04305269
455.81	-0.013428		1045.81	-0.00432537		1635.8	0.00697062		2225.8	0.00823749		2815.8	0.04342895
456.01	-0.01346742		1046.01	-0.00486075		1636	0.00723669		2226	0.00776382		2816	0.04327919
456.21	-0.01324206		1046.21	-0.00486117		1636.2	0.00736218		2226.2	0.00843969		2816.2	0.04298762
456.41	-0.01287269		1046.41	-0.00475758		1636.4	0.00727413		2226.4	0.00846037		2816.4	0.04319798
456.61	-0.01263058		1046.61	-0.00418474		1636.6	0.00842699		2226.6	0.00971474		2816.6	0.04189308
456.81	-0.01193159		1046.81	-0.00392986		1636.8	0.00825944		2226.8	0.00965261		2816.8	0.04176634
457.01	-0.01193797		1047.01	-0.00430319		1637	0.00831102		2227	0.0089557		2817	0.04111283
457.21	-0.0124341		1047.21	-0.00458633		1637.2	0.00849641		2227.2	0.00821006		2817.2	0.041206
457.41	-0.0129142		1047.41	-0.00562741		1637.4	0.008362		2227.4	0.00838647		2817.4	0.04128084
457.61	-0.01374263		1047.61	-0.00581184		1637.6	0.00859086		2227.6	0.00858819		2817.6	0.04116558
457.81	-0.01400997		1047.81	-0.0054277		1637.8	0.00947999		2227.8	0.00895452		2817.8	0.04000008
458.01	-0.01447097		1048.01	-0.00512471		1638	0.00870099		2228	0.00958182		2818	0.03970649
458.21	-0.01412495		1048.21	-0.00599019		1638.2	0.0095785		2228.2	0.01006906		2818.2	0.04009212
458.41	-0.01418966		1048.41	-0.00632754		1638.4	0.00928536		2228.4	0.01065041		2818.4	0.04017154
458.61	-0.01380962		1048.61	-0.00615547		1638.6	0.00980731		2228.6	0.01120158		2818.6	0.03918807
458.81	-0.01361349		1048.81	-0.00645479		1638.8	0.00987991		2228.8	0.01140286		2818.8	0.03890237
459.01	-0.01280714		1049.01	-0.00694167		1639	0.00917327		2229	0.01101701		2819	0.03981347
459.21	-0.01215669		1049.21	-0.00682846		1639.2	0.01004881		2229.2	0.01086385		2819.2	0.03971751
459.41	-0.01234467		1049.41	-0.00694506		1639.4	0.01044884		2229.4	0.01070715		2819.4	0.04040253
459.61	-0.01251423		1049.61	-0.00631682		1639.6	0.01045491		2229.6	0.01066393		2819.6	0.04052406
459.81	-0.0117528		1049.81	-0.00683085		1639.8	0.01088443		2229.8	0.01047676		2819.8	0.04061679
460.01	-0.01155222		1050.01	-0.00797368		1640	0.01201749		2230	0.01099521		2820	0.04113388
460.21	-0.01146782		1050.21	-0.00767808		1640.2	0.01224723		2230.2	0.01057367		2820.2	0.04122876
460.41	-0.01153496		1050.41	-0.00733431		1640.4	0.01260019		2230.4	0.01006832		2820.4	0.04168167
460.61	-0.01160711		1050.61	-0.00675456		1640.6	0.01307481		2230.6	0.00941382		2820.6	0.04096111
460.81	-0.01184687		1050.81	-0.0073678		1640.8	0.01258095		2230.8	0.00837737		2820.8	0.04136293
461.01	-0.01226534		1051.01	-0.00785861		1641	0.01190486		2231	0.00783019		2821	0.04116126
461.21	-0.01265546		1051.21	-0.00773107		1641.2	0.01231425		2231.2	0.00811557		2821.2	0.0422178
461.41	-0.01287409		1051.41	-0.00821162		1641.4	0.0115049		2231.4	0.0087114		2821.4	0.04184048
461.61	-0.0127831		1051.61	-0.00811094		1641.6	0.01073866		2231.6	0.00859942		2821.6	0.0414032
461.81	-0.01221655		1051.81	-0.00816093		1641.8	0.01005244		2231.8	0.00861509		2821.8	0.04168413
462.01	-0.01208139		1052.01	-0.00875716		1642	0.00925156		2232	0.00863353		2822	0.04201
462.21	-0.01166218		1052.21	-0.00953486		1642.2	0.00963956		2232.2	0.00848159		2822.2	0.04249504
462.41	-0.01162524		1052.41	-0.00944883		1642.4	0.00899313		2232.4	0.00790819		2822.4	0.04228321
462.61	-0.01139188		1052.61	-0.00889584		1642.6	0.00891962		2232.6	0.00811109		2822.6	0.04190493
462.81	-0.01156956		1052.81	-0.00928454		1642.8	0.00781949		2232.8	0.00777564		2822.8	0.04247033
463.01	-0.01263892		1053.01	-0.00846586		1643	0.00729902		2233	0.00779103		2823	0.04219171
463.21	-0.01320682		1053.21	-0.00763801		1643.2	0.00731291		2233.2	0.00780784		2823.2	0.04150933
463.41	-0.01422837		1053.41	-0.00664029		1643.4	0.00747573		2233.4	0.00759409		2823.4	0.04184352
463.61	-0.01382035		1053.61	-0.00651784		1643.6	0.00774499		2233.6	0.0081744		2823.6	0.04157984
463.81	-0.0139851		1053.81	-0.00621677		1643.8	0.00823281		2233.8	0.00817636		2823.8	0.04093445
464.01	-0.01497605		1054.01	-0.0059227		1644	0.0080998		2234	0.00835475		2824	0.04096699
464.21	-0.01506485		1054.21	-0.00543466		1644.2	0.00791491		2234.2	0.0075176		2824.2	0.04049666
464.41	-0.0158349		1054.41	-0.00481357		1644.4	0.00831735		2234.4	0.00763429		2824.4	0.04027677
464.61	-0.01591088		1054.61	-0.00432128		1644.6	0.00812165		2234.6	0.00784721		2824.6	0.03959696
464.81	-0.01631994		1054.81	-0.00461776		1644.8	0.00934296		2234.8	0.00802412		2824.8	0.03957526
465.01	-0.01589071		1055.01	-0.00400388		1645	0.0091033		2235	0.00790343		2825	0.03905066
465.21	-0.01551092		1055.21	-0.00431062		1645.2	0.00997215		2235.2	0.009228		2825.2	0.03978081
465.41	-0.01514455		1055.41	-0.0049651		1645.4	0.00962539		2235.4	0.00942661		2825.4	0.03972657
465.61	-0.01443205		1055.61	-0.00526005		1645.6	0.00895883		2235.6	0.00863323		2825.6	0.04087135
465.81	-0.01392425		1055.81	-0.00507274		1645.8	0.00835474		2235.8	0.00881262		2825.8	0.04193345
466.01	-0.0137941		1056.01	-0.0054683		1646	0.00851736		2236	0.00910028		2826	0.04217761
466.21	-0.01402937		1056.21	-0.00590903		1646.2	0.00913572		2236.2	0.00947757		2826.2	0.04293811
466.41	-0.01380472		1056.41	-0.00604699		1646.4	0.00862393		2236.4	0.00991041		2826.4	0.04258539
466.61	-0.01382682		1056.61	-0.00637843		1646.6	0.0077932		2236.6	0.01016557		2826.6	0.0422785
466.81	-0.01407471		1056.81	-0.00676857		1646.8	0.00733102		2236.8	0.01024376		2826.8	0.0420271
467.01	-0.01494157		1057.01	-0.00601821		1647	0.00719717		2237	0.00998402		2827	0.04177263
467.21	-0.01435257		1057.21	-0.00650946		1647.2	0.00708148		2237.2	0.01036204		2827.2	0.04236389
467.41	-0.01410078		1057.41	-0.00599317		1647.4	0.0072019		2237.4	0.01081232		2827.4	0.04217537
467.61	-0.01395898		1057.61	-0.0067213		1647.6	0.00704608		2237.6	0.01137173		2827.6	0.04169712
467.81	-0.01429647		1057.81	-0.0065742		1647.8	0.00691691		2237.8	0.01129475		2827.8	0.04080511
468.01	-0.01365377		1058.01	-0.00726304		1648	0.00639713		2238	0.01116734		2828	0.0407344
468.21	-0.01329655		1058.21	-0.007356		1648.2	0.00665523		2238.2	0.01058983		2828.2	0.04016668
468.41	-0.0129747		1058.41	-0.00691364		1648.4	0.00724077		2238.4	0.0105942		2828.4	0.03957651
468.61	-0.01176662		1058.61	-0.00668341		1648.6	0.00795448		2238.6	0.01045509		2828.6	0.03922569
468.81	-0.01136461		1058.81	-0.00677526		1648.8	0.00890096		2238.8	0.00948831		2828.8	0.0390574
469.01	-0.01060563		1059.01	-0.00663308		1649	0.00859962		2239	0.00900571		2829	0.03872373
469.21	-0.00974236		1059.21	-0.00680444		1649.2	0.00940622		2239.2	0.00922703		2829.2	0.03911545
469.41	-0.0090236		1059.41	-0.00627029		1649.4	0.00942077		2239.4	0.00822583		2829.4	0.03915414
469.61	-0.0083961		1059.61	-0.0059773		1649.6	0.00952034		2239.6	0.00745613		2829.6	0.03956278
469.81	-0.00819527		1059.81	-0.00537596		1649.8	0.00967392		2239.8	0.00761937		2829.8	0.03957996
470.01	-0.00819527		1060.01	-0.00537596		1650	0.00967392		2240	0.00761937		2830	0.03957996
470.21	-0.00956231		1060.21	-0.00551232		1650.2	0.00840822		2240.2	0.00790418		2830.2	0.03750371
470.41	-0.01145954		1060.41	-0.00639748		1650.4	0.00711012		2240.4	0.00760416		2830.4	0.03493982
470.61	-0.01308946		1060.61	-0.00746695		1650.6	0.00569771		2240.6	0.00659339		2830.6	0.03187335
470.81	-0.01464052		1060.81	-0.00856499		1650.8	0.00423352		2240.8	0.00529354		2830.8	0.02834163
471.01	-0.01527334		1061.01	-0.00951442		1651	0.00371358		2241	0.00480788		2831	0.02514813
471.21	-0.01588464		1061.21	-0.0106838		1651.2	0.00214908		2241.2	0.00426466		2831.2	0.02158161
471.41	-0.01698575		1061.41	-0.01199344		1651.4	0.00119869		2241.4	0.00327335		2831.4	0.01843043
471.61	-0.01753787		1061.61	-0.01381334		1651.6	0.0005694		2241.6	0.00203437		2831.6	0.01492853
471.81	-0.01790503		1061.81	-0.01524632		1651.8	-0.00043211		2241.8	0.00131831		2831.8	0.01162133
472.01	-0.01787968		1062.01	-0.01660864		1652	-0.00089152		2242	0.00104734		2832	0.00976212
472.21	-0.01847649		1062.21	-0.01747369		1652.2	-0.00140421		2242.2	0.00012041		2832.2	0.00798647
472.41	-0.01856208		1062.41	-0.01848382		1652.4	-0.00185711		2242.4	0.00025783		2832.4	0.00696854
472.61	-0.01879631		1062.61	-0.01888465		1652.6	-0.00237459		2242.6	0.00067228		2832.6	0.00575214
472.81	-0.01900954		1062.81	-0.01944773		1652.8	-0.00261529		2242.8	0.00045735		2832.8	0.00532774
473.01	-0.01908629		1063.01	-0.01952208		1653	-0.00301677		2243	0.00044962		2833	0.00554194
473.21	-0.0194896		1063.21	-0.01961908		1653.2	-0.00326188		2243.2	0.00048264		2833.2	0.00491327
473.41	-0.02002409		1063.41	-0.01971345		1653.4	-0.00256207		2243.4	0.00027915		2833.4	0.0053327
473.61	-0.01958913		1063.61	-0.01942551		1653.6	-0.00152098		2243.6	0.00014621		2833.6	0.00544686
473.81	-0.01952206		1063.81	-0.01875553		1653.8	-0.00147529		2243.8	0.00001581		2833.8	0.0052637
474.01	-0.01956739		1064.01	-0.01865441		1654	-0.00189872		2244	-0.00025183		2834	0.00574993
474.21	-0.01996474		1064.21	-0.01787344		1654.2	-0.00176328		2244.2	-0.00020468		2834.2	0.00611243
474.41	-0.0207838		1064.41	-0.01775124		1654.4	-0.001824		2244.4	-0.0010121		2834.4	0.00627227
474.61	-0.02134038		1064.61	-0.01782933		1654.6	-0.00133137		2244.6	-0.00197011		2834.6	0.00618823
474.81	-0.02112712		1064.81	-0.01743921		1654.8	-0.0007051		2244.8	-0.00277432		2834.8	0.00683219
475.01	-0.0202434		1065.01	-0.01743101		1655	-0.00016997		2245	-0.00308794		2835	0.00777448
475.21	-0.01964556		1065.21	-0.01752979		1655.2	-0.00009523		2245.2	-0.0035248		2835.2	0.00742235
475.41	-0.01901465		1065.41	-0.01768024		1655.4	0.00074151		2245.4	-0.00442233		2835.4	0.00671831
475.61	-0.01828699		1065.61	-0.01855343		1655.6	0.00162325		2245.6	-0.004293		2835.6	0.00620327
475.81	-0.01787787		1065.81	-0.01834639		1655.8	0.00154298		2245.8	-0.0039628		2835.8	0.00569848
476.01	-0.01746184		1066.01	-0.0184497		1656	0.00137449		2246	-0.00346658		2836	0.00614504
476.21	-0.01799012		1066.21	-0.01874606		1656.2	0.00108634		2246.2	-0.00284804		2836.2	0.00527517
476.41	-0.01762097		1066.41	-0.01918634		1656.4	0.00088786		2246.4	-0.00142214		2836.4	0.00442214
476.61	-0.01806307		1066.61	-0.01943008		1656.6	0.00072387		2246.6	-0.0005158		2836.6	0.00423798
476.81	-0.01800703		1066.81	-0.01948825		1656.8	0.00016984		2246.8	-0.00031397		2836.8	0.00499184
477.01	-0.01750502		1067.01	-0.01938087		1657	0.00019532		2247	0.00019996		2837	0.00409644
477.21	-0.01806965		1067.21	-0.01971784		1657.2	0.00105579		2247.2	0.00070774		2837.2	0.00410948
477.41	-0.01765729		1067.41	-0.02018883		1657.4	0.00132513		2247.4	0.00075646		2837.4	0.00322038
477.61	-0.01785589		1067.61	-0.01974029		1657.6	0.00122047		2247.6	0.00127461		2837.6	0.00332409
477.81	-0.01748212		1067.81	-0.01918071		1657.8	0.00017237		2247.8	0.00118012		2837.8	0.0032236
478.01	-0.0181523		1068.01	-0.01942465		1658	0.00049389		2248	0.00146204		2838	0.00287295
478.21	-0.01890125		1068.21	-0.01882229		1658.2	0.00029398		2248.2	0.00218313		2838.2	0.00277409
478.41	-0.01932172		1068.41	-0.01831957		1658.4	-0.00021154		2248.4	0.00224733		2838.4	0.00265278
478.61	-0.0192037		1068.61	-0.01882677		1658.6	0.00034446		2248.6	0.00139508		2838.6	0.0030703
478.81	-0.01856827		1068.81	-0.01850913		1658.8	0.00056284		2248.8	0.00091253		2838.8	0.00428639
479.01	-0.01842878		1069.01	-0.0185934		1659	0.00022746		2249	0.00026174		2839	0.0037817
479.21	-0.01870586		1069.21	-0.01841657		1659.2	0.00098672		2249.2	0.00046996		2839.2	0.00294672
479.41	-0.01819629		1069.41	-0.01813403		1659.4	0.00110843		2249.4	-0.00024124		2839.4	0.00271673
479.61	-0.01830837		1069.61	-0.01835882		1659.6	0.00164306		2249.6	-0.00037544		2839.6	0.00286782
479.81	-0.01849265		1069.81	-0.01717146		1659.8	0.00085875		2249.8	-0.00090549		2839.8	0.00295865
480.01	-0.01851569		1070.01	-0.01644703		1660	0.00031552		2250	-0.00055816		2840	0.00310646
480.21	-0.01826232		1070.21	-0.01685938		1660.2	0.00050617		2250.2	-0.00083974		2840.2	0.00333131
480.41	-0.0179022		1070.41	-0.01632764		1660.4	0.00002269		2250.4	-0.00001933		2840.4	0.00353085
480.61	-0.01808288		1070.61	-0.01658802		1660.6	0.00052036		2250.6	-0.00015313		2840.6	0.00367539
480.81	-0.01786627		1070.81	-0.01608576		1660.8	0.00036669		2250.8	-0.0004566		2840.8	0.00379749
481.01	-0.01846679		1071.01	-0.01612777		1661	0.00108521		2251	-0.00103175		2841	0.00310705
481.21	-0.01825844		1071.21	-0.01560739		1661.2	0.00102044		2251.2	-0.00079685		2841.2	0.00372102
481.41	-0.01756879		1071.41	-0.01586588		1661.4	0.00098939		2251.4	-0.00064442		2841.4	0.00367828
481.61	-0.01768677		1071.61	-0.01535328		1661.6	0.00078666		2251.6	0.00044319		2841.6	0.00365843
481.81	-0.01680586		1071.81	-0.01548295		1661.8	-0.00023111		2251.8	0.00084221		2841.8	0.00373924
482.01	-0.01682031		1072.01	-0.01624243		1662	0.00011303		2252	0.00204131		2842	0.00369062
482.21	-0.016553		1072.21	-0.016138		1662.2	-0.00061881		2252.2	0.00256022		2842.2	0.00419745
482.41	-0.01632902		1072.41	-0.01643014		1662.4	-0.00063892		2252.4	0.00343233		2842.4	0.00344608
482.61	-0.01610652		1072.61	-0.01724189		1662.6	0.00029007		2252.6	0.00294111		2842.6	0.00445719
482.81	-0.01609913		1072.81	-0.01718325		1662.8	0.00011172		2252.8	0.00349287		2842.8	0.0049521
483.01	-0.0166727		1073.01	-0.01732558		1663	0.00061653		2253	0.00326396		2843	0.00449084
483.21	-0.0171318		1073.21	-0.01784807		1663.2	0.00163016		2253.2	0.00325823		2843.2	0.00502261
483.41	-0.01705895		1073.41	-0.01819178		1663.4	0.00242522		2253.4	0.00326468		2843.4	0.00572525
483.61	-0.01819619		1073.61	-0.01816398		1663.6	0.00305868		2253.6	0.0033174		2843.6	0.00572326
483.81	-0.01782032		1073.81	-0.01724837		1663.8	0.00248368		2253.8	0.00279363		2843.8	0.00601206
484.01	-0.0175545		1074.01	-0.01755679		1664	0.00276763		2254	0.00301092		2844	0.00616547
484.21	-0.01664277		1074.21	-0.01761918		1664.2	0.00225203		2254.2	0.00236423		2844.2	0.00654699
484.41	-0.01702914		1074.41	-0.01688987		1664.4	0.00255289		2254.4	0.00216362		2844.4	0.00633479
484.61	-0.01717025		1074.61	-0.01673971		1664.6	0.00278486		2254.6	0.00082145		2844.6	0.00602843
484.81	-0.0166758		1074.81	-0.01685679		1664.8	0.00299511		2254.8	-0.00004658		2844.8	0.00602612
485.01	-0.01721001		1075.01	-0.01644717		1665	0.00332065		2255	-0.00069814		2845	0.0061005
485.21	-0.0169403		1075.21	-0.01665168		1665.2	0.00301511		2255.2	-0.00077011		2845.2	0.00601668
485.41	-0.01721283		1075.41	-0.01676173		1665.4	0.00285304		2255.4	-0.00048349		2845.4	0.00581754
485.61	-0.01714392		1075.61	-0.01618166		1665.6	0.00206006		2255.6	-0.00067478		2845.6	0.00534354
485.81	-0.01697431		1075.81	-0.01608973		1665.8	0.00185332		2255.8	-0.00082385		2845.8	0.0060338
486.01	-0.01740801		1076.01	-0.01610635		1666	0.00160209		2256	-0.00025599		2846	0.0051498
486.21	-0.01784027		1076.21	-0.01541401		1666.2	0.00136876		2256.2	0.00023665		2846.2	0.00431959
486.41	-0.01882287		1076.41	-0.01563986		1666.4	0.001522		2256.4	0.00061481		2846.4	0.00365927
486.61	-0.0181766		1076.61	-0.01552199		1666.6	0.00177542		2256.6	0.00007565		2846.6	0.0042344
486.81	-0.0182653		1076.81	-0.01507704		1666.8	0.00162445		2256.8	0.00059706		2846.8	0.0037771
487.01	-0.01857981		1077.01	-0.01510151		1667	0.00207454		2257	0.00120512		2847	0.00313497
487.21	-0.01834928		1077.21	-0.01546696		1667.2	0.00253416		2257.2	0.00181719		2847.2	0.00321839
487.41	-0.01801496		1077.41	-0.01576514		1667.4	0.00266453		2257.4	0.00319405		2847.4	0.00340469
487.61	-0.01784448		1077.61	-0.0152393		1667.6	0.00240841		2257.6	0.00305685		2847.6	0.00293733
487.81	-0.0158925		1077.81	-0.01497154		1667.8	0.0021647		2257.8	0.00267657		2847.8	0.00296948
488.01	-0.01575784		1078.01	-0.01479854		1668	0.00200092		2258	0.00370433		2848	0.00310615
488.21	-0.01519544		1078.21	-0.01394839		1668.2	0.00141866		2258.2	0.00320332		2848.2	0.00269602
488.41	-0.01532322		1078.41	-0.01449845		1668.4	0.0021441		2258.4	0.00282527		2848.4	0.00303741
488.61	-0.01527358		1078.61	-0.01472491		1668.6	0.00185656		2258.6	0.00235175		2848.6	0.00392613
488.81	-0.0154792		1078.81	-0.01527363		1668.8	0.00224599		2258.8	0.00242932		2848.8	0.00428395
489.01	-0.01555421		1079.01	-0.01474389		1669	0.00212656		2259	0.0018341		2849	0.00499011
489.21	-0.01638495		1079.21	-0.01536832		1669.2	0.00220347		2259.2	0.00203762		2849.2	0.00473301
489.41	-0.0163025		1079.41	-0.01473755		1669.4	0.00247366		2259.4	0.00242393		2849.4	0.00504643
489.61	-0.0155887		1079.61	-0.01471967		1669.6	0.00209384		2259.6	0.00275502		2849.6	0.0059737
489.81	-0.0150735		1079.81	-0.0155807		1669.8	0.00253155		2259.8	0.00300259		2849.8	0.00631527
490.01	-0.01548587		1080.01	-0.01608348		1670	0.00233911		2260	0.00306002		2850	0.00571943
490.21	-0.01532689		1080.21	-0.01606738		1670.2	0.00267548		2260.2	0.00271686		2850.2	0.00601709
490.41	-0.01567068		1080.41	-0.01690197		1670.4	0.00287427		2260.4	0.00193614		2850.4	0.00662868
490.61	-0.01450954		1080.61	-0.01652291		1670.6	0.00285637		2260.6	0.00133028		2850.6	0.00710813
490.81	-0.0144605		1080.81	-0.01622803		1670.8	0.00279982		2260.8	0.0019504		2850.8	0.00756613
491.01	-0.01342421		1081.01	-0.0165231		1671	0.00271956		2261	0.00271917		2851	0.00757307
491.21	-0.01288753		1081.21	-0.01681191		1671.2	0.00270888		2261.2	0.00363884		2851.2	0.00810319
491.41	-0.01276649		1081.41	-0.01767962		1671.4	0.00273272		2261.4	0.00404852		2851.4	0.00801597
491.61	-0.01280211		1081.61	-0.0174464		1671.6	0.00232829		2261.6	0.00349519		2851.6	0.00781073
491.81	-0.01263077		1081.81	-0.01724844		1671.8	0.00271487		2261.8	0.00371322		2851.8	0.00766098
492.01	-0.01310186		1082.01	-0.01688718		1672	0.00204181		2262	0.00379964		2852	0.00734324
492.21	-0.01447062		1082.21	-0.01671042		1672.2	0.00184342		2262.2	0.00305375		2852.2	0.00727923
492.41	-0.01503314		1082.41	-0.01669692		1672.4	0.00206293		2262.4	0.0029483		2852.4	0.00779215
492.61	-0.01603748		1082.61	-0.01618812		1672.6	0.00180169		2262.6	0.0031926		2852.6	0.00812833
492.81	-0.0160711		1082.81	-0.0160702		1672.8	0.00165079		2262.8	0.00382302		2852.8	0.00775889
493.01	-0.01588248		1083.01	-0.01552073		1673	0.00138791		2263	0.00392785		2853	0.00736519
493.21	-0.01645592		1083.21	-0.01507068		1673.2	0.00167373		2263.2	0.00424715		2853.2	0.00611898
493.41	-0.01580219		1083.41	-0.01460142		1673.4	0.00094081		2263.4	0.00444129		2853.4	0.00653736
493.61	-0.0154639		1083.61	-0.01508008		1673.6	0.00100245		2263.6	0.00348705		2853.6	0.00591251
493.81	-0.01481921		1083.81	-0.01558878		1673.8	0.00132203		2263.8	0.00269532		2853.8	0.00504248
494.01	-0.01553288		1084.01	-0.01491403		1674	0.00100664		2264	0.00258981		2854	0.00465183
494.21	-0.01535731		1084.21	-0.01541689		1674.2	0.00141278		2264.2	0.00164924		2854.2	0.00445258
494.41	-0.01592174		1084.41	-0.01582068		1674.4	0.00209182		2264.4	0.00132148		2854.4	0.00473381
494.61	-0.01546812		1084.61	-0.01612597		1674.6	0.00200822		2264.6	0.00083061		2854.6	0.00427822
494.81	-0.01544016		1084.81	-0.01687374		1674.8	0.00185973		2264.8	0.00186359		2854.8	0.00401326
495.01	-0.01530675		1085.01	-0.01703995		1675	0.00228793		2265	0.00234655		2855	0.00327489
495.21	-0.01592486		1085.21	-0.01739235		1675.2	0.00221057		2265.2	0.00289543		2855.2	0.00303441
495.41	-0.01597833		1085.41	-0.0180099		1675.4	0.00219544		2265.4	0.00213138		2855.4	0.00276228
495.61	-0.01631143		1085.61	-0.01729091		1675.6	0.0022058		2265.6	0.00154792		2855.6	0.0034088
495.81	-0.01743462		1085.81	-0.01742248		1675.8	0.00285591		2265.8	0.00144744		2855.8	0.00344452
496.01	-0.01769403		1086.01	-0.01715981		1676	0.00298794		2266	0.00155063		2856	0.00421498
496.21	-0.01867125		1086.21	-0.01661937		1676.2	0.0029618		2266.2	0.00198126		2856.2	0.0048498
496.41	-0.01864938		1086.41	-0.01629592		1676.4	0.00331354		2266.4	0.00229021		2856.4	0.00559933
496.61	-0.01930563		1086.61	-0.01688047		1676.6	0.00297813		2266.6	0.00258022		2856.6	0.00584442
496.81	-0.01869559		1086.81	-0.01674833		1676.8	0.002943		2266.8	0.00182788		2856.8	0.00662074
497.01	-0.01846553		1087.01	-0.01698407		1677	0.00322447		2267	0.00183376		2857	0.00583669
497.21	-0.01837603		1087.21	-0.01719829		1677.2	0.0037772		2267.2	0.00060336		2857.2	0.00534168
497.41	-0.01824411		1087.41	-0.01722474		1677.4	0.00335983		2267.4	0.00064495		2857.4	0.00600849
497.61	-0.0180661		1087.61	-0.01798087		1677.6	0.00345258		2267.6	0.00004067		2857.6	0.00588199
497.81	-0.0170077		1087.81	-0.01771355		1677.8	0.00320104		2267.8	0.00018592		2857.8	0.00560652
498.01	-0.01725137		1088.01	-0.01773343		1678	0.00333553		2268	0.00003415		2858	0.00532382
498.21	-0.0172865		1088.21	-0.01788247		1678.2	0.00343147		2268.2	-0.0005783		2858.2	0.0053964
498.41	-0.01722581		1088.41	-0.01727803		1678.4	0.00297795		2268.4	-0.00046789		2858.4	0.00579252
498.61	-0.01600352		1088.61	-0.01759614		1678.6	0.00241817		2268.6	-0.00104309		2858.6	0.00458188
498.81	-0.0159979		1088.81	-0.01733899		1678.8	0.00276744		2268.8	0.00002276		2858.8	0.00418655
499.01	-0.0159447		1089.01	-0.01692499		1679	0.00301825		2269	-0.00067776		2859	0.00459455
499.21	-0.01583841		1089.21	-0.01675084		1679.2	0.00313256		2269.2	-0.00092902		2859.2	0.00495724
499.41	-0.01579938		1089.41	-0.01691287		1679.4	0.00322092		2269.4	-0.0005759		2859.4	0.00537752
499.61	-0.01565314		1089.61	-0.01684047		1679.6	0.0029499		2269.6	-0.00174287		2859.6	0.00616031
499.81	-0.01563438		1089.81	-0.01664149		1679.8	0.00241489		2269.8	-0.00137003		2859.8	0.00592767
500.01	-0.01480099		1090.01	-0.01654397		1680	0.00265381		2270	-0.00079368		2860	0.00632984
500.21	-0.01446487		1090.21	-0.01636199		1680.2	0.0022355		2270.2	-0.00079654		2860.2	0.00611562
500.41	-0.014585		1090.41	-0.01695934		1680.4	0.00290899		2270.4	-0.00020871		2860.4	0.00591219
500.61	-0.01455548		1090.61	-0.01748349		1680.6	0.00356499		2270.6	0.00082496		2860.6	0.00565019
500.81	-0.0137226		1090.81	-0.01795867		1680.8	0.00386734		2270.8	0.00090439		2860.8	0.00527123
501.01	-0.01293814		1091.01	-0.01828714		1681	0.00471706		2271	0.00142035		2861	0.00470907
501.21	-0.01291996		1091.21	-0.01796649		1681.2	0.00431925		2271.2	0.00111855		2861.2	0.00463902
501.41	-0.01187928		1091.41	-0.0176269		1681.4	0.00382918		2271.4	0.00215603		2861.4	0.00455535
501.61	-0.01185408		1091.61	-0.01693448		1681.6	0.00378885		2271.6	0.00228647		2861.6	0.00397474
501.81	-0.0111824		1091.81	-0.01645325		1681.8	0.00290113		2271.8	0.00217741		2861.8	0.00328426
502.01	-0.01158881		1092.01	-0.01641659		1682	0.00275454		2272	0.00243284		2862	0.00272034
502.21	-0.01236393		1092.21	-0.01584757		1682.2	0.00236608		2272.2	0.00255627		2862.2	0.00352736
502.41	-0.01252843		1092.41	-0.0160716		1682.4	0.00232331		2272.4	0.00295344		2862.4	0.00272835
502.61	-0.01242636		1092.61	-0.01593707		1682.6	0.00316169		2272.6	0.00245869		2862.6	0.00224857
502.81	-0.01367185		1092.81	-0.01596194		1682.8	0.00381293		2272.8	0.00314197		2862.8	0.00303073
503.01	-0.01406565		1093.01	-0.01654359		1683	0.00402812		2273	0.00228175		2863	0.00306655
503.21	-0.014621		1093.21	-0.01640797		1683.2	0.00429362		2273.2	0.00238572		2863.2	0.00356957
503.41	-0.01491849		1093.41	-0.0171608		1683.4	0.00432979		2273.4	0.00185698		2863.4	0.00388809
503.61	-0.01490825		1093.61	-0.01760279		1683.6	0.00393374		2273.6	0.00020014		2863.6	0.00429395
503.81	-0.01522914		1093.81	-0.0173404		1683.8	0.00442704		2273.8	0.00127128		2863.8	0.00467291
504.01	-0.01544198		1094.01	-0.01806911		1684	0.00511435		2274	0.00141921		2864	0.00474201
504.21	-0.01649562		1094.21	-0.01720481		1684.2	0.0056652		2274.2	0.00211779		2864.2	0.00527158
504.41	-0.01751175		1094.41	-0.01743252		1684.4	0.00620678		2274.4	0.00298474		2864.4	0.00519366
504.61	-0.01763997		1094.61	-0.01731656		1684.6	0.00629415		2274.6	0.00280768		2864.6	0.00599393
504.81	-0.01765089		1094.81	-0.01776343		1684.8	0.00552478		2274.8	0.00169706		2864.8	0.0057373
505.01	-0.01749767		1095.01	-0.01744587		1685	0.00530762		2275	0.00192646		2865	0.00574738
505.21	-0.0179871		1095.21	-0.01761355		1685.2	0.00469237		2275.2	0.00147548		2865.2	0.00425996
505.41	-0.01681777		1095.41	-0.01700617		1685.4	0.00461632		2275.4	0.00197875		2865.4	0.00425106
505.61	-0.01675133		1095.61	-0.01591866		1685.6	0.00383453		2275.6	0.00177065		2865.6	0.00396207
505.81	-0.01578385		1095.81	-0.01652813		1685.8	0.00267566		2275.8	0.00127388		2865.8	0.00388344
506.01	-0.0153834		1096.01	-0.01619517		1686	0.00257789		2276	0.0014547		2866	0.0034908
506.21	-0.01573269		1096.21	-0.01587199		1686.2	0.00233427		2276.2	0.00182067		2866.2	0.00387754
506.41	-0.01576025		1096.41	-0.01555856		1686.4	0.00217429		2276.4	0.00216063		2866.4	0.00306882
506.61	-0.01577725		1096.61	-0.01552222		1686.6	0.00248359		2276.6	0.00209846		2866.6	0.00299091
506.81	-0.01556259		1096.81	-0.01674349		1686.8	0.00202965		2276.8	0.00273145		2866.8	0.00191538
507.01	-0.01514504		1097.01	-0.01687828		1687	0.00267606		2277	0.00267595		2867	0.00077866
507.21	-0.0149999		1097.21	-0.01614161		1687.2	0.00270632		2277.2	0.00221141		2867.2	0.00116933
507.41	-0.01560158		1097.41	-0.01634803		1687.4	0.00313717		2277.4	0.00190558		2867.4	0.00063923
507.61	-0.01578179		1097.61	-0.01575646		1687.6	0.00293712		2277.6	0.00208199		2867.6	0.0000321
507.81	-0.01643013		1097.81	-0.0150859		1687.8	0.0031867		2277.8	0.00272498		2867.8	-0.00034563
508.01	-0.01772718		1098.01	-0.01554201		1688	0.00295428		2278	0.00211151		2868	-0.00084394
508.21	-0.01901461		1098.21	-0.01524445		1688.2	0.00272909		2278.2	0.00267618		2868.2	-0.00065594
508.41	-0.01932879		1098.41	-0.0163914		1688.4	0.0022283		2278.4	0.00233992		2868.4	-0.00084622
508.61	-0.0196119		1098.61	-0.0175356		1688.6	0.0014548		2278.6	0.00176284		2868.6	0.0000961
508.81	-0.01921485		1098.81	-0.01756233		1688.8	0.00088626		2278.8	0.00169014		2868.8	-0.00004379
509.01	-0.01946326		1099.01	-0.01727475		1689	0.0005879		2279	0.00162708		2869	-0.00026659
509.21	-0.0190191		1099.21	-0.01718867		1689.2	0.00019446		2279.2	0.00108587		2869.2	-0.00028427
509.41	-0.01808207		1099.41	-0.01671675		1689.4	-0.00051734		2279.4	0.00067337		2869.4	0.00042431
509.61	-0.01844255		1099.61	-0.01624369		1689.6	-0.00139858		2279.6	0.00017604		2869.6	0.00035004
509.81	-0.01806419		1099.81	-0.01618901		1689.8	-0.00161449		2279.8	0.00013202		2869.8	0.00091184
510.01	-0.01834182		1100.01	-0.01632281		1690	-0.00187751		2280	0.00047079		2870	0.00111572
510.21	-0.0180028		1100.21	-0.01596412		1690.2	-0.00110162		2280.2	0.00023798		2870.2	0.00154696
510.41	-0.01759391		1100.41	-0.01611512		1690.4	-0.00022428		2280.4	0.00058541		2870.4	0.00159353
510.61	-0.01740677		1100.61	-0.01703082		1690.6	0.00021803		2280.6	0.00134529		2870.6	0.00121966
510.81	-0.01638494		1100.81	-0.01692268		1690.8	0.00053251		2280.8	0.00162571		2870.8	0.00081305
511.01	-0.01713582		1101.01	-0.01608901		1691	0.00117352		2281	0.00188742		2871	0.00107831
511.21	-0.01693129		1101.21	-0.01500962		1691.2	0.00091787		2281.2	0.00145704		2871.2	0.00132665
511.41	-0.01676022		1101.41	-0.01548604		1691.4	0.00167743		2281.4	0.00247528		2871.4	0.0005165
511.61	-0.0156997		1101.61	-0.01586107		1691.6	0.00244025		2281.6	0.00274748		2871.6	0.00000367
511.81	-0.01522072		1101.81	-0.01620638		1691.8	0.00339607		2281.8	0.00217116		2871.8	0.00040079
512.01	-0.01454876		1102.01	-0.0166421		1692	0.00356724		2282	0.00214452		2872	0.0011341
512.21	-0.01408777		1102.21	-0.01629211		1692.2	0.0042194		2282.2	0.00300553		2872.2	0.00187836
512.41	-0.01377521		1102.41	-0.01616108		1692.4	0.00438139		2282.4	0.00285651		2872.4	0.00256505
512.61	-0.01400928		1102.61	-0.01605923		1692.6	0.0046447		2282.6	0.00310527		2872.6	0.00336695
512.81	-0.01346741		1102.81	-0.01528396		1692.8	0.00446624		2282.8	0.00292195		2872.8	0.00351406
513.01	-0.01431487		1103.01	-0.01513077		1693	0.00488793		2283	0.00279228		2873	0.00299454
513.21	-0.01382865		1103.21	-0.01516468		1693.2	0.00488912		2283.2	0.00205312		2873.2	0.00231472
513.41	-0.01387015		1103.41	-0.01453005		1693.4	0.00481992		2283.4	0.00162645		2873.4	0.00155419
513.61	-0.01417736		1103.61	-0.01415653		1693.6	0.00500471		2283.6	0.00196149		2873.6	0.00190465
513.81	-0.0136412		1103.81	-0.01498283		1693.8	0.00467425		2283.8	0.00155868		2873.8	0.00208164
514.01	-0.0137057		1104.01	-0.01514534		1694	0.0053052		2284	0.00148172		2874	0.00179013
514.21	-0.0130563		1104.21	-0.01468203		1694.2	0.00559914		2284.2	0.00194744		2874.2	0.00241593
514.41	-0.01436118		1104.41	-0.01537281		1694.4	0.0052697		2284.4	0.00258871		2874.4	0.00301468
514.61	-0.01531815		1104.61	-0.01546055		1694.6	0.00431376		2284.6	0.00338016		2874.6	0.00266507
514.81	-0.01530789		1104.81	-0.01557921		1694.8	0.00419946		2284.8	0.00353167		2874.8	0.00278803
515.01	-0.01630088		1105.01	-0.0159018		1695	0.00351498		2285	0.00378795		2875	0.0034467
515.21	-0.01608818		1105.21	-0.01602063		1695.2	0.00257896		2285.2	0.00378105		2875.2	0.00383202
515.41	-0.01610118		1105.41	-0.01734803		1695.4	0.00280446		2285.4	0.00376554		2875.4	0.00407762
515.61	-0.0159248		1105.61	-0.01712188		1695.6	0.00272075		2285.6	0.002256		2875.6	0.00414333
515.81	-0.01583476		1105.81	-0.01683062		1695.8	0.00257422		2285.8	0.00139636		2875.8	0.00439376
516.01	-0.01588984		1106.01	-0.01650071		1696	0.0023725		2286	0.00194702		2876	0.00471783
516.21	-0.01651021		1106.21	-0.01686868		1696.2	0.00213917		2286.2	0.00221402		2876.2	0.00416498
516.41	-0.01685796		1106.41	-0.01680953		1696.4	0.00263202		2286.4	0.00171008		2876.4	0.00338192
516.61	-0.01733985		1106.61	-0.0170132		1696.6	0.00282026		2286.6	0.00205161		2876.6	0.00294751
516.81	-0.01703697		1106.81	-0.01687722		1696.8	0.00324832		2286.8	0.00133615		2876.8	0.00161814
517.01	-0.0165615		1107.01	-0.01669898		1697	0.00432252		2287	0.00088383		2877	0.00144306
517.21	-0.0154591		1107.21	-0.01604942		1697.2	0.00471102		2287.2	0.00049217		2877.2	0.00092237
517.41	-0.01543562		1107.41	-0.01567165		1697.4	0.00466726		2287.4	0.00030636		2877.4	0.00050729
517.61	-0.01492106		1107.61	-0.01646978		1697.6	0.00402393		2287.6	0.00028657		2877.6	0.00085105
517.81	-0.01472578		1107.81	-0.01648543		1697.8	0.00296677		2287.8	-0.00024412		2877.8	0.00034596
518.01	-0.01501139		1108.01	-0.01634027		1698	0.00313575		2288	0.00048726		2878	0.00015425
518.21	-0.01550396		1108.21	-0.0165066		1698.2	0.00341606		2288.2	0.00063489		2878.2	0.00056622
518.41	-0.01547732		1108.41	-0.01700505		1698.4	0.00310441		2288.4	0.00061674		2878.4	0.00145121
518.61	-0.01535284		1108.61	-0.0173183		1698.6	0.00281797		2288.6	0.00091101		2878.6	0.00091085
518.81	-0.01486781		1108.81	-0.01781386		1698.8	0.00281143		2288.8	0.00018592		2878.8	0.0013843
519.01	-0.01481228		1109.01	-0.01755249		1699	0.00274047		2289	-0.00020945		2879	0.00250746
519.21	-0.01549925		1109.21	-0.01737305		1699.2	0.00266264		2289.2	-0.0010992		2879.2	0.00300992
519.41	-0.01510627		1109.41	-0.01737112		1699.4	0.00356619		2289.4	-0.0015001		2879.4	0.00338107
519.61	-0.01502081		1109.61	-0.01733738		1699.6	0.00329975		2289.6	-0.0016641		2879.6	0.00276277
519.81	-0.01530719		1109.81	-0.01834904		1699.8	0.00384305		2289.8	-0.00087978		2879.8	0.00291337
520.01	-0.01523488		1110.01	-0.01828409		1700	0.0040478		2290	-0.00054135		2880	0.00242879
520.21	-0.01507592		1110.21	-0.01852355		1700.2	0.00404374		2290.2	-0.00050882		2880.2	0.00120678
520.41	-0.01547432		1110.41	-0.01808413		1700.4	0.00460282		2290.4	-0.00068872		2880.4	0.00095169
520.61	-0.01558064		1110.61	-0.01791808		1700.6	0.00478742		2290.6	-0.00027476		2880.6	0.00119899
520.81	-0.01523287		1110.81	-0.0174493		1700.8	0.00540547		2290.8	-0.00084805		2880.8	0.00102779
521.01	-0.01460623		1111.01	-0.0171152		1701	0.00512812		2291	-0.00002135		2881	0.00170044
521.21	-0.01426386		1111.21	-0.01611571		1701.2	0.00546861		2291.2	0.00069979		2881.2	0.00125378
521.41	-0.01491488		1111.41	-0.0154448		1701.4	0.00506145		2291.4	0.00009788		2881.4	0.00097308
521.61	-0.01459946		1111.61	-0.01610384		1701.6	0.0044597		2291.6	0.00047851		2881.6	0.00093759
521.81	-0.0151525		1111.81	-0.01563997		1701.8	0.00386392		2291.8	0.00004453		2881.8	0.00025072
522.01	-0.01508617		1112.01	-0.0166492		1702	0.00368967		2292	0.00079755		2882	0.00096002
522.21	-0.01516878		1112.21	-0.01685083		1702.2	0.00427185		2292.2	0.00068499		2882.2	0.00088161
522.41	-0.01498996		1112.41	-0.0171409		1702.4	0.00300801		2292.4	0.00099877		2882.4	0.0011439
522.61	-0.01555258		1112.61	-0.01681575		1702.6	0.00308628		2292.6	0.00059444		2882.6	0.00057266
522.81	-0.01527535		1112.81	-0.01623014		1702.8	0.00316282		2292.8	0.00036233		2882.8	0.00125997
523.01	-0.01520536		1113.01	-0.0162134		1703	0.00333861		2293	-0.00001964		2883	0.00162713
523.21	-0.01543422		1113.21	-0.01601931		1703.2	0.0030289		2293.2	-0.00021225		2883.2	0.00181138
523.41	-0.01442084		1113.41	-0.01630418		1703.4	0.00303467		2293.4	0.00006209		2883.4	0.00215549
523.61	-0.0152371		1113.61	-0.01643453		1703.6	0.00304664		2293.6	0.00015202		2883.6	0.00200853
523.81	-0.01575841		1113.81	-0.01658242		1703.8	0.00388105		2293.8	0.00007498		2883.8	0.00211862
524.01	-0.016375		1114.01	-0.01664271		1704	0.00392193		2294	0.00018026		2884	0.00177493
524.21	-0.01594868		1114.21	-0.01636678		1704.2	0.00296206		2294.2	0.00046954		2884.2	0.00202142
524.41	-0.01585225		1114.41	-0.01726518		1704.4	0.00336609		2294.4	0.00076106		2884.4	0.00254303
524.61	-0.01533546		1114.61	-0.0172042		1704.6	0.0034573		2294.6	0.00088346		2884.6	0.00265266
524.81	-0.01504564		1114.81	-0.01631363		1704.8	0.0033559		2294.8	0.00095163		2884.8	0.00228481
525.01	-0.01490575		1115.01	-0.01617191		1705	0.00362832		2295	0.00144164		2885	0.00263114
525.21	-0.01548455		1115.21	-0.01564864		1705.2	0.00463832		2295.2	0.0016727		2885.2	0.00303458
525.41	-0.01607268		1115.41	-0.01603726		1705.4	0.00430406		2295.4	0.00171379		2885.4	0.00404753
525.61	-0.01586704		1115.61	-0.01663687		1705.6	0.00430166		2295.6	0.00278907		2885.6	0.00382421
525.81	-0.01552177		1115.81	-0.01681461		1705.8	0.00414257		2295.8	0.00346453		2885.8	0.0037658
526.01	-0.01571541		1116.01	-0.01719408		1706	0.00412405		2296	0.00424715		2886	0.00356264
526.21	-0.01657043		1116.21	-0.01677843		1706.2	0.00452617		2296.2	0.00458005		2886.2	0.0020157
526.41	-0.01791529		1116.41	-0.01606658		1706.4	0.00413776		2296.4	0.00545318		2886.4	0.00116437
526.61	-0.01781226		1116.61	-0.01686944		1706.6	0.00408658		2296.6	0.00499518		2886.6	0.00167805
526.81	-0.01750097		1116.81	-0.01659212		1706.8	0.00361001		2296.8	0.00479145		2886.8	0.00156925
527.01	-0.01755555		1117.01	-0.01742228		1707	0.00331585		2297	0.00449492		2887	0.00105148
527.21	-0.01735883		1117.21	-0.01722992		1707.2	0.00336064		2297.2	0.00425608		2887.2	0.00125805
527.41	-0.01669978		1117.41	-0.01781564		1707.4	0.00351778		2297.4	0.00392629		2887.4	0.00075572
527.61	-0.01748965		1117.61	-0.01807267		1707.6	0.0042698		2297.6	0.00373449		2887.6	-0.00011802
527.81	-0.01775218		1117.81	-0.01844799		1707.8	0.00475268		2297.8	0.00380325		2887.8	0.00012177
528.01	-0.01770074		1118.01	-0.01926431		1708	0.0045199		2298	0.00352122		2888	-0.00004372
528.21	-0.01687319		1118.21	-0.01930365		1708.2	0.00500722		2298.2	0.00351711		2888.2	0.00024402
528.41	-0.01608308		1118.41	-0.02012015		1708.4	0.00579806		2298.4	0.0029393		2888.4	0.00007662
528.61	-0.01582172		1118.61	-0.01969884		1708.6	0.00502806		2298.6	0.00263235		2888.6	0.0011494
528.81	-0.01589852		1118.81	-0.01935465		1708.8	0.00493395		2298.8	0.002145		2888.8	0.00158128
529.01	-0.0164162		1119.01	-0.01925913		1709	0.00442577		2299	0.00185669		2889	0.00248057
529.21	-0.0168805		1119.21	-0.01911762		1709.2	0.00455179		2299.2	0.00207405		2889.2	0.00311088
529.41	-0.01597525		1119.41	-0.01914266		1709.4	0.00453105		2299.4	0.00222913		2889.4	0.00387346
529.61	-0.01498089		1119.61	-0.01867626		1709.6	0.00532214		2299.6	0.00285929		2889.6	0.00322784
529.81	-0.0152983		1119.81	-0.01837784		1709.8	0.00471854		2299.8	0.00205929		2889.8	0.00281944
530.01	-0.01646493		1120.01	-0.01797108		1710	0.00353459		2300	0.00091618		2890	0.00185698
530.21	-0.01704965		1120.21	-0.01805701		1710.2	0.00332523		2300.2	0.00119928		2890.2	0.00116784
530.41	-0.01741531		1120.41	-0.01853211		1710.4	0.0029187		2300.4	0.00058717		2890.4	0.00124325
530.61	-0.01692499		1120.61	-0.0196227		1710.6	0.00208582		2300.6	-0.00044979		2890.6	0.00170294
530.81	-0.01697759		1120.81	-0.01886263		1710.8	0.00204539		2300.8	0.00017656		2890.8	0.00182151
531.01	-0.01760147		1121.01	-0.01855236		1711	0.00186629		2301	0.00048946		2891	0.00170382
531.21	-0.0169053		1121.21	-0.01736226		1711.2	0.00209567		2301.2	0.00002839		2891.2	0.0018471
531.41	-0.01687332		1121.41	-0.01783271		1711.4	0.00171649		2301.4	0.00038795		2891.4	0.00075933
531.61	-0.01663919		1121.61	-0.01750272		1711.6	0.00229629		2301.6	0.00018865		2891.6	0.00048262
531.81	-0.016878		1121.81	-0.01651081		1711.8	0.00236423		2301.8	-0.00005634		2891.8	0.00041504
532.01	-0.01693138		1122.01	-0.01674967		1712	0.00273286		2302	-0.00064185		2892	0.00005148
532.21	-0.01713155		1122.21	-0.01738575		1712.2	0.00286452		2302.2	0.00002845		2892.2	0.00039995
532.41	-0.0163137		1122.41	-0.01818056		1712.4	0.00196632		2302.4	-0.00008632		2892.4	0.00049456
532.61	-0.01625337		1122.61	-0.01834061		1712.6	0.00171148		2302.6	0.00083333		2892.6	0.00164678
532.81	-0.01681026		1122.81	-0.01857753		1712.8	0.002048		2302.8	0.00048623		2892.8	0.00081634
533.01	-0.0172692		1123.01	-0.01762423		1713	0.00203492		2303	0.00065042		2893	0.00186655
533.21	-0.01632444		1123.21	-0.01738303		1713.2	0.0027133		2303.2	0.0006001		2893.2	0.00170966
533.41	-0.01634004		1123.41	-0.01677499		1713.4	0.00208434		2303.4	0.00097228		2893.4	0.00130137
533.61	-0.01675369		1123.61	-0.01808435		1713.6	0.0015331		2303.6	0.00131188		2893.6	0.00121256
533.81	-0.01759155		1123.81	-0.01764081		1713.8	0.00105897		2303.8	0.00085572		2893.8	0.00040678
534.01	-0.01840339		1124.01	-0.01806246		1714	0.00139159		2304	0.00035717		2894	0.00001084
534.21	-0.01911733		1124.21	-0.01869151		1714.2	0.00204282		2304.2	0.00074015		2894.2	0.00001899
534.41	-0.01864461		1124.41	-0.01853406		1714.4	0.00213331		2304.4	-0.00045038		2894.4	0.00028774
534.61	-0.01870093		1124.61	-0.0183881		1714.6	0.00217069		2304.6	-0.00039236		2894.6	0.00028298
534.81	-0.01893879		1124.81	-0.01786456		1714.8	0.00289347		2304.8	0.00034051		2894.8	0.00078722
535.01	-0.01882885		1125.01	-0.01684423		1715	0.00301021		2305	0.00018699		2895	0.00079795
535.21	-0.01717187		1125.21	-0.01650865		1715.2	0.0031538		2305.2	-0.00006887		2895.2	0.00061495
535.41	-0.01678904		1125.41	-0.01697377		1715.4	0.00277705		2305.4	-0.00024191		2895.4	0.00006953
535.61	-0.01590751		1125.61	-0.01668443		1715.6	0.00311067		2305.6	-0.00060459		2895.6	-0.00053773
535.81	-0.01587893		1125.81	-0.01697807		1715.8	0.00325868		2305.8	-0.00051249		2895.8	-0.000675
536.01	-0.01569634		1126.01	-0.01772422		1716	0.00284913		2306	-0.00075502		2896	0.00015282
536.21	-0.01496646		1126.21	-0.0183594		1716.2	0.00248769		2306.2	0.00002685		2896.2	0.00076072
536.41	-0.01460608		1126.41	-0.01835439		1716.4	0.0027555		2306.4	-0.00016187		2896.4	0.00111001
536.61	-0.01498194		1126.61	-0.01833071		1716.6	0.00329507		2306.6	0.00086332		2896.6	0.00178214
536.81	-0.01548243		1126.81	-0.01826974		1716.8	0.00299408		2306.8	0.0003835		2896.8	0.00179513
537.01	-0.01567416		1127.01	-0.01759833		1717	0.00247028		2307	0.00065774		2897	0.00323931
537.21	-0.01541266		1127.21	-0.01753955		1717.2	0.00255728		2307.2	0.00033095		2897.2	0.0028259
537.41	-0.01614742		1127.41	-0.01772862		1717.4	0.00221271		2307.4	0.00089353		2897.4	0.00377107
537.61	-0.01638955		1127.61	-0.01892355		1717.6	0.00268951		2307.6	0.00120552		2897.6	0.00420003
537.81	-0.01649776		1127.81	-0.01759392		1717.8	0.00376454		2307.8	0.00151096		2897.8	0.00379403
538.01	-0.01736233		1128.01	-0.01752464		1718	0.00456721		2308	0.00095943		2898	0.00354139
538.21	-0.01680947		1128.21	-0.01735014		1718.2	0.00458208		2308.2	0.0004495		2898.2	0.00333153
538.41	-0.01573071		1128.41	-0.01668968		1718.4	0.00507659		2308.4	0.00027282		2898.4	0.00342258
538.61	-0.01634925		1128.61	-0.01618279		1718.6	0.00581654		2308.6	0.00011589		2898.6	0.00295514
538.81	-0.01684831		1128.81	-0.01623966		1718.8	0.00610106		2308.8	0.00006602		2898.8	0.00225996
539.01	-0.01662922		1129.01	-0.01622892		1719	0.00575204		2309	0.0001607		2899	0.00177409
539.21	-0.01637173		1129.21	-0.01684428		1719.2	0.00584003		2309.2	-0.00011687		2899.2	0.00064681
539.41	-0.01679545		1129.41	-0.01737731		1719.4	0.00563228		2309.4	0.00001339		2899.4	-0.00000076
539.61	-0.0169064		1129.61	-0.01761552		1719.6	0.00496328		2309.6	-0.00005007		2899.6	-0.00128855
539.81	-0.01684441		1129.81	-0.01750638		1719.8	0.00471521		2309.8	-0.00008225		2899.8	-0.00138353
540.01	-0.0171608		1130.01	-0.01669812		1720	0.00445971		2310	-0.00050651		2900	-0.00150361
540.21	-0.01744127		1130.21	-0.01613493		1720.2	0.00453083		2310.2	-0.00014748		2900.2	-0.00205695
540.41	-0.01834123		1130.41	-0.0163438		1720.4	0.00419507		2310.4	-0.00093229		2900.4	-0.00272515
540.61	-0.01836405		1130.61	-0.01659548		1720.6	0.00383634		2310.6	-0.0007007		2900.6	-0.00307186
540.81	-0.01907697		1130.81	-0.01680454		1720.8	0.00282009		2310.8	-0.00100538		2900.8	-0.00265038
541.01	-0.01838759		1131.01	-0.01687599		1721	0.00280126		2311	-0.00111003		2901	-0.00218838
541.21	-0.01796449		1131.21	-0.01666769		1721.2	0.00343139		2311.2	-0.00085191		2901.2	-0.00243691
541.41	-0.01742737		1131.41	-0.01705122		1721.4	0.00292769		2311.4	-0.00090603		2901.4	-0.00118289
541.61	-0.01707907		1131.61	-0.01784782		1721.6	0.00289218		2311.6	-0.00069577		2901.6	-0.00110844
541.81	-0.0157022		1131.81	-0.01698149		1721.8	0.00347608		2311.8	-0.00062849		2901.8	-0.0006714
542.01	-0.01555596		1132.01	-0.01633469		1722	0.00339869		2312	-0.00071212		2902	-0.00066758
542.21	-0.01499813		1132.21	-0.01620214		1722.2	0.00248341		2312.2	-0.0014579		2902.2	0.0000273
542.41	-0.01518228		1132.41	-0.01598977		1722.4	0.00288981		2312.4	-0.00027229		2902.4	0.0009998
542.61	-0.01666354		1132.61	-0.01675537		1722.6	0.00293787		2312.6	-0.00091247		2902.6	0.00106851
542.81	-0.01728584		1132.81	-0.01750577		1722.8	0.00218933		2312.8	-0.00090057		2902.8	0.00106038
543.01	-0.01743461		1133.01	-0.01821126		1723	0.00207554		2313	-0.00106149		2903	0.00125019
543.21	-0.0170819		1133.21	-0.01970609		1723.2	0.00276259		2313.2	-0.00086311		2903.2	0.00186188
543.41	-0.0170716		1133.41	-0.0202376		1723.4	0.00289217		2313.4	-0.00025672		2903.4	0.00220194
543.61	-0.01722381		1133.61	-0.01988235		1723.6	0.0030322		2313.6	-0.00045149		2903.6	0.00192279
543.81	-0.01693441		1133.81	-0.02037671		1723.8	0.00334135		2313.8	-0.00022301		2903.8	0.00201068
544.01	-0.01727255		1134.01	-0.02042597		1724	0.00361008		2314	0.0002891		2904	0.00226695
544.21	-0.01806619		1134.21	-0.0209991		1724.2	0.0030219		2314.2	0.00079977		2904.2	0.0019908
544.41	-0.01824341		1134.41	-0.02153671		1724.4	0.00328493		2314.4	0.000754		2904.4	0.00164647
544.61	-0.01852353		1134.61	-0.02144844		1724.6	0.00345377		2314.6	0.00095368		2904.6	0.00159599
544.81	-0.0188148		1134.81	-0.02122691		1724.8	0.00356719		2314.8	0.00168841		2904.8	0.00149973
545.01	-0.01766089		1135.01	-0.02084972		1725	0.00485786		2315	0.00199237		2905	0.00109333
545.21	-0.01790421		1135.21	-0.0204042		1725.2	0.00512073		2315.2	0.00129202		2905.2	0.00080775
545.41	-0.01761899		1135.41	-0.02037668		1725.4	0.00457426		2315.4	0.00075694		2905.4	0.00127065
545.61	-0.01743591		1135.61	-0.02101727		1725.6	0.00552841		2315.6	0.00114499		2905.6	0.00120553
545.81	-0.01676058		1135.81	-0.019444		1725.8	0.00503745		2315.8	0.00098399		2905.8	0.00089237
546.01	-0.01723696		1136.01	-0.01870756		1726	0.0043939		2316	0.00133186		2906	0.00036147
546.21	-0.01752866		1136.21	-0.01935402		1726.2	0.0040238		2316.2	0.00089601		2906.2	0.00026474
546.41	-0.01822495		1136.41	-0.01884082		1726.4	0.00400337		2316.4	0.00156877		2906.4	0.00026114
546.61	-0.01867601		1136.61	-0.01922501		1726.6	0.0035099		2316.6	0.00110251		2906.6	-0.00031554
546.81	-0.01852799		1136.81	-0.01885302		1726.8	0.00331791		2316.8	0.00077813		2906.8	-0.0008675
547.01	-0.01797219		1137.01	-0.01912108		1727	0.00347788		2317	0.0010783		2907	-0.00119644
547.21	-0.01740334		1137.21	-0.01942624		1727.2	0.00379049		2317.2	0.00148545		2907.2	-0.00087749
547.41	-0.01747081		1137.41	-0.01916197		1727.4	0.00337178		2317.4	0.00091236		2907.4	-0.00096407
547.61	-0.01783724		1137.61	-0.01910343		1727.6	0.00293065		2317.6	0.00101175		2907.6	-0.00131336
547.81	-0.01716049		1137.81	-0.01957076		1727.8	0.00279889		2317.8	0.00202706		2907.8	-0.00137429
548.01	-0.01774439		1138.01	-0.01939496		1728	0.00300253		2318	0.00261155		2908	-0.001095
548.21	-0.01812613		1138.21	-0.0192865		1728.2	0.00250761		2318.2	0.00249725		2908.2	-0.00122396
548.41	-0.01836932		1138.41	-0.0191447		1728.4	0.0032701		2318.4	0.00185846		2908.4	-0.00073793
548.61	-0.01815919		1138.61	-0.01924231		1728.6	0.0039342		2318.6	0.00216148		2908.6	-0.00175112
548.81	-0.01817346		1138.81	-0.01921775		1728.8	0.00422942		2318.8	0.00229687		2908.8	-0.00164235
549.01	-0.01842134		1139.01	-0.01918824		1729	0.00434285		2319	0.00128699		2909	-0.00163208
549.21	-0.01875398		1139.21	-0.01890936		1729.2	0.00424776		2319.2	0.00037072		2909.2	-0.00163317
549.41	-0.01867208		1139.41	-0.01879344		1729.4	0.00397927		2319.4	0.00056264		2909.4	-0.00155373
549.61	-0.01836353		1139.61	-0.01899478		1729.6	0.00422392		2319.6	0.00052945		2909.6	-0.00124036
549.81	-0.01836597		1139.81	-0.01811727		1729.8	0.00336276		2319.8	0.000234		2909.8	-0.00203142
550.01	-0.01780146		1140.01	-0.01867863		1730	0.00377253		2320	0.00030196		2910	-0.00190835
550.21	-0.0179156		1140.21	-0.01942986		1730.2	0.00299582		2320.2	0.00058216		2910.2	-0.00194318
550.41	-0.01817163		1140.41	-0.01932359		1730.4	0.00257545		2320.4	-0.00004331		2910.4	-0.00234599
550.61	-0.01788082		1140.61	-0.0206614		1730.6	0.00216005		2320.6	0.00012593		2910.6	-0.0024424
550.81	-0.01774063		1140.81	-0.02045733		1730.8	0.00170705		2320.8	0.00007603		2910.8	-0.00217003
551.01	-0.01751659		1141.01	-0.02010464		1731	0.00119304		2321	0.00026064		2911	-0.00192821
551.21	-0.01668398		1141.21	-0.02003182		1731.2	0.00151394		2321.2	-0.00028467		2911.2	-0.00120797
551.41	-0.01730701		1141.41	-0.01967576		1731.4	0.00158679		2321.4	-0.00103389		2911.4	-0.00050585
551.61	-0.01750206		1141.61	-0.01918917		1731.6	0.00202905		2321.6	-0.00104478		2911.6	0.00010573
551.81	-0.01698095		1141.81	-0.01811734		1731.8	0.00223983		2321.8	-0.00033778		2911.8	0.00063251
552.01	-0.01758303		1142.01	-0.01802047		1732	0.00207909		2322	-0.0006015		2912	0.00137722
552.21	-0.01786188		1142.21	-0.01815141		1732.2	0.00235463		2322.2	-0.00058851		2912.2	0.0017318
552.41	-0.01850352		1142.41	-0.01818604		1732.4	0.00278178		2322.4	-0.00068388		2912.4	0.00200806
552.61	-0.0184012		1142.61	-0.01830089		1732.6	0.0035665		2322.6	-0.00043506		2912.6	0.00090918
552.81	-0.01882481		1142.81	-0.01841965		1732.8	0.00319601		2322.8	-0.00072295		2912.8	0.00178496
553.01	-0.019161		1143.01	-0.01877188		1733	0.00300653		2323	-0.00108415		2913	0.00148591
553.21	-0.01864954		1143.21	-0.01810827		1733.2	0.00343565		2323.2	-0.00072889		2913.2	0.00169001
553.41	-0.01827192		1143.41	-0.0185763		1733.4	0.00332714		2323.4	-0.000385		2913.4	0.00220566
553.61	-0.01730594		1143.61	-0.01887309		1733.6	0.00344177		2323.6	0.00040585		2913.6	0.00184889
553.81	-0.017636		1143.81	-0.01952553		1733.8	0.00392646		2323.8	-0.00019593		2913.8	0.00088986
554.01	-0.01673719		1144.01	-0.02031979		1734	0.00367696		2324	0.00042075		2914	0.00139467
554.21	-0.01670283		1144.21	-0.02128043		1734.2	0.00300526		2324.2	0.0003792		2914.2	0.00083063
554.41	-0.01612042		1144.41	-0.02235248		1734.4	0.00335532		2324.4	0.00082318		2914.4	-0.00029037
554.61	-0.01642285		1144.61	-0.02255402		1734.6	0.00351156		2324.6	0.00186308		2914.6	0.00006667
554.81	-0.01621657		1144.81	-0.0216419		1734.8	0.00373299		2324.8	0.00257715		2914.8	0.00010677
555.01	-0.0161987		1145.01	-0.02240529		1735	0.00422959		2325	0.00252041		2915	0.00013653
555.21	-0.01570412		1145.21	-0.02258682		1735.2	0.00417289		2325.2	0.00206997		2915.2	0.00017222
555.41	-0.01668897		1145.41	-0.0219611		1735.4	0.004345		2325.4	0.00110916		2915.4	0.00016004
555.61	-0.01635221		1145.61	-0.02146071		1735.6	0.00444833		2325.6	0.001726		2915.6	0.00005288
555.81	-0.01655753		1145.81	-0.02051526		1735.8	0.00454461		2325.8	0.00285613		2915.8	-0.00076405
556.01	-0.01662696		1146.01	-0.02047099		1736	0.00519477		2326	0.0027365		2916	-0.00091845
556.21	-0.01674317		1146.21	-0.0194919		1736.2	0.00566925		2326.2	0.00261903		2916.2	-0.00115281
556.41	-0.0168558		1146.41	-0.0188198		1736.4	0.00564122		2326.4	0.00222317		2916.4	-0.00077139
556.61	-0.01666029		1146.61	-0.01831152		1736.6	0.00634366		2326.6	0.00242351		2916.6	-0.0014777
556.81	-0.01681039		1146.81	-0.0187698		1736.8	0.00595219		2326.8	0.00258812		2916.8	-0.00175236
557.01	-0.01747114		1147.01	-0.01812284		1737	0.00536702		2327	0.00260389		2917	-0.00166496
557.21	-0.01676359		1147.21	-0.01735791		1737.2	0.00513214		2327.2	0.00257195		2917.2	-0.00089939
557.41	-0.01646839		1147.41	-0.0175018		1737.4	0.00475909		2327.4	0.00227656		2917.4	-0.0005476
557.61	-0.01631994		1147.61	-0.01705058		1737.6	0.00415646		2327.6	0.00182274		2917.6	-0.00167233
557.81	-0.01714988		1147.81	-0.01760619		1737.8	0.00351606		2327.8	0.00131889		2917.8	-0.0020886
558.01	-0.01665091		1148.01	-0.01757835		1738	0.00276683		2328	0.00159746		2918	-0.00131321
558.21	-0.01654797		1148.21	-0.01840626		1738.2	0.00265158		2328.2	0.00127184		2918.2	-0.00125568
558.41	-0.01567085		1148.41	-0.01845397		1738.4	0.00218927		2328.4	0.00185823		2918.4	-0.00113986
558.61	-0.01546993		1148.61	-0.01822799		1738.6	0.00192311		2328.6	0.00166456		2918.6	0.0002013
558.81	-0.01484072		1148.81	-0.01918342		1738.8	0.00202921		2328.8	0.00169762		2918.8	0.0000736
559.01	-0.01480949		1149.01	-0.0197997		1739	0.00098801		2329	0.00123575		2919	-0.0002323
559.21	-0.01454524		1149.21	-0.01909897		1739.2	0.00054382		2329.2	0.00105003		2919.2	-0.00016965
559.41	-0.0145818		1149.41	-0.01897823		1739.4	0.0012737		2329.4	0.00091815		2919.4	-0.00011851
559.61	-0.01468293		1149.61	-0.0180327		1739.6	0.0010206		2329.6	0.00131807		2919.6	-0.00003809
559.81	-0.01435447		1149.81	-0.01677173		1739.8	0.00139167		2329.8	0.0014922		2919.8	-0.00069303
560.01	-0.01416207		1150.01	-0.01668872		1740	0.00183005		2330	0.00107679		2920	-0.00036273
560.21	-0.01452459		1150.21	-0.0158068		1740.2	0.00182862		2330.2	0.00107919		2920.2	-0.00017511
560.41	-0.01433491		1150.41	-0.01618822		1740.4	0.00208888		2330.4	0.00108605		2920.4	-0.00048681
560.61	-0.01415684		1150.61	-0.01613107		1740.6	0.00157178		2330.6	0.00143933		2920.6	-0.00112014
560.81	-0.0144171		1150.81	-0.01676884		1740.8	0.0011492		2330.8	0.00126985		2920.8	-0.00089231
561.01	-0.0140919		1151.01	-0.01643412		1741	0.00094129		2331	0.00148137		2921	-0.00055639
561.21	-0.01355584		1151.21	-0.0179095		1741.2	0.00141254		2331.2	0.00124458		2921.2	-0.00059672
561.41	-0.01362925		1151.41	-0.01838697		1741.4	0.00146616		2331.4	0.0012224		2921.4	-0.00134354
561.61	-0.01455612		1151.61	-0.01960362		1741.6	0.00159709		2331.6	0.00130552		2921.6	-0.0014374
561.81	-0.01501565		1151.81	-0.02003377		1741.8	0.00090726		2331.8	0.00069097		2921.8	-0.00164096
562.01	-0.01537461		1152.01	-0.02050179		1742	0.00110617		2332	-0.00015423		2922	-0.00137167
562.21	-0.01593783		1152.21	-0.02140825		1742.2	0.00065431		2332.2	0.00014251		2922.2	-0.00192321
562.41	-0.01556668		1152.41	-0.02124861		1742.4	0.00039032		2332.4	-0.00048609		2922.4	-0.00244136
562.61	-0.01578242		1152.61	-0.02161141		1742.6	0.00075373		2332.6	-0.00020687		2922.6	-0.00301598
562.81	-0.01732167		1152.81	-0.02169116		1742.8	0.00104038		2332.8	-0.00034283		2922.8	-0.00406998
563.01	-0.01836287		1153.01	-0.02042657		1743	0.00095855		2333	-0.00003691		2923	-0.00395333
563.21	-0.01830014		1153.21	-0.02021415		1743.2	0.00200197		2333.2	0.00040485		2923.2	-0.00332557
563.41	-0.01954481		1153.41	-0.02013891		1743.4	0.00230784		2333.4	0.00048187		2923.4	-0.00265289
563.61	-0.02007697		1153.61	-0.01876617		1743.6	0.00169754		2333.6	0.00015031		2923.6	-0.00229551
563.81	-0.02005231		1153.81	-0.0181918		1743.8	0.0023182		2333.8	0.00001235		2923.8	-0.00235118
564.01	-0.02057209		1154.01	-0.01826404		1744	0.00268564		2334	-0.00017085		2924	-0.00119721
564.21	-0.02038008		1154.21	-0.01840381		1744.2	0.00225092		2334.2	0.00036654		2924.2	0.00008051
564.41	-0.02002424		1154.41	-0.01851895		1744.4	0.00141314		2334.4	0.00030789		2924.4	0.00091153
564.61	-0.01931617		1154.61	-0.01831035		1744.6	-0.00001226		2334.6	-0.00011849		2924.6	0.00237
564.81	-0.01885489		1154.81	-0.01844619		1744.8	0.00026427		2334.8	-0.00078602		2924.8	0.00316411
565.01	-0.0181413		1155.01	-0.01877286		1745	0.00111226		2335	-0.00076182		2925	0.00393559
565.21	-0.01775693		1155.21	-0.01951581		1745.2	0.0013858		2335.2	-0.00113093		2925.2	0.00381905
565.41	-0.01756148		1155.41	-0.01917087		1745.4	0.00070017		2335.4	-0.00071154		2925.4	0.00407899
565.61	-0.01793227		1155.61	-0.01908934		1745.6	0.00086062		2335.6	-0.00036237		2925.6	0.00447378
565.81	-0.01775501		1155.81	-0.01836404		1745.8	-0.0000519		2335.8	-0.00065321		2925.8	0.00373932
566.01	-0.01813629		1156.01	-0.01846015		1746	0.00016958		2336	-0.00001123		2926	0.00346472
566.21	-0.01803968		1156.21	-0.01912546		1746.2	0.00022876		2336.2	0.00052446		2926.2	0.00182503
566.41	-0.01719627		1156.41	-0.01954541		1746.4	0.00031488		2336.4	-0.00000403		2926.4	0.00123614
566.61	-0.01649567		1156.61	-0.01968958		1746.6	0.00132033		2336.6	0.00115605		2926.6	-0.00048531
566.81	-0.0162988		1156.81	-0.01980218		1746.8	0.00221124		2336.8	0.00160049		2926.8	-0.00041724
567.01	-0.01599494		1157.01	-0.01923829		1747	0.00283466		2337	0.00251757		2927	-0.00043407
567.21	-0.01591787		1157.21	-0.01923653		1747.2	0.00320177		2337.2	0.00295484		2927.2	-0.0007556
567.41	-0.01616477		1157.41	-0.01868627		1747.4	0.00340308		2337.4	0.00296132		2927.4	-0.00047309
567.61	-0.01541861		1157.61	-0.01748693		1747.6	0.00259652		2337.6	0.00284281		2927.6	-0.00089808
567.81	-0.01566245		1157.81	-0.01776722		1747.8	0.0028027		2337.8	0.00249829		2927.8	-0.00096133
568.01	-0.01437372		1158.01	-0.0171223		1748	0.00239416		2338	0.00320092		2928	-0.00007254
568.21	-0.01473994		1158.21	-0.01720987		1748.2	0.00275899		2338.2	0.00285175		2928.2	0.00024562
568.41	-0.01516036		1158.41	-0.01645156		1748.4	0.00254184		2338.4	0.00210161		2928.4	-0.0000804
568.61	-0.01524717		1158.61	-0.01684871		1748.6	0.0021936		2338.6	0.00015458		2928.6	-0.0008746
568.81	-0.01558705		1158.81	-0.01671716		1748.8	0.00330955		2338.8	-0.0009436		2928.8	-0.00123978
569.01	-0.01555071		1159.01	-0.01710943		1749	0.00410653		2339	-0.00028341		2929	-0.00111506
569.21	-0.01648716		1159.21	-0.01720152		1749.2	0.00424364		2339.2	0.00059652		2929.2	-0.00149997
569.41	-0.01719699		1159.41	-0.01784684		1749.4	0.00465488		2339.4	0.00061079		2929.4	-0.00060145
569.61	-0.01711143		1159.61	-0.01777924		1749.6	0.0046345		2339.6	0.00052107		2929.6	-0.00102312
569.81	-0.01714308		1159.81	-0.01846769		1749.8	0.00411848		2339.8	0.00016433		2929.8	-0.00131157
570.01	-0.01770354		1160.01	-0.0198405		1750	0.00372216		2340	-0.00034848		2930	-0.00185635
570.21	-0.01705586		1160.21	-0.02087104		1750.2	0.00362046		2340.2	-0.00072228		2930.2	-0.00252141
570.41	-0.01622353		1160.41	-0.02131473		1750.4	0.00336098		2340.4	-0.00148812		2930.4	-0.00165336
570.61	-0.01615059		1160.61	-0.02179861		1750.6	0.00404311		2340.6	-0.00179818		2930.6	-0.00188534
570.81	-0.01628109		1160.81	-0.02256219		1750.8	0.00361793		2340.8	-0.00189196		2930.8	-0.00081872
571.01	-0.01682047		1161.01	-0.02216933		1751	0.00338076		2341	-0.00208483		2931	-0.00081426
571.21	-0.01660261		1161.21	-0.02235803		1751.2	0.00289895		2341.2	-0.00179811		2931.2	-0.00076175
571.41	-0.01615091		1161.41	-0.02213062		1751.4	0.00312771		2341.4	-0.00206208		2931.4	-0.00011127
571.61	-0.01553999		1161.61	-0.02146675		1751.6	0.00230294		2341.6	-0.00230268		2931.6	0.00029758
571.81	-0.01613227		1161.81	-0.02116991		1751.8	0.00233573		2341.8	-0.00269232		2931.8	0.00016445
572.01	-0.01558119		1162.01	-0.02041503		1752	0.0021232		2342	-0.00231616		2932	0.00019853
572.21	-0.01633534		1162.21	-0.02004626		1752.2	0.00293823		2342.2	-0.00260198		2932.2	-0.00004958
572.41	-0.01670459		1162.41	-0.01933087		1752.4	0.00222881		2342.4	-0.00263018		2932.4	-0.00079849
572.61	-0.01691404		1162.61	-0.01894828		1752.6	0.00210467		2342.6	-0.00261343		2932.6	-0.00189644
572.81	-0.01674698		1162.81	-0.01815051		1752.8	0.00172931		2342.8	-0.00156518		2932.8	-0.00159323
573.01	-0.0166581		1163.01	-0.01862153		1753	0.00140512		2343	0.00036714		2933	-0.00158884
573.21	-0.01726701		1163.21	-0.01799049		1753.2	0.00146154		2343.2	0.00096615		2933.2	-0.00158103
573.41	-0.0167279		1163.41	-0.01802799		1753.4	0.00144211		2343.4	0.00081009		2933.4	-0.00185111
573.61	-0.01589104		1163.61	-0.01832384		1753.6	0.00029018		2343.6	0.00174278		2933.6	-0.00269098
573.81	-0.01641021		1163.81	-0.01876248		1753.8	0.000306		2343.8	0.00216514		2933.8	-0.00249237
574.01	-0.01630793		1164.01	-0.01800736		1754	-0.00015406		2344	0.00238327		2934	-0.00227392
574.21	-0.01612904		1164.21	-0.01766518		1754.2	0.00052981		2344.2	0.00214199		2934.2	-0.00107271
574.41	-0.01684167		1164.41	-0.01768167		1754.4	0.00042569		2344.4	0.00133925		2934.4	-0.0004607
574.61	-0.01726115		1164.61	-0.01786459		1754.6	0.00011912		2344.6	0.00124832		2934.6	-0.00066677
574.81	-0.01775264		1164.81	-0.01824525		1754.8	0.00020113		2344.8	0.00083589		2934.8	0.00023166
575.01	-0.01821762		1165.01	-0.01867191		1755	0.00095994		2345	0.00037879		2935	0.00033517
575.21	-0.01788222		1165.21	-0.01923904		1755.2	0.00144962		2345.2	-0.00027234		2935.2	0.0003382
575.41	-0.01800374		1165.41	-0.01927272		1755.4	0.00285045		2345.4	-0.00082451		2935.4	0.00095296
575.61	-0.0174338		1165.61	-0.01960476		1755.6	0.00166028		2345.6	-0.00086152		2935.6	0.00065078
575.81	-0.01805379		1165.81	-0.01915045		1755.8	0.00199374		2345.8	-0.00147654		2935.8	0.00042469
576.01	-0.01717121		1166.01	-0.01999739		1756	0.00085464		2346	-0.00126869		2936	-0.00009041
576.21	-0.01668299		1166.21	-0.01936212		1756.2	0.000428		2346.2	-0.00153777		2936.2	-0.00036927
576.41	-0.01653176		1166.41	-0.01869726		1756.4	-0.00077141		2346.4	-0.00118453		2936.4	-0.00069225
576.61	-0.01546452		1166.61	-0.01825887		1756.6	-0.00141827		2346.6	-0.00105494		2936.6	-0.00100185
576.81	-0.01480137		1166.81	-0.01808307		1756.8	-0.00242408		2346.8	-0.00092789		2936.8	-0.0009218
577.01	-0.01418482		1167.01	-0.01896552		1757	-0.00209854		2347	0.00050429		2937	-0.00163051
577.21	-0.0143019		1167.21	-0.01853482		1757.2	-0.001873		2347.2	0.00116425		2937.2	-0.0014869
577.41	-0.01336087		1167.41	-0.01911543		1757.4	-0.00141664		2347.4	0.00231084		2937.4	-0.00236291
577.61	-0.01284167		1167.61	-0.01994386		1757.6	-0.00186121		2347.6	0.00322458		2937.6	-0.00172443
577.81	-0.0130603		1167.81	-0.01891664		1757.8	-0.0012955		2347.8	0.00394329		2937.8	-0.00145417
578.01	-0.01312423		1168.01	-0.01852348		1758	-0.00090852		2348	0.00399785		2938	-0.00152806
578.21	-0.01369399		1168.21	-0.01895112		1758.2	-0.00071602		2348.2	0.0033702		2938.2	-0.00119036
578.41	-0.0148424		1168.41	-0.01839758		1758.4	-0.00116097		2348.4	0.00322398		2938.4	-0.00098039
578.61	-0.01561577		1168.61	-0.01855778		1758.6	-0.00108595		2348.6	0.00292303		2938.6	-0.00055765
578.81	-0.01708645		1168.81	-0.01901519		1758.8	0.00027507		2348.8	0.00265147		2938.8	0.00029688
579.01	-0.01817563		1169.01	-0.01953446		1759	0.00118844		2349	0.00319775		2939	0.00040273
579.21	-0.0190935		1169.21	-0.01918446		1759.2	0.00157449		2349.2	0.00337505		2939.2	0.00026003
579.41	-0.01932393		1169.41	-0.01967198		1759.4	0.00221214		2349.4	0.00378612		2939.4	0.00067515
579.61	-0.01995778		1169.61	-0.0199607		1759.6	0.00127428		2349.6	0.00388225		2939.6	-0.00025311
579.81	-0.02105717		1169.81	-0.01969906		1759.8	0.00105809		2349.8	0.00208476		2939.8	0.00006922
580.01	-0.02150992		1170.01	-0.02017402		1760	-0.00076737		2350	0.00198193		2940	-0.00040438
580.21	-0.02201941		1170.21	-0.01926026		1760.2	-0.00093871		2350.2	0.00142438		2940.2	0.00035997
580.41	-0.02182589		1170.41	-0.01871719		1760.4	-0.00124491		2350.4	0.00138379		2940.4	0.00081317
580.61	-0.0212856		1170.61	-0.01873033		1760.6	-0.00104922		2350.6	0.00065296		2940.6	0.00124951
580.81	-0.02131657		1170.81	-0.0192272		1760.8	-0.00139933		2350.8	0.00030953		2940.8	0.00093275
581.01	-0.02044673		1171.01	-0.01932989		1761	-0.00132497		2351	0.00119987		2941	0.00035848
581.21	-0.02053751		1171.21	-0.01878291		1761.2	-0.00140516		2351.2	0.00050967		2941.2	-0.00012215
581.41	-0.01920466		1171.41	-0.01933392		1761.4	-0.00089943		2351.4	0.00010863		2941.4	-0.00033765
581.61	-0.01834282		1171.61	-0.01911632		1761.6	-0.0014581		2351.6	-0.00050385		2941.6	-0.00015226
581.81	-0.01782285		1171.81	-0.01884207		1761.8	-0.00095187		2351.8	-0.0006777		2941.8	-0.00079402
582.01	-0.01847118		1172.01	-0.01963355		1762	-0.00023661		2352	-0.00129488		2942	-0.000171
582.21	-0.01772959		1172.21	-0.01925591		1762.2	-0.0004593		2352.2	-0.00168484		2942.2	-0.00011717
582.41	-0.01868948		1172.41	-0.01960886		1762.4	-0.00021405		2352.4	-0.00084592		2942.4	0.00035253
582.61	-0.01908532		1172.61	-0.0200786		1762.6	0.00103637		2352.6	-0.00067816		2942.6	0.0003006
582.81	-0.01970666		1172.81	-0.01966232		1762.8	0.00196781		2352.8	-0.00013135		2942.8	-0.00054869
583.01	-0.01978463		1173.01	-0.02001157		1763	0.0023189		2353	0.0002871		2943	-0.00169147
583.21	-0.01937761		1173.21	-0.02010948		1763.2	0.00317362		2353.2	0.0011489		2943.2	-0.00253611
583.41	-0.01865967		1173.41	-0.0202982		1763.4	0.00370064		2353.4	0.00107977		2943.4	-0.00280192
583.61	-0.01943985		1173.61	-0.02022855		1763.6	0.00319845		2353.6	0.00137669		2943.6	-0.00384135
583.81	-0.01987773		1173.81	-0.01947307		1763.8	0.00247954		2353.8	0.00073903		2943.8	-0.00362042
584.01	-0.01988551		1174.01	-0.01911083		1764	0.00296473		2354	0.00197139		2944	-0.00369413
584.21	-0.0190267		1174.21	-0.01864311		1764.2	0.00309785		2354.2	0.00203575		2944.2	-0.00332015
584.41	-0.01820362		1174.41	-0.01810978		1764.4	0.00281978		2354.4	0.00219701		2944.4	-0.00305744
584.61	-0.01738152		1174.61	-0.01744852		1764.6	0.00216065		2354.6	0.00217009		2944.6	-0.00276927
584.81	-0.01709955		1174.81	-0.01677371		1764.8	0.00161718		2354.8	0.00246766		2944.8	-0.00273371
585.01	-0.0163971		1175.01	-0.01593279		1765	0.00153876		2355	0.0035716		2945	-0.00268161
585.21	-0.0165584		1175.21	-0.01649575		1765.2	0.00100368		2355.2	0.00315647		2945.2	-0.00202548
585.41	-0.0153412		1175.41	-0.0173378		1765.4	0.00095556		2355.4	0.00329697		2945.4	-0.00211237
585.61	-0.01546315		1175.61	-0.01710141		1765.6	0.00004582		2355.6	0.00297831		2945.6	-0.00178147
585.81	-0.01608353		1175.81	-0.01769566		1765.8	-0.00012466		2355.8	0.00272389		2945.8	-0.00082484
586.01	-0.0174887		1176.01	-0.01929032		1766	0.00052862		2356	0.00225448		2946	0.00027855
586.21	-0.01697662		1176.21	-0.01985413		1766.2	0.00029595		2356.2	0.00221426		2946.2	0.00014862
586.41	-0.01766017		1176.41	-0.02182918		1766.4	0.00060935		2356.4	0.00231069		2946.4	0.00036604
586.61	-0.01787686		1176.61	-0.02168703		1766.6	0.00080436		2356.6	0.00156995		2946.6	-0.00026067
586.81	-0.01860067		1176.81	-0.02168491		1766.8	0.00061264		2356.8	0.00115523		2946.8	-0.00135159
587.01	-0.01868307		1177.01	-0.02188294		1767	0.00119779		2357	0.00135452		2947	-0.0014951
587.21	-0.01935025		1177.21	-0.02068703		1767.2	0.00146814		2357.2	0.00111403		2947.2	-0.00019132
587.41	-0.01938964		1177.41	-0.02029402		1767.4	0.00133135		2357.4	-0.00000991		2947.4	-0.00000246
587.61	-0.01972131		1177.61	-0.01998601		1767.6	0.00095088		2357.6	0.00003232		2947.6	-0.00042619
587.81	-0.01974809		1177.81	-0.01878835		1767.8	0.00105758		2357.8	0.00031653		2947.8	-0.0007327
588.01	-0.0204318		1178.01	-0.01841302		1768	0.00186919		2358	0.0002079		2948	-0.00044945
588.21	-0.02043858		1178.21	-0.01780559		1768.2	0.00119106		2358.2	0.00001366		2948.2	-0.00014364
588.41	-0.02122241		1178.41	-0.01734431		1768.4	0.00047903		2358.4	0.00026404		2948.4	-0.00062023
588.61	-0.02143689		1178.61	-0.01748696		1768.6	0.00020227		2358.6	0.00080713		2948.6	-0.00010592
588.81	-0.02134935		1178.81	-0.01793911		1768.8	0.00005743		2358.8	0.0013701		2948.8	0.00036726
589.01	-0.02161176		1179.01	-0.01835072		1769	-0.00012893		2359	0.00138863		2949	0.00003531
589.21	-0.02185696		1179.21	-0.0189302		1769.2	-0.00016259		2359.2	0.00141569		2949.2	-0.0000081
589.41	-0.02131216		1179.41	-0.01901995		1769.4	-0.00042487		2359.4	0.00148192		2949.4	-0.00082353
589.61	-0.02127386		1179.61	-0.01951111		1769.6	-0.00057782		2359.6	0.00095414		2949.6	0.00008402
589.81	-0.02055434		1179.81	-0.02072047		1769.8	-0.00022032		2359.8	0.00067812		2949.8	-0.00033072
590.01	-0.01987559		1180.01	-0.02176831		1770	0.00010333		2360	0.00070514		2950	-0.00022298
590.21	-0.01883677		1180.21	-0.02223116		1770.2	-0.00047692		2360.2	0.00008243		2950.2	-0.00008528
590.41	-0.01848698		1180.41	-0.02269119		1770.4	-0.00116658		2360.4	-0.00018862		2950.4	0.00042412
590.61	-0.0182295		1180.61	-0.02260818		1770.6	-0.00121662		2360.6	-0.00028578		2950.6	0.00030952
590.81	-0.01825769		1180.81	-0.02289234		1770.8	-0.00154702		2360.8	-0.00048373		2950.8	0.00008696
591.01	-0.01787998		1181.01	-0.02203535		1771	-0.00137008		2361	-0.00120111		2951	0.00031338
591.21	-0.01772831		1181.21	-0.02146953		1771.2	-0.00146695		2361.2	-0.00204599		2951.2	0.00045356
591.41	-0.01706332		1181.41	-0.02246282		1771.4	-0.00115901		2361.4	-0.00231516		2951.4	-0.00020532
591.61	-0.0175383		1181.61	-0.0217171		1771.6	-0.00208167		2361.6	-0.00153084		2951.6	-0.00057954
591.81	-0.01830656		1181.81	-0.02149954		1771.8	-0.00145893		2361.8	-0.00085057		2951.8	-0.00048321
592.01	-0.01978469		1182.01	-0.02216037		1772	-0.0013379		2362	-0.00088564		2952	-0.00073214
592.21	-0.02028995		1182.21	-0.02246923		1772.2	-0.00184141		2362.2	-0.000098		2952.2	-0.00126148
592.41	-0.02031829		1182.41	-0.02299609		1772.4	-0.00214067		2362.4	0.00005682		2952.4	-0.00212691
592.61	-0.01996599		1182.61	-0.02327455		1772.6	-0.00167792		2362.6	0.00029701		2952.6	-0.00159316
592.81	-0.01964889		1182.81	-0.02326608		1772.8	-0.00142537		2362.8	0.00069442		2952.8	-0.00136308
593.01	-0.02000107		1183.01	-0.02302612		1773	-0.00079393		2363	0.0010571		2953	-0.00257864
593.21	-0.01934583		1183.21	-0.02304654		1773.2	0.00010817		2363.2	0.00166076		2953.2	-0.00221799
593.41	-0.01819413		1183.41	-0.0226094		1773.4	0.00048563		2363.4	0.00195776		2953.4	-0.00235402
593.61	-0.01740982		1183.61	-0.02263061		1773.6	0.00080741		2363.6	0.00174998		2953.6	-0.00198196
593.81	-0.01773906		1183.81	-0.02310962		1773.8	0.00080608		2363.8	0.00131371		2953.8	-0.00169811
594.01	-0.01726237		1184.01	-0.02282909		1774	0.00077758		2364	0.00131091		2954	-0.00082256
594.21	-0.01746569		1184.21	-0.02322478		1774.2	0.00122552		2364.2	0.00049196		2954.2	-0.00038191
594.41	-0.01744998		1184.41	-0.02340063		1774.4	0.00178044		2364.4	0.00050118		2954.4	0.00046157
594.61	-0.0169538		1184.61	-0.02351679		1774.6	0.00269087		2364.6	-0.00072417		2954.6	-0.00002056
594.81	-0.01738534		1184.81	-0.02346916		1774.8	0.00229277		2364.8	-0.00152452		2954.8	0.00038519
595.01	-0.01735076		1185.01	-0.02273474		1775	0.00254749		2365	-0.00191472		2955	0.00031576
595.21	-0.01816814		1185.21	-0.02193255		1775.2	0.00260795		2365.2	-0.00173119		2955.2	0.00075822
595.41	-0.01910678		1185.41	-0.02151223		1775.4	0.00194352		2365.4	-0.00163302		2955.4	0.00161987
595.61	-0.01957877		1185.61	-0.02050873		1775.6	0.00206528		2365.6	-0.00106573		2955.6	0.00152324
595.81	-0.02004668		1185.81	-0.0206126		1775.8	0.0027052		2365.8	-0.00126242		2955.8	0.00173383
596.01	-0.02023831		1186.01	-0.02043853		1776	0.00240007		2366	-0.00150122		2956	0.00055447
596.21	-0.02002451		1186.21	-0.01984607		1776.2	0.00174137		2366.2	-0.00123468		2956.2	0.00015355
596.41	-0.01854733		1186.41	-0.02033494		1776.4	0.00153098		2366.4	-0.00132647		2956.4	-0.00069347
596.61	-0.01774058		1186.61	-0.01979997		1776.6	0.00122672		2366.6	-0.00131449		2956.6	-0.00060285
596.81	-0.01780542		1186.81	-0.01956982		1776.8	0.00105932		2366.8	-0.00096174		2956.8	-0.00122695
597.01	-0.01800723		1187.01	-0.01928525		1777	0.00148219		2367	-0.00164439		2957	-0.00233562
597.21	-0.01735098		1187.21	-0.01888699		1777.2	0.00149922		2367.2	-0.00174284		2957.2	-0.00169501
597.41	-0.0177623		1187.41	-0.01853991		1777.4	0.00136596		2367.4	-0.00202151		2957.4	-0.00198354
597.61	-0.01861089		1187.61	-0.01851161		1777.6	0.00067544		2367.6	-0.00200154		2957.6	-0.00229945
597.81	-0.01959447		1187.81	-0.01898083		1777.8	0.00060871		2367.8	-0.00244055		2957.8	-0.00265401
598.01	-0.01873372		1188.01	-0.01889051		1778	0.00083139		2368	-0.00239273		2958	-0.00424327
598.21	-0.01873316		1188.21	-0.01970369		1778.2	0.00120382		2368.2	-0.0031746		2958.2	-0.00458255
598.41	-0.01950838		1188.41	-0.01944948		1778.4	0.00177545		2368.4	-0.00262054		2958.4	-0.00434579
598.61	-0.01962186		1188.61	-0.01923226		1778.6	0.00231472		2368.6	-0.00230209		2958.6	-0.0049293
598.81	-0.02084409		1188.81	-0.01965733		1778.8	0.00164799		2368.8	-0.00105528		2958.8	-0.00404786
599.01	-0.01945772		1189.01	-0.01923047		1779	0.00255909		2369	-0.00020296		2959	-0.00397268
599.21	-0.02010218		1189.21	-0.01983144		1779.2	0.00311694		2369.2	0.00038825		2959.2	-0.00365245
599.41	-0.02064335		1189.41	-0.02021679		1779.4	0.00275102		2369.4	0.00089075		2959.4	-0.00350711
599.61	-0.01994694		1189.61	-0.0206703		1779.6	0.00385423		2369.6	0.001638		2959.6	-0.00411849
599.81	-0.02044307		1189.81	-0.0216796		1779.8	0.00366275		2369.8	0.00136204		2959.8	-0.00342798
600.01	-0.01984923		1190.01	-0.02252322		1780	0.00295481		2370	0.00184541		2960	-0.003642
600.21	-0.01903899		1190.21	-0.02311637		1780.2	0.00261817		2370.2	0.00222402		2960.2	-0.00288698
600.41	-0.01829189		1190.41	-0.02368725		1780.4	0.00282991		2370.4	0.00230349		2960.4	-0.00221991
600.61	-0.01857919		1190.61	-0.02248444		1780.6	0.00230975		2370.6	0.00245476		2960.6	-0.00147173
600.81	-0.01885659		1190.81	-0.02214007		1780.8	0.00181227		2370.8	0.00185824		2960.8	-0.00118227
601.01	-0.01934287		1191.01	-0.02143501		1781	0.00147576		2371	0.00114186		2961	-0.00031358
601.21	-0.01919218		1191.21	-0.02133867		1781.2	0.00114919		2371.2	0.00131837		2961.2	0.00015686
601.41	-0.01949466		1191.41	-0.02066323		1781.4	0.00071732		2371.4	0.00043708		2961.4	0.00049179
601.61	-0.01940726		1191.61	-0.0193342		1781.6	0.00034226		2371.6	0.00022805		2961.6	-0.00031804
601.81	-0.01940272		1191.81	-0.01951384		1781.8	-0.00050594		2371.8	-0.00087585		2961.8	-0.00093863
602.01	-0.01911048		1192.01	-0.01945029		1782	-0.00056935		2372	-0.00128285		2962	-0.00206792
602.21	-0.01926749		1192.21	-0.01910541		1782.2	-0.00116059		2372.2	-0.00107251		2962.2	-0.00114079
602.41	-0.01995228		1192.41	-0.01855404		1782.4	-0.00066789		2372.4	-0.00117871		2962.4	-0.00111592
602.61	-0.01942938		1192.61	-0.01864068		1782.6	-0.00086184		2372.6	-0.00071688		2962.6	-0.00110381
602.81	-0.0194462		1192.81	-0.01913956		1782.8	-0.00129019		2372.8	-0.00077421		2962.8	-0.00006078
603.01	-0.01780995		1193.01	-0.01944468		1783	-0.00006142		2373	-0.0009997		2963	-0.00101843
603.21	-0.01883633		1193.21	-0.01985031		1783.2	-0.00154729		2373.2	-0.00152026		2963.2	-0.00104608
603.41	-0.01881639		1193.41	-0.01961822		1783.4	-0.00215883		2373.4	-0.00209315		2963.4	-0.0012208
603.61	-0.01782396		1193.61	-0.02029133		1783.6	-0.0014121		2373.6	-0.00266258		2963.6	-0.00190259
603.81	-0.01770748		1193.81	-0.02093764		1783.8	-0.00118182		2373.8	-0.00302867		2963.8	-0.00175128
604.01	-0.01723953		1194.01	-0.02056044		1784	-0.00120653		2374	-0.00315836		2964	-0.00215479
604.21	-0.01670404		1194.21	-0.02011862		1784.2	-0.0006785		2374.2	-0.00316688		2964.2	-0.00200071
604.41	-0.01707197		1194.41	-0.0202717		1784.4	-0.00007516		2374.4	-0.00248783		2964.4	-0.00164082
604.61	-0.01778106		1194.61	-0.01939695		1784.6	0.00006441		2374.6	-0.00194291		2964.6	-0.00190208
604.81	-0.01857673		1194.81	-0.01931874		1784.8	0.00040766		2374.8	-0.00194374		2964.8	-0.0018867
605.01	-0.02003793		1195.01	-0.01959037		1785	0.00146391		2375	-0.00145369		2965	-0.00168568
605.21	-0.0200158		1195.21	-0.02011298		1785.2	0.00232266		2375.2	-0.00069065		2965.2	-0.00286844
605.41	-0.02025243		1195.41	-0.02021856		1785.4	0.00230913		2375.4	-0.00011289		2965.4	-0.00381731
605.61	-0.02069594		1195.61	-0.0206524		1785.6	0.00330426		2375.6	0.00056457		2965.6	-0.00475494
605.81	-0.02088395		1195.81	-0.02217029		1785.8	0.00358395		2375.8	0.00060245		2965.8	-0.00472972
606.01	-0.02132475		1196.01	-0.02223575		1786	0.00435685		2376	0.00074513		2966	-0.00467651
606.21	-0.02107206		1196.21	-0.02283812		1786.2	0.00472513		2376.2	0.00179813		2966.2	-0.00473875
606.41	-0.02131053		1196.41	-0.02312979		1786.4	0.00451086		2376.4	0.00125946		2966.4	-0.00430883
606.61	-0.02109507		1196.61	-0.0236931		1786.6	0.0040112		2376.6	0.00224113		2966.6	-0.00389034
606.81	-0.02112496		1196.81	-0.02397307		1786.8	0.00358547		2376.8	0.00217132		2966.8	-0.00421396
607.01	-0.02105672		1197.01	-0.02382512		1787	0.00337045		2377	0.00111948		2967	-0.00454541
607.21	-0.02063997		1197.21	-0.02360641		1787.2	0.00169863		2377.2	-0.00030889		2967.2	-0.00371569
607.41	-0.02015099		1197.41	-0.02402799		1787.4	0.00192849		2377.4	-0.00045067		2967.4	-0.00402606
607.61	-0.01971848		1197.61	-0.0240208		1787.6	0.00227106		2377.6	-0.00095731		2967.6	-0.00438283
607.81	-0.01938437		1197.81	-0.02349105		1787.8	0.00163617		2377.8	-0.00096238		2967.8	-0.00375505
608.01	-0.01980468		1198.01	-0.02329987		1788	0.00128454		2378	-0.00097688		2968	-0.00312682
608.21	-0.01920762		1198.21	-0.02300447		1788.2	0.00092447		2378.2	-0.00092718		2968.2	-0.00172644
608.41	-0.01982792		1198.41	-0.02269586		1788.4	0.00115164		2378.4	-0.0004429		2968.4	-0.00159499
608.61	-0.02108925		1198.61	-0.02157202		1788.6	0.00122095		2378.6	-0.00049375		2968.6	-0.00087822
608.81	-0.02185282		1198.81	-0.02191922		1788.8	0.00112227		2378.8	-0.00028108		2968.8	-0.00078382
609.01	-0.02178008		1199.01	-0.02226651		1789	0.00126352		2379	0.00009155		2969	-0.00104691
609.21	-0.02122989		1199.21	-0.02221854		1789.2	0.00081982		2379.2	0.00012893		2969.2	-0.00211717
609.41	-0.02142251		1199.41	-0.02200632		1789.4	0.00024997		2379.4	0.0005576		2969.4	-0.00111594
609.61	-0.02117313		1199.61	-0.02208383		1789.6	0.00085252		2379.6	0.00017348		2969.6	-0.00102255
609.81	-0.02082104		1199.81	-0.02210201		1789.8	0.00084879		2379.8	-0.0002109		2969.8	-0.00129216
610.01	-0.02028206		1200.01	-0.02152336		1790	0.00067509		2380	-0.00007859		2970	-0.00128491
610.21	-0.01914238		1200.21	-0.02203125		1790.2	0.00003461		2380.2	0.00083083		2970.2	-0.00196149
610.41	-0.01884207		1200.41	-0.02225603		1790.4	-0.00126442		2380.4	0.00047383		2970.4	-0.00195465
610.61	-0.01865942		1200.61	-0.02247045		1790.6	-0.0015019		2380.6	0.00016494		2970.6	-0.0020944
610.81	-0.01840391		1200.81	-0.02172562		1790.8	-0.00167641		2380.8	0.00013002		2970.8	-0.00343129
611.01	-0.01829364		1201.01	-0.02208584		1791	-0.00173443		2381	-0.00019128		2971	-0.00385722
611.21	-0.01771731		1201.21	-0.0220352		1791.2	-0.0019023		2381.2	-0.00014018		2971.2	-0.00389619
611.41	-0.01750671		1201.41	-0.02245232		1791.4	-0.00248841		2381.4	0.00022488		2971.4	-0.00438243
611.61	-0.01702992		1201.61	-0.02274295		1791.6	-0.0022672		2381.6	-0.00028445		2971.6	-0.00389597
611.81	-0.01655512		1201.81	-0.02291378		1791.8	-0.00241829		2381.8	0.00010702		2971.8	-0.00297063
612.01	-0.01698644		1202.01	-0.02316074		1792	-0.00146181		2382	0.00088225		2972	-0.00250679
612.21	-0.01708766		1202.21	-0.02206795		1792.2	-0.00163008		2382.2	0.00110382		2972.2	-0.00208467
612.41	-0.01797595		1202.41	-0.02179405		1792.4	-0.00149418		2382.4	0.00069461		2972.4	-0.00308928
612.61	-0.0184144		1202.61	-0.02093817		1792.6	-0.00146743		2382.6	0.0012187		2972.6	-0.00249326
612.81	-0.01890003		1202.81	-0.02122321		1792.8	-0.00216158		2382.8	0.00113976		2972.8	-0.00314953
613.01	-0.01885671		1203.01	-0.02061402		1793	-0.00220126		2383	0.00143157		2973	-0.00326378
613.21	-0.01944154		1203.21	-0.02013368		1793.2	-0.00188162		2383.2	0.00095198		2973.2	-0.00297484
613.41	-0.01967211		1203.41	-0.01967204		1793.4	-0.00181789		2383.4	0.00155812		2973.4	-0.00327284
613.61	-0.01968768		1203.61	-0.01972935		1793.6	-0.00118759		2383.6	0.00042868		2973.6	-0.00349236
613.81	-0.02024012		1203.81	-0.01981297		1793.8	-0.00060137		2383.8	0.00039165		2973.8	-0.00394075
614.01	-0.02034281		1204.01	-0.01951109		1794	-0.00051536		2384	0.00008506		2974	-0.00344099
614.21	-0.02136905		1204.21	-0.01986138		1794.2	-0.00096353		2384.2	0.00015657		2974.2	-0.00396577
614.41	-0.02206735		1204.41	-0.01941044		1794.4	-0.00113364		2384.4	-0.00035403		2974.4	-0.00429866
614.61	-0.02255766		1204.61	-0.01907719		1794.6	-0.00075857		2384.6	-0.00008969		2974.6	-0.00418095
614.81	-0.02273355		1204.81	-0.01917906		1794.8	0.00042772		2384.8	0.00065929		2974.8	-0.00530159
615.01	-0.02267587		1205.01	-0.01958571		1795	0.00049728		2385	0.00106032		2975	-0.00548665
615.21	-0.02195798		1205.21	-0.01915202		1795.2	0.00097067		2385.2	0.00090447		2975.2	-0.00554026
615.41	-0.02173675		1205.41	-0.01943804		1795.4	0.00089747		2385.4	0.00114805		2975.4	-0.00597778
615.61	-0.0210508		1205.61	-0.019955		1795.6	0.00169588		2385.6	0.00149166		2975.6	-0.00524283
615.81	-0.02087665		1205.81	-0.02023919		1795.8	0.00166474		2385.8	0.00222291		2975.8	-0.0051451
616.01	-0.02156945		1206.01	-0.02060492		1796	0.0014028		2386	0.00216032		2976	-0.00484202
616.21	-0.02196003		1206.21	-0.01974906		1796.2	0.00041467		2386.2	0.00142981		2976.2	-0.00444606
616.41	-0.02231456		1206.41	-0.01929598		1796.4	0.00026845		2386.4	0.0009204		2976.4	-0.00449432
616.61	-0.02154639		1206.61	-0.01899941		1796.6	0.00053681		2386.6	0.00174535		2976.6	-0.00363024
616.81	-0.02165876		1206.81	-0.0191991		1796.8	0.00041102		2386.8	0.00204749		2976.8	-0.00313458
617.01	-0.02079636		1207.01	-0.01904423		1797	0.00141234		2387	0.00239995		2977	-0.00223501
617.21	-0.02016019		1207.21	-0.01855479		1797.2	0.00144122		2387.2	0.00138605		2977.2	-0.00195452
617.41	-0.01981984		1207.41	-0.01840794		1797.4	0.00144672		2387.4	0.00035855		2977.4	-0.00250697
617.61	-0.01954889		1207.61	-0.01849341		1797.6	0.00147377		2387.6	-0.00063664		2977.6	-0.00103906
617.81	-0.01995182		1207.81	-0.01847165		1797.8	0.00195487		2387.8	-0.00113082		2977.8	-0.00095108
618.01	-0.01993869		1208.01	-0.01785516		1798	0.00080133		2388	-0.00230086		2978	-0.00014763
618.21	-0.02029379		1208.21	-0.01824663		1798.2	0.00011395		2388.2	-0.00280205		2978.2	-0.00038149
618.41	-0.01963264		1208.41	-0.01808896		1798.4	-0.00057459		2388.4	-0.00299823		2978.4	-0.00080149
618.61	-0.01994953		1208.61	-0.01809044		1798.6	-0.00004711		2388.6	-0.00210629		2978.6	-0.00146795
618.81	-0.01959459		1208.81	-0.01807157		1798.8	-0.00064745		2388.8	-0.00282273		2978.8	-0.00301568
619.01	-0.01913262		1209.01	-0.01740585		1799	-0.00187154		2389	-0.00296842		2979	-0.00387015
619.21	-0.01881635		1209.21	-0.01689878		1799.2	-0.00216505		2389.2	-0.00291564		2979.2	-0.00520536
619.41	-0.01884793		1209.41	-0.01790528		1799.4	-0.00237562		2389.4	-0.00288838		2979.4	-0.00497543
619.61	-0.01760466		1209.61	-0.01876536		1799.6	-0.00287214		2389.6	-0.00274772		2979.6	-0.00467042
619.81	-0.01864483		1209.81	-0.01914087		1799.8	-0.00328779		2389.8	-0.00345819		2979.8	-0.00469141
620.01	-0.01881438		1210.01	-0.01960246		1800	-0.0037979		2390	-0.00434858		2980	-0.00396371
620.21	-0.01856385		1210.21	-0.0196954		1800.2	-0.00340527		2390.2	-0.00436687		2980.2	-0.00320986
620.41	-0.01852098		1210.41	-0.0206991		1800.4	-0.00187011		2390.4	-0.00402695		2980.4	-0.00264392
620.61	-0.01768466		1210.61	-0.02131066		1800.6	-0.00060684		2390.6	-0.00314234		2980.6	-0.00242638
620.81	-0.01756812		1210.81	-0.02130023		1800.8	0.00023004		2390.8	-0.00269649		2980.8	-0.00231478
621.01	-0.01722285		1211.01	-0.02099503		1801	0.00113177		2391	-0.00320348		2981	-0.00226551
621.21	-0.01672264		1211.21	-0.02072883		1801.2	0.00150355		2391.2	-0.00441115		2981.2	-0.00313883
621.41	-0.01681463		1211.41	-0.0209366		1801.4	0.0018771		2391.4	-0.00416904		2981.4	-0.0034765
621.61	-0.01602718		1211.61	-0.02076126		1801.6	0.00247815		2391.6	-0.00391551		2981.6	-0.00326367
621.81	-0.01638635		1211.81	-0.02057276		1801.8	0.00320352		2391.8	-0.00389578		2981.8	-0.00384733
622.01	-0.01564266		1212.01	-0.02052842		1802	0.00268058		2392	-0.00359239		2982	-0.00509476
622.21	-0.01573499		1212.21	-0.0199651		1802.2	0.00293224		2392.2	-0.00328178		2982.2	-0.00585836
622.41	-0.0155248		1212.41	-0.01911331		1802.4	0.00235906		2392.4	-0.00252689		2982.4	-0.00597864
622.61	-0.01620992		1212.61	-0.01790071		1802.6	0.00215543		2392.6	-0.00152154		2982.6	-0.00617853
622.81	-0.01629863		1212.81	-0.01711265		1802.8	0.00082632		2392.8	-0.00148549		2982.8	-0.00692213
623.01	-0.01634139		1213.01	-0.01657864		1803	0.00034784		2393	-0.00033693		2983	-0.00644265
623.21	-0.01682464		1213.21	-0.01659678		1803.2	0.00012821		2393.2	0.00057083		2983.2	-0.00637628
623.41	-0.01745843		1213.41	-0.01752436		1803.4	-0.00039107		2393.4	0.00094931		2983.4	-0.00505254
623.61	-0.01831732		1213.61	-0.01748012		1803.6	-0.00077016		2393.6	0.00135935		2983.6	-0.00479672
623.81	-0.01963575		1213.81	-0.0181922		1803.8	-0.0013257		2393.8	0.00112889		2983.8	-0.00424397
624.01	-0.019799		1214.01	-0.01887903		1804	-0.0017006		2394	0.00095229		2984	-0.00315467
624.21	-0.02001962		1214.21	-0.01973784		1804.2	-0.00115955		2394.2	0.00074241		2984.2	-0.00274407
624.41	-0.02115403		1214.41	-0.02056489		1804.4	-0.00033756		2394.4	0.00035963		2984.4	-0.00233528
624.61	-0.0218072		1214.61	-0.02100987		1804.6	-0.0006362		2394.6	0.00027665		2984.6	-0.00245459
624.81	-0.02271234		1214.81	-0.02113252		1804.8	0.00005319		2394.8	-0.00029373		2984.8	-0.00216072
625.01	-0.02307529		1215.01	-0.02114874		1805	0.00023807		2395	-0.00055932		2985	-0.00198155
625.21	-0.02280703		1215.21	-0.0223372		1805.2	0.00020069		2395.2	-0.00141657		2985.2	-0.00189952
625.41	-0.02320764		1215.41	-0.02254961		1805.4	0.00032436		2395.4	-0.00172991		2985.4	-0.00243563
625.61	-0.02279282		1215.61	-0.02241288		1805.6	0.00144004		2395.6	-0.00274207		2985.6	-0.00229434
625.81	-0.02302738		1215.81	-0.02271274		1805.8	0.00147823		2395.8	-0.00348336		2985.8	-0.00269126
626.01	-0.02180402		1216.01	-0.02264422		1806	0.00213929		2396	-0.00396597		2986	-0.00276921
626.21	-0.02195243		1216.21	-0.02187732		1806.2	0.00256854		2396.2	-0.00399122		2986.2	-0.00249103
626.41	-0.02180446		1216.41	-0.02169095		1806.4	0.00201648		2396.4	-0.00352004		2986.4	-0.00231713
626.61	-0.02155184		1216.61	-0.02107717		1806.6	0.00146102		2396.6	-0.00283177		2986.6	-0.00236663
626.81	-0.02155924		1216.81	-0.02163429		1806.8	0.00080347		2396.8	-0.00262175		2986.8	-0.00290983
627.01	-0.02092015		1217.01	-0.02223268		1807	0.00046412		2397	-0.00261906		2987	-0.00211738
627.21	-0.02143346		1217.21	-0.02212721		1807.2	0.00042683		2397.2	-0.00251966		2987.2	-0.0021183
627.41	-0.02121327		1217.41	-0.02235605		1807.4	0.00010105		2397.4	-0.00240038		2987.4	-0.00251734
627.61	-0.02106314		1217.61	-0.02226612		1807.6	0.00041605		2397.6	-0.00165318		2987.6	-0.00295966
627.81	-0.02062845		1217.81	-0.02245031		1807.8	-0.00069548		2397.8	-0.00139205		2987.8	-0.0033046
628.01	-0.02066523		1218.01	-0.02207695		1808	-0.00128783		2398	-0.00152865		2988	-0.00365902
628.21	-0.02069775		1218.21	-0.02214022		1808.2	-0.00162852		2398.2	-0.00154479		2988.2	-0.00421163
628.41	-0.02159859		1218.41	-0.02258391		1808.4	-0.00207284		2398.4	-0.00110899		2988.4	-0.00402569
628.61	-0.02197247		1218.61	-0.02233879		1808.6	-0.0031509		2398.6	-0.00013609		2988.6	-0.00477595
628.81	-0.02189589		1218.81	-0.02172106		1808.8	-0.00280426		2398.8	-0.00018541		2988.8	-0.00454049
629.01	-0.02179461		1219.01	-0.02216834		1809	-0.00319971		2399	0.000229		2989	-0.00457532
629.21	-0.02151216		1219.21	-0.02262207		1809.2	-0.00273912		2399.2	-0.00075238		2989.2	-0.00466219
629.41	-0.02180099		1219.41	-0.02246587		1809.4	-0.00238489		2399.4	-0.00125038		2989.4	-0.00466067
629.61	-0.02167692		1219.61	-0.02220535		1809.6	-0.00268192		2399.6	-0.00182508		2989.6	-0.00430378
629.81	-0.0213308		1219.81	-0.02244765		1809.8	-0.00314265		2399.8	-0.00247253		2989.8	-0.00390072
630.01	-0.02088749		1220.01	-0.0223262		1810	-0.00284315		2400	-0.00205569		2990	-0.00294869
630.21	-0.02112721		1220.21	-0.02220701		1810.2	-0.00331484		2400.2	-0.00210982		2990.2	-0.00311051
630.41	-0.0206678		1220.41	-0.02250832		1810.4	-0.00379072		2400.4	-0.0021734		2990.4	-0.00233174
630.61	-0.02069608		1220.61	-0.0223875		1810.6	-0.00402536		2400.6	-0.00234701		2990.6	-0.00153209
630.81	-0.02145777		1220.81	-0.02310988		1810.8	-0.00420039		2400.8	-0.00294844		2990.8	-0.0017102
631.01	-0.02132497		1221.01	-0.02264289		1811	-0.00370524		2401	-0.00269549		2991	-0.00157931
631.21	-0.02171918		1221.21	-0.02267933		1811.2	-0.00300285		2401.2	-0.00211865		2991.2	-0.0012938
631.41	-0.02145159		1221.41	-0.02284932		1811.4	-0.00339419		2401.4	-0.00168688		2991.4	-0.00183316
631.61	-0.02198495		1221.61	-0.02197941		1811.6	-0.00327282		2401.6	-0.00101976		2991.6	-0.00202406
631.81	-0.02252179		1221.81	-0.0217368		1811.8	-0.0035557		2401.8	-0.0009477		2991.8	-0.00276042
632.01	-0.02192125		1222.01	-0.02140239		1812	-0.00348776		2402	-0.00072854		2992	-0.00336036
632.21	-0.02203171		1222.21	-0.02108674		1812.2	-0.00384269		2402.2	-0.00065956		2992.2	-0.00372493
632.41	-0.02200167		1222.41	-0.02087666		1812.4	-0.00394389		2402.4	-0.00056241		2992.4	-0.00415039
632.61	-0.02150891		1222.61	-0.02074915		1812.6	-0.00344937		2402.6	0.00006014		2992.6	-0.00461484
632.81	-0.02167064		1222.81	-0.02103548		1812.8	-0.00216398		2402.8	0.00006042		2992.8	-0.0050033
633.01	-0.02174516		1223.01	-0.02113915		1813	-0.0014345		2403	0.00035375		2993	-0.0058154
633.21	-0.02129354		1223.21	-0.02075148		1813.2	-0.00099843		2403.2	0.0000008		2993.2	-0.00584389
633.41	-0.02175105		1223.41	-0.02010071		1813.4	-0.00096294		2403.4	-0.00050637		2993.4	-0.00571315
633.61	-0.0219415		1223.61	-0.01980694		1813.6	-0.00070007		2403.6	-0.00010496		2993.6	-0.00576618
633.81	-0.02149024		1223.81	-0.01952005		1813.8	-0.00000264		2403.8	-0.00032811		2993.8	-0.00531541
634.01	-0.02174977		1224.01	-0.019404		1814	0.000443		2404	-0.00044959		2994	-0.00584064
634.21	-0.02179675		1224.21	-0.02035747		1814.2	0.00055658		2404.2	-0.00038398		2994.2	-0.00629482
634.41	-0.02205616		1224.41	-0.0209703		1814.4	0.00068397		2404.4	-0.00046396		2994.4	-0.0055297
634.61	-0.02256149		1224.61	-0.02113075		1814.6	0.00028067		2404.6	-0.00080022		2994.6	-0.00576083
634.81	-0.02306622		1224.81	-0.02166306		1814.8	0.00000606		2404.8	-0.0008187		2994.8	-0.00676868
635.01	-0.02292177		1225.01	-0.02088631		1815	-0.0001341		2405	-0.0008902		2995	-0.00630779
635.21	-0.02315394		1225.21	-0.02132386		1815.2	-0.00007289		2405.2	-0.00111175		2995.2	-0.0053497
635.41	-0.02306735		1225.41	-0.02174442		1815.4	-0.00077495		2405.4	-0.0020447		2995.4	-0.00547736
635.61	-0.02311517		1225.61	-0.02213188		1815.6	-0.00044888		2405.6	-0.00308264		2995.6	-0.00470176
635.81	-0.02216529		1225.81	-0.02314697		1815.8	-0.00100513		2405.8	-0.00305478		2995.8	-0.00434452
636.01	-0.02170335		1226.01	-0.0238482		1816	-0.00136775		2406	-0.00384806		2996	-0.00404843
636.21	-0.02182949		1226.21	-0.0240172		1816.2	-0.00125742		2406.2	-0.00448674		2996.2	-0.0034451
636.41	-0.02169712		1226.41	-0.02420653		1816.4	-0.0008405		2406.4	-0.00419745		2996.4	-0.00349719
636.61	-0.02167535		1226.61	-0.02475739		1816.6	-0.00130144		2406.6	-0.00429487		2996.6	-0.00345125
636.81	-0.02259259		1226.81	-0.02442921		1816.8	-0.00143152		2406.8	-0.00406708		2996.8	-0.0035988
637.01	-0.02213411		1227.01	-0.0240178		1817	-0.00158287		2407	-0.00353825		2997	-0.00370318
637.21	-0.02187798		1227.21	-0.02343447		1817.2	-0.00108918		2407.2	-0.0030006		2997.2	-0.00329469
637.41	-0.02189579		1227.41	-0.02362778		1817.4	-0.00097705		2407.4	-0.00264143		2997.4	-0.00390298
637.61	-0.02145003		1227.61	-0.02447662		1817.6	-0.00109691		2407.6	-0.00157986		2997.6	-0.0044105
637.81	-0.02120445		1227.81	-0.0239142		1817.8	-0.0012009		2407.8	-0.00195683		2997.8	-0.00491537
638.01	-0.02099309		1228.01	-0.02333831		1818	-0.00159144		2408	-0.00079988		2998	-0.00552206
638.21	-0.02094493		1228.21	-0.02365645		1818.2	-0.0019754		2408.2	-0.00001913		2998.2	-0.00574044
638.41	-0.02106873		1228.41	-0.02338586		1818.4	-0.0019631		2408.4	-0.0002907		2998.4	-0.00659163
638.61	-0.02086134		1228.61	-0.02313293		1818.6	-0.00149988		2408.6	-0.00055438		2998.6	-0.00686056
638.81	-0.02092787		1228.81	-0.02287122		1818.8	-0.00141292		2408.8	-0.00042833		2998.8	-0.00745322
639.01	-0.0208209		1229.01	-0.02239763		1819	-0.00087272		2409	-0.00076746		2999	-0.0073008
639.21	-0.02024236		1229.21	-0.02302169		1819.2	0.00025486		2409.2	-0.00117438		2999.2	-0.00684083
639.41	-0.01987182		1229.41	-0.02371261		1819.4	0.00118143		2409.4	-0.00261912		2999.4	-0.00644022
639.61	-0.01958531		1229.61	-0.02360507		1819.6	0.0016687		2409.6	-0.00317707		2999.6	-0.00627271
639.81	-0.01914407		1229.81	-0.0239127		1819.8	0.00190353		2409.8	-0.00299967		2999.8	-0.00638019
640.01	-0.0200393		1230.01	-0.02409913		1820	0.0024566		2410	-0.00379305		3000	-0.00662525
640.21	-0.01969351		1230.21	-0.02378918		1820.2	0.00171179		2410.2	-0.00356486		3000.2	-0.00615522
640.41	-0.02054669		1230.41	-0.02407244		1820.4	0.00192344		2410.4	-0.00323133		3000.4	-0.0062991
640.61	-0.02069091		1230.61	-0.02357499		1820.6	0.00140785		2410.6	-0.00369723		3000.6	-0.00595062
640.81	-0.02082443		1230.81	-0.0237045		1820.8	0.00227825		2410.8	-0.00362866		3000.8	-0.00541919
641.01	-0.02030587		1231.01	-0.02343646		1821	0.00271019		2411	-0.00322938		3001	-0.00523336
641.21	-0.02036754		1231.21	-0.02344193		1821.2	0.0029311		2411.2	-0.00293423		3001.2	-0.00487125
641.41	-0.02058702		1231.41	-0.02364385		1821.4	0.0016567		2411.4	-0.00282255		3001.4	-0.00423873
641.61	-0.02122484		1231.61	-0.02311958		1821.6	0.00144262		2411.6	-0.0027362		3001.6	-0.00381702
641.81	-0.02153359		1231.81	-0.02312278		1821.8	0.00148809		2411.8	-0.00205248		3001.8	-0.00340092
642.01	-0.02160302		1232.01	-0.02255391		1822	0.00082209		2412	-0.0012476		3002	-0.00370908
642.21	-0.02172051		1232.21	-0.02324746		1822.2	0.00047415		2412.2	-0.00046654		3002.2	-0.00405468
642.41	-0.0216614		1232.41	-0.0236773		1822.4	0.00058659		2412.4	-0.00037383		3002.4	-0.00396488
642.61	-0.02184059		1232.61	-0.02422725		1822.6	0.00110397		2412.6	0.0000585		3002.6	-0.00321281
642.81	-0.02181703		1232.81	-0.02388652		1822.8	0.00063259		2412.8	0.00077765		3002.8	-0.0040456
643.01	-0.02202931		1233.01	-0.02405045		1823	0.00030843		2413	0.00142801		3003	-0.00392482
643.21	-0.02126937		1233.21	-0.0243221		1823.2	0.00046301		2413.2	0.00098767		3003.2	-0.00339887
643.41	-0.02120201		1233.41	-0.02361491		1823.4	0.0006106		2413.4	0.00119468		3003.4	-0.00381288
643.61	-0.02113369		1233.61	-0.02359885		1823.6	-0.00057153		2413.6	0.00182145		3003.6	-0.00475992
643.81	-0.02107474		1233.81	-0.02406661		1823.8	-0.00122024		2413.8	0.00164827		3003.8	-0.00535962
644.01	-0.0210123		1234.01	-0.02388491		1824	-0.0022742		2414	0.00169987		3004	-0.00657968
644.21	-0.02172885		1234.21	-0.02418621		1824.2	-0.00264848		2414.2	0.00224583		3004.2	-0.00635328
644.41	-0.02226545		1234.41	-0.02409583		1824.4	-0.00163213		2414.4	0.00210221		3004.4	-0.0066189
644.61	-0.02213948		1234.61	-0.0233587		1824.6	-0.00171918		2414.6	0.00137447		3004.6	-0.00691761
644.81	-0.02163778		1234.81	-0.02325703		1824.8	-0.00083726		2414.8	0.0004133		3004.8	-0.00711601
645.01	-0.02198238		1235.01	-0.02252732		1825	-0.00060427		2415	0.00053299		3005	-0.00756716
645.21	-0.02241685		1235.21	-0.02221561		1825.2	0.00002754		2415.2	0.00119045		3005.2	-0.00746891
645.41	-0.02271732		1235.41	-0.02160533		1825.4	-0.00016667		2415.4	0.00082268		3005.4	-0.00709223
645.61	-0.02261332		1235.61	-0.02132198		1825.6	0.00049752		2415.6	0.00066851		3005.6	-0.00695753
645.81	-0.02219491		1235.81	-0.0215449		1825.8	0.00065552		2415.8	-0.00006787		3005.8	-0.00697741
646.01	-0.02153748		1236.01	-0.0210721		1826	0.00026604		2416	-0.00138984		3006	-0.00696709
646.21	-0.02103738		1236.21	-0.02188886		1826.2	0.00073839		2416.2	-0.00040796		3006.2	-0.00649942
646.41	-0.02136631		1236.41	-0.02219239		1826.4	0.00068073		2416.4	-0.00107434		3006.4	-0.0063397
646.61	-0.02219131		1236.61	-0.02293937		1826.6	0.00055972		2416.6	-0.00056336		3006.6	-0.00624235
646.81	-0.02233936		1236.81	-0.02221099		1826.8	0.00098793		2416.8	-0.00104141		3006.8	-0.00566838
647.01	-0.02253141		1237.01	-0.02273163		1827	0.00088703		2417	-0.001044		3007	-0.00478589
647.21	-0.0220781		1237.21	-0.02323493		1827.2	0.00127945		2417.2	-0.00138455		3007.2	-0.00429855
647.41	-0.02278082		1237.41	-0.0228433		1827.4	0.00113118		2417.4	-0.00082761		3007.4	-0.0045836
647.61	-0.02300181		1237.61	-0.02343827		1827.6	0.00047167		2417.6	-0.00115986		3007.6	-0.00482927
647.81	-0.02310322		1237.81	-0.02409051		1827.8	0.00065727		2417.8	-0.00161772		3007.8	-0.00472711
648.01	-0.02334874		1238.01	-0.0246286		1828	0.00082325		2418	-0.00136283		3008	-0.00457813
648.21	-0.0243722		1238.21	-0.02518082		1828.2	0.00132362		2418.2	-0.00106324		3008.2	-0.00373329
648.41	-0.02435579		1238.41	-0.0250017		1828.4	0.00150034		2418.4	-0.00149591		3008.4	-0.00411887
648.61	-0.02468666		1238.61	-0.02468686		1828.6	0.00169057		2418.6	-0.00164387		3008.6	-0.00447597
648.81	-0.02453679		1238.81	-0.02414138		1828.8	0.00207259		2418.8	-0.00154647		3008.8	-0.00473783
649.01	-0.02556756		1239.01	-0.02347697		1829	0.00205717		2419	-0.00100774		3009	-0.00514838
649.21	-0.02586573		1239.21	-0.0225919		1829.2	0.00222503		2419.2	-0.00051982		3009.2	-0.00492167
649.41	-0.02602514		1239.41	-0.02183534		1829.4	0.00165383		2419.4	-0.00087931		3009.4	-0.00496391
649.61	-0.02610201		1239.61	-0.02112481		1829.6	0.00156682		2419.6	-0.00124361		3009.6	-0.00485718
649.81	-0.02624752		1239.81	-0.02094704		1829.8	0.00124934		2419.8	-0.00177748		3009.8	-0.00550632
