# Supplementary material for: Functional development of a V3/glycan-specific broadly neutralizing antibody isolated from a case of HIV superinfection
Source: eLife journal article supplement (doi:10.7554/elife.68110), 2021-07-15
Supplement: fig2-data2 [file C5.xls]

Vers 3.43 Data Simulation
Conc1	1.25E-07	1.25E-07	1.25E-07	1.25E-07	1.25E-07	1.25E-07
Start1	290	879.99	1470.01	2060	2650	3240
Stop1	649.8	1239.79	1829.81	2419.8	3009.8	3599.79
Time1	Data1	Sim1	Time2	Data2	Sim2	Time3	Data3	Sim3	Time4	Data4	Sim4	Time5	Data5	Sim5	Time6	Data6	Sim6
290	0.00742317		879.99	-0.00035247		1470.01	-0.00057029		2060	0.00944648		2650	-0.002321		3240	0.00357374
290.2	0.00683902		880.19	-0.00034969		1470.21	-0.00109775		2060.2	0.00890993		2650.2	-0.00281741		3240.2	0.00362439
290.4	0.0066686		880.39	-0.00035131		1470.41	-0.00188292		2060.4	0.0078823		2650.4	-0.00288687		3240.4	0.00293647
290.6	0.00653853		880.59	-0.00013098		1470.61	-0.00242474		2060.6	0.00755386		2650.6	-0.0030557		3240.6	0.00323877
290.8	0.00628682		880.79	-0.00056518		1470.81	-0.00250861		2060.8	0.00732859		2650.8	-0.00370959		3240.8	0.00286685
291	0.00688488		880.99	-0.00109223		1471.01	-0.00271726		2061	0.00651413		2651	-0.00377307		3241	0.00296188
291.2	0.00651322		881.19	-0.00097899		1471.21	-0.0021521		2061.2	0.00631815		2651.2	-0.0033359		3241.2	0.00275047
291.4	0.0054247		881.39	-0.00094198		1471.41	-0.00241622		2061.4	0.00662889		2651.4	-0.00309305		3241.4	0.00308153
291.6	0.00573056		881.59	-0.00048262		1471.61	-0.002348		2061.6	0.00613386		2651.6	-0.00250988		3241.6	0.00365008
291.8	0.00586626		881.79	-0.00044591		1471.81	-0.00197538		2061.8	0.00570187		2651.8	-0.00293197		3241.8	0.00343872
292	0.00693943		881.99	-0.00053535		1472.01	-0.00153657		2062	0.00513601		2652	-0.00234457		3242	0.0029865
292.2	0.00803651		882.19	-0.00047186		1472.21	-0.00095557		2062.2	0.00488638		2652.2	-0.00227274		3242.2	0.00246144
292.4	0.00830664		882.39	-0.00056349		1472.41	-0.00137186		2062.4	0.00448804		2652.4	-0.00239157		3242.4	0.0014938
292.6	0.00942148		882.59	-0.00088649		1472.61	-0.00146522		2062.6	0.00392882		2652.6	-0.00231255		3242.6	0.00200704
292.8	0.00901295		882.79	-0.00046305		1472.81	-0.00198729		2062.8	0.00415013		2652.8	-0.00195491		3242.8	0.00190158
293	0.01017545		882.99	-0.00003582		1473.01	-0.0019442		2063	0.00528303		2653	-0.00131619		3243	0.00197257
293.2	0.01018184		883.19	-0.00035551		1473.21	-0.00179654		2063.2	0.00561529		2653.2	-0.00169263		3243.2	0.00263253
293.4	0.01137281		883.39	0.0002889		1473.41	-0.00210338		2063.4	0.00590045		2653.4	-0.00113043		3243.4	0.00382779
293.6	0.01168949		883.59	0.0002603		1473.61	-0.00288178		2063.6	0.00658514		2653.6	-0.00093789		3243.6	0.00497565
293.8	0.01215979		883.79	0.00078598		1473.81	-0.00233353		2063.8	0.00729315		2653.8	-0.00067653		3243.8	0.00490724
294	0.01218242		883.99	0.00157639		1474.01	-0.0024389		2064	0.00706898		2654	-0.00154009		3244	0.00517697
294.2	0.01232969		884.19	0.00190482		1474.21	-0.002924		2064.2	0.00671716		2654.2	-0.00184808		3244.2	0.00540018
294.4	0.01275262		884.39	0.00293279		1474.41	-0.0038367		2064.4	0.00675844		2654.4	-0.00139646		3244.4	0.00533123
294.6	0.01256239		884.59	0.00348458		1474.61	-0.00441885		2064.6	0.00735025		2654.6	-0.00273335		3244.6	0.00641925
294.8	0.01350135		884.79	0.00322389		1474.81	-0.0045847		2064.8	0.00757174		2654.8	-0.003375		3244.8	0.00585314
295	0.0144586		884.99	0.00383597		1475.01	-0.00480305		2065	0.00784027		2655	-0.00293161		3245	0.0059978
295.2	0.01405555		885.19	0.00486463		1475.21	-0.004988		2065.2	0.00970963		2655.2	-0.00241995		3245.2	0.00604494
295.4	0.0147543		885.39	0.00533886		1475.41	-0.00570608		2065.4	0.00954103		2655.4	-0.00295375		3245.4	0.00608795
295.6	0.01654568		885.59	0.00530852		1475.61	-0.00660229		2065.6	0.00907259		2655.6	-0.0021741		3245.6	0.00589878
295.8	0.01761544		885.79	0.00508826		1475.81	-0.00634387		2065.8	0.00899353		2655.8	-0.00308093		3245.8	0.00516805
296	0.01898571		885.99	0.00496179		1476.01	-0.00624886		2066	0.00844051		2656	-0.00268718		3246	0.00403541
296.2	0.01947865		886.19	0.00473334		1476.21	-0.00542937		2066.2	0.0073513		2656.2	-0.0026534		3246.2	0.0026657
296.4	0.01977712		886.39	0.0037955		1476.41	-0.00447915		2066.4	0.00688046		2656.4	-0.00239072		3246.4	0.00198518
296.6	0.02047423		886.59	0.00351106		1476.61	-0.00464149		2066.6	0.00637468		2656.6	-0.00253325		3246.6	0.00204437
296.8	0.02033478		886.79	0.00340891		1476.81	-0.00444462		2066.8	0.006673		2656.8	-0.00232649		3246.8	0.0016289
297	0.02070135		886.99	0.00337915		1477.01	-0.00347585		2067	0.00597063		2657	-0.00297042		3247	0.00170194
297.2	0.02151137		887.19	0.00237515		1477.21	-0.00268659		2067.2	0.00495268		2657.2	-0.00340926		3247.2	0.00200976
297.4	0.02209809		887.39	0.00205912		1477.41	-0.00142833		2067.4	0.00469507		2657.4	-0.00375052		3247.4	0.00192476
297.6	0.0225579		887.59	0.00147017		1477.61	-0.00112888		2067.6	0.00435537		2657.6	-0.00328153		3247.6	0.00104265
297.8	0.02296159		887.79	0.00043701		1477.81	0.00001412		2067.8	0.00408959		2657.8	-0.00393308		3247.8	0.00153847
298	0.02333777		887.99	0.00115252		1478.01	0.00050851		2068	0.0030432		2658	-0.00469309		3248	0.00190731
298.2	0.02370082		888.19	0.00171688		1478.21	0.0001602		2068.2	0.00334113		2658.2	-0.00459279		3248.2	0.00129226
298.4	0.02403925		888.39	0.00220665		1478.41	0.00008523		2068.4	0.00367038		2658.4	-0.00485712		3248.4	0.00168406
298.6	0.02508876		888.59	0.00216041		1478.61	0.0000389		2068.6	0.00451236		2658.6	-0.00589738		3248.6	0.00175209
298.8	0.02600852		888.79	0.00192436		1478.81	0.00025524		2068.8	0.00640696		2658.8	-0.00575577		3248.8	0.00163522
299	0.02650448		888.99	0.00177488		1479.01	-0.0007084		2069	0.00816568		2659	-0.00537147		3249	0.00218509
299.2	0.02612027		889.19	0.00154304		1479.21	-0.00144045		2069.2	0.00939898		2659.2	-0.00503267		3249.2	0.00296452
299.4	0.02718745		889.39	0.00154967		1479.41	-0.00213274		2069.4	0.00994588		2659.4	-0.0045432		3249.4	0.00294363
299.6	0.02833103		889.59	0.00146946		1479.61	-0.00283579		2069.6	0.01139181		2659.6	-0.00392132		3249.6	0.00393096
299.8	0.02859505		889.79	0.00210447		1479.81	-0.00300511		2069.8	0.01237604		2659.8	-0.00422191		3249.8	0.00380375
300	0.0285142		889.99	0.00255654		1480.01	-0.00331402		2070	0.01286191		2660	-0.00335959		3250	0.00248453
300.2	0.02908004		890.19	0.00265621		1480.21	-0.00288914		2070.2	0.01255039		2660.2	-0.00259776		3250.2	0.00223014
300.4	0.02921594		890.39	0.00248369		1480.41	-0.00371748		2070.4	0.01332869		2660.4	-0.00322192		3250.4	0.00249267
300.6	0.02908503		890.59	0.00314621		1480.61	-0.00507433		2070.6	0.012826		2660.6	-0.00358682		3250.6	0.00340475
300.8	0.02958603		890.79	0.00282826		1480.81	-0.00535567		2070.8	0.01249525		2660.8	-0.00358026		3250.8	0.00293435
301	0.03022084		890.99	0.00348127		1481.01	-0.00556171		2071	0.01236081		2661	-0.00384342		3251	0.00268613
301.2	0.03182498		891.19	0.00318186		1481.21	-0.00550633		2071.2	0.01222054		2661.2	-0.00417759		3251.2	0.00257316
301.4	0.03224419		891.39	0.00335192		1481.41	-0.00588395		2071.4	0.01181547		2661.4	-0.00324784		3251.4	0.00244476
301.6	0.03338915		891.59	0.00324647		1481.61	-0.00640662		2071.6	0.01079698		2661.6	-0.00331123		3251.6	0.00255999
301.8	0.03393869		891.79	0.00366697		1481.81	-0.00677149		2071.8	0.01031979		2661.8	-0.00385766		3251.8	0.00360811
302	0.03462627		891.99	0.00449512		1482.01	-0.00652951		2072	0.00913664		2662	-0.00358553		3252	0.00360271
302.2	0.03479891		892.19	0.00457311		1482.21	-0.00696585		2072.2	0.00922178		2662.2	-0.00349671		3252.2	0.00235839
302.4	0.03514915		892.39	0.00432898		1482.41	-0.00616855		2072.4	0.00906032		2662.4	-0.00316446		3252.4	0.00299062
302.6	0.03553611		892.59	0.00418506		1482.61	-0.00564927		2072.6	0.01006356		2662.6	-0.0033799		3252.6	0.00403675
302.8	0.03500352		892.79	0.00324907		1482.81	-0.0053681		2072.8	0.01054424		2662.8	-0.00350294		3252.8	0.00444129
303	0.03553577		892.99	0.00344572		1483.01	-0.00596885		2073	0.01074761		2663	-0.00306778		3253	0.00481352
303.2	0.03606609		893.19	0.00282193		1483.21	-0.00528959		2073.2	0.01062647		2663.2	-0.00304989		3253.2	0.00487016
303.4	0.03690835		893.39	0.00379255		1483.41	-0.00452964		2073.4	0.01115309		2663.4	-0.00318553		3253.4	0.00493044
303.6	0.03789889		893.59	0.00411642		1483.61	-0.00352488		2073.6	0.0110159		2663.6	-0.00323042		3253.6	0.00580861
303.8	0.03768674		893.79	0.00411463		1483.81	-0.00314137		2073.8	0.01085917		2663.8	-0.00321813		3253.8	0.00520567
304	0.03748405		893.99	0.00405718		1484.01	-0.00234231		2074	0.01073067		2664	-0.00237149		3254	0.00461705
304.2	0.03835549		894.19	0.00418624		1484.21	-0.00225674		2074.2	0.01073463		2664.2	-0.00241536		3254.2	0.00428164
304.4	0.0382192		894.39	0.003481		1484.41	-0.0024693		2074.4	0.010093		2664.4	-0.00286309		3254.4	0.00396256
304.6	0.03851374		894.59	0.00356075		1484.61	-0.00222236		2074.6	0.00963358		2664.6	-0.0027808		3254.6	0.00409923
304.8	0.03891252		894.79	0.00345921		1484.81	-0.00156916		2074.8	0.00934499		2664.8	-0.00247603		3254.8	0.00268629
305	0.03898527		894.99	0.00444133		1485.01	-0.00109859		2075	0.01005309		2665	-0.00286673		3255	0.00302824
305.2	0.03926775		895.19	0.0046192		1485.21	-0.00039517		2075.2	0.0093192		2665.2	-0.00318467		3255.2	0.00305551
305.4	0.03903333		895.39	0.00462672		1485.41	-0.00037091		2075.4	0.00898786		2665.4	-0.00246943		3255.4	0.00265549
305.6	0.03939956		895.59	0.00456408		1485.61	0.00033116		2075.6	0.00837853		2665.6	-0.00263984		3255.6	0.00250146
305.8	0.0395626		895.79	0.00435325		1485.81	0.00033174		2075.8	0.00841695		2665.8	-0.0019043		3255.8	0.0017937
306	0.04018436		895.99	0.00436384		1486.01	0.00115868		2076	0.00828116		2666	-0.00199079		3256	0.00162503
306.2	0.03980969		896.19	0.00422738		1486.21	0.00135312		2076.2	0.00852722		2666.2	-0.00173922		3256.2	0.00142554
306.4	0.04056986		896.39	0.00421379		1486.41	0.00141191		2076.4	0.00861049		2666.4	-0.00167678		3256.4	0.00191095
306.6	0.04084186		896.59	0.00434206		1486.61	0.00123888		2076.6	0.00868233		2666.6	-0.00250269		3256.6	0.00224125
306.8	0.04115205		896.79	0.00418453		1486.81	0.00039483		2076.8	0.0089747		2666.8	-0.00316145		3256.8	0.00174694
307	0.04206185		896.99	0.00465824		1487.01	-0.00028721		2077	0.00995579		2667	-0.00299002		3257	0.00219518
307.2	0.04306955		897.19	0.00417746		1487.21	-0.0007231		2077.2	0.00983509		2667.2	-0.00345332		3257.2	0.00177811
307.4	0.04349614		897.39	0.00537392		1487.41	-0.00079535		2077.4	0.00988259		2667.4	-0.00425676		3257.4	0.00248836
307.6	0.04399951		897.59	0.00568946		1487.61	-0.00143635		2077.6	0.00974217		2667.6	-0.00445831		3257.6	0.00235567
307.8	0.04412368		897.79	0.00642237		1487.81	-0.00188739		2077.8	0.00935401		2667.8	-0.00466273		3257.8	0.00216066
308	0.0442438		897.99	0.00617014		1488.01	-0.00211045		2078	0.00945936		2668	-0.00336282		3258	0.00171152
308.2	0.045232		898.19	0.00551609		1488.21	-0.00279605		2078.2	0.00952196		2668.2	-0.00304352		3258.2	0.00169936
308.4	0.0453928		898.39	0.00598914		1488.41	-0.00296191		2078.4	0.00892085		2668.4	-0.00223998		3258.4	0.00238934
308.6	0.04499072		898.59	0.00592043		1488.61	-0.00281808		2078.6	0.00921702		2668.6	-0.00195725		3258.6	0.00157259
308.8	0.04528244		898.79	0.00675833		1488.81	-0.00310764		2078.8	0.00911454		2668.8	-0.00149304		3258.8	0.0000295
309	0.04546764		898.99	0.00705921		1489.01	-0.00317333		2079	0.00963694		2669	-0.00147842		3259	0.00028315
309.2	0.04575168		899.19	0.00724303		1489.21	-0.0027474		2079.2	0.00940152		2669.2	-0.00100334		3259.2	-0.00048684
309.4	0.04579576		899.39	0.00660415		1489.41	-0.00351037		2079.4	0.00949326		2669.4	-0.00031697		3259.4	-0.00088348
309.6	0.04704147		899.59	0.00573663		1489.61	-0.00264771		2079.6	0.00877546		2669.6	-0.00103934		3259.6	-0.00121211
309.8	0.04801068		899.79	0.00530514		1489.81	-0.0026994		2079.8	0.00918149		2669.8	-0.0017238		3259.8	-0.00178059
310	0.04909164		899.99	0.00583976		1490.01	-0.00274153		2080	0.00889889		2670	-0.00258477		3260	-0.00144393
310.2	0.05060212		900.19	0.00566287		1490.21	-0.00266397		2080.2	0.00881747		2670.2	-0.0031613		3260.2	-0.00216109
310.4	0.05184737		900.39	0.00462295		1490.41	-0.00268423		2080.4	0.00888737		2670.4	-0.00369947		3260.4	-0.0031055
310.6	0.05150424		900.59	0.00451286		1490.61	-0.00248556		2080.6	0.00921705		2670.6	-0.00467891		3260.6	-0.0025765
310.8	0.0518719		900.79	0.00364445		1490.81	-0.00199852		2080.8	0.00972128		2670.8	-0.00497501		3260.8	-0.0023697
311	0.05248953		900.99	0.00349032		1491.01	-0.00146473		2081	0.00958969		2671	-0.00437793		3261	-0.00207604
311.2	0.05386655		901.19	0.00366243		1491.21	-0.00185941		2081.2	0.00987311		2671.2	-0.00492275		3261.2	-0.00186536
311.4	0.05384736		901.39	0.00403807		1491.41	-0.00154685		2081.4	0.01053285		2671.4	-0.00580258		3261.4	-0.00129198
311.6	0.05370067		901.59	0.00447474		1491.61	-0.00181693		2081.6	0.01063922		2671.6	-0.00556691		3261.6	-0.00116375
311.8	0.05364547		901.79	0.00491718		1491.81	-0.00160883		2081.8	0.01076225		2671.8	-0.00455799		3261.8	-0.0010777
312	0.05346348		901.99	0.00481053		1492.01	-0.00188161		2082	0.01078747		2672	-0.00415671		3262	-0.00077841
312.2	0.05409111		902.19	0.00546111		1492.21	-0.00209734		2082.2	0.01142963		2672.2	-0.00439948		3262.2	-0.00026189
312.4	0.05423172		902.39	0.00722845		1492.41	-0.00224739		2082.4	0.0114349		2672.4	-0.00366205		3262.4	-0.00034988
312.6	0.05411825		902.59	0.00669864		1492.61	-0.0025977		2082.6	0.0108294		2672.6	-0.00427321		3262.6	-0.00095613
312.8	0.05556888		902.79	0.00760277		1492.81	-0.00347677		2082.8	0.01021418		2672.8	-0.00467208		3262.8	-0.00168382
313	0.05593476		902.99	0.00717707		1493.01	-0.00394411		2083	0.01026649		2673	-0.00460576		3263	-0.00098462
313.2	0.05600901		903.19	0.00761649		1493.21	-0.00339054		2083.2	0.01090465		2673.2	-0.00498355		3263.2	-0.00062925
313.4	0.0567498		903.39	0.00658213		1493.41	-0.00399936		2083.4	0.01078774		2673.4	-0.00515857		3263.4	-0.00068189
313.6	0.0577461		903.59	0.00657069		1493.61	-0.00303334		2083.6	0.01060204		2673.6	-0.00619286		3263.6	-0.00125639
313.8	0.05814687		903.79	0.00593009		1493.81	-0.00310278		2083.8	0.01107432		2673.8	-0.00615051		3263.8	-0.00069777
314	0.05929542		903.99	0.00595845		1494.01	-0.00345703		2084	0.01103058		2674	-0.00651461		3264	-0.00023267
314.2	0.05976802		904.19	0.00479833		1494.21	-0.00345657		2084.2	0.01172314		2674.2	-0.00600495		3264.2	-0.00004386
314.4	0.05885968		904.39	0.00347737		1494.41	-0.00313451		2084.4	0.01119381		2674.4	-0.00560586		3264.4	0.00113463
314.6	0.05841623		904.59	0.00325679		1494.61	-0.00303604		2084.6	0.01088469		2674.6	-0.00483726		3264.6	0.00189526
314.8	0.05960369		904.79	0.00208439		1494.81	-0.00248059		2084.8	0.01006856		2674.8	-0.00363724		3264.8	0.00215021
315	0.06041221		904.99	0.00217445		1495.01	-0.00278983		2085	0.01026881		2675	-0.00242287		3265	0.00267011
315.2	0.06114188		905.19	0.00180352		1495.21	-0.00312481		2085.2	0.01140695		2675.2	-0.00177985		3265.2	0.00293219
315.4	0.06061101		905.39	0.00157556		1495.41	-0.00327756		2085.4	0.01229606		2675.4	-0.00183888		3265.4	0.00279439
315.6	0.0608216		905.59	0.00183142		1495.61	-0.0035071		2085.6	0.01226788		2675.6	-0.00149153		3265.6	0.00191331
315.8	0.06052558		905.79	0.00251329		1495.81	-0.00333409		2085.8	0.01253567		2675.8	-0.00142393		3265.8	0.00137333
316	0.0607913		905.99	0.00300852		1496.01	-0.0027415		2086	0.01193309		2676	-0.00208012		3266	0.00215849
316.2	0.06170249		906.19	0.00340787		1496.21	-0.00233411		2086.2	0.01183102		2676.2	-0.00141909		3266.2	0.00111544
316.4	0.06178032		906.39	0.00408016		1496.41	-0.00254039		2086.4	0.0105649		2676.4	-0.00100733		3266.4	0.00113221
316.6	0.06276889		906.59	0.00446551		1496.61	-0.00280098		2086.6	0.00974957		2676.6	-0.00182715		3266.6	0.00087764
316.8	0.06349294		906.79	0.00531343		1496.81	-0.00280438		2086.8	0.01012945		2676.8	-0.00208535		3266.8	-0.00023127
317	0.06328698		906.99	0.00538223		1497.01	-0.00281756		2087	0.0104335		2677	-0.00170966		3267	0.00005169
317.2	0.06384532		907.19	0.00618818		1497.21	-0.00222654		2087.2	0.01170265		2677.2	-0.00202435		3267.2	0.00028452
317.4	0.06284781		907.39	0.00691563		1497.41	-0.00237924		2087.4	0.01197938		2677.4	-0.00267561		3267.4	-0.00037353
317.6	0.06300912		907.59	0.00755034		1497.61	-0.00209539		2087.6	0.0124056		2677.6	-0.00367516		3267.6	-0.00000525
317.8	0.06249798		907.79	0.00742088		1497.81	-0.00247522		2087.8	0.01268523		2677.8	-0.0037701		3267.8	0.00122818
318	0.06311069		907.99	0.00785989		1498.01	-0.00342553		2088	0.01301084		2678	-0.00420809		3268	0.00124284
318.2	0.06199361		908.19	0.00698127		1498.21	-0.0039846		2088.2	0.01231874		2678.2	-0.00419939		3268.2	0.00142049
318.4	0.06206537		908.39	0.00686382		1498.41	-0.00448054		2088.4	0.01100244		2678.4	-0.00414273		3268.4	0.00170386
318.6	0.0628166		908.59	0.00671935		1498.61	-0.00447597		2088.6	0.01011965		2678.6	-0.00328282		3268.6	0.00099103
318.8	0.06379218		908.79	0.00701137		1498.81	-0.00459852		2088.8	0.00940894		2678.8	-0.00239393		3268.8	0.00082974
319	0.0640325		908.99	0.00721535		1499.01	-0.00409918		2089	0.00996441		2679	-0.00284311		3269	0.00063579
319.2	0.06441233		909.19	0.00747187		1499.21	-0.00360503		2089.2	0.01031128		2679.2	-0.00266379		3269.2	0.00066563
319.4	0.06506319		909.39	0.00773893		1499.41	-0.00376357		2089.4	0.01046304		2679.4	-0.00291997		3269.4	0.00075947
319.6	0.06544536		909.59	0.00809621		1499.61	-0.00345709		2089.6	0.00949478		2679.6	-0.00287312		3269.6	0.0006921
319.8	0.06574085		909.79	0.00801619		1499.81	-0.00267156		2089.8	0.00921166		2679.8	-0.0021418		3269.8	0.00115083
320	0.06640875		909.99	0.00800464		1500.01	-0.00211625		2090	0.00864903		2680	-0.00176118		3270	0.00091313
320.2	0.06731754		910.19	0.00823226		1500.21	-0.00307182		2090.2	0.00874104		2680.2	-0.00126585		3270.2	-0.00002425
320.4	0.0683513		910.39	0.00866358		1500.41	-0.00264016		2090.4	0.00816188		2680.4	-0.00149448		3270.4	0.00102614
320.6	0.06943546		910.59	0.00890369		1500.61	-0.00229777		2090.6	0.00906665		2680.6	-0.0013512		3270.6	0.00039031
320.8	0.06942432		910.79	0.00890736		1500.81	-0.00149897		2090.8	0.01053679		2680.8	-0.00090772		3270.8	-0.00000072
321	0.06986846		910.99	0.00893977		1501.01	-0.00111487		2091	0.01089516		2681	-0.00071467		3271	0.00076993
321.2	0.06990203		911.19	0.00951007		1501.21	-0.00145232		2091.2	0.01297654		2681.2	-0.00093604		3271.2	0.0013569
321.4	0.06979857		911.39	0.00953855		1501.41	-0.00131715		2091.4	0.01355349		2681.4	-0.00138697		3271.4	0.00074134
321.6	0.07120191		911.59	0.00929485		1501.61	-0.00161609		2091.6	0.01353		2681.6	-0.00184566		3271.6	0.00057551
321.8	0.07067717		911.79	0.00912588		1501.81	-0.00160579		2091.8	0.01349451		2681.8	-0.00164725		3271.8	0.00087087
322	0.07096752		911.99	0.00911511		1502.01	-0.00251493		2092	0.01298426		2682	-0.00237983		3272	-0.00014778
322.2	0.07103438		912.19	0.0084773		1502.21	-0.00253152		2092.2	0.01218857		2682.2	-0.0031432		3272.2	0.00030929
322.4	0.0716012		912.39	0.00834511		1502.41	-0.0031486		2092.4	0.01158932		2682.4	-0.00360035		3272.4	-0.00037054
322.6	0.07254429		912.59	0.00792001		1502.61	-0.00259582		2092.6	0.01067406		2682.6	-0.00380417		3272.6	-0.00101488
322.8	0.07369508		912.79	0.00823715		1502.81	-0.00263305		2092.8	0.01076319		2682.8	-0.0042424		3272.8	-0.00090611
323	0.07368867		912.99	0.00808391		1503.01	-0.00230853		2093	0.01027263		2683	-0.00506754		3273	-0.00084876
323.2	0.07428731		913.19	0.00805298		1503.21	-0.00344916		2093.2	0.010025		2683.2	-0.0046575		3273.2	-0.00140896
323.4	0.07479978		913.39	0.00810949		1503.41	-0.00447104		2093.4	0.00932941		2683.4	-0.00511499		3273.4	-0.00116749
323.6	0.07479578		913.59	0.00756118		1503.61	-0.00438868		2093.6	0.00872767		2683.6	-0.00512938		3273.6	-0.00052302
323.8	0.07529363		913.79	0.00735704		1503.81	-0.00470832		2093.8	0.00833894		2683.8	-0.00486651		3273.8	-0.0005528
324	0.07564324		913.99	0.00752861		1504.01	-0.00533189		2094	0.00815816		2684	-0.00477372		3274	-0.00098189
324.2	0.07666327		914.19	0.00729718		1504.21	-0.005457		2094.2	0.00819757		2684.2	-0.00468603		3274.2	-0.00074768
324.4	0.07700428		914.39	0.00759521		1504.41	-0.00470983		2094.4	0.00830523		2684.4	-0.00431717		3274.4	0.00009179
324.6	0.07688152		914.59	0.00802886		1504.61	-0.00467262		2094.6	0.00936758		2684.6	-0.00411902		3274.6	-0.00012906
324.8	0.0764744		914.79	0.00806533		1504.81	-0.00485415		2094.8	0.01030639		2684.8	-0.00272122		3274.8	0.00108073
325	0.07648594		914.99	0.00843508		1505.01	-0.00556637		2095	0.01102628		2685	-0.00207135		3275	0.00162616
325.2	0.07570127		915.19	0.00882353		1505.21	-0.00653745		2095.2	0.01197698		2685.2	-0.0013626		3275.2	0.00184201
325.4	0.07659644		915.39	0.00841183		1505.41	-0.00595117		2095.4	0.01226725		2685.4	-0.00118624		3275.4	0.00088272
325.6	0.07595282		915.59	0.00914202		1505.61	-0.0051838		2095.6	0.01257898		2685.6	-0.0010035		3275.6	0.00135145
325.8	0.07648859		915.79	0.0091442		1505.81	-0.004214		2095.8	0.01330826		2685.8	-0.00119642		3275.8	0.00189892
326	0.07672496		915.99	0.0092696		1506.01	-0.00390413		2096	0.01364258		2686	-0.00207243		3276	0.00124188
326.2	0.07688947		916.19	0.00889776		1506.21	-0.00297044		2096.2	0.01373135		2686.2	-0.0031073		3276.2	0.00160107
326.4	0.07681902		916.39	0.00884483		1506.41	-0.00287853		2096.4	0.01376769		2686.4	-0.0029513		3276.4	0.00003073
326.6	0.07807829		916.59	0.00793737		1506.61	-0.00188622		2096.6	0.01369136		2686.6	-0.00303191		3276.6	-0.00055873
326.8	0.07781256		916.79	0.00825184		1506.81	-0.00217076		2096.8	0.01359631		2686.8	-0.00371915		3276.8	-0.00117943
327	0.0778269		916.99	0.00764877		1507.01	-0.00218682		2097	0.01306932		2687	-0.00321068		3277	-0.00197101
327.2	0.07858676		917.19	0.00704669		1507.21	-0.00251108		2097.2	0.01261807		2687.2	-0.00350503		3277.2	-0.00229838
327.4	0.07904828		917.39	0.00702284		1507.41	-0.00241274		2097.4	0.01126654		2687.4	-0.0041829		3277.4	-0.00244329
327.6	0.07922263		917.59	0.0061137		1507.61	-0.00212335		2097.6	0.01069695		2687.6	-0.00370082		3277.6	-0.00244725
327.8	0.08008059		917.79	0.00662938		1507.81	-0.00243346		2097.8	0.00929843		2687.8	-0.00323063		3277.8	-0.0031043
328	0.0804297		917.99	0.00692496		1508.01	-0.00266466		2098	0.00884221		2688	-0.003181		3278	-0.0038027
328.2	0.08116074		918.19	0.00730877		1508.21	-0.00332465		2098.2	0.00864028		2688.2	-0.00373472		3278.2	-0.00362209
328.4	0.08072599		918.39	0.00802319		1508.41	-0.00449819		2098.4	0.00914091		2688.4	-0.00386295		3278.4	-0.00383687
328.6	0.08115599		918.59	0.00855427		1508.61	-0.00523109		2098.6	0.00874352		2688.6	-0.00372364		3278.6	-0.00344955
328.8	0.08128364		918.79	0.00877683		1508.81	-0.00637732		2098.8	0.00946186		2688.8	-0.00280714		3278.8	-0.00370188
329	0.08182014		918.99	0.00876113		1509.01	-0.00683978		2099	0.01007781		2689	-0.00256242		3279	-0.00433711
329.2	0.08188253		919.19	0.00912931		1509.21	-0.00671916		2099.2	0.00969734		2689.2	-0.00274752		3279.2	-0.00357292
329.4	0.08305894		919.39	0.00933894		1509.41	-0.00631044		2099.4	0.01020889		2689.4	-0.00268602		3279.4	-0.00339019
329.6	0.08355786		919.59	0.0102725		1509.61	-0.00620271		2099.6	0.01021		2689.6	-0.00236475		3279.6	-0.0023208
329.8	0.084996		919.79	0.01001566		1509.81	-0.00613861		2099.8	0.01096527		2689.8	-0.00265332		3279.8	-0.00325759
330	0.08485543		919.99	0.010034		1510.01	-0.00615647		2100	0.01128654		2690	-0.00272034		3280	-0.00368687
330.2	0.08530447		920.19	0.0099879		1510.21	-0.00587694		2100.2	0.01148777		2690.2	-0.0033281		3280.2	-0.00356609
330.4	0.08620313		920.39	0.00994611		1510.41	-0.00551538		2100.4	0.01163505		2690.4	-0.00300279		3280.4	-0.00371405
330.6	0.08646813		920.59	0.00920638		1510.61	-0.0046612		2100.6	0.01173629		2690.6	-0.00340664		3280.6	-0.00337328
330.8	0.08691508		920.79	0.00918801		1510.81	-0.00469656		2100.8	0.01218769		2690.8	-0.00331845		3280.8	-0.00308959
331	0.08726695		920.99	0.00860076		1511.01	-0.00390118		2101	0.01205966		2691	-0.00324171		3281	-0.00199942
331.2	0.08781468		921.19	0.00796815		1511.21	-0.00311491		2101.2	0.01165083		2691.2	-0.00438839		3281.2	-0.00178883
331.4	0.08782818		921.39	0.00820274		1511.41	-0.0025866		2101.4	0.01119122		2691.4	-0.00471825		3281.4	-0.00250346
331.6	0.08831487		921.59	0.00801321		1511.61	-0.00214011		2101.6	0.01070281		2691.6	-0.00389745		3281.6	-0.00165987
331.8	0.08819768		921.79	0.00809052		1511.81	-0.00189653		2101.8	0.00993198		2691.8	-0.00405562		3281.8	-0.00162864
332	0.08757027		921.99	0.00813994		1512.01	-0.00214456		2102	0.00892826		2692	-0.00451357		3282	-0.00203872
332.2	0.08734848		922.19	0.00881389		1512.21	-0.00154925		2102.2	0.00910623		2692.2	-0.00450245		3282.2	-0.00200714
332.4	0.08786121		922.39	0.00901582		1512.41	-0.00112887		2102.4	0.00933796		2692.4	-0.00452407		3282.4	-0.00200367
332.6	0.08858552		922.59	0.0093258		1512.61	-0.00120637		2102.6	0.00890453		2692.6	-0.00429138		3282.6	-0.00125794
332.8	0.08868198		922.79	0.00979437		1512.81	-0.00168693		2102.8	0.0092645		2692.8	-0.00372312		3282.8	-0.00227634
333	0.08900851		922.99	0.01031801		1513.01	-0.00138607		2103	0.00865352		2693	-0.00326248		3283	-0.00153442
333.2	0.08939229		923.19	0.01073358		1513.21	-0.00097584		2103.2	0.00843554		2693.2	-0.00302141		3283.2	-0.00080682
333.4	0.09088576		923.39	0.01099221		1513.41	-0.00162619		2103.4	0.00880557		2693.4	-0.00266386		3283.4	-0.00130606
333.6	0.09214443		923.59	0.01056224		1513.61	-0.00169641		2103.6	0.00895782		2693.6	-0.00182044		3283.6	-0.00180065
333.8	0.09233825		923.79	0.01060957		1513.81	-0.00170691		2103.8	0.00936385		2693.8	-0.00136087		3283.8	-0.00314881
334	0.09320999		923.99	0.01079245		1514.01	-0.00262494		2104	0.00956596		2694	-0.00076806		3284	-0.00395865
334.2	0.09424475		924.19	0.01078306		1514.21	-0.00188849		2104.2	0.01026773		2694.2	-0.00108237		3284.2	-0.00364706
334.4	0.09502928		924.39	0.0109227		1514.41	-0.0011776		2104.4	0.01009976		2694.4	-0.00161686		3284.4	-0.00312599
334.6	0.09527845		924.59	0.0104676		1514.61	-0.00041227		2104.6	0.01070424		2694.6	-0.00213395		3284.6	-0.00339682
334.8	0.09566032		924.79	0.01033674		1514.81	-0.00031282		2104.8	0.01126949		2694.8	-0.00281219		3284.8	-0.00355514
335	0.09542678		924.99	0.01007102		1515.01	0.00071528		2105	0.01158114		2695	-0.00353751		3285	-0.00365001
335.2	0.09535494		925.19	0.0101984		1515.21	0.00095203		2105.2	0.01097698		2695.2	-0.00354442		3285.2	-0.00458329
335.4	0.09453044		925.39	0.0106773		1515.41	0.00124143		2105.4	0.01055685		2695.4	-0.00335025		3285.4	-0.00514388
335.6	0.09458615		925.59	0.00999976		1515.61	0.00085954		2105.6	0.01047148		2695.6	-0.00258127		3285.6	-0.00424607
335.8	0.09364559		925.79	0.00943501		1515.81	0.00023154		2105.8	0.01093993		2695.8	-0.00287649		3285.8	-0.00498268
336	0.093472		925.99	0.0093385		1516.01	0.00078613		2106	0.01042398		2696	-0.00280341		3286	-0.00525841
336.2	0.09337141		926.19	0.00920298		1516.21	0.00056687		2106.2	0.01135332		2696.2	-0.00254911		3286.2	-0.00491755
336.4	0.0938175		926.39	0.00910105		1516.41	0.00034486		2106.4	0.01185245		2696.4	-0.00307789		3286.4	-0.00434103
336.6	0.09342669		926.59	0.00963881		1516.61	0.00032712		2106.6	0.01161658		2696.6	-0.00287261		3286.6	-0.00344972
336.8	0.09316919		926.79	0.00949688		1516.81	0.00038887		2106.8	0.01192161		2696.8	-0.00293112		3286.8	-0.00418489
337	0.09340846		926.99	0.00898794		1517.01	-0.00012609		2107	0.01135746		2697	-0.00318303		3287	-0.00386667
337.2	0.09343337		927.19	0.00730329		1517.21	-0.0008792		2107.2	0.01151564		2697.2	-0.00312052		3287.2	-0.00389666
337.4	0.09339409		927.39	0.0069578		1517.41	-0.0015997		2107.4	0.0115166		2697.4	-0.00337968		3287.4	-0.00404566
337.6	0.09313075		927.59	0.0065998		1517.61	-0.00249123		2107.6	0.01148125		2697.6	-0.00327297		3287.6	-0.00434502
337.8	0.09307127		927.79	0.00726875		1517.81	-0.00349486		2107.8	0.01066015		2697.8	-0.00336251		3287.8	-0.00456959
338	0.0948447		927.99	0.00699688		1518.01	-0.00402028		2108	0.01054378		2698	-0.00382129		3288	-0.00500296
338.2	0.09508638		928.19	0.00674848		1518.21	-0.00343376		2108.2	0.0098011		2698.2	-0.00424189		3288.2	-0.00451937
338.4	0.09534431		928.39	0.00666229		1518.41	-0.00378607		2108.4	0.00932021		2698.4	-0.0049342		3288.4	-0.00451883
338.6	0.09487887		928.59	0.00605882		1518.61	-0.00496343		2108.6	0.00872301		2698.6	-0.00485119		3288.6	-0.00462174
338.8	0.09534414		928.79	0.0066281		1518.81	-0.00520596		2108.8	0.00851273		2698.8	-0.00439984		3288.8	-0.00467849
339	0.0956912		928.99	0.00600003		1519.01	-0.00545546		2109	0.00803673		2699	-0.00385249		3289	-0.00482546
339.2	0.09544008		929.19	0.00622335		1519.21	-0.00563502		2109.2	0.00776174		2699.2	-0.00289649		3289.2	-0.00434123
339.4	0.09601786		929.39	0.00660326		1519.41	-0.00559199		2109.4	0.0088208		2699.4	-0.00286285		3289.4	-0.00341792
339.6	0.09755615		929.59	0.00614232		1519.61	-0.00604136		2109.6	0.00959206		2699.6	-0.00281447		3289.6	-0.00293218
339.8	0.09890931		929.79	0.00672578		1519.81	-0.00601004		2109.8	0.01011908		2699.8	-0.0026683		3289.8	-0.0033406
340	0.09961984		929.99	0.00736542		1520.01	-0.00586895		2110	0.010463		2700	-0.00209248		3290	-0.00331716
340.2	0.1006742		930.19	0.00767349		1520.21	-0.00591079		2110.2	0.01092328		2700.2	-0.0015157		3290.2	-0.00342068
340.4	0.10162647		930.39	0.00817195		1520.41	-0.00470745		2110.4	0.01131939		2700.4	-0.00181408		3290.4	-0.00298023
340.6	0.10184314		930.59	0.0083692		1520.61	-0.00469497		2110.6	0.0110364		2700.6	-0.00131673		3290.6	-0.00291066
340.8	0.10253391		930.79	0.0087697		1520.81	-0.00459762		2110.8	0.01158543		2700.8	-0.00101336		3290.8	-0.00315294
341	0.10245644		930.99	0.00866069		1521.01	-0.00516359		2111	0.01049178		2701	-0.00075534		3291	-0.00248371
341.2	0.10210396		931.19	0.00925989		1521.21	-0.0056049		2111.2	0.01126774		2701.2	-0.00078352		3291.2	-0.00235727
341.4	0.10233816		931.39	0.01006115		1521.41	-0.00488464		2111.4	0.0111355		2701.4	-0.00074755		3291.4	-0.00242821
341.6	0.10219878		931.59	0.01088213		1521.61	-0.00488497		2111.6	0.01113405		2701.6	-0.00082701		3291.6	-0.00213953
341.8	0.10290016		931.79	0.0114774		1521.81	-0.00442647		2111.8	0.01118399		2701.8	-0.00096098		3291.8	-0.00209525
342	0.10253771		931.99	0.01197923		1522.01	-0.00459218		2112	0.01143525		2702	-0.00189171		3292	-0.00235903
342.2	0.10153277		932.19	0.01221884		1522.21	-0.00474243		2112.2	0.01141584		2702.2	-0.00162392		3292.2	-0.00307365
342.4	0.10062545		932.39	0.01315664		1522.41	-0.00489313		2112.4	0.0119443		2702.4	-0.00257957		3292.4	-0.00227836
342.6	0.09958301		932.59	0.01305923		1522.61	-0.0050794		2112.6	0.01221972		2702.6	-0.0029678		3292.6	-0.00169143
342.8	0.10010011		932.79	0.01387734		1522.81	-0.00436148		2112.8	0.01259125		2702.8	-0.00291125		3292.8	-0.0006552
343	0.09993738		932.99	0.01348878		1523.01	-0.00400259		2113	0.01277974		2703	-0.00315131		3293	-0.00007285
343.2	0.10008173		933.19	0.01426084		1523.21	-0.00356001		2113.2	0.01349124		2703.2	-0.0034738		3293.2	0.00050058
343.4	0.10024487		933.39	0.01520744		1523.41	-0.00383885		2113.4	0.01383189		2703.4	-0.00410588		3293.4	0.00105137
343.6	0.10060257		933.59	0.01465397		1523.61	-0.00422374		2113.6	0.01340404		2703.6	-0.00406104		3293.6	0.00146471
343.8	0.10095118		933.79	0.0148564		1523.81	-0.00429685		2113.8	0.01398442		2703.8	-0.00329077		3293.8	0.00137466
344	0.1014885		933.99	0.01388607		1524.01	-0.00521547		2114	0.01380599		2704	-0.0031718		3294	0.0011617
344.2	0.10331195		934.19	0.01331784		1524.21	-0.005021		2114.2	0.01338263		2704.2	-0.00287732		3294.2	0.00094333
344.4	0.10364695		934.39	0.01382168		1524.41	-0.00588375		2114.4	0.01314135		2704.4	-0.0027357		3294.4	0.00118512
344.6	0.10466004		934.59	0.01377222		1524.61	-0.00645365		2114.6	0.01287878		2704.6	-0.0015548		3294.6	0.00060718
344.8	0.1059372		934.79	0.01340463		1524.81	-0.00625458		2114.8	0.01284721		2704.8	-0.00104379		3294.8	-0.00012375
345	0.1071296		934.99	0.0122915		1525.01	-0.00604065		2115	0.01231809		2705	-0.0005715		3295	-0.00108981
345.2	0.10779767		935.19	0.01242437		1525.21	-0.00603163		2115.2	0.01263518		2705.2	0.00024103		3295.2	-0.00259897
345.4	0.10809837		935.39	0.01138429		1525.41	-0.0049438		2115.4	0.01172463		2705.4	0.00065037		3295.4	-0.00316848
345.6	0.10711682		935.59	0.01055756		1525.61	-0.00516364		2115.6	0.01185493		2705.6	0.00053063		3295.6	-0.00399506
345.8	0.10761628		935.79	0.00999356		1525.81	-0.00484001		2115.8	0.01164459		2705.8	0.00025164		3295.8	-0.00502457
346	0.10724941		935.99	0.01030161		1526.01	-0.00524955		2116	0.01141588		2706	-0.00040358		3296	-0.00568645
346.2	0.10755165		936.19	0.00979113		1526.21	-0.00430119		2116.2	0.01140255		2706.2	0.00004171		3296.2	-0.00619943
346.4	0.1071238		936.39	0.01015271		1526.41	-0.00404957		2116.4	0.01100467		2706.4	-0.00031902		3296.4	-0.00544809
346.6	0.10713793		936.59	0.00937911		1526.61	-0.00422987		2116.6	0.01116917		2706.6	0.00040832		3296.6	-0.00582999
346.8	0.10741407		936.79	0.01010636		1526.81	-0.00394078		2116.8	0.01093972		2706.8	0.00050653		3296.8	-0.00535386
347	0.10743724		936.99	0.01076873		1527.01	-0.00382087		2117	0.01057523		2707	-0.00009535		3297	-0.00558525
347.2	0.10691357		937.19	0.0111848		1527.21	-0.00429998		2117.2	0.0110905		2707.2	-0.0006698		3297.2	-0.00513771
347.4	0.10644892		937.39	0.01171337		1527.41	-0.00465572		2117.4	0.01137085		2707.4	-0.00028117		3297.4	-0.00446076
347.6	0.10707818		937.59	0.01161092		1527.61	-0.00495086		2117.6	0.01129763		2707.6	0.00038959		3297.6	-0.00312604
347.8	0.1074987		937.79	0.01148515		1527.81	-0.00469222		2117.8	0.01192999		2707.8	-0.00012822		3297.8	-0.00326058
348	0.10846996		937.99	0.01149872		1528.01	-0.00570909		2118	0.01182601		2708	-0.00105101		3298	-0.0022383
348.2	0.10886771		938.19	0.0127983		1528.21	-0.00672544		2118.2	0.01200102		2708.2	-0.00154992		3298.2	-0.00185748
348.4	0.10887774		938.39	0.01308633		1528.41	-0.00662681		2118.4	0.01229334		2708.4	-0.00174896		3298.4	-0.00199631
348.6	0.10936745		938.59	0.01198226		1528.61	-0.00592656		2118.6	0.01274358		2708.6	-0.00230706		3298.6	-0.00259496
348.8	0.10911899		938.79	0.01184608		1528.81	-0.00583506		2118.8	0.01295499		2708.8	-0.00290713		3298.8	-0.00353277
349	0.10887635		938.99	0.01238655		1529.01	-0.00557162		2119	0.01291653		2709	-0.00340818		3299	-0.00424942
349.2	0.10849361		939.19	0.01213789		1529.21	-0.005613		2119.2	0.01247317		2709.2	-0.00303446		3299.2	-0.00503703
349.4	0.10854633		939.39	0.01141017		1529.41	-0.00519287		2119.4	0.01223673		2709.4	-0.00383246		3299.4	-0.004866
349.6	0.1084628		939.59	0.01165705		1529.61	-0.00601363		2119.6	0.01225868		2709.6	-0.00415545		3299.6	-0.00493944
349.8	0.109501		939.79	0.01153622		1529.81	-0.00570206		2119.8	0.01221334		2709.8	-0.00451398		3299.8	-0.00487127
350	0.11013526		939.99	0.01119434		1530.01	-0.00597996		2120	0.0121975		2710	-0.00476042		3300	-0.00516495
350.2	0.11047283		940.19	0.01031153		1530.21	-0.00545457		2120.2	0.01088706		2710.2	-0.00391707		3300.2	-0.00531664
350.4	0.11094874		940.39	0.01109283		1530.41	-0.00578881		2120.4	0.01071161		2710.4	-0.00388873		3300.4	-0.00561966
350.6	0.11153989		940.59	0.01143957		1530.61	-0.00501545		2120.6	0.01162456		2710.6	-0.00301362		3300.6	-0.0059119
350.8	0.11208277		940.79	0.01218561		1530.81	-0.00431545		2120.8	0.01225741		2710.8	-0.00305811		3300.8	-0.00550823
351	0.11277891		940.99	0.01211646		1531.01	-0.004141		2121	0.01262634		2711	-0.00228927		3301	-0.00592535
351.2	0.1127344		941.19	0.01122235		1531.21	-0.00412065		2121.2	0.01301407		2711.2	-0.00104868		3301.2	-0.0051766
351.4	0.11350112		941.39	0.01135165		1531.41	-0.00411113		2121.4	0.01205424		2711.4	-0.00105767		3301.4	-0.00435389
351.6	0.11410925		941.59	0.01094385		1531.61	-0.00400328		2121.6	0.01214448		2711.6	-0.00008277		3301.6	-0.00280283
351.8	0.11369396		941.79	0.01063087		1531.81	-0.00316881		2121.8	0.01188881		2711.8	-0.00097051		3301.8	-0.0020833
352	0.11405932		941.99	0.01091353		1532.01	-0.00293206		2122	0.01124555		2712	-0.00170136		3302	-0.00134214
352.2	0.11416927		942.19	0.01156987		1532.21	-0.00315917		2122.2	0.01231501		2712.2	-0.00209659		3302.2	-0.00167032
352.4	0.11454611		942.39	0.01098748		1532.41	-0.00234426		2122.4	0.01246039		2712.4	-0.00182344		3302.4	-0.0019811
352.6	0.11394868		942.59	0.01099028		1532.61	-0.0029996		2122.6	0.01307712		2712.6	-0.00258271		3302.6	-0.00226821
352.8	0.11395627		942.79	0.01148392		1532.81	-0.00362591		2122.8	0.01343369		2712.8	-0.00288634		3302.8	-0.00283541
353	0.11451934		942.99	0.01131806		1533.01	-0.00391342		2123	0.01386997		2713	-0.00350442		3303	-0.00332509
353.2	0.11560862		943.19	0.01114077		1533.21	-0.00401236		2123.2	0.01386535		2713.2	-0.00300138		3303.2	-0.00332299
353.4	0.11551305		943.39	0.01202477		1533.41	-0.00468913		2123.4	0.0144347		2713.4	-0.00302864		3303.4	-0.00301648
353.6	0.11548856		943.59	0.01258876		1533.61	-0.00550743		2123.6	0.01437039		2713.6	-0.00298439		3303.6	-0.00371579
353.8	0.11611997		943.79	0.01134143		1533.81	-0.00541428		2123.8	0.01398024		2713.8	-0.00347369		3303.8	-0.00426059
354	0.1166353		943.99	0.01128108		1534.01	-0.0058303		2124	0.01314705		2714	-0.00290871		3304	-0.00485584
354.2	0.11659355		944.19	0.01247966		1534.21	-0.00591857		2124.2	0.01280209		2714.2	-0.00283467		3304.2	-0.00497954
354.4	0.11748436		944.39	0.01332689		1534.41	-0.00598601		2124.4	0.01288677		2714.4	-0.00292343		3304.4	-0.00545872
354.6	0.11736382		944.59	0.01298739		1534.61	-0.00592344		2124.6	0.01330757		2714.6	-0.00210647		3304.6	-0.00588742
354.8	0.11794303		944.79	0.01221429		1534.81	-0.00626724		2124.8	0.01313071		2714.8	-0.00104332		3304.8	-0.00593719
355	0.11864036		944.99	0.01183518		1535.01	-0.00586408		2125	0.01247789		2715	-0.00053234		3305	-0.00542964
355.2	0.11901206		945.19	0.01203912		1535.21	-0.00640224		2125.2	0.01193823		2715.2	-0.00020344		3305.2	-0.00430339
355.4	0.12011071		945.39	0.01233814		1535.41	-0.0058229		2125.4	0.01165069		2715.4	-0.0004449		3305.4	-0.0044778
355.6	0.11985644		945.59	0.01279762		1535.61	-0.00529633		2125.6	0.01280637		2715.6	0.0000542		3305.6	-0.00395128
355.8	0.12031332		945.79	0.0129888		1535.81	-0.00458529		2125.8	0.01217748		2715.8	0.00004538		3305.8	-0.00392384
356	0.12037984		945.99	0.01396742		1536.01	-0.00440366		2126	0.01290207		2716	0.00022162		3306	-0.00477463
356.2	0.12104054		946.19	0.01511651		1536.21	-0.00441475		2126.2	0.0141385		2716.2	0.00061253		3306.2	-0.00469366
356.4	0.12131275		946.39	0.0151519		1536.41	-0.00401508		2126.4	0.01377697		2716.4	0.00083193		3306.4	-0.00450008
356.6	0.12140425		946.59	0.01579194		1536.61	-0.00414872		2126.6	0.01477147		2716.6	-0.00000625		3306.6	-0.00490006
356.8	0.12203479		946.79	0.01537906		1536.81	-0.00415027		2126.8	0.01461559		2716.8	-0.00031854		3306.8	-0.00475833
357	0.12217663		946.99	0.01567267		1537.01	-0.00438274		2127	0.01499034		2717	-0.00078049		3307	-0.00509537
357.2	0.12256837		947.19	0.01555435		1537.21	-0.00413812		2127.2	0.01457509		2717.2	-0.00036632		3307.2	-0.00545057
357.4	0.12230218		947.39	0.01580453		1537.41	-0.00395396		2127.4	0.01427583		2717.4	-0.00039765		3307.4	-0.00562447
357.6	0.12294455		947.59	0.01502628		1537.61	-0.00372486		2127.6	0.01392255		2717.6	-0.00122532		3307.6	-0.005462
357.8	0.12390844		947.79	0.01494668		1537.81	-0.00392404		2127.8	0.01265254		2717.8	-0.00128448		3307.8	-0.00478248
358	0.12408863		947.99	0.01498562		1538.01	-0.00462863		2128	0.01148835		2718	-0.00124089		3308	-0.00486328
358.2	0.12403533		948.19	0.015875		1538.21	-0.00418873		2128.2	0.01110215		2718.2	-0.0021314		3308.2	-0.00533626
358.4	0.12397456		948.39	0.01490881		1538.41	-0.00443169		2128.4	0.01044247		2718.4	-0.00272556		3308.4	-0.0059355
358.6	0.12404003		948.59	0.01442098		1538.61	-0.00509717		2128.6	0.01124769		2718.6	-0.00271893		3308.6	-0.00571485
358.8	0.12488799		948.79	0.01422684		1538.81	-0.00509334		2128.8	0.01128667		2718.8	-0.0028505		3308.8	-0.0047268
359	0.12533042		948.99	0.01500051		1539.01	-0.00573409		2129	0.01099929		2719	-0.00292741		3309	-0.00486956
359.2	0.12490173		949.19	0.01472348		1539.21	-0.00624096		2129.2	0.01147105		2719.2	-0.00305004		3309.2	-0.00532998
359.4	0.1251775		949.39	0.01430454		1539.41	-0.0063794		2129.4	0.01162861		2719.4	-0.00333997		3309.4	-0.00514537
359.6	0.12446445		949.59	0.01487334		1539.61	-0.0064135		2129.6	0.01243372		2719.6	-0.0029719		3309.6	-0.00433792
359.8	0.12479857		949.79	0.01548445		1539.81	-0.00623664		2129.8	0.01194614		2719.8	-0.00235007		3309.8	-0.00427761
360	0.12359386		949.99	0.01665641		1540.01	-0.00567673		2130	0.01240464		2720	-0.00206245		3310	-0.00453122
360.2	0.12392492		950.19	0.0169488		1540.21	-0.0053101		2130.2	0.01243055		2720.2	-0.00170046		3310.2	-0.00448321
360.4	0.12394555		950.39	0.01696954		1540.41	-0.00536456		2130.4	0.01251798		2720.4	-0.00131396		3310.4	-0.00420561
360.6	0.12422229		950.59	0.0162351		1540.61	-0.00554824		2130.6	0.01321638		2720.6	-0.0012739		3310.6	-0.00419415
360.8	0.12425305		950.79	0.01640416		1540.81	-0.00569398		2130.8	0.0128586		2720.8	-0.00040873		3310.8	-0.004573
361	0.12459259		950.99	0.01711123		1541.01	-0.00524973		2131	0.01363587		2721	-0.00010223		3311	-0.00455614
361.2	0.12517308		951.19	0.01670697		1541.21	-0.00529144		2131.2	0.01332874		2721.2	0.00095843		3311.2	-0.0050173
361.4	0.12521387		951.39	0.01669161		1541.41	-0.00503739		2131.4	0.01297535		2721.4	0.00049329		3311.4	-0.00466913
361.6	0.12632107		951.59	0.01661129		1541.61	-0.00506985		2131.6	0.01239565		2721.6	0.00109778		3311.6	-0.00419761
361.8	0.12648805		951.79	0.01641108		1541.81	-0.00466694		2131.8	0.0119334		2721.8	0.00079566		3311.8	-0.00428407
362	0.12585203		951.99	0.01592348		1542.01	-0.00416034		2132	0.01258148		2722	0.00006472		3312	-0.00404723
362.2	0.12517137		952.19	0.01656442		1542.21	-0.00360181		2132.2	0.01295919		2722.2	-0.00111797		3312.2	-0.00443882
362.4	0.12468828		952.39	0.0160806		1542.41	-0.00409472		2132.4	0.01394394		2722.4	-0.00188106		3312.4	-0.00427979
362.6	0.1258032		952.59	0.01524298		1542.61	-0.00449277		2132.6	0.01423319		2722.6	-0.00215312		3312.6	-0.00441456
362.8	0.12635889		952.79	0.01513512		1542.81	-0.00440656		2132.8	0.01437346		2722.8	-0.0028471		3312.8	-0.0046645
363	0.12660623		952.99	0.01524514		1543.01	-0.00456596		2133	0.01327261		2723	-0.00323369		3313	-0.0046079
363.2	0.1261642		953.19	0.01464571		1543.21	-0.0044998		2133.2	0.01329379		2723.2	-0.00429134		3313.2	-0.00443171
363.4	0.12705291		953.39	0.0145514		1543.41	-0.00469732		2133.4	0.01343718		2723.4	-0.00449079		3313.4	-0.00372447
363.6	0.12754765		953.59	0.01496617		1543.61	-0.00483154		2133.6	0.0134781		2723.6	-0.00441111		3313.6	-0.00379917
363.8	0.12779987		953.79	0.01527153		1543.81	-0.00448282		2133.8	0.01347279		2723.8	-0.00372178		3313.8	-0.00365493
364	0.12784398		953.99	0.01547386		1544.01	-0.00479429		2134	0.01324052		2724	-0.00293692		3314	-0.00432161
364.2	0.12953557		954.19	0.01515341		1544.21	-0.00579567		2134.2	0.01299661		2724.2	-0.00236371		3314.2	-0.00434614
364.4	0.12964773		954.39	0.01502254		1544.41	-0.00551926		2134.4	0.01244296		2724.4	-0.00226148		3314.4	-0.00386597
364.6	0.13024676		954.59	0.01495607		1544.61	-0.0056542		2134.6	0.01293307		2724.6	-0.00222786		3314.6	-0.00433474
364.8	0.13011242		954.79	0.01600849		1544.81	-0.00627026		2134.8	0.01227515		2724.8	-0.00160146		3314.8	-0.00446582
365	0.12995529		954.99	0.01610926		1545.01	-0.00596541		2135	0.012404		2725	-0.00187858		3315	-0.00402772
365.2	0.12972983		955.19	0.01557575		1545.21	-0.00656988		2135.2	0.01147037		2725.2	-0.00125155		3315.2	-0.00384892
365.4	0.1298873		955.39	0.01586754		1545.41	-0.00617959		2135.4	0.01136427		2725.4	-0.00199555		3315.4	-0.0037385
365.6	0.13046514		955.59	0.01623315		1545.61	-0.00631301		2135.6	0.0107001		2725.6	-0.00093666		3315.6	-0.00294703
365.8	0.12988212		955.79	0.01677651		1545.81	-0.00552592		2135.8	0.01095797		2725.8	-0.00164993		3315.8	-0.00368191
366	0.12879879		955.99	0.01750744		1546.01	-0.0054017		2136	0.01063764		2726	-0.000362		3316	-0.00317945
366.2	0.12882538		956.19	0.01825809		1546.21	-0.00546614		2136.2	0.01040835		2726.2	-0.00067897		3316.2	-0.00373077
366.4	0.12934568		956.39	0.01795851		1546.41	-0.00539703		2136.4	0.01079626		2726.4	-0.00036736		3316.4	-0.00431808
366.6	0.13027378		956.59	0.01809842		1546.61	-0.00507221		2136.6	0.01083921		2726.6	0.00006357		3316.6	-0.00502778
366.8	0.13024866		956.79	0.01891181		1546.81	-0.00471802		2136.8	0.01094677		2726.8	-0.00048814		3316.8	-0.00456678
367	0.12967289		956.99	0.01914423		1547.01	-0.00455592		2137	0.01055778		2727	-0.00067612		3317	-0.00388558
367.2	0.12990396		957.19	0.01892663		1547.21	-0.0045608		2137.2	0.0114853		2727.2	-0.00057679		3317.2	-0.00492593
367.4	0.13052262		957.39	0.01891206		1547.41	-0.00456135		2137.4	0.01183061		2727.4	-0.0010028		3317.4	-0.00485398
367.6	0.13086296		957.59	0.01887173		1547.61	-0.00498427		2137.6	0.01196629		2727.6	-0.00058539		3317.6	-0.00533678
367.8	0.13123906		957.79	0.01819942		1547.81	-0.00458764		2137.8	0.01224671		2727.8	-0.00021187		3317.8	-0.00550809
368	0.13215201		957.99	0.0181605		1548.01	-0.00521985		2138	0.01196016		2728	-0.00103575		3318	-0.00617723
368.2	0.13347913		958.19	0.01716997		1548.21	-0.00498787		2138.2	0.01145771		2728.2	-0.00169407		3318.2	-0.00637219
368.4	0.13346495		958.39	0.01642333		1548.41	-0.004552		2138.4	0.01163585		2728.4	-0.00215017		3318.4	-0.00653015
368.6	0.13381228		958.59	0.01696103		1548.61	-0.00520528		2138.6	0.01203182		2728.6	-0.00199669		3318.6	-0.00639385
368.8	0.13367604		958.79	0.01603378		1548.81	-0.0045956		2138.8	0.01166282		2728.8	-0.0021901		3318.8	-0.00536281
369	0.13414331		958.99	0.01562911		1549.01	-0.00469543		2139	0.011753		2729	-0.00283838		3319	-0.0057994
369.2	0.13463064		959.19	0.01480415		1549.21	-0.00462057		2139.2	0.01146151		2729.2	-0.00257745		3319.2	-0.00534792
369.4	0.1352762		959.39	0.01504849		1549.41	-0.00486546		2139.4	0.01160244		2729.4	-0.00342211		3319.4	-0.0055407
369.6	0.13621039		959.59	0.01547778		1549.61	-0.00538221		2139.6	0.00989831		2729.6	-0.00306356		3319.6	-0.00524137
369.8	0.13647876		959.79	0.01640373		1549.81	-0.00468937		2139.8	0.00978515		2729.8	-0.00304268		3319.8	-0.00601766
370	0.13547132		959.99	0.01625287		1550.01	-0.00433951		2140	0.00978883		2730	-0.00213822		3320	-0.00487223
370.2	0.13598679		960.19	0.01669995		1550.21	-0.00430966		2140.2	0.00977825		2730.2	-0.00278456		3320.2	-0.00469961
370.4	0.13628199		960.39	0.01700609		1550.41	-0.0044458		2140.4	0.01014838		2730.4	-0.00194686		3320.4	-0.00432122
370.6	0.13563397		960.59	0.01757818		1550.61	-0.0047226		2140.6	0.00996701		2730.6	-0.00155314		3320.6	-0.00349405
370.8	0.1348648		960.79	0.01795615		1550.81	-0.00477179		2140.8	0.00987312		2730.8	-0.00193324		3320.8	-0.00339184
371	0.13374119		960.99	0.01745007		1551.01	-0.00455382		2141	0.00955652		2731	-0.00215608		3321	-0.00368203
371.2	0.13350397		961.19	0.01689142		1551.21	-0.00393528		2141.2	0.01022533		2731.2	-0.00229714		3321.2	-0.00398008
371.4	0.13315821		961.39	0.0166315		1551.41	-0.00451495		2141.4	0.01065876		2731.4	-0.00327395		3321.4	-0.00393277
371.6	0.13324404		961.59	0.01597199		1551.61	-0.0045135		2141.6	0.01062083		2731.6	-0.00338329		3321.6	-0.00353816
371.8	0.13351311		961.79	0.01579778		1551.81	-0.00411814		2141.8	0.01073214		2731.8	-0.00305996		3321.8	-0.00333907
372	0.13432103		961.99	0.01561483		1552.01	-0.00471666		2142	0.01057647		2732	-0.00272613		3322	-0.00323348
372.2	0.13516701		962.19	0.01536317		1552.21	-0.00406459		2142.2	0.01084971		2732.2	-0.00194331		3322.2	-0.00423021
372.4	0.13561193		962.39	0.01559156		1552.41	-0.00428161		2142.4	0.01125786		2732.4	-0.00182238		3322.4	-0.00479799
372.6	0.13648459		962.59	0.01624496		1552.61	-0.00365314		2142.6	0.01190641		2732.6	-0.00243641		3322.6	-0.00463766
372.8	0.13736966		962.79	0.01568217		1552.81	-0.003283		2142.8	0.01201049		2732.8	-0.00246829		3322.8	-0.00540232
373	0.13865504		962.99	0.01724862		1553.01	-0.00392953		2143	0.01225764		2733	-0.00273428		3323	-0.00591504
373.2	0.13892866		963.19	0.01783583		1553.21	-0.00340219		2143.2	0.01210207		2733.2	-0.00250891		3323.2	-0.00609908
373.4	0.14003932		963.39	0.01884081		1553.41	-0.00381937		2143.4	0.01202723		2733.4	-0.00323441		3323.4	-0.00617085
373.6	0.14102735		963.59	0.01954765		1553.61	-0.00390679		2143.6	0.01072229		2733.6	-0.00316929		3323.6	-0.00549277
373.8	0.14109044		963.79	0.01973964		1553.81	-0.00339434		2143.8	0.01162586		2733.8	-0.00281093		3323.8	-0.00502267
374	0.14141818		963.99	0.01970573		1554.01	-0.00371345		2144	0.01225396		2734	-0.00239052		3324	-0.00455764
374.2	0.14220492		964.19	0.02022934		1554.21	-0.0043035		2144.2	0.01273153		2734.2	-0.00247853		3324.2	-0.00478352
374.4	0.14231169		964.39	0.02103357		1554.41	-0.00464702		2144.4	0.01346313		2734.4	-0.00209436		3324.4	-0.00485365
374.6	0.14151124		964.59	0.02113021		1554.61	-0.0047339		2144.6	0.01259897		2734.6	-0.00174352		3324.6	-0.00499485
374.8	0.14133408		964.79	0.02134415		1554.81	-0.00451639		2144.8	0.01254104		2734.8	-0.00186086		3324.8	-0.00568947
375	0.14112061		964.99	0.02051441		1555.01	-0.00330739		2145	0.01253977		2735	-0.00256436		3325	-0.00476535
375.2	0.14125434		965.19	0.02072264		1555.21	-0.00341047		2145.2	0.01343613		2735.2	-0.00239352		3325.2	-0.00465801
375.4	0.14142905		965.39	0.02061551		1555.41	-0.00366744		2145.4	0.01402448		2735.4	-0.00264875		3325.4	-0.0048113
375.6	0.14168377		965.59	0.02014952		1555.61	-0.0029606		2145.6	0.01389292		2735.6	-0.00204611		3325.6	-0.00454919
375.8	0.14184268		965.79	0.02089631		1555.81	-0.00307122		2145.8	0.0138717		2735.8	-0.0008256		3325.8	-0.00449892
376	0.14223391		965.99	0.02056189		1556.01	-0.00340814		2146	0.01287179		2736	-0.00072957		3326	-0.00543788
376.2	0.14225869		966.19	0.02055998		1556.21	-0.00259275		2146.2	0.0132696		2736.2	-0.00053234		3326.2	-0.00676281
376.4	0.14278174		966.39	0.02100803		1556.41	-0.00334622		2146.4	0.01321513		2736.4	-0.00084502		3326.4	-0.00656451
376.6	0.14252886		966.59	0.02211005		1556.61	-0.0031657		2146.6	0.01283228		2736.6	-0.00021264		3326.6	-0.00597876
376.8	0.14170826		966.79	0.02279149		1556.81	-0.00347851		2146.8	0.01250026		2736.8	0.00061935		3326.8	-0.00618192
377	0.14165077		966.99	0.0240041		1557.01	-0.00329947		2147	0.01192684		2737	0.00070341		3327	-0.00569578
377.2	0.14084299		967.19	0.02368596		1557.21	-0.00330313		2147.2	0.01136649		2737.2	0.00116362		3327.2	-0.00625951
377.4	0.14103588		967.39	0.02288744		1557.41	-0.00311308		2147.4	0.01032636		2737.4	0.00044683		3327.4	-0.00562167
377.6	0.14053997		967.59	0.0225013		1557.61	-0.00310544		2147.6	0.00961619		2737.6	0.00030699		3327.6	-0.00494272
377.8	0.14070995		967.79	0.02189735		1557.81	-0.00337532		2147.8	0.01017806		2737.8	0.00026833		3327.8	-0.00448225
378	0.14131326		967.99	0.02189741		1558.01	-0.00382728		2148	0.01027451		2738	0.00032234		3328	-0.00381281
378.2	0.14145464		968.19	0.02132039		1558.21	-0.00352593		2148.2	0.01015593		2738.2	-0.00075927		3328.2	-0.00390246
378.4	0.14156858		968.39	0.02116559		1558.41	-0.00344806		2148.4	0.00941765		2738.4	-0.00165509		3328.4	-0.00366729
378.6	0.14211331		968.59	0.02104168		1558.61	-0.0032968		2148.6	0.00876581		2738.6	-0.00194468		3328.6	-0.00400431
378.8	0.14250598		968.79	0.02078198		1558.81	-0.004239		2148.8	0.00894666		2738.8	-0.00263111		3328.8	-0.00308182
379	0.14324398		968.99	0.0199112		1559.01	-0.00421991		2149	0.00960728		2739	-0.00320328		3329	-0.00332259
379.2	0.14415864		969.19	0.01927789		1559.21	-0.00458424		2149.2	0.01023011		2739.2	-0.00336707		3329.2	-0.00437823
379.4	0.14479949		969.39	0.01820617		1559.41	-0.00439393		2149.4	0.01078851		2739.4	-0.00372741		3329.4	-0.00373008
379.6	0.14580699		969.59	0.01780912		1559.61	-0.00436055		2149.6	0.01015544		2739.6	-0.00425085		3329.6	-0.00335257
379.8	0.14560767		969.79	0.0179558		1559.81	-0.00432528		2149.8	0.01007748		2739.8	-0.0043662		3329.8	-0.00415194
380	0.14649429		969.99	0.01709268		1560.01	-0.00399098		2150	0.00992875		2740	-0.00423908		3330	-0.00566136
380.2	0.14643134		970.19	0.01741974		1560.21	-0.00421118		2150.2	0.01112202		2740.2	-0.00383861		3330.2	-0.00582423
380.4	0.14615503		970.39	0.0184041		1560.41	-0.00473087		2150.4	0.01169643		2740.4	-0.00277955		3330.4	-0.00548946
380.6	0.14627662		970.59	0.01841596		1560.61	-0.00454119		2150.6	0.01226831		2740.6	-0.00171514		3330.6	-0.00565601
380.8	0.14635456		970.79	0.01855587		1560.81	-0.00450554		2150.8	0.01310507		2740.8	-0.00193768		3330.8	-0.00606844
381	0.14579154		970.99	0.01962903		1561.01	-0.00509254		2151	0.01380199		2741	-0.00159984		3331	-0.00666171
381.2	0.14589191		971.19	0.02055776		1561.21	-0.00470366		2151.2	0.01456541		2741.2	-0.00051024		3331.2	-0.00681705
381.4	0.14552831		971.39	0.02143359		1561.41	-0.00397258		2151.4	0.01424361		2741.4	-0.00070421		3331.4	-0.00694727
381.6	0.14538706		971.59	0.02290807		1561.61	-0.00367073		2151.6	0.01471889		2741.6	-0.00044256		3331.6	-0.00723183
381.8	0.14584973		971.79	0.02265528		1561.81	-0.00404655		2151.8	0.01454773		2741.8	0.00002405		3331.8	-0.00664741
382	0.14630892		971.99	0.02318596		1562.01	-0.00366837		2152	0.01452866		2742	-0.00048713		3332	-0.00708118
382.2	0.14672328		972.19	0.02360424		1562.21	-0.00289181		2152.2	0.01508736		2742.2	-0.0008589		3332.2	-0.00718228
382.4	0.1475525		972.39	0.02433179		1562.41	-0.00344129		2152.4	0.01503064		2742.4	-0.00112432		3332.4	-0.00760901
382.6	0.14771812		972.59	0.02412		1562.61	-0.00420723		2152.6	0.01550749		2742.6	-0.00111928		3332.6	-0.00762198
382.8	0.14757868		972.79	0.02353032		1562.81	-0.00482639		2152.8	0.01499883		2742.8	-0.0011588		3332.8	-0.00682856
383	0.14834516		972.99	0.02358906		1563.01	-0.00474738		2153	0.01555116		2743	-0.00129681		3333	-0.00701664
383.2	0.14947437		973.19	0.02342019		1563.21	-0.00515246		2153.2	0.01464626		2743.2	-0.00097677		3333.2	-0.00609307
383.4	0.14941399		973.39	0.0238696		1563.41	-0.00508469		2153.4	0.01432539		2743.4	-0.00086688		3333.4	-0.0050273
383.6	0.14984753		973.59	0.02431349		1563.61	-0.00406216		2153.6	0.01362105		2743.6	-0.00111935		3333.6	-0.0048743
383.8	0.1500935		973.79	0.02413283		1563.81	-0.00320307		2153.8	0.01316143		2743.8	-0.00114419		3333.8	-0.00561907
384	0.15093126		973.99	0.02338409		1564.01	-0.00292879		2154	0.01338048		2744	-0.00074263		3334	-0.00471179
384.2	0.15071097		974.19	0.02384082		1564.21	-0.00289152		2154.2	0.01415712		2744.2	-0.00063528		3334.2	-0.00387873
384.4	0.15123643		974.39	0.02344731		1564.41	-0.00281717		2154.4	0.01449331		2744.4	-0.00046964		3334.4	-0.00333659
384.6	0.15183641		974.59	0.02273896		1564.61	-0.00333429		2154.6	0.01430464		2744.6	-0.00122784		3334.6	-0.00339916
384.8	0.15166156		974.79	0.02299031		1564.81	-0.0037045		2154.8	0.01472017		2744.8	-0.00229787		3334.8	-0.00367589
385	0.15116936		974.99	0.02415002		1565.01	-0.00383893		2155	0.01486052		2745	-0.00149337		3335	-0.00319804
385.2	0.15159531		975.19	0.02478521		1565.21	-0.00289346		2155.2	0.01544463		2745.2	-0.00099386		3335.2	-0.00374047
385.4	0.15105873		975.39	0.02461138		1565.41	-0.00217374		2155.4	0.01474472		2745.4	-0.00174843		3335.4	-0.00385699
385.6	0.15155783		975.59	0.02378259		1565.61	-0.00190902		2155.6	0.01476012		2745.6	-0.00159345		3335.6	-0.00430469
385.8	0.15220496		975.79	0.02253565		1565.81	-0.0013771		2155.8	0.01499312		2745.8	-0.00098195		3335.8	-0.00368062
386	0.15188978		975.99	0.02261298		1566.01	-0.00072636		2156	0.0155131		2746	-0.00151207		3336	-0.00393171
386.2	0.15164944		976.19	0.02268824		1566.21	-0.00083055		2156.2	0.01615593		2746.2	-0.00100622		3336.2	-0.00360606
386.4	0.15178377		976.39	0.0215963		1566.41	-0.00185111		2156.4	0.01536945		2746.4	-0.00138953		3336.4	-0.00401952
386.6	0.15168563		976.59	0.02122113		1566.61	-0.00278476		2156.6	0.01572944		2746.6	-0.00033468		3336.6	-0.0041582
386.8	0.15150231		976.79	0.0218011		1566.81	-0.00295049		2156.8	0.01560142		2746.8	-0.00019645		3336.8	-0.00419175
387	0.15219703		976.99	0.0223202		1567.01	-0.0037321		2157	0.01578063		2747	0.00072618		3337	-0.00350937
387.2	0.15182856		977.19	0.02207377		1567.21	-0.00443428		2157.2	0.01489408		2747.2	0.00144788		3337.2	-0.00337265
387.4	0.15113017		977.39	0.02199437		1567.41	-0.00475075		2157.4	0.01508646		2747.4	0.00101094		3337.4	-0.00294069
387.6	0.15192971		977.59	0.02185073		1567.61	-0.00526668		2157.6	0.01435786		2747.6	0.00036476		3337.6	-0.0029319
387.8	0.15217536		977.79	0.02069544		1567.81	-0.00587369		2157.8	0.01429364		2747.8	-0.00022216		3337.8	-0.00273147
388	0.15207917		977.99	0.0205748		1568.01	-0.00628396		2158	0.01475507		2748	-0.00067995		3338	-0.00220685
388.2	0.15216656		978.19	0.02143617		1568.21	-0.00674974		2158.2	0.01421471		2748.2	-0.00089959		3338.2	-0.00313709
388.4	0.15262792		978.39	0.02212578		1568.41	-0.00701505		2158.4	0.0134641		2748.4	-0.00153652		3338.4	-0.00358998
388.6	0.15321529		978.59	0.02197884		1568.61	-0.00696758		2158.6	0.01239088		2748.6	-0.00281817		3338.6	-0.0045043
388.8	0.1532239		978.79	0.02194055		1568.81	-0.00667381		2158.8	0.01267668		2748.8	-0.00415186		3338.8	-0.00543161
389	0.15301792		978.99	0.02260284		1569.01	-0.00567825		2159	0.01195529		2749	-0.00349479		3339	-0.00583734
389.2	0.15346088		979.19	0.022613		1569.21	-0.00534181		2159.2	0.0126003		2749.2	-0.00393425		3339.2	-0.00697838
389.4	0.15277462		979.39	0.02266393		1569.41	-0.00505944		2159.4	0.01257077		2749.4	-0.00445911		3339.4	-0.00671871
389.6	0.15297212		979.59	0.02280846		1569.61	-0.00398102		2159.6	0.01275049		2749.6	-0.00473222		3339.6	-0.00721058
389.8	0.15236368		979.79	0.02361915		1569.81	-0.00318082		2159.8	0.01250344		2749.8	-0.0046819		3339.8	-0.00681303
390	0.15151985		979.99	0.02472617		1570.01	-0.00371462		2160	0.01231266		2750	-0.0051742		3340	-0.00710259
390.2	0.15153957		980.19	0.02529764		1570.21	-0.00395355		2160.2	0.01182691		2750.2	-0.00550293		3340.2	-0.00711441
390.4	0.1522315		980.39	0.02512936		1570.41	-0.00357339		2160.4	0.01142		2750.4	-0.00568488		3340.4	-0.00707648
390.6	0.15271315		980.59	0.02569727		1570.61	-0.00328031		2160.6	0.012314		2750.6	-0.0045454		3340.6	-0.00696773
390.8	0.15289767		980.79	0.02582223		1570.81	-0.00308123		2160.8	0.0115653		2750.8	-0.00495139		3340.8	-0.00631024
391	0.15387325		980.99	0.02571901		1571.01	-0.00293897		2161	0.01116708		2751	-0.00490508		3341	-0.00562283
391.2	0.1542465		981.19	0.02514695		1571.21	-0.00333372		2161.2	0.01122253		2751.2	-0.00478457		3341.2	-0.00481548
391.4	0.15511761		981.39	0.02477093		1571.41	-0.00384743		2161.4	0.01138513		2751.4	-0.00487347		3341.4	-0.00430955
391.6	0.1567494		981.59	0.02511737		1571.61	-0.00362851		2161.6	0.01137042		2751.6	-0.00414757		3341.6	-0.00466696
391.8	0.15718327		981.79	0.0241385		1571.81	-0.0030792		2161.8	0.01148125		2751.8	-0.00297096		3341.8	-0.00359529
392	0.15785154		981.99	0.02451984		1572.01	-0.00296447		2162	0.01107852		2752	-0.00302354		3342	-0.003977
392.2	0.1581582		982.19	0.0243398		1572.21	-0.00259693		2162.2	0.01128558		2752.2	-0.0023257		3342.2	-0.00471987
392.4	0.15883727		982.39	0.0244109		1572.41	-0.00256727		2162.4	0.01224478		2752.4	-0.00224891		3342.4	-0.00487799
392.6	0.15930949		982.59	0.0231819		1572.61	-0.00161697		2162.6	0.01275579		2752.6	-0.00241735		3342.6	-0.00573252
392.8	0.15927827		982.79	0.02301491		1572.81	-0.00229072		2162.8	0.01398326		2752.8	-0.00270013		3342.8	-0.00648797
393	0.15936613		982.99	0.02373297		1573.01	-0.00250872		2163	0.01472642		2753	-0.00211381		3343	-0.00647221
393.2	0.15994294		983.19	0.02381634		1573.21	-0.00315724		2163.2	0.01550625		2753.2	-0.00265043		3343.2	-0.00659898
393.4	0.15888545		983.39	0.0241912		1573.41	-0.00363593		2163.4	0.01591982		2753.4	-0.0033165		3343.4	-0.00650615
393.6	0.1593792		983.59	0.02474346		1573.61	-0.00345263		2163.6	0.01516651		2753.6	-0.00378888		3343.6	-0.00708306
393.8	0.15918831		983.79	0.0254897		1573.81	-0.00430268		2163.8	0.01495899		2753.8	-0.00349804		3343.8	-0.00680838
394	0.15942178		983.99	0.02632999		1574.01	-0.00508975		2164	0.01575829		2754	-0.0034493		3344	-0.00753805
394.2	0.1599732		984.19	0.02657818		1574.21	-0.00449801		2164.2	0.01549423		2754.2	-0.00416388		3344.2	-0.0075397
394.4	0.15981875		984.39	0.02588658		1574.41	-0.00416222		2164.4	0.0152158		2754.4	-0.00322157		3344.4	-0.00709108
394.6	0.15999149		984.59	0.02630987		1574.61	-0.00415128		2164.6	0.01476593		2754.6	-0.00266281		3344.6	-0.0062097
394.8	0.16071594		984.79	0.0266238		1574.81	-0.00451839		2164.8	0.01435218		2754.8	-0.00290262		3344.8	-0.00586057
395	0.16096689		984.99	0.02734534		1575.01	-0.00402046		2165	0.01387186		2755	-0.00314168		3345	-0.00485088
395.2	0.16079059		985.19	0.02775833		1575.21	-0.00433358		2165.2	0.01336582		2755.2	-0.00275752		3345.2	-0.00393666
395.4	0.16164915		985.39	0.02824379		1575.41	-0.00457751		2165.4	0.01373311		2755.4	-0.00251523		3345.4	-0.00453013
395.6	0.16225847		985.59	0.02819591		1575.61	-0.00411789		2165.6	0.01291976		2755.6	-0.00147796		3345.6	-0.00379613
395.8	0.16192337		985.79	0.02676068		1575.81	-0.00361839		2165.8	0.01242297		2755.8	-0.00108766		3345.8	-0.00305516
396	0.16222752		985.99	0.02664437		1576.01	-0.00389676		2166	0.01265892		2756	-0.00188682		3346	-0.00364342
396.2	0.16157749		986.19	0.02609813		1576.21	-0.00352374		2166.2	0.01230936		2756.2	-0.00116756		3346.2	-0.00412893
396.4	0.16073018		986.39	0.02503859		1576.41	-0.00388902		2166.4	0.01217961		2756.4	-0.0006674		3346.4	-0.00374264
396.6	0.16135921		986.59	0.02424081		1576.61	-0.0038994		2166.6	0.01188116		2756.6	-0.00104244		3346.6	-0.00394694
396.8	0.16152095		986.79	0.02437696		1576.81	-0.00451638		2166.8	0.01174436		2756.8	-0.00191962		3346.8	-0.00367261
397	0.16134835		986.99	0.0249223		1577.01	-0.00479575		2167	0.01218406		2757	-0.00250139		3347	-0.00369292
397.2	0.1618185		987.19	0.02373076		1577.21	-0.00487942		2167.2	0.01148886		2757.2	-0.00298713		3347.2	-0.00475053
397.4	0.16159345		987.39	0.02479222		1577.41	-0.00529639		2167.4	0.01150126		2757.4	-0.00240649		3347.4	-0.00543834
397.6	0.16242498		987.59	0.02466462		1577.61	-0.00525078		2167.6	0.01140944		2757.6	-0.00264918		3347.6	-0.0064788
397.8	0.16294908		987.79	0.02476193		1577.81	-0.00543339		2167.8	0.01227698		2757.8	-0.00208114		3347.8	-0.00669545
398	0.16332291		987.99	0.02429716		1578.01	-0.00523474		2168	0.01300803		2758	-0.00185828		3348	-0.00759731
398.2	0.16368563		988.19	0.02390417		1578.21	-0.00475872		2168.2	0.01295064		2758.2	-0.00201438		3348.2	-0.00759975
398.4	0.16313563		988.39	0.02417917		1578.41	-0.00432805		2168.4	0.01316726		2758.4	-0.00130311		3348.4	-0.00718295
398.6	0.16341735		988.59	0.02523805		1578.61	-0.0036911		2168.6	0.01343541		2758.6	-0.00137361		3348.6	-0.00737337
398.8	0.16321184		988.79	0.02575878		1578.81	-0.0037655		2168.8	0.0141939		2758.8	-0.00158854		3348.8	-0.00774087
399	0.16315264		988.99	0.02606375		1579.01	-0.00328031		2169	0.01346601		2759	-0.00191744		3349	-0.00756614
399.2	0.16363806		989.19	0.0255153		1579.21	-0.0029867		2169.2	0.01399915		2759.2	-0.00239937		3349.2	-0.00815704
399.4	0.16399822		989.39	0.02546739		1579.41	-0.00313242		2169.4	0.01424026		2759.4	-0.00222226		3349.4	-0.00899625
399.6	0.16351858		989.59	0.02492713		1579.61	-0.00191249		2169.6	0.01366523		2759.6	-0.00211362		3349.6	-0.00813721
399.8	0.16377209		989.79	0.02400155		1579.81	-0.00159276		2169.8	0.01381141		2759.8	-0.00230236		3349.8	-0.00773848
400	0.16378068		989.99	0.02373396		1580.01	-0.00118323		2170	0.01411261		2760	-0.00272256		3350	-0.00804643
400.2	0.1632864		990.19	0.02344531		1580.21	-0.00070274		2170.2	0.01377074		2760.2	-0.00196103		3350.2	-0.00864681
400.4	0.16322948		990.39	0.02357712		1580.41	-0.00039305		2170.4	0.01398724		2760.4	-0.00190578		3350.4	-0.00778295
400.6	0.16363876		990.59	0.02384804		1580.61	-0.00004918		2170.6	0.01471911		2760.6	-0.00190769		3350.6	-0.00775092
400.8	0.16351833		990.79	0.0240763		1580.81	0.00083403		2170.8	0.01483164		2760.8	-0.00177152		3350.8	-0.00681521
401	0.16418231		990.99	0.02431229		1581.01	0.00048562		2171	0.01598877		2761	-0.00156023		3351	-0.00645046
401.2	0.16486388		991.19	0.02434205		1581.21	0.00040941		2171.2	0.01491776		2761.2	-0.00146119		3351.2	-0.0060915
401.4	0.16558979		991.39	0.02466271		1581.41	0.00020094		2171.4	0.01520293		2761.4	-0.0013999		3351.4	-0.00515561
401.6	0.16666341		991.59	0.02344657		1581.61	-0.00037927		2171.6	0.01521406		2761.6	-0.00116987		3351.6	-0.00481817
401.8	0.16746726		991.79	0.02381527		1581.81	-0.00102128		2171.8	0.01505849		2761.8	-0.00118976		3351.8	-0.00408337
402	0.16799728		991.99	0.02349908		1582.01	-0.00100855		2172	0.01484336		2762	-0.00088655		3352	-0.00333281
402.2	0.16749838		992.19	0.02381991		1582.21	-0.00137622		2172.2	0.01478956		2762.2	-0.0004856		3352.2	-0.00360214
402.4	0.16749555		992.39	0.02480901		1582.41	-0.00170827		2172.4	0.0144127		2762.4	0.0001379		3352.4	-0.00376713
402.6	0.16774099		992.59	0.02464802		1582.61	-0.00222096		2172.6	0.01349466		2762.6	0.00017316		3352.6	-0.00418185
402.8	0.16760649		992.79	0.02463243		1582.81	-0.00256849		2172.8	0.01298733		2762.8	-0.00011289		3352.8	-0.00437586
403	0.1671009		992.99	0.02476567		1583.01	-0.00234131		2173	0.01260651		2763	-0.00047516		3353	-0.00489009
403.2	0.16732379		993.19	0.02479275		1583.21	-0.00318975		2173.2	0.01282052		2763.2	-0.00074005		3353.2	-0.00439256
403.4	0.1668711		993.39	0.02613175		1583.41	-0.00380057		2173.4	0.01225022		2763.4	-0.00143822		3353.4	-0.00519502
403.6	0.16661954		993.59	0.02622198		1583.61	-0.00348808		2173.6	0.01300806		2763.6	-0.00220147		3353.6	-0.00513612
403.8	0.16734069		993.79	0.0262786		1583.81	-0.00431472		2173.8	0.01332631		2763.8	-0.00279562		3353.8	-0.00550498
404	0.16718982		993.99	0.0267076		1584.01	-0.00420374		2174	0.01380024		2764	-0.0032885		3354	-0.00724293
404.2	0.16710568		994.19	0.02680133		1584.21	-0.00426311		2174.2	0.01359801		2764.2	-0.00286032		3354.2	-0.00815068
404.4	0.16670898		994.39	0.02613492		1584.41	-0.00378559		2174.4	0.01400599		2764.4	-0.00360837		3354.4	-0.00823126
404.6	0.1665986		994.59	0.02536777		1584.61	-0.00360951		2174.6	0.01445377		2764.6	-0.0036759		3354.6	-0.00814545
404.8	0.16675796		994.79	0.02467472		1584.81	-0.00317815		2174.8	0.01423087		2764.8	-0.00357157		3354.8	-0.00704858
405	0.16708134		994.99	0.02419603		1585.01	-0.00362571		2175	0.01433839		2765	-0.00362296		3355	-0.00722271
405.2	0.16721117		995.19	0.02335283		1585.21	-0.00360376		2175.2	0.01333391		2765.2	-0.00415486		3355.2	-0.00693
405.4	0.16771725		995.39	0.02258741		1585.41	-0.00338218		2175.4	0.01344202		2765.4	-0.00473135		3355.4	-0.00699879
405.6	0.16839701		995.59	0.02257975		1585.61	-0.00372581		2175.6	0.01339649		2765.6	-0.00409623		3355.6	-0.00807695
405.8	0.16966962		995.79	0.02279905		1585.81	-0.00328661		2175.8	0.01270434		2765.8	-0.00369845		3355.8	-0.0076338
406	0.17048796		995.99	0.02307057		1586.01	-0.00253096		2176	0.01265206		2766	-0.00234366		3356	-0.00790849
406.2	0.17078301		996.19	0.02290695		1586.21	-0.00307458		2176.2	0.01246441		2766.2	-0.00209847		3356.2	-0.00869787
406.4	0.17124837		996.39	0.02322832		1586.41	-0.00338009		2176.4	0.01245182		2766.4	-0.00162988		3356.4	-0.00851736
406.6	0.17163628		996.59	0.02315312		1586.61	-0.00324339		2176.6	0.01207206		2766.6	-0.00186224		3356.6	-0.00693044
406.8	0.17172246		996.79	0.0238523		1586.81	-0.0030542		2176.8	0.01232405		2766.8	-0.00111193		3356.8	-0.00654667
407	0.17199563		996.99	0.02442803		1587.01	-0.00340659		2177	0.01226062		2767	-0.00110243		3357	-0.0054053
407.2	0.17257731		997.19	0.02448397		1587.21	-0.00367562		2177.2	0.01263612		2767.2	-0.00119765		3357.2	-0.00531459
407.4	0.17242346		997.39	0.02558805		1587.41	-0.00416183		2177.4	0.01224078		2767.4	-0.00149189		3357.4	-0.00608515
407.6	0.17216169		997.59	0.02597184		1587.61	-0.00444375		2177.6	0.01261475		2767.6	-0.0019398		3357.6	-0.00586691
407.8	0.17280096		997.79	0.02618746		1587.81	-0.00511612		2177.8	0.01243559		2767.8	-0.00182936		3357.8	-0.00642588
408	0.17214047		997.99	0.02621233		1588.01	-0.00524561		2178	0.01225921		2768	-0.0013585		3358	-0.00703393
408.2	0.17145389		998.19	0.02596089		1588.21	-0.00579195		2178.2	0.01281814		2768.2	-0.00071688		3358.2	-0.0063723
408.4	0.17073197		998.39	0.0257056		1588.41	-0.0060056		2178.4	0.01358888		2768.4	-0.00160151		3358.4	-0.00605946
408.6	0.17074053		998.59	0.02635297		1588.61	-0.00620715		2178.6	0.0133583		2768.6	-0.00157607		3358.6	-0.00578942
408.8	0.17024608		998.79	0.02577601		1588.81	-0.0058988		2178.8	0.01316146		2768.8	-0.00109422		3358.8	-0.00557168
409	0.17013237		998.99	0.02630652		1589.01	-0.00602162		2179	0.0132951		2769	-0.00154977		3359	-0.00675719
409.2	0.16988534		999.19	0.02595697		1589.21	-0.00581149		2179.2	0.01349745		2769.2	-0.00242204		3359.2	-0.00686724
409.4	0.16987319		999.39	0.02615859		1589.41	-0.00600891		2179.4	0.01471876		2769.4	-0.00211769		3359.4	-0.00732796
409.6	0.16981836		999.59	0.02616139		1589.61	-0.0055335		2179.6	0.01470039		2769.6	-0.0015904		3359.6	-0.00763037
409.8	0.17014566		999.79	0.02627672		1589.81	-0.00505978		2179.8	0.01487702		2769.8	-0.00045886		3359.8	-0.00703887
410	0.16970977		999.99	0.02682934		1590.01	-0.00500784		2180	0.01523699		2770	-0.00045959		3360	-0.00784038
410.2	0.16987872		1000.19	0.0265358		1590.21	-0.00555927		2180.2	0.01605708		2770.2	-0.00081471		3360.2	-0.00738375
410.4	0.16949338		1000.39	0.02675423		1590.41	-0.00497365		2180.4	0.01561952		2770.4	-0.0008293		3360.4	-0.00696721
410.6	0.17023526		1000.59	0.02682438		1590.61	-0.0051778		2180.6	0.0154704		2770.6	-0.00141474		3360.6	-0.00628609
410.8	0.17052758		1000.79	0.02774796		1590.81	-0.00490174		2180.8	0.01537033		2770.8	-0.00156202		3360.8	-0.00643461
411	0.17123197		1000.99	0.02770672		1591.01	-0.00513807		2181	0.01490535		2771	-0.00176558		3361	-0.00620591
411.2	0.17178737		1001.19	0.02789434		1591.21	-0.00481048		2181.2	0.01465784		2771.2	-0.00224789		3361.2	-0.00714444
411.4	0.17211318		1001.39	0.02805768		1591.41	-0.00555357		2181.4	0.01377442		2771.4	-0.00250031		3361.4	-0.00756513
411.6	0.17255425		1001.59	0.02856456		1591.61	-0.00517499		2181.6	0.01296342		2771.6	-0.00376616		3361.6	-0.00829887
411.8	0.17304604		1001.79	0.02863397		1591.81	-0.00553928		2181.8	0.01252741		2771.8	-0.00448624		3361.8	-0.0087595
412	0.17374581		1001.99	0.02884652		1592.01	-0.00502779		2182	0.01239374		2772	-0.00524161		3362	-0.0087445
412.2	0.17332902		1002.19	0.02852284		1592.21	-0.00465413		2182.2	0.01268692		2772.2	-0.00559575		3362.2	-0.00888165
412.4	0.17325973		1002.39	0.02845745		1592.41	-0.00403401		2182.4	0.01231398		2772.4	-0.00639439		3362.4	-0.00896873
412.6	0.17382716		1002.59	0.02832042		1592.61	-0.00394463		2182.6	0.0121848		2772.6	-0.00654863		3362.6	-0.00897501
412.8	0.17382955		1002.79	0.02786726		1592.81	-0.00366557		2182.8	0.01191429		2772.8	-0.00624751		3362.8	-0.00846216
413	0.17454908		1002.99	0.02802542		1593.01	-0.00370424		2183	0.01215241		2773	-0.00629275		3363	-0.00825261
413.2	0.17428881		1003.19	0.02670643		1593.21	-0.00423537		2183.2	0.01227739		2773.2	-0.00525162		3363.2	-0.00769306
413.4	0.17474745		1003.39	0.0266658		1593.41	-0.00432739		2183.4	0.0120569		2773.4	-0.0035161		3363.4	-0.00705395
413.6	0.17509598		1003.59	0.02649529		1593.61	-0.00373145		2183.6	0.01056545		2773.6	-0.00246047		3363.6	-0.00657825
413.8	0.17537756		1003.79	0.0269306		1593.81	-0.00386076		2183.8	0.01147781		2773.8	-0.0011449		3363.8	-0.00723503
414	0.17509047		1003.99	0.02738455		1594.01	-0.00463115		2184	0.01114323		2774	-0.00088211		3364	-0.00780195
414.2	0.17573435		1004.19	0.02708701		1594.21	-0.0051424		2184.2	0.0112662		2774.2	-0.00078783		3364.2	-0.00768826
414.4	0.1755422		1004.39	0.02707299		1594.41	-0.00524684		2184.4	0.01052944		2774.4	-0.00027532		3364.4	-0.00745108
414.6	0.17577508		1004.59	0.02745657		1594.61	-0.00650145		2184.6	0.01139035		2774.6	0.00019042		3364.6	-0.00614451
414.8	0.17641106		1004.79	0.02852673		1594.81	-0.00679207		2184.8	0.0111777		2774.8	0.00064465		3364.8	-0.00587889
415	0.17696973		1004.99	0.02844642		1595.01	-0.00700716		2185	0.01120122		2775	0.00102144		3365	-0.0060712
415.2	0.17743221		1005.19	0.02779837		1595.21	-0.00725715		2185.2	0.01113141		2775.2	0.00105717		3365.2	-0.00639198
415.4	0.17660975		1005.39	0.02798923		1595.41	-0.00737063		2185.4	0.01125837		2775.4	0.00078883		3365.4	-0.00683661
415.6	0.17694023		1005.59	0.02887224		1595.61	-0.0077356		2185.6	0.01143639		2775.6	-0.00046969		3365.6	-0.00685659
415.8	0.17608493		1005.79	0.0286556		1595.81	-0.00743118		2185.8	0.01190202		2775.8	-0.00137642		3365.8	-0.00696219
416	0.17640175		1005.99	0.02927689		1596.01	-0.00690769		2186	0.01208473		2776	-0.00205704		3366	-0.00694443
416.2	0.17486593		1006.19	0.02908594		1596.21	-0.00689433		2186.2	0.01203067		2776.2	-0.00330824		3366.2	-0.00733855
416.4	0.17436617		1006.39	0.02941569		1596.41	-0.00641406		2186.4	0.01240796		2776.4	-0.0041985		3366.4	-0.0081616
416.6	0.17445383		1006.59	0.02976566		1596.61	-0.0068974		2186.6	0.01256636		2776.6	-0.0049347		3366.6	-0.00891524
416.8	0.17560083		1006.79	0.02977528		1596.81	-0.00640858		2186.8	0.01221873		2776.8	-0.00535002		3366.8	-0.00952565
417	0.17655399		1006.99	0.02924482		1597.01	-0.00624815		2187	0.01195782		2777	-0.00551052		3367	-0.00974579
417.2	0.17654206		1007.19	0.02831567		1597.21	-0.00632608		2187.2	0.01223792		2777.2	-0.00459584		3367.2	-0.01070409
417.4	0.17844999		1007.39	0.02818493		1597.41	-0.00569281		2187.4	0.01241473		2777.4	-0.00450054		3367.4	-0.01060177
417.6	0.17894964		1007.59	0.0271025		1597.61	-0.00598514		2187.6	0.01297262		2777.6	-0.00431642		3367.6	-0.01107839
417.8	0.17906366		1007.79	0.02701693		1597.81	-0.00631059		2187.8	0.01444181		2777.8	-0.00483404		3367.8	-0.0118062
418	0.17861503		1007.99	0.02665253		1598.01	-0.00629443		2188	0.01392818		2778	-0.00459102		3368	-0.01164753
418.2	0.179051		1008.19	0.02585228		1598.21	-0.00533176		2188.2	0.01382318		2778.2	-0.00450434		3368.2	-0.01087045
418.4	0.17887964		1008.39	0.02678445		1598.41	-0.00478836		2188.4	0.01434938		2778.4	-0.00320982		3368.4	-0.00982729
418.6	0.17894742		1008.59	0.02773417		1598.61	-0.00497674		2188.6	0.01503522		2778.6	-0.00283873		3368.6	-0.00917087
418.8	0.1789428		1008.79	0.02783098		1598.81	-0.0043518		2188.8	0.01460692		2778.8	-0.00264111		3368.8	-0.00934536
419	0.17852116		1008.99	0.0275307		1599.01	-0.00393062		2189	0.0151269		2779	-0.00159828		3369	-0.00843678
419.2	0.17881248		1009.19	0.02715804		1599.21	-0.00406152		2189.2	0.01520106		2779.2	-0.0001919		3369.2	-0.0076842
419.4	0.17823828		1009.39	0.02806589		1599.41	-0.0037484		2189.4	0.01524311		2779.4	-0.00009522		3369.4	-0.00725945
419.6	0.17885184		1009.59	0.02802462		1599.61	-0.00386653		2189.6	0.01482966		2779.6	-0.00004573		3369.6	-0.00694253
419.8	0.17797908		1009.79	0.02836743		1599.81	-0.00270509		2189.8	0.01420687		2779.8	-0.00039202		3369.8	-0.00641307
420	0.17939939		1009.99	0.02875736		1600.01	-0.00285646		2190	0.01432342		2780	-0.00040523		3370	-0.0062502
420.2	0.17877016		1010.19	0.02874189		1600.21	-0.00212218		2190.2	0.01429159		2780.2	-0.00115605		3370.2	-0.00709169
420.4	0.17897085		1010.39	0.02970993		1600.41	-0.00172765		2190.4	0.01386869		2780.4	-0.0011616		3370.4	-0.00779097
420.6	0.17946505		1010.59	0.0294509		1600.61	-0.00206349		2190.6	0.01320164		2780.6	-0.00115944		3370.6	-0.00819712
420.8	0.18032714		1010.79	0.0295614		1600.81	-0.0017527		2190.8	0.01236247		2780.8	-0.0009778		3370.8	-0.00819654
421	0.18160825		1010.99	0.02904728		1601.01	-0.00206584		2191	0.0123574		2781	-0.0009431		3371	-0.00786768
421.2	0.18206639		1011.19	0.02885342		1601.21	-0.00203213		2191.2	0.01250871		2781.2	-0.00088708		3371.2	-0.00816706
421.4	0.18290672		1011.39	0.02908666		1601.41	-0.00284741		2191.4	0.01278348		2781.4	-0.00122169		3371.4	-0.00841926
421.6	0.1821279		1011.59	0.02868881		1601.61	-0.00296606		2191.6	0.01254644		2781.6	-0.00087427		3371.6	-0.00882414
421.8	0.18221108		1011.79	0.02900753		1601.81	-0.0029047		2191.8	0.01341135		2781.8	-0.00104913		3371.8	-0.00946056
422	0.18107103		1011.99	0.02922467		1602.01	-0.00259647		2192	0.0134241		2782	-0.00061459		3372	-0.00926608
422.2	0.18106008		1012.19	0.02994038		1602.21	-0.00298398		2192.2	0.01360617		2782.2	-0.00038246		3372.2	-0.00877875
422.4	0.18051457		1012.39	0.03058784		1602.41	-0.00418237		2192.4	0.01463289		2782.4	0.00001605		3372.4	-0.00943081
422.6	0.17955369		1012.59	0.02977625		1602.61	-0.00419993		2192.6	0.01413539		2782.6	-0.00011403		3372.6	-0.00955648
422.8	0.17926777		1012.79	0.02959058		1602.81	-0.00497177		2192.8	0.01348117		2782.8	-0.00029218		3372.8	-0.00921724
423	0.17944702		1012.99	0.0286413		1603.01	-0.00502265		2193	0.01315641		2783	0.00026727		3373	-0.00824333
423.2	0.1795444		1013.19	0.02836946		1603.21	-0.00558332		2193.2	0.01273395		2783.2	0.00020138		3373.2	-0.00859776
423.4	0.17939563		1013.39	0.02840705		1603.41	-0.00656823		2193.4	0.01334541		2783.4	-0.00027779		3373.4	-0.0082748
423.6	0.1797076		1013.59	0.02811165		1603.61	-0.00649078		2193.6	0.01353565		2783.6	-0.00050366		3373.6	-0.00779513
423.8	0.17974497		1013.79	0.02822197		1603.81	-0.00668525		2193.8	0.01421132		2783.8	-0.00043989		3373.8	-0.0072476
424	0.18042819		1013.99	0.02861053		1604.01	-0.00724823		2194	0.01410895		2784	0.00016147		3374	-0.0070541
424.2	0.1794466		1014.19	0.02894615		1604.21	-0.0071497		2194.2	0.0131252		2784.2	-0.00076672		3374.2	-0.00656966
424.4	0.17941286		1014.39	0.02982417		1604.41	-0.00729791		2194.4	0.01243724		2784.4	-0.00127238		3374.4	-0.00601479
424.6	0.17934656		1014.59	0.02883885		1604.61	-0.00664065		2194.6	0.01234789		2784.6	-0.00102018		3374.6	-0.00649746
424.8	0.1803985		1014.79	0.0300523		1604.81	-0.00645658		2194.8	0.01228218		2784.8	-0.00069167		3374.8	-0.00663148
425	0.18112888		1014.99	0.02982292		1605.01	-0.0065569		2195	0.01219513		2785	-0.00104168		3375	-0.00680493
425.2	0.1808872		1015.19	0.0303724		1605.21	-0.00574672		2195.2	0.01248154		2785.2	-0.0013984		3375.2	-0.00687737
425.4	0.18114816		1015.39	0.03071513		1605.41	-0.00593886		2195.4	0.01324916		2785.4	-0.00093586		3375.4	-0.00796059
425.6	0.18132271		1015.59	0.03147458		1605.61	-0.00577456		2195.6	0.01408786		2785.6	-0.00016797		3375.6	-0.00822338
425.8	0.18132787		1015.79	0.03218108		1605.81	-0.00558008		2195.8	0.01541815		2785.8	-0.00002926		3375.8	-0.00823924
426	0.18052792		1015.99	0.03215759		1606.01	-0.005443		2196	0.01600554		2786	0.00060929		3376	-0.00709332
426.2	0.18078954		1016.19	0.03234658		1606.21	-0.00528401		2196.2	0.01634562		2786.2	0.00100786		3376.2	-0.00715225
426.4	0.18059236		1016.39	0.03181014		1606.41	-0.00501587		2196.4	0.01650798		2786.4	0.00078788		3376.4	-0.00772746
426.6	0.18057199		1016.59	0.03142384		1606.61	-0.00463308		2196.6	0.01553294		2786.6	0.0008502		3376.6	-0.00824977
426.8	0.18101006		1016.79	0.03172209		1606.81	-0.00467188		2196.8	0.01502599		2786.8	-0.00037802		3376.8	-0.00844011
427	0.18135327		1016.99	0.03083386		1607.01	-0.0039876		2197	0.01409726		2787	-0.00104363		3377	-0.0088132
427.2	0.18162928		1017.19	0.0311769		1607.21	-0.00494529		2197.2	0.0147132		2787.2	-0.00161999		3377.2	-0.00980819
427.4	0.18221415		1017.39	0.03125704		1607.41	-0.00557455		2197.4	0.01553438		2787.4	-0.00232565		3377.4	-0.00981613
427.6	0.18254798		1017.59	0.03040369		1607.61	-0.00450371		2197.6	0.01481589		2787.6	-0.00276285		3377.6	-0.0096375
427.8	0.18325811		1017.79	0.03019216		1607.81	-0.0045015		2197.8	0.01433752		2787.8	-0.00243764		3377.8	-0.00965104
428	0.18296004		1017.99	0.03072898		1608.01	-0.00412437		2198	0.0130674		2788	-0.00282115		3378	-0.00953866
428.2	0.18303792		1018.19	0.0299399		1608.21	-0.00415339		2198.2	0.0131378		2788.2	-0.00345183		3378.2	-0.00860744
428.4	0.18364517		1018.39	0.03037497		1608.41	-0.00351668		2198.4	0.01375514		2788.4	-0.00399243		3378.4	-0.00837799
428.6	0.18397089		1018.59	0.0293613		1608.61	-0.00249985		2198.6	0.01377639		2788.6	-0.00363113		3378.6	-0.00862875
428.8	0.18499658		1018.79	0.02979351		1608.81	-0.00230685		2198.8	0.01344254		2788.8	-0.00356286		3378.8	-0.00831861
429	0.18523773		1018.99	0.02974613		1609.01	-0.0020591		2199	0.01332001		2789	-0.00378238		3379	-0.00744733
429.2	0.18616915		1019.19	0.02989745		1609.21	-0.00230285		2199.2	0.01374341		2789.2	-0.00438138		3379.2	-0.00746691
429.4	0.18673203		1019.39	0.03065536		1609.41	-0.00351215		2199.4	0.01422985		2789.4	-0.00298771		3379.4	-0.00764614
429.6	0.18732937		1019.59	0.03112296		1609.61	-0.00441042		2199.6	0.01481266		2789.6	-0.0021161		3379.6	-0.00706289
429.8	0.18794224		1019.79	0.03043361		1609.81	-0.00363503		2199.8	0.01510055		2789.8	-0.00157831		3379.8	-0.0067261
430	0.1890411		1019.99	0.0300554		1610.01	-0.00365158		2200	0.01516715		2790	-0.00122337		3380	-0.00614395
430.2	0.18979088		1020.19	0.03004838		1610.21	-0.00370579		2200.2	0.01509691		2790.2	-0.00115909		3380.2	-0.00732318
430.4	0.1897346		1020.39	0.03056769		1610.41	-0.00391961		2200.4	0.01431134		2790.4	-0.00050057		3380.4	-0.00803207
430.6	0.18969939		1020.59	0.02999195		1610.61	-0.00451732		2200.6	0.01368241		2790.6	0.00013848		3380.6	-0.00916278
430.8	0.19053573		1020.79	0.0304557		1610.81	-0.00464362		2200.8	0.01288742		2790.8	-0.00070709		3380.8	-0.00848287
431	0.19074962		1020.99	0.03074909		1611.01	-0.00503971		2201	0.01261207		2791	-0.00123106		3381	-0.00901134
431.2	0.19038854		1021.19	0.03130508		1611.21	-0.00534431		2201.2	0.01334021		2791.2	-0.00088631		3381.2	-0.00943139
431.4	0.19049284		1021.39	0.03093648		1611.41	-0.00562598		2201.4	0.01356019		2791.4	-0.00166243		3381.4	-0.00942717
431.6	0.18993628		1021.59	0.03110551		1611.61	-0.00531242		2201.6	0.01356481		2791.6	-0.0014156		3381.6	-0.00911267
431.8	0.19012706		1021.79	0.0313425		1611.81	-0.00542904		2201.8	0.01344648		2791.8	-0.00138125		3381.8	-0.00908393
432	0.18922193		1021.99	0.03146314		1612.01	-0.00518384		2202	0.01419881		2792	-0.00217448		3382	-0.00825985
432.2	0.18915203		1022.19	0.03230264		1612.21	-0.00492863		2202.2	0.01529597		2792.2	-0.00259832		3382.2	-0.00792146
432.4	0.18895696		1022.39	0.03262151		1612.41	-0.00461132		2202.4	0.01528372		2792.4	-0.00310244		3382.4	-0.00826299
432.6	0.18868391		1022.59	0.03257075		1612.61	-0.00520824		2202.6	0.01490103		2792.6	-0.00371205		3382.6	-0.00801132
432.8	0.18908953		1022.79	0.03255408		1612.81	-0.0059602		2202.8	0.01492382		2792.8	-0.00426153		3382.8	-0.00826808
433	0.18921228		1022.99	0.03201825		1613.01	-0.00645909		2203	0.01542768		2793	-0.00456054		3383	-0.00881633
433.2	0.19041127		1023.19	0.03237254		1613.21	-0.00748219		2203.2	0.01597761		2793.2	-0.00506834		3383.2	-0.00957537
433.4	0.19107149		1023.39	0.03273124		1613.41	-0.00772818		2203.4	0.01608199		2793.4	-0.00400841		3383.4	-0.00953922
433.6	0.19171604		1023.59	0.03249888		1613.61	-0.00731344		2203.6	0.01606729		2793.6	-0.00294627		3383.6	-0.00989128
433.8	0.19190541		1023.79	0.03169744		1613.81	-0.00616659		2203.8	0.01698484		2793.8	-0.00287908		3383.8	-0.01066773
434	0.19218063		1023.99	0.03214793		1614.01	-0.00597776		2204	0.01711329		2794	-0.00259064		3384	-0.01051963
434.2	0.19204631		1024.19	0.03176524		1614.21	-0.00603262		2204.2	0.01672899		2794.2	-0.00158123		3384.2	-0.01089565
434.4	0.1925048		1024.39	0.03170976		1614.41	-0.00624282		2204.4	0.01631381		2794.4	-0.00034743		3384.4	-0.01038163
434.6	0.19291561		1024.59	0.03181463		1614.61	-0.0058691		2204.6	0.01647453		2794.6	0.00019515		3384.6	-0.01012495
434.8	0.19318854		1024.79	0.03205554		1614.81	-0.00497505		2204.8	0.01567738		2794.8	0.00003151		3384.8	-0.00865241
435	0.19267961		1024.99	0.03239333		1615.01	-0.00409941		2205	0.01573688		2795	0.00072258		3385	-0.00884592
435.2	0.19184891		1025.19	0.03231897		1615.21	-0.00339366		2205.2	0.01710186		2795.2	0.00181616		3385.2	-0.00805233
435.4	0.19288871		1025.39	0.03205595		1615.41	-0.00420589		2205.4	0.01723097		2795.4	0.00187928		3385.4	-0.00715116
435.6	0.19346581		1025.59	0.03236704		1615.61	-0.00412596		2205.6	0.0174586		2795.6	0.00265296		3385.6	-0.00640873
435.8	0.19378878		1025.79	0.03253249		1615.81	-0.00442587		2205.8	0.01768285		2795.8	0.00280653		3385.8	-0.00574168
436	0.19453165		1025.99	0.03249173		1616.01	-0.00409753		2206	0.01845568		2796	0.00268017		3386	-0.0049248
436.2	0.19586609		1026.19	0.03333988		1616.21	-0.00430897		2206.2	0.01830961		2796.2	0.00215545		3386.2	-0.00573516
436.4	0.19654896		1026.39	0.03250061		1616.41	-0.00449287		2206.4	0.01729743		2796.4	0.00220442		3386.4	-0.0053608
436.6	0.19721676		1026.59	0.0329542		1616.61	-0.00554386		2206.6	0.01771317		2796.6	0.00134334		3386.6	-0.00522447
436.8	0.1980149		1026.79	0.03195764		1616.81	-0.00592558		2206.8	0.01822757		2796.8	0.00136152		3386.8	-0.00648437
437	0.1983535		1026.99	0.03141847		1617.01	-0.00636501		2207	0.01867127		2797	0.00099281		3387	-0.00667417
437.2	0.19843848		1027.19	0.03166594		1617.21	-0.00743205		2207.2	0.01862941		2797.2	0.00074906		3387.2	-0.00680878
437.4	0.19836284		1027.39	0.03115373		1617.41	-0.00758448		2207.4	0.01853581		2797.4	0.00019781		3387.4	-0.00763356
437.6	0.1975847		1027.59	0.0308609		1617.61	-0.00740228		2207.6	0.01945725		2797.6	0.00017496		3387.6	-0.00808996
437.8	0.1968909		1027.79	0.03036519		1617.81	-0.0074623		2207.8	0.01990804		2797.8	-0.00129661		3387.8	-0.00912402
438	0.19713927		1027.99	0.03095034		1618.01	-0.00853843		2208	0.01888212		2798	-0.00127392		3388	-0.00924575
438.2	0.19654899		1028.19	0.03021319		1618.21	-0.00847825		2208.2	0.01819763		2798.2	-0.00110636		3388.2	-0.0095946
438.4	0.19659861		1028.39	0.03010609		1618.41	-0.0083018		2208.4	0.01780539		2798.4	-0.00106741		3388.4	-0.01026264
438.6	0.1954098		1028.59	0.02943956		1618.61	-0.00775314		2208.6	0.01768864		2798.6	-0.00118987		3388.6	-0.01055534
438.8	0.19538824		1028.79	0.0286117		1618.81	-0.00744245		2208.8	0.01712021		2798.8	-0.00118737		3388.8	-0.01021622
439	0.19472814		1028.99	0.02845481		1619.01	-0.00731968		2209	0.01758759		2799	-0.00085881		3389	-0.01041248
439.2	0.19424344		1029.19	0.0283462		1619.21	-0.00709482		2209.2	0.01767696		2799.2	-0.00108089		3389.2	-0.01037464
439.4	0.19516084		1029.39	0.02898231		1619.41	-0.00800353		2209.4	0.01693687		2799.4	-0.00091881		3389.4	-0.01057915
439.6	0.19548225		1029.59	0.02935938		1619.61	-0.00801518		2209.6	0.01652964		2799.6	-0.00137141		3389.6	-0.01083652
439.8	0.1957669		1029.79	0.03042274		1619.81	-0.0078689		2209.8	0.01633901		2799.8	-0.00160169		3389.8	-0.01075008
440	0.19633575		1029.99	0.03104245		1620.01	-0.00668822		2210	0.01594073		2800	-0.00136171		3390	-0.01105831
440.2	0.19578425		1030.19	0.03233623		1620.21	-0.00640656		2210.2	0.01597141		2800.2	-0.00177181		3390.2	-0.0111484
440.4	0.19578322		1030.39	0.03264989		1620.41	-0.00598665		2210.4	0.01556054		2800.4	-0.00109932		3390.4	-0.01022782
440.6	0.19626498		1030.59	0.03336195		1620.61	-0.006453		2210.6	0.01587289		2800.6	-0.00194562		3390.6	-0.0097829
440.8	0.19680299		1030.79	0.03323761		1620.81	-0.00689137		2210.8	0.01591211		2800.8	-0.00237224		3390.8	-0.00938156
441	0.19648142		1030.99	0.0334203		1621.01	-0.0070694		2211	0.01683108		2801	-0.00329852		3391	-0.00859764
441.2	0.19605706		1031.19	0.03317875		1621.21	-0.00673405		2211.2	0.01642473		2801.2	-0.00391878		3391.2	-0.00812677
441.4	0.19613733		1031.39	0.03342842		1621.41	-0.00665922		2211.4	0.01680469		2801.4	-0.00475785		3391.4	-0.00784441
441.6	0.19562083		1031.59	0.03401268		1621.61	-0.00685168		2211.6	0.01691426		2801.6	-0.0049179		3391.6	-0.00602693
441.8	0.19501231		1031.79	0.03407292		1621.81	-0.00737271		2211.8	0.01555774		2801.8	-0.0047178		3391.8	-0.00563819
442	0.19538247		1031.99	0.03368919		1622.01	-0.00741212		2212	0.01478114		2802	-0.00388588		3392	-0.00555691
442.2	0.19545961		1032.19	0.03335449		1622.21	-0.0060695		2212.2	0.01426802		2802.2	-0.00334796		3392.2	-0.00543808
442.4	0.19650273		1032.39	0.03274493		1622.41	-0.00581459		2212.4	0.01352401		2802.4	-0.00266032		3392.4	-0.00544111
442.6	0.19638037		1032.59	0.03197346		1622.61	-0.00540854		2212.6	0.01428979		2802.6	-0.00184767		3392.6	-0.004941
442.8	0.1969369		1032.79	0.03179435		1622.81	-0.00482908		2212.8	0.01382036		2802.8	-0.00191379		3392.8	-0.00494911
443	0.19636389		1032.99	0.031748		1623.01	-0.00493056		2213	0.01331064		2803	-0.00192926		3393	-0.00478751
443.2	0.19700281		1033.19	0.03235179		1623.21	-0.00545883		2213.2	0.01292		2803.2	-0.00206752		3393.2	-0.00520266
443.4	0.19758222		1033.39	0.03283313		1623.41	-0.00604129		2213.4	0.01306646		2803.4	-0.00210233		3393.4	-0.00561678
443.6	0.19783621		1033.59	0.03308575		1623.61	-0.00551212		2213.6	0.01286126		2803.6	-0.00241742		3393.6	-0.00653336
443.8	0.19768453		1033.79	0.0332238		1623.81	-0.00528967		2213.8	0.01387091		2803.8	-0.00226019		3393.8	-0.00687029
444	0.19718804		1033.99	0.03330646		1624.01	-0.00518785		2214	0.01423302		2804	-0.00217369		3394	-0.00750619
444.2	0.19745023		1034.19	0.03345128		1624.21	-0.00494875		2214.2	0.01420464		2804.2	-0.00238286		3394.2	-0.00715538
444.4	0.19825116		1034.39	0.03355838		1624.41	-0.00505518		2214.4	0.01490876		2804.4	-0.00208829		3394.4	-0.00779159
444.6	0.19871442		1034.59	0.03399327		1624.61	-0.00532375		2214.6	0.01573799		2804.6	-0.00245657		3394.6	-0.00782942
444.8	0.1986924		1034.79	0.0347231		1624.81	-0.00594843		2214.8	0.01667208		2804.8	-0.00258683		3394.8	-0.00880897
445	0.19822486		1034.99	0.03430142		1625.01	-0.00581557		2215	0.0178531		2805	-0.00330799		3395	-0.00928554
445.2	0.19752797		1035.19	0.0347079		1625.21	-0.0058172		2215.2	0.01796032		2805.2	-0.00313873		3395.2	-0.00964331
445.4	0.19791752		1035.39	0.03523301		1625.41	-0.00618262		2215.4	0.01815958		2805.4	-0.00244667		3395.4	-0.00928083
445.6	0.19775755		1035.59	0.03543946		1625.61	-0.00609949		2215.6	0.01745267		2805.6	-0.00212101		3395.6	-0.00856171
445.8	0.19792379		1035.79	0.03466575		1625.81	-0.00542673		2215.8	0.0165412		2805.8	-0.00067912		3395.8	-0.00918478
446	0.19961405		1035.99	0.03542281		1626.01	-0.00464903		2216	0.01581089		2806	0.00002653		3396	-0.01001353
446.2	0.19998038		1036.19	0.03527899		1626.21	-0.00432093		2216.2	0.01544862		2806.2	0.00083836		3396.2	-0.01066903
446.4	0.20020602		1036.39	0.03494328		1626.41	-0.00453575		2216.4	0.01520234		2806.4	0.00134111		3396.4	-0.00994689
446.6	0.19952472		1036.59	0.03420269		1626.61	-0.00455543		2216.6	0.01476253		2806.6	0.00090272		3396.6	-0.01020519
446.8	0.19908082		1036.79	0.03403339		1626.81	-0.00443711		2216.8	0.0140378		2806.8	0.00057621		3396.8	-0.0103289
447	0.1984062		1036.99	0.03438323		1627.01	-0.0050258		2217	0.01398847		2807	0.00083879		3397	-0.00989948
447.2	0.19906657		1037.19	0.03452959		1627.21	-0.00548451		2217.2	0.01437834		2807.2	0.00048463		3397.2	-0.00982494
447.4	0.19837317		1037.39	0.0340011		1627.41	-0.00545904		2217.4	0.01391872		2807.4	-0.00028713		3397.4	-0.00934075
447.6	0.19779825		1037.59	0.03341136		1627.61	-0.0048084		2217.6	0.01351309		2807.6	-0.00011614		3397.6	-0.00994721
447.8	0.19742794		1037.79	0.03210697		1627.81	-0.00576676		2217.8	0.01365407		2807.8	-0.00046101		3397.8	-0.00959702
448	0.19708115		1037.99	0.03211501		1628.01	-0.00545567		2218	0.01353873		2808	-0.00103419		3398	-0.00949584
448.2	0.19713035		1038.19	0.03264078		1628.21	-0.00568997		2218.2	0.01376871		2808.2	-0.00123489		3398.2	-0.00932551
448.4	0.1970812		1038.39	0.03282917		1628.41	-0.00598904		2218.4	0.01457769		2808.4	-0.00124647		3398.4	-0.00925045
448.6	0.1982915		1038.59	0.03229257		1628.61	-0.00657902		2218.6	0.01513124		2808.6	-0.00108199		3398.6	-0.00878038
448.8	0.19921933		1038.79	0.03276395		1628.81	-0.0069828		2218.8	0.01489131		2808.8	-0.00144271		3398.8	-0.00865018
449	0.20000862		1038.99	0.03236381		1629.01	-0.00689168		2219	0.01517748		2809	-0.00137961		3399	-0.00767031
449.2	0.20023475		1039.19	0.03322827		1629.21	-0.00760347		2219.2	0.01497942		2809.2	-0.00127733		3399.2	-0.00716044
449.4	0.20222622		1039.39	0.033034		1629.41	-0.00696268		2219.4	0.01420555		2809.4	-0.0009531		3399.4	-0.00627843
449.6	0.20307415		1039.59	0.03328017		1629.61	-0.00700027		2219.6	0.01364288		2809.6	-0.00075673		3399.6	-0.0057283
449.8	0.20456243		1039.79	0.03375446		1629.81	-0.00640093		2219.8	0.01308154		2809.8	0.00010357		3399.8	-0.00586302
450	0.20583048		1039.99	0.03462833		1630.01	-0.00621534		2220	0.01252314		2810	-0.00004162		3400	-0.0058989
450.2	0.20583253		1040.19	0.03435874		1630.21	-0.00655773		2220.2	0.01269062		2810.2	0.00039999		3400.2	-0.00664772
450.4	0.20565991		1040.39	0.03408987		1630.41	-0.00656392		2220.4	0.01209125		2810.4	-0.0001474		3400.4	-0.00607493
450.6	0.20527717		1040.59	0.03459269		1630.61	-0.0062729		2220.6	0.01135837		2810.6	-0.00006114		3400.6	-0.00717856
450.8	0.2057395		1040.79	0.03503782		1630.81	-0.00621288		2220.8	0.0118885		2810.8	0.00034261		3400.8	-0.00689431
451	0.20596053		1040.99	0.03499956		1631.01	-0.00694825		2221	0.01200301		2811	0.00096869		3401	-0.00705186
451.2	0.20647088		1041.19	0.03530833		1631.21	-0.0074654		2221.2	0.01230855		2811.2	0.00081026		3401.2	-0.00706231
451.4	0.20551692		1041.39	0.03488246		1631.41	-0.00705264		2221.4	0.01145634		2811.4	0.00073428		3401.4	-0.00819751
451.6	0.20611439		1041.59	0.03442067		1631.61	-0.00693051		2221.6	0.01228566		2811.6	0.001135		3401.6	-0.00941397
451.8	0.20572865		1041.79	0.03445782		1631.81	-0.00689087		2221.8	0.01283318		2811.8	0.00072494		3401.8	-0.00977893
452	0.2055835		1041.99	0.03513949		1632.01	-0.00591206		2222	0.01421443		2812	0.00014459		3402	-0.01041086
452.2	0.20487408		1042.19	0.03560752		1632.21	-0.00622008		2222.2	0.01528083		2812.2	-0.00036487		3402.2	-0.01049993
452.4	0.20482532		1042.39	0.03500639		1632.41	-0.00608664		2222.4	0.01647057		2812.4	-0.00007047		3402.4	-0.01095306
452.6	0.20487246		1042.59	0.03418795		1632.61	-0.00699092		2222.6	0.01695823		2812.6	-0.00028434		3402.6	-0.01107322
452.8	0.20425442		1042.79	0.03479335		1632.81	-0.00655422		2222.8	0.01738454		2812.8	-0.00029089		3402.8	-0.01114671
453	0.20341816		1042.99	0.03440471		1633.01	-0.0065861		2223	0.01767471		2813	-0.00088855		3403	-0.01197269
453.2	0.20348622		1043.19	0.03460347		1633.21	-0.00619677		2223.2	0.01655124		2813.2	-0.00189382		3403.2	-0.01218788
453.4	0.20330558		1043.39	0.03444099		1633.41	-0.00496192		2223.4	0.01693695		2813.4	-0.00162679		3403.4	-0.01259622
453.6	0.20264265		1043.59	0.03439302		1633.61	-0.00541201		2223.6	0.01686157		2813.6	-0.00207905		3403.6	-0.01263004
453.8	0.20181567		1043.79	0.03523394		1633.81	-0.00512205		2223.8	0.01656005		2813.8	-0.00177435		3403.8	-0.01221666
454	0.20171983		1043.99	0.0347387		1634.01	-0.00435062		2224	0.01627242		2814	-0.00226131		3404	-0.01164328
454.2	0.20185264		1044.19	0.0343624		1634.21	-0.00434312		2224.2	0.01584873		2814.2	-0.0018958		3404.2	-0.01135321
454.4	0.20181958		1044.39	0.03370569		1634.41	-0.00454183		2224.4	0.01487407		2814.4	-0.00230145		3404.4	-0.01055089
454.6	0.20300159		1044.59	0.03387307		1634.61	-0.00477607		2224.6	0.01451258		2814.6	-0.00206751		3404.6	-0.00976203
454.8	0.20376175		1044.79	0.03305419		1634.81	-0.00558925		2224.8	0.01411503		2814.8	-0.00210864		3404.8	-0.00852734
455	0.20448824		1044.99	0.03305056		1635.01	-0.0059798		2225	0.01381432		2815	-0.00133346		3405	-0.00768648
455.2	0.20464539		1045.19	0.03334672		1635.21	-0.00600856		2225.2	0.0135631		2815.2	-0.00196584		3405.2	-0.00743927
455.4	0.20529943		1045.39	0.03405268		1635.41	-0.00547531		2225.4	0.01371372		2815.4	-0.00243096		3405.4	-0.00845781
455.6	0.20638962		1045.59	0.03418208		1635.61	-0.00526334		2225.6	0.01450746		2815.6	-0.00254293		3405.6	-0.00782557
455.8	0.20616865		1045.79	0.03564956		1635.81	-0.00485854		2225.8	0.01484859		2815.8	-0.00301134		3405.8	-0.00780008
456	0.20601046		1045.99	0.0367403		1636.01	-0.00476005		2226	0.01600728		2816	-0.00312504		3406	-0.00807474
456.2	0.20527871		1046.19	0.03761735		1636.21	-0.00527477		2226.2	0.01649193		2816.2	-0.00316596		3406.2	-0.00810319
456.4	0.20480716		1046.39	0.03819893		1636.41	-0.00502434		2226.4	0.01730633		2816.4	-0.00298252		3406.4	-0.00884363
456.6	0.20538276		1046.59	0.03854182		1636.61	-0.00568691		2226.6	0.01756958		2816.6	-0.00305908		3406.6	-0.0093819
456.8	0.20523168		1046.79	0.03961166		1636.81	-0.00556557		2226.8	0.01800099		2816.8	-0.00232845		3406.8	-0.01036801
457	0.20532862		1046.99	0.04037388		1637.01	-0.00525775		2227	0.01664769		2817	-0.00283023		3407	-0.01070607
457.2	0.20575493		1047.19	0.04139568		1637.21	-0.00499525		2227.2	0.01598647		2817.2	-0.00243907		3407.2	-0.01116419
457.4	0.20552554		1047.39	0.04097233		1637.41	-0.00488684		2227.4	0.01601007		2817.4	-0.00181555		3407.4	-0.01146581
457.6	0.20472892		1047.59	0.04089864		1637.61	-0.00536581		2227.6	0.01585354		2817.6	-0.00215787		3407.6	-0.01132331
457.8	0.20463943		1047.79	0.04172325		1637.81	-0.00472725		2227.8	0.0157969		2817.8	-0.00110691		3407.8	-0.01105439
458	0.20533155		1047.99	0.04125889		1638.01	-0.00421377		2228	0.01563011		2818	-0.00052082		3408	-0.01080878
458.2	0.20624667		1048.19	0.04025574		1638.21	-0.0047005		2228.2	0.01508035		2818.2	-0.00025909		3408.2	-0.01027497
458.4	0.20626772		1048.39	0.04010689		1638.41	-0.00560034		2228.4	0.01430742		2818.4	-0.000142		3408.4	-0.00905555
458.6	0.20707577		1048.59	0.03922371		1638.61	-0.00509899		2228.6	0.01379923		2818.6	0.00023939		3408.6	-0.0084386
458.8	0.20635515		1048.79	0.03785492		1638.81	-0.00517236		2228.8	0.01376384		2818.8	-0.00000289		3408.8	-0.00795539
459	0.20693565		1048.99	0.03704882		1639.01	-0.00539384		2229	0.01383208		2819	-0.00025742		3409	-0.00787183
459.2	0.2070038		1049.19	0.03772629		1639.21	-0.00532089		2229.2	0.0142713		2819.2	-0.00025456		3409.2	-0.00877426
459.4	0.20717094		1049.39	0.03773669		1639.41	-0.00475257		2229.4	0.0146093		2819.4	0.00008227		3409.4	-0.00956837
459.6	0.20710435		1049.59	0.03668903		1639.61	-0.00487442		2229.6	0.01475622		2819.6	0.00069464		3409.6	-0.00927014
459.8	0.20687169		1049.79	0.03668576		1639.81	-0.00551566		2229.8	0.01568053		2819.8	0.00101007		3409.8	-0.00932018
460	0.20643764		1049.99	0.03559492		1640.01	-0.00615638		2230	0.01581406		2820	0.00144965		3410	-0.00973413
460.2	0.20562231		1050.19	0.035315		1640.21	-0.00662891		2230.2	0.01522094		2820.2	0.00147112		3410.2	-0.01008007
460.4	0.20568447		1050.39	0.03581435		1640.41	-0.0069719		2230.4	0.01541796		2820.4	0.00129896		3410.4	-0.00940651
460.6	0.20521278		1050.59	0.03505555		1640.61	-0.00814091		2230.6	0.01531712		2820.6	0.00128932		3410.6	-0.0086863
460.8	0.20397359		1050.79	0.03528697		1640.81	-0.00829637		2230.8	0.01482858		2820.8	0.00104738		3410.8	-0.00868811
461	0.20426427		1050.99	0.03557449		1641.01	-0.00740804		2231	0.01369262		2821	0.00096939		3411	-0.00775569
461.2	0.20465867		1051.19	0.03583244		1641.21	-0.00757245		2231.2	0.01363848		2821.2	0.00137632		3411.2	-0.00763059
461.4	0.20471739		1051.39	0.03548843		1641.41	-0.0077051		2231.4	0.01288784		2821.4	0.00114942		3411.4	-0.0067344
461.6	0.20504261		1051.59	0.03633439		1641.61	-0.0080644		2231.6	0.01375119		2821.6	0.0012003		3411.6	-0.0061777
461.8	0.20551283		1051.79	0.03690918		1641.81	-0.0077535		2231.8	0.01355021		2821.8	0.00150704		3411.8	-0.00585534
462	0.20635123		1051.99	0.03790195		1642.01	-0.00792788		2232	0.01329445		2822	0.00102459		3412	-0.00557592
462.2	0.20705151		1052.19	0.03765846		1642.21	-0.00771531		2232.2	0.01342779		2822.2	0.00063377		3412.2	-0.00530987
462.4	0.20775873		1052.39	0.03807372		1642.41	-0.00753542		2232.4	0.01448428		2822.4	0.00057321		3412.4	-0.00414465
462.6	0.20866218		1052.59	0.03781707		1642.61	-0.00683031		2232.6	0.01489825		2822.6	-0.00070385		3412.6	-0.0054636
462.8	0.20847954		1052.79	0.03812981		1642.81	-0.00645748		2232.8	0.01570115		2822.8	-0.00143292		3412.8	-0.00640754
463	0.21054739		1052.99	0.03824491		1643.01	-0.00618037		2233	0.01603714		2823	-0.0011434		3413	-0.00786609
463.2	0.2112526		1053.19	0.03934212		1643.21	-0.00531819		2233.2	0.01653332		2823.2	-0.00065229		3413.2	-0.00886265
463.4	0.2116454		1053.39	0.03901115		1643.41	-0.00466679		2233.4	0.01667106		2823.4	-0.00064394		3413.4	-0.01017278
463.6	0.21186372		1053.59	0.03843539		1643.61	-0.0049575		2233.6	0.01722872		2823.6	-0.00081053		3413.6	-0.01032656
463.8	0.21182375		1053.79	0.03801832		1643.81	-0.00488355		2233.8	0.01734818		2823.8	-0.0004795		3413.8	-0.01139117
464	0.21223759		1053.99	0.03763963		1644.01	-0.00495268		2234	0.0163486		2824	-0.00092532		3414	-0.01161609
464.2	0.21315988		1054.19	0.03778669		1644.21	-0.00436115		2234.2	0.01581338		2824.2	-0.00121226		3414.2	-0.01227058
464.4	0.21373159		1054.39	0.03781495		1644.41	-0.00454437		2234.4	0.01646869		2824.4	-0.00163266		3414.4	-0.01169338
464.6	0.21247889		1054.59	0.03672453		1644.61	-0.00440859		2234.6	0.01674162		2824.6	-0.00163655		3414.6	-0.01245827
464.8	0.21312521		1054.79	0.03652011		1644.81	-0.00419235		2234.8	0.01666348		2824.8	-0.00161602		3414.8	-0.01295419
465	0.21311618		1054.99	0.0367859		1645.01	-0.00398518		2235	0.01567003		2825	-0.00164981		3415	-0.01254013
465.2	0.21238842		1055.19	0.03664108		1645.21	-0.00443069		2235.2	0.01578042		2825.2	-0.00125412		3415.2	-0.01261869
465.4	0.21196267		1055.39	0.03645203		1645.41	-0.00489014		2235.4	0.01605779		2825.4	-0.00138787		3415.4	-0.01209038
465.6	0.21168196		1055.59	0.03678273		1645.61	-0.00512866		2235.6	0.01665426		2825.6	-0.00087773		3415.6	-0.01240112
465.8	0.21042685		1055.79	0.0372187		1645.81	-0.00587637		2235.8	0.0165177		2825.8	-0.00127889		3415.8	-0.01159098
466	0.21014766		1055.99	0.03762251		1646.01	-0.00609821		2236	0.01699437		2826	-0.00085511		3416	-0.01153639
466.2	0.20907737		1056.19	0.03681515		1646.21	-0.00640917		2236.2	0.01763943		2826.2	-0.00055443		3416.2	-0.01003278
466.4	0.20855453		1056.39	0.03745456		1646.41	-0.00599675		2236.4	0.01844781		2826.4	-0.00120796		3416.4	-0.0089567
466.6	0.20799948		1056.59	0.03757312		1646.61	-0.00567105		2236.6	0.01820719		2826.6	-0.0017796		3416.6	-0.0090871
466.8	0.20751224		1056.79	0.0372825		1646.81	-0.00536919		2236.8	0.01811132		2826.8	-0.00102477		3416.8	-0.00866233
467	0.20800662		1056.99	0.03677304		1647.01	-0.00569079		2237	0.0183616		2827	-0.00042259		3417	-0.00789341
467.2	0.20795824		1057.19	0.03766035		1647.21	-0.00490539		2237.2	0.01760072		2827.2	-0.00030862		3417.2	-0.00694201
467.4	0.20851178		1057.39	0.03808868		1647.41	-0.00493663		2237.4	0.01726574		2827.4	0.00012949		3417.4	-0.00717129
467.6	0.20895268		1057.59	0.0380422		1647.61	-0.00454887		2237.6	0.01663031		2827.6	0.00033928		3417.6	-0.00716421
467.8	0.21041919		1057.79	0.0388067		1647.81	-0.00496373		2237.8	0.01667094		2827.8	0.00056866		3417.8	-0.00748489
468	0.21236018		1057.99	0.03950692		1648.01	-0.00543313		2238	0.01654679		2828	0.00000282		3418	-0.00713781
468.2	0.2136847		1058.19	0.03975345		1648.21	-0.0055026		2238.2	0.01676307		2828.2	-0.00016266		3418.2	-0.00834683
468.4	0.21379354		1058.39	0.04030657		1648.41	-0.00587707		2238.4	0.01664864		2828.4	-0.00043708		3418.4	-0.00896533
468.6	0.2135614		1058.59	0.0403616		1648.61	-0.005828		2238.6	0.01601372		2828.6	-0.00041136		3418.6	-0.01024176
468.8	0.21361634		1058.79	0.04052068		1648.81	-0.0059441		2238.8	0.0151843		2828.8	-0.00074204		3418.8	-0.01131069
469	0.21274467		1058.99	0.04069298		1649.01	-0.00590856		2239	0.01434966		2829	-0.00130777		3419	-0.01264125
469.2	0.21211259		1059.19	0.04040473		1649.21	-0.00561128		2239.2	0.01420238		2829.2	-0.00101016		3419.2	-0.01380077
469.4	0.21179653		1059.39	0.04054563		1649.41	-0.00544345		2239.4	0.01356449		2829.4	-0.00126011		3419.4	-0.01465335
469.6	0.21104656		1059.59	0.04059362		1649.61	-0.00533414		2239.6	0.01254203		2829.6	-0.00125171		3419.6	-0.0160122
469.8	0.21017418		1059.79	0.04013841		1649.81	-0.00515365		2239.8	0.01152614		2829.8	-0.00132969		3419.8	-0.01614833
470	0.21017418		1059.99	0.04013841		1650.01	-0.00515365		2240	0.01152614		2830	-0.00132969		3419.99	-0.01614833
470.2	0.21116799		1060.19	0.04011789		1650.21	-0.00496273		2240.2	0.01172302		2830.2	-0.00110053		3420.19	-0.01621814
470.4	0.21120075		1060.39	0.04037807		1650.41	-0.00566253		2240.4	0.01114521		2830.4	-0.00056751		3420.39	-0.01606055
470.6	0.21207993		1060.59	0.04020508		1650.61	-0.00601514		2240.6	0.01088177		2830.6	-0.00039429		3420.59	-0.01626648
470.8	0.21277247		1060.79	0.03997852		1650.81	-0.00696521		2240.8	0.01017744		2830.8	-0.000389		3420.79	-0.01550925
471	0.21394458		1060.99	0.03976359		1651.01	-0.0073624		2241	0.00934299		2831	-0.00047783		3420.99	-0.01574585
471.2	0.21430451		1061.19	0.03960871		1651.21	-0.00747972		2241.2	0.00885187		2831.2	-0.00019776		3421.19	-0.01578023
471.4	0.21498712		1061.39	0.0397861		1651.41	-0.00783286		2241.4	0.00830912		2831.4	0.00091632		3421.39	-0.01582406
471.6	0.21574828		1061.59	0.03996411		1651.61	-0.00767959		2241.6	0.0078853		2831.6	0.00068013		3421.59	-0.015537
471.8	0.21679279		1061.79	0.03997183		1651.81	-0.00763523		2241.8	0.00768867		2831.8	0.00079358		3421.79	-0.01564328
472	0.2174078		1061.99	0.03905791		1652.01	-0.00717562		2242	0.00677028		2832	0.00136607		3421.99	-0.01483961
472.2	0.21756282		1062.19	0.03957547		1652.21	-0.00696847		2242.2	0.00660743		2832.2	0.00107451		3422.19	-0.01537979
472.4	0.21751788		1062.39	0.03908948		1652.41	-0.00568208		2242.4	0.00654948		2832.4	0.00024875		3422.39	-0.01546998
472.6	0.21620418		1062.59	0.03846088		1652.61	-0.00485625		2242.6	0.00595586		2832.6	0.00024102		3422.59	-0.0151885
472.8	0.21603957		1062.79	0.03902429		1652.81	-0.00506524		2242.8	0.00584933		2832.8	-0.00057663		3422.79	-0.01526393
473	0.21538843		1062.99	0.03868751		1653.01	-0.00457566		2243	0.00575467		2833	-0.00170309		3422.99	-0.01598639
473.2	0.21518948		1063.19	0.03904535		1653.21	-0.00450237		2243.2	0.00542395		2833.2	-0.00121969		3423.19	-0.01647134
473.4	0.21497677		1063.39	0.04003423		1653.41	-0.00501679		2243.4	0.00546049		2833.4	-0.00109158		3423.39	-0.01624621
473.6	0.21368807		1063.59	0.04016036		1653.61	-0.00518245		2243.6	0.00577281		2833.6	-0.00102571		3423.59	-0.01560975
473.8	0.21410766		1063.79	0.04027765		1653.81	-0.00563875		2243.8	0.00586133		2833.8	-0.0010119		3423.79	-0.01591837
474	0.21448053		1063.99	0.04075468		1654.01	-0.00532352		2244	0.00655671		2834	-0.00120786		3423.99	-0.01590691
474.2	0.2138903		1064.19	0.04111563		1654.21	-0.00415173		2244.2	0.00694937		2834.2	-0.00097527		3424.19	-0.01613152
474.4	0.21305364		1064.39	0.04135007		1654.41	-0.00482744		2244.4	0.00644809		2834.4	-0.00072958		3424.39	-0.01661986
474.6	0.21354758		1064.59	0.0415068		1654.61	-0.00459872		2244.6	0.00587774		2834.6	-0.0009144		3424.59	-0.01660366
474.8	0.21308712		1064.79	0.04190207		1654.81	-0.00442115		2244.8	0.00601504		2834.8	-0.00110559		3424.79	-0.01635424
475	0.21325632		1064.99	0.04213492		1655.01	-0.00396445		2245	0.00518507		2835	-0.00061951		3424.99	-0.01710081
475.2	0.21292155		1065.19	0.04254937		1655.21	-0.00409907		2245.2	0.00520194		2835.2	-0.00043097		3425.19	-0.0172712
475.4	0.21334845		1065.39	0.04343573		1655.41	-0.00384122		2245.4	0.00502249		2835.4	-0.00032798		3425.39	-0.01703002
475.6	0.21357231		1065.59	0.04357478		1655.61	-0.00328939		2245.6	0.00449056		2835.6	0.00017807		3425.59	-0.01639083
475.8	0.2135407		1065.79	0.04267167		1655.81	-0.00396604		2245.8	0.00496017		2835.8	0.00098051		3425.79	-0.0166516
476	0.21286506		1065.99	0.04227453		1656.01	-0.00376248		2246	0.00474295		2836	0.00158093		3425.99	-0.01600834
476.2	0.21289259		1066.19	0.04279106		1656.21	-0.00428245		2246.2	0.00524079		2836.2	0.00146967		3426.19	-0.01622913
476.4	0.2122399		1066.39	0.04235919		1656.41	-0.00462662		2246.4	0.00472629		2836.4	0.00237064		3426.39	-0.01554248
476.6	0.21251933		1066.59	0.04293399		1656.61	-0.00483326		2246.6	0.00488464		2836.6	0.00258313		3426.59	-0.0153876
476.8	0.21401637		1066.79	0.04315943		1656.81	-0.00614686		2246.8	0.00512065		2836.8	0.00232722		3426.79	-0.01585046
477	0.21397355		1066.99	0.04231128		1657.01	-0.00678616		2247	0.00537895		2837	0.0026447		3426.99	-0.01492579
477.2	0.21412387		1067.19	0.04285762		1657.21	-0.00771739		2247.2	0.00506205		2837.2	0.00291684		3427.19	-0.01447846
477.4	0.21437323		1067.39	0.04252515		1657.41	-0.00830507		2247.4	0.00591661		2837.4	0.00275018		3427.39	-0.0140151
477.6	0.21460465		1067.59	0.04157228		1657.61	-0.00879318		2247.6	0.00528236		2837.6	0.00283224		3427.59	-0.01309035
477.8	0.21510188		1067.79	0.04120605		1657.81	-0.00791432		2247.8	0.00596525		2837.8	0.00169279		3427.79	-0.0125977
478	0.2148337		1067.99	0.04138096		1658.01	-0.00776419		2248	0.00602486		2838	0.00135318		3427.99	-0.01206528
478.2	0.21439692		1068.19	0.04085847		1658.21	-0.00647733		2248.2	0.00570577		2838.2	0.00107373		3428.19	-0.01237493
478.4	0.21481459		1068.39	0.04076873		1658.41	-0.00655035		2248.4	0.00534893		2838.4	0.00066462		3428.39	-0.01287806
478.6	0.21463207		1068.59	0.04080477		1658.61	-0.0057733		2248.6	0.00482122		2838.6	0.00007863		3428.59	-0.01221836
478.8	0.21467811		1068.79	0.04089028		1658.81	-0.00521975		2248.8	0.00530373		2838.8	-0.00085182		3428.79	-0.0120067
479	0.21527233		1068.99	0.04107636		1659.01	-0.00533086		2249	0.00331809		2839	-0.00123622		3428.99	-0.01212898
479.2	0.21467394		1069.19	0.04144008		1659.21	-0.00510276		2249.2	0.00353728		2839.2	-0.00156456		3429.19	-0.01214401
479.4	0.213377		1069.39	0.04152697		1659.41	-0.00476074		2249.4	0.00316605		2839.4	-0.00062042		3429.39	-0.01218135
479.6	0.21305115		1069.59	0.04101929		1659.61	-0.00487298		2249.6	0.00276801		2839.6	0.00104056		3429.59	-0.01288025
479.8	0.21262966		1069.79	0.04028829		1659.81	-0.00551391		2249.8	0.00359948		2839.8	0.0015041		3429.79	-0.01320509
480	0.2121523		1069.99	0.04085973		1660.01	-0.00536491		2250	0.00388092		2840	0.00259349		3429.99	-0.01385399
480.2	0.21198829		1070.19	0.04130915		1660.21	-0.00588592		2250.2	0.00343642		2840.2	0.00269211		3430.19	-0.01396675
480.4	0.21126051		1070.39	0.04146369		1660.41	-0.00585956		2250.4	0.00327368		2840.4	0.00317097		3430.39	-0.01481482
480.6	0.21102815		1070.59	0.04178207		1660.61	-0.00650047		2250.6	0.00332882		2840.6	0.00262255		3430.59	-0.01577247
480.8	0.21139394		1070.79	0.04154059		1660.81	-0.00699819		2250.8	0.00318477		2840.8	0.00174956		3430.79	-0.0163276
481	0.21079973		1070.99	0.0411001		1661.01	-0.00715318		2251	0.00369853		2841	0.00112001		3430.99	-0.01635158
481.2	0.21133029		1071.19	0.04071859		1661.21	-0.00660705		2251.2	0.00365946		2841.2	0.0011516		3431.19	-0.01719254
481.4	0.21163434		1071.39	0.04033391		1661.41	-0.00580326		2251.4	0.00461733		2841.4	0.00044378		3431.39	-0.01704775
481.6	0.21171773		1071.59	0.04027392		1661.61	-0.00512369		2251.6	0.0046139		2841.6	0.00023719		3431.59	-0.01690307
481.8	0.21175182		1071.79	0.03972722		1661.81	-0.00451942		2251.8	0.00600326		2841.8	-0.00030844		3431.79	-0.01755496
482	0.21172107		1071.99	0.03955871		1662.01	-0.00426237		2252	0.00567049		2842	-0.00043258		3431.99	-0.01744689
482.2	0.21220314		1072.19	0.03948984		1662.21	-0.00357633		2252.2	0.0059137		2842.2	-0.00000351		3432.19	-0.01798711
482.4	0.21261468		1072.39	0.03991255		1662.41	-0.0030287		2252.4	0.00687344		2842.4	0.0000664		3432.39	-0.01673732
482.6	0.21234763		1072.59	0.0400045		1662.61	-0.00254297		2252.6	0.00730289		2842.6	-0.00014075		3432.59	-0.01586203
482.8	0.21302409		1072.79	0.0403767		1662.81	-0.00310563		2252.8	0.00818691		2842.8	-0.00074135		3432.79	-0.01566641
483	0.21283658		1072.99	0.04058646		1663.01	-0.00312349		2253	0.00759496		2843	-0.00008051		3432.99	-0.01599775
483.2	0.21206753		1073.19	0.04026968		1663.21	-0.00249936		2253.2	0.00864031		2843.2	0.00019841		3433.19	-0.01511089
483.4	0.21247401		1073.39	0.04020169		1663.41	-0.00275778		2253.4	0.00931246		2843.4	0.00135467		3433.39	-0.01510836
483.6	0.213109		1073.59	0.04016107		1663.61	-0.00232403		2253.6	0.00927299		2843.6	0.0024961		3433.59	-0.01482121
483.8	0.21290861		1073.79	0.04036002		1663.81	-0.00295929		2253.8	0.00926047		2843.8	0.00286977		3433.79	-0.01422039
484	0.21365105		1073.99	0.04078652		1664.01	-0.00360508		2254	0.00881412		2844	0.00255345		3433.99	-0.01498666
484.2	0.21391973		1074.19	0.04095185		1664.21	-0.00444616		2254.2	0.00802704		2844.2	0.00197787		3434.19	-0.01454967
484.4	0.21416529		1074.39	0.04075239		1664.41	-0.00439124		2254.4	0.0076448		2844.4	0.00139895		3434.39	-0.01476934
484.6	0.21517553		1074.59	0.04120552		1664.61	-0.00542768		2254.6	0.00655834		2844.6	0.00059369		3434.59	-0.0153824
484.8	0.21578148		1074.79	0.04094877		1664.81	-0.00534471		2254.8	0.00585136		2844.8	-0.00028124		3434.79	-0.0149178
485	0.21661189		1074.99	0.04089157		1665.01	-0.00536573		2255	0.00569306		2845	-0.00030211		3434.99	-0.01501108
485.2	0.21615016		1075.19	0.04052519		1665.21	-0.00514401		2255.2	0.00541999		2845.2	-0.00050211		3435.19	-0.01543065
485.4	0.21586387		1075.39	0.04045625		1665.41	-0.00514226		2255.4	0.00548789		2845.4	-0.00021885		3435.39	-0.01596172
485.6	0.2154841		1075.59	0.03967872		1665.61	-0.00493501		2255.6	0.00509635		2845.6	-0.00005705		3435.59	-0.01598903
485.8	0.21541096		1075.79	0.03944747		1665.81	-0.0050504		2255.8	0.00463213		2845.8	0.00050558		3435.79	-0.0167167
486	0.21496452		1075.99	0.03933192		1666.01	-0.00486383		2256	0.00351391		2846	0.00074005		3435.99	-0.0163619
486.2	0.21474139		1076.19	0.03949856		1666.21	-0.00517405		2256.2	0.00383488		2846.2	0.00176318		3436.19	-0.01699438
486.4	0.21420878		1076.39	0.03933804		1666.41	-0.0055665		2256.4	0.00412422		2846.4	0.00211885		3436.39	-0.01709772
486.6	0.21296753		1076.59	0.03995362		1666.61	-0.00539893		2256.6	0.0029315		2846.6	0.00280617		3436.59	-0.0185196
486.8	0.2127632		1076.79	0.04068633		1666.81	-0.00628298		2256.8	0.00319984		2846.8	0.00270813		3436.79	-0.01932252
487	0.21236599		1076.99	0.04074576		1667.01	-0.00603351		2257	0.00259331		2847	0.00290339		3436.99	-0.01955712
487.2	0.21165241		1077.19	0.04076508		1667.21	-0.00572899		2257.2	0.00229078		2847.2	0.00251841		3437.19	-0.01914444
487.4	0.21187745		1077.39	0.04032552		1667.41	-0.00635158		2257.4	0.00222542		2847.4	0.00353576		3437.39	-0.01967991
487.6	0.21119471		1077.59	0.03993981		1667.61	-0.00563108		2257.6	0.00102967		2847.6	0.00376942		3437.59	-0.01936693
487.8	0.21116678		1077.79	0.03970699		1667.81	-0.00591009		2257.8	0.0005568		2847.8	0.00318431		3437.79	-0.01922867
488	0.21237875		1077.99	0.03997579		1668.01	-0.00579291		2258	0.00000362		2848	0.00283622		3437.99	-0.01982798
488.2	0.2126202		1078.19	0.04068479		1668.21	-0.00556984		2258.2	0.00006695		2848.2	0.00254137		3438.19	-0.01934585
488.4	0.21373153		1078.39	0.04071602		1668.41	-0.00503393		2258.4	-0.00010113		2848.4	0.00177215		3438.39	-0.01868737
488.6	0.21451365		1078.59	0.04102034		1668.61	-0.00579427		2258.6	-0.00046401		2848.6	0.00188349		3438.59	-0.01779197
488.8	0.21455019		1078.79	0.04093202		1668.81	-0.00609537		2258.8	-0.00011923		2848.8	0.00193703		3438.79	-0.01704594
489	0.21512444		1078.99	0.04130437		1669.01	-0.00516375		2259	0.00003118		2849	0.00198846		3438.99	-0.01705346
489.2	0.21469227		1079.19	0.04182738		1669.21	-0.00456591		2259.2	0.00025112		2849.2	0.00192822		3439.19	-0.01726198
489.4	0.21527983		1079.39	0.04217847		1669.41	-0.00460543		2259.4	0.00087543		2849.4	0.00223643		3439.39	-0.01774228
489.6	0.21589317		1079.59	0.04209756		1669.61	-0.004694		2259.6	0.0019875		2849.6	0.00299694		3439.59	-0.01786743
489.8	0.21604824		1079.79	0.0421281		1669.81	-0.005504		2259.8	0.00324273		2849.8	0.0038762		3439.79	-0.01848324
490	0.2159098		1079.99	0.04169951		1670.01	-0.00584064		2260	0.00365578		2850	0.00398807		3439.99	-0.01892314
490.2	0.21558948		1080.19	0.04294166		1670.21	-0.00645369		2260.2	0.00471176		2850.2	0.00472457		3440.19	-0.01937538
490.4	0.21536849		1080.39	0.04370272		1670.41	-0.00603611		2260.4	0.00485546		2850.4	0.00534532		3440.39	-0.01955094
490.6	0.21464716		1080.59	0.0447333		1670.61	-0.00590978		2260.6	0.00422101		2850.6	0.00541937		3440.59	-0.01982229
490.8	0.21544434		1080.79	0.0447453		1670.81	-0.0067135		2260.8	0.00543416		2850.8	0.00487576		3440.79	-0.01921202
491	0.21535704		1080.99	0.0430379		1671.01	-0.00723345		2261	0.00570838		2851	0.00396032		3440.99	-0.01907463
491.2	0.21528546		1081.19	0.04238328		1671.21	-0.00728711		2261.2	0.00544786		2851.2	0.00310611		3441.19	-0.01803658
491.4	0.21557575		1081.39	0.04125244		1671.41	-0.00780054		2261.4	0.0052836		2851.4	0.00329912		3441.39	-0.0177183
491.6	0.2154587		1081.59	0.04086549		1671.61	-0.00726215		2261.6	0.00488149		2851.6	0.00261731		3441.59	-0.01672141
491.8	0.2156585		1081.79	0.04071243		1671.81	-0.0069054		2261.8	0.00501744		2851.8	0.00237916		3441.79	-0.01613681
492	0.21611472		1081.99	0.04179842		1672.01	-0.0065106		2262	0.00501187		2852	0.00188858		3441.99	-0.01620656
492.2	0.21619299		1082.19	0.04141575		1672.21	-0.0061676		2262.2	0.00486097		2852.2	0.000688		3442.19	-0.01549334
492.4	0.21627083		1082.39	0.04069035		1672.41	-0.00641577		2262.4	0.00536334		2852.4	0.00037652		3442.39	-0.01473147
492.6	0.21567066		1082.59	0.04153711		1672.61	-0.00616196		2262.6	0.00523732		2852.6	0.00087607		3442.59	-0.01460765
492.8	0.21573785		1082.79	0.04135598		1672.81	-0.0062351		2262.8	0.00539694		2852.8	0.00026345		3442.79	-0.015542
493	0.21600851		1082.99	0.04213651		1673.01	-0.00508526		2263	0.00493334		2853	-0.00017811		3442.99	-0.01563116
493.2	0.21655874		1083.19	0.04214955		1673.21	-0.00550567		2263.2	0.00474697		2853.2	-0.00074467		3443.19	-0.01606995
493.4	0.21599651		1083.39	0.04182838		1673.41	-0.00644212		2263.4	0.00516471		2853.4	0.00016244		3443.39	-0.01615031
493.6	0.21619886		1083.59	0.04181024		1673.61	-0.00651816		2263.6	0.0051955		2853.6	0.00062968		3443.59	-0.01618479
493.8	0.21527745		1083.79	0.0419309		1673.81	-0.0060346		2263.8	0.00606098		2853.8	-0.00017739		3443.79	-0.01624315
494	0.21479867		1083.99	0.04226546		1674.01	-0.0052608		2264	0.00550217		2854	-0.00061373		3443.99	-0.0160009
494.2	0.21498324		1084.19	0.04267229		1674.21	-0.00467123		2264.2	0.00556265		2854.2	0.00076186		3444.19	-0.01601744
494.4	0.21649351		1084.39	0.04173551		1674.41	-0.00402011		2264.4	0.00454662		2854.4	0.00143195		3444.39	-0.01618596
494.6	0.21670995		1084.59	0.04066871		1674.61	-0.00426018		2264.6	0.00445608		2854.6	0.00231299		3444.59	-0.01593322
494.8	0.21702303		1084.79	0.04037104		1674.81	-0.00459531		2264.8	0.00480145		2854.8	0.00297638		3444.79	-0.01584296
495	0.21676735		1084.99	0.03931483		1675.01	-0.0043001		2265	0.00457379		2855	0.00229626		3444.99	-0.01542075
495.2	0.21682406		1085.19	0.03881134		1675.21	-0.00394259		2265.2	0.00388977		2855.2	0.00323057		3445.19	-0.01478071
495.4	0.21595136		1085.39	0.03823544		1675.41	-0.00467032		2265.4	0.00327328		2855.4	0.00312644		3445.39	-0.01447263
495.6	0.21628922		1085.59	0.03745421		1675.61	-0.00449631		2265.6	0.00309645		2855.6	0.00328512		3445.59	-0.01379238
495.8	0.21531154		1085.79	0.0371451		1675.81	-0.00367599		2265.8	0.00335149		2855.8	0.00366044		3445.79	-0.01443255
496	0.21464312		1085.99	0.03718635		1676.01	-0.00326694		2266	0.00282332		2856	0.00354114		3445.99	-0.01536969
496.2	0.21465299		1086.19	0.03673405		1676.21	-0.00282867		2266.2	0.00256247		2856.2	0.00357167		3446.19	-0.01526588
496.4	0.21436199		1086.39	0.036089		1676.41	-0.00277124		2266.4	0.00351758		2856.4	0.00353821		3446.39	-0.01526979
496.6	0.21410961		1086.59	0.03755882		1676.61	-0.00299691		2266.6	0.00286405		2856.6	0.00472182		3446.59	-0.0154278
496.8	0.21387327		1086.79	0.03727598		1676.81	-0.00372365		2266.8	0.00244582		2856.8	0.00427865		3446.79	-0.01548418
497	0.21423613		1086.99	0.03794702		1677.01	-0.00371634		2267	0.00248094		2857	0.00405842		3446.99	-0.01455006
497.2	0.21342293		1087.19	0.03882761		1677.21	-0.00419518		2267.2	0.00205782		2857.2	0.00350649		3447.19	-0.01398732
497.4	0.21292772		1087.39	0.04001904		1677.41	-0.00439899		2267.4	0.00282626		2857.4	0.00387228		3447.39	-0.01304026
497.6	0.21369368		1087.59	0.04047783		1677.61	-0.00439333		2267.6	0.00274943		2857.6	0.00300477		3447.59	-0.01293475
497.8	0.21352104		1087.79	0.04092172		1677.81	-0.00357412		2267.8	0.00386208		2857.8	0.00279798		3447.79	-0.0132723
498	0.21478109		1087.99	0.04130885		1678.01	-0.00395617		2268	0.00358391		2858	0.00346559		3447.99	-0.01305441
498.2	0.21575832		1088.19	0.04124424		1678.21	-0.00396307		2268.2	0.00315671		2858.2	0.00419542		3448.19	-0.01365546
498.4	0.21648385		1088.39	0.04176604		1678.41	-0.00452164		2268.4	0.00324817		2858.4	0.00370857		3448.39	-0.01410486
498.6	0.21600036		1088.59	0.04150836		1678.61	-0.00397614		2268.6	0.00365792		2858.6	0.00308547		3448.59	-0.01384356
498.8	0.21584014		1088.79	0.0421684		1678.81	-0.00333667		2268.8	0.00360324		2858.8	0.0023039		3448.79	-0.01430066
499	0.21573396		1088.99	0.04152498		1679.01	-0.00342282		2269	0.00309933		2859	0.00246144		3448.99	-0.01425512
499.2	0.21615844		1089.19	0.04111543		1679.21	-0.0036914		2269.2	0.00318136		2859.2	0.00395961		3449.19	-0.01512484
499.4	0.215655		1089.39	0.04117714		1679.41	-0.0041539		2269.4	0.00296605		2859.4	0.0037119		3449.39	-0.01514211
499.6	0.21594669		1089.59	0.04118557		1679.61	-0.00414847		2269.6	0.00269215		2859.6	0.00332126		3449.59	-0.01630767
499.8	0.21519709		1089.79	0.0415324		1679.81	-0.00394828		2269.8	0.00248978		2859.8	0.00316995		3449.79	-0.01717143
500	0.21529214		1089.99	0.04134058		1680.01	-0.0032621		2270	0.00212668		2860	0.00303581		3449.99	-0.01736524
500.2	0.21609078		1090.19	0.04117507		1680.21	-0.0032964		2270.2	0.00207992		2860.2	0.00273935		3450.19	-0.01712407
500.4	0.21591331		1090.39	0.04021958		1680.41	-0.00352651		2270.4	0.00250077		2860.4	0.00251455		3450.39	-0.01717914
500.6	0.21562102		1090.59	0.04088321		1680.61	-0.00412343		2270.6	0.00204127		2860.6	0.00366769		3450.59	-0.01679955
500.8	0.21494616		1090.79	0.04018313		1680.81	-0.00426527		2270.8	0.00256947		2860.8	0.00279684		3450.79	-0.01675841
501	0.21506061		1090.99	0.04011374		1681.01	-0.004069		2271	0.00354178		2861	0.00248289		3450.99	-0.01613404
501.2	0.2143239		1091.19	0.03996604		1681.21	-0.00412373		2271.2	0.00296209		2861.2	0.00267953		3451.19	-0.01595288
501.4	0.21432272		1091.39	0.03867057		1681.41	-0.00448142		2271.4	0.0026717		2861.4	0.00270782		3451.39	-0.01559273
501.6	0.21388466		1091.59	0.0387836		1681.61	-0.00473497		2271.6	0.0021952		2861.6	0.0024616		3451.59	-0.01463491
501.8	0.21406201		1091.79	0.03868547		1681.81	-0.00396892		2271.8	0.00247033		2861.8	0.0026847		3451.79	-0.01473073
502	0.21455938		1091.99	0.03891392		1682.01	-0.00407636		2272	0.00230699		2862	0.00230186		3451.99	-0.01458829
502.2	0.21348005		1092.19	0.03851741		1682.21	-0.00377392		2272.2	0.00198214		2862.2	0.00089158		3452.19	-0.01500758
502.4	0.21313998		1092.39	0.03861856		1682.41	-0.00376094		2272.4	0.00288803		2862.4	0.00075573		3452.39	-0.01472457
502.6	0.21280047		1092.59	0.03801629		1682.61	-0.00368745		2272.6	0.00254834		2862.6	0.00002676		3452.59	-0.01443647
502.8	0.21236087		1092.79	0.03887225		1682.81	-0.00337756		2272.8	0.00207632		2862.8	0.00073003		3452.79	-0.01475623
503	0.21213964		1092.99	0.03960418		1683.01	-0.00371233		2273	0.00184648		2863	0.00165774		3452.99	-0.01506799
503.2	0.21220054		1093.19	0.04038322		1683.21	-0.00423017		2273.2	0.00226473		2863.2	0.0019859		3453.19	-0.01538283
503.4	0.21214496		1093.39	0.04156498		1683.41	-0.00472105		2273.4	0.00197055		2863.4	0.00054894		3453.39	-0.01533134
503.6	0.21268515		1093.59	0.04256017		1683.61	-0.005227		2273.6	0.00166084		2863.6	-0.00123984		3453.59	-0.01574166
503.8	0.21262439		1093.79	0.04254338		1683.81	-0.00522237		2273.8	0.00177843		2863.8	-0.00129684		3453.79	-0.01604845
504	0.21263641		1093.99	0.0424483		1684.01	-0.00549522		2274	0.00197785		2864	-0.00170974		3453.99	-0.01679382
504.2	0.21310309		1094.19	0.04230463		1684.21	-0.00604394		2274.2	0.00247754		2864.2	-0.00159035		3454.19	-0.01647303
504.4	0.21308712		1094.39	0.04149887		1684.41	-0.00598238		2274.4	0.00273126		2864.4	-0.00122149		3454.39	-0.01591665
504.6	0.21311423		1094.59	0.04125044		1684.61	-0.00620676		2274.6	0.00277764		2864.6	-0.0007834		3454.59	-0.01538258
504.8	0.21362616		1094.79	0.04140227		1684.81	-0.00698298		2274.8	0.0032039		2864.8	-0.00124938		3454.79	-0.01516444
505	0.21394755		1094.99	0.04097684		1685.01	-0.00736581		2275	0.00312389		2865	-0.00071377		3454.99	-0.01526496
505.2	0.21452698		1095.19	0.04021595		1685.21	-0.00811129		2275.2	0.00271114		2865.2	-0.00049795		3455.19	-0.01534508
505.4	0.21465353		1095.39	0.04005631		1685.41	-0.00866218		2275.4	0.00277012		2865.4	-0.00065251		3455.39	-0.01538196
505.6	0.21490337		1095.59	0.04013074		1685.61	-0.00928115		2275.6	0.00301099		2865.6	0.00013767		3455.59	-0.01516162
505.8	0.21637553		1095.79	0.03904444		1685.81	-0.00892631		2275.8	0.00291313		2865.8	0.00101829		3455.79	-0.01565402
506	0.21704674		1095.99	0.03838687		1686.01	-0.00827738		2276	0.00289074		2866	0.00091516		3455.99	-0.01623558
506.2	0.21669847		1096.19	0.0382337		1686.21	-0.0084304		2276.2	0.00321667		2866.2	0.00187876		3456.19	-0.01635181
506.4	0.21780165		1096.39	0.03915771		1686.41	-0.00876077		2276.4	0.00381306		2866.4	0.00239293		3456.39	-0.0163627
506.6	0.21828031		1096.59	0.03894886		1686.61	-0.00808226		2276.6	0.00385544		2866.6	0.00277876		3456.59	-0.01702133
506.8	0.21937659		1096.79	0.03949678		1686.81	-0.00734378		2276.8	0.00404827		2866.8	0.00355873		3456.79	-0.01753622
507	0.21951959		1096.99	0.03992292		1687.01	-0.00756831		2277	0.00428337		2867	0.00421432		3456.99	-0.01709743
507.2	0.21874819		1097.19	0.04027335		1687.21	-0.00743631		2277.2	0.00457903		2867.2	0.00470741		3457.19	-0.01709114
507.4	0.21843601		1097.39	0.04153779		1687.41	-0.00652431		2277.4	0.00458815		2867.4	0.00430922		3457.39	-0.01668568
507.6	0.21779324		1097.59	0.04233309		1687.61	-0.00562435		2277.6	0.00430591		2867.6	0.00319343		3457.59	-0.01680897
507.8	0.21695019		1097.79	0.04238023		1687.81	-0.00513493		2277.8	0.00487212		2867.8	0.00330248		3457.79	-0.01708862
508	0.21671819		1097.99	0.04324056		1688.01	-0.00522956		2278	0.00545048		2868	0.00360317		3457.99	-0.01608766
508.2	0.2158606		1098.19	0.04306897		1688.21	-0.00428249		2278.2	0.00557561		2868.2	0.00300082		3458.19	-0.01488129
508.4	0.21570216		1098.39	0.0436775		1688.41	-0.00394355		2278.4	0.00511701		2868.4	0.00213636		3458.39	-0.01331733
508.6	0.21532759		1098.59	0.04390637		1688.61	-0.00391983		2278.6	0.00534294		2868.6	0.0015055		3458.59	-0.01279667
508.8	0.21506704		1098.79	0.04377619		1688.81	-0.00506155		2278.8	0.00531085		2868.8	0.00042674		3458.79	-0.01254273
509	0.21382695		1098.99	0.04416461		1689.01	-0.00568516		2279	0.00530663		2869	0.00094104		3458.99	-0.01357928
509.2	0.21420794		1099.19	0.04364724		1689.21	-0.00606594		2279.2	0.00523399		2869.2	0.00117301		3459.19	-0.01337336
509.4	0.21375372		1099.39	0.04336601		1689.41	-0.00641439		2279.4	0.00455155		2869.4	0.00101271		3459.39	-0.01331172
509.6	0.21398369		1099.59	0.04197645		1689.61	-0.00615309		2279.6	0.00431512		2869.6	0.00141716		3459.59	-0.01332245
509.8	0.21441609		1099.79	0.04133534		1689.81	-0.00532936		2279.8	0.00414518		2869.8	0.00068211		3459.79	-0.01327535
510	0.21552528		1099.99	0.04063778		1690.01	-0.00505964		2280	0.00431039		2870	0.00055702		3459.99	-0.01396985
510.2	0.21558003		1100.19	0.04084952		1690.21	-0.0056339		2280.2	0.00437678		2870.2	0.00077792		3460.19	-0.01455677
510.4	0.21674688		1100.39	0.04062945		1690.41	-0.00587305		2280.4	0.00426413		2870.4	0.00026426		3460.39	-0.01600823
510.6	0.21752557		1100.59	0.03940985		1690.61	-0.00496623		2280.6	0.00452286		2870.6	0.00075244		3460.59	-0.01697672
510.8	0.21785479		1100.79	0.03995808		1690.81	-0.00532982		2280.8	0.00452907		2870.8	0.00018407		3460.79	-0.01728712
511	0.21656974		1100.99	0.04031422		1691.01	-0.0052397		2281	0.00368433		2871	0.00008585		3460.99	-0.01717638
511.2	0.21585536		1101.19	0.04108312		1691.21	-0.00496226		2281.2	0.00367907		2871.2	-0.00102722		3461.19	-0.01776564
511.4	0.21681075		1101.39	0.04171441		1691.41	-0.00504927		2281.4	0.00321381		2871.4	-0.00255527		3461.39	-0.01758068
511.6	0.21757273		1101.59	0.04244561		1691.61	-0.00529821		2281.6	0.00267033		2871.6	-0.00398269		3461.59	-0.01842884
511.8	0.21761481		1101.79	0.04244301		1691.81	-0.00528443		2281.8	0.00184772		2871.8	-0.00328331		3461.79	-0.01857644
512	0.21766082		1101.99	0.04291274		1692.01	-0.00531224		2282	0.00086491		2872	-0.00317231		3461.99	-0.01772719
512.2	0.21695092		1102.19	0.04312849		1692.21	-0.00519539		2282.2	0.00001012		2872.2	-0.00393349		3462.19	-0.01744202
512.4	0.21684593		1102.39	0.04371933		1692.41	-0.00628797		2282.4	0.0002924		2872.4	-0.00342431		3462.39	-0.01690047
512.6	0.21716342		1102.59	0.04335667		1692.61	-0.00699831		2282.6	0.00006505		2872.6	-0.00263029		3462.59	-0.01725493
512.8	0.21627501		1102.79	0.04331241		1692.81	-0.00826903		2282.8	-0.00067023		2872.8	-0.00133144		3462.79	-0.01692249
513	0.21613996		1102.99	0.04329398		1693.01	-0.00869891		2283	-0.00057547		2873	-0.00016532		3462.99	-0.01662738
513.2	0.21711543		1103.19	0.04189734		1693.21	-0.00833308		2283.2	-0.00033552		2873.2	0.0008218		3463.19	-0.01523339
513.4	0.21677856		1103.39	0.04146871		1693.41	-0.00796811		2283.4	0.00022437		2873.4	0.00119127		3463.39	-0.01465702
513.6	0.21674889		1103.59	0.0404345		1693.61	-0.00765246		2283.6	0.00109928		2873.6	0.00182129		3463.59	-0.01451975
513.8	0.21653189		1103.79	0.04003148		1693.81	-0.00762833		2283.8	0.00071222		2873.8	0.00190184		3463.79	-0.01456268
514	0.21745605		1103.99	0.03921105		1694.01	-0.00843795		2284	0.00170471		2874	0.00238009		3463.99	-0.01457047
514.2	0.21687071		1104.19	0.03912637		1694.21	-0.00872555		2284.2	0.00131477		2874.2	0.00270735		3464.19	-0.01475275
514.4	0.21685945		1104.39	0.03829826		1694.41	-0.00865198		2284.4	0.00133618		2874.4	0.00349335		3464.39	-0.01522285
514.6	0.2164871		1104.59	0.03867076		1694.61	-0.0079565		2284.6	0.00217866		2874.6	0.00404589		3464.59	-0.01441184
514.8	0.21660534		1104.79	0.03899456		1694.81	-0.00777903		2284.8	0.00282143		2874.8	0.00332656		3464.79	-0.0135808
515	0.21622877		1104.99	0.03877274		1695.01	-0.00697608		2285	0.00230806		2875	0.00328838		3464.99	-0.01291651
515.2	0.21578646		1105.19	0.03957985		1695.21	-0.00630822		2285.2	0.00338344		2875.2	0.00290965		3465.19	-0.0122317
515.4	0.21645662		1105.39	0.03975101		1695.41	-0.00595985		2285.4	0.00343238		2875.4	0.00311533		3465.39	-0.01218224
515.6	0.21597808		1105.59	0.0405789		1695.61	-0.00586786		2285.6	0.00385638		2875.6	0.00285331		3465.59	-0.01249075
515.8	0.21478159		1105.79	0.04036616		1695.81	-0.00540167		2285.8	0.00354198		2875.8	0.00299336		3465.79	-0.01245369
516	0.21406715		1105.99	0.04037601		1696.01	-0.00566713		2286	0.00347465		2876	0.00266923		3465.99	-0.01234241
516.2	0.21358081		1106.19	0.0406115		1696.21	-0.00585053		2286.2	0.00345554		2876.2	0.00167878		3466.19	-0.01294992
516.4	0.21292031		1106.39	0.04031114		1696.41	-0.00647374		2286.4	0.00323521		2876.4	0.00184955		3466.39	-0.01324932
516.6	0.21301438		1106.59	0.04080842		1696.61	-0.00610102		2286.6	0.00245053		2876.6	0.00134669		3466.59	-0.01328774
516.8	0.21195191		1106.79	0.04093079		1696.81	-0.00588365		2286.8	0.00224931		2876.8	0.00145987		3466.79	-0.01362892
517	0.21214122		1106.99	0.0402634		1697.01	-0.00607367		2287	0.00258853		2877	-0.00000764		3466.99	-0.01376076
517.2	0.21185498		1107.19	0.04022128		1697.21	-0.0058631		2287.2	0.00265795		2877.2	0.00061262		3467.19	-0.01349232
517.4	0.21120921		1107.39	0.04082575		1697.41	-0.00629217		2287.4	0.00204167		2877.4	-0.00012116		3467.39	-0.01456611
517.6	0.21137251		1107.59	0.04090829		1697.61	-0.00609184		2287.6	0.00117896		2877.6	-0.00015685		3467.59	-0.01518859
517.8	0.21255687		1107.79	0.04168603		1697.81	-0.00667437		2287.8	0.00047588		2877.8	-0.00033459		3467.79	-0.01589831
518	0.21304567		1107.99	0.0420023		1698.01	-0.0075041		2288	0.00082936		2878	-0.00029664		3467.99	-0.01578393
518.2	0.21318207		1108.19	0.04185308		1698.21	-0.00748715		2288.2	-0.00057623		2878.2	0.00012953		3468.19	-0.01602668
518.4	0.21334155		1108.39	0.04167031		1698.41	-0.00783882		2288.4	-0.00069395		2878.4	0.00104097		3468.39	-0.01645313
518.6	0.21371762		1108.59	0.04181723		1698.61	-0.00727898		2288.6	-0.00070383		2878.6	0.00073701		3468.59	-0.01600493
518.8	0.21422367		1108.79	0.04102507		1698.81	-0.00677354		2288.8	-0.00052886		2878.8	0.00068986		3468.79	-0.01644022
519	0.21423039		1108.99	0.04079553		1699.01	-0.00643952		2289	-0.0010793		2879	0.00090805		3468.99	-0.01681291
519.2	0.21495618		1109.19	0.04116486		1699.21	-0.00714127		2289.2	0.00026412		2879.2	0.00080705		3469.19	-0.01698912
519.4	0.2159305		1109.39	0.0415695		1699.41	-0.00835605		2289.4	0.00040683		2879.4	0.00039826		3469.39	-0.01785926
519.6	0.2155116		1109.59	0.04095357		1699.61	-0.00890595		2289.6	0.00135796		2879.6	0.00028075		3469.59	-0.01817641
519.8	0.21542935		1109.79	0.04017573		1699.81	-0.00862277		2289.8	0.00103165		2879.8	0.0005487		3469.79	-0.01874877
520	0.21555563		1109.99	0.0404346		1700.01	-0.00782255		2290	0.00101056		2880	0.00000712		3469.99	-0.01906256
520.2	0.21545574		1110.19	0.03950796		1700.21	-0.00722911		2290.2	0.00134006		2880.2	-0.00093623		3470.19	-0.01946664
520.4	0.21580236		1110.39	0.03913386		1700.41	-0.00763422		2290.4	0.00255211		2880.4	-0.00078731		3470.39	-0.01928932
520.6	0.21526289		1110.59	0.03925442		1700.61	-0.0070517		2290.6	0.0031309		2880.6	-0.00087763		3470.59	-0.0194812
520.8	0.21502865		1110.79	0.03912886		1700.81	-0.00649621		2290.8	0.00387155		2880.8	-0.00077216		3470.79	-0.01935983
521	0.21521592		1110.99	0.03861769		1701.01	-0.006581		2291	0.00435274		2881	-0.00112447		3470.99	-0.01946025
521.2	0.21460683		1111.19	0.03895966		1701.21	-0.0067057		2291.2	0.0045366		2881.2	0.00053457		3471.19	-0.01928364
521.4	0.2153722		1111.39	0.03965949		1701.41	-0.00730924		2291.4	0.00464777		2881.4	0.00011986		3471.39	-0.02037422
521.6	0.2160257		1111.59	0.04049154		1701.61	-0.00664609		2291.6	0.00495908		2881.6	0.0006843		3471.59	-0.01979903
521.8	0.21715324		1111.79	0.04109189		1701.81	-0.00737122		2291.8	0.00443409		2881.8	0.00128766		3471.79	-0.01938152
522	0.21749502		1111.99	0.04042254		1702.01	-0.00739637		2292	0.00408317		2882	0.00156427		3471.99	-0.0196245
522.2	0.21776475		1112.19	0.04030944		1702.21	-0.00783708		2292.2	0.00349029		2882.2	0.00162398		3472.19	-0.02052889
522.4	0.21775166		1112.39	0.04036992		1702.41	-0.00757138		2292.4	0.00331704		2882.4	0.00210469		3472.39	-0.02093715
522.6	0.21716467		1112.59	0.04009855		1702.61	-0.0071038		2292.6	0.00346938		2882.6	0.00154943		3472.59	-0.02077962
522.8	0.21662905		1112.79	0.04016907		1702.81	-0.00774844		2292.8	0.00399094		2882.8	0.0015346		3472.79	-0.02094238
523	0.21694836		1112.99	0.04095884		1703.01	-0.00842441		2293	0.00327851		2883	0.0012844		3472.99	-0.02126026
523.2	0.217063		1113.19	0.0415191		1703.21	-0.00909768		2293.2	0.00383952		2883.2	0.00101883		3473.19	-0.02071676
523.4	0.21593211		1113.39	0.04202041		1703.41	-0.0092284		2293.4	0.00378775		2883.4	0.00010452		3473.39	-0.01966607
523.6	0.21511984		1113.59	0.04120913		1703.61	-0.00887681		2293.6	0.00334793		2883.6	0.00038552		3473.59	-0.01954655
523.8	0.21471645		1113.79	0.04180233		1703.81	-0.0078871		2293.8	0.00291189		2883.8	-0.00046764		3473.79	-0.01964937
524	0.21433839		1113.99	0.04195987		1704.01	-0.00693223		2294	0.00411203		2884	-0.00171701		3473.99	-0.01841654
524.2	0.21376206		1114.19	0.04025502		1704.21	-0.00664719		2294.2	0.00453498		2884.2	-0.00183892		3474.19	-0.01740587
524.4	0.21364355		1114.39	0.04049791		1704.41	-0.00695423		2294.4	0.00437728		2884.4	-0.0011179		3474.39	-0.01717131
524.6	0.21193135		1114.59	0.04081162		1704.61	-0.0055836		2294.6	0.00323237		2884.6	-0.00025623		3474.59	-0.01669924
524.8	0.2122706		1114.79	0.04086973		1704.81	-0.00506191		2294.8	0.00279701		2884.8	0.00040758		3474.79	-0.01698147
525	0.21224517		1114.99	0.04053922		1705.01	-0.00435268		2295	0.00281987		2885	0.00116559		3474.99	-0.0174893
525.2	0.21206748		1115.19	0.04121427		1705.21	-0.00503741		2295.2	0.00256293		2885.2	0.00209359		3475.19	-0.01656931
525.4	0.21271355		1115.39	0.04196974		1705.41	-0.00527758		2295.4	0.0018129		2885.4	0.0016728		3475.39	-0.01652192
525.6	0.21297002		1115.59	0.04231554		1705.61	-0.00494674		2295.6	0.00138933		2885.6	0.00247553		3475.59	-0.01558245
525.8	0.21390346		1115.79	0.04229462		1705.81	-0.00531892		2295.8	0.00043727		2885.8	0.00300894		3475.79	-0.01584649
526	0.21479041		1115.99	0.04204047		1706.01	-0.00489356		2296	0.000471		2886	0.00293538		3475.99	-0.01633314
526.2	0.2150916		1116.19	0.04295192		1706.21	-0.00522596		2296.2	0.00039309		2886.2	0.00362017		3476.19	-0.01678534
526.4	0.21571262		1116.39	0.04247825		1706.41	-0.00489344		2296.4	0.00091781		2886.4	0.00372485		3476.39	-0.01646103
526.6	0.21560163		1116.59	0.04321455		1706.61	-0.00546256		2296.6	0.00136303		2886.6	0.00300342		3476.59	-0.01591049
526.8	0.21667185		1116.79	0.0438077		1706.81	-0.00586734		2296.8	0.00132747		2886.8	0.00205177		3476.79	-0.01647732
527	0.21662244		1116.99	0.04396032		1707.01	-0.00593377		2297	0.00066806		2887	0.00132058		3476.99	-0.01598554
527.2	0.21712737		1117.19	0.0438827		1707.21	-0.00592168		2297.2	0.00058365		2887.2	-0.00011195		3477.19	-0.01566026
527.4	0.21682363		1117.39	0.043943		1707.41	-0.00567872		2297.4	0.00058652		2887.4	-0.00171068		3477.39	-0.01495577
527.6	0.21695356		1117.59	0.04399084		1707.61	-0.00542037		2297.6	-0.00019829		2887.6	-0.00259255		3477.59	-0.0152565
527.8	0.21742233		1117.79	0.04442115		1707.81	-0.00492948		2297.8	0.00034282		2887.8	-0.00359532		3477.79	-0.01508625
528	0.21804259		1117.99	0.04414956		1708.01	-0.00461171		2298	0.00130209		2888	-0.00364066		3477.99	-0.01456356
528.2	0.21851315		1118.19	0.0430423		1708.21	-0.00515155		2298.2	0.00143025		2888.2	-0.00287891		3478.19	-0.01466447
528.4	0.21817785		1118.39	0.04323194		1708.41	-0.00518279		2298.4	0.00150586		2888.4	-0.0025026		3478.39	-0.01522165
528.6	0.21761052		1118.59	0.04202638		1708.61	-0.00419674		2298.6	0.00191791		2888.6	-0.00216954		3478.59	-0.01491767
528.8	0.21788895		1118.79	0.04200943		1708.81	-0.00387869		2298.8	0.00139702		2888.8	-0.0018923		3478.79	-0.01487862
529	0.21788129		1118.99	0.04243636		1709.01	-0.0031065		2299	0.00157915		2889	-0.00181098		3478.99	-0.01404538
529.2	0.21770963		1119.19	0.04247441		1709.21	-0.00485744		2299.2	0.00176715		2889.2	-0.00112543		3479.19	-0.0134618
529.4	0.21648101		1119.39	0.0420926		1709.41	-0.0051323		2299.4	0.00181988		2889.4	-0.0007388		3479.39	-0.01374821
529.6	0.2166704		1119.59	0.04123825		1709.61	-0.0054678		2299.6	0.00279201		2889.6	0.00037305		3479.59	-0.01417506
529.8	0.2158797		1119.79	0.04119046		1709.81	-0.00473217		2299.8	0.00249144		2889.8	0.00109108		3479.79	-0.01453136
530	0.21573985		1119.99	0.04122843		1710.01	-0.00450211		2300	0.00194403		2890	0.00168916		3479.99	-0.015052
530.2	0.21665626		1120.19	0.04129382		1710.21	-0.00550857		2300.2	0.001902		2890.2	0.00237387		3480.19	-0.01575039
530.4	0.21644537		1120.39	0.0411589		1710.41	-0.00577938		2300.4	0.00195129		2890.4	0.00229226		3480.39	-0.01613953
530.6	0.21599057		1120.59	0.04200807		1710.61	-0.00548097		2300.6	0.00169013		2890.6	0.00160377		3480.59	-0.01651675
530.8	0.21649138		1120.79	0.04139145		1710.81	-0.0057984		2300.8	0.00064136		2890.8	0.0009913		3480.79	-0.01652811
531	0.21565777		1120.99	0.04132023		1711.01	-0.00625533		2301	-0.00020467		2891	0.00113788		3480.99	-0.0163654
531.2	0.2164097		1121.19	0.04135973		1711.21	-0.00632557		2301.2	-0.00053297		2891.2	0.00109106		3481.19	-0.01708199
531.4	0.21661671		1121.39	0.04123123		1711.41	-0.00637401		2301.4	-0.00080718		2891.4	0.00105352		3481.39	-0.01681038
531.6	0.21679775		1121.59	0.04107619		1711.61	-0.0068546		2301.6	-0.00124848		2891.6	0.00101315		3481.59	-0.01695457
531.8	0.21709109		1121.79	0.04056863		1711.81	-0.00802726		2301.8	-0.00110761		2891.8	0.00146642		3481.79	-0.01750373
532	0.21725934		1121.99	0.04043854		1712.01	-0.00781225		2302	-0.00075655		2892	0.00143239		3481.99	-0.01787617
532.2	0.21763941		1122.19	0.04002859		1712.21	-0.00852878		2302.2	-0.00052806		2892.2	0.00098835		3482.19	-0.01826824
532.4	0.21685493		1122.39	0.03963963		1712.41	-0.00868909		2302.4	-0.00053235		2892.4	0.00084755		3482.39	-0.01851113
532.6	0.21711337		1122.59	0.03899653		1712.61	-0.00856324		2302.6	-0.00093228		2892.6	0.00108068		3482.59	-0.01807635
532.8	0.2181373		1122.79	0.04045637		1712.81	-0.00871326		2302.8	-0.00164504		2892.8	0.00128056		3482.79	-0.01780486
533	0.21844083		1122.99	0.04026084		1713.01	-0.00846386		2303	-0.00101243		2893	0.00130162		3482.99	-0.01826636
533.2	0.21812786		1123.19	0.03940625		1713.21	-0.00949246		2303.2	-0.00028311		2893.2	0.00166326		3483.19	-0.01795961
533.4	0.21720147		1123.39	0.03928054		1713.41	-0.00808718		2303.4	0.00029756		2893.4	0.00159913		3483.39	-0.01786862
533.6	0.21770068		1123.59	0.03944534		1713.61	-0.00684922		2303.6	0.00020484		2893.6	0.00175864		3483.59	-0.01801029
533.8	0.21735842		1123.79	0.04053116		1713.81	-0.00595774		2303.8	0.00023134		2893.8	0.00200783		3483.79	-0.0175932
534	0.21739026		1123.99	0.04075633		1714.01	-0.00532554		2304	-0.00030727		2894	0.00238894		3483.99	-0.01744255
534.2	0.21729814		1124.19	0.04056314		1714.21	-0.0046885		2304.2	-0.00003476		2894.2	0.00240053		3484.19	-0.01744285
534.4	0.21616708		1124.39	0.04115807		1714.41	-0.00418933		2304.4	-0.00056452		2894.4	0.00237949		3484.39	-0.01663452
534.6	0.21516717		1124.59	0.04176953		1714.61	-0.00326197		2304.6	-0.00038256		2894.6	0.00175333		3484.59	-0.01657563
534.8	0.2152751		1124.79	0.0411735		1714.81	-0.00351987		2304.8	-0.00119336		2894.8	0.00163455		3484.79	-0.01637146
535	0.21486177		1124.99	0.04146641		1715.01	-0.00341275		2305	-0.00118642		2895	0.00229147		3484.99	-0.01656701
535.2	0.21483731		1125.19	0.04085999		1715.21	-0.00409827		2305.2	-0.00124181		2895.2	0.00290665		3485.19	-0.01615824
535.4	0.21397475		1125.39	0.04081938		1715.41	-0.00421995		2305.4	-0.00189285		2895.4	0.00355945		3485.39	-0.01572788
535.6	0.21325785		1125.59	0.04092408		1715.61	-0.00545127		2305.6	-0.00201795		2895.6	0.00361495		3485.59	-0.01555898
535.8	0.21332576		1125.79	0.04083426		1715.81	-0.00656065		2305.8	-0.00256304		2895.8	0.00335227		3485.79	-0.01658434
536	0.21345011		1125.99	0.0411009		1716.01	-0.00599013		2306	-0.00264982		2896	0.00326437		3485.99	-0.01754495
536.2	0.21365248		1126.19	0.04090172		1716.21	-0.00743306		2306.2	-0.00256996		2896.2	0.00321192		3486.19	-0.01785586
536.4	0.21385835		1126.39	0.04057681		1716.41	-0.00874375		2306.4	-0.00225893		2896.4	0.00354349		3486.39	-0.01782762
536.6	0.21454887		1126.59	0.03967768		1716.61	-0.00919369		2306.6	-0.00220439		2896.6	0.00393754		3486.59	-0.01811922
536.8	0.21454109		1126.79	0.04093578		1716.81	-0.0095154		2306.8	-0.00208925		2896.8	0.00453102		3486.79	-0.01882114
537	0.21493016		1126.99	0.04126883		1717.01	-0.01023306		2307	-0.00154435		2897	0.00445565		3486.99	-0.01859517
537.2	0.2150044		1127.19	0.04074054		1717.21	-0.01029531		2307.2	-0.00161101		2897.2	0.00450766		3487.19	-0.01761955
537.4	0.21512511		1127.39	0.04095505		1717.41	-0.00954109		2307.4	-0.00128205		2897.4	0.00499747		3487.39	-0.01782056
537.6	0.21585418		1127.59	0.0415255		1717.61	-0.00941414		2307.6	-0.00174478		2897.6	0.00464088		3487.59	-0.01792119
537.8	0.21553503		1127.79	0.04201685		1717.81	-0.00896491		2307.8	-0.00103685		2897.8	0.00465979		3487.79	-0.01753972
538	0.21491447		1127.99	0.04205331		1718.01	-0.00781075		2308	-0.00110697		2898	0.0048595		3487.99	-0.01810095
538.2	0.21470414		1128.19	0.04192021		1718.21	-0.00727478		2308.2	-0.00084587		2898.2	0.00397289		3488.19	-0.01829041
538.4	0.21491923		1128.39	0.04357142		1718.41	-0.00695148		2308.4	-0.0010298		2898.4	0.00313422		3488.39	-0.0181354
538.6	0.215133		1128.59	0.04426707		1718.61	-0.00616682		2308.6	-0.00042855		2898.6	0.00142055		3488.59	-0.01913482
538.8	0.21516507		1128.79	0.04297953		1718.81	-0.00666051		2308.8	-0.00019004		2898.8	0.00013017		3488.79	-0.01903074
539	0.21484495		1128.99	0.04301806		1719.01	-0.00607304		2309	0.00039918		2899	0.00037363		3488.99	-0.01862479
539.2	0.2146857		1129.19	0.0426236		1719.21	-0.0063335		2309.2	0.00067141		2899.2	0.00018407		3489.19	-0.01861671
539.4	0.21438669		1129.39	0.0429691		1719.41	-0.00578611		2309.4	0.00029108		2899.4	-0.00029947		3489.39	-0.01770568
539.6	0.21506905		1129.59	0.04347496		1719.61	-0.00661999		2309.6	0.00033342		2899.6	-0.00099619		3489.59	-0.01776496
539.8	0.21506371		1129.79	0.04350824		1719.81	-0.00633444		2309.8	0.0002658		2899.8	-0.00140794		3489.79	-0.0185978
540	0.21564771		1129.99	0.04319459		1720.01	-0.00667507		2310	0.00052198		2900	-0.00172265		3489.99	-0.01857853
540.2	0.21560081		1130.19	0.04336789		1720.21	-0.00771137		2310.2	0.00079407		2900.2	-0.00160442		3490.19	-0.01807609
540.4	0.21564482		1130.39	0.04352394		1720.41	-0.00886633		2310.4	0.00060393		2900.4	-0.00162214		3490.39	-0.01806837
540.6	0.21576646		1130.59	0.04288244		1720.61	-0.00972392		2310.6	0.00065257		2900.6	-0.00050117		3490.59	-0.0188418
540.8	0.21545157		1130.79	0.04367288		1720.81	-0.01111588		2310.8	0.00081937		2900.8	0.00021537		3490.79	-0.01888415
541	0.21644242		1130.99	0.04366044		1721.01	-0.01136986		2311	0.00059221		2901	0.00047123		3490.99	-0.01812319
541.2	0.21546731		1131.19	0.04327181		1721.21	-0.01091575		2311.2	-0.00036351		2901.2	0.00085484		3491.19	-0.01821634
541.4	0.21493591		1131.39	0.04330957		1721.41	-0.01083779		2311.4	0.00042137		2901.4	0.00138864		3491.39	-0.01844603
541.6	0.21431959		1131.59	0.04326096		1721.61	-0.01059087		2311.6	0.00016		2901.6	0.00143732		3491.59	-0.01821221
541.8	0.21411806		1131.79	0.04308674		1721.81	-0.00911878		2311.8	0.0002968		2901.8	0.00249768		3491.79	-0.01852108
542	0.21509687		1131.99	0.04294746		1722.01	-0.00938747		2312	0.00045757		2902	0.00317034		3491.99	-0.0189516
542.2	0.21502777		1132.19	0.04314039		1722.21	-0.00906259		2312.2	-0.00021666		2902.2	0.00253813		3492.19	-0.01805522
542.4	0.21518136		1132.39	0.04416297		1722.41	-0.00860267		2312.4	0.00008588		2902.4	0.00137899		3492.39	-0.01823859
542.6	0.21497092		1132.59	0.04391039		1722.61	-0.00836888		2312.6	0.00032841		2902.6	0.00043217		3492.59	-0.01762918
542.8	0.21441551		1132.79	0.04264719		1722.81	-0.00811049		2312.8	0.00045733		2902.8	-0.00008999		3492.79	-0.01755544
543	0.21499783		1132.99	0.04303769		1723.01	-0.00662248		2313	0.00010183		2903	0.0003419		3492.99	-0.01762826
543.2	0.21536122		1133.19	0.04298831		1723.21	-0.0059759		2313.2	-0.00118434		2903.2	0.00029271		3493.19	-0.01717686
543.4	0.21589692		1133.39	0.04242512		1723.41	-0.00531812		2313.4	-0.00189423		2903.4	-0.00072235		3493.39	-0.01601743
543.6	0.21665435		1133.59	0.04302899		1723.61	-0.00510886		2313.6	-0.00288305		2903.6	-0.00130106		3493.59	-0.01627953
543.8	0.21725543		1133.79	0.04292683		1723.81	-0.00482579		2313.8	-0.00228684		2903.8	-0.00160819		3493.79	-0.01620868
544	0.21813004		1133.99	0.04287413		1724.01	-0.00471859		2314	-0.0023738		2904	-0.00144403		3493.99	-0.01580826
544.2	0.21863416		1134.19	0.04272827		1724.21	-0.00489207		2314.2	-0.00219542		2904.2	-0.00076413		3494.19	-0.0160217
544.4	0.21891182		1134.39	0.04238151		1724.41	-0.00521221		2314.4	-0.0025927		2904.4	-0.00094583		3494.39	-0.01628489
544.6	0.21953299		1134.59	0.04178515		1724.61	-0.0052742		2314.6	-0.00220879		2904.6	-0.00064253		3494.59	-0.01634417
544.8	0.21865766		1134.79	0.04116845		1724.81	-0.00583959		2314.8	-0.00250865		2904.8	-0.00031317		3494.79	-0.01536798
545	0.21842164		1134.99	0.04155319		1725.01	-0.00503216		2315	-0.00284169		2905	-0.00035155		3494.99	-0.01497475
545.2	0.21723143		1135.19	0.0401446		1725.21	-0.00569553		2315.2	-0.00253435		2905.2	-0.00059844		3495.19	-0.01458913
545.4	0.21599708		1135.39	0.04020111		1725.41	-0.00535043		2315.4	-0.00128108		2905.4	-0.00022711		3495.39	-0.01493342
545.6	0.21491142		1135.59	0.03959474		1725.61	-0.00555996		2315.6	-0.00146295		2905.6	0.00018487		3495.59	-0.01523859
545.8	0.2145184		1135.79	0.03949283		1725.81	-0.0054314		2315.8	-0.00154569		2905.8	0.00132031		3495.79	-0.01532984
546	0.214072		1135.99	0.03952707		1726.01	-0.00606198		2316	0.00013645		2906	0.00105601		3495.99	-0.01481452
546.2	0.21312538		1136.19	0.04081397		1726.21	-0.00586472		2316.2	0.00050412		2906.2	0.00027507		3496.19	-0.01495488
546.4	0.21257971		1136.39	0.04124386		1726.41	-0.00573858		2316.4	0.00077595		2906.4	-0.00037062		3496.39	-0.01541966
546.6	0.2122577		1136.59	0.04130748		1726.61	-0.0059832		2316.6	0.00030618		2906.6	0.00025345		3496.59	-0.0160932
546.8	0.21247294		1136.79	0.04100468		1726.81	-0.00574276		2316.8	0.0000807		2906.8	-0.00058939		3496.79	-0.01643642
547	0.21333714		1136.99	0.04125397		1727.01	-0.00565353		2317	0.00011099		2907	-0.00015383		3496.99	-0.01667969
547.2	0.21311269		1137.19	0.04063193		1727.21	-0.00628371		2317.2	-0.00028892		2907.2	0.00037853		3497.19	-0.01624164
547.4	0.21380936		1137.39	0.04037903		1727.41	-0.00625299		2317.4	-0.00003794		2907.4	0.00015307		3497.39	-0.01617587
547.6	0.21425605		1137.59	0.04107363		1727.61	-0.00598422		2317.6	-0.0003177		2907.6	0.00112857		3497.59	-0.01608057
547.8	0.21474732		1137.79	0.04140404		1727.81	-0.00634437		2317.8	0.00051236		2907.8	0.00180687		3497.79	-0.01644302
548	0.21573009		1137.99	0.04136263		1728.01	-0.00606047		2318	0.00039813		2908	0.00243661		3497.99	-0.01728353
548.2	0.2168894		1138.19	0.04067042		1728.21	-0.00604493		2318.2	0.00034385		2908.2	0.00226397		3498.19	-0.01753282
548.4	0.21729782		1138.39	0.04040108		1728.41	-0.00568272		2318.4	0.00029713		2908.4	0.00255926		3498.39	-0.01799419
548.6	0.21792884		1138.59	0.04023312		1728.61	-0.00599167		2318.6	0.00058989		2908.6	0.002694		3498.59	-0.01823714
548.8	0.21747279		1138.79	0.04052011		1728.81	-0.00571438		2318.8	-0.00005418		2908.8	0.00289813		3498.79	-0.01808029
549	0.21812591		1138.99	0.04084869		1729.01	-0.00592864		2319	-0.00044846		2909	0.00227681		3498.99	-0.0190608
549.2	0.21832149		1139.19	0.04074668		1729.21	-0.00550933		2319.2	0.00068404		2909.2	0.00226829		3499.19	-0.01873621
549.4	0.21775589		1139.39	0.04206778		1729.41	-0.00475922		2319.4	0.00089955		2909.4	0.00233142		3499.39	-0.01951928
549.6	0.21755241		1139.59	0.04120132		1729.61	-0.00480977		2319.6	0.00070348		2909.6	0.00228488		3499.59	-0.01992771
549.8	0.21711904		1139.79	0.04083166		1729.81	-0.00467665		2319.8	0.00111492		2909.8	0.00275846		3499.79	-0.02008994
550	0.21675254		1139.99	0.04131388		1730.01	-0.00433115		2320	0.00153188		2910	0.00179908		3499.99	-0.02043137
550.2	0.21655977		1140.19	0.04181631		1730.21	-0.00424738		2320.2	0.00068341		2910.2	0.00119333		3500.19	-0.0209505
550.4	0.21622225		1140.39	0.04159448		1730.41	-0.00440361		2320.4	0.00009616		2910.4	0.00025201		3500.39	-0.02127885
550.6	0.21570475		1140.59	0.04082902		1730.61	-0.00472419		2320.6	-0.00040355		2910.6	-0.00040337		3500.59	-0.02097592
550.8	0.21587536		1140.79	0.04157344		1730.81	-0.00487031		2320.8	-0.00051744		2910.8	-0.00124194		3500.79	-0.02005142
551	0.21540569		1140.99	0.04198717		1731.01	-0.00539163		2321	-0.0003496		2911	0.00008765		3500.99	-0.01961542
551.2	0.21430359		1141.19	0.0419048		1731.21	-0.00576539		2321.2	-0.00083869		2911.2	0.00099192		3501.19	-0.01864317
551.4	0.21453997		1141.39	0.04219993		1731.41	-0.00593028		2321.4	-0.00081917		2911.4	0.00119138		3501.39	-0.01865483
551.6	0.21395841		1141.59	0.04203038		1731.61	-0.00654201		2321.6	-0.00061175		2911.6	0.00092083		3501.59	-0.01836475
551.8	0.21409211		1141.79	0.0429227		1731.81	-0.00676559		2321.8	-0.00117544		2911.8	0.0006765		3501.79	-0.01870635
552	0.21407912		1141.99	0.04222897		1732.01	-0.0068133		2322	-0.00072457		2912	0.00084762		3501.99	-0.01824696
552.2	0.21397824		1142.19	0.04198193		1732.21	-0.00727525		2322.2	-0.00100612		2912.2	0.00079186		3502.19	-0.01810777
552.4	0.21387793		1142.39	0.04191158		1732.41	-0.00756132		2322.4	-0.00040969		2912.4	0.00166652		3502.39	-0.0184298
552.6	0.21379717		1142.59	0.04251016		1732.61	-0.00767461		2322.6	-0.00071198		2912.6	0.00081328		3502.59	-0.01847635
552.8	0.21384457		1142.79	0.04341884		1732.81	-0.00702711		2322.8	-0.00062211		2912.8	0.0009576		3502.79	-0.0177348
553	0.2140656		1142.99	0.04289081		1733.01	-0.008152		2323	-0.00046174		2913	0.00043661		3502.99	-0.01794685
553.2	0.21397676		1143.19	0.04264648		1733.21	-0.00767362		2323.2	0.00007385		2913.2	0.00032469		3503.19	-0.01792862
553.4	0.2140623		1143.39	0.041905		1733.41	-0.00816893		2323.4	-0.00095654		2913.4	0.00038073		3503.39	-0.01780263
553.6	0.21302139		1143.59	0.04092689		1733.61	-0.00904623		2323.6	-0.0009068		2913.6	0.00007164		3503.59	-0.01847387
553.8	0.21200851		1143.79	0.04119366		1733.81	-0.00982369		2323.8	-0.00037018		2913.8	-0.00026936		3503.79	-0.01927651
554	0.2120197		1143.99	0.0424436		1734.01	-0.00973476		2324	-0.00014728		2914	-0.00091712		3503.99	-0.01968917
554.2	0.21199046		1144.19	0.04207538		1734.21	-0.00945118		2324.2	-0.00037165		2914.2	-0.00160832		3504.19	-0.01979103
554.4	0.21285541		1144.39	0.04220525		1734.41	-0.00983486		2324.4	-0.00067305		2914.4	-0.00283913		3504.39	-0.02034818
554.6	0.21311251		1144.59	0.04279295		1734.61	-0.00959379		2324.6	-0.00087451		2914.6	-0.00273538		3504.59	-0.02034738
554.8	0.2140531		1144.79	0.04423041		1734.81	-0.00900962		2324.8	-0.00080617		2914.8	-0.0026169		3504.79	-0.02023402
555	0.21395611		1144.99	0.04397729		1735.01	-0.00929479		2325	-0.00030453		2915	-0.00174607		3504.99	-0.01940213
555.2	0.21437275		1145.19	0.04464155		1735.21	-0.00932291		2325.2	-0.00057775		2915.2	-0.00167344		3505.19	-0.01863706
555.4	0.21548736		1145.39	0.04480205		1735.41	-0.00980741		2325.4	-0.00003051		2915.4	-0.00186166		3505.39	-0.0186155
555.6	0.21567181		1145.59	0.04436981		1735.61	-0.00948553		2325.6	-0.00079701		2915.6	-0.00153606		3505.59	-0.0179238
555.8	0.21650141		1145.79	0.04422379		1735.81	-0.00879388		2325.8	-0.00171687		2915.8	-0.00129734		3505.79	-0.01698303
556	0.21700234		1145.99	0.04372708		1736.01	-0.00925289		2326	-0.00156058		2916	-0.00063557		3505.99	-0.01659045
556.2	0.21753771		1146.19	0.04349031		1736.21	-0.00897713		2326.2	-0.00179895		2916.2	-0.00012507		3506.19	-0.01670892
556.4	0.21795077		1146.39	0.04270634		1736.41	-0.00785311		2326.4	-0.00205686		2916.4	0.00111053		3506.39	-0.01607526
556.6	0.21781185		1146.59	0.04191411		1736.61	-0.00687768		2326.6	-0.00216463		2916.6	0.00141234		3506.59	-0.01629935
556.8	0.21771604		1146.79	0.0411626		1736.81	-0.00628788		2326.8	-0.00245066		2916.8	0.00234709		3506.79	-0.01665719
557	0.21717968		1146.99	0.03970401		1737.01	-0.00634874		2327	-0.00292429		2917	0.00194203		3506.99	-0.01732009
557.2	0.21614436		1147.19	0.03888011		1737.21	-0.00597895		2327.2	-0.00311533		2917.2	0.00268381		3507.19	-0.0180764
557.4	0.21593148		1147.39	0.03857318		1737.41	-0.00641695		2327.4	-0.00378767		2917.4	0.00267335		3507.39	-0.01784303
557.6	0.21515939		1147.59	0.03914491		1737.61	-0.0068026		2327.6	-0.0037556		2917.6	0.00258631		3507.59	-0.01893353
557.8	0.21508647		1147.79	0.04061652		1737.81	-0.00664966		2327.8	-0.00387681		2917.8	0.00250932		3507.79	-0.01992685
558	0.21585425		1147.99	0.04135383		1738.01	-0.00622011		2328	-0.00380639		2918	0.00189808		3507.99	-0.02055919
558.2	0.21573096		1148.19	0.04134703		1738.21	-0.00615604		2328.2	-0.00401296		2918.2	0.00205621		3508.19	-0.02084381
558.4	0.21613415		1148.39	0.04174658		1738.41	-0.00592298		2328.4	-0.00388487		2918.4	0.00094429		3508.39	-0.02090917
558.6	0.21609885		1148.59	0.04264847		1738.61	-0.00603238		2328.6	-0.00353056		2918.6	0.00124855		3508.59	-0.02063507
558.8	0.21620153		1148.79	0.04270148		1738.81	-0.00617815		2328.8	-0.00255716		2918.8	0.00095215		3508.79	-0.02039937
559	0.21638424		1148.99	0.04229767		1739.01	-0.00736468		2329	-0.00178882		2919	0.00119854		3508.99	-0.01988521
559.2	0.2169593		1149.19	0.04335166		1739.21	-0.00757603		2329.2	-0.00170208		2919.2	0.00084195		3509.19	-0.01975736
559.4	0.21777718		1149.39	0.04265943		1739.41	-0.00743157		2329.4	-0.00138566		2919.4	0.00059402		3509.39	-0.0199253
559.6	0.21753654		1149.59	0.04220455		1739.61	-0.00749382		2329.6	-0.0017109		2919.6	0.00067051		3509.59	-0.01930096
559.8	0.21757087		1149.79	0.04226917		1739.81	-0.00753746		2329.8	-0.00129265		2919.8	0.00056123		3509.79	-0.01879896
560	0.21781575		1149.99	0.04238843		1740.01	-0.00785489		2330	-0.00072993		2920	0.00154671		3509.99	-0.0190486
560.2	0.21648457		1150.19	0.041664		1740.21	-0.00702473		2330.2	-0.00042143		2920.2	0.00176705		3510.19	-0.01875951
560.4	0.21623414		1150.39	0.04089413		1740.41	-0.00597522		2330.4	0.00009973		2920.4	0.0031239		3510.39	-0.01822649
560.6	0.21517883		1150.59	0.04043946		1740.61	-0.005722		2330.6	0.00044304		2920.6	0.0031847		3510.59	-0.01815568
560.8	0.21406662		1150.79	0.03976406		1740.81	-0.00636932		2330.8	0.00086069		2920.8	0.00330052		3510.79	-0.0186106
561	0.21310826		1150.99	0.03913716		1741.01	-0.00693509		2331	0.00075377		2921	0.00256606		3510.99	-0.0180719
561.2	0.21298314		1151.19	0.0389118		1741.21	-0.00755582		2331.2	0.00006881		2921.2	0.00217283		3511.19	-0.01767042
561.4	0.21377505		1151.39	0.04017511		1741.41	-0.00795934		2331.4	-0.00148041		2921.4	0.00137942		3511.39	-0.01718852
561.6	0.21440301		1151.59	0.0409399		1741.61	-0.00676814		2331.6	-0.00119196		2921.6	0.00124143		3511.59	-0.01668122
561.8	0.21464495		1151.79	0.04139485		1741.81	-0.00726552		2331.8	-0.00095335		2921.8	0.00084601		3511.79	-0.01705773
562	0.21513807		1151.99	0.04135043		1742.01	-0.00714084		2332	-0.00132976		2922	-0.00000556		3511.99	-0.01752767
562.2	0.21466513		1152.19	0.0413744		1742.21	-0.00737391		2332.2	-0.00063757		2922.2	-0.00032545		3512.19	-0.01758928
562.4	0.21519629		1152.39	0.0411075		1742.41	-0.00753288		2332.4	-0.00105999		2922.4	-0.00041247		3512.39	-0.01784464
562.6	0.21664679		1152.59	0.04110921		1742.61	-0.00789817		2332.6	-0.00100053		2922.6	0.00042476		3512.59	-0.0182364
562.8	0.21714555		1152.79	0.04076291		1742.81	-0.00814511		2332.8	-0.00026665		2922.8	0.00065027		3512.79	-0.01938936
563	0.2181198		1152.99	0.0408663		1743.01	-0.00866705		2333	-0.00068453		2923	0.00091345		3512.99	-0.01966601
563.2	0.21805688		1153.19	0.0410823		1743.21	-0.00858767		2333.2	-0.00124286		2923.2	0.00116451		3513.19	-0.01990959
563.4	0.21772976		1153.39	0.04097258		1743.41	-0.00760629		2333.4	-0.00216675		2923.4	0.00218716		3513.39	-0.01991407
563.6	0.21802158		1153.59	0.04092435		1743.61	-0.00690685		2333.6	-0.00192378		2923.6	0.00347598		3513.59	-0.02078417
563.8	0.21773077		1153.79	0.04056281		1743.81	-0.00667304		2333.8	-0.00129701		2923.8	0.00441414		3513.79	-0.02089715
564	0.21778146		1153.99	0.04011328		1744.01	-0.00587849		2334	-0.00095306		2924	0.00533072		3513.99	-0.02082652
564.2	0.21611777		1154.19	0.04036934		1744.21	-0.00473051		2334.2	-0.00059302		2924.2	0.00497197		3514.19	-0.02045378
564.4	0.21603399		1154.39	0.03992586		1744.41	-0.00513407		2334.4	-0.00023527		2924.4	0.00638324		3514.39	-0.02060669
564.6	0.21541631		1154.59	0.03946732		1744.61	-0.00533244		2334.6	-0.00107699		2924.6	0.00574752		3514.59	-0.0204367
564.8	0.21503245		1154.79	0.03852484		1744.81	-0.00502339		2334.8	-0.0005349		2924.8	0.00545072		3514.79	-0.02021152
565	0.21495366		1154.99	0.03915657		1745.01	-0.00457025		2335	-0.00070134		2925	0.00453256		3514.99	-0.01961662
565.2	0.21541407		1155.19	0.03973568		1745.21	-0.00448647		2335.2	-0.00069221		2925.2	0.00376633		3515.19	-0.01943152
565.4	0.21513239		1155.39	0.04054942		1745.41	-0.00466633		2335.4	-0.00079401		2925.4	0.00363846		3515.39	-0.0193796
565.6	0.21513332		1155.59	0.04022331		1745.61	-0.00418011		2335.6	0.0003233		2925.6	0.0025218		3515.59	-0.01981262
565.8	0.21509597		1155.79	0.03981181		1745.81	-0.00595594		2335.8	-0.00000596		2925.8	0.00205248		3515.79	-0.02067093
566	0.2150107		1155.99	0.04016469		1746.01	-0.00585836		2336	-0.00042968		2926	0.00092755		3515.99	-0.02047703
566.2	0.21511671		1156.19	0.04026316		1746.21	-0.00643873		2336.2	0.00033252		2926.2	0.00038314		3516.19	-0.02087707
566.4	0.21593491		1156.39	0.04008483		1746.41	-0.00728288		2336.4	-0.00028817		2926.4	0.00108451		3516.39	-0.02131322
566.6	0.21681076		1156.59	0.04119803		1746.61	-0.00715048		2336.6	-0.00084349		2926.6	0.00165719		3516.59	-0.02064259
566.8	0.21665566		1156.79	0.04130047		1746.81	-0.00746021		2336.8	-0.00097632		2926.8	0.00194547		3516.79	-0.02068969
567	0.2167395		1156.99	0.04140107		1747.01	-0.007571		2337	-0.00165042		2927	0.00203931		3516.99	-0.01950947
567.2	0.21653074		1157.19	0.04134477		1747.21	-0.0077772		2337.2	-0.00213459		2927.2	0.00255849		3517.19	-0.01919771
567.4	0.21690668		1157.39	0.04167354		1747.41	-0.0074112		2337.4	-0.00206953		2927.4	0.00299878		3517.39	-0.01919857
567.6	0.21749652		1157.59	0.04095846		1747.61	-0.00624133		2337.6	-0.00159501		2927.6	0.00352579		3517.59	-0.02014357
567.8	0.21677913		1157.79	0.04060697		1747.81	-0.00627719		2337.8	-0.0023762		2927.8	0.00264558		3517.79	-0.01925425
568	0.21687009		1157.99	0.03996239		1748.01	-0.00508363		2338	-0.00270053		2928	0.00260274		3517.99	-0.01868335
568.2	0.2162398		1158.19	0.03977109		1748.21	-0.00536681		2338.2	-0.00259779		2928.2	0.00213755		3518.19	-0.01911949
568.4	0.21681647		1158.39	0.03924317		1748.41	-0.00611783		2338.4	-0.00284664		2928.4	0.00224924		3518.39	-0.01988255
568.6	0.21674163		1158.59	0.03932419		1748.61	-0.00511663		2338.6	-0.00250185		2928.6	0.00087902		3518.59	-0.01893831
568.8	0.21632301		1158.79	0.03934689		1748.81	-0.00510674		2338.8	-0.00143605		2928.8	0.00075606		3518.79	-0.01837364
569	0.21596065		1158.99	0.0396967		1749.01	-0.00510969		2339	-0.00076315		2929	0.00050155		3518.99	-0.01845266
569.2	0.21579995		1159.19	0.0397288		1749.21	-0.00597405		2339.2	-0.00042293		2929.2	0.00012416		3519.19	-0.01888099
569.4	0.21520131		1159.39	0.03937272		1749.41	-0.00672624		2339.4	-0.00045048		2929.4	-0.0004767		3519.39	-0.01886039
569.6	0.21464812		1159.59	0.03906639		1749.61	-0.00720421		2339.6	-0.00097851		2929.6	-0.00198947		3519.59	-0.0191845
569.8	0.21415391		1159.79	0.03916246		1749.81	-0.00783199		2339.8	-0.00126432		2929.8	-0.00181088		3519.79	-0.01913655
570	0.21365813		1159.99	0.04014924		1750.01	-0.00762414		2340	-0.0013551		2930	-0.0020934		3519.99	-0.01876609
570.2	0.21377362		1160.19	0.0399708		1750.21	-0.00755317		2340.2	-0.00132917		2930.2	-0.0015052		3520.19	-0.01865164
570.4	0.21342954		1160.39	0.04062324		1750.41	-0.00820343		2340.4	-0.00184857		2930.4	-0.00088667		3520.39	-0.01826487
570.6	0.21328171		1160.59	0.04143298		1750.61	-0.0080287		2340.6	-0.00228503		2930.6	0.00008111		3520.59	-0.01720984
570.8	0.21290701		1160.79	0.04041128		1750.81	-0.0072089		2340.8	-0.00206838		2930.8	0.00055275		3520.79	-0.01649876
571	0.21230188		1160.99	0.04063684		1751.01	-0.00760833		2341	-0.0022328		2931	0.00020781		3520.99	-0.0160128
571.2	0.21242088		1161.19	0.04097028		1751.21	-0.00734824		2341.2	-0.00278097		2931.2	0.00096553		3521.19	-0.01636685
571.4	0.21261928		1161.39	0.04105838		1751.41	-0.00694467		2341.4	-0.00295346		2931.4	0.00104425		3521.39	-0.0168013
571.6	0.21235423		1161.59	0.04026322		1751.61	-0.00547953		2341.6	-0.00363836		2931.6	0.0019676		3521.59	-0.01711667
571.8	0.2122122		1161.79	0.04022036		1751.81	-0.00570204		2341.8	-0.00436034		2931.8	0.00141066		3521.79	-0.01648945
572	0.21274109		1161.99	0.04035322		1752.01	-0.00523641		2342	-0.00334909		2932	0.00246604		3521.99	-0.01670636
572.2	0.21303427		1162.19	0.04015932		1752.21	-0.00566833		2342.2	-0.00321587		2932.2	0.00277199		3522.19	-0.01758828
572.4	0.2125535		1162.39	0.04042509		1752.41	-0.00541884		2342.4	-0.00318816		2932.4	0.00176064		3522.39	-0.01817786
572.6	0.21199753		1162.59	0.04014298		1752.61	-0.00516337		2342.6	-0.00306876		2932.6	0.00150694		3522.59	-0.01776491
572.8	0.21173529		1162.79	0.03982602		1752.81	-0.0050363		2342.8	-0.00293611		2932.8	0.00205753		3522.79	-0.01837861
573	0.21187561		1162.99	0.0398869		1753.01	-0.00503773		2343	-0.00250336		2933	0.00165955		3522.99	-0.0190194
573.2	0.2119177		1163.19	0.03975782		1753.21	-0.00512557		2343.2	-0.00236461		2933.2	0.00086867		3523.19	-0.0196502
573.4	0.21245139		1163.39	0.03927883		1753.41	-0.0053807		2343.4	-0.00264413		2933.4	0.00041446		3523.39	-0.0201477
573.6	0.21221104		1163.59	0.03939509		1753.61	-0.00611375		2343.6	-0.00290311		2933.6	0.00042718		3523.59	-0.02088283
573.8	0.21251151		1163.79	0.03956241		1753.81	-0.00635197		2343.8	-0.00243204		2933.8	0.00046068		3523.79	-0.02096468
574	0.21306223		1163.99	0.03953802		1754.01	-0.00696264		2344	-0.00179463		2934	0.00056749		3523.99	-0.02078653
574.2	0.2132418		1164.19	0.0390667		1754.21	-0.00774723		2344.2	-0.00174033		2934.2	0.00046239		3524.19	-0.02061003
574.4	0.21323969		1164.39	0.03920295		1754.41	-0.00850994		2344.4	-0.00222855		2934.4	0.00027944		3524.39	-0.02091733
574.6	0.21428115		1164.59	0.03899038		1754.61	-0.00887198		2344.6	-0.00233633		2934.6	0.00117919		3524.59	-0.02069002
574.8	0.21480824		1164.79	0.03859418		1754.81	-0.00885492		2344.8	-0.00301681		2934.8	0.00136145		3524.79	-0.0202434
575	0.21490718		1164.99	0.03897514		1755.01	-0.00951889		2345	-0.00367025		2935	0.00149189		3524.99	-0.0196321
575.2	0.21586872		1165.19	0.03890044		1755.21	-0.00938476		2345.2	-0.00407688		2935.2	0.00214417		3525.19	-0.01892652
575.4	0.21594656		1165.39	0.03819786		1755.41	-0.01027873		2345.4	-0.00296398		2935.4	0.00221766		3525.39	-0.01889981
575.6	0.21574135		1165.59	0.03818188		1755.61	-0.00998301		2345.6	-0.00265794		2935.6	0.00242129		3525.59	-0.01845959
575.8	0.21580001		1165.79	0.03842843		1755.81	-0.01062749		2345.8	-0.00275984		2935.8	0.00295767		3525.79	-0.01812103
576	0.21610787		1165.99	0.03969308		1756.01	-0.01011626		2346	-0.00257692		2936	0.00329718		3525.99	-0.01834521
576.2	0.21554624		1166.19	0.03948499		1756.21	-0.01049368		2346.2	-0.00344113		2936.2	0.00260227		3526.19	-0.01871441
576.4	0.2147957		1166.39	0.03980346		1756.41	-0.01008663		2346.4	-0.00272177		2936.4	0.00178847		3526.39	-0.01897851
576.6	0.21438122		1166.59	0.03978801		1756.61	-0.01034354		2346.6	-0.00272806		2936.6	0.00188797		3526.59	-0.01824863
576.8	0.21404691		1166.79	0.03967135		1756.81	-0.00987423		2346.8	-0.00239051		2936.8	0.00146812		3526.79	-0.01887312
577	0.21382864		1166.99	0.04033911		1757.01	-0.01027755		2347	-0.00227192		2937	0.00102212		3526.99	-0.01908323
577.2	0.21376337		1167.19	0.03965659		1757.21	-0.00997239		2347.2	-0.00246366		2937.2	0.00082278		3527.19	-0.01947772
577.4	0.21335747		1167.39	0.03954441		1757.41	-0.0101344		2347.4	-0.00232807		2937.4	0.00132858		3527.39	-0.01981362
577.6	0.21281398		1167.59	0.04004534		1757.61	-0.01083484		2347.6	-0.00228127		2937.6	0.00118238		3527.59	-0.02035647
577.8	0.21316133		1167.79	0.03975751		1757.81	-0.01068559		2347.8	-0.00266156		2937.8	0.0013492		3527.79	-0.02048584
578	0.21201452		1167.99	0.03882338		1758.01	-0.01064868		2348	-0.00270685		2938	0.00112687		3527.99	-0.02133425
578.2	0.21158168		1168.19	0.03884545		1758.21	-0.01033333		2348.2	-0.0042397		2938.2	0.00097694		3528.19	-0.02234784
578.4	0.2126087		1168.39	0.03876156		1758.41	-0.01034085		2348.4	-0.00523995		2938.4	0.0008461		3528.39	-0.02159456
578.6	0.21343779		1168.59	0.03757959		1758.61	-0.01040114		2348.6	-0.00556555		2938.6	0.00069497		3528.59	-0.02100402
578.8	0.21353345		1168.79	0.0363647		1758.81	-0.01034265		2348.8	-0.00623367		2938.8	0.00003706		3528.79	-0.02005366
579	0.21399655		1168.99	0.03587779		1759.01	-0.01039833		2349	-0.00571827		2939	0.00022713		3528.99	-0.0201646
579.2	0.21446743		1169.19	0.03559193		1759.21	-0.01026299		2349.2	-0.00558763		2939.2	-0.00046562		3529.19	-0.02004718
579.4	0.21438076		1169.39	0.03554198		1759.41	-0.01108208		2349.4	-0.00476454		2939.4	0.00017901		3529.39	-0.02122137
579.6	0.21477425		1169.59	0.03609528		1759.61	-0.01102369		2349.6	-0.00469412		2939.6	0.00037127		3529.59	-0.02147002
579.8	0.21545057		1169.79	0.0360204		1759.81	-0.0105464		2349.8	-0.00521873		2939.8	0.00041143		3529.79	-0.02118311
580	0.21623142		1169.99	0.03677184		1760.01	-0.01008204		2350	-0.00482173		2940	-0.00061665		3529.99	-0.02060604
580.2	0.21655735		1170.19	0.03726322		1760.21	-0.00952578		2350.2	-0.00391032		2940.2	-0.00108876		3530.19	-0.02124637
580.4	0.21672975		1170.39	0.0367031		1760.41	-0.00896779		2350.4	-0.00361776		2940.4	-0.00154733		3530.39	-0.02130046
580.6	0.21695351		1170.59	0.03727058		1760.61	-0.00968241		2350.6	-0.00362467		2940.6	-0.00213046		3530.59	-0.02068334
580.8	0.21678893		1170.79	0.03744234		1760.81	-0.00979367		2350.8	-0.00440203		2940.8	-0.00219232		3530.79	-0.02102761
581	0.21633962		1170.99	0.03855966		1761.01	-0.01005031		2351	-0.00469985		2941	-0.0019586		3530.99	-0.02076893
581.2	0.21542475		1171.19	0.03870778		1761.21	-0.00965909		2351.2	-0.0047307		2941.2	-0.00159961		3531.19	-0.02028319
581.4	0.21477479		1171.39	0.0391165		1761.41	-0.0093907		2351.4	-0.00513074		2941.4	-0.00152381		3531.39	-0.02032888
581.6	0.2144234		1171.59	0.03932786		1761.61	-0.00976236		2351.6	-0.00572289		2941.6	-0.00140491		3531.59	-0.02102998
581.8	0.21348894		1171.79	0.03874945		1761.81	-0.00899423		2351.8	-0.00609523		2941.8	-0.00189252		3531.79	-0.02177171
582	0.21224675		1171.99	0.03832652		1762.01	-0.00907075		2352	-0.00654306		2942	-0.00284134		3531.99	-0.02202985
582.2	0.21265288		1172.19	0.03908518		1762.21	-0.00956056		2352.2	-0.00644362		2942.2	-0.00267207		3532.19	-0.02175165
582.4	0.21273821		1172.39	0.03885575		1762.41	-0.00926578		2352.4	-0.00611816		2942.4	-0.00236752		3532.39	-0.01992686
582.6	0.2129675		1172.59	0.03828933		1762.61	-0.00868851		2352.6	-0.00569497		2942.6	-0.00158372		3532.59	-0.02072451
582.8	0.212746		1172.79	0.03837171		1762.81	-0.00965103		2352.8	-0.00573792		2942.8	-0.00108398		3532.79	-0.02125841
583	0.21226192		1172.99	0.0384716		1763.01	-0.00958537		2353	-0.00529554		2943	-0.00017023		3532.99	-0.0226302
583.2	0.21268466		1173.19	0.03904997		1763.21	-0.00850843		2353.2	-0.00454962		2943.2	0.00041524		3533.19	-0.02231639
583.4	0.21220284		1173.39	0.03845539		1763.41	-0.00860733		2353.4	-0.00334438		2943.4	0.00147737		3533.39	-0.02219699
583.6	0.21318291		1173.59	0.03801203		1763.61	-0.00737122		2353.6	-0.00284188		2943.6	0.00156575		3533.59	-0.02258375
583.8	0.21356786		1173.79	0.03729476		1763.81	-0.00613645		2353.8	-0.00256705		2943.8	0.00177759		3533.79	-0.02180997
584	0.21360295		1173.99	0.03747006		1764.01	-0.00648863		2354	-0.00189005		2944	0.00213766		3533.99	-0.02173224
584.2	0.2140487		1174.19	0.03706309		1764.21	-0.00595033		2354.2	-0.00182361		2944.2	0.00247372		3534.19	-0.02248947
584.4	0.21470032		1174.39	0.03595941		1764.41	-0.00601851		2354.4	-0.00189362		2944.4	0.00171686		3534.39	-0.02167166
584.6	0.21557181		1174.59	0.03663963		1764.61	-0.00655965		2354.6	-0.00127089		2944.6	0.00187979		3534.59	-0.02158231
584.8	0.21607473		1174.79	0.03637406		1764.81	-0.00696385		2354.8	-0.00233327		2944.8	0.00208812		3534.79	-0.02140328
585	0.21619249		1174.99	0.03709146		1765.01	-0.00694243		2355	-0.00206046		2945	0.00170632		3534.99	-0.02140708
585.2	0.21508387		1175.19	0.0373743		1765.21	-0.00665845		2355.2	-0.0016919		2945.2	0.00153545		3535.19	-0.02058228
585.4	0.21487026		1175.39	0.0372957		1765.41	-0.00693517		2355.4	-0.00180567		2945.4	0.00111335		3535.39	-0.02049491
585.6	0.21519499		1175.59	0.03760229		1765.61	-0.00702074		2355.6	-0.00193065		2945.6	0.000425		3535.59	-0.02073653
585.8	0.21579338		1175.79	0.03736632		1765.81	-0.0071066		2355.8	-0.00183931		2945.8	-0.00057083		3535.79	-0.02089691
586	0.2154233		1175.99	0.03744482		1766.01	-0.00813399		2356	-0.00225703		2946	-0.00053745		3535.99	-0.0205777
586.2	0.21496867		1176.19	0.03818522		1766.21	-0.00869756		2356.2	-0.00248091		2946.2	-0.00023726		3536.19	-0.02046029
586.4	0.21511781		1176.39	0.03791392		1766.41	-0.00872178		2356.4	-0.00341876		2946.4	-0.00099826		3536.39	-0.02015459
586.6	0.21507061		1176.59	0.0377406		1766.61	-0.00932713		2356.6	-0.00289018		2946.6	-0.00058082		3536.59	-0.02027569
586.8	0.21447205		1176.79	0.03791635		1766.81	-0.00975395		2356.8	-0.00322267		2946.8	-0.0012873		3536.79	-0.0197455
587	0.21410102		1176.99	0.0376113		1767.01	-0.00938378		2357	-0.00304918		2947	-0.00104405		3536.99	-0.01961218
587.2	0.21493288		1177.19	0.03808196		1767.21	-0.00933358		2357.2	-0.00279076		2947.2	-0.00067282		3537.19	-0.01901901
587.4	0.21437435		1177.39	0.03717227		1767.41	-0.00976073		2357.4	-0.00396674		2947.4	-0.00053678		3537.39	-0.01928808
587.6	0.21540613		1177.59	0.03705734		1767.61	-0.01005482		2357.6	-0.00462714		2947.6	-0.0002307		3537.59	-0.01947711
587.8	0.21505109		1177.79	0.03667465		1767.81	-0.01018736		2357.8	-0.00550085		2947.8	0.00003825		3537.79	-0.01873719
588	0.21491094		1177.99	0.03636552		1768.01	-0.01083693		2358	-0.00612925		2948	0.00005348		3537.99	-0.01906087
588.2	0.21484248		1178.19	0.03538482		1768.21	-0.01061309		2358.2	-0.00639604		2948.2	0.00006654		3538.19	-0.01904299
588.4	0.21533977		1178.39	0.03613014		1768.41	-0.01001304		2358.4	-0.00587754		2948.4	-0.00049577		3538.39	-0.01841247
588.6	0.2149822		1178.59	0.03654977		1768.61	-0.01027847		2358.6	-0.00647177		2948.6	-0.00011439		3538.59	-0.01871095
588.8	0.21414318		1178.79	0.03728339		1768.81	-0.01035206		2358.8	-0.00694113		2948.8	-0.00063115		3538.79	-0.01864618
589	0.21296598		1178.99	0.03798945		1769.01	-0.00957164		2359	-0.00697793		2949	-0.00099878		3538.99	-0.01873024
589.2	0.21237192		1179.19	0.03814399		1769.21	-0.00847028		2359.2	-0.00638607		2949.2	-0.00029658		3539.19	-0.0181392
589.4	0.21330377		1179.39	0.03874438		1769.41	-0.00836738		2359.4	-0.00711264		2949.4	-0.00034		3539.39	-0.0187486
589.6	0.21352811		1179.59	0.03871744		1769.61	-0.00792248		2359.6	-0.00748362		2949.6	-0.00080728		3539.59	-0.01903017
589.8	0.21343516		1179.79	0.03899193		1769.81	-0.00854761		2359.8	-0.00690976		2949.8	-0.0004445		3539.79	-0.01887095
590	0.21263422		1179.99	0.03976175		1770.01	-0.00901033		2360	-0.0062543		2950	-0.00050902		3539.99	-0.01929962
590.2	0.21245918		1180.19	0.04078585		1770.21	-0.00920432		2360.2	-0.00643554		2950.2	0.00004299		3540.19	-0.01942292
590.4	0.21277408		1180.39	0.04066709		1770.41	-0.00885712		2360.4	-0.00489155		2950.4	-0.0006286		3540.39	-0.0191288
590.6	0.2123561		1180.59	0.04099595		1770.61	-0.00943743		2360.6	-0.00357408		2950.6	0.00082712		3540.59	-0.01901504
590.8	0.21275297		1180.79	0.04164919		1770.81	-0.00987901		2360.8	-0.00351668		2950.8	0.00014411		3540.79	-0.01924017
591	0.21315173		1180.99	0.04107361		1771.01	-0.01057538		2361	-0.00305236		2951	0.00117151		3540.99	-0.02022964
591.2	0.21347398		1181.19	0.04123891		1771.21	-0.0104755		2361.2	-0.00257295		2951.2	0.00241871		3541.19	-0.02059297
591.4	0.21373593		1181.39	0.04054712		1771.41	-0.01085106		2361.4	-0.00244708		2951.4	0.00236597		3541.39	-0.02108104
591.6	0.21376989		1181.59	0.04068457		1771.61	-0.01090065		2361.6	-0.00142228		2951.6	0.00239177		3541.59	-0.02076421
591.8	0.21439043		1181.79	0.04075554		1771.81	-0.0103242		2361.8	-0.00205028		2951.8	0.00183682		3541.79	-0.02141818
592	0.21393543		1181.99	0.04065802		1772.01	-0.01066281		2362	-0.00215092		2952	0.00225127		3541.99	-0.02145951
592.2	0.21335242		1182.19	0.03975309		1772.21	-0.01047801		2362.2	-0.00177431		2952.2	0.0017168		3542.19	-0.02107395
592.4	0.2136764		1182.39	0.04011398		1772.41	-0.00955224		2362.4	-0.00193938		2952.4	0.00134021		3542.39	-0.02096293
592.6	0.21356337		1182.59	0.03989908		1772.61	-0.00963608		2362.6	-0.00266238		2952.6	0.00111287		3542.59	-0.02162859
592.8	0.21322397		1182.79	0.03900168		1772.81	-0.00870214		2362.8	-0.00387123		2952.8	0.00085813		3542.79	-0.02150215
593	0.21339763		1182.99	0.0382886		1773.01	-0.00811624		2363	-0.00482919		2953	0.00056339		3542.99	-0.02107577
593.2	0.21415034		1183.19	0.03805648		1773.21	-0.00710678		2363.2	-0.00508164		2953.2	0.00070764		3543.19	-0.02149218
593.4	0.21415305		1183.39	0.03791402		1773.41	-0.00716651		2363.4	-0.00630869		2953.4	-0.00023449		3543.39	-0.02188692
593.6	0.21376592		1183.59	0.03718867		1773.61	-0.00671407		2363.6	-0.00569186		2953.6	-0.00050346		3543.59	-0.02090072
593.8	0.21383632		1183.79	0.0370284		1773.81	-0.00672761		2363.8	-0.0061205		2953.8	-0.00113212		3543.79	-0.0207565
594	0.2135575		1183.99	0.03705303		1774.01	-0.00668817		2364	-0.00636915		2954	-0.00197127		3543.99	-0.02120979
594.2	0.21343438		1184.19	0.03715646		1774.21	-0.00731167		2364.2	-0.00654105		2954.2	-0.00226339		3544.19	-0.02089864
594.4	0.21345539		1184.39	0.03649809		1774.41	-0.00815267		2364.4	-0.00568332		2954.4	-0.00325497		3544.39	-0.02002718
594.6	0.21296564		1184.59	0.03726395		1774.61	-0.0093819		2364.6	-0.00609228		2954.6	-0.00260717		3544.59	-0.01929139
594.8	0.21296758		1184.79	0.03722698		1774.81	-0.01006041		2364.8	-0.0063524		2954.8	-0.00316729		3544.79	-0.01955575
595	0.2128439		1184.99	0.03669437		1775.01	-0.00998097		2365	-0.00614185		2955	-0.00201335		3544.99	-0.02027077
595.2	0.21325267		1185.19	0.03744523		1775.21	-0.01079754		2365.2	-0.00528375		2955.2	-0.00184642		3545.19	-0.02039502
595.4	0.2128321		1185.39	0.03781739		1775.41	-0.01143018		2365.4	-0.00542333		2955.4	-0.00219717		3545.39	-0.02130891
595.6	0.21252563		1185.59	0.03878571		1775.61	-0.01151505		2365.6	-0.00518956		2955.6	-0.00225194		3545.59	-0.02095918
595.8	0.21254911		1185.79	0.03896127		1775.81	-0.01168865		2365.8	-0.00609218		2955.8	-0.00258483		3545.79	-0.02142754
596	0.21176378		1185.99	0.04007376		1776.01	-0.01118865		2366	-0.00557042		2956	-0.00132815		3545.99	-0.02147916
596.2	0.21144341		1186.19	0.03911333		1776.21	-0.010151		2366.2	-0.00452692		2956.2	-0.00154815		3546.19	-0.02174075
596.4	0.21223367		1186.39	0.0396513		1776.41	-0.00957417		2366.4	-0.00502627		2956.4	-0.00068137		3546.39	-0.02157339
596.6	0.21312761		1186.59	0.03970456		1776.61	-0.0090073		2366.6	-0.0049206		2956.6	-0.00041162		3546.59	-0.02163162
596.8	0.212002		1186.79	0.03827828		1776.81	-0.0077241		2366.8	-0.00541143		2956.8	-0.00104841		3546.79	-0.0209393
597	0.21209058		1186.99	0.03891264		1777.01	-0.00719617		2367	-0.00477967		2957	-0.00104372		3546.99	-0.02120776
597.2	0.21294144		1187.19	0.03889139		1777.21	-0.00595306		2367.2	-0.00453609		2957.2	-0.00140814		3547.19	-0.02196659
597.4	0.21333591		1187.39	0.03803611		1777.41	-0.00589045		2367.4	-0.00421985		2957.4	-0.00150076		3547.39	-0.02093012
597.6	0.21407422		1187.59	0.03758937		1777.61	-0.00551188		2367.6	-0.00360098		2957.6	-0.00172201		3547.59	-0.02004882
597.8	0.21467041		1187.79	0.03762415		1777.81	-0.00553416		2367.8	-0.00448929		2957.8	-0.0020702		3547.79	-0.01945028
598	0.21532772		1187.99	0.03855283		1778.01	-0.00640181		2368	-0.00358069		2958	-0.00164839		3547.99	-0.01857459
598.2	0.21502174		1188.19	0.03917931		1778.21	-0.00723231		2368.2	-0.00311716		2958.2	-0.00062687		3548.19	-0.01725747
598.4	0.21498247		1188.39	0.03936875		1778.41	-0.00781808		2368.4	-0.00282343		2958.4	-0.0005648		3548.39	-0.01707002
598.6	0.21498535		1188.59	0.03969411		1778.61	-0.00772435		2368.6	-0.00276219		2958.6	-0.00013892		3548.59	-0.01738655
598.8	0.2161181		1188.79	0.04000494		1778.81	-0.00832655		2368.8	-0.00315697		2958.8	-0.00056924		3548.79	-0.01826573
599	0.21681842		1188.99	0.03967103		1779.01	-0.00851475		2369	-0.00310484		2959	-0.00016094		3548.99	-0.01862382
599.2	0.2167151		1189.19	0.0406573		1779.21	-0.00917006		2369.2	-0.00259443		2959.2	-0.00088226		3549.19	-0.01882853
599.4	0.21454311		1189.39	0.04083497		1779.41	-0.00986323		2369.4	-0.00310835		2959.4	-0.00032218		3549.39	-0.01958254
599.6	0.21387364		1189.59	0.04063083		1779.61	-0.00957785		2369.6	-0.00368741		2959.6	-0.00046642		3549.59	-0.02063416
599.8	0.21298694		1189.79	0.04043636		1779.81	-0.00992795		2369.8	-0.00462975		2959.8	0.00007833		3549.79	-0.02127502
600	0.21264732		1189.99	0.04042974		1780.01	-0.00932024		2370	-0.00444362		2960	0.000763		3549.99	-0.02161742
600.2	0.21228233		1190.19	0.0399304		1780.21	-0.0097165		2370.2	-0.00461539		2960.2	0.00018644		3550.19	-0.02234681
600.4	0.21256969		1190.39	0.04018508		1780.41	-0.00923421		2370.4	-0.00563238		2960.4	0.00067824		3550.39	-0.02241823
600.6	0.21149149		1190.59	0.03953632		1780.61	-0.00820533		2370.6	-0.00555418		2960.6	0.00034966		3550.59	-0.02186087
600.8	0.20970375		1190.79	0.03873896		1780.81	-0.00808265		2370.8	-0.00666132		2960.8	0.00015572		3550.79	-0.02115359
601	0.21017084		1190.99	0.03879643		1781.01	-0.00692367		2371	-0.00668678		2961	0.00122216		3550.99	-0.02064183
601.2	0.21063942		1191.19	0.03865935		1781.21	-0.00665141		2371.2	-0.00632285		2961.2	0.00040322		3551.19	-0.02101389
601.4	0.21103829		1191.39	0.03777063		1781.41	-0.007201		2371.4	-0.0062419		2961.4	0.00064908		3551.39	-0.02025069
601.6	0.21197817		1191.59	0.03791338		1781.61	-0.0068349		2371.6	-0.00642744		2961.6	0.00033566		3551.59	-0.02030514
601.8	0.21217595		1191.79	0.03815433		1781.81	-0.00710146		2371.8	-0.0065827		2961.8	-0.0003714		3551.79	-0.02015793
602	0.21150637		1191.99	0.03796472		1782.01	-0.00726224		2372	-0.00536669		2962	-0.0004386		3551.99	-0.02041863
602.2	0.21126537		1192.19	0.03756388		1782.21	-0.00667718		2372.2	-0.00498028		2962.2	-0.00027704		3552.19	-0.02014478
602.4	0.21263301		1192.39	0.03703924		1782.41	-0.00726511		2372.4	-0.00416688		2962.4	-0.00115827		3552.39	-0.02091765
602.6	0.21307		1192.59	0.0365797		1782.61	-0.00720325		2372.6	-0.00337762		2962.6	-0.00212041		3552.59	-0.02109908
602.8	0.21413457		1192.79	0.03722415		1782.81	-0.00769253		2372.8	-0.0037699		2962.8	-0.00191459		3552.79	-0.02124418
603	0.21438147		1192.99	0.03645521		1783.01	-0.00815115		2373	-0.00300582		2963	-0.00220485		3552.99	-0.02117999
603.2	0.21438256		1193.19	0.03655833		1783.21	-0.00822848		2373.2	-0.00203968		2963.2	-0.00238308		3553.19	-0.02185712
603.4	0.21393278		1193.39	0.03713299		1783.41	-0.0084369		2373.4	-0.00287722		2963.4	-0.0012134		3553.39	-0.0229483
603.6	0.21424784		1193.59	0.03716675		1783.61	-0.00791996		2373.6	-0.00291276		2963.6	-0.00092552		3553.59	-0.02272374
603.8	0.21441108		1193.79	0.03704038		1783.81	-0.00907373		2373.8	-0.00270877		2963.8	-0.00033249		3553.79	-0.02202116
604	0.21427701		1193.99	0.0377355		1784.01	-0.0084424		2374	-0.00260479		2964	0.00030132		3553.99	-0.02220472
604.2	0.21387082		1194.19	0.03875255		1784.21	-0.00846815		2374.2	-0.00286684		2964.2	0.00125252		3554.19	-0.02199654
604.4	0.21389558		1194.39	0.03804851		1784.41	-0.00749085		2374.4	-0.00333293		2964.4	0.00230167		3554.39	-0.02130038
604.6	0.21399051		1194.59	0.03792069		1784.61	-0.00697669		2374.6	-0.00295883		2964.6	0.00221947		3554.59	-0.02013216
604.8	0.21418766		1194.79	0.03850554		1784.81	-0.00701126		2374.8	-0.00395707		2964.8	0.00243659		3554.79	-0.01988736
605	0.21518384		1194.99	0.03884302		1785.01	-0.00681169		2375	-0.00366712		2965	0.0023926		3554.99	-0.01951181
605.2	0.21532271		1195.19	0.03956363		1785.21	-0.0070033		2375.2	-0.00275436		2965.2	0.0013164		3555.19	-0.02068883
605.4	0.21581527		1195.39	0.03886239		1785.41	-0.0068269		2375.4	-0.00369546		2965.4	0.0012135		3555.39	-0.02022347
605.6	0.21616577		1195.59	0.03939093		1785.61	-0.00589024		2375.6	-0.00367297		2965.6	0.00040309		3555.59	-0.02077736
605.8	0.21590045		1195.79	0.03901051		1785.81	-0.00641351		2375.8	-0.00416036		2965.8	-0.00048087		3555.79	-0.02121993
606	0.21613239		1195.99	0.03841457		1786.01	-0.00690475		2376	-0.00414501		2966	-0.0005192		3555.99	-0.02196347
606.2	0.216675		1196.19	0.03878779		1786.21	-0.0068686		2376.2	-0.00418962		2966.2	-0.0007703		3556.19	-0.02232604
606.4	0.21743659		1196.39	0.03890629		1786.41	-0.00840887		2376.4	-0.00349275		2966.4	-0.00188907		3556.39	-0.02280626
606.6	0.21654692		1196.59	0.03874355		1786.61	-0.00911		2376.6	-0.00398423		2966.6	-0.00230785		3556.59	-0.02272214
606.8	0.21611451		1196.79	0.03824241		1786.81	-0.0100815		2376.8	-0.00449676		2966.8	-0.00228152		3556.79	-0.02211551
607	0.21615136		1196.99	0.03868319		1787.01	-0.0101943		2377	-0.00434753		2967	-0.00335289		3556.99	-0.02182831
607.2	0.21620988		1197.19	0.03891597		1787.21	-0.01021253		2377.2	-0.00403996		2967.2	-0.00337131		3557.19	-0.02211135
607.4	0.21473326		1197.39	0.0392197		1787.41	-0.01050742		2377.4	-0.00437464		2967.4	-0.00240471		3557.39	-0.02122183
607.6	0.21337364		1197.59	0.03830494		1787.61	-0.01076438		2377.6	-0.00425029		2967.6	-0.00199903		3557.59	-0.01983137
607.8	0.21250312		1197.79	0.03800822		1787.81	-0.01162053		2377.8	-0.00514323		2967.8	-0.00049341		3557.79	-0.02019016
608	0.2123152		1197.99	0.03885462		1788.01	-0.01128177		2378	-0.00594039		2968	0.00014558		3557.99	-0.01992659
608.2	0.21179316		1198.19	0.03793775		1788.21	-0.01169572		2378.2	-0.00623507		2968.2	-0.00054876		3558.19	-0.01973196
608.4	0.21235594		1198.39	0.03733796		1788.41	-0.0116616		2378.4	-0.00653208		2968.4	-0.00124305		3558.39	-0.02007433
608.6	0.21223814		1198.59	0.03823778		1788.61	-0.01127995		2378.6	-0.00613662		2968.6	-0.00193456		3558.59	-0.02059937
608.8	0.21240351		1198.79	0.0387779		1788.81	-0.01103025		2378.8	-0.00611674		2968.8	-0.00147296		3558.79	-0.01980237
609	0.21307679		1198.99	0.03858444		1789.01	-0.01126329		2379	-0.00549533		2969	-0.00112751		3558.99	-0.01977435
609.2	0.21333317		1199.19	0.03829139		1789.21	-0.01040636		2379.2	-0.00398227		2969.2	-0.00046867		3559.19	-0.02057131
609.4	0.21379077		1199.39	0.03812708		1789.41	-0.00903241		2379.4	-0.00424287		2969.4	-0.00013305		3559.39	-0.02052225
609.6	0.21390463		1199.59	0.03853285		1789.61	-0.00892689		2379.6	-0.00367054		2969.6	-0.00067342		3559.59	-0.02161647
609.8	0.21443818		1199.79	0.03804001		1789.81	-0.0095277		2379.8	-0.0032665		2969.8	-0.00117704		3559.79	-0.02281817
610	0.21447714		1199.99	0.03755081		1790.01	-0.0102949		2380	-0.00246341		2970	-0.00113594		3559.99	-0.02372766
610.2	0.21459237		1200.19	0.03809647		1790.21	-0.01036032		2380.2	-0.00154183		2970.2	-0.00120083		3560.19	-0.02450764
610.4	0.21441029		1200.39	0.03777504		1790.41	-0.01103784		2380.4	-0.00086965		2970.4	-0.00133515		3560.39	-0.0246603
610.6	0.21340282		1200.59	0.03739659		1790.61	-0.01168032		2380.6	-0.00084799		2970.6	-0.0001725		3560.59	-0.0250505
610.8	0.21316701		1200.79	0.03641767		1790.81	-0.01145591		2380.8	-0.00035987		2970.8	-0.00113361		3560.79	-0.02508792
611	0.21331931		1200.99	0.03730449		1791.01	-0.01111857		2381	-0.00078772		2971	-0.00146728		3560.99	-0.02454476
611.2	0.21263949		1201.19	0.03674341		1791.21	-0.01172111		2381.2	-0.00047446		2971.2	-0.00064561		3561.19	-0.02384123
611.4	0.2113937		1201.39	0.03605079		1791.41	-0.01224006		2381.4	-0.00078722		2971.4	-0.0000781		3561.39	-0.02285256
611.6	0.21138503		1201.59	0.03537801		1791.61	-0.01156952		2381.6	-0.0017002		2971.6	0.00065518		3561.59	-0.02256038
611.8	0.21145318		1201.79	0.03590886		1791.81	-0.01186301		2381.8	-0.00291283		2971.8	0.0010915		3561.79	-0.0223063
612	0.21186421		1201.99	0.03604765		1792.01	-0.01197493		2382	-0.00398378		2972	-0.0000512		3561.99	-0.02183236
612.2	0.21214237		1202.19	0.03573341		1792.21	-0.01176365		2382.2	-0.00378835		2972.2	-0.00181708		3562.19	-0.02213458
612.4	0.21250383		1202.39	0.03642601		1792.41	-0.01230583		2382.4	-0.00363281		2972.4	-0.00124871		3562.39	-0.02226052
612.6	0.21322574		1202.59	0.03744709		1792.61	-0.01163087		2382.6	-0.00401029		2972.6	-0.00154311		3562.59	-0.02214723
612.8	0.21434601		1202.79	0.03726549		1792.81	-0.01130381		2382.8	-0.0044661		2972.8	-0.00067011		3562.79	-0.02113898
613	0.21479465		1202.99	0.03710261		1793.01	-0.01113637		2383	-0.00514505		2973	-0.0002983		3562.99	-0.02093865
613.2	0.21485086		1203.19	0.03696545		1793.21	-0.0101117		2383.2	-0.0048334		2973.2	0.00040415		3563.19	-0.02036515
613.4	0.21477743		1203.39	0.03721943		1793.41	-0.0098819		2383.4	-0.00541135		2973.4	-0.00022726		3563.39	-0.02057006
613.6	0.21465391		1203.59	0.03691734		1793.61	-0.0103582		2383.6	-0.00521074		2973.6	-0.00020349		3563.59	-0.0207303
613.8	0.21433662		1203.79	0.03646651		1793.81	-0.01060754		2383.8	-0.00492965		2973.8	0.00037082		3563.79	-0.0216946
614	0.21416585		1203.99	0.03622756		1794.01	-0.01067314		2384	-0.00434401		2974	0.00102335		3563.99	-0.02188562
614.2	0.21437239		1204.19	0.03650923		1794.21	-0.00991401		2384.2	-0.0035565		2974.2	0.00060378		3564.19	-0.02230013
614.4	0.21285386		1204.39	0.03638695		1794.41	-0.01037459		2384.4	-0.00373907		2974.4	0.00102228		3564.39	-0.02165948
614.6	0.21288358		1204.59	0.03685571		1794.61	-0.01003609		2384.6	-0.00396426		2974.6	0.00134684		3564.59	-0.02142071
614.8	0.21269059		1204.79	0.03666733		1794.81	-0.01013654		2384.8	-0.00409664		2974.8	0.0009		3564.79	-0.02083216
615	0.21140717		1204.99	0.03727867		1795.01	-0.01057625		2385	-0.00401391		2975	0.00118984		3564.99	-0.01969941
615.2	0.21144557		1205.19	0.03701185		1795.21	-0.01094679		2385.2	-0.00317594		2975.2	0.0021661		3565.19	-0.01971605
615.4	0.21140909		1205.39	0.0374873		1795.41	-0.01080255		2385.4	-0.00307889		2975.4	0.00219487		3565.39	-0.01940348
615.6	0.21136515		1205.59	0.03808518		1795.61	-0.01056495		2385.6	-0.00346082		2975.6	0.00268361		3565.59	-0.01934445
615.8	0.21118504		1205.79	0.03945853		1795.81	-0.01167653		2385.8	-0.00352634		2975.8	0.00271658		3565.79	-0.019924
616	0.21138114		1205.99	0.03936088		1796.01	-0.0122578		2386	-0.00327219		2976	0.00203164		3565.99	-0.01979873
616.2	0.21220767		1206.19	0.0403954		1796.21	-0.01206973		2386.2	-0.00299013		2976.2	0.00134851		3566.19	-0.02089835
616.4	0.21234168		1206.39	0.04121209		1796.41	-0.01292563		2386.4	-0.00289996		2976.4	0.00196506		3566.39	-0.02136715
616.6	0.21293875		1206.59	0.04126864		1796.61	-0.01237142		2386.6	-0.0038238		2976.6	0.00104048		3566.59	-0.02147799
616.8	0.2124495		1206.79	0.04022952		1796.81	-0.01257738		2386.8	-0.00403485		2976.8	0.00111158		3566.79	-0.02166843
617	0.21276981		1206.99	0.04051805		1797.01	-0.01228298		2387	-0.00425392		2977	0.00123536		3566.99	-0.02228788
617.2	0.21265007		1207.19	0.0402037		1797.21	-0.01283019		2387.2	-0.00362209		2977.2	0.00098793		3567.19	-0.02291422
617.4	0.21190865		1207.39	0.03982587		1797.41	-0.01285995		2387.4	-0.00364741		2977.4	0.00072515		3567.39	-0.02336028
617.6	0.21208558		1207.59	0.03959265		1797.61	-0.01206415		2387.6	-0.00322339		2977.6	0.00032678		3567.59	-0.02383304
617.8	0.21150486		1207.79	0.03900153		1797.81	-0.01204036		2387.8	-0.00346565		2977.8	0.00020986		3567.79	-0.0248861
618	0.21167586		1207.99	0.03864073		1798.01	-0.0114637		2388	-0.00397856		2978	-0.00044754		3567.99	-0.02443275
618.2	0.21141854		1208.19	0.03885708		1798.21	-0.01082819		2388.2	-0.0043141		2978.2	-0.0015562		3568.19	-0.02395341
618.4	0.21089192		1208.39	0.03911158		1798.41	-0.01131487		2388.4	-0.00582169		2978.4	-0.00088341		3568.39	-0.02348603
618.6	0.21143083		1208.59	0.03907286		1798.61	-0.01059101		2388.6	-0.00601418		2978.6	-0.00036094		3568.59	-0.02415848
618.8	0.21133902		1208.79	0.03882782		1798.81	-0.01101083		2388.8	-0.00617254		2978.8	0.00020209		3568.79	-0.02426488
619	0.21034936		1208.99	0.0387958		1799.01	-0.01029107		2389	-0.00642696		2979	0.00041304		3568.99	-0.02401137
619.2	0.21122895		1209.19	0.03887542		1799.21	-0.01032011		2389.2	-0.00639821		2979.2	0.00069498		3569.19	-0.02449337
619.4	0.21109847		1209.39	0.03978697		1799.41	-0.01021446		2389.4	-0.00610485		2979.4	0.00069832		3569.39	-0.02419549
619.6	0.21053042		1209.59	0.04028729		1799.61	-0.01045456		2389.6	-0.00608949		2979.6	0.00164275		3569.59	-0.02396372
619.8	0.21052066		1209.79	0.03942123		1799.81	-0.01022783		2389.8	-0.00574328		2979.8	0.00229733		3569.79	-0.02379664
620	0.21057414		1209.99	0.03861327		1800.01	-0.01011534		2390	-0.00564218		2980	0.00124425		3569.99	-0.02294854
620.2	0.21091037		1210.19	0.0397339		1800.21	-0.01000454		2390.2	-0.00532031		2980.2	0.00133334		3570.19	-0.02276397
620.4	0.21091518		1210.39	0.03899848		1800.41	-0.01013173		2390.4	-0.00407532		2980.4	0.00146386		3570.39	-0.02279481
620.6	0.21082447		1210.59	0.03812088		1800.61	-0.01043427		2390.6	-0.00416381		2980.6	0.00092973		3570.59	-0.02229955
620.8	0.21101688		1210.79	0.03738658		1800.81	-0.01049866		2390.8	-0.00374397		2980.8	0.00075935		3570.79	-0.02248798
621	0.21129937		1210.99	0.03681996		1801.01	-0.01015482		2391	-0.00266364		2981	0.00030342		3570.99	-0.02267393
621.2	0.21060378		1211.19	0.03574084		1801.21	-0.01104871		2391.2	-0.00226499		2981.2	-0.00013426		3571.19	-0.02246279
621.4	0.20991616		1211.39	0.03503559		1801.41	-0.01055494		2391.4	-0.00265202		2981.4	-0.00055152		3571.39	-0.02220436
621.6	0.21108499		1211.59	0.03431644		1801.61	-0.01031792		2391.6	-0.00261693		2981.6	-0.00121718		3571.59	-0.02299858
621.8	0.2101393		1211.79	0.03381462		1801.81	-0.01057342		2391.8	-0.0027796		2981.8	-0.00096204		3571.79	-0.02289663
622	0.21023203		1211.99	0.03455549		1802.01	-0.01017803		2392	-0.00433051		2982	-0.0011548		3571.99	-0.02244881
622.2	0.2098236		1212.19	0.03511859		1802.21	-0.01011014		2392.2	-0.00472434		2982.2	-0.0014176		3572.19	-0.02255375
622.4	0.21028507		1212.39	0.03549817		1802.41	-0.01087667		2392.4	-0.00633867		2982.4	-0.00140799		3572.39	-0.02291289
622.6	0.21004148		1212.59	0.0357288		1802.61	-0.01119118		2392.6	-0.00676718		2982.6	-0.00210865		3572.59	-0.02407846
622.8	0.21032105		1212.79	0.03668106		1802.81	-0.01122757		2392.8	-0.00750214		2982.8	-0.00180137		3572.79	-0.02362921
623	0.20956831		1212.99	0.03682948		1803.01	-0.01098582		2393	-0.0078027		2983	-0.00183722		3572.99	-0.02378999
623.2	0.2095875		1213.19	0.0371584		1803.21	-0.01189368		2393.2	-0.00726165		2983.2	-0.00153201		3573.19	-0.02428238
623.4	0.20956111		1213.39	0.03766235		1803.41	-0.01202929		2393.4	-0.00781537		2983.4	-0.00099954		3573.39	-0.02352193
623.6	0.20947373		1213.59	0.03748075		1803.61	-0.01212423		2393.6	-0.00813833		2983.6	-0.0005534		3573.59	-0.02300643
623.8	0.20967821		1213.79	0.03687977		1803.81	-0.0117415		2393.8	-0.00842974		2983.8	-0.00055732		3573.79	-0.02257737
624	0.21048371		1213.99	0.03784216		1804.01	-0.01230488		2394	-0.00849176		2984	-0.00019028		3573.99	-0.02259567
624.2	0.21069275		1214.19	0.03885406		1804.21	-0.01203182		2394.2	-0.00824715		2984.2	-0.00060906		3574.19	-0.02283707
624.4	0.21136023		1214.39	0.03848169		1804.41	-0.0122989		2394.4	-0.00800328		2984.4	-0.00020459		3574.39	-0.02339647
624.6	0.21178131		1214.59	0.03912976		1804.61	-0.01146212		2394.6	-0.00803013		2984.6	-0.00061435		3574.59	-0.02336946
624.8	0.21193607		1214.79	0.0390274		1804.81	-0.01147736		2394.8	-0.00784961		2984.8	-0.00043393		3574.79	-0.02385609
625	0.21196493		1214.99	0.03874939		1805.01	-0.0111201		2395	-0.0076785		2985	-0.00072046		3574.99	-0.02408807
625.2	0.21178816		1215.19	0.0389393		1805.21	-0.01174024		2395.2	-0.00781489		2985.2	-0.00037334		3575.19	-0.02401349
625.4	0.21171767		1215.39	0.03866897		1805.41	-0.01110358		2395.4	-0.00734489		2985.4	-0.0003467		3575.39	-0.02439722
625.6	0.21164567		1215.59	0.03811928		1805.61	-0.01077619		2395.6	-0.00778888		2985.6	-0.00016985		3575.59	-0.02417231
625.8	0.21082484		1215.79	0.03755611		1805.81	-0.01104622		2395.8	-0.00788235		2985.8	-0.00018048		3575.79	-0.02314395
626	0.21098873		1215.99	0.03731368		1806.01	-0.01082894		2396	-0.00962197		2986	-0.0004013		3575.99	-0.02285019
626.2	0.2116888		1216.19	0.03668361		1806.21	-0.01136174		2396.2	-0.00912893		2986.2	-0.00056945		3576.19	-0.02279008
626.4	0.21258385		1216.39	0.03636858		1806.41	-0.01181765		2396.4	-0.00972377		2986.4	-0.00101001		3576.39	-0.02277726
626.6	0.2120359		1216.59	0.03566689		1806.61	-0.01177201		2396.6	-0.00955747		2986.6	-0.00030539		3576.59	-0.02213344
626.8	0.2122446		1216.79	0.03527584		1806.81	-0.01174584		2396.8	-0.01007947		2986.8	0.00001822		3576.79	-0.02134496
627	0.21188778		1216.99	0.03441117		1807.01	-0.0125049		2397	-0.00941826		2987	-0.00007712		3576.99	-0.02127089
627.2	0.21202597		1217.19	0.03463122		1807.21	-0.012775		2397.2	-0.00918147		2987.2	0.00009272		3577.19	-0.02052077
627.4	0.2121021		1217.39	0.03405916		1807.41	-0.01285778		2397.4	-0.00858881		2987.4	-0.0001976		3577.39	-0.01979806
627.6	0.21230859		1217.59	0.03448552		1807.61	-0.01253901		2397.6	-0.00769507		2987.6	-0.00044291		3577.59	-0.01963686
627.8	0.21193645		1217.79	0.03502811		1807.81	-0.01246113		2397.8	-0.00740371		2987.8	-0.00050088		3577.79	-0.01992859
628	0.21231611		1217.99	0.03585376		1808.01	-0.01271312		2398	-0.00688796		2988	-0.0006795		3577.99	-0.01974251
628.2	0.21226993		1218.19	0.03665192		1808.21	-0.01179547		2398.2	-0.00635672		2988.2	-0.00228957		3578.19	-0.02057048
628.4	0.21199767		1218.39	0.03809874		1808.41	-0.01163861		2398.4	-0.00567777		2988.4	-0.00215963		3578.39	-0.02042646
628.6	0.21255994		1218.59	0.03897554		1808.61	-0.00975035		2398.6	-0.00506062		2988.6	-0.00244276		3578.59	-0.02111178
628.8	0.21243582		1218.79	0.03883009		1808.81	-0.01012476		2398.8	-0.0043209		2988.8	-0.00260994		3578.79	-0.02169682
629	0.21210213		1218.99	0.03887527		1809.01	-0.00861321		2399	-0.00411947		2989	-0.00319344		3578.99	-0.02263062
629.2	0.21207276		1219.19	0.03900426		1809.21	-0.00910076		2399.2	-0.00334383		2989.2	-0.0033029		3579.19	-0.02283442
629.4	0.21178923		1219.39	0.03792129		1809.41	-0.00876891		2399.4	-0.00412455		2989.4	-0.00339457		3579.39	-0.02298545
629.6	0.21112877		1219.59	0.03748306		1809.61	-0.00843852		2399.6	-0.00526838		2989.6	-0.00346612		3579.59	-0.02299773
629.8	0.21172427		1219.79	0.03710393		1809.81	-0.00793236		2399.8	-0.00591955		2989.8	-0.00364687		3579.79	-0.02308428
630	0.21182267		1219.99	0.0361059		1810.01	-0.00787685		2400	-0.00730152		2990	-0.00310302		3579.99	-0.02343742
630.2	0.21189276		1220.19	0.03572893		1810.21	-0.00867824		2400.2	-0.00752676		2990.2	-0.00135114		3580.19	-0.02390479
630.4	0.2109792		1220.39	0.03548818		1810.41	-0.00932488		2400.4	-0.00860475		2990.4	-0.00039403		3580.39	-0.02393491
630.6	0.21041052		1220.59	0.03481957		1810.61	-0.01009945		2400.6	-0.00907288		2990.6	-0.00032897		3580.59	-0.02333436
630.8	0.21146605		1220.79	0.03453873		1810.81	-0.01094225		2400.8	-0.00963443		2990.8	-0.00039461		3580.79	-0.02337282
631	0.21202468		1220.99	0.03486022		1811.01	-0.01119157		2401	-0.00970079		2991	-0.00028596		3580.99	-0.02345514
631.2	0.21170243		1221.19	0.03518743		1811.21	-0.01157787		2401.2	-0.01071071		2991.2	-0.0003305		3581.19	-0.02341812
631.4	0.21195158		1221.39	0.03492314		1811.41	-0.01275322		2401.4	-0.00997205		2991.4	-0.00057948		3581.39	-0.02317493
631.6	0.21212981		1221.59	0.03645076		1811.61	-0.01323611		2401.6	-0.01041184		2991.6	-0.00049355		3581.59	-0.02316353
631.8	0.21195954		1221.79	0.0372341		1811.81	-0.01384527		2401.8	-0.01030135		2991.8	-0.00039941		3581.79	-0.02311279
632	0.2123119		1221.99	0.03797044		1812.01	-0.0144792		2402	-0.01009935		2992	-0.00068418		3581.99	-0.0228392
632.2	0.21237024		1222.19	0.03857953		1812.21	-0.01392479		2402.2	-0.00928567		2992.2	-0.00155449		3582.19	-0.02295622
632.4	0.21163289		1222.39	0.03883206		1812.41	-0.01441147		2402.4	-0.00935836		2992.4	-0.00171104		3582.39	-0.02279366
632.6	0.21184476		1222.59	0.03818233		1812.61	-0.01399316		2402.6	-0.00830756		2992.6	-0.00149446		3582.59	-0.02275036
632.8	0.21130103		1222.79	0.03778001		1812.81	-0.01433414		2402.8	-0.00786188		2992.8	-0.00231859		3582.79	-0.02301442
633	0.21041826		1222.99	0.03799021		1813.01	-0.01459322		2403	-0.00805194		2993	-0.00238844		3582.99	-0.02353372
633.2	0.21046056		1223.19	0.03783104		1813.21	-0.01460572		2403.2	-0.00808671		2993.2	-0.00273155		3583.19	-0.02310036
633.4	0.20972059		1223.39	0.03699751		1813.41	-0.01348557		2403.4	-0.0086881		2993.4	-0.00249694		3583.39	-0.02296495
633.6	0.20916398		1223.59	0.0377604		1813.61	-0.01271044		2403.6	-0.0082857		2993.6	-0.00309368		3583.59	-0.02370452
633.8	0.20878243		1223.79	0.03691406		1813.81	-0.01235004		2403.8	-0.00887615		2993.8	-0.00250648		3583.79	-0.0240599
634	0.20813898		1223.99	0.03564099		1814.01	-0.01278694		2404	-0.00852577		2994	-0.00195356		3583.99	-0.02378581
634.2	0.20733063		1224.19	0.03597008		1814.21	-0.01337988		2404.2	-0.00761032		2994.2	-0.00073494		3584.19	-0.02400281
634.4	0.2080767		1224.39	0.03528119		1814.41	-0.01327711		2404.4	-0.00677146		2994.4	-0.00085878		3584.39	-0.02320135
634.6	0.20881239		1224.59	0.03475329		1814.61	-0.01326652		2404.6	-0.00630735		2994.6	-0.00096641		3584.59	-0.022603
634.8	0.21008287		1224.79	0.03478728		1814.81	-0.01276079		2404.8	-0.00619833		2994.8	-0.00036681		3584.79	-0.02277288
635	0.21027751		1224.99	0.03473825		1815.01	-0.01191595		2405	-0.00628681		2995	-0.00061222		3584.99	-0.02346209
635.2	0.21018088		1225.19	0.03416431		1815.21	-0.01238714		2405.2	-0.00600331		2995.2	-0.00017532		3585.19	-0.02310771
635.4	0.21065521		1225.39	0.03426499		1815.41	-0.01190932		2405.4	-0.00619402		2995.4	0.00018282		3585.39	-0.02284792
635.6	0.21060119		1225.59	0.03447614		1815.61	-0.01156148		2405.6	-0.0060091		2995.6	0.00029943		3585.59	-0.02308248
635.8	0.21037636		1225.79	0.03454464		1815.81	-0.01176467		2405.8	-0.00635678		2995.8	0.00020224		3585.79	-0.02293114
636	0.21061952		1225.99	0.03448885		1816.01	-0.0119207		2406	-0.00626618		2996	-0.0003619		3585.99	-0.0229653
636.2	0.21028806		1226.19	0.03447909		1816.21	-0.01136781		2406.2	-0.00684151		2996.2	-0.00080345		3586.19	-0.02302536
636.4	0.21017902		1226.39	0.03400628		1816.41	-0.01109659		2406.4	-0.00706751		2996.4	-0.00047971		3586.39	-0.02314977
636.6	0.21004802		1226.59	0.03474863		1816.61	-0.01059057		2406.6	-0.00642369		2996.6	-0.0007051		3586.59	-0.02286311
636.8	0.21019886		1226.79	0.03436632		1816.81	-0.0101786		2406.8	-0.00665226		2996.8	-0.00164307		3586.79	-0.02336414
637	0.21025347		1226.99	0.03486857		1817.01	-0.01044228		2407	-0.00665954		2997	-0.0016044		3586.99	-0.02344735
637.2	0.21047105		1227.19	0.03469027		1817.21	-0.00978476		2407.2	-0.00696649		2997.2	-0.00176245		3587.19	-0.02409576
637.4	0.20961721		1227.39	0.035591		1817.41	-0.00959686		2407.4	-0.00652527		2997.4	-0.00119141		3587.39	-0.02410137
637.6	0.21004755		1227.59	0.03656981		1817.61	-0.00974573		2407.6	-0.00598364		2997.6	-0.00167573		3587.59	-0.02494139
637.8	0.20992798		1227.79	0.03560796		1817.81	-0.00961078		2407.8	-0.00612112		2997.8	-0.00056849		3587.79	-0.02539438
638	0.21037737		1227.99	0.03673854		1818.01	-0.00966666		2408	-0.00484779		2998	-0.00157641		3587.99	-0.02506957
638.2	0.21083252		1228.19	0.03730623		1818.21	-0.00993238		2408.2	-0.00485227		2998.2	-0.00099771		3588.19	-0.02495023
638.4	0.21130085		1228.39	0.03720171		1818.41	-0.00965639		2408.4	-0.00428015		2998.4	-0.00110476		3588.39	-0.02434956
638.6	0.21059635		1228.59	0.03739959		1818.61	-0.00874648		2408.6	-0.00445127		2998.6	-0.00122431		3588.59	-0.0254306
638.8	0.210628		1228.79	0.03720677		1818.81	-0.00856652		2408.8	-0.00460963		2998.8	-0.00068077		3588.79	-0.02622338
639	0.20989462		1228.99	0.03731414		1819.01	-0.00881101		2409	-0.00492961		2999	-0.00046681		3588.99	-0.02618691
639.2	0.20937294		1229.19	0.03653057		1819.21	-0.00836554		2409.2	-0.00599576		2999.2	-0.00077487		3589.19	-0.02630771
639.4	0.20904054		1229.39	0.03585185		1819.41	-0.00788857		2409.4	-0.00716708		2999.4	-0.00047356		3589.39	-0.02616947
639.6	0.2090276		1229.59	0.03591358		1819.61	-0.00833375		2409.6	-0.00748502		2999.6	-0.00064023		3589.59	-0.02607059
639.8	0.20872657		1229.79	0.03645467		1819.81	-0.00882701		2409.8	-0.00845598		2999.8	-0.00037553		3589.79	-0.02635543
640	0.2087201		1229.99	0.03694517		1820.01	-0.00836992		2410	-0.00862094		3000	-0.00027734		3589.99	-0.02650943
640.2	0.20887162		1230.19	0.03694317		1820.21	-0.00790583		2410.2	-0.00965154		3000.2	-0.00098024		3590.19	-0.02732061
640.4	0.20900717		1230.39	0.03609768		1820.41	-0.00695336		2410.4	-0.00937287		3000.4	-0.00088139		3590.39	-0.02692661
640.6	0.20863723		1230.59	0.03602079		1820.61	-0.00712911		2410.6	-0.01001648		3000.6	-0.00114406		3590.59	-0.02614019
640.8	0.20967775		1230.79	0.03542224		1820.81	-0.00753716		2410.8	-0.01084987		3000.8	-0.00106742		3590.79	-0.02614729
641	0.21058588		1230.99	0.03582675		1821.01	-0.00838131		2411	-0.01105963		3001	-0.00079182		3590.99	-0.02565709
641.2	0.21030546		1231.19	0.03528248		1821.21	-0.00780435		2411.2	-0.01039009		3001.2	-0.00063092		3591.19	-0.02627186
641.4	0.21049335		1231.39	0.03567626		1821.41	-0.007404		2411.4	-0.01006899		3001.4	-0.00084515		3591.39	-0.02588966
641.6	0.21208257		1231.59	0.03518039		1821.61	-0.00775379		2411.6	-0.01045842		3001.6	-0.00141734		3591.59	-0.02576015
641.8	0.21256451		1231.79	0.03437349		1821.81	-0.00753062		2411.8	-0.01029377		3001.8	-0.00203276		3591.79	-0.02483384
642	0.21283537		1231.99	0.03436402		1822.01	-0.00821005		2412	-0.01016328		3002	-0.00357267		3591.99	-0.02408473
642.2	0.21354353		1232.19	0.03388371		1822.21	-0.00841635		2412.2	-0.01036043		3002.2	-0.00326132		3592.19	-0.02394314
642.4	0.21234432		1232.39	0.03387122		1822.41	-0.00859082		2412.4	-0.00958738		3002.4	-0.00399994		3592.39	-0.02343381
642.6	0.21187037		1232.59	0.03324605		1822.61	-0.00868642		2412.6	-0.00961714		3002.6	-0.00444919		3592.59	-0.02413919
642.8	0.21175558		1232.79	0.0327639		1822.81	-0.01083408		2412.8	-0.00981721		3002.8	-0.00450678		3592.79	-0.02360694
643	0.21080829		1232.99	0.03313226		1823.01	-0.01117201		2413	-0.00990558		3003	-0.0044211		3592.99	-0.02288965
643.2	0.21065269		1233.19	0.03287651		1823.21	-0.01091553		2413.2	-0.00965099		3003.2	-0.00394621		3593.19	-0.02242627
643.4	0.21003433		1233.39	0.03341572		1823.41	-0.01210745		2413.4	-0.00909538		3003.4	-0.00346664		3593.39	-0.02242282
643.6	0.20979714		1233.59	0.03422392		1823.61	-0.01329313		2413.6	-0.00813027		3003.6	-0.00325778		3593.59	-0.0223863
643.8	0.20912015		1233.79	0.03468276		1823.81	-0.01358343		2413.8	-0.00742704		3003.8	-0.00343868		3593.79	-0.02312828
644	0.20923669		1233.99	0.0351018		1824.01	-0.01339792		2414	-0.00700012		3004	-0.00324815		3593.99	-0.02357781
644.2	0.20962659		1234.19	0.03427708		1824.21	-0.01314393		2414.2	-0.00772135		3004.2	-0.00357431		3594.19	-0.02437465
644.4	0.20920656		1234.39	0.03300229		1824.41	-0.01294675		2414.4	-0.00784277		3004.4	-0.00338134		3594.39	-0.02411866
644.6	0.2092984		1234.59	0.03314518		1824.61	-0.01321659		2414.6	-0.00816684		3004.6	-0.00286156		3594.59	-0.0239375
644.8	0.20993794		1234.79	0.03362602		1824.81	-0.01350173		2414.8	-0.00826113		3004.8	-0.0028903		3594.79	-0.02438249
645	0.21004584		1234.99	0.03427434		1825.01	-0.0137336		2415	-0.00803254		3005	-0.00322621		3594.99	-0.02439128
645.2	0.20945191		1235.19	0.03375551		1825.21	-0.01342418		2415.2	-0.00806161		3005.2	-0.00305986		3595.19	-0.0243608
645.4	0.20997315		1235.39	0.0340882		1825.41	-0.01320202		2415.4	-0.00882876		3005.4	-0.00314179		3595.39	-0.02451685
645.6	0.20996682		1235.59	0.0344305		1825.61	-0.01314692		2415.6	-0.00973879		3005.6	-0.00303012		3595.59	-0.02458345
645.8	0.20987847		1235.79	0.03414828		1825.81	-0.01326465		2415.8	-0.00997481		3005.8	-0.00328399		3595.79	-0.02444325
646	0.2096449		1235.99	0.03386095		1826.01	-0.01299676		2416	-0.0103441		3006	-0.00283393		3595.99	-0.02478879
646.2	0.21031654		1236.19	0.03370078		1826.21	-0.01268454		2416.2	-0.00950808		3006.2	-0.00271121		3596.19	-0.02508218
646.4	0.2093094		1236.39	0.03362863		1826.41	-0.01315442		2416.4	-0.00902574		3006.4	-0.00252906		3596.39	-0.02473812
646.6	0.20974594		1236.59	0.03338733		1826.61	-0.01374894		2416.6	-0.00898428		3006.6	-0.00214476		3596.59	-0.02531302
646.8	0.21042462		1236.79	0.03389108		1826.81	-0.01421046		2416.8	-0.00890055		3006.8	-0.00134017		3596.79	-0.02447157
647	0.21081837		1236.99	0.03505868		1827.01	-0.01333804		2417	-0.00743258		3007	-0.00028312		3596.99	-0.02408705
647.2	0.21086167		1237.19	0.03547281		1827.21	-0.01391644		2417.2	-0.00712181		3007.2	-0.00059364		3597.19	-0.0240032
647.4	0.21037669		1237.39	0.03587906		1827.41	-0.01493287		2417.4	-0.00591913		3007.4	-0.00140528		3597.39	-0.02474538
647.6	0.21102825		1237.59	0.03558738		1827.61	-0.01477683		2417.6	-0.00542461		3007.6	-0.00159525		3597.59	-0.02484008
647.8	0.21108797		1237.79	0.03590112		1827.81	-0.01393811		2417.8	-0.00552618		3007.8	-0.00266589		3597.79	-0.02536441
648	0.21156568		1237.99	0.03586074		1828.01	-0.01355834		2418	-0.00548582		3008	-0.00281021		3597.99	-0.02534294
648.2	0.21138217		1238.19	0.0351326		1828.21	-0.01297026		2418.2	-0.00592937		3008.2	-0.00333629		3598.19	-0.02518018
648.4	0.21103154		1238.39	0.03484858		1828.41	-0.01288496		2418.4	-0.00590365		3008.4	-0.0037486		3598.39	-0.02478358
648.6	0.21100632		1238.59	0.03540112		1828.61	-0.01286193		2418.6	-0.00577559		3008.6	-0.00333406		3598.59	-0.02436082
648.8	0.21075508		1238.79	0.03554671		1828.81	-0.01321643		2418.8	-0.00601153		3008.8	-0.0033329		3598.79	-0.02397094
649	0.21059273		1238.99	0.0356525		1829.01	-0.01332426		2419	-0.00651979		3009	-0.00272426		3598.99	-0.02367381
649.2	0.21017307		1239.19	0.03495473		1829.21	-0.01315153		2419.2	-0.00672442		3009.2	-0.00181979		3599.19	-0.0234053
649.4	0.2101974		1239.39	0.03498511		1829.41	-0.01264498		2419.4	-0.00692117		3009.4	-0.00116293		3599.39	-0.02394933
649.6	0.20974268		1239.59	0.03464691		1829.61	-0.01279886		2419.6	-0.00737465		3009.6	-0.00014635		3599.59	-0.02378664
649.8	0.20989304		1239.79	0.03374934		1829.81	-0.01296916		2419.8	-0.00729532		3009.8	0.00092667		3599.79	-0.02333953
