# Supplementary material for: Functional development of a V3/glycan-specific broadly neutralizing antibody isolated from a case of HIV superinfection
Source: eLife journal article supplement (doi:10.7554/elife.68110), 2021-07-15
Supplement: fig2-data2 [file C7.xls]

Vers 3.43 Data Simulation
Conc1	5E-07	5E-07	5E-07	5E-07	5E-07	5E-07	5E-07	5E-07
Start1	200	729.99	1259.99	1789.98	2319.98	2849.98	3379.98	3909.98
Stop1	559.79	1089.79	1619.79	2149.78	2679.78	3209.78	3739.78	4269.78
Time1	Data1	Sim1	Time2	Data2	Sim2	Time3	Data3	Sim3	Time4	Data4	Sim4	Time5	Data5	Sim5	Time6	Data6	Sim6	Time7	Data7	Sim7	Time8	Data8	Sim8
200	0.00580132		729.99	0.0015597		1259.99	0.00008933		1789.98	0.00461265		2319.98	0.00501573		2849.98	0.01367802		3379.98	0.01214525		3909.98	0.00450438
200.2	0.00600997		730.19	0.00239246		1260.19	0.00172748		1790.18	0.00548979		2320.18	0.00489025		2850.18	0.01357765		3380.18	0.01230692		3910.18	0.00404362
200.4	0.00556775		730.39	0.00316334		1260.39	0.00237385		1790.38	0.00498543		2320.38	0.00542383		2850.38	0.01324951		3380.38	0.01278038		3910.38	0.0030423
200.6	0.0064612		730.59	0.00425739		1260.59	0.00300235		1790.58	0.00476382		2320.58	0.00578094		2850.58	0.01266958		3380.58	0.01335416		3910.58	0.00195582
200.8	0.00731771		730.79	0.00499488		1260.79	0.00369381		1790.78	0.00484262		2320.78	0.00463274		2850.78	0.01284225		3380.78	0.01326549		3910.78	0.00119411
201	0.00822163		730.99	0.00620732		1260.99	0.00455789		1790.98	0.00484816		2320.98	0.00488095		2850.98	0.01305009		3380.98	0.01359178		3910.98	0.00001465
201.2	0.00874961		731.19	0.0074154		1261.19	0.00383345		1791.18	0.00545485		2321.18	0.00392149		2851.18	0.01350959		3381.18	0.01355011		3911.18	-0.00067825
201.4	0.00955283		731.39	0.00817458		1261.39	0.00390261		1791.38	0.0056097		2321.38	0.00362595		2851.38	0.0131392		3381.38	0.013364		3911.38	-0.00074896
201.6	0.01083665		731.59	0.00902734		1261.59	0.00442907		1791.58	0.00571176		2321.58	0.00370394		2851.58	0.01330512		3381.58	0.01266301		3911.58	-0.00064475
201.8	0.0105066		731.79	0.00991871		1261.79	0.00361707		1791.78	0.00558373		2321.78	0.00360374		2851.78	0.01349086		3381.78	0.01136653		3911.78	-0.00094366
202	0.01058902		731.99	0.0105864		1261.99	0.00341393		1791.98	0.00585167		2321.98	0.00336535		2851.98	0.01352898		3381.98	0.0107311		3911.98	-0.00010813
202.2	0.01103341		732.19	0.010877		1262.19	0.00288045		1792.18	0.00667842		2322.18	0.0032463		2852.18	0.01430485		3382.18	0.01063297		3912.18	0.00061853
202.4	0.01085539		732.39	0.01051709		1262.39	0.00244652		1792.38	0.00642336		2322.38	0.00282661		2852.38	0.01449944		3382.38	0.0105857		3912.38	0.00061355
202.6	0.0114609		732.59	0.00955967		1262.59	0.00272587		1792.58	0.00619429		2322.58	0.00428489		2852.58	0.01472895		3382.58	0.01006455		3912.58	0.0010001
202.8	0.01163118		732.79	0.00989034		1262.79	0.00333834		1792.78	0.00651252		2322.78	0.00402071		2852.78	0.01493197		3382.78	0.00997236		3912.78	0.00165953
203	0.01156122		732.99	0.00908768		1262.99	0.00340674		1792.98	0.00700232		2322.98	0.00430113		2852.98	0.01579508		3382.98	0.01000074		3912.98	0.0019167
203.2	0.01155802		733.19	0.00850179		1263.19	0.00320576		1793.18	0.00623372		2323.18	0.00390361		2853.18	0.01582042		3383.18	0.00917103		3913.18	0.00219736
203.4	0.01031404		733.39	0.00832315		1263.39	0.00353833		1793.38	0.00637963		2323.38	0.00367353		2853.38	0.01673156		3383.38	0.00851134		3913.38	0.00331198
203.6	0.01006695		733.59	0.00877405		1263.59	0.00340859		1793.58	0.00594131		2323.58	0.00347981		2853.58	0.01779909		3383.58	0.0093498		3913.58	0.00354284
203.8	0.01085671		733.79	0.00916554		1263.79	0.00486199		1793.78	0.00624943		2323.78	0.00270388		2853.78	0.01869415		3383.78	0.0108762		3913.78	0.00372567
204	0.00954027		733.99	0.00935434		1263.99	0.00501628		1793.98	0.00613222		2323.98	0.00279912		2853.98	0.01971119		3383.98	0.01166865		3913.98	0.00299372
204.2	0.00962558		734.19	0.0098417		1264.19	0.00493538		1794.18	0.00685356		2324.18	0.00248854		2854.18	0.02027507		3384.18	0.01321878		3914.18	0.00257182
204.4	0.00954186		734.39	0.0097517		1264.39	0.00437288		1794.38	0.00600305		2324.38	0.00330277		2854.38	0.0211575		3384.38	0.0153066		3914.38	0.00157703
204.6	0.01077666		734.59	0.01061192		1264.59	0.00448181		1794.58	0.00530175		2324.58	0.00300803		2854.58	0.02243656		3384.58	0.01641754		3914.58	0.00015541
204.8	0.01155843		734.79	0.0112769		1264.79	0.00428715		1794.78	0.00493007		2324.78	0.0021673		2854.78	0.02365749		3384.78	0.01700159		3914.78	-0.00055274
205	0.01100818		734.99	0.01194051		1264.99	0.00325525		1794.98	0.0044233		2324.98	0.00310308		2854.98	0.02404779		3384.98	0.01812973		3914.98	-0.00184119
205.2	0.01152454		735.19	0.01232163		1265.19	0.0018856		1795.18	0.00460258		2325.18	0.00299215		2855.18	0.02486079		3385.18	0.01747315		3915.18	-0.00134782
205.4	0.01160692		735.39	0.0129125		1265.39	0.00217738		1795.38	0.00413261		2325.38	0.00410376		2855.38	0.0243357		3385.38	0.01691677		3915.38	-0.00154154
205.6	0.01212252		735.59	0.0134537		1265.59	0.00262196		1795.58	0.00358569		2325.58	0.00512388		2855.58	0.02499693		3385.58	0.01603871		3915.58	-0.00184453
205.8	0.01118268		735.79	0.01331585		1265.79	0.00178418		1795.78	0.00345037		2325.78	0.0052777		2855.78	0.02449873		3385.78	0.01545974		3915.78	-0.0025574
206	0.01168837		735.99	0.01285148		1265.99	0.00228653		1795.98	0.00408214		2325.98	0.0056136		2855.98	0.02449744		3385.98	0.01587276		3915.98	-0.00243391
206.2	0.01188566		736.19	0.01211099		1266.19	0.00246488		1796.18	0.00473317		2326.18	0.006064		2856.18	0.02442645		3386.18	0.01504021		3916.18	-0.00200614
206.4	0.0110084		736.39	0.01186108		1266.39	0.00296328		1796.38	0.00462486		2326.38	0.00603406		2856.38	0.02453343		3386.38	0.01379895		3916.38	-0.00192926
206.6	0.01108279		736.59	0.01088417		1266.59	0.00373908		1796.58	0.00493754		2326.58	0.00694929		2856.58	0.02448984		3386.58	0.01287249		3916.58	-0.00191512
206.8	0.01057322		736.79	0.01088801		1266.79	0.00478315		1796.78	0.00588362		2326.78	0.00620435		2856.78	0.02526029		3386.78	0.01235024		3916.78	-0.00175491
207	0.00989189		736.99	0.01028503		1266.99	0.0065026		1796.98	0.00709761		2326.98	0.00544607		2856.98	0.0258475		3386.98	0.01271964		3916.98	-0.00131481
207.2	0.00960459		737.19	0.00991337		1267.19	0.0075663		1797.18	0.00678482		2327.18	0.00457225		2857.18	0.02615179		3387.18	0.01131438		3917.18	-0.00101828
207.4	0.00928495		737.39	0.00972081		1267.39	0.00854123		1797.38	0.00763062		2327.38	0.005225		2857.38	0.02718234		3387.38	0.0110945		3917.38	-0.0001772
207.6	0.0093675		737.59	0.00878301		1267.59	0.0096286		1797.58	0.0073026		2327.58	0.00510762		2857.58	0.02772451		3387.58	0.01119128		3917.58	-0.00044169
207.8	0.01057713		737.79	0.00874675		1267.79	0.00984915		1797.78	0.00775855		2327.78	0.00499692		2857.78	0.02794419		3387.78	0.01071995		3917.78	-0.00137633
208	0.01048214		737.99	0.00861817		1267.99	0.00924798		1797.98	0.00786402		2327.98	0.00548882		2857.98	0.02843605		3387.98	0.0108117		3917.98	-0.00176999
208.2	0.01162164		738.19	0.00827754		1268.19	0.00833276		1798.18	0.00806147		2328.18	0.00595941		2858.18	0.0288213		3388.18	0.0106921		3918.18	-0.00125688
208.4	0.01226113		738.39	0.00848809		1268.39	0.00854679		1798.38	0.00770187		2328.38	0.00682135		2858.38	0.02993672		3388.38	0.01089551		3918.38	-0.00148456
208.6	0.01234533		738.59	0.00949744		1268.59	0.00780818		1798.58	0.00669006		2328.58	0.00692649		2858.58	0.02999472		3388.58	0.01095179		3918.58	-0.00171839
208.8	0.01285406		738.79	0.00983216		1268.79	0.00651656		1798.78	0.00590072		2328.78	0.00717252		2858.78	0.02910394		3388.78	0.01098158		3918.78	-0.00148481
209	0.0133298		738.99	0.0100027		1268.99	0.00530607		1798.98	0.00568849		2328.98	0.00791158		2858.98	0.02916902		3388.98	0.01137036		3918.98	-0.00152527
209.2	0.01478414		739.19	0.00990856		1269.19	0.00477858		1799.18	0.00503744		2329.18	0.00857044		2859.18	0.02881213		3389.18	0.01053877		3919.18	-0.00138298
209.4	0.01447245		739.39	0.01056419		1269.39	0.00442798		1799.38	0.0047163		2329.38	0.00882556		2859.38	0.02840772		3389.38	0.01077894		3919.38	-0.00132374
209.6	0.01581157		739.59	0.0102059		1269.59	0.00376863		1799.58	0.00408787		2329.58	0.00794021		2859.58	0.02808012		3389.58	0.01042389		3919.58	-0.0013811
209.8	0.01622079		739.79	0.00986582		1269.79	0.00281811		1799.78	0.00411311		2329.78	0.00644006		2859.78	0.0273841		3389.78	0.01061379		3919.78	-0.00171891
210	0.01651313		739.99	0.0098119		1269.99	0.00229611		1799.98	0.00441831		2329.98	0.00651888		2859.98	0.02734002		3389.98	0.01015229		3919.98	-0.00180516
210.2	0.01644159		740.19	0.00950658		1270.19	0.00209504		1800.18	0.0049177		2330.18	0.00543822		2860.18	0.02686052		3390.18	0.00972876		3920.18	-0.00046725
210.4	0.01644432		740.39	0.00966451		1270.39	0.00227235		1800.38	0.00531258		2330.38	0.00358702		2860.38	0.02689002		3390.38	0.00988929		3920.38	-0.00124806
210.6	0.01595354		740.59	0.00945824		1270.59	0.00217288		1800.58	0.00560392		2330.58	0.00286547		2860.58	0.02750796		3390.58	0.01031023		3920.58	-0.00171293
210.8	0.01564326		740.79	0.00920556		1270.79	0.00302114		1800.78	0.00564122		2330.78	0.0026757		2860.78	0.0283222		3390.78	0.01150673		3920.78	-0.0017513
211	0.0144146		740.99	0.00877356		1270.99	0.00450472		1800.98	0.00631639		2330.98	0.00227012		2860.98	0.0291713		3390.98	0.01207428		3920.98	-0.00143675
211.2	0.01424739		741.19	0.00895144		1271.19	0.00423813		1801.18	0.00597662		2331.18	0.00248413		2861.18	0.02935142		3391.18	0.0117583		3921.18	-0.00155737
211.4	0.01340656		741.39	0.00926724		1271.39	0.00533616		1801.38	0.00581022		2331.38	0.00292334		2861.38	0.03074041		3391.38	0.01304562		3921.38	-0.00182704
211.6	0.01287351		741.59	0.00996546		1271.59	0.00544921		1801.58	0.00533731		2331.58	0.00287644		2861.58	0.03163445		3391.58	0.01298602		3921.58	-0.00222532
211.8	0.01284295		741.79	0.01098478		1271.79	0.00548448		1801.78	0.00567499		2331.78	0.00364468		2861.78	0.03378483		3391.78	0.01312922		3921.78	-0.00226528
212	0.01234429		741.99	0.01131098		1271.99	0.00542993		1801.98	0.00658448		2331.98	0.00420656		2861.98	0.03555866		3391.98	0.01360749		3921.98	-0.0020599
212.2	0.01221042		742.19	0.01215059		1272.19	0.00503236		1802.18	0.00564708		2332.18	0.00399215		2862.18	0.0367675		3392.18	0.01405441		3922.18	-0.00188605
212.4	0.01089826		742.39	0.01271163		1272.39	0.00527202		1802.38	0.00541781		2332.38	0.00507536		2862.38	0.03714819		3392.38	0.01473975		3922.38	-0.00215283
212.6	0.01013427		742.59	0.01313375		1272.59	0.00427162		1802.58	0.00474471		2332.58	0.00557526		2862.58	0.03736036		3392.58	0.0157351		3922.58	-0.00217495
212.8	0.0106508		742.79	0.01358374		1272.79	0.00442782		1802.78	0.00393266		2332.78	0.00610749		2862.78	0.03823064		3392.78	0.01509282		3922.78	-0.00224594
213	0.01117152		742.99	0.01403987		1272.99	0.00473822		1802.98	0.00433106		2332.98	0.00649001		2862.98	0.038927		3392.98	0.01476742		3922.98	-0.00183741
213.2	0.01078508		743.19	0.01409826		1273.19	0.00467892		1803.18	0.00372474		2333.18	0.00653638		2863.18	0.03884129		3393.18	0.01335519		3923.18	-0.00174928
213.4	0.01028664		743.39	0.01448218		1273.39	0.00532282		1803.38	0.00416207		2333.38	0.00564879		2863.38	0.03939303		3393.38	0.0120966		3923.38	-0.00198205
213.6	0.01136946		743.59	0.01398225		1273.59	0.00459889		1803.58	0.00409686		2333.58	0.00444972		2863.58	0.03995925		3393.58	0.01020583		3923.58	-0.00236578
213.8	0.01209755		743.79	0.01357041		1273.79	0.00463894		1803.78	0.00517579		2333.78	0.00372165		2863.78	0.03973116		3393.78	0.00960575		3923.78	-0.00230761
214	0.01293299		743.99	0.01290449		1273.99	0.00500652		1803.98	0.00527661		2333.98	0.00325134		2863.98	0.03929837		3393.98	0.00811273		3923.98	-0.0021629
214.2	0.01418265		744.19	0.01226345		1274.19	0.00493516		1804.18	0.00579984		2334.18	0.00191087		2864.18	0.03967404		3394.18	0.00730449		3924.18	-0.00159829
214.4	0.01458369		744.39	0.01185807		1274.39	0.00468014		1804.38	0.00585459		2334.38	0.00135085		2864.38	0.03960261		3394.38	0.00651815		3924.38	-0.00187565
214.6	0.01449199		744.59	0.01082898		1274.59	0.00515393		1804.58	0.00563977		2334.58	0.00167261		2864.58	0.0399111		3394.58	0.00624642		3924.58	-0.00187234
214.8	0.01500963		744.79	0.01060163		1274.79	0.00590081		1804.78	0.00555967		2334.78	0.00191114		2864.78	0.03950672		3394.78	0.00664914		3924.78	-0.0018642
215	0.01531201		744.99	0.00993641		1274.99	0.00570137		1804.98	0.00615626		2334.98	0.00132185		2864.98	0.0397857		3394.98	0.00695057		3924.98	-0.00170772
215.2	0.01587164		745.19	0.00965765		1275.19	0.00565202		1805.18	0.00615935		2335.18	0.00142268		2865.18	0.03876772		3395.18	0.00724994		3925.18	-0.00192325
215.4	0.01570139		745.39	0.00960016		1275.39	0.00590047		1805.38	0.00599541		2335.38	0.00252318		2865.38	0.03972262		3395.38	0.00772365		3925.38	-0.00291143
215.6	0.01559318		745.59	0.01025799		1275.59	0.00511594		1805.58	0.00593578		2335.58	0.00262601		2865.58	0.04061873		3395.58	0.0075913		3925.58	-0.00330537
215.8	0.01463106		745.79	0.00972411		1275.79	0.004925		1805.78	0.00511652		2335.78	0.00322715		2865.78	0.04141438		3395.78	0.00868968		3925.78	-0.00323985
216	0.0154464		745.99	0.00951563		1275.99	0.0033184		1805.98	0.00530154		2335.98	0.00251845		2865.98	0.04104457		3395.98	0.01019932		3925.98	-0.00408654
216.2	0.01483904		746.19	0.00961149		1276.19	0.00238953		1806.18	0.00417824		2336.18	0.00258366		2866.18	0.04120476		3396.18	0.0108772		3926.18	-0.00446046
216.4	0.01437592		746.39	0.00929244		1276.39	0.00178517		1806.38	0.00481221		2336.38	0.00281763		2866.38	0.04112475		3396.38	0.01115568		3926.38	-0.00487112
216.6	0.01412292		746.59	0.01019851		1276.59	0.00059616		1806.58	0.0052219		2336.58	0.00295751		2866.58	0.04064769		3396.58	0.01203177		3926.58	-0.00538396
216.8	0.01404365		746.79	0.01045483		1276.79	0.00103359		1806.78	0.00502176		2336.78	0.00271973		2866.78	0.04148552		3396.78	0.01196447		3926.78	-0.00559466
217	0.01355709		746.99	0.01077361		1276.99	0.00042407		1806.98	0.00546466		2336.98	0.00267495		2866.98	0.04129276		3396.98	0.01147655		3926.98	-0.00523553
217.2	0.01318828		747.19	0.01150164		1277.19	0.00037086		1807.18	0.00484511		2337.18	0.00238179		2867.18	0.04087294		3397.18	0.01077398		3927.18	-0.00517797
217.4	0.01317675		747.39	0.01122689		1277.39	0.00100039		1807.38	0.00537689		2337.38	0.00260452		2867.38	0.04098784		3397.38	0.01017496		3927.38	-0.00523629
217.6	0.01403805		747.59	0.01122017		1277.59	0.00070453		1807.58	0.00613307		2337.58	0.00265249		2867.58	0.04136931		3397.58	0.01008552		3927.58	-0.0041653
217.8	0.01420889		747.79	0.01135291		1277.79	0.00215282		1807.78	0.00708256		2337.78	0.00223965		2867.78	0.0406407		3397.78	0.01034182		3927.78	-0.00398248
218	0.01462551		747.99	0.01144956		1277.99	0.00258355		1807.98	0.00732828		2337.98	0.00257565		2867.98	0.04091959		3397.98	0.01034598		3927.98	-0.00319908
218.2	0.01462999		748.19	0.01110432		1278.19	0.00312992		1808.18	0.00744332		2338.18	0.00291798		2868.18	0.04158256		3398.18	0.00958676		3928.18	-0.00256563
218.4	0.01428758		748.39	0.01092453		1278.39	0.00330468		1808.38	0.00738878		2338.38	0.00328159		2868.38	0.04155415		3398.38	0.00975861		3928.38	-0.00163453
218.6	0.01418078		748.59	0.00998931		1278.59	0.00520337		1808.58	0.00794524		2338.58	0.00276874		2868.58	0.04241323		3398.58	0.00921858		3928.58	-0.00136719
218.8	0.01451855		748.79	0.01072328		1278.79	0.00582531		1808.78	0.00783852		2338.78	0.00320271		2868.78	0.04343725		3398.78	0.00942437		3928.78	-0.00116766
219	0.0147358		748.99	0.00988564		1278.99	0.00618066		1808.98	0.00705247		2338.98	0.0036306		2868.98	0.04394733		3398.98	0.00971223		3928.98	-0.0013067
219.2	0.01429666		749.19	0.00961358		1279.19	0.00714635		1809.18	0.00627436		2339.18	0.00382961		2869.18	0.0447857		3399.18	0.0093851		3929.18	-0.00210959
219.4	0.01548715		749.39	0.00997964		1279.39	0.00688769		1809.38	0.00568163		2339.38	0.00517864		2869.38	0.04639623		3399.38	0.00986334		3929.38	-0.00219434
219.6	0.0151368		749.59	0.01005568		1279.59	0.00686393		1809.58	0.00461606		2339.58	0.00433419		2869.58	0.04667193		3399.58	0.01030453		3929.58	-0.00233994
219.8	0.0154323		749.79	0.00986042		1279.79	0.00615307		1809.78	0.00384449		2339.78	0.00441205		2869.78	0.04697318		3399.78	0.01137374		3929.78	-0.00190586
220	0.01734911		749.99	0.00974256		1279.99	0.00581503		1809.98	0.00379099		2339.98	0.00463196		2869.98	0.04658524		3399.98	0.01227658		3929.98	-0.00308051
220.2	0.01676642		750.19	0.0100495		1280.19	0.00583523		1810.18	0.00361426		2340.18	0.00528544		2870.18	0.04693903		3400.18	0.01189579		3930.18	-0.0036842
220.4	0.01711813		750.39	0.01026136		1280.39	0.00531414		1810.38	0.00436683		2340.38	0.00524219		2870.38	0.04656803		3400.38	0.01267903		3930.38	-0.00422864
220.6	0.01673258		750.59	0.01092501		1280.59	0.0045092		1810.58	0.00472684		2340.58	0.00547166		2870.58	0.04613026		3400.58	0.01336259		3930.58	-0.00529734
220.8	0.01650883		750.79	0.01113594		1280.79	0.00501986		1810.78	0.00412847		2340.78	0.00500319		2870.78	0.04651742		3400.78	0.01437254		3930.78	-0.00575952
221	0.01614533		750.99	0.01216052		1280.99	0.00471879		1810.98	0.00412829		2340.98	0.0045057		2870.98	0.04604352		3400.98	0.01392325		3930.98	-0.00594382
221.2	0.01571159		751.19	0.01221495		1281.19	0.00459294		1811.18	0.00390472		2341.18	0.00410098		2871.18	0.04525975		3401.18	0.0138002		3931.18	-0.00553672
221.4	0.01545451		751.39	0.01225086		1281.39	0.00479803		1811.38	0.00453543		2341.38	0.00409704		2871.38	0.0449166		3401.38	0.0134734		3931.38	-0.00508594
221.6	0.01523935		751.59	0.01198585		1281.59	0.00462258		1811.58	0.00576716		2341.58	0.00365833		2871.58	0.04550077		3401.58	0.01348906		3931.58	-0.00467194
221.8	0.01469986		751.79	0.01223665		1281.79	0.00458043		1811.78	0.00696353		2341.78	0.00382317		2871.78	0.04525072		3401.78	0.01292594		3931.78	-0.00401624
222	0.01409681		751.99	0.01240364		1281.99	0.00365539		1811.98	0.00736844		2341.98	0.00345425		2871.98	0.04498969		3401.98	0.01287563		3931.98	-0.00350993
222.2	0.01334572		752.19	0.01222773		1282.19	0.00354688		1812.18	0.0070633		2342.18	0.00336755		2872.18	0.04453116		3402.18	0.0120105		3932.18	-0.00325162
222.4	0.01378837		752.39	0.01231075		1282.39	0.00347347		1812.38	0.00823987		2342.38	0.00331547		2872.38	0.04501311		3402.38	0.01165032		3932.38	-0.00286223
222.6	0.01315712		752.59	0.01168619		1282.59	0.00339504		1812.58	0.00877534		2342.58	0.00223857		2872.58	0.04489919		3402.58	0.01082166		3932.58	-0.00359033
222.8	0.01353194		752.79	0.01206283		1282.79	0.0026426		1812.78	0.00775708		2342.78	0.00257353		2872.78	0.04553857		3402.78	0.01106166		3932.78	-0.00352667
223	0.0135219		752.99	0.01160637		1282.99	0.00175928		1812.98	0.0071455		2342.98	0.00213382		2872.98	0.04579393		3402.98	0.01089009		3932.98	-0.00423164
223.2	0.01410784		753.19	0.01101103		1283.19	0.00158674		1813.18	0.00658183		2343.18	0.00137451		2873.18	0.04704668		3403.18	0.01113263		3933.18	-0.00465861
223.4	0.01587498		753.39	0.01089745		1283.39	0.00075907		1813.38	0.00610498		2343.38	0.00040908		2873.38	0.04742591		3403.38	0.0116286		3933.38	-0.00476101
223.6	0.01533556		753.59	0.01094268		1283.59	0.00072307		1813.58	0.00587357		2343.58	0.00005736		2873.58	0.04789448		3403.58	0.01175704		3933.58	-0.00469514
223.8	0.01641918		753.79	0.01006527		1283.79	0.00041755		1813.78	0.00569869		2343.78	0.00030112		2873.78	0.04827128		3403.78	0.01261926		3933.78	-0.00449079
224	0.01739039		753.99	0.0093546		1283.99	0.00086416		1813.98	0.00528654		2343.98	0.00134168		2873.98	0.048097		3403.98	0.01230759		3933.98	-0.00564225
224.2	0.01664562		754.19	0.00974838		1284.19	0.00109661		1814.18	0.00516476		2344.18	0.00123079		2874.18	0.04929428		3404.18	0.01216569		3934.18	-0.00561666
224.4	0.01652959		754.39	0.00959459		1284.39	0.00143646		1814.38	0.00510689		2344.38	0.00099728		2874.38	0.04963495		3404.38	0.01246603		3934.38	-0.00571762
224.6	0.01606573		754.59	0.00960647		1284.59	0.0026343		1814.58	0.00518849		2344.58	0.00057161		2874.58	0.04931159		3404.58	0.01280926		3934.58	-0.00704076
224.8	0.01578181		754.79	0.00982815		1284.79	0.00343244		1814.78	0.00543058		2344.78	0.0013531		2874.78	0.04959236		3404.78	0.01305163		3934.78	-0.00662368
225	0.01596931		754.99	0.00970191		1284.99	0.00360659		1814.98	0.00574122		2344.98	0.00215641		2874.98	0.0492297		3404.98	0.01184188		3934.98	-0.00626909
225.2	0.01592326		755.19	0.00955034		1285.19	0.00372344		1815.18	0.00634038		2345.18	0.00298862		2875.18	0.04967802		3405.18	0.0115305		3935.18	-0.00464547
225.4	0.01551362		755.39	0.0103913		1285.39	0.0047523		1815.38	0.00773395		2345.38	0.00362513		2875.38	0.05020926		3405.38	0.01056747		3935.38	-0.00400157
225.6	0.01553465		755.59	0.01022828		1285.59	0.00466898		1815.58	0.00852911		2345.58	0.00448451		2875.58	0.0507683		3405.58	0.01015292		3935.58	-0.00315656
225.8	0.0154696		755.79	0.01154827		1285.79	0.00491476		1815.78	0.00941659		2345.78	0.00504027		2875.78	0.05059142		3405.78	0.00970703		3935.78	-0.00311315
226	0.01540537		755.99	0.01170335		1285.99	0.00452863		1815.98	0.00990074		2345.98	0.00391223		2875.98	0.05146436		3405.98	0.00964634		3935.98	-0.00333184
226.2	0.0157764		756.19	0.01108477		1286.19	0.0044509		1816.18	0.00966729		2346.18	0.00368817		2876.18	0.05212499		3406.18	0.00891589		3936.18	-0.00285407
226.4	0.01661086		756.39	0.01107897		1286.39	0.00467465		1816.38	0.01048053		2346.38	0.00294773		2876.38	0.05230492		3406.38	0.00838558		3936.38	-0.00278671
226.6	0.01649017		756.59	0.01105239		1286.59	0.00312052		1816.58	0.01067476		2346.58	0.00164883		2876.58	0.05152968		3406.58	0.00830162		3936.58	-0.00334723
226.8	0.01703074		756.79	0.01119035		1286.79	0.00255956		1816.78	0.01067713		2346.78	0.00114252		2876.78	0.05259529		3406.78	0.00839958		3936.78	-0.00275648
227	0.01723117		756.99	0.01116737		1286.99	0.00231055		1816.98	0.0109228		2346.98	-0.00024978		2876.98	0.05242775		3406.98	0.00839318		3936.98	-0.00352209
227.2	0.01801807		757.19	0.01112068		1287.19	0.00250883		1817.18	0.0103559		2347.18	-0.00164463		2877.18	0.05315456		3407.18	0.00882976		3937.18	-0.00407401
227.4	0.01880881		757.39	0.01114264		1287.39	0.00179082		1817.38	0.01032407		2347.38	-0.00260398		2877.38	0.05365611		3407.38	0.00949362		3937.38	-0.003435
227.6	0.01818816		757.59	0.01122114		1287.59	0.00158475		1817.58	0.01023898		2347.58	-0.00191473		2877.58	0.0538433		3407.58	0.01014977		3937.58	-0.00310116
227.8	0.01854628		757.79	0.01098392		1287.79	0.00181729		1817.78	0.00963493		2347.78	-0.00207597		2877.78	0.05421546		3407.78	0.01054579		3937.78	-0.00420102
228	0.01880106		757.99	0.01129622		1287.99	0.00128932		1817.98	0.00887829		2347.98	-0.00141637		2877.98	0.05443388		3407.98	0.01072691		3937.98	-0.00518418
228.2	0.01787545		758.19	0.01173362		1288.19	0.00130173		1818.18	0.00769918		2348.18	-0.00085737		2878.18	0.05424086		3408.18	0.01108545		3938.18	-0.00470708
228.4	0.01686997		758.39	0.01165425		1288.39	0.00098621		1818.38	0.00781174		2348.38	0.00023111		2878.38	0.05356617		3408.38	0.01135873		3938.38	-0.00494636
228.6	0.01634625		758.59	0.01155307		1288.59	0.00078268		1818.58	0.00790884		2348.58	0.00123371		2878.58	0.05358839		3408.58	0.01166221		3938.58	-0.00596817
228.8	0.01625		758.79	0.01258229		1288.79	-0.00009909		1818.78	0.00812812		2348.78	0.00279345		2878.78	0.05358686		3408.78	0.01180041		3938.78	-0.00576199
229	0.01559073		758.99	0.01244203		1288.99	-0.0000338		1818.98	0.00785987		2348.98	0.00427218		2878.98	0.05346036		3408.98	0.01170819		3938.98	-0.00614565
229.2	0.0145869		759.19	0.01282523		1289.19	0.00044717		1819.18	0.00834935		2349.18	0.00519075		2879.18	0.05437974		3409.18	0.01152031		3939.18	-0.00574756
229.4	0.01377704		759.39	0.01273847		1289.39	0.00128753		1819.38	0.00797004		2349.38	0.00623832		2879.38	0.05504564		3409.38	0.01005833		3939.38	-0.00550718
229.6	0.0126166		759.59	0.01240755		1289.59	0.00095442		1819.58	0.00760499		2349.58	0.00694641		2879.58	0.05582408		3409.58	0.00932723		3939.58	-0.00464485
229.8	0.01239579		759.79	0.0125113		1289.79	0.00114966		1819.78	0.00822596		2349.78	0.00681266		2879.78	0.05666369		3409.78	0.00895892		3939.78	-0.00517926
230	0.01204658		759.99	0.01190136		1289.99	0.00124718		1819.98	0.00785251		2349.98	0.00564815		2879.98	0.0575264		3409.98	0.00912195		3939.98	-0.00515391
230.2	0.01244869		760.19	0.01130811		1290.19	0.0023006		1820.18	0.00679472		2350.18	0.00583415		2880.18	0.05742139		3410.18	0.00826766		3940.18	-0.00540817
230.4	0.01321375		760.39	0.01184975		1290.39	0.0027868		1820.38	0.00700381		2350.38	0.00579261		2880.38	0.05640306		3410.38	0.0080868		3940.38	-0.00578389
230.6	0.01378336		760.59	0.0123936		1290.59	0.00254051		1820.58	0.00718499		2350.58	0.00480676		2880.58	0.05597794		3410.58	0.00782788		3940.58	-0.00562986
230.8	0.01436324		760.79	0.01290065		1290.79	0.00288933		1820.78	0.00720881		2350.78	0.00375241		2880.78	0.05621917		3410.78	0.00824542		3940.78	-0.00581793
231	0.01465044		760.99	0.01267553		1290.99	0.00460625		1820.98	0.00723925		2350.98	0.00349402		2880.98	0.05583667		3410.98	0.00819591		3940.98	-0.00617621
231.2	0.01522552		761.19	0.01285259		1291.19	0.00473168		1821.18	0.00662988		2351.18	0.00233921		2881.18	0.05588337		3411.18	0.00857574		3941.18	-0.00719882
231.4	0.01553804		761.39	0.01329116		1291.39	0.00445369		1821.38	0.00636429		2351.38	0.00189321		2881.38	0.05610371		3411.38	0.00962606		3941.38	-0.00663115
231.6	0.01603004		761.59	0.01403305		1291.59	0.00420253		1821.58	0.00684865		2351.58	0.00198105		2881.58	0.05565331		3411.58	0.01019888		3941.58	-0.00752424
231.8	0.01688816		761.79	0.01438443		1291.79	0.00444822		1821.78	0.00724733		2351.78	0.00223116		2881.78	0.05608184		3411.78	0.01030756		3941.78	-0.00767594
232	0.0168773		761.99	0.01417133		1291.99	0.00336088		1821.98	0.00757115		2351.98	0.00194014		2881.98	0.05546528		3411.98	0.01118936		3941.98	-0.00680835
232.2	0.01625461		762.19	0.01375728		1292.19	0.00334745		1822.18	0.00714593		2352.18	0.00150244		2882.18	0.05518739		3412.18	0.01160394		3942.18	-0.00597955
232.4	0.01522545		762.39	0.01434142		1292.39	0.002985		1822.38	0.00840037		2352.38	0.00064578		2882.38	0.05603626		3412.38	0.01220094		3942.38	-0.00556442
232.6	0.01544693		762.59	0.01344973		1292.59	0.00274421		1822.58	0.00811704		2352.58	0.00051081		2882.58	0.0567042		3412.58	0.012583		3942.58	-0.00559474
232.8	0.01492151		762.79	0.01376781		1292.79	0.0025422		1822.78	0.0081793		2352.78	-0.00012335		2882.78	0.05641018		3412.78	0.01322313		3942.78	-0.00469677
233	0.01478929		762.99	0.01270448		1292.99	0.00330346		1822.98	0.00830765		2352.98	0.00087929		2882.98	0.0567551		3412.98	0.01266068		3942.98	-0.00369325
233.2	0.01470634		763.19	0.01302736		1293.19	0.00284817		1823.18	0.00791661		2353.18	0.00088883		2883.18	0.05721974		3413.18	0.01247252		3943.18	-0.00327313
233.4	0.01344623		763.39	0.01283179		1293.39	0.00298111		1823.38	0.00692563		2353.38	0.00123314		2883.38	0.05793715		3413.38	0.01232583		3943.38	-0.0022698
233.6	0.01209085		763.59	0.01265683		1293.59	0.00251859		1823.58	0.00709353		2353.58	0.00101683		2883.58	0.05850042		3413.58	0.01264336		3943.58	-0.00228214
233.8	0.012839		763.79	0.01320674		1293.79	0.00295207		1823.78	0.00620744		2353.78	0.00073042		2883.78	0.05881837		3413.78	0.01250739		3943.78	-0.00286932
234	0.01274081		763.99	0.01311489		1293.99	0.00422542		1823.98	0.00549264		2353.98	0.001043		2883.98	0.05923051		3413.98	0.01198764		3943.98	-0.00281091
234.2	0.01403733		764.19	0.01340102		1294.19	0.00441981		1824.18	0.004481		2354.18	0.00177431		2884.18	0.05946316		3414.18	0.01040098		3944.18	-0.00303649
234.4	0.01466609		764.39	0.01356648		1294.39	0.00457669		1824.38	0.00457806		2354.38	0.00240169		2884.38	0.05919358		3414.38	0.010808		3944.38	-0.00335393
234.6	0.01514691		764.59	0.01410927		1294.59	0.00492288		1824.58	0.00470425		2354.58	0.00246016		2884.58	0.05960923		3414.58	0.01058148		3944.58	-0.00389771
234.8	0.01611029		764.79	0.01414431		1294.79	0.00554018		1824.78	0.0046182		2354.78	0.00317071		2884.78	0.05957214		3414.78	0.00967257		3944.78	-0.00523122
235	0.0161705		764.99	0.0137032		1294.99	0.00587574		1824.98	0.00490539		2354.98	0.00422362		2884.98	0.0589379		3414.98	0.00866496		3944.98	-0.00605204
235.2	0.01720579		765.19	0.01415929		1295.19	0.00581312		1825.18	0.00460628		2355.18	0.0042542		2885.18	0.05913833		3415.18	0.00913127		3945.18	-0.00732535
235.4	0.01808653		765.39	0.01466792		1295.39	0.00681455		1825.38	0.00532408		2355.38	0.00515999		2885.38	0.05920695		3415.38	0.00961783		3945.38	-0.00776735
235.6	0.01860152		765.59	0.01462389		1295.59	0.00696857		1825.58	0.00605432		2355.58	0.0060433		2885.58	0.05967044		3415.58	0.00922744		3945.58	-0.00838214
235.8	0.01841036		765.79	0.01429648		1295.79	0.00689248		1825.78	0.00641601		2355.78	0.00528224		2885.78	0.05981307		3415.78	0.00958858		3945.78	-0.00854003
236	0.01822873		765.99	0.01394082		1295.99	0.00648535		1825.98	0.00664204		2355.98	0.00429184		2885.98	0.05988129		3415.98	0.0104073		3945.98	-0.0082078
236.2	0.01747063		766.19	0.01396657		1296.19	0.00647581		1826.18	0.0064334		2356.18	0.00417862		2886.18	0.06073642		3416.18	0.01094896		3946.18	-0.00804176
236.4	0.01682782		766.39	0.01377442		1296.39	0.00665946		1826.38	0.0076057		2356.38	0.00340462		2886.38	0.06227126		3416.38	0.01141663		3946.38	-0.00799912
236.6	0.01716341		766.59	0.01307805		1296.59	0.00693996		1826.58	0.00735736		2356.58	0.00282447		2886.58	0.06227529		3416.58	0.01208317		3946.58	-0.00748803
236.8	0.01646239		766.79	0.01365895		1296.79	0.00670402		1826.78	0.00701926		2356.78	0.00165678		2886.78	0.06262772		3416.78	0.01184988		3946.78	-0.00726148
237	0.01573655		766.99	0.01359541		1296.99	0.00702592		1826.98	0.00754483		2356.98	0.0020224		2886.98	0.06353012		3416.98	0.01190528		3946.98	-0.00665027
237.2	0.01456633		767.19	0.01382924		1297.19	0.00602275		1827.18	0.00702813		2357.18	0.00084278		2887.18	0.06380998		3417.18	0.01245031		3947.18	-0.00691655
237.4	0.01316862		767.39	0.01318785		1297.39	0.00654427		1827.38	0.00755936		2357.38	0.00028298		2887.38	0.06407742		3417.38	0.01297534		3947.38	-0.00587388
237.6	0.01228944		767.59	0.01276537		1297.59	0.00614441		1827.58	0.00704004		2357.58	0.00000778		2887.58	0.06439458		3417.58	0.01290295		3947.58	-0.00575436
237.8	0.01237659		767.79	0.01252098		1297.79	0.00595498		1827.78	0.00655785		2357.78	-0.00035949		2887.78	0.06412143		3417.78	0.01175625		3947.78	-0.0055753
238	0.01242056		767.99	0.0114216		1297.99	0.00597688		1827.98	0.00710679		2357.98	-0.00075995		2887.98	0.06417622		3417.98	0.01105826		3947.98	-0.00503709
238.2	0.01284383		768.19	0.01070257		1298.19	0.00515728		1828.18	0.00672161		2358.18	-0.00021875		2888.18	0.06388181		3418.18	0.01141178		3948.18	-0.0053363
238.4	0.01263615		768.39	0.00961709		1298.39	0.00504365		1828.38	0.00760499		2358.38	0.00067119		2888.38	0.06349548		3418.38	0.01224093		3948.38	-0.00568631
238.6	0.01251648		768.59	0.00960637		1298.59	0.004251		1828.58	0.00724904		2358.58	0.00029664		2888.58	0.06387962		3418.58	0.01160557		3948.58	-0.00623895
238.8	0.01261218		768.79	0.00889448		1298.79	0.00383707		1828.78	0.00781		2358.78	0.00104874		2888.78	0.06361819		3418.78	0.0120574		3948.78	-0.00772239
239	0.01222195		768.99	0.00840121		1298.99	0.0034305		1828.98	0.00779693		2358.98	0.00117779		2888.98	0.06394196		3418.98	0.0126959		3948.98	-0.00824611
239.2	0.01257148		769.19	0.00808146		1299.19	0.00509009		1829.18	0.00727637		2359.18	0.00125519		2889.18	0.06413821		3419.18	0.01407836		3949.18	-0.00855162
239.4	0.01287115		769.39	0.00849757		1299.39	0.005511		1829.38	0.00698571		2359.38	0.00141455		2889.38	0.06403941		3419.38	0.01452236		3949.38	-0.00877664
239.6	0.01321267		769.59	0.00850351		1299.59	0.00524409		1829.58	0.0061632		2359.58	0.00131196		2889.58	0.06519337		3419.58	0.01443397		3949.58	-0.00884092
239.8	0.01350966		769.79	0.00848514		1299.79	0.0046045		1829.78	0.00609773		2359.78	0.00029842		2889.78	0.06557041		3419.78	0.01495044		3949.78	-0.00920936
240	0.01448563		769.99	0.0077051		1299.99	0.00446941		1829.98	0.00561087		2359.98	0.00040597		2889.98	0.06633447		3419.98	0.01458907		3949.98	-0.00918378
240.2	0.01431		770.19	0.00846813		1300.19	0.00335434		1830.18	0.00501716		2360.18	0.00069638		2890.18	0.06794061		3420.18	0.01422006		3950.18	-0.00969755
240.4	0.01519405		770.39	0.0083084		1300.39	0.00343075		1830.38	0.00597632		2360.38	0.00031658		2890.38	0.06835727		3420.38	0.01363942		3950.38	-0.00923108
240.6	0.01573269		770.59	0.00921193		1300.59	0.00411373		1830.58	0.00601618		2360.58	0.00072313		2890.58	0.06776233		3420.58	0.01282284		3950.58	-0.00794677
240.8	0.01523151		770.79	0.00945921		1300.79	0.00407361		1830.78	0.00664112		2360.78	0.00108457		2890.78	0.06789947		3420.78	0.01176532		3950.78	-0.00756687
241	0.01508596		770.99	0.01007824		1300.99	0.00498925		1830.98	0.00729478		2360.98	0.00136905		2890.98	0.06873242		3420.98	0.01185404		3950.98	-0.00688622
241.2	0.01605782		771.19	0.00997842		1301.19	0.00546772		1831.18	0.00689708		2361.18	0.00117495		2891.18	0.06770645		3421.18	0.01134807		3951.18	-0.00651985
241.4	0.0166416		771.39	0.01026255		1301.39	0.00622092		1831.38	0.00786681		2361.38	0.0011905		2891.38	0.06760554		3421.38	0.01122424		3951.38	-0.0060915
241.6	0.01620979		771.59	0.01037546		1301.59	0.00560145		1831.58	0.00740294		2361.58	0.0018245		2891.58	0.06801632		3421.58	0.01051385		3951.58	-0.00593402
241.8	0.01679019		771.79	0.01066946		1301.79	0.00544447		1831.78	0.00781815		2361.78	0.00207429		2891.78	0.06757311		3421.78	0.01018542		3951.78	-0.00558156
242	0.0172894		771.99	0.01043058		1301.99	0.0053411		1831.98	0.00802667		2361.98	0.00181791		2891.98	0.06811795		3421.98	0.01046942		3951.98	-0.00529625
242.2	0.01764299		772.19	0.01070546		1302.19	0.00491637		1832.18	0.00826722		2362.18	0.00273425		2892.18	0.06765747		3422.18	0.0114452		3952.18	-0.00588099
242.4	0.01810339		772.39	0.01044797		1302.39	0.00452237		1832.38	0.00786944		2362.38	0.00267371		2892.38	0.06750018		3422.38	0.01176884		3952.38	-0.00580192
242.6	0.01867433		772.59	0.01049443		1302.59	0.00439223		1832.58	0.0075996		2362.58	0.00197625		2892.58	0.06810761		3422.58	0.01244518		3952.58	-0.00618819
242.8	0.01857203		772.79	0.01031546		1302.79	0.00495389		1832.78	0.00686219		2362.78	0.00206785		2892.78	0.0686903		3422.78	0.01267679		3952.78	-0.00735153
243	0.01885277		772.99	0.01062655		1302.99	0.00460905		1832.98	0.00554814		2362.98	0.00197767		2892.98	0.06882069		3422.98	0.01218162		3952.98	-0.00688152
243.2	0.01897529		773.19	0.01113971		1303.19	0.00501677		1833.18	0.00479314		2363.18	0.00216878		2893.18	0.06816666		3423.18	0.01240796		3953.18	-0.0071647
243.4	0.01845924		773.39	0.01236101		1303.39	0.00466347		1833.38	0.00434883		2363.38	0.00158726		2893.38	0.06865842		3423.38	0.01222557		3953.38	-0.00717206
243.6	0.01845621		773.59	0.01199751		1303.59	0.00390759		1833.58	0.00430815		2363.58	0.00087672		2893.58	0.06998632		3423.58	0.01147804		3953.58	-0.00734613
243.8	0.01845124		773.79	0.0116113		1303.79	0.00289688		1833.78	0.004372		2363.78	0.00115023		2893.78	0.06981573		3423.78	0.01145339		3953.78	-0.0080238
244	0.01835784		773.99	0.01168077		1303.99	0.00197288		1833.98	0.00432856		2363.98	0.001535		2893.98	0.06948496		3423.98	0.01105162		3953.98	-0.00744281
244.2	0.01736958		774.19	0.01283083		1304.19	0.00067814		1834.18	0.00478626		2364.18	0.00231223		2894.18	0.06984887		3424.18	0.01073176		3954.18	-0.0076868
244.4	0.01678212		774.39	0.01312563		1304.39	0.00164613		1834.38	0.00561412		2364.38	0.00193004		2894.38	0.0693252		3424.38	0.01043759		3954.38	-0.0072046
244.6	0.01552832		774.59	0.01320164		1304.59	0.00268143		1834.58	0.0055224		2364.58	0.0019696		2894.58	0.06889993		3424.58	0.00991471		3954.58	-0.00719786
244.8	0.01424925		774.79	0.01295576		1304.79	0.00313443		1834.78	0.00601619		2364.78	0.0019628		2894.78	0.06994919		3424.78	0.00971423		3954.78	-0.00801044
245	0.01376048		774.99	0.01389149		1304.99	0.00373991		1834.98	0.00612214		2364.98	0.00226568		2894.98	0.07088047		3424.98	0.00970025		3954.98	-0.00790504
245.2	0.01308253		775.19	0.01302458		1305.19	0.00442842		1835.18	0.0071575		2365.18	0.00208251		2895.18	0.07062406		3425.18	0.00937284		3955.18	-0.00756117
245.4	0.0126213		775.39	0.01358251		1305.39	0.00398026		1835.38	0.00820466		2365.38	0.00207631		2895.38	0.07211254		3425.38	0.00970106		3955.38	-0.00732546
245.6	0.01172628		775.59	0.01288762		1305.59	0.00404355		1835.58	0.00809106		2365.58	0.00252817		2895.58	0.07317605		3425.58	0.0101021		3955.58	-0.00687161
245.8	0.01263437		775.79	0.0129856		1305.79	0.00483198		1835.78	0.00878286		2365.78	0.0023965		2895.78	0.07319654		3425.78	0.0109729		3955.78	-0.00793974
246	0.01375537		775.99	0.01205945		1305.99	0.00511338		1835.98	0.00884111		2365.98	0.0020828		2895.98	0.07379107		3425.98	0.01107649		3955.98	-0.00852678
246.2	0.01475462		776.19	0.01144563		1306.19	0.00475413		1836.18	0.00896329		2366.18	0.00244787		2896.18	0.07368169		3426.18	0.011385		3956.18	-0.00906567
246.4	0.01539217		776.39	0.00967308		1306.39	0.00492965		1836.38	0.00842835		2366.38	0.00211703		2896.38	0.07408419		3426.38	0.0115158		3956.38	-0.00887262
246.6	0.01608816		776.59	0.00952553		1306.59	0.00491948		1836.58	0.00910412		2366.58	0.00189593		2896.58	0.07414976		3426.58	0.01250712		3956.58	-0.00905613
246.8	0.0166206		776.79	0.00902269		1306.79	0.00502865		1836.78	0.00823116		2366.78	0.00204169		2896.78	0.07419588		3426.78	0.01171872		3956.78	-0.00973499
247	0.01722708		776.99	0.0086922		1306.99	0.00370094		1836.98	0.00821532		2366.98	0.00231767		2896.98	0.07298099		3426.98	0.01147738		3956.98	-0.0093564
247.2	0.016427		777.19	0.00878929		1307.19	0.00421897		1837.18	0.00865493		2367.18	0.00193039		2897.18	0.07209479		3427.18	0.01123499		3957.18	-0.00908925
247.4	0.01652275		777.39	0.00909584		1307.39	0.00465233		1837.38	0.00918137		2367.38	0.00171605		2897.38	0.07206628		3427.38	0.01224082		3957.38	-0.0077395
247.6	0.01697948		777.59	0.0087551		1307.59	0.00420142		1837.58	0.00959189		2367.58	0.00198506		2897.58	0.07142498		3427.58	0.01171137		3957.58	-0.00728284
247.8	0.01774769		777.79	0.00913961		1307.79	0.00438422		1837.78	0.00955593		2367.78	0.0028622		2897.78	0.07022567		3427.78	0.01234227		3957.78	-0.00691488
248	0.01730056		777.99	0.00881104		1307.99	0.00451111		1837.98	0.00978598		2367.98	0.00249573		2897.98	0.06980352		3427.98	0.01235904		3957.98	-0.00590616
248.2	0.01710056		778.19	0.00953314		1308.19	0.00440787		1838.18	0.01014353		2368.18	0.00162548		2898.18	0.06997896		3428.18	0.01213458		3958.18	-0.00699373
248.4	0.0173311		778.39	0.0106295		1308.39	0.00464121		1838.38	0.01004831		2368.38	0.00053351		2898.38	0.06976578		3428.38	0.01192305		3958.38	-0.00688179
248.6	0.01671953		778.59	0.01122211		1308.59	0.00474304		1838.58	0.00971811		2368.58	0.00041187		2898.58	0.07054161		3428.58	0.01143893		3958.58	-0.00728965
248.8	0.01710254		778.79	0.01177635		1308.79	0.00442318		1838.78	0.01051939		2368.78	0.00055989		2898.78	0.07197666		3428.78	0.0111787		3958.78	-0.00770615
249	0.01711031		778.99	0.01317222		1308.99	0.0046969		1838.98	0.01095974		2368.98	0.00041627		2898.98	0.07254505		3428.98	0.0107516		3958.98	-0.00662937
249.2	0.01719183		779.19	0.01269558		1309.19	0.004914		1839.18	0.01134187		2369.18	0.000065		2899.18	0.07382246		3429.18	0.01061055		3959.18	-0.00701011
249.4	0.01766016		779.39	0.01357666		1309.39	0.00492107		1839.38	0.01136387		2369.38	-0.00018093		2899.38	0.07480798		3429.38	0.01103984		3959.38	-0.00680848
249.6	0.01758659		779.59	0.0138074		1309.59	0.00593909		1839.58	0.01124997		2369.58	-0.00021343		2899.58	0.07562693		3429.58	0.01032417		3959.58	-0.00786268
249.8	0.01736716		779.79	0.01416779		1309.79	0.00637278		1839.78	0.0112065		2369.78	-0.00012583		2899.78	0.07626438		3429.78	0.0107352		3959.78	-0.00865815
250	0.01727087		779.99	0.01330599		1309.99	0.00624304		1839.98	0.0106107		2369.98	0.0000985		2899.98	0.07612667		3429.98	0.01009111		3959.98	-0.00897855
250.2	0.01754311		780.19	0.01254856		1310.19	0.00631806		1840.18	0.01026944		2370.18	0.00012983		2900.18	0.07571743		3430.18	0.01004735		3960.18	-0.00949349
250.4	0.01701655		780.39	0.01241568		1310.39	0.00659313		1840.38	0.01043598		2370.38	-0.00014163		2900.38	0.07590467		3430.38	0.010237		3960.38	-0.00975616
250.6	0.01742399		780.59	0.01292045		1310.59	0.00602228		1840.58	0.01034806		2370.58	0.00022397		2900.58	0.07511628		3430.58	0.01038775		3960.58	-0.01003285
250.8	0.01778247		780.79	0.01266031		1310.79	0.00643055		1840.78	0.00907297		2370.78	0.00035873		2900.78	0.07495552		3430.78	0.00927376		3960.78	-0.01062281
251	0.01783367		780.99	0.01302146		1310.99	0.00538021		1840.98	0.00916301		2370.98	-0.00015119		2900.98	0.07460013		3430.98	0.00976385		3960.98	-0.01001076
251.2	0.01694517		781.19	0.01396984		1311.19	0.00639846		1841.18	0.00899243		2371.18	0.00002412		2901.18	0.07525932		3431.18	0.01032619		3961.18	-0.00939596
251.4	0.01749979		781.39	0.01425181		1311.39	0.00660546		1841.38	0.00939888		2371.38	0.00014255		2901.38	0.07643476		3431.38	0.01108749		3961.38	-0.00824076
251.6	0.01750243		781.59	0.01469836		1311.59	0.00591374		1841.58	0.00930941		2371.58	-0.00035504		2901.58	0.07601906		3431.58	0.01090927		3961.58	-0.00835395
251.8	0.01775451		781.79	0.0148865		1311.79	0.00557773		1841.78	0.00981546		2371.78	-0.00019038		2901.78	0.07595876		3431.78	0.01157843		3961.78	-0.00734078
252	0.01787566		781.99	0.01515154		1311.99	0.00482869		1841.98	0.00932138		2371.98	-0.00109325		2901.98	0.07617889		3431.98	0.01234608		3961.98	-0.0065603
252.2	0.0184094		782.19	0.01700012		1312.19	0.00390279		1842.18	0.00930772		2372.18	-0.00143583		2902.18	0.07636175		3432.18	0.01240375		3962.18	-0.00747848
252.4	0.01940048		782.39	0.01709126		1312.39	0.0028462		1842.38	0.00877752		2372.38	-0.00178186		2902.38	0.07655123		3432.38	0.01243446		3962.38	-0.00681718
252.6	0.01932799		782.59	0.01634773		1312.59	0.00289048		1842.58	0.0086853		2372.58	-0.00132333		2902.58	0.0778563		3432.58	0.01282837		3962.58	-0.00804896
252.8	0.01991096		782.79	0.01599172		1312.79	0.0030089		1842.78	0.00879572		2372.78	-0.00063965		2902.78	0.0773038		3432.78	0.01301059		3962.78	-0.00792249
253	0.02018463		782.99	0.01606117		1312.99	0.00339453		1842.98	0.00813038		2372.98	-0.00011761		2902.98	0.07734904		3432.98	0.01309744		3962.98	-0.0077601
253.2	0.02049168		783.19	0.015203		1313.19	0.00328158		1843.18	0.00762244		2373.18	0.00016911		2903.18	0.07760212		3433.18	0.01351923		3963.18	-0.00922067
253.4	0.01976458		783.39	0.01487005		1313.39	0.00320351		1843.38	0.00762503		2373.38	0.00019732		2903.38	0.07757759		3433.38	0.01378187		3963.38	-0.00955949
253.6	0.01910037		783.59	0.01406131		1313.59	0.00377866		1843.58	0.00740528		2373.58	0.00019123		2903.58	0.07719299		3433.58	0.01280872		3963.58	-0.0102471
253.8	0.01866683		783.79	0.01270699		1313.79	0.00407704		1843.78	0.00726636		2373.78	0.00041352		2903.78	0.07641604		3433.78	0.01328889		3963.78	-0.01018491
254	0.01871711		783.99	0.0107098		1313.99	0.00392102		1843.98	0.00760609		2373.98	0.0003206		2903.98	0.07481493		3433.98	0.01327208		3963.98	-0.01106057
254.2	0.01825312		784.19	0.01027666		1314.19	0.00428843		1844.18	0.00794177		2374.18	0.00073951		2904.18	0.0733253		3434.18	0.01306122		3964.18	-0.01101544
254.4	0.01765408		784.39	0.01010203		1314.39	0.00381355		1844.38	0.00830752		2374.38	0.00011932		2904.38	0.07268114		3434.38	0.0125915		3964.38	-0.01201652
254.6	0.01792454		784.59	0.01000065		1314.59	0.00412478		1844.58	0.00848072		2374.58	0.00058704		2904.58	0.0718619		3434.58	0.01280613		3964.58	-0.01144918
254.8	0.01753122		784.79	0.00991735		1314.79	0.00516081		1844.78	0.00845669		2374.78	0.00051969		2904.78	0.07244853		3434.78	0.01291735		3964.78	-0.01137061
255	0.01736501		784.99	0.00994747		1314.99	0.00438999		1844.98	0.008711		2374.98	-0.00028609		2904.98	0.07358963		3434.98	0.01319609		3964.98	-0.01045791
255.2	0.01668309		785.19	0.01103654		1315.19	0.00470269		1845.18	0.00875436		2375.18	-0.00086401		2905.18	0.07350398		3435.18	0.01246799		3965.18	-0.01064571
255.4	0.01711835		785.39	0.01127074		1315.39	0.00524772		1845.38	0.00920139		2375.38	-0.0015597		2905.38	0.07345169		3435.38	0.01178797		3965.38	-0.01009845
255.6	0.01724383		785.59	0.01210071		1315.59	0.00541831		1845.58	0.00879835		2375.58	-0.00169412		2905.58	0.07349868		3435.58	0.01185929		3965.58	-0.00962406
255.8	0.01632981		785.79	0.01208576		1315.79	0.00544011		1845.78	0.00913794		2375.78	-0.00130764		2905.78	0.07423171		3435.78	0.01130569		3965.78	-0.00793511
256	0.01694563		785.99	0.01217933		1315.99	0.00482858		1845.98	0.00833406		2375.98	-0.00205622		2905.98	0.07450452		3435.98	0.01147591		3965.98	-0.00790789
256.2	0.01727154		786.19	0.01211042		1316.19	0.00519651		1846.18	0.0086554		2376.18	-0.00218826		2906.18	0.07486937		3436.18	0.01107441		3966.18	-0.00884931
256.4	0.01804995		786.39	0.01149723		1316.39	0.00551693		1846.38	0.00812531		2376.38	-0.00256689		2906.38	0.07546925		3436.38	0.01162604		3966.38	-0.00798084
256.6	0.01820211		786.59	0.01055956		1316.59	0.00611773		1846.58	0.00768533		2376.58	-0.00247315		2906.58	0.07652599		3436.58	0.0120388		3966.58	-0.00804352
256.8	0.01895063		786.79	0.01114153		1316.79	0.00655128		1846.78	0.00758061		2376.78	-0.00204541		2906.78	0.07710878		3436.78	0.01233241		3966.78	-0.00739237
257	0.01937463		786.99	0.01080494		1316.99	0.00659326		1846.98	0.00758171		2376.98	-0.00218813		2906.98	0.07823427		3436.98	0.01164927		3966.98	-0.00766908
257.2	0.01778028		787.19	0.01102695		1317.19	0.00680137		1847.18	0.00733475		2377.18	-0.00207227		2907.18	0.07917282		3437.18	0.01234681		3967.18	-0.00858858
257.4	0.01727507		787.39	0.01136172		1317.39	0.00644498		1847.38	0.00810102		2377.38	-0.00199908		2907.38	0.07951077		3437.38	0.01249348		3967.38	-0.00825852
257.6	0.01732357		787.59	0.01066801		1317.59	0.00669564		1847.58	0.00891865		2377.58	-0.00183541		2907.58	0.07885947		3437.58	0.01183223		3967.58	-0.00779955
257.8	0.0169779		787.79	0.01049499		1317.79	0.00703412		1847.78	0.00902454		2377.78	-0.00116375		2907.78	0.07889754		3437.78	0.01195749		3967.78	-0.00739507
258	0.01684557		787.99	0.01116557		1317.99	0.00663816		1847.98	0.00905824		2377.98	-0.00084031		2907.98	0.07892834		3437.98	0.01244628		3967.98	-0.00684901
258.2	0.01695442		788.19	0.011564		1318.19	0.00708866		1848.18	0.00908951		2378.18	-0.00087832		2908.18	0.07854656		3438.18	0.01221963		3968.18	-0.00696701
258.4	0.0169339		788.39	0.01114698		1318.39	0.00707256		1848.38	0.00862729		2378.38	-0.00046445		2908.38	0.07883723		3438.38	0.01169022		3968.38	-0.00700359
258.6	0.016251		788.59	0.01145875		1318.59	0.00769376		1848.58	0.00873336		2378.58	0.000465		2908.58	0.07949079		3438.58	0.01203139		3968.58	-0.00654666
258.8	0.01664088		788.79	0.01204333		1318.79	0.00660171		1848.78	0.008528		2378.78	0.00037507		2908.78	0.07983987		3438.78	0.01112985		3968.78	-0.00741812
259	0.01734091		788.99	0.01219396		1318.99	0.00544526		1848.98	0.00719834		2378.98	0.00003994		2908.98	0.07960859		3438.98	0.01094244		3968.98	-0.00770008
259.2	0.01731554		789.19	0.01316535		1319.19	0.00528424		1849.18	0.00750539		2379.18	0.00011479		2909.18	0.07769597		3439.18	0.00999761		3969.18	-0.00908814
259.4	0.01779562		789.39	0.01323696		1319.39	0.0051927		1849.38	0.00715082		2379.38	0.0009247		2909.38	0.07795844		3439.38	0.00931173		3969.38	-0.008868
259.6	0.01770971		789.59	0.01308135		1319.59	0.00525221		1849.58	0.00656854		2379.58	0.0014527		2909.58	0.07882837		3439.58	0.00972753		3969.58	-0.00950115
259.8	0.01750519		789.79	0.0135027		1319.79	0.00418388		1849.78	0.00728871		2379.78	0.00203965		2909.78	0.07890888		3439.78	0.00915903		3969.78	-0.00953249
260	0.01764721		789.99	0.01279502		1319.99	0.00350368		1849.98	0.00722989		2379.98	0.00091626		2909.98	0.07854484		3439.98	0.00993891		3969.98	-0.00958817
260.2	0.01787485		790.19	0.0124865		1320.19	0.00381819		1850.18	0.00770136		2380.18	0.00024841		2910.18	0.07939431		3440.18	0.01067323		3970.18	-0.00982123
260.4	0.01838521		790.39	0.01203934		1320.39	0.00381023		1850.38	0.00833209		2380.38	-0.00001367		2910.38	0.08016555		3440.38	0.01198111		3970.38	-0.00969543
260.6	0.0182492		790.59	0.01122017		1320.59	0.00456823		1850.58	0.00860289		2380.58	0.00010999		2910.58	0.08058671		3440.58	0.01257788		3970.58	-0.00995795
260.8	0.01868815		790.79	0.01131846		1320.79	0.00545734		1850.78	0.00954522		2380.78	0.00079147		2910.78	0.08087857		3440.78	0.0131984		3970.78	-0.01040616
261	0.01830585		790.99	0.01086122		1320.99	0.00604803		1850.98	0.00994023		2380.98	0.00063303		2910.98	0.08049862		3440.98	0.0133574		3970.98	-0.01072365
261.2	0.01761197		791.19	0.01072978		1321.19	0.00560962		1851.18	0.01032359		2381.18	0.0008546		2911.18	0.08039336		3441.18	0.01417486		3971.18	-0.01095288
261.4	0.01889214		791.39	0.01060663		1321.39	0.00566197		1851.38	0.01098808		2381.38	0.00079741		2911.38	0.0805376		3441.38	0.01317281		3971.38	-0.01033328
261.6	0.01905308		791.59	0.01028298		1321.59	0.00615546		1851.58	0.01208554		2381.58	0.00083865		2911.58	0.08022947		3441.58	0.01292922		3971.58	-0.01008381
261.8	0.01936604		791.79	0.01024678		1321.79	0.00638593		1851.78	0.01163001		2381.78	0.00050826		2911.78	0.08126021		3441.78	0.0129099		3971.78	-0.00983699
262	0.01998845		791.99	0.01066751		1321.99	0.00652692		1851.98	0.01236486		2381.98	0.00017415		2911.98	0.08154409		3441.98	0.01265892		3971.98	-0.00953107
262.2	0.02086806		792.19	0.00955126		1322.19	0.00633717		1852.18	0.01248711		2382.18	0.00057021		2912.18	0.08171579		3442.18	0.01253586		3972.18	-0.00987408
262.4	0.02073984		792.39	0.00928999		1322.39	0.00627208		1852.38	0.0129075		2382.38	0.00087736		2912.38	0.08200988		3442.38	0.01114723		3972.38	-0.00975094
262.6	0.02016284		792.59	0.01026591		1322.59	0.00666869		1852.58	0.01251485		2382.58	0.00096169		2912.58	0.08167053		3442.58	0.01163657		3972.58	-0.00957167
262.8	0.02124746		792.79	0.01214377		1322.79	0.00579488		1852.78	0.01226157		2382.78	0.00063214		2912.78	0.08093499		3442.78	0.01127099		3972.78	-0.00913813
263	0.02072354		792.99	0.01220761		1322.99	0.00591745		1852.98	0.01149432		2382.98	0.00055913		2912.98	0.08087084		3442.98	0.01059331		3972.98	-0.00884147
263.2	0.01952512		793.19	0.01308667		1323.19	0.00555977		1853.18	0.01216613		2383.18	0.00023472		2913.18	0.08072974		3443.18	0.01023072		3973.18	-0.00913539
263.4	0.01999671		793.39	0.01400522		1323.39	0.00550751		1853.38	0.01203109		2383.38	0.00066324		2913.38	0.08217477		3443.38	0.01030486		3973.38	-0.00803246
263.6	0.01967022		793.59	0.01466942		1323.59	0.0056755		1853.58	0.01084962		2383.58	0.00062714		2913.58	0.08324097		3443.58	0.0108152		3973.58	-0.00843978
263.8	0.01852666		793.79	0.01547355		1323.79	0.0047886		1853.78	0.0106581		2383.78	0.00050342		2913.78	0.08382652		3443.78	0.0103519		3973.78	-0.00732169
264	0.01733829		793.99	0.01486146		1323.99	0.00436954		1853.98	0.00990797		2383.98	0.00017076		2913.98	0.08409831		3443.98	0.01148358		3973.98	-0.00696537
264.2	0.01722651		794.19	0.01520345		1324.19	0.00481267		1854.18	0.00942451		2384.18	0.00030096		2914.18	0.08446028		3444.18	0.01159207		3974.18	-0.00723867
264.4	0.01739295		794.39	0.01541509		1324.39	0.00514772		1854.38	0.00953093		2384.38	0.00057138		2914.38	0.08424986		3444.38	0.01209279		3974.38	-0.00760108
264.6	0.01710646		794.59	0.01568462		1324.59	0.00581465		1854.58	0.00847198		2384.58	0.00057949		2914.58	0.08412436		3444.58	0.01202947		3974.58	-0.00736556
264.8	0.01731427		794.79	0.01542941		1324.79	0.00536111		1854.78	0.00791118		2384.78	0.00008978		2914.78	0.0835164		3444.78	0.01220204		3974.78	-0.0070541
265	0.01732274		794.99	0.01589857		1324.99	0.00526764		1854.98	0.00764006		2384.98	-0.000941		2914.98	0.08368931		3444.98	0.01228515		3974.98	-0.00704935
265.2	0.0166613		795.19	0.01507198		1325.19	0.00401889		1855.18	0.00694359		2385.18	-0.00134228		2915.18	0.08357027		3445.18	0.01177133		3975.18	-0.00730331
265.4	0.01729462		795.39	0.01463444		1325.39	0.00408424		1855.38	0.00655774		2385.38	-0.00151954		2915.38	0.08339333		3445.38	0.01125222		3975.38	-0.00755459
265.6	0.01703638		795.59	0.01400482		1325.59	0.00341403		1855.58	0.00643572		2385.58	-0.00142238		2915.58	0.08274604		3445.58	0.01135405		3975.58	-0.00764724
265.8	0.01742774		795.79	0.01321266		1325.79	0.00387947		1855.78	0.00622387		2385.78	-0.0016264		2915.78	0.08302317		3445.78	0.01066228		3975.78	-0.00776314
266	0.01786527		795.99	0.01333976		1325.99	0.00465517		1855.98	0.00677369		2385.98	-0.0016753		2915.98	0.08256719		3445.98	0.0107865		3975.98	-0.00826696
266.2	0.01801183		796.19	0.01336552		1326.19	0.00459811		1856.18	0.00600742		2386.18	-0.00042382		2916.18	0.08267588		3446.18	0.01110196		3976.18	-0.00829871
266.4	0.0176067		796.39	0.01354791		1326.39	0.00599954		1856.38	0.00657321		2386.38	-0.00057762		2916.38	0.08239167		3446.38	0.0109041		3976.38	-0.00759891
266.6	0.01760765		796.59	0.01447621		1326.59	0.00663689		1856.58	0.00631152		2386.58	0.00038253		2916.58	0.08295836		3446.58	0.01200215		3976.58	-0.00680274
266.8	0.01783514		796.79	0.01472836		1326.79	0.00646758		1856.78	0.00743283		2386.78	0.00028144		2916.78	0.08347366		3446.78	0.01233111		3976.78	-0.00719887
267	0.01748807		796.99	0.01387776		1326.99	0.00682214		1856.98	0.00797198		2386.98	0.00026158		2916.98	0.08442251		3446.98	0.01228849		3976.98	-0.00761853
267.2	0.01767092		797.19	0.01383214		1327.19	0.00724366		1857.18	0.00888722		2387.18	0.000557		2917.18	0.08594949		3447.18	0.01383053		3977.18	-0.00801338
267.4	0.0193857		797.39	0.01378277		1327.39	0.00680179		1857.38	0.00952371		2387.38	0.00134306		2917.38	0.08713757		3447.38	0.01421869		3977.38	-0.00871318
267.6	0.01953808		797.59	0.01369365		1327.59	0.00692211		1857.58	0.00908772		2387.58	0.00104621		2917.58	0.08858667		3447.58	0.01424002		3977.58	-0.01000307
267.8	0.01877516		797.79	0.01294418		1327.79	0.00673251		1857.78	0.01037829		2387.78	0.00105403		2917.78	0.08924643		3447.78	0.01483019		3977.78	-0.01066297
268	0.01920196		797.99	0.01244457		1327.99	0.00660915		1857.98	0.01145717		2387.98	0.00091566		2917.98	0.08929446		3447.98	0.01517588		3977.98	-0.01165435
268.2	0.01981285		798.19	0.01273995		1328.19	0.00686365		1858.18	0.01199237		2388.18	0.00023321		2918.18	0.09051078		3448.18	0.0146565		3978.18	-0.01265266
268.4	0.01962758		798.39	0.01288604		1328.39	0.00689568		1858.38	0.01215828		2388.38	-0.00014208		2918.38	0.0903876		3448.38	0.01385186		3978.38	-0.01328504
268.6	0.01863403		798.59	0.0123654		1328.59	0.00646931		1858.58	0.01173014		2388.58	-0.00061422		2918.58	0.09073165		3448.58	0.01317635		3978.58	-0.01359442
268.8	0.0184952		798.79	0.01184721		1328.79	0.00612334		1858.78	0.01199532		2388.78	-0.00086883		2918.78	0.09069147		3448.78	0.01252255		3978.78	-0.0134047
269	0.01877771		798.99	0.01162438		1328.99	0.00600819		1858.98	0.01172672		2388.98	-0.00171409		2918.98	0.09081261		3448.98	0.01168391		3978.98	-0.01373395
269.2	0.0184296		799.19	0.01054951		1329.19	0.00522509		1859.18	0.01160421		2389.18	-0.00193793		2919.18	0.09011678		3449.18	0.01094821		3979.18	-0.01332219
269.4	0.01966147		799.39	0.0102589		1329.39	0.00493787		1859.38	0.01186657		2389.38	-0.00165726		2919.38	0.08957034		3449.38	0.01004991		3979.38	-0.01256712
269.6	0.01921191		799.59	0.00985972		1329.59	0.00455315		1859.58	0.0114967		2389.58	-0.00100555		2919.58	0.08872499		3449.58	0.00999973		3979.58	-0.01176571
269.8	0.01901328		799.79	0.01035483		1329.79	0.00549034		1859.78	0.01158781		2389.78	-0.00112747		2919.78	0.08939601		3449.78	0.00908873		3979.78	-0.01221664
270	0.01873828		799.99	0.01057787		1329.99	0.0052451		1859.98	0.01169095		2389.98	-0.00073766		2919.98	0.08893457		3449.98	0.00946076		3979.98	-0.01181138
270.2	0.01886395		800.19	0.01094189		1330.19	0.0054261		1860.18	0.01178133		2390.18	0.00002447		2920.18	0.0892586		3450.18	0.00935651		3980.18	-0.01047093
270.4	0.01942631		800.39	0.01098561		1330.39	0.00570542		1860.38	0.01145069		2390.38	-0.00005832		2920.38	0.08875321		3450.38	0.00939443		3980.38	-0.0085922
270.6	0.02035063		800.59	0.01140651		1330.59	0.00467019		1860.58	0.01117792		2390.58	0.00054438		2920.58	0.08893053		3450.58	0.00931749		3980.58	-0.00772036
270.8	0.02056043		800.79	0.01137454		1330.79	0.00504595		1860.78	0.01089369		2390.78	0.00041142		2920.78	0.08882241		3450.78	0.00980229		3980.78	-0.00747514
271	0.02079596		800.99	0.01137538		1330.99	0.00457958		1860.98	0.01049077		2390.98	-0.00056135		2920.98	0.08939414		3450.98	0.00940119		3980.98	-0.00713933
271.2	0.02152376		801.19	0.01052343		1331.19	0.00449728		1861.18	0.00941208		2391.18	-0.00090461		2921.18	0.09025855		3451.18	0.00979976		3981.18	-0.00688493
271.4	0.02228007		801.39	0.01051204		1331.39	0.00417601		1861.38	0.00983577		2391.38	-0.00089484		2921.38	0.09017368		3451.38	0.01044847		3981.38	-0.00763046
271.6	0.02250217		801.59	0.01054189		1331.59	0.00498799		1861.58	0.00977166		2391.58	-0.00121452		2921.58	0.08995071		3451.58	0.01094498		3981.58	-0.00790662
271.8	0.02213019		801.79	0.01047872		1331.79	0.00524361		1861.78	0.00962695		2391.78	-0.00206513		2921.78	0.08954441		3451.78	0.01166805		3981.78	-0.00860922
272	0.02296575		801.99	0.01054254		1331.99	0.00530193		1861.98	0.00885701		2391.98	-0.00184771		2921.98	0.08975425		3451.98	0.01129764		3981.98	-0.00961384
272.2	0.02298137		802.19	0.01092632		1332.19	0.00532083		1862.18	0.00776449		2392.18	-0.00193874		2922.18	0.09026566		3452.18	0.01186353		3982.18	-0.01085474
272.4	0.02248283		802.39	0.01048249		1332.39	0.00550497		1862.38	0.00744496		2392.38	-0.00169778		2922.38	0.0894882		3452.38	0.01155804		3982.38	-0.01073916
272.6	0.0221178		802.59	0.01033706		1332.59	0.00533312		1862.58	0.00825412		2392.58	-0.00135868		2922.58	0.08958358		3452.58	0.01242582		3982.58	-0.01110903
272.8	0.02290744		802.79	0.0107557		1332.79	0.00608232		1862.78	0.00886667		2392.78	-0.00085569		2922.78	0.0892076		3452.78	0.01273229		3982.78	-0.01013055
273	0.02364964		802.99	0.01112632		1332.99	0.0060151		1862.98	0.00966629		2392.98	-0.00128446		2922.98	0.08889909		3452.98	0.01305496		3982.98	-0.01057431
273.2	0.02384989		803.19	0.0113681		1333.19	0.0063015		1863.18	0.01015869		2393.18	-0.00050852		2923.18	0.09002037		3453.18	0.01375369		3983.18	-0.01074764
273.4	0.02369296		803.39	0.01163696		1333.39	0.00580607		1863.38	0.01025013		2393.38	0.00024374		2923.38	0.08998213		3453.38	0.01397886		3983.38	-0.01134168
273.6	0.02270742		803.59	0.01239566		1333.59	0.00568728		1863.58	0.01007636		2393.58	-0.00002435		2923.58	0.08982424		3453.58	0.01439955		3983.58	-0.01219874
273.8	0.02215198		803.79	0.01292181		1333.79	0.00500413		1863.78	0.00996679		2393.78	-0.00013943		2923.78	0.08980043		3453.78	0.01392989		3983.78	-0.01266582
274	0.02210575		803.99	0.01269417		1333.99	0.00538809		1863.98	0.00986571		2393.98	-0.00004232		2923.98	0.08916295		3453.98	0.01456549		3983.98	-0.01171129
274.2	0.02263318		804.19	0.01256401		1334.19	0.00545542		1864.18	0.00951311		2394.18	-0.00085797		2924.18	0.08977455		3454.18	0.01469377		3984.18	-0.01076399
274.4	0.02231233		804.39	0.01215696		1334.39	0.00538373		1864.38	0.00832637		2394.38	-0.0007405		2924.38	0.09004655		3454.38	0.01319803		3984.38	-0.00926987
274.6	0.02267574		804.59	0.011521		1334.59	0.00520631		1864.58	0.00761706		2394.58	-0.00127511		2924.58	0.09133484		3454.58	0.01195736		3984.58	-0.00889798
274.8	0.02169641		804.79	0.01030515		1334.79	0.00624796		1864.78	0.00649718		2394.78	-0.00175512		2924.78	0.09216076		3454.78	0.01138842		3984.78	-0.00968928
275	0.02076286		804.99	0.00984918		1334.99	0.00534771		1864.98	0.0059765		2394.98	-0.00186254		2924.98	0.09207878		3454.98	0.01030356		3984.98	-0.00993153
275.2	0.02114631		805.19	0.00892737		1335.19	0.00559965		1865.18	0.00542085		2395.18	-0.00233634		2925.18	0.09223546		3455.18	0.010656		3985.18	-0.00918042
275.4	0.02072765		805.39	0.00894237		1335.39	0.00596473		1865.38	0.00580728		2395.38	-0.0024943		2925.38	0.09153989		3455.38	0.01019799		3985.38	-0.00984098
275.6	0.02094322		805.59	0.00810217		1335.59	0.00660921		1865.58	0.00564505		2395.58	-0.00309941		2925.58	0.09117089		3455.58	0.00989788		3985.58	-0.00945681
275.8	0.02048642		805.79	0.00774966		1335.79	0.00658938		1865.78	0.00535586		2395.78	-0.00402288		2925.78	0.09185882		3455.78	0.01020828		3985.78	-0.00930627
276	0.02088841		805.99	0.00667205		1335.99	0.00615103		1865.98	0.00566236		2395.98	-0.00350557		2925.98	0.09213687		3455.98	0.00991208		3985.98	-0.01006577
276.2	0.02024855		806.19	0.00751309		1336.19	0.00618612		1866.18	0.00630675		2396.18	-0.00392852		2926.18	0.09177076		3456.18	0.01081727		3986.18	-0.00997225
276.4	0.01960942		806.39	0.00774139		1336.39	0.00566973		1866.38	0.00834097		2396.38	-0.00367636		2926.38	0.0914837		3456.38	0.01066032		3986.38	-0.0093068
276.6	0.02000188		806.59	0.00840417		1336.59	0.00465236		1866.58	0.00979276		2396.58	-0.00356149		2926.58	0.09203227		3456.58	0.01145108		3986.58	-0.0097894
276.8	0.02062661		806.79	0.00895307		1336.79	0.00451582		1866.78	0.01057193		2396.78	-0.0037217		2926.78	0.09190927		3456.78	0.0111687		3986.78	-0.00961468
277	0.01967741		806.99	0.01017798		1336.99	0.0034404		1866.98	0.01154625		2396.98	-0.00401379		2926.98	0.09282313		3456.98	0.01163457		3986.98	-0.0111436
277.2	0.01892665		807.19	0.01104039		1337.19	0.0034389		1867.18	0.01203881		2397.18	-0.00303536		2927.18	0.09348062		3457.18	0.01155558		3987.18	-0.0110911
277.4	0.01865939		807.39	0.01183287		1337.39	0.00325154		1867.38	0.01267427		2397.38	-0.00324962		2927.38	0.09229117		3457.38	0.01129802		3987.38	-0.01199238
277.6	0.01856641		807.59	0.01221803		1337.59	0.00245277		1867.58	0.01283758		2397.58	-0.0039077		2927.58	0.09152465		3457.58	0.01105513		3987.58	-0.0119817
277.8	0.01891884		807.79	0.01307962		1337.79	0.00222685		1867.78	0.01291391		2397.78	-0.00312077		2927.78	0.09103834		3457.78	0.01106376		3987.78	-0.01165543
278	0.01879186		807.99	0.0135905		1337.99	0.00314866		1867.98	0.01348642		2397.98	-0.00227818		2927.98	0.09190307		3457.98	0.01082608		3987.98	-0.01151656
278.2	0.01824897		808.19	0.01339469		1338.19	0.00299853		1868.18	0.01391335		2398.18	-0.00225085		2928.18	0.09329553		3458.18	0.01046518		3988.18	-0.01081573
278.4	0.01745305		808.39	0.01283742		1338.39	0.00343328		1868.38	0.01338616		2398.38	-0.00171699		2928.38	0.09447283		3458.38	0.00978547		3988.38	-0.01103846
278.6	0.01794392		808.59	0.01310815		1338.59	0.00311058		1868.58	0.01264716		2398.58	-0.00155143		2928.58	0.09526377		3458.58	0.0102741		3988.58	-0.01158942
278.8	0.01796573		808.79	0.01291124		1338.79	0.00340923		1868.78	0.01204421		2398.78	-0.00065686		2928.78	0.09494716		3458.78	0.01069422		3988.78	-0.01240697
279	0.01759531		808.99	0.01273547		1338.99	0.00347887		1868.98	0.01134472		2398.98	-0.00043102		2928.98	0.09438061		3458.98	0.01115293		3988.98	-0.0112189
279.2	0.01772616		809.19	0.01185033		1339.19	0.00444265		1869.18	0.01052491		2399.18	-0.00138158		2929.18	0.09431402		3459.18	0.01202617		3989.18	-0.01075571
279.4	0.01719562		809.39	0.01114465		1339.39	0.00559617		1869.38	0.009266		2399.38	-0.00102814		2929.38	0.09365132		3459.38	0.01212941		3989.38	-0.01061
279.6	0.01716284		809.59	0.01053885		1339.59	0.00657693		1869.58	0.0090799		2399.58	-0.00114546		2929.58	0.09387429		3459.58	0.01305569		3989.58	-0.00966281
279.8	0.01740182		809.79	0.01010923		1339.79	0.00649678		1869.78	0.00858567		2399.78	-0.00140573		2929.78	0.09341364		3459.78	0.01229065		3989.78	-0.0094999
280	0.01777186		809.99	0.00976218		1339.99	0.00651918		1869.98	0.00810603		2399.98	-0.0013072		2929.98	0.09304269		3459.98	0.01208313		3989.98	-0.00950837
280.2	0.01716237		810.19	0.00962641		1340.19	0.00655978		1870.18	0.00817684		2400.18	-0.00119423		2930.18	0.09257093		3460.18	0.01258723		3990.18	-0.00954755
280.4	0.01657883		810.39	0.00884361		1340.39	0.00633224		1870.38	0.00811781		2400.38	-0.00155522		2930.38	0.09225807		3460.38	0.01295689		3990.38	-0.01064524
280.6	0.01706067		810.59	0.00860927		1340.59	0.00581172		1870.58	0.00819406		2400.58	-0.00245769		2930.58	0.09220436		3460.58	0.01293636		3990.58	-0.01137377
280.8	0.01661913		810.79	0.00907569		1340.79	0.0064281		1870.78	0.00833438		2400.78	-0.00269565		2930.78	0.09151576		3460.78	0.01250695		3990.78	-0.01185092
281	0.01607067		810.99	0.00976437		1340.99	0.00654871		1870.98	0.00860374		2400.98	-0.00272496		2930.98	0.09213251		3460.98	0.01198367		3990.98	-0.01148783
281.2	0.01653856		811.19	0.01006842		1341.19	0.00727643		1871.18	0.00961448		2401.18	-0.00193887		2931.18	0.09225009		3461.18	0.01124648		3991.18	-0.01090848
281.4	0.01719099		811.39	0.01048988		1341.39	0.00701195		1871.38	0.00995352		2401.38	-0.00235705		2931.38	0.09207622		3461.38	0.01088218		3991.38	-0.01150644
281.6	0.01711665		811.59	0.01130525		1341.59	0.00643831		1871.58	0.00977567		2401.58	-0.00250244		2931.58	0.09241292		3461.58	0.01033415		3991.58	-0.01081909
281.8	0.01752247		811.79	0.01236828		1341.79	0.00658882		1871.78	0.0097757		2401.78	-0.00219705		2931.78	0.09312043		3461.78	0.0097095		3991.78	-0.01020966
282	0.0181234		811.99	0.01210759		1341.99	0.00649075		1871.98	0.01086716		2401.98	-0.00151396		2931.98	0.09416659		3461.98	0.009385		3991.98	-0.0106206
282.2	0.01816356		812.19	0.01122704		1342.19	0.0062699		1872.18	0.01143697		2402.18	-0.0017933		2932.18	0.09501119		3462.18	0.00972481		3992.18	-0.01083662
282.4	0.0192001		812.39	0.01098702		1342.39	0.00566246		1872.38	0.01132678		2402.38	-0.00130992		2932.38	0.09594511		3462.38	0.00941784		3992.38	-0.01143209
282.6	0.0202063		812.59	0.01159781		1342.59	0.00441795		1872.58	0.01171369		2402.58	-0.00022129		2932.58	0.09655885		3462.58	0.00921951		3992.58	-0.01201992
282.8	0.02115997		812.79	0.01054307		1342.79	0.00476093		1872.78	0.01183783		2402.78	-0.00017303		2932.78	0.09622701		3462.78	0.00874417		3992.78	-0.01243751
283	0.02082731		812.99	0.01021136		1342.99	0.00473914		1872.98	0.01188975		2402.98	-0.00035286		2932.98	0.09626273		3462.98	0.00957727		3992.98	-0.01241362
283.2	0.0208804		813.19	0.01063765		1343.19	0.00525543		1873.18	0.01224462		2403.18	-0.00014466		2933.18	0.09631974		3463.18	0.01000282		3993.18	-0.01327692
283.4	0.02088456		813.39	0.01111741		1343.39	0.00507858		1873.38	0.01185518		2403.38	-0.00022525		2933.38	0.09665661		3463.38	0.00991655		3993.38	-0.01348137
283.6	0.02122016		813.59	0.01126053		1343.59	0.0049677		1873.58	0.01280497		2403.58	-0.00080228		2933.58	0.09725934		3463.58	0.01025886		3993.58	-0.01430369
283.8	0.0229193		813.79	0.01090093		1343.79	0.00431938		1873.78	0.0136305		2403.78	-0.00086243		2933.78	0.09759001		3463.78	0.01016664		3993.78	-0.01506055
284	0.02322819		813.99	0.01100416		1343.99	0.00431098		1873.98	0.01329276		2403.98	-0.00069371		2933.98	0.09782743		3463.98	0.0118648		3993.98	-0.01508571
284.2	0.0233049		814.19	0.01098033		1344.19	0.00437894		1874.18	0.01340855		2404.18	-0.00126441		2934.18	0.09780392		3464.18	0.01241812		3994.18	-0.01552396
284.4	0.02360207		814.39	0.01124132		1344.39	0.00495968		1874.38	0.01330252		2404.38	-0.00191789		2934.38	0.09737446		3464.38	0.01355671		3994.38	-0.01580323
284.6	0.02454034		814.59	0.01165085		1344.59	0.00489837		1874.58	0.01366697		2404.58	-0.00173792		2934.58	0.09730251		3464.58	0.01418717		3994.58	-0.01491374
284.8	0.02478657		814.79	0.01261771		1344.79	0.004987		1874.78	0.01320003		2404.78	-0.00111309		2934.78	0.09762262		3464.78	0.01461615		3994.78	-0.01448663
285	0.02481044		814.99	0.01384637		1344.99	0.00434709		1874.98	0.01163805		2404.98	-0.000814		2934.98	0.09699402		3464.98	0.01440168		3994.98	-0.01224159
285.2	0.02436308		815.19	0.01405196		1345.19	0.00434267		1875.18	0.01135428		2405.18	-0.0005477		2935.18	0.09683329		3465.18	0.0146553		3995.18	-0.01149375
285.4	0.02448547		815.39	0.01464414		1345.39	0.00416026		1875.38	0.01020009		2405.38	-0.000663		2935.38	0.09708676		3465.38	0.01503563		3995.38	-0.01075032
285.6	0.02428237		815.59	0.01497183		1345.59	0.00460772		1875.58	0.00819019		2405.58	-0.00124217		2935.58	0.09700149		3465.58	0.01428111		3995.58	-0.01016291
285.8	0.02401536		815.79	0.01440868		1345.79	0.005538		1875.78	0.00702481		2405.78	-0.00122523		2935.78	0.09634398		3465.78	0.01438463		3995.78	-0.00867133
286	0.02430268		815.99	0.01437629		1345.99	0.00616315		1875.98	0.00739345		2405.98	-0.00096723		2935.98	0.09584792		3465.98	0.01401772		3995.98	-0.00881575
286.2	0.02290233		816.19	0.01332726		1346.19	0.0053869		1876.18	0.00694496		2406.18	-0.00092234		2936.18	0.09585423		3466.18	0.01319682		3996.18	-0.00830496
286.4	0.02226238		816.39	0.01288962		1346.39	0.00526034		1876.38	0.00585649		2406.38	-0.00028084		2936.38	0.09625308		3466.38	0.01192295		3996.38	-0.00760886
286.6	0.02080528		816.59	0.01216501		1346.59	0.00460605		1876.58	0.00640629		2406.58	-0.00019273		2936.58	0.09611223		3466.58	0.01092218		3996.58	-0.00814963
286.8	0.0203095		816.79	0.0113873		1346.79	0.00569695		1876.78	0.00587952		2406.78	-0.00097831		2936.78	0.09532974		3466.78	0.01040172		3996.78	-0.00795883
287	0.01928848		816.99	0.011778		1346.99	0.006626		1876.98	0.00564919		2406.98	-0.00135688		2936.98	0.09602496		3466.98	0.01017035		3996.98	-0.00887054
287.2	0.01846566		817.19	0.01134351		1347.19	0.00666818		1877.18	0.00514474		2407.18	-0.00124018		2937.18	0.09707604		3467.18	0.00959288		3997.18	-0.00948809
287.4	0.01750251		817.39	0.01149858		1347.39	0.0058959		1877.38	0.00529091		2407.38	-0.00213693		2937.38	0.09785077		3467.38	0.00939367		3997.38	-0.00970036
287.6	0.01821977		817.59	0.01124192		1347.59	0.00521375		1877.58	0.00582479		2407.58	-0.00277091		2937.58	0.09849975		3467.58	0.01018892		3997.58	-0.01079413
287.8	0.01911068		817.79	0.01099743		1347.79	0.00482805		1877.78	0.00720127		2407.78	-0.00239402		2937.78	0.09997671		3467.78	0.01024179		3997.78	-0.01110571
288	0.01891241		817.99	0.01093158		1347.99	0.00460177		1877.98	0.00710757		2407.98	-0.00228569		2937.98	0.10014737		3467.98	0.01086744		3997.98	-0.01128727
288.2	0.01935288		818.19	0.01082173		1348.19	0.00445485		1878.18	0.00851234		2408.18	-0.00220241		2938.18	0.10005538		3468.18	0.01116947		3998.18	-0.01215123
288.4	0.01980318		818.39	0.01051219		1348.39	0.00400344		1878.38	0.00974898		2408.38	-0.00133077		2938.38	0.09961801		3468.38	0.01164075		3998.38	-0.01317391
288.6	0.020116		818.59	0.01119471		1348.59	0.00367968		1878.58	0.00958485		2408.58	-0.0005321		2938.58	0.10026757		3468.58	0.01218808		3998.58	-0.01387563
288.8	0.01988651		818.79	0.01181449		1348.79	0.00271906		1878.78	0.00975756		2408.78	0.0002069		2938.78	0.09941801		3468.78	0.01214791		3998.78	-0.01440147
289	0.020159		818.99	0.01251804		1348.99	0.00253513		1878.98	0.00959435		2408.98	0.00046418		2938.98	0.09814894		3468.98	0.01223827		3998.98	-0.01401819
289.2	0.01977507		819.19	0.01259013		1349.19	0.00244404		1879.18	0.01006532		2409.18	0.00077113		2939.18	0.0990466		3469.18	0.01234298		3999.18	-0.01487621
289.4	0.02008109		819.39	0.01338153		1349.39	0.00221037		1879.38	0.00963754		2409.38	0.00096929		2939.38	0.09881109		3469.38	0.01283142		3999.38	-0.01494865
289.6	0.02023266		819.59	0.01339005		1349.59	0.00292321		1879.58	0.00895046		2409.58	0.00090286		2939.58	0.09762563		3469.58	0.01254156		3999.58	-0.01463886
289.8	0.01973713		819.79	0.01378209		1349.79	0.00362232		1879.78	0.00904952		2409.78	0.00106024		2939.78	0.09732162		3469.78	0.0133866		3999.78	-0.01362104
290	0.01957753		819.99	0.0140047		1349.99	0.00338806		1879.98	0.00888428		2409.98	0.00091102		2939.98	0.09696176		3469.98	0.01317316		3999.98	-0.01363138
290.2	0.01872748		820.19	0.01290756		1350.19	0.00361246		1880.18	0.00881364		2410.18	0.0010491		2940.18	0.0977895		3470.18	0.0127101		4000.18	-0.01259765
290.4	0.01795312		820.39	0.0126341		1350.39	0.00493249		1880.38	0.00833879		2410.38	0.00104435		2940.38	0.09806635		3470.38	0.01258414		4000.38	-0.01168051
290.6	0.01757275		820.59	0.01277131		1350.59	0.0048114		1880.58	0.00873824		2410.58	0.00085179		2940.58	0.09804368		3470.58	0.01237546		4000.58	-0.01126731
290.8	0.01801807		820.79	0.01351651		1350.79	0.00575058		1880.78	0.00802387		2410.78	0.00024092		2940.78	0.09788732		3470.78	0.01274223		4000.78	-0.01055605
291	0.01898406		820.99	0.01371668		1350.99	0.00615849		1880.98	0.00850143		2410.98	-0.00003838		2940.98	0.09918193		3470.98	0.01259321		4000.98	-0.01042415
291.2	0.01847837		821.19	0.01338124		1351.19	0.00542966		1881.18	0.008111		2411.18	-0.00013958		2941.18	0.09924208		3471.18	0.01311864		4001.18	-0.00961903
291.4	0.01888016		821.39	0.01384425		1351.39	0.00500574		1881.38	0.00894554		2411.38	-0.00142517		2941.38	0.09882755		3471.38	0.01356373		4001.38	-0.00966138
291.6	0.01997112		821.59	0.01392357		1351.59	0.00453031		1881.58	0.00968616		2411.58	-0.00202197		2941.58	0.09925187		3471.58	0.01336627		4001.58	-0.01013167
291.8	0.02002623		821.79	0.01362765		1351.79	0.00385366		1881.78	0.01118564		2411.78	-0.00164825		2941.78	0.09995306		3471.78	0.0136338		4001.78	-0.0101158
292	0.02017974		821.99	0.01380489		1351.99	0.00327178		1881.98	0.01172911		2411.98	-0.00154094		2941.98	0.09975206		3471.98	0.01395239		4001.98	-0.01081423
292.2	0.02030924		822.19	0.01414525		1352.19	0.0028326		1882.18	0.01268462		2412.18	-0.00176233		2942.18	0.09977639		3472.18	0.01427771		4002.18	-0.0118164
292.4	0.02118562		822.39	0.01451662		1352.39	0.00294853		1882.38	0.01325404		2412.38	-0.00232905		2942.38	0.09983067		3472.38	0.01379608		4002.38	-0.01254009
292.6	0.02135047		822.59	0.01495037		1352.59	0.00332939		1882.58	0.01302622		2412.58	-0.00235694		2942.58	0.10037662		3472.58	0.0137799		4002.58	-0.01322266
292.8	0.0205029		822.79	0.01428965		1352.79	0.00204345		1882.78	0.01335685		2412.78	-0.00266844		2942.78	0.09989463		3472.78	0.013428		4002.78	-0.01340593
293	0.02080108		822.99	0.01365768		1352.99	0.00125475		1882.98	0.01304695		2412.98	-0.00303813		2942.98	0.1005985		3472.98	0.0130901		4002.98	-0.01379325
293.2	0.02003747		823.19	0.01318542		1353.19	0.0008403		1883.18	0.01291941		2413.18	-0.00317765		2943.18	0.10132069		3473.18	0.01231214		4003.18	-0.01477478
293.4	0.02005563		823.39	0.01310623		1353.39	0.00061269		1883.38	0.01224071		2413.38	-0.00358896		2943.38	0.10099716		3473.38	0.01291105		4003.38	-0.01492375
293.6	0.02027313		823.59	0.01215776		1353.59	0.00115141		1883.58	0.01200529		2413.58	-0.00350257		2943.58	0.10142016		3473.58	0.01365788		4003.58	-0.01543931
293.8	0.01983754		823.79	0.01188334		1353.79	0.00145572		1883.78	0.01087918		2413.78	-0.00311475		2943.78	0.10231121		3473.78	0.01419469		4003.78	-0.01536193
294	0.01919482		823.99	0.01102783		1353.99	0.00233781		1883.98	0.01064525		2413.98	-0.00238133		2943.98	0.10203045		3473.98	0.01451885		4003.98	-0.01487968
294.2	0.01923454		824.19	0.01056111		1354.19	0.00335269		1884.18	0.01040571		2414.18	-0.00281713		2944.18	0.10249802		3474.18	0.01445311		4004.18	-0.01358243
294.4	0.01893055		824.39	0.01053128		1354.39	0.00349367		1884.38	0.00965743		2414.38	-0.00243448		2944.38	0.10332543		3474.38	0.01395807		4004.38	-0.01273915
294.6	0.01912941		824.59	0.01091045		1354.59	0.00297483		1884.58	0.01019242		2414.58	-0.00178767		2944.58	0.10355044		3474.58	0.01401046		4004.58	-0.01266287
294.8	0.01960923		824.79	0.01113976		1354.79	0.0033607		1884.78	0.01096903		2414.78	-0.00189156		2944.78	0.10348175		3474.78	0.01363904		4004.78	-0.01146921
295	0.01939112		824.99	0.01087475		1354.99	0.00387466		1884.98	0.01132744		2414.98	-0.00110739		2944.98	0.10309328		3474.98	0.01270529		4004.98	-0.01134581
295.2	0.01815669		825.19	0.01116811		1355.19	0.00377246		1885.18	0.01192014		2415.18	-0.00111822		2945.18	0.10307063		3475.18	0.01322536		4005.18	-0.01080563
295.4	0.01858622		825.39	0.0118345		1355.39	0.00290463		1885.38	0.01217867		2415.38	-0.00090406		2945.38	0.10209394		3475.38	0.01273895		4005.38	-0.01093136
295.6	0.01801403		825.59	0.01234455		1355.59	0.00243184		1885.58	0.01181525		2415.58	-0.00106083		2945.58	0.10260012		3475.58	0.01216494		4005.58	-0.01055722
295.8	0.01816033		825.79	0.0122456		1355.79	0.00142639		1885.78	0.01164321		2415.78	-0.00021944		2945.78	0.10324685		3475.78	0.01239785		4005.78	-0.01066869
296	0.01793527		825.99	0.0133623		1355.99	0.00134372		1885.98	0.01254655		2415.98	-0.00020476		2945.98	0.10278544		3475.98	0.01217328		4005.98	-0.01030156
296.2	0.01771419		826.19	0.01297994		1356.19	0.00137595		1886.18	0.01282142		2416.18	-0.00091148		2946.18	0.10271373		3476.18	0.01198484		4006.18	-0.01008535
296.4	0.01866674		826.39	0.01310222		1356.39	0.00164932		1886.38	0.01362677		2416.38	-0.00099011		2946.38	0.10253063		3476.38	0.01147584		4006.38	-0.01038172
296.6	0.01835403		826.59	0.01262588		1356.59	0.00133807		1886.58	0.01302483		2416.58	-0.00104113		2946.58	0.10229027		3476.58	0.01074445		4006.58	-0.01070615
296.8	0.01829146		826.79	0.01215576		1356.79	0.00076524		1886.78	0.01212799		2416.78	-0.00197214		2946.78	0.10244279		3476.78	0.01119963		4006.78	-0.01025091
297	0.01929662		826.99	0.01230479		1356.99	0.0009942		1886.98	0.01174661		2416.98	-0.00179386		2946.98	0.10274155		3476.98	0.01142451		4006.98	-0.0104538
297.2	0.01986012		827.19	0.01216482		1357.19	0.00172055		1887.18	0.01124926		2417.18	-0.00146521		2947.18	0.10277235		3477.18	0.01271158		4007.18	-0.01080947
297.4	0.02032133		827.39	0.01202158		1357.39	0.00235208		1887.38	0.0101765		2417.38	-0.00206114		2947.38	0.1027516		3477.38	0.01413165		4007.38	-0.01096973
297.6	0.02090639		827.59	0.0111781		1357.59	0.00342219		1887.58	0.01021029		2417.58	-0.00121426		2947.58	0.10301208		3477.58	0.0147518		4007.58	-0.01135189
297.8	0.02109687		827.79	0.01088246		1357.79	0.0038635		1887.78	0.00944888		2417.78	-0.00092109		2947.78	0.10287029		3477.78	0.0151028		4007.78	-0.01059058
298	0.02127169		827.99	0.0112818		1357.99	0.0049095		1887.98	0.00967892		2417.98	-0.00129506		2947.98	0.10254123		3477.98	0.01583408		4007.98	-0.00958701
298.2	0.02185294		828.19	0.01155493		1358.19	0.005319		1888.18	0.00971877		2418.18	-0.00216657		2948.18	0.10373088		3478.18	0.01509864		4008.18	-0.00918606
298.4	0.02168441		828.39	0.01143099		1358.39	0.00611065		1888.38	0.00971604		2418.38	-0.00152189		2948.38	0.10372086		3478.38	0.01460361		4008.38	-0.00996065
298.6	0.0214643		828.59	0.01250361		1358.59	0.00614208		1888.58	0.0104026		2418.58	-0.0015132		2948.58	0.10320762		3478.58	0.01532935		4008.58	-0.01027017
298.8	0.02093879		828.79	0.01232944		1358.79	0.00674201		1888.78	0.01051261		2418.78	-0.00180132		2948.78	0.10201136		3478.78	0.01504334		4008.78	-0.00921957
299	0.02007444		828.99	0.01195844		1358.99	0.00679503		1888.98	0.01064984		2418.98	-0.00155361		2948.98	0.10207652		3478.98	0.01489334		4008.98	-0.00967963
299.2	0.02044056		829.19	0.01339055		1359.19	0.00596456		1889.18	0.01081374		2419.18	-0.00207573		2949.18	0.10244841		3479.18	0.01468327		4009.18	-0.00963595
299.4	0.0209446		829.39	0.01425358		1359.39	0.00515395		1889.38	0.00936349		2419.38	-0.00168925		2949.38	0.10181691		3479.38	0.01362929		4009.38	-0.01001387
299.6	0.02071778		829.59	0.0145638		1359.59	0.00455942		1889.58	0.00877847		2419.58	-0.00180906		2949.58	0.10283523		3479.58	0.0138494		4009.58	-0.01069742
299.8	0.02099931		829.79	0.01474821		1359.79	0.00338169		1889.78	0.00932064		2419.78	-0.00133533		2949.78	0.10290105		3479.78	0.01315813		4009.78	-0.01057412
300	0.02098474		829.99	0.01534941		1359.99	0.00289157		1889.98	0.01006554		2419.98	-0.00083091		2949.98	0.10254437		3479.98	0.01259885		4009.98	-0.01155069
300.2	0.02134898		830.19	0.01470101		1360.19	0.00234055		1890.18	0.00993667		2420.18	-0.00075749		2950.18	0.102413		3480.18	0.01242667		4010.18	-0.01239148
300.4	0.02253241		830.39	0.01488946		1360.39	0.00160421		1890.38	0.00991966		2420.38	-0.00010491		2950.38	0.1027746		3480.38	0.01212858		4010.38	-0.01338746
300.6	0.02312957		830.59	0.01474378		1360.59	0.00126802		1890.58	0.00913252		2420.58	0.00019364		2950.58	0.10299705		3480.58	0.01150441		4010.58	-0.01390898
300.8	0.02312855		830.79	0.01426761		1360.79	0.00014301		1890.78	0.00930363		2420.78	0.00020434		2950.78	0.10420441		3480.78	0.01211021		4010.78	-0.0145451
301	0.02257663		830.99	0.01395264		1360.99	-0.00000392		1890.98	0.0094537		2420.98	0.00066105		2950.98	0.10501901		3480.98	0.01250564		4010.98	-0.01455858
301.2	0.02256476		831.19	0.01213575		1361.19	0.00018198		1891.18	0.00971945		2421.18	0.00126917		2951.18	0.10563671		3481.18	0.01268368		4011.18	-0.01515322
301.4	0.02164186		831.39	0.0110436		1361.39	0.00079046		1891.38	0.01001921		2421.38	0.00073169		2951.38	0.10661114		3481.38	0.01303712		4011.38	-0.0149884
301.6	0.02169183		831.59	0.01041839		1361.59	0.00117326		1891.58	0.01083675		2421.58	0.00030831		2951.58	0.10716596		3481.58	0.01359816		4011.58	-0.01423099
301.8	0.02095862		831.79	0.0099136		1361.79	0.00134605		1891.78	0.01134777		2421.78	-0.00019431		2951.78	0.10805045		3481.78	0.01401709		4011.78	-0.0138337
302	0.02097638		831.99	0.00988829		1361.99	0.0022189		1891.98	0.0111455		2421.98	-0.00164325		2951.98	0.10841346		3481.98	0.0146827		4011.98	-0.01352535
302.2	0.02100744		832.19	0.00963471		1362.19	0.00295231		1892.18	0.0114637		2422.18	-0.00110114		2952.18	0.10877215		3482.18	0.01413008		4012.18	-0.0132198
302.4	0.02106335		832.39	0.00985567		1362.39	0.00407745		1892.38	0.01152436		2422.38	-0.0010411		2952.38	0.108684		3482.38	0.01552918		4012.38	-0.01375279
302.6	0.0212424		832.59	0.00990362		1362.59	0.00429292		1892.58	0.01177376		2422.58	-0.00088455		2952.58	0.10974715		3482.58	0.01536952		4012.58	-0.01295581
302.8	0.02104411		832.79	0.01005808		1362.79	0.00494441		1892.78	0.01130003		2422.78	-0.0010872		2952.78	0.10970764		3482.78	0.0146939		4012.78	-0.01231006
303	0.02110968		832.99	0.01054263		1362.99	0.00450896		1892.98	0.01103088		2422.98	-0.00071413		2952.98	0.10954833		3482.98	0.01350434		4012.98	-0.01281591
303.2	0.02242188		833.19	0.01137998		1363.19	0.0044197		1893.18	0.01052054		2423.18	-0.00030653		2953.18	0.1093632		3483.18	0.0128732		4013.18	-0.01326094
303.4	0.0225974		833.39	0.01256765		1363.39	0.00488172		1893.38	0.0095918		2423.38	0.00086999		2953.38	0.10871238		3483.38	0.01322633		4013.38	-0.01378083
303.6	0.02296841		833.59	0.0126598		1363.59	0.00438754		1893.58	0.01013363		2423.58	0.00081408		2953.58	0.10781676		3483.58	0.01328158		4013.58	-0.01474087
303.8	0.02344026		833.79	0.01340763		1363.79	0.003858		1893.78	0.01046781		2423.78	0.0010134		2953.78	0.10765852		3483.78	0.01264719		4013.78	-0.01536437
304	0.023784		833.99	0.01432995		1363.99	0.00404424		1893.98	0.01058289		2423.98	0.0024123		2953.98	0.10697989		3483.98	0.01251136		4013.98	-0.01623595
304.2	0.02391474		834.19	0.01447881		1364.19	0.00294118		1894.18	0.01035667		2424.18	0.00298732		2954.18	0.10650209		3484.18	0.01258875		4014.18	-0.01581498
304.4	0.02402727		834.39	0.01543701		1364.39	0.00253274		1894.38	0.01037442		2424.38	0.00375109		2954.38	0.10689048		3484.38	0.01226208		4014.38	-0.01612242
304.6	0.02386141		834.59	0.01559783		1364.59	0.00252788		1894.58	0.0107284		2424.58	0.00350201		2954.58	0.10603292		3484.58	0.01242741		4014.58	-0.01664779
304.8	0.02230569		834.79	0.01465849		1364.79	0.00253808		1894.78	0.01105084		2424.78	0.00295385		2954.78	0.10577501		3484.78	0.01310244		4014.78	-0.01635823
305	0.02200551		834.99	0.01496094		1364.99	0.00320388		1894.98	0.01156452		2424.98	0.00264811		2954.98	0.10593026		3484.98	0.01377202		4014.98	-0.01511056
305.2	0.0209265		835.19	0.01421087		1365.19	0.00410444		1895.18	0.01236918		2425.18	0.00211227		2955.18	0.10549954		3485.18	0.01349312		4015.18	-0.01568056
305.4	0.0205364		835.39	0.01325779		1365.39	0.00510713		1895.38	0.01285403		2425.38	0.00127441		2955.38	0.10612435		3485.38	0.01443391		4015.38	-0.01484184
305.6	0.02011782		835.59	0.01244062		1365.59	0.0053725		1895.58	0.01324163		2425.58	-0.00050131		2955.58	0.10636408		3485.58	0.01472912		4015.58	-0.01425319
305.8	0.01906939		835.79	0.01223265		1365.79	0.00546755		1895.78	0.01334146		2425.78	-0.00040998		2955.78	0.10679038		3485.78	0.01563595		4015.78	-0.01422746
306	0.01935162		835.99	0.01235795		1365.99	0.00508699		1895.98	0.01251984		2425.98	-0.00177128		2955.98	0.10631296		3485.98	0.01584332		4015.98	-0.01377939
306.2	0.01961243		836.19	0.01264613		1366.19	0.00533732		1896.18	0.01241519		2426.18	-0.00124655		2956.18	0.10683551		3486.18	0.01600735		4016.18	-0.01334768
306.4	0.01969047		836.39	0.01372934		1366.39	0.00571367		1896.38	0.01255396		2426.38	-0.00155528		2956.38	0.10753603		3486.38	0.01580894		4016.38	-0.01347047
306.6	0.01954545		836.59	0.0133671		1366.59	0.00508774		1896.58	0.01302459		2426.58	-0.00176874		2956.58	0.10783119		3486.58	0.01508692		4016.58	-0.01310106
306.8	0.01899197		836.79	0.01370021		1366.79	0.00450273		1896.78	0.01250041		2426.78	-0.00284255		2956.78	0.1070655		3486.78	0.01496255		4016.78	-0.01309435
307	0.01850354		836.99	0.01316863		1366.99	0.00417602		1896.98	0.01198225		2426.98	-0.0028005		2956.98	0.10618603		3486.98	0.01432487		4016.98	-0.01394687
307.2	0.01909989		837.19	0.01363034		1367.19	0.00463497		1897.18	0.01209113		2427.18	-0.00340756		2957.18	0.10706277		3487.18	0.01397017		4017.18	-0.01417047
307.4	0.01859536		837.39	0.0141523		1367.39	0.00380633		1897.38	0.01201234		2427.38	-0.00285535		2957.38	0.10719755		3487.38	0.01310537		4017.38	-0.01474488
307.6	0.01876893		837.59	0.01341645		1367.59	0.00262858		1897.58	0.01260628		2427.58	-0.00312239		2957.58	0.10743432		3487.58	0.01261228		4017.58	-0.01483539
307.8	0.01910519		837.79	0.01414655		1367.79	0.00237465		1897.78	0.01214125		2427.78	-0.00198436		2957.78	0.10799813		3487.78	0.01253149		4017.78	-0.01467322
308	0.01911078		837.99	0.01460321		1367.99	0.00217332		1897.98	0.01107409		2427.98	-0.00123756		2957.98	0.1081671		3487.98	0.01215643		4017.98	-0.01400662
308.2	0.01926406		838.19	0.0145386		1368.19	0.00125911		1898.18	0.01033099		2428.18	-0.00054316		2958.18	0.10926425		3488.18	0.01232048		4018.18	-0.01322455
308.4	0.02019106		838.39	0.01478168		1368.39	0.00193241		1898.38	0.01070608		2428.38	-0.00052636		2958.38	0.1091606		3488.38	0.01189406		4018.38	-0.01279326
308.6	0.02044963		838.59	0.01375692		1368.59	0.00253244		1898.58	0.01132741		2428.58	-0.00025534		2958.58	0.10828504		3488.58	0.01266582		4018.58	-0.01192677
308.8	0.02013885		838.79	0.01358282		1368.79	0.00327151		1898.78	0.01139425		2428.78	0.00010404		2958.78	0.10886341		3488.78	0.01265421		4018.78	-0.01233657
309	0.02070802		838.99	0.01350222		1368.99	0.00397467		1898.98	0.01256414		2428.98	0.00013818		2958.98	0.10937928		3488.98	0.01255581		4018.98	-0.01211191
309.2	0.01954698		839.19	0.01207785		1369.19	0.00515054		1899.18	0.01277905		2429.18	-0.00004371		2959.18	0.1091003		3489.18	0.01222842		4019.18	-0.01318616
309.4	0.0201818		839.39	0.01117519		1369.39	0.00582874		1899.38	0.01256521		2429.38	0.00072478		2959.38	0.10953195		3489.38	0.0125507		4019.38	-0.01256607
309.6	0.01960473		839.59	0.01113934		1369.59	0.00569889		1899.58	0.01214364		2429.58	-0.00059216		2959.58	0.10946607		3489.58	0.01372957		4019.58	-0.0128194
309.8	0.0199415		839.79	0.01107774		1369.79	0.00653461		1899.78	0.01183254		2429.78	-0.00068037		2959.78	0.10914366		3489.78	0.01409289		4019.78	-0.01297695
310	0.02036385		839.99	0.01094051		1369.99	0.00635795		1899.98	0.01106392		2429.98	-0.00096122		2959.98	0.10890113		3489.98	0.01358441		4019.98	-0.01393662
310.2	0.020792		840.19	0.0110318		1370.19	0.00600753		1900.18	0.01052629		2430.18	-0.00107726		2960.18	0.10900171		3490.18	0.01428453		4020.18	-0.0144001
310.4	0.02087022		840.39	0.01175046		1370.39	0.00554896		1900.38	0.01101945		2430.38	-0.00145805		2960.38	0.10864232		3490.38	0.01440079		4020.38	-0.01402541
310.6	0.02060702		840.59	0.01101562		1370.59	0.00468986		1900.58	0.01183749		2430.58	-0.00173894		2960.58	0.10837645		3490.58	0.01504071		4020.58	-0.01468324
310.8	0.02032909		840.79	0.0109111		1370.79	0.00480399		1900.78	0.01103975		2430.78	-0.00182523		2960.78	0.1079174		3490.78	0.0144869		4020.78	-0.01507144
311	0.02014717		840.99	0.01083193		1370.99	0.00429891		1900.98	0.01043926		2430.98	-0.00175542		2960.98	0.10756756		3490.98	0.01438108		4020.98	-0.01622934
311.2	0.02099797		841.19	0.01076384		1371.19	0.00298714		1901.18	0.01037526		2431.18	-0.00183748		2961.18	0.10834889		3491.18	0.01441961		4021.18	-0.01627532
311.4	0.02101767		841.39	0.01092643		1371.39	0.00146739		1901.38	0.0108004		2431.38	-0.00027455		2961.38	0.10902715		3491.38	0.01454783		4021.38	-0.01676847
311.6	0.02236998		841.59	0.0108714		1371.59	0.0004008		1901.58	0.01017274		2431.58	-0.00059247		2961.58	0.1088365		3491.58	0.01462016		4021.58	-0.01584208
311.8	0.02329406		841.79	0.0114654		1371.79	0.00027726		1901.78	0.01003322		2431.78	-0.000803		2961.78	0.10940765		3491.78	0.01440305		4021.78	-0.01513334
312	0.02377681		841.99	0.01140465		1371.99	-0.00041355		1901.98	0.00954495		2431.98	-0.00105895		2961.98	0.1101271		3491.98	0.01388102		4021.98	-0.01423173
312.2	0.02433775		842.19	0.01160873		1372.19	-0.00071456		1902.18	0.00981161		2432.18	-0.00022718		2962.18	0.11099344		3492.18	0.01400014		4022.18	-0.01369653
312.4	0.0248509		842.39	0.01128509		1372.39	-0.00050325		1902.38	0.01000951		2432.38	-0.00073229		2962.38	0.11089941		3492.38	0.0132876		4022.38	-0.012725
312.6	0.02441216		842.59	0.0111354		1372.59	-0.00019513		1902.58	0.01010603		2432.58	-0.00103727		2962.58	0.11033143		3492.58	0.01349709		4022.58	-0.01290668
312.8	0.02452028		842.79	0.01166202		1372.79	0.00034833		1902.78	0.01049496		2432.78	-0.00177826		2962.78	0.11068214		3492.78	0.01233318		4022.78	-0.01341354
313	0.02416951		842.99	0.01086891		1372.99	0.00102233		1902.98	0.01135448		2432.98	-0.00247253		2962.98	0.1106401		3492.98	0.01193408		4022.98	-0.01274414
313.2	0.02355913		843.19	0.01050983		1373.19	0.00161865		1903.18	0.0120124		2433.18	-0.00256313		2963.18	0.11093683		3493.18	0.01107533		4023.18	-0.01267489
313.4	0.02297657		843.39	0.01120251		1373.39	0.00226047		1903.38	0.012683		2433.38	-0.00227187		2963.38	0.11103156		3493.38	0.01108711		4023.38	-0.01226213
313.6	0.02254321		843.59	0.01156429		1373.59	0.0028538		1903.58	0.01254801		2433.58	-0.00316101		2963.58	0.11084178		3493.58	0.01135605		4023.58	-0.01267377
313.8	0.02244732		843.79	0.01182354		1373.79	0.00326852		1903.78	0.01296937		2433.78	-0.0023765		2963.78	0.11158924		3493.78	0.01084906		4023.78	-0.0129426
314	0.02205659		843.99	0.01252688		1373.99	0.00292638		1903.98	0.01333009		2433.98	-0.00145764		2963.98	0.11137419		3493.98	0.01163309		4023.98	-0.01368991
314.2	0.0218942		844.19	0.01276124		1374.19	0.00279578		1904.18	0.0133986		2434.18	-0.00105451		2964.18	0.11149299		3494.18	0.01231237		4024.18	-0.01330372
314.4	0.0217213		844.39	0.01342344		1374.39	0.00266159		1904.38	0.01364602		2434.38	-0.00064525		2964.38	0.11127054		3494.38	0.01199167		4024.38	-0.01298333
314.6	0.02107415		844.59	0.01331654		1374.59	0.00275632		1904.58	0.01427839		2434.58	0.00027298		2964.58	0.11037147		3494.58	0.01218682		4024.58	-0.01333881
314.8	0.02061614		844.79	0.0132768		1374.79	0.00257463		1904.78	0.01389643		2434.78	0.00004621		2964.78	0.11055986		3494.78	0.01246972		4024.78	-0.01417439
315	0.02033298		844.99	0.01389436		1374.99	0.0022766		1904.98	0.01369194		2434.98	-0.00046173		2964.98	0.11035153		3494.98	0.01354893		4024.98	-0.01483683
315.2	0.02033167		845.19	0.01443288		1375.19	0.0014386		1905.18	0.01396808		2435.18	-0.00012749		2965.18	0.11107819		3495.18	0.01431414		4025.18	-0.01436402
315.4	0.0204022		845.39	0.01562372		1375.39	0.00151183		1905.38	0.01402021		2435.38	-0.0002857		2965.38	0.11126565		3495.38	0.01441471		4025.38	-0.01466606
315.6	0.02110774		845.59	0.01447377		1375.59	0.00145055		1905.58	0.01233329		2435.58	-0.00134588		2965.58	0.11202997		3495.58	0.01386119		4025.58	-0.01379329
315.8	0.02038392		845.79	0.01427904		1375.79	0.00231891		1905.78	0.01217519		2435.78	-0.00203211		2965.78	0.11306455		3495.78	0.01452012		4025.78	-0.0137877
316	0.02063068		845.99	0.01437623		1375.99	0.00248232		1905.98	0.01135835		2435.98	-0.00260921		2965.98	0.1145797		3495.98	0.01490102		4025.98	-0.01427772
316.2	0.02091312		846.19	0.01430348		1376.19	0.00286683		1906.18	0.01041289		2436.18	-0.00281181		2966.18	0.11535923		3496.18	0.01509033		4026.18	-0.01400879
316.4	0.0208973		846.39	0.01320099		1376.39	0.0036831		1906.38	0.01000092		2436.38	-0.00421638		2966.38	0.11487726		3496.38	0.01545436		4026.38	-0.01306942
316.6	0.02139667		846.59	0.01290131		1376.59	0.00459694		1906.58	0.00998179		2436.58	-0.00481768		2966.58	0.11472904		3496.58	0.01590953		4026.58	-0.01315516
316.8	0.02150817		846.79	0.01312826		1376.79	0.00522544		1906.78	0.01062244		2436.78	-0.00515832		2966.78	0.11552936		3496.78	0.01522147		4026.78	-0.01277634
317	0.02160724		846.99	0.0124674		1376.99	0.00599154		1906.98	0.01104377		2436.98	-0.00534511		2966.98	0.11551358		3496.98	0.01482046		4026.98	-0.01251099
317.2	0.0216504		847.19	0.0128039		1377.19	0.00566736		1907.18	0.01225644		2437.18	-0.00498506		2967.18	0.11553792		3497.18	0.01453894		4027.18	-0.01169288
317.4	0.0218554		847.39	0.01316657		1377.39	0.00589925		1907.38	0.01232066		2437.38	-0.00528708		2967.38	0.11539152		3497.38	0.01486967		4027.38	-0.01175913
317.6	0.02256758		847.59	0.01302841		1377.59	0.0056658		1907.58	0.01275668		2437.58	-0.00490871		2967.58	0.11522055		3497.58	0.01457298		4027.58	-0.01148983
317.8	0.02307324		847.79	0.01248858		1377.79	0.00560952		1907.78	0.01442723		2437.78	-0.00456744		2967.78	0.11562719		3497.78	0.01407504		4027.78	-0.01151721
318	0.02341635		847.99	0.01232035		1377.99	0.00526163		1907.98	0.01489664		2437.98	-0.00409572		2967.98	0.11523576		3497.98	0.01388758		4027.98	-0.01130384
318.2	0.0234483		848.19	0.01213119		1378.19	0.00447711		1908.18	0.01448707		2438.18	-0.00448305		2968.18	0.11498519		3498.18	0.01339467		4028.18	-0.01119772
318.4	0.0233191		848.39	0.01189756		1378.39	0.00359928		1908.38	0.01452727		2438.38	-0.00487896		2968.38	0.11469224		3498.38	0.01283855		4028.38	-0.01135276
318.6	0.02299413		848.59	0.01216705		1378.59	0.00255881		1908.58	0.01517099		2438.58	-0.00512995		2968.58	0.1141825		3498.58	0.01340727		4028.58	-0.01226701
318.8	0.02277796		848.79	0.01206146		1378.79	0.00180095		1908.78	0.01481023		2438.78	-0.00545292		2968.78	0.11430097		3498.78	0.01293153		4028.78	-0.01275849
319	0.0219623		848.99	0.0130004		1378.99	0.00160173		1908.98	0.01492899		2438.98	-0.00580182		2968.98	0.11341623		3498.98	0.01358901		4028.98	-0.01218461
319.2	0.02164663		849.19	0.0132384		1379.19	0.00022041		1909.18	0.01463691		2439.18	-0.00534744		2969.18	0.11373498		3499.18	0.01307704		4029.18	-0.01198587
319.4	0.02184262		849.39	0.01281924		1379.39	-0.0002717		1909.38	0.01302099		2439.38	-0.00569135		2969.38	0.11394174		3499.38	0.01244734		4029.38	-0.01291157
319.6	0.02084794		849.59	0.01160134		1379.59	-0.00066108		1909.58	0.01205782		2439.58	-0.00518068		2969.58	0.11439555		3499.58	0.01242151		4029.58	-0.01225923
319.8	0.01993383		849.79	0.01139493		1379.79	-0.00046163		1909.78	0.01227753		2439.78	-0.00539448		2969.78	0.11469394		3499.78	0.01222995		4029.78	-0.01303704
320	0.02028798		849.99	0.01251289		1379.99	-0.00063866		1909.98	0.0120364		2439.98	-0.00457514		2969.98	0.11453713		3499.98	0.01204455		4029.98	-0.01360701
320.2	0.01971626		850.19	0.01244996		1380.19	-0.0006689		1910.18	0.01207048		2440.18	-0.00316402		2970.18	0.11373838		3500.18	0.01222773		4030.18	-0.01282783
320.4	0.01876403		850.39	0.01199118		1380.39	0.00052968		1910.38	0.01176664		2440.38	-0.00243306		2970.38	0.11324172		3500.38	0.01250305		4030.38	-0.01272464
320.6	0.01924715		850.59	0.01243358		1380.59	0.0012657		1910.58	0.01153759		2440.58	-0.00148046		2970.58	0.11383291		3500.58	0.01253928		4030.58	-0.01327792
320.8	0.0192069		850.79	0.01290107		1380.79	0.00200323		1910.78	0.01240335		2440.78	-0.00070653		2970.78	0.11328838		3500.78	0.01203706		4030.78	-0.01388246
321	0.01996181		850.99	0.01291643		1380.99	0.00220714		1910.98	0.01259894		2440.98	-0.00013147		2970.98	0.112711		3500.98	0.01230655		4030.98	-0.01426559
321.2	0.01992737		851.19	0.01368857		1381.19	0.00231928		1911.18	0.01271847		2441.18	0.00078457		2971.18	0.11210633		3501.18	0.01291511		4031.18	-0.01403896
321.4	0.02023374		851.39	0.01316955		1381.39	0.00308309		1911.38	0.01301858		2441.38	0.0012103		2971.38	0.11253505		3501.38	0.01297622		4031.38	-0.01436207
321.6	0.02129072		851.59	0.0133232		1381.59	0.00410553		1911.58	0.01412117		2441.58	0.00201945		2971.58	0.11262362		3501.58	0.01333994		4031.58	-0.01493223
321.8	0.0225859		851.79	0.01294226		1381.79	0.00537965		1911.78	0.01436579		2441.78	0.00170713		2971.78	0.11288905		3501.78	0.01360968		4031.78	-0.01554641
322	0.02320386		851.99	0.01331289		1381.99	0.00536495		1911.98	0.01367897		2441.98	0.00101152		2971.98	0.11346092		3501.98	0.01375938		4031.98	-0.01649086
322.2	0.02392561		852.19	0.01320783		1382.19	0.00470588		1912.18	0.01295184		2442.18	0.00050296		2972.18	0.11426761		3502.18	0.01453827		4032.18	-0.01754555
322.4	0.0247781		852.39	0.01299791		1382.39	0.00509196		1912.38	0.01336026		2442.38	0.00034971		2972.38	0.11527281		3502.38	0.01490066		4032.38	-0.01753494
322.6	0.02541848		852.59	0.01368795		1382.59	0.00439447		1912.58	0.01281549		2442.58	-0.00043197		2972.58	0.11577127		3502.58	0.01523506		4032.58	-0.01696508
322.8	0.02597766		852.79	0.01330446		1382.79	0.00504972		1912.78	0.0127899		2442.78	-0.0013374		2972.78	0.1161094		3502.78	0.0153341		4032.78	-0.0157953
323	0.02596573		852.99	0.01330343		1382.99	0.00466003		1912.98	0.01236535		2442.98	-0.00250142		2972.98	0.11668526		3502.98	0.01602666		4032.98	-0.01547604
323.2	0.02680969		853.19	0.01211683		1383.19	0.00387185		1913.18	0.011955		2443.18	-0.00300487		2973.18	0.11788237		3503.18	0.01521385		4033.18	-0.01475027
323.4	0.02650365		853.39	0.01120848		1383.39	0.00347985		1913.38	0.01100265		2443.38	-0.00342896		2973.38	0.11868681		3503.38	0.01553312		4033.38	-0.01451563
323.6	0.02546833		853.59	0.01142081		1383.59	0.00306705		1913.58	0.01135732		2443.58	-0.00294806		2973.58	0.11859331		3503.58	0.01568147		4033.58	-0.01315304
323.8	0.02460318		853.79	0.01186066		1383.79	0.00408359		1913.78	0.01100747		2443.78	-0.00312527		2973.78	0.1179308		3503.78	0.01501087		4033.78	-0.01330504
324	0.02452486		853.99	0.01284117		1383.99	0.00389267		1913.98	0.01069551		2443.98	-0.00231212		2973.98	0.11745563		3503.98	0.01508589		4033.98	-0.01229724
324.2	0.02377493		854.19	0.01188376		1384.19	0.00375371		1914.18	0.01045488		2444.18	-0.00210022		2974.18	0.11747809		3504.18	0.01543294		4034.18	-0.01129985
324.4	0.02285613		854.39	0.01156123		1384.39	0.00349369		1914.38	0.0106224		2444.38	-0.00222426		2974.38	0.11805957		3504.38	0.01526136		4034.38	-0.01111756
324.6	0.02299361		854.59	0.01202447		1384.59	0.00319346		1914.58	0.01136892		2444.58	-0.00253261		2974.58	0.11814562		3504.58	0.0160498		4034.58	-0.01134104
324.8	0.02204275		854.79	0.01201554		1384.79	0.00283254		1914.78	0.01202518		2444.78	-0.00267424		2974.78	0.11716604		3504.78	0.01662357		4034.78	-0.01107441
325	0.02129299		854.99	0.01214003		1384.99	0.00224788		1914.98	0.01242236		2444.98	-0.00281105		2974.98	0.11693079		3504.98	0.0178073		4034.98	-0.01091295
325.2	0.020275		855.19	0.01207233		1385.19	0.0028368		1915.18	0.01309556		2445.18	-0.00230225		2975.18	0.11653642		3505.18	0.01854138		4035.18	-0.00998316
325.4	0.02063897		855.39	0.01138642		1385.39	0.00291419		1915.38	0.01407579		2445.38	-0.00338989		2975.38	0.11666929		3505.38	0.01783792		4035.38	-0.01049246
325.6	0.02090967		855.59	0.01169864		1385.59	0.00287362		1915.58	0.01476555		2445.58	-0.00372676		2975.58	0.11617689		3505.58	0.01825918		4035.58	-0.0117839
325.8	0.02089241		855.79	0.01124506		1385.79	0.00241127		1915.78	0.01492284		2445.78	-0.00350828		2975.78	0.11648568		3505.78	0.01816551		4035.78	-0.01270826
326	0.02002396		855.99	0.01121813		1385.99	0.00178429		1915.98	0.01525482		2445.98	-0.00382151		2975.98	0.11685266		3505.98	0.01752682		4035.98	-0.01368441
326.2	0.01992518		856.19	0.01050614		1386.19	0.00165439		1916.18	0.01530695		2446.18	-0.00358302		2976.18	0.11701562		3506.18	0.01774049		4036.18	-0.01368096
326.4	0.01922012		856.39	0.01037607		1386.39	0.00205632		1916.38	0.01628144		2446.38	-0.00365194		2976.38	0.11638447		3506.38	0.01706624		4036.38	-0.0137388
326.6	0.01978786		856.59	0.00994798		1386.59	0.0009426		1916.58	0.01630098		2446.58	-0.00461217		2976.58	0.11705729		3506.58	0.0168062		4036.58	-0.01361807
326.8	0.0198755		856.79	0.00975154		1386.79	0.00089968		1916.78	0.01563531		2446.78	-0.00544553		2976.78	0.11699237		3506.78	0.01658277		4036.78	-0.01396332
327	0.0201745		856.99	0.00980517		1386.99	0.00049279		1916.98	0.01494454		2446.98	-0.00574386		2976.98	0.11720198		3506.98	0.01583446		4036.98	-0.01377829
327.2	0.02055225		857.19	0.00919813		1387.19	0.00023938		1917.18	0.01512384		2447.18	-0.00579087		2977.18	0.11695617		3507.18	0.01543596		4037.18	-0.01247967
327.4	0.020619		857.39	0.00971862		1387.39	0.00093908		1917.38	0.01440813		2447.38	-0.00562858		2977.38	0.11688055		3507.38	0.01485348		4037.38	-0.01247078
327.6	0.02165948		857.59	0.01107813		1387.59	0.00151372		1917.58	0.01417482		2447.58	-0.00560521		2977.58	0.11628921		3507.58	0.0143394		4037.58	-0.0118487
327.8	0.0214618		857.79	0.01126467		1387.79	0.00274151		1917.78	0.01302118		2447.78	-0.00577985		2977.78	0.11538539		3507.78	0.01377714		4037.78	-0.01132123
328	0.02207857		857.99	0.011888		1387.99	0.00270598		1917.98	0.01262053		2447.98	-0.00528613		2977.98	0.11579404		3507.98	0.0132043		4037.98	-0.01018483
328.2	0.02216005		858.19	0.01189376		1388.19	0.00238345		1918.18	0.01239858		2448.18	-0.00530518		2978.18	0.11588238		3508.18	0.01383187		4038.18	-0.01037718
328.4	0.02245172		858.39	0.01263369		1388.39	0.00252006		1918.38	0.01171471		2448.38	-0.00484753		2978.38	0.11661161		3508.38	0.01377063		4038.38	-0.0105401
328.6	0.02266167		858.59	0.01314333		1388.59	0.00302296		1918.58	0.01095086		2448.58	-0.00525627		2978.58	0.11669343		3508.58	0.01400673		4038.58	-0.01063685
328.8	0.02286528		858.79	0.01329795		1388.79	0.00336826		1918.78	0.01095689		2448.78	-0.00499771		2978.78	0.11668036		3508.78	0.01429092		4038.78	-0.0106585
329	0.02308267		858.99	0.0136376		1388.99	0.00377248		1918.98	0.01184396		2448.98	-0.00400711		2978.98	0.11702062		3508.98	0.01464853		4038.98	-0.01041602
329.2	0.02362931		859.19	0.01352599		1389.19	0.00410271		1919.18	0.01210447		2449.18	-0.00329311		2979.18	0.1170834		3509.18	0.01470458		4039.18	-0.01096034
329.4	0.02355325		859.39	0.01416252		1389.39	0.00366022		1919.38	0.01174396		2449.38	-0.00380339		2979.38	0.11733765		3509.38	0.01441874		4039.38	-0.01223643
329.6	0.02297866		859.59	0.01484196		1389.59	0.00389851		1919.58	0.01250584		2449.58	-0.00266749		2979.58	0.11705663		3509.58	0.01542128		4039.58	-0.01257583
329.8	0.02217661		859.79	0.01531966		1389.79	0.0044429		1919.78	0.0129298		2449.78	-0.00144516		2979.78	0.11767376		3509.78	0.01613726		4039.78	-0.0133444
330	0.02063366		859.99	0.01439977		1389.99	0.00509534		1919.98	0.01320701		2449.98	-0.00149732		2979.98	0.11690195		3509.98	0.01489625		4039.98	-0.01398986
330.2	0.02020195		860.19	0.01472243		1390.19	0.00523204		1920.18	0.01369979		2450.18	-0.00118609		2980.18	0.11701466		3510.18	0.01542663		4040.18	-0.0145693
330.4	0.01954877		860.39	0.01499915		1390.39	0.00448807		1920.38	0.01412426		2450.38	-0.00048538		2980.38	0.1172695		3510.38	0.01513633		4040.38	-0.01567204
330.6	0.02053923		860.59	0.01474359		1390.59	0.00388125		1920.58	0.01385793		2450.58	-0.00139789		2980.58	0.11815219		3510.58	0.01505065		4040.58	-0.01576599
330.8	0.02027503		860.79	0.0153623		1390.79	0.00326781		1920.78	0.01311463		2450.78	-0.0009174		2980.78	0.11842355		3510.78	0.01496224		4040.78	-0.0160557
331	0.02145066		860.99	0.01536084		1390.99	0.00378365		1920.98	0.01428459		2450.98	-0.00067628		2980.98	0.11872026		3510.98	0.01449238		4040.98	-0.01616373
331.2	0.0220166		861.19	0.01457611		1391.19	0.00408738		1921.18	0.01416539		2451.18	-0.00128588		2981.18	0.11844847		3511.18	0.01387606		4041.18	-0.01553489
331.4	0.02276981		861.39	0.01399607		1391.39	0.00469718		1921.38	0.01371516		2451.38	-0.00101829		2981.38	0.11833126		3511.38	0.01362513		4041.38	-0.01582707
331.6	0.02370374		861.59	0.01470718		1391.59	0.00443345		1921.58	0.0136838		2451.58	-0.00106355		2981.58	0.1183311		3511.58	0.01416046		4041.58	-0.01540801
331.8	0.02343601		861.79	0.0134704		1391.79	0.00494079		1921.78	0.01313445		2451.78	-0.00096108		2981.78	0.11858798		3511.78	0.01476541		4041.78	-0.01490143
332	0.02415416		861.99	0.01361851		1391.99	0.00512414		1921.98	0.01334536		2451.98	-0.00066517		2981.98	0.1191212		3511.98	0.0148989		4041.98	-0.01495889
332.2	0.02456881		862.19	0.01330198		1392.19	0.00503531		1922.18	0.01362545		2452.18	-0.00071922		2982.18	0.11918097		3512.18	0.01526288		4042.18	-0.01574467
332.4	0.02551888		862.39	0.0135135		1392.39	0.00554199		1922.38	0.01305887		2452.38	-0.00105842		2982.38	0.11924159		3512.38	0.01546333		4042.38	-0.01554063
332.6	0.02540777		862.59	0.01340701		1392.59	0.00507573		1922.58	0.01363358		2452.58	-0.00144625		2982.58	0.1190174		3512.58	0.01550664		4042.58	-0.01584344
332.8	0.0258216		862.79	0.01324736		1392.79	0.00545087		1922.78	0.01493164		2452.78	-0.00108512		2982.78	0.11890857		3512.78	0.01610839		4042.78	-0.01595215
333	0.02561178		862.99	0.01373574		1392.99	0.0045147		1922.98	0.01546012		2452.98	-0.0011686		2982.98	0.11877146		3512.98	0.01670764		4042.98	-0.01575996
333.2	0.02568792		863.19	0.01321		1393.19	0.00328488		1923.18	0.01473839		2453.18	-0.0020355		2983.18	0.11898143		3513.18	0.01729958		4043.18	-0.01573167
333.4	0.0251043		863.39	0.01435664		1393.39	0.00373269		1923.38	0.01415287		2453.38	-0.00271954		2983.38	0.11987546		3513.38	0.0176113		4043.38	-0.01549186
333.6	0.02506038		863.59	0.01520111		1393.59	0.00350479		1923.58	0.01464308		2453.58	-0.00247044		2983.58	0.12000723		3513.58	0.01768478		4043.58	-0.01507573
333.8	0.02351058		863.79	0.01485284		1393.79	0.00305337		1923.78	0.01454154		2453.78	-0.00237445		2983.78	0.12045554		3513.78	0.01684913		4043.78	-0.01647276
334	0.02235312		863.99	0.01458891		1393.99	0.00341798		1923.98	0.01381842		2453.98	-0.00243019		2983.98	0.12040471		3513.98	0.01566119		4043.98	-0.01670319
334.2	0.02243823		864.19	0.01511639		1394.19	0.00300621		1924.18	0.01327114		2454.18	-0.00205744		2984.18	0.12119849		3514.18	0.01607851		4044.18	-0.01639526
334.4	0.0221987		864.39	0.0144396		1394.39	0.00312115		1924.38	0.01285275		2454.38	-0.00171415		2984.38	0.12203721		3514.38	0.0151422		4044.38	-0.01609781
334.6	0.02218906		864.59	0.01357199		1394.59	0.00334964		1924.58	0.0124937		2454.58	-0.00216007		2984.58	0.12309218		3514.58	0.01453242		4044.58	-0.01683066
334.8	0.02177294		864.79	0.01388747		1394.79	0.00354797		1924.78	0.01242582		2454.78	-0.00169216		2984.78	0.12411612		3514.78	0.0147917		4044.78	-0.01723899
335	0.02172427		864.99	0.01300189		1394.99	0.00479614		1924.98	0.01266977		2454.98	-0.00144422		2984.98	0.12459408		3514.98	0.01386976		4044.98	-0.01708436
335.2	0.02081433		865.19	0.01206331		1395.19	0.0053985		1925.18	0.01229835		2455.18	-0.00139326		2985.18	0.12395881		3515.18	0.01272183		4045.18	-0.01625757
335.4	0.02054624		865.39	0.01115066		1395.39	0.00551436		1925.38	0.01249705		2455.38	-0.0005447		2985.38	0.12450131		3515.38	0.01337193		4045.38	-0.0160786
335.6	0.02099503		865.59	0.01141695		1395.59	0.00621373		1925.58	0.01290475		2455.58	-0.00055638		2985.58	0.12517355		3515.58	0.01356117		4045.58	-0.01623883
335.8	0.02080013		865.79	0.0099695		1395.79	0.00674817		1925.78	0.01309882		2455.78	0.00032925		2985.78	0.12499511		3515.78	0.01364577		4045.78	-0.01565289
336	0.01979763		865.99	0.00999481		1395.99	0.00665918		1925.98	0.01475922		2455.98	0.00037595		2985.98	0.12450608		3515.98	0.01276207		4045.98	-0.01595504
336.2	0.02035556		866.19	0.00936682		1396.19	0.0061213		1926.18	0.01591874		2456.18	-0.00021633		2986.18	0.12336049		3516.18	0.01294483		4046.18	-0.0163403
336.4	0.0211357		866.39	0.00975974		1396.39	0.00533958		1926.38	0.01598305		2456.38	-0.00051398		2986.38	0.12234277		3516.38	0.01305454		4046.38	-0.01529404
336.6	0.02142078		866.59	0.01008068		1396.59	0.00416722		1926.58	0.01642262		2456.58	-0.00025168		2986.58	0.12116367		3516.58	0.01315042		4046.58	-0.01516515
336.8	0.02158014		866.79	0.01116602		1396.79	0.00351764		1926.78	0.01609884		2456.78	-0.00070456		2986.78	0.12083346		3516.78	0.01342087		4046.78	-0.01488307
337	0.02177064		866.99	0.01246664		1396.99	0.00261679		1926.98	0.01489076		2456.98	-0.00167967		2986.98	0.12094155		3516.98	0.01454361		4046.98	-0.01404329
337.2	0.02165403		867.19	0.01315477		1397.19	0.00215602		1927.18	0.01335985		2457.18	-0.00209031		2987.18	0.12027303		3517.18	0.01419243		4047.18	-0.01426334
337.4	0.02199657		867.39	0.01473137		1397.39	0.00291981		1927.38	0.01279686		2457.38	-0.00257977		2987.38	0.12031561		3517.38	0.01336424		4047.38	-0.01477675
337.6	0.02240737		867.59	0.01562449		1397.59	0.00231961		1927.58	0.01232738		2457.58	-0.00332099		2987.58	0.1205716		3517.58	0.014026		4047.58	-0.01518825
337.8	0.02267734		867.79	0.01541932		1397.79	0.00212798		1927.78	0.01172866		2457.78	-0.00465068		2987.78	0.11988793		3517.78	0.01412573		4047.78	-0.01560986
338	0.023334		867.99	0.01624337		1397.99	0.00251186		1927.98	0.00975432		2457.98	-0.00518671		2987.98	0.12033448		3517.98	0.01530984		4047.98	-0.01532627
338.2	0.02350505		868.19	0.01653848		1398.19	0.00197051		1928.18	0.00846825		2458.18	-0.00536925		2988.18	0.12054151		3518.18	0.01622971		4048.18	-0.01512026
338.4	0.02358964		868.39	0.01597311		1398.39	0.00253696		1928.38	0.00804746		2458.38	-0.00598382		2988.38	0.12130584		3518.38	0.01659038		4048.38	-0.01539024
338.6	0.02318172		868.59	0.01569805		1398.59	0.00312239		1928.58	0.00819997		2458.58	-0.00603472		2988.58	0.12263816		3518.58	0.01723786		4048.58	-0.01583899
338.8	0.02288845		868.79	0.01675836		1398.79	0.00369552		1928.78	0.00900006		2458.78	-0.00568167		2988.78	0.12313968		3518.78	0.01760987		4048.78	-0.01540425
339	0.02213471		868.99	0.01553469		1398.99	0.00385685		1928.98	0.00974195		2458.98	-0.00519636		2988.98	0.12325476		3518.98	0.0167444		4048.98	-0.01477285
339.2	0.02108233		869.19	0.01499804		1399.19	0.00430374		1929.18	0.01010759		2459.18	-0.00510881		2989.18	0.12288915		3519.18	0.01726671		4049.18	-0.01440881
339.4	0.02100954		869.39	0.01474316		1399.39	0.00453001		1929.38	0.01043908		2459.38	-0.00430606		2989.38	0.12365194		3519.38	0.01863893		4049.38	-0.01393356
339.6	0.02142149		869.59	0.0141968		1399.59	0.00480995		1929.58	0.01122498		2459.58	-0.00330665		2989.58	0.12407406		3519.58	0.01882907		4049.58	-0.01394573
339.8	0.02079028		869.79	0.01266758		1399.79	0.00482989		1929.78	0.01272315		2459.78	-0.00298269		2989.78	0.12345907		3519.78	0.01878687		4049.78	-0.01416097
340	0.02059334		869.99	0.01245631		1399.99	0.0043948		1929.98	0.01467888		2459.98	-0.00320902		2989.98	0.12334496		3519.98	0.0176085		4049.98	-0.01451348
340.2	0.0210837		870.19	0.01183754		1400.19	0.00405625		1930.18	0.01526787		2460.18	-0.00268028		2990.18	0.12319197		3520.18	0.0172003		4050.18	-0.01417715
340.4	0.0209849		870.39	0.01226483		1400.39	0.00346931		1930.38	0.01555117		2460.38	-0.00139945		2990.38	0.12270746		3520.38	0.01681139		4050.38	-0.01399575
340.6	0.02148851		870.59	0.01221851		1400.59	0.0026805		1930.58	0.0156701		2460.58	-0.00140896		2990.58	0.12213012		3520.58	0.01638292		4050.58	-0.01404209
340.8	0.02079022		870.79	0.01205746		1400.79	0.00346525		1930.78	0.01484939		2460.78	-0.00212988		2990.78	0.1220071		3520.78	0.01544295		4050.78	-0.01446013
341	0.02028743		870.99	0.01200769		1400.99	0.00365789		1930.98	0.01532098		2460.98	-0.00225892		2990.98	0.12157876		3520.98	0.01558816		4050.98	-0.01371746
341.2	0.0202349		871.19	0.01154139		1401.19	0.00330708		1931.18	0.01507483		2461.18	-0.00191126		2991.18	0.12072297		3521.18	0.01428197		4051.18	-0.01403737
341.4	0.02168385		871.39	0.01219009		1401.39	0.00353089		1931.38	0.0146414		2461.38	-0.00285088		2991.38	0.1217941		3521.38	0.01474474		4051.38	-0.0138407
341.6	0.02237333		871.59	0.01282233		1401.59	0.00359028		1931.58	0.01396812		2461.58	-0.00289811		2991.58	0.12231206		3521.58	0.01583774		4051.58	-0.01390388
341.8	0.02335309		871.79	0.01279167		1401.79	0.00308092		1931.78	0.01326928		2461.78	-0.00288371		2991.78	0.12234847		3521.78	0.01555227		4051.78	-0.01346037
342	0.02445908		871.99	0.01369375		1401.99	0.00325365		1931.98	0.01164409		2461.98	-0.0018001		2991.98	0.12333303		3521.98	0.01601528		4051.98	-0.01396277
342.2	0.02429929		872.19	0.0134283		1402.19	0.00346122		1932.18	0.01159635		2462.18	-0.00171944		2992.18	0.12403432		3522.18	0.01513481		4052.18	-0.01423403
342.4	0.02456602		872.39	0.01349997		1402.39	0.00367246		1932.38	0.01167711		2462.38	-0.00200261		2992.38	0.12483011		3522.38	0.01464676		4052.38	-0.01423359
342.6	0.02514038		872.59	0.01338798		1402.59	0.00351937		1932.58	0.01206582		2462.58	-0.00154019		2992.58	0.12546102		3522.58	0.01415461		4052.58	-0.01316692
342.8	0.0249461		872.79	0.01311049		1402.79	0.00324222		1932.78	0.01240876		2462.78	-0.00234782		2992.78	0.12565161		3522.78	0.0142486		4052.78	-0.01309696
343	0.02495408		872.99	0.01249924		1402.99	0.0033814		1932.98	0.01202686		2462.98	-0.00257104		2992.98	0.12497809		3522.98	0.0145305		4052.98	-0.01241235
343.2	0.02458305		873.19	0.01333814		1403.19	0.00276156		1933.18	0.011783		2463.18	-0.00288031		2993.18	0.12553758		3523.18	0.01540365		4053.18	-0.01238536
343.4	0.02496267		873.39	0.01363226		1403.39	0.00330076		1933.38	0.01185763		2463.38	-0.00282748		2993.38	0.12578675		3523.38	0.01582862		4053.38	-0.01199352
343.6	0.02449432		873.59	0.01328251		1403.59	0.00382009		1933.58	0.01236756		2463.58	-0.00313086		2993.58	0.1258558		3523.58	0.01562869		4053.58	-0.01266291
343.8	0.02388266		873.79	0.0130923		1403.79	0.00400721		1933.78	0.01304646		2463.78	-0.00378049		2993.78	0.12546732		3523.78	0.01507032		4053.78	-0.01371511
344	0.02345836		873.99	0.01361338		1403.99	0.0036165		1933.98	0.01340524		2463.98	-0.00345072		2993.98	0.12523317		3523.98	0.0142492		4053.98	-0.01380926
344.2	0.02270707		874.19	0.0125553		1404.19	0.003869		1934.18	0.01302861		2464.18	-0.00384617		2994.18	0.12532365		3524.18	0.01414473		4054.18	-0.01407759
344.4	0.02215698		874.39	0.01204828		1404.39	0.00354858		1934.38	0.01319047		2464.38	-0.00402531		2994.38	0.12423604		3524.38	0.01450362		4054.38	-0.01484621
344.6	0.02196822		874.59	0.0106125		1404.59	0.00357127		1934.58	0.01353501		2464.58	-0.00476266		2994.58	0.12381194		3524.58	0.01395853		4054.58	-0.01530146
344.8	0.02149253		874.79	0.01037787		1404.79	0.00414937		1934.78	0.01368502		2464.78	-0.00497286		2994.78	0.12341329		3524.78	0.01404847		4054.78	-0.0160141
345	0.02105286		874.99	0.01095117		1404.99	0.0034857		1934.98	0.01328515		2464.98	-0.00482959		2994.98	0.12332427		3524.98	0.01449131		4054.98	-0.01574617
345.2	0.02144915		875.19	0.01065292		1405.19	0.00290324		1935.18	0.01251348		2465.18	-0.00499138		2995.18	0.12379336		3525.18	0.01496233		4055.18	-0.01669515
345.4	0.0212866		875.39	0.01158191		1405.39	0.00231774		1935.38	0.0119511		2465.38	-0.00529928		2995.38	0.12484255		3525.38	0.01517483		4055.38	-0.01749222
345.6	0.02087446		875.59	0.01179069		1405.59	0.00248342		1935.58	0.01211098		2465.58	-0.00430451		2995.58	0.12505469		3525.58	0.01568058		4055.58	-0.01795222
345.8	0.02116698		875.79	0.01214789		1405.79	0.00207724		1935.78	0.01174015		2465.78	-0.00384714		2995.78	0.12606671		3525.78	0.01575369		4055.78	-0.01762513
346	0.02146771		875.99	0.01230228		1405.99	0.00267272		1935.98	0.01064494		2465.98	-0.00294477		2995.98	0.12710045		3525.98	0.01567065		4055.98	-0.01848987
346.2	0.02175742		876.19	0.01173791		1406.19	0.00300202		1936.18	0.01042964		2466.18	-0.0028111		2996.18	0.12829935		3526.18	0.01501436		4056.18	-0.01857494
346.4	0.02181076		876.39	0.01232852		1406.39	0.00358048		1936.38	0.01005552		2466.38	-0.00249466		2996.38	0.12931586		3526.38	0.01573669		4056.38	-0.01796001
346.6	0.02252631		876.59	0.01245482		1406.59	0.00427659		1936.58	0.01025294		2466.58	-0.00246076		2996.58	0.12936956		3526.58	0.01593008		4056.58	-0.01712662
346.8	0.02218809		876.79	0.013303		1406.79	0.00524611		1936.78	0.0106676		2466.78	-0.0022217		2996.78	0.13010626		3526.78	0.01752532		4056.78	-0.01782756
347	0.02250431		876.99	0.01455387		1406.99	0.00596622		1936.98	0.01071173		2466.98	-0.00157919		2996.98	0.12986707		3526.98	0.01746837		4056.98	-0.01754508
347.2	0.02245523		877.19	0.01528929		1407.19	0.00605887		1937.18	0.01094346		2467.18	-0.00166343		2997.18	0.13058737		3527.18	0.01773624		4057.18	-0.01751241
347.4	0.02278011		877.39	0.01531086		1407.39	0.00682573		1937.38	0.01116037		2467.38	-0.00164349		2997.38	0.12961464		3527.38	0.01835585		4057.38	-0.01724304
347.6	0.0229247		877.59	0.01607418		1407.59	0.00684723		1937.58	0.01184259		2467.58	-0.0014932		2997.58	0.12939872		3527.58	0.01839679		4057.58	-0.017088
347.8	0.02350957		877.79	0.01621382		1407.79	0.00666515		1937.78	0.0125869		2467.78	-0.0017942		2997.78	0.12847088		3527.78	0.01833303		4057.78	-0.01766222
348	0.02385227		877.99	0.01535329		1407.99	0.00687148		1937.98	0.01299746		2467.98	-0.0030122		2997.98	0.12825472		3527.98	0.01795881		4057.98	-0.01731401
348.2	0.02366302		878.19	0.01465257		1408.19	0.00670426		1938.18	0.01331374		2468.18	-0.00372254		2998.18	0.12749607		3528.18	0.01718596		4058.18	-0.01720833
348.4	0.02377245		878.39	0.01466104		1408.39	0.00654581		1938.38	0.01341733		2468.38	-0.00417579		2998.38	0.1272747		3528.38	0.01681789		4058.38	-0.01789148
348.6	0.02477105		878.59	0.01413478		1408.59	0.00579992		1938.58	0.01388429		2468.58	-0.00415827		2998.58	0.12665477		3528.58	0.01581535		4058.58	-0.01772319
348.8	0.02566343		878.79	0.01448069		1408.79	0.00489002		1938.78	0.01430164		2468.78	-0.00451629		2998.78	0.12604965		3528.78	0.01506707		4058.78	-0.01708864
349	0.02519349		878.99	0.01408562		1408.99	0.00351301		1938.98	0.01330254		2468.98	-0.00494275		2998.98	0.12721327		3528.98	0.01414595		4058.98	-0.01694614
349.2	0.02440342		879.19	0.01344703		1409.19	0.00209045		1939.18	0.01357023		2469.18	-0.00487685		2999.18	0.1278537		3529.18	0.01358754		4059.18	-0.0172276
349.4	0.02336199		879.39	0.01392711		1409.39	0.00127267		1939.38	0.01297011		2469.38	-0.00492535		2999.38	0.12736696		3529.38	0.01317759		4059.38	-0.01673677
349.6	0.02346658		879.59	0.01405634		1409.59	0.00175193		1939.58	0.01204667		2469.58	-0.00457337		2999.58	0.12735029		3529.58	0.01349431		4059.58	-0.01676402
349.8	0.02334033		879.79	0.01387873		1409.79	0.00082437		1939.78	0.01154793		2469.78	-0.00458924		2999.78	0.12808363		3529.78	0.01276745		4059.78	-0.01639665
350	0.02303985		879.99	0.01346874		1409.99	0.00049922		1939.98	0.01045974		2469.98	-0.0039023		2999.98	0.12851138		3529.98	0.01234473		4059.98	-0.01679321
350.2	0.02294418		880.19	0.01447583		1410.19	0.00059124		1940.18	0.01029107		2470.18	-0.00344582		3000.18	0.12840185		3530.18	0.01299242		4060.18	-0.01637058
350.4	0.02180925		880.39	0.01474463		1410.39	0.00157692		1940.38	0.00997831		2470.38	-0.00307359		3000.38	0.12846361		3530.38	0.01344579		4060.38	-0.01610966
350.6	0.02206783		880.59	0.01464276		1410.59	0.00183374		1940.58	0.01069678		2470.58	-0.00226866		3000.58	0.12887952		3530.58	0.01457536		4060.58	-0.01534488
350.8	0.02173321		880.79	0.01459984		1410.79	0.00227013		1940.78	0.01133438		2470.78	-0.0018426		3000.78	0.12927607		3530.78	0.0155798		4060.78	-0.01568155
351	0.0212921		880.99	0.01505288		1410.99	0.00251371		1940.98	0.01138235		2470.98	-0.00250264		3000.98	0.12882362		3530.98	0.015265		4060.98	-0.01601209
351.2	0.02130355		881.19	0.01558432		1411.19	0.00229976		1941.18	0.01102553		2471.18	-0.00283005		3001.18	0.12862709		3531.18	0.01650492		4061.18	-0.01583366
351.4	0.0215783		881.39	0.01556729		1411.39	0.00247495		1941.38	0.01201859		2471.38	-0.00347608		3001.38	0.12798909		3531.38	0.01659454		4061.38	-0.0159959
351.6	0.02168308		881.59	0.0157358		1411.59	0.00307203		1941.58	0.01352789		2471.58	-0.00370356		3001.58	0.12841028		3531.58	0.01736684		4061.58	-0.01659996
351.8	0.02208642		881.79	0.01459765		1411.79	0.00335617		1941.78	0.01385495		2471.78	-0.00456945		3001.78	0.12794217		3531.78	0.01722192		4061.78	-0.01692413
352	0.02185209		881.99	0.0145216		1411.99	0.0035112		1941.98	0.01273576		2471.98	-0.00496906		3001.98	0.12928106		3531.98	0.01608252		4061.98	-0.01748423
352.2	0.02182036		882.19	0.01499389		1412.19	0.00402385		1942.18	0.01300214		2472.18	-0.00477874		3002.18	0.12922519		3532.18	0.01556768		4062.18	-0.01785045
352.4	0.02181261		882.39	0.01493671		1412.39	0.00435668		1942.38	0.01294619		2472.38	-0.00498169		3002.38	0.12968805		3532.38	0.0149363		4062.38	-0.0180719
352.6	0.02180476		882.59	0.01498038		1412.59	0.00433181		1942.58	0.01327508		2472.58	-0.00355224		3002.58	0.12886568		3532.58	0.01387333		4062.58	-0.01752896
352.8	0.02167106		882.79	0.01445341		1412.79	0.00359009		1942.78	0.01320599		2472.78	-0.00276023		3002.78	0.12960935		3532.78	0.01301133		4062.78	-0.01793204
353	0.02088532		882.99	0.01479318		1412.99	0.00406785		1942.98	0.01255613		2472.98	-0.00238147		3002.98	0.1301674		3532.98	0.01227663		4062.98	-0.01876264
353.2	0.02108928		883.19	0.01502721		1413.19	0.00488235		1943.18	0.01246653		2473.18	-0.00218452		3003.18	0.12964942		3533.18	0.01217736		4063.18	-0.01935918
353.4	0.02123583		883.39	0.01518066		1413.39	0.0047017		1943.38	0.01162604		2473.38	-0.00272658		3003.38	0.12963382		3533.38	0.01240599		4063.38	-0.01942113
353.6	0.02148068		883.59	0.01502915		1413.59	0.0044952		1943.58	0.01108634		2473.58	-0.00257596		3003.58	0.13052387		3533.58	0.01205613		4063.58	-0.01994811
353.8	0.02145899		883.79	0.01510749		1413.79	0.00328743		1943.78	0.01099495		2473.78	-0.00255986		3003.78	0.13087789		3533.78	0.01201043		4063.78	-0.0198913
354	0.02119012		883.99	0.01563104		1413.99	0.00257594		1943.98	0.00975377		2473.98	-0.00221025		3003.98	0.13098922		3533.98	0.01266437		4063.98	-0.01895951
354.2	0.02168775		884.19	0.01571008		1414.19	0.00315808		1944.18	0.00997801		2474.18	-0.00166652		3004.18	0.13089901		3534.18	0.01322299		4064.18	-0.01796123
354.4	0.02236756		884.39	0.01384783		1414.39	0.00358417		1944.38	0.00982582		2474.38	-0.00189146		3004.38	0.13155959		3534.38	0.0134514		4064.38	-0.01714432
354.6	0.02373254		884.59	0.013153		1414.59	0.00361143		1944.58	0.01061541		2474.58	-0.00302468		3004.58	0.13273778		3534.58	0.01499064		4064.58	-0.01694172
354.8	0.02335374		884.79	0.01274267		1414.79	0.00377324		1944.78	0.01067231		2474.78	-0.00423752		3004.78	0.13177378		3534.78	0.01545825		4064.78	-0.01764996
355	0.02393992		884.99	0.01364859		1414.99	0.00323092		1944.98	0.01097779		2474.98	-0.00493407		3004.98	0.13160285		3534.98	0.01579318		4064.98	-0.01709292
355.2	0.02415915		885.19	0.01296862		1415.19	0.00259485		1945.18	0.01141458		2475.18	-0.00530385		3005.18	0.13108946		3535.18	0.01657258		4065.18	-0.01647681
355.4	0.0246134		885.39	0.01277192		1415.39	0.00252906		1945.38	0.01215545		2475.38	-0.00609878		3005.38	0.13162271		3535.38	0.01621112		4065.38	-0.01605708
355.6	0.02452401		885.59	0.01259933		1415.59	0.00275368		1945.58	0.0132813		2475.58	-0.0061205		3005.58	0.13183905		3535.58	0.01758505		4065.58	-0.016062
355.8	0.02525374		885.79	0.01222366		1415.79	0.00290103		1945.78	0.01285666		2475.78	-0.00625427		3005.78	0.13159157		3535.78	0.0168256		4065.78	-0.01531232
356	0.02424931		885.99	0.01316028		1415.99	0.00310119		1945.98	0.01263957		2475.98	-0.00606212		3005.98	0.13183345		3535.98	0.0169505		4065.98	-0.01610045
356.2	0.02349595		886.19	0.01293887		1416.19	0.00373962		1946.18	0.0134917		2476.18	-0.00624669		3006.18	0.13087649		3536.18	0.01735146		4066.18	-0.01560667
356.4	0.02213921		886.39	0.0128499		1416.39	0.00363941		1946.38	0.0133954		2476.38	-0.00625814		3006.38	0.13039794		3536.38	0.01671445		4066.38	-0.01517923
356.6	0.02144101		886.59	0.01277959		1416.59	0.00366162		1946.58	0.01278568		2476.58	-0.00512106		3006.58	0.1298737		3536.58	0.01659434		4066.58	-0.01550347
356.8	0.02124227		886.79	0.01290815		1416.79	0.00282642		1946.78	0.01290582		2476.78	-0.0050726		3006.78	0.13025746		3536.78	0.01638418		4066.78	-0.0153476
357	0.02054589		886.99	0.01353256		1416.99	0.00400457		1946.98	0.01312641		2476.98	-0.00584334		3006.98	0.13010229		3536.98	0.01600049		4066.98	-0.01483842
357.2	0.02033612		887.19	0.01390594		1417.19	0.00395251		1947.18	0.01343411		2477.18	-0.00586824		3007.18	0.13074587		3537.18	0.0161267		4067.18	-0.01507926
357.4	0.02014168		887.39	0.01405103		1417.39	0.00344528		1947.38	0.01272327		2477.38	-0.0056404		3007.38	0.1310397		3537.38	0.01561636		4067.38	-0.01478127
357.6	0.02022112		887.59	0.01351225		1417.59	0.00240491		1947.58	0.01199999		2477.58	-0.00492425		3007.58	0.13064115		3537.58	0.01514345		4067.58	-0.01525221
357.8	0.02055555		887.79	0.01424304		1417.79	0.00243843		1947.78	0.01155915		2477.78	-0.00442853		3007.78	0.13081538		3537.78	0.01533942		4067.78	-0.01542526
358	0.02017351		887.99	0.01368965		1417.99	0.00256994		1947.98	0.01177119		2477.98	-0.00463986		3007.98	0.13030316		3537.98	0.01491547		4067.98	-0.01448737
358.2	0.02014459		888.19	0.01276762		1418.19	0.00339977		1948.18	0.01211681		2478.18	-0.00366883		3008.18	0.13038492		3538.18	0.01457398		4068.18	-0.01466004
358.4	0.02064706		888.39	0.01190602		1418.39	0.00376677		1948.38	0.01181086		2478.38	-0.00398371		3008.38	0.13080176		3538.38	0.01460093		4068.38	-0.0148076
358.6	0.02063284		888.59	0.01187284		1418.59	0.00382132		1948.58	0.01212348		2478.58	-0.00417688		3008.58	0.13080185		3538.58	0.01479925		4068.58	-0.01610964
358.8	0.01992537		888.79	0.01201704		1418.79	0.00388107		1948.78	0.01237375		2478.78	-0.00368897		3008.78	0.13009675		3538.78	0.01376722		4068.78	-0.01650238
359	0.02030091		888.99	0.01259253		1418.99	0.00331638		1948.98	0.01287939		2478.98	-0.0035414		3008.98	0.13027854		3538.98	0.01356665		4068.98	-0.01674571
359.2	0.0198741		889.19	0.01144012		1419.19	0.00313312		1949.18	0.01283435		2479.18	-0.00401682		3009.18	0.12939586		3539.18	0.01320849		4069.18	-0.01736762
359.4	0.02013599		889.39	0.01208907		1419.39	0.00418371		1949.38	0.01364098		2479.38	-0.00387698		3009.38	0.12907456		3539.38	0.01360858		4069.38	-0.01759298
359.6	0.02118394		889.59	0.01194487		1419.59	0.00495927		1949.58	0.0147305		2479.58	-0.00343755		3009.58	0.12843165		3539.58	0.01465586		4069.58	-0.0181324
359.8	0.02225548		889.79	0.01205447		1419.79	0.00441005		1949.78	0.01411995		2479.78	-0.00364918		3009.78	0.12842428		3539.78	0.01440355		4069.78	-0.01820947
360	0.02152625		889.99	0.01274014		1419.99	0.00425734		1949.98	0.01380271		2479.98	-0.00364128		3009.98	0.12852705		3539.98	0.01546772		4069.98	-0.01940097
360.2	0.02182661		890.19	0.01312451		1420.19	0.00480359		1950.18	0.01325875		2480.18	-0.00398671		3010.18	0.12901988		3540.18	0.0155675		4070.18	-0.01973121
360.4	0.02301801		890.39	0.01323494		1420.39	0.00454236		1950.38	0.01264092		2480.38	-0.00397962		3010.38	0.13012921		3540.38	0.01532217		4070.38	-0.01910166
360.6	0.02340273		890.59	0.01349403		1420.59	0.00425842		1950.58	0.01252561		2480.58	-0.00369256		3010.58	0.13077156		3540.58	0.01544922		4070.58	-0.01999936
360.8	0.02367049		890.79	0.01467543		1420.79	0.00375646		1950.78	0.01212972		2480.78	-0.00365493		3010.78	0.1308033		3540.78	0.01552556		4070.78	-0.01932444
361	0.02384754		890.99	0.01548257		1420.99	0.00479233		1950.98	0.01263934		2480.98	-0.00367554		3010.98	0.13148489		3540.98	0.01568376		4070.98	-0.01915778
361.2	0.02534299		891.19	0.01631923		1421.19	0.00514436		1951.18	0.01342019		2481.18	-0.00254276		3011.18	0.13191865		3541.18	0.01570173		4071.18	-0.01958282
361.4	0.02572603		891.39	0.0163416		1421.39	0.00475116		1951.38	0.01311586		2481.38	-0.00195721		3011.38	0.13194673		3541.38	0.01596548		4071.38	-0.01896512
361.6	0.02650115		891.59	0.01579922		1421.59	0.00367013		1951.58	0.01319409		2481.58	-0.00179175		3011.58	0.13239364		3541.58	0.01664198		4071.58	-0.01805574
361.8	0.02674141		891.79	0.01639328		1421.79	0.00479727		1951.78	0.01405031		2481.78	-0.00135916		3011.78	0.13282137		3541.78	0.01689908		4071.78	-0.01779544
362	0.02583013		891.99	0.0153948		1421.99	0.00475101		1951.98	0.0149738		2481.98	-0.00220011		3011.98	0.13259947		3541.98	0.01690097		4071.98	-0.01702734
362.2	0.02545009		892.19	0.01500345		1422.19	0.00487429		1952.18	0.01488851		2482.18	-0.00204342		3012.18	0.13294453		3542.18	0.0168441		4072.18	-0.01658177
362.4	0.02574343		892.39	0.01453246		1422.39	0.005107		1952.38	0.01500098		2482.38	-0.00231894		3012.38	0.1331347		3542.38	0.0160813		4072.38	-0.01648393
362.6	0.02446511		892.59	0.01452918		1422.59	0.00497322		1952.58	0.01520701		2482.58	-0.00240214		3012.58	0.13338244		3542.58	0.01587314		4072.58	-0.01653708
362.8	0.02305948		892.79	0.01386058		1422.79	0.00475768		1952.78	0.01625879		2482.78	-0.00253794		3012.78	0.13306618		3542.78	0.01503201		4072.78	-0.01648841
363	0.02264702		892.99	0.01316152		1422.99	0.00430772		1952.98	0.01679181		2482.98	-0.00295549		3012.98	0.13268038		3542.98	0.01499766		4072.98	-0.01587181
363.2	0.02234831		893.19	0.01246299		1423.19	0.00393486		1953.18	0.01731988		2483.18	-0.00342856		3013.18	0.13217166		3543.18	0.01436744		4073.18	-0.01583746
363.4	0.02258131		893.39	0.01318117		1423.39	0.00421422		1953.38	0.01797465		2483.38	-0.00299662		3013.38	0.13222866		3543.38	0.01475087		4073.38	-0.01655075
363.6	0.02299496		893.59	0.01331323		1423.59	0.003793		1953.58	0.0173916		2483.58	-0.00278498		3013.58	0.13266087		3543.58	0.01496181		4073.58	-0.01665502
363.8	0.02191446		893.79	0.01361267		1423.79	0.0036043		1953.78	0.01617143		2483.78	-0.0032355		3013.78	0.13241983		3543.78	0.01534716		4073.78	-0.01714915
364	0.02166528		893.99	0.01446099		1423.99	0.004258		1953.98	0.015874		2483.98	-0.00306515		3013.98	0.13258819		3543.98	0.01528077		4073.98	-0.01728136
364.2	0.02148909		894.19	0.01497529		1424.19	0.00473752		1954.18	0.01540466		2484.18	-0.00306074		3014.18	0.13374482		3544.18	0.01504507		4074.18	-0.0170995
364.4	0.02188263		894.39	0.01512469		1424.39	0.0039559		1954.38	0.01427004		2484.38	-0.00298845		3014.38	0.13454803		3544.38	0.01454707		4074.38	-0.01677938
364.6	0.02165919		894.59	0.01580861		1424.59	0.00397163		1954.58	0.01373155		2484.58	-0.00361879		3014.58	0.13429577		3544.58	0.01442788		4074.58	-0.01668598
364.8	0.02131265		894.79	0.01631759		1424.79	0.00356862		1954.78	0.01236178		2484.78	-0.00336342		3014.78	0.13429095		3544.78	0.01452799		4074.78	-0.01593119
365	0.02227472		894.99	0.01713217		1424.99	0.00409138		1954.98	0.01226058		2484.98	-0.00292708		3014.98	0.13540956		3544.98	0.01487648		4074.98	-0.01539767
365.2	0.02298315		895.19	0.01691449		1425.19	0.00409397		1955.18	0.01209841		2485.18	-0.00321348		3015.18	0.13527117		3545.18	0.01453833		4075.18	-0.01562925
365.4	0.02279339		895.39	0.01654973		1425.39	0.00336939		1955.38	0.01148007		2485.38	-0.00374288		3015.38	0.13528582		3545.38	0.01544884		4075.38	-0.01591798
365.6	0.02427576		895.59	0.01570416		1425.59	0.00278028		1955.58	0.01120666		2485.58	-0.00428468		3015.58	0.13553261		3545.58	0.01593726		4075.58	-0.01557327
365.8	0.02414053		895.79	0.01537118		1425.79	0.00333008		1955.78	0.01139099		2485.78	-0.00454275		3015.78	0.13503749		3545.78	0.01635583		4075.78	-0.0167906
366	0.02408981		895.99	0.01449326		1425.99	0.00377573		1955.98	0.01107639		2485.98	-0.00573198		3015.98	0.13392888		3545.98	0.01654061		4075.98	-0.01654945
366.2	0.02413381		896.19	0.01372542		1426.19	0.00391819		1956.18	0.01025404		2486.18	-0.0046763		3016.18	0.13303614		3546.18	0.01603842		4076.18	-0.01619943
366.4	0.02315311		896.39	0.01347611		1426.39	0.00364548		1956.38	0.01005162		2486.38	-0.00378357		3016.38	0.13309645		3546.38	0.01558078		4076.38	-0.01686327
366.6	0.0219389		896.59	0.01313776		1426.59	0.00341146		1956.58	0.01090074		2486.58	-0.00326999		3016.58	0.13391543		3546.58	0.01608024		4076.58	-0.01728162
366.8	0.02144403		896.79	0.01204432		1426.79	0.0026768		1956.78	0.01231621		2486.78	-0.00314026		3016.78	0.13373886		3546.78	0.01571782		4076.78	-0.01841147
367	0.02181706		896.99	0.01180263		1426.99	0.00205055		1956.98	0.01280217		2486.98	-0.00376425		3016.98	0.13382616		3546.98	0.01482142		4076.98	-0.01867914
367.2	0.02156115		897.19	0.01188956		1427.19	0.00165148		1957.18	0.01367955		2487.18	-0.00336717		3017.18	0.13401217		3547.18	0.01456231		4077.18	-0.01987816
367.4	0.02213023		897.39	0.01243503		1427.39	0.0017328		1957.38	0.01486453		2487.38	-0.00260997		3017.38	0.1346091		3547.38	0.01486885		4077.38	-0.02007631
367.6	0.02174684		897.59	0.01271367		1427.59	0.00157467		1957.58	0.01535922		2487.58	-0.00253009		3017.58	0.13394774		3547.58	0.01507339		4077.58	-0.01961262
367.8	0.02106578		897.79	0.01270817		1427.79	0.00226285		1957.78	0.01540189		2487.78	-0.00280242		3017.78	0.13341738		3547.78	0.0151958		4077.78	-0.01957589
368	0.02110595		897.99	0.01347731		1427.99	0.00219426		1957.98	0.01633189		2487.98	-0.00256908		3017.98	0.1339519		3547.98	0.0145155		4077.98	-0.0189936
368.2	0.02021625		898.19	0.01441655		1428.19	0.00188829		1958.18	0.01597469		2488.18	-0.00248585		3018.18	0.13449064		3548.18	0.01489971		4078.18	-0.01836794
368.4	0.02082565		898.39	0.01465787		1428.39	0.00071906		1958.38	0.01429766		2488.38	-0.00234719		3018.38	0.13393195		3548.38	0.01447361		4078.38	-0.01788104
368.6	0.02171512		898.59	0.01473932		1428.59	0.00039865		1958.58	0.01398628		2488.58	-0.00240835		3018.58	0.1333852		3548.58	0.01487756		4078.58	-0.01677432
368.8	0.02228829		898.79	0.01502928		1428.79	0.00013676		1958.78	0.01310539		2488.78	-0.00162772		3018.78	0.1339156		3548.78	0.0152374		4078.78	-0.0167614
369	0.02274933		898.99	0.01547649		1428.99	0.00111436		1958.98	0.01328879		2488.98	-0.00123929		3018.98	0.13375728		3548.98	0.01599377		4078.98	-0.01659416
369.2	0.02301017		899.19	0.015379		1429.19	0.00152233		1959.18	0.01327566		2489.18	-0.00164334		3019.18	0.13349443		3549.18	0.01579978		4079.18	-0.01653864
369.4	0.02341343		899.39	0.01637287		1429.39	0.00161169		1959.38	0.01287649		2489.38	-0.00116027		3019.38	0.13323302		3549.38	0.01727373		4079.38	-0.0159887
369.6	0.02403607		899.59	0.01612472		1429.59	0.00195329		1959.58	0.01261453		2489.58	-0.00167978		3019.58	0.13294118		3549.58	0.01811319		4079.58	-0.01600649
369.8	0.02431027		899.79	0.01508102		1429.79	0.00249289		1959.78	0.01286068		2489.78	-0.00122447		3019.78	0.13194421		3549.78	0.01856613		4079.78	-0.01655271
370	0.02479668		899.99	0.01470865		1429.99	0.00381812		1959.98	0.01275717		2489.98	-0.00143882		3019.98	0.13176231		3549.98	0.0180171		4079.98	-0.01592935
370.2	0.02435216		900.19	0.01393202		1430.19	0.00350011		1960.18	0.01267036		2490.18	-0.00100198		3020.18	0.13181252		3550.18	0.01817409		4080.18	-0.0161461
370.4	0.02429251		900.39	0.01430535		1430.39	0.00366924		1960.38	0.01385374		2490.38	-0.00183985		3020.38	0.13271523		3550.38	0.01808234		4080.38	-0.01728817
370.6	0.02376728		900.59	0.01418649		1430.59	0.00356768		1960.58	0.01527667		2490.58	-0.00239475		3020.58	0.13422639		3550.58	0.01786735		4080.58	-0.01848852
370.8	0.02353967		900.79	0.01372923		1430.79	0.00253763		1960.78	0.01663885		2490.78	-0.00358208		3020.78	0.13423213		3550.78	0.01697193		4080.78	-0.01853362
371	0.02443803		900.99	0.01397817		1430.99	0.00259131		1960.98	0.01721457		2490.98	-0.0049885		3020.98	0.13492498		3550.98	0.01668571		4080.98	-0.0183883
371.2	0.0240907		901.19	0.01378929		1431.19	0.00191418		1961.18	0.01775223		2491.18	-0.00541056		3021.18	0.13531594		3551.18	0.01650213		4081.18	-0.01913985
371.4	0.02442251		901.39	0.01402348		1431.39	0.00175648		1961.38	0.01825753		2491.38	-0.00567681		3021.38	0.13508886		3551.38	0.01584952		4081.38	-0.01989515
371.6	0.02434905		901.59	0.01446648		1431.59	0.00167077		1961.58	0.01761642		2491.58	-0.00545458		3021.58	0.13425387		3551.58	0.01530533		4081.58	-0.02002134
371.8	0.02361035		901.79	0.01471388		1431.79	0.00253001		1961.78	0.01679932		2491.78	-0.0054062		3021.78	0.13417303		3551.78	0.01512069		4081.78	-0.02081026
372	0.02310211		901.99	0.01492704		1431.99	0.00259936		1961.98	0.01645246		2491.98	-0.00539353		3021.98	0.13435144		3551.98	0.0149844		4081.98	-0.0208532
372.2	0.02233819		902.19	0.0152673		1432.19	0.00308835		1962.18	0.01564329		2492.18	-0.00528535		3022.18	0.13452515		3552.18	0.01468495		4082.18	-0.02092631
372.4	0.02286454		902.39	0.01528473		1432.39	0.00330393		1962.38	0.01500614		2492.38	-0.00513095		3022.38	0.13345819		3552.38	0.01488307		4082.38	-0.02171384
372.6	0.02359041		902.59	0.01499884		1432.59	0.00375439		1962.58	0.01480981		2492.58	-0.0049047		3022.58	0.13353928		3552.58	0.01537686		4082.58	-0.02112548
372.8	0.02387576		902.79	0.01509119		1432.79	0.00421891		1962.78	0.01431967		2492.78	-0.00452985		3022.78	0.13314746		3552.78	0.01553906		4082.78	-0.02091795
373	0.02374222		902.99	0.01416482		1432.99	0.00493335		1962.98	0.014312		2492.98	-0.00411351		3022.98	0.13282981		3552.98	0.01572313		4082.98	-0.02100855
373.2	0.02430919		903.19	0.01388041		1433.19	0.00479712		1963.18	0.01422081		2493.18	-0.00457385		3023.18	0.1337677		3553.18	0.01569288		4083.18	-0.0199982
373.4	0.02478558		903.39	0.01312018		1433.39	0.00493117		1963.38	0.01426635		2493.38	-0.00405928		3023.38	0.13381641		3553.38	0.01709539		4083.38	-0.01992166
373.6	0.02512058		903.59	0.01165377		1433.59	0.00491658		1963.58	0.01418439		2493.58	-0.00370009		3023.58	0.13426353		3553.58	0.01641797		4083.58	-0.01981438
373.8	0.02494833		903.79	0.01063836		1433.79	0.00522726		1963.78	0.0146893		2493.78	-0.00338577		3023.78	0.13422083		3553.78	0.01565223		4083.78	-0.01995159
374	0.02489245		903.99	0.01058779		1433.99	0.00655518		1963.98	0.01475692		2493.98	-0.00387931		3023.98	0.13463154		3553.98	0.01605004		4083.98	-0.0193232
374.2	0.02472444		904.19	0.01005973		1434.19	0.00612089		1964.18	0.01516625		2494.18	-0.00440145		3024.18	0.13508712		3554.18	0.01633005		4084.18	-0.01939925
374.4	0.02471012		904.39	0.01107316		1434.39	0.00610598		1964.38	0.01676737		2494.38	-0.00444323		3024.38	0.13655881		3554.38	0.0162173		4084.38	-0.02049901
374.6	0.02378322		904.59	0.01139618		1434.59	0.00542884		1964.58	0.01675649		2494.58	-0.00516938		3024.58	0.13828719		3554.58	0.01647745		4084.58	-0.02058985
374.8	0.02463877		904.79	0.01195323		1434.79	0.00571001		1964.78	0.01748197		2494.78	-0.00612168		3024.78	0.1387018		3554.78	0.01747054		4084.78	-0.01963712
375	0.02535542		904.99	0.01259338		1434.99	0.00607318		1964.98	0.01734206		2494.98	-0.00617303		3024.98	0.13928535		3554.98	0.01792002		4084.98	-0.01966914
375.2	0.02490651		905.19	0.01380487		1435.19	0.0050663		1965.18	0.01698219		2495.18	-0.00595921		3025.18	0.13906744		3555.18	0.01791855		4085.18	-0.01951524
375.4	0.02548535		905.39	0.01528958		1435.39	0.00513202		1965.38	0.01666839		2495.38	-0.00580522		3025.38	0.13964711		3555.38	0.01795165		4085.38	-0.01909568
375.6	0.0258064		905.59	0.01626313		1435.59	0.00500968		1965.58	0.01603396		2495.58	-0.0052881		3025.58	0.14066743		3555.58	0.01803951		4085.58	-0.01873167
375.8	0.02469375		905.79	0.01662367		1435.79	0.00504917		1965.78	0.01591082		2495.78	-0.00565188		3025.78	0.14093423		3555.78	0.01826005		4085.78	-0.01849437
376	0.02520368		905.99	0.01749888		1435.99	0.00534252		1965.98	0.01538608		2495.98	-0.00632484		3025.98	0.14110473		3555.98	0.01810441		4085.98	-0.0176787
376.2	0.02526501		906.19	0.01787629		1436.19	0.00491437		1966.18	0.01537903		2496.18	-0.00568631		3026.18	0.14196114		3556.18	0.01691569		4086.18	-0.0167853
376.4	0.02573043		906.39	0.01791962		1436.39	0.0043557		1966.38	0.01486852		2496.38	-0.00555471		3026.38	0.14101365		3556.38	0.01697017		4086.38	-0.01584189
376.6	0.02645599		906.59	0.01731218		1436.59	0.0035914		1966.58	0.01374927		2496.58	-0.00507424		3026.58	0.14098762		3556.58	0.01622737		4086.58	-0.01496107
376.8	0.0259167		906.79	0.01654929		1436.79	0.00332339		1966.78	0.01343332		2496.78	-0.00526892		3026.78	0.13996885		3556.78	0.01597474		4086.78	-0.01444263
377	0.02516845		906.99	0.01534828		1436.99	0.00318908		1966.98	0.01386508		2496.98	-0.00508426		3026.98	0.13985985		3556.98	0.01603919		4086.98	-0.0142611
377.2	0.02493986		907.19	0.01373193		1437.19	0.00305861		1967.18	0.01430101		2497.18	-0.00511768		3027.18	0.13956284		3557.18	0.0154358		4087.18	-0.01330784
377.4	0.02499637		907.39	0.01249626		1437.39	0.00322565		1967.38	0.01403434		2497.38	-0.0039096		3027.38	0.13871256		3557.38	0.01579703		4087.38	-0.01370422
377.6	0.02410108		907.59	0.01170285		1437.59	0.00275235		1967.58	0.01395779		2497.58	-0.0037229		3027.58	0.13752104		3557.58	0.01432019		4087.58	-0.01443466
377.8	0.02336983		907.79	0.0109187		1437.79	0.00319624		1967.78	0.01383526		2497.78	-0.00387341		3027.78	0.13664789		3557.78	0.01412389		4087.78	-0.01580623
378	0.02313774		907.99	0.01043724		1437.99	0.00348808		1967.98	0.01357839		2497.98	-0.00381176		3027.98	0.13630434		3557.98	0.01433047		4087.98	-0.01630032
378.2	0.02273986		908.19	0.01023427		1438.19	0.00317169		1968.18	0.0136845		2498.18	-0.00384802		3028.18	0.13646912		3558.18	0.01357212		4088.18	-0.01733349
378.4	0.0223287		908.39	0.01066102		1438.39	0.00327787		1968.38	0.01401803		2498.38	-0.00378222		3028.38	0.1364111		3558.38	0.01347812		4088.38	-0.01876134
378.6	0.02207902		908.59	0.0110049		1438.59	0.00343215		1968.58	0.01346829		2498.58	-0.00471799		3028.58	0.13625728		3558.58	0.01353836		4088.58	-0.01883485
378.8	0.02217355		908.79	0.01158365		1438.79	0.00398869		1968.78	0.01388185		2498.78	-0.004897		3028.78	0.13554207		3558.78	0.01336131		4088.78	-0.01915846
379	0.02181799		908.99	0.01221652		1438.99	0.00363317		1968.98	0.01348199		2498.98	-0.00492925		3028.98	0.1349969		3558.98	0.0128246		4088.98	-0.01956341
379.2	0.02168816		909.19	0.0133491		1439.19	0.00319333		1969.18	0.01292131		2499.18	-0.00566302		3029.18	0.13481202		3559.18	0.01272418		4089.18	-0.01985944
379.4	0.02146442		909.39	0.01361253		1439.39	0.00311423		1969.38	0.01264278		2499.38	-0.00632599		3029.38	0.13501007		3559.38	0.01199376		4089.38	-0.02038952
379.6	0.02123655		909.59	0.01410734		1439.59	0.00292482		1969.58	0.01221405		2499.58	-0.00640035		3029.58	0.13463998		3559.58	0.0113469		4089.58	-0.02098076
379.8	0.0211769		909.79	0.01473488		1439.79	0.00264083		1969.78	0.0119184		2499.78	-0.00693154		3029.78	0.13420506		3559.78	0.01104008		4089.78	-0.0206304
379.99	0.0211769		909.99	0.01473488		1439.99	0.00264083		1969.98	0.0119184		2499.98	-0.00693154		3029.98	0.13420506		3559.98	0.01104008		4089.98	-0.0206304
380.19	0.02219472		910.19	0.01432725		1440.19	0.00250064		1970.18	0.01270492		2500.18	-0.00780687		3030.18	0.13560603		3560.18	0.01052323		4090.18	-0.02056751
380.39	0.02212387		910.39	0.01409848		1440.39	0.00263133		1970.38	0.01340664		2500.38	-0.00828157		3030.38	0.13603066		3560.38	0.01018255		4090.38	-0.02066847
380.59	0.02240131		910.59	0.01363831		1440.59	0.00296275		1970.58	0.01357918		2500.58	-0.00889999		3030.58	0.13677502		3560.58	0.00970488		4090.58	-0.0206368
380.79	0.02242093		910.79	0.01330211		1440.79	0.00274928		1970.78	0.01312537		2500.78	-0.00973069		3030.78	0.13719534		3560.78	0.00905104		4090.78	-0.02017996
380.99	0.022385		910.99	0.01378947		1440.99	0.00259451		1970.98	0.01255839		2500.98	-0.01051775		3030.98	0.13794645		3560.98	0.00881968		4090.98	-0.02014723
381.19	0.02240438		911.19	0.01336245		1441.19	0.00265722		1971.18	0.01281591		2501.18	-0.01110302		3031.18	0.13786778		3561.18	0.00898127		4091.18	-0.02035072
381.39	0.02207257		911.39	0.01370427		1441.39	0.00250469		1971.38	0.0128418		2501.38	-0.01136465		3031.38	0.13779412		3561.38	0.0091459		4091.38	-0.01966091
381.59	0.02164517		911.59	0.01368683		1441.59	0.00285214		1971.58	0.01283443		2501.58	-0.01228685		3031.58	0.13813474		3561.58	0.00924026		4091.58	-0.0192546
381.79	0.02127558		911.79	0.01301767		1441.79	0.00350312		1971.78	0.01271643		2501.78	-0.01255358		3031.78	0.13826793		3561.78	0.00862815		4091.78	-0.01885707
381.99	0.02113883		911.99	0.01303491		1441.99	0.00454226		1971.98	0.01238938		2501.98	-0.01247765		3031.98	0.13752022		3561.98	0.00879813		4091.98	-0.01892462
382.19	0.02111248		912.19	0.01224936		1442.19	0.00493607		1972.18	0.01172593		2502.18	-0.01228064		3032.18	0.13649863		3562.18	0.00916488		4092.18	-0.01870077
382.39	0.02046265		912.39	0.01258732		1442.39	0.00573657		1972.38	0.01012565		2502.38	-0.01257407		3032.38	0.13605453		3562.38	0.00913474		4092.38	-0.01860781
382.59	0.01965985		912.59	0.0131181		1442.59	0.00524511		1972.58	0.00929835		2502.58	-0.01217087		3032.58	0.13482894		3562.58	0.00892745		4092.58	-0.01856482
382.79	0.01944958		912.79	0.01374637		1442.79	0.00571351		1972.78	0.00829172		2502.78	-0.01177869		3032.78	0.13501573		3562.78	0.00884367		4092.78	-0.01889697
382.99	0.02008868		912.99	0.01478453		1442.99	0.00580374		1972.98	0.00778486		2502.98	-0.01145313		3032.98	0.13515916		3562.98	0.00794032		4092.98	-0.02000343
383.19	0.01975853		913.19	0.01389912		1443.19	0.00472794		1973.18	0.00821849		2503.18	-0.0114686		3033.18	0.13476248		3563.18	0.00750763		4093.18	-0.02022371
383.39	0.01942042		913.39	0.01377509		1443.39	0.00408623		1973.38	0.00815998		2503.38	-0.01164584		3033.38	0.13446504		3563.38	0.00697326		4093.38	-0.02053755
383.59	0.01947471		913.59	0.01332069		1443.59	0.00390629		1973.58	0.00842863		2503.58	-0.01115525		3033.58	0.13548381		3563.58	0.00613439		4093.58	-0.0206439
383.79	0.01973428		913.79	0.01270084		1443.79	0.00365796		1973.78	0.00845791		2503.78	-0.01072783		3033.78	0.13532723		3563.78	0.00526759		4093.78	-0.02131018
383.99	0.01906817		913.99	0.01188412		1443.99	0.00417916		1973.98	0.00883567		2503.98	-0.01111491		3033.98	0.13461387		3563.98	0.00502666		4093.98	-0.02153353
384.19	0.01913858		914.19	0.01108096		1444.19	0.00418298		1974.18	0.00977744		2504.18	-0.01067		3034.18	0.13456712		3564.18	0.00506684		4094.18	-0.02109797
384.39	0.01775994		914.39	0.0109616		1444.39	0.00493178		1974.38	0.00967106		2504.38	-0.01065037		3034.38	0.13452723		3564.38	0.00440972		4094.38	-0.02084814
384.59	0.01757393		914.59	0.01159072		1444.59	0.00547145		1974.58	0.00889887		2504.58	-0.0104897		3034.58	0.13444765		3564.58	0.00428659		4094.58	-0.02042062
384.79	0.01706997		914.79	0.01159724		1444.79	0.00442927		1974.78	0.00836089		2504.78	-0.01077954		3034.78	0.13384456		3564.78	0.00443136		4094.78	-0.01999294
384.99	0.01697609		914.99	0.01236232		1444.99	0.00468157		1974.98	0.0083597		2504.98	-0.01081684		3034.98	0.13353439		3564.98	0.00527984		4094.98	-0.01992486
385.19	0.01645376		915.19	0.01188751		1445.19	0.0050478		1975.18	0.00886983		2505.18	-0.0117093		3035.18	0.13300069		3565.18	0.00619545		4095.18	-0.01929483
385.39	0.01552611		915.39	0.01273681		1445.39	0.00481892		1975.38	0.00928527		2505.38	-0.01199572		3035.38	0.13236525		3565.38	0.00691889		4095.38	-0.01810701
385.59	0.01524891		915.59	0.01280656		1445.59	0.00536724		1975.58	0.00913839		2505.58	-0.01275129		3035.58	0.13191478		3565.58	0.00730554		4095.58	-0.01830128
385.79	0.01535199		915.79	0.0122842		1445.79	0.00499384		1975.78	0.00945475		2505.78	-0.01316781		3035.78	0.13079891		3565.78	0.00743807		4095.78	-0.01888057
385.99	0.01568783		915.99	0.0133679		1445.99	0.00558115		1975.98	0.00893097		2505.98	-0.01326909		3035.98	0.12950909		3565.98	0.00848026		4095.98	-0.01939987
386.19	0.01546577		916.19	0.01271261		1446.19	0.00500882		1976.18	0.00811729		2506.18	-0.01351802		3036.18	0.12907983		3566.18	0.00901124		4096.18	-0.01887569
386.39	0.01558179		916.39	0.01373568		1446.39	0.00484003		1976.38	0.00792752		2506.38	-0.01271421		3036.38	0.12850937		3566.38	0.00932549		4096.38	-0.01915685
386.59	0.01592817		916.59	0.01380806		1446.59	0.00382746		1976.58	0.0082502		2506.58	-0.01185292		3036.58	0.12819648		3566.58	0.00987291		4096.58	-0.0187504
386.79	0.01630279		916.79	0.01403664		1446.79	0.00323388		1976.78	0.00873547		2506.78	-0.01162336		3036.78	0.12824194		3566.78	0.00986661		4096.78	-0.01871444
386.99	0.01684368		916.99	0.01321961		1446.99	0.00297695		1976.98	0.00943931		2506.98	-0.01177018		3036.98	0.12886588		3566.98	0.00972137		4096.98	-0.01940755
387.19	0.01686375		917.19	0.01228007		1447.19	0.00265403		1977.18	0.00959417		2507.18	-0.01013415		3037.18	0.12923127		3567.18	0.01031857		4097.18	-0.01917571
387.39	0.01690042		917.39	0.01134884		1447.39	0.00273423		1977.38	0.00899014		2507.38	-0.01048609		3037.38	0.12997238		3567.38	0.00996408		4097.38	-0.02039895
387.59	0.01672081		917.59	0.0107396		1447.59	0.00270057		1977.58	0.00919642		2507.58	-0.01003913		3037.58	0.13082551		3567.58	0.0094887		4097.58	-0.02092425
387.79	0.01696499		917.79	0.00963742		1447.79	0.00256073		1977.78	0.00911462		2507.78	-0.01058634		3037.78	0.13102746		3567.78	0.0091591		4097.78	-0.02135096
387.99	0.01637734		917.99	0.0095759		1447.99	0.00285225		1977.98	0.00979056		2507.98	-0.01030337		3037.98	0.13080483		3567.98	0.00850856		4097.98	-0.02049829
388.19	0.01632973		918.19	0.0098551		1448.19	0.00260506		1978.18	0.01004621		2508.18	-0.01069624		3038.18	0.13125235		3568.18	0.0078047		4098.18	-0.02031102
388.39	0.01593843		918.39	0.01036692		1448.39	0.0032047		1978.38	0.00976806		2508.38	-0.01026761		3038.38	0.13153495		3568.38	0.0065245		4098.38	-0.02026488
388.59	0.01571797		918.59	0.01092588		1448.59	0.00385584		1978.58	0.00930922		2508.58	-0.01026797		3038.58	0.13069539		3568.58	0.00658987		4098.58	-0.0204064
388.79	0.0154896		918.79	0.0105081		1448.79	0.00372519		1978.78	0.00862917		2508.78	-0.0109063		3038.78	0.13060395		3568.78	0.00626605		4098.78	-0.02027026
388.99	0.01488571		918.99	0.01147135		1448.99	0.00377614		1978.98	0.00888427		2508.98	-0.01095159		3038.98	0.13026915		3568.98	0.00609819		4098.98	-0.02070402
389.19	0.01401846		919.19	0.01186068		1449.19	0.00299397		1979.18	0.00849674		2509.18	-0.01104556		3039.18	0.13024472		3569.18	0.00651948		4099.18	-0.02010123
389.39	0.01324072		919.39	0.01293447		1449.39	0.00287923		1979.38	0.00899455		2509.38	-0.01044133		3039.38	0.12872043		3569.38	0.00647034		4099.38	-0.02057799
389.59	0.01324517		919.59	0.01309188		1449.59	0.00306367		1979.58	0.00907409		2509.58	-0.01095799		3039.58	0.12836765		3569.58	0.00723728		4099.58	-0.02078787
389.79	0.01279332		919.79	0.0131625		1449.79	0.00229415		1979.78	0.01049477		2509.78	-0.01192597		3039.78	0.12754687		3569.78	0.00761887		4099.78	-0.02123412
389.99	0.01246443		919.99	0.01415441		1449.99	0.00299735		1979.98	0.00988027		2509.98	-0.01188988		3039.98	0.12658715		3569.98	0.00857862		4099.98	-0.02112779
390.19	0.01288068		920.19	0.01344252		1450.19	0.00318104		1980.18	0.01010458		2510.18	-0.01109256		3040.18	0.12569963		3570.18	0.00903457		4100.18	-0.02132216
390.39	0.01300163		920.39	0.01372629		1450.39	0.00293703		1980.38	0.01076346		2510.38	-0.01086962		3040.38	0.12551953		3570.38	0.00976848		4100.38	-0.0222934
390.59	0.01301536		920.59	0.0134001		1450.59	0.00221822		1980.58	0.01027879		2510.58	-0.01079344		3040.58	0.12578248		3570.58	0.0103871		4100.58	-0.02245114
390.79	0.0133609		920.79	0.01308446		1450.79	0.00244839		1980.78	0.01097737		2510.78	-0.01037354		3040.78	0.12518552		3570.78	0.01088679		4100.78	-0.02288911
390.99	0.01418823		920.99	0.01239684		1450.99	0.00286207		1980.98	0.0108846		2510.98	-0.01040971		3040.98	0.12589269		3570.98	0.01165964		4100.98	-0.02357048
391.19	0.01440364		921.19	0.01283992		1451.19	0.00294376		1981.18	0.01020819		2511.18	-0.01028892		3041.18	0.12605559		3571.18	0.01213101		4101.18	-0.02304826
391.39	0.01485535		921.39	0.0123704		1451.39	0.0023218		1981.38	0.00934774		2511.38	-0.01200917		3041.38	0.12700652		3571.38	0.01153072		4101.38	-0.02333503
391.59	0.01497957		921.59	0.01226648		1451.59	0.00145758		1981.58	0.00918918		2511.58	-0.01119829		3041.58	0.12703872		3571.58	0.01134584		4101.58	-0.02239625
391.79	0.01506328		921.79	0.01215322		1451.79	0.00107895		1981.78	0.00846864		2511.78	-0.01094775		3041.78	0.12720301		3571.78	0.01092338		4101.78	-0.02211789
391.99	0.01513183		921.99	0.01256335		1451.99	0.00121471		1981.98	0.00827525		2511.98	-0.01058334		3041.98	0.12663501		3571.98	0.01078052		4101.98	-0.02187858
392.19	0.01577065		922.19	0.01269159		1452.19	0.00211466		1982.18	0.00797864		2512.18	-0.01108222		3042.18	0.12632685		3572.18	0.01043457		4102.18	-0.02117773
392.39	0.01482768		922.39	0.01236351		1452.39	0.00255867		1982.38	0.00752977		2512.38	-0.01043783		3042.38	0.1263086		3572.38	0.01080105		4102.38	-0.02026241
392.59	0.0144618		922.59	0.01223838		1452.59	0.00293541		1982.58	0.00689279		2512.58	-0.01102364		3042.58	0.12619363		3572.58	0.01075985		4102.58	-0.01956377
392.79	0.01439428		922.79	0.01181478		1452.79	0.00218073		1982.78	0.0061967		2512.78	-0.01052913		3042.78	0.12610355		3572.78	0.01030053		4102.78	-0.01984692
392.99	0.01419233		922.99	0.0119698		1452.99	0.00146383		1982.98	0.0075164		2512.98	-0.0103894		3042.98	0.1257572		3572.98	0.00966844		4102.98	-0.01958781
393.19	0.01416927		923.19	0.01101314		1453.19	0.00151946		1983.18	0.00720101		2513.18	-0.01003312		3043.18	0.12630415		3573.18	0.01029205		4103.18	-0.01866526
393.39	0.01347438		923.39	0.01070374		1453.39	0.00226632		1983.38	0.00850704		2513.38	-0.01012554		3043.38	0.12572572		3573.38	0.00955963		4103.38	-0.0186767
393.59	0.01373176		923.59	0.00991368		1453.59	0.00240835		1983.58	0.00887891		2513.58	-0.01035174		3043.58	0.12634606		3573.58	0.01004291		4103.58	-0.017767
393.79	0.01316416		923.79	0.00946377		1453.79	0.00239897		1983.78	0.00992848		2513.78	-0.01073561		3043.78	0.12555393		3573.78	0.01003479		4103.78	-0.01874311
393.99	0.01320321		923.99	0.00875831		1453.99	0.00249426		1983.98	0.0095665		2513.98	-0.01002279		3043.98	0.1252952		3573.98	0.01030999		4103.98	-0.01836605
394.19	0.01351375		924.19	0.00796507		1454.19	0.0033438		1984.18	0.00957205		2514.18	-0.00921797		3044.18	0.12531152		3574.18	0.00956406		4104.18	-0.01874462
394.39	0.01319186		924.39	0.00847921		1454.39	0.00320676		1984.38	0.01035325		2514.38	-0.00909806		3044.38	0.12587828		3574.38	0.00947635		4104.38	-0.01871868
394.59	0.01361397		924.59	0.00947703		1454.59	0.0023616		1984.58	0.01010216		2514.58	-0.00848428		3044.58	0.12532054		3574.58	0.00926555		4104.58	-0.01766912
394.79	0.01375754		924.79	0.00934382		1454.79	0.00256196		1984.78	0.01101738		2514.78	-0.00730063		3044.78	0.1247623		3574.78	0.00882499		4104.78	-0.01792425
394.99	0.01478906		924.99	0.00962538		1454.99	0.00143761		1984.98	0.01048962		2514.98	-0.00801976		3044.98	0.12525214		3574.98	0.00874327		4104.98	-0.01829999
395.19	0.0148752		925.19	0.01012836		1455.19	0.00093497		1985.18	0.00930807		2515.18	-0.00816308		3045.18	0.12489263		3575.18	0.00825074		4105.18	-0.0182762
395.39	0.01462905		925.39	0.01084442		1455.39	-0.00006989		1985.38	0.0091476		2515.38	-0.00869589		3045.38	0.12458668		3575.38	0.00798213		4105.38	-0.01903505
395.59	0.01430241		925.59	0.0115339		1455.59	0.0000147		1985.58	0.00838127		2515.58	-0.00812156		3045.58	0.12435996		3575.58	0.00790419		4105.58	-0.01980122
395.79	0.01370182		925.79	0.01234936		1455.79	-0.00001847		1985.78	0.00752779		2515.78	-0.00761688		3045.78	0.12470432		3575.78	0.00805114		4105.78	-0.02035186
395.99	0.01343424		925.99	0.01340209		1455.99	0.00057022		1985.98	0.0081548		2515.98	-0.00882562		3045.98	0.12452636		3575.98	0.00760311		4105.98	-0.0208578
396.19	0.01355737		926.19	0.0144777		1456.19	0.00045895		1986.18	0.00774571		2516.18	-0.00921868		3046.18	0.12427743		3576.18	0.00733592		4106.18	-0.02086412
396.39	0.0130951		926.39	0.01438673		1456.39	0.00003113		1986.38	0.00710373		2516.38	-0.00984773		3046.38	0.12412787		3576.38	0.00760185		4106.38	-0.02136235
396.59	0.01354496		926.59	0.01431948		1456.59	0.00019908		1986.58	0.00656165		2516.58	-0.01063243		3046.58	0.12427818		3576.58	0.00756217		4106.58	-0.02202117
396.79	0.01293354		926.79	0.01368439		1456.79	0.00061784		1986.78	0.00658233		2516.78	-0.01068744		3046.78	0.12410259		3576.78	0.00760546		4106.78	-0.02235289
396.99	0.01228408		926.99	0.01324971		1456.99	0.00094306		1986.98	0.00747653		2516.98	-0.01192643		3046.98	0.12435318		3576.98	0.00828023		4106.98	-0.02164991
397.19	0.01166672		927.19	0.01229497		1457.19	0.00123294		1987.18	0.00680567		2517.18	-0.01171336		3047.18	0.12448757		3577.18	0.00799984		4107.18	-0.02136329
397.39	0.01188426		927.39	0.01207389		1457.39	0.00193258		1987.38	0.00672795		2517.38	-0.01205221		3047.38	0.12451998		3577.38	0.00733856		4107.38	-0.02118358
397.59	0.01240481		927.59	0.01168196		1457.59	0.00277697		1987.58	0.0063674		2517.58	-0.01229257		3047.58	0.12564805		3577.58	0.00771398		4107.58	-0.02105226
397.79	0.01190886		927.79	0.01115309		1457.79	0.00312792		1987.78	0.0066916		2517.78	-0.01280056		3047.78	0.12561907		3577.78	0.00742852		4107.78	-0.02131898
397.99	0.01167087		927.99	0.01071632		1457.99	0.00384611		1987.98	0.00644722		2517.98	-0.01221091		3047.98	0.12580089		3577.98	0.00808924		4107.98	-0.02002557
398.19	0.01172618		928.19	0.01105192		1458.19	0.00522737		1988.18	0.00613074		2518.18	-0.01181232		3048.18	0.12539367		3578.18	0.00851174		4108.18	-0.01959442
398.39	0.0126867		928.39	0.01098794		1458.39	0.00557607		1988.38	0.00740857		2518.38	-0.01061383		3048.38	0.12514177		3578.38	0.00869744		4108.38	-0.0191806
398.59	0.01284754		928.59	0.01083482		1458.59	0.00448174		1988.58	0.00647733		2518.58	-0.01006973		3048.58	0.12538499		3578.58	0.00907552		4108.58	-0.01854661
398.79	0.01268695		928.79	0.01030389		1458.79	0.00535068		1988.78	0.00636402		2518.78	-0.00959863		3048.78	0.12612168		3578.78	0.00908994		4108.78	-0.01925562
398.99	0.01381192		928.99	0.01035488		1458.99	0.00544492		1988.98	0.0063426		2518.98	-0.0105687		3048.98	0.12590056		3578.98	0.0093032		4108.98	-0.01947898
399.19	0.01288786		929.19	0.01094761		1459.19	0.00624359		1989.18	0.00626629		2519.18	-0.0110831		3049.18	0.12595102		3579.18	0.00850325		4109.18	-0.01950768
399.39	0.01297423		929.39	0.01152181		1459.39	0.00591973		1989.38	0.00716767		2519.38	-0.01092511		3049.38	0.12576633		3579.38	0.00904631		4109.38	-0.01981055
399.59	0.01306139		929.59	0.01199426		1459.59	0.00580205		1989.58	0.00731219		2519.58	-0.01041601		3049.58	0.1255597		3579.58	0.00800745		4109.58	-0.01967252
399.79	0.01376385		929.79	0.01294948		1459.79	0.00522532		1989.78	0.00784444		2519.78	-0.00989603		3049.78	0.12592322		3579.78	0.00773305		4109.78	-0.01974853
399.99	0.01429516		929.99	0.01366695		1459.99	0.00525085		1989.98	0.00863425		2519.98	-0.01099974		3049.98	0.12619348		3579.98	0.00718516		4109.98	-0.01998777
400.19	0.01557282		930.19	0.01367624		1460.19	0.00409278		1990.18	0.00846157		2520.18	-0.0109368		3050.18	0.12684011		3580.18	0.0079133		4110.18	-0.0197283
400.39	0.01559221		930.39	0.0132132		1460.39	0.00369553		1990.38	0.00912105		2520.38	-0.01125368		3050.38	0.12682186		3580.38	0.00845303		4110.38	-0.01981475
400.59	0.01586422		930.59	0.01279774		1460.59	0.00368673		1990.58	0.00980596		2520.58	-0.01171419		3050.58	0.12664294		3580.58	0.00968256		4110.58	-0.0192627
400.79	0.01439507		930.79	0.01232359		1460.79	0.00314028		1990.78	0.01082664		2520.78	-0.01231761		3050.78	0.12585867		3580.78	0.00880523		4110.78	-0.01835842
400.99	0.01489675		930.99	0.01193936		1460.99	0.0021478		1990.98	0.01050766		2520.98	-0.01308938		3050.98	0.12578262		3580.98	0.00802204		4110.98	-0.01848846
401.19	0.01581271		931.19	0.01232206		1461.19	0.00198889		1991.18	0.01099778		2521.18	-0.01254139		3051.18	0.12499167		3581.18	0.0072453		4111.18	-0.01902365
401.39	0.01622979		931.39	0.01291208		1461.39	0.00194334		1991.38	0.01119577		2521.38	-0.0131382		3051.38	0.12378003		3581.38	0.00791474		4111.38	-0.01902091
401.59	0.01552957		931.59	0.01282508		1461.59	0.00153453		1991.58	0.01140784		2521.58	-0.01354093		3051.58	0.12354058		3581.58	0.00803306		4111.58	-0.01867897
401.79	0.01502987		931.79	0.01244081		1461.79	0.00126356		1991.78	0.0113503		2521.78	-0.01278308		3051.78	0.1225348		3581.78	0.00858766		4111.78	-0.01811382
401.99	0.015061		931.99	0.01217622		1461.99	0.00145924		1991.98	0.01133843		2521.98	-0.01265611		3051.98	0.12188762		3581.98	0.00969944		4111.98	-0.01832486
402.19	0.01515333		932.19	0.01161866		1462.19	0.00106264		1992.18	0.01149849		2522.18	-0.01275333		3052.18	0.12073483		3582.18	0.00956505		4112.18	-0.01862828
402.39	0.01517095		932.39	0.01099312		1462.39	0.00068697		1992.38	0.01172879		2522.38	-0.0120644		3052.38	0.12120301		3582.38	0.00894309		4112.38	-0.01961565
402.59	0.01406006		932.59	0.01097639		1462.59	0.00111869		1992.58	0.01089082		2522.58	-0.01230718		3052.58	0.12167313		3582.58	0.00916947		4112.58	-0.02006759
402.79	0.01358778		932.79	0.01103405		1462.79	0.00215079		1992.78	0.01088434		2522.78	-0.01222246		3052.78	0.12163071		3582.78	0.00867339		4112.78	-0.02064275
402.99	0.01395729		932.99	0.01045591		1462.99	0.00193819		1992.98	0.01100771		2522.98	-0.01249576		3052.98	0.12116255		3582.98	0.00861599		4112.98	-0.02023599
403.19	0.01356657		933.19	0.01016033		1463.19	0.00252016		1993.18	0.01037143		2523.18	-0.01313252		3053.18	0.12232775		3583.18	0.00843712		4113.18	-0.02060655
403.39	0.0136357		933.39	0.01029816		1463.39	0.00286824		1993.38	0.0095945		2523.38	-0.01240758		3053.38	0.12258658		3583.38	0.00847399		4113.38	-0.02041847
403.59	0.01332552		933.59	0.01108945		1463.59	0.00368047		1993.58	0.00935219		2523.58	-0.01224105		3053.58	0.1228195		3583.58	0.00769476		4113.58	-0.02076451
403.79	0.01466352		933.79	0.01075762		1463.79	0.00411721		1993.78	0.00900075		2523.78	-0.01165769		3053.78	0.12378442		3583.78	0.0079771		4113.78	-0.02086456
403.99	0.01446351		933.99	0.01063476		1463.99	0.00442031		1993.98	0.00886763		2523.98	-0.01157728		3053.98	0.12493917		3583.98	0.00739729		4113.98	-0.02136616
404.19	0.01484048		934.19	0.0108102		1464.19	0.0043049		1994.18	0.0091674		2524.18	-0.01180796		3054.18	0.12531125		3584.18	0.00706173		4114.18	-0.02092248
404.39	0.01435228		934.39	0.00966313		1464.39	0.00432802		1994.38	0.00854793		2524.38	-0.01217815		3054.38	0.12565412		3584.38	0.00687516		4114.38	-0.02093437
404.59	0.01442357		934.59	0.00950435		1464.59	0.00392843		1994.58	0.00822248		2524.58	-0.01307354		3054.58	0.12598451		3584.58	0.00646458		4114.58	-0.02031836
404.79	0.01364335		934.79	0.00945841		1464.79	0.0038062		1994.78	0.00755677		2524.78	-0.01258814		3054.78	0.12635811		3584.78	0.00520875		4114.78	-0.01957599
404.99	0.0143341		934.99	0.00969642		1464.99	0.00345859		1994.98	0.00746317		2524.98	-0.01220711		3054.98	0.12615405		3584.98	0.00557449		4114.98	-0.01963002
405.19	0.01390163		935.19	0.01012852		1465.19	0.00307519		1995.18	0.0080155		2525.18	-0.01214556		3055.18	0.12587626		3585.18	0.00700925		4115.18	-0.01918014
405.39	0.01352153		935.39	0.00988189		1465.39	0.00278224		1995.38	0.00830968		2525.38	-0.0123033		3055.38	0.12559238		3585.38	0.00710177		4115.38	-0.01825708
405.59	0.01310525		935.59	0.00875953		1465.59	0.00223274		1995.58	0.00833995		2525.58	-0.01181266		3055.58	0.12597575		3585.58	0.00777463		4115.58	-0.01823544
405.79	0.01290526		935.79	0.00893152		1465.79	0.00140937		1995.78	0.00844949		2525.78	-0.01105351		3055.78	0.12546981		3585.78	0.00749556		4115.78	-0.01846917
405.99	0.01245976		935.99	0.00966066		1465.99	0.00150962		1995.98	0.00923473		2525.98	-0.01180196		3055.98	0.1249675		3585.98	0.00769662		4115.98	-0.01913224
406.19	0.01265625		936.19	0.01007177		1466.19	0.00109503		1996.18	0.01001147		2526.18	-0.01184523		3056.18	0.12482761		3586.18	0.00788944		4116.18	-0.01939396
406.39	0.01216924		936.39	0.01047196		1466.39	0.00072498		1996.38	0.00992027		2526.38	-0.01152505		3056.38	0.12472994		3586.38	0.00778927		4116.38	-0.01947243
406.59	0.01182105		936.59	0.01058157		1466.59	0.001276		1996.58	0.00991567		2526.58	-0.01140317		3056.58	0.12369392		3586.58	0.00802378		4116.58	-0.01948821
406.79	0.011637		936.79	0.01067194		1466.79	0.00105112		1996.78	0.01008899		2526.78	-0.01056097		3056.78	0.12331286		3586.78	0.00855046		4116.78	-0.02009412
406.99	0.01146884		936.99	0.01024829		1466.99	0.00034942		1996.98	0.00977999		2526.98	-0.0113064		3056.98	0.12365078		3586.98	0.00923934		4116.98	-0.02017312
407.19	0.01126416		937.19	0.01079619		1467.19	0.00150851		1997.18	0.00996798		2527.18	-0.01321587		3057.18	0.12343617		3587.18	0.00981951		4117.18	-0.02097669
407.39	0.011191		937.39	0.01202522		1467.39	0.00265322		1997.38	0.00989004		2527.38	-0.01404537		3057.38	0.12288156		3587.38	0.00950986		4117.38	-0.02117844
407.59	0.01171555		937.59	0.01241923		1467.59	0.0038642		1997.58	0.01056488		2527.58	-0.01420271		3057.58	0.12230286		3587.58	0.00926671		4117.58	-0.02176779
407.79	0.0123113		937.79	0.01261968		1467.79	0.00425203		1997.78	0.00985758		2527.78	-0.0137861		3057.78	0.12242079		3587.78	0.00854545		4117.78	-0.02198843
407.99	0.01247154		937.99	0.01277485		1467.99	0.00510136		1997.98	0.0096911		2527.98	-0.0138507		3057.98	0.12253477		3587.98	0.00821531		4117.98	-0.02264465
408.19	0.01331768		938.19	0.01297186		1468.19	0.00525033		1998.18	0.00945493		2528.18	-0.01413821		3058.18	0.12232975		3588.18	0.00804907		4118.18	-0.02197134
408.39	0.01353746		938.39	0.01206731		1468.39	0.0053211		1998.38	0.00944964		2528.38	-0.01422283		3058.38	0.12288707		3588.38	0.0079963		4118.38	-0.02222706
408.59	0.01361512		938.59	0.01257808		1468.59	0.00479945		1998.58	0.00894922		2528.58	-0.0141989		3058.58	0.12241574		3588.58	0.00805418		4118.58	-0.02136532
408.79	0.01346573		938.79	0.01187443		1468.79	0.00571829		1998.78	0.00896113		2528.78	-0.01410522		3058.78	0.12256174		3588.78	0.0078862		4118.78	-0.02041223
408.99	0.01364947		938.99	0.01155054		1468.99	0.00603464		1998.98	0.00958099		2528.98	-0.01438877		3058.98	0.12236235		3588.98	0.00751884		4118.98	-0.02015439
409.19	0.01407119		939.19	0.01085258		1469.19	0.00631136		1999.18	0.00944895		2529.18	-0.0138149		3059.18	0.12274188		3589.18	0.00754687		4119.18	-0.0203881
409.39	0.01415715		939.39	0.01012947		1469.39	0.00689435		1999.38	0.00945888		2529.38	-0.01331889		3059.38	0.12250846		3589.38	0.00768273		4119.38	-0.02047416
409.59	0.01420777		939.59	0.00999612		1469.59	0.00604321		1999.58	0.00847775		2529.58	-0.01350326		3059.58	0.12232158		3589.58	0.00772173		4119.58	-0.02044453
409.79	0.01394867		939.79	0.01056188		1469.79	0.00562561		1999.78	0.00789992		2529.78	-0.01340351		3059.78	0.12234054		3589.78	0.00722878		4119.78	-0.02055052
409.99	0.01372462		939.99	0.01105598		1469.99	0.00573138		1999.98	0.00802204		2529.98	-0.01317657		3059.98	0.12231961		3589.98	0.0079651		4119.98	-0.0205008
410.19	0.01362843		940.19	0.01058077		1470.19	0.00512038		2000.18	0.00726015		2530.18	-0.01289234		3060.18	0.12224176		3590.18	0.00795619		4120.18	-0.02031782
410.39	0.01291305		940.39	0.00998268		1470.39	0.00430455		2000.38	0.00629261		2530.38	-0.01287605		3060.38	0.12184665		3590.38	0.00740553		4120.38	-0.02034417
410.59	0.01291066		940.59	0.00973263		1470.59	0.00399363		2000.58	0.00601679		2530.58	-0.01253327		3060.58	0.12217503		3590.58	0.00748362		4120.58	-0.02139978
410.79	0.01256016		940.79	0.00923092		1470.79	0.00327296		2000.78	0.00509427		2530.78	-0.01192713		3060.78	0.12244948		3590.78	0.00857774		4120.78	-0.02252654
410.99	0.01241539		940.99	0.00928504		1470.99	0.00270811		2000.98	0.00471953		2530.98	-0.01297278		3060.98	0.1229109		3590.98	0.00895253		4120.98	-0.02308185
411.19	0.01192612		941.19	0.00977816		1471.19	0.00423427		2001.18	0.00489201		2531.18	-0.01410887		3061.18	0.12182251		3591.18	0.00951653		4121.18	-0.02311235
411.39	0.01245497		941.39	0.00989322		1471.39	0.00439617		2001.38	0.004555		2531.38	-0.01333428		3061.38	0.12227787		3591.38	0.00864826		4121.38	-0.02248591
411.59	0.01192521		941.59	0.01029839		1471.59	0.00418988		2001.58	0.00473517		2531.58	-0.01230344		3061.58	0.12130825		3591.58	0.0079408		4121.58	-0.02280757
411.79	0.01165285		941.79	0.01058949		1471.79	0.00417498		2001.78	0.00571352		2531.78	-0.01139263		3061.78	0.12133727		3591.78	0.00794007		4121.78	-0.02247953
411.99	0.01156663		941.99	0.01016702		1471.99	0.00364259		2001.98	0.00681086		2531.98	-0.01099055		3061.98	0.12097267		3591.98	0.00907745		4121.98	-0.02211649
412.19	0.0112694		942.19	0.01084786		1472.19	0.00319604		2002.18	0.00756653		2532.18	-0.01049101		3062.18	0.12112119		3592.18	0.00920396		4122.18	-0.02120177
412.39	0.01144137		942.39	0.01171497		1472.39	0.0031283		2002.38	0.00836776		2532.38	-0.01105749		3062.38	0.12097748		3592.38	0.00908713		4122.38	-0.02002493
412.59	0.01129256		942.59	0.01193726		1472.59	0.00309162		2002.58	0.0087339		2532.58	-0.01131112		3062.58	0.12000664		3592.58	0.00926537		4122.58	-0.01967517
412.79	0.01037484		942.79	0.01167025		1472.79	0.00352322		2002.78	0.00987865		2532.78	-0.01166919		3062.78	0.11960497		3592.78	0.0084516		4122.78	-0.018833
412.99	0.0104853		942.99	0.01303817		1472.99	0.00315506		2002.98	0.01092637		2532.98	-0.01105599		3062.98	0.11945949		3592.98	0.00860189		4122.98	-0.01876715
413.19	0.01041888		943.19	0.0131884		1473.19	0.00317899		2003.18	0.01170462		2533.18	-0.01049177		3063.18	0.11924273		3593.18	0.00895031		4123.18	-0.01905718
413.39	0.01002262		943.39	0.01338875		1473.39	0.00365815		2003.38	0.01213606		2533.38	-0.01168376		3063.38	0.11949113		3593.38	0.00846011		4123.38	-0.01945206
413.59	0.0110742		943.59	0.01381476		1473.59	0.00321956		2003.58	0.01201667		2533.58	-0.01240855		3063.58	0.1201384		3593.58	0.00804113		4123.58	-0.01989966
413.79	0.01112561		943.79	0.01375372		1473.79	0.0033026		2003.78	0.0112127		2533.78	-0.01232409		3063.78	0.12095933		3593.78	0.00820653		4123.78	-0.02037777
413.99	0.01099758		943.99	0.01313241		1473.99	0.00353711		2003.98	0.01130426		2533.98	-0.01277106		3063.98	0.12104519		3593.98	0.00879482		4123.98	-0.02041108
414.19	0.01211418		944.19	0.012138		1474.19	0.00397069		2004.18	0.01066572		2534.18	-0.01331597		3064.18	0.12085067		3594.18	0.00878292		4124.18	-0.0205675
414.39	0.01332186		944.39	0.01139092		1474.39	0.00399679		2004.38	0.01013848		2534.38	-0.01397621		3064.38	0.12123352		3594.38	0.00847063		4124.38	-0.02184935
414.59	0.0135977		944.59	0.01080661		1474.59	0.00443377		2004.58	0.00891075		2534.58	-0.01366283		3064.58	0.12213035		3594.58	0.0091994		4124.58	-0.02187344
414.79	0.01373491		944.79	0.01011253		1474.79	0.00452026		2004.78	0.0079865		2534.78	-0.01339011		3064.78	0.1224843		3594.78	0.0094749		4124.78	-0.0222297
414.99	0.01423506		944.99	0.00940565		1474.99	0.00517366		2004.98	0.00795263		2534.98	-0.0141157		3064.98	0.12302127		3594.98	0.00964208		4124.98	-0.02204197
415.19	0.01320339		945.19	0.00884717		1475.19	0.00553176		2005.18	0.00770417		2535.18	-0.01441239		3065.18	0.1230265		3595.18	0.01019992		4125.18	-0.02091206
415.39	0.01307445		945.39	0.00840534		1475.39	0.00508321		2005.38	0.00812193		2535.38	-0.01432651		3065.38	0.12375133		3595.38	0.00982797		4125.38	-0.01999544
415.59	0.0123272		945.59	0.00821586		1475.59	0.00544162		2005.58	0.00928127		2535.58	-0.01394452		3065.58	0.12318731		3595.58	0.00972035		4125.58	-0.02065652
415.79	0.01174017		945.79	0.00834995		1475.79	0.00482103		2005.78	0.00998766		2535.78	-0.01286704		3065.78	0.12396411		3595.78	0.0101303		4125.78	-0.01971399
415.99	0.01157242		945.99	0.0084597		1475.99	0.00429247		2005.98	0.00979719		2535.98	-0.0126971		3065.98	0.12323782		3595.98	0.01135117		4125.98	-0.01911479
416.19	0.01154419		946.19	0.00947154		1476.19	0.00464973		2006.18	0.0096646		2536.18	-0.01260035		3066.18	0.12376915		3596.18	0.01078425		4126.18	-0.01880666
416.39	0.01174736		946.39	0.0102496		1476.39	0.00437098		2006.38	0.00921652		2536.38	-0.01306882		3066.38	0.12310629		3596.38	0.01050926		4126.38	-0.01885596
416.59	0.01118436		946.59	0.00985607		1476.59	0.0035724		2006.58	0.00939552		2536.58	-0.01302328		3066.58	0.12181612		3596.58	0.00995022		4126.58	-0.01910057
416.79	0.01028363		946.79	0.01046798		1476.79	0.00229219		2006.78	0.00930662		2536.78	-0.01261445		3066.78	0.12133486		3596.78	0.00891683		4126.78	-0.01861712
416.99	0.01042036		946.99	0.01241545		1476.99	0.00186348		2006.98	0.00969455		2536.98	-0.01218527		3066.98	0.12090133		3596.98	0.00910592		4126.98	-0.01909012
417.19	0.00990446		947.19	0.0123837		1477.19	0.00241636		2007.18	0.00940804		2537.18	-0.01256265		3067.18	0.12084784		3597.18	0.00805166		4127.18	-0.01919219
417.39	0.01034666		947.39	0.01249752		1477.39	0.0026175		2007.38	0.00991493		2537.38	-0.01301024		3067.38	0.12021347		3597.38	0.00729795		4127.38	-0.0201134
417.59	0.01134947		947.59	0.01251313		1477.59	0.0021296		2007.58	0.00914958		2537.58	-0.01258332		3067.58	0.11999347		3597.58	0.00691776		4127.58	-0.02030529
417.79	0.01195333		947.79	0.01288579		1477.79	0.00233737		2007.78	0.0088198		2537.78	-0.0126503		3067.78	0.1201026		3597.78	0.00652602		4127.78	-0.02028256
417.99	0.01202211		947.99	0.0129334		1477.99	0.0019448		2007.98	0.00916399		2537.98	-0.01282519		3067.98	0.11945914		3597.98	0.00576863		4127.98	-0.02033823
418.19	0.01310736		948.19	0.01275032		1478.19	0.00143976		2008.18	0.00763367		2538.18	-0.01292523		3068.18	0.11898954		3598.18	0.00486687		4128.18	-0.02083734
418.39	0.01285291		948.39	0.01216692		1478.39	0.00168101		2008.38	0.00742825		2538.38	-0.01284506		3068.38	0.11957135		3598.38	0.00506117		4128.38	-0.02153524
418.59	0.01239694		948.59	0.01207192		1478.59	0.00177393		2008.58	0.00737669		2538.58	-0.01241766		3068.58	0.12065953		3598.58	0.00510352		4128.58	-0.02132761
418.79	0.01223203		948.79	0.01154588		1478.79	0.00154256		2008.78	0.0082924		2538.78	-0.01230915		3068.78	0.12112992		3598.78	0.00483385		4128.78	-0.02105256
418.99	0.01187551		948.99	0.01075714		1478.99	0.00153233		2008.98	0.00920877		2538.98	-0.01210159		3068.98	0.12151602		3598.98	0.00596382		4128.98	-0.02078434
419.19	0.01052098		949.19	0.01061916		1479.19	0.00154305		2009.18	0.00982974		2539.18	-0.01217795		3069.18	0.12191756		3599.18	0.00642654		4129.18	-0.02031128
419.39	0.01130211		949.39	0.01014251		1479.39	0.00101313		2009.38	0.00963253		2539.38	-0.0114516		3069.38	0.1224125		3599.38	0.00565105		4129.38	-0.02121053
419.59	0.01133396		949.59	0.01030751		1479.59	0.00053379		2009.58	0.00973498		2539.58	-0.01063087		3069.58	0.1224824		3599.58	0.0057588		4129.58	-0.02163539
419.79	0.01101094		949.79	0.01123811		1479.79	-0.00008158		2009.78	0.00909917		2539.78	-0.01106569		3069.78	0.12208008		3599.78	0.00655282		4129.78	-0.021159
419.99	0.01144494		949.99	0.01144453		1479.99	-0.0001187		2009.98	0.00885211		2539.98	-0.01223327		3069.98	0.12175773		3599.98	0.00690381		4129.98	-0.02044998
420.19	0.01143751		950.19	0.0116465		1480.19	0.00046213		2010.18	0.00839264		2540.18	-0.01275965		3070.18	0.12167808		3600.18	0.006437		4130.18	-0.02062342
420.39	0.01141718		950.39	0.01151326		1480.39	0.00009404		2010.38	0.00751455		2540.38	-0.0135917		3070.38	0.12111583		3600.38	0.00530864		4130.38	-0.02027655
420.59	0.01178849		950.59	0.01117135		1480.59	0.00069077		2010.58	0.00745367		2540.58	-0.01393432		3070.58	0.12063489		3600.58	0.00416117		4130.58	-0.02005347
420.79	0.01162835		950.79	0.01158698		1480.79	0.00029463		2010.78	0.00688137		2540.78	-0.01444256		3070.78	0.12092455		3600.78	0.0038427		4130.78	-0.01972369
420.99	0.01209122		950.99	0.01283441		1480.99	0.00105501		2010.98	0.00698693		2540.98	-0.01448625		3070.98	0.12076046		3600.98	0.00378072		4130.98	-0.01993454
421.19	0.01197558		951.19	0.01257989		1481.19	0.00143537		2011.18	0.00676553		2541.18	-0.01458545		3071.18	0.1206481		3601.18	0.00311999		4131.18	-0.01975462
421.39	0.01241524		951.39	0.01254888		1481.39	0.00213049		2011.38	0.0079065		2541.38	-0.01504211		3071.38	0.1205097		3601.38	0.00280185		4131.38	-0.02026208
421.59	0.01261548		951.59	0.01223427		1481.59	0.00257304		2011.58	0.00724		2541.58	-0.01479668		3071.58	0.12112591		3601.58	0.00242648		4131.58	-0.02021332
421.79	0.01246827		951.79	0.01271595		1481.79	0.00295384		2011.78	0.00650946		2541.78	-0.01561947		3071.78	0.12203916		3601.78	0.00289706		4131.78	-0.02023255
421.99	0.01261773		951.99	0.01218071		1481.99	0.0023893		2011.98	0.00604153		2541.98	-0.01544961		3071.98	0.12143161		3601.98	0.00255763		4131.98	-0.02035869
422.19	0.01332084		952.19	0.01159101		1482.19	0.00252147		2012.18	0.00571553		2542.18	-0.01520684		3072.18	0.12131725		3602.18	0.00277339		4132.18	-0.02216258
422.39	0.01227892		952.39	0.01106942		1482.39	0.00234169		2012.38	0.00735357		2542.38	-0.01461195		3072.38	0.12177729		3602.38	0.00320297		4132.38	-0.02259435
422.59	0.01163696		952.59	0.01021746		1482.59	0.00244227		2012.58	0.00777962		2542.58	-0.01403515		3072.58	0.1209331		3602.58	0.00361508		4132.58	-0.02197535
422.79	0.01091836		952.79	0.00936291		1482.79	0.00229333		2012.78	0.00833784		2542.78	-0.01300188		3072.78	0.12038795		3602.78	0.00414196		4132.78	-0.02143718
422.99	0.01031707		952.99	0.0089242		1482.99	0.00171157		2012.98	0.00824811		2542.98	-0.01261068		3072.98	0.12041898		3602.98	0.00551262		4132.98	-0.02176753
423.19	0.01019511		953.19	0.00859369		1483.19	0.00160915		2013.18	0.00849907		2543.18	-0.01226488		3073.18	0.12018478		3603.18	0.00640043		4133.18	-0.02146613
423.39	0.01063119		953.39	0.00812699		1483.39	0.00142812		2013.38	0.00813379		2543.38	-0.01170349		3073.38	0.12044468		3603.38	0.00681768		4133.38	-0.02228936
423.59	0.01048113		953.59	0.00823166		1483.59	0.00146922		2013.58	0.00811492		2543.58	-0.01215196		3073.58	0.12019429		3603.58	0.0078868		4133.58	-0.0216949
423.79	0.01037716		953.79	0.00905741		1483.79	0.001993		2013.78	0.0083828		2543.78	-0.0128465		3073.78	0.11995927		3603.78	0.00850704		4133.78	-0.02114118
423.99	0.00994199		953.99	0.0093679		1483.99	0.00148274		2013.98	0.00814812		2543.98	-0.01320346		3073.98	0.120198		3603.98	0.00853467		4133.98	-0.01966496
424.19	0.00990566		954.19	0.00928261		1484.19	0.00180286		2014.18	0.00805394		2544.18	-0.0131343		3074.18	0.12006639		3604.18	0.00879992		4134.18	-0.01983138
424.39	0.00987281		954.39	0.00999982		1484.39	0.00194973		2014.38	0.00735623		2544.38	-0.0134025		3074.38	0.12015491		3604.38	0.00877553		4134.38	-0.01953624
424.59	0.0095779		954.59	0.01094984		1484.59	0.00231279		2014.58	0.00773902		2544.58	-0.01344061		3074.58	0.12012624		3604.58	0.01007117		4134.58	-0.01943886
424.79	0.00960131		954.79	0.01165811		1484.79	0.0011735		2014.78	0.00758705		2544.78	-0.0141245		3074.78	0.12080949		3604.78	0.01095595		4134.78	-0.01887724
424.99	0.00985648		954.99	0.01227176		1484.99	0.00111847		2014.98	0.00761952		2544.98	-0.01324418		3074.98	0.12058427		3604.98	0.01097302		4134.98	-0.01940113
425.19	0.00941559		955.19	0.01186792		1485.19	0.00154707		2015.18	0.00740483		2545.18	-0.0122264		3075.18	0.12048712		3605.18	0.01030232		4135.18	-0.01879168
425.39	0.00924276		955.39	0.01188169		1485.39	0.00149706		2015.38	0.0069129		2545.38	-0.01267119		3075.38	0.12099396		3605.38	0.01079282		4135.38	-0.01834498
425.59	0.0092757		955.59	0.01203589		1485.59	0.00149967		2015.58	0.00599979		2545.58	-0.01213491		3075.58	0.12140025		3605.58	0.01080745		4135.58	-0.01845564
425.79	0.00978036		955.79	0.01249487		1485.79	0.00054831		2015.78	0.00569636		2545.78	-0.01310053		3075.78	0.1208569		3605.78	0.01078764		4135.78	-0.01878542
425.99	0.01047498		955.99	0.01255374		1485.99	-0.00066986		2015.98	0.00584442		2545.98	-0.01308019		3075.98	0.11974328		3605.98	0.0098378		4135.98	-0.01915897
426.19	0.01006825		956.19	0.01253312		1486.19	-0.00105796		2016.18	0.00535399		2546.18	-0.01352273		3076.18	0.12019701		3606.18	0.00884483		4136.18	-0.01953703
426.39	0.00869991		956.39	0.01240662		1486.39	-0.00079075		2016.38	0.00584285		2546.38	-0.01425117		3076.38	0.11976314		3606.38	0.00843533		4136.38	-0.01851153
426.59	0.00874437		956.59	0.01273018		1486.59	0.00049266		2016.58	0.00530689		2546.58	-0.01484308		3076.58	0.11844711		3606.58	0.00803575		4136.58	-0.01815371
426.79	0.00870639		956.79	0.01235867		1486.79	0.00079279		2016.78	0.0055928		2546.78	-0.01533191		3076.78	0.11781513		3606.78	0.00725604		4136.78	-0.01821154
426.99	0.008706		956.99	0.01140762		1486.99	0.00030299		2016.98	0.00626023		2546.98	-0.01576527		3076.98	0.11865935		3606.98	0.00716914		4136.98	-0.01767643
427.19	0.00887241		957.19	0.01091952		1487.19	0.00095166		2017.18	0.00781149		2547.18	-0.01626154		3077.18	0.11808505		3607.18	0.00690768		4137.18	-0.01772998
427.39	0.00987857		957.39	0.01086468		1487.39	0.00137826		2017.38	0.00789478		2547.38	-0.01686631		3077.38	0.11886916		3607.38	0.00617287		4137.38	-0.01836703
427.59	0.01068958		957.59	0.01001821		1487.59	0.00086618		2017.58	0.00780063		2547.58	-0.0178112		3077.58	0.11879002		3607.58	0.00635626		4137.58	-0.01878016
427.79	0.0099935		957.79	0.01042262		1487.79	0.00106105		2017.78	0.00814512		2547.78	-0.01776734		3077.78	0.11899151		3607.78	0.00690439		4137.78	-0.01893458
427.99	0.00947445		957.99	0.01023745		1487.99	-0.00006149		2017.98	0.00762336		2547.98	-0.01841673		3077.98	0.11892482		3607.98	0.00714353		4137.98	-0.01842665
428.19	0.01040631		958.19	0.01027446		1488.19	0.00043404		2018.18	0.00772117		2548.18	-0.01691445		3078.18	0.11895594		3608.18	0.00738925		4138.18	-0.0200883
428.39	0.01018029		958.39	0.01118527		1488.39	0.00051981		2018.38	0.00745322		2548.38	-0.0169783		3078.38	0.11866193		3608.38	0.00788728		4138.38	-0.02106239
428.59	0.01014681		958.59	0.01112461		1488.59	0.00052808		2018.58	0.00824407		2548.58	-0.01635333		3078.58	0.11878754		3608.58	0.0087533		4138.58	-0.02135724
428.79	0.01109213		958.79	0.00994878		1488.79	0.00039031		2018.78	0.00684227		2548.78	-0.0156458		3078.78	0.11871145		3608.78	0.00833636		4138.78	-0.02204515
428.99	0.01041896		958.99	0.00958785		1488.99	0.00105533		2018.98	0.00625107		2548.98	-0.01371768		3078.98	0.1180345		3608.98	0.00797772		4138.98	-0.02207854
429.19	0.01019353		959.19	0.00827576		1489.19	0.0020679		2019.18	0.00628663		2549.18	-0.01263582		3079.18	0.11846039		3609.18	0.00796146		4139.18	-0.02216817
429.39	0.01039489		959.39	0.00818657		1489.39	0.00104851		2019.38	0.00621867		2549.38	-0.01238629		3079.38	0.11877302		3609.38	0.00900101		4139.38	-0.022329
429.59	0.01048388		959.59	0.00843868		1489.59	0.00134507		2019.58	0.00602734		2549.58	-0.01206257		3079.58	0.11851034		3609.58	0.00957368		4139.58	-0.02260481
429.79	0.01018592		959.79	0.00830011		1489.79	0.00062347		2019.78	0.00564032		2549.78	-0.01267115		3079.78	0.11845777		3609.78	0.00935142		4139.78	-0.02259215
429.99	0.00992351		959.99	0.00881134		1489.99	0.00135891		2019.98	0.00599805		2549.98	-0.01203029		3079.98	0.11910132		3609.98	0.00977076		4139.98	-0.02211801
430.19	0.01002043		960.19	0.00902386		1490.19	0.00274651		2020.18	0.00583304		2550.18	-0.01164492		3080.18	0.1198018		3610.18	0.00934052		4140.18	-0.02200704
430.39	0.00996323		960.39	0.00912856		1490.39	0.00417553		2020.38	0.00667886		2550.38	-0.01228942		3080.38	0.119396		3610.38	0.00900126		4140.38	-0.02204711
430.59	0.01036088		960.59	0.00950469		1490.59	0.00471337		2020.58	0.00718499		2550.58	-0.01222314		3080.58	0.11949426		3610.58	0.00873209		4140.58	-0.02203585
430.79	0.00978118		960.79	0.00868158		1490.79	0.00448544		2020.78	0.00735901		2550.78	-0.01253991		3080.78	0.11980226		3610.78	0.00872942		4140.78	-0.0215747
430.99	0.00928705		960.99	0.00893852		1490.99	0.00390071		2020.98	0.00737768		2550.98	-0.01296305		3080.98	0.12054532		3610.98	0.00952555		4140.98	-0.02106596
431.19	0.00944931		961.19	0.0094361		1491.19	0.00404283		2021.18	0.00731515		2551.18	-0.01372886		3081.18	0.11986032		3611.18	0.00974517		4141.18	-0.02127533
431.39	0.01042967		961.39	0.00882293		1491.39	0.00324074		2021.38	0.00685207		2551.38	-0.01401606		3081.38	0.12033486		3611.38	0.00937871		4141.38	-0.02134571
431.59	0.00951213		961.59	0.00847728		1491.59	0.00260352		2021.58	0.0070167		2551.58	-0.01446658		3081.58	0.11920516		3611.58	0.00960886		4141.58	-0.02131126
431.79	0.0093216		961.79	0.00910944		1491.79	0.00244572		2021.78	0.0069266		2551.78	-0.01469012		3081.78	0.11906567		3611.78	0.00947078		4141.78	-0.02097399
431.99	0.0091633		961.99	0.01004966		1491.99	0.00201956		2021.98	0.00677066		2551.98	-0.01538225		3081.98	0.11840981		3611.98	0.00867931		4141.98	-0.02083927
432.19	0.00965509		962.19	0.01071326		1492.19	0.00273253		2022.18	0.00715987		2552.18	-0.01586697		3082.18	0.11776237		3612.18	0.00778548		4142.18	-0.02197173
432.39	0.00889382		962.39	0.01140553		1492.39	0.00179144		2022.38	0.00673028		2552.38	-0.01765666		3082.38	0.11708587		3612.38	0.00734187		4142.38	-0.02243028
432.59	0.00950166		962.59	0.01153655		1492.59	0.00133215		2022.58	0.00583583		2552.58	-0.01825413		3082.58	0.11622693		3612.58	0.00649314		4142.58	-0.02187649
432.79	0.00949007		962.79	0.01098628		1492.79	0.00094247		2022.78	0.00497854		2552.78	-0.01812849		3082.78	0.11503356		3612.78	0.00534977		4142.78	-0.02258031
432.99	0.00855999		962.99	0.01090203		1492.99	0.00103002		2022.98	0.0052609		2552.98	-0.01814197		3082.98	0.11487885		3612.98	0.00516018		4142.98	-0.02253937
433.19	0.00920127		963.19	0.00967964		1493.19	0.00110921		2023.18	0.00554359		2553.18	-0.01841585		3083.18	0.11520581		3613.18	0.00486064		4143.18	-0.02241484
433.39	0.00909996		963.39	0.01039314		1493.39	0.00074064		2023.38	0.00572898		2553.38	-0.01862129		3083.38	0.11434989		3613.38	0.00501163		4143.38	-0.02227758
433.59	0.00919289		963.59	0.01002712		1493.59	0.0006756		2023.58	0.00540237		2553.58	-0.01905701		3083.58	0.11446835		3613.58	0.00505249		4143.58	-0.02250587
433.79	0.00889766		963.79	0.00945109		1493.79	0.0009755		2023.78	0.00566436		2553.78	-0.01888312		3083.78	0.11529646		3613.78	0.0036734		4143.78	-0.02349961
433.99	0.01002791		963.99	0.00865047		1493.99	0.0016686		2023.98	0.00696107		2553.98	-0.0171535		3083.98	0.11572679		3613.98	0.00417381		4143.98	-0.02361726
434.19	0.0101279		964.19	0.00776177		1494.19	0.00230407		2024.18	0.00684471		2554.18	-0.01689417		3084.18	0.11639369		3614.18	0.00349872		4144.18	-0.02431714
434.39	0.00984402		964.39	0.00787298		1494.39	0.00227845		2024.38	0.00730837		2554.38	-0.01662135		3084.38	0.11692498		3614.38	0.00379446		4144.38	-0.02440424
434.59	0.00934751		964.59	0.00842494		1494.59	0.0015816		2024.58	0.00755646		2554.58	-0.0157906		3084.58	0.11765696		3614.58	0.00461559		4144.58	-0.02472608
434.79	0.0087692		964.79	0.00833299		1494.79	0.00146142		2024.78	0.00663943		2554.78	-0.01554848		3084.78	0.11820958		3614.78	0.00534803		4144.78	-0.02443147
434.99	0.0094765		964.99	0.00856769		1494.99	0.00109052		2024.98	0.00682361		2554.98	-0.01555437		3084.98	0.11802553		3614.98	0.00501492		4144.98	-0.02461273
435.19	0.00927347		965.19	0.00772694		1495.19	0.00054404		2025.18	0.00702275		2555.18	-0.0150443		3085.18	0.11785239		3615.18	0.00457815		4145.18	-0.02490923
435.39	0.00914049		965.39	0.00764881		1495.39	0.00002279		2025.38	0.00724069		2555.38	-0.01519931		3085.38	0.1173308		3615.38	0.00462928		4145.38	-0.02417668
435.59	0.00880842		965.59	0.00839075		1495.59	-0.00042325		2025.58	0.00831016		2555.58	-0.01555607		3085.58	0.11660399		3615.58	0.00499074		4145.58	-0.02361706
435.79	0.00943496		965.79	0.00928337		1495.79	-0.00133973		2025.78	0.00845807		2555.78	-0.01665694		3085.78	0.11660936		3615.78	0.00523959		4145.78	-0.0235309
435.99	0.00834993		965.99	0.01059058		1495.99	-0.00142358		2025.98	0.00855803		2555.98	-0.0165204		3085.98	0.11613112		3615.98	0.00501096		4145.98	-0.02336655
436.19	0.00814943		966.19	0.01134312		1496.19	-0.00121404		2026.18	0.00836568		2556.18	-0.01671955		3086.18	0.11642442		3616.18	0.00557841		4146.18	-0.0239941
436.39	0.0083007		966.39	0.01161456		1496.39	-0.00201106		2026.38	0.00777221		2556.38	-0.01673578		3086.38	0.1160514		3616.38	0.00574216		4146.38	-0.02420377
436.59	0.00950734		966.59	0.01206055		1496.59	-0.00189914		2026.58	0.00697625		2556.58	-0.01577505		3086.58	0.11577457		3616.58	0.00541321		4146.58	-0.02407973
436.79	0.00997649		966.79	0.01205485		1496.79	-0.00086062		2026.78	0.00738962		2556.78	-0.01456245		3086.78	0.11507674		3616.78	0.00541795		4146.78	-0.02363503
436.99	0.00952358		966.99	0.01207248		1496.99	0.00004394		2026.98	0.00658614		2556.98	-0.01475715		3086.98	0.11586769		3616.98	0.00599052		4146.98	-0.02372267
437.19	0.01030609		967.19	0.01186703		1497.19	0.00124343		2027.18	0.00638221		2557.18	-0.01398256		3087.18	0.11608068		3617.18	0.00571147		4147.18	-0.02346454
437.39	0.01013565		967.39	0.01163937		1497.39	0.00149279		2027.38	0.0057735		2557.38	-0.01347887		3087.38	0.11630493		3617.38	0.00567374		4147.38	-0.02341851
437.59	0.01048703		967.59	0.0107422		1497.59	0.0012556		2027.58	0.00477262		2557.58	-0.01324326		3087.58	0.11736213		3617.58	0.00521557		4147.58	-0.02387092
437.79	0.01054016		967.79	0.00958767		1497.79	0.00213242		2027.78	0.0044559		2557.78	-0.01201976		3087.78	0.11789179		3617.78	0.00507546		4147.78	-0.02425829
437.99	0.01028941		967.99	0.00916492		1497.99	0.0030268		2027.98	0.00481601		2557.98	-0.01126124		3087.98	0.11863835		3617.98	0.00569139		4147.98	-0.02354505
438.19	0.01043478		968.19	0.00891737		1498.19	0.0033154		2028.18	0.00405997		2558.18	-0.01098685		3088.18	0.11916248		3618.18	0.00645763		4148.18	-0.02268977
438.39	0.00982993		968.39	0.00921209		1498.39	0.0031342		2028.38	0.00368547		2558.38	-0.01083917		3088.38	0.11879908		3618.38	0.00729748		4148.38	-0.02316439
438.59	0.01048629		968.59	0.00880574		1498.59	0.00317583		2028.58	0.00362295		2558.58	-0.01120627		3088.58	0.11842334		3618.58	0.00807943		4148.58	-0.023349
438.79	0.01023251		968.79	0.00845276		1498.79	0.00337824		2028.78	0.00413656		2558.78	-0.01162801		3088.78	0.11845731		3618.78	0.00755257		4148.78	-0.02331719
438.99	0.01033967		968.99	0.00833645		1498.99	0.00325827		2028.98	0.00407941		2558.98	-0.01248555		3088.98	0.11739526		3618.98	0.00645928		4148.98	-0.023751
439.19	0.00977566		969.19	0.00808523		1499.19	0.00275605		2029.18	0.00398303		2559.18	-0.01309221		3089.18	0.11670628		3619.18	0.00687021		4149.18	-0.0233154
439.39	0.0097802		969.39	0.00838833		1499.39	0.00248267		2029.38	0.00427751		2559.38	-0.0137844		3089.38	0.11654583		3619.38	0.00662408		4149.38	-0.02281369
439.59	0.00936468		969.59	0.00871709		1499.59	0.00124987		2029.58	0.00524355		2559.58	-0.01490423		3089.58	0.11691686		3619.58	0.00647477		4149.58	-0.02287976
439.79	0.00971771		969.79	0.00924426		1499.79	0.00153333		2029.78	0.00478918		2559.78	-0.01509955		3089.78	0.1157867		3619.78	0.00692346		4149.78	-0.02264768
439.99	0.00859751		969.99	0.00921697		1499.99	0.00156549		2029.98	0.0048727		2559.98	-0.01492315		3089.98	0.11529909		3619.98	0.00710008		4149.98	-0.02249248
440.19	0.00860455		970.19	0.00887375		1500.19	0.00206389		2030.18	0.00513404		2560.18	-0.01563754		3090.18	0.11509238		3620.18	0.00732424		4150.18	-0.02216094
440.39	0.00920611		970.39	0.00823078		1500.39	0.00203374		2030.38	0.00588929		2560.38	-0.01566977		3090.38	0.11366227		3620.38	0.00721469		4150.38	-0.02145409
440.59	0.00935839		970.59	0.00830652		1500.59	0.00301052		2030.58	0.00563002		2560.58	-0.01487144		3090.58	0.11281496		3620.58	0.00697531		4150.58	-0.0220387
440.79	0.00894682		970.79	0.0084195		1500.79	0.00348046		2030.78	0.00652651		2560.78	-0.0142486		3090.78	0.11211713		3620.78	0.00732616		4150.78	-0.02139288
440.99	0.00844332		970.99	0.00783471		1500.99	0.00303354		2030.98	0.00647972		2560.98	-0.01368566		3090.98	0.11250347		3620.98	0.00753894		4150.98	-0.02252001
441.19	0.009016		971.19	0.00839326		1501.19	0.00287019		2031.18	0.00633252		2561.18	-0.01287058		3091.18	0.11317289		3621.18	0.00674959		4151.18	-0.02186849
441.39	0.00834215		971.39	0.0082581		1501.39	0.00259818		2031.38	0.00591855		2561.38	-0.01232726		3091.38	0.11350357		3621.38	0.00659384		4151.38	-0.02227649
441.59	0.00769832		971.59	0.00847001		1501.59	0.00193134		2031.58	0.00646358		2561.58	-0.01276191		3091.58	0.11325021		3621.58	0.0067674		4151.58	-0.02242473
441.79	0.00754476		971.79	0.0077834		1501.79	0.00194782		2031.78	0.0070389		2561.78	-0.01295288		3091.78	0.11307889		3621.78	0.00743374		4151.78	-0.02160822
441.99	0.00744189		971.99	0.00845116		1501.99	0.00213062		2031.98	0.0071889		2561.98	-0.01272567		3091.98	0.11344345		3621.98	0.00827392		4151.98	-0.02045136
442.19	0.00857275		972.19	0.00776366		1502.19	0.00080622		2032.18	0.00731137		2562.18	-0.01250097		3092.18	0.11359953		3622.18	0.00904722		4152.18	-0.02027159
442.39	0.00823538		972.39	0.00698389		1502.39	0.00084085		2032.38	0.00750041		2562.38	-0.01313217		3092.38	0.11426609		3622.38	0.00917738		4152.38	-0.02136021
442.59	0.00878565		972.59	0.0070227		1502.59	0.00029307		2032.58	0.00769973		2562.58	-0.01346302		3092.58	0.11464518		3622.58	0.00941493		4152.58	-0.02122576
442.79	0.00799802		972.79	0.00702321		1502.79	0.00006073		2032.78	0.00802013		2562.78	-0.01434786		3092.78	0.11611845		3622.78	0.00833086		4152.78	-0.02106746
442.99	0.00854849		972.99	0.00771631		1502.99	0.00043575		2032.98	0.00740688		2562.98	-0.01539355		3092.98	0.11600886		3622.98	0.0076452		4152.98	-0.02093223
443.19	0.00874961		973.19	0.0081918		1503.19	0.00026233		2033.18	0.0073817		2563.18	-0.01572203		3093.18	0.11711084		3623.18	0.00780681		4153.18	-0.02132421
443.39	0.00834014		973.39	0.00850988		1503.39	-0.00012596		2033.38	0.00723411		2563.38	-0.01685243		3093.38	0.11789023		3623.38	0.00648264		4153.38	-0.02100596
443.59	0.00824713		973.59	0.0086848		1503.59	-0.00002902		2033.58	0.00786318		2563.58	-0.01779073		3093.58	0.11810839		3623.58	0.00567364		4153.58	-0.02101275
443.79	0.00903629		973.79	0.00860902		1503.79	0.00103921		2033.78	0.00767294		2563.78	-0.01875242		3093.78	0.11757205		3623.78	0.00627527		4153.78	-0.02010095
443.99	0.00772457		973.99	0.00988802		1503.99	0.00111105		2033.98	0.00766278		2563.98	-0.01905338		3093.98	0.11734264		3623.98	0.00583837		4153.98	-0.01980083
444.19	0.00798618		974.19	0.00994421		1504.19	0.00269056		2034.18	0.00741531		2564.18	-0.01921698		3094.18	0.11639391		3624.18	0.00586259		4154.18	-0.01913393
444.39	0.00853942		974.39	0.01001734		1504.39	0.00333083		2034.38	0.00745196		2564.38	-0.01754628		3094.38	0.11650156		3624.38	0.00649687		4154.38	-0.0203182
444.59	0.00816721		974.59	0.01017539		1504.59	0.00353672		2034.58	0.00707278		2564.58	-0.01728028		3094.58	0.11621783		3624.58	0.00698874		4154.58	-0.02136494
444.79	0.00812778		974.79	0.01013248		1504.79	0.00350059		2034.78	0.00775152		2564.78	-0.01647256		3094.78	0.1166324		3624.78	0.0071369		4154.78	-0.02078604
444.99	0.00846699		974.99	0.0103633		1504.99	0.00300423		2034.98	0.00719785		2564.98	-0.01645802		3094.98	0.11673314		3624.98	0.00678736		4154.98	-0.02107728
445.19	0.00840248		975.19	0.01099574		1505.19	0.00286322		2035.18	0.00708403		2565.18	-0.01629272		3095.18	0.11686352		3625.18	0.00716774		4155.18	-0.02049203
445.39	0.00776185		975.39	0.01049051		1505.39	0.00357572		2035.38	0.00713346		2565.38	-0.01622247		3095.38	0.11602006		3625.38	0.00758866		4155.38	-0.02153396
445.59	0.00699329		975.59	0.01049975		1505.59	0.0025136		2035.58	0.00740833		2565.58	-0.01646009		3095.58	0.11457766		3625.58	0.00818015		4155.58	-0.02074531
445.79	0.00706495		975.79	0.00974989		1505.79	0.0023923		2035.78	0.00725044		2565.78	-0.01563658		3095.78	0.11458512		3625.78	0.00955866		4155.78	-0.02055073
445.99	0.0070362		975.99	0.00905896		1505.99	0.00222651		2035.98	0.00733409		2565.98	-0.01426479		3095.98	0.11473322		3625.98	0.0094362		4155.98	-0.02153751
446.19	0.00714466		976.19	0.00754615		1506.19	0.00106301		2036.18	0.00744455		2566.18	-0.01412949		3096.18	0.11504439		3626.18	0.00948381		4156.18	-0.02200992
446.39	0.00714594		976.39	0.00649147		1506.39	0.00111882		2036.38	0.00735429		2566.38	-0.01385264		3096.38	0.11499686		3626.38	0.0091052		4156.38	-0.02295696
446.59	0.00681946		976.59	0.00696894		1506.59	0.00055756		2036.58	0.00708767		2566.58	-0.01412635		3096.58	0.11432795		3626.58	0.00947821		4156.58	-0.02297952
446.79	0.00704806		976.79	0.00721144		1506.79	0.00024912		2036.78	0.00756562		2566.78	-0.01436495		3096.78	0.11463304		3626.78	0.00911385		4156.78	-0.02322794
446.99	0.00703642		976.99	0.00761123		1506.99	0.00058737		2036.98	0.00680102		2566.98	-0.0140652		3096.98	0.1134023		3626.98	0.0089509		4156.98	-0.02312224
447.19	0.00650168		977.19	0.00713049		1507.19	0.00073132		2037.18	0.00618944		2567.18	-0.01420629		3097.18	0.11323275		3627.18	0.00884254		4157.18	-0.02289583
447.39	0.00678647		977.39	0.00681296		1507.39	0.00077745		2037.38	0.00667875		2567.38	-0.01610094		3097.38	0.11332153		3627.38	0.00770372		4157.38	-0.02231185
447.59	0.00698159		977.59	0.00684383		1507.59	0.00132094		2037.58	0.00683936		2567.58	-0.01613981		3097.58	0.11407703		3627.58	0.00779755		4157.58	-0.02184881
447.79	0.00716383		977.79	0.00740482		1507.79	0.00158632		2037.78	0.00652886		2567.78	-0.01713868		3097.78	0.11322652		3627.78	0.00841825		4157.78	-0.02070853
447.99	0.00684918		977.99	0.00802508		1507.99	0.00225318		2037.98	0.00552748		2567.98	-0.01640227		3097.98	0.11260219		3627.98	0.0077337		4157.98	-0.02049055
448.19	0.00653893		978.19	0.00744898		1508.19	0.00276284		2038.18	0.00459221		2568.18	-0.01690229		3098.18	0.11246726		3628.18	0.00842996		4158.18	-0.02074372
448.39	0.00602739		978.39	0.00657007		1508.39	0.00238327		2038.38	0.00390413		2568.38	-0.01641849		3098.38	0.11288416		3628.38	0.00865039		4158.38	-0.02148701
448.59	0.00567439		978.59	0.0069995		1508.59	0.00171318		2038.58	0.00353696		2568.58	-0.01746789		3098.58	0.11253551		3628.58	0.00914186		4158.58	-0.02060959
448.79	0.00581895		978.79	0.00693264		1508.79	0.00170799		2038.78	0.0035038		2568.78	-0.01754423		3098.78	0.11238722		3628.78	0.00852653		4158.78	-0.02025162
448.99	0.00555147		978.99	0.00664669		1508.99	0.0006362		2038.98	0.00390799		2568.98	-0.01786278		3098.98	0.11252475		3628.98	0.00852728		4158.98	-0.02003761
449.19	0.00486562		979.19	0.00564765		1509.19	0.00013317		2039.18	0.00426311		2569.18	-0.01790775		3099.18	0.11239088		3629.18	0.00819099		4159.18	-0.01976765
449.39	0.00451762		979.39	0.00467966		1509.39	0.00011694		2039.38	0.00428939		2569.38	-0.0177894		3099.38	0.11195915		3629.38	0.00765179		4159.38	-0.02075369
449.59	0.00509369		979.59	0.00483501		1509.59	-0.00138307		2039.58	0.00438589		2569.58	-0.01769038		3099.58	0.11219828		3629.58	0.00749588		4159.58	-0.0203302
449.79	0.00506316		979.79	0.00374879		1509.79	-0.00126079		2039.78	0.00563615		2569.78	-0.01698914		3099.78	0.11377743		3629.78	0.00723066		4159.78	-0.02146652
449.99	0.00558728		979.99	0.00369311		1509.99	-0.00163038		2039.98	0.00633721		2569.98	-0.01608764		3099.98	0.11359486		3629.98	0.00597479		4159.98	-0.0229794
450.19	0.00581618		980.19	0.00461646		1510.19	-0.00290535		2040.18	0.00631251		2570.18	-0.01541595		3100.18	0.11368538		3630.18	0.00562722		4160.18	-0.02319105
450.39	0.00663599		980.39	0.00496987		1510.39	-0.00312419		2040.38	0.00713772		2570.38	-0.01549071		3100.38	0.11350516		3630.38	0.00499168		4160.38	-0.02460122
450.59	0.00732605		980.59	0.00642135		1510.59	-0.00336566		2040.58	0.00724308		2570.58	-0.01500207		3100.58	0.11347573		3630.58	0.00494946		4160.58	-0.02387785
450.79	0.00828649		980.79	0.00687127		1510.79	-0.00399844		2040.78	0.0074027		2570.78	-0.01485895		3100.78	0.11403536		3630.78	0.00434978		4160.78	-0.02383209
450.99	0.00859582		980.99	0.00692364		1510.99	-0.00369169		2040.98	0.00670029		2570.98	-0.01449663		3100.98	0.11439499		3630.98	0.00368227		4160.98	-0.02360588
451.19	0.00842375		981.19	0.00702393		1511.19	-0.00273285		2041.18	0.00602134		2571.18	-0.01514351		3101.18	0.11511333		3631.18	0.00360553		4161.18	-0.02366287
451.39	0.0096148		981.39	0.0075618		1511.39	-0.00257705		2041.38	0.0060481		2571.38	-0.01557332		3101.38	0.11536544		3631.38	0.0036971		4161.38	-0.02398053
451.59	0.00961873		981.59	0.00805815		1511.59	-0.00207826		2041.58	0.00529474		2571.58	-0.0147571		3101.58	0.11520473		3631.58	0.00375422		4161.58	-0.0234184
451.79	0.00931608		981.79	0.0080423		1511.79	-0.0003731		2041.78	0.00448172		2571.78	-0.01444973		3101.78	0.11440038		3631.78	0.00344505		4161.78	-0.02397328
451.99	0.00844441		981.99	0.00755636		1511.99	0.00076505		2041.98	0.00308134		2571.98	-0.01371622		3101.98	0.11456869		3631.98	0.00359886		4161.98	-0.02403504
452.19	0.00730209		982.19	0.00792121		1512.19	0.00100095		2042.18	0.00224488		2572.18	-0.01420978		3102.18	0.11487811		3632.18	0.00334282		4162.18	-0.02449023
452.39	0.0071975		982.39	0.00747777		1512.39	0.00108661		2042.38	0.00148071		2572.38	-0.01377588		3102.38	0.11490175		3632.38	0.00420233		4162.38	-0.0239009
452.59	0.00753631		982.59	0.00767205		1512.59	0.00096261		2042.58	0.00163974		2572.58	-0.0139743		3102.58	0.11490224		3632.58	0.00518564		4162.58	-0.02288295
452.79	0.00701518		982.79	0.00744321		1512.79	0.00077432		2042.78	0.00212411		2572.78	-0.0139023		3102.78	0.11471753		3632.78	0.00538239		4162.78	-0.02373017
452.99	0.00599007		982.99	0.00658239		1512.99	0.00080224		2042.98	0.0032484		2572.98	-0.01492638		3102.98	0.11476009		3632.98	0.0054543		4162.98	-0.02306634
453.19	0.00536712		983.19	0.00559706		1513.19	0.00153881		2043.18	0.00361771		2573.18	-0.01539055		3103.18	0.11482237		3633.18	0.00539143		4163.18	-0.02300294
453.39	0.00488427		983.39	0.00542036		1513.39	0.00198185		2043.38	0.00410757		2573.38	-0.01572227		3103.38	0.11521528		3633.38	0.00639169		4163.38	-0.0226733
453.59	0.00476876		983.59	0.00555215		1513.59	0.00135614		2043.58	0.00505925		2573.58	-0.01609171		3103.58	0.11624929		3633.58	0.0069757		4163.58	-0.02247163
453.79	0.00448761		983.79	0.00483462		1513.79	0.00170688		2043.78	0.00703202		2573.78	-0.01557145		3103.78	0.11569909		3633.78	0.00736256		4163.78	-0.023631
453.99	0.00465684		983.99	0.00572847		1513.99	0.0013106		2043.98	0.00697024		2573.98	-0.01556988		3103.98	0.1144882		3633.98	0.00753768		4163.98	-0.02398322
454.19	0.00401768		984.19	0.00642834		1514.19	0.00056392		2044.18	0.00719252		2574.18	-0.01601499		3104.18	0.1148222		3634.18	0.00833558		4164.18	-0.02368918
454.39	0.00475969		984.39	0.00634363		1514.39	0.00030696		2044.38	0.00793774		2574.38	-0.01704864		3104.38	0.11522261		3634.38	0.00875109		4164.38	-0.0239729
454.59	0.00515635		984.59	0.00702528		1514.59	-0.00098213		2044.58	0.00753957		2574.58	-0.01703755		3104.58	0.11494135		3634.58	0.00854664		4164.58	-0.02326972
454.79	0.00452278		984.79	0.00687823		1514.79	-0.0016282		2044.78	0.0075013		2574.78	-0.0173743		3104.78	0.11530765		3634.78	0.009112		4164.78	-0.023282
454.99	0.00497289		984.99	0.00726671		1514.99	-0.00137584		2044.98	0.00714267		2574.98	-0.01667379		3104.98	0.11530945		3634.98	0.00926479		4164.98	-0.02375082
455.19	0.00467977		985.19	0.00734442		1515.19	-0.00046763		2045.18	0.0061176		2575.18	-0.01651599		3105.18	0.11437975		3635.18	0.00874581		4165.18	-0.02347647
455.39	0.005484		985.39	0.0075947		1515.39	-0.00106531		2045.38	0.00624789		2575.38	-0.01606965		3105.38	0.11282628		3635.38	0.00803393		4165.38	-0.02297505
455.59	0.0052402		985.59	0.00728004		1515.59	-0.00045113		2045.58	0.0053269		2575.58	-0.01567491		3105.58	0.11256714		3635.58	0.00796714		4165.58	-0.02295836
455.79	0.00523641		985.79	0.0073835		1515.79	-0.0002384		2045.78	0.00501837		2575.78	-0.0153207		3105.78	0.11276958		3635.78	0.0072764		4165.78	-0.02328789
455.99	0.0054266		985.99	0.00690035		1515.99	-0.00067812		2045.98	0.00387939		2575.98	-0.01528045		3105.98	0.11244031		3635.98	0.00660755		4165.98	-0.02263937
456.19	0.00566807		986.19	0.00741997		1516.19	-0.00065055		2046.18	0.00325714		2576.18	-0.01547745		3106.18	0.11201947		3636.18	0.00548941		4166.18	-0.02219713
456.39	0.00675175		986.39	0.00738806		1516.39	-0.00070725		2046.38	0.0018978		2576.38	-0.01509624		3106.38	0.11166662		3636.38	0.00629814		4166.38	-0.02239943
456.59	0.00667571		986.59	0.00753775		1516.59	-0.00070828		2046.58	0.00146383		2576.58	-0.01571255		3106.58	0.1112706		3636.58	0.00567267		4166.58	-0.02292655
456.79	0.00660507		986.79	0.00831856		1516.79	-0.00106367		2046.78	0.00251265		2576.78	-0.01510682		3106.78	0.11097118		3636.78	0.0053267		4166.78	-0.02351097
456.99	0.00601639		986.99	0.00780977		1516.99	-0.00137615		2046.98	0.00332637		2576.98	-0.01525281		3106.98	0.11110683		3636.98	0.00457615		4166.98	-0.0227202
457.19	0.00619545		987.19	0.00668224		1517.19	-0.00146829		2047.18	0.00437181		2577.18	-0.01460101		3107.18	0.11154491		3637.18	0.00457102		4167.18	-0.02245138
457.39	0.00583359		987.39	0.00687134		1517.39	-0.00118944		2047.38	0.00476046		2577.38	-0.01494369		3107.38	0.11102905		3637.38	0.00530859		4167.38	-0.02169743
457.59	0.00654608		987.59	0.00688055		1517.59	-0.00150001		2047.58	0.00524673		2577.58	-0.01512014		3107.58	0.11098713		3637.58	0.00549626		4167.58	-0.0218134
457.79	0.00670136		987.79	0.00690513		1517.79	-0.00063611		2047.78	0.0061172		2577.78	-0.01504644		3107.78	0.11125787		3637.78	0.00562251		4167.78	-0.0227716
457.99	0.00535779		987.99	0.00623271		1517.99	0.00017642		2047.98	0.00610347		2577.98	-0.01526718		3107.98	0.11199417		3637.98	0.00553747		4167.98	-0.02311333
458.19	0.00512891		988.19	0.00615232		1518.19	0.00005011		2048.18	0.0064785		2578.18	-0.01554013		3108.18	0.11323433		3638.18	0.00631895		4168.18	-0.02346705
458.39	0.00620953		988.39	0.00601519		1518.39	-0.00054046		2048.38	0.00691434		2578.38	-0.01596806		3108.38	0.11382564		3638.38	0.00588221		4168.38	-0.02385189
458.59	0.00622586		988.59	0.0056111		1518.59	-0.00072956		2048.58	0.00665599		2578.58	-0.01575206		3108.58	0.11399105		3638.58	0.00585984		4168.58	-0.02383059
458.79	0.00614233		988.79	0.00573964		1518.79	0.00006118		2048.78	0.00734082		2578.78	-0.01558303		3108.78	0.11427928		3638.78	0.00637101		4168.78	-0.02388046
458.99	0.00692879		988.99	0.00574017		1518.99	0.00045229		2048.98	0.00681885		2578.98	-0.01535804		3108.98	0.11406584		3638.98	0.00625371		4168.98	-0.02387082
459.19	0.00608279		989.19	0.00558737		1519.19	0.00115816		2049.18	0.00661271		2579.18	-0.01531935		3109.18	0.11305248		3639.18	0.00546184		4169.18	-0.02225116
459.39	0.00527752		989.39	0.00621802		1519.39	0.00067593		2049.38	0.00663278		2579.38	-0.01477414		3109.38	0.11176454		3639.38	0.00629257		4169.38	-0.02215374
459.59	0.00494084		989.59	0.00672845		1519.59	0.00078444		2049.58	0.00588398		2579.58	-0.01487773		3109.58	0.11162257		3639.58	0.00640771		4169.58	-0.02191016
459.79	0.00546211		989.79	0.00716486		1519.79	0.00007789		2049.78	0.0061136		2579.78	-0.01485645		3109.78	0.11135736		3639.78	0.0057199		4169.78	-0.02147207
459.99	0.00545339		989.99	0.0082473		1519.99	0.00022515		2049.98	0.00463551		2579.98	-0.01483492		3109.98	0.11064706		3639.98	0.00481677		4169.98	-0.02169646
460.19	0.00479178		990.19	0.00886707		1520.19	-0.00004565		2050.18	0.00399201		2580.18	-0.01488332		3110.18	0.11058446		3640.18	0.00460119		4170.18	-0.02153219
460.39	0.00451613		990.39	0.00974996		1520.39	-0.00078493		2050.38	0.00310969		2580.38	-0.01580246		3110.38	0.11023833		3640.38	0.00480787		4170.38	-0.02185261
460.59	0.00354055		990.59	0.00976559		1520.59	-0.00168892		2050.58	0.00305253		2580.58	-0.01656009		3110.58	0.11004843		3640.58	0.0044388		4170.58	-0.02186663
460.79	0.00339365		990.79	0.00973033		1520.79	-0.00273704		2050.78	0.00412783		2580.78	-0.01591203		3110.78	0.1107199		3640.78	0.00417543		4170.78	-0.02179764
460.99	0.00206659		990.99	0.0095659		1520.99	-0.0035471		2050.98	0.00371968		2580.98	-0.01688139		3110.98	0.11056743		3640.98	0.00370838		4170.98	-0.02173836
461.19	0.0024851		991.19	0.00867667		1521.19	-0.00345743		2051.18	0.00384909		2581.18	-0.01738547		3111.18	0.10962887		3641.18	0.0033147		4171.18	-0.02095304
461.39	0.00234753		991.39	0.00900606		1521.39	-0.00344989		2051.38	0.00336442		2581.38	-0.01886248		3111.38	0.10973359		3641.38	0.00371316		4171.38	-0.02080282
461.59	0.00247721		991.59	0.00887518		1521.59	-0.00318283		2051.58	0.00373323		2581.58	-0.01890877		3111.58	0.1104455		3641.58	0.00292221		4171.58	-0.02108812
461.79	0.00156495		991.79	0.00788372		1521.79	-0.00190781		2051.78	0.00357569		2581.78	-0.01859544		3111.78	0.11123502		3641.78	0.00211074		4171.78	-0.02143392
461.99	0.0014223		991.99	0.00721893		1521.99	-0.00176084		2051.98	0.00367199		2581.98	-0.01841414		3111.98	0.11227943		3641.98	0.00194465		4171.98	-0.02164167
462.19	0.00302167		992.19	0.00724014		1522.19	-0.00161895		2052.18	0.00330721		2582.18	-0.01855026		3112.18	0.11351849		3642.18	0.00221319		4172.18	-0.02125671
462.39	0.0033519		992.39	0.00667229		1522.39	-0.00154064		2052.38	0.00346114		2582.38	-0.01761681		3112.38	0.11390827		3642.38	0.0017716		4172.38	-0.0215685
462.59	0.0033656		992.59	0.00590474		1522.59	-0.0010455		2052.58	0.00301794		2582.58	-0.01689066		3112.58	0.11378085		3642.58	0.00237963		4172.58	-0.02265426
462.79	0.0044794		992.79	0.00583684		1522.79	-0.00068464		2052.78	0.00330302		2582.78	-0.01606849		3112.78	0.11344874		3642.78	0.00321653		4172.78	-0.02288772
462.99	0.00539674		992.99	0.00523973		1522.99	-0.00044991		2052.98	0.0024126		2582.98	-0.01604922		3112.98	0.11324796		3642.98	0.00326492		4172.98	-0.02316418
463.19	0.00498842		993.19	0.00556241		1523.19	0.00019091		2053.18	0.002778		2583.18	-0.01481689		3113.18	0.11271072		3643.18	0.00397666		4173.18	-0.02322879
463.39	0.00502255		993.39	0.00593233		1523.39	0.0002117		2053.38	0.0027451		2583.38	-0.01439238		3113.38	0.11236346		3643.38	0.00485554		4173.38	-0.02368197
463.59	0.00631831		993.59	0.00684591		1523.59	0.00023324		2053.58	0.00285797		2583.58	-0.01522464		3113.58	0.11304085		3643.58	0.00534391		4173.58	-0.02385316
463.79	0.00711095		993.79	0.0071167		1523.79	0.00035684		2053.78	0.00304121		2583.78	-0.01500409		3113.78	0.11316482		3643.78	0.00598012		4173.78	-0.02344429
463.99	0.00678816		993.99	0.00796425		1523.99	0.00053177		2053.98	0.00298432		2583.98	-0.01555646		3113.98	0.11309088		3643.98	0.00621396		4173.98	-0.02327737
464.19	0.00659184		994.19	0.00781676		1524.19	0.00095975		2054.18	0.00379157		2584.18	-0.01601324		3114.18	0.11296777		3644.18	0.00715627		4174.18	-0.02301496
464.39	0.00692761		994.39	0.00876872		1524.39	0.00035185		2054.38	0.00446072		2584.38	-0.01714314		3114.38	0.11214862		3644.38	0.00726879		4174.38	-0.0233417
464.59	0.00712699		994.59	0.00850066		1524.59	0.00015451		2054.58	0.0045882		2584.58	-0.01768597		3114.58	0.11210261		3644.58	0.00709615		4174.58	-0.02344102
464.79	0.00741658		994.79	0.0090487		1524.79	0.00065394		2054.78	0.00533654		2584.78	-0.01761435		3114.78	0.11137596		3644.78	0.0067891		4174.78	-0.02359983
464.99	0.00745141		994.99	0.00960666		1524.99	0.00001278		2054.98	0.00550111		2584.98	-0.01828438		3114.98	0.11006851		3644.98	0.00697428		4174.98	-0.02283486
465.19	0.0081675		995.19	0.00909393		1525.19	-0.00026639		2055.18	0.00658331		2585.18	-0.01872258		3115.18	0.10974544		3645.18	0.00697572		4175.18	-0.02181014
465.39	0.00754087		995.39	0.00920144		1525.39	-0.00047666		2055.38	0.00696141		2585.38	-0.0185333		3115.38	0.10984719		3645.38	0.00673016		4175.38	-0.0216783
465.59	0.0069975		995.59	0.00927768		1525.59	0.00025214		2055.58	0.00740264		2585.58	-0.01746922		3115.58	0.10886693		3645.58	0.00555639		4175.58	-0.02071955
465.79	0.00647286		995.79	0.00899614		1525.79	0.00007477		2055.78	0.00674332		2585.78	-0.01713042		3115.78	0.10881891		3645.78	0.00567607		4175.78	-0.02043163
465.99	0.00638494		995.99	0.0085759		1525.99	-0.00059724		2055.98	0.00710749		2585.98	-0.01735323		3115.98	0.10957809		3645.98	0.00545501		4175.98	-0.02033978
466.19	0.00628131		996.19	0.00740238		1526.19	-0.00057558		2056.18	0.00658683		2586.18	-0.01688702		3116.18	0.10952694		3646.18	0.00452711		4176.18	-0.01961885
466.39	0.00517297		996.39	0.00729867		1526.39	-0.00158282		2056.38	0.00615994		2586.38	-0.01623238		3116.38	0.10894342		3646.38	0.00452966		4176.38	-0.02069127
466.59	0.00554068		996.59	0.0064981		1526.59	-0.00290126		2056.58	0.00550146		2586.58	-0.01589734		3116.58	0.10894869		3646.58	0.0055936		4176.58	-0.02171012
466.79	0.00616629		996.79	0.00585872		1526.79	-0.00321405		2056.78	0.00481011		2586.78	-0.01550097		3116.78	0.10916856		3646.78	0.00605834		4176.78	-0.02170118
466.99	0.00603932		996.99	0.00524005		1526.99	-0.003172		2056.98	0.00388029		2586.98	-0.01620842		3116.98	0.10940533		3646.98	0.00573583		4176.98	-0.02234732
467.19	0.00527957		997.19	0.00512195		1527.19	-0.00309508		2057.18	0.00383585		2587.18	-0.01569625		3117.18	0.1097469		3647.18	0.00627546		4177.18	-0.02257605
467.39	0.0053929		997.39	0.00493065		1527.39	-0.00304375		2057.38	0.00410683		2587.38	-0.01635099		3117.38	0.11020717		3647.38	0.00545274		4177.38	-0.02188563
467.59	0.00553429		997.59	0.00485223		1527.59	-0.00334417		2057.58	0.00435747		2587.58	-0.01671432		3117.58	0.11050675		3647.58	0.00527611		4177.58	-0.02218742
467.79	0.0057477		997.79	0.0041425		1527.79	-0.003009		2057.78	0.00506131		2587.78	-0.01584898		3117.78	0.11050864		3647.78	0.00462429		4177.78	-0.02191881
467.99	0.00560143		997.99	0.00429292		1527.99	-0.00238067		2057.98	0.0060412		2587.98	-0.01610396		3117.98	0.11061082		3647.98	0.00433196		4177.98	-0.0218423
468.19	0.00580061		998.19	0.00498031		1528.19	-0.00217081		2058.18	0.00672779		2588.18	-0.0165442		3118.18	0.11072766		3648.18	0.00376746		4178.18	-0.02241948
468.39	0.00572568		998.39	0.00521796		1528.39	-0.00269879		2058.38	0.00694921		2588.38	-0.01674019		3118.38	0.11068903		3648.38	0.00309518		4178.38	-0.02194858
468.59	0.00603005		998.59	0.00568977		1528.59	-0.00157195		2058.58	0.00703038		2588.58	-0.01654399		3118.58	0.11037173		3648.58	0.00245939		4178.58	-0.02078083
468.79	0.00595187		998.79	0.00674771		1528.79	-0.00090669		2058.78	0.00792761		2588.78	-0.016053		3118.78	0.10990433		3648.78	0.00181341		4178.78	-0.02092867
468.99	0.00585875		998.99	0.00788658		1528.99	-0.00077204		2058.98	0.00859642		2588.98	-0.0163531		3118.98	0.11021531		3648.98	0.0016104		4178.98	-0.01990503
469.19	0.00512679		999.19	0.0075862		1529.19	-0.00019708		2059.18	0.00933347		2589.18	-0.0156862		3119.18	0.11004353		3649.18	0.00090398		4179.18	-0.01991968
469.39	0.00509345		999.39	0.00669614		1529.39	-0.00020744		2059.38	0.00890741		2589.38	-0.01602652		3119.38	0.10970832		3649.38	-0.00040622		4179.38	-0.0200201
469.59	0.00464428		999.59	0.00673796		1529.59	-0.00010364		2059.58	0.00898916		2589.58	-0.01699803		3119.58	0.10927423		3649.58	-0.00178389		4179.58	-0.019385
469.79	0.00441485		999.79	0.00636667		1529.79	-0.00016651		2059.78	0.00843511		2589.78	-0.01727416		3119.78	0.10936507		3649.78	-0.00186085		4179.78	-0.01874902
469.99	0.00453807		999.99	0.00610075		1529.99	0.00052705		2059.98	0.00834746		2589.98	-0.01795752		3119.98	0.11018532		3649.98	-0.00199585		4179.98	-0.01852237
470.19	0.00470307		1000.19	0.00674391		1530.19	0.00020662		2060.18	0.00767658		2590.18	-0.01829528		3120.18	0.11024969		3650.18	-0.00216633		4180.18	-0.01841061
470.39	0.00430626		1000.39	0.00728116		1530.39	-0.00057944		2060.38	0.0073283		2590.38	-0.01759485		3120.38	0.11001603		3650.38	-0.00129106		4180.38	-0.01992791
470.59	0.00507339		1000.59	0.00638159		1530.59	-0.00086017		2060.58	0.00687924		2590.58	-0.01694208		3120.58	0.11048581		3650.58	-0.00031085		4180.58	-0.02027494
470.79	0.00515764		1000.79	0.0067399		1530.79	-0.00023926		2060.78	0.00645898		2590.78	-0.01670867		3120.78	0.11040755		3650.78	0.00008257		4180.78	-0.02018368
470.99	0.00483404		1000.99	0.00647366		1530.99	-0.00023614		2060.98	0.00573971		2590.98	-0.01654494		3120.98	0.11044459		3650.98	0.00028366		4180.98	-0.02132648
471.19	0.00420832		1001.19	0.00621336		1531.19	-0.00083689		2061.18	0.00533189		2591.18	-0.01616875		3121.18	0.10989322		3651.18	0.0006234		4181.18	-0.02161065
471.39	0.00465007		1001.39	0.00673066		1531.39	-0.00153475		2061.38	0.00487883		2591.38	-0.0160199		3121.38	0.11005416		3651.38	0.00071827		4181.38	-0.02194212
471.59	0.0048115		1001.59	0.0059092		1531.59	-0.00227539		2061.58	0.00467851		2591.58	-0.01539834		3121.58	0.1100872		3651.58	0.00097778		4181.58	-0.02241645
471.79	0.0045775		1001.79	0.0057872		1531.79	-0.00256174		2061.78	0.00472879		2591.78	-0.01529943		3121.78	0.11029991		3651.78	0.00153592		4181.78	-0.02287815
471.99	0.00413697		1001.99	0.00604455		1531.99	-0.00308658		2061.98	0.00466215		2591.98	-0.01578633		3121.98	0.10989196		3651.98	0.0016064		4181.98	-0.02297268
472.19	0.00373288		1002.19	0.00694119		1532.19	-0.00411375		2062.18	0.00458912		2592.18	-0.01604329		3122.18	0.1100103		3652.18	0.00166038		4182.18	-0.02340064
472.39	0.00395695		1002.39	0.00646854		1532.39	-0.0045911		2062.38	0.00426796		2592.38	-0.01589059		3122.38	0.10913139		3652.38	0.00175404		4182.38	-0.02319154
472.59	0.00411028		1002.59	0.00670872		1532.59	-0.00474651		2062.58	0.00453771		2592.58	-0.0156209		3122.58	0.10880799		3652.58	0.00234953		4182.58	-0.02280965
472.79	0.00364568		1002.79	0.00667081		1532.79	-0.00501414		2062.78	0.00469934		2592.78	-0.01613029		3122.78	0.1084909		3652.78	0.0030311		4182.78	-0.02361958
472.99	0.0039567		1002.99	0.00686751		1532.99	-0.004701		2062.98	0.00471832		2592.98	-0.01675747		3122.98	0.10847726		3652.98	0.0035612		4182.98	-0.02436858
473.19	0.00361688		1003.19	0.0053709		1533.19	-0.00484536		2063.18	0.00461747		2593.18	-0.01682234		3123.18	0.10872143		3653.18	0.0030905		4183.18	-0.02508423
473.39	0.00363309		1003.39	0.0049126		1533.39	-0.00505436		2063.38	0.00506867		2593.38	-0.01840264		3123.38	0.10831049		3653.38	0.00259449		4183.38	-0.02499296
473.59	0.00333267		1003.59	0.00507305		1533.59	-0.00500565		2063.58	0.00530819		2593.58	-0.01836982		3123.58	0.10818957		3653.58	0.002429		4183.58	-0.02497172
473.79	0.00383527		1003.79	0.00515713		1533.79	-0.00521958		2063.78	0.00563165		2593.78	-0.01863636		3123.78	0.10856686		3653.78	0.00377377		4183.78	-0.02496814
473.99	0.00501246		1003.99	0.0058396		1533.99	-0.00488293		2063.98	0.006787		2593.98	-0.01933394		3123.98	0.10933209		3653.98	0.00421628		4183.98	-0.02542029
474.19	0.00518994		1004.19	0.00649406		1534.19	-0.00553204		2064.18	0.00693567		2594.18	-0.01906763		3124.18	0.10923401		3654.18	0.0049737		4184.18	-0.02578445
474.39	0.00564925		1004.39	0.00599555		1534.39	-0.00516066		2064.38	0.00674688		2594.38	-0.01795467		3124.38	0.10873601		3654.38	0.0055228		4184.38	-0.02616727
474.59	0.00598842		1004.59	0.00635837		1534.59	-0.00448756		2064.58	0.00653177		2594.58	-0.01804403		3124.58	0.10835191		3654.58	0.00666327		4184.58	-0.0256491
474.79	0.00528844		1004.79	0.00783418		1534.79	-0.00411715		2064.78	0.00708136		2594.78	-0.01787102		3124.78	0.10815927		3654.78	0.00673376		4184.78	-0.02550211
474.99	0.00516161		1004.99	0.00783999		1534.99	-0.00417122		2064.98	0.00623575		2594.98	-0.01736355		3124.98	0.10836368		3654.98	0.00632872		4184.98	-0.02534439
475.19	0.00446093		1005.19	0.00846585		1535.19	-0.00350376		2065.18	0.00564206		2595.18	-0.01779801		3125.18	0.10803097		3655.18	0.00534315		4185.18	-0.02450906
475.39	0.00410838		1005.39	0.00897016		1535.39	-0.00332176		2065.38	0.00481545		2595.38	-0.01807608		3125.38	0.10887022		3655.38	0.00426039		4185.38	-0.02411014
475.59	0.00269047		1005.59	0.00898661		1535.59	-0.00252917		2065.58	0.00527776		2595.58	-0.01810651		3125.58	0.10885363		3655.58	0.00275952		4185.58	-0.0229554
475.79	0.00129976		1005.79	0.00954363		1535.79	-0.00210611		2065.78	0.00514585		2595.78	-0.01802448		3125.78	0.10911241		3655.78	0.00186951		4185.78	-0.02233303
475.99	0.00123237		1005.99	0.01034473		1535.99	-0.0019566		2065.98	0.00460809		2595.98	-0.01788063		3125.98	0.10843495		3655.98	0.00083285		4185.98	-0.02233584
476.19	0.00139612		1006.19	0.01045344		1536.19	-0.0019764		2066.18	0.0038928		2596.18	-0.01797568		3126.18	0.10840101		3656.18	0.00108136		4186.18	-0.02196982
476.39	0.00133679		1006.39	0.00996066		1536.39	-0.00228997		2066.38	0.00314641		2596.38	-0.0183683		3126.38	0.10822113		3656.38	0.00097841		4186.38	-0.02142342
476.59	0.00138132		1006.59	0.01024703		1536.59	-0.00184605		2066.58	0.00288734		2596.58	-0.01854118		3126.58	0.10895969		3656.58	0.00174289		4186.58	-0.02046006
476.79	0.00144336		1006.79	0.01068955		1536.79	-0.0015597		2066.78	0.0026322		2596.78	-0.0193488		3126.78	0.10852118		3656.78	0.00225027		4186.78	-0.02064772
476.99	0.00221419		1006.99	0.01079751		1536.99	-0.00084112		2066.98	0.00254848		2596.98	-0.01949081		3126.98	0.10855499		3656.98	0.00158084		4186.98	-0.02072046
477.19	0.0031718		1007.19	0.00967297		1537.19	-0.00089491		2067.18	0.00285232		2597.18	-0.01943271		3127.18	0.10830672		3657.18	0.00149762		4187.18	-0.0202974
477.39	0.00371096		1007.39	0.00906348		1537.39	-0.00064983		2067.38	0.00263585		2597.38	-0.02022055		3127.38	0.10836476		3657.38	0.00191452		4187.38	-0.02073782
477.59	0.00437185		1007.59	0.00822985		1537.59	-0.00036486		2067.58	0.00273293		2597.58	-0.02048977		3127.58	0.10862801		3657.58	0.00267823		4187.58	-0.02062558
477.79	0.00531296		1007.79	0.00782957		1537.79	-0.00111263		2067.78	0.00365337		2597.78	-0.02056302		3127.78	0.1090938		3657.78	0.00394362		4187.78	-0.02058166
477.99	0.0068557		1007.99	0.00737772		1537.99	-0.00110507		2067.98	0.00354867		2597.98	-0.01990702		3127.98	0.1090268		3657.98	0.00403921		4187.98	-0.02113272
478.19	0.00638973		1008.19	0.00678006		1538.19	-0.00108097		2068.18	0.00296203		2598.18	-0.02005439		3128.18	0.10846412		3658.18	0.00483686		4188.18	-0.02151615
478.39	0.00652153		1008.39	0.00584492		1538.39	-0.00200959		2068.38	0.00178871		2598.38	-0.01988175		3128.38	0.10722745		3658.38	0.00438792		4188.38	-0.02220118
478.59	0.0062366		1008.59	0.00590515		1538.59	-0.00192373		2068.58	0.00236368		2598.58	-0.01944887		3128.58	0.1064306		3658.58	0.00501465		4188.58	-0.0229013
478.79	0.00572239		1008.79	0.00610465		1538.79	-0.00208821		2068.78	0.00275591		2598.78	-0.01887796		3128.78	0.10725655		3658.78	0.0043472		4188.78	-0.02403447
478.99	0.00513133		1008.99	0.005615		1538.99	-0.00163932		2068.98	0.00301223		2598.98	-0.01808865		3128.98	0.10733276		3658.98	0.00320974		4188.98	-0.02378249
479.19	0.00398621		1009.19	0.00594215		1539.19	-0.00119924		2069.18	0.00299892		2599.18	-0.01867188		3129.18	0.10707283		3659.18	0.00247143		4189.18	-0.02442616
479.39	0.00277448		1009.39	0.00652879		1539.39	-0.00180511		2069.38	0.00300739		2599.38	-0.01890176		3129.38	0.10760446		3659.38	0.00161233		4189.38	-0.02496524
479.59	0.00198152		1009.59	0.00719497		1539.59	-0.00162603		2069.58	0.00285393		2599.58	-0.01819941		3129.58	0.10751582		3659.58	-0.00009271		4189.58	-0.02468071
479.79	0.00142353		1009.79	0.00763687		1539.79	-0.00239751		2069.78	0.00246186		2599.78	-0.01739988		3129.78	0.10754178		3659.78	-0.00007088		4189.78	-0.02482581
479.99	0.0010988		1009.99	0.008282		1539.99	-0.00295454		2069.98	0.00189348		2599.98	-0.01749846		3129.98	0.10700191		3659.98	-0.00020273		4189.98	-0.0246796
480.19	0.00087781		1010.19	0.00813776		1540.19	-0.00318165		2070.18	0.00188456		2600.18	-0.01769382		3130.18	0.10733758		3660.18	0.00047672		4190.18	-0.02413173
480.39	0.0002002		1010.39	0.00894441		1540.39	-0.00349775		2070.38	0.00144974		2600.38	-0.01795896		3130.38	0.10805795		3660.38	-0.00003493		4190.38	-0.02372941
480.59	0.00017261		1010.59	0.009452		1540.59	-0.00364698		2070.58	0.00153153		2600.58	-0.01783371		3130.58	0.10816973		3660.58	0.00010578		4190.58	-0.02319533
480.79	0.0007252		1010.79	0.00993767		1540.79	-0.00397218		2070.78	0.00217993		2600.78	-0.01734869		3130.78	0.10881065		3660.78	-0.00004445		4190.78	-0.02294179
480.99	0.00250468		1010.99	0.00975254		1540.99	-0.00375557		2070.98	0.00179958		2600.98	-0.01701958		3130.98	0.10900639		3660.98	-0.00035221		4190.98	-0.02345614
481.19	0.00287022		1011.19	0.00895488		1541.19	-0.00361886		2071.18	0.0018101		2601.18	-0.0165698		3131.18	0.10927265		3661.18	-0.00010005		4191.18	-0.02305415
481.39	0.00275324		1011.39	0.00860929		1541.39	-0.00394189		2071.38	0.00190966		2601.38	-0.01581544		3131.38	0.10995019		3661.38	0.00043014		4191.38	-0.02243323
481.59	0.003484		1011.59	0.00765681		1541.59	-0.00409337		2071.58	0.00295648		2601.58	-0.0143157		3131.58	0.10988298		3661.58	0.00089443		4191.58	-0.02122921
481.79	0.00471321		1011.79	0.00667496		1541.79	-0.00473293		2071.78	0.0035511		2601.78	-0.01366614		3131.78	0.11015344		3661.78	0.00200257		4191.78	-0.0210783
481.99	0.00510714		1011.99	0.00600809		1541.99	-0.00484792		2071.98	0.00274286		2601.98	-0.01337663		3131.98	0.10958537		3661.98	0.00194004		4191.98	-0.02140143
482.19	0.00462259		1012.19	0.00542673		1542.19	-0.00484033		2072.18	0.00287128		2602.18	-0.01401136		3132.18	0.10994186		3662.18	0.00161237		4192.18	-0.02181814
482.39	0.00528978		1012.39	0.00488256		1542.39	-0.00606784		2072.38	0.00271658		2602.38	-0.01301499		3132.38	0.10903288		3662.38	0.00207531		4192.38	-0.02266691
482.59	0.00603255		1012.59	0.004848		1542.59	-0.00452531		2072.58	0.00350432		2602.58	-0.01289227		3132.58	0.1096785		3662.58	0.00253419		4192.58	-0.02248103
482.79	0.0064715		1012.79	0.00470725		1542.79	-0.00442592		2072.78	0.00476001		2602.78	-0.01294642		3132.78	0.110501		3662.78	0.00307014		4192.78	-0.02293713
482.99	0.00727145		1012.99	0.004698		1542.99	-0.00448245		2072.98	0.00588335		2602.98	-0.01303013		3132.98	0.11073387		3662.98	0.00253249		4192.98	-0.02298655
483.19	0.00782357		1013.19	0.00448657		1543.19	-0.004747		2073.18	0.00617957		2603.18	-0.01406968		3133.18	0.11068927		3663.18	0.00321718		4193.18	-0.02420368
483.39	0.0071737		1013.39	0.00438926		1543.39	-0.00475154		2073.38	0.0056184		2603.38	-0.01458938		3133.38	0.11169853		3663.38	0.002756		4193.38	-0.02468512
483.59	0.00593003		1013.59	0.00479108		1543.59	-0.00416208		2073.58	0.00460369		2603.58	-0.01492305		3133.58	0.11149904		3663.58	0.00253599		4193.58	-0.02464378
483.79	0.00564867		1013.79	0.00500045		1543.79	-0.0036336		2073.78	0.00452277		2603.78	-0.01566683		3133.78	0.1113818		3663.78	0.00303107		4193.78	-0.02466064
483.99	0.00547953		1013.99	0.00540218		1543.99	-0.00265969		2073.98	0.00434967		2603.98	-0.01605378		3133.98	0.11133871		3663.98	0.0032399		4193.98	-0.0244855
484.19	0.00539247		1014.19	0.00641329		1544.19	-0.00207878		2074.18	0.00398915		2604.18	-0.0174765		3134.18	0.112268		3664.18	0.0031925		4194.18	-0.02545554
484.39	0.00430749		1014.39	0.00647602		1544.39	-0.00164722		2074.38	0.00293462		2604.38	-0.01806145		3134.38	0.1128632		3664.38	0.00322625		4194.38	-0.0264761
484.59	0.0043884		1014.59	0.00729499		1544.59	-0.00172909		2074.58	0.0026648		2604.58	-0.01805277		3134.58	0.11195495		3664.58	0.00248109		4194.58	-0.0265938
484.79	0.00492001		1014.79	0.00839165		1544.79	-0.00184931		2074.78	0.00222341		2604.78	-0.0172405		3134.78	0.11172742		3664.78	0.00270031		4194.78	-0.02641548
484.99	0.00380857		1014.99	0.00873184		1544.99	-0.00150593		2074.98	0.00164955		2604.98	-0.01755294		3134.98	0.11015574		3664.98	0.00222612		4194.98	-0.02722157
485.19	0.0022187		1015.19	0.00820049		1545.19	-0.0014977		2075.18	0.00164903		2605.18	-0.01633839		3135.18	0.10927519		3665.18	0.00169166		4195.18	-0.02624739
485.39	0.00169287		1015.39	0.00807542		1545.39	-0.00163561		2075.38	0.00182181		2605.38	-0.01535767		3135.38	0.10847095		3665.38	0.00246103		4195.38	-0.02592592
485.59	0.0014795		1015.59	0.00829078		1545.59	-0.00168849		2075.58	0.00190639		2605.58	-0.01537123		3135.58	0.10782461		3665.58	0.00266181		4195.58	-0.02494865
485.79	0.00127539		1015.79	0.00749066		1545.79	-0.00138277		2075.78	0.00233151		2605.78	-0.01527313		3135.78	0.10690432		3665.78	0.00266175		4195.78	-0.02509407
485.99	0.00092997		1015.99	0.00758347		1545.99	-0.00200551		2075.98	0.00218806		2605.98	-0.01534536		3135.98	0.10538558		3665.98	0.00188124		4195.98	-0.0257366
486.19	0.00097218		1016.19	0.00770535		1546.19	-0.00238071		2076.18	0.00311954		2606.18	-0.01579542		3136.18	0.10576006		3666.18	0.00154014		4196.18	-0.02516753
486.39	0.00159423		1016.39	0.0073841		1546.39	-0.00346682		2076.38	0.00399429		2606.38	-0.0155275		3136.38	0.10453844		3666.38	0.00221957		4196.38	-0.0244304
486.59	0.00177872		1016.59	0.00790312		1546.59	-0.00317249		2076.58	0.00530573		2606.58	-0.01583783		3136.58	0.10509025		3666.58	0.00237735		4196.58	-0.02378629
486.79	0.00246524		1016.79	0.00716524		1546.79	-0.00463499		2076.78	0.00705662		2606.78	-0.01594254		3136.78	0.10565531		3666.78	0.00284693		4196.78	-0.02400324
486.99	0.00240428		1016.99	0.00615518		1546.99	-0.0048239		2076.98	0.00695259		2606.98	-0.01651923		3136.98	0.10554929		3666.98	0.00215429		4196.98	-0.02393014
487.19	0.00222751		1017.19	0.00560102		1547.19	-0.00450815		2077.18	0.00703629		2607.18	-0.0168716		3137.18	0.10528917		3667.18	0.00282655		4197.18	-0.02362766
487.39	0.00275069		1017.39	0.00596655		1547.39	-0.00466785		2077.38	0.00724814		2607.38	-0.01766977		3137.38	0.10558953		3667.38	0.00280556		4197.38	-0.02264846
487.59	0.00304425		1017.59	0.00534209		1547.59	-0.00413115		2077.58	0.00670722		2607.58	-0.01876314		3137.58	0.10533965		3667.58	0.0036779		4197.58	-0.02218008
487.79	0.00404986		1017.79	0.00463966		1547.79	-0.00426555		2077.78	0.00660535		2607.78	-0.01938372		3137.78	0.10626262		3667.78	0.00359697		4197.78	-0.02166212
487.99	0.00398852		1017.99	0.00534754		1547.99	-0.00428309		2077.98	0.00625573		2607.98	-0.02060873		3137.98	0.10705246		3667.98	0.00408908		4197.98	-0.0223461
488.19	0.00351151		1018.19	0.00513679		1548.19	-0.00482948		2078.18	0.00603733		2608.18	-0.02203316		3138.18	0.10831501		3668.18	0.00388284		4198.18	-0.02330701
488.39	0.00256207		1018.39	0.00457325		1548.39	-0.00495149		2078.38	0.00612604		2608.38	-0.02183793		3138.38	0.1083656		3668.38	0.00489579		4198.38	-0.02388116
488.59	0.00255901		1018.59	0.00541313		1548.59	-0.00594836		2078.58	0.00655827		2608.58	-0.02259672		3138.58	0.10745713		3668.58	0.00397287		4198.58	-0.02408439
488.79	0.00212328		1018.79	0.0059734		1548.79	-0.00646966		2078.78	0.00575789		2608.78	-0.02285443		3138.78	0.10746748		3668.78	0.00354065		4198.78	-0.02433915
488.99	-0.00001192		1018.99	0.00602125		1548.99	-0.00585245		2078.98	0.00561586		2608.98	-0.02430236		3138.98	0.10683119		3668.98	0.00315805		4198.98	-0.02534402
489.19	-0.00019228		1019.19	0.00597313		1549.19	-0.00536804		2079.18	0.00518361		2609.18	-0.02320652		3139.18	0.10703948		3669.18	0.00302188		4199.18	-0.02510571
489.39	-0.0005619		1019.39	0.00640781		1549.39	-0.00539603		2079.38	0.00522489		2609.38	-0.02378751		3139.38	0.10743255		3669.38	0.00372037		4199.38	-0.02510546
489.59	-0.00008848		1019.59	0.00704248		1549.59	-0.00553238		2079.58	0.00541994		2609.58	-0.0237223		3139.58	0.10813823		3669.58	0.0034186		4199.58	-0.02441385
489.79	0.00035667		1019.79	0.00692356		1549.79	-0.00492315		2079.78	0.00491606		2609.78	-0.02346159		3139.78	0.10799319		3669.78	0.00325098		4199.78	-0.02519182
489.99	0.00033983		1019.99	0.00721573		1549.99	-0.00578447		2079.98	0.00525592		2609.98	-0.02387629		3139.98	0.10792783		3669.98	0.00384099		4199.98	-0.02545828
490.19	0.0008513		1020.19	0.00703113		1550.19	-0.00569338		2080.18	0.00549144		2610.18	-0.02379831		3140.18	0.10859986		3670.18	0.00413623		4200.18	-0.0256041
490.39	0.0010556		1020.39	0.00678315		1550.39	-0.00505626		2080.38	0.00610945		2610.38	-0.02358516		3140.38	0.10881148		3670.38	0.00466524		4200.38	-0.02622281
490.59	0.00146677		1020.59	0.0072602		1550.59	-0.00419373		2080.58	0.00608139		2610.58	-0.02340852		3140.58	0.10940534		3670.58	0.00442562		4200.58	-0.02599586
490.79	0.0025672		1020.79	0.00626991		1550.79	-0.0038881		2080.78	0.00594446		2610.78	-0.02296589		3140.78	0.10982035		3670.78	0.00411821		4200.78	-0.02621291
490.99	0.00311534		1020.99	0.00632646		1550.99	-0.00238974		2080.98	0.00464533		2610.98	-0.02283609		3140.98	0.10901741		3670.98	0.00390405		4200.98	-0.02651105
491.19	0.00442182		1021.19	0.00698713		1551.19	-0.0014244		2081.18	0.00437902		2611.18	-0.02247953		3141.18	0.10905815		3671.18	0.00424926		4201.18	-0.02680427
491.39	0.00600552		1021.39	0.00665384		1551.39	-0.00166778		2081.38	0.00377347		2611.38	-0.02242354		3141.38	0.10915854		3671.38	0.00439172		4201.38	-0.02735118
491.59	0.00608216		1021.59	0.00523299		1551.59	-0.00166854		2081.58	0.00256879		2611.58	-0.02193689		3141.58	0.11039824		3671.58	0.00435029		4201.58	-0.02718957
491.79	0.00586401		1021.79	0.00525841		1551.79	-0.00222339		2081.78	0.00261264		2611.78	-0.02217857		3141.78	0.11088334		3671.78	0.00470211		4201.78	-0.02657973
491.99	0.00523305		1021.99	0.00527006		1551.99	-0.00233063		2081.98	0.00265592		2611.98	-0.02207991		3141.98	0.11087159		3671.98	0.00480388		4201.98	-0.02726638
492.19	0.00471242		1022.19	0.00455188		1552.19	-0.00264683		2082.18	0.00388258		2612.18	-0.02138623		3142.18	0.11117252		3672.18	0.00431451		4202.18	-0.02693023
492.39	0.00392137		1022.39	0.00453642		1552.39	-0.00255838		2082.38	0.00461826		2612.38	-0.02069489		3142.38	0.11042176		3672.38	0.00419327		4202.38	-0.02708863
492.59	0.00418685		1022.59	0.00456076		1552.59	-0.00302551		2082.58	0.005026		2612.58	-0.02073946		3142.58	0.10966151		3672.58	0.00258372		4202.58	-0.02630041
492.79	0.00381893		1022.79	0.00525825		1552.79	-0.00359238		2082.78	0.00483143		2612.78	-0.02042596		3142.78	0.10875797		3672.78	0.00239887		4202.78	-0.02583013
492.99	0.00298307		1022.99	0.00494216		1552.99	-0.00340965		2082.98	0.00510322		2612.98	-0.02063117		3142.98	0.10835799		3672.98	0.00262625		4202.98	-0.02545403
493.19	0.00358846		1023.19	0.00508698		1553.19	-0.00392405		2083.18	0.00532586		2613.18	-0.02012574		3143.18	0.10860129		3673.18	0.00192932		4203.18	-0.02426112
493.39	0.00346234		1023.39	0.00536512		1553.39	-0.0046515		2083.38	0.00569151		2613.38	-0.02102726		3143.38	0.10817436		3673.38	0.00179786		4203.38	-0.02362761
493.59	0.00433454		1023.59	0.0058259		1553.59	-0.00377886		2083.58	0.00613744		2613.58	-0.01999226		3143.58	0.10765685		3673.58	0.00122339		4203.58	-0.02329381
493.79	0.00364374		1023.79	0.00577533		1553.79	-0.00415578		2083.78	0.00596393		2613.78	-0.02054901		3143.78	0.10713106		3673.78	0.00140887		4203.78	-0.02369794
493.99	0.00291131		1023.99	0.00469061		1553.99	-0.0043684		2083.98	0.00720964		2613.98	-0.02063946		3143.98	0.10623956		3673.98	0.00196444		4203.98	-0.02379438
494.19	0.00294622		1024.19	0.00433248		1554.19	-0.00422178		2084.18	0.00762657		2614.18	-0.02165146		3144.18	0.1061733		3674.18	0.00186449		4204.18	-0.02501971
494.39	0.00242989		1024.39	0.00486925		1554.39	-0.00407738		2084.38	0.00740406		2614.38	-0.02164799		3144.38	0.10630141		3674.38	0.00210148		4204.38	-0.02487137
494.59	0.00291824		1024.59	0.00504451		1554.59	-0.00461653		2084.58	0.00699461		2614.58	-0.02176034		3144.58	0.10551601		3674.58	0.00197787		4204.58	-0.02476745
494.79	0.00303062		1024.79	0.00507386		1554.79	-0.00436471		2084.78	0.00715011		2614.78	-0.02199182		3144.78	0.10492256		3674.78	0.00197185		4204.78	-0.02590576
494.99	0.00254619		1024.99	0.00596849		1554.99	-0.003743		2084.98	0.00627273		2614.98	-0.02226438		3144.98	0.10413399		3674.98	0.00243638		4204.98	-0.02686797
495.19	0.0021506		1025.19	0.0059056		1555.19	-0.00403447		2085.18	0.00594762		2615.18	-0.02238349		3145.18	0.1045347		3675.18	0.00249725		4205.18	-0.02775666
495.39	0.00234163		1025.39	0.00575509		1555.39	-0.00385424		2085.38	0.00573884		2615.38	-0.02165602		3145.38	0.10474794		3675.38	0.00182174		4205.38	-0.02829305
495.59	0.00229106		1025.59	0.00555417		1555.59	-0.00430516		2085.58	0.00643218		2615.58	-0.02146419		3145.58	0.10639244		3675.58	0.00133122		4205.58	-0.02756826
495.79	0.00165776		1025.79	0.00556646		1555.79	-0.00388415		2085.78	0.00654616		2615.78	-0.02140041		3145.78	0.10611275		3675.78	0.0013556		4205.78	-0.02775322
495.99	0.00102874		1025.99	0.00499921		1555.99	-0.00318882		2085.98	0.00656274		2615.98	-0.0209046		3145.98	0.10594711		3675.98	0.00020317		4205.98	-0.02819584
496.19	0.00072636		1026.19	0.00475392		1556.19	-0.00271074		2086.18	0.00618536		2616.18	-0.02122884		3146.18	0.10585146		3676.18	-0.00084928		4206.18	-0.02852961
496.39	0.00111779		1026.39	0.0050658		1556.39	-0.00239153		2086.38	0.00598617		2616.38	-0.02053541		3146.38	0.10508024		3676.38	-0.00089812		4206.38	-0.02841152
496.59	0.00172234		1026.59	0.00561512		1556.59	-0.00258085		2086.58	0.00591421		2616.58	-0.0201738		3146.58	0.10525895		3676.58	-0.00061703		4206.58	-0.02741116
496.79	0.00185758		1026.79	0.00564139		1556.79	-0.00281463		2086.78	0.00547952		2616.78	-0.02032945		3146.78	0.10488699		3676.78	-0.0001562		4206.78	-0.02762001
496.99	0.00184462		1026.99	0.00555242		1556.99	-0.00243241		2086.98	0.00448493		2616.98	-0.02016644		3146.98	0.10484067		3676.98	-0.00060411		4206.98	-0.02736278
497.19	0.00237551		1027.19	0.00636924		1557.19	-0.00206367		2087.18	0.00380294		2617.18	-0.01997509		3147.18	0.105058		3677.18	-0.00044683		4207.18	-0.02665071
497.39	0.00237521		1027.39	0.00629492		1557.39	-0.00128366		2087.38	0.00358171		2617.38	-0.01902548		3147.38	0.10516754		3677.38	0.00058015		4207.38	-0.02671488
497.59	0.00242805		1027.59	0.005971		1557.59	-0.00084721		2087.58	0.00327357		2617.58	-0.01797754		3147.58	0.10517609		3677.58	0.00102123		4207.58	-0.02562202
497.79	0.00131457		1027.79	0.00579545		1557.79	-0.00177372		2087.78	0.00293853		2617.78	-0.01879064		3147.78	0.10583847		3677.78	0.00142615		4207.78	-0.02435327
497.99	0.00121572		1027.99	0.00516012		1557.99	-0.00277468		2087.98	0.00349101		2617.98	-0.01873795		3147.98	0.10559023		3677.98	0.00226868		4207.98	-0.0234877
498.19	0.00113514		1028.19	0.00565425		1558.19	-0.00362131		2088.18	0.00299662		2618.18	-0.01840974		3148.18	0.10686027		3678.18	0.00256998		4208.18	-0.0234166
498.39	0.00084723		1028.39	0.00608058		1558.39	-0.00441808		2088.38	0.00223045		2618.38	-0.01768429		3148.38	0.10688983		3678.38	0.00272788		4208.38	-0.02254011
498.59	0.00042152		1028.59	0.00543583		1558.59	-0.00513927		2088.58	0.00233078		2618.58	-0.01830699		3148.58	0.10683295		3678.58	0.0036686		4208.58	-0.02233073
498.79	-0.0001631		1028.79	0.00453065		1558.79	-0.00508634		2088.78	0.00219399		2618.78	-0.01886412		3148.78	0.1076107		3678.78	0.00444594		4208.78	-0.02280059
498.99	-0.00033809		1028.99	0.00492259		1558.99	-0.0058899		2088.98	0.00250638		2618.98	-0.01834994		3148.98	0.10833475		3678.98	0.00505915		4208.98	-0.02277772
499.19	-0.00016929		1029.19	0.00474252		1559.19	-0.0064295		2089.18	0.00292226		2619.18	-0.01856715		3149.18	0.10956295		3679.18	0.00468105		4209.18	-0.02250168
499.39	0.00008095		1029.39	0.00489844		1559.39	-0.00610597		2089.38	0.00347831		2619.38	-0.01884114		3149.38	0.11012277		3679.38	0.00413134		4209.38	-0.02299344
499.59	0.00007506		1029.59	0.00467		1559.59	-0.00679276		2089.58	0.00345876		2619.58	-0.01911942		3149.58	0.11079455		3679.58	0.00387272		4209.58	-0.02273447
499.79	-0.00058704		1029.79	0.00446161		1559.79	-0.0064289		2089.78	0.00358237		2619.78	-0.0194126		3149.78	0.10990949		3679.78	0.00293026		4209.78	-0.02318612
499.99	-0.00009762		1029.99	0.00421912		1559.99	-0.0070074		2089.98	0.00363711		2619.98	-0.02052187		3149.98	0.10909839		3679.98	0.00236083		4209.98	-0.02194423
500.19	-0.0003539		1030.19	0.00464881		1560.19	-0.00661301		2090.18	0.00290832		2620.18	-0.02150925		3150.18	0.10911257		3680.18	0.00178966		4210.18	-0.02214682
500.39	0.00072452		1030.39	0.00516654		1560.39	-0.00690376		2090.38	0.00397743		2620.38	-0.02088096		3150.38	0.1083915		3680.38	0.00184954		4210.38	-0.02254668
500.59	0.00074283		1030.59	0.00564953		1560.59	-0.00638138		2090.58	0.00327345		2620.58	-0.02112215		3150.58	0.10821412		3680.58	0.00215274		4210.58	-0.02260179
500.79	0.00098234		1030.79	0.00621622		1560.79	-0.00576973		2090.78	0.00288156		2620.78	-0.02060846		3150.78	0.10788066		3680.78	0.00105958		4210.78	-0.02340971
500.99	0.0005946		1030.99	0.00670432		1560.99	-0.00519594		2090.98	0.00232971		2620.98	-0.02007909		3150.98	0.10690836		3680.98	0.00055683		4210.98	-0.02396171
501.19	0.00097744		1031.19	0.00738269		1561.19	-0.00456675		2091.18	0.00176002		2621.18	-0.01940667		3151.18	0.1065905		3681.18	0.00060093		4211.18	-0.02452478
501.39	0.00082908		1031.39	0.00703079		1561.39	-0.00400881		2091.38	0.00118789		2621.38	-0.01874462		3151.38	0.10661263		3681.38	0.00109441		4211.38	-0.02487577
501.59	0.00050867		1031.59	0.00800203		1561.59	-0.00380165		2091.58	0.00163085		2621.58	-0.01903122		3151.58	0.10572441		3681.58	0.00033813		4211.58	-0.0246469
501.79	0.00060447		1031.79	0.00875441		1561.79	-0.0036591		2091.78	0.0018707		2621.78	-0.0184363		3151.78	0.10621813		3681.78	-0.00003654		4211.78	-0.02517266
501.99	0.0011521		1031.99	0.00898413		1561.99	-0.00394957		2091.98	0.00229786		2621.98	-0.01842547		3151.98	0.10573126		3681.98	0.00038502		4211.98	-0.026178
502.19	0.00190162		1032.19	0.00976928		1562.19	-0.00325481		2092.18	0.00242118		2622.18	-0.0177947		3152.18	0.10660899		3682.18	0.00070948		4212.18	-0.02762386
502.39	0.00232308		1032.39	0.0096564		1562.39	-0.00310589		2092.38	0.002581		2622.38	-0.01835555		3152.38	0.10706859		3682.38	0.00089845		4212.38	-0.02830987
502.59	0.00246404		1032.59	0.00913692		1562.59	-0.00235119		2092.58	0.00296271		2622.58	-0.01818717		3152.58	0.10763467		3682.58	0.00220497		4212.58	-0.0290356
502.79	0.00282115		1032.79	0.00930673		1562.79	-0.00206769		2092.78	0.00378085		2622.78	-0.01849671		3152.78	0.10829987		3682.78	0.00243912		4212.78	-0.02923687
502.99	0.00371795		1032.99	0.00985745		1562.99	-0.00264894		2092.98	0.00502233		2622.98	-0.01857355		3152.98	0.10824454		3682.98	0.00320307		4212.98	-0.02915806
503.19	0.00373297		1033.19	0.00991341		1563.19	-0.00227864		2093.18	0.00523701		2623.18	-0.01985274		3153.18	0.10791264		3683.18	0.00378026		4213.18	-0.02986777
503.39	0.00326013		1033.39	0.00963381		1563.39	-0.00202177		2093.38	0.00554567		2623.38	-0.02102223		3153.38	0.10794359		3683.38	0.00320956		4213.38	-0.0301831
503.59	0.00298149		1033.59	0.00930163		1563.59	-0.0023103		2093.58	0.00545529		2623.58	-0.02168608		3153.58	0.10805722		3683.58	0.00297665		4213.58	-0.02968979
503.79	0.00256514		1033.79	0.00902285		1563.79	-0.00316095		2093.78	0.00570343		2623.78	-0.02275071		3153.78	0.10719948		3683.78	0.00288263		4213.78	-0.02920633
503.99	0.00263815		1033.99	0.00858336		1563.99	-0.00441409		2093.98	0.00503801		2623.98	-0.02307452		3153.98	0.10700363		3683.98	0.00306955		4213.98	-0.02801807
504.19	0.00194498		1034.19	0.00773854		1564.19	-0.00445744		2094.18	0.00433701		2624.18	-0.02348586		3154.18	0.10689529		3684.18	0.00296227		4214.18	-0.02860286
504.39	0.00233909		1034.39	0.00740943		1564.39	-0.00536166		2094.38	0.00392783		2624.38	-0.02325401		3154.38	0.10659794		3684.38	0.00331111		4214.38	-0.02794568
504.59	0.00204593		1034.59	0.00771288		1564.59	-0.00536085		2094.58	0.00295517		2624.58	-0.02325179		3154.58	0.10612267		3684.58	0.00282941		4214.58	-0.02652824
504.79	0.00238747		1034.79	0.00766675		1564.79	-0.00548576		2094.78	0.00214402		2624.78	-0.02355847		3154.78	0.10519482		3684.78	0.00213609		4214.78	-0.02636733
504.99	0.00195722		1034.99	0.00667908		1564.99	-0.00619699		2094.98	0.00201098		2624.98	-0.02405006		3154.98	0.10410392		3684.98	0.00223971		4214.98	-0.02575251
505.19	0.00205982		1035.19	0.00675989		1565.19	-0.00638491		2095.18	0.00117343		2625.18	-0.02332786		3155.18	0.10334691		3685.18	0.00244365		4215.18	-0.02558788
505.39	0.00158447		1035.39	0.00594859		1565.39	-0.00650294		2095.38	0.00040315		2625.38	-0.02348472		3155.38	0.10330235		3685.38	0.0032789		4215.38	-0.02570356
505.59	0.00125302		1035.59	0.00637174		1565.59	-0.006991		2095.58	0.00077215		2625.58	-0.02368932		3155.58	0.1028085		3685.58	0.00357539		4215.58	-0.02595166
505.79	0.00199505		1035.79	0.00555951		1565.79	-0.00729491		2095.78	0.00063639		2625.78	-0.0230105		3155.78	0.10250573		3685.78	0.00357297		4215.78	-0.02544569
505.99	0.00245705		1035.99	0.00508558		1565.99	-0.00734021		2095.98	0.00117679		2625.98	-0.02339033		3155.98	0.10283767		3685.98	0.0043743		4215.98	-0.02578334
506.19	0.00304559		1036.19	0.00474305		1566.19	-0.00701621		2096.18	0.0018349		2626.18	-0.02239582		3156.18	0.10355638		3686.18	0.00465097		4216.18	-0.02557321
506.39	0.00370946		1036.39	0.00435098		1566.39	-0.00600086		2096.38	0.00219212		2626.38	-0.02199329		3156.38	0.10393998		3686.38	0.00481541		4216.38	-0.02495287
506.59	0.00405276		1036.59	0.00392033		1566.59	-0.00547776		2096.58	0.00270933		2626.58	-0.0212726		3156.58	0.10405487		3686.58	0.00542555		4216.58	-0.02463001
506.79	0.0042522		1036.79	0.00382381		1566.79	-0.00585031		2096.78	0.00297033		2626.78	-0.02117748		3156.78	0.10400188		3686.78	0.00585329		4216.78	-0.0242564
506.99	0.00453967		1036.99	0.00308648		1566.99	-0.00532245		2096.98	0.00361358		2626.98	-0.02107923		3156.98	0.10429957		3686.98	0.00567339		4216.98	-0.0246685
507.19	0.00461337		1037.19	0.00322148		1567.19	-0.00490437		2097.18	0.00376443		2627.18	-0.0216667		3157.18	0.10451326		3687.18	0.00491419		4217.18	-0.02496773
507.39	0.00463582		1037.39	0.00337914		1567.39	-0.00473918		2097.38	0.00352861		2627.38	-0.02169713		3157.38	0.10530435		3687.38	0.00416555		4217.38	-0.0242424
507.59	0.00442587		1037.59	0.00404678		1567.59	-0.00513666		2097.58	0.00330285		2627.58	-0.0221567		3157.58	0.10576247		3687.58	0.00436756		4217.58	-0.02472848
507.79	0.00378601		1037.79	0.00311926		1567.79	-0.0055259		2097.78	0.00261675		2627.78	-0.02180966		3157.78	0.10559232		3687.78	0.00383963		4217.78	-0.02553071
507.99	0.00372572		1037.99	0.00324337		1567.99	-0.0059781		2097.98	0.00200296		2627.98	-0.02155466		3157.98	0.1066873		3687.98	0.00305619		4217.98	-0.02632705
508.19	0.00436492		1038.19	0.00284066		1568.19	-0.00599841		2098.18	0.00156829		2628.18	-0.02140918		3158.18	0.10700576		3688.18	0.00255604		4218.18	-0.0271526
508.39	0.00389608		1038.39	0.00348666		1568.39	-0.0059235		2098.38	0.00121344		2628.38	-0.02086936		3158.38	0.10727681		3688.38	0.00236678		4218.38	-0.02670265
508.59	0.00392235		1038.59	0.00398711		1568.59	-0.00646068		2098.58	0.00075906		2628.58	-0.02063984		3158.58	0.10673073		3688.58	0.00110995		4218.58	-0.02706289
508.79	0.00361949		1038.79	0.00428942		1568.79	-0.00681228		2098.78	0.00042144		2628.78	-0.02107586		3158.78	0.1060703		3688.78	0.00133801		4218.78	-0.02718827
508.99	0.00282669		1038.99	0.00419505		1568.99	-0.00714351		2098.98	0.00050718		2628.98	-0.0210593		3158.98	0.10645688		3688.98	0.0014517		4218.98	-0.0275389
509.19	0.00254073		1039.19	0.00506361		1569.19	-0.00715894		2099.18	-0.00054215		2629.18	-0.02077885		3159.18	0.10535777		3689.18	0.00161324		4219.18	-0.02848035
509.39	0.00153645		1039.39	0.00589209		1569.39	-0.00753983		2099.38	-0.0008878		2629.38	-0.02062043		3159.38	0.10581788		3689.38	0.00210165		4219.38	-0.0290033
509.59	0.00119744		1039.59	0.00629346		1569.59	-0.00755308		2099.58	-0.000842		2629.58	-0.02054242		3159.58	0.10597976		3689.58	0.00249443		4219.58	-0.02881004
509.79	0.00140158		1039.79	0.00525557		1569.79	-0.00697797		2099.78	-0.00085991		2629.78	-0.02101813		3159.78	0.10485701		3689.78	0.00266378		4219.78	-0.02836205
509.99	0.00135791		1039.99	0.00580043		1569.99	-0.00618975		2099.98	-0.00018782		2629.98	-0.02038892		3159.98	0.10623686		3689.98	0.00314121		4219.98	-0.02908286
510.19	0.00135207		1040.19	0.00600627		1570.19	-0.00508877		2100.18	0.00056245		2630.18	-0.02020724		3160.18	0.10574263		3690.18	0.00245628		4220.18	-0.0286995
510.39	0.00152544		1040.39	0.00551512		1570.39	-0.00347072		2100.38	0.00146248		2630.38	-0.02023829		3160.38	0.10604914		3690.38	0.00360988		4220.38	-0.02872828
510.59	0.00145056		1040.59	0.00562544		1570.59	-0.00366175		2100.58	0.00283938		2630.58	-0.02035574		3160.58	0.10616551		3690.58	0.00365009		4220.58	-0.02860354
510.79	0.00129184		1040.79	0.00570338		1570.79	-0.00355257		2100.78	0.00428074		2630.78	-0.02048231		3160.78	0.10630195		3690.78	0.00384287		4220.78	-0.02818976
510.99	0.00165563		1040.99	0.00458288		1570.99	-0.00263411		2100.98	0.00577733		2630.98	-0.0209496		3160.98	0.10622208		3690.98	0.00271522		4220.98	-0.0281226
511.19	0.0021261		1041.19	0.00448572		1571.19	-0.00234062		2101.18	0.00681782		2631.18	-0.02132923		3161.18	0.10604351		3691.18	0.00213191		4221.18	-0.02743727
511.39	0.00167621		1041.39	0.00442419		1571.39	-0.00201478		2101.38	0.00742222		2631.38	-0.02179577		3161.38	0.10642192		3691.38	0.00203834		4221.38	-0.02728483
511.59	0.00156153		1041.59	0.00417932		1571.59	-0.00179078		2101.58	0.00857519		2631.58	-0.02235505		3161.58	0.10602093		3691.58	0.00107316		4221.58	-0.02758792
511.79	0.00107418		1041.79	0.00315235		1571.79	-0.00167446		2101.78	0.00878744		2631.78	-0.02215995		3161.78	0.10546202		3691.78	0.00042063		4221.78	-0.02847209
511.99	0.00190792		1041.99	0.00371546		1571.99	-0.00209097		2101.98	0.00875406		2631.98	-0.02231515		3161.98	0.10537018		3691.98	0.00015229		4221.98	-0.02840014
512.19	0.00151712		1042.19	0.00345669		1572.19	-0.00251849		2102.18	0.00805473		2632.18	-0.02156247		3162.18	0.10531745		3692.18	0.00035936		4222.18	-0.02863242
512.39	0.00103096		1042.39	0.0041463		1572.39	-0.0032575		2102.38	0.0083858		2632.38	-0.02193713		3162.38	0.1050467		3692.38	0.00065951		4222.38	-0.02770636
512.59	0.00091349		1042.59	0.00442772		1572.59	-0.00503919		2102.58	0.00713906		2632.58	-0.02130929		3162.58	0.10543554		3692.58	0.00022408		4222.58	-0.02850373
512.79	0.00100228		1042.79	0.0052589		1572.79	-0.00578051		2102.78	0.0070574		2632.78	-0.02136032		3162.78	0.10547436		3692.78	0.00088228		4222.78	-0.02810953
512.99	0.00106985		1042.99	0.00535483		1572.99	-0.00604746		2102.98	0.00588926		2632.98	-0.02107079		3162.98	0.10546408		3692.98	0.0008597		4222.98	-0.02857177
513.19	0.00101129		1043.19	0.00612431		1573.19	-0.00724854		2103.18	0.00401279		2633.18	-0.02032164		3163.18	0.10486862		3693.18	0.00061457		4223.18	-0.02878788
513.39	0.00105637		1043.39	0.00681322		1573.39	-0.0078388		2103.38	0.00335873		2633.38	-0.01962855		3163.38	0.10620979		3693.38	0.0011113		4223.38	-0.02833485
513.59	0.00149827		1043.59	0.00685626		1573.59	-0.00790612		2103.58	0.00218351		2633.58	-0.01928221		3163.58	0.10634171		3693.58	0.00217953		4223.58	-0.0279298
513.79	0.00194177		1043.79	0.00632504		1573.79	-0.00795897		2103.78	0.000629		2633.78	-0.01984058		3163.78	0.1062188		3693.78	0.00254183		4223.78	-0.02765261
513.99	0.00184228		1043.99	0.00673465		1573.99	-0.00792964		2103.98	0.00109204		2633.98	-0.01899093		3163.98	0.10770709		3693.98	0.00284329		4223.98	-0.02778281
514.19	0.0008148		1044.19	0.0067242		1574.19	-0.00701386		2104.18	0.0008452		2634.18	-0.01959169		3164.18	0.10772629		3694.18	0.00251886		4224.18	-0.02772238
514.39	0.00044408		1044.39	0.00678814		1574.39	-0.0075904		2104.38	0.00069623		2634.38	-0.02029393		3164.38	0.10790792		3694.38	0.00430659		4224.38	-0.02742853
514.59	0.00040293		1044.59	0.00655346		1574.59	-0.00804176		2104.58	0.00108711		2634.58	-0.02054145		3164.58	0.10789321		3694.58	0.00437138		4224.58	-0.02670499
514.79	0.00001499		1044.79	0.00569252		1574.79	-0.00718955		2104.78	0.00082378		2634.78	-0.02016845		3164.78	0.10817115		3694.78	0.00391062		4224.78	-0.02553418
514.99	0.00042592		1044.99	0.00495005		1574.99	-0.00669565		2104.98	0.00144696		2634.98	-0.01976821		3164.98	0.10760437		3694.98	0.00303544		4224.98	-0.02529137
515.19	0.0000363		1045.19	0.00469762		1575.19	-0.00561955		2105.18	0.00199837		2635.18	-0.0199081		3165.18	0.10778798		3695.18	0.00195363		4225.18	-0.02461545
515.39	-0.00015823		1045.39	0.00448088		1575.39	-0.00455219		2105.38	0.00269348		2635.38	-0.02020746		3165.38	0.10755029		3695.38	0.00174834		4225.38	-0.02407666
515.59	-0.00014141		1045.59	0.00520188		1575.59	-0.0036285		2105.58	0.00330101		2635.58	-0.01954777		3165.58	0.10571436		3695.58	0.00108295		4225.58	-0.02389552
515.79	-0.00042489		1045.79	0.00499818		1575.79	-0.00263308		2105.78	0.00332551		2635.78	-0.0195896		3165.78	0.10501795		3695.78	0.00083534		4225.78	-0.02441694
515.99	0.00005257		1045.99	0.00524862		1575.99	-0.00266751		2105.98	0.00301775		2635.98	-0.02039821		3165.98	0.10492667		3695.98	0.00027447		4225.98	-0.02378042
516.19	-0.00003926		1046.19	0.00592651		1576.19	-0.00223659		2106.18	0.00368276		2636.18	-0.02093475		3166.18	0.10558652		3696.18	0.00044678		4226.18	-0.02405147
516.39	0.00018867		1046.39	0.00589961		1576.39	-0.00257104		2106.38	0.00519099		2636.38	-0.02185482		3166.38	0.10539715		3696.38	0.00015498		4226.38	-0.02433978
516.59	-0.00008771		1046.59	0.00487891		1576.59	-0.00313245		2106.58	0.00499652		2636.58	-0.02116299		3166.58	0.10493919		3696.58	-0.00037455		4226.58	-0.0250951
516.79	0.00008648		1046.79	0.00527717		1576.79	-0.00364118		2106.78	0.00564576		2636.78	-0.02122109		3166.78	0.10472376		3696.78	-0.00076057		4226.78	-0.02544822
516.99	0.0006558		1046.99	0.00516501		1576.99	-0.00325861		2106.98	0.00540842		2636.98	-0.02129963		3166.98	0.10420604		3696.98	-0.00132418		4226.98	-0.02568433
517.19	0.000882		1047.19	0.00558828		1577.19	-0.0039251		2107.18	0.00426075		2637.18	-0.02168004		3167.18	0.1043391		3697.18	-0.00113611		4227.18	-0.02658119
517.39	0.00087123		1047.39	0.00561246		1577.39	-0.00400919		2107.38	0.00367523		2637.38	-0.02212389		3167.38	0.10479254		3697.38	-0.0001052		4227.38	-0.02711136
517.59	0.00068075		1047.59	0.00553789		1577.59	-0.00411582		2107.58	0.00264272		2637.58	-0.02228236		3167.58	0.10483545		3697.58	0.00052172		4227.58	-0.02741622
517.79	0.00060542		1047.79	0.00472653		1577.79	-0.00477547		2107.78	0.00250828		2637.78	-0.02302547		3167.78	0.10417322		3697.78	0.00040491		4227.78	-0.02715263
517.99	-0.00021353		1047.99	0.00425182		1577.99	-0.00545897		2107.98	0.00309108		2637.98	-0.02348347		3167.98	0.10484398		3697.98	-0.00003242		4227.98	-0.02765161
518.19	-0.00096545		1048.19	0.00412984		1578.19	-0.00537011		2108.18	0.00224614		2638.18	-0.02458061		3168.18	0.10489613		3698.18	-0.0007603		4228.18	-0.02823641
518.39	-0.00075748		1048.39	0.00493573		1578.39	-0.00677071		2108.38	0.00214892		2638.38	-0.02514094		3168.38	0.10436552		3698.38	-0.0007075		4228.38	-0.02797378
518.59	-0.00025585		1048.59	0.00495526		1578.59	-0.00678041		2108.58	0.0014722		2638.58	-0.02507948		3168.58	0.10442038		3698.58	-0.00146647		4228.58	-0.02793995
518.79	-0.00088901		1048.79	0.00524911		1578.79	-0.00717987		2108.78	0.0013544		2638.78	-0.02452964		3168.78	0.10507241		3698.78	-0.00224187		4228.78	-0.02807546
518.99	-0.00124188		1048.99	0.00623088		1578.99	-0.00715348		2108.98	0.00105272		2638.98	-0.02411432		3168.98	0.10469086		3698.98	-0.002043		4228.98	-0.02849992
519.19	-0.00190654		1049.19	0.00611824		1579.19	-0.00637665		2109.18	0.00049432		2639.18	-0.02429079		3169.18	0.10517892		3699.18	-0.00292088		4229.18	-0.0280273
519.39	-0.00214913		1049.39	0.00604868		1579.39	-0.00613495		2109.38	0.0012038		2639.38	-0.02361978		3169.38	0.10436889		3699.38	-0.00229383		4229.38	-0.02858906
519.59	-0.00192015		1049.59	0.00583737		1579.59	-0.00645318		2109.58	0.00133378		2639.58	-0.02240797		3169.58	0.10339426		3699.58	-0.00229201		4229.58	-0.02891965
519.79	-0.00199239		1049.79	0.00576186		1579.79	-0.00650312		2109.78	0.00094981		2639.78	-0.02225937		3169.78	0.10366295		3699.78	-0.00184952		4229.78	-0.0285696
519.99	-0.00169224		1049.99	0.00546583		1579.99	-0.00683596		2109.98	0.00211461		2639.98	-0.02297437		3169.98	0.10371628		3699.98	-0.00082946		4229.98	-0.02819144
520.19	-0.00128456		1050.19	0.00526875		1580.19	-0.00669713		2110.18	0.00363473		2640.18	-0.02249764		3170.18	0.10433315		3700.18	0.00016114		4230.18	-0.02823775
520.39	-0.00087152		1050.39	0.0035188		1580.39	-0.00742891		2110.38	0.00417952		2640.38	-0.0220843		3170.38	0.10351261		3700.38	0.00048883		4230.38	-0.02828499
520.59	0.00018308		1050.59	0.00262517		1580.59	-0.00787234		2110.58	0.00425082		2640.58	-0.02057562		3170.58	0.10331742		3700.58	0.0010556		4230.58	-0.02785313
520.79	0.00100271		1050.79	0.00251111		1580.79	-0.00821349		2110.78	0.00452234		2640.78	-0.01948561		3170.78	0.10359158		3700.78	0.00117266		4230.78	-0.02822986
520.99	0.001919		1050.99	0.0019367		1580.99	-0.00713387		2110.98	0.00447658		2640.98	-0.01991096		3170.98	0.10297404		3700.98	0.00126811		4230.98	-0.028173
521.19	0.00120976		1051.19	0.00131367		1581.19	-0.00762752		2111.18	0.00449386		2641.18	-0.01968213		3171.18	0.10326681		3701.18	0.0023332		4231.18	-0.02915164
521.39	0.00150781		1051.39	0.00027544		1581.39	-0.0070957		2111.38	0.00447611		2641.38	-0.01970942		3171.38	0.10384937		3701.38	0.00265666		4231.38	-0.02878064
521.59	0.00190122		1051.59	-0.00037037		1581.59	-0.0068728		2111.58	0.00478792		2641.58	-0.01990447		3171.58	0.10437162		3701.58	0.00208592		4231.58	-0.02851565
521.79	0.00189312		1051.79	-0.00134474		1581.79	-0.00740667		2111.78	0.00477712		2641.78	-0.02012044		3171.78	0.10390104		3701.78	0.00197711		4231.78	-0.02821591
521.99	0.00181776		1051.99	-0.00180284		1581.99	-0.0073743		2111.98	0.00447104		2641.98	-0.02061812		3171.98	0.10467703		3701.98	0.00078513		4231.98	-0.02893228
522.19	0.00257292		1052.19	-0.00167346		1582.19	-0.00659059		2112.18	0.00404363		2642.18	-0.02149427		3172.18	0.10501416		3702.18	0.00030603		4232.18	-0.02882751
522.39	0.00360249		1052.39	-0.000238		1582.39	-0.00658023		2112.38	0.00438112		2642.38	-0.02193461		3172.38	0.10492376		3702.38	-0.00015604		4232.38	-0.0289971
522.59	0.00306113		1052.59	0.00005188		1582.59	-0.00570949		2112.58	0.0040707		2642.58	-0.02227945		3172.58	0.10554807		3702.58	-0.00024777		4232.58	-0.02905243
522.79	0.00152141		1052.79	0.00050138		1582.79	-0.00466432		2112.78	0.00409529		2642.78	-0.02211222		3172.78	0.10597228		3702.78	-0.00009075		4232.78	-0.02921701
522.99	0.0010801		1052.99	0.00123899		1582.99	-0.00385897		2112.98	0.00321036		2642.98	-0.0220495		3172.98	0.10582548		3702.98	-0.00080205		4232.98	-0.02855898
523.19	0.00053023		1053.19	0.0014477		1583.19	-0.00364598		2113.18	0.00259658		2643.18	-0.02266758		3173.18	0.10611364		3703.18	-0.00055973		4233.18	-0.02811686
523.39	-0.00007062		1053.39	0.00129178		1583.39	-0.00389956		2113.38	0.00292839		2643.38	-0.02235349		3173.38	0.10524986		3703.38	-0.00018493		4233.38	-0.0280698
523.59	-0.00037599		1053.59	0.00175233		1583.59	-0.00439136		2113.58	0.0020819		2643.58	-0.02269934		3173.58	0.10463647		3703.58	0.00011181		4233.58	-0.02792604
523.79	-0.00110752		1053.79	0.00265144		1583.79	-0.00406889		2113.78	0.00165982		2643.78	-0.02362654		3173.78	0.10438971		3703.78	0.00095597		4233.78	-0.02724199
523.99	-0.00142286		1053.99	0.00235674		1583.99	-0.00372041		2113.98	0.00276338		2643.98	-0.02433317		3173.98	0.10422837		3703.98	0.0009938		4233.98	-0.02752083
524.19	-0.00071682		1054.19	0.00286615		1584.19	-0.00403644		2114.18	0.00254142		2644.18	-0.02424441		3174.18	0.10426691		3704.18	0.0008998		4234.18	-0.02772008
524.39	-0.00062419		1054.39	0.00257639		1584.39	-0.0042954		2114.38	0.00222272		2644.38	-0.02363612		3174.38	0.10373718		3704.38	0.00046209		4234.38	-0.02765269
524.59	-0.00083448		1054.59	0.00297129		1584.59	-0.00424318		2114.58	0.00326817		2644.58	-0.02303349		3174.58	0.10363014		3704.58	0.00072938		4234.58	-0.02771979
524.79	-0.00148447		1054.79	0.00270359		1584.79	-0.00387512		2114.78	0.00363596		2644.78	-0.02339116		3174.78	0.1029622		3704.78	0.00017123		4234.78	-0.02845576
524.99	-0.00165092		1054.99	0.0027328		1584.99	-0.00433949		2114.98	0.00382509		2644.98	-0.02434848		3174.98	0.10307371		3704.98	-0.00019469		4234.98	-0.02891405
525.19	-0.00218584		1055.19	0.00269602		1585.19	-0.00445332		2115.18	0.00435622		2645.18	-0.02380485		3175.18	0.10367113		3705.18	0.0003095		4235.18	-0.02824853
525.39	-0.00144375		1055.39	0.0029238		1585.39	-0.00431224		2115.38	0.00430067		2645.38	-0.02343714		3175.38	0.10426433		3705.38	-0.00009666		4235.38	-0.02761261
525.59	-0.00106644		1055.59	0.00314053		1585.59	-0.00498907		2115.58	0.00458823		2645.58	-0.02294264		3175.58	0.10350161		3705.58	-0.0003808		4235.58	-0.02780133
525.79	-0.00121107		1055.79	0.00258573		1585.79	-0.00542061		2115.78	0.00448727		2645.78	-0.02253384		3175.78	0.10299238		3705.78	-0.00059912		4235.78	-0.02751247
525.99	-0.00073292		1055.99	0.00319843		1585.99	-0.00430741		2115.98	0.00568808		2645.98	-0.02200824		3175.98	0.10313921		3705.98	-0.00151597		4235.98	-0.02708973
526.19	-0.00028877		1056.19	0.00339909		1586.19	-0.00397578		2116.18	0.00642785		2646.18	-0.02234222		3176.18	0.10410485		3706.18	-0.00080489		4236.18	-0.02637506
526.39	-0.00058758		1056.39	0.00407394		1586.39	-0.00394426		2116.38	0.00718947		2646.38	-0.02260977		3176.38	0.10361022		3706.38	-0.00182334		4236.38	-0.02623892
526.59	-0.00148122		1056.59	0.00434438		1586.59	-0.00391559		2116.58	0.00719527		2646.58	-0.02233798		3176.58	0.10354352		3706.58	-0.00159811		4236.58	-0.02600616
526.79	-0.00177294		1056.79	0.00463489		1586.79	-0.00470424		2116.78	0.00636541		2646.78	-0.02152468		3176.78	0.10338657		3706.78	-0.00180301		4236.78	-0.02571789
526.99	-0.0013001		1056.99	0.00468337		1586.99	-0.00567858		2116.98	0.00575746		2646.98	-0.02131412		3176.98	0.10324646		3706.98	-0.00194381		4236.98	-0.02577069
527.19	-0.00141356		1057.19	0.00504625		1587.19	-0.00653405		2117.18	0.00423095		2647.18	-0.02175025		3177.18	0.10282979		3707.18	-0.0015782		4237.18	-0.02520685
527.39	-0.00082348		1057.39	0.00474639		1587.39	-0.00716982		2117.38	0.00385891		2647.38	-0.02282009		3177.38	0.10268174		3707.38	-0.00121341		4237.38	-0.02441219
527.59	-0.00085676		1057.59	0.00380139		1587.59	-0.00746887		2117.58	0.00294009		2647.58	-0.02331878		3177.58	0.10266855		3707.58	-0.00088869		4237.58	-0.02578222
527.79	-0.0002536		1057.79	0.00335032		1587.79	-0.00699238		2117.78	0.00216509		2647.78	-0.02362656		3177.78	0.10343509		3707.78	-0.00015705		4237.78	-0.02555712
527.99	-0.00060507		1057.99	0.00301732		1587.99	-0.00736958		2117.98	0.00156508		2647.98	-0.02409195		3177.98	0.10387863		3707.98	0.00057771		4237.98	-0.02625804
528.19	0.00030749		1058.19	0.00292038		1588.19	-0.00758685		2118.18	0.00050903		2648.18	-0.02404579		3178.18	0.10314482		3708.18	0.00110838		4238.18	-0.02748853
528.39	-0.00013606		1058.39	0.00263857		1588.39	-0.00737953		2118.38	0.00002301		2648.38	-0.0239259		3178.38	0.10313077		3708.38	0.00108045		4238.38	-0.02830437
528.59	0.0004169		1058.59	0.00232118		1588.59	-0.00779274		2118.58	0.00030897		2648.58	-0.02444591		3178.58	0.10290283		3708.58	0.00135984		4238.58	-0.02914012
528.79	0.00050438		1058.79	0.00153108		1588.79	-0.00754751		2118.78	0.00063757		2648.78	-0.02481287		3178.78	0.10256286		3708.78	0.00050845		4238.78	-0.03020045
528.99	0.00147096		1058.99	0.00096584		1588.99	-0.00754315		2118.98	0.00079597		2648.98	-0.02480961		3178.98	0.10271583		3708.98	0.00058694		4238.98	-0.02975989
529.19	0.00102711		1059.19	0.00144271		1589.19	-0.00705604		2119.18	0.00162271		2649.18	-0.02407616		3179.18	0.10220858		3709.18	0.00072657		4239.18	-0.03035017
529.39	0.00123466		1059.39	0.00163491		1589.39	-0.00672939		2119.38	0.00228008		2649.38	-0.02435888		3179.38	0.10216525		3709.38	-0.00004577		4239.38	-0.03032544
529.59	0.00151622		1059.59	0.00094563		1589.59	-0.00681683		2119.58	0.00288936		2649.58	-0.02436928		3179.58	0.10108742		3709.58	-0.00061766		4239.58	-0.02980254
529.79	0.00044746		1059.79	0.00073382		1589.79	-0.00630272		2119.78	0.00343663		2649.78	-0.02420404		3179.78	0.10100911		3709.78	-0.00108593		4239.78	-0.02994488
529.99	-0.00016903		1059.99	0.00147148		1589.99	-0.00502478		2119.98	0.00429824		2649.98	-0.02457391		3179.98	0.10179851		3709.98	-0.00137142		4239.98	-0.02989947
530.19	-0.00050056		1060.19	0.00155151		1590.19	-0.00509743		2120.18	0.0042471		2650.18	-0.02447952		3180.18	0.10285562		3710.18	-0.00134121		4240.18	-0.03091838
530.39	-0.00133019		1060.39	0.00288351		1590.39	-0.00576118		2120.38	0.00454365		2650.38	-0.02511696		3180.38	0.10280022		3710.38	-0.00287542		4240.38	-0.03119592
530.59	-0.00115957		1060.59	0.00309401		1590.59	-0.00651584		2120.58	0.00463894		2650.58	-0.02442251		3180.58	0.10244903		3710.58	-0.00263542		4240.58	-0.03110715
530.79	-0.00108374		1060.79	0.00389883		1590.79	-0.00672749		2120.78	0.00444577		2650.78	-0.02384743		3180.78	0.10144013		3710.78	-0.00341133		4240.78	-0.03113051
530.99	-0.00110187		1060.99	0.00368125		1590.99	-0.00664372		2120.98	0.00464404		2650.98	-0.0245441		3180.98	0.10155883		3710.98	-0.00376418		4240.98	-0.03140697
531.19	-0.00064689		1061.19	0.003626		1591.19	-0.00650924		2121.18	0.00420063		2651.18	-0.024245		3181.18	0.10289638		3711.18	-0.00318337		4241.18	-0.03022578
531.39	-0.0002811		1061.39	0.00352261		1591.39	-0.00683598		2121.38	0.00390393		2651.38	-0.02424153		3181.38	0.10383164		3711.38	-0.00292472		4241.38	-0.03008908
531.59	-0.00100369		1061.59	0.00364674		1591.59	-0.00743357		2121.58	0.00354664		2651.58	-0.02333332		3181.58	0.1046666		3711.58	-0.00318451		4241.58	-0.03103015
531.79	-0.00075319		1061.79	0.00435718		1591.79	-0.0077883		2121.78	0.00277509		2651.78	-0.02258244		3181.78	0.10425149		3711.78	-0.00216045		4241.78	-0.03083291
531.99	-0.00118513		1061.99	0.00445638		1591.99	-0.00838109		2121.98	0.00279161		2651.98	-0.02241765		3181.98	0.10360595		3711.98	-0.00185675		4241.98	-0.03123244
532.19	-0.00086193		1062.19	0.00487999		1592.19	-0.00843154		2122.18	0.0030662		2652.18	-0.02233744		3182.18	0.10303488		3712.18	-0.00215939		4242.18	-0.03152056
532.39	-0.00063693		1062.39	0.00425293		1592.39	-0.00853584		2122.38	0.00297775		2652.38	-0.0218343		3182.38	0.10360227		3712.38	-0.00177995		4242.38	-0.03186215
532.59	-0.000774		1062.59	0.00339287		1592.59	-0.0089472		2122.58	0.00377913		2652.58	-0.02188303		3182.58	0.10320022		3712.58	-0.00119114		4242.58	-0.03160009
532.79	-0.00079112		1062.79	0.00326565		1592.79	-0.00744645		2122.78	0.0039153		2652.78	-0.02194864		3182.78	0.10318483		3712.78	-0.00130211		4242.78	-0.03107895
532.99	-0.00080859		1062.99	0.00278863		1592.99	-0.00723138		2122.98	0.00353278		2652.98	-0.02225611		3182.98	0.10267524		3712.98	-0.00061316		4242.98	-0.03059765
533.19	-0.00046095		1063.19	0.00275504		1593.19	-0.00723081		2123.18	0.00395635		2653.18	-0.02267513		3183.18	0.10226504		3713.18	-0.00013086		4243.18	-0.03117753
533.39	-0.00047413		1063.39	0.00139966		1593.39	-0.00659289		2123.38	0.0033697		2653.38	-0.0233395		3183.38	0.10294157		3713.38	-0.00044422		4243.38	-0.02981179
533.59	-0.00024188		1063.59	0.00038462		1593.59	-0.00687887		2123.58	0.0034321		2653.58	-0.02366364		3183.58	0.10278212		3713.58	-0.00026111		4243.58	-0.02926667
533.79	-0.00076767		1063.79	0.00064692		1593.79	-0.00665256		2123.78	0.00338116		2653.78	-0.02355197		3183.78	0.10294191		3713.78	0.00040031		4243.78	-0.02915878
533.99	-0.00112132		1063.99	0.00026672		1593.99	-0.00557846		2123.98	0.00283596		2653.98	-0.02429781		3183.98	0.10318531		3713.98	0.00048531		4243.98	-0.02893697
534.19	-0.00117444		1064.19	-0.00004128		1594.19	-0.00564857		2124.18	0.00171677		2654.18	-0.02485457		3184.18	0.10334066		3714.18	0.00009442		4244.18	-0.02913848
534.39	-0.00141877		1064.39	0.00034977		1594.39	-0.00569778		2124.38	0.00032214		2654.38	-0.02594166		3184.38	0.10309997		3714.38	0.00004627		4244.38	-0.02739066
534.59	-0.00092387		1064.59	-0.00046041		1594.59	-0.00561776		2124.58	-0.00026226		2654.58	-0.02568102		3184.58	0.10244528		3714.58	0.00032181		4244.58	-0.02731161
534.79	-0.00167936		1064.79	0.00015527		1594.79	-0.00557682		2124.78	-0.00091388		2654.78	-0.02581937		3184.78	0.10238103		3714.78	-0.00070887		4244.78	-0.02776074
534.99	-0.00219279		1064.99	-0.00111755		1594.99	-0.00578722		2124.98	-0.00180463		2654.98	-0.02546633		3184.98	0.10404478		3714.98	-0.00119308		4244.98	-0.02774576
535.19	-0.00214754		1065.19	-0.00102705		1595.19	-0.00658148		2125.18	-0.00240335		2655.18	-0.02504985		3185.18	0.10457748		3715.18	-0.0012442		4245.18	-0.02820883
535.39	-0.00241328		1065.39	-0.00059259		1595.39	-0.00796761		2125.38	-0.00313571		2655.38	-0.0250139		3185.38	0.1046542		3715.38	-0.00190083		4245.38	-0.02884698
535.59	-0.00277848		1065.59	-0.00044578		1595.59	-0.00880432		2125.58	-0.00246887		2655.58	-0.02453121		3185.58	0.10484953		3715.58	-0.00173261		4245.58	-0.02899181
535.79	-0.00267906		1065.79	-0.00051295		1595.79	-0.00937203		2125.78	-0.0020109		2655.78	-0.0240963		3185.78	0.10356436		3715.78	-0.00171174		4245.78	-0.02930518
535.99	-0.00239047		1065.99	-0.0006879		1595.99	-0.00947452		2125.98	-0.00069717		2655.98	-0.02353293		3185.98	0.10313189		3715.98	-0.00209129		4245.98	-0.02966719
536.19	-0.00214241		1066.19	-0.00012184		1596.19	-0.00894765		2126.18	-0.0000344		2656.18	-0.02407609		3186.18	0.10309403		3716.18	-0.002113		4246.18	-0.03008889
536.39	-0.00221703		1066.39	-0.00169429		1596.39	-0.00898647		2126.38	0.00048844		2656.38	-0.02321442		3186.38	0.10280003		3716.38	-0.00142248		4246.38	-0.03068498
536.59	-0.00251757		1066.59	-0.00073242		1596.59	-0.00874574		2126.58	0.00121762		2656.58	-0.02332571		3186.58	0.10279379		3716.58	-0.00148667		4246.58	-0.03017433
536.79	-0.0020762		1066.79	0.00025781		1596.79	-0.00842041		2126.78	0.0010776		2656.78	-0.02320451		3186.78	0.10214002		3716.78	-0.00124319		4246.78	-0.03013131
536.99	-0.00121194		1066.99	0.00020032		1596.99	-0.0090115		2126.98	0.0023495		2656.98	-0.02301105		3186.98	0.10089046		3716.98	-0.00015955		4246.98	-0.03035712
537.19	0.00014652		1067.19	0.00057223		1597.19	-0.00857542		2127.18	0.00320189		2657.18	-0.02294347		3187.18	0.10127306		3717.18	0.00069366		4247.18	-0.03040713
537.39	-0.00068383		1067.39	0.00133221		1597.39	-0.00920426		2127.38	0.00329338		2657.38	-0.02246786		3187.38	0.10181806		3717.38	0.00028904		4247.38	-0.03012697
537.59	0.0004065		1067.59	0.00277084		1597.59	-0.00968013		2127.58	0.00417511		2657.58	-0.02182433		3187.58	0.10094794		3717.58	0.00063004		4247.58	-0.02997018
537.79	0.00033253		1067.79	0.00356727		1597.79	-0.0098263		2127.78	0.00379838		2657.78	-0.02133579		3187.78	0.10101746		3717.78	0.0013167		4247.78	-0.02895702
537.99	0.00002701		1067.99	0.00303901		1597.99	-0.00912152		2127.98	0.00294167		2657.98	-0.02128891		3187.98	0.10176637		3717.98	0.0002979		4247.98	-0.02879597
538.19	0.00022217		1068.19	0.00308365		1598.19	-0.00939029		2128.18	0.00163512		2658.18	-0.0220099		3188.18	0.10154421		3718.18	-0.00060166		4248.18	-0.02812647
538.39	0.0001205		1068.39	0.00309998		1598.39	-0.00917578		2128.38	0.00133839		2658.38	-0.02199586		3188.38	0.10110414		3718.38	-0.00075016		4248.38	-0.02797294
538.59	-0.00047162		1068.59	0.00334638		1598.59	-0.00880107		2128.58	0.00120046		2658.58	-0.02145074		3188.58	0.10033508		3718.58	-0.00105346		4248.58	-0.02824337
538.79	-0.00102611		1068.79	0.00341203		1598.79	-0.00840254		2128.78	0.00073367		2658.78	-0.02196335		3188.78	0.10041438		3718.78	-0.00240749		4248.78	-0.02836859
538.99	-0.00064738		1068.99	0.00255533		1598.99	-0.00819643		2128.98	-0.00012779		2658.98	-0.02175354		3188.98	0.10041375		3718.98	-0.00264196		4248.98	-0.02806299
539.19	-0.00080502		1069.19	0.00263752		1599.19	-0.00881529		2129.18	-0.00000642		2659.18	-0.02308776		3189.18	0.10038346		3719.18	-0.00306619		4249.18	-0.0280913
539.39	-0.00016962		1069.39	0.00205829		1599.39	-0.00799119		2129.38	-0.00058865		2659.38	-0.02371267		3189.38	0.10081989		3719.38	-0.0026136		4249.38	-0.02785696
539.59	-0.00027265		1069.59	0.00198503		1599.59	-0.00749817		2129.58	-0.00029246		2659.58	-0.02400692		3189.58	0.09972168		3719.58	-0.00253188		4249.58	-0.02746478
539.79	-0.00057465		1069.79	0.00202734		1599.79	-0.00733768		2129.78	-0.00035471		2659.78	-0.02404577		3189.78	0.09958338		3719.78	-0.00285868		4249.78	-0.02788168
539.99	-0.00069235		1069.99	0.00142932		1599.99	-0.00637195		2129.98	0.00020703		2659.98	-0.02433022		3189.98	0.09970372		3719.98	-0.0023144		4249.98	-0.02858365
540.19	-0.00065561		1070.19	0.00132016		1600.19	-0.00592374		2130.18	-0.00017227		2660.18	-0.02576411		3190.18	0.09994538		3720.18	-0.00175836		4250.18	-0.02919448
540.39	-0.00145227		1070.39	0.00149455		1600.39	-0.00666175		2130.38	-0.00021062		2660.38	-0.02635597		3190.38	0.09980044		3720.38	-0.00073064		4250.38	-0.02928398
540.59	-0.00163117		1070.59	0.0029976		1600.59	-0.0073833		2130.58	0.00052456		2660.58	-0.0268136		3190.58	0.09983383		3720.58	-0.00051244		4250.58	-0.02900882
540.79	-0.00183823		1070.79	0.00303569		1600.79	-0.00773783		2130.78	0.00105893		2660.78	-0.02677281		3190.78	0.09961485		3720.78	0.00064732		4250.78	-0.02942473
540.99	-0.00181741		1070.99	0.00314615		1600.99	-0.00793244		2130.98	0.00249956		2660.98	-0.02689071		3190.98	0.10038087		3720.98	0.00170802		4250.98	-0.02924181
541.19	-0.00201139		1071.19	0.00394209		1601.19	-0.00880601		2131.18	0.00313043		2661.18	-0.02641325		3191.18	0.10101242		3721.18	0.00144683		4251.18	-0.02949091
541.39	-0.00203739		1071.39	0.00423017		1601.39	-0.00945885		2131.38	0.00398536		2661.38	-0.0260301		3191.38	0.1011558		3721.38	0.00095898		4251.38	-0.02949956
541.59	-0.0017373		1071.59	0.00430987		1601.59	-0.00955371		2131.58	0.00426291		2661.58	-0.02583625		3191.58	0.10125932		3721.58	0.00141211		4251.58	-0.02903088
541.79	-0.00198921		1071.79	0.00381831		1601.79	-0.00976066		2131.78	0.00372934		2661.78	-0.02636656		3191.78	0.10225805		3721.78	0.00126372		4251.78	-0.02836336
541.99	-0.0024293		1071.99	0.00302814		1601.99	-0.00947693		2131.98	0.00380663		2661.98	-0.02590596		3191.98	0.10177634		3721.98	-0.00026411		4251.98	-0.02813498
542.19	-0.00187391		1072.19	0.00288285		1602.19	-0.01000822		2132.18	0.00333723		2662.18	-0.02586873		3192.18	0.10009788		3722.18	-0.00061768		4252.18	-0.02821395
542.39	-0.0020507		1072.39	0.00276764		1602.39	-0.00929582		2132.38	0.00371659		2662.38	-0.02532146		3192.38	0.09920671		3722.38	-0.00025153		4252.38	-0.02897542
542.59	-0.00263032		1072.59	0.00251215		1602.59	-0.00905824		2132.58	0.00361605		2662.58	-0.02441548		3192.58	0.09908515		3722.58	0.00048338		4252.58	-0.02814571
542.79	-0.00209522		1072.79	0.00193134		1602.79	-0.00859929		2132.78	0.00363715		2662.78	-0.02459927		3192.78	0.09995232		3722.78	-0.00043		4252.78	-0.02839482
542.99	-0.00208189		1072.99	0.00125716		1602.99	-0.00812551		2132.98	0.00285478		2662.98	-0.0239819		3192.98	0.10012357		3722.98	-0.000765		4252.98	-0.02892421
543.19	-0.00193811		1073.19	0.00037723		1603.19	-0.00705079		2133.18	0.00225059		2663.18	-0.02475839		3193.18	0.10110089		3723.18	-0.00139613		4253.18	-0.02967028
543.39	-0.00134489		1073.39	-0.00034574		1603.39	-0.0059293		2133.38	0.00147571		2663.38	-0.02422334		3193.38	0.10111773		3723.38	-0.00048928		4253.38	-0.03063956
543.59	-0.00141938		1073.59	-0.00032153		1603.59	-0.00576067		2133.58	0.00086437		2663.58	-0.0234466		3193.58	0.1003965		3723.58	-0.00020262		4253.58	-0.03133624
543.79	-0.0018284		1073.79	-0.00054544		1603.79	-0.00520435		2133.78	0.00100907		2663.78	-0.02316172		3193.78	0.10110516		3723.78	-0.00064947		4253.78	-0.03193853
543.99	-0.00233436		1073.99	-0.00074871		1603.99	-0.00460186		2133.98	0.00083773		2663.98	-0.02393155		3193.98	0.10078418		3723.98	0.00010128		4253.98	-0.03297017
544.19	-0.00257308		1074.19	0.00018524		1604.19	-0.00469062		2134.18	0.00013959		2664.18	-0.02428899		3194.18	0.10081396		3724.18	-0.00005085		4254.18	-0.03364389
544.39	-0.00304393		1074.39	0.00168567		1604.39	-0.00561834		2134.38	0.00058996		2664.38	-0.02511663		3194.38	0.10100204		3724.38	-0.00007175		4254.38	-0.03402435
544.59	-0.00316398		1074.59	0.00142438		1604.59	-0.00544215		2134.58	0.00117728		2664.58	-0.02460497		3194.58	0.10155085		3724.58	-0.00049142		4254.58	-0.03392994
544.79	-0.00342351		1074.79	0.00127039		1604.79	-0.00492079		2134.78	0.00189589		2664.78	-0.02537557		3194.78	0.10212606		3724.78	-0.00089313		4254.78	-0.03409735
544.99	-0.00422218		1074.99	0.00228105		1604.99	-0.00497711		2134.98	0.0022722		2664.98	-0.02527265		3194.98	0.10158339		3724.98	-0.00140365		4254.98	-0.03349305
545.19	-0.00317055		1075.19	0.00251606		1605.19	-0.00604664		2135.18	0.00335672		2665.18	-0.02521528		3195.18	0.10059735		3725.18	-0.00286866		4255.18	-0.03279604
545.39	-0.00302591		1075.39	0.00263835		1605.39	-0.00507541		2135.38	0.00360087		2665.38	-0.02582796		3195.38	0.10062409		3725.38	-0.00295548		4255.38	-0.0319313
545.59	-0.00289102		1075.59	0.00309847		1605.59	-0.00562257		2135.58	0.00365035		2665.58	-0.02582842		3195.58	0.09949481		3725.58	-0.00289237		4255.58	-0.0310998
545.79	-0.00221016		1075.79	0.00311901		1605.79	-0.00588218		2135.78	0.00437832		2665.78	-0.02578017		3195.78	0.09899314		3725.78	-0.0036467		4255.78	-0.0301219
545.99	-0.00230752		1075.99	0.00323813		1605.99	-0.00633481		2135.98	0.0049723		2665.98	-0.0253693		3195.98	0.09823971		3725.98	-0.00423704		4255.98	-0.02925122
546.19	-0.00265943		1076.19	0.00285238		1606.19	-0.00697219		2136.18	0.00476792		2666.18	-0.02531379		3196.18	0.09838097		3726.18	-0.0028317		4256.18	-0.02985783
546.39	-0.00343831		1076.39	0.00254647		1606.39	-0.00660537		2136.38	0.00589523		2666.38	-0.02452153		3196.38	0.09878943		3726.38	-0.0019758		4256.38	-0.02953696
546.59	-0.0038373		1076.59	0.002352		1606.59	-0.00693728		2136.58	0.00555494		2666.58	-0.02387944		3196.58	0.09988122		3726.58	-0.00114093		4256.58	-0.02867847
546.79	-0.00350562		1076.79	0.00204964		1606.79	-0.00608423		2136.78	0.00478849		2666.78	-0.02363596		3196.78	0.10069678		3726.78	-0.00095311		4256.78	-0.02923561
546.99	-0.00386936		1076.99	0.00122722		1606.99	-0.00605236		2136.98	0.00368448		2666.98	-0.02365587		3196.98	0.10060347		3726.98	-0.00116484		4256.98	-0.02999082
547.19	-0.00370642		1077.19	0.00083248		1607.19	-0.00637609		2137.18	0.00257688		2667.18	-0.02370282		3197.18	0.1011939		3727.18	-0.00022399		4257.18	-0.02965574
547.39	-0.00355081		1077.39	0.00126175		1607.39	-0.00661955		2137.38	0.00221361		2667.38	-0.0230378		3197.38	0.1009981		3727.38	0.00094436		4257.38	-0.02969601
547.59	-0.00360433		1077.59	0.00152259		1607.59	-0.00617473		2137.58	0.00146445		2667.58	-0.02289648		3197.58	0.10133159		3727.58	0.00064429		4257.58	-0.03018869
547.79	-0.00460444		1077.79	0.00184231		1607.79	-0.00561442		2137.78	0.00218998		2667.78	-0.02266785		3197.78	0.10217781		3727.78	0.00092622		4257.78	-0.03064574
547.99	-0.00461843		1077.99	0.00262043		1607.99	-0.00693618		2137.98	0.00149716		2667.98	-0.02331331		3197.98	0.10238181		3727.98	0.00136008		4257.98	-0.0310979
548.19	-0.0032301		1078.19	0.0034893		1608.19	-0.00685559		2138.18	0.00114774		2668.18	-0.02412008		3198.18	0.10329824		3728.18	0.00104206		4258.18	-0.03144267
548.39	-0.00323846		1078.39	0.00381212		1608.39	-0.00727881		2138.38	0.0011181		2668.38	-0.02449492		3198.38	0.10420863		3728.38	0.00038297		4258.38	-0.03215915
548.59	-0.00330213		1078.59	0.00366175		1608.59	-0.00760076		2138.58	0.00055831		2668.58	-0.02442591		3198.58	0.10389193		3728.58	0.00004292		4258.58	-0.03257685
548.79	-0.00298027		1078.79	0.00394908		1608.79	-0.00793024		2138.78	0.00068661		2668.78	-0.02551452		3198.78	0.10302911		3728.78	-0.00088554		4258.78	-0.03233003
548.99	-0.00254063		1078.99	0.00388387		1608.99	-0.00847491		2138.98	0.00061148		2668.98	-0.02486091		3198.98	0.10219026		3728.98	-0.00210482		4258.98	-0.03236166
549.19	-0.00076378		1079.19	0.00368509		1609.19	-0.00911674		2139.18	0.00160032		2669.18	-0.02500036		3199.18	0.10155951		3729.18	-0.00296374		4259.18	-0.03207299
549.39	0.00002506		1079.39	0.00329901		1609.39	-0.0089813		2139.38	0.00117419		2669.38	-0.02522119		3199.38	0.10068261		3729.38	-0.00292545		4259.38	-0.03176545
549.59	0.00116295		1079.59	0.00306608		1609.59	-0.0101986		2139.58	0.0017824		2669.58	-0.02603999		3199.58	0.09900102		3729.58	-0.00328278		4259.58	-0.03101298
549.79	0.00128529		1079.79	0.00276612		1609.79	-0.00987691		2139.78	0.0023929		2669.78	-0.02691642		3199.78	0.09871501		3729.78	-0.00400266		4259.78	-0.03054537
549.99	0.00084549		1079.99	0.00170654		1609.99	-0.0100192		2139.98	0.00226273		2669.98	-0.02750771		3199.98	0.09754776		3729.98	-0.00400147		4259.98	-0.03088138
550.19	0.00089836		1080.19	0.00059556		1610.19	-0.00972232		2140.18	0.00234111		2670.18	-0.0270844		3200.18	0.0971467		3730.18	-0.00329481		4260.18	-0.03150996
550.39	0.00148608		1080.39	0.00003303		1610.39	-0.00934926		2140.38	0.00240464		2670.38	-0.02621279		3200.38	0.09615092		3730.38	-0.00377617		4260.38	-0.0314498
550.59	0.00105632		1080.59	0.00035626		1610.59	-0.0096247		2140.58	0.00137832		2670.58	-0.02639994		3200.58	0.0954728		3730.58	-0.00422316		4260.58	-0.03121162
550.79	0.00098478		1080.79	-0.00072502		1610.79	-0.01007615		2140.78	0.00035789		2670.78	-0.02617576		3200.78	0.09525505		3730.78	-0.00415851		4260.78	-0.03152269
550.99	0.00048251		1080.99	-0.00084333		1610.99	-0.01012364		2140.98	-0.00063202		2670.98	-0.02612304		3200.98	0.09520793		3730.98	-0.00480081		4260.98	-0.03197791
551.19	-0.00004047		1081.19	-0.00052714		1611.19	-0.00917759		2141.18	-0.00044638		2671.18	-0.02557692		3201.18	0.09625432		3731.18	-0.00399859		4261.18	-0.03211284
551.39	-0.00080376		1081.39	-0.00051838		1611.39	-0.00862704		2141.38	-0.00026232		2671.38	-0.02571434		3201.38	0.09670478		3731.38	-0.00364012		4261.38	-0.03222102
551.59	-0.0007925		1081.59	-0.00047874		1611.59	-0.00796705		2141.58	-0.00041669		2671.58	-0.02572883		3201.58	0.09783651		3731.58	-0.00406136		4261.58	-0.03221193
551.79	-0.00150486		1081.79	0.00047541		1611.79	-0.0075814		2141.78	0.00004593		2671.78	-0.02611574		3201.78	0.09785846		3731.78	-0.0041322		4261.78	-0.03176014
551.99	-0.00086555		1081.99	0.00051953		1611.99	-0.00743291		2141.98	-0.00023522		2671.98	-0.02686731		3201.98	0.09801967		3731.98	-0.00384024		4261.98	-0.0318853
552.19	-0.00117216		1082.19	0.00043125		1612.19	-0.00678784		2142.18	-0.00012455		2672.18	-0.02674533		3202.18	0.09867258		3732.18	-0.00421057		4262.18	-0.03183087
552.39	-0.00250666		1082.39	0.00069774		1612.39	-0.00810978		2142.38	-0.00017679		2672.38	-0.02595942		3202.38	0.09936737		3732.38	-0.00386935		4262.38	-0.03265763
552.59	-0.00213085		1082.59	0.00182854		1612.59	-0.00820053		2142.58	0.00035306		2672.58	-0.0266633		3202.58	0.09906275		3732.58	-0.00313094		4262.58	-0.03257956
552.79	-0.00150894		1082.79	0.00236585		1612.79	-0.00780222		2142.78	0.0010513		2672.78	-0.02659424		3202.78	0.09934964		3732.78	-0.00358995		4262.78	-0.0318759
552.99	-0.00156024		1082.99	0.00232351		1612.99	-0.0082892		2142.98	0.00196943		2672.98	-0.02643082		3202.98	0.09918469		3732.98	-0.00421655		4262.98	-0.03169458
553.19	-0.00153609		1083.19	0.00284755		1613.19	-0.00831602		2143.18	0.00212594		2673.18	-0.02663157		3203.18	0.09920988		3733.18	-0.00355968		4263.18	-0.03141376
553.39	-0.00125351		1083.39	0.00226281		1613.39	-0.00900422		2143.38	0.00210856		2673.38	-0.02787225		3203.38	0.09910032		3733.38	-0.00340736		4263.38	-0.03079255
553.59	-0.00207237		1083.59	0.0030632		1613.59	-0.00976344		2143.58	0.00311642		2673.58	-0.02856228		3203.58	0.09922274		3733.58	-0.00316723		4263.58	-0.03046091
553.79	-0.00242956		1083.79	0.00336189		1613.79	-0.00913071		2143.78	0.00405361		2673.78	-0.02887829		3203.78	0.09868799		3733.78	-0.00286771		4263.78	-0.03133102
553.99	-0.00258619		1083.99	0.0030919		1613.99	-0.00878709		2143.98	0.00408297		2673.98	-0.02827752		3203.98	0.09714428		3733.98	-0.00246904		4263.98	-0.03185067
554.19	-0.00224676		1084.19	0.00401474		1614.19	-0.0086572		2144.18	0.00428228		2674.18	-0.02770778		3204.18	0.09699178		3734.18	-0.0021852		4264.18	-0.03192195
554.39	-0.00322473		1084.39	0.00382528		1614.39	-0.00873713		2144.38	0.00364112		2674.38	-0.02765658		3204.38	0.09658534		3734.38	-0.00219671		4264.38	-0.03185494
554.59	-0.00397186		1084.59	0.0044366		1614.59	-0.00926367		2144.58	0.00336218		2674.58	-0.02703398		3204.58	0.09688653		3734.58	-0.00161625		4264.58	-0.03109318
554.79	-0.004187		1084.79	0.00399802		1614.79	-0.00968567		2144.78	0.00262207		2674.78	-0.02599031		3204.78	0.09719406		3734.78	-0.00119003		4264.78	-0.03141353
554.99	-0.00437888		1084.99	0.00463432		1614.99	-0.0088524		2144.98	0.00275698		2674.98	-0.02513621		3204.98	0.09771923		3734.98	-0.00148769		4264.98	-0.03120987
555.19	-0.00402349		1085.19	0.00439744		1615.19	-0.00915158		2145.18	0.00208396		2675.18	-0.02445846		3205.18	0.09814843		3735.18	-0.00063664		4265.18	-0.03076002
555.39	-0.00404168		1085.39	0.00386897		1615.39	-0.00969628		2145.38	0.00143291		2675.38	-0.02458194		3205.38	0.09824874		3735.38	-0.0009279		4265.38	-0.03046364
555.59	-0.00333321		1085.59	0.00371382		1615.59	-0.00899871		2145.58	0.00061418		2675.58	-0.02452385		3205.58	0.09864951		3735.58	-0.00168373		4265.58	-0.03051595
555.79	-0.00304725		1085.79	0.00304609		1615.79	-0.00869895		2145.78	0.00033418		2675.78	-0.02433393		3205.78	0.09863269		3735.78	-0.00212599		4265.78	-0.03095251
555.99	-0.00265826		1085.99	0.00216844		1615.99	-0.00885489		2145.98	0.00022283		2675.98	-0.02483005		3205.98	0.09927083		3735.98	-0.00222992		4265.98	-0.03083351
556.19	-0.00229091		1086.19	0.00185666		1616.19	-0.00993705		2146.18	0.00114797		2676.18	-0.02480763		3206.18	0.09989577		3736.18	-0.00247648		4266.18	-0.02974463
556.39	-0.00188459		1086.39	0.00243617		1616.39	-0.01082592		2146.38	0.00172471		2676.38	-0.02499766		3206.38	0.10039448		3736.38	-0.00212928		4266.38	-0.0300585
556.59	-0.00151179		1086.59	0.00208153		1616.59	-0.00969298		2146.58	0.00283543		2676.58	-0.02570859		3206.58	0.09950281		3736.58	-0.00212065		4266.58	-0.02942725
556.79	-0.0019187		1086.79	0.00124236		1616.79	-0.01006212		2146.78	0.00287269		2676.78	-0.02569886		3206.78	0.09912273		3736.78	-0.00298576		4266.78	-0.0295046
556.99	-0.0022649		1086.99	0.00058801		1616.99	-0.01019936		2146.98	0.00340084		2676.98	-0.02577976		3206.98	0.09903207		3736.98	-0.00382099		4266.98	-0.03014611
557.19	-0.00217731		1087.19	0.0003654		1617.19	-0.01002065		2147.18	0.00394664		2677.18	-0.02579495		3207.18	0.09908534		3737.18	-0.00325307		4267.18	-0.03114799
557.39	-0.00147839		1087.39	0.00002095		1617.39	-0.00984355		2147.38	0.00394964		2677.38	-0.02586655		3207.38	0.09997117		3737.38	-0.00358719		4267.38	-0.03170249
557.59	-0.00173154		1087.59	-0.00004058		1617.59	-0.0101388		2147.58	0.00389082		2677.58	-0.02589976		3207.58	0.09993817		3737.58	-0.00251363		4267.58	-0.03262082
557.79	-0.00130809		1087.79	-0.00043589		1617.79	-0.00916827		2147.78	0.00384078		2677.78	-0.02600557		3207.78	0.09901701		3737.78	-0.00179089		4267.78	-0.03373732
557.99	-0.00139664		1087.99	-0.00091788		1617.99	-0.0087231		2147.98	0.00332659		2677.98	-0.02561557		3207.98	0.09841445		3737.98	-0.00123547		4267.98	-0.03402967
558.19	-0.00154942		1088.19	-0.00078481		1618.19	-0.00894049		2148.18	0.00316097		2678.18	-0.02570325		3208.18	0.09874914		3738.18	-0.00091266		4268.18	-0.03396393
558.39	-0.00212013		1088.39	-0.00089285		1618.39	-0.00914098		2148.38	0.0025964		2678.38	-0.02544726		3208.38	0.09884802		3738.38	-0.00040511		4268.38	-0.03358335
558.59	-0.00189329		1088.59	-0.00016426		1618.59	-0.00959522		2148.58	0.00231151		2678.58	-0.02476932		3208.58	0.09885234		3738.58	-0.00017351		4268.58	-0.03315112
558.79	-0.00201651		1088.79	0.00027397		1618.79	-0.01011115		2148.78	0.00147906		2678.78	-0.0243417		3208.78	0.09894783		3738.78	-0.00076778		4268.78	-0.03299811
558.99	-0.00167756		1088.99	0.00089569		1618.99	-0.01044097		2148.98	0.00072591		2678.98	-0.02403392		3208.98	0.09927021		3738.98	-0.00087293		4268.98	-0.03219935
559.19	-0.00152111		1089.19	0.00118		1619.19	-0.0113469		2149.18	-0.00049559		2679.18	-0.02404101		3209.18	0.09933257		3739.18	-0.00082763		4269.18	-0.03182968
559.39	-0.00203879		1089.39	0.00173704		1619.39	-0.01127131		2149.38	-0.00083039		2679.38	-0.02452148		3209.38	0.09969618		3739.38	-0.00168267		4269.38	-0.03129415
559.59	-0.00205302		1089.59	0.00221045		1619.59	-0.01151962		2149.58	-0.00176625		2679.58	-0.02507334		3209.58	0.10009218		3739.58	-0.0020318		4269.58	-0.03031717
559.79	-0.00204362		1089.79	0.00281726		1619.79	-0.01215148		2149.78	-0.00183007		2679.78	-0.02540564		3209.78	0.10049315		3739.78	-0.00271077		4269.78	-0.02908255
