# Supplementary material for: Functional development of a V3/glycan-specific broadly neutralizing antibody isolated from a case of HIV superinfection
Source: eLife journal article supplement (doi:10.7554/elife.68110), 2021-07-15
Supplement: fig2-data2 [file C7.xls]

Vers 3.43 Data Simulation
Conc1	2.5E-07	2.5E-07	2.5E-07	2.5E-07	2.5E-07	2.5E-07	2.5E-07
Start1	200	730.02	1260.01	1790.04	2320.04	2850.04	3380.04
Stop1	559.79	1089.82	1619.81	2149.84	2679.84	3209.84	3739.84
Time1	Data1	Sim1	Time2	Data2	Sim2	Time3	Data3	Sim3	Time4	Data4	Sim4	Time5	Data5	Sim5	Time6	Data6	Sim6	Time7	Data7	Sim7
200	0.00143302		730.02	-0.00334473		1260.01	-0.00038372		1790.04	-0.0039431		2320.04	-0.00542654		2850.04	-0.00578912		3380.04	-0.00240697
200.2	0.00163882		730.22	-0.00352198		1260.21	0.00081617		1790.24	-0.00383442		2320.24	-0.00598068		2850.24	-0.00666916		3380.24	-0.0022807
200.4	0.00264209		730.42	-0.00422823		1260.41	0.00109607		1790.44	-0.00323193		2320.44	-0.00650899		2850.44	-0.00737514		3380.44	-0.00201677
200.6	0.00309374		730.62	-0.00478261		1260.61	0.00197104		1790.64	-0.00207449		2320.64	-0.00770651		2850.64	-0.00837301		3380.64	-0.00201203
200.8	0.00383389		730.82	-0.00452605		1260.81	0.00280199		1790.84	-0.00188223		2320.84	-0.00838336		2850.84	-0.00924515		3380.84	-0.00241694
201	0.00345682		731.02	-0.00435946		1261.01	0.00269768		1791.04	-0.00179913		2321.04	-0.00850623		2851.04	-0.00971334		3381.04	-0.00206521
201.2	0.00398876		731.22	-0.00415519		1261.21	0.00297056		1791.24	-0.00237777		2321.24	-0.00934456		2851.24	-0.01067125		3381.24	-0.00162684
201.4	0.00430454		731.42	-0.00390403		1261.41	0.00305536		1791.44	-0.00228777		2321.44	-0.00968539		2851.44	-0.01154161		3381.44	-0.00150658
201.6	0.00480599		731.62	-0.00363166		1261.61	0.00272696		1791.64	-0.00244846		2321.64	-0.00948417		2851.64	-0.01196361		3381.64	-0.00139782
201.8	0.00493358		731.82	-0.00419108		1261.81	0.00271788		1791.84	-0.00233049		2321.84	-0.01044165		2851.84	-0.01220077		3381.84	-0.00192768
202	0.00520367		732.02	-0.00372379		1262.01	0.00296666		1792.04	-0.00225179		2322.04	-0.01159743		2852.04	-0.01266318		3382.04	-0.0014647
202.2	0.00498794		732.22	-0.00381958		1262.21	0.00262725		1792.24	-0.00217105		2322.24	-0.01221041		2852.24	-0.01285493		3382.24	-0.00086213
202.4	0.00474073		732.42	-0.00329158		1262.41	0.00242581		1792.44	-0.00282586		2322.44	-0.01111119		2852.44	-0.01211205		3382.44	-0.00086938
202.6	0.00457522		732.62	-0.00338162		1262.61	0.00238127		1792.64	-0.0032454		2322.64	-0.01145377		2852.64	-0.01194852		3382.64	-0.00052388
202.8	0.00566707		732.82	-0.00212825		1262.81	0.00249681		1792.84	-0.00289034		2322.84	-0.01149953		2852.84	-0.01244451		3382.84	-0.00012188
203	0.00598399		733.02	-0.00221916		1263.01	0.00298876		1793.04	-0.00312603		2323.04	-0.01104914		2853.04	-0.01185481		3383.04	-0.00019748
203.2	0.00719349		733.22	-0.00180494		1263.21	0.00436996		1793.24	-0.0031611		2323.24	-0.01151159		2853.24	-0.01169534		3383.24	-0.00026887
203.4	0.00737592		733.42	-0.0018205		1263.41	0.00465074		1793.44	-0.00314382		2323.44	-0.01217087		2853.44	-0.01201396		3383.44	-0.00038715
203.6	0.00839033		733.62	-0.00183986		1263.61	0.00454635		1793.64	-0.00318571		2323.64	-0.01154642		2853.64	-0.01195271		3383.64	0.00019916
203.8	0.00779727		733.82	-0.00199734		1263.81	0.00428813		1793.84	-0.00306658		2323.84	-0.01111953		2853.84	-0.01102318		3383.84	0.00034398
204	0.00844437		734.02	-0.00240726		1264.01	0.00412664		1794.04	-0.00238102		2324.04	-0.0109411		2854.04	-0.01070549		3384.04	0.00035617
204.2	0.00901613		734.22	-0.00127149		1264.21	0.0044697		1794.24	-0.00264129		2324.24	-0.01043822		2854.24	-0.01120773		3384.24	0.00076127
204.4	0.00992522		734.42	-0.00141127		1264.41	0.00364459		1794.44	-0.00214176		2324.44	-0.01036717		2854.44	-0.01115273		3384.44	0.00058769
204.6	0.01017054		734.62	-0.00045844		1264.61	0.00423719		1794.64	-0.00186127		2324.64	-0.01043988		2854.64	-0.01121659		3384.64	-0.00033814
204.8	0.01049328		734.82	0.00049903		1264.81	0.0039116		1794.84	-0.00226424		2324.84	-0.00992485		2854.84	-0.01104422		3384.84	-0.00035303
205	0.01018998		735.02	0.00087772		1265.01	0.00268254		1795.04	-0.00268113		2325.04	-0.0092783		2855.04	-0.01065067		3385.04	-0.00011291
205.2	0.01135584		735.22	0.00058001		1265.21	0.00290973		1795.24	-0.00303129		2325.24	-0.00936461		2855.24	-0.01070702		3385.24	-0.00108407
205.4	0.0120933		735.42	0.00024003		1265.41	0.00251714		1795.44	-0.002663		2325.44	-0.00898086		2855.44	-0.01065844		3385.44	-0.0022014
205.6	0.01149143		735.62	-0.00025229		1265.61	0.00246644		1795.64	-0.00281456		2325.64	-0.00914024		2855.64	-0.01043819		3385.64	-0.00326499
205.8	0.01191218		735.82	-0.00113442		1265.81	0.00242963		1795.84	-0.00199883		2325.84	-0.00953472		2855.84	-0.01048258		3385.84	-0.00376203
206	0.01225943		736.02	-0.00073188		1266.01	0.0028879		1796.04	-0.00183821		2326.04	-0.00908087		2856.04	-0.01081711		3386.04	-0.00262388
206.2	0.01126687		736.22	-0.00073538		1266.21	0.00286254		1796.24	-0.00212049		2326.24	-0.0082784		2856.24	-0.0110155		3386.24	-0.00309696
206.4	0.01074279		736.42	0.0005765		1266.41	0.00288219		1796.44	-0.00273756		2326.44	-0.00878982		2856.44	-0.01091585		3386.44	-0.00340355
206.6	0.0108473		736.62	0.00031086		1266.61	0.0034918		1796.64	-0.00306571		2326.64	-0.00958243		2856.64	-0.01185477		3386.64	-0.00336883
206.8	0.01175899		736.82	0.00065022		1266.81	0.00470327		1796.84	-0.0038323		2326.84	-0.0094847		2856.84	-0.0124853		3386.84	-0.00303936
207	0.01066136		737.02	0.00036825		1267.01	0.005039		1797.04	-0.00383132		2327.04	-0.01011212		2857.04	-0.012164		3387.04	-0.00268795
207.2	0.00983779		737.22	0.00019276		1267.21	0.00554497		1797.24	-0.00334921		2327.24	-0.01069785		2857.24	-0.01248795		3387.24	-0.00321542
207.4	0.00837764		737.42	0.00005628		1267.41	0.00482542		1797.44	-0.00249298		2327.44	-0.01098587		2857.44	-0.01346988		3387.44	-0.00309261
207.6	0.00843683		737.62	0.00015097		1267.61	0.00503699		1797.64	-0.00214214		2327.64	-0.01076452		2857.64	-0.01271408		3387.64	-0.00322938
207.8	0.00853102		737.82	0.00035424		1267.81	0.00519936		1797.84	-0.00217862		2327.84	-0.0111368		2857.84	-0.01212139		3387.84	-0.003321
208	0.00953743		738.02	0.00000704		1268.01	0.00514827		1798.04	-0.00233744		2328.04	-0.01081029		2858.04	-0.01238932		3388.04	-0.00360198
208.2	0.01001621		738.22	0.00000068		1268.21	0.00500432		1798.24	-0.00341734		2328.24	-0.01186788		2858.24	-0.0123731		3388.24	-0.00382091
208.4	0.00963117		738.42	-0.00023845		1268.41	0.00478174		1798.44	-0.0029179		2328.44	-0.01186413		2858.44	-0.01231032		3388.44	-0.00389178
208.6	0.01039103		738.62	0.0001444		1268.61	0.00554634		1798.64	-0.00254325		2328.64	-0.01271262		2858.64	-0.01186227		3388.64	-0.00475048
208.8	0.01031731		738.82	0.00001297		1268.81	0.00573601		1798.84	-0.00212211		2328.84	-0.01297701		2858.84	-0.0112412		3388.84	-0.00440891
209	0.01093846		739.02	-0.00082588		1269.01	0.00536504		1799.04	-0.00252789		2329.04	-0.01260449		2859.04	-0.01056001		3389.04	-0.00508251
209.2	0.01122157		739.22	-0.00135379		1269.21	0.00544409		1799.24	-0.00212283		2329.24	-0.01198088		2859.24	-0.00988392		3389.24	-0.00614034
209.4	0.011772		739.42	-0.00148602		1269.41	0.00468527		1799.44	-0.00165988		2329.44	-0.01179744		2859.44	-0.00981563		3389.44	-0.00635462
209.6	0.01125436		739.62	-0.00222779		1269.61	0.00466816		1799.64	-0.0016163		2329.64	-0.01165582		2859.64	-0.00950377		3389.64	-0.00605684
209.8	0.01252051		739.82	-0.00261002		1269.81	0.00401155		1799.84	-0.0007277		2329.84	-0.01088479		2859.84	-0.00936889		3389.84	-0.00510747
210	0.01287803		740.02	-0.00227618		1270.01	0.00430559		1800.04	-0.0003948		2330.04	-0.01131371		2860.04	-0.00927765		3390.04	-0.00416959
210.2	0.01309938		740.22	-0.00205929		1270.21	0.00421315		1800.24	-0.00090552		2330.24	-0.010808		2860.24	-0.00903981		3390.24	-0.00465511
210.4	0.01339515		740.42	-0.00189112		1270.41	0.00353992		1800.44	-0.00136722		2330.44	-0.01116333		2860.44	-0.00851474		3390.44	-0.00322707
210.6	0.01440117		740.62	-0.00253345		1270.61	0.00340716		1800.64	-0.00198076		2330.64	-0.0107372		2860.64	-0.00766895		3390.64	-0.00241922
210.8	0.01376733		740.82	-0.00254528		1270.81	0.00386543		1800.84	-0.00199388		2330.84	-0.01098017		2860.84	-0.00742253		3390.84	-0.0020282
211	0.01298811		741.02	-0.00285868		1271.01	0.00272474		1801.04	-0.00128921		2331.04	-0.01117503		2861.04	-0.00746573		3391.04	-0.0015968
211.2	0.0129668		741.22	-0.00364287		1271.21	0.00266711		1801.24	-0.00109514		2331.24	-0.01057061		2861.24	-0.00703994		3391.24	-0.00125986
211.4	0.01338178		741.42	-0.00359915		1271.41	0.002111		1801.44	-0.00115536		2331.44	-0.01093152		2861.44	-0.00746646		3391.44	-0.00079646
211.6	0.01430554		741.62	-0.0040003		1271.61	0.00151782		1801.64	-0.00201023		2331.64	-0.01069637		2861.64	-0.00633668		3391.64	-0.00115902
211.8	0.01561919		741.82	-0.00389724		1271.81	0.0010202		1801.84	-0.00248416		2331.84	-0.01029295		2861.84	-0.00657794		3391.84	-0.00097571
212	0.01570539		742.02	-0.00427839		1272.01	0.00054009		1802.04	-0.00304137		2332.04	-0.01053781		2862.04	-0.00643611		3392.04	-0.00121319
212.2	0.01530354		742.22	-0.00393478		1272.21	0.00088742		1802.24	-0.00374211		2332.24	-0.01112421		2862.24	-0.00571529		3392.24	-0.00161032
212.4	0.0150908		742.42	-0.00429823		1272.41	0.00116516		1802.44	-0.00392325		2332.44	-0.01132656		2862.44	-0.00591985		3392.44	-0.0018557
212.6	0.01613963		742.62	-0.00432768		1272.61	0.00185568		1802.64	-0.00428067		2332.64	-0.01189608		2862.64	-0.00660073		3392.64	-0.00275201
212.8	0.01621835		742.82	-0.00394798		1272.81	0.00246282		1802.84	-0.00522229		2332.84	-0.01202782		2862.84	-0.00654962		3392.84	-0.00273411
213	0.01724784		743.02	-0.0035915		1273.01	0.0021849		1803.04	-0.00616096		2333.04	-0.01179685		2863.04	-0.00717264		3393.04	-0.00285832
213.2	0.01693156		743.22	-0.0030609		1273.21	0.00269395		1803.24	-0.00599387		2333.24	-0.01187435		2863.24	-0.00721779		3393.24	-0.00351311
213.4	0.01764366		743.42	-0.00260558		1273.41	0.00228403		1803.44	-0.00616428		2333.44	-0.01271248		2863.44	-0.00783837		3393.44	-0.00352802
213.6	0.01788928		743.62	-0.00293994		1273.61	0.00248754		1803.64	-0.00645528		2333.64	-0.01263431		2863.64	-0.00852773		3393.64	-0.00361333
213.8	0.0180038		743.82	-0.00236417		1273.81	0.00233681		1803.84	-0.00571591		2333.84	-0.01251619		2863.84	-0.00857449		3393.84	-0.003199
214	0.01807421		744.02	-0.00191319		1274.01	0.00213653		1804.04	-0.00569768		2334.04	-0.01254473		2864.04	-0.0087696		3394.04	-0.00285889
214.2	0.01767304		744.22	-0.00118274		1274.21	0.00284211		1804.24	-0.00601808		2334.24	-0.01132464		2864.24	-0.00901362		3394.24	-0.00312129
214.4	0.01714015		744.42	-0.00057315		1274.41	0.00232915		1804.44	-0.00559039		2334.44	-0.01140532		2864.44	-0.00993731		3394.44	-0.00202116
214.6	0.01723708		744.62	-0.00039708		1274.61	0.00175525		1804.64	-0.00521138		2334.64	-0.01138112		2864.64	-0.00993566		3394.64	-0.0020907
214.8	0.01657484		744.82	-0.00075253		1274.81	0.00174466		1804.84	-0.00380254		2334.84	-0.01067784		2864.84	-0.01011929		3394.84	-0.00236964
215	0.01635839		745.02	-0.00173797		1275.01	0.00108823		1805.04	-0.00252107		2335.04	-0.00944001		2865.04	-0.00980175		3395.04	-0.0022601
215.2	0.0162721		745.22	-0.00189343		1275.21	0.00118935		1805.24	-0.00199035		2335.24	-0.00945218		2865.24	-0.00877611		3395.24	-0.00241468
215.4	0.01624256		745.42	-0.00221165		1275.41	0.00042285		1805.44	-0.0018096		2335.44	-0.00919969		2865.44	-0.0089981		3395.44	-0.00255753
215.6	0.01596635		745.62	-0.00227097		1275.61	-0.00071093		1805.64	-0.00139265		2335.64	-0.008169		2865.64	-0.00779534		3395.64	-0.002985
215.8	0.01534273		745.82	-0.00201056		1275.81	-0.00003029		1805.84	-0.00063051		2335.84	-0.00795551		2865.84	-0.00726943		3395.84	-0.00274532
216	0.01510388		746.02	-0.00195445		1276.01	0.00064753		1806.04	-0.00036706		2336.04	-0.00806273		2866.04	-0.00673623		3396.04	-0.00266874
216.2	0.01391444		746.22	-0.00254094		1276.21	0.00097845		1806.24	-0.00002561		2336.24	-0.00819338		2866.24	-0.00675952		3396.24	-0.002808
216.4	0.01356877		746.42	-0.00230891		1276.41	0.00148616		1806.44	-0.00000302		2336.44	-0.00856681		2866.44	-0.00732763		3396.44	-0.00256956
216.6	0.01452004		746.62	-0.00206626		1276.61	0.00194281		1806.64	-0.00005714		2336.64	-0.00846057		2866.64	-0.00813519		3396.64	-0.00243001
216.8	0.01496563		746.82	-0.00065245		1276.81	0.00258502		1806.84	-0.00051095		2336.84	-0.00985333		2866.84	-0.00772091		3396.84	-0.00261842
217	0.01495545		747.02	0.00024893		1277.01	0.00377823		1807.04	0.00019052		2337.04	-0.01132344		2867.04	-0.00831138		3397.04	-0.00283093
217.2	0.01502357		747.22	0.00051859		1277.21	0.00466615		1807.24	0.00054849		2337.24	-0.01197605		2867.24	-0.00872446		3397.24	-0.00364647
217.4	0.01578929		747.42	0.00225781		1277.41	0.00416856		1807.44	-0.0000795		2337.44	-0.01196725		2867.44	-0.00919741		3397.44	-0.00410743
217.6	0.01573888		747.62	0.00212898		1277.61	0.00477224		1807.64	0.0002988		2337.64	-0.01118233		2867.64	-0.00946302		3397.64	-0.00444061
217.8	0.01553007		747.82	0.0021641		1277.81	0.00510632		1807.84	0.00023732		2337.84	-0.01193028		2867.84	-0.00856016		3397.84	-0.00431881
218	0.0160663		748.02	0.00220483		1278.01	0.00629451		1808.04	-0.00030665		2338.04	-0.01222895		2868.04	-0.00945564		3398.04	-0.00468383
218.2	0.0167969		748.22	0.00239949		1278.21	0.00742572		1808.24	-0.00076284		2338.24	-0.01221955		2868.24	-0.01038222		3398.24	-0.00393639
218.4	0.01748001		748.42	0.00183642		1278.41	0.00718933		1808.44	-0.0003845		2338.44	-0.01278422		2868.44	-0.01088321		3398.44	-0.0042149
218.6	0.01811965		748.62	0.00102374		1278.61	0.00689398		1808.64	-0.00127184		2338.64	-0.01295631		2868.64	-0.01040277		3398.64	-0.00453833
218.8	0.01863503		748.82	0.00041945		1278.81	0.00750688		1808.84	-0.00116374		2338.84	-0.01336125		2868.84	-0.00964422		3398.84	-0.00382902
219	0.01929557		749.02	-0.00038503		1279.01	0.0078542		1809.04	-0.00192898		2339.04	-0.01295815		2869.04	-0.00981265		3399.04	-0.00357594
219.2	0.0195579		749.22	-0.00100597		1279.21	0.00804294		1809.24	-0.00252976		2339.24	-0.01283091		2869.24	-0.00963228		3399.24	-0.00284091
219.4	0.01939428		749.42	-0.00195663		1279.41	0.00740923		1809.44	-0.00316346		2339.44	-0.01187028		2869.44	-0.00970788		3399.44	-0.00267139
219.6	0.01936972		749.62	-0.00195508		1279.61	0.00792971		1809.64	-0.00348889		2339.64	-0.01088976		2869.64	-0.00995562		3399.64	-0.00180237
219.8	0.01875111		749.82	-0.00117985		1279.81	0.00750809		1809.84	-0.00280895		2339.84	-0.01037207		2869.84	-0.00939626		3399.84	-0.00096739
220	0.01860837		750.02	-0.00104097		1280.01	0.00737123		1810.04	-0.00308833		2340.04	-0.00984254		2870.04	-0.00986978		3400.04	-0.00019545
220.2	0.01735077		750.22	-0.00093384		1280.21	0.00665815		1810.24	-0.00295425		2340.24	-0.00985968		2870.24	-0.01032528		3400.24	-0.00015868
220.4	0.01762146		750.42	0.0003377		1280.41	0.0064915		1810.44	-0.00321872		2340.44	-0.00951086		2870.44	-0.00990943		3400.44	-0.00041125
220.6	0.01807915		750.62	0.00021463		1280.61	0.00621739		1810.64	-0.00373108		2340.64	-0.00958804		2870.64	-0.01037101		3400.64	-0.00055873
220.8	0.01791578		750.82	0.0009881		1280.81	0.00599079		1810.84	-0.00360897		2340.84	-0.01023069		2870.84	-0.00973335		3400.84	-0.00166899
221	0.01779634		751.02	0.00149982		1281.01	0.00600673		1811.04	-0.00323468		2341.04	-0.00994148		2871.04	-0.00984168		3401.04	-0.00228489
221.2	0.01794026		751.22	0.00207677		1281.21	0.00517746		1811.24	-0.00305189		2341.24	-0.00812091		2871.24	-0.00970599		3401.24	-0.00267589
221.4	0.01766521		751.42	0.00247564		1281.41	0.00495616		1811.44	-0.00358351		2341.44	-0.00720283		2871.44	-0.00900608		3401.44	-0.00302124
221.6	0.01817415		751.62	0.00229579		1281.61	0.00452036		1811.64	-0.00347227		2341.64	-0.00612491		2871.64	-0.00827019		3401.64	-0.00334029
221.8	0.0187276		751.82	0.00243715		1281.81	0.00498872		1811.84	-0.00431631		2341.84	-0.00632261		2871.84	-0.00729939		3401.84	-0.00399551
222	0.01885366		752.02	0.00246442		1282.01	0.00527904		1812.04	-0.00477058		2342.04	-0.00648234		2872.04	-0.00795433		3402.04	-0.00368008
222.2	0.0193751		752.22	0.00270668		1282.21	0.00543014		1812.24	-0.00566241		2342.24	-0.00673681		2872.24	-0.00779442		3402.24	-0.00260623
222.4	0.01913642		752.42	0.00277326		1282.41	0.00545346		1812.44	-0.005802		2342.44	-0.00722562		2872.44	-0.00684899		3402.44	-0.00297135
222.6	0.01940659		752.62	0.00327071		1282.61	0.00567648		1812.64	-0.00684404		2342.64	-0.00696798		2872.64	-0.00649155		3402.64	-0.00238711
222.8	0.01944316		752.82	0.00323688		1282.81	0.00621487		1812.84	-0.006294		2342.84	-0.00718256		2872.84	-0.00594748		3402.84	-0.00128047
223	0.0199508		753.02	0.00295367		1283.01	0.00669025		1813.04	-0.00564799		2343.04	-0.00722547		2873.04	-0.00599026		3403.04	-0.00142089
223.2	0.02046		753.22	0.00281854		1283.21	0.0074067		1813.24	-0.00444188		2343.24	-0.00745774		2873.24	-0.00537031		3403.24	-0.00132945
223.4	0.02129318		753.42	0.00272681		1283.41	0.00727731		1813.44	-0.00399033		2343.44	-0.00716009		2873.44	-0.00567293		3403.44	-0.0023707
223.6	0.02190692		753.62	0.00256037		1283.61	0.00751388		1813.64	-0.00372646		2343.64	-0.00681833		2873.64	-0.00608942		3403.64	-0.00181734
223.8	0.02189101		753.82	0.00257557		1283.81	0.0065939		1813.84	-0.00283435		2343.84	-0.00700394		2873.84	-0.00470951		3403.84	-0.0020166
224	0.02242125		754.02	0.00150397		1284.01	0.00707121		1814.04	-0.00367814		2344.04	-0.00782489		2874.04	-0.00505656		3404.04	-0.00226406
224.2	0.02254277		754.22	0.00015774		1284.21	0.00681226		1814.24	-0.00356669		2344.24	-0.00853345		2874.24	-0.00544129		3404.24	-0.0030574
224.4	0.0227985		754.42	-0.00049957		1284.41	0.00629567		1814.44	-0.00353806		2344.44	-0.00809122		2874.44	-0.00496927		3404.44	-0.00444927
224.6	0.02245531		754.62	-0.00122456		1284.61	0.00578986		1814.64	-0.0035735		2344.64	-0.00862332		2874.64	-0.00523605		3404.64	-0.00471151
224.8	0.02261256		754.82	-0.00206168		1284.81	0.00513325		1814.84	-0.00345026		2344.84	-0.00813342		2874.84	-0.00509985		3404.84	-0.00487922
225	0.0219132		755.02	-0.00219779		1285.01	0.00474787		1815.04	-0.00334732		2345.04	-0.00818657		2875.04	-0.00518095		3405.04	-0.00514843
225.2	0.02095506		755.22	-0.00260569		1285.21	0.00462846		1815.24	-0.00327079		2345.24	-0.00755588		2875.24	-0.00556604		3405.24	-0.00494325
225.4	0.02143506		755.42	-0.00249572		1285.41	0.00438725		1815.44	-0.0044408		2345.44	-0.00781535		2875.44	-0.00615662		3405.44	-0.00508602
225.6	0.02159356		755.62	-0.00183015		1285.61	0.00372946		1815.64	-0.00505819		2345.64	-0.00757292		2875.64	-0.0064972		3405.64	-0.00543027
225.8	0.02102101		755.82	-0.00149873		1285.81	0.0044073		1815.84	-0.00534171		2345.84	-0.00875258		2875.84	-0.00741282		3405.84	-0.00553709
226	0.0201044		756.02	-0.00056284		1286.01	0.00402477		1816.04	-0.00522174		2346.04	-0.00909856		2876.04	-0.00788824		3406.04	-0.00447101
226.2	0.01945096		756.22	0.00056746		1286.21	0.00460717		1816.24	-0.005332		2346.24	-0.00932366		2876.24	-0.00784209		3406.24	-0.00384625
226.4	0.01905988		756.42	0.00200453		1286.41	0.00401742		1816.44	-0.0049289		2346.44	-0.00960103		2876.44	-0.00799557		3406.44	-0.00368641
226.6	0.0188603		756.62	0.00301881		1286.61	0.00468511		1816.64	-0.00466052		2346.64	-0.00903357		2876.64	-0.00844021		3406.64	-0.003769
226.8	0.0194093		756.82	0.00348393		1286.81	0.00504816		1816.84	-0.00378932		2346.84	-0.00968268		2876.84	-0.00841109		3406.84	-0.00358131
227	0.01974254		757.02	0.0042465		1287.01	0.00573965		1817.04	-0.00324418		2347.04	-0.00978984		2877.04	-0.00884704		3407.04	-0.00421519
227.2	0.02113818		757.22	0.00487739		1287.21	0.00623326		1817.24	-0.00293401		2347.24	-0.00987479		2877.24	-0.00877203		3407.24	-0.00482724
227.4	0.02178124		757.42	0.00472944		1287.41	0.0063775		1817.44	-0.00341852		2347.44	-0.00864487		2877.44	-0.00884847		3407.44	-0.00572506
227.6	0.02253315		757.62	0.00446732		1287.61	0.00673121		1817.64	-0.00386563		2347.64	-0.0082591		2877.64	-0.00851765		3407.64	-0.0056516
227.8	0.02319074		757.82	0.00442407		1287.81	0.00735348		1817.84	-0.0037377		2347.84	-0.00850179		2877.84	-0.00794304		3407.84	-0.00590601
228	0.02400358		758.02	0.00324536		1288.01	0.00757096		1818.04	-0.00426213		2348.04	-0.00876842		2878.04	-0.00738315		3408.04	-0.00622202
228.2	0.0245472		758.22	0.00218354		1288.21	0.00832496		1818.24	-0.00284939		2348.24	-0.00822283		2878.24	-0.00655637		3408.24	-0.00628877
228.4	0.02550578		758.42	0.00242025		1288.41	0.0088195		1818.44	-0.00275531		2348.44	-0.00820764		2878.44	-0.00561813		3408.44	-0.00688838
228.6	0.02646142		758.62	0.00205929		1288.61	0.00889944		1818.64	-0.0027384		2348.64	-0.00900999		2878.64	-0.00489283		3408.64	-0.00562687
228.8	0.02701524		758.82	0.00190351		1288.81	0.00949573		1818.84	-0.00302629		2348.84	-0.00870495		2878.84	-0.00474898		3408.84	-0.0058233
229	0.02758107		759.02	0.00117211		1289.01	0.00993039		1819.04	-0.00339435		2349.04	-0.00892134		2879.04	-0.0040836		3409.04	-0.00579322
229.2	0.02819359		759.22	0.00035888		1289.21	0.00959306		1819.24	-0.00440374		2349.24	-0.00869384		2879.24	-0.00392804		3409.24	-0.00552527
229.4	0.02896434		759.42	0.00010437		1289.41	0.00994494		1819.44	-0.00432128		2349.44	-0.00910226		2879.44	-0.00502511		3409.44	-0.00607617
229.6	0.02866796		759.62	0.00019182		1289.61	0.00964389		1819.64	-0.00456252		2349.64	-0.00929687		2879.64	-0.00588569		3409.64	-0.00604323
229.8	0.0283757		759.82	0.00065909		1289.81	0.00923054		1819.84	-0.00451046		2349.84	-0.01003562		2879.84	-0.007122		3409.84	-0.00586895
230	0.02795677		760.02	0.00120069		1290.01	0.00838299		1820.04	-0.00403514		2350.04	-0.01001591		2880.04	-0.00752093		3410.04	-0.00572086
230.2	0.02763422		760.22	0.00096817		1290.21	0.00746586		1820.24	-0.00448819		2350.24	-0.01011671		2880.24	-0.0089294		3410.24	-0.00547514
230.4	0.02800602		760.42	0.00164487		1290.41	0.00646612		1820.44	-0.00455104		2350.44	-0.01034482		2880.44	-0.00993438		3410.44	-0.00479043
230.6	0.02735081		760.62	0.00168749		1290.61	0.00643822		1820.64	-0.0047836		2350.64	-0.00949674		2880.64	-0.0104784		3410.64	-0.00413926
230.8	0.0266233		760.82	0.00259348		1290.81	0.00641752		1820.84	-0.00497955		2350.84	-0.00987623		2880.84	-0.011327		3410.84	-0.00413792
231	0.02625968		761.02	0.00294393		1291.01	0.00626908		1821.04	-0.0049952		2351.04	-0.00920631		2881.04	-0.01259019		3411.04	-0.00389659
231.2	0.02644594		761.22	0.00287693		1291.21	0.00579319		1821.24	-0.00497987		2351.24	-0.00931897		2881.24	-0.01188846		3411.24	-0.00349962
231.4	0.02564527		761.42	0.00227978		1291.41	0.005908		1821.44	-0.0041567		2351.44	-0.00838598		2881.44	-0.01150942		3411.44	-0.00392469
231.6	0.02603577		761.62	0.00170616		1291.61	0.00629739		1821.64	-0.00299393		2351.64	-0.0088076		2881.64	-0.01165727		3411.64	-0.00399929
231.8	0.02643608		761.82	0.00110282		1291.81	0.00582412		1821.84	-0.00304067		2351.84	-0.00895042		2881.84	-0.01029591		3411.84	-0.00331485
232	0.02722729		762.02	0.0005826		1292.01	0.00655496		1822.04	-0.0025956		2352.04	-0.00841857		2882.04	-0.00872896		3412.04	-0.00378252
232.2	0.0276437		762.22	0.00027963		1292.21	0.00722817		1822.24	-0.00203183		2352.24	-0.00842349		2882.24	-0.00879499		3412.24	-0.00467787
232.4	0.02799051		762.42	-0.00008815		1292.41	0.00747302		1822.44	-0.00299073		2352.44	-0.00889608		2882.44	-0.00844804		3412.44	-0.00546067
232.6	0.0279564		762.62	-0.00058744		1292.61	0.00770229		1822.64	-0.00250019		2352.64	-0.00916216		2882.64	-0.0076901		3412.64	-0.00527787
232.8	0.02805566		762.82	-0.00078253		1292.81	0.00786882		1822.84	-0.00319224		2352.84	-0.00845203		2882.84	-0.00712761		3412.84	-0.00657707
233	0.02839139		763.02	-0.00151384		1293.01	0.00806158		1823.04	-0.00402236		2353.04	-0.00897744		2883.04	-0.00627978		3413.04	-0.00681245
233.2	0.02841812		763.22	-0.00186978		1293.21	0.00778909		1823.24	-0.00424529		2353.24	-0.0085942		2883.24	-0.00598968		3413.24	-0.0068593
233.4	0.02785089		763.42	-0.00150068		1293.41	0.0087546		1823.44	-0.00374497		2353.44	-0.00851833		2883.44	-0.00704967		3413.44	-0.00734981
233.6	0.02735351		763.62	-0.00044671		1293.61	0.0077439		1823.64	-0.00387502		2353.64	-0.00888431		2883.64	-0.00707152		3413.64	-0.00738031
233.8	0.02681573		763.82	-0.00027685		1293.81	0.00723472		1823.84	-0.00450646		2353.84	-0.00881391		2883.84	-0.00842289		3413.84	-0.00717399
234	0.02657176		764.02	0.00040419		1294.01	0.00656678		1824.04	-0.00366199		2354.04	-0.00943175		2884.04	-0.00872571		3414.04	-0.00700916
234.2	0.02686377		764.22	0.0008294		1294.21	0.00633399		1824.24	-0.00418959		2354.24	-0.0090344		2884.24	-0.00905403		3414.24	-0.00677517
234.4	0.02592275		764.42	0.00157599		1294.41	0.00684545		1824.44	-0.00390979		2354.44	-0.00899279		2884.44	-0.00878186		3414.44	-0.00608465
234.6	0.02581231		764.62	0.00234347		1294.61	0.00710188		1824.64	-0.0041558		2354.64	-0.00816001		2884.64	-0.00980811		3414.64	-0.00515103
234.8	0.02565628		764.82	0.00298447		1294.81	0.0074978		1824.84	-0.00381034		2354.84	-0.00753383		2884.84	-0.00963453		3414.84	-0.00593807
235	0.02555701		765.02	0.00324937		1295.01	0.00718434		1825.04	-0.00280807		2355.04	-0.00723086		2885.04	-0.00977661		3415.04	-0.00534075
235.2	0.02512802		765.22	0.00273579		1295.21	0.00669031		1825.24	-0.00181604		2355.24	-0.00707102		2885.24	-0.00912025		3415.24	-0.00460556
235.4	0.02493365		765.42	0.00188848		1295.41	0.00725369		1825.44	-0.00089291		2355.44	-0.00722887		2885.44	-0.00867073		3415.44	-0.00473826
235.6	0.02596566		765.62	0.00120509		1295.61	0.00748934		1825.64	-0.00081342		2355.64	-0.00726812		2885.64	-0.00845264		3415.64	-0.00464857
235.8	0.02580396		765.82	0.00140627		1295.81	0.00747538		1825.84	-0.00133147		2355.84	-0.00663894		2885.84	-0.00793557		3415.84	-0.00417448
236	0.02671006		766.02	0.00106915		1296.01	0.00870461		1826.04	-0.00137725		2356.04	-0.00603319		2886.04	-0.00869902		3416.04	-0.00459271
236.2	0.02568714		766.22	0.00108508		1296.21	0.00877039		1826.24	-0.0014808		2356.24	-0.00589843		2886.24	-0.00881207		3416.24	-0.00499211
236.4	0.02527006		766.42	0.00104814		1296.41	0.00978287		1826.44	-0.00146369		2356.44	-0.00579453		2886.44	-0.00834743		3416.44	-0.00471309
236.6	0.02523142		766.62	0.00110492		1296.61	0.00959625		1826.64	-0.00105929		2356.64	-0.00581074		2886.64	-0.00858645		3416.64	-0.00465742
236.8	0.02653988		766.82	0.00108692		1296.81	0.00955842		1826.84	-0.00158941		2356.84	-0.00555239		2886.84	-0.00849537		3416.84	-0.00484469
237	0.02684067		767.02	0.00125519		1297.01	0.00954448		1827.04	-0.00094652		2357.04	-0.0068221		2887.04	-0.00798565		3417.04	-0.00472357
237.2	0.02695114		767.22	0.001256		1297.21	0.00958939		1827.24	-0.00069249		2357.24	-0.00724042		2887.24	-0.00842785		3417.24	-0.00483292
237.4	0.02658395		767.42	0.00225891		1297.41	0.00975466		1827.44	-0.00059888		2357.44	-0.008251		2887.44	-0.00872998		3417.44	-0.00416646
237.6	0.027044		767.62	0.0025366		1297.61	0.00831948		1827.64	-0.00065394		2357.64	-0.00783394		2887.64	-0.00939337		3417.64	-0.0045637
237.8	0.02786675		767.82	0.00268918		1297.81	0.00750478		1827.84	-0.00047544		2357.84	-0.0075575		2887.84	-0.01065605		3417.84	-0.00520958
238	0.02907647		768.02	0.00315129		1298.01	0.0070433		1828.04	0.00058046		2358.04	-0.00853741		2888.04	-0.01060492		3418.04	-0.00578762
238.2	0.0301635		768.22	0.00313923		1298.21	0.00748648		1828.24	-0.00022025		2358.24	-0.00848003		2888.24	-0.01066708		3418.24	-0.00704897
238.4	0.0301036		768.42	0.00294861		1298.41	0.00730573		1828.44	-0.00059703		2358.44	-0.00818118		2888.44	-0.01072865		3418.44	-0.00704154
238.6	0.03216734		768.62	0.00264185		1298.61	0.00725961		1828.64	0.00003628		2358.64	-0.0079769		2888.64	-0.01065502		3418.64	-0.00723077
238.8	0.03233497		768.82	0.00288029		1298.81	0.00637307		1828.84	-0.00006476		2358.84	-0.00804145		2888.84	-0.00974375		3418.84	-0.00773378
239	0.0321762		769.02	0.00320207		1299.01	0.00577034		1829.04	0.00014647		2359.04	-0.00794202		2889.04	-0.01057856		3419.04	-0.0063239
239.2	0.03271912		769.22	0.00282505		1299.21	0.00576785		1829.24	0.00005874		2359.24	-0.00821266		2889.24	-0.0095269		3419.24	-0.00629489
239.4	0.03306938		769.42	0.00294749		1299.41	0.00630378		1829.44	-0.00100199		2359.44	-0.00868293		2889.44	-0.00882067		3419.44	-0.0068385
239.6	0.03291828		769.62	0.00287505		1299.61	0.00663087		1829.64	-0.0007293		2359.64	-0.00837931		2889.64	-0.00825174		3419.64	-0.00734731
239.8	0.03246763		769.82	0.00233631		1299.81	0.00785632		1829.84	-0.00053438		2359.84	-0.00804959		2889.84	-0.00798002		3419.84	-0.00703607
240	0.03258589		770.02	0.0019341		1300.01	0.00825335		1830.04	-0.00053811		2360.04	-0.00746663		2890.04	-0.00722528		3420.04	-0.00681373
240.2	0.03143573		770.22	0.00285412		1300.21	0.00840664		1830.24	0.00006478		2360.24	-0.00714227		2890.24	-0.00717518		3420.24	-0.00664645
240.4	0.03105158		770.42	0.00248178		1300.41	0.009397		1830.44	-0.00050948		2360.44	-0.00819517		2890.44	-0.00674246		3420.44	-0.00664955
240.6	0.03067435		770.62	0.00182042		1300.61	0.00925736		1830.64	-0.00036626		2360.64	-0.00793841		2890.64	-0.00632846		3420.64	-0.00622808
240.8	0.02993119		770.82	0.00138269		1300.81	0.00940182		1830.84	-0.00027288		2360.84	-0.00761784		2890.84	-0.00574486		3420.84	-0.00594678
241	0.02887043		771.02	0.0010015		1301.01	0.00920607		1831.04	-0.00046744		2361.04	-0.00831957		2891.04	-0.00587656		3421.04	-0.00565778
241.2	0.02851195		771.22	0.00137348		1301.21	0.00932654		1831.24	-0.00147086		2361.24	-0.00798358		2891.24	-0.00676011		3421.24	-0.00541704
241.4	0.02845708		771.42	0.00160501		1301.41	0.00890175		1831.44	-0.00175317		2361.44	-0.00776834		2891.44	-0.00666154		3421.44	-0.00447511
241.6	0.02874963		771.62	0.00114083		1301.61	0.00850085		1831.64	-0.00134143		2361.64	-0.00668038		2891.64	-0.00808155		3421.64	-0.00614901
241.8	0.02911918		771.82	0.00062343		1301.81	0.00783444		1831.84	-0.00052955		2361.84	-0.00611489		2891.84	-0.00875232		3421.84	-0.00687368
242	0.02945696		772.02	0.00004256		1302.01	0.0079953		1832.04	-0.00064392		2362.04	-0.00666536		2892.04	-0.00894135		3422.04	-0.00644048
242.2	0.02991274		772.22	-0.00088323		1302.21	0.00751606		1832.24	-0.00162381		2362.24	-0.00697067		2892.24	-0.00897291		3422.24	-0.00635564
242.4	0.03038548		772.42	-0.00138702		1302.41	0.00720042		1832.44	-0.00211681		2362.44	-0.00662431		2892.44	-0.00850299		3422.44	-0.00529067
242.6	0.03131105		772.62	-0.00102249		1302.61	0.00765301		1832.64	-0.00203142		2362.64	-0.00676195		2892.64	-0.0087871		3422.64	-0.00452479
242.8	0.03054006		772.82	-0.00002142		1302.81	0.00652		1832.84	-0.00299712		2362.84	-0.00702602		2892.84	-0.00979755		3422.84	-0.00422876
243	0.0304518		773.02	-0.00006595		1303.01	0.00720713		1833.04	-0.00311217		2363.04	-0.00657327		2893.04	-0.01009836		3423.04	-0.00386927
243.2	0.03160055		773.22	0.00075702		1303.21	0.00794401		1833.24	-0.00360648		2363.24	-0.00696495		2893.24	-0.00925626		3423.24	-0.0043637
243.4	0.03113397		773.42	0.00095816		1303.41	0.00848583		1833.44	-0.00346236		2363.44	-0.00681998		2893.44	-0.00875188		3423.44	-0.00467763
243.6	0.03112166		773.62	0.00080005		1303.61	0.00857505		1833.64	-0.00214872		2363.64	-0.00691034		2893.64	-0.00808928		3423.64	-0.00521684
243.8	0.03210793		773.82	0.00101522		1303.81	0.00906424		1833.84	-0.00187311		2363.84	-0.0073347		2893.84	-0.00744901		3423.84	-0.00550809
244	0.0320774		774.02	0.00199411		1304.01	0.00879183		1834.04	-0.00125102		2364.04	-0.00709682		2894.04	-0.00720756		3424.04	-0.00599306
244.2	0.03209358		774.22	0.00241564		1304.21	0.00906581		1834.24	-0.0009682		2364.24	-0.00722758		2894.24	-0.00662795		3424.24	-0.00569699
244.4	0.03175134		774.42	0.00189017		1304.41	0.00924159		1834.44	-0.00079068		2364.44	-0.00805413		2894.44	-0.00523921		3424.44	-0.00638126
244.6	0.03181832		774.62	0.0022715		1304.61	0.00889977		1834.64	0.00008536		2364.64	-0.00725538		2894.64	-0.00473362		3424.64	-0.00623293
244.8	0.03166037		774.82	0.00249972		1304.81	0.00888253		1834.84	0.00063091		2364.84	-0.00719195		2894.84	-0.0043384		3424.84	-0.0072969
245	0.03273248		775.02	0.00210342		1305.01	0.00801941		1835.04	0.00018292		2365.04	-0.00807227		2895.04	-0.00410238		3425.04	-0.00813423
245.2	0.03387342		775.22	0.0029103		1305.21	0.00763101		1835.24	0.00077807		2365.24	-0.00823749		2895.24	-0.00415055		3425.24	-0.00867835
245.4	0.03426388		775.42	0.00308486		1305.41	0.00677476		1835.44	0.00166961		2365.44	-0.00927999		2895.44	-0.00459139		3425.44	-0.00908194
245.6	0.0345877		775.62	0.00281236		1305.61	0.00648099		1835.64	0.00292037		2365.64	-0.00815103		2895.64	-0.00543957		3425.64	-0.00928235
245.8	0.03445058		775.82	0.00167387		1305.81	0.00517485		1835.84	0.00217145		2365.84	-0.00776225		2895.84	-0.00527573		3425.84	-0.00875922
246	0.0345633		776.02	0.00150626		1306.01	0.00533077		1836.04	0.00182968		2366.04	-0.00851747		2896.04	-0.00550466		3426.04	-0.00797617
246.2	0.0351163		776.22	0.00155815		1306.21	0.0050571		1836.24	0.00150682		2366.24	-0.00868867		2896.24	-0.00572364		3426.24	-0.00717537
246.4	0.03448096		776.42	0.00225441		1306.41	0.00580533		1836.44	0.00130001		2366.44	-0.00840895		2896.44	-0.00598185		3426.44	-0.00700146
246.6	0.03417544		776.62	0.00234008		1306.61	0.00562011		1836.64	0.00124239		2366.64	-0.00872844		2896.64	-0.0073643		3426.64	-0.00637634
246.8	0.0327437		776.82	0.00172132		1306.81	0.00558263		1836.84	0.00093427		2366.84	-0.00830877		2896.84	-0.00745847		3426.84	-0.00623344
247	0.03334901		777.02	0.00173917		1307.01	0.00683901		1837.04	0.00060517		2367.04	-0.00784205		2897.04	-0.00727857		3427.04	-0.0053848
247.2	0.03371827		777.22	0.00183608		1307.21	0.00732435		1837.24	-0.00060863		2367.24	-0.00798763		2897.24	-0.00733659		3427.24	-0.00499839
247.4	0.03238516		777.42	0.00194442		1307.41	0.00722611		1837.44	-0.00089111		2367.44	-0.00838609		2897.44	-0.00769742		3427.44	-0.00525819
247.6	0.03276026		777.62	0.00223781		1307.61	0.00698461		1837.64	-0.0013611		2367.64	-0.00824265		2897.64	-0.00769486		3427.64	-0.00480631
247.8	0.0333787		777.82	0.00268333		1307.81	0.00779905		1837.84	-0.00243175		2367.84	-0.00836859		2897.84	-0.00711443		3427.84	-0.00514929
248	0.03232262		778.02	0.002593		1308.01	0.00724649		1838.04	-0.00271427		2368.04	-0.00703622		2898.04	-0.00734234		3428.04	-0.0048419
248.2	0.03250763		778.22	0.00160721		1308.21	0.00720655		1838.24	-0.00400069		2368.24	-0.00667018		2898.24	-0.00675607		3428.24	-0.00348834
248.4	0.03284364		778.42	0.00149311		1308.41	0.00706099		1838.44	-0.00438257		2368.44	-0.00687961		2898.44	-0.00642539		3428.44	-0.00360305
248.6	0.03342293		778.62	0.00125533		1308.61	0.00694476		1838.64	-0.0049316		2368.64	-0.00708992		2898.64	-0.00625843		3428.64	-0.00395066
248.8	0.03373741		778.82	0.00084543		1308.81	0.00648581		1838.84	-0.00503458		2368.84	-0.00724284		2898.84	-0.00536873		3428.84	-0.00516403
249	0.03418348		779.02	0.0001615		1309.01	0.00522478		1839.04	-0.0056368		2369.04	-0.00772086		2899.04	-0.00593256		3429.04	-0.00517812
249.2	0.03482209		779.22	0.00065927		1309.21	0.00524463		1839.24	-0.0050014		2369.24	-0.00787607		2899.24	-0.00615576		3429.24	-0.00503399
249.4	0.03431541		779.42	0.0007043		1309.41	0.00483087		1839.44	-0.00436363		2369.44	-0.00723774		2899.44	-0.00623082		3429.44	-0.00510402
249.6	0.03417462		779.62	0.00028306		1309.61	0.00502446		1839.64	-0.00414166		2369.64	-0.00595883		2899.64	-0.00548125		3429.64	-0.00541779
249.8	0.03444125		779.82	0.00049871		1309.81	0.00528527		1839.84	-0.00458408		2369.84	-0.00638338		2899.84	-0.00557704		3429.84	-0.00538784
250	0.03490571		780.02	0.00135384		1310.01	0.00651303		1840.04	-0.00344541		2370.04	-0.0061653		2900.04	-0.00595073		3430.04	-0.00539812
250.2	0.03519208		780.22	0.00179291		1310.21	0.00667726		1840.24	-0.00293692		2370.24	-0.00647807		2900.24	-0.00566551		3430.24	-0.00580486
250.4	0.03442328		780.42	0.00206871		1310.41	0.00729158		1840.44	-0.00255771		2370.44	-0.00654367		2900.44	-0.0055928		3430.44	-0.00595246
250.6	0.03439508		780.62	0.00136563		1310.61	0.0074213		1840.64	-0.00194815		2370.64	-0.0066561		2900.64	-0.00544515		3430.64	-0.00611073
250.8	0.03453949		780.82	0.00103132		1310.81	0.0081575		1840.84	-0.00163721		2370.84	-0.00606347		2900.84	-0.00498222		3430.84	-0.00710906
251	0.03493687		781.02	0.00093608		1311.01	0.00871244		1841.04	-0.00161504		2371.04	-0.00640549		2901.04	-0.00530249		3431.04	-0.00658768
251.2	0.03449151		781.22	0.00011219		1311.21	0.00839911		1841.24	-0.00200953		2371.24	-0.00706515		2901.24	-0.00596204		3431.24	-0.0064257
251.4	0.03440155		781.42	0.00024983		1311.41	0.00826652		1841.44	-0.00102751		2371.44	-0.00685393		2901.44	-0.00706309		3431.44	-0.00685984
251.6	0.03447038		781.62	0.00042856		1311.61	0.00817009		1841.64	-0.0013615		2371.64	-0.00673599		2901.64	-0.00716355		3431.64	-0.00662575
251.8	0.03421991		781.82	0.00119001		1311.81	0.00907999		1841.84	-0.00155063		2371.84	-0.00634904		2901.84	-0.00731824		3431.84	-0.00744737
252	0.03376296		782.02	0.00117824		1312.01	0.0091686		1842.04	-0.00218296		2372.04	-0.006036		2902.04	-0.00819784		3432.04	-0.00696013
252.2	0.03449446		782.22	0.00067018		1312.21	0.00936579		1842.24	-0.00275704		2372.24	-0.00610404		2902.24	-0.00875861		3432.24	-0.00654332
252.4	0.03411485		782.42	0.0009463		1312.41	0.00934396		1842.44	-0.00270396		2372.44	-0.00628544		2902.44	-0.00877915		3432.44	-0.00650736
252.6	0.03396913		782.62	0.00059016		1312.61	0.00920319		1842.64	-0.00269784		2372.64	-0.00716051		2902.64	-0.00915228		3432.64	-0.00737859
252.8	0.03433591		782.82	0.00068087		1312.81	0.00834454		1842.84	-0.00233981		2372.84	-0.0068386		2902.84	-0.00899359		3432.84	-0.00755108
253	0.03407211		783.02	0.00035743		1313.01	0.00804932		1843.04	-0.00190723		2373.04	-0.00661318		2903.04	-0.00984725		3433.04	-0.00760315
253.2	0.03404868		783.22	0.00154985		1313.21	0.00828866		1843.24	-0.00186746		2373.24	-0.00606726		2903.24	-0.00954285		3433.24	-0.0075753
253.4	0.03345573		783.42	0.00234638		1313.41	0.00818857		1843.44	-0.00097657		2373.44	-0.00567085		2903.44	-0.00957159		3433.44	-0.00802869
253.6	0.03401812		783.62	0.002089		1313.61	0.00797073		1843.64	-0.00097049		2373.64	-0.00629971		2903.64	-0.00922469		3433.64	-0.00768788
253.8	0.03518095		783.82	0.00361599		1313.81	0.00818973		1843.84	-0.001042		2373.84	-0.00773609		2903.84	-0.00958433		3433.84	-0.00686897
254	0.03464926		784.02	0.00415296		1314.01	0.00826745		1844.04	-0.00094041		2374.04	-0.00755164		2904.04	-0.00861913		3434.04	-0.00627555
254.2	0.03447542		784.22	0.00396781		1314.21	0.00801615		1844.24	-0.00169513		2374.24	-0.00796632		2904.24	-0.00750937		3434.24	-0.00635542
254.4	0.03431713		784.42	0.00443561		1314.41	0.00792179		1844.44	-0.00166893		2374.44	-0.00754625		2904.44	-0.00695417		3434.44	-0.00589486
254.6	0.0344484		784.62	0.00416093		1314.61	0.00817936		1844.64	-0.00132731		2374.64	-0.00708785		2904.64	-0.00648449		3434.64	-0.00667209
254.8	0.03481686		784.82	0.00378291		1314.81	0.0080138		1844.84	-0.00201113		2374.84	-0.00708463		2904.84	-0.00610945		3434.84	-0.0063119
255	0.03454676		785.02	0.00340718		1315.01	0.00865167		1845.04	-0.00178019		2375.04	-0.00734259		2905.04	-0.00643522		3435.04	-0.00590477
255.2	0.03464082		785.22	0.00297048		1315.21	0.00957407		1845.24	-0.00131886		2375.24	-0.00720401		2905.24	-0.00687518		3435.24	-0.00638277
255.4	0.03429101		785.42	0.0034083		1315.41	0.00999487		1845.44	-0.00053614		2375.44	-0.00690392		2905.44	-0.00748409		3435.44	-0.00681234
255.6	0.03378076		785.62	0.00308763		1315.61	0.01030639		1845.64	-0.00086146		2375.64	-0.00731803		2905.64	-0.00726693		3435.64	-0.00641558
255.8	0.03346446		785.82	0.00353218		1315.81	0.01145055		1845.84	-0.00033098		2375.84	-0.00690907		2905.84	-0.00742284		3435.84	-0.00622171
256	0.033741		786.02	0.00279248		1316.01	0.01120736		1846.04	0.00000128		2376.04	-0.00677737		2906.04	-0.00796057		3436.04	-0.00500763
256.2	0.03382315		786.22	0.00220923		1316.21	0.01042328		1846.24	0.00054009		2376.24	-0.00579275		2906.24	-0.00835467		3436.24	-0.00528221
256.4	0.03447868		786.42	0.00105463		1316.41	0.01095512		1846.44	0.00055366		2376.44	-0.00611215		2906.44	-0.00886966		3436.44	-0.00493228
256.6	0.03482066		786.62	-0.00007571		1316.61	0.0105941		1846.64	0.00112827		2376.64	-0.00642709		2906.64	-0.00956922		3436.64	-0.00486858
256.8	0.03466903		786.82	-0.00063577		1316.81	0.01043347		1846.84	0.00137448		2376.84	-0.00539355		2906.84	-0.01007023		3436.84	-0.00489374
257	0.03496754		787.02	-0.00125215		1317.01	0.01082497		1847.04	0.00145681		2377.04	-0.00544511		2907.04	-0.0097824		3437.04	-0.00451288
257.2	0.03564541		787.22	-0.00074936		1317.21	0.01055032		1847.24	0.00101341		2377.24	-0.00540078		2907.24	-0.01007586		3437.24	-0.00377703
257.4	0.03631767		787.42	-0.00134992		1317.41	0.01004866		1847.44	0.00159624		2377.44	-0.00619004		2907.44	-0.01035669		3437.44	-0.00371395
257.6	0.03802654		787.62	-0.00125987		1317.61	0.00958488		1847.64	0.00124856		2377.64	-0.00725285		2907.64	-0.01048228		3437.64	-0.00350151
257.8	0.03879794		787.82	0.0002788		1317.81	0.00874645		1847.84	0.00079639		2377.84	-0.00822633		2907.84	-0.01058979		3437.84	-0.00311246
258	0.03858947		788.02	0.00053294		1318.01	0.00828421		1848.04	0.00074151		2378.04	-0.00847897		2908.04	-0.00998379		3438.04	-0.0022636
258.2	0.039338		788.22	0.00072795		1318.21	0.00815149		1848.24	-0.00006614		2378.24	-0.00902839		2908.24	-0.01048456		3438.24	-0.00266186
258.4	0.03960616		788.42	0.00145475		1318.41	0.00808303		1848.44	0.00017006		2378.44	-0.00890363		2908.44	-0.01051008		3438.44	-0.00321146
258.6	0.03948825		788.62	0.00143294		1318.61	0.0084476		1848.64	-0.00016062		2378.64	-0.00911918		2908.64	-0.01013656		3438.64	-0.00358372
258.8	0.0395274		788.82	0.00210543		1318.81	0.00914666		1848.84	-0.00085109		2378.84	-0.01002833		2908.84	-0.00927809		3438.84	-0.00342748
259	0.03903059		789.02	0.00303027		1319.01	0.0099167		1849.04	-0.00055222		2379.04	-0.01024686		2909.04	-0.0097291		3439.04	-0.00391349
259.2	0.03816643		789.22	0.00393963		1319.21	0.01030158		1849.24	-0.00110177		2379.24	-0.01002819		2909.24	-0.0098512		3439.24	-0.00361755
259.4	0.03702127		789.42	0.0047802		1319.41	0.00966344		1849.44	-0.00116147		2379.44	-0.01012001		2909.44	-0.00972442		3439.44	-0.00353856
259.6	0.03612014		789.62	0.00466763		1319.61	0.0088743		1849.64	-0.001805		2379.64	-0.00978072		2909.64	-0.00910955		3439.64	-0.00377947
259.8	0.03581867		789.82	0.00498671		1319.81	0.00868987		1849.84	-0.00060959		2379.84	-0.009131		2909.84	-0.00922678		3439.84	-0.00376883
260	0.03640871		790.02	0.00449546		1320.01	0.00829158		1850.04	-0.00100299		2380.04	-0.00779485		2910.04	-0.00834661		3440.04	-0.00400139
260.2	0.03680937		790.22	0.00367425		1320.21	0.00831059		1850.24	-0.00122042		2380.24	-0.00756441		2910.24	-0.00810846		3440.24	-0.00500734
260.4	0.03643408		790.42	0.00273339		1320.41	0.00834355		1850.44	-0.00229427		2380.44	-0.00760576		2910.44	-0.00822588		3440.44	-0.0048578
260.6	0.03572882		790.62	0.00219043		1320.61	0.00843262		1850.64	-0.00242606		2380.64	-0.00760427		2910.64	-0.00782362		3440.64	-0.00563091
260.8	0.03527823		790.82	0.00239182		1320.81	0.00886946		1850.84	-0.0031498		2380.84	-0.00671759		2910.84	-0.00711354		3440.84	-0.00689503
261	0.03645645		791.02	0.00218293		1321.01	0.00910533		1851.04	-0.00331461		2381.04	-0.00580224		2911.04	-0.00599583		3441.04	-0.00714418
261.2	0.03687793		791.22	0.00209866		1321.21	0.0083923		1851.24	-0.00493252		2381.24	-0.00549736		2911.24	-0.0058407		3441.24	-0.00816275
261.4	0.03710962		791.42	0.00166871		1321.41	0.0089627		1851.44	-0.0050037		2381.44	-0.00515551		2911.44	-0.00597842		3441.44	-0.0085145
261.6	0.03775914		791.62	0.00247308		1321.61	0.00905252		1851.64	-0.00545921		2381.64	-0.00508018		2911.64	-0.00525648		3441.64	-0.00860276
261.8	0.03732378		791.82	0.00230543		1321.81	0.00840408		1851.84	-0.00597889		2381.84	-0.00454629		2911.84	-0.00540525		3441.84	-0.0082511
262	0.03684938		792.02	0.00192924		1322.01	0.00870956		1852.04	-0.00501819		2382.04	-0.00431174		2912.04	-0.00558384		3442.04	-0.00771762
262.2	0.03764333		792.22	0.001578		1322.21	0.00919191		1852.24	-0.00426491		2382.24	-0.00433904		2912.24	-0.00610074		3442.24	-0.00751233
262.4	0.03693458		792.42	0.00163229		1322.41	0.00945946		1852.44	-0.00306096		2382.44	-0.00429488		2912.44	-0.00572458		3442.44	-0.00720161
262.6	0.03670447		792.62	0.00214269		1322.61	0.0102966		1852.64	-0.00332244		2382.64	-0.00456905		2912.64	-0.00583052		3442.64	-0.00656616
262.8	0.03666746		792.82	0.00339782		1322.81	0.0109542		1852.84	-0.00233891		2382.84	-0.00432376		2912.84	-0.00583746		3442.84	-0.00592857
263	0.03643898		793.02	0.00404683		1323.01	0.01113277		1853.04	-0.00206859		2383.04	-0.00408485		2913.04	-0.0074271		3443.04	-0.00563281
263.2	0.03607576		793.22	0.00489797		1323.21	0.01169297		1853.24	-0.0021506		2383.24	-0.00410322		2913.24	-0.00799323		3443.24	-0.00581263
263.4	0.03582373		793.42	0.00523638		1323.41	0.01152708		1853.44	-0.00134799		2383.44	-0.00447832		2913.44	-0.00788627		3443.44	-0.00593359
263.6	0.03606432		793.62	0.00479115		1323.61	0.01164385		1853.64	-0.00097755		2383.64	-0.00468026		2913.64	-0.00792276		3443.64	-0.00570425
263.8	0.03661093		793.82	0.00493269		1323.81	0.01235821		1853.84	0.00006308		2383.84	-0.00505763		2913.84	-0.00815701		3443.84	-0.00509381
264	0.03753206		794.02	0.00521803		1324.01	0.01262888		1854.04	0.0001601		2384.04	-0.00448928		2914.04	-0.00822088		3444.04	-0.00489524
264.2	0.03766477		794.22	0.00364914		1324.21	0.01240603		1854.24	0.0009163		2384.24	-0.00572033		2914.24	-0.00848943		3444.24	-0.00435587
264.4	0.03739404		794.42	0.00445127		1324.41	0.0122138		1854.44	0.00053304		2384.44	-0.00674038		2914.44	-0.00856426		3444.44	-0.00473259
264.6	0.03854928		794.62	0.00423382		1324.61	0.01237195		1854.64	0.00060915		2384.64	-0.00738228		2914.64	-0.00857068		3444.64	-0.00487408
264.8	0.03910167		794.82	0.0041164		1324.81	0.01227671		1854.84	0.00000904		2384.84	-0.00716309		2914.84	-0.00815311		3444.84	-0.00509266
265	0.04043621		795.02	0.00382332		1325.01	0.0125445		1855.04	-0.00049261		2385.04	-0.00654698		2915.04	-0.0079302		3445.04	-0.00484711
265.2	0.04055612		795.22	0.00316218		1325.21	0.01164172		1855.24	-0.00184039		2385.24	-0.00768466		2915.24	-0.00762337		3445.24	-0.00417514
265.4	0.04069974		795.42	0.0028624		1325.41	0.01200057		1855.44	-0.00165021		2385.44	-0.00728752		2915.44	-0.00764706		3445.44	-0.00355612
265.6	0.04064364		795.62	0.00276146		1325.61	0.01146602		1855.64	-0.00182487		2385.64	-0.00714273		2915.64	-0.00665016		3445.64	-0.00321019
265.8	0.04078512		795.82	0.00245606		1325.81	0.01052415		1855.84	-0.00137456		2385.84	-0.00719349		2915.84	-0.00721828		3445.84	-0.00262575
266	0.04078528		796.02	0.0014721		1326.01	0.009856		1856.04	-0.00039163		2386.04	-0.00745671		2916.04	-0.00631167		3446.04	-0.00168258
266.2	0.04160726		796.22	0.00154496		1326.21	0.00943948		1856.24	-0.00057071		2386.24	-0.00812692		2916.24	-0.00636244		3446.24	-0.00187723
266.4	0.04042986		796.42	0.00147168		1326.41	0.00926789		1856.44	-0.00080852		2386.44	-0.00803699		2916.44	-0.00587086		3446.44	-0.00219676
266.6	0.04020528		796.62	0.0016812		1326.61	0.00887376		1856.64	-0.00098148		2386.64	-0.00815102		2916.64	-0.00612718		3446.64	-0.00271504
266.8	0.03968867		796.82	0.00179586		1326.81	0.00909879		1856.84	0.00009208		2386.84	-0.00739569		2916.84	-0.00677313		3446.84	-0.00265182
267	0.03924433		797.02	0.00220708		1327.01	0.00990358		1857.04	-0.00074321		2387.04	-0.00735525		2917.04	-0.00753599		3447.04	-0.00362594
267.2	0.03917914		797.22	0.00204357		1327.21	0.01019211		1857.24	-0.00023809		2387.24	-0.00743563		2917.24	-0.00750248		3447.24	-0.00362074
267.4	0.03969697		797.42	0.0020767		1327.41	0.00982679		1857.44	-0.00011781		2387.44	-0.00781021		2917.44	-0.0079498		3447.44	-0.00343352
267.6	0.03966574		797.62	0.00158727		1327.61	0.01013667		1857.64	-0.0002549		2387.64	-0.00739297		2917.64	-0.00762781		3447.64	-0.00403551
267.8	0.03975164		797.82	0.00150489		1327.81	0.01087619		1857.84	-0.00031286		2387.84	-0.00774752		2917.84	-0.00740979		3447.84	-0.00483881
268	0.0393804		798.02	0.00108526		1328.01	0.011846		1858.04	0.00034968		2388.04	-0.00747446		2918.04	-0.00763848		3448.04	-0.00582825
268.2	0.04020223		798.22	0.00009866		1328.21	0.01203		1858.24	-0.00017007		2388.24	-0.00764847		2918.24	-0.00743168		3448.24	-0.00666234
268.4	0.04077607		798.42	0.00101399		1328.41	0.0122542		1858.44	-0.00045315		2388.44	-0.00700452		2918.44	-0.00741223		3448.44	-0.00752405
268.6	0.04103654		798.62	0.00059684		1328.61	0.01286494		1858.64	-0.00097057		2388.64	-0.0061137		2918.64	-0.00829417		3448.64	-0.00748869
268.8	0.04161522		798.82	0.00080297		1328.81	0.01371988		1858.84	-0.00070625		2388.84	-0.00625561		2918.84	-0.00870283		3448.84	-0.00818872
269	0.04207528		799.02	0.00130951		1329.01	0.01311786		1859.04	-0.00071457		2389.04	-0.00522039		2919.04	-0.00889077		3449.04	-0.00765647
269.2	0.04189686		799.22	0.00140241		1329.21	0.01293419		1859.24	-0.00070592		2389.24	-0.00597569		2919.24	-0.00837217		3449.24	-0.00757031
269.4	0.04192044		799.42	0.00190186		1329.41	0.01306275		1859.44	-0.00092544		2389.44	-0.00589439		2919.44	-0.00855319		3449.44	-0.00843969
269.6	0.04171855		799.62	0.00217135		1329.61	0.01294371		1859.64	-0.00084709		2389.64	-0.00625544		2919.64	-0.00823188		3449.64	-0.00846035
269.8	0.04138638		799.82	0.00284652		1329.81	0.01251089		1859.84	-0.00094381		2389.84	-0.00730216		2919.84	-0.00804003		3449.84	-0.00890785
270	0.04069697		800.02	0.00295512		1330.01	0.01240709		1860.04	-0.00151726		2390.04	-0.00834348		2920.04	-0.00723379		3450.04	-0.00897981
270.2	0.04056424		800.22	0.00409619		1330.21	0.01226623		1860.24	-0.0014815		2390.24	-0.00823113		2920.24	-0.00746166		3450.24	-0.00904348
270.4	0.0400364		800.42	0.00506327		1330.41	0.01119326		1860.44	-0.00170527		2390.44	-0.00836951		2920.44	-0.00745192		3450.44	-0.00865467
270.6	0.03961343		800.62	0.00540573		1330.61	0.0112683		1860.64	-0.00165631		2390.64	-0.00882981		2920.64	-0.00775217		3450.64	-0.00821911
270.8	0.0393466		800.82	0.00569531		1330.81	0.0119581		1860.84	-0.00218044		2390.84	-0.00838315		2920.84	-0.00821451		3450.84	-0.0081514
271	0.03986682		801.02	0.00588854		1331.01	0.01155178		1861.04	-0.00305741		2391.04	-0.00847016		2921.04	-0.00895744		3451.04	-0.00815289
271.2	0.04024436		801.22	0.00544333		1331.21	0.01082844		1861.24	-0.00321619		2391.24	-0.00829084		2921.24	-0.00876101		3451.24	-0.00796052
271.4	0.04068305		801.42	0.00557696		1331.41	0.0101857		1861.44	-0.00397289		2391.44	-0.00891252		2921.44	-0.00840194		3451.44	-0.00832835
271.6	0.04045046		801.62	0.0042727		1331.61	0.01026822		1861.64	-0.004573		2391.64	-0.00831855		2921.64	-0.00713707		3451.64	-0.00921196
271.8	0.0406226		801.82	0.00375108		1331.81	0.01026763		1861.84	-0.00616695		2391.84	-0.00829073		2921.84	-0.00695511		3451.84	-0.00926128
272	0.04086245		802.02	0.00334011		1332.01	0.01031751		1862.04	-0.00684291		2392.04	-0.0076227		2922.04	-0.00734309		3452.04	-0.00962158
272.2	0.04144054		802.22	0.00306349		1332.21	0.009836		1862.24	-0.00682265		2392.24	-0.00639151		2922.24	-0.0070505		3452.24	-0.00958428
272.4	0.04216228		802.42	0.00275259		1332.41	0.00975601		1862.44	-0.00707169		2392.44	-0.00648602		2922.44	-0.00623193		3452.44	-0.00909444
272.6	0.04244092		802.62	0.00255769		1332.61	0.00963279		1862.64	-0.00679804		2392.64	-0.00640873		2922.64	-0.00615908		3452.64	-0.00870396
272.8	0.04388229		802.82	0.00223767		1332.81	0.00868822		1862.84	-0.00640499		2392.84	-0.00640541		2922.84	-0.00627836		3452.84	-0.00884476
273	0.04377561		803.02	0.00251448		1333.01	0.00790002		1863.04	-0.00633517		2393.04	-0.00616997		2923.04	-0.00637767		3453.04	-0.00865341
273.2	0.04421961		803.22	0.00314431		1333.21	0.00828036		1863.24	-0.00581674		2393.24	-0.00601712		2923.24	-0.0063344		3453.24	-0.00967552
273.4	0.0435563		803.42	0.00321429		1333.41	0.0087149		1863.44	-0.00511752		2393.44	-0.0061221		2923.44	-0.00662842		3453.44	-0.0098852
273.6	0.04333853		803.62	0.00271495		1333.61	0.00891674		1863.64	-0.00415521		2393.64	-0.00676054		2923.64	-0.0070445		3453.64	-0.00872861
273.8	0.04216154		803.82	0.00270997		1333.81	0.00947382		1863.84	-0.00395607		2393.84	-0.00678171		2923.84	-0.00649988		3453.84	-0.0094069
274	0.04257818		804.02	0.00266011		1334.01	0.01058195		1864.04	-0.00287697		2394.04	-0.00693893		2924.04	-0.00677492		3454.04	-0.00821433
274.2	0.04245237		804.22	0.00319434		1334.21	0.01038899		1864.24	-0.00154329		2394.24	-0.00655467		2924.24	-0.00673578		3454.24	-0.00844839
274.4	0.04180926		804.42	0.00368056		1334.41	0.01086205		1864.44	-0.00193802		2394.44	-0.00714914		2924.44	-0.00754235		3454.44	-0.00845281
274.6	0.0410615		804.62	0.00329468		1334.61	0.01208432		1864.64	-0.00136571		2394.64	-0.0077547		2924.64	-0.00784671		3454.64	-0.00869287
274.8	0.04024949		804.82	0.00319026		1334.81	0.01313504		1864.84	-0.00095768		2394.84	-0.00775667		2924.84	-0.00855097		3454.84	-0.00894157
275	0.04010885		805.02	0.00361363		1335.01	0.01277229		1865.04	-0.00010215		2395.04	-0.00787815		2925.04	-0.00969267		3455.04	-0.00858477
275.2	0.03959182		805.22	0.00382042		1335.21	0.01329972		1865.24	-0.00027772		2395.24	-0.00775436		2925.24	-0.00943768		3455.24	-0.0083573
275.4	0.03936082		805.42	0.0037496		1335.41	0.01314343		1865.44	0.00038082		2395.44	-0.00915993		2925.44	-0.00964923		3455.44	-0.0078357
275.6	0.03926478		805.62	0.00331013		1335.61	0.01341364		1865.64	-0.0001171		2395.64	-0.00875843		2925.64	-0.01024981		3455.64	-0.00788576
275.8	0.03987948		805.82	0.0037368		1335.81	0.01340667		1865.84	-0.00050261		2395.84	-0.00923521		2925.84	-0.01107809		3455.84	-0.00780885
276	0.04030376		806.02	0.00372512		1336.01	0.01348152		1866.04	0.00033425		2396.04	-0.00975736		2926.04	-0.01065652		3456.04	-0.00722295
276.2	0.03996478		806.22	0.00492618		1336.21	0.01383463		1866.24	0.00053938		2396.24	-0.00961679		2926.24	-0.0094168		3456.24	-0.00647792
276.4	0.0417524		806.42	0.00518668		1336.41	0.01373219		1866.44	-0.00070692		2396.44	-0.0106985		2926.44	-0.00922991		3456.44	-0.00589417
276.6	0.04156177		806.62	0.00591755		1336.61	0.01349199		1866.64	-0.0005781		2396.64	-0.01074664		2926.64	-0.00912748		3456.64	-0.0056666
276.8	0.04172916		806.82	0.00653673		1336.81	0.01273234		1866.84	-0.00125771		2396.84	-0.01068251		2926.84	-0.00969872		3456.84	-0.00554477
277	0.04108632		807.02	0.00737912		1337.01	0.01255921		1867.04	-0.00069839		2397.04	-0.01013311		2927.04	-0.00953231		3457.04	-0.0056613
277.2	0.04178192		807.22	0.00739497		1337.21	0.01291094		1867.24	-0.00100166		2397.24	-0.00907642		2927.24	-0.00962536		3457.24	-0.0059249
277.4	0.04140168		807.42	0.0066374		1337.41	0.01250661		1867.44	-0.00148728		2397.44	-0.00911702		2927.44	-0.00923264		3457.44	-0.00564857
277.6	0.04151914		807.62	0.00565793		1337.61	0.01205015		1867.64	-0.00231673		2397.64	-0.00897807		2927.64	-0.00905135		3457.64	-0.00582854
277.8	0.04193001		807.82	0.00429503		1337.81	0.01189598		1867.84	-0.00204384		2397.84	-0.00779846		2927.84	-0.00823655		3457.84	-0.00751333
278	0.04284936		808.02	0.00417102		1338.01	0.01159885		1868.04	-0.00173587		2398.04	-0.00765803		2928.04	-0.00861797		3458.04	-0.00710447
278.2	0.04224433		808.22	0.00415263		1338.21	0.0110239		1868.24	-0.00202183		2398.24	-0.00736192		2928.24	-0.00810017		3458.24	-0.00731303
278.4	0.04221219		808.42	0.00376821		1338.41	0.01083986		1868.44	-0.00250607		2398.44	-0.00684872		2928.44	-0.00827341		3458.44	-0.00753244
278.6	0.04161954		808.62	0.00294801		1338.61	0.01067737		1868.64	-0.00231901		2398.64	-0.00662687		2928.64	-0.00866195		3458.64	-0.00836176
278.8	0.04139325		808.82	0.00223532		1338.81	0.0101064		1868.84	-0.00260476		2398.84	-0.00640906		2928.84	-0.00886314		3458.84	-0.00874195
279	0.04123904		809.02	0.0025959		1339.01	0.00936982		1869.04	-0.00305571		2399.04	-0.00592424		2929.04	-0.00868259		3459.04	-0.00859509
279.2	0.04067603		809.22	0.00180845		1339.21	0.01002386		1869.24	-0.00350475		2399.24	-0.00590378		2929.24	-0.00853807		3459.24	-0.00892706
279.4	0.0401711		809.42	0.00138319		1339.41	0.00945401		1869.44	-0.0025966		2399.44	-0.00538487		2929.44	-0.00834937		3459.44	-0.00946287
279.6	0.0410055		809.62	0.00094473		1339.61	0.00969028		1869.64	-0.00241552		2399.64	-0.00495032		2929.64	-0.00856826		3459.64	-0.01004568
279.8	0.04111881		809.82	0.00153947		1339.81	0.00945685		1869.84	-0.00213957		2399.84	-0.00521518		2929.84	-0.00803234		3459.84	-0.00953362
280	0.04132248		810.02	0.00165264		1340.01	0.00970107		1870.04	-0.0017992		2400.04	-0.00535956		2930.04	-0.0069682		3460.04	-0.0082112
280.2	0.04162598		810.22	0.00245841		1340.21	0.01071264		1870.24	-0.00236966		2400.24	-0.00639954		2930.24	-0.00618803		3460.24	-0.00811397
280.4	0.04197084		810.42	0.00224859		1340.41	0.0115498		1870.44	-0.00257474		2400.44	-0.00725383		2930.44	-0.00677712		3460.44	-0.00746928
280.6	0.04117118		810.62	0.00294187		1340.61	0.01120537		1870.64	-0.00258677		2400.64	-0.00793838		2930.64	-0.00650571		3460.64	-0.00730838
280.8	0.04174017		810.82	0.00401527		1340.81	0.01121148		1870.84	-0.00297724		2400.84	-0.00840325		2930.84	-0.00755126		3460.84	-0.00641337
281	0.04217176		811.02	0.00473103		1341.01	0.01096242		1871.04	-0.00237514		2401.04	-0.00818304		2931.04	-0.00702058		3461.04	-0.00780282
281.2	0.04294582		811.22	0.00477736		1341.21	0.01085318		1871.24	-0.0029331		2401.24	-0.00982848		2931.24	-0.00673316		3461.24	-0.00782361
281.4	0.04263882		811.42	0.00481014		1341.41	0.0100473		1871.44	-0.00344781		2401.44	-0.00993935		2931.44	-0.00624885		3461.44	-0.00812097
281.6	0.04385181		811.62	0.0048776		1341.61	0.01026448		1871.64	-0.0027363		2401.64	-0.0098126		2931.64	-0.0072006		3461.64	-0.00821922
281.8	0.04444052		811.82	0.0055043		1341.81	0.00989473		1871.84	-0.00208216		2401.84	-0.00903491		2931.84	-0.00782531		3461.84	-0.00824274
282	0.04446403		812.02	0.00542828		1342.01	0.01005758		1872.04	-0.002424		2402.04	-0.00990285		2932.04	-0.00826473		3462.04	-0.00781336
282.2	0.04445799		812.22	0.00525979		1342.21	0.00976826		1872.24	-0.00197237		2402.24	-0.01012067		2932.24	-0.00830681		3462.24	-0.0069873
282.4	0.04442779		812.42	0.00495324		1342.41	0.00968393		1872.44	-0.00124854		2402.44	-0.01044321		2932.44	-0.00808088		3462.44	-0.00767267
282.6	0.04353955		812.62	0.00475636		1342.61	0.01010033		1872.64	-0.00093748		2402.64	-0.01024197		2932.64	-0.00863568		3462.64	-0.0081794
282.8	0.04359937		812.82	0.00476817		1342.81	0.0087605		1872.84	-0.00137327		2402.84	-0.00972179		2932.84	-0.00873942		3462.84	-0.00821888
283	0.04290733		813.02	0.00488173		1343.01	0.00921298		1873.04	-0.00102612		2403.04	-0.00927449		2933.04	-0.00895731		3463.04	-0.00794034
283.2	0.04352426		813.22	0.00471137		1343.21	0.00980345		1873.24	-0.00021412		2403.24	-0.00879175		2933.24	-0.00958656		3463.24	-0.00793569
283.4	0.04257598		813.42	0.00452697		1343.41	0.00927383		1873.44	0.00008816		2403.44	-0.00748381		2933.44	-0.00971469		3463.44	-0.00816943
283.6	0.04314632		813.62	0.0039807		1343.61	0.00912448		1873.64	0.00029929		2403.64	-0.00832601		2933.64	-0.00958687		3463.64	-0.00741154
283.8	0.0428349		813.82	0.00396303		1343.81	0.00958868		1873.84	-0.0002036		2403.84	-0.00843276		2933.84	-0.00881428		3463.84	-0.00673761
284	0.04367896		814.02	0.00298761		1344.01	0.01040168		1874.04	-0.00046755		2404.04	-0.00821591		2934.04	-0.00878576		3464.04	-0.00697024
284.2	0.04408503		814.22	0.00317724		1344.21	0.01051347		1874.24	-0.00148124		2404.24	-0.00849315		2934.24	-0.00860108		3464.24	-0.00709454
284.4	0.04425081		814.42	0.00260274		1344.41	0.01088894		1874.44	-0.00212954		2404.44	-0.00766808		2934.44	-0.00852762		3464.44	-0.00667347
284.6	0.0446104		814.62	0.0036352		1344.61	0.01008497		1874.64	-0.0030656		2404.64	-0.00781869		2934.64	-0.00824615		3464.64	-0.00708686
284.8	0.04521799		814.82	0.00367531		1344.81	0.01001864		1874.84	-0.00378041		2404.84	-0.00780868		2934.84	-0.00812606		3464.84	-0.00715902
285	0.04569259		815.02	0.00363719		1345.01	0.00922658		1875.04	-0.00392202		2405.04	-0.00703348		2935.04	-0.0068602		3465.04	-0.00885454
285.2	0.04638155		815.22	0.00387421		1345.21	0.01017624		1875.24	-0.00425143		2405.24	-0.0073896		2935.24	-0.00698267		3465.24	-0.00852208
285.4	0.04590951		815.42	0.00431845		1345.41	0.01065737		1875.44	-0.00499301		2405.44	-0.00589766		2935.44	-0.00706916		3465.44	-0.0095965
285.6	0.04724142		815.62	0.00553283		1345.61	0.01085223		1875.64	-0.00444789		2405.64	-0.00588133		2935.64	-0.00631776		3465.64	-0.00972393
285.8	0.04713092		815.82	0.0061951		1345.81	0.01123959		1875.84	-0.00478433		2405.84	-0.00571459		2935.84	-0.00586874		3465.84	-0.01038236
286	0.04688036		816.02	0.00519414		1346.01	0.01144266		1876.04	-0.00485435		2406.04	-0.00693534		2936.04	-0.00588549		3466.04	-0.01046351
286.2	0.04650895		816.22	0.0063662		1346.21	0.01098316		1876.24	-0.00501351		2406.24	-0.00686606		2936.24	-0.00563069		3466.24	-0.00977446
286.4	0.04628179		816.42	0.00694106		1346.41	0.01160954		1876.44	-0.00412193		2406.44	-0.00669034		2936.44	-0.00490592		3466.44	-0.00967992
286.6	0.04616128		816.62	0.00741125		1346.61	0.01152142		1876.64	-0.00425394		2406.64	-0.00692598		2936.64	-0.00643321		3466.64	-0.01053862
286.8	0.04633474		816.82	0.00796545		1346.81	0.01127251		1876.84	-0.00541041		2406.84	-0.00667071		2936.84	-0.00729368		3466.84	-0.01065212
287	0.04625237		817.02	0.00834642		1347.01	0.01229135		1877.04	-0.0049823		2407.04	-0.0072747		2937.04	-0.00707123		3467.04	-0.01034055
287.2	0.04612667		817.22	0.00765591		1347.21	0.01213028		1877.24	-0.00450833		2407.24	-0.00721357		2937.24	-0.00713435		3467.24	-0.00990547
287.4	0.04511487		817.42	0.0064399		1347.41	0.01196981		1877.44	-0.00480645		2407.44	-0.00732395		2937.44	-0.00720583		3467.44	-0.00987879
287.6	0.04490935		817.62	0.00622667		1347.61	0.01206597		1877.64	-0.00511652		2407.64	-0.00728054		2937.64	-0.00713785		3467.64	-0.00886622
287.8	0.04487362		817.82	0.00505978		1347.81	0.01237092		1877.84	-0.00569647		2407.84	-0.00690277		2937.84	-0.00743122		3467.84	-0.00968645
288	0.04551641		818.02	0.00466599		1348.01	0.01213869		1878.04	-0.00554452		2408.04	-0.00659594		2938.04	-0.00845589		3468.04	-0.00971487
288.2	0.04578168		818.22	0.00441572		1348.21	0.01106887		1878.24	-0.00469384		2408.24	-0.00635813		2938.24	-0.00832984		3468.24	-0.00903279
288.4	0.04620511		818.42	0.0033155		1348.41	0.01174053		1878.44	-0.00411217		2408.44	-0.00592901		2938.44	-0.00829317		3468.44	-0.00912808
288.6	0.04628194		818.62	0.00297633		1348.61	0.01120708		1878.64	-0.00346614		2408.64	-0.00596117		2938.64	-0.00895554		3468.64	-0.00893678
288.8	0.04632309		818.82	0.00229309		1348.81	0.01082296		1878.84	-0.00265373		2408.84	-0.00626123		2938.84	-0.00937115		3468.84	-0.0090115
289	0.04637301		819.02	0.00231327		1349.01	0.01098425		1879.04	-0.00238406		2409.04	-0.0057431		2939.04	-0.00953705		3469.04	-0.00914973
289.2	0.04640945		819.22	0.00277038		1349.21	0.01093495		1879.24	-0.00231269		2409.24	-0.00600198		2939.24	-0.00999424		3469.24	-0.00879633
289.4	0.04599506		819.42	0.00352064		1349.41	0.01001519		1879.44	-0.00218421		2409.44	-0.00551939		2939.44	-0.00879971		3469.44	-0.00929643
289.6	0.04642872		819.62	0.00377174		1349.61	0.00992266		1879.64	-0.00225266		2409.64	-0.00623212		2939.64	-0.00839153		3469.64	-0.00844421
289.8	0.04653497		819.82	0.00365822		1349.81	0.00989145		1879.84	-0.00236154		2409.84	-0.00634244		2939.84	-0.00905267		3469.84	-0.00877356
290	0.04737527		820.02	0.00339262		1350.01	0.00919866		1880.04	-0.00270339		2410.04	-0.00695858		2940.04	-0.00882491		3470.04	-0.00866193
290.2	0.04778512		820.22	0.00433703		1350.21	0.00857859		1880.24	-0.00202973		2410.24	-0.00649145		2940.24	-0.00785201		3470.24	-0.00779197
290.4	0.04744257		820.42	0.00493564		1350.41	0.00842722		1880.44	-0.00129335		2410.44	-0.00627646		2940.44	-0.00725616		3470.44	-0.00808912
290.6	0.04734467		820.62	0.00493289		1350.61	0.00814908		1880.64	-0.00209467		2410.64	-0.00689663		2940.64	-0.00751391		3470.64	-0.00902351
290.8	0.04799269		820.82	0.00485631		1350.81	0.00846764		1880.84	-0.00343303		2410.84	-0.00664939		2940.84	-0.00658062		3470.84	-0.00881767
291	0.04861283		821.02	0.00413015		1351.01	0.00781529		1881.04	-0.00354024		2411.04	-0.00654082		2941.04	-0.00557051		3471.04	-0.00867702
291.2	0.04838494		821.22	0.00294989		1351.21	0.0076981		1881.24	-0.00307292		2411.24	-0.00601466		2941.24	-0.00567073		3471.24	-0.00931615
291.4	0.04902346		821.42	0.00303001		1351.41	0.00863896		1881.44	-0.00317193		2411.44	-0.00580849		2941.44	-0.0058077		3471.44	-0.00981734
291.6	0.04881496		821.62	0.00319837		1351.61	0.00849388		1881.64	-0.00391369		2411.64	-0.00556051		2941.64	-0.0059217		3471.64	-0.01030796
291.8	0.04960722		821.82	0.00218348		1351.81	0.00857483		1881.84	-0.00274441		2411.84	-0.00633413		2941.84	-0.00558724		3471.84	-0.01081998
292	0.04993538		822.02	0.0030617		1352.01	0.00863919		1882.04	-0.00179433		2412.04	-0.0062566		2942.04	-0.00583966		3472.04	-0.0104646
292.2	0.04923453		822.22	0.00312015		1352.21	0.00870025		1882.24	-0.00135308		2412.24	-0.00577651		2942.24	-0.00620701		3472.24	-0.01028906
292.4	0.04917804		822.42	0.00306666		1352.41	0.00944793		1882.44	-0.00079897		2412.44	-0.00590334		2942.44	-0.0070921		3472.44	-0.01037414
292.6	0.04878365		822.62	0.00327085		1352.61	0.00904043		1882.64	-0.00025509		2412.64	-0.00631729		2942.64	-0.00809644		3472.64	-0.01042636
292.8	0.04801152		822.82	0.00395816		1352.81	0.00854908		1882.84	0.0001702		2412.84	-0.00685762		2942.84	-0.00807199		3472.84	-0.0101282
293	0.04697335		823.02	0.00325403		1353.01	0.00856504		1883.04	-0.00018267		2413.04	-0.00606527		2943.04	-0.00947117		3473.04	-0.0096827
293.2	0.04654164		823.22	0.00356633		1353.21	0.00811556		1883.24	0.00005922		2413.24	-0.00630004		2943.24	-0.01035056		3473.24	-0.00929343
293.4	0.04632291		823.42	0.00384649		1353.41	0.00837985		1883.44	0.00006521		2413.44	-0.00583477		2943.44	-0.01011412		3473.44	-0.00943528
293.6	0.04535184		823.62	0.00355893		1353.61	0.00908772		1883.64	-0.00014752		2413.64	-0.00612227		2943.64	-0.01071697		3473.64	-0.00874694
293.8	0.04570838		823.82	0.00384852		1353.81	0.0087227		1883.84	0.00066556		2413.84	-0.00607264		2943.84	-0.01137679		3473.84	-0.008856
294	0.04566267		824.02	0.00400098		1354.01	0.00869673		1884.04	0.00064414		2414.04	-0.00554199		2944.04	-0.01136621		3474.04	-0.00839076
294.2	0.04469774		824.22	0.00387394		1354.21	0.00888342		1884.24	0.00116182		2414.24	-0.00548486		2944.24	-0.01065469		3474.24	-0.00713898
294.4	0.04420936		824.42	0.0031435		1354.41	0.00947114		1884.44	0.00062564		2414.44	-0.00508235		2944.44	-0.01030554		3474.44	-0.00703987
294.6	0.04455904		824.62	0.00197248		1354.61	0.00962923		1884.64	-0.00027208		2414.64	-0.00556712		2944.64	-0.0097107		3474.64	-0.00651806
294.8	0.04569142		824.82	0.00145559		1354.81	0.00972145		1884.84	-0.00062135		2414.84	-0.00543714		2944.84	-0.00974567		3474.84	-0.00660169
295	0.04612528		825.02	0.00062672		1355.01	0.00961697		1885.04	-0.00027628		2415.04	-0.00548883		2945.04	-0.0092326		3475.04	-0.0065818
295.2	0.04554286		825.22	0.00095418		1355.21	0.01085239		1885.24	0.0002213		2415.24	-0.00556713		2945.24	-0.00855181		3475.24	-0.00669596
295.4	0.04628184		825.42	0.00063485		1355.41	0.01172508		1885.44	-0.00013833		2415.44	-0.00621958		2945.44	-0.00759599		3475.44	-0.00631194
295.6	0.04627893		825.62	0.00077092		1355.61	0.01189088		1885.64	-0.00062983		2415.64	-0.00675965		2945.64	-0.00647356		3475.64	-0.00580552
295.8	0.04655774		825.82	0.00049837		1355.81	0.01311716		1885.84	0.00049393		2415.84	-0.00653486		2945.84	-0.00542117		3475.84	-0.00591537
296	0.04672192		826.02	0.00121566		1356.01	0.0138186		1886.04	0.00085504		2416.04	-0.00611401		2946.04	-0.00535771		3476.04	-0.00608443
296.2	0.04665358		826.22	0.0006914		1356.21	0.01380354		1886.24	0.00126344		2416.24	-0.00622598		2946.24	-0.00532421		3476.24	-0.00580978
296.4	0.04730931		826.42	0.00048432		1356.41	0.01374624		1886.44	0.00146121		2416.44	-0.00631374		2946.44	-0.00502328		3476.44	-0.00638866
296.6	0.04699416		826.62	0.000522		1356.61	0.0133934		1886.64	0.00189721		2416.64	-0.00626938		2946.64	-0.00480611		3476.64	-0.00669888
296.8	0.04651572		826.82	0.00059876		1356.81	0.01310596		1886.84	0.00122486		2416.84	-0.00693011		2946.84	-0.00402974		3476.84	-0.00568488
297	0.04621183		827.02	-0.00017993		1357.01	0.01356557		1887.04	0.00129667		2417.04	-0.00609995		2947.04	-0.00461049		3477.04	-0.00606901
297.2	0.04632838		827.22	-0.00018146		1357.21	0.01289362		1887.24	0.00101373		2417.24	-0.00673909		2947.24	-0.00533427		3477.24	-0.00601053
297.4	0.04621622		827.42	-0.00036943		1357.41	0.01264727		1887.44	0.00039836		2417.44	-0.00694075		2947.44	-0.00553745		3477.44	-0.00675426
297.6	0.04588973		827.62	0.00015855		1357.61	0.01290024		1887.64	0.0004927		2417.64	-0.00734853		2947.64	-0.00582347		3477.64	-0.00735373
297.8	0.0466943		827.82	-0.0001363		1357.81	0.01202882		1887.84	0.00043593		2417.84	-0.00725201		2947.84	-0.00634911		3477.84	-0.00731551
298	0.04753615		828.02	0.00095742		1358.01	0.01233954		1888.04	-0.00072349		2418.04	-0.00708536		2948.04	-0.00646602		3478.04	-0.00691992
298.2	0.04835718		828.22	0.00061691		1358.21	0.01266832		1888.24	-0.00159769		2418.24	-0.0079284		2948.24	-0.00623553		3478.24	-0.00658085
298.4	0.04941166		828.42	-0.00003724		1358.41	0.01315892		1888.44	-0.00255034		2418.44	-0.00748604		2948.44	-0.00685783		3478.44	-0.00660074
298.6	0.04988769		828.62	0.00065137		1358.61	0.01296665		1888.64	-0.00329005		2418.64	-0.00775178		2948.64	-0.00741324		3478.64	-0.00699333
298.8	0.05092037		828.82	0.00145804		1358.81	0.01317734		1888.84	-0.00331792		2418.84	-0.00702032		2948.84	-0.00903557		3478.84	-0.00689946
299	0.05127676		829.02	0.00137762		1359.01	0.01312915		1889.04	-0.00367252		2419.04	-0.00721327		2949.04	-0.00924827		3479.04	-0.00745588
299.2	0.0509567		829.22	0.00194357		1359.21	0.01433835		1889.24	-0.00439136		2419.24	-0.00653033		2949.24	-0.00914188		3479.24	-0.00769326
299.4	0.05131458		829.42	0.00166057		1359.41	0.01466793		1889.44	-0.00449494		2419.44	-0.00686364		2949.44	-0.0090369		3479.44	-0.00796682
299.6	0.05139896		829.62	0.00215558		1359.61	0.01502704		1889.64	-0.00370096		2419.64	-0.00660631		2949.64	-0.00938361		3479.64	-0.00870743
299.8	0.05134637		829.82	0.00209172		1359.81	0.01573215		1889.84	-0.00319353		2419.84	-0.00568993		2949.84	-0.00868877		3479.84	-0.00882144
300	0.05079733		830.02	0.0023459		1360.01	0.01559023		1890.04	-0.00302236		2420.04	-0.00539365		2950.04	-0.00844493		3480.04	-0.00858668
300.2	0.05035145		830.22	0.00215313		1360.21	0.01540176		1890.24	-0.00277191		2420.24	-0.00533943		2950.24	-0.00838161		3480.24	-0.00862732
300.4	0.04990327		830.42	0.00238831		1360.41	0.01472042		1890.44	-0.00321272		2420.44	-0.00506125		2950.44	-0.00820973		3480.44	-0.0094061
300.6	0.0493572		830.62	0.00303505		1360.61	0.01404766		1890.64	-0.00189082		2420.64	-0.004587		2950.64	-0.00764636		3480.64	-0.00919234
300.8	0.04967315		830.82	0.003132		1360.81	0.01344081		1890.84	-0.00173687		2420.84	-0.00501289		2950.84	-0.00742072		3480.84	-0.00923848
301	0.04955644		831.02	0.00281323		1361.01	0.01265093		1891.04	-0.00076658		2421.04	-0.00413517		2951.04	-0.00781581		3481.04	-0.01106557
301.2	0.04896085		831.22	0.00319988		1361.21	0.01120234		1891.24	-0.00093356		2421.24	-0.00477172		2951.24	-0.00914027		3481.24	-0.01122128
301.4	0.04855799		831.42	0.00365428		1361.41	0.01058531		1891.44	-0.00068084		2421.44	-0.00457035		2951.44	-0.00803996		3481.44	-0.01221051
301.6	0.04807149		831.62	0.00520087		1361.61	0.01001867		1891.64	0.00047663		2421.64	-0.00474666		2951.64	-0.00798427		3481.64	-0.01318779
301.8	0.04806552		831.82	0.00589143		1361.81	0.00924488		1891.84	0.00015761		2421.84	-0.00511586		2951.84	-0.00790368		3481.84	-0.01229418
302	0.04833223		832.02	0.00705551		1362.01	0.00917637		1892.04	0.00015866		2422.04	-0.00505942		2952.04	-0.00794207		3482.04	-0.01168947
302.2	0.04775366		832.22	0.00703591		1362.21	0.00962529		1892.24	-0.00036393		2422.24	-0.00489282		2952.24	-0.00772346		3482.24	-0.01020884
302.4	0.04815093		832.42	0.00667332		1362.41	0.00935458		1892.44	0.00004993		2422.44	-0.00460314		2952.44	-0.00794304		3482.44	-0.00987965
302.6	0.04709978		832.62	0.00762662		1362.61	0.00933922		1892.64	0.00053431		2422.64	-0.00426211		2952.64	-0.00865127		3482.64	-0.00944251
302.8	0.04747552		832.82	0.00781011		1362.81	0.0094241		1892.84	0.0003012		2422.84	-0.0046025		2952.84	-0.00923099		3482.84	-0.00786322
303	0.04804227		833.02	0.00760404		1363.01	0.0097458		1893.04	-0.00020508		2423.04	-0.00490881		2953.04	-0.00873953		3483.04	-0.00791608
303.2	0.04835857		833.22	0.00755738		1363.21	0.01057637		1893.24	-0.00123121		2423.24	-0.00413426		2953.24	-0.00857959		3483.24	-0.0068256
303.4	0.04882537		833.42	0.00712283		1363.41	0.00993933		1893.44	-0.00167491		2423.44	-0.00489496		2953.44	-0.00865789		3483.44	-0.00567803
303.6	0.04918186		833.62	0.00656267		1363.61	0.01064625		1893.64	-0.00195486		2423.64	-0.0044856		2953.64	-0.00826008		3483.64	-0.00586247
303.8	0.04891421		833.82	0.00560205		1363.81	0.01131447		1893.84	-0.00284872		2423.84	-0.00454987		2953.84	-0.0074141		3483.84	-0.00518876
304	0.04990534		834.02	0.00475267		1364.01	0.01148242		1894.04	-0.00264379		2424.04	-0.00422377		2954.04	-0.00821421		3484.04	-0.00583025
304.2	0.05025489		834.22	0.00475681		1364.21	0.0113431		1894.24	-0.00207976		2424.24	-0.00418959		2954.24	-0.00821727		3484.24	-0.00653576
304.4	0.0510478		834.42	0.00378013		1364.41	0.01101289		1894.44	-0.00177908		2424.44	-0.00382068		2954.44	-0.00823035		3484.44	-0.00757355
304.6	0.05161254		834.62	0.00376456		1364.61	0.01139234		1894.64	-0.00087611		2424.64	-0.00367117		2954.64	-0.00859962		3484.64	-0.0082701
304.8	0.05283737		834.82	0.00311443		1364.81	0.01140017		1894.84	-0.00105303		2424.84	-0.00423346		2954.84	-0.00861844		3484.84	-0.00961271
305	0.05266276		835.02	0.00285148		1365.01	0.01200634		1895.04	-0.0014287		2425.04	-0.00429177		2955.04	-0.00800618		3485.04	-0.01110071
305.2	0.05241439		835.22	0.0034496		1365.21	0.01264811		1895.24	-0.00105908		2425.24	-0.00402113		2955.24	-0.00773398		3485.24	-0.01142388
305.4	0.05249972		835.42	0.00341835		1365.41	0.01280594		1895.44	0.00041567		2425.44	-0.00341342		2955.44	-0.00755126		3485.44	-0.01265737
305.6	0.05207926		835.62	0.00329032		1365.61	0.01281928		1895.64	0.00059471		2425.64	-0.00387521		2955.64	-0.00761298		3485.64	-0.01351104
305.8	0.0518308		835.82	0.00330024		1365.81	0.01272111		1895.84	0.00028096		2425.84	-0.00345865		2955.84	-0.0073049		3485.84	-0.01218095
306	0.05085813		836.02	0.00399496		1366.01	0.01297363		1896.04	-0.00001449		2426.04	-0.00327169		2956.04	-0.00777914		3486.04	-0.01162476
306.2	0.0498233		836.22	0.00404096		1366.21	0.0131842		1896.24	-0.00092164		2426.24	-0.00311644		2956.24	-0.00746578		3486.24	-0.01106514
306.4	0.05024366		836.42	0.00380747		1366.41	0.01344728		1896.44	-0.00066184		2426.44	-0.00448084		2956.44	-0.00735707		3486.44	-0.01121209
306.6	0.04937689		836.62	0.00492305		1366.61	0.0141273		1896.64	-0.00119072		2426.64	-0.00412827		2956.64	-0.00781595		3486.64	-0.00987502
306.8	0.05025146		836.82	0.00545701		1366.81	0.01421728		1896.84	-0.0019322		2426.84	-0.00450341		2956.84	-0.00773664		3486.84	-0.00932701
307	0.04976079		837.02	0.00623641		1367.01	0.01382527		1897.04	-0.00252361		2427.04	-0.0044694		2957.04	-0.00790851		3487.04	-0.00913609
307.2	0.05001174		837.22	0.00653119		1367.21	0.01265683		1897.24	-0.0035681		2427.24	-0.00421865		2957.24	-0.0082468		3487.24	-0.00814967
307.4	0.04953129		837.42	0.0057021		1367.41	0.01218271		1897.44	-0.00377074		2427.44	-0.00531458		2957.44	-0.00788059		3487.44	-0.00767155
307.6	0.04917126		837.62	0.00600457		1367.61	0.01247087		1897.64	-0.0033845		2427.64	-0.00546475		2957.64	-0.00838238		3487.64	-0.00900848
307.8	0.04868456		837.82	0.005463		1367.81	0.01174422		1897.84	-0.00291495		2427.84	-0.00548404		2957.84	-0.00826579		3487.84	-0.00942883
308	0.04979992		838.02	0.00608192		1368.01	0.01079289		1898.04	-0.00220268		2428.04	-0.00505216		2958.04	-0.009039		3488.04	-0.0100691
308.2	0.04891303		838.22	0.00648211		1368.21	0.01019791		1898.24	-0.00174041		2428.24	-0.00503148		2958.24	-0.00873194		3488.24	-0.01034112
308.4	0.0484006		838.42	0.00637119		1368.41	0.00978135		1898.44	-0.00201671		2428.44	-0.0055862		2958.44	-0.00879103		3488.44	-0.01055278
308.6	0.04764094		838.62	0.00650408		1368.61	0.00997028		1898.64	-0.00198287		2428.64	-0.00539651		2958.64	-0.00848363		3488.64	-0.01102643
308.8	0.04861824		838.82	0.00670019		1368.81	0.01015242		1898.84	-0.00193034		2428.84	-0.00552756		2958.84	-0.00843457		3488.84	-0.01144811
309	0.04799565		839.02	0.00707517		1369.01	0.01036867		1899.04	-0.00147849		2429.04	-0.00493627		2959.04	-0.00783864		3489.04	-0.01195611
309.2	0.04881167		839.22	0.0069504		1369.21	0.01043245		1899.24	-0.00124401		2429.24	-0.00385035		2959.24	-0.007799		3489.24	-0.01235298
309.4	0.04921506		839.42	0.00691346		1369.41	0.00958202		1899.44	-0.00039641		2429.44	-0.00318009		2959.44	-0.00834347		3489.44	-0.01253193
309.6	0.04942018		839.62	0.00660335		1369.61	0.00968591		1899.64	-0.00177446		2429.64	-0.00353563		2959.64	-0.00828387		3489.64	-0.0125641
309.8	0.04947314		839.82	0.00690483		1369.81	0.00956588		1899.84	-0.00199817		2429.84	-0.00361636		2959.84	-0.00820705		3489.84	-0.0113004
310	0.04937045		840.02	0.00709484		1370.01	0.00995116		1900.04	-0.00169492		2430.04	-0.00423479		2960.04	-0.00731917		3490.04	-0.01162897
310.2	0.04922934		840.22	0.00622436		1370.21	0.01012699		1900.24	-0.00140979		2430.24	-0.00390257		2960.24	-0.00717821		3490.24	-0.01200872
310.4	0.05030283		840.42	0.00642937		1370.41	0.01192005		1900.44	-0.00054617		2430.44	-0.00469103		2960.44	-0.00695033		3490.44	-0.01112727
310.6	0.05021685		840.62	0.00653855		1370.61	0.011766		1900.64	-0.00048921		2430.64	-0.00400772		2960.64	-0.00695825		3490.64	-0.01026569
310.8	0.0508563		840.82	0.00622581		1370.81	0.01179165		1900.84	0.00023318		2430.84	-0.00435751		2960.84	-0.00656045		3490.84	-0.00987098
311	0.0498884		841.02	0.00681625		1371.01	0.01161859		1901.04	0.00036685		2431.04	-0.00397779		2961.04	-0.00653611		3491.04	-0.00862016
311.2	0.0503864		841.22	0.0059666		1371.21	0.01180999		1901.24	0.00044708		2431.24	-0.00444843		2961.24	-0.00615		3491.24	-0.00735013
311.4	0.04984722		841.42	0.00508538		1371.41	0.01288419		1901.44	0.00105304		2431.44	-0.00461539		2961.44	-0.00538939		3491.44	-0.00709073
311.6	0.04972504		841.62	0.00476354		1371.61	0.0119174		1901.64	0.00110007		2431.64	-0.00439043		2961.64	-0.00585518		3491.64	-0.00779609
311.8	0.05001328		841.82	0.00385939		1371.81	0.01150986		1901.84	0.00010622		2431.84	-0.00422737		2961.84	-0.00509408		3491.84	-0.00747666
312	0.05022564		842.02	0.0038634		1372.01	0.01216902		1902.04	-0.00042486		2432.04	-0.00447277		2962.04	-0.00490857		3492.04	-0.00685062
312.2	0.04951849		842.22	0.00398328		1372.21	0.01202331		1902.24	-0.00029216		2432.24	-0.00471807		2962.24	-0.00487035		3492.24	-0.0062734
312.4	0.04868198		842.42	0.0044415		1372.41	0.01143024		1902.44	-0.0006514		2432.44	-0.00555691		2962.44	-0.00515506		3492.44	-0.006339
312.6	0.04926524		842.62	0.00364123		1372.61	0.01202837		1902.64	-0.00006902		2432.64	-0.00513136		2962.64	-0.00566657		3492.64	-0.00652927
312.8	0.04995335		842.82	0.00411864		1372.81	0.01142955		1902.84	-0.00011302		2432.84	-0.00505717		2962.84	-0.00655375		3492.84	-0.00615274
313	0.04981349		843.02	0.00347855		1373.01	0.01071151		1903.04	-0.00010542		2433.04	-0.00385856		2963.04	-0.00594402		3493.04	-0.00602375
313.2	0.05130766		843.22	0.0037845		1373.21	0.01018522		1903.24	-0.00036442		2433.24	-0.00359836		2963.24	-0.00580603		3493.24	-0.00667549
313.4	0.0512633		843.42	0.00406909		1373.41	0.00986175		1903.44	-0.00001518		2433.44	-0.00333704		2963.44	-0.00621722		3493.44	-0.00708156
313.6	0.05151668		843.62	0.00370169		1373.61	0.00965724		1903.64	-0.00097115		2433.64	-0.00376321		2963.64	-0.00680158		3493.64	-0.00779899
313.8	0.05128988		843.82	0.00378088		1373.81	0.00984202		1903.84	-0.000759		2433.84	-0.00307175		2963.84	-0.00554159		3493.84	-0.0077403
314	0.05141482		844.02	0.00370413		1374.01	0.01078177		1904.04	-0.0003338		2434.04	-0.00281208		2964.04	-0.00526386		3494.04	-0.00880174
314.2	0.05088947		844.22	0.00357916		1374.21	0.01091993		1904.24	-0.00038683		2434.24	-0.0025127		2964.24	-0.00627562		3494.24	-0.00892034
314.4	0.05177698		844.42	0.00389086		1374.41	0.01196509		1904.44	-0.0000742		2434.44	-0.00252835		2964.44	-0.00562558		3494.44	-0.00810766
314.6	0.05165275		844.62	0.00349308		1374.61	0.01170915		1904.64	-0.00044907		2434.64	-0.00299171		2964.64	-0.00578836		3494.64	-0.00875476
314.8	0.05198014		844.82	0.0032635		1374.81	0.01204008		1904.84	0.00015649		2434.84	-0.00308225		2964.84	-0.00542696		3494.84	-0.00879474
315	0.05118109		845.02	0.0036507		1375.01	0.01237082		1905.04	-0.00030584		2435.04	-0.00366627		2965.04	-0.00566889		3495.04	-0.00870863
315.2	0.0513596		845.22	0.00365458		1375.21	0.01312101		1905.24	-0.00026815		2435.24	-0.0039571		2965.24	-0.00510532		3495.24	-0.00872636
315.4	0.05120033		845.42	0.00385881		1375.41	0.01312335		1905.44	-0.00061375		2435.44	-0.00354818		2965.44	-0.00508425		3495.44	-0.00884278
315.6	0.05106898		845.62	0.00457542		1375.61	0.01197736		1905.64	-0.0016534		2435.64	-0.0033127		2965.64	-0.00550826		3495.64	-0.00873327
315.8	0.05084864		845.82	0.00508192		1375.81	0.01268657		1905.84	-0.00282989		2435.84	-0.00401184		2965.84	-0.00480571		3495.84	-0.00856
316	0.05004949		846.02	0.00477248		1376.01	0.01343742		1906.04	-0.00254178		2436.04	-0.00417849		2966.04	-0.00422434		3496.04	-0.00821174
316.2	0.04985462		846.22	0.0053923		1376.21	0.01286128		1906.24	-0.00193442		2436.24	-0.00458779		2966.24	-0.00536573		3496.24	-0.00882863
316.4	0.0491098		846.42	0.00513694		1376.41	0.01222973		1906.44	-0.0017853		2436.44	-0.00414722		2966.44	-0.00622454		3496.44	-0.00913033
316.6	0.04916496		846.62	0.00440334		1376.61	0.01253907		1906.64	-0.00173097		2436.64	-0.00359585		2966.64	-0.00668329		3496.64	-0.00872291
316.8	0.04920379		846.82	0.00472863		1376.81	0.01165346		1906.84	-0.00204105		2436.84	-0.00309218		2966.84	-0.0069007		3496.84	-0.00848513
317	0.04942145		847.02	0.00423578		1377.01	0.01183548		1907.04	-0.00126027		2437.04	-0.00236336		2967.04	-0.007114		3497.04	-0.00917069
317.2	0.04934515		847.22	0.00445152		1377.21	0.01207461		1907.24	-0.00149376		2437.24	-0.0018794		2967.24	-0.00741236		3497.24	-0.01017182
317.4	0.04821955		847.42	0.00401402		1377.41	0.01136634		1907.44	-0.00098279		2437.44	-0.00190185		2967.44	-0.00784059		3497.44	-0.01093049
317.6	0.04823216		847.62	0.00356754		1377.61	0.01053053		1907.64	-0.00174325		2437.64	-0.00177574		2967.64	-0.00816978		3497.64	-0.01185078
317.8	0.04749654		847.82	0.00367133		1377.81	0.01077667		1907.84	-0.00229211		2437.84	-0.00182594		2967.84	-0.00757402		3497.84	-0.01113498
318	0.04780237		848.02	0.00285973		1378.01	0.01021602		1908.04	-0.00236447		2438.04	-0.00263514		2968.04	-0.00818207		3498.04	-0.01152711
318.2	0.04711816		848.22	0.00203145		1378.21	0.00935787		1908.24	-0.00198678		2438.24	-0.00297637		2968.24	-0.00827797		3498.24	-0.01105984
318.4	0.04755575		848.42	0.00184107		1378.41	0.00933279		1908.44	-0.0018518		2438.44	-0.00400742		2968.44	-0.00881709		3498.44	-0.01040378
318.6	0.04723222		848.62	0.00133435		1378.61	0.00853489		1908.64	-0.00099452		2438.64	-0.00500923		2968.64	-0.00847175		3498.64	-0.01054801
318.8	0.04734794		848.82	0.00101265		1378.81	0.00797859		1908.84	-0.00074193		2438.84	-0.00451069		2968.84	-0.0084278		3498.84	-0.00963062
319	0.04754271		849.02	0.00196867		1379.01	0.00790186		1909.04	-0.00067233		2439.04	-0.00476816		2969.04	-0.00865775		3499.04	-0.00857721
319.2	0.0481928		849.22	0.00258294		1379.21	0.00804848		1909.24	-0.00061439		2439.24	-0.00353747		2969.24	-0.00846216		3499.24	-0.00806969
319.4	0.04890715		849.42	0.00284956		1379.41	0.00792528		1909.44	-0.00175523		2439.44	-0.00390288		2969.44	-0.00866992		3499.44	-0.00772392
319.6	0.04925102		849.62	0.00283449		1379.61	0.00839182		1909.64	-0.002068		2439.64	-0.00355564		2969.64	-0.00832749		3499.64	-0.00800385
319.8	0.05011731		849.82	0.00295493		1379.81	0.00934311		1909.84	-0.00224782		2439.84	-0.00416078		2969.84	-0.00759204		3499.84	-0.00920585
320	0.05058991		850.02	0.00312192		1380.01	0.01048184		1910.04	-0.00253436		2440.04	-0.0043623		2970.04	-0.00703634		3500.04	-0.00882397
320.2	0.05171525		850.22	0.00430818		1380.21	0.0108761		1910.24	-0.00213877		2440.24	-0.00340802		2970.24	-0.00742755		3500.24	-0.00872562
320.4	0.0523476		850.42	0.00392424		1380.41	0.01178236		1910.44	-0.00214929		2440.44	-0.00261535		2970.44	-0.00748262		3500.44	-0.00860461
320.6	0.05305372		850.62	0.0044649		1380.61	0.01305143		1910.64	-0.00284191		2440.64	-0.00278877		2970.64	-0.00701967		3500.64	-0.00894956
320.8	0.05462996		850.82	0.00517858		1380.81	0.0141926		1910.84	-0.00180627		2440.84	-0.00240708		2970.84	-0.00663432		3500.84	-0.00945134
321	0.05435116		851.02	0.00500571		1381.01	0.01539683		1911.04	-0.00213343		2441.04	-0.00164937		2971.04	-0.00632788		3501.04	-0.01061546
321.2	0.05384455		851.22	0.0054037		1381.21	0.01579528		1911.24	-0.00257936		2441.24	-0.00148007		2971.24	-0.00593809		3501.24	-0.01119164
321.4	0.05354752		851.42	0.0057975		1381.41	0.01574472		1911.44	-0.00237111		2441.44	-0.00221123		2971.44	-0.00571752		3501.44	-0.01287526
321.6	0.053613		851.62	0.00567068		1381.61	0.01639015		1911.64	-0.00367656		2441.64	-0.00173371		2971.64	-0.00572803		3501.64	-0.01318968
321.8	0.05271417		851.82	0.00631548		1381.81	0.01645619		1911.84	-0.00411775		2441.84	-0.00143701		2971.84	-0.00550559		3501.84	-0.01273729
322	0.05284255		852.02	0.0055515		1382.01	0.01574805		1912.04	-0.00352881		2442.04	-0.00180751		2972.04	-0.00540376		3502.04	-0.01327502
322.2	0.05192507		852.22	0.00460864		1382.21	0.015108		1912.24	-0.00299261		2442.24	-0.00175167		2972.24	-0.00533327		3502.24	-0.01215516
322.4	0.05208254		852.42	0.00512948		1382.41	0.01486472		1912.44	-0.00251309		2442.44	-0.00256256		2972.44	-0.00599277		3502.44	-0.01088893
322.6	0.05124999		852.62	0.0046606		1382.61	0.01465597		1912.64	-0.00199646		2442.64	-0.00230767		2972.64	-0.00544172		3502.64	-0.0099065
322.8	0.05102301		852.82	0.00451739		1382.81	0.01447019		1912.84	-0.00177687		2442.84	-0.00236291		2972.84	-0.00531478		3502.84	-0.00976312
323	0.05167515		853.02	0.00498454		1383.01	0.01407935		1913.04	-0.00144942		2443.04	-0.0027815		2973.04	-0.00510497		3503.04	-0.00918686
323.2	0.05195716		853.22	0.00489043		1383.21	0.01400068		1913.24	-0.00166182		2443.24	-0.00359916		2973.24	-0.00513106		3503.24	-0.00940474
323.4	0.05208362		853.42	0.00443147		1383.41	0.01359092		1913.44	-0.00109042		2443.44	-0.00466817		2973.44	-0.00475449		3503.44	-0.00961752
323.6	0.05304831		853.62	0.00396031		1383.61	0.01298458		1913.64	-0.00074509		2443.64	-0.00450875		2973.64	-0.00389962		3503.64	-0.00974352
323.8	0.05442276		853.82	0.00512501		1383.81	0.0124717		1913.84	-0.00023612		2443.84	-0.00495772		2973.84	-0.00423663		3503.84	-0.00940286
324	0.05507266		854.02	0.00564067		1384.01	0.01209521		1914.04	-0.00010906		2444.04	-0.00511314		2974.04	-0.00367987		3504.04	-0.00838269
324.2	0.05592883		854.22	0.00591809		1384.21	0.01169229		1914.24	0.00118788		2444.24	-0.00514148		2974.24	-0.00354544		3504.24	-0.00851238
324.4	0.05588316		854.42	0.00559468		1384.41	0.01129443		1914.44	0.00094413		2444.44	-0.00580284		2974.44	-0.00397011		3504.44	-0.00954552
324.6	0.05727946		854.62	0.00572599		1384.61	0.01078693		1914.64	0.00019198		2444.64	-0.00610105		2974.64	-0.00461004		3504.64	-0.00954398
324.8	0.05799991		854.82	0.00580709		1384.81	0.01050673		1914.84	0.00007476		2444.84	-0.00642304		2974.84	-0.00434412		3504.84	-0.00989343
325	0.05697739		855.02	0.00589361		1385.01	0.0108483		1915.04	-0.0011775		2445.04	-0.00667308		2975.04	-0.00408507		3505.04	-0.01102329
325.2	0.05710871		855.22	0.0060208		1385.21	0.01159336		1915.24	-0.00084125		2445.24	-0.00628681		2975.24	-0.00364809		3505.24	-0.01139807
325.4	0.05704132		855.42	0.00484691		1385.41	0.01144162		1915.44	-0.00120067		2445.44	-0.00584222		2975.44	-0.0042973		3505.44	-0.01197369
325.6	0.05693261		855.62	0.0047366		1385.61	0.01114611		1915.64	-0.00167208		2445.64	-0.00507408		2975.64	-0.00447105		3505.64	-0.01196303
325.8	0.05621155		855.82	0.00451353		1385.81	0.0109632		1915.84	-0.0020635		2445.84	-0.00476772		2975.84	-0.0045243		3505.84	-0.01177927
326	0.05603008		856.02	0.00355542		1386.01	0.01118655		1916.04	-0.00180254		2446.04	-0.00487627		2976.04	-0.00580975		3506.04	-0.01181542
326.2	0.05532368		856.22	0.00335587		1386.21	0.01160242		1916.24	-0.00221208		2446.24	-0.00493004		2976.24	-0.00622568		3506.24	-0.01112335
326.4	0.05542691		856.42	0.00355424		1386.41	0.01292125		1916.44	-0.00270219		2446.44	-0.0055412		2976.44	-0.00661209		3506.44	-0.01052883
326.6	0.05401121		856.62	0.00401091		1386.61	0.01344074		1916.64	-0.00274669		2446.64	-0.00528854		2976.64	-0.00629159		3506.64	-0.01038846
326.8	0.05391783		856.82	0.00449186		1386.81	0.0135102		1916.84	-0.00235189		2446.84	-0.00576876		2976.84	-0.005911		3506.84	-0.01121271
327	0.05374405		857.02	0.00415907		1387.01	0.01360799		1917.04	-0.00252587		2447.04	-0.00555567		2977.04	-0.00602485		3507.04	-0.01043884
327.2	0.05366222		857.22	0.00407075		1387.21	0.01330602		1917.24	-0.00242432		2447.24	-0.00580998		2977.24	-0.00583999		3507.24	-0.01063049
327.4	0.0532015		857.42	0.00431617		1387.41	0.01264091		1917.44	-0.00187276		2447.44	-0.00436406		2977.44	-0.00595047		3507.44	-0.01031706
327.6	0.05415111		857.62	0.00490595		1387.61	0.01281349		1917.64	-0.00201834		2447.64	-0.00325245		2977.64	-0.0056938		3507.64	-0.01027571
327.8	0.05368293		857.82	0.00573753		1387.81	0.0128515		1917.84	-0.00117652		2447.84	-0.00286593		2977.84	-0.00605727		3507.84	-0.01013465
328	0.05438639		858.02	0.00576081		1388.01	0.01207378		1918.04	-0.00045454		2448.04	-0.00254672		2978.04	-0.00621815		3508.04	-0.00978368
328.2	0.05422411		858.22	0.0049602		1388.21	0.01148988		1918.24	-0.00034357		2448.24	-0.00209348		2978.24	-0.00601069		3508.24	-0.01026037
328.4	0.05433983		858.42	0.00541257		1388.41	0.01126493		1918.44	-0.00159103		2448.44	-0.0012561		2978.44	-0.00671159		3508.44	-0.01034018
328.6	0.05414622		858.62	0.00462639		1388.61	0.01089187		1918.64	-0.00152668		2448.64	-0.00145751		2978.64	-0.00683625		3508.64	-0.00943263
328.8	0.05374844		858.82	0.00439173		1388.81	0.01121391		1918.84	-0.00193338		2448.84	-0.00161472		2978.84	-0.00573438		3508.84	-0.00985037
329	0.0533244		859.02	0.00398257		1389.01	0.0114699		1919.04	-0.00182025		2449.04	-0.0015322		2979.04	-0.00536122		3509.04	-0.00973265
329.2	0.0536029		859.22	0.00332176		1389.21	0.01124529		1919.24	-0.00194901		2449.24	-0.00069527		2979.24	-0.00576738		3509.24	-0.00933295
329.4	0.0532345		859.42	0.00294164		1389.41	0.01048415		1919.44	-0.00204672		2449.44	-0.00078459		2979.44	-0.00653207		3509.44	-0.01005453
329.6	0.05308787		859.62	0.00330392		1389.61	0.01058597		1919.64	-0.00218757		2449.64	-0.00160142		2979.64	-0.00664547		3509.64	-0.01047422
329.8	0.05287291		859.82	0.00286943		1389.81	0.01055092		1919.84	-0.00277994		2449.84	-0.00207523		2979.84	-0.00718059		3509.84	-0.01080136
330	0.05264304		860.02	0.00346102		1390.01	0.01072982		1920.04	-0.00280254		2450.04	-0.0031747		2980.04	-0.00848559		3510.04	-0.01165282
330.2	0.0523138		860.22	0.00352935		1390.21	0.0115173		1920.24	-0.00338612		2450.24	-0.00426054		2980.24	-0.00789433		3510.24	-0.01123481
330.4	0.05238111		860.42	0.00386032		1390.41	0.01219955		1920.44	-0.00370593		2450.44	-0.00481951		2980.44	-0.00805603		3510.44	-0.01130731
330.6	0.05186483		860.62	0.00410363		1390.61	0.01249518		1920.64	-0.00372501		2450.64	-0.0053062		2980.64	-0.00810554		3510.64	-0.01123708
330.8	0.05264497		860.82	0.0038493		1390.81	0.01331159		1920.84	-0.00367599		2450.84	-0.00658752		2980.84	-0.00858117		3510.84	-0.01112136
331	0.05264708		861.02	0.00343569		1391.01	0.01326443		1921.04	-0.0037355		2451.04	-0.00659521		2981.04	-0.00830635		3511.04	-0.01044111
331.2	0.05299718		861.22	0.00408308		1391.21	0.01283989		1921.24	-0.00409342		2451.24	-0.0065362		2981.24	-0.00835696		3511.24	-0.0103101
331.4	0.05349935		861.42	0.00500162		1391.41	0.0128987		1921.44	-0.00447679		2451.44	-0.00604256		2981.44	-0.00788051		3511.44	-0.01009689
331.6	0.05388245		861.62	0.0060807		1391.61	0.01305461		1921.64	-0.00471137		2451.64	-0.00586626		2981.64	-0.00738707		3511.64	-0.01097123
331.8	0.05455693		861.82	0.00618452		1391.81	0.01257552		1921.84	-0.00423129		2451.84	-0.00628606		2981.84	-0.00720967		3511.84	-0.01081469
332	0.05571105		862.02	0.00600171		1392.01	0.0119509		1922.04	-0.00338383		2452.04	-0.00596855		2982.04	-0.00819512		3512.04	-0.01042487
332.2	0.05520984		862.22	0.00605506		1392.21	0.01184279		1922.24	-0.00454864		2452.24	-0.00543417		2982.24	-0.00829418		3512.24	-0.01036975
332.4	0.05557263		862.42	0.0062038		1392.41	0.01252779		1922.44	-0.00518116		2452.44	-0.00491042		2982.44	-0.00873806		3512.44	-0.00981478
332.6	0.05466074		862.62	0.00529012		1392.61	0.01195504		1922.64	-0.00425439		2452.64	-0.00522218		2982.64	-0.00882512		3512.64	-0.01015858
332.8	0.05580496		862.82	0.00556643		1392.81	0.01199607		1922.84	-0.00446052		2452.84	-0.00527018		2982.84	-0.00854443		3512.84	-0.01070901
333	0.05597457		863.02	0.00589234		1393.01	0.0112643		1923.04	-0.00474415		2453.04	-0.00512608		2983.04	-0.00904435		3513.04	-0.01095085
333.2	0.05641725		863.22	0.00568909		1393.21	0.01104583		1923.24	-0.0046316		2453.24	-0.00450865		2983.24	-0.00937489		3513.24	-0.01189097
333.4	0.05596712		863.42	0.00601914		1393.41	0.01100752		1923.44	-0.0045252		2453.44	-0.005078		2983.44	-0.00903269		3513.44	-0.01206602
333.6	0.05603207		863.62	0.0054627		1393.61	0.0106719		1923.64	-0.00502682		2453.64	-0.00546096		2983.64	-0.0097536		3513.64	-0.01172377
333.8	0.05485927		863.82	0.0049032		1393.81	0.01089456		1923.84	-0.00445581		2453.84	-0.00540622		2983.84	-0.01053037		3513.84	-0.01183368
334	0.05375187		864.02	0.00440107		1394.01	0.01166449		1924.04	-0.00421681		2454.04	-0.00512337		2984.04	-0.00991198		3514.04	-0.01111491
334.2	0.05265062		864.22	0.00246608		1394.21	0.01217945		1924.24	-0.00444588		2454.24	-0.00433438		2984.24	-0.00916269		3514.24	-0.00987246
334.4	0.05199524		864.42	0.00239644		1394.41	0.01267851		1924.44	-0.00424903		2454.44	-0.00432428		2984.44	-0.00957575		3514.44	-0.00982341
334.6	0.05208803		864.62	0.00161482		1394.61	0.01313376		1924.64	-0.00466737		2454.64	-0.00458021		2984.64	-0.00891058		3514.64	-0.00849082
334.8	0.05187044		864.82	0.00112428		1394.81	0.01327535		1924.84	-0.00437513		2454.84	-0.0040677		2984.84	-0.00868027		3514.84	-0.00761395
335	0.05121089		865.02	0.00078521		1395.01	0.01297848		1925.04	-0.00435033		2455.04	-0.00376053		2985.04	-0.00718048		3515.04	-0.00740857
335.2	0.05132271		865.22	0.00122063		1395.21	0.01370688		1925.24	-0.00451862		2455.24	-0.00332041		2985.24	-0.0065163		3515.24	-0.00764833
335.4	0.05190932		865.42	0.00251418		1395.41	0.01342822		1925.44	-0.00467203		2455.44	-0.00323776		2985.44	-0.00554583		3515.44	-0.00827552
335.6	0.0517711		865.62	0.00399555		1395.61	0.01359368		1925.64	-0.00414799		2455.64	-0.00351318		2985.64	-0.00588343		3515.64	-0.00874158
335.8	0.0523352		865.82	0.0035327		1395.81	0.01363914		1925.84	-0.00389965		2455.84	-0.00350432		2985.84	-0.00642597		3515.84	-0.00759225
336	0.05153271		866.02	0.00325196		1396.01	0.01413142		1926.04	-0.00309189		2456.04	-0.00284122		2986.04	-0.00673578		3516.04	-0.00777154
336.2	0.05192046		866.22	0.00424795		1396.21	0.01520985		1926.24	-0.00410934		2456.24	-0.00260471		2986.24	-0.00686181		3516.24	-0.00759495
336.4	0.05242499		866.42	0.00425028		1396.41	0.01629822		1926.44	-0.00325417		2456.44	-0.00248552		2986.44	-0.0068887		3516.44	-0.00849303
336.6	0.05268942		866.62	0.00540455		1396.61	0.01694864		1926.64	-0.00199567		2456.64	-0.00295911		2986.64	-0.00737549		3516.64	-0.00932516
336.8	0.05346026		866.82	0.00524645		1396.81	0.01763168		1926.84	-0.00183052		2456.84	-0.0028409		2986.84	-0.0070483		3516.84	-0.00936589
337	0.05439889		867.02	0.00497817		1397.01	0.01759397		1927.04	-0.00144214		2457.04	-0.00253696		2987.04	-0.00731942		3517.04	-0.00992446
337.2	0.0545276		867.22	0.00524399		1397.21	0.01764161		1927.24	-0.00099055		2457.24	-0.00263812		2987.24	-0.00728222		3517.24	-0.01052071
337.4	0.05400776		867.42	0.00522392		1397.41	0.01732249		1927.44	-0.00136989		2457.44	-0.00297936		2987.44	-0.0073379		3517.44	-0.01038305
337.6	0.05366192		867.62	0.00406229		1397.61	0.01669055		1927.64	-0.00125096		2457.64	-0.00280374		2987.64	-0.0076369		3517.64	-0.01016884
337.8	0.05302496		867.82	0.0030084		1397.81	0.01647786		1927.84	-0.00039094		2457.84	-0.00298914		2987.84	-0.00708144		3517.84	-0.01045964
338	0.05309113		868.02	0.0020768		1398.01	0.01609425		1928.04	-0.00045658		2458.04	-0.00268996		2988.04	-0.00530195		3518.04	-0.01052318
338.2	0.05290948		868.22	0.00128139		1398.21	0.01541719		1928.24	-0.00033563		2458.24	-0.00286844		2988.24	-0.00593769		3518.24	-0.01149412
338.4	0.05333703		868.42	0.00168615		1398.41	0.01436866		1928.44	0.00014361		2458.44	-0.00327336		2988.44	-0.00581556		3518.44	-0.01191665
338.6	0.05353273		868.62	0.00114641		1398.61	0.01323095		1928.64	-0.00009544		2458.64	-0.00390064		2988.64	-0.00599489		3518.64	-0.0118445
338.8	0.053252		868.82	0.00089841		1398.81	0.01234687		1928.84	0.00048383		2458.84	-0.00355826		2988.84	-0.0066416		3518.84	-0.01200777
339	0.05374869		869.02	0.00088086		1399.01	0.01239588		1929.04	0.00077151		2459.04	-0.00435033		2989.04	-0.00657775		3519.04	-0.01260451
339.2	0.05440246		869.22	0.0008481		1399.21	0.01236441		1929.24	0.0007283		2459.24	-0.00386413		2989.24	-0.00711874		3519.24	-0.01198626
339.4	0.05473991		869.42	0.00153976		1399.41	0.01144606		1929.44	0.00005432		2459.44	-0.00392996		2989.44	-0.00868102		3519.44	-0.01137558
339.6	0.05427008		869.62	0.00186213		1399.61	0.01166806		1929.64	-0.00048596		2459.64	-0.00441444		2989.64	-0.00933923		3519.64	-0.01063086
339.8	0.05419775		869.82	0.00176817		1399.81	0.011956		1929.84	-0.00099953		2459.84	-0.00406884		2989.84	-0.01009608		3519.84	-0.01028121
340	0.05378452		870.02	0.00206508		1400.01	0.0124116		1930.04	-0.00114378		2460.04	-0.00422075		2990.04	-0.00935137		3520.04	-0.0098738
340.2	0.05463354		870.22	0.00335162		1400.21	0.01297776		1930.24	-0.00215681		2460.24	-0.00336438		2990.24	-0.00941028		3520.24	-0.0088474
340.4	0.05494371		870.42	0.00305984		1400.41	0.01378757		1930.44	-0.00226899		2460.44	-0.00280472		2990.44	-0.00988074		3520.44	-0.00900962
340.6	0.0560826		870.62	0.00317642		1400.61	0.01447271		1930.64	-0.00274046		2460.64	-0.00275464		2990.64	-0.01017638		3520.64	-0.00818233
340.8	0.05628145		870.82	0.00303921		1400.81	0.01439989		1930.84	-0.00325813		2460.84	-0.00263254		2990.84	-0.00979179		3520.84	-0.00844605
341	0.0568431		871.02	0.00370902		1401.01	0.01397508		1931.04	-0.00291473		2461.04	-0.00307581		2991.04	-0.00995798		3521.04	-0.00909446
341.2	0.05623885		871.22	0.00431157		1401.21	0.01336808		1931.24	-0.00344356		2461.24	-0.003124		2991.24	-0.00965452		3521.24	-0.00924027
341.4	0.05588672		871.42	0.00380271		1401.41	0.0130761		1931.44	-0.003824		2461.44	-0.00322825		2991.44	-0.00906722		3521.44	-0.00879038
341.6	0.05539447		871.62	0.0040487		1401.61	0.01338628		1931.64	-0.00306492		2461.64	-0.00373874		2991.64	-0.00865144		3521.64	-0.00915502
341.8	0.05587799		871.82	0.00426937		1401.81	0.0138953		1931.84	-0.00265601		2461.84	-0.00363674		2991.84	-0.00798517		3521.84	-0.00974009
342	0.05553901		872.02	0.00454909		1402.01	0.01406466		1932.04	-0.00235188		2462.04	-0.00351982		2992.04	-0.00711128		3522.04	-0.01069604
342.2	0.05569876		872.22	0.00471214		1402.21	0.01397492		1932.24	-0.00147793		2462.24	-0.00369675		2992.24	-0.00738053		3522.24	-0.0116169
342.4	0.05595982		872.42	0.00529326		1402.41	0.01401362		1932.44	-0.00096552		2462.44	-0.00471478		2992.44	-0.00687673		3522.44	-0.01150154
342.6	0.05590816		872.62	0.00563488		1402.61	0.01431991		1932.64	-0.00023655		2462.64	-0.00486691		2992.64	-0.00783312		3522.64	-0.01199454
342.8	0.05619302		872.82	0.0055249		1402.81	0.0151885		1932.84	-0.00003956		2462.84	-0.00480754		2992.84	-0.00775405		3522.84	-0.01154125
343	0.05585426		873.02	0.00540161		1403.01	0.01605761		1933.04	-0.00003415		2463.04	-0.00432545		2993.04	-0.00814999		3523.04	-0.01161717
343.2	0.05590139		873.22	0.00576855		1403.21	0.01578729		1933.24	-0.00044116		2463.24	-0.0044386		2993.24	-0.00858144		3523.24	-0.01094149
343.4	0.05547463		873.42	0.00606729		1403.41	0.01557397		1933.44	-0.00108091		2463.44	-0.00459166		2993.44	-0.0086674		3523.44	-0.01120525
343.6	0.05456403		873.62	0.00668821		1403.61	0.01574148		1933.64	-0.00114247		2463.64	-0.0046084		2993.64	-0.00679787		3523.64	-0.01149352
343.8	0.05440214		873.82	0.00678402		1403.81	0.01509699		1933.84	-0.00168757		2463.84	-0.0036973		2993.84	-0.00595792		3523.84	-0.01151171
344	0.05406858		874.02	0.00624529		1404.01	0.01476144		1934.04	-0.00287268		2464.04	-0.00341953		2994.04	-0.00553649		3524.04	-0.01101537
344.2	0.05538039		874.22	0.00605063		1404.21	0.01450281		1934.24	-0.00351448		2464.24	-0.00277467		2994.24	-0.0056456		3524.24	-0.01104697
344.4	0.05597113		874.42	0.00551156		1404.41	0.01463215		1934.44	-0.00472692		2464.44	-0.00302151		2994.44	-0.00597314		3524.44	-0.01183572
344.6	0.05635024		874.62	0.00622826		1404.61	0.01382262		1934.64	-0.0050418		2464.64	-0.00342785		2994.64	-0.00606359		3524.64	-0.01113929
344.8	0.05661237		874.82	0.00663569		1404.81	0.01286056		1934.84	-0.00452913		2464.84	-0.00349981		2994.84	-0.00641507		3524.84	-0.01158441
345	0.05656993		875.02	0.00656493		1405.01	0.01258007		1935.04	-0.00406747		2465.04	-0.00331062		2995.04	-0.00665144		3525.04	-0.01170381
345.2	0.05701466		875.22	0.00548526		1405.21	0.01241175		1935.24	-0.00394289		2465.24	-0.00334061		2995.24	-0.00692902		3525.24	-0.01160447
345.4	0.05788015		875.42	0.00511812		1405.41	0.01279365		1935.44	-0.00391193		2465.44	-0.00351325		2995.44	-0.00703404		3525.44	-0.01160632
345.6	0.05794221		875.62	0.00532699		1405.61	0.01389071		1935.64	-0.00304735		2465.64	-0.0041094		2995.64	-0.00711097		3525.64	-0.01225997
345.8	0.05839293		875.82	0.00549928		1405.81	0.01445343		1935.84	-0.00291993		2465.84	-0.00339828		2995.84	-0.00625817		3525.84	-0.0116471
346	0.05813279		876.02	0.00578379		1406.01	0.01480448		1936.04	-0.00197013		2466.04	-0.00336831		2996.04	-0.00602		3526.04	-0.01255812
346.2	0.05833176		876.22	0.00611647		1406.21	0.01519518		1936.24	-0.00054073		2466.24	-0.0034797		2996.24	-0.00610095		3526.24	-0.0120717
346.4	0.05867355		876.42	0.00674654		1406.41	0.0153108		1936.44	-0.00054805		2466.44	-0.00320896		2996.44	-0.00633724		3526.44	-0.01124711
346.6	0.05836142		876.62	0.00689125		1406.61	0.01495079		1936.64	-0.00060107		2466.64	-0.00258745		2996.64	-0.00653395		3526.64	-0.01032729
346.8	0.05803245		876.82	0.00607986		1406.81	0.01478781		1936.84	-0.00087621		2466.84	-0.0036447		2996.84	-0.00623503		3526.84	-0.00972914
347	0.0570793		877.02	0.0065007		1407.01	0.01434562		1937.04	-0.00061141		2467.04	-0.00365207		2997.04	-0.00655015		3527.04	-0.00931748
347.2	0.05701335		877.22	0.00608883		1407.21	0.01313765		1937.24	-0.00052779		2467.24	-0.00433801		2997.24	-0.00624414		3527.24	-0.0090795
347.4	0.05566666		877.42	0.00597599		1407.41	0.01299715		1937.44	-0.00116815		2467.44	-0.00419721		2997.44	-0.00618708		3527.44	-0.00926552
347.6	0.05463398		877.62	0.00595104		1407.61	0.01309341		1937.64	-0.00168157		2467.64	-0.00427789		2997.64	-0.00632028		3527.64	-0.00953776
347.8	0.05549472		877.82	0.00566744		1407.81	0.01261171		1937.84	-0.0019242		2467.84	-0.00428628		2997.84	-0.00596681		3527.84	-0.00907086
348	0.05557951		878.02	0.00556147		1408.01	0.01253329		1938.04	-0.00229096		2468.04	-0.00543397		2998.04	-0.00682013		3528.04	-0.00982383
348.2	0.05591953		878.22	0.0052528		1408.21	0.011446		1938.24	-0.00249302		2468.24	-0.00527524		2998.24	-0.00686646		3528.24	-0.01021571
348.4	0.05570179		878.42	0.00550754		1408.41	0.01221624		1938.44	-0.00315024		2468.44	-0.0046679		2998.44	-0.00704863		3528.44	-0.01101532
348.6	0.05596937		878.62	0.00586206		1408.61	0.01180367		1938.64	-0.00338498		2468.64	-0.00525604		2998.64	-0.00715353		3528.64	-0.01037562
348.8	0.05639581		878.82	0.00507748		1408.81	0.01255554		1938.84	-0.00403967		2468.84	-0.0055733		2998.84	-0.00861256		3528.84	-0.01079498
349	0.05675614		879.02	0.00404878		1409.01	0.01318096		1939.04	-0.00443965		2469.04	-0.00544292		2999.04	-0.00888778		3529.04	-0.01164013
349.2	0.05740099		879.22	0.00281416		1409.21	0.01347491		1939.24	-0.00468455		2469.24	-0.00551581		2999.24	-0.00899267		3529.24	-0.01171478
349.4	0.05886384		879.42	0.00289014		1409.41	0.01391835		1939.44	-0.00569579		2469.44	-0.00546378		2999.44	-0.00816137		3529.44	-0.01164321
349.6	0.05838842		879.62	0.00286933		1409.61	0.01480351		1939.64	-0.00516351		2469.64	-0.00577756		2999.64	-0.0073168		3529.64	-0.01141072
349.8	0.05869058		879.82	0.00350528		1409.81	0.01494029		1939.84	-0.0043071		2469.84	-0.00505269		2999.84	-0.00656594		3529.84	-0.01137616
350	0.05869039		880.02	0.00349599		1410.01	0.01514363		1940.04	-0.00363366		2470.04	-0.00481475		3000.04	-0.00604521		3530.04	-0.01118721
350.2	0.05882768		880.22	0.00386404		1410.21	0.0145533		1940.24	-0.00399001		2470.24	-0.00455251		3000.24	-0.00499199		3530.24	-0.01082396
350.4	0.05868427		880.42	0.0045793		1410.41	0.01447693		1940.44	-0.00406944		2470.44	-0.00444172		3000.44	-0.00435191		3530.44	-0.01080033
350.6	0.05799344		880.62	0.00388501		1410.61	0.0141136		1940.64	-0.00404109		2470.64	-0.00451742		3000.64	-0.00328147		3530.64	-0.01132443
350.8	0.05730208		880.82	0.00352573		1410.81	0.01370731		1940.84	-0.00372009		2470.84	-0.00505037		3000.84	-0.00282281		3530.84	-0.01218835
351	0.05706054		881.02	0.00425717		1411.01	0.01400557		1941.04	-0.00346299		2471.04	-0.00479295		3001.04	-0.00365642		3531.04	-0.01287274
351.2	0.05663686		881.22	0.00396466		1411.21	0.01322598		1941.24	-0.00343003		2471.24	-0.00486065		3001.24	-0.00393016		3531.24	-0.01290906
351.4	0.05609484		881.42	0.00484903		1411.41	0.01298532		1941.44	-0.00366462		2471.44	-0.0046636		3001.44	-0.00441615		3531.44	-0.01393671
351.6	0.05609963		881.62	0.00565608		1411.61	0.01253892		1941.64	-0.00328676		2471.64	-0.00431517		3001.64	-0.00356425		3531.64	-0.01408735
351.8	0.05680785		881.82	0.0057729		1411.81	0.01161435		1941.84	-0.00226571		2471.84	-0.00398187		3001.84	-0.0030108		3531.84	-0.01494982
352	0.05563134		882.02	0.00552768		1412.01	0.01143096		1942.04	-0.00191409		2472.04	-0.00369097		3002.04	-0.00372407		3532.04	-0.01572525
352.2	0.05555304		882.22	0.00568017		1412.21	0.01110576		1942.24	-0.00209335		2472.24	-0.00254282		3002.24	-0.00456388		3532.24	-0.01595178
352.4	0.05550052		882.42	0.00669198		1412.41	0.01165863		1942.44	-0.00301613		2472.44	-0.00156456		3002.44	-0.00456474		3532.44	-0.01517514
352.6	0.05515326		882.62	0.00634585		1412.61	0.01105168		1942.64	-0.00354591		2472.64	-0.0019732		3002.64	-0.0051404		3532.64	-0.01432782
352.8	0.05537884		882.82	0.00601045		1412.81	0.01126508		1942.84	-0.00385296		2472.84	-0.00170322		3002.84	-0.00639327		3532.84	-0.01386399
353	0.05575646		883.02	0.00560494		1413.01	0.01059937		1943.04	-0.00319944		2473.04	-0.00065601		3003.04	-0.00656187		3533.04	-0.01322206
353.2	0.05592096		883.22	0.00473088		1413.21	0.01024416		1943.24	-0.00313119		2473.24	-0.00038373		3003.24	-0.00646176		3533.24	-0.01169289
353.4	0.05640195		883.42	0.00491748		1413.41	0.01080706		1943.44	-0.00365138		2473.44	-0.00084837		3003.44	-0.00586473		3533.44	-0.01059909
353.6	0.05697242		883.62	0.0053465		1413.61	0.01109347		1943.64	-0.00332865		2473.64	-0.001092		3003.64	-0.00666729		3533.64	-0.00943151
353.8	0.05804325		883.82	0.00589072		1413.81	0.01099083		1943.84	-0.00298709		2473.84	-0.00148241		3003.84	-0.00630012		3533.84	-0.00799107
354	0.05833118		884.02	0.00561767		1414.01	0.0113151		1944.04	-0.00328609		2474.04	-0.00201247		3004.04	-0.00504294		3534.04	-0.00757789
354.2	0.05842462		884.22	0.00583624		1414.21	0.0121011		1944.24	-0.00311361		2474.24	-0.00244841		3004.24	-0.00447373		3534.24	-0.00768502
354.4	0.05882091		884.42	0.00553918		1414.41	0.01355012		1944.44	-0.00237758		2474.44	-0.00308419		3004.44	-0.00508517		3534.44	-0.00810046
354.6	0.05923197		884.62	0.00489942		1414.61	0.01394601		1944.64	-0.00302083		2474.64	-0.00260996		3004.64	-0.00453531		3534.64	-0.00829506
354.8	0.05969597		884.82	0.00542044		1414.81	0.01399305		1944.84	-0.00331362		2474.84	-0.00318475		3004.84	-0.00367213		3534.84	-0.00838072
355	0.06054165		885.02	0.00544703		1415.01	0.01413527		1945.04	-0.00280042		2475.04	-0.00369514		3005.04	-0.00375944		3535.04	-0.00811953
355.2	0.05987537		885.22	0.00543882		1415.21	0.01404833		1945.24	-0.00236607		2475.24	-0.00397793		3005.24	-0.00287131		3535.24	-0.00816011
355.4	0.06051555		885.42	0.00641143		1415.41	0.01425241		1945.44	-0.00248731		2475.44	-0.00375747		3005.44	-0.00242379		3535.44	-0.00879336
355.6	0.05990107		885.62	0.00662279		1415.61	0.01383489		1945.64	-0.00267075		2475.64	-0.00324188		3005.64	-0.00205695		3535.64	-0.00872038
355.8	0.06050076		885.82	0.00603008		1415.81	0.01375121		1945.84	-0.00232549		2475.84	-0.00357074		3005.84	-0.00251161		3535.84	-0.0097197
356	0.06000122		886.02	0.0061402		1416.01	0.01442934		1946.04	-0.00201728		2476.04	-0.00378772		3006.04	-0.00247928		3536.04	-0.01037411
356.2	0.05994867		886.22	0.00745467		1416.21	0.01392181		1946.24	-0.00293272		2476.24	-0.00381629		3006.24	-0.00256385		3536.24	-0.01121077
356.4	0.059034		886.42	0.00792139		1416.41	0.01337258		1946.44	-0.0032184		2476.44	-0.00430214		3006.44	-0.00196808		3536.44	-0.01121598
356.6	0.05830243		886.62	0.00734377		1416.61	0.0126224		1946.64	-0.00280425		2476.64	-0.00467954		3006.64	-0.00243259		3536.64	-0.01233692
356.8	0.05781043		886.82	0.00776454		1416.81	0.01262788		1946.84	-0.00308653		2476.84	-0.00495992		3006.84	-0.00333585		3536.84	-0.01259519
357	0.05680694		887.02	0.00742811		1417.01	0.0122301		1947.04	-0.00312226		2477.04	-0.00451565		3007.04	-0.0045785		3537.04	-0.01346121
357.2	0.05700505		887.22	0.00733997		1417.21	0.01201191		1947.24	-0.00325717		2477.24	-0.00469205		3007.24	-0.00462561		3537.24	-0.01316041
357.4	0.05768409		887.42	0.00801628		1417.41	0.01182776		1947.44	-0.0035087		2477.44	-0.0050353		3007.44	-0.00511706		3537.44	-0.01288584
357.6	0.0592095		887.62	0.00745826		1417.61	0.01104484		1947.64	-0.00366936		2477.64	-0.0055924		3007.64	-0.00584746		3537.64	-0.01258984
357.8	0.05843778		887.82	0.00688787		1417.81	0.01079884		1947.84	-0.00291891		2477.84	-0.00579244		3007.84	-0.00521842		3537.84	-0.01159704
358	0.05770107		888.02	0.00645076		1418.01	0.01107091		1948.04	-0.00241331		2478.04	-0.00626664		3008.04	-0.00537963		3538.04	-0.01249618
358.2	0.05772506		888.22	0.00543067		1418.21	0.0115241		1948.24	-0.00233466		2478.24	-0.00578472		3008.24	-0.00596007		3538.24	-0.01188736
358.4	0.05795375		888.42	0.00437177		1418.41	0.01237747		1948.44	-0.00247466		2478.44	-0.00636854		3008.44	-0.00580951		3538.44	-0.0125767
358.6	0.05821337		888.62	0.00480748		1418.61	0.01218335		1948.64	-0.00226519		2478.64	-0.00559663		3008.64	-0.00472721		3538.64	-0.01242493
358.8	0.05790011		888.82	0.00409912		1418.81	0.01228368		1948.84	-0.00136379		2478.84	-0.00541625		3008.84	-0.00428682		3538.84	-0.01186394
359	0.05792552		889.02	0.0037642		1419.01	0.01263959		1949.04	-0.00040946		2479.04	-0.00461951		3009.04	-0.00456922		3539.04	-0.01162667
359.2	0.05782893		889.22	0.00374515		1419.21	0.01282719		1949.24	0.00045138		2479.24	-0.00438964		3009.24	-0.00399274		3539.24	-0.01181617
359.4	0.05826436		889.42	0.00410093		1419.41	0.01302217		1949.44	0.00069183		2479.44	-0.00447969		3009.44	-0.00454162		3539.44	-0.01145013
359.6	0.05734452		889.62	0.00419377		1419.61	0.01270179		1949.64	0.00063315		2479.64	-0.00438573		3009.64	-0.0046101		3539.64	-0.01148643
359.8	0.05837503		889.82	0.00335983		1419.81	0.01318365		1949.84	0.00114124		2479.84	-0.00477905		3009.84	-0.00446965		3539.84	-0.01192144
360	0.05770314		890.02	0.00304886		1420.01	0.01419436		1950.04	0.00112911		2480.04	-0.00506864		3010.04	-0.00439065		3540.04	-0.01236395
360.2	0.05783549		890.22	0.0044444		1420.21	0.01407345		1950.24	0.00012321		2480.24	-0.00440427		3010.24	-0.00442354		3540.24	-0.01247946
360.4	0.0578401		890.42	0.00410676		1420.41	0.01445033		1950.44	0.00023535		2480.44	-0.00413891		3010.44	-0.00408849		3540.44	-0.01245618
360.6	0.05821407		890.62	0.0034989		1420.61	0.01370937		1950.64	-0.00029119		2480.64	-0.0034743		3010.64	-0.00465652		3540.64	-0.01331614
360.8	0.0586707		890.82	0.00417018		1420.81	0.01388398		1950.84	-0.00029954		2480.84	-0.00329579		3010.84	-0.00416462		3540.84	-0.01321455
361	0.05953929		891.02	0.00381066		1421.01	0.01340235		1951.04	-0.00043956		2481.04	-0.00276624		3011.04	-0.00381317		3541.04	-0.01398479
361.2	0.06102235		891.22	0.00457886		1421.21	0.01293573		1951.24	-0.00036228		2481.24	-0.00286879		3011.24	-0.00317984		3541.24	-0.01319475
361.4	0.06125347		891.42	0.00424995		1421.41	0.01262245		1951.44	-0.00049291		2481.44	-0.0026274		3011.44	-0.00395878		3541.44	-0.01276937
361.6	0.06071417		891.62	0.0044102		1421.61	0.01194709		1951.64	-0.0011866		2481.64	-0.00290905		3011.64	-0.00419699		3541.64	-0.01224847
361.8	0.05940966		891.82	0.00452825		1421.81	0.01140541		1951.84	-0.00162538		2481.84	-0.00283442		3011.84	-0.00407236		3541.84	-0.01151219
362	0.05880334		892.02	0.00402443		1422.01	0.01204029		1952.04	-0.00236551		2482.04	-0.00359336		3012.04	-0.00431804		3542.04	-0.01206305
362.2	0.05915168		892.22	0.00442362		1422.21	0.0123331		1952.24	-0.00274211		2482.24	-0.00324902		3012.24	-0.00410533		3542.24	-0.01190253
362.4	0.05901294		892.42	0.00552868		1422.41	0.01319267		1952.44	-0.00283055		2482.44	-0.00454178		3012.44	-0.00429937		3542.44	-0.01166929
362.6	0.05945137		892.62	0.0065195		1422.61	0.013071		1952.64	-0.0026569		2482.64	-0.00386289		3012.64	-0.00421695		3542.64	-0.01102989
362.8	0.05879316		892.82	0.0051057		1422.81	0.01290432		1952.84	-0.00226801		2482.84	-0.00445776		3012.84	-0.00397538		3542.84	-0.01056088
363	0.05888533		893.02	0.0061643		1423.01	0.012982		1953.04	-0.00225102		2483.04	-0.00448908		3013.04	-0.00380448		3543.04	-0.01105282
363.2	0.05851403		893.22	0.0062254		1423.21	0.01317346		1953.24	-0.00166527		2483.24	-0.00578608		3013.24	-0.00317788		3543.24	-0.0110646
363.4	0.05755851		893.42	0.0064478		1423.41	0.01417259		1953.44	-0.00191158		2483.44	-0.00662273		3013.44	-0.00350806		3543.44	-0.01072574
363.6	0.05750529		893.62	0.00626587		1423.61	0.01482902		1953.64	-0.00140087		2483.64	-0.007188		3013.64	-0.00349439		3543.64	-0.01091535
363.8	0.05773073		893.82	0.00575819		1423.81	0.0157641		1953.84	-0.0016715		2483.84	-0.00697206		3013.84	-0.00363229		3543.84	-0.01133701
364	0.05690164		894.02	0.00694611		1424.01	0.01625233		1954.04	-0.00171084		2484.04	-0.00720162		3014.04	-0.00330292		3544.04	-0.011382
364.2	0.05747919		894.22	0.00733352		1424.21	0.0153497		1954.24	-0.0023582		2484.24	-0.00670857		3014.24	-0.00332759		3544.24	-0.01168775
364.4	0.05780367		894.42	0.00592801		1424.41	0.0151497		1954.44	-0.002437		2484.44	-0.0072504		3014.44	-0.0032018		3544.44	-0.01217973
364.6	0.05755708		894.62	0.0057383		1424.61	0.01462039		1954.64	-0.00251427		2484.64	-0.00650997		3014.64	-0.00314911		3544.64	-0.01241695
364.8	0.05753325		894.82	0.0066025		1424.81	0.01483852		1954.84	-0.00153044		2484.84	-0.00627586		3014.84	-0.00249177		3544.84	-0.01317215
365	0.0579327		895.02	0.00659563		1425.01	0.01450986		1955.04	-0.00171923		2485.04	-0.00674163		3015.04	-0.00290084		3545.04	-0.01395765
365.2	0.05857979		895.22	0.00717478		1425.21	0.01472565		1955.24	-0.00118028		2485.24	-0.00621746		3015.24	-0.00402591		3545.24	-0.01324573
365.4	0.0585109		895.42	0.00703806		1425.41	0.01434339		1955.44	-0.00184022		2485.44	-0.00462314		3015.44	-0.00546154		3545.44	-0.01367502
365.6	0.05841733		895.62	0.00754686		1425.61	0.01377004		1955.64	-0.00187157		2485.64	-0.00458156		3015.64	-0.00536194		3545.64	-0.01383004
365.8	0.05857887		895.82	0.00720232		1425.81	0.01420595		1955.84	-0.00153995		2485.84	-0.00405777		3015.84	-0.00512786		3545.84	-0.01431858
366	0.05872498		896.02	0.00684833		1426.01	0.01420907		1956.04	-0.00135437		2486.04	-0.00347135		3016.04	-0.00553149		3546.04	-0.01430705
366.2	0.05941274		896.22	0.00757999		1426.21	0.0143858		1956.24	-0.00069849		2486.24	-0.00236321		3016.24	-0.00502786		3546.24	-0.01436284
366.4	0.05995878		896.42	0.00736207		1426.41	0.01446483		1956.44	0.00001258		2486.44	-0.00321705		3016.44	-0.00562044		3546.44	-0.01423942
366.6	0.06080363		896.62	0.00741901		1426.61	0.01485781		1956.64	0.00008686		2486.64	-0.00253617		3016.64	-0.00453645		3546.64	-0.01463718
366.8	0.06121249		896.82	0.00658588		1426.81	0.01476115		1956.84	0.00028337		2486.84	-0.00326524		3016.84	-0.00391585		3546.84	-0.0150659
367	0.06113999		897.02	0.00746584		1427.01	0.01449154		1957.04	0.00005577		2487.04	-0.00350285		3017.04	-0.00393973		3547.04	-0.01537731
367.2	0.06141089		897.22	0.00655606		1427.21	0.01485456		1957.24	-0.00014125		2487.24	-0.00401544		3017.24	-0.00347758		3547.24	-0.01460663
367.4	0.06234061		897.42	0.00710823		1427.41	0.01503804		1957.44	0.00021366		2487.44	-0.00360164		3017.44	-0.00335283		3547.44	-0.01488178
367.6	0.06255345		897.62	0.00729948		1427.61	0.01555771		1957.64	0.00049919		2487.64	-0.00357859		3017.64	-0.00388035		3547.64	-0.01546483
367.8	0.06245992		897.82	0.00725719		1427.81	0.01518163		1957.84	-0.00078993		2487.84	-0.00339961		3017.84	-0.00349639		3547.84	-0.01511788
368	0.06258472		898.02	0.00770089		1428.01	0.01411959		1958.04	-0.00097853		2488.04	-0.00367937		3018.04	-0.00322579		3548.04	-0.01457251
368.2	0.0631339		898.22	0.00622715		1428.21	0.01332306		1958.24	-0.00189051		2488.24	-0.00402521		3018.24	-0.00314512		3548.24	-0.01414119
368.4	0.0619151		898.42	0.00523183		1428.41	0.01411607		1958.44	-0.00297625		2488.44	-0.00452378		3018.44	-0.00329865		3548.44	-0.01387257
368.6	0.06080852		898.62	0.00579342		1428.61	0.01437301		1958.64	-0.00250264		2488.64	-0.00428373		3018.64	-0.0035637		3548.64	-0.01329114
368.8	0.06103508		898.82	0.00605843		1428.81	0.01384671		1958.84	-0.00255699		2488.84	-0.00477827		3018.84	-0.00453589		3548.84	-0.01346073
369	0.06062625		899.02	0.00570306		1429.01	0.0136476		1959.04	-0.00369617		2489.04	-0.00527443		3019.04	-0.00474941		3549.04	-0.01217943
369.2	0.06048137		899.22	0.00568729		1429.21	0.013438		1959.24	-0.00435717		2489.24	-0.00391229		3019.24	-0.00608871		3549.24	-0.01101679
369.4	0.05956906		899.42	0.005596		1429.41	0.01239631		1959.44	-0.00531028		2489.44	-0.00405759		3019.44	-0.00717942		3549.44	-0.01117107
369.6	0.05838391		899.62	0.00548791		1429.61	0.01212116		1959.64	-0.00486698		2489.64	-0.00435082		3019.64	-0.00638021		3549.64	-0.01103288
369.8	0.05755737		899.82	0.00521374		1429.81	0.01253149		1959.84	-0.00487132		2489.84	-0.00385402		3019.84	-0.00693355		3549.84	-0.01100801
370	0.05679819		900.02	0.0047243		1430.01	0.01240553		1960.04	-0.00477563		2490.04	-0.00351533		3020.04	-0.00739645		3550.04	-0.01044841
370.2	0.05739025		900.22	0.00536033		1430.21	0.0126529		1960.24	-0.00396704		2490.24	-0.0034845		3020.24	-0.00648013		3550.24	-0.01143998
370.4	0.05786666		900.42	0.0052986		1430.41	0.01197477		1960.44	-0.00418661		2490.44	-0.00412454		3020.44	-0.00715679		3550.44	-0.01125592
370.6	0.05795661		900.62	0.0066574		1430.61	0.012773		1960.64	-0.00431304		2490.64	-0.00414627		3020.64	-0.00638774		3550.64	-0.01107302
370.8	0.05860145		900.82	0.0074447		1430.81	0.01238768		1960.84	-0.0047152		2490.84	-0.00399557		3020.84	-0.00624832		3550.84	-0.01068926
371	0.05947112		901.02	0.00814782		1431.01	0.01213854		1961.04	-0.00497055		2491.04	-0.00333549		3021.04	-0.00595163		3551.04	-0.01096944
371.2	0.06100231		901.22	0.00870782		1431.21	0.01286014		1961.24	-0.00479372		2491.24	-0.00273814		3021.24	-0.005051		3551.24	-0.01069931
371.4	0.06180132		901.42	0.0092316		1431.41	0.01271785		1961.44	-0.00416702		2491.44	-0.0017861		3021.44	-0.00446863		3551.44	-0.01152481
371.6	0.06155099		901.62	0.00929345		1431.61	0.01369301		1961.64	-0.00463687		2491.64	-0.00130758		3021.64	-0.00383881		3551.64	-0.01161883
371.8	0.06302513		901.82	0.00903788		1431.81	0.01317455		1961.84	-0.00474816		2491.84	-0.00124494		3021.84	-0.00291614		3551.84	-0.01096287
372	0.06333693		902.02	0.00941389		1432.01	0.01351704		1962.04	-0.00489022		2492.04	-0.00158995		3022.04	-0.00255628		3552.04	-0.01116566
372.2	0.06272181		902.22	0.00852361		1432.21	0.01411464		1962.24	-0.00475176		2492.24	-0.0028936		3022.24	-0.00214704		3552.24	-0.01054631
372.4	0.06240875		902.42	0.00814744		1432.41	0.01501544		1962.44	-0.00456512		2492.44	-0.0032949		3022.44	-0.00263357		3552.44	-0.01011565
372.6	0.06211145		902.62	0.00783017		1432.61	0.0150038		1962.64	-0.00336106		2492.64	-0.00360311		3022.64	-0.00342972		3552.64	-0.0099327
372.8	0.06253625		902.82	0.00709367		1432.81	0.01517354		1962.84	-0.00324357		2492.84	-0.0036063		3022.84	-0.00355815		3552.84	-0.00950421
373	0.06198064		903.02	0.00622995		1433.01	0.01504885		1963.04	-0.00323623		2493.04	-0.00335419		3023.04	-0.00425514		3553.04	-0.00960893
373.2	0.06178		903.22	0.00628167		1433.21	0.0137276		1963.24	-0.00233177		2493.24	-0.00308069		3023.24	-0.00443942		3553.24	-0.0097845
373.4	0.06066851		903.42	0.00593168		1433.41	0.01288099		1963.44	-0.00225633		2493.44	-0.00409006		3023.44	-0.00447069		3553.44	-0.00990009
373.6	0.0599256		903.62	0.00508965		1433.61	0.01318197		1963.64	-0.00166427		2493.64	-0.00363137		3023.64	-0.00462138		3553.64	-0.01048679
373.8	0.05923845		903.82	0.00486589		1433.81	0.01361949		1963.84	-0.00179158		2493.84	-0.0042048		3023.84	-0.00618399		3553.84	-0.01125079
374	0.05901067		904.02	0.00437811		1434.01	0.01264294		1964.04	-0.00114728		2494.04	-0.00410985		3024.04	-0.00651923		3554.04	-0.01212665
374.2	0.0592494		904.22	0.0045133		1434.21	0.01201543		1964.24	-0.00179835		2494.24	-0.00506618		3024.24	-0.00627614		3554.24	-0.0127492
374.4	0.05880765		904.42	0.00448423		1434.41	0.01266029		1964.44	-0.00192999		2494.44	-0.00521993		3024.44	-0.00735968		3554.44	-0.01230033
374.6	0.058681		904.62	0.00591698		1434.61	0.01310431		1964.64	-0.00172171		2494.64	-0.00523063		3024.64	-0.00705213		3554.64	-0.01294347
374.8	0.05967411		904.82	0.00618236		1434.81	0.01258707		1964.84	-0.0023505		2494.84	-0.0047902		3024.84	-0.00696521		3554.84	-0.0140224
375	0.05968132		905.02	0.00489945		1435.01	0.0117435		1965.04	-0.00225168		2495.04	-0.00515787		3025.04	-0.00696762		3555.04	-0.01474405
375.2	0.05924089		905.22	0.00560026		1435.21	0.01145429		1965.24	-0.00191944		2495.24	-0.00532171		3025.24	-0.00672034		3555.24	-0.01450687
375.4	0.05912841		905.42	0.00544018		1435.41	0.01087931		1965.44	-0.00215794		2495.44	-0.00465105		3025.44	-0.00632272		3555.44	-0.01459309
375.6	0.0597017		905.62	0.00630936		1435.61	0.01064068		1965.64	-0.00248672		2495.64	-0.00507399		3025.64	-0.00544986		3555.64	-0.01422032
375.8	0.06032352		905.82	0.00636539		1435.81	0.01026624		1965.84	-0.00273387		2495.84	-0.00553504		3025.84	-0.00615789		3555.84	-0.01429217
376	0.06084927		906.02	0.00662291		1436.01	0.01092094		1966.04	-0.00293657		2496.04	-0.00606881		3026.04	-0.00648643		3556.04	-0.0141179
376.2	0.060367		906.22	0.00709975		1436.21	0.0111988		1966.24	-0.00217456		2496.24	-0.00614753		3026.24	-0.00661624		3556.24	-0.01335802
376.4	0.06135544		906.42	0.00630693		1436.41	0.01178852		1966.44	-0.0014497		2496.44	-0.00568599		3026.44	-0.00655822		3556.44	-0.01265378
376.6	0.06111174		906.62	0.00627618		1436.61	0.01241944		1966.64	-0.00087499		2496.64	-0.00546137		3026.64	-0.00693636		3556.64	-0.01238982
376.8	0.06183933		906.82	0.00658364		1436.81	0.01276734		1966.84	-0.00048029		2496.84	-0.00483896		3026.84	-0.00603546		3556.84	-0.01280036
377	0.06283235		907.02	0.00654978		1437.01	0.01222516		1967.04	-0.00085856		2497.04	-0.00383032		3027.04	-0.00604242		3557.04	-0.01251349
377.2	0.06347634		907.22	0.00661701		1437.21	0.01178944		1967.24	-0.00036653		2497.24	-0.00375538		3027.24	-0.00498288		3557.24	-0.01167393
377.4	0.06322474		907.42	0.00663283		1437.41	0.01234033		1967.44	-0.00043572		2497.44	-0.00351498		3027.44	-0.00483361		3557.44	-0.01172593
377.6	0.06340008		907.62	0.00630262		1437.61	0.01299269		1967.64	-0.00021243		2497.64	-0.00328471		3027.64	-0.00454652		3557.64	-0.01210633
377.8	0.06337162		907.82	0.00652959		1437.81	0.01301648		1967.84	-0.00076556		2497.84	-0.00407522		3027.84	-0.00419554		3557.84	-0.01257128
378	0.06360798		908.02	0.00619819		1438.01	0.01292845		1968.04	-0.00066251		2498.04	-0.00382934		3028.04	-0.0034925		3558.04	-0.01249963
378.2	0.06357752		908.22	0.00639241		1438.21	0.01369707		1968.24	-0.00139098		2498.24	-0.00425343		3028.24	-0.00285162		3558.24	-0.01211111
378.4	0.06343917		908.42	0.00647259		1438.41	0.01406641		1968.44	-0.00081913		2498.44	-0.00335021		3028.44	-0.00245658		3558.44	-0.01224816
378.6	0.06317295		908.62	0.00633066		1438.61	0.01362016		1968.64	-0.00099922		2498.64	-0.00278866		3028.64	-0.001767		3558.64	-0.01266871
378.8	0.06293163		908.82	0.00583309		1438.81	0.0132892		1968.84	-0.00086947		2498.84	-0.00232544		3028.84	-0.00159385		3558.84	-0.01295135
379	0.06212565		909.02	0.00552022		1439.01	0.01271349		1969.04	-0.00078544		2499.04	-0.001644		3029.04	-0.00152091		3559.04	-0.0123384
379.2	0.06192452		909.22	0.0066705		1439.21	0.01269151		1969.24	-0.00080026		2499.24	-0.0005104		3029.24	-0.00088856		3559.24	-0.01203822
379.4	0.06185281		909.42	0.00654903		1439.41	0.0122816		1969.44	-0.00117877		2499.44	0.00034967		3029.44	-0.00042221		3559.44	-0.0118346
379.6	0.06165258		909.62	0.00682801		1439.61	0.01216197		1969.64	-0.00126102		2499.64	0.00095555		3029.64	-0.00043033		3559.64	-0.01159005
379.8	0.06101822		909.82	0.00673139		1439.81	0.01249503		1969.84	-0.00127383		2499.84	0.00217596		3029.84	-0.00125672		3559.84	-0.01178752
379.99	0.06101822		910.02	0.00673139		1440.01	0.01249503		1970.04	-0.00127383		2500.04	0.00217596		3030.04	-0.00125672		3560.04	-0.01178752
380.19	0.06178629		910.22	0.00682408		1440.21	0.01335865		1970.24	-0.00122867		2500.24	0.00149854		3030.24	-0.0004336		3560.24	-0.01255416
380.39	0.06260001		910.42	0.00696029		1440.41	0.01376716		1970.44	-0.00072086		2500.44	0.00089386		3030.44	0.00054702		3560.44	-0.01288265
380.59	0.06344242		910.62	0.00664714		1440.61	0.01496931		1970.64	-0.00001417		2500.64	0.00055339		3030.64	0.00103161		3560.64	-0.01260279
380.79	0.06476938		910.82	0.0073645		1440.81	0.01588644		1970.84	-0.00000743		2500.84	0.00036824		3030.84	0.00126891		3560.84	-0.01236208
380.99	0.06544467		911.02	0.00748709		1441.01	0.01662989		1971.04	-0.00005395		2501.04	0.00024239		3031.04	0.00194519		3561.04	-0.0120657
381.19	0.06621646		911.22	0.00672884		1441.21	0.01686018		1971.24	0.00002957		2501.24	-0.00084646		3031.24	0.00256779		3561.24	-0.01252062
381.39	0.06674922		911.42	0.006646		1441.41	0.01671841		1971.44	0.00017556		2501.44	-0.00061981		3031.44	0.00248868		3561.44	-0.01273929
381.59	0.0665468		911.62	0.00669371		1441.61	0.01555621		1971.64	0.00004116		2501.64	-0.00091644		3031.64	0.00186533		3561.64	-0.01282095
381.79	0.06655656		911.82	0.00670657		1441.81	0.01538752		1971.84	0.00049314		2501.84	-0.00057521		3031.84	0.00203458		3561.84	-0.0126226
381.99	0.06651143		912.02	0.00630217		1442.01	0.01513311		1972.04	0.00040185		2502.04	-0.00056599		3032.04	0.0014628		3562.04	-0.01256416
382.19	0.06593192		912.22	0.00595826		1442.21	0.01474619		1972.24	0.00048625		2502.24	0.00034417		3032.24	0.00053813		3562.24	-0.01210057
382.39	0.06618067		912.42	0.00543813		1442.41	0.0137034		1972.44	0.00095341		2502.44	0.00078537		3032.44	0.00019447		3562.44	-0.01136972
382.59	0.06621481		912.62	0.00595777		1442.61	0.0132133		1972.64	0.00032417		2502.64	0.0007687		3032.64	-0.00102405		3562.64	-0.01144603
382.79	0.06587044		912.82	0.0071939		1442.81	0.01282066		1972.84	0.00097779		2502.84	0.00060612		3032.84	-0.00170156		3562.84	-0.01109866
382.99	0.0649042		913.02	0.0068494		1443.01	0.01235862		1973.04	0.00098915		2503.04	-0.00047903		3033.04	-0.0014564		3563.04	-0.01049265
383.19	0.06365991		913.22	0.00755318		1443.21	0.01202737		1973.24	0.00124421		2503.24	-0.00020521		3033.24	-0.00161698		3563.24	-0.01081763
383.39	0.06336284		913.42	0.00719988		1443.41	0.0117738		1973.44	0.00162528		2503.44	-0.00039101		3033.44	-0.00113354		3563.44	-0.01069467
383.59	0.06341844		913.62	0.0077186		1443.61	0.01221457		1973.64	0.00103067		2503.64	-0.00108161		3033.64	-0.00155337		3563.64	-0.01029288
383.79	0.06326513		913.82	0.00756276		1443.81	0.01238815		1973.84	0.00026436		2503.84	-0.00098119		3033.84	-0.0020808		3563.84	-0.01074255
383.99	0.06338682		914.02	0.00751478		1444.01	0.01208198		1974.04	-0.00019812		2504.04	-0.00056382		3034.04	-0.00232388		3564.04	-0.01099811
384.19	0.06186747		914.22	0.00734023		1444.21	0.0120313		1974.24	0.00008514		2504.24	-0.00075903		3034.24	-0.00172854		3564.24	-0.01177347
384.39	0.06124829		914.42	0.00751387		1444.41	0.01238079		1974.44	0.00030727		2504.44	-0.00052581		3034.44	-0.00170278		3564.44	-0.01106795
384.59	0.06131159		914.62	0.00819123		1444.61	0.01342706		1974.64	0.00040226		2504.64	-0.00030357		3034.64	-0.00167282		3564.64	-0.01084768
384.79	0.06155869		914.82	0.00828673		1444.81	0.01306819		1974.84	-0.00030482		2504.84	-0.00026873		3034.84	-0.00147005		3564.84	-0.01177436
384.99	0.06125373		915.02	0.00755829		1445.01	0.01286382		1975.04	-0.00029922		2505.04	-0.00018721		3035.04	-0.00100587		3565.04	-0.0121826
385.19	0.0616351		915.22	0.00706527		1445.21	0.01224797		1975.24	-0.00074907		2505.24	-0.00095684		3035.24	0.00002673		3565.24	-0.01302228
385.39	0.0617399		915.42	0.00734284		1445.41	0.01181788		1975.44	-0.00090074		2505.44	0.00023244		3035.44	-0.00047038		3565.44	-0.0137201
385.59	0.06155122		915.62	0.00716646		1445.61	0.01089161		1975.64	-0.00021444		2505.64	-0.00058923		3035.64	-0.00027989		3565.64	-0.01367606
385.79	0.06205164		915.82	0.00725138		1445.81	0.01160581		1975.84	0.00028459		2505.84	-0.00057727		3035.84	0.00046315		3565.84	-0.01411177
385.99	0.0622078		916.02	0.00699117		1446.01	0.01189834		1976.04	-0.00015915		2506.04	-0.00025411		3036.04	0.00014932		3566.04	-0.01381993
386.19	0.06216256		916.22	0.00723534		1446.21	0.01242004		1976.24	0.00057655		2506.24	0.00074687		3036.24	0.0003284		3566.24	-0.0137098
386.39	0.06135334		916.42	0.00760848		1446.41	0.0117977		1976.44	0.00034024		2506.44	0.00112673		3036.44	-0.0008694		3566.44	-0.01333056
386.59	0.06075009		916.62	0.00806629		1446.61	0.01136159		1976.64	0.00015708		2506.64	0.0009655		3036.64	-0.00122448		3566.64	-0.01265495
386.79	0.05995321		916.82	0.00802122		1446.81	0.01100189		1976.84	0.00095354		2506.84	0.00024388		3036.84	-0.00065432		3566.84	-0.01204032
386.99	0.05930563		917.02	0.00777952		1447.01	0.01185527		1977.04	0.00024594		2507.04	-0.00019374		3037.04	-0.00115863		3567.04	-0.01119981
387.19	0.05870838		917.22	0.007039		1447.21	0.01199297		1977.24	-0.00029569		2507.24	0.00054916		3037.24	-0.00143527		3567.24	-0.01148609
387.39	0.05974727		917.42	0.00620531		1447.41	0.01165524		1977.44	-0.00081043		2507.44	0.0001869		3037.44	-0.00091856		3567.44	-0.01104434
387.59	0.06028178		917.62	0.00608122		1447.61	0.01101947		1977.64	-0.00177289		2507.64	0.00001624		3037.64	-0.00031961		3567.64	-0.01086706
387.79	0.05989223		917.82	0.00685023		1447.81	0.01048749		1977.84	-0.00218114		2507.84	-0.00022474		3037.84	-0.0005103		3567.84	-0.01117871
387.99	0.05977973		918.02	0.00733664		1448.01	0.01027576		1978.04	-0.00189641		2508.04	-0.00097978		3038.04	-0.00017103		3568.04	-0.01179654
388.19	0.0588111		918.22	0.00717298		1448.21	0.01108844		1978.24	-0.0021674		2508.24	-0.00117078		3038.24	-0.00020112		3568.24	-0.0120571
388.39	0.05951252		918.42	0.00784034		1448.41	0.01147631		1978.44	-0.00311842		2508.44	-0.00133452		3038.44	-0.00042802		3568.44	-0.01214343
388.59	0.05995693		918.62	0.00821297		1448.61	0.01159896		1978.64	-0.00322541		2508.64	-0.00175058		3038.64	-0.00068264		3568.64	-0.01249614
388.79	0.0595262		918.82	0.00712776		1448.81	0.01146254		1978.84	-0.00376602		2508.84	-0.001735		3038.84	-0.00134322		3568.84	-0.01328435
388.99	0.059949		919.02	0.00719754		1449.01	0.01124664		1979.04	-0.00441751		2509.04	-0.00194126		3039.04	-0.00137756		3569.04	-0.01355606
389.19	0.06024998		919.22	0.00659536		1449.21	0.01144859		1979.24	-0.00460776		2509.24	-0.00268771		3039.24	-0.00108326		3569.24	-0.01394432
389.39	0.06070774		919.42	0.00665448		1449.41	0.01177188		1979.44	-0.00388312		2509.44	-0.00320079		3039.44	-0.00143083		3569.44	-0.0134033
389.59	0.06091968		919.62	0.00668156		1449.61	0.01185462		1979.64	-0.00311986		2509.64	-0.00391227		3039.64	-0.00129724		3569.64	-0.01361867
389.79	0.06118737		919.82	0.00661871		1449.81	0.01213099		1979.84	-0.00235759		2509.84	-0.00421382		3039.84	-0.00096214		3569.84	-0.01371166
389.99	0.06127644		920.02	0.00666641		1450.01	0.0127936		1980.04	-0.00213752		2510.04	-0.00352998		3040.04	-0.0010072		3570.04	-0.01332784
390.19	0.0614886		920.22	0.0067973		1450.21	0.01295274		1980.24	-0.00121805		2510.24	-0.00369362		3040.24	-0.00105088		3570.24	-0.013487
390.39	0.06115369		920.42	0.00659824		1450.41	0.01308437		1980.44	-0.0007865		2510.44	-0.0043801		3040.44	-0.00160246		3570.44	-0.01302394
390.59	0.06143147		920.62	0.00613023		1450.61	0.01283878		1980.64	0.00027558		2510.64	-0.00516697		3040.64	-0.00113561		3570.64	-0.01322217
390.79	0.06122028		920.82	0.00602149		1450.81	0.01305729		1980.84	-0.0009379		2510.84	-0.00528059		3040.84	-0.00059303		3570.84	-0.01386313
390.99	0.06088189		921.02	0.00589141		1451.01	0.01326595		1981.04	-0.00100449		2511.04	-0.00498767		3041.04	-0.00121891		3571.04	-0.01438609
391.19	0.06063443		921.22	0.00553693		1451.21	0.01325841		1981.24	-0.00125278		2511.24	-0.00461058		3041.24	-0.00170228		3571.24	-0.01487268
391.39	0.06178779		921.42	0.00597126		1451.41	0.01277786		1981.44	-0.00088892		2511.44	-0.00463026		3041.44	-0.00085592		3571.44	-0.01447692
391.59	0.06143775		921.62	0.00632366		1451.61	0.0115659		1981.64	-0.00035686		2511.64	-0.00403661		3041.64	-0.00032688		3571.64	-0.01455097
391.79	0.0614654		921.82	0.00703082		1451.81	0.01232487		1981.84	0.00015373		2511.84	-0.00327959		3041.84	-0.00092263		3571.84	-0.01465335
391.99	0.06097532		922.02	0.00714595		1452.01	0.01139355		1982.04	-0.00004216		2512.04	-0.00231197		3042.04	-0.00090207		3572.04	-0.01504597
392.19	0.0609332		922.22	0.00716271		1452.21	0.01224879		1982.24	-0.00109504		2512.24	-0.00123867		3042.24	-0.00099666		3572.24	-0.01544653
392.39	0.06066818		922.42	0.00776478		1452.41	0.01190794		1982.44	-0.00225788		2512.44	-0.00061249		3042.44	-0.00215191		3572.44	-0.01529202
392.59	0.05982747		922.62	0.00811538		1452.61	0.01214963		1982.64	-0.00150317		2512.64	-0.00013347		3042.64	-0.00297856		3572.64	-0.01521697
392.79	0.05935465		922.82	0.00747147		1452.81	0.01223086		1982.84	-0.00176684		2512.84	0.00110399		3042.84	-0.00299268		3572.84	-0.01586641
392.99	0.05931105		923.02	0.00705789		1453.01	0.01199656		1983.04	-0.00203937		2513.04	0.00092735		3043.04	-0.0022099		3573.04	-0.01604469
393.19	0.05895656		923.22	0.00663334		1453.21	0.01273022		1983.24	-0.00138393		2513.24	0.0005526		3043.24	-0.00169465		3573.24	-0.01570906
393.39	0.05906692		923.42	0.00700163		1453.41	0.01292823		1983.44	-0.00124166		2513.44	0.00035278		3043.44	-0.00086127		3573.44	-0.0154745
393.59	0.05890707		923.62	0.00680998		1453.61	0.0133749		1983.64	-0.00151942		2513.64	0.00044791		3043.64	-0.00067286		3573.64	-0.0156439
393.79	0.05911353		923.82	0.00744838		1453.81	0.01285177		1983.84	-0.00070479		2513.84	0.00005948		3043.84	-0.00021879		3573.84	-0.01486234
393.99	0.05932685		924.02	0.00826354		1454.01	0.01297219		1984.04	-0.00137359		2514.04	-0.00037367		3044.04	0.00044966		3574.04	-0.01493148
394.19	0.05885293		924.22	0.00824246		1454.21	0.01272024		1984.24	-0.00151827		2514.24	-0.00160835		3044.24	0.00097169		3574.24	-0.01512873
394.39	0.05855549		924.42	0.00753369		1454.41	0.01339554		1984.44	-0.00116572		2514.44	-0.00250149		3044.44	0.00202278		3574.44	-0.01475661
394.59	0.05796994		924.62	0.00822739		1454.61	0.01294388		1984.64	-0.00197261		2514.64	-0.0029919		3044.64	0.00274694		3574.64	-0.01473866
394.79	0.05706888		924.82	0.00823325		1454.81	0.01245491		1984.84	-0.00277799		2514.84	-0.0042713		3044.84	0.00310101		3574.84	-0.01450122
394.99	0.05720393		925.02	0.00789877		1455.01	0.01249575		1985.04	-0.00214537		2515.04	-0.00472332		3045.04	0.00259623		3575.04	-0.01490697
395.19	0.05734754		925.22	0.00750204		1455.21	0.01208608		1985.24	-0.00251118		2515.24	-0.00511281		3045.24	0.00237872		3575.24	-0.01423393
395.39	0.05796815		925.42	0.0063989		1455.41	0.01104055		1985.44	-0.00121773		2515.44	-0.0062457		3045.44	0.00322612		3575.44	-0.01398253
395.59	0.05749223		925.62	0.00669555		1455.61	0.00978069		1985.64	-0.00132259		2515.64	-0.00604791		3045.64	0.00296753		3575.64	-0.01405514
395.79	0.05858946		925.82	0.00640067		1455.81	0.00984952		1985.84	-0.00229637		2515.84	-0.0054162		3045.84	0.00195777		3575.84	-0.01415683
395.99	0.05906932		926.02	0.00638383		1456.01	0.00874105		1986.04	-0.0032757		2516.04	-0.00543145		3046.04	0.00046618		3576.04	-0.01420319
396.19	0.05940776		926.22	0.00636001		1456.21	0.00904459		1986.24	-0.00320794		2516.24	-0.00575359		3046.24	-0.00033031		3576.24	-0.01502606
396.39	0.05930888		926.42	0.00630593		1456.41	0.00904934		1986.44	-0.00341351		2516.44	-0.00607521		3046.44	-0.00138518		3576.44	-0.01520034
396.59	0.05997772		926.62	0.00623777		1456.61	0.00926727		1986.64	-0.00302884		2516.64	-0.00614816		3046.64	-0.00152416		3576.64	-0.01510002
396.79	0.06087458		926.82	0.00535182		1456.81	0.00925338		1986.84	-0.00345384		2516.84	-0.00496866		3046.84	-0.00217731		3576.84	-0.01435647
396.99	0.06040007		927.02	0.00485609		1457.01	0.00851164		1987.04	-0.0032099		2517.04	-0.00519168		3047.04	-0.00252357		3577.04	-0.01438044
397.19	0.06071304		927.22	0.00453154		1457.21	0.00870732		1987.24	-0.00325579		2517.24	-0.0047472		3047.24	-0.00342011		3577.24	-0.0136211
397.39	0.06069697		927.42	0.00491142		1457.41	0.00886584		1987.44	-0.0032685		2517.44	-0.00410236		3047.44	-0.00393707		3577.44	-0.01339377
397.59	0.06046498		927.62	0.00528739		1457.61	0.00888501		1987.64	-0.00343156		2517.64	-0.00416707		3047.64	-0.00376097		3577.64	-0.01258467
397.79	0.05981988		927.82	0.00637103		1457.81	0.00839435		1987.84	-0.00236264		2517.84	-0.00362873		3047.84	-0.00310957		3577.84	-0.01309467
397.99	0.05972476		928.02	0.00687861		1458.01	0.00785216		1988.04	-0.0023973		2518.04	-0.00479435		3048.04	-0.00274677		3578.04	-0.01352138
398.19	0.05867659		928.22	0.00678246		1458.21	0.00880541		1988.24	-0.00278278		2518.24	-0.00485412		3048.24	-0.0028656		3578.24	-0.01392812
398.39	0.05790754		928.42	0.00686436		1458.41	0.00945551		1988.44	-0.00323478		2518.44	-0.00466223		3048.44	-0.0017343		3578.44	-0.01310093
398.59	0.05684071		928.62	0.00798471		1458.61	0.00984836		1988.64	-0.00344712		2518.64	-0.00489865		3048.64	-0.00107586		3578.64	-0.01358751
398.79	0.05574437		928.82	0.00817141		1458.81	0.01031362		1988.84	-0.00363375		2518.84	-0.00496768		3048.84	-0.00107802		3578.84	-0.01344139
398.99	0.05590426		929.02	0.00763497		1459.01	0.01098486		1989.04	-0.00316331		2519.04	-0.00492297		3049.04	-0.00155819		3579.04	-0.01431115
399.19	0.05540679		929.22	0.00728371		1459.21	0.01155661		1989.24	-0.00339727		2519.24	-0.00536256		3049.24	-0.0013536		3579.24	-0.01430189
399.39	0.05538318		929.42	0.00675264		1459.41	0.01207179		1989.44	-0.00334145		2519.44	-0.00579642		3049.44	-0.00148779		3579.44	-0.01407304
399.59	0.05547707		929.62	0.00649455		1459.61	0.01251675		1989.64	-0.00320034		2519.64	-0.00515652		3049.64	-0.00245298		3579.64	-0.01420136
399.79	0.0566876		929.82	0.0055509		1459.81	0.01311739		1989.84	-0.00324576		2519.84	-0.00524598		3049.84	-0.00333524		3579.84	-0.01482288
399.99	0.05722094		930.02	0.00483791		1460.01	0.01316894		1990.04	-0.00336036		2520.04	-0.00600494		3050.04	-0.00436366		3580.04	-0.01469272
400.19	0.05698664		930.22	0.00511226		1460.21	0.01326953		1990.24	-0.00268603		2520.24	-0.00637456		3050.24	-0.00424923		3580.24	-0.0156397
400.39	0.05753407		930.42	0.00473466		1460.41	0.0135797		1990.44	-0.0032269		2520.44	-0.00565224		3050.44	-0.00410484		3580.44	-0.01598192
400.59	0.05696766		930.62	0.00427169		1460.61	0.01232471		1990.64	-0.0031106		2520.64	-0.00564991		3050.64	-0.00401699		3580.64	-0.01522809
400.79	0.05811499		930.82	0.00395706		1460.81	0.01090843		1990.84	-0.00318661		2520.84	-0.00534883		3050.84	-0.00460014		3580.84	-0.01513699
400.99	0.05771892		931.02	0.00364998		1461.01	0.00959545		1991.04	-0.00295774		2521.04	-0.00564767		3051.04	-0.003857		3581.04	-0.01596958
401.19	0.05776425		931.22	0.00410645		1461.21	0.00906518		1991.24	-0.00289639		2521.24	-0.00568459		3051.24	-0.00230811		3581.24	-0.01508521
401.39	0.0575383		931.42	0.00456936		1461.41	0.00802353		1991.44	-0.00284285		2521.44	-0.00593228		3051.44	-0.00197872		3581.44	-0.01505801
401.59	0.05739167		931.62	0.00468477		1461.61	0.00739316		1991.64	-0.00306201		2521.64	-0.00609714		3051.64	-0.00088399		3581.64	-0.0150302
401.79	0.05724876		931.82	0.00622752		1461.81	0.00625558		1991.84	-0.00305937		2521.84	-0.00699985		3051.84	-0.00023002		3581.84	-0.0153848
401.99	0.05776881		932.02	0.00703005		1462.01	0.00548502		1992.04	-0.00375379		2522.04	-0.00816936		3052.04	-0.00019147		3582.04	-0.01496944
402.19	0.05726145		932.22	0.00711073		1462.21	0.00639852		1992.24	-0.00404385		2522.24	-0.00811853		3052.24	0.00000579		3582.24	-0.01507598
402.39	0.05678248		932.42	0.00755623		1462.41	0.00628373		1992.44	-0.00435464		2522.44	-0.0083998		3052.44	0.00061867		3582.44	-0.01497801
402.59	0.05652291		932.62	0.00852537		1462.61	0.00717278		1992.64	-0.00410416		2522.64	-0.00812329		3052.64	0.00084881		3582.64	-0.01543403
402.79	0.05596917		932.82	0.00853209		1462.81	0.00765108		1992.84	-0.00454094		2522.84	-0.00752895		3052.84	0.00014141		3582.84	-0.01464552
402.99	0.05593389		933.02	0.00714574		1463.01	0.00787165		1993.04	-0.00480544		2523.04	-0.0076348		3053.04	-0.00013269		3583.04	-0.01474271
403.19	0.05538614		933.22	0.00660157		1463.21	0.0087025		1993.24	-0.00507622		2523.24	-0.00689414		3053.24	-0.00023135		3583.24	-0.01432539
403.39	0.05496013		933.42	0.00577916		1463.41	0.00913263		1993.44	-0.00442906		2523.44	-0.00681338		3053.44	-0.0009153		3583.44	-0.01378286
403.59	0.05542809		933.62	0.00557782		1463.61	0.00902595		1993.64	-0.00359211		2523.64	-0.00634543		3053.64	-0.0018406		3583.64	-0.01344307
403.79	0.05505402		933.82	0.00536427		1463.81	0.00909332		1993.84	-0.00291369		2523.84	-0.0058985		3053.84	-0.00219001		3583.84	-0.01338908
403.99	0.054527		934.02	0.00462978		1464.01	0.00918143		1994.04	-0.00375671		2524.04	-0.00523373		3054.04	-0.00352283		3584.04	-0.01318613
404.19	0.05400172		934.22	0.00450615		1464.21	0.00856484		1994.24	-0.0030847		2524.24	-0.00442887		3054.24	-0.00350016		3584.24	-0.0137929
404.39	0.05441569		934.42	0.0045669		1464.41	0.00790056		1994.44	-0.00322515		2524.44	-0.00406642		3054.44	-0.00337162		3584.44	-0.01484526
404.59	0.05328184		934.62	0.00406118		1464.61	0.00758374		1994.64	-0.00292549		2524.64	-0.00485369		3054.64	-0.0033808		3584.64	-0.01468788
404.79	0.05378646		934.82	0.00387195		1464.81	0.00671077		1994.84	-0.00297967		2524.84	-0.00539307		3054.84	-0.00335357		3584.84	-0.01453235
404.99	0.0537467		935.02	0.00350927		1465.01	0.00715395		1995.04	-0.00225063		2525.04	-0.00583042		3055.04	-0.00287008		3585.04	-0.01458948
405.19	0.05316854		935.22	0.00340077		1465.21	0.00676889		1995.24	-0.00238548		2525.24	-0.00572784		3055.24	-0.00303451		3585.24	-0.01360751
405.39	0.0533765		935.42	0.00301979		1465.41	0.00638083		1995.44	-0.00207933		2525.44	-0.00577181		3055.44	-0.00431929		3585.44	-0.01340213
405.59	0.05359788		935.62	0.00321608		1465.61	0.00662537		1995.64	-0.00192373		2525.64	-0.00628278		3055.64	-0.00369224		3585.64	-0.01351169
405.79	0.05387264		935.82	0.00444099		1465.81	0.00621923		1995.84	-0.00166046		2525.84	-0.0082703		3055.84	-0.00324106		3585.84	-0.0142999
405.99	0.05420453		936.02	0.00414612		1466.01	0.00609948		1996.04	-0.00179465		2526.04	-0.00876932		3056.04	-0.00316411		3586.04	-0.01412799
406.19	0.05438293		936.22	0.0038458		1466.21	0.00650714		1996.24	-0.00187985		2526.24	-0.00884846		3056.24	-0.00321411		3586.24	-0.01460099
406.39	0.05440898		936.42	0.00426539		1466.41	0.00653278		1996.44	-0.00267262		2526.44	-0.00877054		3056.44	-0.00306972		3586.44	-0.0147816
406.59	0.05396511		936.62	0.00516249		1466.61	0.0073157		1996.64	-0.00380358		2526.64	-0.00840937		3056.64	-0.00335847		3586.64	-0.01519732
406.79	0.05373308		936.82	0.00524085		1466.81	0.00703045		1996.84	-0.00366798		2526.84	-0.00761377		3056.84	-0.00327368		3586.84	-0.0157681
406.99	0.05382141		937.02	0.00524426		1467.01	0.00723572		1997.04	-0.00421824		2527.04	-0.00712284		3057.04	-0.00353769		3587.04	-0.01561131
407.19	0.05426477		937.22	0.00591887		1467.21	0.00739502		1997.24	-0.0042624		2527.24	-0.00745868		3057.24	-0.00327677		3587.24	-0.01606824
407.39	0.05441434		937.42	0.00625734		1467.41	0.00718881		1997.44	-0.00389941		2527.44	-0.007233		3057.44	-0.00356703		3587.44	-0.01659327
407.59	0.0548325		937.62	0.00612922		1467.61	0.00732639		1997.64	-0.0032935		2527.64	-0.00657702		3057.64	-0.00333966		3587.64	-0.01698759
407.79	0.05443322		937.82	0.0049495		1467.81	0.00808849		1997.84	-0.00329652		2527.84	-0.00591169		3057.84	-0.0033007		3587.84	-0.0169388
407.99	0.05461596		938.02	0.00445252		1468.01	0.00777574		1998.04	-0.00398184		2528.04	-0.00576969		3058.04	-0.00383521		3588.04	-0.01819721
408.19	0.055998		938.22	0.00463803		1468.21	0.00704304		1998.24	-0.00375197		2528.24	-0.0055662		3058.24	-0.00321847		3588.24	-0.01873522
408.39	0.05565123		938.42	0.00484029		1468.41	0.00755921		1998.44	-0.00325572		2528.44	-0.00544123		3058.44	-0.0027166		3588.44	-0.0193352
408.59	0.05464776		938.62	0.00330876		1468.61	0.00793868		1998.64	-0.00320646		2528.64	-0.00541668		3058.64	-0.00222455		3588.64	-0.01969352
408.79	0.05465819		938.82	0.00234692		1468.81	0.0078507		1998.84	-0.00338196		2528.84	-0.0055052		3058.84	-0.00208597		3588.84	-0.01982477
408.99	0.05528337		939.02	0.00166228		1469.01	0.00889782		1999.04	-0.0029788		2529.04	-0.00548231		3059.04	-0.0023459		3589.04	-0.01926671
409.19	0.05407749		939.22	0.00049508		1469.21	0.008542		1999.24	-0.00326183		2529.24	-0.00505837		3059.24	-0.00259812		3589.24	-0.01857199
409.39	0.05440712		939.42	0.0008593		1469.41	0.00843855		1999.44	-0.00284478		2529.44	-0.00518118		3059.44	-0.00228391		3589.44	-0.01871879
409.59	0.05383746		939.62	0.00132652		1469.61	0.00886461		1999.64	-0.00305231		2529.64	-0.00553449		3059.64	-0.00212078		3589.64	-0.01837827
409.79	0.05329133		939.82	0.00166379		1469.81	0.00941933		1999.84	-0.00280988		2529.84	-0.00505083		3059.84	-0.00220855		3589.84	-0.01855221
409.99	0.05257522		940.02	0.00163101		1470.01	0.00945052		2000.04	-0.00337524		2530.04	-0.00503113		3060.04	-0.00213029		3590.04	-0.01733101
410.19	0.05200702		940.22	0.00202833		1470.21	0.01000281		2000.24	-0.0042525		2530.24	-0.00482286		3060.24	-0.00229736		3590.24	-0.01708752
410.39	0.05230602		940.42	0.0029762		1470.41	0.0097477		2000.44	-0.00517362		2530.44	-0.00420722		3060.44	-0.00235167		3590.44	-0.01705175
410.59	0.05205992		940.62	0.00361807		1470.61	0.01050858		2000.64	-0.00589235		2530.64	-0.00394276		3060.64	-0.00208168		3590.64	-0.01737871
410.79	0.05229617		940.82	0.00368023		1470.81	0.01014995		2000.84	-0.00559107		2530.84	-0.00281527		3060.84	-0.00172744		3590.84	-0.01791574
410.99	0.05244086		941.02	0.00363081		1471.01	0.00994841		2001.04	-0.00644203		2531.04	-0.00351856		3061.04	-0.00242478		3591.04	-0.01731159
411.19	0.05208432		941.22	0.00372262		1471.21	0.00969331		2001.24	-0.00678453		2531.24	-0.00369679		3061.24	-0.00202026		3591.24	-0.01838284
411.39	0.05262183		941.42	0.00321187		1471.41	0.00972261		2001.44	-0.0065852		2531.44	-0.00315461		3061.44	-0.00210944		3591.44	-0.01915775
411.59	0.0530658		941.62	0.00247626		1471.61	0.00981314		2001.64	-0.00658906		2531.64	-0.00392022		3061.64	-0.0013993		3591.64	-0.01858361
411.79	0.0532227		941.82	0.00209606		1471.81	0.00931293		2001.84	-0.00673941		2531.84	-0.00387421		3061.84	-0.00174287		3591.84	-0.01898974
411.99	0.05325485		942.02	0.00259913		1472.01	0.0088443		2002.04	-0.0064459		2532.04	-0.00371704		3062.04	-0.001894		3592.04	-0.01938888
412.19	0.05402912		942.22	0.00217692		1472.21	0.00858708		2002.24	-0.00664749		2532.24	-0.00420425		3062.24	-0.00163893		3592.24	-0.01963379
412.39	0.0527046		942.42	0.00239599		1472.41	0.00886726		2002.44	-0.00643251		2532.44	-0.00459051		3062.44	-0.00180973		3592.44	-0.01984702
412.59	0.05270237		942.62	0.00216357		1472.61	0.0087444		2002.64	-0.00692934		2532.64	-0.00566761		3062.64	-0.00205572		3592.64	-0.02026967
412.79	0.05355038		942.82	0.00249154		1472.81	0.00901971		2002.84	-0.00684077		2532.84	-0.00616777		3062.84	-0.00290811		3592.84	-0.01980369
412.99	0.0533036		943.02	0.00299812		1473.01	0.00908052		2003.04	-0.00655211		2533.04	-0.00734393		3063.04	-0.00286563		3593.04	-0.01847779
413.19	0.05239293		943.22	0.00337016		1473.21	0.00898189		2003.24	-0.00625572		2533.24	-0.00837466		3063.24	-0.0027995		3593.24	-0.01841084
413.39	0.05222625		943.42	0.00493136		1473.41	0.00869154		2003.44	-0.00582687		2533.44	-0.00807158		3063.44	-0.00330515		3593.44	-0.01848782
413.59	0.05097943		943.62	0.00527518		1473.61	0.00856423		2003.64	-0.00432999		2533.64	-0.00887715		3063.64	-0.00374876		3593.64	-0.01860894
413.79	0.05033056		943.82	0.00566045		1473.81	0.00880156		2003.84	-0.00361334		2533.84	-0.00929281		3063.84	-0.0037978		3593.84	-0.01895577
413.99	0.05015004		944.02	0.00641226		1474.01	0.00825114		2004.04	-0.0037956		2534.04	-0.01119091		3064.04	-0.00371282		3594.04	-0.01801912
414.19	0.05052464		944.22	0.00654036		1474.21	0.00743584		2004.24	-0.00430898		2534.24	-0.01010036		3064.24	-0.00358108		3594.24	-0.01758333
414.39	0.05097001		944.42	0.00641069		1474.41	0.0068081		2004.44	-0.00506813		2534.44	-0.00944968		3064.44	-0.00344875		3594.44	-0.01808314
414.59	0.05112129		944.62	0.00606481		1474.61	0.00707323		2004.64	-0.00539067		2534.64	-0.00928448		3064.64	-0.00259786		3594.64	-0.01803519
414.79	0.05194693		944.82	0.0058302		1474.81	0.00624177		2004.84	-0.005779		2534.84	-0.00871626		3064.84	-0.00313361		3594.84	-0.01866719
414.99	0.05181046		945.02	0.00569534		1475.01	0.00597316		2005.04	-0.00605467		2535.04	-0.0085482		3065.04	-0.00340525		3595.04	-0.01827271
415.19	0.0512417		945.22	0.0051894		1475.21	0.00546076		2005.24	-0.00627434		2535.24	-0.00829507		3065.24	-0.00358873		3595.24	-0.01833181
415.39	0.05125137		945.42	0.00453044		1475.41	0.00571509		2005.44	-0.00667125		2535.44	-0.00802541		3065.44	-0.0030838		3595.44	-0.01768953
415.59	0.05148935		945.62	0.00471216		1475.61	0.00605611		2005.64	-0.00637022		2535.64	-0.00751924		3065.64	-0.0036856		3595.64	-0.01722455
415.79	0.05150019		945.82	0.00440826		1475.81	0.00614108		2005.84	-0.00564227		2535.84	-0.00570379		3065.84	-0.00450292		3595.84	-0.01789827
415.99	0.05165631		946.02	0.00419374		1476.01	0.00626793		2006.04	-0.00579305		2536.04	-0.00521837		3066.04	-0.005046		3596.04	-0.01763677
416.19	0.05158345		946.22	0.00385755		1476.21	0.00594477		2006.24	-0.00632233		2536.24	-0.00559426		3066.24	-0.00536697		3596.24	-0.01838393
416.39	0.05178671		946.42	0.0036004		1476.41	0.00572831		2006.44	-0.00579975		2536.44	-0.00455653		3066.44	-0.00627871		3596.44	-0.01818516
416.59	0.05209814		946.62	0.00374925		1476.61	0.00576239		2006.64	-0.00523391		2536.64	-0.00472762		3066.64	-0.00646066		3596.64	-0.01856489
416.79	0.05269797		946.82	0.00393815		1476.81	0.00597322		2006.84	-0.00463063		2536.84	-0.00436782		3066.84	-0.00721311		3596.84	-0.01801603
416.99	0.0512036		947.02	0.00398571		1477.01	0.00564991		2007.04	-0.00482988		2537.04	-0.00422617		3067.04	-0.00740329		3597.04	-0.0176651
417.19	0.05099323		947.22	0.00372744		1477.21	0.00553389		2007.24	-0.00458535		2537.24	-0.00409689		3067.24	-0.00788516		3597.24	-0.01762259
417.39	0.0507298		947.42	0.0030128		1477.41	0.00501415		2007.44	-0.00496587		2537.44	-0.00382104		3067.44	-0.0083313		3597.44	-0.01807051
417.59	0.05101706		947.62	0.00301354		1477.61	0.00393366		2007.64	-0.0045939		2537.64	-0.00482372		3067.64	-0.00846768		3597.64	-0.01856756
417.79	0.05136491		947.82	0.00305832		1477.81	0.00400678		2007.84	-0.00545783		2537.84	-0.0041902		3067.84	-0.00914476		3597.84	-0.01873871
417.99	0.05200626		948.02	0.00283344		1478.01	0.0036204		2008.04	-0.00533772		2538.04	-0.00414478		3068.04	-0.00933562		3598.04	-0.01834039
418.19	0.05168985		948.22	0.00242114		1478.21	0.00427004		2008.24	-0.00603752		2538.24	-0.00364118		3068.24	-0.00854894		3598.24	-0.01830945
418.39	0.05176475		948.42	0.00235958		1478.41	0.00512539		2008.44	-0.00698791		2538.44	-0.00470268		3068.44	-0.00813637		3598.44	-0.01863326
418.59	0.05273668		948.62	0.00282136		1478.61	0.00617615		2008.64	-0.00628278		2538.64	-0.00482361		3068.64	-0.00740782		3598.64	-0.01774562
418.79	0.05227984		948.82	0.00329018		1478.81	0.00673739		2008.84	-0.00610909		2538.84	-0.005969		3068.84	-0.007351		3598.84	-0.018195
418.99	0.05160554		949.02	0.00338223		1479.01	0.00765516		2009.04	-0.0061472		2539.04	-0.00755472		3069.04	-0.00703623		3599.04	-0.01786366
419.19	0.05065298		949.22	0.00377679		1479.21	0.0080177		2009.24	-0.00625223		2539.24	-0.00816953		3069.24	-0.00741224		3599.24	-0.01796613
419.39	0.05061968		949.42	0.00356427		1479.41	0.00891114		2009.44	-0.00651062		2539.44	-0.00765896		3069.44	-0.00664945		3599.44	-0.01770115
419.59	0.05147627		949.62	0.00411883		1479.61	0.00915893		2009.64	-0.00541176		2539.64	-0.00734557		3069.64	-0.00665316		3599.64	-0.01822303
419.79	0.05151067		949.82	0.00365903		1479.81	0.00896243		2009.84	-0.00539839		2539.84	-0.00772915		3069.84	-0.00592459		3599.84	-0.01809083
419.99	0.05051719		950.02	0.00338825		1480.01	0.00850891		2010.04	-0.00605298		2540.04	-0.00782082		3070.04	-0.00528677		3600.04	-0.01790805
420.19	0.05112211		950.22	0.00379923		1480.21	0.00814219		2010.24	-0.00607594		2540.24	-0.00799523		3070.24	-0.00499825		3600.24	-0.0180148
420.39	0.05098401		950.42	0.00346637		1480.41	0.00737043		2010.44	-0.00535354		2540.44	-0.00786448		3070.44	-0.00573978		3600.44	-0.01834411
420.59	0.05047466		950.62	0.00395266		1480.61	0.00737247		2010.64	-0.00635121		2540.64	-0.00831783		3070.64	-0.00621802		3600.64	-0.01843647
420.79	0.04992728		950.82	0.00332151		1480.81	0.00741368		2010.84	-0.00617487		2540.84	-0.00771409		3070.84	-0.00614194		3600.84	-0.01806012
420.99	0.04892692		951.02	0.00261643		1481.01	0.00677714		2011.04	-0.00712982		2541.04	-0.0075352		3071.04	-0.00522283		3601.04	-0.01766018
421.19	0.04888917		951.22	0.00164957		1481.21	0.00635141		2011.24	-0.00705559		2541.24	-0.00798425		3071.24	-0.00425303		3601.24	-0.01736713
421.39	0.04885603		951.42	0.00050798		1481.41	0.00639703		2011.44	-0.00762605		2541.44	-0.0080421		3071.44	-0.00366222		3601.44	-0.01771794
421.59	0.04908366		951.62	0.0011167		1481.61	0.00509431		2011.64	-0.00788654		2541.64	-0.00765718		3071.64	-0.00419636		3601.64	-0.01775136
421.79	0.04937875		951.82	0.00152493		1481.81	0.0054166		2011.84	-0.00725422		2541.84	-0.00759793		3071.84	-0.00502777		3601.84	-0.01768695
421.99	0.04904741		952.02	0.0009894		1482.01	0.00480617		2012.04	-0.00621323		2542.04	-0.00851775		3072.04	-0.00438596		3602.04	-0.01711955
422.19	0.04927193		952.22	0.00097507		1482.21	0.00459234		2012.24	-0.00681864		2542.24	-0.00914895		3072.24	-0.00386694		3602.24	-0.01767774
422.39	0.04954121		952.42	0.00110825		1482.41	0.0044057		2012.44	-0.0056798		2542.44	-0.00898611		3072.44	-0.00351048		3602.44	-0.01800161
422.59	0.04992441		952.62	0.00117258		1482.61	0.00477057		2012.64	-0.00423143		2542.64	-0.00931432		3072.64	-0.00411722		3602.64	-0.01808347
422.79	0.0494555		952.82	0.00032413		1482.81	0.00469644		2012.84	-0.00418517		2542.84	-0.01042398		3072.84	-0.00471692		3602.84	-0.01867043
422.99	0.04988425		953.02	-0.00072595		1483.01	0.00459939		2013.04	-0.00433604		2543.04	-0.01042675		3073.04	-0.00570325		3603.04	-0.01842572
423.19	0.04918186		953.22	-0.00099375		1483.21	0.00478079		2013.24	-0.00430148		2543.24	-0.00946526		3073.24	-0.00681138		3603.24	-0.01896997
423.39	0.04956704		953.42	-0.0011792		1483.41	0.00517438		2013.44	-0.00408947		2543.44	-0.00907905		3073.44	-0.00638124		3603.44	-0.01849653
423.59	0.0497853		953.62	-0.00117298		1483.61	0.00475363		2013.64	-0.00437443		2543.64	-0.0090446		3073.64	-0.00677802		3603.64	-0.01890024
423.79	0.04939846		953.82	-0.00110699		1483.81	0.0053248		2013.84	-0.00565897		2543.84	-0.00906632		3073.84	-0.00712946		3603.84	-0.01889227
423.99	0.04970851		954.02	-0.00117367		1484.01	0.00560707		2014.04	-0.00652614		2544.04	-0.00922322		3074.04	-0.00817382		3604.04	-0.01868048
424.19	0.05034696		954.22	-0.00125197		1484.21	0.00649819		2014.24	-0.00676689		2544.24	-0.00976768		3074.24	-0.00911159		3604.24	-0.01872901
424.39	0.04999682		954.42	-0.00197641		1484.41	0.00665482		2014.44	-0.00740505		2544.44	-0.00972938		3074.44	-0.00987526		3604.44	-0.01899663
424.59	0.04987886		954.62	-0.00271501		1484.61	0.0071428		2014.64	-0.00750827		2544.64	-0.01023512		3074.64	-0.0095934		3604.64	-0.01925108
424.79	0.05010118		954.82	-0.00276646		1484.81	0.00778699		2014.84	-0.00695058		2544.84	-0.01056099		3074.84	-0.00843803		3604.84	-0.01867636
424.99	0.05044301		955.02	-0.00212488		1485.01	0.00755003		2015.04	-0.00788304		2545.04	-0.01020665		3075.04	-0.00830411		3605.04	-0.01802515
425.19	0.05033857		955.22	-0.00189215		1485.21	0.0074964		2015.24	-0.00804092		2545.24	-0.01017026		3075.24	-0.00832797		3605.24	-0.01801213
425.39	0.05091206		955.42	-0.00095069		1485.41	0.00779237		2015.44	-0.0079178		2545.44	-0.01065628		3075.44	-0.00796029		3605.44	-0.01843746
425.59	0.05123735		955.62	0.00072753		1485.61	0.0064656		2015.64	-0.00757606		2545.64	-0.01073875		3075.64	-0.00887651		3605.64	-0.01833685
425.79	0.05156026		955.82	0.00134056		1485.81	0.00653838		2015.84	-0.00711016		2545.84	-0.01157454		3075.84	-0.00861858		3605.84	-0.01833969
425.99	0.05072554		956.02	0.00115695		1486.01	0.00558138		2016.04	-0.00767566		2546.04	-0.01152549		3076.04	-0.00731612		3606.04	-0.01920404
426.19	0.050986		956.22	0.00119515		1486.21	0.00507063		2016.24	-0.00767553		2546.24	-0.01139576		3076.24	-0.00750842		3606.24	-0.02010498
426.39	0.05068934		956.42	0.00100325		1486.41	0.00568807		2016.44	-0.00659552		2546.44	-0.01080292		3076.44	-0.00642098		3606.44	-0.01964554
426.59	0.05063499		956.62	0.00165809		1486.61	0.00562219		2016.64	-0.00655141		2546.64	-0.01085019		3076.64	-0.00684207		3606.64	-0.01976179
426.79	0.04999107		956.82	0.00188521		1486.81	0.00516665		2016.84	-0.0067663		2546.84	-0.00973634		3076.84	-0.00735629		3606.84	-0.01969163
426.99	0.04945876		957.02	0.0016989		1487.01	0.00595563		2017.04	-0.00690494		2547.04	-0.00906079		3077.04	-0.00751297		3607.04	-0.01942378
427.19	0.04824913		957.22	0.00255965		1487.21	0.00669396		2017.24	-0.00711603		2547.24	-0.00833219		3077.24	-0.00786178		3607.24	-0.01970098
427.39	0.04777841		957.42	0.00232509		1487.41	0.00725802		2017.44	-0.00729466		2547.44	-0.00733466		3077.44	-0.0075866		3607.44	-0.01894838
427.59	0.04714847		957.62	0.00194777		1487.61	0.00610545		2017.64	-0.00809157		2547.64	-0.00717811		3077.64	-0.00768585		3607.64	-0.01912873
427.79	0.04655984		957.82	0.00209518		1487.81	0.00727035		2017.84	-0.00799977		2547.84	-0.006901		3077.84	-0.007626		3607.84	-0.01872927
427.99	0.04749888		958.02	0.00190283		1488.01	0.00697974		2018.04	-0.00817152		2548.04	-0.0069848		3078.04	-0.00775975		3608.04	-0.01824063
428.19	0.04707852		958.22	0.00050507		1488.21	0.00788482		2018.24	-0.00820811		2548.24	-0.00651095		3078.24	-0.00762458		3608.24	-0.01767345
428.39	0.04834678		958.42	0.00030632		1488.41	0.00754117		2018.44	-0.00810882		2548.44	-0.00702137		3078.44	-0.00777507		3608.44	-0.01724114
428.59	0.04838932		958.62	0.00002324		1488.61	0.00771174		2018.64	-0.00806379		2548.64	-0.00695263		3078.64	-0.0072196		3608.64	-0.01777633
428.79	0.04888222		958.82	0.00122117		1488.81	0.00793432		2018.84	-0.00789516		2548.84	-0.00690705		3078.84	-0.00778331		3608.84	-0.01696177
428.99	0.04863215		959.02	0.00088444		1489.01	0.00747805		2019.04	-0.00758791		2549.04	-0.00625981		3079.04	-0.00880611		3609.04	-0.01755263
429.19	0.04877431		959.22	0.00085146		1489.21	0.00751812		2019.24	-0.00697004		2549.24	-0.00752571		3079.24	-0.00859603		3609.24	-0.01777644
429.39	0.04873049		959.42	0.00085132		1489.41	0.00754794		2019.44	-0.00617118		2549.44	-0.00855901		3079.44	-0.00856845		3609.44	-0.01875244
429.59	0.04855059		959.62	0.000304		1489.61	0.00750584		2019.64	-0.00607834		2549.64	-0.00829649		3079.64	-0.00952942		3609.64	-0.0185206
429.79	0.04832329		959.82	-0.00049104		1489.81	0.00771656		2019.84	-0.00624808		2549.84	-0.00935358		3079.84	-0.00894275		3609.84	-0.0188181
429.99	0.04871636		960.02	-0.00039296		1490.01	0.00697946		2020.04	-0.00629827		2550.04	-0.00953481		3080.04	-0.00811976		3610.04	-0.01883533
430.19	0.04941507		960.22	-0.00081271		1490.21	0.00658814		2020.24	-0.00543893		2550.24	-0.01050343		3080.24	-0.00850906		3610.24	-0.01881569
430.39	0.05006258		960.42	-0.00009939		1490.41	0.00586349		2020.44	-0.00555248		2550.44	-0.01011164		3080.44	-0.00758327		3610.44	-0.01909227
430.59	0.04956451		960.62	0.0005846		1490.61	0.00549911		2020.64	-0.0059099		2550.64	-0.00999667		3080.64	-0.00817965		3610.64	-0.01958981
430.79	0.04941402		960.82	0.00005419		1490.81	0.00512052		2020.84	-0.00668886		2550.84	-0.00940964		3080.84	-0.00756635		3610.84	-0.01989794
430.99	0.04884583		961.02	-0.00096		1491.01	0.00471423		2021.04	-0.00695442		2551.04	-0.00983257		3081.04	-0.00671192		3611.04	-0.02006838
431.19	0.04826211		961.22	-0.0007368		1491.21	0.00344757		2021.24	-0.00681698		2551.24	-0.00938012		3081.24	-0.00634021		3611.24	-0.02024371
431.39	0.04846002		961.42	-0.00059728		1491.41	0.00321173		2021.44	-0.00703701		2551.44	-0.0091812		3081.44	-0.00555476		3611.44	-0.02029787
431.59	0.0484744		961.62	0.00045328		1491.61	0.00214796		2021.64	-0.00709329		2551.64	-0.00930981		3081.64	-0.00439026		3611.64	-0.02121468
431.79	0.04929732		961.82	0.00074023		1491.81	0.00258281		2021.84	-0.00681007		2551.84	-0.00917854		3081.84	-0.00424846		3611.84	-0.02111827
431.99	0.05025785		962.02	0.0005134		1492.01	0.00269643		2022.04	-0.0072376		2552.04	-0.00917968		3082.04	-0.00372536		3612.04	-0.02090193
432.19	0.05015685		962.22	0.00014623		1492.21	0.00343167		2022.24	-0.0071589		2552.24	-0.00934888		3082.24	-0.00388827		3612.24	-0.02035478
432.39	0.0507178		962.42	0.0009822		1492.41	0.00349723		2022.44	-0.00785246		2552.44	-0.00973962		3082.44	-0.0035075		3612.44	-0.02123218
432.59	0.05003547		962.62	0.00104894		1492.61	0.00348102		2022.64	-0.00790467		2552.64	-0.00969056		3082.64	-0.00345099		3612.64	-0.02150311
432.79	0.04964226		962.82	0.00150031		1492.81	0.0034541		2022.84	-0.00761379		2552.84	-0.0105805		3082.84	-0.00454843		3612.84	-0.02197837
432.99	0.04977044		963.02	0.00053809		1493.01	0.00398249		2023.04	-0.0077105		2553.04	-0.01072765		3083.04	-0.00476249		3613.04	-0.02233092
433.19	0.0494196		963.22	0.00085053		1493.21	0.00506995		2023.24	-0.00822268		2553.24	-0.01081518		3083.24	-0.00535918		3613.24	-0.02161636
433.39	0.04862412		963.42	0.00003815		1493.41	0.00583136		2023.44	-0.00771156		2553.44	-0.01013936		3083.44	-0.00597185		3613.44	-0.02249659
433.59	0.04891504		963.62	-0.00057751		1493.61	0.00677801		2023.64	-0.00778561		2553.64	-0.01047704		3083.64	-0.00705518		3613.64	-0.02192239
433.79	0.04911919		963.82	-0.00061043		1493.81	0.00711226		2023.84	-0.00683783		2553.84	-0.01033423		3083.84	-0.007461		3613.84	-0.02201448
433.99	0.04986955		964.02	0.00012853		1494.01	0.00735683		2024.04	-0.00793053		2554.04	-0.0094097		3084.04	-0.00784394		3614.04	-0.02117874
434.19	0.04853223		964.22	-0.00001079		1494.21	0.00738463		2024.24	-0.00760639		2554.24	-0.00948188		3084.24	-0.00884664		3614.24	-0.02095071
434.39	0.04841001		964.42	-0.00010403		1494.41	0.00642171		2024.44	-0.00798994		2554.44	-0.00837748		3084.44	-0.00925703		3614.44	-0.02269476
434.59	0.04791504		964.62	-0.000828		1494.61	0.00646964		2024.64	-0.00792127		2554.64	-0.00815525		3084.64	-0.00957214		3614.64	-0.02311397
434.79	0.04792197		964.82	-0.00154364		1494.81	0.00574877		2024.84	-0.00766545		2554.84	-0.00754099		3084.84	-0.00854809		3614.84	-0.02393275
434.99	0.04710009		965.02	-0.00197715		1495.01	0.00450713		2025.04	-0.00702239		2555.04	-0.00810239		3085.04	-0.00881601		3615.04	-0.02418466
435.19	0.04703102		965.22	-0.00176348		1495.21	0.00391255		2025.24	-0.00702445		2555.24	-0.00827128		3085.24	-0.00921608		3615.24	-0.02396259
435.39	0.04699605		965.42	-0.00112956		1495.41	0.00421768		2025.44	-0.0073151		2555.44	-0.00884748		3085.44	-0.00911649		3615.44	-0.02350191
435.59	0.04677801		965.62	-0.00133405		1495.61	0.00326884		2025.64	-0.00731475		2555.64	-0.00941495		3085.64	-0.00898674		3615.64	-0.02320976
435.79	0.04769524		965.82	-0.0016579		1495.81	0.0034684		2025.84	-0.00716861		2555.84	-0.00986272		3085.84	-0.00979284		3615.84	-0.02274342
435.99	0.04699726		966.02	-0.00210725		1496.01	0.00326729		2026.04	-0.00699835		2556.04	-0.00953306		3086.04	-0.00933334		3616.04	-0.02221397
436.19	0.04570488		966.22	-0.00165219		1496.21	0.00308845		2026.24	-0.00735479		2556.24	-0.0095275		3086.24	-0.00891208		3616.24	-0.02223739
436.39	0.04587506		966.42	-0.00123786		1496.41	0.00246095		2026.44	-0.00842532		2556.44	-0.00979863		3086.44	-0.00776148		3616.44	-0.02268986
436.59	0.04516279		966.62	-0.00130835		1496.61	0.00153418		2026.64	-0.00832585		2556.64	-0.01098638		3086.64	-0.0080046		3616.64	-0.0215592
436.79	0.04538332		966.82	-0.00161719		1496.81	0.00159388		2026.84	-0.00848659		2556.84	-0.01117011		3086.84	-0.00794834		3616.84	-0.02283279
436.99	0.0453016		967.02	-0.0019349		1497.01	0.00215313		2027.04	-0.00899375		2557.04	-0.01148513		3087.04	-0.00701596		3617.04	-0.02208226
437.19	0.04431233		967.22	-0.00136228		1497.21	0.00223679		2027.24	-0.00913125		2557.24	-0.01183864		3087.24	-0.00705817		3617.24	-0.02199443
437.39	0.04402781		967.42	-0.00178002		1497.41	0.00246759		2027.44	-0.0088653		2557.44	-0.01263648		3087.44	-0.00656313		3617.44	-0.02325404
437.59	0.04440667		967.62	-0.00128555		1497.61	0.00331151		2027.64	-0.00883156		2557.64	-0.0125191		3087.64	-0.00715572		3617.64	-0.02352137
437.79	0.04424906		967.82	-0.00081643		1497.81	0.00311003		2027.84	-0.00879747		2557.84	-0.01133431		3087.84	-0.00678916		3617.84	-0.02381961
437.99	0.04356392		968.02	-0.00026663		1498.01	0.00292145		2028.04	-0.00928563		2558.04	-0.01120207		3088.04	-0.00660564		3618.04	-0.02406415
438.19	0.04197726		968.22	-0.00008496		1498.21	0.00246458		2028.24	-0.0085013		2558.24	-0.01114065		3088.24	-0.0069854		3618.24	-0.02423143
438.39	0.04267293		968.42	-0.00042126		1498.41	0.00117933		2028.44	-0.00809894		2558.44	-0.01054693		3088.44	-0.00741325		3618.44	-0.02583992
438.59	0.0425739		968.62	-0.00046959		1498.61	0.00114023		2028.64	-0.0071043		2558.64	-0.00959347		3088.64	-0.00691524		3618.64	-0.02510452
438.79	0.04262221		968.82	-0.00041121		1498.81	0.00084748		2028.84	-0.00606991		2558.84	-0.00922091		3088.84	-0.00682364		3618.84	-0.02491813
438.99	0.04308368		969.02	-0.00047752		1499.01	0.00002775		2029.04	-0.00588863		2559.04	-0.00940629		3089.04	-0.00793705		3619.04	-0.02369025
439.19	0.04278292		969.22	-0.00077408		1499.21	0.0000624		2029.24	-0.0062429		2559.24	-0.00879655		3089.24	-0.00856618		3619.24	-0.02301037
439.39	0.04281056		969.42	-0.00091853		1499.41	0.00053732		2029.44	-0.00596735		2559.44	-0.00885767		3089.44	-0.00922821		3619.44	-0.02227957
439.59	0.04331653		969.62	-0.00172462		1499.61	0.0002869		2029.64	-0.00640401		2559.64	-0.00883145		3089.64	-0.0096991		3619.64	-0.022055
439.79	0.04400166		969.82	-0.00203322		1499.81	0.00140623		2029.84	-0.00609469		2559.84	-0.00869531		3089.84	-0.01023149		3619.84	-0.02271295
439.99	0.04402438		970.02	-0.00214791		1500.01	0.00198009		2030.04	-0.00612125		2560.04	-0.0083916		3090.04	-0.01028326		3620.04	-0.02223785
440.19	0.04399273		970.22	-0.00198044		1500.21	0.00219047		2030.24	-0.00704207		2560.24	-0.00911967		3090.24	-0.00992095		3620.24	-0.02202901
440.39	0.04508703		970.42	-0.00252978		1500.41	0.00172277		2030.44	-0.0077884		2560.44	-0.00988515		3090.44	-0.01001842		3620.44	-0.0218856
440.59	0.04524433		970.62	-0.00257908		1500.61	0.00197106		2030.64	-0.00857981		2560.64	-0.0105844		3090.64	-0.00994062		3620.64	-0.0222481
440.79	0.04595095		970.82	-0.00271019		1500.81	0.00236239		2030.84	-0.00918942		2560.84	-0.01093646		3090.84	-0.00947938		3620.84	-0.02383647
440.99	0.04623433		971.02	-0.00293143		1501.01	0.00294035		2031.04	-0.01003279		2561.04	-0.01175834		3091.04	-0.00934696		3621.04	-0.02331125
441.19	0.04589168		971.22	-0.00300612		1501.21	0.0031498		2031.24	-0.0109158		2561.24	-0.01275519		3091.24	-0.00860122		3621.24	-0.02420147
441.39	0.0465571		971.42	-0.00388021		1501.41	0.00387775		2031.44	-0.01111056		2561.44	-0.01281765		3091.44	-0.00791078		3621.44	-0.02522827
441.59	0.04671337		971.62	-0.0035064		1501.61	0.00421341		2031.64	-0.01141148		2561.64	-0.01261578		3091.64	-0.00790761		3621.64	-0.02511016
441.79	0.04617026		971.82	-0.00335319		1501.81	0.00398806		2031.84	-0.01176617		2561.84	-0.01315888		3091.84	-0.00685508		3621.84	-0.02518806
441.99	0.04521212		972.02	-0.00298488		1502.01	0.00516658		2032.04	-0.0114029		2562.04	-0.01351649		3092.04	-0.00699574		3622.04	-0.02551779
442.19	0.04491224		972.22	-0.00245255		1502.21	0.00507527		2032.24	-0.01155312		2562.24	-0.0125042		3092.24	-0.00733545		3622.24	-0.02473621
442.39	0.04540159		972.42	-0.00213059		1502.41	0.00462922		2032.44	-0.01059748		2562.44	-0.01177105		3092.44	-0.00741607		3622.44	-0.0250555
442.59	0.04540373		972.62	-0.0016811		1502.61	0.00502782		2032.64	-0.00989722		2562.64	-0.01063728		3092.64	-0.00719636		3622.64	-0.02443161
442.79	0.04604525		972.82	-0.00120573		1502.81	0.00474662		2032.84	-0.0093951		2562.84	-0.01064222		3092.84	-0.00800174		3622.84	-0.02363461
442.99	0.04591625		973.02	-0.00096967		1503.01	0.0043054		2033.04	-0.00958633		2563.04	-0.01063211		3093.04	-0.00852693		3623.04	-0.02338726
443.19	0.04503758		973.22	-0.00106989		1503.21	0.00463856		2033.24	-0.00872556		2563.24	-0.01079292		3093.24	-0.0087868		3623.24	-0.02378803
443.39	0.04611506		973.42	-0.00089162		1503.41	0.00541799		2033.44	-0.00742065		2563.44	-0.01127265		3093.44	-0.00904143		3623.44	-0.02295144
443.59	0.04622677		973.62	-0.00083275		1503.61	0.00536486		2033.64	-0.00715624		2563.64	-0.01226864		3093.64	-0.00907002		3623.64	-0.02258545
443.79	0.04688692		973.82	-0.00054186		1503.81	0.00541983		2033.84	-0.0072012		2563.84	-0.01279876		3093.84	-0.00904009		3623.84	-0.02300149
443.99	0.04743696		974.02	-0.00038217		1504.01	0.00485208		2034.04	-0.00724614		2564.04	-0.01344571		3094.04	-0.00879327		3624.04	-0.02305773
444.19	0.04718809		974.22	-0.00097053		1504.21	0.00442464		2034.24	-0.00765467		2564.24	-0.01405881		3094.24	-0.0084617		3624.24	-0.02344915
444.39	0.04711252		974.42	-0.00105096		1504.41	0.00457972		2034.44	-0.0081155		2564.44	-0.01424444		3094.44	-0.00865995		3624.44	-0.02416063
444.59	0.04769862		974.62	-0.00032146		1504.61	0.00514789		2034.64	-0.0092626		2564.64	-0.01427835		3094.64	-0.00766808		3624.64	-0.02528704
444.79	0.04778375		974.82	-0.00059387		1504.81	0.00529356		2034.84	-0.00965068		2564.84	-0.01418774		3094.84	-0.00820668		3624.84	-0.02511428
444.99	0.04771048		975.02	-0.00164043		1505.01	0.00532357		2035.04	-0.00943146		2565.04	-0.01411421		3095.04	-0.00830117		3625.04	-0.02380473
445.19	0.04574303		975.22	-0.00278223		1505.21	0.00463656		2035.24	-0.0101867		2565.24	-0.0142523		3095.24	-0.00674537		3625.24	-0.02366258
445.39	0.04515188		975.42	-0.00306232		1505.41	0.00454392		2035.44	-0.01025868		2565.44	-0.01361811		3095.44	-0.00641735		3625.44	-0.02298752
445.59	0.0443201		975.62	-0.00323321		1505.61	0.00508229		2035.64	-0.01118662		2565.64	-0.01379322		3095.64	-0.00712789		3625.64	-0.02252531
445.79	0.04391319		975.82	-0.00270581		1505.81	0.0059779		2035.84	-0.0111977		2565.84	-0.01336702		3095.84	-0.00736488		3625.84	-0.02307036
445.99	0.0439723		976.02	-0.00245479		1506.01	0.00685897		2036.04	-0.01133099		2566.04	-0.01185666		3096.04	-0.00867225		3626.04	-0.02320464
446.19	0.04400097		976.22	-0.00211039		1506.21	0.00582034		2036.24	-0.01084184		2566.24	-0.01012267		3096.24	-0.00937567		3626.24	-0.02336984
446.39	0.04447433		976.42	-0.00228851		1506.41	0.00548802		2036.44	-0.01096669		2566.44	-0.00900706		3096.44	-0.01040188		3626.44	-0.0229533
446.59	0.04444048		976.62	-0.00262662		1506.61	0.00535272		2036.64	-0.0111125		2566.64	-0.0081306		3096.64	-0.01067935		3626.64	-0.02275751
446.79	0.04416526		976.82	-0.00248947		1506.81	0.00500728		2036.84	-0.01092691		2566.84	-0.00809622		3096.84	-0.01065882		3626.84	-0.02262856
446.99	0.04369062		977.02	-0.00209063		1507.01	0.00412221		2037.04	-0.01059509		2567.04	-0.00816468		3097.04	-0.01132472		3627.04	-0.02219656
447.19	0.04350859		977.22	-0.00215676		1507.21	0.00425983		2037.24	-0.00957791		2567.24	-0.0083449		3097.24	-0.01179418		3627.24	-0.02153215
447.39	0.0439668		977.42	-0.00190215		1507.41	0.00383806		2037.44	-0.00934305		2567.44	-0.00917125		3097.44	-0.01156657		3627.44	-0.02112863
447.59	0.04401248		977.62	-0.00265168		1507.61	0.00261311		2037.64	-0.00987169		2567.64	-0.00964539		3097.64	-0.010751		3627.64	-0.02185623
447.79	0.04457481		977.82	-0.00296827		1507.81	0.00165331		2037.84	-0.00985092		2567.84	-0.00992942		3097.84	-0.01075556		3627.84	-0.02206913
447.99	0.04413807		978.02	-0.0028575		1508.01	0.00160242		2038.04	-0.00927393		2568.04	-0.00997796		3098.04	-0.010675		3628.04	-0.02239365
448.19	0.04433159		978.22	-0.00270276		1508.21	0.00197476		2038.24	-0.00955245		2568.24	-0.01043345		3098.24	-0.01037942		3628.24	-0.0222698
448.39	0.04432276		978.42	-0.00217976		1508.41	0.00210666		2038.44	-0.00956141		2568.44	-0.01019861		3098.44	-0.00997222		3628.44	-0.02174475
448.59	0.043737		978.62	-0.00167083		1508.61	0.00188965		2038.64	-0.01051766		2568.64	-0.01016975		3098.64	-0.00957781		3628.64	-0.0216287
448.79	0.04309491		978.82	-0.00202895		1508.81	0.00138418		2038.84	-0.00988512		2568.84	-0.01016159		3098.84	-0.00956907		3628.84	-0.02091878
448.99	0.04216548		979.02	-0.00241709		1509.01	0.00111344		2039.04	-0.00947467		2569.04	-0.01109115		3099.04	-0.00862159		3629.04	-0.02040122
449.19	0.04057068		979.22	-0.00327162		1509.21	0.00146048		2039.24	-0.0104276		2569.24	-0.0107196		3099.24	-0.00728789		3629.24	-0.02129832
449.39	0.04092959		979.42	-0.0029156		1509.41	0.00184722		2039.44	-0.01043508		2569.44	-0.01040852		3099.44	-0.00771011		3629.44	-0.02178033
449.59	0.04141077		979.62	-0.00243506		1509.61	0.00249439		2039.64	-0.01098542		2569.64	-0.01072497		3099.64	-0.00880545		3629.64	-0.02304015
449.79	0.0413834		979.82	-0.00142168		1509.81	0.00332086		2039.84	-0.01119749		2569.84	-0.01020997		3099.84	-0.00935116		3629.84	-0.02372475
449.99	0.04164011		980.02	-0.00083065		1510.01	0.00257879		2040.04	-0.0108618		2570.04	-0.00959322		3100.04	-0.01032469		3630.04	-0.02314857
450.19	0.04120391		980.22	-0.00149427		1510.21	0.00326301		2040.24	-0.0099969		2570.24	-0.01000444		3100.24	-0.01026475		3630.24	-0.02307551
450.39	0.04106073		980.42	-0.00201025		1510.41	0.0031151		2040.44	-0.01041773		2570.44	-0.00943158		3100.44	-0.01083382		3630.44	-0.02219981
450.59	0.04042772		980.62	-0.00205063		1510.61	0.00381611		2040.64	-0.01030172		2570.64	-0.00906123		3100.64	-0.01082117		3630.64	-0.0216685
450.79	0.03989626		980.82	-0.00222475		1510.81	0.00379347		2040.84	-0.01130165		2570.84	-0.00988624		3100.84	-0.01041253		3630.84	-0.02172329
450.99	0.03946496		981.02	-0.00239344		1511.01	0.0037929		2041.04	-0.01120278		2571.04	-0.01044553		3101.04	-0.01026961		3631.04	-0.02152841
451.19	0.03912599		981.22	-0.0026702		1511.21	0.00377984		2041.24	-0.01121341		2571.24	-0.01108522		3101.24	-0.00941108		3631.24	-0.02184447
451.39	0.03931885		981.42	-0.00377952		1511.41	0.00344324		2041.44	-0.01118035		2571.44	-0.01119214		3101.44	-0.00893159		3631.44	-0.02233099
451.59	0.04028752		981.62	-0.00471026		1511.61	0.0028819		2041.64	-0.01149425		2571.64	-0.01098168		3101.64	-0.00835647		3631.64	-0.02252178
451.79	0.03978111		981.82	-0.00415026		1511.81	0.00293385		2041.84	-0.01135318		2571.84	-0.0111103		3101.84	-0.00852322		3631.84	-0.02163691
451.99	0.03933656		982.02	-0.00353487		1512.01	0.00336679		2042.04	-0.01192899		2572.04	-0.01085644		3102.04	-0.00809467		3632.04	-0.0215094
452.19	0.03922309		982.22	-0.00300136		1512.21	0.00299696		2042.24	-0.0129067		2572.24	-0.01164691		3102.24	-0.00772059		3632.24	-0.02137366
452.39	0.03932826		982.42	-0.0026691		1512.41	0.00213153		2042.44	-0.01262766		2572.44	-0.01131709		3102.44	-0.00723546		3632.44	-0.02168545
452.59	0.0392383		982.62	-0.00266276		1512.61	0.00154287		2042.64	-0.01388759		2572.64	-0.01178277		3102.64	-0.00719465		3632.64	-0.0225604
452.79	0.0401312		982.82	-0.00297015		1512.81	0.00195803		2042.84	-0.01400674		2572.84	-0.01190243		3102.84	-0.00709391		3632.84	-0.02350847
452.99	0.04029726		983.02	-0.00263714		1513.01	0.00191115		2043.04	-0.01379256		2573.04	-0.01157102		3103.04	-0.00756451		3633.04	-0.02484433
453.19	0.04125783		983.22	-0.00350798		1513.21	0.00133916		2043.24	-0.01402352		2573.24	-0.01105516		3103.24	-0.00849105		3633.24	-0.025737
453.39	0.0418005		983.42	-0.00270987		1513.41	0.0008925		2043.44	-0.01362675		2573.44	-0.01157659		3103.44	-0.00981493		3633.44	-0.02617969
453.59	0.04273089		983.62	-0.00176544		1513.61	0.00126373		2043.64	-0.01396487		2573.64	-0.01209739		3103.64	-0.01078202		3633.64	-0.02667363
453.79	0.04414329		983.82	-0.00107101		1513.81	0.00099554		2043.84	-0.01343243		2573.84	-0.01154411		3103.84	-0.01157307		3633.84	-0.02636471
453.99	0.04481153		984.02	-0.00021409		1514.01	0.00064012		2044.04	-0.01194543		2574.04	-0.0117386		3104.04	-0.01135437		3634.04	-0.02617808
454.19	0.04411549		984.22	-0.00080414		1514.21	0.00117803		2044.24	-0.01112434		2574.24	-0.01173504		3104.24	-0.01127605		3634.24	-0.02620369
454.39	0.04355023		984.42	-0.00080056		1514.41	0.00050939		2044.44	-0.01070644		2574.44	-0.01132123		3104.44	-0.01179928		3634.44	-0.02575747
454.59	0.04296705		984.62	-0.00064295		1514.61	0.00115355		2044.64	-0.01026916		2574.64	-0.01113904		3104.64	-0.01191535		3634.64	-0.02614016
454.79	0.04289347		984.82	-0.00088132		1514.81	0.00110315		2044.84	-0.0097885		2574.84	-0.0115522		3104.84	-0.01155928		3634.84	-0.02707045
454.99	0.04239964		985.02	-0.0005941		1515.01	0.00147139		2045.04	-0.00822457		2575.04	-0.01056338		3105.04	-0.01165102		3635.04	-0.02672111
455.19	0.04319956		985.22	-0.00094245		1515.21	0.00136395		2045.24	-0.00868775		2575.24	-0.0099885		3105.24	-0.01127441		3635.24	-0.02612569
455.39	0.04287946		985.42	-0.00205391		1515.41	0.0018934		2045.44	-0.00921136		2575.44	-0.00977537		3105.44	-0.01090636		3635.44	-0.02601101
455.59	0.04321587		985.62	-0.00201883		1515.61	0.00242353		2045.64	-0.00979004		2575.64	-0.01013447		3105.64	-0.01037476		3635.64	-0.02595094
455.79	0.04173542		985.82	-0.001982		1515.81	0.00290925		2045.84	-0.01035805		2575.84	-0.00994289		3105.84	-0.00871393		3635.84	-0.02620522
455.99	0.04089088		986.02	-0.00227424		1516.01	0.00259279		2046.04	-0.01084481		2576.04	-0.01002078		3106.04	-0.00807175		3636.04	-0.02608282
456.19	0.0406741		986.22	-0.00317889		1516.21	0.00167308		2046.24	-0.01074087		2576.24	-0.01025776		3106.24	-0.00791978		3636.24	-0.02670773
456.39	0.04119632		986.42	-0.00303884		1516.41	0.00134825		2046.44	-0.01033107		2576.44	-0.00955323		3106.44	-0.00764427		3636.44	-0.02714733
456.59	0.04014205		986.62	-0.00435549		1516.61	0.0016824		2046.64	-0.01239496		2576.64	-0.00967849		3106.64	-0.00792477		3636.64	-0.02743276
456.79	0.04036003		986.82	-0.00505921		1516.81	0.00128991		2046.84	-0.01235818		2576.84	-0.00965347		3106.84	-0.00821603		3636.84	-0.02771137
456.99	0.0407331		987.02	-0.00596511		1517.01	0.00022144		2047.04	-0.011638		2577.04	-0.00956394		3107.04	-0.00879259		3637.04	-0.02832017
457.19	0.04117073		987.22	-0.00707878		1517.21	-0.00060616		2047.24	-0.0116808		2577.24	-0.0103571		3107.24	-0.00906294		3637.24	-0.02761131
457.39	0.04118036		987.42	-0.0069002		1517.41	-0.0003621		2047.44	-0.01229345		2577.44	-0.01129623		3107.44	-0.00955946		3637.44	-0.02678113
457.59	0.04158139		987.62	-0.00716506		1517.61	-0.00062148		2047.64	-0.01261472		2577.64	-0.01262343		3107.64	-0.00995938		3637.64	-0.0268568
457.79	0.0410489		987.82	-0.00714525		1517.81	-0.00085872		2047.84	-0.01230299		2577.84	-0.01272809		3107.84	-0.01010729		3637.84	-0.02634294
457.99	0.03968144		988.02	-0.00696509		1518.01	-0.00016036		2048.04	-0.01186493		2578.04	-0.01313798		3108.04	-0.00954138		3638.04	-0.02600056
458.19	0.03862112		988.22	-0.00766165		1518.21	-0.00066485		2048.24	-0.01154962		2578.24	-0.01258254		3108.24	-0.0108177		3638.24	-0.02537786
458.39	0.03806363		988.42	-0.0076938		1518.41	-0.00038759		2048.44	-0.0112488		2578.44	-0.01289992		3108.44	-0.01151287		3638.44	-0.0253218
458.59	0.0381974		988.62	-0.0070067		1518.61	-0.00046846		2048.64	-0.01109682		2578.64	-0.01240969		3108.64	-0.01238631		3638.64	-0.02600054
458.79	0.03888408		988.82	-0.00658182		1518.81	-0.00026338		2048.84	-0.01017782		2578.84	-0.01252569		3108.84	-0.01302014		3638.84	-0.02543867
458.99	0.03853722		989.02	-0.00581763		1519.01	0.0011669		2049.04	-0.01026566		2579.04	-0.01253055		3109.04	-0.01343066		3639.04	-0.02495145
459.19	0.03893761		989.22	-0.00664499		1519.21	0.00156527		2049.24	-0.01099932		2579.24	-0.01297099		3109.24	-0.01349448		3639.24	-0.02479413
459.39	0.03872211		989.42	-0.00689135		1519.41	0.00278946		2049.44	-0.00998283		2579.44	-0.01311037		3109.44	-0.01325098		3639.44	-0.0249186
459.59	0.03930582		989.62	-0.00671975		1519.61	0.00322246		2049.64	-0.00997681		2579.64	-0.01271186		3109.64	-0.01287557		3639.64	-0.02575431
459.79	0.03939768		989.82	-0.00644782		1519.81	0.00320193		2049.84	-0.00994224		2579.84	-0.01193353		3109.84	-0.01179171		3639.84	-0.02645843
459.99	0.04001686		990.02	-0.00621964		1520.01	0.00378718		2050.04	-0.00928		2580.04	-0.01115563		3110.04	-0.01196746		3640.04	-0.02649619
460.19	0.04041614		990.22	-0.00580909		1520.21	0.00361972		2050.24	-0.0088157		2580.24	-0.01054782		3110.24	-0.01159154		3640.24	-0.02609833
460.39	0.04078154		990.42	-0.00586012		1520.41	0.0033231		2050.44	-0.00945544		2580.44	-0.0098863		3110.44	-0.0109344		3640.44	-0.02584399
460.59	0.04058996		990.62	-0.00677867		1520.61	0.00293548		2050.64	-0.01008426		2580.64	-0.01023639		3110.64	-0.01038439		3640.64	-0.02587398
460.79	0.0418071		990.82	-0.00663671		1520.81	0.00214344		2050.84	-0.00922123		2580.84	-0.01075489		3110.84	-0.01057733		3640.84	-0.02582529
460.99	0.04153928		991.02	-0.00646599		1521.01	0.00164341		2051.04	-0.00884638		2581.04	-0.01139442		3111.04	-0.01141569		3641.04	-0.02620631
461.19	0.04157657		991.22	-0.0061408		1521.21	0.00188331		2051.24	-0.00977349		2581.24	-0.0126341		3111.24	-0.0111491		3641.24	-0.02498649
461.39	0.04225863		991.42	-0.00538076		1521.41	0.00147397		2051.44	-0.01080807		2581.44	-0.01380031		3111.44	-0.0110244		3641.44	-0.02414316
461.59	0.04166305		991.62	-0.00554806		1521.61	0.00110595		2051.64	-0.01030724		2581.64	-0.01467198		3111.64	-0.01027935		3641.64	-0.0243582
461.79	0.04127251		991.82	-0.00488841		1521.81	0.00150437		2051.84	-0.00967327		2581.84	-0.01436041		3111.84	-0.00948352		3641.84	-0.02408603
461.99	0.04132028		992.02	-0.00406986		1522.01	0.00134319		2052.04	-0.00968774		2582.04	-0.01464492		3112.04	-0.00939669		3642.04	-0.02468031
462.19	0.04180937		992.22	-0.00353962		1522.21	0.0009938		2052.24	-0.01013704		2582.24	-0.01445254		3112.24	-0.00990033		3642.24	-0.02502737
462.39	0.04180286		992.42	-0.0034044		1522.41	-0.00012971		2052.44	-0.01068		2582.44	-0.01538608		3112.44	-0.00960433		3642.44	-0.02527779
462.59	0.04218844		992.62	-0.00282695		1522.61	-0.00036652		2052.64	-0.01018431		2582.64	-0.01543894		3112.64	-0.01014785		3642.64	-0.02582243
462.79	0.04197903		992.82	-0.00301056		1522.81	-0.00012427		2052.84	-0.00973533		2582.84	-0.01544891		3112.84	-0.01084527		3642.84	-0.02586213
462.99	0.04110341		993.02	-0.00241421		1523.01	0.00005199		2053.04	-0.01008748		2583.04	-0.01503502		3113.04	-0.01121362		3643.04	-0.02660312
463.19	0.04041535		993.22	-0.00246662		1523.21	-0.00052096		2053.24	-0.01047856		2583.24	-0.01494035		3113.24	-0.01192162		3643.24	-0.02680854
463.39	0.03977741		993.42	-0.00177069		1523.41	0.00003237		2053.44	-0.00945458		2583.44	-0.01433878		3113.44	-0.01137483		3643.44	-0.02658068
463.59	0.04020315		993.62	-0.00130354		1523.61	0.00008216		2053.64	-0.0096966		2583.64	-0.01307881		3113.64	-0.01174826		3643.64	-0.02708216
463.79	0.04043619		993.82	-0.00149459		1523.81	0.00088533		2053.84	-0.00960265		2583.84	-0.012437		3113.84	-0.01129816		3643.84	-0.02676666
463.99	0.04023952		994.02	-0.00216024		1524.01	0.00117814		2054.04	-0.00973517		2584.04	-0.01209619		3114.04	-0.01103238		3644.04	-0.02657721
464.19	0.04023939		994.22	-0.00299612		1524.21	0.00031618		2054.24	-0.01016052		2584.24	-0.01209508		3114.24	-0.01089908		3644.24	-0.02505656
464.39	0.04103801		994.42	-0.00413305		1524.41	0.0011595		2054.44	-0.01060542		2584.44	-0.01167432		3114.44	-0.01202593		3644.44	-0.02488157
464.59	0.04106156		994.62	-0.00443969		1524.61	0.00173603		2054.64	-0.01020798		2584.64	-0.01261661		3114.64	-0.01218477		3644.64	-0.02481231
464.79	0.04195392		994.82	-0.00466152		1524.81	0.00199884		2054.84	-0.00965646		2584.84	-0.01306966		3114.84	-0.01212487		3644.84	-0.02440306
464.99	0.04176028		995.02	-0.00482767		1525.01	0.00177014		2055.04	-0.01057476		2585.04	-0.01346987		3115.04	-0.01163133		3645.04	-0.02446551
465.19	0.04184338		995.22	-0.00496498		1525.21	0.00199559		2055.24	-0.01107905		2585.24	-0.01347116		3115.24	-0.01090861		3645.24	-0.02357626
465.39	0.04291504		995.42	-0.00530157		1525.41	0.00220117		2055.44	-0.01109061		2585.44	-0.01417973		3115.44	-0.01010263		3645.44	-0.02295029
465.59	0.04295365		995.62	-0.00623612		1525.61	0.00344482		2055.64	-0.01040406		2585.64	-0.01476936		3115.64	-0.0097833		3645.64	-0.02220683
465.79	0.04328312		995.82	-0.00644432		1525.81	0.00370178		2055.84	-0.00984839		2585.84	-0.01510506		3115.84	-0.00906745		3645.84	-0.02273188
465.99	0.04274547		996.02	-0.00648696		1526.01	0.00263986		2056.04	-0.01035463		2586.04	-0.01503496		3116.04	-0.00946651		3646.04	-0.02240832
466.19	0.04371759		996.22	-0.00713975		1526.21	0.00193914		2056.24	-0.01060984		2586.24	-0.01519372		3116.24	-0.00917767		3646.24	-0.02214515
466.39	0.0431155		996.42	-0.00799256		1526.41	0.00013978		2056.44	-0.00896278		2586.44	-0.01506006		3116.44	-0.0091483		3646.44	-0.02240238
466.59	0.0426477		996.62	-0.00735687		1526.61	-0.00008845		2056.64	-0.00845047		2586.64	-0.01452334		3116.64	-0.00988714		3646.64	-0.0233179
466.79	0.04195878		996.82	-0.00777076		1526.81	-0.00122644		2056.84	-0.00890483		2586.84	-0.01478418		3116.84	-0.00957636		3646.84	-0.02387462
466.99	0.0412119		997.02	-0.00737578		1527.01	-0.00210553		2057.04	-0.00989773		2587.04	-0.01421826		3117.04	-0.00954043		3647.04	-0.02451898
467.19	0.04063999		997.22	-0.00734528		1527.21	-0.00282012		2057.24	-0.01007351		2587.24	-0.01472228		3117.24	-0.0098962		3647.24	-0.0243776
467.39	0.03986665		997.42	-0.00751401		1527.41	-0.00255446		2057.44	-0.01011936		2587.44	-0.01407852		3117.44	-0.01030319		3647.44	-0.02432682
467.59	0.04103397		997.62	-0.00751168		1527.61	-0.00207183		2057.64	-0.01100758		2587.64	-0.01345673		3117.64	-0.01070247		3647.64	-0.02466169
467.79	0.04139716		997.82	-0.00794458		1527.81	-0.00193313		2057.84	-0.01163147		2587.84	-0.01357288		3117.84	-0.00963436		3647.84	-0.02566114
467.99	0.04104082		998.02	-0.00796324		1528.01	-0.0020976		2058.04	-0.01202994		2588.04	-0.01323074		3118.04	-0.00952175		3648.04	-0.02601439
468.19	0.04163404		998.22	-0.00742285		1528.21	-0.00131951		2058.24	-0.01203235		2588.24	-0.01366467		3118.24	-0.01010041		3648.24	-0.02497308
468.39	0.04211963		998.42	-0.0078147		1528.41	0.00007362		2058.44	-0.01208503		2588.44	-0.0139835		3118.44	-0.01060522		3648.44	-0.02525808
468.59	0.04177931		998.62	-0.0078736		1528.61	-0.00003103		2058.64	-0.0122653		2588.64	-0.01451038		3118.64	-0.01023547		3648.64	-0.02548015
468.79	0.04208218		998.82	-0.00704482		1528.81	0.00055921		2058.84	-0.01303592		2588.84	-0.01377992		3118.84	-0.0095962		3648.84	-0.02496327
468.99	0.04109753		999.02	-0.00587156		1529.01	0.00121818		2059.04	-0.01452587		2589.04	-0.01344965		3119.04	-0.00989789		3649.04	-0.02541383
469.19	0.04072226		999.22	-0.0060498		1529.21	0.00170123		2059.24	-0.01390485		2589.24	-0.01313983		3119.24	-0.01113521		3649.24	-0.02454016
469.39	0.04131865		999.42	-0.00589394		1529.41	0.00220321		2059.44	-0.0143122		2589.44	-0.01357401		3119.44	-0.01106792		3649.44	-0.02479404
469.59	0.04100326		999.62	-0.00519259		1529.61	0.00227894		2059.64	-0.01355316		2589.64	-0.01335885		3119.64	-0.01126383		3649.64	-0.02432671
469.79	0.04085171		999.82	-0.00431108		1529.81	0.00068988		2059.84	-0.01264115		2589.84	-0.01362959		3119.84	-0.01128312		3649.84	-0.02474072
469.99	0.03970551		1000.02	-0.00376213		1530.01	-0.00119626		2060.04	-0.01202386		2590.04	-0.01373393		3120.04	-0.01129344		3650.04	-0.02502079
470.19	0.04069793		1000.22	-0.00337365		1530.21	-0.00306062		2060.24	-0.0112062		2590.24	-0.01318513		3120.24	-0.0114633		3650.24	-0.02552769
470.39	0.04045509		1000.42	-0.00259606		1530.41	-0.00488157		2060.44	-0.00976871		2590.44	-0.01234328		3120.44	-0.01130865		3650.44	-0.02583486
470.59	0.04049523		1000.62	-0.00232988		1530.61	-0.00517421		2060.64	-0.01049769		2590.64	-0.01273224		3120.64	-0.01107646		3650.64	-0.02592929
470.79	0.04078052		1000.82	-0.00243306		1530.81	-0.00591817		2060.84	-0.01129073		2590.84	-0.01279571		3120.84	-0.01074733		3650.84	-0.02606837
470.99	0.04118798		1001.02	-0.00251188		1531.01	-0.00593882		2061.04	-0.01214917		2591.04	-0.0119018		3121.04	-0.01190906		3651.04	-0.02555909
471.19	0.04060063		1001.22	-0.00274895		1531.21	-0.00669822		2061.24	-0.01196664		2591.24	-0.01238556		3121.24	-0.01328221		3651.24	-0.02500733
471.39	0.04093958		1001.42	-0.00314083		1531.41	-0.00633559		2061.44	-0.01253386		2591.44	-0.01182323		3121.44	-0.01376036		3651.44	-0.02509396
471.59	0.04284158		1001.62	-0.00349812		1531.61	-0.00686327		2061.64	-0.01184338		2591.64	-0.01199865		3121.64	-0.01323437		3651.64	-0.02525433
471.79	0.04215983		1001.82	-0.00349427		1531.81	-0.00641924		2061.84	-0.01172563		2591.84	-0.01201867		3121.84	-0.01249131		3651.84	-0.02620161
471.99	0.04212821		1002.02	-0.0039828		1532.01	-0.00520275		2062.04	-0.0123096		2592.04	-0.01240964		3122.04	-0.01200496		3652.04	-0.02592931
472.19	0.04346256		1002.22	-0.00520925		1532.21	-0.00403132		2062.24	-0.01235344		2592.24	-0.01296432		3122.24	-0.0125537		3652.24	-0.02527555
472.39	0.04382272		1002.42	-0.00708199		1532.41	-0.0028142		2062.44	-0.01295744		2592.44	-0.01313767		3122.44	-0.01264567		3652.44	-0.02577592
472.59	0.04392238		1002.62	-0.00674283		1532.61	-0.00222355		2062.64	-0.01381811		2592.64	-0.01276931		3122.64	-0.01280073		3652.64	-0.02586366
472.79	0.04388257		1002.82	-0.00738833		1532.81	-0.00149895		2062.84	-0.0141647		2592.84	-0.01298736		3122.84	-0.01185998		3652.84	-0.02627312
472.99	0.04433888		1003.02	-0.00745471		1533.01	-0.0012121		2063.04	-0.01407472		2593.04	-0.0133846		3123.04	-0.01246639		3653.04	-0.02690851
473.19	0.04406113		1003.22	-0.00841443		1533.21	-0.00144243		2063.24	-0.01288042		2593.24	-0.01417982		3123.24	-0.01262705		3653.24	-0.02622572
473.39	0.04396275		1003.42	-0.00818738		1533.41	-0.00143486		2063.44	-0.01290777		2593.44	-0.01479543		3123.44	-0.01192496		3653.44	-0.02636862
473.59	0.04442079		1003.62	-0.00776668		1533.61	-0.00212544		2063.64	-0.01199529		2593.64	-0.01600612		3123.64	-0.01145792		3653.64	-0.02607762
473.79	0.04362377		1003.82	-0.00764058		1533.81	-0.00253505		2063.84	-0.01132184		2593.84	-0.01685128		3123.84	-0.01102104		3653.84	-0.02594518
473.99	0.04361699		1004.02	-0.00747001		1534.01	-0.00219386		2064.04	-0.01062919		2594.04	-0.01613126		3124.04	-0.0103753		3654.04	-0.02653029
474.19	0.04423425		1004.22	-0.00611217		1534.21	-0.00226718		2064.24	-0.01049787		2594.24	-0.01511727		3124.24	-0.01005069		3654.24	-0.02648907
474.39	0.04281144		1004.42	-0.0053845		1534.41	-0.00202192		2064.44	-0.01023043		2594.44	-0.01551868		3124.44	-0.00889614		3654.44	-0.02616822
474.59	0.04176534		1004.62	-0.00513292		1534.61	-0.0017651		2064.64	-0.01061671		2594.64	-0.01646733		3124.64	-0.00876342		3654.64	-0.02558917
474.79	0.04128348		1004.82	-0.0053107		1534.81	-0.00205158		2064.84	-0.0103833		2594.84	-0.01613241		3124.84	-0.00849136		3654.84	-0.0249859
474.99	0.04160563		1005.02	-0.00601862		1535.01	-0.00198392		2065.04	-0.01021537		2595.04	-0.01563204		3125.04	-0.0094195		3655.04	-0.0240852
475.19	0.04052853		1005.22	-0.00593843		1535.21	-0.0018841		2065.24	-0.00961879		2595.24	-0.01553324		3125.24	-0.00991716		3655.24	-0.02333591
475.39	0.04080077		1005.42	-0.00629657		1535.41	-0.00172669		2065.44	-0.00945769		2595.44	-0.01498303		3125.44	-0.00979926		3655.44	-0.02327403
475.59	0.04030806		1005.62	-0.00648109		1535.61	-0.0011901		2065.64	-0.00993192		2595.64	-0.01565342		3125.64	-0.00969372		3655.64	-0.02344658
475.79	0.03834534		1005.82	-0.00593961		1535.81	-0.0002063		2065.84	-0.01058245		2595.84	-0.01499586		3125.84	-0.00885745		3655.84	-0.02423488
475.99	0.03918255		1006.02	-0.00613469		1536.01	0.00049126		2066.04	-0.0111862		2596.04	-0.01445498		3126.04	-0.00946591		3656.04	-0.02376003
476.19	0.03887207		1006.22	-0.00662871		1536.21	0.00045004		2066.24	-0.01102029		2596.24	-0.01387999		3126.24	-0.01034996		3656.24	-0.02410933
476.39	0.03859906		1006.42	-0.00728677		1536.41	0.00097871		2066.44	-0.01199182		2596.44	-0.01403527		3126.44	-0.01039683		3656.44	-0.02526376
476.59	0.03784104		1006.62	-0.00708644		1536.61	0.00001155		2066.64	-0.01188109		2596.64	-0.01469296		3126.64	-0.01043035		3656.64	-0.02565692
476.79	0.03817439		1006.82	-0.00760852		1536.81	-0.00038783		2066.84	-0.0121571		2596.84	-0.01527896		3126.84	-0.009943		3656.84	-0.02599091
476.99	0.03895382		1007.02	-0.00691057		1537.01	-0.00071295		2067.04	-0.0124262		2597.04	-0.01524857		3127.04	-0.01148793		3657.04	-0.02596119
477.19	0.0384053		1007.22	-0.00688516		1537.21	-0.00095078		2067.24	-0.01265328		2597.24	-0.01625589		3127.24	-0.01151591		3657.24	-0.02592891
477.39	0.03831883		1007.42	-0.00644177		1537.41	-0.00123797		2067.44	-0.01325491		2597.44	-0.01689353		3127.44	-0.01223716		3657.44	-0.02617339
477.59	0.03940521		1007.62	-0.00598999		1537.61	-0.00175703		2067.64	-0.01301541		2597.64	-0.01723715		3127.64	-0.01249319		3657.64	-0.02659396
477.79	0.03904397		1007.82	-0.00557832		1537.81	-0.00118592		2067.84	-0.01266741		2597.84	-0.01689826		3127.84	-0.01198012		3657.84	-0.02596513
477.99	0.0401189		1008.02	-0.00494921		1538.01	-0.00119189		2068.04	-0.01258447		2598.04	-0.0168086		3128.04	-0.01194397		3658.04	-0.02702218
478.19	0.04002239		1008.22	-0.0042731		1538.21	-0.00217496		2068.24	-0.01260368		2598.24	-0.0174279		3128.24	-0.01147162		3658.24	-0.02707574
478.39	0.04023508		1008.42	-0.00430481		1538.41	-0.00225388		2068.44	-0.01318793		2598.44	-0.01831397		3128.44	-0.01132879		3658.44	-0.02650664
478.59	0.04112133		1008.62	-0.00474754		1538.61	-0.0026799		2068.64	-0.01214873		2598.64	-0.01919984		3128.64	-0.01118873		3658.64	-0.02586529
478.79	0.04125654		1008.82	-0.0055638		1538.81	-0.00198568		2068.84	-0.01157164		2598.84	-0.0186072		3128.84	-0.01071593		3658.84	-0.02618241
478.99	0.04156139		1009.02	-0.00548849		1539.01	-0.00099621		2069.04	-0.01131793		2599.04	-0.01850248		3129.04	-0.01092922		3659.04	-0.02576621
479.19	0.04016269		1009.22	-0.00518673		1539.21	-0.00057729		2069.24	-0.01145493		2599.24	-0.01853371		3129.24	-0.01015934		3659.24	-0.02595638
479.39	0.04012142		1009.42	-0.00521959		1539.41	-0.00027472		2069.44	-0.01175444		2599.44	-0.01765236		3129.44	-0.01038254		3659.44	-0.02676748
479.59	0.04068592		1009.62	-0.00472706		1539.61	0.00093308		2069.64	-0.01157685		2599.64	-0.0175135		3129.64	-0.01090354		3659.64	-0.0268317
479.79	0.03991292		1009.82	-0.00481546		1539.81	0.00105868		2069.84	-0.01100755		2599.84	-0.01616936		3129.84	-0.0107044		3659.84	-0.02753426
479.99	0.0407092		1010.02	-0.00470933		1540.01	0.0013828		2070.04	-0.01152214		2600.04	-0.01601713		3130.04	-0.01201808		3660.04	-0.02762911
480.19	0.04016082		1010.22	-0.00516726		1540.21	0.00142325		2070.24	-0.01138224		2600.24	-0.0155191		3130.24	-0.01128889		3660.24	-0.02856493
480.39	0.04066708		1010.42	-0.0056747		1540.41	0.00157182		2070.44	-0.01137057		2600.44	-0.01504907		3130.44	-0.01176192		3660.44	-0.02878534
480.59	0.04016295		1010.62	-0.00536602		1540.61	0.00119925		2070.64	-0.01140357		2600.64	-0.01534093		3130.64	-0.01227904		3660.64	-0.02836365
480.79	0.04116014		1010.82	-0.00515122		1540.81	0.00116264		2070.84	-0.01239465		2600.84	-0.01485474		3130.84	-0.0123212		3660.84	-0.02797311
480.99	0.04122499		1011.02	-0.00513155		1541.01	0.00118023		2071.04	-0.0127775		2601.04	-0.0147059		3131.04	-0.01340842		3661.04	-0.0275635
481.19	0.0410294		1011.22	-0.00591738		1541.21	0.00200452		2071.24	-0.01280146		2601.24	-0.01483788		3131.24	-0.01305668		3661.24	-0.0280425
481.39	0.04069495		1011.42	-0.00631618		1541.41	0.0018466		2071.44	-0.01247149		2601.44	-0.01438774		3131.44	-0.01285632		3661.44	-0.02747179
481.59	0.04060791		1011.62	-0.00641532		1541.61	0.00064145		2071.64	-0.01300392		2601.64	-0.01378383		3131.64	-0.01252522		3661.64	-0.02696056
481.79	0.04011606		1011.82	-0.00646959		1541.81	-0.00077092		2071.84	-0.01329823		2601.84	-0.01362929		3131.84	-0.01221721		3661.84	-0.02592516
481.99	0.04023579		1012.02	-0.00708403		1542.01	-0.00132404		2072.04	-0.0133335		2602.04	-0.01390109		3132.04	-0.01274446		3662.04	-0.02668894
482.19	0.04007868		1012.22	-0.00729988		1542.21	-0.00156465		2072.24	-0.0133665		2602.24	-0.01427624		3132.24	-0.01298638		3662.24	-0.02541509
482.39	0.03948167		1012.42	-0.00744598		1542.41	-0.00206871		2072.44	-0.01335126		2602.44	-0.01469238		3132.44	-0.01308685		3662.44	-0.02537976
482.59	0.03829528		1012.62	-0.00815695		1542.61	-0.00250056		2072.64	-0.01330739		2602.64	-0.0148285		3132.64	-0.01253147		3662.64	-0.02560968
482.79	0.03777341		1012.82	-0.00857681		1542.81	-0.00247241		2072.84	-0.01415617		2602.84	-0.01521987		3132.84	-0.01215672		3662.84	-0.02589635
482.99	0.0375181		1013.02	-0.00863918		1543.01	-0.00245122		2073.04	-0.01392265		2603.04	-0.0155879		3133.04	-0.01203612		3663.04	-0.02564071
483.19	0.03753133		1013.22	-0.00891368		1543.21	-0.00304578		2073.24	-0.01452486		2603.24	-0.01541672		3133.24	-0.01182391		3663.24	-0.02639627
483.39	0.03848501		1013.42	-0.00920847		1543.41	-0.00224963		2073.44	-0.01419942		2603.44	-0.01546587		3133.44	-0.01321806		3663.44	-0.02704225
483.59	0.03952944		1013.62	-0.0097223		1543.61	-0.00242762		2073.64	-0.01390525		2603.64	-0.01625973		3133.64	-0.01393174		3663.64	-0.02741278
483.79	0.03954815		1013.82	-0.00988074		1543.81	-0.00324062		2073.84	-0.0141219		2603.84	-0.01703863		3133.84	-0.01372647		3663.84	-0.02783805
483.99	0.03960778		1014.02	-0.00951028		1544.01	-0.0031725		2074.04	-0.01478146		2604.04	-0.01712042		3134.04	-0.01427623		3664.04	-0.02777439
484.19	0.03958607		1014.22	-0.00898898		1544.21	-0.00305921		2074.24	-0.01422301		2604.24	-0.01750353		3134.24	-0.0141542		3664.24	-0.02739509
484.39	0.03991527		1014.42	-0.00893181		1544.41	-0.00265377		2074.44	-0.01391966		2604.44	-0.01781605		3134.44	-0.01525204		3664.44	-0.02724684
484.59	0.04001774		1014.62	-0.00855586		1544.61	-0.00254342		2074.64	-0.01438849		2604.64	-0.01844155		3134.64	-0.0150928		3664.64	-0.02725127
484.79	0.04041096		1014.82	-0.00848284		1544.81	-0.00220287		2074.84	-0.01412344		2604.84	-0.01800763		3134.84	-0.01507147		3664.84	-0.02734687
484.99	0.04022398		1015.02	-0.00944433		1545.01	-0.00096102		2075.04	-0.01344099		2605.04	-0.01724895		3135.04	-0.01494717		3665.04	-0.0276118
485.19	0.03914434		1015.22	-0.00948744		1545.21	0.00034023		2075.24	-0.01312256		2605.24	-0.01684116		3135.24	-0.01442035		3665.24	-0.02890601
485.39	0.03911832		1015.42	-0.00918356		1545.41	-0.00026138		2075.44	-0.01311487		2605.44	-0.01609422		3135.44	-0.01347944		3665.44	-0.02840585
485.59	0.03853918		1015.62	-0.00926097		1545.61	-0.00045627		2075.64	-0.01278373		2605.64	-0.01531017		3135.64	-0.01306982		3665.64	-0.02841904
485.79	0.03846815		1015.82	-0.00907597		1545.81	-0.00055314		2075.84	-0.01195911		2605.84	-0.01514407		3135.84	-0.0128914		3665.84	-0.02851143
485.99	0.03779032		1016.02	-0.00920606		1546.01	-0.00055524		2076.04	-0.01112244		2606.04	-0.01529056		3136.04	-0.01260674		3666.04	-0.02942531
486.19	0.03731782		1016.22	-0.00855684		1546.21	-0.0011213		2076.24	-0.01133974		2606.24	-0.01547359		3136.24	-0.01201217		3666.24	-0.02918657
486.39	0.03743964		1016.42	-0.00843689		1546.41	-0.0014277		2076.44	-0.01170931		2606.44	-0.01564507		3136.44	-0.01084058		3666.44	-0.03006161
486.59	0.03760132		1016.62	-0.00867438		1546.61	-0.00088238		2076.64	-0.01190909		2606.64	-0.01568509		3136.64	-0.00991629		3666.64	-0.0300709
486.79	0.0368905		1016.82	-0.0083503		1546.81	-0.00170958		2076.84	-0.01158976		2606.84	-0.01604207		3136.84	-0.00944504		3666.84	-0.03005193
486.99	0.03576155		1017.02	-0.00790906		1547.01	-0.00200592		2077.04	-0.0117213		2607.04	-0.01602377		3137.04	-0.00976354		3667.04	-0.03044357
487.19	0.03620297		1017.22	-0.00827914		1547.21	-0.00250309		2077.24	-0.01202386		2607.24	-0.01673902		3137.24	-0.00940946		3667.24	-0.03070263
487.39	0.03569802		1017.42	-0.00805258		1547.41	-0.00200366		2077.44	-0.01202614		2607.44	-0.01709006		3137.44	-0.00946805		3667.44	-0.03092815
487.59	0.03558968		1017.62	-0.00804012		1547.61	-0.00303204		2077.64	-0.01261519		2607.64	-0.017492		3137.64	-0.00979193		3667.64	-0.03073049
487.79	0.03437078		1017.82	-0.00717112		1547.81	-0.00264811		2077.84	-0.01327443		2607.84	-0.01753887		3137.84	-0.00963608		3667.84	-0.03010075
487.99	0.03384963		1018.02	-0.00676702		1548.01	-0.00297595		2078.04	-0.01382285		2608.04	-0.01719268		3138.04	-0.00977606		3668.04	-0.02902476
488.19	0.03393907		1018.22	-0.00659894		1548.21	-0.00261937		2078.24	-0.01286099		2608.24	-0.01718209		3138.24	-0.00985215		3668.24	-0.02860443
488.39	0.03410756		1018.42	-0.0067841		1548.41	-0.00206538		2078.44	-0.01315552		2608.44	-0.01671758		3138.44	-0.0104396		3668.44	-0.02870463
488.59	0.03406446		1018.62	-0.00642771		1548.61	-0.00171788		2078.64	-0.01301716		2608.64	-0.01625646		3138.64	-0.01066764		3668.64	-0.02890088
488.79	0.03413499		1018.82	-0.00704773		1548.81	-0.00122765		2078.84	-0.01239113		2608.84	-0.01494941		3138.84	-0.01002079		3668.84	-0.02848955
488.99	0.03385584		1019.02	-0.00777941		1549.01	-0.0002514		2079.04	-0.0122359		2609.04	-0.01489318		3139.04	-0.00978142		3669.04	-0.02874668
489.19	0.03492778		1019.22	-0.00778466		1549.21	-0.00015961		2079.24	-0.01242926		2609.24	-0.01519667		3139.24	-0.01055467		3669.24	-0.02953843
489.39	0.0363264		1019.42	-0.00888671		1549.41	-0.00027133		2079.44	-0.0117241		2609.44	-0.01561208		3139.44	-0.01142983		3669.44	-0.02942949
489.59	0.03698072		1019.62	-0.00897251		1549.61	-0.00012676		2079.64	-0.01171928		2609.64	-0.01593967		3139.64	-0.01256658		3669.64	-0.02995754
489.79	0.03815001		1019.82	-0.00857771		1549.81	-0.00046363		2079.84	-0.01138468		2609.84	-0.0170068		3139.84	-0.01315231		3669.84	-0.02992237
489.99	0.03915379		1020.02	-0.008625		1550.01	-0.00153225		2080.04	-0.01139646		2610.04	-0.01729467		3140.04	-0.01276417		3670.04	-0.03003924
490.19	0.03992687		1020.22	-0.00852881		1550.21	-0.0015314		2080.24	-0.01248151		2610.24	-0.01810405		3140.24	-0.01302172		3670.24	-0.02930741
490.39	0.04090717		1020.42	-0.00827058		1550.41	-0.00172311		2080.44	-0.01258894		2610.44	-0.01834681		3140.44	-0.01253975		3670.44	-0.02946863
490.59	0.04023368		1020.62	-0.00817701		1550.61	-0.00180961		2080.64	-0.01188496		2610.64	-0.01827384		3140.64	-0.0124324		3670.64	-0.02897379
490.79	0.03872851		1020.82	-0.00774469		1550.81	-0.00284716		2080.84	-0.01221117		2610.84	-0.01864882		3140.84	-0.01291537		3670.84	-0.02874265
490.99	0.03818769		1021.02	-0.00737444		1551.01	-0.00369462		2081.04	-0.01186163		2611.04	-0.01878875		3141.04	-0.01375563		3671.04	-0.02891035
491.19	0.03885711		1021.22	-0.00767973		1551.21	-0.00364919		2081.24	-0.01051803		2611.24	-0.01892128		3141.24	-0.01359001		3671.24	-0.02919013
491.39	0.03797611		1021.42	-0.0071833		1551.41	-0.00333515		2081.44	-0.01052013		2611.44	-0.01778947		3141.44	-0.01392311		3671.44	-0.02855959
491.59	0.03722533		1021.62	-0.00723363		1551.61	-0.00366862		2081.64	-0.01174752		2611.64	-0.01718115		3141.64	-0.01409477		3671.64	-0.02816735
491.79	0.03671262		1021.82	-0.00684571		1551.81	-0.00345563		2081.84	-0.0114729		2611.84	-0.0162623		3141.84	-0.01392916		3671.84	-0.02787588
491.99	0.03727822		1022.02	-0.00744444		1552.01	-0.00392129		2082.04	-0.0110092		2612.04	-0.01559009		3142.04	-0.01394975		3672.04	-0.02679128
492.19	0.03715713		1022.22	-0.00770716		1552.21	-0.0033343		2082.24	-0.00993		2612.24	-0.01480906		3142.24	-0.01347418		3672.24	-0.02786259
492.39	0.03740527		1022.42	-0.00742874		1552.41	-0.00282965		2082.44	-0.01042312		2612.44	-0.01403712		3142.44	-0.0137007		3672.44	-0.0276686
492.59	0.03724227		1022.62	-0.00733514		1552.61	-0.0022247		2082.64	-0.01010482		2612.64	-0.01292212		3142.64	-0.01451046		3672.64	-0.02801989
492.79	0.03722112		1022.82	-0.0082358		1552.81	-0.0018798		2082.84	-0.01075791		2612.84	-0.01240099		3142.84	-0.01429347		3672.84	-0.02855242
492.99	0.03762022		1023.02	-0.00834682		1553.01	-0.00235337		2083.04	-0.01216978		2613.04	-0.01287603		3143.04	-0.01490871		3673.04	-0.02879535
493.19	0.03831021		1023.22	-0.00934522		1553.21	-0.0026406		2083.24	-0.01215625		2613.24	-0.01337823		3143.24	-0.01586206		3673.24	-0.02894235
493.39	0.03758511		1023.42	-0.00953913		1553.41	-0.00201505		2083.44	-0.01279343		2613.44	-0.0138159		3143.44	-0.01622895		3673.44	-0.02952878
493.59	0.03809948		1023.62	-0.00997837		1553.61	-0.00177484		2083.64	-0.01408619		2613.64	-0.01370704		3143.64	-0.01636158		3673.64	-0.02983296
493.79	0.0379562		1023.82	-0.01059401		1553.81	-0.00112352		2083.84	-0.01438316		2613.84	-0.01399406		3143.84	-0.01621026		3673.84	-0.02987654
493.99	0.03764461		1024.02	-0.01002543		1554.01	-0.00077384		2084.04	-0.0149976		2614.04	-0.01453216		3144.04	-0.01540714		3674.04	-0.02950858
494.19	0.03665964		1024.22	-0.01009885		1554.21	-0.000571		2084.24	-0.01631692		2614.24	-0.01488141		3144.24	-0.01614306		3674.24	-0.02948878
494.39	0.03587745		1024.42	-0.01016132		1554.41	-0.00097226		2084.44	-0.016347		2614.44	-0.01529199		3144.44	-0.01511644		3674.44	-0.03050306
494.59	0.03528335		1024.62	-0.01048942		1554.61	-0.00077535		2084.64	-0.01585011		2614.64	-0.01587722		3144.64	-0.01497126		3674.64	-0.03004545
494.79	0.03381952		1024.82	-0.01002192		1554.81	-0.00201751		2084.84	-0.01533724		2614.84	-0.01670746		3144.84	-0.01577206		3674.84	-0.02970725
494.99	0.03337969		1025.02	-0.00929336		1555.01	-0.00314531		2085.04	-0.01366955		2615.04	-0.01735739		3145.04	-0.01535175		3675.04	-0.02985204
495.19	0.0334772		1025.22	-0.00866723		1555.21	-0.00253251		2085.24	-0.01283838		2615.24	-0.01786829		3145.24	-0.01478465		3675.24	-0.02993826
495.39	0.03244152		1025.42	-0.00833385		1555.41	-0.00264268		2085.44	-0.0136375		2615.44	-0.01658136		3145.44	-0.01494802		3675.44	-0.02891596
495.59	0.03215054		1025.62	-0.00844589		1555.61	-0.00310617		2085.64	-0.01324554		2615.64	-0.01692932		3145.64	-0.0142945		3675.64	-0.02841518
495.79	0.03259185		1025.82	-0.0091836		1555.81	-0.00318357		2085.84	-0.01226207		2615.84	-0.01698451		3145.84	-0.01456956		3675.84	-0.02771162
495.99	0.03214798		1026.02	-0.00878716		1556.01	-0.00334943		2086.04	-0.01178337		2616.04	-0.01709759		3146.04	-0.01384306		3676.04	-0.02706649
496.19	0.03230769		1026.22	-0.00845421		1556.21	-0.00440114		2086.24	-0.011421		2616.24	-0.01686284		3146.24	-0.01345808		3676.24	-0.02681728
496.39	0.0322511		1026.42	-0.00785891		1556.41	-0.00429175		2086.44	-0.01139336		2616.44	-0.01529995		3146.44	-0.01413802		3676.44	-0.02566274
496.59	0.03246585		1026.62	-0.00778823		1556.61	-0.003635		2086.64	-0.01131033		2616.64	-0.01524343		3146.64	-0.01454923		3676.64	-0.02548323
496.79	0.0332959		1026.82	-0.00807613		1556.81	-0.00439082		2086.84	-0.01206793		2616.84	-0.01591002		3146.84	-0.01386748		3676.84	-0.02554196
496.99	0.03389826		1027.02	-0.00804207		1557.01	-0.0056071		2087.04	-0.0118238		2617.04	-0.01617684		3147.04	-0.01364083		3677.04	-0.0246804
497.19	0.03352548		1027.22	-0.00831506		1557.21	-0.00465792		2087.24	-0.01158746		2617.24	-0.01618556		3147.24	-0.01386251		3677.24	-0.02514342
497.39	0.03373513		1027.42	-0.00892581		1557.41	-0.00321792		2087.44	-0.01258034		2617.44	-0.01497643		3147.44	-0.01410468		3677.44	-0.02532868
497.59	0.03432421		1027.62	-0.00935648		1557.61	-0.00248594		2087.64	-0.01312993		2617.64	-0.01413751		3147.64	-0.01361379		3677.64	-0.02527382
497.79	0.03443787		1027.82	-0.00871948		1557.81	-0.00223107		2087.84	-0.01354437		2617.84	-0.01389692		3147.84	-0.01399846		3677.84	-0.02557197
497.99	0.03516474		1028.02	-0.00862895		1558.01	-0.00208717		2088.04	-0.01383486		2618.04	-0.01395371		3148.04	-0.01243453		3678.04	-0.02581275
498.19	0.03520488		1028.22	-0.00915549		1558.21	-0.00239456		2088.24	-0.01462448		2618.24	-0.01385445		3148.24	-0.01295403		3678.24	-0.02713471
498.39	0.0352797		1028.42	-0.00930793		1558.41	-0.00248588		2088.44	-0.01435		2618.44	-0.01469754		3148.44	-0.01231589		3678.44	-0.02805831
498.59	0.03578626		1028.62	-0.00848566		1558.61	-0.00238486		2088.64	-0.01374552		2618.64	-0.01565855		3148.64	-0.01273931		3678.64	-0.02818753
498.79	0.03478455		1028.82	-0.00760799		1558.81	-0.00249925		2088.84	-0.01376138		2618.84	-0.01674482		3148.84	-0.01304896		3678.84	-0.02798059
498.99	0.03467681		1029.02	-0.00689339		1559.01	-0.00209404		2089.04	-0.01337446		2619.04	-0.01711647		3149.04	-0.01215109		3679.04	-0.02863486
499.19	0.03467323		1029.22	-0.00724486		1559.21	-0.00119651		2089.24	-0.0141773		2619.24	-0.01776321		3149.24	-0.011651		3679.24	-0.02904396
499.39	0.03371417		1029.42	-0.00718812		1559.41	-0.00158866		2089.44	-0.01521273		2619.44	-0.01736188		3149.44	-0.01281936		3679.44	-0.02977135
499.59	0.03419581		1029.62	-0.0081164		1559.61	-0.00269997		2089.64	-0.01521391		2619.64	-0.01840093		3149.64	-0.01286681		3679.64	-0.02970757
499.79	0.03350559		1029.82	-0.00798085		1559.81	-0.00270417		2089.84	-0.01611662		2619.84	-0.01826698		3149.84	-0.01347946		3679.84	-0.02974593
499.99	0.03232695		1030.02	-0.0070963		1560.01	-0.00278665		2090.04	-0.01615524		2620.04	-0.01765554		3150.04	-0.01401661		3680.04	-0.0295107
500.19	0.03243624		1030.22	-0.00682801		1560.21	-0.00352642		2090.24	-0.0163363		2620.24	-0.01681827		3150.24	-0.01525727		3680.24	-0.02871542
500.39	0.0323765		1030.42	-0.00654791		1560.41	-0.00296151		2090.44	-0.01656503		2620.44	-0.01613127		3150.44	-0.0167682		3680.44	-0.02897301
500.59	0.03281709		1030.62	-0.00710349		1560.61	-0.00326925		2090.64	-0.01722739		2620.64	-0.01667203		3150.64	-0.01729223		3680.64	-0.02834275
500.79	0.03251115		1030.82	-0.00741726		1560.81	-0.00414013		2090.84	-0.01736848		2620.84	-0.01650285		3150.84	-0.01722202		3680.84	-0.0289952
500.99	0.03266953		1031.02	-0.008003		1561.01	-0.00399243		2091.04	-0.0173842		2621.04	-0.01564649		3151.04	-0.01718602		3681.04	-0.02876986
501.19	0.03251732		1031.22	-0.00904619		1561.21	-0.0029665		2091.24	-0.01828895		2621.24	-0.01481025		3151.24	-0.01723517		3681.24	-0.02808469
501.39	0.03225591		1031.42	-0.00956628		1561.41	-0.00209004		2091.44	-0.01778916		2621.44	-0.01405083		3151.44	-0.01668985		3681.44	-0.02761391
501.59	0.03250105		1031.62	-0.00959283		1561.61	-0.00143711		2091.64	-0.01655209		2621.64	-0.01427527		3151.64	-0.01566692		3681.64	-0.0276555
501.79	0.03278877		1031.82	-0.01004296		1561.81	-0.0011562		2091.84	-0.01691919		2621.84	-0.01477765		3151.84	-0.01558855		3681.84	-0.02800916
501.99	0.03324859		1032.02	-0.01048329		1562.01	-0.00088755		2092.04	-0.01627489		2622.04	-0.01504436		3152.04	-0.01429297		3682.04	-0.02860127
502.19	0.0331429		1032.22	-0.00996778		1562.21	-0.00088776		2092.24	-0.01508355		2622.24	-0.0158129		3152.24	-0.01432937		3682.24	-0.02849221
502.39	0.03261134		1032.42	-0.01053069		1562.41	-0.00023847		2092.44	-0.01434219		2622.44	-0.01652432		3152.44	-0.01314429		3682.44	-0.02887243
502.59	0.03189178		1032.62	-0.01032523		1562.61	-0.00040228		2092.64	-0.01381436		2622.64	-0.01712703		3152.64	-0.01227729		3682.64	-0.02817311
502.79	0.03161705		1032.82	-0.01049131		1562.81	-0.00026526		2092.84	-0.01325098		2622.84	-0.0173143		3152.84	-0.01223886		3682.84	-0.02728837
502.99	0.03133177		1033.02	-0.01076649		1563.01	-0.00050413		2093.04	-0.01244613		2623.04	-0.01757381		3153.04	-0.01162422		3683.04	-0.02797533
503.19	0.03099283		1033.22	-0.01082631		1563.21	-0.00128443		2093.24	-0.01179321		2623.24	-0.01837512		3153.24	-0.01256601		3683.24	-0.02783766
503.39	0.03098863		1033.42	-0.01060935		1563.41	-0.00253061		2093.44	-0.01142923		2623.44	-0.01786402		3153.44	-0.01363922		3683.44	-0.02835787
503.59	0.03221978		1033.62	-0.01120637		1563.61	-0.00263573		2093.64	-0.01111597		2623.64	-0.01844363		3153.64	-0.01331887		3683.64	-0.02858986
503.79	0.03174399		1033.82	-0.0100569		1563.81	-0.00301491		2093.84	-0.01109205		2623.84	-0.01885446		3153.84	-0.01438421		3683.84	-0.02861802
503.99	0.03201724		1034.02	-0.00919096		1564.01	-0.00366984		2094.04	-0.01144539		2624.04	-0.01919347		3154.04	-0.01497506		3684.04	-0.0280022
504.19	0.03298393		1034.22	-0.00820399		1564.21	-0.00410669		2094.24	-0.01131559		2624.24	-0.01910666		3154.24	-0.01626813		3684.24	-0.02786587
504.39	0.03426654		1034.42	-0.00854959		1564.41	-0.00472978		2094.44	-0.01161238		2624.44	-0.01912099		3154.44	-0.01648043		3684.44	-0.02899543
504.59	0.03483891		1034.62	-0.00909764		1564.61	-0.00582993		2094.64	-0.01237039		2624.64	-0.0190817		3154.64	-0.01585141		3684.64	-0.02864157
504.79	0.03484549		1034.82	-0.00897144		1564.81	-0.00616464		2094.84	-0.01252268		2624.84	-0.01950513		3154.84	-0.01516794		3684.84	-0.02932738
504.99	0.03566076		1035.02	-0.00956512		1565.01	-0.00470335		2095.04	-0.01325475		2625.04	-0.01950433		3155.04	-0.01563376		3685.04	-0.02912463
505.19	0.03554326		1035.22	-0.01033002		1565.21	-0.00407526		2095.24	-0.01396712		2625.24	-0.01960744		3155.24	-0.01585348		3685.24	-0.02846421
505.39	0.03522162		1035.42	-0.00990733		1565.41	-0.00362457		2095.44	-0.01347563		2625.44	-0.02018153		3155.44	-0.01565257		3685.44	-0.02939838
505.59	0.03532493		1035.62	-0.01016294		1565.61	-0.00315381		2095.64	-0.01333015		2625.64	-0.02046576		3155.64	-0.01588152		3685.64	-0.02954143
505.79	0.03493292		1035.82	-0.00977641		1565.81	-0.00387933		2095.84	-0.01463376		2625.84	-0.02081579		3155.84	-0.01524256		3685.84	-0.02976026
505.99	0.0343033		1036.02	-0.00950295		1566.01	-0.00398287		2096.04	-0.01424703		2626.04	-0.02085004		3156.04	-0.01427131		3686.04	-0.02997719
506.19	0.03394871		1036.22	-0.01036182		1566.21	-0.00380003		2096.24	-0.01419288		2626.24	-0.02022463		3156.24	-0.01357433		3686.24	-0.02938584
506.39	0.03204373		1036.42	-0.01109519		1566.41	-0.00350337		2096.44	-0.01468612		2626.44	-0.02074521		3156.44	-0.01328074		3686.44	-0.02897921
506.59	0.03163389		1036.62	-0.01071296		1566.61	-0.00369161		2096.64	-0.01436223		2626.64	-0.02080465		3156.64	-0.01348763		3686.64	-0.02862364
506.79	0.03151734		1036.82	-0.01090654		1566.81	-0.00342312		2096.84	-0.01391237		2626.84	-0.02040804		3156.84	-0.01501215		3686.84	-0.02863617
506.99	0.03042717		1037.02	-0.01160717		1567.01	-0.00290597		2097.04	-0.01400567		2627.04	-0.02048792		3157.04	-0.01488458		3687.04	-0.02886828
507.19	0.03018379		1037.22	-0.01145308		1567.21	-0.00259404		2097.24	-0.01462098		2627.24	-0.02013382		3157.24	-0.01493459		3687.24	-0.02835815
507.39	0.03067015		1037.42	-0.01200252		1567.41	-0.0021297		2097.44	-0.01521907		2627.44	-0.0199317		3157.44	-0.0144671		3687.44	-0.02909835
507.59	0.03024152		1037.62	-0.0120245		1567.61	-0.001714		2097.64	-0.01553382		2627.64	-0.02036854		3157.64	-0.01492727		3687.64	-0.02947443
507.79	0.03036781		1037.82	-0.01163934		1567.81	-0.00209033		2097.84	-0.01570433		2627.84	-0.02036028		3157.84	-0.01496487		3687.84	-0.0292844
507.99	0.03126251		1038.02	-0.0115086		1568.01	-0.00156174		2098.04	-0.0158164		2628.04	-0.01986702		3158.04	-0.01446584		3688.04	-0.0291916
508.19	0.03174201		1038.22	-0.01148448		1568.21	-0.0014584		2098.24	-0.01569367		2628.24	-0.01891837		3158.24	-0.01453964		3688.24	-0.0292273
508.39	0.0319816		1038.42	-0.01218905		1568.41	-0.00250648		2098.44	-0.01559649		2628.44	-0.018509		3158.44	-0.01422263		3688.44	-0.0294917
508.59	0.03233582		1038.62	-0.01233422		1568.61	-0.00360495		2098.64	-0.01582342		2628.64	-0.01816698		3158.64	-0.0131816		3688.64	-0.02912859
508.79	0.0330374		1038.82	-0.01270638		1568.81	-0.00334947		2098.84	-0.01586479		2628.84	-0.01824553		3158.84	-0.01341857		3688.84	-0.02957401
508.99	0.03341796		1039.02	-0.01379854		1569.01	-0.00280456		2099.04	-0.01593898		2629.04	-0.0179916		3159.04	-0.01415263		3689.04	-0.02972715
509.19	0.03374659		1039.22	-0.01391436		1569.21	-0.00422847		2099.24	-0.01628782		2629.24	-0.0176963		3159.24	-0.01462364		3689.24	-0.0300538
509.39	0.03343778		1039.42	-0.01355765		1569.41	-0.00500251		2099.44	-0.01563914		2629.44	-0.01747309		3159.44	-0.01509648		3689.44	-0.03111268
509.59	0.03376763		1039.62	-0.01388118		1569.61	-0.00548275		2099.64	-0.01581981		2629.64	-0.01675716		3159.64	-0.01549302		3689.64	-0.03050258
509.79	0.03409065		1039.82	-0.01491901		1569.81	-0.00615668		2099.84	-0.01496252		2629.84	-0.01770831		3159.84	-0.0150528		3689.84	-0.03073476
509.99	0.03396403		1040.02	-0.01508255		1570.01	-0.00599551		2100.04	-0.0143587		2630.04	-0.01787903		3160.04	-0.01545946		3690.04	-0.03066603
510.19	0.03391014		1040.22	-0.01540506		1570.21	-0.00601248		2100.24	-0.013986		2630.24	-0.01844509		3160.24	-0.01573725		3690.24	-0.03075016
510.39	0.03383874		1040.42	-0.01450763		1570.41	-0.0059875		2100.44	-0.01393465		2630.44	-0.01909334		3160.44	-0.01670059		3690.44	-0.03025264
510.59	0.03492822		1040.62	-0.01372032		1570.61	-0.00591095		2100.64	-0.01331908		2630.64	-0.01892107		3160.64	-0.01682734		3690.64	-0.03036826
510.79	0.03477262		1040.82	-0.013533		1570.81	-0.00658875		2100.84	-0.01356483		2630.84	-0.01835372		3160.84	-0.01755694		3690.84	-0.0303516
510.99	0.03430891		1041.02	-0.01331677		1571.01	-0.00635319		2101.04	-0.01405108		2631.04	-0.01801967		3161.04	-0.0173364		3691.04	-0.03036086
511.19	0.03464487		1041.22	-0.01228475		1571.21	-0.00629966		2101.24	-0.01450685		2631.24	-0.01855188		3161.24	-0.01650337		3691.24	-0.03045493
511.39	0.03408341		1041.42	-0.01213508		1571.41	-0.0064209		2101.44	-0.01432449		2631.44	-0.01862569		3161.44	-0.01770885		3691.44	-0.03006798
511.59	0.03335413		1041.62	-0.01154369		1571.61	-0.00625764		2101.64	-0.01421628		2631.64	-0.01896368		3161.64	-0.01738912		3691.64	-0.03000654
511.79	0.03394536		1041.82	-0.01135324		1571.81	-0.00674492		2101.84	-0.01480419		2631.84	-0.0195463		3161.84	-0.01662545		3691.84	-0.03016475
511.99	0.0335011		1042.02	-0.01142492		1572.01	-0.00649413		2102.04	-0.01575388		2632.04	-0.01899188		3162.04	-0.0166044		3692.04	-0.02976863
512.19	0.03297507		1042.22	-0.01088142		1572.21	-0.00715262		2102.24	-0.01643922		2632.24	-0.01853479		3162.24	-0.0154763		3692.24	-0.02937048
512.39	0.03290537		1042.42	-0.01063106		1572.41	-0.00742432		2102.44	-0.01631755		2632.44	-0.01883572		3162.44	-0.01557286		3692.44	-0.02964119
512.59	0.0331708		1042.62	-0.01057674		1572.61	-0.00806926		2102.64	-0.01676672		2632.64	-0.01905407		3162.64	-0.01443853		3692.64	-0.03041373
512.79	0.03307326		1042.82	-0.01086242		1572.81	-0.00774174		2102.84	-0.01711562		2632.84	-0.01968997		3162.84	-0.01538474		3692.84	-0.03119593
512.99	0.03228173		1043.02	-0.01122931		1573.01	-0.00746735		2103.04	-0.01763772		2633.04	-0.02030689		3163.04	-0.01571013		3693.04	-0.03092206
513.19	0.03162338		1043.22	-0.01109289		1573.21	-0.0067109		2103.24	-0.01785137		2633.24	-0.02061542		3163.24	-0.01550961		3693.24	-0.03046653
513.39	0.03102351		1043.42	-0.01135563		1573.41	-0.00663804		2103.44	-0.01710383		2633.44	-0.02038601		3163.44	-0.01561031		3693.44	-0.03004207
513.59	0.03121017		1043.62	-0.01214654		1573.61	-0.00642807		2103.64	-0.01664444		2633.64	-0.02078457		3163.64	-0.0157515		3693.64	-0.02986886
513.79	0.03118095		1043.82	-0.01255998		1573.81	-0.00605262		2103.84	-0.01647422		2633.84	-0.02188061		3163.84	-0.01543233		3693.84	-0.02951851
513.99	0.03061844		1044.02	-0.01179741		1574.01	-0.0054259		2104.04	-0.01649902		2634.04	-0.02157725		3164.04	-0.01537917		3694.04	-0.02941206
514.19	0.03076924		1044.22	-0.01165611		1574.21	-0.0049946		2104.24	-0.01626734		2634.24	-0.02100762		3164.24	-0.01530589		3694.24	-0.02930279
514.39	0.0316437		1044.42	-0.01145242		1574.41	-0.00475667		2104.44	-0.0159564		2634.44	-0.02086167		3164.44	-0.01565323		3694.44	-0.02875528
514.59	0.03156282		1044.62	-0.01111246		1574.61	-0.00592173		2104.64	-0.01596455		2634.64	-0.02118569		3164.64	-0.01554212		3694.64	-0.02990765
514.79	0.0315617		1044.82	-0.01113827		1574.81	-0.00646603		2104.84	-0.01623869		2634.84	-0.02091251		3164.84	-0.01593476		3694.84	-0.03001236
514.99	0.03193384		1045.02	-0.01055791		1575.01	-0.00638138		2105.04	-0.01681389		2635.04	-0.02071263		3165.04	-0.01586978		3695.04	-0.0307737
515.19	0.03169894		1045.22	-0.01110949		1575.21	-0.00639287		2105.24	-0.01678968		2635.24	-0.02116636		3165.24	-0.01556169		3695.24	-0.03068546
515.39	0.0320365		1045.42	-0.01167897		1575.41	-0.00634247		2105.44	-0.01685126		2635.44	-0.02069508		3165.44	-0.0168486		3695.44	-0.03003134
515.59	0.0320164		1045.62	-0.01186188		1575.61	-0.00624212		2105.64	-0.01690648		2635.64	-0.02037788		3165.64	-0.01639333		3695.64	-0.03147072
515.79	0.03250923		1045.82	-0.01254646		1575.81	-0.0065965		2105.84	-0.01722028		2635.84	-0.01984898		3165.84	-0.01668409		3695.84	-0.03193441
515.99	0.0326727		1046.02	-0.01280004		1576.01	-0.00637933		2106.04	-0.01732177		2636.04	-0.01852201		3166.04	-0.0169231		3696.04	-0.0322217
516.19	0.03223273		1046.22	-0.01193483		1576.21	-0.00735613		2106.24	-0.01731886		2636.24	-0.01858431		3166.24	-0.01709689		3696.24	-0.03238622
516.39	0.03215102		1046.42	-0.01168222		1576.41	-0.0078321		2106.44	-0.01713944		2636.44	-0.01891538		3166.44	-0.01683442		3696.44	-0.03377907
516.59	0.03158406		1046.62	-0.01192035		1576.61	-0.00842		2106.64	-0.01725996		2636.64	-0.01866124		3166.64	-0.01652951		3696.64	-0.03424748
516.79	0.03108354		1046.82	-0.01170071		1576.81	-0.00821077		2106.84	-0.01720815		2636.84	-0.01865367		3166.84	-0.01706599		3696.84	-0.03449539
516.99	0.0308614		1047.02	-0.01216558		1577.01	-0.00750506		2107.04	-0.01733095		2637.04	-0.01958304		3167.04	-0.01677364		3697.04	-0.03403655
517.19	0.03087075		1047.22	-0.01217674		1577.21	-0.00740769		2107.24	-0.01662501		2637.24	-0.02011248		3167.24	-0.01672787		3697.24	-0.0338043
517.39	0.03099438		1047.42	-0.01304579		1577.41	-0.00850473		2107.44	-0.01625142		2637.44	-0.02062525		3167.44	-0.01721266		3697.44	-0.03300538
517.59	0.03117085		1047.62	-0.01366353		1577.61	-0.00802489		2107.64	-0.01674672		2637.64	-0.02116501		3167.64	-0.01746402		3697.64	-0.03337784
517.79	0.03133943		1047.82	-0.0133237		1577.81	-0.0077097		2107.84	-0.01740307		2637.84	-0.02111647		3167.84	-0.01705068		3697.84	-0.0323761
517.99	0.03090012		1048.02	-0.0133632		1578.01	-0.0067204		2108.04	-0.01702628		2638.04	-0.02076427		3168.04	-0.016443		3698.04	-0.03307294
518.19	0.0309575		1048.22	-0.01336241		1578.21	-0.00665411		2108.24	-0.01724426		2638.24	-0.02078315		3168.24	-0.01647677		3698.24	-0.03297327
518.39	0.03087022		1048.42	-0.01314438		1578.41	-0.00643389		2108.44	-0.01714734		2638.44	-0.02087693		3168.44	-0.01617973		3698.44	-0.03319832
518.59	0.03087879		1048.62	-0.01297722		1578.61	-0.00721526		2108.64	-0.01729066		2638.64	-0.02099244		3168.64	-0.01570615		3698.64	-0.03299152
518.79	0.03112343		1048.82	-0.0126396		1578.81	-0.00696971		2108.84	-0.01698379		2638.84	-0.02033196		3168.84	-0.0149148		3698.84	-0.03145136
518.99	0.03090469		1049.02	-0.01324222		1579.01	-0.00587444		2109.04	-0.01732968		2639.04	-0.02010948		3169.04	-0.01409931		3699.04	-0.03151892
519.19	0.03075544		1049.22	-0.01393459		1579.21	-0.00528781		2109.24	-0.01715232		2639.24	-0.01980391		3169.24	-0.01376851		3699.24	-0.03099539
519.39	0.03122997		1049.42	-0.01322529		1579.41	-0.00466097		2109.44	-0.01680073		2639.44	-0.01984442		3169.44	-0.01381455		3699.44	-0.03046333
519.59	0.03048838		1049.62	-0.01333766		1579.61	-0.00417967		2109.64	-0.01579679		2639.64	-0.01965896		3169.64	-0.01330059		3699.64	-0.03060257
519.79	0.03094269		1049.82	-0.01273687		1579.81	-0.00442738		2109.84	-0.01475535		2639.84	-0.01941286		3169.84	-0.01243299		3699.84	-0.03001696
519.99	0.03111801		1050.02	-0.01233608		1580.01	-0.00469237		2110.04	-0.01424422		2640.04	-0.01945828		3170.04	-0.01183479		3700.04	-0.02912577
520.19	0.03045835		1050.22	-0.01105169		1580.21	-0.00424577		2110.24	-0.0143334		2640.24	-0.01996927		3170.24	-0.01131944		3700.24	-0.02882173
520.39	0.03031496		1050.42	-0.01115335		1580.41	-0.00473718		2110.44	-0.01380127		2640.44	-0.01956248		3170.44	-0.01044103		3700.44	-0.02931443
520.59	0.03003225		1050.62	-0.01087866		1580.61	-0.00514308		2110.64	-0.01345348		2640.64	-0.0201314		3170.64	-0.0110373		3700.64	-0.02870624
520.79	0.03020029		1050.82	-0.01033298		1580.81	-0.00525441		2110.84	-0.01301643		2640.84	-0.02071653		3170.84	-0.01210445		3700.84	-0.02840943
520.99	0.03062758		1051.02	-0.01184121		1581.01	-0.0053931		2111.04	-0.01331007		2641.04	-0.02221612		3171.04	-0.01270433		3701.04	-0.02857512
521.19	0.03087483		1051.22	-0.01230022		1581.21	-0.00624589		2111.24	-0.01368079		2641.24	-0.02263971		3171.24	-0.01427063		3701.24	-0.02856026
521.39	0.03080992		1051.42	-0.01305954		1581.41	-0.00708034		2111.44	-0.0146678		2641.44	-0.0228439		3171.44	-0.01507485		3701.44	-0.02811498
521.59	0.03102502		1051.62	-0.01326874		1581.61	-0.00681753		2111.64	-0.01596787		2641.64	-0.02301265		3171.64	-0.01635469		3701.64	-0.02925348
521.79	0.03156719		1051.82	-0.01257868		1581.81	-0.00667386		2111.84	-0.0164156		2641.84	-0.02257192		3171.84	-0.01687766		3701.84	-0.02871752
521.99	0.03214932		1052.02	-0.01330117		1582.01	-0.00730503		2112.04	-0.01743491		2642.04	-0.02229322		3172.04	-0.01794958		3702.04	-0.02949127
522.19	0.03271634		1052.22	-0.01335484		1582.21	-0.00821518		2112.24	-0.01755659		2642.24	-0.02205135		3172.24	-0.0188688		3702.24	-0.02857272
522.39	0.03303956		1052.42	-0.0133959		1582.41	-0.00860095		2112.44	-0.01751385		2642.44	-0.02141702		3172.44	-0.01903221		3702.44	-0.02850735
522.59	0.0335684		1052.62	-0.01369569		1582.61	-0.00898664		2112.64	-0.01764917		2642.64	-0.02191436		3172.64	-0.01877822		3702.64	-0.02767474
522.79	0.03295205		1052.82	-0.01380558		1582.81	-0.00902104		2112.84	-0.01840185		2642.84	-0.02174824		3172.84	-0.01834471		3702.84	-0.02737892
522.99	0.03233732		1053.02	-0.01432658		1583.01	-0.00769264		2113.04	-0.01923699		2643.04	-0.02208562		3173.04	-0.01788509		3703.04	-0.02843455
523.19	0.03173551		1053.22	-0.01330715		1583.21	-0.00784963		2113.24	-0.01943821		2643.24	-0.02265258		3173.24	-0.01797085		3703.24	-0.02939435
523.39	0.03143743		1053.42	-0.01280445		1583.41	-0.00783788		2113.44	-0.01872888		2643.44	-0.02325011		3173.44	-0.01717663		3703.44	-0.02883964
523.59	0.03126625		1053.62	-0.0130002		1583.61	-0.00798828		2113.64	-0.01771774		2643.64	-0.02388957		3173.64	-0.01653748		3703.64	-0.02860077
523.79	0.0317079		1053.82	-0.01346641		1583.81	-0.00753956		2113.84	-0.01784332		2643.84	-0.02392057		3173.84	-0.01544746		3703.84	-0.02910799
523.99	0.03214528		1054.02	-0.01374922		1584.01	-0.0070263		2114.04	-0.01704917		2644.04	-0.02422897		3174.04	-0.01494662		3704.04	-0.02924556
524.19	0.03138667		1054.22	-0.01259964		1584.21	-0.00694331		2114.24	-0.01646344		2644.24	-0.02356158		3174.24	-0.01570002		3704.24	-0.03036858
524.39	0.0312322		1054.42	-0.01293491		1584.41	-0.00749845		2114.44	-0.016079		2644.44	-0.02347506		3174.44	-0.01607604		3704.44	-0.0314312
524.59	0.03107526		1054.62	-0.01296282		1584.61	-0.00731105		2114.64	-0.01643392		2644.64	-0.02369746		3174.64	-0.01629036		3704.64	-0.03246074
524.79	0.03145413		1054.82	-0.01332092		1584.81	-0.00671098		2114.84	-0.01563899		2644.84	-0.02326905		3174.84	-0.01707237		3704.84	-0.03337686
524.99	0.03137134		1055.02	-0.01421481		1585.01	-0.00651442		2115.04	-0.01566871		2645.04	-0.02356949		3175.04	-0.01672124		3705.04	-0.03428708
525.19	0.03112183		1055.22	-0.01355059		1585.21	-0.00679897		2115.24	-0.01564867		2645.24	-0.02292378		3175.24	-0.01729862		3705.24	-0.03448863
525.39	0.03103721		1055.42	-0.01449114		1585.41	-0.00598554		2115.44	-0.01619587		2645.44	-0.02215064		3175.44	-0.01696181		3705.44	-0.03497455
525.59	0.03120698		1055.62	-0.01465718		1585.61	-0.00504009		2115.64	-0.01596317		2645.64	-0.02279626		3175.64	-0.01753317		3705.64	-0.03450774
525.79	0.03171788		1055.82	-0.01418574		1585.81	-0.00468927		2115.84	-0.01586021		2645.84	-0.0215129		3175.84	-0.01773135		3705.84	-0.03369798
525.99	0.03146767		1056.02	-0.01448212		1586.01	-0.0048796		2116.04	-0.01651847		2646.04	-0.02153306		3176.04	-0.01821074		3706.04	-0.03396412
526.19	0.03106817		1056.22	-0.01421184		1586.21	-0.00484257		2116.24	-0.01614292		2646.24	-0.02152061		3176.24	-0.01708841		3706.24	-0.03339765
526.39	0.03070617		1056.42	-0.01384385		1586.41	-0.0039672		2116.44	-0.01621503		2646.44	-0.02069727		3176.44	-0.01642555		3706.44	-0.03379075
526.59	0.02969794		1056.62	-0.0131781		1586.61	-0.00382509		2116.64	-0.01607513		2646.64	-0.02022749		3176.64	-0.01627243		3706.64	-0.03339165
526.79	0.02844142		1056.82	-0.01269533		1586.81	-0.00372657		2116.84	-0.01644696		2646.84	-0.01988012		3176.84	-0.01575619		3706.84	-0.03431645
526.99	0.02786523		1057.02	-0.01178116		1587.01	-0.00319682		2117.04	-0.01652662		2647.04	-0.01921527		3177.04	-0.01554826		3707.04	-0.034577
527.19	0.02694807		1057.22	-0.0112297		1587.21	-0.00396934		2117.24	-0.01647914		2647.24	-0.0194172		3177.24	-0.01557938		3707.24	-0.03400062
527.39	0.02742702		1057.42	-0.01082648		1587.41	-0.00429017		2117.44	-0.01580399		2647.44	-0.01882396		3177.44	-0.01509563		3707.44	-0.03283516
527.59	0.02772124		1057.62	-0.01156943		1587.61	-0.00459504		2117.64	-0.01621082		2647.64	-0.0193405		3177.64	-0.01586645		3707.64	-0.03249959
527.79	0.02812641		1057.82	-0.01225961		1587.81	-0.00432603		2117.84	-0.01663934		2647.84	-0.01842384		3177.84	-0.01585578		3707.84	-0.03266127
527.99	0.02820738		1058.02	-0.01223466		1588.01	-0.00455487		2118.04	-0.01587604		2648.04	-0.01790084		3178.04	-0.01583063		3708.04	-0.03316082
528.19	0.02813156		1058.22	-0.01218346		1588.21	-0.00565551		2118.24	-0.01682836		2648.24	-0.01732443		3178.24	-0.01690867		3708.24	-0.03369433
528.39	0.02862554		1058.42	-0.01247363		1588.41	-0.00624337		2118.44	-0.01823781		2648.44	-0.0176639		3178.44	-0.01720079		3708.44	-0.03329322
528.59	0.02933967		1058.62	-0.01294176		1588.61	-0.00637637		2118.64	-0.01841866		2648.64	-0.01771745		3178.64	-0.01677349		3708.64	-0.03335435
528.79	0.02988976		1058.82	-0.01253355		1588.81	-0.00684361		2118.84	-0.01848631		2648.84	-0.01730858		3178.84	-0.01643485		3708.84	-0.03285811
528.99	0.02948617		1059.02	-0.01247716		1589.01	-0.00764029		2119.04	-0.01912852		2649.04	-0.01766922		3179.04	-0.01582369		3709.04	-0.03244478
529.19	0.02919664		1059.22	-0.01337987		1589.21	-0.00811776		2119.24	-0.01960379		2649.24	-0.01791615		3179.24	-0.01573896		3709.24	-0.03200621
529.39	0.02975015		1059.42	-0.01439346		1589.41	-0.00748863		2119.44	-0.01995096		2649.44	-0.01929386		3179.44	-0.01556074		3709.44	-0.03146391
529.59	0.02997512		1059.62	-0.01450966		1589.61	-0.00778293		2119.64	-0.02034457		2649.64	-0.02022017		3179.64	-0.01575758		3709.64	-0.03098744
529.79	0.03005118		1059.82	-0.01431057		1589.81	-0.00774169		2119.84	-0.02040413		2649.84	-0.02050325		3179.84	-0.01591657		3709.84	-0.03128808
529.99	0.03016361		1060.02	-0.01494959		1590.01	-0.00777567		2120.04	-0.02024369		2650.04	-0.02211203		3180.04	-0.01595564		3710.04	-0.03178031
530.19	0.02933659		1060.22	-0.01437959		1590.21	-0.0084328		2120.24	-0.01975556		2650.24	-0.02258911		3180.24	-0.01490485		3710.24	-0.0324836
530.39	0.02852414		1060.42	-0.01375975		1590.41	-0.00855173		2120.44	-0.0190108		2650.44	-0.02191493		3180.44	-0.01544707		3710.44	-0.03300328
530.59	0.02785947		1060.62	-0.01313641		1590.61	-0.00947998		2120.64	-0.01884034		2650.64	-0.0221953		3180.64	-0.01529603		3710.64	-0.03356256
530.79	0.02732137		1060.82	-0.01291354		1590.81	-0.00907044		2120.84	-0.01878625		2650.84	-0.02221466		3180.84	-0.0148424		3710.84	-0.03408316
530.99	0.02721838		1061.02	-0.01205739		1591.01	-0.00920844		2121.04	-0.01856564		2651.04	-0.0214808		3181.04	-0.01416566		3711.04	-0.03349802
531.19	0.0271997		1061.22	-0.01251158		1591.21	-0.00924278		2121.24	-0.01801482		2651.24	-0.02192841		3181.24	-0.01354573		3711.24	-0.03324029
531.39	0.027396		1061.42	-0.01212739		1591.41	-0.00844073		2121.44	-0.01717618		2651.44	-0.02207205		3181.44	-0.0136468		3711.44	-0.03351014
531.59	0.02659722		1061.62	-0.01293645		1591.61	-0.00901558		2121.64	-0.01687157		2651.64	-0.02212975		3181.64	-0.0139376		3711.64	-0.03363827
531.79	0.02600647		1061.82	-0.01288603		1591.81	-0.00866584		2121.84	-0.01662193		2651.84	-0.02194983		3181.84	-0.01439558		3711.84	-0.03413932
531.99	0.02666618		1062.02	-0.01354721		1592.01	-0.00813051		2122.04	-0.01615308		2652.04	-0.02181119		3182.04	-0.01430602		3712.04	-0.03519233
532.19	0.02764481		1062.22	-0.01289972		1592.21	-0.00843418		2122.24	-0.01674968		2652.24	-0.02206939		3182.24	-0.0147368		3712.24	-0.03527321
532.39	0.02812544		1062.42	-0.01252584		1592.41	-0.00769731		2122.44	-0.01673791		2652.44	-0.0215831		3182.44	-0.01528468		3712.44	-0.03506767
532.59	0.02899495		1062.62	-0.01195423		1592.61	-0.00730198		2122.64	-0.01664105		2652.64	-0.02197115		3182.64	-0.01537219		3712.64	-0.03578432
532.79	0.02916658		1062.82	-0.010857		1592.81	-0.00723498		2122.84	-0.01746388		2652.84	-0.0212774		3182.84	-0.0160121		3712.84	-0.03595124
532.99	0.02933683		1063.02	-0.01097277		1593.01	-0.006659		2123.04	-0.01717599		2653.04	-0.02195181		3183.04	-0.01676979		3713.04	-0.03681879
533.19	0.02961241		1063.22	-0.01171876		1593.21	-0.00637484		2123.24	-0.01697568		2653.24	-0.02243844		3183.24	-0.01747489		3713.24	-0.03666881
533.39	0.03017711		1063.42	-0.0119324		1593.41	-0.00598689		2123.44	-0.01718706		2653.44	-0.02231328		3183.44	-0.01824955		3713.44	-0.03671454
533.59	0.03116454		1063.62	-0.01155193		1593.61	-0.00593903		2123.64	-0.01761074		2653.64	-0.02188903		3183.64	-0.01874853		3713.64	-0.03728208
533.79	0.031167		1063.82	-0.0115858		1593.81	-0.00586523		2123.84	-0.0173208		2653.84	-0.02195205		3183.84	-0.01911369		3713.84	-0.03740818
533.99	0.03156406		1064.02	-0.01236994		1594.01	-0.00648978		2124.04	-0.01766968		2654.04	-0.02195522		3184.04	-0.01953859		3714.04	-0.0365947
534.19	0.03078304		1064.22	-0.01204904		1594.21	-0.00680174		2124.24	-0.01811501		2654.24	-0.02143252		3184.24	-0.01879563		3714.24	-0.03682169
534.39	0.03130868		1064.42	-0.01271619		1594.41	-0.0076878		2124.44	-0.01777685		2654.44	-0.02182175		3184.44	-0.0187127		3714.44	-0.0362883
534.59	0.031486		1064.62	-0.01295561		1594.61	-0.00791782		2124.64	-0.01849493		2654.64	-0.02208648		3184.64	-0.01765028		3714.64	-0.03524059
534.79	0.03062783		1064.82	-0.01352579		1594.81	-0.0073838		2124.84	-0.0187406		2654.84	-0.02189377		3184.84	-0.01667583		3714.84	-0.03417193
534.99	0.03017194		1065.02	-0.01371242		1595.01	-0.00818754		2125.04	-0.01884255		2655.04	-0.02228755		3185.04	-0.01614627		3715.04	-0.03320776
535.19	0.02985421		1065.22	-0.01469967		1595.21	-0.00808284		2125.24	-0.01826866		2655.24	-0.02328394		3185.24	-0.01647927		3715.24	-0.0325672
535.39	0.02902687		1065.42	-0.01476517		1595.41	-0.00825403		2125.44	-0.01771549		2655.44	-0.02364435		3185.44	-0.01671858		3715.44	-0.03272634
535.59	0.02788327		1065.62	-0.01493006		1595.61	-0.00894063		2125.64	-0.01753908		2655.64	-0.02373091		3185.64	-0.01556184		3715.64	-0.03244357
535.79	0.0279008		1065.82	-0.01480172		1595.81	-0.00837572		2125.84	-0.01748074		2655.84	-0.02511793		3185.84	-0.0154289		3715.84	-0.03266155
535.99	0.02824999		1066.02	-0.01516746		1596.01	-0.00844701		2126.04	-0.01713195		2656.04	-0.02567098		3186.04	-0.01451161		3716.04	-0.03293994
536.19	0.02763684		1066.22	-0.01464991		1596.21	-0.00840524		2126.24	-0.01776311		2656.24	-0.02577484		3186.24	-0.01524029		3716.24	-0.03257154
536.39	0.02645001		1066.42	-0.01460665		1596.41	-0.00745673		2126.44	-0.01723407		2656.44	-0.02536643		3186.44	-0.01596007		3716.44	-0.03292455
536.59	0.02573247		1066.62	-0.01365999		1596.61	-0.00693343		2126.64	-0.01719784		2656.64	-0.02584947		3186.64	-0.01616043		3716.64	-0.03371646
536.79	0.02482398		1066.82	-0.01338266		1596.81	-0.00658347		2126.84	-0.01641749		2656.84	-0.02474821		3186.84	-0.01708264		3716.84	-0.03446359
536.99	0.02432469		1067.02	-0.01308198		1597.01	-0.00593852		2127.04	-0.0165367		2657.04	-0.02441578		3187.04	-0.01704058		3717.04	-0.03518334
537.19	0.02364603		1067.22	-0.0130112		1597.21	-0.0054824		2127.24	-0.01620802		2657.24	-0.02345465		3187.24	-0.01789556		3717.24	-0.03545554
537.39	0.02353293		1067.42	-0.01250139		1597.41	-0.00568728		2127.44	-0.01607989		2657.44	-0.02222269		3187.44	-0.01761213		3717.44	-0.03589764
537.59	0.02431095		1067.62	-0.01284242		1597.61	-0.00597023		2127.64	-0.01653634		2657.64	-0.02168607		3187.64	-0.01729434		3717.64	-0.03597421
537.79	0.02371513		1067.82	-0.01394369		1597.81	-0.00610309		2127.84	-0.01684921		2657.84	-0.02065448		3187.84	-0.01724356		3717.84	-0.0354443
537.99	0.02361867		1068.02	-0.01424691		1598.01	-0.0064855		2128.04	-0.01717064		2658.04	-0.02041274		3188.04	-0.01789781		3718.04	-0.03443141
538.19	0.02357361		1068.22	-0.01480416		1598.21	-0.00682547		2128.24	-0.01742815		2658.24	-0.02023385		3188.24	-0.01745193		3718.24	-0.03403479
538.39	0.023476		1068.42	-0.01534362		1598.41	-0.00817598		2128.44	-0.01687879		2658.44	-0.02066054		3188.44	-0.01765103		3718.44	-0.03329602
538.59	0.0230516		1068.62	-0.01513396		1598.61	-0.00829785		2128.64	-0.01661479		2658.64	-0.02005299		3188.64	-0.01734983		3718.64	-0.03264601
538.79	0.02280787		1068.82	-0.01582097		1598.81	-0.00823508		2128.84	-0.01693582		2658.84	-0.0198988		3188.84	-0.01752506		3718.84	-0.03273265
538.99	0.02293014		1069.02	-0.01549388		1599.01	-0.00832108		2129.04	-0.01699621		2659.04	-0.02101948		3189.04	-0.01877773		3719.04	-0.0327729
539.19	0.02324012		1069.22	-0.01581289		1599.21	-0.00850405		2129.24	-0.0170903		2659.24	-0.02078307		3189.24	-0.0191247		3719.24	-0.03243165
539.39	0.02332862		1069.42	-0.01527443		1599.41	-0.00858588		2129.44	-0.01755903		2659.44	-0.02137834		3189.44	-0.01837034		3719.44	-0.03297055
539.59	0.02384492		1069.62	-0.01480444		1599.61	-0.00911221		2129.64	-0.01836159		2659.64	-0.02220377		3189.64	-0.01716805		3719.64	-0.03340422
539.79	0.02425795		1069.82	-0.01470708		1599.81	-0.00968932		2129.84	-0.0180195		2659.84	-0.02339211		3189.84	-0.01766472		3719.84	-0.03312195
539.99	0.02481895		1070.02	-0.01471454		1600.01	-0.01056349		2130.04	-0.01826548		2660.04	-0.02354949		3190.04	-0.01835127		3720.04	-0.03305097
540.19	0.02499636		1070.22	-0.01439053		1600.21	-0.01052876		2130.24	-0.01866611		2660.24	-0.02349227		3190.24	-0.01972317		3720.24	-0.0338674
540.39	0.0242332		1070.42	-0.01441945		1600.41	-0.00943529		2130.44	-0.01764766		2660.44	-0.02391777		3190.44	-0.01916377		3720.44	-0.03377329
540.59	0.02456234		1070.62	-0.01362753		1600.61	-0.00954035		2130.64	-0.01724729		2660.64	-0.02468429		3190.64	-0.01938508		3720.64	-0.03435696
540.79	0.02416154		1070.82	-0.01357777		1600.81	-0.0091034		2130.84	-0.01657158		2660.84	-0.02433662		3190.84	-0.02017226		3720.84	-0.03490581
540.99	0.02425457		1071.02	-0.01326722		1601.01	-0.00847145		2131.04	-0.01695528		2661.04	-0.02425074		3191.04	-0.01985287		3721.04	-0.03424848
541.19	0.0240541		1071.22	-0.01354468		1601.21	-0.00820858		2131.24	-0.01636609		2661.24	-0.02432877		3191.24	-0.01960045		3721.24	-0.03467928
541.39	0.0239327		1071.42	-0.01421708		1601.41	-0.0087958		2131.44	-0.01613201		2661.44	-0.02375569		3191.44	-0.01824374		3721.44	-0.03456929
541.59	0.02426872		1071.62	-0.01515878		1601.61	-0.00865176		2131.64	-0.01659581		2661.64	-0.02300695		3191.64	-0.01747455		3721.64	-0.03464369
541.79	0.02361222		1071.82	-0.01508656		1601.81	-0.0092995		2131.84	-0.01650955		2661.84	-0.02287504		3191.84	-0.0173828		3721.84	-0.03432515
541.99	0.02368388		1072.02	-0.01544329		1602.01	-0.01042505		2132.04	-0.01673277		2662.04	-0.02280937		3192.04	-0.01770502		3722.04	-0.03343473
542.19	0.02400074		1072.22	-0.01582801		1602.21	-0.01085909		2132.24	-0.01741319		2662.24	-0.02182261		3192.24	-0.01716204		3722.24	-0.03309925
542.39	0.02421437		1072.42	-0.01545483		1602.41	-0.01132497		2132.44	-0.01733888		2662.44	-0.02251481		3192.44	-0.01725539		3722.44	-0.03337571
542.59	0.02447673		1072.62	-0.01517045		1602.61	-0.01057246		2132.64	-0.0175733		2662.64	-0.02254196		3192.64	-0.01688459		3722.64	-0.03378978
542.79	0.02481889		1072.82	-0.01620139		1602.81	-0.01084982		2132.84	-0.01793431		2662.84	-0.02251236		3192.84	-0.01693879		3722.84	-0.03397419
542.99	0.02524248		1073.02	-0.01587199		1603.01	-0.01007756		2133.04	-0.01799575		2663.04	-0.02301279		3193.04	-0.01687514		3723.04	-0.03379829
543.19	0.02576498		1073.22	-0.01575937		1603.21	-0.00992198		2133.24	-0.01791826		2663.24	-0.02235774		3193.24	-0.01651478		3723.24	-0.03348192
543.39	0.02779453		1073.42	-0.01546166		1603.41	-0.0094411		2133.44	-0.01778135		2663.44	-0.02269835		3193.44	-0.01539389		3723.44	-0.03443436
543.59	0.0298145		1073.62	-0.01549963		1603.61	-0.01021014		2133.64	-0.01866655		2663.64	-0.02346232		3193.64	-0.01540136		3723.64	-0.03475511
543.79	0.03031891		1073.82	-0.01587704		1603.81	-0.01032572		2133.84	-0.01766003		2663.84	-0.02375415		3193.84	-0.01602804		3723.84	-0.03430235
543.99	0.03128859		1074.02	-0.01557682		1604.01	-0.01021158		2134.04	-0.01869562		2664.04	-0.02351267		3194.04	-0.01625283		3724.04	-0.03471515
544.19	0.03189232		1074.22	-0.01568117		1604.21	-0.00961279		2134.24	-0.01870044		2664.24	-0.02387289		3194.24	-0.01622664		3724.24	-0.03511647
544.39	0.03095933		1074.42	-0.01507308		1604.41	-0.00933554		2134.44	-0.01872664		2664.44	-0.02435852		3194.44	-0.01582777		3724.44	-0.03399589
544.59	0.03071774		1074.62	-0.01533518		1604.61	-0.00945924		2134.64	-0.01809036		2664.64	-0.02479868		3194.64	-0.01654623		3724.64	-0.03447221
544.79	0.03023695		1074.82	-0.01658691		1604.81	-0.00844887		2134.84	-0.01726629		2664.84	-0.02457666		3194.84	-0.01756369		3724.84	-0.03499868
544.99	0.03084585		1075.02	-0.01619678		1605.01	-0.0083354		2135.04	-0.0180234		2665.04	-0.02398238		3195.04	-0.0172882		3725.04	-0.03483081
545.19	0.0298892		1075.22	-0.01668212		1605.21	-0.0084417		2135.24	-0.01719928		2665.24	-0.02434819		3195.24	-0.01720761		3725.24	-0.03585681
545.39	0.02887572		1075.42	-0.01625677		1605.41	-0.00914052		2135.44	-0.01724542		2665.44	-0.02437237		3195.44	-0.01712653		3725.44	-0.03527095
545.59	0.02775879		1075.62	-0.01613439		1605.61	-0.00899913		2135.64	-0.01751709		2665.64	-0.02385541		3195.64	-0.01685028		3725.64	-0.03544029
545.79	0.02694275		1075.82	-0.01612994		1605.81	-0.00974944		2135.84	-0.01757424		2665.84	-0.02428239		3195.84	-0.01753959		3725.84	-0.0347756
545.99	0.02649665		1076.02	-0.01624473		1606.01	-0.00944019		2136.04	-0.01805232		2666.04	-0.02445701		3196.04	-0.01886426		3726.04	-0.03398099
546.19	0.02574689		1076.22	-0.01550165		1606.21	-0.00901686		2136.24	-0.01860875		2666.24	-0.02449432		3196.24	-0.01952679		3726.24	-0.03400005
546.39	0.02419797		1076.42	-0.01486501		1606.41	-0.00900329		2136.44	-0.0180005		2666.44	-0.02562924		3196.44	-0.02007874		3726.44	-0.03321048
546.59	0.02376198		1076.62	-0.01533456		1606.61	-0.00888105		2136.64	-0.01723639		2666.64	-0.02567995		3196.64	-0.01975949		3726.64	-0.03341856
546.79	0.02316398		1076.82	-0.01533714		1606.81	-0.00809808		2136.84	-0.01740595		2666.84	-0.02626016		3196.84	-0.02023814		3726.84	-0.03305803
546.99	0.02281513		1077.02	-0.0148593		1607.01	-0.00706222		2137.04	-0.01779852		2667.04	-0.02608205		3197.04	-0.02019728		3727.04	-0.03284133
547.19	0.02242603		1077.22	-0.01476391		1607.21	-0.00653169		2137.24	-0.01805606		2667.24	-0.02589199		3197.24	-0.02012036		3727.24	-0.03260426
547.39	0.02351275		1077.42	-0.01516568		1607.41	-0.00619088		2137.44	-0.01828037		2667.44	-0.02668745		3197.44	-0.01885437		3727.44	-0.03282549
547.59	0.02347409		1077.62	-0.0154488		1607.61	-0.00672728		2137.64	-0.01843133		2667.64	-0.02708829		3197.64	-0.01893446		3727.64	-0.03226636
547.79	0.02324214		1077.82	-0.01629222		1607.81	-0.00623213		2137.84	-0.01832061		2667.84	-0.02657805		3197.84	-0.01852178		3727.84	-0.03194352
547.99	0.02329358		1078.02	-0.0161567		1608.01	-0.00694542		2138.04	-0.01921725		2668.04	-0.02603386		3198.04	-0.01793207		3728.04	-0.03180401
548.19	0.02337563		1078.22	-0.01661337		1608.21	-0.00771681		2138.24	-0.01796615		2668.24	-0.02553736		3198.24	-0.01767934		3728.24	-0.03220929
548.39	0.02265564		1078.42	-0.01653525		1608.41	-0.00883179		2138.44	-0.01791868		2668.44	-0.02578453		3198.44	-0.01707587		3728.44	-0.03194593
548.59	0.02258454		1078.62	-0.01817522		1608.61	-0.00928546		2138.64	-0.01672311		2668.64	-0.02494388		3198.64	-0.0177987		3728.64	-0.03336643
548.79	0.02323334		1078.82	-0.01795911		1608.81	-0.00930065		2138.84	-0.01629713		2668.84	-0.02398667		3198.84	-0.01840289		3728.84	-0.03450965
548.99	0.02357718		1079.02	-0.01705699		1609.01	-0.01065724		2139.04	-0.0168323		2669.04	-0.02288039		3199.04	-0.01853025		3729.04	-0.03478345
549.19	0.02319479		1079.22	-0.01746141		1609.21	-0.01112858		2139.24	-0.01595057		2669.24	-0.02322108		3199.24	-0.01900667		3729.24	-0.0346875
549.39	0.02335191		1079.42	-0.01693032		1609.41	-0.01187983		2139.44	-0.01634346		2669.44	-0.02277916		3199.44	-0.0185047		3729.44	-0.03437668
549.59	0.02386839		1079.62	-0.01751221		1609.61	-0.01176251		2139.64	-0.01649957		2669.64	-0.02186501		3199.64	-0.01836522		3729.64	-0.03486659
549.79	0.02479696		1079.82	-0.01713749		1609.81	-0.01183533		2139.84	-0.0162697		2669.84	-0.02197467		3199.84	-0.01850032		3729.84	-0.03448296
549.99	0.02523974		1080.02	-0.01681627		1610.01	-0.01163926		2140.04	-0.01696687		2670.04	-0.02215128		3200.04	-0.01862887		3730.04	-0.0339579
550.19	0.02570813		1080.22	-0.01628909		1610.21	-0.01135229		2140.24	-0.0169645		2670.24	-0.02203359		3200.24	-0.01751541		3730.24	-0.03408677
550.39	0.02602512		1080.42	-0.01613189		1610.41	-0.01057122		2140.44	-0.0170442		2670.44	-0.02253455		3200.44	-0.01727275		3730.44	-0.03345978
550.59	0.02697782		1080.62	-0.01670785		1610.61	-0.01102026		2140.64	-0.01715448		2670.64	-0.02335354		3200.64	-0.01636021		3730.64	-0.03338097
550.79	0.02727464		1080.82	-0.01647741		1610.81	-0.00960483		2140.84	-0.01843526		2670.84	-0.02392135		3200.84	-0.01616841		3730.84	-0.03398656
550.99	0.02703547		1081.02	-0.01706097		1611.01	-0.01000401		2141.04	-0.01864057		2671.04	-0.02412895		3201.04	-0.01532774		3731.04	-0.03393667
551.19	0.02718382		1081.22	-0.01764385		1611.21	-0.00963724		2141.24	-0.01816872		2671.24	-0.02467981		3201.24	-0.01469771		3731.24	-0.03409054
551.39	0.02781702		1081.42	-0.01768682		1611.41	-0.00941874		2141.44	-0.018031		2671.44	-0.02505973		3201.44	-0.01396031		3731.44	-0.03359582
551.59	0.02731224		1081.62	-0.01840024		1611.61	-0.0094719		2141.64	-0.01844436		2671.64	-0.02521723		3201.64	-0.01410775		3731.64	-0.03351613
551.79	0.02733487		1081.82	-0.01877587		1611.81	-0.00948715		2141.84	-0.01887517		2671.84	-0.02546482		3201.84	-0.01355726		3731.84	-0.03414066
551.99	0.02665893		1082.02	-0.01855104		1612.01	-0.01015283		2142.04	-0.0181327		2672.04	-0.02526249		3202.04	-0.01359126		3732.04	-0.03416693
552.19	0.02625383		1082.22	-0.01792697		1612.21	-0.01065725		2142.24	-0.01716213		2672.24	-0.0247924		3202.24	-0.0135141		3732.24	-0.03459692
552.39	0.02527748		1082.42	-0.01769483		1612.41	-0.01024485		2142.44	-0.01732528		2672.44	-0.02502067		3202.44	-0.01354673		3732.44	-0.03448523
552.59	0.02494326		1082.62	-0.01771133		1612.61	-0.0103029		2142.64	-0.01727871		2672.64	-0.02418573		3202.64	-0.01448695		3732.64	-0.03552292
552.79	0.02501811		1082.82	-0.01680772		1612.81	-0.01064812		2142.84	-0.01713421		2672.84	-0.02374756		3202.84	-0.01507689		3732.84	-0.03522343
552.99	0.02515705		1083.02	-0.01639088		1613.01	-0.01116164		2143.04	-0.01789548		2673.04	-0.02407859		3203.04	-0.01529469		3733.04	-0.03477908
553.19	0.02480802		1083.22	-0.0166776		1613.21	-0.0110129		2143.24	-0.01767041		2673.24	-0.02485838		3203.24	-0.01521708		3733.24	-0.03460887
553.39	0.02403694		1083.42	-0.01583886		1613.41	-0.01137202		2143.44	-0.01765766		2673.44	-0.02497438		3203.44	-0.01557858		3733.44	-0.03497163
553.59	0.02374777		1083.62	-0.01515957		1613.61	-0.01121738		2143.64	-0.01769991		2673.64	-0.02516826		3203.64	-0.01666747		3733.64	-0.03520672
553.79	0.02351841		1083.82	-0.01483593		1613.81	-0.01126716		2143.84	-0.01749977		2673.84	-0.0247925		3203.84	-0.01692157		3733.84	-0.03480506
553.99	0.02354088		1084.02	-0.01516456		1614.01	-0.01105882		2144.04	-0.0174412		2674.04	-0.02484257		3204.04	-0.01778456		3734.04	-0.03472817
554.19	0.02417431		1084.22	-0.01485608		1614.21	-0.01037397		2144.24	-0.01757227		2674.24	-0.02517052		3204.24	-0.01858184		3734.24	-0.03524691
554.39	0.02451696		1084.42	-0.01460144		1614.41	-0.00992176		2144.44	-0.01765875		2674.44	-0.02556156		3204.44	-0.02021967		3734.44	-0.0348676
554.59	0.02433685		1084.62	-0.01589903		1614.61	-0.01057497		2144.64	-0.01755881		2674.64	-0.02585433		3204.64	-0.02063841		3734.64	-0.0353272
554.79	0.02513213		1084.82	-0.01528433		1614.81	-0.01009509		2144.84	-0.01767707		2674.84	-0.02668549		3204.84	-0.02212385		3734.84	-0.03646196
554.99	0.02556776		1085.02	-0.01532097		1615.01	-0.01027313		2145.04	-0.01769853		2675.04	-0.02687524		3205.04	-0.0231532		3735.04	-0.03629255
555.19	0.02587024		1085.22	-0.01521545		1615.21	-0.01003709		2145.24	-0.01709631		2675.24	-0.02582463		3205.24	-0.02393259		3735.24	-0.03666422
555.39	0.02592237		1085.42	-0.01592483		1615.41	-0.0089271		2145.44	-0.01751594		2675.44	-0.02567157		3205.44	-0.0240833		3735.44	-0.03700535
555.59	0.02558278		1085.62	-0.01650382		1615.61	-0.00799218		2145.64	-0.01777542		2675.64	-0.02530502		3205.64	-0.02420081		3735.64	-0.03746243
555.79	0.02602219		1085.82	-0.0156625		1615.81	-0.00793676		2145.84	-0.01780887		2675.84	-0.0253859		3205.84	-0.02410572		3735.84	-0.03779814
555.99	0.02619336		1086.02	-0.01534096		1616.01	-0.00793076		2146.04	-0.01786559		2676.04	-0.0254057		3206.04	-0.02419931		3736.04	-0.03779
556.19	0.02603037		1086.22	-0.01508392		1616.21	-0.00820365		2146.24	-0.01844797		2676.24	-0.02379118		3206.24	-0.0236591		3736.24	-0.03748733
556.39	0.02602649		1086.42	-0.01535255		1616.41	-0.00727201		2146.44	-0.01910252		2676.44	-0.02442819		3206.44	-0.02264808		3736.44	-0.03779409
556.59	0.02662403		1086.62	-0.01619525		1616.61	-0.00860521		2146.64	-0.02015047		2676.64	-0.0242849		3206.64	-0.02142702		3736.64	-0.0380098
556.79	0.02694298		1086.82	-0.0164097		1616.81	-0.00960649		2146.84	-0.02037002		2676.84	-0.02357294		3206.84	-0.02012659		3736.84	-0.03760164
556.99	0.02674644		1087.02	-0.01630654		1617.01	-0.01024299		2147.04	-0.02067082		2677.04	-0.02405579		3207.04	-0.01901278		3737.04	-0.03761383
557.19	0.02637556		1087.22	-0.01646743		1617.21	-0.01088737		2147.24	-0.02119947		2677.24	-0.02432828		3207.24	-0.01884804		3737.24	-0.03842946
557.39	0.02524338		1087.42	-0.01595714		1617.41	-0.01088915		2147.44	-0.02119703		2677.44	-0.02459752		3207.44	-0.01888712		3737.44	-0.03907507
557.59	0.02490175		1087.62	-0.01634218		1617.61	-0.01153563		2147.64	-0.02136524		2677.64	-0.02451914		3207.64	-0.01912987		3737.64	-0.03917265
557.79	0.02456375		1087.82	-0.01732627		1617.81	-0.01161974		2147.84	-0.02161977		2677.84	-0.02439443		3207.84	-0.01845999		3737.84	-0.03862165
557.99	0.02417802		1088.02	-0.01768064		1618.01	-0.01114434		2148.04	-0.02191149		2678.04	-0.02490069		3208.04	-0.01845241		3738.04	-0.03868724
558.19	0.0238174		1088.22	-0.01746769		1618.21	-0.01101653		2148.24	-0.02262401		2678.24	-0.02530951		3208.24	-0.01842292		3738.24	-0.03855685
558.39	0.02308253		1088.42	-0.01751448		1618.41	-0.01096673		2148.44	-0.02231099		2678.44	-0.02522113		3208.44	-0.01832551		3738.44	-0.0382613
558.59	0.02243979		1088.62	-0.01803564		1618.61	-0.0109694		2148.64	-0.02225146		2678.64	-0.02533838		3208.64	-0.01803515		3738.64	-0.03808538
558.79	0.02244831		1088.82	-0.01707658		1618.81	-0.01088333		2148.84	-0.02203629		2678.84	-0.0255033		3208.84	-0.01823893		3738.84	-0.03775841
558.99	0.02186322		1089.02	-0.01713393		1619.01	-0.01018751		2149.04	-0.02193485		2679.04	-0.02464399		3209.04	-0.01793222		3739.04	-0.03749365
559.19	0.02076209		1089.22	-0.01712335		1619.21	-0.00963108		2149.24	-0.0213733		2679.24	-0.02383626		3209.24	-0.01767547		3739.24	-0.03735665
559.39	0.0202293		1089.42	-0.01747933		1619.41	-0.00853396		2149.44	-0.02149786		2679.44	-0.02367915		3209.44	-0.01739432		3739.44	-0.03732657
559.59	0.01982107		1089.62	-0.01654271		1619.61	-0.00852935		2149.64	-0.02154858		2679.64	-0.02297215		3209.64	-0.0175338		3739.64	-0.03685849
559.79	0.01974748		1089.82	-0.01550835		1619.81	-0.00885918		2149.84	-0.02169845		2679.84	-0.0232226		3209.84	-0.01749701		3739.84	-0.0368426
