# Supplementary material for: Functional development of a V3/glycan-specific broadly neutralizing antibody isolated from a case of HIV superinfection
Source: eLife journal article supplement (doi:10.7554/elife.68110), 2021-07-15
Supplement: fig2-data2 [file C9.xls]

Vers 3.43 Data Simulation
Conc1	1.25E-07	1.25E-07	1.25E-07	1.25E-07	1.25E-07	1.25E-07	1.25E-07
Start1	199.99	729.99	1259.98	1789.98	2319.97	2849.97	3380
Stop1	559.79	1089.79	1619.78	2149.78	2679.77	3209.77	3739.8
Time1	Data1	Sim1	Time2	Data2	Sim2	Time3	Data3	Sim3	Time4	Data4	Sim4	Time5	Data5	Sim5	Time6	Data6	Sim6	Time7	Data7	Sim7
199.99	0.00568709		729.99	-0.00759963		1259.98	0.01104802		1789.98	-0.00036497		2319.97	-0.00312951		2849.97	0.00072111		3380	0.00143112
200.19	0.00574621		730.19	-0.00808194		1260.18	0.01094561		1790.18	-0.00036028		2320.17	-0.00297386		2850.17	-0.00067211		3380.2	0.00235415
200.39	0.00651747		730.39	-0.00848876		1260.38	0.0111066		1790.38	-0.00011078		2320.37	-0.00292878		2850.37	-0.00213118		3380.4	0.00369832
200.59	0.00728653		730.59	-0.00955642		1260.58	0.01062223		1790.58	0.00020836		2320.57	-0.00153211		2850.57	-0.00395521		3380.6	0.00411159
200.79	0.00854843		730.79	-0.0094124		1260.78	0.01066371		1790.78	0.00022757		2320.77	-0.00150723		2850.77	-0.00491044		3380.8	0.00485833
200.99	0.0088306		730.99	-0.00974471		1260.98	0.01036321		1790.98	0.0002661		2320.97	-0.00109234		2850.97	-0.00666668		3381	0.00598289
201.19	0.01016921		731.19	-0.01047506		1261.18	0.01125643		1791.18	0.00015958		2321.17	-0.00100065		2851.17	-0.00815571		3381.2	0.00713973
201.39	0.01060507		731.39	-0.01087819		1261.38	0.01191729		1791.38	0.00089445		2321.37	-0.00069968		2851.37	-0.00923305		3381.4	0.00861426
201.59	0.01153844		731.59	-0.01136658		1261.58	0.0123177		1791.58	0.00083376		2321.57	-0.00033083		2851.57	-0.00917441		3381.6	0.00886392
201.79	0.01207445		731.79	-0.01176113		1261.78	0.01295473		1791.78	0.00061237		2321.77	0.00000306		2851.77	-0.00904377		3381.8	0.00890959
201.99	0.01294477		731.99	-0.01223303		1261.98	0.01326938		1791.98	0.00053489		2321.97	0.00031223		2851.97	-0.00864283		3382	0.00859814
202.19	0.01405475		732.19	-0.01289287		1262.18	0.01437736		1792.18	0.00094055		2322.17	0.0007157		2852.17	-0.00711352		3382.2	0.00797515
202.39	0.01567801		732.39	-0.01223913		1262.38	0.01488442		1792.38	0.00092246		2322.37	0.00096692		2852.37	-0.00729628		3382.4	0.00656381
202.59	0.01623345		732.59	-0.01348743		1262.58	0.01507426		1792.58	0.00111174		2322.57	0.00133805		2852.57	-0.00673007		3382.6	0.00557957
202.79	0.01703149		732.79	-0.01388075		1262.78	0.01437417		1792.78	0.00118458		2322.77	0.00212958		2852.77	-0.00664516		3382.8	0.00431081
202.99	0.01799475		732.99	-0.01345651		1262.98	0.01384837		1792.98	0.00098963		2322.97	0.00235308		2852.97	-0.00664868		3383	0.00347918
203.19	0.01813173		733.19	-0.01411134		1263.18	0.01340188		1793.18	0.00128915		2323.17	0.00225431		2853.17	-0.00655715		3383.2	0.00304815
203.39	0.0182559		733.39	-0.01334387		1263.38	0.01270684		1793.38	0.0016585		2323.37	0.00227606		2853.37	-0.00574304		3383.4	0.00272434
203.59	0.01839216		733.59	-0.01414631		1263.58	0.01226771		1793.58	0.00138788		2323.57	0.0018629		2853.57	-0.00583549		3383.6	0.00311542
203.79	0.01881749		733.79	-0.01379318		1263.78	0.01193079		1793.78	0.00127109		2323.77	0.00133662		2853.77	-0.00581522		3383.8	0.00310896
203.99	0.0195875		733.99	-0.01340751		1263.98	0.01183797		1793.98	0.00132995		2323.97	0.00119107		2853.97	-0.00573375		3384	0.0029092
204.19	0.02021941		734.19	-0.01337365		1264.18	0.01183512		1794.18	0.00154731		2324.17	0.00106237		2854.17	-0.00570004		3384.2	0.00236868
204.39	0.02241375		734.39	-0.01306365		1264.38	0.01163025		1794.38	0.0022092		2324.37	0.00145121		2854.37	-0.00599642		3384.4	0.00285197
204.59	0.02417787		734.59	-0.01265129		1264.58	0.01181214		1794.58	0.00181365		2324.57	0.00162475		2854.57	-0.0061509		3384.6	0.00287252
204.79	0.02509065		734.79	-0.01151749		1264.78	0.01229779		1794.78	0.00149887		2324.77	0.00054903		2854.77	-0.00617712		3384.8	0.00278327
204.99	0.02541103		734.99	-0.01151476		1264.98	0.01240174		1794.98	0.00114066		2324.97	0.00122504		2854.97	-0.00656915		3385	0.00356429
205.19	0.02742602		735.19	-0.01111522		1265.18	0.01386134		1795.18	0.00106852		2325.17	0.00113965		2855.17	-0.00610289		3385.2	0.00412023
205.39	0.02771204		735.39	-0.00977711		1265.38	0.01423564		1795.38	0.00120566		2325.37	0.00205024		2855.37	-0.00550134		3385.4	0.00468544
205.59	0.02850249		735.59	-0.01017851		1265.58	0.01495826		1795.58	0.00016199		2325.57	0.00134432		2855.57	-0.00422339		3385.6	0.00417205
205.79	0.0287386		735.79	-0.01001321		1265.78	0.01605339		1795.78	-0.00044674		2325.77	0.00120768		2855.77	-0.00401363		3385.8	0.00411371
205.99	0.02986661		735.99	-0.01018268		1265.98	0.01619101		1795.98	-0.0001834		2325.97	0.00156269		2855.97	-0.00349672		3386	0.00317459
206.19	0.03055741		736.19	-0.01090776		1266.18	0.01696068		1796.18	-0.0000785		2326.17	0.00127537		2856.17	-0.00284989		3386.2	0.00255919
206.39	0.03087711		736.39	-0.01138256		1266.38	0.0170145		1796.38	-0.00063914		2326.37	0.00202113		2856.37	-0.00265234		3386.4	0.0021335
206.59	0.03090501		736.59	-0.01271371		1266.58	0.01749278		1796.58	-0.00045055		2326.57	0.0030023		2856.57	-0.00220574		3386.6	0.00237696
206.79	0.03232093		736.79	-0.01277953		1266.78	0.01675319		1796.78	-0.00008028		2326.77	0.00334273		2856.77	-0.00163139		3386.8	0.0015819
206.99	0.03286227		736.99	-0.01320938		1266.98	0.01711289		1796.98	-0.00028695		2326.97	0.00332659		2856.97	-0.00164175		3387	0.00170198
207.19	0.03310069		737.19	-0.01420311		1267.18	0.01714634		1797.18	0.00023127		2327.17	0.00402862		2857.17	-0.00129335		3387.2	0.00190383
207.39	0.03447086		737.39	-0.01420829		1267.38	0.01695863		1797.38	0.00006432		2327.37	0.00430033		2857.37	-0.00159539		3387.4	0.00249196
207.59	0.03543568		737.59	-0.01420005		1267.58	0.01759613		1797.58	0.00024232		2327.57	0.00491302		2857.57	-0.00175059		3387.6	0.00304686
207.79	0.03761462		737.79	-0.01335289		1267.78	0.01703418		1797.78	0.00018755		2327.77	0.00526892		2857.77	-0.00235572		3387.8	0.00231005
207.99	0.03897135		737.99	-0.01303445		1267.98	0.0169899		1797.98	0.00087182		2327.97	0.00553948		2857.97	-0.00210725		3388	0.00223296
208.19	0.03974102		738.19	-0.01228586		1268.18	0.01696403		1798.18	0.00097334		2328.17	0.00613505		2858.17	-0.00213528		3388.2	0.00226256
208.39	0.04172853		738.39	-0.0115079		1268.38	0.01678221		1798.38	0.00099287		2328.37	0.00654183		2858.37	-0.00209203		3388.4	0.00248833
208.59	0.04324172		738.59	-0.01093284		1268.58	0.01702007		1798.58	0.00057821		2328.57	0.0061969		2858.57	-0.00234937		3388.6	0.00232609
208.79	0.04429619		738.79	-0.01009977		1268.78	0.01680954		1798.78	0.00056278		2328.77	0.00717018		2858.77	-0.00296184		3388.8	0.00186735
208.99	0.04541176		738.99	-0.00895748		1268.98	0.01641862		1798.98	0.00010097		2328.97	0.00762532		2858.97	-0.0027446		3389	0.0023402
209.19	0.04661877		739.19	-0.00791447		1269.18	0.0168956		1799.18	0.00013859		2329.17	0.00703405		2859.17	-0.00301456		3389.2	0.00229361
209.39	0.04646623		739.39	-0.00717773		1269.38	0.01671039		1799.38	0.00016576		2329.37	0.00649833		2859.37	-0.00321143		3389.4	0.00214066
209.59	0.04634959		739.59	-0.00833517		1269.58	0.01679835		1799.58	-0.00012876		2329.57	0.00464151		2859.57	-0.00326747		3389.6	0.00159156
209.79	0.04690996		739.79	-0.00824603		1269.78	0.01618437		1799.78	-0.00075079		2329.77	0.00421283		2859.77	-0.00302652		3389.8	0.00080864
209.99	0.04732378		739.99	-0.00847592		1269.98	0.01583784		1799.98	-0.0006568		2329.97	0.00317682		2859.97	-0.00332295		3390	0.00056183
210.19	0.0477075		740.19	-0.00908429		1270.18	0.01672156		1800.18	-0.0017777		2330.17	0.00140596		2860.17	-0.00291397		3390.2	0.00077243
210.39	0.04862035		740.39	-0.00961994		1270.38	0.01674825		1800.38	-0.00146099		2330.37	0.00196449		2860.37	-0.0029794		3390.4	0.00072873
210.59	0.04867498		740.59	-0.01003204		1270.58	0.01639268		1800.58	-0.00177565		2330.57	0.00221179		2860.57	-0.00275072		3390.6	0.00024076
210.79	0.04957438		740.79	-0.01069785		1270.78	0.01582394		1800.78	-0.001162		2330.77	0.00188813		2860.77	-0.00211166		3390.8	-0.00008188
210.99	0.04927984		740.99	-0.01136934		1270.98	0.01643328		1800.98	-0.00155997		2330.97	0.00221874		2860.97	-0.00122698		3391	-0.00043297
211.19	0.04933803		741.19	-0.01143296		1271.18	0.0165499		1801.18	-0.00079665		2331.17	0.00277623		2861.17	-0.00129533		3391.2	0.00031601
211.39	0.0511301		741.39	-0.01204176		1271.38	0.01573689		1801.38	-0.00105192		2331.37	0.00257221		2861.37	-0.00112101		3391.4	-0.00006495
211.59	0.05225785		741.59	-0.01231709		1271.58	0.01571557		1801.58	-0.00039339		2331.57	0.00292915		2861.57	-0.0011731		3391.6	-0.000566
211.79	0.05331586		741.79	-0.01280966		1271.78	0.01458029		1801.78	-0.00009238		2331.77	0.0031202		2861.77	-0.00114075		3391.8	-0.00004274
211.99	0.05355889		741.99	-0.0132525		1271.98	0.01369896		1801.98	0.00013406		2331.97	0.00407083		2861.97	-0.00052012		3392	0.00016871
212.19	0.05376135		742.19	-0.01257834		1272.18	0.01357782		1802.18	-0.00012572		2332.17	0.00508805		2862.17	-0.00024753		3392.2	0.00017475
212.39	0.05488418		742.39	-0.0128953		1272.38	0.01342202		1802.38	0.00042624		2332.37	0.00507322		2862.37	-0.00060199		3392.4	-0.00011226
212.59	0.05594563		742.59	-0.01340649		1272.58	0.01487758		1802.58	-0.00013453		2332.57	0.00502269		2862.57	-0.0015487		3392.6	0.00114198
212.79	0.05649263		742.79	-0.01314566		1272.78	0.01570593		1802.78	-0.00000059		2332.77	0.00514612		2862.77	-0.00193938		3392.8	0.00118607
212.99	0.0571141		742.99	-0.01342463		1272.98	0.01519842		1802.98	-0.00028019		2332.97	0.00497587		2862.97	-0.00162097		3393	0.00128966
213.19	0.0580271		743.19	-0.01395459		1273.18	0.01579915		1803.18	-0.00058597		2333.17	0.00480362		2863.17	-0.00229865		3393.2	0.00145445
213.39	0.05861973		743.39	-0.01476337		1273.38	0.01612295		1803.38	-0.00047367		2333.37	0.00490995		2863.37	-0.00281721		3393.4	0.00139766
213.59	0.05962444		743.59	-0.01466144		1273.58	0.01653329		1803.58	-0.00148586		2333.57	0.00388748		2863.57	-0.00325605		3393.6	0.0014248
213.79	0.0603208		743.79	-0.0143999		1273.78	0.01662014		1803.78	-0.00175335		2333.77	0.003947		2863.77	-0.00342848		3393.8	0.00116528
213.99	0.06098513		743.99	-0.01404952		1273.98	0.01752497		1803.98	-0.00184117		2333.97	0.00384345		2863.97	-0.00391061		3394	0.00154309
214.19	0.0614184		744.19	-0.01289188		1274.18	0.01832532		1804.18	-0.00226205		2334.17	0.00379923		2864.17	-0.0039		3394.2	0.00029724
214.39	0.0623613		744.39	-0.01235326		1274.38	0.01757727		1804.38	-0.00082473		2334.37	0.00469278		2864.37	-0.00455045		3394.4	-0.0008126
214.59	0.06175986		744.59	-0.01185433		1274.58	0.0178038		1804.58	-0.00070214		2334.57	0.0053394		2864.57	-0.00379764		3394.6	-0.0005777
214.79	0.06307705		744.79	-0.01166744		1274.78	0.01846118		1804.78	0.00077744		2334.77	0.00526368		2864.77	-0.00275503		3394.8	-0.00039698
214.99	0.06398383		744.99	-0.01121154		1274.98	0.01848373		1804.98	0.00181941		2334.97	0.00613558		2864.97	-0.00190337		3395	-0.00006604
215.19	0.06436379		745.19	-0.01167681		1275.18	0.01883858		1805.18	0.00302241		2335.17	0.00607304		2865.17	-0.00165887		3395.2	0.00022094
215.39	0.06557243		745.39	-0.01301486		1275.38	0.01742244		1805.38	0.00336408		2335.37	0.00630548		2865.37	-0.0006472		3395.4	-0.00010661
215.59	0.06621501		745.59	-0.01249201		1275.58	0.01741875		1805.58	0.00347162		2335.57	0.00682133		2865.57	-0.00052717		3395.6	0.00044424
215.79	0.0669704		745.79	-0.01254466		1275.78	0.01724263		1805.78	0.00376679		2335.77	0.00712958		2865.77	0.00058052		3395.8	0.00101989
215.99	0.06800966		745.99	-0.01285961		1275.98	0.01757611		1805.98	0.00373458		2335.97	0.00759992		2865.97	0.00050259		3396	0.00151876
216.19	0.06886823		746.19	-0.01210631		1276.18	0.01802589		1806.18	0.00357215		2336.17	0.00795983		2866.17	0.00063786		3396.2	0.00184469
216.39	0.06993166		746.39	-0.0132753		1276.38	0.01851033		1806.38	0.00322208		2336.37	0.00729266		2866.37	0.00010681		3396.4	0.00216453
216.59	0.07036347		746.59	-0.01355438		1276.58	0.02011729		1806.58	0.00167652		2336.57	0.00762461		2866.57	0.0001471		3396.6	0.00316896
216.79	0.07085488		746.79	-0.01370148		1276.78	0.01917338		1806.78	0.00191807		2336.77	0.00799791		2866.77	0.00021856		3396.8	0.00238001
216.99	0.07185363		746.99	-0.01287769		1276.98	0.0183376		1806.98	0.00026984		2336.97	0.00865894		2866.97	-0.00006281		3397	0.00226458
217.19	0.0723268		747.19	-0.01319912		1277.18	0.01835306		1807.18	-0.00050763		2337.17	0.00964376		2867.17	-0.00078789		3397.2	0.00264657
217.39	0.07240664		747.39	-0.01287566		1277.38	0.01856055		1807.38	-0.00113877		2337.37	0.00950856		2867.37	-0.00065242		3397.4	0.0022106
217.59	0.07228057		747.59	-0.01192132		1277.58	0.01838939		1807.58	-0.00171516		2337.57	0.00908629		2867.57	-0.00041694		3397.6	0.00181723
217.79	0.07269372		747.79	-0.01198009		1277.78	0.01809325		1807.78	-0.00191194		2337.77	0.01026545		2867.77	-0.00064223		3397.8	0.00130706
217.99	0.07367346		747.99	-0.01201276		1277.98	0.01837024		1807.98	-0.00242754		2337.97	0.01027542		2867.97	-0.00041707		3398	0.0010073
218.19	0.07394173		748.19	-0.0114777		1278.18	0.01879219		1808.18	-0.00225563		2338.17	0.00967205		2868.17	-0.00146036		3398.2	-0.00004557
218.39	0.07481253		748.39	-0.01101481		1278.38	0.01853338		1808.38	-0.00189881		2338.37	0.0094267		2868.37	-0.00189299		3398.4	-0.00045138
218.59	0.07585546		748.59	-0.0109816		1278.58	0.01899704		1808.58	-0.00130822		2338.57	0.00990381		2868.57	-0.00182472		3398.6	-0.00031332
218.79	0.07717005		748.79	-0.01092745		1278.78	0.01819354		1808.78	-0.00043731		2338.77	0.00960099		2868.77	-0.00155076		3398.8	-0.00120405
218.99	0.0778498		748.99	-0.01074143		1278.98	0.01785122		1808.98	0.00000383		2338.97	0.00958769		2868.97	-0.00164497		3399	-0.00123848
219.19	0.07871307		749.19	-0.01059462		1279.18	0.0175802		1809.18	0.00026778		2339.17	0.0087238		2869.17	-0.00116485		3399.2	-0.00103972
219.39	0.07960954		749.39	-0.0108543		1279.38	0.01685451		1809.38	-0.00026599		2339.37	0.00844629		2869.37	-0.00175831		3399.4	-0.000811
219.59	0.08017786		749.59	-0.01065732		1279.58	0.01746448		1809.58	-0.00020922		2339.57	0.00791831		2869.57	-0.00145826		3399.6	-0.00107578
219.79	0.08112091		749.79	-0.01054602		1279.78	0.01734801		1809.78	-0.0000793		2339.77	0.00754646		2869.77	-0.0010909		3399.8	-0.00129906
219.99	0.08168527		749.99	-0.01061383		1279.98	0.01757047		1809.98	0.00007392		2339.97	0.00786307		2869.97	-0.00165901		3400	-0.00006576
220.19	0.08278234		750.19	-0.01030376		1280.18	0.01630365		1810.18	-0.00085674		2340.17	0.00761393		2870.17	-0.00098778		3400.2	0.00034673
220.39	0.08316246		750.39	-0.01043515		1280.38	0.0164436		1810.38	-0.00088663		2340.37	0.0078358		2870.37	-0.00068931		3400.4	0.00034505
220.59	0.08321976		750.59	-0.01007209		1280.58	0.01639699		1810.58	-0.00143302		2340.57	0.00815445		2870.57	-0.00058237		3400.6	0.00030654
220.79	0.08328095		750.79	-0.00999999		1280.78	0.01527711		1810.78	-0.00188627		2340.77	0.00909246		2870.77	0.00079098		3400.8	-0.00009312
220.99	0.08367509		750.99	-0.00930016		1280.98	0.01471834		1810.98	-0.00257564		2340.97	0.00939829		2870.97	0.00150472		3401	-0.00022927
221.19	0.08404912		751.19	-0.01020062		1281.18	0.01504306		1811.18	-0.00237121		2341.17	0.01015284		2871.17	0.0026047		3401.2	-0.00055
221.39	0.08394325		751.39	-0.01042096		1281.38	0.01497456		1811.38	-0.00269018		2341.37	0.00993462		2871.37	0.00411229		3401.4	-0.00110012
221.59	0.08409975		751.59	-0.01144867		1281.58	0.01511492		1811.58	-0.00218535		2341.57	0.01041258		2871.57	0.00560289		3401.6	-0.00124638
221.79	0.08485503		751.79	-0.01277511		1281.78	0.01545414		1811.78	-0.0025795		2341.77	0.01107722		2871.77	0.00608013		3401.8	-0.00142652
221.99	0.08401706		751.99	-0.01357406		1281.98	0.01602658		1811.98	-0.00266607		2341.97	0.01072904		2871.97	0.00694915		3402	-0.00189014
222.19	0.08304566		752.19	-0.01329147		1282.18	0.01624043		1812.18	-0.00204899		2342.17	0.01072045		2872.17	0.00630304		3402.2	-0.00283772
222.39	0.08334534		752.39	-0.01306697		1282.38	0.01643648		1812.38	-0.00174587		2342.37	0.01103414		2872.37	0.00647767		3402.4	-0.0041516
222.59	0.08388625		752.59	-0.01383598		1282.58	0.01683047		1812.58	-0.00013084		2342.57	0.01137628		2872.57	0.00682403		3402.6	-0.00467826
222.79	0.08355295		752.79	-0.01333396		1282.78	0.01674475		1812.78	0.00037244		2342.77	0.01208604		2872.77	0.00714117		3402.8	-0.00508726
222.99	0.08380474		752.99	-0.0137166		1282.98	0.01717843		1812.98	0.0008449		2342.97	0.0120328		2872.97	0.006951		3403	-0.00494221
223.19	0.0850184		753.19	-0.01429538		1283.18	0.01789128		1813.18	0.00100869		2343.17	0.01199383		2873.17	0.00603151		3403.2	-0.00446076
223.39	0.08522809		753.39	-0.01509563		1283.38	0.0186668		1813.38	0.00136179		2343.37	0.01186055		2873.37	0.00471006		3403.4	-0.00421685
223.59	0.08596765		753.59	-0.01554406		1283.58	0.01959632		1813.58	0.0026491		2343.57	0.01215923		2873.57	0.00406554		3403.6	-0.00351719
223.79	0.08745348		753.79	-0.01472138		1283.78	0.01936711		1813.78	0.00324879		2343.77	0.01178711		2873.77	0.00346942		3403.8	-0.00226267
223.99	0.08806591		753.99	-0.01426394		1283.98	0.01932881		1813.98	0.00337354		2343.97	0.01173664		2873.97	0.00241325		3404	-0.00114425
224.19	0.08979522		754.19	-0.01341018		1284.18	0.01983455		1814.18	0.00252498		2344.17	0.01163635		2874.17	0.00187697		3404.2	0.00033621
224.39	0.09074598		754.39	-0.01316871		1284.38	0.02026394		1814.38	0.00250654		2344.37	0.01119869		2874.37	0.0014917		3404.4	0.00134109
224.59	0.09181766		754.59	-0.01274802		1284.58	0.01964172		1814.58	0.00189272		2344.57	0.01097466		2874.57	0.0011669		3404.6	0.00088493
224.79	0.09280213		754.79	-0.0121477		1284.78	0.01894388		1814.78	0.00152405		2344.77	0.01121581		2874.77	0.00148219		3404.8	0.00071865
224.99	0.09418125		754.99	-0.01090518		1284.98	0.01899893		1814.98	0.00097919		2344.97	0.01054125		2874.97	0.00161081		3405	0.00107253
225.19	0.09559393		755.19	-0.00982783		1285.18	0.01965746		1815.18	0.00058505		2345.17	0.01050072		2875.17	0.00266026		3405.2	0.00058657
225.39	0.09624505		755.39	-0.0097326		1285.38	0.0193039		1815.38	0.00042526		2345.37	0.01046795		2875.37	0.00415218		3405.4	0.00103013
225.59	0.0970872		755.59	-0.00994776		1285.58	0.01927273		1815.58	-0.00020165		2345.57	0.0111661		2875.57	0.00484575		3405.6	0.00068009
225.79	0.09715729		755.79	-0.00955393		1285.78	0.01939102		1815.78	-0.00074095		2345.77	0.01083392		2875.77	0.00603177		3405.8	0.00032618
225.99	0.09743725		755.99	-0.0087869		1285.98	0.0188161		1815.98	-0.00055863		2345.97	0.01041321		2875.97	0.00645343		3406	0.00004526
226.19	0.09905293		756.19	-0.0086569		1286.18	0.01898522		1816.18	-0.00039992		2346.17	0.01086028		2876.17	0.00558813		3406.2	-0.00066567
226.39	0.10000946		756.39	-0.00948251		1286.38	0.01926217		1816.38	-0.0001939		2346.37	0.01150405		2876.37	0.00581687		3406.4	-0.00159081
226.59	0.1005524		756.59	-0.00955715		1286.58	0.0197833		1816.58	0.00020591		2346.57	0.01260846		2876.57	0.00637529		3406.6	-0.0018927
226.79	0.10104148		756.79	-0.00923755		1286.78	0.01998908		1816.78	0.00035785		2346.77	0.01367751		2876.77	0.00543044		3406.8	-0.00273139
226.99	0.1019199		756.99	-0.01094254		1286.98	0.02014241		1816.98	0.00075158		2346.97	0.01323695		2876.97	0.00474048		3407	-0.00211419
227.19	0.10294533		757.19	-0.01193613		1287.18	0.02095996		1817.18	0.00079256		2347.17	0.01340457		2877.17	0.00390192		3407.2	-0.00146499
227.39	0.10325435		757.39	-0.01169359		1287.38	0.02148799		1817.38	0.00072074		2347.37	0.01334997		2877.37	0.00342708		3407.4	-0.0009516
227.59	0.10371909		757.59	-0.01199846		1287.58	0.0214623		1817.58	0.00118407		2347.57	0.01374369		2877.57	0.00311916		3407.6	-0.00041996
227.79	0.10425942		757.79	-0.01150158		1287.78	0.02066746		1817.78	0.00061789		2347.77	0.01252608		2877.77	0.00238492		3407.8	-0.00003591
227.99	0.10467587		757.99	-0.01090273		1287.98	0.0204416		1817.98	-0.00025431		2347.97	0.01238213		2877.97	0.00120262		3408	0.00003206
228.19	0.10568402		758.19	-0.01066389		1288.18	0.02147016		1818.18	-0.00006102		2348.17	0.01159813		2878.17	0.00091063		3408.2	0.00132136
228.39	0.10551942		758.39	-0.01119004		1288.38	0.0207202		1818.38	-0.00057456		2348.37	0.01059215		2878.37	0.0010653		3408.4	0.00097862
228.59	0.10509229		758.59	-0.01125113		1288.58	0.02072161		1818.58	-0.00073332		2348.57	0.01080611		2878.57	0.00081904		3408.6	0.00067391
228.79	0.10549261		758.79	-0.01117528		1288.78	0.0213008		1818.78	-0.00128704		2348.77	0.01074436		2878.77	0.00128853		3408.8	0.00196505
228.99	0.10511711		758.99	-0.01065406		1288.98	0.02211542		1818.98	-0.00198285		2348.97	0.01155992		2878.97	0.00211298		3409	0.00276996
229.19	0.10539325		759.19	-0.01123322		1289.18	0.0217172		1819.18	-0.00192705		2349.17	0.01168846		2879.17	0.00240722		3409.2	0.00193797
229.39	0.10525476		759.39	-0.01160457		1289.38	0.02097622		1819.38	-0.00209175		2349.37	0.011379		2879.37	0.00292351		3409.4	0.00207881
229.59	0.10541879		759.59	-0.01225103		1289.58	0.02042385		1819.58	-0.00253645		2349.57	0.01127252		2879.57	0.0034051		3409.6	0.00107388
229.79	0.1053811		759.79	-0.01197746		1289.78	0.02036455		1819.78	-0.002436		2349.77	0.0107054		2879.77	0.00481922		3409.8	0.000461
229.99	0.10684114		759.99	-0.01208165		1289.98	0.01949241		1819.98	-0.00239185		2349.97	0.01185467		2879.97	0.00479494		3410	-0.00035518
230.19	0.10758273		760.19	-0.012629		1290.18	0.01949614		1820.18	-0.00167708		2350.17	0.01266662		2880.17	0.00532772		3410.2	-0.00142159
230.39	0.10685024		760.39	-0.01346335		1290.38	0.01916592		1820.38	-0.00172255		2350.37	0.01307404		2880.37	0.00631406		3410.4	-0.00256547
230.59	0.10762721		760.59	-0.0131368		1290.58	0.01979396		1820.58	-0.00126286		2350.57	0.01350131		2880.57	0.00673709		3410.6	-0.0030493
230.79	0.10767505		760.79	-0.01378986		1290.78	0.01963914		1820.78	-0.0007279		2350.77	0.01302304		2880.77	0.00631417		3410.8	-0.00344243
230.99	0.10831696		760.99	-0.01472606		1290.98	0.01983958		1820.98	-0.00018503		2350.97	0.01308789		2880.97	0.00717727		3411	-0.00304687
231.19	0.10833706		761.19	-0.01374713		1291.18	0.02022146		1821.18	-0.00027804		2351.17	0.01349985		2881.17	0.00653742		3411.2	-0.00304721
231.39	0.10889979		761.39	-0.01258458		1291.38	0.01957621		1821.38	-0.0007815		2351.37	0.01457661		2881.37	0.00628243		3411.4	-0.00259469
231.59	0.10970092		761.59	-0.01293784		1291.58	0.01862623		1821.58	0.00003486		2351.57	0.01390963		2881.57	0.00599016		3411.6	-0.00308859
231.79	0.11073452		761.79	-0.01266935		1291.78	0.01871493		1821.78	-0.00001133		2351.77	0.01341044		2881.77	0.00580805		3411.8	-0.00259895
231.99	0.11172164		761.99	-0.0122494		1291.98	0.01818781		1821.98	0.00032899		2351.97	0.01408885		2881.97	0.0060422		3412	-0.00130442
232.19	0.11217363		762.19	-0.01209721		1292.18	0.01884271		1822.18	-0.00030807		2352.17	0.01276135		2882.17	0.00582725		3412.2	-0.00043535
232.39	0.11229376		762.39	-0.01224041		1292.38	0.01893683		1822.38	-0.00083564		2352.37	0.01300139		2882.37	0.00515839		3412.4	0.00060054
232.59	0.11269539		762.59	-0.01182968		1292.58	0.0193361		1822.58	-0.00098687		2352.57	0.01368542		2882.57	0.00527959		3412.6	0.00163595
232.79	0.11359817		762.79	-0.01182468		1292.78	0.01938088		1822.78	-0.00146646		2352.77	0.01374589		2882.77	0.00482028		3412.8	0.00160954
232.99	0.11395531		762.99	-0.01206908		1292.98	0.01954778		1822.98	-0.00214441		2352.97	0.01376043		2882.97	0.00416243		3413	0.0017394
233.19	0.11492366		763.19	-0.01215656		1293.18	0.01887815		1823.18	-0.00244046		2353.17	0.01294954		2883.17	0.00437634		3413.2	0.00118021
233.39	0.11515186		763.39	-0.01216954		1293.38	0.01958082		1823.38	-0.00313501		2353.37	0.01258204		2883.37	0.00412393		3413.4	0.00107842
233.59	0.11555298		763.59	-0.01281139		1293.58	0.02056547		1823.58	-0.00360788		2353.57	0.01349876		2883.57	0.00422105		3413.6	0.0000429
233.79	0.1157272		763.79	-0.01197618		1293.78	0.0211702		1823.78	-0.00440696		2353.77	0.01464522		2883.77	0.0049805		3413.8	-0.00034815
233.99	0.11665017		763.99	-0.01242756		1293.98	0.02108705		1823.98	-0.00411836		2353.97	0.01444917		2883.97	0.00610465		3414	-0.00088182
234.19	0.11738515		764.19	-0.01230913		1294.18	0.02164725		1824.18	-0.0038627		2354.17	0.0141861		2884.17	0.00652168		3414.2	-0.00101101
234.39	0.11723082		764.39	-0.01207383		1294.38	0.02216415		1824.38	-0.00456134		2354.37	0.01377694		2884.37	0.00682245		3414.4	-0.00116025
234.59	0.11827753		764.59	-0.01200243		1294.58	0.02274004		1824.58	-0.00398515		2354.57	0.01362234		2884.57	0.0076336		3414.6	-0.00123107
234.79	0.11782689		764.79	-0.01206002		1294.78	0.02297094		1824.78	-0.00372911		2354.77	0.01448076		2884.77	0.00801816		3414.8	-0.00109012
234.99	0.11751951		764.99	-0.01186768		1294.98	0.02302231		1824.98	-0.00279377		2354.97	0.01563331		2884.97	0.00910874		3415	-0.00136767
235.19	0.11769116		765.19	-0.01166089		1295.18	0.02264017		1825.18	-0.00225206		2355.17	0.01677176		2885.17	0.00892362		3415.2	-0.00123663
235.39	0.11820321		765.39	-0.01148801		1295.38	0.02214573		1825.38	-0.00193823		2355.37	0.01788284		2885.37	0.0090515		3415.4	-0.00145524
235.59	0.11789172		765.59	-0.01186352		1295.58	0.021705		1825.58	-0.00135496		2355.57	0.01776223		2885.57	0.00932683		3415.6	-0.0020344
235.79	0.11803146		765.79	-0.01149817		1295.78	0.02214068		1825.78	-0.00115484		2355.77	0.01839617		2885.77	0.00962671		3415.8	-0.00095356
235.99	0.11797953		765.99	-0.0111215		1295.98	0.02138991		1825.98	-0.00165039		2355.97	0.01820135		2885.97	0.00855645		3416	-0.00018367
236.19	0.11869027		766.19	-0.0104694		1296.18	0.02161202		1826.18	-0.00227757		2356.17	0.01704777		2886.17	0.00775375		3416.2	-0.00101212
236.39	0.11952208		766.39	-0.01034761		1296.38	0.02129982		1826.38	-0.00144472		2356.37	0.01704209		2886.37	0.00835091		3416.4	-0.00111122
236.59	0.12028588		766.59	-0.01041937		1296.58	0.02133646		1826.58	-0.00171502		2356.57	0.01684406		2886.57	0.00847841		3416.6	-0.00200615
236.79	0.12208157		766.79	-0.01089881		1296.78	0.02096567		1826.78	-0.00212445		2356.77	0.01573227		2886.77	0.00801148		3416.8	-0.00181346
236.99	0.12285458		766.99	-0.01148039		1296.98	0.02114167		1826.98	-0.00302773		2356.97	0.01483404		2886.97	0.00869069		3417	-0.00218179
237.19	0.12297557		767.19	-0.01110145		1297.18	0.02034305		1827.18	-0.00310528		2357.17	0.01496069		2887.17	0.00935529		3417.2	-0.00249357
237.39	0.12318985		767.39	-0.01061522		1297.38	0.02054812		1827.38	-0.00364762		2357.37	0.01532433		2887.37	0.00876472		3417.4	-0.00280115
237.59	0.12376723		767.59	-0.01038798		1297.58	0.02064961		1827.58	-0.00433467		2357.57	0.01605265		2887.57	0.00900494		3417.6	-0.00311815
237.79	0.1250757		767.79	-0.00925052		1297.78	0.02124226		1827.78	-0.00486466		2357.77	0.01537343		2887.77	0.0098232		3417.8	-0.00299197
237.99	0.12595646		767.99	-0.00944567		1297.98	0.0207735		1827.98	-0.00479044		2357.97	0.01502295		2887.97	0.01046237		3418	-0.00327718
238.19	0.12711023		768.19	-0.00886369		1298.18	0.02126115		1828.18	-0.00440255		2358.17	0.01503682		2888.17	0.01032129		3418.2	-0.00238942
238.39	0.12710004		768.39	-0.00903476		1298.38	0.0214608		1828.38	-0.00399924		2358.37	0.01517046		2888.37	0.00985223		3418.4	-0.00275708
238.59	0.1279881		768.59	-0.00921457		1298.58	0.02167277		1828.58	-0.00410132		2358.57	0.01554239		2888.57	0.0106589		3418.6	-0.00320265
238.79	0.12753819		768.79	-0.00916389		1298.78	0.02242198		1828.78	-0.00407425		2358.77	0.01724865		2888.77	0.01020705		3418.8	-0.00332058
238.99	0.12837279		768.99	-0.00923987		1298.98	0.02229441		1828.98	-0.00365043		2358.97	0.01806459		2888.97	0.00911883		3419	-0.00347328
239.19	0.12856214		769.19	-0.00903977		1299.18	0.02227653		1829.18	-0.00318173		2359.17	0.01885565		2889.17	0.00892254		3419.2	-0.00292928
239.39	0.12871692		769.39	-0.00862457		1299.38	0.02297086		1829.38	-0.00332675		2359.37	0.01949969		2889.37	0.00836493		3419.4	-0.00251971
239.59	0.12863511		769.59	-0.00847037		1299.58	0.02297124		1829.58	-0.00274277		2359.57	0.01988334		2889.57	0.00858685		3419.6	-0.00186138
239.79	0.12886344		769.79	-0.00767651		1299.78	0.02348059		1829.78	-0.00262666		2359.77	0.02000822		2889.77	0.00844873		3419.8	-0.00152331
239.99	0.12824236		769.99	-0.00827936		1299.98	0.02328358		1829.98	-0.00310991		2359.97	0.01936933		2889.97	0.007871		3420	-0.00140373
240.19	0.12897584		770.19	-0.00882107		1300.18	0.02276875		1830.18	-0.00348113		2360.17	0.01892148		2890.17	0.00865817		3420.2	-0.00230745
240.39	0.1296242		770.39	-0.00961907		1300.38	0.02313487		1830.38	-0.00326125		2360.37	0.01826134		2890.37	0.00909057		3420.4	-0.00137105
240.59	0.1301775		770.59	-0.01003603		1300.58	0.02296617		1830.58	-0.0038754		2360.57	0.01794726		2890.57	0.00987071		3420.6	-0.00156702
240.79	0.13101872		770.79	-0.01044556		1300.78	0.02311513		1830.78	-0.00401646		2360.77	0.01747874		2890.77	0.01021215		3420.8	-0.00137797
240.99	0.13010389		770.99	-0.01157314		1300.98	0.02315942		1830.98	-0.00405142		2360.97	0.01760975		2890.97	0.01111665		3421	-0.00238682
241.19	0.12951692		771.19	-0.01111098		1301.18	0.0221493		1831.18	-0.00372646		2361.17	0.01886375		2891.17	0.01196976		3421.2	-0.00250835
241.39	0.12992702		771.39	-0.01144906		1301.38	0.02231611		1831.38	-0.00437158		2361.37	0.01930851		2891.37	0.0119787		3421.4	-0.00209193
241.59	0.13001891		771.59	-0.01164951		1301.58	0.02240009		1831.58	-0.00501237		2361.57	0.01995423		2891.57	0.01218088		3421.6	-0.00202827
241.79	0.13094815		771.79	-0.01118198		1301.78	0.02267328		1831.78	-0.00490426		2361.77	0.02077729		2891.77	0.01282921		3421.8	-0.00190033
241.99	0.13152523		771.99	-0.01103143		1301.98	0.02181446		1831.98	-0.00504863		2361.97	0.020958		2891.97	0.01262769		3422	-0.00225068
242.19	0.13248177		772.19	-0.01103148		1302.18	0.02150136		1832.18	-0.00424442		2362.17	0.02140065		2892.17	0.01270383		3422.2	-0.00191777
242.39	0.13297694		772.39	-0.01049919		1302.38	0.02116097		1832.38	-0.00465217		2362.37	0.02219381		2892.37	0.01233906		3422.4	-0.00352664
242.59	0.13386309		772.59	-0.0104684		1302.58	0.02018044		1832.58	-0.00475684		2362.57	0.02264428		2892.57	0.01324264		3422.6	-0.00361876
242.79	0.13399761		772.79	-0.01055833		1302.78	0.01945263		1832.78	-0.00470103		2362.77	0.02365545		2892.77	0.01233014		3422.8	-0.00388383
242.99	0.13553023		772.99	-0.00958543		1302.98	0.01847226		1832.98	-0.00442153		2362.97	0.02436518		2892.97	0.01195546		3423	-0.00328812
243.19	0.1360816		773.19	-0.00983407		1303.18	0.0179067		1833.18	-0.0033749		2363.17	0.02469091		2893.17	0.01410149		3423.2	-0.00285546
243.39	0.1371805		773.39	-0.00892715		1303.38	0.01785314		1833.38	-0.00334203		2363.37	0.02480754		2893.37	0.01368157		3423.4	-0.00292878
243.59	0.1371162		773.59	-0.00842922		1303.58	0.01652387		1833.58	-0.00246013		2363.57	0.02438831		2893.57	0.01460574		3423.6	-0.00269916
243.79	0.13765595		773.79	-0.00841491		1303.78	0.01602685		1833.78	-0.00303612		2363.77	0.02340817		2893.77	0.01461242		3423.8	-0.00347618
243.99	0.13757256		773.99	-0.00927028		1303.98	0.01652118		1833.98	-0.00359595		2363.97	0.02225347		2893.97	0.01454697		3424	-0.00315595
244.19	0.13844533		774.19	-0.00997638		1304.18	0.01606781		1834.18	-0.00349726		2364.17	0.0218085		2894.17	0.01512285		3424.2	-0.00243238
244.39	0.13859894		774.39	-0.01000282		1304.38	0.01751761		1834.38	-0.00331955		2364.37	0.02051733		2894.37	0.01506901		3424.4	-0.00164882
244.59	0.13809109		774.59	-0.01016002		1304.58	0.01832421		1834.58	-0.00338614		2364.57	0.0200474		2894.57	0.01600983		3424.6	-0.00202041
244.79	0.13792821		774.79	-0.01085352		1304.78	0.01945295		1834.78	-0.00336913		2364.77	0.01986566		2894.77	0.01513513		3424.8	-0.00163139
244.99	0.13734545		774.99	-0.01135274		1304.98	0.02043504		1834.98	-0.00349356		2364.97	0.0194454		2894.97	0.01628029		3425	-0.00128015
245.19	0.13791673		775.19	-0.01123203		1305.18	0.02066829		1835.18	-0.00362953		2365.17	0.01936422		2895.17	0.01661502		3425.2	-0.00104784
245.39	0.13829812		775.39	-0.01069922		1305.38	0.02226585		1835.38	-0.00341127		2365.37	0.01858131		2895.37	0.01577403		3425.4	-0.00086825
245.59	0.13873267		775.59	-0.00974998		1305.58	0.02287479		1835.58	-0.00335712		2365.57	0.01834398		2895.57	0.01583778		3425.6	-0.00113712
245.79	0.13969982		775.79	-0.00965851		1305.78	0.02377508		1835.78	-0.00347491		2365.77	0.01898395		2895.77	0.01612343		3425.8	-0.0013908
245.99	0.1399373		775.99	-0.00934874		1305.98	0.02370795		1835.98	-0.00363253		2365.97	0.01778721		2895.97	0.01600946		3426	-0.00172158
246.19	0.14011251		776.19	-0.01003288		1306.18	0.02357889		1836.18	-0.00354732		2366.17	0.01841904		2896.17	0.01694413		3426.2	-0.00234115
246.39	0.1403225		776.39	-0.00997356		1306.38	0.02331922		1836.38	-0.00441759		2366.37	0.01841328		2896.37	0.01583575		3426.4	-0.00319153
246.59	0.14048535		776.59	-0.01043803		1306.58	0.02255217		1836.58	-0.00362017		2366.57	0.01941376		2896.57	0.01557898		3426.6	-0.00269593
246.79	0.14106611		776.79	-0.01037017		1306.78	0.02298154		1836.78	-0.00366174		2366.77	0.01965914		2896.77	0.01456052		3426.8	-0.00323878
246.99	0.14255015		776.99	-0.0090409		1306.98	0.0223161		1836.98	-0.00350461		2366.97	0.0199025		2896.97	0.01476414		3427	-0.00368631
247.19	0.14307423		777.19	-0.00905513		1307.18	0.02200219		1837.18	-0.00328651		2367.17	0.0203273		2897.17	0.01569168		3427.2	-0.00429578
247.39	0.14330513		777.39	-0.00855088		1307.38	0.02116563		1837.38	-0.00368097		2367.37	0.02099028		2897.37	0.01481157		3427.4	-0.00435904
247.59	0.14399393		777.59	-0.00801042		1307.58	0.02037281		1837.58	-0.00338549		2367.57	0.02135316		2897.57	0.01479371		3427.6	-0.00534152
247.79	0.1448376		777.79	-0.00734992		1307.78	0.02047211		1837.78	-0.0038741		2367.77	0.02158261		2897.77	0.01458146		3427.8	-0.00581091
247.99	0.14496648		777.99	-0.0072971		1307.98	0.02075587		1837.98	-0.00395217		2367.97	0.02222066		2897.97	0.01531625		3428	-0.00468535
248.19	0.14473828		778.19	-0.00737062		1308.18	0.02053611		1838.18	-0.00461486		2368.17	0.02309415		2898.17	0.0153269		3428.2	-0.0037702
248.39	0.14430389		778.39	-0.00773507		1308.38	0.02122986		1838.38	-0.0055254		2368.37	0.02303722		2898.37	0.0158564		3428.4	-0.00406381
248.59	0.14388276		778.59	-0.00744855		1308.58	0.02152628		1838.58	-0.00586349		2368.57	0.02436798		2898.57	0.01666365		3428.6	-0.00388941
248.79	0.14431134		778.79	-0.0071111		1308.78	0.02212848		1838.78	-0.00609724		2368.77	0.02495331		2898.77	0.01672735		3428.8	-0.00308696
248.99	0.14446439		778.99	-0.00782651		1308.98	0.02278332		1838.98	-0.00524623		2368.97	0.02472949		2898.97	0.01781066		3429	-0.00250552
249.19	0.14445716		779.19	-0.00798666		1309.18	0.02327893		1839.18	-0.00481297		2369.17	0.02439648		2899.17	0.01754577		3429.2	-0.00196477
249.39	0.1439538		779.39	-0.00821988		1309.38	0.02527235		1839.38	-0.00364875		2369.37	0.0240185		2899.37	0.01716387		3429.4	-0.0014212
249.59	0.14475467		779.59	-0.0082374		1309.58	0.02520146		1839.58	-0.00431287		2369.57	0.02436462		2899.57	0.01712327		3429.6	-0.00111013
249.79	0.14486528		779.79	-0.00892649		1309.78	0.02620127		1839.78	-0.00442596		2369.77	0.02478948		2899.77	0.01734411		3429.8	-0.0007759
249.99	0.1450198		779.99	-0.00941656		1309.98	0.0259113		1839.98	-0.00371553		2369.97	0.02490083		2899.97	0.01711733		3430	-0.00024727
250.19	0.1452635		780.19	-0.01081559		1310.18	0.02526766		1840.18	-0.00391458		2370.17	0.02534532		2900.17	0.01709731		3430.2	-0.00101934
250.39	0.14496545		780.39	-0.01155698		1310.38	0.02456098		1840.38	-0.00298304		2370.37	0.02518986		2900.37	0.01656449		3430.4	-0.00139281
250.59	0.14542297		780.59	-0.01162244		1310.58	0.02472005		1840.58	-0.00102985		2370.57	0.02608055		2900.57	0.01743145		3430.6	-0.00162256
250.79	0.14604979		780.79	-0.01132731		1310.78	0.02448229		1840.78	-0.00091688		2370.77	0.02560182		2900.77	0.0172566		3430.8	-0.0023375
250.99	0.14653222		780.99	-0.01111594		1310.98	0.02326516		1840.98	-0.00016964		2370.97	0.02604049		2900.97	0.0178978		3431	-0.00258815
251.19	0.1473455		781.19	-0.01133931		1311.18	0.02334636		1841.18	-0.00019169		2371.17	0.02610777		2901.17	0.01743157		3431.2	-0.00243773
251.39	0.14775634		781.39	-0.01128982		1311.38	0.02205992		1841.38	0.00073829		2371.37	0.02633394		2901.37	0.01682371		3431.4	-0.00176317
251.59	0.14910152		781.59	-0.0103925		1311.58	0.02156351		1841.58	0.00071835		2371.57	0.02639987		2901.57	0.01678728		3431.6	-0.00342997
251.79	0.14964237		781.79	-0.0102502		1311.78	0.02088597		1841.78	-0.00076159		2371.77	0.02618594		2901.77	0.01688297		3431.8	-0.00290516
251.99	0.15060055		781.99	-0.01000901		1311.98	0.0205392		1841.98	-0.00186981		2371.97	0.02642556		2901.97	0.01711734		3432	-0.00267331
252.19	0.15110984		782.19	-0.01044421		1312.18	0.02008229		1842.18	-0.00341285		2372.17	0.0272974		2902.17	0.01719044		3432.2	-0.00269926
252.39	0.15116689		782.39	-0.0105673		1312.38	0.01986745		1842.38	-0.0037377		2372.37	0.02780564		2902.37	0.01720151		3432.4	-0.00269867
252.59	0.1514687		782.59	-0.01012265		1312.58	0.02026829		1842.58	-0.00357756		2372.57	0.02841727		2902.57	0.01813503		3432.6	-0.00222543
252.79	0.15234274		782.79	-0.00923629		1312.78	0.02059659		1842.78	-0.00365208		2372.77	0.02811394		2902.77	0.01803588		3432.8	-0.00098776
252.99	0.15238222		782.99	-0.00944509		1312.98	0.0206495		1842.98	-0.00350676		2372.97	0.02728986		2902.97	0.0185453		3433	-0.00039248
253.19	0.15309372		783.19	-0.00857672		1313.18	0.02148693		1843.18	-0.00438435		2373.17	0.02704095		2903.17	0.01809586		3433.2	-0.00005753
253.39	0.15449758		783.39	-0.00803095		1313.38	0.02223691		1843.38	-0.00395547		2373.37	0.02709755		2903.37	0.01787295		3433.4	0.00028382
253.59	0.15544839		783.59	-0.00671401		1313.58	0.02270154		1843.58	-0.00485686		2373.57	0.02757045		2903.57	0.0174105		3433.6	-0.0000786
253.79	0.15577585		783.79	-0.00731498		1313.78	0.02375144		1843.78	-0.00378822		2373.77	0.02755612		2903.77	0.01727527		3433.8	0.00006112
253.99	0.15667602		783.99	-0.00804174		1313.98	0.02315504		1843.98	-0.00306448		2373.97	0.02719768		2903.97	0.01685702		3434	-0.00067264
254.19	0.15708758		784.19	-0.00836352		1314.18	0.02323769		1844.18	-0.00286378		2374.17	0.02627618		2904.17	0.01662155		3434.2	-0.00165084
254.39	0.15725002		784.39	-0.00842796		1314.38	0.02353108		1844.38	-0.00203495		2374.37	0.0256626		2904.37	0.01759698		3434.4	-0.0015947
254.59	0.1573275		784.59	-0.00798731		1314.58	0.02431622		1844.58	-0.00172997		2374.57	0.02586943		2904.57	0.01811335		3434.6	-0.00185736
254.79	0.15768209		784.79	-0.00850598		1314.78	0.0240769		1844.78	-0.00192039		2374.77	0.02529421		2904.77	0.01790846		3434.8	-0.00237688
254.99	0.15849948		784.99	-0.0092828		1314.98	0.02358302		1844.98	-0.00145929		2374.97	0.02493345		2904.97	0.01774596		3435	-0.00276553
255.19	0.15894984		785.19	-0.00944239		1315.18	0.0238307		1845.18	-0.00152641		2375.17	0.02465812		2905.17	0.01755324		3435.2	-0.00262919
255.39	0.15916745		785.39	-0.00995758		1315.38	0.02286778		1845.38	-0.0012947		2375.37	0.02522972		2905.37	0.01706641		3435.4	-0.00266332
255.59	0.15954721		785.59	-0.00943911		1315.58	0.02267017		1845.58	-0.00178247		2375.57	0.02596826		2905.57	0.01697946		3435.6	-0.00425639
255.79	0.15974032		785.79	-0.00910241		1315.78	0.02292616		1845.78	-0.00249518		2375.77	0.02626083		2905.77	0.01657244		3435.8	-0.00382652
255.99	0.15991827		785.99	-0.00937411		1315.98	0.02364901		1845.98	-0.00227654		2375.97	0.02702133		2905.97	0.01674931		3436	-0.00415366
256.19	0.15975409		786.19	-0.01004871		1316.18	0.02359051		1846.18	-0.00262513		2376.17	0.02798275		2906.17	0.01640037		3436.2	-0.00414551
256.39	0.15865353		786.39	-0.00914529		1316.38	0.02301411		1846.38	-0.00284028		2376.37	0.02877384		2906.37	0.0160555		3436.4	-0.00415937
256.59	0.15936119		786.59	-0.00927899		1316.58	0.02292393		1846.58	-0.00282911		2376.57	0.02908995		2906.57	0.01664126		3436.6	-0.00336012
256.79	0.15917265		786.79	-0.00918233		1316.78	0.02290505		1846.78	-0.0043544		2376.77	0.02920463		2906.77	0.01617798		3436.8	-0.00325683
256.99	0.15847287		786.99	-0.00871262		1316.98	0.02301071		1846.98	-0.00521806		2376.97	0.02945495		2906.97	0.01568853		3437	-0.00283101
257.19	0.15878532		787.19	-0.00933374		1317.18	0.02392164		1847.18	-0.00579385		2377.17	0.02933647		2907.17	0.01446628		3437.2	-0.00301813
257.39	0.15858096		787.39	-0.00931004		1317.38	0.02435608		1847.38	-0.00581441		2377.37	0.02942412		2907.37	0.01429438		3437.4	-0.00282902
257.59	0.15855616		787.59	-0.00948173		1317.58	0.02568176		1847.58	-0.00600094		2377.57	0.02959534		2907.57	0.01401968		3437.6	-0.00312414
257.79	0.15941952		787.79	-0.01030394		1317.78	0.02535546		1847.78	-0.00618508		2377.77	0.02924181		2907.77	0.01458798		3437.8	-0.00427298
257.99	0.15981206		787.99	-0.01025623		1317.98	0.0256928		1847.98	-0.0070617		2377.97	0.02859376		2907.97	0.01487551		3438	-0.00458356
258.19	0.15958785		788.19	-0.00949618		1318.18	0.02675004		1848.18	-0.00713189		2378.17	0.02847501		2908.17	0.01638796		3438.2	-0.00468252
258.39	0.1598021		788.39	-0.0099683		1318.38	0.02651435		1848.38	-0.00725065		2378.37	0.02849014		2908.37	0.01762179		3438.4	-0.00467423
258.59	0.16051891		788.59	-0.00928057		1318.58	0.02700268		1848.58	-0.00711602		2378.57	0.02875546		2908.57	0.01868881		3438.6	-0.00520083
258.79	0.16176997		788.79	-0.00901019		1318.78	0.02617609		1848.78	-0.00615988		2378.77	0.02862893		2908.77	0.01828619		3438.8	-0.00555806
258.99	0.16225562		788.99	-0.0082119		1318.98	0.02549779		1848.98	-0.00526424		2378.97	0.02905041		2908.97	0.01894255		3439	-0.00523138
259.19	0.16174123		789.19	-0.00775924		1319.18	0.02649324		1849.18	-0.00400637		2379.17	0.02926513		2909.17	0.02044383		3439.2	-0.00519147
259.39	0.16234318		789.39	-0.00738732		1319.38	0.02634742		1849.38	-0.00359667		2379.37	0.02975389		2909.37	0.02041431		3439.4	-0.00561807
259.59	0.16215757		789.59	-0.00620494		1319.58	0.02626209		1849.58	-0.00317344		2379.57	0.0304922		2909.57	0.02088194		3439.6	-0.00560898
259.79	0.16277965		789.79	-0.00651151		1319.78	0.0270878		1849.78	-0.00336007		2379.77	0.03032933		2909.77	0.02083158		3439.8	-0.00499965
259.99	0.16243847		789.99	-0.00620044		1319.98	0.02706753		1849.98	-0.00405629		2379.97	0.03061572		2909.97	0.0217902		3440	-0.00460719
260.19	0.16249806		790.19	-0.00566266		1320.18	0.02571658		1850.18	-0.00471735		2380.17	0.03065782		2910.17	0.02178265		3440.2	-0.00337546
260.39	0.1623882		790.39	-0.00519749		1320.38	0.02469052		1850.38	-0.00410979		2380.37	0.03071477		2910.37	0.02156774		3440.4	-0.00305885
260.59	0.16316023		790.59	-0.00562802		1320.58	0.02492906		1850.58	-0.00334231		2380.57	0.03087209		2910.57	0.02138401		3440.6	-0.00158967
260.79	0.16275808		790.79	-0.00570714		1320.78	0.02546646		1850.78	-0.00403402		2380.77	0.02996566		2910.77	0.02157981		3440.8	-0.00113494
260.99	0.1631028		790.99	-0.00526161		1320.98	0.02591719		1850.98	-0.00377645		2380.97	0.03013756		2910.97	0.02147597		3441	-0.00017726
261.19	0.16325047		791.19	-0.00659923		1321.18	0.02683561		1851.18	-0.0029356		2381.17	0.02957197		2911.17	0.02177073		3441.2	0.00009983
261.39	0.16377959		791.39	-0.00570944		1321.38	0.02658388		1851.38	-0.0032436		2381.37	0.02935341		2911.37	0.02230902		3441.4	-0.00013208
261.59	0.16488982		791.59	-0.00563534		1321.58	0.02647579		1851.58	-0.00251445		2381.57	0.02945195		2911.57	0.02299794		3441.6	-0.00087889
261.79	0.16475113		791.79	-0.00527334		1321.78	0.02623192		1851.78	-0.0023772		2381.77	0.02952984		2911.77	0.024245		3441.8	-0.00154162
261.99	0.16501497		791.99	-0.00514464		1321.98	0.02718341		1851.98	-0.0021049		2381.97	0.02893186		2911.97	0.0248675		3442	-0.00153868
262.19	0.16558112		792.19	-0.00574588		1322.18	0.02757525		1852.18	-0.00129949		2382.17	0.02907595		2912.17	0.02566847		3442.2	-0.00235227
262.39	0.16662874		792.39	-0.00682436		1322.38	0.02686672		1852.38	-0.00033069		2382.37	0.02914562		2912.37	0.02536633		3442.4	-0.00260029
262.59	0.16741613		792.59	-0.00647999		1322.58	0.02733627		1852.58	0.00140048		2382.57	0.029407		2912.57	0.02489233		3442.6	-0.00351391
262.79	0.16782851		792.79	-0.00665731		1322.78	0.02663394		1852.78	0.00267656		2382.77	0.03000568		2912.77	0.02374711		3442.8	-0.00424627
262.99	0.16895572		792.99	-0.00687029		1322.98	0.02656393		1852.98	0.00356285		2382.97	0.03103378		2912.97	0.0245029		3443	-0.00446896
263.19	0.16921033		793.19	-0.00731656		1323.18	0.0276073		1853.18	0.00331631		2383.17	0.03154554		2913.17	0.02428153		3443.2	-0.00591064
263.39	0.16973821		793.39	-0.00835812		1323.38	0.02722657		1853.38	0.0024472		2383.37	0.03244538		2913.37	0.02265044		3443.4	-0.00635006
263.59	0.1700832		793.59	-0.00827021		1323.58	0.02693197		1853.58	0.00174203		2383.57	0.03296901		2913.57	0.02128271		3443.6	-0.00653196
263.79	0.17055528		793.79	-0.00880928		1323.78	0.02680129		1853.78	0.00013727		2383.77	0.03347836		2913.77	0.02171147		3443.8	-0.00620487
263.99	0.17081553		793.99	-0.00775777		1323.98	0.02612894		1853.98	-0.00090367		2383.97	0.03381782		2913.97	0.02174617		3444	-0.00587172
264.19	0.17107602		794.19	-0.00774954		1324.18	0.0252135		1854.18	-0.00107229		2384.17	0.03351211		2914.17	0.02025345		3444.2	-0.00524209
264.39	0.17130918		794.39	-0.0076795		1324.38	0.02557651		1854.38	-0.0012985		2384.37	0.03364622		2914.37	0.01941369		3444.4	-0.00452103
264.59	0.17239479		794.59	-0.00770914		1324.58	0.02637273		1854.58	-0.00228168		2384.57	0.0334447		2914.57	0.01956993		3444.6	-0.00315242
264.79	0.17269488		794.79	-0.00776568		1324.78	0.02659388		1854.78	-0.00364856		2384.77	0.03318382		2914.77	0.01937851		3444.8	-0.0029612
264.99	0.17350328		794.99	-0.00716104		1324.98	0.02685097		1854.98	-0.00443104		2384.97	0.03280423		2914.97	0.02013423		3445	-0.00270961
265.19	0.17383633		795.19	-0.00601332		1325.18	0.02705598		1855.18	-0.00506294		2385.17	0.0320893		2915.17	0.01988535		3445.2	-0.00256771
265.39	0.17425115		795.39	-0.00470003		1325.38	0.02728552		1855.38	-0.00556194		2385.37	0.03143001		2915.37	0.02041852		3445.4	-0.00308953
265.59	0.17428724		795.59	-0.00494537		1325.58	0.0271449		1855.58	-0.00498533		2385.57	0.03202047		2915.57	0.02105869		3445.6	-0.00361309
265.79	0.17418626		795.79	-0.00475245		1325.78	0.02738824		1855.78	-0.0059401		2385.77	0.03184853		2915.77	0.02256089		3445.8	-0.00387198
265.99	0.17509842		795.99	-0.00516926		1325.98	0.02743941		1855.98	-0.00636659		2385.97	0.03082925		2915.97	0.022708		3446	-0.0038517
266.19	0.17516965		796.19	-0.00562714		1326.18	0.02782718		1856.18	-0.0047402		2386.17	0.03145193		2916.17	0.02310858		3446.2	-0.00420488
266.39	0.17562629		796.39	-0.00619814		1326.38	0.02774199		1856.38	-0.00363796		2386.37	0.03157215		2916.37	0.02275624		3446.4	-0.00481109
266.59	0.1755854		796.59	-0.00560377		1326.58	0.02836015		1856.58	-0.00265204		2386.57	0.0327079		2916.57	0.0218716		3446.6	-0.00529179
266.79	0.17630868		796.79	-0.00545055		1326.78	0.02768579		1856.78	-0.00226799		2386.77	0.03313303		2916.77	0.02162878		3446.8	-0.00561939
266.99	0.17713182		796.99	-0.00478532		1326.98	0.02838895		1856.98	-0.00154474		2386.97	0.03304491		2916.97	0.02219018		3447	-0.00502636
267.19	0.17655816		797.19	-0.00436925		1327.18	0.02828267		1857.18	-0.00178894		2387.17	0.03383565		2917.17	0.02177918		3447.2	-0.00584725
267.39	0.17618964		797.39	-0.00417662		1327.38	0.027301		1857.38	-0.00167011		2387.37	0.03410915		2917.37	0.02096729		3447.4	-0.00552933
267.59	0.17655296		797.59	-0.00368137		1327.58	0.02690324		1857.58	-0.00171779		2387.57	0.0346916		2917.57	0.02051394		3447.6	-0.00476137
267.79	0.17602307		797.79	-0.00363101		1327.78	0.02637118		1857.78	-0.00142031		2387.77	0.03538236		2917.77	0.02092517		3447.8	-0.00429279
267.99	0.17575543		797.99	-0.00367371		1327.98	0.0257575		1857.98	-0.00107888		2387.97	0.03569364		2917.97	0.02028352		3448	-0.00440941
268.19	0.17604848		798.19	-0.00476405		1328.18	0.02531247		1858.18	-0.00104256		2388.17	0.03595068		2918.17	0.01916149		3448.2	-0.00468605
268.39	0.17655088		798.39	-0.00525484		1328.38	0.02500989		1858.38	-0.00156791		2388.37	0.03598174		2918.37	0.01914727		3448.4	-0.00425431
268.59	0.17667789		798.59	-0.00587023		1328.58	0.02528886		1858.58	-0.00178002		2388.57	0.03587178		2918.57	0.0194788		3448.6	-0.00523936
268.79	0.17639254		798.79	-0.00685666		1328.78	0.02573294		1858.78	-0.001846		2388.77	0.03625283		2918.77	0.0200901		3448.8	-0.00617919
268.99	0.17738818		798.99	-0.00621465		1328.98	0.02628841		1858.98	-0.00202554		2388.97	0.035584		2918.97	0.02162966		3449	-0.00628239
269.19	0.1782314		799.19	-0.00607621		1329.18	0.02680881		1859.18	-0.0019995		2389.17	0.03566907		2919.17	0.02215398		3449.2	-0.00666456
269.39	0.17913427		799.39	-0.00640724		1329.38	0.02727991		1859.38	-0.00172348		2389.37	0.03537357		2919.37	0.02374749		3449.4	-0.00754879
269.59	0.18025616		799.59	-0.00653158		1329.58	0.0267154		1859.58	-0.00314381		2389.57	0.03617377		2919.57	0.02438075		3449.6	-0.00826538
269.79	0.18120071		799.79	-0.00656933		1329.78	0.027071		1859.78	-0.00353891		2389.77	0.035983		2919.77	0.02570186		3449.8	-0.0082851
269.99	0.18205923		799.99	-0.00648533		1329.98	0.02800048		1859.98	-0.00316169		2389.97	0.0355874		2919.97	0.02589751		3450	-0.00835365
270.19	0.18240055		800.19	-0.00719199		1330.18	0.02896589		1860.18	-0.00203984		2390.17	0.03631942		2920.17	0.02726653		3450.2	-0.00878603
270.39	0.18280827		800.39	-0.00732861		1330.38	0.0291872		1860.38	-0.00223758		2390.37	0.03633975		2920.37	0.02716519		3450.4	-0.00975904
270.59	0.18341645		800.59	-0.00648176		1330.58	0.03009096		1860.58	-0.00209861		2390.57	0.03676946		2920.57	0.02786058		3450.6	-0.01029214
270.79	0.18408391		800.79	-0.00604271		1330.78	0.03075035		1860.78	-0.00115803		2390.77	0.03547005		2920.77	0.02814474		3450.8	-0.00989594
270.99	0.18487405		800.99	-0.00453031		1330.98	0.03128493		1860.98	-0.0008992		2390.97	0.03538507		2920.97	0.0284253		3451	-0.00869548
271.19	0.18457905		801.19	-0.00344503		1331.18	0.03016073		1861.18	-0.00035048		2391.17	0.03567752		2921.17	0.02785811		3451.2	-0.00838739
271.39	0.18456734		801.39	-0.00337579		1331.38	0.03009614		1861.38	-0.00021667		2391.37	0.0352599		2921.37	0.02681786		3451.4	-0.00737671
271.59	0.18536594		801.59	-0.00332851		1331.58	0.03007327		1861.58	0.00041847		2391.57	0.03534681		2921.57	0.02648168		3451.6	-0.00670326
271.79	0.18537503		801.79	-0.00350159		1331.78	0.0296081		1861.78	0.00101598		2391.77	0.03476716		2921.77	0.02690897		3451.8	-0.00651354
271.99	0.18543204		801.99	-0.00349637		1331.98	0.02915878		1861.98	-0.0002864		2391.97	0.03384499		2921.97	0.02587171		3452	-0.00615296
272.19	0.18525352		802.19	-0.00331969		1332.18	0.02868487		1862.18	-0.00012858		2392.17	0.03380836		2922.17	0.0249286		3452.2	-0.00568485
272.39	0.18417196		802.39	-0.00376924		1332.38	0.02863906		1862.38	-0.00104856		2392.37	0.03297883		2922.37	0.02469883		3452.4	-0.00493653
272.59	0.18303856		802.59	-0.00449686		1332.58	0.02952411		1862.58	-0.00129684		2392.57	0.03259209		2922.57	0.02440497		3452.6	-0.00494253
272.79	0.18278073		802.79	-0.00442548		1332.78	0.02966776		1862.78	-0.0022051		2392.77	0.03220642		2922.77	0.02502829		3452.8	-0.0051336
272.99	0.18344523		802.99	-0.00356284		1332.98	0.02907975		1862.98	-0.00285162		2392.97	0.03124093		2922.97	0.02547347		3453	-0.00498619
273.19	0.18413253		803.19	-0.00313635		1333.18	0.02892282		1863.18	-0.00385777		2393.17	0.03142464		2923.17	0.02587406		3453.2	-0.00552872
273.39	0.18407218		803.39	-0.00316415		1333.38	0.02803825		1863.38	-0.00539053		2393.37	0.0317564		2923.37	0.02648298		3453.4	-0.00627156
273.59	0.18412168		803.59	-0.00308604		1333.58	0.02744966		1863.58	-0.00638268		2393.57	0.03343573		2923.57	0.02624109		3453.6	-0.00621543
273.79	0.18425744		803.79	-0.00288541		1333.78	0.0277507		1863.78	-0.0059458		2393.77	0.03419758		2923.77	0.02667995		3453.8	-0.00640038
273.99	0.18512899		803.99	-0.00334059		1333.98	0.02771657		1863.98	-0.00695245		2393.97	0.03478524		2923.97	0.02677118		3454	-0.00671718
274.19	0.18501456		804.19	-0.00359501		1334.18	0.02781103		1864.18	-0.00648661		2394.17	0.03565936		2924.17	0.02716995		3454.2	-0.00797713
274.39	0.18590498		804.39	-0.00423595		1334.38	0.02739417		1864.38	-0.00644531		2394.37	0.03587063		2924.37	0.02727033		3454.4	-0.00888412
274.59	0.18650428		804.59	-0.00475862		1334.58	0.02727099		1864.58	-0.00705445		2394.57	0.03621577		2924.57	0.02738676		3454.6	-0.00873037
274.79	0.1872591		804.79	-0.0044046		1334.78	0.02668139		1864.78	-0.00635292		2394.77	0.03576664		2924.77	0.02719029		3454.8	-0.00783533
274.99	0.18836371		804.99	-0.00435816		1334.98	0.02595411		1864.98	-0.00649381		2394.97	0.03586727		2924.97	0.02724788		3455	-0.00754032
275.19	0.18785296		805.19	-0.00414178		1335.18	0.02582096		1865.18	-0.00568802		2395.17	0.03618428		2925.17	0.02710022		3455.2	-0.00680521
275.39	0.18921717		805.39	-0.00428408		1335.38	0.02602441		1865.38	-0.00598415		2395.37	0.03594876		2925.37	0.02729646		3455.4	-0.00669635
275.59	0.18999007		805.59	-0.00393032		1335.58	0.02632171		1865.58	-0.00565443		2395.57	0.03626618		2925.57	0.02679333		3455.6	-0.00710718
275.79	0.19052615		805.79	-0.00383233		1335.78	0.02716768		1865.78	-0.00563692		2395.77	0.03576373		2925.77	0.02654517		3455.8	-0.00667496
275.99	0.19045002		805.99	-0.00316745		1335.98	0.02834993		1865.98	-0.0057544		2395.97	0.03530638		2925.97	0.02527582		3456	-0.00615738
276.19	0.19034358		806.19	-0.00331569		1336.18	0.02915535		1866.18	-0.00422629		2396.17	0.03507754		2926.17	0.02536183		3456.2	-0.00567059
276.39	0.19041117		806.39	-0.00369562		1336.38	0.02995168		1866.38	-0.00424826		2396.37	0.03396154		2926.37	0.02523244		3456.4	-0.00544297
276.59	0.1901589		806.59	-0.00430874		1336.58	0.03015455		1866.58	-0.00339366		2396.57	0.03410095		2926.57	0.02550051		3456.6	-0.00560998
276.79	0.19046892		806.79	-0.00344044		1336.78	0.03064597		1866.78	-0.00317828		2396.77	0.03358069		2926.77	0.02628812		3456.8	-0.00608871
276.99	0.19031973		806.99	-0.00310788		1336.98	0.03116214		1866.98	-0.00330763		2396.97	0.03390137		2926.97	0.02673963		3457	-0.00581335
277.19	0.19023714		807.19	-0.00267705		1337.18	0.03200738		1867.18	-0.00352002		2397.17	0.03455348		2927.17	0.02723316		3457.2	-0.0071396
277.39	0.18994984		807.39	-0.0025805		1337.38	0.03165118		1867.38	-0.00363773		2397.37	0.03526326		2927.37	0.02750602		3457.4	-0.00692276
277.59	0.19076958		807.59	-0.00262118		1337.58	0.03179075		1867.58	-0.00321905		2397.57	0.03646533		2927.57	0.02710315		3457.6	-0.00655118
277.79	0.19104847		807.79	-0.00243759		1337.78	0.03145712		1867.78	-0.00377214		2397.77	0.03708172		2927.77	0.02820778		3457.8	-0.00686892
277.99	0.19172812		807.99	-0.00411352		1337.98	0.03204835		1867.98	-0.00458054		2397.97	0.03776069		2927.97	0.02920513		3458	-0.00715012
278.19	0.19195174		808.19	-0.00395311		1338.18	0.03173011		1868.18	-0.00379908		2398.17	0.03781945		2928.17	0.03003891		3458.2	-0.00788869
278.39	0.19242368		808.39	-0.00469808		1338.38	0.03071371		1868.38	-0.00334073		2398.37	0.03823072		2928.37	0.03054817		3458.4	-0.00711892
278.59	0.19263909		808.59	-0.00462171		1338.58	0.03021236		1868.58	-0.0037499		2398.57	0.03895654		2928.57	0.03040826		3458.6	-0.00716551
278.79	0.19269219		808.79	-0.00362846		1338.78	0.03003486		1868.78	-0.00375146		2398.77	0.03862407		2928.77	0.03096905		3458.8	-0.00683878
278.99	0.19234727		808.99	-0.00363165		1338.98	0.02927111		1868.98	-0.00387564		2398.97	0.03919714		2928.97	0.03088405		3459	-0.00650571
279.19	0.19183718		809.19	-0.00248083		1339.18	0.02928543		1869.18	-0.00318086		2399.17	0.04054748		2929.17	0.03024515		3459.2	-0.00603791
279.39	0.19243968		809.39	-0.00189841		1339.38	0.02855712		1869.38	-0.00340824		2399.37	0.04120591		2929.37	0.03014573		3459.4	-0.00666257
279.59	0.19314173		809.59	-0.00178575		1339.58	0.02848752		1869.58	-0.00303637		2399.57	0.04126426		2929.57	0.02920382		3459.6	-0.00602689
279.79	0.19397831		809.79	-0.00131074		1339.78	0.02895398		1869.78	-0.00339387		2399.77	0.04101846		2929.77	0.02890047		3459.8	-0.00515144
279.99	0.19434002		809.99	-0.00158143		1339.98	0.02940469		1869.98	-0.00325916		2399.97	0.04093636		2929.97	0.02849585		3460	-0.00448968
280.19	0.19547417		810.19	-0.00179337		1340.18	0.02857079		1870.18	-0.00267445		2400.17	0.04058726		2930.17	0.02889341		3460.2	-0.00473751
280.39	0.19588662		810.39	-0.00168584		1340.38	0.0272666		1870.38	-0.00267083		2400.37	0.04054829		2930.37	0.02800564		3460.4	-0.00456268
280.59	0.19607322		810.59	-0.00198465		1340.58	0.02677956		1870.58	-0.0030295		2400.57	0.0408086		2930.57	0.02747299		3460.6	-0.00464845
280.79	0.19692803		810.79	-0.00190837		1340.78	0.02729896		1870.78	-0.0033592		2400.77	0.0408366		2930.77	0.0283793		3460.8	-0.00483447
280.99	0.19756043		810.99	-0.00231981		1340.98	0.0273264		1870.98	-0.00485245		2400.97	0.04137618		2930.97	0.02850953		3461	-0.00539382
281.19	0.1979439		811.19	-0.0039267		1341.18	0.02808659		1871.18	-0.00535113		2401.17	0.04048814		2931.17	0.02820136		3461.2	-0.00636953
281.39	0.19830162		811.39	-0.00495319		1341.38	0.02748182		1871.38	-0.00562942		2401.37	0.04090388		2931.37	0.02815637		3461.4	-0.00633321
281.59	0.19878682		811.59	-0.00610515		1341.58	0.02810828		1871.58	-0.00565348		2401.57	0.04093413		2931.57	0.02824986		3461.6	-0.00638507
281.79	0.19912679		811.79	-0.00699746		1341.78	0.02845363		1871.78	-0.00638023		2401.77	0.04099353		2931.77	0.02940349		3461.8	-0.00718989
281.99	0.19934377		811.99	-0.00780677		1341.98	0.02960746		1871.98	-0.00553999		2401.97	0.04145596		2931.97	0.02915393		3462	-0.00777868
282.19	0.19925502		812.19	-0.00731808		1342.18	0.03034143		1872.18	-0.00480183		2402.17	0.04125825		2932.17	0.02931516		3462.2	-0.00813769
282.39	0.1989553		812.39	-0.00732881		1342.38	0.03096275		1872.38	-0.00417161		2402.37	0.04215517		2932.37	0.02855681		3462.4	-0.00832038
282.59	0.19935292		812.59	-0.00769575		1342.58	0.0315487		1872.58	-0.00480833		2402.57	0.04198984		2932.57	0.02887776		3462.6	-0.00799471
282.79	0.19918622		812.79	-0.00740576		1342.78	0.03178714		1872.78	-0.00481497		2402.77	0.04122755		2932.77	0.02860538		3462.8	-0.00749933
282.99	0.19947188		812.99	-0.00664564		1342.98	0.0307498		1872.98	-0.0038068		2402.97	0.04181344		2932.97	0.02758438		3463	-0.00743028
283.19	0.20062107		813.19	-0.00621898		1343.18	0.0310935		1873.18	-0.00336946		2403.17	0.04241083		2933.17	0.02693805		3463.2	-0.00740763
283.39	0.20019997		813.39	-0.00624123		1343.38	0.03133414		1873.38	-0.00361142		2403.37	0.04225829		2933.37	0.02733496		3463.4	-0.00750946
283.59	0.20180643		813.59	-0.00575729		1343.58	0.03195889		1873.58	-0.00283764		2403.57	0.04177902		2933.57	0.02732951		3463.6	-0.00674889
283.79	0.20242569		813.79	-0.0048073		1343.78	0.03220298		1873.78	-0.00275813		2403.77	0.04282012		2933.77	0.02750502		3463.8	-0.00719181
283.99	0.20238439		813.99	-0.00336134		1343.98	0.03248472		1873.98	-0.00241687		2403.97	0.04359232		2933.97	0.02799594		3464	-0.0068404
284.19	0.202139		814.19	-0.00266368		1344.18	0.0316454		1874.18	-0.00243228		2404.17	0.04298561		2934.17	0.02888209		3464.2	-0.00637248
284.39	0.20215643		814.39	-0.00203181		1344.38	0.03123232		1874.38	-0.00279536		2404.37	0.04278464		2934.37	0.02863736		3464.4	-0.00576278
284.59	0.20268076		814.59	-0.00184445		1344.58	0.03171621		1874.58	-0.00236084		2404.57	0.04256137		2934.57	0.02961499		3464.6	-0.00544743
284.79	0.20332818		814.79	-0.00153268		1344.78	0.03237685		1874.78	-0.00173073		2404.77	0.04277973		2934.77	0.03117427		3464.8	-0.00522345
284.99	0.20390089		814.99	-0.00154687		1344.98	0.03315349		1874.98	-0.00297492		2404.97	0.04236201		2934.97	0.03014164		3465	-0.00584022
285.19	0.20309143		815.19	-0.0018976		1345.18	0.03470576		1875.18	-0.00288603		2405.17	0.04111241		2935.17	0.03037674		3465.2	-0.00578855
285.39	0.20289817		815.39	-0.00161149		1345.38	0.03474419		1875.38	-0.00269459		2405.37	0.04059736		2935.37	0.03109789		3465.4	-0.00581671
285.59	0.20258162		815.59	-0.00150091		1345.58	0.03559107		1875.58	-0.00273846		2405.57	0.04056656		2935.57	0.03192817		3465.6	-0.00488377
285.79	0.20252512		815.79	-0.00168109		1345.78	0.03615708		1875.78	-0.00306579		2405.77	0.04077686		2935.77	0.0326892		3465.8	-0.00558913
285.99	0.20250532		815.99	-0.0009467		1345.98	0.03606274		1875.98	-0.00217626		2405.97	0.04131774		2935.97	0.03277578		3466	-0.0062478
286.19	0.2018991		816.19	-0.00087561		1346.18	0.03642341		1876.18	-0.00257054		2406.17	0.04161558		2936.17	0.03355151		3466.2	-0.00583413
286.39	0.20190428		816.39	-0.00062285		1346.38	0.03595379		1876.38	-0.00198015		2406.37	0.04245015		2936.37	0.03265022		3466.4	-0.00607134
286.59	0.20291311		816.59	-0.00105308		1346.58	0.03449273		1876.58	-0.00193229		2406.57	0.04219854		2936.57	0.03292182		3466.6	-0.00606501
286.79	0.20422957		816.79	-0.00183927		1346.78	0.03337903		1876.78	-0.00137464		2406.77	0.0426949		2936.77	0.03148459		3466.8	-0.00714222
286.99	0.20454396		816.99	-0.00203062		1346.98	0.03265939		1876.98	-0.00085118		2406.97	0.04385431		2936.97	0.03104096		3467	-0.00688631
287.19	0.20579593		817.19	-0.00227885		1347.18	0.03291782		1877.18	-0.00066067		2407.17	0.04513885		2937.17	0.03134991		3467.2	-0.00708042
287.39	0.20470853		817.39	-0.00278745		1347.38	0.03275329		1877.38	-0.00088248		2407.37	0.0453115		2937.37	0.03173705		3467.4	-0.00671742
287.59	0.20631139		817.59	-0.00250793		1347.58	0.03195581		1877.58	-0.00078149		2407.57	0.04630971		2937.57	0.03190703		3467.6	-0.00588861
287.79	0.20598338		817.79	-0.00214003		1347.78	0.03144804		1877.78	-0.00156327		2407.77	0.04637173		2937.77	0.03225483		3467.8	-0.005762
287.99	0.20516353		817.99	-0.00183632		1347.98	0.03101131		1877.98	-0.0018037		2407.97	0.04586543		2937.97	0.03186491		3468	-0.00499458
288.19	0.20541056		818.19	-0.00258589		1348.18	0.03096898		1878.18	-0.00233914		2408.17	0.04493284		2938.17	0.03130411		3468.2	-0.00482263
288.39	0.20647406		818.39	-0.00279982		1348.38	0.03022949		1878.38	-0.00239811		2408.37	0.0448823		2938.37	0.03142653		3468.4	-0.00526514
288.59	0.20572863		818.59	-0.00286364		1348.58	0.03124226		1878.58	-0.00187573		2408.57	0.04412449		2938.57	0.03113514		3468.6	-0.00498941
288.79	0.20537874		818.79	-0.00238665		1348.78	0.03163697		1878.78	-0.00300382		2408.77	0.04401928		2938.77	0.03091102		3468.8	-0.00535457
288.99	0.2053481		818.99	-0.00320867		1348.98	0.03255828		1878.98	-0.0042735		2408.97	0.04357406		2938.97	0.03080975		3469	-0.00607417
289.19	0.20469839		819.19	-0.00372175		1349.18	0.03348497		1879.18	-0.0040317		2409.17	0.04228837		2939.17	0.03137122		3469.2	-0.00614139
289.39	0.20443046		819.39	-0.00339538		1349.38	0.03385552		1879.38	-0.00452159		2409.37	0.04193824		2939.37	0.0317334		3469.4	-0.00657564
289.59	0.2044161		819.59	-0.00395654		1349.58	0.03454422		1879.58	-0.00505119		2409.57	0.04256605		2939.57	0.03204959		3469.6	-0.00674858
289.79	0.20446882		819.79	-0.00427731		1349.78	0.03478991		1879.78	-0.00547704		2409.77	0.0425242		2939.77	0.03211354		3469.8	-0.00824491
289.99	0.2048587		819.99	-0.00367782		1349.98	0.03394795		1879.98	-0.00592075		2409.97	0.04274307		2939.97	0.03259222		3470	-0.0087219
290.19	0.2045823		820.19	-0.00404856		1350.18	0.03395866		1880.18	-0.00643058		2410.17	0.04293934		2940.17	0.03254425		3470.2	-0.00878065
290.39	0.20555112		820.39	-0.004344		1350.38	0.03388912		1880.38	-0.00580985		2410.37	0.04353805		2940.37	0.03261251		3470.4	-0.00911196
290.59	0.20665605		820.59	-0.00480206		1350.58	0.03297411		1880.58	-0.00613075		2410.57	0.043196		2940.57	0.03289511		3470.6	-0.00890289
290.79	0.20779942		820.79	-0.00535479		1350.78	0.03309922		1880.78	-0.00566668		2410.77	0.04336993		2940.77	0.03207471		3470.8	-0.0084579
290.99	0.20806219		820.99	-0.00542044		1350.98	0.03342249		1880.98	-0.00576858		2410.97	0.043173		2940.97	0.0322599		3471	-0.00694313
291.19	0.2093265		821.19	-0.00532255		1351.18	0.0333573		1881.18	-0.00514495		2411.17	0.04430425		2941.17	0.03291228		3471.2	-0.0067392
291.39	0.2090595		821.39	-0.00577593		1351.38	0.03328183		1881.38	-0.00576124		2411.37	0.04378981		2941.37	0.0331706		3471.4	-0.00623684
291.59	0.20969417		821.59	-0.00524008		1351.58	0.03331575		1881.58	-0.00571564		2411.57	0.04398152		2941.57	0.03257103		3471.6	-0.00475964
291.79	0.21014373		821.79	-0.00494917		1351.78	0.0342292		1881.78	-0.00522002		2411.77	0.0432326		2941.77	0.03247155		3471.8	-0.00392367
291.99	0.21052851		821.99	-0.00449453		1351.98	0.034103		1881.98	-0.00483435		2411.97	0.04336205		2941.97	0.03251826		3472	-0.00367209
292.19	0.21129263		822.19	-0.00471161		1352.18	0.03464261		1882.18	-0.00463477		2412.17	0.04342471		2942.17	0.03262938		3472.2	-0.00256915
292.39	0.21137264		822.39	-0.00456313		1352.38	0.033707		1882.38	-0.00440724		2412.37	0.04383699		2942.37	0.03318285		3472.4	-0.00295311
292.59	0.21052776		822.59	-0.0040418		1352.58	0.03520289		1882.58	-0.00433821		2412.57	0.04369685		2942.57	0.03277634		3472.6	-0.00340202
292.79	0.21092118		822.79	-0.00377175		1352.78	0.03490364		1882.78	-0.00433965		2412.77	0.0446898		2942.77	0.03386798		3472.8	-0.00420832
292.99	0.21087599		822.99	-0.00403274		1352.98	0.03533435		1882.98	-0.00376607		2412.97	0.04510513		2942.97	0.03424579		3473	-0.00483468
293.19	0.21086414		823.19	-0.00310816		1353.18	0.03552204		1883.18	-0.00321294		2413.17	0.04543965		2943.17	0.03364574		3473.2	-0.00485706
293.39	0.2104619		823.39	-0.00189003		1353.38	0.03668994		1883.38	-0.00347961		2413.37	0.04639007		2943.37	0.03373745		3473.4	-0.0059952
293.59	0.21096688		823.59	-0.00173952		1353.58	0.03665185		1883.58	-0.00358591		2413.57	0.04622411		2943.57	0.03380529		3473.6	-0.00720357
293.79	0.21086849		823.79	-0.00066237		1353.78	0.03594287		1883.78	-0.00392733		2413.77	0.04609553		2943.77	0.03353918		3473.8	-0.00867872
293.99	0.21164376		823.99	0.00003642		1353.98	0.0349769		1883.98	-0.00419741		2413.97	0.04537501		2943.97	0.03379678		3474	-0.00876456
294.19	0.21183233		824.19	0.00076387		1354.18	0.0340995		1884.18	-0.00381475		2414.17	0.04525267		2944.17	0.03341541		3474.2	-0.00871977
294.39	0.21197849		824.39	0.00132643		1354.38	0.03401772		1884.38	-0.00313234		2414.37	0.04468321		2944.37	0.03395499		3474.4	-0.0083141
294.59	0.21265627		824.59	0.00234737		1354.58	0.03366492		1884.58	-0.00282241		2414.57	0.04368318		2944.57	0.03343254		3474.6	-0.00880498
294.79	0.21383948		824.79	0.00192234		1354.78	0.03374896		1884.78	-0.00222129		2414.77	0.04345477		2944.77	0.03298302		3474.8	-0.00835902
294.99	0.21414152		824.99	0.00198768		1354.98	0.03452952		1884.98	-0.00241432		2414.97	0.04399618		2944.97	0.03315792		3475	-0.00849171
295.19	0.2140023		825.19	0.00252741		1355.18	0.03504475		1885.18	-0.00181226		2415.17	0.04457175		2945.17	0.03423488		3475.2	-0.00840569
295.39	0.21394367		825.39	0.00187876		1355.38	0.03525175		1885.38	-0.00206516		2415.37	0.04376882		2945.37	0.03414782		3475.4	-0.00862313
295.59	0.2147156		825.59	0.00140751		1355.58	0.0362481		1885.58	-0.00157864		2415.57	0.04396749		2945.57	0.03348242		3475.6	-0.00735689
295.79	0.21613762		825.79	0.00102405		1355.78	0.0372019		1885.78	-0.00180403		2415.77	0.04377117		2945.77	0.03418992		3475.8	-0.00719352
295.99	0.21689768		825.99	0.00060426		1355.98	0.03664406		1885.98	-0.00219062		2415.97	0.04348496		2945.97	0.03421718		3476	-0.00752432
296.19	0.21670469		826.19	0.00001682		1356.18	0.03694544		1886.18	-0.00252214		2416.17	0.04336669		2946.17	0.03421457		3476.2	-0.00691972
296.39	0.21604873		826.39	-0.00039409		1356.38	0.03670193		1886.38	-0.0028105		2416.37	0.04383486		2946.37	0.03379607		3476.4	-0.00721731
296.59	0.21572175		826.59	-0.00100093		1356.58	0.03804747		1886.58	-0.00295588		2416.57	0.04429557		2946.57	0.03427167		3476.6	-0.00666937
296.79	0.21556199		826.79	-0.00186472		1356.78	0.03707301		1886.78	-0.0029436		2416.77	0.04448533		2946.77	0.0345109		3476.8	-0.0065163
296.99	0.21471622		826.99	-0.00189352		1356.98	0.03682269		1886.98	-0.00284146		2416.97	0.04464905		2946.97	0.03365753		3477	-0.00623199
297.19	0.21452374		827.19	-0.00175147		1357.18	0.03690896		1887.18	-0.003235		2417.17	0.04452466		2947.17	0.03341116		3477.2	-0.005665
297.39	0.21352632		827.39	-0.00180527		1357.38	0.03823795		1887.38	-0.00378981		2417.37	0.04394754		2947.37	0.03386756		3477.4	-0.0060265
297.59	0.213807		827.59	-0.00240415		1357.58	0.03662767		1887.58	-0.00346833		2417.57	0.04421785		2947.57	0.03431808		3477.6	-0.00572837
297.79	0.2137052		827.79	-0.00288376		1357.78	0.03552474		1887.78	-0.00409124		2417.77	0.0449291		2947.77	0.03441358		3477.8	-0.00545036
297.99	0.21371924		827.99	-0.00365458		1357.98	0.03458342		1887.98	-0.00371152		2417.97	0.04568762		2947.97	0.03492613		3478	-0.00411146
298.19	0.21316053		828.19	-0.00367788		1358.18	0.03420443		1888.18	-0.00282712		2418.17	0.04642345		2948.17	0.03485735		3478.2	-0.00306268
298.39	0.21371686		828.39	-0.00383169		1358.38	0.03432764		1888.38	-0.00244482		2418.37	0.04661889		2948.37	0.03504698		3478.4	-0.00329332
298.59	0.21478598		828.59	-0.00337752		1358.58	0.03338499		1888.58	-0.00176644		2418.57	0.04723862		2948.57	0.0350862		3478.6	-0.00323065
298.79	0.2151437		828.79	-0.00468766		1358.78	0.03307717		1888.78	-0.00197817		2418.77	0.04777695		2948.77	0.0361625		3478.8	-0.00279916
298.99	0.21539224		828.99	-0.00426263		1358.98	0.03333941		1888.98	-0.00176801		2418.97	0.04888661		2948.97	0.03630104		3479	-0.00287437
299.19	0.21592036		829.19	-0.0040143		1359.18	0.03322209		1889.18	-0.00124418		2419.17	0.04833183		2949.17	0.03745945		3479.2	-0.00310686
299.39	0.21767279		829.39	-0.00419328		1359.38	0.03291203		1889.38	-0.00145619		2419.37	0.0480226		2949.37	0.03750277		3479.4	-0.00507706
299.59	0.21938774		829.59	-0.00303317		1359.58	0.03348565		1889.58	-0.00161553		2419.57	0.04859863		2949.57	0.03725063		3479.6	-0.00495679
299.79	0.22002695		829.79	-0.0024753		1359.78	0.0331103		1889.78	-0.00201793		2419.77	0.04850218		2949.77	0.03760944		3479.8	-0.00560697
299.99	0.22076106		829.99	-0.00154136		1359.98	0.03306184		1889.98	-0.00219149		2419.97	0.04825454		2949.97	0.03697201		3480	-0.00601045
300.19	0.22113552		830.19	-0.00108287		1360.18	0.03328883		1890.18	-0.00195883		2420.17	0.04844387		2950.17	0.03618572		3480.2	-0.00570447
300.39	0.22168566		830.39	-0.00129497		1360.38	0.03404076		1890.38	-0.00201815		2420.37	0.04805658		2950.37	0.035799		3480.4	-0.00611114
300.59	0.22144397		830.59	-0.00066943		1360.58	0.0354129		1890.58	-0.00234296		2420.57	0.04764202		2950.57	0.0356507		3480.6	-0.00744715
300.79	0.22167374		830.79	0.00022176		1360.78	0.03533959		1890.78	-0.00245028		2420.77	0.04697176		2950.77	0.03541166		3480.8	-0.00830926
300.99	0.22190042		830.99	0.00068859		1360.98	0.03589722		1890.98	-0.00329106		2420.97	0.04691889		2950.97	0.0359528		3481	-0.00863634
301.19	0.22144732		831.19	0.0003795		1361.18	0.03698986		1891.18	-0.0039958		2421.17	0.04653877		2951.17	0.0370547		3481.2	-0.00886522
301.39	0.22068383		831.39	0.00077382		1361.38	0.03797961		1891.38	-0.00393307		2421.37	0.04731773		2951.37	0.03780386		3481.4	-0.00878007
301.59	0.22169003		831.59	0.00017798		1361.58	0.0379051		1891.58	-0.00346412		2421.57	0.04904382		2951.57	0.03780605		3481.6	-0.00930864
301.79	0.22204065		831.79	0.00006337		1361.78	0.03807872		1891.78	-0.00328258		2421.77	0.04968893		2951.77	0.0379405		3481.8	-0.00956038
301.99	0.2216052		831.99	-0.00000797		1361.98	0.03893212		1891.98	-0.00201122		2421.97	0.05083403		2951.97	0.03811917		3482	-0.00956865
302.19	0.22155509		832.19	-0.00041419		1362.18	0.03926838		1892.18	-0.0005873		2422.17	0.05145296		2952.17	0.03794555		3482.2	-0.01006365
302.39	0.22210706		832.39	-0.00041718		1362.38	0.03965742		1892.38	-0.00060433		2422.37	0.05163274		2952.37	0.03843667		3482.4	-0.00938201
302.59	0.22283594		832.59	-0.00067162		1362.58	0.04062109		1892.58	-0.0006707		2422.57	0.05210585		2952.57	0.03945631		3482.6	-0.00828263
302.79	0.22306552		832.79	-0.00159926		1362.78	0.04169009		1892.78	-0.00019687		2422.77	0.05172738		2952.77	0.03938285		3482.8	-0.00808701
302.99	0.22417187		832.99	-0.00117191		1362.98	0.04167596		1892.98	0.00013604		2422.97	0.05253199		2952.97	0.03926611		3483	-0.00754027
303.19	0.2243928		833.19	-0.00050759		1363.18	0.04140467		1893.18	0.00024524		2423.17	0.05152187		2953.17	0.03959798		3483.2	-0.00744846
303.39	0.22529546		833.39	-0.00025781		1363.38	0.04083561		1893.38	-0.00039208		2423.37	0.05080106		2953.37	0.03879261		3483.4	-0.00724849
303.59	0.22521099		833.59	-0.00025033		1363.58	0.04033357		1893.58	-0.00048604		2423.57	0.05118667		2953.57	0.03813076		3483.6	-0.00590204
303.79	0.22550558		833.79	-0.00015896		1363.78	0.0399008		1893.78	-0.00107592		2423.77	0.05035181		2953.77	0.03829427		3483.8	-0.00544023
303.99	0.22701135		833.99	0.00052135		1363.98	0.03964984		1893.98	-0.00185918		2423.97	0.04955207		2953.97	0.03774097		3484	-0.00458972
304.19	0.22732312		834.19	0.00022375		1364.18	0.03991106		1894.18	-0.00203426		2424.17	0.04868228		2954.17	0.0370147		3484.2	-0.0047975
304.39	0.22663002		834.39	0.00015655		1364.38	0.04065445		1894.38	-0.00322784		2424.37	0.04817233		2954.37	0.03764007		3484.4	-0.00507995
304.59	0.22636321		834.59	0.00129578		1364.58	0.04064175		1894.58	-0.00444784		2424.57	0.04747328		2954.57	0.03784752		3484.6	-0.00524498
304.79	0.22679215		834.79	0.0016637		1364.78	0.04028769		1894.78	-0.0048792		2424.77	0.04687373		2954.77	0.03774285		3484.8	-0.00541018
304.99	0.22687423		834.99	0.00162598		1364.98	0.03973775		1894.98	-0.00507331		2424.97	0.04745826		2954.97	0.03836324		3485	-0.00588147
305.19	0.2251478		835.19	0.00211845		1365.18	0.04092315		1895.18	-0.00462611		2425.17	0.04744498		2955.17	0.03933087		3485.2	-0.00607359
305.39	0.22420631		835.39	0.00247432		1365.38	0.04070615		1895.38	-0.0046082		2425.37	0.04833397		2955.37	0.03935223		3485.4	-0.00626683
305.59	0.22490301		835.59	0.00196783		1365.58	0.04063195		1895.58	-0.00412044		2425.57	0.0495732		2955.57	0.03951148		3485.6	-0.00705636
305.79	0.22430883		835.79	0.00198828		1365.78	0.04068438		1895.78	-0.00288621		2425.77	0.05099294		2955.77	0.04027735		3485.8	-0.00732925
305.99	0.22340942		835.99	0.00246524		1365.98	0.04138414		1895.98	-0.00164427		2425.97	0.05199361		2955.97	0.04134126		3486	-0.00771938
306.19	0.2235026		836.19	0.00135147		1366.18	0.04097217		1896.18	0.00009122		2426.17	0.0529852		2956.17	0.04148604		3486.2	-0.00710439
306.39	0.22403296		836.39	0.00057391		1366.38	0.04119373		1896.38	0.00022031		2426.37	0.05370177		2956.37	0.04221983		3486.4	-0.00622455
306.59	0.22582293		836.59	0.00000741		1366.58	0.04159517		1896.58	0.00002372		2426.57	0.05501156		2956.57	0.04237165		3486.6	-0.00605787
306.79	0.22647546		836.79	-0.00042108		1366.78	0.04103532		1896.78	0.00110519		2426.77	0.05472688		2956.77	0.04250726		3486.8	-0.00592084
306.99	0.22716191		836.99	-0.0011117		1366.98	0.03982751		1896.98	0.00127513		2426.97	0.05577424		2956.97	0.04353367		3487	-0.00496072
307.19	0.22681658		837.19	-0.00149625		1367.18	0.03963473		1897.18	0.00127157		2427.17	0.05449417		2957.17	0.04281274		3487.2	-0.00486034
307.39	0.22727855		837.39	-0.00188608		1367.38	0.03932926		1897.38	0.00124205		2427.37	0.05387977		2957.37	0.04173397		3487.4	-0.00539625
307.59	0.22790175		837.59	-0.00207329		1367.58	0.03856073		1897.58	0.00119386		2427.57	0.05393034		2957.57	0.04169761		3487.6	-0.00574359
307.79	0.22932369		837.79	-0.00194884		1367.78	0.03813267		1897.78	0.00058524		2427.77	0.05299444		2957.77	0.04115105		3487.8	-0.00592855
307.99	0.23007814		837.99	-0.00240924		1367.98	0.0385792		1897.98	-0.0002013		2427.97	0.05231777		2957.97	0.03972537		3488	-0.00616815
308.19	0.22997336		838.19	-0.00260357		1368.18	0.03902004		1898.18	-0.00104277		2428.17	0.05121012		2958.17	0.03909317		3488.2	-0.00728532
308.39	0.23037789		838.39	-0.00213853		1368.38	0.03885006		1898.38	-0.00241873		2428.37	0.0500128		2958.37	0.03905954		3488.4	-0.00715864
308.59	0.23060055		838.59	-0.00173186		1368.58	0.03882714		1898.58	-0.00309697		2428.57	0.04897587		2958.57	0.03860081		3488.6	-0.00810322
308.79	0.23041529		838.79	-0.00163952		1368.78	0.04010272		1898.78	-0.00255717		2428.77	0.04850772		2958.77	0.03761821		3488.8	-0.00910775
308.99	0.22991232		838.99	-0.00190252		1368.98	0.0401103		1898.98	-0.00230988		2428.97	0.0484504		2958.97	0.03823767		3489	-0.01024137
309.19	0.22905672		839.19	-0.00219031		1369.18	0.04101539		1899.18	-0.00242815		2429.17	0.04784305		2959.17	0.03818534		3489.2	-0.01099568
309.39	0.22892621		839.39	-0.00234478		1369.38	0.04048853		1899.38	-0.00274823		2429.37	0.04839352		2959.37	0.03805017		3489.4	-0.01161888
309.59	0.22930551		839.59	-0.00238038		1369.58	0.04038929		1899.58	-0.00222982		2429.57	0.04912951		2959.57	0.038735		3489.6	-0.01192924
309.79	0.22848114		839.79	-0.00191717		1369.78	0.03995608		1899.78	-0.00100301		2429.77	0.04914894		2959.77	0.03994186		3489.8	-0.01202742
309.99	0.22818177		839.99	-0.0013984		1369.98	0.03927882		1899.98	-0.00077294		2429.97	0.04900064		2959.97	0.04161614		3490	-0.01227954
310.19	0.22829623		840.19	-0.00145463		1370.18	0.03844604		1900.18	-0.00007736		2430.17	0.04997603		2960.17	0.04232177		3490.2	-0.01248908
310.39	0.22911218		840.39	-0.0005175		1370.38	0.0380698		1900.38	-0.00089285		2430.37	0.0508972		2960.37	0.04388285		3490.4	-0.01190433
310.59	0.22998342		840.59	0.00046208		1370.58	0.03821719		1900.58	-0.00103839		2430.57	0.05136391		2960.57	0.04461664		3490.6	-0.01095347
310.79	0.22970647		840.79	0.00081433		1370.78	0.03872074		1900.78	-0.00072868		2430.77	0.05168596		2960.77	0.04604244		3490.8	-0.01038466
310.99	0.22945165		840.99	0.00066283		1370.98	0.03866843		1900.98	-0.0007584		2430.97	0.05202072		2960.97	0.04632457		3491	-0.01000375
311.19	0.22994459		841.19	0.00086923		1371.18	0.03935794		1901.18	-0.00126127		2431.17	0.05211263		2961.17	0.04500411		3491.2	-0.0096282
311.39	0.23005741		841.39	0.00152247		1371.38	0.03987335		1901.38	-0.00129827		2431.37	0.0528607		2961.37	0.04480586		3491.4	-0.0095044
311.59	0.23110294		841.59	0.00188841		1371.58	0.0399292		1901.58	-0.00252825		2431.57	0.05247216		2961.57	0.04429731		3491.6	-0.00937829
311.79	0.23198607		841.79	0.00232019		1371.78	0.03989223		1901.78	-0.00391224		2431.77	0.05238057		2961.77	0.04274217		3491.8	-0.00921847
311.99	0.2317462		841.99	0.00264773		1371.98	0.04049269		1901.98	-0.00540603		2431.97	0.0518337		2961.97	0.04127994		3492	-0.00866182
312.19	0.23298615		842.19	0.00318145		1372.18	0.04092439		1902.18	-0.00592935		2432.17	0.05190172		2962.17	0.04094416		3492.2	-0.0086287
312.39	0.23397018		842.39	0.00367454		1372.38	0.04174936		1902.38	-0.00615876		2432.37	0.05148321		2962.37	0.03982011		3492.4	-0.00743972
312.59	0.23458582		842.59	0.00387844		1372.58	0.04302413		1902.58	-0.00608928		2432.57	0.05205999		2962.57	0.0387221		3492.6	-0.00719951
312.79	0.2348129		842.79	0.00376164		1372.78	0.04399158		1902.78	-0.00543686		2432.77	0.05268438		2962.77	0.03752936		3492.8	-0.00758269
312.99	0.23529258		842.99	0.00222886		1372.98	0.04438822		1902.98	-0.00486721		2432.97	0.05276698		2962.97	0.03696732		3493	-0.0085987
313.19	0.23554623		843.19	0.00251251		1373.18	0.04505673		1903.18	-0.00418258		2433.17	0.05283432		2963.17	0.03622468		3493.2	-0.00785153
313.39	0.23566186		843.39	0.00272136		1373.38	0.04459739		1903.38	-0.00313614		2433.37	0.05279336		2963.37	0.03666409		3493.4	-0.00792952
313.59	0.23548269		843.59	0.00203003		1373.58	0.04407303		1903.58	-0.00186299		2433.57	0.05360549		2963.57	0.03713746		3493.6	-0.00744985
313.79	0.23474037		843.79	0.00142545		1373.78	0.04438248		1903.78	-0.00095059		2433.77	0.05291246		2963.77	0.03831492		3493.8	-0.00828614
313.99	0.23423947		843.99	0.00167968		1373.98	0.04421394		1903.98	-0.0005855		2433.97	0.05382127		2963.97	0.03903847		3494	-0.00862422
314.19	0.23425261		844.19	0.0015022		1374.18	0.04355797		1904.18	0.00015513		2434.17	0.0544599		2964.17	0.04047651		3494.2	-0.00876137
314.39	0.23412664		844.39	0.00164685		1374.38	0.04273143		1904.38	0.00112317		2434.37	0.05467019		2964.37	0.04154886		3494.4	-0.008895
314.59	0.23374274		844.59	0.0011445		1374.58	0.04226742		1904.58	0.00202333		2434.57	0.05494935		2964.57	0.04195563		3494.6	-0.00978338
314.79	0.23409955		844.79	0.00074295		1374.78	0.04194793		1904.78	0.00219211		2434.77	0.0559928		2964.77	0.04274026		3494.8	-0.01030634
314.99	0.2341125		844.99	0.00006119		1374.98	0.04149087		1904.98	0.00212326		2434.97	0.05596178		2964.97	0.04362149		3495	-0.01007215
315.19	0.2344615		845.19	-0.0001628		1375.18	0.04086761		1905.18	0.00199779		2435.17	0.05677819		2965.17	0.04364805		3495.2	-0.00952782
315.39	0.23415101		845.39	0.00023103		1375.38	0.04089214		1905.38	0.00203758		2435.37	0.05637617		2965.37	0.0440734		3495.4	-0.00995635
315.59	0.23492409		845.59	0.00079319		1375.58	0.04064794		1905.58	0.00137762		2435.57	0.05541036		2965.57	0.04324537		3495.6	-0.01040497
315.79	0.23497234		845.79	0.00100534		1375.78	0.03992276		1905.78	0.00156257		2435.77	0.05571583		2965.77	0.0431515		3495.8	-0.01007021
315.99	0.23528009		845.99	0.00123161		1375.98	0.03970964		1905.98	0.00077381		2435.97	0.05490043		2965.97	0.04251826		3496	-0.00933103
316.19	0.23674793		846.19	0.0006966		1376.18	0.04100503		1906.18	0.0005858		2436.17	0.05568353		2966.17	0.04313378		3496.2	-0.00922761
316.39	0.23669672		846.39	0.00094622		1376.38	0.04158916		1906.38	-0.00047351		2436.37	0.05550707		2966.37	0.04303098		3496.4	-0.0084443
316.59	0.23664189		846.59	0.0015517		1376.58	0.04225777		1906.58	-0.00122988		2436.57	0.05609108		2966.57	0.04296615		3496.6	-0.00910068
316.79	0.23699137		846.79	0.0011446		1376.78	0.04225859		1906.78	-0.00130321		2436.77	0.05666366		2966.77	0.04294781		3496.8	-0.00940997
316.99	0.23765901		846.99	0.00003045		1376.98	0.04317519		1906.98	-0.00125384		2436.97	0.05560879		2966.97	0.04348781		3497	-0.00897994
317.19	0.23799719		847.19	0.00008778		1377.18	0.04327155		1907.18	-0.00202551		2437.17	0.05577152		2967.17	0.04363222		3497.2	-0.00784495
317.39	0.23881656		847.39	-0.00034184		1377.38	0.04322639		1907.38	-0.00173737		2437.37	0.05575517		2967.37	0.04405743		3497.4	-0.00810164
317.59	0.23898147		847.59	-0.00070493		1377.58	0.04365896		1907.58	-0.00194859		2437.57	0.05523528		2967.57	0.04446768		3497.6	-0.00840132
317.79	0.23903102		847.79	-0.00058038		1377.78	0.04375741		1907.78	-0.00252652		2437.77	0.0544868		2967.77	0.04505308		3497.8	-0.00929251
317.99	0.23860742		847.99	0.00068219		1377.98	0.04299674		1907.98	-0.0034973		2437.97	0.05542017		2967.97	0.04505241		3498	-0.00903703
318.19	0.23845296		848.19	-0.00045677		1378.18	0.04203513		1908.18	-0.00338823		2438.17	0.05502328		2968.17	0.04610681		3498.2	-0.00932582
318.39	0.23824415		848.39	-0.000217		1378.38	0.04137601		1908.38	-0.00312501		2438.37	0.05487924		2968.37	0.04556199		3498.4	-0.0096537
318.59	0.23869989		848.59	-0.00002733		1378.58	0.03980437		1908.58	-0.00308432		2438.57	0.0550007		2968.57	0.04540965		3498.6	-0.00947408
318.79	0.2391796		848.79	0.00063789		1378.78	0.04049779		1908.78	-0.00260584		2438.77	0.05476218		2968.77	0.04594101		3498.8	-0.00953707
318.99	0.23847613		848.99	0.00070855		1378.98	0.040634		1908.98	-0.00201813		2438.97	0.05465545		2968.97	0.04579456		3499	-0.00835851
319.19	0.23800045		849.19	0.00135006		1379.18	0.04064734		1909.18	-0.0017668		2439.17	0.05513169		2969.17	0.04410572		3499.2	-0.00793769
319.39	0.23768522		849.39	0.00269931		1379.38	0.04142286		1909.38	-0.0013388		2439.37	0.05496481		2969.37	0.04395557		3499.4	-0.00757323
319.59	0.23794574		849.59	0.0030986		1379.58	0.04158656		1909.58	-0.00154813		2439.57	0.05504205		2969.57	0.04314529		3499.6	-0.00715929
319.79	0.23761676		849.79	0.00320463		1379.78	0.0417763		1909.78	-0.00102851		2439.77	0.05494875		2969.77	0.04288175		3499.8	-0.00620174
319.99	0.23873303		849.99	0.00332572		1379.98	0.04282224		1909.98	-0.00191186		2439.97	0.0551945		2969.97	0.04243638		3500	-0.00582938
320.19	0.2393413		850.19	0.00302035		1380.18	0.04413973		1910.18	-0.00212812		2440.17	0.05516543		2970.17	0.04257519		3500.2	-0.00593793
320.39	0.23963415		850.39	0.00321972		1380.38	0.04421677		1910.38	-0.00257815		2440.37	0.05446376		2970.37	0.04247574		3500.4	-0.00580325
320.59	0.2396735		850.59	0.00377019		1380.58	0.04473487		1910.58	-0.00282837		2440.57	0.05499138		2970.57	0.04274238		3500.6	-0.00644567
320.79	0.24108815		850.79	0.00362149		1380.78	0.04417992		1910.78	-0.00349524		2440.77	0.0550375		2970.77	0.04290446		3500.8	-0.00616672
320.99	0.2409468		850.99	0.00234247		1380.98	0.04428233		1910.98	-0.00380198		2440.97	0.05471336		2970.97	0.04408758		3501	-0.0059423
321.19	0.24103896		851.19	0.00247899		1381.18	0.04461632		1911.18	-0.00455206		2441.17	0.05515724		2971.17	0.04465452		3501.2	-0.00532038
321.39	0.24159667		851.39	0.00340872		1381.38	0.04443493		1911.38	-0.00456219		2441.37	0.05521813		2971.37	0.044542		3501.4	-0.00498738
321.59	0.24155187		851.59	0.00406775		1381.58	0.04433481		1911.58	-0.00515166		2441.57	0.05505552		2971.57	0.04516435		3501.6	-0.00585126
321.79	0.24146787		851.79	0.00423706		1381.78	0.04429592		1911.78	-0.00587609		2441.77	0.05617688		2971.77	0.04520074		3501.8	-0.00621986
321.99	0.2409961		851.99	0.0042082		1381.98	0.04370343		1911.98	-0.00663532		2441.97	0.05680539		2971.97	0.04494729		3502	-0.00596594
322.19	0.24157571		852.19	0.00316648		1382.18	0.04271991		1912.18	-0.00607897		2442.17	0.05660976		2972.17	0.04565206		3502.2	-0.00606873
322.39	0.24185685		852.39	0.00282017		1382.38	0.04282154		1912.38	-0.00512673		2442.37	0.05699923		2972.37	0.04558696		3502.4	-0.00582377
322.59	0.24189445		852.59	0.0031795		1382.58	0.04182562		1912.58	-0.00421439		2442.57	0.05759336		2972.57	0.04546997		3502.6	-0.00627073
322.79	0.24234428		852.79	0.00326973		1382.78	0.04294559		1912.78	-0.00270665		2442.77	0.05779924		2972.77	0.04588112		3502.8	-0.00653189
322.99	0.2428138		852.99	0.00298553		1382.98	0.04241773		1912.98	-0.00202058		2442.97	0.05912014		2972.97	0.04543278		3503	-0.0061988
323.19	0.24318192		853.19	0.00276698		1383.18	0.04243073		1913.18	-0.00135265		2443.17	0.05968844		2973.17	0.04505154		3503.2	-0.00691187
323.39	0.24362854		853.39	0.00316134		1383.38	0.04233989		1913.38	-0.00030214		2443.37	0.05966541		2973.37	0.04558779		3503.4	-0.00726563
323.59	0.24512197		853.59	0.00222144		1383.58	0.04283305		1913.58	0.00037126		2443.57	0.05976016		2973.57	0.04526245		3503.6	-0.00743988
323.79	0.24534981		853.79	0.00237598		1383.78	0.04389892		1913.78	0.00085899		2443.77	0.05963907		2973.77	0.0452075		3503.8	-0.00763221
323.99	0.24634248		853.99	0.00228662		1383.98	0.0442924		1913.98	0.00088903		2443.97	0.05958161		2973.97	0.045747		3504	-0.00856989
324.19	0.24661704		854.19	0.00193027		1384.18	0.04450102		1914.18	0.00087078		2444.17	0.05845862		2974.17	0.04545034		3504.2	-0.01005601
324.39	0.24660149		854.39	0.00131272		1384.38	0.04514552		1914.38	0.00033298		2444.37	0.05858476		2974.37	0.04527567		3504.4	-0.0105691
324.59	0.2460054		854.59	0.000798		1384.58	0.04571064		1914.58	-0.0006807		2444.57	0.05944462		2974.57	0.04630833		3504.6	-0.01164857
324.79	0.2467931		854.79	0.00062409		1384.78	0.04539194		1914.78	-0.00158418		2444.77	0.05947417		2974.77	0.04642677		3504.8	-0.01232121
324.99	0.24569553		854.99	-0.00012776		1384.98	0.04625263		1914.98	-0.00122236		2444.97	0.05973852		2974.97	0.04736849		3505	-0.01240326
325.19	0.24568176		855.19	0.00077144		1385.18	0.04650497		1915.18	-0.00189475		2445.17	0.05942396		2975.17	0.04799991		3505.2	-0.0118617
325.39	0.24561784		855.39	0.0012811		1385.38	0.04651281		1915.38	-0.00286053		2445.37	0.05946902		2975.37	0.04780929		3505.4	-0.01230311
325.59	0.24506371		855.59	0.00119493		1385.58	0.04697748		1915.58	-0.00380223		2445.57	0.05963432		2975.57	0.0483264		3505.6	-0.0127488
325.79	0.24461158		855.79	0.00171396		1385.78	0.04757364		1915.78	-0.00482544		2445.77	0.05988368		2975.77	0.04817711		3505.8	-0.01265218
325.99	0.24397475		855.99	0.00222037		1385.98	0.04738545		1915.98	-0.00507756		2445.97	0.05999379		2975.97	0.04772333		3506	-0.01252094
326.19	0.24411597		856.19	0.00243991		1386.18	0.04709225		1916.18	-0.00450964		2446.17	0.06004087		2976.17	0.04828914		3506.2	-0.01256997
326.39	0.2436221		856.39	0.00182247		1386.38	0.04761433		1916.38	-0.003571		2446.37	0.05993953		2976.37	0.04836005		3506.4	-0.01268945
326.59	0.24411879		856.59	0.00319541		1386.58	0.04706651		1916.58	-0.00287038		2446.57	0.06005917		2976.57	0.04829213		3506.6	-0.01276057
326.79	0.24505828		856.79	0.00263301		1386.78	0.04652454		1916.78	-0.00215184		2446.77	0.05896955		2976.77	0.04869146		3506.8	-0.01176808
326.99	0.24538969		856.99	0.00283741		1386.98	0.04636626		1916.98	-0.00224109		2446.97	0.05848313		2976.97	0.0481996		3507	-0.01150297
327.19	0.24518367		857.19	0.00313809		1387.18	0.0453989		1917.18	-0.00160019		2447.17	0.05871986		2977.17	0.04757434		3507.2	-0.01086431
327.39	0.24563917		857.39	0.00286369		1387.38	0.04463621		1917.38	-0.00121869		2447.37	0.0585994		2977.37	0.04663991		3507.4	-0.01017542
327.59	0.24630848		857.59	0.00274028		1387.58	0.04453063		1917.58	-0.00064434		2447.57	0.05873874		2977.57	0.04650084		3507.6	-0.0092257
327.79	0.24599178		857.79	0.00378694		1387.78	0.04418673		1917.78	-0.00165135		2447.77	0.05786957		2977.77	0.04548746		3507.8	-0.00967739
327.99	0.24713736		857.99	0.00496306		1387.98	0.04302068		1917.98	-0.00210571		2447.97	0.05700048		2977.97	0.0449116		3508	-0.01032977
328.19	0.24800634		858.19	0.00526729		1388.18	0.04280231		1918.18	-0.0036829		2448.17	0.05722342		2978.17	0.04449911		3508.2	-0.01054054
328.39	0.24855981		858.39	0.00446076		1388.38	0.04293962		1918.38	-0.00435674		2448.37	0.05732628		2978.37	0.04339493		3508.4	-0.00996608
328.59	0.24896135		858.59	0.00424347		1388.58	0.04281089		1918.58	-0.005559		2448.57	0.05715385		2978.57	0.04380732		3508.6	-0.01065929
328.79	0.24940879		858.79	0.00495242		1388.78	0.04283111		1918.78	-0.00590155		2448.77	0.05685096		2978.77	0.04318298		3508.8	-0.01034634
328.99	0.24943147		858.99	0.00445904		1388.98	0.04319734		1918.98	-0.00579867		2448.97	0.05676198		2978.97	0.04385621		3509	-0.00934474
329.19	0.24972176		859.19	0.00491861		1389.18	0.0430032		1919.18	-0.00690591		2449.17	0.05618501		2979.17	0.04477587		3509.2	-0.00849096
329.39	0.24914692		859.39	0.00413322		1389.38	0.04326297		1919.38	-0.00743479		2449.37	0.0565365		2979.37	0.04472613		3509.4	-0.00755641
329.59	0.24845262		859.59	0.00403044		1389.58	0.04361305		1919.58	-0.007355		2449.57	0.05695647		2979.57	0.04564478		3509.6	-0.00735874
329.79	0.24792985		859.79	0.00477827		1389.78	0.04411801		1919.78	-0.0074172		2449.77	0.05738006		2979.77	0.04657955		3509.8	-0.00709794
329.99	0.24844069		859.99	0.00395624		1389.98	0.0439524		1919.98	-0.00677385		2449.97	0.05774693		2979.97	0.04636974		3510	-0.00748789
330.19	0.24877772		860.19	0.00312312		1390.18	0.04370232		1920.18	-0.00628779		2450.17	0.05790263		2980.17	0.04782412		3510.2	-0.00740144
330.39	0.24868252		860.39	0.00329644		1390.38	0.04389101		1920.38	-0.00564603		2450.37	0.05831825		2980.37	0.04892688		3510.4	-0.0075957
330.59	0.24888143		860.59	0.00267229		1390.58	0.04378282		1920.58	-0.00477796		2450.57	0.05945482		2980.57	0.04993479		3510.6	-0.00742446
330.79	0.24897436		860.79	0.00239088		1390.78	0.04384541		1920.78	-0.00457784		2450.77	0.05905174		2980.77	0.05024378		3510.8	-0.007244
330.99	0.24810976		860.99	0.00293718		1390.98	0.0439923		1920.98	-0.00380286		2450.97	0.06000351		2980.97	0.04966348		3511	-0.00784699
331.19	0.24819235		861.19	0.00354394		1391.18	0.04345041		1921.18	-0.003055		2451.17	0.06023597		2981.17	0.0493799		3511.2	-0.00750842
331.39	0.24933332		861.39	0.00345116		1391.38	0.0444201		1921.38	-0.00182832		2451.37	0.06064368		2981.37	0.04911079		3511.4	-0.00742686
331.59	0.24946453		861.59	0.00486422		1391.58	0.04466679		1921.58	-0.00077399		2451.57	0.06005851		2981.57	0.05073377		3511.6	-0.00736108
331.79	0.25009781		861.79	0.00599745		1391.78	0.04485483		1921.78	-0.00211952		2451.77	0.05908281		2981.77	0.05051317		3511.8	-0.00820925
331.99	0.2513957		861.99	0.00655673		1391.98	0.04547042		1921.98	-0.00247079		2451.97	0.05892304		2981.97	0.05007958		3512	-0.0090166
332.19	0.25164154		862.19	0.00618589		1392.18	0.04665337		1922.18	-0.00282111		2452.17	0.05909246		2982.17	0.05009269		3512.2	-0.00823245
332.39	0.25171297		862.39	0.00561989		1392.38	0.04783438		1922.38	-0.00242695		2452.37	0.05802378		2982.37	0.0491094		3512.4	-0.00811554
332.59	0.25209752		862.59	0.00493768		1392.58	0.04914863		1922.58	-0.00401716		2452.57	0.05710943		2982.57	0.0486947		3512.6	-0.00867667
332.79	0.25185706		862.79	0.00442828		1392.78	0.04911957		1922.78	-0.00408134		2452.77	0.05687837		2982.77	0.0482142		3512.8	-0.00752462
332.99	0.25244234		862.99	0.00405036		1392.98	0.04980865		1922.98	-0.00463259		2452.97	0.05679642		2982.97	0.04744317		3513	-0.00743193
333.19	0.25259151		863.19	0.00356424		1393.18	0.04958259		1923.18	-0.00567855		2453.17	0.05640182		2983.17	0.04654987		3513.2	-0.00746019
333.39	0.25196771		863.39	0.00259616		1393.38	0.04849834		1923.38	-0.00544821		2453.37	0.05650947		2983.37	0.04675879		3513.4	-0.00734019
333.59	0.25149254		863.59	0.00200735		1393.58	0.04718295		1923.58	-0.00482373		2453.57	0.05729772		2983.57	0.04626961		3513.6	-0.00784198
333.79	0.25107182		863.79	0.00201631		1393.78	0.04667457		1923.78	-0.00517559		2453.77	0.05796377		2983.77	0.04595988		3513.8	-0.00786532
333.99	0.25211039		863.99	0.00093307		1393.98	0.04615417		1923.98	-0.00494599		2453.97	0.05799529		2983.97	0.04572308		3514	-0.007818
334.19	0.25150165		864.19	0.00037864		1394.18	0.04539816		1924.18	-0.00455265		2454.17	0.05887879		2984.17	0.04647979		3514.2	-0.00749443
334.39	0.2518588		864.39	0.00061692		1394.38	0.04445055		1924.38	-0.00404585		2454.37	0.06014458		2984.37	0.04663925		3514.4	-0.00870166
334.59	0.25198119		864.59	0.00033235		1394.58	0.04457732		1924.58	-0.00380269		2454.57	0.06098681		2984.57	0.04717341		3514.6	-0.00865012
334.79	0.25205812		864.79	0.00146717		1394.78	0.04459871		1924.78	-0.00326845		2454.77	0.06167946		2984.77	0.04666974		3514.8	-0.0086872
334.99	0.25200339		864.99	0.0006987		1394.98	0.04428832		1924.98	-0.0026772		2454.97	0.06230064		2984.97	0.04646054		3515	-0.00826437
335.19	0.25270585		865.19	0.00155714		1395.18	0.04467951		1925.18	-0.00210682		2455.17	0.06265828		2985.17	0.04694621		3515.2	-0.00721438
335.39	0.2535473		865.39	0.00150836		1395.38	0.04623113		1925.38	-0.00064285		2455.37	0.06331228		2985.37	0.04808981		3515.4	-0.00728325
335.59	0.2531202		865.59	0.00185896		1395.58	0.04651285		1925.58	-0.00024615		2455.57	0.0624399		2985.57	0.04927605		3515.6	-0.00788676
335.79	0.25324517		865.79	0.00138017		1395.78	0.04783616		1925.78	-0.00044598		2455.77	0.06224721		2985.77	0.04983998		3515.8	-0.00823802
335.99	0.2532655		865.99	0.00128634		1395.98	0.0484273		1925.98	-0.00036462		2455.97	0.06180329		2985.97	0.05047363		3516	-0.00988635
336.19	0.25300924		866.19	0.00143491		1396.18	0.0493821		1926.18	0.00002646		2456.17	0.06142905		2986.17	0.05118984		3516.2	-0.00950443
336.39	0.25295204		866.39	0.00181676		1396.38	0.04991568		1926.38	-0.00084114		2456.37	0.06057756		2986.37	0.05101298		3516.4	-0.0099772
336.59	0.253939		866.59	0.00161735		1396.58	0.04975393		1926.58	-0.00201464		2456.57	0.06059807		2986.57	0.0510894		3516.6	-0.01028427
336.79	0.25422108		866.79	0.00238448		1396.78	0.05034702		1926.78	-0.00224386		2456.77	0.06060947		2986.77	0.05024726		3516.8	-0.01004899
336.99	0.25398377		866.99	0.002678		1396.98	0.05108894		1926.98	-0.00347405		2456.97	0.06037296		2986.97	0.04959521		3517	-0.01105801
337.19	0.25352603		867.19	0.00258756		1397.18	0.05095171		1927.18	-0.00367973		2457.17	0.06003752		2987.17	0.05001068		3517.2	-0.011829
337.39	0.25258759		867.39	0.00261513		1397.38	0.05041699		1927.38	-0.00332334		2457.37	0.05997257		2987.37	0.05058598		3517.4	-0.01214495
337.59	0.25163336		867.59	0.00249699		1397.58	0.05094641		1927.58	-0.00228378		2457.57	0.05997857		2987.57	0.04979562		3517.6	-0.01254199
337.79	0.25140317		867.79	0.00315252		1397.78	0.05177416		1927.78	-0.00313273		2457.77	0.05926541		2987.77	0.05051629		3517.8	-0.01336065
337.99	0.25255172		867.99	0.00323722		1397.98	0.05147036		1927.98	-0.00256433		2457.97	0.05981026		2987.97	0.05068572		3518	-0.01239242
338.19	0.25263479		868.19	0.00288808		1398.18	0.05027254		1928.18	-0.00350547		2458.17	0.06073025		2988.17	0.05060819		3518.2	-0.01188586
338.39	0.25369362		868.39	0.00320305		1398.38	0.04954767		1928.38	-0.00347887		2458.37	0.0612796		2988.37	0.05101039		3518.4	-0.01186781
338.59	0.25420867		868.59	0.00359454		1398.58	0.04945081		1928.58	-0.00326271		2458.57	0.06174294		2988.57	0.05013915		3518.6	-0.01076552
338.79	0.254427		868.79	0.00283267		1398.78	0.04849428		1928.78	-0.00308873		2458.77	0.06324332		2988.77	0.04891139		3518.8	-0.00911614
338.99	0.25559991		868.99	0.00219437		1398.98	0.04777298		1928.98	-0.00207992		2458.97	0.0636014		2988.97	0.04888117		3519	-0.00777274
339.19	0.25652255		869.19	0.00284435		1399.18	0.04757557		1929.18	-0.00143881		2459.17	0.06412616		2989.17	0.04926186		3519.2	-0.00804756
339.39	0.25707815		869.39	0.00258032		1399.38	0.04747661		1929.38	-0.00024306		2459.37	0.06412908		2989.37	0.04966215		3519.4	-0.00855895
339.59	0.25748442		869.59	0.00229476		1399.58	0.04683694		1929.58	-0.00017039		2459.57	0.06430418		2989.57	0.05014131		3519.6	-0.00944363
339.79	0.25789834		869.79	0.00234407		1399.78	0.04679194		1929.78	0.00017932		2459.77	0.0648112		2989.77	0.05082036		3519.8	-0.00972681
339.99	0.25812063		869.99	0.00296878		1399.98	0.04639521		1929.98	-0.0000022		2459.97	0.06475748		2989.97	0.05052136		3520	-0.01061683
340.19	0.2593817		870.19	0.00411707		1400.18	0.04657292		1930.18	-0.00012082		2460.17	0.06502528		2990.17	0.05013436		3520.2	-0.00984663
340.39	0.25988185		870.39	0.00415164		1400.38	0.04639191		1930.38	-0.00109521		2460.37	0.0650848		2990.37	0.05001152		3520.4	-0.01002401
340.59	0.26049383		870.59	0.00397579		1400.58	0.04629326		1930.58	-0.00141619		2460.57	0.06532448		2990.57	0.04973296		3520.6	-0.01028457
340.79	0.25943099		870.79	0.0038126		1400.78	0.04809385		1930.78	-0.00284557		2460.77	0.0652827		2990.77	0.04911062		3520.8	-0.01067124
340.99	0.25837001		870.99	0.00377662		1400.98	0.04799322		1930.98	-0.00351259		2460.97	0.06524069		2990.97	0.04941611		3521	-0.01087091
341.19	0.25823221		871.19	0.00386736		1401.18	0.04910315		1931.18	-0.00319958		2461.17	0.06504523		2991.17	0.05004853		3521.2	-0.01036342
341.39	0.25740222		871.39	0.00420031		1401.38	0.05004633		1931.38	-0.0035471		2461.37	0.06509623		2991.37	0.05001932		3521.4	-0.01083851
341.59	0.25615727		871.59	0.00443537		1401.58	0.05028024		1931.58	-0.00346504		2461.57	0.06536272		2991.57	0.05008391		3521.6	-0.01093555
341.79	0.25621249		871.79	0.00475279		1401.78	0.04967079		1931.78	-0.00396086		2461.77	0.06563305		2991.77	0.0502288		3521.8	-0.01060997
341.99	0.25610843		871.99	0.00463369		1401.98	0.04822969		1931.98	-0.00339802		2461.97	0.06716295		2991.97	0.0505521		3522	-0.01008331
342.19	0.25530184		872.19	0.00417234		1402.18	0.04684572		1932.18	-0.00354953		2462.17	0.0672099		2992.17	0.05092469		3522.2	-0.00918004
342.39	0.25560485		872.39	0.00444661		1402.38	0.04611207		1932.38	-0.00303525		2462.37	0.06693315		2992.37	0.05068804		3522.4	-0.00841721
342.59	0.25615785		872.59	0.00386096		1402.58	0.04546673		1932.58	-0.00260149		2462.57	0.06742027		2992.57	0.04916277		3522.6	-0.00786508
342.79	0.25709301		872.79	0.00339037		1402.78	0.04463956		1932.78	-0.00206047		2462.77	0.06875566		2992.77	0.04908557		3522.8	-0.00594452
342.99	0.25790182		872.99	0.00417346		1402.98	0.04344584		1932.98	-0.00174418		2462.97	0.06877915		2992.97	0.05007585		3523	-0.00630165
343.19	0.25852389		873.19	0.00353212		1403.18	0.04275032		1933.18	-0.00165563		2463.17	0.06821856		2993.17	0.05040023		3523.2	-0.00727444
343.39	0.25850661		873.39	0.0026394		1403.38	0.04250543		1933.38	-0.00135225		2463.37	0.06777175		2993.37	0.0510488		3523.4	-0.00767942
343.59	0.25812436		873.59	0.00251455		1403.58	0.04251904		1933.58	-0.00139638		2463.57	0.06756954		2993.57	0.05136698		3523.6	-0.00830728
343.79	0.25855573		873.79	0.00228104		1403.78	0.04304771		1933.78	-0.00062931		2463.77	0.0671364		2993.77	0.0517703		3523.8	-0.00864667
343.99	0.25968774		873.99	0.00300543		1403.98	0.04318555		1933.98	-0.00075153		2463.97	0.06606502		2993.97	0.05297213		3524	-0.00907835
344.19	0.26065971		874.19	0.00278673		1404.18	0.04397141		1934.18	-0.0010187		2464.17	0.06508287		2994.17	0.05269494		3524.2	-0.00901718
344.39	0.26102178		874.39	0.00221367		1404.38	0.04517781		1934.38	-0.00137841		2464.37	0.06486235		2994.37	0.05302036		3524.4	-0.00935263
344.59	0.26118126		874.59	0.00195716		1404.58	0.04743858		1934.58	-0.0020868		2464.57	0.06479279		2994.57	0.05301342		3524.6	-0.01003377
344.79	0.26140526		874.79	0.00323839		1404.78	0.04907575		1934.78	-0.00227864		2464.77	0.06556935		2994.77	0.05409034		3524.8	-0.01015905
344.99	0.26162137		874.99	0.003698		1404.98	0.05059049		1934.98	-0.00195284		2464.97	0.06520316		2994.97	0.05477817		3525	-0.01034661
345.19	0.2624156		875.19	0.00423134		1405.18	0.0525289		1935.18	-0.00248878		2465.17	0.06568317		2995.17	0.0553111		3525.2	-0.01022137
345.39	0.26206056		875.39	0.00509646		1405.38	0.05334239		1935.38	-0.00325491		2465.37	0.06609549		2995.37	0.05530456		3525.4	-0.01130606
345.59	0.2617028		875.59	0.00547576		1405.58	0.05292859		1935.58	-0.00268435		2465.57	0.06617238		2995.57	0.05511224		3525.6	-0.01116101
345.79	0.26187399		875.79	0.00517246		1405.78	0.05285365		1935.78	-0.00207963		2465.77	0.06658844		2995.77	0.05480196		3525.8	-0.0114879
345.99	0.26171705		875.99	0.00524755		1405.98	0.0523402		1935.98	-0.0020888		2465.97	0.06708728		2995.97	0.05504138		3526	-0.01220437
346.19	0.26177876		876.19	0.00490379		1406.18	0.05258157		1936.18	-0.00127374		2466.17	0.06692966		2996.17	0.05480087		3526.2	-0.01093336
346.39	0.2624827		876.39	0.0050026		1406.38	0.05137206		1936.38	-0.00104973		2466.37	0.06721429		2996.37	0.05418633		3526.4	-0.0104347
346.59	0.26313975		876.59	0.00415471		1406.58	0.05069842		1936.58	-0.00012243		2466.57	0.06768719		2996.57	0.05308829		3526.6	-0.0098151
346.79	0.26359326		876.79	0.00420522		1406.78	0.05004857		1936.78	-0.00024981		2466.77	0.06774057		2996.77	0.05323485		3526.8	-0.00849181
346.99	0.26302429		876.99	0.0042888		1406.98	0.04892942		1936.98	-0.00107878		2466.97	0.06727531		2996.97	0.05299767		3527	-0.00868836
347.19	0.2638579		877.19	0.00339027		1407.18	0.04808746		1937.18	-0.00049497		2467.17	0.0668789		2997.17	0.05268521		3527.2	-0.00881079
347.39	0.263705		877.39	0.003038		1407.38	0.0481604		1937.38	-0.00031085		2467.37	0.06698191		2997.37	0.05347005		3527.4	-0.00890834
347.59	0.2634588		877.59	0.00334645		1407.58	0.04802238		1937.58	0.00059209		2467.57	0.06733012		2997.57	0.05354732		3527.6	-0.00797321
347.79	0.2646877		877.79	0.00405884		1407.78	0.04764759		1937.78	0.00119471		2467.77	0.06710119		2997.77	0.05489932		3527.8	-0.00694937
347.99	0.26589003		877.99	0.00521579		1407.98	0.04802728		1937.98	0.00092407		2467.97	0.066182		2997.97	0.05542156		3528	-0.00658375
348.19	0.26630418		878.19	0.00522138		1408.18	0.04946705		1938.18	0.00054519		2468.17	0.06626996		2998.17	0.05517034		3528.2	-0.00537887
348.39	0.26716512		878.39	0.00557575		1408.38	0.05103954		1938.38	-0.00019301		2468.37	0.06755053		2998.37	0.05654673		3528.4	-0.00554611
348.59	0.26695837		878.59	0.00553402		1408.58	0.05282082		1938.58	-0.00070917		2468.57	0.06783502		2998.57	0.05700136		3528.6	-0.00647864
348.79	0.26723363		878.79	0.00670072		1408.78	0.05300266		1938.78	-0.00012912		2468.77	0.06807172		2998.77	0.05794765		3528.8	-0.00542521
348.99	0.26731823		878.99	0.00638459		1408.98	0.05468212		1938.98	-0.00148015		2468.97	0.06784429		2998.97	0.05827857		3529	-0.00598701
349.19	0.26733072		879.19	0.00714583		1409.18	0.05511793		1939.18	-0.00197218		2469.17	0.06792537		2999.17	0.05790228		3529.2	-0.00622285
349.39	0.26638715		879.39	0.00806798		1409.38	0.05499753		1939.38	-0.00227841		2469.37	0.06837845		2999.37	0.05819703		3529.4	-0.00682693
349.59	0.26659066		879.59	0.00788612		1409.58	0.05460272		1939.58	-0.00248911		2469.57	0.06880463		2999.57	0.05848734		3529.6	-0.00782968
349.79	0.26595858		879.79	0.00730212		1409.78	0.05440331		1939.78	-0.00248874		2469.77	0.06974694		2999.77	0.05756648		3529.8	-0.00827884
349.99	0.26646894		879.99	0.00717242		1409.98	0.05336036		1939.98	-0.00258252		2469.97	0.07023859		2999.97	0.05779804		3530	-0.00877345
350.19	0.2662345		880.19	0.00638592		1410.18	0.05245336		1940.18	-0.00188649		2470.17	0.07054049		3000.17	0.0573532		3530.2	-0.00864207
350.39	0.26606603		880.39	0.0070365		1410.38	0.05056692		1940.38	-0.00187076		2470.37	0.07075834		3000.37	0.05670852		3530.4	-0.00910687
350.59	0.26614277		880.59	0.00648383		1410.58	0.05020491		1940.58	-0.00232279		2470.57	0.07081166		3000.57	0.05603211		3530.6	-0.00836482
350.79	0.26583436		880.79	0.00629522		1410.78	0.04963826		1940.78	-0.00235931		2470.77	0.07030504		3000.77	0.05521394		3530.8	-0.0076768
350.99	0.26558873		880.99	0.00686108		1410.98	0.04870271		1940.98	-0.00187598		2470.97	0.07071164		3000.97	0.05399769		3531	-0.00814876
351.19	0.26645802		881.19	0.00767625		1411.18	0.04790923		1941.18	-0.00079078		2471.17	0.07066649		3001.17	0.0536766		3531.2	-0.00814668
351.39	0.26639527		881.39	0.00784697		1411.38	0.04837039		1941.38	-0.0008219		2471.37	0.07062902		3001.37	0.05372967		3531.4	-0.00739514
351.59	0.26712348		881.59	0.007896		1411.58	0.04745919		1941.58	-0.00017888		2471.57	0.07036786		3001.57	0.05342156		3531.6	-0.00633824
351.79	0.26791974		881.79	0.00863688		1411.78	0.0470843		1941.78	-0.0002843		2471.77	0.06964734		3001.77	0.05398926		3531.8	-0.00598875
351.99	0.26860376		881.99	0.00859299		1411.98	0.04760594		1941.98	-0.0006801		2471.97	0.06871864		3001.97	0.0542782		3532	-0.00692413
352.19	0.26875724		882.19	0.00790685		1412.18	0.04824199		1942.18	-0.00160107		2472.17	0.06870991		3002.17	0.05476068		3532.2	-0.00688821
352.39	0.26875934		882.39	0.00774214		1412.38	0.04889603		1942.38	-0.00198167		2472.37	0.06838642		3002.37	0.05477288		3532.4	-0.00693585
352.59	0.26884131		882.59	0.00741884		1412.58	0.0500336		1942.58	-0.00267519		2472.57	0.06759096		3002.57	0.05457226		3532.6	-0.00688908
352.79	0.26937135		882.79	0.00719772		1412.78	0.05036848		1942.78	-0.0022563		2472.77	0.06718951		3002.77	0.05557789		3532.8	-0.00624953
352.99	0.26925642		882.99	0.00745588		1412.98	0.05161151		1942.98	-0.00340932		2472.97	0.06720834		3002.97	0.05646843		3533	-0.00770493
353.19	0.26936037		883.19	0.00815918		1413.18	0.05223763		1943.18	-0.00329521		2473.17	0.06713422		3003.17	0.05708642		3533.2	-0.00827505
353.39	0.26985537		883.39	0.00875037		1413.38	0.05250142		1943.38	-0.00409772		2473.37	0.06800182		3003.37	0.058682		3533.4	-0.00847591
353.59	0.27103621		883.59	0.00854872		1413.58	0.05245389		1943.58	-0.00461722		2473.57	0.06821914		3003.57	0.0593414		3533.6	-0.00905357
353.79	0.27056612		883.79	0.00854128		1413.78	0.05187465		1943.78	-0.00368801		2473.77	0.06920562		3003.77	0.05964363		3533.8	-0.00883817
353.99	0.27183722		883.99	0.00786922		1413.98	0.05074049		1943.98	-0.00408072		2473.97	0.0692575		3003.97	0.0608183		3534	-0.00890625
354.19	0.27132615		884.19	0.00884448		1414.18	0.05039519		1944.18	-0.00431875		2474.17	0.06904661		3004.17	0.06137313		3534.2	-0.00901976
354.39	0.27145689		884.39	0.00939257		1414.38	0.04928311		1944.38	-0.00446812		2474.37	0.06955623		3004.37	0.0619434		3534.4	-0.00908259
354.59	0.27130492		884.59	0.00907705		1414.58	0.04948364		1944.58	-0.00501267		2474.57	0.06970453		3004.57	0.0623279		3534.6	-0.00838612
354.79	0.271703		884.79	0.0090028		1414.78	0.0496417		1944.78	-0.00480165		2474.77	0.06983791		3004.77	0.06186393		3534.8	-0.00799589
354.99	0.27202969		884.99	0.00949393		1414.98	0.04904412		1944.98	-0.00389797		2474.97	0.07084062		3004.97	0.06152375		3535	-0.00824925
355.19	0.27210856		885.19	0.00966341		1415.18	0.04888432		1945.18	-0.0033851		2475.17	0.06986756		3005.17	0.06149983		3535.2	-0.00725323
355.39	0.27146586		885.39	0.00850575		1415.38	0.04888217		1945.38	-0.00377328		2475.37	0.07040121		3005.37	0.06124613		3535.4	-0.00654691
355.59	0.27241716		885.59	0.00873924		1415.58	0.0478751		1945.58	-0.00366239		2475.57	0.06974454		3005.57	0.06139615		3535.6	-0.00694537
355.79	0.27142292		885.79	0.00819923		1415.78	0.04868351		1945.78	-0.00449909		2475.77	0.06932034		3005.77	0.0613631		3535.8	-0.00725342
355.99	0.2710469		885.99	0.00807929		1415.98	0.0487894		1945.98	-0.00502348		2475.97	0.06934577		3005.97	0.06076142		3536	-0.00721027
356.19	0.27061308		886.19	0.00731645		1416.18	0.04928255		1946.18	-0.00671706		2476.17	0.06924223		3006.17	0.05968111		3536.2	-0.0072379
356.39	0.27036498		886.39	0.0075857		1416.38	0.0494381		1946.38	-0.00719824		2476.37	0.06807632		3006.37	0.05906388		3536.4	-0.00739061
356.59	0.26995746		886.59	0.00712731		1416.58	0.04981421		1946.58	-0.00785695		2476.57	0.06832832		3006.57	0.05887262		3536.6	-0.00903893
356.79	0.26913665		886.79	0.00664115		1416.78	0.05052905		1946.78	-0.00714709		2476.77	0.06858122		3006.77	0.05911426		3536.8	-0.00992399
356.99	0.26852719		886.99	0.00735559		1416.98	0.05055637		1946.98	-0.00805453		2476.97	0.06834819		3006.97	0.0591138		3537	-0.01098603
357.19	0.26799259		887.19	0.00784787		1417.18	0.05031611		1947.18	-0.00789256		2477.17	0.0679411		3007.17	0.05817737		3537.2	-0.01150701
357.39	0.26778549		887.39	0.0079829		1417.38	0.05034878		1947.38	-0.00764378		2477.37	0.06829699		3007.37	0.05872064		3537.4	-0.01157666
357.59	0.26749883		887.59	0.00731966		1417.58	0.05020111		1947.58	-0.00637981		2477.57	0.06928074		3007.57	0.05859147		3537.6	-0.01196426
357.79	0.26691949		887.79	0.00737228		1417.78	0.04992581		1947.78	-0.00556846		2477.77	0.06962429		3007.77	0.05890544		3537.8	-0.01273227
357.99	0.26696556		887.99	0.00723042		1417.98	0.05054119		1947.98	-0.00529145		2477.97	0.06954296		3007.97	0.05919158		3538	-0.01329763
358.19	0.2668682		888.19	0.00800308		1418.18	0.05068936		1948.18	-0.00463785		2478.17	0.07054546		3008.17	0.05975713		3538.2	-0.01423149
358.39	0.26750505		888.39	0.00745188		1418.38	0.05042658		1948.38	-0.00367869		2478.37	0.07107049		3008.37	0.05952539		3538.4	-0.01449475
358.59	0.26835202		888.59	0.00823406		1418.58	0.05125889		1948.58	-0.00372036		2478.57	0.07152076		3008.57	0.06000355		3538.6	-0.01504649
358.79	0.26949599		888.79	0.00767951		1418.78	0.05125127		1948.78	-0.00248623		2478.77	0.0723428		3008.77	0.06013236		3538.8	-0.01344179
358.99	0.269865		888.99	0.00744394		1418.98	0.05115673		1948.98	-0.00155574		2478.97	0.07255117		3008.97	0.06021321		3539	-0.01230302
359.19	0.27026114		889.19	0.00716793		1419.18	0.05165193		1949.18	-0.00043236		2479.17	0.07232161		3009.17	0.06104448		3539.2	-0.01094064
359.39	0.26982949		889.39	0.00742798		1419.38	0.05150833		1949.38	-0.00009267		2479.37	0.07311624		3009.37	0.06096861		3539.4	-0.0104754
359.59	0.271601		889.59	0.00810414		1419.58	0.05255131		1949.58	0.00053333		2479.57	0.07183831		3009.57	0.06105119		3539.6	-0.01088334
359.79	0.27151566		889.79	0.00724594		1419.78	0.05372788		1949.78	0.00019089		2479.77	0.07212128		3009.77	0.05984309		3539.8	-0.01018561
359.99	0.27292239		889.99	0.00773479		1419.98	0.05335105		1949.98	0.00028885		2479.97	0.07296975		3009.97	0.05973574		3540	-0.0094768
360.19	0.27315361		890.19	0.00814069		1420.18	0.05411529		1950.18	-0.00001519		2480.17	0.07254618		3010.17	0.05920267		3540.2	-0.01027873
360.39	0.27338671		890.39	0.00834075		1420.38	0.05550709		1950.38	0.00077415		2480.37	0.07175383		3010.37	0.05880548		3540.4	-0.0108173
360.59	0.27226517		890.59	0.0081988		1420.58	0.05612137		1950.58	0.00053274		2480.57	0.07258503		3010.57	0.05845752		3540.6	-0.01127771
360.79	0.27137242		890.79	0.0079658		1420.78	0.05678366		1950.78	0.00008676		2480.77	0.07257394		3010.77	0.05763903		3540.8	-0.01089785
360.99	0.27077546		890.99	0.00851235		1420.98	0.05531623		1950.98	-0.00059951		2480.97	0.07283653		3010.97	0.05748667		3541	-0.00991166
361.19	0.27033259		891.19	0.00905978		1421.18	0.05587818		1951.18	-0.00106557		2481.17	0.07272781		3011.17	0.05683414		3541.2	-0.00980139
361.39	0.27053294		891.39	0.00894984		1421.38	0.05585534		1951.38	-0.00088119		2481.37	0.07352163		3011.37	0.05713136		3541.4	-0.01015992
361.59	0.2692879		891.59	0.00862509		1421.58	0.0549986		1951.58	-0.00172065		2481.57	0.07287003		3011.57	0.05686743		3541.6	-0.01073317
361.79	0.26892931		891.79	0.00890378		1421.78	0.05467959		1951.78	-0.00213655		2481.77	0.07194514		3011.77	0.05677904		3541.8	-0.01145263
361.99	0.26932342		891.99	0.00918966		1421.98	0.05393956		1951.98	-0.00217823		2481.97	0.07177779		3011.97	0.05666805		3542	-0.01128613
362.19	0.27031884		892.19	0.00936901		1422.18	0.05307068		1952.18	-0.00158106		2482.17	0.07183679		3012.17	0.05734535		3542.2	-0.0112621
362.39	0.27142212		892.39	0.00925296		1422.38	0.05179123		1952.38	-0.00273992		2482.37	0.07129337		3012.37	0.05731926		3542.4	-0.0109462
362.59	0.27275287		892.59	0.00944217		1422.58	0.05039514		1952.58	-0.00318961		2482.57	0.07135787		3012.57	0.05807698		3542.6	-0.01091217
362.79	0.27370897		892.79	0.00913557		1422.78	0.05077808		1952.78	-0.00267598		2482.77	0.07190671		3012.77	0.0581731		3542.8	-0.00939296
362.99	0.27375099		892.99	0.00906817		1422.98	0.05042185		1952.98	-0.00223496		2482.97	0.07261296		3012.97	0.05772599		3543	-0.00924482
363.19	0.27386167		893.19	0.00952444		1423.18	0.04910904		1953.18	-0.00153469		2483.17	0.07356765		3013.17	0.05819378		3543.2	-0.00916856
363.39	0.27414359		893.39	0.01031263		1423.38	0.04915759		1953.38	-0.00138369		2483.37	0.07298372		3013.37	0.05737236		3543.4	-0.00904354
363.59	0.27496377		893.59	0.00945218		1423.58	0.04986324		1953.58	-0.00118358		2483.57	0.07331157		3013.57	0.05715914		3543.6	-0.00951203
363.79	0.27526107		893.79	0.01008261		1423.78	0.04987541		1953.78	-0.00131653		2483.77	0.07469603		3013.77	0.0569406		3543.8	-0.00920495
363.99	0.2758781		893.99	0.0099587		1423.98	0.05062821		1953.98	-0.00067746		2483.97	0.07538783		3013.97	0.05790714		3544	-0.00930442
364.19	0.27573048		894.19	0.01027434		1424.18	0.05341646		1954.18	-0.00014911		2484.17	0.07550418		3014.17	0.05740836		3544.2	-0.01000583
364.39	0.2751517		894.39	0.00945826		1424.38	0.05510922		1954.38	-0.00051005		2484.37	0.07557921		3014.37	0.05806735		3544.4	-0.00994713
364.59	0.27443099		894.59	0.00965039		1424.58	0.05536457		1954.58	-0.00065956		2484.57	0.07647502		3014.57	0.0578695		3544.6	-0.00997581
364.79	0.27373269		894.79	0.00995105		1424.78	0.05484265		1954.78	-0.0014393		2484.77	0.07770011		3014.77	0.05807192		3544.8	-0.00960841
364.99	0.27383176		894.99	0.01020217		1424.98	0.05466821		1954.98	-0.00197844		2484.97	0.07762948		3014.97	0.05898113		3545	-0.00906619
365.19	0.27395875		895.19	0.00956389		1425.18	0.05448831		1955.18	-0.00274117		2485.17	0.07677218		3015.17	0.05921824		3545.2	-0.00988437
365.39	0.27389201		895.39	0.00908174		1425.38	0.05380571		1955.38	-0.00320085		2485.37	0.07646667		3015.37	0.06001063		3545.4	-0.01052981
365.59	0.27427158		895.59	0.0086097		1425.58	0.05417248		1955.58	-0.00335591		2485.57	0.07480567		3015.57	0.06067077		3545.6	-0.01065499
365.79	0.27488267		895.79	0.00945699		1425.78	0.05397116		1955.78	-0.00341875		2485.77	0.07405096		3015.77	0.06093283		3545.8	-0.0101379
365.99	0.27625985		895.99	0.00990149		1425.98	0.05340872		1955.98	-0.0030424		2485.97	0.07347269		3015.97	0.06167317		3546	-0.0095992
366.19	0.27731255		896.19	0.00946668		1426.18	0.05326552		1956.18	-0.00233601		2486.17	0.07312852		3016.17	0.06234465		3546.2	-0.01001101
366.39	0.27815558		896.39	0.00918595		1426.38	0.05256601		1956.38	-0.00226605		2486.37	0.07296321		3016.37	0.06121286		3546.4	-0.01021902
366.59	0.27850646		896.59	0.00910816		1426.58	0.05190248		1956.58	-0.00137406		2486.57	0.07314326		3016.57	0.06167417		3546.6	-0.0097952
366.79	0.2786407		896.79	0.00941393		1426.78	0.05245852		1956.78	-0.00071572		2486.77	0.07296057		3016.77	0.06072371		3546.8	-0.00983484
366.99	0.27906975		896.99	0.00937258		1426.98	0.05176087		1956.98	-0.00047337		2486.97	0.07301746		3016.97	0.06011835		3547	-0.00947678
367.19	0.27970723		897.19	0.00944275		1427.18	0.05212104		1957.18	-0.00022962		2487.17	0.07333767		3017.17	0.06042311		3547.2	-0.00961492
367.39	0.28027336		897.39	0.00879028		1427.38	0.05251019		1957.38	0.00054861		2487.37	0.07330275		3017.37	0.06012184		3547.4	-0.00955077
367.59	0.27986079		897.59	0.00816486		1427.58	0.05263382		1957.58	0.00067912		2487.57	0.07424083		3017.57	0.06059058		3547.6	-0.0099128
367.79	0.28118016		897.79	0.00839874		1427.78	0.05405124		1957.78	0.00058683		2487.77	0.07401534		3017.77	0.06164662		3547.8	-0.01011134
367.99	0.28074427		897.99	0.00726334		1427.98	0.05473815		1957.98	0.00017586		2487.97	0.07406228		3017.97	0.0618702		3548	-0.01064253
368.19	0.28044798		898.19	0.0067492		1428.18	0.0565599		1958.18	0.00008794		2488.17	0.07420649		3018.17	0.06205692		3548.2	-0.01092551
368.39	0.27996394		898.39	0.00674712		1428.38	0.05622865		1958.38	-0.00025676		2488.37	0.07395895		3018.37	0.06271487		3548.4	-0.01059802
368.59	0.27927173		898.59	0.00709881		1428.58	0.05622571		1958.58	-0.00048758		2488.57	0.07462445		3018.57	0.06287528		3548.6	-0.01152192
368.79	0.27817953		898.79	0.00681559		1428.78	0.05554807		1958.78	-0.00187677		2488.77	0.07516813		3018.77	0.06364268		3548.8	-0.01142546
368.99	0.27728924		898.99	0.00621882		1428.98	0.05468998		1958.98	-0.00221597		2488.97	0.07470972		3018.97	0.06354923		3549	-0.01126826
369.19	0.27661928		899.19	0.00553389		1429.18	0.05444934		1959.18	-0.00273891		2489.17	0.07524		3019.17	0.06383663		3549.2	-0.01062408
369.39	0.27590407		899.39	0.00629459		1429.38	0.0545113		1959.38	-0.00280827		2489.37	0.07543476		3019.37	0.06435812		3549.4	-0.01026672
369.59	0.27608418		899.59	0.00597227		1429.58	0.05553476		1959.58	-0.00258921		2489.57	0.07530003		3019.57	0.06472844		3549.6	-0.00996508
369.79	0.27502985		899.79	0.00696034		1429.78	0.05423374		1959.78	-0.00381775		2489.77	0.07538351		3019.77	0.06457438		3549.8	-0.01008277
369.99	0.27546127		899.99	0.00723918		1429.98	0.05341199		1959.98	-0.0035244		2489.97	0.07622444		3019.97	0.06445822		3550	-0.00979959
370.19	0.27587331		900.19	0.00761158		1430.18	0.05241458		1960.18	-0.00314752		2490.17	0.07630381		3020.17	0.06366006		3550.2	-0.01024472
370.39	0.27650025		900.39	0.00744377		1430.38	0.05148777		1960.38	-0.00303723		2490.37	0.07672724		3020.37	0.06329766		3550.4	-0.00940933
370.59	0.27722071		900.59	0.0072875		1430.58	0.05121559		1960.58	-0.00358114		2490.57	0.0766418		3020.57	0.06348519		3550.6	-0.00878326
370.79	0.27830517		900.79	0.00763157		1430.78	0.05079378		1960.78	-0.00302447		2490.77	0.07758202		3020.77	0.06217148		3550.8	-0.00907522
370.99	0.27933887		900.99	0.00785921		1430.98	0.0509678		1960.98	-0.00237463		2490.97	0.07880792		3020.97	0.06215007		3551	-0.00856056
371.19	0.28039778		901.19	0.00752629		1431.18	0.05186405		1961.18	-0.00143574		2491.17	0.07940846		3021.17	0.06193196		3551.2	-0.00808522
371.39	0.28123504		901.39	0.00680848		1431.38	0.05140934		1961.38	-0.00102627		2491.37	0.07998038		3021.37	0.06167243		3551.4	-0.00757236
371.59	0.28209336		901.59	0.00652539		1431.58	0.05240876		1961.58	-0.00063823		2491.57	0.07944829		3021.57	0.0613977		3551.6	-0.00718702
371.79	0.28363044		901.79	0.00654619		1431.78	0.05299431		1961.78	-0.00040562		2491.77	0.07894627		3021.77	0.06177038		3551.8	-0.00682152
371.99	0.28339667		901.99	0.00681453		1431.98	0.05280543		1961.98	-0.00014106		2491.97	0.07855917		3021.97	0.06165453		3552	-0.00698755
372.19	0.28308327		902.19	0.00691848		1432.18	0.05311003		1962.18	0.00034984		2492.17	0.0778667		3022.17	0.06163471		3552.2	-0.00629478
372.39	0.28246878		902.39	0.0075947		1432.38	0.05364055		1962.38	-0.00011166		2492.37	0.07729409		3022.37	0.06176257		3552.4	-0.00617397
372.59	0.28150284		902.59	0.00703508		1432.58	0.05448617		1962.58	-0.00117285		2492.57	0.07735806		3022.57	0.0620216		3552.6	-0.00691547
372.79	0.28084447		902.79	0.00618619		1432.78	0.05486214		1962.78	-0.00119005		2492.77	0.07744201		3022.77	0.06196248		3552.8	-0.00661532
372.99	0.28026703		902.99	0.00509757		1432.98	0.05523192		1962.98	-0.00174574		2492.97	0.07716413		3022.97	0.06230331		3553	-0.00680111
373.19	0.27992065		903.19	0.00473456		1433.18	0.05570018		1963.18	-0.00324956		2493.17	0.07716234		3023.17	0.06267682		3553.2	-0.00696709
373.39	0.28011525		903.39	0.00452361		1433.38	0.05648916		1963.38	-0.00367955		2493.37	0.07714084		3023.37	0.06389644		3553.4	-0.00756468
373.59	0.27975536		903.59	0.00426256		1433.58	0.05795703		1963.58	-0.00525557		2493.57	0.07629979		3023.57	0.06527644		3553.6	-0.0085047
373.79	0.27915502		903.79	0.00516404		1433.78	0.05734371		1963.78	-0.00649123		2493.77	0.07704239		3023.77	0.06513507		3553.8	-0.00931854
373.99	0.27954967		903.99	0.00538129		1433.98	0.05662683		1963.98	-0.00645644		2493.97	0.0775741		3023.97	0.06524542		3554	-0.00883612
374.19	0.28016837		904.19	0.00527524		1434.18	0.05595962		1964.18	-0.00619278		2494.17	0.07797968		3024.17	0.06507993		3554.2	-0.00905645
374.39	0.28024086		904.39	0.00518293		1434.38	0.05569894		1964.38	-0.00671207		2494.37	0.0785045		3024.37	0.06485906		3554.4	-0.00871284
374.59	0.2803379		904.59	0.00602417		1434.58	0.0556129		1964.58	-0.00619698		2494.57	0.07909306		3024.57	0.06392994		3554.6	-0.00872989
374.79	0.2804991		904.79	0.00726385		1434.78	0.05527254		1964.78	-0.00587413		2494.77	0.08016096		3024.77	0.0637851		3554.8	-0.00873495
374.99	0.28150775		904.99	0.00822185		1434.98	0.05511237		1964.98	-0.00471745		2494.97	0.07986495		3024.97	0.06428872		3555	-0.00780076
375.19	0.28261271		905.19	0.00920801		1435.18	0.05573079		1965.18	-0.00434248		2495.17	0.07972723		3025.17	0.06388795		3555.2	-0.00717119
375.39	0.2829409		905.39	0.00979043		1435.38	0.05503057		1965.38	-0.00417515		2495.37	0.07953591		3025.37	0.06323799		3555.4	-0.0078422
375.59	0.28424259		905.59	0.01023498		1435.58	0.05464447		1965.58	-0.0025236		2495.57	0.07939626		3025.57	0.06346331		3555.6	-0.00797795
375.79	0.28453089		905.79	0.01132758		1435.78	0.0541052		1965.78	-0.00220563		2495.77	0.07956086		3025.77	0.06410571		3555.8	-0.0082475
375.99	0.28372045		905.99	0.01110187		1435.98	0.0541269		1965.98	-0.00212702		2495.97	0.07924252		3025.97	0.06447738		3556	-0.00865576
376.19	0.28354843		906.19	0.01058948		1436.18	0.05398137		1966.18	-0.00274527		2496.17	0.07892526		3026.17	0.06418864		3556.2	-0.00883927
376.39	0.28358391		906.39	0.01008837		1436.38	0.05436781		1966.38	-0.00266633		2496.37	0.07868337		3026.37	0.06513855		3556.4	-0.01005302
376.59	0.28427391		906.59	0.00909653		1436.58	0.05492373		1966.58	-0.00244541		2496.57	0.07852961		3026.57	0.06534432		3556.6	-0.01098206
376.79	0.28458595		906.79	0.00881298		1436.78	0.0549167		1966.78	-0.00160763		2496.77	0.07863583		3026.77	0.06539941		3556.8	-0.01153453
376.99	0.28509856		906.99	0.00769685		1436.98	0.05496058		1966.98	-0.00268623		2496.97	0.07853152		3026.97	0.06620995		3557	-0.0120062
377.19	0.2850997		907.19	0.00716988		1437.18	0.05454546		1967.18	-0.00309016		2497.17	0.07839171		3027.17	0.06714074		3557.2	-0.01204507
377.39	0.28476775		907.39	0.00670667		1437.38	0.05565324		1967.38	-0.00317561		2497.37	0.07825405		3027.37	0.06806063		3557.4	-0.01215832
377.59	0.28374213		907.59	0.00623754		1437.58	0.05630761		1967.58	-0.00332812		2497.57	0.07897332		3027.57	0.06854715		3557.6	-0.01240614
377.79	0.28386804		907.79	0.00567561		1437.78	0.05569936		1967.78	-0.00251113		2497.77	0.08081945		3027.77	0.06811173		3557.8	-0.0131232
377.99	0.28395738		907.99	0.00525482		1437.98	0.0546566		1967.98	-0.00168997		2497.97	0.08115155		3027.97	0.0678888		3558	-0.01337349
378.19	0.28410807		908.19	0.00556976		1438.18	0.05436469		1968.18	-0.00137882		2498.17	0.08187743		3028.17	0.06718143		3558.2	-0.01367322
378.39	0.28405426		908.39	0.00628251		1438.38	0.05404879		1968.38	-0.00117251		2498.37	0.08199977		3028.37	0.06655768		3558.4	-0.01376703
378.59	0.28449129		908.59	0.00744846		1438.58	0.0538067		1968.58	-0.00073968		2498.57	0.08217645		3028.57	0.06613987		3558.6	-0.01372009
378.79	0.28515788		908.79	0.00878276		1438.78	0.05386113		1968.78	-0.00102441		2498.77	0.08210961		3028.77	0.06619311		3558.8	-0.01363903
378.99	0.28619949		908.99	0.01007988		1438.98	0.05347651		1968.98	-0.00053627		2498.97	0.08208512		3028.97	0.06572206		3559	-0.01333834
379.19	0.28652751		909.19	0.01135578		1439.18	0.05386111		1969.18	-0.00111884		2499.17	0.08200014		3029.17	0.06464079		3559.2	-0.01364348
379.39	0.28689634		909.39	0.01213602		1439.38	0.05341595		1969.38	-0.00127832		2499.37	0.08165783		3029.37	0.06401295		3559.4	-0.01419281
379.59	0.28760394		909.59	0.0127427		1439.58	0.05336333		1969.58	-0.00072609		2499.57	0.08193678		3029.57	0.06396336		3559.6	-0.01393495
379.79	0.28733156		909.79	0.01383175		1439.78	0.05350252		1969.78	-0.00175868		2499.77	0.08137934		3029.77	0.0636095		3559.8	-0.0138934
379.99	0.28733156		909.99	0.01383175		1439.98	0.05350252		1969.98	-0.00175868		2499.97	0.08137934		3029.97	0.0636095		3560	-0.0138934
380.19	0.28735961		910.19	0.0143501		1440.18	0.05222784		1970.18	-0.00067496		2500.17	0.08253345		3030.17	0.06384849		3560.2	-0.01407798
380.39	0.28743651		910.39	0.01525152		1440.38	0.0505065		1970.38	0.0001141		2500.37	0.08349731		3030.37	0.06394439		3560.4	-0.01430992
380.59	0.28711743		910.59	0.0165782		1440.58	0.04903212		1970.58	0.00040221		2500.57	0.08437754		3030.57	0.06374577		3560.6	-0.01429766
380.79	0.28650971		910.79	0.01701598		1440.78	0.04775596		1970.78	0.00087325		2500.77	0.08507316		3030.77	0.06404062		3560.8	-0.01519441
380.99	0.28600673		910.99	0.01782816		1440.98	0.0460781		1970.98	0.00152594		2500.97	0.08577664		3030.97	0.06369725		3561	-0.01549741
381.19	0.28529229		911.19	0.01783373		1441.18	0.04559821		1971.18	0.00169583		2501.17	0.08566009		3031.17	0.06407718		3561.2	-0.01517327
381.39	0.28506487		911.39	0.01814185		1441.38	0.04498892		1971.38	0.00184292		2501.37	0.08492816		3031.37	0.06378618		3561.4	-0.01448297
381.59	0.28545162		911.59	0.01862287		1441.58	0.04525776		1971.58	0.00225587		2501.57	0.08536259		3031.57	0.06376422		3561.6	-0.0143277
381.79	0.28471878		911.79	0.01916013		1441.78	0.0455427		1971.78	0.00191292		2501.77	0.08557575		3031.77	0.0633632		3561.8	-0.01536408
381.99	0.28556014		911.99	0.01824603		1441.98	0.04641751		1971.98	0.00211797		2501.97	0.08551238		3031.97	0.06286082		3562	-0.01553411
382.19	0.28608543		912.19	0.01787218		1442.18	0.04751376		1972.18	0.0015716		2502.17	0.08544373		3032.17	0.06401409		3562.2	-0.01601302
382.39	0.28534682		912.39	0.01903164		1442.38	0.04798897		1972.38	0.00133521		2502.37	0.08611721		3032.37	0.0652835		3562.4	-0.01559185
382.59	0.28545424		912.59	0.01935657		1442.58	0.04948474		1972.58	0.00143872		2502.57	0.08676582		3032.57	0.06586785		3562.6	-0.0154903
382.79	0.28536256		912.79	0.01905472		1442.78	0.05095871		1972.78	0.00180315		2502.77	0.08645116		3032.77	0.06622715		3562.8	-0.01483924
382.99	0.28578569		912.99	0.01946898		1442.98	0.05187184		1972.98	0.00278762		2502.97	0.08689816		3032.97	0.06683579		3563	-0.01495835
383.19	0.28577329		913.19	0.01922189		1443.18	0.05313897		1973.18	0.00301398		2503.17	0.08689818		3033.17	0.06691888		3563.2	-0.01493403
383.39	0.28518295		913.39	0.01931375		1443.38	0.05469298		1973.38	0.00330955		2503.37	0.08720157		3033.37	0.06844111		3563.4	-0.01421126
383.59	0.28417984		913.59	0.01817242		1443.58	0.05463645		1973.58	0.00441328		2503.57	0.08804233		3033.57	0.06861224		3563.6	-0.01316786
383.79	0.28442395		913.79	0.0180503		1443.78	0.05484973		1973.78	0.00494162		2503.77	0.08909992		3033.77	0.06963124		3563.8	-0.01216202
383.99	0.28484389		913.99	0.01831414		1443.98	0.05367817		1973.98	0.00497373		2503.97	0.08993059		3033.97	0.07114394		3564	-0.0111875
384.19	0.28575244		914.19	0.01844466		1444.18	0.0543317		1974.18	0.00522167		2504.17	0.09028971		3034.17	0.07114144		3564.2	-0.01160964
384.39	0.285316		914.39	0.01962357		1444.38	0.05388932		1974.38	0.00514697		2504.37	0.09036638		3034.37	0.07158558		3564.4	-0.01133476
384.59	0.28520362		914.59	0.02038269		1444.58	0.0534879		1974.58	0.00541301		2504.57	0.09026981		3034.57	0.0716516		3564.6	-0.0105691
384.79	0.28502095		914.79	0.01949255		1444.78	0.05285022		1974.78	0.00535616		2504.77	0.09009966		3034.77	0.07215979		3564.8	-0.01146549
384.99	0.28585523		914.99	0.01989461		1444.98	0.05184735		1974.98	0.00521872		2504.97	0.08970368		3034.97	0.07166615		3565	-0.01095951
385.19	0.28645692		915.19	0.01983675		1445.18	0.05198692		1975.18	0.00544032		2505.17	0.08857118		3035.17	0.07149905		3565.2	-0.01109606
385.39	0.2867581		915.39	0.02001557		1445.38	0.05155113		1975.38	0.00597351		2505.37	0.088064		3035.37	0.0702071		3565.4	-0.01113098
385.59	0.28727507		915.59	0.02069527		1445.58	0.05143939		1975.58	0.00626791		2505.57	0.08931155		3035.57	0.07017164		3565.6	-0.0123917
385.79	0.28748023		915.79	0.0209673		1445.78	0.05098773		1975.78	0.00579471		2505.77	0.08968127		3035.77	0.06943348		3565.8	-0.01348155
385.99	0.28842438		915.99	0.02074682		1445.98	0.05156069		1975.98	0.00643792		2505.97	0.08983217		3035.97	0.06947025		3566	-0.01408293
386.19	0.28777864		916.19	0.02138273		1446.18	0.05143106		1976.18	0.00603941		2506.17	0.09009046		3036.17	0.07039629		3566.2	-0.01464072
386.39	0.28712642		916.39	0.0224249		1446.38	0.05176786		1976.38	0.00542466		2506.37	0.08905326		3036.37	0.06930663		3566.4	-0.01405842
386.59	0.28761613		916.59	0.02166664		1446.58	0.05141364		1976.58	0.00646993		2506.57	0.08747833		3036.57	0.06857987		3566.6	-0.0147768
386.79	0.28859562		916.79	0.02065918		1446.78	0.05180431		1976.78	0.00602511		2506.77	0.08678992		3036.77	0.06864024		3566.8	-0.01573962
386.99	0.28852018		916.99	0.02009773		1446.98	0.0519862		1976.98	0.00642391		2506.97	0.08772003		3036.97	0.06920045		3567	-0.01665406
387.19	0.28843092		917.19	0.01957021		1447.18	0.05116273		1977.18	0.00578262		2507.17	0.08852753		3037.17	0.06864048		3567.2	-0.0162219
387.39	0.28816031		917.39	0.01939253		1447.38	0.05185347		1977.38	0.00574459		2507.37	0.08915064		3037.37	0.06967316		3567.4	-0.01563648
387.59	0.28749747		917.59	0.01801362		1447.58	0.05191011		1977.58	0.00514666		2507.57	0.08953425		3037.57	0.06957185		3567.6	-0.01515193
387.79	0.28756148		917.79	0.01908203		1447.78	0.05181573		1977.78	0.00493547		2507.77	0.09014081		3037.77	0.06924751		3567.8	-0.01452651
387.99	0.28734615		917.99	0.01861066		1447.98	0.05086717		1977.98	0.00426896		2507.97	0.09009861		3037.97	0.06939815		3568	-0.01333535
388.19	0.28739059		918.19	0.01920479		1448.18	0.05132882		1978.18	0.00460368		2508.17	0.08985161		3038.17	0.06879192		3568.2	-0.01249336
388.39	0.28692149		918.39	0.01975382		1448.38	0.05079921		1978.38	0.00486989		2508.37	0.09018547		3038.37	0.069861		3568.4	-0.01182266
388.59	0.28676654		918.59	0.01939216		1448.58	0.05047301		1978.58	0.00564164		2508.57	0.09012843		3038.57	0.07022152		3568.6	-0.01157391
388.79	0.28707001		918.79	0.0188716		1448.78	0.04967407		1978.78	0.00546598		2508.77	0.09092962		3038.77	0.07022959		3568.8	-0.0115407
388.99	0.28758979		918.99	0.01924144		1448.98	0.04907058		1978.98	0.00580836		2508.97	0.09009794		3038.97	0.07024002		3569	-0.01071844
389.19	0.28727817		919.19	0.01896966		1449.18	0.04869032		1979.18	0.00664696		2509.17	0.08930015		3039.17	0.07046354		3569.2	-0.01045563
389.39	0.28690233		919.39	0.01883816		1449.38	0.04862261		1979.38	0.00678459		2509.37	0.08967838		3039.37	0.07108121		3569.4	-0.00981712
389.59	0.28688033		919.59	0.01916346		1449.58	0.04882069		1979.58	0.00649144		2509.57	0.09019238		3039.57	0.07181694		3569.6	-0.0102238
389.79	0.28667958		919.79	0.01884085		1449.78	0.0493754		1979.78	0.00689777		2509.77	0.09014471		3039.77	0.07191612		3569.8	-0.00983051
389.99	0.28614517		919.99	0.01889116		1449.98	0.05063296		1979.98	0.00749186		2509.97	0.09015742		3039.97	0.07232729		3570	-0.0108197
390.19	0.28695995		920.19	0.0188997		1450.18	0.05093837		1980.18	0.00685488		2510.17	0.08916543		3040.17	0.07150011		3570.2	-0.01096648
390.39	0.28828463		920.39	0.0192811		1450.38	0.05146351		1980.38	0.00583415		2510.37	0.0880822		3040.37	0.07123333		3570.4	-0.01170981
390.59	0.28991363		920.59	0.01904392		1450.58	0.05113078		1980.58	0.00602472		2510.57	0.08809701		3040.57	0.07261132		3570.6	-0.01183789
390.79	0.29079922		920.79	0.0194734		1450.78	0.05216525		1980.78	0.00546239		2510.77	0.08865334		3040.77	0.07229058		3570.8	-0.01280594
390.99	0.29075647		920.99	0.02014982		1450.98	0.05274904		1980.98	0.00500596		2510.97	0.08903242		3040.97	0.07138317		3571	-0.01391553
391.19	0.29039389		921.19	0.02119603		1451.18	0.05258494		1981.18	0.0044559		2511.17	0.08894805		3041.17	0.07047762		3571.2	-0.01305676
391.39	0.28999901		921.39	0.02125229		1451.38	0.05256534		1981.38	0.00484652		2511.37	0.08894298		3041.37	0.06979585		3571.4	-0.01326243
391.59	0.28916769		921.59	0.02103065		1451.58	0.05282332		1981.58	0.00515239		2511.57	0.0889384		3041.57	0.06934357		3571.6	-0.01223564
391.79	0.28975409		921.79	0.02201921		1451.78	0.0518876		1981.78	0.00640864		2511.77	0.08897315		3041.77	0.06905416		3571.8	-0.01097211
391.99	0.28958022		921.99	0.02139924		1451.98	0.05073272		1981.98	0.00783298		2511.97	0.08854422		3041.97	0.0688437		3572	-0.01073775
392.19	0.28982381		922.19	0.02184217		1452.18	0.05033903		1982.18	0.00921174		2512.17	0.08881239		3042.17	0.06851764		3572.2	-0.01026655
392.39	0.28942094		922.39	0.02259405		1452.38	0.05024564		1982.38	0.00962115		2512.37	0.08914858		3042.37	0.06900468		3572.4	-0.00926345
392.59	0.2887702		922.59	0.0227601		1452.58	0.04945647		1982.58	0.011327		2512.57	0.08926612		3042.57	0.06942627		3572.6	-0.00928709
392.79	0.289178		922.79	0.02279285		1452.78	0.04903772		1982.78	0.0118155		2512.77	0.08968391		3042.77	0.06907068		3572.8	-0.00927197
392.99	0.28870145		922.99	0.02257503		1452.98	0.0488316		1982.98	0.01199715		2512.97	0.08842491		3042.97	0.0694904		3573	-0.00965739
393.19	0.28836837		923.19	0.02179314		1453.18	0.04919394		1983.18	0.01243799		2513.17	0.08883236		3043.17	0.0695736		3573.2	-0.00970926
393.39	0.28747136		923.39	0.02171747		1453.38	0.04915566		1983.38	0.01246386		2513.37	0.08944338		3043.37	0.0697887		3573.4	-0.01000944
393.59	0.28678379		923.59	0.02077279		1453.58	0.04938002		1983.58	0.01222724		2513.57	0.08976438		3043.57	0.06965564		3573.6	-0.00993943
393.79	0.28736273		923.79	0.02051613		1453.78	0.0494751		1983.78	0.01162715		2513.77	0.09007205		3043.77	0.0694723		3573.8	-0.00935058
393.99	0.2874595		923.99	0.02056047		1453.98	0.04988032		1983.98	0.01172902		2513.97	0.09043166		3043.97	0.06889566		3574	-0.01113685
394.19	0.28804715		924.19	0.02072555		1454.18	0.05030519		1984.18	0.01021954		2514.17	0.09015908		3044.17	0.06790245		3574.2	-0.01090439
394.39	0.2885132		924.39	0.01979571		1454.38	0.05068291		1984.38	0.00875954		2514.37	0.09064489		3044.37	0.06889298		3574.4	-0.01149006
394.59	0.28968863		924.59	0.02028891		1454.58	0.0503753		1984.58	0.00842328		2514.57	0.09057692		3044.57	0.06908833		3574.6	-0.01141101
394.79	0.2891504		924.79	0.01985317		1454.78	0.05040561		1984.78	0.00799498		2514.77	0.09041189		3044.77	0.06796599		3574.8	-0.012168
394.99	0.28828929		924.99	0.02023461		1454.98	0.05083978		1984.98	0.00713111		2514.97	0.08957654		3044.97	0.06755065		3575	-0.0122973
395.19	0.28787011		925.19	0.020159		1455.18	0.04998226		1985.18	0.00663463		2515.17	0.08944063		3045.17	0.06713256		3575.2	-0.01180251
395.39	0.28747311		925.39	0.01993414		1455.38	0.04997587		1985.38	0.00723968		2515.37	0.08902772		3045.37	0.06750209		3575.4	-0.01208358
395.59	0.28776986		925.59	0.01934615		1455.58	0.05093103		1985.58	0.00842745		2515.57	0.08879882		3045.57	0.06801165		3575.6	-0.01093284
395.79	0.28779639		925.79	0.01942539		1455.78	0.05017866		1985.78	0.00994772		2515.77	0.08801084		3045.77	0.0684682		3575.8	-0.01061858
395.99	0.28736035		925.99	0.01981585		1455.98	0.04956331		1985.98	0.01176301		2515.97	0.08741635		3045.97	0.06783642		3576	-0.01063335
396.19	0.28738866		926.19	0.02080083		1456.18	0.04986824		1986.18	0.0127012		2516.17	0.0877894		3046.17	0.06819071		3576.2	-0.0102719
396.39	0.28775525		926.39	0.02166679		1456.38	0.05044972		1986.38	0.01321441		2516.37	0.0872677		3046.37	0.06890663		3576.4	-0.01068499
396.59	0.28773875		926.59	0.0220833		1456.58	0.05002368		1986.58	0.01552196		2516.57	0.0874132		3046.57	0.06910892		3576.6	-0.01159829
396.79	0.28784434		926.79	0.02212052		1456.78	0.05029547		1986.78	0.0169744		2516.77	0.08710876		3046.77	0.06833142		3576.8	-0.01196206
396.99	0.2882023		926.99	0.02254783		1456.98	0.05022057		1986.98	0.018043		2516.97	0.0864667		3046.97	0.06770368		3577	-0.01188142
397.19	0.28846828		927.19	0.02274591		1457.18	0.05064394		1987.18	0.01872843		2517.17	0.08689909		3047.17	0.06766746		3577.2	-0.01140383
397.39	0.28823575		927.39	0.02269434		1457.38	0.04982251		1987.38	0.01821258		2517.37	0.08691192		3047.37	0.06761162		3577.4	-0.01149541
397.59	0.28928372		927.59	0.02225543		1457.58	0.05035738		1987.58	0.01805466		2517.57	0.08724009		3047.57	0.06749868		3577.6	-0.01168125
397.79	0.28986582		927.79	0.02191278		1457.78	0.05061725		1987.78	0.01754825		2517.77	0.08747887		3047.77	0.06807374		3577.8	-0.01198698
397.99	0.29024787		927.99	0.02088982		1457.98	0.05034123		1987.98	0.01717616		2517.97	0.0879389		3047.97	0.06817812		3578	-0.01330486
398.19	0.29068158		928.19	0.02013201		1458.18	0.04995085		1988.18	0.01487093		2518.17	0.08771982		3048.17	0.06834335		3578.2	-0.01182162
398.39	0.29102393		928.39	0.01853155		1458.38	0.04930076		1988.38	0.01344512		2518.37	0.08739071		3048.37	0.06893033		3578.4	-0.01188826
398.59	0.29124156		928.59	0.01850263		1458.58	0.04848003		1988.58	0.01214222		2518.57	0.08748523		3048.57	0.06874661		3578.6	-0.01179565
398.79	0.29019029		928.79	0.01818073		1458.78	0.04840996		1988.78	0.01048963		2518.77	0.08710906		3048.77	0.06976598		3578.8	-0.01115567
398.99	0.28940811		928.99	0.01812524		1458.98	0.04888457		1988.98	0.00896255		2518.97	0.08619645		3048.97	0.06975169		3579	-0.01146288
399.19	0.2885396		929.19	0.01785374		1459.18	0.04901302		1989.18	0.007918		2519.17	0.0859471		3049.17	0.06976549		3579.2	-0.01143575
399.39	0.28749685		929.39	0.01837285		1459.38	0.0492043		1989.38	0.00815947		2519.37	0.08560281		3049.37	0.07063423		3579.4	-0.01108155
399.59	0.28778465		929.59	0.01835296		1459.58	0.04917725		1989.58	0.00879995		2519.57	0.08544979		3049.57	0.07026386		3579.6	-0.01080233
399.79	0.28721264		929.79	0.01959606		1459.78	0.04914543		1989.78	0.00968482		2519.77	0.08515455		3049.77	0.07006478		3579.8	-0.01080118
399.99	0.2878886		929.99	0.01992859		1459.98	0.04930777		1989.98	0.01081355		2519.97	0.0856215		3049.97	0.06900585		3580	-0.01039887
400.19	0.28744855		930.19	0.02042477		1460.18	0.05070121		1990.18	0.01193088		2520.17	0.08537909		3050.17	0.068047		3580.2	-0.01066225
400.39	0.28722857		930.39	0.02087842		1460.38	0.05048007		1990.38	0.01366084		2520.37	0.08532918		3050.37	0.06773636		3580.4	-0.0116222
400.59	0.28644524		930.59	0.02127486		1460.58	0.04924006		1990.58	0.01527552		2520.57	0.08563363		3050.57	0.06715319		3580.6	-0.0119676
400.79	0.28644594		930.79	0.02133095		1460.78	0.04924504		1990.78	0.01610989		2520.77	0.08574431		3050.77	0.06662688		3580.8	-0.01240585
400.99	0.28646406		930.99	0.0220173		1460.98	0.04944336		1990.98	0.01665156		2520.97	0.08588751		3050.97	0.06614773		3581	-0.01290244
401.19	0.2858562		931.19	0.0215455		1461.18	0.04956554		1991.18	0.0160767		2521.17	0.08624355		3051.17	0.06649212		3581.2	-0.01279109
401.39	0.28540728		931.39	0.02120003		1461.38	0.04911493		1991.38	0.01553604		2521.37	0.08648171		3051.37	0.06626824		3581.4	-0.01339655
401.59	0.28587538		931.59	0.02081452		1461.58	0.04929045		1991.58	0.01584983		2521.57	0.08725268		3051.57	0.06697548		3581.6	-0.0130811
401.79	0.2857649		931.79	0.02035595		1461.78	0.04880504		1991.78	0.01566491		2521.77	0.08720078		3051.77	0.06755074		3581.8	-0.01237688
401.99	0.28588401		931.99	0.01995984		1461.98	0.04742514		1991.98	0.0145677		2521.97	0.08741025		3051.97	0.06828044		3582	-0.01156753
402.19	0.28477014		932.19	0.019726		1462.18	0.04717169		1992.18	0.01387086		2522.17	0.08713871		3052.17	0.069049		3582.2	-0.01058394
402.39	0.28405016		932.39	0.01894736		1462.38	0.04699331		1992.38	0.01269999		2522.37	0.08688322		3052.37	0.069512		3582.4	-0.01076837
402.59	0.28479816		932.59	0.0188564		1462.58	0.04706272		1992.58	0.01173285		2522.57	0.08771087		3052.57	0.07011122		3582.6	-0.0107303
402.79	0.2856156		932.79	0.01895449		1462.78	0.04746714		1992.78	0.01078865		2522.77	0.08750343		3052.77	0.07158357		3582.8	-0.01034029
402.99	0.28624629		932.99	0.01850173		1462.98	0.04758581		1992.98	0.00963892		2522.97	0.08772541		3052.97	0.07221571		3583	-0.0101505
403.19	0.28684074		933.19	0.01908951		1463.18	0.04816041		1993.18	0.00923253		2523.17	0.08798326		3053.17	0.07266277		3583.2	-0.01021248
403.39	0.28807713		933.39	0.02028924		1463.38	0.04807963		1993.38	0.01020667		2523.37	0.08815683		3053.37	0.07342752		3583.4	-0.01015812
403.59	0.28960159		933.59	0.02074148		1463.58	0.048756		1993.58	0.01160138		2523.57	0.08848528		3053.57	0.07320541		3583.6	-0.0092596
403.79	0.29049066		933.79	0.02095288		1463.78	0.04978463		1993.78	0.01202376		2523.77	0.08877102		3053.77	0.07278794		3583.8	-0.00891686
403.99	0.29094521		933.99	0.02128127		1463.98	0.05038374		1993.98	0.01243713		2523.97	0.08888783		3053.97	0.07209355		3584	-0.00879156
404.19	0.29084887		934.19	0.02177956		1464.18	0.05100295		1994.18	0.01324373		2524.17	0.08802134		3054.17	0.07131965		3584.2	-0.010388
404.39	0.29082989		934.39	0.02167073		1464.38	0.04948635		1994.38	0.01372918		2524.37	0.08810556		3054.37	0.07172624		3584.4	-0.01223292
404.59	0.29085153		934.59	0.02127492		1464.58	0.04950965		1994.58	0.01357684		2524.57	0.08827593		3054.57	0.07112194		3584.6	-0.01323663
404.79	0.29071417		934.79	0.02120016		1464.78	0.05051726		1994.78	0.01356615		2524.77	0.08927352		3054.77	0.07034591		3584.8	-0.01322606
404.99	0.29066907		934.99	0.02150853		1464.98	0.05070475		1994.98	0.01352584		2524.97	0.0888547		3054.97	0.0691725		3585	-0.0141015
405.19	0.29012343		935.19	0.02104921		1465.18	0.0505896		1995.18	0.01326335		2525.17	0.08881761		3055.17	0.06841629		3585.2	-0.01406089
405.39	0.29023315		935.39	0.02170804		1465.38	0.05031623		1995.38	0.01298338		2525.37	0.08832681		3055.37	0.06701894		3585.4	-0.01431377
405.59	0.28936719		935.59	0.02182555		1465.58	0.05080056		1995.58	0.013134		2525.57	0.08805089		3055.57	0.06646098		3585.6	-0.01413662
405.79	0.28926145		935.79	0.02223746		1465.78	0.05135934		1995.78	0.01283876		2525.77	0.08804005		3055.77	0.06634708		3585.8	-0.01392162
405.99	0.28902028		935.99	0.02210228		1465.98	0.05113076		1995.98	0.01187883		2525.97	0.08742969		3055.97	0.06640374		3586	-0.01327339
406.19	0.28872443		936.19	0.02120249		1466.18	0.05176931		1996.18	0.0114124		2526.17	0.0868181		3056.17	0.06573893		3586.2	-0.0136186
406.39	0.28942613		936.39	0.02082284		1466.38	0.05201904		1996.38	0.01038914		2526.37	0.08596052		3056.37	0.06560426		3586.4	-0.01397833
406.59	0.2901116		936.59	0.02044021		1466.58	0.05259148		1996.58	0.01017731		2526.57	0.08631512		3056.57	0.0653856		3586.6	-0.01385274
406.79	0.29019897		936.79	0.02006885		1466.78	0.0529426		1996.78	0.01079042		2526.77	0.08546932		3056.77	0.06638008		3586.8	-0.0141296
406.99	0.29072024		936.99	0.02000421		1466.98	0.05245481		1996.98	0.0111902		2526.97	0.08530302		3056.97	0.06692463		3587	-0.01386141
407.19	0.29048208		937.19	0.02026178		1467.18	0.05227897		1997.18	0.01216722		2527.17	0.08477669		3057.17	0.06725491		3587.2	-0.01338221
407.39	0.28994861		937.39	0.02076901		1467.38	0.05226756		1997.38	0.01365127		2527.37	0.08445483		3057.37	0.06786456		3587.4	-0.01253238
407.59	0.2904155		937.59	0.0204873		1467.58	0.05164196		1997.58	0.01468851		2527.57	0.08528716		3057.57	0.06749849		3587.6	-0.01159022
407.79	0.29021374		937.79	0.02002125		1467.78	0.05055739		1997.78	0.01443943		2527.77	0.0855959		3057.77	0.06711598		3587.8	-0.0112034
407.99	0.28954283		937.99	0.02060691		1467.98	0.04971334		1997.98	0.01440558		2527.97	0.08553127		3057.97	0.06786637		3588	-0.011396
408.19	0.2895952		938.19	0.02007329		1468.18	0.04882898		1998.18	0.01440119		2528.17	0.08565377		3058.17	0.06783827		3588.2	-0.01199515
408.39	0.28865573		938.39	0.02012507		1468.38	0.04775508		1998.38	0.01479274		2528.37	0.08644234		3058.37	0.0686746		3588.4	-0.01184187
408.59	0.28787144		938.59	0.02065959		1468.58	0.04747461		1998.58	0.01548926		2528.57	0.08694562		3058.57	0.06928899		3588.6	-0.01098436
408.79	0.28755893		938.79	0.02099108		1468.78	0.04668158		1998.78	0.01574229		2528.77	0.08746057		3058.77	0.06968429		3588.8	-0.01090776
408.99	0.2873077		938.99	0.02140615		1468.98	0.04610088		1998.98	0.01597713		2528.97	0.0875355		3058.97	0.07043049		3589	-0.01139191
409.19	0.28713607		939.19	0.0214615		1469.18	0.04628921		1999.18	0.01609855		2529.17	0.08739623		3059.17	0.07027473		3589.2	-0.01101571
409.39	0.28728779		939.39	0.02229638		1469.38	0.04643016		1999.38	0.01536809		2529.37	0.08687821		3059.37	0.06973513		3589.4	-0.01109243
409.59	0.28624888		939.59	0.0222202		1469.58	0.04621451		1999.58	0.01494071		2529.57	0.08716144		3059.57	0.06941413		3589.6	-0.01104397
409.79	0.28678709		939.79	0.02142143		1469.78	0.04686247		1999.78	0.01370243		2529.77	0.08697371		3059.77	0.0701322		3589.8	-0.00996622
409.99	0.28640054		939.99	0.02136552		1469.98	0.04619649		1999.98	0.01236814		2529.97	0.08578962		3059.97	0.06995212		3590	-0.009705
410.19	0.28721092		940.19	0.021508		1470.18	0.04658986		2000.18	0.01229789		2530.17	0.08503286		3060.17	0.06959093		3590.2	-0.01008594
410.39	0.28795979		940.39	0.02175069		1470.38	0.04695533		2000.38	0.01107011		2530.37	0.08371264		3060.37	0.0698805		3590.4	-0.01031454
410.59	0.28831753		940.59	0.02152931		1470.58	0.04693537		2000.58	0.01115653		2530.57	0.08315186		3060.57	0.06930565		3590.6	-0.01092142
410.79	0.2890567		940.79	0.02051962		1470.78	0.04690232		2000.78	0.0119869		2530.77	0.08261438		3060.77	0.06952126		3590.8	-0.01174822
410.99	0.28937302		940.99	0.0202728		1470.98	0.04675053		2000.98	0.01158541		2530.97	0.08258124		3060.97	0.06959189		3591	-0.01183651
411.19	0.28963786		941.19	0.02026577		1471.18	0.04673699		2001.18	0.01137869		2531.17	0.08302626		3061.17	0.06920584		3591.2	-0.01137802
411.39	0.2897469		941.39	0.01994426		1471.38	0.04709332		2001.38	0.01180841		2531.37	0.08369857		3061.37	0.06859011		3591.4	-0.01184278
411.59	0.29029521		941.59	0.01974849		1471.58	0.04675333		2001.58	0.01165075		2531.57	0.08477785		3061.57	0.06762777		3591.6	-0.01212506
411.79	0.2900976		941.79	0.01978442		1471.78	0.04710313		2001.78	0.01145736		2531.77	0.08516057		3061.77	0.06852026		3591.8	-0.01186272
411.99	0.28992291		941.99	0.02048952		1471.98	0.04703308		2001.98	0.0112223		2531.97	0.08589101		3061.97	0.06850599		3592	-0.01218452
412.19	0.29032098		942.19	0.02100256		1472.18	0.0469851		2002.18	0.01095566		2532.17	0.08766407		3062.17	0.06892905		3592.2	-0.01261028
412.39	0.28942154		942.39	0.02156788		1472.38	0.04636515		2002.38	0.01204505		2532.37	0.08844322		3062.37	0.06932865		3592.4	-0.01236852
412.59	0.28859799		942.59	0.02115588		1472.58	0.04604823		2002.58	0.01226192		2532.57	0.08871781		3062.57	0.06982592		3592.6	-0.01300576
412.79	0.28894902		942.79	0.02138565		1472.78	0.04574124		2002.78	0.01203336		2532.77	0.08878183		3062.77	0.07046145		3592.8	-0.01339137
412.99	0.28914571		942.99	0.02151269		1472.98	0.04657067		2002.98	0.01166293		2532.97	0.08897945		3062.97	0.07104879		3593	-0.01361675
413.19	0.28940321		943.19	0.02109454		1473.18	0.04646045		2003.18	0.01115475		2533.17	0.08806124		3063.17	0.07072991		3593.2	-0.01405105
413.39	0.2883702		943.39	0.02179285		1473.38	0.04562419		2003.38	0.01098606		2533.37	0.0877685		3063.37	0.07069914		3593.4	-0.01361735
413.59	0.28774241		943.59	0.02124642		1473.58	0.04569377		2003.58	0.00974757		2533.57	0.08831157		3063.57	0.07019303		3593.6	-0.01355477
413.79	0.2872086		943.79	0.02119839		1473.78	0.04633175		2003.78	0.0083291		2533.77	0.08754793		3063.77	0.07119271		3593.8	-0.0129663
413.99	0.28650693		943.99	0.0216477		1473.98	0.04588909		2003.98	0.00815842		2533.97	0.08645477		3063.97	0.07123332		3594	-0.01269716
414.19	0.28713479		944.19	0.02194634		1474.18	0.04644478		2004.18	0.00834134		2534.17	0.08529503		3064.17	0.07046608		3594.2	-0.01237666
414.39	0.28598534		944.39	0.02143559		1474.38	0.04651293		2004.38	0.0066788		2534.37	0.08451574		3064.37	0.0707437		3594.4	-0.01203126
414.59	0.28537463		944.59	0.02150334		1474.58	0.0461341		2004.58	0.00616322		2534.57	0.08440383		3064.57	0.07057788		3594.6	-0.01172715
414.79	0.28497756		944.79	0.0209765		1474.78	0.04617043		2004.78	0.0062697		2534.77	0.08486909		3064.77	0.0705907		3594.8	-0.01150609
414.99	0.28498237		944.99	0.02181334		1474.98	0.0461759		2004.98	0.00570535		2534.97	0.08462342		3064.97	0.07099603		3595	-0.01136061
415.19	0.28485155		945.19	0.02192202		1475.18	0.04631121		2005.18	0.00576282		2535.17	0.08578704		3065.17	0.07059615		3595.2	-0.0107342
415.39	0.28368229		945.39	0.02109434		1475.38	0.04649181		2005.38	0.00644492		2535.37	0.0858487		3065.37	0.0708896		3595.4	-0.01142843
415.59	0.28375686		945.59	0.02139858		1475.58	0.04813852		2005.58	0.00674984		2535.57	0.0869857		3065.57	0.07147373		3595.6	-0.01159466
415.79	0.28393077		945.79	0.02207842		1475.78	0.04840605		2005.78	0.00717167		2535.77	0.08836204		3065.77	0.07221815		3595.8	-0.01148367
415.99	0.28468813		945.99	0.02234091		1475.98	0.04837791		2005.98	0.00706231		2535.97	0.08924729		3065.97	0.07164904		3596	-0.01246455
416.19	0.28438476		946.19	0.02207047		1476.18	0.04883717		2006.18	0.00708015		2536.17	0.09074143		3066.17	0.07159945		3596.2	-0.01346287
416.39	0.28463924		946.39	0.02124392		1476.38	0.04923752		2006.38	0.00759878		2536.37	0.09075352		3066.37	0.07099656		3596.4	-0.01403238
416.59	0.28587585		946.59	0.02076209		1476.58	0.0502052		2006.58	0.00759604		2536.57	0.09056296		3066.57	0.07154726		3596.6	-0.01503387
416.79	0.28681853		946.79	0.0210677		1476.78	0.05032071		2006.78	0.00753375		2536.77	0.09017969		3066.77	0.07162713		3596.8	-0.01476157
416.99	0.28791591		946.99	0.02086394		1476.98	0.0504973		2006.98	0.0070311		2536.97	0.09003718		3066.97	0.0702339		3597	-0.01651042
417.19	0.28846178		947.19	0.02087224		1477.18	0.04960027		2007.18	0.00696959		2537.17	0.09014317		3067.17	0.0696662		3597.2	-0.01715825
417.39	0.28860012		947.39	0.02120669		1477.38	0.04971214		2007.38	0.00660604		2537.37	0.09013604		3067.37	0.06959671		3597.4	-0.01713654
417.59	0.28920587		947.59	0.02027311		1477.58	0.05016091		2007.58	0.00594248		2537.57	0.09024965		3067.57	0.06946578		3597.6	-0.01762179
417.79	0.28931287		947.79	0.02015876		1477.78	0.04949166		2007.78	0.00613639		2537.77	0.0888537		3067.77	0.0702758		3597.8	-0.01653162
417.99	0.28897161		947.99	0.01969663		1477.98	0.04916049		2007.98	0.00701763		2537.97	0.08821392		3067.97	0.06990918		3598	-0.01571987
418.19	0.28872848		948.19	0.02032528		1478.18	0.04870948		2008.18	0.00730207		2538.17	0.08766091		3068.17	0.06899957		3598.2	-0.01568154
418.39	0.28842565		948.39	0.01980752		1478.38	0.04811209		2008.38	0.00637964		2538.37	0.08712898		3068.37	0.06899521		3598.4	-0.01473327
418.59	0.28924884		948.59	0.01992532		1478.58	0.0478723		2008.58	0.00741676		2538.57	0.08706993		3068.57	0.06796183		3598.6	-0.01379783
418.79	0.28925689		948.79	0.01992709		1478.78	0.04742354		2008.78	0.00810843		2538.77	0.0871734		3068.77	0.06761957		3598.8	-0.01308353
418.99	0.28953995		948.99	0.01999431		1478.98	0.04705027		2008.98	0.00805003		2538.97	0.08684966		3068.97	0.06777507		3599	-0.01215077
419.19	0.28863813		949.19	0.01913627		1479.18	0.04711767		2009.18	0.00881429		2539.17	0.08687133		3069.17	0.06811903		3599.2	-0.01106941
419.39	0.28839831		949.39	0.01865295		1479.38	0.04660449		2009.38	0.00941967		2539.37	0.0863494		3069.37	0.06887786		3599.4	-0.01140158
419.59	0.28852563		949.59	0.01869155		1479.58	0.04685856		2009.58	0.00951422		2539.57	0.08696454		3069.57	0.06975983		3599.6	-0.01108085
419.79	0.28855707		949.79	0.01852257		1479.78	0.04654043		2009.78	0.00950078		2539.77	0.0870138		3069.77	0.06975078		3599.8	-0.01060102
419.99	0.2889879		949.99	0.01826685		1479.98	0.04736281		2009.98	0.00998323		2539.97	0.08633186		3069.97	0.07011801		3600	-0.01097048
420.19	0.28886644		950.19	0.01728485		1480.18	0.04735141		2010.18	0.00948278		2540.17	0.08691971		3070.17	0.07033986		3600.2	-0.01101742
420.39	0.28977104		950.39	0.01757595		1480.38	0.04780969		2010.38	0.0088125		2540.37	0.0871031		3070.37	0.07097449		3600.4	-0.01110122
420.59	0.29025319		950.59	0.01821723		1480.58	0.04835354		2010.58	0.00879231		2540.57	0.08630517		3070.57	0.07160577		3600.6	-0.01115155
420.79	0.28924972		950.79	0.01862432		1480.78	0.04838027		2010.78	0.00708597		2540.77	0.08621442		3070.77	0.07069108		3600.8	-0.01163026
420.99	0.29022355		950.99	0.01965315		1480.98	0.0480044		2010.98	0.00589183		2540.97	0.08645584		3070.97	0.07071588		3601	-0.01327654
421.19	0.28992272		951.19	0.01989425		1481.18	0.04799615		2011.18	0.00430704		2541.17	0.08719666		3071.17	0.07188267		3601.2	-0.01283594
421.39	0.28920048		951.39	0.02032935		1481.38	0.04728587		2011.38	0.0039871		2541.37	0.08695385		3071.37	0.07219145		3601.4	-0.01386104
421.59	0.28948544		951.59	0.02011229		1481.58	0.04724559		2011.58	0.00328221		2541.57	0.08656745		3071.57	0.07136945		3601.6	-0.01376064
421.79	0.28924629		951.79	0.0202098		1481.78	0.04679311		2011.78	0.00333736		2541.77	0.08596624		3071.77	0.07056696		3601.8	-0.01380599
421.99	0.28869355		951.99	0.02083648		1481.98	0.04644712		2011.98	0.00401748		2541.97	0.08632799		3071.97	0.0692195		3602	-0.01426456
422.19	0.28763437		952.19	0.02126381		1482.18	0.04707926		2012.18	0.00400442		2542.17	0.08567018		3072.17	0.06814149		3602.2	-0.01459875
422.39	0.28767286		952.39	0.02094498		1482.38	0.04740562		2012.38	0.00383417		2542.37	0.08528421		3072.37	0.06806377		3602.4	-0.01404233
422.59	0.28788096		952.59	0.02067062		1482.58	0.04740381		2012.58	0.00442874		2542.57	0.08544922		3072.57	0.06756213		3602.6	-0.01319295
422.79	0.28666397		952.79	0.02042514		1482.78	0.04755085		2012.78	0.00426599		2542.77	0.08469539		3072.77	0.06816628		3602.8	-0.01201845
422.99	0.28637816		952.99	0.02049739		1482.98	0.04784984		2012.98	0.0050256		2542.97	0.08370863		3072.97	0.06898196		3603	-0.0117707
423.19	0.28622196		953.19	0.02003375		1483.18	0.04776675		2013.18	0.00633226		2543.17	0.08346943		3073.17	0.06861807		3603.2	-0.01180048
423.39	0.28665697		953.39	0.0198709		1483.38	0.04764044		2013.38	0.00692117		2543.37	0.08354882		3073.37	0.06876242		3603.4	-0.01241878
423.59	0.28653324		953.59	0.01965794		1483.58	0.0489043		2013.58	0.00767643		2543.57	0.08380217		3073.57	0.06947864		3603.6	-0.01250115
423.79	0.2874967		953.79	0.01948673		1483.78	0.04924964		2013.78	0.00804972		2543.77	0.08361383		3073.77	0.07029458		3603.8	-0.01273539
423.99	0.28727454		953.99	0.01888063		1483.98	0.04991367		2013.98	0.00868864		2543.97	0.08393644		3073.97	0.071024		3604	-0.0125665
424.19	0.28714726		954.19	0.0187669		1484.18	0.05048164		2014.18	0.0079907		2544.17	0.0849179		3074.17	0.07189942		3604.2	-0.01289058
424.39	0.28724654		954.39	0.01888454		1484.38	0.05033933		2014.38	0.00847621		2544.37	0.08509823		3074.37	0.07224248		3604.4	-0.01293135
424.59	0.28752567		954.59	0.0187269		1484.58	0.05036532		2014.58	0.00781394		2544.57	0.08542209		3074.57	0.07267686		3604.6	-0.01251738
424.79	0.28738456		954.79	0.01932618		1484.78	0.05040879		2014.78	0.00701065		2544.77	0.08650252		3074.77	0.07284761		3604.8	-0.01234268
424.99	0.28868267		954.99	0.02055327		1484.98	0.04935194		2014.98	0.00670675		2544.97	0.08700074		3074.97	0.07333968		3605	-0.0119695
425.19	0.2887165		955.19	0.02054071		1485.18	0.04806287		2015.18	0.00606261		2545.17	0.08762929		3075.17	0.07332798		3605.2	-0.0118062
425.39	0.28854252		955.39	0.0203778		1485.38	0.04673053		2015.38	0.00610558		2545.37	0.08714652		3075.37	0.07248652		3605.4	-0.01244788
425.59	0.28875498		955.59	0.020495		1485.58	0.04699975		2015.58	0.00541231		2545.57	0.08705301		3075.57	0.07225472		3605.6	-0.01218738
425.79	0.28804095		955.79	0.02081335		1485.78	0.04666168		2015.78	0.00607107		2545.77	0.08691525		3075.77	0.07139123		3605.8	-0.01268331
425.99	0.28836639		955.99	0.02128983		1485.98	0.04699984		2015.98	0.00551267		2545.97	0.08718268		3075.97	0.07064255		3606	-0.01270191
426.19	0.2876923		956.19	0.02115044		1486.18	0.04741022		2016.18	0.00444186		2546.17	0.08675523		3076.17	0.07017496		3606.2	-0.01314654
426.39	0.28876014		956.39	0.02085813		1486.38	0.04720566		2016.38	0.00385628		2546.37	0.08545387		3076.37	0.07044738		3606.4	-0.01325339
426.59	0.28856398		956.59	0.02042142		1486.58	0.04649464		2016.58	0.00319907		2546.57	0.08486771		3076.57	0.07013706		3606.6	-0.01358378
426.79	0.28765616		956.79	0.02096277		1486.78	0.04612255		2016.78	0.00391765		2546.77	0.08392546		3076.77	0.06967055		3606.8	-0.01495282
426.99	0.28767523		956.99	0.02147267		1486.98	0.04587751		2016.98	0.00368963		2546.97	0.08407468		3076.97	0.06853812		3607	-0.01617881
427.19	0.28812001		957.19	0.02116913		1487.18	0.04595712		2017.18	0.0037555		2547.17	0.08419958		3077.17	0.06724154		3607.2	-0.0164049
427.39	0.28720508		957.39	0.02099231		1487.38	0.04651214		2017.38	0.00329183		2547.37	0.08468044		3077.37	0.06719535		3607.4	-0.01623219
427.59	0.28723795		957.59	0.02016002		1487.58	0.0465828		2017.58	0.00291974		2547.57	0.08487014		3077.57	0.06742751		3607.6	-0.0163288
427.79	0.28732925		957.79	0.01863437		1487.78	0.04563994		2017.78	0.00263052		2547.77	0.08527999		3077.77	0.06792101		3607.8	-0.01671008
427.99	0.28732491		957.99	0.01655783		1487.98	0.04628046		2017.98	0.00295294		2547.97	0.08596345		3077.97	0.06748802		3608	-0.01644997
428.19	0.28703211		958.19	0.01639615		1488.18	0.04676789		2018.18	0.00267769		2548.17	0.08607271		3078.17	0.06775587		3608.2	-0.01649015
428.39	0.28698102		958.39	0.01455085		1488.38	0.04574423		2018.38	0.00362529		2548.37	0.08633263		3078.37	0.06763897		3608.4	-0.01583928
428.59	0.28694381		958.59	0.01497765		1488.58	0.04605548		2018.58	0.00333504		2548.57	0.08751048		3078.57	0.06855423		3608.6	-0.0151342
428.79	0.28704389		958.79	0.01542428		1488.78	0.04601583		2018.78	0.00394372		2548.77	0.0871067		3078.77	0.06900853		3608.8	-0.01410445
428.99	0.28618649		958.99	0.01619854		1488.98	0.04535314		2018.98	0.00430073		2548.97	0.08714241		3078.97	0.06910186		3609	-0.01359978
429.19	0.28552576		959.19	0.01556049		1489.18	0.04527342		2019.18	0.00391086		2549.17	0.08799037		3079.17	0.07005583		3609.2	-0.01347339
429.39	0.28577392		959.39	0.01535657		1489.38	0.04604265		2019.38	0.00370463		2549.37	0.08686211		3079.37	0.07015763		3609.4	-0.01360707
429.59	0.28506099		959.59	0.01586263		1489.58	0.04636442		2019.58	0.00404836		2549.57	0.08704548		3079.57	0.06999152		3609.6	-0.01373863
429.79	0.2850314		959.79	0.01547889		1489.78	0.04681242		2019.78	0.00384585		2549.77	0.08634288		3079.77	0.0685152		3609.8	-0.01355534
429.99	0.28572465		959.99	0.01611061		1489.98	0.04766366		2019.98	0.00300781		2549.97	0.08619437		3079.97	0.06788994		3610	-0.01418474
430.19	0.28596132		960.19	0.01623538		1490.18	0.04744746		2020.18	0.00265159		2550.17	0.08545633		3080.17	0.06745709		3610.2	-0.01448066
430.39	0.28678437		960.39	0.01629525		1490.38	0.0470476		2020.38	0.0031686		2550.37	0.08462959		3080.37	0.06746278		3610.4	-0.01525566
430.59	0.28571926		960.59	0.0173468		1490.58	0.04602299		2020.58	0.00407568		2550.57	0.08419115		3080.57	0.06767176		3610.6	-0.01606274
430.79	0.28631822		960.79	0.01803906		1490.78	0.04628999		2020.78	0.00400962		2550.77	0.08397192		3080.77	0.06741402		3610.8	-0.01685262
430.99	0.28669297		960.99	0.0180405		1490.98	0.04697204		2020.98	0.00329199		2550.97	0.08421306		3080.97	0.06683822		3611	-0.01622296
431.19	0.2878485		961.19	0.01825978		1491.18	0.04717823		2021.18	0.00299289		2551.17	0.08397159		3081.17	0.06705117		3611.2	-0.01533608
431.39	0.2881461		961.39	0.0189687		1491.38	0.0469113		2021.38	0.00276292		2551.37	0.08454982		3081.37	0.0672047		3611.4	-0.01455164
431.59	0.28878799		961.59	0.01888555		1491.58	0.04655446		2021.58	0.00277966		2551.57	0.08453087		3081.57	0.06781751		3611.6	-0.0151408
431.79	0.28918401		961.79	0.01860621		1491.78	0.04711624		2021.78	0.00346282		2551.77	0.08400497		3081.77	0.06833472		3611.8	-0.01545717
431.99	0.28969347		961.99	0.01880814		1491.98	0.04751785		2021.98	0.00433741		2551.97	0.08398795		3081.97	0.06831642		3612	-0.01492447
432.19	0.287841		962.19	0.0198806		1492.18	0.04853574		2022.18	0.00509391		2552.17	0.08396045		3082.17	0.06902146		3612.2	-0.01441043
432.39	0.28768787		962.39	0.02002507		1492.38	0.04836849		2022.38	0.00531231		2552.37	0.08489781		3082.37	0.06952226		3612.4	-0.0133842
432.59	0.28761539		962.59	0.02139916		1492.58	0.04965454		2022.58	0.00403091		2552.57	0.08574158		3082.57	0.06945793		3612.6	-0.01266618
432.79	0.28692369		962.79	0.02112101		1492.78	0.04977676		2022.78	0.00423578		2552.77	0.08567797		3082.77	0.06912427		3612.8	-0.01214034
432.99	0.28572178		962.99	0.02170532		1492.98	0.04950083		2022.98	0.00427595		2552.97	0.08699143		3082.97	0.06908749		3613	-0.0125558
433.19	0.28590409		963.19	0.02112517		1493.18	0.04971117		2023.18	0.00291805		2553.17	0.08666476		3083.17	0.06976678		3613.2	-0.01299243
433.39	0.2862824		963.39	0.02065814		1493.38	0.04910968		2023.38	0.00283532		2553.37	0.08568148		3083.37	0.069771		3613.4	-0.01331386
433.59	0.28476321		963.59	0.01968118		1493.58	0.04835777		2023.58	0.00203027		2553.57	0.08641953		3083.57	0.06978073		3613.6	-0.01317705
433.79	0.28477054		963.79	0.01922549		1493.78	0.04869459		2023.78	0.00157375		2553.77	0.08629162		3083.77	0.06997137		3613.8	-0.01275491
433.99	0.28470108		963.99	0.01821146		1493.98	0.04771158		2023.98	0.00098493		2553.97	0.08650494		3083.97	0.06962831		3614	-0.01342642
434.19	0.28483723		964.19	0.01702516		1494.18	0.04678548		2024.18	0.00028287		2554.17	0.0859491		3084.17	0.06942993		3614.2	-0.01388656
434.39	0.28428055		964.39	0.01655327		1494.38	0.04638733		2024.38	0.00089184		2554.37	0.08555557		3084.37	0.06941		3614.4	-0.01452752
434.59	0.28389499		964.59	0.01670919		1494.58	0.04648894		2024.58	-0.00027954		2554.57	0.08501736		3084.57	0.06940812		3614.6	-0.01550169
434.79	0.28509059		964.79	0.01644002		1494.78	0.04687146		2024.78	-0.00083025		2554.77	0.08448629		3084.77	0.06843355		3614.8	-0.01595185
434.99	0.28542775		964.99	0.01663072		1494.98	0.04644063		2024.98	-0.00058982		2554.97	0.08435017		3084.97	0.06884669		3615	-0.01624796
435.19	0.28600571		965.19	0.01758043		1495.18	0.0469338		2025.18	-0.00046091		2555.17	0.08424596		3085.17	0.0695356		3615.2	-0.01638568
435.39	0.28567394		965.39	0.01799094		1495.38	0.04610126		2025.38	0.00057645		2555.37	0.0841114		3085.37	0.06989386		3615.4	-0.01666334
435.59	0.28472627		965.59	0.01700562		1495.58	0.04628522		2025.58	0.0012161		2555.57	0.08395891		3085.57	0.07037681		3615.6	-0.01650195
435.79	0.28537503		965.79	0.01732664		1495.78	0.04679285		2025.78	0.00164788		2555.77	0.08308268		3085.77	0.07035296		3615.8	-0.01685006
435.99	0.28515525		965.99	0.01739118		1495.98	0.04718294		2025.98	0.00252287		2555.97	0.08275801		3085.97	0.07039773		3616	-0.01680726
436.19	0.28485503		966.19	0.01754499		1496.18	0.04795446		2026.18	0.00237222		2556.17	0.08284509		3086.17	0.07013722		3616.2	-0.01684007
436.39	0.2856378		966.39	0.01734139		1496.38	0.048458		2026.38	0.00168301		2556.37	0.08311789		3086.37	0.06965964		3616.4	-0.01603886
436.59	0.28559941		966.59	0.01728947		1496.58	0.04886493		2026.58	0.00164513		2556.57	0.08260014		3086.57	0.06893278		3616.6	-0.01659507
436.79	0.2856721		966.79	0.0161979		1496.78	0.04806644		2026.78	0.0023502		2556.77	0.08312717		3086.77	0.06849236		3616.8	-0.01637384
436.99	0.28548978		966.99	0.01617594		1496.98	0.04778023		2026.98	0.00235984		2556.97	0.08378207		3086.97	0.0686757		3617	-0.01622401
437.19	0.28651589		967.19	0.01506558		1497.18	0.0481277		2027.18	0.00159401		2557.17	0.08380981		3087.17	0.06860354		3617.2	-0.0157067
437.39	0.28692233		967.39	0.01508825		1497.38	0.04746225		2027.38	0.00180535		2557.37	0.08394918		3087.37	0.06823882		3617.4	-0.01509899
437.59	0.28642951		967.59	0.01486981		1497.58	0.04684001		2027.58	0.00087044		2557.57	0.08520994		3087.57	0.06740517		3617.6	-0.01399716
437.79	0.28619185		967.79	0.01523242		1497.78	0.04689681		2027.78	0.00134949		2557.77	0.08547026		3087.77	0.06666455		3617.8	-0.01370131
437.99	0.28639877		967.99	0.01493704		1497.98	0.0460175		2027.98	0.00068998		2557.97	0.08632852		3087.97	0.06535685		3618	-0.01326372
438.19	0.28691763		968.19	0.01489886		1498.18	0.04648342		2028.18	0.00037976		2558.17	0.08601815		3088.17	0.06550764		3618.2	-0.01325843
438.39	0.28707092		968.39	0.01557789		1498.38	0.0470298		2028.38	0.00084309		2558.37	0.08633497		3088.37	0.06466105		3618.4	-0.01385957
438.59	0.28692876		968.59	0.01527452		1498.58	0.04707918		2028.58	0.00068845		2558.57	0.0867022		3088.57	0.06407524		3618.6	-0.01496332
438.79	0.28695075		968.79	0.01606789		1498.78	0.04712604		2028.78	0.00142737		2558.77	0.08623823		3088.77	0.06426348		3618.8	-0.01502146
438.99	0.28661081		968.99	0.01702772		1498.98	0.04737287		2028.98	0.00198231		2558.97	0.08678941		3088.97	0.06615287		3619	-0.01545537
439.19	0.28701627		969.19	0.0171557		1499.18	0.04830692		2029.18	0.00234258		2559.17	0.0871369		3089.17	0.0669007		3619.2	-0.0159723
439.39	0.28742811		969.39	0.01705377		1499.38	0.04832772		2029.38	0.00324049		2559.37	0.08728994		3089.37	0.06679107		3619.4	-0.01577981
439.59	0.28703696		969.59	0.01742099		1499.58	0.04873676		2029.58	0.00317611		2559.57	0.08734796		3089.57	0.06787685		3619.6	-0.01567187
439.79	0.28682742		969.79	0.01742961		1499.78	0.04858615		2029.78	0.00377049		2559.77	0.08653855		3089.77	0.06817217		3619.8	-0.01686362
439.99	0.28606298		969.99	0.01743398		1499.98	0.04831095		2029.98	0.00412467		2559.97	0.08639843		3089.97	0.06869779		3620	-0.01641033
440.19	0.28617568		970.19	0.01783239		1500.18	0.0482459		2030.18	0.00356105		2560.17	0.08643505		3090.17	0.0694151		3620.2	-0.01701706
440.39	0.28587323		970.39	0.01782524		1500.38	0.04838152		2030.38	0.00356316		2560.37	0.08568144		3090.37	0.06957844		3620.4	-0.01740176
440.59	0.2849188		970.59	0.01745089		1500.58	0.0478886		2030.58	0.0039061		2560.57	0.0849806		3090.57	0.06977298		3620.6	-0.0173058
440.79	0.28525688		970.79	0.01715529		1500.78	0.04764353		2030.78	0.00450292		2560.77	0.08610059		3090.77	0.06915901		3620.8	-0.01698796
440.99	0.28510043		970.99	0.01773546		1500.98	0.04743517		2030.98	0.00493461		2560.97	0.08573681		3090.97	0.0694791		3621	-0.01657882
441.19	0.28551966		971.19	0.01721745		1501.18	0.04696695		2031.18	0.00433771		2561.17	0.08528681		3091.17	0.06877112		3621.2	-0.01533848
441.39	0.28459337		971.39	0.01733202		1501.38	0.04646126		2031.38	0.00381416		2561.37	0.08495087		3091.37	0.06859433		3621.4	-0.01498382
441.59	0.28442587		971.59	0.01732356		1501.58	0.04609687		2031.58	0.00310391		2561.57	0.08523395		3091.57	0.06871108		3621.6	-0.01451211
441.79	0.28463725		971.79	0.017171		1501.78	0.04670949		2031.78	0.00317344		2561.77	0.08535459		3091.77	0.06894962		3621.8	-0.01539433
441.99	0.28456542		971.99	0.01695396		1501.98	0.04748408		2031.98	0.00224687		2561.97	0.08528152		3091.97	0.06849756		3622	-0.01472274
442.19	0.28468752		972.19	0.0164568		1502.18	0.04773151		2032.18	0.00266962		2562.17	0.08528188		3092.17	0.06921264		3622.2	-0.01501173
442.39	0.2847246		972.39	0.01675485		1502.38	0.04846698		2032.38	0.00238093		2562.37	0.08545049		3092.37	0.06853255		3622.4	-0.01580308
442.59	0.28432904		972.59	0.01636462		1502.58	0.04819774		2032.58	0.00204147		2562.57	0.08492232		3092.57	0.06907773		3622.6	-0.01566223
442.79	0.2843787		972.79	0.01715045		1502.78	0.04901651		2032.78	0.0009791		2562.77	0.08443958		3092.77	0.06983657		3622.8	-0.01595833
442.99	0.28476323		972.99	0.01711294		1502.98	0.0501057		2032.98	0.00105897		2562.97	0.08485201		3092.97	0.06989023		3623	-0.01581365
443.19	0.2850856		973.19	0.01653969		1503.18	0.05075013		2033.18	0.00104354		2563.17	0.08501659		3093.17	0.07001361		3623.2	-0.01546389
443.39	0.28448852		973.39	0.0166219		1503.38	0.05148769		2033.38	0.00081272		2563.37	0.0849555		3093.37	0.07008477		3623.4	-0.01562262
443.59	0.28441248		973.59	0.01570664		1503.58	0.05088353		2033.58	0.00048164		2563.57	0.0850752		3093.57	0.07070489		3623.6	-0.01598552
443.79	0.28456298		973.79	0.01492533		1503.78	0.05065331		2033.78	0.00086137		2563.77	0.08485205		3093.77	0.07010005		3623.8	-0.01602327
443.99	0.28489413		973.99	0.01505541		1503.98	0.05077498		2033.98	0.00129051		2563.97	0.08579166		3093.97	0.06998091		3624	-0.0164743
444.19	0.28509663		974.19	0.01563789		1504.18	0.05063603		2034.18	0.00176758		2564.17	0.08606992		3094.17	0.06996796		3624.2	-0.01712368
444.39	0.28447961		974.39	0.01519025		1504.38	0.04972475		2034.38	0.00219611		2564.37	0.08574011		3094.37	0.06884474		3624.4	-0.0170357
444.59	0.28359648		974.59	0.01465963		1504.58	0.04833508		2034.58	0.00262474		2564.57	0.08542661		3094.57	0.06888779		3624.6	-0.01645639
444.79	0.28403231		974.79	0.01429157		1504.78	0.04727696		2034.78	0.00323672		2564.77	0.08567623		3094.77	0.0692395		3624.8	-0.01633228
444.99	0.28321574		974.99	0.01400038		1504.98	0.04649846		2034.98	0.00339841		2564.97	0.08519384		3094.97	0.06926323		3625	-0.01539765
445.19	0.28267668		975.19	0.0139266		1505.18	0.04599667		2035.18	0.00284894		2565.17	0.08504722		3095.17	0.06894685		3625.2	-0.01489041
445.39	0.28294571		975.39	0.01443877		1505.38	0.0461724		2035.38	0.00266614		2565.37	0.0850805		3095.37	0.06842328		3625.4	-0.01498804
445.59	0.2832956		975.59	0.01477229		1505.58	0.04506409		2035.58	0.00271595		2565.57	0.08511422		3095.57	0.06875745		3625.6	-0.01597448
445.79	0.28323101		975.79	0.01568484		1505.78	0.04520583		2035.78	0.00248161		2565.77	0.08562548		3095.77	0.06865947		3625.8	-0.01615379
445.99	0.28303083		975.99	0.01680192		1505.98	0.04458487		2035.98	0.00222384		2565.97	0.08592718		3095.97	0.06848279		3626	-0.01459741
446.19	0.28392326		976.19	0.0166576		1506.18	0.04407002		2036.18	0.00287667		2566.17	0.0867866		3096.17	0.06907401		3626.2	-0.01488159
446.39	0.28417102		976.39	0.01724962		1506.38	0.04441294		2036.38	0.00158761		2566.37	0.08637197		3096.37	0.06872651		3626.4	-0.01499428
446.59	0.28329189		976.59	0.01732254		1506.58	0.04379507		2036.58	0.00107866		2566.57	0.08608625		3096.57	0.06891936		3626.6	-0.01522317
446.79	0.2826231		976.79	0.0170506		1506.78	0.04437422		2036.78	0.00017419		2566.77	0.08549505		3096.77	0.06872696		3626.8	-0.01565387
446.99	0.28230552		976.99	0.01598582		1506.98	0.04428023		2036.98	0.00099978		2566.97	0.08554621		3096.97	0.06884409		3627	-0.01469096
447.19	0.28211744		977.19	0.01632926		1507.18	0.04412157		2037.18	0.00145896		2567.17	0.08545312		3097.17	0.06985673		3627.2	-0.01556123
447.39	0.28247682		977.39	0.0161176		1507.38	0.04436965		2037.38	0.00113519		2567.37	0.08499498		3097.37	0.07024635		3627.4	-0.0167324
447.59	0.28372795		977.59	0.01553979		1507.58	0.04443624		2037.58	0.0016144		2567.57	0.08546008		3097.57	0.07018801		3627.6	-0.01658986
447.79	0.28373918		977.79	0.01623069		1507.78	0.04478827		2037.78	0.00214801		2567.77	0.08521875		3097.77	0.07028591		3627.8	-0.01677776
447.99	0.28394664		977.99	0.01654997		1507.98	0.04478346		2037.98	0.00258017		2567.97	0.08627016		3097.97	0.07070367		3628	-0.01665962
448.19	0.28414986		978.19	0.01685451		1508.18	0.0442274		2038.18	0.0028127		2568.17	0.08586104		3098.17	0.07028183		3628.2	-0.01590686
448.39	0.28408651		978.39	0.01590044		1508.38	0.04380651		2038.38	0.00274747		2568.37	0.08539939		3098.37	0.06985298		3628.4	-0.01570299
448.59	0.2844242		978.59	0.01600043		1508.58	0.0435219		2038.58	0.00299106		2568.57	0.08549525		3098.57	0.07079622		3628.6	-0.01461436
448.79	0.2849228		978.79	0.01569432		1508.78	0.04390474		2038.78	0.00345995		2568.77	0.08587699		3098.77	0.07035687		3628.8	-0.0146707
448.99	0.28468469		978.99	0.01606368		1508.98	0.04479481		2038.98	0.00366533		2568.97	0.08627441		3098.97	0.06947841		3629	-0.01485327
449.19	0.28501593		979.19	0.01654879		1509.18	0.04579337		2039.18	0.00342351		2569.17	0.0859584		3099.17	0.06857221		3629.2	-0.01457628
449.39	0.28607518		979.39	0.01657546		1509.38	0.04627037		2039.38	0.00295338		2569.37	0.08620932		3099.37	0.0676829		3629.4	-0.014621
449.59	0.28653098		979.59	0.01707302		1509.58	0.04606097		2039.58	0.00235252		2569.57	0.08703902		3099.57	0.06812513		3629.6	-0.0155477
449.79	0.28658474		979.79	0.01759071		1509.78	0.04696847		2039.78	0.00207329		2569.77	0.08827809		3099.77	0.06717166		3629.8	-0.01485276
449.99	0.28613143		979.99	0.01704803		1509.98	0.04662358		2039.98	0.00164976		2569.97	0.08868493		3099.97	0.06722887		3630	-0.0149829
450.19	0.28608376		980.19	0.01640313		1510.18	0.04697277		2040.18	0.00097152		2570.17	0.08846162		3100.17	0.06633377		3630.2	-0.01565579
450.39	0.28521508		980.39	0.01595512		1510.38	0.04678196		2040.38	-0.00014171		2570.37	0.08706662		3100.37	0.06665047		3630.4	-0.01533703
450.59	0.28391831		980.59	0.01548091		1510.58	0.04718125		2040.58	0.00013309		2570.57	0.08606244		3100.57	0.06706305		3630.6	-0.01602652
450.79	0.2835482		980.79	0.01514834		1510.78	0.0467544		2040.78	-0.00045498		2570.77	0.08522963		3100.77	0.0667383		3630.8	-0.01632805
450.99	0.28404631		980.99	0.01470478		1510.98	0.0464998		2040.98	0.00013018		2570.97	0.08381555		3100.97	0.06684829		3631	-0.01597925
451.19	0.28372738		981.19	0.01489597		1511.18	0.04653803		2041.18	-0.0000743		2571.17	0.08336759		3101.17	0.06746737		3631.2	-0.01708086
451.39	0.28376247		981.39	0.01527992		1511.38	0.04661777		2041.38	-0.00006146		2571.37	0.08333183		3101.37	0.06729061		3631.4	-0.01718515
451.59	0.28287367		981.59	0.01542796		1511.58	0.04642356		2041.58	0.00034396		2571.57	0.0829145		3101.57	0.06767402		3631.6	-0.01764404
451.79	0.28296252		981.79	0.01599724		1511.78	0.04624581		2041.78	0.00029914		2571.77	0.08217096		3101.77	0.06860321		3631.8	-0.01882585
451.99	0.28341325		981.99	0.01553183		1511.98	0.04574634		2041.98	0.00025756		2571.97	0.08163107		3101.97	0.06875597		3632	-0.01864078
452.19	0.28311973		982.19	0.01537507		1512.18	0.04499645		2042.18	0.00064624		2572.17	0.08104808		3102.17	0.06854648		3632.2	-0.01894169
452.39	0.28292372		982.39	0.01491743		1512.38	0.04409933		2042.38	0.00012909		2572.37	0.08062132		3102.37	0.06956216		3632.4	-0.01927987
452.59	0.28213405		982.59	0.01497452		1512.58	0.04405044		2042.58	0.00007561		2572.57	0.08054449		3102.57	0.06974135		3632.6	-0.01913284
452.79	0.28137844		982.79	0.01496229		1512.78	0.04392293		2042.78	-0.00037466		2572.77	0.08090471		3102.77	0.0695827		3632.8	-0.02027128
452.99	0.28098539		982.99	0.01534095		1512.98	0.04434752		2042.98	-0.00065003		2572.97	0.08104865		3102.97	0.06971356		3633	-0.02029504
453.19	0.28122079		983.19	0.01592608		1513.18	0.04423989		2043.18	-0.00133986		2573.17	0.08112762		3103.17	0.0690451		3633.2	-0.01961355
453.39	0.28165337		983.39	0.01657579		1513.38	0.04373589		2043.38	-0.00227155		2573.37	0.08078891		3103.37	0.0692772		3633.4	-0.01955094
453.59	0.28165113		983.59	0.01760006		1513.58	0.04350728		2043.58	-0.00238886		2573.57	0.08183058		3103.57	0.06920989		3633.6	-0.01952069
453.79	0.28093889		983.79	0.01756758		1513.78	0.04292188		2043.78	-0.00182563		2573.77	0.08251288		3103.77	0.06858579		3633.8	-0.01912659
453.99	0.28134304		983.99	0.01750354		1513.98	0.04268955		2043.98	-0.00242824		2573.97	0.08203268		3103.97	0.06927457		3634	-0.01840478
454.19	0.28150382		984.19	0.01736117		1514.18	0.04272511		2044.18	-0.00235301		2574.17	0.08165962		3104.17	0.06893508		3634.2	-0.01789341
454.39	0.28078818		984.39	0.01762749		1514.38	0.04301632		2044.38	-0.00189273		2574.37	0.08092814		3104.37	0.06964978		3634.4	-0.01763569
454.59	0.28107604		984.59	0.01842585		1514.58	0.04426412		2044.58	-0.0014324		2574.57	0.08089948		3104.57	0.06927217		3634.6	-0.01712069
454.79	0.28178513		984.79	0.0178975		1514.78	0.04456168		2044.78	-0.00147937		2574.77	0.08103809		3104.77	0.06825882		3634.8	-0.01623036
454.99	0.2824984		984.99	0.01831165		1514.98	0.04544329		2044.98	-0.00031563		2574.97	0.08071597		3104.97	0.06803063		3635	-0.01523574
455.19	0.28195951		985.19	0.01846117		1515.18	0.04616402		2045.18	0.00060076		2575.17	0.08191463		3105.17	0.06840316		3635.2	-0.01511471
455.39	0.28193495		985.39	0.01902687		1515.38	0.04729435		2045.38	0.00136526		2575.37	0.0820171		3105.37	0.06810743		3635.4	-0.01506244
455.59	0.2816236		985.59	0.01875687		1515.58	0.04759517		2045.58	0.00181481		2575.57	0.08158698		3105.57	0.06848424		3635.6	-0.01556381
455.79	0.28260611		985.79	0.01837765		1515.78	0.04800919		2045.78	0.00097458		2575.77	0.08158743		3105.77	0.06850273		3635.8	-0.01659688
455.99	0.28245513		985.99	0.01733625		1515.98	0.04802326		2045.98	0.0017142		2575.97	0.08140287		3105.97	0.06846091		3636	-0.01627477
456.19	0.2820939		986.19	0.01744671		1516.18	0.04767468		2046.18	0.00205158		2576.17	0.0824386		3106.17	0.06812353		3636.2	-0.01705787
456.39	0.28142155		986.39	0.01672466		1516.38	0.04726491		2046.38	0.00075053		2576.37	0.08230832		3106.37	0.06850173		3636.4	-0.01698917
456.59	0.28021111		986.59	0.0167885		1516.58	0.04724216		2046.58	0.00008872		2576.57	0.08380297		3106.57	0.06784577		3636.6	-0.01630849
456.79	0.28113546		986.79	0.01650363		1516.78	0.04713378		2046.78	-0.0007862		2576.77	0.08448819		3106.77	0.06824829		3636.8	-0.01641408
456.99	0.28160793		986.99	0.01613695		1516.98	0.04696286		2046.98	-0.00101221		2576.97	0.08490688		3106.97	0.06745306		3637	-0.01554981
457.19	0.28158101		987.19	0.01560461		1517.18	0.04590149		2047.18	-0.00196079		2577.17	0.08503042		3107.17	0.06726679		3637.2	-0.01603125
457.39	0.28124885		987.39	0.01573503		1517.38	0.04550192		2047.38	-0.00289903		2577.37	0.08499431		3107.37	0.06739076		3637.4	-0.01585856
457.59	0.28123259		987.59	0.01638337		1517.58	0.04498787		2047.58	-0.00320513		2577.57	0.08522872		3107.57	0.0678063		3637.6	-0.01579123
457.79	0.28165499		987.79	0.01554138		1517.78	0.04455452		2047.78	-0.00263684		2577.77	0.08492513		3107.77	0.06803668		3637.8	-0.01605282
457.99	0.28147933		987.99	0.01526959		1517.98	0.04457945		2047.98	-0.00374018		2577.97	0.0845222		3107.97	0.06822694		3638	-0.01606552
458.19	0.28040571		988.19	0.01476987		1518.18	0.04462875		2048.18	-0.00329646		2578.17	0.08386286		3108.17	0.06767306		3638.2	-0.01632183
458.39	0.280877		988.39	0.01420743		1518.38	0.04443492		2048.38	-0.00343239		2578.37	0.08322759		3108.37	0.06734334		3638.4	-0.01667822
458.59	0.28123385		988.59	0.01382189		1518.58	0.04408502		2048.58	-0.00247203		2578.57	0.08279184		3108.57	0.06733094		3638.6	-0.01640931
458.79	0.28067628		988.79	0.01403365		1518.78	0.04369341		2048.78	-0.00194704		2578.77	0.08227207		3108.77	0.06709569		3638.8	-0.01648051
458.99	0.28029455		988.99	0.01449512		1518.98	0.04318694		2048.98	-0.00122932		2578.97	0.08213652		3108.97	0.06669661		3639	-0.0166541
459.19	0.28061954		989.19	0.01353482		1519.18	0.04289949		2049.18	-0.00096385		2579.17	0.08171373		3109.17	0.06730515		3639.2	-0.0170806
459.39	0.28055098		989.39	0.01322793		1519.38	0.04321508		2049.38	-0.00051061		2579.37	0.08072173		3109.37	0.06664965		3639.4	-0.01699089
459.59	0.28079958		989.59	0.01342517		1519.58	0.04293004		2049.58	0.00025503		2579.57	0.08133276		3109.57	0.06622159		3639.6	-0.01764841
459.79	0.28130845		989.79	0.01337582		1519.78	0.04300264		2049.78	0.00088953		2579.77	0.08169609		3109.77	0.06584298		3639.8	-0.01828487
459.99	0.28093615		989.99	0.01351669		1519.98	0.04282834		2049.98	0.00214514		2579.97	0.08202822		3109.97	0.06587937		3640	-0.01825674
460.19	0.28077627		990.19	0.01421304		1520.18	0.04263995		2050.18	0.00231634		2580.17	0.08230989		3110.17	0.06566739		3640.2	-0.01800216
460.39	0.28041127		990.39	0.01404828		1520.38	0.0427488		2050.38	0.0020904		2580.37	0.08284187		3110.37	0.06589647		3640.4	-0.01786892
460.59	0.2807867		990.59	0.01314257		1520.58	0.04402836		2050.58	0.00132497		2580.57	0.08311403		3110.57	0.06604312		3640.6	-0.01802738
460.79	0.28183987		990.79	0.01334083		1520.78	0.045279		2050.78	0.0013632		2580.77	0.08314589		3110.77	0.06685837		3640.8	-0.01830006
460.99	0.28138971		990.99	0.01342486		1520.98	0.04559707		2050.98	0.00055998		2580.97	0.08393438		3110.97	0.06645043		3641	-0.01836884
461.19	0.28084242		991.19	0.01395201		1521.18	0.04615672		2051.18	-0.00087208		2581.17	0.08382168		3111.17	0.06683973		3641.2	-0.01959454
461.39	0.28134483		991.39	0.01424411		1521.38	0.04708539		2051.38	-0.00163762		2581.37	0.08381732		3111.37	0.06705743		3641.4	-0.01916001
461.59	0.28114173		991.59	0.01347255		1521.58	0.04759842		2051.58	-0.00197066		2581.57	0.08354164		3111.57	0.06814619		3641.6	-0.02002382
461.79	0.28195031		991.79	0.01299006		1521.78	0.04761696		2051.78	-0.00228506		2581.77	0.08389811		3111.77	0.06735488		3641.8	-0.02029909
461.99	0.28116894		991.99	0.01301154		1521.98	0.0473202		2051.98	-0.00399192		2581.97	0.0843306		3111.97	0.06689731		3642	-0.01947596
462.19	0.2812836		992.19	0.01318804		1522.18	0.04733696		2052.18	-0.00376882		2582.17	0.08393395		3112.17	0.06600719		3642.2	-0.01948207
462.39	0.28189339		992.39	0.01255766		1522.38	0.04652039		2052.38	-0.00361037		2582.37	0.08237483		3112.37	0.06632524		3642.4	-0.02034044
462.59	0.28153104		992.59	0.01375398		1522.58	0.0453363		2052.58	-0.00314238		2582.57	0.08151098		3112.57	0.06632815		3642.6	-0.01931833
462.79	0.28074802		992.79	0.01377986		1522.78	0.04542536		2052.78	-0.00274106		2582.77	0.0812674		3112.77	0.06653649		3642.8	-0.01924846
462.99	0.28068194		992.99	0.01305442		1522.98	0.0453607		2052.98	-0.00222171		2582.97	0.08040638		3112.97	0.067145		3643	-0.01921029
463.19	0.28041038		993.19	0.01249602		1523.18	0.04574704		2053.18	-0.00240452		2583.17	0.08016207		3113.17	0.06779141		3643.2	-0.01911259
463.39	0.28021361		993.39	0.01282993		1523.38	0.04697483		2053.38	-0.00110592		2583.37	0.07985604		3113.37	0.06792269		3643.4	-0.01808575
463.59	0.28026874		993.59	0.01321623		1523.58	0.04684272		2053.58	0.00032028		2583.57	0.07996722		3113.57	0.06887475		3643.6	-0.01725306
463.79	0.2810741		993.79	0.01333306		1523.78	0.04678162		2053.78	0.00130045		2583.77	0.07990916		3113.77	0.06879217		3643.8	-0.01680626
463.99	0.28116264		993.99	0.01284603		1523.98	0.04628267		2053.98	0.00204181		2583.97	0.07980686		3113.97	0.06885703		3644	-0.01639491
464.19	0.28166265		994.19	0.01300647		1524.18	0.04582155		2054.18	0.00193124		2584.17	0.07985854		3114.17	0.06863285		3644.2	-0.01596444
464.39	0.2821178		994.39	0.01249827		1524.38	0.04611054		2054.38	0.00194313		2584.37	0.08112594		3114.37	0.06830271		3644.4	-0.01688635
464.59	0.28254415		994.59	0.01171236		1524.58	0.04659312		2054.58	0.00083354		2584.57	0.08146961		3114.57	0.06846944		3644.6	-0.01671867
464.79	0.28218043		994.79	0.01201858		1524.78	0.04555398		2054.78	-0.00023974		2584.77	0.08240901		3114.77	0.0685095		3644.8	-0.0166297
464.99	0.28209079		994.99	0.01154587		1524.98	0.0454478		2054.98	-0.00175026		2584.97	0.08307028		3114.97	0.06823579		3645	-0.0170887
465.19	0.28244479		995.19	0.01194684		1525.18	0.0452369		2055.18	-0.00235923		2585.17	0.08349034		3115.17	0.06843771		3645.2	-0.01765522
465.39	0.2824043		995.39	0.01159749		1525.38	0.04457904		2055.38	-0.00151249		2585.37	0.08388675		3115.37	0.06821071		3645.4	-0.01765068
465.59	0.28242235		995.59	0.0117927		1525.58	0.04361282		2055.58	-0.00194056		2585.57	0.084434		3115.57	0.06812736		3645.6	-0.01839483
465.79	0.28348552		995.79	0.0128053		1525.78	0.04268673		2055.78	-0.00200873		2585.77	0.08452207		3115.77	0.06749515		3645.8	-0.01799182
465.99	0.28294057		995.99	0.01317761		1525.98	0.04163175		2055.98	-0.00257506		2585.97	0.08441539		3115.97	0.06770596		3646	-0.01888296
466.19	0.28300006		996.19	0.01388643		1526.18	0.04065718		2056.18	-0.00237579		2586.17	0.08314487		3116.17	0.0670595		3646.2	-0.01975564
466.39	0.28311388		996.39	0.013627		1526.38	0.03955876		2056.38	-0.0022193		2586.37	0.08208135		3116.37	0.06755725		3646.4	-0.02073681
466.59	0.28325351		996.59	0.01426988		1526.58	0.03943594		2056.58	-0.00286474		2586.57	0.08255873		3116.57	0.06727691		3646.6	-0.0207103
466.79	0.28275201		996.79	0.01344587		1526.78	0.03948252		2056.78	-0.00254339		2586.77	0.08253776		3116.77	0.06841365		3646.8	-0.02100935
466.99	0.28201048		996.99	0.01371525		1526.98	0.04021171		2056.98	-0.00212115		2586.97	0.08160636		3116.97	0.06926528		3647	-0.02069203
467.19	0.28233462		997.19	0.01339263		1527.18	0.04169771		2057.18	-0.0023609		2587.17	0.08140331		3117.17	0.06883915		3647.2	-0.020811
467.39	0.2823439		997.39	0.01330339		1527.38	0.04192707		2057.38	-0.00127945		2587.37	0.08124702		3117.37	0.06910577		3647.4	-0.01999901
467.59	0.28266284		997.59	0.01325042		1527.58	0.04252038		2057.58	-0.00062851		2587.57	0.08107637		3117.57	0.06846676		3647.6	-0.0202339
467.79	0.28356553		997.79	0.01259481		1527.78	0.04236309		2057.78	-0.00043857		2587.77	0.0814895		3117.77	0.06704888		3647.8	-0.01985513
467.99	0.28379008		997.99	0.01215248		1527.98	0.04284207		2057.98	-0.00034775		2587.97	0.0820803		3117.97	0.0664523		3648	-0.01933935
468.19	0.28315556		998.19	0.01202738		1528.18	0.04306254		2058.18	-0.00041777		2588.17	0.08249335		3118.17	0.06612622		3648.2	-0.01901847
468.39	0.28326775		998.39	0.01114046		1528.38	0.04427741		2058.38	0.00029995		2588.37	0.08434267		3118.37	0.06546284		3648.4	-0.019738
468.59	0.28307577		998.59	0.00983291		1528.58	0.0444894		2058.58	0.00015672		2588.57	0.08504157		3118.57	0.06563948		3648.6	-0.01920936
468.79	0.28240465		998.79	0.00942851		1528.78	0.04476125		2058.78	-0.00073613		2588.77	0.08549796		3118.77	0.06562554		3648.8	-0.01881995
468.99	0.28262521		998.99	0.00896652		1528.98	0.0458124		2058.98	-0.00058746		2588.97	0.0859131		3118.97	0.06613701		3649	-0.01899993
469.19	0.28255571		999.19	0.00922497		1529.18	0.0452093		2059.18	-0.00055866		2589.17	0.08613377		3119.17	0.06568086		3649.2	-0.01901573
469.39	0.2814091		999.39	0.00908204		1529.38	0.04498715		2059.38	0.00024503		2589.37	0.08577267		3119.37	0.06555968		3649.4	-0.01894358
469.59	0.28172434		999.59	0.00943167		1529.58	0.044704		2059.58	-0.00052024		2589.57	0.08589373		3119.57	0.06617529		3649.6	-0.01907722
469.79	0.28187756		999.79	0.00914434		1529.78	0.0447929		2059.78	0.00011545		2589.77	0.0849725		3119.77	0.06659427		3649.8	-0.01953176
469.99	0.28114042		999.99	0.00939344		1529.98	0.044423		2059.98	-0.00036053		2589.97	0.08451686		3119.97	0.06698018		3650	-0.02035786
470.19	0.28125407		1000.19	0.00976326		1530.18	0.04312284		2060.18	-0.00079527		2590.17	0.08371457		3120.17	0.06648041		3650.2	-0.01936687
470.39	0.28148958		1000.39	0.01037741		1530.38	0.04206043		2060.38	-0.00068292		2590.37	0.08367131		3120.37	0.06689941		3650.4	-0.01930173
470.59	0.28229563		1000.59	0.01050238		1530.58	0.04216864		2060.58	-0.00137198		2590.57	0.08374305		3120.57	0.06661877		3650.6	-0.01835137
470.79	0.28252072		1000.79	0.01043921		1530.78	0.04222215		2060.78	-0.00225146		2590.77	0.08294223		3120.77	0.06680808		3650.8	-0.01802542
470.99	0.28161328		1000.99	0.01096994		1530.98	0.0432739		2060.98	-0.00291839		2590.97	0.08198111		3120.97	0.06635811		3651	-0.01773067
471.19	0.28228507		1001.19	0.01123741		1531.18	0.04311918		2061.18	-0.00435302		2591.17	0.0809239		3121.17	0.06521171		3651.2	-0.0181902
471.39	0.28138733		1001.39	0.01159137		1531.38	0.04257842		2061.38	-0.00503856		2591.37	0.08075657		3121.37	0.06507346		3651.4	-0.01837687
471.59	0.28245441		1001.59	0.01234537		1531.58	0.04299025		2061.58	-0.0062175		2591.57	0.07978465		3121.57	0.06497352		3651.6	-0.01819169
471.79	0.28286131		1001.79	0.01224189		1531.78	0.04175843		2061.78	-0.00631986		2591.77	0.07949683		3121.77	0.06468671		3651.8	-0.01734544
471.99	0.28278028		1001.99	0.01269361		1531.98	0.04270555		2061.98	-0.00557202		2591.97	0.0802054		3121.97	0.06449163		3652	-0.01778104
472.19	0.28200038		1002.19	0.01291485		1532.18	0.04275795		2062.18	-0.00454667		2592.17	0.080237		3122.17	0.06436363		3652.2	-0.01840103
472.39	0.28234686		1002.39	0.01275081		1532.38	0.04288297		2062.38	-0.00405547		2592.37	0.08164159		3122.37	0.06400842		3652.4	-0.01910887
472.59	0.28127766		1002.59	0.0125599		1532.58	0.04298012		2062.58	-0.00392771		2592.57	0.08217567		3122.57	0.06452916		3652.6	-0.01847211
472.79	0.28027068		1002.79	0.01337051		1532.78	0.04276616		2062.78	-0.00406		2592.77	0.08230192		3122.77	0.06406967		3652.8	-0.01832666
472.99	0.28029528		1002.99	0.01256062		1532.98	0.04256435		2062.98	-0.00377669		2592.97	0.08187416		3122.97	0.0643497		3653	-0.01926905
473.19	0.2795988		1003.19	0.0128965		1533.18	0.04213957		2063.18	-0.00302164		2593.17	0.08234898		3123.17	0.06432135		3653.2	-0.01996068
473.39	0.27855683		1003.39	0.01324168		1533.38	0.04313847		2063.38	-0.00240107		2593.37	0.08176818		3123.37	0.06456719		3653.4	-0.01987832
473.59	0.27845517		1003.59	0.0136694		1533.58	0.04311581		2063.58	-0.00243873		2593.57	0.0814356		3123.57	0.06492711		3653.6	-0.01989215
473.79	0.27888099		1003.79	0.01299463		1533.78	0.04314127		2063.78	-0.00146809		2593.77	0.08067498		3123.77	0.0650604		3653.8	-0.02065823
473.99	0.27878536		1003.99	0.01345359		1533.98	0.04396967		2063.98	-0.00157757		2593.97	0.08058221		3123.97	0.06566668		3654	-0.02040587
474.19	0.27940613		1004.19	0.01369447		1534.18	0.04305131		2064.18	-0.00195871		2594.17	0.0803079		3124.17	0.06577905		3654.2	-0.01942055
474.39	0.2800921		1004.39	0.01359132		1534.38	0.04296034		2064.38	-0.00215375		2594.37	0.08110473		3124.37	0.06707666		3654.4	-0.0194091
474.59	0.28042879		1004.59	0.01308719		1534.58	0.04344242		2064.58	-0.0030675		2594.57	0.08031329		3124.57	0.06769372		3654.6	-0.02046734
474.79	0.28039009		1004.79	0.01323676		1534.78	0.04412768		2064.78	-0.00374824		2594.77	0.08006596		3124.77	0.06746023		3654.8	-0.02048016
474.99	0.28024265		1004.99	0.01284845		1534.98	0.04426518		2064.98	-0.00430072		2594.97	0.07981105		3124.97	0.06821925		3655	-0.0199386
475.19	0.28077388		1005.19	0.01248167		1535.18	0.04390079		2065.18	-0.00474815		2595.17	0.07884357		3125.17	0.06921633		3655.2	-0.02005671
475.39	0.28094031		1005.39	0.01209598		1535.38	0.04388204		2065.38	-0.00511706		2595.37	0.0790154		3125.37	0.06969267		3655.4	-0.02021297
475.59	0.28227467		1005.59	0.01245599		1535.58	0.04394546		2065.58	-0.00556162		2595.57	0.07875476		3125.57	0.06967904		3655.6	-0.01975294
475.79	0.28304013		1005.79	0.01175456		1535.78	0.04427326		2065.78	-0.00438217		2595.77	0.07862064		3125.77	0.06909599		3655.8	-0.02004388
475.99	0.28273649		1005.99	0.0121725		1535.98	0.04446717		2065.98	-0.00376569		2595.97	0.07937866		3125.97	0.0687596		3656	-0.02028277
476.19	0.28265143		1006.19	0.01229634		1536.18	0.04473783		2066.18	-0.00352724		2596.17	0.07901351		3126.17	0.06918144		3656.2	-0.01988676
476.39	0.28233441		1006.39	0.01222714		1536.38	0.04436018		2066.38	-0.00316916		2596.37	0.07886509		3126.37	0.06912206		3656.4	-0.01986484
476.59	0.28188158		1006.59	0.01178424		1536.58	0.04442751		2066.58	-0.00273334		2596.57	0.07973229		3126.57	0.06874904		3656.6	-0.01985569
476.79	0.28250889		1006.79	0.01196888		1536.78	0.04375552		2066.78	-0.00267788		2596.77	0.07971137		3126.77	0.06805561		3656.8	-0.01967896
476.99	0.28208983		1006.99	0.01128196		1536.98	0.04372063		2066.98	-0.00248281		2596.97	0.07997988		3126.97	0.06762401		3657	-0.0202174
477.19	0.28154032		1007.19	0.012279		1537.18	0.04393418		2067.18	-0.00219503		2597.17	0.08032118		3127.17	0.06674358		3657.2	-0.01960103
477.39	0.2809958		1007.39	0.0125935		1537.38	0.04408637		2067.38	-0.00281438		2597.37	0.0800104		3127.37	0.06589283		3657.4	-0.01866472
477.59	0.28064496		1007.59	0.01272697		1537.58	0.04326027		2067.58	-0.00353326		2597.57	0.07960231		3127.57	0.06559086		3657.6	-0.01838848
477.79	0.28116607		1007.79	0.01232154		1537.78	0.04312166		2067.78	-0.00346816		2597.77	0.07928288		3127.77	0.06508161		3657.8	-0.01846858
477.99	0.28097002		1007.99	0.01328013		1537.98	0.04341026		2067.98	-0.00386543		2597.97	0.0799237		3127.97	0.06541412		3658	-0.01890051
478.19	0.28056705		1008.19	0.01267524		1538.18	0.04201865		2068.18	-0.00426282		2598.17	0.07948707		3128.17	0.06580848		3658.2	-0.01827846
478.39	0.27953682		1008.39	0.012478		1538.38	0.04185753		2068.38	-0.00413493		2598.37	0.07962357		3128.37	0.0664789		3658.4	-0.0190519
478.59	0.27868855		1008.59	0.01254101		1538.58	0.04229765		2068.58	-0.00339641		2598.57	0.07928448		3128.57	0.06598779		3658.6	-0.01918423
478.79	0.27813549		1008.79	0.01238287		1538.78	0.04305857		2068.78	-0.00262502		2598.77	0.08045904		3128.77	0.06586766		3658.8	-0.01853737
478.99	0.27748333		1008.99	0.01145735		1538.98	0.04278578		2068.98	-0.00352494		2598.97	0.07911266		3128.97	0.06640984		3659	-0.01816821
479.19	0.27695324		1009.19	0.0112263		1539.18	0.04286941		2069.18	-0.00355214		2599.17	0.07826785		3129.17	0.06562625		3659.2	-0.01817288
479.39	0.27677853		1009.39	0.01143455		1539.38	0.04370066		2069.38	-0.00323213		2599.37	0.07856912		3129.37	0.06468108		3659.4	-0.01834457
479.59	0.2771192		1009.59	0.01200967		1539.58	0.04399232		2069.58	-0.00364498		2599.57	0.07787908		3129.57	0.06474443		3659.6	-0.01849433
479.79	0.27737101		1009.79	0.01199785		1539.78	0.04422805		2069.78	-0.00312682		2599.77	0.07789087		3129.77	0.06483296		3659.8	-0.01865407
479.99	0.27732419		1009.99	0.01244115		1539.98	0.0446379		2069.98	-0.00324915		2599.97	0.07780427		3129.97	0.06427827		3660	-0.01867205
480.19	0.27797819		1010.19	0.01225581		1540.18	0.04515279		2070.18	-0.00307503		2600.17	0.07794086		3130.17	0.06456924		3660.2	-0.01945224
480.39	0.27843022		1010.39	0.01187909		1540.38	0.04491858		2070.38	-0.00301313		2600.37	0.07788517		3130.37	0.06336752		3660.4	-0.01977819
480.59	0.27889979		1010.59	0.01123879		1540.58	0.0452805		2070.58	-0.00275126		2600.57	0.07936737		3130.57	0.06237873		3660.6	-0.01998932
480.79	0.27933332		1010.79	0.01177162		1540.78	0.04533398		2070.78	-0.00255568		2600.77	0.07939935		3130.77	0.06172506		3660.8	-0.01923876
480.99	0.27924854		1010.99	0.01217045		1540.98	0.04615868		2070.98	-0.00291396		2600.97	0.07942106		3130.97	0.0611505		3661	-0.01967208
481.19	0.28058548		1011.19	0.01234315		1541.18	0.04565111		2071.18	-0.00245316		2601.17	0.07999041		3131.17	0.06039158		3661.2	-0.01947592
481.39	0.28101004		1011.39	0.01270614		1541.38	0.04497166		2071.38	-0.0024387		2601.37	0.08024889		3131.37	0.06046716		3661.4	-0.0199362
481.59	0.28198584		1011.59	0.01258563		1541.58	0.04457748		2071.58	-0.00345443		2601.57	0.07993811		3131.57	0.06016692		3661.6	-0.01988287
481.79	0.28256771		1011.79	0.01194689		1541.78	0.04394927		2071.78	-0.00340799		2601.77	0.08066271		3131.77	0.06048863		3661.8	-0.02003716
481.99	0.28266704		1011.99	0.01269097		1541.98	0.04352579		2071.98	-0.00388768		2601.97	0.08138412		3131.97	0.06147889		3662	-0.01972473
482.19	0.28242704		1012.19	0.01211252		1542.18	0.04356		2072.18	-0.00463431		2602.17	0.08146196		3132.17	0.06210452		3662.2	-0.01878303
482.39	0.28103917		1012.39	0.01253249		1542.38	0.0442161		2072.38	-0.00420232		2602.37	0.08294657		3132.37	0.06242177		3662.4	-0.01937904
482.59	0.28055704		1012.59	0.01187348		1542.58	0.04453905		2072.58	-0.0036813		2602.57	0.08326		3132.57	0.06196496		3662.6	-0.01862741
482.79	0.27948293		1012.79	0.01158818		1542.78	0.04385725		2072.78	-0.00373325		2602.77	0.0826347		3132.77	0.06294253		3662.8	-0.01899042
482.99	0.2783507		1012.99	0.01131403		1542.98	0.04322741		2072.98	-0.00426105		2602.97	0.08117857		3132.97	0.06380474		3663	-0.01898538
483.19	0.27811913		1013.19	0.01189619		1543.18	0.0436431		2073.18	-0.00413625		2603.17	0.08014179		3133.17	0.06432991		3663.2	-0.01912027
483.39	0.27788569		1013.39	0.01279112		1543.38	0.04404871		2073.38	-0.00393832		2603.37	0.07965344		3133.37	0.06492497		3663.4	-0.01865723
483.59	0.27807325		1013.59	0.01373394		1543.58	0.04317024		2073.58	-0.00437502		2603.57	0.07888246		3133.57	0.06522164		3663.6	-0.01941596
483.79	0.27823771		1013.79	0.01391681		1543.78	0.043415		2073.78	-0.00438124		2603.77	0.07909436		3133.77	0.06539361		3663.8	-0.01989236
483.99	0.27857516		1013.99	0.01357073		1543.98	0.0438634		2073.98	-0.00449147		2603.97	0.07927256		3133.97	0.06531537		3664	-0.02057816
484.19	0.27830789		1014.19	0.01353003		1544.18	0.04363916		2074.18	-0.00429439		2604.17	0.07927448		3134.17	0.06566109		3664.2	-0.02185208
484.39	0.27835174		1014.39	0.01316027		1544.38	0.04350164		2074.38	-0.0043779		2604.37	0.07878647		3134.37	0.06424865		3664.4	-0.02208044
484.59	0.2787576		1014.59	0.01376074		1544.58	0.04414257		2074.58	-0.00408693		2604.57	0.07889135		3134.57	0.0642429		3664.6	-0.02239909
484.79	0.27911923		1014.79	0.01495423		1544.78	0.04389054		2074.78	-0.0038363		2604.77	0.07887305		3134.77	0.06401286		3664.8	-0.02285748
484.99	0.27948223		1014.99	0.01525507		1544.98	0.04396524		2074.98	-0.00396447		2604.97	0.07877722		3134.97	0.06381983		3665	-0.02349446
485.19	0.28127724		1015.19	0.0154864		1545.18	0.04221721		2075.18	-0.00365569		2605.17	0.07922238		3135.17	0.06409005		3665.2	-0.02296215
485.39	0.28132185		1015.39	0.01603719		1545.38	0.04235611		2075.38	-0.00461344		2605.37	0.07976308		3135.37	0.06440681		3665.4	-0.0233995
485.59	0.28193173		1015.59	0.01562804		1545.58	0.04362611		2075.58	-0.00543516		2605.57	0.07975634		3135.57	0.0647937		3665.6	-0.0228386
485.79	0.28200167		1015.79	0.01610138		1545.78	0.04316863		2075.78	-0.0051204		2605.77	0.08017767		3135.77	0.06528633		3665.8	-0.02253475
485.99	0.28186299		1015.99	0.01658571		1545.98	0.04327374		2075.98	-0.00526673		2605.97	0.08030767		3135.97	0.06564333		3666	-0.02164024
486.19	0.28130619		1016.19	0.01577922		1546.18	0.04351645		2076.18	-0.00598101		2606.17	0.08080901		3136.17	0.0657216		3666.2	-0.02176598
486.39	0.28080088		1016.39	0.01452546		1546.38	0.04311052		2076.38	-0.00547795		2606.37	0.08042297		3136.37	0.06548266		3666.4	-0.0221441
486.59	0.28084304		1016.59	0.01421211		1546.58	0.04241651		2076.58	-0.00566139		2606.57	0.07941157		3136.57	0.0654061		3666.6	-0.0210493
486.79	0.28066776		1016.79	0.01423341		1546.78	0.04164644		2076.78	-0.00572652		2606.77	0.07902813		3136.77	0.06741213		3666.8	-0.0215491
486.99	0.27990858		1016.99	0.01352487		1546.98	0.04163029		2076.98	-0.00605565		2606.97	0.07838774		3136.97	0.068143		3667	-0.02236419
487.19	0.28026045		1017.19	0.01377035		1547.18	0.04240199		2077.18	-0.00590441		2607.17	0.07735183		3137.17	0.06799916		3667.2	-0.02110282
487.39	0.27999329		1017.39	0.01347234		1547.38	0.04182021		2077.38	-0.00578949		2607.37	0.07698803		3137.37	0.06750851		3667.4	-0.02127934
487.59	0.27986035		1017.59	0.01246501		1547.58	0.04185245		2077.58	-0.00586319		2607.57	0.07815306		3137.57	0.067842		3667.6	-0.02140056
487.79	0.27967552		1017.79	0.01126298		1547.78	0.04229903		2077.78	-0.00521363		2607.77	0.07851394		3137.77	0.06828706		3667.8	-0.02056277
487.99	0.27936197		1017.99	0.01111541		1547.98	0.04251641		2077.98	-0.00427184		2607.97	0.07833916		3137.97	0.0680287		3668	-0.02047393
488.19	0.27874524		1018.19	0.01130576		1548.18	0.04286874		2078.18	-0.00422268		2608.17	0.07736235		3138.17	0.0673332		3668.2	-0.0203848
488.39	0.27825541		1018.39	0.01065897		1548.38	0.04286067		2078.38	-0.0039523		2608.37	0.07740846		3138.37	0.06619542		3668.4	-0.02024692
488.59	0.27807313		1018.59	0.01108848		1548.58	0.04364503		2078.58	-0.00349784		2608.57	0.07698922		3138.57	0.06615704		3668.6	-0.01954447
488.79	0.27793185		1018.79	0.01174962		1548.78	0.04331934		2078.78	-0.00353668		2608.77	0.07735118		3138.77	0.06556641		3668.8	-0.01948671
488.99	0.27822042		1018.99	0.01162058		1548.98	0.04345329		2078.98	-0.00332459		2608.97	0.0771256		3138.97	0.06568066		3669	-0.0184805
489.19	0.27876735		1019.19	0.01142898		1549.18	0.04294072		2079.18	-0.00325967		2609.17	0.07783678		3139.17	0.06569864		3669.2	-0.01820346
489.39	0.27758737		1019.39	0.01193875		1549.38	0.0438636		2079.38	-0.00305562		2609.37	0.07845694		3139.37	0.06491098		3669.4	-0.01832366
489.59	0.27790808		1019.59	0.01245266		1549.58	0.04449083		2079.58	-0.00242422		2609.57	0.07788925		3139.57	0.0653568		3669.6	-0.01798535
489.79	0.27792724		1019.79	0.01220895		1549.78	0.04342579		2079.78	-0.00211922		2609.77	0.07855305		3139.77	0.06463822		3669.8	-0.01843938
489.99	0.27737512		1019.99	0.01170976		1549.98	0.04349327		2079.98	-0.00291801		2609.97	0.07846991		3139.97	0.06472873		3670	-0.0181562
490.19	0.27833946		1020.19	0.01151466		1550.18	0.04243573		2080.18	-0.0038769		2610.17	0.07962927		3140.17	0.06458752		3670.2	-0.01859674
490.39	0.27862696		1020.39	0.01157096		1550.38	0.04250405		2080.38	-0.00436501		2610.37	0.0793975		3140.37	0.06551532		3670.4	-0.0189752
490.59	0.27895962		1020.59	0.01267295		1550.58	0.04211171		2080.58	-0.00399185		2610.57	0.07986015		3140.57	0.06626355		3670.6	-0.01935738
490.79	0.2796484		1020.79	0.01248179		1550.78	0.04170706		2080.78	-0.00321187		2610.77	0.08031355		3140.77	0.06738899		3670.8	-0.01989083
490.99	0.27983617		1020.99	0.01232519		1550.98	0.04130336		2080.98	-0.00332546		2610.97	0.08028231		3140.97	0.06782726		3671	-0.02008997
491.19	0.2801909		1021.19	0.01200165		1551.18	0.04116618		2081.18	-0.00348161		2611.17	0.08033077		3141.17	0.06841886		3671.2	-0.01909982
491.39	0.28056274		1021.39	0.01062596		1551.38	0.03996029		2081.38	-0.00358253		2611.37	0.08023957		3141.37	0.068271		3671.4	-0.01954038
491.59	0.28056831		1021.59	0.01018135		1551.58	0.04038781		2081.58	-0.00338654		2611.57	0.08117359		3141.57	0.06794661		3671.6	-0.01967388
491.79	0.28002299		1021.79	0.01073509		1551.78	0.04042109		2081.78	-0.00285612		2611.77	0.07971772		3141.77	0.06771139		3671.8	-0.02031818
491.99	0.27992272		1021.99	0.01142607		1551.98	0.04052783		2081.98	-0.0028897		2611.97	0.07924231		3141.97	0.06750911		3672	-0.02046484
492.19	0.27930822		1022.19	0.01122211		1552.18	0.04095595		2082.18	-0.00302229		2612.17	0.07891838		3142.17	0.06710368		3672.2	-0.02101549
492.39	0.278991		1022.39	0.01107401		1552.38	0.04078729		2082.38	-0.00348311		2612.37	0.07848079		3142.37	0.06634516		3672.4	-0.02206036
492.59	0.27854973		1022.59	0.01140582		1552.58	0.04092468		2082.58	-0.00384736		2612.57	0.07805847		3142.57	0.06611764		3672.6	-0.02182454
492.79	0.27891134		1022.79	0.01151146		1552.78	0.04117346		2082.78	-0.00469196		2612.77	0.07759258		3142.77	0.06619477		3672.8	-0.02149104
492.99	0.27793358		1022.99	0.01042645		1552.98	0.04129225		2082.98	-0.00496658		2612.97	0.07730533		3142.97	0.06604746		3673	-0.02143473
493.19	0.27741639		1023.19	0.00892795		1553.18	0.04192596		2083.18	-0.00539213		2613.17	0.07755218		3143.17	0.06607135		3673.2	-0.02195166
493.39	0.2764583		1023.39	0.00916361		1553.38	0.04287262		2083.38	-0.00581311		2613.37	0.07722121		3143.37	0.0660817		3673.4	-0.02148352
493.59	0.2762757		1023.59	0.0086978		1553.58	0.04331187		2083.58	-0.00591254		2613.57	0.07750219		3143.57	0.06594796		3673.6	-0.02195453
493.79	0.27654274		1023.79	0.00828807		1553.78	0.04382011		2083.78	-0.00544304		2613.77	0.07791709		3143.77	0.06494044		3673.8	-0.02239254
493.99	0.27686267		1023.99	0.00823658		1553.98	0.04477593		2083.98	-0.00601382		2613.97	0.07829209		3143.97	0.06467821		3674	-0.0218587
494.19	0.27810413		1024.19	0.00855235		1554.18	0.04540804		2084.18	-0.00591315		2614.17	0.07986604		3144.17	0.06497073		3674.2	-0.02210905
494.39	0.27810844		1024.39	0.00905494		1554.38	0.04648618		2084.38	-0.0057173		2614.37	0.07996474		3144.37	0.06533632		3674.4	-0.02216668
494.59	0.27805637		1024.59	0.00992005		1554.58	0.04545485		2084.58	-0.00458982		2614.57	0.08000401		3144.57	0.06504194		3674.6	-0.02234967
494.79	0.27858263		1024.79	0.00984086		1554.78	0.04498146		2084.78	-0.00386026		2614.77	0.07999223		3144.77	0.06461128		3674.8	-0.02158864
494.99	0.27783943		1024.99	0.0105157		1554.98	0.04453278		2084.98	-0.00393982		2614.97	0.0797137		3144.97	0.06488259		3675	-0.02131073
495.19	0.27822327		1025.19	0.01081043		1555.18	0.04360269		2085.18	-0.00316023		2615.17	0.07944931		3145.17	0.06435032		3675.2	-0.02196628
495.39	0.2788779		1025.39	0.0110921		1555.38	0.04322258		2085.38	-0.00233351		2615.37	0.07912511		3145.37	0.06315683		3675.4	-0.0229381
495.59	0.27884328		1025.59	0.01208516		1555.58	0.04304044		2085.58	-0.002127		2615.57	0.07945561		3145.57	0.06316126		3675.6	-0.02413953
495.79	0.27819652		1025.79	0.01270207		1555.78	0.04174263		2085.78	-0.00154414		2615.77	0.07916834		3145.77	0.06292837		3675.8	-0.02401154
495.99	0.27857948		1025.99	0.01362741		1555.98	0.04120462		2085.98	-0.00128437		2615.97	0.07870619		3145.97	0.06232373		3676	-0.023489
496.19	0.27834273		1026.19	0.01345899		1556.18	0.04100016		2086.18	-0.00108586		2616.17	0.07819703		3146.17	0.06176248		3676.2	-0.02492323
496.39	0.27849413		1026.39	0.01414373		1556.38	0.0400399		2086.38	-0.00167011		2616.37	0.07709049		3146.37	0.0612615		3676.4	-0.025932
496.59	0.27909752		1026.59	0.01412835		1556.58	0.039647		2086.58	-0.00139961		2616.57	0.07645359		3146.57	0.0618709		3676.6	-0.02532388
496.79	0.27865773		1026.79	0.01279293		1556.78	0.03973063		2086.78	-0.00237486		2616.77	0.07601306		3146.77	0.06280425		3676.8	-0.02527892
496.99	0.27814938		1026.99	0.01182492		1556.98	0.0393963		2086.98	-0.00234228		2616.97	0.07624505		3146.97	0.0636255		3677	-0.02491069
497.19	0.27881874		1027.19	0.01148129		1557.18	0.03931839		2087.18	-0.00213317		2617.17	0.07609184		3147.17	0.06487957		3677.2	-0.02417941
497.39	0.27851675		1027.39	0.01188535		1557.38	0.03885332		2087.38	-0.00215768		2617.37	0.07545943		3147.37	0.06492731		3677.4	-0.0244734
497.59	0.27901568		1027.59	0.01103624		1557.58	0.03869336		2087.58	-0.00230548		2617.57	0.07598356		3147.57	0.06510807		3677.6	-0.02449315
497.79	0.27964426		1027.79	0.01054964		1557.78	0.03950865		2087.78	-0.0030387		2617.77	0.07610381		3147.77	0.06532898		3677.8	-0.02414271
497.99	0.27998499		1027.99	0.0095062		1557.98	0.04021632		2087.98	-0.00440955		2617.97	0.0766513		3147.97	0.06563685		3678	-0.02374461
498.19	0.28039342		1028.19	0.01004136		1558.18	0.0407868		2088.18	-0.00491416		2618.17	0.07690089		3148.17	0.06555356		3678.2	-0.02341451
498.39	0.27963917		1028.39	0.0100012		1558.38	0.04082618		2088.38	-0.00486555		2618.37	0.07705503		3148.37	0.06540346		3678.4	-0.02252251
498.59	0.27869497		1028.59	0.0098661		1558.58	0.04053145		2088.58	-0.00480336		2618.57	0.07696782		3148.57	0.06547383		3678.6	-0.02272696
498.79	0.27922226		1028.79	0.00989008		1558.78	0.04068288		2088.78	-0.00467872		2618.77	0.07753447		3148.77	0.06486196		3678.8	-0.02249383
498.99	0.27908508		1028.99	0.00920026		1558.98	0.04121298		2088.98	-0.00523989		2618.97	0.07807891		3148.97	0.06494056		3679	-0.02275918
499.19	0.27967892		1029.19	0.00893943		1559.18	0.04069023		2089.18	-0.00505718		2619.17	0.07868078		3149.17	0.0651431		3679.2	-0.02429348
499.39	0.27965343		1029.39	0.00845683		1559.38	0.04101194		2089.38	-0.00501579		2619.37	0.07907628		3149.37	0.06518333		3679.4	-0.02361471
499.59	0.27971884		1029.59	0.00903656		1559.58	0.04102318		2089.58	-0.00443397		2619.57	0.07916915		3149.57	0.06530776		3679.6	-0.02356645
499.79	0.27887707		1029.79	0.00961708		1559.78	0.04150206		2089.78	-0.00466897		2619.77	0.07840303		3149.77	0.06420193		3679.8	-0.02336401
499.99	0.27970785		1029.99	0.01032578		1559.98	0.0426212		2089.98	-0.00419602		2619.97	0.07762047		3149.97	0.06361133		3680	-0.02327895
500.19	0.280304		1030.19	0.00978941		1560.18	0.04261806		2090.18	-0.00404408		2620.17	0.07745749		3150.17	0.06341687		3680.2	-0.02358306
500.39	0.28102516		1030.39	0.01047634		1560.38	0.04178017		2090.38	-0.00391697		2620.37	0.07743563		3150.37	0.0630044		3680.4	-0.02377756
500.59	0.28075169		1030.59	0.01056755		1560.58	0.04203196		2090.58	-0.00323532		2620.57	0.07815562		3150.57	0.06267504		3680.6	-0.02304086
500.79	0.28027184		1030.79	0.01022235		1560.78	0.04238771		2090.78	-0.00415087		2620.77	0.07812607		3150.77	0.06277425		3680.8	-0.02245534
500.99	0.28070314		1030.99	0.01041211		1560.98	0.04249571		2090.98	-0.00393784		2620.97	0.077877		3150.97	0.06291163		3681	-0.02154333
501.19	0.28034229		1031.19	0.0104266		1561.18	0.04263353		2091.18	-0.00464371		2621.17	0.07785272		3151.17	0.06295869		3681.2	-0.02201098
501.39	0.27952107		1031.39	0.00957529		1561.38	0.04257021		2091.38	-0.00528861		2621.37	0.07778345		3151.37	0.06266782		3681.4	-0.02268765
501.59	0.27920351		1031.59	0.00859588		1561.58	0.04308179		2091.58	-0.00543251		2621.57	0.07798774		3151.57	0.06343618		3681.6	-0.0221098
501.79	0.27774431		1031.79	0.00811171		1561.78	0.04363753		2091.78	-0.00726478		2621.77	0.07726907		3151.77	0.06332471		3681.8	-0.02168066
501.99	0.27669251		1031.99	0.00791873		1561.98	0.0435399		2091.98	-0.00796526		2621.97	0.07746022		3151.97	0.06325642		3682	-0.021421
502.19	0.27694814		1032.19	0.0081381		1562.18	0.04316108		2092.18	-0.007674		2622.17	0.07755684		3152.17	0.06305842		3682.2	-0.02143403
502.39	0.27603686		1032.39	0.00798048		1562.38	0.04252666		2092.38	-0.00746645		2622.37	0.07786482		3152.37	0.06404124		3682.4	-0.02114885
502.59	0.2754954		1032.59	0.00755086		1562.58	0.04250611		2092.58	-0.00807935		2622.57	0.07736782		3152.57	0.06462351		3682.6	-0.02189423
502.79	0.27568133		1032.79	0.00758867		1562.78	0.04207946		2092.78	-0.00814061		2622.77	0.07808772		3152.77	0.06455404		3682.8	-0.02159817
502.99	0.27514171		1032.99	0.00697595		1562.98	0.04233084		2092.98	-0.00780517		2622.97	0.07746562		3152.97	0.06419437		3683	-0.02186949
503.19	0.27437024		1033.19	0.00756617		1563.18	0.04161426		2093.18	-0.00646357		2623.17	0.07721159		3153.17	0.06552636		3683.2	-0.02135701
503.39	0.27462516		1033.39	0.00855101		1563.38	0.04137183		2093.38	-0.00557241		2623.37	0.07691926		3153.37	0.06521522		3683.4	-0.02000977
503.59	0.27418074		1033.59	0.00938843		1563.58	0.04157461		2093.58	-0.00466272		2623.57	0.07664813		3153.57	0.06477985		3683.6	-0.02050731
503.79	0.27416287		1033.79	0.00913375		1563.78	0.04118183		2093.78	-0.00461596		2623.77	0.07712417		3153.77	0.06465501		3683.8	-0.02077553
503.99	0.27532987		1033.99	0.00829865		1563.98	0.04017782		2093.98	-0.0036153		2623.97	0.07696781		3153.97	0.06461448		3684	-0.0207001
504.19	0.27611186		1034.19	0.00773007		1564.18	0.03920482		2094.18	-0.0032507		2624.17	0.07748478		3154.17	0.06455774		3684.2	-0.02071802
504.39	0.27655822		1034.39	0.00818847		1564.38	0.03800635		2094.38	-0.00328189		2624.37	0.07743686		3154.37	0.06466022		3684.4	-0.02176579
504.59	0.2763315		1034.59	0.00809445		1564.58	0.03799196		2094.58	-0.00282943		2624.57	0.07802698		3154.57	0.06373961		3684.6	-0.02161606
504.79	0.27719901		1034.79	0.008252		1564.78	0.03830866		2094.78	-0.00410747		2624.77	0.07710961		3154.77	0.0641082		3684.8	-0.02158904
504.99	0.27659524		1034.99	0.00834292		1564.98	0.03772903		2094.98	-0.0041188		2624.97	0.07720785		3154.97	0.06388987		3685	-0.02205536
505.19	0.27655085		1035.19	0.00855013		1565.18	0.03830297		2095.18	-0.00470266		2625.17	0.07767824		3155.17	0.06395301		3685.2	-0.02209318
505.39	0.2762914		1035.39	0.0082395		1565.38	0.03845095		2095.38	-0.0048208		2625.37	0.07729185		3155.37	0.06428081		3685.4	-0.02219795
505.59	0.2761796		1035.59	0.00842669		1565.58	0.03866462		2095.58	-0.00564843		2625.57	0.07681786		3155.57	0.06468663		3685.6	-0.02230752
505.79	0.27522256		1035.79	0.00815451		1565.78	0.03849609		2095.78	-0.00713473		2625.77	0.07749246		3155.77	0.06409042		3685.8	-0.02250804
505.99	0.2750914		1035.99	0.0084787		1565.98	0.03924085		2095.98	-0.00723988		2625.97	0.07757518		3155.97	0.06461398		3686	-0.02286989
506.19	0.27600253		1036.19	0.00875461		1566.18	0.03977491		2096.18	-0.0073293		2626.17	0.0775148		3156.17	0.06449916		3686.2	-0.02369752
506.39	0.27571501		1036.39	0.00891228		1566.38	0.0404592		2096.38	-0.0072314		2626.37	0.07724822		3156.37	0.06419059		3686.4	-0.02290277
506.59	0.27547287		1036.59	0.00844529		1566.58	0.04166247		2096.58	-0.00769276		2626.57	0.07689824		3156.57	0.06352583		3686.6	-0.02274048
506.79	0.27538644		1036.79	0.00853908		1566.78	0.04174723		2096.78	-0.00691729		2626.77	0.07702625		3156.77	0.06190463		3686.8	-0.02314447
506.99	0.27550035		1036.99	0.00857555		1566.98	0.04205288		2096.98	-0.00627899		2626.97	0.07637947		3156.97	0.0614257		3687	-0.0228679
507.19	0.27504667		1037.19	0.00928307		1567.18	0.04163278		2097.18	-0.00598587		2627.17	0.07790064		3157.17	0.06165982		3687.2	-0.02285572
507.39	0.27478539		1037.39	0.00951962		1567.38	0.04203008		2097.38	-0.00573461		2627.37	0.07873719		3157.37	0.06071321		3687.4	-0.023019
507.59	0.27478161		1037.59	0.00870592		1567.58	0.04251538		2097.58	-0.00527339		2627.57	0.0794194		3157.57	0.06043773		3687.6	-0.02321735
507.79	0.27524384		1037.79	0.00846816		1567.78	0.04190318		2097.78	-0.00497693		2627.77	0.07994947		3157.77	0.06078551		3687.8	-0.02372802
507.99	0.27615109		1037.99	0.00829619		1567.98	0.04187729		2097.98	-0.00396989		2627.97	0.07888219		3157.97	0.06067597		3688	-0.02427303
508.19	0.27597942		1038.19	0.00881336		1568.18	0.04139424		2098.18	-0.00365068		2628.17	0.07889561		3158.17	0.06178721		3688.2	-0.0242458
508.39	0.27582561		1038.39	0.00902249		1568.38	0.04046379		2098.38	-0.00314234		2628.37	0.07917662		3158.37	0.0618039		3688.4	-0.02437916
508.59	0.27611333		1038.59	0.00878934		1568.58	0.04066323		2098.58	-0.00316857		2628.57	0.07904882		3158.57	0.0611206		3688.6	-0.02349911
508.79	0.27664688		1038.79	0.00985152		1568.78	0.04084213		2098.78	-0.00412535		2628.77	0.07837923		3158.77	0.06200597		3688.8	-0.02326745
508.99	0.27730728		1038.99	0.00984415		1568.98	0.04028453		2098.98	-0.0036705		2628.97	0.07858414		3158.97	0.06184346		3689	-0.02205072
509.19	0.27785881		1039.19	0.00985365		1569.18	0.04072643		2099.18	-0.00425343		2629.17	0.07842043		3159.17	0.06243183		3689.2	-0.02084964
509.39	0.27836555		1039.39	0.01002242		1569.38	0.04020169		2099.38	-0.00458185		2629.37	0.07722977		3159.37	0.06221544		3689.4	-0.02074915
509.59	0.27792254		1039.59	0.01024734		1569.58	0.04011024		2099.58	-0.00504146		2629.57	0.07725765		3159.57	0.06159787		3689.6	-0.01961159
509.79	0.27769638		1039.79	0.00972482		1569.78	0.03970299		2099.78	-0.00535125		2629.77	0.07734885		3159.77	0.06084109		3689.8	-0.01985018
509.99	0.27773303		1039.99	0.00975712		1569.98	0.04024633		2099.98	-0.00577521		2629.97	0.07633212		3159.97	0.06132757		3690	-0.01887663
510.19	0.27798865		1040.19	0.00957557		1570.18	0.03980859		2100.18	-0.00584754		2630.17	0.07686224		3160.17	0.06083409		3690.2	-0.01942474
510.39	0.27890493		1040.39	0.00948775		1570.38	0.03908277		2100.38	-0.00623338		2630.37	0.0765594		3160.37	0.06071628		3690.4	-0.0186558
510.59	0.27835426		1040.59	0.00923278		1570.58	0.03893251		2100.58	-0.00638405		2630.57	0.07576917		3160.57	0.0606881		3690.6	-0.01864972
510.79	0.27875604		1040.79	0.00961172		1570.78	0.03898977		2100.78	-0.0058937		2630.77	0.07506885		3160.77	0.06023672		3690.8	-0.01879366
510.99	0.278217		1040.99	0.01046502		1570.98	0.03883288		2100.98	-0.00591814		2630.97	0.07527903		3160.97	0.06040679		3691	-0.01862138
511.19	0.27750632		1041.19	0.01078041		1571.18	0.0386606		2101.18	-0.00575944		2631.17	0.0760701		3161.17	0.06028333		3691.2	-0.01979463
511.39	0.27742207		1041.39	0.00981769		1571.38	0.03846101		2101.38	-0.00550371		2631.37	0.07565832		3161.37	0.06062016		3691.4	-0.01989273
511.59	0.27668708		1041.59	0.01032936		1571.58	0.0384358		2101.58	-0.00547567		2631.57	0.07467515		3161.57	0.0609137		3691.6	-0.02074616
511.79	0.27674953		1041.79	0.01037164		1571.78	0.03876287		2101.78	-0.00520391		2631.77	0.07474316		3161.77	0.06079047		3691.8	-0.02180552
511.99	0.277214		1041.99	0.01049261		1571.98	0.03911687		2101.98	-0.00435012		2631.97	0.07398999		3161.97	0.06077911		3692	-0.02228692
512.19	0.27651391		1042.19	0.01038774		1572.18	0.03945354		2102.18	-0.00518608		2632.17	0.0747478		3162.17	0.06119622		3692.2	-0.0219602
512.39	0.27674481		1042.39	0.00991517		1572.38	0.03873151		2102.38	-0.00529558		2632.37	0.07536219		3162.37	0.06095232		3692.4	-0.02295949
512.59	0.27725934		1042.59	0.00945287		1572.58	0.03852937		2102.58	-0.00624756		2632.57	0.07540542		3162.57	0.06041966		3692.6	-0.02320642
512.79	0.27779724		1042.79	0.00912738		1572.78	0.03899057		2102.78	-0.00687914		2632.77	0.07572665		3162.77	0.06117685		3692.8	-0.02376912
512.99	0.27732671		1042.99	0.00885115		1572.98	0.03859178		2102.98	-0.0069579		2632.97	0.07609964		3162.97	0.06079921		3693	-0.02277531
513.19	0.27769062		1043.19	0.00921589		1573.18	0.0391015		2103.18	-0.00737771		2633.17	0.07592117		3163.17	0.06126539		3693.2	-0.02278893
513.39	0.277807		1043.39	0.00959115		1573.38	0.03941595		2103.38	-0.0072004		2633.37	0.07557304		3163.37	0.06132368		3693.4	-0.0228464
513.59	0.27724848		1043.59	0.00885472		1573.58	0.03951677		2103.58	-0.00778193		2633.57	0.07640857		3163.57	0.06156671		3693.6	-0.02125078
513.79	0.2774802		1043.79	0.00849648		1573.78	0.03944741		2103.78	-0.0081707		2633.77	0.07734411		3163.77	0.06239712		3693.8	-0.02139074
513.99	0.27746081		1043.99	0.00863042		1573.98	0.03998261		2103.98	-0.00870553		2633.97	0.07761409		3163.97	0.06368468		3694	-0.02068886
514.19	0.27734793		1044.19	0.00758629		1574.18	0.03985475		2104.18	-0.00842152		2634.17	0.07823734		3164.17	0.06407186		3694.2	-0.02000825
514.39	0.27812308		1044.39	0.00624838		1574.38	0.03999885		2104.38	-0.00849944		2634.37	0.0782737		3164.37	0.06489853		3694.4	-0.0185748
514.59	0.27744673		1044.59	0.00523343		1574.58	0.04096921		2104.58	-0.00765787		2634.57	0.07774293		3164.57	0.0649837		3694.6	-0.01808103
514.79	0.27727826		1044.79	0.0059136		1574.78	0.04169436		2104.78	-0.00847858		2634.77	0.07786515		3164.77	0.06480915		3694.8	-0.01884933
514.99	0.27634143		1044.99	0.00617646		1574.98	0.04107014		2104.98	-0.00814389		2634.97	0.07702301		3164.97	0.06479909		3695	-0.01928369
515.19	0.27675022		1045.19	0.0056732		1575.18	0.04087133		2105.18	-0.00728856		2635.17	0.07688508		3165.17	0.06522907		3695.2	-0.01988079
515.39	0.27660789		1045.39	0.00586718		1575.38	0.0407532		2105.38	-0.00693912		2635.37	0.07600454		3165.37	0.0655927		3695.4	-0.01954225
515.59	0.2765219		1045.59	0.00617301		1575.58	0.04089816		2105.58	-0.00688999		2635.57	0.07519601		3165.57	0.06519255		3695.6	-0.02071448
515.79	0.27770175		1045.79	0.0061383		1575.78	0.04133367		2105.78	-0.00683124		2635.77	0.07490779		3165.77	0.06519352		3695.8	-0.02150766
515.99	0.27805756		1045.99	0.00665587		1575.98	0.03998562		2105.98	-0.00683008		2635.97	0.07343436		3165.97	0.06554352		3696	-0.02214565
516.19	0.2782186		1046.19	0.00638557		1576.18	0.03986299		2106.18	-0.00719643		2636.17	0.07320003		3166.17	0.06566983		3696.2	-0.02340054
516.39	0.27792469		1046.39	0.00632546		1576.38	0.03939909		2106.38	-0.007166		2636.37	0.07298359		3166.37	0.06600532		3696.4	-0.02420254
516.59	0.27808307		1046.59	0.00658034		1576.58	0.03939813		2106.58	-0.00680223		2636.57	0.07323761		3166.57	0.0649654		3696.6	-0.02439356
516.79	0.27768367		1046.79	0.00717895		1576.78	0.03982378		2106.78	-0.00742739		2636.77	0.07271346		3166.77	0.0651388		3696.8	-0.02469337
516.99	0.27697803		1046.99	0.00812731		1576.98	0.03925923		2106.98	-0.00770659		2636.97	0.07288006		3166.97	0.06432015		3697	-0.02430854
517.19	0.27737163		1047.19	0.00871428		1577.18	0.03967938		2107.18	-0.00766874		2637.17	0.0733679		3167.17	0.06484107		3697.2	-0.02486341
517.39	0.27618435		1047.39	0.00889125		1577.38	0.03880168		2107.38	-0.00832037		2637.37	0.07380275		3167.37	0.06475497		3697.4	-0.02438068
517.59	0.2752453		1047.59	0.00888597		1577.58	0.03794158		2107.58	-0.00926456		2637.57	0.07473378		3167.57	0.06475111		3697.6	-0.02310277
517.79	0.27455557		1047.79	0.00898925		1577.78	0.03775114		2107.78	-0.00905691		2637.77	0.07532655		3167.77	0.06467024		3697.8	-0.02262492
517.99	0.27402714		1047.99	0.00932596		1577.98	0.03722283		2107.98	-0.00944916		2637.97	0.07555773		3167.97	0.06452476		3698	-0.02242906
518.19	0.27309779		1048.19	0.00920336		1578.18	0.03641135		2108.18	-0.00883766		2638.17	0.07621542		3168.17	0.06368529		3698.2	-0.02138443
518.39	0.27294622		1048.39	0.00918232		1578.38	0.03599519		2108.38	-0.00947183		2638.37	0.076578		3168.37	0.06315409		3698.4	-0.02238977
518.59	0.27274187		1048.59	0.00950739		1578.58	0.03582518		2108.58	-0.00970648		2638.57	0.07746272		3168.57	0.06247102		3698.6	-0.02265972
518.79	0.27291353		1048.79	0.01004214		1578.78	0.03487202		2108.78	-0.01032223		2638.77	0.07826321		3168.77	0.06222691		3698.8	-0.02280609
518.99	0.27305162		1048.99	0.0100926		1578.98	0.03413618		2108.98	-0.00873198		2638.97	0.07793313		3168.97	0.0626887		3699	-0.02241231
519.19	0.2732834		1049.19	0.01036333		1579.18	0.03378036		2109.18	-0.00775877		2639.17	0.07858368		3169.17	0.06269158		3699.2	-0.02296924
519.39	0.27433837		1049.39	0.01106126		1579.38	0.03412097		2109.38	-0.00743132		2639.37	0.07843708		3169.37	0.06233567		3699.4	-0.02298682
519.59	0.27539394		1049.59	0.0107941		1579.58	0.03403883		2109.58	-0.00709332		2639.57	0.07836584		3169.57	0.06181204		3699.6	-0.02426407
519.79	0.2761079		1049.79	0.01049036		1579.78	0.0353017		2109.78	-0.00728542		2639.77	0.07741274		3169.77	0.06249026		3699.8	-0.02381345
519.99	0.27662488		1049.99	0.00997778		1579.98	0.03562849		2109.98	-0.00695031		2639.97	0.07670493		3169.97	0.06249705		3700	-0.02368376
520.19	0.27667117		1050.19	0.00874505		1580.18	0.03735359		2110.18	-0.0061822		2640.17	0.07720531		3170.17	0.06300336		3700.2	-0.02319353
520.39	0.27663473		1050.39	0.0087758		1580.38	0.03859989		2110.38	-0.00514045		2640.37	0.07708526		3170.37	0.06304366		3700.4	-0.02260461
520.59	0.27744073		1050.59	0.00911209		1580.58	0.03861011		2110.58	-0.00553825		2640.57	0.07691642		3170.57	0.0625645		3700.6	-0.02248148
520.79	0.27771635		1050.79	0.00871253		1580.78	0.0396489		2110.78	-0.00692904		2640.77	0.07607733		3170.77	0.06244491		3700.8	-0.02225392
520.99	0.2774385		1050.99	0.00777367		1580.98	0.03940142		2110.98	-0.00773507		2640.97	0.07640276		3170.97	0.0623745		3701	-0.0226053
521.19	0.27639373		1051.19	0.00693396		1581.18	0.03924735		2111.18	-0.00810168		2641.17	0.07612504		3171.17	0.0625866		3701.2	-0.02248368
521.39	0.27577521		1051.39	0.00661205		1581.38	0.03913131		2111.38	-0.0089002		2641.37	0.07561135		3171.37	0.06237507		3701.4	-0.0221327
521.59	0.27480133		1051.59	0.00659267		1581.58	0.03905196		2111.58	-0.0088072		2641.57	0.074622		3171.57	0.06222078		3701.6	-0.02128047
521.79	0.27430908		1051.79	0.00656588		1581.78	0.03872008		2111.78	-0.00914975		2641.77	0.07411301		3171.77	0.06187701		3701.8	-0.0216762
521.99	0.27325104		1051.99	0.00733935		1581.98	0.03907602		2111.98	-0.01006352		2641.97	0.07437682		3171.97	0.06171085		3702	-0.02293433
522.19	0.27315437		1052.19	0.00679552		1582.18	0.038305		2112.18	-0.01006748		2642.17	0.07317935		3172.17	0.06088112		3702.2	-0.02326153
522.39	0.27355047		1052.39	0.00577004		1582.38	0.03779264		2112.38	-0.0105572		2642.37	0.07282996		3172.37	0.06056706		3702.4	-0.02410991
522.59	0.27298435		1052.59	0.00475363		1582.58	0.03704307		2112.58	-0.01043662		2642.57	0.07286133		3172.57	0.06095757		3702.6	-0.02389185
522.79	0.27312511		1052.79	0.00518357		1582.78	0.0367006		2112.78	-0.01059976		2642.77	0.07269447		3172.77	0.06113423		3702.8	-0.02422219
522.99	0.27344607		1052.99	0.00659858		1582.98	0.03662793		2112.98	-0.01023663		2642.97	0.07249032		3172.97	0.06109237		3703	-0.02405904
523.19	0.27357153		1053.19	0.00682072		1583.18	0.03674211		2113.18	-0.00954892		2643.17	0.07280501		3173.17	0.06077826		3703.2	-0.02409338
523.39	0.27385084		1053.39	0.00663496		1583.38	0.03768443		2113.38	-0.00926926		2643.37	0.07305633		3173.37	0.060505		3703.4	-0.02379465
523.59	0.27368584		1053.59	0.00600257		1583.58	0.0381877		2113.58	-0.00881256		2643.57	0.07272971		3173.57	0.06022467		3703.6	-0.02375972
523.79	0.27409582		1053.79	0.00587438		1583.78	0.03932035		2113.78	-0.00884241		2643.77	0.07190447		3173.77	0.06082406		3703.8	-0.0233622
523.99	0.27448966		1053.99	0.00539039		1583.98	0.03944691		2113.98	-0.00835715		2643.97	0.07241639		3173.97	0.06126364		3704	-0.02378649
524.19	0.27519178		1054.19	0.00506453		1584.18	0.04016345		2114.18	-0.00749967		2644.17	0.07360821		3174.17	0.06243476		3704.2	-0.02327037
524.39	0.27624676		1054.39	0.00611478		1584.38	0.04041249		2114.38	-0.0064267		2644.37	0.07289706		3174.37	0.06196338		3704.4	-0.02263207
524.59	0.27649546		1054.59	0.00602155		1584.58	0.04104618		2114.58	-0.00679167		2644.57	0.07263283		3174.57	0.06188833		3704.6	-0.02201164
524.79	0.27606085		1054.79	0.00579374		1584.78	0.04088121		2114.78	-0.0068946		2644.77	0.07280795		3174.77	0.06176927		3704.8	-0.02203983
524.99	0.27533768		1054.99	0.00484981		1584.98	0.04070797		2114.98	-0.00742769		2644.97	0.07379905		3174.97	0.06185592		3705	-0.02197124
525.19	0.27516777		1055.19	0.00493754		1585.18	0.04123902		2115.18	-0.00729499		2645.17	0.07295894		3175.17	0.0621988		3705.2	-0.02153093
525.39	0.27498212		1055.39	0.00520344		1585.38	0.04193109		2115.38	-0.00691487		2645.37	0.07359161		3175.37	0.06119166		3705.4	-0.0217598
525.59	0.2739926		1055.59	0.00504431		1585.58	0.04161406		2115.58	-0.00598184		2645.57	0.07294711		3175.57	0.06009953		3705.6	-0.02131919
525.79	0.27458738		1055.79	0.00513272		1585.78	0.04135575		2115.78	-0.00607763		2645.77	0.07319393		3175.77	0.05946065		3705.8	-0.02202894
525.99	0.27486032		1055.99	0.00576003		1585.98	0.0413729		2115.98	-0.00590761		2645.97	0.07201766		3175.97	0.05813901		3706	-0.02199945
526.19	0.27619775		1056.19	0.00597844		1586.18	0.04033346		2116.18	-0.00575679		2646.17	0.07140163		3176.17	0.0573593		3706.2	-0.02311367
526.39	0.27606932		1056.39	0.00655148		1586.38	0.04031028		2116.38	-0.00643723		2646.37	0.07136287		3176.37	0.05681954		3706.4	-0.02309046
526.59	0.27564513		1056.59	0.00711007		1586.58	0.04035564		2116.58	-0.00687605		2646.57	0.07116315		3176.57	0.05656567		3706.6	-0.02306198
526.79	0.27656486		1056.79	0.00782055		1586.78	0.03984847		2116.78	-0.00706054		2646.77	0.07160767		3176.77	0.05622298		3706.8	-0.02290918
526.99	0.27682633		1056.99	0.00809764		1586.98	0.04001036		2116.98	-0.00745881		2646.97	0.07228715		3176.97	0.05570563		3707	-0.02242538
527.19	0.27630298		1057.19	0.0073716		1587.18	0.04034579		2117.18	-0.00717945		2647.17	0.07230332		3177.17	0.05666529		3707.2	-0.02268727
527.39	0.27596508		1057.39	0.00687369		1587.38	0.03951433		2117.38	-0.00828467		2647.37	0.07251703		3177.37	0.05687736		3707.4	-0.02343083
527.59	0.27557179		1057.59	0.00654563		1587.58	0.04003188		2117.58	-0.00892952		2647.57	0.07235204		3177.57	0.05593428		3707.6	-0.02360489
527.79	0.27630037		1057.79	0.00595822		1587.78	0.03957815		2117.78	-0.01020734		2647.77	0.07261291		3177.77	0.05657472		3707.8	-0.02373934
527.99	0.27581129		1057.99	0.00520195		1587.98	0.03911766		2117.98	-0.01008326		2647.97	0.07303869		3177.97	0.05661908		3708	-0.02362071
528.19	0.27503831		1058.19	0.00545481		1588.18	0.03903993		2118.18	-0.00918642		2648.17	0.07247139		3178.17	0.0574074		3708.2	-0.02303653
528.39	0.2748401		1058.39	0.00522772		1588.38	0.03831922		2118.38	-0.00906356		2648.37	0.07123466		3178.37	0.05804813		3708.4	-0.02288405
528.59	0.2741809		1058.59	0.00504489		1588.58	0.03804528		2118.58	-0.00979365		2648.57	0.071139		3178.57	0.05895534		3708.6	-0.02335855
528.79	0.2736876		1058.79	0.00576227		1588.78	0.03716692		2118.78	-0.00966745		2648.77	0.07102127		3178.77	0.05925979		3708.8	-0.02412355
528.99	0.27308425		1058.99	0.00595848		1588.98	0.03845625		2118.98	-0.01021992		2648.97	0.07041567		3178.97	0.06014982		3709	-0.02421213
529.19	0.2725845		1059.19	0.00643071		1589.18	0.03822824		2119.18	-0.00899654		2649.17	0.07007514		3179.17	0.06066708		3709.2	-0.02419018
529.39	0.27246466		1059.39	0.00705276		1589.38	0.03784966		2119.38	-0.008741		2649.37	0.06977721		3179.37	0.06040888		3709.4	-0.02423608
529.59	0.27264355		1059.59	0.00726373		1589.58	0.03745231		2119.58	-0.0085489		2649.57	0.06874781		3179.57	0.06096203		3709.6	-0.02430583
529.79	0.27349646		1059.79	0.00799943		1589.78	0.03721904		2119.78	-0.00854032		2649.77	0.0682982		3179.77	0.06161827		3709.8	-0.02463369
529.99	0.27337062		1059.99	0.00879501		1589.98	0.03698756		2119.98	-0.0084026		2649.97	0.06708753		3179.97	0.06118946		3710	-0.02442398
530.19	0.2738291		1060.19	0.00855918		1590.18	0.03771205		2120.18	-0.00880481		2650.17	0.0672302		3180.17	0.06079611		3710.2	-0.02478748
530.39	0.27426121		1060.39	0.00897767		1590.38	0.03791445		2120.38	-0.0082421		2650.37	0.06742796		3180.37	0.06091101		3710.4	-0.0236057
530.59	0.2748093		1060.59	0.00926786		1590.58	0.0378849		2120.58	-0.00763335		2650.57	0.06749676		3180.57	0.06133123		3710.6	-0.02417356
530.79	0.27533609		1060.79	0.00873546		1590.78	0.03769629		2120.78	-0.0074255		2650.77	0.06809093		3180.77	0.0618453		3710.8	-0.02374516
530.99	0.27545876		1060.99	0.00836877		1590.98	0.03896664		2120.98	-0.00815527		2650.97	0.06896544		3180.97	0.06147595		3711	-0.02461927
531.19	0.27507238		1061.19	0.00857636		1591.18	0.03937096		2121.18	-0.00795762		2651.17	0.06888296		3181.17	0.06187476		3711.2	-0.02546899
531.39	0.27556352		1061.39	0.00760021		1591.38	0.0392841		2121.38	-0.00838141		2651.37	0.06998778		3181.37	0.061345		3711.4	-0.02573087
531.59	0.27488984		1061.59	0.00719271		1591.58	0.03977457		2121.58	-0.0081807		2651.57	0.07095187		3181.57	0.06091101		3711.6	-0.02551514
531.79	0.27531225		1061.79	0.00579468		1591.78	0.03865436		2121.78	-0.0084857		2651.77	0.07170456		3181.77	0.06061529		3711.8	-0.02569234
531.99	0.27411738		1061.99	0.00588379		1591.98	0.03895759		2121.98	-0.00765242		2651.97	0.07211937		3181.97	0.06044272		3712	-0.02544136
532.19	0.27416204		1062.19	0.00568908		1592.18	0.03862319		2122.18	-0.00742448		2652.17	0.07232165		3182.17	0.06047509		3712.2	-0.02501823
532.39	0.27486197		1062.39	0.0056175		1592.38	0.03847446		2122.38	-0.00776835		2652.37	0.07247055		3182.37	0.05981872		3712.4	-0.02505455
532.59	0.27470381		1062.59	0.00623256		1592.58	0.03847152		2122.58	-0.00786465		2652.57	0.0720519		3182.57	0.05927333		3712.6	-0.02612692
532.79	0.27349499		1062.79	0.00659249		1592.78	0.03825038		2122.78	-0.00775248		2652.77	0.07206307		3182.77	0.05965015		3712.8	-0.02581539
532.99	0.27261867		1062.99	0.00634778		1592.98	0.0378299		2122.98	-0.00881427		2652.97	0.07238401		3182.97	0.06064219		3713	-0.02498039
533.19	0.27289265		1063.19	0.00708634		1593.18	0.03717422		2123.18	-0.00877505		2653.17	0.07315108		3183.17	0.06088757		3713.2	-0.02483765
533.39	0.27264773		1063.39	0.00652611		1593.38	0.03738411		2123.38	-0.00943688		2653.37	0.07273447		3183.37	0.06126598		3713.4	-0.02480177
533.59	0.27249388		1063.59	0.00582383		1593.58	0.03712591		2123.58	-0.00952077		2653.57	0.07251271		3183.57	0.06133995		3713.6	-0.02439431
533.79	0.27232621		1063.79	0.00529255		1593.78	0.03673135		2123.78	-0.00937206		2653.77	0.07291432		3183.77	0.06101004		3713.8	-0.02434968
533.99	0.27268696		1063.99	0.00531327		1593.98	0.03674042		2123.98	-0.00960418		2653.97	0.07239862		3183.97	0.05960719		3714	-0.02463673
534.19	0.27347429		1064.19	0.00557599		1594.18	0.03750835		2124.18	-0.00911359		2654.17	0.07311243		3184.17	0.05931629		3714.2	-0.02461476
534.39	0.27421505		1064.39	0.00606445		1594.38	0.03745151		2124.38	-0.00889959		2654.37	0.07277379		3184.37	0.06000435		3714.4	-0.02451921
534.59	0.27430857		1064.59	0.00537788		1594.58	0.03805376		2124.58	-0.00925521		2654.57	0.07256143		3184.57	0.06008181		3714.6	-0.02485587
534.79	0.27402304		1064.79	0.00451884		1594.78	0.03838738		2124.78	-0.00914838		2654.77	0.07182619		3184.77	0.06033955		3714.8	-0.02510621
534.99	0.27447942		1064.99	0.00471863		1594.98	0.03928692		2124.98	-0.00916388		2654.97	0.07162047		3184.97	0.0595676		3715	-0.02552978
535.19	0.27459033		1065.19	0.00595665		1595.18	0.03936034		2125.18	-0.00718344		2655.17	0.07153567		3185.17	0.05947887		3715.2	-0.02496459
535.39	0.27502256		1065.39	0.00521041		1595.38	0.03950762		2125.38	-0.0061171		2655.37	0.07129027		3185.37	0.06027412		3715.4	-0.02359813
535.59	0.2741351		1065.59	0.00495628		1595.58	0.03944283		2125.58	-0.00526805		2655.57	0.07160694		3185.57	0.06031054		3715.6	-0.02321336
535.79	0.27421446		1065.79	0.00410314		1595.78	0.03941936		2125.78	-0.00476625		2655.77	0.07149102		3185.77	0.06030969		3715.8	-0.02227991
535.99	0.27347018		1065.99	0.00538877		1595.98	0.04024388		2125.98	-0.0040099		2655.97	0.07205175		3185.97	0.06071181		3716	-0.02140026
536.19	0.2741866		1066.19	0.00481423		1596.18	0.03947105		2126.18	-0.00333848		2656.17	0.07109065		3186.17	0.05991754		3716.2	-0.02124958
536.39	0.27458701		1066.39	0.00517124		1596.38	0.0386532		2126.38	-0.00352636		2656.37	0.07043106		3186.37	0.05953156		3716.4	-0.02202733
536.59	0.27458133		1066.59	0.00617304		1596.58	0.0373658		2126.58	-0.00381883		2656.57	0.07073236		3186.57	0.06019598		3716.6	-0.0235191
536.79	0.27419814		1066.79	0.00617773		1596.78	0.03622849		2126.78	-0.00478133		2656.77	0.07121631		3186.77	0.06011853		3716.8	-0.02310467
536.99	0.27461081		1066.99	0.00607408		1596.98	0.03554284		2126.98	-0.00539752		2656.97	0.07141683		3186.97	0.05968792		3717	-0.02333061
537.19	0.27412019		1067.19	0.00624024		1597.18	0.03683291		2127.18	-0.00663859		2657.17	0.07138779		3187.17	0.05952714		3717.2	-0.02409612
537.39	0.27401594		1067.39	0.00520823		1597.38	0.03678278		2127.38	-0.00733887		2657.37	0.0714957		3187.37	0.05967855		3717.4	-0.0243889
537.59	0.274426		1067.59	0.00471579		1597.58	0.03631178		2127.58	-0.00834784		2657.57	0.07201766		3187.57	0.05918082		3717.6	-0.02529438
537.79	0.27419008		1067.79	0.00392232		1597.78	0.03684955		2127.78	-0.00924411		2657.77	0.07281566		3187.77	0.05922223		3717.8	-0.02621511
537.99	0.27396808		1067.99	0.00342779		1597.98	0.03724195		2127.98	-0.01010771		2657.97	0.07289086		3187.97	0.0593273		3718	-0.02714733
538.19	0.27336186		1068.19	0.00342464		1598.18	0.03759925		2128.18	-0.01116043		2658.17	0.07298804		3188.17	0.0602248		3718.2	-0.02717846
538.39	0.27271771		1068.39	0.00251337		1598.38	0.03744028		2128.38	-0.01265385		2658.37	0.07195198		3188.37	0.06024616		3718.4	-0.0271537
538.59	0.27224941		1068.59	0.00250838		1598.58	0.0380253		2128.58	-0.01259834		2658.57	0.07262183		3188.57	0.06077142		3718.6	-0.02732018
538.79	0.27190782		1068.79	0.00281536		1598.78	0.03831636		2128.78	-0.01207128		2658.77	0.07218814		3188.77	0.06172271		3718.8	-0.02703241
538.99	0.27227998		1068.99	0.00323062		1598.98	0.03797114		2128.98	-0.01084422		2658.97	0.0726872		3188.97	0.06176092		3719	-0.02682392
539.19	0.27162454		1069.19	0.00328134		1599.18	0.03828285		2129.18	-0.00921247		2659.17	0.0725069		3189.17	0.06198882		3719.2	-0.02626044
539.39	0.27095726		1069.39	0.00243493		1599.38	0.03829874		2129.38	-0.00917181		2659.37	0.07271991		3189.37	0.06325356		3719.4	-0.0257714
539.59	0.27066734		1069.59	0.00214203		1599.58	0.03818227		2129.58	-0.00845967		2659.57	0.07299911		3189.57	0.06338817		3719.6	-0.02531382
539.79	0.27095184		1069.79	0.00249981		1599.78	0.03765747		2129.78	-0.00871495		2659.77	0.07323786		3189.77	0.06384601		3719.8	-0.02493758
539.99	0.27082469		1069.99	0.00354964		1599.98	0.0376679		2129.98	-0.00808026		2659.97	0.07319575		3189.97	0.06392873		3720	-0.02565884
540.19	0.27232915		1070.19	0.00323283		1600.18	0.03754173		2130.18	-0.00784236		2660.17	0.071356		3190.17	0.06279833		3720.2	-0.02633289
540.39	0.27314551		1070.39	0.00423802		1600.38	0.03722053		2130.38	-0.00901999		2660.37	0.07090562		3190.37	0.06311224		3720.4	-0.02631452
540.59	0.27316038		1070.59	0.00492002		1600.58	0.03673323		2130.58	-0.00898634		2660.57	0.07140371		3190.57	0.06284995		3720.6	-0.02609308
540.79	0.2728644		1070.79	0.00410531		1600.78	0.03640306		2130.78	-0.00921062		2660.77	0.07075061		3190.77	0.0615713		3720.8	-0.02650321
540.99	0.27269624		1070.99	0.00361314		1600.98	0.03581984		2130.98	-0.00984828		2660.97	0.06998551		3190.97	0.06170149		3721	-0.02618256
541.19	0.27209511		1071.19	0.00381323		1601.18	0.03657268		2131.18	-0.01034498		2661.17	0.06954827		3191.17	0.06228778		3721.2	-0.02628461
541.39	0.27245147		1071.39	0.00382174		1601.38	0.03652977		2131.38	-0.00992907		2661.37	0.06985905		3191.37	0.0609859		3721.4	-0.02653212
541.59	0.27232634		1071.59	0.00363289		1601.58	0.03665248		2131.58	-0.00975083		2661.57	0.06989469		3191.57	0.05939352		3721.6	-0.02712732
541.79	0.27225823		1071.79	0.00366144		1601.78	0.03575057		2131.78	-0.01011928		2661.77	0.07030814		3191.77	0.0592285		3721.8	-0.02713516
541.99	0.27222926		1071.99	0.00433603		1601.98	0.03532926		2131.98	-0.0104631		2661.97	0.0702368		3191.97	0.05953758		3722	-0.02758824
542.19	0.27235661		1072.19	0.00484753		1602.18	0.03588013		2132.18	-0.01047564		2662.17	0.07073962		3192.17	0.05913626		3722.2	-0.02819557
542.39	0.27308882		1072.39	0.0057744		1602.38	0.03642243		2132.38	-0.00996963		2662.37	0.07098954		3192.37	0.05845229		3722.4	-0.02730704
542.59	0.27318504		1072.59	0.00644774		1602.58	0.03589019		2132.58	-0.0088834		2662.57	0.0709928		3192.57	0.05867837		3722.6	-0.02713858
542.79	0.2727941		1072.79	0.00586986		1602.78	0.03546569		2132.78	-0.0088424		2662.77	0.07194541		3192.77	0.05902528		3722.8	-0.02651305
542.99	0.27301467		1072.99	0.00529382		1602.98	0.03500706		2132.98	-0.008868		2662.97	0.07132014		3192.97	0.05809016		3723	-0.0273264
543.19	0.27265892		1073.19	0.00553215		1603.18	0.03475795		2133.18	-0.00940295		2663.17	0.07140022		3193.17	0.05781526		3723.2	-0.02621169
543.39	0.27273744		1073.39	0.00556814		1603.38	0.03475805		2133.38	-0.00952249		2663.37	0.0715469		3193.37	0.05875676		3723.4	-0.02591214
543.59	0.27373899		1073.59	0.00539693		1603.58	0.03460702		2133.58	-0.00949607		2663.57	0.07070812		3193.57	0.05934248		3723.6	-0.0253111
543.79	0.27396527		1073.79	0.00488113		1603.78	0.03527071		2133.78	-0.00945962		2663.77	0.07062537		3193.77	0.05975096		3723.8	-0.0256844
543.99	0.2734797		1073.99	0.00452015		1603.98	0.03605577		2133.98	-0.00874627		2663.97	0.06973377		3193.97	0.05940205		3724	-0.02608306
544.19	0.27376462		1074.19	0.00313349		1604.18	0.03665593		2134.18	-0.00846106		2664.17	0.06904256		3194.17	0.05932018		3724.2	-0.02611155
544.39	0.27354426		1074.39	0.00297032		1604.38	0.03604892		2134.38	-0.00842723		2664.37	0.06917469		3194.37	0.06019666		3724.4	-0.02497591
544.59	0.27260976		1074.59	0.00186578		1604.58	0.03547063		2134.58	-0.00797315		2664.57	0.06926315		3194.57	0.0595988		3724.6	-0.02550979
544.79	0.27282984		1074.79	0.00189917		1604.78	0.03580964		2134.78	-0.00826912		2664.77	0.06868769		3194.77	0.0595939		3724.8	-0.02614772
544.99	0.27374591		1074.99	0.00117893		1604.98	0.03552758		2134.98	-0.00826987		2664.97	0.06833495		3194.97	0.06116425		3725	-0.02554852
545.19	0.27387599		1075.19	0.00104343		1605.18	0.03679146		2135.18	-0.00808998		2665.17	0.06911425		3195.17	0.0613923		3725.2	-0.02529548
545.39	0.27430241		1075.39	0.00091017		1605.38	0.0373822		2135.38	-0.00775281		2665.37	0.06930558		3195.37	0.06020205		3725.4	-0.0256621
545.59	0.27437386		1075.59	0.00205443		1605.58	0.03725902		2135.58	-0.00789134		2665.57	0.06961701		3195.57	0.0597397		3725.6	-0.02564376
545.79	0.27458955		1075.79	0.00278678		1605.78	0.03692008		2135.78	-0.00793426		2665.77	0.07006894		3195.77	0.05996082		3725.8	-0.02578989
545.99	0.27493237		1075.99	0.00404724		1605.98	0.03792669		2135.98	-0.00761417		2665.97	0.06977329		3195.97	0.06045271		3726	-0.02615189
546.19	0.27523996		1076.19	0.0035711		1606.18	0.03898502		2136.18	-0.00706162		2666.17	0.07018788		3196.17	0.05984862		3726.2	-0.02563371
546.39	0.27572762		1076.39	0.00466696		1606.38	0.03841011		2136.38	-0.00736187		2666.37	0.07001673		3196.37	0.05967816		3726.4	-0.02355524
546.59	0.27443649		1076.59	0.00485643		1606.58	0.03743914		2136.58	-0.00720966		2666.57	0.06980934		3196.57	0.05982911		3726.6	-0.02338015
546.79	0.27354875		1076.79	0.0046877		1606.78	0.03781649		2136.78	-0.00731503		2666.77	0.07006143		3196.77	0.05968646		3726.8	-0.02360586
546.99	0.27288446		1076.99	0.00511624		1606.98	0.03781823		2136.98	-0.0075034		2666.97	0.06899818		3196.97	0.05817895		3727	-0.02320071
547.19	0.27233153		1077.19	0.00539688		1607.18	0.03695344		2137.18	-0.00752293		2667.17	0.06866429		3197.17	0.05792494		3727.2	-0.02261687
547.39	0.27259917		1077.39	0.00564352		1607.38	0.03699018		2137.38	-0.00703747		2667.37	0.06855243		3197.37	0.05808238		3727.4	-0.02328031
547.59	0.27267768		1077.59	0.00572678		1607.58	0.03537548		2137.58	-0.00718685		2667.57	0.06837418		3197.57	0.05740243		3727.6	-0.02354908
547.79	0.27109034		1077.79	0.00573292		1607.78	0.03571789		2137.78	-0.00630933		2667.77	0.0682871		3197.77	0.05633543		3727.8	-0.02406053
547.99	0.26990427		1077.99	0.0058491		1607.98	0.03547201		2137.98	-0.0067007		2667.97	0.06836255		3197.97	0.05540999		3728	-0.02488388
548.19	0.26924464		1078.19	0.00567809		1608.18	0.03555779		2138.18	-0.00626193		2668.17	0.06858521		3198.17	0.05550031		3728.2	-0.02428417
548.39	0.26851055		1078.39	0.00604484		1608.38	0.03541666		2138.38	-0.00693969		2668.37	0.06832559		3198.37	0.05467771		3728.4	-0.02418078
548.59	0.2682646		1078.59	0.00582875		1608.58	0.03539181		2138.58	-0.00819943		2668.57	0.06899493		3198.57	0.05461543		3728.6	-0.02487028
548.79	0.26865984		1078.79	0.00595019		1608.78	0.03539472		2138.78	-0.00792842		2668.77	0.06941476		3198.77	0.05589707		3728.8	-0.02545953
548.99	0.26850652		1078.99	0.00529727		1608.98	0.03493762		2138.98	-0.00817105		2668.97	0.06970236		3198.97	0.05689529		3729	-0.02533616
549.19	0.26842477		1079.19	0.00558021		1609.18	0.03574279		2139.18	-0.00853583		2669.17	0.0703458		3199.17	0.05691837		3729.2	-0.0258305
549.39	0.26892744		1079.39	0.00628401		1609.38	0.03488852		2139.38	-0.00839102		2669.37	0.07040733		3199.37	0.05639654		3729.4	-0.02676249
549.59	0.26867288		1079.59	0.00685087		1609.58	0.03468196		2139.58	-0.00918836		2669.57	0.07052517		3199.57	0.05698682		3729.6	-0.02619074
549.79	0.26925969		1079.79	0.00631312		1609.78	0.03513083		2139.78	-0.00869601		2669.77	0.07049434		3199.77	0.05714968		3729.8	-0.02698439
549.99	0.26916663		1079.99	0.00609228		1609.98	0.03546624		2139.98	-0.00821648		2669.97	0.07146768		3199.97	0.05809198		3730	-0.02658768
550.19	0.26948756		1080.19	0.00481864		1610.18	0.03596783		2140.18	-0.00805195		2670.17	0.07124329		3200.17	0.05891391		3730.2	-0.0258027
550.39	0.26943794		1080.39	0.00466578		1610.38	0.03600825		2140.38	-0.00784777		2670.37	0.07157729		3200.37	0.05927079		3730.4	-0.02528945
550.59	0.2691914		1080.59	0.00459192		1610.58	0.03566385		2140.58	-0.00721579		2670.57	0.07116352		3200.57	0.05918235		3730.6	-0.02621606
550.79	0.26985536		1080.79	0.00408466		1610.78	0.03635002		2140.78	-0.0073939		2670.77	0.07053831		3200.77	0.05955329		3730.8	-0.02623377
550.99	0.27045278		1080.99	0.00372084		1610.98	0.03676948		2140.98	-0.00785472		2670.97	0.07000257		3200.97	0.05901673		3731	-0.02593778
551.19	0.27095893		1081.19	0.00386138		1611.18	0.03623271		2141.18	-0.0081298		2671.17	0.06942469		3201.17	0.05963827		3731.2	-0.0268096
551.39	0.27114466		1081.39	0.00420037		1611.38	0.03617105		2141.38	-0.00797776		2671.37	0.06969941		3201.37	0.06004		3731.4	-0.02728738
551.59	0.27117529		1081.59	0.00455798		1611.58	0.03583649		2141.58	-0.00792468		2671.57	0.06974084		3201.57	0.06022696		3731.6	-0.02699786
551.79	0.27086943		1081.79	0.00428405		1611.78	0.03624272		2141.78	-0.0084516		2671.77	0.06992729		3201.77	0.06037523		3731.8	-0.02740361
551.99	0.27090497		1081.99	0.00448702		1611.98	0.03625668		2141.98	-0.0095456		2671.97	0.07041418		3201.97	0.06056108		3732	-0.02823067
552.19	0.27106846		1082.19	0.00518051		1612.18	0.03651045		2142.18	-0.00963125		2672.17	0.07040775		3202.17	0.06058504		3732.2	-0.02729244
552.39	0.27163209		1082.39	0.00539365		1612.38	0.03599058		2142.38	-0.01012836		2672.37	0.07035394		3202.37	0.06089018		3732.4	-0.02799376
552.59	0.27261414		1082.59	0.00544926		1612.58	0.03614468		2142.58	-0.00989858		2672.57	0.07126906		3202.57	0.06130845		3732.6	-0.02791486
552.79	0.27253107		1082.79	0.00520854		1612.78	0.03535962		2142.78	-0.00960966		2672.77	0.07113412		3202.77	0.06160405		3732.8	-0.02805971
552.99	0.27232995		1082.99	0.00553548		1612.98	0.03534914		2142.98	-0.01046898		2672.97	0.07060647		3202.97	0.06114907		3733	-0.02823176
553.19	0.27208198		1083.19	0.00549149		1613.18	0.03553844		2143.18	-0.01087448		2673.17	0.07053715		3203.17	0.06067617		3733.2	-0.02835609
553.39	0.27162784		1083.39	0.00556489		1613.38	0.03512945		2143.38	-0.01053343		2673.37	0.06981946		3203.37	0.060805		3733.4	-0.0277605
553.59	0.27071191		1083.59	0.0051122		1613.58	0.03543978		2143.58	-0.0105042		2673.57	0.06922022		3203.57	0.06125337		3733.6	-0.02761152
553.79	0.27074107		1083.79	0.00496075		1613.78	0.03453447		2143.78	-0.00973212		2673.77	0.06880245		3203.77	0.06042037		3733.8	-0.02842556
553.99	0.27017138		1083.99	0.00531906		1613.98	0.03393593		2143.98	-0.00908318		2673.97	0.0689094		3203.97	0.06034923		3734	-0.02790144
554.19	0.27094231		1084.19	0.00451489		1614.18	0.03457368		2144.18	-0.00954985		2674.17	0.06745782		3204.17	0.06007561		3734.2	-0.02748098
554.39	0.27091314		1084.39	0.00448383		1614.38	0.03481558		2144.38	-0.00956988		2674.37	0.06754602		3204.37	0.05907298		3734.4	-0.02687588
554.59	0.27130591		1084.59	0.00468381		1614.58	0.03424542		2144.58	-0.01018914		2674.57	0.06670021		3204.57	0.0580915		3734.6	-0.02675455
554.79	0.27169182		1084.79	0.00375167		1614.78	0.03486236		2144.78	-0.00998338		2674.77	0.06631419		3204.77	0.05834613		3734.8	-0.0266084
554.99	0.27146963		1084.99	0.00367195		1614.98	0.03433151		2144.98	-0.00945555		2674.97	0.06628719		3204.97	0.05780724		3735	-0.0273552
555.19	0.27053595		1085.19	0.00338464		1615.18	0.03407819		2145.18	-0.00966586		2675.17	0.06659844		3205.17	0.05822495		3735.2	-0.02715267
555.39	0.26960142		1085.39	0.00369315		1615.38	0.03426532		2145.38	-0.00908022		2675.37	0.06652358		3205.37	0.05831494		3735.4	-0.02686636
555.59	0.26934962		1085.59	0.00400006		1615.58	0.03447983		2145.58	-0.00851929		2675.57	0.0666684		3205.57	0.05785074		3735.6	-0.0273012
555.79	0.26887882		1085.79	0.00409666		1615.78	0.03505608		2145.78	-0.00855014		2675.77	0.06716347		3205.77	0.05792135		3735.8	-0.02796096
555.99	0.26884967		1085.99	0.00424088		1615.98	0.03610811		2145.98	-0.00891771		2675.97	0.06710314		3205.97	0.05880549		3736	-0.02832246
556.19	0.26840571		1086.19	0.00448672		1616.18	0.03695993		2146.18	-0.00854609		2676.17	0.0672758		3206.17	0.05867977		3736.2	-0.02790397
556.39	0.26882292		1086.39	0.00394661		1616.38	0.03710145		2146.38	-0.00849838		2676.37	0.06775273		3206.37	0.05821473		3736.4	-0.02886575
556.59	0.26873824		1086.59	0.0035139		1616.58	0.03824709		2146.58	-0.00835844		2676.57	0.06877431		3206.57	0.05804874		3736.6	-0.02865855
556.79	0.26770144		1086.79	0.00400615		1616.78	0.0387723		2146.78	-0.00918616		2676.77	0.06867762		3206.77	0.05785667		3736.8	-0.02854312
556.99	0.26704552		1086.99	0.00438819		1616.98	0.03962795		2146.98	-0.00936768		2676.97	0.06802618		3206.97	0.05814373		3737	-0.02877531
557.19	0.26676238		1087.19	0.00415708		1617.18	0.04035101		2147.18	-0.00939355		2677.17	0.06800731		3207.17	0.05827298		3737.2	-0.02864483
557.39	0.26744527		1087.39	0.0046899		1617.38	0.03958286		2147.38	-0.0089311		2677.37	0.06795542		3207.37	0.05874526		3737.4	-0.02865109
557.59	0.26729793		1087.59	0.00397625		1617.58	0.03850212		2147.58	-0.00986857		2677.57	0.06791792		3207.57	0.05834165		3737.6	-0.02922589
557.79	0.26840358		1087.79	0.00398988		1617.78	0.03758031		2147.78	-0.01046887		2677.77	0.06733327		3207.77	0.05798851		3737.8	-0.02858347
557.99	0.2690388		1087.99	0.00375349		1617.98	0.0380951		2147.98	-0.01093506		2677.97	0.06736112		3207.97	0.05784038		3738	-0.02791599
558.19	0.27027356		1088.19	0.00318101		1618.18	0.0383878		2148.18	-0.01180137		2678.17	0.06713603		3208.17	0.05779341		3738.2	-0.02728587
558.39	0.27071516		1088.39	0.00325375		1618.38	0.03776129		2148.38	-0.01210152		2678.37	0.06756893		3208.37	0.0574634		3738.4	-0.02730775
558.59	0.27142315		1088.59	0.00298192		1618.58	0.03707699		2148.58	-0.01251961		2678.57	0.06781672		3208.57	0.05748654		3738.6	-0.02753635
558.79	0.271921		1088.79	0.00263856		1618.78	0.0367495		2148.78	-0.01200687		2678.77	0.0684428		3208.77	0.05812871		3738.8	-0.02792176
558.99	0.27184696		1088.99	0.00323223		1618.98	0.03648449		2148.98	-0.01216214		2678.97	0.06891309		3208.97	0.05842594		3739	-0.02825858
559.19	0.27144627		1089.19	0.00315605		1619.18	0.03693128		2149.18	-0.01217827		2679.17	0.06926164		3209.17	0.05879743		3739.2	-0.02812372
559.39	0.27072255		1089.39	0.00397376		1619.38	0.03717147		2149.38	-0.01157722		2679.37	0.06946456		3209.37	0.05886969		3739.4	-0.02863823
559.59	0.2707515		1089.59	0.00394635		1619.58	0.03782421		2149.58	-0.01123508		2679.57	0.07023478		3209.57	0.05864449		3739.6	-0.02959609
559.79	0.27052251		1089.79	0.0042536		1619.78	0.03826083		2149.78	-0.0112478		2679.77	0.07116449		3209.77	0.05936916		3739.8	-0.03007278
