# Supplementary material for: Functional development of a V3/glycan-specific broadly neutralizing antibody isolated from a case of HIV superinfection
Source: eLife journal article supplement (doi:10.7554/elife.68110), 2021-07-15
Supplement: fig2-data2 [file C9.xls]

Vers 3.43 Data Simulation
Conc1	1.25E-07	1.25E-07	1.25E-07	1.25E-07	5E-07	5E-07	5E-07	5E-07
Start1	199.99	729.99	1259.98	1789.99	2319.98	2850.01	3380	3910
Stop1	559.79	1089.79	1619.78	2149.79	2679.78	3209.81	3739.8	4269.8
Time1	Data1	Sim1	Time2	Data2	Sim2	Time3	Data3	Sim3	Time4	Data4	Sim4	Time5	Data5	Sim5	Time6	Data6	Sim6	Time7	Data7	Sim7	Time8	Data8	Sim8
199.99	0.01094848		729.99	0.003745		1259.98	0.00267903		1789.99	-0.00217289		2319.98	0.00625363		2850.01	-0.00507427		3380	0.00746048		3910	-0.00147736
200.19	0.01035915		730.19	0.00308241		1260.18	0.00223031		1790.19	-0.00218313		2320.18	0.00551476		2850.21	-0.00511212		3380.2	0.00842448		3910.2	-0.00047923
200.39	0.01010323		730.39	0.00251697		1260.38	0.00210617		1790.39	-0.0020583		2320.38	0.00482496		2850.41	-0.00563872		3380.4	0.00940598		3910.4	0.00038169
200.59	0.00972321		730.59	0.00277654		1260.58	0.00196459		1790.59	-0.00224284		2320.58	0.0047619		2850.61	-0.0062704		3380.6	0.01020361		3910.6	0.00134113
200.79	0.00928131		730.79	0.00329725		1260.78	0.00159712		1790.79	-0.00193556		2320.78	0.00488036		2850.81	-0.00632418		3380.8	0.01049345		3910.8	0.00210571
200.99	0.00926129		730.99	0.00255182		1260.98	0.00106264		1790.99	-0.0015902		2320.98	0.0046327		2851.01	-0.00600256		3381	0.01130164		3911	0.00285162
201.19	0.00884339		731.19	0.00320145		1261.18	0.00055495		1791.19	-0.0017035		2321.18	0.00512234		2851.21	-0.00614543		3381.2	0.01154138		3911.2	0.00299471
201.39	0.00866832		731.39	0.00287747		1261.38	0.00092983		1791.39	-0.00149691		2321.38	0.00535448		2851.41	-0.0064445		3381.4	0.01160926		3911.4	0.00324788
201.59	0.00920038		731.59	0.0019605		1261.58	0.00061282		1791.59	-0.00138605		2321.58	0.00552631		2851.61	-0.00613796		3381.6	0.01105618		3911.6	0.00307975
201.79	0.00968152		731.79	0.0017332		1261.78	0.00027304		1791.79	-0.00120416		2321.78	0.00549109		2851.81	-0.00625588		3381.8	0.01080708		3911.8	0.00264834
201.99	0.01102413		731.99	0.00169343		1261.98	-0.00039518		1791.99	-0.00123303		2321.98	0.00662264		2852.01	-0.00653366		3382	0.01061824		3912	0.00220729
202.19	0.01254135		732.19	0.00184871		1262.18	0.00012911		1792.19	-0.00137202		2322.18	0.00716466		2852.21	-0.00700671		3382.2	0.01075254		3912.2	0.00104105
202.39	0.01364432		732.39	0.00111853		1262.38	0.00005898		1792.39	-0.00178245		2322.38	0.00767535		2852.41	-0.0075644		3382.4	0.01028969		3912.4	-0.00011195
202.59	0.01397817		732.59	0.00147336		1262.58	0.00031748		1792.59	-0.0021759		2322.58	0.00775371		2852.61	-0.00788738		3382.6	0.01100994		3912.6	-0.00076147
202.79	0.01479482		732.79	0.00150815		1262.78	0.0006497		1792.79	-0.00212941		2322.78	0.00830848		2852.81	-0.00796736		3382.8	0.00970337		3912.8	-0.00124333
202.99	0.01679624		732.99	0.00226148		1262.98	0.00085207		1792.99	-0.00293802		2322.98	0.00848576		2853.01	-0.00796055		3383	0.01035937		3913	-0.0010492
203.19	0.01857019		733.19	0.00219647		1263.18	0.00016501		1793.19	-0.00274888		2323.18	0.00918433		2853.21	-0.00743244		3383.2	0.01034644		3913.2	-0.00056511
203.39	0.02055208		733.39	0.00240002		1263.38	0.00069929		1793.39	-0.00256515		2323.38	0.00957658		2853.41	-0.00814153		3383.4	0.01022711		3913.4	-0.00102409
203.59	0.02213667		733.59	0.00246147		1263.58	0.00050135		1793.59	-0.00183796		2323.58	0.00911256		2853.61	-0.00872293		3383.6	0.01079008		3913.6	-0.00089224
203.79	0.0234562		733.79	0.00333409		1263.78	0.00184148		1793.79	-0.00295576		2323.78	0.00832774		2853.81	-0.0084539		3383.8	0.01159201		3913.8	-0.00074195
203.99	0.02454705		733.99	0.00286545		1263.98	0.00179859		1793.99	-0.00341796		2323.98	0.00816948		2854.01	-0.00753341		3384	0.01207434		3914	-0.00027878
204.19	0.02692545		734.19	0.00288628		1264.18	0.00201906		1794.19	-0.00320633		2324.18	0.00757207		2854.21	-0.00818314		3384.2	0.01272124		3914.2	0.00028967
204.39	0.02888673		734.39	0.00275404		1264.38	0.00298446		1794.39	-0.00301533		2324.38	0.00760044		2854.41	-0.00863149		3384.4	0.01254389		3914.4	0.00062254
204.59	0.02955292		734.59	0.00374196		1264.58	0.0031569		1794.59	-0.00320751		2324.58	0.00794459		2854.61	-0.00815097		3384.6	0.01258727		3914.6	0.00029151
204.79	0.03030252		734.79	0.0038742		1264.78	0.00284941		1794.79	-0.00274442		2324.78	0.00772603		2854.81	-0.00780573		3384.8	0.01193044		3914.8	0.00042657
204.99	0.03118336		734.99	0.0028408		1264.98	0.00393698		1794.99	-0.00286168		2324.98	0.00698027		2855.01	-0.00764745		3385	0.01163762		3915	0.00001963
205.19	0.03210762		735.19	0.00341024		1265.18	0.00499816		1795.19	-0.00308438		2325.18	0.00743477		2855.21	-0.0079023		3385.2	0.01070218		3915.2	-0.0003971
205.39	0.0333805		735.39	0.00241196		1265.38	0.00655317		1795.39	-0.00311973		2325.38	0.00744748		2855.41	-0.00786017		3385.4	0.01064062		3915.4	-0.00051361
205.59	0.03426948		735.59	0.00092714		1265.58	0.00663622		1795.59	-0.00438882		2325.58	0.00768593		2855.61	-0.0073389		3385.6	0.01042851		3915.6	-0.00065543
205.79	0.03436436		735.79	0.00130827		1265.78	0.00723755		1795.79	-0.0045687		2325.78	0.00769331		2855.81	-0.0073827		3385.8	0.01076868		3915.8	-0.00063398
205.99	0.0352175		735.99	0.00145052		1265.98	0.00821304		1795.99	-0.00430588		2325.98	0.00894543		2856.01	-0.00785816		3386	0.00986228		3916	-0.00112241
206.19	0.03482435		736.19	0.00151115		1266.18	0.00902454		1796.19	-0.00421522		2326.18	0.00828673		2856.21	-0.0072342		3386.2	0.00931358		3916.2	-0.00235423
206.39	0.03506104		736.39	0.00037941		1266.38	0.00834775		1796.39	-0.0035164		2326.38	0.00884064		2856.41	-0.00752321		3386.4	0.00881638		3916.4	-0.00326233
206.59	0.03501632		736.59	0.00046282		1266.58	0.0075399		1796.59	-0.00308211		2326.58	0.00982803		2856.61	-0.00691656		3386.6	0.00867971		3916.6	-0.00322438
206.79	0.03687534		736.79	0.00090837		1266.78	0.00623227		1796.79	-0.00304418		2326.78	0.010371		2856.81	-0.00696406		3386.8	0.00734741		3916.8	-0.00315358
206.99	0.03778438		736.99	0.00106882		1266.98	0.00501383		1796.99	-0.00395655		2326.98	0.01003636		2857.01	-0.00682807		3387	0.00712513		3917	-0.00277415
207.19	0.03850337		737.19	0.00131577		1267.18	0.00442019		1797.19	-0.00285112		2327.18	0.01081035		2857.21	-0.00778307		3387.2	0.00621097		3917.2	-0.0027755
207.39	0.03911534		737.39	0.00148524		1267.38	0.00426508		1797.39	-0.00262462		2327.38	0.01106803		2857.41	-0.00884592		3387.4	0.0063045		3917.4	-0.00365039
207.59	0.039325		737.59	0.0018254		1267.58	0.0035027		1797.59	-0.00299221		2327.58	0.0105709		2857.61	-0.00900064		3387.6	0.00600824		3917.6	-0.00289388
207.79	0.04016988		737.79	0.00267109		1267.78	0.00333194		1797.79	-0.00399436		2327.78	0.01133345		2857.81	-0.00809893		3387.8	0.00610031		3917.8	-0.00280696
207.99	0.04103373		737.99	0.00277529		1267.98	0.00343052		1797.99	-0.00371078		2327.98	0.01127131		2858.01	-0.00794664		3388	0.00604512		3918	-0.00220585
208.19	0.04226916		738.19	0.00293915		1268.18	0.0028108		1798.19	-0.00339939		2328.18	0.011664		2858.21	-0.0087318		3388.2	0.0058281		3918.2	-0.0013219
208.39	0.0435656		738.39	0.00305596		1268.38	0.00380206		1798.39	-0.00333723		2328.38	0.01148845		2858.41	-0.00837607		3388.4	0.00580849		3918.4	-0.00186084
208.59	0.04498831		738.59	0.00393188		1268.58	0.00393642		1798.59	-0.00397367		2328.58	0.01092124		2858.61	-0.00800247		3388.6	0.00622458		3918.6	-0.00236868
208.79	0.04720904		738.79	0.00380076		1268.78	0.00455941		1798.79	-0.00420468		2328.78	0.01046984		2858.81	-0.00749857		3388.8	0.00662283		3918.8	-0.00198136
208.99	0.04917414		738.99	0.00358317		1268.98	0.00639277		1798.99	-0.0041274		2328.98	0.01090057		2859.01	-0.00728752		3389	0.00761602		3919	-0.0023849
209.19	0.05135985		739.19	0.00355845		1269.18	0.00750022		1799.19	-0.00434444		2329.18	0.01097044		2859.21	-0.00652057		3389.2	0.00891606		3919.2	-0.00242347
209.39	0.05267717		739.39	0.00308858		1269.38	0.00864487		1799.39	-0.00510298		2329.38	0.01095864		2859.41	-0.00647209		3389.4	0.00991546		3919.4	-0.00162339
209.59	0.05261489		739.59	0.00257432		1269.58	0.00981767		1799.59	-0.00512399		2329.58	0.01042641		2859.61	-0.006489		3389.6	0.01026994		3919.6	-0.00146834
209.79	0.05367178		739.79	0.00297452		1269.78	0.01065348		1799.79	-0.00463788		2329.78	0.0108724		2859.81	-0.0060529		3389.8	0.00969211		3919.8	-0.00112714
209.99	0.05427772		739.99	0.00295953		1269.98	0.01154328		1799.99	-0.00364022		2329.98	0.01166272		2860.01	-0.00617791		3390	0.00897453		3920	-0.00074966
210.19	0.05467951		740.19	0.00311714		1270.18	0.01146808		1800.19	-0.00351181		2330.18	0.0110145		2860.21	-0.00572734		3390.2	0.00931427		3920.2	-0.00019617
210.39	0.05571463		740.39	0.00243846		1270.38	0.01101139		1800.39	-0.0027558		2330.38	0.01167372		2860.41	-0.0066148		3390.4	0.00957644		3920.4	0.00108727
210.59	0.0568232		740.59	0.00275669		1270.58	0.01049008		1800.59	-0.00335547		2330.58	0.01168036		2860.61	-0.0061069		3390.6	0.00980579		3920.6	0.00113946
210.79	0.05758542		740.79	0.00331362		1270.78	0.00958313		1800.79	-0.0031782		2330.78	0.0124761		2860.81	-0.00704658		3390.8	0.00937775		3920.8	0.00061011
210.99	0.05722102		740.99	0.0024419		1270.98	0.00840026		1800.99	-0.00380067		2330.98	0.01211736		2861.01	-0.0082436		3391	0.00931359		3921	0.00098823
211.19	0.05829384		741.19	0.00178689		1271.18	0.00860875		1801.19	-0.00290236		2331.18	0.01296123		2861.21	-0.00910219		3391.2	0.00960443		3921.2	0.00135107
211.39	0.05846612		741.39	0.00181526		1271.38	0.00805449		1801.39	-0.00293881		2331.38	0.01311071		2861.41	-0.00872964		3391.4	0.00946489		3921.4	0.00178166
211.59	0.05910689		741.59	0.00211446		1271.58	0.00722908		1801.59	-0.00289458		2331.58	0.01326558		2861.61	-0.00849368		3391.6	0.00958572		3921.6	0.00242247
211.79	0.05910856		741.79	0.00238903		1271.78	0.00681182		1801.79	-0.00286632		2331.78	0.013917		2861.81	-0.00761419		3391.8	0.0101433		3921.8	0.00204515
211.99	0.06020303		741.99	0.00223873		1271.98	0.00668272		1801.99	-0.00259525		2331.98	0.0136213		2862.01	-0.00788596		3392	0.01079052		3922	0.00168493
212.19	0.06156676		742.19	0.00238562		1272.18	0.00544961		1802.19	-0.00226646		2332.18	0.01398248		2862.21	-0.00769797		3392.2	0.01094483		3922.2	0.00137932
212.39	0.06376669		742.39	0.00321185		1272.38	0.00595658		1802.39	-0.00133682		2332.38	0.01374499		2862.41	-0.00773373		3392.4	0.01141361		3922.4	0.00057471
212.59	0.0654607		742.59	0.00305361		1272.58	0.00556976		1802.59	-0.00136273		2332.58	0.01328278		2862.61	-0.00721389		3392.6	0.01201885		3922.6	0.00022627
212.79	0.06691224		742.79	0.00319207		1272.78	0.00602994		1802.79	-0.00149525		2332.78	0.01323987		2862.81	-0.00715202		3392.8	0.01221511		3922.8	-0.00040654
212.99	0.06811198		742.99	0.0037052		1272.98	0.00691719		1802.99	-0.00124893		2332.98	0.01280333		2863.01	-0.00787957		3393	0.0124053		3923	-0.00153533
213.19	0.06970817		743.19	0.00390227		1273.18	0.00756332		1803.19	-0.00125731		2333.18	0.01253524		2863.21	-0.00767185		3393.2	0.01212014		3923.2	-0.00247872
213.39	0.07035593		743.39	0.00387119		1273.38	0.00759254		1803.39	-0.00146534		2333.38	0.01323872		2863.41	-0.00772205		3393.4	0.01116407		3923.4	-0.00278142
213.59	0.07078008		743.59	0.00431605		1273.58	0.00788211		1803.59	-0.0013889		2333.58	0.01383437		2863.61	-0.00754437		3393.6	0.01095244		3923.6	-0.00418436
213.79	0.07267468		743.79	0.00465328		1273.78	0.0078742		1803.79	-0.00188593		2333.78	0.01452426		2863.81	-0.00740888		3393.8	0.00975313		3923.8	-0.00387487
213.99	0.07328765		743.99	0.00519751		1273.98	0.00866294		1803.99	-0.00164483		2333.98	0.01413961		2864.01	-0.00735349		3394	0.00925659		3924	-0.00354861
214.19	0.07411914		744.19	0.00590966		1274.18	0.00853343		1804.19	-0.00176689		2334.18	0.01375312		2864.21	-0.00746631		3394.2	0.00822125		3924.2	-0.003583
214.39	0.0746388		744.39	0.00561808		1274.38	0.00779346		1804.39	-0.00204457		2334.38	0.01412265		2864.41	-0.00787925		3394.4	0.00794051		3924.4	-0.00328473
214.59	0.07528986		744.59	0.00588419		1274.58	0.00703098		1804.59	-0.00324121		2334.58	0.01490476		2864.61	-0.00798464		3394.6	0.00832419		3924.6	-0.00375937
214.79	0.07570696		744.79	0.0059127		1274.78	0.0061514		1804.79	-0.00374916		2334.78	0.0155202		2864.81	-0.00872582		3394.8	0.0075266		3924.8	-0.00423013
214.99	0.07667064		744.99	0.00428589		1274.98	0.00514073		1804.99	-0.00451618		2334.98	0.01555448		2865.01	-0.00851731		3395	0.00772838		3925	-0.00339395
215.19	0.07773566		745.19	0.00399914		1275.18	0.00585776		1805.19	-0.00392305		2335.18	0.01658933		2865.21	-0.00727886		3395.2	0.00775797		3925.2	-0.00261648
215.39	0.07758913		745.39	0.00453156		1275.38	0.00562959		1805.39	-0.0044049		2335.38	0.01719491		2865.41	-0.00671921		3395.4	0.00717783		3925.4	-0.00169872
215.59	0.07791642		745.59	0.0048059		1275.58	0.00531365		1805.59	-0.00495907		2335.58	0.01735689		2865.61	-0.0063942		3395.6	0.00789767		3925.6	-0.00164073
215.79	0.07783765		745.79	0.00474129		1275.78	0.00527538		1805.79	-0.00506413		2335.78	0.01741883		2865.81	-0.00630977		3395.8	0.0080903		3925.8	-0.00153369
215.99	0.07953371		745.99	0.00487764		1275.98	0.00509794		1805.99	-0.00471102		2335.98	0.01784039		2866.01	-0.00664499		3396	0.00832496		3926	-0.00156735
216.19	0.08050385		746.19	0.00527602		1276.18	0.00496552		1806.19	-0.00482119		2336.18	0.01797251		2866.21	-0.00648056		3396.2	0.00853496		3926.2	-0.00043526
216.39	0.0807509		746.39	0.00515604		1276.38	0.00590541		1806.39	-0.00412017		2336.38	0.01786452		2866.41	-0.00713461		3396.4	0.00961334		3926.4	-0.00011412
216.59	0.08137924		746.59	0.00483589		1276.58	0.00672955		1806.59	-0.00433334		2336.58	0.0170436		2866.61	-0.00743088		3396.6	0.01004545		3926.6	-0.00013358
216.79	0.08168625		746.79	0.00562365		1276.78	0.00720744		1806.79	-0.00494286		2336.78	0.01646761		2866.81	-0.00707637		3396.8	0.01013224		3926.8	-0.00010809
216.99	0.08257022		746.99	0.00576459		1276.98	0.00739702		1806.99	-0.00525975		2336.98	0.01651755		2867.01	-0.00704725		3397	0.01116153		3927	0.00019473
217.19	0.08306749		747.19	0.00594551		1277.18	0.00741675		1807.19	-0.00587155		2337.18	0.01744641		2867.21	-0.00669141		3397.2	0.01183706		3927.2	-0.0001415
217.39	0.0833657		747.39	0.00684402		1277.38	0.0077464		1807.39	-0.00596648		2337.38	0.01716346		2867.41	-0.00598896		3397.4	0.01164156		3927.4	-0.00066011
217.59	0.08407196		747.59	0.0073403		1277.58	0.00863006		1807.59	-0.00566501		2337.58	0.0169207		2867.61	-0.00614795		3397.6	0.01148523		3927.6	-0.00108834
217.79	0.08455274		747.79	0.00744923		1277.78	0.00894212		1807.79	-0.00553377		2337.78	0.01585872		2867.81	-0.00614615		3397.8	0.01014064		3927.8	-0.0005887
217.99	0.08551333		747.99	0.00805082		1277.98	0.00884985		1807.99	-0.00477867		2337.98	0.01541035		2868.01	-0.00635697		3398	0.00959727		3928	-0.00058512
218.19	0.08657035		748.19	0.00884407		1278.18	0.00856333		1808.19	-0.00412757		2338.18	0.01531895		2868.21	-0.00679505		3398.2	0.00911247		3928.2	-0.00113783
218.39	0.08759663		748.39	0.00857702		1278.38	0.00821512		1808.39	-0.004285		2338.38	0.01519735		2868.41	-0.007015		3398.4	0.00964476		3928.4	-0.00131492
218.59	0.08946566		748.59	0.00859481		1278.58	0.00789791		1808.59	-0.00364488		2338.58	0.01496832		2868.61	-0.00694586		3398.6	0.00989334		3928.6	-0.00134528
218.79	0.0898813		748.79	0.00837274		1278.78	0.00792435		1808.79	-0.00327345		2338.78	0.01430658		2868.81	-0.00691729		3398.8	0.00935862		3928.8	-0.00218008
218.99	0.09091543		748.99	0.00819098		1278.98	0.00790549		1808.99	-0.00300076		2338.98	0.01483883		2869.01	-0.00624999		3399	0.00908632		3929	-0.00210783
219.19	0.09141229		749.19	0.00893609		1279.18	0.0086832		1809.19	-0.00320023		2339.18	0.01486659		2869.21	-0.00619837		3399.2	0.00785447		3929.2	-0.00182641
219.39	0.09204795		749.39	0.00888382		1279.38	0.00981404		1809.39	-0.00395449		2339.38	0.01522136		2869.41	-0.00618735		3399.4	0.00690175		3929.4	-0.00206957
219.59	0.09352508		749.59	0.00914859		1279.58	0.01004602		1809.59	-0.00380515		2339.58	0.01486611		2869.61	-0.00637928		3399.6	0.00661112		3929.6	-0.00254813
219.79	0.09484339		749.79	0.00914624		1279.78	0.01066849		1809.79	-0.00350681		2339.78	0.01538902		2869.81	-0.00638391		3399.8	0.00592692		3929.8	-0.002607
219.99	0.09623885		749.99	0.00982606		1279.98	0.0110931		1809.99	-0.00323736		2339.98	0.01572691		2870.01	-0.0062139		3400	0.00648814		3930	-0.00321704
220.19	0.09618578		750.19	0.0099661		1280.18	0.01139124		1810.19	-0.00387263		2340.18	0.01619178		2870.21	-0.00613935		3400.2	0.00772375		3930.2	-0.00300609
220.39	0.09684163		750.39	0.0103484		1280.38	0.01221759		1810.39	-0.00347792		2340.38	0.01600984		2870.41	-0.00710126		3400.4	0.0088038		3930.4	-0.00377789
220.59	0.09705736		750.59	0.01098963		1280.58	0.012292		1810.59	-0.00347235		2340.58	0.01539429		2870.61	-0.00773698		3400.6	0.0088485		3930.6	-0.00440889
220.79	0.09733921		750.79	0.01131402		1280.78	0.01252596		1810.79	-0.00393622		2340.78	0.0150285		2870.81	-0.00705303		3400.8	0.00962423		3930.8	-0.00421704
220.99	0.09806482		750.99	0.01147808		1280.98	0.01399593		1810.99	-0.00412833		2340.98	0.01551672		2871.01	-0.00830799		3401	0.01023989		3931	-0.00466305
221.19	0.09870184		751.19	0.01198193		1281.18	0.01501148		1811.19	-0.00394365		2341.18	0.01526868		2871.21	-0.00839365		3401.2	0.01046188		3931.2	-0.00526523
221.39	0.09934537		751.39	0.01217399		1281.38	0.01644459		1811.39	-0.00297483		2341.38	0.01443793		2871.41	-0.00812492		3401.4	0.01042178		3931.4	-0.00460826
221.59	0.10012918		751.59	0.01156839		1281.58	0.01708355		1811.59	-0.00321133		2341.58	0.01413787		2871.61	-0.00860526		3401.6	0.01069951		3931.6	-0.00412498
221.79	0.10084923		751.79	0.01101383		1281.78	0.01757551		1811.79	-0.00260312		2341.78	0.01330693		2871.81	-0.00875132		3401.8	0.0107991		3931.8	-0.00320642
221.99	0.10236059		751.99	0.01089502		1281.98	0.01800012		1811.99	-0.00186265		2341.98	0.01343358		2872.01	-0.00922053		3402	0.01090606		3932	-0.00320594
222.19	0.10326376		752.19	0.01020366		1282.18	0.01805009		1812.19	-0.00149747		2342.18	0.01353103		2872.21	-0.0089279		3402.2	0.01090038		3932.2	-0.00272677
222.39	0.10363256		752.39	0.00902898		1282.38	0.01776838		1812.39	-0.00065257		2342.38	0.0142817		2872.41	-0.00901859		3402.4	0.01133039		3932.4	-0.00180801
222.59	0.10491185		752.59	0.00879151		1282.58	0.01706919		1812.59	0.00018252		2342.58	0.0144832		2872.61	-0.0088742		3402.6	0.01121828		3932.6	-0.00095581
222.79	0.10511793		752.79	0.00828031		1282.78	0.01657891		1812.79	0.00034424		2342.78	0.01550324		2872.81	-0.0089145		3402.8	0.01079197		3932.8	-0.00042295
222.99	0.10611692		752.99	0.008513		1282.98	0.0159389		1812.99	0.0004468		2342.98	0.01666587		2873.01	-0.00786427		3403	0.01077577		3933	-0.00028869
223.19	0.10597774		753.19	0.00840607		1283.18	0.01595409		1813.19	-0.00023907		2343.18	0.01676471		2873.21	-0.00738355		3403.2	0.0099133		3933.2	0.0003387
223.39	0.10697826		753.39	0.00791509		1283.38	0.01614818		1813.39	-0.00028118		2343.38	0.01838739		2873.41	-0.00664109		3403.4	0.00961764		3933.4	0.00042639
223.59	0.10777294		753.59	0.00839807		1283.58	0.01526934		1813.59	-0.00081016		2343.58	0.01912923		2873.61	-0.00607148		3403.6	0.00990316		3933.6	0.00066458
223.79	0.10815924		753.79	0.0090212		1283.78	0.01536919		1813.79	-0.00213427		2343.78	0.01966976		2873.81	-0.00561279		3403.8	0.00986172		3933.8	0.00095251
223.99	0.10848821		753.99	0.00981933		1283.98	0.01443691		1813.99	-0.00320723		2343.98	0.01976123		2874.01	-0.00519347		3404	0.01027875		3934	0.00096884
224.19	0.10863633		754.19	0.01025806		1284.18	0.01432026		1814.19	-0.00393834		2344.18	0.01994085		2874.21	-0.00502921		3404.2	0.01088634		3934.2	0.00054409
224.39	0.10880798		754.39	0.01048284		1284.38	0.01347217		1814.39	-0.00381699		2344.38	0.01916705		2874.41	-0.00506165		3404.4	0.01159512		3934.4	0.00004158
224.59	0.10887232		754.59	0.01081097		1284.58	0.01266665		1814.59	-0.0036505		2344.58	0.01827656		2874.61	-0.00477478		3404.6	0.01158821		3934.6	-0.0005142
224.79	0.11009455		754.79	0.01174871		1284.78	0.01286451		1814.79	-0.00396542		2344.78	0.01804312		2874.81	-0.00400929		3404.8	0.01198203		3934.8	-0.00043844
224.99	0.11059042		754.99	0.01168266		1284.98	0.01426165		1814.99	-0.0039732		2344.98	0.01817129		2875.01	-0.00473778		3405	0.01205482		3935	-0.00054254
225.19	0.11112914		755.19	0.01183478		1285.18	0.01404659		1815.19	-0.00457116		2345.18	0.01745154		2875.21	-0.00499692		3405.2	0.01281853		3935.2	0.00024343
225.39	0.11169216		755.39	0.01170376		1285.38	0.01511781		1815.39	-0.00509419		2345.38	0.01583482		2875.41	-0.0044698		3405.4	0.01371504		3935.4	0.00108078
225.59	0.11266713		755.59	0.01212149		1285.58	0.01522948		1815.59	-0.00515843		2345.58	0.01539555		2875.61	-0.0042501		3405.6	0.01409009		3935.6	0.00085123
225.79	0.1132592		755.79	0.01184587		1285.78	0.01579023		1815.79	-0.00457455		2345.78	0.01534268		2875.81	-0.00420997		3405.8	0.01350042		3935.8	0.0008554
225.99	0.11407577		755.99	0.01137065		1285.98	0.01527697		1815.99	-0.00480169		2345.98	0.01552867		2876.01	-0.00496464		3406	0.01357267		3936	0.00028704
226.19	0.11455658		756.19	0.01101192		1286.18	0.01499718		1816.19	-0.00443984		2346.18	0.01646359		2876.21	-0.00508678		3406.2	0.01328048		3936.2	0.00118613
226.39	0.11461408		756.39	0.01061858		1286.38	0.01486207		1816.39	-0.00376584		2346.38	0.01628435		2876.41	-0.00569247		3406.4	0.01314323		3936.4	0.00118882
226.59	0.11519861		756.59	0.01038176		1286.58	0.0141156		1816.59	-0.00297368		2346.58	0.01603701		2876.61	-0.00629525		3406.6	0.01232368		3936.6	0.00080896
226.79	0.11589632		756.79	0.00981617		1286.78	0.01451892		1816.79	-0.00215912		2346.78	0.01680643		2876.81	-0.00720206		3406.8	0.01164946		3936.8	0.00015869
226.99	0.11636424		756.99	0.01116084		1286.98	0.01485635		1816.99	-0.00222929		2346.98	0.0170698		2877.01	-0.00763027		3407	0.01103152		3937	-0.00044736
227.19	0.11687377		757.19	0.01027339		1287.18	0.01582254		1817.19	-0.00287753		2347.18	0.01690564		2877.21	-0.00789582		3407.2	0.00959991		3937.2	-0.00040616
227.39	0.11700182		757.39	0.01074741		1287.38	0.01650063		1817.39	-0.00268024		2347.38	0.01717885		2877.41	-0.00780738		3407.4	0.00874354		3937.4	-0.00037912
227.59	0.11762289		757.59	0.01102065		1287.58	0.01717969		1817.59	-0.00339111		2347.58	0.01688383		2877.61	-0.00773453		3407.6	0.00887113		3937.6	0.0003485
227.79	0.11778019		757.79	0.01108565		1287.78	0.01800306		1817.79	-0.00342386		2347.78	0.01708885		2877.81	-0.00820585		3407.8	0.00864019		3937.8	0.00035214
227.99	0.11933665		757.99	0.01069902		1287.98	0.01743291		1817.99	-0.00416209		2347.98	0.0177466		2878.01	-0.00787563		3408	0.00853891		3938	0.00070555
228.19	0.12025463		758.19	0.01127039		1288.18	0.01775931		1818.19	-0.0037754		2348.18	0.01717174		2878.21	-0.00781194		3408.2	0.00942817		3938.2	0.00074818
228.39	0.12059853		758.39	0.01192519		1288.38	0.01686889		1818.39	-0.00399358		2348.38	0.01687679		2878.41	-0.00672995		3408.4	0.01003856		3938.4	0.00098749
228.59	0.12205711		758.59	0.0131912		1288.58	0.01701651		1818.59	-0.00450036		2348.58	0.01657473		2878.61	-0.00593291		3408.6	0.01009983		3938.6	0.00112079
228.79	0.12322644		758.79	0.01393769		1288.78	0.01842772		1818.79	-0.00473753		2348.78	0.0173364		2878.81	-0.00585307		3408.8	0.01073493		3938.8	0.00107764
228.99	0.12348581		758.99	0.01359804		1288.98	0.01952168		1818.99	-0.00509542		2348.98	0.01725736		2879.01	-0.00566482		3409	0.0110265		3939	0.00098949
229.19	0.12461915		759.19	0.01435546		1289.18	0.01987157		1819.19	-0.00545246		2349.18	0.01756326		2879.21	-0.00496719		3409.2	0.01224394		3939.2	0.00154413
229.39	0.12627895		759.39	0.01500216		1289.38	0.02123784		1819.39	-0.00549682		2349.38	0.0173089		2879.41	-0.00308239		3409.4	0.01207627		3939.4	0.00134891
229.59	0.12753743		759.59	0.01539481		1289.58	0.02124657		1819.59	-0.00550737		2349.58	0.01793026		2879.61	-0.00263893		3409.6	0.01197449		3939.6	0.00045583
229.79	0.12912297		759.79	0.01517397		1289.78	0.02104087		1819.79	-0.00590855		2349.78	0.01806252		2879.81	-0.00327516		3409.8	0.01175065		3939.8	0.00034666
229.99	0.1292745		759.99	0.01448181		1289.98	0.02114653		1819.99	-0.00545608		2349.98	0.01876126		2880.01	-0.00322189		3410	0.01229435		3940	-0.00016991
230.19	0.12982707		760.19	0.01466135		1290.18	0.02109105		1820.19	-0.00547579		2350.18	0.01861726		2880.21	-0.00247824		3410.2	0.01192042		3940.2	-0.00018609
230.39	0.12973356		760.39	0.01457282		1290.38	0.02087878		1820.39	-0.00520098		2350.38	0.01751461		2880.41	-0.0030892		3410.4	0.01190029		3940.4	-0.00075809
230.59	0.13058691		760.59	0.01413273		1290.58	0.0208494		1820.59	-0.0042253		2350.58	0.01840787		2880.61	-0.0033307		3410.6	0.0111014		3940.6	-0.00206077
230.79	0.13216295		760.79	0.01383254		1290.78	0.02110561		1820.79	-0.00404935		2350.78	0.0195361		2880.81	-0.00389818		3410.8	0.01119605		3940.8	-0.00226248
230.99	0.1328156		760.99	0.01400913		1290.98	0.02031167		1820.99	-0.00401764		2350.98	0.01900684		2881.01	-0.00324115		3411	0.01127129		3941	-0.00181906
231.19	0.13279544		761.19	0.01336266		1291.18	0.02044244		1821.19	-0.00303346		2351.18	0.01769283		2881.21	-0.0027945		3411.2	0.01141707		3941.2	-0.00241545
231.39	0.13278771		761.39	0.01351625		1291.38	0.01995569		1821.39	-0.00259525		2351.38	0.01739209		2881.41	-0.00318011		3411.4	0.01142771		3941.4	-0.0018575
231.59	0.13404357		761.59	0.01286251		1291.58	0.01935744		1821.59	-0.0022497		2351.58	0.01826159		2881.61	-0.00431169		3411.6	0.01227181		3941.6	-0.00116004
231.79	0.13418517		761.79	0.0119552		1291.78	0.01899637		1821.79	-0.0027788		2351.78	0.01864224		2881.81	-0.00481961		3411.8	0.01251142		3941.8	-0.00164893
231.99	0.13557705		761.99	0.01221909		1291.98	0.01769794		1821.99	-0.00388856		2351.98	0.01863127		2882.01	-0.00440017		3412	0.01375858		3942	-0.00123928
232.19	0.1357211		762.19	0.01372885		1292.18	0.01718407		1822.19	-0.00387176		2352.18	0.01774259		2882.21	-0.00421889		3412.2	0.0145882		3942.2	-0.00117239
232.39	0.13618857		762.39	0.01398616		1292.38	0.01608577		1822.39	-0.00435985		2352.38	0.01754081		2882.41	-0.00371334		3412.4	0.01555725		3942.4	-0.00065172
232.59	0.13644044		762.59	0.01332971		1292.58	0.01590974		1822.59	-0.00465237		2352.58	0.01770664		2882.61	-0.00457779		3412.6	0.01606261		3942.6	0.00018175
232.79	0.13723358		762.79	0.01296139		1292.78	0.0163954		1822.79	-0.00457464		2352.78	0.01755631		2882.81	-0.00490382		3412.8	0.01704596		3942.8	0.00068846
232.99	0.13760008		762.99	0.01358765		1292.98	0.01641679		1822.99	-0.00445003		2352.98	0.01761559		2883.01	-0.0043223		3413	0.01739523		3943	0.00107684
233.19	0.13808303		763.19	0.01438132		1293.18	0.01628604		1823.19	-0.00407851		2353.18	0.01869308		2883.21	-0.00371598		3413.2	0.01773852		3943.2	0.00125283
233.39	0.13807778		763.39	0.01424259		1293.38	0.01711337		1823.39	-0.00467152		2353.38	0.01851908		2883.41	-0.00412967		3413.4	0.01666009		3943.4	0.00065746
233.59	0.13874413		763.59	0.01415509		1293.58	0.01664011		1823.59	-0.00505882		2353.58	0.01874393		2883.61	-0.00426485		3413.6	0.01649274		3943.6	0.00144522
233.79	0.13895081		763.79	0.01451976		1293.78	0.01635515		1823.79	-0.00486502		2353.78	0.01886143		2883.81	-0.00438353		3413.8	0.0158932		3943.8	0.00076288
233.99	0.13765852		763.99	0.01462974		1293.98	0.01754483		1823.99	-0.00437985		2353.98	0.01879825		2884.01	-0.00411201		3414	0.01539621		3944	0.00083298
234.19	0.1385529		764.19	0.01481756		1294.18	0.01799476		1824.19	-0.00444838		2354.18	0.0183056		2884.21	-0.00379368		3414.2	0.01452796		3944.2	0.00031972
234.39	0.13882597		764.39	0.01480625		1294.38	0.01902115		1824.39	-0.00476717		2354.38	0.01874172		2884.41	-0.00418703		3414.4	0.01397288		3944.4	-0.0003297
234.59	0.13975935		764.59	0.01470653		1294.58	0.02046072		1824.59	-0.004005		2354.58	0.01913503		2884.61	-0.00364423		3414.6	0.01287938		3944.6	-0.00114677
234.79	0.13990292		764.79	0.01501482		1294.78	0.02071926		1824.79	-0.00447096		2354.78	0.01941984		2884.81	-0.00335343		3414.8	0.01284907		3944.8	-0.00040522
234.99	0.1402124		764.99	0.01494793		1294.98	0.02174812		1824.99	-0.00405022		2354.98	0.01897222		2885.01	-0.00253617		3415	0.0116071		3945	-0.00104724
235.19	0.14020658		765.19	0.01465487		1295.18	0.0229396		1825.19	-0.00407035		2355.18	0.01884465		2885.21	-0.003234		3415.2	0.01034381		3945.2	-0.00204675
235.39	0.14108538		765.39	0.01360851		1295.38	0.02348845		1825.39	-0.00515977		2355.38	0.01878707		2885.41	-0.0035053		3415.4	0.00942206		3945.4	-0.00190756
235.59	0.141271		765.59	0.01336007		1295.58	0.0241959		1825.59	-0.00580409		2355.58	0.01886615		2885.61	-0.00360489		3415.6	0.00894516		3945.6	-0.00274603
235.79	0.1409064		765.79	0.0134565		1295.78	0.02400935		1825.79	-0.00604416		2355.78	0.01830499		2885.81	-0.00327651		3415.8	0.00927942		3945.8	-0.00368719
235.99	0.14199511		765.99	0.01462041		1295.98	0.02384387		1825.99	-0.00595362		2355.98	0.01738273		2886.01	-0.00284722		3416	0.00952695		3946	-0.00414293
236.19	0.14269896		766.19	0.01502201		1296.18	0.02338955		1826.19	-0.00605438		2356.18	0.0167386		2886.21	-0.00283943		3416.2	0.00956853		3946.2	-0.00421734
236.39	0.14330467		766.39	0.01497101		1296.38	0.02287054		1826.39	-0.005987		2356.38	0.01666732		2886.41	-0.00297157		3416.4	0.01007568		3946.4	-0.0039798
236.59	0.14407357		766.59	0.01431759		1296.58	0.02193118		1826.59	-0.00577327		2356.58	0.01742518		2886.61	-0.00348431		3416.6	0.01030565		3946.6	-0.00380263
236.79	0.14496391		766.79	0.01598232		1296.78	0.02153215		1826.79	-0.0052487		2356.78	0.01721588		2886.81	-0.00247177		3416.8	0.01139871		3946.8	-0.00356295
236.99	0.14557226		766.99	0.01735784		1296.98	0.02075156		1826.99	-0.00447612		2356.98	0.01815129		2887.01	-0.00242538		3417	0.0120209		3947	-0.004375
237.19	0.14599661		767.19	0.01767085		1297.18	0.02040606		1827.19	-0.00464626		2357.18	0.01856115		2887.21	-0.00297849		3417.2	0.0122371		3947.2	-0.00455754
237.39	0.14693385		767.39	0.01741269		1297.38	0.02046378		1827.39	-0.00524989		2357.38	0.01862399		2887.41	-0.00391043		3417.4	0.01213178		3947.4	-0.00372833
237.59	0.14818806		767.59	0.01868091		1297.58	0.01983324		1827.59	-0.00519019		2357.58	0.01929622		2887.61	-0.00374118		3417.6	0.01266982		3947.6	-0.0026162
237.79	0.14882629		767.79	0.01854552		1297.78	0.01933727		1827.79	-0.00442584		2357.78	0.01891925		2887.81	-0.00461385		3417.8	0.01274603		3947.8	-0.00320035
237.99	0.14969586		767.99	0.01842908		1297.98	0.02061628		1827.99	-0.00438308		2357.98	0.0184898		2888.01	-0.00471065		3418	0.01296473		3948	-0.00179968
238.19	0.15149326		768.19	0.01810374		1298.18	0.02048872		1828.19	-0.00434536		2358.18	0.01902357		2888.21	-0.00438385		3418.2	0.01263936		3948.2	-0.00121328
238.39	0.15275859		768.39	0.01825582		1298.38	0.02131708		1828.39	-0.00501549		2358.38	0.01972651		2888.41	-0.00480412		3418.4	0.01260672		3948.4	-0.00011859
238.59	0.15338662		768.59	0.01771151		1298.58	0.02146367		1828.59	-0.00473407		2358.58	0.02038436		2888.61	-0.00402815		3418.6	0.01226905		3948.6	0.00044596
238.79	0.15405882		768.79	0.01724559		1298.78	0.02181553		1828.79	-0.00528422		2358.78	0.02191183		2888.81	-0.00386672		3418.8	0.01205462		3948.8	0.00088873
238.99	0.15487354		768.99	0.01617862		1298.98	0.02345711		1828.99	-0.00521684		2358.98	0.02184609		2889.01	-0.00362161		3419	0.01115021		3949	0.00137212
239.19	0.15534519		769.19	0.01577941		1299.18	0.0232228		1829.19	-0.00539637		2359.18	0.02243083		2889.21	-0.0039576		3419.2	0.01069065		3949.2	0.00178341
239.39	0.15571055		769.39	0.01566629		1299.38	0.02388797		1829.39	-0.00533401		2359.38	0.02191167		2889.41	-0.00312855		3419.4	0.01013441		3949.4	0.00194094
239.59	0.15553356		769.59	0.01536684		1299.58	0.02424738		1829.59	-0.0052448		2359.58	0.02242739		2889.61	-0.00252757		3419.6	0.01022796		3949.6	0.00172302
239.79	0.15562508		769.79	0.01587932		1299.78	0.02407911		1829.79	-0.00486642		2359.78	0.02194977		2889.81	-0.00226629		3419.8	0.01063297		3949.8	0.0016528
239.99	0.15658901		769.99	0.01630404		1299.98	0.02391546		1829.99	-0.00515886		2359.98	0.02205129		2890.01	-0.00121054		3420	0.00996988		3950	0.00159977
240.19	0.15754112		770.19	0.01695156		1300.18	0.02315157		1830.19	-0.00513528		2360.18	0.0219794		2890.21	-0.00102185		3420.2	0.01049821		3950.2	0.00170479
240.39	0.15792258		770.39	0.01723843		1300.38	0.02344108		1830.39	-0.0048112		2360.38	0.02279481		2890.41	-0.00026883		3420.4	0.01034146		3950.4	0.00110763
240.59	0.15881288		770.59	0.01700124		1300.58	0.02228688		1830.59	-0.00369909		2360.58	0.02306964		2890.61	0.00005843		3420.6	0.01043363		3950.6	0.00038259
240.79	0.15973983		770.79	0.01774761		1300.78	0.02306782		1830.79	-0.00314047		2360.78	0.02232068		2890.81	0.00048514		3420.8	0.01074279		3950.8	-0.0005365
240.99	0.16017596		770.99	0.01784014		1300.98	0.0233799		1830.99	-0.00268123		2360.98	0.0219932		2891.01	0.00027915		3421	0.01102005		3951	-0.00131206
241.19	0.15977073		771.19	0.01767074		1301.18	0.02409509		1831.19	-0.00182997		2361.18	0.02166158		2891.21	-0.00008936		3421.2	0.01106426		3951.2	-0.00170542
241.39	0.16059996		771.39	0.01798505		1301.38	0.02489531		1831.39	-0.00123199		2361.38	0.02159462		2891.41	-0.00091436		3421.4	0.01135516		3951.4	-0.001665
241.59	0.16125404		771.59	0.01878319		1301.58	0.02528735		1831.59	-0.00062725		2361.58	0.02115306		2891.61	-0.00185813		3421.6	0.01212139		3951.6	-0.00167817
241.79	0.16151241		771.79	0.01802045		1301.78	0.02546496		1831.79	0.0000108		2361.78	0.01998956		2891.81	-0.00267108		3421.8	0.01220085		3951.8	-0.00226391
241.99	0.1620823		771.99	0.01864271		1301.98	0.02676938		1831.99	0.00009191		2361.98	0.02032797		2892.01	-0.00253558		3422	0.01270171		3952	-0.00179505
242.19	0.16274429		772.19	0.01829975		1302.18	0.02658959		1832.19	0.00021597		2362.18	0.02041881		2892.21	-0.00310939		3422.2	0.01224194		3952.2	-0.00210837
242.39	0.16292454		772.39	0.01813297		1302.38	0.02701116		1832.39	-0.00021735		2362.38	0.02044634		2892.41	-0.00347977		3422.4	0.012073		3952.4	-0.00224662
242.59	0.16323093		772.59	0.0180054		1302.58	0.02711115		1832.59	-0.00069413		2362.58	0.02061292		2892.61	-0.00334842		3422.6	0.01250133		3952.6	-0.00304282
242.79	0.16379055		772.79	0.01833983		1302.78	0.0269521		1832.79	-0.00086444		2362.78	0.02081849		2892.81	-0.00394544		3422.8	0.01298523		3952.8	-0.00268426
242.99	0.16395697		772.99	0.01914958		1302.98	0.02720338		1832.99	-0.00121375		2362.98	0.02132753		2893.01	-0.00414266		3423	0.01284999		3953	-0.00124549
243.19	0.16429001		773.19	0.01955609		1303.18	0.02668426		1833.19	-0.0020951		2363.18	0.02171156		2893.21	-0.00380737		3423.2	0.01293355		3953.2	-0.00073102
243.39	0.16458381		773.39	0.01997224		1303.38	0.02660176		1833.39	-0.00313117		2363.38	0.0214209		2893.41	-0.00337015		3423.4	0.01311287		3953.4	-0.00035271
243.59	0.16537287		773.59	0.02013581		1303.58	0.02544579		1833.59	-0.00453618		2363.58	0.02171956		2893.61	-0.00344632		3423.6	0.01379912		3953.6	-0.00051973
243.79	0.1661388		773.79	0.02086067		1303.78	0.02526915		1833.79	-0.00503596		2363.78	0.02204344		2893.81	-0.00374519		3423.8	0.01395952		3953.8	-0.000561
243.99	0.16763514		773.99	0.02152518		1303.98	0.02526646		1833.99	-0.00554671		2363.98	0.02275363		2894.01	-0.0036103		3424	0.01378747		3954	-0.00069269
244.19	0.16891092		774.19	0.02209609		1304.18	0.02508538		1834.19	-0.00640992		2364.18	0.02343475		2894.21	-0.00401438		3424.2	0.01440168		3954.2	-0.00108884
244.39	0.1694147		774.39	0.02132406		1304.38	0.0257741		1834.39	-0.00623631		2364.38	0.02443603		2894.41	-0.00305214		3424.4	0.01370624		3954.4	-0.00179853
244.59	0.17074011		774.59	0.02133756		1304.58	0.02579326		1834.59	-0.00575303		2364.58	0.02379048		2894.61	-0.00306785		3424.6	0.01345156		3954.6	-0.00234835
244.79	0.17060951		774.79	0.02077148		1304.78	0.02684189		1834.79	-0.0060712		2364.78	0.02321999		2894.81	-0.00278686		3424.8	0.0133797		3954.8	-0.0022574
244.99	0.17074145		774.99	0.02082582		1304.98	0.02736229		1834.99	-0.00567237		2364.98	0.02280193		2895.01	-0.0025965		3425	0.01315618		3955	-0.00147451
245.19	0.17112194		775.19	0.0203711		1305.18	0.02757327		1835.19	-0.00528563		2365.18	0.02304696		2895.21	-0.00365461		3425.2	0.01240335		3955.2	-0.00166021
245.39	0.17219427		775.39	0.0206643		1305.38	0.02854542		1835.39	-0.0056517		2365.38	0.02263759		2895.41	-0.00474668		3425.4	0.0125555		3955.4	-0.00136205
245.59	0.17219691		775.59	0.0206364		1305.58	0.02832852		1835.59	-0.00535434		2365.58	0.02199594		2895.61	-0.00439369		3425.6	0.01232513		3955.6	-0.00158329
245.79	0.1714652		775.79	0.02025821		1305.78	0.02864622		1835.79	-0.00527467		2365.78	0.02178761		2895.81	-0.00410217		3425.8	0.01192398		3955.8	-0.00101707
245.99	0.17155327		775.99	0.02034929		1305.98	0.02891778		1835.99	-0.00461587		2365.98	0.02174375		2896.01	-0.00379308		3426	0.0114093		3956	-0.00077677
246.19	0.17110101		776.19	0.01978427		1306.18	0.02915986		1836.19	-0.00512076		2366.18	0.02109149		2896.21	-0.00370091		3426.2	0.01045473		3956.2	-0.00104705
246.39	0.17047386		776.39	0.0196097		1306.38	0.02909969		1836.39	-0.00532683		2366.38	0.02144224		2896.41	-0.00388493		3426.4	0.00955304		3956.4	-0.0007498
246.59	0.17052475		776.59	0.01982201		1306.58	0.02888829		1836.59	-0.00537045		2366.58	0.02207689		2896.61	-0.00382482		3426.6	0.00999066		3956.6	-0.00144068
246.79	0.17042728		776.79	0.02029031		1306.78	0.02867651		1836.79	-0.00437995		2366.78	0.02183901		2896.81	-0.00352787		3426.8	0.01039999		3956.8	-0.00052905
246.99	0.17037674		776.99	0.02074534		1306.98	0.02921126		1836.99	-0.00515791		2366.98	0.02190116		2897.01	-0.0033718		3427	0.00986964		3957	0.00033862
247.19	0.17043558		777.19	0.02069001		1307.18	0.02891717		1837.19	-0.00534672		2367.18	0.02055893		2897.21	-0.00288007		3427.2	0.009904		3957.2	0.00030699
247.39	0.17144869		777.39	0.02015084		1307.38	0.0280866		1837.39	-0.00449309		2367.38	0.02067642		2897.41	-0.0034989		3427.4	0.01093912		3957.4	-0.00041472
247.59	0.17219482		777.59	0.02071014		1307.58	0.02798063		1837.59	-0.00487586		2367.58	0.02092944		2897.61	-0.00356689		3427.6	0.01165421		3957.6	-0.00122576
247.79	0.17245395		777.79	0.02081028		1307.78	0.02853049		1837.79	-0.00494441		2367.78	0.02253497		2897.81	-0.00352876		3427.8	0.01205747		3957.8	-0.00185992
247.99	0.17287725		777.99	0.0210464		1307.98	0.02893475		1837.99	-0.00546247		2367.98	0.0231721		2898.01	-0.00380272		3428	0.01266652		3958	-0.00214418
248.19	0.17348128		778.19	0.0217611		1308.18	0.02880319		1838.19	-0.00520376		2368.18	0.02441862		2898.21	-0.0034072		3428.2	0.01294072		3958.2	-0.0023672
248.39	0.17485661		778.39	0.02182335		1308.38	0.03006368		1838.39	-0.00419135		2368.38	0.02411268		2898.41	-0.00227266		3428.4	0.0131585		3958.4	-0.00239554
248.59	0.17551055		778.59	0.02203558		1308.58	0.02981105		1838.59	-0.005048		2368.58	0.02308667		2898.61	-0.00199842		3428.6	0.01332981		3958.6	-0.00194146
248.79	0.1760396		778.79	0.02197453		1308.78	0.02936813		1838.79	-0.00524419		2368.78	0.02229097		2898.81	-0.00160346		3428.8	0.01339179		3958.8	-0.00176367
248.99	0.17739615		778.99	0.02200286		1308.98	0.02929628		1838.99	-0.00531808		2368.98	0.02252809		2899.01	-0.00237475		3429	0.01267186		3959	-0.00101464
249.19	0.17784303		779.19	0.02185025		1309.18	0.028989		1839.19	-0.00560548		2369.18	0.02228869		2899.21	-0.00286046		3429.2	0.01277945		3959.2	-0.00148291
249.39	0.17810161		779.39	0.02164628		1309.38	0.02875447		1839.39	-0.00617289		2369.38	0.02171301		2899.41	-0.00250588		3429.4	0.01289206		3959.4	-0.00101719
249.59	0.17810401		779.59	0.02031212		1309.58	0.02880598		1839.59	-0.00616436		2369.58	0.02128544		2899.61	-0.00185513		3429.6	0.01234411		3959.6	-0.00126021
249.79	0.17729585		779.79	0.02030606		1309.78	0.02872438		1839.79	-0.00673564		2369.78	0.02117816		2899.81	-0.00188189		3429.8	0.01143931		3959.8	-0.00003543
249.99	0.17741576		779.99	0.02039115		1309.98	0.02900237		1839.99	-0.0061816		2369.98	0.02134981		2900.01	-0.00208709		3430	0.01098613		3960	-0.00058344
250.19	0.17706718		780.19	0.01968427		1310.18	0.02965557		1840.19	-0.006811		2370.18	0.02221056		2900.21	-0.0017132		3430.2	0.01078131		3960.2	-0.00075375
250.39	0.17743355		780.39	0.01911789		1310.38	0.02949685		1840.39	-0.00650156		2370.38	0.02218227		2900.41	-0.00170036		3430.4	0.00956017		3960.4	-0.0008362
250.59	0.17753877		780.59	0.01921506		1310.58	0.02961651		1840.59	-0.00643459		2370.58	0.0218916		2900.61	-0.00216507		3430.6	0.01046383		3960.6	-0.00064648
250.79	0.17912762		780.79	0.01942363		1310.78	0.02990429		1840.79	-0.00609271		2370.78	0.02123381		2900.81	-0.00223175		3430.8	0.01016847		3960.8	0.00096065
250.99	0.17903201		780.99	0.01888636		1310.98	0.0296813		1840.99	-0.00713794		2370.98	0.0204451		2901.01	-0.00338966		3431	0.00932418		3961	0.00061855
251.19	0.17997125		781.19	0.0185902		1311.18	0.02966616		1841.19	-0.00737583		2371.18	0.02073761		2901.21	-0.00350168		3431.2	0.0093781		3961.2	0.00035456
251.39	0.18137408		781.39	0.01862191		1311.38	0.02916071		1841.39	-0.00752129		2371.38	0.02116714		2901.41	-0.00428102		3431.4	0.01031201		3961.4	-0.00053752
251.59	0.18166582		781.59	0.01864931		1311.58	0.02923208		1841.59	-0.00849135		2371.58	0.02125995		2901.61	-0.0047659		3431.6	0.00999203		3961.6	-0.00143614
251.79	0.1817404		781.79	0.01960734		1311.78	0.0290107		1841.79	-0.00848469		2371.78	0.02196261		2901.81	-0.0045189		3431.8	0.00963696		3961.8	-0.00167627
251.99	0.18312305		781.99	0.02086719		1311.98	0.02899749		1841.99	-0.00792232		2371.98	0.02199038		2902.01	-0.00507552		3432	0.01043777		3962	-0.00196968
252.19	0.18446407		782.19	0.02221885		1312.18	0.02966856		1842.19	-0.00758141		2372.18	0.02233709		2902.21	-0.00466148		3432.2	0.0099902		3962.2	-0.00160792
252.39	0.18602787		782.39	0.02217647		1312.38	0.03022806		1842.39	-0.00784188		2372.38	0.02191286		2902.41	-0.00421481		3432.4	0.01098997		3962.4	-0.00153495
252.59	0.18671287		782.59	0.0226286		1312.58	0.02879311		1842.59	-0.00840401		2372.58	0.02155892		2902.61	-0.00428689		3432.6	0.0109682		3962.6	-0.0015539
252.79	0.18698641		782.79	0.02285282		1312.78	0.02841903		1842.79	-0.00761369		2372.78	0.02188894		2902.81	-0.00459872		3432.8	0.01164118		3962.8	-0.00158249
252.99	0.18669972		782.99	0.02318355		1312.98	0.0290007		1842.99	-0.00753707		2372.98	0.02283139		2903.01	-0.00520914		3433	0.01190718		3963	-0.00189793
253.19	0.18793028		783.19	0.02361437		1313.18	0.0286922		1843.19	-0.00723674		2373.18	0.02224333		2903.21	-0.00516033		3433.2	0.01283598		3963.2	-0.00264734
253.39	0.18785941		783.39	0.0234801		1313.38	0.02871263		1843.39	-0.00734942		2373.38	0.02315141		2903.41	-0.00548767		3433.4	0.01288731		3963.4	-0.00239003
253.59	0.18729925		783.59	0.0232533		1313.58	0.02980963		1843.59	-0.00626484		2373.58	0.02317632		2903.61	-0.00500643		3433.6	0.01295868		3963.6	-0.00206788
253.79	0.18609263		783.79	0.02433931		1313.78	0.03004509		1843.79	-0.00588227		2373.78	0.0237997		2903.81	-0.00420473		3433.8	0.01309146		3963.8	-0.00168083
253.99	0.18653112		783.99	0.02410946		1313.98	0.03043743		1843.99	-0.00517834		2373.98	0.02435333		2904.01	-0.00345671		3434	0.01384864		3964	-0.00133239
254.19	0.18695229		784.19	0.0236711		1314.18	0.03043315		1844.19	-0.00542323		2374.18	0.02456913		2904.21	-0.00288168		3434.2	0.01408555		3964.2	-0.00078457
254.39	0.18783403		784.39	0.02363533		1314.38	0.03085728		1844.39	-0.00615586		2374.38	0.02358841		2904.41	-0.0026465		3434.4	0.01397853		3964.4	-0.0010392
254.59	0.18841219		784.59	0.02382001		1314.58	0.03141167		1844.59	-0.00589202		2374.58	0.02380411		2904.61	-0.00275359		3434.6	0.01524749		3964.6	-0.00066391
254.79	0.18900362		784.79	0.0244442		1314.78	0.03189712		1844.79	-0.00593292		2374.78	0.02380494		2904.81	-0.00275002		3434.8	0.01545783		3964.8	-0.00045714
254.99	0.18808133		784.99	0.0245324		1314.98	0.03189168		1844.99	-0.00612411		2374.98	0.02353767		2905.01	-0.00290974		3435	0.0154598		3965	-0.00115632
255.19	0.18876275		785.19	0.02474694		1315.18	0.03208751		1845.19	-0.00643724		2375.18	0.02346831		2905.21	-0.00232861		3435.2	0.01534287		3965.2	-0.0013631
255.39	0.18858262		785.39	0.02468747		1315.38	0.03221302		1845.39	-0.00625613		2375.38	0.02255682		2905.41	-0.00290603		3435.4	0.01521075		3965.4	-0.00271105
255.59	0.18763887		785.59	0.0238913		1315.58	0.03263771		1845.59	-0.00664433		2375.58	0.02131884		2905.61	-0.0032206		3435.6	0.01440137		3965.6	-0.00323888
255.79	0.18795059		785.79	0.02512003		1315.78	0.0328465		1845.79	-0.00663319		2375.78	0.02093768		2905.81	-0.00273588		3435.8	0.01421646		3965.8	-0.00279912
255.99	0.18836568		785.99	0.02522327		1315.98	0.03280186		1845.99	-0.00644711		2375.98	0.02126076		2906.01	-0.0026095		3436	0.0145759		3966	-0.00297686
256.19	0.18835706		786.19	0.02490768		1316.18	0.03355765		1846.19	-0.0068489		2376.18	0.02125892		2906.21	-0.00277641		3436.2	0.01456409		3966.2	-0.00264764
256.39	0.18944221		786.39	0.02486905		1316.38	0.03298286		1846.39	-0.00666744		2376.38	0.02143422		2906.41	-0.00305629		3436.4	0.01515446		3966.4	-0.00333266
256.59	0.18925227		786.59	0.02501757		1316.58	0.03253552		1846.59	-0.006871		2376.58	0.0214199		2906.61	-0.00291353		3436.6	0.01466192		3966.6	-0.00394099
256.79	0.18889617		786.79	0.02502953		1316.78	0.03304893		1846.79	-0.00685135		2376.78	0.02162521		2906.81	-0.00330002		3436.8	0.01443339		3966.8	-0.00403693
256.99	0.18917965		786.99	0.0258143		1316.98	0.03341738		1846.99	-0.00625901		2376.98	0.02179822		2907.01	-0.00393098		3437	0.01390658		3967	-0.0041953
257.19	0.18965857		787.19	0.02555846		1317.18	0.0333426		1847.19	-0.00611164		2377.18	0.0211207		2907.21	-0.00343962		3437.2	0.01318011		3967.2	-0.0033625
257.39	0.18907439		787.39	0.02542109		1317.38	0.03348024		1847.39	-0.00595337		2377.38	0.02167468		2907.41	-0.00299115		3437.4	0.01202495		3967.4	-0.00342734
257.59	0.18929711		787.59	0.02570048		1317.58	0.03414793		1847.59	-0.00554248		2377.58	0.02165368		2907.61	-0.00236215		3437.6	0.0113866		3967.6	-0.00289642
257.79	0.18969005		787.79	0.02549616		1317.78	0.03433561		1847.79	-0.00603811		2377.78	0.02231552		2907.81	-0.00259107		3437.8	0.01064647		3967.8	-0.00277512
257.99	0.19178761		787.99	0.02614834		1317.98	0.03469128		1847.99	-0.00616779		2377.98	0.02199245		2908.01	-0.00248314		3438	0.01051282		3968	-0.00225003
258.19	0.1937327		788.19	0.02624243		1318.18	0.03496532		1848.19	-0.00666975		2378.18	0.02240249		2908.21	-0.00300054		3438.2	0.01077408		3968.2	-0.00218475
258.39	0.19472432		788.39	0.02616142		1318.38	0.03573263		1848.39	-0.00672806		2378.38	0.02240901		2908.41	-0.00314969		3438.4	0.01089767		3968.4	-0.00253511
258.59	0.19591113		788.59	0.02666602		1318.58	0.03636022		1848.59	-0.00564707		2378.58	0.02354743		2908.61	-0.0028319		3438.6	0.01129057		3968.6	-0.0019265
258.79	0.19609446		788.79	0.0266287		1318.78	0.03694137		1848.79	-0.00556142		2378.78	0.02473895		2908.81	-0.00372262		3438.8	0.01140685		3968.8	-0.00221025
258.99	0.1971266		788.99	0.02633799		1318.98	0.03636779		1848.99	-0.00471422		2378.98	0.02452909		2909.01	-0.00369972		3439	0.01094575		3969	-0.00218782
259.19	0.19751157		789.19	0.02567715		1319.18	0.037067		1849.19	-0.00397942		2379.18	0.0243362		2909.21	-0.00407047		3439.2	0.01059384		3969.2	-0.00279294
259.39	0.19719216		789.39	0.02423395		1319.38	0.03651743		1849.39	-0.00360652		2379.38	0.0238769		2909.41	-0.00431798		3439.4	0.01061677		3969.4	-0.00329477
259.59	0.19726731		789.59	0.02419946		1319.58	0.03576955		1849.59	-0.00362356		2379.58	0.0232831		2909.61	-0.00453295		3439.6	0.01100418		3969.6	-0.00311203
259.79	0.19830544		789.79	0.02396685		1319.78	0.03487116		1849.79	-0.00339416		2379.78	0.02307554		2909.81	-0.00310102		3439.8	0.01188737		3969.8	-0.00329816
259.99	0.19873726		789.99	0.02363325		1319.98	0.03430445		1849.99	-0.00349738		2379.98	0.02316338		2910.01	-0.00348666		3440	0.01227267		3970	-0.00312824
260.19	0.19949536		790.19	0.02386748		1320.18	0.03456615		1850.19	-0.00371901		2380.18	0.02341217		2910.21	-0.0038294		3440.2	0.01327532		3970.2	-0.00310916
260.39	0.20044641		790.39	0.02366645		1320.38	0.03348336		1850.39	-0.00378467		2380.38	0.02365022		2910.41	-0.00370043		3440.4	0.01327974		3970.4	-0.00364847
260.59	0.1997391		790.59	0.02325606		1320.58	0.03324432		1850.59	-0.0044905		2380.58	0.02315477		2910.61	-0.00290057		3440.6	0.01346782		3970.6	-0.00333646
260.79	0.19922797		790.79	0.02373735		1320.78	0.03312943		1850.79	-0.00432675		2380.78	0.02300948		2910.81	-0.00307928		3440.8	0.01372074		3970.8	-0.00292009
260.99	0.19844265		790.99	0.02358058		1320.98	0.032753		1850.99	-0.00403835		2380.98	0.02248541		2911.01	-0.00322727		3441	0.01364468		3971	-0.00242608
261.19	0.19800988		791.19	0.02330512		1321.18	0.0323488		1851.19	-0.0054499		2381.18	0.02233533		2911.21	-0.00278342		3441.2	0.01335507		3971.2	-0.00253599
261.39	0.19944705		791.39	0.02416297		1321.38	0.03234054		1851.39	-0.00609795		2381.38	0.02265549		2911.41	-0.00380027		3441.4	0.01313669		3971.4	-0.00309502
261.59	0.20003149		791.59	0.02528917		1321.58	0.03186908		1851.59	-0.00589487		2381.58	0.02337306		2911.61	-0.00403597		3441.6	0.01277675		3971.6	-0.00274814
261.79	0.20027338		791.79	0.02525166		1321.78	0.03210771		1851.79	-0.00575231		2381.78	0.0233463		2911.81	-0.00460144		3441.8	0.01173106		3971.8	-0.00244624
261.99	0.20113948		791.99	0.02614458		1321.98	0.03280806		1851.99	-0.00619875		2381.98	0.02319789		2912.01	-0.00456457		3442	0.0116805		3972	-0.00266663
262.19	0.20167318		792.19	0.02559025		1322.18	0.0330584		1852.19	-0.0062432		2382.18	0.02362018		2912.21	-0.00472228		3442.2	0.01204433		3972.2	-0.00229717
262.39	0.20189		792.39	0.02669363		1322.38	0.03384458		1852.39	-0.00606783		2382.38	0.02320582		2912.41	-0.00456764		3442.4	0.0114728		3972.4	-0.00320479
262.59	0.20262396		792.59	0.02702072		1322.58	0.0347522		1852.59	-0.00578536		2382.58	0.0230921		2912.61	-0.00404811		3442.6	0.01125591		3972.6	-0.00394865
262.79	0.20327842		792.79	0.02710518		1322.78	0.03536505		1852.79	-0.00503434		2382.78	0.02277558		2912.81	-0.00427406		3442.8	0.01050128		3972.8	-0.00401119
262.99	0.20346525		792.99	0.02725464		1322.98	0.03514248		1852.99	-0.00425777		2382.98	0.0215189		2913.01	-0.00413314		3443	0.01051481		3973	-0.00471121
263.19	0.20262064		793.19	0.02694606		1323.18	0.03550739		1853.19	-0.00372771		2383.18	0.02095728		2913.21	-0.00392398		3443.2	0.01024987		3973.2	-0.00486051
263.39	0.20266683		793.39	0.02648925		1323.38	0.03543323		1853.39	-0.00447522		2383.38	0.01959569		2913.41	-0.00355778		3443.4	0.00974953		3973.4	-0.00567759
263.59	0.20380477		793.59	0.0275509		1323.58	0.03571887		1853.59	-0.00463199		2383.58	0.01859682		2913.61	-0.0030178		3443.6	0.01027224		3973.6	-0.00604223
263.79	0.20429612		793.79	0.02776974		1323.78	0.03516036		1853.79	-0.00518047		2383.78	0.01800712		2913.81	-0.00230169		3443.8	0.01022331		3973.8	-0.00694117
263.99	0.20426312		793.99	0.02833569		1323.98	0.03584371		1853.99	-0.00574808		2383.98	0.01820898		2914.01	-0.00270979		3444	0.01038054		3974	-0.00670296
264.19	0.2047533		794.19	0.02855621		1324.18	0.03657509		1854.19	-0.00550355		2384.18	0.01854908		2914.21	-0.00198545		3444.2	0.01150375		3974.2	-0.00705139
264.39	0.20508345		794.39	0.02856001		1324.38	0.03590595		1854.39	-0.00661001		2384.38	0.01860103		2914.41	-0.0020438		3444.4	0.01221358		3974.4	-0.00672323
264.59	0.20454818		794.59	0.02830465		1324.58	0.03669434		1854.59	-0.00707049		2384.58	0.01802205		2914.61	-0.00257521		3444.6	0.0126255		3974.6	-0.00616701
264.79	0.2047214		794.79	0.02879714		1324.78	0.03714521		1854.79	-0.00738357		2384.78	0.01893597		2914.81	-0.00304397		3444.8	0.01238158		3974.8	-0.00613059
264.99	0.20523402		794.99	0.02882702		1324.98	0.03664568		1854.99	-0.0070743		2384.98	0.01931629		2915.01	-0.00348126		3445	0.01252556		3975	-0.00612932
265.19	0.20686246		795.19	0.02944066		1325.18	0.03625398		1855.19	-0.00770473		2385.18	0.02051134		2915.21	-0.00335803		3445.2	0.01232636		3975.2	-0.00596878
265.39	0.20805786		795.39	0.02985284		1325.38	0.03574362		1855.39	-0.00698445		2385.38	0.02189659		2915.41	-0.00320175		3445.4	0.01179785		3975.4	-0.0057054
265.59	0.20785367		795.59	0.03016891		1325.58	0.03499352		1855.59	-0.00650938		2385.58	0.02271116		2915.61	-0.00224579		3445.6	0.01073313		3975.6	-0.00525494
265.79	0.20752873		795.79	0.02994635		1325.78	0.03509065		1855.79	-0.00592281		2385.78	0.02250435		2915.81	-0.00262658		3445.8	0.0102415		3975.8	-0.00507643
265.99	0.2085483		795.99	0.03021449		1325.98	0.03502394		1855.99	-0.00566824		2385.98	0.02267094		2916.01	-0.00275854		3446	0.0109723		3976	-0.00467469
266.19	0.2097402		796.19	0.03007858		1326.18	0.03476012		1856.19	-0.00549417		2386.18	0.02313763		2916.21	-0.00182365		3446.2	0.01165297		3976.2	-0.00416461
266.39	0.21040936		796.39	0.03082182		1326.38	0.03514999		1856.39	-0.0053337		2386.38	0.02295419		2916.41	-0.00127459		3446.4	0.01098507		3976.4	-0.00412999
266.59	0.21110497		796.59	0.03090594		1326.58	0.03532168		1856.59	-0.00536846		2386.58	0.02290315		2916.61	-0.00137406		3446.6	0.01088301		3976.6	-0.003034
266.79	0.21213512		796.79	0.03111217		1326.78	0.03478157		1856.79	-0.00520664		2386.78	0.02279462		2916.81	-0.00123486		3446.8	0.01110747		3976.8	-0.00241509
266.99	0.21220267		796.99	0.03116645		1326.98	0.03432515		1856.99	-0.00505477		2386.98	0.02284081		2917.01	-0.00178886		3447	0.01204024		3977	-0.0022439
267.19	0.21236593		797.19	0.03161483		1327.18	0.03557045		1857.19	-0.00448868		2387.18	0.02301838		2917.21	-0.00131547		3447.2	0.01223449		3977.2	-0.00180464
267.39	0.21306782		797.39	0.03148543		1327.38	0.03580045		1857.39	-0.0043219		2387.38	0.0225907		2917.41	-0.00148115		3447.4	0.01173005		3977.4	-0.00210845
267.59	0.21306163		797.59	0.03156037		1327.58	0.03523956		1857.59	-0.00394422		2387.58	0.02278401		2917.61	-0.00057216		3447.6	0.01278464		3977.6	-0.00125142
267.79	0.21253615		797.79	0.03179398		1327.78	0.03524537		1857.79	-0.00395211		2387.78	0.0230216		2917.81	-0.00057191		3447.8	0.01287965		3977.8	-0.00101527
267.99	0.21263437		797.99	0.03162991		1327.98	0.03662975		1857.99	-0.00392664		2387.98	0.02296758		2918.01	0.00008101		3448	0.01304339		3978	-0.00048385
268.19	0.21304949		798.19	0.03119996		1328.18	0.03712035		1858.19	-0.00314006		2388.18	0.02273883		2918.21	0.00018606		3448.2	0.01395374		3978.2	-0.00041308
268.39	0.21373053		798.39	0.03120432		1328.38	0.03766259		1858.39	-0.00408165		2388.38	0.02242024		2918.41	-0.00038024		3448.4	0.01416222		3978.4	-0.00038437
268.59	0.21344922		798.59	0.03046887		1328.58	0.0382911		1858.59	-0.00326373		2388.58	0.02262636		2918.61	-0.00099148		3448.6	0.01319508		3978.6	-0.0004073
268.79	0.21354801		798.79	0.03095892		1328.78	0.03857923		1858.79	-0.00223758		2388.78	0.02364359		2918.81	-0.00102166		3448.8	0.01305065		3978.8	-0.00118428
268.99	0.21373059		798.99	0.03117737		1328.98	0.0380151		1858.99	-0.00159397		2388.98	0.02345015		2919.01	-0.00095062		3449	0.01377449		3979	-0.00165603
269.19	0.21402932		799.19	0.03064911		1329.18	0.03801968		1859.19	-0.00215571		2389.18	0.02392919		2919.21	-0.00118771		3449.2	0.01347574		3979.2	-0.00129865
269.39	0.21354191		799.39	0.03043758		1329.38	0.03768841		1859.39	-0.00195605		2389.38	0.0239114		2919.41	-0.00155259		3449.4	0.0135095		3979.4	-0.00130436
269.59	0.21414454		799.59	0.03108182		1329.58	0.03814934		1859.59	-0.00244546		2389.58	0.02276201		2919.61	-0.00158493		3449.6	0.01329655		3979.6	-0.00112191
269.79	0.214181		799.79	0.03076688		1329.78	0.03798899		1859.79	-0.00252368		2389.78	0.02299767		2919.81	-0.00195172		3449.8	0.01263299		3979.8	-0.00133658
269.99	0.21591692		799.99	0.03054849		1329.98	0.03804173		1859.99	-0.00371392		2389.98	0.02341803		2920.01	-0.00208187		3450	0.01374035		3980	-0.00126012
270.19	0.21646194		800.19	0.03120771		1330.18	0.03860531		1860.19	-0.00448567		2390.18	0.02359557		2920.21	-0.00126625		3450.2	0.01380329		3980.2	-0.00142682
270.39	0.21674786		800.39	0.03132176		1330.38	0.03871332		1860.39	-0.00550406		2390.38	0.02332767		2920.41	-0.00157395		3450.4	0.01381753		3980.4	-0.00185329
270.59	0.21735342		800.59	0.03128704		1330.58	0.03848514		1860.59	-0.00669488		2390.58	0.02309632		2920.61	-0.00198786		3450.6	0.01383358		3980.6	-0.00285162
270.79	0.21776622		800.79	0.03176531		1330.78	0.03806321		1860.79	-0.00644073		2390.78	0.02334751		2920.81	-0.00168512		3450.8	0.01409787		3980.8	-0.00348414
270.99	0.2185476		800.99	0.03161248		1330.98	0.03890283		1860.99	-0.00625082		2390.98	0.02395016		2921.01	-0.00151569		3451	0.01379239		3981	-0.00319085
271.19	0.21887529		801.19	0.03183446		1331.18	0.04015408		1861.19	-0.0061762		2391.18	0.02427104		2921.21	-0.00122404		3451.2	0.01373532		3981.2	-0.00368823
271.39	0.21959444		801.39	0.0316532		1331.38	0.03891605		1861.39	-0.00555114		2391.38	0.02405102		2921.41	-0.00114839		3451.4	0.01290006		3981.4	-0.0038949
271.59	0.21978615		801.59	0.03179116		1331.58	0.03883796		1861.59	-0.00568692		2391.58	0.02519819		2921.61	-0.00040523		3451.6	0.01329475		3981.6	-0.00430155
271.79	0.22087133		801.79	0.03153214		1331.78	0.03911359		1861.79	-0.0058518		2391.78	0.02523325		2921.81	-0.00046368		3451.8	0.01288991		3981.8	-0.00556225
271.99	0.22167351		801.99	0.0316659		1331.98	0.03930446		1861.99	-0.00562657		2391.98	0.02488621		2922.01	-0.00047752		3452	0.01254731		3982	-0.00645466
272.19	0.22256317		802.19	0.03192855		1332.18	0.0388479		1862.19	-0.00555358		2392.18	0.02436232		2922.21	0.0002845		3452.2	0.01231656		3982.2	-0.00640714
272.39	0.22246026		802.39	0.03177812		1332.38	0.03898215		1862.39	-0.00655147		2392.38	0.0244991		2922.41	-0.00001231		3452.4	0.01170424		3982.4	-0.00718589
272.59	0.22197394		802.59	0.03113726		1332.58	0.03866906		1862.59	-0.00635239		2392.58	0.02514646		2922.61	-0.00085281		3452.6	0.01143299		3982.6	-0.0070152
272.79	0.22154265		802.79	0.0314228		1332.78	0.0386476		1862.79	-0.00606917		2392.78	0.02511244		2922.81	-0.00131942		3452.8	0.01180489		3982.8	-0.00707409
272.99	0.22110717		802.99	0.0312889		1332.98	0.0382787		1862.99	-0.00650244		2392.98	0.0249061		2923.01	-0.00156952		3453	0.01160282		3983	-0.00621918
273.19	0.22124824		803.19	0.03101815		1333.18	0.03869527		1863.19	-0.00684378		2393.18	0.02443604		2923.21	-0.00220379		3453.2	0.01100182		3983.2	-0.00463658
273.39	0.2212146		803.39	0.03104734		1333.38	0.03902344		1863.39	-0.00672818		2393.38	0.02395597		2923.41	-0.00199812		3453.4	0.01023227		3983.4	-0.00371933
273.59	0.22223435		803.59	0.03112815		1333.58	0.03895719		1863.59	-0.00737784		2393.58	0.02348069		2923.61	-0.00216651		3453.6	0.00904073		3983.6	-0.00299737
273.79	0.22239477		803.79	0.03055519		1333.78	0.03916266		1863.79	-0.00778312		2393.78	0.02378004		2923.81	-0.00179459		3453.8	0.00901575		3983.8	-0.0031569
273.99	0.22275478		803.99	0.03092634		1333.98	0.03977075		1863.99	-0.00780103		2393.98	0.02352256		2924.01	-0.00279641		3454	0.01014964		3984	-0.00253765
274.19	0.22263348		804.19	0.03126839		1334.18	0.03990238		1864.19	-0.00786327		2394.18	0.02266655		2924.21	-0.00215355		3454.2	0.01060556		3984.2	-0.00159072
274.39	0.22216887		804.39	0.03046739		1334.38	0.03981698		1864.39	-0.00826536		2394.38	0.02208456		2924.41	-0.00224012		3454.4	0.01035749		3984.4	-0.00179125
274.59	0.2221293		804.59	0.03087585		1334.58	0.03980167		1864.59	-0.00756306		2394.58	0.02241156		2924.61	-0.00178787		3454.6	0.01029092		3984.6	-0.00110744
274.79	0.22279799		804.79	0.03163905		1334.78	0.03931266		1864.79	-0.00688516		2394.78	0.023479		2924.81	-0.00213805		3454.8	0.01069824		3984.8	0.00021036
274.99	0.22334416		804.99	0.03161792		1334.98	0.03935627		1864.99	-0.00619757		2394.98	0.02361071		2925.01	-0.0019774		3455	0.01135735		3985	0.00057117
275.19	0.22311617		805.19	0.03192063		1335.18	0.0391033		1865.19	-0.00561933		2395.18	0.02363745		2925.21	-0.00220886		3455.2	0.01188299		3985.2	0.00031762
275.39	0.22326631		805.39	0.03204724		1335.38	0.03865367		1865.39	-0.00380423		2395.38	0.02380185		2925.41	-0.00237313		3455.4	0.01256038		3985.4	0.0004366
275.59	0.22311849		805.59	0.03209475		1335.58	0.03878932		1865.59	-0.00382199		2395.58	0.02493693		2925.61	-0.00261001		3455.6	0.01270079		3985.6	-0.00067112
275.79	0.22366243		805.79	0.03166108		1335.78	0.03880982		1865.79	-0.00406402		2395.78	0.02437734		2925.81	-0.00273977		3455.8	0.01361023		3985.8	-0.00193608
275.99	0.22374913		805.99	0.03228916		1335.98	0.03960935		1865.99	-0.00423764		2395.98	0.0240559		2926.01	-0.00288386		3456	0.01396755		3986	-0.0027352
276.19	0.22465326		806.19	0.03264786		1336.18	0.04019778		1866.19	-0.00439252		2396.18	0.02376352		2926.21	-0.00220152		3456.2	0.01350221		3986.2	-0.00353194
276.39	0.22431171		806.39	0.03270777		1336.38	0.04069508		1866.39	-0.00445478		2396.38	0.02451522		2926.41	-0.00318973		3456.4	0.01372415		3986.4	-0.00434693
276.59	0.22457654		806.59	0.03256766		1336.58	0.04059286		1866.59	-0.00471689		2396.58	0.02440463		2926.61	-0.00375702		3456.6	0.01369145		3986.6	-0.0044827
276.79	0.22436452		806.79	0.03358247		1336.78	0.04062436		1866.79	-0.00493384		2396.78	0.02490934		2926.81	-0.00362521		3456.8	0.01381683		3986.8	-0.004126
276.99	0.22486882		806.99	0.03324336		1336.98	0.04034293		1866.99	-0.00530739		2396.98	0.02485076		2927.01	-0.0037708		3457	0.0135574		3987	-0.00397709
277.19	0.22648628		807.19	0.03281074		1337.18	0.04037185		1867.19	-0.00570926		2397.18	0.02478049		2927.21	-0.00275082		3457.2	0.01316431		3987.2	-0.00418232
277.39	0.22700326		807.39	0.03305296		1337.38	0.04043754		1867.39	-0.00534302		2397.38	0.0246851		2927.41	-0.00241406		3457.4	0.01247523		3987.4	-0.00406193
277.59	0.228593		807.59	0.03369926		1337.58	0.04006407		1867.59	-0.00596133		2397.58	0.02445237		2927.61	-0.00294129		3457.6	0.01194704		3987.6	-0.00495831
277.79	0.22906194		807.79	0.03459453		1337.78	0.04022275		1867.79	-0.00608126		2397.78	0.02402618		2927.81	-0.00276332		3457.8	0.01137164		3987.8	-0.00488467
277.99	0.22980225		807.99	0.03500602		1337.98	0.03960906		1867.99	-0.00575357		2397.98	0.02420853		2928.01	-0.00291724		3458	0.01109861		3988	-0.0037926
278.19	0.23019388		808.19	0.03517139		1338.18	0.03890395		1868.19	-0.0059405		2398.18	0.02384541		2928.21	-0.00176905		3458.2	0.01059673		3988.2	-0.00341027
278.39	0.23018137		808.39	0.03560077		1338.38	0.03909936		1868.39	-0.00487152		2398.38	0.02407256		2928.41	-0.00172457		3458.4	0.00987368		3988.4	-0.00288218
278.59	0.23081827		808.59	0.03550681		1338.58	0.03824375		1868.59	-0.00407303		2398.58	0.02490813		2928.61	-0.00153773		3458.6	0.01068639		3988.6	-0.00198146
278.79	0.23067585		808.79	0.0355746		1338.78	0.03850689		1868.79	-0.00364532		2398.78	0.02594952		2928.81	-0.00202565		3458.8	0.01135896		3988.8	-0.00209213
278.99	0.22987286		808.99	0.0351007		1338.98	0.03887121		1868.99	-0.00251053		2398.98	0.02533359		2929.01	-0.00182986		3459	0.01195404		3989	-0.00227963
279.19	0.22970756		809.19	0.03488724		1339.18	0.03864334		1869.19	-0.0021687		2399.18	0.0253123		2929.21	-0.0016346		3459.2	0.01215633		3989.2	-0.00241054
279.39	0.22910291		809.39	0.03513089		1339.38	0.03936402		1869.39	-0.00175619		2399.38	0.02545529		2929.41	-0.00183981		3459.4	0.01300891		3989.4	-0.00289023
279.59	0.22762346		809.59	0.0354339		1339.58	0.03964356		1869.59	-0.00196554		2399.58	0.02572185		2929.61	-0.00116916		3459.6	0.01314445		3989.6	-0.00369137
279.79	0.22733834		809.79	0.03510688		1339.78	0.0409125		1869.79	-0.00215413		2399.78	0.02530661		2929.81	-0.001043		3459.8	0.01490729		3989.8	-0.0045503
279.99	0.22780683		809.99	0.03542737		1339.98	0.04204025		1869.99	-0.00234684		2399.98	0.02486399		2930.01	-0.00116233		3460	0.01472677		3990	-0.00488365
280.19	0.22777086		810.19	0.03548882		1340.18	0.04206564		1870.19	-0.00197569		2400.18	0.02415864		2930.21	-0.00088914		3460.2	0.01451848		3990.2	-0.00486187
280.39	0.22718048		810.39	0.03498506		1340.38	0.04150515		1870.39	-0.00267855		2400.38	0.02409643		2930.41	-0.00113404		3460.4	0.01469144		3990.4	-0.00427601
280.59	0.22747147		810.59	0.03508272		1340.58	0.04122145		1870.59	-0.00383785		2400.58	0.02393275		2930.61	-0.00146632		3460.6	0.0145933		3990.6	-0.00432886
280.79	0.22765551		810.79	0.034698		1340.78	0.04107269		1870.79	-0.00477877		2400.78	0.02417225		2930.81	-0.00144543		3460.8	0.01453971		3990.8	-0.00384366
280.99	0.22877112		810.99	0.03394659		1340.98	0.04052917		1870.99	-0.00531959		2400.98	0.02425419		2931.01	-0.00106943		3461	0.01428784		3991	-0.00373697
281.19	0.23025445		811.19	0.03343892		1341.18	0.04117861		1871.19	-0.00643341		2401.18	0.0244491		2931.21	-0.00085442		3461.2	0.01410533		3991.2	-0.00390797
281.39	0.23127253		811.39	0.03394944		1341.38	0.04106109		1871.39	-0.00667665		2401.38	0.02436932		2931.41	-0.0016763		3461.4	0.0129743		3991.4	-0.00322374
281.59	0.23242546		811.59	0.03390884		1341.58	0.04115833		1871.59	-0.00794483		2401.58	0.02494629		2931.61	-0.00204039		3461.6	0.01218697		3991.6	-0.00377607
281.79	0.23326041		811.79	0.03435776		1341.78	0.04151195		1871.79	-0.00862497		2401.78	0.02519147		2931.81	-0.00205151		3461.8	0.01154537		3991.8	-0.0027516
281.99	0.23484197		811.99	0.03456807		1341.98	0.04081665		1871.99	-0.00775236		2401.98	0.02539816		2932.01	-0.00170737		3462	0.01137123		3992	-0.00240622
282.19	0.23521432		812.19	0.03447426		1342.18	0.04145981		1872.19	-0.00799106		2402.18	0.02463444		2932.21	-0.00156137		3462.2	0.01102972		3992.2	-0.00189253
282.39	0.23654727		812.39	0.03366206		1342.38	0.04181183		1872.39	-0.00635759		2402.38	0.02437153		2932.41	-0.00132501		3462.4	0.01196955		3992.4	-0.00189945
282.59	0.23809499		812.59	0.0330821		1342.58	0.04224659		1872.59	-0.00632111		2402.58	0.02418086		2932.61	-0.00168276		3462.6	0.012471		3992.6	-0.00190095
282.79	0.23887266		812.79	0.03353823		1342.78	0.04330108		1872.79	-0.00579236		2402.78	0.02438131		2932.81	-0.00077648		3462.8	0.01249699		3992.8	-0.00166087
282.99	0.23970627		812.99	0.03332191		1342.98	0.04302435		1872.99	-0.00511413		2402.98	0.02366365		2933.01	-0.00052765		3463	0.01253597		3993	-0.001857
283.19	0.24036866		813.19	0.03361438		1343.18	0.04311349		1873.19	-0.00401119		2403.18	0.02373275		2933.21	0.00026519		3463.2	0.01308459		3993.2	-0.0011785
283.39	0.23966104		813.39	0.03409319		1343.38	0.04406592		1873.39	-0.00335656		2403.38	0.02396136		2933.41	0.00035186		3463.4	0.01302701		3993.4	-0.00129633
283.59	0.23979902		813.59	0.03500069		1343.58	0.0445421		1873.59	-0.00289782		2403.58	0.02417431		2933.61	0.00056158		3463.6	0.01314691		3993.6	-0.00123931
283.79	0.24103946		813.79	0.03499781		1343.78	0.04564991		1873.79	-0.00299024		2403.78	0.02404211		2933.81	0.00072656		3463.8	0.01264062		3993.8	-0.00187388
283.99	0.24055225		813.99	0.03515733		1343.98	0.04553091		1873.99	-0.00309182		2403.98	0.02317074		2934.01	0.00025328		3464	0.01152434		3994	-0.0017587
284.19	0.23977354		814.19	0.03434235		1344.18	0.04484337		1874.19	-0.00236232		2404.18	0.02292612		2934.21	-0.00035146		3464.2	0.01128817		3994.2	-0.00222103
284.39	0.23901469		814.39	0.03411259		1344.38	0.0453814		1874.39	-0.00306159		2404.38	0.02250184		2934.41	-0.00035619		3464.4	0.0111252		3994.4	-0.00201791
284.59	0.23878609		814.59	0.03482117		1344.58	0.04608935		1874.59	-0.00349758		2404.58	0.02300274		2934.61	-0.00133956		3464.6	0.01059184		3994.6	-0.00229651
284.79	0.23791711		814.79	0.03550184		1344.78	0.04632866		1874.79	-0.00460807		2404.78	0.02342516		2934.81	-0.00190949		3464.8	0.01065526		3994.8	-0.00156562
284.99	0.23791258		814.99	0.03607342		1344.98	0.04666732		1874.99	-0.00568597		2404.98	0.02417067		2935.01	-0.00266258		3465	0.01122933		3995	-0.00144799
285.19	0.23756203		815.19	0.03504468		1345.18	0.04700568		1875.19	-0.00641295		2405.18	0.02439803		2935.21	-0.0031311		3465.2	0.01156948		3995.2	-0.00162589
285.39	0.23770474		815.39	0.03537407		1345.38	0.04637256		1875.39	-0.00739674		2405.38	0.02457937		2935.41	-0.00405794		3465.4	0.01102685		3995.4	-0.00128604
285.59	0.23725802		815.59	0.03554514		1345.58	0.04632407		1875.59	-0.00827288		2405.58	0.02476435		2935.61	-0.00484734		3465.6	0.01138093		3995.6	-0.00161013
285.79	0.23675349		815.79	0.03553248		1345.78	0.04606925		1875.79	-0.00821398		2405.78	0.02448563		2935.81	-0.00543942		3465.8	0.01118772		3995.8	-0.00097846
285.99	0.23678067		815.99	0.0356265		1345.98	0.0452606		1875.99	-0.00788419		2405.98	0.02388345		2936.01	-0.00447302		3466	0.01144284		3996	-0.00156269
286.19	0.23645135		816.19	0.03534462		1346.18	0.04575837		1876.19	-0.00883575		2406.18	0.02346531		2936.21	-0.00385654		3466.2	0.01158558		3996.2	-0.00155881
286.39	0.23724918		816.39	0.03543779		1346.38	0.04603429		1876.39	-0.0081253		2406.38	0.02402284		2936.41	-0.00308305		3466.4	0.01160058		3996.4	-0.00154244
286.59	0.23789762		816.59	0.03571414		1346.58	0.04711082		1876.59	-0.00833542		2406.58	0.02377708		2936.61	-0.00223073		3466.6	0.01176225		3996.6	-0.00103607
286.79	0.23847116		816.79	0.03610738		1346.78	0.04718456		1876.79	-0.00730177		2406.78	0.02415105		2936.81	-0.0016409		3466.8	0.01241342		3996.8	-0.00063512
286.99	0.23977031		816.99	0.03591109		1346.98	0.04718958		1876.99	-0.00617965		2406.98	0.02393669		2937.01	-0.00145731		3467	0.01310222		3997	-0.00097956
287.19	0.2407163		817.19	0.03584851		1347.18	0.04714072		1877.19	-0.00540147		2407.18	0.02468277		2937.21	-0.00035062		3467.2	0.01378036		3997.2	-0.00059241
287.39	0.24188735		817.39	0.03606408		1347.38	0.04744266		1877.39	-0.00535453		2407.38	0.02558426		2937.41	-0.00017792		3467.4	0.01303085		3997.4	-0.00154125
287.59	0.24330007		817.59	0.03631384		1347.58	0.04707901		1877.59	-0.00583982		2407.58	0.02551399		2937.61	0.00014318		3467.6	0.01266294		3997.6	-0.00175116
287.79	0.24369152		817.79	0.03586152		1347.78	0.04685086		1877.79	-0.00587033		2407.78	0.02550862		2937.81	0.00081353		3467.8	0.01105381		3997.8	-0.00190873
287.99	0.24385617		817.99	0.03537634		1347.98	0.0462733		1877.99	-0.00574454		2407.98	0.02503683		2938.01	0.00096251		3468	0.01141638		3998	-0.00230978
288.19	0.24471891		818.19	0.03508918		1348.18	0.04581111		1878.19	-0.00548347		2408.18	0.02487578		2938.21	0.0007498		3468.2	0.01194826		3998.2	-0.00255773
288.39	0.24477354		818.39	0.03610122		1348.38	0.0465564		1878.39	-0.00593307		2408.38	0.02427826		2938.41	0.00091219		3468.4	0.01218347		3998.4	-0.00231677
288.59	0.24563179		818.59	0.03749123		1348.58	0.04577419		1878.59	-0.00572462		2408.58	0.0246349		2938.61	0.00016188		3468.6	0.01164561		3998.6	-0.00203219
288.79	0.24598779		818.79	0.03923473		1348.78	0.04506586		1878.79	-0.00675159		2408.78	0.02368687		2938.81	-0.00012603		3468.8	0.01239765		3998.8	-0.00142722
288.99	0.24672744		818.99	0.03863617		1348.98	0.04469691		1878.99	-0.00791624		2408.98	0.02334913		2939.01	-0.00072369		3469	0.01291538		3999	-0.00190243
289.19	0.24727078		819.19	0.03777512		1349.18	0.04355942		1879.19	-0.00831376		2409.18	0.02342764		2939.21	-0.00072731		3469.2	0.01235253		3999.2	-0.00209662
289.39	0.2474049		819.39	0.03855487		1349.38	0.04341723		1879.39	-0.00905679		2409.38	0.02288315		2939.41	-0.00150482		3469.4	0.01199621		3999.4	-0.002114
289.59	0.24678489		819.59	0.03817991		1349.58	0.04295237		1879.59	-0.00879059		2409.58	0.02271958		2939.61	-0.00111325		3469.6	0.01217093		3999.6	-0.00280977
289.79	0.24542474		819.79	0.03797297		1349.78	0.04259415		1879.79	-0.00883779		2409.78	0.02317153		2939.81	-0.00049146		3469.8	0.01180336		3999.8	-0.00299339
289.99	0.24564071		819.99	0.03837295		1349.98	0.04258971		1879.99	-0.00928147		2409.98	0.02254138		2940.01	-0.00014357		3470	0.01157834		4000	-0.00303789
290.19	0.24537006		820.19	0.03808637		1350.18	0.0425954		1880.19	-0.0086359		2410.18	0.02218062		2940.21	-0.00027804		3470.2	0.01132357		4000.2	-0.00318884
290.39	0.24580245		820.39	0.03849529		1350.38	0.04407333		1880.39	-0.00745707		2410.38	0.02257989		2940.41	-0.00031146		3470.4	0.0119584		4000.4	-0.00293891
290.59	0.24571417		820.59	0.03819263		1350.58	0.04534844		1880.59	-0.006852		2410.58	0.02261176		2940.61	0.00019161		3470.6	0.01256625		4000.6	-0.00327183
290.79	0.24586099		820.79	0.03851747		1350.78	0.04593469		1880.79	-0.00694004		2410.78	0.02311765		2940.81	-0.00032303		3470.8	0.01285968		4000.8	-0.00262293
290.99	0.24588168		820.99	0.03814996		1350.98	0.04651642		1880.99	-0.00660545		2410.98	0.02326525		2941.01	0.00005187		3471	0.01296556		4001	-0.00317827
291.19	0.24589277		821.19	0.03713723		1351.18	0.04679996		1881.19	-0.0065487		2411.18	0.02478272		2941.21	-0.00025778		3471.2	0.01296753		4001.2	-0.00341572
291.39	0.24649275		821.39	0.03701077		1351.38	0.04776565		1881.39	-0.00568026		2411.38	0.02509864		2941.41	-0.00032357		3471.4	0.01230462		4001.4	-0.00327894
291.59	0.24639976		821.59	0.03693008		1351.58	0.0476622		1881.59	-0.00535812		2411.58	0.02459533		2941.61	0.00008592		3471.6	0.01168956		4001.6	-0.00255415
291.79	0.24638224		821.79	0.03638444		1351.78	0.04814543		1881.79	-0.00521961		2411.78	0.02499067		2941.81	-0.00025412		3471.8	0.01097562		4001.8	-0.00198877
291.99	0.24698124		821.99	0.03539447		1351.98	0.04874071		1881.99	-0.00482683		2411.98	0.02480898		2942.01	-0.00036278		3472	0.01166012		4002	-0.00214
292.19	0.2472936		822.19	0.03489294		1352.18	0.04857555		1882.19	-0.00518776		2412.18	0.0251841		2942.21	-0.00161827		3472.2	0.01128472		4002.2	-0.00157381
292.39	0.24712651		822.39	0.03470483		1352.38	0.04844119		1882.39	-0.00434906		2412.38	0.02516581		2942.41	-0.00182256		3472.4	0.01094605		4002.4	-0.00103997
292.59	0.24716392		822.59	0.03516675		1352.58	0.04752045		1882.59	-0.00441108		2412.58	0.02505079		2942.61	-0.00224458		3472.6	0.01085455		4002.6	-0.00035884
292.79	0.24753851		822.79	0.03529062		1352.78	0.04750337		1882.79	-0.0051552		2412.78	0.02500952		2942.81	-0.00261301		3472.8	0.01216916		4002.8	-0.00059277
292.99	0.24817935		822.99	0.0345637		1352.98	0.04719347		1882.99	-0.00560558		2412.98	0.02599578		2943.01	-0.00289422		3473	0.01186064		4003	-0.00138475
293.19	0.24830205		823.19	0.0353306		1353.18	0.0466756		1883.19	-0.00499142		2413.18	0.02675493		2943.21	-0.00282219		3473.2	0.01191233		4003.2	-0.00164442
293.39	0.24816315		823.39	0.03589036		1353.38	0.04723255		1883.39	-0.0047495		2413.38	0.02677003		2943.41	-0.00217799		3473.4	0.01262854		4003.4	-0.00137223
293.59	0.24839009		823.59	0.03524396		1353.58	0.04654245		1883.59	-0.00428349		2413.58	0.02736074		2943.61	-0.00186139		3473.6	0.01300436		4003.6	-0.00166486
293.79	0.24863329		823.79	0.0351662		1353.78	0.04594627		1883.79	-0.00353518		2413.78	0.02741614		2943.81	-0.00206825		3473.8	0.0128894		4003.8	-0.00187196
293.99	0.24901249		823.99	0.03570652		1353.98	0.04615644		1883.99	-0.00305676		2413.98	0.02685379		2944.01	-0.00195891		3474	0.0128057		4004	-0.00062559
294.19	0.24918398		824.19	0.03620593		1354.18	0.04627163		1884.19	-0.00277678		2414.18	0.02646758		2944.21	-0.00197625		3474.2	0.01288269		4004.2	-0.00054283
294.39	0.24962103		824.39	0.03682054		1354.38	0.04728644		1884.39	-0.00296872		2414.38	0.02683286		2944.41	-0.00141053		3474.4	0.01332795		4004.4	0.00003883
294.59	0.25041344		824.59	0.03750504		1354.58	0.04793143		1884.59	-0.00462655		2414.58	0.02638858		2944.61	-0.00052553		3474.6	0.01310057		4004.6	-0.00035287
294.79	0.25023735		824.79	0.03837626		1354.78	0.048441		1884.79	-0.00525846		2414.78	0.02680015		2944.81	-0.00095829		3474.8	0.01331816		4004.8	-0.00004573
294.99	0.25049857		824.99	0.03785911		1354.98	0.04822993		1884.99	-0.00528315		2414.98	0.02687642		2945.01	-0.00108765		3475	0.01325695		4005	-0.00085667
295.19	0.25098544		825.19	0.03776178		1355.18	0.04887658		1885.19	-0.00563441		2415.18	0.02666773		2945.21	-0.00103645		3475.2	0.01292238		4005.2	-0.0018061
295.39	0.25143853		825.39	0.03889645		1355.38	0.0498821		1885.39	-0.00567711		2415.38	0.02593451		2945.41	-0.00014858		3475.4	0.0126659		4005.4	-0.00202043
295.59	0.25157834		825.59	0.03846479		1355.58	0.04966927		1885.59	-0.00628613		2415.58	0.02519074		2945.61	-0.00087422		3475.6	0.01250952		4005.6	-0.00192065
295.79	0.25142674		825.79	0.03816106		1355.78	0.04999947		1885.79	-0.00697887		2415.78	0.02574227		2945.81	-0.00099145		3475.8	0.01221522		4005.8	-0.00182087
295.99	0.25161624		825.99	0.03805814		1355.98	0.05014043		1885.99	-0.00735433		2415.98	0.02550782		2946.01	-0.00115655		3476	0.01228142		4006	-0.00248192
296.19	0.25169514		826.19	0.03800414		1356.18	0.04964661		1886.19	-0.00755612		2416.18	0.0265152		2946.21	-0.00193181		3476.2	0.01187943		4006.2	-0.0030349
296.39	0.25155058		826.39	0.03844969		1356.38	0.04902818		1886.39	-0.00701968		2416.38	0.02622374		2946.41	-0.00165799		3476.4	0.0120551		4006.4	-0.00340779
296.59	0.25202162		826.59	0.03919508		1356.58	0.0485831		1886.59	-0.00680859		2416.58	0.02688379		2946.61	-0.00282681		3476.6	0.0120947		4006.6	-0.00366418
296.79	0.25329006		826.79	0.03914763		1356.78	0.04813949		1886.79	-0.0065885		2416.78	0.02699631		2946.81	-0.00269543		3476.8	0.01301997		4006.8	-0.00410299
296.99	0.25372076		826.99	0.0397249		1356.98	0.04747394		1886.99	-0.0061164		2416.98	0.02813405		2947.01	-0.00286198		3477	0.01320031		4007	-0.00485312
297.19	0.25373482		827.19	0.04006574		1357.18	0.04779199		1887.19	-0.00565403		2417.18	0.02834562		2947.21	-0.00285291		3477.2	0.01448015		4007.2	-0.00477586
297.39	0.25403353		827.39	0.03978429		1357.38	0.0484644		1887.39	-0.0047474		2417.38	0.02849179		2947.41	-0.00192831		3477.4	0.0143416		4007.4	-0.00472346
297.59	0.25447875		827.59	0.03946958		1357.58	0.04777491		1887.59	-0.00428239		2417.58	0.0283633		2947.61	-0.00161126		3477.6	0.01396812		4007.6	-0.00448624
297.79	0.25499421		827.79	0.03973787		1357.78	0.04705255		1887.79	-0.00403658		2417.78	0.02778653		2947.81	-0.0015668		3477.8	0.01424884		4007.8	-0.00345929
297.99	0.25509327		827.99	0.04010436		1357.98	0.04724002		1887.99	-0.00436579		2417.98	0.02757029		2948.01	-0.00107985		3478	0.01431923		4008	-0.00190446
298.19	0.25642789		828.19	0.03941667		1358.18	0.04751943		1888.19	-0.00441429		2418.18	0.02706028		2948.21	-0.00074328		3478.2	0.01429432		4008.2	-0.00123938
298.39	0.25704506		828.39	0.03931031		1358.38	0.04812817		1888.39	-0.00492747		2418.38	0.0273005		2948.41	0.00001592		3478.4	0.0150412		4008.4	-0.00009309
298.59	0.25790054		828.59	0.04021116		1358.58	0.0488873		1888.59	-0.00559974		2418.58	0.02709675		2948.61	-0.00022585		3478.6	0.01532804		4008.6	-0.0005655
298.79	0.25809363		828.79	0.04026304		1358.78	0.0492277		1888.79	-0.00546608		2418.78	0.02705786		2948.81	-0.00124744		3478.8	0.01586504		4008.8	-0.00009659
298.99	0.2579617		828.99	0.040175		1358.98	0.04966691		1888.99	-0.00574247		2418.98	0.02656008		2949.01	-0.00139207		3479	0.01587648		4009	-0.00050724
299.19	0.25740831		829.19	0.04063059		1359.18	0.05046763		1889.19	-0.00647165		2419.18	0.02590267		2949.21	-0.0010948		3479.2	0.01547981		4009.2	-0.00112185
299.39	0.25748482		829.39	0.04002319		1359.38	0.05120557		1889.39	-0.00709748		2419.38	0.02514918		2949.41	-0.00082565		3479.4	0.01524827		4009.4	-0.00119494
299.59	0.25705815		829.59	0.03948498		1359.58	0.05131619		1889.59	-0.00768372		2419.58	0.0244889		2949.61	-0.00104035		3479.6	0.01478172		4009.6	-0.00135
299.79	0.2567518		829.79	0.04012573		1359.78	0.05257909		1889.79	-0.00748615		2419.78	0.02547496		2949.81	-0.00061046		3479.8	0.01432453		4009.8	-0.0019241
299.99	0.2570903		829.99	0.040513		1359.98	0.05291892		1889.99	-0.00714676		2419.98	0.02468833		2950.01	-0.00142048		3480	0.01349825		4010	-0.0031936
300.19	0.2574849		830.19	0.04006511		1360.18	0.05273425		1890.19	-0.00639433		2420.18	0.02510348		2950.21	-0.00199689		3480.2	0.01275893		4010.2	-0.00436334
300.39	0.25815217		830.39	0.04030642		1360.38	0.05210163		1890.39	-0.00577083		2420.38	0.02478816		2950.41	-0.00200422		3480.4	0.0124369		4010.4	-0.00478372
300.59	0.25882471		830.59	0.04000978		1360.58	0.05205844		1890.59	-0.00563094		2420.58	0.02423446		2950.61	-0.00282458		3480.6	0.01297531		4010.6	-0.00476071
300.79	0.25939672		830.79	0.04000865		1360.78	0.05154156		1890.79	-0.00597045		2420.78	0.0236357		2950.81	-0.00270162		3480.8	0.01350221		4010.8	-0.00590122
300.99	0.25895623		830.99	0.04055867		1360.98	0.05130121		1890.99	-0.00612564		2420.98	0.02442842		2951.01	-0.00246804		3481	0.014166		4011	-0.00692057
301.19	0.25897711		831.19	0.04022902		1361.18	0.05198959		1891.19	-0.00605212		2421.18	0.02391546		2951.21	-0.00153955		3481.2	0.01451504		4011.2	-0.00670327
301.39	0.25942791		831.39	0.03996801		1361.38	0.05163307		1891.39	-0.00594166		2421.38	0.02371737		2951.41	-0.00041852		3481.4	0.01325397		4011.4	-0.00627417
301.59	0.25947052		831.59	0.04039185		1361.58	0.05167467		1891.59	-0.00624281		2421.58	0.02381173		2951.61	0.00042603		3481.6	0.0129098		4011.6	-0.00556019
301.79	0.25948324		831.79	0.03940025		1361.78	0.05182364		1891.79	-0.0059604		2421.78	0.02432711		2951.81	0.00029096		3481.8	0.01378693		4011.8	-0.00519405
301.99	0.2599827		831.99	0.03978805		1361.98	0.051834		1891.99	-0.00680569		2421.98	0.02490473		2952.01	0.00062876		3482	0.01375729		4012	-0.00477988
302.19	0.26051472		832.19	0.03984308		1362.18	0.0519692		1892.19	-0.00680983		2422.18	0.02594032		2952.21	0.00059747		3482.2	0.01328693		4012.2	-0.00371682
302.39	0.26100928		832.39	0.04040824		1362.38	0.05240254		1892.39	-0.00760354		2422.38	0.02684537		2952.41	0.00030657		3482.4	0.01364764		4012.4	-0.00312068
302.59	0.26111055		832.59	0.04048253		1362.58	0.05291966		1892.59	-0.00784999		2422.58	0.02703387		2952.61	0.00035005		3482.6	0.0136511		4012.6	-0.00413426
302.79	0.26080174		832.79	0.04003749		1362.78	0.05369711		1892.79	-0.00875463		2422.78	0.02741115		2952.81	0.00007878		3482.8	0.01390134		4012.8	-0.00328927
302.99	0.25938082		832.99	0.04032385		1362.98	0.05381122		1892.99	-0.00896957		2422.98	0.02812214		2953.01	0.00056689		3483	0.01365211		4013	-0.00330329
303.19	0.25868133		833.19	0.03990428		1363.18	0.05446227		1893.19	-0.00955416		2423.18	0.02812499		2953.21	0.00066001		3483.2	0.01330384		4013.2	-0.00341643
303.39	0.25790713		833.39	0.0394053		1363.38	0.05457652		1893.39	-0.01022209		2423.38	0.02785015		2953.41	0.00015623		3483.4	0.01250743		4013.4	-0.00367987
303.59	0.2575308		833.59	0.0403372		1363.58	0.05479986		1893.59	-0.01003337		2423.58	0.02811509		2953.61	-0.00023004		3483.6	0.01209801		4013.6	-0.00464221
303.79	0.25801993		833.79	0.04126563		1363.78	0.055015		1893.79	-0.01004552		2423.78	0.02854206		2953.81	-0.00113955		3483.8	0.01197625		4013.8	-0.0047199
303.99	0.25884202		833.99	0.04085046		1363.98	0.05463561		1893.99	-0.00888925		2423.98	0.0278538		2954.01	-0.00168885		3484	0.01184229		4014	-0.00471555
304.19	0.25960349		834.19	0.04079492		1364.18	0.05371406		1894.19	-0.00845423		2424.18	0.02719952		2954.21	-0.00184502		3484.2	0.01175694		4014.2	-0.00577572
304.39	0.26054596		834.39	0.04125803		1364.38	0.05264921		1894.39	-0.00773504		2424.38	0.02707688		2954.41	-0.00243308		3484.4	0.01186627		4014.4	-0.00549811
304.59	0.26086445		834.59	0.04049892		1364.58	0.05194476		1894.59	-0.00829717		2424.58	0.026291		2954.61	-0.00272985		3484.6	0.01229966		4014.6	-0.00517311
304.79	0.26099401		834.79	0.040662		1364.78	0.05157077		1894.79	-0.00848402		2424.78	0.02630743		2954.81	-0.00234468		3484.8	0.01202837		4014.8	-0.0050849
304.99	0.2612811		834.99	0.04035362		1364.98	0.05208501		1894.99	-0.00822021		2424.98	0.02663483		2955.01	-0.00150576		3485	0.01298933		4015	-0.00402755
305.19	0.26176484		835.19	0.04049133		1365.18	0.05165335		1895.19	-0.00821155		2425.18	0.02639545		2955.21	-0.00026857		3485.2	0.0124838		4015.2	-0.00300256
305.39	0.26206084		835.39	0.04067689		1365.38	0.05096603		1895.39	-0.00790191		2425.38	0.02615203		2955.41	-0.00030062		3485.4	0.01144797		4015.4	-0.00380521
305.59	0.26259126		835.59	0.0406523		1365.58	0.05107149		1895.59	-0.00706482		2425.58	0.02617003		2955.61	0.00021637		3485.6	0.01159193		4015.6	-0.00363787
305.79	0.26384233		835.79	0.0399855		1365.78	0.04927844		1895.79	-0.00724738		2425.78	0.02630639		2955.81	0.00049642		3485.8	0.01144652		4015.8	-0.00340186
305.99	0.26525122		835.99	0.04084492		1365.98	0.04820978		1895.99	-0.00798488		2425.98	0.02613405		2956.01	0.00100318		3486	0.01087451		4016	-0.00327215
306.19	0.26647153		836.19	0.04048079		1366.18	0.04834661		1896.19	-0.00771513		2426.18	0.02630435		2956.21	0.00103628		3486.2	0.01048923		4016.2	-0.00248986
306.39	0.26702036		836.39	0.04057		1366.38	0.04814144		1896.39	-0.00762082		2426.38	0.02665156		2956.41	0.00110392		3486.4	0.01109138		4016.4	-0.00239231
306.59	0.26740062		836.59	0.04087898		1366.58	0.04863314		1896.59	-0.00786201		2426.58	0.02648972		2956.61	0.00174754		3486.6	0.01117214		4016.6	-0.00240423
306.79	0.2671679		836.79	0.04101184		1366.78	0.04924307		1896.79	-0.00801654		2426.78	0.0275786		2956.81	0.00184318		3486.8	0.01199789		4016.8	-0.00209171
306.99	0.2670484		836.99	0.04150232		1366.98	0.04981257		1896.99	-0.00739757		2426.98	0.02794328		2957.01	0.0023692		3487	0.0122707		4017	-0.00211121
307.19	0.26573847		837.19	0.04191581		1367.18	0.05040642		1897.19	-0.0068328		2427.18	0.02808738		2957.21	0.00261389		3487.2	0.01224363		4017.2	-0.00103194
307.39	0.26541926		837.39	0.04263963		1367.38	0.04964003		1897.39	-0.00684563		2427.38	0.02844346		2957.41	0.00244606		3487.4	0.01201362		4017.4	-0.00127244
307.59	0.26614159		837.59	0.04346709		1367.58	0.05053138		1897.59	-0.0061759		2427.58	0.02885728		2957.61	0.00207122		3487.6	0.01251186		4017.6	-0.0020981
307.79	0.2662438		837.79	0.04363837		1367.78	0.051595		1897.79	-0.0060346		2427.78	0.02895009		2957.81	0.00116791		3487.8	0.01276748		4017.8	-0.00177439
307.99	0.26665696		837.99	0.0433888		1367.98	0.05255336		1897.99	-0.00484923		2427.98	0.02947004		2958.01	0.00105823		3488	0.01249989		4018	-0.0019388
308.19	0.26646335		838.19	0.04337243		1368.18	0.05257264		1898.19	-0.00499301		2428.18	0.03007121		2958.21	0.00013369		3488.2	0.01206208		4018.2	-0.00293067
308.39	0.26672417		838.39	0.0429833		1368.38	0.05349681		1898.39	-0.00502906		2428.38	0.03090506		2958.41	-0.00068561		3488.4	0.01205016		4018.4	-0.00194743
308.59	0.26640768		838.59	0.04252807		1368.58	0.05376078		1898.59	-0.00582363		2428.58	0.03115827		2958.61	-0.00058217		3488.6	0.0127981		4018.6	-0.00220574
308.79	0.26621875		838.79	0.0424705		1368.78	0.05426103		1898.79	-0.00585004		2428.78	0.03117798		2958.81	-0.00063942		3488.8	0.01371217		4018.8	-0.00231224
308.99	0.26577224		838.99	0.04272462		1368.98	0.05414433		1898.99	-0.00658486		2428.98	0.0309471		2959.01	-0.00089965		3489	0.01424556		4019	-0.00319508
309.19	0.26594851		839.19	0.04328177		1369.18	0.05323371		1899.19	-0.00640551		2429.18	0.03020996		2959.21	-0.00072959		3489.2	0.01366314		4019.2	-0.00441193
309.39	0.26609995		839.39	0.0428028		1369.38	0.05338738		1899.39	-0.0064069		2429.38	0.02988016		2959.41	-0.00105965		3489.4	0.01338141		4019.4	-0.00564696
309.59	0.26674792		839.59	0.04251186		1369.58	0.05297185		1899.59	-0.0072127		2429.58	0.02887906		2959.61	-0.00015073		3489.6	0.01314887		4019.6	-0.00496755
309.79	0.26759648		839.79	0.04256643		1369.78	0.05256953		1899.79	-0.0083513		2429.78	0.02733044		2959.81	0.00077063		3489.8	0.01323421		4019.8	-0.00516836
309.99	0.26798828		839.99	0.04312945		1369.98	0.05250421		1899.99	-0.00885473		2429.98	0.02618945		2960.01	0.00093631		3490	0.01324208		4020	-0.00483272
310.19	0.26904732		840.19	0.04295804		1370.18	0.05206414		1900.19	-0.00957761		2430.18	0.02547286		2960.21	0.0008593		3490.2	0.01336111		4020.2	-0.00573222
310.39	0.26919719		840.39	0.04326702		1370.38	0.05140249		1900.39	-0.00963911		2430.38	0.02458155		2960.41	0.00123346		3490.4	0.01330544		4020.4	-0.00612608
310.59	0.26950712		840.59	0.04293805		1370.58	0.05259669		1900.59	-0.01041009		2430.58	0.02410827		2960.61	0.00188735		3490.6	0.01330133		4020.6	-0.00617279
310.79	0.2692107		840.79	0.0425235		1370.78	0.05319258		1900.79	-0.00991526		2430.78	0.02455865		2960.81	0.00172477		3490.8	0.01287848		4020.8	-0.00606019
310.99	0.2693531		840.99	0.04291421		1370.98	0.05432493		1900.99	-0.00946172		2430.98	0.02428772		2961.01	0.00240231		3491	0.0114214		4021	-0.00555487
311.19	0.26946695		841.19	0.04352139		1371.18	0.05409812		1901.19	-0.00955601		2431.18	0.02406698		2961.21	0.00268046		3491.2	0.01040567		4021.2	-0.00536624
311.39	0.2708353		841.39	0.04331143		1371.38	0.05415301		1901.39	-0.00928911		2431.38	0.02426415		2961.41	0.00278714		3491.4	0.01018085		4021.4	-0.00584476
311.59	0.27178816		841.59	0.04339732		1371.58	0.05523726		1901.59	-0.008684		2431.58	0.02431013		2961.61	0.00248668		3491.6	0.01006313		4021.6	-0.00524458
311.79	0.27120853		841.79	0.04321784		1371.78	0.05576163		1901.79	-0.0087559		2431.78	0.02432529		2961.81	0.00270743		3491.8	0.00980117		4021.8	-0.00416906
311.99	0.27218606		841.99	0.04329622		1371.98	0.05605573		1901.99	-0.00815249		2431.98	0.02566441		2962.01	0.00268415		3492	0.0091003		4022	-0.00357523
312.19	0.27245093		842.19	0.04311468		1372.18	0.05534152		1902.19	-0.00855074		2432.18	0.02610852		2962.21	0.0021569		3492.2	0.00941882		4022.2	-0.00291729
312.39	0.2718915		842.39	0.04374665		1372.38	0.05512741		1902.39	-0.00818405		2432.38	0.02628391		2962.41	0.00164257		3492.4	0.00966655		4022.4	-0.00211379
312.59	0.27155714		842.59	0.04395633		1372.58	0.0544323		1902.59	-0.00703956		2432.58	0.02707061		2962.61	0.00140501		3492.6	0.01048991		4022.6	-0.00199739
312.79	0.27125127		842.79	0.04362968		1372.78	0.05398804		1902.79	-0.00633137		2432.78	0.02737358		2962.81	0.00178509		3492.8	0.01046162		4022.8	-0.00252255
312.99	0.27111518		842.99	0.04424951		1372.98	0.05363702		1902.99	-0.00638272		2432.98	0.02779441		2963.01	0.00205297		3493	0.01035922		4023	-0.00314682
313.19	0.271653		843.19	0.04482297		1373.18	0.05339987		1903.19	-0.00520795		2433.18	0.0282437		2963.21	0.00199566		3493.2	0.01026781		4023.2	-0.00336224
313.39	0.27141253		843.39	0.04424064		1373.38	0.05349959		1903.39	-0.00536837		2433.38	0.02851429		2963.41	0.00207144		3493.4	0.01082446		4023.4	-0.00336221
313.59	0.27161854		843.59	0.04404954		1373.58	0.05348958		1903.59	-0.00491232		2433.58	0.02771941		2963.61	0.0020728		3493.6	0.01106595		4023.6	-0.00360491
313.79	0.27160276		843.79	0.04413048		1373.78	0.05339032		1903.79	-0.00365736		2433.78	0.02744107		2963.81	0.00170294		3493.8	0.01174153		4023.8	-0.00474707
313.99	0.27091066		843.99	0.0446414		1373.98	0.05325661		1903.99	-0.00343066		2433.98	0.02701965		2964.01	0.00148861		3494	0.01241151		4024	-0.00562179
314.19	0.27049924		844.19	0.04405026		1374.18	0.05296678		1904.19	-0.00322488		2434.18	0.02622499		2964.21	0.00138537		3494.2	0.01274206		4024.2	-0.00714044
314.39	0.27044738		844.39	0.04425618		1374.38	0.05297494		1904.39	-0.00274928		2434.38	0.02597997		2964.41	0.00049094		3494.4	0.01239688		4024.4	-0.00736386
314.59	0.27016184		844.59	0.0444014		1374.58	0.05396743		1904.59	-0.00255965		2434.58	0.02621797		2964.61	-0.00035406		3494.6	0.01216766		4024.6	-0.00760569
314.79	0.27071589		844.79	0.04443221		1374.78	0.05461157		1904.79	-0.0030536		2434.78	0.02632915		2964.81	-0.00117109		3494.8	0.01129053		4024.8	-0.00796355
314.99	0.27082201		844.99	0.04533519		1374.98	0.05513496		1904.99	-0.00335596		2434.98	0.02568687		2965.01	-0.00043424		3495	0.01074793		4025	-0.00869514
315.19	0.27118837		845.19	0.0448477		1375.18	0.05525185		1905.19	-0.00428528		2435.18	0.02526388		2965.21	-0.00046575		3495.2	0.011839		4025.2	-0.00862878
315.39	0.27176406		845.39	0.04437674		1375.38	0.05576119		1905.39	-0.00423128		2435.38	0.02524736		2965.41	-0.00008085		3495.4	0.01269577		4025.4	-0.00732027
315.59	0.27276169		845.59	0.04511519		1375.58	0.0562039		1905.59	-0.00503885		2435.58	0.02497911		2965.61	-0.0002883		3495.6	0.01291967		4025.6	-0.00658977
315.79	0.27274		845.79	0.04509608		1375.78	0.05651539		1905.79	-0.00607388		2435.78	0.02486521		2965.81	-0.00008295		3495.8	0.01348257		4025.8	-0.00544638
315.99	0.27410237		845.99	0.0453052		1375.98	0.05644533		1905.99	-0.00632904		2435.98	0.02485922		2966.01	-0.00075172		3496	0.014004		4026	-0.00396212
316.19	0.27417486		846.19	0.04515565		1376.18	0.05646625		1906.19	-0.00762523		2436.18	0.02475491		2966.21	-0.00143827		3496.2	0.01433738		4026.2	-0.00243712
316.39	0.27455534		846.39	0.0452867		1376.38	0.05708363		1906.39	-0.0074835		2436.38	0.0258862		2966.41	-0.00078395		3496.4	0.0140986		4026.4	-0.00173249
316.59	0.27631515		846.59	0.04455008		1376.58	0.05761819		1906.59	-0.00762276		2436.58	0.02596202		2966.61	0.00005505		3496.6	0.01326103		4026.6	-0.00106035
316.79	0.27759915		846.79	0.04501345		1376.78	0.05743744		1906.79	-0.00845124		2436.78	0.02685016		2966.81	0.0004922		3496.8	0.01339354		4026.8	-0.00186461
316.99	0.27824734		846.99	0.04495183		1376.98	0.0577359		1906.99	-0.0084637		2436.98	0.02715489		2967.01	0.00049719		3497	0.01288234		4027	-0.00096438
317.19	0.27834322		847.19	0.04523621		1377.18	0.05754785		1907.19	-0.00855395		2437.18	0.02744855		2967.21	0.00021878		3497.2	0.0126302		4027.2	-0.0009412
317.39	0.27861583		847.39	0.04444985		1377.38	0.05752288		1907.39	-0.00867212		2437.38	0.02737525		2967.41	-0.00006405		3497.4	0.01272887		4027.4	-0.00123932
317.59	0.27914188		847.59	0.04422843		1377.58	0.05794359		1907.59	-0.00796445		2437.58	0.02670582		2967.61	-0.00006108		3497.6	0.01189731		4027.6	-0.0011492
317.79	0.2781765		847.79	0.0446739		1377.78	0.05789113		1907.79	-0.00751003		2437.78	0.0271626		2967.81	-0.00022261		3497.8	0.01188036		4027.8	-0.00190188
317.99	0.27733779		847.99	0.04486918		1377.98	0.05811492		1907.99	-0.00764104		2437.98	0.02661794		2968.01	0.00056235		3498	0.01201622		4028	-0.00159237
318.19	0.27711081		848.19	0.04503348		1378.18	0.05757098		1908.19	-0.00687896		2438.18	0.02680992		2968.21	0.00061416		3498.2	0.01144339		4028.2	-0.0017189
318.39	0.27698749		848.39	0.04544417		1378.38	0.05726632		1908.39	-0.00702708		2438.38	0.02767816		2968.41	-0.00027151		3498.4	0.01087936		4028.4	-0.00304314
318.59	0.27635721		848.59	0.0451868		1378.58	0.05782707		1908.59	-0.00742373		2438.58	0.02803765		2968.61	-0.00025184		3498.6	0.01018913		4028.6	-0.00397646
318.79	0.27510558		848.79	0.04513525		1378.78	0.05838969		1908.79	-0.00824775		2438.78	0.02857181		2968.81	-0.00015316		3498.8	0.01044629		4028.8	-0.00494537
318.99	0.27440176		848.99	0.04592512		1378.98	0.05832923		1908.99	-0.00784663		2438.98	0.02837456		2969.01	0.00019121		3499	0.01071397		4029	-0.00589236
319.19	0.27434185		849.19	0.04503744		1379.18	0.05821159		1909.19	-0.00828797		2439.18	0.02907268		2969.21	0.00082315		3499.2	0.01089349		4029.2	-0.00562962
319.39	0.27462448		849.39	0.0447096		1379.38	0.05799012		1909.39	-0.00780806		2439.38	0.02932685		2969.41	0.00119618		3499.4	0.01119481		4029.4	-0.00578437
319.59	0.27526352		849.59	0.04484297		1379.58	0.05794886		1909.59	-0.00776721		2439.58	0.02909078		2969.61	0.00098074		3499.6	0.01111672		4029.6	-0.00593694
319.79	0.27540111		849.79	0.04441524		1379.78	0.05875721		1909.79	-0.0074807		2439.78	0.02943728		2969.81	0.00089431		3499.8	0.01215913		4029.8	-0.0045958
319.99	0.27557547		849.99	0.04382449		1379.98	0.05896713		1909.99	-0.00693877		2439.98	0.02911278		2970.01	0.00054739		3500	0.01205249		4030	-0.00420727
320.19	0.27627249		850.19	0.04336346		1380.18	0.05983079		1910.19	-0.00702474		2440.18	0.02952615		2970.21	0.00033794		3500.2	0.01245137		4030.2	-0.00481813
320.39	0.27854025		850.39	0.04395996		1380.38	0.0597531		1910.39	-0.00656954		2440.38	0.02922251		2970.41	0.00166284		3500.4	0.01273895		4030.4	-0.00470359
320.59	0.27925867		850.59	0.04408552		1380.58	0.06048739		1910.59	-0.00633699		2440.58	0.0282854		2970.61	0.00127475		3500.6	0.01299136		4030.6	-0.00458445
320.79	0.27956629		850.79	0.04497342		1380.78	0.06036363		1910.79	-0.0067102		2440.78	0.02877471		2970.81	0.00091045		3500.8	0.01463855		4030.8	-0.00392385
320.99	0.2800205		850.99	0.04415965		1380.98	0.06102801		1910.99	-0.00655143		2440.98	0.02843585		2971.01	0.00150784		3501	0.01452269		4031	-0.00302308
321.19	0.28058114		851.19	0.04460985		1381.18	0.06067084		1911.19	-0.00679733		2441.18	0.02785551		2971.21	0.00111659		3501.2	0.01576883		4031.2	-0.0025302
321.39	0.2819563		851.39	0.04446384		1381.38	0.06042795		1911.39	-0.00668328		2441.38	0.02664527		2971.41	0.00136295		3501.4	0.01599832		4031.4	-0.0014143
321.59	0.28271183		851.59	0.04407736		1381.58	0.06019508		1911.59	-0.00661604		2441.58	0.02560712		2971.61	0.00175388		3501.6	0.01640759		4031.6	-0.00122475
321.79	0.28314508		851.79	0.04482366		1381.78	0.05992603		1911.79	-0.00637291		2441.78	0.02620419		2971.81	0.00124833		3501.8	0.01674815		4031.8	-0.00088337
321.99	0.2837733		851.99	0.04516616		1381.98	0.06018712		1911.99	-0.00670677		2441.98	0.02549962		2972.01	0.00173212		3502	0.01674531		4032	-0.00055204
322.19	0.28455706		852.19	0.04537208		1382.18	0.06004363		1912.19	-0.00701939		2442.18	0.02523833		2972.21	0.00146544		3502.2	0.01635989		4032.2	-0.00147944
322.39	0.28384382		852.39	0.04548214		1382.38	0.05908235		1912.39	-0.00755681		2442.38	0.025678		2972.41	0.00049441		3502.4	0.01530957		4032.4	-0.00205016
322.59	0.2835175		852.59	0.04577226		1382.58	0.05960011		1912.59	-0.00755992		2442.58	0.02576451		2972.61	0.0002993		3502.6	0.01449714		4032.6	-0.00220424
322.79	0.28290209		852.79	0.04695728		1382.78	0.05924695		1912.79	-0.00750553		2442.78	0.02580132		2972.81	0.00094645		3502.8	0.01475619		4032.8	-0.00259008
322.99	0.28215989		852.99	0.04654615		1382.98	0.05864375		1912.99	-0.00679439		2442.98	0.02564346		2973.01	0.00091686		3503	0.01420626		4033	-0.00333181
323.19	0.28133397		853.19	0.04557743		1383.18	0.05819356		1913.19	-0.00656873		2443.18	0.02609608		2973.21	0.00122963		3503.2	0.01391398		4033.2	-0.00376866
323.39	0.28122194		853.39	0.04548854		1383.38	0.05841805		1913.39	-0.00633824		2443.38	0.02561983		2973.41	0.00112869		3503.4	0.01391354		4033.4	-0.00436002
323.59	0.28153246		853.59	0.04535082		1383.58	0.05904972		1913.59	-0.0064697		2443.58	0.02488344		2973.61	0.00038558		3503.6	0.01357322		4033.6	-0.00541695
323.79	0.28132025		853.79	0.04577502		1383.78	0.05967269		1913.79	-0.00625403		2443.78	0.02474038		2973.81	0.000578		3503.8	0.01356188		4033.8	-0.00498738
323.99	0.28183463		853.99	0.04579211		1383.98	0.05974151		1913.99	-0.00639648		2443.98	0.02384295		2974.01	0.00020288		3504	0.01329509		4034	-0.00610217
324.19	0.28250478		854.19	0.04641786		1384.18	0.06029546		1914.19	-0.00637332		2444.18	0.02362051		2974.21	0.00024036		3504.2	0.01352279		4034.2	-0.00677297
324.39	0.28221503		854.39	0.04734395		1384.38	0.0608225		1914.39	-0.00638166		2444.38	0.02305251		2974.41	0.00074846		3504.4	0.01314261		4034.4	-0.00577651
324.59	0.28087288		854.59	0.04717531		1384.58	0.06172206		1914.59	-0.00635402		2444.58	0.02338531		2974.61	0.00006171		3504.6	0.01334478		4034.6	-0.00558264
324.79	0.28057547		854.79	0.04717284		1384.78	0.06274236		1914.79	-0.00727848		2444.78	0.02400414		2974.81	-0.00002446		3504.8	0.01415688		4034.8	-0.00426607
324.99	0.28141751		854.99	0.04680588		1384.98	0.06338484		1914.99	-0.00742262		2444.98	0.02438282		2975.01	0.00016977		3505	0.01393946		4035	-0.00513374
325.19	0.28166013		855.19	0.04698498		1385.18	0.06337543		1915.19	-0.00805441		2445.18	0.02411021		2975.21	-0.0005337		3505.2	0.01429964		4035.2	-0.00489035
325.39	0.2822766		855.39	0.04761937		1385.38	0.06311955		1915.39	-0.00804403		2445.38	0.0240598		2975.41	-0.00061162		3505.4	0.01420081		4035.4	-0.00493789
325.59	0.28288555		855.59	0.04727351		1385.58	0.06316163		1915.59	-0.00788253		2445.58	0.02458668		2975.61	-0.00097234		3505.6	0.0139622		4035.6	-0.00520768
325.79	0.28399297		855.79	0.04784918		1385.78	0.06372048		1915.79	-0.00798795		2445.78	0.02518942		2975.81	-0.00179569		3505.8	0.01306058		4035.8	-0.00445384
325.99	0.28431037		855.99	0.04815271		1385.98	0.06402019		1915.99	-0.0078509		2445.98	0.0256694		2976.01	-0.00194206		3506	0.01270551		4036	-0.00440257
326.19	0.28478264		856.19	0.04787319		1386.18	0.06382831		1916.19	-0.00775374		2446.18	0.0263513		2976.21	-0.00259677		3506.2	0.01214633		4036.2	-0.00403699
326.39	0.28479216		856.39	0.04858088		1386.38	0.06308586		1916.39	-0.00771134		2446.38	0.02756373		2976.41	-0.00326826		3506.4	0.01139563		4036.4	-0.00328643
326.59	0.28451549		856.59	0.04823988		1386.58	0.06392428		1916.59	-0.00806035		2446.58	0.02781945		2976.61	-0.00280257		3506.6	0.0114849		4036.6	-0.00305189
326.79	0.2843959		856.79	0.0486446		1386.78	0.06315012		1916.79	-0.00805229		2446.78	0.02820229		2976.81	-0.0023572		3506.8	0.01212223		4036.8	-0.00360076
326.99	0.28365505		856.99	0.04818867		1386.98	0.0634709		1916.99	-0.00790853		2446.98	0.02884711		2977.01	-0.00277959		3507	0.01192296		4037	-0.00365391
327.19	0.28433147		857.19	0.04911278		1387.18	0.06271965		1917.19	-0.00824472		2447.18	0.02837597		2977.21	-0.00218192		3507.2	0.01216062		4037.2	-0.00395635
327.39	0.28553659		857.39	0.0487478		1387.38	0.06253082		1917.39	-0.00826648		2447.38	0.02754982		2977.41	-0.00097786		3507.4	0.01263289		4037.4	-0.00394877
327.59	0.28657147		857.59	0.04851774		1387.58	0.06242264		1917.59	-0.00822852		2447.58	0.02734599		2977.61	-0.00113121		3507.6	0.01277349		4037.6	-0.00442783
327.79	0.28662494		857.79	0.04886166		1387.78	0.06193774		1917.79	-0.00822265		2447.78	0.02686253		2977.81	-0.0005678		3507.8	0.01245696		4037.8	-0.00368768
327.99	0.28782942		857.99	0.04903371		1387.98	0.06139277		1917.99	-0.00823988		2447.98	0.02626482		2978.01	0.0005393		3508	0.01266481		4038	-0.00359771
328.19	0.28741869		858.19	0.04943154		1388.18	0.06092714		1918.19	-0.00819636		2448.18	0.02583804		2978.21	0.00190622		3508.2	0.01253993		4038.2	-0.00383455
328.39	0.28723214		858.39	0.04956576		1388.38	0.06037289		1918.39	-0.00834363		2448.38	0.02576588		2978.41	0.0029247		3508.4	0.01213976		4038.4	-0.00297753
328.59	0.28803656		858.59	0.04905643		1388.58	0.05995186		1918.59	-0.0083175		2448.58	0.02629785		2978.61	0.00335722		3508.6	0.01200377		4038.6	-0.00381648
328.79	0.28844225		858.79	0.04938299		1388.78	0.05977574		1918.79	-0.00879976		2448.78	0.02663087		2978.81	0.00408739		3508.8	0.01266206		4038.8	-0.00403972
328.99	0.28886501		858.99	0.04983074		1388.98	0.05914656		1918.99	-0.00824266		2448.98	0.02625165		2979.01	0.00466044		3509	0.01240099		4039	-0.00541568
329.19	0.28881903		859.19	0.04978831		1389.18	0.05899196		1919.19	-0.00820131		2449.18	0.02569927		2979.21	0.00450618		3509.2	0.01287217		4039.2	-0.00570907
329.39	0.28882259		859.39	0.04983485		1389.38	0.05870504		1919.39	-0.00684474		2449.38	0.02566138		2979.41	0.00420212		3509.4	0.01275704		4039.4	-0.00546013
329.59	0.2887884		859.59	0.04911805		1389.58	0.05895358		1919.59	-0.00664041		2449.58	0.02612862		2979.61	0.00418777		3509.6	0.01214895		4039.6	-0.00542977
329.79	0.28935291		859.79	0.04910794		1389.78	0.059796		1919.79	-0.00574422		2449.78	0.02574426		2979.81	0.0035932		3509.8	0.01229958		4039.8	-0.00557951
329.99	0.28944608		859.99	0.04932104		1389.98	0.06059646		1919.99	-0.00479738		2449.98	0.02706074		2980.01	0.00395733		3510	0.01307182		4040	-0.00552708
330.19	0.28922714		860.19	0.04937879		1390.18	0.06057283		1920.19	-0.00535385		2450.18	0.02713607		2980.21	0.00356931		3510.2	0.01339081		4040.2	-0.00526619
330.39	0.28833951		860.39	0.04936982		1390.38	0.06097185		1920.39	-0.00573882		2450.38	0.0277959		2980.41	0.00280114		3510.4	0.0133838		4040.4	-0.00512662
330.59	0.28716432		860.59	0.04914966		1390.58	0.06181455		1920.59	-0.00645315		2450.58	0.02842273		2980.61	0.00207163		3510.6	0.01444946		4040.6	-0.00455977
330.79	0.28743301		860.79	0.05020045		1390.78	0.06272649		1920.79	-0.00612266		2450.78	0.02956611		2980.81	0.00150176		3510.8	0.01445552		4040.8	-0.00474614
330.99	0.28721437		860.99	0.04990515		1390.98	0.06284605		1920.99	-0.00634431		2450.98	0.03000778		2981.01	0.00096566		3511	0.01458501		4041	-0.00400871
331.19	0.28835055		861.19	0.04956796		1391.18	0.06305874		1921.19	-0.00667275		2451.18	0.02969016		2981.21	0.00047017		3511.2	0.01538569		4041.2	-0.00334629
331.39	0.28953885		861.39	0.04888319		1391.38	0.06380655		1921.39	-0.00676208		2451.38	0.02940537		2981.41	-0.00002368		3511.4	0.01538572		4041.4	-0.00306584
331.59	0.29068753		861.59	0.04911813		1391.58	0.06472147		1921.59	-0.00668212		2451.58	0.02966848		2981.61	-0.00071102		3511.6	0.01529019		4041.6	-0.00313802
331.79	0.2910993		861.79	0.04968383		1391.78	0.06467929		1921.79	-0.0077331		2451.78	0.02863926		2981.81	-0.00068108		3511.8	0.01473808		4041.8	-0.00292915
331.99	0.2916251		861.99	0.05082154		1391.98	0.06443315		1921.99	-0.00810307		2451.98	0.0283719		2982.01	0.00050087		3512	0.01462759		4042	-0.00222414
332.19	0.29198717		862.19	0.05067003		1392.18	0.06428007		1922.19	-0.00808253		2452.18	0.02844486		2982.21	0.00068303		3512.2	0.01393522		4042.2	-0.00208385
332.39	0.29290902		862.39	0.05057356		1392.38	0.06450651		1922.39	-0.00790536		2452.38	0.02859006		2982.41	0.00098927		3512.4	0.01292261		4042.4	-0.00200155
332.59	0.29355331		862.59	0.05025385		1392.58	0.06385704		1922.59	-0.00773742		2452.58	0.0272457		2982.61	0.00065944		3512.6	0.01339428		4042.6	-0.00259573
332.79	0.29323364		862.79	0.05058094		1392.78	0.0631662		1922.79	-0.00777117		2452.78	0.02714926		2982.81	0.00086306		3512.8	0.01316444		4042.8	-0.00301303
332.99	0.2933786		862.99	0.05002285		1392.98	0.06344195		1922.99	-0.00694108		2452.98	0.02593248		2983.01	0.00131564		3513	0.01302938		4043	-0.00402583
333.19	0.29315652		863.19	0.04945305		1393.18	0.06254467		1923.19	-0.00659801		2453.18	0.02475774		2983.21	0.00082723		3513.2	0.01283716		4043.2	-0.00512987
333.39	0.29252742		863.39	0.04921639		1393.38	0.06237717		1923.39	-0.00647465		2453.38	0.02492401		2983.41	0.0005077		3513.4	0.01209179		4043.4	-0.00525957
333.59	0.29199384		863.59	0.04889982		1393.58	0.06238017		1923.59	-0.00632649		2453.58	0.02463459		2983.61	0.00073495		3513.6	0.01151986		4043.6	-0.00578637
333.79	0.29196727		863.79	0.04878166		1393.78	0.06255654		1923.79	-0.00510613		2453.78	0.02467138		2983.81	0.00101059		3513.8	0.01148761		4043.8	-0.00622322
333.99	0.29114053		863.99	0.04909889		1393.98	0.06247934		1923.99	-0.00576933		2453.98	0.02583534		2984.01	0.00128559		3514	0.0114761		4044	-0.00615582
334.19	0.29034731		864.19	0.04876538		1394.18	0.06186549		1924.19	-0.00619446		2454.18	0.02571253		2984.21	0.00135804		3514.2	0.01172266		4044.2	-0.00627966
334.39	0.28939319		864.39	0.04824594		1394.38	0.06209202		1924.39	-0.00684653		2454.38	0.02712923		2984.41	0.00101821		3514.4	0.01164902		4044.4	-0.00702865
334.59	0.28913186		864.59	0.0477455		1394.58	0.06252235		1924.59	-0.00726374		2454.58	0.0286793		2984.61	0.00136428		3514.6	0.01191804		4044.6	-0.00611542
334.79	0.2894722		864.79	0.04731258		1394.78	0.06285718		1924.79	-0.0070729		2454.78	0.02884372		2984.81	0.00121271		3514.8	0.01105479		4044.8	-0.00620867
334.99	0.28933896		864.99	0.04666048		1394.98	0.06293637		1924.99	-0.00747716		2454.98	0.02856688		2985.01	0.00059756		3515	0.01057298		4045	-0.00528567
335.19	0.29069087		865.19	0.0466907		1395.18	0.06402269		1925.19	-0.00773431		2455.18	0.02860152		2985.21	0.00040658		3515.2	0.01069339		4045.2	-0.00404344
335.39	0.29067316		865.39	0.04739598		1395.38	0.06457781		1925.39	-0.00806957		2455.38	0.02835233		2985.41	0.00058055		3515.4	0.01029736		4045.4	-0.00415708
335.59	0.29112758		865.59	0.04771851		1395.58	0.06494468		1925.59	-0.00872737		2455.58	0.02883428		2985.61	0.00094402		3515.6	0.00987172		4045.6	-0.00434593
335.79	0.29059919		865.79	0.04808921		1395.78	0.06484767		1925.79	-0.00905985		2455.78	0.02875013		2985.81	0.00139565		3515.8	0.0089415		4045.8	-0.0030867
335.99	0.29022078		865.99	0.04853622		1395.98	0.06444379		1925.99	-0.00870953		2455.98	0.02884855		2986.01	0.00192459		3516	0.00901889		4046	-0.00307595
336.19	0.29093246		866.19	0.04823862		1396.18	0.0642373		1926.19	-0.00673516		2456.18	0.02887384		2986.21	0.00256952		3516.2	0.00938615		4046.2	-0.00279886
336.39	0.29126786		866.39	0.04841195		1396.38	0.06362593		1926.39	-0.00662573		2456.38	0.02851713		2986.41	0.00293432		3516.4	0.00957325		4046.4	-0.00335484
336.59	0.29189206		866.59	0.04876195		1396.58	0.06290121		1926.59	-0.0062128		2456.58	0.02830211		2986.61	0.00256028		3516.6	0.0102727		4046.6	-0.00336002
336.79	0.29214637		866.79	0.04849354		1396.78	0.06298495		1926.79	-0.00629183		2456.78	0.02940554		2986.81	0.00245126		3516.8	0.01080757		4046.8	-0.00446179
336.99	0.29293377		866.99	0.04848501		1396.98	0.06380949		1926.99	-0.00527622		2456.98	0.02877457		2987.01	0.00260144		3517	0.01199767		4047	-0.00532642
337.19	0.29282713		867.19	0.04822519		1397.18	0.06345583		1927.19	-0.00434629		2457.18	0.02808718		2987.21	0.00244412		3517.2	0.01168597		4047.2	-0.00537289
337.39	0.29293904		867.39	0.04812689		1397.38	0.06333146		1927.39	-0.00461774		2457.38	0.02821926		2987.41	0.0023367		3517.4	0.01157607		4047.4	-0.00491989
337.59	0.29276058		867.59	0.04783841		1397.58	0.06351327		1927.59	-0.00421446		2457.58	0.02769854		2987.61	0.00245971		3517.6	0.01098628		4047.6	-0.00512875
337.79	0.29277399		867.79	0.04782813		1397.78	0.06322372		1927.79	-0.00453906		2457.78	0.02802068		2987.81	0.00239748		3517.8	0.01181801		4047.8	-0.00585903
337.99	0.29332935		867.99	0.04802569		1397.98	0.06327484		1927.99	-0.00487864		2457.98	0.02767699		2988.01	0.00230794		3518	0.01222704		4048	-0.00554018
338.19	0.29351785		868.19	0.04784751		1398.18	0.06300439		1928.19	-0.00545095		2458.18	0.02706429		2988.21	0.00258509		3518.2	0.01338339		4048.2	-0.00564079
338.39	0.29398975		868.39	0.04814179		1398.38	0.0635353		1928.39	-0.00600043		2458.38	0.0272754		2988.41	0.00141225		3518.4	0.01331574		4048.4	-0.00508002
338.59	0.2944228		868.59	0.04756821		1398.58	0.06473067		1928.59	-0.00564653		2458.58	0.02679678		2988.61	0.00190686		3518.6	0.01356706		4048.6	-0.00401032
338.79	0.29548119		868.79	0.04803766		1398.78	0.06526978		1928.79	-0.00616264		2458.78	0.02596684		2988.81	0.00100277		3518.8	0.01329776		4048.8	-0.00465648
338.99	0.29540454		868.99	0.04792351		1398.98	0.06632865		1928.99	-0.00707048		2458.98	0.02564652		2989.01	0.0000859		3519	0.01345493		4049	-0.00391226
339.19	0.2965033		869.19	0.04803917		1399.18	0.06629541		1929.19	-0.0077146		2459.18	0.02572457		2989.21	-0.00053215		3519.2	0.01400912		4049.2	-0.00248651
339.39	0.29644994		869.39	0.0490102		1399.38	0.06649391		1929.39	-0.00860711		2459.38	0.02592166		2989.41	0.00012411		3519.4	0.01362453		4049.4	-0.00284131
339.59	0.29714596		869.59	0.04946916		1399.58	0.06621138		1929.59	-0.00897319		2459.58	0.02558112		2989.61	0.00056864		3519.6	0.01299403		4049.6	-0.00318232
339.79	0.29690136		869.79	0.04907689		1399.78	0.06607753		1929.79	-0.00935371		2459.78	0.02519625		2989.81	0.00084674		3519.8	0.01265839		4049.8	-0.00240782
339.99	0.29672024		869.99	0.04981146		1399.98	0.06492595		1929.99	-0.00889142		2459.98	0.02528169		2990.01	0.00055584		3520	0.01232713		4050	-0.00318088
340.19	0.29694484		870.19	0.04956709		1400.18	0.06468558		1930.19	-0.00784703		2460.18	0.02556498		2990.21	0.00048582		3520.2	0.01270333		4050.2	-0.00326605
340.39	0.29658503		870.39	0.05089397		1400.38	0.06410926		1930.39	-0.00839033		2460.38	0.02577607		2990.41	-0.00026794		3520.4	0.01232866		4050.4	-0.00345405
340.59	0.29724814		870.59	0.05238492		1400.58	0.06451088		1930.59	-0.00776804		2460.58	0.02629654		2990.61	-0.00016568		3520.6	0.01245331		4050.6	-0.00360137
340.79	0.29724624		870.79	0.05189739		1400.78	0.06401038		1930.79	-0.00738836		2460.78	0.0266295		2990.81	-0.00019423		3520.8	0.01288841		4050.8	-0.00382637
340.99	0.29740277		870.99	0.05205687		1400.98	0.06420272		1930.99	-0.00718854		2460.98	0.02729675		2991.01	0.00015897		3521	0.01214032		4051	-0.00365732
341.19	0.2970625		871.19	0.05190221		1401.18	0.0641945		1931.19	-0.00720873		2461.18	0.027167		2991.21	0.00028054		3521.2	0.0108207		4051.2	-0.00338385
341.39	0.2967621		871.39	0.05242254		1401.38	0.06413223		1931.39	-0.00809154		2461.38	0.02806213		2991.41	-0.00021799		3521.4	0.01068063		4051.4	-0.00414275
341.59	0.29656551		871.59	0.05235601		1401.58	0.06428418		1931.59	-0.00853611		2461.58	0.02893022		2991.61	-0.00003025		3521.6	0.0097196		4051.6	-0.00427545
341.79	0.29640513		871.79	0.05233378		1401.78	0.06426564		1931.79	-0.00879009		2461.78	0.02898837		2991.81	0.00041665		3521.8	0.01096381		4051.8	-0.00471523
341.99	0.29690237		871.99	0.05211984		1401.98	0.0641727		1931.99	-0.00893221		2461.98	0.02861972		2992.01	0.00100018		3522	0.01063273		4052	-0.00409086
342.19	0.29730066		872.19	0.05232543		1402.18	0.0645051		1932.19	-0.00928237		2462.18	0.02846556		2992.21	0.00063187		3522.2	0.01011893		4052.2	-0.00421126
342.39	0.29771435		872.39	0.05255533		1402.38	0.06597471		1932.39	-0.00839049		2462.38	0.02855368		2992.41	0.00001335		3522.4	0.0096089		4052.4	-0.00441258
342.59	0.29776559		872.59	0.05181027		1402.58	0.06715103		1932.59	-0.00857333		2462.58	0.02902632		2992.61	0.00066578		3522.6	0.00948552		4052.6	-0.00500848
342.79	0.29868768		872.79	0.0513621		1402.78	0.06759289		1932.79	-0.00903919		2462.78	0.02908025		2992.81	0.00025743		3522.8	0.0095356		4052.8	-0.0055463
342.99	0.299181		872.99	0.05093357		1402.98	0.06823984		1932.99	-0.00921625		2462.98	0.03001396		2993.01	0.00022235		3523	0.01035087		4053	-0.0048406
343.19	0.30084015		873.19	0.05146624		1403.18	0.06870323		1933.19	-0.00873444		2463.18	0.03047065		2993.21	0.00022898		3523.2	0.01070597		4053.2	-0.00444418
343.39	0.30115417		873.39	0.05172961		1403.38	0.06873394		1933.39	-0.00948492		2463.38	0.02991132		2993.41	0.00108462		3523.4	0.01074341		4053.4	-0.00504506
343.59	0.30162678		873.59	0.0509292		1403.58	0.06864627		1933.59	-0.00992452		2463.58	0.02936503		2993.61	0.00127131		3523.6	0.01132164		4053.6	-0.00440443
343.79	0.30156419		873.79	0.05105608		1403.78	0.06957731		1933.79	-0.01052587		2463.78	0.02942199		2993.81	0.0008341		3523.8	0.01163767		4053.8	-0.00409009
343.99	0.3019454		873.99	0.05161861		1403.98	0.06924651		1933.99	-0.00971245		2463.98	0.02941296		2994.01	0.00108899		3524	0.01242174		4054	-0.00429818
344.19	0.30248907		874.19	0.0515025		1404.18	0.06970243		1934.19	-0.00929331		2464.18	0.02863736		2994.21	0.00151949		3524.2	0.01350139		4054.2	-0.00475969
344.39	0.30254052		874.39	0.05205974		1404.38	0.06933639		1934.39	-0.00859991		2464.38	0.02833855		2994.41	0.00183261		3524.4	0.01369131		4054.4	-0.00442891
344.59	0.30322123		874.59	0.05170572		1404.58	0.068693		1934.59	-0.00868857		2464.58	0.02853993		2994.61	0.00221835		3524.6	0.01505555		4054.6	-0.0047532
344.79	0.30309032		874.79	0.05086848		1404.78	0.06798237		1934.79	-0.00904479		2464.78	0.02886126		2994.81	0.00211714		3524.8	0.01553418		4054.8	-0.00472068
344.99	0.30348884		874.99	0.0514118		1404.98	0.06830643		1934.99	-0.01056612		2464.98	0.0290041		2995.01	0.00190871		3525	0.01533918		4055	-0.00540241
345.19	0.30367131		875.19	0.05276176		1405.18	0.06882691		1935.19	-0.0101393		2465.18	0.02876226		2995.21	0.00202053		3525.2	0.01525769		4055.2	-0.00560746
345.39	0.30317107		875.39	0.05203295		1405.38	0.06856337		1935.39	-0.00981577		2465.38	0.0285996		2995.41	0.00149793		3525.4	0.01518925		4055.4	-0.00583836
345.59	0.30275035		875.59	0.05133336		1405.58	0.06815185		1935.59	-0.00911378		2465.58	0.02738904		2995.61	0.00195207		3525.6	0.01547874		4055.6	-0.00560358
345.79	0.30163592		875.79	0.05205671		1405.78	0.06878717		1935.79	-0.00908318		2465.78	0.02617307		2995.81	0.00158885		3525.8	0.01615867		4055.8	-0.00576078
345.99	0.30129281		875.99	0.05206425		1405.98	0.06835551		1935.99	-0.00924544		2465.98	0.02617718		2996.01	0.0013007		3526	0.01458214		4056	-0.00543254
346.19	0.3009392		876.19	0.05314158		1406.18	0.06830454		1936.19	-0.00850771		2466.18	0.02629218		2996.21	0.00063802		3526.2	0.01377434		4056.2	-0.00545361
346.39	0.30044219		876.39	0.05260086		1406.38	0.06840329		1936.39	-0.00785875		2466.38	0.02718567		2996.41	0.00016691		3526.4	0.0135304		4056.4	-0.00506904
346.59	0.29990345		876.59	0.05256715		1406.58	0.06772726		1936.59	-0.00838627		2466.58	0.02747679		2996.61	0.00019317		3526.6	0.01285859		4056.6	-0.00488919
346.79	0.3000445		876.79	0.05307009		1406.78	0.06753137		1936.79	-0.00741792		2466.78	0.02758562		2996.81	0.00038018		3526.8	0.01247036		4056.8	-0.00468331
346.99	0.30044675		876.99	0.05407862		1406.98	0.06770408		1936.99	-0.00790463		2466.98	0.02776759		2997.01	0.00071754		3527	0.01231137		4057	-0.00379718
347.19	0.30054417		877.19	0.05432382		1407.18	0.06677555		1937.19	-0.00734889		2467.18	0.02793015		2997.21	0.00076253		3527.2	0.01209846		4057.2	-0.00336635
347.39	0.29978016		877.39	0.05423486		1407.38	0.06642546		1937.39	-0.00814968		2467.38	0.02768292		2997.41	0.00136163		3527.4	0.01129899		4057.4	-0.00262944
347.59	0.29956148		877.59	0.05436245		1407.58	0.06731718		1937.59	-0.00841668		2467.58	0.02889867		2997.61	0.00192597		3527.6	0.01174269		4057.6	-0.00219632
347.79	0.29984826		877.79	0.05561884		1407.78	0.06799509		1937.79	-0.00819244		2467.78	0.02903063		2997.81	0.00250051		3527.8	0.01185921		4057.8	-0.00309943
347.99	0.30038411		877.99	0.05596439		1407.98	0.06731329		1937.99	-0.00799514		2467.98	0.02922162		2998.01	0.00381071		3528	0.01169798		4058	-0.00410509
348.19	0.30038914		878.19	0.05576597		1408.18	0.0672378		1938.19	-0.00792313		2468.18	0.02918758		2998.21	0.00402921		3528.2	0.01245311		4058.2	-0.00452189
348.39	0.30091502		878.39	0.05524471		1408.38	0.06738978		1938.39	-0.00817315		2468.38	0.02907346		2998.41	0.00384524		3528.4	0.01297693		4058.4	-0.00525593
348.59	0.30191167		878.59	0.05571173		1408.58	0.06719093		1938.59	-0.00856864		2468.58	0.02938454		2998.61	0.00348822		3528.6	0.01419762		4058.6	-0.00646706
348.79	0.30313994		878.79	0.05673192		1408.78	0.06777815		1938.79	-0.00850514		2468.78	0.02928464		2998.81	0.00347567		3528.8	0.01330065		4058.8	-0.00743517
348.99	0.30426823		878.99	0.0580407		1408.98	0.06850272		1938.99	-0.00854797		2468.98	0.02918387		2999.01	0.00295562		3529	0.01273356		4059	-0.00743813
349.19	0.30533931		879.19	0.05815505		1409.18	0.06930994		1939.19	-0.00699259		2469.18	0.02917184		2999.21	0.00345191		3529.2	0.01305955		4059.2	-0.00720407
349.39	0.3061869		879.39	0.0568458		1409.38	0.06960802		1939.39	-0.0067936		2469.38	0.02866821		2999.41	0.00269194		3529.4	0.01330844		4059.4	-0.0075373
349.59	0.3070192		879.59	0.0568797		1409.58	0.06994403		1939.59	-0.00709838		2469.58	0.02780461		2999.61	0.00234736		3529.6	0.01422488		4059.6	-0.0083047
349.79	0.30783133		879.79	0.05700731		1409.78	0.07064923		1939.79	-0.00772781		2469.78	0.02838562		2999.81	0.00146847		3529.8	0.01394686		4059.8	-0.0081696
349.99	0.30823282		879.99	0.05660597		1409.98	0.07029903		1939.99	-0.00761858		2469.98	0.02884849		3000.01	0.00075577		3530	0.01287922		4060	-0.0066363
350.19	0.30813724		880.19	0.05612098		1410.18	0.07019892		1940.19	-0.00738004		2470.18	0.02921485		3000.21	0.00018061		3530.2	0.01382297		4060.2	-0.00598126
350.39	0.30830945		880.39	0.05510785		1410.38	0.07059774		1940.39	-0.00721953		2470.38	0.03000069		3000.41	-0.00100307		3530.4	0.01340787		4060.4	-0.00551553
350.59	0.30771919		880.59	0.05527973		1410.58	0.07078303		1940.59	-0.00758407		2470.58	0.0292436		3000.61	-0.00113899		3530.6	0.01291542		4060.6	-0.00508701
350.79	0.30841165		880.79	0.05480983		1410.78	0.07134287		1940.79	-0.00707049		2470.78	0.02885068		3000.81	-0.001019		3530.8	0.01279929		4060.8	-0.00541325
350.99	0.30808016		880.99	0.05465936		1410.98	0.07190292		1940.99	-0.00868851		2470.98	0.02907542		3001.01	-0.00059674		3531	0.01292133		4061	-0.00492034
351.19	0.30769027		881.19	0.05390785		1411.18	0.07145657		1941.19	-0.00813813		2471.18	0.02958082		3001.21	-0.00095006		3531.2	0.01308326		4061.2	-0.00527602
351.39	0.30668203		881.39	0.05368		1411.38	0.07120549		1941.39	-0.00778842		2471.38	0.02925247		3001.41	-0.00083593		3531.4	0.01232205		4061.4	-0.00521903
351.59	0.30648801		881.59	0.05413418		1411.58	0.07147681		1941.59	-0.0077847		2471.58	0.02938317		3001.61	-0.00101382		3531.6	0.01246245		4061.6	-0.00583439
351.79	0.30625482		881.79	0.05510754		1411.78	0.07071264		1941.79	-0.00790836		2471.78	0.02880612		3001.81	0.00018316		3531.8	0.01155604		4061.8	-0.00619715
351.99	0.30567135		881.99	0.05521297		1411.98	0.07114407		1941.99	-0.00860219		2471.98	0.0294583		3002.01	0.00078878		3532	0.01131583		4062	-0.00688651
352.19	0.30594098		882.19	0.05461735		1412.18	0.0716115		1942.19	-0.00898509		2472.18	0.02871328		3002.21	0.00099151		3532.2	0.01177191		4062.2	-0.00659385
352.39	0.30589692		882.39	0.05432235		1412.38	0.07210364		1942.39	-0.00845907		2472.38	0.0280775		3002.41	0.0009841		3532.4	0.0115651		4062.4	-0.00767705
352.59	0.30688517		882.59	0.05514954		1412.58	0.07186773		1942.59	-0.00695428		2472.58	0.02894935		3002.61	0.00114888		3532.6	0.01167229		4062.6	-0.00764695
352.79	0.30712424		882.79	0.05633645		1412.78	0.07127327		1942.79	-0.00637344		2472.78	0.02890679		3002.81	0.00159314		3532.8	0.0115417		4062.8	-0.00780039
352.99	0.30797109		882.99	0.05697328		1412.98	0.07127224		1942.99	-0.00605335		2472.98	0.02879899		3003.01	0.0022733		3533	0.01217607		4063	-0.00671259
353.19	0.30890678		883.19	0.05651222		1413.18	0.07097524		1943.19	-0.00563127		2473.18	0.02862292		3003.21	0.00264198		3533.2	0.01404092		4063.2	-0.00759118
353.39	0.30916005		883.39	0.05649415		1413.38	0.07030421		1943.39	-0.00621945		2473.38	0.02790484		3003.41	0.00239281		3533.4	0.01483794		4063.4	-0.00773326
353.59	0.30912303		883.59	0.05630225		1413.58	0.07001561		1943.59	-0.00681912		2473.58	0.02681634		3003.61	0.00248706		3533.6	0.01495849		4063.6	-0.00691948
353.79	0.31008256		883.79	0.05609598		1413.78	0.06988454		1943.79	-0.00665562		2473.78	0.0270592		3003.81	0.00223554		3533.8	0.01507621		4063.8	-0.00631859
353.99	0.30967412		883.99	0.05627789		1413.98	0.06996965		1943.99	-0.00705033		2473.98	0.02732226		3004.01	0.00204879		3534	0.0144914		4064	-0.00519176
354.19	0.30987724		884.19	0.05599273		1414.18	0.07046262		1944.19	-0.00684161		2474.18	0.02766165		3004.21	0.00240512		3534.2	0.01504848		4064.2	-0.00534804
354.39	0.31174854		884.39	0.05606392		1414.38	0.07029726		1944.39	-0.00637273		2474.38	0.02740227		3004.41	0.00160787		3534.4	0.01404829		4064.4	-0.00575019
354.59	0.31237982		884.59	0.05640624		1414.58	0.07093013		1944.59	-0.00716818		2474.58	0.02686344		3004.61	0.00154043		3534.6	0.01436611		4064.6	-0.00568577
354.79	0.31328423		884.79	0.05610146		1414.78	0.07051702		1944.79	-0.00675958		2474.78	0.02646528		3004.81	0.00176136		3534.8	0.01426737		4064.8	-0.00613866
354.99	0.31316613		884.99	0.05634623		1414.98	0.07055773		1944.99	-0.00783338		2474.98	0.02622605		3005.01	0.00200455		3535	0.01373228		4065	-0.00512258
355.19	0.313686		885.19	0.05596326		1415.18	0.07004462		1945.19	-0.00765021		2475.18	0.02580776		3005.21	0.00131903		3535.2	0.01281969		4065.2	-0.0044815
355.39	0.31305895		885.39	0.05542589		1415.38	0.06972939		1945.39	-0.00730618		2475.38	0.02604974		3005.41	0.00167461		3535.4	0.01249246		4065.4	-0.00420704
355.59	0.31309487		885.59	0.05588578		1415.58	0.07126154		1945.59	-0.00827118		2475.58	0.02639396		3005.61	0.00146855		3535.6	0.01221072		4065.6	-0.00431813
355.79	0.31176853		885.79	0.05567728		1415.78	0.07162242		1945.79	-0.0089917		2475.78	0.02782963		3005.81	0.00261824		3535.8	0.01202034		4065.8	-0.00410037
355.99	0.31215217		885.99	0.05471887		1415.98	0.07307458		1945.99	-0.00871979		2475.98	0.0287517		3006.01	0.00237809		3536	0.01295461		4066	-0.00381491
356.19	0.31234898		886.19	0.05343582		1416.18	0.07293464		1946.19	-0.00809939		2476.18	0.02871635		3006.21	0.00246483		3536.2	0.01276623		4066.2	-0.00332035
356.39	0.31100433		886.39	0.05306433		1416.38	0.07262818		1946.39	-0.00653445		2476.38	0.02898492		3006.41	0.00154297		3536.4	0.01272001		4066.4	-0.00399366
356.59	0.31168677		886.59	0.05333266		1416.58	0.0723959		1946.59	-0.00576981		2476.58	0.0301381		3006.61	0.00172761		3536.6	0.01363483		4066.6	-0.00377882
356.79	0.31129918		886.79	0.05327945		1416.78	0.07203774		1946.79	-0.00586763		2476.78	0.02978093		3006.81	0.00175057		3536.8	0.01465215		4066.8	-0.00449124
356.99	0.31103854		886.99	0.05302169		1416.98	0.07258439		1946.99	-0.00625805		2476.98	0.02962144		3007.01	0.00180284		3537	0.01578868		4067	-0.00463049
357.19	0.31054415		887.19	0.05317671		1417.18	0.07266915		1947.19	-0.00585624		2477.18	0.02970023		3007.21	0.00095887		3537.2	0.0170567		4067.2	-0.00466748
357.39	0.30927537		887.39	0.05398044		1417.38	0.07297728		1947.39	-0.00614464		2477.38	0.02972851		3007.41	0.00101978		3537.4	0.01661778		4067.4	-0.00426509
357.59	0.3091668		887.59	0.05409356		1417.58	0.07365165		1947.59	-0.00594141		2477.58	0.0302156		3007.61	0.00083819		3537.6	0.01637503		4067.6	-0.00437108
357.79	0.30953087		887.79	0.0546159		1417.78	0.07405636		1947.79	-0.00662911		2477.78	0.03019335		3007.81	0.00094189		3537.8	0.0162267		4067.8	-0.00460464
357.99	0.30878865		887.99	0.0550901		1417.98	0.07504585		1947.99	-0.00625529		2477.98	0.02969177		3008.01	0.00041849		3538	0.01484165		4068	-0.00457666
358.19	0.30945453		888.19	0.0558951		1418.18	0.07541586		1948.19	-0.00548398		2478.18	0.02929639		3008.21	0.00081681		3538.2	0.01411535		4068.2	-0.00436046
358.39	0.3107182		888.39	0.0561283		1418.38	0.07489865		1948.39	-0.00552827		2478.38	0.02887005		3008.41	0.00065606		3538.4	0.01336551		4068.4	-0.0051495
358.59	0.30983539		888.59	0.05638359		1418.58	0.07545614		1948.59	-0.00636029		2478.58	0.02883798		3008.61	0.00055705		3538.6	0.01368906		4068.6	-0.00439439
358.79	0.31085693		888.79	0.05652907		1418.78	0.07424538		1948.79	-0.00659656		2478.78	0.02838039		3008.81	0.00029515		3538.8	0.01326472		4068.8	-0.00468038
358.99	0.3117502		888.99	0.05728738		1418.98	0.07473244		1948.99	-0.00786101		2478.98	0.0278129		3009.01	0.00031129		3539	0.01244483		4069	-0.004445
359.19	0.31201247		889.19	0.05767616		1419.18	0.07522078		1949.19	-0.00768215		2479.18	0.02884944		3009.21	0.00076242		3539.2	0.0122608		4069.2	-0.0044155
359.39	0.31111449		889.39	0.05795375		1419.38	0.07523509		1949.39	-0.00778592		2479.38	0.02893877		3009.41	0.00115156		3539.4	0.01200096		4069.4	-0.0052392
359.59	0.31110961		889.59	0.05798755		1419.58	0.07606412		1949.59	-0.00823228		2479.58	0.02954139		3009.61	0.00093497		3539.6	0.01131209		4069.6	-0.0053716
359.79	0.31092657		889.79	0.05748944		1419.78	0.07593102		1949.79	-0.00770421		2479.78	0.03008815		3009.81	0.00112415		3539.8	0.01213563		4069.8	-0.00492197
359.99	0.312245		889.99	0.05624885		1419.98	0.075297		1949.99	-0.00764879		2479.98	0.02980848		3010.01	0.00099657		3540	0.01231223		4070	-0.00512283
360.19	0.31228217		890.19	0.05545738		1420.18	0.0739672		1950.19	-0.00737483		2480.18	0.02970076		3010.21	0.00105827		3540.2	0.01182888		4070.2	-0.00596755
360.39	0.31212466		890.39	0.05515857		1420.38	0.07330295		1950.39	-0.00706222		2480.38	0.02915254		3010.41	0.00035635		3540.4	0.01225087		4070.4	-0.00688282
360.59	0.31380415		890.59	0.05507663		1420.58	0.07332643		1950.59	-0.00732813		2480.58	0.02960613		3010.61	0.00064784		3540.6	0.0130681		4070.6	-0.00739063
360.79	0.31405514		890.79	0.05497938		1420.78	0.07359262		1950.79	-0.00724258		2480.78	0.02914092		3010.81	0.00040884		3540.8	0.01385215		4070.8	-0.00794257
360.99	0.31352988		890.99	0.05532536		1420.98	0.07320917		1950.99	-0.00692938		2480.98	0.02910732		3011.01	0.00039267		3541	0.01447426		4071	-0.00784184
361.19	0.31363709		891.19	0.05623319		1421.18	0.07329657		1951.19	-0.00692345		2481.18	0.0298178		3011.21	-0.00011107		3541.2	0.01497799		4071.2	-0.00735503
361.39	0.31340446		891.39	0.05634024		1421.38	0.07325431		1951.39	-0.00720954		2481.38	0.03039776		3011.41	0.00076454		3541.4	0.0144611		4071.4	-0.00791663
361.59	0.31338211		891.59	0.05624078		1421.58	0.0738467		1951.59	-0.00707925		2481.58	0.03001255		3011.61	0.00150161		3541.6	0.01449341		4071.6	-0.00727818
361.79	0.31279647		891.79	0.05690964		1421.78	0.07455762		1951.79	-0.00768471		2481.78	0.0287176		3011.81	0.00190713		3541.8	0.01423605		4071.8	-0.00660935
361.99	0.3127131		891.99	0.05677642		1421.98	0.07475349		1951.99	-0.00736491		2481.98	0.02851333		3012.01	0.00201847		3542	0.01364388		4072	-0.00628248
362.19	0.31309893		892.19	0.05761533		1422.18	0.07521345		1952.19	-0.0073256		2482.18	0.0287767		3012.21	0.00361463		3542.2	0.01351874		4072.2	-0.00586252
362.39	0.31353566		892.39	0.05755707		1422.38	0.07609329		1952.39	-0.00777196		2482.38	0.02888426		3012.41	0.00350418		3542.4	0.01376729		4072.4	-0.00506311
362.59	0.31274449		892.59	0.05783467		1422.58	0.07664606		1952.59	-0.00848826		2482.58	0.0285584		3012.61	0.00308983		3542.6	0.0141091		4072.6	-0.00423481
362.79	0.31369029		892.79	0.05884222		1422.78	0.07682163		1952.79	-0.00810442		2482.78	0.02834102		3012.81	0.00325945		3542.8	0.01330853		4072.8	-0.00419786
362.99	0.31349814		892.99	0.05972948		1422.98	0.07753101		1952.99	-0.00826707		2482.98	0.02845792		3013.01	0.00444801		3543	0.01269986		4073	-0.0037243
363.19	0.31306452		893.19	0.0604903		1423.18	0.0773862		1953.19	-0.00784882		2483.18	0.02843179		3013.21	0.00357903		3543.2	0.01224599		4073.2	-0.00344905
363.39	0.3125466		893.39	0.06087433		1423.38	0.07695389		1953.39	-0.00783267		2483.38	0.0277246		3013.41	0.00378959		3543.4	0.01060166		4073.4	-0.00285817
363.59	0.31367987		893.59	0.06064358		1423.58	0.0771487		1953.59	-0.00756329		2483.58	0.02770475		3013.61	0.00363989		3543.6	0.01083047		4073.6	-0.00293577
363.79	0.31406456		893.79	0.06074314		1423.78	0.07702589		1953.79	-0.00704916		2483.78	0.02757513		3013.81	0.00372885		3543.8	0.0109652		4073.8	-0.00303332
363.99	0.31422015		893.99	0.05978262		1423.98	0.07689913		1953.99	-0.00798645		2483.98	0.02761669		3014.01	0.00348277		3544	0.01079891		4074	-0.00357178
364.19	0.31520427		894.19	0.05981488		1424.18	0.07609577		1954.19	-0.0080779		2484.18	0.0282358		3014.21	0.00319141		3544.2	0.01091019		4074.2	-0.00344489
364.39	0.31561399		894.39	0.05973072		1424.38	0.07599265		1954.39	-0.00816828		2484.38	0.02874564		3014.41	0.00228687		3544.4	0.01094049		4074.4	-0.00404019
364.59	0.31657944		894.59	0.0599281		1424.58	0.07580794		1954.59	-0.0074913		2484.58	0.02939807		3014.61	0.00197573		3544.6	0.01069641		4074.6	-0.00446765
364.79	0.31684622		894.79	0.05997242		1424.78	0.07526736		1954.79	-0.0077189		2484.78	0.02998053		3014.81	0.00207238		3544.8	0.01123663		4074.8	-0.00466544
364.99	0.31722146		894.99	0.05971676		1424.98	0.07416235		1954.99	-0.00733807		2484.98	0.03043198		3015.01	0.00177977		3545	0.01208714		4075	-0.00531648
365.19	0.31793185		895.19	0.05941464		1425.18	0.07387019		1955.19	-0.00728814		2485.18	0.03122751		3015.21	0.00241624		3545.2	0.01199814		4075.2	-0.00593892
365.39	0.31853342		895.39	0.05864897		1425.38	0.07333756		1955.39	-0.00731684		2485.38	0.03084227		3015.41	0.00266173		3545.4	0.01121806		4075.4	-0.00613296
365.59	0.31855326		895.59	0.0580586		1425.58	0.07333776		1955.59	-0.00741008		2485.58	0.02986048		3015.61	0.0028427		3545.6	0.01156466		4075.6	-0.00588933
365.79	0.31844108		895.79	0.05753068		1425.78	0.07381636		1955.79	-0.00703118		2485.78	0.02929979		3015.81	0.00246634		3545.8	0.01160606		4075.8	-0.00615978
365.99	0.31932103		895.99	0.05664186		1425.98	0.07373521		1955.99	-0.00731597		2485.98	0.02905429		3016.01	0.00252633		3546	0.01177305		4076	-0.00596693
366.19	0.31964103		896.19	0.05679961		1426.18	0.07429444		1956.19	-0.00649312		2486.18	0.02832801		3016.21	0.0019549		3546.2	0.01169718		4076.2	-0.005617
366.39	0.31952811		896.39	0.05650977		1426.38	0.07460106		1956.39	-0.00669248		2486.38	0.02833952		3016.41	0.00126912		3546.4	0.01256009		4076.4	-0.00489743
366.59	0.31875946		896.59	0.05677395		1426.58	0.0747763		1956.59	-0.00690115		2486.58	0.02806479		3016.61	0.0017051		3546.6	0.01256221		4076.6	-0.00503459
366.79	0.31964424		896.79	0.05826929		1426.78	0.07524899		1956.79	-0.00648033		2486.78	0.02767474		3016.81	0.00201833		3546.8	0.01209019		4076.8	-0.00494509
366.99	0.31930509		896.99	0.05950027		1426.98	0.075667		1956.99	-0.00755916		2486.98	0.02763151		3017.01	0.0016231		3547	0.01217566		4077	-0.00575828
367.19	0.31974608		897.19	0.06042408		1427.18	0.07606248		1957.19	-0.00666178		2487.18	0.0265329		3017.21	0.00042812		3547.2	0.01213323		4077.2	-0.00578309
367.39	0.31973585		897.39	0.06157916		1427.38	0.07595611		1957.39	-0.00589868		2487.38	0.02656235		3017.41	0.00156669		3547.4	0.01221668		4077.4	-0.00563248
367.59	0.31931712		897.59	0.06176631		1427.58	0.07589369		1957.59	-0.00677956		2487.58	0.02736223		3017.61	0.00086972		3547.6	0.01256308		4077.6	-0.00649838
367.79	0.31857515		897.79	0.06221897		1427.78	0.07665582		1957.79	-0.00742538		2487.78	0.02741989		3017.81	0.00082898		3547.8	0.01234446		4077.8	-0.0060887
367.99	0.31873724		897.99	0.06180645		1427.98	0.07615814		1957.99	-0.0083002		2487.98	0.02836264		3018.01	0.00070135		3548	0.01221587		4078	-0.00569002
368.19	0.31857736		898.19	0.06261809		1428.18	0.07581266		1958.19	-0.00827852		2488.18	0.02899811		3018.21	0.00074355		3548.2	0.01172778		4078.2	-0.00504742
368.39	0.31776321		898.39	0.06266708		1428.38	0.07575262		1958.39	-0.00774248		2488.38	0.0292071		3018.41	0.00022575		3548.4	0.01170146		4078.4	-0.00495614
368.59	0.31746261		898.59	0.06286909		1428.58	0.07490609		1958.59	-0.00797026		2488.58	0.02886261		3018.61	0.0005958		3548.6	0.01116231		4078.6	-0.00449336
368.79	0.3172757		898.79	0.06299773		1428.78	0.07468233		1958.79	-0.00837078		2488.78	0.0292208		3018.81	0.00033045		3548.8	0.01142038		4078.8	-0.00368729
368.99	0.31724171		898.99	0.06265985		1428.98	0.07416464		1958.99	-0.00777324		2488.98	0.02827457		3019.01	0.00040334		3549	0.01177299		4079	-0.00407477
369.19	0.31739804		899.19	0.06216212		1429.18	0.07432044		1959.19	-0.00742376		2489.18	0.02782249		3019.21	0.00112099		3549.2	0.01086902		4079.2	-0.00393303
369.39	0.31734889		899.39	0.06135807		1429.38	0.07398677		1959.39	-0.00787545		2489.38	0.02678437		3019.41	0.00054126		3549.4	0.01024436		4079.4	-0.00356844
369.59	0.31791817		899.59	0.06145873		1429.58	0.07437345		1959.59	-0.00797525		2489.58	0.02555932		3019.61	0.00112651		3549.6	0.00977616		4079.6	-0.00393513
369.79	0.31750862		899.79	0.06147298		1429.78	0.0741897		1959.79	-0.00726395		2489.78	0.02501499		3019.81	0.0004895		3549.8	0.00917098		4079.8	-0.00376435
369.99	0.31828068		899.99	0.06135832		1429.98	0.07322225		1959.99	-0.00807266		2489.98	0.02576595		3020.01	0.00050014		3550	0.0101051		4080	-0.00394427
370.19	0.31865242		900.19	0.06157431		1430.18	0.07231207		1960.19	-0.00803585		2490.18	0.0258277		3020.21	0.00000845		3550.2	0.01071907		4080.2	-0.00438271
370.39	0.3194616		900.39	0.0615151		1430.38	0.07196085		1960.39	-0.00827209		2490.38	0.02671299		3020.41	0.0008658		3550.4	0.01158347		4080.4	-0.00438898
370.59	0.31995801		900.59	0.06171273		1430.58	0.0725583		1960.59	-0.00832298		2490.58	0.02663443		3020.61	0.00156677		3550.6	0.01240288		4080.6	-0.00539885
370.79	0.32115144		900.79	0.06200788		1430.78	0.07273537		1960.79	-0.00851741		2490.78	0.02718246		3020.81	0.00145658		3550.8	0.01199369		4080.8	-0.00670871
370.99	0.32153471		900.99	0.06197929		1430.98	0.07301142		1960.99	-0.00868946		2490.98	0.02814386		3021.01	0.00152472		3551	0.01212173		4081	-0.00769379
371.19	0.32236214		901.19	0.06132318		1431.18	0.07266825		1961.19	-0.007659		2491.18	0.0285005		3021.21	0.00277898		3551.2	0.01262945		4081.2	-0.00826279
371.39	0.32293471		901.39	0.06121802		1431.38	0.07245032		1961.39	-0.00754605		2491.38	0.02870741		3021.41	0.00360815		3551.4	0.01347053		4081.4	-0.00919873
371.59	0.32291519		901.59	0.06071346		1431.58	0.07276511		1961.59	-0.00850219		2491.58	0.02992994		3021.61	0.0034692		3551.6	0.01254129		4081.6	-0.00970217
371.79	0.32301574		901.79	0.06045142		1431.78	0.07385092		1961.79	-0.00824294		2491.78	0.03018895		3021.81	0.00406754		3551.8	0.01198074		4081.8	-0.00930006
371.99	0.32374569		901.99	0.05901242		1431.98	0.07369547		1961.99	-0.00816332		2491.98	0.03155642		3022.01	0.00472321		3552	0.01114803		4082	-0.00871474
372.19	0.32288162		902.19	0.05927662		1432.18	0.07466677		1962.19	-0.00747025		2492.18	0.0312711		3022.21	0.00382221		3552.2	0.01162242		4082.2	-0.00811504
372.39	0.32348416		902.39	0.05885686		1432.38	0.07467445		1962.39	-0.00717828		2492.38	0.03089615		3022.41	0.00318563		3552.4	0.01237374		4082.4	-0.00757757
372.59	0.32406788		902.59	0.0588589		1432.58	0.07440494		1962.59	-0.00739199		2492.58	0.0311519		3022.61	0.00298213		3552.6	0.01276161		4082.6	-0.00649449
372.79	0.32404826		902.79	0.05923412		1432.78	0.07485057		1962.79	-0.00630609		2492.78	0.0310363		3022.81	0.00142091		3552.8	0.0134492		4082.8	-0.00554033
372.99	0.32462967		902.99	0.05993362		1432.98	0.07582468		1962.99	-0.00615612		2492.98	0.03008085		3023.01	0.00135596		3553	0.01403965		4083	-0.00597103
373.19	0.32482053		903.19	0.06029105		1433.18	0.07697461		1963.19	-0.00568171		2493.18	0.02922503		3023.21	0.00121314		3553.2	0.01367213		4083.2	-0.00553015
373.39	0.32433976		903.39	0.06122986		1433.38	0.07833808		1963.39	-0.00604059		2493.38	0.02853679		3023.41	0.0005119		3553.4	0.01341994		4083.4	-0.00534015
373.59	0.32399466		903.59	0.06245737		1433.58	0.07908905		1963.59	-0.00591652		2493.58	0.02744002		3023.61	0.00015806		3553.6	0.01378284		4083.6	-0.00461135
373.79	0.32269114		903.79	0.06311061		1433.78	0.07894824		1963.79	-0.00636378		2493.78	0.02818037		3023.81	-0.00034836		3553.8	0.01453922		4083.8	-0.00309798
373.99	0.32271216		903.99	0.06371883		1433.98	0.07884263		1963.99	-0.00670699		2493.98	0.02864954		3024.01	-0.00022176		3554	0.01575264		4084	-0.00282189
374.19	0.32255377		904.19	0.0643798		1434.18	0.07923739		1964.19	-0.00578132		2494.18	0.02779713		3024.21	-0.00080206		3554.2	0.01580019		4084.2	-0.00287538
374.39	0.32248344		904.39	0.06461478		1434.38	0.07939204		1964.39	-0.00558513		2494.38	0.02840641		3024.41	-0.00078497		3554.4	0.01581174		4084.4	-0.00154926
374.59	0.32233778		904.59	0.06500882		1434.58	0.07985431		1964.59	-0.00591167		2494.58	0.02768768		3024.61	-0.0001403		3554.6	0.01587303		4084.6	-0.00189927
374.79	0.32334756		904.79	0.06451481		1434.78	0.08019801		1964.79	-0.00669171		2494.78	0.02799045		3024.81	0.00047635		3554.8	0.01447811		4084.8	-0.00206945
374.99	0.32339951		904.99	0.06399276		1434.98	0.07964518		1964.99	-0.00704962		2494.98	0.02828751		3025.01	0.00133643		3555	0.014907		4085	-0.00220358
375.19	0.32308273		905.19	0.06261426		1435.18	0.08003053		1965.19	-0.00716004		2495.18	0.02857459		3025.21	0.00312099		3555.2	0.01487868		4085.2	-0.00246727
375.39	0.32297413		905.39	0.06241761		1435.38	0.08038473		1965.39	-0.00725048		2495.38	0.02785351		3025.41	0.00318102		3555.4	0.01459984		4085.4	-0.00291076
375.59	0.32259289		905.59	0.06221387		1435.58	0.08079547		1965.59	-0.00807762		2495.58	0.02888714		3025.61	0.00308742		3555.6	0.01267977		4085.6	-0.00294779
375.79	0.32232476		905.79	0.06135027		1435.78	0.07966275		1965.79	-0.00779662		2495.78	0.02911341		3025.81	0.00390739		3555.8	0.01147354		4085.8	-0.00366543
375.99	0.32261149		905.99	0.06075525		1435.98	0.07903766		1965.99	-0.00857825		2495.98	0.02961763		3026.01	0.00461517		3556	0.01162256		4086	-0.00413687
376.19	0.32247529		906.19	0.06037659		1436.18	0.0792062		1966.19	-0.00849005		2496.18	0.02940111		3026.21	0.00383326		3556.2	0.0128772		4086.2	-0.00505401
376.39	0.32394405		906.39	0.05950284		1436.38	0.07814444		1966.39	-0.00822933		2496.38	0.02881414		3026.41	0.0038103		3556.4	0.01364142		4086.4	-0.00521819
376.59	0.32464884		906.59	0.05914759		1436.58	0.0780595		1966.59	-0.00838906		2496.58	0.03035763		3026.61	0.00364249		3556.6	0.01479768		4086.6	-0.00501932
376.79	0.32467865		906.79	0.05927701		1436.78	0.07867813		1966.79	-0.00905273		2496.78	0.02964579		3026.81	0.00239675		3556.8	0.01485671		4086.8	-0.00644313
376.99	0.32572275		906.99	0.0601637		1436.98	0.07979501		1966.99	-0.00951085		2496.98	0.0297275		3027.01	0.00276809		3557	0.01542018		4087	-0.00740046
377.19	0.32566798		907.19	0.06032198		1437.18	0.08029927		1967.19	-0.00921457		2497.18	0.02950549		3027.21	0.0022813		3557.2	0.01572458		4087.2	-0.00735896
377.39	0.32505276		907.39	0.06050553		1437.38	0.08090487		1967.39	-0.00948467		2497.38	0.02949431		3027.41	0.00207502		3557.4	0.01622116		4087.4	-0.00666356
377.59	0.3253776		907.59	0.06147279		1437.58	0.08052837		1967.59	-0.00896193		2497.58	0.02911988		3027.61	0.00213352		3557.6	0.01686292		4087.6	-0.00578141
377.79	0.32542298		907.79	0.06217385		1437.78	0.0805568		1967.79	-0.00935476		2497.78	0.02947319		3027.81	0.00269334		3557.8	0.01659766		4087.8	-0.00538114
377.99	0.32580135		907.99	0.06259647		1437.98	0.0805447		1967.99	-0.00859591		2497.98	0.02894124		3028.01	0.00277964		3558	0.01641098		4088	-0.00549273
378.19	0.3259649		908.19	0.06314214		1438.18	0.08074187		1968.19	-0.00819174		2498.18	0.02894898		3028.21	0.00263059		3558.2	0.01587066		4088.2	-0.00517888
378.39	0.32630386		908.39	0.06338366		1438.38	0.08022533		1968.39	-0.00869598		2498.38	0.02924297		3028.41	0.00297792		3558.4	0.01553268		4088.4	-0.00393351
378.59	0.32687959		908.59	0.06341956		1438.58	0.08001829		1968.59	-0.0088199		2498.58	0.02868986		3028.61	0.00352411		3558.6	0.01519825		4088.6	-0.00378056
378.79	0.32715864		908.79	0.06297914		1438.78	0.08000277		1968.79	-0.00881207		2498.78	0.02901598		3028.81	0.00361298		3558.8	0.01461101		4088.8	-0.00330904
378.99	0.32658078		908.99	0.06287609		1438.98	0.07938808		1968.99	-0.0084946		2498.98	0.02950177		3029.01	0.00398131		3559	0.01436649		4089	-0.00267429
379.19	0.32632224		909.19	0.06286289		1439.18	0.0797626		1969.19	-0.00802728		2499.18	0.02941993		3029.21	0.00471215		3559.2	0.01322688		4089.2	-0.00200203
379.39	0.32602307		909.39	0.06364627		1439.38	0.07912552		1969.39	-0.00760775		2499.38	0.02871099		3029.41	0.00443261		3559.4	0.01209609		4089.4	-0.00182786
379.59	0.32599175		909.59	0.06381051		1439.58	0.07889521		1969.59	-0.00744872		2499.58	0.0290137		3029.61	0.00465815		3559.6	0.01105669		4089.6	-0.00173122
379.79	0.32563614		909.79	0.06379485		1439.78	0.07777608		1969.79	-0.00690149		2499.78	0.02903573		3029.81	0.00520931		3559.8	0.01048314		4089.8	-0.0019411
379.99	0.32563614		909.99	0.06379485		1439.98	0.07777608		1969.99	-0.00690149		2499.98	0.02903573		3030.01	0.00520931		3560	0.01048314		4090	-0.0019411
380.19	0.32550319		910.19	0.06267999		1440.18	0.07759673		1970.19	-0.00694733		2500.18	0.0290075		3030.21	0.00644084		3560.2	0.00957299		4090.2	-0.0025005
380.39	0.32520552		910.39	0.06192118		1440.38	0.07777747		1970.39	-0.00711851		2500.38	0.02888168		3030.41	0.00713507		3560.4	0.009108		4090.4	-0.00255354
380.59	0.32512289		910.59	0.061689		1440.58	0.07807188		1970.59	-0.00678217		2500.58	0.02916401		3030.61	0.00795897		3560.6	0.00855732		4090.6	-0.00226515
380.79	0.32491428		910.79	0.0611488		1440.78	0.07868238		1970.79	-0.00679827		2500.78	0.02913404		3030.81	0.0085947		3560.8	0.00825146		4090.8	-0.00208178
380.99	0.32444272		910.99	0.06149605		1440.98	0.07958217		1970.99	-0.00693576		2500.98	0.0292559		3031.01	0.00901223		3561	0.00790928		4091	-0.00214637
381.19	0.32409197		911.19	0.06170195		1441.18	0.07996062		1971.19	-0.00691278		2501.18	0.02907411		3031.21	0.00900114		3561.2	0.00748087		4091.2	-0.00206178
381.39	0.32318927		911.39	0.06189139		1441.38	0.08103066		1971.39	-0.00721101		2501.38	0.02862654		3031.41	0.01011445		3561.4	0.00714278		4091.4	-0.00241848
381.59	0.32295267		911.59	0.06298574		1441.58	0.08176999		1971.59	-0.00768198		2501.58	0.02840965		3031.61	0.01068641		3561.6	0.00714715		4091.6	-0.00277926
381.79	0.32251328		911.79	0.0636343		1441.78	0.08244223		1971.79	-0.00803728		2501.78	0.02796747		3031.81	0.0108744		3561.8	0.00714694		4091.8	-0.00243259
381.99	0.32232966		911.99	0.06493714		1441.98	0.08335595		1971.99	-0.00837477		2501.98	0.02762257		3032.01	0.01146105		3562	0.00761813		4092	-0.00239164
382.19	0.32237726		912.19	0.06603852		1442.18	0.08371021		1972.19	-0.00839628		2502.18	0.02677077		3032.21	0.01120132		3562.2	0.00837752		4092.2	-0.00239543
382.39	0.3224698		912.39	0.06637852		1442.38	0.08402244		1972.39	-0.00971442		2502.38	0.02635429		3032.41	0.01056987		3562.4	0.00782957		4092.4	-0.00321627
382.59	0.3232122		912.59	0.06677557		1442.58	0.08474771		1972.59	-0.00951525		2502.58	0.02628328		3032.61	0.00973168		3562.6	0.00744151		4092.6	-0.00331415
382.79	0.32407571		912.79	0.06640822		1442.78	0.08512444		1972.79	-0.00909168		2502.78	0.02524977		3032.81	0.00949031		3562.8	0.00724734		4092.8	-0.00373005
382.99	0.32399535		912.99	0.06669037		1442.98	0.08568804		1972.99	-0.00874958		2502.98	0.02467099		3033.01	0.00939643		3563	0.0069061		4093	-0.00367264
383.19	0.3241705		913.19	0.06661779		1443.18	0.08555889		1973.19	-0.00844368		2503.18	0.02421527		3033.21	0.00880618		3563.2	0.00691809		4093.2	-0.00352103
383.39	0.32438026		913.39	0.067294		1443.38	0.0855721		1973.39	-0.00772505		2503.38	0.02404495		3033.41	0.00892632		3563.4	0.00634115		4093.4	-0.0036105
383.59	0.32471443		913.59	0.06674112		1443.58	0.08513878		1973.59	-0.00712572		2503.58	0.02417163		3033.61	0.00958967		3563.6	0.00622646		4093.6	-0.00341762
383.79	0.32531301		913.79	0.06605962		1443.78	0.08525573		1973.79	-0.00662587		2503.78	0.02359817		3033.81	0.00971037		3563.8	0.00658649		4093.8	-0.0031726
383.99	0.32567989		913.99	0.06613237		1443.98	0.08419111		1973.99	-0.00695903		2503.98	0.02293445		3034.01	0.01010161		3564	0.00648656		4094	-0.00284492
384.19	0.32554397		914.19	0.06520114		1444.18	0.0842691		1974.19	-0.00708434		2504.18	0.02300489		3034.21	0.01059593		3564.2	0.00586691		4094.2	-0.00411579
384.39	0.32684345		914.39	0.06518232		1444.38	0.08472654		1974.39	-0.00651284		2504.38	0.02332623		3034.41	0.00997595		3564.4	0.00602931		4094.4	-0.00400868
384.59	0.32713737		914.59	0.0650734		1444.58	0.08467466		1974.59	-0.00579882		2504.58	0.02378786		3034.61	0.00944893		3564.6	0.00591009		4094.6	-0.00418249
384.79	0.32751835		914.79	0.06546852		1444.78	0.08459651		1974.79	-0.00611529		2504.78	0.02347643		3034.81	0.00885441		3564.8	0.00676559		4094.8	-0.0042906
384.99	0.32711179		914.99	0.06557384		1444.98	0.08407772		1974.99	-0.00654318		2504.98	0.02325437		3035.01	0.00835565		3565	0.00695452		4095	-0.00502781
385.19	0.32766341		915.19	0.065249		1445.18	0.08357182		1975.19	-0.00668245		2505.18	0.02319895		3035.21	0.0087946		3565.2	0.00696345		4095.2	-0.00494277
385.39	0.32722242		915.39	0.06502792		1445.38	0.08355194		1975.39	-0.00716419		2505.38	0.02373156		3035.41	0.00947101		3565.4	0.00769697		4095.4	-0.00558258
385.59	0.32691786		915.59	0.06513402		1445.58	0.08336307		1975.59	-0.00684316		2505.58	0.02461586		3035.61	0.00859949		3565.6	0.00789832		4095.6	-0.00547722
385.79	0.32651495		915.79	0.06581073		1445.78	0.08275654		1975.79	-0.00720056		2505.78	0.02462351		3035.81	0.00812845		3565.8	0.00855278		4095.8	-0.00503823
385.99	0.32765484		915.99	0.06596972		1445.98	0.08314936		1975.99	-0.00732868		2505.98	0.02408778		3036.01	0.00878553		3566	0.0087679		4096	-0.00432572
386.19	0.32766596		916.19	0.06560886		1446.18	0.08221351		1976.19	-0.00800424		2506.18	0.02387082		3036.21	0.0078003		3566.2	0.00825827		4096.2	-0.00335526
386.39	0.32772319		916.39	0.06519724		1446.38	0.08305026		1976.39	-0.00881347		2506.38	0.02349013		3036.41	0.00776155		3566.4	0.00759119		4096.4	-0.00283957
386.59	0.32759854		916.59	0.06487706		1446.58	0.08282252		1976.59	-0.00788626		2506.58	0.02238122		3036.61	0.00733283		3566.6	0.00812903		4096.6	-0.00233092
386.79	0.32794131		916.79	0.06476668		1446.78	0.08277887		1976.79	-0.00787141		2506.78	0.02068567		3036.81	0.00827382		3566.8	0.00765536		4096.8	-0.00234563
386.99	0.32787332		916.99	0.06485905		1446.98	0.08173249		1976.99	-0.00749419		2506.98	0.02046547		3037.01	0.00823926		3567	0.00716965		4097	-0.00159096
387.19	0.32762672		917.19	0.06503298		1447.18	0.08143072		1977.19	-0.00757523		2507.18	0.01996059		3037.21	0.00814875		3567.2	0.00726414		4097.2	-0.0013925
387.39	0.32727455		917.39	0.0651129		1447.38	0.08081947		1977.39	-0.00686099		2507.38	0.01978795		3037.41	0.00853229		3567.4	0.00772809		4097.4	-0.00126545
387.59	0.32742029		917.59	0.06478032		1447.58	0.08031456		1977.59	-0.00698118		2507.58	0.02036354		3037.61	0.00874003		3567.6	0.00802329		4097.6	-0.00079674
387.79	0.32738422		917.79	0.06518352		1447.78	0.08062523		1977.79	-0.00699747		2507.78	0.02014399		3037.81	0.00827989		3567.8	0.00870065		4097.8	-0.00102219
387.99	0.32663982		917.99	0.06454071		1447.98	0.0801152		1977.99	-0.00742468		2507.98	0.02000923		3038.01	0.00825972		3568	0.00844822		4098	-0.000694
388.19	0.32628035		918.19	0.06453242		1448.18	0.08176316		1978.19	-0.00730437		2508.18	0.0208026		3038.21	0.00819526		3568.2	0.00840683		4098.2	-0.00150783
388.39	0.32763933		918.39	0.06479811		1448.38	0.08243982		1978.39	-0.00599315		2508.38	0.02090677		3038.41	0.00828547		3568.4	0.00830363		4098.4	-0.00192708
388.59	0.32723624		918.59	0.06534582		1448.58	0.08196121		1978.59	-0.00589879		2508.58	0.02111511		3038.61	0.00771316		3568.6	0.00884014		4098.6	-0.00293093
388.79	0.32734614		918.79	0.06469047		1448.78	0.08243332		1978.79	-0.00603762		2508.78	0.02076146		3038.81	0.00794628		3568.8	0.00902448		4098.8	-0.00334507
388.99	0.32733772		918.99	0.06432792		1448.98	0.08269288		1978.99	-0.00511457		2508.98	0.02039194		3039.01	0.00864054		3569	0.00923963		4099	-0.00409264
389.19	0.32731382		919.19	0.06437513		1449.18	0.08337802		1979.19	-0.00395179		2509.18	0.02052173		3039.21	0.00973441		3569.2	0.00925266		4099.2	-0.00388736
389.39	0.32646889		919.39	0.0640152		1449.38	0.08380379		1979.39	-0.00365881		2509.38	0.02091509		3039.41	0.00937735		3569.4	0.00897489		4099.4	-0.00388481
389.59	0.32586858		919.59	0.06414804		1449.58	0.08444433		1979.59	-0.00286233		2509.58	0.02043016		3039.61	0.00942535		3569.6	0.00865879		4099.6	-0.00363238
389.79	0.32676293		919.79	0.06524789		1449.78	0.08426472		1979.79	-0.00313015		2509.78	0.01956265		3039.81	0.00963399		3569.8	0.00914702		4099.8	-0.00346461
389.99	0.32700888		919.99	0.06409043		1449.98	0.08476192		1979.99	-0.00304219		2509.98	0.01863945		3040.01	0.01032878		3570	0.00805449		4100	-0.00211349
390.19	0.32682515		920.19	0.06479063		1450.18	0.08438059		1980.19	-0.00404734		2510.18	0.01808589		3040.21	0.01056565		3570.2	0.00733218		4100.2	-0.00119811
390.39	0.32684645		920.39	0.06456982		1450.38	0.08447104		1980.39	-0.00456171		2510.38	0.01747317		3040.41	0.01156314		3570.4	0.00658208		4100.4	-0.00162698
390.59	0.32658339		920.59	0.06462089		1450.58	0.08311049		1980.59	-0.00401072		2510.58	0.01687474		3040.61	0.01242975		3570.6	0.00632509		4100.6	-0.00238832
390.79	0.32692463		920.79	0.06431585		1450.78	0.08228437		1980.79	-0.00330714		2510.78	0.01680398		3040.81	0.01257513		3570.8	0.00567915		4100.8	-0.00208538
390.99	0.32701471		920.99	0.06433979		1450.98	0.0807317		1980.99	-0.00365288		2510.98	0.01704208		3041.01	0.01211129		3571	0.00587122		4101	-0.00164832
391.19	0.326743		921.19	0.06448128		1451.18	0.08004542		1981.19	-0.00343985		2511.18	0.01698667		3041.21	0.01140991		3571.2	0.00624738		4101.2	-0.00145795
391.39	0.32685306		921.39	0.06442721		1451.38	0.07949975		1981.39	-0.00301618		2511.38	0.01667662		3041.41	0.01090528		3571.4	0.00673679		4101.4	-0.00120055
391.59	0.32730878		921.59	0.06425893		1451.58	0.07971977		1981.59	-0.00354797		2511.58	0.0182014		3041.61	0.01076546		3571.6	0.0060413		4101.6	-0.00154992
391.79	0.32705187		921.79	0.06454955		1451.78	0.07918751		1981.79	-0.00412164		2511.78	0.01867857		3041.81	0.01005766		3571.8	0.00573932		4101.8	-0.00123001
391.99	0.32720967		921.99	0.06343444		1451.98	0.07886347		1981.99	-0.00421596		2511.98	0.01943424		3042.01	0.00948172		3572	0.00556038		4102	-0.00087355
392.19	0.32767895		922.19	0.06357172		1452.18	0.08032786		1982.19	-0.00432163		2512.18	0.02064356		3042.21	0.00901744		3572.2	0.00523942		4102.2	-0.00156347
392.39	0.32812599		922.39	0.06398562		1452.38	0.0805284		1982.39	-0.00471268		2512.38	0.02125989		3042.41	0.00882627		3572.4	0.00527824		4102.4	-0.00236649
392.59	0.32783323		922.59	0.06423948		1452.58	0.08093141		1982.59	-0.00503369		2512.58	0.02150327		3042.61	0.00785313		3572.6	0.00534664		4102.6	-0.00279425
392.79	0.32771475		922.79	0.06382824		1452.78	0.08203645		1982.79	-0.00373314		2512.78	0.02114523		3042.81	0.00809107		3572.8	0.0050682		4102.8	-0.00313561
392.99	0.3277919		922.99	0.06543672		1452.98	0.08248187		1982.99	-0.00334325		2512.98	0.02046467		3043.01	0.00784054		3573	0.00574134		4103	-0.0032828
393.19	0.32737368		923.19	0.06542844		1453.18	0.08264259		1983.19	-0.00377415		2513.18	0.02056005		3043.21	0.00736838		3573.2	0.00605143		4103.2	-0.00347222
393.39	0.3277517		923.39	0.06609824		1453.38	0.08328391		1983.39	-0.0045108		2513.38	0.02101042		3043.41	0.00733143		3573.4	0.00591571		4103.4	-0.00341338
393.59	0.32759841		923.59	0.0668827		1453.58	0.08344215		1983.59	-0.00519125		2513.58	0.02044458		3043.61	0.007594		3573.6	0.00610745		4103.6	-0.00398531
393.79	0.32801209		923.79	0.06720379		1453.78	0.08470402		1983.79	-0.00521437		2513.78	0.01999568		3043.81	0.00701082		3573.8	0.00635834		4103.8	-0.00425294
393.99	0.32724168		923.99	0.06667694		1453.98	0.08507286		1983.99	-0.00524663		2513.98	0.01922177		3044.01	0.00741944		3574	0.00573114		4104	-0.00398802
394.19	0.32813319		924.19	0.06795802		1454.18	0.08520785		1984.19	-0.00520803		2514.18	0.01912068		3044.21	0.00805689		3574.2	0.00521696		4104.2	-0.00406007
394.39	0.32796928		924.39	0.06780582		1454.38	0.08440283		1984.39	-0.00473463		2514.38	0.01929259		3044.41	0.00868766		3574.4	0.00479388		4104.4	-0.00432612
394.59	0.32802122		924.59	0.06840779		1454.58	0.08382895		1984.59	-0.00460771		2514.58	0.01810815		3044.61	0.00876388		3574.6	0.00478965		4104.6	-0.0045299
394.79	0.32799656		924.79	0.06835716		1454.78	0.08322221		1984.79	-0.00358644		2514.78	0.0179338		3044.81	0.00874267		3574.8	0.00479315		4104.8	-0.00390789
394.99	0.32801809		924.99	0.06821913		1454.98	0.08228142		1984.99	-0.00417764		2514.98	0.01796915		3045.01	0.00886985		3575	0.00589102		4105	-0.00394522
395.19	0.32782463		925.19	0.06830727		1455.18	0.08149346		1985.19	-0.0036365		2515.18	0.01764526		3045.21	0.00895658		3575.2	0.00580117		4105.2	-0.00438507
395.39	0.3270556		925.39	0.06814573		1455.38	0.08232039		1985.39	-0.0037362		2515.38	0.01768482		3045.41	0.00953611		3575.4	0.0052833		4105.4	-0.00444377
395.59	0.32702455		925.59	0.0680158		1455.58	0.08214904		1985.59	-0.00389713		2515.58	0.0183384		3045.61	0.00916449		3575.6	0.00463544		4105.6	-0.00480684
395.79	0.32707472		925.79	0.06857106		1455.78	0.08134949		1985.79	-0.00361421		2515.78	0.01852003		3045.81	0.00895367		3575.8	0.00500326		4105.8	-0.0038465
395.99	0.32755507		925.99	0.06834741		1455.98	0.08160533		1985.99	-0.00409266		2515.98	0.0191334		3046.01	0.00865077		3576	0.00520247		4106	-0.00359323
396.19	0.3274467		926.19	0.06852124		1456.18	0.08223272		1986.19	-0.00350764		2516.18	0.01863494		3046.21	0.00894568		3576.2	0.00515895		4106.2	-0.00342749
396.39	0.32764389		926.39	0.06844298		1456.38	0.0821777		1986.39	-0.00302427		2516.38	0.01837633		3046.41	0.00914048		3576.4	0.00508247		4106.4	-0.00336973
396.59	0.32741327		926.59	0.06824038		1456.58	0.08214973		1986.59	-0.00217367		2516.58	0.01841413		3046.61	0.00929419		3576.6	0.00493779		4106.6	-0.0029579
396.79	0.32770449		926.79	0.0682194		1456.78	0.08146648		1986.79	-0.001301		2516.78	0.01792288		3046.81	0.00930311		3576.8	0.00490402		4106.8	-0.0026948
396.99	0.3274371		926.99	0.06817515		1456.98	0.08204843		1986.99	-0.0019698		2516.98	0.01755066		3047.01	0.00958024		3577	0.00567567		4107	-0.00220996
397.19	0.32824258		927.19	0.06765408		1457.18	0.08282106		1987.19	-0.00207996		2517.18	0.01803723		3047.21	0.00977869		3577.2	0.00617284		4107.2	-0.0022673
397.39	0.32811308		927.39	0.06712011		1457.38	0.08370746		1987.39	-0.00232422		2517.38	0.01833572		3047.41	0.01023186		3577.4	0.00608988		4107.4	-0.00202346
397.59	0.32802207		927.59	0.06667719		1457.58	0.08448583		1987.59	-0.00240877		2517.58	0.01810588		3047.61	0.00960689		3577.6	0.00550817		4107.6	-0.00234095
397.79	0.32832414		927.79	0.06548419		1457.78	0.08554426		1987.79	-0.00232026		2517.78	0.01802023		3047.81	0.00843845		3577.8	0.00619342		4107.8	-0.00253064
397.99	0.32734439		927.99	0.06477098		1457.98	0.08538334		1987.99	-0.00251583		2517.98	0.01711051		3048.01	0.00804692		3578	0.00659892		4108	-0.00228813
398.19	0.32754609		928.19	0.06516038		1458.18	0.08495808		1988.19	-0.00275788		2518.18	0.01742765		3048.21	0.00799604		3578.2	0.00648087		4108.2	-0.00219903
398.39	0.32730428		928.39	0.06509233		1458.38	0.08460432		1988.39	-0.00373173		2518.38	0.01718051		3048.41	0.00825685		3578.4	0.00629437		4108.4	-0.00182851
398.59	0.32687425		928.59	0.06504075		1458.58	0.08461824		1988.59	-0.00508086		2518.58	0.01606576		3048.61	0.00778511		3578.6	0.00618564		4108.6	-0.00221826
398.79	0.32736053		928.79	0.0647782		1458.78	0.08428388		1988.79	-0.00531685		2518.78	0.01631297		3048.81	0.00719214		3578.8	0.00653269		4108.8	-0.00167912
398.99	0.32733686		928.99	0.06415426		1458.98	0.08385047		1988.99	-0.00671916		2518.98	0.01684559		3049.01	0.0071829		3579	0.00680904		4109	-0.00136908
399.19	0.32714289		929.19	0.06440778		1459.18	0.08396663		1989.19	-0.00717495		2519.18	0.01684478		3049.21	0.00719395		3579.2	0.00651228		4109.2	-0.00143815
399.39	0.32685338		929.39	0.06487639		1459.38	0.08481353		1989.39	-0.00708714		2519.38	0.01609135		3049.41	0.00680497		3579.4	0.00626766		4109.4	-0.00167945
399.59	0.32838403		929.59	0.06466312		1459.58	0.08398484		1989.59	-0.00772613		2519.58	0.01599567		3049.61	0.00699878		3579.6	0.00600635		4109.6	-0.00194879
399.79	0.32978109		929.79	0.06502588		1459.78	0.08388704		1989.79	-0.00776465		2519.78	0.01629649		3049.81	0.00725397		3579.8	0.00600882		4109.8	-0.00140554
399.99	0.33031587		929.99	0.06461383		1459.98	0.08387545		1989.99	-0.00787103		2519.98	0.01607618		3050.01	0.00651912		3580	0.00521245		4110	-0.0015436
400.19	0.33057511		930.19	0.06399087		1460.18	0.08383488		1990.19	-0.00760394		2520.18	0.01596519		3050.21	0.00594016		3580.2	0.0055153		4110.2	-0.00184841
400.39	0.33092492		930.39	0.06413848		1460.38	0.08270654		1990.39	-0.00809682		2520.38	0.01584901		3050.41	0.0052469		3580.4	0.00502709		4110.4	-0.0022698
400.59	0.33054472		930.59	0.06476876		1460.58	0.08226152		1990.59	-0.00810939		2520.58	0.0163425		3050.61	0.00615434		3580.6	0.00541837		4110.6	-0.00286363
400.79	0.33076238		930.79	0.06534768		1460.78	0.08323378		1990.79	-0.00771357		2520.78	0.01632143		3050.81	0.0064742		3580.8	0.00590715		4110.8	-0.00289603
400.99	0.33040304		930.99	0.0651361		1460.98	0.0841523		1990.99	-0.00744623		2520.98	0.01664407		3051.01	0.00716374		3581	0.00652674		4111	-0.00371753
401.19	0.33087022		931.19	0.06549234		1461.18	0.08400016		1991.19	-0.00691938		2521.18	0.01692561		3051.21	0.0065888		3581.2	0.00676639		4111.2	-0.00476396
401.39	0.33036455		931.39	0.06544546		1461.38	0.08397375		1991.39	-0.00675527		2521.38	0.0167236		3051.41	0.00662438		3581.4	0.00693772		4111.4	-0.00515735
401.59	0.32998667		931.59	0.06662613		1461.58	0.08355148		1991.59	-0.00574961		2521.58	0.01700623		3051.61	0.00644848		3581.6	0.00688168		4111.6	-0.00552699
401.79	0.32851544		931.79	0.06650171		1461.78	0.08344122		1991.79	-0.00661487		2521.78	0.01674229		3051.81	0.00665167		3581.8	0.00738618		4111.8	-0.00611696
401.99	0.32743797		931.99	0.06657441		1461.98	0.08252119		1991.99	-0.00560268		2521.98	0.01624275		3052.01	0.00671635		3582	0.00799111		4112	-0.00690912
402.19	0.32715065		932.19	0.06692535		1462.18	0.08154837		1992.19	-0.0056068		2522.18	0.01646171		3052.21	0.00777096		3582.2	0.00729684		4112.2	-0.00674274
402.39	0.32750592		932.39	0.06663385		1462.38	0.08142388		1992.39	-0.00546486		2522.38	0.0158373		3052.41	0.00784996		3582.4	0.0073463		4112.4	-0.00605979
402.59	0.32762005		932.59	0.06614813		1462.58	0.08162007		1992.59	-0.00491058		2522.58	0.0149542		3052.61	0.00832126		3582.6	0.00715739		4112.6	-0.00530144
402.79	0.32816956		932.79	0.06624877		1462.78	0.08139921		1992.79	-0.0049564		2522.78	0.01492253		3052.81	0.00811176		3582.8	0.00725903		4112.8	-0.0045959
402.99	0.32781871		932.99	0.06531399		1462.98	0.08099245		1992.99	-0.00467797		2522.98	0.01512426		3053.01	0.00942061		3583	0.00704447		4113	-0.00412648
403.19	0.32828891		933.19	0.06578175		1463.18	0.08167182		1993.19	-0.00383832		2523.18	0.0156644		3053.21	0.0092171		3583.2	0.0073459		4113.2	-0.00385776
403.39	0.32898443		933.39	0.06579714		1463.38	0.08188474		1993.39	-0.00348246		2523.38	0.01579061		3053.41	0.00950257		3583.4	0.00642553		4113.4	-0.00310471
403.59	0.32959418		933.59	0.06476305		1463.58	0.08215896		1993.59	-0.00399777		2523.58	0.01554555		3053.61	0.00953114		3583.6	0.0062398		4113.6	-0.00232802
403.79	0.33015041		933.79	0.06443166		1463.78	0.08254663		1993.79	-0.00303539		2523.78	0.0154521		3053.81	0.00825332		3583.8	0.00556442		4113.8	-0.00205536
403.99	0.32942043		933.99	0.0645718		1463.98	0.08240398		1993.99	-0.00314047		2523.98	0.01637094		3054.01	0.00640892		3584	0.00579102		4114	-0.00258563
404.19	0.32955381		934.19	0.06529115		1464.18	0.08226762		1994.19	-0.00319678		2524.18	0.01583522		3054.21	0.00564135		3584.2	0.0061897		4114.2	-0.00266314
404.39	0.32951874		934.39	0.06614275		1464.38	0.0821745		1994.39	-0.00314265		2524.38	0.01585557		3054.41	0.00527472		3584.4	0.00651479		4114.4	-0.00253302
404.59	0.32912063		934.59	0.0661756		1464.58	0.08289793		1994.59	-0.00281491		2524.58	0.01625812		3054.61	0.00654985		3584.6	0.00732005		4114.6	-0.00255678
404.79	0.3293346		934.79	0.06634001		1464.78	0.08407863		1994.79	-0.00256146		2524.78	0.01680114		3054.81	0.00588393		3584.8	0.00769688		4114.8	-0.00247756
404.99	0.32907887		934.99	0.06609687		1464.98	0.08336595		1994.99	-0.00278176		2524.98	0.01632335		3055.01	0.00542798		3585	0.00751099		4115	-0.00281833
405.19	0.32897293		935.19	0.06671185		1465.18	0.08299466		1995.19	-0.00290914		2525.18	0.01640701		3055.21	0.00511398		3585.2	0.00843319		4115.2	-0.002721
405.39	0.32888296		935.39	0.06693094		1465.38	0.0832701		1995.39	-0.00279272		2525.38	0.01581504		3055.41	0.00467615		3585.4	0.0083948		4115.4	-0.00237202
405.59	0.32758052		935.59	0.06732578		1465.58	0.0832078		1995.59	-0.00252585		2525.58	0.01601652		3055.61	0.00506505		3585.6	0.00796223		4115.6	-0.00269065
405.79	0.32770127		935.79	0.06691765		1465.78	0.08309278		1995.79	-0.00317732		2525.78	0.01505412		3055.81	0.00518037		3585.8	0.00824193		4115.8	-0.00287212
405.99	0.32854853		935.99	0.06611622		1465.98	0.08233876		1995.99	-0.0028086		2525.98	0.01477156		3056.01	0.00575326		3586	0.00814644		4116	-0.00360683
406.19	0.32907871		936.19	0.06608651		1466.18	0.08196084		1996.19	-0.0028011		2526.18	0.01419867		3056.21	0.00608161		3586.2	0.00802635		4116.2	-0.00285227
406.39	0.32953818		936.39	0.06563093		1466.38	0.08106717		1996.39	-0.00263162		2526.38	0.0135025		3056.41	0.00579629		3586.4	0.00785331		4116.4	-0.00286316
406.59	0.32980381		936.59	0.06491973		1466.58	0.08047523		1996.59	-0.00236288		2526.58	0.01340898		3056.61	0.00676502		3586.6	0.00664958		4116.6	-0.00339487
406.79	0.33017005		936.79	0.06476999		1466.78	0.07974804		1996.79	-0.00295572		2526.78	0.01338376		3056.81	0.00706555		3586.8	0.00714684		4116.8	-0.00418004
406.99	0.33030052		936.99	0.0646883		1466.98	0.0792052		1996.99	-0.00337793		2526.98	0.01378846		3057.01	0.00794545		3587	0.00688208		4117	-0.00447859
407.19	0.33068861		937.19	0.06508451		1467.18	0.07997964		1997.19	-0.00373455		2527.18	0.01489215		3057.21	0.00778088		3587.2	0.00713027		4117.2	-0.00496341
407.39	0.33028908		937.39	0.06491073		1467.38	0.08006196		1997.39	-0.00429876		2527.38	0.01429523		3057.41	0.00837617		3587.4	0.00642877		4117.4	-0.0047725
407.59	0.33025456		937.59	0.06439692		1467.58	0.0803064		1997.59	-0.00424707		2527.58	0.01435252		3057.61	0.00875669		3587.6	0.00677469		4117.6	-0.00518321
407.79	0.3299017		937.79	0.06432531		1467.78	0.08034812		1997.79	-0.00421653		2527.78	0.01522803		3057.81	0.00896218		3587.8	0.00629416		4117.8	-0.00603821
407.99	0.32891505		937.99	0.06555129		1467.98	0.08179293		1997.99	-0.00424587		2527.98	0.01552774		3058.01	0.00898056		3588	0.00685511		4118	-0.00644668
408.19	0.32825766		938.19	0.06562138		1468.18	0.08260863		1998.19	-0.00427351		2528.18	0.01488651		3058.21	0.00914452		3588.2	0.00713053		4118.2	-0.00586044
408.39	0.327623		938.39	0.06663553		1468.38	0.08387568		1998.39	-0.0047619		2528.38	0.01589564		3058.41	0.00899129		3588.4	0.00763472		4118.4	-0.00505157
408.59	0.32755828		938.59	0.06691234		1468.58	0.08538044		1998.59	-0.00467073		2528.58	0.01535335		3058.61	0.00938047		3588.6	0.00767888		4118.6	-0.00493721
408.79	0.32703123		938.79	0.06773388		1468.78	0.08698128		1998.79	-0.0056264		2528.78	0.01592653		3058.81	0.00815723		3588.8	0.00736599		4118.8	-0.00543496
408.99	0.32680793		938.99	0.06805173		1468.98	0.0877809		1998.99	-0.00619886		2528.98	0.01584688		3059.01	0.00746454		3589	0.00752324		4119	-0.00475175
409.19	0.32711938		939.19	0.06836075		1469.18	0.08848282		1999.19	-0.0068772		2529.18	0.01568534		3059.21	0.00704292		3589.2	0.00810769		4119.2	-0.00419317
409.39	0.32684284		939.39	0.06801641		1469.38	0.08929684		1999.39	-0.00657808		2529.38	0.01506179		3059.41	0.00599803		3589.4	0.00731898		4119.4	-0.00446339
409.59	0.32692872		939.59	0.06844765		1469.58	0.0896771		1999.59	-0.00683125		2529.58	0.01438056		3059.61	0.00520457		3589.6	0.0065958		4119.6	-0.00445127
409.79	0.32872162		939.79	0.06846709		1469.78	0.08902614		1999.79	-0.00657927		2529.78	0.01388409		3059.81	0.00523996		3589.8	0.00735279		4119.8	-0.00450362
409.99	0.32925899		939.99	0.06795771		1469.98	0.08886711		1999.99	-0.00708115		2529.98	0.01394662		3060.01	0.00543315		3590	0.00713896		4120	-0.00530053
410.19	0.32999242		940.19	0.06779938		1470.18	0.08710384		2000.19	-0.00732413		2530.18	0.01368121		3060.21	0.00440341		3590.2	0.00803827		4120.2	-0.00506823
410.39	0.33007868		940.39	0.06693303		1470.38	0.08668913		2000.39	-0.00743718		2530.38	0.0131789		3060.41	0.00480835		3590.4	0.00723799		4120.4	-0.00549903
410.59	0.33098697		940.59	0.06588455		1470.58	0.08645244		2000.59	-0.00748543		2530.58	0.0129322		3060.61	0.00562104		3590.6	0.00705103		4120.6	-0.00602889
410.79	0.33152398		940.79	0.06545556		1470.78	0.08542192		2000.79	-0.00830184		2530.78	0.01248394		3060.81	0.00656872		3590.8	0.00831658		4120.8	-0.00547747
410.99	0.33119826		940.99	0.0652108		1470.98	0.08434521		2000.99	-0.00879773		2530.98	0.01255786		3061.01	0.00629728		3591	0.00796755		4121	-0.00539367
411.19	0.3313634		941.19	0.06379697		1471.18	0.08324976		2001.19	-0.00839001		2531.18	0.01328309		3061.21	0.0067193		3591.2	0.00777348		4121.2	-0.00528111
411.39	0.33060647		941.39	0.06253908		1471.38	0.0828437		2001.39	-0.00881134		2531.38	0.01293669		3061.41	0.0077366		3591.4	0.00753066		4121.4	-0.00423312
411.59	0.33050651		941.59	0.06192162		1471.58	0.08271303		2001.59	-0.00857292		2531.58	0.01355634		3061.61	0.00790645		3591.6	0.00767374		4121.6	-0.00442842
411.79	0.3294312		941.79	0.06136221		1471.78	0.08336339		2001.79	-0.00820868		2531.78	0.01371504		3061.81	0.00810842		3591.8	0.00702739		4121.8	-0.00452569
411.99	0.32939159		941.99	0.06192799		1471.98	0.08413728		2001.99	-0.00814824		2531.98	0.01353994		3062.01	0.00773867		3592	0.00702411		4122	-0.00441564
412.19	0.32859729		942.19	0.06214888		1472.18	0.08383872		2002.19	-0.00798333		2532.18	0.01385115		3062.21	0.00706522		3592.2	0.0062654		4122.2	-0.00397357
412.39	0.32849038		942.39	0.06324417		1472.38	0.08390991		2002.39	-0.00803943		2532.38	0.01409804		3062.41	0.00672541		3592.4	0.00573283		4122.4	-0.00368504
412.59	0.32819654		942.59	0.06244171		1472.58	0.08417099		2002.59	-0.00790299		2532.58	0.0140403		3062.61	0.00649266		3592.6	0.00537894		4122.6	-0.00437147
412.79	0.32675712		942.79	0.06315018		1472.78	0.0839715		2002.79	-0.00776045		2532.78	0.01414066		3062.81	0.00560155		3592.8	0.00515758		4122.8	-0.00485196
412.99	0.32654219		942.99	0.06310812		1472.98	0.08400501		2002.99	-0.00663087		2532.98	0.01371213		3063.01	0.00523123		3593	0.00501728		4123	-0.00383596
413.19	0.32635995		943.19	0.06334859		1473.18	0.08349596		2003.19	-0.00636878		2533.18	0.01370425		3063.21	0.0044819		3593.2	0.00513063		4123.2	-0.00515679
413.39	0.32689223		943.39	0.06350824		1473.38	0.08387122		2003.39	-0.0052533		2533.38	0.01387229		3063.41	0.00336687		3593.4	0.00452243		4123.4	-0.00560996
413.59	0.3276733		943.59	0.06436342		1473.58	0.0836919		2003.59	-0.00538981		2533.58	0.0128673		3063.61	0.00353887		3593.6	0.00422941		4123.6	-0.00538827
413.79	0.32783135		943.79	0.06370095		1473.78	0.08381735		2003.79	-0.00486365		2533.78	0.01324422		3063.81	0.00491912		3593.8	0.00490372		4123.8	-0.00518602
413.99	0.32738575		943.99	0.06417608		1473.98	0.08366276		2003.99	-0.00480805		2533.98	0.01370087		3064.01	0.00479854		3594	0.00514311		4124	-0.0056602
414.19	0.32696103		944.19	0.06458944		1474.18	0.0822019		2004.19	-0.0043551		2534.18	0.01383676		3064.21	0.00422762		3594.2	0.00531259		4124.2	-0.00548404
414.39	0.32675478		944.39	0.0647461		1474.38	0.08281561		2004.39	-0.0037547		2534.38	0.01311175		3064.41	0.00522217		3594.4	0.00533447		4124.4	-0.00502557
414.59	0.3271854		944.59	0.06496227		1474.58	0.08173975		2004.59	-0.00397217		2534.58	0.01341858		3064.61	0.00596126		3594.6	0.00528281		4124.6	-0.00463199
414.79	0.32667		944.79	0.06551141		1474.78	0.08063395		2004.79	-0.00433513		2534.78	0.01317375		3064.81	0.00612618		3594.8	0.00604228		4124.8	-0.00500994
414.99	0.32563272		944.99	0.06521684		1474.98	0.07965568		2004.99	-0.00404665		2534.98	0.0130965		3065.01	0.00606302		3595	0.00573146		4125	-0.00589048
415.19	0.32605337		945.19	0.06466815		1475.18	0.07917078		2005.19	-0.00379428		2535.18	0.01379193		3065.21	0.00655919		3595.2	0.00535152		4125.2	-0.0063602
415.39	0.32608224		945.39	0.06439068		1475.38	0.07935811		2005.39	-0.00458726		2535.38	0.0130703		3065.41	0.00694788		3595.4	0.0052058		4125.4	-0.00678281
415.59	0.3268968		945.59	0.06504863		1475.58	0.07984409		2005.59	-0.00462337		2535.58	0.01341377		3065.61	0.00755936		3595.6	0.00567568		4125.6	-0.00775159
415.79	0.32667599		945.79	0.0651236		1475.78	0.08075391		2005.79	-0.00484234		2535.78	0.01325069		3065.81	0.0075707		3595.8	0.0052737		4125.8	-0.00781559
415.99	0.3273434		945.99	0.06563334		1475.98	0.08094538		2005.99	-0.00517386		2535.98	0.01322481		3066.01	0.00776307		3596	0.00528042		4126	-0.00841475
416.19	0.326503		946.19	0.06561538		1476.18	0.08057326		2006.19	-0.00529319		2536.18	0.01275937		3066.21	0.00762391		3596.2	0.00526763		4126.2	-0.00898678
416.39	0.32632089		946.39	0.06494544		1476.38	0.08055287		2006.39	-0.00534091		2536.38	0.01210218		3066.41	0.0078504		3596.4	0.00584701		4126.4	-0.00887742
416.59	0.32613086		946.59	0.06451667		1476.58	0.08099033		2006.59	-0.00593449		2536.58	0.01187288		3066.61	0.00794573		3596.6	0.00580726		4126.6	-0.0086611
416.79	0.32587061		946.79	0.06503055		1476.78	0.08162817		2006.79	-0.0057316		2536.78	0.0106842		3066.81	0.00762958		3596.8	0.0059826		4126.8	-0.00867248
416.99	0.32621116		946.99	0.06476124		1476.98	0.08199995		2006.99	-0.00561283		2536.98	0.0102598		3067.01	0.00786276		3597	0.00610015		4127	-0.00793154
417.19	0.32731606		947.19	0.06446623		1477.18	0.08245101		2007.19	-0.00603491		2537.18	0.0106182		3067.21	0.0080229		3597.2	0.00643006		4127.2	-0.0076132
417.39	0.32860912		947.39	0.06454435		1477.38	0.08373279		2007.39	-0.00599714		2537.38	0.01110461		3067.41	0.00852057		3597.4	0.00590708		4127.4	-0.00632299
417.59	0.32807576		947.59	0.0645643		1477.58	0.08361238		2007.59	-0.00709218		2537.58	0.01091519		3067.61	0.00986609		3597.6	0.00662774		4127.6	-0.00581038
417.79	0.32767899		947.79	0.06482618		1477.78	0.08362497		2007.79	-0.00694769		2537.78	0.01228126		3067.81	0.00970559		3597.8	0.00672842		4127.8	-0.00510895
417.99	0.32700515		947.99	0.06531902		1477.98	0.08315262		2007.99	-0.0070929		2537.98	0.01250033		3068.01	0.00916832		3598	0.00666571		4128	-0.00546064
418.19	0.32628248		948.19	0.06565604		1478.18	0.0821252		2008.19	-0.00725182		2538.18	0.01225836		3068.21	0.00949033		3598.2	0.00615519		4128.2	-0.00491219
418.39	0.32619268		948.39	0.06561441		1478.38	0.08195633		2008.39	-0.00781516		2538.38	0.01223745		3068.41	0.00927376		3598.4	0.00589287		4128.4	-0.00529707
418.59	0.32572553		948.59	0.06543489		1478.58	0.08118867		2008.59	-0.00748578		2538.58	0.01311603		3068.61	0.00941855		3598.6	0.00557124		4128.6	-0.00658525
418.79	0.32454108		948.79	0.06610885		1478.78	0.08107921		2008.79	-0.00843061		2538.78	0.01367802		3068.81	0.00908565		3598.8	0.00591743		4128.8	-0.00674707
418.99	0.32426433		948.99	0.06543368		1478.98	0.08036349		2008.99	-0.00898842		2538.98	0.01425171		3069.01	0.00933175		3599	0.00594745		4129	-0.00664365
419.19	0.3254412		949.19	0.06476122		1479.18	0.08048489		2009.19	-0.00957627		2539.18	0.01532073		3069.21	0.00889629		3599.2	0.00501837		4129.2	-0.00703927
419.39	0.32608776		949.39	0.06491922		1479.38	0.08092232		2009.39	-0.0099424		2539.38	0.01543467		3069.41	0.0086819		3599.4	0.00484256		4129.4	-0.00698411
419.59	0.32654285		949.59	0.06468999		1479.58	0.08167161		2009.59	-0.01019252		2539.58	0.01576706		3069.61	0.00830866		3599.6	0.00525124		4129.6	-0.00662174
419.79	0.32601382		949.79	0.06443773		1479.78	0.08185247		2009.79	-0.0097243		2539.78	0.01532294		3069.81	0.00761282		3599.8	0.00521242		4129.8	-0.0065047
419.99	0.32681566		949.99	0.06428416		1479.98	0.08233484		2009.99	-0.00989569		2539.98	0.01564195		3070.01	0.00764742		3600	0.00550499		4130	-0.00649704
420.19	0.32691332		950.19	0.06403535		1480.18	0.08169301		2010.19	-0.01020016		2540.18	0.01476709		3070.21	0.00782924		3600.2	0.00598012		4130.2	-0.0061198
420.39	0.32725501		950.39	0.06379397		1480.38	0.08169758		2010.39	-0.00964416		2540.38	0.01439381		3070.41	0.00767269		3600.4	0.00606534		4130.4	-0.00512654
420.59	0.32738177		950.59	0.06399611		1480.58	0.08200621		2010.59	-0.01037653		2540.58	0.0139118		3070.61	0.00796223		3600.6	0.00645994		4130.6	-0.00471975
420.79	0.32726579		950.79	0.06428129		1480.78	0.08174105		2010.79	-0.00974711		2540.78	0.01292444		3070.81	0.00755579		3600.8	0.00685006		4130.8	-0.00458663
420.99	0.32754856		950.99	0.06470611		1480.98	0.08136679		2010.99	-0.00971426		2540.98	0.01272645		3071.01	0.00861403		3601	0.00726746		4131	-0.00378382
421.19	0.32821038		951.19	0.06515633		1481.18	0.0816562		2011.19	-0.00927644		2541.18	0.01292519		3071.21	0.0083071		3601.2	0.00756268		4131.2	-0.00252811
421.39	0.32836895		951.39	0.0653891		1481.38	0.08166712		2011.39	-0.00844971		2541.38	0.01339359		3071.41	0.00794427		3601.4	0.00788105		4131.4	-0.00259352
421.59	0.32769932		951.59	0.06497655		1481.58	0.08167511		2011.59	-0.00857314		2541.58	0.01334945		3071.61	0.00784132		3601.6	0.0084031		4131.6	-0.00199185
421.79	0.3280501		951.79	0.0649464		1481.78	0.08177948		2011.79	-0.00824189		2541.78	0.0129702		3071.81	0.00758475		3601.8	0.00713445		4131.8	-0.00139116
421.99	0.32762349		951.99	0.06480384		1481.98	0.0819339		2011.99	-0.00755021		2541.98	0.01252401		3072.01	0.00688725		3602	0.00709684		4132	-0.00202766
422.19	0.32718648		952.19	0.06581733		1482.18	0.08176704		2012.19	-0.00758008		2542.18	0.01301325		3072.21	0.00648818		3602.2	0.00600368		4132.2	-0.00257391
422.39	0.32673831		952.39	0.06491025		1482.38	0.08152723		2012.39	-0.0081525		2542.38	0.0134964		3072.41	0.0056347		3602.4	0.00637851		4132.4	-0.00327246
422.59	0.32543295		952.59	0.06378564		1482.58	0.08216814		2012.59	-0.00794603		2542.58	0.01374274		3072.61	0.0058634		3602.6	0.00604755		4132.6	-0.00378384
422.79	0.32473972		952.79	0.06388674		1482.78	0.08264808		2012.79	-0.00906853		2542.78	0.01438306		3072.81	0.00525746		3602.8	0.0051875		4132.8	-0.00383118
422.99	0.32446925		952.99	0.06291978		1482.98	0.08245884		2012.99	-0.00924176		2542.98	0.01447617		3073.01	0.00532704		3603	0.00473331		4133	-0.00454357
423.19	0.3245816		953.19	0.06244732		1483.18	0.0832109		2013.19	-0.00908259		2543.18	0.01469156		3073.21	0.00554458		3603.2	0.00387027		4133.2	-0.00457555
423.39	0.324281		953.39	0.06330566		1483.38	0.08364285		2013.39	-0.00876675		2543.38	0.01468915		3073.41	0.00574784		3603.4	0.00289376		4133.4	-0.00435573
423.59	0.32396289		953.59	0.0625263		1483.58	0.08332683		2013.59	-0.00870066		2543.58	0.01418958		3073.61	0.00592527		3603.6	0.00277018		4133.6	-0.00488563
423.79	0.32437439		953.79	0.0628255		1483.78	0.082872		2013.79	-0.00768563		2543.78	0.01349231		3073.81	0.00636033		3603.8	0.0033039		4133.8	-0.00546403
423.99	0.32492593		953.99	0.06327193		1483.98	0.08291676		2013.99	-0.00820343		2543.98	0.01353474		3074.01	0.0068074		3604	0.00377609		4134	-0.0058095
424.19	0.32432548		954.19	0.06423733		1484.18	0.08195014		2014.19	-0.00808929		2544.18	0.01274384		3074.21	0.0074539		3604.2	0.00385003		4134.2	-0.00567684
424.39	0.32401748		954.39	0.06504872		1484.38	0.08175202		2014.39	-0.00761646		2544.38	0.01245949		3074.41	0.00792158		3604.4	0.00456051		4134.4	-0.00617893
424.59	0.32342739		954.59	0.066075		1484.58	0.08193455		2014.59	-0.00822601		2544.58	0.01251721		3074.61	0.00822635		3604.6	0.0050751		4134.6	-0.00664917
424.79	0.32358883		954.79	0.06636164		1484.78	0.08126596		2014.79	-0.0076813		2544.78	0.01180187		3074.81	0.00835457		3604.8	0.00545465		4134.8	-0.00712445
424.99	0.32368005		954.99	0.06692418		1484.98	0.08136517		2014.99	-0.00779121		2544.98	0.01106649		3075.01	0.00892791		3605	0.00598199		4135	-0.00681182
425.19	0.3237127		955.19	0.0663727		1485.18	0.08041837		2015.19	-0.00676953		2545.18	0.01108641		3075.21	0.00830924		3605.2	0.00617029		4135.2	-0.00590784
425.39	0.32404088		955.39	0.06514464		1485.38	0.08043261		2015.39	-0.00634961		2545.38	0.01079136		3075.41	0.00925656		3605.4	0.00631548		4135.4	-0.00612586
425.59	0.32493585		955.59	0.06453103		1485.58	0.08135619		2015.59	-0.00657229		2545.58	0.01020396		3075.61	0.00918501		3605.6	0.00591835		4135.6	-0.0064792
425.79	0.32611196		955.79	0.0646321		1485.78	0.08156646		2015.79	-0.00670328		2545.78	0.00942751		3075.81	0.00933307		3605.8	0.00575302		4135.8	-0.00681257
425.99	0.32684306		955.99	0.06459574		1485.98	0.08184235		2015.99	-0.0070534		2545.98	0.01014957		3076.01	0.00859781		3606	0.00576337		4136	-0.00727417
426.19	0.32663229		956.19	0.06473759		1486.18	0.08204983		2016.19	-0.00797484		2546.18	0.01084024		3076.21	0.00872124		3606.2	0.0052439		4136.2	-0.00762576
426.39	0.32587645		956.39	0.06313096		1486.38	0.08219977		2016.39	-0.00885842		2546.38	0.01123003		3076.41	0.00897044		3606.4	0.00537895		4136.4	-0.00714679
426.59	0.32584166		956.59	0.06222757		1486.58	0.08219639		2016.59	-0.00867015		2546.58	0.01201668		3076.61	0.00803668		3606.6	0.00425563		4136.6	-0.00716296
426.79	0.32600093		956.79	0.06253846		1486.78	0.08123443		2016.79	-0.00913125		2546.78	0.01301863		3076.81	0.00803549		3606.8	0.00438206		4136.8	-0.0072975
426.99	0.32641309		956.99	0.06230551		1486.98	0.08074041		2016.99	-0.00910497		2546.98	0.01368716		3077.01	0.00805844		3607	0.00478642		4137	-0.00683775
427.19	0.32695172		957.19	0.06262644		1487.18	0.08127013		2017.19	-0.00905989		2547.18	0.01397108		3077.21	0.00739116		3607.2	0.00502755		4137.2	-0.00593838
427.39	0.32748915		957.39	0.0627899		1487.38	0.08129442		2017.39	-0.00917406		2547.38	0.01437641		3077.41	0.00739512		3607.4	0.00390551		4137.4	-0.00616673
427.59	0.32808407		957.59	0.06298824		1487.58	0.0809358		2017.59	-0.00885595		2547.58	0.0145052		3077.61	0.00694574		3607.6	0.00509046		4137.6	-0.00640678
427.79	0.32936892		957.79	0.06392099		1487.78	0.08075898		2017.79	-0.00824605		2547.78	0.01470972		3077.81	0.00723684		3607.8	0.00555		4137.8	-0.00621649
427.99	0.32912415		957.99	0.06431715		1487.98	0.08118879		2017.99	-0.00919032		2547.98	0.01512014		3078.01	0.00680649		3608	0.00565624		4138	-0.00592573
428.19	0.32797744		958.19	0.06479468		1488.18	0.08114531		2018.19	-0.00871597		2548.18	0.01510913		3078.21	0.00632697		3608.2	0.00595709		4138.2	-0.00575978
428.39	0.3275618		958.39	0.0647429		1488.38	0.08047686		2018.39	-0.00835735		2548.38	0.01494631		3078.41	0.00694691		3608.4	0.0060386		4138.4	-0.00605734
428.59	0.32732819		958.59	0.06526234		1488.58	0.0803563		2018.59	-0.00871363		2548.58	0.01495393		3078.61	0.00661943		3608.6	0.00609629		4138.6	-0.00652028
428.79	0.32665628		958.79	0.06485071		1488.78	0.07977496		2018.79	-0.00836909		2548.78	0.01332771		3078.81	0.00700489		3608.8	0.00602207		4138.8	-0.00670645
428.99	0.32551915		958.99	0.06512936		1488.98	0.07996764		2018.99	-0.00817062		2548.98	0.01224581		3079.01	0.0067581		3609	0.00601788		4139	-0.00694006
429.19	0.32564029		959.19	0.06439036		1489.18	0.07958508		2019.19	-0.00819813		2549.18	0.01215088		3079.21	0.00690244		3609.2	0.00583914		4139.2	-0.00671746
429.39	0.32535957		959.39	0.06427363		1489.38	0.07991703		2019.39	-0.0081088		2549.38	0.01098921		3079.41	0.00743886		3609.4	0.00514878		4139.4	-0.00694104
429.59	0.32576725		959.59	0.06422094		1489.58	0.08024332		2019.59	-0.00830304		2549.58	0.0108286		3079.61	0.00641187		3609.6	0.00455019		4139.6	-0.00693881
429.79	0.32544628		959.79	0.06439743		1489.78	0.0804742		2019.79	-0.00778208		2549.78	0.0115825		3079.81	0.00668088		3609.8	0.00424432		4139.8	-0.00696539
429.99	0.32603332		959.99	0.06438483		1489.98	0.08040776		2019.99	-0.0076849		2549.98	0.01240789		3080.01	0.00652505		3610	0.00396624		4140	-0.00640616
430.19	0.32576642		960.19	0.06462753		1490.18	0.08051799		2020.19	-0.00767508		2550.18	0.01287464		3080.21	0.00711296		3610.2	0.0039477		4140.2	-0.00617955
430.39	0.32590684		960.39	0.06327529		1490.38	0.08117161		2020.39	-0.00836743		2550.38	0.01273788		3080.41	0.00696981		3610.4	0.00365463		4140.4	-0.00564805
430.59	0.32663512		960.59	0.06317725		1490.58	0.08052503		2020.59	-0.00815656		2550.58	0.01339191		3080.61	0.00725988		3610.6	0.0031398		4140.6	-0.00555797
430.79	0.32752648		960.79	0.06328274		1490.78	0.08092249		2020.79	-0.00873614		2550.78	0.0134794		3080.81	0.00731455		3610.8	0.00333824		4140.8	-0.00507701
430.99	0.32873109		960.99	0.06339351		1490.98	0.08250787		2020.99	-0.00820634		2550.98	0.01326775		3081.01	0.00579872		3611	0.00453623		4141	-0.00474063
431.19	0.32963297		961.19	0.06377267		1491.18	0.08343458		2021.19	-0.00861756		2551.18	0.01370441		3081.21	0.0053298		3611.2	0.00526917		4141.2	-0.00450061
431.39	0.32966915		961.39	0.06332145		1491.38	0.08353394		2021.39	-0.00906477		2551.38	0.01349413		3081.41	0.00633673		3611.4	0.00478297		4141.4	-0.00440228
431.59	0.32970268		961.59	0.06287087		1491.58	0.08351079		2021.59	-0.00948097		2551.58	0.01234312		3081.61	0.00664615		3611.6	0.00624069		4141.6	-0.00447903
431.79	0.32990811		961.79	0.06215555		1491.78	0.0841036		2021.79	-0.01002801		2551.78	0.01141866		3081.81	0.00753121		3611.8	0.00572557		4141.8	-0.00390223
431.99	0.32891234		961.99	0.06118909		1491.98	0.08427687		2021.99	-0.01060254		2551.98	0.01105547		3082.01	0.00709273		3612	0.00546272		4142	-0.00412808
432.19	0.32793012		962.19	0.06063045		1492.18	0.0836111		2022.19	-0.01035876		2552.18	0.01034517		3082.21	0.00746618		3612.2	0.00547317		4142.2	-0.00517464
432.39	0.32769249		962.39	0.0611757		1492.38	0.08296127		2022.39	-0.01104838		2552.38	0.00974292		3082.41	0.00747193		3612.4	0.00547467		4142.4	-0.00514155
432.59	0.32735439		962.59	0.06146167		1492.58	0.08322151		2022.59	-0.01158897		2552.58	0.00881008		3082.61	0.00719594		3612.6	0.00550992		4142.6	-0.00571484
432.79	0.32626721		962.79	0.06069219		1492.78	0.08321037		2022.79	-0.01196877		2552.78	0.00796435		3082.81	0.00705512		3612.8	0.00509883		4142.8	-0.00594111
432.99	0.32623188		962.99	0.06046455		1492.98	0.08261636		2022.99	-0.01224077		2552.98	0.00757717		3083.01	0.00685317		3613	0.00450953		4143	-0.00661045
433.19	0.32620169		963.19	0.05991045		1493.18	0.08203828		2023.19	-0.01320825		2553.18	0.00807062		3083.21	0.00669115		3613.2	0.00395352		4143.2	-0.00661039
433.39	0.32516777		963.39	0.05976367		1493.38	0.08104831		2023.39	-0.01238837		2553.38	0.00806152		3083.41	0.00672115		3613.4	0.00305501		4143.4	-0.00650885
433.59	0.3257953		963.59	0.05956058		1493.58	0.08147455		2023.59	-0.01223274		2553.58	0.00924316		3083.61	0.00612651		3613.6	0.00357027		4143.6	-0.00657518
433.79	0.32511255		963.79	0.0597351		1493.78	0.08139971		2023.79	-0.01156506		2553.78	0.00946915		3083.81	0.00614827		3613.8	0.00345413		4143.8	-0.00692717
433.99	0.32571454		963.99	0.06032183		1493.98	0.08120265		2023.99	-0.01158851		2553.98	0.00936597		3084.01	0.00669093		3614	0.00372823		4144	-0.00619851
434.19	0.32565385		964.19	0.060153		1494.18	0.08137797		2024.19	-0.01090183		2554.18	0.00971687		3084.21	0.00665845		3614.2	0.00354276		4144.2	-0.00594936
434.39	0.32540802		964.39	0.06030678		1494.38	0.08160119		2024.39	-0.0100321		2554.38	0.00988237		3084.41	0.00698691		3614.4	0.00283742		4144.4	-0.00623773
434.59	0.32591758		964.59	0.06159823		1494.58	0.08195681		2024.59	-0.00879056		2554.58	0.01121787		3084.61	0.00709767		3614.6	0.00241786		4144.6	-0.00560786
434.79	0.32665482		964.79	0.06303802		1494.78	0.08294347		2024.79	-0.00791282		2554.78	0.01169071		3084.81	0.00614667		3614.8	0.0029285		4144.8	-0.00513858
434.99	0.32660718		964.99	0.0644741		1494.98	0.08341933		2024.99	-0.00676389		2554.98	0.01240847		3085.01	0.00510106		3615	0.00433784		4145	-0.00560683
435.19	0.32632381		965.19	0.06433335		1495.18	0.08309691		2025.19	-0.00701601		2555.18	0.0131283		3085.21	0.00530771		3615.2	0.00392664		4145.2	-0.00584728
435.39	0.32556166		965.39	0.06438011		1495.38	0.08283908		2025.39	-0.00639021		2555.38	0.01269485		3085.41	0.00630918		3615.4	0.00370294		4145.4	-0.00508832
435.59	0.32587918		965.59	0.06405843		1495.58	0.0832661		2025.59	-0.0064955		2555.58	0.01184273		3085.61	0.00726252		3615.6	0.00418613		4145.6	-0.00480536
435.79	0.32554253		965.79	0.06430235		1495.78	0.08345823		2025.79	-0.00598529		2555.78	0.01206443		3085.81	0.00677206		3615.8	0.00342221		4145.8	-0.00465139
435.99	0.32550418		965.99	0.06472396		1495.98	0.08339216		2025.99	-0.00620135		2555.98	0.01269875		3086.01	0.00581173		3616	0.00385526		4146	-0.00545583
436.19	0.32515336		966.19	0.0644241		1496.18	0.08292936		2026.19	-0.00613447		2556.18	0.01230125		3086.21	0.00551824		3616.2	0.00432377		4146.2	-0.00560098
436.39	0.32447916		966.39	0.06512035		1496.38	0.08237529		2026.39	-0.00703362		2556.38	0.01206746		3086.41	0.00463485		3616.4	0.00493293		4146.4	-0.00494668
436.59	0.32440076		966.59	0.06413044		1496.58	0.08221755		2026.59	-0.00780165		2556.58	0.01173097		3086.61	0.00453379		3616.6	0.00469807		4146.6	-0.00538847
436.79	0.32484315		966.79	0.06330404		1496.78	0.08149695		2026.79	-0.00861517		2556.78	0.01177678		3086.81	0.0048394		3616.8	0.0044106		4146.8	-0.00572239
436.99	0.32536831		966.99	0.0628099		1496.98	0.08036585		2026.99	-0.0092029		2556.98	0.01178125		3087.01	0.00526041		3617	0.00396019		4147	-0.00592641
437.19	0.32491501		967.19	0.0621831		1497.18	0.08070201		2027.19	-0.00930599		2557.18	0.0115229		3087.21	0.00560551		3617.2	0.00387694		4147.2	-0.00606984
437.39	0.32452942		967.39	0.06219263		1497.38	0.08018363		2027.39	-0.0089102		2557.38	0.010992		3087.41	0.0065237		3617.4	0.00476326		4147.4	-0.00555313
437.59	0.32454879		967.59	0.06249045		1497.58	0.08029243		2027.59	-0.00975939		2557.58	0.01083943		3087.61	0.00617808		3617.6	0.00567456		4147.6	-0.00556922
437.79	0.32389457		967.79	0.06285137		1497.78	0.0798221		2027.79	-0.00976096		2557.78	0.00958134		3087.81	0.0065684		3617.8	0.00541772		4147.8	-0.00625482
437.99	0.32406969		967.99	0.06370932		1497.98	0.07987022		2027.99	-0.00925639		2557.98	0.00996057		3088.01	0.00788545		3618	0.00560139		4148	-0.0062514
438.19	0.32426571		968.19	0.06343503		1498.18	0.07949537		2028.19	-0.00828501		2558.18	0.0104585		3088.21	0.00762796		3618.2	0.00573358		4148.2	-0.00602975
438.39	0.3243931		968.39	0.06392917		1498.38	0.07926704		2028.39	-0.00844802		2558.38	0.01016734		3088.41	0.00853424		3618.4	0.00551432		4148.4	-0.00674789
438.59	0.325639		968.59	0.06398009		1498.58	0.08002769		2028.59	-0.00854565		2558.58	0.01043377		3088.61	0.00835018		3618.6	0.00557896		4148.6	-0.00632088
438.79	0.32619398		968.79	0.06388816		1498.78	0.07954138		2028.79	-0.00924109		2558.78	0.01070294		3088.81	0.0081883		3618.8	0.0058777		4148.8	-0.00620472
438.99	0.32620988		968.99	0.0636461		1498.98	0.079862		2028.99	-0.00896237		2558.98	0.01068295		3089.01	0.00796252		3619	0.00643996		4149	-0.00613456
439.19	0.32620503		969.19	0.06316317		1499.18	0.0793453		2029.19	-0.00968128		2559.18	0.01002359		3089.21	0.00798681		3619.2	0.00631744		4149.2	-0.0053573
439.39	0.32641092		969.39	0.06324845		1499.38	0.07953512		2029.39	-0.0095171		2559.38	0.00975694		3089.41	0.00857516		3619.4	0.00662327		4149.4	-0.00538622
439.59	0.32697905		969.59	0.06242026		1499.58	0.08000039		2029.59	-0.01043566		2559.58	0.00982158		3089.61	0.00865772		3619.6	0.00655366		4149.6	-0.00583972
439.79	0.32623989		969.79	0.0630693		1499.78	0.07999515		2029.79	-0.0108708		2559.78	0.01053973		3089.81	0.00693502		3619.8	0.00692894		4149.8	-0.00638879
439.99	0.32694419		969.99	0.06362433		1499.98	0.08027196		2029.99	-0.01229914		2559.98	0.011109		3090.01	0.00630788		3620	0.0074376		4150	-0.00667436
440.19	0.32676418		970.19	0.06320094		1500.18	0.0793137		2030.19	-0.01253742		2560.18	0.01109175		3090.21	0.00645425		3620.2	0.00794946		4150.2	-0.00679807
440.39	0.32615963		970.39	0.06310436		1500.38	0.07871931		2030.39	-0.01367578		2560.38	0.01156544		3090.41	0.00577483		3620.4	0.00850694		4150.4	-0.00688716
440.59	0.32662686		970.59	0.06270193		1500.58	0.07865824		2030.59	-0.01385283		2560.58	0.01188706		3090.61	0.00580772		3620.6	0.00839298		4150.6	-0.00765865
440.79	0.32612474		970.79	0.06284495		1500.78	0.07870418		2030.79	-0.01399154		2560.78	0.01166391		3090.81	0.00609089		3620.8	0.00808367		4150.8	-0.00798457
440.99	0.32530823		970.99	0.0630808		1500.98	0.07834876		2030.99	-0.01380179		2560.98	0.01218234		3091.01	0.00601561		3621	0.00810842		4151	-0.00850079
441.19	0.32471455		971.19	0.06263791		1501.18	0.07881676		2031.19	-0.01296922		2561.18	0.01198545		3091.21	0.00630714		3621.2	0.00838082		4151.2	-0.00938557
441.39	0.32331237		971.39	0.06346472		1501.38	0.07808081		2031.39	-0.01248634		2561.38	0.01203026		3091.41	0.00719153		3621.4	0.00859084		4151.4	-0.00944133
441.59	0.32260822		971.59	0.06361254		1501.58	0.07779507		2031.59	-0.01213506		2561.58	0.01233065		3091.61	0.00728628		3621.6	0.00759185		4151.6	-0.00965465
441.79	0.32263156		971.79	0.06375085		1501.78	0.07780997		2031.79	-0.01148988		2561.78	0.0122995		3091.81	0.00735757		3621.8	0.00753266		4151.8	-0.01000489
441.99	0.32264225		971.99	0.06400738		1501.98	0.07725518		2031.99	-0.01147957		2561.98	0.01275322		3092.01	0.00776774		3622	0.0077189		4152	-0.00936617
442.19	0.32397109		972.19	0.06287326		1502.18	0.07709036		2032.19	-0.01124906		2562.18	0.0128372		3092.21	0.00683182		3622.2	0.00717031		4152.2	-0.00871293
442.39	0.32392583		972.39	0.06173563		1502.38	0.07708627		2032.39	-0.01104282		2562.38	0.01250729		3092.41	0.00679259		3622.4	0.00630364		4152.4	-0.0084431
442.59	0.32485313		972.59	0.06154658		1502.58	0.07765205		2032.59	-0.01100746		2562.58	0.01203414		3092.61	0.00636799		3622.6	0.00589253		4152.6	-0.00738055
442.79	0.32552757		972.79	0.06167287		1502.78	0.07772678		2032.79	-0.0106493		2562.78	0.01224575		3092.81	0.00618462		3622.8	0.00564596		4152.8	-0.00685135
442.99	0.32544268		972.99	0.06168087		1502.98	0.07900291		2032.99	-0.01010986		2562.98	0.01140363		3093.01	0.00575845		3623	0.00512034		4153	-0.0065887
443.19	0.3256318		973.19	0.06203104		1503.18	0.07867603		2033.19	-0.01061045		2563.18	0.01082447		3093.21	0.00581861		3623.2	0.00417521		4153.2	-0.00540654
443.39	0.32552654		973.39	0.06191614		1503.38	0.07948335		2033.39	-0.01071199		2563.38	0.01096511		3093.41	0.00570352		3623.4	0.00338357		4153.4	-0.00605173
443.59	0.32552836		973.59	0.06252085		1503.58	0.08018126		2033.59	-0.01178366		2563.58	0.01077677		3093.61	0.00516578		3623.6	0.00304081		4153.6	-0.00641629
443.79	0.32502237		973.79	0.06354234		1503.78	0.08013097		2033.79	-0.01155544		2563.78	0.01065955		3093.81	0.00467481		3623.8	0.0032101		4153.8	-0.00596233
443.99	0.32587278		973.99	0.06406688		1503.98	0.08068844		2033.99	-0.01234418		2563.98	0.01027173		3094.01	0.00500632		3624	0.00270902		4154	-0.00626598
444.19	0.32546418		974.19	0.06367348		1504.18	0.07994256		2034.19	-0.01197642		2564.18	0.00979884		3094.21	0.00514982		3624.2	0.00317528		4154.2	-0.00634316
444.39	0.32547015		974.39	0.062799		1504.38	0.08077148		2034.39	-0.01224733		2564.38	0.00926087		3094.41	0.00497277		3624.4	0.0034218		4154.4	-0.00651401
444.59	0.32594876		974.59	0.06270849		1504.58	0.08127257		2034.59	-0.01203692		2564.58	0.00852557		3094.61	0.00516853		3624.6	0.00285256		4154.6	-0.00792676
444.79	0.32508762		974.79	0.06210926		1504.78	0.08198852		2034.79	-0.01165939		2564.78	0.00791976		3094.81	0.0052782		3624.8	0.00271292		4154.8	-0.00882671
444.99	0.32445327		974.99	0.06198336		1504.98	0.08152896		2034.99	-0.01074424		2564.98	0.00782602		3095.01	0.00530233		3625	0.00336749		4155	-0.00927731
445.19	0.32345889		975.19	0.06125289		1505.18	0.08241047		2035.19	-0.01007483		2565.18	0.00751447		3095.21	0.00608745		3625.2	0.00338317		4155.2	-0.0093516
445.39	0.32390081		975.39	0.061479		1505.38	0.08174347		2035.39	-0.01014558		2565.38	0.0079672		3095.41	0.00633342		3625.4	0.00423953		4155.4	-0.00900556
445.59	0.32450251		975.59	0.0609103		1505.58	0.08129399		2035.59	-0.01015864		2565.58	0.00819436		3095.61	0.00607133		3625.6	0.00458074		4155.6	-0.00920245
445.79	0.32566015		975.79	0.06044138		1505.78	0.08118812		2035.79	-0.00998277		2565.78	0.00839193		3095.81	0.00538341		3625.8	0.00554872		4155.8	-0.00954853
445.99	0.32615936		975.99	0.06042757		1505.98	0.08081557		2035.99	-0.0102547		2565.98	0.00818123		3096.01	0.00528716		3626	0.00632976		4156	-0.00915682
446.19	0.32715816		976.19	0.0601287		1506.18	0.08068285		2036.19	-0.00940766		2566.18	0.00936725		3096.21	0.0055242		3626.2	0.00628886		4156.2	-0.00795781
446.39	0.32748144		976.39	0.06005381		1506.38	0.0805892		2036.39	-0.0088214		2566.38	0.00964609		3096.41	0.00596466		3626.4	0.00688386		4156.4	-0.00722974
446.59	0.327746		976.59	0.06011934		1506.58	0.08040248		2036.59	-0.00953358		2566.58	0.00935961		3096.61	0.00546533		3626.6	0.00754749		4156.6	-0.0066077
446.79	0.32838154		976.79	0.0599571		1506.78	0.07993382		2036.79	-0.00913814		2566.78	0.00981696		3096.81	0.00549127		3626.8	0.00749392		4156.8	-0.00711976
446.99	0.32797163		976.99	0.05960178		1506.98	0.08034101		2036.99	-0.01042882		2566.98	0.00942947		3097.01	0.00541652		3627	0.00734443		4157	-0.00660825
447.19	0.32674244		977.19	0.06012807		1507.18	0.07908552		2037.19	-0.01035739		2567.18	0.00981133		3097.21	0.006189		3627.2	0.00693844		4157.2	-0.00517407
447.39	0.32588478		977.39	0.06013731		1507.38	0.07885727		2037.39	-0.01098254		2567.38	0.00987024		3097.41	0.00624871		3627.4	0.0060895		4157.4	-0.00555919
447.59	0.32558963		977.59	0.06120113		1507.58	0.07898413		2037.59	-0.01157365		2567.58	0.01008454		3097.61	0.00603082		3627.6	0.0066432		4157.6	-0.00570686
447.79	0.32507038		977.79	0.06122753		1507.78	0.07912803		2037.79	-0.0115797		2567.78	0.00955445		3097.81	0.0064685		3627.8	0.0063968		4157.8	-0.00606794
447.99	0.32585974		977.99	0.06129637		1507.98	0.07939054		2037.99	-0.01277997		2567.98	0.00990508		3098.01	0.00669188		3628	0.00527551		4158	-0.00655131
448.19	0.32611748		978.19	0.06094665		1508.18	0.07950195		2038.19	-0.01245793		2568.18	0.00963272		3098.21	0.00705286		3628.2	0.00531949		4158.2	-0.00676499
448.39	0.32661687		978.39	0.06055547		1508.38	0.07996413		2038.39	-0.01269371		2568.38	0.00923013		3098.41	0.00714571		3628.4	0.00499321		4158.4	-0.00691277
448.59	0.32635523		978.59	0.06120632		1508.58	0.07990251		2038.59	-0.01266904		2568.58	0.00896875		3098.61	0.00668717		3628.6	0.00427459		4158.6	-0.00822753
448.79	0.32595365		978.79	0.06119416		1508.78	0.07977267		2038.79	-0.01167703		2568.78	0.00870636		3098.81	0.00637662		3628.8	0.0037293		4158.8	-0.00751531
448.99	0.32586271		978.99	0.06142061		1508.98	0.07965906		2038.99	-0.01187126		2568.98	0.00818712		3099.01	0.00588323		3629	0.00381055		4159	-0.00767516
449.19	0.32686208		979.19	0.06148163		1509.18	0.08053148		2039.19	-0.01170568		2569.18	0.00846012		3099.21	0.00575733		3629.2	0.00344802		4159.2	-0.00726403
449.39	0.32824129		979.39	0.06206532		1509.38	0.07976475		2039.39	-0.01245747		2569.38	0.00857797		3099.41	0.00518734		3629.4	0.00387928		4159.4	-0.00714845
449.59	0.32783017		979.59	0.06224386		1509.58	0.07856182		2039.59	-0.01229203		2569.58	0.00866012		3099.61	0.00497483		3629.6	0.00362289		4159.6	-0.00700017
449.79	0.32830499		979.79	0.06271773		1509.78	0.07840179		2039.79	-0.0117341		2569.78	0.00909891		3099.81	0.00489604		3629.8	0.00414724		4159.8	-0.00698721
449.99	0.32874668		979.99	0.06353088		1509.98	0.07806811		2039.99	-0.01180902		2569.98	0.00920894		3100.01	0.00520615		3630	0.00525283		4160	-0.00653849
450.19	0.3286195		980.19	0.06362461		1510.18	0.07784626		2040.19	-0.01139324		2570.18	0.01094004		3100.21	0.00536668		3630.2	0.00571361		4160.2	-0.005532
450.39	0.32831444		980.39	0.06288427		1510.38	0.07806497		2040.39	-0.01115833		2570.38	0.01118798		3100.41	0.00500157		3630.4	0.00594721		4160.4	-0.00539315
450.59	0.32793321		980.59	0.06240295		1510.58	0.07790186		2040.59	-0.01234978		2570.58	0.01083486		3100.61	0.00415143		3630.6	0.0059453		4160.6	-0.00551401
450.79	0.32729549		980.79	0.0630159		1510.78	0.07792144		2040.79	-0.01190522		2570.78	0.01084066		3100.81	0.00466174		3630.8	0.00502608		4160.8	-0.00685205
450.99	0.3265725		980.99	0.06331307		1510.98	0.07826057		2040.99	-0.01224128		2570.98	0.01213527		3101.01	0.00486377		3631	0.00500829		4161	-0.00584584
451.19	0.3257494		981.19	0.06388862		1511.18	0.07767974		2041.19	-0.01171052		2571.18	0.01255829		3101.21	0.00467102		3631.2	0.00522488		4161.2	-0.00529685
451.39	0.32617706		981.39	0.06369514		1511.38	0.07826085		2041.39	-0.01184556		2571.38	0.01170618		3101.41	0.00444909		3631.4	0.0059921		4161.4	-0.00649484
451.59	0.32554285		981.59	0.06421801		1511.58	0.07906984		2041.59	-0.01224681		2571.58	0.01116028		3101.61	0.00442436		3631.6	0.0069087		4161.6	-0.00729391
451.79	0.32530977		981.79	0.0639402		1511.78	0.07947364		2041.79	-0.01215631		2571.78	0.01014999		3101.81	0.00503287		3631.8	0.00764798		4161.8	-0.00848465
451.99	0.32567209		981.99	0.06437689		1511.98	0.07939597		2041.99	-0.01192219		2571.98	0.0109665		3102.01	0.00464619		3632	0.00701532		4162	-0.00804807
452.19	0.32566152		982.19	0.06426237		1512.18	0.07953835		2042.19	-0.0117128		2572.18	0.00996543		3102.21	0.00489048		3632.2	0.00696544		4162.2	-0.00770604
452.39	0.32557625		982.39	0.06404698		1512.38	0.07932984		2042.39	-0.01145673		2572.38	0.0096719		3102.41	0.00421394		3632.4	0.00651587		4162.4	-0.00770628
452.59	0.32570129		982.59	0.06369108		1512.58	0.07958548		2042.59	-0.01120615		2572.58	0.00967563		3102.61	0.00340364		3632.6	0.00578037		4162.6	-0.00823451
452.79	0.32578867		982.79	0.06300235		1512.78	0.07976631		2042.79	-0.00986247		2572.78	0.00955031		3102.81	0.00341954		3632.8	0.00454442		4162.8	-0.00809945
452.99	0.3256079		982.99	0.06286368		1512.98	0.08040636		2042.99	-0.01031448		2572.98	0.0092107		3103.01	0.00372076		3633	0.00408524		4163	-0.0089021
453.19	0.3259773		983.19	0.06297116		1513.18	0.08090882		2043.19	-0.00985798		2573.18	0.00945059		3103.21	0.00381661		3633.2	0.00404038		4163.2	-0.00893892
453.39	0.32519643		983.39	0.06281203		1513.38	0.08030589		2043.39	-0.01024001		2573.38	0.00923875		3103.41	0.00378827		3633.4	0.00420709		4163.4	-0.00852789
453.59	0.32551143		983.59	0.06249075		1513.58	0.07984912		2043.59	-0.00890833		2573.58	0.00979675		3103.61	0.00359737		3633.6	0.00418417		4163.6	-0.00882432
453.79	0.32565158		983.79	0.06226895		1513.78	0.07975309		2043.79	-0.00885075		2573.78	0.01077101		3103.81	0.0034794		3633.8	0.00438194		4163.8	-0.00846265
453.99	0.32590173		983.99	0.06167166		1513.98	0.07994796		2043.99	-0.00933215		2573.98	0.01107269		3104.01	0.00329019		3634	0.00500945		4164	-0.00841925
454.19	0.32534514		984.19	0.0615704		1514.18	0.08064519		2044.19	-0.01016732		2574.18	0.01220475		3104.21	0.00290933		3634.2	0.00492593		4164.2	-0.00791524
454.39	0.32567352		984.39	0.06114697		1514.38	0.08104938		2044.39	-0.01022808		2574.38	0.011899		3104.41	0.00260627		3634.4	0.0042276		4164.4	-0.00801821
454.59	0.32601269		984.59	0.0618391		1514.58	0.08114949		2044.59	-0.01135592		2574.58	0.01191486		3104.61	0.00217667		3634.6	0.00448048		4164.6	-0.00855877
454.79	0.32602277		984.79	0.06217638		1514.78	0.08051431		2044.79	-0.01120596		2574.78	0.01220405		3104.81	0.00208217		3634.8	0.00418557		4164.8	-0.00870407
454.99	0.32677002		984.99	0.06244127		1514.98	0.08055906		2044.99	-0.01154366		2574.98	0.01316863		3105.01	0.00140695		3635	0.00492271		4165	-0.00776105
455.19	0.32692929		985.19	0.06276143		1515.18	0.08030486		2045.19	-0.01189036		2575.18	0.01218801		3105.21	0.00136936		3635.2	0.00578422		4165.2	-0.00779913
455.39	0.3275709		985.39	0.06232794		1515.38	0.08006562		2045.39	-0.01275255		2575.38	0.01164042		3105.41	0.00187448		3635.4	0.00627191		4165.4	-0.00861282
455.59	0.3270983		985.59	0.06268444		1515.58	0.07969822		2045.59	-0.01386998		2575.58	0.01092123		3105.61	0.00260553		3635.6	0.00632205		4165.6	-0.00904447
455.79	0.32776933		985.79	0.06244626		1515.78	0.07930324		2045.79	-0.01394601		2575.78	0.01036514		3105.81	0.00212166		3635.8	0.00665319		4165.8	-0.00906038
455.99	0.32762523		985.99	0.06155763		1515.98	0.07887045		2045.99	-0.01376202		2575.98	0.00958634		3106.01	0.00175903		3636	0.00602872		4166	-0.0085448
456.19	0.32805812		986.19	0.0607553		1516.18	0.07823027		2046.19	-0.01432791		2576.18	0.00928157		3106.21	0.00248791		3636.2	0.00586423		4166.2	-0.008493
456.39	0.32854835		986.39	0.0606714		1516.38	0.07827319		2046.39	-0.01373719		2576.38	0.00970256		3106.41	0.00298678		3636.4	0.00545594		4166.4	-0.00943545
456.59	0.32795864		986.59	0.0598846		1516.58	0.07865912		2046.59	-0.01340304		2576.58	0.00933061		3106.61	0.00346406		3636.6	0.00529896		4166.6	-0.00998345
456.79	0.3275359		986.79	0.05997267		1516.78	0.07867038		2046.79	-0.01255154		2576.78	0.00950589		3106.81	0.00448482		3636.8	0.00432302		4166.8	-0.0105269
456.99	0.32730727		986.99	0.06001268		1516.98	0.07853202		2046.99	-0.0125473		2576.98	0.00929355		3107.01	0.00562968		3637	0.00479906		4167	-0.00999066
457.19	0.3276081		987.19	0.06041415		1517.18	0.07884688		2047.19	-0.01171914		2577.18	0.00920431		3107.21	0.00604834		3637.2	0.00458274		4167.2	-0.00923889
457.39	0.3273799		987.39	0.06064		1517.38	0.07873752		2047.39	-0.01065345		2577.38	0.00922129		3107.41	0.00685544		3637.4	0.00414565		4167.4	-0.00773205
457.59	0.32762597		987.59	0.06118529		1517.58	0.07857669		2047.59	-0.00981161		2577.58	0.00950553		3107.61	0.0070099		3637.6	0.00397159		4167.6	-0.00668916
457.79	0.32763618		987.79	0.06165806		1517.78	0.07908491		2047.79	-0.01047669		2577.78	0.00977029		3107.81	0.00723451		3637.8	0.00436276		4167.8	-0.0058746
457.99	0.32780156		987.99	0.06190753		1517.98	0.07941407		2047.99	-0.01089342		2577.98	0.00893236		3108.01	0.00765657		3638	0.00412788		4168	-0.00572719
458.19	0.328259		988.19	0.06293746		1518.18	0.0803641		2048.19	-0.01121528		2578.18	0.00913199		3108.21	0.00823764		3638.2	0.00433129		4168.2	-0.00610881
458.39	0.32817882		988.39	0.06281852		1518.38	0.08083665		2048.39	-0.01104602		2578.38	0.00848241		3108.41	0.00800381		3638.4	0.00326983		4168.4	-0.00665673
458.59	0.32791929		988.59	0.06393064		1518.58	0.0802962		2048.59	-0.01085948		2578.58	0.00871282		3108.61	0.00751144		3638.6	0.00368643		4168.6	-0.00733843
458.79	0.32821715		988.79	0.06453691		1518.78	0.07949522		2048.79	-0.01121614		2578.78	0.00842837		3108.81	0.00784159		3638.8	0.00283648		4168.8	-0.00689968
458.99	0.32756974		988.99	0.06508821		1518.98	0.08011335		2048.99	-0.01147862		2578.98	0.0090911		3109.01	0.00786718		3639	0.00331846		4169	-0.00740548
459.19	0.32657442		989.19	0.06515698		1519.18	0.0798518		2049.19	-0.01202205		2579.18	0.00878481		3109.21	0.00853402		3639.2	0.00373873		4169.2	-0.00805334
459.39	0.32680344		989.39	0.06449677		1519.38	0.07939807		2049.39	-0.01220696		2579.38	0.00894857		3109.41	0.00873989		3639.4	0.00377687		4169.4	-0.00881201
459.59	0.3264156		989.59	0.06396474		1519.58	0.07924912		2049.59	-0.01191903		2579.58	0.00794313		3109.61	0.00805751		3639.6	0.00409295		4169.6	-0.00980722
459.79	0.32624011		989.79	0.06231665		1519.78	0.07959		2049.79	-0.01084474		2579.78	0.00772947		3109.81	0.00697558		3639.8	0.00411476		4169.8	-0.01062807
459.99	0.32565858		989.99	0.06194719		1519.98	0.0794069		2049.99	-0.01019633		2579.98	0.0073874		3110.01	0.00715975		3640	0.00461531		4170	-0.01136678
460.19	0.3259606		990.19	0.06129016		1520.18	0.07888923		2050.19	-0.01091198		2580.18	0.0082501		3110.21	0.00717372		3640.2	0.00418126		4170.2	-0.01136234
460.39	0.32565827		990.39	0.0604442		1520.38	0.07933783		2050.39	-0.010944		2580.38	0.00857502		3110.41	0.00754353		3640.4	0.00447917		4170.4	-0.01193772
460.59	0.32483754		990.59	0.05978892		1520.58	0.08004873		2050.59	-0.01093461		2580.58	0.00877047		3110.61	0.00702168		3640.6	0.00470178		4170.6	-0.01188835
460.79	0.32478613		990.79	0.05924738		1520.78	0.07892571		2050.79	-0.01118512		2580.78	0.00964993		3110.81	0.00714993		3640.8	0.00389408		4170.8	-0.01119863
460.99	0.32393225		990.99	0.05900701		1520.98	0.07839212		2050.99	-0.0109518		2580.98	0.00999916		3111.01	0.00658078		3641	0.00435808		4171	-0.01011802
461.19	0.32450583		991.19	0.06013903		1521.18	0.07885795		2051.19	-0.01166039		2581.18	0.01046643		3111.21	0.00592091		3641.2	0.00441237		4171.2	-0.00887197
461.39	0.32419726		991.39	0.0598334		1521.38	0.0792189		2051.39	-0.01172304		2581.38	0.01093709		3111.41	0.00546344		3641.4	0.0047053		4171.4	-0.00807823
461.59	0.32438071		991.59	0.06018143		1521.58	0.07939262		2051.59	-0.01249181		2581.58	0.01149551		3111.61	0.00491997		3641.6	0.00476325		4171.6	-0.00783282
461.79	0.32445262		991.79	0.06007414		1521.78	0.07981686		2051.79	-0.0130606		2581.78	0.01187451		3111.81	0.0041981		3641.8	0.00430629		4171.8	-0.00891746
461.99	0.32508885		991.99	0.06025328		1521.98	0.07934376		2051.99	-0.01350487		2581.98	0.01196563		3112.01	0.00428275		3642	0.00335393		4172	-0.00865328
462.19	0.32564175		992.19	0.06124135		1522.18	0.07989527		2052.19	-0.0139225		2582.18	0.01165953		3112.21	0.0035708		3642.2	0.00308185		4172.2	-0.00932121
462.39	0.32515922		992.39	0.06179557		1522.38	0.07973294		2052.39	-0.01493842		2582.38	0.01104677		3112.41	0.00281791		3642.4	0.00171403		4172.4	-0.00907895
462.59	0.32476052		992.59	0.06323525		1522.58	0.07978373		2052.59	-0.01466088		2582.58	0.01139798		3112.61	0.00299676		3642.6	0.00226389		4172.6	-0.00846789
462.79	0.32531478		992.79	0.06360823		1522.78	0.0798522		2052.79	-0.01551324		2582.78	0.01125174		3112.81	0.00335704		3642.8	0.00173029		4172.8	-0.00790076
462.99	0.32510022		992.99	0.06365588		1522.98	0.08056019		2052.99	-0.01581869		2582.98	0.0117932		3113.01	0.00328345		3643	0.00200652		4173	-0.00832669
463.19	0.32413885		993.19	0.06313918		1523.18	0.07984251		2053.19	-0.01573473		2583.18	0.01141196		3113.21	0.00362067		3643.2	0.0016862		4173.2	-0.00909092
463.39	0.32492695		993.39	0.06235416		1523.38	0.07962745		2053.39	-0.01505182		2583.38	0.01163271		3113.41	0.00359977		3643.4	0.00185379		4173.4	-0.00920849
463.59	0.32494523		993.59	0.06243787		1523.58	0.0803804		2053.59	-0.01494726		2583.58	0.01114626		3113.61	0.00344094		3643.6	0.00180121		4173.6	-0.00976742
463.79	0.32476677		993.79	0.06153149		1523.78	0.08028134		2053.79	-0.01497167		2583.78	0.01071056		3113.81	0.00442895		3643.8	0.00126404		4173.8	-0.01077226
463.99	0.32418624		993.99	0.061499		1523.98	0.08000746		2053.99	-0.01507702		2583.98	0.0100061		3114.01	0.00476932		3644	0.00084978		4174	-0.01068355
464.19	0.32444076		994.19	0.06000742		1524.18	0.0798009		2054.19	-0.01534865		2584.18	0.00980723		3114.21	0.00511682		3644.2	0.00078419		4174.2	-0.01046568
464.39	0.32406217		994.39	0.06007568		1524.38	0.07953965		2054.39	-0.01493687		2584.38	0.00936777		3114.41	0.00531051		3644.4	0.00129443		4174.4	-0.01087626
464.59	0.32434019		994.59	0.05963298		1524.58	0.07983453		2054.59	-0.01391369		2584.58	0.00940397		3114.61	0.00521633		3644.6	0.0006283		4174.6	-0.01087113
464.79	0.32385277		994.79	0.05931995		1524.78	0.07842127		2054.79	-0.0131997		2584.78	0.00926087		3114.81	0.00546936		3644.8	0.00058884		4174.8	-0.01019412
464.99	0.32341778		994.99	0.05903979		1524.98	0.07901658		2054.99	-0.01259541		2584.98	0.00914491		3115.01	0.00508676		3645	0.00133479		4175	-0.00988518
465.19	0.32375901		995.19	0.05944969		1525.18	0.07895939		2055.19	-0.01243298		2585.18	0.00900594		3115.21	0.00521175		3645.2	0.00230825		4175.2	-0.00973121
465.39	0.32344126		995.39	0.05915852		1525.38	0.07944975		2055.39	-0.01192565		2585.38	0.00941588		3115.41	0.00503738		3645.4	0.00238758		4175.4	-0.01032301
465.59	0.3238018		995.59	0.05930475		1525.58	0.07927154		2055.59	-0.01144133		2585.58	0.00923452		3115.61	0.00573749		3645.6	0.00197013		4175.6	-0.01076273
465.79	0.32406982		995.79	0.05954151		1525.78	0.07932506		2055.79	-0.01141079		2585.78	0.0091576		3115.81	0.00496929		3645.8	0.00175943		4175.8	-0.01097747
465.99	0.32401594		995.99	0.06005115		1525.98	0.07955872		2055.99	-0.01101585		2585.98	0.00886005		3116.01	0.00490636		3646	0.00175772		4176	-0.00978336
466.19	0.32388385		996.19	0.06091463		1526.18	0.08009724		2056.19	-0.01155176		2586.18	0.00865893		3116.21	0.00516319		3646.2	0.00221656		4176.2	-0.00914784
466.39	0.32370277		996.39	0.06155114		1526.38	0.08080785		2056.39	-0.01192396		2586.38	0.00857744		3116.41	0.00573629		3646.4	0.00196866		4176.4	-0.00815168
466.59	0.32406541		996.59	0.06199216		1526.58	0.08084667		2056.59	-0.01137914		2586.58	0.00905329		3116.61	0.00616936		3646.6	0.00168755		4176.6	-0.00783895
466.79	0.32466677		996.79	0.0620737		1526.78	0.08098008		2056.79	-0.01223621		2586.78	0.00938431		3116.81	0.00589592		3646.8	0.00187969		4176.8	-0.00789994
466.99	0.32524614		996.99	0.06227153		1526.98	0.0811352		2056.99	-0.01294521		2586.98	0.00934225		3117.01	0.00616539		3647	0.00160565		4177	-0.00794815
467.19	0.32458759		997.19	0.06185951		1527.18	0.08054562		2057.19	-0.01330185		2587.18	0.00983645		3117.21	0.00606206		3647.2	0.00185792		4177.2	-0.00881282
467.39	0.32461244		997.39	0.06270755		1527.38	0.08055416		2057.39	-0.01370191		2587.38	0.01011044		3117.41	0.00693192		3647.4	0.00171509		4177.4	-0.00857259
467.59	0.32391684		997.59	0.06334301		1527.58	0.08048077		2057.59	-0.01459123		2587.58	0.01046005		3117.61	0.00700563		3647.6	0.00117333		4177.6	-0.00909482
467.79	0.32311932		997.79	0.063549		1527.78	0.07949979		2057.79	-0.01517869		2587.78	0.00931951		3117.81	0.0076618		3647.8	0.00001999		4177.8	-0.01001976
467.99	0.3223119		997.99	0.06301547		1527.98	0.07855496		2057.99	-0.01441458		2587.98	0.00921921		3118.01	0.00702245		3648	0.0002568		4178	-0.00945625
468.19	0.32245112		998.19	0.0629173		1528.18	0.07717728		2058.19	-0.01455653		2588.18	0.00908288		3118.21	0.00693011		3648.2	0.00065543		4178.2	-0.00978393
468.39	0.32197977		998.39	0.06241239		1528.38	0.07619457		2058.39	-0.01393528		2588.38	0.00904649		3118.41	0.00726395		3648.4	0.00097047		4178.4	-0.0095842
468.59	0.32164744		998.59	0.06170658		1528.58	0.07591371		2058.59	-0.01325882		2588.58	0.00947045		3118.61	0.00708462		3648.6	0.00094597		4178.6	-0.0086488
468.79	0.32120384		998.79	0.06102084		1528.78	0.07508812		2058.79	-0.01250669		2588.78	0.00913114		3118.81	0.00697846		3648.8	0.00192706		4178.8	-0.00856252
468.99	0.32129781		998.99	0.05990792		1528.98	0.07535432		2058.99	-0.0121505		2588.98	0.00916993		3119.01	0.00674779		3649	0.00248592		4179	-0.00825277
469.19	0.32150871		999.19	0.05970613		1529.18	0.07483825		2059.19	-0.01156023		2589.18	0.00888561		3119.21	0.00666259		3649.2	0.00318628		4179.2	-0.00849296
469.39	0.32164224		999.39	0.05924089		1529.38	0.07519273		2059.39	-0.01218884		2589.38	0.00914622		3119.41	0.00645907		3649.4	0.00336173		4179.4	-0.00807871
469.59	0.32177205		999.59	0.05929436		1529.58	0.07491753		2059.59	-0.01161221		2589.58	0.00857857		3119.61	0.00657402		3649.6	0.00345423		4179.6	-0.0077348
469.79	0.32177201		999.79	0.05921979		1529.78	0.075197		2059.79	-0.01198111		2589.78	0.00830635		3119.81	0.00623476		3649.8	0.00380443		4179.8	-0.00761652
469.99	0.32165922		999.99	0.05902409		1529.98	0.07540784		2059.99	-0.01135788		2589.98	0.00782096		3120.01	0.00643538		3650	0.00412214		4180	-0.0072934
470.19	0.32304223		1000.19	0.05999711		1530.18	0.07596002		2060.19	-0.01188348		2590.18	0.00806167		3120.21	0.00677594		3650.2	0.00450413		4180.2	-0.00705311
470.39	0.3230643		1000.39	0.05953654		1530.38	0.07609801		2060.39	-0.01177374		2590.38	0.007655		3120.41	0.00702093		3650.4	0.00395831		4180.4	-0.00760516
470.59	0.32358258		1000.59	0.05989975		1530.58	0.07651232		2060.59	-0.01234384		2590.58	0.00797609		3120.61	0.00667227		3650.6	0.00364352		4180.6	-0.00815716
470.79	0.32378665		1000.79	0.06064168		1530.78	0.07760916		2060.79	-0.01279123		2590.78	0.00755279		3120.81	0.00594642		3650.8	0.00328373		4180.8	-0.00755173
470.99	0.32433196		1000.99	0.06102033		1530.98	0.07877332		2060.99	-0.01296488		2590.98	0.00684072		3121.01	0.00617491		3651	0.00262862		4181	-0.00778429
471.19	0.32318048		1001.19	0.06154937		1531.18	0.07939246		2061.19	-0.01340911		2591.18	0.00691115		3121.21	0.00547857		3651.2	0.00281688		4181.2	-0.00826052
471.39	0.32287079		1001.39	0.06203949		1531.38	0.08004453		2061.39	-0.01313491		2591.38	0.00736862		3121.41	0.00541991		3651.4	0.00173576		4181.4	-0.00830227
471.59	0.32303648		1001.59	0.06217371		1531.58	0.08063959		2061.59	-0.01366437		2591.58	0.0070571		3121.61	0.00476059		3651.6	0.00140078		4181.6	-0.0082996
471.79	0.32275406		1001.79	0.06241229		1531.78	0.08074216		2061.79	-0.01314234		2591.78	0.00640601		3121.81	0.00481646		3651.8	0.00111407		4181.8	-0.00842729
471.99	0.3222745		1001.99	0.06143678		1531.98	0.08069664		2061.99	-0.01244358		2591.98	0.00678301		3122.01	0.00407728		3652	0.00097911		4182	-0.00821003
472.19	0.32214029		1002.19	0.06132835		1532.18	0.08115565		2062.19	-0.01284147		2592.18	0.00727075		3122.21	0.00335997		3652.2	0.00062571		4182.2	-0.00854316
472.39	0.32184301		1002.39	0.05981074		1532.38	0.08215535		2062.39	-0.0118202		2592.38	0.0079778		3122.41	0.00301135		3652.4	0.00148305		4182.4	-0.00764246
472.59	0.32188151		1002.59	0.05963191		1532.58	0.08203869		2062.59	-0.01161531		2592.58	0.00906291		3122.61	0.00281357		3652.6	0.00127622		4182.6	-0.00694922
472.79	0.32203926		1002.79	0.05880533		1532.78	0.08222846		2062.79	-0.01136185		2592.78	0.00922839		3122.81	0.00269873		3652.8	0.00079796		4182.8	-0.00714829
472.99	0.32253684		1002.99	0.05900397		1532.98	0.08262599		2062.99	-0.01163238		2592.98	0.00937688		3123.01	0.00209847		3653	0.000244		4183	-0.00631152
473.19	0.32306574		1003.19	0.05940901		1533.18	0.08251624		2063.19	-0.0114581		2593.18	0.00898036		3123.21	0.00200837		3653.2	-0.00002595		4183.2	-0.00713681
473.39	0.32295472		1003.39	0.05950584		1533.38	0.08222747		2063.39	-0.01039566		2593.38	0.00882784		3123.41	0.0022817		3653.4	-0.00042124		4183.4	-0.00762501
473.59	0.32329688		1003.59	0.0602472		1533.58	0.08225117		2063.59	-0.00980443		2593.58	0.00829283		3123.61	0.00296955		3653.6	-0.00052695		4183.6	-0.00864234
473.79	0.32411037		1003.79	0.05999241		1533.78	0.08235485		2063.79	-0.01043787		2593.78	0.00746776		3123.81	0.00363828		3653.8	-0.00015182		4183.8	-0.00923337
473.99	0.32447222		1003.99	0.06015153		1533.98	0.08142355		2063.99	-0.01107707		2593.98	0.00727099		3124.01	0.00317964		3654	0.00018909		4184	-0.00948367
474.19	0.325554		1004.19	0.06005451		1534.18	0.08136091		2064.19	-0.01104317		2594.18	0.00737376		3124.21	0.00380026		3654.2	0.00042924		4184.2	-0.01034653
474.39	0.32498757		1004.39	0.06007792		1534.38	0.08065618		2064.39	-0.01110517		2594.38	0.00691359		3124.41	0.00444444		3654.4	-0.00008975		4184.4	-0.01064594
474.59	0.32512081		1004.59	0.06099625		1534.58	0.0801351		2064.59	-0.01163474		2594.58	0.00637051		3124.61	0.00343977		3654.6	0.00014149		4184.6	-0.0103736
474.79	0.32505592		1004.79	0.0613101		1534.78	0.08009144		2064.79	-0.01174487		2594.78	0.00571436		3124.81	0.00295128		3654.8	0.0003751		4184.8	-0.00981938
474.99	0.32420298		1004.99	0.06064981		1534.98	0.08047242		2064.99	-0.01180209		2594.98	0.00515269		3125.01	0.00358352		3655	0.00114022		4185	-0.01063406
475.19	0.32391963		1005.19	0.06043479		1535.18	0.07966171		2065.19	-0.0119542		2595.18	0.00490998		3125.21	0.00297488		3655.2	0.00149762		4185.2	-0.01120672
475.39	0.32426432		1005.39	0.06000087		1535.38	0.07864175		2065.39	-0.01200815		2595.38	0.00499292		3125.41	0.00268566		3655.4	0.00103004		4185.4	-0.01129999
475.59	0.32451046		1005.59	0.0597358		1535.58	0.0783863		2065.59	-0.01246686		2595.58	0.00417445		3125.61	0.00282837		3655.6	0.00190579		4185.6	-0.01172575
475.79	0.32480037		1005.79	0.05941929		1535.78	0.07776918		2065.79	-0.01199928		2595.78	0.00415323		3125.81	0.00261147		3655.8	0.00194232		4185.8	-0.01220981
475.99	0.3246161		1005.99	0.0589063		1535.98	0.07727861		2065.99	-0.01283545		2595.98	0.00380865		3126.01	0.00197558		3656	0.00225868		4186	-0.01250367
476.19	0.32415742		1006.19	0.05868891		1536.18	0.07694675		2066.19	-0.0131527		2596.18	0.00466593		3126.21	0.00181237		3656.2	0.00324121		4186.2	-0.01140662
476.39	0.32374301		1006.39	0.05857477		1536.38	0.0765521		2066.39	-0.01335411		2596.38	0.00493344		3126.41	0.00138113		3656.4	0.00332734		4186.4	-0.01042798
476.59	0.32327605		1006.59	0.05901684		1536.58	0.07618865		2066.59	-0.01403181		2596.58	0.00493963		3126.61	0.00189593		3656.6	0.00295389		4186.6	-0.01051957
476.79	0.32323351		1006.79	0.05917879		1536.78	0.07510447		2066.79	-0.01371453		2596.78	0.00503052		3126.81	0.00133138		3656.8	0.00239733		4186.8	-0.01027015
476.99	0.32370945		1006.99	0.05986254		1536.98	0.07593218		2066.99	-0.01338654		2596.98	0.00570926		3127.01	0.00033299		3657	0.00233259		4187	-0.01077252
477.19	0.32398212		1007.19	0.06008049		1537.18	0.07613099		2067.19	-0.01267556		2597.18	0.00548676		3127.21	0.00057236		3657.2	0.00246348		4187.2	-0.01059913
477.39	0.32314687		1007.39	0.06001411		1537.38	0.07674712		2067.39	-0.01205067		2597.38	0.00497325		3127.41	0.00153649		3657.4	0.00234825		4187.4	-0.01018261
477.59	0.3234598		1007.59	0.06098325		1537.58	0.07753592		2067.59	-0.01314807		2597.58	0.00510792		3127.61	0.00218792		3657.6	0.0022274		4187.6	-0.01020052
477.79	0.32401616		1007.79	0.0620585		1537.78	0.07804955		2067.79	-0.01399041		2597.78	0.00522234		3127.81	0.00292988		3657.8	0.00252643		4187.8	-0.00954819
477.99	0.32370091		1007.99	0.06265824		1537.98	0.0775318		2067.99	-0.01424419		2597.98	0.00590287		3128.01	0.00358993		3658	0.00224071		4188	-0.00930115
478.19	0.32462063		1008.19	0.06325757		1538.18	0.07772062		2068.19	-0.01303723		2598.18	0.00561997		3128.21	0.00394926		3658.2	0.00164556		4188.2	-0.00908263
478.39	0.32397774		1008.39	0.06402151		1538.38	0.07786319		2068.39	-0.01327018		2598.38	0.00544998		3128.41	0.00480819		3658.4	0.00131687		4188.4	-0.00860706
478.59	0.32354675		1008.59	0.06449757		1538.58	0.07799076		2068.59	-0.01369503		2598.58	0.00623104		3128.61	0.00393224		3658.6	0.00135714		4188.6	-0.00828124
478.79	0.32289845		1008.79	0.06478215		1538.78	0.07841745		2068.79	-0.01364987		2598.78	0.00641109		3128.81	0.00416889		3658.8	0.00080601		4188.8	-0.00899416
478.99	0.32272692		1008.99	0.06379397		1538.98	0.07835814		2068.99	-0.01317355		2598.98	0.00619157		3129.01	0.00496001		3659	-0.00015953		4189	-0.00899136
479.19	0.32273221		1009.19	0.06339561		1539.18	0.07816169		2069.19	-0.01295558		2599.18	0.00602234		3129.21	0.00528801		3659.2	-0.00028152		4189.2	-0.00976954
479.39	0.32313218		1009.39	0.06365234		1539.38	0.077663		2069.39	-0.01310547		2599.38	0.00570726		3129.41	0.00548403		3659.4	-0.00100139		4189.4	-0.01048329
479.59	0.3236767		1009.59	0.06305073		1539.58	0.07775777		2069.59	-0.0127243		2599.58	0.00572637		3129.61	0.0058493		3659.6	-0.00049064		4189.6	-0.01057327
479.79	0.32436396		1009.79	0.06259001		1539.78	0.07813685		2069.79	-0.01244784		2599.78	0.00596426		3129.81	0.00507216		3659.8	-0.00086417		4189.8	-0.01053325
479.99	0.32418962		1009.99	0.06175696		1539.98	0.07850626		2069.99	-0.01246829		2599.98	0.00553339		3130.01	0.0052591		3660	-0.00068089		4190	-0.01040038
480.19	0.32438044		1010.19	0.06094132		1540.18	0.078035		2070.19	-0.01198127		2600.18	0.00618509		3130.21	0.00513519		3660.2	-0.00074845		4190.2	-0.00943228
480.39	0.32486615		1010.39	0.05979187		1540.38	0.07841821		2070.39	-0.01164765		2600.38	0.0066788		3130.41	0.00415384		3660.4	-0.00099759		4190.4	-0.00965958
480.59	0.32534619		1010.59	0.05842122		1540.58	0.07859494		2070.59	-0.01107821		2600.58	0.007537		3130.61	0.00446573		3660.6	0.00033236		4190.6	-0.00997485
480.79	0.32568082		1010.79	0.05740198		1540.78	0.07780515		2070.79	-0.01061692		2600.78	0.00834974		3130.81	0.00352611		3660.8	0.00044757		4190.8	-0.01012085
480.99	0.32487461		1010.99	0.0574436		1540.98	0.07888801		2070.99	-0.01175095		2600.98	0.00889874		3131.01	0.00343462		3661	0.00034137		4191	-0.0101002
481.19	0.3247359		1011.19	0.05690611		1541.18	0.07909375		2071.19	-0.01302446		2601.18	0.00867685		3131.21	0.00391983		3661.2	0.00037971		4191.2	-0.00961208
481.39	0.32359168		1011.39	0.05711249		1541.38	0.07967743		2071.39	-0.01385256		2601.38	0.00948194		3131.41	0.00506535		3661.4	0.00068161		4191.4	-0.01020568
481.59	0.32338285		1011.59	0.05787754		1541.58	0.08010892		2071.59	-0.01461755		2601.58	0.00943706		3131.61	0.00531737		3661.6	0.00074351		4191.6	-0.01045749
481.79	0.32302484		1011.79	0.0586635		1541.78	0.08014834		2071.79	-0.01569556		2601.78	0.00974959		3131.81	0.0060379		3661.8	0.00115837		4191.8	-0.00959298
481.99	0.32336213		1011.99	0.05863378		1541.98	0.07973479		2071.99	-0.01574569		2601.98	0.01007919		3132.01	0.00560894		3662	0.0013919		4192	-0.00933926
482.19	0.32369971		1012.19	0.05864163		1542.18	0.08015921		2072.19	-0.01583333		2602.18	0.00903757		3132.21	0.00478654		3662.2	0.00137829		4192.2	-0.00952492
482.39	0.32322097		1012.39	0.05943609		1542.38	0.08082237		2072.39	-0.01687258		2602.38	0.00899598		3132.41	0.00463748		3662.4	0.00146036		4192.4	-0.0101742
482.59	0.32271933		1012.59	0.06030321		1542.58	0.08098513		2072.59	-0.01736102		2602.58	0.00958642		3132.61	0.00397285		3662.6	0.00176615		4192.6	-0.01046141
482.79	0.32261929		1012.79	0.06031968		1542.78	0.08042739		2072.79	-0.01761701		2602.78	0.00825394		3132.81	0.00400146		3662.8	0.0017032		4192.8	-0.0116946
482.99	0.32265356		1012.99	0.05970384		1542.98	0.0810208		2072.99	-0.01810352		2602.98	0.00740131		3133.01	0.00418825		3663	0.00130538		4193	-0.0120763
483.19	0.32275727		1013.19	0.06051146		1543.18	0.08077638		2073.19	-0.01835291		2603.18	0.00664077		3133.21	0.00399234		3663.2	0.00161059		4193.2	-0.01374114
483.39	0.32285336		1013.39	0.06103681		1543.38	0.0801668		2073.39	-0.01833769		2603.38	0.00670251		3133.41	0.00372172		3663.4	0.00161657		4193.4	-0.01406745
483.59	0.32309216		1013.59	0.06076235		1543.58	0.08081547		2073.59	-0.0176726		2603.58	0.0067949		3133.61	0.00322874		3663.6	0.00202567		4193.6	-0.01306738
483.79	0.32339059		1013.79	0.06011781		1543.78	0.08093853		2073.79	-0.01729404		2603.78	0.00716411		3133.81	0.00207496		3663.8	0.00161566		4193.8	-0.0134966
483.99	0.32402338		1013.99	0.06016478		1543.98	0.08092317		2073.99	-0.01661308		2603.98	0.00659343		3134.01	0.00230013		3664	0.00098825		4194	-0.01328169
484.19	0.32441101		1014.19	0.05959384		1544.18	0.0804978		2074.19	-0.01613833		2604.18	0.00654017		3134.21	0.00239208		3664.2	0.00145471		4194.2	-0.01266317
484.39	0.32399109		1014.39	0.0587815		1544.38	0.08058152		2074.39	-0.01479842		2604.38	0.00678707		3134.41	0.0023396		3664.4	0.00116851		4194.4	-0.01229841
484.59	0.32377805		1014.59	0.05867802		1544.58	0.08049854		2074.59	-0.01447197		2604.58	0.00684977		3134.61	0.00269053		3664.6	0.00127103		4194.6	-0.01162594
484.79	0.32308345		1014.79	0.05821501		1544.78	0.07990324		2074.79	-0.01462929		2604.78	0.00715262		3134.81	0.00245703		3664.8	0.00051398		4194.8	-0.01182142
484.99	0.32320306		1014.99	0.0587452		1544.98	0.07982376		2074.99	-0.01558136		2604.98	0.0070727		3135.01	0.00324417		3665	0.0004482		4195	-0.0113946
485.19	0.32408354		1015.19	0.05833807		1545.18	0.08046547		2075.19	-0.01593033		2605.18	0.00684742		3135.21	0.0027627		3665.2	0.00097624		4195.2	-0.01115583
485.39	0.32393929		1015.39	0.05830049		1545.38	0.0799477		2075.39	-0.01537036		2605.38	0.00753428		3135.41	0.0030328		3665.4	0.00179813		4195.4	-0.01065902
485.59	0.32388875		1015.59	0.05736568		1545.58	0.07969469		2075.59	-0.01491895		2605.58	0.00721982		3135.61	0.00359054		3665.6	0.00236992		4195.6	-0.00948996
485.79	0.32476798		1015.79	0.05760197		1545.78	0.07931124		2075.79	-0.01522562		2605.78	0.00795214		3135.81	0.00382171		3665.8	0.00240515		4195.8	-0.00893651
485.99	0.32606414		1015.99	0.05748159		1545.98	0.07937251		2075.99	-0.01478128		2605.98	0.00860801		3136.01	0.00346131		3666	0.0028399		4196	-0.00900835
486.19	0.3260515		1016.19	0.05771324		1546.18	0.07991089		2076.19	-0.01506952		2606.18	0.00770044		3136.21	0.00396249		3666.2	0.00273125		4196.2	-0.00966921
486.39	0.32578539		1016.39	0.05855948		1546.38	0.08055532		2076.39	-0.01554145		2606.38	0.00817448		3136.41	0.00397421		3666.4	0.00299289		4196.4	-0.00980549
486.59	0.32557514		1016.59	0.05892174		1546.58	0.07970519		2076.59	-0.01569767		2606.58	0.0078405		3136.61	0.00394911		3666.6	0.00333673		4196.6	-0.01041748
486.79	0.32529107		1016.79	0.05918013		1546.78	0.0795327		2076.79	-0.01624969		2606.78	0.00786504		3136.81	0.00320331		3666.8	0.00357304		4196.8	-0.01069852
486.99	0.32454367		1016.99	0.05957574		1546.98	0.07964537		2076.99	-0.01701242		2606.98	0.00740047		3137.01	0.00331666		3667	0.00320219		4197	-0.0111028
487.19	0.32445993		1017.19	0.06007533		1547.18	0.07923999		2077.19	-0.0161989		2607.18	0.00721606		3137.21	0.00328802		3667.2	0.00357817		4197.2	-0.0112494
487.39	0.32383987		1017.39	0.06078824		1547.38	0.07947252		2077.39	-0.01571309		2607.38	0.00774137		3137.41	0.00284564		3667.4	0.00369956		4197.4	-0.01129113
487.59	0.32357167		1017.59	0.06140747		1547.58	0.07961558		2077.59	-0.01502017		2607.58	0.00753111		3137.61	0.00287462		3667.6	0.00324654		4197.6	-0.01043591
487.79	0.32310036		1017.79	0.06121179		1547.78	0.07946314		2077.79	-0.0150989		2607.78	0.00708012		3137.81	0.00223066		3667.8	0.00264235		4197.8	-0.01039764
487.99	0.32274686		1017.99	0.06162682		1547.98	0.08020897		2077.99	-0.01450718		2607.98	0.00540468		3138.01	0.00281444		3668	0.00250933		4198	-0.00975507
488.19	0.3218289		1018.19	0.06161608		1548.18	0.07955705		2078.19	-0.01435156		2608.18	0.00485284		3138.21	0.0032529		3668.2	0.0030219		4198.2	-0.00918658
488.39	0.32116874		1018.39	0.06148938		1548.38	0.07924979		2078.39	-0.01429405		2608.38	0.00520819		3138.41	0.002826		3668.4	0.00218508		4198.4	-0.00911883
488.59	0.32123033		1018.59	0.06160567		1548.58	0.07939063		2078.59	-0.01404104		2608.58	0.00505744		3138.61	0.00290474		3668.6	0.00254995		4198.6	-0.00941122
488.79	0.32180057		1018.79	0.06097626		1548.78	0.07943425		2078.79	-0.01483108		2608.78	0.00461729		3138.81	0.00274835		3668.8	0.00279664		4198.8	-0.00994577
488.99	0.3224273		1018.99	0.06146703		1548.98	0.07867773		2078.99	-0.01552989		2608.98	0.00390001		3139.01	0.003389		3669	0.00352324		4199	-0.01021485
489.19	0.32245608		1019.19	0.06154089		1549.18	0.07813856		2079.19	-0.01527615		2609.18	0.00409044		3139.21	0.0025107		3669.2	0.00387201		4199.2	-0.01032173
489.39	0.32262248		1019.39	0.06075765		1549.38	0.07819959		2079.39	-0.01537827		2609.38	0.00451683		3139.41	0.0032414		3669.4	0.00427532		4199.4	-0.01164499
489.59	0.32263088		1019.59	0.06045835		1549.58	0.07799017		2079.59	-0.01564275		2609.58	0.0047057		3139.61	0.00458083		3669.6	0.00410261		4199.6	-0.01171245
489.79	0.32370491		1019.79	0.06142444		1549.78	0.07812834		2079.79	-0.01575998		2609.78	0.00529021		3139.81	0.00455838		3669.8	0.00306436		4199.8	-0.01268762
489.99	0.32377872		1019.99	0.06156752		1549.98	0.07817943		2079.99	-0.0161132		2609.98	0.00602657		3140.01	0.00538394		3670	0.0030593		4200	-0.01329237
490.19	0.32383228		1020.19	0.06220248		1550.18	0.07809928		2080.19	-0.01601108		2610.18	0.00651832		3140.21	0.00606703		3670.2	0.0022637		4200.2	-0.01391166
490.39	0.3237534		1020.39	0.06262401		1550.38	0.07755956		2080.39	-0.01579762		2610.38	0.00689577		3140.41	0.00559589		3670.4	0.00144803		4200.4	-0.01324299
490.59	0.322733		1020.59	0.06323438		1550.58	0.07711697		2080.59	-0.01616911		2610.58	0.00709338		3140.61	0.00495897		3670.6	0.00117118		4200.6	-0.01326808
490.79	0.32277655		1020.79	0.06324798		1550.78	0.07742096		2080.79	-0.01580457		2610.78	0.00823071		3140.81	0.00459843		3670.8	0.00094215		4200.8	-0.013094
490.99	0.32256762		1020.99	0.0629489		1550.98	0.07659286		2080.99	-0.01577277		2610.98	0.0079829		3141.01	0.0040084		3671	-0.0000562		4201	-0.01260128
491.19	0.32188805		1021.19	0.06316563		1551.18	0.07700994		2081.19	-0.01538115		2611.18	0.00791846		3141.21	0.00295352		3671.2	-0.00012485		4201.2	-0.01258896
491.39	0.32174715		1021.39	0.06347961		1551.38	0.07726445		2081.39	-0.01496388		2611.38	0.00763956		3141.41	0.00178446		3671.4	-0.00058083		4201.4	-0.01239543
491.59	0.32112009		1021.59	0.06300478		1551.58	0.07738225		2081.59	-0.01479811		2611.58	0.00734286		3141.61	0.00223983		3671.6	-0.00125499		4201.6	-0.01128137
491.79	0.32137927		1021.79	0.06232991		1551.78	0.07813416		2081.79	-0.01483616		2611.78	0.00639332		3141.81	0.00095747		3671.8	-0.00112052		4201.8	-0.01066024
491.99	0.3213264		1021.99	0.06248468		1551.98	0.07821407		2081.99	-0.0150685		2611.98	0.00595531		3142.01	0.00086292		3672	-0.00111593		4202	-0.01040064
492.19	0.32116449		1022.19	0.06184046		1552.18	0.07817253		2082.19	-0.01493249		2612.18	0.00691505		3142.21	0.00061181		3672.2	-0.00087285		4202.2	-0.01054595
492.39	0.32181421		1022.39	0.06144119		1552.38	0.07823125		2082.39	-0.01442515		2612.38	0.00653754		3142.41	0.00077606		3672.4	-0.00063529		4202.4	-0.01004129
492.59	0.32238945		1022.59	0.06060388		1552.58	0.07830059		2082.59	-0.01438633		2612.58	0.00593764		3142.61	0.00078254		3672.6	0.00004657		4202.6	-0.00960294
492.79	0.32269528		1022.79	0.0601276		1552.78	0.07869884		2082.79	-0.01467889		2612.78	0.00533002		3142.81	0.00108384		3672.8	0.00023684		4202.8	-0.00949588
492.99	0.3226821		1022.99	0.06036443		1552.98	0.07766609		2082.99	-0.01448429		2612.98	0.00613284		3143.01	0.00168525		3673	-0.00017662		4203	-0.00976101
493.19	0.32296336		1023.19	0.06028409		1553.18	0.0780024		2083.19	-0.01386065		2613.18	0.00564164		3143.21	0.00128576		3673.2	0.00081045		4203.2	-0.01035097
493.39	0.32324198		1023.39	0.05926723		1553.38	0.0787194		2083.39	-0.01368198		2613.38	0.00541306		3143.41	0.00275186		3673.4	0.00074449		4203.4	-0.01041638
493.59	0.32343793		1023.59	0.05873335		1553.58	0.07842693		2083.59	-0.01322693		2613.58	0.00550816		3143.61	0.00362048		3673.6	0.00057879		4203.6	-0.0099331
493.79	0.32380219		1023.79	0.05900924		1553.78	0.07805931		2083.79	-0.01389695		2613.78	0.00579139		3143.81	0.00410469		3673.8	0.00015709		4203.8	-0.00976767
493.99	0.32370623		1023.99	0.05824891		1553.98	0.0775124		2083.99	-0.01403958		2613.98	0.00648727		3144.01	0.00490607		3674	0.00051858		4204	-0.00962598
494.19	0.32386055		1024.19	0.05839755		1554.18	0.07669256		2084.19	-0.01426195		2614.18	0.00724048		3144.21	0.00487113		3674.2	-0.00039055		4204.2	-0.01004313
494.39	0.32367513		1024.39	0.05823718		1554.38	0.07691083		2084.39	-0.01435178		2614.38	0.00656072		3144.41	0.00466685		3674.4	-0.00080816		4204.4	-0.00947558
494.59	0.32336375		1024.59	0.05877456		1554.58	0.07693352		2084.59	-0.01438859		2614.58	0.00757368		3144.61	0.00423708		3674.6	-0.00083647		4204.6	-0.0102261
494.79	0.32397345		1024.79	0.05818042		1554.78	0.07599573		2084.79	-0.01360883		2614.78	0.00759154		3144.81	0.00356481		3674.8	-0.0011809		4204.8	-0.00980286
494.99	0.3234057		1024.99	0.05788086		1554.98	0.07663097		2084.99	-0.0148943		2614.98	0.00738233		3145.01	0.00280446		3675	-0.00111219		4205	-0.00992052
495.19	0.32272281		1025.19	0.05808984		1555.18	0.07734314		2085.19	-0.0152107		2615.18	0.00675551		3145.21	0.00228312		3675.2	-0.00078738		4205.2	-0.0101305
495.39	0.3235232		1025.39	0.05812785		1555.38	0.07775498		2085.39	-0.01494428		2615.38	0.00686813		3145.41	0.00215758		3675.4	-0.00022126		4205.4	-0.0102444
495.59	0.32382851		1025.59	0.05883913		1555.58	0.07839578		2085.59	-0.0148577		2615.58	0.00747863		3145.61	0.00226127		3675.6	-0.00018776		4205.6	-0.01016719
495.79	0.32428996		1025.79	0.05888732		1555.78	0.07870086		2085.79	-0.01400778		2615.78	0.00790692		3145.81	0.00171183		3675.8	0.00005386		4205.8	-0.01059145
495.99	0.32486464		1025.99	0.05906168		1555.98	0.0786825		2085.99	-0.01416782		2615.98	0.00808185		3146.01	0.00224647		3676	0.00062068		4206	-0.01106024
496.19	0.32472511		1026.19	0.0590604		1556.18	0.07869874		2086.19	-0.01351343		2616.18	0.00928024		3146.21	0.00275904		3676.2	0.00106445		4206.2	-0.01097462
496.39	0.32488904		1026.39	0.0595176		1556.38	0.07846744		2086.39	-0.01333788		2616.38	0.00892203		3146.41	0.00350979		3676.4	0.00121276		4206.4	-0.01080611
496.59	0.32507667		1026.59	0.05934307		1556.58	0.07888217		2086.59	-0.01379031		2616.58	0.00897711		3146.61	0.00320421		3676.6	0.00094357		4206.6	-0.01072696
496.79	0.32512394		1026.79	0.05996522		1556.78	0.07885998		2086.79	-0.01316409		2616.78	0.00927865		3146.81	0.003585		3676.8	0.00024554		4206.8	-0.01092115
496.99	0.32521024		1026.99	0.05981452		1556.98	0.07910539		2086.99	-0.01351186		2616.98	0.00980317		3147.01	0.00447401		3677	-0.00017473		4207	-0.01063184
497.19	0.32568515		1027.19	0.05899231		1557.18	0.07941741		2087.19	-0.01394406		2617.18	0.00918717		3147.21	0.00484622		3677.2	0.00101601		4207.2	-0.01068086
497.39	0.32519756		1027.39	0.05859919		1557.38	0.07950669		2087.39	-0.01420542		2617.38	0.00877592		3147.41	0.0050198		3677.4	0.00037661		4207.4	-0.0094006
497.59	0.32485109		1027.59	0.05854086		1557.58	0.07927963		2087.59	-0.01535026		2617.58	0.00838105		3147.61	0.00451312		3677.6	0.00078053		4207.6	-0.00903211
497.79	0.3246191		1027.79	0.05911419		1557.78	0.07880454		2087.79	-0.01654514		2617.78	0.00832983		3147.81	0.00342038		3677.8	0.00008932		4207.8	-0.00862949
497.99	0.32383427		1027.99	0.05792692		1557.98	0.07818691		2087.99	-0.01600058		2617.98	0.00845411		3148.01	0.00284018		3678	0.0002526		4208	-0.00840688
498.19	0.32303948		1028.19	0.05771786		1558.18	0.07722239		2088.19	-0.01679045		2618.18	0.00857025		3148.21	0.0021198		3678.2	-0.00053424		4208.2	-0.00924515
498.39	0.3230332		1028.39	0.05703362		1558.38	0.07629482		2088.39	-0.0162567		2618.38	0.00779304		3148.41	0.00163024		3678.4	-0.00053272		4208.4	-0.00844643
498.59	0.32326879		1028.59	0.05758808		1558.58	0.07588037		2088.59	-0.01565535		2618.58	0.00738911		3148.61	0.00127038		3678.6	-0.00085248		4208.6	-0.00889298
498.79	0.32338646		1028.79	0.05722102		1558.78	0.07517032		2088.79	-0.01660884		2618.78	0.00667437		3148.81	0.00128258		3678.8	-0.00028649		4208.8	-0.00845515
498.99	0.32343594		1028.99	0.05730292		1558.98	0.07547369		2088.99	-0.01842862		2618.98	0.00612387		3149.01	0.00118658		3679	-0.00052479		4209	-0.00965309
499.19	0.32353467		1029.19	0.05776476		1559.18	0.07519666		2089.19	-0.0180471		2619.18	0.00577565		3149.21	0.00078337		3679.2	-0.00073099		4209.2	-0.01003346
499.39	0.32356308		1029.39	0.05865071		1559.38	0.07547824		2089.39	-0.01718995		2619.38	0.00582897		3149.41	-0.00003505		3679.4	-0.00024122		4209.4	-0.01134577
499.59	0.32343888		1029.59	0.05859844		1559.58	0.07556433		2089.59	-0.01643457		2619.58	0.00525519		3149.61	-0.00028638		3679.6	-0.00071707		4209.6	-0.01177841
499.79	0.32352573		1029.79	0.05811412		1559.78	0.07505211		2089.79	-0.01641337		2619.78	0.00549675		3149.81	-0.00112956		3679.8	0.00036824		4209.8	-0.01239787
499.99	0.32388282		1029.99	0.05808685		1559.98	0.07535165		2089.99	-0.0164743		2619.98	0.00513575		3150.01	-0.00115815		3680	0.00050266		4210	-0.01240865
500.19	0.32359292		1030.19	0.05816518		1560.18	0.07569419		2090.19	-0.01573686		2620.18	0.00645595		3150.21	-0.00093855		3680.2	-0.00029509		4210.2	-0.01333572
500.39	0.32316553		1030.39	0.05780856		1560.38	0.07515774		2090.39	-0.0156956		2620.38	0.00629904		3150.41	-0.0003077		3680.4	-0.00005534		4210.4	-0.01310722
500.59	0.32353308		1030.59	0.05814788		1560.58	0.07552684		2090.59	-0.01526754		2620.58	0.006447		3150.61	-0.00056622		3680.6	-0.00025464		4210.6	-0.01272963
500.79	0.32400855		1030.79	0.05831867		1560.78	0.0758114		2090.79	-0.0148323		2620.78	0.0072181		3150.81	0.00112348		3680.8	-0.00007662		4210.8	-0.01279037
500.99	0.32327663		1030.99	0.05833549		1560.98	0.07682133		2090.99	-0.01543436		2620.98	0.0074436		3151.01	0.00256367		3681	0.00043863		4211	-0.01276005
501.19	0.32345023		1031.19	0.05882619		1561.18	0.07685465		2091.19	-0.01592602		2621.18	0.00681095		3151.21	0.00246188		3681.2	0.00121278		4211.2	-0.01310483
501.39	0.32241582		1031.39	0.05915401		1561.38	0.07673651		2091.39	-0.0161578		2621.38	0.00576743		3151.41	0.00239216		3681.4	0.00076225		4211.4	-0.01215262
501.59	0.32180906		1031.59	0.0591		1561.58	0.07669479		2091.59	-0.01658109		2621.58	0.00570842		3151.61	0.00308085		3681.6	0.00063868		4211.6	-0.01186445
501.79	0.32110618		1031.79	0.05876466		1561.78	0.07716038		2091.79	-0.016445		2621.78	0.00520815		3151.81	0.00337836		3681.8	0.00034168		4211.8	-0.01182119
501.99	0.32006681		1031.99	0.05848199		1561.98	0.07670014		2091.99	-0.01669701		2621.98	0.00506736		3152.01	0.00459805		3682	0.00041526		4212	-0.01138338
502.19	0.32015841		1032.19	0.05826929		1562.18	0.07655817		2092.19	-0.01794838		2622.18	0.00464351		3152.21	0.00431712		3682.2	0.00096695		4212.2	-0.01222814
502.39	0.3204206		1032.39	0.05825451		1562.38	0.0759122		2092.39	-0.01828257		2622.38	0.00418962		3152.41	0.00464693		3682.4	0.00109632		4212.4	-0.01215996
502.59	0.32159382		1032.59	0.05977778		1562.58	0.07649989		2092.59	-0.01776303		2622.58	0.00396362		3152.61	0.0046198		3682.6	0.00141865		4212.6	-0.01272164
502.79	0.3223663		1032.79	0.06008047		1562.78	0.07675082		2092.79	-0.01889025		2622.78	0.00395186		3152.81	0.0045095		3682.8	0.00150311		4212.8	-0.01279917
502.99	0.32249943		1032.99	0.06080462		1562.98	0.07731779		2092.99	-0.01904517		2622.98	0.00337732		3153.01	0.00416023		3683	0.00035889		4213	-0.01317289
503.19	0.32292787		1033.19	0.06155486		1563.18	0.0779773		2093.19	-0.01853187		2623.18	0.00295792		3153.21	0.0031935		3683.2	0.00085695		4213.2	-0.0126579
503.39	0.32353127		1033.39	0.06229981		1563.38	0.07839115		2093.39	-0.01745122		2623.38	0.00282928		3153.41	0.00244178		3683.4	0.00180284		4213.4	-0.01311534
503.59	0.32470665		1033.59	0.06196493		1563.58	0.07843645		2093.59	-0.0172725		2623.58	0.00203564		3153.61	0.00199347		3683.6	0.00258843		4213.6	-0.0128341
503.79	0.32563874		1033.79	0.06206286		1563.78	0.07832144		2093.79	-0.01715044		2623.78	0.00285976		3153.81	0.00154867		3683.8	0.00289882		4213.8	-0.01185553
503.99	0.3258576		1033.99	0.06252399		1563.98	0.07874253		2093.99	-0.01632567		2623.98	0.00357438		3154.01	0.00183162		3684	0.00158339		4214	-0.0115684
504.19	0.32565198		1034.19	0.06198943		1564.18	0.07803796		2094.19	-0.01558168		2624.18	0.00486128		3154.21	0.00147214		3684.2	0.00085448		4214.2	-0.01110283
504.39	0.32495087		1034.39	0.06213667		1564.38	0.07715906		2094.39	-0.01575691		2624.38	0.00545562		3154.41	0.00132268		3684.4	0.00114558		4214.4	-0.01045057
504.59	0.32477353		1034.59	0.06222377		1564.58	0.07775167		2094.59	-0.01493559		2624.58	0.00656131		3154.61	0.00075127		3684.6	0.00108037		4214.6	-0.01046186
504.79	0.32480151		1034.79	0.06239091		1564.78	0.07770201		2094.79	-0.01487937		2624.78	0.00695344		3154.81	0.00095506		3684.8	0.00067621		4214.8	-0.01104005
504.99	0.32428363		1034.99	0.06247647		1564.98	0.07756975		2094.99	-0.01558121		2624.98	0.00656168		3155.01	0.00092436		3685	0.00015139		4215	-0.01153266
505.19	0.32374343		1035.19	0.06250534		1565.18	0.07703973		2095.19	-0.01555113		2625.18	0.00604846		3155.21	0.00018927		3685.2	-0.00064524		4215.2	-0.01229841
505.39	0.32274993		1035.39	0.06111295		1565.38	0.07662748		2095.39	-0.01559608		2625.38	0.00701366		3155.41	0.00091124		3685.4	-0.00170342		4215.4	-0.01248249
505.59	0.32220873		1035.59	0.060566		1565.58	0.07667447		2095.59	-0.0155499		2625.58	0.00734732		3155.61	0.00174756		3685.6	-0.00233626		4215.6	-0.01308233
505.79	0.32207424		1035.79	0.05995774		1565.78	0.07645137		2095.79	-0.01602912		2625.78	0.00584062		3155.81	0.00140283		3685.8	-0.00187352		4215.8	-0.01374029
505.99	0.32147177		1035.99	0.05898439		1565.98	0.07627301		2095.99	-0.01706807		2625.98	0.00515067		3156.01	0.00110179		3686	-0.00210684		4216	-0.01384473
506.19	0.32123888		1036.19	0.05792528		1566.18	0.07637069		2096.19	-0.01719297		2626.18	0.0041005		3156.21	-0.00013686		3686.2	-0.00164502		4216.2	-0.01461116
506.39	0.32168742		1036.39	0.05706916		1566.38	0.07639561		2096.39	-0.01625795		2626.38	0.00376663		3156.41	0.00022811		3686.4	-0.00172001		4216.4	-0.01472691
506.59	0.32261975		1036.59	0.05647011		1566.58	0.07694828		2096.59	-0.01558929		2626.58	0.00313031		3156.61	0.00012066		3686.6	-0.00183752		4216.6	-0.01472591
506.79	0.32188987		1036.79	0.055613		1566.78	0.07684434		2096.79	-0.0164479		2626.78	0.00191429		3156.81	0.0006358		3686.8	-0.00210824		4216.8	-0.01481643
506.99	0.32171114		1036.99	0.05609377		1566.98	0.07651741		2096.99	-0.01583442		2626.98	0.00124571		3157.01	0.00094646		3687	-0.00266691		4217	-0.01487772
507.19	0.32238114		1037.19	0.05577973		1567.18	0.07607864		2097.19	-0.0149959		2627.18	0.00027459		3157.21	0.00161474		3687.2	-0.00203362		4217.2	-0.01454598
507.39	0.32328627		1037.39	0.05584507		1567.38	0.075961		2097.39	-0.01463301		2627.38	-0.00008771		3157.41	0.00255837		3687.4	-0.00108207		4217.4	-0.0149793
507.59	0.32347328		1037.59	0.05547467		1567.58	0.07538238		2097.59	-0.01458076		2627.58	0.00050059		3157.61	0.00284942		3687.6	-0.00087507		4217.6	-0.01409164
507.79	0.32386429		1037.79	0.05513489		1567.78	0.07529659		2097.79	-0.01498317		2627.78	0.00140215		3157.81	0.00278976		3687.8	-0.00149831		4217.8	-0.01307295
507.99	0.32351051		1037.99	0.0558012		1567.98	0.07517646		2097.99	-0.01547303		2627.98	0.00235901		3158.01	0.00248514		3688	-0.00188502		4218	-0.0121748
508.19	0.3233883		1038.19	0.05551751		1568.18	0.07422126		2098.19	-0.01535997		2628.18	0.00310222		3158.21	0.00244455		3688.2	-0.00186742		4218.2	-0.01064582
508.39	0.32365596		1038.39	0.05614148		1568.38	0.07407095		2098.39	-0.01596174		2628.38	0.00407131		3158.41	0.00264671		3688.4	-0.00109045		4218.4	-0.01101159
508.59	0.32374441		1038.59	0.05668965		1568.58	0.07418154		2098.59	-0.01596929		2628.58	0.00442078		3158.61	0.00246838		3688.6	-0.00101982		4218.6	-0.01051526
508.79	0.32388118		1038.79	0.05684275		1568.78	0.07461613		2098.79	-0.01661459		2628.78	0.00452811		3158.81	0.00227936		3688.8	-0.00109266		4218.8	-0.01073489
508.99	0.32349284		1038.99	0.05717095		1568.98	0.07472334		2098.99	-0.01733145		2628.98	0.00495523		3159.01	0.00264898		3689	-0.00027727		4219	-0.01084775
509.19	0.32204621		1039.19	0.0576114		1569.18	0.0749369		2099.19	-0.01682153		2629.18	0.0056239		3159.21	0.00252138		3689.2	-0.00040215		4219.2	-0.01127797
509.39	0.32203868		1039.39	0.05733873		1569.38	0.07558589		2099.39	-0.01641592		2629.38	0.00728842		3159.41	0.00312456		3689.4	-0.00019459		4219.4	-0.01089241
509.59	0.32188879		1039.59	0.05699768		1569.58	0.07582682		2099.59	-0.01700217		2629.58	0.00789344		3159.61	0.00346455		3689.6	-0.00050477		4219.6	-0.01043325
509.79	0.32213144		1039.79	0.05676293		1569.78	0.07625418		2099.79	-0.0171294		2629.78	0.00718614		3159.81	0.00365365		3689.8	0.00017368		4219.8	-0.00976343
509.99	0.32193581		1039.99	0.05651136		1569.98	0.07674276		2099.99	-0.01605438		2629.98	0.00732153		3160.01	0.00354162		3690	-0.00001685		4220	-0.0096798
510.19	0.32236215		1040.19	0.05663952		1570.18	0.07773857		2100.19	-0.01628298		2630.18	0.00745847		3160.21	0.00366853		3690.2	-0.00054975		4220.2	-0.00983394
510.39	0.32344595		1040.39	0.05641354		1570.38	0.0786444		2100.39	-0.01620811		2630.38	0.0066548		3160.41	0.00393358		3690.4	-0.00045365		4220.4	-0.01003361
510.59	0.32349822		1040.59	0.05652362		1570.58	0.07908332		2100.59	-0.01688942		2630.58	0.00663526		3160.61	0.00445164		3690.6	-0.00074247		4220.6	-0.01022033
510.79	0.32369028		1040.79	0.05713124		1570.78	0.07827223		2100.79	-0.01622986		2630.78	0.00685214		3160.81	0.00496068		3690.8	-0.00032795		4220.8	-0.01048505
510.99	0.32429243		1040.99	0.05820764		1570.98	0.07866891		2100.99	-0.01490704		2630.98	0.00697982		3161.01	0.00503878		3691	-0.00065232		4221	-0.0104751
511.19	0.32537484		1041.19	0.0578749		1571.18	0.07812813		2101.19	-0.01476643		2631.18	0.00713123		3161.21	0.00507612		3691.2	-0.00070687		4221.2	-0.01086525
511.39	0.32525078		1041.39	0.05819297		1571.38	0.07849434		2101.39	-0.01603394		2631.38	0.00759985		3161.41	0.00462163		3691.4	-0.00039755		4221.4	-0.01119443
511.59	0.32568198		1041.59	0.05796754		1571.58	0.07828561		2101.59	-0.01598275		2631.58	0.00814787		3161.61	0.0044973		3691.6	-0.00015485		4221.6	-0.01115242
511.79	0.32647122		1041.79	0.05827908		1571.78	0.07839625		2101.79	-0.01594573		2631.78	0.00735118		3161.81	0.00388025		3691.8	-0.00049955		4221.8	-0.01118835
511.99	0.32602525		1041.99	0.05942287		1571.98	0.07753752		2101.99	-0.01630223		2631.98	0.00682208		3162.01	0.00426367		3692	-0.00049038		4222	-0.01047622
512.19	0.32561755		1042.19	0.05951038		1572.18	0.07627634		2102.19	-0.01628776		2632.18	0.00666533		3162.21	0.00337089		3692.2	0.00001395		4222.2	-0.01016327
512.39	0.32567842		1042.39	0.05974474		1572.38	0.07668809		2102.39	-0.01720774		2632.38	0.00582935		3162.41	0.00254381		3692.4	0.00040514		4222.4	-0.01108345
512.59	0.32517751		1042.59	0.05953284		1572.58	0.07663846		2102.59	-0.01728361		2632.58	0.00502192		3162.61	0.00221978		3692.6	0.00037804		4222.6	-0.01095644
512.79	0.32419034		1042.79	0.05871521		1572.78	0.07711093		2102.79	-0.01823138		2632.78	0.00512878		3162.81	0.00157829		3692.8	0.00131867		4222.8	-0.01107263
512.99	0.32317135		1042.99	0.05940023		1572.98	0.07647663		2102.99	-0.01872403		2632.98	0.0051175		3163.01	0.00136222		3693	0.00195722		4223	-0.01171061
513.19	0.32259445		1043.19	0.05934431		1573.18	0.07637195		2103.19	-0.01840841		2633.18	0.00535952		3163.21	0.00122098		3693.2	0.00196773		4223.2	-0.01161524
513.39	0.32247379		1043.39	0.05950492		1573.38	0.07633538		2103.39	-0.01918032		2633.38	0.00664209		3163.41	0.00111134		3693.4	0.00213589		4223.4	-0.01161457
513.59	0.32165351		1043.59	0.05900453		1573.58	0.07510472		2103.59	-0.0195657		2633.58	0.00630613		3163.61	0.00113057		3693.6	0.00274601		4223.6	-0.01133253
513.79	0.32139113		1043.79	0.0593985		1573.78	0.07464492		2103.79	-0.01945478		2633.78	0.0057262		3163.81	0.00054214		3693.8	0.00303749		4223.8	-0.01171069
513.99	0.32116845		1043.99	0.05906421		1573.98	0.0742362		2103.99	-0.01906654		2633.98	0.00592902		3164.01	0.00003577		3694	0.00270259		4224	-0.01361837
514.19	0.32120462		1044.19	0.05908504		1574.18	0.07474254		2104.19	-0.02010633		2634.18	0.00577839		3164.21	0.00036554		3694.2	0.00231925		4224.2	-0.01394641
514.39	0.32052359		1044.39	0.05900707		1574.38	0.07461203		2104.39	-0.01916226		2634.38	0.00512904		3164.41	0.00057661		3694.4	0.00271926		4224.4	-0.01403739
514.59	0.31956193		1044.59	0.0594518		1574.58	0.07421663		2104.59	-0.01896563		2634.58	0.0059451		3164.61	0.00125584		3694.6	0.00253699		4224.6	-0.01370374
514.79	0.3196441		1044.79	0.05891825		1574.78	0.07343519		2104.79	-0.01795172		2634.78	0.00592362		3164.81	0.00132228		3694.8	0.00279699		4224.8	-0.01361799
514.99	0.3197081		1044.99	0.05882591		1574.98	0.07433433		2104.99	-0.01785859		2634.98	0.00536529		3165.01	0.00120232		3695	0.00240847		4225	-0.01323927
515.19	0.32004289		1045.19	0.05811568		1575.18	0.0745216		2105.19	-0.01808817		2635.18	0.00518312		3165.21	0.00147149		3695.2	0.00183196		4225.2	-0.01377126
515.39	0.31949484		1045.39	0.05783952		1575.38	0.07498528		2105.39	-0.01869087		2635.38	0.00522557		3165.41	0.00176415		3695.4	0.00153211		4225.4	-0.0136744
515.59	0.32011379		1045.59	0.05777928		1575.58	0.07464421		2105.59	-0.01845638		2635.58	0.00509225		3165.61	0.00250639		3695.6	0.00150179		4225.6	-0.01339538
515.79	0.32002984		1045.79	0.05793006		1575.78	0.07444192		2105.79	-0.01788218		2635.78	0.00488693		3165.81	0.00253114		3695.8	0.00106087		4225.8	-0.0136728
515.99	0.32004177		1045.99	0.05717795		1575.98	0.07498782		2105.99	-0.01805677		2635.98	0.00492957		3166.01	0.00244826		3696	0.00108929		4226	-0.01306678
516.19	0.32036296		1046.19	0.05622838		1576.18	0.07544077		2106.19	-0.01778004		2636.18	0.0049484		3166.21	0.00172415		3696.2	0.00097789		4226.2	-0.01225496
516.39	0.32102685		1046.39	0.05570554		1576.38	0.07592167		2106.39	-0.01766156		2636.38	0.00410992		3166.41	0.00204921		3696.4	0.00116515		4226.4	-0.01222522
516.59	0.32180854		1046.59	0.05471987		1576.58	0.07591173		2106.59	-0.01746025		2636.58	0.00451683		3166.61	0.00221866		3696.6	0.00049053		4226.6	-0.01166354
516.79	0.3221357		1046.79	0.05411696		1576.78	0.07683665		2106.79	-0.01819175		2636.78	0.0042485		3166.81	0.00123768		3696.8	0.000646		4226.8	-0.01137203
516.99	0.32211576		1046.99	0.05482193		1576.98	0.07697556		2106.99	-0.0178607		2636.98	0.00420436		3167.01	0.00082408		3697	0.00034416		4227	-0.01194369
517.19	0.32248527		1047.19	0.05448678		1577.18	0.07764893		2107.19	-0.01801647		2637.18	0.00431189		3167.21	0.00048448		3697.2	0.00016037		4227.2	-0.01197949
517.39	0.32242229		1047.39	0.05454156		1577.38	0.07741686		2107.39	-0.01848497		2637.38	0.00456736		3167.41	-0.00024111		3697.4	-0.0004941		4227.4	-0.01227241
517.59	0.32272992		1047.59	0.05435522		1577.58	0.07644101		2107.59	-0.01791863		2637.58	0.00425746		3167.61	-0.00119415		3697.6	-0.00078553		4227.6	-0.01259192
517.79	0.32299342		1047.79	0.05431857		1577.78	0.07596214		2107.79	-0.01776551		2637.78	0.00513897		3167.81	-0.00179689		3697.8	-0.0013338		4227.8	-0.01366888
517.99	0.32293036		1047.99	0.05450219		1577.98	0.07663226		2107.99	-0.01697771		2637.98	0.0048386		3168.01	-0.00143115		3698	-0.00245072		4228	-0.01436893
518.19	0.32238281		1048.19	0.05539314		1578.18	0.07669922		2108.19	-0.01650782		2638.18	0.0044283		3168.21	-0.00117768		3698.2	-0.00289339		4228.2	-0.01394281
518.39	0.32166758		1048.39	0.05631858		1578.38	0.07579906		2108.39	-0.01630798		2638.38	0.0047575		3168.41	-0.00053054		3698.4	-0.00244695		4228.4	-0.0134853
518.59	0.32147041		1048.59	0.05722278		1578.58	0.0760702		2108.59	-0.01637151		2638.58	0.00394523		3168.61	-0.0005047		3698.6	-0.00222648		4228.6	-0.01308755
518.79	0.32186238		1048.79	0.05771573		1578.78	0.07642979		2108.79	-0.01610344		2638.78	0.00306983		3168.81	-0.00034614		3698.8	-0.00272244		4228.8	-0.01362643
518.99	0.32244305		1048.99	0.05795617		1578.98	0.07719405		2108.99	-0.01636224		2638.98	0.00345873		3169.01	0.00032722		3699	-0.00337086		4229	-0.01399973
519.19	0.32200586		1049.19	0.05848525		1579.18	0.07714991		2109.19	-0.01702511		2639.18	0.00463921		3169.21	0.0012709		3699.2	-0.00345576		4229.2	-0.01472008
519.39	0.32232284		1049.39	0.05890519		1579.38	0.0760958		2109.39	-0.01832036		2639.38	0.00502601		3169.41	0.00143325		3699.4	-0.00306457		4229.4	-0.01479044
519.59	0.32337054		1049.59	0.05918926		1579.58	0.07589018		2109.59	-0.01861569		2639.58	0.0056875		3169.61	0.00163609		3699.6	-0.00212835		4229.6	-0.01429438
519.79	0.32354438		1049.79	0.05871546		1579.78	0.07669314		2109.79	-0.01865166		2639.78	0.00621464		3169.81	0.00231182		3699.8	-0.00152553		4229.8	-0.01475069
519.99	0.3237921		1049.99	0.05820317		1579.98	0.07731706		2109.99	-0.01887278		2639.98	0.00661484		3170.01	0.00234173		3700	-0.0009672		4230	-0.01356025
520.19	0.32323252		1050.19	0.05828975		1580.18	0.07698144		2110.19	-0.01903799		2640.18	0.00621027		3170.21	0.00283575		3700.2	-0.00058049		4230.2	-0.01311402
520.39	0.32325295		1050.39	0.0582233		1580.38	0.07619988		2110.39	-0.01985377		2640.38	0.00637994		3170.41	0.00332614		3700.4	-0.00022597		4230.4	-0.0130001
520.59	0.32334039		1050.59	0.05751041		1580.58	0.07668933		2110.59	-0.02046337		2640.58	0.00631627		3170.61	0.00277594		3700.6	-0.00038866		4230.6	-0.01257772
520.79	0.32239907		1050.79	0.05669586		1580.78	0.07679503		2110.79	-0.02099919		2640.78	0.00555798		3170.81	0.00209096		3700.8	-0.00046627		4230.8	-0.01263956
520.99	0.32172295		1050.99	0.05650421		1580.98	0.07586054		2110.99	-0.0215195		2640.98	0.00521476		3171.01	0.00197171		3701	-0.00053121		4231	-0.01280123
521.19	0.32174674		1051.19	0.0552064		1581.18	0.07574248		2111.19	-0.02120396		2641.18	0.00522994		3171.21	0.00168322		3701.2	-0.00093127		4231.2	-0.01344765
521.39	0.32188015		1051.39	0.05541698		1581.38	0.07517143		2111.39	-0.02148195		2641.38	0.00401238		3171.41	0.0013873		3701.4	-0.00095718		4231.4	-0.01369217
521.59	0.32184899		1051.59	0.05556111		1581.58	0.07410044		2111.59	-0.0206453		2641.58	0.00293527		3171.61	0.00073872		3701.6	-0.0002928		4231.6	-0.0139939
521.79	0.32138682		1051.79	0.05614679		1581.78	0.0741166		2111.79	-0.02032548		2641.78	0.0029706		3171.81	0.00069168		3701.8	0.00042819		4231.8	-0.01344343
521.99	0.32066029		1051.99	0.05728221		1581.98	0.07448579		2111.99	-0.01968325		2641.98	0.00197673		3172.01	0.00112547		3702	0.00003315		4232	-0.01341734
522.19	0.3204549		1052.19	0.05729365		1582.18	0.07433724		2112.19	-0.01953734		2642.18	0.00173237		3172.21	0.00110076		3702.2	0.00088501		4232.2	-0.01377304
522.39	0.32071879		1052.39	0.05718408		1582.38	0.07424775		2112.39	-0.0195189		2642.38	0.00147239		3172.41	0.00063567		3702.4	0.00110101		4232.4	-0.01326007
522.59	0.32032054		1052.59	0.05728072		1582.58	0.07467132		2112.59	-0.01844782		2642.58	0.0004213		3172.61	0.00050886		3702.6	0.00032555		4232.6	-0.01341801
522.79	0.32103117		1052.79	0.05778707		1582.78	0.0756787		2112.79	-0.01817035		2642.78	0.00042304		3172.81	0.00010796		3702.8	-0.00035213		4232.8	-0.01312133
522.99	0.3214104		1052.99	0.05723041		1582.98	0.07590169		2112.99	-0.01869698		2642.98	0.00129264		3173.01	0.00035426		3703	-0.00056306		4233	-0.01313024
523.19	0.32214729		1053.19	0.05768447		1583.18	0.07609152		2113.19	-0.01947844		2643.18	0.00240515		3173.21	-0.00026691		3703.2	0.00025976		4233.2	-0.01310004
523.39	0.3223031		1053.39	0.05737348		1583.38	0.07616006		2113.39	-0.01980724		2643.38	0.00251781		3173.41	-0.00128807		3703.4	0.00089916		4233.4	-0.01253974
523.59	0.32249007		1053.59	0.05770849		1583.58	0.07741141		2113.59	-0.01928675		2643.58	0.00401421		3173.61	-0.00101186		3703.6	0.00098851		4233.6	-0.01217452
523.79	0.32160293		1053.79	0.05803729		1583.78	0.07775859		2113.79	-0.01926982		2643.78	0.00422856		3173.81	-0.00090853		3703.8	0.00101527		4233.8	-0.01244446
523.99	0.32123391		1053.99	0.05925269		1583.98	0.07752914		2113.99	-0.02002968		2643.98	0.00466976		3174.01	-0.00109629		3704	0.0014159		4234	-0.0118376
524.19	0.32031756		1054.19	0.06003594		1584.18	0.07698143		2114.19	-0.02086654		2644.18	0.00491981		3174.21	-0.0010054		3704.2	0.00118304		4234.2	-0.01184657
524.39	0.32000039		1054.39	0.0603075		1584.38	0.07623237		2114.39	-0.02142796		2644.38	0.00586252		3174.41	-0.00028043		3704.4	0.00080107		4234.4	-0.01238396
524.59	0.31896707		1054.59	0.05984116		1584.58	0.07569262		2114.59	-0.02129757		2644.58	0.00560719		3174.61	-0.00110407		3704.6	0.00060194		4234.6	-0.01257569
524.79	0.31835222		1054.79	0.05887241		1584.78	0.07451548		2114.79	-0.02134078		2644.78	0.0052498		3174.81	-0.00100757		3704.8	0.00032638		4234.8	-0.01319439
524.99	0.31837279		1054.99	0.05871646		1584.98	0.07342999		2114.99	-0.0209691		2644.98	0.0052308		3175.01	-0.00104556		3705	0.00060022		4235	-0.01386223
525.19	0.31800397		1055.19	0.05780695		1585.18	0.07357876		2115.19	-0.0202965		2645.18	0.00559899		3175.21	-0.00029656		3705.2	0.001357		4235.2	-0.01465031
525.39	0.31803917		1055.39	0.05826323		1585.38	0.07238981		2115.39	-0.02036274		2645.38	0.00516757		3175.41	-0.00012561		3705.4	0.00173167		4235.4	-0.01401235
525.59	0.31777296		1055.59	0.05755664		1585.58	0.07168535		2115.59	-0.01930957		2645.58	0.00464748		3175.61	0.00010188		3705.6	0.00195199		4235.6	-0.01377778
525.79	0.3181706		1055.79	0.05765251		1585.78	0.07178574		2115.79	-0.01893631		2645.78	0.00537396		3175.81	0.00014276		3705.8	0.00222884		4235.8	-0.01346725
525.99	0.31818722		1055.99	0.05692103		1585.98	0.0715281		2115.99	-0.01771584		2645.98	0.0054102		3176.01	-0.00018096		3706	0.00145324		4236	-0.0137226
526.19	0.31867839		1056.19	0.05644797		1586.18	0.07199641		2116.19	-0.01724152		2646.18	0.00552034		3176.21	-0.00043415		3706.2	0.00087291		4236.2	-0.01343231
526.39	0.31887916		1056.39	0.05634852		1586.38	0.07233354		2116.39	-0.01647064		2646.38	0.0060847		3176.41	-0.00062476		3706.4	-0.00012706		4236.4	-0.0131609
526.59	0.31904609		1056.59	0.05620744		1586.58	0.07185221		2116.59	-0.01591556		2646.58	0.00634787		3176.61	-0.00024377		3706.6	-0.00050515		4236.6	-0.01338192
526.79	0.32014617		1056.79	0.05631248		1586.78	0.07227514		2116.79	-0.01553933		2646.78	0.00674415		3176.81	-0.00101111		3706.8	-0.00087689		4236.8	-0.01267138
526.99	0.32106745		1056.99	0.05598519		1586.98	0.07224589		2116.99	-0.01534632		2646.98	0.00730178		3177.01	-0.00140944		3707	-0.00113764		4237	-0.01414219
527.19	0.32158015		1057.19	0.05521442		1587.18	0.07307651		2117.19	-0.0155047		2647.18	0.0076058		3177.21	-0.00187786		3707.2	-0.00090447		4237.2	-0.01397989
527.39	0.32133267		1057.39	0.0553674		1587.38	0.07337526		2117.39	-0.015019		2647.38	0.00665532		3177.41	-0.00108578		3707.4	-0.00206357		4237.4	-0.0144053
527.59	0.32237992		1057.59	0.05614408		1587.58	0.07356468		2117.59	-0.01476308		2647.58	0.0061465		3177.61	-0.00061968		3707.6	-0.00257895		4237.6	-0.01431492
527.79	0.32253956		1057.79	0.05655824		1587.78	0.0735055		2117.79	-0.01566716		2647.78	0.00584679		3177.81	-0.00085051		3707.8	-0.00313172		4237.8	-0.01484423
527.99	0.32255817		1057.99	0.05685095		1587.98	0.07410029		2117.99	-0.01657784		2647.98	0.0056816		3178.01	0.00011445		3708	-0.0029878		4238	-0.01467936
528.19	0.32221825		1058.19	0.05672388		1588.18	0.07345744		2118.19	-0.01693211		2648.18	0.00519602		3178.21	0.00029544		3708.2	-0.0025837		4238.2	-0.01403571
528.39	0.32192899		1058.39	0.05596785		1588.38	0.0740283		2118.39	-0.01723328		2648.38	0.00553885		3178.41	0.00121998		3708.4	-0.00257519		4238.4	-0.01428304
528.59	0.32191843		1058.59	0.05579542		1588.58	0.07390186		2118.59	-0.01745704		2648.58	0.00519677		3178.61	0.00078834		3708.6	-0.00175177		4238.6	-0.01381728
528.79	0.32186276		1058.79	0.05575168		1588.78	0.07428815		2118.79	-0.01713507		2648.78	0.00468179		3178.81	0.00145243		3708.8	-0.0012233		4238.8	-0.0135245
528.99	0.32180813		1058.99	0.05642473		1588.98	0.07423408		2118.99	-0.01802696		2648.98	0.0049388		3179.01	0.00143932		3709	-0.00097445		4239	-0.01289061
529.19	0.32141756		1059.19	0.05550938		1589.18	0.07397238		2119.19	-0.01822145		2649.18	0.00442827		3179.21	0.00295701		3709.2	-0.00102879		4239.2	-0.01187641
529.39	0.32188266		1059.39	0.05566007		1589.38	0.07364033		2119.39	-0.01857574		2649.38	0.00388676		3179.41	0.00253923		3709.4	-0.00084902		4239.4	-0.01115689
529.59	0.32227085		1059.59	0.05546407		1589.58	0.07423703		2119.59	-0.01829943		2649.58	0.00263794		3179.61	0.00217098		3709.6	-0.000411		4239.6	-0.01118201
529.79	0.32238114		1059.79	0.05576873		1589.78	0.07451853		2119.79	-0.01821899		2649.78	0.00350822		3179.81	0.00081859		3709.8	-0.00042424		4239.8	-0.01046249
529.99	0.32182934		1059.99	0.05671791		1589.98	0.07493047		2119.99	-0.01790244		2649.98	0.00415514		3180.01	-0.00030459		3710	-0.00075409		4240	-0.01024087
530.19	0.32175476		1060.19	0.05783129		1590.18	0.075687		2120.19	-0.01837233		2650.18	0.0043594		3180.21	-0.00045768		3710.2	-0.0005567		4240.2	-0.01021031
530.39	0.32114665		1060.39	0.05719537		1590.38	0.07498703		2120.39	-0.01891927		2650.38	0.00603946		3180.41	-0.00064016		3710.4	-0.00144554		4240.4	-0.01060661
530.59	0.32136649		1060.59	0.05715786		1590.58	0.07456		2120.59	-0.01898015		2650.58	0.00631459		3180.61	-0.00100114		3710.6	-0.0016885		4240.6	-0.01124367
530.79	0.32156856		1060.79	0.0575995		1590.78	0.07515218		2120.79	-0.01894625		2650.78	0.0063235		3180.81	-0.00170155		3710.8	-0.00114023		4240.8	-0.01191974
530.99	0.32172674		1060.99	0.05746161		1590.98	0.07595138		2120.99	-0.01887011		2650.98	0.00606695		3181.01	-0.00166751		3711	-0.00093601		4241	-0.01261674
531.19	0.32085262		1061.19	0.05717964		1591.18	0.07552984		2121.19	-0.01901136		2651.18	0.00498693		3181.21	-0.00069888		3711.2	-0.00173138		4241.2	-0.01266208
531.39	0.32105583		1061.39	0.05768195		1591.38	0.07483629		2121.39	-0.01886714		2651.38	0.00372299		3181.41	-0.00050136		3711.4	-0.00235044		4241.4	-0.01375437
531.59	0.321598		1061.59	0.05776024		1591.58	0.07502433		2121.59	-0.01943191		2651.58	0.00318368		3181.61	-0.00126931		3711.6	-0.00178738		4241.6	-0.01351186
531.79	0.32110169		1061.79	0.0571389		1591.78	0.07495923		2121.79	-0.01922373		2651.78	0.00257301		3181.81	-0.000853		3711.8	-0.00142531		4241.8	-0.01379163
531.99	0.32107592		1061.99	0.05696991		1591.98	0.07462321		2121.99	-0.01891791		2651.98	0.00185676		3182.01	-0.00067419		3712	-0.00047906		4242	-0.01313142
532.19	0.32056281		1062.19	0.05774479		1592.18	0.07402852		2122.19	-0.01849854		2652.18	0.00165281		3182.21	-0.00052503		3712.2	-0.00002787		4242.2	-0.01283384
532.39	0.32044386		1062.39	0.057971		1592.38	0.07445461		2122.39	-0.01844201		2652.38	0.00162739		3182.41	0.00028708		3712.4	-0.00083412		4242.4	-0.01351471
532.59	0.32087016		1062.59	0.05866866		1592.58	0.07331999		2122.59	-0.01786748		2652.58	0.00128952		3182.61	-0.00007266		3712.6	-0.00094911		4242.6	-0.01408746
532.79	0.32044557		1062.79	0.05778944		1592.78	0.07346648		2122.79	-0.01719757		2652.78	0.00136854		3182.81	-0.00040202		3712.8	-0.00115069		4242.8	-0.01385036
532.99	0.3208961		1062.99	0.05741555		1592.98	0.07302428		2122.99	-0.01800426		2652.98	0.0014298		3183.01	-0.00071246		3713	-0.00154159		4243	-0.0133682
533.19	0.32099293		1063.19	0.05666944		1593.18	0.07216843		2123.19	-0.01794698		2653.18	0.00130279		3183.21	-0.00043618		3713.2	-0.00226933		4243.2	-0.01297051
533.39	0.32146727		1063.39	0.05685445		1593.38	0.07302767		2123.39	-0.01871356		2653.38	0.0020794		3183.41	-0.00069858		3713.4	-0.00186986		4243.4	-0.01289882
533.59	0.32103547		1063.59	0.05650573		1593.58	0.07317922		2123.59	-0.01865398		2653.58	0.00209693		3183.61	-0.00095014		3713.6	-0.00234321		4243.6	-0.0128994
533.79	0.32044147		1063.79	0.05548577		1593.78	0.07348576		2123.79	-0.01942509		2653.78	0.00271637		3183.81	-0.00068759		3713.8	-0.00332219		4243.8	-0.01216417
533.99	0.31984342		1063.99	0.05646055		1593.98	0.07378151		2123.99	-0.01919924		2653.98	0.0028951		3184.01	-0.00003951		3714	-0.00367883		4244	-0.01209831
534.19	0.32036406		1064.19	0.05600828		1594.18	0.07408581		2124.19	-0.02008381		2654.18	0.00399704		3184.21	0.0005474		3714.2	-0.00421485		4244.2	-0.01180347
534.39	0.31965477		1064.39	0.05497452		1594.38	0.07372761		2124.39	-0.02059569		2654.38	0.00514882		3184.41	0.00125543		3714.4	-0.00539069		4244.4	-0.01136327
534.59	0.32018837		1064.59	0.05488697		1594.58	0.07479365		2124.59	-0.02079901		2654.58	0.00511354		3184.61	0.00132607		3714.6	-0.00499907		4244.6	-0.01135892
534.79	0.32002745		1064.79	0.05493544		1594.78	0.07533074		2124.79	-0.02162953		2654.78	0.00521323		3184.81	0.00135999		3714.8	-0.00456392		4244.8	-0.01129309
534.99	0.31982844		1064.99	0.05520156		1594.98	0.07562342		2124.99	-0.02138877		2654.98	0.00528248		3185.01	0.00233274		3715	-0.00475572		4245	-0.01059729
535.19	0.31993212		1065.19	0.0554492		1595.18	0.07551877		2125.19	-0.02215034		2655.18	0.00492439		3185.21	0.00217068		3715.2	-0.00423421		4245.2	-0.01022396
535.39	0.32103801		1065.39	0.05528866		1595.38	0.07596615		2125.39	-0.02196223		2655.38	0.0045467		3185.41	0.0017132		3715.4	-0.00386831		4245.4	-0.00989527
535.59	0.32180301		1065.59	0.055626		1595.58	0.07660984		2125.59	-0.02182763		2655.58	0.00354246		3185.61	0.00083588		3715.6	-0.00311457		4245.6	-0.01000499
535.79	0.32212745		1065.79	0.05529005		1595.78	0.07669745		2125.79	-0.0202396		2655.78	0.00310066		3185.81	0.00120663		3715.8	-0.00216569		4245.8	-0.0097629
535.99	0.32205706		1065.99	0.05613774		1595.98	0.07668564		2125.99	-0.02008026		2655.98	0.00309173		3186.01	0.00132755		3716	-0.00225205		4246	-0.01051164
536.19	0.321162		1066.19	0.0574278		1596.18	0.07683695		2126.19	-0.01867845		2656.18	0.0027964		3186.21	0.00189776		3716.2	-0.00194263		4246.2	-0.01185938
536.39	0.32202427		1066.39	0.05785355		1596.38	0.07666976		2126.39	-0.0178623		2656.38	0.00309746		3186.41	0.00122237		3716.4	-0.00210238		4246.4	-0.01293547
536.59	0.3217861		1066.59	0.05784402		1596.58	0.07636411		2126.59	-0.01768659		2656.58	0.00300437		3186.61	0.0007055		3716.6	-0.00141417		4246.6	-0.01424815
536.79	0.32174498		1066.79	0.05717864		1596.78	0.07711226		2126.79	-0.01796738		2656.78	0.0035849		3186.81	-0.0003081		3716.8	-0.0011893		4246.8	-0.0141278
536.99	0.32207045		1066.99	0.05790186		1596.98	0.0765308		2126.99	-0.01799562		2656.98	0.00327479		3187.01	0.00030679		3717	-0.00087403		4247	-0.01378573
537.19	0.32126489		1067.19	0.05805081		1597.18	0.07603119		2127.19	-0.01827975		2657.18	0.00294925		3187.21	0.00079782		3717.2	-0.00063858		4247.2	-0.01448733
537.39	0.32078227		1067.39	0.05756157		1597.38	0.07680022		2127.39	-0.01911593		2657.38	0.0028013		3187.41	0.00088868		3717.4	-0.00010676		4247.4	-0.01489211
537.59	0.31922571		1067.59	0.05720033		1597.58	0.07619683		2127.59	-0.0196138		2657.58	0.00240982		3187.61	0.00090178		3717.6	-0.00052986		4247.6	-0.01549407
537.79	0.31927954		1067.79	0.05686708		1597.78	0.07641304		2127.79	-0.02006919		2657.78	0.0023537		3187.81	0.00115176		3717.8	-0.00077353		4247.8	-0.0151321
537.99	0.31960087		1067.99	0.05708283		1597.98	0.0767539		2127.99	-0.02022393		2657.98	0.00292318		3188.01	0.00075388		3718	-0.00036094		4248	-0.01600138
538.19	0.31926094		1068.19	0.05605902		1598.18	0.0763777		2128.19	-0.02178491		2658.18	0.00397661		3188.21	0.00056938		3718.2	-0.0001195		4248.2	-0.01585234
538.39	0.31846321		1068.39	0.05575008		1598.38	0.07673174		2128.39	-0.02219127		2658.38	0.00434317		3188.41	0.00037216		3718.4	-0.00089561		4248.4	-0.01568868
538.59	0.31863447		1068.59	0.05566852		1598.58	0.076784		2128.59	-0.02287875		2658.58	0.00424581		3188.61	-0.00025462		3718.6	-0.00071422		4248.6	-0.01607479
538.79	0.31889351		1068.79	0.05592703		1598.78	0.07695682		2128.79	-0.02339247		2658.78	0.00428513		3188.81	-0.00064529		3718.8	-0.00028932		4248.8	-0.01598869
538.99	0.31880007		1068.99	0.05576619		1598.98	0.07675926		2128.99	-0.02347466		2658.98	0.0046672		3189.01	-0.00089235		3719	-0.00012427		4249	-0.01542059
539.19	0.31864612		1069.19	0.0556017		1599.18	0.07664317		2129.19	-0.02383035		2659.18	0.00445356		3189.21	-0.00073775		3719.2	0.00011097		4249.2	-0.01511627
539.39	0.31936507		1069.39	0.05593042		1599.38	0.07546187		2129.39	-0.02305957		2659.38	0.00329406		3189.41	0.0000118		3719.4	-0.00030802		4249.4	-0.0153443
539.59	0.31849194		1069.59	0.05593888		1599.58	0.07523965		2129.59	-0.02204713		2659.58	0.00252865		3189.61	-0.00003148		3719.6	0.00020839		4249.6	-0.01582982
539.79	0.31822433		1069.79	0.0561241		1599.78	0.07517792		2129.79	-0.02062037		2659.78	0.00345075		3189.81	0.00083024		3719.8	-0.00006034		4249.8	-0.01520193
539.99	0.31795873		1069.99	0.05732865		1599.98	0.07494252		2129.99	-0.02026483		2659.98	0.00300699		3190.01	0.00198884		3720	-0.00089127		4250	-0.0168803
540.19	0.31798391		1070.19	0.05821805		1600.18	0.07431302		2130.19	-0.01936447		2660.18	0.00312056		3190.21	0.00261051		3720.2	-0.00048059		4250.2	-0.016907
540.39	0.31855912		1070.39	0.05857275		1600.38	0.07349217		2130.39	-0.01906279		2660.38	0.00373666		3190.41	0.00317153		3720.4	-0.00038943		4250.4	-0.01675262
540.59	0.31785572		1070.59	0.05858938		1600.58	0.07270722		2130.59	-0.01882353		2660.58	0.0028754		3190.61	0.00301729		3720.6	-0.00014194		4250.6	-0.01664831
540.79	0.31802876		1070.79	0.05880673		1600.78	0.0727238		2130.79	-0.01781925		2660.78	0.00289384		3190.81	0.00264213		3720.8	0.00000017		4250.8	-0.01558874
540.99	0.31771574		1070.99	0.0592311		1600.98	0.07274365		2130.99	-0.01681504		2660.98	0.00200039		3191.01	0.00323749		3721	-0.00040766		4251	-0.01561664
541.19	0.31742564		1071.19	0.05905633		1601.18	0.07237736		2131.19	-0.01703853		2661.18	0.00195777		3191.21	0.00299483		3721.2	-0.00090698		4251.2	-0.01630066
541.39	0.31759267		1071.39	0.05902106		1601.38	0.07273089		2131.39	-0.01700515		2661.38	0.00221274		3191.41	0.00281747		3721.4	-0.00118081		4251.4	-0.01591363
541.59	0.31710984		1071.59	0.05914042		1601.58	0.07262666		2131.59	-0.01765501		2661.58	0.00259207		3191.61	0.00314745		3721.6	-0.00208568		4251.6	-0.01569149
541.79	0.31861595		1071.79	0.05879131		1601.78	0.07306696		2131.79	-0.01672021		2661.78	0.0023757		3191.81	0.00260095		3721.8	-0.0013157		4251.8	-0.01597372
541.99	0.31964064		1071.99	0.05753495		1601.98	0.07377032		2131.99	-0.01674669		2661.98	0.00239562		3192.01	0.00236461		3722	-0.00129125		4252	-0.01677336
542.19	0.31967641		1072.19	0.05798608		1602.18	0.07323709		2132.19	-0.01657198		2662.18	0.00288426		3192.21	0.00236229		3722.2	-0.0009647		4252.2	-0.01612559
542.39	0.32008098		1072.39	0.05867333		1602.38	0.07444841		2132.39	-0.01673456		2662.38	0.00332853		3192.41	0.00144429		3722.4	-0.00128487		4252.4	-0.01625983
542.59	0.32104738		1072.59	0.05806129		1602.58	0.07434917		2132.59	-0.01732515		2662.58	0.00314558		3192.61	0.00077585		3722.6	-0.00112794		4252.6	-0.01600683
542.79	0.32163958		1072.79	0.05712662		1602.78	0.07429412		2132.79	-0.01781995		2662.78	0.00296997		3192.81	0.00073695		3722.8	-0.00133152		4252.8	-0.01530268
542.99	0.32119887		1072.99	0.05713851		1602.98	0.07450508		2132.99	-0.01734585		2662.98	0.00303695		3193.01	0.00089217		3723	-0.00209155		4253	-0.01461635
543.19	0.32120709		1073.19	0.0576757		1603.18	0.07470395		2133.19	-0.01817594		2663.18	0.00235574		3193.21	0.00153616		3723.2	-0.00224545		4253.2	-0.01369712
543.39	0.32149709		1073.39	0.05816508		1603.38	0.07410927		2133.39	-0.01781045		2663.38	0.00181536		3193.41	0.0012477		3723.4	-0.00222349		4253.4	-0.01320786
543.59	0.32135462		1073.59	0.05844445		1603.58	0.07432194		2133.59	-0.01759379		2663.58	0.00237513		3193.61	0.00069697		3723.6	-0.0027226		4253.6	-0.01329206
543.79	0.32123471		1073.79	0.05849134		1603.78	0.07445165		2133.79	-0.01843999		2663.78	0.00343158		3193.81	0.0007907		3723.8	-0.00348372		4253.8	-0.01285359
543.99	0.32078738		1073.99	0.0589019		1603.98	0.07459469		2133.99	-0.01913699		2663.98	0.00227174		3194.01	0.00154996		3724	-0.00360765		4254	-0.01348467
544.19	0.3203508		1074.19	0.05882656		1604.18	0.07428113		2134.19	-0.01933042		2664.18	0.00322368		3194.21	0.00106729		3724.2	-0.00288048		4254.2	-0.01262796
544.39	0.31975497		1074.39	0.05930539		1604.38	0.07342585		2134.39	-0.01931265		2664.38	0.00352092		3194.41	0.0005814		3724.4	-0.00300188		4254.4	-0.01245251
544.59	0.31848976		1074.59	0.05892136		1604.58	0.07239846		2134.59	-0.01930503		2664.58	0.00294536		3194.61	-0.00080042		3724.6	-0.00306534		4254.6	-0.01197103
544.79	0.31734307		1074.79	0.05889043		1604.78	0.07284972		2134.79	-0.01913801		2664.78	0.00317523		3194.81	-0.00074174		3724.8	-0.00270969		4254.8	-0.01271616
544.99	0.31739881		1074.99	0.058564		1604.98	0.07235596		2134.99	-0.01896281		2664.98	0.0033601		3195.01	-0.00095152		3725	-0.00353928		4255	-0.01331039
545.19	0.31829472		1075.19	0.05840711		1605.18	0.07177671		2135.19	-0.01980468		2665.18	0.00379274		3195.21	-0.00078329		3725.2	-0.00374088		4255.2	-0.01366273
545.39	0.31887828		1075.39	0.05746965		1605.38	0.07198387		2135.39	-0.01966097		2665.38	0.00393804		3195.41	-0.00025709		3725.4	-0.00363011		4255.4	-0.01370766
545.59	0.31948851		1075.59	0.05708023		1605.58	0.0720793		2135.59	-0.02014494		2665.58	0.00395182		3195.61	-0.000706		3725.6	-0.00361853		4255.6	-0.01436719
545.79	0.32067901		1075.79	0.05680478		1605.78	0.07260522		2135.79	-0.0183662		2665.78	0.00409604		3195.81	-0.00052662		3725.8	-0.00270674		4255.8	-0.01517726
545.99	0.321405		1075.99	0.05584455		1605.98	0.07338022		2135.99	-0.01926106		2665.98	0.00523167		3196.01	0.0001475		3726	-0.00303691		4256	-0.01469619
546.19	0.32174574		1076.19	0.05600159		1606.18	0.07283833		2136.19	-0.0196631		2666.18	0.00537357		3196.21	-0.00034603		3726.2	-0.00268784		4256.2	-0.01418379
546.39	0.32187221		1076.39	0.0558322		1606.38	0.07429457		2136.39	-0.02005746		2666.38	0.00492207		3196.41	-0.00056264		3726.4	-0.00261358		4256.4	-0.01423258
546.59	0.32224666		1076.59	0.05463683		1606.58	0.07446063		2136.59	-0.02046275		2666.58	0.00416369		3196.61	-0.00101266		3726.6	-0.00312845		4256.6	-0.01387179
546.79	0.32183189		1076.79	0.05401063		1606.78	0.07503697		2136.79	-0.01979764		2666.78	0.00310696		3196.81	-0.00067694		3726.8	-0.00386271		4256.8	-0.01366073
546.99	0.32149285		1076.99	0.05525922		1606.98	0.07545978		2136.99	-0.01948311		2666.98	0.00267476		3197.01	-0.00028258		3727	-0.00367198		4257	-0.01298396
547.19	0.32197372		1077.19	0.05577158		1607.18	0.0754887		2137.19	-0.0204505		2667.18	0.00211002		3197.21	-0.00004634		3727.2	-0.0032387		4257.2	-0.01323877
547.39	0.32099937		1077.39	0.05618554		1607.38	0.07501065		2137.39	-0.02000386		2667.38	0.00171974		3197.41	-0.0003776		3727.4	-0.00336168		4257.4	-0.01407164
547.59	0.32075584		1077.59	0.05625442		1607.58	0.07512371		2137.59	-0.02053382		2667.58	0.00189884		3197.61	-0.00074448		3727.6	-0.00383375		4257.6	-0.01402226
547.79	0.31987974		1077.79	0.05571157		1607.78	0.07472314		2137.79	-0.02046636		2667.78	0.00156044		3197.81	-0.00024333		3727.8	-0.00361754		4257.8	-0.01407678
547.99	0.31972637		1077.99	0.05700194		1607.98	0.07514875		2137.99	-0.0198223		2667.98	0.00075112		3198.01	-0.00060477		3728	-0.00309661		4258	-0.01454715
548.19	0.31970239		1078.19	0.05709922		1608.18	0.0745284		2138.19	-0.02013114		2668.18	0.00074302		3198.21	-0.00140971		3728.2	-0.00270691		4258.2	-0.01497814
548.39	0.31843071		1078.39	0.05776413		1608.38	0.07370638		2138.39	-0.02027012		2668.38	0.00042484		3198.41	-0.00146999		3728.4	-0.00244653		4258.4	-0.01515218
548.59	0.31741034		1078.59	0.05705541		1608.58	0.07315676		2138.59	-0.02097607		2668.58	-0.00002073		3198.61	-0.0016936		3728.6	-0.00197552		4258.6	-0.0146276
548.79	0.31736572		1078.79	0.05682155		1608.78	0.07316465		2138.79	-0.02094237		2668.78	0.00032789		3198.81	-0.00085952		3728.8	-0.00187933		4258.8	-0.01545185
548.99	0.31826751		1078.99	0.05682931		1608.98	0.07312228		2138.99	-0.0214306		2668.98	0.00063031		3199.01	-0.0006536		3729	-0.00187974		4259	-0.01478618
549.19	0.3184962		1079.19	0.05710687		1609.18	0.07328778		2139.19	-0.022054		2669.18	0.00121593		3199.21	-0.00020546		3729.2	-0.00280389		4259.2	-0.01506395
549.39	0.318116		1079.39	0.05699918		1609.38	0.07336482		2139.39	-0.02204528		2669.38	0.00203027		3199.41	-0.00032283		3729.4	-0.00215237		4259.4	-0.01442495
549.59	0.31804311		1079.59	0.0576443		1609.58	0.07330356		2139.59	-0.02171912		2669.58	0.0030232		3199.61	-0.00038552		3729.6	-0.00258107		4259.6	-0.01397329
549.79	0.31837265		1079.79	0.05766094		1609.78	0.07402404		2139.79	-0.02145153		2669.78	0.00402072		3199.81	0.0006959		3729.8	-0.00240205		4259.8	-0.01282301
549.99	0.31858335		1079.99	0.05761581		1609.98	0.07431535		2139.99	-0.02205378		2669.98	0.00439491		3200.01	0.00044977		3730	-0.00257415		4260	-0.01225088
550.19	0.31800266		1080.19	0.05768114		1610.18	0.07418666		2140.19	-0.02137318		2670.18	0.00358576		3200.21	-0.000378		3730.2	-0.00301887		4260.2	-0.01135504
550.39	0.31805644		1080.39	0.05796218		1610.38	0.07467904		2140.39	-0.02103319		2670.38	0.00313052		3200.41	-0.00015581		3730.4	-0.00265953		4260.4	-0.01146058
550.59	0.31767819		1080.59	0.05773046		1610.58	0.07424821		2140.59	-0.02103882		2670.58	0.00292152		3200.61	-0.00093116		3730.6	-0.00352723		4260.6	-0.01178459
550.79	0.31788392		1080.79	0.05823003		1610.78	0.07408951		2140.79	-0.02053387		2670.78	0.00308546		3200.81	-0.00059953		3730.8	-0.00361099		4260.8	-0.01202811
550.99	0.31828221		1080.99	0.05849375		1610.98	0.07340213		2140.99	-0.02105944		2670.98	0.0026938		3201.01	-0.00024453		3731	-0.00402441		4261	-0.01197498
551.19	0.31916725		1081.19	0.05794898		1611.18	0.07341423		2141.19	-0.02077178		2671.18	0.00286756		3201.21	-0.00077982		3731.2	-0.00458519		4261.2	-0.01230564
551.39	0.31851959		1081.39	0.05769137		1611.38	0.0728996		2141.39	-0.02032233		2671.38	0.00292168		3201.41	-0.00173119		3731.4	-0.00485489		4261.4	-0.01229659
551.59	0.31918109		1081.59	0.05784496		1611.58	0.07332948		2141.59	-0.02009958		2671.58	0.00289392		3201.61	-0.00183703		3731.6	-0.00505586		4261.6	-0.01268852
551.79	0.31948943		1081.79	0.05739556		1611.78	0.0729999		2141.79	-0.01897947		2671.78	0.00222037		3201.81	-0.0017792		3731.8	-0.00496927		4261.8	-0.01399094
551.99	0.31962542		1081.99	0.05718394		1611.98	0.07339471		2141.99	-0.01931212		2671.98	0.00146033		3202.01	-0.00207992		3732	-0.00458719		4262	-0.01446171
552.19	0.31906195		1082.19	0.05664954		1612.18	0.07339281		2142.19	-0.01975522		2672.18	0.00075323		3202.21	-0.00132317		3732.2	-0.00471554		4262.2	-0.01482279
552.39	0.31819326		1082.39	0.05628872		1612.38	0.07337592		2142.39	-0.02029014		2672.38	0.00060582		3202.41	-0.00106424		3732.4	-0.00512984		4262.4	-0.01528821
552.59	0.3182589		1082.59	0.05552217		1612.58	0.0732123		2142.59	-0.02159857		2672.58	0.0000657		3202.61	-0.00162392		3732.6	-0.00506479		4262.6	-0.01570579
552.79	0.31812467		1082.79	0.05535593		1612.78	0.073127		2142.79	-0.02101564		2672.78	0.00050662		3202.81	-0.0010987		3732.8	-0.00546583		4262.8	-0.01611784
552.99	0.31799766		1082.99	0.05563476		1612.98	0.0730996		2142.99	-0.02117181		2672.98	0.00053645		3203.01	-0.00176166		3733	-0.00486434		4263	-0.01549259
553.19	0.31824885		1083.19	0.05565406		1613.18	0.07243663		2143.19	-0.02108157		2673.18	0.00094909		3203.21	-0.00143418		3733.2	-0.00483594		4263.2	-0.01563315
553.39	0.31830464		1083.39	0.05543508		1613.38	0.07225944		2143.39	-0.02184225		2673.38	0.00091672		3203.41	-0.00162238		3733.4	-0.00399678		4263.4	-0.01499392
553.59	0.31965861		1083.59	0.05534134		1613.58	0.0717333		2143.59	-0.02175723		2673.58	0.00130633		3203.61	-0.00206782		3733.6	-0.00400941		4263.6	-0.01491966
553.79	0.31949223		1083.79	0.05561365		1613.78	0.07223028		2143.79	-0.02208926		2673.78	0.00157038		3203.81	-0.00141935		3733.8	-0.00309014		4263.8	-0.01474536
553.99	0.31929856		1083.99	0.05548008		1613.98	0.07270485		2143.99	-0.02239313		2673.98	0.00127722		3204.01	-0.00146843		3734	-0.00251734		4264	-0.01509733
554.19	0.31920571		1084.19	0.05559901		1614.18	0.07182918		2144.19	-0.02222451		2674.18	0.00156706		3204.21	-0.00126141		3734.2	-0.00190851		4264.2	-0.01447295
554.39	0.32053706		1084.39	0.05562174		1614.38	0.0721393		2144.39	-0.02266253		2674.38	0.00108896		3204.41	-0.00154199		3734.4	-0.00144192		4264.4	-0.01569576
554.59	0.32062391		1084.59	0.0564875		1614.58	0.07248014		2144.59	-0.02273425		2674.58	0.00107511		3204.61	-0.00161197		3734.6	-0.00208271		4264.6	-0.01605824
554.79	0.32145321		1084.79	0.05698378		1614.78	0.07266708		2144.79	-0.02289347		2674.78	0.00074696		3204.81	-0.00156118		3734.8	-0.00238753		4264.8	-0.01557783
554.99	0.32175792		1084.99	0.05692321		1614.98	0.07279069		2144.99	-0.0220685		2674.98	0.00050055		3205.01	-0.00151312		3735	-0.0035507		4265	-0.0151278
555.19	0.32192061		1085.19	0.05789592		1615.18	0.07328548		2145.19	-0.02113623		2675.18	0.00037255		3205.21	-0.00165193		3735.2	-0.00426716		4265.2	-0.01438972
555.39	0.3211299		1085.39	0.05888628		1615.38	0.0732709		2145.39	-0.02084742		2675.38	0.00095901		3205.41	-0.001379		3735.4	-0.00382962		4265.4	-0.01457868
555.59	0.32061485		1085.59	0.05948987		1615.58	0.07451915		2145.59	-0.02032143		2675.58	0.00091081		3205.61	0.0000319		3735.6	-0.00420272		4265.6	-0.01426973
555.79	0.32003572		1085.79	0.05847308		1615.78	0.07485511		2145.79	-0.01930323		2675.78	0.00010942		3205.81	-0.00004775		3735.8	-0.00440856		4265.8	-0.01467747
555.99	0.31996525		1085.99	0.05899971		1615.98	0.07513964		2145.99	-0.02017694		2675.98	0.00006102		3206.01	-0.00018084		3736	-0.00451578		4266	-0.01472609
556.19	0.31947713		1086.19	0.05985433		1616.18	0.07495487		2146.19	-0.02011384		2676.18	0.0002087		3206.21	-0.00079226		3736.2	-0.00530963		4266.2	-0.0149638
556.39	0.31996302		1086.39	0.05912202		1616.38	0.07400881		2146.39	-0.02050381		2676.38	0.00046925		3206.41	-0.00146257		3736.4	-0.00603614		4266.4	-0.0151922
556.59	0.31982025		1086.59	0.05906285		1616.58	0.07331875		2146.59	-0.02063948		2676.58	0.00110602		3206.61	-0.00193412		3736.6	-0.0056325		4266.6	-0.01469812
556.79	0.32016342		1086.79	0.0583454		1616.78	0.07288536		2146.79	-0.02005398		2676.78	0.00111815		3206.81	-0.0012526		3736.8	-0.00570863		4266.8	-0.0137921
556.99	0.32025867		1086.99	0.05817319		1616.98	0.07234666		2146.99	-0.020577		2676.98	0.00121428		3207.01	-0.00225933		3737	-0.00507877		4267	-0.01324831
557.19	0.32024529		1087.19	0.05702636		1617.18	0.07185359		2147.19	-0.02105157		2677.18	0.00203106		3207.21	-0.00213083		3737.2	-0.00447143		4267.2	-0.0135986
557.39	0.32012583		1087.39	0.05611921		1617.38	0.07115904		2147.39	-0.02178446		2677.38	0.00305898		3207.41	-0.00210146		3737.4	-0.00432533		4267.4	-0.01329453
557.59	0.32054436		1087.59	0.05568395		1617.58	0.0708414		2147.59	-0.02211579		2677.58	0.00394055		3207.61	-0.00181246		3737.6	-0.00360098		4267.6	-0.01317505
557.79	0.31924072		1087.79	0.05511986		1617.78	0.07069984		2147.79	-0.02204377		2677.78	0.00501847		3207.81	-0.00129707		3737.8	-0.00323219		4267.8	-0.01343564
557.99	0.31917148		1087.99	0.05421483		1617.98	0.07086798		2147.99	-0.02214818		2677.98	0.00527121		3208.01	-0.0014543		3738	-0.00283735		4268	-0.01379252
558.19	0.31904268		1088.19	0.05400189		1618.18	0.07027272		2148.19	-0.02181948		2678.18	0.00565637		3208.21	-0.00164364		3738.2	-0.00283893		4268.2	-0.0138856
558.39	0.31904256		1088.39	0.05347806		1618.38	0.07120895		2148.39	-0.02177303		2678.38	0.00502643		3208.41	-0.00173516		3738.4	-0.00338709		4268.4	-0.01454869
558.59	0.31847358		1088.59	0.053747		1618.58	0.07135392		2148.59	-0.02160649		2678.58	0.00481796		3208.61	-0.00107726		3738.6	-0.00377991		4268.6	-0.01423585
558.79	0.31838258		1088.79	0.0533797		1618.78	0.07159306		2148.79	-0.02115056		2678.78	0.0042841		3208.81	-0.00098216		3738.8	-0.00417597		4268.8	-0.01393027
558.99	0.31795272		1088.99	0.05330163		1618.98	0.0720929		2148.99	-0.02042841		2678.98	0.00405424		3209.01	-0.00028004		3739	-0.00477017		4269	-0.01387624
559.19	0.31771737		1089.19	0.05365001		1619.18	0.07274493		2149.19	-0.02055136		2679.18	0.0033304		3209.21	0.00053328		3739.2	-0.00531373		4269.2	-0.01353844
559.39	0.31728157		1089.39	0.05353944		1619.38	0.07342961		2149.39	-0.02064734		2679.38	0.00335719		3209.41	0.00138672		3739.4	-0.00498738		4269.4	-0.01368704
559.59	0.31732995		1089.59	0.05308783		1619.58	0.07463002		2149.59	-0.02058703		2679.58	0.00218972		3209.61	0.00225118		3739.6	-0.00555116		4269.6	-0.01337427
559.79	0.31791357		1089.79	0.05286888		1619.78	0.07486062		2149.79	-0.02085539		2679.78	0.00110495		3209.81	0.00189756		3739.8	-0.00598827		4269.8	-0.01399168
