# Supplementary material for: Functional development of a V3/glycan-specific broadly neutralizing antibody isolated from a case of HIV superinfection
Source: eLife journal article supplement (doi:10.7554/elife.68110), 2021-07-15
Supplement: fig2-data2 [file D1.xls]

Vers 3.43 Data Simulation
Conc1	6.25E-08	6.25E-08	6.25E-08	6.25E-08	6.25E-08
Start1	200	729.99	1260	1790	2320
Stop1	559.8	1089.79	1619.8	2149.8	2679.8
Time1	Data1	Sim1	Time2	Data2	Sim2	Time3	Data3	Sim3	Time4	Data4	Sim4	Time5	Data5	Sim5
200	0.01238014		729.99	0.0019983		1260	0.00089454		1790	-0.0071839		2320	-0.00743265
200.2	0.0125316		730.19	0.001792		1260.2	0.00176254		1790.2	-0.00723491		2320.2	-0.00683686
200.4	0.01274164		730.39	0.00197796		1260.4	0.00208865		1790.4	-0.00741806		2320.4	-0.00622239
200.6	0.01310261		730.59	0.00189452		1260.6	0.0027094		1790.6	-0.00755582		2320.6	-0.00519763
200.8	0.01366918		730.79	0.00225491		1260.8	0.00305796		1790.8	-0.00830213		2320.8	-0.00413382
201	0.0142693		730.99	0.0020154		1261	0.00283508		1791	-0.00885721		2321	-0.00324712
201.2	0.01508486		731.19	0.00203338		1261.2	0.00266518		1791.2	-0.00860166		2321.2	-0.00319465
201.4	0.01550426		731.39	0.00226782		1261.4	0.00311989		1791.4	-0.00903731		2321.4	-0.0027099
201.6	0.0157445		731.59	0.00233143		1261.6	0.00293045		1791.6	-0.00869815		2321.6	-0.00204898
201.8	0.01586248		731.79	0.00253227		1261.8	0.00278061		1791.8	-0.00887952		2321.8	-0.00195733
202	0.01552345		731.99	0.00270763		1262	0.00291034		1792	-0.009005		2322	-0.00187042
202.2	0.01580594		732.19	0.00245715		1262.2	0.00261181		1792.2	-0.00895524		2322.2	-0.00228279
202.4	0.01565057		732.39	0.0019673		1262.4	0.00255075		1792.4	-0.00957555		2322.4	-0.00262872
202.6	0.01617553		732.59	0.00160736		1262.6	0.00205866		1792.6	-0.00933807		2322.6	-0.00293637
202.8	0.01613306		732.79	0.00181256		1262.8	0.00107509		1792.8	-0.00935415		2322.8	-0.00423994
203	0.01633206		732.99	0.00160111		1263	-0.00007283		1793	-0.01015203		2323	-0.00353598
203.2	0.01662743		733.19	0.00112056		1263.2	-0.00020649		1793.2	-0.00998637		2323.2	-0.00391052
203.4	0.01653887		733.39	0.00093791		1263.4	-0.00000642		1793.4	-0.00862562		2323.4	-0.00498657
203.6	0.01714279		733.59	-0.00027217		1263.6	-0.00035753		1793.6	-0.00857178		2323.6	-0.00504178
203.8	0.01776671		733.79	-0.00027399		1263.8	-0.00038728		1793.8	-0.00821665		2323.8	-0.00616841
204	0.01787465		733.99	-0.00064191		1264	0.00020138		1794	-0.00783817		2324	-0.00656539
204.2	0.0174306		734.19	-0.00026085		1264.2	0.00107008		1794.2	-0.00752573		2324.2	-0.00625803
204.4	0.01804481		734.39	-0.00028887		1264.4	0.00113233		1794.4	-0.00756917		2324.4	-0.00565914
204.6	0.01812734		734.59	-0.00020197		1264.6	0.00202258		1794.6	-0.0067686		2324.6	-0.00483905
204.8	0.01862234		734.79	-0.0002353		1264.8	0.00261895		1794.8	-0.00712109		2324.8	-0.00439725
205	0.01851447		734.99	-0.0005118		1265	0.00219582		1795	-0.00639122		2325	-0.00367859
205.2	0.01829861		735.19	-0.00068414		1265.2	0.00279114		1795.2	-0.00587634		2325.2	-0.00334804
205.4	0.01789198		735.39	-0.0002659		1265.4	0.00342297		1795.4	-0.00556454		2325.4	-0.0025098
205.6	0.01793007		735.59	-0.00008853		1265.6	0.00299202		1795.6	-0.00492125		2325.6	-0.00159192
205.8	0.01806522		735.79	0.00061259		1265.8	0.00245788		1795.8	-0.00503038		2325.8	-0.00082978
206	0.0179675		735.99	0.00099469		1266	0.00215367		1796	-0.00472738		2326	-0.00047208
206.2	0.0180303		736.19	0.00120705		1266.2	0.00101584		1796.2	-0.00467447		2326.2	-0.00035286
206.4	0.01813418		736.39	0.00191149		1266.4	0.00029494		1796.4	-0.00451992		2326.4	-0.00143928
206.6	0.01884248		736.59	0.00204866		1266.6	-0.00016399		1796.6	-0.00478185		2326.6	-0.00239074
206.8	0.01886332		736.79	0.00290649		1266.8	-0.00102087		1796.8	-0.00578291		2326.8	-0.00258992
207	0.01916449		736.99	0.00310961		1267	-0.00149146		1797	-0.00680035		2327	-0.00249484
207.2	0.01917946		737.19	0.0039825		1267.2	-0.00133925		1797.2	-0.00661336		2327.2	-0.00379357
207.4	0.01892012		737.39	0.00401631		1267.4	-0.00181453		1797.4	-0.00698916		2327.4	-0.00486142
207.6	0.0193053		737.59	0.00406889		1267.6	-0.00238625		1797.6	-0.00715816		2327.6	-0.00565286
207.8	0.01888407		737.79	0.00554579		1267.8	-0.00233189		1797.8	-0.00666817		2327.8	-0.00641193
208	0.01893902		737.99	0.00535394		1268	-0.00218097		1798	-0.00632898		2328	-0.00667026
208.2	0.01936667		738.19	0.00510732		1268.2	-0.00221676		1798.2	-0.00620478		2328.2	-0.00682327
208.4	0.01900471		738.39	0.00448405		1268.4	-0.00180496		1798.4	-0.00644369		2328.4	-0.00747419
208.6	0.01934205		738.59	0.00508867		1268.6	-0.00086894		1798.6	-0.00627001		2328.6	-0.0077773
208.8	0.0195439		738.79	0.00560242		1268.8	-0.00061209		1798.8	-0.00709161		2328.8	-0.00785005
209	0.01977186		738.99	0.0059995		1269	-0.00042974		1799	-0.00677779		2329	-0.00745892
209.2	0.01942602		739.19	0.00532229		1269.2	-0.00023155		1799.2	-0.00662009		2329.2	-0.00741523
209.4	0.01962737		739.39	0.00513757		1269.4	-0.00060705		1799.4	-0.0056267		2329.4	-0.00652501
209.6	0.02012745		739.59	0.00509522		1269.6	-0.00086506		1799.6	-0.00524248		2329.6	-0.00515051
209.8	0.01988383		739.79	0.0056229		1269.8	-0.00062028		1799.8	-0.00473522		2329.8	-0.0040949
210	0.0198429		739.99	0.00481695		1270	0.00002813		1800	-0.00455646		2330	-0.00419206
210.2	0.02034574		740.19	0.00462439		1270.2	-0.00018955		1800.2	-0.00394758		2330.2	-0.00295558
210.4	0.02205117		740.39	0.00434751		1270.4	0.00019554		1800.4	-0.00398736		2330.4	-0.00257204
210.6	0.02190738		740.59	0.00416402		1270.6	0.00089636		1800.6	-0.00473355		2330.6	-0.00198786
210.8	0.02186864		740.79	0.00406624		1270.8	0.00061796		1800.8	-0.00492586		2330.8	-0.00136482
211	0.02236674		740.99	0.0041338		1271	0.00055254		1801	-0.00476797		2331	-0.00071309
211.2	0.02248911		741.19	0.00453621		1271.2	0.0010139		1801.2	-0.00405936		2331.2	-0.00057204
211.4	0.02311672		741.39	0.00411789		1271.4	0.00137068		1801.4	-0.00325919		2331.4	-0.00075454
211.6	0.02310314		741.59	0.00395157		1271.6	0.00076573		1801.6	-0.00196256		2331.6	-0.00115096
211.8	0.02354552		741.79	0.00319967		1271.8	0.00047937		1801.8	-0.00222719		2331.8	-0.00087605
212	0.02442703		741.99	0.00268617		1272	0.00107237		1802	-0.00230429		2332	-0.00036063
212.2	0.02484567		742.19	0.00305585		1272.2	0.0013417		1802.2	-0.0026267		2332.2	-0.00094014
212.4	0.02497436		742.39	0.00308927		1272.4	0.00200571		1802.4	-0.00323736		2332.4	-0.00204907
212.6	0.02632015		742.59	0.00365897		1272.6	0.00243554		1802.6	-0.0039575		2332.6	-0.00284875
212.8	0.02635143		742.79	0.00394508		1272.8	0.00154293		1802.8	-0.00500751		2332.8	-0.00340203
213	0.02673048		742.99	0.00294809		1273	0.00102917		1803	-0.00475614		2333	-0.0035765
213.2	0.02555019		743.19	0.00198488		1273.2	-0.00026083		1803.2	-0.00464703		2333.2	-0.00351373
213.4	0.02533622		743.39	0.00217663		1273.4	-0.00066675		1803.4	-0.0045551		2333.4	-0.00319752
213.6	0.0246421		743.59	0.00265183		1273.6	-0.00045185		1803.6	-0.00497269		2333.6	-0.00395101
213.8	0.02397211		743.79	0.00294645		1273.8	-0.00036832		1803.8	-0.00501652		2333.8	-0.00384229
214	0.02399743		743.99	0.00269834		1274	-0.00032766		1804	-0.00570388		2334	-0.00421924
214.2	0.02396263		744.19	0.00317396		1274.2	-0.00033548		1804.2	-0.00585695		2334.2	-0.00380714
214.4	0.02360172		744.39	0.00324631		1274.4	-0.00009128		1804.4	-0.00565472		2334.4	-0.00409586
214.6	0.02187487		744.59	0.00364584		1274.6	-0.00046763		1804.6	-0.00520457		2334.6	-0.00450915
214.8	0.02194612		744.79	0.00409916		1274.8	-0.00005684		1804.8	-0.0058944		2334.8	-0.00524955
215	0.02183169		744.99	0.00425541		1275	0.00022182		1805	-0.00523429		2335	-0.00528028
215.2	0.02188792		745.19	0.00400448		1275.2	0.00048599		1805.2	-0.00392018		2335.2	-0.00530114
215.4	0.02244137		745.39	0.00332832		1275.4	-0.00025935		1805.4	-0.00371941		2335.4	-0.00577224
215.6	0.02300331		745.59	0.00309621		1275.6	-0.00136705		1805.6	-0.00336098		2335.6	-0.00515209
215.8	0.02397356		745.79	0.0025075		1275.8	-0.00106209		1805.8	-0.00440568		2335.8	-0.00533976
216	0.02416357		745.99	0.00291237		1276	-0.0011223		1806	-0.00457836		2336	-0.00543392
216.2	0.02503431		746.19	0.00215929		1276.2	-0.00131483		1806.2	-0.00468919		2336.2	-0.00578139
216.4	0.02552528		746.39	0.00151696		1276.4	-0.00217729		1806.4	-0.00516791		2336.4	-0.00637139
216.6	0.02572454		746.59	0.00098575		1276.6	-0.00272825		1806.6	-0.00569893		2336.6	-0.00732034
216.8	0.02677015		746.79	0.00158704		1276.8	-0.00417575		1806.8	-0.00630607		2336.8	-0.00717041
217	0.02679911		746.99	0.00127542		1277	-0.00493342		1807	-0.00540009		2337	-0.00691596
217.2	0.02642509		747.19	0.00212142		1277.2	-0.00495516		1807.2	-0.00577015		2337.2	-0.00670167
217.4	0.02556283		747.39	0.00295458		1277.4	-0.00493268		1807.4	-0.0058776		2337.4	-0.0067608
217.6	0.02507801		747.59	0.00352988		1277.6	-0.00461926		1807.6	-0.00558708		2337.6	-0.00703849
217.8	0.02521453		747.79	0.00355383		1277.8	-0.00413561		1807.8	-0.00591239		2337.8	-0.00574192
218	0.02499207		747.99	0.00440376		1278	-0.00281224		1808	-0.00591573		2338	-0.00583777
218.2	0.02516061		748.19	0.00471907		1278.2	-0.00130037		1808.2	-0.0046582		2338.2	-0.00589399
218.4	0.02486005		748.39	0.00466426		1278.4	-0.00063984		1808.4	-0.00368263		2338.4	-0.00528065
218.6	0.02565483		748.59	0.00493057		1278.6	0.00044756		1808.6	-0.00335655		2338.6	-0.00447504
218.8	0.02612407		748.79	0.00518261		1278.8	0.00179469		1808.8	-0.00322994		2338.8	-0.00449647
219	0.0263911		748.99	0.00419986		1279	0.00149196		1809	-0.00245565		2339	-0.00436416
219.2	0.02707964		749.19	0.00335385		1279.2	0.00169873		1809.2	-0.00241817		2339.2	-0.0037679
219.4	0.02784871		749.39	0.00293392		1279.4	0.00143262		1809.4	-0.00295231		2339.4	-0.00412598
219.6	0.02848587		749.59	0.00280781		1279.6	0.00208083		1809.6	-0.00318921		2339.6	-0.00373404
219.8	0.0286189		749.79	0.00226824		1279.8	0.00234284		1809.8	-0.00356524		2339.8	-0.00414897
220	0.02853827		749.99	0.00227294		1280	0.00196533		1810	-0.00285153		2340	-0.0037223
220.2	0.02949444		750.19	0.00142171		1280.2	0.0022204		1810.2	-0.00296319		2340.2	-0.00376811
220.4	0.02949112		750.39	0.0012091		1280.4	0.00190127		1810.4	-0.00375827		2340.4	-0.0045249
220.6	0.02949432		750.59	0.00121243		1280.6	0.00196194		1810.6	-0.00473349		2340.6	-0.00498211
220.8	0.0297098		750.79	0.00213984		1280.8	0.00106381		1810.8	-0.00546188		2340.8	-0.00450412
221	0.029239		750.99	0.0016805		1281	0.00107204		1811	-0.00635463		2341	-0.00348992
221.2	0.02916879		751.19	0.00190552		1281.2	0.00127431		1811.2	-0.00686687		2341.2	-0.00317567
221.4	0.02812041		751.39	0.00210163		1281.4	0.0008176		1811.4	-0.00691557		2341.4	-0.00325215
221.6	0.02802537		751.59	0.00256223		1281.6	0.00137506		1811.6	-0.00762922		2341.6	-0.00338397
221.8	0.02852618		751.79	0.00240247		1281.8	0.00183131		1811.8	-0.00771713		2341.8	-0.0030046
222	0.02787161		751.99	0.00253035		1282	0.0024916		1812	-0.00705158		2342	-0.00346194
222.2	0.02808695		752.19	0.00195466		1282.2	0.00215876		1812.2	-0.00654305		2342.2	-0.00386948
222.4	0.02813612		752.39	0.00146247		1282.4	0.00183209		1812.4	-0.00619979		2342.4	-0.00370261
222.6	0.02814269		752.59	0.00181463		1282.6	0.00206589		1812.6	-0.00585391		2342.6	-0.00425582
222.8	0.02700352		752.79	0.00156114		1282.8	0.00160657		1812.8	-0.00553595		2342.8	-0.00454775
223	0.02687601		752.99	0.00151558		1283	0.00113499		1813	-0.00600236		2343	-0.00452562
223.2	0.02621001		753.19	0.0016518		1283.2	0.0006778		1813.2	-0.00609807		2343.2	-0.00411835
223.4	0.02582127		753.39	0.00194239		1283.4	0.00049132		1813.4	-0.00538352		2343.4	-0.0043528
223.6	0.02564463		753.59	0.00174398		1283.6	0.00050549		1813.6	-0.00442497		2343.6	-0.0043624
223.8	0.02607046		753.79	0.00172669		1283.8	0.00024062		1813.8	-0.00439168		2343.8	-0.00428105
224	0.02604288		753.99	0.00114391		1284	0.00011355		1814	-0.00416766		2344	-0.00417756
224.2	0.0259973		754.19	0.0009284		1284.2	0.00067118		1814.2	-0.00487828		2344.2	-0.00449866
224.4	0.02622194		754.39	0.00085603		1284.4	0.00016121		1814.4	-0.00576334		2344.4	-0.0053202
224.6	0.02716377		754.59	0.00081561		1284.6	0.00035935		1814.6	-0.0065949		2344.6	-0.00500718
224.8	0.02796828		754.79	0.00149514		1284.8	0.00072857		1814.8	-0.00689691		2344.8	-0.0044834
225	0.02897961		754.99	0.00150688		1285	0.00061316		1815	-0.007406		2345	-0.00350883
225.2	0.02874734		755.19	0.00209755		1285.2	0.00058144		1815.2	-0.00679168		2345.2	-0.0041579
225.4	0.02853819		755.39	0.00275206		1285.4	0.00110373		1815.4	-0.00753602		2345.4	-0.0042306
225.6	0.02904077		755.59	0.00265961		1285.6	0.00180937		1815.6	-0.00817217		2345.6	-0.00481916
225.8	0.03035774		755.79	0.00231523		1285.8	0.00189626		1815.8	-0.00759523		2345.8	-0.00507492
226	0.02960988		755.99	0.0014129		1286	0.00143472		1816	-0.0083669		2346	-0.00501287
226.2	0.02953157		756.19	0.00111014		1286.2	0.00002669		1816.2	-0.00768657		2346.2	-0.00551799
226.4	0.02953923		756.39	0.0018756		1286.4	-0.00002664		1816.4	-0.00772572		2346.4	-0.00540678
226.6	0.02935451		756.59	0.0022186		1286.6	-0.00040418		1816.6	-0.00811077		2346.6	-0.00460153
226.8	0.02951859		756.79	0.00247088		1286.8	-0.0010579		1816.8	-0.00745667		2346.8	-0.00411978
227	0.02939384		756.99	0.00361954		1287	-0.00176714		1817	-0.00752905		2347	-0.00368172
227.2	0.02946135		757.19	0.00335525		1287.2	-0.00185046		1817.2	-0.00699355		2347.2	-0.00405192
227.4	0.02971307		757.39	0.00298969		1287.4	-0.00152998		1817.4	-0.00612053		2347.4	-0.00427955
227.6	0.02998654		757.59	0.00312731		1287.6	-0.00167459		1817.6	-0.00554066		2347.6	-0.00443757
227.8	0.03032298		757.79	0.00361858		1287.8	-0.00220857		1817.8	-0.00557849		2347.8	-0.00449085
228	0.03062847		757.99	0.00372068		1288	-0.00186901		1818	-0.00400283		2348	-0.00534074
228.2	0.03098917		758.19	0.00444072		1288.2	-0.00140815		1818.2	-0.00382303		2348.2	-0.00638184
228.4	0.03171099		758.39	0.00382016		1288.4	-0.00127863		1818.4	-0.00416569		2348.4	-0.0070371
228.6	0.03256947		758.59	0.00331247		1288.6	-0.00097826		1818.6	-0.00398304		2348.6	-0.00766056
228.8	0.0326116		758.79	0.00382484		1288.8	-0.00163044		1818.8	-0.00335839		2348.8	-0.00827462
229	0.03229546		758.99	0.00323087		1289	-0.00225321		1819	-0.00339635		2349	-0.00819591
229.2	0.03134765		759.19	0.0033682		1289.2	-0.00214774		1819.2	-0.00374007		2349.2	-0.00885406
229.4	0.0315391		759.39	0.00341215		1289.4	-0.00146021		1819.4	-0.0043703		2349.4	-0.00860069
229.6	0.03169398		759.59	0.00295492		1289.6	-0.00105283		1819.6	-0.00494251		2349.6	-0.00896445
229.8	0.03116242		759.79	0.00228103		1289.8	-0.00078843		1819.8	-0.00530807		2349.8	-0.00890243
230	0.02995242		759.99	0.00166186		1290	-0.00092722		1820	-0.00586453		2350	-0.00873427
230.2	0.02942394		760.19	0.00168391		1290.2	-0.00110038		1820.2	-0.0051509		2350.2	-0.00804513
230.4	0.02991789		760.39	0.00277557		1290.4	-0.00089218		1820.4	-0.00574793		2350.4	-0.00698569
230.6	0.0305292		760.59	0.00285967		1290.6	-0.00065903		1820.6	-0.0052451		2350.6	-0.00648565
230.8	0.03064488		760.79	0.0035321		1290.8	-0.00031757		1820.8	-0.00444693		2350.8	-0.00716117
231	0.03065944		760.99	0.00472782		1291	0.00076061		1821	-0.00451982		2351	-0.00639117
231.2	0.03191829		761.19	0.00469467		1291.2	0.00085865		1821.2	-0.00471828		2351.2	-0.00695131
231.4	0.03287136		761.39	0.00569825		1291.4	0.00012953		1821.4	-0.00408045		2351.4	-0.00624607
231.6	0.03322826		761.59	0.00620918		1291.6	-0.00016952		1821.6	-0.00300448		2351.6	-0.00673147
231.8	0.03340653		761.79	0.00717684		1291.8	0.00020672		1821.8	-0.00265326		2351.8	-0.00674331
232	0.034414		761.99	0.00712492		1292	0.00081514		1822	-0.00212866		2352	-0.00693449
232.2	0.03482873		762.19	0.0070089		1292.2	0.00063135		1822.2	-0.00278616		2352.2	-0.00751636
232.4	0.03469176		762.39	0.00659842		1292.4	0.00020077		1822.4	-0.00384435		2352.4	-0.00752146
232.6	0.03565751		762.59	0.00595345		1292.6	0.00003497		1822.6	-0.00438565		2352.6	-0.00857701
232.8	0.0358617		762.79	0.00611591		1292.8	0.00048426		1822.8	-0.00490465		2352.8	-0.00837804
233	0.0353084		762.99	0.00484089		1293	0.00130974		1823	-0.00580706		2353	-0.00735319
233.2	0.03488816		763.19	0.00522916		1293.2	0.0015128		1823.2	-0.00607341		2353.2	-0.00747681
233.4	0.03452504		763.39	0.00520054		1293.4	0.00215049		1823.4	-0.0057735		2353.4	-0.00779349
233.6	0.03404619		763.59	0.00427115		1293.6	0.00250938		1823.6	-0.00572011		2353.6	-0.00784538
233.8	0.03274246		763.79	0.00295965		1293.8	0.00307364		1823.8	-0.00572895		2353.8	-0.00826471
234	0.03286928		763.99	0.00258262		1294	0.0035812		1824	-0.00516383		2354	-0.00765457
234.2	0.03234811		764.19	0.00227158		1294.2	0.00375873		1824.2	-0.00466043		2354.2	-0.00753946
234.4	0.03313909		764.39	0.00228426		1294.4	0.002908		1824.4	-0.00477871		2354.4	-0.00785545
234.6	0.03316222		764.59	0.00214705		1294.6	0.00266184		1824.6	-0.00414299		2354.6	-0.0085635
234.8	0.03339628		764.79	0.00256297		1294.8	0.00245988		1824.8	-0.00378064		2354.8	-0.00873516
235	0.03397083		764.99	0.00231535		1295	0.00221356		1825	-0.00318563		2355	-0.00919014
235.2	0.03471412		765.19	0.00188559		1295.2	0.00113434		1825.2	-0.00260715		2355.2	-0.00979026
235.4	0.03521508		765.39	0.00183894		1295.4	0.00096649		1825.4	-0.00196947		2355.4	-0.00932079
235.6	0.03487992		765.59	0.00125332		1295.6	0.00103871		1825.6	-0.00198892		2355.6	-0.00978192
235.8	0.03490347		765.79	0.00172737		1295.8	0.0016788		1825.8	-0.00169218		2355.8	-0.0091563
236	0.03550552		765.99	0.0010618		1296	0.0010629		1826	-0.00136815		2356	-0.00852386
236.2	0.03590042		766.19	0.00106483		1296.2	0.00141747		1826.2	-0.00143641		2356.2	-0.00883572
236.4	0.0355948		766.39	0.00114707		1296.4	0.00163134		1826.4	-0.00206997		2356.4	-0.00862377
236.6	0.03605597		766.59	0.00124994		1296.6	0.00217714		1826.6	-0.00221149		2356.6	-0.00878664
236.8	0.03509677		766.79	0.00162757		1296.8	0.00263093		1826.8	-0.00132145		2356.8	-0.00772575
237	0.03451943		766.99	0.00194406		1297	0.0022014		1827	-0.00102037		2357	-0.00738927
237.2	0.03371374		767.19	0.00370807		1297.2	0.0014469		1827.2	-0.00047024		2357.2	-0.00835733
237.4	0.0333435		767.39	0.0041968		1297.4	0.00217004		1827.4	-0.00029413		2357.4	-0.00868386
237.6	0.03326596		767.59	0.0039677		1297.6	0.0026285		1827.6	-0.00078434		2357.6	-0.00890568
237.8	0.0328696		767.79	0.0040212		1297.8	0.0036082		1827.8	-0.00156793		2357.8	-0.00885975
238	0.03339174		767.99	0.00344553		1298	0.00384928		1828	-0.00133507		2358	-0.00849411
238.2	0.03317317		768.19	0.00339499		1298.2	0.00372216		1828.2	-0.00156757		2358.2	-0.00899582
238.4	0.03366168		768.39	0.00337747		1298.4	0.00241328		1828.4	-0.00188362		2358.4	-0.00887643
238.6	0.03342236		768.59	0.00382579		1298.6	0.00255424		1828.6	-0.00189033		2358.6	-0.00911723
238.8	0.0348782		768.79	0.00333707		1298.8	0.00277999		1828.8	-0.00152029		2358.8	-0.00888518
239	0.03519152		768.99	0.00219736		1299	0.00251139		1829	-0.00166309		2359	-0.00919253
239.2	0.0351794		769.19	0.0024442		1299.2	0.00226605		1829.2	-0.00189358		2359.2	-0.00829916
239.4	0.03571036		769.39	0.0019142		1299.4	0.0019603		1829.4	-0.00220909		2359.4	-0.00761146
239.6	0.03591317		769.59	0.00219876		1299.6	0.00140344		1829.6	-0.00168046		2359.6	-0.00765412
239.8	0.03557553		769.79	0.00166808		1299.8	0.00121334		1829.8	-0.00158272		2359.8	-0.0065378
240	0.0361848		769.99	0.00103632		1300	0.00064183		1830	-0.00250374		2360	-0.0054193
240.2	0.03584113		770.19	0.00119175		1300.2	0.00061835		1830.2	-0.00240304		2360.2	-0.00534355
240.4	0.03499553		770.39	0.0021887		1300.4	0.00018235		1830.4	-0.00292179		2360.4	-0.00521335
240.6	0.0352398		770.59	0.00231943		1300.6	-0.00024681		1830.6	-0.00335795		2360.6	-0.00479488
240.8	0.03387778		770.79	0.00226522		1300.8	-0.00030494		1830.8	-0.00334913		2360.8	-0.00410461
241	0.0336226		770.99	0.00293096		1301	-0.001304		1831	-0.00426234		2361	-0.00440239
241.2	0.03337257		771.19	0.00347823		1301.2	-0.00071291		1831.2	-0.00462772		2361.2	-0.0049414
241.4	0.03370166		771.39	0.00365854		1301.4	0.00000534		1831.4	-0.00488767		2361.4	-0.00484261
241.6	0.03393623		771.59	0.00343045		1301.6	-0.00003858		1831.6	-0.00538106		2361.6	-0.00507252
241.8	0.03296401		771.79	0.00373916		1301.8	0.00057625		1831.8	-0.00556352		2361.8	-0.00482873
242	0.03302267		771.99	0.00245248		1302	0.00089626		1832	-0.00519853		2362	-0.00522753
242.2	0.03325049		772.19	0.00317289		1302.2	0.00114753		1832.2	-0.00458522		2362.2	-0.00555476
242.4	0.03400852		772.39	0.00332305		1302.4	0.00104838		1832.4	-0.00415497		2362.4	-0.00600982
242.6	0.03434351		772.59	0.00345205		1302.6	0.00154324		1832.6	-0.00397772		2362.6	-0.00578303
242.8	0.03473017		772.79	0.0032512		1302.8	0.0019319		1832.8	-0.00337421		2362.8	-0.00641952
243	0.03452528		772.99	0.00347383		1303	0.00214429		1833	-0.00302552		2363	-0.00734878
243.2	0.03501679		773.19	0.00392159		1303.2	0.00286159		1833.2	-0.00205359		2363.2	-0.00747952
243.4	0.03527646		773.39	0.0048375		1303.4	0.00297035		1833.4	-0.00151642		2363.4	-0.00834234
243.6	0.03577124		773.59	0.00579428		1303.6	0.00311645		1833.6	-0.0009739		2363.6	-0.00850192
243.8	0.03603635		773.79	0.00545941		1303.8	0.00344218		1833.8	-0.00122409		2363.8	-0.00831365
244	0.03648213		773.99	0.00644403		1304	0.00373787		1834	-0.00163208		2364	-0.00860913
244.2	0.0367941		774.19	0.00751721		1304.2	0.00392642		1834.2	-0.00047926		2364.2	-0.00964879
244.4	0.03691019		774.39	0.00782317		1304.4	0.00438537		1834.4	-0.00160694		2364.4	-0.01010191
244.6	0.03663378		774.59	0.00740847		1304.6	0.00406668		1834.6	-0.00253316		2364.6	-0.00976484
244.8	0.03604576		774.79	0.00745397		1304.8	0.00409529		1834.8	-0.00203862		2364.8	-0.00914532
245	0.03725283		774.99	0.00750309		1305	0.00434808		1835	-0.00209972		2365	-0.0094322
245.2	0.03816054		775.19	0.00726464		1305.2	0.0052243		1835.2	-0.00263769		2365.2	-0.00950353
245.4	0.03829761		775.39	0.00821496		1305.4	0.00504952		1835.4	-0.00263132		2365.4	-0.00933242
245.6	0.03812481		775.59	0.00803925		1305.6	0.00462221		1835.6	-0.00297144		2365.6	-0.00889506
245.8	0.03775812		775.79	0.00764668		1305.8	0.00468075		1835.8	-0.00241395		2365.8	-0.00921865
246	0.0378826		775.99	0.00696121		1306	0.00471495		1836	-0.00193945		2366	-0.00936199
246.2	0.03860402		776.19	0.00698371		1306.2	0.00388883		1836.2	-0.00133849		2366.2	-0.00894465
246.4	0.03785922		776.39	0.0066105		1306.4	0.00311054		1836.4	-0.00113049		2366.4	-0.00870754
246.6	0.03686354		776.59	0.00561894		1306.6	0.0027068		1836.6	-0.00133363		2366.6	-0.00834231
246.8	0.03673257		776.79	0.00480434		1306.8	0.00304739		1836.8	-0.00054178		2366.8	-0.00915416
247	0.03752193		776.99	0.00407406		1307	0.00304097		1837	-0.00030812		2367	-0.00871646
247.2	0.03695401		777.19	0.00381024		1307.2	0.00189174		1837.2	-0.00060953		2367.2	-0.00827787
247.4	0.03706474		777.39	0.00420786		1307.4	0.0004628		1837.4	-0.00024121		2367.4	-0.00831707
247.6	0.03720408		777.59	0.0033813		1307.6	0.00022892		1837.6	-0.00027509		2367.6	-0.00819887
247.8	0.03724639		777.79	0.00285653		1307.8	-0.00021088		1837.8	0.00011381		2367.8	-0.00842614
248	0.03671145		777.99	0.00261238		1308	-0.00088821		1838	0.00020495		2368	-0.00816673
248.2	0.03649251		778.19	0.00264402		1308.2	-0.00097295		1838.2	0.00076891		2368.2	-0.00860238
248.4	0.0362317		778.39	0.00216942		1308.4	-0.00089623		1838.4	0.0000452		2368.4	-0.00808963
248.6	0.03568024		778.59	0.00227365		1308.6	-0.0014366		1838.6	-0.00040621		2368.6	-0.00753236
248.8	0.0365313		778.79	0.00280898		1308.8	-0.00129504		1838.8	-0.00027209		2368.8	-0.00790857
249	0.03687021		778.99	0.00304873		1309	-0.00112391		1839	-0.00131564		2369	-0.00822426
249.2	0.0365112		779.19	0.00432105		1309.2	-0.00177215		1839.2	-0.00225487		2369.2	-0.00775041
249.4	0.0366365		779.39	0.00572617		1309.4	-0.00219439		1839.4	-0.00260184		2369.4	-0.00731851
249.6	0.03705481		779.59	0.0056962		1309.6	-0.00219494		1839.6	-0.00338196		2369.6	-0.007125
249.8	0.03745397		779.79	0.00604252		1309.8	-0.00162542		1839.8	-0.00317197		2369.8	-0.00839189
250	0.03723222		779.99	0.00648769		1310	-0.000981		1840	-0.00394296		2370	-0.00818929
250.2	0.0383232		780.19	0.00567963		1310.2	-0.00117393		1840.2	-0.00421475		2370.2	-0.0074993
250.4	0.03812508		780.39	0.00516612		1310.4	0.00011521		1840.4	-0.00461569		2370.4	-0.00722182
250.6	0.03831367		780.59	0.00455622		1310.6	0.0006802		1840.6	-0.00470516		2370.6	-0.00714999
250.8	0.03832866		780.79	0.00419836		1310.8	0.0011601		1840.8	-0.00499716		2370.8	-0.00658022
251	0.03799167		780.99	0.00371161		1311	0.0008435		1841	-0.00579421		2371	-0.00596829
251.2	0.03737151		781.19	0.00342878		1311.2	0.00063223		1841.2	-0.00606395		2371.2	-0.00581665
251.4	0.03786002		781.39	0.00299229		1311.4	0.00132037		1841.4	-0.00542176		2371.4	-0.0061726
251.6	0.03733831		781.59	0.00238547		1311.6	0.0018983		1841.6	-0.00512372		2371.6	-0.00637077
251.8	0.03722042		781.79	0.00193168		1311.8	0.00158282		1841.8	-0.00389671		2371.8	-0.00640897
252	0.03671322		781.99	0.00202021		1312	0.00132946		1842	-0.00308087		2372	-0.00660437
252.2	0.0370184		782.19	0.00246724		1312.2	0.00198172		1842.2	-0.00283788		2372.2	-0.00743786
252.4	0.03766217		782.39	0.00264427		1312.4	0.00130935		1842.4	-0.00236325		2372.4	-0.0067698
252.6	0.03725072		782.59	0.00266706		1312.6	0.00077659		1842.6	-0.00252838		2372.6	-0.00765249
252.8	0.03718662		782.79	0.00316738		1312.8	0.00020326		1842.8	-0.00172252		2372.8	-0.00809458
253	0.0365769		782.99	0.00338366		1313	0.00022093		1843	-0.0010914		2373	-0.00763789
253.2	0.03718692		783.19	0.0040713		1313.2	0.00034008		1843.2	-0.0015458		2373.2	-0.00706649
253.4	0.03799578		783.39	0.00411412		1313.4	0.00070093		1843.4	-0.00180933		2373.4	-0.00727108
253.6	0.03847111		783.59	0.00421818		1313.6	0.00172076		1843.6	-0.00194374		2373.6	-0.00788144
253.8	0.038749		783.79	0.00414214		1313.8	0.00287645		1843.8	-0.00118391		2373.8	-0.00829932
254	0.03867317		783.99	0.00370668		1314	0.00330271		1844	-0.00117397		2374	-0.00769495
254.2	0.03920203		784.19	0.00308243		1314.2	0.00400489		1844.2	-0.00017428		2374.2	-0.00719734
254.4	0.03919334		784.39	0.00330881		1314.4	0.00473501		1844.4	-0.00044454		2374.4	-0.00784009
254.6	0.0380988		784.59	0.0036285		1314.6	0.00450629		1844.6	-0.00025362		2374.6	-0.00837141
254.8	0.03861779		784.79	0.0028587		1314.8	0.00422026		1844.8	-0.000629		2374.8	-0.00835775
255	0.03855712		784.99	0.00300714		1315	0.00407017		1845	-0.00026666		2375	-0.00876416
255.2	0.03929851		785.19	0.00315803		1315.2	0.00379203		1845.2	-0.00011994		2375.2	-0.0091039
255.4	0.03997767		785.39	0.00334876		1315.4	0.00316936		1845.4	-0.00002448		2375.4	-0.00945914
255.6	0.04036194		785.59	0.00331827		1315.6	0.00262665		1845.6	-0.00006222		2375.6	-0.00892529
255.8	0.04076648		785.79	0.00345008		1315.8	0.00199613		1845.8	-0.00001019		2375.8	-0.00878539
256	0.04065402		785.99	0.00341244		1316	0.00144637		1846	-0.00002133		2376	-0.00883478
256.2	0.0416331		786.19	0.00386809		1316.2	0.0011935		1846.2	0.00008349		2376.2	-0.00847698
256.4	0.04186976		786.39	0.00379652		1316.4	0.00060525		1846.4	0.00024259		2376.4	-0.00780902
256.6	0.04179989		786.59	0.00296691		1316.6	0.00029251		1846.6	0.00015977		2376.6	-0.00868043
256.8	0.04070999		786.79	0.00257773		1316.8	-0.00006992		1846.8	0.00052477		2376.8	-0.00816116
257	0.04011656		786.99	0.00322178		1317	0.00025321		1847	0.0000494		2377	-0.00695418
257.2	0.04060569		787.19	0.00275327		1317.2	-0.00046521		1847.2	-0.00070437		2377.2	-0.00684917
257.4	0.03941699		787.39	0.00211071		1317.4	-0.0000796		1847.4	-0.00034697		2377.4	-0.00692507
257.6	0.03935287		787.59	0.00199685		1317.6	-0.00000486		1847.6	-0.0002701		2377.6	-0.00682075
257.8	0.03901068		787.79	0.00164609		1317.8	0.00029389		1847.8	0.00000597		2377.8	-0.00695092
258	0.0390385		787.99	0.00157294		1318	-0.00024399		1848	-0.0001318		2378	-0.00790299
258.2	0.0387271		788.19	0.00219298		1318.2	0.00011187		1848.2	0.00025601		2378.2	-0.00912706
258.4	0.03840727		788.39	0.00258048		1318.4	0.000665		1848.4	-0.00011713		2378.4	-0.0103089
258.6	0.03799821		788.59	0.00285461		1318.6	0.0007429		1848.6	0.00032326		2378.6	-0.0105318
258.8	0.0390633		788.79	0.00328069		1318.8	0.00055579		1848.8	0.00071826		2378.8	-0.01131876
259	0.03823411		788.99	0.00456952		1319	0.00054969		1849	0.00028608		2379	-0.01194441
259.2	0.03834428		789.19	0.00393062		1319.2	0.00002956		1849.2	-0.00024759		2379.2	-0.01312343
259.4	0.03806933		789.39	0.00389865		1319.4	0.00039413		1849.4	-0.00011929		2379.4	-0.01347857
259.6	0.03807123		789.59	0.00410725		1319.6	0.00110028		1849.6	-0.00058761		2379.6	-0.01398993
259.8	0.03849755		789.79	0.00423654		1319.8	0.00104709		1849.8	-0.00037125		2379.8	-0.0146323
260	0.03802841		789.99	0.00470369		1320	0.00068115		1850	-0.00022489		2380	-0.01471162
260.2	0.03925547		790.19	0.00542213		1320.2	0.00070313		1850.2	0.00008241		2380.2	-0.01416598
260.4	0.03907385		790.39	0.00525794		1320.4	0.00113171		1850.4	0.00020059		2380.4	-0.01391139
260.6	0.03915231		790.59	0.00496037		1320.6	0.0004086		1850.6	0.00030325		2380.6	-0.01321854
260.8	0.03849558		790.79	0.00488389		1320.8	0.00085595		1850.8	0.00016216		2380.8	-0.01252354
261	0.03882071		790.99	0.00533439		1321	0.00106444		1851	-0.00008827		2381	-0.01128892
261.2	0.03941809		791.19	0.00479222		1321.2	0.00093179		1851.2	-0.00071274		2381.2	-0.01083088
261.4	0.03880897		791.39	0.00516381		1321.4	0.00178566		1851.4	-0.00075117		2381.4	-0.01000685
261.6	0.04003775		791.59	0.00514286		1321.6	0.00182507		1851.6	-0.00124778		2381.6	-0.00858777
261.8	0.04060635		791.79	0.00449796		1321.8	0.00209633		1851.8	-0.00157844		2381.8	-0.00867157
262	0.04114505		791.99	0.00492925		1322	0.00174697		1852	-0.00186066		2382	-0.00816226
262.2	0.04148755		792.19	0.00535019		1322.2	0.00202914		1852.2	-0.00156956		2382.2	-0.0073185
262.4	0.04221384		792.39	0.00473673		1322.4	0.00232751		1852.4	-0.00150065		2382.4	-0.00634069
262.6	0.04295277		792.59	0.00516323		1322.6	0.00187772		1852.6	-0.00139927		2382.6	-0.00558774
262.8	0.04285749		792.79	0.00537009		1322.8	0.00157153		1852.8	-0.00129995		2382.8	-0.00656866
263	0.04260521		792.99	0.00475431		1323	0.00123286		1853	-0.0024296		2383	-0.00718823
263.2	0.04256175		793.19	0.00355734		1323.2	0.0014326		1853.2	-0.00221198		2383.2	-0.00799886
263.4	0.04257464		793.39	0.0027976		1323.4	0.00153342		1853.4	-0.00202133		2383.4	-0.00838856
263.6	0.04277529		793.59	0.00308667		1323.6	0.00240468		1853.6	-0.00225499		2383.6	-0.00894538
263.8	0.04327199		793.79	0.00273307		1323.8	0.0023294		1853.8	-0.00187854		2383.8	-0.00897906
264	0.04353491		793.99	0.00352585		1324	0.0021364		1854	-0.00131379		2384	-0.00849618
264.2	0.04455111		794.19	0.00351973		1324.2	0.00242236		1854.2	-0.00073716		2384.2	-0.00906294
264.4	0.04405904		794.39	0.00364465		1324.4	0.0031384		1854.4	-0.00031703		2384.4	-0.00969733
264.6	0.04373583		794.59	0.00367399		1324.6	0.00238659		1854.6	-0.00027161		2384.6	-0.01046785
264.8	0.04270166		794.79	0.00341852		1324.8	0.00276884		1854.8	-0.00089587		2384.8	-0.01203454
265	0.04237808		794.99	0.00314181		1325	0.00317747		1855	-0.00052509		2385	-0.01186065
265.2	0.04191821		795.19	0.00361805		1325.2	0.00267592		1855.2	-0.00042519		2385.2	-0.01120952
265.4	0.04149434		795.39	0.00368264		1325.4	0.00281637		1855.4	0.00030061		2385.4	-0.01125814
265.6	0.04125823		795.59	0.0032416		1325.6	0.00189846		1855.6	0.00071464		2385.6	-0.01030553
265.8	0.04153842		795.79	0.00333538		1325.8	0.00163518		1855.8	0.00079322		2385.8	-0.01101191
266	0.04209152		795.99	0.00419838		1326	0.00143876		1856	0.00037777		2386	-0.01056901
266.2	0.04283032		796.19	0.00450709		1326.2	0.00129196		1856.2	0.00073369		2386.2	-0.00985763
266.4	0.04267633		796.39	0.00492737		1326.4	0.00115436		1856.4	0.00061294		2386.4	-0.00959071
266.6	0.04303504		796.59	0.00602339		1326.6	0.00131415		1856.6	0.00022736		2386.6	-0.00980951
266.8	0.04254349		796.79	0.00582582		1326.8	0.00148856		1856.8	-0.0002648		2386.8	-0.01065797
267	0.04318279		796.99	0.0054079		1327	0.00180826		1857	-0.00061791		2387	-0.01108945
267.2	0.04289511		797.19	0.00568457		1327.2	0.002118		1857.2	-0.00111677		2387.2	-0.01059697
267.4	0.04303016		797.39	0.00591641		1327.4	0.00187863		1857.4	-0.00161222		2387.4	-0.01064348
267.6	0.04239237		797.59	0.00715318		1327.6	0.00171539		1857.6	-0.00205995		2387.6	-0.01087249
267.8	0.04310381		797.79	0.00724831		1327.8	0.00149966		1857.8	-0.00235036		2387.8	-0.01056853
268	0.04332589		797.99	0.00804051		1328	0.00229078		1858	-0.00168745		2388	-0.01032968
268.2	0.04338663		798.19	0.00765759		1328.2	0.00229561		1858.2	-0.00198998		2388.2	-0.01074522
268.4	0.04274579		798.39	0.00777705		1328.4	0.0018381		1858.4	-0.00196355		2388.4	-0.01183356
268.6	0.04268126		798.59	0.00715708		1328.6	0.00074407		1858.6	-0.00134716		2388.6	-0.01220389
268.8	0.04238384		798.79	0.00636714		1328.8	0.00073303		1858.8	-0.00120096		2388.8	-0.01256119
269	0.04339096		798.99	0.00554216		1329	0.00053822		1859	-0.00028129		2389	-0.01160606
269.2	0.04380283		799.19	0.00551341		1329.2	-0.00048439		1859.2	-0.00061788		2389.2	-0.01048002
269.4	0.04402568		799.39	0.00456355		1329.4	-0.00025919		1859.4	-0.00057907		2389.4	-0.01039665
269.6	0.04375329		799.59	0.00348838		1329.6	-0.00119784		1859.6	-0.00053551		2389.6	-0.01022186
269.8	0.04477973		799.79	0.00339567		1329.8	-0.00023387		1859.8	-0.00110532		2389.8	-0.01072233
270	0.0447873		799.99	0.00341112		1330	-0.00019959		1860	-0.00162311		2390	-0.01028548
270.2	0.04491785		800.19	0.00247969		1330.2	-0.00023216		1860.2	-0.00116981		2390.2	-0.00929733
270.4	0.04470246		800.39	0.00247698		1330.4	0.0003257		1860.4	-0.00062433		2390.4	-0.00941145
270.6	0.04552436		800.59	0.00216971		1330.6	0.00032146		1860.6	-0.00121051		2390.6	-0.00969245
270.8	0.04598839		800.79	0.00158655		1330.8	0.00027054		1860.8	-0.00114995		2390.8	-0.00954601
271	0.04572605		800.99	0.00205526		1331	0.00014563		1861	-0.00131692		2391	-0.00967709
271.2	0.04526905		801.19	0.00250599		1331.2	-0.00045521		1861.2	-0.00270416		2391.2	-0.00921254
271.4	0.04504218		801.39	0.00304269		1331.4	-0.00147745		1861.4	-0.00269526		2391.4	-0.00891423
271.6	0.04427881		801.59	0.00329664		1331.6	-0.00178852		1861.6	-0.00198568		2391.6	-0.00902836
271.8	0.0449918		801.79	0.00324968		1331.8	-0.0002852		1861.8	-0.0013184		2391.8	-0.00809528
272	0.04447134		801.99	0.00386024		1332	0.00051502		1862	-0.00093186		2392	-0.00770998
272.2	0.04457709		802.19	0.00385415		1332.2	0.00031978		1862.2	-0.00079947		2392.2	-0.00837675
272.4	0.04461657		802.39	0.00412259		1332.4	-0.00010746		1862.4	-0.00054106		2392.4	-0.00971246
272.6	0.0454482		802.59	0.00437679		1332.6	-0.000321		1862.6	0.000475		2392.6	-0.00983682
272.8	0.04611755		802.79	0.00467605		1332.8	-0.00030701		1862.8	0.00055334		2392.8	-0.00995969
273	0.04689168		802.99	0.00463059		1333	0.00052831		1863	0.00006291		2393	-0.00999755
273.2	0.04632269		803.19	0.00434585		1333.2	0.00075886		1863.2	0.00000466		2393.2	-0.00963427
273.4	0.04608013		803.39	0.00343468		1333.4	0.00047175		1863.4	0.00096117		2393.4	-0.00988519
273.6	0.04550613		803.59	0.00290751		1333.6	0.00061553		1863.6	0.00081413		2393.6	-0.00976617
273.8	0.04540868		803.79	0.00307182		1333.8	0.00170113		1863.8	0.00083246		2393.8	-0.00959181
274	0.04466572		803.99	0.00245089		1334	0.00122067		1864	0.00163233		2394	-0.00916672
274.2	0.0446575		804.19	0.00270033		1334.2	0.00098068		1864.2	0.00225854		2394.2	-0.0090817
274.4	0.04402258		804.39	0.00389691		1334.4	0.00082867		1864.4	0.00204929		2394.4	-0.00880652
274.6	0.0449471		804.59	0.00394444		1334.6	0.00036212		1864.6	0.00097492		2394.6	-0.00855047
274.8	0.04451736		804.79	0.00414336		1334.8	0.00036741		1864.8	-0.00006513		2394.8	-0.00881417
275	0.04320993		804.99	0.00455037		1335	0.00071824		1865	-0.00069057		2395	-0.00897493
275.2	0.04317335		805.19	0.00481048		1335.2	0.00039183		1865.2	-0.00183437		2395.2	-0.00932034
275.4	0.04381681		805.39	0.00452023		1335.4	0.00009685		1865.4	-0.00157067		2395.4	-0.00954101
275.6	0.04421724		805.59	0.00473038		1335.6	0.00097097		1865.6	-0.00136813		2395.6	-0.00935984
275.8	0.04449178		805.79	0.00486628		1335.8	0.00203104		1865.8	-0.0021555		2395.8	-0.00901913
276	0.04527689		805.99	0.00485611		1336	0.00166421		1866	-0.00249273		2396	-0.00917918
276.2	0.04571568		806.19	0.00454977		1336.2	0.00142962		1866.2	-0.00211178		2396.2	-0.01000181
276.4	0.04680703		806.39	0.00435812		1336.4	0.00107768		1866.4	-0.00164847		2396.4	-0.01064629
276.6	0.04782515		806.59	0.00449477		1336.6	0.00152374		1866.6	-0.00111114		2396.6	-0.01029617
276.8	0.04889973		806.79	0.0040028		1336.8	0.00240995		1866.8	-0.00146424		2396.8	-0.01056649
277	0.04854451		806.99	0.00426632		1337	0.0029456		1867	-0.00113584		2397	-0.01168932
277.2	0.04887381		807.19	0.00350108		1337.2	0.00215801		1867.2	-0.00060207		2397.2	-0.01171205
277.4	0.04929695		807.39	0.00312368		1337.4	0.00141312		1867.4	0.00021252		2397.4	-0.01168428
277.6	0.04902297		807.59	0.003645		1337.6	0.00261248		1867.6	0.00003563		2397.6	-0.01135792
277.8	0.04815826		807.79	0.0035163		1337.8	0.00293201		1867.8	0.00022045		2397.8	-0.01167376
278	0.04852076		807.99	0.00333173		1338	0.00237496		1868	0.00029245		2398	-0.01211429
278.2	0.04838163		808.19	0.00359528		1338.2	0.00308972		1868.2	-0.00030066		2398.2	-0.01180579
278.4	0.04751351		808.39	0.00340199		1338.4	0.00351215		1868.4	-0.00122841		2398.4	-0.01189286
278.6	0.04663709		808.59	0.00289095		1338.6	0.00342655		1868.6	-0.00122169		2398.6	-0.01191416
278.8	0.04488374		808.79	0.0027366		1338.8	0.00371617		1868.8	-0.00193482		2398.8	-0.01190374
279	0.04443201		808.99	0.00296552		1339	0.00455241		1869	-0.00145891		2399	-0.01215505
279.2	0.04450617		809.19	0.00289484		1339.2	0.00490018		1869.2	-0.00205837		2399.2	-0.01156745
279.4	0.04434681		809.39	0.00217369		1339.4	0.00522937		1869.4	-0.00195716		2399.4	-0.01140684
279.6	0.04434307		809.59	0.00245109		1339.6	0.0054562		1869.6	-0.00234798		2399.6	-0.01051411
279.8	0.0439384		809.79	0.00198018		1339.8	0.0055466		1869.8	-0.00279019		2399.8	-0.01015463
280	0.04387951		809.99	0.00184509		1340	0.0050326		1870	-0.00264184		2400	-0.00939189
280.2	0.04374701		810.19	0.00168841		1340.2	0.00458939		1870.2	-0.00200789		2400.2	-0.00946369
280.4	0.04410696		810.39	0.00199261		1340.4	0.00450825		1870.4	-0.00190617		2400.4	-0.00967247
280.6	0.04452548		810.59	0.00216722		1340.6	0.00411696		1870.6	-0.00235016		2400.6	-0.00983991
280.8	0.04514776		810.79	0.00245578		1340.8	0.00394646		1870.8	-0.00224069		2400.8	-0.01067464
281	0.04535558		810.99	0.00312423		1341	0.00305878		1871	-0.00229106		2401	-0.01060113
281.2	0.04655534		811.19	0.00317134		1341.2	0.0020751		1871.2	-0.00158473		2401.2	-0.01066258
281.4	0.04708221		811.39	0.00336278		1341.4	0.00184504		1871.4	-0.00125349		2401.4	-0.01106113
281.6	0.04739956		811.59	0.0042631		1341.6	0.00230904		1871.6	-0.00151628		2401.6	-0.01060321
281.8	0.04776883		811.79	0.00427207		1341.8	0.00218827		1871.8	-0.00225481		2401.8	-0.01124106
282	0.04904676		811.99	0.00425895		1342	0.00161786		1872	-0.00278568		2402	-0.01261089
282.2	0.04916103		812.19	0.0040488		1342.2	0.00176416		1872.2	-0.00282117		2402.2	-0.01309455
282.4	0.04896215		812.39	0.00367623		1342.4	0.00099732		1872.4	-0.00271941		2402.4	-0.01391057
282.6	0.04851475		812.59	0.00353663		1342.6	0.00063548		1872.6	-0.00282901		2402.6	-0.01359006
282.8	0.04884353		812.79	0.00341184		1342.8	0.00111834		1872.8	-0.00303537		2402.8	-0.01353
283	0.04960566		812.99	0.00353036		1343	0.00173981		1873	-0.00315324		2403	-0.0134157
283.2	0.04920618		813.19	0.00311544		1343.2	0.00191371		1873.2	-0.00381976		2403.2	-0.01232652
283.4	0.04826401		813.39	0.00302171		1343.4	0.00160099		1873.4	-0.00368567		2403.4	-0.01200451
283.6	0.04784059		813.59	0.00350791		1343.6	0.00105577		1873.6	-0.00387165		2403.6	-0.01115553
283.8	0.04820179		813.79	0.00463355		1343.8	0.00190269		1873.8	-0.0036054		2403.8	-0.0106245
284	0.04727103		813.99	0.00541793		1344	0.00268741		1874	-0.00295263		2404	-0.01046962
284.2	0.04802313		814.19	0.00569426		1344.2	0.0031252		1874.2	-0.00207546		2404.2	-0.01028575
284.4	0.04792357		814.39	0.00593072		1344.4	0.00340952		1874.4	-0.00128793		2404.4	-0.0105485
284.6	0.0483677		814.59	0.00598744		1344.6	0.00323027		1874.6	-0.00070564		2404.6	-0.01040243
284.8	0.04889757		814.79	0.00620142		1344.8	0.00294892		1874.8	0.00044606		2404.8	-0.00949396
285	0.04914432		814.99	0.00627533		1345	0.0028032		1875	0.00119169		2405	-0.00914266
285.2	0.04926878		815.19	0.00643768		1345.2	0.002527		1875.2	0.00239314		2405.2	-0.00969083
285.4	0.04900595		815.39	0.00623079		1345.4	0.00274307		1875.4	0.00170298		2405.4	-0.0099052
285.6	0.04863761		815.59	0.00665887		1345.6	0.00280003		1875.6	0.00101081		2405.6	-0.0102711
285.8	0.04906903		815.79	0.0060731		1345.8	0.00285595		1875.8	0.00015873		2405.8	-0.01161971
286	0.04891903		815.99	0.00474005		1346	0.00287204		1876	-0.0000906		2406	-0.01289325
286.2	0.04958928		816.19	0.00356897		1346.2	0.00272528		1876.2	0.00021906		2406.2	-0.01325759
286.4	0.04850242		816.39	0.00245915		1346.4	0.00182077		1876.4	-0.001338		2406.4	-0.0129784
286.6	0.0484273		816.59	0.00251016		1346.6	0.00195482		1876.6	-0.00261086		2406.6	-0.0131865
286.8	0.0487388		816.79	0.00250276		1346.8	0.0013264		1876.8	-0.00280697		2406.8	-0.01294078
287	0.0494856		816.99	0.00221015		1347	0.00067646		1877	-0.00420126		2407	-0.01205042
287.2	0.04837405		817.19	0.0015278		1347.2	0.00016467		1877.2	-0.00473408		2407.2	-0.01224782
287.4	0.04855296		817.39	0.00169795		1347.4	0.00002625		1877.4	-0.00424956		2407.4	-0.01167105
287.6	0.04837034		817.59	0.00255833		1347.6	0.00070164		1877.6	-0.00421911		2407.6	-0.01216066
287.8	0.04956489		817.79	0.0026498		1347.8	0.0017022		1877.8	-0.00346455		2407.8	-0.01262472
288	0.04864688		817.99	0.00210801		1348	0.00180306		1878	-0.00226754		2408	-0.01220283
288.2	0.04984977		818.19	0.00223221		1348.2	0.00172683		1878.2	-0.00151045		2408.2	-0.01233534
288.4	0.04999775		818.39	0.00229873		1348.4	0.00135319		1878.4	-0.00047775		2408.4	-0.0126317
288.6	0.04997896		818.59	0.00238815		1348.6	0.00120227		1878.6	-0.0005918		2408.6	-0.01242943
288.8	0.04995615		818.79	0.0025503		1348.8	0.00104111		1878.8	0.00046404		2408.8	-0.0125911
289	0.04967861		818.99	0.0021471		1349	0.00104005		1879	0.00112276		2409	-0.0131674
289.2	0.04980084		819.19	0.00175366		1349.2	0.00080197		1879.2	0.00098309		2409.2	-0.01407746
289.4	0.0493862		819.39	0.00160727		1349.4	0.00063927		1879.4	0.00081604		2409.4	-0.01380052
289.6	0.04818787		819.59	0.00167435		1349.6	0.00043692		1879.6	0.00071839		2409.6	-0.01374963
289.8	0.04838226		819.79	0.00227745		1349.8	0.00105288		1879.8	0.00040156		2409.8	-0.01337199
290	0.04874439		819.99	0.00228832		1350	0.00113084		1880	0.0004113		2410	-0.01317185
290.2	0.04852415		820.19	0.00208553		1350.2	0.00001271		1880.2	0.00020506		2410.2	-0.012408
290.4	0.04819024		820.39	0.00254906		1350.4	0.00053999		1880.4	-0.00096021		2410.4	-0.01226386
290.6	0.04883922		820.59	0.00348022		1350.6	0.00087482		1880.6	-0.00127946		2410.6	-0.01242236
290.8	0.0492735		820.79	0.00371696		1350.8	0.00065374		1880.8	-0.00143818		2410.8	-0.01246373
291	0.04894254		820.99	0.00366028		1351	0.00089942		1881	-0.0020921		2411	-0.01242156
291.2	0.04746213		821.19	0.00383041		1351.2	0.00099239		1881.2	-0.00184385		2411.2	-0.01283872
291.4	0.04793425		821.39	0.00418644		1351.4	0.00148216		1881.4	-0.00089664		2411.4	-0.01213747
291.6	0.04738348		821.59	0.0036247		1351.6	0.00142578		1881.6	-0.00189979		2411.6	-0.01272959
291.8	0.04761876		821.79	0.00338029		1351.8	0.00094761		1881.8	-0.00185083		2411.8	-0.0127351
292	0.04783736		821.99	0.00348775		1352	0.00128718		1882	-0.00130106		2412	-0.01250939
292.2	0.04825211		822.19	0.00381736		1352.2	0.00097132		1882.2	-0.00167846		2412.2	-0.01321199
292.4	0.04764623		822.39	0.00324776		1352.4	0.00063687		1882.4	-0.0014643		2412.4	-0.01262086
292.6	0.04757784		822.59	0.00293364		1352.6	0.00036781		1882.6	-0.00210226		2412.6	-0.01319666
292.8	0.04790385		822.79	0.0027564		1352.8	-0.0002283		1882.8	-0.00192479		2412.8	-0.01356013
293	0.04799752		822.99	0.00198616		1353	-0.00078705		1883	-0.00175646		2413	-0.01345429
293.2	0.04798854		823.19	0.00125384		1353.2	-0.00079102		1883.2	-0.00176193		2413.2	-0.01354306
293.4	0.0475826		823.39	0.00160224		1353.4	-0.00087009		1883.4	-0.00177007		2413.4	-0.01181127
293.6	0.04728449		823.59	0.00195124		1353.6	-0.00067937		1883.6	-0.00214044		2413.6	-0.01124982
293.8	0.04892628		823.79	0.00195271		1353.8	-0.0005923		1883.8	-0.00276751		2413.8	-0.01056615
294	0.04960816		823.99	0.00134388		1354	-0.00133623		1884	-0.00178825		2414	-0.00998386
294.2	0.04924587		824.19	0.00103145		1354.2	-0.00146177		1884.2	-0.00151299		2414.2	-0.01003796
294.4	0.05010678		824.39	0.00201445		1354.4	-0.0000221		1884.4	-0.00122642		2414.4	-0.01054352
294.6	0.04969088		824.59	0.00291843		1354.6	-0.00087334		1884.6	-0.00115154		2414.6	-0.00997713
294.8	0.04929705		824.79	0.00401849		1354.8	-0.0003758		1884.8	-0.0003804		2414.8	-0.01025697
295	0.04832843		824.99	0.00398954		1355	-0.00012136		1885	-0.00033659		2415	-0.01051571
295.2	0.04885149		825.19	0.00411662		1355.2	-0.00041316		1885.2	-0.00052065		2415.2	-0.01106196
295.4	0.04950741		825.39	0.00433133		1355.4	-0.00006218		1885.4	0.0004474		2415.4	-0.01106921
295.6	0.04998511		825.59	0.0042912		1355.6	-0.00029357		1885.6	-0.00048514		2415.6	-0.01201103
295.8	0.05039302		825.79	0.00517823		1355.8	0.00083276		1885.8	0.00072646		2415.8	-0.01259511
296	0.05126609		825.99	0.00506947		1356	0.00128404		1886	0.00146857		2416	-0.01318771
296.2	0.05160199		826.19	0.00533069		1356.2	0.0005152		1886.2	0.00164773		2416.2	-0.01387036
296.4	0.05211127		826.39	0.00492206		1356.4	-0.00001523		1886.4	0.00153035		2416.4	-0.01437315
296.6	0.05348939		826.59	0.00472613		1356.6	-0.00049386		1886.6	0.0009251		2416.6	-0.01574038
296.8	0.05358477		826.79	0.00445143		1356.8	-0.00065709		1886.8	0.00096149		2416.8	-0.01547959
297	0.05346627		826.99	0.00400961		1357	-0.00116159		1887	0.00093486		2417	-0.01556313
297.2	0.05339387		827.19	0.00449466		1357.2	-0.00158181		1887.2	0.00122631		2417.2	-0.01564293
297.4	0.05306671		827.39	0.004803		1357.4	-0.0020084		1887.4	0.00096347		2417.4	-0.01521297
297.6	0.05317146		827.59	0.00415714		1357.6	-0.00299962		1887.6	0.00067255		2417.6	-0.01468202
297.8	0.05387694		827.79	0.00339073		1357.8	-0.00274806		1887.8	-0.00004951		2417.8	-0.01393759
298	0.05262529		827.99	0.00349273		1358	-0.00251636		1888	0.00081337		2418	-0.01397052
298.2	0.052041		828.19	0.004038		1358.2	-0.00187582		1888.2	0.00038152		2418.2	-0.01356883
298.4	0.0510557		828.39	0.00368002		1358.4	-0.00080301		1888.4	0.00103979		2418.4	-0.0125777
298.6	0.05055395		828.59	0.00338563		1358.6	-0.00050969		1888.6	0.00150068		2418.6	-0.01154856
298.8	0.05025522		828.79	0.00299406		1358.8	0.00071783		1888.8	0.00147741		2418.8	-0.01111951
299	0.05015976		828.99	0.00265779		1359	0.00136848		1889	0.00143735		2419	-0.01118405
299.2	0.05054463		829.19	0.00352424		1359.2	0.00183724		1889.2	0.00218815		2419.2	-0.01087639
299.4	0.05094311		829.39	0.00362258		1359.4	0.00236775		1889.4	0.00249602		2419.4	-0.01052834
299.6	0.05155903		829.59	0.00315547		1359.6	0.00321829		1889.6	0.00149297		2419.6	-0.01062395
299.8	0.05131808		829.79	0.00324541		1359.8	0.00472254		1889.8	0.00126899		2419.8	-0.01063941
300	0.0516585		829.99	0.00356491		1360	0.00413083		1890	0.00183131		2420	-0.01086284
300.2	0.05213904		830.19	0.00416367		1360.2	0.00386985		1890.2	0.00156989		2420.2	-0.0114779
300.4	0.05223755		830.39	0.00323363		1360.4	0.00299929		1890.4	0.00101362		2420.4	-0.01152297
300.6	0.05251469		830.59	0.00286363		1360.6	0.00302189		1890.6	0.00035523		2420.6	-0.01195935
300.8	0.05147978		830.79	0.00317271		1360.8	0.00343107		1890.8	-0.00005756		2420.8	-0.01211453
301	0.05131194		830.99	0.00279755		1361	0.00201832		1891	-0.00026348		2421	-0.01290344
301.2	0.05070123		831.19	0.00292863		1361.2	0.00157594		1891.2	-0.00109242		2421.2	-0.01334144
301.4	0.05050293		831.39	0.00242933		1361.4	0.00201976		1891.4	-0.00166011		2421.4	-0.01334515
301.6	0.04997331		831.59	0.00166797		1361.6	0.00193439		1891.6	-0.00209085		2421.6	-0.01312039
301.8	0.0493998		831.79	0.00140206		1361.8	0.00324442		1891.8	-0.00251703		2421.8	-0.0126856
302	0.04803693		831.99	0.0014417		1362	0.00262521		1892	-0.00215161		2422	-0.01267526
302.2	0.04780128		832.19	0.00115454		1362.2	0.00261299		1892.2	-0.00208729		2422.2	-0.01236622
302.4	0.04753712		832.39	0.00021705		1362.4	0.00254555		1892.4	-0.00095737		2422.4	-0.01198796
302.6	0.04821754		832.59	0.00069989		1362.6	0.00226036		1892.6	-0.00154122		2422.6	-0.01106879
302.8	0.048085		832.79	0.00053631		1362.8	0.00197654		1892.8	-0.00109057		2422.8	-0.01095132
303	0.04800693		832.99	0.00076503		1363	0.00195583		1893	-0.00049093		2423	-0.01126575
303.2	0.04884791		833.19	0.00106982		1363.2	0.00188665		1893.2	0.00038558		2423.2	-0.01134104
303.4	0.05005319		833.39	0.00101151		1363.4	0.00204623		1893.4	0.00032495		2423.4	-0.01113644
303.6	0.05011727		833.59	0.00113417		1363.6	0.00222494		1893.6	0.00051216		2423.6	-0.01122521
303.8	0.05004641		833.79	0.00228643		1363.8	0.00210559		1893.8	0.00121767		2423.8	-0.0117815
304	0.05080283		833.99	0.00244943		1364	0.00138526		1894	0.00154548		2424	-0.01249568
304.2	0.05139899		834.19	0.00320564		1364.2	0.00094068		1894.2	0.00163877		2424.2	-0.01384317
304.4	0.05229102		834.39	0.00307397		1364.4	0.0009044		1894.4	0.00145774		2424.4	-0.01443683
304.6	0.0532094		834.59	0.00355258		1364.6	0.00107505		1894.6	0.00166522		2424.6	-0.01560892
304.8	0.05345998		834.79	0.00376466		1364.8	0.00175382		1894.8	0.00144918		2424.8	-0.01612515
305	0.05395275		834.99	0.00384593		1365	0.00084749		1895	0.00109015		2425	-0.01615478
305.2	0.05426977		835.19	0.00424849		1365.2	0.00146745		1895.2	0.0005967		2425.2	-0.01579142
305.4	0.05497349		835.39	0.00381302		1365.4	0.00164098		1895.4	0.00084699		2425.4	-0.01568683
305.6	0.05459229		835.59	0.00348847		1365.6	0.00106652		1895.6	0.00020479		2425.6	-0.01556009
305.8	0.05470997		835.79	0.00353025		1365.8	0.00077333		1895.8	-0.00054349		2425.8	-0.01513833
306	0.05421789		835.99	0.00353477		1366	0.00032509		1896	-0.00083116		2426	-0.01477113
306.2	0.05437298		836.19	0.00305276		1366.2	0.00061592		1896.2	-0.00080426		2426.2	-0.01468395
306.4	0.05421475		836.39	0.00296498		1366.4	0.00092513		1896.4	-0.00083075		2426.4	-0.01387766
306.6	0.05392509		836.59	0.00238776		1366.6	0.00143804		1896.6	-0.00193295		2426.6	-0.01291685
306.8	0.05355947		836.79	0.00196172		1366.8	0.00168674		1896.8	-0.00159226		2426.8	-0.01300871
307	0.05342016		836.99	0.00188285		1367	0.00244993		1897	-0.00189832		2427	-0.01317728
307.2	0.05339692		837.19	0.00243356		1367.2	0.00291484		1897.2	-0.00055835		2427.2	-0.01318063
307.4	0.05323154		837.39	0.00286081		1367.4	0.00321415		1897.4	-0.00094045		2427.4	-0.01364373
307.6	0.05211737		837.59	0.00236108		1367.6	0.00332082		1897.6	-0.00100856		2427.6	-0.01370433
307.8	0.05199888		837.79	0.00302548		1367.8	0.00288048		1897.8	-0.0013767		2427.8	-0.01399329
308	0.05158994		837.99	0.00332152		1368	0.00197388		1898	-0.00129283		2428	-0.0141298
308.2	0.05107049		838.19	0.00525107		1368.2	0.00161726		1898.2	-0.00022652		2428.2	-0.01482461
308.4	0.05060532		838.39	0.00554985		1368.4	0.00218082		1898.4	-0.00104102		2428.4	-0.01402015
308.6	0.05023393		838.59	0.0051694		1368.6	0.00169008		1898.6	-0.0010911		2428.6	-0.01370063
308.8	0.04964235		838.79	0.00450869		1368.8	0.00138505		1898.8	-0.00145819		2428.8	-0.01347053
309	0.04921622		838.99	0.00420857		1369	-0.00029967		1899	-0.00070812		2429	-0.01264552
309.2	0.04947398		839.19	0.00399176		1369.2	-0.00048552		1899.2	-0.00009739		2429.2	-0.01243245
309.4	0.04989913		839.39	0.00352652		1369.4	-0.00127766		1899.4	-0.00026627		2429.4	-0.01259303
309.6	0.04909815		839.59	0.00380023		1369.6	-0.00179331		1899.6	-0.00065215		2429.6	-0.01276015
309.8	0.04895772		839.79	0.003534		1369.8	-0.00147308		1899.8	-0.00127147		2429.8	-0.01283042
310	0.0492888		839.99	0.00315754		1370	-0.00116124		1900	-0.00063393		2430	-0.01246598
310.2	0.05000968		840.19	0.00224245		1370.2	-0.00101566		1900.2	-0.00130358		2430.2	-0.01278359
310.4	0.05090189		840.39	0.00148983		1370.4	-0.00109863		1900.4	-0.00097096		2430.4	-0.01335484
310.6	0.05152287		840.59	0.00107273		1370.6	-0.00071553		1900.6	-0.0013909		2430.6	-0.01368219
310.8	0.0522151		840.79	0.00167289		1370.8	-0.00048637		1900.8	-0.00084987		2430.8	-0.01439464
311	0.052782		840.99	0.00124127		1371	0.00025989		1901	0.00056527		2431	-0.01512484
311.2	0.05369943		841.19	0.00019784		1371.2	0.00091586		1901.2	0.00217215		2431.2	-0.01571771
311.4	0.05459975		841.39	-0.00007149		1371.4	0.00176501		1901.4	0.00189083		2431.4	-0.01626882
311.6	0.05412601		841.59	-0.00091922		1371.6	0.00187422		1901.6	0.00151378		2431.6	-0.01531102
311.8	0.05517424		841.79	-0.00066002		1371.8	0.00162205		1901.8	0.00114864		2431.8	-0.01542894
312	0.05490756		841.99	-0.00066205		1372	0.00154116		1902	0.00137604		2432	-0.01554887
312.2	0.05464941		842.19	-0.00033204		1372.2	0.00163785		1902.2	0.00108679		2432.2	-0.01556126
312.4	0.05478334		842.39	-0.00111435		1372.4	0.00138937		1902.4	0.00066195		2432.4	-0.01536949
312.6	0.05409994		842.59	-0.0020312		1372.6	0.00007626		1902.6	0.00083708		2432.6	-0.01574328
312.8	0.05361342		842.79	-0.00174268		1372.8	-0.00016476		1902.8	0.00072346		2432.8	-0.01555146
313	0.05362768		842.99	-0.00169776		1373	-0.00145036		1903	0.00061926		2433	-0.01430031
313.2	0.05351947		843.19	-0.00030103		1373.2	-0.00194206		1903.2	-0.00034386		2433.2	-0.01391463
313.4	0.05356964		843.39	0.0008164		1373.4	-0.00200726		1903.4	-0.00114687		2433.4	-0.01307126
313.6	0.0532981		843.59	0.00190751		1373.6	-0.00262138		1903.6	-0.00214129		2433.6	-0.01279611
313.8	0.05307887		843.79	0.00254953		1373.8	-0.00270639		1903.8	-0.00287752		2433.8	-0.01201182
314	0.05319717		843.99	0.00325486		1374	-0.00306028		1904	-0.00218663		2434	-0.01186801
314.2	0.05304169		844.19	0.00335608		1374.2	-0.00320947		1904.2	-0.00271556		2434.2	-0.01201333
314.4	0.05318669		844.39	0.00373488		1374.4	-0.00213007		1904.4	-0.00145835		2434.4	-0.01242387
314.6	0.05396412		844.59	0.00429354		1374.6	-0.00173787		1904.6	-0.00080034		2434.6	-0.01264901
314.8	0.05465025		844.79	0.00549986		1374.8	-0.00104838		1904.8	0.00017139		2434.8	-0.01242198
315	0.05479298		844.99	0.00515955		1375	-0.00006419		1905	0.00082948		2435	-0.01246096
315.2	0.05606143		845.19	0.00469899		1375.2	0.00098078		1905.2	0.00130934		2435.2	-0.01276607
315.4	0.05637742		845.39	0.00554628		1375.4	0.00154253		1905.4	0.00157716		2435.4	-0.01246935
315.6	0.05583664		845.59	0.00534051		1375.6	0.00143139		1905.6	0.00103257		2435.6	-0.01264441
315.8	0.05661152		845.79	0.00513248		1375.8	0.00114921		1905.8	0.00177225		2435.8	-0.01417856
316	0.05618256		845.99	0.00430983		1376	0.00149817		1906	0.00164347		2436	-0.01481849
316.2	0.05565389		846.19	0.00354525		1376.2	0.00219465		1906.2	0.0015809		2436.2	-0.01534683
316.4	0.05546225		846.39	0.00346981		1376.4	0.00212012		1906.4	0.00121802		2436.4	-0.01547573
316.6	0.05428845		846.59	0.00327826		1376.6	0.00238553		1906.6	0.0010118		2436.6	-0.01536535
316.8	0.05468703		846.79	0.00333955		1376.8	0.0027576		1906.8	0.00074483		2436.8	-0.01490052
317	0.05462935		846.99	0.00280463		1377	0.0014488		1907	0.00078977		2437	-0.01417589
317.2	0.05395113		847.19	0.00333487		1377.2	0.00175075		1907.2	0.00066931		2437.2	-0.0142531
317.4	0.05418752		847.39	0.00315595		1377.4	0.00243285		1907.4	0.00114751		2437.4	-0.01490236
317.6	0.05286587		847.59	0.00312038		1377.6	0.00157392		1907.6	0.00074183		2437.6	-0.01472429
317.8	0.05206917		847.79	0.00279406		1377.8	0.00128541		1907.8	0.00025667		2437.8	-0.01506492
318	0.05220356		847.99	0.00306039		1378	0.00141593		1908	0.00053404		2438	-0.01543057
318.2	0.0522116		848.19	0.00293806		1378.2	0.00121094		1908.2	0.0006569		2438.2	-0.01480288
318.4	0.05345108		848.39	0.00236555		1378.4	0.00103496		1908.4	0.00130272		2438.4	-0.01466949
318.6	0.0546529		848.59	0.00251514		1378.6	0.00125851		1908.6	0.00079045		2438.6	-0.01549286
318.8	0.0544966		848.79	0.00317411		1378.8	0.00161532		1908.8	0.00055185		2438.8	-0.01546653
319	0.05519095		848.99	0.00367009		1379	0.00108253		1909	0.00077265		2439	-0.01579041
319.2	0.05646915		849.19	0.00411776		1379.2	0.00082277		1909.2	0.00135595		2439.2	-0.01594216
319.4	0.05629151		849.39	0.00451276		1379.4	0.00023557		1909.4	0.00066895		2439.4	-0.01616066
319.6	0.05624919		849.59	0.0046089		1379.6	-0.00014453		1909.6	-0.00011983		2439.6	-0.01766689
319.8	0.0570935		849.79	0.00482274		1379.8	-0.00054284		1909.8	-0.00034355		2439.8	-0.01744467
320	0.0571138		849.99	0.00441024		1380	-0.00017645		1910	-0.00127696		2440	-0.01647582
320.2	0.05701183		850.19	0.00511886		1380.2	0.00066921		1910.2	-0.00114997		2440.2	-0.015509
320.4	0.05780756		850.39	0.00563623		1380.4	0.0010343		1910.4	-0.00094296		2440.4	-0.01497302
320.6	0.0574848		850.59	0.0053307		1380.6	0.001838		1910.6	-0.00074685		2440.6	-0.01448111
320.8	0.0578102		850.79	0.00563839		1380.8	0.00132904		1910.8	-0.00035207		2440.8	-0.01366782
321	0.05763607		850.99	0.00471028		1381	0.00110522		1911	-0.00015806		2441	-0.01354562
321.2	0.05719861		851.19	0.00424621		1381.2	0.00100422		1911.2	0.00009469		2441.2	-0.01303644
321.4	0.05698346		851.39	0.00450422		1381.4	0.00122732		1911.4	0.00054559		2441.4	-0.01253574
321.6	0.05659093		851.59	0.00426512		1381.6	0.00105026		1911.6	-0.00024055		2441.6	-0.01086091
321.8	0.05662341		851.79	0.0039543		1381.8	0.0003764		1911.8	-0.00056855		2441.8	-0.01115592
322	0.05672972		851.99	0.00363057		1382	-0.00027859		1912	0.00050535		2442	-0.01098236
322.2	0.05638623		852.19	0.00297305		1382.2	-0.00093238		1912.2	0.00073938		2442.2	-0.00985273
322.4	0.0568535		852.39	0.00308839		1382.4	-0.00135826		1912.4	0.00121576		2442.4	-0.01102569
322.6	0.05617798		852.59	0.00360685		1382.6	0.00002845		1912.6	0.00125112		2442.6	-0.01240441
322.8	0.05601208		852.79	0.00468478		1382.8	-0.00074967		1912.8	0.00170715		2442.8	-0.01328129
323	0.05674211		852.99	0.0048337		1383	-0.0010757		1913	0.00207946		2443	-0.01367247
323.2	0.05647557		853.19	0.00487266		1383.2	-0.00041677		1913.2	0.0015853		2443.2	-0.01430316
323.4	0.05641348		853.39	0.00473603		1383.4	-0.00062516		1913.4	0.00081835		2443.4	-0.01530335
323.6	0.05673145		853.59	0.00510609		1383.6	-0.00068035		1913.6	0.00089343		2443.6	-0.01588784
323.8	0.05734814		853.79	0.00548752		1383.8	-0.00078898		1913.8	0.00092481		2443.8	-0.01514829
324	0.05751143		853.99	0.00513121		1384	-0.00069922		1914	0.00076491		2444	-0.01560026
324.2	0.05783539		854.19	0.00576361		1384.2	0.00014633		1914.2	0.0006467		2444.2	-0.01538193
324.4	0.058354		854.39	0.00565781		1384.4	0.00083865		1914.4	0.00019228		2444.4	-0.01592643
324.6	0.05852908		854.59	0.00572873		1384.6	0.0006572		1914.6	-0.00026778		2444.6	-0.01584785
324.8	0.05868486		854.79	0.00531583		1384.8	0.00011337		1914.8	0.00001009		2444.8	-0.01497879
325	0.05883663		854.99	0.00327818		1385	0.00058692		1915	-0.00032698		2445	-0.01448823
325.2	0.05898687		855.19	0.00355159		1385.2	0.00091825		1915.2	-0.00011113		2445.2	-0.01393374
325.4	0.05890209		855.39	0.00292599		1385.4	0.00139382		1915.4	0.00011887		2445.4	-0.01396927
325.6	0.05859073		855.59	0.00108061		1385.6	0.00187612		1915.6	-0.00091948		2445.6	-0.01337698
325.8	0.05745784		855.79	0.0004797		1385.8	0.00144098		1915.8	-0.0003283		2445.8	-0.01397941
326	0.0572296		855.99	-0.00020067		1386	0.00080672		1916	0.00006724		2446	-0.01299792
326.2	0.05649181		856.19	0.00043806		1386.2	0.0013925		1916.2	-0.00035294		2446.2	-0.01273508
326.4	0.05667316		856.39	0.0015603		1386.4	0.00109011		1916.4	-0.00035505		2446.4	-0.0135421
326.6	0.05585443		856.59	0.00111319		1386.6	0.00172737		1916.6	-0.00051148		2446.6	-0.01360201
326.8	0.05580365		856.79	0.00184949		1386.8	0.00116946		1916.8	-0.00176693		2446.8	-0.01407464
327	0.05604504		856.99	0.00177604		1387	0.00105876		1917	-0.00257827		2447	-0.01443552
327.2	0.05580073		857.19	0.00288106		1387.2	0.00125792		1917.2	-0.00266948		2447.2	-0.0150978
327.4	0.0563105		857.39	0.00320348		1387.4	0.00073035		1917.4	-0.00275037		2447.4	-0.01497253
327.6	0.05641572		857.59	0.00430094		1387.6	0.00081977		1917.6	-0.00280189		2447.6	-0.01453132
327.8	0.05644416		857.79	0.0052802		1387.8	0.00081044		1917.8	-0.00257105		2447.8	-0.01436487
328	0.05664645		857.99	0.0058699		1388	0.00037578		1918	-0.00314219		2448	-0.01527812
328.2	0.05754577		858.19	0.00716698		1388.2	0.00052085		1918.2	-0.00373979		2448.2	-0.01494617
328.4	0.05839817		858.39	0.00733783		1388.4	0.00069737		1918.4	-0.00349133		2448.4	-0.01535421
328.6	0.05874943		858.59	0.00737105		1388.6	0.00057021		1918.6	-0.0033753		2448.6	-0.01527435
328.8	0.05815228		858.79	0.00722664		1388.8	0.00011502		1918.8	-0.00292299		2448.8	-0.01481806
329	0.0580274		858.99	0.00679239		1389	0.00052114		1919	-0.00156845		2449	-0.01525871
329.2	0.0583558		859.19	0.00712269		1389.2	0.00129687		1919.2	-0.0010973		2449.2	-0.0162108
329.4	0.05841231		859.39	0.00599944		1389.4	0.00105159		1919.4	-0.00119581		2449.4	-0.01644631
329.6	0.05839223		859.59	0.00541554		1389.6	0.00133655		1919.6	-0.00080015		2449.6	-0.01602914
329.8	0.05888986		859.79	0.00524986		1389.8	0.0009889		1919.8	0.00039699		2449.8	-0.01651477
330	0.05918442		859.99	0.00519651		1390	0.00065837		1920	0.00011643		2450	-0.01628638
330.2	0.05966565		860.19	0.00501013		1390.2	0.00128369		1920.2	0.00028478		2450.2	-0.01723659
330.4	0.06033032		860.39	0.00441909		1390.4	0.00088555		1920.4	-0.00006707		2450.4	-0.01693851
330.6	0.06026951		860.59	0.00271888		1390.6	0.00171253		1920.6	0.00040963		2450.6	-0.01771184
330.8	0.06117427		860.79	0.00309258		1390.8	0.00079906		1920.8	-0.00046617		2450.8	-0.01816657
331	0.06118446		860.99	0.00258203		1391	0.00020765		1921	-0.00043512		2451	-0.01882572
331.2	0.06137777		861.19	0.00233933		1391.2	0.00035865		1921.2	0.00049281		2451.2	-0.01822639
331.4	0.06131501		861.39	0.00168217		1391.4	0.00003651		1921.4	0.00052459		2451.4	-0.0178135
331.6	0.06045861		861.59	0.00163784		1391.6	-0.00005105		1921.6	-0.00008036		2451.6	-0.01790803
331.8	0.05945644		861.79	0.00176373		1391.8	0.00045702		1921.8	0.00005165		2451.8	-0.01742749
332	0.05904553		861.99	0.00181456		1392	-0.00027012		1922	0.00007095		2452	-0.01684499
332.2	0.05876693		862.19	0.00191522		1392.2	-0.00015662		1922.2	-0.00027471		2452.2	-0.01546183
332.4	0.05767954		862.39	0.00145073		1392.4	-0.00015194		1922.4	0.00016643		2452.4	-0.01524075
332.6	0.0563858		862.59	0.00222078		1392.6	0.00005181		1922.6	0.00078148		2452.6	-0.01448687
332.8	0.05561449		862.79	0.0026323		1392.8	0.00041334		1922.8	0.00068283		2452.8	-0.01479439
333	0.05491311		862.99	0.00301089		1393	0.00113126		1923	0.0012836		2453	-0.01427566
333.2	0.05618472		863.19	0.00387297		1393.2	0.00138503		1923.2	0.00024747		2453.2	-0.01401398
333.4	0.05601843		863.39	0.0049272		1393.4	0.00105865		1923.4	0.00062176		2453.4	-0.01379299
333.6	0.05708809		863.59	0.00517558		1393.6	0.00068494		1923.6	0.0024823		2453.6	-0.01361353
333.8	0.0572231		863.79	0.00525842		1393.8	0.00018724		1923.8	0.00297009		2453.8	-0.01353186
334	0.05684498		863.99	0.00615228		1394	0.00031577		1924	0.00360218		2454	-0.01347261
334.2	0.05810702		864.19	0.00626732		1394.2	0.00040496		1924.2	0.00467475		2454.2	-0.01395789
334.4	0.05897668		864.39	0.00684572		1394.4	0.00025347		1924.4	0.00487758		2454.4	-0.01399708
334.6	0.05912737		864.59	0.00681006		1394.6	0.0000638		1924.6	0.00480714		2454.6	-0.01443956
334.8	0.05948575		864.79	0.00679481		1394.8	-0.0012831		1924.8	0.00414827		2454.8	-0.0143315
335	0.06015043		864.99	0.00629708		1395	-0.00177008		1925	0.00369156		2455	-0.01504784
335.2	0.06072504		865.19	0.00584341		1395.2	-0.00123811		1925.2	0.00327504		2455.2	-0.01474663
335.4	0.06007584		865.39	0.00539446		1395.4	-0.0012495		1925.4	0.00254737		2455.4	-0.01537141
335.6	0.05957891		865.59	0.0046784		1395.6	-0.00055233		1925.6	0.00210104		2455.6	-0.01552953
335.8	0.05937305		865.79	0.00465611		1395.8	0.00033376		1925.8	0.00178143		2455.8	-0.01466567
336	0.05871966		865.99	0.00385513		1396	-0.00002922		1926	0.0011509		2456	-0.01378936
336.2	0.05878029		866.19	0.00374394		1396.2	0.00103357		1926.2	0.00018849		2456.2	-0.0140564
336.4	0.05815338		866.39	0.00306691		1396.4	0.00179969		1926.4	-0.0006484		2456.4	-0.01465146
336.6	0.05809885		866.59	0.00368702		1396.6	0.00253863		1926.6	-0.00211698		2456.6	-0.01464956
336.8	0.05829698		866.79	0.00307115		1396.8	0.00307529		1926.8	-0.0035203		2456.8	-0.01532971
337	0.05795203		866.99	0.00280709		1397	0.0028462		1927	-0.00341885		2457	-0.01487333
337.2	0.05878069		867.19	0.00338781		1397.2	0.00307648		1927.2	-0.00336876		2457.2	-0.01469069
337.4	0.05814674		867.39	0.00351046		1397.4	0.00317454		1927.4	-0.00261729		2457.4	-0.01479328
337.6	0.05890475		867.59	0.00358531		1397.6	0.00285059		1927.6	-0.0012944		2457.6	-0.01493427
337.8	0.05801688		867.79	0.00491918		1397.8	0.00220452		1927.8	-0.00090197		2457.8	-0.01460727
338	0.05788733		867.99	0.00631839		1398	0.00178065		1928	0.00024827		2458	-0.01455711
338.2	0.0590406		868.19	0.00679999		1398.2	0.00083616		1928.2	0.00093592		2458.2	-0.01545995
338.4	0.0588589		868.39	0.00702278		1398.4	0.00071499		1928.4	0.00100503		2458.4	-0.01481599
338.6	0.05930364		868.59	0.00628957		1398.6	0.00034917		1928.6	0.00111148		2458.6	-0.01488662
338.8	0.05941473		868.79	0.00529494		1398.8	-0.00046277		1928.8	0.00193373		2458.8	-0.01490919
339	0.05995114		868.99	0.00549547		1399	-0.00110048		1929	0.00207282		2459	-0.01489273
339.2	0.05901726		869.19	0.00550651		1399.2	-0.00112205		1929.2	0.00214173		2459.2	-0.01492766
339.4	0.05872313		869.39	0.00500932		1399.4	-0.0013		1929.4	0.00234582		2459.4	-0.01531819
339.6	0.0596325		869.59	0.00490987		1399.6	-0.00098074		1929.6	0.00249165		2459.6	-0.01443766
339.8	0.0601814		869.79	0.00496386		1399.8	-0.00095904		1929.8	0.00191982		2459.8	-0.01384954
340	0.05936934		869.99	0.00433254		1400	-0.00069357		1930	0.00162107		2460	-0.013632
340.2	0.05955683		870.19	0.00440216		1400.2	-0.00024562		1930.2	0.0013835		2460.2	-0.01449341
340.4	0.05901356		870.39	0.00331863		1400.4	-0.00075945		1930.4	0.00085192		2460.4	-0.01512801
340.6	0.05890854		870.59	0.00328732		1400.6	-0.00107167		1930.6	0.00002131		2460.6	-0.01517794
340.8	0.0588913		870.79	0.00278087		1400.8	-0.00120706		1930.8	-0.00016991		2460.8	-0.01548244
341	0.05880378		870.99	0.00250068		1401	0.00021632		1931	-0.00032315		2461	-0.01552684
341.2	0.05917048		871.19	0.00281386		1401.2	0.00103811		1931.2	-0.00073847		2461.2	-0.01520422
341.4	0.05967722		871.39	0.00278946		1401.4	0.00153214		1931.4	-0.00041578		2461.4	-0.01556482
341.6	0.05972716		871.59	0.00293821		1401.6	0.00110034		1931.6	-0.0006682		2461.6	-0.01567759
341.8	0.05962025		871.79	0.00337332		1401.8	0.00066758		1931.8	-0.0000009		2461.8	-0.01620811
342	0.06008045		871.99	0.00256174		1402	0.00101701		1932	0.00032537		2462	-0.01630376
342.2	0.06138656		872.19	0.00252866		1402.2	0.00105446		1932.2	0.00084662		2462.2	-0.01660006
342.4	0.06115143		872.39	0.00170132		1402.4	0.00067304		1932.4	0.00145522		2462.4	-0.01610283
342.6	0.06172095		872.59	0.00177018		1402.6	-0.000148		1932.6	0.00211095		2462.6	-0.01611389
342.8	0.06145417		872.79	0.00215266		1402.8	-0.00075465		1932.8	0.00285381		2462.8	-0.01538028
343	0.06167352		872.99	0.00165315		1403	-0.00117178		1933	0.00229067		2463	-0.01595653
343.2	0.06208586		873.19	0.00130881		1403.2	-0.00189687		1933.2	0.00185803		2463.2	-0.01604323
343.4	0.06316344		873.39	0.0010696		1403.4	-0.00158382		1933.4	0.00199773		2463.4	-0.01570634
343.6	0.06341575		873.59	0.00178694		1403.6	-0.00072465		1933.6	0.00221498		2463.6	-0.01422658
343.8	0.06302267		873.79	0.00197167		1403.8	-0.00060034		1933.8	0.00252957		2463.8	-0.0143154
344	0.06213587		873.99	0.00233		1404	-0.00080427		1934	0.00234855		2464	-0.01435064
344.2	0.06208355		874.19	0.00270478		1404.2	-0.00083314		1934.2	0.00259254		2464.2	-0.01469235
344.4	0.06129522		874.39	0.00202882		1404.4	-0.00105799		1934.4	0.00210179		2464.4	-0.01405385
344.6	0.0609112		874.59	0.00191645		1404.6	-0.000963		1934.6	0.00097055		2464.6	-0.01338886
344.8	0.06066628		874.79	0.00161902		1404.8	-0.00045201		1934.8	0.00046861		2464.8	-0.01331338
345	0.05997615		874.99	0.00123379		1405	0.00038433		1935	-0.00030202		2465	-0.01359016
345.2	0.05909737		875.19	0.00127513		1405.2	-0.00013512		1935.2	-0.00059403		2465.2	-0.01354264
345.4	0.05939151		875.39	0.00135766		1405.4	0.00004578		1935.4	-0.00064887		2465.4	-0.0145351
345.6	0.05914188		875.59	0.00098175		1405.6	-0.00044509		1935.6	-0.00150811		2465.6	-0.01564178
345.8	0.05901965		875.79	0.00049637		1405.8	-0.00034529		1935.8	-0.00074857		2465.8	-0.01631045
346	0.0594091		875.99	0.00001761		1406	-0.00027701		1936	-0.0000074		2466	-0.01573057
346.2	0.05932779		876.19	0.00045837		1406.2	-0.00095836		1936.2	0.00007414		2466.2	-0.01662641
346.4	0.05880742		876.39	-0.00000052		1406.4	-0.00147921		1936.4	0.00054808		2466.4	-0.01742774
346.6	0.05926009		876.59	0.00070538		1406.6	-0.00126558		1936.6	0.00153721		2466.6	-0.01773229
346.8	0.05964766		876.79	0.00021915		1406.8	-0.0017227		1936.8	0.001058		2466.8	-0.01863593
347	0.06014318		876.99	-0.00081982		1407	-0.00203404		1937	0.00054151		2467	-0.01994855
347.2	0.06123946		877.19	-0.00024348		1407.2	-0.00225267		1937.2	0.00056624		2467.2	-0.01944555
347.4	0.06123072		877.39	0.00013899		1407.4	-0.00175939		1937.4	0.00071926		2467.4	-0.01947917
347.6	0.0614532		877.59	0.000067		1407.6	-0.00102615		1937.6	0.00134357		2467.6	-0.0184503
347.8	0.06204414		877.79	0.00040306		1407.8	-0.00135683		1937.8	0.00157931		2467.8	-0.01803141
348	0.06188564		877.99	-0.00011206		1408	-0.00148757		1938	0.000941		2468	-0.01717924
348.2	0.06094155		878.19	0.00010222		1408.2	-0.00042422		1938.2	0.00108641		2468.2	-0.01628971
348.4	0.06042856		878.39	-0.00024519		1408.4	-0.00046809		1938.4	0.00140542		2468.4	-0.01508282
348.6	0.05995882		878.59	0.00042812		1408.6	-0.00067739		1938.6	0.00138552		2468.6	-0.01455769
348.8	0.05983054		878.79	0.00075687		1408.8	0.00019946		1938.8	0.00199833		2468.8	-0.01374056
349	0.05967678		878.99	0.00120051		1409	0.00030339		1939	0.00130154		2469	-0.01334936
349.2	0.05986972		879.19	0.00147268		1409.2	0.00073106		1939.2	0.00216176		2469.2	-0.01303713
349.4	0.06104514		879.39	0.00145549		1409.4	0.00074172		1939.4	0.00207002		2469.4	-0.01307101
349.6	0.06078618		879.59	0.00127893		1409.6	0.00074548		1939.6	0.00213197		2469.6	-0.01323015
349.8	0.06048191		879.79	0.00145188		1409.8	0.0010549		1939.8	0.003144		2469.8	-0.012503
350	0.06007649		879.99	0.00217853		1410	0.00130286		1940	0.00375474		2470	-0.01287095
350.2	0.06002736		880.19	0.00229141		1410.2	0.00123722		1940.2	0.00334774		2470.2	-0.013643
350.4	0.06015675		880.39	0.00241204		1410.4	0.00067337		1940.4	0.00402212		2470.4	-0.01395151
350.6	0.05970008		880.59	0.00215865		1410.6	0.00034877		1940.6	0.00336316		2470.6	-0.01476276
350.8	0.05954469		880.79	0.00218548		1410.8	-0.00019502		1940.8	0.00209133		2470.8	-0.01575127
351	0.06012654		880.99	0.00262771		1411	-0.0006124		1941	0.00202779		2471	-0.01612634
351.2	0.06037533		881.19	0.00234155		1411.2	-0.00137162		1941.2	0.00078452		2471.2	-0.01660096
351.4	0.06051912		881.39	0.00176688		1411.4	-0.00141152		1941.4	0.00032336		2471.4	-0.01655508
351.6	0.06037382		881.59	0.00171329		1411.6	-0.00071401		1941.6	0.00069964		2471.6	-0.01561078
351.8	0.06008238		881.79	0.00247618		1411.8	-0.00099584		1941.8	0.00033949		2471.8	-0.01515398
352	0.05961619		881.99	0.00277385		1412	-0.00115364		1942	0.0005166		2472	-0.01520964
352.2	0.05976328		882.19	0.00426992		1412.2	-0.00056512		1942.2	0.00120456		2472.2	-0.01646929
352.4	0.06121897		882.39	0.0045936		1412.4	-0.00062654		1942.4	0.00149537		2472.4	-0.01679657
352.6	0.06166264		882.59	0.00419818		1412.6	-0.00084068		1942.6	0.00132028		2472.6	-0.01716692
352.8	0.06231122		882.79	0.00410903		1412.8	-0.00077687		1942.8	0.00183441		2472.8	-0.01772752
353	0.06281107		882.99	0.00442345		1413	-0.00117582		1943	0.00127004		2473	-0.01755782
353.2	0.06275704		883.19	0.00410636		1413.2	-0.00114265		1943.2	0.00254081		2473.2	-0.01756561
353.4	0.06329628		883.39	0.00391181		1413.4	-0.00128752		1943.4	0.00166618		2473.4	-0.017148
353.6	0.06324334		883.59	0.00401072		1413.6	-0.00100851		1943.6	0.00233475		2473.6	-0.01746967
353.8	0.06272512		883.79	0.00396242		1413.8	-0.00131235		1943.8	0.0029556		2473.8	-0.01728609
354	0.06301797		883.99	0.00316553		1414	-0.0014961		1944	0.00321557		2474	-0.01742851
354.2	0.06353424		884.19	0.00253843		1414.2	-0.00157735		1944.2	0.0032586		2474.2	-0.01697758
354.4	0.06286711		884.39	0.00188183		1414.4	-0.00161789		1944.4	0.00317784		2474.4	-0.01719697
354.6	0.06125783		884.59	0.00151815		1414.6	-0.00144944		1944.6	0.00267902		2474.6	-0.01660799
354.8	0.0610604		884.79	0.00249453		1414.8	-0.00120203		1944.8	0.00261618		2474.8	-0.01575689
355	0.06131329		884.99	0.00265531		1415	-0.00118257		1945	0.00249595		2475	-0.01529307
355.2	0.06041427		885.19	0.0018665		1415.2	-0.00088748		1945.2	0.00265736		2475.2	-0.014646
355.4	0.06066194		885.39	0.00254109		1415.4	0.00015358		1945.4	0.00304934		2475.4	-0.01336822
355.6	0.05990541		885.59	0.00297609		1415.6	0.00073241		1945.6	0.00342322		2475.6	-0.01338364
355.8	0.06015512		885.79	0.00399409		1415.8	0.00000109		1945.8	0.00372966		2475.8	-0.01392428
356	0.0612594		885.99	0.00380071		1416	-0.00022937		1946	0.00422271		2476	-0.01465948
356.2	0.06156872		886.19	0.00433904		1416.2	0.00016627		1946.2	0.00435146		2476.2	-0.01563271
356.4	0.06215509		886.39	0.0037388		1416.4	-0.00039738		1946.4	0.00378291		2476.4	-0.01554835
356.6	0.06240172		886.59	0.0034168		1416.6	-0.00063653		1946.6	0.00306473		2476.6	-0.01667787
356.8	0.06213677		886.79	0.00401841		1416.8	-0.00019736		1946.8	0.00285007		2476.8	-0.01728047
357	0.06233403		886.99	0.00423607		1417	0.00065455		1947	0.00259221		2477	-0.01681189
357.2	0.06230949		887.19	0.00354106		1417.2	0.00079777		1947.2	0.00277533		2477.2	-0.01693666
357.4	0.06299483		887.39	0.00366929		1417.4	0.00109015		1947.4	0.00187493		2477.4	-0.01733916
357.6	0.06340843		887.59	0.00378378		1417.6	0.00118781		1947.6	0.00293303		2477.6	-0.01839466
357.8	0.06391804		887.79	0.00282894		1417.8	0.00125126		1947.8	0.00298293		2477.8	-0.01882179
358	0.06496758		887.99	0.00153967		1418	0.00162643		1948	0.00335685		2478	-0.01871953
358.2	0.06461434		888.19	0.00067636		1418.2	0.00234238		1948.2	0.00330038		2478.2	-0.01803185
358.4	0.06401804		888.39	0.00037126		1418.4	0.00265393		1948.4	0.00326116		2478.4	-0.01759087
358.6	0.06291456		888.59	0.00014695		1418.6	0.00331944		1948.6	0.00292511		2478.6	-0.01696135
358.8	0.06295523		888.79	0.00023545		1418.8	0.00403446		1948.8	0.00281183		2478.8	-0.01701886
359	0.06290892		888.99	-0.00106848		1419	0.00390675		1949	0.00323534		2479	-0.01715239
359.2	0.0621593		889.19	-0.00062933		1419.2	0.0032822		1949.2	0.00416125		2479.2	-0.0163641
359.4	0.06210263		889.39	-0.00035251		1419.4	0.00306939		1949.4	0.00334499		2479.4	-0.01653639
359.6	0.06194071		889.59	-0.00049292		1419.6	0.00157661		1949.6	0.0033296		2479.6	-0.0164296
359.8	0.06260612		889.79	-0.00014151		1419.8	0.00058454		1949.8	0.00300725		2479.8	-0.0154654
360	0.06241046		889.99	-0.00104293		1420	0.00021738		1950	0.00224437		2480	-0.01490064
360.2	0.06187266		890.19	-0.00056083		1420.2	-0.00049462		1950.2	0.00186914		2480.2	-0.01499711
360.4	0.06212255		890.39	-0.00071213		1420.4	-0.00098182		1950.4	0.00142619		2480.4	-0.01513052
360.6	0.0622247		890.59	0.00075865		1420.6	0.00002167		1950.6	0.00117164		2480.6	-0.01566408
360.8	0.06180695		890.79	0.0011182		1420.8	-0.00014369		1950.8	0.0018189		2480.8	-0.01581993
361	0.06225351		890.99	0.00178758		1421	-0.00050458		1951	0.00176029		2481	-0.01652604
361.2	0.06282999		891.19	0.00206995		1421.2	-0.00142601		1951.2	0.00237996		2481.2	-0.01665408
361.4	0.06322566		891.39	0.0021711		1421.4	-0.00183157		1951.4	0.00207882		2481.4	-0.0171179
361.6	0.06299558		891.59	0.0029009		1421.6	-0.00181556		1951.6	0.00246644		2481.6	-0.01756592
361.8	0.06314802		891.79	0.00205515		1421.8	-0.00168088		1951.8	0.00287836		2481.8	-0.01795133
362	0.0635535		891.99	0.00212136		1422	-0.00105914		1952	0.00295723		2482	-0.01764626
362.2	0.06376974		892.19	0.00184331		1422.2	-0.00062035		1952.2	0.00295247		2482.2	-0.01813698
362.4	0.0635212		892.39	0.00207957		1422.4	-0.00038278		1952.4	0.00273428		2482.4	-0.01829737
362.6	0.06304598		892.59	0.00234823		1422.6	0.00035796		1952.6	0.00252947		2482.6	-0.01824804
362.8	0.06375967		892.79	0.00205089		1422.8	0.00130134		1952.8	0.00341326		2482.8	-0.0181732
363	0.06382741		892.99	0.00210189		1423	0.00123794		1953	0.00432863		2483	-0.01782206
363.2	0.06377839		893.19	0.00229972		1423.2	0.00138579		1953.2	0.00408561		2483.2	-0.01682707
363.4	0.06350466		893.39	0.00194206		1423.4	0.00250365		1953.4	0.00233814		2483.4	-0.01655984
363.6	0.06390867		893.59	0.00230966		1423.6	0.00206255		1953.6	0.00194336		2483.6	-0.01615144
363.8	0.06441449		893.79	0.00194065		1423.8	0.00311371		1953.8	0.0012619		2483.8	-0.01586734
364	0.06320694		893.99	0.00184902		1424	0.00253223		1954	0.00131713		2484	-0.01611837
364.2	0.06409726		894.19	0.0018717		1424.2	0.00253627		1954.2	0.00193277		2484.2	-0.01629036
364.4	0.06398898		894.39	0.00212937		1424.4	0.00317909		1954.4	0.00195687		2484.4	-0.01588958
364.6	0.06398937		894.59	0.00316192		1424.6	0.00340954		1954.6	0.00228613		2484.6	-0.01665074
364.8	0.06421039		894.79	0.00216253		1424.8	0.00266804		1954.8	0.00225016		2484.8	-0.01750531
365	0.06374535		894.99	0.00249555		1425	0.0020738		1955	0.00189731		2485	-0.01768253
365.2	0.06323929		895.19	0.00288369		1425.2	0.00127555		1955.2	0.0022777		2485.2	-0.0170477
365.4	0.06224147		895.39	0.00285906		1425.4	0.00085852		1955.4	0.00207524		2485.4	-0.01745541
365.6	0.0612088		895.59	0.00340279		1425.6	-0.00015445		1955.6	0.00317708		2485.6	-0.01797064
365.8	0.06113905		895.79	0.00263444		1425.8	-0.00049189		1955.8	0.00447364		2485.8	-0.01874798
366	0.06096798		895.99	0.00236391		1426	-0.00154067		1956	0.00439623		2486	-0.01886241
366.2	0.06013358		896.19	0.00202579		1426.2	-0.00205462		1956.2	0.00497453		2486.2	-0.01930605
366.4	0.05939997		896.39	0.00241436		1426.4	-0.00178525		1956.4	0.00540316		2486.4	-0.01898748
366.6	0.05934301		896.59	0.0025535		1426.6	-0.00176527		1956.6	0.00640946		2486.6	-0.01952385
366.8	0.05978482		896.79	0.00249282		1426.8	-0.00135115		1956.8	0.00730479		2486.8	-0.01951524
367	0.05965639		896.99	0.00277446		1427	-0.00122865		1957	0.00724765		2487	-0.01907095
367.2	0.06057518		897.19	0.00211361		1427.2	-0.00153147		1957.2	0.00661191		2487.2	-0.01801358
367.4	0.06128111		897.39	0.00277138		1427.4	-0.00076211		1957.4	0.00690887		2487.4	-0.01791917
367.6	0.06251477		897.59	0.00280145		1427.6	-0.00147164		1957.6	0.00751736		2487.6	-0.01773373
367.8	0.06394921		897.79	0.00237747		1427.8	-0.0013951		1957.8	0.00757045		2487.8	-0.01713116
368	0.06432175		897.99	0.0023584		1428	-0.00177602		1958	0.00742979		2488	-0.01665739
368.2	0.06500415		898.19	0.00195028		1428.2	-0.0009877		1958.2	0.00628362		2488.2	-0.01642177
368.4	0.0655871		898.39	0.00270296		1428.4	-0.0004847		1958.4	0.00548557		2488.4	-0.01591166
368.6	0.06631866		898.59	0.00255253		1428.6	-0.00048177		1958.6	0.00528682		2488.6	-0.01658114
368.8	0.06689142		898.79	0.00249153		1428.8	0.00056693		1958.8	0.00421904		2488.8	-0.01618774
369	0.0672889		898.99	0.00318603		1429	0.00055024		1959	0.00366281		2489	-0.01621378
369.2	0.06740417		899.19	0.00272897		1429.2	0.00050101		1959.2	0.00349127		2489.2	-0.01605842
369.4	0.06662495		899.39	0.00190118		1429.4	0.00066199		1959.4	0.00314406		2489.4	-0.01696498
369.6	0.06674156		899.59	0.00207609		1429.6	0.00083955		1959.6	0.00311405		2489.6	-0.01710953
369.8	0.0667341		899.79	0.00106829		1429.8	0.00121415		1959.8	0.00344096		2489.8	-0.01779963
370	0.0656915		899.99	0.00099918		1430	0.00092788		1960	0.00286037		2490	-0.01789953
370.2	0.06559451		900.19	0.00101094		1430.2	0.00167115		1960.2	0.00279536		2490.2	-0.0178236
370.4	0.06504944		900.39	0.00108574		1430.4	0.00166935		1960.4	0.00309411		2490.4	-0.01819449
370.6	0.06506215		900.59	0.00131421		1430.6	0.00131403		1960.6	0.00339656		2490.6	-0.01857774
370.8	0.0653854		900.79	0.00181764		1430.8	0.00083041		1960.8	0.00285196		2490.8	-0.01801626
371	0.06590429		900.99	0.00237057		1431	0.00032767		1961	0.00258877		2491	-0.01740583
371.2	0.06623077		901.19	0.00229292		1431.2	-0.00100307		1961.2	0.0028348		2491.2	-0.01728145
371.4	0.06608386		901.39	0.00288201		1431.4	-0.00053105		1961.4	0.00314995		2491.4	-0.01709765
371.6	0.0665167		901.59	0.00268509		1431.6	-0.00154785		1961.6	0.00321189		2491.6	-0.01694038
371.8	0.06600273		901.79	0.0033674		1431.8	-0.00116124		1961.8	0.00398264		2491.8	-0.01690504
372	0.06544239		901.99	0.00359772		1432	-0.00114588		1962	0.00425444		2492	-0.01661778
372.2	0.06524747		902.19	0.00404635		1432.2	-0.0004345		1962.2	0.00432687		2492.2	-0.01632342
372.4	0.0656622		902.39	0.00480694		1432.4	-0.00032257		1962.4	0.00477916		2492.4	-0.01614351
372.6	0.06507231		902.59	0.00443149		1432.6	-0.0004443		1962.6	0.00485321		2492.6	-0.01609388
372.8	0.06466568		902.79	0.00450777		1432.8	0.00094938		1962.8	0.00502735		2492.8	-0.01621251
373	0.0638858		902.99	0.00420461		1433	0.00089375		1963	0.00533522		2493	-0.01674248
373.2	0.06325024		903.19	0.00324631		1433.2	0.00108866		1963.2	0.00516451		2493.2	-0.01662355
373.4	0.06366875		903.39	0.00359037		1433.4	0.00154546		1963.4	0.00561273		2493.4	-0.01657192
373.6	0.06354933		903.59	0.00279769		1433.6	0.00216652		1963.6	0.00544022		2493.6	-0.01605833
373.8	0.06294154		903.79	0.00147871		1433.8	0.00191424		1963.8	0.00524378		2493.8	-0.01586518
374	0.06238327		903.99	0.00135675		1434	0.00256293		1964	0.00427136		2494	-0.01517558
374.2	0.06327785		904.19	0.00141268		1434.2	0.0024014		1964.2	0.00412765		2494.2	-0.01497693
374.4	0.06286525		904.39	0.00118562		1434.4	0.00188497		1964.4	0.00379562		2494.4	-0.01545637
374.6	0.06379684		904.59	0.00111189		1434.6	0.00074664		1964.6	0.00280276		2494.6	-0.01519952
374.8	0.0637763		904.79	0.00112305		1434.8	0.00011419		1964.8	0.00157022		2494.8	-0.01572093
375	0.0636744		904.99	0.00190063		1435	-0.00005614		1965	0.00066025		2495	-0.01562839
375.2	0.06392273		905.19	0.00172486		1435.2	-0.00024897		1965.2	0.00039263		2495.2	-0.01630269
375.4	0.06463993		905.39	0.00179276		1435.4	0.00010032		1965.4	0.0006156		2495.4	-0.01595942
375.6	0.06579829		905.59	0.00140935		1435.6	-0.00037925		1965.6	0.00100877		2495.6	-0.01632196
375.8	0.06587986		905.79	0.00237433		1435.8	0.00015575		1965.8	0.00113366		2495.8	-0.01664351
376	0.06607846		905.99	0.00262927		1436	-0.00020875		1966	0.00067298		2496	-0.01637615
376.2	0.0672081		906.19	0.0022122		1436.2	-0.00010291		1966.2	0.00086173		2496.2	-0.0169824
376.4	0.06764975		906.39	0.00260133		1436.4	-0.00031659		1966.4	0.00102482		2496.4	-0.01721406
376.6	0.06852397		906.59	0.00228238		1436.6	-0.00064702		1966.6	0.00143711		2496.6	-0.01729641
376.8	0.06862275		906.79	0.00269971		1436.8	-0.00028036		1966.8	0.00156954		2496.8	-0.01800192
377	0.06887081		906.99	0.0027369		1437	-0.00058868		1967	0.00183672		2497	-0.01783553
377.2	0.07031737		907.19	0.00302854		1437.2	0.00006662		1967.2	0.00237466		2497.2	-0.01701208
377.4	0.07024629		907.39	0.00413212		1437.4	0.00085946		1967.4	0.00270291		2497.4	-0.01657591
377.6	0.06936287		907.59	0.00361679		1437.6	0.00185479		1967.6	0.00209583		2497.6	-0.01655065
377.8	0.06970223		907.79	0.0040326		1437.8	0.00164783		1967.8	0.00258648		2497.8	-0.01690718
378	0.06972901		907.99	0.00408298		1438	0.00189813		1968	0.00321883		2498	-0.01716414
378.2	0.06968769		908.19	0.00419388		1438.2	0.0013224		1968.2	0.0041364		2498.2	-0.0175688
378.4	0.06870229		908.39	0.00338556		1438.4	0.00116947		1968.4	0.00422338		2498.4	-0.01755756
378.6	0.06810375		908.59	0.00316189		1438.6	0.00098441		1968.6	0.00439094		2498.6	-0.01723011
378.8	0.0666534		908.79	0.00290484		1438.8	0.00168483		1968.8	0.00448143		2498.8	-0.01758654
379	0.06578974		908.99	0.00258657		1439	0.00189111		1969	0.00471199		2499	-0.01705483
379.2	0.06531678		909.19	0.00166539		1439.2	0.00192352		1969.2	0.00509095		2499.2	-0.01682713
379.4	0.06469633		909.39	0.00074287		1439.4	0.00201543		1969.4	0.00524481		2499.4	-0.01624807
379.6	0.06405373		909.59	0.00016779		1439.6	0.00193926		1969.6	0.00494209		2499.6	-0.01611413
379.8	0.06322475		909.79	0.00004183		1439.8	0.00199281		1969.8	0.0046661		2499.8	-0.01585791
380	0.06322475		909.99	0.00004183		1440	0.00199281		1970	0.0046661		2500	-0.01585791
380.2	0.06263302		910.19	-0.00001676		1440.2	0.00108446		1970.2	0.00605676		2500.2	-0.01559538
380.4	0.06196874		910.39	0.00029874		1440.4	0.00058199		1970.4	0.00709606		2500.4	-0.01529103
380.6	0.06114067		910.59	0.00013208		1440.6	-0.00057958		1970.6	0.00828478		2500.6	-0.01533792
380.8	0.06123775		910.79	-0.0007392		1440.8	0.0000797		1970.8	0.00985352		2500.8	-0.01468761
381	0.06004089		910.99	-0.00112997		1441	-0.00092046		1971	0.01106847		2501	-0.01406777
381.2	0.06001023		911.19	-0.00110219		1441.2	-0.00111557		1971.2	0.0124197		2501.2	-0.01305599
381.4	0.05937192		911.39	-0.00100559		1441.4	-0.00071156		1971.4	0.0132339		2501.4	-0.01251028
381.6	0.059027		911.59	-0.00087487		1441.6	-0.00034633		1971.6	0.01367961		2501.6	-0.01198327
381.8	0.0586117		911.79	-0.00100457		1441.8	0.00062277		1971.8	0.01377226		2501.8	-0.01198316
382	0.05830563		911.99	-0.00117363		1442	0.00076179		1972	0.0138831		2502	-0.01194371
382.2	0.05918667		912.19	-0.00096695		1442.2	0.00040277		1972.2	0.01308733		2502.2	-0.01211684
382.4	0.05934618		912.39	-0.00125089		1442.4	-0.00054625		1972.4	0.01167404		2502.4	-0.01160611
382.6	0.05958274		912.59	-0.00100896		1442.6	-0.00079226		1972.6	0.01052091		2502.6	-0.01101401
382.8	0.06006199		912.79	-0.00170143		1442.8	-0.00159291		1972.8	0.010237		2502.8	-0.01084298
383	0.05988026		912.99	-0.00224474		1443	-0.00254192		1973	0.00984194		2503	-0.01130067
383.2	0.06064408		913.19	-0.00214693		1443.2	-0.00282067		1973.2	0.00907124		2503.2	-0.01170999
383.4	0.0605973		913.39	-0.00152259		1443.4	-0.00260709		1973.4	0.00863622		2503.4	-0.01252285
383.6	0.06009095		913.59	-0.00087645		1443.6	-0.00322391		1973.6	0.00927445		2503.6	-0.01249218
383.8	0.05991717		913.79	-0.00069308		1443.8	-0.00359486		1973.8	0.00830328		2503.8	-0.01283214
384	0.05977101		913.99	-0.00091134		1444	-0.00393042		1974	0.00777553		2504	-0.01306323
384.2	0.05974904		914.19	-0.00112441		1444.2	-0.00446993		1974.2	0.00879214		2504.2	-0.01311802
384.4	0.05965264		914.39	-0.0017218		1444.4	-0.00405186		1974.4	0.00939819		2504.4	-0.01276752
384.6	0.05957801		914.59	-0.00240079		1444.6	-0.00371037		1974.6	0.00932541		2504.6	-0.0129085
384.8	0.06029679		914.79	-0.0030447		1444.8	-0.00214103		1974.8	0.01002435		2504.8	-0.01216538
385	0.05857313		914.99	-0.00278784		1445	-0.00262007		1975	0.00999657		2505	-0.01211389
385.2	0.05831246		915.19	-0.00136856		1445.2	-0.00209387		1975.2	0.01084158		2505.2	-0.0125254
385.4	0.0577771		915.39	-0.00142543		1445.4	-0.00145101		1975.4	0.01074482		2505.4	-0.01338673
385.6	0.05775458		915.59	-0.00058334		1445.6	-0.00123155		1975.6	0.01060695		2505.6	-0.01418105
385.8	0.05786509		915.79	-0.00053816		1445.8	-0.00147902		1975.8	0.01115688		2505.8	-0.0146444
386	0.0577973		915.99	-0.00025486		1446	-0.00314605		1976	0.01065578		2506	-0.01526269
386.2	0.05825329		916.19	0.00058056		1446.2	-0.00426894		1976.2	0.00963895		2506.2	-0.01552282
386.4	0.05728327		916.39	0.00093106		1446.4	-0.00531525		1976.4	0.00848016		2506.4	-0.01565707
386.6	0.05748365		916.59	0.00146671		1446.6	-0.00579653		1976.6	0.00822387		2506.6	-0.01564644
386.8	0.05761338		916.79	0.0007173		1446.8	-0.00634612		1976.8	0.00838094		2506.8	-0.01533975
387	0.05761031		916.99	0.00073403		1447	-0.00639386		1977	0.00867397		2507	-0.01555441
387.2	0.05664356		917.19	0.00165742		1447.2	-0.00589995		1977.2	0.00804412		2507.2	-0.01500847
387.4	0.05609303		917.39	0.00153798		1447.4	-0.00643791		1977.4	0.00788432		2507.4	-0.01409523
387.6	0.05529775		917.59	0.00105271		1447.6	-0.00649107		1977.6	0.00736931		2507.6	-0.01262777
387.8	0.05516275		917.79	0.00041875		1447.8	-0.00651923		1977.8	0.00709385		2507.8	-0.01190437
388	0.05451287		917.99	-0.0005213		1448	-0.00538247		1978	0.00771779		2508	-0.0108133
388.2	0.05486928		918.19	-0.00108758		1448.2	-0.00601447		1978.2	0.008503		2508.2	-0.0105185
388.4	0.05411186		918.39	-0.00152269		1448.4	-0.00492992		1978.4	0.00908328		2508.4	-0.01012663
388.6	0.05360343		918.59	-0.00149728		1448.6	-0.00405818		1978.6	0.00883425		2508.6	-0.00954407
388.8	0.05324806		918.79	-0.00147287		1448.8	-0.0036475		1978.8	0.0090384		2508.8	-0.00952699
389	0.05261773		918.99	-0.00118481		1449	-0.00362308		1979	0.00979102		2509	-0.01033912
389.2	0.05275019		919.19	-0.00087699		1449.2	-0.0037773		1979.2	0.01076726		2509.2	-0.01164604
389.4	0.05337182		919.39	-0.00145835		1449.4	-0.0036265		1979.4	0.01100093		2509.4	-0.01287376
389.6	0.05316342		919.59	-0.00064235		1449.6	-0.00370281		1979.6	0.01163289		2509.6	-0.01440362
389.8	0.05358825		919.79	-0.00077746		1449.8	-0.00345444		1979.8	0.01175556		2509.8	-0.01478381
390	0.05394075		919.99	-0.00052142		1450	-0.00345489		1980	0.01123107		2510	-0.01632151
390.2	0.05459487		920.19	-0.00004478		1450.2	-0.0036802		1980.2	0.01075456		2510.2	-0.01706211
390.4	0.05481945		920.39	-0.00053613		1450.4	-0.00435698		1980.4	0.01016248		2510.4	-0.01843161
390.6	0.05595927		920.59	-0.0005699		1450.6	-0.00381817		1980.6	0.0101273		2510.6	-0.01846993
390.8	0.05605982		920.79	-0.00132376		1450.8	-0.00357468		1980.8	0.00959869		2510.8	-0.01785345
391	0.05629915		920.99	-0.00162062		1451	-0.00310631		1981	0.0087703		2511	-0.01769233
391.2	0.05633138		921.19	-0.00177172		1451.2	-0.00331937		1981.2	0.0077033		2511.2	-0.01712983
391.4	0.05658507		921.39	-0.00180892		1451.4	-0.00385496		1981.4	0.0069883		2511.4	-0.0158768
391.6	0.05689761		921.59	-0.00227312		1451.6	-0.00322116		1981.6	0.00681813		2511.6	-0.01533293
391.8	0.05608426		921.79	-0.00243198		1451.8	-0.00332174		1981.8	0.00723526		2511.8	-0.01552082
392	0.05603764		921.99	-0.00269683		1452	-0.00286154		1982	0.00782508		2512	-0.01584487
392.2	0.05637108		922.19	-0.00314644		1452.2	-0.00345939		1982.2	0.00835907		2512.2	-0.01593306
392.4	0.05496259		922.39	-0.00268683		1452.4	-0.00296956		1982.4	0.00879963		2512.4	-0.01461501
392.6	0.05483347		922.59	-0.00303907		1452.6	-0.00276309		1982.6	0.00916116		2512.6	-0.01380573
392.8	0.05447923		922.79	-0.00269746		1452.8	-0.0029759		1982.8	0.00967843		2512.8	-0.01359763
393	0.05425368		922.99	-0.00272571		1453	-0.00314123		1983	0.01067974		2513	-0.0144196
393.2	0.05318088		923.19	-0.00291241		1453.2	-0.0034295		1983.2	0.01089346		2513.2	-0.01455733
393.4	0.05248392		923.39	-0.00239534		1453.4	-0.0035845		1983.4	0.0105458		2513.4	-0.01472834
393.6	0.05210462		923.59	-0.00188649		1453.6	-0.0034371		1983.6	0.00970965		2513.6	-0.01463109
393.8	0.052934		923.79	-0.00222121		1453.8	-0.00311888		1983.8	0.008866		2513.8	-0.01398223
394	0.05313852		923.99	-0.00240718		1454	-0.00333315		1984	0.0086117		2514	-0.01485702
394.2	0.05302896		924.19	-0.00247813		1454.2	-0.00419557		1984.2	0.00768982		2514.2	-0.01556422
394.4	0.05298251		924.39	-0.00278339		1454.4	-0.00426863		1984.4	0.0074929		2514.4	-0.01639105
394.6	0.05252045		924.59	-0.00212152		1454.6	-0.00396262		1984.6	0.0075276		2514.6	-0.0157711
394.8	0.05225886		924.79	-0.00279719		1454.8	-0.00449937		1984.8	0.00669576		2514.8	-0.0154924
395	0.0525212		924.99	-0.00356621		1455	-0.00500736		1985	0.006002		2515	-0.01576061
395.2	0.05224428		925.19	-0.00388293		1455.2	-0.00561295		1985.2	0.00672469		2515.2	-0.01536257
395.4	0.05191714		925.39	-0.00440823		1455.4	-0.00582774		1985.4	0.0065884		2515.4	-0.01628468
395.6	0.05164913		925.59	-0.00552656		1455.6	-0.00561127		1985.6	0.00696108		2515.6	-0.01676931
395.8	0.05084999		925.79	-0.00579781		1455.8	-0.00505522		1985.8	0.00718197		2515.8	-0.01730853
396	0.0521792		925.99	-0.00599029		1456	-0.00497878		1986	0.00772697		2516	-0.01682717
396.2	0.05265192		926.19	-0.0056259		1456.2	-0.00478462		1986.2	0.00805297		2516.2	-0.01578528
396.4	0.052565		926.39	-0.0051103		1456.4	-0.00501252		1986.4	0.00784449		2516.4	-0.01515246
396.6	0.05307216		926.59	-0.00562745		1456.6	-0.00494197		1986.6	0.00837555		2516.6	-0.01503681
396.8	0.05279676		926.79	-0.00475292		1456.8	-0.00490175		1986.8	0.00905756		2516.8	-0.01456754
397	0.05316992		926.99	-0.00473812		1457	-0.00501965		1987	0.00862111		2517	-0.01477125
397.2	0.05332273		927.19	-0.00457655		1457.2	-0.00517406		1987.2	0.00867878		2517.2	-0.01413169
397.4	0.05339026		927.39	-0.00411231		1457.4	-0.00499662		1987.4	0.00781628		2517.4	-0.0143019
397.6	0.0543007		927.59	-0.00397989		1457.6	-0.00555948		1987.6	0.00746297		2517.6	-0.0146335
397.8	0.05480383		927.79	-0.00384808		1457.8	-0.00540925		1987.8	0.00720919		2517.8	-0.01544702
398	0.05433066		927.99	-0.00346607		1458	-0.00522452		1988	0.00726684		2518	-0.01697723
398.2	0.05474766		928.19	-0.00265415		1458.2	-0.00490391		1988.2	0.00688622		2518.2	-0.01716773
398.4	0.05456606		928.39	-0.00153078		1458.4	-0.00435873		1988.4	0.00723007		2518.4	-0.01749993
398.6	0.05348307		928.59	-0.00080259		1458.6	-0.00485445		1988.6	0.00640662		2518.6	-0.01738533
398.8	0.05317446		928.79	-0.001214		1458.8	-0.00540439		1988.8	0.00638884		2518.8	-0.01796699
399	0.05284891		928.99	-0.00107745		1459	-0.00583276		1989	0.00654916		2519	-0.0176592
399.2	0.05186381		929.19	-0.00134719		1459.2	-0.0056355		1989.2	0.00696671		2519.2	-0.01789508
399.4	0.05134949		929.39	-0.00187672		1459.4	-0.00596495		1989.4	0.00673952		2519.4	-0.01851387
399.6	0.05093694		929.59	-0.00164517		1459.6	-0.00542802		1989.6	0.00657772		2519.6	-0.0186065
399.8	0.0511179		929.79	-0.00141958		1459.8	-0.00490367		1989.8	0.00675997		2519.8	-0.0183083
400	0.05178502		929.99	-0.00109071		1460	-0.00492546		1990	0.00621871		2520	-0.01704915
400.2	0.05221538		930.19	-0.00082932		1460.2	-0.00511134		1990.2	0.00653599		2520.2	-0.01668894
400.4	0.05188776		930.39	-0.00130401		1460.4	-0.00550043		1990.4	0.00593252		2520.4	-0.01676128
400.6	0.05133786		930.59	-0.00236556		1460.6	-0.00552316		1990.6	0.00679693		2520.6	-0.01580651
400.8	0.05042152		930.79	-0.00193163		1460.8	-0.005987		1990.8	0.0070437		2520.8	-0.01511538
401	0.05105445		930.99	-0.00384208		1461	-0.00597081		1991	0.00644593		2521	-0.01470744
401.2	0.05143555		931.19	-0.00429829		1461.2	-0.00612918		1991.2	0.00676743		2521.2	-0.01514671
401.4	0.05155515		931.39	-0.0053534		1461.4	-0.00589207		1991.4	0.00605611		2521.4	-0.01538138
401.6	0.0521529		931.59	-0.00525709		1461.6	-0.00611651		1991.6	0.00527755		2521.6	-0.01533821
401.8	0.05222498		931.79	-0.0053333		1461.8	-0.00588073		1991.8	0.00489578		2521.8	-0.01547924
402	0.05217949		931.99	-0.00524886		1462	-0.00550322		1992	0.00469812		2522	-0.01504103
402.2	0.05279519		932.19	-0.00501473		1462.2	-0.00541603		1992.2	0.00468119		2522.2	-0.01474741
402.4	0.05234095		932.39	-0.00450524		1462.4	-0.00588332		1992.4	0.00495231		2522.4	-0.01547896
402.6	0.0516289		932.59	-0.00396923		1462.6	-0.00622115		1992.6	0.0043707		2522.6	-0.01626175
402.8	0.05184471		932.79	-0.00372912		1462.8	-0.00630488		1992.8	0.00554638		2522.8	-0.01668292
403	0.05160698		932.99	-0.00342715		1463	-0.00625379		1993	0.00557129		2523	-0.01606976
403.2	0.05130732		933.19	-0.00379744		1463.2	-0.00634341		1993.2	0.00575008		2523.2	-0.01658202
403.4	0.05034866		933.39	-0.00353214		1463.4	-0.0065508		1993.4	0.00701681		2523.4	-0.01697682
403.6	0.0507088		933.59	-0.00398627		1463.6	-0.0066417		1993.6	0.00747852		2523.6	-0.01766648
403.8	0.05101057		933.79	-0.00412905		1463.8	-0.00567768		1993.8	0.00798109		2523.8	-0.01796658
404	0.0505123		933.99	-0.00410796		1464	-0.00552072		1994	0.0087946		2524	-0.01744633
404.2	0.05075745		934.19	-0.0039123		1464.2	-0.00624283		1994.2	0.00972591		2524.2	-0.01781015
404.4	0.05048475		934.39	-0.00507737		1464.4	-0.00613624		1994.4	0.01005224		2524.4	-0.01712962
404.6	0.04981397		934.59	-0.00518943		1464.6	-0.00607049		1994.6	0.01008039		2524.6	-0.01564389
404.8	0.04980603		934.79	-0.00575004		1464.8	-0.00639361		1994.8	0.00990852		2524.8	-0.01579104
405	0.05141273		934.99	-0.00684866		1465	-0.0059796		1995	0.00926315		2525	-0.01577119
405.2	0.05137671		935.19	-0.00650322		1465.2	-0.0056435		1995.2	0.00917714		2525.2	-0.01597422
405.4	0.05174976		935.39	-0.00651665		1465.4	-0.0050799		1995.4	0.00767128		2525.4	-0.01587955
405.6	0.05179111		935.59	-0.00547784		1465.6	-0.00526716		1995.6	0.00661936		2525.6	-0.01559906
405.8	0.05190467		935.79	-0.00571376		1465.8	-0.00567614		1995.8	0.00618586		2525.8	-0.01564201
406	0.05146766		935.99	-0.00485116		1466	-0.00617601		1996	0.00566005		2526	-0.01592928
406.2	0.05157932		936.19	-0.00549289		1466.2	-0.00686355		1996.2	0.0056307		2526.2	-0.01649562
406.4	0.0513704		936.39	-0.00541112		1466.4	-0.00739769		1996.4	0.00577618		2526.4	-0.01705697
406.6	0.05122139		936.59	-0.00482938		1466.6	-0.00732275		1996.6	0.00566859		2526.6	-0.01794786
406.8	0.0516308		936.79	-0.00549958		1466.8	-0.00814365		1996.8	0.00608145		2526.8	-0.01752107
407	0.05126106		936.99	-0.00560193		1467	-0.00873814		1997	0.00638636		2527	-0.01765095
407.2	0.05115132		937.19	-0.00603058		1467.2	-0.00840085		1997.2	0.0066489		2527.2	-0.01794412
407.4	0.04991821		937.39	-0.00665097		1467.4	-0.00779018		1997.4	0.00735794		2527.4	-0.01893505
407.6	0.05026931		937.59	-0.00712412		1467.6	-0.0073699		1997.6	0.00774289		2527.6	-0.01919773
407.8	0.049602		937.79	-0.00700518		1467.8	-0.00659773		1997.8	0.00819017		2527.8	-0.01901645
408	0.04911672		937.99	-0.00716138		1468	-0.00664669		1998	0.00843142		2528	-0.01805755
408.2	0.04908483		938.19	-0.00726936		1468.2	-0.00740019		1998.2	0.00840827		2528.2	-0.01833426
408.4	0.04865004		938.39	-0.00663838		1468.4	-0.00773044		1998.4	0.00812654		2528.4	-0.01805159
408.6	0.04815619		938.59	-0.00622085		1468.6	-0.00748357		1998.6	0.00871875		2528.6	-0.01774564
408.8	0.04823378		938.79	-0.00615887		1468.8	-0.00673468		1998.8	0.00875563		2528.8	-0.0178069
409	0.04887827		938.99	-0.00556033		1469	-0.00618881		1999	0.00803246		2529	-0.01805764
409.2	0.04927553		939.19	-0.00514771		1469.2	-0.00564404		1999.2	0.00740466		2529.2	-0.017225
409.4	0.05022393		939.39	-0.00494846		1469.4	-0.00504561		1999.4	0.00714065		2529.4	-0.01696867
409.6	0.05026052		939.59	-0.00431671		1469.6	-0.00522441		1999.6	0.00721291		2529.6	-0.01701579
409.8	0.04980904		939.79	-0.00345539		1469.8	-0.00581949		1999.8	0.00794501		2529.8	-0.01706725
410	0.04904792		939.99	-0.00325504		1470	-0.00665114		2000	0.00869769		2530	-0.01733597
410.2	0.04864163		940.19	-0.00369751		1470.2	-0.00724873		2000.2	0.00887541		2530.2	-0.01758338
410.4	0.04861283		940.39	-0.00325457		1470.4	-0.00735965		2000.4	0.00925452		2530.4	-0.01737386
410.6	0.04870826		940.59	-0.00365934		1470.6	-0.00706435		2000.6	0.00935453		2530.6	-0.01779077
410.8	0.04831442		940.79	-0.00439413		1470.8	-0.00757168		2000.8	0.00961852		2530.8	-0.01766272
411	0.04778815		940.99	-0.00453139		1471	-0.00704698		2001	0.00978867		2531	-0.01841728
411.2	0.04775924		941.19	-0.00566847		1471.2	-0.00616824		2001.2	0.00908939		2531.2	-0.01806676
411.4	0.04668014		941.39	-0.00641998		1471.4	-0.00574123		2001.4	0.00884452		2531.4	-0.01860948
411.6	0.04633228		941.59	-0.00672767		1471.6	-0.00621024		2001.6	0.00882205		2531.6	-0.01861641
411.8	0.04598793		941.79	-0.00769448		1471.8	-0.00661427		2001.8	0.00801151		2531.8	-0.01927571
412	0.04619719		941.99	-0.00744963		1472	-0.00671617		2002	0.00810815		2532	-0.01995308
412.2	0.04651663		942.19	-0.00704241		1472.2	-0.00775324		2002.2	0.00793054		2532.2	-0.02081495
412.4	0.04700887		942.39	-0.00638453		1472.4	-0.00807836		2002.4	0.00807827		2532.4	-0.02118456
412.6	0.04812256		942.59	-0.00748198		1472.6	-0.00812561		2002.6	0.00816003		2532.6	-0.02058614
412.8	0.04917097		942.79	-0.0073213		1472.8	-0.00776288		2002.8	0.00683666		2532.8	-0.01986527
413	0.05054798		942.99	-0.00697004		1473	-0.00784348		2003	0.00596806		2533	-0.01958928
413.2	0.0518273		943.19	-0.00604091		1473.2	-0.00797572		2003.2	0.00536986		2533.2	-0.01821107
413.4	0.05214163		943.39	-0.00588463		1473.4	-0.0072467		2003.4	0.00570939		2533.4	-0.01864231
413.6	0.05208315		943.59	-0.00491756		1473.6	-0.00740484		2003.6	0.00550591		2533.6	-0.01847895
413.8	0.05044156		943.79	-0.00461333		1473.8	-0.00776662		2003.8	0.00550534		2533.8	-0.0186045
414	0.05013558		943.99	-0.00500841		1474	-0.0076325		2004	0.00467166		2534	-0.01876489
414.2	0.04929817		944.19	-0.00449447		1474.2	-0.00725808		2004.2	0.00368191		2534.2	-0.0181136
414.4	0.04847976		944.39	-0.0053164		1474.4	-0.0068443		2004.4	0.00328479		2534.4	-0.01732295
414.6	0.04793273		944.59	-0.00556994		1474.6	-0.00666346		2004.6	0.0037642		2534.6	-0.01795377
414.8	0.04645762		944.79	-0.00545808		1474.8	-0.00665674		2004.8	0.00444056		2534.8	-0.01797827
415	0.04551346		944.99	-0.00567637		1475	-0.00637353		2005	0.00487143		2535	-0.01705385
415.2	0.04438485		945.19	-0.00625869		1475.2	-0.00602906		2005.2	0.00477121		2535.2	-0.01655408
415.4	0.04357664		945.39	-0.00687478		1475.4	-0.00552255		2005.4	0.00577062		2535.4	-0.01733939
415.6	0.04383006		945.59	-0.00770352		1475.6	-0.00588764		2005.6	0.00565894		2535.6	-0.01754934
415.8	0.04432167		945.79	-0.00884547		1475.8	-0.005664		2005.8	0.00585946		2535.8	-0.01773334
416	0.04497217		945.99	-0.00829744		1476	-0.00568067		2006	0.00669164		2536	-0.01795841
416.2	0.04590451		946.19	-0.00867935		1476.2	-0.0057697		2006.2	0.00648814		2536.2	-0.0177719
416.4	0.04659652		946.39	-0.00832199		1476.4	-0.00565032		2006.4	0.00736818		2536.4	-0.0174376
416.6	0.04770001		946.59	-0.00808428		1476.6	-0.0060855		2006.6	0.00698729		2536.6	-0.01681279
416.8	0.04851744		946.79	-0.00741327		1476.8	-0.00536513		2006.8	0.00705681		2536.8	-0.01623981
417	0.04879866		946.99	-0.00669407		1477	-0.00573083		2007	0.00651801		2537	-0.01661286
417.2	0.04977964		947.19	-0.00608723		1477.2	-0.00587498		2007.2	0.00593285		2537.2	-0.01713679
417.4	0.0498778		947.39	-0.0061611		1477.4	-0.00604144		2007.4	0.00561467		2537.4	-0.01735105
417.6	0.04947085		947.59	-0.00576658		1477.6	-0.00600661		2007.6	0.00587028		2537.6	-0.01767741
417.8	0.04875102		947.79	-0.00543793		1477.8	-0.00626291		2007.8	0.00561996		2537.8	-0.01797322
418	0.04963495		947.99	-0.00452602		1478	-0.00616958		2008	0.00587244		2538	-0.01763344
418.2	0.04887971		948.19	-0.00444674		1478.2	-0.0062311		2008.2	0.00617363		2538.2	-0.01776789
418.4	0.04789318		948.39	-0.00517268		1478.4	-0.00701954		2008.4	0.00629135		2538.4	-0.01876471
418.6	0.04844354		948.59	-0.00503756		1478.6	-0.00762314		2008.6	0.00767046		2538.6	-0.01960851
418.8	0.04769386		948.79	-0.00556801		1478.8	-0.00766125		2008.8	0.00837094		2538.8	-0.01955673
419	0.0465891		948.99	-0.00632632		1479	-0.00775576		2009	0.00850474		2539	-0.01912622
419.2	0.04574186		949.19	-0.00701731		1479.2	-0.00755053		2009.2	0.0086528		2539.2	-0.01951328
419.4	0.04590274		949.39	-0.00754326		1479.4	-0.0071052		2009.4	0.00849263		2539.4	-0.02018907
419.6	0.04547524		949.59	-0.00837422		1479.6	-0.00728802		2009.6	0.00783733		2539.6	-0.01934791
419.8	0.04567952		949.79	-0.0087806		1479.8	-0.00728386		2009.8	0.00828255		2539.8	-0.01950535
420	0.04560109		949.99	-0.00797199		1480	-0.00634095		2010	0.00808564		2540	-0.02001361
420.2	0.04526568		950.19	-0.00804815		1480.2	-0.00483234		2010.2	0.0082869		2540.2	-0.01983727
420.4	0.0454046		950.39	-0.00763302		1480.4	-0.0043781		2010.4	0.00842504		2540.4	-0.01971049
420.6	0.04522721		950.59	-0.00781293		1480.6	-0.00459869		2010.6	0.00737562		2540.6	-0.02015422
420.8	0.04503551		950.79	-0.00790301		1480.8	-0.00437033		2010.8	0.00617636		2540.8	-0.0201472
421	0.0449944		950.99	-0.00680794		1481	-0.00473603		2011	0.00507889		2541	-0.02045255
421.2	0.0455321		951.19	-0.00642726		1481.2	-0.00525648		2011.2	0.00419828		2541.2	-0.02115511
421.4	0.04514755		951.39	-0.00558734		1481.4	-0.005716		2011.4	0.00414448		2541.4	-0.02112959
421.6	0.04553455		951.59	-0.00546484		1481.6	-0.00605523		2011.6	0.00523484		2541.6	-0.02075242
421.8	0.04562605		951.79	-0.00489101		1481.8	-0.00634836		2011.8	0.00504709		2541.8	-0.01938862
422	0.04654651		951.99	-0.00434569		1482	-0.00654326		2012	0.00456858		2542	-0.01986678
422.2	0.04648303		952.19	-0.00543792		1482.2	-0.00715713		2012.2	0.00400907		2542.2	-0.02000503
422.4	0.04639688		952.39	-0.0062676		1482.4	-0.00811966		2012.4	0.0045068		2542.4	-0.01994907
422.6	0.04768226		952.59	-0.0066574		1482.6	-0.00833748		2012.6	0.00566563		2542.6	-0.01906938
422.8	0.04681504		952.79	-0.00640786		1482.8	-0.00868365		2012.8	0.00591652		2542.8	-0.01869165
423	0.04578824		952.99	-0.00614424		1483	-0.00912999		2013	0.00684683		2543	-0.01853909
423.2	0.04568155		953.19	-0.00556853		1483.2	-0.00932278		2013.2	0.00789141		2543.2	-0.01804369
423.4	0.04575309		953.39	-0.00549789		1483.4	-0.00925441		2013.4	0.0089895		2543.4	-0.01826685
423.6	0.04521774		953.59	-0.00637313		1483.6	-0.01014574		2013.6	0.01015321		2543.6	-0.01791946
423.8	0.04599261		953.79	-0.00650334		1483.8	-0.00975497		2013.8	0.01033285		2543.8	-0.01891354
424	0.04584052		953.99	-0.00619654		1484	-0.00872319		2014	0.01081997		2544	-0.0197218
424.2	0.04562422		954.19	-0.00651303		1484.2	-0.00831668		2014.2	0.01159058		2544.2	-0.01941596
424.4	0.04577813		954.39	-0.00692638		1484.4	-0.00811284		2014.4	0.01057512		2544.4	-0.01948839
424.6	0.0450914		954.59	-0.00735581		1484.6	-0.00851101		2014.6	0.0095501		2544.6	-0.01989997
424.8	0.04551074		954.79	-0.00681067		1484.8	-0.00859897		2014.8	0.00826846		2544.8	-0.02081589
425	0.04577965		954.99	-0.00636877		1485	-0.00822848		2015	0.00776911		2545	-0.0219292
425.2	0.04588857		955.19	-0.00685973		1485.2	-0.00872643		2015.2	0.00715388		2545.2	-0.02349638
425.4	0.04535664		955.39	-0.00650561		1485.4	-0.00892995		2015.4	0.00662584		2545.4	-0.02338484
425.6	0.04485149		955.59	-0.00667218		1485.6	-0.00897864		2015.6	0.00625984		2545.6	-0.02326412
425.8	0.04452631		955.79	-0.00652255		1485.8	-0.00854097		2015.8	0.00437097		2545.8	-0.02382857
426	0.04562749		955.99	-0.00680369		1486	-0.00831244		2016	0.00263609		2546	-0.02409702
426.2	0.04560772		956.19	-0.00770892		1486.2	-0.00868502		2016.2	0.00191491		2546.2	-0.02347398
426.4	0.04522413		956.39	-0.00778274		1486.4	-0.00841345		2016.4	0.00284808		2546.4	-0.02259188
426.6	0.04517431		956.59	-0.00802989		1486.6	-0.00836409		2016.6	0.00323332		2546.6	-0.02148029
426.8	0.0444109		956.79	-0.00724314		1486.8	-0.00791036		2016.8	0.00348254		2546.8	-0.0210211
427	0.04397022		956.99	-0.00729452		1487	-0.0080556		2017	0.00380211		2547	-0.02098438
427.2	0.04386569		957.19	-0.00758258		1487.2	-0.00805126		2017.2	0.00476603		2547.2	-0.02057867
427.4	0.04353268		957.39	-0.0079927		1487.4	-0.00832256		2017.4	0.00520676		2547.4	-0.02071743
427.6	0.04390708		957.59	-0.0081896		1487.6	-0.00899127		2017.6	0.00574827		2547.6	-0.02028783
427.8	0.04508073		957.79	-0.00787159		1487.8	-0.00844375		2017.8	0.0059151		2547.8	-0.02011981
428	0.0445656		957.99	-0.00770584		1488	-0.00877575		2018	0.00647386		2548	-0.01982173
428.2	0.04503767		958.19	-0.00835819		1488.2	-0.00878516		2018.2	0.00660611		2548.2	-0.01871545
428.4	0.04525643		958.39	-0.00861548		1488.4	-0.00854826		2018.4	0.0051402		2548.4	-0.01952487
428.6	0.04525542		958.59	-0.00853858		1488.6	-0.0091437		2018.6	0.00502721		2548.6	-0.020646
428.8	0.04550275		958.79	-0.00794827		1488.8	-0.00865471		2018.8	0.0042372		2548.8	-0.02115681
429	0.04582157		958.99	-0.00755088		1489	-0.00801241		2019	0.00376321		2549	-0.02172769
429.2	0.04622416		959.19	-0.00675124		1489.2	-0.00909254		2019.2	0.00348641		2549.2	-0.02189827
429.4	0.04576238		959.39	-0.00632542		1489.4	-0.0098063		2019.4	0.00252417		2549.4	-0.02170251
429.6	0.04501753		959.59	-0.00674212		1489.6	-0.0097205		2019.6	0.00182369		2549.6	-0.02209421
429.8	0.04521799		959.79	-0.0075707		1489.8	-0.0097612		2019.8	0.00131177		2549.8	-0.02195348
430	0.04611873		959.99	-0.00808564		1490	-0.01020419		2020	0.00126752		2550	-0.02068942
430.2	0.04544246		960.19	-0.00903996		1490.2	-0.0099671		2020.2	0.00180485		2550.2	-0.01991797
430.4	0.04420503		960.39	-0.00887067		1490.4	-0.00959993		2020.4	0.00259039		2550.4	-0.01904634
430.6	0.04377798		960.59	-0.00926892		1490.6	-0.00940514		2020.6	0.00259019		2550.6	-0.01848646
430.8	0.04407437		960.79	-0.00990239		1490.8	-0.00891056		2020.8	0.00308367		2550.8	-0.01833588
431	0.04389505		960.99	-0.01006327		1491	-0.00967678		2021	0.0028678		2551	-0.01812175
431.2	0.04350555		961.19	-0.01068498		1491.2	-0.00893828		2021.2	0.00397349		2551.2	-0.01763824
431.4	0.0435838		961.39	-0.01032634		1491.4	-0.00946553		2021.4	0.00432483		2551.4	-0.01668438
431.6	0.04401854		961.59	-0.01000905		1491.6	-0.00902572		2021.6	0.00574476		2551.6	-0.01552144
431.8	0.04378437		961.79	-0.01035431		1491.8	-0.00866439		2021.8	0.00552664		2551.8	-0.01583053
432	0.04285844		961.99	-0.01018496		1492	-0.00822167		2022	0.00583468		2552	-0.01606174
432.2	0.04285778		962.19	-0.00986638		1492.2	-0.00795522		2022.2	0.00553501		2552.2	-0.01717621
432.4	0.04247517		962.39	-0.00907256		1492.4	-0.00787508		2022.4	0.00446625		2552.4	-0.01876162
432.6	0.04211376		962.59	-0.00857493		1492.6	-0.00764228		2022.6	0.00434406		2552.6	-0.01943134
432.8	0.04208275		962.79	-0.00717779		1492.8	-0.00696267		2022.8	0.00310165		2552.8	-0.01963509
433	0.04260281		962.99	-0.00644443		1493	-0.00695932		2023	0.0021254		2553	-0.02043069
433.2	0.04301834		963.19	-0.00635096		1493.2	-0.00841792		2023.2	0.00188789		2553.2	-0.02157346
433.4	0.04223075		963.39	-0.00591273		1493.4	-0.00904975		2023.4	0.00114646		2553.4	-0.02232676
433.6	0.04191926		963.59	-0.00646625		1493.6	-0.00899182		2023.6	0.00164906		2553.6	-0.02315153
433.8	0.04205917		963.79	-0.00661647		1493.8	-0.00902262		2023.8	0.00206439		2553.8	-0.02325969
434	0.04265651		963.99	-0.00712515		1494	-0.00903272		2024	0.00171293		2554	-0.02384839
434.2	0.04240803		964.19	-0.00766499		1494.2	-0.00834506		2024.2	0.00180752		2554.2	-0.02400675
434.4	0.0425783		964.39	-0.00714736		1494.4	-0.00879408		2024.4	0.00185404		2554.4	-0.02398601
434.6	0.04406891		964.59	-0.00751722		1494.6	-0.0080921		2024.6	0.00237491		2554.6	-0.02335072
434.8	0.0450366		964.79	-0.00775337		1494.8	-0.00859584		2024.8	0.00363338		2554.8	-0.02252784
435	0.0449635		964.99	-0.00705733		1495	-0.00833689		2025	0.00403014		2555	-0.02125119
435.2	0.04471717		965.19	-0.00758714		1495.2	-0.00811006		2025.2	0.00520715		2555.2	-0.02063211
435.4	0.04468837		965.39	-0.00695964		1495.4	-0.0083481		2025.4	0.00586095		2555.4	-0.01944327
435.6	0.04553998		965.59	-0.00712426		1495.6	-0.00739585		2025.6	0.00572653		2555.6	-0.019264
435.8	0.04598547		965.79	-0.00795906		1495.8	-0.00684411		2025.8	0.00562252		2555.8	-0.0190596
436	0.04499582		965.99	-0.0079834		1496	-0.00682395		2026	0.00602106		2556	-0.01871336
436.2	0.04473957		966.19	-0.00862196		1496.2	-0.00725038		2026.2	0.00506031		2556.2	-0.01927797
436.4	0.04519121		966.39	-0.0094658		1496.4	-0.00698581		2026.4	0.00491994		2556.4	-0.01889653
436.6	0.04521213		966.59	-0.01003331		1496.6	-0.00673597		2026.6	0.00460642		2556.6	-0.01879297
436.8	0.04508743		966.79	-0.01005693		1496.8	-0.00678664		2026.8	0.00433175		2556.8	-0.01879492
437	0.04513272		966.99	-0.01074466		1497	-0.00769989		2027	0.00382881		2557	-0.01901699
437.2	0.04512394		967.19	-0.01151829		1497.2	-0.00886226		2027.2	0.00448461		2557.2	-0.01958923
437.4	0.04396968		967.39	-0.01105257		1497.4	-0.00818756		2027.4	0.00436271		2557.4	-0.01980479
437.6	0.04275243		967.59	-0.01187381		1497.6	-0.00813282		2027.6	0.00456682		2557.6	-0.02032204
437.8	0.04199918		967.79	-0.01219899		1497.8	-0.00777631		2027.8	0.0040575		2557.8	-0.02029154
438	0.04223258		967.99	-0.01219317		1498	-0.00832694		2028	0.00362677		2558	-0.02058878
438.2	0.04153408		968.19	-0.01216161		1498.2	-0.00891579		2028.2	0.00491671		2558.2	-0.01938351
438.4	0.04160296		968.39	-0.01189942		1498.4	-0.00872578		2028.4	0.00506211		2558.4	-0.0185482
438.6	0.04161366		968.59	-0.01204252		1498.6	-0.00826382		2028.6	0.00654715		2558.6	-0.01787457
438.8	0.04042921		968.79	-0.01199299		1498.8	-0.00811009		2028.8	0.0073928		2558.8	-0.0173613
439	0.04032118		968.99	-0.01280813		1499	-0.00764457		2029	0.0082821		2559	-0.01748504
439.2	0.0410426		969.19	-0.01320091		1499.2	-0.00770093		2029.2	0.00878346		2559.2	-0.01753541
439.4	0.04179838		969.39	-0.01283712		1499.4	-0.00746032		2029.4	0.00866599		2559.4	-0.01706233
439.6	0.04292732		969.59	-0.01282223		1499.6	-0.00696175		2029.6	0.00738869		2559.6	-0.01707178
439.8	0.04306968		969.79	-0.01325466		1499.8	-0.0069909		2029.8	0.00775792		2559.8	-0.01668389
440	0.04393991		969.99	-0.01343267		1500	-0.00728646		2030	0.00778826		2560	-0.01703485
440.2	0.04488942		970.19	-0.0128659		1500.2	-0.00685142		2030.2	0.00716264		2560.2	-0.01706386
440.4	0.04625344		970.39	-0.01228557		1500.4	-0.00648512		2030.4	0.00634042		2560.4	-0.0170194
440.6	0.04673358		970.59	-0.01070116		1500.6	-0.00643311		2030.6	0.00575872		2560.6	-0.01747284
440.8	0.04660057		970.79	-0.0096101		1500.8	-0.00675715		2030.8	0.00524203		2560.8	-0.01758858
441	0.04659374		970.99	-0.00921918		1501	-0.00721695		2031	0.00512248		2561	-0.01820541
441.2	0.04689952		971.19	-0.00935638		1501.2	-0.0069201		2031.2	0.00555907		2561.2	-0.01849712
441.4	0.04618962		971.39	-0.00917391		1501.4	-0.00663181		2031.4	0.00467677		2561.4	-0.02006596
441.6	0.04502819		971.59	-0.00915624		1501.6	-0.00742538		2031.6	0.0044082		2561.6	-0.02046537
441.8	0.04470505		971.79	-0.00868819		1501.8	-0.0075851		2031.8	0.00440967		2561.8	-0.02028119
442	0.04465058		971.99	-0.00889143		1502	-0.00806853		2032	0.00433124		2562	-0.02037638
442.2	0.04412034		972.19	-0.00935878		1502.2	-0.00761942		2032.2	0.00502512		2562.2	-0.02009203
442.4	0.04448233		972.39	-0.00945378		1502.4	-0.00688359		2032.4	0.00498971		2562.4	-0.02030285
442.6	0.04315495		972.59	-0.009409		1502.6	-0.00675632		2032.6	0.0060053		2562.6	-0.0202085
442.8	0.04266367		972.79	-0.01012285		1502.8	-0.00692784		2032.8	0.00577279		2562.8	-0.02103653
443	0.04248963		972.99	-0.01060311		1503	-0.00763997		2033	0.00586721		2563	-0.02199749
443.2	0.04251823		973.19	-0.01069378		1503.2	-0.00834576		2033.2	0.00651554		2563.2	-0.02215038
443.4	0.0421755		973.39	-0.01011375		1503.4	-0.00856832		2033.4	0.0057054		2563.4	-0.02152544
443.6	0.04197685		973.59	-0.00973891		1503.6	-0.0091617		2033.6	0.00549281		2563.6	-0.02191516
443.8	0.04341206		973.79	-0.0101179		1503.8	-0.01022679		2033.8	0.00560803		2563.8	-0.0223109
444	0.04423204		973.99	-0.00985081		1504	-0.00980006		2034	0.00575275		2564	-0.02176768
444.2	0.04425024		974.19	-0.00903369		1504.2	-0.01037448		2034.2	0.00475651		2564.2	-0.02141137
444.4	0.04535559		974.39	-0.00822722		1504.4	-0.01070381		2034.4	0.00417173		2564.4	-0.0213301
444.6	0.04486519		974.59	-0.00801008		1504.6	-0.01099161		2034.6	0.00439378		2564.6	-0.02145621
444.8	0.04510023		974.79	-0.00955092		1504.8	-0.01119136		2034.8	0.0043		2564.8	-0.0217882
445	0.04451362		974.99	-0.01060741		1505	-0.01109295		2035	0.00441907		2565	-0.02180559
445.2	0.04497517		975.19	-0.01202197		1505.2	-0.01061021		2035.2	0.00461071		2565.2	-0.02195284
445.4	0.04452617		975.39	-0.01294549		1505.4	-0.01004429		2035.4	0.00486114		2565.4	-0.02173567
445.6	0.04389905		975.59	-0.01259015		1505.6	-0.00885487		2035.6	0.00497821		2565.6	-0.02118871
445.8	0.04361263		975.79	-0.01265399		1505.8	-0.00816832		2035.8	0.00599759		2565.8	-0.02097522
446	0.0435256		975.99	-0.01286687		1506	-0.00738399		2036	0.00589533		2566	-0.02115093
446.2	0.04354451		976.19	-0.01250824		1506.2	-0.00620458		2036.2	0.00592281		2566.2	-0.02009126
446.4	0.04342434		976.39	-0.01309318		1506.4	-0.00567255		2036.4	0.00579683		2566.4	-0.01960045
446.6	0.04326199		976.59	-0.01243104		1506.6	-0.00547948		2036.6	0.00660955		2566.6	-0.01979328
446.8	0.04355829		976.79	-0.01255891		1506.8	-0.0059248		2036.8	0.00620532		2566.8	-0.02085728
447	0.04302017		976.99	-0.01306893		1507	-0.00609694		2037	0.00573199		2567	-0.02096146
447.2	0.04369259		977.19	-0.01353218		1507.2	-0.00639905		2037.2	0.00602447		2567.2	-0.02106995
447.4	0.04424277		977.39	-0.01270052		1507.4	-0.00678326		2037.4	0.00499612		2567.4	-0.02124913
447.6	0.04466856		977.59	-0.01199026		1507.6	-0.00723926		2037.6	0.00418047		2567.6	-0.02147365
447.8	0.04556229		977.79	-0.01287951		1507.8	-0.00764302		2037.8	0.00373253		2567.8	-0.02184352
448	0.04500336		977.99	-0.01181343		1508	-0.00690564		2038	0.00379292		2568	-0.02199977
448.2	0.04510401		978.19	-0.01185041		1508.2	-0.00755309		2038.2	0.00292518		2568.2	-0.02255717
448.4	0.04410754		978.39	-0.01193047		1508.4	-0.00769941		2038.4	0.00243104		2568.4	-0.02232956
448.6	0.04316301		978.59	-0.01196423		1508.6	-0.00824382		2038.6	0.00182483		2568.6	-0.02213372
448.8	0.04318341		978.79	-0.01204372		1508.8	-0.00861052		2038.8	0.0020485		2568.8	-0.02308204
449	0.04251192		978.99	-0.01256368		1509	-0.00866863		2039	0.00199009		2569	-0.02200225
449.2	0.0426285		979.19	-0.01333519		1509.2	-0.0085769		2039.2	0.00241837		2569.2	-0.02170458
449.4	0.04224305		979.39	-0.01310998		1509.4	-0.0086247		2039.4	0.00219246		2569.4	-0.02092155
449.6	0.04141387		979.59	-0.01162639		1509.6	-0.00819155		2039.6	0.00233417		2569.6	-0.02138738
449.8	0.04097678		979.79	-0.01171761		1509.8	-0.00872912		2039.8	0.00271798		2569.8	-0.02092088
450	0.04057943		979.99	-0.01160188		1510	-0.00807447		2040	0.002518		2570	-0.02039364
450.2	0.04094365		980.19	-0.01171796		1510.2	-0.00791798		2040.2	0.00307685		2570.2	-0.01949718
450.4	0.04120749		980.39	-0.01173323		1510.4	-0.0076245		2040.4	0.0041807		2570.4	-0.0194187
450.6	0.04171973		980.59	-0.01031727		1510.6	-0.00779721		2040.6	0.00473934		2570.6	-0.01934668
450.8	0.04229272		980.79	-0.01079676		1510.8	-0.00808677		2040.8	0.00431463		2570.8	-0.0199207
451	0.04180098		980.99	-0.01178693		1511	-0.00830777		2041	0.0043528		2571	-0.01937556
451.2	0.04247573		981.19	-0.01151567		1511.2	-0.00798281		2041.2	0.00449012		2571.2	-0.01970315
451.4	0.04242877		981.39	-0.01132683		1511.4	-0.00784223		2041.4	0.00418717		2571.4	-0.01990384
451.6	0.04251749		981.59	-0.01169524		1511.6	-0.00726066		2041.6	0.00404594		2571.6	-0.01942397
451.8	0.04291531		981.79	-0.01199034		1511.8	-0.00782974		2041.8	0.00422143		2571.8	-0.02089114
452	0.0427705		981.99	-0.01128981		1512	-0.0072115		2042	0.0044164		2572	-0.02188016
452.2	0.04171606		982.19	-0.01163477		1512.2	-0.007616		2042.2	0.00463789		2572.2	-0.02233587
452.4	0.04114472		982.39	-0.01170733		1512.4	-0.00794446		2042.4	0.00427737		2572.4	-0.02256202
452.6	0.04163574		982.59	-0.01155473		1512.6	-0.00845792		2042.6	0.00489909		2572.6	-0.02279818
452.8	0.04191517		982.79	-0.01254739		1512.8	-0.00835827		2042.8	0.00540466		2572.8	-0.0234397
453	0.04196849		982.99	-0.0133837		1513	-0.00746777		2043	0.0053983		2573	-0.02287694
453.2	0.0417501		983.19	-0.01351814		1513.2	-0.00786939		2043.2	0.00567373		2573.2	-0.02360197
453.4	0.04149674		983.39	-0.01266415		1513.4	-0.00815187		2043.4	0.00539029		2573.4	-0.02395926
453.6	0.04110703		983.59	-0.01181896		1513.6	-0.00816452		2043.6	0.00582887		2573.6	-0.02436884
453.8	0.04023401		983.79	-0.01243911		1513.8	-0.00829463		2043.8	0.00612541		2573.8	-0.0238198
454	0.03971982		983.99	-0.0127539		1514	-0.00768787		2044	0.00641971		2574	-0.02379192
454.2	0.03961198		984.19	-0.01294136		1514.2	-0.00769331		2044.2	0.00638384		2574.2	-0.02339863
454.4	0.03966377		984.39	-0.01262844		1514.4	-0.00696694		2044.4	0.0068544		2574.4	-0.0225287
454.6	0.04053334		984.59	-0.01161941		1514.6	-0.00653853		2044.6	0.00642834		2574.6	-0.02165727
454.8	0.04105678		984.79	-0.01218574		1514.8	-0.00683118		2044.8	0.0064629		2574.8	-0.0213287
455	0.04089653		984.99	-0.01180258		1515	-0.00654854		2045	0.00592634		2575	-0.02094929
455.2	0.04177606		985.19	-0.01182838		1515.2	-0.00618136		2045.2	0.00581227		2575.2	-0.02121416
455.4	0.04255681		985.39	-0.01161973		1515.4	-0.00627958		2045.4	0.00534896		2575.4	-0.0214703
455.6	0.04323474		985.59	-0.01129275		1515.6	-0.00616889		2045.6	0.00476318		2575.6	-0.0219232
455.8	0.04319248		985.79	-0.01057565		1515.8	-0.00636234		2045.8	0.00456564		2575.8	-0.02370745
456	0.0427187		985.99	-0.01100651		1516	-0.00654248		2046	0.00558031		2576	-0.02458398
456.2	0.04128537		986.19	-0.01049256		1516.2	-0.00691835		2046.2	0.0052664		2576.2	-0.02507341
456.4	0.04215282		986.39	-0.01042408		1516.4	-0.00693178		2046.4	0.00443231		2576.4	-0.02527217
456.6	0.0417504		986.59	-0.01049228		1516.6	-0.00776537		2046.6	0.00528198		2576.6	-0.02563362
456.8	0.04176931		986.79	-0.01075228		1516.8	-0.00739448		2046.8	0.00542274		2576.8	-0.02584414
457	0.0410692		986.99	-0.01045338		1517	-0.00795128		2047	0.00540339		2577	-0.02610194
457.2	0.04094376		987.19	-0.01080738		1517.2	-0.00897186		2047.2	0.0052899		2577.2	-0.02618276
457.4	0.04040819		987.39	-0.01073393		1517.4	-0.00980534		2047.4	0.00492938		2577.4	-0.02587061
457.6	0.03955998		987.59	-0.01125343		1517.6	-0.01014794		2047.6	0.00536611		2577.6	-0.02571672
457.8	0.03906553		987.79	-0.01257382		1517.8	-0.01005808		2047.8	0.00587587		2577.8	-0.02449144
458	0.03913801		987.99	-0.01373431		1518	-0.00976721		2048	0.00473903		2578	-0.02449516
458.2	0.03919728		988.19	-0.01372347		1518.2	-0.00983682		2048.2	0.00413149		2578.2	-0.02368612
458.4	0.03917693		988.39	-0.01356196		1518.4	-0.00906553		2048.4	0.00398618		2578.4	-0.02230364
458.6	0.03911871		988.59	-0.01316375		1518.6	-0.00863299		2048.6	0.00314625		2578.6	-0.02195597
458.8	0.03932253		988.79	-0.01326266		1518.8	-0.00844592		2048.8	0.00296349		2578.8	-0.02134106
459	0.03973486		988.99	-0.01353187		1519	-0.00875175		2049	0.00282318		2579	-0.02188006
459.2	0.03946121		989.19	-0.01337095		1519.2	-0.00915748		2049.2	0.00273446		2579.2	-0.02172849
459.4	0.04029257		989.39	-0.0126247		1519.4	-0.00914533		2049.4	0.00277148		2579.4	-0.02180677
459.6	0.04002375		989.59	-0.01271217		1519.6	-0.00894833		2049.6	0.00291305		2579.6	-0.02241502
459.8	0.03961696		989.79	-0.01279129		1519.8	-0.00958214		2049.8	0.00435755		2579.8	-0.02320574
460	0.0396739		989.99	-0.01293052		1520	-0.01078949		2050	0.0050156		2580	-0.02350896
460.2	0.03898772		990.19	-0.01190701		1520.2	-0.0108825		2050.2	0.00488844		2580.2	-0.02264319
460.4	0.03965723		990.39	-0.01158737		1520.4	-0.01106153		2050.4	0.00562348		2580.4	-0.02299928
460.6	0.03958947		990.59	-0.01177848		1520.6	-0.01169358		2050.6	0.00591391		2580.6	-0.02388513
460.8	0.04022709		990.79	-0.0115242		1520.8	-0.01184169		2050.8	0.00558322		2580.8	-0.02430191
461	0.03986032		990.99	-0.01129937		1521	-0.0126449		2051	0.00566659		2581	-0.02451218
461.2	0.03997772		991.19	-0.01168584		1521.2	-0.01183057		2051.2	0.00621157		2581.2	-0.02396203
461.4	0.03983918		991.39	-0.01189305		1521.4	-0.01143752		2051.4	0.00702793		2581.4	-0.02405858
461.6	0.04021149		991.59	-0.01258527		1521.6	-0.01057916		2051.6	0.00661148		2581.6	-0.02399986
461.8	0.04099474		991.79	-0.01394282		1521.8	-0.01024402		2051.8	0.00560315		2581.8	-0.0234914
462	0.04164703		991.99	-0.01433336		1522	-0.00930159		2052	0.00438783		2582	-0.02329792
462.2	0.04199934		992.19	-0.01403007		1522.2	-0.0088745		2052.2	0.0038971		2582.2	-0.02253227
462.4	0.04185317		992.39	-0.01455203		1522.4	-0.00836935		2052.4	0.00274231		2582.4	-0.02285772
462.6	0.04190755		992.59	-0.01463917		1522.6	-0.00836585		2052.6	0.0018105		2582.6	-0.02353421
462.8	0.04180677		992.79	-0.01465401		1522.8	-0.0093154		2052.8	0.00155411		2582.8	-0.02354612
463	0.0416434		992.99	-0.01472424		1523	-0.01042463		2053	0.0007301		2583	-0.02399739
463.2	0.04238398		993.19	-0.01368127		1523.2	-0.01016705		2053.2	-0.00002131		2583.2	-0.02362933
463.4	0.04295686		993.39	-0.01296285		1523.4	-0.0103788		2053.4	0.00053587		2583.4	-0.02373056
463.6	0.04232106		993.59	-0.01288312		1523.6	-0.01088832		2053.6	0.00070156		2583.6	-0.02366732
463.8	0.04122911		993.79	-0.01227078		1523.8	-0.01146258		2053.8	0.00123187		2583.8	-0.02307822
464	0.04102549		993.99	-0.0114992		1524	-0.01193305		2054	0.00167921		2584	-0.02250224
464.2	0.04058181		994.19	-0.01190287		1524.2	-0.01236499		2054.2	0.00184173		2584.2	-0.02191139
464.4	0.04011691		994.39	-0.01131211		1524.4	-0.01248899		2054.4	0.00286751		2584.4	-0.02222073
464.6	0.03960827		994.59	-0.01104117		1524.6	-0.01258468		2054.6	0.00342312		2584.6	-0.0225252
464.8	0.03919981		994.79	-0.01092149		1524.8	-0.0124461		2054.8	0.0046574		2584.8	-0.02235657
465	0.03754115		994.99	-0.01180496		1525	-0.01145835		2055	0.00540182		2585	-0.02217472
465.2	0.03722949		995.19	-0.01277849		1525.2	-0.01003712		2055.2	0.00633793		2585.2	-0.02149157
465.4	0.03766625		995.39	-0.01281692		1525.4	-0.00972484		2055.4	0.00670081		2585.4	-0.02128519
465.6	0.03788213		995.59	-0.0132491		1525.6	-0.00932143		2055.6	0.00626962		2585.6	-0.02097947
465.8	0.03831305		995.79	-0.0141093		1525.8	-0.00922643		2055.8	0.0060778		2585.8	-0.0207726
466	0.03855076		995.99	-0.01453941		1526	-0.00894181		2056	0.00633715		2586	-0.0202271
466.2	0.03870732		996.19	-0.01448756		1526.2	-0.00914354		2056.2	0.00597452		2586.2	-0.02088648
466.4	0.03848292		996.39	-0.01467476		1526.4	-0.01005135		2056.4	0.00482094		2586.4	-0.02234435
466.6	0.03817948		996.59	-0.01424541		1526.6	-0.00967439		2056.6	0.00454353		2586.6	-0.02297885
466.8	0.03855331		996.79	-0.01413749		1526.8	-0.01045613		2056.8	0.00399718		2586.8	-0.02356401
467	0.03904155		996.99	-0.01382076		1527	-0.00957819		2057	0.00267231		2587	-0.02385019
467.2	0.03972831		997.19	-0.01388171		1527.2	-0.00950445		2057.2	0.00228852		2587.2	-0.02406549
467.4	0.03934122		997.39	-0.01359068		1527.4	-0.00930077		2057.4	0.00250751		2587.4	-0.02508631
467.6	0.0387569		997.59	-0.01325943		1527.6	-0.00986636		2057.6	0.00161653		2587.6	-0.02502342
467.8	0.0392222		997.79	-0.01260707		1527.8	-0.0100971		2057.8	0.00125049		2587.8	-0.02516974
468	0.04013882		997.99	-0.01268636		1528	-0.01055244		2058	0.00193916		2588	-0.02534885
468.2	0.03962082		998.19	-0.0127939		1528.2	-0.01067528		2058.2	0.00186136		2588.2	-0.02513177
468.4	0.03895261		998.39	-0.01212257		1528.4	-0.00998533		2058.4	0.00227782		2588.4	-0.02496986
468.6	0.0392818		998.59	-0.01222451		1528.6	-0.01007855		2058.6	0.00252785		2588.6	-0.02504778
468.8	0.03943959		998.79	-0.0124223		1528.8	-0.0099199		2058.8	0.00336873		2588.8	-0.02490338
469	0.0386567		998.99	-0.01261457		1529	-0.00898905		2059	0.00278412		2589	-0.02452088
469.2	0.03882167		999.19	-0.01218586		1529.2	-0.00908117		2059.2	0.00326936		2589.2	-0.02388947
469.4	0.03797607		999.39	-0.01148726		1529.4	-0.0094044		2059.4	0.0028332		2589.4	-0.02344855
469.6	0.03728249		999.59	-0.01125717		1529.6	-0.00930264		2059.6	0.002548		2589.6	-0.02267056
469.8	0.03723081		999.79	-0.01147636		1529.8	-0.00965173		2059.8	0.00196016		2589.8	-0.0225994
470	0.03758185		999.99	-0.01102699		1530	-0.00945646		2060	0.00164676		2590	-0.02217804
470.2	0.03860874		1000.19	-0.0106575		1530.2	-0.00944618		2060.2	0.0008173		2590.2	-0.02284256
470.4	0.03864894		1000.39	-0.0105086		1530.4	-0.00979569		2060.4	0.00098209		2590.4	-0.02340639
470.6	0.03984911		1000.59	-0.01154805		1530.6	-0.00895642		2060.6	0.00116133		2590.6	-0.02409521
470.8	0.04020059		1000.79	-0.01210942		1530.8	-0.00927437		2060.8	0.0015466		2590.8	-0.02443694
471	0.0404081		1000.99	-0.01261266		1531	-0.00971313		2061	0.00122185		2591	-0.02437734
471.2	0.04081001		1001.19	-0.01334151		1531.2	-0.00995721		2061.2	0.00125628		2591.2	-0.02477844
471.4	0.04130284		1001.39	-0.01368082		1531.4	-0.00994416		2061.4	0.00130039		2591.4	-0.02474702
471.6	0.04115483		1001.59	-0.01304638		1531.6	-0.01100161		2061.6	0.00143377		2591.6	-0.02427845
471.8	0.04168441		1001.79	-0.01278377		1531.8	-0.01138567		2061.8	0.00160969		2591.8	-0.02453383
472	0.0413826		1001.99	-0.01290147		1532	-0.01170362		2062	0.00227831		2592	-0.02457882
472.2	0.0407348		1002.19	-0.01317578		1532.2	-0.01209299		2062.2	0.00178779		2592.2	-0.02370068
472.4	0.04097022		1002.39	-0.01373974		1532.4	-0.01240826		2062.4	0.00146926		2592.4	-0.02412391
472.6	0.04115976		1002.59	-0.01356848		1532.6	-0.01333921		2062.6	0.00187238		2592.6	-0.02432519
472.8	0.04106298		1002.79	-0.01347018		1532.8	-0.01275743		2062.8	0.00262879		2592.8	-0.02383156
473	0.04045431		1002.99	-0.01323976		1533	-0.0120905		2063	0.00221531		2593	-0.02338512
473.2	0.03990133		1003.19	-0.01317502		1533.2	-0.01250781		2063.2	0.00276115		2593.2	-0.0228815
473.4	0.03941667		1003.39	-0.01266539		1533.4	-0.01217298		2063.4	0.00277664		2593.4	-0.02320778
473.6	0.03951988		1003.59	-0.0121836		1533.6	-0.01166886		2063.6	0.00296753		2593.6	-0.02313392
473.8	0.04012652		1003.79	-0.01175389		1533.8	-0.01126784		2063.8	0.00244643		2593.8	-0.02443692
474	0.04134407		1003.99	-0.01152061		1534	-0.01041938		2064	0.00268754		2594	-0.0248765
474.2	0.04249537		1004.19	-0.01146607		1534.2	-0.01049883		2064.2	0.00254658		2594.2	-0.02518958
474.4	0.04278016		1004.39	-0.01120584		1534.4	-0.0111766		2064.4	0.00330537		2594.4	-0.02525707
474.6	0.04330792		1004.59	-0.01106608		1534.6	-0.01094863		2064.6	0.00337297		2594.6	-0.02552839
474.8	0.04242835		1004.79	-0.01035661		1534.8	-0.01169382		2064.8	0.00351087		2594.8	-0.02545674
475	0.04242191		1004.99	-0.01050619		1535	-0.01244165		2065	0.00219003		2595	-0.02582586
475.2	0.04193465		1005.19	-0.01040121		1535.2	-0.01250092		2065.2	0.00176126		2595.2	-0.02609057
475.4	0.04171897		1005.39	-0.01016189		1535.4	-0.01311952		2065.4	0.00175006		2595.4	-0.02506186
475.6	0.04070935		1005.59	-0.00974488		1535.6	-0.01384088		2065.6	0.0012568		2595.6	-0.0254242
475.8	0.04010307		1005.79	-0.01013283		1535.8	-0.01425246		2065.8	0.00078751		2595.8	-0.0259589
476	0.0394766		1005.99	-0.01044261		1536	-0.01319473		2066	0.0008213		2596	-0.02513294
476.2	0.03929842		1006.19	-0.01154183		1536.2	-0.01378945		2066.2	0.00012141		2596.2	-0.02488377
476.4	0.03877491		1006.39	-0.01237973		1536.4	-0.01311666		2066.4	0.00054588		2596.4	-0.02556164
476.6	0.03809919		1006.59	-0.01263978		1536.6	-0.0127507		2066.6	0.00058177		2596.6	-0.02522146
476.8	0.03827684		1006.79	-0.0131011		1536.8	-0.01171028		2066.8	0.00161397		2596.8	-0.02365898
477	0.03817424		1006.99	-0.01386779		1537	-0.01056677		2067	0.00205202		2597	-0.02309093
477.2	0.03808572		1007.19	-0.01454165		1537.2	-0.01044946		2067.2	0.00264667		2597.2	-0.0223077
477.4	0.03840714		1007.39	-0.01461404		1537.4	-0.01014822		2067.4	0.0036433		2597.4	-0.0226614
477.6	0.03872047		1007.59	-0.01524659		1537.6	-0.0096769		2067.6	0.00439562		2597.6	-0.02215356
477.8	0.03941143		1007.79	-0.01479004		1537.8	-0.00946459		2067.8	0.00459677		2597.8	-0.02200065
478	0.04083914		1007.99	-0.01418472		1538	-0.00944316		2068	0.00555869		2598	-0.02151282
478.2	0.04121704		1008.19	-0.01384331		1538.2	-0.0099189		2068.2	0.00508223		2598.2	-0.02132998
478.4	0.04142747		1008.39	-0.01405653		1538.4	-0.01080127		2068.4	0.00520253		2598.4	-0.02243648
478.6	0.04077313		1008.59	-0.01430083		1538.6	-0.01115006		2068.6	0.00458306		2598.6	-0.0235186
478.8	0.04014938		1008.79	-0.01465254		1538.8	-0.01145512		2068.8	0.0044821		2598.8	-0.02432637
479	0.0397496		1008.99	-0.01443786		1539	-0.01150151		2069	0.0032317		2599	-0.02458444
479.2	0.04027238		1009.19	-0.01353657		1539.2	-0.01145584		2069.2	0.00288815		2599.2	-0.02419206
479.4	0.04057671		1009.39	-0.01341691		1539.4	-0.0116537		2069.4	0.00233114		2599.4	-0.0237334
479.6	0.04004373		1009.59	-0.0138066		1539.6	-0.01138385		2069.6	0.00201377		2599.6	-0.02460253
479.8	0.03965832		1009.79	-0.01428731		1539.8	-0.01041843		2069.8	0.00198366		2599.8	-0.02455236
480	0.03976471		1009.99	-0.01435442		1540	-0.00945954		2070	0.00247491		2600	-0.02429151
480.2	0.03953484		1010.19	-0.01543268		1540.2	-0.01039882		2070.2	0.00216282		2600.2	-0.02489694
480.4	0.03880591		1010.39	-0.01594681		1540.4	-0.01032848		2070.4	0.00174052		2600.4	-0.02464961
480.6	0.03879025		1010.59	-0.01577314		1540.6	-0.01062232		2070.6	0.00121268		2600.6	-0.0245901
480.8	0.03920974		1010.79	-0.01628994		1540.8	-0.01066849		2070.8	0.00123641		2600.8	-0.0233644
481	0.04001038		1010.99	-0.01573362		1541	-0.01061407		2071	0.00103116		2601	-0.02323845
481.2	0.03935626		1011.19	-0.01572602		1541.2	-0.01088946		2071.2	0.00086063		2601.2	-0.02309257
481.4	0.03906515		1011.39	-0.01617738		1541.4	-0.01109565		2071.4	0.00151577		2601.4	-0.02332825
481.6	0.0388462		1011.59	-0.01617066		1541.6	-0.0109404		2071.6	0.00174502		2601.6	-0.02354927
481.8	0.03907715		1011.79	-0.0153906		1541.8	-0.01185791		2071.8	0.00150349		2601.8	-0.02454353
482	0.03985796		1011.99	-0.01509368		1542	-0.01240847		2072	0.00143008		2602	-0.02515331
482.2	0.03907702		1012.19	-0.01544546		1542.2	-0.01331982		2072.2	0.0014234		2602.2	-0.02563612
482.4	0.03887508		1012.39	-0.01548634		1542.4	-0.01404672		2072.4	0.00205353		2602.4	-0.02656608
482.6	0.03815434		1012.59	-0.0153409		1542.6	-0.014645		2072.6	0.00120286		2602.6	-0.02690951
482.8	0.03812835		1012.79	-0.01500754		1542.8	-0.01454399		2072.8	0.00131279		2602.8	-0.02726934
483	0.03777306		1012.99	-0.01416235		1543	-0.01463918		2073	0.001104		2603	-0.02682424
483.2	0.03829831		1013.19	-0.01426253		1543.2	-0.01448138		2073.2	0.0012254		2603.2	-0.02686075
483.4	0.03768836		1013.39	-0.01430579		1543.4	-0.01535835		2073.4	0.00209887		2603.4	-0.02688643
483.6	0.03706409		1013.59	-0.01456055		1543.6	-0.0153086		2073.6	0.00300414		2603.6	-0.02758753
483.8	0.03726976		1013.79	-0.0146425		1543.8	-0.01570129		2073.8	0.003811		2603.8	-0.02663129
484	0.03675896		1013.99	-0.014661		1544	-0.0160481		2074	0.00393836		2604	-0.02648215
484.2	0.03672567		1014.19	-0.0145148		1544.2	-0.01639468		2074.2	0.00353536		2604.2	-0.02574674
484.4	0.03738906		1014.39	-0.01448623		1544.4	-0.01605131		2074.4	0.00271201		2604.4	-0.02564557
484.6	0.03763795		1014.59	-0.01434261		1544.6	-0.01517575		2074.6	0.00312456		2604.6	-0.02557411
484.8	0.03733451		1014.79	-0.01446052		1544.8	-0.0139406		2074.8	0.00335237		2604.8	-0.02481377
485	0.03720838		1014.99	-0.01375481		1545	-0.01169772		2075	0.00406276		2605	-0.02492553
485.2	0.03532999		1015.19	-0.01532875		1545.2	-0.01123331		2075.2	0.00348568		2605.2	-0.02524453
485.4	0.03544105		1015.39	-0.01479508		1545.4	-0.0108944		2075.4	0.00349427		2605.4	-0.02470783
485.6	0.03568974		1015.59	-0.01540082		1545.6	-0.01082265		2075.6	0.00299087		2605.6	-0.02417935
485.8	0.03566769		1015.79	-0.01541877		1545.8	-0.01064519		2075.8	0.00247005		2605.8	-0.02447048
486	0.03596274		1015.99	-0.01539338		1546	-0.01043289		2076	0.00188164		2606	-0.02406156
486.2	0.03626941		1016.19	-0.01562575		1546.2	-0.01045399		2076.2	0.00182525		2606.2	-0.02443552
486.4	0.03609735		1016.39	-0.0158745		1546.4	-0.01044179		2076.4	0.0012245		2606.4	-0.02520556
486.6	0.03622006		1016.59	-0.01596232		1546.6	-0.01140605		2076.6	0.00016939		2606.6	-0.0259877
486.8	0.03671835		1016.79	-0.01651614		1546.8	-0.01183186		2076.8	-0.00044107		2606.8	-0.02679933
487	0.03711784		1016.99	-0.01598061		1547	-0.01213825		2077	-0.00052119		2607	-0.02669218
487.2	0.03764945		1017.19	-0.01623522		1547.2	-0.01207933		2077.2	-0.0004714		2607.2	-0.0278055
487.4	0.03769401		1017.39	-0.01584368		1547.4	-0.01314861		2077.4	-0.00028637		2607.4	-0.02888589
487.6	0.03750886		1017.59	-0.01612501		1547.6	-0.01360079		2077.6	-0.00115077		2607.6	-0.0292735
487.8	0.03787753		1017.79	-0.01600482		1547.8	-0.01414683		2077.8	-0.00078109		2607.8	-0.02786056
488	0.0367685		1017.99	-0.01524844		1548	-0.01276397		2078	-0.00137129		2608	-0.02806421
488.2	0.03717188		1018.19	-0.01427311		1548.2	-0.01304401		2078.2	-0.00041137		2608.2	-0.02785367
488.4	0.0371565		1018.39	-0.0141074		1548.4	-0.01239718		2078.4	-0.00007505		2608.4	-0.0278218
488.6	0.03576437		1018.59	-0.01346116		1548.6	-0.01202077		2078.6	0.00134649		2608.6	-0.02725875
488.8	0.03498821		1018.79	-0.01292883		1548.8	-0.01167827		2078.8	0.00231586		2608.8	-0.02639159
489	0.03477814		1018.99	-0.01290729		1549	-0.0111787		2079	0.00313967		2609	-0.02498051
489.2	0.03407012		1019.19	-0.01318834		1549.2	-0.0116841		2079.2	0.00299202		2609.2	-0.02437857
489.4	0.03413375		1019.39	-0.01226716		1549.4	-0.01104348		2079.4	0.003188		2609.4	-0.02295659
489.6	0.03251829		1019.59	-0.01357841		1549.6	-0.01124725		2079.6	0.00297427		2609.6	-0.0227136
489.8	0.03244005		1019.79	-0.01368895		1549.8	-0.01092035		2079.8	0.00318084		2609.8	-0.02273327
490	0.03265777		1019.99	-0.01368498		1550	-0.01126378		2080	0.00301368		2610	-0.02260885
490.2	0.03264498		1020.19	-0.0142897		1550.2	-0.01096606		2080.2	0.00311465		2610.2	-0.02309627
490.4	0.03200708		1020.39	-0.01353976		1550.4	-0.01159866		2080.4	0.00244773		2610.4	-0.02322331
490.6	0.03253417		1020.59	-0.013663		1550.6	-0.0122501		2080.6	0.00169829		2610.6	-0.02414879
490.8	0.0331783		1020.79	-0.01402733		1550.8	-0.01164154		2080.8	0.00151182		2610.8	-0.02450165
491	0.03391307		1020.99	-0.01386492		1551	-0.01117341		2081	0.00180941		2611	-0.02506771
491.2	0.0339773		1021.19	-0.0142509		1551.2	-0.0102148		2081.2	0.00198626		2611.2	-0.02554207
491.4	0.03462047		1021.39	-0.01436015		1551.4	-0.01077598		2081.4	0.00205342		2611.4	-0.02560649
491.6	0.03518335		1021.59	-0.01454859		1551.6	-0.01077285		2081.6	0.00243694		2611.6	-0.02497125
491.8	0.03530022		1021.79	-0.01375494		1551.8	-0.01082101		2081.8	0.00303086		2611.8	-0.02453871
492	0.03530522		1021.99	-0.01291792		1552	-0.01112442		2082	0.00246706		2612	-0.02535769
492.2	0.03658267		1022.19	-0.01227985		1552.2	-0.01268245		2082.2	0.00324955		2612.2	-0.02557973
492.4	0.03666532		1022.39	-0.01196269		1552.4	-0.01279451		2082.4	0.00338885		2612.4	-0.0251632
492.6	0.0367573		1022.59	-0.01223788		1552.6	-0.0136341		2082.6	0.00322864		2612.6	-0.02508323
492.8	0.03822672		1022.79	-0.012017		1552.8	-0.01392312		2082.8	0.00340964		2612.8	-0.02477786
493	0.03833361		1022.99	-0.01292821		1553	-0.01413381		2083	0.00406044		2613	-0.02482311
493.2	0.03859511		1023.19	-0.0129541		1553.2	-0.01417357		2083.2	0.00375202		2613.2	-0.02642064
493.4	0.03876742		1023.39	-0.01289853		1553.4	-0.01499247		2083.4	0.00257266		2613.4	-0.02693612
493.6	0.03857959		1023.59	-0.01299612		1553.6	-0.0154715		2083.6	0.00173263		2613.6	-0.02782577
493.8	0.03915425		1023.79	-0.0133869		1553.8	-0.01494887		2083.8	0.00175218		2613.8	-0.02806922
494	0.03838448		1023.99	-0.01397238		1554	-0.01465119		2084	0.00084828		2614	-0.02921839
494.2	0.03826523		1024.19	-0.01360494		1554.2	-0.01390855		2084.2	0.00011659		2614.2	-0.03004489
494.4	0.03846855		1024.39	-0.01333289		1554.4	-0.01411412		2084.4	-0.00044576		2614.4	-0.03105623
494.6	0.03804161		1024.59	-0.01395961		1554.6	-0.01324121		2084.6	0.00004712		2614.6	-0.03168458
494.8	0.03707775		1024.79	-0.01404529		1554.8	-0.01239071		2084.8	0.00054714		2614.8	-0.03131035
495	0.03653997		1024.99	-0.01470176		1555	-0.01132112		2085	0.00146781		2615	-0.03127201
495.2	0.0362636		1025.19	-0.0151716		1555.2	-0.01050691		2085.2	0.00219569		2615.2	-0.03017512
495.4	0.03636167		1025.39	-0.01611705		1555.4	-0.01098247		2085.4	0.00290315		2615.4	-0.02980012
495.6	0.03642288		1025.59	-0.01680246		1555.6	-0.01080233		2085.6	0.0031604		2615.6	-0.0296568
495.8	0.03536443		1025.79	-0.01655809		1555.8	-0.01113771		2085.8	0.0032127		2615.8	-0.02961936
496	0.03535356		1025.99	-0.0173151		1556	-0.01155053		2086	0.00343455		2616	-0.02954333
496.2	0.03577617		1026.19	-0.01779277		1556.2	-0.01119194		2086.2	0.00453185		2616.2	-0.02868649
496.4	0.03521462		1026.39	-0.01790302		1556.4	-0.01082833		2086.4	0.00456846		2616.4	-0.02698884
496.6	0.03507782		1026.59	-0.01841065		1556.6	-0.01073464		2086.6	0.00393578		2616.6	-0.02618732
496.8	0.03575527		1026.79	-0.01802907		1556.8	-0.01090268		2086.8	0.00401238		2616.8	-0.02544095
497	0.0358591		1026.99	-0.01814879		1557	-0.01105673		2087	0.00391393		2617	-0.02602792
497.2	0.03768593		1027.19	-0.01690903		1557.2	-0.01101508		2087.2	0.00308953		2617.2	-0.02684006
497.4	0.03847023		1027.39	-0.01616502		1557.4	-0.01171213		2087.4	0.0022044		2617.4	-0.02626
497.6	0.03960023		1027.59	-0.01558173		1557.6	-0.01154335		2087.6	0.0023107		2617.6	-0.0254177
497.8	0.04010582		1027.79	-0.01555887		1557.8	-0.01104834		2087.8	0.00154092		2617.8	-0.0249139
498	0.04036479		1027.99	-0.01529628		1558	-0.01165521		2088	0.00068244		2618	-0.02533279
498.2	0.04185237		1028.19	-0.01399893		1558.2	-0.01182278		2088.2	0.00039049		2618.2	-0.02629418
498.4	0.04173975		1028.39	-0.01427812		1558.4	-0.01218159		2088.4	0.00009986		2618.4	-0.02690918
498.6	0.0411535		1028.59	-0.01388632		1558.6	-0.01191357		2088.6	-0.00005012		2618.6	-0.0262769
498.8	0.04002263		1028.79	-0.01325155		1558.8	-0.01243632		2088.8	-0.00057345		2618.8	-0.02584376
499	0.03945487		1028.99	-0.01377108		1559	-0.01246947		2089	0.00009906		2619	-0.02516357
499.2	0.03953914		1029.19	-0.01407736		1559.2	-0.01255139		2089.2	-0.00097011		2619.2	-0.02559061
499.4	0.03904779		1029.39	-0.01532814		1559.4	-0.01299607		2089.4	-0.00038249		2619.4	-0.02618734
499.6	0.038592		1029.59	-0.01587159		1559.6	-0.01355649		2089.6	-0.00009332		2619.6	-0.02623839
499.8	0.0377699		1029.79	-0.01612241		1559.8	-0.01238284		2089.8	0.00045127		2619.8	-0.02515582
500	0.03730533		1029.99	-0.01710866		1560	-0.01194492		2090	0.0003043		2620	-0.02436885
500.2	0.03672364		1030.19	-0.01709736		1560.2	-0.01148511		2090.2	0.00072829		2620.2	-0.023515
500.4	0.03631821		1030.39	-0.01753738		1560.4	-0.01060441		2090.4	0.0004167		2620.4	-0.0225255
500.6	0.03619128		1030.59	-0.01742453		1560.6	-0.01097246		2090.6	-0.00025393		2620.6	-0.02297379
500.8	0.03663306		1030.79	-0.01781265		1560.8	-0.01119754		2090.8	-0.00068169		2620.8	-0.02370602
501	0.03670555		1030.99	-0.01779125		1561	-0.01081639		2091	-0.00078285		2621	-0.02480247
501.2	0.03772729		1031.19	-0.01751922		1561.2	-0.01130266		2091.2	-0.00125147		2621.2	-0.02509792
501.4	0.03718349		1031.39	-0.01735663		1561.4	-0.01141253		2091.4	-0.00119419		2621.4	-0.0252339
501.6	0.03742052		1031.59	-0.01701017		1561.6	-0.01128082		2091.6	-0.00170292		2621.6	-0.02565756
501.8	0.03737797		1031.79	-0.01681499		1561.8	-0.0114337		2091.8	-0.00216835		2621.8	-0.02752549
502	0.03681523		1031.99	-0.01697419		1562	-0.01218446		2092	-0.0014576		2622	-0.02809346
502.2	0.03729444		1032.19	-0.01690247		1562.2	-0.01280438		2092.2	-0.00130444		2622.2	-0.02919881
502.4	0.03699329		1032.39	-0.016736		1562.4	-0.01317111		2092.4	-0.0009794		2622.4	-0.0290224
502.6	0.03731717		1032.59	-0.01612317		1562.6	-0.01375504		2092.6	-0.00085486		2622.6	-0.02856911
502.8	0.03627049		1032.79	-0.01590976		1562.8	-0.0139349		2092.8	-0.00081013		2622.8	-0.02935287
503	0.03606082		1032.99	-0.01625568		1563	-0.01430757		2093	-0.00044922		2623	-0.02920115
503.2	0.0361273		1033.19	-0.01540878		1563.2	-0.0141144		2093.2	-0.00056071		2623.2	-0.03008402
503.4	0.03571516		1033.39	-0.01545639		1563.4	-0.01392482		2093.4	0.00020365		2623.4	-0.02907598
503.6	0.03618479		1033.59	-0.01464671		1563.6	-0.0138584		2093.6	0.00108231		2623.6	-0.02801925
503.8	0.0361618		1033.79	-0.01442884		1563.8	-0.01240996		2093.8	0.00198848		2623.8	-0.02659574
504	0.03599132		1033.99	-0.01490618		1564	-0.01251857		2094	0.00199964		2624	-0.0266671
504.2	0.03613941		1034.19	-0.01481019		1564.2	-0.01205437		2094.2	0.00231878		2624.2	-0.02621096
504.4	0.03657348		1034.39	-0.01477416		1564.4	-0.01176439		2094.4	0.00246975		2624.4	-0.02572786
504.6	0.03638382		1034.59	-0.01529826		1564.6	-0.0124347		2094.6	0.00207854		2624.6	-0.02628676
504.8	0.03561344		1034.79	-0.01543461		1564.8	-0.01214036		2094.8	0.00186647		2624.8	-0.02661587
505	0.0350007		1034.99	-0.01533104		1565	-0.01154993		2095	0.0024729		2625	-0.02633419
505.2	0.03579942		1035.19	-0.01512501		1565.2	-0.01203539		2095.2	0.00236797		2625.2	-0.02671965
505.4	0.03564057		1035.39	-0.0146625		1565.4	-0.01150305		2095.4	0.00252114		2625.4	-0.02663708
505.6	0.0365091		1035.59	-0.01527286		1565.6	-0.01207645		2095.6	0.00171966		2625.6	-0.02672184
505.8	0.03651328		1035.79	-0.01557618		1565.8	-0.01196242		2095.8	0.0012484		2625.8	-0.02680392
506	0.03626458		1035.99	-0.01574898		1566	-0.0128903		2096	0.00080162		2626	-0.02598049
506.2	0.03650355		1036.19	-0.01589729		1566.2	-0.01382027		2096.2	0.00014426		2626.2	-0.02658358
506.4	0.03637053		1036.39	-0.01689632		1566.4	-0.01474212		2096.4	-0.00012291		2626.4	-0.02692836
506.6	0.03591582		1036.59	-0.01684056		1566.6	-0.01512625		2096.6	-0.00115206		2626.6	-0.02728591
506.8	0.03511341		1036.79	-0.01745074		1566.8	-0.01503995		2096.8	-0.00087954		2626.8	-0.02816715
507	0.0352775		1036.99	-0.01715902		1567	-0.01555656		2097	-0.00109751		2627	-0.02873724
507.2	0.03507617		1037.19	-0.01690632		1567.2	-0.01533526		2097.2	-0.00099175		2627.2	-0.02873746
507.4	0.03469522		1037.39	-0.01717358		1567.4	-0.01489476		2097.4	-0.00116198		2627.4	-0.02825619
507.6	0.03472605		1037.59	-0.01662765		1567.6	-0.01524699		2097.6	0.00104617		2627.6	-0.02863668
507.8	0.03494539		1037.79	-0.01734251		1567.8	-0.0150302		2097.8	0.00094682		2627.8	-0.0287771
508	0.03520062		1037.99	-0.01746962		1568	-0.01472167		2098	0.00125676		2628	-0.02938223
508.2	0.03572801		1038.19	-0.0173769		1568.2	-0.01476213		2098.2	0.0017211		2628.2	-0.02957076
508.4	0.03564089		1038.39	-0.01703983		1568.4	-0.01502147		2098.4	0.00283758		2628.4	-0.02963323
508.6	0.03611466		1038.59	-0.01657971		1568.6	-0.01536238		2098.6	0.00323175		2628.6	-0.03061868
508.8	0.03616871		1038.79	-0.01512234		1568.8	-0.01494845		2098.8	0.0040415		2628.8	-0.03030014
509	0.03694258		1038.99	-0.01479999		1569	-0.01389122		2099	0.00389527		2629	-0.02970184
509.2	0.03799164		1039.19	-0.01440594		1569.2	-0.01331606		2099.2	0.00351402		2629.2	-0.02973039
509.4	0.03801881		1039.39	-0.01380259		1569.4	-0.0126429		2099.4	0.00252389		2629.4	-0.02856081
509.6	0.03808047		1039.59	-0.01361895		1569.6	-0.01275699		2099.6	0.00127276		2629.6	-0.02914586
509.8	0.03705034		1039.79	-0.01314898		1569.8	-0.01140097		2099.8	0.00032622		2629.8	-0.02884424
510	0.03597153		1039.99	-0.01245189		1570	-0.01147173		2100	-0.00022582		2630	-0.02894497
510.2	0.03550271		1040.19	-0.01313373		1570.2	-0.01071994		2100.2	-0.00088114		2630.2	-0.02851773
510.4	0.03475996		1040.39	-0.01364789		1570.4	-0.01042221		2100.4	-0.00152689		2630.4	-0.02794311
510.6	0.0343656		1040.59	-0.01285303		1570.6	-0.00956087		2100.6	-0.00136709		2630.6	-0.02772522
510.8	0.03341525		1040.79	-0.01392217		1570.8	-0.00884304		2100.8	-0.0003451		2630.8	-0.02784833
511	0.03263413		1040.99	-0.01418862		1571	-0.00808104		2101	-0.00044206		2631	-0.02727693
511.2	0.03279157		1041.19	-0.01479551		1571.2	-0.00823002		2101.2	-0.00032218		2631.2	-0.02606422
511.4	0.03270119		1041.39	-0.01579676		1571.4	-0.008019		2101.4	-0.00020172		2631.4	-0.02603161
511.6	0.03328301		1041.59	-0.01627909		1571.6	-0.00857697		2101.6	0.00074898		2631.6	-0.02673628
511.8	0.03441967		1041.79	-0.01714018		1571.8	-0.0086744		2101.8	0.00073044		2631.8	-0.02641999
512	0.03442846		1041.99	-0.01690531		1572	-0.00901329		2102	0.00126128		2632	-0.02646442
512.2	0.03524243		1042.19	-0.01655748		1572.2	-0.01022654		2102.2	0.00233696		2632.2	-0.02660077
512.4	0.0359601		1042.39	-0.01627912		1572.4	-0.01097874		2102.4	0.00302847		2632.4	-0.02662305
512.6	0.03638063		1042.59	-0.01540394		1572.6	-0.01214813		2102.6	0.00318267		2632.6	-0.02710089
512.8	0.03669056		1042.79	-0.01572519		1572.8	-0.01228802		2102.8	0.00325568		2632.8	-0.02641368
513	0.03753308		1042.99	-0.01499141		1573	-0.01175033		2103	0.00355158		2633	-0.02674037
513.2	0.03782979		1043.19	-0.0142308		1573.2	-0.01255511		2103.2	0.00344221		2633.2	-0.02704157
513.4	0.03722058		1043.39	-0.01359933		1573.4	-0.0138162		2103.4	0.00234995		2633.4	-0.02737764
513.6	0.03660605		1043.59	-0.01333035		1573.6	-0.01417294		2103.6	0.00248332		2633.6	-0.02881289
513.8	0.03573528		1043.79	-0.013489		1573.8	-0.01399352		2103.8	0.0024573		2633.8	-0.02837603
514	0.03535047		1043.99	-0.01324325		1574	-0.01459458		2104	0.00232046		2634	-0.0286773
514.2	0.035278		1044.19	-0.01391625		1574.2	-0.01471246		2104.2	0.00147205		2634.2	-0.02907015
514.4	0.03456513		1044.39	-0.01364253		1574.4	-0.01451324		2104.4	0.00159052		2634.4	-0.0288919
514.6	0.03457182		1044.59	-0.01407259		1574.6	-0.01466797		2104.6	0.00181954		2634.6	-0.02967491
514.8	0.03401245		1044.79	-0.01504171		1574.8	-0.01485475		2104.8	0.0012472		2634.8	-0.03003723
515	0.03455975		1044.99	-0.01505215		1575	-0.01473143		2105	0.00103914		2635	-0.0295449
515.2	0.03537121		1045.19	-0.01623791		1575.2	-0.01583205		2105.2	0.00014089		2635.2	-0.03001638
515.4	0.03582037		1045.39	-0.01684793		1575.4	-0.01523376		2105.4	0.00032528		2635.4	-0.03011958
515.6	0.0358042		1045.59	-0.01676004		1575.6	-0.01494352		2105.6	-0.00011846		2635.6	-0.03081746
515.8	0.03561238		1045.79	-0.01703469		1575.8	-0.01441006		2105.8	0.00033943		2635.8	-0.03030868
516	0.03528061		1045.99	-0.01741813		1576	-0.01442009		2106	0.00010552		2636	-0.03024805
516.2	0.03566643		1046.19	-0.01731773		1576.2	-0.01416689		2106.2	0.00032097		2636.2	-0.03018878
516.4	0.03550062		1046.39	-0.0181021		1576.4	-0.01352833		2106.4	-0.00022397		2636.4	-0.02991605
516.6	0.03439652		1046.59	-0.01786163		1576.6	-0.01376943		2106.6	-0.00015081		2636.6	-0.02906641
516.8	0.03458622		1046.79	-0.01751766		1576.8	-0.01292834		2106.8	0.00007566		2636.8	-0.02874771
517	0.03446511		1046.99	-0.01689627		1577	-0.0124482		2107	0.00038996		2637	-0.02875386
517.2	0.03369691		1047.19	-0.01676534		1577.2	-0.01324202		2107.2	-0.0010761		2637.2	-0.02883306
517.4	0.03300801		1047.39	-0.01732551		1577.4	-0.01365216		2107.4	-0.0015624		2637.4	-0.02958919
517.6	0.03295871		1047.59	-0.01700491		1577.6	-0.01315363		2107.6	-0.00104487		2637.6	-0.02940766
517.8	0.03347456		1047.79	-0.01717905		1577.8	-0.01286525		2107.8	-0.00048589		2637.8	-0.02862051
518	0.033873		1047.99	-0.01727199		1578	-0.01211683		2108	-0.00002685		2638	-0.02842005
518.2	0.03424846		1048.19	-0.01804702		1578.2	-0.0119603		2108.2	0.00046748		2638.2	-0.02739225
518.4	0.03439952		1048.39	-0.01837359		1578.4	-0.01132383		2108.4	0.0000294		2638.4	-0.02684386
518.6	0.03463106		1048.59	-0.01867053		1578.6	-0.01207896		2108.6	-0.00034769		2638.6	-0.02667817
518.8	0.03518225		1048.79	-0.01897002		1578.8	-0.0124107		2108.8	0.00036149		2638.8	-0.02539425
519	0.03555834		1048.99	-0.01909718		1579	-0.0128759		2109	0.00169199		2639	-0.02460041
519.2	0.0357238		1049.19	-0.01925777		1579.2	-0.01372254		2109.2	0.00184096		2639.2	-0.0242417
519.4	0.03613864		1049.39	-0.01961914		1579.4	-0.01396095		2109.4	0.00267488		2639.4	-0.0242198
519.6	0.03565417		1049.59	-0.02000314		1579.6	-0.01366764		2109.6	0.00203137		2639.6	-0.02469398
519.8	0.03652048		1049.79	-0.02076449		1579.8	-0.01407086		2109.8	0.00228972		2639.8	-0.02427203
520	0.03704698		1049.99	-0.0212768		1580	-0.01411528		2110	0.00174028		2640	-0.02419017
520.2	0.03697371		1050.19	-0.02054474		1580.2	-0.01439933		2110.2	0.00129576		2640.2	-0.02470499
520.4	0.03636669		1050.39	-0.02087026		1580.4	-0.01506199		2110.4	0.00183965		2640.4	-0.0252304
520.6	0.03578932		1050.59	-0.01952321		1580.6	-0.01599976		2110.6	0.001863		2640.6	-0.02590043
520.8	0.03587206		1050.79	-0.01856223		1580.8	-0.0157939		2110.8	0.00244411		2640.8	-0.02738062
521	0.03567237		1050.99	-0.01879669		1581	-0.01618708		2111	0.0018154		2641	-0.02862063
521.2	0.03598799		1051.19	-0.01766346		1581.2	-0.01649513		2111.2	0.00180539		2641.2	-0.02952082
521.4	0.03572686		1051.39	-0.0167073		1581.4	-0.01709127		2111.4	0.00096125		2641.4	-0.03052415
521.6	0.03579528		1051.59	-0.01521411		1581.6	-0.01594162		2111.6	0.00124567		2641.6	-0.02996407
521.8	0.03624627		1051.79	-0.01488723		1581.8	-0.01565503		2111.8	0.00149295		2641.8	-0.03041395
522	0.03590624		1051.99	-0.01502353		1582	-0.01577061		2112	0.0009392		2642	-0.03052561
522.2	0.03577613		1052.19	-0.01515231		1582.2	-0.01533333		2112.2	0.0002523		2642.2	-0.03015167
522.4	0.03470607		1052.39	-0.01522143		1582.4	-0.01507501		2112.4	-0.00077848		2642.4	-0.03099609
522.6	0.03432036		1052.59	-0.01574473		1582.6	-0.01472043		2112.6	-0.00035028		2642.6	-0.02993401
522.8	0.03483753		1052.79	-0.01666841		1582.8	-0.01429161		2112.8	0.00001287		2642.8	-0.02888458
523	0.03432425		1052.99	-0.01687616		1583	-0.01414521		2113	0.00024707		2643	-0.02946339
523.2	0.03493301		1053.19	-0.01746398		1583.2	-0.01426632		2113.2	-0.00009495		2643.2	-0.0287297
523.4	0.03542467		1053.39	-0.01840214		1583.4	-0.01403088		2113.4	-0.00029453		2643.4	-0.02864187
523.6	0.03655105		1053.59	-0.01794096		1583.6	-0.01307501		2113.6	-0.00018181		2643.6	-0.02864345
523.8	0.03765445		1053.79	-0.01850554		1583.8	-0.01312868		2113.8	-0.00018635		2643.8	-0.02840913
524	0.03792291		1053.99	-0.01905152		1584	-0.01242583		2114	0.00030918		2644	-0.02825072
524.2	0.03737345		1054.19	-0.01857063		1584.2	-0.01285136		2114.2	0.00090611		2644.2	-0.02989123
524.4	0.03767438		1054.39	-0.01791197		1584.4	-0.01249939		2114.4	0.00177376		2644.4	-0.02981604
524.6	0.03708089		1054.59	-0.01669449		1584.6	-0.01291498		2114.6	0.00160704		2644.6	-0.03064626
524.8	0.0370355		1054.79	-0.01649719		1584.8	-0.01285504		2114.8	0.00272869		2644.8	-0.03057982
525	0.03648796		1054.99	-0.0156797		1585	-0.01327525		2115	0.00258402		2645	-0.03037555
525.2	0.03590919		1055.19	-0.01369113		1585.2	-0.01424627		2115.2	0.00281727		2645.2	-0.03026768
525.4	0.03468031		1055.39	-0.01305666		1585.4	-0.01525243		2115.4	0.00191209		2645.4	-0.02993591
525.6	0.03494761		1055.59	-0.01223661		1585.6	-0.01475401		2115.6	0.00181745		2645.6	-0.02956505
525.8	0.03457906		1055.79	-0.01171546		1585.8	-0.01557142		2115.8	0.00101792		2645.8	-0.02970722
526	0.03376862		1055.99	-0.01135974		1586	-0.01565138		2116	0.00079836		2646	-0.02973784
526.2	0.03365634		1056.19	-0.01099324		1586.2	-0.01494229		2116.2	0.0007062		2646.2	-0.02897084
526.4	0.03282847		1056.39	-0.0116509		1586.4	-0.01478822		2116.4	0.00030822		2646.4	-0.02855022
526.6	0.03312058		1056.59	-0.01235496		1586.6	-0.01517055		2116.6	-0.00021492		2646.6	-0.02674255
526.8	0.03279545		1056.79	-0.01284588		1586.8	-0.01478022		2116.8	-0.00076786		2646.8	-0.02641661
527	0.03273091		1056.99	-0.01406156		1587	-0.01513304		2117	-0.00052968		2647	-0.02634756
527.2	0.03286265		1057.19	-0.01499483		1587.2	-0.01519748		2117.2	-0.00069666		2647.2	-0.02609168
527.4	0.03262178		1057.39	-0.01532281		1587.4	-0.01475414		2117.4	-0.00041747		2647.4	-0.02581772
527.6	0.03325121		1057.59	-0.0152044		1587.6	-0.01424821		2117.6	-0.00046742		2647.6	-0.02579781
527.8	0.0340168		1057.79	-0.01644383		1587.8	-0.01411186		2117.8	-0.00114549		2647.8	-0.0256222
528	0.03421602		1057.99	-0.0180572		1588	-0.01346688		2118	-0.00101806		2648	-0.02628823
528.2	0.03335157		1058.19	-0.01782865		1588.2	-0.01377651		2118.2	-0.00098078		2648.2	-0.02766712
528.4	0.03328642		1058.39	-0.01820636		1588.4	-0.01422838		2118.4	-0.00067435		2648.4	-0.02786569
528.6	0.03260275		1058.59	-0.01873208		1588.6	-0.01503282		2118.6	-0.00046491		2648.6	-0.02870946
528.8	0.0327803		1058.79	-0.01808838		1588.8	-0.01567454		2118.8	-0.00002147		2648.8	-0.02882949
529	0.03231475		1058.99	-0.01749561		1589	-0.0160281		2119	-0.00023207		2649	-0.02893049
529.2	0.03246738		1059.19	-0.0166336		1589.2	-0.01663134		2119.2	0.00027383		2649.2	-0.0294892
529.4	0.03241159		1059.39	-0.01701692		1589.4	-0.01679338		2119.4	0.00018658		2649.4	-0.02894547
529.6	0.03235425		1059.59	-0.01655562		1589.6	-0.01621547		2119.6	0.00007837		2649.6	-0.02951871
529.8	0.03187364		1059.79	-0.01638611		1589.8	-0.01635937		2119.8	0.00008619		2649.8	-0.02887294
530	0.03160822		1059.99	-0.01599863		1590	-0.01535297		2120	0.00052126		2650	-0.0285741
530.2	0.03157405		1060.19	-0.01647305		1590.2	-0.01494654		2120.2	0.00060491		2650.2	-0.02740765
530.4	0.03097188		1060.39	-0.01687875		1590.4	-0.01453816		2120.4	0.00031357		2650.4	-0.02704673
530.6	0.03065264		1060.59	-0.01655323		1590.6	-0.01471704		2120.6	0.00081634		2650.6	-0.02563351
530.8	0.03030798		1060.79	-0.01689668		1590.8	-0.01392245		2120.8	0.00080123		2650.8	-0.02567067
531	0.03047768		1060.99	-0.0176687		1591	-0.01405991		2121	0.00157646		2651	-0.02534634
531.2	0.03057817		1061.19	-0.01773363		1591.2	-0.01311738		2121.2	0.00131465		2651.2	-0.02512398
531.4	0.03172846		1061.39	-0.01768064		1591.4	-0.01280709		2121.4	0.00185521		2651.4	-0.02461986
531.6	0.03266675		1061.59	-0.01768333		1591.6	-0.01270961		2121.6	0.00132005		2651.6	-0.02499727
531.8	0.03253416		1061.79	-0.01822215		1591.8	-0.01324679		2121.8	0.00117433		2651.8	-0.02533929
532	0.03201499		1061.99	-0.01812768		1592	-0.01343903		2122	0.00115652		2652	-0.02651098
532.2	0.03249206		1062.19	-0.01799135		1592.2	-0.01383111		2122.2	0.00192517		2652.2	-0.02733216
532.4	0.03288439		1062.39	-0.01834608		1592.4	-0.01506196		2122.4	0.00189261		2652.4	-0.02844581
532.6	0.03340917		1062.59	-0.01751052		1592.6	-0.01538784		2122.6	0.0016328		2652.6	-0.02934858
532.8	0.03357177		1062.79	-0.01671872		1592.8	-0.01594898		2122.8	0.00116701		2652.8	-0.02959184
533	0.03365819		1062.99	-0.01666275		1593	-0.01585186		2123	0.00140671		2653	-0.02961326
533.2	0.03384147		1063.19	-0.01623017		1593.2	-0.0163199		2123.2	0.00209142		2653.2	-0.02981423
533.4	0.0330514		1063.39	-0.01693512		1593.4	-0.01712047		2123.4	0.00168889		2653.4	-0.02952907
533.6	0.03268311		1063.59	-0.01630783		1593.6	-0.01742976		2123.6	0.00152179		2653.6	-0.02990332
533.8	0.03183529		1063.79	-0.01618816		1593.8	-0.01755825		2123.8	0.00102144		2653.8	-0.02935153
534	0.03151356		1063.99	-0.01605927		1594	-0.01721356		2124	0.00026661		2654	-0.02951566
534.2	0.03136983		1064.19	-0.016432		1594.2	-0.01749026		2124.2	0.00012763		2654.2	-0.02907956
534.4	0.03052123		1064.39	-0.01611488		1594.4	-0.01736346		2124.4	0.00000514		2654.4	-0.02866985
534.6	0.03067357		1064.59	-0.01611614		1594.6	-0.01752793		2124.6	0.00003996		2654.6	-0.02742809
534.8	0.03141804		1064.79	-0.01696214		1594.8	-0.0175087		2124.8	0.00029738		2654.8	-0.02709959
535	0.03071565		1064.99	-0.01697387		1595	-0.01610818		2125	0.00113784		2655	-0.02724977
535.2	0.03099084		1065.19	-0.01733095		1595.2	-0.0155278		2125.2	0.00147865		2655.2	-0.02760949
535.4	0.0310006		1065.39	-0.01688512		1595.4	-0.01568567		2125.4	0.00161091		2655.4	-0.02879366
535.6	0.03076503		1065.59	-0.01697841		1595.6	-0.01587814		2125.6	0.00053618		2655.6	-0.02931567
535.8	0.03117055		1065.79	-0.01646475		1595.8	-0.01611752		2125.8	-0.0003044		2655.8	-0.02954027
536	0.03246218		1065.99	-0.01611116		1596	-0.01543242		2126	-0.00050175		2656	-0.03065461
536.2	0.03327755		1066.19	-0.01623159		1596.2	-0.01567964		2126.2	-0.0006194		2656.2	-0.03167738
536.4	0.03377833		1066.39	-0.01533797		1596.4	-0.01654245		2126.4	-0.00098916		2656.4	-0.03292812
536.6	0.03446381		1066.59	-0.01543546		1596.6	-0.01643222		2126.6	-0.00133355		2656.6	-0.03391396
536.8	0.03549132		1066.79	-0.01497542		1596.8	-0.01655342		2126.8	-0.00215466		2656.8	-0.03311705
537	0.03592917		1066.99	-0.01409022		1597	-0.01672895		2127	-0.00098216		2657	-0.03409215
537.2	0.03532656		1067.19	-0.01423522		1597.2	-0.01732457		2127.2	-0.00102315		2657.2	-0.03380525
537.4	0.03502427		1067.39	-0.01407365		1597.4	-0.01757452		2127.4	-0.00177396		2657.4	-0.03405374
537.6	0.03500876		1067.59	-0.01304013		1597.6	-0.01775323		2127.6	-0.00197363		2657.6	-0.03362385
537.8	0.03399778		1067.79	-0.01287809		1597.8	-0.01758354		2127.8	-0.0024801		2657.8	-0.03310906
538	0.03412646		1067.99	-0.01325952		1598	-0.01798341		2128	-0.00346493		2658	-0.03227004
538.2	0.03385342		1068.19	-0.01395822		1598.2	-0.0177438		2128.2	-0.00242284		2658.2	-0.03076326
538.4	0.03275506		1068.39	-0.0142792		1598.4	-0.01730617		2128.4	-0.00210714		2658.4	-0.02933343
538.6	0.03256461		1068.59	-0.01442123		1598.6	-0.01697429		2128.6	-0.0020497		2658.6	-0.02832305
538.8	0.03223607		1068.79	-0.01430097		1598.8	-0.01612921		2128.8	-0.00081941		2658.8	-0.02766473
539	0.0317447		1068.99	-0.01426309		1599	-0.0147149		2129	0.00017707		2659	-0.02688166
539.2	0.03177952		1069.19	-0.01447294		1599.2	-0.0153076		2129.2	0.000387		2659.2	-0.02655136
539.4	0.03174888		1069.39	-0.0145407		1599.4	-0.01487543		2129.4	-0.00006974		2659.4	-0.02661191
539.6	0.03217773		1069.59	-0.01496599		1599.6	-0.01472765		2129.6	-0.00095205		2659.6	-0.02635351
539.8	0.03240423		1069.79	-0.01497767		1599.8	-0.01504372		2129.8	-0.00091987		2659.8	-0.02630054
540	0.03264569		1069.99	-0.01535497		1600	-0.01484344		2130	-0.00031462		2660	-0.02713359
540.2	0.03341012		1070.19	-0.0156647		1600.2	-0.01634299		2130.2	-0.00033971		2660.2	-0.02817014
540.4	0.03392773		1070.39	-0.01609834		1600.4	-0.01675327		2130.4	-0.00079321		2660.4	-0.02948386
540.6	0.03393568		1070.59	-0.01648381		1600.6	-0.01670056		2130.6	-0.00119192		2660.6	-0.03027462
540.8	0.03473423		1070.79	-0.01650744		1600.8	-0.01615748		2130.8	-0.00135958		2660.8	-0.03066661
541	0.03380725		1070.99	-0.01625729		1601	-0.01605293		2131	0.0003206		2661	-0.03174191
541.2	0.03322266		1071.19	-0.01668169		1601.2	-0.01584138		2131.2	0.00018218		2661.2	-0.03172867
541.4	0.03368992		1071.39	-0.01625801		1601.4	-0.01554368		2131.4	0.00054971		2661.4	-0.03200543
541.6	0.03351104		1071.59	-0.01640967		1601.6	-0.01593291		2131.6	0.00037081		2661.6	-0.03136113
541.8	0.03292622		1071.79	-0.01705902		1601.8	-0.01555529		2131.8	0.00023981		2661.8	-0.03133068
542	0.03261879		1071.99	-0.01765892		1602	-0.01533459		2132	0.00029917		2662	-0.03131527
542.2	0.03162513		1072.19	-0.01838813		1602.2	-0.01453993		2132.2	0.00093221		2662.2	-0.0311135
542.4	0.031428		1072.39	-0.01821678		1602.4	-0.01431716		2132.4	0.00062999		2662.4	-0.0307036
542.6	0.03168295		1072.59	-0.01834727		1602.6	-0.01387029		2132.6	0.00054351		2662.6	-0.030479
542.8	0.03169117		1072.79	-0.0186533		1602.8	-0.01424668		2132.8	0.00050803		2662.8	-0.02982951
543	0.0323262		1072.99	-0.01894721		1603	-0.01365901		2133	-0.00035743		2663	-0.02926727
543.2	0.03224578		1073.19	-0.01907402		1603.2	-0.01387176		2133.2	-0.00101544		2663.2	-0.03019022
543.4	0.03305366		1073.39	-0.01953128		1603.4	-0.01313866		2133.4	-0.00099633		2663.4	-0.03045815
543.6	0.03380974		1073.59	-0.01895713		1603.6	-0.01379589		2133.6	-0.00198211		2663.6	-0.03028551
543.8	0.03394425		1073.79	-0.01974671		1603.8	-0.01453871		2133.8	-0.00197468		2663.8	-0.03071261
544	0.03437915		1073.99	-0.01989186		1604	-0.01502788		2134	-0.00281792		2664	-0.03186243
544.2	0.03440025		1074.19	-0.01994484		1604.2	-0.01572439		2134.2	-0.00376166		2664.2	-0.03223656
544.4	0.03393374		1074.39	-0.01928775		1604.4	-0.01523901		2134.4	-0.0044855		2664.4	-0.03287739
544.6	0.03371714		1074.59	-0.01908163		1604.6	-0.01533625		2134.6	-0.00340495		2664.6	-0.03328255
544.8	0.03429455		1074.79	-0.01903034		1604.8	-0.01484903		2134.8	-0.00218845		2664.8	-0.03338878
545	0.03403855		1074.99	-0.01848823		1605	-0.01566163		2135	-0.00109941		2665	-0.03322771
545.2	0.03451923		1075.19	-0.01866804		1605.2	-0.01496189		2135.2	-0.00105413		2665.2	-0.03376164
545.4	0.03416107		1075.39	-0.01824199		1605.4	-0.01459419		2135.4	-0.0006471		2665.4	-0.03342246
545.6	0.0338462		1075.59	-0.01862152		1605.6	-0.01462707		2135.6	0.00005424		2665.6	-0.03275568
545.8	0.03313692		1075.79	-0.0188005		1605.8	-0.01465047		2135.8	0.00105214		2665.8	-0.03215683
546	0.03240149		1075.99	-0.01914946		1606	-0.0138607		2136	0.00142255		2666	-0.0318969
546.2	0.03214683		1076.19	-0.01865916		1606.2	-0.01362818		2136.2	0.00174938		2666.2	-0.03157099
546.4	0.0324292		1076.39	-0.01817821		1606.4	-0.01393164		2136.4	0.00192774		2666.4	-0.03014888
546.6	0.03151129		1076.59	-0.01764363		1606.6	-0.01456552		2136.6	0.00159692		2666.6	-0.0293962
546.8	0.0305463		1076.79	-0.01737647		1606.8	-0.01551245		2136.8	0.00098246		2666.8	-0.02914845
547	0.03108064		1076.99	-0.01688777		1607	-0.01466705		2137	-0.00041914		2667	-0.02848184
547.2	0.0312718		1077.19	-0.01609287		1607.2	-0.01506763		2137.2	-0.00061532		2667.2	-0.02970419
547.4	0.03296693		1077.39	-0.01567101		1607.4	-0.01458433		2137.4	-0.0006937		2667.4	-0.02948606
547.6	0.0333695		1077.59	-0.01503534		1607.6	-0.01474695		2137.6	-0.0013485		2667.6	-0.02905333
547.8	0.03276209		1077.79	-0.01526736		1607.8	-0.01433897		2137.8	-0.00126246		2667.8	-0.03001652
548	0.03289356		1077.99	-0.01469519		1608	-0.01403403		2138	-0.00130336		2668	-0.02985004
548.2	0.03262948		1078.19	-0.01456491		1608.2	-0.01389429		2138.2	-0.00154186		2668.2	-0.02960372
548.4	0.03243209		1078.39	-0.01407031		1608.4	-0.01455104		2138.4	-0.00196948		2668.4	-0.03060468
548.6	0.03227574		1078.59	-0.01440646		1608.6	-0.01529069		2138.6	-0.00146135		2668.6	-0.03143712
548.8	0.03271673		1078.79	-0.01417854		1608.8	-0.01524921		2138.8	-0.00151702		2668.8	-0.03141008
549	0.03249786		1078.99	-0.014158		1609	-0.01595564		2139	-0.00180558		2669	-0.03165217
549.2	0.03233322		1079.19	-0.01430297		1609.2	-0.01544344		2139.2	-0.00191669		2669.2	-0.03152883
549.4	0.03154375		1079.39	-0.01455553		1609.4	-0.01661214		2139.4	-0.00133441		2669.4	-0.03095148
549.6	0.03175473		1079.59	-0.01586532		1609.6	-0.01661601		2139.6	-0.00089127		2669.6	-0.03007869
549.8	0.03093773		1079.79	-0.01711087		1609.8	-0.01647851		2139.8	-0.00046699		2669.8	-0.0291575
550	0.03076262		1079.99	-0.01809378		1610	-0.01534326		2140	0.00052613		2670	-0.02891364
550.2	0.03077812		1080.19	-0.01725489		1610.2	-0.01579985		2140.2	0.00087562		2670.2	-0.02833335
550.4	0.02989923		1080.39	-0.01851314		1610.4	-0.01632735		2140.4	0.00125749		2670.4	-0.02723417
550.6	0.02908593		1080.59	-0.01890263		1610.6	-0.01698706		2140.6	0.00084803		2670.6	-0.02691317
550.8	0.0286072		1080.79	-0.01967625		1610.8	-0.01689203		2140.8	0.00002288		2670.8	-0.0267262
551	0.02889997		1080.99	-0.02027426		1611	-0.0163857		2141	-0.00062828		2671	-0.02705249
551.2	0.03018207		1081.19	-0.02017998		1611.2	-0.01642489		2141.2	-0.00033857		2671.2	-0.02842828
551.4	0.03095453		1081.39	-0.02046202		1611.4	-0.01539654		2141.4	-0.00070216		2671.4	-0.02878031
551.6	0.03114309		1081.59	-0.02058737		1611.6	-0.01532784		2141.6	-0.00106342		2671.6	-0.02907051
551.8	0.03087069		1081.79	-0.02021668		1611.8	-0.01493038		2141.8	-0.00113812		2671.8	-0.03032221
552	0.03125486		1081.99	-0.02052897		1612	-0.01424056		2142	-0.0019009		2672	-0.03015836
552.2	0.03089143		1082.19	-0.02039874		1612.2	-0.01544551		2142.2	-0.00240439		2672.2	-0.03133273
552.4	0.03035851		1082.39	-0.02037565		1612.4	-0.01562421		2142.4	-0.00294275		2672.4	-0.03181081
552.6	0.03039389		1082.59	-0.02011953		1612.6	-0.01520437		2142.6	-0.00327887		2672.6	-0.03149431
552.8	0.02995467		1082.79	-0.01975481		1612.8	-0.0157591		2142.8	-0.00309148		2672.8	-0.03095252
553	0.02916535		1082.99	-0.01996109		1613	-0.0160438		2143	-0.00210334		2673	-0.03120285
553.2	0.02810966		1083.19	-0.02010612		1613.2	-0.01601948		2143.2	-0.00200906		2673.2	-0.03088239
553.4	0.02766509		1083.39	-0.02048639		1613.4	-0.01629988		2143.4	-0.0024567		2673.4	-0.0308679
553.6	0.02780984		1083.59	-0.0210765		1613.6	-0.01507301		2143.6	-0.00239388		2673.6	-0.03061809
553.8	0.02724755		1083.79	-0.02151781		1613.8	-0.01438559		2143.8	-0.00140637		2673.8	-0.0306432
554	0.02760992		1083.99	-0.02209803		1614	-0.0138173		2144	-0.00094721		2674	-0.03080765
554.2	0.02735723		1084.19	-0.02143933		1614.2	-0.01381084		2144.2	-0.00151145		2674.2	-0.03095335
554.4	0.02734208		1084.39	-0.02289698		1614.4	-0.01449249		2144.4	-0.00133326		2674.4	-0.03053092
554.6	0.02774368		1084.59	-0.02223815		1614.6	-0.01481079		2144.6	-0.00175884		2674.6	-0.03018064
554.8	0.02760034		1084.79	-0.02295825		1614.8	-0.01457353		2144.8	-0.00112786		2674.8	-0.03098782
555	0.02801836		1084.99	-0.02298404		1615	-0.01486019		2145	-0.00111827		2675	-0.03222104
555.2	0.02923679		1085.19	-0.02231228		1615.2	-0.01548477		2145.2	-0.00149545		2675.2	-0.03226055
555.4	0.02905502		1085.39	-0.02162966		1615.4	-0.01542612		2145.4	-0.00200528		2675.4	-0.03332969
555.6	0.02934527		1085.59	-0.02099592		1615.6	-0.01543408		2145.6	-0.00159473		2675.6	-0.0328305
555.8	0.02958691		1085.79	-0.02028355		1615.8	-0.01527366		2145.8	-0.00144669		2675.8	-0.03368142
556	0.02948717		1085.99	-0.01977746		1616	-0.01513362		2146	-0.00100758		2676	-0.03366374
556.2	0.02940991		1086.19	-0.01980095		1616.2	-0.01586891		2146.2	-0.00059248		2676.2	-0.03357911
556.4	0.02937014		1086.39	-0.01944909		1616.4	-0.0150179		2146.4	-0.00048298		2676.4	-0.03230057
556.6	0.02970126		1086.59	-0.01867362		1616.6	-0.01599646		2146.6	-0.00083725		2676.6	-0.03180692
556.8	0.02932832		1086.79	-0.01819053		1616.8	-0.01653829		2146.8	0.00015		2676.8	-0.03150574
557	0.02900894		1086.99	-0.01749534		1617	-0.0159906		2147	-0.00007366		2677	-0.03194351
557.2	0.02862976		1087.19	-0.01743709		1617.2	-0.01600308		2147.2	-0.00073792		2677.2	-0.03112402
557.4	0.02924904		1087.39	-0.01799093		1617.4	-0.01592529		2147.4	-0.00150186		2677.4	-0.03031692
557.6	0.02913928		1087.59	-0.01845159		1617.6	-0.01528289		2147.6	-0.00178903		2677.6	-0.02967648
557.8	0.02886426		1087.79	-0.01881593		1617.8	-0.01488219		2147.8	-0.00225534		2677.8	-0.02990207
558	0.02877699		1087.99	-0.01921413		1618	-0.01500825		2148	-0.0030594		2678	-0.02995015
558.2	0.02877748		1088.19	-0.01888072		1618.2	-0.01518491		2148.2	-0.00362287		2678.2	-0.02979564
558.4	0.02923959		1088.39	-0.01939987		1618.4	-0.01587967		2148.4	-0.0036879		2678.4	-0.02916438
558.6	0.02929449		1088.59	-0.019047		1618.6	-0.01589516		2148.6	-0.00384255		2678.6	-0.02917587
558.8	0.02928025		1088.79	-0.01952207		1618.8	-0.01617497		2148.8	-0.00374176		2678.8	-0.02933018
559	0.02956195		1088.99	-0.01880239		1619	-0.01693986		2149	-0.00448293		2679	-0.02894726
559.2	0.0299413		1089.19	-0.01818945		1619.2	-0.01750529		2149.2	-0.00451099		2679.2	-0.02829638
559.4	0.02981484		1089.39	-0.0174127		1619.4	-0.0176084		2149.4	-0.00462938		2679.4	-0.02832737
559.6	0.02994219		1089.59	-0.01684652		1619.6	-0.01805534		2149.6	-0.00459039		2679.6	-0.02746437
559.8	0.03052897		1089.79	-0.01641072		1619.8	-0.01860001		2149.8	-0.00494324		2679.8	-0.0278397
