# Supplementary material for: Functional development of a V3/glycan-specific broadly neutralizing antibody isolated from a case of HIV superinfection
Source: eLife journal article supplement (doi:10.7554/elife.68110), 2021-07-15
Supplement: fig2-data2 [file D1.xls]

Vers 3.43 Data Simulation
Conc1	6.25E-08	6.25E-08	6.25E-08	6.25E-08
Start1	200.03	730.02	1260.02	1790.01
Stop1	559.82	1089.82	1619.82	2149.81
Time1	Data1	Sim1	Time2	Data2	Sim2	Time3	Data3	Sim3	Time4	Data4	Sim4
200.03	0.01761693		730.02	0.00033585		1260.02	0.001829		1790.01	0.00110421
200.23	0.01729221		730.22	-0.00073202		1260.22	0.00361227		1790.21	0.00091333
200.43	0.01644119		730.42	-0.00151269		1260.42	0.0048351		1790.41	0.00101277
200.63	0.01508115		730.62	-0.00144845		1260.62	0.0066089		1790.61	0.00159436
200.83	0.01456193		730.82	-0.00198578		1260.82	0.00803953		1790.81	0.00165094
201.03	0.01399102		731.02	-0.00190434		1261.02	0.00854319		1791.01	0.00259593
201.23	0.01403782		731.22	-0.00181721		1261.22	0.00927074		1791.21	0.00297167
201.43	0.01423836		731.42	-0.00166269		1261.42	0.00996811		1791.41	0.00312206
201.63	0.01461261		731.62	-0.0015717		1261.62	0.00948816		1791.61	0.00315946
201.83	0.01522825		731.82	-0.00103111		1261.82	0.00863758		1791.81	0.00353812
202.03	0.01610558		732.02	-0.00053089		1262.02	0.00822687		1792.01	0.00448519
202.23	0.0173678		732.22	0.0005574		1262.22	0.00747547		1792.21	0.00473635
202.43	0.01873763		732.42	-0.00047636		1262.42	0.00749338		1792.41	0.00440644
202.63	0.02023637		732.62	-0.00007972		1262.62	0.00646188		1792.61	0.0050187
202.83	0.02128094		732.82	0.00007333		1262.82	0.00619774		1792.81	0.00433929
203.03	0.02172019		733.02	-0.00026921		1263.02	0.00663962		1793.01	0.0046164
203.23	0.02224961		733.22	-0.0004353		1263.22	0.00682098		1793.21	0.00397176
203.43	0.02287592		733.42	-0.0008898		1263.42	0.00597891		1793.41	0.00362682
203.63	0.02312038		733.62	-0.00067575		1263.62	0.00575079		1793.61	0.00381724
203.83	0.02430014		733.82	-0.00099895		1263.82	0.00575862		1793.81	0.00365749
204.03	0.02518921		734.02	-0.00146113		1264.02	0.00658259		1794.01	0.00399321
204.23	0.02639543		734.22	-0.00187891		1264.22	0.00621275		1794.21	0.00309781
204.43	0.02635096		734.42	-0.00139799		1264.42	0.00500601		1794.41	0.00284038
204.63	0.02642399		734.62	-0.00041168		1264.62	0.00562622		1794.61	0.00277538
204.83	0.02742786		734.82	-0.00010361		1264.82	0.00510401		1794.81	0.00223651
205.03	0.02780096		735.02	0.00035279		1265.02	0.00428705		1795.01	0.00221714
205.23	0.02837013		735.22	0.00111186		1265.22	0.00448562		1795.21	0.00126685
205.43	0.0292502		735.42	0.00155919		1265.42	0.00356291		1795.41	0.00144097
205.63	0.02942832		735.62	0.00186213		1265.62	0.0019369		1795.61	0.00120038
205.83	0.03003059		735.82	0.00185408		1265.82	0.00191372		1795.81	0.00127732
206.03	0.03086506		736.02	0.00165779		1266.02	0.00219375		1796.01	0.00225037
206.23	0.03221759		736.22	0.00182274		1266.22	0.00175285		1796.21	0.00158438
206.43	0.03347874		736.42	0.00038906		1266.42	0.00152659		1796.41	0.00244673
206.63	0.03435106		736.62	-0.00007167		1266.62	0.00087766		1796.61	0.00266801
206.83	0.0356034		736.82	0.00034052		1266.82	0.00253214		1796.81	0.00239548
207.03	0.03628497		737.02	-0.00018906		1267.02	0.00333172		1797.01	0.00274059
207.23	0.03678594		737.22	-0.00024893		1267.22	0.00405368		1797.21	0.00283725
207.43	0.03802019		737.42	-0.00036571		1267.42	0.00475269		1797.41	0.00308805
207.63	0.03871149		737.62	0.00032578		1267.62	0.00590463		1797.61	0.00364267
207.83	0.03905743		737.82	0.00046824		1267.82	0.00626427		1797.81	0.00413062
208.03	0.03933983		738.02	0.00146266		1268.02	0.00638412		1798.01	0.00393144
208.23	0.04025807		738.22	0.00197633		1268.22	0.00614698		1798.21	0.00339541
208.43	0.03998081		738.42	0.00286678		1268.42	0.00569979		1798.41	0.00349441
208.63	0.03955713		738.62	0.00358422		1268.62	0.00711789		1798.61	0.00417854
208.83	0.04060736		738.82	0.00389833		1268.82	0.00673025		1798.81	0.0042809
209.03	0.0402877		739.02	0.00440613		1269.02	0.00648213		1799.01	0.00529658
209.23	0.040492		739.22	0.00468376		1269.22	0.00618453		1799.21	0.005606
209.43	0.04150853		739.42	0.00336385		1269.42	0.00523139		1799.41	0.00621385
209.63	0.04069119		739.62	0.00308835		1269.62	0.00471915		1799.61	0.00588394
209.83	0.04119748		739.82	0.00256301		1269.82	0.00497392		1799.81	0.00650692
210.03	0.04204661		740.02	0.00225088		1270.02	0.00456589		1800.01	0.00715511
210.23	0.04323371		740.22	0.00165788		1270.22	0.00344847		1800.21	0.00676918
210.43	0.04367597		740.42	0.00051758		1270.42	0.00298291		1800.41	0.00747091
210.63	0.04514938		740.62	0.00012333		1270.62	0.0022621		1800.61	0.00655075
210.83	0.0464983		740.82	0.00010657		1270.82	0.00240115		1800.81	0.00690724
211.03	0.04642473		741.02	-0.00101588		1271.02	0.00207776		1801.01	0.00681306
211.23	0.04756328		741.22	-0.00125142		1271.22	0.00251855		1801.21	0.00766027
211.43	0.0479715		741.42	-0.0013496		1271.42	0.00340579		1801.41	0.00756878
211.63	0.0485018		741.62	-0.00132682		1271.62	0.00398374		1801.61	0.00706286
211.83	0.04848536		741.82	-0.00101342		1271.82	0.00388034		1801.81	0.00721883
212.03	0.04950901		742.02	-0.00038747		1272.02	0.00400483		1802.01	0.00660496
212.23	0.05039976		742.22	-0.00053725		1272.22	0.00358781		1802.21	0.00612387
212.43	0.05096712		742.42	0.00033676		1272.42	0.00374841		1802.41	0.00623341
212.63	0.05145659		742.62	0.0006585		1272.62	0.00396288		1802.61	0.00568785
212.83	0.05266684		742.82	0.00095395		1272.82	0.00350393		1802.81	0.00583627
213.03	0.05262177		743.02	0.00207179		1273.02	0.00371558		1803.01	0.00617181
213.23	0.05315496		743.22	0.00235238		1273.22	0.00396716		1803.21	0.00624892
213.43	0.05292964		743.42	0.00312594		1273.42	0.00374063		1803.41	0.00620646
213.63	0.0522726		743.62	0.00430448		1273.62	0.00355965		1803.61	0.00664679
213.83	0.05418988		743.82	0.00459798		1273.82	0.00383502		1803.81	0.00648876
214.03	0.05399947		744.02	0.00460738		1274.02	0.00304378		1804.01	0.00629973
214.23	0.05509547		744.22	0.00464742		1274.22	0.0020392		1804.21	0.00642091
214.43	0.05563878		744.42	0.00385561		1274.42	0.00147628		1804.41	0.00637833
214.63	0.05704159		744.62	0.00369405		1274.62	0.00169639		1804.61	0.00600616
214.83	0.05886698		744.82	0.00347405		1274.82	0.0024034		1804.81	0.00640962
215.03	0.05958479		745.02	0.00289776		1275.02	0.00339316		1805.01	0.00563068
215.23	0.06130674		745.22	0.00310897		1275.22	0.00411721		1805.21	0.00712939
215.43	0.06231359		745.42	0.00389419		1275.42	0.00578784		1805.41	0.00717493
215.63	0.06349063		745.62	0.00386624		1275.62	0.00634061		1805.61	0.00658121
215.83	0.06451885		745.82	0.00393969		1275.82	0.00646323		1805.81	0.00701707
216.03	0.06580171		746.02	0.00377036		1276.02	0.00670536		1806.01	0.00610201
216.23	0.06714055		746.22	0.00327216		1276.22	0.00665629		1806.21	0.00601742
216.43	0.06813924		746.42	0.00312539		1276.42	0.00674375		1806.41	0.00574332
216.63	0.06830943		746.62	0.00291324		1276.62	0.00674387		1806.61	0.00541068
216.83	0.06843929		746.82	0.00334455		1276.82	0.00740698		1806.81	0.00654704
217.03	0.06828192		747.02	0.00390349		1277.02	0.00749182		1807.01	0.00699329
217.23	0.06697754		747.22	0.00340473		1277.22	0.00702127		1807.21	0.00799811
217.43	0.06653937		747.42	0.00448763		1277.42	0.00556874		1807.41	0.00795343
217.63	0.06694832		747.62	0.00521224		1277.62	0.00468439		1807.61	0.00859662
217.83	0.0678922		747.82	0.00546433		1277.82	0.00510297		1807.81	0.0080637
218.03	0.06723501		748.02	0.00578696		1278.02	0.00397908		1808.01	0.0071751
218.23	0.06855758		748.22	0.00572886		1278.22	0.00406987		1808.21	0.00736146
218.43	0.06887022		748.42	0.00620775		1278.42	0.00418986		1808.41	0.00714911
218.63	0.06961822		748.62	0.00612977		1278.62	0.00463019		1808.61	0.00667031
218.83	0.07046854		748.82	0.00690349		1278.82	0.0046437		1808.81	0.00626157
219.03	0.07068694		749.02	0.00686713		1279.02	0.00504747		1809.01	0.00583062
219.23	0.0712415		749.22	0.00706189		1279.22	0.00466499		1809.21	0.00643951
219.43	0.07183484		749.42	0.00685741		1279.42	0.005364		1809.41	0.00529309
219.63	0.07237679		749.62	0.00542603		1279.62	0.00584783		1809.61	0.00457913
219.83	0.07279393		749.82	0.00556629		1279.82	0.00563833		1809.81	0.00511521
220.03	0.07361536		750.02	0.00524622		1280.02	0.00646686		1810.01	0.00513331
220.23	0.07455491		750.22	0.00421533		1280.22	0.00653494		1810.21	0.00562544
220.43	0.07463893		750.42	0.00348482		1280.42	0.00621303		1810.41	0.00541926
220.63	0.07443894		750.62	0.00398133		1280.62	0.00596849		1810.61	0.00639846
220.83	0.07461689		750.82	0.00383064		1280.82	0.00530933		1810.81	0.00652562
221.03	0.07523949		751.02	0.00319617		1281.02	0.00391844		1811.01	0.00787779
221.23	0.07556306		751.22	0.00287423		1281.22	0.00294072		1811.21	0.00852475
221.43	0.07619426		751.42	0.00418848		1281.42	0.00212687		1811.41	0.00903593
221.63	0.07621265		751.62	0.00394113		1281.62	0.00238345		1811.61	0.01001409
221.83	0.0767112		751.82	0.00267748		1281.82	0.00282291		1811.81	0.00983674
222.03	0.07715297		752.02	0.00282663		1282.02	0.00254663		1812.01	0.0095669
222.23	0.0774608		752.22	0.00283797		1282.22	0.00401911		1812.21	0.01007269
222.43	0.07744501		752.42	0.00353155		1282.42	0.00411996		1812.41	0.00959592
222.63	0.07799646		752.62	0.00354543		1282.62	0.00493358		1812.61	0.00923642
222.83	0.07919131		752.82	0.00480249		1282.82	0.00489248		1812.81	0.00988861
223.03	0.07955072		753.02	0.00468059		1283.02	0.00526652		1813.01	0.01039479
223.23	0.08046418		753.22	0.00513955		1283.22	0.00515192		1813.21	0.00997603
223.43	0.08119116		753.42	0.0060022		1283.42	0.0065473		1813.41	0.01009039
223.63	0.0823773		753.62	0.00694817		1283.62	0.00733475		1813.61	0.01030031
223.83	0.0828921		753.82	0.00791899		1283.82	0.00689571		1813.81	0.0101846
224.03	0.08388593		754.02	0.0081009		1284.02	0.00784095		1814.01	0.00984362
224.23	0.0849064		754.22	0.0080785		1284.22	0.00649055		1814.21	0.00948202
224.43	0.0852932		754.42	0.00841598		1284.42	0.00566944		1814.41	0.00873055
224.63	0.08663684		754.62	0.00887709		1284.62	0.00439726		1814.61	0.00803208
224.83	0.08795372		754.82	0.00871163		1284.82	0.00364209		1814.81	0.00745528
225.03	0.08903359		755.02	0.00865056		1285.02	0.003336		1815.01	0.00800592
225.23	0.08988406		755.22	0.00793656		1285.22	0.00341435		1815.21	0.00723447
225.43	0.08977478		755.42	0.00761137		1285.42	0.00357546		1815.41	0.00710595
225.63	0.09035491		755.62	0.00719177		1285.62	0.00324593		1815.61	0.00698155
225.83	0.09101392		755.82	0.00716851		1285.82	0.00330761		1815.81	0.00595675
226.03	0.09172281		756.02	0.00734736		1286.02	0.00347488		1816.01	0.00483723
226.23	0.09297113		756.22	0.00728966		1286.22	0.00406709		1816.21	0.00383255
226.43	0.09342432		756.42	0.00703858		1286.42	0.00436005		1816.41	0.00317269
226.63	0.09413976		756.62	0.00771465		1286.62	0.00454975		1816.61	0.00279501
226.83	0.09496841		756.82	0.00703611		1286.82	0.00411068		1816.81	0.00363515
227.03	0.09474666		757.02	0.00668621		1287.02	0.00485636		1817.01	0.00380935
227.23	0.09568245		757.22	0.00708765		1287.22	0.00534358		1817.21	0.00329629
227.43	0.09532195		757.42	0.0072492		1287.42	0.00598496		1817.41	0.00389119
227.63	0.09546526		757.62	0.00693269		1287.62	0.00537205		1817.61	0.00378256
227.83	0.09557534		757.82	0.00568875		1287.82	0.00513978		1817.81	0.00423783
228.03	0.09600292		758.02	0.005463		1288.02	0.00558663		1818.01	0.00509283
228.23	0.09612777		758.22	0.00419168		1288.22	0.00488168		1818.21	0.00546718
228.43	0.09696892		758.42	0.00413776		1288.42	0.00450333		1818.41	0.00612558
228.63	0.09776781		758.62	0.00438101		1288.62	0.00425071		1818.61	0.0064741
228.83	0.09787072		758.82	0.00503092		1288.82	0.00392575		1818.81	0.00729643
229.03	0.09829273		759.02	0.00485942		1289.02	0.00448936		1819.01	0.00794122
229.23	0.09876949		759.22	0.00453245		1289.22	0.00406435		1819.21	0.00796354
229.43	0.09908339		759.42	0.00490311		1289.42	0.00403601		1819.41	0.00895398
229.63	0.09932619		759.62	0.00548253		1289.62	0.00316047		1819.61	0.00908022
229.83	0.09994563		759.82	0.00512599		1289.82	0.00409129		1819.81	0.00955324
230.03	0.10076522		760.02	0.00462138		1290.02	0.0042102		1820.01	0.00973846
230.23	0.10154238		760.22	0.00379745		1290.22	0.0054665		1820.21	0.00977486
230.43	0.10167139		760.42	0.00267833		1290.42	0.00655076		1820.41	0.0086183
230.63	0.10220472		760.62	0.00283331		1290.62	0.00731465		1820.61	0.00753543
230.83	0.10292869		760.82	0.00265388		1290.82	0.00890551		1820.81	0.00743607
231.03	0.10325683		761.02	0.00342572		1291.02	0.00946162		1821.01	0.00657409
231.23	0.10349714		761.22	0.00360386		1291.22	0.00950154		1821.21	0.00617671
231.43	0.10380918		761.42	0.00359892		1291.42	0.0092726		1821.41	0.00578701
231.63	0.10523646		761.62	0.00286766		1291.62	0.00866393		1821.61	0.00456674
231.83	0.1058965		761.82	0.00244912		1291.82	0.00949357		1821.81	0.00484283
232.03	0.10600651		762.02	0.0029034		1292.02	0.01003374		1822.01	0.00545944
232.23	0.10566672		762.22	0.00352143		1292.22	0.00953667		1822.21	0.00504424
232.43	0.10628595		762.42	0.00519239		1292.42	0.00896119		1822.41	0.00498872
232.63	0.10687238		762.62	0.00517057		1292.62	0.00829023		1822.61	0.00461696
232.83	0.10692494		762.82	0.00591678		1292.82	0.00637988		1822.81	0.00444434
233.03	0.1070538		763.02	0.00591118		1293.02	0.0064763		1823.01	0.00400149
233.23	0.10780097		763.22	0.00558905		1293.22	0.00562278		1823.21	0.00422559
233.43	0.1085424		763.42	0.00634062		1293.42	0.00621126		1823.41	0.00494048
233.63	0.10864852		763.62	0.00679652		1293.62	0.0068665		1823.61	0.00503736
233.83	0.10910333		763.82	0.00683532		1293.82	0.00830932		1823.81	0.00634221
234.03	0.108629		764.02	0.00633644		1294.02	0.00831832		1824.01	0.00621818
234.23	0.10861819		764.22	0.00592979		1294.22	0.00928736		1824.21	0.00548948
234.43	0.10996071		764.42	0.00548088		1294.42	0.00941984		1824.41	0.00458592
234.63	0.11119314		764.62	0.00622004		1294.62	0.00953953		1824.61	0.00405707
234.83	0.11145976		764.82	0.00733652		1294.82	0.00964421		1824.81	0.00469005
235.03	0.11330604		765.02	0.00708336		1295.02	0.00853902		1825.01	0.0043517
235.23	0.11403193		765.22	0.0068428		1295.22	0.0081169		1825.21	0.00487259
235.43	0.11464242		765.42	0.0072676		1295.42	0.00723874		1825.41	0.00515575
235.63	0.11498195		765.62	0.00706751		1295.62	0.00701208		1825.61	0.0056096
235.83	0.11485115		765.82	0.00667941		1295.82	0.00736716		1825.81	0.0072271
236.03	0.11511722		766.02	0.00691929		1296.02	0.00748012		1826.01	0.00784232
236.23	0.11597203		766.22	0.00694815		1296.22	0.00688691		1826.21	0.00794278
236.43	0.11749547		766.42	0.00701433		1296.42	0.0061634		1826.41	0.00820044
236.63	0.1190742		766.62	0.00653213		1296.62	0.00532192		1826.61	0.00875293
236.83	0.11909904		766.82	0.00643834		1296.82	0.00443281		1826.81	0.00986697
237.03	0.12001658		767.02	0.0062822		1297.02	0.00547084		1827.01	0.00985497
237.23	0.11991116		767.22	0.00622374		1297.22	0.0058183		1827.21	0.01089543
237.43	0.12036877		767.42	0.00770961		1297.42	0.00738024		1827.41	0.00951542
237.63	0.11994317		767.62	0.00791311		1297.62	0.00828173		1827.61	0.00891116
237.83	0.12013386		767.82	0.00827585		1297.82	0.00881378		1827.81	0.00947938
238.03	0.11999707		768.02	0.0077329		1298.02	0.0085452		1828.01	0.00887598
238.23	0.12037347		768.22	0.00810881		1298.22	0.00831142		1828.21	0.00834582
238.43	0.12131713		768.42	0.0079813		1298.42	0.00815002		1828.41	0.00896384
238.63	0.12142963		768.62	0.00760467		1298.62	0.0085079		1828.61	0.00847716
238.83	0.12052601		768.82	0.00847208		1298.82	0.00951129		1828.81	0.00921478
239.03	0.12150643		769.02	0.00825817		1299.02	0.00878771		1829.01	0.00842494
239.23	0.12081703		769.22	0.00838282		1299.22	0.00871484		1829.21	0.00762205
239.43	0.12024964		769.42	0.00780041		1299.42	0.00761488		1829.41	0.00780024
239.63	0.12096066		769.62	0.00698073		1299.62	0.00770552		1829.61	0.00778861
239.83	0.12176097		769.82	0.00644793		1299.82	0.00850934		1829.81	0.00773434
240.03	0.12249983		770.02	0.00617366		1300.02	0.00961553		1830.01	0.00762086
240.23	0.12354299		770.22	0.00565701		1300.22	0.00950855		1830.21	0.0075497
240.43	0.12348749		770.42	0.00592046		1300.42	0.00890969		1830.41	0.00808708
240.63	0.12383653		770.62	0.00530141		1300.62	0.00911046		1830.61	0.00923943
240.83	0.12367451		770.82	0.004558		1300.82	0.00932996		1830.81	0.01018414
241.03	0.12368185		771.02	0.00544916		1301.02	0.00969141		1831.01	0.00991913
241.23	0.12305565		771.22	0.00503056		1301.22	0.01003912		1831.21	0.00937126
241.43	0.12405472		771.42	0.00596683		1301.42	0.01045058		1831.41	0.00756513
241.63	0.12432176		771.62	0.00568963		1301.62	0.01060006		1831.61	0.00709004
241.83	0.12476866		771.82	0.00597771		1301.82	0.01050219		1831.81	0.00847023
242.03	0.1241278		772.02	0.00633127		1302.02	0.01001384		1832.01	0.00828924
242.23	0.12423949		772.22	0.00652433		1302.22	0.00995779		1832.21	0.00867532
242.43	0.12474544		772.42	0.00649081		1302.42	0.01027758		1832.41	0.00859208
242.63	0.12473308		772.62	0.00704706		1302.62	0.01000012		1832.61	0.00769738
242.83	0.12410308		772.82	0.00913817		1302.82	0.00992455		1832.81	0.00794665
243.03	0.12491603		773.02	0.00953451		1303.02	0.0085813		1833.01	0.00599262
243.23	0.12580944		773.22	0.01008896		1303.22	0.00774742		1833.21	0.00540839
243.43	0.12656019		773.42	0.01064772		1303.42	0.00720579		1833.41	0.00592729
243.63	0.12832418		773.62	0.01100236		1303.62	0.00744048		1833.61	0.00591946
243.83	0.12882292		773.82	0.01134136		1303.82	0.00762511		1833.81	0.00586138
244.03	0.12899929		774.02	0.0108571		1304.02	0.00628163		1834.01	0.00571498
244.23	0.12942065		774.22	0.01093491		1304.22	0.00495651		1834.21	0.00567916
244.43	0.12880485		774.42	0.01052271		1304.42	0.0051312		1834.41	0.00568136
244.63	0.13040133		774.62	0.00982101		1304.62	0.00505877		1834.61	0.00607942
244.83	0.13045346		774.82	0.00913852		1304.82	0.00483882		1834.81	0.00630469
245.03	0.13079128		775.02	0.00901992		1305.02	0.00449611		1835.01	0.00645837
245.23	0.13162275		775.22	0.00835607		1305.22	0.00435948		1835.21	0.00589063
245.43	0.1324447		775.42	0.00912739		1305.42	0.00477525		1835.41	0.00567351
245.63	0.13398413		775.62	0.00889296		1305.62	0.00589178		1835.61	0.00558086
245.83	0.13384456		775.82	0.00915289		1305.82	0.00672864		1835.81	0.00707172
246.03	0.13452569		776.02	0.00898812		1306.02	0.00773943		1836.01	0.00747098
246.23	0.1350312		776.22	0.00973704		1306.22	0.00837433		1836.21	0.00838418
246.43	0.13611796		776.42	0.01050905		1306.42	0.00910819		1836.41	0.00804185
246.63	0.1363283		776.62	0.01193855		1306.62	0.00942115		1836.61	0.00831995
246.83	0.13725995		776.82	0.01268468		1306.82	0.00999163		1836.81	0.00833486
247.03	0.13948279		777.02	0.01312174		1307.02	0.01008329		1837.01	0.00794055
247.23	0.14086829		777.22	0.01322961		1307.22	0.0105787		1837.21	0.00895311
247.43	0.14180774		777.42	0.01334076		1307.42	0.0109879		1837.41	0.00915598
247.63	0.14259328		777.62	0.01276105		1307.62	0.01059865		1837.61	0.00942588
247.83	0.14235277		777.82	0.01303318		1307.82	0.01016157		1837.81	0.00990682
248.03	0.1426022		778.02	0.01292695		1308.02	0.00824783		1838.01	0.00902758
248.23	0.14327773		778.22	0.01237895		1308.22	0.00769501		1838.21	0.00914681
248.43	0.14330813		778.42	0.01143374		1308.42	0.00705964		1838.41	0.00847069
248.63	0.14430198		778.62	0.01060146		1308.62	0.00653048		1838.61	0.00892584
248.83	0.14337853		778.82	0.0099577		1308.82	0.00638065		1838.81	0.00903503
249.03	0.14352092		779.02	0.00940266		1309.02	0.00656559		1839.01	0.00977596
249.23	0.14395008		779.22	0.01016961		1309.22	0.00738663		1839.21	0.01023643
249.43	0.14376142		779.42	0.01029696		1309.42	0.00779216		1839.41	0.00965648
249.63	0.14404793		779.62	0.00928479		1309.62	0.00825333		1839.61	0.00912789
249.83	0.14297262		779.82	0.00853662		1309.82	0.00855525		1839.81	0.00986307
250.03	0.1424546		780.02	0.00859187		1310.02	0.00873435		1840.01	0.01005167
250.23	0.14218435		780.22	0.00994203		1310.22	0.00940834		1840.21	0.01074337
250.43	0.14246077		780.42	0.00960018		1310.42	0.0095322		1840.41	0.0104645
250.63	0.14226512		780.62	0.00948416		1310.62	0.0091508		1840.61	0.01022643
250.83	0.1431525		780.82	0.00988218		1310.82	0.00920812		1840.81	0.00984702
251.03	0.14465127		781.02	0.01032536		1311.02	0.01018613		1841.01	0.00927559
251.23	0.14487855		781.22	0.01019743		1311.22	0.01000611		1841.21	0.00932956
251.43	0.14563884		781.42	0.0108852		1311.42	0.00935254		1841.41	0.0090154
251.63	0.14603742		781.62	0.01130956		1311.62	0.0094544		1841.61	0.00942461
251.83	0.14650981		781.82	0.01174227		1311.82	0.00912052		1841.81	0.00921091
252.03	0.14737647		782.02	0.01235139		1312.02	0.00739922		1842.01	0.00839129
252.23	0.14767601		782.22	0.012013		1312.22	0.00754351		1842.21	0.0085933
252.43	0.14818663		782.42	0.01179446		1312.42	0.00708496		1842.41	0.00823047
252.63	0.14870421		782.62	0.01184964		1312.62	0.00860415		1842.61	0.00837976
252.83	0.14919156		782.82	0.01215796		1312.82	0.00890454		1842.81	0.00801303
253.03	0.15048697		783.02	0.01274216		1313.02	0.00927973		1843.01	0.0087963
253.23	0.15146476		783.22	0.01383552		1313.22	0.009858		1843.21	0.00919916
253.43	0.15150557		783.42	0.0130682		1313.42	0.0095971		1843.41	0.00825328
253.63	0.15146288		783.62	0.01278398		1313.62	0.01039934		1843.61	0.00856074
253.83	0.15125336		783.82	0.01286945		1313.82	0.01024163		1843.81	0.00845043
254.03	0.15104078		784.02	0.01300014		1314.02	0.01046966		1844.01	0.00866983
254.23	0.15189567		784.22	0.01228525		1314.22	0.01055555		1844.21	0.00821809
254.43	0.15264655		784.42	0.01084488		1314.42	0.00998296		1844.41	0.00743169
254.63	0.1535593		784.62	0.01067647		1314.62	0.01026422		1844.61	0.00692703
254.83	0.15449372		784.82	0.01056235		1314.82	0.01102848		1844.81	0.00710615
255.03	0.15528333		785.02	0.01024874		1315.02	0.01041712		1845.01	0.00709038
255.23	0.15476346		785.22	0.00992163		1315.22	0.00879545		1845.21	0.00776467
255.43	0.15510017		785.42	0.00970474		1315.42	0.00952918		1845.41	0.00766841
255.63	0.15473577		785.62	0.00891634		1315.62	0.008958		1845.61	0.00795271
255.83	0.1555896		785.82	0.00836959		1315.82	0.0084722		1845.81	0.00692688
256.03	0.15529936		786.02	0.00851051		1316.02	0.00795897		1846.01	0.00708042
256.23	0.15482269		786.22	0.0085985		1316.22	0.00792924		1846.21	0.00727907
256.43	0.15541484		786.42	0.00773504		1316.42	0.00783861		1846.41	0.00739
256.63	0.15617891		786.62	0.00854369		1316.62	0.00843108		1846.61	0.00746224
256.83	0.15654768		786.82	0.0096181		1316.82	0.00788324		1846.81	0.0074593
257.03	0.15780867		787.02	0.01080098		1317.02	0.00764791		1847.01	0.00872844
257.23	0.15868984		787.22	0.01159852		1317.22	0.00821274		1847.21	0.00870077
257.43	0.158485		787.42	0.01193107		1317.42	0.0088083		1847.41	0.00770442
257.63	0.1592048		787.62	0.01203071		1317.62	0.00906573		1847.61	0.00762515
257.83	0.15970358		787.82	0.01197434		1317.82	0.00842787		1847.81	0.00640304
258.03	0.16079464		788.02	0.01165326		1318.02	0.00910408		1848.01	0.00643159
258.23	0.16153826		788.22	0.01195672		1318.22	0.00945685		1848.21	0.00582022
258.43	0.16212993		788.42	0.01252981		1318.42	0.00947238		1848.41	0.00644015
258.63	0.16232132		788.62	0.01337885		1318.62	0.00884909		1848.61	0.00693952
258.83	0.16263233		788.82	0.0135404		1318.82	0.00779864		1848.81	0.00802135
259.03	0.16209625		789.02	0.01360557		1319.02	0.00629225		1849.01	0.00920264
259.23	0.16186688		789.22	0.01384946		1319.22	0.00607745		1849.21	0.01004321
259.43	0.16234568		789.42	0.0126195		1319.42	0.00631394		1849.41	0.01016371
259.63	0.16207297		789.62	0.01180005		1319.62	0.0055908		1849.61	0.00916694
259.83	0.16218545		789.82	0.01145761		1319.82	0.00651298		1849.81	0.00845304
260.03	0.16229269		790.02	0.01143769		1320.02	0.00611257		1850.01	0.00908868
260.23	0.16185528		790.22	0.01093376		1320.22	0.00604284		1850.21	0.00946153
260.43	0.16273051		790.42	0.01040052		1320.42	0.00633586		1850.41	0.00905987
260.63	0.16346112		790.62	0.0107884		1320.62	0.00644665		1850.61	0.00933388
260.83	0.16382137		790.82	0.01108461		1320.82	0.00702408		1850.81	0.00972078
261.03	0.16542936		791.02	0.01113325		1321.02	0.00759772		1851.01	0.01000984
261.23	0.1660118		791.22	0.01052475		1321.22	0.00796223		1851.21	0.00977571
261.43	0.16632467		791.42	0.01083943		1321.42	0.00803227		1851.41	0.00945835
261.63	0.16733259		791.62	0.01092557		1321.62	0.0076737		1851.61	0.00957444
261.83	0.16771188		791.82	0.01144949		1321.82	0.00760796		1851.81	0.00853488
262.03	0.16888016		792.02	0.01197797		1322.02	0.00797934		1852.01	0.00852935
262.23	0.16891374		792.22	0.01292178		1322.22	0.00744309		1852.21	0.00914086
262.43	0.16983323		792.42	0.01349733		1322.42	0.00635142		1852.41	0.00908959
262.63	0.17106874		792.62	0.013677		1322.62	0.00526358		1852.61	0.00910429
262.83	0.1711127		792.82	0.01426947		1322.82	0.00514902		1852.81	0.00965894
263.03	0.17031188		793.02	0.01427494		1323.02	0.00446282		1853.01	0.00971581
263.23	0.1712379		793.22	0.01436424		1323.22	0.00423616		1853.21	0.00963253
263.43	0.171459		793.42	0.01392738		1323.42	0.00430796		1853.41	0.00858109
263.63	0.17050839		793.62	0.01452521		1323.62	0.00474136		1853.61	0.00774889
263.83	0.17030973		793.82	0.01429617		1323.82	0.00458579		1853.81	0.00812605
264.03	0.17068815		794.02	0.01458106		1324.02	0.00476662		1854.01	0.00830011
264.23	0.16955954		794.22	0.01345789		1324.22	0.00585913		1854.21	0.00769705
264.43	0.17065993		794.42	0.01328307		1324.42	0.00602384		1854.41	0.00773415
264.63	0.17034227		794.62	0.01288513		1324.62	0.00598923		1854.61	0.00902266
264.83	0.16980223		794.82	0.01255659		1324.82	0.00633169		1854.81	0.00946331
265.03	0.16946644		795.02	0.01172769		1325.02	0.00611502		1855.01	0.00987865
265.23	0.16887851		795.22	0.01160408		1325.22	0.00561626		1855.21	0.01073618
265.43	0.16907746		795.42	0.01216533		1325.42	0.00537807		1855.41	0.01041762
265.63	0.16897668		795.62	0.01189836		1325.62	0.00543009		1855.61	0.01072044
265.83	0.16925819		795.82	0.01199704		1325.82	0.0057127		1855.81	0.01013666
266.03	0.17017981		796.02	0.01263721		1326.02	0.00559098		1856.01	0.01086443
266.23	0.17025069		796.22	0.01301107		1326.22	0.00533313		1856.21	0.0111684
266.43	0.17100782		796.42	0.01327124		1326.42	0.00537396		1856.41	0.01080921
266.63	0.17116125		796.62	0.01349625		1326.62	0.00522288		1856.61	0.01117778
266.83	0.17122176		796.82	0.01362723		1326.82	0.00518869		1856.81	0.0117647
267.03	0.17219235		797.02	0.01371914		1327.02	0.00488052		1857.01	0.01227278
267.23	0.17295014		797.22	0.01340978		1327.22	0.00471636		1857.21	0.01265775
267.43	0.17275004		797.42	0.01389217		1327.42	0.00527132		1857.41	0.01241202
267.63	0.17246396		797.62	0.01345422		1327.62	0.00573483		1857.61	0.01322331
267.83	0.17304163		797.82	0.01341758		1327.82	0.00586228		1857.81	0.01355447
268.03	0.17356789		798.02	0.01291101		1328.02	0.00647321		1858.01	0.01265012
268.23	0.17418298		798.22	0.01195407		1328.22	0.00638785		1858.21	0.01294145
268.43	0.1757819		798.42	0.01228172		1328.42	0.00657239		1858.41	0.01327886
268.63	0.17530782		798.62	0.0118778		1328.62	0.00678384		1858.61	0.01268232
268.83	0.17507725		798.82	0.01193296		1328.82	0.00772304		1858.81	0.01172781
269.03	0.1757643		799.02	0.01218077		1329.02	0.00797156		1859.01	0.01092603
269.23	0.17613244		799.22	0.01264339		1329.22	0.00836778		1859.21	0.00935156
269.43	0.1764649		799.42	0.01244503		1329.42	0.00864442		1859.41	0.00844912
269.63	0.17612343		799.62	0.01268342		1329.62	0.00835946		1859.61	0.00806648
269.83	0.17721743		799.82	0.01340156		1329.82	0.00789393		1859.81	0.00687272
270.03	0.17795323		800.02	0.01445621		1330.02	0.00757167		1860.01	0.00617064
270.23	0.17824462		800.22	0.01471315		1330.22	0.00741491		1860.21	0.00624398
270.43	0.17908077		800.42	0.01531173		1330.42	0.0074872		1860.41	0.00674363
270.63	0.17919557		800.62	0.01571496		1330.62	0.00672875		1860.61	0.00779637
270.83	0.17974785		800.82	0.01655227		1330.82	0.00634072		1860.81	0.00842997
271.03	0.18014216		801.02	0.01717068		1331.02	0.005484		1861.01	0.00918863
271.23	0.17988458		801.22	0.01659146		1331.22	0.00433208		1861.21	0.00924915
271.43	0.18034292		801.42	0.01729579		1331.42	0.00432693		1861.41	0.01050184
271.63	0.18093896		801.62	0.01670061		1331.62	0.00364707		1861.61	0.0116207
271.83	0.18125158		801.82	0.01660484		1331.82	0.0034682		1861.81	0.01191779
272.03	0.18255		802.02	0.01560133		1332.02	0.0030689		1862.01	0.01230021
272.23	0.18336028		802.22	0.01511497		1332.22	0.00259242		1862.21	0.01358913
272.43	0.18339783		802.42	0.01464643		1332.42	0.00336758		1862.41	0.01357346
272.63	0.18330809		802.62	0.01342555		1332.62	0.00395728		1862.61	0.01411098
272.83	0.1833756		802.82	0.01409407		1332.82	0.00427005		1862.81	0.0138207
273.03	0.18381099		803.02	0.01309794		1333.02	0.00465437		1863.01	0.01212586
273.23	0.18341215		803.22	0.01231387		1333.22	0.00500923		1863.21	0.0111352
273.43	0.18285597		803.42	0.01218223		1333.42	0.00523012		1863.41	0.01102612
273.63	0.18345398		803.62	0.01231264		1333.62	0.00515882		1863.61	0.01027127
273.83	0.1839106		803.82	0.01273968		1333.82	0.0048487		1863.81	0.00870902
274.03	0.1837806		804.02	0.01331647		1334.02	0.0056253		1864.01	0.00861886
274.23	0.18465376		804.22	0.01334182		1334.22	0.00532362		1864.21	0.00976428
274.43	0.18507904		804.42	0.01369202		1334.42	0.00546067		1864.41	0.01013333
274.63	0.18519379		804.62	0.01444858		1334.62	0.00520894		1864.61	0.01068373
274.83	0.18569615		804.82	0.01581285		1334.82	0.00484907		1864.81	0.01078992
275.03	0.18594128		805.02	0.01616509		1335.02	0.00434657		1865.01	0.01091415
275.23	0.18618807		805.22	0.01568401		1335.22	0.00415474		1865.21	0.0105491
275.43	0.18684974		805.42	0.01626201		1335.42	0.00346244		1865.41	0.01160265
275.63	0.18740504		805.62	0.01575662		1335.62	0.0036733		1865.61	0.01215522
275.83	0.18821716		805.82	0.01530035		1335.82	0.00346655		1865.81	0.01256982
276.03	0.18984384		806.02	0.01571473		1336.02	0.00281574		1866.01	0.0134386
276.23	0.18949841		806.22	0.01526337		1336.22	0.00320051		1866.21	0.01490027
276.43	0.18932081		806.42	0.01520439		1336.42	0.00434252		1866.41	0.0157736
276.63	0.18905736		806.62	0.01491562		1336.62	0.00454584		1866.61	0.016748
276.83	0.18943217		806.82	0.01545843		1336.82	0.00434913		1866.81	0.01542773
277.03	0.18916953		807.02	0.01501392		1337.02	0.00551473		1867.01	0.01455739
277.23	0.18875773		807.22	0.01565425		1337.22	0.00619127		1867.21	0.0144734
277.43	0.18791062		807.42	0.01650435		1337.42	0.00720563		1867.41	0.01458475
277.63	0.18878854		807.62	0.01681959		1337.62	0.00727793		1867.61	0.01473611
277.83	0.18885773		807.82	0.01711428		1337.82	0.00723456		1867.81	0.0136048
278.03	0.18977559		808.02	0.01767097		1338.02	0.00809735		1868.01	0.01389332
278.23	0.19102613		808.22	0.01740366		1338.22	0.00801054		1868.21	0.0144389
278.43	0.19060181		808.42	0.01799702		1338.42	0.00791398		1868.41	0.01386973
278.63	0.19054736		808.62	0.01807124		1338.62	0.00780376		1868.61	0.01383204
278.83	0.19114084		808.82	0.01854756		1338.82	0.00788058		1868.81	0.01339681
279.03	0.19118905		809.02	0.01856286		1339.02	0.00812048		1869.01	0.01172642
279.23	0.1923211		809.22	0.01787345		1339.22	0.00799835		1869.21	0.0116355
279.43	0.19320109		809.42	0.01868875		1339.42	0.00757875		1869.41	0.01101745
279.63	0.1936431		809.62	0.01835846		1339.62	0.00786581		1869.61	0.01123712
279.83	0.19370403		809.82	0.01847536		1339.82	0.00784036		1869.81	0.01062118
280.03	0.19333245		810.02	0.01945188		1340.02	0.00785255		1870.01	0.01132919
280.23	0.19298723		810.22	0.01886013		1340.22	0.00861698		1870.21	0.01186191
280.43	0.19272177		810.42	0.01921379		1340.42	0.00896914		1870.41	0.01124547
280.63	0.19171576		810.62	0.01901256		1340.62	0.00877377		1870.61	0.01058941
280.83	0.19185216		810.82	0.01906659		1340.82	0.00871961		1870.81	0.0096493
281.03	0.19150303		811.02	0.01867307		1341.02	0.00907792		1871.01	0.00989745
281.23	0.1914009		811.22	0.01861649		1341.22	0.00929951		1871.21	0.01023033
281.43	0.19136913		811.42	0.01841643		1341.42	0.0090388		1871.41	0.01057663
281.63	0.19263835		811.62	0.01793016		1341.62	0.00834983		1871.61	0.01032503
281.83	0.19351524		811.82	0.01700767		1341.82	0.00751981		1871.81	0.00998514
282.03	0.1935701		812.02	0.0161589		1342.02	0.00681906		1872.01	0.01138567
282.23	0.19324145		812.22	0.01550191		1342.22	0.00553817		1872.21	0.01207947
282.43	0.19318227		812.42	0.01516132		1342.42	0.00476169		1872.41	0.01220225
282.63	0.19413937		812.62	0.01377243		1342.62	0.00506144		1872.61	0.01215248
282.83	0.19552921		812.82	0.01343344		1342.82	0.00578554		1872.81	0.01191314
283.03	0.19644179		813.02	0.01319808		1343.02	0.00566686		1873.01	0.01217335
283.23	0.19687958		813.22	0.01354157		1343.22	0.0057266		1873.21	0.01305937
283.43	0.1969478		813.42	0.01386756		1343.42	0.00551227		1873.41	0.01223288
283.63	0.19767394		813.62	0.01318045		1343.62	0.00633158		1873.61	0.01335782
283.83	0.19709975		813.82	0.01291199		1343.82	0.00703002		1873.81	0.01268097
284.03	0.19794269		814.02	0.01355191		1344.02	0.00718064		1874.01	0.01251624
284.23	0.19843185		814.22	0.01387562		1344.22	0.00825263		1874.21	0.01187402
284.43	0.19771451		814.42	0.01425177		1344.42	0.00858564		1874.41	0.01154169
284.63	0.19780562		814.62	0.01483047		1344.62	0.00771493		1874.61	0.01073554
284.83	0.19788323		814.82	0.01523483		1344.82	0.00693004		1874.81	0.01090122
285.03	0.1985961		815.02	0.01538755		1345.02	0.00720722		1875.01	0.01121309
285.23	0.199395		815.22	0.01641386		1345.22	0.00760925		1875.21	0.01097624
285.43	0.19948933		815.42	0.01730496		1345.42	0.00703306		1875.41	0.00977622
285.63	0.19953623		815.62	0.01729714		1345.62	0.00707955		1875.61	0.01004245
285.83	0.20008367		815.82	0.01721591		1345.82	0.00575587		1875.81	0.01105489
286.03	0.19965172		816.02	0.01760339		1346.02	0.00472952		1876.01	0.0116296
286.23	0.19957184		816.22	0.01828215		1346.22	0.00430327		1876.21	0.01199238
286.43	0.20080086		816.42	0.01780939		1346.42	0.0045997		1876.41	0.01318281
286.63	0.20113228		816.62	0.01753364		1346.62	0.00427713		1876.61	0.01317495
286.83	0.20189173		816.82	0.0178424		1346.82	0.00408935		1876.81	0.01389887
287.03	0.20207786		817.02	0.0178606		1347.02	0.00445646		1877.01	0.01441626
287.23	0.2024723		817.22	0.01756992		1347.22	0.00508411		1877.21	0.01420608
287.43	0.20321155		817.42	0.01722348		1347.42	0.00575203		1877.41	0.01385777
287.63	0.20424912		817.62	0.01675938		1347.62	0.00611933		1877.61	0.01375008
287.83	0.20360794		817.82	0.01652173		1347.82	0.00626395		1877.81	0.01376632
288.03	0.20356457		818.02	0.01714089		1348.02	0.00615184		1878.01	0.01344288
288.23	0.20235777		818.22	0.01727404		1348.22	0.00667767		1878.21	0.01319957
288.43	0.20148011		818.42	0.01688776		1348.42	0.00666966		1878.41	0.01227003
288.63	0.20114734		818.62	0.01785123		1348.62	0.00626411		1878.61	0.01139621
288.83	0.20108171		818.82	0.01755515		1348.82	0.0063931		1878.81	0.01113434
289.03	0.20129478		819.02	0.01792255		1349.02	0.00648326		1879.01	0.01043521
289.23	0.20143238		819.22	0.01889469		1349.22	0.00637355		1879.21	0.00950429
289.43	0.20095752		819.42	0.01804396		1349.42	0.00564072		1879.41	0.00925455
289.63	0.20118412		819.62	0.01741388		1349.62	0.00581806		1879.61	0.01067934
289.83	0.20152651		819.82	0.01749089		1349.82	0.00468967		1879.81	0.01076836
290.03	0.2017769		820.02	0.01771211		1350.02	0.00489157		1880.01	0.01189997
290.23	0.20246175		820.22	0.01751254		1350.22	0.00519201		1880.21	0.01310534
290.43	0.20299426		820.42	0.01778752		1350.42	0.00546776		1880.41	0.01325159
290.63	0.20348566		820.62	0.01866148		1350.62	0.00511382		1880.61	0.01259178
290.83	0.20525641		820.82	0.0190945		1350.82	0.0046052		1880.81	0.01243868
291.03	0.20597984		821.02	0.01891386		1351.02	0.00514407		1881.01	0.01221627
291.23	0.20679727		821.22	0.01938758		1351.22	0.00623527		1881.21	0.01215882
291.43	0.20751441		821.42	0.02013104		1351.42	0.00583227		1881.41	0.01093262
291.63	0.20820151		821.62	0.01963369		1351.62	0.00531258		1881.61	0.01022367
291.83	0.20776319		821.82	0.02026801		1351.82	0.006179		1881.81	0.01061981
292.03	0.20868345		822.02	0.02061359		1352.02	0.00584848		1882.01	0.0098019
292.23	0.20954674		822.22	0.02134759		1352.22	0.00698255		1882.21	0.00928586
292.43	0.21011494		822.42	0.02246864		1352.42	0.00702116		1882.41	0.00876873
292.63	0.21038222		822.62	0.02316604		1352.62	0.00625657		1882.61	0.00920419
292.83	0.21094106		822.82	0.02230978		1352.82	0.0061703		1882.81	0.00957523
293.03	0.21098058		823.02	0.02279669		1353.02	0.006068		1883.01	0.0099442
293.23	0.21124591		823.22	0.02197198		1353.22	0.0062452		1883.21	0.01097211
293.43	0.21123003		823.42	0.02060058		1353.42	0.00655747		1883.41	0.01141413
293.63	0.21105805		823.62	0.02021603		1353.62	0.00802448		1883.61	0.01294455
293.83	0.21096956		823.82	0.02041861		1353.82	0.00741368		1883.81	0.01365512
294.03	0.21079696		824.02	0.01955239		1354.02	0.00697302		1884.01	0.01519302
294.23	0.21099978		824.22	0.01899141		1354.22	0.00667127		1884.21	0.01462235
294.43	0.20992489		824.42	0.01978531		1354.42	0.00617655		1884.41	0.01438787
294.63	0.21044679		824.62	0.01927001		1354.62	0.00477054		1884.61	0.0137745
294.83	0.21109054		824.82	0.01884635		1354.82	0.00443094		1884.81	0.01243593
295.03	0.21063532		825.02	0.01870594		1355.02	0.00353977		1885.01	0.01155168
295.23	0.21072953		825.22	0.01857843		1355.22	0.00404752		1885.21	0.01110444
295.43	0.21174464		825.42	0.01858197		1355.42	0.00310204		1885.41	0.01061038
295.63	0.21169585		825.62	0.01812906		1355.62	0.00315739		1885.61	0.01146931
295.83	0.21191093		825.82	0.01883082		1355.82	0.00357514		1885.81	0.01138087
296.03	0.21352172		826.02	0.01862373		1356.02	0.00402095		1886.01	0.01120342
296.23	0.21345517		826.22	0.01871395		1356.22	0.00431171		1886.21	0.01110866
296.43	0.21279577		826.42	0.01864306		1356.42	0.00456406		1886.41	0.01056955
296.63	0.21230875		826.62	0.01793259		1356.62	0.00436224		1886.61	0.01164737
296.83	0.21359167		826.82	0.01710962		1356.82	0.00526137		1886.81	0.01124429
297.03	0.21407833		827.02	0.01742458		1357.02	0.00622051		1887.01	0.01187994
297.23	0.21425384		827.22	0.01680872		1357.22	0.00665962		1887.21	0.01210014
297.43	0.21450279		827.42	0.01661245		1357.42	0.00665034		1887.41	0.01202909
297.63	0.21503274		827.62	0.01677535		1357.62	0.00663979		1887.61	0.01238323
297.83	0.21577413		827.82	0.01783243		1357.82	0.00580885		1887.81	0.01230139
298.03	0.21624309		828.02	0.01672602		1358.02	0.00628979		1888.01	0.0120752
298.23	0.21677593		828.22	0.01741648		1358.22	0.00676547		1888.21	0.01074604
298.43	0.21633204		828.42	0.01806417		1358.42	0.00666835		1888.41	0.01038846
298.63	0.21721234		828.62	0.01810868		1358.62	0.00560547		1888.61	0.00840861
298.83	0.21765562		828.82	0.01883033		1358.82	0.00547793		1888.81	0.00811239
299.03	0.21846738		829.02	0.01865816		1359.02	0.0043587		1889.01	0.00884949
299.23	0.21849976		829.22	0.01799084		1359.22	0.00456122		1889.21	0.00878426
299.43	0.21904688		829.42	0.01864246		1359.42	0.00375795		1889.41	0.00971277
299.63	0.2187236		829.62	0.0189685		1359.62	0.00303977		1889.61	0.01046905
299.83	0.21937976		829.82	0.01806346		1359.82	0.00326413		1889.81	0.01020464
300.03	0.21975004		830.02	0.01723139		1360.02	0.00272554		1890.01	0.01082899
300.23	0.21949037		830.22	0.01728166		1360.22	0.00213493		1890.21	0.01137539
300.43	0.21945553		830.42	0.01803928		1360.42	0.00214127		1890.41	0.01164708
300.63	0.21942699		830.62	0.01916318		1360.62	0.00166854		1890.61	0.01279638
300.83	0.22048905		830.82	0.02021667		1360.82	0.00252606		1890.81	0.01255622
301.03	0.22017378		831.02	0.02092586		1361.02	0.00311866		1891.01	0.01399083
301.23	0.22024579		831.22	0.0209924		1361.22	0.00185499		1891.21	0.01369339
301.43	0.22083937		831.42	0.02086681		1361.42	0.0021094		1891.41	0.01390497
301.63	0.22151434		831.62	0.02142152		1361.62	0.00294226		1891.61	0.01420766
301.83	0.22099462		831.82	0.02158817		1361.82	0.00462671		1891.81	0.01407392
302.03	0.22052901		832.02	0.02092142		1362.02	0.00597128		1892.01	0.01430457
302.23	0.21986993		832.22	0.02133932		1362.22	0.0055145		1892.21	0.01315516
302.43	0.21972948		832.42	0.0214673		1362.42	0.00534237		1892.41	0.01292639
302.63	0.21982973		832.62	0.02141357		1362.62	0.00449524		1892.61	0.01274086
302.83	0.22039127		832.82	0.02086185		1362.82	0.00448039		1892.81	0.01391755
303.03	0.22072757		833.02	0.01994609		1363.02	0.00376657		1893.01	0.0139334
303.23	0.22124685		833.22	0.02030381		1363.22	0.00345867		1893.21	0.01391918
303.43	0.22183443		833.42	0.02128393		1363.42	0.00307293		1893.41	0.0146218
303.63	0.22246606		833.62	0.02123238		1363.62	0.00289669		1893.61	0.0145574
303.83	0.22365748		833.82	0.02064471		1363.82	0.00363309		1893.81	0.01462828
304.03	0.22478754		834.02	0.02145811		1364.02	0.00269527		1894.01	0.01492478
304.23	0.22468295		834.22	0.02292651		1364.22	0.00228425		1894.21	0.01486635
304.43	0.22498347		834.42	0.02352841		1364.42	0.00248298		1894.41	0.01468018
304.63	0.22549674		834.62	0.02456059		1364.62	0.00352422		1894.61	0.01508894
304.83	0.22669162		834.82	0.0246391		1364.82	0.00356654		1894.81	0.01523817
305.03	0.22735249		835.02	0.02376997		1365.02	0.00306978		1895.01	0.01591351
305.23	0.22842662		835.22	0.02290186		1365.22	0.00317303		1895.21	0.01564332
305.43	0.22892771		835.42	0.02272855		1365.42	0.00394678		1895.41	0.01539664
305.63	0.22951275		835.62	0.02194548		1365.62	0.00393795		1895.61	0.01625482
305.83	0.22837074		835.82	0.02105442		1365.82	0.00473797		1895.81	0.01563656
306.03	0.2291505		836.02	0.02084872		1366.02	0.00383733		1896.01	0.01545778
306.23	0.22902146		836.22	0.02108987		1366.22	0.00269483		1896.21	0.01423266
306.43	0.22884643		836.42	0.02140972		1366.42	0.00219772		1896.41	0.01439859
306.63	0.22874867		836.62	0.02215435		1366.62	0.00255498		1896.61	0.01472745
306.83	0.22847711		836.82	0.02197586		1366.82	0.00243912		1896.81	0.01427885
307.03	0.22728855		837.02	0.02226526		1367.02	0.00186359		1897.01	0.01321964
307.23	0.22752238		837.22	0.02294757		1367.22	0.00200198		1897.21	0.01265908
307.43	0.22717923		837.42	0.02261241		1367.42	0.00164558		1897.41	0.01193729
307.63	0.22778268		837.62	0.022301		1367.62	0.00216031		1897.61	0.01137363
307.83	0.22814538		837.82	0.02215664		1367.82	0.00243276		1897.81	0.01091295
308.03	0.22859948		838.02	0.02217501		1368.02	0.00164346		1898.01	0.01035512
308.23	0.22869883		838.22	0.02165737		1368.22	0.00282322		1898.21	0.00996403
308.43	0.22929488		838.42	0.02121624		1368.42	0.00370055		1898.41	0.01052014
308.63	0.22945745		838.62	0.0210863		1368.62	0.00393515		1898.61	0.01120613
308.83	0.22945975		838.82	0.0200912		1368.82	0.00415483		1898.81	0.01203682
309.03	0.2301029		839.02	0.01917069		1369.02	0.00462598		1899.01	0.01235342
309.23	0.23046771		839.22	0.01839605		1369.22	0.00480699		1899.21	0.01322092
309.43	0.23091445		839.42	0.01788514		1369.42	0.00439191		1899.41	0.0136713
309.63	0.23156129		839.62	0.01845964		1369.62	0.00499319		1899.61	0.01516952
309.83	0.23139133		839.82	0.01852236		1369.82	0.00585996		1899.81	0.01510137
310.03	0.23164532		840.02	0.01988597		1370.02	0.00532891		1900.01	0.0149108
310.23	0.23170504		840.22	0.02157545		1370.22	0.00467307		1900.21	0.01578524
310.43	0.2326096		840.42	0.02218813		1370.42	0.00463388		1900.41	0.01483539
310.63	0.23347779		840.62	0.02335549		1370.62	0.00495512		1900.61	0.01434583
310.83	0.23339794		840.82	0.02451759		1370.82	0.00450284		1900.81	0.01351348
311.03	0.233206		841.02	0.02481131		1371.02	0.00383412		1901.01	0.01234427
311.23	0.23415387		841.22	0.02499175		1371.22	0.00479813		1901.21	0.01208824
311.43	0.23504279		841.42	0.02468158		1371.42	0.00522547		1901.41	0.01187963
311.63	0.23597878		841.62	0.02527701		1371.62	0.00567286		1901.61	0.01188112
311.83	0.2362967		841.82	0.02516836		1371.82	0.00635441		1901.81	0.01079007
312.03	0.23730111		842.02	0.0250711		1372.02	0.00621915		1902.01	0.01132696
312.23	0.23737988		842.22	0.0238405		1372.22	0.0066821		1902.21	0.01159405
312.43	0.23641991		842.42	0.02384388		1372.42	0.00550935		1902.41	0.01122545
312.63	0.23567803		842.62	0.02292736		1372.62	0.00585383		1902.61	0.01125589
312.83	0.23578208		842.82	0.02181051		1372.82	0.00655455		1902.81	0.01095798
313.03	0.235794		843.02	0.02068335		1373.02	0.00635416		1903.01	0.01110548
313.23	0.2355637		843.22	0.01981285		1373.22	0.00632264		1903.21	0.01204379
313.43	0.23586337		843.42	0.0200834		1373.42	0.00680913		1903.41	0.01255682
313.63	0.23569634		843.62	0.02053044		1373.62	0.00684307		1903.61	0.01343788
313.83	0.23579768		843.82	0.02005167		1373.82	0.00626158		1903.81	0.01394985
314.03	0.2361678		844.02	0.02037888		1374.02	0.0049917		1904.01	0.01354743
314.23	0.2377798		844.22	0.02043037		1374.22	0.00408874		1904.21	0.01431271
314.43	0.23901035		844.42	0.02033409		1374.42	0.00457458		1904.41	0.01245368
314.63	0.23862287		844.62	0.02078594		1374.62	0.00402402		1904.61	0.01280082
314.83	0.23817006		844.82	0.02089124		1374.82	0.00373485		1904.81	0.01234214
315.03	0.23791949		845.02	0.02093228		1375.02	0.00397703		1905.01	0.01208224
315.23	0.23812039		845.22	0.02189743		1375.22	0.00402207		1905.21	0.01310227
315.43	0.23838628		845.42	0.02272359		1375.42	0.00429762		1905.41	0.01353022
315.63	0.23844623		845.62	0.02359275		1375.62	0.00442454		1905.61	0.01441887
315.83	0.23778401		845.82	0.02328157		1375.82	0.0042101		1905.81	0.01366853
316.03	0.23791431		846.02	0.02350388		1376.02	0.00371714		1906.01	0.01462067
316.23	0.23666633		846.22	0.02337971		1376.22	0.00342589		1906.21	0.01330366
316.43	0.2359404		846.42	0.02427581		1376.42	0.00381518		1906.41	0.01243588
316.63	0.23642687		846.62	0.02418478		1376.62	0.00499269		1906.61	0.01263106
316.83	0.23731099		846.82	0.02464053		1376.82	0.00494115		1906.81	0.01248343
317.03	0.2374084		847.02	0.02532998		1377.02	0.00499043		1907.01	0.01309282
317.23	0.2386452		847.22	0.02595028		1377.22	0.00586059		1907.21	0.01392289
317.43	0.23918284		847.42	0.02720575		1377.42	0.00685419		1907.41	0.01452653
317.63	0.24101231		847.62	0.0274966		1377.62	0.00674122		1907.61	0.01487208
317.83	0.24190379		847.82	0.02798385		1377.82	0.00732736		1907.81	0.01498544
318.03	0.24288978		848.02	0.02786435		1378.02	0.0075252		1908.01	0.01456435
318.23	0.2442281		848.22	0.02882769		1378.22	0.00780961		1908.21	0.01521839
318.43	0.24479878		848.42	0.02888981		1378.42	0.00747513		1908.41	0.01430422
318.63	0.24514503		848.62	0.02814206		1378.62	0.00676403		1908.61	0.01416906
318.83	0.24517077		848.82	0.02722117		1378.82	0.00665334		1908.81	0.01322482
319.03	0.24537208		849.02	0.02759558		1379.02	0.00704313		1909.01	0.01280848
319.23	0.2455789		849.22	0.02754337		1379.22	0.00620379		1909.21	0.01266351
319.43	0.24544422		849.42	0.02651703		1379.42	0.00674532		1909.41	0.01199556
319.63	0.24572483		849.62	0.02649708		1379.62	0.00589722		1909.61	0.01181161
319.83	0.24535077		849.82	0.02641311		1379.82	0.00556645		1909.81	0.01059015
320.03	0.24552652		850.02	0.02611612		1380.02	0.00514642		1910.01	0.01051617
320.23	0.24453344		850.22	0.0251068		1380.22	0.00453804		1910.21	0.01048821
320.43	0.24464589		850.42	0.02520725		1380.42	0.00441168		1910.41	0.01064207
320.63	0.24582529		850.62	0.02515149		1380.62	0.00342811		1910.61	0.01076567
320.83	0.24576826		850.82	0.02550432		1380.82	0.00174254		1910.81	0.01108497
321.03	0.24591195		851.02	0.02538643		1381.02	0.00219835		1911.01	0.01109377
321.23	0.24618956		851.22	0.02563291		1381.22	0.00172218		1911.21	0.01086996
321.43	0.24631562		851.42	0.02563412		1381.42	0.00145334		1911.41	0.01120877
321.63	0.24728228		851.62	0.02537582		1381.62	0.00064497		1911.61	0.01062022
321.83	0.24694599		851.82	0.02539237		1381.82	0.00083056		1911.81	0.01030936
322.03	0.24711364		852.02	0.02548892		1382.02	0.00054931		1912.01	0.01028571
322.23	0.24762846		852.22	0.0259332		1382.22	0.00022439		1912.21	0.01089167
322.43	0.24710592		852.42	0.02490616		1382.42	-0.00063815		1912.41	0.0101241
322.63	0.24704707		852.62	0.02422484		1382.62	-0.00024821		1912.61	0.01121295
322.83	0.24592765		852.82	0.02416089		1382.82	0.00009548		1912.81	0.01042352
323.03	0.24624072		853.02	0.02427518		1383.02	0.00022084		1913.01	0.01023018
323.23	0.2461516		853.22	0.02405078		1383.22	0.00057315		1913.21	0.01075085
323.43	0.24624364		853.42	0.02461863		1383.42	0.00157865		1913.41	0.01083267
323.63	0.24637499		853.62	0.02588708		1383.62	0.00223215		1913.61	0.01161088
323.83	0.24620826		853.82	0.02604658		1383.82	0.00274301		1913.81	0.01203699
324.03	0.24689694		854.02	0.02514568		1384.02	0.00320107		1914.01	0.01316629
324.23	0.24729901		854.22	0.02425368		1384.22	0.00438499		1914.21	0.01356635
324.43	0.24894309		854.42	0.02477193		1384.42	0.00501208		1914.41	0.01255725
324.63	0.24936936		854.62	0.02530652		1384.62	0.00414367		1914.61	0.01295139
324.83	0.24946963		854.82	0.02541133		1384.82	0.00444389		1914.81	0.01248005
325.03	0.24970036		855.02	0.0253851		1385.02	0.00521331		1915.01	0.01190656
325.23	0.25052389		855.22	0.02538509		1385.22	0.00427944		1915.21	0.01119201
325.43	0.25013075		855.42	0.02535108		1385.42	0.00385541		1915.41	0.01141552
325.63	0.24998862		855.62	0.02446584		1385.62	0.00340791		1915.61	0.01058606
325.83	0.2502559		855.82	0.02375839		1385.82	0.00269598		1915.81	0.01098857
326.03	0.25047887		856.02	0.02425276		1386.02	0.00281735		1916.01	0.01120482
326.23	0.24992516		856.22	0.0247299		1386.22	0.00321358		1916.21	0.01226227
326.43	0.24919354		856.42	0.02417112		1386.42	0.00205011		1916.41	0.0115009
326.63	0.24980361		856.62	0.02494128		1386.62	0.0027237		1916.61	0.01242921
326.83	0.24960772		856.82	0.02527697		1386.82	0.0030255		1916.81	0.01090878
327.03	0.24981986		857.02	0.02524031		1387.02	0.00302295		1917.01	0.01097161
327.23	0.2498524		857.22	0.02558004		1387.22	0.00394481		1917.21	0.01128192
327.43	0.24953133		857.42	0.02668201		1387.42	0.00426691		1917.41	0.01172121
327.63	0.24952737		857.62	0.02709683		1387.62	0.00458204		1917.61	0.01189514
327.83	0.25061401		857.82	0.02704036		1387.82	0.00531935		1917.81	0.01178446
328.03	0.25139817		858.02	0.02639474		1388.02	0.00609714		1918.01	0.01163177
328.23	0.25202477		858.22	0.02701299		1388.22	0.00614506		1918.21	0.01129298
328.43	0.25258411		858.42	0.02738642		1388.42	0.00618037		1918.41	0.01140785
328.63	0.25248878		858.62	0.02756143		1388.62	0.00572916		1918.61	0.01192428
328.83	0.25295621		858.82	0.0269837		1388.82	0.00650424		1918.81	0.01322865
329.03	0.25335635		859.02	0.02660692		1389.02	0.00600563		1919.01	0.01445355
329.23	0.25378835		859.22	0.0265457		1389.22	0.00458349		1919.21	0.01487266
329.43	0.25399282		859.42	0.02610996		1389.42	0.0037002		1919.41	0.01542481
329.63	0.25375682		859.62	0.02427123		1389.62	0.00361269		1919.61	0.01604293
329.83	0.25334758		859.82	0.02382973		1389.82	0.003736		1919.81	0.01643694
330.03	0.25269836		860.02	0.02447815		1390.02	0.0041227		1920.01	0.01653362
330.23	0.25254231		860.22	0.02307626		1390.22	0.00292594		1920.21	0.01630275
330.43	0.25334078		860.42	0.02230767		1390.42	0.0023819		1920.41	0.01532316
330.63	0.25427443		860.62	0.02280624		1390.62	0.00299087		1920.61	0.01523122
330.83	0.25439966		860.82	0.02236117		1390.82	0.0028025		1920.81	0.01403965
331.03	0.25402356		861.02	0.02231978		1391.02	0.00258216		1921.01	0.01365402
331.23	0.25508886		861.22	0.02232488		1391.22	0.00203753		1921.21	0.01324934
331.43	0.25530225		861.42	0.02252701		1391.42	0.00103546		1921.41	0.0134308
331.63	0.25702918		861.62	0.02244175		1391.62	0.00142054		1921.61	0.01265902
331.83	0.25775713		861.82	0.02341742		1391.82	0.0011883		1921.81	0.01269341
332.03	0.25820495		862.02	0.0243204		1392.02	0.00027109		1922.01	0.01202346
332.23	0.25869975		862.22	0.02637062		1392.22	-0.00056145		1922.21	0.01171197
332.43	0.25892286		862.42	0.02682971		1392.42	-0.0004595		1922.41	0.01231904
332.63	0.26047088		862.62	0.0274507		1392.62	-0.00050173		1922.61	0.01286794
332.83	0.26046834		862.82	0.02753663		1392.82	-0.0008297		1922.81	0.01381569
333.03	0.2609016		863.02	0.02816737		1393.02	-0.00087087		1923.01	0.01313488
333.23	0.26082739		863.22	0.02836087		1393.22	-0.00103765		1923.21	0.01317823
333.43	0.26085857		863.42	0.02875527		1393.42	-0.00074775		1923.41	0.01324917
333.63	0.25895139		863.62	0.02908593		1393.62	-0.00050116		1923.61	0.01345727
333.83	0.25907224		863.82	0.02899146		1393.82	-0.00006338		1923.81	0.01356441
334.03	0.25860836		864.02	0.02951982		1394.02	-0.00053591		1924.01	0.01395267
334.23	0.25846303		864.22	0.02883784		1394.22	-0.00099072		1924.21	0.01440199
334.43	0.25800823		864.42	0.02976034		1394.42	0.00009809		1924.41	0.01481063
334.63	0.25756177		864.62	0.03033474		1394.62	0.00012287		1924.61	0.01455307
334.83	0.25691304		864.82	0.02994425		1394.82	0.00053932		1924.81	0.01395067
335.03	0.25734068		865.02	0.03010562		1395.02	0.00064066		1925.01	0.01345113
335.23	0.25812635		865.22	0.0297271		1395.22	0.00105434		1925.21	0.01470278
335.43	0.25839202		865.42	0.02961207		1395.42	0.00172848		1925.41	0.01524136
335.63	0.25959981		865.62	0.02977192		1395.62	0.00228815		1925.61	0.01499093
335.83	0.25917016		865.82	0.03068112		1395.82	0.00233249		1925.81	0.01465702
336.03	0.25935024		866.02	0.03045271		1396.02	0.00263894		1926.01	0.01405776
336.23	0.25951833		866.22	0.02993255		1396.22	0.00282967		1926.21	0.01415272
336.43	0.25988673		866.42	0.02874344		1396.42	0.00313112		1926.41	0.01467068
336.63	0.26024503		866.62	0.02770045		1396.62	0.00349269		1926.61	0.01469356
336.83	0.25938205		866.82	0.0267246		1396.82	0.00348432		1926.81	0.01426237
337.03	0.26008133		867.02	0.02615835		1397.02	0.0043747		1927.01	0.01360957
337.23	0.25990423		867.22	0.02605104		1397.22	0.00424717		1927.21	0.01352312
337.43	0.26041898		867.42	0.02596314		1397.42	0.00459637		1927.41	0.01321862
337.63	0.26043866		867.62	0.02506919		1397.62	0.0051051		1927.61	0.01283977
337.83	0.26143503		867.82	0.02483826		1397.82	0.00441046		1927.81	0.01237571
338.03	0.26057607		868.02	0.02534805		1398.02	0.00339937		1928.01	0.01285649
338.23	0.26102789		868.22	0.02529933		1398.22	0.00321378		1928.21	0.01285569
338.43	0.26158558		868.42	0.02600477		1398.42	0.00298599		1928.41	0.01273943
338.63	0.26257464		868.62	0.0258767		1398.62	0.0032938		1928.61	0.01220476
338.83	0.26194317		868.82	0.02595967		1398.82	0.00374896		1928.81	0.01119784
339.03	0.26307461		869.02	0.02727332		1399.02	0.00335195		1929.01	0.0100212
339.23	0.26312207		869.22	0.02834278		1399.22	0.00406477		1929.21	0.01134058
339.43	0.2637386		869.42	0.02897957		1399.42	0.00413226		1929.41	0.01075758
339.63	0.26450856		869.62	0.02980323		1399.62	0.00444775		1929.61	0.01064124
339.83	0.2642991		869.82	0.03058268		1399.82	0.00453433		1929.81	0.01130015
340.03	0.26408267		870.02	0.03097304		1400.02	0.00434543		1930.01	0.01159976
340.23	0.26453821		870.22	0.03016598		1400.22	0.00352873		1930.21	0.01259514
340.43	0.26401484		870.42	0.03106868		1400.42	0.00329202		1930.41	0.01452373
340.63	0.26376864		870.62	0.0312542		1400.62	0.00306168		1930.61	0.01509367
340.83	0.26486053		870.82	0.03210319		1400.82	0.00256265		1930.81	0.01648845
341.03	0.26516826		871.02	0.03257599		1401.02	0.00291166		1931.01	0.01699662
341.23	0.26459929		871.22	0.0325803		1401.22	0.00303916		1931.21	0.01713897
341.43	0.26523262		871.42	0.03142188		1401.42	0.00391581		1931.41	0.01711351
341.63	0.26530762		871.62	0.03114775		1401.62	0.0036456		1931.61	0.01664733
341.83	0.26610939		871.82	0.03097506		1401.82	0.00315663		1931.81	0.01694529
342.03	0.26625737		872.02	0.0301633		1402.02	0.00389074		1932.01	0.01684168
342.23	0.26663947		872.22	0.02979729		1402.22	0.00449795		1932.21	0.01617042
342.43	0.26744138		872.42	0.02985376		1402.42	0.00467985		1932.41	0.01578965
342.63	0.26769204		872.62	0.02944994		1402.62	0.00515066		1932.61	0.01425067
342.83	0.26613741		872.82	0.02949302		1402.82	0.006146		1932.81	0.0118062
343.03	0.26706289		873.02	0.03022031		1403.02	0.00654433		1933.01	0.01063876
343.23	0.267138		873.22	0.03040019		1403.22	0.00693558		1933.21	0.01064209
343.43	0.26741229		873.42	0.03031726		1403.42	0.00751607		1933.41	0.0095135
343.63	0.26832852		873.62	0.03132114		1403.62	0.00742241		1933.61	0.00928496
343.83	0.26830401		873.82	0.03171098		1403.82	0.00652456		1933.81	0.00963642
344.03	0.2684486		874.02	0.03197193		1404.02	0.00569089		1934.01	0.00917665
344.23	0.26941181		874.22	0.03161465		1404.22	0.00500992		1934.21	0.00930657
344.43	0.26914253		874.42	0.0313588		1404.42	0.00440809		1934.41	0.01046743
344.63	0.26965131		874.62	0.03125443		1404.62	0.00334369		1934.61	0.01021458
344.83	0.27020167		874.82	0.03233655		1404.82	0.0030303		1934.81	0.01196607
345.03	0.26968716		875.02	0.03150831		1405.02	0.0029791		1935.01	0.01136929
345.23	0.27010738		875.22	0.03104401		1405.22	0.00330571		1935.21	0.01073269
345.43	0.27028524		875.42	0.03027148		1405.42	0.00325224		1935.41	0.01065682
345.63	0.26971065		875.62	0.0302854		1405.62	0.0013164		1935.61	0.01043753
345.83	0.27037033		875.82	0.03012237		1405.82	0.00162913		1935.81	0.01138788
346.03	0.27049217		876.02	0.03021178		1406.02	0.00216217		1936.01	0.01062504
346.23	0.27038906		876.22	0.0300866		1406.22	0.00272508		1936.21	0.01032458
346.43	0.2711234		876.42	0.03003019		1406.42	0.00310889		1936.41	0.01078395
346.63	0.27056241		876.62	0.02956834		1406.62	0.00326597		1936.61	0.01034385
346.83	0.27107096		876.82	0.02991233		1406.82	0.00406781		1936.81	0.01046515
347.03	0.27241585		877.02	0.02996181		1407.02	0.00433144		1937.01	0.01160244
347.23	0.27353626		877.22	0.03036659		1407.22	0.0039594		1937.21	0.01204457
347.43	0.27410819		877.42	0.03033953		1407.42	0.00538744		1937.41	0.01246439
347.63	0.27524272		877.62	0.0311378		1407.62	0.00601437		1937.61	0.01389567
347.83	0.27542096		877.82	0.03149996		1407.82	0.00588355		1937.81	0.01458889
348.03	0.27636956		878.02	0.0313232		1408.02	0.00559928		1938.01	0.0151661
348.23	0.27623916		878.22	0.03076618		1408.22	0.00616946		1938.21	0.01489699
348.43	0.27611308		878.42	0.03070927		1408.42	0.006031		1938.41	0.01599675
348.63	0.27534693		878.62	0.03109074		1408.62	0.00535624		1938.61	0.01612215
348.83	0.27486557		878.82	0.03190869		1408.82	0.00563829		1938.81	0.01644554
349.03	0.27495092		879.02	0.03187766		1409.02	0.00541826		1939.01	0.01599422
349.23	0.27537116		879.22	0.0328215		1409.22	0.0053466		1939.21	0.01516735
349.43	0.2744623		879.42	0.03301039		1409.42	0.00532146		1939.41	0.01510033
349.63	0.27342281		879.62	0.03290106		1409.62	0.00320259		1939.61	0.0148832
349.83	0.27400782		879.82	0.03345399		1409.82	0.003869		1939.81	0.01455118
350.03	0.27362468		880.02	0.03286002		1410.02	0.00424806		1940.01	0.01390104
350.23	0.27350604		880.22	0.03231117		1410.22	0.00394679		1940.21	0.01382927
350.43	0.27396421		880.42	0.03186214		1410.42	0.00285936		1940.41	0.01433795
350.63	0.2739265		880.62	0.0309565		1410.62	0.00326731		1940.61	0.01508618
350.83	0.27453132		880.82	0.03128127		1410.82	0.00293902		1940.81	0.01519412
351.03	0.27440476		881.02	0.03129487		1411.02	0.00299695		1941.01	0.0147294
351.23	0.27489702		881.22	0.03136856		1411.22	0.0035039		1941.21	0.01435329
351.43	0.27522232		881.42	0.03089744		1411.42	0.00483902		1941.41	0.01465956
351.63	0.27484117		881.62	0.03158775		1411.62	0.00459874		1941.61	0.01500396
351.83	0.27484274		881.82	0.03180998		1411.82	0.00382536		1941.81	0.01504431
352.03	0.27547549		882.02	0.03142335		1412.02	0.00395034		1942.01	0.01577706
352.23	0.27464252		882.22	0.03201165		1412.22	0.00471203		1942.21	0.01572447
352.43	0.2745167		882.42	0.03327372		1412.42	0.00475038		1942.41	0.01659065
352.63	0.27327491		882.62	0.03327039		1412.62	0.00414154		1942.61	0.01680586
352.83	0.27337947		882.82	0.03429517		1412.82	0.00473769		1942.81	0.01687336
353.03	0.27447736		883.02	0.03428849		1413.02	0.00442087		1943.01	0.01698036
353.23	0.27516978		883.22	0.03474306		1413.22	0.0046669		1943.21	0.01658492
353.43	0.27524626		883.42	0.03506105		1413.42	0.00476452		1943.41	0.01704079
353.63	0.27576651		883.62	0.03471283		1413.62	0.00353363		1943.61	0.01658091
353.83	0.27701824		883.82	0.03541918		1413.82	0.00362748		1943.81	0.01611216
354.03	0.27788329		884.02	0.0334709		1414.02	0.00323154		1944.01	0.01590637
354.23	0.27865405		884.22	0.03229812		1414.22	0.0023486		1944.21	0.01559682
354.43	0.27914355		884.42	0.03189058		1414.42	0.00214499		1944.41	0.01517895
354.63	0.27912058		884.62	0.03158678		1414.62	0.00200584		1944.61	0.01528036
354.83	0.27975699		884.82	0.03220293		1414.82	0.00102156		1944.81	0.01344986
355.03	0.28060106		885.02	0.03174339		1415.02	0.00110698		1945.01	0.01289984
355.23	0.28146765		885.22	0.03080621		1415.22	0.00185042		1945.21	0.01246784
355.43	0.28176481		885.42	0.03050196		1415.42	0.00208544		1945.41	0.01315004
355.63	0.28107735		885.62	0.02945553		1415.62	0.00150495		1945.61	0.01327626
355.83	0.2824038		885.82	0.02890134		1415.82	0.00210613		1945.81	0.01390395
356.03	0.28228222		886.02	0.02893631		1416.02	0.00267468		1946.01	0.01427913
356.23	0.28213975		886.22	0.02918129		1416.22	0.00336568		1946.21	0.01428154
356.43	0.28215416		886.42	0.02944306		1416.42	0.00338445		1946.41	0.01429601
356.63	0.28200361		886.62	0.02934214		1416.62	0.00251376		1946.61	0.01480138
356.83	0.28252364		886.82	0.02974051		1416.82	0.00273241		1946.81	0.01561836
357.03	0.28355576		887.02	0.03003904		1417.02	0.00250336		1947.01	0.01570403
357.23	0.28404149		887.22	0.03118352		1417.22	0.0033282		1947.21	0.01603884
357.43	0.28440381		887.42	0.03112033		1417.42	0.00313273		1947.41	0.01642511
357.63	0.2844861		887.62	0.0309704		1417.62	0.00335096		1947.61	0.01640034
357.83	0.28460309		887.82	0.03122387		1417.82	0.00288177		1947.81	0.0164151
358.03	0.284767		888.02	0.0300655		1418.02	0.00235612		1948.01	0.01553821
358.23	0.28409865		888.22	0.03153262		1418.22	0.00280374		1948.21	0.0153496
358.43	0.2837755		888.42	0.03260754		1418.42	0.00346387		1948.41	0.01556251
358.63	0.28392571		888.62	0.03401588		1418.62	0.00243716		1948.61	0.01514965
358.83	0.28511085		888.82	0.03454728		1418.82	0.00211439		1948.81	0.01433936
359.03	0.28476946		889.02	0.03514023		1419.02	0.00206545		1949.01	0.01432054
359.23	0.28430662		889.22	0.03494699		1419.22	0.00295296		1949.21	0.01427039
359.43	0.2845028		889.42	0.03424348		1419.42	0.00413324		1949.41	0.01487726
359.63	0.28393571		889.62	0.03316441		1419.62	0.00460633		1949.61	0.01472489
359.83	0.28421546		889.82	0.03385262		1419.82	0.00518788		1949.81	0.01397134
360.03	0.28317011		890.02	0.03447143		1420.02	0.0051953		1950.01	0.01323527
360.23	0.28368885		890.22	0.03313436		1420.22	0.00507628		1950.21	0.01320683
360.43	0.28434138		890.42	0.03302763		1420.42	0.00406923		1950.41	0.01277461
360.63	0.28450017		890.62	0.0331325		1420.62	0.00356278		1950.61	0.01282295
360.83	0.28478642		890.82	0.03342564		1420.82	0.00345794		1950.81	0.01379525
361.03	0.28540191		891.02	0.0330819		1421.02	0.0032203		1951.01	0.01252175
361.23	0.28474979		891.22	0.03280877		1421.22	0.00383781		1951.21	0.01328075
361.43	0.28374441		891.42	0.03161554		1421.42	0.00355694		1951.41	0.01306247
361.63	0.28357397		891.62	0.03173378		1421.62	0.00329004		1951.61	0.01293951
361.83	0.28400452		891.82	0.03173594		1421.82	0.00363661		1951.81	0.01319925
362.03	0.28306416		892.02	0.03143806		1422.02	0.00394149		1952.01	0.01255497
362.23	0.28291423		892.22	0.03249307		1422.22	0.00437493		1952.21	0.01238673
362.43	0.28315683		892.42	0.03261134		1422.42	0.00469231		1952.41	0.01304309
362.63	0.28415299		892.62	0.03381163		1422.62	0.0035255		1952.61	0.01281606
362.83	0.28555281		892.82	0.03349112		1422.82	0.00353562		1952.81	0.01291849
363.03	0.28474004		893.02	0.0334925		1423.02	0.004246		1953.01	0.01296143
363.23	0.28528183		893.22	0.03313916		1423.22	0.00537167		1953.21	0.01296849
363.43	0.28557699		893.42	0.0331125		1423.42	0.00680995		1953.41	0.01333732
363.63	0.28541933		893.62	0.03385873		1423.62	0.00665764		1953.61	0.01339268
363.83	0.28590002		893.82	0.03483701		1423.82	0.00662353		1953.81	0.01305796
364.03	0.28600004		894.02	0.03515656		1424.02	0.00644485		1954.01	0.01372619
364.23	0.28670728		894.22	0.03492439		1424.22	0.00646408		1954.21	0.01382859
364.43	0.28738467		894.42	0.03617287		1424.42	0.00636704		1954.41	0.01402695
364.63	0.28730712		894.62	0.03682569		1424.62	0.00682179		1954.61	0.0145749
364.83	0.28772412		894.82	0.0371682		1424.82	0.00654132		1954.81	0.01574497
365.03	0.28803228		895.02	0.03778085		1425.02	0.0071709		1955.01	0.0153725
365.23	0.28647463		895.22	0.03727775		1425.22	0.00697598		1955.21	0.01638787
365.43	0.28711094		895.42	0.03696971		1425.42	0.00608386		1955.41	0.01612035
365.63	0.28716988		895.62	0.03709825		1425.62	0.00535127		1955.61	0.01626291
365.83	0.28722897		895.82	0.03615909		1425.82	0.00590705		1955.81	0.01545654
366.03	0.28649807		896.02	0.03529853		1426.02	0.0047244		1956.01	0.01483709
366.23	0.28708447		896.22	0.03495542		1426.22	0.00406319		1956.21	0.01484534
366.43	0.28723934		896.42	0.03432585		1426.42	0.00403648		1956.41	0.01565326
366.63	0.28898088		896.62	0.03344628		1426.62	0.00292315		1956.61	0.01608964
366.83	0.28932748		896.82	0.03271553		1426.82	0.0025018		1956.81	0.01601817
367.03	0.28920195		897.02	0.03278535		1427.02	0.002325		1957.01	0.01628414
367.23	0.28971855		897.22	0.03315348		1427.22	0.00263553		1957.21	0.01678747
367.43	0.29002602		897.42	0.0335806		1427.42	0.00334554		1957.41	0.01771241
367.63	0.29064573		897.62	0.03412642		1427.62	0.00259859		1957.61	0.01789641
367.83	0.29093724		897.82	0.03470029		1427.82	0.00326108		1957.81	0.0176642
368.03	0.29144209		898.02	0.03525978		1428.02	0.00266226		1958.01	0.01769589
368.23	0.29144478		898.22	0.03629616		1428.22	0.0027059		1958.21	0.01745965
368.43	0.2920091		898.42	0.03689771		1428.42	0.00221411		1958.41	0.01750352
368.63	0.29218846		898.62	0.03692427		1428.62	0.00221447		1958.61	0.01755673
368.83	0.29275198		898.82	0.03710695		1428.82	0.00172502		1958.81	0.01765212
369.03	0.29281765		899.02	0.03778209		1429.02	0.00234213		1959.01	0.01676765
369.23	0.29143392		899.22	0.03788144		1429.22	0.00187107		1959.21	0.01534593
369.43	0.29257996		899.42	0.03811135		1429.42	0.00227869		1959.41	0.01328429
369.63	0.29175998		899.62	0.03825724		1429.62	0.00287008		1959.61	0.01166248
369.83	0.29173116		899.82	0.03758692		1429.82	0.00265182		1959.81	0.010904
370.03	0.29180386		900.02	0.03722828		1430.02	0.00276408		1960.01	0.011048
370.23	0.29180266		900.22	0.03717431		1430.22	0.00434384		1960.21	0.01176182
370.43	0.29132989		900.42	0.03675934		1430.42	0.00491791		1960.41	0.01195254
370.63	0.29133538		900.62	0.03666658		1430.62	0.00513345		1960.61	0.01196842
370.83	0.29143993		900.82	0.03793323		1430.82	0.00534433		1960.81	0.0123644
371.03	0.29177353		901.02	0.03868771		1431.02	0.00590623		1961.01	0.0131
371.23	0.29225314		901.22	0.03874748		1431.22	0.00650513		1961.21	0.01391502
371.43	0.29279592		901.42	0.03911533		1431.42	0.00707409		1961.41	0.01472799
371.63	0.29369154		901.62	0.03828304		1431.62	0.00658981		1961.61	0.01499395
371.83	0.29426625		901.82	0.03820097		1431.82	0.00688053		1961.81	0.01503803
372.03	0.29472203		902.02	0.03804164		1432.02	0.00561864		1962.01	0.01533229
372.23	0.29466719		902.22	0.0378704		1432.22	0.00568426		1962.21	0.01593806
372.43	0.29470872		902.42	0.03781543		1432.42	0.00534396		1962.41	0.01610268
372.63	0.29500299		902.62	0.03713236		1432.62	0.00566952		1962.61	0.01653097
372.83	0.29643113		902.82	0.0370115		1432.82	0.00579483		1962.81	0.01617284
373.03	0.29618897		903.02	0.03669043		1433.02	0.00598177		1963.01	0.01547411
373.23	0.2962604		903.22	0.03727199		1433.22	0.00615657		1963.21	0.01460398
373.43	0.29709154		903.42	0.03661523		1433.42	0.0064898		1963.41	0.01453552
373.63	0.29654858		903.62	0.03653178		1433.62	0.0067963		1963.61	0.01456792
373.83	0.29743172		903.82	0.0357528		1433.82	0.0065341		1963.81	0.01482145
374.03	0.29745595		904.02	0.03529774		1434.02	0.00735406		1964.01	0.01366651
374.23	0.29714546		904.22	0.03556189		1434.22	0.00771065		1964.21	0.01363287
374.43	0.29629891		904.42	0.03560971		1434.42	0.00680329		1964.41	0.01258597
374.63	0.29615749		904.62	0.03589822		1434.62	0.00688379		1964.61	0.01170288
374.83	0.29640252		904.82	0.03671155		1434.82	0.00638858		1964.81	0.01202066
375.03	0.29628471		905.02	0.03572657		1435.02	0.00610341		1965.01	0.01218897
375.23	0.29654269		905.22	0.03537007		1435.22	0.00590826		1965.21	0.01318492
375.43	0.29613171		905.42	0.03489522		1435.42	0.00608537		1965.41	0.01390637
375.63	0.29643861		905.62	0.03484397		1435.62	0.00552517		1965.61	0.0127416
375.83	0.29629892		905.82	0.03503598		1435.82	0.00647111		1965.81	0.01219889
376.03	0.29657032		906.02	0.03605846		1436.02	0.00666906		1966.01	0.0115708
376.23	0.29649468		906.22	0.03630257		1436.22	0.00739618		1966.21	0.01159481
376.43	0.29526234		906.42	0.03687334		1436.42	0.00692764		1966.41	0.01221563
376.63	0.29638891		906.62	0.03725007		1436.62	0.00666312		1966.61	0.01292727
376.83	0.29716339		906.82	0.0376087		1436.82	0.00709981		1966.81	0.01330857
377.03	0.29690864		907.02	0.03768859		1437.02	0.00660476		1967.01	0.01412331
377.23	0.2975311		907.22	0.03919233		1437.22	0.00705443		1967.21	0.01397491
377.43	0.29714699		907.42	0.03941233		1437.42	0.00669898		1967.41	0.01475649
377.63	0.29780463		907.62	0.03974147		1437.62	0.0063182		1967.61	0.01456172
377.83	0.29821528		907.82	0.04011561		1437.82	0.00539923		1967.81	0.01468964
378.03	0.29718353		908.02	0.04043782		1438.02	0.0047829		1968.01	0.01436555
378.23	0.29680061		908.22	0.04090565		1438.22	0.00408167		1968.21	0.01484376
378.43	0.2961539		908.42	0.04093696		1438.42	0.00354143		1968.41	0.01464518
378.63	0.2957483		908.62	0.04090407		1438.62	0.00348059		1968.61	0.01446014
378.83	0.29550818		908.82	0.04107911		1438.82	0.00285106		1968.81	0.01475098
379.03	0.29550242		909.02	0.04036954		1439.02	0.00269294		1969.01	0.01466888
379.23	0.29525369		909.22	0.04050078		1439.22	0.00283035		1969.21	0.01444606
379.43	0.29490025		909.42	0.04032825		1439.42	0.00300577		1969.41	0.0132289
379.63	0.29514022		909.62	0.04056007		1439.62	0.00329395		1969.61	0.0114612
379.83	0.29528093		909.82	0.03996392		1439.82	0.00418053		1969.81	0.01106361
380.02	0.29528093		910.02	0.03996392		1440.02	0.00418053		1970.01	0.01106361
380.22	0.29615379		910.22	0.04115921		1440.22	0.00380675		1970.21	0.01123564
380.42	0.2967643		910.42	0.04214145		1440.42	0.0034863		1970.41	0.01184415
380.62	0.2966482		910.62	0.04262058		1440.62	0.00407165		1970.61	0.01155788
380.82	0.29700219		910.82	0.04310664		1440.82	0.0043233		1970.81	0.01206809
381.02	0.29790519		911.02	0.04352061		1441.02	0.00477812		1971.01	0.01175676
381.22	0.29796405		911.22	0.04380938		1441.22	0.0045923		1971.21	0.01206203
381.42	0.29824241		911.42	0.04401553		1441.42	0.00472545		1971.41	0.01263336
381.62	0.29799131		911.62	0.04356183		1441.62	0.00541233		1971.61	0.01198308
381.82	0.29800099		911.82	0.0437147		1441.82	0.00585126		1971.81	0.012721
382.02	0.29758681		912.02	0.04325033		1442.02	0.00597586		1972.01	0.01356849
382.22	0.2969342		912.22	0.04258237		1442.22	0.00590546		1972.21	0.01430911
382.42	0.29598579		912.42	0.04161411		1442.42	0.00586636		1972.41	0.01393384
382.62	0.29617459		912.62	0.04163321		1442.62	0.00546082		1972.61	0.01328731
382.82	0.29586481		912.82	0.04166037		1442.82	0.00537916		1972.81	0.01349285
383.02	0.2961565		913.02	0.04130259		1443.02	0.00606422		1973.01	0.01323253
383.22	0.29695733		913.22	0.04070142		1443.22	0.00579455		1973.21	0.01272675
383.42	0.29606758		913.42	0.04125313		1443.42	0.00489522		1973.41	0.01251845
383.62	0.29625531		913.62	0.04047356		1443.62	0.00448822		1973.61	0.01269426
383.82	0.29574389		913.82	0.04089936		1443.82	0.00387234		1973.81	0.01180264
384.02	0.29604955		914.02	0.04143889		1444.02	0.00322638		1974.01	0.01136349
384.22	0.29572374		914.22	0.04242131		1444.22	0.0028968		1974.21	0.01068792
384.42	0.29516708		914.42	0.04270418		1444.42	0.00327037		1974.41	0.01033282
384.62	0.29413347		914.62	0.04264368		1444.62	0.00314041		1974.61	0.00853918
384.82	0.29517976		914.82	0.04219314		1444.82	0.00265687		1974.81	0.00890037
385.02	0.29525118		915.02	0.04241217		1445.02	0.00272226		1975.01	0.00901508
385.22	0.29418532		915.22	0.04250712		1445.22	0.00216677		1975.21	0.01022013
385.42	0.29432616		915.42	0.04219909		1445.42	0.00208559		1975.41	0.010273
385.62	0.29425204		915.62	0.04290114		1445.62	0.00253115		1975.61	0.01020686
385.82	0.2941909		915.82	0.04309826		1445.82	0.00270919		1975.81	0.01201156
386.02	0.29430893		916.02	0.04190248		1446.02	0.00236516		1976.01	0.01359126
386.22	0.29417906		916.22	0.04170379		1446.22	0.00259396		1976.21	0.01487941
386.42	0.29380125		916.42	0.04070092		1446.42	0.00298551		1976.41	0.01552571
386.62	0.294751		916.62	0.04150113		1446.62	0.00318298		1976.61	0.01552361
386.82	0.29449395		916.82	0.04199836		1446.82	0.00434676		1976.81	0.01525236
387.02	0.29495802		917.02	0.04172398		1447.02	0.0042631		1977.01	0.01593177
387.22	0.29496213		917.22	0.04144409		1447.22	0.00324005		1977.21	0.0158415
387.42	0.2939915		917.42	0.0421453		1447.42	0.00360387		1977.41	0.01557925
387.62	0.29436123		917.62	0.04148112		1447.62	0.00429068		1977.61	0.01420041
387.82	0.2949288		917.82	0.04137443		1447.82	0.00416666		1977.81	0.01286291
388.02	0.2948454		918.02	0.04132824		1448.02	0.00452261		1978.01	0.01045296
388.22	0.29422667		918.22	0.04172514		1448.22	0.00462114		1978.21	0.00934669
388.42	0.29420676		918.42	0.04107602		1448.42	0.00459374		1978.41	0.00867538
388.62	0.29453658		918.62	0.03989454		1448.62	0.0038867		1978.61	0.00757993
388.82	0.29521425		918.82	0.03961066		1448.82	0.0039162		1978.81	0.00824604
389.02	0.29421517		919.02	0.0402203		1449.02	0.0042714		1979.01	0.00875907
389.22	0.29322428		919.22	0.04011648		1449.22	0.00296462		1979.21	0.00812084
389.42	0.2931678		919.42	0.04086158		1449.42	0.00279592		1979.41	0.0074638
389.62	0.29252264		919.62	0.04149014		1449.62	0.00367436		1979.61	0.00784556
389.82	0.29233481		919.82	0.0397647		1449.82	0.00413587		1979.81	0.00853079
390.02	0.29264672		920.02	0.03942499		1450.02	0.00386457		1980.01	0.01021738
390.22	0.2924205		920.22	0.0396373		1450.22	0.00368676		1980.21	0.01118049
390.42	0.29229946		920.42	0.03919291		1450.42	0.00336958		1980.41	0.01155419
390.62	0.29263954		920.62	0.03973269		1450.62	0.00338526		1980.61	0.01122612
390.82	0.29222444		920.82	0.03999661		1450.82	0.00331648		1980.81	0.01263512
391.02	0.2925116		921.02	0.03934708		1451.02	0.00228466		1981.01	0.01295935
391.22	0.29224069		921.22	0.03921661		1451.22	0.00239372		1981.21	0.01178174
391.42	0.29194204		921.42	0.03953294		1451.42	0.00211323		1981.41	0.01087764
391.62	0.29184735		921.62	0.03833541		1451.62	0.00142258		1981.61	0.00930446
391.82	0.29234855		921.82	0.03804103		1451.82	0.00043298		1981.81	0.00909566
392.02	0.29269046		922.02	0.03798444		1452.02	0.00099331		1982.01	0.00756061
392.22	0.29298271		922.22	0.03782517		1452.22	0.00011863		1982.21	0.00815174
392.42	0.2929735		922.42	0.03767491		1452.42	-0.00070769		1982.41	0.00736421
392.62	0.29292488		922.62	0.03708085		1452.62	-0.00096512		1982.61	0.0064019
392.82	0.29246674		922.82	0.03678394		1452.82	-0.00138584		1982.81	0.00647152
393.02	0.29275204		923.02	0.03695686		1453.02	-0.00089236		1983.01	0.00659423
393.22	0.29237214		923.22	0.03715803		1453.22	-0.00163043		1983.21	0.00653116
393.42	0.29280037		923.42	0.03779052		1453.42	-0.00122846		1983.41	0.0069463
393.62	0.29206444		923.62	0.03748708		1453.62	-0.00065427		1983.61	0.00737023
393.82	0.29203499		923.82	0.03708154		1453.82	-0.00069038		1983.81	0.00849937
394.02	0.29194388		924.02	0.03723619		1454.02	-0.00074249		1984.01	0.00972856
394.22	0.29156173		924.22	0.03647068		1454.22	-0.00072496		1984.21	0.00966125
394.42	0.29256617		924.42	0.03695218		1454.42	-0.00075742		1984.41	0.00959861
394.62	0.29295405		924.62	0.03698524		1454.62	-0.00024359		1984.61	0.00965707
394.82	0.29318804		924.82	0.03617005		1454.82	-0.00074625		1984.81	0.00946577
395.02	0.29337353		925.02	0.03602141		1455.02	-0.00058587		1985.01	0.00797364
395.22	0.29160565		925.22	0.03629307		1455.22	-0.00044588		1985.21	0.00786308
395.42	0.29116732		925.42	0.0362981		1455.42	-0.00134485		1985.41	0.00770482
395.62	0.29069533		925.62	0.03586197		1455.62	-0.00196072		1985.61	0.00778252
395.82	0.29094705		925.82	0.03701161		1455.82	-0.00162509		1985.81	0.00759331
396.02	0.29059866		926.02	0.03727234		1456.02	-0.00109434		1986.01	0.00700108
396.22	0.2910393		926.22	0.03671381		1456.22	-0.00248564		1986.21	0.00699426
396.42	0.28977387		926.42	0.03545268		1456.42	-0.00267641		1986.41	0.00678071
396.62	0.29005898		926.62	0.03454876		1456.62	-0.00264698		1986.61	0.00682735
396.82	0.29057684		926.82	0.03368529		1456.82	-0.00288866		1986.81	0.00743003
397.02	0.29120911		927.02	0.03432813		1457.02	-0.00270718		1987.01	0.00869573
397.22	0.29150374		927.22	0.034832		1457.22	-0.00371345		1987.21	0.00917011
397.42	0.29149512		927.42	0.034802		1457.42	-0.00389092		1987.41	0.00942564
397.62	0.29066556		927.62	0.03500836		1457.62	-0.00394067		1987.61	0.00980014
397.82	0.29077164		927.82	0.03434017		1457.82	-0.00404795		1987.81	0.01037672
398.02	0.2918369		928.02	0.03377698		1458.02	-0.00337771		1988.01	0.01051906
398.22	0.29246331		928.22	0.03329463		1458.22	-0.00324212		1988.21	0.01028252
398.42	0.29339987		928.42	0.03325243		1458.42	-0.00295903		1988.41	0.0105171
398.62	0.29335665		928.62	0.03321915		1458.62	-0.00226047		1988.61	0.01094901
398.82	0.29348356		928.82	0.03357007		1458.82	-0.00207093		1988.81	0.00968511
399.02	0.29305288		929.02	0.0344059		1459.02	-0.00069136		1989.01	0.00959032
399.22	0.29143627		929.22	0.03538701		1459.22	-0.00055626		1989.21	0.00983617
399.42	0.29105459		929.42	0.03539273		1459.42	-0.00041622		1989.41	0.0096353
399.62	0.29154059		929.62	0.03545833		1459.62	0.00070668		1989.61	0.00867009
399.82	0.292804		929.82	0.0364009		1459.82	0.00128891		1989.81	0.00801497
400.02	0.29215501		930.02	0.03617115		1460.02	0.00081591		1990.01	0.00765054
400.22	0.29291107		930.22	0.03562945		1460.22	-0.00019239		1990.21	0.00698192
400.42	0.29133836		930.42	0.03514723		1460.42	-0.00007908		1990.41	0.00724264
400.62	0.29127591		930.62	0.03511687		1460.62	0.00011141		1990.61	0.00598492
400.82	0.29048941		930.82	0.03505493		1460.82	0.0001251		1990.81	0.00606961
401.02	0.28958645		931.02	0.03490009		1461.02	-0.00045281		1991.01	0.00653577
401.22	0.28953909		931.22	0.03538041		1461.22	-0.00130294		1991.21	0.00617277
401.42	0.28843733		931.42	0.03446626		1461.42	-0.0021614		1991.41	0.0066904
401.62	0.28766982		931.62	0.03463281		1461.62	-0.00259203		1991.61	0.00710351
401.82	0.2881451		931.82	0.03437766		1461.82	-0.00264468		1991.81	0.0077877
402.02	0.28876524		932.02	0.0346127		1462.02	-0.00240573		1992.01	0.00912439
402.22	0.28790717		932.22	0.03487681		1462.22	-0.00285772		1992.21	0.01019668
402.42	0.28788192		932.42	0.03611208		1462.42	-0.00235412		1992.41	0.01083916
402.62	0.28856809		932.62	0.03803235		1462.62	-0.00233409		1992.61	0.01081788
402.82	0.28879427		932.82	0.0381012		1462.82	-0.00152591		1992.81	0.00965418
403.02	0.28957938		933.02	0.03748625		1463.02	-0.00054498		1993.01	0.00979477
403.22	0.28916658		933.22	0.03796984		1463.22	-0.00020974		1993.21	0.00964801
403.42	0.2905367		933.42	0.03754012		1463.42	0.00000267		1993.41	0.00922307
403.62	0.2920591		933.62	0.03778561		1463.62	0.00085067		1993.61	0.00712468
403.82	0.29252959		933.82	0.0381637		1463.82	-0.00033354		1993.81	0.00614034
404.02	0.2922736		934.02	0.03711361		1464.02	-0.00108286		1994.01	0.0048203
404.22	0.29295937		934.22	0.03671837		1464.22	-0.00187166		1994.21	0.00403411
404.42	0.29185262		934.42	0.03587189		1464.42	-0.00172586		1994.41	0.00394519
404.62	0.29185679		934.62	0.03527934		1464.62	-0.00205175		1994.61	0.00331798
404.82	0.29157433		934.82	0.03516555		1464.82	-0.00253443		1994.81	0.00383927
405.02	0.29090389		935.02	0.03447366		1465.02	-0.00381488		1995.01	0.00428084
405.22	0.29070766		935.22	0.03409883		1465.22	-0.00456858		1995.21	0.00519108
405.42	0.29051252		935.42	0.03322289		1465.42	-0.00542244		1995.41	0.00536424
405.62	0.29087398		935.62	0.03372097		1465.62	-0.00531025		1995.61	0.0059927
405.82	0.29183175		935.82	0.03309536		1465.82	-0.00556449		1995.81	0.00694784
406.02	0.29140999		936.02	0.03390706		1466.02	-0.00533287		1996.01	0.00890043
406.22	0.29055838		936.22	0.03456784		1466.22	-0.00485995		1996.21	0.00977292
406.42	0.29112397		936.42	0.03559956		1466.42	-0.00369567		1996.41	0.00995642
406.62	0.29187485		936.62	0.03468618		1466.62	-0.00368144		1996.61	0.01054859
406.82	0.29204501		936.82	0.03360732		1466.82	-0.00294915		1996.81	0.01070771
407.02	0.29217963		937.02	0.03351308		1467.02	-0.00267803		1997.01	0.01114949
407.22	0.29240967		937.22	0.03403257		1467.22	-0.00169786		1997.21	0.01047255
407.42	0.29330896		937.42	0.03372641		1467.42	-0.00073595		1997.41	0.00911472
407.62	0.29342858		937.62	0.03313795		1467.62	0.00034656		1997.61	0.00735915
407.82	0.29350081		937.82	0.03270119		1467.82	-0.00048521		1997.81	0.00604328
408.02	0.29382173		938.02	0.03127732		1468.02	-0.00041993		1998.01	0.00585079
408.22	0.29319253		938.22	0.03104311		1468.22	-0.00155491		1998.21	0.00523992
408.42	0.29217926		938.42	0.03092002		1468.42	-0.00230162		1998.41	0.00551006
408.62	0.29133037		938.62	0.03162104		1468.62	-0.00280243		1998.61	0.00515665
408.82	0.29044547		938.82	0.03162334		1468.82	-0.00440879		1998.81	0.00452012
409.02	0.28990857		939.02	0.03171191		1469.02	-0.00594849		1999.01	0.00422623
409.22	0.28968621		939.22	0.03167551		1469.22	-0.00710655		1999.21	0.00407906
409.42	0.28965513		939.42	0.03200805		1469.42	-0.00801281		1999.41	0.00323305
409.62	0.2896174		939.62	0.03335139		1469.62	-0.00768929		1999.61	0.0039659
409.82	0.28940079		939.82	0.03371687		1469.82	-0.00803674		1999.81	0.00447815
410.02	0.28821342		940.02	0.03558145		1470.02	-0.00757089		2000.01	0.00545827
410.22	0.28762915		940.22	0.03607564		1470.22	-0.00726652		2000.21	0.0058554
410.42	0.28799126		940.42	0.03647737		1470.42	-0.00710393		2000.41	0.00641236
410.62	0.28913511		940.62	0.03612799		1470.62	-0.00677519		2000.61	0.00704048
410.82	0.28976975		940.82	0.03646048		1470.82	-0.0063518		2000.81	0.0072604
411.02	0.28976003		941.02	0.03654989		1471.02	-0.00552254		2001.01	0.00733102
411.22	0.29064702		941.22	0.03630787		1471.22	-0.00453202		2001.21	0.00662758
411.42	0.29097843		941.42	0.03560412		1471.42	-0.00374607		2001.41	0.00665798
411.62	0.29089099		941.62	0.0345633		1471.62	-0.00376904		2001.61	0.00637901
411.82	0.29053508		941.82	0.03385383		1471.82	-0.00513843		2001.81	0.0069807
412.02	0.29006513		942.02	0.03226282		1472.02	-0.0050793		2002.01	0.00704117
412.22	0.28942229		942.22	0.03119798		1472.22	-0.00638322		2002.21	0.00686548
412.42	0.28943905		942.42	0.03111431		1472.42	-0.00646805		2002.41	0.00722873
412.62	0.2894407		942.62	0.03040086		1472.62	-0.00664794		2002.61	0.00672428
412.82	0.2898202		942.82	0.02983815		1472.82	-0.00811076		2002.81	0.00671427
413.02	0.28972394		943.02	0.02969778		1473.02	-0.0078546		2003.01	0.00711632
413.22	0.28886907		943.22	0.02958721		1473.22	-0.00771131		2003.21	0.00671596
413.42	0.28849666		943.42	0.03024508		1473.42	-0.00728984		2003.41	0.00709712
413.62	0.2892789		943.62	0.03249233		1473.62	-0.00569592		2003.61	0.00761606
413.82	0.28895566		943.82	0.03329328		1473.82	-0.00579562		2003.81	0.00697345
414.02	0.28946142		944.02	0.03452673		1474.02	-0.00496256		2004.01	0.00700126
414.22	0.29039105		944.22	0.0344158		1474.22	-0.00489974		2004.21	0.00684395
414.42	0.29063932		944.42	0.03510964		1474.42	-0.00441105		2004.41	0.00632378
414.62	0.29212124		944.62	0.03588186		1474.62	-0.00374856		2004.61	0.00630609
414.82	0.29188348		944.82	0.03660994		1474.82	-0.00449067		2004.81	0.00575688
415.02	0.29056562		945.02	0.03671251		1475.02	-0.00478719		2005.01	0.0051085
415.22	0.29028823		945.22	0.03595813		1475.22	-0.00559112		2005.21	0.00450429
415.42	0.29035851		945.42	0.03494028		1475.42	-0.00564439		2005.41	0.00458797
415.62	0.28984847		945.62	0.03439579		1475.62	-0.00705912		2005.61	0.00367329
415.82	0.28946989		945.82	0.03319248		1475.82	-0.00771593		2005.81	0.00393085
416.02	0.28951157		946.02	0.03214319		1476.02	-0.00772874		2006.01	0.00325046
416.22	0.28860728		946.22	0.0308209		1476.22	-0.0076152		2006.21	0.00324538
416.42	0.28868247		946.42	0.03054892		1476.42	-0.00777661		2006.41	0.00331762
416.62	0.28927232		946.62	0.02966858		1476.62	-0.00789278		2006.61	0.00360592
416.82	0.28809643		946.82	0.02962873		1476.82	-0.00728576		2006.81	0.00344092
417.02	0.28768151		947.02	0.02911245		1477.02	-0.0069393		2007.01	0.00445253
417.22	0.28746281		947.22	0.02916827		1477.22	-0.0064993		2007.21	0.00395724
417.42	0.28814329		947.42	0.0294654		1477.42	-0.00538312		2007.41	0.00438233
417.62	0.28902781		947.62	0.03046694		1477.62	-0.00394116		2007.61	0.00446631
417.82	0.28942448		947.82	0.02990452		1477.82	-0.00466359		2007.81	0.00398896
418.02	0.29009602		948.02	0.02988701		1478.02	-0.00389714		2008.01	0.00527144
418.22	0.28976043		948.22	0.03030378		1478.22	-0.00398702		2008.21	0.00534855
418.42	0.28917128		948.42	0.03169104		1478.42	-0.00390595		2008.41	0.00565085
418.62	0.28914964		948.62	0.03214514		1478.62	-0.00418892		2008.61	0.00585615
418.82	0.28863979		948.82	0.03326111		1478.82	-0.00470974		2008.81	0.00437374
419.02	0.2877055		949.02	0.03315762		1479.02	-0.00508335		2009.01	0.00429826
419.22	0.28774376		949.22	0.03343817		1479.22	-0.00529312		2009.21	0.0040349
419.42	0.28807527		949.42	0.03414564		1479.42	-0.00600783		2009.41	0.00444133
419.62	0.28646994		949.62	0.03414873		1479.62	-0.00749965		2009.61	0.00377587
419.82	0.28548188		949.82	0.03422281		1479.82	-0.00752411		2009.81	0.00516193
420.02	0.28493127		950.02	0.03447706		1480.02	-0.00867034		2010.01	0.00502396
420.22	0.28432668		950.22	0.03451912		1480.22	-0.00865025		2010.21	0.00504335
420.42	0.2857017		950.42	0.03416736		1480.42	-0.00943341		2010.41	0.00565097
420.62	0.28606835		950.62	0.03368788		1480.62	-0.00982131		2010.61	0.00598701
420.82	0.28521259		950.82	0.03310768		1480.82	-0.00937503		2010.81	0.00599381
421.02	0.28528016		951.02	0.03277054		1481.02	-0.0094474		2011.01	0.00622243
421.22	0.28557399		951.22	0.03258792		1481.22	-0.00863877		2011.21	0.00565107
421.42	0.28660068		951.42	0.03288181		1481.42	-0.00830313		2011.41	0.00570383
421.62	0.2870448		951.62	0.03234857		1481.62	-0.00826387		2011.61	0.00628972
421.82	0.28799		951.82	0.03191588		1481.82	-0.00768854		2011.81	0.00606176
422.02	0.28770172		952.02	0.03227976		1482.02	-0.00711296		2012.01	0.00626337
422.22	0.28775129		952.22	0.03296788		1482.22	-0.00718395		2012.21	0.0046328
422.42	0.28773233		952.42	0.03271637		1482.42	-0.00718264		2012.41	0.00398631
422.62	0.28820723		952.62	0.03244954		1482.62	-0.00653092		2012.61	0.00293828
422.82	0.28862649		952.82	0.03209299		1482.82	-0.00627748		2012.81	0.00209191
423.02	0.28806596		953.02	0.03074705		1483.02	-0.00617567		2013.01	0.00232359
423.22	0.28791837		953.22	0.02972793		1483.22	-0.00558304		2013.21	0.00198598
423.42	0.28713765		953.42	0.02912826		1483.42	-0.00656204		2013.41	0.00163592
423.62	0.28580115		953.62	0.02802379		1483.62	-0.00680678		2013.61	0.00196547
423.82	0.28552825		953.82	0.02778893		1483.82	-0.00677622		2013.81	0.00292324
424.02	0.28542017		954.02	0.02829086		1484.02	-0.00812825		2014.01	0.00294808
424.22	0.28539844		954.22	0.02859102		1484.22	-0.00801012		2014.21	0.00323444
424.42	0.28544592		954.42	0.0285038		1484.42	-0.0089509		2014.41	0.0034745
424.62	0.28465569		954.62	0.0294639		1484.62	-0.00947615		2014.61	0.00439932
424.82	0.28412878		954.82	0.0296967		1484.82	-0.00938803		2014.81	0.00495372
425.02	0.28405454		955.02	0.0305537		1485.02	-0.00951551		2015.01	0.00579967
425.22	0.28496426		955.22	0.030567		1485.22	-0.00889864		2015.21	0.00641889
425.42	0.28563704		955.42	0.03144837		1485.42	-0.00886308		2015.41	0.00608319
425.62	0.28602158		955.62	0.03147471		1485.62	-0.00840258		2015.61	0.00604788
425.82	0.28709306		955.82	0.03188306		1485.82	-0.00771731		2015.81	0.00507472
426.02	0.28691496		956.02	0.03278625		1486.02	-0.00763315		2016.01	0.00481211
426.22	0.2866385		956.22	0.03330686		1486.22	-0.00743892		2016.21	0.00465013
426.42	0.28692441		956.42	0.03240165		1486.42	-0.00733841		2016.41	0.0046977
426.62	0.28743348		956.62	0.03206255		1486.62	-0.00718078		2016.61	0.00435238
426.82	0.28647547		956.82	0.03079416		1486.82	-0.0066356		2016.81	0.0037458
427.02	0.28609187		957.02	0.03067712		1487.02	-0.00616388		2017.01	0.00231153
427.22	0.28598487		957.22	0.03011426		1487.22	-0.00581985		2017.21	0.00242835
427.42	0.28588654		957.42	0.03048658		1487.42	-0.00662003		2017.41	0.00124378
427.62	0.28540354		957.62	0.03047624		1487.62	-0.00570813		2017.61	0.00201131
427.82	0.28528066		957.82	0.0302786		1487.82	-0.00634254		2017.81	0.00144585
428.02	0.28530885		958.02	0.03110393		1488.02	-0.00719129		2018.01	0.00138243
428.22	0.28561884		958.22	0.03133427		1488.22	-0.0072274		2018.21	0.00102335
428.42	0.28588527		958.42	0.03168096		1488.42	-0.00714699		2018.41	0.00166835
428.62	0.28563525		958.62	0.03249079		1488.62	-0.00759122		2018.61	0.00345939
428.82	0.28628567		958.82	0.03165922		1488.82	-0.00741043		2018.81	0.00388916
429.02	0.28652677		959.02	0.0318116		1489.02	-0.00735674		2019.01	0.00442822
429.22	0.28746114		959.22	0.03171811		1489.22	-0.00677		2019.21	0.00385189
429.42	0.28838919		959.42	0.03214308		1489.42	-0.00755324		2019.41	0.00328519
429.62	0.28906621		959.62	0.03204126		1489.62	-0.00783339		2019.61	0.00345959
429.82	0.28990059		959.82	0.03127228		1489.82	-0.00790738		2019.81	0.00321311
430.02	0.28924331		960.02	0.03225543		1490.02	-0.0082462		2020.01	0.00345304
430.22	0.28920061		960.22	0.03204635		1490.22	-0.00872111		2020.21	0.00350742
430.42	0.28948567		960.42	0.03229076		1490.42	-0.00889882		2020.41	0.00265644
430.62	0.2887891		960.62	0.03260796		1490.62	-0.00872854		2020.61	0.00269876
430.82	0.2884705		960.82	0.03221812		1490.82	-0.00837991		2020.81	0.00286682
431.02	0.28840375		961.02	0.03187495		1491.02	-0.00882256		2021.01	0.00270288
431.22	0.28757937		961.22	0.03211829		1491.22	-0.00966258		2021.21	0.00419098
431.42	0.28676217		961.42	0.03152976		1491.42	-0.00995525		2021.41	0.00295767
431.62	0.28517114		961.62	0.03030675		1491.62	-0.00960019		2021.61	0.0039968
431.82	0.28465097		961.82	0.02872827		1491.82	-0.01008315		2021.81	0.00383286
432.02	0.28417868		962.02	0.02847263		1492.02	-0.01001733		2022.01	0.0040761
432.22	0.28462054		962.22	0.02856152		1492.22	-0.00974508		2022.21	0.0035781
432.42	0.28432307		962.42	0.02844545		1492.42	-0.00891526		2022.41	0.00428909
432.62	0.28359604		962.62	0.02858352		1492.62	-0.00951002		2022.61	0.00526932
432.82	0.28323756		962.82	0.02752719		1492.82	-0.00865282		2022.81	0.00468478
433.02	0.2827186		963.02	0.0276978		1493.02	-0.00865963		2023.01	0.00422339
433.22	0.28393341		963.22	0.02751946		1493.22	-0.0089593		2023.21	0.00385036
433.42	0.28460994		963.42	0.02748001		1493.42	-0.00859046		2023.41	0.00282779
433.62	0.28540203		963.62	0.02806967		1493.62	-0.00862503		2023.61	0.00275625
433.82	0.28541553		963.82	0.02800952		1493.82	-0.00892679		2023.81	0.00201943
434.02	0.28483041		964.02	0.0291638		1494.02	-0.00888276		2024.01	0.00197575
434.22	0.2860141		964.22	0.03007095		1494.22	-0.00911956		2024.21	0.00203404
434.42	0.28585457		964.42	0.03066104		1494.42	-0.00915244		2024.41	0.00255706
434.62	0.28620537		964.62	0.03049977		1494.62	-0.00935989		2024.61	0.00306906
434.82	0.286546		964.82	0.03004016		1494.82	-0.00976735		2024.81	0.00259998
435.02	0.28470523		965.02	0.02995798		1495.02	-0.00999703		2025.01	0.00229093
435.22	0.28391741		965.22	0.02994126		1495.22	-0.01024592		2025.21	0.00311588
435.42	0.28396343		965.42	0.02898366		1495.42	-0.01013551		2025.41	0.00289719
435.62	0.28339964		965.62	0.02863353		1495.62	-0.01024236		2025.61	0.00357593
435.82	0.2838047		965.82	0.02798945		1495.82	-0.00972169		2025.81	0.00315101
436.02	0.28468788		966.02	0.0283424		1496.02	-0.00931642		2026.01	0.00253406
436.22	0.28463565		966.22	0.02888824		1496.22	-0.00864792		2026.21	0.00223741
436.42	0.28343912		966.42	0.02908703		1496.42	-0.00775487		2026.41	0.00318528
436.62	0.28334884		966.62	0.0285925		1496.62	-0.0081498		2026.61	0.00381793
436.82	0.28339705		966.82	0.02807725		1496.82	-0.00800948		2026.81	0.00410263
437.02	0.28391125		967.02	0.02787894		1497.02	-0.00824402		2027.01	0.00382244
437.22	0.28498035		967.22	0.02798174		1497.22	-0.00920881		2027.21	0.00449524
437.42	0.28559543		967.42	0.02839685		1497.42	-0.0090138		2027.41	0.00383195
437.62	0.28572652		967.62	0.0291461		1497.62	-0.00951733		2027.61	0.00454572
437.82	0.28580217		967.82	0.02952077		1497.82	-0.00968905		2027.81	0.00410988
438.02	0.28603392		968.02	0.02999927		1498.02	-0.01057427		2028.01	0.00436397
438.22	0.28735915		968.22	0.03008339		1498.22	-0.01121449		2028.21	0.00413112
438.42	0.28729438		968.42	0.029554		1498.42	-0.01122643		2028.41	0.00379228
438.62	0.28806606		968.62	0.02952021		1498.62	-0.0115405		2028.61	0.0022263
438.82	0.2879126		968.82	0.02892263		1498.82	-0.01199584		2028.81	0.00127701
439.02	0.28726392		969.02	0.02948436		1499.02	-0.01316858		2029.01	0.00167077
439.22	0.28835608		969.22	0.02854422		1499.22	-0.01297709		2029.21	0.00098268
439.42	0.2882387		969.42	0.02760252		1499.42	-0.01276262		2029.41	0.00024344
439.62	0.28825021		969.62	0.02703702		1499.62	-0.01200829		2029.61	-0.0003559
439.82	0.28835923		969.82	0.02595814		1499.82	-0.01227448		2029.81	-0.0009221
440.02	0.28829994		970.02	0.0261385		1500.02	-0.01238749		2030.01	-0.0014562
440.22	0.28622624		970.22	0.02632452		1500.22	-0.01220513		2030.21	-0.00115433
440.42	0.28571607		970.42	0.02629268		1500.42	-0.01167481		2030.41	-0.00084912
440.62	0.28628469		970.62	0.02580509		1500.62	-0.01231432		2030.61	-0.00031914
440.82	0.28619237		970.82	0.02625182		1500.82	-0.01169765		2030.81	0.00068381
441.02	0.28552949		971.02	0.02663634		1501.02	-0.01084127		2031.01	0.000892
441.22	0.28540526		971.22	0.02738146		1501.22	-0.01096235		2031.21	0.00291377
441.42	0.2851493		971.42	0.02772214		1501.42	-0.00954456		2031.41	0.003134
441.62	0.28456966		971.62	0.02899645		1501.62	-0.00888794		2031.61	0.00384642
441.82	0.28521643		971.82	0.0289734		1501.82	-0.00949054		2031.81	0.00366426
442.02	0.28397543		972.02	0.02889845		1502.02	-0.00964008		2032.01	0.0039417
442.22	0.28428737		972.22	0.02875728		1502.22	-0.00942366		2032.21	0.00320903
442.42	0.28358201		972.42	0.02986157		1502.42	-0.0102467		2032.41	0.00254883
442.62	0.28374253		972.62	0.03005635		1502.62	-0.0112189		2032.61	0.00253322
442.82	0.28435053		972.82	0.03124461		1502.82	-0.01314555		2032.81	0.00188586
443.02	0.28403316		973.02	0.03112884		1503.02	-0.01309149		2033.01	0.00159013
443.22	0.28399971		973.22	0.03000138		1503.22	-0.01257225		2033.21	0.00030475
443.42	0.284069		973.42	0.02935943		1503.42	-0.01324722		2033.41	0.00041068
443.62	0.28411168		973.62	0.02929785		1503.62	-0.01361487		2033.61	0.00024232
443.82	0.28425732		973.82	0.02893716		1503.82	-0.01518155		2033.81	0.00050596
444.02	0.28442367		974.02	0.02891542		1504.02	-0.01470239		2034.01	0.0005743
444.22	0.28434878		974.22	0.02960429		1504.22	-0.01474295		2034.21	0.00143743
444.42	0.28661468		974.42	0.0294201		1504.42	-0.01401849		2034.41	0.00139417
444.62	0.28770285		974.62	0.02894928		1504.62	-0.01390997		2034.61	0.00151616
444.82	0.28845034		974.82	0.02931019		1504.82	-0.01195919		2034.81	0.00225163
445.02	0.28792625		975.02	0.02874511		1505.02	-0.01062671		2035.01	0.00180453
445.22	0.28738533		975.22	0.02788649		1505.22	-0.01091225		2035.21	0.00299325
445.42	0.28757268		975.42	0.02711881		1505.42	-0.01000749		2035.41	0.0027491
445.62	0.28806481		975.62	0.02739357		1505.62	-0.01003875		2035.61	0.00170344
445.82	0.28723876		975.82	0.02611678		1505.82	-0.00924529		2035.81	0.00133213
446.02	0.28669049		976.02	0.02549574		1506.02	-0.00913299		2036.01	0.00125416
446.22	0.28700537		976.22	0.02591272		1506.22	-0.01008353		2036.21	0.00058147
446.42	0.28631599		976.42	0.02653124		1506.42	-0.01216149		2036.41	0.00025427
446.62	0.28589374		976.62	0.02647512		1506.62	-0.01352698		2036.61	-0.0008217
446.82	0.28493057		976.82	0.02772229		1506.82	-0.01381599		2036.81	-0.00151395
447.02	0.2828067		977.02	0.02655292		1507.02	-0.01358093		2037.01	-0.00122395
447.22	0.28265795		977.22	0.02571208		1507.22	-0.01449614		2037.21	-0.00188381
447.42	0.28171188		977.42	0.02483709		1507.42	-0.01517226		2037.41	-0.0013012
447.62	0.28077652		977.62	0.02471619		1507.62	-0.01458244		2037.61	-0.00099881
447.82	0.28123988		977.82	0.02501352		1507.82	-0.01434026		2037.81	-0.00096278
448.02	0.28100433		978.02	0.02477947		1508.02	-0.01404286		2038.01	-0.0010306
448.22	0.28094096		978.22	0.02452516		1508.22	-0.01498907		2038.21	-0.00049716
448.42	0.28098769		978.42	0.02387013		1508.42	-0.01379155		2038.41	-0.00144843
448.62	0.28071077		978.62	0.02347832		1508.62	-0.01299059		2038.61	-0.00166985
448.82	0.28106395		978.82	0.02312979		1508.82	-0.012309		2038.81	-0.00166073
449.02	0.28074022		979.02	0.02278694		1509.02	-0.01260317		2039.01	-0.00099621
449.22	0.28071754		979.22	0.02247711		1509.22	-0.01249945		2039.21	0.00061261
449.42	0.28081097		979.42	0.02290683		1509.42	-0.01173587		2039.41	-0.00002978
449.62	0.2813709		979.62	0.02376691		1509.62	-0.01123221		2039.61	-0.00101764
449.82	0.28127985		979.82	0.02354003		1509.82	-0.01129984		2039.81	-0.00053771
450.02	0.28224905		980.02	0.02431066		1510.02	-0.01199486		2040.01	-0.00086282
450.22	0.28256432		980.22	0.02477055		1510.22	-0.01225937		2040.21	-0.0014002
450.42	0.2824895		980.42	0.02442011		1510.42	-0.01285498		2040.41	-0.00172071
450.62	0.28237296		980.62	0.02512716		1510.62	-0.01221931		2040.61	-0.00237934
450.82	0.28268984		980.82	0.02507856		1510.82	-0.01130829		2040.81	-0.00236069
451.02	0.28239157		981.02	0.02471536		1511.02	-0.01116406		2041.01	-0.00273497
451.22	0.28239026		981.22	0.02468797		1511.22	-0.00997816		2041.21	-0.00292456
451.42	0.28164331		981.42	0.02548166		1511.42	-0.00888019		2041.41	-0.00233383
451.62	0.28193362		981.62	0.02567837		1511.62	-0.00841224		2041.61	-0.00277319
451.82	0.28183921		981.82	0.02596682		1511.82	-0.00817825		2041.81	-0.00362534
452.02	0.28113455		982.02	0.02593712		1512.02	-0.00869438		2042.01	-0.00348492
452.22	0.28193843		982.22	0.02592346		1512.22	-0.00927191		2042.21	-0.00282269
452.42	0.28249946		982.42	0.02670288		1512.42	-0.00939027		2042.41	-0.00399678
452.62	0.28447003		982.62	0.02679585		1512.62	-0.00898162		2042.61	-0.0036175
452.82	0.28499957		982.82	0.02752005		1512.82	-0.00976905		2042.81	-0.00383881
453.02	0.28545832		983.02	0.02798685		1513.02	-0.01078234		2043.01	-0.00305551
453.22	0.28576509		983.22	0.02877836		1513.22	-0.01068384		2043.21	-0.00248263
453.42	0.28554067		983.42	0.02874628		1513.42	-0.01101444		2043.41	-0.00300349
453.62	0.28616813		983.62	0.0282217		1513.62	-0.01105884		2043.61	-0.00280203
453.82	0.28526032		983.82	0.02751272		1513.82	-0.01199352		2043.81	-0.00184774
454.02	0.28548052		984.02	0.0273582		1514.02	-0.01147536		2044.01	-0.00162925
454.22	0.28504576		984.22	0.02679691		1514.22	-0.01156593		2044.21	-0.00064947
454.42	0.28513585		984.42	0.02645944		1514.42	-0.01222347		2044.41	0.00026745
454.62	0.28518184		984.62	0.0262017		1514.62	-0.01213576		2044.61	0.00058074
454.82	0.28495295		984.82	0.02599677		1514.82	-0.01214861		2044.81	0.00028172
455.02	0.28431657		985.02	0.02559808		1515.02	-0.01277904		2045.01	0.00090282
455.22	0.28425507		985.22	0.02531		1515.22	-0.01181024		2045.21	0.00155466
455.42	0.28411715		985.42	0.02458535		1515.42	-0.01223752		2045.41	0.00214179
455.62	0.28309034		985.62	0.02398805		1515.62	-0.01281989		2045.61	0.00162349
455.82	0.28270283		985.82	0.0245695		1515.82	-0.01184711		2045.81	0.00183244
456.02	0.28300873		986.02	0.02472034		1516.02	-0.01280298		2046.01	0.00243796
456.22	0.28355034		986.22	0.02581283		1516.22	-0.01244162		2046.21	0.00225872
456.42	0.28338319		986.42	0.02669304		1516.42	-0.01189439		2046.41	0.00122581
456.62	0.28441078		986.62	0.02811427		1516.62	-0.01051777		2046.61	0.00162855
456.82	0.28380598		986.82	0.02959704		1516.82	-0.01118823		2046.81	0.00048425
457.02	0.28418831		987.02	0.03021303		1517.02	-0.01101758		2047.01	-0.00030418
457.22	0.28384343		987.22	0.02984861		1517.22	-0.01075504		2047.21	-0.00023595
457.42	0.2829847		987.42	0.02899854		1517.42	-0.00955132		2047.41	-0.00068848
457.62	0.2818322		987.62	0.02852575		1517.62	-0.01005478		2047.61	-0.0000625
457.82	0.2802127		987.82	0.02863205		1517.82	-0.01083383		2047.81	0.00128014
458.02	0.28074317		988.02	0.02758935		1518.02	-0.01133568		2048.01	0.00113677
458.22	0.27987417		988.22	0.02714082		1518.22	-0.01219044		2048.21	0.00203469
458.42	0.28053201		988.42	0.0258045		1518.42	-0.01353733		2048.41	0.00214946
458.62	0.28084474		988.62	0.02501069		1518.62	-0.01352645		2048.61	0.00188195
458.82	0.28129617		988.82	0.02437279		1518.82	-0.01459705		2048.81	0.00155926
459.02	0.28103806		989.02	0.02341514		1519.02	-0.01631897		2049.01	0.0016821
459.22	0.28150594		989.22	0.02313151		1519.22	-0.01607353		2049.21	0.00201066
459.42	0.28197193		989.42	0.02231233		1519.42	-0.01629795		2049.41	0.00134672
459.62	0.28243715		989.62	0.02240577		1519.62	-0.01587354		2049.61	0.00076992
459.82	0.28325273		989.82	0.02306106		1519.82	-0.01510761		2049.81	0.00130981
460.02	0.28403348		990.02	0.02362073		1520.02	-0.01537059		2050.01	0.00051384
460.22	0.28418187		990.22	0.02472309		1520.22	-0.01443349		2050.21	-0.00053329
460.42	0.28396754		990.42	0.02621825		1520.42	-0.01344316		2050.41	-0.00106223
460.62	0.28379277		990.62	0.02773128		1520.62	-0.01235387		2050.61	-0.00169443
460.82	0.28351151		990.82	0.02718462		1520.82	-0.01169682		2050.81	-0.00222544
461.02	0.28388205		991.02	0.0274938		1521.02	-0.01112341		2051.01	-0.0028301
461.22	0.28407326		991.22	0.02667233		1521.22	-0.01133391		2051.21	-0.00209874
461.42	0.28414928		991.42	0.02712603		1521.42	-0.00974122		2051.41	-0.00155801
461.62	0.28426511		991.62	0.026586		1521.62	-0.01021744		2051.61	-0.00096078
461.82	0.28340336		991.82	0.02651852		1521.82	-0.01045039		2051.81	-0.00083786
462.02	0.28439734		992.02	0.02545778		1522.02	-0.01083005		2052.01	-0.00110317
462.22	0.28369397		992.22	0.0258884		1522.22	-0.0119694		2052.21	-0.00134265
462.42	0.28395824		992.42	0.0253477		1522.42	-0.01288178		2052.41	-0.001836
462.62	0.28337934		992.62	0.02582449		1522.62	-0.01270538		2052.61	-0.00190399
462.82	0.28326676		992.82	0.02557653		1522.82	-0.01323427		2052.81	-0.00164737
463.02	0.28336477		993.02	0.0258727		1523.02	-0.01353818		2053.01	-0.00187411
463.22	0.28401157		993.22	0.02543054		1523.22	-0.01310096		2053.21	-0.00200325
463.42	0.28390113		993.42	0.02550955		1523.42	-0.01296694		2053.41	-0.00151769
463.62	0.28389888		993.62	0.02597503		1523.62	-0.01318697		2053.61	-0.00001673
463.82	0.28418306		993.82	0.02632437		1523.82	-0.01308434		2053.81	-0.00028553
464.02	0.28443502		994.02	0.02588744		1524.02	-0.01334474		2054.01	-0.00100845
464.22	0.28408341		994.22	0.02538213		1524.22	-0.013272		2054.21	-0.00065123
464.42	0.28355995		994.42	0.02529935		1524.42	-0.01165574		2054.41	0.00014394
464.62	0.28401811		994.62	0.02442752		1524.62	-0.0113279		2054.61	0.00102956
464.82	0.28416981		994.82	0.02290854		1524.82	-0.01150603		2054.81	0.00138554
465.02	0.28459687		995.02	0.02278352		1525.02	-0.01133051		2055.01	0.00112098
465.22	0.28428314		995.22	0.02265777		1525.22	-0.01081086		2055.21	0.00088647
465.42	0.28454311		995.42	0.02292608		1525.42	-0.01005918		2055.41	0.00033077
465.62	0.28373977		995.62	0.02242441		1525.62	-0.00983131		2055.61	-0.00043672
465.82	0.2825638		995.82	0.02295239		1525.82	-0.01077466		2055.81	-0.00141272
466.02	0.28224043		996.02	0.02334892		1526.02	-0.01103566		2056.01	-0.00233822
466.22	0.28151908		996.22	0.02353968		1526.22	-0.01186919		2056.21	-0.00272273
466.42	0.28143369		996.42	0.02384938		1526.42	-0.01192059		2056.41	-0.00250933
466.62	0.2798888		996.62	0.02448497		1526.62	-0.01160578		2056.61	-0.00223835
466.82	0.27960312		996.82	0.0250094		1526.82	-0.01193189		2056.81	-0.00136841
467.02	0.27939173		997.02	0.02549797		1527.02	-0.01271746		2057.01	-0.00136137
467.22	0.27896219		997.22	0.02603521		1527.22	-0.01348401		2057.21	-0.00067435
467.42	0.27920833		997.42	0.02682707		1527.42	-0.01428228		2057.41	0.0006032
467.62	0.28004067		997.62	0.02701336		1527.62	-0.01510274		2057.61	-0.00022279
467.82	0.28043227		997.82	0.02691688		1527.82	-0.01590247		2057.81	-0.00095078
468.02	0.28075703		998.02	0.0268245		1528.02	-0.01580901		2058.01	-0.00134525
468.22	0.2813999		998.22	0.02686439		1528.22	-0.01593567		2058.21	-0.00109966
468.42	0.28212687		998.42	0.02588468		1528.42	-0.01536385		2058.41	-0.00051532
468.62	0.28248073		998.62	0.02549086		1528.62	-0.01614863		2058.61	-0.00079257
468.82	0.28205544		998.82	0.02451473		1528.82	-0.01580474		2058.81	-0.00198546
469.02	0.28203488		999.02	0.02432738		1529.02	-0.01478539		2059.01	-0.00255203
469.22	0.28123		999.22	0.0251503		1529.22	-0.01370515		2059.21	-0.00345624
469.42	0.28173032		999.42	0.02442369		1529.42	-0.01260632		2059.41	-0.00419324
469.62	0.28198884		999.62	0.0251536		1529.62	-0.01235907		2059.61	-0.00506598
469.82	0.28185616		999.82	0.0257789		1529.82	-0.01293477		2059.81	-0.00502572
470.02	0.28171671		1000.02	0.02519002		1530.02	-0.01210105		2060.01	-0.00439515
470.22	0.28132037		1000.22	0.0242914		1530.22	-0.01257869		2060.21	-0.0029994
470.42	0.28154817		1000.42	0.02406786		1530.42	-0.01269087		2060.41	-0.00201729
470.62	0.28059894		1000.62	0.02469251		1530.62	-0.01240378		2060.61	-0.00149073
470.82	0.28162612		1000.82	0.02521459		1530.82	-0.01303577		2060.81	-0.00096468
471.02	0.2828756		1001.02	0.02451211		1531.02	-0.01318985		2061.01	-0.00015986
471.22	0.28353882		1001.22	0.02492371		1531.22	-0.01399213		2061.21	0.00022302
471.42	0.28355423		1001.42	0.02545377		1531.42	-0.01524979		2061.41	0.00001114
471.62	0.28368902		1001.62	0.02567125		1531.62	-0.01598879		2061.61	-0.0011833
471.82	0.28459191		1001.82	0.02611833		1531.82	-0.01569908		2061.81	-0.00059644
472.02	0.28620027		1002.02	0.02584765		1532.02	-0.01465106		2062.01	-0.00068005
472.22	0.2874019		1002.22	0.02510719		1532.22	-0.01512732		2062.21	-0.00103293
472.42	0.28754853		1002.42	0.02338622		1532.42	-0.01392669		2062.41	-0.00073853
472.62	0.28694602		1002.62	0.02311999		1532.62	-0.01372331		2062.61	-0.00215104
472.82	0.28669384		1002.82	0.0221166		1532.82	-0.01260667		2062.81	-0.00326974
473.02	0.28593919		1003.02	0.02277993		1533.02	-0.01167136		2063.01	-0.00412109
473.22	0.28531555		1003.22	0.02302082		1533.22	-0.01107749		2063.21	-0.00453086
473.42	0.28430814		1003.42	0.02248842		1533.42	-0.0114139		2063.41	-0.00508209
473.62	0.28389162		1003.62	0.02294215		1533.62	-0.01231875		2063.61	-0.00541678
473.82	0.28351339		1003.82	0.02150665		1533.82	-0.0125309		2063.81	-0.00494585
474.02	0.28347929		1004.02	0.02022712		1534.02	-0.01255932		2064.01	-0.00425519
474.22	0.28311029		1004.22	0.01957065		1534.22	-0.01349987		2064.21	-0.00380671
474.42	0.2841342		1004.42	0.01960632		1534.42	-0.01339228		2064.41	-0.00400019
474.62	0.28378245		1004.62	0.02063332		1534.62	-0.01382252		2064.61	-0.00373238
474.82	0.28465131		1004.82	0.02072591		1534.82	-0.01385736		2064.81	-0.00337117
475.02	0.28509972		1005.02	0.02079748		1535.02	-0.01389922		2065.01	-0.00279176
475.22	0.28475317		1005.22	0.02126203		1535.22	-0.01441698		2065.21	-0.00346536
475.42	0.28426324		1005.42	0.02142988		1535.42	-0.01452944		2065.41	-0.00341856
475.62	0.28494203		1005.62	0.02202357		1535.62	-0.01448717		2065.61	-0.00275089
475.82	0.28664954		1005.82	0.02189425		1535.82	-0.0134439		2065.81	-0.00164129
476.02	0.2874553		1006.02	0.02138702		1536.02	-0.01332193		2066.01	-0.00124835
476.22	0.28699451		1006.22	0.02113758		1536.22	-0.01384371		2066.21	-0.00184927
476.42	0.28624169		1006.42	0.0206291		1536.42	-0.01378038		2066.41	-0.00143589
476.62	0.28622818		1006.62	0.02103467		1536.62	-0.01420553		2066.61	-0.00208768
476.82	0.28629257		1006.82	0.02155288		1536.82	-0.01475007		2066.81	-0.00195477
477.02	0.28459523		1007.02	0.02217682		1537.02	-0.01529377		2067.01	-0.00154245
477.22	0.28351873		1007.22	0.02190146		1537.22	-0.01681994		2067.21	-0.00103658
477.42	0.28271522		1007.42	0.02177576		1537.42	-0.01742879		2067.41	-0.00043111
477.62	0.2840401		1007.62	0.02186435		1537.62	-0.01779001		2067.61	-0.00002759
477.82	0.28369884		1007.82	0.02184675		1537.82	-0.0179088		2067.81	0.00009503
478.02	0.28305798		1008.02	0.02209904		1538.02	-0.01762972		2068.01	0.00126751
478.22	0.28282324		1008.22	0.0223624		1538.22	-0.01711395		2068.21	0.00162363
478.42	0.28302073		1008.42	0.02328206		1538.42	-0.01706785		2068.41	0.00139477
478.62	0.28234984		1008.62	0.02424603		1538.62	-0.01594966		2068.61	0.00166896
478.82	0.28283888		1008.82	0.02498903		1538.82	-0.01470646		2068.81	0.00108866
479.02	0.28284632		1009.02	0.02584375		1539.02	-0.01415919		2069.01	0.00037947
479.22	0.28215304		1009.22	0.02602911		1539.22	-0.01300393		2069.21	0.00096684
479.42	0.28225886		1009.42	0.02651694		1539.42	-0.01228023		2069.41	0.00061983
479.62	0.28292553		1009.62	0.0267153		1539.62	-0.01228569		2069.61	0.0006272
479.82	0.28346787		1009.82	0.02686326		1539.82	-0.01177844		2069.81	0.00010866
480.02	0.28315777		1010.02	0.02629459		1540.02	-0.01318295		2070.01	-0.00121762
480.22	0.28292627		1010.22	0.02583141		1540.22	-0.01416359		2070.21	-0.00284585
480.42	0.28284085		1010.42	0.02500375		1540.42	-0.01441003		2070.41	-0.00321051
480.62	0.28248876		1010.62	0.02486924		1540.62	-0.01443387		2070.61	-0.00346255
480.82	0.28169189		1010.82	0.025095		1540.82	-0.01506236		2070.81	-0.00398516
481.02	0.28015152		1011.02	0.02426846		1541.02	-0.01498021		2071.01	-0.00392863
481.22	0.27946701		1011.22	0.02396118		1541.22	-0.01552356		2071.21	-0.00418685
481.42	0.27918079		1011.42	0.02329878		1541.42	-0.01520903		2071.41	-0.0034015
481.62	0.27916816		1011.62	0.02286396		1541.62	-0.01587643		2071.61	-0.00428986
481.82	0.27732827		1011.82	0.02164352		1541.82	-0.01575995		2071.81	-0.00439726
482.02	0.27744658		1012.02	0.02145457		1542.02	-0.01539439		2072.01	-0.00375443
482.22	0.27824625		1012.22	0.02130436		1542.22	-0.01507388		2072.21	-0.00324376
482.42	0.27843048		1012.42	0.02138839		1542.42	-0.01572443		2072.41	-0.00308681
482.62	0.27881146		1012.62	0.02190671		1542.62	-0.01451995		2072.61	-0.00281838
482.82	0.28006441		1012.82	0.02232815		1542.82	-0.01524407		2072.81	-0.00254245
483.02	0.2811		1013.02	0.0221642		1543.02	-0.0155273		2073.01	-0.00197824
483.22	0.28204954		1013.22	0.02184913		1543.22	-0.01522922		2073.21	-0.00165804
483.42	0.28316457		1013.42	0.02141953		1543.42	-0.01528472		2073.41	-0.00259439
483.62	0.28327491		1013.62	0.02133881		1543.62	-0.01622333		2073.61	-0.00306822
483.82	0.28449838		1013.82	0.02183752		1543.82	-0.01566967		2073.81	-0.00350721
484.02	0.28518819		1014.02	0.02058927		1544.02	-0.0155976		2074.01	-0.00465322
484.22	0.28558797		1014.22	0.02153659		1544.22	-0.01477221		2074.21	-0.00540617
484.42	0.28527305		1014.42	0.02191039		1544.42	-0.01380247		2074.41	-0.00534226
484.62	0.2850624		1014.62	0.02273263		1544.62	-0.01336014		2074.61	-0.00555096
484.82	0.28470015		1014.82	0.02241742		1544.82	-0.01259638		2074.81	-0.00592224
485.02	0.28339504		1015.02	0.0222559		1545.02	-0.01224457		2075.01	-0.00602058
485.22	0.28202591		1015.22	0.02243278		1545.22	-0.01285159		2075.21	-0.00581588
485.42	0.28210137		1015.42	0.02280066		1545.42	-0.01261207		2075.41	-0.00574863
485.62	0.28095077		1015.62	0.0213534		1545.62	-0.01305699		2075.61	-0.00655042
485.82	0.27952955		1015.82	0.02098742		1545.82	-0.01282703		2075.81	-0.00542946
486.02	0.27958305		1016.02	0.02188866		1546.02	-0.01314159		2076.01	-0.00474016
486.22	0.27945753		1016.22	0.02210575		1546.22	-0.01316495		2076.21	-0.00395452
486.42	0.27963349		1016.42	0.02267329		1546.42	-0.01411173		2076.41	-0.00339264
486.62	0.27990557		1016.62	0.02211143		1546.62	-0.01426259		2076.61	-0.00318172
486.82	0.28019054		1016.82	0.02255302		1546.82	-0.01562338		2076.81	-0.0032757
487.02	0.28011904		1017.02	0.02194233		1547.02	-0.01648183		2077.01	-0.00222797
487.22	0.27969117		1017.22	0.02162861		1547.22	-0.01599978		2077.21	-0.00271239
487.42	0.27975303		1017.42	0.02177391		1547.42	-0.01550578		2077.41	-0.00353695
487.62	0.2801463		1017.62	0.02194045		1547.62	-0.01585114		2077.61	-0.00427401
487.82	0.28130063		1017.82	0.02202566		1547.82	-0.015116		2077.81	-0.00389869
488.02	0.28168247		1018.02	0.02277094		1548.02	-0.01497567		2078.01	-0.00387179
488.22	0.28171642		1018.22	0.02448777		1548.22	-0.01532219		2078.21	-0.00439777
488.42	0.28207701		1018.42	0.02404539		1548.42	-0.0154573		2078.41	-0.00516946
488.62	0.28190348		1018.62	0.0243131		1548.62	-0.01585676		2078.61	-0.00565396
488.82	0.28135961		1018.82	0.02475244		1548.82	-0.01598975		2078.81	-0.0052073
489.02	0.28024685		1019.02	0.02571442		1549.02	-0.01677089		2079.01	-0.00462603
489.22	0.2799895		1019.22	0.02533756		1549.22	-0.01697915		2079.21	-0.00434108
489.42	0.28027971		1019.42	0.02511444		1549.42	-0.01684736		2079.41	-0.00462299
489.62	0.27895239		1019.62	0.02398394		1549.62	-0.01820669		2079.61	-0.00458777
489.82	0.27879616		1019.82	0.02445697		1549.82	-0.01875129		2079.81	-0.00457405
490.02	0.27917352		1020.02	0.02502893		1550.02	-0.01895527		2080.01	-0.0047701
490.22	0.27973027		1020.22	0.02514019		1550.22	-0.01813351		2080.21	-0.00502978
490.42	0.28050182		1020.42	0.02527505		1550.42	-0.01756013		2080.41	-0.00485163
490.62	0.28028685		1020.62	0.02358503		1550.62	-0.01753626		2080.61	-0.00451839
490.82	0.27986468		1020.82	0.02409219		1550.82	-0.01732332		2080.81	-0.00366783
491.02	0.27979508		1021.02	0.02200351		1551.02	-0.01758346		2081.01	-0.00285583
491.22	0.27987509		1021.22	0.02067692		1551.22	-0.01666316		2081.21	-0.00263571
491.42	0.28114859		1021.42	0.02073936		1551.42	-0.01648288		2081.41	-0.00207827
491.62	0.28120476		1021.62	0.0205222		1551.62	-0.01663297		2081.61	-0.00243934
491.82	0.2816328		1021.82	0.02098682		1551.82	-0.01633411		2081.81	-0.00199807
492.02	0.28178293		1022.02	0.02198271		1552.02	-0.01628544		2082.01	-0.00182517
492.22	0.28159578		1022.22	0.02104112		1552.22	-0.01731907		2082.21	-0.00264171
492.42	0.28250036		1022.42	0.02031896		1552.42	-0.01719954		2082.41	-0.00384937
492.62	0.28226875		1022.62	0.02044228		1552.62	-0.01838699		2082.61	-0.00294222
492.82	0.28274106		1022.82	0.02114731		1552.82	-0.01854245		2082.81	-0.0024347
493.02	0.28338762		1023.02	0.02089645		1553.02	-0.01910613		2083.01	-0.0034084
493.22	0.28264764		1023.22	0.02027661		1553.22	-0.01916017		2083.21	-0.00362585
493.42	0.2824685		1023.42	0.02113227		1553.42	-0.01957261		2083.41	-0.00397411
493.62	0.28225831		1023.62	0.02121557		1553.62	-0.01945577		2083.61	-0.00381376
493.82	0.28217853		1023.82	0.0204399		1553.82	-0.01897906		2083.81	-0.00418087
494.02	0.28266989		1024.02	0.02149316		1554.02	-0.01830322		2084.01	-0.00330786
494.22	0.28340505		1024.22	0.02134133		1554.22	-0.01749991		2084.21	-0.00312282
494.42	0.28354222		1024.42	0.02111205		1554.42	-0.01666291		2084.41	-0.00355585
494.62	0.28276297		1024.62	0.02039132		1554.62	-0.0171063		2084.61	-0.00366195
494.82	0.28287946		1024.82	0.0209294		1554.82	-0.01562338		2084.81	-0.00318347
495.02	0.28368645		1025.02	0.02061839		1555.02	-0.01515391		2085.01	-0.00337427
495.22	0.28339674		1025.22	0.02055348		1555.22	-0.01467264		2085.21	-0.00305407
495.42	0.28341966		1025.42	0.02179145		1555.42	-0.01393407		2085.41	-0.00255976
495.62	0.28251755		1025.62	0.02172775		1555.62	-0.01345171		2085.61	-0.00351709
495.82	0.28260133		1025.82	0.02205968		1555.82	-0.01369015		2085.81	-0.00335194
496.02	0.28214093		1026.02	0.02224586		1556.02	-0.01438851		2086.01	-0.00252364
496.22	0.28161571		1026.22	0.02185011		1556.22	-0.01407452		2086.21	-0.00309579
496.42	0.28172446		1026.42	0.02338789		1556.42	-0.01356447		2086.41	-0.00302011
496.62	0.28145449		1026.62	0.02376627		1556.62	-0.01437113		2086.61	-0.00272194
496.82	0.2809103		1026.82	0.02473401		1556.82	-0.0140925		2086.81	-0.00365143
497.02	0.27985024		1027.02	0.02441474		1557.02	-0.01456679		2087.01	-0.00363778
497.22	0.27845884		1027.22	0.02372559		1557.22	-0.01491255		2087.21	-0.00201478
497.42	0.27784288		1027.42	0.02378418		1557.42	-0.0154942		2087.41	-0.00197237
497.62	0.27796153		1027.62	0.02137492		1557.62	-0.01556263		2087.61	-0.00182777
497.82	0.2777159		1027.82	0.01960667		1557.82	-0.01627503		2087.81	-0.00230783
498.02	0.27807343		1028.02	0.0194699		1558.02	-0.01635222		2088.01	-0.00216169
498.22	0.27805227		1028.22	0.01877961		1558.22	-0.01726785		2088.21	-0.00299126
498.42	0.2782883		1028.42	0.01761328		1558.42	-0.01733515		2088.41	-0.00416111
498.62	0.27827267		1028.62	0.01733122		1558.62	-0.01673669		2088.61	-0.00396707
498.82	0.27942202		1028.82	0.01646501		1558.82	-0.01599255		2088.81	-0.00389
499.02	0.27974655		1029.02	0.01645857		1559.02	-0.01692774		2089.01	-0.00370691
499.22	0.27925829		1029.22	0.01694743		1559.22	-0.01765032		2089.21	-0.0039885
499.42	0.27979633		1029.42	0.01769554		1559.42	-0.01672493		2089.41	-0.0041304
499.62	0.28017893		1029.62	0.01753514		1559.62	-0.01650248		2089.61	-0.0046394
499.82	0.2799541		1029.82	0.01943309		1559.82	-0.01666416		2089.81	-0.00425925
500.02	0.28040789		1030.02	0.02049904		1560.02	-0.01692374		2090.01	-0.00410148
500.22	0.28067687		1030.22	0.02202904		1560.22	-0.01693537		2090.21	-0.00499127
500.42	0.28160175		1030.42	0.02385162		1560.42	-0.0174328		2090.41	-0.0045104
500.62	0.28133099		1030.62	0.0235403		1560.62	-0.01770451		2090.61	-0.00459789
500.82	0.28100894		1030.82	0.02423356		1560.82	-0.01834935		2090.81	-0.00388069
501.02	0.28125706		1031.02	0.02348356		1561.02	-0.01816936		2091.01	-0.00340006
501.22	0.28168669		1031.22	0.02299092		1561.22	-0.01809667		2091.21	-0.00329737
501.42	0.28117271		1031.42	0.02270344		1561.42	-0.01803979		2091.41	-0.0030125
501.62	0.2822013		1031.62	0.02118812		1561.62	-0.01754646		2091.61	-0.00337262
501.82	0.28208782		1031.82	0.02062365		1561.82	-0.0176025		2091.81	-0.00281672
502.02	0.28139612		1032.02	0.02116517		1562.02	-0.016448		2092.01	-0.00243765
502.22	0.28088166		1032.22	0.02055944		1562.22	-0.01645557		2092.21	-0.00179428
502.42	0.28068462		1032.42	0.019297		1562.42	-0.01468783		2092.41	-0.00149426
502.62	0.28038258		1032.62	0.01916225		1562.62	-0.01477914		2092.61	-0.00093947
502.82	0.27956062		1032.82	0.01851447		1562.82	-0.01537904		2092.81	-0.0008747
503.02	0.27947026		1033.02	0.01995892		1563.02	-0.01619125		2093.01	-0.00064606
503.22	0.27892016		1033.22	0.02047952		1563.22	-0.01545152		2093.21	-0.00193489
503.42	0.27843348		1033.42	0.02015912		1563.42	-0.01476823		2093.41	-0.0017384
503.62	0.27856499		1033.62	0.01996095		1563.62	-0.01485535		2093.61	-0.00181216
503.82	0.27819201		1033.82	0.02037938		1563.82	-0.01555704		2093.81	-0.00187003
504.02	0.27852446		1034.02	0.01963572		1564.02	-0.01690321		2094.01	-0.00241651
504.22	0.27777054		1034.22	0.02033518		1564.22	-0.01761402		2094.21	-0.00333
504.42	0.27751703		1034.42	0.0202519		1564.42	-0.01764857		2094.41	-0.00296079
504.62	0.27722389		1034.62	0.01982962		1564.62	-0.01831433		2094.61	-0.00328168
504.82	0.27743998		1034.82	0.02065575		1564.82	-0.01956128		2094.81	-0.00346776
505.02	0.27757676		1035.02	0.02005399		1565.02	-0.01905126		2095.01	-0.00415521
505.22	0.27775599		1035.22	0.02079934		1565.22	-0.01872731		2095.21	-0.00380454
505.42	0.2783298		1035.42	0.02083734		1565.42	-0.01852479		2095.41	-0.00268481
505.62	0.27870526		1035.62	0.02043548		1565.62	-0.01771292		2095.61	-0.00380427
505.82	0.27903079		1035.82	0.02029042		1565.82	-0.01688848		2095.81	-0.00256
506.02	0.27933814		1036.02	0.02157064		1566.02	-0.01557866		2096.01	-0.00178897
506.22	0.28008069		1036.22	0.02097037		1566.22	-0.01502975		2096.21	-0.001468
506.42	0.28011313		1036.42	0.02044793		1566.42	-0.01429837		2096.41	-0.00105993
506.62	0.28054632		1036.62	0.01978241		1566.62	-0.01554521		2096.61	-0.00061264
506.82	0.28057295		1036.82	0.02036131		1566.82	-0.01528727		2096.81	-0.00068617
507.02	0.2823702		1037.02	0.02134617		1567.02	-0.01603769		2097.01	-0.00074143
507.22	0.28078175		1037.22	0.0206895		1567.22	-0.01601727		2097.21	-0.00097014
507.42	0.27988064		1037.42	0.01953277		1567.42	-0.01643022		2097.41	-0.00110926
507.62	0.28058941		1037.62	0.01813289		1567.62	-0.0158731		2097.61	-0.00177245
507.82	0.27928587		1037.82	0.01705873		1567.82	-0.01681449		2097.81	-0.00204474
508.02	0.27850824		1038.02	0.01663973		1568.02	-0.01737404		2098.01	-0.00331213
508.22	0.27756697		1038.22	0.01725851		1568.22	-0.01807579		2098.21	-0.00480848
508.42	0.2775673		1038.42	0.01723857		1568.42	-0.01881258		2098.41	-0.00622399
508.62	0.27792595		1038.62	0.01768514		1568.62	-0.01999986		2098.61	-0.00712609
508.82	0.27786598		1038.82	0.01803298		1568.82	-0.02053249		2098.81	-0.00728547
509.02	0.27823353		1039.02	0.01840212		1569.02	-0.02025746		2099.01	-0.007465
509.22	0.27879685		1039.22	0.01929415		1569.22	-0.01987154		2099.21	-0.00726271
509.42	0.27942718		1039.42	0.01947755		1569.42	-0.01926952		2099.41	-0.00639815
509.62	0.27950509		1039.62	0.0201298		1569.62	-0.01844852		2099.61	-0.00677704
509.82	0.27976595		1039.82	0.0210225		1569.82	-0.01728841		2099.81	-0.00607762
510.02	0.2806834		1040.02	0.02249525		1570.02	-0.01716865		2100.01	-0.00536626
510.22	0.28137729		1040.22	0.02241719		1570.22	-0.0172648		2100.21	-0.00534637
510.42	0.28098963		1040.42	0.02264818		1570.42	-0.01747474		2100.41	-0.00474101
510.62	0.28136647		1040.62	0.02295501		1570.62	-0.01815644		2100.61	-0.00328118
510.82	0.28149833		1040.82	0.02384325		1570.82	-0.0189054		2100.81	-0.00326063
511.02	0.28114929		1041.02	0.02341991		1571.02	-0.01899477		2101.01	-0.00250773
511.22	0.27790957		1041.22	0.02232405		1571.22	-0.01796077		2101.21	-0.00196649
511.42	0.27759985		1041.42	0.02032806		1571.42	-0.01637534		2101.41	-0.00167662
511.62	0.27740402		1041.62	0.01880575		1571.62	-0.01532844		2101.61	-0.00060809
511.82	0.27650608		1041.82	0.01807261		1571.82	-0.01579245		2101.81	-0.00113033
512.02	0.27593784		1042.02	0.01748451		1572.02	-0.01545183		2102.01	-0.00213375
512.22	0.27536047		1042.22	0.01747086		1572.22	-0.01594143		2102.21	-0.00286249
512.42	0.27502703		1042.42	0.01704986		1572.42	-0.01519644		2102.41	-0.00429835
512.62	0.27519525		1042.62	0.01675407		1572.62	-0.01518935		2102.61	-0.00383352
512.82	0.27488302		1042.82	0.01680172		1572.82	-0.01532593		2102.81	-0.00383002
513.02	0.27536955		1043.02	0.01766328		1573.02	-0.01562609		2103.01	-0.00386431
513.22	0.27514184		1043.22	0.01763301		1573.22	-0.01560051		2103.21	-0.00331885
513.42	0.27536263		1043.42	0.01784539		1573.42	-0.01514153		2103.41	-0.00218501
513.62	0.27542597		1043.62	0.01833757		1573.62	-0.01650713		2103.61	-0.00286147
513.82	0.27548076		1043.82	0.01893025		1573.82	-0.01653554		2103.81	-0.00362255
514.02	0.27651052		1044.02	0.01903433		1574.02	-0.01808649		2104.01	-0.00251398
514.22	0.27745593		1044.22	0.01922739		1574.22	-0.01924718		2104.21	-0.00227453
514.42	0.27730543		1044.42	0.01937921		1574.42	-0.01925393		2104.41	-0.00235743
514.62	0.27804427		1044.62	0.0193691		1574.62	-0.01891194		2104.61	-0.00118903
514.82	0.27766177		1044.82	0.01911297		1574.82	-0.01911843		2104.81	-0.00180212
515.02	0.27689223		1045.02	0.0186898		1575.02	-0.01831133		2105.01	-0.00151889
515.22	0.27637773		1045.22	0.01842035		1575.22	-0.01781082		2105.21	-0.00168654
515.42	0.27677326		1045.42	0.01819751		1575.42	-0.01800626		2105.41	-0.00249288
515.62	0.27689751		1045.62	0.01769333		1575.62	-0.01779619		2105.61	-0.00320228
515.82	0.27687544		1045.82	0.01748568		1575.82	-0.01776477		2105.81	-0.00437282
516.02	0.27680653		1046.02	0.01814734		1576.02	-0.01787874		2106.01	-0.00556866
516.22	0.27667767		1046.22	0.01826465		1576.22	-0.01825316		2106.21	-0.00604629
516.42	0.27700427		1046.42	0.01799383		1576.42	-0.01757486		2106.41	-0.00674397
516.62	0.27827307		1046.62	0.017586		1576.62	-0.01762725		2106.61	-0.00664721
516.82	0.2792166		1046.82	0.01745488		1576.82	-0.01789016		2106.81	-0.00611224
517.02	0.27969044		1047.02	0.01846047		1577.02	-0.01805048		2107.01	-0.00488817
517.22	0.27970444		1047.22	0.018297		1577.22	-0.0184373		2107.21	-0.00435149
517.42	0.28015857		1047.42	0.01780246		1577.42	-0.01863837		2107.41	-0.00358772
517.62	0.28030267		1047.62	0.01745275		1577.62	-0.01900605		2107.61	-0.00391181
517.82	0.28043236		1047.82	0.01789399		1577.82	-0.01778992		2107.81	-0.00222073
518.02	0.28044977		1048.02	0.01814972		1578.02	-0.01745256		2108.01	-0.00143351
518.22	0.28127586		1048.22	0.01896215		1578.22	-0.01674471		2108.21	-0.00052372
518.42	0.28088442		1048.42	0.01825594		1578.42	-0.01575468		2108.41	-0.00042149
518.62	0.28043633		1048.62	0.01861939		1578.62	-0.01466877		2108.61	0.00042085
518.82	0.27938146		1048.82	0.01853438		1578.82	-0.01454282		2108.81	0.00031364
519.02	0.27892099		1049.02	0.01866506		1579.02	-0.01419331		2109.01	-0.00041935
519.22	0.27930139		1049.22	0.01948749		1579.22	-0.01402882		2109.21	-0.00029913
519.42	0.27769745		1049.42	0.01991813		1579.42	-0.01391127		2109.41	-0.00170937
519.62	0.27790043		1049.62	0.01936717		1579.62	-0.01374715		2109.61	-0.00190068
519.82	0.27713576		1049.82	0.01900669		1579.82	-0.0138397		2109.81	-0.00187693
520.02	0.27757337		1050.02	0.02025408		1580.02	-0.01438475		2110.01	-0.00277157
520.22	0.27670918		1050.22	0.01874985		1580.22	-0.01509568		2110.21	-0.00290636
520.42	0.27755815		1050.42	0.01868631		1580.42	-0.01595142		2110.41	-0.00387433
520.62	0.27829694		1050.62	0.01811433		1580.62	-0.01647829		2110.61	-0.00376038
520.82	0.27831938		1050.82	0.01830435		1580.82	-0.01803697		2110.81	-0.00356095
521.02	0.27762342		1051.02	0.02010444		1581.02	-0.01989806		2111.01	-0.0034258
521.22	0.27876379		1051.22	0.01945087		1581.22	-0.02057706		2111.21	-0.00321683
521.42	0.27781066		1051.42	0.01925966		1581.42	-0.02093002		2111.41	-0.00232672
521.62	0.27766854		1051.62	0.02044278		1581.62	-0.02051866		2111.61	-0.00211604
521.82	0.27837732		1051.82	0.02196184		1581.82	-0.02039443		2111.81	-0.00078116
522.02	0.2771492		1052.02	0.02160454		1582.02	-0.02013419		2112.01	-0.0017677
522.22	0.27745148		1052.22	0.02195943		1582.22	-0.02002874		2112.21	-0.00153163
522.42	0.27694631		1052.42	0.02197274		1582.42	-0.01995753		2112.41	-0.00242335
522.62	0.27607579		1052.62	0.02215719		1582.62	-0.01902911		2112.61	-0.00242035
522.82	0.27566525		1052.82	0.02275717		1582.82	-0.01866697		2112.81	-0.00293798
523.02	0.27561008		1053.02	0.02282275		1583.02	-0.01862742		2113.01	-0.00344138
523.22	0.27587223		1053.22	0.02326295		1583.22	-0.01828173		2113.21	-0.00316022
523.42	0.27480384		1053.42	0.02278622		1583.42	-0.01821553		2113.41	-0.00542047
523.62	0.27593768		1053.62	0.02260143		1583.62	-0.01848064		2113.61	-0.00604527
523.82	0.27494051		1053.82	0.02229631		1583.82	-0.0186404		2113.81	-0.00666683
524.02	0.27535987		1054.02	0.02287333		1584.02	-0.01861968		2114.01	-0.00708867
524.22	0.2747712		1054.22	0.02186476		1584.22	-0.01921856		2114.21	-0.00744866
524.42	0.27591721		1054.42	0.02263104		1584.42	-0.02041421		2114.41	-0.00785907
524.62	0.27600874		1054.62	0.02272429		1584.62	-0.02021616		2114.61	-0.0076695
524.82	0.27702386		1054.82	0.02337909		1584.82	-0.02074419		2114.81	-0.00808883
525.02	0.27742668		1055.02	0.02388573		1585.02	-0.02061805		2115.01	-0.00658305
525.22	0.27827644		1055.22	0.02365386		1585.22	-0.01945871		2115.21	-0.00540104
525.42	0.27758558		1055.42	0.02383322		1585.42	-0.01819124		2115.41	-0.00456556
525.62	0.27766155		1055.62	0.02368226		1585.62	-0.0173716		2115.61	-0.00327007
525.82	0.27842852		1055.82	0.02282463		1585.82	-0.01663409		2115.81	-0.00259327
526.02	0.27636347		1056.02	0.02076318		1586.02	-0.01579582		2116.01	-0.00284538
526.22	0.27637913		1056.22	0.02078194		1586.22	-0.01577101		2116.21	-0.00232706
526.42	0.27586549		1056.42	0.01949627		1586.42	-0.01586907		2116.41	-0.00228136
526.62	0.27445135		1056.62	0.01873467		1586.62	-0.01478972		2116.61	-0.00142377
526.82	0.2738199		1056.82	0.01866875		1586.82	-0.01519407		2116.81	-0.0022205
527.02	0.27394885		1057.02	0.01825212		1587.02	-0.01526133		2117.01	-0.00170598
527.22	0.27436933		1057.22	0.01821601		1587.22	-0.01569887		2117.21	-0.00160201
527.42	0.2733625		1057.42	0.01772859		1587.42	-0.01663593		2117.41	-0.00269392
527.62	0.2729086		1057.62	0.01749471		1587.62	-0.01724639		2117.61	-0.002793
527.82	0.2716441		1057.82	0.01756205		1587.82	-0.01807436		2117.81	-0.00243067
528.02	0.27166167		1058.02	0.01806605		1588.02	-0.01890617		2118.01	-0.00288984
528.22	0.27137754		1058.22	0.01801039		1588.22	-0.01983689		2118.21	-0.00391122
528.42	0.27181403		1058.42	0.0188096		1588.42	-0.0216347		2118.41	-0.00415512
528.62	0.27251483		1058.62	0.01911981		1588.62	-0.02183374		2118.61	-0.00516884
528.82	0.27375714		1058.82	0.01881547		1588.82	-0.02262167		2118.81	-0.00549596
529.02	0.27421595		1059.02	0.01842946		1589.02	-0.02343389		2119.01	-0.00449318
529.22	0.27525359		1059.22	0.01928375		1589.22	-0.02267859		2119.21	-0.005248
529.42	0.27536706		1059.42	0.0189833		1589.42	-0.02258581		2119.41	-0.00521683
529.62	0.27548641		1059.62	0.01896893		1589.62	-0.02241077		2119.61	-0.00552315
529.82	0.27617618		1059.82	0.01875912		1589.82	-0.02197075		2119.81	-0.00592322
530.02	0.27525653		1060.02	0.01839741		1590.02	-0.02167063		2120.01	-0.00694695
530.22	0.27518056		1060.22	0.01888554		1590.22	-0.02109178		2120.21	-0.00730595
530.42	0.27495832		1060.42	0.01906953		1590.42	-0.02070223		2120.41	-0.00819784
530.62	0.27419056		1060.62	0.02036466		1590.62	-0.01958963		2120.61	-0.0070745
530.82	0.27425025		1060.82	0.02011582		1590.82	-0.02012396		2120.81	-0.0075893
531.02	0.27470018		1061.02	0.02052937		1591.02	-0.01914776		2121.01	-0.00607766
531.22	0.27489736		1061.22	0.01962076		1591.22	-0.01957679		2121.21	-0.00605307
531.42	0.27427911		1061.42	0.019585		1591.42	-0.01976772		2121.41	-0.00677841
531.62	0.27407287		1061.62	0.02029859		1591.62	-0.02016703		2121.61	-0.00631433
531.82	0.2736128		1061.82	0.01986727		1591.82	-0.02091566		2121.81	-0.00557996
532.02	0.27391389		1062.02	0.02013916		1592.02	-0.02204753		2122.01	-0.0056494
532.22	0.27461147		1062.22	0.02017957		1592.22	-0.02234148		2122.21	-0.00472293
532.42	0.27607992		1062.42	0.01984914		1592.42	-0.02282745		2122.41	-0.00490271
532.62	0.27575779		1062.62	0.02004221		1592.62	-0.02228574		2122.61	-0.00548113
532.82	0.27683991		1062.82	0.02002564		1592.82	-0.02309958		2122.81	-0.00511123
533.02	0.27815274		1063.02	0.02007019		1593.02	-0.02224284		2123.01	-0.00488559
533.22	0.2790042		1063.22	0.02043626		1593.22	-0.02175112		2123.21	-0.00546843
533.42	0.27906822		1063.42	0.02043479		1593.42	-0.02220977		2123.41	-0.00566654
533.62	0.27881506		1063.62	0.02065797		1593.62	-0.02098975		2123.61	-0.00576994
533.82	0.2788747		1063.82	0.02052005		1593.82	-0.02039044		2123.81	-0.00598217
534.02	0.27761551		1064.02	0.02049315		1594.02	-0.01973148		2124.01	-0.00735867
534.22	0.27734045		1064.22	0.02048713		1594.22	-0.01910895		2124.21	-0.00699597
534.42	0.27635325		1064.42	0.02064331		1594.42	-0.0190687		2124.41	-0.00657125
534.62	0.27553517		1064.62	0.02053715		1594.62	-0.01890178		2124.61	-0.00654093
534.82	0.2752476		1064.82	0.01909928		1594.82	-0.01941155		2124.81	-0.00761635
535.02	0.27434647		1065.02	0.01827872		1595.02	-0.019139		2125.01	-0.00759338
535.22	0.27427755		1065.22	0.01702769		1595.22	-0.02043784		2125.21	-0.00865742
535.42	0.27364604		1065.42	0.01732616		1595.42	-0.02069843		2125.41	-0.00849687
535.62	0.27323288		1065.62	0.01723218		1595.62	-0.02007201		2125.61	-0.00706919
535.82	0.2726576		1065.82	0.0163935		1595.82	-0.02062126		2125.81	-0.00668514
536.02	0.27308026		1066.02	0.01698221		1596.02	-0.02052889		2126.01	-0.00586359
536.22	0.27321657		1066.22	0.01681424		1596.22	-0.01986313		2126.21	-0.00523287
536.42	0.27434547		1066.42	0.01603154		1596.42	-0.01983149		2126.41	-0.00608312
536.62	0.27426178		1066.62	0.01697392		1596.62	-0.02052489		2126.61	-0.00553694
536.82	0.27663571		1066.82	0.01650924		1596.82	-0.02066772		2126.81	-0.00455141
537.02	0.27702154		1067.02	0.01588597		1597.02	-0.02081658		2127.01	-0.00470811
537.22	0.27749518		1067.22	0.01635805		1597.22	-0.02100478		2127.21	-0.00435888
537.42	0.27828597		1067.42	0.01648374		1597.42	-0.02186828		2127.41	-0.00402017
537.62	0.2781787		1067.62	0.01765096		1597.62	-0.02183828		2127.61	-0.00387969
537.82	0.278847		1067.82	0.01828159		1597.82	-0.02141906		2127.81	-0.00329613
538.02	0.27786889		1068.02	0.01783131		1598.02	-0.0211462		2128.01	-0.00364738
538.22	0.27824765		1068.22	0.01894337		1598.22	-0.02157649		2128.21	-0.00282806
538.42	0.27748297		1068.42	0.01958868		1598.42	-0.02220563		2128.41	-0.00268156
538.62	0.27734443		1068.62	0.01946266		1598.62	-0.02278353		2128.61	-0.00381524
538.82	0.27745368		1068.82	0.01892968		1598.82	-0.02290783		2128.81	-0.00379541
539.02	0.27627902		1069.02	0.0190927		1599.02	-0.02317629		2129.01	-0.00417549
539.22	0.27658923		1069.22	0.0188976		1599.22	-0.0226114		2129.21	-0.00460675
539.42	0.27618779		1069.42	0.01977456		1599.42	-0.02187813		2129.41	-0.00403162
539.62	0.27641033		1069.62	0.02018668		1599.62	-0.02150506		2129.61	-0.00411712
539.82	0.27575971		1069.82	0.02014351		1599.82	-0.02281432		2129.81	-0.00435595
540.02	0.27632883		1070.02	0.01992838		1600.02	-0.02179075		2130.01	-0.00398238
540.22	0.27709054		1070.22	0.0192087		1600.22	-0.02178861		2130.21	-0.00399259
540.42	0.27811843		1070.42	0.01915587		1600.42	-0.02226453		2130.41	-0.00379913
540.62	0.27823911		1070.62	0.01940031		1600.62	-0.02160042		2130.61	-0.00321475
540.82	0.27873494		1070.82	0.0184422		1600.82	-0.02075382		2130.81	-0.00330584
541.02	0.27850518		1071.02	0.01841938		1601.02	-0.02107712		2131.01	-0.00396651
541.22	0.27878418		1071.22	0.01926443		1601.22	-0.02041511		2131.21	-0.00379274
541.42	0.27916679		1071.42	0.01866199		1601.42	-0.02118683		2131.41	-0.00391634
541.62	0.27877518		1071.62	0.01935816		1601.62	-0.02065901		2131.61	-0.00321113
541.82	0.27759997		1071.82	0.018898		1601.82	-0.01973951		2131.81	-0.00248523
542.02	0.27691721		1072.02	0.01834115		1602.02	-0.02065226		2132.01	-0.00357684
542.22	0.27604085		1072.22	0.01941817		1602.22	-0.0216211		2132.21	-0.00328506
542.42	0.27593552		1072.42	0.01897907		1602.42	-0.02281011		2132.41	-0.00380814
542.62	0.27570049		1072.62	0.01823037		1602.62	-0.02334068		2132.61	-0.0053078
542.82	0.2752272		1072.82	0.01845915		1602.82	-0.02430226		2132.81	-0.00576051
543.02	0.27465171		1073.02	0.0186416		1603.02	-0.02455209		2133.01	-0.00692988
543.22	0.2750151		1073.22	0.01897239		1603.22	-0.02453551		2133.21	-0.00761979
543.42	0.27464763		1073.42	0.01900816		1603.42	-0.02541514		2133.41	-0.00717342
543.62	0.2755829		1073.62	0.01876373		1603.62	-0.02549674		2133.61	-0.00772289
543.82	0.27566925		1073.82	0.01886961		1603.82	-0.02541694		2133.81	-0.0074125
544.02	0.27624128		1074.02	0.01860692		1604.02	-0.02453598		2134.01	-0.00664179
544.22	0.27692116		1074.22	0.01811899		1604.22	-0.0254737		2134.21	-0.00574523
544.42	0.27713229		1074.42	0.01823486		1604.42	-0.02506475		2134.41	-0.00514103
544.62	0.27791795		1074.62	0.01795585		1604.62	-0.02488984		2134.61	-0.00553865
544.82	0.27863306		1074.82	0.01703929		1604.82	-0.02495179		2134.81	-0.00551205
545.02	0.27934328		1075.02	0.0166832		1605.02	-0.02450987		2135.01	-0.00456033
545.22	0.27881479		1075.22	0.0171337		1605.22	-0.02431542		2135.21	-0.00450393
545.42	0.27859264		1075.42	0.01719279		1605.42	-0.0234383		2135.41	-0.0038802
545.62	0.27769739		1075.62	0.01730264		1605.62	-0.02314861		2135.61	-0.0026899
545.82	0.27700349		1075.82	0.01726738		1605.82	-0.02269188		2135.81	-0.00324818
546.02	0.27720981		1076.02	0.01780835		1606.02	-0.02232327		2136.01	-0.00435349
546.22	0.27675856		1076.22	0.01815784		1606.22	-0.02244096		2136.21	-0.00480301
546.42	0.27634627		1076.42	0.01801624		1606.42	-0.02301753		2136.41	-0.00539022
546.62	0.2755211		1076.62	0.01881029		1606.62	-0.02318743		2136.61	-0.00649207
546.82	0.27521133		1076.82	0.01908725		1606.82	-0.02328149		2136.81	-0.00672776
547.02	0.27496541		1077.02	0.01898092		1607.02	-0.0224722		2137.01	-0.00672858
547.22	0.27431822		1077.22	0.01944746		1607.22	-0.02183444		2137.21	-0.00583996
547.42	0.27357916		1077.42	0.019177		1607.42	-0.02070506		2137.41	-0.00519183
547.62	0.27369117		1077.62	0.01914904		1607.62	-0.01977188		2137.61	-0.00551089
547.82	0.27351551		1077.82	0.01924934		1607.82	-0.02011085		2137.81	-0.00536983
548.02	0.27368381		1078.02	0.01890727		1608.02	-0.0200753		2138.01	-0.00538646
548.22	0.27407027		1078.22	0.01823334		1608.22	-0.02129531		2138.21	-0.00589794
548.42	0.27456719		1078.42	0.0186294		1608.42	-0.02111369		2138.41	-0.00558775
548.62	0.275308		1078.62	0.01873901		1608.62	-0.02098437		2138.61	-0.00592664
548.82	0.27560266		1078.82	0.01844968		1608.82	-0.02141591		2138.81	-0.00536079
549.02	0.27568256		1079.02	0.01930639		1609.02	-0.02123344		2139.01	-0.00555931
549.22	0.2752008		1079.22	0.01961436		1609.22	-0.02125019		2139.21	-0.00564581
549.42	0.27576758		1079.42	0.01900143		1609.42	-0.02071974		2139.41	-0.00535477
549.62	0.2750898		1079.62	0.01801729		1609.62	-0.02018466		2139.61	-0.00493836
549.82	0.27511843		1079.82	0.01810251		1609.82	-0.02064954		2139.81	-0.005835
550.02	0.27435004		1080.02	0.01870856		1610.02	-0.02033501		2140.01	-0.00585691
550.22	0.27369554		1080.22	0.01887976		1610.22	-0.02214652		2140.21	-0.00599348
550.42	0.27368839		1080.42	0.01939335		1610.42	-0.02255865		2140.41	-0.00606967
550.62	0.27394409		1080.62	0.02063782		1610.62	-0.02279917		2140.61	-0.00597313
550.82	0.27341123		1080.82	0.02106271		1610.82	-0.02310053		2140.81	-0.00508463
551.02	0.27244237		1081.02	0.02118051		1611.02	-0.02283146		2141.01	-0.00460002
551.22	0.2719567		1081.22	0.02123743		1611.22	-0.02258959		2141.21	-0.00400635
551.42	0.27212153		1081.42	0.020965		1611.42	-0.02262581		2141.41	-0.00382936
551.62	0.27323074		1081.62	0.0201586		1611.62	-0.02331466		2141.61	-0.00357453
551.82	0.2741227		1081.82	0.01967449		1611.82	-0.02398703		2141.81	-0.00317841
552.02	0.27469855		1082.02	0.02025832		1612.02	-0.02323676		2142.01	-0.00275327
552.22	0.27526194		1082.22	0.02013794		1612.22	-0.0239502		2142.21	-0.00180981
552.42	0.2757574		1082.42	0.02049152		1612.42	-0.02372487		2142.41	-0.00109328
552.62	0.27668155		1082.62	0.02090463		1612.62	-0.02309983		2142.61	-0.00138724
552.82	0.27687921		1082.82	0.02040846		1612.82	-0.0234583		2142.81	-0.00112433
553.02	0.27745817		1083.02	0.02038334		1613.02	-0.0226101		2143.01	-0.0010138
553.22	0.27738362		1083.22	0.01815433		1613.22	-0.0223364		2143.21	-0.00062656
553.42	0.27751071		1083.42	0.01569686		1613.42	-0.02173941		2143.41	-0.00096139
553.62	0.27598533		1083.62	0.01478447		1613.62	-0.02126931		2143.61	-0.00095535
553.82	0.27563605		1083.82	0.01411921		1613.82	-0.02183911		2143.81	-0.00122097
554.02	0.27567308		1084.02	0.01367228		1614.02	-0.02145305		2144.01	-0.00102824
554.22	0.27499639		1084.22	0.01354893		1614.22	-0.02262839		2144.21	-0.00095667
554.42	0.27542341		1084.42	0.01379533		1614.42	-0.02218504		2144.41	-0.00084145
554.62	0.27426866		1084.62	0.01419165		1614.62	-0.02161862		2144.61	-0.00061457
554.82	0.27350275		1084.82	0.01423197		1614.82	-0.02182869		2144.81	-0.00126838
555.02	0.27359862		1085.02	0.01269778		1615.02	-0.02194345		2145.01	-0.00119581
555.22	0.27332969		1085.22	0.01251885		1615.22	-0.02206546		2145.21	-0.00041424
555.42	0.27403056		1085.42	0.01271467		1615.42	-0.02196233		2145.41	-0.00110745
555.62	0.27396349		1085.62	0.01342571		1615.62	-0.02168208		2145.61	-0.00103565
555.82	0.274102		1085.82	0.01397236		1615.82	-0.02169049		2145.81	-0.00126714
556.02	0.27406269		1086.02	0.0154934		1616.02	-0.02083745		2146.01	-0.00210609
556.22	0.2742835		1086.22	0.01613918		1616.22	-0.02063016		2146.21	-0.00217336
556.42	0.27489586		1086.42	0.01650603		1616.42	-0.02076126		2146.41	-0.0033574
556.62	0.27554978		1086.62	0.01802066		1616.62	-0.0205435		2146.61	-0.00368036
556.82	0.27593158		1086.82	0.01750559		1616.82	-0.02086326		2146.81	-0.00478085
557.02	0.27690925		1087.02	0.01800451		1617.02	-0.02082243		2147.01	-0.00540727
557.22	0.27733652		1087.22	0.01702262		1617.22	-0.02125647		2147.21	-0.0067493
557.42	0.27848405		1087.42	0.01576414		1617.42	-0.02145004		2147.41	-0.0075781
557.62	0.27839727		1087.62	0.01609226		1617.62	-0.02153486		2147.61	-0.00791345
557.82	0.27856798		1087.82	0.01608076		1617.82	-0.02205417		2147.81	-0.00829191
558.02	0.27878499		1088.02	0.01631585		1618.02	-0.02265824		2148.01	-0.00840188
558.22	0.27822014		1088.22	0.0166702		1618.22	-0.02319723		2148.21	-0.00802206
558.42	0.27862946		1088.42	0.01701099		1618.42	-0.02276326		2148.41	-0.00799259
558.62	0.27848321		1088.62	0.01719507		1618.62	-0.02237189		2148.61	-0.00757137
558.82	0.27857889		1088.82	0.01707618		1618.82	-0.02240981		2148.81	-0.00709077
559.02	0.27853857		1089.02	0.0168275		1619.02	-0.02220505		2149.01	-0.0058758
559.22	0.27821787		1089.22	0.01771933		1619.22	-0.02157695		2149.21	-0.00559303
559.42	0.27849933		1089.42	0.01829726		1619.42	-0.02091253		2149.41	-0.0058559
559.62	0.27818732		1089.62	0.01900156		1619.62	-0.02025557		2149.61	-0.00479299
559.82	0.27874728		1089.82	0.01881443		1619.82	-0.01987148		2149.81	-0.00455255
