# Supplementary material for: Functional development of a V3/glycan-specific broadly neutralizing antibody isolated from a case of HIV superinfection
Source: eLife journal article supplement (doi:10.7554/elife.68110), 2021-07-15
Supplement: fig2-data2 [file D1.xls]

Vers 3.43 Data Simulation
Conc1	2.5E-07	2.5E-07	2.5E-07	2.5E-07	2.5E-07
Start1	199.99	730	1259.99	1790	2320
Stop1	559.79	1089.8	1619.79	2149.8	2679.8
Time1	Data1	Sim1	Time2	Data2	Sim2	Time3	Data3	Sim3	Time4	Data4	Sim4	Time5	Data5	Sim5
199.99	-0.00025466		730	-0.00181929		1259.99	-0.00133485		1790	0.00454862		2320	0.00436643
200.19	-0.00056382		730.2	-0.00321037		1260.19	-0.00107305		1790.2	0.0039936		2320.2	0.00423643
200.39	-0.00064958		730.4	-0.00464902		1260.39	-0.00125398		1790.4	0.00452251		2320.4	0.00475479
200.59	-0.00151134		730.6	-0.00502821		1260.59	-0.00139562		1790.6	0.00419239		2320.6	0.0051032
200.79	-0.00188822		730.8	-0.00566812		1260.79	-0.00118342		1790.8	0.00421453		2320.8	0.0051284
200.99	-0.00207673		731	-0.00490066		1260.99	-0.00144655		1791	0.00421113		2321	0.00520694
201.19	-0.00152286		731.2	-0.00489898		1261.19	-0.00137737		1791.2	0.00450429		2321.2	0.00578931
201.39	-0.00153659		731.4	-0.00474815		1261.39	-0.00106158		1791.4	0.00477112		2321.4	0.00587811
201.59	-0.00057654		731.6	-0.00476307		1261.59	-0.00077351		1791.6	0.00461082		2321.6	0.00585602
201.79	-0.00022195		731.8	-0.00401371		1261.79	-0.00066461		1791.8	0.005211		2321.8	0.00612619
201.99	0.0006904		732	-0.00344401		1261.99	-0.00046132		1792	0.00554406		2322	0.00715759
202.19	0.00166565		732.2	-0.00242199		1262.19	-0.00099286		1792.2	0.00595678		2322.2	0.00773857
202.39	0.00176		732.4	-0.00245744		1262.39	-0.00137287		1792.4	0.0062179		2322.4	0.00738849
202.59	0.00225002		732.6	-0.00241698		1262.59	-0.00202575		1792.6	0.00658356		2322.6	0.00705509
202.79	0.00359322		732.8	-0.00295683		1262.79	-0.00212543		1792.8	0.00662871		2322.8	0.00694373
202.99	0.00466787		733	-0.00363557		1262.99	-0.00200975		1793	0.00715706		2323	0.00690937
203.19	0.00520511		733.2	-0.0049805		1263.19	-0.00229265		1793.2	0.00704652		2323.2	0.00748613
203.39	0.00647804		733.4	-0.00445142		1263.39	-0.00200302		1793.4	0.00736585		2323.4	0.00698424
203.59	0.00695972		733.6	-0.0062662		1263.59	-0.00241956		1793.6	0.00708965		2323.6	0.00612917
203.79	0.00781633		733.8	-0.00639576		1263.79	-0.00187924		1793.8	0.00698632		2323.8	0.00561252
203.99	0.00886125		734	-0.00664316		1263.99	-0.00143305		1794	0.0074778		2324	0.00498402
204.19	0.00909493		734.2	-0.00638281		1264.19	-0.00124841		1794.2	0.0078811		2324.2	0.0043781
204.39	0.0095144		734.4	-0.00660043		1264.39	-0.0019107		1794.4	0.00841587		2324.4	0.00480369
204.59	0.00905569		734.6	-0.00495321		1264.59	-0.00150348		1794.6	0.00806641		2324.6	0.00419446
204.79	0.00902073		734.8	-0.00459888		1264.79	-0.00089697		1794.8	0.00873803		2324.8	0.00338799
204.99	0.00919022		735	-0.00352918		1264.99	-0.00072815		1795	0.00901229		2325	0.00314871
205.19	0.00963006		735.2	-0.0037953		1265.19	0.00081938		1795.2	0.00917216		2325.2	0.00302779
205.39	0.00924168		735.4	-0.00373321		1265.39	0.00145504		1795.4	0.00968323		2325.4	0.00332266
205.59	0.01027896		735.6	-0.00358146		1265.59	0.00157833		1795.6	0.00999552		2325.6	0.00370855
205.79	0.00996734		735.8	-0.00315849		1265.79	0.00159643		1795.8	0.01055915		2325.8	0.00507107
205.99	0.01062139		736	-0.0029008		1265.99	0.00164656		1796	0.01042524		2326	0.00562785
206.19	0.01081014		736.2	-0.00275786		1266.19	0.00110009		1796.2	0.00995739		2326.2	0.0059492
206.39	0.01123757		736.4	-0.00354344		1266.39	0.00063663		1796.4	0.00880627		2326.4	0.00617674
206.59	0.01230469		736.6	-0.00420318		1266.59	0.0010688		1796.6	0.00899044		2326.6	0.00626307
206.79	0.01288954		736.8	-0.00395434		1266.79	0.00180785		1796.8	0.00907707		2326.8	0.00630906
206.99	0.01363857		737	-0.00404253		1266.99	0.00175882		1797	0.00884487		2327	0.00666107
207.19	0.01388152		737.2	-0.00438034		1267.19	0.00070591		1797.2	0.00867783		2327.2	0.00672287
207.39	0.01559943		737.4	-0.00430834		1267.39	0.00072982		1797.4	0.00854933		2327.4	0.00605154
207.59	0.01642461		737.6	-0.00428229		1267.59	0.00069726		1797.6	0.00827716		2327.6	0.00520525
207.79	0.01703769		737.8	-0.00360369		1267.79	0.000853		1797.8	0.00816318		2327.8	0.00428721
207.99	0.0176557		738	-0.00389504		1267.99	0.00001252		1798	0.00813098		2328	0.00476567
208.19	0.01699991		738.2	-0.00381038		1268.19	-0.00057463		1798.2	0.00741241		2328.2	0.004877
208.39	0.01691089		738.4	-0.00459736		1268.39	-0.00147487		1798.4	0.00735012		2328.4	0.00434117
208.59	0.01655452		738.6	-0.00382883		1268.59	-0.00121256		1798.6	0.00758204		2328.6	0.00396251
208.79	0.01618095		738.8	-0.00468932		1268.79	-0.00117004		1798.8	0.0079238		2328.8	0.00356332
208.99	0.01576606		739	-0.00455585		1268.99	-0.00127693		1799	0.00801343		2329	0.00391794
209.19	0.01555066		739.2	-0.00465794		1269.19	-0.00083082		1799.2	0.00856517		2329.2	0.00437317
209.39	0.01546649		739.4	-0.00531687		1269.39	-0.00234887		1799.4	0.00928128		2329.4	0.00514432
209.59	0.01510391		739.6	-0.00472745		1269.59	-0.00280286		1799.6	0.00921868		2329.6	0.00515163
209.79	0.01469548		739.8	-0.00440022		1269.79	-0.00323427		1799.8	0.00890624		2329.8	0.00468203
209.99	0.01516244		740	-0.00399535		1269.99	-0.00299153		1800	0.00919996		2330	0.00373634
210.19	0.01572928		740.2	-0.00377237		1270.19	-0.00286394		1800.2	0.00920226		2330.2	0.00387463
210.39	0.01634293		740.4	-0.00405239		1270.39	-0.00264331		1800.4	0.00907531		2330.4	0.00386045
210.59	0.0172325		740.6	-0.00296349		1270.59	-0.0020183		1800.6	0.00953717		2330.6	0.00332762
210.79	0.01689994		740.8	-0.00136196		1270.79	-0.0015224		1800.8	0.00943325		2330.8	0.00320028
210.99	0.0177216		741	-0.00178243		1270.99	-0.00201014		1801	0.00907531		2331	0.00349651
211.19	0.01883953		741.2	-0.00213878		1271.19	-0.00334944		1801.2	0.00899071		2331.2	0.00329286
211.39	0.02002459		741.4	-0.00253419		1271.39	-0.0031108		1801.4	0.00907894		2331.4	0.00335294
211.59	0.02053754		741.6	-0.001698		1271.59	-0.00267569		1801.6	0.00897144		2331.6	0.00317499
211.79	0.02134604		741.8	-0.00226656		1271.79	-0.00208065		1801.8	0.00824358		2331.8	0.00303709
211.99	0.02136672		742	-0.00311546		1271.99	-0.00198476		1802	0.0083068		2332	0.00351592
212.19	0.02139447		742.2	-0.00324515		1272.19	-0.00152926		1802.2	0.00753358		2332.2	0.00327111
212.39	0.02201283		742.4	-0.00351056		1272.39	-0.0011498		1802.4	0.00773836		2332.4	0.00372452
212.59	0.02234111		742.6	-0.00342825		1272.59	-0.000066		1802.6	0.00743546		2332.6	0.00463576
212.79	0.02177791		742.8	-0.0033984		1272.79	0.00035945		1802.8	0.00767581		2332.8	0.00581988
212.99	0.02083947		743	-0.00269617		1272.99	0.00056546		1803	0.0085143		2333	0.00602505
213.19	0.02094259		743.2	-0.00309707		1273.19	0.00082051		1803.2	0.00895093		2333.2	0.00536319
213.39	0.02049967		743.4	-0.0042339		1273.39	0.00052105		1803.4	0.00885188		2333.4	0.0043709
213.59	0.019594		743.6	-0.00378154		1273.59	0.00090503		1803.6	0.00842696		2333.6	0.00313904
213.79	0.02040015		743.8	-0.00435412		1273.79	0.00068407		1803.8	0.0086673		2333.8	0.0020178
213.99	0.02129779		744	-0.00320176		1273.99	0.00118037		1804	0.00933448		2334	0.00192143
214.19	0.02176823		744.2	-0.00306272		1274.19	0.00037043		1804.2	0.00952186		2334.2	0.00183681
214.39	0.02164956		744.4	-0.00300576		1274.39	-0.00046515		1804.4	0.0101194		2334.4	0.00206945
214.59	0.02195235		744.6	-0.00270999		1274.59	-0.0007424		1804.6	0.00958801		2334.6	0.00200943
214.79	0.02190034		744.8	-0.00329212		1274.79	-0.00116183		1804.8	0.00919341		2334.8	0.00139764
214.99	0.0221091		745	-0.00449502		1274.99	-0.00294021		1805	0.00931315		2335	0.00167245
215.19	0.02308011		745.2	-0.00480792		1275.19	-0.00380318		1805.2	0.00871704		2335.2	0.00188983
215.39	0.02301194		745.4	-0.00540615		1275.39	-0.00269656		1805.4	0.00875368		2335.4	0.00239824
215.59	0.02357593		745.6	-0.00424801		1275.59	-0.00184154		1805.6	0.00803752		2335.6	0.00294862
215.79	0.02503923		745.8	-0.00494726		1275.79	-0.00131387		1805.8	0.00733465		2335.8	0.00313503
215.99	0.02538944		746	-0.00521192		1275.99	-0.00129227		1806	0.00761389		2336	0.00391121
216.19	0.02631248		746.2	-0.00410758		1276.19	-0.00048949		1806.2	0.00721992		2336.2	0.00447534
216.39	0.0266442		746.4	-0.00388495		1276.39	-0.00063417		1806.4	0.00666966		2336.4	0.00575934
216.59	0.02678229		746.6	-0.00351079		1276.59	0.00033048		1806.6	0.0066826		2336.6	0.00621352
216.79	0.02598109		746.8	-0.00244906		1276.79	0.00088407		1806.8	0.00720481		2336.8	0.0063808
216.99	0.02577297		747	-0.00241685		1276.99	0.00135817		1807	0.00775288		2337	0.00493401
217.19	0.02676054		747.2	-0.00207946		1277.19	0.00202936		1807.2	0.00734075		2337.2	0.0036884
217.39	0.02697038		747.4	-0.0020872		1277.39	0.00275373		1807.4	0.00730863		2337.4	0.00297914
217.59	0.02674693		747.6	-0.00168881		1277.59	0.00310732		1807.6	0.00688729		2337.6	0.00208135
217.79	0.02696564		747.8	-0.00107763		1277.79	0.00230017		1807.8	0.00731105		2337.8	0.00132034
217.99	0.02643882		748	-0.00000052		1277.99	0.00203477		1808	0.00731669		2338	0.00126305
218.19	0.02608678		748.2	-0.00047313		1278.19	0.00152073		1808.2	0.00787629		2338.2	0.0010274
218.39	0.02660498		748.4	-0.0009932		1278.39	0.00082531		1808.4	0.00890576		2338.4	0.00221864
218.59	0.02698926		748.6	-0.00103848		1278.59	0.000637		1808.6	0.00899414		2338.6	0.00297393
218.79	0.02723418		748.8	-0.00129071		1278.79	0.00000546		1808.8	0.00914256		2338.8	0.00195858
218.99	0.0270185		749	-0.00187316		1278.99	-0.00081623		1809	0.00947746		2339	0.00229275
219.19	0.0275456		749.2	-0.00202626		1279.19	0.00010989		1809.2	0.00929242		2339.2	0.0035102
219.39	0.02752132		749.4	-0.00193922		1279.39	0.00090052		1809.4	0.0093255		2339.4	0.00466168
219.59	0.02851765		749.6	-0.00122281		1279.59	0.00051558		1809.6	0.00911115		2339.6	0.00498825
219.79	0.02957199		749.8	-0.00234922		1279.79	0.00014106		1809.8	0.00849102		2339.8	0.00585919
219.99	0.02970968		750	-0.00193227		1279.99	0.00095793		1810	0.00867046		2340	0.0061605
220.19	0.02937439		750.2	-0.00184186		1280.19	0.00041908		1810.2	0.00862601		2340.2	0.0069796
220.39	0.02948688		750.4	-0.00304089		1280.39	0.00023396		1810.4	0.00825842		2340.4	0.00830337
220.59	0.03008641		750.6	-0.00284833		1280.59	0.0007965		1810.6	0.00962683		2340.6	0.00829467
220.79	0.03010984		750.8	-0.00217962		1280.79	0.00135084		1810.8	0.00978685		2340.8	0.00807551
220.99	0.0299834		751	-0.00177061		1280.99	0.0011206		1811	0.01049427		2341	0.00800157
221.19	0.03064731		751.2	-0.00138226		1281.19	0.00205074		1811.2	0.01095334		2341.2	0.00692899
221.39	0.03044535		751.4	-0.00131927		1281.39	0.00272101		1811.4	0.01126201		2341.4	0.00652425
221.59	0.0293568		751.6	-0.00185196		1281.59	0.00304988		1811.6	0.01139735		2341.6	0.00611357
221.79	0.02876334		751.8	-0.00140873		1281.79	0.00182845		1811.8	0.01182444		2341.8	0.0050393
221.99	0.0282325		752	-0.00092774		1281.99	0.00203032		1812	0.01230903		2342	0.00508648
222.19	0.02814462		752.2	-0.00017862		1282.19	0.00205338		1812.2	0.01267094		2342.2	0.00468161
222.39	0.0287846		752.4	-0.00079465		1282.39	0.00070512		1812.4	0.01308041		2342.4	0.0043501
222.59	0.02810096		752.6	-0.00066462		1282.59	0.00105086		1812.6	0.01302843		2342.6	0.00348953
222.79	0.02769726		752.8	-0.00093256		1282.79	0.00035003		1812.8	0.01232555		2342.8	0.00164802
222.99	0.0283329		753	-0.00104517		1282.99	0.00020092		1813	0.01243218		2343	0.0017483
223.19	0.02850379		753.2	-0.00035351		1283.19	0.00036028		1813.2	0.01237203		2343.2	0.00224565
223.39	0.02922983		753.4	-0.00019896		1283.39	-0.00014915		1813.4	0.01153877		2343.4	0.00145532
223.59	0.02963473		753.6	-0.00021108		1283.59	-0.00077265		1813.6	0.01103025		2343.6	0.00069844
223.79	0.02998549		753.8	-0.00139943		1283.79	0.00007979		1813.8	0.01089721		2343.8	0.00097939
223.99	0.03089629		754	-0.00151983		1283.99	0.00079952		1814	0.0109843		2344	0.00132179
224.19	0.03202089		754.2	-0.0016082		1284.19	0.00019662		1814.2	0.01106507		2344.2	0.00202851
224.39	0.03273428		754.4	-0.00235483		1284.39	0.00106894		1814.4	0.01187681		2344.4	0.00242004
224.59	0.0335768		754.6	-0.00089339		1284.59	0.00157612		1814.6	0.01281756		2344.6	0.00249179
224.79	0.03398006		754.8	-0.00014883		1284.79	0.00234804		1814.8	0.01200728		2344.8	0.00303203
224.99	0.03374631		755	-0.00009321		1284.99	0.00234827		1815	0.01211968		2345	0.00383515
225.19	0.03369837		755.2	-0.00014838		1285.19	0.00232438		1815.2	0.01206214		2345.2	0.0041161
225.39	0.03317451		755.4	-0.00071936		1285.39	0.00246913		1815.4	0.01221459		2345.4	0.00431901
225.59	0.03290041		755.6	-0.00152737		1285.59	0.00267112		1815.6	0.01233325		2345.6	0.00464034
225.79	0.03265596		755.8	-0.00136992		1285.79	0.00193801		1815.8	0.01213202		2345.8	0.00359835
225.99	0.03188975		756	-0.00139092		1285.99	0.00200794		1816	0.01207005		2346	0.00394559
226.19	0.0314082		756.2	-0.00164798		1286.19	0.00104799		1816.2	0.01148672		2346.2	0.00414355
226.39	0.03135218		756.4	-0.00262564		1286.39	0.00027977		1816.4	0.01139283		2346.4	0.00330646
226.59	0.03034272		756.6	-0.00329891		1286.59	0.00036582		1816.6	0.01224873		2346.6	0.00294951
226.79	0.03073726		756.8	-0.00249127		1286.79	-0.00035545		1816.8	0.01263549		2346.8	0.0028109
226.99	0.0323006		757	-0.00217135		1286.99	-0.00064346		1817	0.01326199		2347	0.0030908
227.19	0.03233941		757.2	-0.00214273		1287.19	-0.00027171		1817.2	0.01295453		2347.2	0.00282697
227.39	0.03288182		757.4	-0.00128003		1287.39	-0.00053788		1817.4	0.01254286		2347.4	0.0019024
227.59	0.03251353		757.6	-0.00072023		1287.59	0.00037172		1817.6	0.0125131		2347.6	0.00198703
227.79	0.03310529		757.8	-0.00059819		1287.79	0.0011236		1817.8	0.01295366		2347.8	0.00183426
227.99	0.0339582		758	0.00048609		1287.99	0.00051447		1818	0.01265702		2348	0.00200072
228.19	0.03411903		758.2	0.00138682		1288.19	0.0004189		1818.2	0.01295797		2348.2	0.00142255
228.39	0.03408056		758.4	0.00190009		1288.39	0.00053278		1818.4	0.01338346		2348.4	0.001213
228.59	0.03467207		758.6	0.00278048		1288.59	0.0012365		1818.6	0.01368853		2348.6	0.00182238
228.79	0.0351046		758.8	0.00277488		1288.79	0.00151885		1818.8	0.01259639		2348.8	0.00204286
228.99	0.0346358		759	0.00201966		1288.99	0.00052616		1819	0.01268636		2349	0.00296897
229.19	0.03385995		759.2	0.00143041		1289.19	0.00012251		1819.2	0.01226359		2349.2	0.00349667
229.39	0.03437568		759.4	0.00075462		1289.39	0.0005253		1819.4	0.01238327		2349.4	0.00411889
229.59	0.0351551		759.6	0.00094663		1289.59	0.00030705		1819.6	0.01201338		2349.6	0.00552875
229.79	0.03413991		759.8	0.00105098		1289.79	0.00004294		1819.8	0.01182558		2349.8	0.005757
229.99	0.03353511		760	0.00005694		1289.99	0.00013346		1820	0.01163065		2350	0.00654558
230.19	0.03370058		760.2	-0.00029215		1290.19	-0.00028211		1820.2	0.01175571		2350.2	0.00710123
230.39	0.0337474		760.4	-0.00094266		1290.39	0.00043176		1820.4	0.0111386		2350.4	0.00667748
230.59	0.03409158		760.6	-0.00115291		1290.59	0.00163199		1820.6	0.01215033		2350.6	0.00701917
230.79	0.03458892		760.8	-0.00066151		1290.79	0.00119069		1820.8	0.0116874		2350.8	0.00801096
230.99	0.0347356		761	-0.00018635		1290.99	0.00152012		1821	0.01183575		2351	0.00782398
231.19	0.03454581		761.2	-0.00049146		1291.19	0.00191109		1821.2	0.01141038		2351.2	0.00816398
231.39	0.0346108		761.4	0.00071482		1291.39	0.00140241		1821.4	0.01230643		2351.4	0.00765477
231.59	0.03491119		761.6	0.00051703		1291.59	0.00091913		1821.6	0.01284988		2351.6	0.00711021
231.79	0.03606505		761.8	0.00016401		1291.79	0.00103942		1821.8	0.01352449		2351.8	0.00660088
231.99	0.03688668		762	-0.00000191		1291.99	-0.000138		1822	0.01295589		2352	0.0057454
232.19	0.03762492		762.2	-0.00110506		1292.19	0.00064252		1822.2	0.01333776		2352.2	0.00483893
232.39	0.03844019		762.4	-0.00103064		1292.39	0.00101595		1822.4	0.01393752		2352.4	0.00433398
232.59	0.03893904		762.6	-0.00172836		1292.59	0.0013816		1822.6	0.01444916		2352.6	0.00487503
232.79	0.03866063		762.8	-0.0009727		1292.79	0.00142483		1822.8	0.01354846		2352.8	0.00461577
232.99	0.03832854		763	-0.00104152		1292.99	0.00082643		1823	0.01298353		2353	0.00569366
233.19	0.03798766		763.2	-0.00049096		1293.19	0.00097975		1823.2	0.01250072		2353.2	0.00643259
233.39	0.03863134		763.4	0.00014325		1293.39	0.00085791		1823.4	0.01349735		2353.4	0.00735898
233.59	0.0382072		763.6	-0.00011709		1293.59	0.00100317		1823.6	0.01290771		2353.6	0.00727199
233.79	0.0375433		763.8	-0.00056089		1293.79	0.00244412		1823.8	0.01231475		2353.8	0.00711966
233.99	0.03806791		764	-0.00098233		1293.99	0.00317651		1824	0.01197396		2354	0.0071624
234.19	0.0385529		764.2	-0.00035752		1294.19	0.00360733		1824.2	0.01155949		2354.2	0.00732483
234.39	0.03895026		764.4	0.00004635		1294.39	0.00470003		1824.4	0.01073478		2354.4	0.00795708
234.59	0.03887511		764.6	0.00033664		1294.59	0.00494851		1824.6	0.01105357		2354.6	0.00752709
234.79	0.03870354		764.8	0.00075929		1294.79	0.00439639		1824.8	0.01178325		2354.8	0.00724339
234.99	0.03801893		765	0.00155566		1294.99	0.00478698		1825	0.01263013		2355	0.00608382
235.19	0.0375586		765.2	0.00109682		1295.19	0.00386018		1825.2	0.01257684		2355.2	0.00599672
235.39	0.03809641		765.4	0.00171976		1295.39	0.00378608		1825.4	0.01328442		2355.4	0.00549277
235.59	0.03870871		765.6	0.00131456		1295.59	0.00303236		1825.6	0.01273365		2355.6	0.00407009
235.79	0.03881077		765.8	0.00094514		1295.79	0.00369406		1825.8	0.01269723		2355.8	0.00422367
235.99	0.03870943		766	0.00043798		1295.99	0.00304927		1826	0.01239807		2356	0.00323652
236.19	0.03885938		766.2	-0.00020751		1296.19	0.00388138		1826.2	0.01290133		2356.2	0.00327434
236.39	0.03926467		766.4	-0.00034711		1296.39	0.00374496		1826.4	0.01257093		2356.4	0.00302807
236.59	0.03938754		766.6	-0.00000709		1296.59	0.00352245		1826.6	0.01240173		2356.6	0.00308402
236.79	0.03891619		766.8	0.00117094		1296.79	0.00375439		1826.8	0.0122142		2356.8	0.00313056
236.99	0.03884515		767	0.00085306		1296.99	0.00331876		1827	0.01196161		2357	0.00384125
237.19	0.03957939		767.2	-0.00045503		1297.19	0.00393047		1827.2	0.01270392		2357.2	0.00445397
237.39	0.0402654		767.4	-0.00122083		1297.39	0.00399598		1827.4	0.01212425		2357.4	0.0049497
237.59	0.04025393		767.6	-0.00188082		1297.59	0.00410322		1827.6	0.01082873		2357.6	0.00494109
237.79	0.04033029		767.8	-0.00214115		1297.79	0.00448829		1827.8	0.01039055		2357.8	0.00526822
237.99	0.04020646		768	-0.00253496		1297.99	0.00425985		1828	0.01028396		2358	0.00562135
238.19	0.04037992		768.2	-0.00231405		1298.19	0.00495329		1828.2	0.00970238		2358.2	0.00547223
238.39	0.04088909		768.4	-0.00166079		1298.39	0.00588941		1828.4	0.01035461		2358.4	0.00566023
238.59	0.04011848		768.6	-0.001512		1298.59	0.00540571		1828.6	0.01143971		2358.6	0.00398473
238.79	0.03975607		768.8	-0.00058998		1298.79	0.0056217		1828.8	0.01216077		2358.8	0.00355544
238.99	0.03867953		769	-0.00021094		1298.99	0.00505635		1829	0.01162325		2359	0.0025564
239.19	0.03935207		769.2	0.00006305		1299.19	0.0046409		1829.2	0.01113426		2359.2	0.00219245
239.39	0.04025599		769.4	0.00045122		1299.39	0.00397155		1829.4	0.0112268		2359.4	0.0025441
239.59	0.04024715		769.6	0.00059925		1299.59	0.00332679		1829.6	0.01068612		2359.6	0.00130196
239.79	0.04019784		769.8	0.0007844		1299.79	0.00339847		1829.8	0.01106529		2359.8	0.00181394
239.99	0.04056192		770	0.00171311		1299.99	0.003245		1830	0.01145074		2360	0.00105164
240.19	0.04166165		770.2	0.00142011		1300.19	0.00354402		1830.2	0.01140046		2360.2	0.00102338
240.39	0.04277471		770.4	0.00177773		1300.39	0.00261212		1830.4	0.01139263		2360.4	0.00058457
240.59	0.04333111		770.6	0.00303363		1300.59	0.00230246		1830.6	0.01140343		2360.6	0.00058931
240.79	0.04324055		770.8	0.00332171		1300.79	0.00121453		1830.8	0.01106528		2360.8	0.00042976
240.99	0.04312911		771	0.00298555		1300.99	0.00054515		1831	0.01031473		2361	0.000991
241.19	0.0442202		771.2	0.00189521		1301.19	-0.00032165		1831.2	0.00969497		2361.2	0.00120704
241.39	0.0434453		771.4	0.00245199		1301.39	-0.0016004		1831.4	0.00808452		2361.4	0.00104504
241.59	0.0431671		771.6	0.00259215		1301.59	-0.00224186		1831.6	0.00834483		2361.6	0.00090286
241.79	0.04277823		771.8	0.00217172		1301.79	-0.00225951		1831.8	0.00794817		2361.8	0.00084593
241.99	0.04271603		772	0.00166543		1301.99	-0.00226626		1832	0.00772706		2362	0.00081432
242.19	0.04299796		772.2	0.00138923		1302.19	-0.00137829		1832.2	0.00754311		2362.2	0.00029639
242.39	0.04243848		772.4	0.00173486		1302.39	-0.0011316		1832.4	0.00921313		2362.4	0.00061525
242.59	0.04121404		772.6	0.00032787		1302.59	-0.00166309		1832.6	0.00966156		2362.6	-0.00023648
242.79	0.04077397		772.8	-0.00012021		1302.79	-0.00099931		1832.8	0.00981282		2362.8	0.00043427
242.99	0.0403142		773	-0.00106415		1302.99	-0.0005223		1833	0.01052716		2363	0.00124959
243.19	0.04050968		773.2	-0.00046342		1303.19	0.00091231		1833.2	0.01063941		2363.2	0.00231967
243.39	0.04011728		773.4	-0.0009638		1303.39	0.00181509		1833.4	0.01073805		2363.4	0.00305363
243.59	0.03958647		773.6	-0.00092382		1303.59	0.00347484		1833.6	0.01091612		2363.6	0.00243206
243.79	0.03912881		773.8	-0.00034515		1303.79	0.00489456		1833.8	0.01048452		2363.8	0.0028946
243.99	0.0391907		774	0.00023649		1303.99	0.00589244		1834	0.01117238		2364	0.00308918
244.19	0.04027456		774.2	0.00033144		1304.19	0.00694162		1834.2	0.01044005		2364.2	0.00357114
244.39	0.0406615		774.4	0.00073654		1304.39	0.00651795		1834.4	0.01021484		2364.4	0.00431601
244.59	0.04054061		774.6	0.0013122		1304.59	0.00748478		1834.6	0.00946756		2364.6	0.00486799
244.79	0.04037119		774.8	0.00174573		1304.79	0.00647027		1834.8	0.00979702		2364.8	0.00477167
244.99	0.04029439		775	0.00151049		1304.99	0.00561673		1835	0.00997939		2365	0.00518845
245.19	0.04052817		775.2	0.00158294		1305.19	0.00599269		1835.2	0.01019785		2365.2	0.00486803
245.39	0.04170687		775.4	0.00153125		1305.39	0.00533014		1835.4	0.01086489		2365.4	0.00506432
245.59	0.04279925		775.6	0.00206404		1305.59	0.00405379		1835.6	0.01136423		2365.6	0.00515316
245.79	0.04319504		775.8	0.001929		1305.79	0.00388596		1835.8	0.01118485		2365.8	0.00466106
245.99	0.04315896		776	0.00171167		1305.99	0.00368333		1836	0.01199395		2366	0.00409755
246.19	0.04373877		776.2	0.00106103		1306.19	0.00437598		1836.2	0.01284109		2366.2	0.00376226
246.39	0.04391537		776.4	0.00160154		1306.39	0.00322819		1836.4	0.01442472		2366.4	0.00316866
246.59	0.04452426		776.6	0.00135423		1306.59	0.00300405		1836.6	0.01540296		2366.6	0.00268768
246.79	0.04445301		776.8	0.00144461		1306.79	0.00329977		1836.8	0.01605892		2366.8	0.00371894
246.99	0.04495244		777	0.0018299		1306.99	0.00399618		1837	0.0156754		2367	0.00416841
247.19	0.044722		777.2	0.0019199		1307.19	0.00431995		1837.2	0.01546416		2367.2	0.00367463
247.39	0.04526407		777.4	0.00172714		1307.39	0.00425895		1837.4	0.01494933		2367.4	0.00195609
247.59	0.04504188		777.6	0.00165737		1307.59	0.00491344		1837.6	0.01447417		2367.6	0.00121362
247.79	0.04587842		777.8	0.00197312		1307.79	0.00525157		1837.8	0.01330258		2367.8	0.00077478
247.99	0.0466198		778	0.00179927		1307.99	0.0051356		1838	0.01275228		2368	0.00120214
248.19	0.04764903		778.2	0.00260689		1308.19	0.00521193		1838.2	0.01184047		2368.2	0.00190648
248.39	0.04689174		778.4	0.00199949		1308.39	0.00550612		1838.4	0.01150697		2368.4	0.00218027
248.59	0.04662079		778.6	0.00176629		1308.59	0.00562194		1838.6	0.01134081		2368.6	0.00243867
248.79	0.04644869		778.8	0.0017937		1308.79	0.00549691		1838.8	0.0118452		2368.8	0.00240288
248.99	0.04647457		779	0.00151727		1308.99	0.00620623		1839	0.01194189		2369	0.00271292
249.19	0.0465047		779.2	0.00126636		1309.19	0.00676292		1839.2	0.01191652		2369.2	0.00321162
249.39	0.04676217		779.4	0.00189906		1309.39	0.00563162		1839.4	0.01206791		2369.4	0.00405846
249.59	0.04613147		779.6	0.00231001		1309.59	0.00587429		1839.6	0.01154217		2369.6	0.00388363
249.79	0.0456473		779.8	0.00204869		1309.79	0.00671733		1839.8	0.01198106		2369.8	0.00443849
249.99	0.04523103		780	0.00155656		1309.99	0.00719845		1840	0.01217058		2370	0.00483321
250.19	0.04583291		780.2	0.00210276		1310.19	0.00771384		1840.2	0.01220184		2370.2	0.00518552
250.39	0.04618915		780.4	0.0026492		1310.39	0.00630844		1840.4	0.01361863		2370.4	0.00531373
250.59	0.04576171		780.6	0.00271592		1310.59	0.00602921		1840.6	0.01423055		2370.6	0.00626518
250.79	0.04537122		780.8	0.0019887		1310.79	0.00617323		1840.8	0.01390639		2370.8	0.00647158
250.99	0.04547285		781	0.00194331		1310.99	0.0061417		1841	0.01402023		2371	0.00556061
251.19	0.04535923		781.2	0.0017789		1311.19	0.00531612		1841.2	0.01445129		2371.2	0.00470277
251.39	0.04607328		781.4	0.00243746		1311.39	0.00595659		1841.4	0.01429727		2371.4	0.00328704
251.59	0.04567936		781.6	0.00212074		1311.59	0.00583569		1841.6	0.01436699		2371.6	0.0026194
251.79	0.04617266		781.8	0.0024901		1311.79	0.00608346		1841.8	0.01418956		2371.8	0.00181371
251.99	0.0463565		782	0.0021283		1311.99	0.00517545		1842	0.01361922		2372	0.00088455
252.19	0.04614879		782.2	0.0023242		1312.19	0.00516348		1842.2	0.0135848		2372.2	0.00081103
252.39	0.04469795		782.4	0.00127329		1312.39	0.00550384		1842.4	0.01251045		2372.4	0.00024715
252.59	0.04432554		782.6	0.00096388		1312.59	0.00479375		1842.6	0.01188191		2372.6	0.00053225
252.79	0.045492		782.8	0.00201362		1312.79	0.00525255		1842.8	0.01088		2372.8	0.0006358
252.99	0.04623638		783	0.00255459		1312.99	0.00515434		1843	0.00956386		2373	0.0013002
253.19	0.04567917		783.2	0.00158703		1313.19	0.00456507		1843.2	0.00902132		2373.2	0.00210848
253.39	0.04537393		783.4	0.0023101		1313.39	0.00489888		1843.4	0.008253		2373.4	0.00261483
253.59	0.04626347		783.6	0.00142459		1313.59	0.00505441		1843.6	0.00832982		2373.6	0.00353021
253.79	0.04624768		783.8	0.00112364		1313.79	0.00552813		1843.8	0.00867957		2373.8	0.00412373
253.99	0.04655745		784	0.00133235		1313.99	0.0066285		1844	0.00870081		2374	0.00492977
254.19	0.0473955		784.2	0.00195107		1314.19	0.00705484		1844.2	0.00857183		2374.2	0.00571018
254.39	0.04788559		784.4	0.00224571		1314.39	0.00648329		1844.4	0.00922608		2374.4	0.00584285
254.59	0.04784952		784.6	0.00176046		1314.59	0.00609691		1844.6	0.00892207		2374.6	0.00707115
254.79	0.04867618		784.8	0.00155001		1314.79	0.00587333		1844.8	0.00966076		2374.8	0.00688793
254.99	0.04900907		785	0.00141258		1314.99	0.00564206		1845	0.00946412		2375	0.00739977
255.19	0.04940352		785.2	0.00184324		1315.19	0.00610727		1845.2	0.01009658		2375.2	0.00691556
255.39	0.0499924		785.4	0.00148536		1315.39	0.00667513		1845.4	0.01132515		2375.4	0.00600291
255.59	0.04940689		785.6	0.00128743		1315.59	0.00657418		1845.6	0.01160656		2375.6	0.00536484
255.79	0.04942393		785.8	0.00092261		1315.79	0.00689298		1845.8	0.01249157		2375.8	0.00511741
255.99	0.04903473		786	-0.00000727		1315.99	0.00617593		1846	0.01218911		2376	0.00476069
256.19	0.04767495		786.2	0.0005061		1316.19	0.00640388		1846.2	0.01239122		2376.2	0.00547681
256.39	0.04715196		786.4	-0.00016379		1316.39	0.00590094		1846.4	0.01187651		2376.4	0.00524631
256.59	0.04793832		786.6	-0.00049291		1316.59	0.00500824		1846.6	0.01132562		2376.6	0.00530986
256.79	0.04871468		786.8	0.00002715		1316.79	0.00514809		1846.8	0.01115593		2376.8	0.00586264
256.99	0.04799794		787	-0.00110697		1316.99	0.00514786		1847	0.01148127		2377	0.00590461
257.19	0.04754426		787.2	-0.00249698		1317.19	0.00494775		1847.2	0.0113935		2377.2	0.00534435
257.39	0.04743636		787.4	-0.00277847		1317.39	0.00563212		1847.4	0.0113394		2377.4	0.00484505
257.59	0.04845175		787.6	-0.00281634		1317.59	0.00584712		1847.6	0.01159961		2377.6	0.00494327
257.79	0.04845161		787.8	-0.00238359		1317.79	0.00594396		1847.8	0.0107644		2377.8	0.00417774
257.99	0.04894963		788	-0.00110696		1317.99	0.00615772		1848	0.00982267		2378	0.00501003
258.19	0.04970391		788.2	-0.00130787		1318.19	0.00534301		1848.2	0.00857698		2378.2	0.00489919
258.39	0.04971966		788.4	-0.00097134		1318.39	0.0045816		1848.4	0.00844661		2378.4	0.00460459
258.59	0.05024397		788.6	-0.00072826		1318.59	0.0037662		1848.6	0.00798434		2378.6	0.00485749
258.79	0.05050256		788.8	0.00007668		1318.79	0.00391954		1848.8	0.00789477		2378.8	0.00463101
258.99	0.05069012		789	0.0006412		1318.99	0.00525705		1849	0.00776879		2379	0.00539931
259.19	0.05094232		789.2	0.00180858		1319.19	0.00576762		1849.2	0.00825758		2379.2	0.0040391
259.39	0.05124735		789.4	0.00249775		1319.39	0.00610917		1849.4	0.00851451		2379.4	0.00433888
259.59	0.05080682		789.6	0.00256102		1319.59	0.00714338		1849.6	0.00835768		2379.6	0.00573325
259.79	0.05114997		789.8	0.00314215		1319.79	0.00765925		1849.8	0.00840138		2379.8	0.00647742
259.99	0.05141779		790	0.00299492		1319.99	0.00768171		1850	0.00881076		2380	0.00681751
260.19	0.0507204		790.2	0.00468768		1320.19	0.00786928		1850.2	0.00951858		2380.2	0.00745174
260.39	0.05064475		790.4	0.00403933		1320.39	0.00848377		1850.4	0.00949437		2380.4	0.00777708
260.59	0.05146563		790.6	0.00317155		1320.59	0.00811845		1850.6	0.00949015		2380.6	0.00805889
260.79	0.05101542		790.8	0.00409354		1320.79	0.00854718		1850.8	0.01033931		2380.8	0.00870741
260.99	0.05086832		791	0.00321293		1320.99	0.00881458		1851	0.01072437		2381	0.00794513
261.19	0.05022691		791.2	0.00293827		1321.19	0.00816483		1851.2	0.01011946		2381.2	0.00722216
261.39	0.05069884		791.4	0.00272189		1321.39	0.00871472		1851.4	0.01044742		2381.4	0.00674055
261.59	0.05152978		791.6	0.00280574		1321.59	0.00806879		1851.6	0.01012003		2381.6	0.00667323
261.79	0.05152821		791.8	0.00210624		1321.79	0.0076835		1851.8	0.01038147		2381.8	0.00716513
261.99	0.05068696		792	0.00152719		1321.99	0.00777229		1852	0.01000951		2382	0.006701
262.19	0.05073034		792.2	0.00080863		1322.19	0.00682876		1852.2	0.01020005		2382.2	0.00556883
262.39	0.04996125		792.4	0.00112039		1322.39	0.00659193		1852.4	0.01052373		2382.4	0.00517168
262.59	0.04969586		792.6	0.00153189		1322.59	0.00559552		1852.6	0.01015708		2382.6	0.00418586
262.79	0.04927961		792.8	0.0007663		1322.79	0.00595869		1852.8	0.01061606		2382.8	0.00423169
262.99	0.04880869		793	0.00039004		1322.99	0.00606992		1853	0.01105294		2383	0.00399272
263.19	0.04902963		793.2	0.00045505		1323.19	0.00539628		1853.2	0.01055565		2383.2	0.00254636
263.39	0.0496762		793.4	0.00029729		1323.39	0.00621164		1853.4	0.01086905		2383.4	0.00302113
263.59	0.05021095		793.6	-0.00038681		1323.59	0.00668675		1853.6	0.01177818		2383.6	0.00388113
263.79	0.05090525		793.8	0.00012288		1323.79	0.00637053		1853.8	0.01096039		2383.8	0.00281562
263.99	0.05060257		794	0.00083217		1323.99	0.0067015		1854	0.01176152		2384	0.00320901
264.19	0.04987393		794.2	0.00156205		1324.19	0.00646601		1854.2	0.01215936		2384.2	0.00361415
264.39	0.05087739		794.4	0.00151315		1324.39	0.00677691		1854.4	0.01195382		2384.4	0.00412872
264.59	0.05224545		794.6	0.00140149		1324.59	0.00610845		1854.6	0.01192563		2384.6	0.00412253
264.79	0.05167416		794.8	0.00231967		1324.79	0.00641301		1854.8	0.01300279		2384.8	0.00422924
264.99	0.0518566		795	0.00176728		1324.99	0.00617856		1855	0.01353473		2385	0.0039646
265.19	0.05222594		795.2	0.00199564		1325.19	0.00618886		1855.2	0.01344248		2385.2	0.00428174
265.39	0.05451263		795.4	0.00183724		1325.39	0.00744746		1855.4	0.01355852		2385.4	0.00487449
265.59	0.05513798		795.6	0.00123588		1325.59	0.00779474		1855.6	0.01414008		2385.6	0.00591659
265.79	0.0549348		795.8	0.00096701		1325.79	0.00793643		1855.8	0.01421269		2385.8	0.00618081
265.99	0.0542929		796	0.0020857		1325.99	0.0075188		1856	0.01317066		2386	0.00581778
266.19	0.0541629		796.2	0.00279377		1326.19	0.0072991		1856.2	0.0140166		2386.2	0.00685227
266.39	0.05431658		796.4	0.00353703		1326.39	0.00728645		1856.4	0.01433617		2386.4	0.00784211
266.59	0.05349224		796.6	0.00351494		1326.59	0.00630466		1856.6	0.01386791		2386.6	0.00730284
266.79	0.05284681		796.8	0.00327985		1326.79	0.00698955		1856.8	0.01444273		2386.8	0.00757623
266.99	0.05185916		797	0.00404823		1326.99	0.00641907		1857	0.01340388		2387	0.00754992
267.19	0.05212179		797.2	0.00426933		1327.19	0.00676059		1857.2	0.01260719		2387.2	0.00694285
267.39	0.05163987		797.4	0.00471333		1327.39	0.0075116		1857.4	0.01316951		2387.4	0.00736207
267.59	0.05131175		797.6	0.00407999		1327.59	0.00702702		1857.6	0.01302318		2387.6	0.00704422
267.79	0.05077174		797.8	0.00421799		1327.79	0.00796027		1857.8	0.01183246		2387.8	0.00632249
267.99	0.04978343		798	0.00397077		1327.99	0.0087376		1858	0.01211226		2388	0.00678402
268.19	0.05044714		798.2	0.00305703		1328.19	0.00795922		1858.2	0.01192085		2388.2	0.00615934
268.39	0.0511192		798.4	0.00340715		1328.39	0.00822746		1858.4	0.0111907		2388.4	0.00602669
268.59	0.05087071		798.6	0.00208664		1328.59	0.00785802		1858.6	0.01158967		2388.6	0.00528898
268.79	0.05076073		798.8	0.00232181		1328.79	0.00769072		1858.8	0.01208694		2388.8	0.00533472
268.99	0.05133481		799	0.00213449		1328.99	0.00815065		1859	0.01173489		2389	0.00545905
269.19	0.05206575		799.2	0.00147433		1329.19	0.00912303		1859.2	0.01154577		2389.2	0.00589961
269.39	0.05241847		799.4	0.00075828		1329.39	0.00956365		1859.4	0.0113892		2389.4	0.00578114
269.59	0.05176523		799.6	0.00059981		1329.59	0.00905276		1859.6	0.01144864		2389.6	0.00567224
269.79	0.05134653		799.8	0.00061515		1329.79	0.00904618		1859.8	0.01094717		2389.8	0.00483489
269.99	0.05164057		800	0.00141348		1329.99	0.00825298		1860	0.01152633		2390	0.00525623
270.19	0.05196355		800.2	0.00044395		1330.19	0.00768089		1860.2	0.01175469		2390.2	0.00552095
270.39	0.0524701		800.4	-0.00001264		1330.39	0.00754257		1860.4	0.01159185		2390.4	0.00507905
270.59	0.05206052		800.6	-0.00071925		1330.59	0.0071856		1860.6	0.01157574		2390.6	0.00463225
270.79	0.05257222		800.8	-0.00035323		1330.79	0.00718457		1860.8	0.01157716		2390.8	0.00518411
270.99	0.05289771		801	-0.00028771		1330.99	0.00666586		1861	0.01069598		2391	0.00466124
271.19	0.05336655		801.2	-0.00083708		1331.19	0.00684461		1861.2	0.01070419		2391.2	0.00403142
271.39	0.05385295		801.4	-0.00032826		1331.39	0.00675326		1861.4	0.01090947		2391.4	0.00372945
271.59	0.05440241		801.6	-0.00119052		1331.59	0.00693736		1861.6	0.01037725		2391.6	0.00315837
271.79	0.05431165		801.8	-0.00088909		1331.79	0.00806624		1861.8	0.00993879		2391.8	0.00339881
271.99	0.05482882		802	-0.00085976		1331.99	0.00832092		1862	0.0093419		2392	0.00327608
272.19	0.05495566		802.2	-0.0003722		1332.19	0.00729398		1862.2	0.00945432		2392.2	0.00322905
272.39	0.05480778		802.4	0.00062038		1332.39	0.00744235		1862.4	0.00976356		2392.4	0.00334763
272.59	0.05505084		802.6	0.00030558		1332.59	0.00756596		1862.6	0.00944799		2392.6	0.00331776
272.79	0.05504105		802.8	0.00108766		1332.79	0.0080562		1862.8	0.00993136		2392.8	0.00319385
272.99	0.05508182		803	0.00074434		1332.99	0.00815519		1863	0.01064155		2393	0.00309061
273.19	0.0551813		803.2	0.00126851		1333.19	0.00822061		1863.2	0.01080561		2393.2	0.00379378
273.39	0.05432068		803.4	0.00223236		1333.39	0.00726396		1863.4	0.01076351		2393.4	0.00361523
273.59	0.0542353		803.6	0.00359707		1333.59	0.00687304		1863.6	0.01066815		2393.6	0.00344814
273.79	0.05398024		803.8	0.00379575		1333.79	0.00701841		1863.8	0.011226		2393.8	0.00276612
273.99	0.05393945		804	0.00430975		1333.99	0.00631237		1864	0.01161448		2394	0.00336886
274.19	0.05415696		804.2	0.00447018		1334.19	0.00658279		1864.2	0.01104308		2394.2	0.00318194
274.39	0.05397086		804.4	0.00570716		1334.39	0.00677904		1864.4	0.01196811		2394.4	0.00286588
274.59	0.05410316		804.6	0.00566312		1334.59	0.00601774		1864.6	0.0121547		2394.6	0.00322159
274.79	0.0543993		804.8	0.00602727		1334.79	0.00541122		1864.8	0.01222658		2394.8	0.00282552
274.99	0.0543277		805	0.00550926		1334.99	0.00530531		1865	0.01276385		2395	0.00218276
275.19	0.05468599		805.2	0.00576671		1335.19	0.0052824		1865.2	0.01254797		2395.2	0.00251929
275.39	0.05453538		805.4	0.00619807		1335.39	0.00595917		1865.4	0.01332073		2395.4	0.00292269
275.59	0.05461392		805.6	0.00537262		1335.59	0.00656243		1865.6	0.01357039		2395.6	0.00384972
275.79	0.05480721		805.8	0.00512027		1335.79	0.0065137		1865.8	0.01322253		2395.8	0.00446991
275.99	0.05476797		806	0.00426725		1335.99	0.00704957		1866	0.01338652		2396	0.00470497
276.19	0.05495541		806.2	0.00351262		1336.19	0.00706325		1866.2	0.01311701		2396.2	0.00580765
276.39	0.05593638		806.4	0.00275231		1336.39	0.00862934		1866.4	0.01268476		2396.4	0.0058677
276.59	0.05682734		806.6	0.00106892		1336.59	0.00906796		1866.6	0.01256831		2396.6	0.00627749
276.79	0.05737889		806.8	0.00071401		1336.79	0.00903344		1866.8	0.01387398		2396.8	0.00584662
276.99	0.05748955		807	0.00043147		1336.99	0.00872121		1867	0.01419498		2397	0.00550912
277.19	0.05789829		807.2	0.00159403		1337.19	0.00897165		1867.2	0.01405487		2397.2	0.00631834
277.39	0.05804835		807.4	0.00162928		1337.39	0.00889322		1867.4	0.01411726		2397.4	0.00539801
277.59	0.05890992		807.6	0.00193615		1337.59	0.0091187		1867.6	0.01421011		2397.6	0.00462271
277.79	0.05881198		807.8	0.00152929		1337.79	0.0088892		1867.8	0.01498212		2397.8	0.00387634
277.99	0.05870832		808	0.00209567		1337.99	0.0086814		1868	0.01486596		2398	0.00290244
278.19	0.05912178		808.2	0.00236063		1338.19	0.00814284		1868.2	0.014927		2398.2	0.001788
278.39	0.05836673		808.4	0.00284072		1338.39	0.00833615		1868.4	0.01492926		2398.4	0.00158482
278.59	0.05843297		808.6	0.00240169		1338.59	0.00816757		1868.6	0.01348139		2398.6	0.00142343
278.79	0.05822197		808.8	0.00206126		1338.79	0.00920708		1868.8	0.01356836		2398.8	0.00090974
278.99	0.05822786		809	0.00201926		1338.99	0.01006237		1869	0.01372617		2399	0.00103733
279.19	0.05835707		809.2	0.00163151		1339.19	0.01023987		1869.2	0.01357622		2399.2	0.00166446
279.39	0.0576656		809.4	0.00153006		1339.39	0.01001963		1869.4	0.01392687		2399.4	0.00197973
279.59	0.05717672		809.6	0.00075796		1339.59	0.0101418		1869.6	0.01353605		2399.6	0.0028384
279.79	0.05626507		809.8	0.00050986		1339.79	0.00979054		1869.8	0.01336006		2399.8	0.00344965
279.99	0.05602538		810	0.00024944		1339.99	0.01055985		1870	0.0127365		2400	0.00455235
280.19	0.05635241		810.2	-0.00010896		1340.19	0.01145452		1870.2	0.01243947		2400.2	0.00540138
280.39	0.05608671		810.4	-0.00004959		1340.39	0.01191407		1870.4	0.01351244		2400.4	0.00546753
280.59	0.05595884		810.6	-0.00053092		1340.59	0.01183232		1870.6	0.01423045		2400.6	0.00604922
280.79	0.05577292		810.8	0.00064706		1340.79	0.01158246		1870.8	0.01430256		2400.8	0.00530806
280.99	0.05516599		811	0.00109435		1340.99	0.01186907		1871	0.01448611		2401	0.0048481
281.19	0.05552472		811.2	0.00241485		1341.19	0.01144472		1871.2	0.01442191		2401.2	0.00532486
281.39	0.05574048		811.4	0.00292185		1341.39	0.01123342		1871.4	0.01426391		2401.4	0.00374858
281.59	0.0562921		811.6	0.00328455		1341.59	0.01001368		1871.6	0.01410248		2401.6	0.00330698
281.79	0.05605919		811.8	0.0041551		1341.79	0.00993083		1871.8	0.01424355		2401.8	0.00277596
281.99	0.05606289		812	0.00481574		1341.99	0.01003944		1872	0.01362522		2402	0.00197679
282.19	0.0559175		812.2	0.00497453		1342.19	0.00946055		1872.2	0.013144		2402.2	0.00218011
282.39	0.05641483		812.4	0.00581924		1342.39	0.00908131		1872.4	0.01247214		2402.4	0.00247178
282.59	0.05737498		812.6	0.00514666		1342.59	0.0091283		1872.6	0.01123436		2402.6	0.00255698
282.79	0.05734661		812.8	0.00451308		1342.79	0.00985534		1872.8	0.01129771		2402.8	0.00376804
282.99	0.05752765		813	0.00416433		1342.99	0.00947711		1873	0.01171258		2403	0.00376703
283.19	0.05784586		813.2	0.00366487		1343.19	0.00899199		1873.2	0.01197008		2403.2	0.00494335
283.39	0.05735792		813.4	0.00377467		1343.39	0.00811302		1873.4	0.01200984		2403.4	0.00485871
283.59	0.05664876		813.6	0.00345817		1343.59	0.00839615		1873.6	0.01250276		2403.6	0.00510209
283.79	0.05657844		813.8	0.00384026		1343.79	0.00766016		1873.8	0.01217948		2403.8	0.00583792
283.99	0.05737111		814	0.00357056		1343.99	0.00818045		1874	0.01214952		2404	0.00607481
284.19	0.05753419		814.2	0.00266352		1344.19	0.0083583		1874.2	0.01292908		2404.2	0.006163
284.39	0.05679002		814.4	0.00256119		1344.39	0.00846696		1874.4	0.01312662		2404.4	0.00706615
284.59	0.05685813		814.6	0.00327297		1344.59	0.00777456		1874.6	0.01286077		2404.6	0.00704349
284.79	0.05665083		814.8	0.00427073		1344.79	0.00766958		1874.8	0.01232531		2404.8	0.00670632
284.99	0.05714283		815	0.00435117		1344.99	0.0076839		1875	0.0125268		2405	0.00588554
285.19	0.05780454		815.2	0.00474968		1345.19	0.00741423		1875.2	0.01198882		2405.2	0.00589658
285.39	0.0586768		815.4	0.00494536		1345.39	0.00776092		1875.4	0.01128049		2405.4	0.00523624
285.59	0.05842019		815.6	0.00445196		1345.59	0.00747619		1875.6	0.01141558		2405.6	0.00547761
285.79	0.05821788		815.8	0.00510769		1345.79	0.00765711		1875.8	0.01149017		2405.8	0.00485187
285.99	0.05833781		816	0.00493512		1345.99	0.00686961		1876	0.01115407		2406	0.00394994
286.19	0.05755446		816.2	0.00471968		1346.19	0.0061616		1876.2	0.01165015		2406.2	0.00343134
286.39	0.05848823		816.4	0.00546106		1346.39	0.00633226		1876.4	0.01272438		2406.4	0.00289003
286.59	0.0577744		816.6	0.00555287		1346.59	0.00760761		1876.6	0.01310037		2406.6	0.00307309
286.79	0.05713766		816.8	0.00624487		1346.79	0.00790445		1876.8	0.01373753		2406.8	0.00303871
286.99	0.05645374		817	0.00571766		1346.99	0.00847253		1877	0.01429639		2407	0.00177666
287.19	0.05632188		817.2	0.00625916		1347.19	0.00847975		1877.2	0.01385178		2407.2	0.00171789
287.39	0.05628524		817.4	0.00543227		1347.39	0.0083495		1877.4	0.01346835		2407.4	0.00053024
287.59	0.05640785		817.6	0.00575044		1347.59	0.00895012		1877.6	0.01325512		2407.6	0.00046389
287.79	0.05643332		817.8	0.00520126		1347.79	0.00924271		1877.8	0.01236904		2407.8	0.00132653
287.99	0.05645265		818	0.00416371		1347.99	0.00910629		1878	0.01293061		2408	0.00079116
288.19	0.0564597		818.2	0.00334669		1348.19	0.00968029		1878.2	0.01302876		2408.2	0.00168981
288.39	0.05662426		818.4	0.00321208		1348.39	0.00931157		1878.4	0.01286881		2408.4	0.00227429
288.59	0.05708774		818.6	0.00332208		1348.59	0.00821963		1878.6	0.01275046		2408.6	0.00197144
288.79	0.05805809		818.8	0.00218692		1348.79	0.00895179		1878.8	0.01175666		2408.8	0.00223155
288.99	0.05890779		819	0.0013729		1348.99	0.00848839		1879	0.01135308		2409	0.00212625
289.19	0.0597044		819.2	0.00039746		1349.19	0.00845814		1879.2	0.01067512		2409.2	0.00321168
289.39	0.06018005		819.4	0.00124573		1349.39	0.00890151		1879.4	0.00979353		2409.4	0.00362337
289.59	0.05935588		819.6	0.00148713		1349.59	0.0092046		1879.6	0.00981185		2409.6	0.00342849
289.79	0.05942174		819.8	0.00253725		1349.79	0.00888344		1879.8	0.00967482		2409.8	0.00376316
289.99	0.05969429		820	0.0032306		1349.99	0.00887359		1880	0.00987493		2410	0.0040536
290.19	0.05911895		820.2	0.00345821		1350.19	0.00973092		1880.2	0.0111091		2410.2	0.00438222
290.39	0.05913976		820.4	0.00456107		1350.39	0.01030889		1880.4	0.01151735		2410.4	0.00420403
290.59	0.05849797		820.6	0.00450837		1350.59	0.01079215		1880.6	0.01173183		2410.6	0.00419813
290.79	0.05820456		820.8	0.00472865		1350.79	0.01087934		1880.8	0.01157387		2410.8	0.00380421
290.99	0.0583488		821	0.00526556		1350.99	0.01144061		1881	0.01203879		2411	0.00352133
291.19	0.05881649		821.2	0.00568195		1351.19	0.01037209		1881.2	0.01213633		2411.2	0.00320818
291.39	0.05944529		821.4	0.00553064		1351.39	0.01010594		1881.4	0.01278532		2411.4	0.00389094
291.59	0.0592212		821.6	0.00655354		1351.59	0.00987938		1881.6	0.01300504		2411.6	0.0042211
291.79	0.0590693		821.8	0.00610688		1351.79	0.01028988		1881.8	0.01348292		2411.8	0.0043465
291.99	0.0589595		822	0.00591843		1351.99	0.00985598		1882	0.01451778		2412	0.00386624
292.19	0.05916681		822.2	0.00522571		1352.19	0.00898759		1882.2	0.01492137		2412.2	0.00425662
292.39	0.05964188		822.4	0.00480314		1352.39	0.00690851		1882.4	0.01491123		2412.4	0.0046141
292.59	0.05943711		822.6	0.00476208		1352.59	0.00564182		1882.6	0.01433927		2412.6	0.00455654
292.79	0.05976251		822.8	0.00433519		1352.79	0.00551664		1882.8	0.01416447		2412.8	0.00423649
292.99	0.05927802		823	0.00389473		1352.99	0.00457357		1883	0.01462306		2413	0.00417692
293.19	0.05972408		823.2	0.00321287		1353.19	0.00454704		1883.2	0.01441242		2413.2	0.00364449
293.39	0.06040701		823.4	0.00336609		1353.39	0.00529085		1883.4	0.01430542		2413.4	0.00348887
293.59	0.06012432		823.6	0.00361468		1353.59	0.00516511		1883.6	0.01445638		2413.6	0.00341556
293.79	0.05960813		823.8	0.00339977		1353.79	0.00490683		1883.8	0.01507623		2413.8	0.00477758
293.99	0.05912243		824	0.00382671		1353.99	0.00517093		1884	0.0148537		2414	0.00441408
294.19	0.05896406		824.2	0.00401563		1354.19	0.00592184		1884.2	0.01515391		2414.2	0.00411227
294.39	0.05880669		824.4	0.0043605		1354.39	0.00627919		1884.4	0.01448724		2414.4	0.00372775
294.59	0.05943682		824.6	0.00456804		1354.59	0.00688512		1884.6	0.01571755		2414.6	0.00412795
294.79	0.06036234		824.8	0.00516816		1354.79	0.00795554		1884.8	0.0166713		2414.8	0.00427864
294.99	0.06026747		825	0.00515755		1354.99	0.00917095		1885	0.01666642		2415	0.00422307
295.19	0.05969252		825.2	0.00509102		1355.19	0.00883315		1885.2	0.01693718		2415.2	0.00430393
295.39	0.0599697		825.4	0.00640671		1355.39	0.00973085		1885.4	0.01706385		2415.4	0.00505889
295.59	0.05971979		825.6	0.007036		1355.59	0.01048404		1885.6	0.01685752		2415.6	0.0047655
295.79	0.05982318		825.8	0.00638289		1355.79	0.0116839		1885.8	0.01664655		2415.8	0.00490531
295.99	0.05972528		826	0.00704071		1355.99	0.01111986		1886	0.01653468		2416	0.00566403
296.19	0.06078816		826.2	0.0071841		1356.19	0.01032738		1886.2	0.01598926		2416.2	0.00580685
296.39	0.06129118		826.4	0.00764113		1356.39	0.01029914		1886.4	0.01558339		2416.4	0.00597048
296.59	0.06133764		826.6	0.0083912		1356.59	0.00921379		1886.6	0.01487416		2416.6	0.00536528
296.79	0.06042134		826.8	0.00733748		1356.79	0.00904039		1886.8	0.01487644		2416.8	0.00502332
296.99	0.06034861		827	0.00691499		1356.99	0.00863974		1887	0.01455572		2417	0.00508048
297.19	0.06180806		827.2	0.00573885		1357.19	0.00831828		1887.2	0.01345769		2417.2	0.00501456
297.39	0.06127743		827.4	0.00520324		1357.39	0.00828123		1887.4	0.01351647		2417.4	0.00554466
297.59	0.06046171		827.6	0.00578588		1357.59	0.00823682		1887.6	0.01309216		2417.6	0.00603709
297.79	0.05992782		827.8	0.00605227		1357.79	0.00866012		1887.8	0.01257268		2417.8	0.00523409
297.99	0.05919456		828	0.00661259		1357.99	0.008768		1888	0.01225947		2418	0.00464116
298.19	0.06029761		828.2	0.00616305		1358.19	0.00918766		1888.2	0.01255677		2418.2	0.00538401
298.39	0.06051741		828.4	0.00544433		1358.39	0.00986592		1888.4	0.01284413		2418.4	0.00545506
298.59	0.06032956		828.6	0.0056112		1358.59	0.0106765		1888.6	0.01410382		2418.6	0.00546357
298.79	0.06029247		828.8	0.00521986		1358.79	0.01161131		1888.8	0.01347278		2418.8	0.00425664
298.99	0.05911578		829	0.00429255		1358.99	0.01127952		1889	0.01265478		2419	0.00337308
299.19	0.05867582		829.2	0.00498773		1359.19	0.01120519		1889.2	0.01322817		2419.2	0.00318266
299.39	0.05984151		829.4	0.0054803		1359.39	0.01116457		1889.4	0.01321547		2419.4	0.00337748
299.59	0.05977247		829.6	0.00476063		1359.59	0.0108392		1889.6	0.01320506		2419.6	0.00387251
299.79	0.05992568		829.8	0.00381906		1359.79	0.01054356		1889.8	0.01289369		2419.8	0.00410986
299.99	0.0602465		830	0.00454221		1359.99	0.00968495		1890	0.01332414		2420	0.00436557
300.19	0.0609418		830.2	0.00385594		1360.19	0.00965204		1890.2	0.01373684		2420.2	0.00326131
300.39	0.06137506		830.4	0.00392751		1360.39	0.00839745		1890.4	0.01493099		2420.4	0.00336394
300.59	0.06152621		830.6	0.00324416		1360.59	0.0066353		1890.6	0.01506674		2420.6	0.00403853
300.79	0.06172412		830.8	0.00222815		1360.79	0.00690983		1890.8	0.01492964		2420.8	0.00484624
300.99	0.06215092		831	0.00260577		1360.99	0.00712112		1891	0.01458578		2421	0.00499696
301.19	0.06253325		831.2	0.0022838		1361.19	0.00725957		1891.2	0.01433686		2421.2	0.00528371
301.39	0.06093831		831.4	0.00240177		1361.39	0.00718886		1891.4	0.01503273		2421.4	0.0053659
301.59	0.06179773		831.6	0.00361627		1361.59	0.00829458		1891.6	0.01472329		2421.6	0.00521499
301.79	0.06139328		831.8	0.00455119		1361.79	0.00934417		1891.8	0.01502059		2421.8	0.00422364
301.99	0.06160013		832	0.0051182		1361.99	0.00994321		1892	0.01595925		2422	0.00466557
302.19	0.06147826		832.2	0.00591773		1362.19	0.00988689		1892.2	0.01634538		2422.2	0.00502742
302.39	0.06161988		832.4	0.00621835		1362.39	0.0106101		1892.4	0.01671871		2422.4	0.00462911
302.59	0.06063962		832.6	0.00747739		1362.59	0.01123187		1892.6	0.01698574		2422.6	0.00370437
302.79	0.06118549		832.8	0.0075917		1362.79	0.01206109		1892.8	0.01573833		2422.8	0.00279675
302.99	0.05954946		833	0.00689903		1362.99	0.01220821		1893	0.01568554		2423	0.00262843
303.19	0.05903015		833.2	0.00739248		1363.19	0.01296024		1893.2	0.01575283		2423.2	0.00321823
303.39	0.05948124		833.4	0.00718301		1363.39	0.01300595		1893.4	0.01555276		2423.4	0.00397707
303.59	0.05905591		833.6	0.00676841		1363.59	0.01354643		1893.6	0.01618674		2423.6	0.00481215
303.79	0.05914986		833.8	0.00610564		1363.79	0.01386154		1893.8	0.01568286		2423.8	0.00466497
303.99	0.05909454		834	0.00572203		1363.99	0.01351703		1894	0.01610506		2424	0.00453576
304.19	0.05992978		834.2	0.00479907		1364.19	0.01432487		1894.2	0.01601252		2424.2	0.00460438
304.39	0.06113295		834.4	0.00461444		1364.39	0.01371607		1894.4	0.01605313		2424.4	0.00505766
304.59	0.06030286		834.6	0.00353316		1364.59	0.01330786		1894.6	0.01512768		2424.6	0.0050385
304.79	0.06084261		834.8	0.0040314		1364.79	0.01367637		1894.8	0.01463677		2424.8	0.00533762
304.99	0.06011573		835	0.00404458		1364.99	0.01356729		1895	0.01478703		2425	0.00517502
305.19	0.06090803		835.2	0.00408746		1365.19	0.01352431		1895.2	0.01462215		2425.2	0.00470902
305.39	0.06115332		835.4	0.00421461		1365.39	0.0127165		1895.4	0.01415799		2425.4	0.00452228
305.59	0.06120289		835.6	0.00447696		1365.59	0.01229983		1895.6	0.01421502		2425.6	0.0041722
305.79	0.06140308		835.8	0.00510091		1365.79	0.01211648		1895.8	0.0142686		2425.8	0.00438193
305.99	0.0626832		836	0.00569719		1365.99	0.01150498		1896	0.01451016		2426	0.00392269
306.19	0.0615441		836.2	0.00540248		1366.19	0.01082045		1896.2	0.01461139		2426.2	0.00472641
306.39	0.0625222		836.4	0.00458282		1366.39	0.01100197		1896.4	0.01431877		2426.4	0.00454076
306.59	0.06239217		836.6	0.00488263		1366.59	0.01135365		1896.6	0.01371669		2426.6	0.00399189
306.79	0.06265486		836.8	0.00433515		1366.79	0.01059607		1896.8	0.01321136		2426.8	0.00437125
306.99	0.06141082		837	0.00330466		1366.99	0.01048595		1897	0.01370659		2427	0.00457336
307.19	0.06170142		837.2	0.00348625		1367.19	0.01028535		1897.2	0.01338216		2427.2	0.00489513
307.39	0.06220214		837.4	0.0035235		1367.39	0.00992431		1897.4	0.01366435		2427.4	0.00540246
307.59	0.0631031		837.6	0.00315618		1367.59	0.00934087		1897.6	0.01425688		2427.6	0.00616188
307.79	0.06261564		837.8	0.0034744		1367.79	0.00964077		1897.8	0.01358261		2427.8	0.00618739
307.99	0.06257649		838	0.00300092		1367.99	0.00965405		1898	0.01392741		2428	0.00591471
308.19	0.06303356		838.2	0.00270402		1368.19	0.01030387		1898.2	0.01349162		2428.2	0.00572868
308.39	0.06367739		838.4	0.00301008		1368.39	0.01044399		1898.4	0.01323489		2428.4	0.0052145
308.59	0.06337041		838.6	0.00321754		1368.59	0.01052355		1898.6	0.01287164		2428.6	0.00594639
308.79	0.06381198		838.8	0.00469913		1368.79	0.01042629		1898.8	0.01302002		2428.8	0.00579443
308.99	0.06373503		839	0.00418687		1368.99	0.01022365		1899	0.01382584		2429	0.00565479
309.19	0.06447907		839.2	0.00504551		1369.19	0.01028379		1899.2	0.01415621		2429.2	0.00508978
309.39	0.06365178		839.4	0.00488499		1369.39	0.00971804		1899.4	0.01464314		2429.4	0.00538786
309.59	0.06409305		839.6	0.00475885		1369.59	0.01005608		1899.6	0.01503775		2429.6	0.00487962
309.79	0.06432639		839.8	0.00552284		1369.79	0.01032896		1899.8	0.01499987		2429.8	0.00470975
309.99	0.06439684		840	0.00532553		1369.99	0.01056506		1900	0.01549017		2430	0.00414142
310.19	0.06428035		840.2	0.00498568		1370.19	0.01048432		1900.2	0.01577515		2430.2	0.0041611
310.39	0.06525711		840.4	0.00513776		1370.39	0.01023972		1900.4	0.0156701		2430.4	0.00389749
310.59	0.06541023		840.6	0.00561015		1370.59	0.0093941		1900.6	0.0163225		2430.6	0.0042646
310.79	0.06501811		840.8	0.00567626		1370.79	0.00900279		1900.8	0.01740938		2430.8	0.00502547
310.99	0.06488477		841	0.00565593		1370.99	0.00981543		1901	0.01777354		2431	0.00448924
311.19	0.0650617		841.2	0.00641213		1371.19	0.0095266		1901.2	0.01843356		2431.2	0.00458962
311.39	0.06503217		841.4	0.00669592		1371.39	0.00910676		1901.4	0.01961792		2431.4	0.00535376
311.59	0.06435082		841.6	0.00678761		1371.59	0.00922657		1901.6	0.01979767		2431.6	0.00546132
311.79	0.06363045		841.8	0.00684177		1371.79	0.00901862		1901.8	0.01909159		2431.8	0.00583741
311.99	0.06467977		842	0.00657057		1371.99	0.00957746		1902	0.01840127		2432	0.00552834
312.19	0.06447771		842.2	0.00629709		1372.19	0.00950668		1902.2	0.01759187		2432.2	0.00562853
312.39	0.06440849		842.4	0.00644707		1372.39	0.00949369		1902.4	0.01690202		2432.4	0.00647122
312.59	0.06403679		842.6	0.00654958		1372.59	0.00851199		1902.6	0.01679911		2432.6	0.0076843
312.79	0.06399559		842.8	0.00683348		1372.79	0.00780974		1902.8	0.01700994		2432.8	0.00753888
312.99	0.0635847		843	0.00487493		1372.99	0.00794272		1903	0.01733512		2433	0.0072059
313.19	0.06358434		843.2	0.00483124		1373.19	0.00839454		1903.2	0.01667668		2433.2	0.00759276
313.39	0.06344368		843.4	0.00411734		1373.39	0.00831774		1903.4	0.01618302		2433.4	0.0071078
313.59	0.06357796		843.6	0.00391712		1373.59	0.00921322		1903.6	0.01576331		2433.6	0.00682789
313.79	0.06319678		843.8	0.00470496		1373.79	0.00956865		1903.8	0.01593147		2433.8	0.00685549
313.99	0.06318179		844	0.0047896		1373.99	0.01049251		1904	0.01581446		2434	0.0061825
314.19	0.06374387		844.2	0.00547346		1374.19	0.01067053		1904.2	0.01573027		2434.2	0.00594298
314.39	0.0631196		844.4	0.00627808		1374.39	0.0099124		1904.4	0.01550003		2434.4	0.00616476
314.59	0.06294636		844.6	0.00672295		1374.59	0.00973617		1904.6	0.01578543		2434.6	0.00611957
314.79	0.06245045		844.8	0.00728755		1374.79	0.01037958		1904.8	0.01600916		2434.8	0.00578192
314.99	0.06252247		845	0.00770557		1374.99	0.01044004		1905	0.01594842		2435	0.0048637
315.19	0.06187632		845.2	0.0078085		1375.19	0.01013365		1905.2	0.01662132		2435.2	0.00474622
315.39	0.06092098		845.4	0.00797891		1375.39	0.00931798		1905.4	0.01711007		2435.4	0.00449267
315.59	0.06081978		845.6	0.00768872		1375.59	0.00880379		1905.6	0.01670495		2435.6	0.00423832
315.79	0.06185807		845.8	0.00753726		1375.79	0.00801875		1905.8	0.01590618		2435.8	0.00557855
315.99	0.06262979		846	0.00798123		1375.99	0.00869706		1906	0.01639664		2436	0.00618153
316.19	0.06183144		846.2	0.00765876		1376.19	0.00789104		1906.2	0.01640098		2436.2	0.00669299
316.39	0.062148		846.4	0.00664248		1376.39	0.00732519		1906.4	0.01671426		2436.4	0.00758156
316.59	0.06231371		846.6	0.00617244		1376.59	0.00710491		1906.6	0.01586738		2436.6	0.00681394
316.79	0.06282348		846.8	0.00552119		1376.79	0.00844678		1906.8	0.01573566		2436.8	0.00645077
316.99	0.06294336		847	0.00491835		1376.99	0.00982847		1907	0.01542845		2437	0.00589892
317.19	0.06340855		847.2	0.0046798		1377.19	0.01101722		1907.2	0.0159731		2437.2	0.00539386
317.39	0.06358643		847.4	0.00513953		1377.39	0.01177504		1907.4	0.01636503		2437.4	0.00407692
317.59	0.06376243		847.6	0.00594624		1377.59	0.01315704		1907.6	0.01639231		2437.6	0.00414994
317.79	0.06494835		847.8	0.00651136		1377.79	0.01391829		1907.8	0.01634595		2437.8	0.00264201
317.99	0.06471079		848	0.00671798		1377.99	0.01353778		1908	0.01595314		2438	0.00229265
318.19	0.06470647		848.2	0.00701348		1378.19	0.01278527		1908.2	0.0159557		2438.2	0.00247834
318.39	0.06480647		848.4	0.00745606		1378.39	0.01179735		1908.4	0.01566591		2438.4	0.00306133
318.59	0.06467515		848.6	0.00721473		1378.59	0.01187518		1908.6	0.01551436		2438.6	0.00258924
318.79	0.06393804		848.8	0.00715429		1378.79	0.01180354		1908.8	0.01559226		2438.8	0.00211829
318.99	0.06449748		849	0.00699558		1378.99	0.01173361		1909	0.01630544		2439	0.00212924
319.19	0.06438019		849.2	0.00755523		1379.19	0.01178521		1909.2	0.01679134		2439.2	0.00240759
319.39	0.06470797		849.4	0.00791534		1379.39	0.01140344		1909.4	0.01700064		2439.4	0.00263385
319.59	0.06535772		849.6	0.00747388		1379.59	0.01142609		1909.6	0.01653211		2439.6	0.00394497
319.79	0.06565895		849.8	0.00760864		1379.79	0.01179286		1909.8	0.01652292		2439.8	0.00549173
319.99	0.06600898		850	0.00738537		1379.99	0.01123823		1910	0.01689107		2440	0.00568141
320.19	0.06663719		850.2	0.00704721		1380.19	0.01153663		1910.2	0.01619331		2440.2	0.00605185
320.39	0.066929		850.4	0.00608803		1380.39	0.01141691		1910.4	0.01635052		2440.4	0.00550588
320.59	0.06564467		850.6	0.00605305		1380.59	0.01225979		1910.6	0.01580014		2440.6	0.00493001
320.79	0.0656235		850.8	0.00632905		1380.79	0.01354646		1910.8	0.01709913		2440.8	0.00487216
320.99	0.06588304		851	0.00648857		1380.99	0.01304579		1911	0.01679025		2441	0.00456497
321.19	0.06497415		851.2	0.00619146		1381.19	0.01268052		1911.2	0.01717525		2441.2	0.00332839
321.39	0.06441565		851.4	0.00732469		1381.39	0.01183202		1911.4	0.01627509		2441.4	0.00364975
321.59	0.06476631		851.6	0.00821266		1381.59	0.01165289		1911.6	0.01560286		2441.6	0.00307395
321.79	0.06436253		851.8	0.00858141		1381.79	0.01146086		1911.8	0.01542402		2441.8	0.0023304
321.99	0.06431784		852	0.00851595		1381.99	0.01089559		1912	0.01523683		2442	0.00280242
322.19	0.06430844		852.2	0.00886659		1382.19	0.01085169		1912.2	0.01475058		2442.2	0.00273896
322.39	0.06403304		852.4	0.00979667		1382.39	0.01104487		1912.4	0.01508369		2442.4	0.00280986
322.59	0.06344438		852.6	0.00911561		1382.59	0.01132328		1912.6	0.01527888		2442.6	0.00180317
322.79	0.0644779		852.8	0.00894019		1382.79	0.01170263		1912.8	0.01546843		2442.8	0.00221789
322.99	0.06564832		853	0.00877281		1382.99	0.01157301		1913	0.0158993		2443	0.00261651
323.19	0.06620208		853.2	0.00924035		1383.19	0.01182607		1913.2	0.01557094		2443.2	0.00272697
323.39	0.06693336		853.4	0.00877319		1383.39	0.01204984		1913.4	0.01535761		2443.4	0.00344182
323.59	0.06695603		853.6	0.00831274		1383.59	0.01222398		1913.6	0.01525623		2443.6	0.00466786
323.79	0.06720407		853.8	0.00823592		1383.79	0.01250453		1913.8	0.01459699		2443.8	0.00460689
323.99	0.06789232		854	0.00713715		1383.99	0.01190297		1914	0.01402202		2444	0.00450061
324.19	0.06834744		854.2	0.00683113		1384.19	0.01224171		1914.2	0.01345828		2444.2	0.00470391
324.39	0.06772		854.4	0.00615091		1384.39	0.01190933		1914.4	0.01393796		2444.4	0.005066
324.59	0.06711735		854.6	0.00540448		1384.59	0.01306942		1914.6	0.01353331		2444.6	0.005391
324.79	0.06650879		854.8	0.00671749		1384.79	0.01224696		1914.8	0.01435025		2444.8	0.00565049
324.99	0.06640457		855	0.00698629		1384.99	0.01103287		1915	0.0134538		2445	0.00598149
325.19	0.06504385		855.2	0.00750639		1385.19	0.01109046		1915.2	0.01419764		2445.2	0.00568272
325.39	0.06462691		855.4	0.0082897		1385.39	0.01150693		1915.4	0.01364581		2445.4	0.00624176
325.59	0.06525047		855.6	0.00867922		1385.59	0.01138737		1915.6	0.01409094		2445.6	0.00553609
325.79	0.06493199		855.8	0.0088539		1385.79	0.01139357		1915.8	0.01470058		2445.8	0.00561377
325.99	0.06525869		856	0.00842541		1385.99	0.01052048		1916	0.01422912		2446	0.00519874
326.19	0.06489515		856.2	0.0087087		1386.19	0.01047203		1916.2	0.01485962		2446.2	0.00497259
326.39	0.06489328		856.4	0.00910288		1386.39	0.00999477		1916.4	0.01645743		2446.4	0.00388192
326.59	0.06561995		856.6	0.00843174		1386.59	0.00905594		1916.6	0.01617391		2446.6	0.00366365
326.79	0.06627116		856.8	0.00871666		1386.79	0.00852018		1916.8	0.01687363		2446.8	0.00443114
326.99	0.06645883		857	0.00900701		1386.99	0.00853788		1917	0.01718593		2447	0.00505047
327.19	0.06649498		857.2	0.00912211		1387.19	0.00900067		1917.2	0.01765177		2447.2	0.00474036
327.39	0.06723829		857.4	0.00882976		1387.39	0.00960267		1917.4	0.01728168		2447.4	0.00495754
327.59	0.06684682		857.6	0.00851447		1387.59	0.00935544		1917.6	0.01715414		2447.6	0.00448962
327.79	0.06696224		857.8	0.00828377		1387.79	0.00946433		1917.8	0.01668054		2447.8	0.00431841
327.99	0.06647879		858	0.00786935		1387.99	0.00952826		1918	0.01648806		2448	0.00381487
328.19	0.0667947		858.2	0.00807408		1388.19	0.01029765		1918.2	0.01579804		2448.2	0.00370329
328.39	0.06633699		858.4	0.00757681		1388.39	0.0103599		1918.4	0.01614625		2448.4	0.00473291
328.59	0.06603871		858.6	0.00754822		1388.59	0.01097841		1918.6	0.01678757		2448.6	0.00426417
328.79	0.06491166		858.8	0.00879838		1388.79	0.01043615		1918.8	0.01718214		2448.8	0.00473395
328.99	0.06566557		859	0.00787349		1388.99	0.01141163		1919	0.01692272		2449	0.00538023
329.19	0.06568497		859.2	0.00766635		1389.19	0.01230717		1919.2	0.01739551		2449.2	0.00564147
329.39	0.06614714		859.4	0.00731073		1389.39	0.01308728		1919.4	0.01728905		2449.4	0.00607313
329.59	0.06687541		859.6	0.00618246		1389.59	0.01258079		1919.6	0.01803076		2449.6	0.00612981
329.79	0.06685238		859.8	0.00583044		1389.79	0.01255672		1919.8	0.01717429		2449.8	0.0060756
329.99	0.06711307		860	0.00566566		1389.99	0.01285934		1920	0.01627868		2450	0.00554751
330.19	0.06718927		860.2	0.00559541		1390.19	0.01317603		1920.2	0.01764376		2450.2	0.0049867
330.39	0.06712626		860.4	0.00598681		1390.39	0.01315973		1920.4	0.0175239		2450.4	0.00456161
330.59	0.06673475		860.6	0.00570109		1390.59	0.01313671		1920.6	0.01703395		2450.6	0.00501592
330.79	0.06682116		860.8	0.00603493		1390.79	0.0130611		1920.8	0.0174848		2450.8	0.00569642
330.99	0.06700223		861	0.00599022		1390.99	0.01388721		1921	0.01725503		2451	0.00581974
331.19	0.06678889		861.2	0.00577015		1391.19	0.01408022		1921.2	0.01717046		2451.2	0.00547687
331.39	0.06694613		861.4	0.00514623		1391.39	0.01504316		1921.4	0.01678514		2451.4	0.00533874
331.59	0.06676086		861.6	0.00559816		1391.59	0.01472834		1921.6	0.01705188		2451.6	0.0052828
331.79	0.06678878		861.8	0.00631007		1391.79	0.01458128		1921.8	0.01704454		2451.8	0.00492996
331.99	0.06628757		862	0.00719811		1391.99	0.01446449		1922	0.01648175		2452	0.00539838
332.19	0.06708428		862.2	0.00748374		1392.19	0.01508882		1922.2	0.01648466		2452.2	0.00650052
332.39	0.06793272		862.4	0.00791261		1392.39	0.01494386		1922.4	0.0170651		2452.4	0.00664344
332.59	0.06930722		862.6	0.0085352		1392.59	0.01526603		1922.6	0.01698874		2452.6	0.00711572
332.79	0.07005307		862.8	0.00929174		1392.79	0.0155271		1922.8	0.01616319		2452.8	0.00735681
332.99	0.07064751		863	0.00897861		1392.99	0.0152437		1923	0.0164671		2453	0.00748119
333.19	0.07115112		863.2	0.00952733		1393.19	0.01554927		1923.2	0.01621988		2453.2	0.00678337
333.39	0.07169301		863.4	0.00978177		1393.39	0.01547782		1923.4	0.01642473		2453.4	0.00702093
333.59	0.0716021		863.6	0.0092153		1393.59	0.01511133		1923.6	0.01660748		2453.6	0.00692821
333.79	0.07174843		863.8	0.00976832		1393.79	0.0149781		1923.8	0.01647538		2453.8	0.00636713
333.99	0.07159603		864	0.0097282		1393.99	0.01437922		1924	0.01652323		2454	0.00599916
334.19	0.07093101		864.2	0.01009139		1394.19	0.01389715		1924.2	0.01643258		2454.2	0.00651454
334.39	0.07025672		864.4	0.00970764		1394.39	0.01271024		1924.4	0.01582031		2454.4	0.00718354
334.59	0.06981742		864.6	0.00916205		1394.59	0.01174103		1924.6	0.0150654		2454.6	0.00713195
334.79	0.06925433		864.8	0.00916163		1394.79	0.01112203		1924.8	0.01489954		2454.8	0.00722913
334.99	0.06836123		865	0.0084767		1394.99	0.01156387		1925	0.01457745		2455	0.00725065
335.19	0.06758291		865.2	0.00686773		1395.19	0.01215469		1925.2	0.01417981		2455.2	0.00774327
335.39	0.0673617		865.4	0.00614174		1395.39	0.0123442		1925.4	0.01406168		2455.4	0.00674822
335.59	0.06739111		865.6	0.00681913		1395.59	0.0117108		1925.6	0.0145863		2455.6	0.00712668
335.79	0.06727782		865.8	0.0066801		1395.79	0.01244568		1925.8	0.01537721		2455.8	0.00748317
335.99	0.0664841		866	0.00703308		1395.99	0.0125301		1926	0.01541106		2456	0.00852345
336.19	0.06717923		866.2	0.00662385		1396.19	0.01419919		1926.2	0.0155636		2456.2	0.00826438
336.39	0.06814736		866.4	0.00656713		1396.39	0.01399864		1926.4	0.01486098		2456.4	0.00786719
336.59	0.06769197		866.6	0.00715389		1396.59	0.01365256		1926.6	0.0146012		2456.6	0.00844305
336.79	0.06741737		866.8	0.00682564		1396.79	0.01368199		1926.8	0.01477009		2456.8	0.00750354
336.99	0.06706563		867	0.00737334		1396.99	0.01396711		1927	0.01550073		2457	0.00714943
337.19	0.0674447		867.2	0.00857495		1397.19	0.01496491		1927.2	0.0162757		2457.2	0.00696526
337.39	0.06738146		867.4	0.00853486		1397.39	0.01468389		1927.4	0.01732848		2457.4	0.00674314
337.59	0.06726313		867.6	0.00854739		1397.59	0.0149665		1927.6	0.01802559		2457.6	0.00622708
337.79	0.0678571		867.8	0.00933443		1397.79	0.01441645		1927.8	0.0189001		2457.8	0.00650348
337.99	0.06815313		868	0.00963942		1397.99	0.01349547		1928	0.01833336		2458	0.00685986
338.19	0.06813529		868.2	0.00952467		1398.19	0.01317745		1928.2	0.01762987		2458.2	0.00740348
338.39	0.06765446		868.4	0.00909177		1398.39	0.01153576		1928.4	0.01804987		2458.4	0.00759886
338.59	0.06805294		868.6	0.00845552		1398.59	0.01081387		1928.6	0.01713655		2458.6	0.00716383
338.79	0.06821887		868.8	0.00821905		1398.79	0.01106736		1928.8	0.01709811		2458.8	0.00696735
338.99	0.0681347		869	0.00740174		1398.99	0.0102544		1929	0.01720171		2459	0.00708788
339.19	0.0679068		869.2	0.00679871		1399.19	0.01090653		1929.2	0.01713576		2459.2	0.00691378
339.39	0.06850476		869.4	0.00705025		1399.39	0.01033424		1929.4	0.01764308		2459.4	0.00610893
339.59	0.06829824		869.6	0.0066313		1399.59	0.01020496		1929.6	0.01800302		2459.6	0.00637235
339.79	0.06807137		869.8	0.00589215		1399.79	0.01156192		1929.8	0.01800828		2459.8	0.0062388
339.99	0.06730848		870	0.00642098		1399.99	0.01252197		1930	0.01719412		2460	0.00604877
340.19	0.06767602		870.2	0.00632347		1400.19	0.0128087		1930.2	0.01733903		2460.2	0.00574372
340.39	0.06769159		870.4	0.00597195		1400.39	0.01251151		1930.4	0.01679793		2460.4	0.00547786
340.59	0.06698661		870.6	0.00579009		1400.59	0.01260014		1930.6	0.01680721		2460.6	0.00508518
340.79	0.0667151		870.8	0.00567918		1400.79	0.01358611		1930.8	0.01720951		2460.8	0.00485872
340.99	0.06697391		871	0.00683827		1400.99	0.01454013		1931	0.01792451		2461	0.0046983
341.19	0.06738745		871.2	0.00686525		1401.19	0.0152163		1931.2	0.01750997		2461.2	0.00456591
341.39	0.06798389		871.4	0.00666552		1401.39	0.01553406		1931.4	0.01727745		2461.4	0.00414592
341.59	0.06867802		871.6	0.00755586		1401.59	0.01596636		1931.6	0.01677483		2461.6	0.00504189
341.79	0.06851711		871.8	0.00816939		1401.79	0.01634259		1931.8	0.01678152		2461.8	0.00520112
341.99	0.06947221		872	0.00762033		1401.99	0.01557321		1932	0.01598186		2462	0.00463768
342.19	0.06901364		872.2	0.00751648		1402.19	0.01499604		1932.2	0.01637903		2462.2	0.00485874
342.39	0.06887444		872.4	0.00708591		1402.39	0.01439685		1932.4	0.01670465		2462.4	0.00576042
342.59	0.06969895		872.6	0.00675242		1402.59	0.01380234		1932.6	0.01617798		2462.6	0.00614123
342.79	0.06958738		872.8	0.00725913		1402.79	0.0144748		1932.8	0.01630813		2462.8	0.00673086
342.99	0.07017161		873	0.007552		1402.99	0.01363257		1933	0.01741358		2463	0.00694919
343.19	0.07072459		873.2	0.00832187		1403.19	0.013932		1933.2	0.01763139		2463.2	0.0075862
343.39	0.0709616		873.4	0.00800767		1403.39	0.01269566		1933.4	0.01804552		2463.4	0.00808074
343.59	0.07197443		873.6	0.00805789		1403.59	0.01258624		1933.6	0.0179937		2463.6	0.00815508
343.79	0.07243844		873.8	0.00811867		1403.79	0.01371804		1933.8	0.01893069		2463.8	0.00878163
343.99	0.07214999		874	0.00844988		1403.99	0.01355267		1934	0.01984386		2464	0.00820815
344.19	0.07249987		874.2	0.00818242		1404.19	0.01209789		1934.2	0.02087038		2464.2	0.00773034
344.39	0.07185247		874.4	0.00780202		1404.39	0.01224504		1934.4	0.02030421		2464.4	0.00824859
344.59	0.07053071		874.6	0.00757952		1404.59	0.01197175		1934.6	0.0202939		2464.6	0.00792892
344.79	0.07017014		874.8	0.00777456		1404.79	0.012206		1934.8	0.01948064		2464.8	0.00759837
344.99	0.07108436		875	0.00790229		1404.99	0.01250553		1935	0.01898182		2465	0.00642464
345.19	0.07181845		875.2	0.00792178		1405.19	0.01323368		1935.2	0.01776036		2465.2	0.00525649
345.39	0.07153439		875.4	0.00834572		1405.39	0.01402634		1935.4	0.01769113		2465.4	0.00451078
345.59	0.07125315		875.6	0.00853668		1405.59	0.01421305		1935.6	0.01754242		2465.6	0.00451409
345.79	0.07054382		875.8	0.00873636		1405.79	0.01396326		1935.8	0.01798321		2465.8	0.00406476
345.99	0.07070945		876	0.00828003		1405.99	0.01343084		1936	0.01759162		2466	0.00363333
346.19	0.06966872		876.2	0.00841852		1406.19	0.01342806		1936.2	0.01781432		2466.2	0.00461768
346.39	0.06973027		876.4	0.00738141		1406.39	0.01304185		1936.4	0.01690981		2466.4	0.00520596
346.59	0.07019357		876.6	0.00792452		1406.59	0.01330261		1936.6	0.01672515		2466.6	0.00521945
346.79	0.07044402		876.8	0.00808786		1406.79	0.01386547		1936.8	0.01771225		2466.8	0.00563833
346.99	0.07087456		877	0.00859399		1406.99	0.01363759		1937	0.0183036		2467	0.00619529
347.19	0.07084741		877.2	0.00811019		1407.19	0.01328828		1937.2	0.01796965		2467.2	0.00585897
347.39	0.07038349		877.4	0.0081762		1407.39	0.01297123		1937.4	0.01820023		2467.4	0.00553203
347.59	0.07190951		877.6	0.00834505		1407.59	0.01370673		1937.6	0.0187813		2467.6	0.00493933
347.79	0.07125044		877.8	0.00821117		1407.79	0.01443523		1937.8	0.01845201		2467.8	0.00480648
347.99	0.07120355		878	0.00812324		1407.99	0.01464063		1938	0.01889776		2468	0.00362714
348.19	0.07099555		878.2	0.00843676		1408.19	0.01415104		1938.2	0.01876458		2468.2	0.00391673
348.39	0.07042388		878.4	0.00816127		1408.39	0.01461057		1938.4	0.01897563		2468.4	0.00427896
348.59	0.07037337		878.6	0.00715951		1408.59	0.01507498		1938.6	0.01909764		2468.6	0.00314425
348.79	0.07232208		878.8	0.0063943		1408.79	0.01480131		1938.8	0.01844951		2468.8	0.00217772
348.99	0.07287691		879	0.00605978		1408.99	0.01490578		1939	0.01845224		2469	0.00184333
349.19	0.0734448		879.2	0.00629054		1409.19	0.01510438		1939.2	0.01834844		2469.2	0.00113575
349.39	0.07227371		879.4	0.0066737		1409.39	0.01490017		1939.4	0.01801057		2469.4	0.00184365
349.59	0.07248035		879.6	0.00714771		1409.59	0.01380212		1939.6	0.01759021		2469.6	0.00287134
349.79	0.07241396		879.8	0.00782325		1409.79	0.01260325		1939.8	0.01658553		2469.8	0.0031834
349.99	0.07225773		880	0.00764758		1409.99	0.01300542		1940	0.01593678		2470	0.00282525
350.19	0.07201238		880.2	0.00732594		1410.19	0.01269213		1940.2	0.01570641		2470.2	0.0040574
350.39	0.07205265		880.4	0.00733519		1410.39	0.01211538		1940.4	0.01523924		2470.4	0.00446118
350.59	0.07221487		880.6	0.00830712		1410.59	0.01254913		1940.6	0.01469126		2470.6	0.00477054
350.79	0.07136601		880.8	0.00899315		1410.79	0.01273599		1940.8	0.0145509		2470.8	0.00512783
350.99	0.07036227		881	0.00986144		1410.99	0.01359568		1941	0.01376412		2471	0.00520128
351.19	0.07034402		881.2	0.00914545		1411.19	0.01375927		1941.2	0.01412697		2471.2	0.00424364
351.39	0.06980319		881.4	0.00994444		1411.39	0.01421655		1941.4	0.01459305		2471.4	0.00524622
351.59	0.07000772		881.6	0.01024817		1411.59	0.01478768		1941.6	0.01508664		2471.6	0.0050598
351.79	0.06962156		881.8	0.01022794		1411.79	0.01537516		1941.8	0.01444225		2471.8	0.00511773
351.99	0.07077034		882	0.01017419		1411.99	0.01527152		1942	0.01563003		2472	0.00434722
352.19	0.07010191		882.2	0.00955325		1412.19	0.01507578		1942.2	0.01599765		2472.2	0.00391563
352.39	0.0705577		882.4	0.00827426		1412.39	0.01618735		1942.4	0.01661818		2472.4	0.0035788
352.59	0.07151089		882.6	0.00802083		1412.59	0.01655081		1942.6	0.01650662		2472.6	0.00360676
352.79	0.07265241		882.8	0.00838712		1412.79	0.01573959		1942.8	0.01707563		2472.8	0.00335021
352.99	0.0723407		883	0.00838273		1412.99	0.01553		1943	0.01679323		2473	0.00375863
353.19	0.07282798		883.2	0.00852076		1413.19	0.01525482		1943.2	0.0173555		2473.2	0.00303812
353.39	0.07269266		883.4	0.00859175		1413.39	0.01507562		1943.4	0.01755142		2473.4	0.00360033
353.59	0.07337482		883.6	0.00864028		1413.59	0.0143046		1943.6	0.01803506		2473.6	0.00338789
353.79	0.07316883		883.8	0.00873875		1413.79	0.0142419		1943.8	0.01894509		2473.8	0.00274471
353.99	0.07302502		884	0.00846408		1413.99	0.01529761		1944	0.0197678		2474	0.00301058
354.19	0.07238027		884.2	0.00841243		1414.19	0.01510656		1944.2	0.01981402		2474.2	0.00341388
354.39	0.07198253		884.4	0.00883025		1414.39	0.01506853		1944.4	0.01939115		2474.4	0.0031773
354.59	0.07177659		884.6	0.00900271		1414.59	0.01569405		1944.6	0.01875594		2474.6	0.00283859
354.79	0.07158193		884.8	0.0090565		1414.79	0.01626563		1944.8	0.01993919		2474.8	0.00312769
354.99	0.07125318		885	0.00940073		1414.99	0.01686039		1945	0.02055844		2475	0.00373964
355.19	0.07139711		885.2	0.00872925		1415.19	0.01612648		1945.2	0.02076783		2475.2	0.00419022
355.39	0.07069299		885.4	0.00923934		1415.39	0.01551774		1945.4	0.02047739		2475.4	0.00433424
355.59	0.07051457		885.6	0.00918497		1415.59	0.01571073		1945.6	0.01971359		2475.6	0.00354923
355.79	0.07039374		885.8	0.009338		1415.79	0.01605221		1945.8	0.01939252		2475.8	0.00300002
355.99	0.07010331		886	0.01010732		1415.99	0.01537781		1946	0.01917893		2476	0.00262617
356.19	0.06901211		886.2	0.00979176		1416.19	0.01534307		1946.2	0.01856407		2476.2	0.0030618
356.39	0.0695768		886.4	0.01082969		1416.39	0.01472998		1946.4	0.01817402		2476.4	0.00391461
356.59	0.06982934		886.6	0.01126599		1416.59	0.01460502		1946.6	0.01758554		2476.6	0.00469699
356.79	0.06979691		886.8	0.01133187		1416.79	0.01427138		1946.8	0.01731317		2476.8	0.00428059
356.99	0.06979034		887	0.01014252		1416.99	0.0136875		1947	0.01627802		2477	0.00495732
357.19	0.06919275		887.2	0.00961826		1417.19	0.01306562		1947.2	0.01708379		2477.2	0.00544489
357.39	0.06962188		887.4	0.00943219		1417.39	0.01252722		1947.4	0.01757853		2477.4	0.00582411
357.59	0.06922356		887.6	0.0089714		1417.59	0.01235286		1947.6	0.01797935		2477.6	0.00592802
357.79	0.06920419		887.8	0.0098156		1417.79	0.01291883		1947.8	0.01833562		2477.8	0.00650512
357.99	0.0692082		888	0.00968716		1417.99	0.01334288		1948	0.01809741		2478	0.00687575
358.19	0.06937072		888.2	0.00900196		1418.19	0.01388619		1948.2	0.01853772		2478.2	0.00696713
358.39	0.06945211		888.4	0.00867684		1418.39	0.0147916		1948.4	0.01818839		2478.4	0.00706031
358.59	0.0701197		888.6	0.00872813		1418.59	0.01479659		1948.6	0.0180937		2478.6	0.00744453
358.79	0.07031048		888.8	0.00932774		1418.79	0.01519761		1948.8	0.01875687		2478.8	0.00804252
358.99	0.07032978		889	0.00953928		1418.99	0.01486057		1949	0.01844842		2479	0.00848927
359.19	0.07006026		889.2	0.00893553		1419.19	0.01468038		1949.2	0.01876293		2479.2	0.0080324
359.39	0.07012019		889.4	0.00907589		1419.39	0.01474083		1949.4	0.01858057		2479.4	0.00715904
359.59	0.0704867		889.6	0.00909056		1419.59	0.01539232		1949.6	0.01805915		2479.6	0.00741912
359.79	0.07026436		889.8	0.01006632		1419.79	0.01527152		1949.8	0.0189874		2479.8	0.00659404
359.99	0.07043076		890	0.01035402		1419.99	0.01410154		1950	0.018257		2480	0.0069339
360.19	0.0709973		890.2	0.00942765		1420.19	0.01332354		1950.2	0.01790863		2480.2	0.00672667
360.39	0.07113337		890.4	0.00914648		1420.39	0.01335789		1950.4	0.01769672		2480.4	0.0071466
360.59	0.07090332		890.6	0.00836642		1420.59	0.01429765		1950.6	0.01697993		2480.6	0.007657
360.79	0.07101248		890.8	0.0082742		1420.79	0.01383694		1950.8	0.01692403		2480.8	0.00771656
360.99	0.07145123		891	0.007819		1420.99	0.01358764		1951	0.01707341		2481	0.00813566
361.19	0.07185855		891.2	0.0078997		1421.19	0.01368123		1951.2	0.01833927		2481.2	0.00822898
361.39	0.07259133		891.4	0.00806929		1421.39	0.0136479		1951.4	0.01869212		2481.4	0.00869988
361.59	0.0723615		891.6	0.00828122		1421.59	0.01375477		1951.6	0.01949171		2481.6	0.00904599
361.79	0.07308991		891.8	0.00879665		1421.79	0.0137646		1951.8	0.01918079		2481.8	0.00927731
361.99	0.0725913		892	0.0085625		1421.99	0.01468802		1952	0.01937356		2482	0.00957857
362.19	0.07246578		892.2	0.00842073		1422.19	0.0154943		1952.2	0.01980485		2482.2	0.00937806
362.39	0.07172494		892.4	0.00852651		1422.39	0.0158679		1952.4	0.01958479		2482.4	0.00908927
362.59	0.07144117		892.6	0.00938546		1422.59	0.01605352		1952.6	0.01966079		2482.6	0.00857207
362.79	0.07146204		892.8	0.00972773		1422.79	0.01701		1952.8	0.01996287		2482.8	0.00789134
362.99	0.07186199		893	0.00992668		1422.99	0.01740999		1953	0.02054443		2483	0.00782588
363.19	0.07146033		893.2	0.01005674		1423.19	0.01761213		1953.2	0.02028895		2483.2	0.00659768
363.39	0.07097292		893.4	0.00983014		1423.39	0.01829437		1953.4	0.01959362		2483.4	0.0057578
363.59	0.07124211		893.6	0.00990883		1423.59	0.01831423		1953.6	0.01943592		2483.6	0.00592374
363.79	0.06993379		893.8	0.00984884		1423.79	0.01742131		1953.8	0.0195135		2483.8	0.00443293
363.99	0.07015353		894	0.00934463		1423.99	0.01738165		1954	0.01906864		2484	0.00459996
364.19	0.07031335		894.2	0.0083263		1424.19	0.01730633		1954.2	0.01915804		2484.2	0.00411237
364.39	0.07047205		894.4	0.00810128		1424.39	0.01765205		1954.4	0.01837854		2484.4	0.00505241
364.59	0.07036406		894.6	0.00870428		1424.59	0.01704158		1954.6	0.01822726		2484.6	0.00528905
364.79	0.07063014		894.8	0.00831615		1424.79	0.01604637		1954.8	0.01839188		2484.8	0.00488202
364.99	0.07211737		895	0.00831736		1424.99	0.01557623		1955	0.01787314		2485	0.0052765
365.19	0.07256654		895.2	0.00853864		1425.19	0.01412881		1955.2	0.01826211		2485.2	0.00614103
365.39	0.0724307		895.4	0.00835201		1425.39	0.01294847		1955.4	0.01846055		2485.4	0.00700301
365.59	0.0730899		895.6	0.007827		1425.59	0.01149542		1955.6	0.01835526		2485.6	0.00724949
365.79	0.07415588		895.8	0.00836338		1425.79	0.01234024		1955.8	0.0179834		2485.8	0.00751855
365.99	0.07391464		896	0.00954501		1425.99	0.0121284		1956	0.01865579		2486	0.00785362
366.19	0.07384297		896.2	0.00980214		1426.19	0.01206478		1956.2	0.01851831		2486.2	0.00789996
366.39	0.07421103		896.4	0.00878529		1426.39	0.01216919		1956.4	0.01886192		2486.4	0.00806903
366.59	0.07438954		896.6	0.00901144		1426.59	0.01277932		1956.6	0.01888567		2486.6	0.00788638
366.79	0.07471681		896.8	0.00864005		1426.79	0.01333109		1956.8	0.01907589		2486.8	0.0076448
366.99	0.07463985		897	0.00867445		1426.99	0.013306		1957	0.01896183		2487	0.00759724
367.19	0.07359723		897.2	0.00847646		1427.19	0.01312726		1957.2	0.0185846		2487.2	0.00663955
367.39	0.07233643		897.4	0.00735226		1427.39	0.01389887		1957.4	0.0187818		2487.4	0.00622354
367.59	0.07262268		897.6	0.00749101		1427.59	0.0139773		1957.6	0.01918706		2487.6	0.00618434
367.79	0.07217844		897.8	0.00714546		1427.79	0.0148078		1957.8	0.01883483		2487.8	0.00498869
367.99	0.0735467		898	0.00687179		1427.99	0.01559554		1958	0.01944257		2488	0.00448431
368.19	0.07437055		898.2	0.00663798		1428.19	0.01560617		1958.2	0.01888897		2488.2	0.00446601
368.39	0.07525023		898.4	0.00689585		1428.39	0.01561001		1958.4	0.01827877		2488.4	0.00450892
368.59	0.075149		898.6	0.00790683		1428.59	0.01557029		1958.6	0.01884469		2488.6	0.00398564
368.79	0.07540616		898.8	0.00837279		1428.79	0.01550602		1958.8	0.01910165		2488.8	0.0041825
368.99	0.07568279		899	0.00847446		1428.99	0.01551133		1959	0.01865678		2489	0.00458872
369.19	0.07481932		899.2	0.00865554		1429.19	0.01615252		1959.2	0.01860671		2489.2	0.00507673
369.39	0.07543929		899.4	0.00898069		1429.39	0.01646682		1959.4	0.01866305		2489.4	0.00576922
369.59	0.07572667		899.6	0.00959814		1429.59	0.0159975		1959.6	0.01806136		2489.6	0.0059363
369.79	0.07589487		899.8	0.01114626		1429.79	0.01698939		1959.8	0.01814364		2489.8	0.00569032
369.99	0.07608642		900	0.01120035		1429.99	0.01637091		1960	0.01776581		2490	0.00615585
370.19	0.0758013		900.2	0.01021915		1430.19	0.01700938		1960.2	0.01749723		2490.2	0.00729851
370.39	0.07642556		900.4	0.00917949		1430.39	0.01719984		1960.4	0.01836804		2490.4	0.0075243
370.59	0.07555153		900.6	0.01012895		1430.59	0.01725999		1960.6	0.01823881		2490.6	0.00705479
370.79	0.07512781		900.8	0.00989882		1430.79	0.01662162		1960.8	0.01849001		2490.8	0.00634421
370.99	0.07482331		901	0.01078339		1430.99	0.01694687		1961	0.01886619		2491	0.00671571
371.19	0.07458289		901.2	0.01108819		1431.19	0.01673739		1961.2	0.01855028		2491.2	0.00672742
371.39	0.07468676		901.4	0.01071489		1431.39	0.01644239		1961.4	0.01871076		2491.4	0.0063123
371.59	0.07496994		901.6	0.01147122		1431.59	0.01614854		1961.6	0.01833924		2491.6	0.00643337
371.79	0.0746456		901.8	0.01217259		1431.79	0.01651416		1961.8	0.01778463		2491.8	0.00591063
371.99	0.07545299		902	0.01284613		1431.99	0.01537395		1962	0.01759398		2492	0.00639366
372.19	0.07565665		902.2	0.01260764		1432.19	0.01520318		1962.2	0.01653809		2492.2	0.00646893
372.39	0.07532931		902.4	0.01299921		1432.39	0.01455671		1962.4	0.01711389		2492.4	0.00660828
372.59	0.07460248		902.6	0.0137778		1432.59	0.0143536		1962.6	0.01667895		2492.6	0.00655927
372.79	0.07379608		902.8	0.01372682		1432.79	0.01466174		1962.8	0.01692146		2492.8	0.0071623
372.99	0.07342161		903	0.01306152		1432.99	0.0153722		1963	0.01597873		2493	0.00674764
373.19	0.07376662		903.2	0.01315853		1433.19	0.01608997		1963.2	0.01652784		2493.2	0.00726377
373.39	0.07467288		903.4	0.01294512		1433.39	0.01589521		1963.4	0.01640524		2493.4	0.00666073
373.59	0.07489645		903.6	0.01319474		1433.59	0.01629292		1963.6	0.01572733		2493.6	0.00657144
373.79	0.07583883		903.8	0.01343517		1433.79	0.01693823		1963.8	0.01610905		2493.8	0.00666762
373.99	0.07597851		904	0.01257966		1433.99	0.01698702		1964	0.01654868		2494	0.00697472
374.19	0.07644375		904.2	0.0117933		1434.19	0.01735703		1964.2	0.01778625		2494.2	0.00671878
374.39	0.07804642		904.4	0.01169651		1434.39	0.01754111		1964.4	0.0185452		2494.4	0.00577233
374.59	0.07806303		904.6	0.0121795		1434.59	0.0172396		1964.6	0.01878179		2494.6	0.00512179
374.79	0.07877338		904.8	0.01220433		1434.79	0.01734098		1964.8	0.01928298		2494.8	0.00605279
374.99	0.07865743		905	0.0126295		1434.99	0.01737685		1965	0.01956255		2495	0.00615971
375.19	0.07855117		905.2	0.01190725		1435.19	0.01596577		1965.2	0.01893994		2495.2	0.00571701
375.39	0.07802507		905.4	0.01198592		1435.39	0.01531707		1965.4	0.01939644		2495.4	0.00561689
375.59	0.07775162		905.6	0.01192308		1435.59	0.0154761		1965.6	0.0187689		2495.6	0.00655233
375.79	0.07733783		905.8	0.01164349		1435.79	0.01487886		1965.8	0.01848613		2495.8	0.00743081
375.99	0.07719286		906	0.01071111		1435.99	0.0136134		1966	0.01880052		2496	0.00834578
376.19	0.07616493		906.2	0.0101173		1436.19	0.01320714		1966.2	0.019319		2496.2	0.00918761
376.39	0.07573177		906.4	0.0101697		1436.39	0.013327		1966.4	0.01976024		2496.4	0.01016265
376.59	0.07503764		906.6	0.00967634		1436.59	0.01360008		1966.6	0.01915105		2496.6	0.01023583
376.79	0.07462477		906.8	0.00957646		1436.79	0.0133525		1966.8	0.02056526		2496.8	0.01048816
376.99	0.07486679		907	0.01005305		1436.99	0.01404102		1967	0.0203799		2497	0.00973951
377.19	0.07530577		907.2	0.00995566		1437.19	0.01346085		1967.2	0.02141688		2497.2	0.01014373
377.39	0.07554536		907.4	0.00989937		1437.39	0.01365348		1967.4	0.02049414		2497.4	0.00926581
377.59	0.07575894		907.6	0.01044672		1437.59	0.01364825		1967.6	0.02020566		2497.6	0.00942526
377.79	0.07598686		907.8	0.00997738		1437.79	0.0131295		1967.8	0.02111006		2497.8	0.00839504
377.99	0.07600652		908	0.00931497		1437.99	0.01310392		1968	0.02129108		2498	0.00724434
378.19	0.07726569		908.2	0.00898951		1438.19	0.01342718		1968.2	0.02146351		2498.2	0.00605536
378.39	0.0780252		908.4	0.00919778		1438.39	0.01338046		1968.4	0.02091732		2498.4	0.0051166
378.59	0.07770471		908.6	0.00966114		1438.59	0.01327863		1968.6	0.02025917		2498.6	0.00448128
378.79	0.07777849		908.8	0.00979491		1438.79	0.01323816		1968.8	0.01957222		2498.8	0.0040025
378.99	0.07750513		909	0.00962508		1438.99	0.01281004		1969	0.01896101		2499	0.00247829
379.19	0.07767849		909.2	0.0099143		1439.19	0.01271048		1969.2	0.01830429		2499.2	0.00211633
379.39	0.07779107		909.4	0.01058102		1439.39	0.01308822		1969.4	0.01760075		2499.4	0.00217175
379.59	0.0779537		909.6	0.01048149		1439.59	0.0134202		1969.6	0.01661274		2499.6	0.00248176
379.79	0.07750175		909.8	0.01071295		1439.79	0.01297207		1969.8	0.01608418		2499.8	0.00249562
379.99	0.07750175		910	0.01071295		1439.99	0.01297207		1970	0.01608418		2500	0.00249562
380.19	0.07697291		910.2	0.01101935		1440.19	0.01231493		1970.2	0.0157259		2500.2	0.00195953
380.39	0.07635858		910.4	0.01199487		1440.39	0.01263601		1970.4	0.01493327		2500.4	0.00162348
380.59	0.07595702		910.6	0.01300731		1440.59	0.01295931		1970.6	0.0146606		2500.6	0.00066537
380.79	0.07523465		910.8	0.01381729		1440.79	0.01343633		1970.8	0.01419303		2500.8	-0.00014091
380.99	0.07414438		911	0.01481882		1440.99	0.01378939		1971	0.01411133		2501	-0.00071242
381.19	0.07428051		911.2	0.01563602		1441.19	0.01464389		1971.2	0.01383482		2501.2	-0.00176712
381.39	0.07360441		911.4	0.01652287		1441.39	0.01510675		1971.4	0.01409246		2501.4	-0.00237982
381.59	0.07341808		911.6	0.01655546		1441.59	0.01537325		1971.6	0.0136776		2501.6	-0.00212237
381.79	0.07315156		911.8	0.01595245		1441.79	0.01602482		1971.8	0.014103		2501.8	-0.00262389
381.99	0.07298017		912	0.01664825		1441.99	0.01614122		1972	0.01465094		2502	-0.00316277
382.19	0.073447		912.2	0.01539859		1442.19	0.01657725		1972.2	0.0147764		2502.2	-0.00341397
382.39	0.07261642		912.4	0.01524835		1442.39	0.01774653		1972.4	0.01565419		2502.4	-0.00419813
382.59	0.07292683		912.6	0.01503967		1442.59	0.01748143		1972.6	0.01594698		2502.6	-0.00361662
382.79	0.07297381		912.8	0.01505877		1442.79	0.01783248		1972.8	0.01631132		2502.8	-0.00439941
382.99	0.07168084		913	0.01569533		1442.99	0.01817645		1973	0.01606013		2503	-0.00431934
383.19	0.07066013		913.2	0.01538714		1443.19	0.01830186		1973.2	0.01550219		2503.2	-0.00387332
383.39	0.06924013		913.4	0.01524133		1443.39	0.01884178		1973.4	0.01521168		2503.4	-0.00365191
383.59	0.06812819		913.6	0.01443493		1443.59	0.01923769		1973.6	0.01523493		2503.6	-0.00281567
383.79	0.06686363		913.8	0.01426882		1443.79	0.01953501		1973.8	0.01451556		2503.8	-0.0016107
383.99	0.0667699		914	0.01373976		1443.99	0.01890474		1974	0.01433686		2504	-0.00134218
384.19	0.06577693		914.2	0.01281232		1444.19	0.01779556		1974.2	0.01433305		2504.2	-0.00109718
384.39	0.06496106		914.4	0.01317358		1444.39	0.01784062		1974.4	0.0134083		2504.4	-0.00088032
384.59	0.06442536		914.6	0.01289983		1444.59	0.01707732		1974.6	0.01290313		2504.6	-0.00024599
384.79	0.0633723		914.8	0.01284081		1444.79	0.0167477		1974.8	0.01260394		2504.8	0.00057909
384.99	0.06298358		915	0.0132434		1444.99	0.01700982		1975	0.01176736		2505	0.00045508
385.19	0.06394691		915.2	0.01330396		1445.19	0.01730626		1975.2	0.01110253		2505.2	0.0004907
385.39	0.06376557		915.4	0.01293882		1445.39	0.01683703		1975.4	0.01064765		2505.4	0.00158688
385.59	0.06518107		915.6	0.01267802		1445.59	0.01679403		1975.6	0.01006138		2505.6	0.00198315
385.79	0.06564001		915.8	0.01268548		1445.79	0.01699869		1975.8	0.01060877		2505.8	0.00087324
385.99	0.06650338		916	0.01260177		1445.99	0.01641212		1976	0.01092825		2506	0.00020502
386.19	0.06702099		916.2	0.0111794		1446.19	0.01654265		1976.2	0.01160346		2506.2	-0.00002896
386.39	0.06738477		916.4	0.01122978		1446.39	0.01632301		1976.4	0.01231423		2506.4	0.0000047
386.59	0.06729003		916.6	0.01163756		1446.59	0.01575258		1976.6	0.01288695		2506.6	0.00032562
386.79	0.06637323		916.8	0.01175957		1446.79	0.01550328		1976.8	0.01357884		2506.8	0.00028239
386.99	0.06551064		917	0.01246171		1446.99	0.01570843		1977	0.01326292		2507	-0.00005151
387.19	0.06465941		917.2	0.01261971		1447.19	0.01573583		1977.2	0.01392391		2507.2	0.00017575
387.39	0.06412215		917.4	0.01264211		1447.39	0.0153603		1977.4	0.01475546		2507.4	0.00067984
387.59	0.06257342		917.6	0.01247332		1447.59	0.01551239		1977.6	0.01548174		2507.6	0.00104832
387.79	0.06237711		917.8	0.01225141		1447.79	0.01598436		1977.8	0.01543384		2507.8	0.00106191
387.99	0.06219		918	0.01085054		1447.99	0.01557895		1978	0.01588066		2508	0.00005089
388.19	0.06140906		918.2	0.010489		1448.19	0.01501807		1978.2	0.01542124		2508.2	-0.00041238
388.39	0.06035933		918.4	0.01067774		1448.39	0.01521591		1978.4	0.0146236		2508.4	0.00080098
388.59	0.05995591		918.6	0.01042781		1448.59	0.01504152		1978.6	0.01514398		2508.6	0.00077861
388.79	0.05985644		918.8	0.01107176		1448.79	0.01634226		1978.8	0.01465931		2508.8	0.0005697
388.99	0.05948349		919	0.01134591		1448.99	0.01747066		1979	0.01325475		2509	0.00045479
389.19	0.05945777		919.2	0.01175986		1449.19	0.0183687		1979.2	0.01267136		2509.2	0.00138855
389.39	0.05913831		919.4	0.01248136		1449.39	0.01874715		1979.4	0.01171947		2509.4	0.00191757
389.59	0.05983829		919.6	0.01350656		1449.59	0.01956545		1979.6	0.0115848		2509.6	0.00179024
389.79	0.05951753		919.8	0.01307177		1449.79	0.01986569		1979.8	0.01178137		2509.8	0.00113905
389.99	0.05962595		920	0.01283833		1449.99	0.02033328		1980	0.01223645		2510	0.00088821
390.19	0.05930493		920.2	0.01345758		1450.19	0.0203678		1980.2	0.01213812		2510.2	0.0016789
390.39	0.05953558		920.4	0.01343389		1450.39	0.01986044		1980.4	0.01221303		2510.4	0.00216019
390.59	0.05896667		920.6	0.01409068		1450.59	0.01865904		1980.6	0.01224534		2510.6	0.00198613
390.79	0.05957569		920.8	0.01371507		1450.79	0.0181614		1980.8	0.01277654		2510.8	0.00162691
390.99	0.05853173		921	0.01473324		1450.99	0.01776559		1981	0.01317506		2511	0.00149174
391.19	0.0583562		921.2	0.01510754		1451.19	0.01737128		1981.2	0.01353043		2511.2	0.00160269
391.39	0.05858587		921.4	0.01465608		1451.39	0.01660332		1981.4	0.01338666		2511.4	0.00142289
391.59	0.05860156		921.6	0.01454527		1451.59	0.0170066		1981.6	0.01335941		2511.6	0.00141641
391.79	0.05990183		921.8	0.01425696		1451.79	0.01638806		1981.8	0.01286		2511.8	0.00039446
391.99	0.05988346		922	0.01359823		1451.99	0.01597635		1982	0.01384198		2512	-0.00101618
392.19	0.05966482		922.2	0.01407263		1452.19	0.01574579		1982.2	0.01346431		2512.2	-0.00100618
392.39	0.05939031		922.4	0.01362679		1452.39	0.01560274		1982.4	0.01364776		2512.4	-0.00041279
392.59	0.06007388		922.6	0.01448044		1452.59	0.01495717		1982.6	0.01501844		2512.6	-0.00135116
392.79	0.06043387		922.8	0.01455555		1452.79	0.01576768		1982.8	0.01445741		2512.8	-0.00122697
392.99	0.05975014		923	0.01466358		1452.99	0.0156994		1983	0.01469907		2513	-0.00100135
393.19	0.06000297		923.2	0.01433244		1453.19	0.01567068		1983.2	0.01468961		2513.2	-0.00111167
393.39	0.0597641		923.4	0.01459207		1453.39	0.01570055		1983.4	0.01465063		2513.4	-0.00098017
393.59	0.05982172		923.6	0.01434683		1453.59	0.01522398		1983.6	0.01484184		2513.6	-0.0010604
393.79	0.0590672		923.8	0.01496173		1453.79	0.01612358		1983.8	0.01487376		2513.8	-0.00235277
393.99	0.05887487		924	0.01532061		1453.99	0.01664051		1984	0.01470921		2514	-0.00150263
394.19	0.05867788		924.2	0.01553701		1454.19	0.01624121		1984.2	0.01434432		2514.2	-0.00144538
394.39	0.05921501		924.4	0.01524298		1454.39	0.01668449		1984.4	0.01441496		2514.4	-0.00119417
394.59	0.0591094		924.6	0.01578358		1454.59	0.01684871		1984.6	0.01428119		2514.6	-0.00156469
394.79	0.05881945		924.8	0.01602783		1454.79	0.01865596		1984.8	0.01465077		2514.8	-0.00106104
394.99	0.05843782		925	0.01611703		1454.99	0.01907828		1985	0.01466792		2515	-0.00099197
395.19	0.05919635		925.2	0.01569903		1455.19	0.01908719		1985.2	0.01390607		2515.2	-0.00072346
395.39	0.05985641		925.4	0.0157726		1455.39	0.01876278		1985.4	0.013652		2515.4	0.00001671
395.59	0.06040756		925.6	0.01618091		1455.59	0.01896053		1985.6	0.01361511		2515.6	-0.00028561
395.79	0.06011747		925.8	0.01552626		1455.79	0.01866427		1985.8	0.01319147		2515.8	-0.0004161
395.99	0.05914909		926	0.01515667		1455.99	0.01842735		1986	0.01387721		2516	0.00002773
396.19	0.05915673		926.2	0.01520184		1456.19	0.01776085		1986.2	0.01192747		2516.2	0.00019956
396.39	0.05953164		926.4	0.01477964		1456.39	0.01727532		1986.4	0.01226355		2516.4	0.00089088
396.59	0.06008403		926.6	0.01482473		1456.59	0.01712355		1986.6	0.01293203		2516.6	0.0008906
396.79	0.05975446		926.8	0.0136538		1456.79	0.01730703		1986.8	0.01304601		2516.8	-0.00017251
396.99	0.05947172		927	0.01312252		1456.99	0.01681109		1987	0.01311961		2517	-0.0000639
397.19	0.05929804		927.2	0.01203501		1457.19	0.01665802		1987.2	0.01319312		2517.2	-0.00028256
397.39	0.05864457		927.4	0.01202909		1457.39	0.01630952		1987.4	0.01320129		2517.4	-0.00032724
397.59	0.05800783		927.6	0.01215545		1457.59	0.01562239		1987.6	0.01332191		2517.6	-0.00051525
397.79	0.05733804		927.8	0.01288737		1457.79	0.01718834		1987.8	0.01345867		2517.8	-0.00096905
397.99	0.05748655		928	0.01179614		1457.99	0.01663991		1988	0.01313905		2518	-0.00077883
398.19	0.05798855		928.2	0.01172794		1458.19	0.01725194		1988.2	0.01323129		2518.2	-0.00174905
398.39	0.05869097		928.4	0.01196375		1458.39	0.01862483		1988.4	0.01487388		2518.4	-0.00133499
398.59	0.05809473		928.6	0.01321385		1458.59	0.01980234		1988.6	0.01494031		2518.6	-0.00160936
398.79	0.05797663		928.8	0.01440688		1458.79	0.02046353		1988.8	0.01496922		2518.8	-0.00133888
398.99	0.05791111		929	0.01465721		1458.99	0.01987624		1989	0.01541789		2519	-0.00130186
399.19	0.05773118		929.2	0.0150591		1459.19	0.01983435		1989.2	0.01499837		2519.2	-0.00041918
399.39	0.05793408		929.4	0.01546683		1459.39	0.01945737		1989.4	0.01529283		2519.4	0.00007853
399.59	0.05752586		929.6	0.01450918		1459.59	0.02008166		1989.6	0.01640636		2519.6	-0.00026863
399.79	0.05664272		929.8	0.01395985		1459.79	0.02061839		1989.8	0.01658013		2519.8	0.00067314
399.99	0.05598437		930	0.01458716		1459.99	0.02101998		1990	0.01688954		2520	0.00084118
400.19	0.05680935		930.2	0.01486519		1460.19	0.02082349		1990.2	0.0152495		2520.2	0.00136016
400.39	0.05663106		930.4	0.01470472		1460.39	0.02205907		1990.4	0.01598419		2520.4	0.00224377
400.59	0.05651893		930.6	0.01473087		1460.59	0.02226956		1990.6	0.0156433		2520.6	0.00190897
400.79	0.05513445		930.8	0.01425816		1460.79	0.02213601		1990.8	0.01624337		2520.8	0.00123571
400.99	0.05525504		931	0.01343809		1460.99	0.02121632		1991	0.01515597		2521	0.00181643
401.19	0.05480346		931.2	0.01379691		1461.19	0.02097691		1991.2	0.01465861		2521.2	0.00168571
401.39	0.05424407		931.4	0.01368575		1461.39	0.01899726		1991.4	0.01389739		2521.4	0.00182126
401.59	0.05369814		931.6	0.01378699		1461.59	0.01776048		1991.6	0.01311609		2521.6	0.00162607
401.79	0.05395417		931.8	0.01337608		1461.79	0.0174533		1991.8	0.01246832		2521.8	0.00111461
401.99	0.05441094		932	0.01250701		1461.99	0.01705191		1992	0.01164588		2522	0.00090753
402.19	0.05444482		932.2	0.01313223		1462.19	0.01670465		1992.2	0.01169279		2522.2	0.00027233
402.39	0.0548369		932.4	0.01324804		1462.39	0.01719639		1992.4	0.01148065		2522.4	0.00023288
402.59	0.054629		932.6	0.01406253		1462.59	0.01698147		1992.6	0.00886359		2522.6	0.00079977
402.79	0.05452449		932.8	0.01459215		1462.79	0.01652309		1992.8	0.00918161		2522.8	0.00050084
402.99	0.05472245		933	0.01461433		1462.99	0.01705778		1993	0.00923818		2523	0.0005169
403.19	0.05528459		933.2	0.01427946		1463.19	0.01758144		1993.2	0.00931569		2523.2	0.00101207
403.39	0.05549686		933.4	0.01433391		1463.39	0.01713385		1993.4	0.01004543		2523.4	0.00069824
403.59	0.05556853		933.6	0.01371379		1463.59	0.01802893		1993.6	0.01038608		2523.6	0.00033715
403.79	0.05665441		933.8	0.01390764		1463.79	0.01908813		1993.8	0.00990001		2523.8	0.00115397
403.99	0.05672356		934	0.01394581		1463.99	0.02045964		1994	0.01030679		2524	0.00172093
404.19	0.05701998		934.2	0.01427702		1464.19	0.02038637		1994.2	0.00995335		2524.2	0.00172022
404.39	0.05656705		934.4	0.0142399		1464.39	0.02189099		1994.4	0.01087337		2524.4	0.00130065
404.59	0.05645216		934.6	0.01423997		1464.59	0.02161522		1994.6	0.01163185		2524.6	0.00103559
404.79	0.05627551		934.8	0.01400112		1464.79	0.02162195		1994.8	0.01253466		2524.8	0.00087359
404.99	0.05695522		935	0.01415919		1464.99	0.02179263		1995	0.01265125		2525	0.00067915
405.19	0.05583786		935.2	0.01398231		1465.19	0.02221626		1995.2	0.01355067		2525.2	0.00056608
405.39	0.05491142		935.4	0.01399457		1465.39	0.02111707		1995.4	0.01465294		2525.4	-0.00008513
405.59	0.0547868		935.6	0.01373931		1465.59	0.02072171		1995.6	0.01593465		2525.6	-0.00063366
405.79	0.05436621		935.8	0.01333838		1465.79	0.02065593		1995.8	0.01689542		2525.8	-0.00116174
405.99	0.05378425		936	0.01304631		1465.99	0.02002796		1996	0.01685175		2526	-0.00086831
406.19	0.05359336		936.2	0.01351366		1466.19	0.01907265		1996.2	0.01694782		2526.2	-0.00223374
406.39	0.05429859		936.4	0.01306675		1466.39	0.01979483		1996.4	0.01624091		2526.4	-0.00193766
406.59	0.05382141		936.6	0.01365121		1466.59	0.01923086		1996.6	0.01576173		2526.6	-0.00168416
406.79	0.05391769		936.8	0.01379692		1466.79	0.01950321		1996.8	0.01692822		2526.8	-0.00179968
406.99	0.05402054		937	0.01336999		1466.99	0.01937221		1997	0.01717156		2527	-0.00196468
407.19	0.05392965		937.2	0.01256698		1467.19	0.01841912		1997.2	0.01717253		2527.2	-0.00235128
407.39	0.0532452		937.4	0.01259223		1467.39	0.0168869		1997.4	0.01693087		2527.4	-0.00240237
407.59	0.0532194		937.6	0.01190543		1467.59	0.01650557		1997.6	0.0168157		2527.6	-0.001768
407.79	0.05424422		937.8	0.0123974		1467.79	0.01727345		1997.8	0.01592742		2527.8	-0.00132446
407.99	0.05340503		938	0.01319618		1467.99	0.01790048		1998	0.01565279		2528	-0.00205087
408.19	0.0535376		938.2	0.01438526		1468.19	0.0180626		1998.2	0.01520854		2528.2	-0.00207216
408.39	0.0541205		938.4	0.01505729		1468.39	0.01859282		1998.4	0.01555566		2528.4	-0.00098055
408.59	0.05442847		938.6	0.01582172		1468.59	0.019579		1998.6	0.0151116		2528.6	-0.00100327
408.79	0.05480115		938.8	0.01654626		1468.79	0.01996224		1998.8	0.0148408		2528.8	-0.00072625
408.99	0.05412311		939	0.01608327		1468.99	0.02045519		1999	0.01382878		2529	-0.00053809
409.19	0.05318067		939.2	0.01596516		1469.19	0.02093738		1999.2	0.01387717		2529.2	-0.0006252
409.39	0.05339782		939.4	0.01703284		1469.39	0.0204248		1999.4	0.01353331		2529.4	-0.00108641
409.59	0.05317446		939.6	0.01630783		1469.59	0.02040502		1999.6	0.0137401		2529.6	-0.00080034
409.79	0.05276548		939.8	0.01636823		1469.79	0.02078048		1999.8	0.01292089		2529.8	-0.00096048
409.99	0.05306349		940	0.0165719		1469.99	0.02018516		2000	0.01310746		2530	-0.00021252
410.19	0.05277614		940.2	0.01714652		1470.19	0.0198409		2000.2	0.01334943		2530.2	-0.00029356
410.39	0.05296728		940.4	0.01597143		1470.39	0.01929511		2000.4	0.0137981		2530.4	0.00023353
410.59	0.05265004		940.6	0.01510433		1470.59	0.01819291		2000.6	0.01393062		2530.6	0.00044602
410.79	0.05246239		940.8	0.01398008		1470.79	0.01750732		2000.8	0.014308		2530.8	0.0012155
410.99	0.05135541		941	0.01260186		1470.99	0.01616361		2001	0.01467584		2531	0.00076937
411.19	0.05115233		941.2	0.01195394		1471.19	0.01518359		2001.2	0.0154571		2531.2	0.00042303
411.39	0.05040724		941.4	0.01137477		1471.39	0.01463116		2001.4	0.01584407		2531.4	0.00063701
411.59	0.05124167		941.6	0.01177765		1471.59	0.01504552		2001.6	0.01621334		2531.6	0.0005323
411.79	0.05238941		941.8	0.01301347		1471.79	0.01666268		2001.8	0.01542997		2531.8	-0.00017077
411.99	0.05238314		942	0.01340922		1471.99	0.01714211		2002	0.01603958		2532	0.00018949
412.19	0.05253418		942.2	0.01436944		1472.19	0.01744566		2002.2	0.01625553		2532.2	0.00081542
412.39	0.05285524		942.4	0.0150434		1472.39	0.01778436		2002.4	0.01638544		2532.4	0.00024407
412.59	0.05388342		942.6	0.01450144		1472.59	0.01872435		2002.6	0.01571589		2532.6	-0.0003055
412.79	0.05425162		942.8	0.01468086		1472.79	0.01840421		2002.8	0.01612163		2532.8	-0.00061891
412.99	0.05398645		943	0.01455494		1472.99	0.01912757		2003	0.01573232		2533	-0.00045798
413.19	0.05425551		943.2	0.01457338		1473.19	0.02008988		2003.2	0.01565184		2533.2	-0.00085664
413.39	0.05429381		943.4	0.01496932		1473.39	0.02026045		2003.4	0.01448935		2533.4	-0.00022646
413.59	0.05369592		943.6	0.0146194		1473.59	0.02087362		2003.6	0.01483605		2533.6	-0.00019408
413.79	0.05380476		943.8	0.01578539		1473.79	0.02104706		2003.8	0.01461646		2533.8	-0.0000332
413.99	0.05356627		944	0.01643657		1473.99	0.02034599		2004	0.01538703		2534	-0.00004522
414.19	0.05258665		944.2	0.01599489		1474.19	0.01983534		2004.2	0.01510036		2534.2	0.00061927
414.39	0.05186117		944.4	0.01521969		1474.39	0.01974571		2004.4	0.01580145		2534.4	0.00066232
414.59	0.05105667		944.6	0.01533593		1474.59	0.01945149		2004.6	0.01540511		2534.6	0.0010793
414.79	0.05026873		944.8	0.01573281		1474.79	0.0189861		2004.8	0.01495859		2534.8	0.00151895
414.99	0.04980998		945	0.01578337		1474.99	0.01911495		2005	0.01515506		2535	0.00074564
415.19	0.05002222		945.2	0.0159833		1475.19	0.01955296		2005.2	0.01547948		2535.2	-0.00009688
415.39	0.0489243		945.4	0.01604582		1475.39	0.0203447		2005.4	0.01545131		2535.4	-0.0000525
415.59	0.04930732		945.6	0.01707074		1475.59	0.0208452		2005.6	0.01534138		2535.6	0.00051734
415.79	0.04961422		945.8	0.01701854		1475.79	0.02124724		2005.8	0.01563132		2535.8	0.00050114
415.99	0.0493603		946	0.01673771		1475.99	0.02067219		2006	0.01666902		2536	0.0011358
416.19	0.05007295		946.2	0.01684436		1476.19	0.02043307		2006.2	0.01633751		2536.2	0.0004643
416.39	0.05017082		946.4	0.01608608		1476.39	0.01946571		2006.4	0.01613128		2536.4	0.00067209
416.59	0.05102006		946.6	0.01526535		1476.59	0.01935059		2006.6	0.01612516		2536.6	0.00118963
416.79	0.05190919		946.8	0.01531491		1476.79	0.01953397		2006.8	0.01628963		2536.8	0.00064144
416.99	0.05174013		947	0.01543899		1476.99	0.02013533		2007	0.01570253		2537	0.00047042
417.19	0.05163891		947.2	0.01498757		1477.19	0.01986715		2007.2	0.01439698		2537.2	0.00037678
417.39	0.05197187		947.4	0.01558566		1477.39	0.01985039		2007.4	0.01361613		2537.4	0.00071007
417.59	0.05175456		947.6	0.01539953		1477.59	0.02027131		2007.6	0.01341223		2537.6	0.00033158
417.79	0.0518992		947.8	0.01483995		1477.79	0.02056278		2007.8	0.01321939		2537.8	0.00030825
417.99	0.05194934		948	0.01462146		1477.99	0.02093778		2008	0.0141754		2538	0.00011432
418.19	0.05143127		948.2	0.01406867		1478.19	0.02158391		2008.2	0.01376176		2538.2	0.00092837
418.39	0.05092		948.4	0.0142712		1478.39	0.02168949		2008.4	0.01456473		2538.4	0.00005964
418.59	0.05135571		948.6	0.01431038		1478.59	0.02187514		2008.6	0.01432085		2538.6	0.00008452
418.79	0.05202055		948.8	0.01483011		1478.79	0.02182868		2008.8	0.01360384		2538.8	0.0005341
418.99	0.05258449		949	0.01492362		1478.99	0.02190513		2009	0.01425187		2539	-0.00007366
419.19	0.05289609		949.2	0.01527954		1479.19	0.02155789		2009.2	0.01534671		2539.2	-0.00004683
419.39	0.05306159		949.4	0.0159942		1479.39	0.02098212		2009.4	0.01632729		2539.4	0.00120087
419.59	0.05375541		949.6	0.01588825		1479.59	0.02004729		2009.6	0.01657359		2539.6	0.00177102
419.79	0.05343627		949.8	0.01495381		1479.79	0.01956127		2009.8	0.01720729		2539.8	0.00154284
419.99	0.05386828		950	0.01443548		1479.99	0.01907238		2010	0.01664807		2540	0.00200287
420.19	0.05449484		950.2	0.01418981		1480.19	0.0186196		2010.2	0.01620684		2540.2	0.00193002
420.39	0.0544616		950.4	0.01402907		1480.39	0.01795601		2010.4	0.0162795		2540.4	0.00217039
420.59	0.05527742		950.6	0.01395783		1480.59	0.01841815		2010.6	0.01612876		2540.6	0.00190662
420.79	0.05499474		950.8	0.0138132		1480.79	0.01896149		2010.8	0.01496954		2540.8	0.00105727
420.99	0.05317489		951	0.01450374		1480.99	0.01849031		2011	0.01469494		2541	0.00080117
421.19	0.05173039		951.2	0.01420338		1481.19	0.01865367		2011.2	0.01415815		2541.2	0.00050294
421.39	0.05166281		951.4	0.01396454		1481.39	0.01871563		2011.4	0.01406392		2541.4	0.00063557
421.59	0.05026131		951.6	0.01294989		1481.59	0.01905497		2011.6	0.01436443		2541.6	0.00033199
421.79	0.05030153		951.8	0.01298884		1481.79	0.01899311		2011.8	0.01430045		2541.8	0.00053679
421.99	0.04967083		952	0.0141307		1481.99	0.01979492		2012	0.0145175		2542	-0.00004403
422.19	0.04896514		952.2	0.01431741		1482.19	0.02000175		2012.2	0.01377193		2542.2	-0.00003632
422.39	0.04918865		952.4	0.01443384		1482.39	0.02014633		2012.4	0.01398406		2542.4	-0.00052266
422.59	0.04937071		952.6	0.01483073		1482.59	0.01990657		2012.6	0.0135512		2542.6	0.00003987
422.79	0.04973306		952.8	0.01556641		1482.79	0.01827854		2012.8	0.01391654		2542.8	0.00012573
422.99	0.04892434		953	0.01637945		1482.99	0.01799186		2013	0.01461484		2543	-0.00018874
423.19	0.04920792		953.2	0.01645801		1483.19	0.0178471		2013.2	0.01479891		2543.2	0.00042342
423.39	0.04936665		953.4	0.01644252		1483.39	0.01684931		2013.4	0.01381155		2543.4	0.00085751
423.59	0.04876324		953.6	0.01550394		1483.59	0.0169785		2013.6	0.01322576		2543.6	0.00085684
423.79	0.04884135		953.8	0.01519416		1483.79	0.01753335		2013.8	0.01259878		2543.8	0.00088206
423.99	0.05045656		954	0.01510679		1483.99	0.01800482		2014	0.01265704		2544	0.00115671
424.19	0.05026819		954.2	0.01467478		1484.19	0.01864386		2014.2	0.01364968		2544.2	0.00080639
424.39	0.05014349		954.4	0.01449153		1484.39	0.01906713		2014.4	0.01381174		2544.4	0.00125332
424.59	0.04950248		954.6	0.01437985		1484.59	0.01863424		2014.6	0.01301852		2544.6	0.00165435
424.79	0.04863009		954.8	0.01431964		1484.79	0.01944181		2014.8	0.01299901		2544.8	0.00113307
424.99	0.04776515		955	0.01462861		1484.99	0.01962966		2015	0.01329067		2545	0.00087047
425.19	0.04766588		955.2	0.01389391		1485.19	0.02073169		2015.2	0.01280462		2545.2	0.00053828
425.39	0.04739492		955.4	0.01467383		1485.39	0.02037577		2015.4	0.01242972		2545.4	0.00052338
425.59	0.04634622		955.6	0.01513901		1485.59	0.02120409		2015.6	0.01224373		2545.6	0.00041237
425.79	0.04723042		955.8	0.01650054		1485.79	0.02130712		2015.8	0.01252036		2545.8	-0.00016712
425.99	0.04703294		956	0.01658096		1485.99	0.02184346		2016	0.01270364		2546	-0.00010407
426.19	0.04666749		956.2	0.0173298		1486.19	0.02140936		2016.2	0.01391672		2546.2	0.00004116
426.39	0.04686959		956.4	0.01747168		1486.39	0.02129939		2016.4	0.01459404		2546.4	0.00040217
426.59	0.04538283		956.6	0.01782222		1486.59	0.02076256		2016.6	0.01523122		2546.6	0.00011646
426.79	0.04511075		956.8	0.01769107		1486.79	0.02062483		2016.8	0.01542273		2546.8	-0.00013882
426.99	0.04491866		957	0.0179942		1486.99	0.02122333		2017	0.01497615		2547	0.00062517
427.19	0.04637185		957.2	0.01761224		1487.19	0.02077198		2017.2	0.01443316		2547.2	0.00053485
427.39	0.04616898		957.4	0.01794894		1487.39	0.02075247		2017.4	0.0136835		2547.4	0.00047957
427.59	0.04687247		957.6	0.01801367		1487.59	0.02126952		2017.6	0.01409396		2547.6	0.00116573
427.79	0.04748562		957.8	0.01794141		1487.79	0.02172303		2017.8	0.01475998		2547.8	0.00084096
427.99	0.04811827		958	0.01695792		1487.99	0.02122326		2018	0.01508186		2548	0.0007026
428.19	0.04768074		958.2	0.01574524		1488.19	0.02107264		2018.2	0.01557517		2548.2	-0.00001541
428.39	0.04801566		958.4	0.01567858		1488.39	0.02086386		2018.4	0.01527665		2548.4	0.00038575
428.59	0.04857685		958.6	0.01441508		1488.59	0.02037855		2018.6	0.01491736		2548.6	-0.0006804
428.79	0.04891947		958.8	0.01439694		1488.79	0.02179201		2018.8	0.01546999		2548.8	-0.00161946
428.99	0.04790783		959	0.01445133		1488.99	0.02151762		2019	0.01455986		2549	-0.00225426
429.19	0.0481936		959.2	0.01439268		1489.19	0.02124633		2019.2	0.01369251		2549.2	-0.00293901
429.39	0.04781233		959.4	0.01505064		1489.39	0.02093159		2019.4	0.01248583		2549.4	-0.00365036
429.59	0.04850797		959.6	0.01473253		1489.59	0.02093021		2019.6	0.01278051		2549.6	-0.00311307
429.79	0.04892959		959.8	0.01484253		1489.79	0.02014583		2019.8	0.01354932		2549.8	-0.00304943
429.99	0.04820876		960	0.01466612		1489.99	0.01955369		2020	0.01317046		2550	-0.00151055
430.19	0.04786177		960.2	0.01450247		1490.19	0.01867173		2020.2	0.01503089		2550.2	-0.00154684
430.39	0.04769884		960.4	0.01391496		1490.39	0.01891392		2020.4	0.01541467		2550.4	-0.00146984
430.59	0.04691881		960.6	0.01312123		1490.59	0.01916137		2020.6	0.01485718		2550.6	-0.00106926
430.79	0.0471837		960.8	0.01313088		1490.79	0.02001597		2020.8	0.01450273		2550.8	-0.00076577
430.99	0.04729636		961	0.01449465		1490.99	0.01908727		2021	0.0141052		2551	-0.00030897
431.19	0.0474904		961.2	0.01502408		1491.19	0.01889997		2021.2	0.01327577		2551.2	-0.00008121
431.39	0.04718322		961.4	0.0143659		1491.39	0.01916187		2021.4	0.01280917		2551.4	-0.00000732
431.59	0.04759509		961.6	0.01350821		1491.59	0.0188109		2021.6	0.0126453		2551.6	0.00023648
431.79	0.04849371		961.8	0.01304548		1491.79	0.01887488		2021.8	0.0125078		2551.8	-0.00028389
431.99	0.04960998		962	0.01279464		1491.99	0.01890024		2022	0.01237001		2552	0.00011942
432.19	0.04897779		962.2	0.01213377		1492.19	0.01922815		2022.2	0.01258936		2552.2	-0.00027384
432.39	0.04973462		962.4	0.01160769		1492.39	0.02028935		2022.4	0.01261161		2552.4	0.00066798
432.59	0.0504375		962.6	0.01126009		1492.59	0.0214474		2022.6	0.01341025		2552.6	0.00072371
432.79	0.05014923		962.8	0.01218468		1492.79	0.02254422		2022.8	0.01288698		2552.8	0.00088205
432.99	0.04971659		963	0.01185845		1492.99	0.02242074		2023	0.01212314		2553	0.00102597
433.19	0.05037945		963.2	0.01165627		1493.19	0.02306567		2023.2	0.0112784		2553.2	0.00133374
433.39	0.05117598		963.4	0.01202929		1493.39	0.02310433		2023.4	0.01035893		2553.4	0.00145103
433.59	0.05207385		963.6	0.0120967		1493.59	0.02290623		2023.6	0.01126123		2553.6	0.00194979
433.79	0.05267152		963.8	0.01248735		1493.79	0.02207331		2023.8	0.01192383		2553.8	0.00157749
433.99	0.05224058		964	0.01337455		1493.99	0.02053981		2024	0.01219494		2554	0.00192239
434.19	0.05192731		964.2	0.01324514		1494.19	0.02086604		2024.2	0.01402376		2554.2	0.00141051
434.39	0.05103354		964.4	0.01393126		1494.39	0.02156277		2024.4	0.01405775		2554.4	0.00039191
434.59	0.05079913		964.6	0.01391621		1494.59	0.02142898		2024.6	0.01406983		2554.6	0.00095169
434.79	0.0507751		964.8	0.01476671		1494.79	0.02136444		2024.8	0.0143099		2554.8	-0.00033555
434.99	0.05032043		965	0.01511422		1494.99	0.01981624		2025	0.01406303		2555	-0.00061813
435.19	0.04973422		965.2	0.0143931		1495.19	0.02003516		2025.2	0.01416509		2555.2	-0.00096145
435.39	0.04950094		965.4	0.01341018		1495.39	0.01979611		2025.4	0.01435396		2555.4	-0.00261582
435.59	0.04917725		965.6	0.01358017		1495.59	0.01952277		2025.6	0.01471855		2555.6	-0.00303339
435.79	0.04992268		965.8	0.01415814		1495.79	0.01968507		2025.8	0.01521402		2555.8	-0.002229
435.99	0.04958955		966	0.01406688		1495.99	0.02026027		2026	0.0157403		2556	-0.00147465
436.19	0.04879298		966.2	0.01334772		1496.19	0.01965013		2026.2	0.01467206		2556.2	-0.00101389
436.39	0.0488907		966.4	0.01332226		1496.39	0.02050939		2026.4	0.01508731		2556.4	0.00042199
436.59	0.04860567		966.6	0.0136278		1496.59	0.02130072		2026.6	0.01458448		2556.6	0.00134986
436.79	0.04821202		966.8	0.01325309		1496.79	0.02172715		2026.8	0.01284039		2556.8	0.00049038
436.99	0.04885439		967	0.01276171		1496.99	0.02220889		2027	0.01254326		2557	0.00060549
437.19	0.04886621		967.2	0.01271902		1497.19	0.02173909		2027.2	0.01283477		2557.2	0.00061733
437.39	0.04968313		967.4	0.01329812		1497.39	0.0207908		2027.4	0.01282064		2557.4	-0.00015067
437.59	0.05016677		967.6	0.01338479		1497.59	0.02073974		2027.6	0.01339716		2557.6	0.00008092
437.79	0.05111785		967.8	0.01353022		1497.79	0.0202889		2027.8	0.01322723		2557.8	-0.00008223
437.99	0.05058517		968	0.0134045		1497.99	0.01995792		2028	0.01348858		2558	-0.00005582
438.19	0.05101133		968.2	0.01272274		1498.19	0.02032728		2028.2	0.01353922		2558.2	-0.0007601
438.39	0.05116136		968.4	0.01263118		1498.39	0.01986764		2028.4	0.01326384		2558.4	-0.00132753
438.59	0.05135909		968.6	0.01217524		1498.59	0.01932325		2028.6	0.01341173		2558.6	-0.00160079
438.79	0.05168447		968.8	0.01154557		1498.79	0.01944391		2028.8	0.01320522		2558.8	-0.00290809
438.99	0.05136879		969	0.01103084		1498.99	0.0194709		2029	0.0137368		2559	-0.00274469
439.19	0.05134766		969.2	0.01061451		1499.19	0.01872958		2029.2	0.01440651		2559.2	-0.00322417
439.39	0.05182957		969.4	0.0107733		1499.39	0.01863212		2029.4	0.01365379		2559.4	-0.00383232
439.59	0.05138301		969.6	0.01132779		1499.59	0.01842128		2029.6	0.0140981		2559.6	-0.00356478
439.79	0.05102248		969.8	0.01163664		1499.79	0.01880128		2029.8	0.01435423		2559.8	-0.00240262
439.99	0.05079046		970	0.01190205		1499.99	0.01897955		2030	0.01472497		2560	-0.00201716
440.19	0.049802		970.2	0.01172061		1500.19	0.01860175		2030.2	0.01422643		2560.2	-0.00115707
440.39	0.04819093		970.4	0.01216307		1500.39	0.01930728		2030.4	0.01499117		2560.4	-0.00037336
440.59	0.04725831		970.6	0.01282231		1500.59	0.02018467		2030.6	0.01445297		2560.6	0.00033938
440.79	0.04719936		970.8	0.01336366		1500.79	0.02037182		2030.8	0.015085		2560.8	0.00062138
440.99	0.04640359		971	0.01365209		1500.99	0.02070667		2031	0.01573776		2561	0.00109782
441.19	0.0454186		971.2	0.01376315		1501.19	0.02056533		2031.2	0.01646636		2561.2	0.00150124
441.39	0.04533417		971.4	0.01400143		1501.39	0.02109645		2031.4	0.01636657		2561.4	0.00145128
441.59	0.04520448		971.6	0.01429376		1501.59	0.02163909		2031.6	0.01648299		2561.6	0.00188384
441.79	0.04641785		971.8	0.01412016		1501.79	0.02111138		2031.8	0.01592449		2561.8	0.00103103
441.99	0.04631847		972	0.0139129		1501.99	0.02041547		2032	0.01619141		2562	0.00088469
442.19	0.04695815		972.2	0.01490631		1502.19	0.01971733		2032.2	0.01622415		2562.2	0.00100943
442.39	0.04725174		972.4	0.01501464		1502.39	0.01981306		2032.4	0.01624285		2562.4	0.00122517
442.59	0.04728312		972.6	0.01529965		1502.59	0.02016526		2032.6	0.01626838		2562.6	0.00011536
442.79	0.04823031		972.8	0.01425883		1502.79	0.02027635		2032.8	0.0165247		2562.8	0.00002821
442.99	0.0485556		973	0.01480997		1502.99	0.01977558		2033	0.01687018		2563	-0.00036174
443.19	0.04908949		973.2	0.01507584		1503.19	0.01918552		2033.2	0.01660647		2563.2	-0.001007
443.39	0.04950734		973.4	0.01582882		1503.39	0.01927742		2033.4	0.01614482		2563.4	-0.00170628
443.59	0.04933449		973.6	0.01636345		1503.59	0.01955543		2033.6	0.01648415		2563.6	-0.00229349
443.79	0.04878411		973.8	0.01640935		1503.79	0.01972712		2033.8	0.01667066		2563.8	-0.00090271
443.99	0.04920107		974	0.0163297		1503.99	0.01967083		2034	0.01700412		2564	-0.00000439
444.19	0.04927605		974.2	0.01537076		1504.19	0.01996172		2034.2	0.0169065		2564.2	0.00076999
444.39	0.04869373		974.4	0.0160717		1504.39	0.02120882		2034.4	0.0172536		2564.4	0.001588
444.59	0.04859385		974.6	0.01630965		1504.59	0.02150775		2034.6	0.01679937		2564.6	0.0026339
444.79	0.04842592		974.8	0.01552662		1504.79	0.02132899		2034.8	0.01781647		2564.8	0.00391785
444.99	0.04783095		975	0.01487481		1504.99	0.02192955		2035	0.01657731		2565	0.00401401
445.19	0.04770991		975.2	0.01444133		1505.19	0.02183458		2035.2	0.01567628		2565.2	0.00414601
445.39	0.0477926		975.4	0.0153254		1505.39	0.02210681		2035.4	0.01567437		2565.4	0.00387723
445.59	0.04817697		975.6	0.01524336		1505.59	0.0216735		2035.6	0.01593233		2565.6	0.00388438
445.79	0.0491955		975.8	0.01524758		1505.79	0.02179773		2035.8	0.01607977		2565.8	0.00359647
445.99	0.04902937		976	0.01573794		1505.99	0.02237419		2036	0.01633668		2566	0.00335222
446.19	0.04894084		976.2	0.01603593		1506.19	0.02274473		2036.2	0.01644266		2566.2	0.00354844
446.39	0.04805858		976.4	0.01557981		1506.39	0.02290514		2036.4	0.01535945		2566.4	0.00294216
446.59	0.0468837		976.6	0.01538119		1506.59	0.02292468		2036.6	0.01564842		2566.6	0.00161793
446.79	0.04682591		976.8	0.01508254		1506.79	0.02274463		2036.8	0.01642275		2566.8	0.000595
446.99	0.0457812		977	0.0157353		1506.99	0.02259338		2037	0.01632899		2567	-0.00096219
447.19	0.04542217		977.2	0.01572372		1507.19	0.02234828		2037.2	0.01670974		2567.2	-0.00151751
447.39	0.04474078		977.4	0.0159761		1507.39	0.02227891		2037.4	0.01638472		2567.4	-0.00221705
447.59	0.04452301		977.6	0.01626806		1507.59	0.02278136		2037.6	0.01608062		2567.6	-0.00216147
447.79	0.04418256		977.8	0.01648861		1507.79	0.02192967		2037.8	0.01615115		2567.8	-0.002115
447.99	0.04515068		978	0.01545922		1507.99	0.02221426		2038	0.01587032		2568	-0.00212595
448.19	0.04487402		978.2	0.01484555		1508.19	0.02167336		2038.2	0.01592016		2568.2	-0.00219067
448.39	0.04447942		978.4	0.01464801		1508.39	0.02213388		2038.4	0.01639532		2568.4	-0.00194728
448.59	0.04442292		978.6	0.01347259		1508.59	0.02050874		2038.6	0.01663568		2568.6	-0.0008931
448.79	0.04493239		978.8	0.01250687		1508.79	0.02046703		2038.8	0.01707667		2568.8	0.0000614
448.99	0.04526534		979	0.01231889		1508.99	0.02126708		2039	0.01649921		2569	0.00048434
449.19	0.04610583		979.2	0.01234973		1509.19	0.02117128		2039.2	0.0153205		2569.2	0.00012168
449.39	0.04690306		979.4	0.01292724		1509.39	0.02164619		2039.4	0.01594978		2569.4	0.00009282
449.59	0.04758261		979.6	0.01306205		1509.59	0.02219895		2039.6	0.01529826		2569.6	-0.00055812
449.79	0.04791699		979.8	0.01348428		1509.79	0.02290443		2039.8	0.01444793		2569.8	-0.00045947
449.99	0.04795011		980	0.01443103		1509.99	0.02336303		2040	0.01386497		2570	-0.00069263
450.19	0.04848594		980.2	0.01397105		1510.19	0.02238994		2040.2	0.01342946		2570.2	0.00022353
450.39	0.04900412		980.4	0.01459783		1510.39	0.0219434		2040.4	0.01335009		2570.4	0.00037018
450.59	0.04936041		980.6	0.01565685		1510.59	0.02257601		2040.6	0.01452311		2570.6	-0.00021163
450.79	0.04964022		980.8	0.01604167		1510.79	0.02246433		2040.8	0.01537269		2570.8	-0.00013612
450.99	0.04942641		981	0.01639661		1510.99	0.02286995		2041	0.01496814		2571	0.00005856
451.19	0.04911028		981.2	0.01708214		1511.19	0.02234582		2041.2	0.01542933		2571.2	-0.00057259
451.39	0.04813396		981.4	0.01825373		1511.39	0.02222352		2041.4	0.01525576		2571.4	-0.00144479
451.59	0.04775478		981.6	0.01864993		1511.59	0.02164025		2041.6	0.01571235		2571.6	-0.00126694
451.79	0.04683476		981.8	0.01862443		1511.79	0.02023014		2041.8	0.01617963		2571.8	-0.00172255
451.99	0.04628046		982	0.0178206		1511.99	0.01940269		2042	0.01588037		2572	-0.00055605
452.19	0.04494543		982.2	0.01781161		1512.19	0.0180489		2042.2	0.0164417		2572.2	-0.00047119
452.39	0.04536125		982.4	0.01743412		1512.39	0.01863585		2042.4	0.01746233		2572.4	0.00047653
452.59	0.04541761		982.6	0.01785275		1512.59	0.01826721		2042.6	0.01803884		2572.6	0.00104078
452.79	0.04591065		982.8	0.01706763		1512.79	0.01926897		2042.8	0.01782375		2572.8	0.0011505
452.99	0.04508563		983	0.0164626		1512.99	0.01927314		2043	0.01779291		2573	0.00040447
453.19	0.04578334		983.2	0.01672546		1513.19	0.0192571		2043.2	0.01675456		2573.2	-0.00069401
453.39	0.04513342		983.4	0.01677516		1513.39	0.01870372		2043.4	0.01642345		2573.4	-0.00161096
453.59	0.04514026		983.6	0.01654448		1513.59	0.01878161		2043.6	0.01566273		2573.6	-0.00235349
453.79	0.0454805		983.8	0.01521087		1513.79	0.01906255		2043.8	0.01556108		2573.8	-0.00210929
453.99	0.04625535		984	0.01498371		1513.99	0.01836985		2044	0.0159862		2574	-0.00239988
454.19	0.04741343		984.2	0.01417737		1514.19	0.01823635		2044.2	0.01680176		2574.2	-0.0023105
454.39	0.04751706		984.4	0.01485273		1514.39	0.01950256		2044.4	0.01684636		2574.4	-0.00276016
454.59	0.04789169		984.6	0.01468581		1514.59	0.01999878		2044.6	0.01705612		2574.6	-0.00324722
454.79	0.04737354		984.8	0.01413785		1514.79	0.01938427		2044.8	0.01683469		2574.8	-0.00368811
454.99	0.04702064		985	0.01480873		1514.99	0.01867686		2045	0.0165287		2575	-0.00409629
455.19	0.04620535		985.2	0.0151297		1515.19	0.01804519		2045.2	0.01672867		2575.2	-0.00381482
455.39	0.04570054		985.4	0.01587177		1515.39	0.01772781		2045.4	0.01683758		2575.4	-0.00247203
455.59	0.04597166		985.6	0.01587888		1515.59	0.01657691		2045.6	0.01669197		2575.6	-0.00082306
455.79	0.04520417		985.8	0.01569882		1515.79	0.01565974		2045.8	0.01690854		2575.8	0.00011527
455.99	0.04477043		986	0.01554663		1515.99	0.01602321		2046	0.01645186		2576	0.00096318
456.19	0.04478277		986.2	0.01626256		1516.19	0.01624119		2046.2	0.01743235		2576.2	0.00155249
456.39	0.04591711		986.4	0.01684973		1516.39	0.01604618		2046.4	0.0174579		2576.4	0.00178488
456.59	0.04539957		986.6	0.01726293		1516.59	0.01596312		2046.6	0.01745253		2576.6	0.00212311
456.79	0.04483287		986.8	0.01630914		1516.79	0.0163558		2046.8	0.01706136		2576.8	0.00217026
456.99	0.04470331		987	0.01683612		1516.99	0.01592754		2047	0.01642017		2577	0.00130825
457.19	0.04538445		987.2	0.0173392		1517.19	0.01662865		2047.2	0.01603244		2577.2	0.00089137
457.39	0.04436187		987.4	0.01663825		1517.39	0.01710125		2047.4	0.01614074		2577.4	-0.00022513
457.59	0.04427589		987.6	0.01511032		1517.59	0.0180853		2047.6	0.01661527		2577.6	-0.00069368
457.79	0.04431525		987.8	0.01463452		1517.79	0.01848154		2047.8	0.01677818		2577.8	-0.00121439
457.99	0.04460213		988	0.01425844		1517.99	0.01848855		2048	0.01651603		2578	-0.00115879
458.19	0.04479115		988.2	0.01400056		1518.19	0.01955313		2048.2	0.0161634		2578.2	-0.00171289
458.39	0.04445947		988.4	0.01418401		1518.39	0.02036436		2048.4	0.01456552		2578.4	-0.00208033
458.59	0.04462363		988.6	0.01376797		1518.59	0.0205034		2048.6	0.01429574		2578.6	-0.00206828
458.79	0.04426003		988.8	0.01404809		1518.79	0.0200496		2048.8	0.01354597		2578.8	-0.00207024
458.99	0.04419945		989	0.0148591		1518.99	0.01949419		2049	0.01318373		2579	-0.00144873
459.19	0.04480475		989.2	0.01551771		1519.19	0.0202695		2049.2	0.01290597		2579.2	-0.00094647
459.39	0.04580163		989.4	0.01557057		1519.39	0.02045769		2049.4	0.01290966		2579.4	-0.00107383
459.59	0.04652875		989.6	0.01548193		1519.59	0.02065931		2049.6	0.01312148		2579.6	-0.00139333
459.79	0.04578131		989.8	0.015416		1519.79	0.02171652		2049.8	0.01406895		2579.8	-0.00183743
459.99	0.04629178		990	0.01638785		1519.99	0.02188064		2050	0.01460076		2580	-0.00173946
460.19	0.04618551		990.2	0.01784867		1520.19	0.02112693		2050.2	0.01503198		2580.2	-0.00039234
460.39	0.04574987		990.4	0.01777069		1520.39	0.02063823		2050.4	0.01469276		2580.4	-0.00046444
460.59	0.04526804		990.6	0.01817368		1520.59	0.02170138		2050.6	0.01544142		2580.6	0.0008794
460.79	0.04484427		990.8	0.01802031		1520.79	0.02242991		2050.8	0.01572436		2580.8	0.00125181
460.99	0.04502494		991	0.01812982		1520.99	0.02230221		2051	0.015878		2581	0.00112991
461.19	0.04441192		991.2	0.01772656		1521.19	0.02314771		2051.2	0.01659513		2581.2	0.0012352
461.39	0.04392939		991.4	0.01696659		1521.39	0.02300468		2051.4	0.01764905		2581.4	0.00109258
461.59	0.04409774		991.6	0.01581591		1521.59	0.02170357		2051.6	0.01704957		2581.6	0.00112779
461.79	0.04434159		991.8	0.01622486		1521.79	0.02149048		2051.8	0.01752314		2581.8	0.0018247
461.99	0.04476954		992	0.01551443		1521.99	0.02166424		2052	0.0171793		2582	0.0016216
462.19	0.04404647		992.2	0.01528784		1522.19	0.02133123		2052.2	0.01768505		2582.2	0.00174809
462.39	0.043321		992.4	0.01626709		1522.39	0.02228983		2052.4	0.01729676		2582.4	0.00141508
462.59	0.04281799		992.6	0.01622727		1522.59	0.02197882		2052.6	0.0164876		2582.6	0.00102956
462.79	0.04244004		992.8	0.01668612		1522.79	0.02255283		2052.8	0.01648963		2582.8	0.00007692
462.99	0.04253558		993	0.01704397		1522.99	0.02210681		2053	0.01643834		2583	-0.00120938
463.19	0.04379419		993.2	0.0174597		1523.19	0.02216296		2053.2	0.01616151		2583.2	-0.00140072
463.39	0.04464362		993.4	0.01668162		1523.39	0.02238742		2053.4	0.01641547		2583.4	-0.00168852
463.59	0.04482167		993.6	0.01706537		1523.59	0.02269392		2053.6	0.01652861		2583.6	-0.00199501
463.79	0.04471124		993.8	0.01768406		1523.79	0.02253109		2053.8	0.01666679		2583.8	-0.00210661
463.99	0.0444709		994	0.01803005		1523.99	0.02282094		2054	0.01626027		2584	-0.00092951
464.19	0.04357513		994.2	0.01803873		1524.19	0.02315031		2054.2	0.01556255		2584.2	-0.00037832
464.39	0.04386999		994.4	0.0164967		1524.39	0.02333578		2054.4	0.01501919		2584.4	-0.00001249
464.59	0.04416412		994.6	0.0160072		1524.59	0.02388682		2054.6	0.01492667		2584.6	0.00078592
464.79	0.04300071		994.8	0.01584113		1524.79	0.02356255		2054.8	0.01433514		2584.8	0.00054443
464.99	0.04320373		995	0.01447272		1524.99	0.02335661		2055	0.01429293		2585	0.00018629
465.19	0.04323203		995.2	0.01403359		1525.19	0.02353786		2055.2	0.01475718		2585.2	0.00042599
465.39	0.04409188		995.4	0.01299171		1525.39	0.0227952		2055.4	0.01580733		2585.4	0.00054679
465.59	0.04421303		995.6	0.0122082		1525.59	0.02220401		2055.6	0.01562714		2585.6	0.0003603
465.79	0.04359222		995.8	0.01329287		1525.79	0.02230004		2055.8	0.01680657		2585.8	0.00059448
465.99	0.04383307		996	0.01377282		1525.99	0.02165862		2056	0.01670072		2586	-0.00025774
466.19	0.04255867		996.2	0.01399896		1526.19	0.02177521		2056.2	0.01707312		2586.2	-0.00000552
466.39	0.04272222		996.4	0.01507752		1526.39	0.02209129		2056.4	0.01657249		2586.4	-0.0010503
466.59	0.04298882		996.6	0.01487432		1526.59	0.0214595		2056.6	0.01579642		2586.6	-0.00138157
466.79	0.04347656		996.8	0.01544513		1526.79	0.02199461		2056.8	0.01640344		2586.8	-0.00148981
466.99	0.04466881		997	0.01514013		1526.99	0.02059831		2057	0.01613519		2587	-0.00215727
467.19	0.04555269		997.2	0.01513803		1527.19	0.02060952		2057.2	0.01622693		2587.2	-0.00213638
467.39	0.04564804		997.4	0.0148398		1527.39	0.02100448		2057.4	0.01661358		2587.4	-0.00233588
467.59	0.04621338		997.6	0.01577509		1527.59	0.02107776		2057.6	0.0158994		2587.6	-0.00188442
467.79	0.04662889		997.8	0.01568896		1527.79	0.02128594		2057.8	0.01576827		2587.8	-0.00078939
467.99	0.04619994		998	0.01532973		1527.99	0.02158443		2058	0.01554253		2588	-0.00048384
468.19	0.04586263		998.2	0.01430164		1528.19	0.02194387		2058.2	0.0154844		2588.2	0.00023214
468.39	0.04531175		998.4	0.01352262		1528.39	0.0216435		2058.4	0.01574336		2588.4	0.00087324
468.59	0.04384599		998.6	0.01359175		1528.59	0.02203159		2058.6	0.01564947		2588.6	0.00100371
468.79	0.04314985		998.8	0.01395326		1528.79	0.02187217		2058.8	0.0155746		2588.8	0.00049185
468.99	0.04254977		999	0.01232554		1528.99	0.02182511		2059	0.01572235		2589	0.000357
469.19	0.04219151		999.2	0.01203342		1529.19	0.02235159		2059.2	0.01632931		2589.2	-0.00005521
469.39	0.04197226		999.4	0.01202727		1529.39	0.02159723		2059.4	0.01634188		2589.4	-0.00084023
469.59	0.04118886		999.6	0.01285036		1529.59	0.02163048		2059.6	0.01539104		2589.6	-0.00183447
469.79	0.04096007		999.8	0.01378945		1529.79	0.02122133		2059.8	0.01559851		2589.8	-0.00248205
469.99	0.0414642		1000	0.01295243		1529.99	0.02172029		2060	0.01497442		2590	-0.00338048
470.19	0.04136152		1000.2	0.01242964		1530.19	0.02152666		2060.2	0.01537464		2590.2	-0.0035043
470.39	0.04228471		1000.4	0.01281636		1530.39	0.02152382		2060.4	0.01502794		2590.4	-0.00448054
470.59	0.04337926		1000.6	0.01237773		1530.59	0.02165421		2060.6	0.01500379		2590.6	-0.00560098
470.79	0.04384416		1000.8	0.01241438		1530.79	0.02119615		2060.8	0.01497136		2590.8	-0.00612172
470.99	0.04476364		1001	0.01220449		1530.99	0.02174634		2061	0.01526302		2591	-0.00594638
471.19	0.04511885		1001.2	0.01254378		1531.19	0.02191062		2061.2	0.01571019		2591.2	-0.0059832
471.39	0.04565561		1001.4	0.01317298		1531.39	0.02251372		2061.4	0.01620304		2591.4	-0.00547369
471.59	0.04633199		1001.6	0.01370193		1531.59	0.02296095		2061.6	0.01679646		2591.6	-0.00489172
471.79	0.04668146		1001.8	0.01336792		1531.79	0.02319232		2061.8	0.01774888		2591.8	-0.00464066
471.99	0.04622744		1002	0.01362031		1531.99	0.02292342		2062	0.01831548		2592	-0.00371766
472.19	0.04601314		1002.2	0.01424286		1532.19	0.02459495		2062.2	0.01878402		2592.2	-0.00141866
472.39	0.04507324		1002.4	0.0156715		1532.39	0.02422896		2062.4	0.01909576		2592.4	-0.00078456
472.59	0.04519577		1002.6	0.01578721		1532.59	0.02463927		2062.6	0.01931297		2592.6	-0.00071759
472.79	0.04590169		1002.8	0.01606241		1532.79	0.02447156		2062.8	0.01920514		2592.8	-0.0008931
472.99	0.0455344		1003	0.01533683		1532.99	0.02536572		2063	0.01878919		2593	-0.00122566
473.19	0.04579246		1003.2	0.01555938		1533.19	0.0253675		2063.2	0.01941047		2593.2	-0.00183799
473.39	0.04569956		1003.4	0.01655537		1533.39	0.02425648		2063.4	0.01925235		2593.4	-0.00199085
473.59	0.0459139		1003.6	0.01635326		1533.59	0.02466383		2063.6	0.0186887		2593.6	-0.00128179
473.79	0.04601854		1003.8	0.01626221		1533.79	0.0239139		2063.8	0.0188527		2593.8	-0.0013769
473.99	0.04663474		1004	0.01590489		1533.99	0.02400741		2064	0.0176735		2594	-0.00206146
474.19	0.04756031		1004.2	0.01684132		1534.19	0.02270183		2064.2	0.01682838		2594.2	-0.00245321
474.39	0.04785221		1004.4	0.01694828		1534.39	0.02220461		2064.4	0.01636722		2594.4	-0.00292156
474.59	0.0479238		1004.6	0.01613298		1534.59	0.02146428		2064.6	0.01590785		2594.6	-0.00302605
474.79	0.04799211		1004.8	0.01639327		1534.79	0.02001618		2064.8	0.01492112		2594.8	-0.00268512
474.99	0.04822248		1005	0.01639043		1534.99	0.02064554		2065	0.01438836		2595	-0.00258853
475.19	0.04794955		1005.2	0.01697039		1535.19	0.02000201		2065.2	0.01404823		2595.2	-0.0037442
475.39	0.04752025		1005.4	0.01679086		1535.39	0.01974831		2065.4	0.01445635		2595.4	-0.00357842
475.59	0.04669585		1005.6	0.01725052		1535.59	0.02041992		2065.6	0.01458883		2595.6	-0.00371148
475.79	0.04693539		1005.8	0.01689769		1535.79	0.02069439		2065.8	0.01433408		2595.8	-0.00356462
475.99	0.04672287		1006	0.01722232		1535.99	0.0216034		2066	0.01428852		2596	-0.0024712
476.19	0.04753077		1006.2	0.01728219		1536.19	0.02262621		2066.2	0.01396717		2596.2	-0.00171025
476.39	0.04769233		1006.4	0.01710485		1536.39	0.02234693		2066.4	0.01468318		2596.4	-0.00193182
476.59	0.04871925		1006.6	0.01594766		1536.59	0.02348773		2066.6	0.01483589		2596.6	-0.00282121
476.79	0.04845411		1006.8	0.01559093		1536.79	0.02391781		2066.8	0.01439134		2596.8	-0.00259482
476.99	0.04821298		1007	0.01482942		1536.99	0.02395436		2067	0.0147805		2597	-0.00267485
477.19	0.04804471		1007.2	0.01433232		1537.19	0.02403817		2067.2	0.01573703		2597.2	-0.00232092
477.39	0.04844731		1007.4	0.01377563		1537.39	0.02406108		2067.4	0.01614466		2597.4	-0.00195502
477.59	0.04854082		1007.6	0.01344991		1537.59	0.02464116		2067.6	0.01601732		2597.6	-0.00202237
477.79	0.04813337		1007.8	0.01386928		1537.79	0.02352409		2067.8	0.01609979		2597.8	-0.00329625
477.99	0.04874883		1008	0.01372979		1537.99	0.02396157		2068	0.01581306		2598	-0.0029334
478.19	0.04812213		1008.2	0.01411594		1538.19	0.02288899		2068.2	0.01571534		2598.2	-0.00303994
478.39	0.0478239		1008.4	0.01313157		1538.39	0.02206057		2068.4	0.01546282		2598.4	-0.00231025
478.59	0.04622887		1008.6	0.01272784		1538.59	0.02110923		2068.6	0.01507913		2598.6	-0.00203866
478.79	0.04644078		1008.8	0.0137687		1538.79	0.02017782		2068.8	0.01521785		2598.8	-0.00217216
478.99	0.04558038		1009	0.01414758		1538.99	0.01993958		2069	0.01482758		2599	-0.00215085
479.19	0.044837		1009.2	0.01434427		1539.19	0.01946889		2069.2	0.01574482		2599.2	-0.00211523
479.39	0.04311286		1009.4	0.01486887		1539.39	0.01996825		2069.4	0.01584604		2599.4	-0.00207668
479.59	0.04224398		1009.6	0.01597669		1539.59	0.02120912		2069.6	0.01558508		2599.6	-0.00305186
479.79	0.04246025		1009.8	0.01590732		1539.79	0.02220719		2069.8	0.01579883		2599.8	-0.00244358
479.99	0.04203996		1010	0.01636031		1539.99	0.02287744		2070	0.01551002		2600	-0.0021182
480.19	0.04329671		1010.2	0.01704942		1540.19	0.02292545		2070.2	0.01540546		2600.2	-0.00149416
480.39	0.04304303		1010.4	0.01712929		1540.39	0.02384829		2070.4	0.01557124		2600.4	-0.00189765
480.59	0.04296013		1010.6	0.01695624		1540.59	0.02432035		2070.6	0.01436854		2600.6	-0.00243738
480.79	0.04284202		1010.8	0.01633087		1540.79	0.02428848		2070.8	0.01392416		2600.8	-0.00251322
480.99	0.04348948		1011	0.01584513		1540.99	0.0242905		2071	0.01369669		2601	-0.0023817
481.19	0.04388769		1011.2	0.01521142		1541.19	0.02562194		2071.2	0.01332526		2601.2	-0.00236552
481.39	0.04394159		1011.4	0.01536967		1541.39	0.02610891		2071.4	0.01371931		2601.4	-0.00306979
481.59	0.04414345		1011.6	0.01514198		1541.59	0.02622008		2071.6	0.01309236		2601.6	-0.00283642
481.79	0.04427283		1011.8	0.01477625		1541.79	0.02519368		2071.8	0.01283856		2601.8	-0.00278221
481.99	0.04471515		1012	0.01486213		1541.99	0.0253259		2072	0.01220376		2602	-0.00226616
482.19	0.04469189		1012.2	0.01482209		1542.19	0.02428021		2072.2	0.01175916		2602.2	-0.00317373
482.39	0.04516188		1012.4	0.01432134		1542.39	0.02365845		2072.4	0.01133112		2602.4	-0.00168728
482.59	0.04441356		1012.6	0.01504611		1542.59	0.02284818		2072.6	0.01232666		2602.6	-0.00160081
482.79	0.0457591		1012.8	0.01547582		1542.79	0.0220768		2072.8	0.0126437		2602.8	-0.0022377
482.99	0.04526777		1013	0.01488879		1542.99	0.02182571		2073	0.01316744		2603	-0.00292019
483.19	0.04531229		1013.2	0.01527198		1543.19	0.02163783		2073.2	0.01374721		2603.2	-0.00301093
483.39	0.04546557		1013.4	0.01617504		1543.39	0.02195333		2073.4	0.01348174		2603.4	-0.00301493
483.59	0.04565881		1013.6	0.01652984		1543.59	0.02214454		2073.6	0.01403523		2603.6	-0.00303292
483.79	0.04584908		1013.8	0.01705916		1543.79	0.02253579		2073.8	0.01418669		2603.8	-0.00190779
483.99	0.0466522		1014	0.01703023		1543.99	0.02237032		2074	0.01416449		2604	-0.00109181
484.19	0.04795101		1014.2	0.01692492		1544.19	0.02195532		2074.2	0.01457189		2604.2	-0.00002544
484.39	0.04750556		1014.4	0.01613289		1544.39	0.02283962		2074.4	0.01368557		2604.4	0.00045917
484.59	0.04746153		1014.6	0.01575672		1544.59	0.02281027		2074.6	0.0130571		2604.6	0.00040693
484.79	0.04699452		1014.8	0.0150802		1544.79	0.02283964		2074.8	0.0134175		2604.8	0.00016758
484.99	0.04726071		1015	0.0144601		1544.99	0.02319591		2075	0.01403131		2605	0.00031434
485.19	0.0466859		1015.2	0.01381559		1545.19	0.02325677		2075.2	0.014766		2605.2	0.00012807
485.39	0.04607557		1015.4	0.0137325		1545.39	0.02311333		2075.4	0.01486173		2605.4	0.00017267
485.59	0.0465209		1015.6	0.01378031		1545.59	0.02226345		2075.6	0.01449217		2605.6	0.00012838
485.79	0.04605988		1015.8	0.01361465		1545.79	0.02223876		2075.8	0.01483351		2605.8	-0.00018182
485.99	0.04617826		1016	0.01416135		1545.99	0.02224335		2076	0.01427263		2606	-0.0008892
486.19	0.0461387		1016.2	0.01443825		1546.19	0.02233157		2076.2	0.01433633		2606.2	-0.00019821
486.39	0.04584266		1016.4	0.01552939		1546.39	0.0223214		2076.4	0.01454236		2606.4	-0.00018087
486.59	0.0456989		1016.6	0.01600861		1546.59	0.02224973		2076.6	0.01522964		2606.6	-0.00154997
486.79	0.04561993		1016.8	0.01545491		1546.79	0.02236094		2076.8	0.01538352		2606.8	-0.00267493
486.99	0.04580236		1017	0.01542904		1546.99	0.02258432		2077	0.0156826		2607	-0.00352678
487.19	0.04550547		1017.2	0.01566024		1547.19	0.02221681		2077.2	0.01438265		2607.2	-0.00429631
487.39	0.04601525		1017.4	0.01622929		1547.39	0.02209203		2077.4	0.01460747		2607.4	-0.00477605
487.59	0.04503864		1017.6	0.01712196		1547.59	0.02161817		2077.6	0.01423914		2607.6	-0.00499796
487.79	0.04459968		1017.8	0.01803025		1547.79	0.02146681		2077.8	0.01452669		2607.8	-0.0050765
487.99	0.04552515		1018	0.01741664		1547.99	0.02151278		2078	0.01515174		2608	-0.00404223
488.19	0.04545361		1018.2	0.01766336		1548.19	0.02151369		2078.2	0.01512817		2608.2	-0.00423431
488.39	0.04556091		1018.4	0.01774309		1548.39	0.02225748		2078.4	0.01527918		2608.4	-0.00435031
488.59	0.04600219		1018.6	0.01776679		1548.59	0.02156565		2078.6	0.01541575		2608.6	-0.00542177
488.79	0.04610961		1018.8	0.01766904		1548.79	0.02103481		2078.8	0.01610176		2608.8	-0.00535857
488.99	0.0473141		1019	0.01761093		1548.99	0.02078684		2079	0.01751649		2609	-0.00513066
489.19	0.04719223		1019.2	0.01790796		1549.19	0.02036852		2079.2	0.01709339		2609.2	-0.00530844
489.39	0.04737294		1019.4	0.01810297		1549.39	0.02069718		2079.4	0.01659713		2609.4	-0.00421992
489.59	0.04804146		1019.6	0.01882024		1549.59	0.02085781		2079.6	0.01738235		2609.6	-0.0045734
489.79	0.04760376		1019.8	0.01899257		1549.79	0.02166944		2079.8	0.01737723		2609.8	-0.0038099
489.99	0.04801846		1020	0.0197225		1549.99	0.02206949		2080	0.01644019		2610	-0.00312156
490.19	0.04767344		1020.2	0.01984791		1550.19	0.02234859		2080.2	0.01587574		2610.2	-0.00258552
490.39	0.04714209		1020.4	0.02012367		1550.39	0.02240426		2080.4	0.01640925		2610.4	-0.00301583
490.59	0.04703529		1020.6	0.01950189		1550.59	0.02251746		2080.6	0.01653827		2610.6	-0.00257943
490.79	0.04655396		1020.8	0.01860098		1550.79	0.02334714		2080.8	0.01554018		2610.8	-0.00255174
490.99	0.04623173		1021	0.01845887		1550.99	0.02334992		2081	0.01492421		2611	-0.00229064
491.19	0.04442392		1021.2	0.01805848		1551.19	0.02324986		2081.2	0.01456844		2611.2	-0.00208371
491.39	0.04423723		1021.4	0.01816024		1551.39	0.02270512		2081.4	0.01508498		2611.4	-0.00190745
491.59	0.04353328		1021.6	0.01841115		1551.59	0.02296242		2081.6	0.01442512		2611.6	-0.00219249
491.79	0.04300487		1021.8	0.01838155		1551.79	0.02293145		2081.8	0.01465404		2611.8	-0.00268537
491.99	0.04323628		1022	0.01777108		1551.99	0.02206545		2082	0.01523417		2612	-0.00217196
492.19	0.04330232		1022.2	0.01777791		1552.19	0.02194095		2082.2	0.01548875		2612.2	-0.00288527
492.39	0.04357721		1022.4	0.01725457		1552.39	0.02210652		2082.4	0.01627395		2612.4	-0.00163735
492.59	0.04295901		1022.6	0.01751812		1552.59	0.02091607		2082.6	0.01598087		2612.6	-0.00190131
492.79	0.04356892		1022.8	0.01774705		1552.79	0.02085332		2082.8	0.01678479		2612.8	-0.0014965
492.99	0.04399254		1023	0.01785306		1552.99	0.02019812		2083	0.01771461		2613	-0.0015661
493.19	0.04436905		1023.2	0.01737597		1553.19	0.02064581		2083.2	0.0181686		2613.2	-0.00157808
493.39	0.04512475		1023.4	0.01764925		1553.39	0.02016797		2083.4	0.01886726		2613.4	-0.00145666
493.59	0.04532761		1023.6	0.01825232		1553.59	0.01993816		2083.6	0.01929146		2613.6	-0.00215058
493.79	0.0447066		1023.8	0.01925062		1553.79	0.02055993		2083.8	0.01859065		2613.8	-0.00141926
493.99	0.04542451		1024	0.01915947		1553.99	0.02056571		2084	0.01836163		2614	-0.00144304
494.19	0.04586084		1024.2	0.01874637		1554.19	0.01972339		2084.2	0.01812188		2614.2	-0.00180926
494.39	0.04551579		1024.4	0.018639		1554.39	0.0195582		2084.4	0.01839351		2614.4	-0.00059038
494.59	0.04571173		1024.6	0.01836152		1554.59	0.02005422		2084.6	0.01804995		2614.6	-0.00073194
494.79	0.04547653		1024.8	0.01778687		1554.79	0.02007224		2084.8	0.01661581		2614.8	-0.00133664
494.99	0.04499386		1025	0.01754192		1554.99	0.01954819		2085	0.01693854		2615	-0.00128601
495.19	0.04492165		1025.2	0.01736725		1555.19	0.01969408		2085.2	0.0161567		2615.2	-0.00127613
495.39	0.04598744		1025.4	0.01726408		1555.39	0.02001259		2085.4	0.01476144		2615.4	-0.00146745
495.59	0.045825		1025.6	0.01767048		1555.59	0.02051131		2085.6	0.01381318		2615.6	-0.00264032
495.79	0.04561		1025.8	0.01703923		1555.79	0.02012493		2085.8	0.01294645		2615.8	-0.0026581
495.99	0.04556743		1026	0.01624655		1555.99	0.01970879		2086	0.01312071		2616	-0.00208415
496.19	0.0450498		1026.2	0.01609174		1556.19	0.01989289		2086.2	0.01208712		2616.2	-0.00256421
496.39	0.04424577		1026.4	0.01549824		1556.39	0.01982418		2086.4	0.01196886		2616.4	-0.00206506
496.59	0.04453065		1026.6	0.01553777		1556.59	0.01901209		2086.6	0.01127326		2616.6	-0.00300489
496.79	0.04531557		1026.8	0.01552326		1556.79	0.01899298		2086.8	0.01184423		2616.8	-0.00375954
496.99	0.04521189		1027	0.01492275		1556.99	0.01860176		2087	0.01200967		2617	-0.00446185
497.19	0.04591218		1027.2	0.01470997		1557.19	0.01914704		2087.2	0.01305139		2617.2	-0.00557334
497.39	0.04607467		1027.4	0.01498481		1557.39	0.01954254		2087.4	0.01266354		2617.4	-0.00520096
497.59	0.04538104		1027.6	0.01543854		1557.59	0.01969859		2087.6	0.01268039		2617.6	-0.00454461
497.79	0.04614443		1027.8	0.01561094		1557.79	0.01968848		2087.8	0.01298117		2617.8	-0.00342665
497.99	0.04707876		1028	0.01517638		1557.99	0.01955655		2088	0.01364397		2618	-0.00390586
498.19	0.04689219		1028.2	0.01542604		1558.19	0.01950209		2088.2	0.01430932		2618.2	-0.00315301
498.39	0.04620473		1028.4	0.0159754		1558.39	0.0201231		2088.4	0.01561988		2618.4	-0.0022539
498.59	0.0458974		1028.6	0.01671058		1558.59	0.02004127		2088.6	0.01629688		2618.6	-0.00253155
498.79	0.044949		1028.8	0.01761337		1558.79	0.01987581		2088.8	0.01608523		2618.8	-0.00231842
498.99	0.04472435		1029	0.01808373		1558.99	0.02053403		2089	0.01644194		2619	-0.00106713
499.19	0.04514949		1029.2	0.01945889		1559.19	0.02171919		2089.2	0.01628004		2619.2	-0.0006357
499.39	0.04567452		1029.4	0.02001223		1559.39	0.0226339		2089.4	0.01577673		2619.4	-0.0003798
499.59	0.04434336		1029.6	0.01994561		1559.59	0.02268115		2089.6	0.01558554		2619.6	-0.00052039
499.79	0.04443306		1029.8	0.02006901		1559.79	0.02279423		2089.8	0.01495618		2619.8	0.00016003
499.99	0.04402371		1030	0.01998947		1559.99	0.02279813		2090	0.01457134		2620	0.00028014
500.19	0.04320033		1030.2	0.01935906		1560.19	0.022047		2090.2	0.01393114		2620.2	-0.00110908
500.39	0.04347427		1030.4	0.01883947		1560.39	0.02172142		2090.4	0.01392704		2620.4	-0.00111109
500.59	0.04402308		1030.6	0.01903466		1560.59	0.02105746		2090.6	0.01354541		2620.6	-0.00211867
500.79	0.04351277		1030.8	0.01822233		1560.79	0.02007078		2090.8	0.01364049		2620.8	-0.00333366
500.99	0.04371128		1031	0.01737642		1560.99	0.02039667		2091	0.01305952		2621	-0.00401131
501.19	0.04375347		1031.2	0.016097		1561.19	0.02049581		2091.2	0.01356788		2621.2	-0.00464087
501.39	0.04424242		1031.4	0.01600913		1561.39	0.02060218		2091.4	0.01236046		2621.4	-0.0045853
501.59	0.04453375		1031.6	0.01595371		1561.59	0.0194074		2091.6	0.01167532		2621.6	-0.00547574
501.79	0.04517066		1031.8	0.01555878		1561.79	0.01981198		2091.8	0.01216962		2621.8	-0.00534091
501.99	0.04491218		1032	0.01559384		1561.99	0.01986435		2092	0.01255912		2622	-0.00650456
502.19	0.04471268		1032.2	0.01528687		1562.19	0.02032582		2092.2	0.01287696		2622.2	-0.00535036
502.39	0.04349848		1032.4	0.01527857		1562.39	0.02152308		2092.4	0.01361265		2622.4	-0.0054927
502.59	0.04252801		1032.6	0.01458055		1562.59	0.02079888		2092.6	0.01336614		2622.6	-0.00524999
502.79	0.04111271		1032.8	0.01447712		1562.79	0.02118861		2092.8	0.01360073		2622.8	-0.00517952
502.99	0.04083211		1033	0.01318595		1562.99	0.0220163		2093	0.01355526		2623	-0.00427789
503.19	0.04083055		1033.2	0.01357209		1563.19	0.02322009		2093.2	0.01391104		2623.2	-0.00428354
503.39	0.04001183		1033.4	0.01368571		1563.39	0.02373759		2093.4	0.01346468		2623.4	-0.00319434
503.59	0.03970811		1033.6	0.01352967		1563.59	0.02300479		2093.6	0.01444417		2623.6	-0.00264228
503.79	0.03994444		1033.8	0.01425543		1563.79	0.02301072		2093.8	0.01507499		2623.8	-0.00274025
503.99	0.03972732		1034	0.01477623		1563.99	0.02289702		2094	0.01545385		2624	-0.0018282
504.19	0.03957481		1034.2	0.01455341		1564.19	0.02233455		2094.2	0.01696782		2624.2	-0.00234843
504.39	0.04031269		1034.4	0.01519904		1564.39	0.02229841		2094.4	0.0173637		2624.4	-0.00178334
504.59	0.03999021		1034.6	0.01547383		1564.59	0.02232862		2094.6	0.01781342		2624.6	-0.00218906
504.79	0.03986939		1034.8	0.01550928		1564.79	0.02200049		2094.8	0.0177176		2624.8	-0.00218519
504.99	0.04050412		1035	0.01610065		1564.99	0.02292878		2095	0.01833845		2625	-0.00272209
505.19	0.04055097		1035.2	0.01596242		1565.19	0.02159527		2095.2	0.01887097		2625.2	-0.00402811
505.39	0.04123586		1035.4	0.01752936		1565.39	0.02137962		2095.4	0.01800474		2625.4	-0.00382342
505.59	0.04148031		1035.6	0.01773359		1565.59	0.02132969		2095.6	0.01794684		2625.6	-0.00380956
505.79	0.04204746		1035.8	0.01887558		1565.79	0.02191212		2095.8	0.01859638		2625.8	-0.00361176
505.99	0.04294848		1036	0.01892925		1565.99	0.02133755		2096	0.01807551		2626	-0.00376403
506.19	0.04382826		1036.2	0.01883809		1566.19	0.02134195		2096.2	0.01756357		2626.2	-0.00369607
506.39	0.04259504		1036.4	0.01897189		1566.39	0.02166967		2096.4	0.01707223		2626.4	-0.00503396
506.59	0.04292005		1036.6	0.01835454		1566.59	0.02085155		2096.6	0.01640917		2626.6	-0.00529723
506.79	0.0426923		1036.8	0.01787423		1566.79	0.02120444		2096.8	0.0155398		2626.8	-0.00489085
506.99	0.0430717		1037	0.01762162		1566.99	0.02148398		2097	0.01482345		2627	-0.00436635
507.19	0.04327335		1037.2	0.01827446		1567.19	0.02092166		2097.2	0.01481282		2627.2	-0.00513729
507.39	0.0436465		1037.4	0.01827936		1567.39	0.020478		2097.4	0.01408922		2627.4	-0.00462184
507.59	0.04505646		1037.6	0.01779177		1567.59	0.01902622		2097.6	0.0144604		2627.6	-0.00444214
507.79	0.04493915		1037.8	0.01810856		1567.79	0.01863397		2097.8	0.01446741		2627.8	-0.00411713
507.99	0.04496941		1038	0.01818473		1567.99	0.01890649		2098	0.01429151		2628	-0.00331625
508.19	0.04491767		1038.2	0.01715823		1568.19	0.01914042		2098.2	0.01448705		2628.2	-0.00385037
508.39	0.04500639		1038.4	0.01728712		1568.39	0.01937374		2098.4	0.01425982		2628.4	-0.0034169
508.59	0.04396596		1038.6	0.01690686		1568.59	0.01949864		2098.6	0.01425696		2628.6	-0.00342492
508.79	0.04388805		1038.8	0.01733224		1568.79	0.01950712		2098.8	0.0150176		2628.8	-0.00347436
508.99	0.04360629		1039	0.01665776		1568.99	0.01978318		2099	0.01567632		2629	-0.00385256
509.19	0.04240353		1039.2	0.01650589		1569.19	0.0199701		2099.2	0.01570285		2629.2	-0.00337795
509.39	0.0418352		1039.4	0.01727525		1569.39	0.02087829		2099.4	0.01457068		2629.4	-0.00284157
509.59	0.04116799		1039.6	0.01761994		1569.59	0.0212041		2099.6	0.01469469		2629.6	-0.00320381
509.79	0.04124132		1039.8	0.01843531		1569.79	0.02124504		2099.8	0.01456122		2629.8	-0.00281032
509.99	0.04111564		1040	0.01805853		1569.99	0.02193365		2100	0.01373922		2630	-0.00324278
510.19	0.04119854		1040.2	0.01797474		1570.19	0.02193662		2100.2	0.01434344		2630.2	-0.00526246
510.39	0.04068978		1040.4	0.01747279		1570.39	0.02274539		2100.4	0.01365254		2630.4	-0.00639487
510.59	0.04126582		1040.6	0.01684987		1570.59	0.02267754		2100.6	0.01319076		2630.6	-0.00665276
510.79	0.04166638		1040.8	0.01626912		1570.79	0.02267001		2100.8	0.01332424		2630.8	-0.00625359
510.99	0.04115087		1041	0.01599582		1570.99	0.02268275		2101	0.01302798		2631	-0.00655265
511.19	0.04160077		1041.2	0.01578778		1571.19	0.02259206		2101.2	0.01361381		2631.2	-0.00713181
511.39	0.04242885		1041.4	0.01526277		1571.39	0.02214645		2101.4	0.01300903		2631.4	-0.00630736
511.59	0.04369377		1041.6	0.01497229		1571.59	0.02149543		2101.6	0.01314853		2631.6	-0.00603722
511.79	0.04346093		1041.8	0.01532728		1571.79	0.02207598		2101.8	0.01323409		2631.8	-0.00539328
511.99	0.04296565		1042	0.01494319		1571.99	0.0227936		2102	0.01344611		2632	-0.0044646
512.19	0.0431888		1042.2	0.01399334		1572.19	0.0232443		2102.2	0.01451921		2632.2	-0.00468685
512.39	0.04304902		1042.4	0.01409427		1572.39	0.02330947		2102.4	0.01520331		2632.4	-0.00472333
512.59	0.04318225		1042.6	0.01401216		1572.59	0.02347339		2102.6	0.01553774		2632.6	-0.00446193
512.79	0.04278602		1042.8	0.01416309		1572.79	0.02342265		2102.8	0.01593768		2632.8	-0.00338146
512.99	0.04216005		1043	0.01452355		1572.99	0.02316231		2103	0.01604423		2633	-0.00281487
513.19	0.04169678		1043.2	0.01531444		1573.19	0.02431158		2103.2	0.01632369		2633.2	-0.00238627
513.39	0.04133708		1043.4	0.01658775		1573.39	0.02389834		2103.4	0.01564544		2633.4	-0.00229378
513.59	0.04147974		1043.6	0.0173899		1573.59	0.02329315		2103.6	0.0161443		2633.6	-0.00179252
513.79	0.04225467		1043.8	0.01743704		1573.79	0.02324218		2103.8	0.01510806		2633.8	-0.00195115
513.99	0.04207511		1044	0.01825929		1573.99	0.02362222		2104	0.01516181		2634	-0.00260401
514.19	0.04234908		1044.2	0.01829529		1574.19	0.02236577		2104.2	0.01603396		2634.2	-0.00425203
514.39	0.04281245		1044.4	0.01786888		1574.39	0.02242231		2104.4	0.01472054		2634.4	-0.00406632
514.59	0.04281477		1044.6	0.01804039		1574.59	0.0216807		2104.6	0.01397346		2634.6	-0.00367478
514.79	0.04258665		1044.8	0.01866349		1574.79	0.02091553		2104.8	0.01365994		2634.8	-0.00333972
514.99	0.04156692		1045	0.01873676		1574.99	0.02022623		2105	0.01323976		2635	-0.00279211
515.19	0.04196218		1045.2	0.01945198		1575.19	0.02001855		2105.2	0.01322648		2635.2	-0.00244211
515.39	0.04147253		1045.4	0.01919776		1575.39	0.01907095		2105.4	0.01289349		2635.4	-0.00235333
515.59	0.04176716		1045.6	0.01999461		1575.59	0.01875895		2105.6	0.01235232		2635.6	-0.00298144
515.79	0.04135505		1045.8	0.01992228		1575.79	0.01902907		2105.8	0.01260264		2635.8	-0.00318328
515.99	0.04103987		1046	0.01934384		1575.99	0.01875795		2106	0.01272071		2636	-0.00379057
516.19	0.04183067		1046.2	0.01831842		1576.19	0.01888636		2106.2	0.01296049		2636.2	-0.0045634
516.39	0.04231262		1046.4	0.01827543		1576.39	0.01919142		2106.4	0.01221727		2636.4	-0.00471354
516.59	0.04312994		1046.6	0.01775363		1576.59	0.0197245		2106.6	0.01268847		2636.6	-0.00439732
516.79	0.04268221		1046.8	0.0173319		1576.79	0.02004386		2106.8	0.01333679		2636.8	-0.00346182
516.99	0.04373453		1047	0.01807417		1576.99	0.02028588		2107	0.01420681		2637	-0.00380116
517.19	0.04381207		1047.2	0.01754406		1577.19	0.02149984		2107.2	0.01426256		2637.2	-0.00400096
517.39	0.04510651		1047.4	0.01742127		1577.39	0.02197965		2107.4	0.01337987		2637.4	-0.00364999
517.59	0.04616804		1047.6	0.017344		1577.59	0.022039		2107.6	0.01301348		2637.6	-0.00362553
517.79	0.04699059		1047.8	0.01627012		1577.79	0.02242573		2107.8	0.01263618		2637.8	-0.00340931
517.99	0.04636162		1048	0.01584602		1577.99	0.02287251		2108	0.01361625		2638	-0.00379209
518.19	0.04617343		1048.2	0.01449034		1578.19	0.02245947		2108.2	0.0133998		2638.2	-0.00452839
518.39	0.04645407		1048.4	0.01340132		1578.39	0.02297117		2108.4	0.01246834		2638.4	-0.00404076
518.59	0.04650201		1048.6	0.01401624		1578.59	0.02196239		2108.6	0.01189263		2638.6	-0.0034067
518.79	0.04562668		1048.8	0.01440868		1578.79	0.0214596		2108.8	0.01200377		2638.8	-0.00331201
518.99	0.04416081		1049	0.01484783		1578.99	0.02109331		2109	0.01303297		2639	-0.00287409
519.19	0.0432731		1049.2	0.01576316		1579.19	0.02109709		2109.2	0.01335649		2639.2	-0.00264764
519.39	0.04239039		1049.4	0.01633955		1579.39	0.02107588		2109.4	0.01408747		2639.4	-0.00333127
519.59	0.04246384		1049.6	0.01723326		1579.59	0.02120296		2109.6	0.01356704		2639.6	-0.00350293
519.79	0.04206444		1049.8	0.01697518		1579.79	0.02130053		2109.8	0.01414839		2639.8	-0.00389048
519.99	0.04186177		1050	0.0175975		1579.99	0.02143676		2110	0.01379997		2640	-0.00455882
520.19	0.04229391		1050.2	0.0188206		1580.19	0.02224839		2110.2	0.01392873		2640.2	-0.0049133
520.39	0.04276716		1050.4	0.01908933		1580.39	0.02247861		2110.4	0.01418669		2640.4	-0.00465117
520.59	0.04229586		1050.6	0.01883094		1580.59	0.02263264		2110.6	0.0150279		2640.6	-0.00422325
520.79	0.04281613		1050.8	0.01926543		1580.79	0.0227534		2110.8	0.01561205		2640.8	-0.00351559
520.99	0.0433741		1051	0.02031599		1580.99	0.02265723		2111	0.01602944		2641	-0.00364068
521.19	0.04317956		1051.2	0.01929002		1581.19	0.02346418		2111.2	0.01522076		2641.2	-0.00361224
521.39	0.04392765		1051.4	0.01985538		1581.39	0.02458372		2111.4	0.01547793		2641.4	-0.00317731
521.59	0.04407362		1051.6	0.01921504		1581.59	0.02419613		2111.6	0.01555953		2641.6	-0.00299624
521.79	0.04403165		1051.8	0.01877138		1581.79	0.02408877		2111.8	0.01562049		2641.8	-0.00279215
521.99	0.0436467		1052	0.01839375		1581.99	0.02365354		2112	0.01619066		2642	-0.00302096
522.19	0.04398016		1052.2	0.01776048		1582.19	0.02337365		2112.2	0.01549213		2642.2	-0.0025358
522.39	0.04441145		1052.4	0.01793022		1582.39	0.0238014		2112.4	0.01496539		2642.4	-0.00248719
522.59	0.0441682		1052.6	0.01849121		1582.59	0.02358844		2112.6	0.0158804		2642.6	-0.00183603
522.79	0.04273026		1052.8	0.01812057		1582.79	0.02389382		2112.8	0.01678039		2642.8	-0.00177293
522.99	0.04162026		1053	0.01747167		1582.99	0.02330431		2113	0.01718468		2643	-0.00099835
523.19	0.04145263		1053.2	0.01651467		1583.19	0.0232538		2113.2	0.01766583		2643.2	-0.00066299
523.39	0.04102802		1053.4	0.01571697		1583.39	0.02302205		2113.4	0.0168132		2643.4	-0.00041993
523.59	0.04142826		1053.6	0.01526082		1583.59	0.02187992		2113.6	0.01644297		2643.6	0.00030523
523.79	0.04126617		1053.8	0.01465522		1583.79	0.02158616		2113.8	0.01645183		2643.8	-0.00112756
523.99	0.0408097		1054	0.01500055		1583.99	0.02120637		2114	0.01604368		2644	-0.00183039
524.19	0.04100478		1054.2	0.01541266		1584.19	0.02140836		2114.2	0.01658081		2644.2	-0.00184541
524.39	0.04175223		1054.4	0.014625		1584.39	0.02069381		2114.4	0.01637919		2644.4	-0.0020793
524.59	0.04225385		1054.6	0.01409954		1584.59	0.02086631		2114.6	0.01657515		2644.6	-0.00160285
524.79	0.04293944		1054.8	0.01373918		1584.79	0.02140859		2114.8	0.01646637		2644.8	-0.00193751
524.99	0.04283935		1055	0.01381972		1584.99	0.02148593		2115	0.01672934		2645	-0.0016639
525.19	0.04311409		1055.2	0.0130997		1585.19	0.02173071		2115.2	0.01573895		2645.2	-0.00093197
525.39	0.04387424		1055.4	0.0140279		1585.39	0.02131913		2115.4	0.01572567		2645.4	-0.00142374
525.59	0.0442929		1055.6	0.0135606		1585.59	0.02009263		2115.6	0.01521898		2645.6	-0.00093671
525.79	0.04402437		1055.8	0.01415109		1585.79	0.02004789		2115.8	0.01499367		2645.8	-0.00078508
525.99	0.04450214		1056	0.01400647		1585.99	0.02005434		2116	0.01446071		2646	-0.00073417
526.19	0.04427275		1056.2	0.01484871		1586.19	0.02059819		2116.2	0.01394369		2646.2	-0.00175505
526.39	0.04288951		1056.4	0.0157358		1586.39	0.02130649		2116.4	0.01392075		2646.4	-0.00257098
526.59	0.04248783		1056.6	0.01602377		1586.59	0.02083372		2116.6	0.01494866		2646.6	-0.00283032
526.79	0.04209848		1056.8	0.01585351		1586.79	0.0203796		2116.8	0.01412685		2646.8	-0.00277739
526.99	0.04152603		1057	0.0156425		1586.99	0.01968123		2117	0.01404101		2647	-0.00290931
527.19	0.04182164		1057.2	0.0156529		1587.19	0.01913382		2117.2	0.0137185		2647.2	-0.00325306
527.39	0.04184511		1057.4	0.01611224		1587.39	0.01918893		2117.4	0.01242376		2647.4	-0.00272707
527.59	0.04169012		1057.6	0.01658249		1587.59	0.01850487		2117.6	0.01246363		2647.6	-0.00255676
527.79	0.04070298		1057.8	0.01683247		1587.79	0.01884248		2117.8	0.01243367		2647.8	-0.00412276
527.99	0.0403213		1058	0.01769953		1587.99	0.01890849		2118	0.01271205		2648	-0.00424439
528.19	0.04105667		1058.2	0.01818267		1588.19	0.01969115		2118.2	0.01322566		2648.2	-0.0041452
528.39	0.04169435		1058.4	0.01809524		1588.39	0.02001077		2118.4	0.01286744		2648.4	-0.00427621
528.59	0.04238311		1058.6	0.01765268		1588.59	0.02025857		2118.6	0.01290677		2648.6	-0.0035568
528.79	0.0424432		1058.8	0.01763229		1588.79	0.0208984		2118.8	0.01302957		2648.8	-0.00311632
528.99	0.04375561		1059	0.01763766		1588.99	0.02059321		2119	0.01409137		2649	-0.00215053
529.19	0.04380861		1059.2	0.01764408		1589.19	0.02019667		2119.2	0.01429942		2649.2	-0.00163657
529.39	0.04421129		1059.4	0.01770134		1589.39	0.02043359		2119.4	0.01458007		2649.4	-0.0020637
529.59	0.04329065		1059.6	0.0172226		1589.59	0.02143485		2119.6	0.0158093		2649.6	-0.00107803
529.79	0.04319201		1059.8	0.01719248		1589.79	0.0226402		2119.8	0.01584359		2649.8	-0.00124337
529.99	0.04336146		1060	0.0171843		1589.99	0.02246783		2120	0.01533601		2650	-0.00149206
530.19	0.04269187		1060.2	0.01754396		1590.19	0.02242471		2120.2	0.0153584		2650.2	-0.00250313
530.39	0.04183424		1060.4	0.01685103		1590.39	0.02193767		2120.4	0.01530888		2650.4	-0.00330051
530.59	0.04201229		1060.6	0.01684506		1590.59	0.02038678		2120.6	0.01555698		2650.6	-0.00288062
530.79	0.0415869		1060.8	0.01655524		1590.79	0.02013052		2120.8	0.01482783		2650.8	-0.00271912
530.99	0.04122827		1061	0.01672735		1590.99	0.02006961		2121	0.01460517		2651	-0.00218549
531.19	0.04093071		1061.2	0.01709802		1591.19	0.01989384		2121.2	0.01331124		2651.2	-0.00244948
531.39	0.04071048		1061.4	0.0181024		1591.39	0.02011313		2121.4	0.01226469		2651.4	-0.00265698
531.59	0.04013719		1061.6	0.0179324		1591.59	0.01955078		2121.6	0.01242299		2651.6	-0.00368866
531.79	0.04002801		1061.8	0.01801779		1591.79	0.01992611		2121.8	0.01192011		2651.8	-0.00416876
531.99	0.04073944		1062	0.0182703		1591.99	0.02056423		2122	0.01206046		2652	-0.00449418
532.19	0.04074492		1062.2	0.01780186		1592.19	0.02015847		2122.2	0.01175262		2652.2	-0.00448544
532.39	0.04108151		1062.4	0.01681449		1592.39	0.02111186		2122.4	0.01152285		2652.4	-0.00438834
532.59	0.04228506		1062.6	0.01682381		1592.59	0.02074922		2122.6	0.01188808		2652.6	-0.0042219
532.79	0.04291068		1062.8	0.01622154		1592.79	0.02118391		2122.8	0.01290673		2652.8	-0.00419021
532.99	0.0435885		1063	0.01604682		1592.99	0.02196279		2123	0.01408871		2653	-0.00423709
533.19	0.04285334		1063.2	0.01614064		1593.19	0.02235743		2123.2	0.01477922		2653.2	-0.00337591
533.39	0.0430545		1063.4	0.01608351		1593.39	0.0231913		2123.4	0.01537605		2653.4	-0.00323358
533.59	0.04320567		1063.6	0.01578015		1593.59	0.0241479		2123.6	0.01628094		2653.6	-0.00293544
533.79	0.0432225		1063.8	0.01624697		1593.79	0.02452201		2123.8	0.01645006		2653.8	-0.00242899
533.99	0.0431808		1064	0.01560415		1593.99	0.02355503		2124	0.01611591		2654	-0.00214176
534.19	0.04237305		1064.2	0.01506442		1594.19	0.0235255		2124.2	0.01645349		2654.2	-0.00229492
534.39	0.04159047		1064.4	0.01481793		1594.39	0.0235247		2124.4	0.01667423		2654.4	-0.00254942
534.59	0.04136777		1064.6	0.01561579		1594.59	0.02310627		2124.6	0.01689279		2654.6	-0.00136648
534.79	0.04128303		1064.8	0.01652034		1594.79	0.0237627		2124.8	0.01678525		2654.8	-0.00182953
534.99	0.04157461		1065	0.01706914		1594.99	0.02373834		2125	0.01630095		2655	-0.00164497
535.19	0.0411549		1065.2	0.01726723		1595.19	0.0237073		2125.2	0.01576285		2655.2	-0.00242825
535.39	0.0411955		1065.4	0.01726724		1595.39	0.0228077		2125.4	0.01586401		2655.4	-0.00259667
535.59	0.04109768		1065.6	0.01685176		1595.59	0.02255826		2125.6	0.01589918		2655.6	-0.00238892
535.79	0.04150984		1065.8	0.01629348		1595.79	0.02170227		2125.8	0.01504933		2655.8	-0.00172663
535.99	0.04110098		1066	0.01585649		1595.99	0.02198441		2126	0.01484148		2656	-0.00256186
536.19	0.03998656		1066.2	0.01551173		1596.19	0.0215951		2126.2	0.01431622		2656.2	-0.00272573
536.39	0.0401288		1066.4	0.01510489		1596.39	0.02154855		2126.4	0.01358642		2656.4	-0.00297861
536.59	0.04055692		1066.6	0.0155693		1596.59	0.02051565		2126.6	0.01391733		2656.6	-0.00333662
536.79	0.03965272		1066.8	0.01482192		1596.79	0.02091315		2126.8	0.01352299		2656.8	-0.00413916
536.99	0.03922215		1067	0.01536178		1596.99	0.02123852		2127	0.01354289		2657	-0.00353274
537.19	0.03859966		1067.2	0.01582578		1597.19	0.02129165		2127.2	0.01295769		2657.2	-0.00323015
537.39	0.03847571		1067.4	0.01586025		1597.39	0.02152139		2127.4	0.01341129		2657.4	-0.00417658
537.59	0.03858997		1067.6	0.0159402		1597.59	0.02243996		2127.6	0.01326946		2657.6	-0.00419342
537.79	0.03808453		1067.8	0.01611291		1597.79	0.02249408		2127.8	0.01238675		2657.8	-0.00374914
537.99	0.03822008		1068	0.01590817		1597.99	0.02307596		2128	0.011829		2658	-0.00350737
538.19	0.03814622		1068.2	0.01638995		1598.19	0.02434155		2128.2	0.01233895		2658.2	-0.0040076
538.39	0.03843141		1068.4	0.01754458		1598.39	0.02542338		2128.4	0.01211277		2658.4	-0.00393118
538.59	0.03945247		1068.6	0.01780193		1598.59	0.02509883		2128.6	0.01277424		2658.6	-0.00391621
538.79	0.03946317		1068.8	0.01849096		1598.79	0.02526146		2128.8	0.01254891		2658.8	-0.00423557
538.99	0.03970344		1069	0.01871593		1598.99	0.02512749		2129	0.01267298		2659	-0.00411752
539.19	0.03904444		1069.2	0.01912019		1599.19	0.02539992		2129.2	0.01317314		2659.2	-0.00339305
539.39	0.03911706		1069.4	0.01958478		1599.39	0.02446844		2129.4	0.01366718		2659.4	-0.00239709
539.59	0.03984077		1069.6	0.01880598		1599.59	0.02525058		2129.6	0.01269558		2659.6	-0.00233015
539.79	0.0403624		1069.8	0.01812135		1599.79	0.02499953		2129.8	0.01299814		2659.8	-0.00201672
539.99	0.0403448		1070	0.01858513		1599.99	0.02552246		2130	0.01299958		2660	-0.00252205
540.19	0.04063888		1070.2	0.01841444		1600.19	0.02500955		2130.2	0.01308256		2660.2	-0.00240953
540.39	0.04069888		1070.4	0.0180995		1600.39	0.02473799		2130.4	0.01227754		2660.4	-0.00250417
540.59	0.04116198		1070.6	0.01746038		1600.59	0.02502261		2130.6	0.01280506		2660.6	-0.00209627
540.79	0.04067483		1070.8	0.0168743		1600.79	0.02472232		2130.8	0.01290819		2660.8	-0.00198787
540.99	0.0414278		1071	0.01780813		1600.99	0.02446878		2131	0.01380926		2661	-0.00234253
541.19	0.04167839		1071.2	0.01888756		1601.19	0.02438621		2131.2	0.01422314		2661.2	-0.00220438
541.39	0.04205742		1071.4	0.01881967		1601.39	0.02372019		2131.4	0.01571399		2661.4	-0.00292387
541.59	0.04234987		1071.6	0.0188227		1601.59	0.02290341		2131.6	0.01477982		2661.6	-0.00297047
541.79	0.04243891		1071.8	0.01911379		1601.79	0.02257232		2131.8	0.01400501		2661.8	-0.00281607
541.99	0.04227244		1072	0.01973291		1601.99	0.02294952		2132	0.01439528		2662	-0.00340459
542.19	0.04282094		1072.2	0.0197074		1602.19	0.02276655		2132.2	0.01459186		2662.2	-0.00364082
542.39	0.04261762		1072.4	0.0200276		1602.39	0.02281404		2132.4	0.01416266		2662.4	-0.00415368
542.59	0.04256581		1072.6	0.01986421		1602.59	0.02240136		2132.6	0.01464561		2662.6	-0.00391283
542.79	0.04077824		1072.8	0.02026789		1602.79	0.02246039		2132.8	0.01390529		2662.8	-0.00401363
542.99	0.04049224		1073	0.02054095		1602.99	0.02261164		2133	0.0142959		2663	-0.00342547
543.19	0.04000919		1073.2	0.02049728		1603.19	0.02218573		2133.2	0.01365437		2663.2	-0.00306184
543.39	0.03977521		1073.4	0.01945518		1603.39	0.02177404		2133.4	0.01385107		2663.4	-0.00271943
543.59	0.03999317		1073.6	0.01810419		1603.59	0.02270412		2133.6	0.0133466		2663.6	-0.00228018
543.79	0.04019772		1073.8	0.01803452		1603.79	0.02276654		2133.8	0.0135849		2663.8	-0.0028443
543.99	0.03957642		1074	0.01717211		1603.99	0.0235331		2134	0.01258395		2664	-0.00341835
544.19	0.0389229		1074.2	0.01620826		1604.19	0.02452699		2134.2	0.01343615		2664.2	-0.00342657
544.39	0.03855704		1074.4	0.01540152		1604.39	0.02506925		2134.4	0.01274331		2664.4	-0.00299647
544.59	0.03878041		1074.6	0.01453698		1604.59	0.02513295		2134.6	0.01289714		2664.6	-0.00197426
544.79	0.03877472		1074.8	0.01515038		1604.79	0.02467439		2134.8	0.01348969		2664.8	-0.00164075
544.99	0.03886148		1075	0.01523509		1604.99	0.02564177		2135	0.01356165		2665	-0.00141848
545.19	0.03892186		1075.2	0.01558995		1605.19	0.02531954		2135.2	0.0131463		2665.2	-0.00087894
545.39	0.03756733		1075.4	0.01435117		1605.39	0.02537171		2135.4	0.01283535		2665.4	-0.00123903
545.59	0.03792116		1075.6	0.0139814		1605.59	0.02519447		2135.6	0.01161415		2665.6	-0.00185919
545.79	0.03864574		1075.8	0.01456023		1605.79	0.02581047		2135.8	0.0114183		2665.8	-0.00147461
545.99	0.03975255		1076	0.0148295		1605.99	0.02600678		2136	0.01106708		2666	-0.0020241
546.19	0.04031927		1076.2	0.01501464		1606.19	0.02628743		2136.2	0.01048105		2666.2	-0.00225463
546.39	0.03983783		1076.4	0.01555689		1606.39	0.02577807		2136.4	0.01023984		2666.4	-0.00270177
546.59	0.04010695		1076.6	0.01559021		1606.59	0.02544766		2136.6	0.01013928		2666.6	-0.00222403
546.79	0.03976112		1076.8	0.01625626		1606.79	0.02547972		2136.8	0.00891887		2666.8	-0.00214221
546.99	0.04099149		1077	0.01685695		1606.99	0.02453067		2137	0.00933527		2667	-0.0011009
547.19	0.04098065		1077.2	0.01689118		1607.19	0.02360085		2137.2	0.00937133		2667.2	-0.00127187
547.39	0.04138023		1077.4	0.01710973		1607.39	0.02300947		2137.4	0.01028257		2667.4	-0.00122656
547.59	0.04189606		1077.6	0.01773163		1607.59	0.02343877		2137.6	0.00997542		2667.6	-0.00144202
547.79	0.04182578		1077.8	0.01780274		1607.79	0.02245493		2137.8	0.01017397		2667.8	-0.00276079
547.99	0.04152093		1078	0.01761736		1607.99	0.02199437		2138	0.01084799		2668	-0.00235174
548.19	0.04163486		1078.2	0.01791643		1608.19	0.02177506		2138.2	0.01208723		2668.2	-0.00216397
548.39	0.04162984		1078.4	0.01796722		1608.39	0.02131236		2138.4	0.01085284		2668.4	-0.00211538
548.59	0.040935		1078.6	0.01786089		1608.59	0.02061908		2138.6	0.01195557		2668.6	-0.00187052
548.79	0.04045159		1078.8	0.01810333		1608.79	0.02065086		2138.8	0.01254403		2668.8	-0.00154717
548.99	0.03996383		1079	0.01798315		1608.99	0.02097525		2139	0.01263042		2669	-0.00085974
549.19	0.03966091		1079.2	0.01854813		1609.19	0.02050058		2139.2	0.01344444		2669.2	-0.00149457
549.39	0.03894794		1079.4	0.01752727		1609.39	0.02137204		2139.4	0.01330179		2669.4	-0.00146434
549.59	0.04062164		1079.6	0.01805369		1609.59	0.02142692		2139.6	0.01419744		2669.6	-0.00224306
549.79	0.04100376		1079.8	0.01873652		1609.79	0.02134607		2139.8	0.01502804		2669.8	-0.00215762
549.99	0.04096128		1080	0.01809868		1609.99	0.0217203		2140	0.01471628		2670	-0.0025863
550.19	0.04074434		1080.2	0.01849558		1610.19	0.02204256		2140.2	0.01465933		2670.2	-0.00327621
550.39	0.04079069		1080.4	0.01832838		1610.39	0.02187307		2140.4	0.01370571		2670.4	-0.00333259
550.59	0.04209534		1080.6	0.01876409		1610.59	0.0225798		2140.6	0.01355467		2670.6	-0.00341892
550.79	0.04294608		1080.8	0.01915666		1610.79	0.02266509		2140.8	0.01300994		2670.8	-0.0027038
550.99	0.04276245		1081	0.01916662		1610.99	0.02224332		2141	0.01354294		2671	-0.00240696
551.19	0.04305408		1081.2	0.01907003		1611.19	0.02297337		2141.2	0.01309931		2671.2	-0.00224135
551.39	0.0431236		1081.4	0.01932585		1611.39	0.02308832		2141.4	0.01220268		2671.4	-0.00183108
551.59	0.04284448		1081.6	0.01831208		1611.59	0.02296119		2141.6	0.01186408		2671.6	-0.00157319
551.79	0.04263333		1081.8	0.01801056		1611.79	0.02232435		2141.8	0.01132		2671.8	-0.00144082
551.99	0.04243751		1082	0.01857841		1611.99	0.02320996		2142	0.01115449		2672	-0.00065541
552.19	0.0419616		1082.2	0.01925346		1612.19	0.02373325		2142.2	0.0110826		2672.2	-0.00132767
552.39	0.04173213		1082.4	0.01928938		1612.39	0.02354456		2142.4	0.01045602		2672.4	-0.00198433
552.59	0.04121441		1082.6	0.01779387		1612.59	0.02363632		2142.6	0.01120576		2672.6	-0.00197584
552.79	0.04130066		1082.8	0.01739987		1612.79	0.02378959		2142.8	0.01185638		2672.8	-0.00118195
552.99	0.04142621		1083	0.01712108		1612.99	0.02342413		2143	0.01230367		2673	-0.00111863
553.19	0.04079859		1083.2	0.01695161		1613.19	0.02402442		2143.2	0.01259574		2673.2	-0.00132304
553.39	0.04067894		1083.4	0.01667192		1613.39	0.02384648		2143.4	0.01249631		2673.4	-0.00059772
553.59	0.0407996		1083.6	0.0164155		1613.59	0.02311371		2143.6	0.01315375		2673.6	-0.00058181
553.79	0.0404876		1083.8	0.01568567		1613.79	0.02223851		2143.8	0.0131723		2673.8	-0.00066854
553.99	0.03993495		1084	0.01529864		1613.99	0.02297172		2144	0.01306081		2674	0.00003897
554.19	0.04056087		1084.2	0.01627082		1614.19	0.02297291		2144.2	0.01348222		2674.2	-0.00103323
554.39	0.04122315		1084.4	0.01588845		1614.39	0.02371445		2144.4	0.0131178		2674.4	-0.00144252
554.59	0.04150484		1084.6	0.01550748		1614.59	0.02390145		2144.6	0.01382988		2674.6	-0.00091798
554.79	0.04106209		1084.8	0.01498272		1614.79	0.02444774		2144.8	0.01416201		2674.8	-0.00109569
554.99	0.04005529		1085	0.01559624		1614.99	0.02437908		2145	0.01488301		2675	-0.00073698
555.19	0.04056141		1085.2	0.0152739		1615.19	0.02517763		2145.2	0.014417		2675.2	0.00012337
555.39	0.03997024		1085.4	0.01575137		1615.39	0.02503895		2145.4	0.01463868		2675.4	-0.00001912
555.59	0.03981293		1085.6	0.01642308		1615.59	0.02445688		2145.6	0.01458324		2675.6	-0.00044956
555.79	0.03992083		1085.8	0.01768579		1615.79	0.02423372		2145.8	0.01413821		2675.8	-0.00152742
555.99	0.03986873		1086	0.01864325		1615.99	0.02470544		2146	0.01439641		2676	-0.00161732
556.19	0.04002373		1086.2	0.018341		1616.19	0.02428963		2146.2	0.01433294		2676.2	-0.00272859
556.39	0.03999636		1086.4	0.01821342		1616.39	0.0237136		2146.4	0.01450833		2676.4	-0.00311035
556.59	0.040283		1086.6	0.01758347		1616.59	0.02368992		2146.6	0.01450384		2676.6	-0.00266689
556.79	0.04037327		1086.8	0.01845758		1616.79	0.023231		2146.8	0.01481441		2676.8	-0.0027626
556.99	0.04004119		1087	0.01824785		1616.99	0.02264282		2147	0.01392756		2677	-0.00272121
557.19	0.0403588		1087.2	0.01868277		1617.19	0.02318561		2147.2	0.01345609		2677.2	-0.00272036
557.39	0.04006892		1087.4	0.01975201		1617.39	0.02248491		2147.4	0.01258018		2677.4	-0.00263301
557.59	0.03953799		1087.6	0.01995851		1617.59	0.02229313		2147.6	0.01238391		2677.6	-0.00306175
557.79	0.03878451		1087.8	0.01987651		1617.79	0.02249608		2147.8	0.01208805		2677.8	-0.00340394
557.99	0.03828743		1088	0.02036122		1617.99	0.02338001		2148	0.01198217		2678	-0.00311881
558.19	0.03895221		1088.2	0.02030817		1618.19	0.02348432		2148.2	0.0116951		2678.2	-0.00366364
558.39	0.03920318		1088.4	0.01956554		1618.39	0.02375798		2148.4	0.0112246		2678.4	-0.00330779
558.59	0.03887634		1088.6	0.01942865		1618.59	0.02319898		2148.6	0.0113462		2678.6	-0.00244055
558.79	0.03940106		1088.8	0.01976942		1618.79	0.02315041		2148.8	0.01174319		2678.8	-0.00257955
558.99	0.03997085		1089	0.02054859		1618.99	0.022381		2149	0.01179603		2679	-0.00160229
559.19	0.04073295		1089.2	0.02068501		1619.19	0.02246552		2149.2	0.01156114		2679.2	-0.0013028
559.39	0.04156001		1089.4	0.0214957		1619.39	0.0216027		2149.4	0.01182242		2679.4	-0.00144382
559.59	0.04242315		1089.6	0.02179315		1619.59	0.02065813		2149.6	0.01142935		2679.6	-0.0009586
559.79	0.04368466		1089.8	0.02144604		1619.79	0.02004613		2149.8	0.0117005		2679.8	-0.00064108
