# Supplementary material for: Functional development of a V3/glycan-specific broadly neutralizing antibody isolated from a case of HIV superinfection
Source: eLife journal article supplement (doi:10.7554/elife.68110), 2021-07-15
Supplement: fig2-data2 [file D3.xls]

Vers 3.43 Data Simulation
Conc1	1.25E-07	1.25E-07	1.25E-07	1.25E-07	1.25E-07	1.25E-07
Start1	290	879.99	1469.99	2059.98	2649.98	3239.98
Stop1	649.8	1239.79	1829.79	2419.78	3009.78	3599.78
Time1	Data1	Sim1	Time2	Data2	Sim2	Time3	Data3	Sim3	Time4	Data4	Sim4	Time5	Data5	Sim5	Time6	Data6	Sim6
290	-0.00218796		879.99	0.00010748		1469.99	-0.00152374		2059.98	-0.00574893		2649.98	0.00239353		3239.98	-0.00557812
290.2	-0.00164143		880.19	0.00012889		1470.19	-0.00093028		2060.18	-0.00639463		2650.18	0.00148393		3240.18	-0.00498037
290.4	-0.00165735		880.39	-0.00024645		1470.39	-0.00051843		2060.38	-0.00675435		2650.38	-0.0002645		3240.38	-0.00549967
290.6	-0.00063442		880.59	-0.00106226		1470.59	-0.00003817		2060.58	-0.0075096		2650.58	-0.00172281		3240.58	-0.00537463
290.8	-0.00032336		880.79	-0.00185303		1470.79	0.00018929		2060.78	-0.00752501		2650.78	-0.00253284		3240.78	-0.00525473
291	0.00077014		880.99	-0.0020627		1470.99	0.00080324		2060.98	-0.00733745		2650.98	-0.00315108		3240.98	-0.00564059
291.2	0.00061987		881.19	-0.00248166		1471.19	0.00045344		2061.18	-0.00803726		2651.18	-0.00364297		3241.18	-0.00567939
291.4	0.00097308		881.39	-0.00269258		1471.39	0.00066217		2061.38	-0.00809145		2651.38	-0.00308336		3241.38	-0.00630145
291.6	0.00030011		881.59	-0.00252968		1471.59	0.00049325		2061.58	-0.00800131		2651.58	-0.00326847		3241.58	-0.0063994
291.8	0.0001803		881.79	-0.00215789		1471.79	0.00040604		2061.78	-0.00754162		2651.78	-0.00354685		3241.78	-0.0062853
292	0.00037053		881.99	-0.00200605		1471.99	0.00029366		2061.98	-0.00728444		2651.98	-0.00359992		3241.98	-0.00549971
292.2	-0.00052025		882.19	-0.00147034		1472.19	0.00001155		2062.18	-0.00707809		2652.18	-0.00401872		3242.18	-0.00429336
292.4	-0.00006541		882.39	-0.00172519		1472.39	0.00049189		2062.38	-0.00704571		2652.38	-0.0043492		3242.38	-0.00461523
292.6	-0.00071152		882.59	-0.0016092		1472.59	0.00070844		2062.58	-0.00675507		2652.58	-0.00485696		3242.58	-0.00468268
292.8	-0.000791		882.79	-0.00131118		1472.79	0.00104044		2062.78	-0.00654237		2652.78	-0.00454248		3242.78	-0.00466278
293	-0.00157153		882.99	-0.00265802		1472.99	0.00194861		2062.98	-0.00698399		2652.98	-0.00468133		3242.98	-0.00475364
293.2	-0.0011124		883.19	-0.00315964		1473.19	0.00264978		2063.18	-0.00694073		2653.18	-0.00387445		3243.18	-0.0050031
293.4	-0.00057059		883.39	-0.00417374		1473.39	0.00283883		2063.38	-0.00646267		2653.38	-0.00336917		3243.38	-0.00475961
293.6	0.00089096		883.59	-0.00499208		1473.59	0.00205812		2063.58	-0.00656413		2653.58	-0.00358433		3243.58	-0.00469412
293.8	0.00092951		883.79	-0.00527693		1473.79	0.0027097		2063.78	-0.00619244		2653.78	-0.00490568		3243.78	-0.0043842
294	0.00214665		883.99	-0.00507658		1473.99	0.0031464		2063.98	-0.00630019		2653.98	-0.00441334		3243.98	-0.00337801
294.2	0.00196104		884.19	-0.0036542		1474.19	0.00401747		2064.18	-0.00687974		2654.18	-0.00381317		3244.18	-0.00277581
294.4	0.00186584		884.39	-0.0031411		1474.39	0.00427395		2064.38	-0.00666169		2654.38	-0.0039358		3244.38	-0.00402755
294.6	0.00289412		884.59	-0.00280902		1474.59	0.00492472		2064.58	-0.00714021		2654.58	-0.00318826		3244.58	-0.00408463
294.8	0.00319579		884.79	-0.00259925		1474.79	0.0045595		2064.78	-0.0064039		2654.78	-0.00204877		3244.78	-0.00513602
295	0.00406144		884.99	-0.00174318		1474.99	0.00471438		2064.98	-0.00680781		2654.98	-0.00104075		3244.98	-0.00645936
295.2	0.00403901		885.19	-0.00099394		1475.19	0.0042385		2065.18	-0.00778086		2655.18	-0.00025988		3245.18	-0.00740493
295.4	0.00479578		885.39	-0.00065599		1475.39	0.0044639		2065.38	-0.00764229		2655.38	0.00013856		3245.38	-0.00773688
295.6	0.00416549		885.59	0.00045003		1475.59	0.00453521		2065.58	-0.0072026		2655.58	-0.00037079		3245.58	-0.00785723
295.8	0.00403195		885.79	0.00123382		1475.79	0.00444382		2065.78	-0.00768804		2655.78	-0.00150578		3245.78	-0.00709189
296	0.00385295		885.99	0.00178779		1475.99	0.00386607		2065.98	-0.00778394		2655.98	-0.00204547		3245.98	-0.0063692
296.2	0.00281502		886.19	0.00217461		1476.19	0.0038246		2066.18	-0.00822339		2656.18	-0.00224713		3246.18	-0.0057069
296.4	0.00350268		886.39	0.0020556		1476.39	0.00398736		2066.38	-0.00744629		2656.38	-0.0016572		3246.38	-0.00525855
296.6	0.00300101		886.59	0.00223055		1476.59	0.00432567		2066.58	-0.00733362		2656.58	-0.0007487		3246.58	-0.00507246
296.8	0.0028618		886.79	0.00150052		1476.79	0.00409904		2066.78	-0.00661601		2656.78	0.00016899		3246.78	-0.00485755
297	0.00235296		886.99	0.00019427		1476.99	0.00457889		2066.98	-0.00660306		2656.98	0.00000895		3246.98	-0.00480464
297.2	0.00212095		887.19	-0.00012834		1477.19	0.00405996		2067.18	-0.00708149		2657.18	0.00138444		3247.18	-0.00486472
297.4	0.00226028		887.39	-0.00132392		1477.39	0.00361066		2067.38	-0.006908		2657.38	0.00174288		3247.38	-0.00408456
297.6	0.0020512		887.59	-0.0016688		1477.59	0.00359844		2067.58	-0.00680666		2657.58	0.00157232		3247.58	-0.00383346
297.8	0.0017569		887.79	-0.00145059		1477.79	0.00394807		2067.78	-0.00724367		2657.78	0.00202977		3247.78	-0.00285267
298	0.00200864		887.99	-0.00139018		1477.99	0.00377635		2067.98	-0.00721784		2657.98	0.00217354		3247.98	-0.00261258
298.2	0.00181745		888.19	-0.000621		1478.19	0.00381368		2068.18	-0.00758552		2658.18	0.00246553		3248.18	-0.00299015
298.4	0.00140759		888.39	-0.00052304		1478.39	0.00370691		2068.38	-0.00721154		2658.38	0.0023895		3248.38	-0.00394028
298.6	0.00221294		888.59	-0.00112153		1478.59	0.00384213		2068.58	-0.00687152		2658.58	0.0029581		3248.58	-0.00442925
298.8	0.00286354		888.79	-0.00110014		1478.79	0.00343053		2068.78	-0.00554635		2658.78	0.00300919		3248.78	-0.00499414
299	0.00381626		888.99	-0.00072907		1478.99	0.00386693		2068.98	-0.00593189		2658.98	0.00304456		3248.98	-0.00473468
299.2	0.00483598		889.19	-0.00013715		1479.19	0.00354763		2069.18	-0.00542667		2659.18	0.00244265		3249.18	-0.00445456
299.4	0.00460965		889.39	-0.00035651		1479.39	0.00422832		2069.38	-0.00499117		2659.38	0.00161094		3249.38	-0.00395788
299.6	0.00502338		889.59	0.00074765		1479.59	0.00441382		2069.58	-0.00403195		2659.58	0.00114991		3249.58	-0.00460764
299.8	0.00504207		889.79	0.00108286		1479.79	0.00397202		2069.78	-0.00346993		2659.78	0.00071571		3249.78	-0.00363972
300	0.00528997		889.99	0.00114255		1479.99	0.00353086		2069.98	-0.00217285		2659.98	0.00113392		3249.98	-0.00381486
300.2	0.00611277		890.19	0.00136538		1480.19	0.00391469		2070.18	-0.00135201		2660.18	0.00176958		3250.18	-0.00329076
300.4	0.00650338		890.39	0.00107348		1480.39	0.00407139		2070.38	0.00013882		2660.38	0.00209034		3250.38	-0.00345403
300.6	0.00730605		890.59	0.00056591		1480.59	0.00444921		2070.58	-0.00008707		2660.58	0.00244407		3250.58	-0.00383687
300.8	0.00737817		890.79	-0.00087946		1480.79	0.0044181		2070.78	0.00074019		2660.78	0.00195827		3250.78	-0.00439626
301	0.00765492		890.99	-0.00114573		1480.99	0.0050892		2070.98	0.00001574		2660.98	0.00166979		3250.98	-0.00471454
301.2	0.00775632		891.19	-0.00137873		1481.19	0.00503931		2071.18	-0.00108685		2661.18	0.00180001		3251.18	-0.00461461
301.4	0.00853453		891.39	-0.00176292		1481.39	0.00547786		2071.38	-0.00167535		2661.38	0.00061788		3251.38	-0.00454303
301.6	0.00844764		891.59	-0.00191784		1481.59	0.00585087		2071.58	-0.00251541		2661.58	0.00052489		3251.58	-0.00519446
301.8	0.00813375		891.79	-0.00138969		1481.79	0.00552332		2071.78	-0.00404074		2661.78	0.00033018		3251.78	-0.00516314
302	0.00727373		891.99	-0.0017107		1481.99	0.00559102		2071.98	-0.00472365		2661.98	0.00012723		3251.98	-0.00521146
302.2	0.00686371		892.19	-0.00115314		1482.19	0.00530271		2072.18	-0.00579322		2662.18	0.00059903		3252.18	-0.00520796
302.4	0.00659192		892.39	-0.00059749		1482.39	0.00516183		2072.38	-0.00616271		2662.38	0.00069227		3252.38	-0.00551408
302.6	0.00637289		892.59	-0.00086255		1482.59	0.00534111		2072.58	-0.00669365		2662.58	0.00130958		3252.58	-0.00517668
302.8	0.00601804		892.79	-0.00004971		1482.79	0.00551345		2072.78	-0.0076312		2662.78	0.00079442		3252.78	-0.00497807
303	0.00638345		892.99	0.00114257		1482.99	0.00522654		2072.98	-0.00927111		2662.98	0.00046425		3252.98	-0.00429344
303.2	0.00537221		893.19	0.00188449		1483.19	0.00529606		2073.18	-0.00969861		2663.18	0.0004715		3253.18	-0.00451209
303.4	0.00504445		893.39	0.00236236		1483.39	0.0053134		2073.38	-0.01001635		2663.38	0.00092465		3253.38	-0.00534527
303.6	0.00550823		893.59	0.0030156		1483.59	0.00449004		2073.58	-0.0093273		2663.58	0.00132706		3253.58	-0.00581984
303.8	0.00536028		893.79	0.00319173		1483.79	0.00397439		2073.78	-0.00884015		2663.78	0.00158249		3253.78	-0.00526356
304	0.00551684		893.99	0.00296409		1483.99	0.00346062		2073.98	-0.00845351		2663.98	0.00136922		3253.98	-0.005606
304.2	0.00659162		894.19	0.00297525		1484.19	0.00340763		2074.18	-0.00852753		2664.18	0.00159632		3254.18	-0.00527551
304.4	0.00747737		894.39	0.0020269		1484.39	0.00439833		2074.38	-0.00852298		2664.38	0.00221253		3254.38	-0.00515318
304.6	0.00869765		894.59	0.00092811		1484.59	0.00474842		2074.58	-0.00854629		2664.58	0.00255373		3254.58	-0.00470885
304.8	0.00814869		894.79	0.00084901		1484.79	0.005642		2074.78	-0.00757183		2664.78	0.00279436		3254.78	-0.00452518
305	0.00849305		894.99	0.00117094		1484.99	0.00590148		2074.98	-0.00786114		2664.98	0.0032955		3254.98	-0.00420424
305.2	0.00846461		895.19	0.00051379		1485.19	0.00566102		2075.18	-0.00848448		2665.18	0.00307123		3255.18	-0.00404111
305.4	0.00870691		895.39	-0.00060197		1485.39	0.0053213		2075.38	-0.00804479		2665.38	0.00311748		3255.38	-0.0041898
305.6	0.00866639		895.59	-0.00192824		1485.59	0.00463454		2075.58	-0.00834215		2665.58	0.00394135		3255.58	-0.0047293
305.8	0.00797939		895.79	-0.00188479		1485.79	0.00418383		2075.78	-0.00849247		2665.78	0.00400161		3255.78	-0.00402303
306	0.00804436		895.99	-0.00203435		1485.99	0.00439955		2075.98	-0.00805181		2665.98	0.00456608		3255.98	-0.00335974
306.2	0.00825416		896.19	-0.00179572		1486.19	0.00403508		2076.18	-0.00794285		2666.18	0.00401914		3256.18	-0.00388726
306.4	0.00786974		896.39	-0.00192763		1486.39	0.00426852		2076.38	-0.00795547		2666.38	0.00376407		3256.38	-0.00353165
306.6	0.00716705		896.59	-0.00223907		1486.59	0.00455994		2076.58	-0.00879593		2666.58	0.00368568		3256.58	-0.00328311
306.8	0.00701503		896.79	-0.00137012		1486.79	0.0044864		2076.78	-0.00781738		2666.78	0.00309906		3256.78	-0.00385602
307	0.00650032		896.99	-0.00074411		1486.99	0.00470131		2076.98	-0.0072808		2666.98	0.00324889		3256.98	-0.00368964
307.2	0.00579845		897.19	-0.00044801		1487.19	0.00515293		2077.18	-0.00682108		2667.18	0.00321478		3257.18	-0.00415845
307.4	0.0057293		897.39	-0.00031549		1487.39	0.00456336		2077.38	-0.00634429		2667.38	0.00314514		3257.38	-0.00498728
307.6	0.00530379		897.59	0.00015342		1487.59	0.00511099		2077.58	-0.00607486		2667.58	0.0026054		3257.58	-0.00551033
307.8	0.00621233		897.79	-0.00006533		1487.79	0.00538683		2077.78	-0.00572276		2667.78	0.00220481		3257.78	-0.00550624
308	0.00706593		897.99	-0.00047453		1487.99	0.00578517		2077.98	-0.00529335		2667.98	0.00232465		3257.98	-0.00535093
308.2	0.00789167		898.19	0.00002257		1488.19	0.00617546		2078.18	-0.00539289		2668.18	0.0027762		3258.18	-0.00457052
308.4	0.00894592		898.39	-0.00054601		1488.39	0.00792029		2078.38	-0.00470496		2668.38	0.0041347		3258.38	-0.00444818
308.6	0.00914615		898.59	-0.00002674		1488.59	0.00793828		2078.58	-0.00332039		2668.58	0.0048321		3258.58	-0.00361234
308.8	0.00913445		898.79	0.00046276		1488.79	0.00894176		2078.78	-0.00229713		2668.78	0.00534907		3258.78	-0.00360177
309	0.00978436		898.99	0.00051154		1488.99	0.00928266		2078.98	-0.00214034		2668.98	0.00544819		3258.98	-0.00332712
309.2	0.01032004		899.19	-0.00028926		1489.19	0.00930442		2079.18	-0.00206638		2669.18	0.00544073		3259.18	-0.00428467
309.4	0.01083897		899.39	-0.00108319		1489.39	0.00994013		2079.38	-0.00278507		2669.38	0.00555233		3259.38	-0.00447161
309.6	0.01114502		899.59	-0.00002605		1489.59	0.00985237		2079.58	-0.00259382		2669.58	0.00629332		3259.58	-0.00417932
309.8	0.01132904		899.79	0.00106044		1489.79	0.0104208		2079.78	-0.0027646		2669.78	0.00593385		3259.78	-0.00379187
310	0.01157115		899.99	0.00122136		1489.99	0.010713		2079.98	-0.00267064		2669.98	0.0059465		3259.98	-0.00407331
310.2	0.01122517		900.19	0.00201827		1490.19	0.01080817		2080.18	-0.00315906		2670.18	0.00572579		3260.18	-0.0040362
310.4	0.01096636		900.39	0.00188988		1490.39	0.01079261		2080.38	-0.00338059		2670.38	0.00637364		3260.38	-0.00289563
310.6	0.01100022		900.59	0.00258535		1490.59	0.01119659		2080.58	-0.00362676		2670.58	0.00603008		3260.58	-0.0027946
310.8	0.01063478		900.79	0.00308405		1490.79	0.01103442		2080.78	-0.00289887		2670.78	0.00620489		3260.78	-0.00191528
311	0.01055266		900.99	0.0034113		1490.99	0.01032768		2080.98	-0.00391551		2670.98	0.00638752		3260.98	-0.00066366
311.2	0.01044462		901.19	0.00406068		1491.19	0.00978327		2081.18	-0.00496292		2671.18	0.00607495		3261.18	-0.00096931
311.4	0.00997602		901.39	0.00398557		1491.39	0.0083567		2081.38	-0.00581003		2671.38	0.0059974		3261.38	-0.00135423
311.6	0.01004807		901.59	0.00438848		1491.59	0.00721385		2081.58	-0.00556961		2671.58	0.00521151		3261.58	-0.00202812
311.8	0.01037278		901.79	0.0038716		1491.79	0.00658978		2081.78	-0.00570216		2671.78	0.00575709		3261.78	-0.00170815
312	0.01067746		901.99	0.00395291		1491.99	0.00592342		2081.98	-0.00558901		2671.98	0.00556621		3261.98	-0.00128392
312.2	0.01028701		902.19	0.00476149		1492.19	0.0049094		2082.18	-0.00540146		2672.18	0.00539127		3262.18	-0.0011031
312.4	0.01095522		902.39	0.00342672		1492.39	0.00504094		2082.38	-0.00473363		2672.38	0.00540089		3262.38	-0.00174252
312.6	0.01056789		902.59	0.00387285		1492.59	0.00501963		2082.58	-0.00339617		2672.58	0.00516397		3262.58	-0.00144098
312.8	0.0105115		902.79	0.00338337		1492.79	0.00479067		2082.78	-0.00305615		2672.78	0.00528893		3262.78	-0.00275255
313	0.01022347		902.99	0.00367768		1492.99	0.0048263		2082.98	-0.00298303		2672.98	0.00533984		3262.98	-0.0030573
313.2	0.01080842		903.19	0.003328		1493.19	0.00506638		2083.18	-0.00221285		2673.18	0.00512545		3263.18	-0.00447551
313.4	0.01106566		903.39	0.00251165		1493.39	0.00570185		2083.38	-0.0024633		2673.38	0.00558248		3263.38	-0.0046524
313.6	0.01084786		903.59	0.00270282		1493.59	0.00664602		2083.58	-0.00130518		2673.58	0.00533489		3263.58	-0.00504285
313.8	0.01046871		903.79	0.00221492		1493.79	0.00787676		2083.78	-0.00209482		2673.78	0.00469914		3263.78	-0.00506289
314	0.01053061		903.99	0.00255458		1493.99	0.0084969		2083.98	-0.00154825		2673.98	0.00515901		3263.98	-0.00532648
314.2	0.0107151		904.19	0.00297139		1494.19	0.00855415		2084.18	-0.00195254		2674.18	0.00484476		3264.18	-0.00445611
314.4	0.01118507		904.39	0.00188652		1494.39	0.00836078		2084.38	-0.00196132		2674.38	0.00470559		3264.38	-0.00434465
314.6	0.01150062		904.59	0.00199878		1494.59	0.00850635		2084.58	-0.0028059		2674.58	0.00399787		3264.58	-0.00435496
314.8	0.01164726		904.79	0.00215293		1494.79	0.00771141		2084.78	-0.00265411		2674.78	0.00395141		3264.78	-0.00393737
315	0.01157255		904.99	0.00186006		1494.99	0.00701808		2084.98	-0.00328285		2674.98	0.00396735		3264.98	-0.00440068
315.2	0.01169681		905.19	0.00264746		1495.19	0.00755035		2085.18	-0.0032621		2675.18	0.00412281		3265.18	-0.00463278
315.4	0.01167569		905.39	0.00249721		1495.39	0.00691125		2085.38	-0.00302142		2675.38	0.00337756		3265.38	-0.00401056
315.6	0.01186238		905.59	0.0029428		1495.59	0.00768375		2085.58	-0.00229739		2675.58	0.00368886		3265.58	-0.00374655
315.8	0.01277809		905.79	0.00341589		1495.79	0.00844598		2085.78	-0.00373259		2675.78	0.00444548		3265.78	-0.00302549
316	0.01285712		905.99	0.00392052		1495.99	0.00909349		2085.98	-0.00345688		2675.98	0.00432793		3265.98	-0.00296647
316.2	0.01325059		906.19	0.003969		1496.19	0.00901638		2086.18	-0.00338366		2676.18	0.00421775		3266.18	-0.00263014
316.4	0.01390686		906.39	0.00289591		1496.39	0.00982542		2086.38	-0.00357264		2676.38	0.0049367		3266.38	-0.00284929
316.6	0.01422881		906.59	0.00359239		1496.59	0.0104691		2086.58	-0.00333768		2676.58	0.00549505		3266.58	-0.0029127
316.8	0.01542574		906.79	0.00349422		1496.79	0.00975494		2086.78	-0.00306913		2676.78	0.00566459		3266.78	-0.00310609
317	0.01603517		906.99	0.00365762		1496.99	0.01034313		2086.98	-0.00307452		2676.98	0.00599855		3266.98	-0.00248829
317.2	0.01666682		907.19	0.00370753		1497.19	0.0109983		2087.18	-0.00240215		2677.18	0.00575201		3267.18	-0.00288738
317.4	0.0158637		907.39	0.00253889		1497.39	0.01168528		2087.38	-0.00256832		2677.38	0.00645186		3267.38	-0.00230528
317.6	0.01552489		907.59	0.00267071		1497.59	0.01219877		2087.58	-0.00251266		2677.58	0.00580774		3267.58	-0.00229428
317.8	0.01608823		907.79	0.0028875		1497.79	0.01141229		2087.78	-0.00279482		2677.78	0.00619987		3267.78	-0.00200789
318	0.01623895		907.99	0.00287914		1497.99	0.01036814		2087.98	-0.00197161		2677.98	0.00658313		3267.98	-0.00260651
318.2	0.01539415		908.19	0.00194362		1498.19	0.00987919		2088.18	-0.00194863		2678.18	0.00671048		3268.18	-0.00282837
318.4	0.01520304		908.39	0.00121432		1498.39	0.00951498		2088.38	-0.00219237		2678.38	0.00734979		3268.38	-0.00360051
318.6	0.01493471		908.59	0.00145358		1498.59	0.00876363		2088.58	-0.0023866		2678.58	0.00670429		3268.58	-0.00393279
318.8	0.0142982		908.79	0.00167806		1498.79	0.00830641		2088.78	-0.00159991		2678.78	0.00724479		3268.78	-0.00356038
319	0.01348899		908.99	0.00179724		1498.99	0.00869022		2088.98	-0.0012721		2678.98	0.00697145		3268.98	-0.00408241
319.2	0.01336247		909.19	0.00159215		1499.19	0.00889985		2089.18	0.00020321		2679.18	0.00706077		3269.18	-0.00361937
319.4	0.0124958		909.39	0.00166941		1499.39	0.00876193		2089.38	0.00003525		2679.38	0.00740715		3269.38	-0.00363844
319.6	0.01264961		909.59	0.00247557		1499.59	0.0094158		2089.58	-0.00015624		2679.58	0.00813461		3269.58	-0.00379037
319.8	0.01293766		909.79	0.00268212		1499.79	0.00893932		2089.78	-0.00106619		2679.78	0.00789013		3269.78	-0.00453218
320	0.01198557		909.99	0.00260162		1499.99	0.00870719		2089.98	-0.00139484		2679.98	0.00728856		3269.98	-0.00469487
320.2	0.0121184		910.19	0.00242186		1500.19	0.00890674		2090.18	-0.00180924		2680.18	0.0071194		3270.18	-0.00433754
320.4	0.01253407		910.39	0.00257217		1500.39	0.00926089		2090.38	-0.00196066		2680.38	0.00758636		3270.38	-0.00446595
320.6	0.01296654		910.59	0.00338459		1500.59	0.00960996		2090.58	-0.00156337		2680.58	0.00663155		3270.58	-0.00445769
320.8	0.01371613		910.79	0.00323315		1500.79	0.00981099		2090.78	-0.0006314		2680.78	0.00591162		3270.78	-0.00403663
321	0.01387531		910.99	0.00392342		1500.99	0.01013377		2090.98	-0.00036643		2680.98	0.00668858		3270.98	-0.00344823
321.2	0.01329985		911.19	0.00472562		1501.19	0.01048353		2091.18	-0.00000843		2681.18	0.0064252		3271.18	-0.00376582
321.4	0.01332488		911.39	0.00450017		1501.39	0.01099548		2091.38	0.00073102		2681.38	0.00656622		3271.38	-0.00384753
321.6	0.01432702		911.59	0.0049881		1501.59	0.01046592		2091.58	0.0002791		2681.58	0.00615792		3271.58	-0.00417047
321.8	0.01470814		911.79	0.00488655		1501.79	0.01007087		2091.78	0.00015814		2681.78	0.00625693		3271.78	-0.00398048
322	0.01432173		911.99	0.00450542		1501.99	0.01017733		2091.98	0.00000215		2681.98	0.00767637		3271.98	-0.00401139
322.2	0.01442983		912.19	0.00354408		1502.19	0.01065818		2092.18	-0.00077616		2682.18	0.00911007		3272.18	-0.00403474
322.4	0.01446814		912.39	0.00419521		1502.39	0.00999436		2092.38	-0.00114385		2682.38	0.00974006		3272.38	-0.00371382
322.6	0.01479819		912.59	0.00401639		1502.59	0.00901293		2092.58	-0.00102133		2682.58	0.0093862		3272.58	-0.00392295
322.8	0.01416986		912.79	0.00359065		1502.79	0.00913555		2092.78	-0.00096472		2682.78	0.00989308		3272.78	-0.00373213
323	0.01408836		912.99	0.0030995		1502.99	0.00968971		2092.98	-0.00032887		2682.98	0.00959431		3272.98	-0.00375622
323.2	0.01442637		913.19	0.00291347		1503.19	0.0088674		2093.18	-0.00014361		2683.18	0.00915575		3273.18	-0.00324582
323.4	0.01493251		913.39	0.0035642		1503.39	0.00873064		2093.38	-0.00140026		2683.38	0.00948401		3273.38	-0.00282898
323.6	0.01538399		913.59	0.00321598		1503.59	0.00912682		2093.58	-0.00182309		2683.58	0.00853905		3273.58	-0.00305095
323.8	0.01581917		913.79	0.00290934		1503.79	0.00826464		2093.78	-0.00287634		2683.78	0.0079998		3273.78	-0.00312727
324	0.01480495		913.99	0.00274388		1503.99	0.00813909		2093.98	-0.00385908		2683.98	0.00748866		3273.98	-0.00230106
324.2	0.01543771		914.19	0.00271524		1504.19	0.00910405		2094.18	-0.00351438		2684.18	0.00750696		3274.18	-0.00240026
324.4	0.01611078		914.39	0.00243512		1504.39	0.00834763		2094.38	-0.00361905		2684.38	0.00721719		3274.38	-0.00203205
324.6	0.01560054		914.59	0.00187279		1504.59	0.00865119		2094.58	-0.00339102		2684.58	0.00647889		3274.58	-0.00251632
324.8	0.01661628		914.79	0.00206764		1504.79	0.00868954		2094.78	-0.00352313		2684.78	0.00603736		3274.78	-0.0017505
325	0.01707044		914.99	0.00341066		1504.99	0.00919689		2094.98	-0.0030943		2684.98	0.00655456		3274.98	-0.00181367
325.2	0.01654773		915.19	0.00437754		1505.19	0.00948131		2095.18	-0.00374431		2685.18	0.0062272		3275.18	-0.0021626
325.4	0.01685582		915.39	0.00458435		1505.39	0.00979397		2095.38	-0.00398534		2685.38	0.00570906		3275.38	-0.0019628
325.6	0.01744053		915.59	0.00496981		1505.59	0.00927216		2095.58	-0.00364423		2685.58	0.0058454		3275.58	-0.00193878
325.8	0.0175966		915.79	0.00519877		1505.79	0.00835849		2095.78	-0.00321294		2685.78	0.00591936		3275.78	-0.00241994
326	0.01727		915.99	0.00490248		1505.99	0.00800234		2095.98	-0.00254828		2685.98	0.00770523		3275.98	-0.00275666
326.2	0.0169658		916.19	0.00516046		1506.19	0.00786132		2096.18	-0.00186014		2686.18	0.0081178		3276.18	-0.0024461
326.4	0.01589363		916.39	0.00553205		1506.39	0.00783388		2096.38	-0.00049204		2686.38	0.00800751		3276.38	-0.00229883
326.6	0.01546971		916.59	0.00493823		1506.59	0.00789854		2096.58	0.00001827		2686.58	0.00792842		3276.58	-0.00273983
326.8	0.01433783		916.79	0.00453967		1506.79	0.0083867		2096.78	0.00078662		2686.78	0.00823727		3276.78	-0.00231301
327	0.01452629		916.99	0.00485895		1506.99	0.00916163		2096.98	0.00124521		2686.98	0.00812473		3276.98	-0.00227822
327.2	0.01379927		917.19	0.00436333		1507.19	0.00916525		2097.18	0.00158259		2687.18	0.00777885		3277.18	-0.00228677
327.4	0.01478352		917.39	0.00466367		1507.39	0.00983615		2097.38	0.00182524		2687.38	0.00863451		3277.38	-0.00281263
327.6	0.01484639		917.59	0.00480483		1507.59	0.01083605		2097.58	0.00241838		2687.58	0.00761518		3277.58	-0.00267123
327.8	0.01559756		917.79	0.00428707		1507.79	0.0109727		2097.78	0.00195403		2687.78	0.00784953		3277.78	-0.00284208
328	0.01571486		917.99	0.004166		1507.99	0.011671		2097.98	0.00190553		2687.98	0.0074733		3277.98	-0.00307231
328.2	0.0166022		918.19	0.00398929		1508.19	0.01121842		2098.18	0.00159492		2688.18	0.00750352		3278.18	-0.00287606
328.4	0.01558584		918.39	0.00322413		1508.39	0.01098936		2098.38	0.00086729		2688.38	0.00813933		3278.38	-0.00236773
328.6	0.01474608		918.59	0.00212853		1508.59	0.01189246		2098.58	0.00101761		2688.58	0.00825406		3278.58	-0.00300006
328.8	0.01622656		918.79	0.00379475		1508.79	0.01218544		2098.78	-0.00001192		2688.78	0.00839419		3278.78	-0.00251175
329	0.01627081		918.99	0.00411841		1508.99	0.01304003		2098.98	0.00030969		2688.98	0.00899248		3278.98	-0.00278459
329.2	0.01588555		919.19	0.00439079		1509.19	0.01291103		2099.18	-0.00060319		2689.18	0.00896823		3279.18	-0.00183297
329.4	0.01613446		919.39	0.00469664		1509.39	0.01259874		2099.38	-0.00082066		2689.38	0.00879496		3279.38	-0.00144734
329.6	0.01607029		919.59	0.00524462		1509.59	0.01157968		2099.58	-0.00016981		2689.58	0.00935508		3279.58	-0.00156551
329.8	0.01534774		919.79	0.00564257		1509.79	0.0102793		2099.78	-0.00044951		2689.78	0.00895467		3279.78	-0.00141922
330	0.01558615		919.99	0.00569488		1509.99	0.01035754		2099.98	-0.0008604		2689.98	0.00914171		3279.98	-0.00059605
330.2	0.01584869		920.19	0.00572283		1510.19	0.01018165		2100.18	-0.00088645		2690.18	0.00858905		3280.18	-0.00004141
330.4	0.01526122		920.39	0.00506544		1510.39	0.01016338		2100.38	-0.0008055		2690.38	0.00790466		3280.38	-0.00059791
330.6	0.01485018		920.59	0.00491741		1510.59	0.00978164		2100.58	-0.0015917		2690.58	0.00781017		3280.58	-0.00130719
330.8	0.0142542		920.79	0.00518844		1510.79	0.00957623		2100.78	-0.00200368		2690.78	0.0081766		3280.78	-0.00135741
331	0.01461057		920.99	0.00595618		1510.99	0.00995998		2100.98	-0.00115863		2690.98	0.0080894		3280.98	-0.00177679
331.2	0.01469959		921.19	0.00627589		1511.19	0.00985299		2101.18	-0.0010114		2691.18	0.00756472		3281.18	-0.00178998
331.4	0.01550307		921.39	0.00778704		1511.39	0.00948361		2101.38	-0.00079189		2691.38	0.00748508		3281.38	-0.00240299
331.6	0.01595476		921.59	0.00725761		1511.59	0.01004673		2101.58	-0.00066029		2691.58	0.00707319		3281.58	-0.0024385
331.8	0.01703658		921.79	0.00688032		1511.79	0.01034265		2101.78	-0.00149341		2691.78	0.00732151		3281.78	-0.00305014
332	0.01717102		921.99	0.00686692		1511.99	0.01002784		2101.98	-0.00169914		2691.98	0.00773494		3281.98	-0.00330428
332.2	0.01791414		922.19	0.00651828		1512.19	0.0096117		2102.18	-0.00097901		2692.18	0.0087866		3282.18	-0.00284023
332.4	0.0182376		922.39	0.00597652		1512.39	0.0103694		2102.38	-0.00077042		2692.38	0.009695		3282.38	-0.00302392
332.6	0.01823475		922.59	0.00598908		1512.59	0.01144223		2102.58	-0.00070552		2692.58	0.00961383		3282.58	-0.00340241
332.8	0.01889832		922.79	0.00711088		1512.79	0.01224506		2102.78	-0.00053048		2692.78	0.0099928		3282.78	-0.00274369
333	0.01867335		922.99	0.0064519		1512.99	0.01210399		2102.98	-0.0004209		2692.98	0.01040716		3282.98	-0.00209626
333.2	0.01835564		923.19	0.00622573		1513.19	0.01291458		2103.18	-0.00052177		2693.18	0.01045304		3283.18	-0.00131337
333.4	0.01802366		923.39	0.00650889		1513.39	0.0130037		2103.38	-0.00027798		2693.38	0.01036371		3283.38	-0.00062453
333.6	0.01814836		923.59	0.00629183		1513.59	0.01305892		2103.58	0.000176		2693.58	0.00987599		3283.58	0.00009713
333.8	0.01829651		923.79	0.00663765		1513.79	0.01283307		2103.78	0.00039055		2693.78	0.00962384		3283.78	-0.00023781
334	0.01880538		923.99	0.0060731		1513.99	0.01283553		2103.98	0.00000648		2693.98	0.00884565		3283.98	-0.00021417
334.2	0.01837739		924.19	0.00575576		1514.19	0.01258296		2104.18	-0.00009487		2694.18	0.00812069		3284.18	-0.000729
334.4	0.01760788		924.39	0.00539729		1514.39	0.01251792		2104.38	0.00020205		2694.38	0.00688424		3284.38	-0.00032858
334.6	0.01761965		924.59	0.00527962		1514.59	0.01282465		2104.58	-0.00006398		2694.58	0.00667231		3284.58	-0.00116117
334.8	0.01651057		924.79	0.00576556		1514.79	0.01299221		2104.78	-0.00001401		2694.78	0.00690993		3284.78	-0.00100351
335	0.01630317		924.99	0.00612404		1514.99	0.01278744		2104.98	0.00014307		2694.98	0.00685728		3284.98	-0.00149425
335.2	0.01591178		925.19	0.00634829		1515.19	0.01335636		2105.18	-0.00054294		2695.18	0.00672633		3285.18	-0.00090722
335.4	0.0161188		925.39	0.0064187		1515.39	0.01268049		2105.38	-0.00101857		2695.38	0.00679246		3285.38	-0.00151426
335.6	0.01697288		925.59	0.00531763		1515.59	0.01304		2105.58	-0.00070022		2695.58	0.00663441		3285.58	-0.00216039
335.8	0.01720626		925.79	0.00552684		1515.79	0.01212418		2105.78	-0.00066935		2695.78	0.00637005		3285.78	-0.00202089
336	0.01829593		925.99	0.00476537		1515.99	0.01117593		2105.98	-0.00059603		2695.98	0.007339		3285.98	-0.00244683
336.2	0.01985529		926.19	0.00566146		1516.19	0.01137924		2106.18	-0.00060889		2696.18	0.00826739		3286.18	-0.0025696
336.4	0.01986501		926.39	0.0063053		1516.39	0.01141563		2106.38	-0.00167573		2696.38	0.00899116		3286.38	-0.00276079
336.6	0.01878382		926.59	0.0070245		1516.59	0.01221822		2106.58	-0.00178014		2696.58	0.00946676		3286.58	-0.00316617
336.8	0.01848394		926.79	0.00754677		1516.79	0.01230608		2106.78	-0.00069233		2696.78	0.01019432		3286.78	-0.00359933
337	0.01837552		926.99	0.00742344		1516.99	0.01229035		2106.98	-0.00130148		2696.98	0.01074219		3286.98	-0.00329109
337.2	0.01822625		927.19	0.00735619		1517.19	0.0128506		2107.18	-0.00048597		2697.18	0.01108615		3287.18	-0.0023614
337.4	0.01793356		927.39	0.00836077		1517.39	0.01262439		2107.38	0.00058793		2697.38	0.01035436		3287.38	-0.00135721
337.6	0.01811593		927.59	0.00817048		1517.59	0.01270924		2107.58	0.00087894		2697.58	0.00992754		3287.58	-0.00215911
337.8	0.01781009		927.79	0.00881862		1517.79	0.01247131		2107.78	0.00082165		2697.78	0.0099266		3287.78	-0.00306917
338	0.01773873		927.99	0.00795405		1517.99	0.01207939		2107.98	0.00108771		2697.98	0.00929929		3287.98	-0.00304311
338.2	0.01760544		928.19	0.00803863		1518.19	0.01161378		2108.18	0.00102047		2698.18	0.00876791		3288.18	-0.00350278
338.4	0.01729731		928.39	0.00775008		1518.39	0.01109235		2108.38	0.00155616		2698.38	0.00789786		3288.38	-0.00294303
338.6	0.01759656		928.59	0.00793541		1518.59	0.01130924		2108.58	0.00158189		2698.58	0.00855105		3288.58	-0.00401019
338.8	0.01716623		928.79	0.00858888		1518.79	0.01039169		2108.78	0.00141901		2698.78	0.00884816		3288.78	-0.0043609
339	0.0173187		928.99	0.00866611		1518.99	0.00988656		2108.98	0.0006887		2698.98	0.00870185		3288.98	-0.00538331
339.2	0.01796631		929.19	0.00833344		1519.19	0.00995329		2109.18	0.0014526		2699.18	0.00785221		3289.18	-0.00552806
339.4	0.01862001		929.39	0.0081612		1519.39	0.0093968		2109.38	0.00113401		2699.38	0.00677243		3289.38	-0.00625704
339.6	0.01795039		929.59	0.00767384		1519.59	0.00944501		2109.58	0.0021548		2699.58	0.00716698		3289.58	-0.00654617
339.8	0.01806839		929.79	0.00661421		1519.79	0.00858453		2109.78	0.00265048		2699.78	0.00740977		3289.78	-0.0060821
340	0.01882224		929.99	0.00664033		1519.99	0.00894661		2109.98	0.00202044		2699.98	0.00756919		3289.98	-0.00641842
340.2	0.01890089		930.19	0.00716761		1520.19	0.00957835		2110.18	0.00175368		2700.18	0.00790266		3290.18	-0.00600992
340.4	0.0189241		930.39	0.00699385		1520.39	0.01003415		2110.38	0.0027032		2700.38	0.00836039		3290.38	-0.00575088
340.6	0.01847333		930.59	0.00708725		1520.59	0.01141219		2110.58	0.00351214		2700.58	0.00879659		3290.58	-0.00535017
340.8	0.0187515		930.79	0.00703787		1520.79	0.01205284		2110.78	0.00434243		2700.78	0.00818598		3290.78	-0.00423825
341	0.01904341		930.99	0.0064196		1520.99	0.01295707		2110.98	0.00460656		2700.98	0.00848897		3290.98	-0.00205115
341.2	0.01925162		931.19	0.00624307		1521.19	0.01361164		2111.18	0.00501634		2701.18	0.00802206		3291.18	-0.00131774
341.4	0.01992697		931.39	0.00664759		1521.39	0.01488052		2111.38	0.00467539		2701.38	0.0073346		3291.38	-0.00084705
341.6	0.02093051		931.59	0.00720132		1521.59	0.01602058		2111.58	0.00400001		2701.58	0.00757028		3291.58	-0.00151785
341.8	0.02117978		931.79	0.00759979		1521.79	0.01633682		2111.78	0.0030764		2701.78	0.00759195		3291.78	-0.00163467
342	0.02094935		931.99	0.00714584		1521.99	0.01551534		2111.98	0.00345814		2701.98	0.00794989		3291.98	-0.00165062
342.2	0.02001129		932.19	0.00726639		1522.19	0.01516399		2112.18	0.00315109		2702.18	0.00761957		3292.18	-0.00131816
342.4	0.02022101		932.39	0.00746635		1522.39	0.01462912		2112.38	0.00272386		2702.38	0.0075265		3292.38	-0.00080592
342.6	0.02037124		932.59	0.00764075		1522.59	0.01417636		2112.58	0.00210675		2702.58	0.00819088		3292.58	-0.0019998
342.8	0.01965338		932.79	0.00788117		1522.79	0.0127149		2112.78	0.00107223		2702.78	0.00855434		3292.78	-0.00297717
343	0.01858302		932.99	0.00791413		1522.99	0.0125614		2112.98	0.00051118		2702.98	0.00888628		3292.98	-0.00294584
343.2	0.01862522		933.19	0.00832296		1523.19	0.01276021		2113.18	0.00079105		2703.18	0.00948391		3293.18	-0.00272435
343.4	0.01739249		933.39	0.00835436		1523.39	0.01234228		2113.38	0.00105842		2703.38	0.01042277		3293.38	-0.00297413
343.6	0.01679326		933.59	0.00781442		1523.59	0.01170493		2113.58	0.00189714		2703.58	0.01154849		3293.58	-0.00334209
343.8	0.01712145		933.79	0.0071981		1523.79	0.01135317		2113.78	0.0019513		2703.78	0.01227052		3293.78	-0.00347902
344	0.01745122		933.99	0.00841679		1523.99	0.01152047		2113.98	0.00124744		2703.98	0.01215041		3293.98	-0.00321113
344.2	0.01805555		934.19	0.00814027		1524.19	0.01190585		2114.18	0.00095408		2704.18	0.01243484		3294.18	-0.00250895
344.4	0.01802122		934.39	0.00826211		1524.39	0.01255201		2114.38	0.0016822		2704.38	0.01266158		3294.38	-0.00266136
344.6	0.01808586		934.59	0.00832672		1524.59	0.01301731		2114.58	0.00151994		2704.58	0.0122972		3294.58	-0.00205916
344.8	0.01900516		934.79	0.00812115		1524.79	0.01381382		2114.78	0.00160919		2704.78	0.01180296		3294.78	-0.00079893
345	0.01849264		934.99	0.00827538		1524.99	0.01476601		2114.98	0.00148985		2704.98	0.01181868		3294.98	-0.00039322
345.2	0.01906141		935.19	0.00805313		1525.19	0.01597302		2115.18	0.00035005		2705.18	0.0109343		3295.18	-0.00115079
345.4	0.01969268		935.39	0.00828978		1525.39	0.01719826		2115.38	-0.00000996		2705.38	0.00990045		3295.38	-0.00163771
345.6	0.01914766		935.59	0.00868976		1525.59	0.01775554		2115.58	-0.00024107		2705.58	0.01007653		3295.58	-0.00194676
345.8	0.0191249		935.79	0.00821397		1525.79	0.01742363		2115.78	-0.00019637		2705.78	0.00948014		3295.78	-0.00222905
346	0.0188633		935.99	0.00782867		1525.99	0.01676336		2115.98	0.00069292		2705.98	0.00889824		3295.98	-0.00133658
346.2	0.01904682		936.19	0.00764004		1526.19	0.01718077		2116.18	0.00008058		2706.18	0.00781719		3296.18	0.00019173
346.4	0.02081257		936.39	0.00737306		1526.39	0.01711265		2116.38	0.0003094		2706.38	0.00714523		3296.38	-0.00000848
346.6	0.02152626		936.59	0.00716545		1526.59	0.01665485		2116.58	0.00039012		2706.58	0.0067188		3296.58	-0.00072326
346.8	0.02063081		936.79	0.00787482		1526.79	0.01610665		2116.78	0.0004586		2706.78	0.00711666		3296.78	-0.00086996
347	0.02176373		936.99	0.00769417		1526.99	0.0163419		2116.98	0.00147679		2706.98	0.0071516		3296.98	-0.00096402
347.2	0.02203935		937.19	0.00823673		1527.19	0.01629796		2117.18	0.00243569		2707.18	0.00703157		3297.18	-0.00142263
347.4	0.02276084		937.39	0.00817034		1527.39	0.0154091		2117.38	0.00335746		2707.38	0.00773942		3297.38	-0.00222698
347.6	0.02424554		937.59	0.00846645		1527.59	0.01522769		2117.58	0.00326093		2707.58	0.00802722		3297.58	-0.00269079
347.8	0.02548903		937.79	0.0092617		1527.79	0.01524721		2117.78	0.00235258		2707.78	0.00844062		3297.78	-0.00228479
348	0.02568036		937.99	0.01025893		1527.99	0.01547096		2117.98	0.00239718		2707.98	0.00814858		3297.98	-0.00134089
348.2	0.02549873		938.19	0.01008424		1528.19	0.01575855		2118.18	0.00258041		2708.18	0.00843158		3298.18	-0.00077269
348.4	0.0252296		938.39	0.00972059		1528.39	0.0159532		2118.38	0.00308415		2708.38	0.00885924		3298.38	-0.00072999
348.6	0.02535949		938.59	0.01012254		1528.59	0.01578495		2118.58	0.00255138		2708.58	0.00943952		3298.58	0.00043684
348.8	0.0246442		938.79	0.01074227		1528.79	0.01634651		2118.78	0.00195189		2708.78	0.00917527		3298.78	0.00034503
349	0.02319908		938.99	0.01078793		1528.99	0.01657468		2118.98	0.00208176		2708.98	0.00870127		3298.98	0.00027148
349.2	0.02245184		939.19	0.01007641		1529.19	0.01723768		2119.18	0.00200818		2709.18	0.00861134		3299.18	-0.00034002
349.4	0.02187825		939.39	0.00908706		1529.39	0.01664154		2119.38	0.00212545		2709.38	0.00884686		3299.38	-0.00045738
349.6	0.02116797		939.59	0.00910114		1529.59	0.01566588		2119.58	0.00205739		2709.58	0.01010059		3299.58	-0.0004074
349.8	0.02171982		939.79	0.00898622		1529.79	0.01458527		2119.78	0.00192169		2709.78	0.01059665		3299.78	-0.00048328
350	0.02098714		939.99	0.00832023		1529.99	0.01387028		2119.98	0.00205845		2709.98	0.01109254		3299.98	-0.00068823
350.2	0.02092286		940.19	0.00799586		1530.19	0.01313332		2120.18	0.00180738		2710.18	0.01065882		3300.18	-0.00093963
350.4	0.02100985		940.39	0.00738708		1530.39	0.01257358		2120.38	0.00275999		2710.38	0.01084661		3300.38	-0.00198745
350.6	0.02027655		940.59	0.00745878		1530.59	0.01168213		2120.58	0.0031541		2710.58	0.00975856		3300.58	-0.00283024
350.8	0.01984667		940.79	0.00763905		1530.79	0.0107918		2120.78	0.00312291		2710.78	0.00943773		3300.78	-0.00328654
351	0.02095379		940.99	0.0074955		1530.99	0.01089326		2120.98	0.0033		2710.98	0.00917951		3300.98	-0.00322923
351.2	0.02087402		941.19	0.00783954		1531.19	0.01068118		2121.18	0.00349102		2711.18	0.00901261		3301.18	-0.00333581
351.4	0.02206818		941.39	0.00805558		1531.39	0.01114071		2121.38	0.00330891		2711.38	0.00887055		3301.38	-0.00393355
351.6	0.02250835		941.59	0.00962252		1531.59	0.01150685		2121.58	0.00331859		2711.58	0.00817382		3301.58	-0.00424175
351.8	0.02317049		941.79	0.00991322		1531.79	0.01228166		2121.78	0.00336936		2711.78	0.00785687		3301.78	-0.00333798
352	0.02242044		941.99	0.01066988		1531.99	0.01282719		2121.98	0.00354879		2711.98	0.00809229		3301.98	-0.00253913
352.2	0.02219062		942.19	0.01028421		1532.19	0.01328747		2122.18	0.00294208		2712.18	0.00825572		3302.18	-0.00228795
352.4	0.02216116		942.39	0.01062145		1532.39	0.01406155		2122.38	0.00232888		2712.38	0.0088496		3302.38	-0.00230858
352.6	0.02195316		942.59	0.01106337		1532.59	0.01437403		2122.58	0.00289035		2712.58	0.00848639		3302.58	-0.00229356
352.8	0.0214647		942.79	0.01168225		1532.79	0.01474551		2122.78	0.00362967		2712.78	0.00845598		3302.78	-0.00356244
353	0.02106807		942.99	0.01119899		1532.99	0.01514634		2122.98	0.0051966		2712.98	0.00855067		3302.98	-0.00344266
353.2	0.02034034		943.19	0.01169577		1533.19	0.01486412		2123.18	0.00498115		2713.18	0.00939981		3303.18	-0.00404142
353.4	0.02115215		943.39	0.01162848		1533.39	0.01400119		2123.38	0.0053252		2713.38	0.01015632		3303.38	-0.00449668
353.6	0.02060136		943.59	0.01175778		1533.59	0.01453403		2123.58	0.00490266		2713.58	0.0102476		3303.58	-0.00476373
353.8	0.02082379		943.79	0.01082375		1533.79	0.01349488		2123.78	0.0052471		2713.78	0.01149807		3303.78	-0.00501326
354	0.02103831		943.99	0.00980468		1533.99	0.01262191		2123.98	0.00518491		2713.98	0.0119051		3303.98	-0.00530372
354.2	0.02146948		944.19	0.00973192		1534.19	0.01229975		2124.18	0.00524489		2714.18	0.01093348		3304.18	-0.0052577
354.4	0.02126101		944.39	0.0090786		1534.39	0.01254998		2124.38	0.00555494		2714.38	0.01087401		3304.38	-0.00553445
354.6	0.02088615		944.59	0.00917454		1534.59	0.01276358		2124.58	0.00534003		2714.58	0.01011654		3304.58	-0.00540574
354.8	0.02191411		944.79	0.00891921		1534.79	0.01248668		2124.78	0.00452216		2714.78	0.01095794		3304.78	-0.00558151
355	0.02268321		944.99	0.00885402		1534.99	0.0129945		2124.98	0.00362536		2714.98	0.01118157		3304.98	-0.00542185
355.2	0.02326476		945.19	0.00865881		1535.19	0.01285305		2125.18	0.00255143		2715.18	0.0105466		3305.18	-0.00556129
355.4	0.02407765		945.39	0.00968269		1535.39	0.01410793		2125.38	0.00217772		2715.38	0.01020076		3305.38	-0.00540298
355.6	0.0244166		945.59	0.01069644		1535.59	0.01375469		2125.58	0.00303859		2715.58	0.01028657		3305.58	-0.00487777
355.8	0.02436092		945.79	0.0103891		1535.79	0.01373151		2125.78	0.00260078		2715.78	0.01114146		3305.78	-0.00421041
356	0.02409367		945.99	0.01040697		1535.99	0.01252238		2125.98	0.00238336		2715.98	0.01123272		3305.98	-0.00323092
356.2	0.02454721		946.19	0.01041296		1536.19	0.01232533		2126.18	0.00222444		2716.18	0.01157202		3306.18	-0.00324847
356.4	0.02468687		946.39	0.01112641		1536.39	0.01334296		2126.38	0.00277835		2716.38	0.01202869		3306.38	-0.00310837
356.6	0.0238355		946.59	0.0117983		1536.59	0.01325284		2126.58	0.00392685		2716.58	0.01237329		3306.58	-0.00321198
356.8	0.02306825		946.79	0.01287493		1536.79	0.0136245		2126.78	0.00412496		2716.78	0.01293288		3306.78	-0.00310594
357	0.02230477		946.99	0.01260657		1536.99	0.01362466		2126.98	0.00473272		2716.98	0.01301607		3306.98	-0.00271254
357.2	0.02236042		947.19	0.01304456		1537.19	0.01359763		2127.18	0.00347438		2717.18	0.01282452		3307.18	-0.00246864
357.4	0.02315254		947.39	0.01190222		1537.39	0.01404369		2127.38	0.00410268		2717.38	0.0121094		3307.38	-0.00230719
357.6	0.02299991		947.59	0.01074573		1537.59	0.01391962		2127.58	0.00383686		2717.58	0.01105265		3307.58	-0.00279526
357.8	0.02384346		947.79	0.00948859		1537.79	0.01326621		2127.78	0.00422945		2717.78	0.01193521		3307.78	-0.00265427
358	0.02475551		947.99	0.00884665		1537.99	0.01371539		2127.98	0.00290669		2717.98	0.01189885		3307.98	-0.00332563
358.2	0.02489898		948.19	0.0086025		1538.19	0.01431177		2128.18	0.0027478		2718.18	0.01113844		3308.18	-0.00456896
358.4	0.02471628		948.39	0.00757113		1538.39	0.01440631		2128.38	0.00229825		2718.38	0.01115247		3308.38	-0.00540428
358.6	0.02420818		948.59	0.00630252		1538.59	0.013319		2128.58	0.00145446		2718.58	0.01072584		3308.58	-0.00616576
358.8	0.02479103		948.79	0.00563666		1538.79	0.01279343		2128.78	0.00032248		2718.78	0.01104553		3308.78	-0.00664296
359	0.02500592		948.99	0.0051878		1538.99	0.01288901		2128.98	-0.00061137		2718.98	0.01096862		3308.98	-0.00677737
359.2	0.02534218		949.19	0.00527742		1539.19	0.01227706		2129.18	-0.00144884		2719.18	0.01093569		3309.18	-0.00643278
359.4	0.02625685		949.39	0.00569541		1539.39	0.01289464		2129.38	-0.00107617		2719.38	0.01177077		3309.38	-0.00603629
359.6	0.02568379		949.59	0.00643103		1539.59	0.01220746		2129.58	-0.00007206		2719.58	0.01235896		3309.58	-0.00558132
359.8	0.02613369		949.79	0.00761297		1539.79	0.012185		2129.78	-0.00098041		2719.78	0.01280952		3309.78	-0.00535196
360	0.0265291		949.99	0.0079874		1539.99	0.01197028		2129.98	-0.00043089		2719.98	0.0118804		3309.98	-0.0045775
360.2	0.02626503		950.19	0.00892435		1540.19	0.01341087		2130.18	-0.0007944		2720.18	0.01217568		3310.18	-0.00484687
360.4	0.02661702		950.39	0.01013974		1540.39	0.01426193		2130.38	-0.00085459		2720.38	0.01256227		3310.38	-0.00343001
360.6	0.02678378		950.59	0.0102998		1540.59	0.01459519		2130.58	-0.00046953		2720.58	0.01283651		3310.58	-0.00292802
360.8	0.02725032		950.79	0.01107467		1540.79	0.01539232		2130.78	-0.00045924		2720.78	0.01258637		3310.78	-0.00205095
361	0.02657717		950.99	0.01070471		1540.99	0.01503494		2130.98	0.00026198		2720.98	0.01257543		3310.98	-0.00166145
361.2	0.02693802		951.19	0.01133751		1541.19	0.01516149		2131.18	0.00003828		2721.18	0.01179349		3311.18	-0.00156893
361.4	0.0274128		951.39	0.01121001		1541.39	0.01478518		2131.38	0.0013731		2721.38	0.01132619		3311.38	-0.00059341
361.6	0.02723235		951.59	0.01099039		1541.59	0.01445978		2131.58	0.00150723		2721.58	0.01120678		3311.58	-0.0003494
361.8	0.02825565		951.79	0.01086135		1541.79	0.01395272		2131.78	0.00220814		2721.78	0.01172621		3311.78	0.0002877
362	0.0283123		951.99	0.01173958		1541.99	0.01364808		2131.98	0.00238817		2721.98	0.01188738		3311.98	0.00059603
362.2	0.02805265		952.19	0.0109847		1542.19	0.01345462		2132.18	0.002401		2722.18	0.01090586		3312.18	0.00078881
362.4	0.02728953		952.39	0.01014309		1542.39	0.01284713		2132.38	0.00217686		2722.38	0.01041028		3312.38	0.00010702
362.6	0.02557259		952.59	0.0091896		1542.59	0.01231618		2132.58	0.00176104		2722.58	0.01041431		3312.58	-0.00024568
362.8	0.02525441		952.79	0.0087225		1542.79	0.01261383		2132.78	0.00170158		2722.78	0.01136494		3312.78	-0.0004277
363	0.02537206		952.99	0.00812738		1542.99	0.01290076		2132.98	0.001984		2722.98	0.01203413		3312.98	-0.00167694
363.2	0.0244847		953.19	0.00755643		1543.19	0.01231882		2133.18	0.00149252		2723.18	0.0121224		3313.18	-0.0018802
363.4	0.02326848		953.39	0.00766533		1543.39	0.01252282		2133.38	0.00172365		2723.38	0.01245545		3313.38	-0.00245342
363.6	0.0219066		953.59	0.0086316		1543.59	0.01343703		2133.58	0.00164382		2723.58	0.01199369		3313.58	-0.00279038
363.8	0.02123965		953.79	0.00949816		1543.79	0.01424516		2133.78	0.00148481		2723.78	0.01182519		3313.78	-0.00330036
364	0.02038113		953.99	0.00950883		1543.99	0.01519912		2133.98	0.00122012		2723.98	0.01165984		3313.98	-0.00395848
364.2	0.02012033		954.19	0.0094721		1544.19	0.01582846		2134.18	0.00034575		2724.18	0.01242655		3314.18	-0.00477396
364.4	0.02003468		954.39	0.0103754		1544.39	0.01528623		2134.38	0.00054841		2724.38	0.01337246		3314.38	-0.00428142
364.6	0.01987148		954.59	0.01054917		1544.59	0.01623315		2134.58	0.00091974		2724.58	0.01324196		3314.58	-0.00452868
364.8	0.01991329		954.79	0.01127828		1544.79	0.01629332		2134.78	0.00115592		2724.78	0.01199274		3314.78	-0.00449368
365	0.01922823		954.99	0.01081896		1544.99	0.01660582		2134.98	0.00201409		2724.98	0.01161331		3314.98	-0.00503181
365.2	0.01955607		955.19	0.01160229		1545.19	0.01674288		2135.18	0.00273776		2725.18	0.01145124		3315.18	-0.00477789
365.4	0.02031992		955.39	0.01144249		1545.39	0.01619178		2135.38	0.00417376		2725.38	0.01147098		3315.38	-0.00396896
365.6	0.02130178		955.59	0.01138791		1545.59	0.01599036		2135.58	0.00448454		2725.58	0.01131646		3315.58	-0.003016
365.8	0.02269376		955.79	0.01194934		1545.79	0.01581575		2135.78	0.00535986		2725.78	0.01160533		3315.78	-0.00328992
366	0.02253453		955.99	0.01238327		1545.99	0.0163483		2135.98	0.00513706		2725.98	0.01234386		3315.98	-0.00257697
366.2	0.02309605		956.19	0.01108305		1546.19	0.01611313		2136.18	0.00465033		2726.18	0.01220258		3316.18	-0.00341878
366.4	0.02351054		956.39	0.01053263		1546.39	0.01643076		2136.38	0.0053522		2726.38	0.01288307		3316.38	-0.00403491
366.6	0.02332933		956.59	0.00989525		1546.59	0.01704537		2136.58	0.0051683		2726.58	0.01321291		3316.58	-0.00398577
366.8	0.02367726		956.79	0.00969332		1546.79	0.01696596		2136.78	0.00426085		2726.78	0.01398606		3316.78	-0.00472
367	0.02391995		956.99	0.00972957		1546.99	0.01793808		2136.98	0.00401662		2726.98	0.01353771		3316.98	-0.00366533
367.2	0.0233777		957.19	0.00966469		1547.19	0.01755555		2137.18	0.00310891		2727.18	0.01262332		3317.18	-0.00308151
367.4	0.0234786		957.39	0.00977024		1547.39	0.01779887		2137.38	0.00339589		2727.38	0.01226616		3317.38	-0.00192925
367.6	0.02342194		957.59	0.00958619		1547.59	0.01889458		2137.58	0.00237099		2727.58	0.01215983		3317.58	-0.00243361
367.8	0.02338792		957.79	0.00966973		1547.79	0.0184397		2137.78	0.00233362		2727.78	0.01293805		3317.78	-0.00227318
368	0.02368414		957.99	0.00917599		1547.99	0.01857078		2137.98	0.00090392		2727.98	0.01315159		3317.98	-0.00224774
368.2	0.02405007		958.19	0.0089056		1548.19	0.01765958		2138.18	0.0006823		2728.18	0.0134969		3318.18	-0.00213194
368.4	0.02371387		958.39	0.00893379		1548.39	0.01684573		2138.38	0.00161085		2728.38	0.01332717		3318.38	-0.0016723
368.6	0.02431402		958.59	0.00838564		1548.59	0.01729579		2138.58	0.00129806		2728.58	0.01212296		3318.58	-0.00167134
368.8	0.02471		958.79	0.00754206		1548.79	0.01688697		2138.78	0.00126518		2728.78	0.01121998		3318.78	-0.00190197
369	0.02397058		958.99	0.00822864		1548.99	0.01712037		2138.98	0.00160188		2728.98	0.01099378		3318.98	-0.00199126
369.2	0.02414244		959.19	0.00874016		1549.19	0.01614037		2139.18	0.00217763		2729.18	0.01100553		3319.18	-0.00240095
369.4	0.02531244		959.39	0.00862845		1549.39	0.01504047		2139.38	0.00224548		2729.38	0.01149169		3319.38	-0.00244216
369.6	0.02646622		959.59	0.00905145		1549.59	0.01475065		2139.58	0.00218759		2729.58	0.01141392		3319.58	-0.00213424
369.8	0.02637973		959.79	0.00896457		1549.79	0.01473433		2139.78	0.00272416		2729.78	0.01219531		3319.78	-0.00345929
370	0.02623025		959.99	0.00927413		1549.99	0.01487423		2139.98	0.00351317		2729.98	0.01300568		3319.98	-0.00381565
370.2	0.02672911		960.19	0.00918298		1550.19	0.01551116		2140.18	0.00410857		2730.18	0.01441393		3320.18	-0.00408445
370.4	0.02644439		960.39	0.00994007		1550.39	0.01617726		2140.38	0.00359457		2730.38	0.01524273		3320.38	-0.00369121
370.6	0.02559351		960.59	0.01018337		1550.59	0.01648939		2140.58	0.00221149		2730.58	0.01516762		3320.58	-0.00414966
370.8	0.02538287		960.79	0.01121168		1550.79	0.01601131		2140.78	0.00141656		2730.78	0.01583797		3320.78	-0.00346259
371	0.0255589		960.99	0.01179939		1550.99	0.01575996		2140.98	0.00131678		2730.98	0.01531925		3320.98	-0.0022583
371.2	0.02549281		961.19	0.01121505		1551.19	0.01554231		2141.18	0.00168315		2731.18	0.01496679		3321.18	-0.00318166
371.4	0.02550787		961.39	0.01101391		1551.39	0.01493375		2141.38	0.00208267		2731.38	0.01531273		3321.38	-0.00309107
371.6	0.02527661		961.59	0.01101781		1551.59	0.01486816		2141.58	0.0014116		2731.58	0.01614329		3321.58	-0.00462745
371.8	0.02494942		961.79	0.01112629		1551.79	0.01496999		2141.78	0.00144227		2731.78	0.01645795		3321.78	-0.00411463
372	0.02423399		961.99	0.01109052		1551.99	0.01546687		2141.98	0.00118249		2731.98	0.01653266		3321.98	-0.00416463
372.2	0.0243755		962.19	0.01127827		1552.19	0.0146886		2142.18	0.00119351		2732.18	0.01631944		3322.18	-0.00468463
372.4	0.0236746		962.39	0.01096876		1552.39	0.0153721		2142.38	0.002359		2732.38	0.01587992		3322.38	-0.0050383
372.6	0.02375396		962.59	0.0105237		1552.59	0.01640883		2142.58	0.00212145		2732.58	0.01469928		3322.58	-0.00513299
372.8	0.02470512		962.79	0.01040407		1552.79	0.01645523		2142.78	0.00215708		2732.78	0.01378025		3322.78	-0.00519633
373	0.02541717		962.99	0.01132769		1552.99	0.01711508		2142.98	0.00200981		2732.98	0.01268873		3322.98	-0.00625127
373.2	0.02553235		963.19	0.01158796		1553.19	0.01665673		2143.18	0.00264488		2733.18	0.01267803		3323.18	-0.00611537
373.4	0.02634175		963.39	0.01046685		1553.39	0.01737339		2143.38	0.00247597		2733.38	0.0118737		3323.38	-0.0052255
373.6	0.02708618		963.59	0.00960052		1553.59	0.01845651		2143.58	0.00372738		2733.58	0.01135155		3323.58	-0.00451709
373.8	0.02695924		963.79	0.00922509		1553.79	0.01830204		2143.78	0.00423426		2733.78	0.01160875		3323.78	-0.00431952
374	0.02748042		963.99	0.00944488		1553.99	0.01905296		2143.98	0.00498513		2733.98	0.01189225		3323.98	-0.00351596
374.2	0.02792869		964.19	0.01020534		1554.19	0.01866853		2144.18	0.0049641		2734.18	0.01199874		3324.18	-0.00247143
374.4	0.02804342		964.39	0.01067395		1554.39	0.01739467		2144.38	0.00429736		2734.38	0.01178271		3324.38	-0.00141904
374.6	0.02750657		964.59	0.01045011		1554.59	0.0171493		2144.58	0.00388466		2734.58	0.01174418		3324.58	-0.00206933
374.8	0.02751331		964.79	0.01088639		1554.79	0.01599211		2144.78	0.00397853		2734.78	0.01277154		3324.78	-0.0009406
375	0.02664311		964.99	0.01126877		1554.99	0.01508615		2144.98	0.00378135		2734.98	0.01300436		3324.98	-0.00103446
375.2	0.02586917		965.19	0.01101455		1555.19	0.01478277		2145.18	0.00436154		2735.18	0.01301034		3325.18	-0.00109616
375.4	0.02511676		965.39	0.01100199		1555.39	0.01420595		2145.38	0.00420539		2735.38	0.01347463		3325.38	-0.00065532
375.6	0.02430899		965.59	0.01087474		1555.59	0.01472343		2145.58	0.00381211		2735.58	0.01438816		3325.58	-0.00124782
375.8	0.02319921		965.79	0.01087414		1555.79	0.01425519		2145.78	0.00395627		2735.78	0.01427311		3325.78	-0.00102088
376	0.02277896		965.99	0.0110819		1555.99	0.01361702		2145.98	0.00444564		2735.98	0.01491544		3325.98	-0.00217264
376.2	0.02303382		966.19	0.01087967		1556.19	0.01375263		2146.18	0.00503283		2736.18	0.01506756		3326.18	-0.00236907
376.4	0.02362453		966.39	0.01040721		1556.39	0.01407867		2146.38	0.0061178		2736.38	0.01516019		3326.38	-0.00204474
376.6	0.02351774		966.59	0.00981907		1556.59	0.0144274		2146.58	0.00661341		2736.58	0.01465189		3326.58	-0.00246333
376.8	0.02401236		966.79	0.00986805		1556.79	0.01489159		2146.78	0.00656174		2736.78	0.01428778		3326.78	-0.00340721
377	0.02372988		966.99	0.00978671		1556.99	0.01515301		2146.98	0.00690194		2736.98	0.01357295		3326.98	-0.00430815
377.2	0.02373589		967.19	0.00975757		1557.19	0.01525053		2147.18	0.00739461		2737.18	0.01267605		3327.18	-0.00398322
377.4	0.02497854		967.39	0.00891819		1557.39	0.01551473		2147.38	0.00764725		2737.38	0.01186234		3327.38	-0.00416834
377.6	0.02613098		967.59	0.00987512		1557.59	0.01472958		2147.58	0.00825931		2737.58	0.01181077		3327.58	-0.00444049
377.8	0.02692098		967.79	0.01068928		1557.79	0.01478388		2147.78	0.00837488		2737.78	0.01093548		3327.78	-0.00504007
378	0.02758953		967.99	0.01156365		1557.99	0.01573677		2147.98	0.00876335		2737.98	0.01049289		3327.98	-0.00487861
378.2	0.0281893		968.19	0.01268904		1558.19	0.01615784		2148.18	0.00863305		2738.18	0.01043735		3328.18	-0.00464317
378.4	0.02828416		968.39	0.01314267		1558.39	0.01666077		2148.38	0.00821351		2738.38	0.01096248		3328.38	-0.00477186
378.6	0.02782608		968.59	0.01304904		1558.59	0.01745388		2148.58	0.00738691		2738.58	0.01117946		3328.58	-0.00514707
378.8	0.02716865		968.79	0.01380808		1558.79	0.01725334		2148.78	0.00680709		2738.78	0.01093742		3328.78	-0.0038397
379	0.02695343		968.99	0.01442049		1558.99	0.01709886		2148.98	0.00622159		2738.98	0.0107853		3328.98	-0.00363119
379.2	0.02620237		969.19	0.01382856		1559.19	0.01660399		2149.18	0.00558343		2739.18	0.01149708		3329.18	-0.0029477
379.4	0.02644288		969.39	0.01312451		1559.39	0.01647499		2149.38	0.00488639		2739.38	0.01185359		3329.38	-0.00241241
379.6	0.02600989		969.59	0.01226071		1559.59	0.01642687		2149.58	0.00364201		2739.58	0.01303759		3329.58	-0.00225118
379.8	0.02590074		969.79	0.01212065		1559.79	0.01630337		2149.78	0.00391918		2739.78	0.01423533		3329.78	-0.00157358
380	0.02648177		969.99	0.01155983		1559.99	0.01632244		2149.98	0.00367199		2739.98	0.01498369		3329.98	-0.00192287
380.2	0.02680773		970.19	0.0112164		1560.19	0.01679407		2150.18	0.00339893		2740.18	0.01578348		3330.18	-0.00104652
380.4	0.02685872		970.39	0.01025985		1560.39	0.01662414		2150.38	0.00252		2740.38	0.01618742		3330.38	-0.00130838
380.6	0.02601751		970.59	0.00968668		1560.59	0.01729409		2150.58	0.00203586		2740.58	0.0162691		3330.58	-0.00205417
380.8	0.02636695		970.79	0.00918633		1560.79	0.01720271		2150.78	0.00161564		2740.78	0.01643844		3330.78	-0.00176199
381	0.02623429		970.99	0.00924135		1560.99	0.01612568		2150.98	0.00180236		2740.98	0.01537803		3330.98	-0.00194632
381.2	0.02651515		971.19	0.00956641		1561.19	0.01536159		2151.18	0.00168593		2741.18	0.01574076		3331.18	-0.0020354
381.4	0.02685008		971.39	0.00961316		1561.39	0.01441252		2151.38	0.00200148		2741.38	0.01601273		3331.38	-0.00245186
381.6	0.02692016		971.59	0.0096814		1561.59	0.01414315		2151.58	0.00279468		2741.58	0.01583079		3331.58	-0.00255606
381.8	0.02599623		971.79	0.00955103		1561.79	0.01453724		2151.78	0.00318343		2741.78	0.01496564		3331.78	-0.00258468
382	0.02559886		971.99	0.01029545		1561.99	0.01501405		2151.98	0.00378604		2741.98	0.01545952		3331.98	-0.00228231
382.2	0.02523063		972.19	0.01015465		1562.19	0.01539294		2152.18	0.00465602		2742.18	0.01454081		3332.18	-0.00204949
382.4	0.02508864		972.39	0.01051834		1562.39	0.01508999		2152.38	0.00451919		2742.38	0.01479919		3332.38	-0.00254028
382.6	0.02412892		972.59	0.01094852		1562.59	0.01477597		2152.58	0.00427067		2742.58	0.01423428		3332.58	-0.00220505
382.8	0.02390647		972.79	0.0114222		1562.79	0.01352934		2152.78	0.00465905		2742.78	0.01387991		3332.78	-0.00271243
383	0.02454998		972.99	0.01193682		1562.99	0.01321053		2152.98	0.00470966		2742.98	0.01493956		3332.98	-0.00274783
383.2	0.02376443		973.19	0.01237148		1563.19	0.01246263		2153.18	0.00429901		2743.18	0.01532276		3333.18	-0.00263784
383.4	0.02427491		973.39	0.01303928		1563.39	0.01278767		2153.38	0.00422641		2743.38	0.01479697		3333.38	-0.00244618
383.6	0.02375262		973.59	0.01246824		1563.59	0.01410658		2153.58	0.00396005		2743.58	0.01572633		3333.58	-0.002153
383.8	0.02511059		973.79	0.01366676		1563.79	0.0155442		2153.78	0.00369515		2743.78	0.01601033		3333.78	-0.00247691
384	0.02535142		973.99	0.01413269		1563.99	0.01688561		2153.98	0.0033712		2743.98	0.01605624		3333.98	-0.00397731
384.2	0.0255729		974.19	0.01405187		1564.19	0.01830599		2154.18	0.00323671		2744.18	0.01660285		3334.18	-0.00448287
384.4	0.02593561		974.39	0.01340096		1564.39	0.01899154		2154.38	0.00316183		2744.38	0.01673867		3334.38	-0.00491835
384.6	0.02621352		974.59	0.01332911		1564.59	0.01945035		2154.58	0.00314075		2744.58	0.01598308		3334.58	-0.00501218
384.8	0.02708892		974.79	0.01320407		1564.79	0.01913662		2154.78	0.00345776		2744.78	0.01523488		3334.78	-0.00416588
385	0.02735737		974.99	0.01302207		1564.99	0.0183802		2154.98	0.00377665		2744.98	0.01418438		3334.98	-0.00468533
385.2	0.02822276		975.19	0.01257063		1565.19	0.01773382		2155.18	0.00400795		2745.18	0.01462761		3335.18	-0.00432065
385.4	0.02793419		975.39	0.01281485		1565.39	0.01776058		2155.38	0.00497894		2745.38	0.01416632		3335.38	-0.00450076
385.6	0.02780097		975.59	0.01206056		1565.59	0.01766116		2155.58	0.00545663		2745.58	0.01398683		3335.58	-0.0034885
385.8	0.02772876		975.79	0.01227959		1565.79	0.01753053		2155.78	0.00543662		2745.78	0.01286352		3335.78	-0.0026847
386	0.02771148		975.99	0.01256472		1565.99	0.01781818		2155.98	0.00629108		2745.98	0.01306557		3335.98	-0.00273705
386.2	0.02793588		976.19	0.01231352		1566.19	0.01667037		2156.18	0.00691819		2746.18	0.0128227		3336.18	-0.00266118
386.4	0.02791523		976.39	0.01274443		1566.39	0.01637634		2156.38	0.00685143		2746.38	0.01388892		3336.38	-0.00241309
386.6	0.0273718		976.59	0.01262651		1566.59	0.01583302		2156.58	0.00702157		2746.58	0.01305573		3336.58	-0.0021892
386.8	0.0279217		976.79	0.01293283		1566.79	0.01514392		2156.78	0.00741044		2746.78	0.01338381		3336.78	-0.00239798
387	0.02740575		976.99	0.01353361		1566.99	0.01462938		2156.98	0.00692071		2746.98	0.01342323		3336.98	-0.00113002
387.2	0.02746		977.19	0.01371586		1567.19	0.01436971		2157.18	0.00652378		2747.18	0.01354834		3337.18	-0.00132428
387.4	0.02737795		977.39	0.01377449		1567.39	0.01548739		2157.38	0.00645817		2747.38	0.01437449		3337.38	-0.00177551
387.6	0.02730963		977.59	0.01369693		1567.59	0.01616392		2157.58	0.00544503		2747.58	0.01534515		3337.58	-0.00126364
387.8	0.0280511		977.79	0.01441647		1567.79	0.01736503		2157.78	0.00500924		2747.78	0.01611925		3337.78	-0.00190778
388	0.02735909		977.99	0.01418291		1567.99	0.01722646		2157.98	0.00532579		2747.98	0.01662396		3337.98	-0.00274638
388.2	0.02757365		978.19	0.01385544		1568.19	0.0171016		2158.18	0.00542968		2748.18	0.01670973		3338.18	-0.00200542
388.4	0.02763523		978.39	0.01364534		1568.39	0.01698009		2158.38	0.00559469		2748.38	0.01679718		3338.38	-0.00253861
388.6	0.02849373		978.59	0.01348654		1568.59	0.01683838		2158.58	0.00470222		2748.58	0.01632924		3338.58	-0.0029246
388.8	0.02839575		978.79	0.01294367		1568.79	0.01713223		2158.78	0.00505895		2748.78	0.01643291		3338.78	-0.0032034
389	0.02798233		978.99	0.01252713		1568.99	0.01676133		2158.98	0.00476292		2748.98	0.01641733		3338.98	-0.00375223
389.2	0.02801524		979.19	0.01281301		1569.19	0.01601289		2159.18	0.00486435		2749.18	0.01631227		3339.18	-0.0042153
389.4	0.02713244		979.39	0.01255749		1569.39	0.0158503		2159.38	0.00548763		2749.38	0.01636545		3339.38	-0.00391836
389.6	0.02778972		979.59	0.01234869		1569.59	0.0156023		2159.58	0.00495448		2749.58	0.01659129		3339.58	-0.00274249
389.8	0.02746919		979.79	0.01299425		1569.79	0.01546283		2159.78	0.00519759		2749.78	0.01618535		3339.78	-0.00232006
390	0.02755493		979.99	0.01363911		1569.99	0.01525074		2159.98	0.00545555		2749.98	0.01640483		3339.98	-0.00268418
390.2	0.02817065		980.19	0.01396356		1570.19	0.01412993		2160.18	0.0060325		2750.18	0.01576131		3340.18	-0.00215877
390.4	0.02827757		980.39	0.01379219		1570.39	0.01452919		2160.38	0.00618141		2750.38	0.01530755		3340.38	-0.00203488
390.6	0.0285832		980.59	0.01363508		1570.59	0.01333137		2160.58	0.00605416		2750.58	0.01426978		3340.58	-0.00146101
390.8	0.02818436		980.79	0.01334149		1570.79	0.01235879		2160.78	0.00663768		2750.78	0.01383673		3340.78	-0.00155797
391	0.02919019		980.99	0.01304667		1570.99	0.01187953		2160.98	0.00677636		2750.98	0.01324		3340.98	-0.00074335
391.2	0.03019213		981.19	0.01372559		1571.19	0.01169101		2161.18	0.00630061		2751.18	0.01391928		3341.18	-0.00076237
391.4	0.02995043		981.39	0.01378434		1571.39	0.01160666		2161.38	0.00620163		2751.38	0.01445895		3341.38	-0.00119947
391.6	0.03068428		981.59	0.0136275		1571.59	0.01190027		2161.58	0.00578727		2751.58	0.01390336		3341.58	-0.00040845
391.8	0.03110385		981.79	0.01334887		1571.79	0.0128957		2161.78	0.00597265		2751.78	0.01442694		3341.78	-0.00020277
392	0.03095586		981.99	0.01286836		1571.99	0.01266705		2161.98	0.00604041		2751.98	0.01369132		3341.98	-0.0002597
392.2	0.0316585		982.19	0.01232651		1572.19	0.01321499		2162.18	0.00663161		2752.18	0.01389213		3342.18	-0.00041965
392.4	0.03186796		982.39	0.01174103		1572.39	0.01488172		2162.38	0.00576928		2752.38	0.01373222		3342.38	-0.00087663
392.6	0.03226335		982.59	0.01189702		1572.59	0.01579063		2162.58	0.00571715		2752.58	0.01373809		3342.58	-0.00150249
392.8	0.03092632		982.79	0.01171012		1572.79	0.01638259		2162.78	0.00564574		2752.78	0.01349472		3342.78	-0.00149788
393	0.03081772		982.99	0.01160114		1572.99	0.01608227		2162.98	0.00445368		2752.98	0.01281091		3342.98	-0.00140546
393.2	0.03064219		983.19	0.01142714		1573.19	0.01645038		2163.18	0.0045796		2753.18	0.01351966		3343.18	-0.00126144
393.4	0.03038625		983.39	0.01022627		1573.39	0.01668817		2163.38	0.00408312		2753.38	0.01409407		3343.38	-0.00025353
393.6	0.02957763		983.59	0.00980355		1573.59	0.01747215		2163.58	0.00364153		2753.58	0.01466927		3343.58	-0.00020634
393.8	0.02921248		983.79	0.00971653		1573.79	0.01792236		2163.78	0.00307117		2753.78	0.01529264		3343.78	-0.00040189
394	0.02917595		983.99	0.01006012		1573.99	0.01819062		2163.98	0.00391504		2753.98	0.0153896		3343.98	0.00005277
394.2	0.02807617		984.19	0.01015418		1574.19	0.01705802		2164.18	0.00432553		2754.18	0.01480087		3344.18	-0.00022475
394.4	0.02732425		984.39	0.00970127		1574.39	0.01701205		2164.38	0.00464711		2754.38	0.01475193		3344.38	-0.00072229
394.6	0.02625546		984.59	0.01027541		1574.59	0.01640235		2164.58	0.00563906		2754.58	0.01467718		3344.58	-0.00072144
394.8	0.02539488		984.79	0.01013771		1574.79	0.01613045		2164.78	0.00568944		2754.78	0.01578499		3344.78	-0.0017456
395	0.02606136		984.99	0.01128572		1574.99	0.0154654		2164.98	0.00639314		2754.98	0.01631657		3344.98	-0.00146566
395.2	0.02557409		985.19	0.0116322		1575.19	0.01521408		2165.18	0.00650434		2755.18	0.01749668		3345.18	-0.00205373
395.4	0.02502809		985.39	0.01197518		1575.39	0.01510528		2165.38	0.00747559		2755.38	0.01777575		3345.38	-0.00272689
395.6	0.02533851		985.59	0.0122925		1575.59	0.01541672		2165.58	0.00732578		2755.58	0.01790265		3345.58	-0.00282747
395.8	0.0253185		985.79	0.01306997		1575.79	0.01482166		2165.78	0.00755482		2755.78	0.01789955		3345.78	-0.00314857
396	0.02607255		985.99	0.01334577		1575.99	0.014654		2165.98	0.0083674		2755.98	0.01783913		3345.98	-0.00372065
396.2	0.02641459		986.19	0.01442552		1576.19	0.0150302		2166.18	0.0082295		2756.18	0.01797105		3346.18	-0.0039816
396.4	0.02680739		986.39	0.01510134		1576.39	0.01578378		2166.38	0.00681332		2756.38	0.01748534		3346.38	-0.00356233
396.6	0.02704889		986.59	0.01522578		1576.59	0.01582248		2166.58	0.0068906		2756.58	0.01757815		3346.58	-0.00406335
396.8	0.02739582		986.79	0.01486079		1576.79	0.01564907		2166.78	0.0062723		2756.78	0.01651807		3346.78	-0.00354748
397	0.02814374		986.99	0.01337739		1576.99	0.01588751		2166.98	0.00562991		2756.98	0.01661543		3346.98	-0.00331661
397.2	0.02888534		987.19	0.01254826		1577.19	0.01662198		2167.18	0.00534665		2757.18	0.0169443		3347.18	-0.00289648
397.4	0.02965618		987.39	0.01092571		1577.39	0.01653519		2167.38	0.00474342		2757.38	0.01646883		3347.38	-0.00261765
397.6	0.02960408		987.59	0.01062961		1577.59	0.01749053		2167.58	0.00467247		2757.58	0.01580967		3347.58	-0.00188226
397.8	0.03053733		987.79	0.0102993		1577.79	0.01778642		2167.78	0.00447236		2757.78	0.01558346		3347.78	-0.00133148
398	0.02997728		987.99	0.00987515		1577.99	0.01744516		2167.98	0.00527035		2757.98	0.01523106		3347.98	-0.00074421
398.2	0.02964838		988.19	0.00989439		1578.19	0.01796448		2168.18	0.00482886		2758.18	0.01378294		3348.18	-0.00135094
398.4	0.02913823		988.39	0.0103296		1578.39	0.0181425		2168.38	0.00533214		2758.38	0.01358023		3348.38	-0.00110458
398.6	0.02840333		988.59	0.01055842		1578.59	0.01871956		2168.58	0.00572328		2758.58	0.01422216		3348.58	-0.00069281
398.8	0.02820587		988.79	0.00896376		1578.79	0.01874572		2168.78	0.00548561		2758.78	0.01456755		3348.78	0.0001889
399	0.02822368		988.99	0.00882704		1578.99	0.01872894		2168.98	0.00589382		2758.98	0.01420547		3348.98	0.000461
399.2	0.02818989		989.19	0.00861668		1579.19	0.01860179		2169.18	0.00532309		2759.18	0.01484554		3349.18	0.00053812
399.4	0.02735033		989.39	0.00971092		1579.39	0.01751081		2169.38	0.00501979		2759.38	0.01478037		3349.38	0.00134512
399.6	0.0272484		989.59	0.01041197		1579.59	0.01661184		2169.58	0.00487817		2759.58	0.01547927		3349.58	0.0013517
399.8	0.02737907		989.79	0.0112512		1579.79	0.01574246		2169.78	0.00512925		2759.78	0.01547207		3349.78	0.0014759
400	0.02762075		989.99	0.01182012		1579.99	0.01568149		2169.98	0.00499807		2759.98	0.01588074		3349.98	0.00115796
400.2	0.02730556		990.19	0.0127761		1580.19	0.01498189		2170.18	0.00444313		2760.18	0.01598935		3350.18	0.00077026
400.4	0.02808596		990.39	0.01200282		1580.39	0.0146085		2170.38	0.00453865		2760.38	0.0169841		3350.38	0.00072736
400.6	0.02726809		990.59	0.01202926		1580.59	0.01447313		2170.58	0.0052597		2760.58	0.01785346		3350.58	0.00006844
400.8	0.02749679		990.79	0.01239475		1580.79	0.01410646		2170.78	0.00492176		2760.78	0.01830273		3350.78	-0.00035943
401	0.02785448		990.99	0.01266347		1580.99	0.01411976		2170.98	0.00473855		2760.98	0.01906024		3350.98	-0.00075827
401.2	0.02844858		991.19	0.01370444		1581.19	0.01451849		2171.18	0.00488332		2761.18	0.01824289		3351.18	-0.00158019
401.4	0.0288168		991.39	0.01421349		1581.39	0.01501888		2171.38	0.00514771		2761.38	0.0182662		3351.38	-0.00236153
401.6	0.02869226		991.59	0.01538545		1581.59	0.01565563		2171.58	0.00517129		2761.58	0.01806589		3351.58	-0.00280452
401.8	0.02884164		991.79	0.01510427		1581.79	0.01510517		2171.78	0.00598129		2761.78	0.01842817		3351.78	-0.00360301
402	0.02874547		991.99	0.01565259		1581.99	0.01492743		2171.98	0.00712199		2761.98	0.01895635		3351.98	-0.00337189
402.2	0.02931852		992.19	0.01580334		1582.19	0.01577996		2172.18	0.00808925		2762.18	0.01839105		3352.18	-0.00413701
402.4	0.02948629		992.39	0.01540533		1582.39	0.01599966		2172.38	0.00851435		2762.38	0.01858184		3352.38	-0.00404619
402.6	0.02986077		992.59	0.01453876		1582.59	0.01611055		2172.58	0.0088782		2762.58	0.01844454		3352.58	-0.0038807
402.8	0.03030194		992.79	0.01419346		1582.79	0.01627858		2172.78	0.00864433		2762.78	0.01813084		3352.78	-0.00411117
403	0.03090191		992.99	0.01433581		1582.99	0.01714907		2172.98	0.00790559		2762.98	0.01769668		3352.98	-0.00467502
403.2	0.03086593		993.19	0.0150711		1583.19	0.0171114		2173.18	0.0076118		2763.18	0.017409		3353.18	-0.00455587
403.4	0.03045283		993.39	0.0149397		1583.39	0.0173009		2173.38	0.00814153		2763.38	0.01634187		3353.38	-0.00402098
403.6	0.03031603		993.59	0.01437689		1583.59	0.01694682		2173.58	0.00793831		2763.58	0.0160156		3353.58	-0.00437729
403.8	0.03027162		993.79	0.01383951		1583.79	0.01755542		2173.78	0.00713265		2763.78	0.01541504		3353.78	-0.00396326
404	0.03020072		993.99	0.01335203		1583.99	0.0179263		2173.98	0.0073797		2763.98	0.01466584		3353.98	-0.00427109
404.2	0.03023443		994.19	0.01281211		1584.19	0.01815439		2174.18	0.00778248		2764.18	0.01505672		3354.18	-0.00377732
404.4	0.03001462		994.39	0.01249826		1584.39	0.01815254		2174.38	0.00761248		2764.38	0.01557684		3354.38	-0.00290621
404.6	0.02868291		994.59	0.01260776		1584.59	0.01887269		2174.58	0.00676552		2764.58	0.01488388		3354.58	-0.0033943
404.8	0.02897275		994.79	0.01224227		1584.79	0.01933119		2174.78	0.005518		2764.78	0.01487366		3354.78	-0.00372807
405	0.0297404		994.99	0.0126332		1584.99	0.01947298		2174.98	0.00510072		2764.98	0.01420893		3354.98	-0.00363524
405.2	0.02945361		995.19	0.01240847		1585.19	0.01916112		2175.18	0.00420341		2765.18	0.01403066		3355.18	-0.00379809
405.4	0.02956396		995.39	0.01196989		1585.39	0.01910326		2175.38	0.00407778		2765.38	0.01420829		3355.38	-0.00399433
405.6	0.02913299		995.59	0.01175427		1585.59	0.0176451		2175.58	0.00460502		2765.58	0.01444798		3355.58	-0.00400933
405.8	0.02992097		995.79	0.01122928		1585.79	0.01660777		2175.78	0.00495046		2765.78	0.01468462		3355.78	-0.00420341
406	0.03097629		995.99	0.01114213		1585.99	0.01612881		2175.98	0.00568521		2765.98	0.01511084		3355.98	-0.00392293
406.2	0.0314558		996.19	0.01075398		1586.19	0.01625755		2176.18	0.00581833		2766.18	0.01461095		3356.18	-0.00424228
406.4	0.03180397		996.39	0.01103361		1586.39	0.01674678		2176.38	0.00515247		2766.38	0.01477549		3356.38	-0.00416133
406.6	0.03192838		996.59	0.01255798		1586.59	0.01596752		2176.58	0.00550448		2766.58	0.01501406		3356.58	-0.00436222
406.8	0.03221269		996.79	0.01319821		1586.79	0.01693865		2176.78	0.00524047		2766.78	0.01446171		3356.78	-0.00442869
407	0.03201485		996.99	0.01276905		1586.99	0.01755005		2176.98	0.00534916		2766.98	0.01364372		3356.98	-0.00486249
407.2	0.03165382		997.19	0.01335677		1587.19	0.01758625		2177.18	0.00509874		2767.18	0.01400883		3357.18	-0.00472036
407.4	0.03107698		997.39	0.01319788		1587.39	0.01837654		2177.38	0.00531698		2767.38	0.01413281		3357.38	-0.00476727
407.6	0.03040236		997.59	0.01320889		1587.59	0.01930137		2177.58	0.00455942		2767.58	0.01379328		3357.58	-0.00510348
407.8	0.0305166		997.79	0.01350281		1587.79	0.0201006		2177.78	0.00562502		2767.78	0.01459076		3357.78	-0.00451805
408	0.02975244		997.99	0.01418396		1587.99	0.02007927		2177.98	0.00633154		2767.98	0.01476627		3357.98	-0.00429468
408.2	0.02980027		998.19	0.01471461		1588.19	0.02064251		2178.18	0.00625763		2768.18	0.01493752		3358.18	-0.00367593
408.4	0.02936417		998.39	0.01440879		1588.39	0.02053496		2178.38	0.00622512		2768.38	0.01473012		3358.38	-0.00255946
408.6	0.02836738		998.59	0.01411025		1588.59	0.02080694		2178.58	0.00624251		2768.58	0.01458044		3358.58	-0.00284243
408.8	0.02835461		998.79	0.01299055		1588.79	0.0200507		2178.78	0.00628236		2768.78	0.01517323		3358.78	-0.00261766
409	0.02870691		998.99	0.01307284		1588.99	0.01982599		2178.98	0.00667999		2768.98	0.01518136		3358.98	-0.00229432
409.2	0.02767464		999.19	0.0124769		1589.19	0.01902462		2179.18	0.00705524		2769.18	0.01576083		3359.18	-0.00186394
409.4	0.02791342		999.39	0.01259371		1589.39	0.01855386		2179.38	0.00710215		2769.38	0.01603925		3359.38	-0.00169338
409.6	0.02781711		999.59	0.01368856		1589.59	0.01727186		2179.58	0.00850218		2769.58	0.01583527		3359.58	-0.00186488
409.8	0.02874621		999.79	0.01366851		1589.79	0.0164542		2179.78	0.00799989		2769.78	0.01559034		3359.78	-0.00160301
410	0.02933288		999.99	0.01320494		1589.99	0.01624464		2179.98	0.00878609		2769.98	0.01587355		3359.98	-0.00106603
410.2	0.0290315		1000.19	0.01334526		1590.19	0.01564848		2180.18	0.008935		2770.18	0.01556611		3360.18	-0.00093158
410.4	0.029544		1000.39	0.01484619		1590.39	0.01514817		2180.38	0.00925792		2770.38	0.01598498		3360.38	-0.00150527
410.6	0.02999403		1000.59	0.01496395		1590.59	0.01459245		2180.58	0.00954473		2770.58	0.01584382		3360.58	-0.0027568
410.8	0.03036626		1000.79	0.0143162		1590.79	0.01483026		2180.78	0.0093893		2770.78	0.01537924		3360.78	-0.00317257
411	0.03114937		1000.99	0.0134639		1590.99	0.01453289		2180.98	0.00887293		2770.98	0.01569648		3360.98	-0.00479694
411.2	0.03222424		1001.19	0.01312825		1591.19	0.01496974		2181.18	0.00855321		2771.18	0.01693251		3361.18	-0.00570722
411.4	0.03203433		1001.39	0.01273655		1591.39	0.01603433		2181.38	0.00897581		2771.38	0.01722506		3361.38	-0.00614336
411.6	0.03280782		1001.59	0.01252185		1591.59	0.01643303		2181.58	0.00911784		2771.58	0.01750628		3361.58	-0.00681882
411.8	0.0331053		1001.79	0.01340814		1591.79	0.01654794		2181.78	0.01019316		2771.78	0.01830336		3361.78	-0.00659549
412	0.03263034		1001.99	0.0137266		1591.99	0.01774113		2181.98	0.00906088		2771.98	0.01828003		3361.98	-0.00608992
412.2	0.03331376		1002.19	0.01293219		1592.19	0.01842445		2182.18	0.008764		2772.18	0.01817839		3362.18	-0.00544537
412.4	0.03315473		1002.39	0.01198732		1592.39	0.01866871		2182.38	0.00836289		2772.38	0.01796289		3362.38	-0.00507172
412.6	0.03273029		1002.59	0.01248558		1592.59	0.01880896		2182.58	0.00815515		2772.58	0.01862567		3362.58	-0.00549706
412.8	0.03304738		1002.79	0.01245926		1592.79	0.01901917		2182.78	0.00764774		2772.78	0.01909395		3362.78	-0.00513606
413	0.03310304		1002.99	0.01304662		1592.99	0.01904003		2182.98	0.00748906		2772.98	0.0194581		3362.98	-0.0040574
413.2	0.03176108		1003.19	0.01241814		1593.19	0.01861144		2183.18	0.00687753		2773.18	0.01960256		3363.18	-0.00355544
413.4	0.03224349		1003.39	0.01318608		1593.39	0.01852263		2183.38	0.00618596		2773.38	0.01929387		3363.38	-0.00311265
413.6	0.03185573		1003.59	0.01339308		1593.59	0.01770927		2183.58	0.007046		2773.58	0.01895037		3363.58	-0.00242237
413.8	0.0309837		1003.79	0.01278794		1593.79	0.01697498		2183.78	0.00653999		2773.78	0.01938974		3363.78	-0.00213031
414	0.03071282		1003.99	0.01320481		1593.99	0.017258		2183.98	0.00649426		2773.98	0.01974689		3363.98	-0.00187322
414.2	0.0306527		1004.19	0.01413157		1594.19	0.01670518		2184.18	0.00660029		2774.18	0.01983768		3364.18	-0.00247568
414.4	0.03048093		1004.39	0.01425611		1594.39	0.01663192		2184.38	0.00698004		2774.38	0.01978492		3364.38	-0.00332642
414.6	0.03056419		1004.59	0.01308648		1594.59	0.01646858		2184.58	0.00682876		2774.58	0.01933189		3364.58	-0.00388503
414.8	0.03119314		1004.79	0.01254695		1594.79	0.01666786		2184.78	0.00661299		2774.78	0.01876421		3364.78	-0.00436198
415	0.03177256		1004.99	0.01194192		1594.99	0.01688572		2184.98	0.00724327		2774.98	0.01833675		3364.98	-0.0046028
415.2	0.031637		1005.19	0.0125621		1595.19	0.0177638		2185.18	0.00752647		2775.18	0.01798916		3365.18	-0.00477098
415.4	0.03122766		1005.39	0.01267164		1595.39	0.01871244		2185.38	0.00734061		2775.38	0.01771466		3365.38	-0.00507539
415.6	0.03227554		1005.59	0.01300877		1595.59	0.01937938		2185.58	0.00723417		2775.58	0.01748131		3365.58	-0.00526663
415.8	0.03179286		1005.79	0.01390967		1595.79	0.01996277		2185.78	0.00671583		2775.78	0.01690463		3365.78	-0.00488445
416	0.03202294		1005.99	0.01376052		1595.99	0.02130154		2185.98	0.00628049		2775.98	0.01674765		3365.98	-0.00514103
416.2	0.03252832		1006.19	0.01397357		1596.19	0.02132749		2186.18	0.00669656		2776.18	0.01731551		3366.18	-0.00552245
416.4	0.03297243		1006.39	0.01510855		1596.39	0.02086644		2186.38	0.00571539		2776.38	0.01734376		3366.38	-0.00584282
416.6	0.03332383		1006.59	0.01601297		1596.59	0.02080149		2186.58	0.00565642		2776.58	0.01790786		3366.58	-0.00550802
416.8	0.03323448		1006.79	0.01617684		1596.79	0.0208371		2186.78	0.00491167		2776.78	0.01849554		3366.78	-0.00452771
417	0.03232984		1006.99	0.01628427		1596.99	0.02056805		2186.98	0.00516459		2776.98	0.01888925		3366.98	-0.00360594
417.2	0.03165021		1007.19	0.01594851		1597.19	0.01987799		2187.18	0.00511888		2777.18	0.01854465		3367.18	-0.00422698
417.4	0.03219616		1007.39	0.01708334		1597.39	0.01945376		2187.38	0.00546573		2777.38	0.01912636		3367.38	-0.00292408
417.6	0.03217365		1007.59	0.01653262		1597.59	0.01879092		2187.58	0.00572681		2777.58	0.01987816		3367.58	-0.00222846
417.8	0.03178146		1007.79	0.01680447		1597.79	0.01804588		2187.78	0.00618172		2777.78	0.02001763		3367.78	-0.00201222
418	0.03238194		1007.99	0.01672783		1597.99	0.01763422		2187.98	0.00591912		2777.98	0.01973907		3367.98	-0.00155751
418.2	0.03235406		1008.19	0.01659121		1598.19	0.01662312		2188.18	0.00711229		2778.18	0.01958399		3368.18	-0.00068627
418.4	0.03148559		1008.39	0.01538384		1598.39	0.01589061		2188.38	0.00752895		2778.38	0.01835107		3368.38	0.00036817
418.6	0.03172707		1008.59	0.01501604		1598.59	0.01538362		2188.58	0.00696131		2778.58	0.01734477		3368.58	0.00133913
418.8	0.03233003		1008.79	0.0141281		1598.79	0.01477536		2188.78	0.00790903		2778.78	0.01665267		3368.78	0.00147655
419	0.03189289		1008.99	0.01368791		1598.99	0.01576886		2188.98	0.00847852		2778.98	0.01595749		3368.98	0.00169107
419.2	0.03156072		1009.19	0.01438572		1599.19	0.01631122		2189.18	0.00752502		2779.18	0.01514149		3369.18	0.00012958
419.4	0.03134364		1009.39	0.0131178		1599.39	0.01659281		2189.38	0.0075491		2779.38	0.01487108		3369.38	-0.00055226
419.6	0.03172989		1009.59	0.01267535		1599.59	0.01658891		2189.58	0.00802446		2779.58	0.01435994		3369.58	-0.00036179
419.8	0.03081572		1009.79	0.01269775		1599.79	0.01707522		2189.78	0.00807145		2779.78	0.01445167		3369.78	-0.001711
420	0.03111434		1009.99	0.01232784		1599.99	0.01797431		2189.98	0.00900031		2779.98	0.01470777		3369.98	-0.0019564
420.2	0.03006986		1010.19	0.01219121		1600.19	0.01811429		2190.18	0.00899735		2780.18	0.01587672		3370.18	-0.00251644
420.4	0.02976696		1010.39	0.01229843		1600.39	0.01757162		2190.38	0.00852837		2780.38	0.01578974		3370.38	-0.00276372
420.6	0.03004195		1010.59	0.01149394		1600.59	0.01864119		2190.58	0.00830006		2780.58	0.01595977		3370.58	-0.00289958
420.8	0.03005749		1010.79	0.01140308		1600.79	0.01925237		2190.78	0.00787709		2780.78	0.0167128		3370.78	-0.00243483
421	0.03078132		1010.99	0.01185984		1600.99	0.01893343		2190.98	0.00759333		2780.98	0.01749685		3370.98	-0.00217838
421.2	0.03175442		1011.19	0.01135812		1601.19	0.01875223		2191.18	0.00614934		2781.18	0.01795523		3371.18	-0.00260921
421.4	0.03257517		1011.39	0.01138674		1601.39	0.01891676		2191.38	0.0057664		2781.38	0.01841375		3371.38	-0.00280209
421.6	0.03347539		1011.59	0.01047242		1601.59	0.01897857		2191.58	0.00537881		2781.58	0.01853055		3371.58	-0.0035259
421.8	0.03329512		1011.79	0.01161434		1601.79	0.01875839		2191.78	0.0057514		2781.78	0.01758097		3371.78	-0.00405207
422	0.03283478		1011.99	0.01191222		1601.99	0.01877463		2191.98	0.00500864		2781.98	0.01706986		3371.98	-0.00315968
422.2	0.03260689		1012.19	0.01179144		1602.19	0.01884388		2192.18	0.00584582		2782.18	0.01666605		3372.18	-0.00217092
422.4	0.03347272		1012.39	0.0111343		1602.39	0.01868697		2192.38	0.00628693		2782.38	0.01605914		3372.38	-0.00215624
422.6	0.0339358		1012.59	0.01141353		1602.59	0.01889634		2192.58	0.00575585		2782.58	0.0163851		3372.58	-0.0025252
422.8	0.03504762		1012.79	0.01145482		1602.79	0.01885498		2192.78	0.00691167		2782.78	0.01682544		3372.78	-0.00314176
423	0.0343776		1012.99	0.01218407		1602.99	0.01948137		2192.98	0.00734973		2782.98	0.01619035		3372.98	-0.00450505
423.2	0.03357271		1013.19	0.01269429		1603.19	0.01836692		2193.18	0.00746048		2783.18	0.01574074		3373.18	-0.00457697
423.4	0.03263878		1013.39	0.01263188		1603.39	0.01777932		2193.38	0.00823776		2783.38	0.01580957		3373.38	-0.00428829
423.6	0.03238645		1013.59	0.01313284		1603.59	0.01807696		2193.58	0.0093672		2783.58	0.01629496		3373.58	-0.00433768
423.8	0.03133493		1013.79	0.01368691		1603.79	0.01780707		2193.78	0.0087626		2783.78	0.01610793		3373.78	-0.00448314
424	0.03074817		1013.99	0.01392908		1603.99	0.01686955		2193.98	0.00885847		2783.98	0.01644524		3373.98	-0.00356451
424.2	0.03010741		1014.19	0.01367972		1604.19	0.01662657		2194.18	0.00880454		2784.18	0.01670352		3374.18	-0.0038521
424.4	0.03057127		1014.39	0.01326628		1604.39	0.01620641		2194.38	0.00853333		2784.38	0.01658789		3374.38	-0.00360785
424.6	0.03144901		1014.59	0.01318716		1604.59	0.01708812		2194.58	0.00870734		2784.58	0.01730006		3374.58	-0.00291179
424.8	0.0322699		1014.79	0.01298333		1604.79	0.01627597		2194.78	0.00847888		2784.78	0.01845223		3374.78	-0.00252851
425	0.03263231		1014.99	0.01322473		1604.99	0.01595728		2194.98	0.00739724		2784.98	0.01899414		3374.98	-0.00298274
425.2	0.03245157		1015.19	0.01372023		1605.19	0.0154693		2195.18	0.00651652		2785.18	0.01846946		3375.18	-0.00302374
425.4	0.03285797		1015.39	0.01421031		1605.39	0.01614143		2195.38	0.00642877		2785.38	0.01852279		3375.38	-0.00329414
425.6	0.03323659		1015.59	0.01420109		1605.59	0.01578306		2195.58	0.00620685		2785.58	0.01857057		3375.58	-0.00323196
425.8	0.03346613		1015.79	0.0154439		1605.79	0.01649566		2195.78	0.0058739		2785.78	0.01772888		3375.78	-0.0028
426	0.03341496		1015.99	0.01579216		1605.99	0.01726057		2195.98	0.00538699		2785.98	0.01738492		3375.98	-0.00195917
426.2	0.0353616		1016.19	0.01572864		1606.19	0.01732062		2196.18	0.00554065		2786.18	0.01654118		3376.18	-0.00246361
426.4	0.03651998		1016.39	0.01588974		1606.39	0.0176745		2196.38	0.00514132		2786.38	0.01672066		3376.38	-0.00236924
426.6	0.03701361		1016.59	0.01620811		1606.59	0.01775581		2196.58	0.00384422		2786.58	0.01685141		3376.58	-0.00207591
426.8	0.03765616		1016.79	0.0158451		1606.79	0.01751002		2196.78	0.00358967		2786.78	0.01640383		3376.78	-0.00227791
427	0.0371828		1016.99	0.01477082		1606.99	0.01762144		2196.98	0.00416461		2786.98	0.01578621		3376.98	-0.0024198
427.2	0.03660979		1017.19	0.01505803		1607.19	0.01735856		2197.18	0.00417916		2787.18	0.01563459		3377.18	-0.0023232
427.4	0.03552126		1017.39	0.01545318		1607.39	0.0179569		2197.38	0.00401185		2787.38	0.0159739		3377.38	-0.00239659
427.6	0.03527329		1017.59	0.01506843		1607.59	0.01865505		2197.58	0.00338048		2787.58	0.01550334		3377.58	-0.00342541
427.8	0.03473675		1017.79	0.01535448		1607.79	0.01808079		2197.78	0.00193803		2787.78	0.01506377		3377.78	-0.0041439
428	0.03416922		1017.99	0.01510573		1607.99	0.01768754		2197.98	0.00255047		2787.98	0.01564141		3377.98	-0.00426317
428.2	0.03379773		1018.19	0.01473476		1608.19	0.01768058		2198.18	0.00301096		2788.18	0.01570529		3378.18	-0.00397662
428.4	0.03245627		1018.39	0.01424257		1608.39	0.01687976		2198.38	0.00358573		2788.38	0.01623929		3378.38	-0.00409728
428.6	0.03172577		1018.59	0.01475902		1608.59	0.01634705		2198.58	0.00510811		2788.58	0.01693556		3378.58	-0.00447114
428.8	0.03148295		1018.79	0.01429147		1608.79	0.01573238		2198.78	0.00444436		2788.78	0.01677845		3378.78	-0.00433117
429	0.03021407		1018.99	0.01414099		1608.99	0.0163477		2198.98	0.00497001		2788.98	0.01610171		3378.98	-0.00463595
429.2	0.03031572		1019.19	0.01422603		1609.19	0.01539809		2199.18	0.00503997		2789.18	0.0163173		3379.18	-0.00385587
429.4	0.03007526		1019.39	0.01428854		1609.39	0.0158304		2199.38	0.0048619		2789.38	0.01671563		3379.38	-0.00356353
429.6	0.02963097		1019.59	0.01384379		1609.59	0.01543545		2199.58	0.00529572		2789.58	0.01642503		3379.58	-0.00337625
429.8	0.03004798		1019.79	0.01403343		1609.79	0.01660202		2199.78	0.00593547		2789.78	0.01662903		3379.78	-0.00297467
430	0.03030985		1019.99	0.01447056		1609.99	0.01622446		2199.98	0.0058999		2789.98	0.01672973		3379.98	-0.00287895
430.2	0.03167331		1020.19	0.01370262		1610.19	0.01639276		2200.18	0.00572756		2790.18	0.01657479		3380.18	-0.0030641
430.4	0.03157889		1020.39	0.0135272		1610.39	0.01688422		2200.38	0.00579366		2790.38	0.01720744		3380.38	-0.00212925
430.6	0.03136882		1020.59	0.01334192		1610.59	0.01694973		2200.58	0.00499358		2790.58	0.01732527		3380.58	-0.00260726
430.8	0.03125631		1020.79	0.01310086		1610.79	0.01783748		2200.78	0.00546248		2790.78	0.01691442		3380.78	-0.00289003
431	0.03109258		1020.99	0.01266104		1610.99	0.01864005		2200.98	0.0059845		2790.98	0.01672766		3380.98	-0.003603
431.2	0.03040204		1021.19	0.01356759		1611.19	0.01895954		2201.18	0.00591999		2791.18	0.01700488		3381.18	-0.00448429
431.4	0.02961557		1021.39	0.01370604		1611.39	0.01938456		2201.38	0.00558083		2791.38	0.01668683		3381.38	-0.004274
431.6	0.03022906		1021.59	0.01424552		1611.59	0.0190603		2201.58	0.00567262		2791.58	0.01588982		3381.58	-0.00529721
431.8	0.03027725		1021.79	0.01535825		1611.79	0.01856932		2201.78	0.00576636		2791.78	0.01635037		3381.78	-0.00505343
432	0.02994467		1021.99	0.0154785		1611.99	0.01708592		2201.98	0.00566738		2791.98	0.01562028		3381.98	-0.00485694
432.2	0.03005148		1022.19	0.01511518		1612.19	0.01609392		2202.18	0.00654445		2792.18	0.01552868		3382.18	-0.00444322
432.4	0.03040331		1022.39	0.01489428		1612.39	0.01554795		2202.38	0.00595918		2792.38	0.01585807		3382.38	-0.00462053
432.6	0.03107199		1022.59	0.01511185		1612.59	0.01545985		2202.58	0.00613817		2792.58	0.01529275		3382.58	-0.00452652
432.8	0.03199946		1022.79	0.01495532		1612.79	0.01566297		2202.78	0.00575423		2792.78	0.01459084		3382.78	-0.0045449
433	0.03203792		1022.99	0.01455199		1612.99	0.01565054		2202.98	0.00586562		2792.98	0.01421204		3382.98	-0.00498254
433.2	0.03259433		1023.19	0.01466808		1613.19	0.01491578		2203.18	0.0055297		2793.18	0.01471945		3383.18	-0.00450383
433.4	0.03206277		1023.39	0.01456092		1613.39	0.01572281		2203.38	0.00498406		2793.38	0.01463484		3383.38	-0.00348571
433.6	0.03273187		1023.59	0.01402853		1613.59	0.01632371		2203.58	0.00503394		2793.58	0.01525387		3383.58	-0.00268139
433.8	0.03377784		1023.79	0.01375886		1613.79	0.01628741		2203.78	0.00522553		2793.78	0.01627351		3383.78	-0.00218337
434	0.03384553		1023.99	0.01347774		1613.99	0.01622329		2203.98	0.00497415		2793.98	0.01678699		3383.98	-0.00181947
434.2	0.03393853		1024.19	0.01301608		1614.19	0.01685862		2204.18	0.00468291		2794.18	0.0171555		3384.18	-0.0023181
434.4	0.03265501		1024.39	0.01334319		1614.39	0.01655712		2204.38	0.00449623		2794.38	0.01730297		3384.38	-0.00198408
434.6	0.03120572		1024.59	0.0130609		1614.59	0.0170127		2204.58	0.00383789		2794.58	0.01761454		3384.58	-0.00225529
434.8	0.03123315		1024.79	0.01328361		1614.79	0.01703033		2204.78	0.00501543		2794.78	0.01753868		3384.78	-0.00151937
435	0.03106417		1024.99	0.01308346		1614.99	0.01709867		2204.98	0.00427252		2794.98	0.01807487		3384.98	-0.00205379
435.2	0.03110053		1025.19	0.01327293		1615.19	0.01616517		2205.18	0.00496776		2795.18	0.01867262		3385.18	-0.00164809
435.4	0.03128951		1025.39	0.01344588		1615.39	0.01522172		2205.38	0.00529392		2795.38	0.01827271		3385.38	-0.00158927
435.6	0.03104993		1025.59	0.01314903		1615.59	0.01473279		2205.58	0.00570505		2795.58	0.01864525		3385.58	-0.00186898
435.8	0.03080489		1025.79	0.01318324		1615.79	0.01473077		2205.78	0.00568629		2795.78	0.01813747		3385.78	-0.0030124
436	0.03040702		1025.99	0.01281502		1615.99	0.01377732		2205.98	0.00623815		2795.98	0.01767855		3385.98	-0.0041768
436.2	0.03144086		1026.19	0.01279543		1616.19	0.01377357		2206.18	0.00794812		2796.18	0.01803785		3386.18	-0.00509677
436.4	0.03247718		1026.39	0.01357868		1616.39	0.01362328		2206.38	0.00696743		2796.38	0.01786472		3386.38	-0.00587738
436.6	0.03261356		1026.59	0.01438564		1616.59	0.01344612		2206.58	0.00738217		2796.58	0.01720881		3386.58	-0.00642648
436.8	0.03313238		1026.79	0.0153928		1616.79	0.01311452		2206.78	0.00773372		2796.78	0.01737389		3386.78	-0.00812562
437	0.03318641		1026.99	0.01613883		1616.99	0.01284169		2206.98	0.00685076		2796.98	0.01699108		3386.98	-0.00825012
437.2	0.03322525		1027.19	0.01619709		1617.19	0.01369781		2207.18	0.00685191		2797.18	0.01698914		3387.18	-0.00810504
437.4	0.03343767		1027.39	0.01643131		1617.39	0.01518632		2207.38	0.00674276		2797.38	0.01689357		3387.38	-0.00740513
437.6	0.03422078		1027.59	0.01683867		1617.59	0.01573464		2207.58	0.00665525		2797.58	0.01675766		3387.58	-0.00652987
437.8	0.03412638		1027.79	0.01728455		1617.79	0.01601548		2207.78	0.00757943		2797.78	0.01677709		3387.78	-0.00643515
438	0.03359745		1027.99	0.01720083		1617.99	0.01710459		2207.98	0.00766906		2797.98	0.01727022		3387.98	-0.00620989
438.2	0.033411		1028.19	0.01690796		1618.19	0.01759784		2208.18	0.00743355		2798.18	0.01720141		3388.18	-0.0065792
438.4	0.03245804		1028.39	0.01593001		1618.39	0.01851294		2208.38	0.0087282		2798.38	0.01698383		3388.38	-0.00549712
438.6	0.03191003		1028.59	0.01620854		1618.59	0.01922384		2208.58	0.00936665		2798.58	0.01736369		3388.58	-0.00485132
438.8	0.03221279		1028.79	0.01615225		1618.79	0.01942531		2208.78	0.00967423		2798.78	0.0173689		3388.78	-0.00361862
439	0.03202313		1028.99	0.01602387		1618.99	0.01993808		2208.98	0.00948844		2798.98	0.01708676		3388.98	-0.00340964
439.2	0.03180381		1029.19	0.0157637		1619.19	0.01980863		2209.18	0.00961303		2799.18	0.0177228		3389.18	-0.00317624
439.4	0.03049807		1029.39	0.01464713		1619.39	0.02047871		2209.38	0.00853597		2799.38	0.01733058		3389.38	-0.00326361
439.6	0.02984079		1029.59	0.01377054		1619.59	0.02085386		2209.58	0.00864673		2799.58	0.01717643		3389.58	-0.00321566
439.8	0.0301615		1029.79	0.0134727		1619.79	0.02157239		2209.78	0.00909162		2799.78	0.01597553		3389.78	-0.00383499
440	0.02961982		1029.99	0.01368885		1619.99	0.02034411		2209.98	0.00911124		2799.98	0.01646774		3389.98	-0.00451756
440.2	0.03051952		1030.19	0.01351305		1620.19	0.02003371		2210.18	0.00854697		2800.18	0.01630467		3390.18	-0.00497853
440.4	0.03112849		1030.39	0.01346609		1620.39	0.01968255		2210.38	0.00790322		2800.38	0.0162527		3390.38	-0.00430353
440.6	0.03081		1030.59	0.01338341		1620.59	0.01923025		2210.58	0.00741525		2800.58	0.0166767		3390.58	-0.00330719
440.8	0.03175618		1030.79	0.01460841		1620.79	0.01757935		2210.78	0.00680751		2800.78	0.01692013		3390.78	-0.00382141
441	0.0316833		1030.99	0.01501225		1620.99	0.01758034		2210.98	0.00646119		2800.98	0.01666128		3390.98	-0.00308031
441.2	0.0325912		1031.19	0.01482578		1621.19	0.01857444		2211.18	0.00618393		2801.18	0.0168375		3391.18	-0.00316693
441.4	0.03294222		1031.39	0.01526664		1621.39	0.01838419		2211.38	0.00583413		2801.38	0.01698948		3391.38	-0.00313327
441.6	0.0337528		1031.59	0.01475599		1621.59	0.01766284		2211.58	0.00519826		2801.58	0.01683979		3391.58	-0.00303615
441.8	0.03450681		1031.79	0.01441386		1621.79	0.01720834		2211.78	0.00558125		2801.78	0.01681114		3391.78	-0.00409826
442	0.03523536		1031.99	0.01405823		1621.99	0.01753125		2211.98	0.00525025		2801.98	0.01706962		3391.98	-0.00480391
442.2	0.03569727		1032.19	0.01376056		1622.19	0.01671006		2212.18	0.00595884		2802.18	0.0177548		3392.18	-0.00554991
442.4	0.03550279		1032.39	0.01315163		1622.39	0.0175936		2212.38	0.0076899		2802.38	0.01738298		3392.38	-0.00558229
442.6	0.03569348		1032.59	0.01395548		1622.59	0.01749877		2212.58	0.00770427		2802.58	0.01744156		3392.58	-0.00597679
442.8	0.03590221		1032.79	0.01381439		1622.79	0.01738522		2212.78	0.00806322		2802.78	0.0170913		3392.78	-0.00633035
443	0.03619051		1032.99	0.01428885		1622.99	0.01769142		2212.98	0.00826245		2802.98	0.01664435		3392.98	-0.00781635
443.2	0.03614963		1033.19	0.01441471		1623.19	0.01829797		2213.18	0.00735937		2803.18	0.01710572		3393.18	-0.00826273
443.4	0.03491171		1033.39	0.01423712		1623.39	0.01803796		2213.38	0.00719376		2803.38	0.01656788		3393.38	-0.00895582
443.6	0.03540627		1033.59	0.01473554		1623.59	0.01829416		2213.58	0.00683455		2803.58	0.01734655		3393.58	-0.00912221
443.8	0.0352324		1033.79	0.01551342		1623.79	0.01908567		2213.78	0.00672221		2803.78	0.01742163		3393.78	-0.00876037
444	0.03464635		1033.99	0.01575613		1623.99	0.018545		2213.98	0.00603999		2803.98	0.01788641		3393.98	-0.00855507
444.2	0.03444179		1034.19	0.01606225		1624.19	0.01986423		2214.18	0.00549715		2804.18	0.01792185		3394.18	-0.00745176
444.4	0.0340929		1034.39	0.01687939		1624.39	0.02096301		2214.38	0.00502688		2804.38	0.01766626		3394.38	-0.00564796
444.6	0.03360341		1034.59	0.0179629		1624.59	0.02013704		2214.58	0.00471389		2804.58	0.01791634		3394.58	-0.00475937
444.8	0.03374542		1034.79	0.01917173		1624.79	0.01962393		2214.78	0.00405443		2804.78	0.01746265		3394.78	-0.00497659
445	0.03304855		1034.99	0.01883706		1624.99	0.02081612		2214.98	0.00409378		2804.98	0.01759808		3394.98	-0.004244
445.2	0.03316829		1035.19	0.01886649		1625.19	0.02139607		2215.18	0.00338931		2805.18	0.01827991		3395.18	-0.00418924
445.4	0.03268384		1035.39	0.01829934		1625.39	0.02042786		2215.38	0.00313004		2805.38	0.01800428		3395.38	-0.00402664
445.6	0.03328655		1035.59	0.01782165		1625.59	0.01992284		2215.58	0.00324949		2805.58	0.01780327		3395.58	-0.00378456
445.8	0.03313809		1035.79	0.01798676		1625.79	0.01966995		2215.78	0.00359643		2805.78	0.01761516		3395.78	-0.00386512
446	0.03324887		1035.99	0.01792119		1625.99	0.01903626		2215.98	0.00390248		2805.98	0.01733295		3395.98	-0.00367229
446.2	0.03308408		1036.19	0.01742477		1626.19	0.01783662		2216.18	0.00511925		2806.18	0.01681017		3396.18	-0.00364746
446.4	0.03379514		1036.39	0.01660631		1626.39	0.01865874		2216.38	0.00639014		2806.38	0.01625178		3396.38	-0.0039623
446.6	0.03533834		1036.59	0.01641205		1626.59	0.01795615		2216.58	0.00647696		2806.58	0.01644691		3396.58	-0.00505854
446.8	0.03588361		1036.79	0.0164037		1626.79	0.01663546		2216.78	0.00730556		2806.78	0.01566134		3396.78	-0.00645117
447	0.03669249		1036.99	0.01565486		1626.99	0.01682689		2216.98	0.00848067		2806.98	0.0155813		3396.98	-0.00743962
447.2	0.03659463		1037.19	0.01594959		1627.19	0.01637174		2217.18	0.00839054		2807.18	0.01548322		3397.18	-0.00771459
447.4	0.03694278		1037.39	0.01592705		1627.39	0.01519601		2217.38	0.00864627		2807.38	0.01625618		3397.38	-0.00715952
447.6	0.03724564		1037.59	0.01585379		1627.59	0.01559474		2217.58	0.00771275		2807.58	0.01714073		3397.58	-0.00660209
447.8	0.03781578		1037.79	0.01531104		1627.79	0.01602104		2217.78	0.00778452		2807.78	0.01672191		3397.78	-0.00600315
448	0.03742216		1037.99	0.01536839		1627.99	0.01644697		2217.98	0.00813012		2807.98	0.01725445		3397.98	-0.00577374
448.2	0.03693117		1038.19	0.01643197		1628.19	0.01747853		2218.18	0.00769805		2808.18	0.0173974		3398.18	-0.00560935
448.4	0.03709751		1038.39	0.01645233		1628.39	0.01739604		2218.38	0.00713576		2808.38	0.01724843		3398.38	-0.00503365
448.6	0.03737615		1038.59	0.01681715		1628.59	0.01654034		2218.58	0.00808445		2808.58	0.01727569		3398.58	-0.00476797
448.8	0.03698366		1038.79	0.01678426		1628.79	0.01712737		2218.78	0.00753635		2808.78	0.0172047		3398.78	-0.00356098
449	0.03618674		1038.99	0.01746369		1628.99	0.0177109		2218.98	0.00704073		2808.98	0.01836418		3398.98	-0.00319532
449.2	0.03609862		1039.19	0.01756573		1629.19	0.01748565		2219.18	0.0062065		2809.18	0.01841445		3399.18	-0.00265667
449.4	0.03586747		1039.39	0.01816901		1629.39	0.01711551		2219.38	0.00610579		2809.38	0.0179597		3399.38	-0.00342233
449.6	0.03519903		1039.59	0.01877276		1629.59	0.017736		2219.58	0.00599297		2809.58	0.01747383		3399.58	-0.00357745
449.8	0.03478966		1039.79	0.0187309		1629.79	0.01796169		2219.78	0.00583515		2809.78	0.017314		3399.78	-0.00310139
450	0.03485878		1039.99	0.01822854		1629.99	0.01768524		2219.98	0.00614699		2809.98	0.01697349		3399.98	-0.00345008
450.2	0.03507952		1040.19	0.01782206		1630.19	0.01741418		2220.18	0.00658232		2810.18	0.01656439		3400.18	-0.00372418
450.4	0.03656748		1040.39	0.01666656		1630.39	0.01795066		2220.38	0.00695525		2810.38	0.01711278		3400.38	-0.0039152
450.6	0.03703026		1040.59	0.01627328		1630.59	0.01767388		2220.58	0.00676888		2810.58	0.01681848		3400.58	-0.004806
450.8	0.03643768		1040.79	0.01616076		1630.79	0.01736826		2220.78	0.00784268		2810.78	0.01610509		3400.78	-0.0062541
451	0.03641154		1040.99	0.01570935		1630.99	0.018312		2220.98	0.00844042		2810.98	0.01600263		3400.98	-0.00644181
451.2	0.03623971		1041.19	0.01610908		1631.19	0.018128		2221.18	0.00762412		2811.18	0.01627706		3401.18	-0.00619546
451.4	0.03600925		1041.39	0.01522564		1631.39	0.01800818		2221.38	0.00743636		2811.38	0.0167405		3401.38	-0.00543474
451.6	0.03609098		1041.59	0.01472359		1631.59	0.01875455		2221.58	0.0072785		2811.58	0.01693185		3401.58	-0.00600309
451.8	0.03630075		1041.79	0.01504008		1631.79	0.01860901		2221.78	0.0077903		2811.78	0.01734487		3401.78	-0.00570439
452	0.03489079		1041.99	0.01603945		1631.99	0.01864555		2221.98	0.00784071		2811.98	0.01802717		3401.98	-0.00580257
452.2	0.03413212		1042.19	0.01634388		1632.19	0.01875426		2222.18	0.00796249		2812.18	0.01800481		3402.18	-0.00512951
452.4	0.03397184		1042.39	0.01582526		1632.39	0.0180664		2222.38	0.00778382		2812.38	0.01797255		3402.38	-0.00424951
452.6	0.03307902		1042.59	0.01625245		1632.59	0.0180697		2222.58	0.00748327		2812.58	0.01814197		3402.58	-0.00405394
452.8	0.03306187		1042.79	0.0155745		1632.79	0.01789266		2222.78	0.00647086		2812.78	0.01855087		3402.78	-0.00382467
453	0.03274172		1042.99	0.01526861		1632.99	0.01842142		2222.98	0.005855		2812.98	0.01858052		3402.98	-0.00420427
453.2	0.03324517		1043.19	0.01460034		1633.19	0.01801977		2223.18	0.00602138		2813.18	0.01838276		3403.18	-0.00374049
453.4	0.0332861		1043.39	0.01395828		1633.39	0.01815771		2223.38	0.00587993		2813.38	0.01863115		3403.38	-0.00461644
453.6	0.03396526		1043.59	0.01357449		1633.59	0.01800324		2223.58	0.00541078		2813.58	0.01872619		3403.58	-0.00362171
453.8	0.03362341		1043.79	0.01262394		1633.79	0.01740344		2223.78	0.00532913		2813.78	0.01913579		3403.78	-0.00209727
454	0.03323285		1043.99	0.01232011		1633.99	0.01714928		2223.98	0.00620642		2813.98	0.01961271		3403.98	-0.0027272
454.2	0.03366917		1044.19	0.0119218		1634.19	0.0167363		2224.18	0.00676952		2814.18	0.0196744		3404.18	-0.00238546
454.4	0.03414636		1044.39	0.01118997		1634.39	0.01664734		2224.38	0.00726962		2814.38	0.01996971		3404.38	-0.0016736
454.6	0.03360147		1044.59	0.01138852		1634.59	0.01613228		2224.58	0.00752908		2814.58	0.02022054		3404.58	-0.00269503
454.8	0.03333142		1044.79	0.01159093		1634.79	0.01589922		2224.78	0.00851743		2814.78	0.02030298		3404.78	-0.00324145
455	0.0332575		1044.99	0.01212694		1634.99	0.01559091		2224.98	0.00791613		2814.98	0.02058494		3404.98	-0.00234056
455.2	0.03331974		1045.19	0.0131979		1635.19	0.01452161		2225.18	0.00824587		2815.18	0.02051663		3405.18	-0.00226208
455.4	0.03371729		1045.39	0.01298194		1635.39	0.01330047		2225.38	0.00868228		2815.38	0.02050096		3405.38	-0.00182761
455.6	0.03444975		1045.59	0.01381481		1635.59	0.01323553		2225.58	0.00908754		2815.58	0.02140396		3405.58	-0.00237784
455.8	0.0334252		1045.79	0.01525053		1635.79	0.01211239		2225.78	0.00991003		2815.78	0.02093661		3405.78	-0.00294023
456	0.03334223		1045.99	0.01616585		1635.99	0.01231615		2225.98	0.00989209		2815.98	0.01988244		3405.98	-0.00352203
456.2	0.03353761		1046.19	0.01657088		1636.19	0.01250413		2226.18	0.01012953		2816.18	0.01924853		3406.18	-0.00324349
456.4	0.03341862		1046.39	0.01643422		1636.39	0.01266628		2226.38	0.00933648		2816.38	0.01818323		3406.38	-0.00390988
456.6	0.03363947		1046.59	0.01683137		1636.59	0.01356423		2226.58	0.00926613		2816.58	0.01784977		3406.58	-0.00448403
456.8	0.03495373		1046.79	0.01693618		1636.79	0.0139194		2226.78	0.01001918		2816.78	0.01749363		3406.78	-0.00476892
457	0.03548918		1046.99	0.01671627		1636.99	0.01477735		2226.98	0.00991064		2816.98	0.01717455		3406.98	-0.00505579
457.2	0.03577662		1047.19	0.01666991		1637.19	0.01480893		2227.18	0.00924037		2817.18	0.01688331		3407.18	-0.00499692
457.4	0.03664172		1047.39	0.0164193		1637.39	0.01615538		2227.38	0.00814031		2817.38	0.01673334		3407.38	-0.00477748
457.6	0.03743224		1047.59	0.0172214		1637.59	0.01716123		2227.58	0.0077772		2817.58	0.01697492		3407.58	-0.00427912
457.8	0.03601062		1047.79	0.01650287		1637.79	0.01778824		2227.78	0.0081393		2817.78	0.01735114		3407.78	-0.00348889
458	0.03594881		1047.99	0.01704211		1637.99	0.01843777		2227.98	0.00855738		2817.98	0.01773553		3407.98	-0.00423252
458.2	0.03654109		1048.19	0.01643518		1638.19	0.01870895		2228.18	0.00832431		2818.18	0.017674		3408.18	-0.00336761
458.4	0.03677126		1048.39	0.01614488		1638.39	0.01925099		2228.38	0.00733956		2818.38	0.01834456		3408.38	-0.0024785
458.6	0.03677263		1048.59	0.01595874		1638.59	0.01887024		2228.58	0.00735447		2818.58	0.01914606		3408.58	-0.00301704
458.8	0.03712651		1048.79	0.01666833		1638.79	0.01844302		2228.78	0.00713497		2818.78	0.01978832		3408.78	-0.00247661
459	0.03690637		1048.99	0.01703893		1638.99	0.01900086		2228.98	0.00596199		2818.98	0.02039667		3408.98	-0.00230985
459.2	0.03701661		1049.19	0.0176281		1639.19	0.01862318		2229.18	0.00668018		2819.18	0.02086711		3409.18	-0.00241336
459.4	0.03651186		1049.39	0.01698612		1639.39	0.01863725		2229.38	0.00740694		2819.38	0.02161358		3409.38	-0.00236102
459.6	0.03627177		1049.59	0.01719446		1639.59	0.01889496		2229.58	0.0070509		2819.58	0.02169161		3409.58	-0.00187171
459.8	0.03599665		1049.79	0.01754998		1639.79	0.01822598		2229.78	0.00735013		2819.78	0.02054962		3409.78	-0.00158902
460	0.03602353		1049.99	0.0181163		1639.99	0.01849107		2229.98	0.00642764		2819.98	0.01974648		3409.98	-0.00103616
460.2	0.03526403		1050.19	0.01785341		1640.19	0.01817098		2230.18	0.00604145		2820.18	0.01941193		3410.18	-0.00117616
460.4	0.03473327		1050.39	0.01754473		1640.39	0.01791941		2230.38	0.0065197		2820.38	0.01872641		3410.38	-0.00152138
460.6	0.03446149		1050.59	0.01789571		1640.59	0.01790276		2230.58	0.00702996		2820.58	0.0194738		3410.58	-0.00246599
460.8	0.03439075		1050.79	0.01774093		1640.79	0.0179535		2230.78	0.00799008		2820.78	0.02018618		3410.78	-0.00354528
461	0.03368138		1050.99	0.01715307		1640.99	0.0181842		2230.98	0.00734568		2820.98	0.01994026		3410.98	-0.00365574
461.2	0.0339379		1051.19	0.01780208		1641.19	0.01794778		2231.18	0.00730232		2821.18	0.01917529		3411.18	-0.00325735
461.4	0.03387805		1051.39	0.01803775		1641.39	0.01839005		2231.38	0.0071749		2821.38	0.01913084		3411.38	-0.0030276
461.6	0.03414584		1051.59	0.01798688		1641.59	0.01809867		2231.58	0.00738924		2821.58	0.01841824		3411.58	-0.00348353
461.8	0.03412751		1051.79	0.01730994		1641.79	0.01761321		2231.78	0.00774953		2821.78	0.01861295		3411.78	-0.00331621
462	0.03361445		1051.99	0.01739435		1641.99	0.01715433		2231.98	0.00732093		2821.98	0.01820868		3411.98	-0.00442226
462.2	0.03364645		1052.19	0.01654827		1642.19	0.01736254		2232.18	0.00746308		2822.18	0.01821653		3412.18	-0.00495484
462.4	0.03456733		1052.39	0.01670393		1642.39	0.01744632		2232.38	0.00749969		2822.38	0.0189323		3412.38	-0.00429056
462.6	0.03551435		1052.59	0.01621386		1642.59	0.01599126		2232.58	0.00835362		2822.58	0.01918027		3412.58	-0.00417888
462.8	0.0358377		1052.79	0.01571728		1642.79	0.01607361		2232.78	0.00834463		2822.78	0.01827007		3412.78	-0.00387858
463	0.03635016		1052.99	0.01558556		1642.99	0.01721073		2232.98	0.00914049		2822.98	0.0186821		3412.98	-0.00394641
463.2	0.036736		1053.19	0.01605289		1643.19	0.0166463		2233.18	0.01003762		2823.18	0.01810317		3413.18	-0.00377935
463.4	0.03657549		1053.39	0.01582083		1643.39	0.01619425		2233.38	0.0100225		2823.38	0.01879418		3413.38	-0.00236939
463.6	0.03654137		1053.59	0.01531765		1643.59	0.01660203		2233.58	0.00893559		2823.58	0.01901775		3413.58	-0.00135593
463.8	0.03643752		1053.79	0.01552367		1643.79	0.01644645		2233.78	0.009202		2823.78	0.01902704		3413.78	-0.00207707
464	0.03618603		1053.99	0.01528883		1643.99	0.01713674		2233.98	0.00913946		2823.98	0.01901564		3413.98	-0.00195298
464.2	0.03618208		1054.19	0.01365293		1644.19	0.01665322		2234.18	0.00919594		2824.18	0.01973054		3414.18	-0.00143913
464.4	0.0361827		1054.39	0.01269287		1644.39	0.01711666		2234.38	0.00978374		2824.38	0.02019616		3414.38	-0.00158094
464.6	0.03590322		1054.59	0.01246899		1644.59	0.01822782		2234.58	0.0096714		2824.58	0.02107473		3414.58	-0.00224153
464.8	0.0351985		1054.79	0.01243564		1644.79	0.01879674		2234.78	0.01016423		2824.78	0.02125644		3414.78	-0.00184935
465	0.03492657		1054.99	0.01252048		1644.99	0.01804431		2234.98	0.00961231		2824.98	0.02066904		3414.98	-0.00111205
465.2	0.0349221		1055.19	0.01234496		1645.19	0.01834355		2235.18	0.00879709		2825.18	0.01992201		3415.18	-0.00143175
465.4	0.03352866		1055.39	0.01265347		1645.39	0.01878399		2235.38	0.0082619		2825.38	0.01891722		3415.38	-0.00173268
465.6	0.03390538		1055.59	0.01269477		1645.59	0.01887165		2235.58	0.00836127		2825.58	0.01820398		3415.58	-0.00221808
465.8	0.03358184		1055.79	0.01353757		1645.79	0.01893523		2235.78	0.00821853		2825.78	0.01765467		3415.78	-0.00283414
466	0.03177895		1055.99	0.01438794		1645.99	0.019366		2235.98	0.00792035		2825.98	0.01745024		3415.98	-0.00285893
466.2	0.03235402		1056.19	0.01468263		1646.19	0.02002584		2236.18	0.00867153		2826.18	0.01711275		3416.18	-0.00341631
466.4	0.03321235		1056.39	0.01512194		1646.39	0.0193574		2236.38	0.00792483		2826.38	0.01731441		3416.38	-0.0028023
466.6	0.03341366		1056.59	0.01488235		1646.59	0.01911567		2236.58	0.00735672		2826.58	0.01731726		3416.58	-0.00304944
466.8	0.0337224		1056.79	0.01485116		1646.79	0.01867506		2236.78	0.00715697		2826.78	0.01646431		3416.78	-0.00349263
467	0.03480519		1056.99	0.01616914		1646.99	0.01866127		2236.98	0.00742466		2826.98	0.017481		3416.98	-0.00467741
467.2	0.03459937		1057.19	0.01680247		1647.19	0.01870551		2237.18	0.00677043		2827.18	0.01808546		3417.18	-0.00469015
467.4	0.03395928		1057.39	0.01733777		1647.39	0.018565		2237.38	0.00595288		2827.38	0.01933333		3417.38	-0.00469754
467.6	0.03415652		1057.59	0.01687108		1647.59	0.01880482		2237.58	0.00572843		2827.58	0.01958018		3417.58	-0.00539568
467.8	0.03546202		1057.79	0.01726185		1647.79	0.01843574		2237.78	0.00645339		2827.78	0.02037203		3417.78	-0.00614752
468	0.03635803		1057.99	0.01686035		1647.99	0.01855322		2237.98	0.00661742		2827.98	0.02109065		3417.98	-0.00578766
468.2	0.03701039		1058.19	0.01635099		1648.19	0.01811049		2238.18	0.00676784		2828.18	0.02189451		3418.18	-0.00544346
468.4	0.03745824		1058.39	0.01654022		1648.39	0.01856925		2238.38	0.00750335		2828.38	0.02214855		3418.38	-0.0059746
468.6	0.03755642		1058.59	0.01664918		1648.59	0.01877467		2238.58	0.00783468		2828.58	0.02209782		3418.58	-0.00554918
468.8	0.03716947		1058.79	0.01669816		1648.79	0.01839878		2238.78	0.00864158		2828.78	0.02190866		3418.78	-0.0047233
469	0.03745886		1058.99	0.01634506		1648.99	0.01812893		2238.98	0.00892899		2828.98	0.02138884		3418.98	-0.00396076
469.2	0.03689528		1059.19	0.01644605		1649.19	0.01916431		2239.18	0.00888573		2829.18	0.02033039		3419.18	-0.0033396
469.4	0.03635534		1059.39	0.01735149		1649.39	0.01918195		2239.38	0.00978635		2829.38	0.01933742		3419.38	-0.00237975
469.6	0.03630272		1059.59	0.01749534		1649.59	0.01953086		2239.58	0.01047678		2829.58	0.01878727		3419.58	-0.00150831
469.8	0.03565132		1059.79	0.01827288		1649.79	0.01996121		2239.78	0.01078481		2829.78	0.01803332		3419.78	-0.00073504
470	0.03565132		1059.99	0.01827288		1649.99	0.01996121		2239.98	0.01078481		2829.98	0.01803332		3419.98	-0.00073504
470.2	0.03613419		1060.19	0.01758585		1650.19	0.02056293		2240.18	0.01052501		2830.18	0.01786209		3420.18	-0.00128196
470.4	0.03670121		1060.39	0.01748718		1650.39	0.02120908		2240.38	0.01061312		2830.38	0.01834033		3420.38	-0.00076762
470.6	0.03799977		1060.59	0.01807118		1650.59	0.02140696		2240.58	0.01090118		2830.58	0.017837		3420.58	-0.00141948
470.8	0.03797476		1060.79	0.0180306		1650.79	0.02053815		2240.78	0.01119664		2830.78	0.01782525		3420.78	-0.00141418
471	0.03864791		1060.99	0.0176748		1650.99	0.02040246		2240.98	0.01076664		2830.98	0.01808577		3420.98	-0.00181282
471.2	0.03890761		1061.19	0.01696239		1651.19	0.0202307		2241.18	0.01125594		2831.18	0.01779404		3421.18	-0.00245813
471.4	0.03906595		1061.39	0.01657959		1651.39	0.01979686		2241.38	0.0114519		2831.38	0.0183016		3421.38	-0.00247716
471.6	0.03818066		1061.59	0.01625953		1651.59	0.01961736		2241.58	0.0114815		2831.58	0.01784609		3421.58	-0.00225631
471.8	0.0380832		1061.79	0.01674295		1651.79	0.01937183		2241.78	0.01098313		2831.78	0.01790943		3421.78	-0.00293923
472	0.03724065		1061.99	0.01703948		1651.99	0.01922108		2241.98	0.01133483		2831.98	0.01736484		3421.98	-0.00294521
472.2	0.03653896		1062.19	0.01673273		1652.19	0.01870959		2242.18	0.01184763		2832.18	0.01775629		3422.18	-0.0025211
472.4	0.0363226		1062.39	0.01586161		1652.39	0.01859183		2242.38	0.0125493		2832.38	0.01758303		3422.38	-0.00181059
472.6	0.0362706		1062.59	0.01486739		1652.59	0.01797005		2242.58	0.01277389		2832.58	0.01716594		3422.58	-0.00220082
472.8	0.03605807		1062.79	0.01439322		1652.79	0.01745381		2242.78	0.01269889		2832.78	0.01760375		3422.78	-0.00147236
473	0.03505251		1062.99	0.01428306		1652.99	0.01687808		2242.98	0.01205866		2832.98	0.01767574		3422.98	-0.00117434
473.2	0.03519038		1063.19	0.01417867		1653.19	0.01590667		2243.18	0.01155611		2833.18	0.01683338		3423.18	-0.000861
473.4	0.0349706		1063.39	0.01414198		1653.39	0.01650313		2243.38	0.01113531		2833.38	0.01625959		3423.38	-0.00092626
473.6	0.03453755		1063.59	0.01440409		1653.59	0.01609567		2243.58	0.01137174		2833.58	0.01633763		3423.58	-0.00148176
473.8	0.03488778		1063.79	0.01480708		1653.79	0.01553073		2243.78	0.01179984		2833.78	0.01567186		3423.78	-0.00040035
474	0.03547493		1063.99	0.01553357		1653.99	0.0161486		2243.98	0.01128277		2833.98	0.01454242		3423.98	-0.0002434
474.2	0.03648891		1064.19	0.01547078		1654.19	0.0158135		2244.18	0.0121521		2834.18	0.01371959		3424.18	-0.00039642
474.4	0.0361373		1064.39	0.01664818		1654.39	0.01610831		2244.38	0.01201134		2834.38	0.01340975		3424.38	0.00004451
474.6	0.03715652		1064.59	0.01696506		1654.59	0.01533883		2244.58	0.01158937		2834.58	0.01260301		3424.58	0.00005653
474.8	0.03724295		1064.79	0.0165927		1654.79	0.01515933		2244.78	0.0122031		2834.78	0.0125269		3424.78	0.00009746
475	0.03735511		1064.99	0.01629187		1654.99	0.01502423		2244.98	0.01215074		2834.98	0.01223184		3424.98	-0.00062576
475.2	0.03719292		1065.19	0.01567727		1655.19	0.01456405		2245.18	0.01326102		2835.18	0.01212428		3425.18	-0.00140152
475.4	0.03684627		1065.39	0.015179		1655.39	0.01396109		2245.38	0.01340534		2835.38	0.0124189		3425.38	-0.00147954
475.6	0.03646056		1065.59	0.01446847		1655.59	0.01425914		2245.58	0.01420569		2835.58	0.01204502		3425.58	-0.00166451
475.8	0.03705783		1065.79	0.01462731		1655.79	0.01393743		2245.78	0.01460884		2835.78	0.01233383		3425.78	-0.00251516
476	0.03683055		1065.99	0.01391404		1655.99	0.01498512		2245.98	0.01484759		2835.98	0.01207511		3425.98	-0.00295556
476.2	0.03712256		1066.19	0.0130717		1656.19	0.01509988		2246.18	0.01450487		2836.18	0.01288717		3426.18	-0.00405942
476.4	0.03635056		1066.39	0.01288285		1656.39	0.01596307		2246.38	0.01425341		2836.38	0.01285094		3426.38	-0.00398532
476.6	0.03514312		1066.59	0.01236443		1656.59	0.01575202		2246.58	0.01437571		2836.58	0.01349695		3426.58	-0.00369278
476.8	0.03458454		1066.79	0.01230189		1656.79	0.01547364		2246.78	0.01398641		2836.78	0.01403233		3426.78	-0.00363876
477	0.03302544		1066.99	0.0116448		1656.99	0.01528145		2246.98	0.01274718		2836.98	0.01457231		3426.98	-0.00362114
477.2	0.03321519		1067.19	0.01166098		1657.19	0.01578926		2247.18	0.01169495		2837.18	0.01544462		3427.18	-0.00410508
477.4	0.03319942		1067.39	0.01138676		1657.39	0.01632248		2247.38	0.01149518		2837.38	0.01570455		3427.38	-0.00489459
477.6	0.03340309		1067.59	0.01130849		1657.59	0.01591214		2247.58	0.01129536		2837.58	0.01602971		3427.58	-0.00435275
477.8	0.03338578		1067.79	0.0112819		1657.79	0.01614933		2247.78	0.01121975		2837.78	0.01648402		3427.78	-0.0038645
478	0.03413876		1067.99	0.01235717		1657.99	0.01697989		2247.98	0.0114006		2837.98	0.0165979		3427.98	-0.00365336
478.2	0.03360334		1068.19	0.01211616		1658.19	0.01628774		2248.18	0.01134949		2838.18	0.01641683		3428.18	-0.00294153
478.4	0.03317077		1068.39	0.01274786		1658.39	0.01704093		2248.38	0.01007719		2838.38	0.0175192		3428.38	-0.00219917
478.6	0.03419638		1068.59	0.01269532		1658.59	0.0171983		2248.58	0.01000933		2838.58	0.01802568		3428.58	-0.00175823
478.8	0.03408728		1068.79	0.01309401		1658.79	0.0168442		2248.78	0.01077295		2838.78	0.01755339		3428.78	-0.00246093
479	0.03311755		1068.99	0.01296244		1658.99	0.01593375		2248.98	0.01037951		2838.98	0.01732925		3428.98	-0.00232736
479.2	0.03282196		1069.19	0.01324858		1659.19	0.01591343		2249.18	0.01084549		2839.18	0.01768889		3429.18	-0.00234901
479.4	0.03245843		1069.39	0.01352325		1659.39	0.01532606		2249.38	0.01034966		2839.38	0.01717922		3429.38	-0.00207874
479.6	0.03276307		1069.59	0.0135925		1659.59	0.01516545		2249.58	0.01005022		2839.58	0.01671921		3429.58	-0.00154441
479.8	0.03270389		1069.79	0.01389104		1659.79	0.01443276		2249.78	0.00939844		2839.78	0.01601128		3429.78	-0.00155399
480	0.03218963		1069.99	0.01454087		1659.99	0.01498875		2249.98	0.00792983		2839.98	0.01504858		3429.98	-0.00189757
480.2	0.03170111		1070.19	0.014373		1660.19	0.01461206		2250.18	0.00770873		2840.18	0.0142642		3430.18	-0.00223088
480.4	0.03106722		1070.39	0.01386916		1660.39	0.01484117		2250.38	0.00770543		2840.38	0.01379167		3430.38	-0.00177179
480.6	0.03130733		1070.59	0.0131625		1660.59	0.01471599		2250.58	0.00746884		2840.58	0.01295268		3430.58	-0.00221492
480.8	0.03173508		1070.79	0.01271607		1660.79	0.01470752		2250.78	0.00763289		2840.78	0.01307154		3430.78	-0.00318289
481	0.03222113		1070.99	0.01170146		1660.99	0.01517995		2250.98	0.00719511		2840.98	0.01321048		3430.98	-0.0038761
481.2	0.03285277		1071.19	0.0118444		1661.19	0.01503655		2251.18	0.00731813		2841.18	0.0137894		3431.18	-0.00429828
481.4	0.03369777		1071.39	0.01151336		1661.39	0.01507486		2251.38	0.00799981		2841.38	0.01274275		3431.38	-0.00392666
481.6	0.03340097		1071.59	0.01171358		1661.59	0.01491689		2251.58	0.00873972		2841.58	0.0130627		3431.58	-0.00347505
481.8	0.03353106		1071.79	0.01190129		1661.79	0.01455391		2251.78	0.00922178		2841.78	0.01390931		3431.78	-0.00350147
482	0.03403318		1071.99	0.01176332		1661.99	0.01508704		2251.98	0.01060992		2841.98	0.01417203		3431.98	-0.00366565
482.2	0.03390745		1072.19	0.01125456		1662.19	0.01495954		2252.18	0.01124452		2842.18	0.01377979		3432.18	-0.00417698
482.4	0.03482623		1072.39	0.0108876		1662.39	0.01529537		2252.38	0.01088415		2842.38	0.0145216		3432.38	-0.00406723
482.6	0.03426036		1072.59	0.01021784		1662.59	0.01561834		2252.58	0.01099142		2842.58	0.01421766		3432.58	-0.00458019
482.8	0.03334138		1072.79	0.01014056		1662.79	0.01474293		2252.78	0.00995106		2842.78	0.01347266		3432.78	-0.00459994
483	0.03166088		1072.99	0.00967941		1662.99	0.01479459		2252.98	0.00956557		2842.98	0.01420091		3432.98	-0.00386718
483.2	0.03089219		1073.19	0.0098946		1663.19	0.01428893		2253.18	0.00905541		2843.18	0.01421389		3433.18	-0.00445396
483.4	0.03035109		1073.39	0.00921032		1663.39	0.0134301		2253.38	0.00814835		2843.38	0.01388689		3433.38	-0.00460263
483.6	0.02976857		1073.59	0.00847653		1663.59	0.01344321		2253.58	0.00781465		2843.58	0.01320249		3433.58	-0.00335361
483.8	0.02890658		1073.79	0.00788113		1663.79	0.01330262		2253.78	0.00759931		2843.78	0.01285463		3433.78	-0.00351893
484	0.02787268		1073.99	0.00820405		1663.99	0.01322565		2253.98	0.00614803		2843.98	0.01248339		3433.98	-0.00325299
484.2	0.02757961		1074.19	0.00785305		1664.19	0.01390724		2254.18	0.00581007		2844.18	0.01260785		3434.18	-0.00400532
484.4	0.02734201		1074.39	0.00855831		1664.39	0.01387839		2254.38	0.00555903		2844.38	0.01329497		3434.38	-0.00481065
484.6	0.02719527		1074.59	0.00935313		1664.59	0.01331053		2254.58	0.00611117		2844.58	0.01385986		3434.58	-0.00512362
484.8	0.02670429		1074.79	0.01023103		1664.79	0.01318669		2254.78	0.00608486		2844.78	0.01409954		3434.78	-0.00480826
485	0.02630655		1074.99	0.01107489		1664.99	0.01377874		2254.98	0.00619299		2844.98	0.01421433		3434.98	-0.00380507
485.2	0.02627126		1075.19	0.01193712		1665.19	0.01374403		2255.18	0.00622185		2845.18	0.01421539		3435.18	-0.00323582
485.4	0.02625417		1075.39	0.01335357		1665.39	0.01395556		2255.38	0.00588013		2845.38	0.01339093		3435.38	-0.00305529
485.6	0.02628389		1075.59	0.01382173		1665.59	0.01359851		2255.58	0.00664827		2845.58	0.01389429		3435.58	-0.00352018
485.8	0.02696577		1075.79	0.01403659		1665.79	0.01441188		2255.78	0.00701418		2845.78	0.01323875		3435.78	-0.00325974
486	0.02716808		1075.99	0.01350435		1665.99	0.01561414		2255.98	0.00805641		2845.98	0.01369366		3435.98	-0.00353505
486.2	0.02728875		1076.19	0.01402538		1666.19	0.01537602		2256.18	0.00786789		2846.18	0.01363708		3436.18	-0.00369437
486.4	0.02744662		1076.39	0.01346853		1666.39	0.01501881		2256.38	0.00724893		2846.38	0.0134597		3436.38	-0.00379927
486.6	0.02670574		1076.59	0.0130278		1666.59	0.01534323		2256.58	0.00721614		2846.58	0.01369359		3436.58	-0.00461454
486.8	0.02633825		1076.79	0.0129099		1666.79	0.01455216		2256.78	0.00575765		2846.78	0.01378554		3436.78	-0.00490841
487	0.02635408		1076.99	0.01214769		1666.99	0.01475339		2256.98	0.00613885		2846.98	0.01397359		3436.98	-0.00490737
487.2	0.02723092		1077.19	0.01191443		1667.19	0.0140883		2257.18	0.00549699		2847.18	0.01328754		3437.18	-0.00571137
487.4	0.02798794		1077.39	0.01065973		1667.39	0.01322459		2257.38	0.00476705		2847.38	0.01344736		3437.38	-0.00564422
487.6	0.02814334		1077.59	0.01011665		1667.59	0.0132791		2257.58	0.00373302		2847.58	0.01298632		3437.58	-0.00524235
487.8	0.0284431		1077.79	0.00938703		1667.79	0.01251491		2257.78	0.00253111		2847.78	0.01310525		3437.78	-0.00574961
488	0.02879217		1077.99	0.00922886		1667.99	0.01296836		2257.98	0.00227834		2847.98	0.01321724		3437.98	-0.00520419
488.2	0.02892913		1078.19	0.00957784		1668.19	0.01296877		2258.18	0.00222839		2848.18	0.01401254		3438.18	-0.00650869
488.4	0.02913527		1078.39	0.01017828		1668.39	0.01304807		2258.38	0.00228427		2848.38	0.01470545		3438.38	-0.00671585
488.6	0.02954898		1078.59	0.00984292		1668.59	0.01318513		2258.58	0.00300266		2848.58	0.01452932		3438.58	-0.00611888
488.8	0.02952911		1078.79	0.00937165		1668.79	0.0140145		2258.78	0.00275734		2848.78	0.01440202		3438.78	-0.0054442
489	0.02906898		1078.99	0.0092306		1668.99	0.0146173		2258.98	0.00302078		2848.98	0.01385608		3438.98	-0.00496037
489.2	0.02937481		1079.19	0.00876938		1669.19	0.0150407		2259.18	0.00327367		2849.18	0.01438388		3439.18	-0.00562903
489.4	0.02913412		1079.39	0.00852947		1669.39	0.01541631		2259.38	0.00350946		2849.38	0.01436713		3439.38	-0.00578559
489.6	0.02924971		1079.59	0.00721582		1669.59	0.01610178		2259.58	0.00418845		2849.58	0.01460793		3439.58	-0.00603579
489.8	0.02929509		1079.79	0.00750149		1669.79	0.01671755		2259.78	0.00412639		2849.78	0.0143298		3439.78	-0.00598485
490	0.02955285		1079.99	0.00729586		1669.99	0.016392		2259.98	0.00513262		2849.98	0.01491248		3439.98	-0.00624086
490.2	0.02896853		1080.19	0.00767645		1670.19	0.01676253		2260.18	0.00589352		2850.18	0.01522219		3440.18	-0.00665414
490.4	0.02856812		1080.39	0.00767305		1670.39	0.01707446		2260.38	0.00576946		2850.38	0.01473636		3440.38	-0.007379
490.6	0.02828153		1080.59	0.00801583		1670.59	0.0167976		2260.58	0.00618168		2850.58	0.01541765		3440.58	-0.00772622
490.8	0.028188		1080.79	0.00733532		1670.79	0.01643575		2260.78	0.00509863		2850.78	0.01577442		3440.78	-0.00801688
491	0.02813606		1080.99	0.00704132		1670.99	0.01632437		2260.98	0.00527532		2850.98	0.0147582		3440.98	-0.00848938
491.2	0.02819018		1081.19	0.00665978		1671.19	0.01499394		2261.18	0.00502876		2851.18	0.01441315		3441.18	-0.00909779
491.4	0.02843718		1081.39	0.00612359		1671.39	0.01449747		2261.38	0.00459849		2851.38	0.01444746		3441.38	-0.00911315
491.6	0.02886413		1081.59	0.00555195		1671.59	0.01458585		2261.58	0.00444192		2851.58	0.01351536		3441.58	-0.00862117
491.8	0.02867903		1081.79	0.00537208		1671.79	0.01458694		2261.78	0.00446886		2851.78	0.01288184		3441.78	-0.00823498
492	0.02849828		1081.99	0.00542116		1671.99	0.01476327		2261.98	0.00466667		2851.98	0.01227977		3441.98	-0.00861297
492.2	0.0290081		1082.19	0.00646297		1672.19	0.01411192		2262.18	0.00368025		2852.18	0.01200031		3442.18	-0.0094417
492.4	0.02931112		1082.39	0.00603562		1672.39	0.01382998		2262.38	0.00369481		2852.38	0.01193774		3442.38	-0.00899417
492.6	0.02965221		1082.59	0.00542378		1672.59	0.01335971		2262.58	0.00413556		2852.58	0.01150581		3442.58	-0.00890251
492.8	0.02923077		1082.79	0.00561069		1672.79	0.01231606		2262.78	0.00420116		2852.78	0.01092486		3442.78	-0.00862381
493	0.02898671		1082.99	0.00602028		1672.99	0.01168715		2262.98	0.00419555		2852.98	0.01040388		3442.98	-0.00759969
493.2	0.02937067		1083.19	0.00644821		1673.19	0.01133502		2263.18	0.00504306		2853.18	0.01096854		3443.18	-0.00728507
493.4	0.02948239		1083.39	0.00663504		1673.39	0.01078583		2263.38	0.00449815		2853.38	0.01056674		3443.38	-0.00686911
493.6	0.03021919		1083.59	0.00799984		1673.59	0.01059558		2263.58	0.00440561		2853.58	0.01036798		3443.58	-0.00716983
493.8	0.03138917		1083.79	0.00854925		1673.79	0.01047931		2263.78	0.00442709		2853.78	0.01078245		3443.78	-0.00686701
494	0.03085346		1083.99	0.00911557		1673.99	0.01088742		2263.98	0.00472561		2853.98	0.01042388		3443.98	-0.00653732
494.2	0.03033153		1084.19	0.00987984		1674.19	0.01102741		2264.18	0.0046039		2854.18	0.01071509		3444.18	-0.00774237
494.4	0.02980163		1084.39	0.01026817		1674.39	0.01087244		2264.38	0.00387316		2854.38	0.00997528		3444.38	-0.00884126
494.6	0.02956985		1084.59	0.00943446		1674.59	0.01065307		2264.58	0.00443944		2854.58	0.01013212		3444.58	-0.00887225
494.8	0.02892425		1084.79	0.00851276		1674.79	0.01028007		2264.78	0.00394529		2854.78	0.00949093		3444.78	-0.00848641
495	0.02777094		1084.99	0.00936775		1674.99	0.00997167		2264.98	0.00451125		2854.98	0.00822456		3444.98	-0.0084766
495.2	0.02739254		1085.19	0.00982282		1675.19	0.00968172		2265.18	0.00472886		2855.18	0.0084259		3445.18	-0.00780625
495.4	0.02698731		1085.39	0.00959838		1675.39	0.01054461		2265.38	0.00430972		2855.38	0.00891592		3445.38	-0.00720274
495.6	0.02670406		1085.59	0.008278		1675.59	0.01073475		2265.58	0.00391932		2855.58	0.00886272		3445.58	-0.00660747
495.8	0.02524669		1085.79	0.00825873		1675.79	0.01136004		2265.78	0.00379536		2855.78	0.00910179		3445.78	-0.00689872
496	0.02453175		1085.99	0.0080778		1675.99	0.01111315		2265.98	0.00322904		2855.98	0.00932975		3445.98	-0.0070425
496.2	0.02526315		1086.19	0.00740938		1676.19	0.01090828		2266.18	0.00241553		2856.18	0.00925635		3446.18	-0.00704689
496.4	0.02492618		1086.39	0.00611727		1676.39	0.010839		2266.38	0.00224016		2856.38	0.0097457		3446.38	-0.00669034
496.6	0.0247968		1086.59	0.00547851		1676.59	0.01057544		2266.58	0.00310583		2856.58	0.00980423		3446.58	-0.00599342
496.8	0.02475712		1086.79	0.00591773		1676.79	0.01001617		2266.78	0.0028294		2856.78	0.01035487		3446.78	-0.00568885
497	0.02443545		1086.99	0.00657624		1676.99	0.00979458		2266.98	0.00284528		2856.98	0.01174684		3446.98	-0.00530548
497.2	0.02477954		1087.19	0.0064336		1677.19	0.00978469		2267.18	0.00234434		2857.18	0.01189106		3447.18	-0.00608263
497.4	0.02490352		1087.39	0.00622879		1677.39	0.0097455		2267.38	0.001946		2857.38	0.01245637		3447.38	-0.00672448
497.6	0.02593289		1087.59	0.00617462		1677.59	0.00992032		2267.58	0.00221053		2857.58	0.01239167		3447.58	-0.0071585
497.8	0.02541648		1087.79	0.00571162		1677.79	0.01034121		2267.78	0.00190117		2857.78	0.01270669		3447.78	-0.0080937
498	0.02429031		1087.99	0.00678188		1677.99	0.01027088		2267.98	0.00173747		2857.98	0.01208446		3447.98	-0.00768299
498.2	0.02533087		1088.19	0.00629933		1678.19	0.00991738		2268.18	0.00161045		2858.18	0.01083637		3448.18	-0.00890428
498.4	0.02479544		1088.39	0.00703937		1678.39	0.01018903		2268.38	0.00129818		2858.38	0.00981784		3448.38	-0.00923255
498.6	0.02505216		1088.59	0.00634116		1678.59	0.00992418		2268.58	0.00203824		2858.58	0.00961011		3448.58	-0.0078503
498.8	0.0247632		1088.79	0.00734175		1678.79	0.00994741		2268.78	0.00281322		2858.78	0.00799151		3448.78	-0.00723546
499	0.0246106		1088.99	0.00829395		1678.99	0.00995754		2268.98	0.00269103		2858.98	0.00848027		3448.98	-0.00761563
499.2	0.02530427		1089.19	0.00879509		1679.19	0.01060761		2269.18	0.00223875		2859.18	0.00863272		3449.18	-0.007176
499.4	0.02507598		1089.39	0.00896897		1679.39	0.01124926		2269.38	0.00173834		2859.38	0.00889372		3449.38	-0.00676531
499.6	0.025154		1089.59	0.0081975		1679.59	0.01089486		2269.58	0.00176257		2859.58	0.00834961		3449.58	-0.00659258
499.8	0.02515928		1089.79	0.00830833		1679.79	0.01117383		2269.78	0.00277052		2859.78	0.00809273		3449.78	-0.0073761
500	0.02512931		1089.99	0.00864785		1679.99	0.01049202		2269.98	0.00307515		2859.98	0.00730904		3449.98	-0.00698436
500.2	0.02611047		1090.19	0.0083081		1680.19	0.01002726		2270.18	0.00360908		2860.18	0.00673486		3450.18	-0.00727647
500.4	0.02592674		1090.39	0.00851466		1680.39	0.00977173		2270.38	0.00422002		2860.38	0.00722967		3450.38	-0.00721568
500.6	0.02617029		1090.59	0.00877833		1680.59	0.00857149		2270.58	0.00519872		2860.58	0.00777581		3450.58	-0.00706895
500.8	0.02627273		1090.79	0.00905748		1680.79	0.00781462		2270.78	0.00498587		2860.78	0.00859118		3450.78	-0.00833927
501	0.02570264		1090.99	0.00867324		1680.99	0.00753034		2270.98	0.00481494		2860.98	0.00866963		3450.98	-0.0088791
501.2	0.02602091		1091.19	0.00764829		1681.19	0.00767205		2271.18	0.00424269		2861.18	0.00890624		3451.18	-0.00952667
501.4	0.02594665		1091.39	0.00709912		1681.39	0.00710226		2271.38	0.004841		2861.38	0.00888786		3451.38	-0.00990995
501.6	0.02621551		1091.59	0.0058865		1681.59	0.00666527		2271.58	0.00459066		2861.58	0.00821487		3451.58	-0.00998779
501.8	0.02462742		1091.79	0.00633435		1681.79	0.00710337		2271.78	0.00394002		2861.78	0.00816309		3451.78	-0.01084402
502	0.02418124		1091.99	0.00609835		1681.99	0.0062436		2271.98	0.00339889		2861.98	0.00861331		3451.98	-0.0099039
502.2	0.0247626		1092.19	0.00502417		1682.19	0.00606411		2272.18	0.00226452		2862.18	0.00840167		3452.18	-0.0105022
502.4	0.02366829		1092.39	0.00462873		1682.39	0.00636055		2272.38	0.00192644		2862.38	0.00869364		3452.38	-0.01070525
502.6	0.02394419		1092.59	0.00360653		1682.59	0.00642675		2272.58	0.001977		2862.58	0.008376		3452.58	-0.00984319
502.8	0.02366376		1092.79	0.00411158		1682.79	0.00626121		2272.78	0.00124817		2862.78	0.00812396		3452.78	-0.01030552
503	0.02425147		1092.99	0.00409595		1682.99	0.00590179		2272.98	-0.00011859		2862.98	0.0096836		3452.98	-0.01045426
503.2	0.02414215		1093.19	0.00459377		1683.19	0.00669505		2273.18	-0.00184609		2863.18	0.01032256		3453.18	-0.0107736
503.4	0.02335764		1093.39	0.00441992		1683.39	0.00750507		2273.38	-0.00170621		2863.38	0.01055371		3453.38	-0.01067426
503.6	0.02377552		1093.59	0.00419787		1683.59	0.00650096		2273.58	-0.00146066		2863.58	0.00990596		3453.58	-0.01094626
503.8	0.02436227		1093.79	0.00444285		1683.79	0.0071897		2273.78	-0.00074227		2863.78	0.01008619		3453.78	-0.01103122
504	0.0244481		1093.99	0.00496567		1683.99	0.00719615		2273.98	-0.00049106		2863.98	0.00994662		3453.98	-0.01083953
504.2	0.02518329		1094.19	0.0044061		1684.19	0.0069736		2274.18	0.00031448		2864.18	0.00922502		3454.18	-0.01040848
504.4	0.0251069		1094.39	0.00369627		1684.39	0.00667019		2274.38	0.00010447		2864.38	0.00902364		3454.38	-0.01040561
504.6	0.02513862		1094.59	0.00365603		1684.59	0.00628501		2274.58	0.00072555		2864.58	0.00848028		3454.58	-0.01024599
504.8	0.0252096		1094.79	0.00311851		1684.79	0.00665938		2274.78	0.00141593		2864.78	0.00806732		3454.78	-0.01107494
505	0.02601624		1094.99	0.00321233		1684.99	0.00791148		2274.98	0.00065527		2864.98	0.00775986		3454.98	-0.01134733
505.2	0.02572105		1095.19	0.00374718		1685.19	0.00825235		2275.18	0.00083791		2865.18	0.0077248		3455.18	-0.01170023
505.4	0.02582281		1095.39	0.00362726		1685.39	0.0080389		2275.38	0.00064174		2865.38	0.00719135		3455.38	-0.0115707
505.6	0.02613763		1095.59	0.00395595		1685.59	0.00819156		2275.58	0.0005123		2865.58	0.00643398		3455.58	-0.01180665
505.8	0.02566088		1095.79	0.00471603		1685.79	0.00834887		2275.78	0.00048773		2865.78	0.00651773		3455.78	-0.0125373
506	0.02657183		1095.99	0.00468453		1685.99	0.006957		2275.98	0.00033941		2865.98	0.00692629		3455.98	-0.01197884
506.2	0.02673038		1096.19	0.0043173		1686.19	0.00743523		2276.18	-0.00007363		2866.18	0.00653737		3456.18	-0.01226072
506.4	0.02611013		1096.39	0.00377641		1686.39	0.00815154		2276.38	0.00020431		2866.38	0.00660175		3456.38	-0.01245396
506.6	0.02513708		1096.59	0.00457944		1686.59	0.00806707		2276.58	-0.00019049		2866.58	0.00733189		3456.58	-0.01240958
506.8	0.02525552		1096.79	0.00510466		1686.79	0.00791689		2276.78	-0.00046626		2866.78	0.00829756		3456.78	-0.01255484
507	0.02508942		1096.99	0.00537343		1686.99	0.00894455		2276.98	-0.00141879		2866.98	0.0089929		3456.98	-0.01219883
507.2	0.02412308		1097.19	0.00496161		1687.19	0.00941135		2277.18	-0.00121608		2867.18	0.00927337		3457.18	-0.01196526
507.4	0.02281097		1097.39	0.00458766		1687.39	0.00971937		2277.38	-0.00040351		2867.38	0.00852641		3457.38	-0.01147147
507.6	0.02291449		1097.59	0.00387958		1687.59	0.00884197		2277.58	-0.00074888		2867.58	0.00877632		3457.58	-0.01143245
507.8	0.02270699		1097.79	0.00250685		1687.79	0.00919941		2277.78	-0.00064269		2867.78	0.00855039		3457.78	-0.01147812
508	0.02199344		1097.99	0.00146357		1687.99	0.00869863		2277.98	0.00017622		2867.98	0.00903496		3457.98	-0.01102814
508.2	0.02148935		1098.19	0.00024145		1688.19	0.00824933		2278.18	0.00207839		2868.18	0.00768563		3458.18	-0.01004759
508.4	0.02022588		1098.39	0.00080428		1688.39	0.00815664		2278.38	0.00246331		2868.38	0.00782264		3458.38	-0.01082505
508.6	0.01917366		1098.59	0.00095569		1688.59	0.0078465		2278.58	0.00369912		2868.58	0.00813366		3458.58	-0.01088548
508.8	0.0202164		1098.79	0.00105861		1688.79	0.00758397		2278.78	0.00436316		2868.78	0.00762637		3458.78	-0.01066802
509	0.020485		1098.99	0.00197508		1688.99	0.00748715		2278.98	0.0043893		2868.98	0.00744197		3458.98	-0.01068025
509.2	0.02009074		1099.19	0.00258926		1689.19	0.00671923		2279.18	0.00523235		2869.18	0.00667376		3459.18	-0.01025552
509.4	0.02113356		1099.39	0.00305152		1689.39	0.00608021		2279.38	0.00550284		2869.38	0.00676365		3459.38	-0.01059954
509.6	0.02217985		1099.59	0.00351299		1689.59	0.00564743		2279.58	0.0052396		2869.58	0.00621125		3459.58	-0.01137132
509.8	0.02229269		1099.79	0.00364641		1689.79	0.00572307		2279.78	0.00427676		2869.78	0.00746847		3459.78	-0.01181691
510	0.02212893		1099.99	0.00333073		1689.99	0.00540396		2279.98	0.00398558		2869.98	0.00796782		3459.98	-0.01141904
510.2	0.02158771		1100.19	0.00365074		1690.19	0.00575254		2280.18	0.00378319		2870.18	0.00797122		3460.18	-0.01191715
510.4	0.02106869		1100.39	0.00344772		1690.39	0.00587544		2280.38	0.00349346		2870.38	0.00900706		3460.38	-0.01118318
510.6	0.02081287		1100.59	0.0044561		1690.59	0.00550445		2280.58	0.00285792		2870.58	0.0095775		3460.58	-0.0115547
510.8	0.02195209		1100.79	0.00397435		1690.79	0.00547351		2280.78	0.00240775		2870.78	0.00853572		3460.78	-0.01094479
511	0.02160222		1100.99	0.00347216		1690.99	0.00644532		2280.98	0.0016117		2870.98	0.00866375		3460.98	-0.01078406
511.2	0.02084181		1101.19	0.00203474		1691.19	0.00684392		2281.18	0.0017015		2871.18	0.00963327		3461.18	-0.01101325
511.4	0.02074409		1101.39	0.00139587		1691.39	0.00696646		2281.38	-0.00021596		2871.38	0.00968847		3461.38	-0.01114382
511.6	0.02218754		1101.59	0.00108014		1691.59	0.00644411		2281.58	-0.00067699		2871.58	0.00964385		3461.58	-0.0118604
511.8	0.02240025		1101.79	0.00144212		1691.79	0.00530803		2281.78	-0.00081514		2871.78	0.00885935		3461.78	-0.01258579
512	0.02130456		1101.99	0.00124712		1691.99	0.00610594		2281.98	0.00009051		2871.98	0.00948354		3461.98	-0.01250836
512.2	0.02138766		1102.19	0.00144275		1692.19	0.0064212		2282.18	0.00122408		2872.18	0.00851294		3462.18	-0.01306829
512.4	0.0212027		1102.39	0.00234947		1692.39	0.00618967		2282.38	0.00077492		2872.38	0.00851311		3462.38	-0.01404056
512.6	0.02173302		1102.59	0.0016292		1692.59	0.0063867		2282.58	0.00082116		2872.58	0.00795331		3462.58	-0.01339227
512.8	0.02252212		1102.79	0.00267762		1692.79	0.00576526		2282.78	0.00074885		2872.78	0.00658111		3462.78	-0.01177639
513	0.02251057		1102.99	0.00381618		1692.99	0.00601724		2282.98	-0.00006202		2872.98	0.0056386		3462.98	-0.01206561
513.2	0.02264131		1103.19	0.00404369		1693.19	0.0057496		2283.18	0.00048926		2873.18	0.00456614		3463.18	-0.0121113
513.4	0.02292758		1103.39	0.00374801		1693.39	0.00550178		2283.38	0.00019082		2873.38	0.00470642		3463.38	-0.01200612
513.6	0.02318714		1103.59	0.00280438		1693.59	0.00494216		2283.58	-0.0004812		2873.58	0.0052711		3463.58	-0.01217168
513.8	0.0230881		1103.79	0.00291326		1693.79	0.00548043		2283.78	-0.00036009		2873.78	0.00558701		3463.78	-0.01223732
514	0.02322822		1103.99	0.00221985		1693.99	0.00473864		2283.98	-0.0003827		2873.98	0.00476704		3463.98	-0.01172409
514.2	0.02321946		1104.19	0.00212347		1694.19	0.00449557		2284.18	-0.00016363		2874.18	0.00476204		3464.18	-0.0123626
514.4	0.02334002		1104.39	0.0017869		1694.39	0.00452697		2284.38	0.00001727		2874.38	0.00519054		3464.38	-0.0125651
514.6	0.02368198		1104.59	0.00197581		1694.59	0.00435452		2284.58	-0.00001452		2874.58	0.00466314		3464.58	-0.01284729
514.8	0.02449248		1104.79	0.00132611		1694.79	0.00391882		2284.78	0.00034919		2874.78	0.00482129		3464.78	-0.01211376
515	0.02414523		1104.99	0.00071715		1694.99	0.00422509		2284.98	-0.0001154		2874.98	0.00648914		3464.98	-0.01215653
515.2	0.02350623		1105.19	0.0002736		1695.19	0.00421296		2285.18	-0.00056505		2875.18	0.00707527		3465.18	-0.01167528
515.4	0.02364506		1105.39	0.00078288		1695.39	0.00392291		2285.38	-0.00086678		2875.38	0.0069874		3465.38	-0.01104773
515.6	0.02355532		1105.59	0.00142026		1695.59	0.00349432		2285.58	0.00010456		2875.58	0.00702985		3465.58	-0.01151856
515.8	0.02315892		1105.79	0.00171962		1695.79	0.00423256		2285.78	-0.00057711		2875.78	0.0077048		3465.78	-0.01129968
516	0.02261081		1105.99	0.00145116		1695.99	0.00604976		2285.98	-0.00035605		2875.98	0.00858267		3465.98	-0.01078259
516.2	0.02286878		1106.19	0.00127994		1696.19	0.00640256		2286.18	-0.00000285		2876.18	0.0087375		3466.18	-0.01036053
516.4	0.02190058		1106.39	0.002071		1696.39	0.00686713		2286.38	-0.00030908		2876.38	0.00745244		3466.38	-0.01031267
516.6	0.02149015		1106.59	0.00273975		1696.59	0.00657683		2286.58	-0.00029277		2876.58	0.00678879		3466.58	-0.00904043
516.8	0.02111873		1106.79	0.00342873		1696.79	0.00699262		2286.78	-0.00033397		2876.78	0.00621868		3466.78	-0.00871151
517	0.02160694		1106.99	0.00330969		1696.99	0.00715298		2286.98	-0.00082678		2876.98	0.00542945		3466.98	-0.00950884
517.2	0.02102248		1107.19	0.0024228		1697.19	0.00732948		2287.18	0.00034343		2877.18	0.00513337		3467.18	-0.01000352
517.4	0.02141004		1107.39	0.00197928		1697.39	0.00691971		2287.38	0.000271		2877.38	0.0052887		3467.38	-0.01025145
517.6	0.02126311		1107.59	0.00213372		1697.59	0.00651837		2287.58	0.00034749		2877.58	0.00596065		3467.58	-0.0117619
517.8	0.0209104		1107.79	0.00216075		1697.79	0.00683742		2287.78	0.00058692		2877.78	0.00535255		3467.78	-0.01267685
518	0.02095869		1107.99	0.00113024		1697.99	0.00600648		2287.98	0.00057975		2877.98	0.00515891		3467.98	-0.01376238
518.2	0.02068807		1108.19	0.00094897		1698.19	0.00598529		2288.18	0.00101262		2878.18	0.00454139		3468.18	-0.01473546
518.4	0.02089336		1108.39	0.00096928		1698.39	0.00594539		2288.38	0.00073144		2878.38	0.00449616		3468.38	-0.01435812
518.6	0.0207095		1108.59	0.0013182		1698.59	0.00534354		2288.58	-0.00014413		2878.58	0.00337286		3468.58	-0.01461631
518.8	0.02067398		1108.79	0.0005615		1698.79	0.00454064		2288.78	-0.00128021		2878.78	0.00403833		3468.78	-0.01386419
519	0.02026236		1108.99	-0.00009254		1698.99	0.00427044		2288.98	-0.00256565		2878.98	0.00366325		3468.98	-0.01339474
519.2	0.0196988		1109.19	0.00003344		1699.19	0.00429198		2289.18	-0.00337428		2879.18	0.00386824		3469.18	-0.01310184
519.4	0.02054771		1109.39	-0.00035109		1699.39	0.00460061		2289.38	-0.00367803		2879.38	0.0051301		3469.38	-0.0131036
519.6	0.02157062		1109.59	-0.00060405		1699.59	0.00527757		2289.58	-0.00419873		2879.58	0.00543248		3469.58	-0.01261132
519.8	0.02248492		1109.79	-0.00075927		1699.79	0.00657181		2289.78	-0.00481208		2879.78	0.00547153		3469.78	-0.01314253
520	0.02237045		1109.99	-0.00120546		1699.99	0.00691355		2289.98	-0.0042937		2879.98	0.00522341		3469.98	-0.01305294
520.2	0.02230482		1110.19	-0.00229889		1700.19	0.00695075		2290.18	-0.00342735		2880.18	0.00483913		3470.18	-0.01239678
520.4	0.02190703		1110.39	-0.00194617		1700.39	0.00708277		2290.38	-0.00305552		2880.38	0.00394522		3470.38	-0.01240251
520.6	0.02174499		1110.59	-0.00147772		1700.59	0.0066852		2290.58	-0.00277535		2880.58	0.00385861		3470.58	-0.01200441
520.8	0.02134606		1110.79	-0.00184208		1700.79	0.00785382		2290.78	-0.00253428		2880.78	0.0042864		3470.78	-0.01257226
521	0.02065566		1110.99	-0.00247495		1700.99	0.00747337		2290.98	-0.00230172		2880.98	0.00426415		3470.98	-0.01320963
521.2	0.01923107		1111.19	-0.00232134		1701.19	0.00677338		2291.18	-0.00141969		2881.18	0.00453733		3471.18	-0.01364803
521.4	0.01880073		1111.39	-0.00143511		1701.39	0.0060288		2291.38	-0.0009199		2881.38	0.00515834		3471.38	-0.01373404
521.6	0.017863		1111.59	-0.00027115		1701.59	0.00538155		2291.58	-0.00049385		2881.58	0.0056443		3471.58	-0.01417616
521.8	0.01763201		1111.79	-0.00029362		1701.79	0.00486438		2291.78	-0.00028073		2881.78	0.00521089		3471.78	-0.01490894
522	0.01803063		1111.99	0.0003918		1701.99	0.00516998		2291.98	-0.00038591		2881.98	0.00456372		3471.98	-0.01426047
522.2	0.01770741		1112.19	0.0014687		1702.19	0.00485158		2292.18	-0.00072201		2882.18	0.00381058		3472.18	-0.01331455
522.4	0.01711233		1112.39	0.00243886		1702.39	0.00445577		2292.38	-0.00215605		2882.38	0.00465604		3472.38	-0.01332826
522.6	0.0163252		1112.59	0.00437803		1702.59	0.0037158		2292.58	-0.00314903		2882.58	0.00416256		3472.58	-0.0142591
522.8	0.01662971		1112.79	0.00480267		1702.79	0.00363741		2292.78	-0.00345428		2882.78	0.00507431		3472.78	-0.01351807
523	0.017774		1112.99	0.00589546		1702.99	0.00306903		2292.98	-0.00394689		2882.98	0.00480248		3472.98	-0.0139484
523.2	0.01755781		1113.19	0.00644301		1703.19	0.00320548		2293.18	-0.00467344		2883.18	0.00568891		3473.18	-0.01480297
523.4	0.01785432		1113.39	0.00639702		1703.39	0.00401697		2293.38	-0.00375269		2883.38	0.00630442		3473.38	-0.01454865
523.6	0.01868051		1113.59	0.00645902		1703.59	0.00487252		2293.58	-0.00419845		2883.58	0.00540424		3473.58	-0.01482228
523.8	0.01870064		1113.79	0.00570084		1703.79	0.0050261		2293.78	-0.00384278		2883.78	0.00470779		3473.78	-0.0153435
524	0.01797147		1113.99	0.00518824		1703.99	0.0050017		2293.98	-0.00390303		2883.98	0.00519458		3473.98	-0.01523834
524.2	0.0178576		1114.19	0.00419088		1704.19	0.00544898		2294.18	-0.0038529		2884.18	0.00534835		3474.18	-0.0148113
524.4	0.01739409		1114.39	0.00348795		1704.39	0.00582125		2294.38	-0.00384295		2884.38	0.00480396		3474.38	-0.01458653
524.6	0.01687342		1114.59	0.00281174		1704.59	0.00604713		2294.58	-0.00375655		2884.58	0.00446474		3474.58	-0.01520759
524.8	0.01710446		1114.79	0.00208691		1704.79	0.00575198		2294.78	-0.00287067		2884.78	0.00534831		3474.78	-0.01558735
525	0.0164616		1114.99	0.00095966		1704.99	0.00561788		2294.98	-0.00283745		2884.98	0.00551768		3474.98	-0.01599405
525.2	0.01646577		1115.19	0.00081731		1705.19	0.00463658		2295.18	-0.00170741		2885.18	0.00551213		3475.18	-0.01582999
525.4	0.01639941		1115.39	0.00119916		1705.39	0.00529141		2295.38	-0.00109063		2885.38	0.00591853		3475.38	-0.0163092
525.6	0.01695881		1115.59	0.00083163		1705.59	0.00538945		2295.58	-0.00167122		2885.58	0.00609632		3475.58	-0.01597405
525.8	0.0172742		1115.79	0.00031333		1705.79	0.00529242		2295.78	-0.0018991		2885.78	0.00623038		3475.78	-0.01612841
526	0.01781071		1115.99	0.0007242		1705.99	0.00558428		2295.98	-0.00112036		2885.98	0.00645484		3475.98	-0.01481199
526.2	0.01669253		1116.19	0.00179249		1706.19	0.0049151		2296.18	-0.00093788		2886.18	0.0071289		3476.18	-0.01463206
526.4	0.01635696		1116.39	0.00252066		1706.39	0.0054841		2296.38	-0.00062668		2886.38	0.00837433		3476.38	-0.01427401
526.6	0.01569583		1116.59	0.00340716		1706.59	0.0055368		2296.58	0.00017609		2886.58	0.00902474		3476.58	-0.01349006
526.8	0.01616538		1116.79	0.00260997		1706.79	0.00556066		2296.78	0.00025767		2886.78	0.00989558		3476.78	-0.01281297
527	0.016058		1116.99	0.00284184		1706.99	0.00465608		2296.98	0.00069561		2886.98	0.00976183		3476.98	-0.01218173
527.2	0.01572113		1117.19	0.00250418		1707.19	0.00477936		2297.18	0.00007086		2887.18	0.00971316		3477.18	-0.01204483
527.4	0.01539979		1117.39	0.0021064		1707.39	0.00461801		2297.38	0.00028016		2887.38	0.00992353		3477.38	-0.01188161
527.6	0.01599267		1117.59	0.00126249		1707.59	0.00458366		2297.58	-0.00105748		2887.58	0.00925865		3477.58	-0.0118522
527.8	0.01575259		1117.79	0.00034144		1707.79	0.00392898		2297.78	-0.00141515		2887.78	0.00937717		3477.78	-0.01196806
528	0.01513695		1117.99	0.00004217		1707.99	0.00323167		2297.98	-0.00177812		2887.98	0.00947582		3477.98	-0.01238898
528.2	0.01543633		1118.19	-0.00032785		1708.19	0.00334736		2298.18	-0.0023643		2888.18	0.00875987		3478.18	-0.01169214
528.4	0.0155468		1118.39	-0.00064873		1708.39	0.00301808		2298.38	-0.00258178		2888.38	0.00806021		3478.38	-0.01234127
528.6	0.01611024		1118.59	0.00007669		1708.59	0.00222278		2298.58	-0.00279601		2888.58	0.00804047		3478.58	-0.01355521
528.8	0.01588618		1118.79	0.00025284		1708.79	0.00180025		2298.78	-0.00307569		2888.78	0.00779293		3478.78	-0.01400319
529	0.01493687		1118.99	0.00031726		1708.99	0.00140895		2298.98	-0.00345092		2888.98	0.00677895		3478.98	-0.01533264
529.2	0.01605965		1119.19	0.00080278		1709.19	0.00039255		2299.18	-0.0030855		2889.18	0.00608865		3479.18	-0.01603519
529.4	0.01669101		1119.39	0.00127714		1709.39	0.00041025		2299.38	-0.00298833		2889.38	0.00615428		3479.38	-0.01618427
529.6	0.01733954		1119.59	0.0010053		1709.59	0.00075942		2299.58	-0.00365308		2889.58	0.00534322		3479.58	-0.01580918
529.8	0.01751556		1119.79	0.00207802		1709.79	0.0011874		2299.78	-0.00321341		2889.78	0.00547249		3479.78	-0.01617926
530	0.01785426		1119.99	0.00279576		1709.99	0.0022005		2299.98	-0.00301375		2889.98	0.00523171		3479.98	-0.0156632
530.2	0.01738775		1120.19	0.00368602		1710.19	0.00273068		2300.18	-0.00285147		2890.18	0.00547116		3480.18	-0.01539466
530.4	0.01744577		1120.39	0.00348321		1710.39	0.00362324		2300.38	-0.00178577		2890.38	0.00488942		3480.38	-0.01416814
530.6	0.01699883		1120.59	0.00348816		1710.59	0.0034708		2300.58	-0.00208591		2890.58	0.00560959		3480.58	-0.01434106
530.8	0.01773359		1120.79	0.00278097		1710.79	0.00336145		2300.78	-0.00290961		2890.78	0.00606609		3480.78	-0.01462356
531	0.01789893		1120.99	0.00298227		1710.99	0.00287839		2300.98	-0.00275206		2890.98	0.0058265		3480.98	-0.01463869
531.2	0.01904476		1121.19	0.00261748		1711.19	0.00295373		2301.18	-0.00331063		2891.18	0.0059354		3481.18	-0.01507354
531.4	0.0180398		1121.39	0.00275446		1711.39	0.00303874		2301.38	-0.00294408		2891.38	0.00678916		3481.38	-0.01508876
531.6	0.01836685		1121.59	0.0024821		1711.59	0.00320953		2301.58	-0.00256715		2891.58	0.00677458		3481.58	-0.01441759
531.8	0.0184221		1121.79	0.0028283		1711.79	0.00217809		2301.78	-0.00255054		2891.78	0.00721405		3481.78	-0.01479854
532	0.01759735		1121.99	0.00328325		1711.99	0.00263171		2301.98	-0.00294917		2891.98	0.00717747		3481.98	-0.01416238
532.2	0.01749484		1122.19	0.00376113		1712.19	0.00292894		2302.18	-0.00267174		2892.18	0.0084082		3482.18	-0.01446157
532.4	0.01685342		1122.39	0.00366348		1712.39	0.00278452		2302.38	-0.0025928		2892.38	0.00847826		3482.38	-0.01580322
532.6	0.01713759		1122.59	0.00387134		1712.59	0.00270746		2302.58	-0.00304827		2892.58	0.00909323		3482.58	-0.01642713
532.8	0.01656678		1122.79	0.00369547		1712.79	0.00279391		2302.78	-0.0027302		2892.78	0.00845729		3482.78	-0.01632802
533	0.01713105		1122.99	0.00334333		1712.99	0.00144889		2302.98	-0.0023905		2892.98	0.00732507		3482.98	-0.01750043
533.2	0.01825488		1123.19	0.00242981		1713.19	0.00130742		2303.18	-0.00191197		2893.18	0.00705098		3483.18	-0.01722965
533.4	0.01795962		1123.39	0.00131636		1713.39	0.00166284		2303.38	-0.00119104		2893.38	0.00651445		3483.38	-0.01671424
533.6	0.01778354		1123.59	0.00125841		1713.59	0.00196846		2303.58	-0.00141319		2893.58	0.00627427		3483.58	-0.01671258
533.8	0.01775967		1123.79	0.00086732		1713.79	0.00144208		2303.78	-0.0021732		2893.78	0.0060636		3483.78	-0.01696641
534	0.01792449		1123.99	0.00019391		1713.99	0.00142942		2303.98	-0.00201496		2893.98	0.00549647		3483.98	-0.01745442
534.2	0.01758536		1124.19	-0.00074618		1714.19	0.00070379		2304.18	-0.00222928		2894.18	0.0043433		3484.18	-0.01710192
534.4	0.01694401		1124.39	-0.00137937		1714.39	0.00098264		2304.38	-0.00240072		2894.38	0.00411854		3484.38	-0.01724858
534.6	0.01677203		1124.59	-0.00148628		1714.59	0.00143311		2304.58	-0.00406878		2894.58	0.00432146		3484.58	-0.01723268
534.8	0.01679525		1124.79	-0.00174298		1714.79	0.00083417		2304.78	-0.00466851		2894.78	0.00429895		3484.78	-0.01690771
535	0.0166141		1124.99	-0.00100202		1714.99	0.00051802		2304.98	-0.00392472		2894.98	0.00378295		3484.98	-0.01658811
535.2	0.01633683		1125.19	-0.0009452		1715.19	0.00140723		2305.18	-0.00388971		2895.18	0.00394788		3485.18	-0.0157142
535.4	0.01526503		1125.39	-0.00053757		1715.39	0.00124923		2305.38	-0.00346527		2895.38	0.00442092		3485.38	-0.01550917
535.6	0.01565201		1125.59	0.0002988		1715.59	0.00084681		2305.58	-0.00411948		2895.58	0.0050045		3485.58	-0.01481226
535.8	0.01579414		1125.79	0.00068351		1715.79	0.00098457		2305.78	-0.00433622		2895.78	0.0055717		3485.78	-0.01372858
536	0.01510354		1125.99	0.00164166		1715.99	0.00106242		2305.98	-0.00363324		2895.98	0.00591737		3485.98	-0.01338288
536.2	0.01531306		1126.19	0.0018488		1716.19	0.00146205		2306.18	-0.00308463		2896.18	0.00668226		3486.18	-0.01344206
536.4	0.0154707		1126.39	0.00188372		1716.39	0.00214039		2306.38	-0.0030946		2896.38	0.00702626		3486.38	-0.01291816
536.6	0.01625751		1126.59	0.00219643		1716.59	0.00204132		2306.58	-0.00377587		2896.58	0.00666698		3486.58	-0.01181435
536.8	0.01708469		1126.79	0.00181093		1716.79	0.00143088		2306.78	-0.00337566		2896.78	0.00584499		3486.78	-0.01148261
537	0.01664204		1126.99	0.00209097		1716.99	0.0011475		2306.98	-0.00334489		2896.98	0.00566644		3486.98	-0.01176444
537.2	0.01682727		1127.19	0.00201825		1717.19	0.00126547		2307.18	-0.00229943		2897.18	0.00626764		3487.18	-0.01065216
537.4	0.01682397		1127.39	0.00186902		1717.39	0.00102519		2307.38	-0.00211332		2897.38	0.00681628		3487.38	-0.01038922
537.6	0.01720559		1127.59	0.00154303		1717.59	0.00032191		2307.58	-0.00214705		2897.58	0.0058783		3487.58	-0.00999779
537.8	0.01741838		1127.79	0.00050572		1717.79	-0.0003766		2307.78	-0.00311595		2897.78	0.00471538		3487.78	-0.01101512
538	0.01742138		1127.99	-0.00045248		1717.99	-0.00078382		2307.98	-0.00265876		2897.98	0.00524026		3487.98	-0.01228897
538.2	0.01734351		1128.19	-0.00148064		1718.19	-0.00140386		2308.18	-0.00386338		2898.18	0.00465199		3488.18	-0.01254325
538.4	0.01704914		1128.39	-0.00125564		1718.39	-0.00112702		2308.38	-0.00363686		2898.38	0.00580295		3488.38	-0.01323973
538.6	0.01672294		1128.59	-0.00035515		1718.59	-0.00041435		2308.58	-0.00333988		2898.58	0.00587978		3488.58	-0.01318699
538.8	0.01655632		1128.79	-0.00108849		1718.79	-0.00128267		2308.78	-0.00260446		2898.78	0.00588361		3488.78	-0.01459249
539	0.01592922		1128.99	-0.00192637		1718.99	-0.00090104		2308.98	-0.0020243		2898.98	0.00586058		3488.98	-0.01477073
539.2	0.01534411		1129.19	-0.00281345		1719.19	-0.00039283		2309.18	-0.00183389		2899.18	0.0061748		3489.18	-0.01638207
539.4	0.01601091		1129.39	-0.00262915		1719.39	-0.00077677		2309.38	-0.00119588		2899.38	0.00695819		3489.38	-0.01714414
539.6	0.01642452		1129.59	-0.00235089		1719.59	-0.00089359		2309.58	-0.00134062		2899.58	0.00694202		3489.58	-0.01670922
539.8	0.01652051		1129.79	-0.00248939		1719.79	-0.00014242		2309.78	-0.00069563		2899.78	0.00768496		3489.78	-0.01698962
540	0.01681431		1129.99	-0.00244793		1719.99	-0.00031191		2309.98	-0.00084031		2899.98	0.00787574		3489.98	-0.01760018
540.2	0.01749673		1130.19	-0.00294239		1720.19	0.00125209		2310.18	-0.00170134		2900.18	0.00827426		3490.18	-0.01780617
540.4	0.01827762		1130.39	-0.00308223		1720.39	0.00114506		2310.38	-0.00208701		2900.38	0.0084404		3490.38	-0.01735889
540.6	0.01808206		1130.59	-0.00256414		1720.59	0.00095335		2310.58	-0.00258411		2900.58	0.00760699		3490.58	-0.01703886
540.8	0.01888746		1130.79	-0.00247113		1720.79	0.00126645		2310.78	-0.00239779		2900.78	0.00727895		3490.78	-0.017217
541	0.01802288		1130.99	-0.00193402		1720.99	0.00208461		2310.98	-0.00263844		2900.98	0.00657002		3490.98	-0.01597411
541.2	0.01801619		1131.19	-0.0023305		1721.19	0.00293769		2311.18	-0.00311832		2901.18	0.00624798		3491.18	-0.01519976
541.4	0.01802638		1131.39	-0.00160202		1721.39	0.0031808		2311.38	-0.0045047		2901.38	0.00544197		3491.38	-0.01454549
541.6	0.01829242		1131.59	-0.00269563		1721.59	0.00287707		2311.58	-0.00521762		2901.58	0.00395508		3491.58	-0.0143793
541.8	0.01807267		1131.79	-0.00282386		1721.79	0.00221763		2311.78	-0.00617849		2901.78	0.00441964		3491.78	-0.01460831
542	0.01772132		1131.99	-0.00328037		1721.99	0.00203317		2311.98	-0.00574384		2901.98	0.00458202		3491.98	-0.01482204
542.2	0.01765207		1132.19	-0.00366326		1722.19	0.00210527		2312.18	-0.00664263		2902.18	0.00399485		3492.18	-0.01482915
542.4	0.01674752		1132.39	-0.00326312		1722.39	0.00186762		2312.38	-0.0061203		2902.38	0.0037906		3492.38	-0.01432412
542.6	0.01631766		1132.59	-0.00300385		1722.59	0.00230341		2312.58	-0.00610528		2902.58	0.00362377		3492.58	-0.01411459
542.8	0.01624351		1132.79	-0.00445986		1722.79	0.00161332		2312.78	-0.00661043		2902.78	0.00246715		3492.78	-0.01440298
543	0.01604122		1132.99	-0.00496977		1722.99	0.00210396		2312.98	-0.00578815		2902.98	0.00323371		3492.98	-0.01451957
543.2	0.01674423		1133.19	-0.00490886		1723.19	0.00258543		2313.18	-0.00579035		2903.18	0.00292743		3493.18	-0.01547396
543.4	0.01747961		1133.39	-0.00462276		1723.39	0.00231772		2313.38	-0.00553542		2903.38	0.00265609		3493.38	-0.01490047
543.6	0.0171024		1133.59	-0.004208		1723.59	0.00172452		2313.58	-0.00496584		2903.58	0.00243192		3493.58	-0.01494704
543.8	0.01750685		1133.79	-0.00389573		1723.79	0.00234826		2313.78	-0.00477211		2903.78	0.00265069		3493.78	-0.01576274
544	0.0177417		1133.99	-0.00389168		1723.99	0.00238254		2313.98	-0.00475217		2903.98	0.00296482		3493.98	-0.01539306
544.2	0.01776183		1134.19	-0.00377011		1724.19	0.00224195		2314.18	-0.00399634		2904.18	0.00319064		3494.18	-0.01528522
544.4	0.01818201		1134.39	-0.00401683		1724.39	0.00197862		2314.38	-0.00368486		2904.38	0.00365602		3494.38	-0.01463545
544.6	0.01776003		1134.59	-0.00335776		1724.59	0.00218125		2314.58	-0.00396997		2904.58	0.00368218		3494.58	-0.01441455
544.8	0.01776752		1134.79	-0.00319553		1724.79	0.00241662		2314.78	-0.00502574		2904.78	0.00356096		3494.78	-0.01414843
545	0.01658429		1134.99	-0.00259491		1724.99	0.00200186		2314.98	-0.00534073		2904.98	0.00301628		3494.98	-0.01321179
545.2	0.0158929		1135.19	-0.00141181		1725.19	0.00190826		2315.18	-0.00535644		2905.18	0.00388881		3495.18	-0.01284401
545.4	0.01618472		1135.39	-0.0001772		1725.39	0.00107145		2315.38	-0.00548271		2905.38	0.00334934		3495.38	-0.0126444
545.6	0.01612286		1135.59	-0.00122538		1725.59	0.00077548		2315.58	-0.00596148		2905.58	0.00331955		3495.58	-0.01301773
545.8	0.01556602		1135.79	-0.00048956		1725.79	-0.00050451		2315.78	-0.0047152		2905.78	0.0028721		3495.78	-0.01309177
546	0.01539263		1135.99	-0.00028934		1725.99	-0.00021769		2315.98	-0.00452628		2905.98	0.00310545		3495.98	-0.01380802
546.2	0.01488069		1136.19	0.0007349		1726.19	-0.00071212		2316.18	-0.00481369		2906.18	0.00296638		3496.18	-0.01385927
546.4	0.0148598		1136.39	0.00093162		1726.39	-0.00087361		2316.38	-0.00473981		2906.38	0.00334649		3496.38	-0.01332711
546.6	0.01568647		1136.59	0.0012613		1726.59	-0.00082976		2316.58	-0.0058011		2906.58	0.00347191		3496.58	-0.01425112
546.8	0.01644629		1136.79	0.00085661		1726.79	-0.00161445		2316.78	-0.0060702		2906.78	0.00310715		3496.78	-0.0148336
547	0.017202		1136.99	0.00070507		1726.99	-0.00129614		2316.98	-0.00584686		2906.98	0.00373551		3496.98	-0.01461864
547.2	0.01773972		1137.19	0.00060142		1727.19	-0.00012594		2317.18	-0.006467		2907.18	0.00271098		3497.18	-0.0148688
547.4	0.01764916		1137.39	0.00060442		1727.39	0.00002444		2317.38	-0.00639186		2907.38	0.00239528		3497.38	-0.01477261
547.6	0.01701186		1137.59	0.00057812		1727.59	0.00079054		2317.58	-0.00635979		2907.58	0.00254086		3497.58	-0.01502957
547.8	0.01741273		1137.79	0.00030725		1727.79	0.00188699		2317.78	-0.00591934		2907.78	0.00244035		3497.78	-0.01489266
548	0.01732251		1137.99	-0.00168185		1727.99	0.00294078		2317.98	-0.00601794		2907.98	0.00342142		3497.98	-0.01423289
548.2	0.01761996		1138.19	-0.00288975		1728.19	0.00316912		2318.18	-0.00584866		2908.18	0.00438532		3498.18	-0.01363244
548.4	0.01765606		1138.39	-0.00390155		1728.39	0.00372615		2318.38	-0.00655768		2908.38	0.00529457		3498.38	-0.0137047
548.6	0.01707138		1138.59	-0.00394662		1728.59	0.00379554		2318.58	-0.00723619		2908.58	0.00517231		3498.58	-0.01360128
548.8	0.01639832		1138.79	-0.004324		1728.79	0.00309891		2318.78	-0.00705661		2908.78	0.00589534		3498.78	-0.0129784
549	0.01679073		1138.99	-0.00415532		1728.99	0.00281563		2318.98	-0.00590664		2908.98	0.00485279		3498.98	-0.01253931
549.2	0.01623137		1139.19	-0.00415973		1729.19	0.00242888		2319.18	-0.00614578		2909.18	0.00530269		3499.18	-0.01244604
549.4	0.01601556		1139.39	-0.00359523		1729.39	0.00262591		2319.38	-0.00598096		2909.38	0.00432332		3499.38	-0.01298371
549.6	0.01560616		1139.59	-0.00450813		1729.59	0.00246766		2319.58	-0.00564733		2909.58	0.00461682		3499.58	-0.01371522
549.8	0.01562448		1139.79	-0.00319779		1729.79	0.00196513		2319.78	-0.00402222		2909.78	0.00427095		3499.78	-0.01401429
550	0.01573945		1139.99	-0.00200588		1729.99	0.00291285		2319.98	-0.00420478		2909.98	0.00566534		3499.98	-0.01398302
550.2	0.01637422		1140.19	-0.00092179		1730.19	0.00184645		2320.18	-0.0038488		2910.18	0.00533913		3500.18	-0.01365743
550.4	0.01650894		1140.39	-0.00060165		1730.39	0.00146982		2320.38	-0.00450758		2910.38	0.0050506		3500.38	-0.0140718
550.6	0.01768896		1140.59	0.00012284		1730.59	0.00085419		2320.58	-0.00532935		2910.58	0.00436708		3500.58	-0.01517062
550.8	0.01783614		1140.79	0.00001498		1730.79	-0.00006928		2320.78	-0.00520108		2910.78	0.00420331		3500.78	-0.01539735
551	0.0181447		1140.99	-0.0002933		1730.99	0.00025773		2320.98	-0.00518842		2910.98	0.0031515		3500.98	-0.01565555
551.2	0.01851422		1141.19	-0.00087116		1731.19	0.00082325		2321.18	-0.00505037		2911.18	0.00307657		3501.18	-0.01636056
551.4	0.01758962		1141.39	-0.0014549		1731.39	0.00031303		2321.38	-0.00490617		2911.38	0.0030087		3501.38	-0.01594304
551.6	0.01687996		1141.59	-0.0016261		1731.59	0.00021583		2321.58	-0.00532649		2911.58	0.00322083		3501.58	-0.01577052
551.8	0.01737438		1141.79	-0.00289103		1731.79	0.00039188		2321.78	-0.00494865		2911.78	0.00303404		3501.78	-0.01567699
552	0.01723031		1141.99	-0.0039223		1731.99	0.00041878		2321.98	-0.00490812		2911.98	0.00328359		3501.98	-0.01478618
552.2	0.01708428		1142.19	-0.00403291		1732.19	-0.00030688		2322.18	-0.00506097		2912.18	0.00456117		3502.18	-0.01474912
552.4	0.01654395		1142.39	-0.00375355		1732.39	-0.00021506		2322.38	-0.00512268		2912.38	0.00438352		3502.38	-0.0150485
552.6	0.01598059		1142.59	-0.0036512		1732.59	-0.00065923		2322.58	-0.00527983		2912.58	0.00451464		3502.58	-0.01468698
552.8	0.01602501		1142.79	-0.00415699		1732.79	-0.00149833		2322.78	-0.00550718		2912.78	0.00501234		3502.78	-0.01465697
553	0.01615987		1142.99	-0.00414425		1732.99	-0.00206187		2322.98	-0.0055633		2912.98	0.00367237		3502.98	-0.01485845
553.2	0.0157802		1143.19	-0.0047544		1733.19	-0.00196291		2323.18	-0.00586637		2913.18	0.00397761		3503.18	-0.01483158
553.4	0.01493837		1143.39	-0.00487105		1733.39	-0.00091964		2323.38	-0.00563378		2913.38	0.00399955		3503.38	-0.01471133
553.6	0.01450058		1143.59	-0.00456192		1733.59	-0.00061922		2323.58	-0.00610633		2913.58	0.00405922		3503.58	-0.01476211
553.8	0.0145679		1143.79	-0.00304079		1733.79	-0.00000434		2323.78	-0.00595763		2913.78	0.00424773		3503.78	-0.01407449
554	0.01558093		1143.99	-0.00285819		1733.99	0.00020635		2323.98	-0.00551567		2913.98	0.00445841		3503.98	-0.01447033
554.2	0.01601897		1144.19	-0.00268408		1734.19	-0.00008346		2324.18	-0.0047499		2914.18	0.00382092		3504.18	-0.01434895
554.4	0.01617464		1144.39	-0.00232433		1734.39	0.0005042		2324.38	-0.00527746		2914.38	0.00353731		3504.38	-0.0157883
554.6	0.01702526		1144.59	-0.00288902		1734.59	0.00088867		2324.58	-0.00491047		2914.58	0.00359443		3504.58	-0.0165563
554.8	0.01663846		1144.79	-0.00305322		1734.79	0.00081699		2324.78	-0.00436226		2914.78	0.00335921		3504.78	-0.01711079
555	0.01688155		1144.99	-0.00345665		1734.99	0.00154384		2324.98	-0.00372012		2914.98	0.0033397		3504.98	-0.01743398
555.2	0.01630316		1145.19	-0.00347472		1735.19	0.00140124		2325.18	-0.0029885		2915.18	0.00388799		3505.18	-0.01774184
555.4	0.01557882		1145.39	-0.00373324		1735.39	0.00186797		2325.38	-0.00366129		2915.38	0.00425769		3505.38	-0.01809489
555.6	0.0157747		1145.59	-0.00393761		1735.59	0.00201838		2325.58	-0.00403708		2915.58	0.00386197		3505.58	-0.01799219
555.8	0.01672434		1145.79	-0.00503737		1735.79	0.00247414		2325.78	-0.00350373		2915.78	0.00354713		3505.78	-0.01875083
556	0.01602667		1145.99	-0.00412661		1735.99	0.0024823		2325.98	-0.00402832		2915.98	0.00401849		3505.98	-0.01878397
556.2	0.01564249		1146.19	-0.00467425		1736.19	0.00242028		2326.18	-0.00447123		2916.18	0.00387273		3506.18	-0.01975414
556.4	0.01482811		1146.39	-0.00461742		1736.39	0.00334998		2326.38	-0.00455044		2916.38	0.00369323		3506.38	-0.01977568
556.6	0.01508393		1146.59	-0.00459978		1736.59	0.00265925		2326.58	-0.00569373		2916.58	0.00363507		3506.58	-0.01984831
556.8	0.01538198		1146.79	-0.00510748		1736.79	0.00295127		2326.78	-0.00675164		2916.78	0.00332102		3506.78	-0.02019908
557	0.01556222		1146.99	-0.0047598		1736.99	0.0030853		2326.98	-0.00702261		2916.98	0.00276023		3506.98	-0.01884701
557.2	0.01529454		1147.19	-0.00500182		1737.19	0.00402101		2327.18	-0.00740482		2917.18	0.00281852		3507.18	-0.01824849
557.4	0.01430734		1147.39	-0.00476434		1737.39	0.00381996		2327.38	-0.00756099		2917.38	0.00307996		3507.38	-0.0168211
557.6	0.01434641		1147.59	-0.00423776		1737.59	0.00352127		2327.58	-0.00711472		2917.58	0.00173699		3507.58	-0.01638375
557.8	0.01459106		1147.79	-0.00463333		1737.79	0.00356177		2327.78	-0.00752037		2917.78	0.00128016		3507.78	-0.01604099
558	0.01535653		1147.99	-0.00581051		1737.99	0.00328105		2327.98	-0.00719527		2917.98	0.00022315		3507.98	-0.01621994
558.2	0.01514785		1148.19	-0.00601239		1738.19	0.00362968		2328.18	-0.00788502		2918.18	-0.00011116		3508.18	-0.01580878
558.4	0.01434072		1148.39	-0.00552638		1738.39	0.00278225		2328.38	-0.008959		2918.38	-0.00022939		3508.38	-0.01582009
558.6	0.01303614		1148.59	-0.00571925		1738.59	0.00203166		2328.58	-0.00855417		2918.58	-0.00008949		3508.58	-0.01499575
558.8	0.01140551		1148.79	-0.00572151		1738.79	0.0019488		2328.78	-0.00871161		2918.78	0.00029014		3508.78	-0.0148668
559	0.01068302		1148.99	-0.00599019		1738.99	0.00122762		2328.98	-0.00805702		2918.98	0.00082855		3508.98	-0.01533682
559.2	0.01020721		1149.19	-0.00681748		1739.19	0.00039642		2329.18	-0.0070675		2919.18	0.0010126		3509.18	-0.01603353
559.4	0.01047593		1149.39	-0.00808753		1739.39	0.00053938		2329.38	-0.00773364		2919.38	0.00179499		3509.38	-0.01643079
559.6	0.01073155		1149.59	-0.00892188		1739.59	0.0005831		2329.58	-0.00718537		2919.58	0.00212727		3509.58	-0.01664945
559.8	0.01119076		1149.79	-0.0095778		1739.79	0.00053932		2329.78	-0.00704288		2919.78	0.00287372		3509.78	-0.0172304
560	0.01055974		1149.99	-0.00887055		1739.99	0.00093572		2329.98	-0.00702645		2919.98	0.00333586		3509.98	-0.01847518
560.2	0.0106438		1150.19	-0.00897154		1740.19	0.00164418		2330.18	-0.00728718		2920.18	0.00345572		3510.18	-0.01898165
560.4	0.0115425		1150.39	-0.00821122		1740.39	0.00211902		2330.38	-0.0074048		2920.38	0.00448495		3510.38	-0.01879508
560.6	0.01265386		1150.59	-0.00628789		1740.59	0.00170051		2330.58	-0.00858411		2920.58	0.00520043		3510.58	-0.01902159
560.8	0.01348262		1150.79	-0.00610758		1740.79	0.00212638		2330.78	-0.00914308		2920.78	0.00574806		3510.78	-0.01868824
561	0.01371191		1150.99	-0.00544721		1740.99	0.00149464		2330.98	-0.00903617		2920.98	0.00623206		3510.98	-0.01747231
561.2	0.01417679		1151.19	-0.0053681		1741.19	0.00102582		2331.18	-0.00866012		2921.18	0.0060733		3511.18	-0.01695923
561.4	0.01421294		1151.39	-0.00443474		1741.39	0.00030178		2331.38	-0.00802267		2921.38	0.00630123		3511.38	-0.01643722
561.6	0.01446245		1151.59	-0.00372932		1741.59	0.00051001		2331.58	-0.00717021		2921.58	0.00475462		3511.58	-0.01672606
561.8	0.01426256		1151.79	-0.00333209		1741.79	0.00114589		2331.78	-0.00841733		2921.78	0.00480121		3511.78	-0.01717001
562	0.01425922		1151.99	-0.00360977		1741.99	0.00110074		2331.98	-0.00826246		2921.98	0.00371207		3511.98	-0.01704642
562.2	0.01439623		1152.19	-0.00249473		1742.19	0.00074374		2332.18	-0.00913043		2922.18	0.00327809		3512.18	-0.0164336
562.4	0.01305968		1152.39	-0.00210842		1742.39	-0.00081993		2332.38	-0.00942997		2922.38	0.00310793		3512.38	-0.01636253
562.6	0.01243045		1152.59	-0.00223892		1742.59	-0.00101916		2332.58	-0.00936918		2922.58	0.00299115		3512.58	-0.01717674
562.8	0.01177876		1152.79	-0.00230285		1742.79	-0.00059761		2332.78	-0.00869172		2922.78	0.00246883		3512.78	-0.01799248
563	0.01317997		1152.99	-0.0028902		1742.99	-0.00077876		2332.98	-0.00785034		2922.98	0.00200266		3512.98	-0.01878091
563.2	0.0128716		1153.19	-0.00388629		1743.19	0.00019906		2333.18	-0.00775805		2923.18	0.00167917		3513.18	-0.01870571
563.4	0.01287435		1153.39	-0.00457641		1743.39	0.00052553		2333.38	-0.00792999		2923.38	0.00166035		3513.38	-0.01870242
563.6	0.01282057		1153.59	-0.00472776		1743.59	0.00084055		2333.58	-0.00773073		2923.58	0.00112051		3513.58	-0.01940921
563.8	0.01297435		1153.79	-0.00460567		1743.79	0.0005822		2333.78	-0.00796609		2923.78	0.00076483		3513.78	-0.01979318
564	0.01324718		1153.99	-0.00503806		1743.99	0.00084755		2333.98	-0.00801951		2923.98	0.00124629		3513.98	-0.02049423
564.2	0.01345124		1154.19	-0.00558056		1744.19	0.00111623		2334.18	-0.00880927		2924.18	0.00092748		3514.18	-0.01967134
564.4	0.01434907		1154.39	-0.005906		1744.39	0.00115515		2334.38	-0.00873538		2924.38	0.00179739		3514.38	-0.01880029
564.6	0.01488039		1154.59	-0.00628953		1744.59	0.00104806		2334.58	-0.0095297		2924.58	0.00218961		3514.58	-0.01877723
564.8	0.01511691		1154.79	-0.0073033		1744.79	0.00101989		2334.78	-0.0103623		2924.78	0.00266622		3514.78	-0.01812309
565	0.01489224		1154.99	-0.00731507		1744.99	0.00030977		2334.98	-0.00917491		2924.98	0.0026414		3514.98	-0.01795203
565.2	0.01510012		1155.19	-0.00697715		1745.19	-0.00014944		2335.18	-0.00736584		2925.18	0.00367349		3515.18	-0.0176183
565.4	0.01383532		1155.39	-0.00629169		1745.39	-0.00054599		2335.38	-0.00664852		2925.38	0.0046015		3515.38	-0.01799295
565.6	0.01332641		1155.59	-0.00623415		1745.59	-0.00074304		2335.58	-0.00611633		2925.58	0.0047157		3515.58	-0.01842905
565.8	0.01257306		1155.79	-0.00563445		1745.79	-0.00203636		2335.78	-0.00689925		2925.78	0.00493664		3515.78	-0.01807963
566	0.01197529		1155.99	-0.00536891		1745.99	-0.00228807		2335.98	-0.00772069		2925.98	0.00469443		3515.98	-0.01794461
566.2	0.01187194		1156.19	-0.00437634		1746.19	-0.0029832		2336.18	-0.00790742		2926.18	0.00492447		3516.18	-0.01841455
566.4	0.01115052		1156.39	-0.00431199		1746.39	-0.00347727		2336.38	-0.00807666		2926.38	0.00487556		3516.38	-0.01923069
566.6	0.01133604		1156.59	-0.00363456		1746.59	-0.00274886		2336.58	-0.00760569		2926.58	0.00453605		3516.58	-0.01959774
566.8	0.01114119		1156.79	-0.00403482		1746.79	-0.00139494		2336.78	-0.00762443		2926.78	0.00451272		3516.78	-0.01919656
567	0.01209196		1156.99	-0.00319872		1746.99	-0.00118244		2336.98	-0.00788507		2926.98	0.00460828		3516.98	-0.01891608
567.2	0.01027801		1157.19	-0.00312167		1747.19	-0.00064045		2337.18	-0.007977		2927.18	0.00483367		3517.18	-0.01844642
567.4	0.01051104		1157.39	-0.00223081		1747.39	-0.00048458		2337.38	-0.00714442		2927.38	0.00538152		3517.38	-0.01884609
567.6	0.01069928		1157.59	-0.00202934		1747.59	-0.00049573		2337.58	-0.00761262		2927.58	0.00499836		3517.58	-0.01986999
567.8	0.01132093		1157.79	-0.00217064		1747.79	-0.00035584		2337.78	-0.00749067		2927.78	0.00542744		3517.78	-0.01948648
568	0.01200007		1157.99	-0.00294236		1747.99	0.000348		2337.98	-0.00774826		2927.98	0.00524541		3517.98	-0.01907043
568.2	0.01247578		1158.19	-0.00406131		1748.19	0.00127707		2338.18	-0.00792394		2928.18	0.00502783		3518.18	-0.01883361
568.4	0.01352608		1158.39	-0.00448852		1748.39	0.00107322		2338.38	-0.007453		2928.38	0.00477004		3518.38	-0.01818018
568.6	0.01462131		1158.59	-0.00474488		1748.59	0.00062957		2338.58	-0.00734046		2928.58	0.00450549		3518.58	-0.01875564
568.8	0.01510377		1158.79	-0.00491942		1748.79	-0.00009332		2338.78	-0.00672508		2928.78	0.00447489		3518.78	-0.01924734
569	0.01464499		1158.99	-0.00569986		1748.99	-0.00110295		2338.98	-0.00534047		2928.98	0.00399263		3518.98	-0.02035529
569.2	0.01491398		1159.19	-0.00630937		1749.19	-0.00188703		2339.18	-0.00573104		2929.18	0.0044645		3519.18	-0.01978587
569.4	0.01451891		1159.39	-0.00603588		1749.39	-0.00253312		2339.38	-0.00643998		2929.38	0.00423206		3519.38	-0.01944452
569.6	0.01415319		1159.59	-0.00676088		1749.59	-0.00330608		2339.58	-0.00612127		2929.58	0.00362056		3519.58	-0.01945998
569.8	0.0141688		1159.79	-0.00708749		1749.79	-0.0034414		2339.78	-0.00651054		2929.78	0.00280004		3519.78	-0.01918842
570	0.01401802		1159.99	-0.00718564		1749.99	-0.00274525		2339.98	-0.00670713		2929.98	0.00286564		3519.98	-0.0197685
570.2	0.01406915		1160.19	-0.00733226		1750.19	-0.00222994		2340.18	-0.00651356		2930.18	0.00283202		3520.18	-0.02005894
570.4	0.01397388		1160.39	-0.00724625		1750.39	-0.00182143		2340.38	-0.00675893		2930.38	0.0021794		3520.38	-0.01995915
570.6	0.01401176		1160.59	-0.00723059		1750.59	-0.00105725		2340.58	-0.006825		2930.58	0.00244396		3520.58	-0.01982525
570.8	0.01371014		1160.79	-0.00729545		1750.79	-0.00139904		2340.78	-0.00684238		2930.78	0.002809		3520.78	-0.0200028
571	0.01375884		1160.99	-0.0060037		1750.99	-0.0017707		2340.98	-0.00621467		2930.98	0.00230619		3520.98	-0.02024301
571.2	0.01242463		1161.19	-0.00604307		1751.19	-0.00164663		2341.18	-0.00597001		2931.18	0.00280941		3521.18	-0.02026767
571.4	0.01251774		1161.39	-0.00502597		1751.39	-0.00135141		2341.38	-0.00601006		2931.38	0.00286928		3521.38	-0.0207696
571.6	0.01297002		1161.59	-0.00493688		1751.59	-0.00130903		2341.58	-0.00593336		2931.58	0.00280369		3521.58	-0.02115991
571.8	0.01233535		1161.79	-0.00520094		1751.79	-0.00078054		2341.78	-0.00674775		2931.78	0.00196122		3521.78	-0.020353
572	0.01156453		1161.99	-0.00480106		1751.99	-0.00085886		2341.98	-0.00683047		2931.98	0.00230505		3521.98	-0.02025263
572.2	0.01086089		1162.19	-0.004842		1752.19	-0.00098407		2342.18	-0.00655455		2932.18	0.00236271		3522.18	-0.02021977
572.4	0.01111894		1162.39	-0.00462257		1752.39	-0.00141979		2342.38	-0.00628486		2932.38	0.00197638		3522.38	-0.01997893
572.6	0.01075168		1162.59	-0.00463513		1752.59	-0.00076359		2342.58	-0.00622503		2932.58	0.00222517		3522.58	-0.02075325
572.8	0.01086494		1162.79	-0.00561772		1752.79	-0.00129626		2342.78	-0.00653356		2932.78	0.00172903		3522.78	-0.02074489
573	0.01054395		1162.99	-0.00661391		1752.99	-0.00059313		2342.98	-0.00772136		2932.98	0.00189461		3522.98	-0.01969979
573.2	0.01084635		1163.19	-0.00644004		1753.19	-0.00007928		2343.18	-0.00850307		2933.18	0.00236119		3523.18	-0.01873232
573.4	0.01096679		1163.39	-0.00604146		1753.39	0.00033797		2343.38	-0.00799741		2933.38	0.00236264		3523.38	-0.01841676
573.6	0.01102901		1163.59	-0.00679111		1753.59	0.00118552		2343.58	-0.00739387		2933.58	0.00214078		3523.58	-0.01853085
573.8	0.01142213		1163.79	-0.00661027		1753.79	0.00146808		2343.78	-0.0074966		2933.78	0.00232959		3523.78	-0.01851786
574	0.01171044		1163.99	-0.00638862		1753.99	0.00227944		2343.98	-0.00815418		2933.98	0.00276872		3523.98	-0.01867088
574.2	0.01130015		1164.19	-0.00658906		1754.19	0.00276124		2344.18	-0.00906193		2934.18	0.00273909		3524.18	-0.01942247
574.4	0.01250073		1164.39	-0.00627693		1754.39	0.00205606		2344.38	-0.00920474		2934.38	0.00209709		3524.38	-0.01930371
574.6	0.01375983		1164.59	-0.00652533		1754.59	0.00125651		2344.58	-0.00887939		2934.58	0.00178909		3524.58	-0.019057
574.8	0.01399825		1164.79	-0.0065005		1754.79	0.00036673		2344.78	-0.00881388		2934.78	0.00189129		3524.78	-0.01945059
575	0.01389836		1164.99	-0.00555606		1754.99	0.00006765		2344.98	-0.00810063		2934.98	0.00172123		3524.98	-0.01957603
575.2	0.01413847		1165.19	-0.00529443		1755.19	-0.00058232		2345.18	-0.00799926		2935.18	0.00141782		3525.18	-0.01976456
575.4	0.01473289		1165.39	-0.00497644		1755.39	-0.00011317		2345.38	-0.00846194		2935.38	0.0007158		3525.38	-0.02029354
575.6	0.01494465		1165.59	-0.00439397		1755.59	-0.00008005		2345.58	-0.00815172		2935.58	0.000594		3525.58	-0.02033827
575.8	0.01456185		1165.79	-0.00468962		1755.79	-0.00052815		2345.78	-0.00868295		2935.78	0.00006151		3525.78	-0.01960254
576	0.01364639		1165.99	-0.00323214		1755.99	-0.00163303		2345.98	-0.00793334		2935.98	0.00121588		3525.98	-0.02003019
576.2	0.01270168		1166.19	-0.00339819		1756.19	-0.00186167		2346.18	-0.00833345		2936.18	0.0011933		3526.18	-0.01879076
576.4	0.01241246		1166.39	-0.00409455		1756.39	-0.00198583		2346.38	-0.00856086		2936.38	0.00110977		3526.38	-0.01839363
576.6	0.01249423		1166.59	-0.00417782		1756.59	-0.00256464		2346.58	-0.00843501		2936.58	0.00171446		3526.58	-0.01756185
576.8	0.0119714		1166.79	-0.00462102		1756.79	-0.00329707		2346.78	-0.00925736		2936.78	0.00175206		3526.78	-0.0172013
577	0.01056709		1166.99	-0.00397023		1756.99	-0.00228606		2346.98	-0.01019513		2936.98	0.00227469		3526.98	-0.01644577
577.2	0.0097853		1167.19	-0.00333667		1757.19	-0.0024574		2347.18	-0.0097634		2937.18	0.00202753		3527.18	-0.01665929
577.4	0.00941072		1167.39	-0.0028871		1757.39	-0.00267949		2347.38	-0.00970944		2937.38	0.00245609		3527.38	-0.01649977
577.6	0.00931613		1167.59	-0.00380927		1757.59	-0.00262522		2347.58	-0.0092144		2937.58	0.00254871		3527.58	-0.01639419
577.8	0.00871571		1167.79	-0.00417104		1757.79	-0.00285156		2347.78	-0.00893859		2937.78	0.00249642		3527.78	-0.01674701
578	0.00879376		1167.99	-0.00470334		1757.99	-0.0024897		2347.98	-0.00971869		2937.98	0.00229975		3527.98	-0.01820844
578.2	0.00940429		1168.19	-0.00474386		1758.19	-0.00304425		2348.18	-0.00884204		2938.18	0.00239703		3528.18	-0.01867944
578.4	0.01052188		1168.39	-0.00466177		1758.39	-0.00287389		2348.38	-0.00760179		2938.38	0.00220406		3528.38	-0.01863212
578.6	0.01008465		1168.59	-0.00463218		1758.59	-0.003101		2348.58	-0.00703227		2938.58	0.00197091		3528.58	-0.01915301
578.8	0.00987804		1168.79	-0.00445718		1758.79	-0.00296756		2348.78	-0.00647425		2938.78	0.00254944		3528.78	-0.01930524
579	0.01022031		1168.99	-0.0041568		1758.99	-0.00310658		2348.98	-0.00573441		2938.98	0.00197115		3528.98	-0.0197466
579.2	0.0102889		1169.19	-0.00476528		1759.19	-0.00229672		2349.18	-0.00604943		2939.18	0.00102975		3529.18	-0.0199143
579.4	0.00993365		1169.39	-0.0050134		1759.39	-0.00155186		2349.38	-0.00639335		2939.38	0.00175659		3529.38	-0.02032921
579.6	0.01030215		1169.59	-0.00488017		1759.59	-0.00125601		2349.58	-0.00553632		2939.58	0.00212629		3529.58	-0.02022553
579.8	0.01075565		1169.79	-0.00539441		1759.79	-0.00146982		2349.78	-0.00526966		2939.78	0.00264408		3529.78	-0.0196073
580	0.00999612		1169.99	-0.0051347		1759.99	-0.00222683		2349.98	-0.00550153		2939.98	0.00317513		3529.98	-0.01990161
580.2	0.01008972		1170.19	-0.00582767		1760.19	-0.0017556		2350.18	-0.00596533		2940.18	0.00342227		3530.18	-0.01920418
580.4	0.01064126		1170.39	-0.00521494		1760.39	-0.00207325		2350.38	-0.00612013		2940.38	0.00342899		3530.38	-0.02024746
580.6	0.01038711		1170.59	-0.00461962		1760.59	-0.00184599		2350.58	-0.00614526		2940.58	0.00389867		3530.58	-0.02086359
580.8	0.0096232		1170.79	-0.00468068		1760.79	-0.00151509		2350.78	-0.00745559		2940.78	0.00318383		3530.78	-0.02201056
581	0.00911278		1170.99	-0.00399265		1760.99	-0.00185802		2350.98	-0.00866039		2940.98	0.00317042		3530.98	-0.02197382
581.2	0.00951041		1171.19	-0.00420428		1761.19	-0.00197489		2351.18	-0.00853728		2941.18	0.0034267		3531.18	-0.02238843
581.4	0.00989743		1171.39	-0.00471147		1761.39	-0.00263502		2351.38	-0.00862291		2941.38	0.00366548		3531.38	-0.02214818
581.6	0.01046323		1171.59	-0.00579634		1761.59	-0.00314716		2351.58	-0.00760258		2941.58	0.00342526		3531.58	-0.02179905
581.8	0.01030436		1171.79	-0.00583388		1761.79	-0.00394761		2351.78	-0.00767319		2941.78	0.00260259		3531.78	-0.02280037
582	0.01111033		1171.99	-0.0060406		1761.99	-0.00441389		2351.98	-0.00674593		2941.98	0.00231541		3531.98	-0.02318056
582.2	0.0109318		1172.19	-0.00615244		1762.19	-0.0044007		2352.18	-0.00558285		2942.18	0.00248715		3532.18	-0.02253568
582.4	0.01072694		1172.39	-0.00593705		1762.39	-0.00464742		2352.38	-0.00571058		2942.38	0.00177814		3532.38	-0.02210009
582.6	0.00984036		1172.59	-0.00620196		1762.59	-0.0058419		2352.58	-0.00587043		2942.58	0.0011073		3532.58	-0.02133821
582.8	0.00991371		1172.79	-0.00669603		1762.79	-0.00613642		2352.78	-0.0056226		2942.78	0.00073472		3532.78	-0.02024394
583	0.00956701		1172.99	-0.00732679		1762.99	-0.00622112		2352.98	-0.00585139		2942.98	-0.00053306		3532.98	-0.01951664
583.2	0.00835865		1173.19	-0.00792298		1763.19	-0.00541846		2353.18	-0.0057427		2943.18	-0.00010655		3533.18	-0.01812193
583.4	0.00883135		1173.39	-0.00832424		1763.39	-0.00508118		2353.38	-0.0057623		2943.38	0.00005415		3533.38	-0.01811708
583.6	0.01001574		1173.59	-0.00914101		1763.59	-0.00469523		2353.58	-0.00579305		2943.58	-0.00083386		3533.58	-0.01813185
583.8	0.00967274		1173.79	-0.00933222		1763.79	-0.00513107		2353.78	-0.00633784		2943.78	0.00003355		3533.78	-0.01906927
584	0.009601		1173.99	-0.00930186		1763.99	-0.00466948		2353.98	-0.00721337		2943.98	0.00010094		3533.98	-0.01997254
584.2	0.00972077		1174.19	-0.00868836		1764.19	-0.00412535		2354.18	-0.00726011		2944.18	0.00085716		3534.18	-0.02089517
584.4	0.00949645		1174.39	-0.00788258		1764.39	-0.00336471		2354.38	-0.00715057		2944.38	0.00072383		3534.38	-0.02083319
584.6	0.00900758		1174.59	-0.00835087		1764.59	-0.00209027		2354.58	-0.00785234		2944.58	0.00038316		3534.58	-0.02140734
584.8	0.01001491		1174.79	-0.00777339		1764.79	-0.00228445		2354.78	-0.00848337		2944.78	0.00064313		3534.78	-0.02210989
585	0.00981459		1174.99	-0.00674361		1764.99	-0.00136909		2354.98	-0.00876166		2944.98	0.00124015		3534.98	-0.02231383
585.2	0.00983723		1175.19	-0.0069308		1765.19	-0.00124491		2355.18	-0.00830466		2945.18	0.00168253		3535.18	-0.02229988
585.4	0.01032432		1175.39	-0.00659876		1765.39	-0.00229663		2355.38	-0.00786349		2945.38	0.00182824		3535.38	-0.02193374
585.6	0.00966345		1175.59	-0.00610362		1765.59	-0.00289164		2355.58	-0.0077653		2945.58	0.00227146		3535.58	-0.02201551
585.8	0.00968944		1175.79	-0.00603459		1765.79	-0.00350226		2355.78	-0.0078986		2945.78	0.00205634		3535.78	-0.02255177
586	0.00877647		1175.99	-0.00505531		1765.99	-0.00371052		2355.98	-0.00716121		2945.98	0.00234806		3535.98	-0.0219448
586.2	0.00747349		1176.19	-0.00478682		1766.19	-0.00402303		2356.18	-0.0075095		2946.18	0.00262378		3536.18	-0.02058458
586.4	0.00714005		1176.39	-0.00447583		1766.39	-0.0042746		2356.38	-0.00745266		2946.38	0.00208949		3536.38	-0.02027451
586.6	0.00629722		1176.59	-0.00469073		1766.59	-0.0051385		2356.58	-0.00701407		2946.58	0.001742		3536.58	-0.01960149
586.8	0.00643607		1176.79	-0.00586494		1766.79	-0.00524045		2356.78	-0.00724313		2946.78	0.00207577		3536.78	-0.01886197
587	0.00604737		1176.99	-0.00657174		1766.99	-0.00547416		2356.98	-0.0073206		2946.98	0.00143765		3536.98	-0.01792679
587.2	0.00648967		1177.19	-0.00695945		1767.19	-0.00529239		2357.18	-0.00763332		2947.18	0.00272833		3537.18	-0.01809888
587.4	0.00787102		1177.39	-0.00706788		1767.39	-0.00575807		2357.38	-0.00803173		2947.38	0.00256981		3537.38	-0.01906256
587.6	0.00818777		1177.59	-0.00779037		1767.59	-0.00587924		2357.58	-0.00909011		2947.58	0.00228336		3537.58	-0.0199604
587.8	0.00940006		1177.79	-0.0077295		1767.79	-0.00551487		2357.78	-0.00999557		2947.78	0.00318456		3537.78	-0.02104142
588	0.01043794		1177.99	-0.00818586		1767.99	-0.00420592		2357.98	-0.01044369		2947.98	0.00304709		3537.98	-0.02028893
588.2	0.01081213		1178.19	-0.00853311		1768.19	-0.00407013		2358.18	-0.01080828		2948.18	0.00319747		3538.18	-0.02025321
588.4	0.01083525		1178.39	-0.00843251		1768.39	-0.00284523		2358.38	-0.01110007		2948.38	0.00211421		3538.38	-0.01971538
588.6	0.01128174		1178.59	-0.0083134		1768.59	-0.00247013		2358.58	-0.01089958		2948.58	0.00088983		3538.58	-0.02075679
588.8	0.01176176		1178.79	-0.0070865		1768.79	-0.0017265		2358.78	-0.01043248		2948.78	0.00054991		3538.78	-0.02075669
589	0.01196603		1178.99	-0.00677167		1768.99	-0.00107888		2358.98	-0.01147742		2948.98	-0.00068089		3538.98	-0.02112458
589.2	0.01147653		1179.19	-0.00662307		1769.19	-0.00205139		2359.18	-0.01117909		2949.18	-0.00127001		3539.18	-0.02022916
589.4	0.01169054		1179.39	-0.00594895		1769.39	-0.00176739		2359.38	-0.01078775		2949.38	-0.00169172		3539.38	-0.02030037
589.6	0.01092261		1179.59	-0.00535389		1769.59	-0.00141731		2359.58	-0.01035521		2949.58	-0.00232142		3539.58	-0.01975547
589.8	0.01027802		1179.79	-0.00503547		1769.79	-0.00155664		2359.78	-0.00978474		2949.78	-0.00216159		3539.78	-0.01959032
590	0.00867366		1179.99	-0.004402		1769.99	-0.00202767		2359.98	-0.00918604		2949.98	-0.00263551		3539.98	-0.0189514
590.2	0.0085042		1180.19	-0.00418623		1770.19	-0.00242355		2360.18	-0.00864587		2950.18	-0.00270229		3540.18	-0.01814076
590.4	0.0083312		1180.39	-0.00335612		1770.39	-0.0033229		2360.38	-0.00755267		2950.38	-0.00220992		3540.38	-0.01889161
590.6	0.00866483		1180.59	-0.00406302		1770.59	-0.00482391		2360.58	-0.00668712		2950.58	-0.00175204		3540.58	-0.01783846
590.8	0.00915509		1180.79	-0.00524034		1770.79	-0.00517907		2360.78	-0.00651254		2950.78	-0.00043387		3540.78	-0.01812265
591	0.00959088		1180.99	-0.00558244		1770.99	-0.00594669		2360.98	-0.0063681		2950.98	0.00044614		3540.98	-0.01823178
591.2	0.01060646		1181.19	-0.00568338		1771.19	-0.00627675		2361.18	-0.00676937		2951.18	0.00167521		3541.18	-0.01880545
591.4	0.01100428		1181.39	-0.00577146		1771.39	-0.00671593		2361.38	-0.00686522		2951.38	0.00200095		3541.38	-0.01843023
591.6	0.01148116		1181.59	-0.00663519		1771.59	-0.00612417		2361.58	-0.00745534		2951.58	0.00242368		3541.58	-0.01899438
591.8	0.0128934		1181.79	-0.00696209		1771.79	-0.00596438		2361.78	-0.00734961		2951.78	0.00314795		3541.78	-0.01901331
592	0.01224966		1181.99	-0.0080298		1771.99	-0.0053325		2361.98	-0.00704915		2951.98	0.0031339		3541.98	-0.01904793
592.2	0.01136528		1182.19	-0.00874925		1772.19	-0.00583086		2362.18	-0.00753217		2952.18	0.00311398		3542.18	-0.01962862
592.4	0.01068586		1182.39	-0.00871786		1772.39	-0.0059982		2362.38	-0.00742031		2952.38	0.00213739		3542.38	-0.02005128
592.6	0.01036149		1182.59	-0.01020878		1772.59	-0.00511142		2362.58	-0.00767177		2952.58	0.00146179		3542.58	-0.02053428
592.8	0.00969517		1182.79	-0.00919501		1772.79	-0.00385294		2362.78	-0.00826599		2952.78	0.00115888		3542.78	-0.020045
593	0.01001244		1182.99	-0.00965826		1772.99	-0.00303571		2362.98	-0.00926524		2952.98	0.00084374		3542.98	-0.02097546
593.2	0.0088909		1183.19	-0.00968198		1773.19	-0.00241511		2363.18	-0.0092436		2953.18	0.00141122		3543.18	-0.02084948
593.4	0.0082304		1183.39	-0.00847486		1773.39	-0.0012538		2363.38	-0.00964211		2953.38	0.00115245		3543.38	-0.02165042
593.6	0.00703055		1183.59	-0.00809495		1773.59	-0.00107414		2363.58	-0.00918734		2953.58	0.00080867		3543.58	-0.02137028
593.8	0.00644383		1183.79	-0.00682702		1773.79	-0.00185146		2363.78	-0.00900595		2953.78	0.00069251		3543.78	-0.0216726
594	0.00658299		1183.99	-0.00555054		1773.99	-0.00193508		2363.98	-0.00887139		2953.98	0.00016751		3543.98	-0.02161438
594.2	0.00669458		1184.19	-0.00484892		1774.19	-0.00278812		2364.18	-0.0085265		2954.18	-0.00024025		3544.18	-0.02132343
594.4	0.00672625		1184.39	-0.00432324		1774.39	-0.00267646		2364.38	-0.00750741		2954.38	0.00067103		3544.38	-0.02124314
594.6	0.00763957		1184.59	-0.00488074		1774.59	-0.00211685		2364.58	-0.00756119		2954.58	0.00073984		3544.58	-0.01993766
594.8	0.00834342		1184.79	-0.00536713		1774.79	-0.0014133		2364.78	-0.00819543		2954.78	0.00116945		3544.78	-0.02064212
595	0.00912044		1184.99	-0.00572513		1774.99	-0.00133121		2364.98	-0.00865964		2954.98	0.001064		3544.98	-0.02021056
595.2	0.00979318		1185.19	-0.0052826		1775.19	-0.00088405		2365.18	-0.00853451		2955.18	0.00106252		3545.18	-0.02000026
595.4	0.01056563		1185.39	-0.00519456		1775.39	-0.0006313		2365.38	-0.00795301		2955.38	0.00119024		3545.38	-0.02011422
595.6	0.01087243		1185.59	-0.00545076		1775.59	0.00030406		2365.58	-0.00809379		2955.58	0.00075261		3545.58	-0.02155165
595.8	0.01107759		1185.79	-0.00634875		1775.79	0.00027227		2365.78	-0.00751006		2955.78	0.00019264		3545.78	-0.02210566
596	0.01111046		1185.99	-0.00757708		1775.99	-0.00050188		2365.98	-0.00779984		2955.98	-0.0004601		3545.98	-0.02179859
596.2	0.01108861		1186.19	-0.0079596		1776.19	-0.00125431		2366.18	-0.00808444		2956.18	-0.00083926		3546.18	-0.02193107
596.4	0.0117162		1186.39	-0.00905877		1776.39	-0.00102359		2366.38	-0.00792186		2956.38	-0.00116896		3546.38	-0.02221841
596.6	0.01122145		1186.59	-0.00993726		1776.59	-0.00075421		2366.58	-0.00837765		2956.58	-0.00024875		3546.58	-0.02204968
596.8	0.01085486		1186.79	-0.00913175		1776.79	-0.0007597		2366.78	-0.00790673		2956.78	0.00015838		3546.78	-0.02180235
597	0.01085513		1186.99	-0.00955671		1776.99	-0.00093643		2366.98	-0.00797117		2956.98	0.00088767		3546.98	-0.022117
597.2	0.01037478		1187.19	-0.00944778		1777.19	-0.0018128		2367.18	-0.00780186		2957.18	0.00127402		3547.18	-0.02193869
597.4	0.0097526		1187.39	-0.00884371		1777.39	-0.00244094		2367.38	-0.00727131		2957.38	0.00125411		3547.38	-0.02089049
597.6	0.00932218		1187.59	-0.00864237		1777.59	-0.0034369		2367.58	-0.00679325		2957.58	0.00164904		3547.58	-0.02030609
597.8	0.00911456		1187.79	-0.00731712		1777.79	-0.00498158		2367.78	-0.00682879		2957.78	0.00193307		3547.78	-0.02009947
598	0.00902305		1187.99	-0.0062515		1777.99	-0.00530327		2367.98	-0.00671563		2957.98	0.00231578		3547.98	-0.01971081
598.2	0.00848423		1188.19	-0.00653754		1778.19	-0.00595501		2368.18	-0.00715865		2958.18	0.00282517		3548.18	-0.01858194
598.4	0.00873698		1188.39	-0.00616209		1778.39	-0.00504657		2368.38	-0.00710802		2958.38	0.00396076		3548.38	-0.01910546
598.6	0.00975084		1188.59	-0.00657179		1778.59	-0.00471246		2368.58	-0.00748353		2958.58	0.00468532		3548.58	-0.01917308
598.8	0.00983794		1188.79	-0.00664301		1778.79	-0.0044608		2368.78	-0.00697944		2958.78	0.00432858		3548.78	-0.01986481
599	0.00989703		1188.99	-0.00636869		1778.99	-0.00464456		2368.98	-0.00723053		2958.98	0.00473985		3548.98	-0.02024722
599.2	0.00923167		1189.19	-0.00570799		1779.19	-0.00459304		2369.18	-0.00695475		2959.18	0.00490854		3549.18	-0.02189571
599.4	0.00913294		1189.39	-0.00560679		1779.39	-0.00479597		2369.38	-0.00781907		2959.38	0.0040992		3549.38	-0.02274587
599.6	0.0089999		1189.59	-0.00576869		1779.59	-0.00476379		2369.58	-0.00895792		2959.58	0.00412977		3549.58	-0.02322471
599.8	0.00946241		1189.79	-0.00623917		1779.79	-0.00513346		2369.78	-0.00848931		2959.78	0.00368018		3549.78	-0.02387203
600	0.00965011		1189.99	-0.00636164		1779.99	-0.00607942		2369.98	-0.00895946		2959.98	0.00250635		3549.98	-0.02402745
600.2	0.00999412		1190.19	-0.00729987		1780.19	-0.00517215		2370.18	-0.00822583		2960.18	0.00206684		3550.18	-0.02510114
600.4	0.0101414		1190.39	-0.00821869		1780.39	-0.00445969		2370.38	-0.00792036		2960.38	0.00285271		3550.38	-0.02527971
600.6	0.00911155		1190.59	-0.00827247		1780.59	-0.0046126		2370.58	-0.00840754		2960.58	0.00269559		3550.58	-0.02527396
600.8	0.00958508		1190.79	-0.00846139		1780.79	-0.00429749		2370.78	-0.00864769		2960.78	0.00205512		3550.78	-0.02465209
601	0.01059523		1190.99	-0.00884571		1780.99	-0.00427485		2370.98	-0.00936225		2960.98	0.00147837		3550.98	-0.02449001
601.2	0.01045158		1191.19	-0.00898002		1781.19	-0.00451584		2371.18	-0.01016246		2961.18	0.00095287		3551.18	-0.02434864
601.4	0.00965988		1191.39	-0.00871844		1781.39	-0.00480988		2371.38	-0.01100959		2961.38	0.00058179		3551.38	-0.02347578
601.6	0.00931481		1191.59	-0.00826576		1781.59	-0.0050768		2371.58	-0.01182086		2961.58	0.00059988		3551.58	-0.02382935
601.8	0.00923814		1191.79	-0.00822142		1781.79	-0.00537557		2371.78	-0.01207544		2961.78	0.00135985		3551.78	-0.02352052
602	0.00965036		1191.99	-0.00789041		1781.99	-0.00493105		2371.98	-0.01281648		2961.98	0.0010311		3551.98	-0.02314301
602.2	0.00971441		1192.19	-0.00864605		1782.19	-0.00472923		2372.18	-0.01326387		2962.18	0.00093816		3552.18	-0.02278727
602.4	0.00991321		1192.39	-0.00833427		1782.39	-0.00420709		2372.38	-0.01297341		2962.38	0.00125321		3552.38	-0.02340164
602.6	0.01030432		1192.59	-0.00818894		1782.59	-0.00430619		2372.58	-0.01291953		2962.58	0.00179582		3552.58	-0.02321318
602.8	0.00903292		1192.79	-0.00719196		1782.79	-0.00483083		2372.78	-0.01271568		2962.78	0.00087441		3552.78	-0.02284335
603	0.00836025		1192.99	-0.00704487		1782.99	-0.00496148		2372.98	-0.01333305		2962.98	0.00075274		3552.98	-0.02284915
603.2	0.0071385		1193.19	-0.00713298		1783.19	-0.00464858		2373.18	-0.01345762		2963.18	0.00095939		3553.18	-0.02285782
603.4	0.00664651		1193.39	-0.00734051		1783.39	-0.00562384		2373.38	-0.01377825		2963.38	0.00106613		3553.38	-0.02226639
603.6	0.00667207		1193.59	-0.00743829		1783.59	-0.0055841		2373.58	-0.01275808		2963.58	0.00174354		3553.58	-0.02248109
603.8	0.00602423		1193.79	-0.00788042		1783.79	-0.00609136		2373.78	-0.01131406		2963.78	0.00108562		3553.78	-0.02290292
604	0.00542806		1193.99	-0.00838199		1783.99	-0.00639004		2373.98	-0.01137868		2963.98	0.00086152		3553.98	-0.02214259
604.2	0.00560352		1194.19	-0.00977034		1784.19	-0.00597068		2374.18	-0.01107337		2964.18	0.00229956		3554.18	-0.02135964
604.4	0.00582057		1194.39	-0.0096402		1784.39	-0.00567712		2374.38	-0.01128211		2964.38	0.00236592		3554.38	-0.0213702
604.6	0.00615413		1194.59	-0.00912665		1784.59	-0.00604521		2374.58	-0.01130069		2964.58	0.00141056		3554.58	-0.02124345
604.8	0.00736676		1194.79	-0.00920279		1784.79	-0.00638077		2374.78	-0.01146978		2964.78	0.00090905		3554.78	-0.02042567
605	0.00788055		1194.99	-0.01001332		1784.99	-0.00593851		2374.98	-0.0106098		2964.98	0.00042723		3554.98	-0.02089839
605.2	0.00707965		1195.19	-0.00967517		1785.19	-0.00683822		2375.18	-0.01056124		2965.18	0.00051722		3555.18	-0.02137767
605.4	0.00727307		1195.39	-0.0097437		1785.39	-0.0066679		2375.38	-0.00986078		2965.38	0.00034712		3555.38	-0.02088104
605.6	0.00809152		1195.59	-0.01001489		1785.59	-0.00707047		2375.58	-0.010063		2965.58	0.00053371		3555.58	-0.02089442
605.8	0.0088116		1195.79	-0.01037327		1785.79	-0.00652356		2375.78	-0.00963406		2965.78	0.00060131		3555.78	-0.02081833
606	0.0093854		1195.99	-0.00990808		1785.99	-0.00695296		2375.98	-0.00956609		2965.98	-0.00018612		3555.98	-0.02073586
606.2	0.0098467		1196.19	-0.00915954		1786.19	-0.00709083		2376.18	-0.00936595		2966.18	-0.00013122		3556.18	-0.02077782
606.4	0.00969436		1196.39	-0.00815247		1786.39	-0.00713849		2376.38	-0.0091707		2966.38	-0.00016486		3556.38	-0.02042351
606.6	0.00938366		1196.59	-0.00730163		1786.59	-0.00734198		2376.58	-0.00869055		2966.58	0.00032559		3556.58	-0.02069366
606.8	0.00917064		1196.79	-0.00703313		1786.79	-0.00672659		2376.78	-0.00808527		2966.78	-0.00005725		3556.78	-0.0206058
607	0.0092994		1196.99	-0.00679729		1786.99	-0.00531783		2376.98	-0.00776459		2966.98	-0.00003093		3556.98	-0.02007561
607.2	0.00883864		1197.19	-0.00706075		1787.19	-0.0051091		2377.18	-0.00785011		2967.18	0.00050992		3557.18	-0.02056991
607.4	0.00813415		1197.39	-0.00652227		1787.39	-0.00550411		2377.38	-0.00761145		2967.38	0.00035024		3557.38	-0.020055
607.6	0.00816678		1197.59	-0.00753712		1787.59	-0.00527553		2377.58	-0.007555		2967.58	0.00049969		3557.58	-0.01930401
607.8	0.00807939		1197.79	-0.00863016		1787.79	-0.00516155		2377.78	-0.00801521		2967.78	0.00017256		3557.78	-0.01920437
608	0.00840801		1197.99	-0.00879335		1787.99	-0.00479653		2377.98	-0.00886815		2967.98	0.00019181		3557.98	-0.01953232
608.2	0.00799829		1198.19	-0.00947443		1788.19	-0.00454869		2378.18	-0.0090762		2968.18	0.00073734		3558.18	-0.02005502
608.4	0.00778256		1198.39	-0.00934295		1788.39	-0.00355293		2378.38	-0.00887181		2968.38	-0.00037637		3558.38	-0.02061783
608.6	0.00766944		1198.59	-0.00946579		1788.59	-0.00341448		2378.58	-0.00894942		2968.58	-0.00039938		3558.58	-0.02130315
608.8	0.00796981		1198.79	-0.01035704		1788.79	-0.00325568		2378.78	-0.00996323		2968.78	-0.00024819		3558.78	-0.02162033
609	0.00797049		1198.99	-0.01130697		1788.99	-0.00309715		2378.98	-0.00954037		2968.98	-0.00018307		3558.98	-0.02255554
609.2	0.00711362		1199.19	-0.01132468		1789.19	-0.00438845		2379.18	-0.01047505		2969.18	-0.00069212		3559.18	-0.02256328
609.4	0.00746155		1199.39	-0.01174879		1789.39	-0.00409331		2379.38	-0.01042549		2969.38	-0.00113594		3559.38	-0.02226557
609.6	0.00755833		1199.59	-0.01172696		1789.59	-0.00475982		2379.58	-0.01125698		2969.58	-0.00147354		3559.58	-0.0227437
609.8	0.0071616		1199.79	-0.0113294		1789.79	-0.00480345		2379.78	-0.01095261		2969.78	-0.00097309		3559.78	-0.02265119
610	0.00763793		1199.99	-0.01083485		1789.99	-0.00610566		2379.98	-0.01041042		2969.98	-0.00071237		3559.98	-0.02181912
610.2	0.00770609		1200.19	-0.00988876		1790.19	-0.006053		2380.18	-0.01037589		2970.18	-0.00077313		3560.18	-0.02146748
610.4	0.00697206		1200.39	-0.00976927		1790.39	-0.00639071		2380.38	-0.00905579		2970.38	-0.00097067		3560.38	-0.02067986
610.6	0.00769239		1200.59	-0.00902328		1790.59	-0.00562315		2380.58	-0.00848257		2970.58	-0.00028402		3560.58	-0.01969272
610.8	0.0087863		1200.79	-0.00880612		1790.79	-0.00523924		2380.78	-0.00759613		2970.78	-0.00051813		3560.78	-0.01884059
611	0.00869326		1200.99	-0.00797333		1790.99	-0.00438893		2380.98	-0.00783379		2970.98	-0.00047494		3560.98	-0.01798577
611.2	0.00848368		1201.19	-0.00786612		1791.19	-0.0040555		2381.18	-0.00830332		2971.18	-0.00035298		3561.18	-0.01715637
611.4	0.00787966		1201.39	-0.00780226		1791.39	-0.00448955		2381.38	-0.00836584		2971.38	-0.00053878		3561.38	-0.01608119
611.6	0.00779095		1201.59	-0.00886464		1791.59	-0.00402944		2381.58	-0.00886269		2971.58	-0.00041329		3561.58	-0.0159941
611.8	0.00765587		1201.79	-0.00884989		1791.79	-0.00399385		2381.78	-0.00854062		2971.78	-0.00077632		3561.78	-0.01608246
612	0.00717092		1201.99	-0.00817406		1791.99	-0.00464241		2381.98	-0.00787285		2971.98	-0.00088156		3561.98	-0.01687234
612.2	0.00642566		1202.19	-0.00812552		1792.19	-0.00415109		2382.18	-0.00793411		2972.18	-0.00089782		3562.18	-0.01761862
612.4	0.00662818		1202.39	-0.00870034		1792.39	-0.00363636		2382.38	-0.00829052		2972.38	-0.00039848		3562.38	-0.01837293
612.6	0.00734243		1202.59	-0.00888331		1792.59	-0.00478066		2382.58	-0.00907956		2972.58	0.0001568		3562.58	-0.01927206
612.8	0.00788591		1202.79	-0.00855634		1792.79	-0.00474119		2382.78	-0.00922479		2972.78	-0.00007456		3562.78	-0.01980937
613	0.00778392		1202.99	-0.00863136		1792.99	-0.00511122		2382.98	-0.00878787		2972.98	-0.0008317		3562.98	-0.02016162
613.2	0.00693811		1203.19	-0.00869697		1793.19	-0.0056995		2383.18	-0.00933115		2973.18	-0.0018741		3563.18	-0.02044723
613.4	0.00715488		1203.39	-0.00804671		1793.39	-0.00515989		2383.38	-0.00913857		2973.38	-0.00192827		3563.38	-0.02161519
613.6	0.00765551		1203.59	-0.0080875		1793.59	-0.00514373		2383.58	-0.00955829		2973.58	-0.0011755		3563.58	-0.02201664
613.8	0.00853662		1203.79	-0.00870404		1793.79	-0.00514261		2383.78	-0.00913517		2973.78	0.00000474		3563.78	-0.02159358
614	0.00883093		1203.99	-0.00915242		1793.99	-0.00508424		2383.98	-0.00825521		2973.98	0.0000504		3563.98	-0.02130855
614.2	0.00813852		1204.19	-0.00953831		1794.19	-0.00452792		2384.18	-0.00851094		2974.18	-0.00036054		3564.18	-0.02182082
614.4	0.00825861		1204.39	-0.0100406		1794.39	-0.00434318		2384.38	-0.00773988		2974.38	-0.00074531		3564.38	-0.02161472
614.6	0.00909432		1204.59	-0.00919219		1794.59	-0.00420243		2384.58	-0.00760709		2974.58	-0.00006438		3564.58	-0.02110977
614.8	0.00918511		1204.79	-0.0097213		1794.79	-0.00445199		2384.78	-0.00792134		2974.78	-0.00006277		3564.78	-0.02128019
615	0.00992179		1204.99	-0.00920327		1794.99	-0.00348333		2384.98	-0.00928385		2974.98	-0.00001565		3564.98	-0.02128652
615.2	0.01001896		1205.19	-0.00972358		1795.19	-0.00331891		2385.18	-0.00995717		2975.18	0.00013996		3565.18	-0.02083447
615.4	0.00940149		1205.39	-0.00983507		1795.39	-0.00330688		2385.38	-0.01092414		2975.38	0.00026958		3565.38	-0.02118729
615.6	0.0086801		1205.59	-0.00988993		1795.59	-0.00254519		2385.58	-0.01098221		2975.58	0.00085826		3565.58	-0.02116418
615.8	0.00830537		1205.79	-0.01025606		1795.79	-0.00363019		2385.78	-0.01078344		2975.78	0.00095201		3565.78	-0.02124515
616	0.00780384		1205.99	-0.00967836		1795.99	-0.00353902		2385.98	-0.01093177		2975.98	0.00069792		3565.98	-0.02258338
616.2	0.00764239		1206.19	-0.009811		1796.19	-0.003583		2386.18	-0.01106832		2976.18	0.00062465		3566.18	-0.0226696
616.4	0.00769533		1206.39	-0.01075852		1796.39	-0.00413105		2386.38	-0.011585		2976.38	0.00147321		3566.38	-0.02265762
616.6	0.0069916		1206.59	-0.01062378		1796.59	-0.0044065		2386.58	-0.01208815		2976.58	0.00054838		3566.58	-0.02230951
616.8	0.00630096		1206.79	-0.00999023		1796.79	-0.0037382		2386.78	-0.01079642		2976.78	-0.00019155		3566.78	-0.02345059
617	0.0059275		1206.99	-0.01008608		1796.99	-0.00447995		2386.98	-0.01092881		2976.98	-0.00110379		3566.98	-0.02377248
617.2	0.00544477		1207.19	-0.00989701		1797.19	-0.00413847		2387.18	-0.01170679		2977.18	-0.0011545		3567.18	-0.02466115
617.4	0.00562411		1207.39	-0.010054		1797.39	-0.00390339		2387.38	-0.01122224		2977.38	-0.0011399		3567.38	-0.02557149
617.6	0.00626419		1207.59	-0.01089642		1797.59	-0.00418654		2387.58	-0.01106931		2977.58	0.00020026		3567.58	-0.02592785
617.8	0.00558011		1207.79	-0.01127683		1797.79	-0.00424227		2387.78	-0.01082125		2977.78	-0.0002626		3567.78	-0.0253163
618	0.0050433		1207.99	-0.01128304		1797.99	-0.00458267		2387.98	-0.01090524		2977.98	-0.00140974		3567.98	-0.02521695
618.2	0.00457127		1208.19	-0.01130396		1798.19	-0.00562121		2388.18	-0.01078313		2978.18	-0.00245735		3568.18	-0.02525489
618.4	0.00507965		1208.39	-0.01079297		1798.39	-0.00568785		2388.38	-0.01034736		2978.38	-0.00280867		3568.38	-0.02474249
618.6	0.00616368		1208.59	-0.01001754		1798.59	-0.00638547		2388.58	-0.00970466		2978.58	-0.00253577		3568.58	-0.02420464
618.8	0.00659672		1208.79	-0.01055369		1798.79	-0.00607937		2388.78	-0.00924779		2978.78	-0.00362015		3568.78	-0.02410233
619	0.00760508		1208.99	-0.01054119		1798.99	-0.00551176		2388.98	-0.00906407		2978.98	-0.00327779		3568.98	-0.02379202
619.2	0.00777032		1209.19	-0.01150332		1799.19	-0.00571526		2389.18	-0.00905467		2979.18	-0.0028022		3569.18	-0.02295471
619.4	0.00694958		1209.39	-0.0108935		1799.39	-0.00656262		2389.38	-0.00884003		2979.38	-0.00298077		3569.38	-0.02281198
619.6	0.00692252		1209.59	-0.01130826		1799.59	-0.00735051		2389.58	-0.00835831		2979.58	-0.00230425		3569.58	-0.02261399
619.8	0.00700205		1209.79	-0.01141015		1799.79	-0.008142		2389.78	-0.00807021		2979.78	-0.00284578		3569.78	-0.02218546
620	0.00702042		1209.99	-0.0114102		1799.99	-0.00828776		2389.98	-0.00760079		2979.98	-0.00323641		3569.98	-0.02221464
620.2	0.00714744		1210.19	-0.01160389		1800.19	-0.00916267		2390.18	-0.00627897		2980.18	-0.00273708		3570.18	-0.02164108
620.4	0.00715249		1210.39	-0.01255108		1800.39	-0.00918666		2390.38	-0.00642699		2980.38	-0.00169148		3570.38	-0.02155543
620.6	0.0060323		1210.59	-0.01159563		1800.59	-0.00952391		2390.58	-0.00647557		2980.58	-0.00191569		3570.58	-0.02174176
620.8	0.00633338		1210.79	-0.01125772		1800.79	-0.00929536		2390.78	-0.0059332		2980.78	-0.00142547		3570.78	-0.02237803
621	0.0069583		1210.99	-0.01133458		1800.99	-0.0093718		2390.98	-0.00710882		2980.98	-0.00041871		3570.98	-0.02274894
621.2	0.00671862		1211.19	-0.01150917		1801.19	-0.00876853		2391.18	-0.00837487		2981.18	0.0007746		3571.18	-0.02296966
621.4	0.00724096		1211.39	-0.01221017		1801.39	-0.00834312		2391.38	-0.00922066		2981.38	0.00111792		3571.38	-0.02281083
621.6	0.00723932		1211.59	-0.01221424		1801.59	-0.00745285		2391.58	-0.00997597		2981.58	0.0024094		3571.58	-0.02327325
621.8	0.00679979		1211.79	-0.01179294		1801.79	-0.00694154		2391.78	-0.01168573		2981.78	0.00218356		3571.78	-0.02266482
622	0.00685325		1211.99	-0.01164496		1801.99	-0.00610305		2391.98	-0.01183735		2981.98	0.00273705		3571.98	-0.02275741
622.2	0.00594836		1212.19	-0.0112014		1802.19	-0.00581412		2392.18	-0.01211084		2982.18	0.00324748		3572.18	-0.02313333
622.4	0.00646672		1212.39	-0.01141458		1802.39	-0.00464611		2392.38	-0.01232754		2982.38	0.0033451		3572.38	-0.02358814
622.6	0.00674083		1212.59	-0.01080735		1802.59	-0.00433873		2392.58	-0.01137813		2982.58	0.00359639		3572.58	-0.02371122
622.8	0.00530006		1212.79	-0.0106788		1802.79	-0.00437756		2392.78	-0.01181266		2982.78	0.00315318		3572.78	-0.02355705
623	0.00562661		1212.99	-0.01070915		1802.99	-0.00396207		2392.98	-0.01249488		2982.98	0.00330139		3572.98	-0.02314782
623.2	0.00564242		1213.19	-0.01014594		1803.19	-0.00468306		2393.18	-0.01206527		2983.18	0.00195601		3573.18	-0.02233856
623.4	0.00473887		1213.39	-0.0099487		1803.39	-0.00560946		2393.38	-0.01166578		2983.38	0.00057934		3573.38	-0.02274918
623.6	0.00546116		1213.59	-0.0100051		1803.59	-0.0064506		2393.58	-0.01129354		2983.58	-0.00026382		3573.58	-0.02329488
623.8	0.00506983		1213.79	-0.00968176		1803.79	-0.00681299		2393.78	-0.01049369		2983.78	-0.0015021		3573.78	-0.022675
624	0.00510958		1213.99	-0.00977576		1803.99	-0.00761955		2393.98	-0.00982103		2983.98	-0.00236059		3573.98	-0.02330569
624.2	0.00518084		1214.19	-0.00969367		1804.19	-0.0073317		2394.18	-0.00901001		2984.18	-0.00339219		3574.18	-0.02357337
624.4	0.00567732		1214.39	-0.00966005		1804.39	-0.00707105		2394.38	-0.0090614		2984.38	-0.00389175		3574.38	-0.02384068
624.6	0.00515501		1214.59	-0.00872054		1804.59	-0.00708331		2394.58	-0.00950423		2984.58	-0.00493495		3574.58	-0.02367269
624.8	0.00621062		1214.79	-0.00921386		1804.79	-0.00671892		2394.78	-0.01061678		2984.78	-0.00411356		3574.78	-0.02362748
625	0.0066524		1214.99	-0.00950204		1804.99	-0.00645909		2394.98	-0.01090252		2984.98	-0.00309693		3574.98	-0.02382125
625.2	0.00745618		1215.19	-0.00994118		1805.19	-0.00596259		2395.18	-0.01079434		2985.18	-0.003453		3575.18	-0.02277328
625.4	0.00791788		1215.39	-0.00996812		1805.39	-0.00562022		2395.38	-0.01149178		2985.38	-0.00294623		3575.38	-0.02255469
625.6	0.00787833		1215.59	-0.00961907		1805.59	-0.00537228		2395.58	-0.01135399		2985.58	-0.00260491		3575.58	-0.02292609
625.8	0.00847569		1215.79	-0.00919002		1805.79	-0.00467721		2395.78	-0.01197102		2985.78	-0.00209278		3575.78	-0.02278188
626	0.00899057		1215.99	-0.0092267		1805.99	-0.00448828		2395.98	-0.01125206		2985.98	-0.00128935		3575.98	-0.02274471
626.2	0.00845265		1216.19	-0.00893787		1806.19	-0.00527923		2396.18	-0.01138628		2986.18	-0.00076892		3576.18	-0.02362504
626.4	0.00836944		1216.39	-0.00958168		1806.39	-0.00501565		2396.38	-0.01071157		2986.38	-0.00026633		3576.38	-0.02238159
626.6	0.00805482		1216.59	-0.00936655		1806.59	-0.00598927		2396.58	-0.01054537		2986.58	0.00030206		3576.58	-0.02134818
626.8	0.00736065		1216.79	-0.00988631		1806.79	-0.00670015		2396.78	-0.01075236		2986.78	-0.00062508		3576.78	-0.02101075
627	0.00796238		1216.99	-0.01010119		1806.99	-0.00661894		2396.98	-0.00967728		2986.98	-0.00108233		3576.98	-0.02069998
627.2	0.00744602		1217.19	-0.01023005		1807.19	-0.00676649		2397.18	-0.0084956		2987.18	-0.001076		3577.18	-0.02088558
627.4	0.00706341		1217.39	-0.01052263		1807.39	-0.00706879		2397.38	-0.00792693		2987.38	-0.00122727		3577.38	-0.02195984
627.6	0.00695382		1217.59	-0.01110281		1807.59	-0.00783413		2397.58	-0.00780316		2987.58	-0.00179238		3577.58	-0.02270844
627.8	0.00610308		1217.79	-0.01073959		1807.79	-0.00729782		2397.78	-0.00720358		2987.78	-0.00162389		3577.78	-0.02249773
628	0.00600502		1217.99	-0.01130976		1807.99	-0.00716836		2397.98	-0.00733129		2987.98	-0.00212513		3577.98	-0.02422911
628.2	0.00632322		1218.19	-0.01179962		1808.19	-0.00669181		2398.18	-0.00712177		2988.18	-0.00224575		3578.18	-0.02431897
628.4	0.00657307		1218.39	-0.0119036		1808.39	-0.00662291		2398.38	-0.00758482		2988.38	-0.00146991		3578.38	-0.02466879
628.6	0.00605866		1218.59	-0.01291667		1808.59	-0.00664517		2398.58	-0.00878088		2988.58	-0.0011582		3578.58	-0.02517188
628.8	0.00617336		1218.79	-0.01348698		1808.79	-0.00666966		2398.78	-0.00949291		2988.78	-0.00019403		3578.78	-0.02486873
629	0.00652153		1218.99	-0.01390492		1808.99	-0.00667012		2398.98	-0.00895045		2988.98	-0.00040496		3578.98	-0.02489809
629.2	0.00747511		1219.19	-0.01393508		1809.19	-0.00713294		2399.18	-0.00838052		2989.18	-0.00083808		3579.18	-0.02395192
629.4	0.00728168		1219.39	-0.01408774		1809.39	-0.00722725		2399.38	-0.00917899		2989.38	-0.00036882		3579.38	-0.02410126
629.6	0.00731353		1219.59	-0.01385225		1809.59	-0.00680814		2399.58	-0.00892003		2989.58	-0.00002014		3579.58	-0.02437216
629.8	0.00775832		1219.79	-0.01341646		1809.79	-0.00645462		2399.78	-0.00842518		2989.78	0.00085469		3579.78	-0.02366859
630	0.0082664		1219.99	-0.01266399		1809.99	-0.00725433		2399.98	-0.00835919		2989.98	0.00122217		3579.98	-0.02311488
630.2	0.00716585		1220.19	-0.01282507		1810.19	-0.00764403		2400.18	-0.00818703		2990.18	0.00241806		3580.18	-0.0231908
630.4	0.00657011		1220.39	-0.01314997		1810.39	-0.00714176		2400.38	-0.00796558		2990.38	0.00225487		3580.38	-0.02163334
630.6	0.00709324		1220.59	-0.01314457		1810.59	-0.00674249		2400.58	-0.0081099		2990.58	0.00201119		3580.58	-0.02187017
630.8	0.00748387		1220.79	-0.01240797		1810.79	-0.00665951		2400.78	-0.00819601		2990.78	0.00065001		3580.78	-0.02204726
631	0.00746996		1220.99	-0.01152014		1810.99	-0.00624037		2400.98	-0.00755379		2990.98	0.00141582		3580.98	-0.02142832
631.2	0.00694963		1221.19	-0.0108841		1811.19	-0.00571999		2401.18	-0.00770049		2991.18	0.0014482		3581.18	-0.02163371
631.4	0.00664168		1221.39	-0.01061175		1811.39	-0.0060054		2401.38	-0.00747122		2991.38	0.00054861		3581.38	-0.02163111
631.6	0.00621354		1221.59	-0.01038209		1811.59	-0.00649264		2401.58	-0.00881089		2991.58	-0.00018059		3581.58	-0.02224611
631.8	0.00545324		1221.79	-0.00936147		1811.79	-0.00599318		2401.78	-0.00942025		2991.78	0.00007979		3581.78	-0.02260559
632	0.00614401		1221.99	-0.01024521		1811.99	-0.00621821		2401.98	-0.01081261		2991.98	-0.00012591		3581.98	-0.02397137
632.2	0.00610651		1222.19	-0.01000974		1812.19	-0.00655268		2402.18	-0.01105921		2992.18	-0.00031704		3582.18	-0.02402395
632.4	0.00566344		1222.39	-0.00983562		1812.39	-0.00612913		2402.38	-0.01271513		2992.38	-0.00066074		3582.38	-0.02499882
632.6	0.00449926		1222.59	-0.00972344		1812.59	-0.00678813		2402.58	-0.01354348		2992.58	-0.00038919		3582.58	-0.02578991
632.8	0.00494562		1222.79	-0.00954986		1812.79	-0.00743402		2402.78	-0.01419775		2992.78	-0.00059676		3582.78	-0.02620006
633	0.00475074		1222.99	-0.00965382		1812.99	-0.00837901		2402.98	-0.01422402		2992.98	-0.00123358		3582.98	-0.02718362
633.2	0.00481083		1223.19	-0.01078648		1813.19	-0.00879665		2403.18	-0.01348677		2993.18	-0.00138353		3583.18	-0.02711395
633.4	0.00483505		1223.39	-0.01106193		1813.39	-0.00856335		2403.38	-0.013204		2993.38	-0.00156402		3583.38	-0.02734775
633.6	0.0048161		1223.59	-0.00969908		1813.59	-0.00790975		2403.58	-0.01195177		2993.58	-0.0014706		3583.58	-0.02728297
633.8	0.00467934		1223.79	-0.00937602		1813.79	-0.00764833		2403.78	-0.01214648		2993.78	-0.00198461		3583.78	-0.02692344
634	0.00539427		1223.99	-0.00883647		1813.99	-0.00801335		2403.98	-0.0119348		2993.98	-0.00209216		3583.98	-0.02734957
634.2	0.00399049		1224.19	-0.00870376		1814.19	-0.00713398		2404.18	-0.01136732		2994.18	-0.00109766		3584.18	-0.02809034
634.4	0.00369569		1224.39	-0.00883169		1814.39	-0.00673005		2404.38	-0.01083029		2994.38	-0.00231578		3584.38	-0.02754308
634.6	0.00446814		1224.59	-0.00967877		1814.59	-0.00565242		2404.58	-0.01064306		2994.58	-0.00258882		3584.58	-0.02716447
634.8	0.00474136		1224.79	-0.00936563		1814.79	-0.00570786		2404.78	-0.00992476		2994.78	-0.0034962		3584.78	-0.02630824
635	0.00405179		1224.99	-0.00936667		1814.99	-0.00490787		2404.98	-0.00896038		2994.98	-0.00298775		3584.98	-0.02547107
635.2	0.00394519		1225.19	-0.00987466		1815.19	-0.0044464		2405.18	-0.00852841		2995.18	-0.0031294		3585.18	-0.02515159
635.4	0.00400748		1225.39	-0.00998524		1815.39	-0.004318		2405.38	-0.00805934		2995.38	-0.00289727		3585.38	-0.02512767
635.6	0.00407162		1225.59	-0.01021043		1815.59	-0.00407738		2405.58	-0.00824573		2995.58	-0.00267302		3585.58	-0.02482562
635.8	0.00425646		1225.79	-0.011066		1815.79	-0.00364599		2405.78	-0.00808577		2995.78	-0.00291395		3585.78	-0.02355201
636	0.00454008		1225.99	-0.01156958		1815.99	-0.00369034		2405.98	-0.0075754		2995.98	-0.00269517		3585.98	-0.02367134
636.2	0.00368882		1226.19	-0.01193734		1816.19	-0.0038552		2406.18	-0.00794394		2996.18	-0.00286563		3586.18	-0.0224455
636.4	0.00325394		1226.39	-0.0121556		1816.39	-0.0043845		2406.38	-0.00927893		2996.38	-0.00278971		3586.38	-0.02184102
636.6	0.00278698		1226.59	-0.01290543		1816.59	-0.00581544		2406.58	-0.00897827		2996.58	-0.00156864		3586.58	-0.02152585
636.8	0.00361283		1226.79	-0.01401925		1816.79	-0.00642337		2406.78	-0.00949163		2996.78	-0.00128502		3586.78	-0.02096339
637	0.00339779		1226.99	-0.013562		1816.99	-0.00694596		2406.98	-0.00935563		2996.98	-0.00204546		3586.98	-0.01962355
637.2	0.00475261		1227.19	-0.01396026		1817.19	-0.00685159		2407.18	-0.00921433		2997.18	-0.00125876		3587.18	-0.01963547
637.4	0.00552358		1227.39	-0.01310328		1817.39	-0.00659702		2407.38	-0.00964112		2997.38	-0.00112121		3587.38	-0.01946022
637.6	0.00540041		1227.59	-0.01216464		1817.59	-0.00634973		2407.58	-0.00998204		2997.58	-0.00092648		3587.58	-0.02001214
637.8	0.00567327		1227.79	-0.01215637		1817.79	-0.00651338		2407.78	-0.01144867		2997.78	-0.00039457		3587.78	-0.02084879
638	0.00637517		1227.99	-0.01143454		1817.99	-0.00744536		2407.98	-0.01140888		2997.98	0.0000438		3587.98	-0.02148755
638.2	0.005945		1228.19	-0.01157706		1818.19	-0.00739605		2408.18	-0.01132308		2998.18	0.00082489		3588.18	-0.02207218
638.4	0.00658566		1228.39	-0.01141966		1818.39	-0.00806082		2408.38	-0.01261966		2998.38	0.00045411		3588.38	-0.02223628
638.6	0.0063983		1228.59	-0.01112452		1818.59	-0.0064969		2408.58	-0.01284772		2998.58	0.0008583		3588.58	-0.02252871
638.8	0.00676951		1228.79	-0.01059427		1818.79	-0.00627949		2408.78	-0.01254491		2998.78	0.00061375		3588.78	-0.02229513
639	0.00682172		1228.99	-0.01061587		1818.99	-0.0060761		2408.98	-0.01243627		2998.98	0.00085521		3588.98	-0.02277682
639.2	0.00770194		1229.19	-0.01085791		1819.19	-0.0056296		2409.18	-0.01196148		2999.18	0.0008694		3589.18	-0.0225084
639.4	0.00797346		1229.39	-0.01018803		1819.39	-0.00591667		2409.38	-0.01174986		2999.38	0.00016868		3589.38	-0.0231173
639.6	0.00807982		1229.59	-0.01083743		1819.59	-0.00542355		2409.58	-0.01148592		2999.58	-0.00086665		3589.58	-0.02253576
639.8	0.00775766		1229.79	-0.01205116		1819.79	-0.00514209		2409.78	-0.01123849		2999.78	-0.00241607		3589.78	-0.022959
640	0.0069196		1229.99	-0.01227551		1819.99	-0.00531187		2409.98	-0.01058266		2999.98	-0.00282168		3589.98	-0.0240381
640.2	0.0065261		1230.19	-0.012653		1820.19	-0.00529609		2410.18	-0.0107569		3000.18	-0.00338098		3590.18	-0.02293989
640.4	0.0054434		1230.39	-0.01297198		1820.39	-0.00507836		2410.38	-0.0102493		3000.38	-0.00333715		3590.38	-0.02288097
640.6	0.00476557		1230.59	-0.01277983		1820.59	-0.00510243		2410.58	-0.00915		3000.58	-0.00333198		3590.58	-0.02322338
640.8	0.00481234		1230.79	-0.01298375		1820.79	-0.00493347		2410.78	-0.00903631		3000.78	-0.00337247		3590.78	-0.02366789
641	0.00509172		1230.99	-0.01225246		1820.99	-0.00479127		2410.98	-0.00863068		3000.98	-0.0035049		3590.98	-0.02393909
641.2	0.00574115		1231.19	-0.01301659		1821.19	-0.00549715		2411.18	-0.00845499		3001.18	-0.00258617		3591.18	-0.02474586
641.4	0.00570831		1231.39	-0.01324746		1821.39	-0.00650872		2411.38	-0.00936231		3001.38	-0.00227696		3591.38	-0.024418
641.6	0.00490121		1231.59	-0.01255853		1821.59	-0.00746712		2411.58	-0.0092037		3001.58	-0.00233108		3591.58	-0.02494488
641.8	0.00513478		1231.79	-0.01234654		1821.79	-0.00808175		2411.78	-0.01053397		3001.78	-0.00186642		3591.78	-0.02506095
642	0.00419716		1231.99	-0.0124668		1821.99	-0.00938377		2411.98	-0.01073646		3001.98	-0.00170502		3591.98	-0.02526295
642.2	0.00416505		1232.19	-0.01228555		1822.19	-0.00999724		2412.18	-0.01196163		3002.18	-0.00126266		3592.18	-0.02508073
642.4	0.00344932		1232.39	-0.01076719		1822.39	-0.00967832		2412.38	-0.0133025		3002.38	-0.00113236		3592.38	-0.02482346
642.6	0.00226842		1232.59	-0.01032378		1822.59	-0.00948854		2412.58	-0.01349792		3002.58	-0.00132066		3592.58	-0.02464325
642.8	0.00310904		1232.79	-0.01067948		1822.79	-0.00999938		2412.78	-0.01478535		3002.78	-0.00220519		3592.78	-0.02453635
643	0.00311141		1232.99	-0.0106111		1822.99	-0.01069294		2412.98	-0.01508655		3002.98	-0.00316914		3592.98	-0.0250325
643.2	0.00323598		1233.19	-0.00974662		1823.19	-0.0105997		2413.18	-0.01506727		3003.18	-0.00274983		3593.18	-0.02513647
643.4	0.00262711		1233.39	-0.00947531		1823.39	-0.01144581		2413.38	-0.01518827		3003.38	-0.00272889		3593.38	-0.02547453
643.6	0.00203428		1233.59	-0.01013963		1823.59	-0.01099813		2413.58	-0.01594454		3003.58	-0.00329867		3593.58	-0.02513956
643.8	0.00145037		1233.79	-0.01062889		1823.79	-0.01092745		2413.78	-0.01505397		3003.78	-0.00327216		3593.78	-0.02614364
644	0.00066331		1233.99	-0.01026734		1823.99	-0.01066966		2413.98	-0.01495784		3003.98	-0.0032675		3593.98	-0.02605514
644.2	0.00094238		1234.19	-0.01150389		1824.19	-0.0088495		2414.18	-0.01411167		3004.18	-0.00246433		3594.18	-0.02544442
644.4	0.00095715		1234.39	-0.01151964		1824.39	-0.00864707		2414.38	-0.01348154		3004.38	-0.00194664		3594.38	-0.0252123
644.6	0.00152251		1234.59	-0.01161007		1824.59	-0.00910152		2414.58	-0.01314366		3004.58	-0.00177421		3594.58	-0.02511453
644.8	0.00236012		1234.79	-0.0120217		1824.79	-0.00969599		2414.78	-0.01303361		3004.78	-0.00056718		3594.78	-0.02495922
645	0.00378344		1234.99	-0.01246841		1824.99	-0.00897772		2414.98	-0.01361365		3004.98	-0.00055702		3594.98	-0.02406373
645.2	0.00423302		1235.19	-0.01211251		1825.19	-0.00964711		2415.18	-0.01413242		3005.18	-0.00047444		3595.18	-0.02358531
645.4	0.00473704		1235.39	-0.01144037		1825.39	-0.01011025		2415.38	-0.01451067		3005.38	-0.00049478		3595.38	-0.02362299
645.6	0.00492336		1235.59	-0.01148031		1825.59	-0.01028359		2415.58	-0.01389266		3005.58	-0.00067492		3595.58	-0.02394216
645.8	0.00536824		1235.79	-0.01178119		1825.79	-0.00987334		2415.78	-0.0149376		3005.78	-0.00080422		3595.78	-0.02428455
646	0.00494771		1235.99	-0.0119584		1825.99	-0.00986435		2415.98	-0.01444409		3005.98	-0.00085725		3595.98	-0.02403564
646.2	0.00554752		1236.19	-0.01114395		1826.19	-0.0100868		2416.18	-0.01428707		3006.18	-0.00094574		3596.18	-0.02386563
646.4	0.0051994		1236.39	-0.01094892		1826.39	-0.0097741		2416.38	-0.01383419		3006.38	-0.00113576		3596.38	-0.02323248
646.6	0.00512175		1236.59	-0.01083399		1826.59	-0.00972384		2416.58	-0.01459843		3006.58	-0.00224782		3596.58	-0.0230766
646.8	0.00522489		1236.79	-0.01163064		1826.79	-0.00968112		2416.78	-0.01489964		3006.78	-0.00347952		3596.78	-0.02341564
647	0.0051798		1236.99	-0.0115385		1826.99	-0.01043071		2416.98	-0.01424664		3006.98	-0.00363921		3596.98	-0.0241592
647.2	0.0040219		1237.19	-0.01100183		1827.19	-0.01010972		2417.18	-0.01388958		3007.18	-0.0029098		3597.18	-0.02397613
647.4	0.00301619		1237.39	-0.01146792		1827.39	-0.01083304		2417.38	-0.01387576		3007.38	-0.0035473		3597.38	-0.02458661
647.6	0.00243389		1237.59	-0.01219036		1827.59	-0.0096622		2417.58	-0.0139919		3007.58	-0.00439567		3597.58	-0.02509217
647.8	0.00178882		1237.79	-0.01205428		1827.79	-0.00917258		2417.78	-0.01330749		3007.78	-0.00447226		3597.78	-0.02590697
648	0.00111771		1237.99	-0.0122404		1827.99	-0.00870721		2417.98	-0.01340885		3007.98	-0.00477439		3597.98	-0.02569057
648.2	0.0012049		1238.19	-0.01282764		1828.19	-0.0080379		2418.18	-0.01269115		3008.18	-0.00429887		3598.18	-0.02547034
648.4	0.00089939		1238.39	-0.0121178		1828.39	-0.00867488		2418.38	-0.01272061		3008.38	-0.00421838		3598.38	-0.02491743
648.6	0.0008767		1238.59	-0.0126575		1828.59	-0.00852814		2418.58	-0.01249776		3008.58	-0.00429806		3598.58	-0.02499487
648.8	0.00109554		1238.79	-0.01261905		1828.79	-0.00824773		2418.78	-0.01215596		3008.78	-0.0038505		3598.78	-0.02474206
649	0.00172999		1238.99	-0.0132349		1828.99	-0.00720515		2418.98	-0.01193782		3008.98	-0.00410945		3598.98	-0.0242591
649.2	0.00183826		1239.19	-0.01289396		1829.19	-0.00766086		2419.18	-0.01106123		3009.18	-0.00357354		3599.18	-0.0239797
649.4	0.00270328		1239.39	-0.01354575		1829.39	-0.00784205		2419.38	-0.00996791		3009.38	-0.00330768		3599.38	-0.02369051
649.6	0.00314709		1239.59	-0.01463044		1829.59	-0.00764013		2419.58	-0.00899526		3009.58	-0.0027516		3599.58	-0.02293392
649.8	0.0034263		1239.79	-0.01509672		1829.79	-0.00733892		2419.78	-0.00823171		3009.78	-0.00231038		3599.78	-0.02224415
