# Supplementary material for: Functional development of a V3/glycan-specific broadly neutralizing antibody isolated from a case of HIV superinfection
Source: eLife journal article supplement (doi:10.7554/elife.68110), 2021-07-15
Supplement: fig2-data2 [file D3.xls]

Vers 3.43 Data Simulation
Conc1	6.25E-08	6.25E-08	6.25E-08	6.25E-08	6.25E-08	6.25E-08	6.25E-08
Start1	290	879.99	1469.99	2059.99	2650	3240	3830
Stop1	649.8	1239.79	1829.8	2419.79	3009.8	3599.8	4189.8
Time1	Data1	Sim1	Time2	Data2	Sim2	Time3	Data3	Sim3	Time4	Data4	Sim4	Time5	Data5	Sim5	Time6	Data6	Sim6	Time7	Data7	Sim7
290	0.00655409		879.99	0.00619125		1469.99	-0.00151644		2059.99	0.0007256		2650	0.00276323		3240	0.00631621		3830	-0.00635849
290.2	0.00713545		880.19	0.0064911		1470.19	-0.0015141		2060.19	0.00003606		2650.2	0.00227466		3240.2	0.00636383		3830.2	-0.00605052
290.4	0.00730368		880.39	0.00578926		1470.39	-0.00174347		2060.39	-0.00133614		2650.4	0.00176099		3240.4	0.0065198		3830.4	-0.0055618
290.6	0.00822359		880.59	0.00518051		1470.59	-0.0018264		2060.59	-0.00203642		2650.6	0.00110051		3240.6	0.00589778		3830.6	-0.00559206
290.8	0.00895556		880.79	0.00521088		1470.79	-0.00199355		2060.79	-0.00187917		2650.8	0.00069955		3240.8	0.00452832		3830.8	-0.00554138
291	0.00943353		880.99	0.00577261		1470.99	-0.00265394		2060.99	-0.00182299		2651	0.00000265		3241	0.00426324		3831	-0.00513789
291.2	0.01017069		881.19	0.00481778		1471.19	-0.00284034		2061.19	-0.00220033		2651.2	-0.00036543		3241.2	0.00416169		3831.2	-0.00471142
291.4	0.01096413		881.39	0.00463951		1471.39	-0.00269562		2061.39	-0.00193873		2651.4	-0.00087355		3241.4	0.00385379		3831.4	-0.00401451
291.6	0.01225631		881.59	0.00394725		1471.59	-0.00258835		2061.59	-0.0020341		2651.6	-0.0018899		3241.6	0.00351513		3831.6	-0.00351325
291.8	0.01312113		881.79	0.00374391		1471.79	-0.00224483		2061.79	-0.00105211		2651.8	-0.00190186		3241.8	0.00384269		3831.8	-0.002992
292	0.01405772		881.99	0.00487268		1471.99	-0.00180973		2061.99	-0.00078804		2652	-0.00163523		3242	0.00379408		3832	-0.00310509
292.2	0.01506018		882.19	0.00576856		1472.19	-0.0009757		2062.19	0.00019286		2652.2	-0.00153299		3242.2	0.00489337		3832.2	-0.00349481
292.4	0.01595327		882.39	0.00674112		1472.39	-0.00145		2062.39	-0.00016365		2652.4	-0.00227125		3242.4	0.0058038		3832.4	-0.00349398
292.6	0.01705162		882.59	0.00670608		1472.59	-0.00094348		2062.59	-0.00129228		2652.6	-0.00168473		3242.6	0.00633668		3832.6	-0.00343189
292.8	0.01727396		882.79	0.00751414		1472.79	-0.00110018		2062.79	-0.00108631		2652.8	-0.00045309		3242.8	0.00728152		3832.8	-0.00292826
293	0.01801343		882.99	0.00792993		1472.99	-0.00083191		2062.99	-0.00148094		2653	0.00035671		3243	0.00863687		3833	-0.00278434
293.2	0.01841355		883.19	0.00902572		1473.19	-0.00047639		2063.19	-0.00142199		2653.2	-0.00001795		3243.2	0.00851276		3833.2	-0.00224708
293.4	0.01963277		883.39	0.01049148		1473.39	-0.00034201		2063.39	-0.001495		2653.4	0.00009615		3243.4	0.00953676		3833.4	-0.00239465
293.6	0.02080851		883.59	0.01079895		1473.59	0.00020949		2063.59	-0.00113029		2653.6	0.00005255		3243.6	0.01031275		3833.6	-0.00252421
293.8	0.02162868		883.79	0.01103637		1473.79	-0.00022794		2063.79	-0.00089567		2653.8	-0.00007908		3243.8	0.01176304		3833.8	-0.00342067
294	0.02190089		883.99	0.01286166		1473.99	0.00045526		2063.99	-0.00206693		2654	0.00032763		3244	0.01336856		3834	-0.00376113
294.2	0.02239409		884.19	0.01311161		1474.19	0.00078773		2064.19	-0.0027652		2654.2	0.00075503		3244.2	0.01365151		3834.2	-0.00517335
294.4	0.02341263		884.39	0.01294198		1474.39	0.0007706		2064.39	-0.00321359		2654.4	0.00061797		3244.4	0.013384		3834.4	-0.005426
294.6	0.02448393		884.59	0.01320155		1474.59	0.00015308		2064.59	-0.00218314		2654.6	0.00022633		3244.6	0.01160151		3834.6	-0.00668364
294.8	0.02533322		884.79	0.0140926		1474.79	-0.00033331		2064.79	-0.00134577		2654.8	0.00010354		3244.8	0.01077181		3834.8	-0.00643139
295	0.02581735		884.99	0.01363981		1474.99	-0.0012912		2064.99	-0.00186274		2655	-0.00016352		3245	0.01121311		3835	-0.00587574
295.2	0.02741838		885.19	0.01240164		1475.19	-0.00063563		2065.19	-0.00232734		2655.2	-0.00018542		3245.2	0.0105359		3835.2	-0.00513967
295.4	0.02795285		885.39	0.01242668		1475.39	-0.00049621		2065.39	-0.00103864		2655.4	-0.00072272		3245.4	0.00972676		3835.4	-0.00459847
295.6	0.02911993		885.59	0.01206877		1475.59	0.00016307		2065.59	-0.00091534		2655.6	-0.00142882		3245.6	0.00843181		3835.6	-0.00445272
295.8	0.03004351		885.79	0.01370302		1475.79	0.00064437		2065.79	0.00046854		2655.8	-0.00136481		3245.8	0.00821138		3835.8	-0.00431963
296	0.03120161		885.99	0.01484628		1475.99	0.00127497		2065.99	-0.00011376		2656	-0.00176187		3246	0.00765283		3836	-0.00536949
296.2	0.03191498		886.19	0.01473084		1476.19	0.0017766		2066.19	-0.00033765		2656.2	-0.00157455		3246.2	0.00803675		3836.2	-0.00464205
296.4	0.03330516		886.39	0.01489322		1476.39	0.0014285		2066.39	-0.00015524		2656.4	-0.00191544		3246.4	0.00819413		3836.4	-0.00474041
296.6	0.03377588		886.59	0.01519097		1476.59	0.00146319		2066.59	-0.00051317		2656.6	-0.00031875		3246.6	0.0085231		3836.6	-0.00430761
296.8	0.03397592		886.79	0.0153102		1476.79	0.0009688		2066.79	-0.00010093		2656.8	0.00010915		3246.8	0.0096825		3836.8	-0.00365048
297	0.03458147		886.99	0.01506897		1476.99	0.00162381		2066.99	0.00036841		2657	0.00058208		3247	0.00975833		3837	-0.00360482
297.2	0.03516558		887.19	0.01539741		1477.19	0.00166068		2067.19	0.00088637		2657.2	0.00033388		3247.2	0.00957658		3837.2	-0.00401143
297.4	0.03687669		887.39	0.01573537		1477.39	0.00303271		2067.39	0.00130013		2657.4	0.00075491		3247.4	0.00994034		3837.4	-0.00467994
297.6	0.0373814		887.59	0.01581672		1477.59	0.00411723		2067.59	0.00185143		2657.6	0.00118497		3247.6	0.01007162		3837.6	-0.005012
297.8	0.03815956		887.79	0.01651976		1477.79	0.00445536		2067.79	0.00186275		2657.8	0.0012028		3247.8	0.01120893		3837.8	-0.00487334
298	0.03959271		887.99	0.01755758		1477.99	0.00418206		2067.99	0.00125443		2658	0.00232482		3248	0.01068017		3838	-0.00420054
298.2	0.04110013		888.19	0.01752558		1478.19	0.00369165		2068.19	0.00187282		2658.2	0.0021097		3248.2	0.00977947		3838.2	-0.00325864
298.4	0.04333591		888.39	0.01771873		1478.39	0.00289624		2068.39	0.00216659		2658.4	0.00185543		3248.4	0.00970098		3838.4	-0.00228282
298.6	0.04445804		888.59	0.01833572		1478.59	0.00222094		2068.59	0.00277871		2658.6	0.00188939		3248.6	0.00934934		3838.6	-0.00219763
298.8	0.04522909		888.79	0.01817037		1478.79	0.00256733		2068.79	0.00196821		2658.8	0.00161158		3248.8	0.01010734		3838.8	-0.00096397
299	0.04694991		888.99	0.0175724		1478.99	0.00168784		2068.99	0.00162063		2659	0.00204485		3249	0.01054582		3839	-0.00015294
299.2	0.04874633		889.19	0.01798668		1479.19	0.00213633		2069.19	0.00195418		2659.2	0.00245564		3249.2	0.00948806		3839.2	0.00070332
299.4	0.04808086		889.39	0.01826323		1479.39	0.00203784		2069.39	0.00280037		2659.4	0.00253169		3249.4	0.00942553		3839.4	0.00133453
299.6	0.04888115		889.59	0.01839067		1479.59	0.00229592		2069.59	0.0025841		2659.6	0.00232478		3249.6	0.00864345		3839.6	0.00109256
299.8	0.05038401		889.79	0.01854613		1479.79	0.00229972		2069.79	0.00293987		2659.8	0.0024525		3249.8	0.00896691		3839.8	0.00112507
300	0.0516438		889.99	0.01726226		1479.99	0.00303081		2069.99	0.00232403		2660	0.00305666		3250	0.00845441		3840	0.00082597
300.2	0.05213951		890.19	0.0170075		1480.19	0.00287599		2070.19	0.00191591		2660.2	0.00400828		3250.2	0.00813987		3840.2	0.00197285
300.4	0.05382439		890.39	0.01772961		1480.39	0.00228055		2070.39	0.00306829		2660.4	0.00343753		3250.4	0.00896503		3840.4	0.00034018
300.6	0.05427379		890.59	0.01792061		1480.59	0.00235497		2070.59	0.00291526		2660.6	0.00340255		3250.6	0.00815069		3840.6	0.00083463
300.8	0.05554728		890.79	0.01703962		1480.79	0.00279793		2070.79	0.00382843		2660.8	0.00309995		3250.8	0.0089408		3840.8	0.00039202
301	0.05569475		890.99	0.01697303		1480.99	0.00437715		2070.99	0.00353727		2661	0.00337381		3251	0.00897965		3841	-0.00032731
301.2	0.05704864		891.19	0.0175586		1481.19	0.00516304		2071.19	0.00301812		2661.2	0.00350791		3251.2	0.00938581		3841.2	-0.00166291
301.4	0.05769239		891.39	0.01788655		1481.39	0.0059061		2071.39	0.00384309		2661.4	0.00336374		3251.4	0.00976527		3841.4	-0.00197185
301.6	0.05769239		891.59	0.0189453		1481.59	0.00650415		2071.59	0.00399145		2661.6	0.00368513		3251.6	0.00957592		3841.6	-0.00256305
301.8	0.05850254		891.79	0.02001449		1481.79	0.00679771		2071.79	0.00330019		2661.8	0.00441711		3251.8	0.00993481		3841.8	-0.002667
302	0.05924642		891.99	0.0214464		1481.99	0.00677833		2071.99	0.00303447		2662	0.00455149		3252	0.00980895		3842	-0.0015303
302.2	0.06003068		892.19	0.02190378		1482.19	0.00635589		2072.19	0.00243257		2662.2	0.00390208		3252.2	0.01049619		3842.2	-0.00117331
302.4	0.06058178		892.39	0.02246341		1482.39	0.0067648		2072.39	0.00233286		2662.4	0.00473028		3252.4	0.01084207		3842.4	-0.00129555
302.6	0.06098077		892.59	0.02279107		1482.59	0.00719796		2072.59	0.00131525		2662.6	0.00486326		3252.6	0.0106093		3842.6	-0.00180599
302.8	0.06101941		892.79	0.02252723		1482.79	0.00697031		2072.79	0.00033333		2662.8	0.00484899		3252.8	0.01099129		3842.8	-0.00202652
303	0.06251011		892.99	0.02256554		1482.99	0.00647716		2072.99	0.00060656		2663	0.00573359		3253	0.01118827		3843	-0.00198361
303.2	0.06224881		893.19	0.022581		1483.19	0.00695061		2073.19	0.00054588		2663.2	0.0066361		3253.2	0.01097393		3843.2	-0.00171096
303.4	0.06241788		893.39	0.02257909		1483.39	0.00628406		2073.39	0.0010736		2663.4	0.00694204		3253.4	0.01142109		3843.4	-0.0012955
303.6	0.06392825		893.59	0.02178146		1483.59	0.00600496		2073.59	0.00081649		2663.6	0.00782811		3253.6	0.01114266		3843.6	-0.00225193
303.8	0.06506383		893.79	0.02181195		1483.79	0.00552496		2073.79	0.00137829		2663.8	0.00873989		3253.8	0.01122552		3843.8	-0.00191153
304	0.06626931		893.99	0.02201716		1483.99	0.00539163		2073.99	0.00148351		2664	0.00861443		3254	0.01067793		3844	-0.00300263
304.2	0.06705629		894.19	0.02246647		1484.19	0.00469672		2074.19	0.0013462		2664.2	0.00832848		3254.2	0.01092621		3844.2	-0.0031348
304.4	0.06844724		894.39	0.02284374		1484.39	0.00453315		2074.39	0.00200619		2664.4	0.00790676		3254.4	0.01183134		3844.4	-0.00404369
304.6	0.06910037		894.59	0.02259709		1484.59	0.00409495		2074.59	0.0022493		2664.6	0.00754535		3254.6	0.01080018		3844.6	-0.00330595
304.8	0.06941302		894.79	0.02191677		1484.79	0.00399644		2074.79	0.00267791		2664.8	0.00729386		3254.8	0.01150371		3844.8	-0.00420785
305	0.06899749		894.99	0.02221359		1484.99	0.00464435		2074.99	0.00195065		2665	0.00648754		3255	0.01203362		3845	-0.00442999
305.2	0.07002954		895.19	0.02225309		1485.19	0.00506665		2075.19	0.00269756		2665.2	0.00606401		3255.2	0.01202816		3845.2	-0.00450927
305.4	0.06990044		895.39	0.02271092		1485.39	0.00531536		2075.39	0.00334265		2665.4	0.00514648		3255.4	0.0115242		3845.4	-0.00414832
305.6	0.07081226		895.59	0.02321344		1485.59	0.00633555		2075.59	0.00265798		2665.6	0.00533375		3255.6	0.01069484		3845.6	-0.00441645
305.8	0.07150988		895.79	0.02448043		1485.79	0.00646697		2075.79	0.0029968		2665.8	0.00520566		3255.8	0.01102324		3845.8	-0.00353153
306	0.07195054		895.99	0.02530193		1485.99	0.00635287		2075.99	0.00200068		2666	0.00474484		3256	0.01157106		3846	-0.00276396
306.2	0.07309318		896.19	0.02393624		1486.19	0.00637686		2076.19	0.00204313		2666.2	0.00483151		3256.2	0.01164963		3846.2	-0.002159
306.4	0.07312003		896.39	0.02387296		1486.39	0.00731532		2076.39	0.00139444		2666.4	0.0052985		3256.4	0.0115702		3846.4	-0.00149763
306.6	0.07404795		896.59	0.02383629		1486.59	0.00739964		2076.59	0.00109341		2666.6	0.00443553		3256.6	0.01189854		3846.6	-0.00189845
306.8	0.07460748		896.79	0.02350723		1486.79	0.00793887		2076.79	0.00113177		2666.8	0.00433852		3256.8	0.01288089		3846.8	-0.00149002
307	0.0756475		896.99	0.02349056		1486.99	0.00828329		2076.99	0.00116229		2667	0.0054728		3257	0.01340988		3847	-0.00072975
307.2	0.0763771		897.19	0.02389124		1487.19	0.00907691		2077.19	0.00198533		2667.2	0.00621975		3257.2	0.01349356		3847.2	0.00030575
307.4	0.07802581		897.39	0.0248758		1487.39	0.00870161		2077.39	0.00237618		2667.4	0.00663294		3257.4	0.0137166		3847.4	0.00013158
307.6	0.07820585		897.59	0.02568903		1487.59	0.00913138		2077.59	0.00204166		2667.6	0.00783282		3257.6	0.01379849		3847.6	-0.00029673
307.8	0.07972181		897.79	0.02690274		1487.79	0.00920413		2077.79	0.00268462		2667.8	0.00848586		3257.8	0.01450608		3847.8	-0.00055308
308	0.08138179		897.99	0.02721429		1487.99	0.0096493		2077.99	0.00199557		2668	0.0084641		3258	0.01402341		3848	-0.001178
308.2	0.08226941		898.19	0.02747512		1488.19	0.00988866		2078.19	0.00157485		2668.2	0.00882825		3258.2	0.01435517		3848.2	-0.00062585
308.4	0.08231399		898.39	0.02813845		1488.39	0.00967487		2078.39	0.00188848		2668.4	0.00943558		3258.4	0.01380732		3848.4	-0.00093064
308.6	0.08260668		898.59	0.0281948		1488.59	0.00949766		2078.59	0.00192548		2668.6	0.00815591		3258.6	0.01357486		3848.6	-0.00055755
308.8	0.08238539		898.79	0.02768138		1488.79	0.0100261		2078.79	0.00152569		2668.8	0.00769533		3258.8	0.01335025		3848.8	-0.00036292
309	0.08268674		898.99	0.02788416		1488.99	0.01089404		2078.99	0.00129348		2669	0.0077539		3259	0.01313953		3849	-0.00052387
309.2	0.0836641		899.19	0.02793645		1489.19	0.01119775		2079.19	0.00260229		2669.2	0.00798393		3259.2	0.01307762		3849.2	0.00000492
309.4	0.08419209		899.39	0.02871755		1489.39	0.01108632		2079.39	0.00203497		2669.4	0.00797607		3259.4	0.01285468		3849.4	-0.00060187
309.6	0.08461495		899.59	0.02814972		1489.59	0.01079754		2079.59	0.00177102		2669.6	0.00796496		3259.6	0.01229401		3849.6	-0.00081061
309.8	0.08503877		899.79	0.02892858		1489.79	0.01027312		2079.79	0.00259363		2669.8	0.00713779		3259.8	0.01285656		3849.8	-0.00027448
310	0.08472769		899.99	0.02870487		1489.99	0.0095095		2079.99	0.00192595		2670	0.00664304		3260	0.01280361		3850	-0.00098617
310.2	0.08550871		900.19	0.02717443		1490.19	0.00967652		2080.19	0.00290386		2670.2	0.00625298		3260.2	0.01291399		3850.2	-0.00040495
310.4	0.08560588		900.39	0.02753644		1490.39	0.01079867		2080.39	0.00297118		2670.4	0.00581821		3260.4	0.01336194		3850.4	-0.00067194
310.6	0.08560131		900.59	0.02751068		1490.59	0.0108504		2080.59	0.0030712		2670.6	0.00509401		3260.6	0.0137668		3850.6	-0.0006206
310.8	0.08612808		900.79	0.0267667		1490.79	0.01092628		2080.79	0.00202849		2670.8	0.0049344		3260.8	0.01402913		3850.8	-0.00082612
311	0.08668094		900.99	0.0271239		1490.99	0.01065976		2080.99	0.00247622		2671	0.00552758		3261	0.01441568		3851	-0.00116791
311.2	0.08737592		901.19	0.02751429		1491.19	0.01052821		2081.19	0.00269078		2671.2	0.0051357		3261.2	0.01489269		3851.2	-0.00129429
311.4	0.08824077		901.39	0.02810872		1491.39	0.0100334		2081.39	0.0022976		2671.4	0.00541514		3261.4	0.01503328		3851.4	-0.00207566
311.6	0.08943079		901.59	0.02839609		1491.59	0.00929892		2081.59	0.00197124		2671.6	0.00624375		3261.6	0.01453833		3851.6	-0.00228335
311.8	0.09166592		901.79	0.0280555		1491.79	0.00914236		2081.79	0.00217072		2671.8	0.00657744		3261.8	0.01500664		3851.8	-0.00305784
312	0.09207009		901.99	0.02754522		1491.99	0.00904045		2081.99	0.00068471		2672	0.00665816		3262	0.01399227		3852	-0.00331303
312.2	0.09307804		902.19	0.02723996		1492.19	0.00922118		2082.19	0.00084449		2672.2	0.0071538		3262.2	0.0142622		3852.2	-0.00358135
312.4	0.09411345		902.39	0.02661482		1492.39	0.00938143		2082.39	0.0008044		2672.4	0.00770366		3262.4	0.01413876		3852.4	-0.00429788
312.6	0.0953658		902.59	0.02651554		1492.59	0.01020471		2082.59	0.00028521		2672.6	0.0072976		3262.6	0.01463901		3852.6	-0.0030412
312.8	0.09564651		902.79	0.02611353		1492.79	0.01099424		2082.79	0.00050599		2672.8	0.00869464		3262.8	0.0142037		3852.8	-0.00335702
313	0.09631265		902.99	0.02677837		1492.99	0.01086521		2082.99	0.00164118		2673	0.00887425		3263	0.01362121		3853	-0.00440638
313.2	0.09726132		903.19	0.02730681		1493.19	0.01017745		2083.19	0.00236786		2673.2	0.00895725		3263.2	0.0136907		3853.2	-0.00374782
313.4	0.09786852		903.39	0.02812275		1493.39	0.00995652		2083.39	0.00252796		2673.4	0.00845987		3263.4	0.01355807		3853.4	-0.00407853
313.6	0.09855128		903.59	0.0286805		1493.59	0.0097503		2083.59	0.00345959		2673.6	0.00780753		3263.6	0.01289884		3853.6	-0.00330635
313.8	0.09882866		903.79	0.02992473		1493.79	0.01052614		2083.79	0.00442447		2673.8	0.00677021		3263.8	0.01298517		3853.8	-0.00305931
314	0.09997129		903.99	0.03037475		1493.99	0.01090247		2083.99	0.00490744		2674	0.0066016		3264	0.01307944		3854	-0.0033113
314.2	0.10135839		904.19	0.0309297		1494.19	0.01173275		2084.19	0.00557613		2674.2	0.00565417		3264.2	0.01373727		3854.2	-0.00300315
314.4	0.10181698		904.39	0.03207784		1494.39	0.01219192		2084.39	0.00533403		2674.4	0.00499056		3264.4	0.01411363		3854.4	-0.00225404
314.6	0.10233		904.59	0.03277941		1494.59	0.01195403		2084.59	0.00425649		2674.6	0.00405942		3264.6	0.01456977		3854.6	-0.00208493
314.8	0.1030406		904.79	0.03344664		1494.79	0.01192661		2084.79	0.00399793		2674.8	0.004424		3264.8	0.01483934		3854.8	-0.00210675
315	0.10375479		904.99	0.03432319		1494.99	0.01138531		2084.99	0.00472842		2675	0.00427021		3265	0.0153351		3855	-0.00186783
315.2	0.10459474		905.19	0.03556622		1495.19	0.01120062		2085.19	0.00411649		2675.2	0.00441968		3265.2	0.01592883		3855.2	-0.0013311
315.4	0.10522282		905.39	0.03649768		1495.39	0.01147369		2085.39	0.0038168		2675.4	0.00496156		3265.4	0.01614791		3855.4	-0.00167054
315.6	0.10643443		905.59	0.03620299		1495.59	0.01107816		2085.59	0.00299514		2675.6	0.00590808		3265.6	0.01660646		3855.6	-0.00187075
315.8	0.10765796		905.79	0.03659691		1495.79	0.01211369		2085.79	0.00251643		2675.8	0.00634144		3265.8	0.01778047		3855.8	-0.00221288
316	0.10808691		905.99	0.03604634		1495.99	0.01319907		2085.99	0.00060585		2676	0.00646184		3266	0.01778215		3856	-0.00221365
316.2	0.10989767		906.19	0.03537979		1496.19	0.01357576		2086.19	0.00111148		2676.2	0.00706292		3266.2	0.01825314		3856.2	-0.00212783
316.4	0.11084072		906.39	0.03507747		1496.39	0.01443224		2086.39	0.00137825		2676.4	0.00737561		3266.4	0.01857224		3856.4	-0.00208328
316.6	0.11159545		906.59	0.03519262		1496.59	0.01476856		2086.59	0.00105896		2676.6	0.00791102		3266.6	0.01807392		3856.6	-0.00197414
316.8	0.1120572		906.79	0.0347212		1496.79	0.01475597		2086.79	0.00131045		2676.8	0.00882119		3266.8	0.01791959		3856.8	-0.00280783
317	0.11225026		906.99	0.03486852		1496.99	0.01450839		2086.99	0.00216994		2677	0.00829266		3267	0.01806455		3857	-0.00290461
317.2	0.11231466		907.19	0.03459506		1497.19	0.0149653		2087.19	0.00169626		2677.2	0.00856453		3267.2	0.01860304		3857.2	-0.00291138
317.4	0.11203447		907.39	0.03359098		1497.39	0.01567184		2087.39	0.00248333		2677.4	0.00906785		3267.4	0.01836867		3857.4	-0.00405999
317.6	0.11233821		907.59	0.03335014		1497.59	0.01655873		2087.59	0.00239548		2677.6	0.00952468		3267.6	0.01778737		3857.6	-0.00429929
317.8	0.11175567		907.79	0.03266137		1497.79	0.0165818		2087.79	0.00309263		2677.8	0.00885443		3267.8	0.01859036		3857.8	-0.00446517
318	0.11277991		907.99	0.03210073		1497.99	0.0165453		2087.99	0.00296149		2678	0.00957219		3268	0.01833913		3858	-0.00450089
318.2	0.11230517		908.19	0.03217095		1498.19	0.01718734		2088.19	0.0035063		2678.2	0.00946834		3268.2	0.01776368		3858.2	-0.00496879
318.4	0.11161397		908.39	0.03242673		1498.39	0.0178131		2088.39	0.00340558		2678.4	0.01033701		3268.4	0.01692542		3858.4	-0.00484961
318.6	0.11173563		908.59	0.03253155		1498.59	0.01829133		2088.59	0.0033406		2678.6	0.00907653		3268.6	0.01630531		3858.6	-0.00512383
318.8	0.1115001		908.79	0.03329859		1498.79	0.01873158		2088.79	0.00328983		2678.8	0.00915757		3268.8	0.01637181		3858.8	-0.00504482
319	0.11188269		908.99	0.03376249		1498.99	0.01834143		2088.99	0.00426568		2679	0.00938877		3269	0.01707945		3859	-0.00538068
319.2	0.11253928		909.19	0.03529242		1499.19	0.01792544		2089.19	0.00466865		2679.2	0.0097727		3269.2	0.01774278		3859.2	-0.00483159
319.4	0.11287744		909.39	0.03656014		1499.39	0.01788604		2089.39	0.00523939		2679.4	0.00991117		3269.4	0.01750538		3859.4	-0.00516336
319.6	0.11394579		909.59	0.03709206		1499.59	0.01842934		2089.59	0.00512369		2679.6	0.00933118		3269.6	0.01803894		3859.6	-0.00440099
319.8	0.11518686		909.79	0.03886482		1499.79	0.01915991		2089.79	0.00522401		2679.8	0.00795359		3269.8	0.01826723		3859.8	-0.0045786
320	0.11647826		909.99	0.03955926		1499.99	0.01963507		2089.99	0.00563357		2680	0.00703025		3270	0.01788242		3860	-0.00456589
320.2	0.11856653		910.19	0.04088391		1500.19	0.01900673		2090.19	0.00649064		2680.2	0.00675525		3270.2	0.01801092		3860.2	-0.00452684
320.4	0.12019333		910.39	0.04182601		1500.39	0.01866183		2090.39	0.00740618		2680.4	0.00672646		3270.4	0.01798838		3860.4	-0.00541814
320.6	0.12213656		910.59	0.04232224		1500.59	0.01820356		2090.59	0.0076335		2680.6	0.00701286		3270.6	0.01741012		3860.6	-0.00591029
320.8	0.12345995		910.79	0.04224675		1500.79	0.01870848		2090.79	0.00797169		2680.8	0.00707591		3270.8	0.01758929		3860.8	-0.00589763
321	0.12377403		910.99	0.04250624		1500.99	0.01894487		2090.99	0.00757158		2681	0.00724213		3271	0.01825491		3861	-0.00636142
321.2	0.12438709		911.19	0.04200128		1501.19	0.01887963		2091.19	0.00696542		2681.2	0.00759588		3271.2	0.01870624		3861.2	-0.00714074
321.4	0.12454932		911.39	0.04121114		1501.39	0.01841383		2091.39	0.00686951		2681.4	0.00843878		3271.4	0.01876734		3861.4	-0.00732528
321.6	0.12525915		911.59	0.04129067		1501.59	0.01862007		2091.59	0.00644793		2681.6	0.0083312		3271.6	0.01883038		3861.6	-0.00684244
321.8	0.12538781		911.79	0.04116252		1501.79	0.01805389		2091.79	0.00659104		2681.8	0.00794312		3271.8	0.01976858		3861.8	-0.00589726
322	0.12588171		911.99	0.04094821		1501.99	0.01904587		2091.99	0.00562179		2682	0.00870614		3272	0.01897975		3862	-0.00543575
322.2	0.125435		912.19	0.04077636		1502.19	0.01882328		2092.19	0.00606089		2682.2	0.00871196		3272.2	0.01931978		3862.2	-0.00491165
322.4	0.12527251		912.39	0.04036207		1502.39	0.01868114		2092.39	0.00531417		2682.4	0.00898028		3272.4	0.01875628		3862.4	-0.00434118
322.6	0.12619221		912.59	0.0399843		1502.59	0.01902803		2092.59	0.00490943		2682.6	0.00767261		3272.6	0.01863696		3862.6	-0.00383432
322.8	0.12642446		912.79	0.03977322		1502.79	0.0187797		2092.79	0.00451358		2682.8	0.00863677		3272.8	0.01929957		3862.8	-0.00286738
323	0.12636651		912.99	0.03955927		1502.99	0.01801777		2092.99	0.00475627		2683	0.0096802		3273	0.01929511		3863	-0.0019831
323.2	0.12669232		913.19	0.03955662		1503.19	0.01724637		2093.19	0.00475864		2683.2	0.00921222		3273.2	0.01948369		3863.2	-0.00165547
323.4	0.1265097		913.39	0.03927112		1503.39	0.01762387		2093.39	0.00432059		2683.4	0.00908335		3273.4	0.01913674		3863.4	-0.00121754
323.6	0.12698579		913.59	0.0398077		1503.59	0.01833174		2093.59	0.00260536		2683.6	0.00874955		3273.6	0.01957142		3863.6	-0.0007808
323.8	0.12712842		913.79	0.04032512		1503.79	0.01865082		2093.79	0.0030479		2683.8	0.0093219		3273.8	0.01967947		3863.8	-0.00079161
324	0.12765169		913.99	0.0408677		1503.99	0.01864336		2093.99	0.00363005		2684	0.0104209		3274	0.01913077		3864	-0.00082612
324.2	0.12904909		914.19	0.04099063		1504.19	0.01847837		2094.19	0.00360604		2684.2	0.01090497		3274.2	0.01836142		3864.2	-0.00122764
324.4	0.12983661		914.39	0.04120311		1504.39	0.01867966		2094.39	0.00449794		2684.4	0.01118982		3274.4	0.01830139		3864.4	-0.00142195
324.6	0.13107606		914.59	0.04144442		1504.59	0.01986733		2094.59	0.00402446		2684.6	0.01209678		3274.6	0.01867077		3864.6	-0.00085857
324.8	0.13174244		914.79	0.04151142		1504.79	0.0195775		2094.79	0.00350111		2684.8	0.01241117		3274.8	0.01922382		3864.8	-0.00110941
325	0.13237544		914.99	0.04203508		1504.99	0.01882661		2094.99	0.00275433		2685	0.01254408		3275	0.01952024		3865	-0.00146182
325.2	0.13329292		915.19	0.04210328		1505.19	0.01900092		2095.19	0.00436343		2685.2	0.01225111		3275.2	0.02027807		3865.2	-0.00146531
325.4	0.13383597		915.39	0.04248778		1505.39	0.01901179		2095.39	0.00406276		2685.4	0.01291228		3275.4	0.02050822		3865.4	-0.00159092
325.6	0.13530634		915.59	0.0436437		1505.59	0.01911059		2095.59	0.00474078		2685.6	0.01323258		3275.6	0.02148782		3865.6	-0.00165699
325.8	0.13604871		915.79	0.04369018		1505.79	0.01923104		2095.79	0.00480811		2685.8	0.01315464		3275.8	0.02255318		3865.8	-0.00066311
326	0.13625603		915.99	0.0439179		1505.99	0.01991313		2095.99	0.00505585		2686	0.01341727		3276	0.0228956		3866	-0.00079231
326.2	0.13717297		916.19	0.04390944		1506.19	0.01995348		2096.19	0.00580887		2686.2	0.01413959		3276.2	0.02331812		3866.2	-0.00075096
326.4	0.13790727		916.39	0.04446305		1506.39	0.02049157		2096.39	0.00585364		2686.4	0.01401665		3276.4	0.02262071		3866.4	-0.00122846
326.6	0.13799296		916.59	0.04492796		1506.59	0.02118321		2096.59	0.00606117		2686.6	0.01280466		3276.6	0.02199207		3866.6	-0.00089152
326.8	0.13839848		916.79	0.04470183		1506.79	0.02099247		2096.79	0.00595537		2686.8	0.01328621		3276.8	0.02221914		3866.8	-0.00102721
327	0.13901631		916.99	0.04574889		1506.99	0.0209386		2096.99	0.00594891		2687	0.01347793		3277	0.02192853		3867	-0.00140495
327.2	0.13952796		917.19	0.04542883		1507.19	0.02086405		2097.19	0.00529677		2687.2	0.0136502		3277.2	0.02237997		3867.2	-0.00117516
327.4	0.1390635		917.39	0.04592302		1507.39	0.02108372		2097.39	0.00481718		2687.4	0.01366127		3277.4	0.02175421		3867.4	-0.00083355
327.6	0.13905112		917.59	0.04739467		1507.59	0.02172475		2097.59	0.00426987		2687.6	0.01320965		3277.6	0.0214079		3867.6	-0.00121977
327.8	0.13869067		917.79	0.04624282		1507.79	0.02284073		2097.79	0.00487605		2687.8	0.01367334		3277.8	0.02034054		3867.8	-0.00116023
328	0.13862346		917.99	0.04643281		1507.99	0.02276733		2097.99	0.00455612		2688	0.01278677		3278	0.01944381		3868	-0.00205672
328.2	0.13900173		918.19	0.04565982		1508.19	0.02293863		2098.19	0.0048381		2688.2	0.0114929		3278.2	0.01937395		3868.2	-0.00231924
328.4	0.13879106		918.39	0.04569254		1508.39	0.02293143		2098.39	0.00484156		2688.4	0.0107248		3278.4	0.01984587		3868.4	-0.00134941
328.6	0.13909963		918.59	0.04543777		1508.59	0.02243273		2098.59	0.00449359		2688.6	0.01145924		3278.6	0.01970772		3868.6	-0.00092927
328.8	0.13907335		918.79	0.0445109		1508.79	0.02136752		2098.79	0.00490652		2688.8	0.01050818		3278.8	0.0188186		3868.8	-0.00038936
329	0.13923747		918.99	0.04400602		1508.99	0.02120765		2098.99	0.00542361		2689	0.00993968		3279	0.01845874		3869	-0.00000146
329.2	0.139359		919.19	0.04383828		1509.19	0.02110534		2099.19	0.00626727		2689.2	0.0104587		3279.2	0.0186417		3869.2	0.00065213
329.4	0.13974266		919.39	0.04412177		1509.39	0.02178706		2099.39	0.00510464		2689.4	0.01098337		3279.4	0.01869266		3869.4	0.00083854
329.6	0.14116372		919.59	0.04410783		1509.59	0.02266458		2099.59	0.00534971		2689.6	0.01085278		3279.6	0.01992785		3869.6	0.00100581
329.8	0.14028812		919.79	0.04397702		1509.79	0.02355675		2099.79	0.00454381		2689.8	0.01064686		3279.8	0.02072896		3869.8	0.00148828
330	0.14062527		919.99	0.04540762		1509.99	0.02471129		2099.99	0.0052625		2690	0.01068101		3280	0.02139583		3870	0.00105675
330.2	0.1418984		920.19	0.04573842		1510.19	0.02520481		2100.19	0.00624183		2690.2	0.01142413		3280.2	0.02120761		3870.2	0.00111569
330.4	0.14222159		920.39	0.04685959		1510.39	0.02507275		2100.39	0.00650917		2690.4	0.01128134		3280.4	0.02088346		3870.4	0.00145594
330.6	0.14300716		920.59	0.04778623		1510.59	0.02606268		2100.59	0.00687932		2690.6	0.01107737		3280.6	0.02073019		3870.6	0.00176491
330.8	0.14497568		920.79	0.04853474		1510.79	0.02594521		2100.79	0.00708441		2690.8	0.01210796		3280.8	0.02107384		3870.8	0.00088072
331	0.14613634		920.99	0.04960299		1510.99	0.0255963		2100.99	0.00719685		2691	0.01288989		3281	0.02192578		3871	0.00121575
331.2	0.14718406		921.19	0.04928866		1511.19	0.02577537		2101.19	0.00667277		2691.2	0.01306494		3281.2	0.02254718		3871.2	0.00095671
331.4	0.14781543		921.39	0.05026805		1511.39	0.02576356		2101.39	0.00703643		2691.4	0.01274615		3281.4	0.02196337		3871.4	0.00004079
331.6	0.14843327		921.59	0.05028305		1511.59	0.02588042		2101.59	0.00726614		2691.6	0.01237342		3281.6	0.02117648		3871.6	-0.00078653
331.8	0.14865225		921.79	0.04931139		1511.79	0.02644117		2101.79	0.00678799		2691.8	0.01287054		3281.8	0.02030245		3871.8	-0.00196298
332	0.14904274		921.99	0.0495382		1511.99	0.02562934		2101.99	0.00701225		2692	0.01178415		3282	0.02044023		3872	-0.00197489
332.2	0.14903514		922.19	0.04878302		1512.19	0.0254511		2102.19	0.00748262		2692.2	0.0125291		3282.2	0.02016968		3872.2	-0.00256822
332.4	0.14908753		922.39	0.04941031		1512.39	0.02503504		2102.39	0.00736188		2692.4	0.01319734		3282.4	0.02004631		3872.4	-0.00268075
332.6	0.14984112		922.59	0.04963178		1512.59	0.02453842		2102.59	0.00703147		2692.6	0.0127595		3282.6	0.01938228		3872.6	-0.00302088
332.8	0.15013171		922.79	0.0491759		1512.79	0.02424942		2102.79	0.00666336		2692.8	0.01163899		3282.8	0.01945468		3872.8	-0.00312136
333	0.14989391		922.99	0.04957524		1512.99	0.02327464		2102.99	0.00623594		2693	0.01218528		3283	0.0203255		3873	-0.00414139
333.2	0.15009206		923.19	0.04978345		1513.19	0.02302399		2103.19	0.00488388		2693.2	0.01311007		3283.2	0.02085203		3873.2	-0.00507331
333.4	0.1503699		923.39	0.05050053		1513.39	0.02397188		2103.39	0.00405552		2693.4	0.01307418		3283.4	0.02160367		3873.4	-0.00564946
333.6	0.15029564		923.59	0.05080839		1513.59	0.02391439		2103.59	0.00420022		2693.6	0.01205617		3283.6	0.0229898		3873.6	-0.00608718
333.8	0.14901214		923.79	0.05194356		1513.79	0.02411586		2103.79	0.00427528		2693.8	0.01193498		3283.8	0.02366074		3873.8	-0.00567631
334	0.1500519		923.99	0.05162948		1513.99	0.02484467		2103.99	0.00483707		2694	0.01234029		3284	0.02367926		3874	-0.00536438
334.2	0.15059859		924.19	0.05095063		1514.19	0.02511638		2104.19	0.00454881		2694.2	0.01267243		3284.2	0.02404599		3874.2	-0.00487802
334.4	0.15086492		924.39	0.05127459		1514.39	0.02526207		2104.39	0.00436968		2694.4	0.01184103		3284.4	0.02435289		3874.4	-0.00380555
334.6	0.15116873		924.59	0.05105537		1514.59	0.02627173		2104.59	0.00459941		2694.6	0.0118119		3284.6	0.02509739		3874.6	-0.0031156
334.8	0.15155157		924.79	0.05196032		1514.79	0.0261702		2104.79	0.00443255		2694.8	0.01151927		3284.8	0.02534066		3874.8	-0.00218824
335	0.15186578		924.99	0.0517851		1514.99	0.02662065		2104.99	0.00438606		2695	0.01138728		3285	0.02610432		3875	-0.00129151
335.2	0.15260649		925.19	0.05192321		1515.19	0.02787204		2105.19	0.0041496		2695.2	0.01080267		3285.2	0.02584		3875.2	-0.00048997
335.4	0.1527452		925.39	0.05233956		1515.39	0.02827968		2105.39	0.00426838		2695.4	0.01109547		3285.4	0.02476312		3875.4	0.00002084
335.6	0.15228169		925.59	0.0526637		1515.59	0.02963542		2105.59	0.00497548		2695.6	0.01095163		3285.6	0.02447678		3875.6	0.00038368
335.8	0.15295865		925.79	0.05274593		1515.79	0.02970748		2105.79	0.00427978		2695.8	0.01151213		3285.8	0.02384518		3875.8	0.00117777
336	0.15362703		925.99	0.05310048		1515.99	0.02961668		2105.99	0.00502364		2696	0.01214959		3286	0.0230843		3876	0.00166277
336.2	0.15379052		926.19	0.05435897		1516.19	0.02883662		2106.19	0.00535937		2696.2	0.01339502		3286.2	0.02269318		3876.2	0.00076172
336.4	0.15462638		926.39	0.05497133		1516.39	0.02855765		2106.39	0.00489232		2696.4	0.01277566		3286.4	0.02243173		3876.4	0.00061258
336.6	0.15621081		926.59	0.05532967		1516.59	0.02831074		2106.59	0.00398663		2696.6	0.01259842		3286.6	0.02149131		3876.6	0.00050988
336.8	0.15642727		926.79	0.05547829		1516.79	0.02733683		2106.79	0.00304594		2696.8	0.01309623		3286.8	0.02198334		3876.8	-0.00026842
337	0.15645836		926.99	0.05559266		1516.99	0.02688329		2106.99	0.00189781		2697	0.01378299		3287	0.02184925		3877	-0.00188122
337.2	0.15678163		927.19	0.05558836		1517.19	0.02668588		2107.19	0.00259742		2697.2	0.01392526		3287.2	0.02198462		3877.2	-0.00257547
337.4	0.15852132		927.39	0.05547978		1517.39	0.02666154		2107.39	0.00306851		2697.4	0.01277941		3287.4	0.02166084		3877.4	-0.00239537
337.6	0.1587523		927.59	0.05569691		1517.59	0.02686714		2107.59	0.00360723		2697.6	0.01263099		3287.6	0.02168516		3877.6	-0.00252042
337.8	0.16030976		927.79	0.05560183		1517.79	0.02808165		2107.79	0.00348943		2697.8	0.01266403		3287.8	0.0224371		3877.8	-0.00209891
338	0.16132734		927.99	0.05485489		1517.99	0.029025		2107.99	0.00321297		2698	0.01334864		3288	0.02254066		3878	-0.00187812
338.2	0.16190302		928.19	0.05425051		1518.19	0.029913		2108.19	0.00281021		2698.2	0.01328427		3288.2	0.02353785		3878.2	-0.0010385
338.4	0.16216697		928.39	0.05437028		1518.39	0.02939829		2108.39	0.00290946		2698.4	0.01290206		3288.4	0.02387018		3878.4	-0.00040352
338.6	0.16262713		928.59	0.05424533		1518.59	0.02932982		2108.59	0.00363238		2698.6	0.01375774		3288.6	0.0245225		3878.6	0.00025576
338.8	0.16247993		928.79	0.05480237		1518.79	0.02963123		2108.79	0.00406202		2698.8	0.01379486		3288.8	0.02528592		3878.8	0.0005354
339	0.16269591		928.99	0.05393186		1518.99	0.0297474		2108.99	0.00439776		2699	0.01443121		3289	0.02589344		3879	0.00024512
339.2	0.16321085		929.19	0.0533529		1519.19	0.0298865		2109.19	0.00466684		2699.2	0.01557814		3289.2	0.0269191		3879.2	0.00088618
339.4	0.16363801		929.39	0.05363405		1519.39	0.02953677		2109.39	0.00570392		2699.4	0.01657632		3289.4	0.02765243		3879.4	0.00049949
339.6	0.16335757		929.59	0.05289789		1519.59	0.0299703		2109.59	0.00696748		2699.6	0.01726899		3289.6	0.02787303		3879.6	0.00093047
339.8	0.16407799		929.79	0.05285867		1519.79	0.02847895		2109.79	0.0072941		2699.8	0.01763935		3289.8	0.02749502		3879.8	0.00080382
340	0.16408962		929.99	0.05381913		1519.99	0.02823393		2109.99	0.00806187		2700	0.01869428		3290	0.02704329		3880	0.00010088
340.2	0.16383651		930.19	0.05427065		1520.19	0.02752922		2110.19	0.00838146		2700.2	0.01863025		3290.2	0.02702179		3880.2	0.00005496
340.4	0.16420614		930.39	0.05466085		1520.39	0.02758159		2110.39	0.0082861		2700.4	0.01846874		3290.4	0.02689428		3880.4	-0.00052309
340.6	0.16499942		930.59	0.05604935		1520.59	0.0271733		2110.59	0.0082687		2700.6	0.01864445		3290.6	0.02633899		3880.6	-0.00173738
340.8	0.16566205		930.79	0.05672444		1520.79	0.02714707		2110.79	0.00802352		2700.8	0.01796865		3290.8	0.02625236		3880.8	-0.00258182
341	0.16554114		930.99	0.05749801		1520.99	0.02671989		2110.99	0.00809305		2701	0.01700304		3291	0.02639519		3881	-0.00279028
341.2	0.16603153		931.19	0.05850675		1521.19	0.02663509		2111.19	0.00927892		2701.2	0.01629134		3291.2	0.02633191		3881.2	-0.00351125
341.4	0.1671938		931.39	0.05940173		1521.39	0.02699028		2111.39	0.00886249		2701.4	0.01568381		3291.4	0.02583771		3881.4	-0.00265564
341.6	0.1671364		931.59	0.06115997		1521.59	0.02864		2111.59	0.00875582		2701.6	0.01608606		3291.6	0.02462237		3881.6	-0.00184301
341.8	0.16858794		931.79	0.06182645		1521.79	0.02953429		2111.79	0.0085003		2701.8	0.01514063		3291.8	0.02488875		3881.8	-0.00170722
342	0.16806492		931.99	0.06245015		1521.99	0.02900579		2111.99	0.0082031		2702	0.01586752		3292	0.02451215		3882	-0.0013205
342.2	0.16877577		932.19	0.06122696		1522.19	0.02888234		2112.19	0.00709718		2702.2	0.01541366		3292.2	0.02436443		3882.2	-0.00097463
342.4	0.16885748		932.39	0.06152166		1522.39	0.02812711		2112.39	0.0063575		2702.4	0.01467259		3292.4	0.02415199		3882.4	-0.00142724
342.6	0.16957156		932.59	0.06147084		1522.59	0.0286939		2112.59	0.00675988		2702.6	0.01491591		3292.6	0.0241756		3882.6	-0.00103281
342.8	0.1702907		932.79	0.06074692		1522.79	0.02961733		2112.79	0.00583926		2702.8	0.014969		3292.8	0.0248178		3882.8	0.00012671
343	0.17138793		932.99	0.06085542		1522.99	0.02980865		2112.99	0.00534098		2703	0.01450655		3293	0.02483166		3883	0.00070547
343.2	0.17278155		933.19	0.05984136		1523.19	0.03003066		2113.19	0.00485371		2703.2	0.01447926		3293.2	0.0257096		3883.2	0.00149511
343.4	0.17354705		933.39	0.06037483		1523.39	0.03032374		2113.39	0.00507991		2703.4	0.01467464		3293.4	0.02543008		3883.4	0.00167294
343.6	0.17328963		933.59	0.05907517		1523.59	0.03077438		2113.59	0.00470608		2703.6	0.01404364		3293.6	0.02486748		3883.6	0.00204234
343.8	0.17434135		933.79	0.06031205		1523.79	0.03119834		2113.79	0.00459051		2703.8	0.01397504		3293.8	0.02589019		3883.8	0.00172693
344	0.17475625		933.99	0.06034148		1523.99	0.03087508		2113.99	0.00384216		2704	0.01460544		3294	0.02620631		3884	0.0011709
344.2	0.1754156		934.19	0.06062332		1524.19	0.03085364		2114.19	0.0034251		2704.2	0.01414104		3294.2	0.02670542		3884.2	0.00025612
344.4	0.17642321		934.39	0.06116666		1524.39	0.03092114		2114.39	0.00358252		2704.4	0.01418175		3294.4	0.02657534		3884.4	-0.00057135
344.6	0.17678972		934.59	0.06105845		1524.59	0.03038712		2114.59	0.00331732		2704.6	0.01473568		3294.6	0.02710082		3884.6	-0.00088728
344.8	0.17793251		934.79	0.06103883		1524.79	0.03053267		2114.79	0.00328455		2704.8	0.01484646		3294.8	0.02731254		3884.8	-0.00074906
345	0.17748788		934.99	0.06156471		1524.99	0.0303893		2114.99	0.00380604		2705	0.01588144		3295	0.02749548		3885	-0.00043202
345.2	0.1776171		935.19	0.06110041		1525.19	0.03122247		2115.19	0.00453303		2705.2	0.01616669		3295.2	0.02676198		3885.2	-0.00065537
345.4	0.17764249		935.39	0.0615634		1525.39	0.03097565		2115.39	0.00547217		2705.4	0.01687879		3295.4	0.02572701		3885.4	0.00071655
345.6	0.17758299		935.59	0.0622507		1525.59	0.03141175		2115.59	0.00619965		2705.6	0.01717592		3295.6	0.02590115		3885.6	0.0008195
345.8	0.17767545		935.79	0.06241184		1525.79	0.03057479		2115.79	0.00682765		2705.8	0.01749907		3295.8	0.02649237		3885.8	-0.00016161
346	0.17769302		935.99	0.06236909		1525.99	0.03095892		2115.99	0.00680332		2706	0.01789288		3296	0.02631057		3886	-0.00072853
346.2	0.17840745		936.19	0.06195294		1526.19	0.03206773		2116.19	0.00693695		2706.2	0.0170014		3296.2	0.02606175		3886.2	-0.00118872
346.4	0.17762153		936.39	0.06206867		1526.39	0.03210078		2116.39	0.00775893		2706.4	0.01630121		3296.4	0.02611838		3886.4	-0.00123214
346.6	0.17828123		936.59	0.06213663		1526.59	0.03185753		2116.59	0.00844998		2706.6	0.01711996		3296.6	0.02610925		3886.6	-0.00022038
346.8	0.17824344		936.79	0.06196977		1526.79	0.0321003		2116.79	0.00816141		2706.8	0.01705947		3296.8	0.02677817		3886.8	0.00086
347	0.17880725		936.99	0.06237929		1526.99	0.03246133		2116.99	0.00832011		2707	0.01715885		3297	0.02611622		3887	0.00042434
347.2	0.1794298		937.19	0.06208564		1527.19	0.03228369		2117.19	0.00817592		2707.2	0.01815667		3297.2	0.02665372		3887.2	0.0007971
347.4	0.18025655		937.39	0.06263386		1527.39	0.03199253		2117.39	0.0078169		2707.4	0.01869389		3297.4	0.02732378		3887.4	0.00072923
347.6	0.1806808		937.59	0.06290218		1527.59	0.03215562		2117.59	0.00727215		2707.6	0.01796396		3297.6	0.02790654		3887.6	0.00079802
347.8	0.1817806		937.79	0.06361369		1527.79	0.03251931		2117.79	0.00703164		2707.8	0.01872147		3297.8	0.02869241		3887.8	0.00007017
348	0.18149396		937.99	0.06323867		1527.99	0.0329318		2117.99	0.00619401		2708	0.01812325		3298	0.02832557		3888	-0.00088272
348.2	0.18230055		938.19	0.06420954		1528.19	0.03350446		2118.19	0.00527833		2708.2	0.01785727		3298.2	0.02839174		3888.2	-0.00139067
348.4	0.18237228		938.39	0.06368629		1528.39	0.03320433		2118.39	0.00545929		2708.4	0.01848818		3298.4	0.02885884		3888.4	-0.0019
348.6	0.18248225		938.59	0.06377121		1528.59	0.03330331		2118.59	0.00458973		2708.6	0.01860026		3298.6	0.03030449		3888.6	-0.00132112
348.8	0.18402049		938.79	0.06421335		1528.79	0.03368612		2118.79	0.00476811		2708.8	0.01734139		3298.8	0.02930859		3888.8	-0.00164025
349	0.18415573		938.99	0.06411196		1528.99	0.03417831		2118.99	0.00514698		2709	0.01780153		3299	0.0282133		3889	-0.00156586
349.2	0.18478919		939.19	0.06355971		1529.19	0.03418036		2119.19	0.00506711		2709.2	0.01636272		3299.2	0.02754668		3889.2	-0.00219399
349.4	0.18441649		939.39	0.06444086		1529.39	0.03367155		2119.39	0.00473323		2709.4	0.01588315		3299.4	0.02691791		3889.4	-0.0018939
349.6	0.18462821		939.59	0.06446503		1529.59	0.03396209		2119.59	0.00504802		2709.6	0.01543946		3299.6	0.02756397		3889.6	-0.00310868
349.8	0.18540802		939.79	0.06453347		1529.79	0.03440859		2119.79	0.00463449		2709.8	0.01554825		3299.8	0.02628425		3889.8	-0.00411916
350	0.18615505		939.99	0.0651094		1529.99	0.03537961		2119.99	0.00478651		2710	0.01433291		3300	0.02601311		3890	-0.00518215
350.2	0.18556849		940.19	0.06568684		1530.19	0.03494083		2120.19	0.00552478		2710.2	0.01366564		3300.2	0.02526517		3890.2	-0.00465613
350.4	0.18463214		940.39	0.06533808		1530.39	0.03404616		2120.39	0.00634046		2710.4	0.0139457		3300.4	0.02501513		3890.4	-0.00432932
350.6	0.18514305		940.59	0.06624458		1530.59	0.0331992		2120.59	0.00593289		2710.6	0.01523227		3300.6	0.02432205		3890.6	-0.00419197
350.8	0.18557717		940.79	0.0662335		1530.79	0.03346096		2120.79	0.00557273		2710.8	0.0157161		3300.8	0.02414053		3890.8	-0.00368699
351	0.18639028		940.99	0.06616569		1530.99	0.03334819		2120.99	0.00570167		2711	0.01659775		3301	0.02330167		3891	-0.0034654
351.2	0.18706884		941.19	0.0671271		1531.19	0.03304641		2121.19	0.0050178		2711.2	0.01738431		3301.2	0.02397052		3891.2	-0.00311982
351.4	0.18823808		941.39	0.06783243		1531.39	0.03282708		2121.39	0.00461518		2711.4	0.01704825		3301.4	0.0242349		3891.4	-0.00328823
351.6	0.18825092		941.59	0.06852712		1531.59	0.03350966		2121.59	0.0051409		2711.6	0.01753853		3301.6	0.02449468		3891.6	-0.00247884
351.8	0.18781738		941.79	0.06875374		1531.79	0.03446363		2121.79	0.00499498		2711.8	0.01751856		3301.8	0.02502674		3891.8	-0.00223657
352	0.18750339		941.99	0.06913916		1531.99	0.03461306		2121.99	0.00507064		2712	0.01661619		3302	0.024881		3892	-0.001932
352.2	0.18815439		942.19	0.06991333		1532.19	0.03438888		2122.19	0.00498367		2712.2	0.01636316		3302.2	0.02538231		3892.2	-0.00172421
352.4	0.18806209		942.39	0.06925215		1532.39	0.03416628		2122.39	0.00546895		2712.4	0.01627771		3302.4	0.02662289		3892.4	-0.00182821
352.6	0.1887801		942.59	0.06913338		1532.59	0.03444948		2122.59	0.00527011		2712.6	0.01522748		3302.6	0.02659863		3892.6	-0.00146546
352.8	0.18983275		942.79	0.06851902		1532.79	0.03343107		2122.79	0.00570835		2712.8	0.0145265		3302.8	0.02625168		3892.8	-0.00195041
353	0.19079505		942.99	0.06797636		1532.99	0.03346863		2122.99	0.00583981		2713	0.01473591		3303	0.02665042		3893	-0.00132924
353.2	0.19094397		943.19	0.06736582		1533.19	0.03288092		2123.19	0.00593062		2713.2	0.01361851		3303.2	0.02692308		3893.2	-0.00129336
353.4	0.19097184		943.39	0.06715525		1533.39	0.03156526		2123.39	0.00609113		2713.4	0.01374557		3303.4	0.02688917		3893.4	-0.00045987
353.6	0.19187601		943.59	0.06666232		1533.59	0.03168915		2123.59	0.006765		2713.6	0.01431058		3303.6	0.02755225		3893.6	-0.00128582
353.8	0.19214813		943.79	0.06693645		1533.79	0.03190177		2123.79	0.00677248		2713.8	0.01530735		3303.8	0.02737214		3893.8	-0.00163085
354	0.19234168		943.99	0.06743808		1533.99	0.03217368		2123.99	0.00754566		2714	0.01522848		3304	0.02708289		3894	-0.00183363
354.2	0.19250377		944.19	0.06760174		1534.19	0.03219962		2124.19	0.00755696		2714.2	0.01670833		3304.2	0.02646905		3894.2	-0.00107596
354.4	0.19260798		944.39	0.06781433		1534.39	0.03226757		2124.39	0.00755256		2714.4	0.01838735		3304.4	0.02619906		3894.4	-0.00074561
354.6	0.19328759		944.59	0.06806762		1534.59	0.03189634		2124.59	0.00651082		2714.6	0.01976773		3304.6	0.02541028		3894.6	-0.00098732
354.8	0.1939285		944.79	0.06789167		1534.79	0.0325355		2124.79	0.00658255		2714.8	0.02010828		3304.8	0.02532347		3894.8	-0.00004598
355	0.19392757		944.99	0.06871204		1534.99	0.03296499		2124.99	0.00649386		2715	0.0210069		3305	0.02516813		3895	-0.00048377
355.2	0.19557158		945.19	0.06978599		1535.19	0.03384998		2125.19	0.0060343		2715.2	0.02182992		3305.2	0.02552682		3895.2	-0.0016841
355.4	0.19674001		945.39	0.06962267		1535.39	0.0337469		2125.39	0.00638192		2715.4	0.02157081		3305.4	0.02650358		3895.4	-0.00183061
355.6	0.1966058		945.59	0.0696934		1535.59	0.03436452		2125.59	0.00703842		2715.6	0.02141713		3305.6	0.02700276		3895.6	-0.00124344
355.8	0.19715566		945.79	0.07074369		1535.79	0.0352312		2125.79	0.00798363		2715.8	0.02022034		3305.8	0.02674207		3895.8	-0.00174615
356	0.19779218		945.99	0.07124043		1535.99	0.03522432		2125.99	0.00880184		2716	0.0197743		3306	0.02625223		3896	-0.00182248
356.2	0.19818062		946.19	0.07126012		1536.19	0.03663834		2126.19	0.00923406		2716.2	0.01930168		3306.2	0.02682952		3896.2	-0.00186213
356.4	0.199094		946.39	0.07158081		1536.39	0.03706302		2126.39	0.00921905		2716.4	0.01916311		3306.4	0.02770298		3896.4	-0.00203208
356.6	0.19933302		946.59	0.07113258		1536.59	0.03704345		2126.59	0.00945672		2716.6	0.01793406		3306.6	0.02776501		3896.6	-0.00194549
356.8	0.19937985		946.79	0.07142753		1536.79	0.03699732		2126.79	0.00943575		2716.8	0.01710955		3306.8	0.0299837		3896.8	-0.00131168
357	0.20007835		946.99	0.07240788		1536.99	0.03803075		2126.99	0.00911156		2717	0.0164745		3307	0.03062392		3897	-0.00074661
357.2	0.1999635		947.19	0.07274409		1537.19	0.03803192		2127.19	0.00933847		2717.2	0.01579587		3307.2	0.03078947		3897.2	-0.00049201
357.4	0.1999469		947.39	0.07265983		1537.39	0.03759753		2127.39	0.00874494		2717.4	0.01601116		3307.4	0.03154597		3897.4	-0.00054853
357.6	0.19962437		947.59	0.07229919		1537.59	0.0387226		2127.59	0.00803042		2717.6	0.01592042		3307.6	0.03240307		3897.6	-0.00077713
357.8	0.19937782		947.79	0.07234254		1537.79	0.03890578		2127.79	0.00780026		2717.8	0.01553673		3307.8	0.03289304		3897.8	-0.00072358
358	0.1994108		947.99	0.07244345		1537.99	0.03929254		2127.99	0.00745459		2718	0.01549835		3308	0.03308094		3898	-0.00067756
358.2	0.19936039		948.19	0.07233687		1538.19	0.0401558		2128.19	0.00768591		2718.2	0.01608252		3308.2	0.03279024		3898.2	0.00044604
358.4	0.19916388		948.39	0.07331398		1538.39	0.04065378		2128.39	0.00709049		2718.4	0.01618603		3308.4	0.03187126		3898.4	0.00135296
358.6	0.19945635		948.59	0.07308624		1538.59	0.04066965		2128.59	0.00567272		2718.6	0.01615551		3308.6	0.03203844		3898.6	0.00133262
358.8	0.19936678		948.79	0.07405426		1538.79	0.04057853		2128.79	0.00608663		2718.8	0.01541365		3308.8	0.03123205		3898.8	0.00250951
359	0.19945311		948.99	0.07445456		1538.99	0.04027363		2128.99	0.00589058		2719	0.01629892		3309	0.03178246		3899	0.00172918
359.2	0.19995429		949.19	0.07502178		1539.19	0.03951286		2129.19	0.00608041		2719.2	0.0168333		3309.2	0.03160217		3899.2	0.00166219
359.4	0.20006292		949.39	0.07522391		1539.39	0.03873481		2129.39	0.00576332		2719.4	0.01666596		3309.4	0.03151987		3899.4	0.00195174
359.6	0.20009929		949.59	0.07601814		1539.59	0.03911729		2129.59	0.00667075		2719.6	0.01623082		3309.6	0.02961039		3899.6	0.00115196
359.8	0.20071828		949.79	0.07663822		1539.79	0.03918321		2129.79	0.00796618		2719.8	0.0163761		3309.8	0.02880703		3899.8	0.00129564
360	0.20089104		949.99	0.07652401		1539.99	0.03920631		2129.99	0.00759301		2720	0.01651555		3310	0.0279414		3900	0.00188062
360.2	0.2018248		950.19	0.07687889		1540.19	0.03991008		2130.19	0.00848195		2720.2	0.01682515		3310.2	0.02754354		3900.2	0.00214271
360.4	0.20292789		950.39	0.07802827		1540.39	0.03957282		2130.39	0.00828916		2720.4	0.01670711		3310.4	0.02673067		3900.4	0.00164931
360.6	0.20332788		950.59	0.07763237		1540.59	0.03915104		2130.59	0.00874068		2720.6	0.0159225		3310.6	0.02660916		3900.6	0.00135569
360.8	0.20339875		950.79	0.07861247		1540.79	0.03975113		2130.79	0.00820651		2720.8	0.01657163		3310.8	0.02732055		3900.8	0.00100053
361	0.20470088		950.99	0.0788654		1540.99	0.03941583		2130.99	0.00852779		2721	0.01716144		3311	0.02632642		3901	0.00039669
361.2	0.20481421		951.19	0.07823937		1541.19	0.03873235		2131.19	0.00880595		2721.2	0.01672996		3311.2	0.02668626		3901.2	-0.00101375
361.4	0.20471351		951.39	0.07727418		1541.39	0.0388207		2131.39	0.00845601		2721.4	0.01703058		3311.4	0.02706099		3901.4	-0.00233594
361.6	0.20526186		951.59	0.07728782		1541.59	0.03987707		2131.59	0.00821875		2721.6	0.01647968		3311.6	0.02735597		3901.6	-0.00278095
361.8	0.20575941		951.79	0.07719426		1541.79	0.04048602		2131.79	0.00898547		2721.8	0.0163878		3311.8	0.02868128		3901.8	-0.00343979
362	0.20590463		951.99	0.07769766		1541.99	0.04125376		2131.99	0.00885434		2722	0.0171384		3312	0.02916434		3902	-0.00365711
362.2	0.20678214		952.19	0.07776869		1542.19	0.04193962		2132.19	0.00956555		2722.2	0.01713091		3312.2	0.029548		3902.2	-0.00343354
362.4	0.20786326		952.39	0.07793222		1542.39	0.04183815		2132.39	0.00773264		2722.4	0.01654469		3312.4	0.03028291		3902.4	-0.00383955
362.6	0.20794589		952.59	0.07713121		1542.59	0.04196014		2132.59	0.00595523		2722.6	0.01725729		3312.6	0.03217229		3902.6	-0.00407221
362.8	0.20769634		952.79	0.07768345		1542.79	0.04157604		2132.79	0.00629109		2722.8	0.01732932		3312.8	0.03236719		3902.8	-0.00383216
363	0.20760511		952.99	0.07730144		1542.99	0.04105377		2132.99	0.00593531		2723	0.0179628		3313	0.03401304		3903	-0.00441598
363.2	0.20735678		953.19	0.07811109		1543.19	0.04125314		2133.19	0.00570538		2723.2	0.01814414		3313.2	0.03455585		3903.2	-0.0035945
363.4	0.20816234		953.39	0.07808213		1543.39	0.04195917		2133.39	0.00496639		2723.4	0.01840676		3313.4	0.03525034		3903.4	-0.00424276
363.6	0.20934544		953.59	0.07766801		1543.59	0.04238491		2133.59	0.00539491		2723.6	0.01808559		3313.6	0.03470519		3903.6	-0.0039242
363.8	0.2099251		953.79	0.07746121		1543.79	0.04239333		2133.79	0.00570097		2723.8	0.01867982		3313.8	0.03576193		3903.8	-0.00301894
364	0.21064805		953.99	0.07832439		1543.99	0.04264892		2133.99	0.00631172		2724	0.01825008		3314	0.03520575		3904	-0.00241946
364.2	0.21151574		954.19	0.07766239		1544.19	0.04292075		2134.19	0.00719334		2724.2	0.01872341		3314.2	0.03584907		3904.2	-0.0014315
364.4	0.21171792		954.39	0.07695335		1544.39	0.04197519		2134.39	0.00674959		2724.4	0.01776374		3314.4	0.03501078		3904.4	-0.00147452
364.6	0.2114484		954.59	0.07620514		1544.59	0.04209224		2134.59	0.00730436		2724.6	0.01683376		3314.6	0.03505961		3904.6	-0.00068502
364.8	0.21075126		954.79	0.07647531		1544.79	0.04300147		2134.79	0.00803097		2724.8	0.01675805		3314.8	0.03464029		3904.8	-0.00041769
365	0.21240898		954.99	0.07603218		1544.99	0.04245334		2134.99	0.00921274		2725	0.01594943		3315	0.03418373		3905	-0.00063875
365.2	0.21176449		955.19	0.07641646		1545.19	0.04294275		2135.19	0.00891214		2725.2	0.01492909		3315.2	0.03390395		3905.2	-0.00080023
365.4	0.21145527		955.39	0.07726065		1545.39	0.04404106		2135.39	0.00887769		2725.4	0.01467991		3315.4	0.03327493		3905.4	-0.00014265
365.6	0.21160689		955.59	0.07823826		1545.59	0.04467129		2135.59	0.00983388		2725.6	0.01419295		3315.6	0.03348655		3905.6	-0.00003256
365.8	0.21219786		955.79	0.07838511		1545.79	0.04518759		2135.79	0.01008983		2725.8	0.01417244		3315.8	0.03388942		3905.8	-0.00022545
366	0.21253635		955.99	0.07849656		1545.99	0.04519935		2135.99	0.01003696		2726	0.0137787		3316	0.03334477		3906	0.00053118
366.2	0.21357776		956.19	0.07727202		1546.19	0.04499232		2136.19	0.01168161		2726.2	0.01392191		3316.2	0.03337153		3906.2	0.00015941
366.4	0.21338813		956.39	0.07662868		1546.39	0.04416042		2136.39	0.01081853		2726.4	0.01396842		3316.4	0.03273853		3906.4	0.00013229
366.6	0.21244312		956.59	0.07636257		1546.59	0.04390289		2136.59	0.01037638		2726.6	0.0156165		3316.6	0.03256256		3906.6	-0.00079446
366.8	0.21267489		956.79	0.0768413		1546.79	0.04335		2136.79	0.01114239		2726.8	0.01554845		3316.8	0.03170126		3906.8	-0.00113626
367	0.21236013		956.99	0.0764982		1546.99	0.042237		2136.99	0.01093046		2727	0.01655524		3317	0.03229018		3907	-0.00186502
367.2	0.21205082		957.19	0.07714055		1547.19	0.04235827		2137.19	0.01045949		2727.2	0.01712022		3317.2	0.03265287		3907.2	-0.00227042
367.4	0.21273683		957.39	0.07835428		1547.39	0.04226867		2137.39	0.01038191		2727.4	0.01819026		3317.4	0.03243214		3907.4	-0.00316798
367.6	0.2136064		957.59	0.07825696		1547.59	0.04191858		2137.59	0.01055477		2727.6	0.0190001		3317.6	0.03265566		3907.6	-0.00251648
367.8	0.21368798		957.79	0.07869047		1547.79	0.04219622		2137.79	0.01068591		2727.8	0.01979451		3317.8	0.03392062		3907.8	-0.00303126
368	0.21338921		957.99	0.0790034		1547.99	0.04136219		2137.99	0.01113304		2728	0.01942875		3318	0.03350471		3908	-0.00248061
368.2	0.21351484		958.19	0.07863333		1548.19	0.04152388		2138.19	0.01088626		2728.2	0.01961006		3318.2	0.03410074		3908.2	-0.00241043
368.4	0.21306599		958.39	0.07975317		1548.39	0.03997269		2138.39	0.01099363		2728.4	0.01925932		3318.4	0.03332417		3908.4	-0.00299491
368.6	0.21305135		958.59	0.08112885		1548.59	0.04111105		2138.59	0.0110076		2728.6	0.01934882		3318.6	0.0336494		3908.6	-0.00241431
368.8	0.21398176		958.79	0.08228991		1548.79	0.04183808		2138.79	0.01095744		2728.8	0.01966213		3318.8	0.03351099		3908.8	-0.00250576
369	0.21454392		958.99	0.0834937		1548.99	0.04189731		2138.99	0.00923043		2729	0.01977763		3319	0.03397997		3909	-0.0033461
369.2	0.21387916		959.19	0.08494812		1549.19	0.04269857		2139.19	0.00838075		2729.2	0.01957446		3319.2	0.03392077		3909.2	-0.00298758
369.4	0.21404679		959.39	0.0862217		1549.39	0.0428924		2139.39	0.00829963		2729.4	0.01951698		3319.4	0.03442806		3909.4	-0.00325272
369.6	0.21499248		959.59	0.08652743		1549.59	0.04347831		2139.59	0.00899729		2729.6	0.01957682		3319.6	0.03469926		3909.6	-0.00365187
369.8	0.21637825		959.79	0.08635111		1549.79	0.04496441		2139.79	0.0074351		2729.8	0.01946517		3319.8	0.03529769		3909.8	-0.00347252
370	0.21707611		959.99	0.08609271		1549.99	0.04558354		2139.99	0.0088226		2730	0.02027633		3320	0.03531447		3910	-0.00211726
370.2	0.21748537		960.19	0.08545395		1550.19	0.04577714		2140.19	0.00927895		2730.2	0.02029558		3320.2	0.03574458		3910.2	-0.00306221
370.4	0.21740047		960.39	0.0856614		1550.39	0.04507985		2140.39	0.00792582		2730.4	0.02057077		3320.4	0.03535776		3910.4	-0.00321757
370.6	0.2172409		960.59	0.08528388		1550.59	0.04615508		2140.59	0.00786482		2730.6	0.02070121		3320.6	0.03608122		3910.6	-0.00419066
370.8	0.21824758		960.79	0.08549185		1550.79	0.04599752		2140.79	0.00717458		2730.8	0.02079598		3320.8	0.03634675		3910.8	-0.00370375
371	0.21876214		960.99	0.08548408		1550.99	0.04594037		2140.99	0.00619016		2731	0.02063659		3321	0.03717025		3911	-0.00385887
371.2	0.21892161		961.19	0.08594367		1551.19	0.04672744		2141.19	0.00485038		2731.2	0.01970389		3321.2	0.03687247		3911.2	-0.00401303
371.4	0.21978627		961.39	0.08602238		1551.39	0.04763343		2141.39	0.00421029		2731.4	0.01940776		3321.4	0.03641747		3911.4	-0.00378773
371.6	0.22060154		961.59	0.08532319		1551.59	0.04779066		2141.59	0.00349938		2731.6	0.02003989		3321.6	0.03639631		3911.6	-0.00312232
371.8	0.22092186		961.79	0.0849521		1551.79	0.04791087		2141.79	0.00340304		2731.8	0.01977094		3321.8	0.03518208		3911.8	-0.00316606
372	0.22087268		961.99	0.08417183		1551.99	0.04670104		2141.99	0.00352742		2732	0.01906632		3322	0.03314305		3912	-0.00226789
372.2	0.22186464		962.19	0.08393268		1552.19	0.04657364		2142.19	0.00358783		2732.2	0.01913995		3322.2	0.03273131		3912.2	-0.00234105
372.4	0.22187172		962.39	0.08358276		1552.39	0.04506004		2142.39	0.00421351		2732.4	0.01912818		3322.4	0.03260721		3912.4	-0.00193673
372.6	0.22278366		962.59	0.08364794		1552.59	0.04585717		2142.59	0.00462173		2732.6	0.01966397		3322.6	0.03253451		3912.6	-0.00104526
372.8	0.22313829		962.79	0.08322575		1552.79	0.0460124		2142.79	0.0043542		2732.8	0.01922206		3322.8	0.03230568		3912.8	-0.00134005
373	0.22203064		962.99	0.08341562		1552.99	0.04620946		2142.99	0.00410287		2733	0.01920361		3323	0.03307913		3913	-0.00140966
373.2	0.22257566		963.19	0.08398978		1553.19	0.04598069		2143.19	0.00514272		2733.2	0.01885385		3323.2	0.03281703		3913.2	-0.00073541
373.4	0.22225763		963.39	0.08442535		1553.39	0.04565352		2143.39	0.00594291		2733.4	0.01848945		3323.4	0.03274843		3913.4	-0.00049804
373.6	0.22290849		963.59	0.08427288		1553.59	0.04620241		2143.59	0.00731758		2733.6	0.01863531		3323.6	0.03376532		3913.6	-0.00096465
373.8	0.22338004		963.79	0.08418345		1553.79	0.0469839		2143.79	0.00760416		2733.8	0.01932208		3323.8	0.0355393		3913.8	-0.00036318
374	0.22348175		963.99	0.08453585		1553.99	0.04704635		2143.99	0.01019855		2734	0.01916998		3324	0.03715613		3914	-0.00060101
374.2	0.22344743		964.19	0.08466875		1554.19	0.04676238		2144.19	0.01016915		2734.2	0.01837112		3324.2	0.03742311		3914.2	-0.00204496
374.4	0.22388045		964.39	0.08573956		1554.39	0.04662679		2144.39	0.01084571		2734.4	0.01918381		3324.4	0.03775472		3914.4	-0.0017706
374.6	0.2234835		964.59	0.08636405		1554.59	0.04772116		2144.59	0.01117509		2734.6	0.01906656		3324.6	0.03831069		3914.6	-0.00198989
374.8	0.22402669		964.79	0.08711272		1554.79	0.04745125		2144.79	0.01050458		2734.8	0.01906839		3324.8	0.03812877		3914.8	-0.00206327
375	0.22467067		964.99	0.08720215		1554.99	0.04792435		2144.99	0.01032437		2735	0.0183858		3325	0.03856117		3915	-0.00266878
375.2	0.22496455		965.19	0.08713042		1555.19	0.04840028		2145.19	0.00972603		2735.2	0.01758591		3325.2	0.03748075		3915.2	-0.00322259
375.4	0.22553695		965.39	0.08775689		1555.39	0.04869559		2145.39	0.00920436		2735.4	0.01779097		3325.4	0.03660859		3915.4	-0.00281161
375.6	0.22606019		965.59	0.08911086		1555.59	0.04842777		2145.59	0.00849603		2735.6	0.01840754		3325.6	0.03549057		3915.6	-0.00338476
375.8	0.22635129		965.79	0.08876165		1555.79	0.04850794		2145.79	0.00749377		2735.8	0.01822253		3325.8	0.03475443		3915.8	-0.00283565
376	0.22749526		965.99	0.08865813		1555.99	0.04740031		2145.99	0.00712488		2736	0.01867507		3326	0.03512492		3916	-0.00234012
376.2	0.22798819		966.19	0.0883141		1556.19	0.04673364		2146.19	0.00689489		2736.2	0.0190763		3326.2	0.03586115		3916.2	-0.00148143
376.4	0.22865563		966.39	0.08775091		1556.39	0.04547174		2146.39	0.00635518		2736.4	0.01936292		3326.4	0.03596039		3916.4	-0.00025343
376.6	0.23020626		966.59	0.08724437		1556.59	0.04592666		2146.59	0.00687195		2736.6	0.0194547		3326.6	0.03518139		3916.6	0.00119828
376.8	0.22996993		966.79	0.0872738		1556.79	0.04597073		2146.79	0.00638543		2736.8	0.01911739		3326.8	0.03520912		3916.8	0.00130112
377	0.23021512		966.99	0.08771738		1556.99	0.0456025		2146.99	0.00609486		2737	0.01997358		3327	0.03568422		3917	0.00227837
377.2	0.23165279		967.19	0.08782268		1557.19	0.04526149		2147.19	0.00544547		2737.2	0.01978045		3327.2	0.0358282		3917.2	0.00194235
377.4	0.23146686		967.39	0.08737249		1557.39	0.04588281		2147.39	0.00593658		2737.4	0.02053673		3327.4	0.03585978		3917.4	0.00251695
377.6	0.23185859		967.59	0.08635753		1557.59	0.04493593		2147.59	0.00646214		2737.6	0.02172273		3327.6	0.03705905		3917.6	0.00183994
377.8	0.23150389		967.79	0.08610396		1557.79	0.04535741		2147.79	0.00686925		2737.8	0.02213341		3327.8	0.03718353		3917.8	0.00174342
378	0.23168474		967.99	0.08602121		1557.99	0.045448		2147.99	0.00740004		2738	0.02164317		3328	0.03758536		3918	0.00122992
378.2	0.23175326		968.19	0.0859501		1558.19	0.04567524		2148.19	0.00721893		2738.2	0.02170003		3328.2	0.036582		3918.2	0.00099288
378.4	0.23118016		968.39	0.08612348		1558.39	0.04592501		2148.39	0.00823692		2738.4	0.0214921		3328.4	0.03686621		3918.4	0.00141149
378.6	0.23011504		968.59	0.08576441		1558.59	0.04681878		2148.59	0.00864358		2738.6	0.02141554		3328.6	0.03612834		3918.6	0.00168194
378.8	0.23021027		968.79	0.085262		1558.79	0.04662871		2148.79	0.00916676		2738.8	0.02089113		3328.8	0.03578738		3918.8	0.00102228
379	0.22978476		968.99	0.08494433		1558.99	0.04749686		2148.99	0.00938283		2739	0.02047899		3329	0.03578645		3919	0.00007567
379.2	0.22985397		969.19	0.08574699		1559.19	0.04740087		2149.19	0.00876012		2739.2	0.02035291		3329.2	0.03472814		3919.2	0.0001913
379.4	0.2297788		969.39	0.08704426		1559.39	0.04806378		2149.39	0.00821995		2739.4	0.02030746		3329.4	0.03492852		3919.4	-0.00042067
379.6	0.22892173		969.59	0.08843742		1559.59	0.04862538		2149.59	0.00824574		2739.6	0.02078901		3329.6	0.03532468		3919.6	-0.0014443
379.8	0.2292222		969.79	0.08846299		1559.79	0.04816023		2149.79	0.00766242		2739.8	0.02128556		3329.8	0.0358594		3919.8	-0.00148129
380	0.22913361		969.99	0.08799368		1559.99	0.04789548		2149.99	0.00821781		2740	0.02183774		3330	0.03674322		3920	-0.00166773
380.2	0.22843145		970.19	0.08817226		1560.19	0.0481744		2150.19	0.00753821		2740.2	0.02092963		3330.2	0.03715666		3920.2	-0.00087764
380.4	0.22993054		970.39	0.08893519		1560.39	0.04828179		2150.39	0.00718732		2740.4	0.02028555		3330.4	0.03740032		3920.4	-0.00064086
380.6	0.23036654		970.59	0.08968507		1560.59	0.04838546		2150.59	0.00843287		2740.6	0.01972713		3330.6	0.03660425		3920.6	-0.00026661
380.8	0.23139424		970.79	0.09085032		1560.79	0.04807237		2150.79	0.00764688		2740.8	0.02015443		3330.8	0.03720904		3920.8	-0.00057779
381	0.23297744		970.99	0.09109282		1560.99	0.04825994		2150.99	0.0069947		2741	0.02077978		3331	0.03731035		3921	0.00017699
381.2	0.2345657		971.19	0.09099257		1561.19	0.04865376		2151.19	0.00614648		2741.2	0.02080689		3331.2	0.03698133		3921.2	-0.00005823
381.4	0.23465067		971.39	0.09139491		1561.39	0.04913571		2151.39	0.00633595		2741.4	0.02152528		3331.4	0.03605716		3921.4	0.00060509
381.6	0.23578842		971.59	0.09158465		1561.59	0.04851804		2151.59	0.00644027		2741.6	0.02162454		3331.6	0.03608956		3921.6	0.00023772
381.8	0.23606732		971.79	0.09248235		1561.79	0.04877071		2151.79	0.00582318		2741.8	0.02108011		3331.8	0.03587485		3921.8	0.00027758
382	0.23701441		971.99	0.09234148		1561.99	0.04875186		2151.99	0.00547889		2742	0.02123844		3332	0.0360303		3922	0.00084151
382.2	0.2371258		972.19	0.0924625		1562.19	0.04826486		2152.19	0.00609012		2742.2	0.02122227		3332.2	0.03580902		3922.2	0.00033864
382.4	0.23685661		972.39	0.09229102		1562.39	0.04815597		2152.39	0.00658005		2742.4	0.02106755		3332.4	0.03492259		3922.4	0.00070343
382.6	0.23701282		972.59	0.09248609		1562.59	0.04906944		2152.59	0.00706291		2742.6	0.02235603		3332.6	0.03415427		3922.6	0.00090941
382.8	0.23703338		972.79	0.09264248		1562.79	0.04866914		2152.79	0.00734294		2742.8	0.02287798		3332.8	0.03458766		3922.8	-0.00022025
383	0.23723536		972.99	0.09336938		1562.99	0.04897984		2152.99	0.00691586		2743	0.0230817		3333	0.03514761		3923	-0.00052684
383.2	0.23808581		973.19	0.09351828		1563.19	0.04805508		2153.19	0.00779584		2743.2	0.02339163		3333.2	0.03499064		3923.2	-0.00057483
383.4	0.23841456		973.39	0.09349922		1563.39	0.04915156		2153.39	0.00852224		2743.4	0.02312283		3333.4	0.03585615		3923.4	-0.00080882
383.6	0.23811098		973.59	0.09391026		1563.59	0.0496139		2153.59	0.00919997		2743.6	0.02394384		3333.6	0.03589705		3923.6	-0.00047268
383.8	0.23849542		973.79	0.09321844		1563.79	0.04894431		2153.79	0.00870214		2743.8	0.02357976		3333.8	0.03619285		3923.8	-0.0009166
384	0.23792279		973.99	0.09288484		1563.99	0.04979004		2153.99	0.0086407		2744	0.02278138		3334	0.03705467		3924	-0.00044155
384.2	0.23761374		974.19	0.093201		1564.19	0.04996842		2154.19	0.00840275		2744.2	0.02208799		3334.2	0.03631712		3924.2	0.00039847
384.4	0.23849712		974.39	0.09328813		1564.39	0.04976439		2154.39	0.00869051		2744.4	0.02168474		3334.4	0.0364452		3924.4	0.00050213
384.6	0.2389049		974.59	0.09266306		1564.59	0.04954733		2154.59	0.00918348		2744.6	0.02120074		3334.6	0.03609544		3924.6	0.00045639
384.8	0.24005044		974.79	0.09213631		1564.79	0.05046155		2154.79	0.0090755		2744.8	0.02135263		3334.8	0.03641254		3924.8	0.00031033
385	0.24066725		974.99	0.09136505		1564.99	0.05119283		2154.99	0.00891751		2745	0.0207692		3335	0.03615198		3925	0.0009102
385.2	0.24079786		975.19	0.09133502		1565.19	0.05136533		2155.19	0.00802312		2745.2	0.02063885		3335.2	0.03636657		3925.2	0.00032876
385.4	0.24026735		975.39	0.09224259		1565.39	0.05083459		2155.39	0.00736432		2745.4	0.02008608		3335.4	0.03624861		3925.4	-0.00048953
385.6	0.24043511		975.59	0.0925573		1565.59	0.05087333		2155.59	0.00627901		2745.6	0.0202688		3335.6	0.03618137		3925.6	-0.00191466
385.8	0.23977906		975.79	0.09292384		1565.79	0.05025589		2155.79	0.00477555		2745.8	0.02030718		3335.8	0.03593283		3925.8	-0.00187435
386	0.23993371		975.99	0.09362434		1565.99	0.05048136		2155.99	0.00451696		2746	0.02063024		3336	0.03610539		3926	-0.00239681
386.2	0.23950755		976.19	0.09485716		1566.19	0.05002562		2156.19	0.00478971		2746.2	0.02066912		3336.2	0.03620003		3926.2	-0.00330892
386.4	0.23885395		976.39	0.09529294		1566.39	0.05102039		2156.39	0.00427465		2746.4	0.02161023		3336.4	0.0366651		3926.4	-0.00306634
386.6	0.23933648		976.59	0.09702747		1566.59	0.05216838		2156.59	0.00469808		2746.6	0.02258398		3336.6	0.03704395		3926.6	-0.00360845
386.8	0.23959044		976.79	0.09774216		1566.79	0.05173131		2156.79	0.00422248		2746.8	0.02284244		3336.8	0.03732119		3926.8	-0.0043282
387	0.24016662		976.99	0.09816904		1566.99	0.05165126		2156.99	0.00384661		2747	0.02291698		3337	0.03761841		3927	-0.0048222
387.2	0.24045197		977.19	0.09815111		1567.19	0.05172371		2157.19	0.00411217		2747.2	0.02251376		3337.2	0.03696477		3927.2	-0.00431934
387.4	0.24113928		977.39	0.09915451		1567.39	0.05201835		2157.39	0.0040471		2747.4	0.02305323		3337.4	0.0377168		3927.4	-0.0033435
387.6	0.24201477		977.59	0.09900052		1567.59	0.052442		2157.59	0.00393448		2747.6	0.02335066		3337.6	0.03764639		3927.6	-0.00228405
387.8	0.24220905		977.79	0.09779968		1567.79	0.05247937		2157.79	0.00388542		2747.8	0.02400728		3337.8	0.03863276		3927.8	-0.00204105
388	0.24278452		977.99	0.09778953		1567.99	0.05331835		2157.99	0.00495599		2748	0.02345833		3338	0.03903959		3928	-0.00187698
388.2	0.24325926		978.19	0.09781978		1568.19	0.05436164		2158.19	0.00583059		2748.2	0.02325238		3338.2	0.03868981		3928.2	-0.00188012
388.4	0.24445652		978.39	0.09789461		1568.39	0.05490368		2158.39	0.00638435		2748.4	0.02274762		3338.4	0.03977523		3928.4	-0.00221333
388.6	0.24586238		978.59	0.0970079		1568.59	0.0553496		2158.59	0.00737166		2748.6	0.02204174		3338.6	0.03937918		3928.6	-0.00253084
388.8	0.24627343		978.79	0.09682827		1568.79	0.05620587		2158.79	0.00852442		2748.8	0.02138931		3338.8	0.0392864		3928.8	-0.00218068
389	0.24629329		978.99	0.09701782		1568.99	0.05545924		2158.99	0.00899727		2749	0.02028537		3339	0.03917752		3929	-0.00174682
389.2	0.24598278		979.19	0.09749896		1569.19	0.05451555		2159.19	0.00871103		2749.2	0.02082913		3339.2	0.03842986		3929.2	-0.00211896
389.4	0.24528281		979.39	0.09843854		1569.39	0.05388218		2159.39	0.00875579		2749.4	0.02015904		3339.4	0.03836101		3929.4	-0.0026769
389.6	0.24473984		979.59	0.09895514		1569.59	0.05452074		2159.59	0.00854986		2749.6	0.0192933		3339.6	0.03834167		3929.6	-0.00286623
389.8	0.24486536		979.79	0.09980923		1569.79	0.05336348		2159.79	0.00853608		2749.8	0.01850251		3339.8	0.03780714		3929.8	-0.0014618
390	0.24480137		979.99	0.10032649		1569.99	0.05287084		2159.99	0.0091811		2750	0.01816636		3340	0.03788354		3930	-0.00083408
390.2	0.24450237		980.19	0.1001595		1570.19	0.05197204		2160.19	0.0100385		2750.2	0.01837646		3340.2	0.03735499		3930.2	-0.00047433
390.4	0.24442829		980.39	0.09987315		1570.39	0.05207992		2160.39	0.00917332		2750.4	0.01910683		3340.4	0.0374742		3930.4	-0.00089187
390.6	0.24464177		980.59	0.09985149		1570.59	0.05151346		2160.59	0.00907973		2750.6	0.01866402		3340.6	0.03699037		3930.6	-0.00071229
390.8	0.24467424		980.79	0.09882692		1570.79	0.05023344		2160.79	0.00764731		2750.8	0.01906455		3340.8	0.03765976		3930.8	-0.00017204
391	0.24390021		980.99	0.09888522		1570.99	0.04986012		2160.99	0.00714592		2751	0.01893878		3341	0.03741541		3931	-0.00070801
391.2	0.24385124		981.19	0.09887217		1571.19	0.04896729		2161.19	0.0068306		2751.2	0.01884723		3341.2	0.03734249		3931.2	0.0002861
391.4	0.24506242		981.39	0.0989456		1571.39	0.04935423		2161.39	0.00668122		2751.4	0.02008983		3341.4	0.03827177		3931.4	0.000641
391.6	0.24533162		981.59	0.09739582		1571.59	0.05008373		2161.59	0.00609035		2751.6	0.02013063		3341.6	0.03906301		3931.6	0.00160981
391.8	0.24592337		981.79	0.09680408		1571.79	0.05068626		2161.79	0.00620299		2751.8	0.02108875		3341.8	0.04055627		3931.8	0.00161359
392	0.24680666		981.99	0.09731005		1571.99	0.05129443		2161.99	0.00647971		2752	0.02142727		3342	0.04051174		3932	0.00122479
392.2	0.24727685		982.19	0.09781738		1572.19	0.05225996		2162.19	0.00622236		2752.2	0.02208559		3342.2	0.040934		3932.2	0.00118254
392.4	0.24828243		982.39	0.09790523		1572.39	0.05224469		2162.39	0.00599348		2752.4	0.0223307		3342.4	0.04187102		3932.4	0.00112078
392.6	0.24841615		982.59	0.09755624		1572.59	0.05237432		2162.59	0.00720041		2752.6	0.02220566		3342.6	0.04143097		3932.6	0.00099908
392.8	0.24764186		982.79	0.09766669		1572.79	0.05340168		2162.79	0.00812562		2752.8	0.02227026		3342.8	0.04108252		3932.8	0.00046621
393	0.24667764		982.99	0.09793341		1572.99	0.05316323		2162.99	0.00829945		2753	0.02321349		3343	0.04094308		3933	0.00059406
393.2	0.24663375		983.19	0.09879014		1573.19	0.05365326		2163.19	0.00900158		2753.2	0.02294746		3343.2	0.04046578		3933.2	0.00051711
393.4	0.24646178		983.39	0.09983786		1573.39	0.05433177		2163.39	0.00955033		2753.4	0.02248605		3343.4	0.04202196		3933.4	0.00002021
393.6	0.24626172		983.59	0.10049937		1573.59	0.054934		2163.59	0.00994276		2753.6	0.02249005		3343.6	0.04146573		3933.6	0.00000797
393.8	0.2467623		983.79	0.1005249		1573.79	0.05432598		2163.79	0.01067541		2753.8	0.02261788		3343.8	0.04079129		3933.8	0.00048157
394	0.24644653		983.99	0.10029258		1573.99	0.05523739		2163.99	0.01145248		2754	0.02301471		3344	0.04058987		3934	0.00025948
394.2	0.24708867		984.19	0.10045157		1574.19	0.05577744		2164.19	0.01114344		2754.2	0.02339026		3344.2	0.03961739		3934.2	-0.00007933
394.4	0.24799817		984.39	0.10077724		1574.39	0.05675587		2164.39	0.0103807		2754.4	0.02345772		3344.4	0.03913267		3934.4	0.00016298
394.6	0.24801039		984.59	0.10071345		1574.59	0.05665644		2164.59	0.01009006		2754.6	0.02362153		3344.6	0.03884436		3934.6	0.00092698
394.8	0.24929439		984.79	0.10094721		1574.79	0.05658413		2164.79	0.00973218		2754.8	0.02335964		3344.8	0.03831928		3934.8	0.00045553
395	0.24981901		984.99	0.10146169		1574.99	0.0568542		2164.99	0.01008308		2755	0.02263234		3345	0.03711218		3935	-0.00031773
395.2	0.25056231		985.19	0.10190789		1575.19	0.05732083		2165.19	0.00937535		2755.2	0.02201919		3345.2	0.03805436		3935.2	-0.00030466
395.4	0.25171445		985.39	0.10201984		1575.39	0.05846358		2165.39	0.00887468		2755.4	0.02246956		3345.4	0.03886089		3935.4	-0.00040945
395.6	0.25222648		985.59	0.1023649		1575.59	0.05798393		2165.59	0.00900879		2755.6	0.022522		3345.6	0.04047096		3935.6	-0.00018582
395.8	0.2528385		985.79	0.10208072		1575.79	0.05818238		2165.79	0.00795472		2755.8	0.02314292		3345.8	0.04064151		3935.8	-0.0003311
396	0.25306006		985.99	0.10255718		1575.99	0.058392		2165.99	0.00754778		2756	0.0242577		3346	0.04105578		3936	-0.00024538
396.2	0.2529595		986.19	0.10277136		1576.19	0.05742288		2166.19	0.00794277		2756.2	0.02383454		3346.2	0.04119185		3936.2	-0.000943
396.4	0.25233319		986.39	0.10261911		1576.39	0.0569094		2166.39	0.00734601		2756.4	0.023964		3346.4	0.04178659		3936.4	-0.00147751
396.6	0.25206268		986.59	0.10169197		1576.59	0.05679152		2166.59	0.00800318		2756.6	0.02387926		3346.6	0.04070232		3936.6	-0.00184683
396.8	0.25298636		986.79	0.10210751		1576.79	0.05647456		2166.79	0.00839563		2756.8	0.02397254		3346.8	0.04033061		3936.8	-0.00356209
397	0.25280101		986.99	0.10261765		1576.99	0.05585573		2166.99	0.00867693		2757	0.0240995		3347	0.04114819		3937	-0.00385824
397.2	0.25336937		987.19	0.1025344		1577.19	0.05515555		2167.19	0.00899696		2757.2	0.02249233		3347.2	0.04177006		3937.2	-0.00507569
397.4	0.25408081		987.39	0.10305252		1577.39	0.05441609		2167.39	0.00783849		2757.4	0.023394		3347.4	0.04225507		3937.4	-0.00536979
397.6	0.25347639		987.59	0.10345017		1577.59	0.05406412		2167.59	0.00705357		2757.6	0.02373536		3347.6	0.04118659		3937.6	-0.00525335
397.8	0.25320094		987.79	0.10310467		1577.79	0.05364864		2167.79	0.0063381		2757.8	0.02334252		3347.8	0.04104762		3937.8	-0.00505561
398	0.25281899		987.99	0.10373304		1577.99	0.05408252		2167.99	0.00584816		2758	0.02348295		3348	0.04102816		3938	-0.00454771
398.2	0.2532204		988.19	0.10467887		1578.19	0.0536792		2168.19	0.00561376		2758.2	0.0224663		3348.2	0.04009901		3938.2	-0.0035005
398.4	0.25319082		988.39	0.10489735		1578.39	0.0537534		2168.39	0.00652927		2758.4	0.02214211		3348.4	0.04017251		3938.4	-0.00325928
398.6	0.25272638		988.59	0.10457777		1578.59	0.05326414		2168.59	0.00662		2758.6	0.02228063		3348.6	0.04112829		3938.6	-0.00327754
398.8	0.25316454		988.79	0.1052055		1578.79	0.05351904		2168.79	0.00679456		2758.8	0.02126852		3348.8	0.04126858		3938.8	-0.00375432
399	0.25383091		988.99	0.10560727		1578.99	0.05471967		2168.99	0.00712362		2759	0.02141219		3349	0.04158047		3939	-0.00260181
399.2	0.2531104		989.19	0.10586494		1579.19	0.05587795		2169.19	0.00687069		2759.2	0.02130667		3349.2	0.04270455		3939.2	-0.00241507
399.4	0.25358777		989.39	0.10494203		1579.39	0.05646508		2169.39	0.0081022		2759.4	0.02199311		3349.4	0.04338876		3939.4	-0.00186864
399.6	0.2543106		989.59	0.1051519		1579.59	0.05659396		2169.59	0.0087901		2759.6	0.02266028		3349.6	0.04474248		3939.6	-0.00074988
399.8	0.25372911		989.79	0.10468861		1579.79	0.05728931		2169.79	0.00763774		2759.8	0.02223092		3349.8	0.04454197		3939.8	-0.00007585
400	0.25400149		989.99	0.10447391		1579.99	0.05799646		2169.99	0.0078371		2760	0.02295515		3350	0.04429058		3940	0.00036946
400.2	0.25408112		990.19	0.10479321		1580.19	0.05838693		2170.19	0.00864769		2760.2	0.02333069		3350.2	0.04330192		3940.2	0.00028549
400.4	0.25418266		990.39	0.10431561		1580.39	0.05955912		2170.39	0.00853915		2760.4	0.02357809		3350.4	0.0431955		3940.4	0.0006571
400.6	0.25565015		990.59	0.10447663		1580.59	0.06019176		2170.59	0.00901048		2760.6	0.0239661		3350.6	0.04130614		3940.6	-0.0004927
400.8	0.25656268		990.79	0.10457823		1580.79	0.06047805		2170.79	0.00890601		2760.8	0.02417604		3350.8	0.04113804		3940.8	-0.001765
401	0.2564456		990.99	0.10398505		1580.99	0.06126915		2170.99	0.0087936		2761	0.02434961		3351	0.04091845		3941	-0.00203022
401.2	0.25713513		991.19	0.10337523		1581.19	0.06127855		2171.19	0.00863872		2761.2	0.0237114		3351.2	0.04057165		3941.2	-0.00160983
401.4	0.25801502		991.39	0.10426952		1581.39	0.06115651		2171.39	0.00737705		2761.4	0.02482639		3351.4	0.0407805		3941.4	-0.00107181
401.6	0.25793892		991.59	0.10429781		1581.59	0.06116516		2171.59	0.00601521		2761.6	0.02451316		3351.6	0.04013608		3941.6	-0.00171334
401.8	0.25680909		991.79	0.10429007		1581.79	0.06050316		2171.79	0.00597504		2761.8	0.02392573		3351.8	0.04020586		3941.8	-0.00146566
402	0.25635696		991.99	0.10518765		1581.99	0.06056332		2171.99	0.00601644		2762	0.02350537		3352	0.04085303		3942	-0.00114441
402.2	0.25590434		992.19	0.10529436		1582.19	0.06098887		2172.19	0.00606423		2762.2	0.02264744		3352.2	0.04037201		3942.2	-0.0011249
402.4	0.25673443		992.39	0.10543913		1582.39	0.06148168		2172.39	0.00651782		2762.4	0.02313384		3352.4	0.04091912		3942.4	-0.00053592
402.6	0.25684838		992.59	0.10502383		1582.59	0.06125982		2172.59	0.00608839		2762.6	0.02291839		3352.6	0.0415675		3942.6	-0.0004824
402.8	0.25765825		992.79	0.10529579		1582.79	0.06160139		2172.79	0.00607829		2762.8	0.02230602		3352.8	0.04158929		3942.8	-0.00043961
403	0.25815913		992.99	0.10467234		1582.99	0.06238865		2172.99	0.00691527		2763	0.02326311		3353	0.04193182		3943	0.00076284
403.2	0.25792838		993.19	0.10486609		1583.19	0.06188412		2173.19	0.00753573		2763.2	0.02207627		3353.2	0.04291648		3943.2	0.0002214
403.4	0.25893057		993.39	0.10509556		1583.39	0.06156599		2173.39	0.00846082		2763.4	0.02194521		3353.4	0.04350274		3943.4	0.00009832
403.6	0.25894564		993.59	0.10614337		1583.59	0.06115056		2173.59	0.00861693		2763.6	0.02242032		3353.6	0.04436667		3943.6	0.00029871
403.8	0.25863038		993.79	0.10650507		1583.79	0.06066435		2173.79	0.00796374		2763.8	0.02189592		3353.8	0.04342959		3943.8	0.00029985
404	0.2595555		993.99	0.10705072		1583.99	0.06104766		2173.99	0.00866859		2764	0.02277062		3354	0.04261118		3944	-0.00012953
404.2	0.2598938		994.19	0.10746015		1584.19	0.06102815		2174.19	0.00919703		2764.2	0.02285194		3354.2	0.04242076		3944.2	-0.00063665
404.4	0.26088132		994.39	0.10783309		1584.39	0.06054395		2174.39	0.00919494		2764.4	0.02284058		3354.4	0.04159661		3944.4	-0.00138906
404.6	0.26181479		994.59	0.10866669		1584.59	0.06057999		2174.59	0.00879625		2764.6	0.02333531		3354.6	0.04082791		3944.6	-0.0027615
404.8	0.26289328		994.79	0.1082403		1584.79	0.06033129		2174.79	0.0086144		2764.8	0.02273138		3354.8	0.04074606		3944.8	-0.00271933
405	0.26333705		994.99	0.10787186		1584.99	0.06053316		2174.99	0.00894824		2765	0.02353444		3355	0.04127769		3945	-0.00232799
405.2	0.26411576		995.19	0.10811276		1585.19	0.06034423		2175.19	0.00872271		2765.2	0.02304271		3355.2	0.04152738		3945.2	-0.00215397
405.4	0.26514565		995.39	0.1095341		1585.39	0.0595127		2175.39	0.00844446		2765.4	0.02330759		3355.4	0.0414545		3945.4	-0.002762
405.6	0.26467561		995.59	0.10941928		1585.59	0.05905449		2175.59	0.00847049		2765.6	0.02346501		3355.6	0.04109162		3945.6	-0.00385367
405.8	0.26457528		995.79	0.10964472		1585.79	0.05905519		2175.79	0.00907997		2765.8	0.02404127		3355.8	0.04211628		3945.8	-0.00285298
406	0.2656738		995.99	0.10965533		1585.99	0.05915723		2175.99	0.00818098		2766	0.02474476		3356	0.0426578		3946	-0.0034593
406.2	0.26548178		996.19	0.10854285		1586.19	0.06061988		2176.19	0.00831662		2766.2	0.02441745		3356.2	0.04270873		3946.2	-0.00333912
406.4	0.26670693		996.39	0.10816075		1586.39	0.06085566		2176.39	0.00853084		2766.4	0.02531581		3356.4	0.04314764		3946.4	-0.0023744
406.6	0.26579598		996.59	0.10696495		1586.59	0.06122212		2176.59	0.00797588		2766.6	0.02576547		3356.6	0.04321775		3946.6	-0.00241006
406.8	0.26522554		996.79	0.10657052		1586.79	0.06199324		2176.79	0.00779234		2766.8	0.02623665		3356.8	0.04423516		3946.8	-0.00147642
407	0.26399259		996.99	0.10637984		1586.99	0.06282832		2176.99	0.00821544		2767	0.02640441		3357	0.04494242		3947	-0.00038926
407.2	0.26396421		997.19	0.10713608		1587.19	0.06235534		2177.19	0.00758734		2767.2	0.026197		3357.2	0.04593162		3947.2	-0.0003828
407.4	0.26380353		997.39	0.10713384		1587.39	0.06269747		2177.39	0.00788143		2767.4	0.0271197		3357.4	0.04592685		3947.4	-0.00013935
407.6	0.26265568		997.59	0.10716778		1587.59	0.06363298		2177.59	0.00756737		2767.6	0.02739883		3357.6	0.04568176		3947.6	0.00016745
407.8	0.26271485		997.79	0.10758177		1587.79	0.06381316		2177.79	0.0079751		2767.8	0.02763055		3357.8	0.04539473		3947.8	0.00017489
408	0.26263338		997.99	0.1074683		1587.99	0.06351762		2177.99	0.00760026		2768	0.02760222		3358	0.04544027		3948	-0.00061301
408.2	0.2623706		998.19	0.10697352		1588.19	0.06334148		2178.19	0.00723622		2768.2	0.02715418		3358.2	0.04468274		3948.2	-0.00053356
408.4	0.2633952		998.39	0.10700886		1588.39	0.06261764		2178.39	0.00693271		2768.4	0.02748198		3358.4	0.04413671		3948.4	-0.00008407
408.6	0.26373407		998.59	0.10697427		1588.59	0.06262337		2178.59	0.0063025		2768.6	0.02651229		3358.6	0.04453265		3948.6	0.00022495
408.8	0.26344263		998.79	0.10669428		1588.79	0.06210691		2178.79	0.00585933		2768.8	0.02607006		3358.8	0.04485076		3948.8	0.00132725
409	0.26309912		998.99	0.10749111		1588.99	0.06231156		2178.99	0.00647547		2769	0.02610157		3359	0.04545924		3949	0.00223158
409.2	0.26397801		999.19	0.10876767		1589.19	0.06142791		2179.19	0.00681231		2769.2	0.02535553		3359.2	0.0449464		3949.2	0.00262267
409.4	0.26440876		999.39	0.11056291		1589.39	0.06051952		2179.39	0.00703866		2769.4	0.02572078		3359.4	0.04515822		3949.4	0.00250688
409.6	0.26456068		999.59	0.11080963		1589.59	0.06014951		2179.59	0.00674836		2769.6	0.02554561		3359.6	0.04591241		3949.6	0.00273962
409.8	0.2662152		999.79	0.1120153		1589.79	0.06034001		2179.79	0.00701529		2769.8	0.02577546		3359.8	0.04611447		3949.8	0.0030862
410	0.26667835		999.99	0.11203902		1589.99	0.06053437		2179.99	0.00728142		2770	0.02617274		3360	0.046131		3950	0.00175737
410.2	0.26588637		1000.19	0.11135814		1590.19	0.06214265		2180.19	0.0080551		2770.2	0.02575363		3360.2	0.04643747		3950.2	0.0022991
410.4	0.26629749		1000.39	0.11181731		1590.39	0.06212856		2180.39	0.0076085		2770.4	0.02686805		3360.4	0.04567843		3950.4	0.00241124
410.6	0.26635177		1000.59	0.11219599		1590.59	0.06273815		2180.59	0.007028		2770.6	0.02658552		3360.6	0.04514801		3950.6	0.00186911
410.8	0.26693712		1000.79	0.11238409		1590.79	0.06274271		2180.79	0.00758741		2770.8	0.02675535		3360.8	0.04547402		3950.8	0.00212575
411	0.26726576		1000.99	0.11309305		1590.99	0.06281329		2180.99	0.0080567		2771	0.02585185		3361	0.04556817		3951	0.00143734
411.2	0.26783438		1001.19	0.11369174		1591.19	0.06282296		2181.19	0.00864653		2771.2	0.02680901		3361.2	0.04609616		3951.2	0.00040199
411.4	0.26759614		1001.39	0.1138139		1591.39	0.06296477		2181.39	0.01021691		2771.4	0.02659623		3361.4	0.04595075		3951.4	-0.00096325
411.6	0.2675836		1001.59	0.1140349		1591.59	0.06308297		2181.59	0.01005407		2771.6	0.02725608		3361.6	0.04616747		3951.6	-0.00188612
411.8	0.26804144		1001.79	0.11473922		1591.79	0.06287356		2181.79	0.01019962		2771.8	0.02726223		3361.8	0.04608527		3951.8	-0.00337761
412	0.26820421		1001.99	0.11415774		1591.99	0.06225073		2181.99	0.01013356		2772	0.02734246		3362	0.04476451		3952	-0.00335728
412.2	0.26922383		1002.19	0.1139894		1592.19	0.06194001		2182.19	0.00980535		2772.2	0.02740124		3362.2	0.04408552		3952.2	-0.0031943
412.4	0.26987272		1002.39	0.11340088		1592.39	0.06167322		2182.39	0.00942008		2772.4	0.02790139		3362.4	0.04430051		3952.4	-0.00323172
412.6	0.27041569		1002.59	0.11440439		1592.59	0.06157426		2182.59	0.00852587		2772.6	0.02731428		3362.6	0.04524357		3952.6	-0.00278115
412.8	0.27128483		1002.79	0.11520763		1592.79	0.06169812		2182.79	0.00836946		2772.8	0.0271967		3362.8	0.04440709		3952.8	-0.00230749
413	0.27173506		1002.99	0.11625801		1592.99	0.06172988		2182.99	0.00845048		2773	0.02664856		3363	0.04451346		3953	-0.00140328
413.2	0.27265615		1003.19	0.11597785		1593.19	0.06127751		2183.19	0.00791233		2773.2	0.02662693		3363.2	0.04409643		3953.2	-0.00097997
413.4	0.27315367		1003.39	0.11685526		1593.39	0.06269207		2183.39	0.00706149		2773.4	0.02648835		3363.4	0.04397459		3953.4	-0.00060486
413.6	0.27354741		1003.59	0.11684428		1593.59	0.06317525		2183.59	0.00735016		2773.6	0.02589417		3363.6	0.04343601		3953.6	0.00056075
413.8	0.27328444		1003.79	0.11696152		1593.79	0.06454202		2183.79	0.00718287		2773.8	0.02544401		3363.8	0.04370948		3953.8	0.00087608
414	0.27248017		1003.99	0.11658394		1593.99	0.06565567		2183.99	0.00739845		2774	0.02512467		3364	0.04402483		3954	0.00064536
414.2	0.27188805		1004.19	0.1163199		1594.19	0.06646156		2184.19	0.00666652		2774.2	0.02444722		3364.2	0.04338978		3954.2	0.00240098
414.4	0.27221273		1004.39	0.11646417		1594.39	0.06596272		2184.39	0.00617719		2774.4	0.02408131		3364.4	0.04267513		3954.4	0.00256948
414.6	0.27177339		1004.59	0.11708446		1594.59	0.06575879		2184.59	0.00610368		2774.6	0.02380751		3364.6	0.04323574		3954.6	0.0025952
414.8	0.27108073		1004.79	0.11693269		1594.79	0.06545476		2184.79	0.00723746		2774.8	0.0241527		3364.8	0.04367349		3954.8	0.00432407
415	0.27047837		1004.99	0.11716442		1594.99	0.06559231		2184.99	0.00740544		2775	0.02472219		3365	0.04462411		3955	0.00410382
415.2	0.26931422		1005.19	0.11653894		1595.19	0.06531491		2185.19	0.00814217		2775.2	0.0254163		3365.2	0.04529371		3955.2	0.00431299
415.4	0.26873402		1005.39	0.11631584		1595.39	0.06508221		2185.39	0.00820857		2775.4	0.02517786		3365.4	0.0456629		3955.4	0.00474914
415.6	0.26932402		1005.59	0.11667216		1595.59	0.06506776		2185.59	0.00779686		2775.6	0.02568305		3365.6	0.04579079		3955.6	0.00434543
415.8	0.26926301		1005.79	0.11747553		1595.79	0.06466083		2185.79	0.00851143		2775.8	0.02524994		3365.8	0.04461426		3955.8	0.00334883
416	0.26939014		1005.99	0.11723411		1595.99	0.06341612		2185.99	0.00910814		2776	0.025891		3366	0.04497896		3956	0.00381384
416.2	0.26939304		1006.19	0.1171911		1596.19	0.06301788		2186.19	0.00910092		2776.2	0.02586522		3366.2	0.04577118		3956.2	0.00253225
416.4	0.26903963		1006.39	0.11707134		1596.39	0.06314508		2186.39	0.0096276		2776.4	0.02584245		3366.4	0.04585278		3956.4	0.00144786
416.6	0.27009433		1006.59	0.11824171		1596.59	0.06261353		2186.59	0.00925837		2776.6	0.02540997		3366.6	0.04615465		3956.6	0.00049444
416.8	0.27047524		1006.79	0.11785889		1596.79	0.06285148		2186.79	0.00970617		2776.8	0.02514826		3366.8	0.04600321		3956.8	-0.00065519
417	0.2704749		1006.99	0.1169541		1596.99	0.06332613		2186.99	0.01008912		2777	0.02477757		3367	0.04663884		3957	-0.00165347
417.2	0.27085265		1007.19	0.1167943		1597.19	0.06419934		2187.19	0.01026938		2777.2	0.0249025		3367.2	0.04592472		3957.2	-0.00293485
417.4	0.27108603		1007.39	0.11669487		1597.39	0.06499594		2187.39	0.00965412		2777.4	0.0242681		3367.4	0.04636415		3957.4	-0.00305791
417.6	0.27182349		1007.59	0.11666311		1597.59	0.06461114		2187.59	0.01039896		2777.6	0.0232434		3367.6	0.04580607		3957.6	-0.00213175
417.8	0.27143144		1007.79	0.11653559		1597.79	0.06546868		2187.79	0.01024144		2777.8	0.0220215		3367.8	0.04607185		3957.8	-0.00185874
418	0.27233723		1007.99	0.1170048		1597.99	0.06552414		2187.99	0.01115644		2778	0.02290692		3368	0.04574825		3958	-0.00194656
418.2	0.27275467		1008.19	0.11687915		1598.19	0.06509937		2188.19	0.0109146		2778.2	0.0226612		3368.2	0.04508644		3958.2	-0.00060636
418.4	0.27349401		1008.39	0.11660827		1598.39	0.06414841		2188.39	0.01056754		2778.4	0.02279223		3368.4	0.0452536		3958.4	-0.00081186
418.6	0.27284488		1008.59	0.11700266		1598.59	0.06552626		2188.59	0.01036198		2778.6	0.02416376		3368.6	0.04497609		3958.6	-0.00077665
418.8	0.27394401		1008.79	0.11625456		1598.79	0.06623834		2188.79	0.01030975		2778.8	0.02547754		3368.8	0.04504565		3958.8	0.00065719
419	0.27441466		1008.99	0.115986		1598.99	0.06639296		2188.99	0.00970319		2779	0.02656333		3369	0.04485993		3959	0.00128308
419.2	0.27369925		1009.19	0.11579248		1599.19	0.06661505		2189.19	0.0095524		2779.2	0.02666223		3369.2	0.0443413		3959.2	0.00189559
419.4	0.27486973		1009.39	0.11607018		1599.39	0.06699664		2189.39	0.00915207		2779.4	0.02750737		3369.4	0.04391949		3959.4	0.00223875
419.6	0.27525884		1009.59	0.1166149		1599.59	0.06672713		2189.59	0.00923622		2779.6	0.02836065		3369.6	0.04391474		3959.6	0.00153901
419.8	0.27507253		1009.79	0.1169326		1599.79	0.06649564		2189.79	0.00938358		2779.8	0.02897306		3369.8	0.04439774		3959.8	0.00100652
420	0.27508346		1009.99	0.11702078		1599.99	0.06635931		2189.99	0.00874949		2780	0.02918289		3370	0.04554564		3960	0.00060846
420.2	0.27482284		1010.19	0.1173861		1600.19	0.06696175		2190.19	0.00866056		2780.2	0.02930129		3370.2	0.04552435		3960.2	0.00000657
420.4	0.27479954		1010.39	0.11818424		1600.39	0.06697796		2190.39	0.00747871		2780.4	0.02934619		3370.4	0.04560806		3960.4	-0.00000024
420.6	0.27472445		1010.59	0.11823172		1600.59	0.06797365		2190.59	0.00697728		2780.6	0.02968041		3370.6	0.0462558		3960.6	-0.00062331
420.8	0.27488394		1010.79	0.11792287		1600.79	0.06803562		2190.79	0.00692719		2780.8	0.02885435		3370.8	0.04697157		3960.8	-0.00129343
421	0.27520936		1010.99	0.11788126		1600.99	0.06834444		2190.99	0.00713184		2781	0.02868348		3371	0.04725046		3961	-0.00201372
421.2	0.27446197		1011.19	0.11823622		1601.19	0.06832196		2191.19	0.00775288		2781.2	0.02801293		3371.2	0.04822242		3961.2	-0.00212055
421.4	0.2752076		1011.39	0.11773941		1601.39	0.06761665		2191.39	0.00786227		2781.4	0.02704004		3371.4	0.04956143		3961.4	-0.00090964
421.6	0.27540517		1011.59	0.1181531		1601.59	0.06704272		2191.59	0.00802206		2781.6	0.02632195		3371.6	0.04929847		3961.6	0.00016816
421.8	0.27547383		1011.79	0.11764024		1601.79	0.06828489		2191.79	0.00835853		2781.8	0.02603018		3371.8	0.04924939		3961.8	-0.00029723
422	0.2761072		1011.99	0.11761373		1601.99	0.06853941		2191.99	0.00932415		2782	0.02635822		3372	0.04880708		3962	-0.00067478
422.2	0.27577966		1012.19	0.11681657		1602.19	0.06897778		2192.19	0.00997452		2782.2	0.02551313		3372.2	0.04835579		3962.2	0.00011738
422.4	0.27617943		1012.39	0.11680461		1602.39	0.06893215		2192.39	0.00995016		2782.4	0.02597404		3372.4	0.04921444		3962.4	0.00013616
422.6	0.27540267		1012.59	0.1164144		1602.59	0.07016137		2192.59	0.01059614		2782.6	0.02746613		3372.6	0.04873586		3962.6	0.00012677
422.8	0.27585938		1012.79	0.11635737		1602.79	0.06939194		2192.79	0.01077001		2782.8	0.0273814		3372.8	0.04967193		3962.8	0.00097773
423	0.27574851		1012.99	0.1167607		1602.99	0.06926542		2192.99	0.01112558		2783	0.0279907		3373	0.04914074		3963	0.00104165
423.2	0.27577212		1013.19	0.11742531		1603.19	0.06911988		2193.19	0.01147627		2783.2	0.02857857		3373.2	0.04916571		3963.2	0.00086698
423.4	0.27691602		1013.39	0.11766937		1603.39	0.06893401		2193.39	0.01214851		2783.4	0.02980636		3373.4	0.04911637		3963.4	0.00169031
423.6	0.2768879		1013.59	0.11845796		1603.59	0.06881653		2193.59	0.01182172		2783.6	0.02999073		3373.6	0.05029021		3963.6	0.00268031
423.8	0.27781987		1013.79	0.11891749		1603.79	0.0687426		2193.79	0.01141659		2783.8	0.03036567		3373.8	0.05022063		3963.8	0.00218349
424	0.27949262		1013.99	0.11933613		1603.99	0.06841186		2193.99	0.01081306		2784	0.03010762		3374	0.04992457		3964	0.00294328
424.2	0.28047205		1014.19	0.1205147		1604.19	0.06833147		2194.19	0.01028628		2784.2	0.03005407		3374.2	0.04979362		3964.2	0.00401808
424.4	0.28171404		1014.39	0.12098438		1604.39	0.06865718		2194.39	0.00932815		2784.4	0.02924129		3374.4	0.04955		3964.4	0.00408559
424.6	0.28252095		1014.59	0.1206992		1604.59	0.06882113		2194.59	0.00896829		2784.6	0.02878075		3374.6	0.04975864		3964.6	0.00325184
424.8	0.28357589		1014.79	0.12156102		1604.79	0.06822033		2194.79	0.00780909		2784.8	0.02856999		3374.8	0.04935961		3964.8	0.00308383
425	0.28366595		1014.99	0.12085814		1604.99	0.06844298		2194.99	0.00805992		2785	0.02890738		3375	0.04974374		3965	0.00301981
425.2	0.28424204		1015.19	0.12192143		1605.19	0.06844907		2195.19	0.00763677		2785.2	0.02787044		3375.2	0.04978359		3965.2	0.00284407
425.4	0.28565676		1015.39	0.12175618		1605.39	0.06848141		2195.39	0.00645961		2785.4	0.02715623		3375.4	0.04945473		3965.4	0.00347101
425.6	0.28531965		1015.59	0.12224341		1605.59	0.06863105		2195.59	0.00605864		2785.6	0.02651869		3375.6	0.04840179		3965.6	0.00288873
425.8	0.28568371		1015.79	0.12211464		1605.79	0.07023689		2195.79	0.00687269		2785.8	0.02627526		3375.8	0.04800617		3965.8	0.00150257
426	0.28531737		1015.99	0.12184192		1605.99	0.07002242		2195.99	0.00781644		2786	0.02544729		3376	0.04781258		3966	0.00127706
426.2	0.28466479		1016.19	0.12239791		1606.19	0.0701434		2196.19	0.00719948		2786.2	0.0257308		3376.2	0.04886805		3966.2	0.00142815
426.4	0.28411529		1016.39	0.12318693		1606.39	0.06977812		2196.39	0.00694521		2786.4	0.02563073		3376.4	0.04922208		3966.4	0.00067468
426.6	0.28284351		1016.59	0.12288843		1606.59	0.0704242		2196.59	0.00771794		2786.6	0.02560984		3376.6	0.04862626		3966.6	0.00005655
426.8	0.28255831		1016.79	0.12317329		1606.79	0.06953132		2196.79	0.00769134		2786.8	0.02508745		3376.8	0.0493782		3966.8	-0.00005078
427	0.28154351		1016.99	0.12339802		1606.99	0.06989032		2196.99	0.00840084		2787	0.02554208		3377	0.04942133		3967	-0.00068047
427.2	0.28080293		1017.19	0.12343072		1607.19	0.07006994		2197.19	0.00872554		2787.2	0.02637544		3377.2	0.04958941		3967.2	-0.00053334
427.4	0.28113987		1017.39	0.12367612		1607.39	0.07030747		2197.39	0.00853331		2787.4	0.02803503		3377.4	0.04949617		3967.4	-0.00032575
427.6	0.28108868		1017.59	0.12391112		1607.59	0.07030663		2197.59	0.00796111		2787.6	0.02806387		3377.6	0.04935375		3967.6	-0.00006342
427.8	0.281551		1017.79	0.12328162		1607.79	0.07047055		2197.79	0.00756207		2787.8	0.02855718		3377.8	0.0485496		3967.8	-0.00029469
428	0.28275927		1017.99	0.12315148		1607.99	0.07041831		2197.99	0.00744525		2788	0.02942531		3378	0.04866428		3968	0.00008822
428.2	0.28348548		1018.19	0.12385422		1608.19	0.07054169		2198.19	0.00696249		2788.2	0.02963423		3378.2	0.04838316		3968.2	0.0003523
428.4	0.28405753		1018.39	0.1229875		1608.39	0.06993636		2198.39	0.00656324		2788.4	0.02965862		3378.4	0.04769921		3968.4	0.00018997
428.6	0.2836994		1018.59	0.12318373		1608.59	0.06986014		2198.59	0.00653009		2788.6	0.03001028		3378.6	0.0480022		3968.6	0.0000835
428.8	0.28382605		1018.79	0.12282545		1608.79	0.06990864		2198.79	0.0069011		2788.8	0.03039394		3378.8	0.04773121		3968.8	0.00108744
429	0.2840035		1018.99	0.1218877		1608.99	0.06976691		2198.99	0.00719645		2789	0.03061358		3379	0.04784523		3969	0.0019429
429.2	0.28499973		1019.19	0.12285416		1609.19	0.06971465		2199.19	0.00674257		2789.2	0.03045266		3379.2	0.04753576		3969.2	0.00231674
429.4	0.28467435		1019.39	0.1228297		1609.39	0.06957531		2199.39	0.00711198		2789.4	0.03045159		3379.4	0.04854679		3969.4	0.00298734
429.6	0.28477921		1019.59	0.1241721		1609.59	0.0687228		2199.59	0.00760748		2789.6	0.03091043		3379.6	0.04880026		3969.6	0.00268137
429.8	0.28503925		1019.79	0.12509755		1609.79	0.06967169		2199.79	0.00872252		2789.8	0.03154918		3379.8	0.04995583		3969.8	0.00277227
430	0.28556289		1019.99	0.12512382		1609.99	0.06980238		2199.99	0.00912802		2790	0.0312805		3380	0.05055929		3970	0.00321837
430.2	0.28510671		1020.19	0.12554558		1610.19	0.07059876		2200.19	0.00882489		2790.2	0.03182569		3380.2	0.05207629		3970.2	0.00314087
430.4	0.28471357		1020.39	0.12581137		1610.39	0.07078468		2200.39	0.00939645		2790.4	0.03048576		3380.4	0.05178038		3970.4	0.00315281
430.6	0.28396927		1020.59	0.12555726		1610.59	0.07108605		2200.59	0.01055874		2790.6	0.03085095		3380.6	0.0523504		3970.6	0.00296386
430.8	0.28402069		1020.79	0.12578285		1610.79	0.07082626		2200.79	0.01046294		2790.8	0.03144651		3380.8	0.0526137		3970.8	0.00211085
431	0.28392183		1020.99	0.12569604		1610.99	0.07160667		2200.99	0.01041087		2791	0.03167541		3381	0.05220751		3971	0.00143585
431.2	0.28397516		1021.19	0.12546703		1611.19	0.07215147		2201.19	0.00978794		2791.2	0.03216172		3381.2	0.05204757		3971.2	0.00079868
431.4	0.28522166		1021.39	0.12503072		1611.39	0.07216142		2201.39	0.00919198		2791.4	0.03278137		3381.4	0.05175349		3971.4	0.0010145
431.6	0.28538561		1021.59	0.124584		1611.59	0.07277931		2201.59	0.00838341		2791.6	0.03241838		3381.6	0.0511657		3971.6	0.00084446
431.8	0.28599543		1021.79	0.12436476		1611.79	0.07246468		2201.79	0.00727131		2791.8	0.03259347		3381.8	0.05069831		3971.8	0.00017171
432	0.2869477		1021.99	0.12461321		1611.99	0.07258294		2201.99	0.00704165		2792	0.03240534		3382	0.05044197		3972	-0.00023517
432.2	0.28743541		1022.19	0.12529369		1612.19	0.07207927		2202.19	0.00577646		2792.2	0.03142593		3382.2	0.04977339		3972.2	-0.00042296
432.4	0.28730855		1022.39	0.12506155		1612.39	0.07174983		2202.39	0.00594537		2792.4	0.03130252		3382.4	0.05005964		3972.4	-0.00109153
432.6	0.28754366		1022.59	0.12538265		1612.59	0.07227062		2202.59	0.0067095		2792.6	0.03071911		3382.6	0.05011976		3972.6	-0.00130477
432.8	0.28751943		1022.79	0.12499624		1612.79	0.07161238		2202.79	0.00678161		2792.8	0.0302118		3382.8	0.04972752		3972.8	-0.000556
433	0.28740844		1022.99	0.12542168		1612.99	0.07081944		2202.99	0.00610954		2793	0.03097937		3383	0.04908948		3973	-0.00069369
433.2	0.28845098		1023.19	0.12620829		1613.19	0.07108316		2203.19	0.00593268		2793.2	0.0305944		3383.2	0.04964137		3973.2	-0.00098028
433.4	0.2884811		1023.39	0.12717953		1613.39	0.07161612		2203.39	0.0063763		2793.4	0.03103339		3383.4	0.05015461		3973.4	-0.00064508
433.6	0.28934072		1023.59	0.12764539		1613.59	0.07129305		2203.59	0.00710754		2793.6	0.03028006		3383.6	0.05017668		3973.6	-0.00117706
433.8	0.28899858		1023.79	0.12739452		1613.79	0.07203997		2203.79	0.00788263		2793.8	0.0296645		3383.8	0.05004202		3973.8	-0.00117628
434	0.28869995		1023.99	0.12631994		1613.99	0.07252888		2203.99	0.00886982		2794	0.02855685		3384	0.04958422		3974	-0.00104948
434.2	0.28861545		1024.19	0.12616344		1614.19	0.07334534		2204.19	0.00865213		2794.2	0.02856254		3384.2	0.04984323		3974.2	-0.00006944
434.4	0.28816517		1024.39	0.12685693		1614.39	0.0724822		2204.39	0.00920195		2794.4	0.0289201		3384.4	0.05026754		3974.4	-0.00014071
434.6	0.2881493		1024.59	0.12663236		1614.59	0.07233921		2204.59	0.01047403		2794.6	0.02952571		3384.6	0.05075242		3974.6	-0.00050385
434.8	0.28855877		1024.79	0.12602766		1614.79	0.07264846		2204.79	0.01076668		2794.8	0.02958423		3384.8	0.0500611		3974.8	-0.00115936
435	0.28936614		1024.99	0.12553793		1614.99	0.0717207		2204.99	0.01100506		2795	0.02937894		3385	0.05013432		3975	-0.00028652
435.2	0.28916116		1025.19	0.1253893		1615.19	0.07230585		2205.19	0.01138915		2795.2	0.02909395		3385.2	0.05064502		3975.2	0.0002088
435.4	0.29004859		1025.39	0.12479725		1615.39	0.07187076		2205.39	0.01164958		2795.4	0.02928183		3385.4	0.05142895		3975.4	0.00087208
435.6	0.28955629		1025.59	0.12524496		1615.59	0.0719233		2205.59	0.01089432		2795.6	0.02960027		3385.6	0.05192824		3975.6	-0.00030156
435.8	0.28942518		1025.79	0.1257438		1615.79	0.07121723		2205.79	0.01068122		2795.8	0.02984114		3385.8	0.05246613		3975.8	-0.00044065
436	0.28950443		1025.99	0.1260961		1615.99	0.07149144		2205.99	0.01036243		2796	0.02999055		3386	0.05308066		3976	-0.00013793
436.2	0.28916072		1026.19	0.12645558		1616.19	0.07099362		2206.19	0.00962153		2796.2	0.03039474		3386.2	0.0530653		3976.2	-0.00019502
436.4	0.28926688		1026.39	0.12591906		1616.39	0.07212616		2206.39	0.01046666		2796.4	0.03019472		3386.4	0.05346443		3976.4	-0.00032261
436.6	0.28993989		1026.59	0.12643931		1616.59	0.07239841		2206.59	0.01000492		2796.6	0.02905495		3386.6	0.05307798		3976.6	0.00043882
436.8	0.2898045		1026.79	0.12589172		1616.79	0.07220853		2206.79	0.00924307		2796.8	0.02919422		3386.8	0.05265972		3976.8	0.00129592
437	0.29084708		1026.99	0.12623447		1616.99	0.07288387		2206.99	0.00788741		2797	0.02994076		3387	0.05268891		3977	0.00098456
437.2	0.29142001		1027.19	0.12606992		1617.19	0.07391664		2207.19	0.00721227		2797.2	0.02997302		3387.2	0.05233245		3977.2	0.00132613
437.4	0.29136695		1027.39	0.1259667		1617.39	0.07428986		2207.39	0.00699739		2797.4	0.02936271		3387.4	0.05106718		3977.4	0.00130201
437.6	0.29191557		1027.59	0.1263062		1617.59	0.07414788		2207.59	0.00682411		2797.6	0.02819154		3387.6	0.05078294		3977.6	0.00081875
437.8	0.29137914		1027.79	0.1257746		1617.79	0.0749366		2207.79	0.00624503		2797.8	0.02894836		3387.8	0.0496843		3977.8	0.00119465
438	0.29112838		1027.99	0.12595452		1617.99	0.07542813		2207.99	0.00621638		2798	0.02975971		3388	0.0494908		3978	0.00158925
438.2	0.29178395		1028.19	0.12683745		1618.19	0.07490294		2208.19	0.00461229		2798.2	0.03066514		3388.2	0.04941257		3978.2	0.00198356
438.4	0.29172986		1028.39	0.12755579		1618.39	0.07399106		2208.39	0.00569565		2798.4	0.03151113		3388.4	0.05004289		3978.4	0.0013542
438.6	0.29313618		1028.59	0.12780878		1618.59	0.07418802		2208.59	0.00577859		2798.6	0.03103656		3388.6	0.04984015		3978.6	0.00110835
438.8	0.29434468		1028.79	0.12831965		1618.79	0.07347828		2208.79	0.00544097		2798.8	0.03132645		3388.8	0.04891295		3978.8	0.00108849
439	0.29532671		1028.99	0.12930237		1618.99	0.07261897		2208.99	0.0063255		2799	0.03209515		3389	0.04887875		3979	0.00177316
439.2	0.29536546		1029.19	0.12929004		1619.19	0.07331679		2209.19	0.00660594		2799.2	0.03260207		3389.2	0.04928203		3979.2	0.00152428
439.4	0.29517431		1029.39	0.12913114		1619.39	0.07309571		2209.39	0.00669831		2799.4	0.03266499		3389.4	0.05017838		3979.4	0.00067827
439.6	0.29471656		1029.59	0.1289999		1619.59	0.0735544		2209.59	0.00652376		2799.6	0.03312645		3389.6	0.05121566		3979.6	-0.00042555
439.8	0.29522064		1029.79	0.12860445		1619.79	0.07441646		2209.79	0.00705473		2799.8	0.03312742		3389.8	0.05099109		3979.8	0.00003297
440	0.29525235		1029.99	0.12808475		1619.99	0.07418212		2209.99	0.00682074		2800	0.0332121		3390	0.05066887		3980	-0.00025815
440.2	0.29542773		1030.19	0.12733323		1620.19	0.07502999		2210.19	0.00688265		2800.2	0.03237976		3390.2	0.05106738		3980.2	0.00024737
440.4	0.2962338		1030.39	0.12701217		1620.39	0.0771074		2210.39	0.00650571		2800.4	0.03105191		3390.4	0.05103209		3980.4	0.00071277
440.6	0.29688061		1030.59	0.12721053		1620.59	0.07764496		2210.59	0.00627944		2800.6	0.0310695		3390.6	0.05063623		3980.6	0.00174141
440.8	0.29663528		1030.79	0.12638193		1620.79	0.07788704		2210.79	0.00696744		2800.8	0.03185956		3390.8	0.05099338		3980.8	0.00176998
441	0.2966929		1030.99	0.12629797		1620.99	0.07862238		2210.99	0.00689848		2801	0.03171965		3391	0.05154183		3981	0.00111388
441.2	0.29542524		1031.19	0.12668249		1621.19	0.07881474		2211.19	0.00666687		2801.2	0.03107336		3391.2	0.0504267		3981.2	0.00171869
441.4	0.29530833		1031.39	0.12700376		1621.39	0.07881035		2211.39	0.00693404		2801.4	0.03012159		3391.4	0.04997327		3981.4	0.00078183
441.6	0.29500428		1031.59	0.1277299		1621.59	0.07916615		2211.59	0.0071533		2801.6	0.03060009		3391.6	0.05105532		3981.6	0.00100363
441.8	0.29387888		1031.79	0.1280337		1621.79	0.07876355		2211.79	0.00698054		2801.8	0.03118887		3391.8	0.05131674		3981.8	0.00197189
442	0.29383381		1031.99	0.12904025		1621.99	0.0784851		2211.99	0.00702041		2802	0.03056272		3392	0.05067064		3982	0.00224778
442.2	0.29420819		1032.19	0.13005331		1622.19	0.07775152		2212.19	0.0070167		2802.2	0.0297444		3392.2	0.05139439		3982.2	0.00341933
442.4	0.29475361		1032.39	0.13125353		1622.39	0.07696721		2212.39	0.00683167		2802.4	0.02948146		3392.4	0.05215544		3982.4	0.00354064
442.6	0.29597056		1032.59	0.13284137		1622.59	0.07636857		2212.59	0.0059652		2802.6	0.0292571		3392.6	0.05236621		3982.6	0.00367466
442.8	0.29682673		1032.79	0.13407335		1622.79	0.07600693		2212.79	0.00556385		2802.8	0.02987513		3392.8	0.05152004		3982.8	0.00428284
443	0.29685756		1032.99	0.1342353		1622.99	0.07637587		2212.99	0.00653717		2803	0.03041049		3393	0.05161576		3983	0.0038154
443.2	0.29718289		1033.19	0.13366616		1623.19	0.07616628		2213.19	0.006207		2803.2	0.02989675		3393.2	0.05199736		3983.2	0.00347254
443.4	0.29653976		1033.39	0.13375192		1623.39	0.0763679		2213.39	0.00610952		2803.4	0.02964581		3393.4	0.05246633		3983.4	0.0031109
443.6	0.29750324		1033.59	0.13387388		1623.59	0.0765494		2213.59	0.0065099		2803.6	0.02989409		3393.6	0.05305855		3983.6	0.00185364
443.8	0.29866729		1033.79	0.13377408		1623.79	0.07636319		2213.79	0.00708199		2803.8	0.03033564		3393.8	0.05242891		3983.8	0.00181071
444	0.29966436		1033.99	0.13379313		1623.99	0.07570811		2213.99	0.00667744		2804	0.03105105		3394	0.05286824		3984	0.00198527
444.2	0.30067321		1034.19	0.13357563		1624.19	0.07596218		2214.19	0.00754969		2804.2	0.03103187		3394.2	0.05365228		3984.2	0.00232517
444.4	0.3018756		1034.39	0.13345473		1624.39	0.07602521		2214.39	0.00702853		2804.4	0.03140576		3394.4	0.05391283		3984.4	0.00213228
444.6	0.30195886		1034.59	0.13254639		1624.59	0.07492774		2214.59	0.00780337		2804.6	0.03313467		3394.6	0.05406822		3984.6	0.00243762
444.8	0.30150758		1034.79	0.13166401		1624.79	0.07378806		2214.79	0.00860682		2804.8	0.0332046		3394.8	0.05409324		3984.8	0.00185379
445	0.30183187		1034.99	0.13087703		1624.99	0.07403608		2214.99	0.0083284		2805	0.03344469		3395	0.05460961		3985	0.00196282
445.2	0.30068418		1035.19	0.13077108		1625.19	0.07381754		2215.19	0.00822025		2805.2	0.03349884		3395.2	0.05422091		3985.2	0.00199229
445.4	0.30073547		1035.39	0.13011487		1625.39	0.07361083		2215.39	0.00861165		2805.4	0.03384477		3395.4	0.05459739		3985.4	0.00219882
445.6	0.30056969		1035.59	0.13019443		1625.59	0.07326786		2215.59	0.00823675		2805.6	0.03475117		3395.6	0.05517743		3985.6	0.00314635
445.8	0.29974222		1035.79	0.13122818		1625.79	0.07328306		2215.79	0.00871291		2805.8	0.03470861		3395.8	0.0554954		3985.8	0.00307625
446	0.29896851		1035.99	0.13075052		1625.99	0.07412385		2215.99	0.00942313		2806	0.0340213		3396	0.05580834		3986	0.00285704
446.2	0.29833224		1036.19	0.13216741		1626.19	0.07406443		2216.19	0.00953287		2806.2	0.03395907		3396.2	0.05673217		3986.2	0.00334252
446.4	0.2979128		1036.39	0.13331497		1626.39	0.07492333		2216.39	0.00864796		2806.4	0.03353478		3396.4	0.05630772		3986.4	0.00216274
446.6	0.29783379		1036.59	0.13432911		1626.59	0.07609396		2216.59	0.00891426		2806.6	0.03285757		3396.6	0.05574412		3986.6	0.00145283
446.8	0.29702593		1036.79	0.13471319		1626.79	0.07706441		2216.79	0.00890636		2806.8	0.03296182		3396.8	0.05508582		3986.8	0.00158317
447	0.29669159		1036.99	0.13503914		1626.99	0.07675356		2216.99	0.01000341		2807	0.03220036		3397	0.05564001		3987	0.00088574
447.2	0.29673337		1037.19	0.1354173		1627.19	0.07744306		2217.19	0.01038062		2807.2	0.03201296		3397.2	0.05546198		3987.2	0.00044158
447.4	0.29666671		1037.39	0.13601449		1627.39	0.07787489		2217.39	0.01047133		2807.4	0.0318757		3397.4	0.05547558		3987.4	-0.00020537
447.6	0.29738549		1037.59	0.13662607		1627.59	0.07870758		2217.59	0.01058639		2807.6	0.03157364		3397.6	0.05513496		3987.6	-0.00060581
447.8	0.29788232		1037.79	0.13661636		1627.79	0.07788331		2217.79	0.010336		2807.8	0.03157415		3397.8	0.0549204		3987.8	-0.00007518
448	0.29911872		1037.99	0.13709707		1627.99	0.07855096		2217.99	0.00973363		2808	0.03151678		3398	0.05443027		3988	-0.0008297
448.2	0.30022563		1038.19	0.13668935		1628.19	0.07777728		2218.19	0.01009538		2808.2	0.03098873		3398.2	0.05383403		3988.2	-0.00126208
448.4	0.30133921		1038.39	0.13666189		1628.39	0.07693092		2218.39	0.00930818		2808.4	0.03179636		3398.4	0.05359432		3988.4	-0.0009983
448.6	0.30126209		1038.59	0.13588327		1628.59	0.0760942		2218.59	0.00983446		2808.6	0.0328598		3398.6	0.05331357		3988.6	-0.0008699
448.8	0.30109787		1038.79	0.13476348		1628.79	0.07660728		2218.79	0.00995353		2808.8	0.03286102		3398.8	0.05335754		3988.8	0.00002777
449	0.30155987		1038.99	0.13376206		1628.99	0.07822678		2218.99	0.009191		2809	0.03336248		3399	0.05390296		3989	0.00026077
449.2	0.3012971		1039.19	0.13322648		1629.19	0.07827894		2219.19	0.00911983		2809.2	0.03442735		3399.2	0.05339444		3989.2	0.00037462
449.4	0.30215148		1039.39	0.13252798		1629.39	0.07876338		2219.39	0.00888975		2809.4	0.03545169		3399.4	0.05355982		3989.4	0.00152956
449.6	0.30259128		1039.59	0.13265766		1629.59	0.07891792		2219.59	0.00843458		2809.6	0.03623038		3399.6	0.05373269		3989.6	0.00164082
449.8	0.30250304		1039.79	0.13280725		1629.79	0.07995321		2219.79	0.00925665		2809.8	0.03587433		3399.8	0.05468598		3989.8	0.00132446
450	0.30168527		1039.99	0.13194311		1629.99	0.08097242		2219.99	0.00919114		2810	0.03578291		3400	0.05484021		3990	0.00140377
450.2	0.30140367		1040.19	0.13307125		1630.19	0.08181308		2220.19	0.00848888		2810.2	0.03602828		3400.2	0.05450448		3990.2	0.0008675
450.4	0.30177648		1040.39	0.13210673		1630.39	0.08334791		2220.39	0.00804118		2810.4	0.03590359		3400.4	0.0548386		3990.4	0.00037157
450.6	0.30215596		1040.59	0.13248077		1630.59	0.08307023		2220.59	0.00851698		2810.6	0.03525413		3400.6	0.05515809		3990.6	0.00010465
450.8	0.30152486		1040.79	0.13234355		1630.79	0.08293697		2220.79	0.00875228		2810.8	0.03558074		3400.8	0.05568686		3990.8	0.00064921
451	0.30251536		1040.99	0.13294127		1630.99	0.08249203		2220.99	0.00963829		2811	0.03440287		3401	0.05648011		3991	0.00025337
451.2	0.30336287		1041.19	0.13304912		1631.19	0.08316185		2221.19	0.0096277		2811.2	0.0337117		3401.2	0.05624345		3991.2	-0.00028026
451.4	0.30352561		1041.39	0.13253776		1631.39	0.08265015		2221.39	0.00885255		2811.4	0.03315906		3401.4	0.0563104		3991.4	0.00025456
451.6	0.30323889		1041.59	0.13256499		1631.59	0.0822888		2221.59	0.00812566		2811.6	0.03233942		3401.6	0.05600775		3991.6	0.00045835
451.8	0.30362647		1041.79	0.1329073		1631.79	0.08136403		2221.79	0.00736411		2811.8	0.03257949		3401.8	0.05604524		3991.8	0.00048864
452	0.30492061		1041.99	0.13328519		1631.99	0.08123801		2221.99	0.00736027		2812	0.03250582		3402	0.05501807		3992	0.00032879
452.2	0.30530912		1042.19	0.13329027		1632.19	0.08005337		2222.19	0.00752143		2812.2	0.03325307		3402.2	0.05514949		3992.2	0.00133087
452.4	0.30611662		1042.39	0.13417061		1632.39	0.07909124		2222.39	0.00734315		2812.4	0.03399446		3402.4	0.05573949		3992.4	0.00175742
452.6	0.30598446		1042.59	0.13327481		1632.59	0.07876596		2222.59	0.00741862		2812.6	0.03442016		3402.6	0.05600629		3992.6	0.00198172
452.8	0.30678689		1042.79	0.13289662		1632.79	0.07938591		2222.79	0.0073832		2812.8	0.03417053		3402.8	0.05543464		3992.8	0.00255256
453	0.30781024		1042.99	0.13324014		1632.99	0.07984613		2222.99	0.00757288		2813	0.03477775		3403	0.05521301		3993	0.00212936
453.2	0.30862502		1043.19	0.13374205		1633.19	0.07856957		2223.19	0.00859339		2813.2	0.03593609		3403.2	0.05502147		3993.2	0.00256632
453.4	0.30858779		1043.39	0.13424834		1633.39	0.07839533		2223.39	0.00814844		2813.4	0.03611279		3403.4	0.05507232		3993.4	0.00293244
453.6	0.30779294		1043.59	0.13543071		1633.59	0.07726024		2223.59	0.00787006		2813.6	0.03537122		3403.6	0.05568634		3993.6	0.00297096
453.8	0.30688113		1043.79	0.13579732		1633.79	0.07768072		2223.79	0.00833961		2813.8	0.03451848		3403.8	0.05580202		3993.8	0.00257968
454	0.30522344		1043.99	0.13653393		1633.99	0.07808064		2223.99	0.0073217		2814	0.03394869		3404	0.05493501		3994	0.00131162
454.2	0.30563244		1044.19	0.13773403		1634.19	0.07834618		2224.19	0.00729116		2814.2	0.03441277		3404.2	0.05528635		3994.2	0.00065279
454.4	0.30575324		1044.39	0.13745171		1634.39	0.07884187		2224.39	0.00704125		2814.4	0.03346087		3404.4	0.05501828		3994.4	0.00024845
454.6	0.30524838		1044.59	0.13857838		1634.59	0.07838523		2224.59	0.00750906		2814.6	0.03321506		3404.6	0.05430742		3994.6	-0.00049821
454.8	0.30518725		1044.79	0.13793994		1634.79	0.07920017		2224.79	0.00795895		2814.8	0.03345371		3404.8	0.05412919		3994.8	-0.00051532
455	0.30563901		1044.99	0.13868117		1634.99	0.0796048		2224.99	0.00852504		2815	0.03211778		3405	0.05476865		3995	-0.00130827
455.2	0.3064994		1045.19	0.13818396		1635.19	0.08012226		2225.19	0.00821193		2815.2	0.03208743		3405.2	0.05493645		3995.2	-0.00170414
455.4	0.30604315		1045.39	0.13774751		1635.39	0.08026846		2225.39	0.00727276		2815.4	0.03258858		3405.4	0.05521546		3995.4	-0.0012891
455.6	0.30627962		1045.59	0.13838437		1635.59	0.08110622		2225.59	0.00715498		2815.6	0.03294119		3405.6	0.05543324		3995.6	-0.00092302
455.8	0.30706281		1045.79	0.13888735		1635.79	0.0819308		2225.79	0.00679823		2815.8	0.03353362		3405.8	0.05581778		3995.8	0.00000256
456	0.30824969		1045.99	0.13915176		1635.99	0.08259943		2225.99	0.00755401		2816	0.03373485		3406	0.05535369		3996	0.00032151
456.2	0.30922129		1046.19	0.13888217		1636.19	0.08326641		2226.19	0.00718213		2816.2	0.03447808		3406.2	0.05526239		3996.2	0.00033773
456.4	0.31072244		1046.39	0.13831653		1636.39	0.08291769		2226.39	0.00796885		2816.4	0.03440245		3406.4	0.05552278		3996.4	0.00011628
456.6	0.31090474		1046.59	0.13696927		1636.59	0.08314797		2226.59	0.0086717		2816.6	0.03485128		3406.6	0.0557158		3996.6	0.00018344
456.8	0.31168555		1046.79	0.13734012		1636.79	0.08403457		2226.79	0.01018598		2816.8	0.03501374		3406.8	0.0562672		3996.8	0.00037121
457	0.31126434		1046.99	0.1379295		1636.99	0.08440917		2226.99	0.01085118		2817	0.03570593		3407	0.05743701		3997	0.00056724
457.2	0.31071231		1047.19	0.13837985		1637.19	0.08401311		2227.19	0.01152592		2817.2	0.03619574		3407.2	0.05657668		3997.2	-0.00015453
457.4	0.30947589		1047.39	0.13784955		1637.39	0.08390142		2227.39	0.01056877		2817.4	0.03620844		3407.4	0.05686466		3997.4	0.00002401
457.6	0.30856996		1047.59	0.13816088		1637.59	0.08347128		2227.59	0.01157165		2817.6	0.03602965		3407.6	0.05708106		3997.6	0.00073813
457.8	0.30821609		1047.79	0.13878408		1637.79	0.08440514		2227.79	0.01167377		2817.8	0.03573944		3407.8	0.05656001		3997.8	-0.00045284
458	0.30732712		1047.99	0.13929015		1637.99	0.08369462		2227.99	0.01086725		2818	0.03652575		3408	0.0559486		3998	-0.00079535
458.2	0.30766681		1048.19	0.13936102		1638.19	0.0833618		2228.19	0.01151802		2818.2	0.03710004		3408.2	0.0565457		3998.2	-0.00028853
458.4	0.3069602		1048.39	0.13850478		1638.39	0.08371773		2228.39	0.01040488		2818.4	0.03654627		3408.4	0.0553546		3998.4	-0.00015102
458.6	0.30699822		1048.59	0.13843331		1638.59	0.08335921		2228.59	0.00961819		2818.6	0.03758796		3408.6	0.05484192		3998.6	-0.00005223
458.8	0.30705621		1048.79	0.13721037		1638.79	0.08369646		2228.79	0.00913297		2818.8	0.03696827		3408.8	0.05507502		3998.8	0.00018054
459	0.30696718		1048.99	0.13778667		1638.99	0.08328698		2228.99	0.00824145		2819	0.03610849		3409	0.0550852		3999	-0.00002697
459.2	0.30729727		1049.19	0.13808813		1639.19	0.08306813		2229.19	0.00744476		2819.2	0.03647043		3409.2	0.05472208		3999.2	0.0005347
459.4	0.30728632		1049.39	0.13857451		1639.39	0.08203385		2229.39	0.00617797		2819.4	0.0363027		3409.4	0.05382145		3999.4	0.00091118
459.6	0.30766507		1049.59	0.13857305		1639.59	0.08292947		2229.59	0.00569367		2819.6	0.03555053		3409.6	0.05297063		3999.6	0.0015777
459.8	0.30798469		1049.79	0.13902937		1639.79	0.08248678		2229.79	0.00481567		2819.8	0.03456814		3409.8	0.05257679		3999.8	0.00216989
460	0.30910433		1049.99	0.13909692		1639.99	0.08202161		2229.99	0.00452865		2820	0.03384198		3410	0.0524475		4000	0.00198722
460.2	0.31008896		1050.19	0.13837747		1640.19	0.08136671		2230.19	0.00360094		2820.2	0.0340052		3410.2	0.0524698		4000.2	0.00145721
460.4	0.3107483		1050.39	0.13835221		1640.39	0.08125545		2230.39	0.00460084		2820.4	0.03365798		3410.4	0.05324849		4000.4	0.00194736
460.6	0.31080797		1050.59	0.13858307		1640.59	0.08168232		2230.59	0.00423528		2820.6	0.03376397		3410.6	0.05370184		4000.6	0.00204444
460.8	0.31081576		1050.79	0.13939053		1640.79	0.0820701		2230.79	0.00404274		2820.8	0.03396645		3410.8	0.05516331		4000.8	0.00214132
461	0.3111451		1050.99	0.1395924		1640.99	0.08235833		2230.99	0.00448772		2821	0.03439457		3411	0.05551269		4001	0.001841
461.2	0.31139512		1051.19	0.13900029		1641.19	0.08358804		2231.19	0.00409685		2821.2	0.03472651		3411.2	0.05491042		4001.2	0.0013033
461.4	0.31088432		1051.39	0.13890389		1641.39	0.08351011		2231.39	0.00406706		2821.4	0.03417679		3411.4	0.05632466		4001.4	0.00201146
461.6	0.31071621		1051.59	0.13978584		1641.59	0.08392672		2231.59	0.00582429		2821.6	0.03404656		3411.6	0.05799223		4001.6	0.0016266
461.8	0.31126597		1051.79	0.14009425		1641.79	0.08466133		2231.79	0.00670111		2821.8	0.03323705		3411.8	0.05854208		4001.8	0.00061525
462	0.31096597		1051.99	0.13981781		1641.99	0.08422944		2231.99	0.00723764		2822	0.03321419		3412	0.05860535		4002	0.00119995
462.2	0.31203677		1052.19	0.14068539		1642.19	0.08502027		2232.19	0.00760432		2822.2	0.03309742		3412.2	0.05926751		4002.2	0.00137543
462.4	0.31220895		1052.39	0.14095385		1642.39	0.08467509		2232.39	0.00715194		2822.4	0.03317483		3412.4	0.05883148		4002.4	0.00031096
462.6	0.31251766		1052.59	0.14132837		1642.59	0.08482684		2232.59	0.00755578		2822.6	0.03356447		3412.6	0.05832223		4002.6	0.00001444
462.8	0.31258529		1052.79	0.14099534		1642.79	0.08485872		2232.79	0.00840123		2822.8	0.03302607		3412.8	0.05779379		4002.8	0.00015997
463	0.31203485		1052.99	0.14187214		1642.99	0.08493361		2232.99	0.00893125		2823	0.03344196		3413	0.05664634		4003	0.00092233
463.2	0.31164719		1053.19	0.141832		1643.19	0.08403627		2233.19	0.0088976		2823.2	0.03328033		3413.2	0.05650958		4003.2	0.00139764
463.4	0.31155395		1053.39	0.14232826		1643.39	0.0830931		2233.39	0.00922338		2823.4	0.0333826		3413.4	0.05611278		4003.4	0.00155809
463.6	0.31154706		1053.59	0.14273236		1643.59	0.08466159		2233.59	0.00952002		2823.6	0.03297963		3413.6	0.05583311		4003.6	0.00209879
463.8	0.31213201		1053.79	0.14320305		1643.79	0.08382916		2233.79	0.00987524		2823.8	0.03298709		3413.8	0.05591416		4003.8	0.00186237
464	0.31302946		1053.99	0.14327366		1643.99	0.08342374		2233.99	0.01033887		2824	0.03341253		3414	0.05612754		4004	0.00160539
464.2	0.31298331		1054.19	0.14258556		1644.19	0.08339747		2234.19	0.00987594		2824.2	0.03489453		3414.2	0.05593726		4004.2	0.00230609
464.4	0.31317253		1054.39	0.14352941		1644.39	0.08387194		2234.39	0.01018896		2824.4	0.03532527		3414.4	0.05647421		4004.4	0.00256501
464.6	0.3127026		1054.59	0.14367384		1644.59	0.0834314		2234.59	0.00910667		2824.6	0.03585936		3414.6	0.05652781		4004.6	0.00225135
464.8	0.31279559		1054.79	0.14369481		1644.79	0.08416622		2234.79	0.009054		2824.8	0.03616189		3414.8	0.05716392		4004.8	0.0023581
465	0.31340969		1054.99	0.14352671		1644.99	0.08490109		2234.99	0.00965369		2825	0.03574484		3415	0.05693933		4005	0.00200209
465.2	0.31355777		1055.19	0.14324876		1645.19	0.08558589		2235.19	0.0090741		2825.2	0.03604385		3415.2	0.05677593		4005.2	0.0018112
465.4	0.31346497		1055.39	0.1440213		1645.39	0.08543659		2235.39	0.00892092		2825.4	0.03501596		3415.4	0.05786835		4005.4	0.00206191
465.6	0.31397675		1055.59	0.14339789		1645.59	0.08577661		2235.59	0.00952481		2825.6	0.03510467		3415.6	0.058077		4005.6	0.00120223
465.8	0.31523088		1055.79	0.14376909		1645.79	0.08625893		2235.79	0.00878435		2825.8	0.03503956		3415.8	0.05751003		4005.8	0.00130067
466	0.31613044		1055.99	0.14370675		1645.99	0.08537044		2235.99	0.00773119		2826	0.03523841		3416	0.05815782		4006	0.00097704
466.2	0.31695912		1056.19	0.14456276		1646.19	0.08572871		2236.19	0.00726324		2826.2	0.03497347		3416.2	0.05818271		4006.2	0.00147318
466.4	0.31718898		1056.39	0.14457109		1646.39	0.08505724		2236.39	0.00674713		2826.4	0.03525575		3416.4	0.05811313		4006.4	0.00061033
466.6	0.31758389		1056.59	0.14407077		1646.59	0.0854257		2236.59	0.00641852		2826.6	0.03511897		3416.6	0.05807333		4006.6	0.00131549
466.8	0.31716874		1056.79	0.14373618		1646.79	0.08444973		2236.79	0.00627632		2826.8	0.03477843		3416.8	0.05830922		4006.8	0.00241557
467	0.31660818		1056.99	0.14346181		1646.99	0.08538237		2236.99	0.00634837		2827	0.03554565		3417	0.05907748		4007	0.00320682
467.2	0.31694021		1057.19	0.14288449		1647.19	0.08477595		2237.19	0.00688694		2827.2	0.03544812		3417.2	0.06029565		4007.2	0.00385454
467.4	0.31703215		1057.39	0.14307705		1647.39	0.08501112		2237.39	0.00786069		2827.4	0.03588503		3417.4	0.06050957		4007.4	0.00416372
467.6	0.31727879		1057.59	0.14225691		1647.59	0.08605551		2237.59	0.00839381		2827.6	0.03591518		3417.6	0.06083141		4007.6	0.00423607
467.8	0.31691573		1057.79	0.14160168		1647.79	0.0853721		2237.79	0.00882519		2827.8	0.03569498		3417.8	0.06085111		4007.8	0.00378602
468	0.31631269		1057.99	0.14139948		1647.99	0.08538758		2237.99	0.0089848		2828	0.03575824		3418	0.06098396		4008	0.00390478
468.2	0.31555593		1058.19	0.14092656		1648.19	0.0858132		2238.19	0.0087504		2828.2	0.03586243		3418.2	0.06102627		4008.2	0.00385714
468.4	0.31513932		1058.39	0.14162472		1648.39	0.08649751		2238.39	0.00935811		2828.4	0.03543196		3418.4	0.06097908		4008.4	0.00297784
468.6	0.31462878		1058.59	0.1413937		1648.59	0.08695587		2238.59	0.00960027		2828.6	0.03506755		3418.6	0.06004168		4008.6	0.00254657
468.8	0.31468164		1058.79	0.14133628		1648.79	0.08830718		2238.79	0.01035565		2828.8	0.03468372		3418.8	0.05960919		4008.8	0.00210071
469	0.31471273		1058.99	0.14133618		1648.99	0.08889112		2238.99	0.01072871		2829	0.03433502		3419	0.05889619		4009	0.00169682
469.2	0.31449621		1059.19	0.14146587		1649.19	0.08967867		2239.19	0.01086924		2829.2	0.03473747		3419.2	0.05798469		4009.2	0.00154425
469.4	0.31450433		1059.39	0.14196057		1649.39	0.09066558		2239.39	0.0104768		2829.4	0.03376808		3419.4	0.05777607		4009.4	0.00118586
469.6	0.31458131		1059.59	0.14184453		1649.59	0.0914644		2239.59	0.01062816		2829.6	0.03397268		3419.6	0.05720874		4009.6	0.00052408
469.8	0.31513303		1059.79	0.14250882		1649.79	0.09215999		2239.79	0.01006406		2829.8	0.03367768		3419.8	0.05705382		4009.8	0.00068319
470	0.31513303		1059.99	0.14250882		1650	0.09215999		2239.99	0.01006406		2830	0.03367768		3420	0.05705382		4010	0.00068319
470.2	0.3154234		1060.19	0.14311999		1650.2	0.09226233		2240.19	0.01005698		2830.2	0.03398905		3420.2	0.05611436		4010.2	0.00135766
470.4	0.31580558		1060.39	0.14246818		1650.4	0.09215318		2240.39	0.00957979		2830.4	0.03489279		3420.4	0.05530025		4010.4	0.00241162
470.6	0.31572141		1060.59	0.14262101		1650.6	0.09196121		2240.59	0.00912313		2830.6	0.03516107		3420.6	0.05385327		4010.6	0.00221139
470.8	0.31561199		1060.79	0.14177225		1650.8	0.09114584		2240.79	0.00928805		2830.8	0.03512999		3420.8	0.05237283		4010.8	0.00267082
471	0.31552089		1060.99	0.14118877		1651	0.09067987		2240.99	0.00898495		2831	0.03516603		3421	0.05090034		4011	0.0040856
471.2	0.31571071		1061.19	0.1418209		1651.2	0.0902758		2241.19	0.00850688		2831.2	0.03563592		3421.2	0.04994725		4011.2	0.00453716
471.4	0.31562019		1061.39	0.14240861		1651.4	0.09016357		2241.39	0.00795194		2831.4	0.03561315		3421.4	0.04991567		4011.4	0.00551154
471.6	0.31558296		1061.59	0.14312787		1651.6	0.09037858		2241.59	0.00740617		2831.6	0.03668444		3421.6	0.04982964		4011.6	0.00596194
471.8	0.31548305		1061.79	0.14386949		1651.8	0.09026311		2241.79	0.00731037		2831.8	0.03666737		3421.8	0.04969723		4011.8	0.00585704
472	0.31567134		1061.99	0.14451796		1652	0.09090486		2241.99	0.00627777		2832	0.03611265		3422	0.04986371		4012	0.00580538
472.2	0.31580287		1062.19	0.14469658		1652.2	0.09144414		2242.19	0.00596694		2832.2	0.03576459		3422.2	0.05053447		4012.2	0.00578036
472.4	0.31508734		1062.39	0.14444434		1652.4	0.09059858		2242.39	0.00621401		2832.4	0.03514245		3422.4	0.05041675		4012.4	0.00638001
472.6	0.31446682		1062.59	0.14412086		1652.6	0.09093494		2242.59	0.00588544		2832.6	0.03458867		3422.6	0.05144792		4012.6	0.00606467
472.8	0.31361501		1062.79	0.14549279		1652.8	0.09082076		2242.79	0.0060506		2832.8	0.0349405		3422.8	0.05153709		4012.8	0.00653482
473	0.3136301		1062.99	0.14521491		1653	0.09065466		2242.99	0.00574824		2833	0.03394525		3423	0.05161422		4013	0.00649523
473.2	0.31285878		1063.19	0.1452502		1653.2	0.09089181		2243.19	0.00610567		2833.2	0.03368006		3423.2	0.05164494		4013.2	0.00572083
473.4	0.31210235		1063.39	0.14486902		1653.4	0.09101621		2243.39	0.00650228		2833.4	0.03375617		3423.4	0.05198819		4013.4	0.00599626
473.6	0.31168687		1063.59	0.14448545		1653.6	0.09146982		2243.59	0.00730013		2833.6	0.03287514		3423.6	0.05126731		4013.6	0.00594704
473.8	0.31142954		1063.79	0.14439218		1653.8	0.09170155		2243.79	0.00655035		2833.8	0.03370543		3423.8	0.0512002		4013.8	0.00598053
474	0.31205303		1063.99	0.1442198		1654	0.09156354		2243.99	0.0058561		2834	0.03329449		3424	0.05039127		4014	0.00537722
474.2	0.31237789		1064.19	0.14430799		1654.2	0.09181136		2244.19	0.00607297		2834.2	0.03340029		3424.2	0.05023858		4014.2	0.0049116
474.4	0.31237817		1064.39	0.14303398		1654.4	0.09177975		2244.39	0.00585284		2834.4	0.03396282		3424.4	0.04993257		4014.4	0.00511398
474.6	0.31227307		1064.59	0.1424961		1654.6	0.09087609		2244.59	0.00631316		2834.6	0.03333006		3424.6	0.04937409		4014.6	0.00436367
474.8	0.31225975		1064.79	0.14157196		1654.8	0.09016391		2244.79	0.00655267		2834.8	0.03361133		3424.8	0.04940792		4014.8	0.00481598
475	0.31231125		1064.99	0.14140294		1655	0.08952533		2244.99	0.00570795		2835	0.03403898		3425	0.04952265		4015	0.00510602
475.2	0.3128475		1065.19	0.14118192		1655.2	0.0889829		2245.19	0.00550909		2835.2	0.03475014		3425.2	0.05015235		4015.2	0.00459892
475.4	0.31269032		1065.39	0.14096957		1655.4	0.0881405		2245.39	0.00488027		2835.4	0.0346291		3425.4	0.05095919		4015.4	0.00406155
475.6	0.31346454		1065.59	0.14106922		1655.6	0.08792609		2245.59	0.00431642		2835.6	0.03537589		3425.6	0.05073372		4015.6	0.00355513
475.8	0.31367119		1065.79	0.14110744		1655.8	0.08742374		2245.79	0.00421749		2835.8	0.03443136		3425.8	0.0511062		4015.8	0.00279107
476	0.31387229		1065.99	0.14077395		1656	0.08709369		2245.99	0.00320447		2836	0.03387998		3426	0.051655		4016	0.0023543
476.2	0.31327198		1066.19	0.13987222		1656.2	0.08637813		2246.19	0.00288451		2836.2	0.0336497		3426.2	0.05186944		4016.2	0.00235895
476.4	0.31254916		1066.39	0.14025387		1656.4	0.08524776		2246.39	0.00173399		2836.4	0.03267471		3426.4	0.05151261		4016.4	0.00186256
476.6	0.31215292		1066.59	0.14038429		1656.6	0.08507329		2246.59	0.00101699		2836.6	0.03223444		3426.6	0.0515798		4016.6	0.00167343
476.8	0.31190695		1066.79	0.1413838		1656.8	0.08511282		2246.79	0.00133202		2836.8	0.03170382		3426.8	0.0516273		4016.8	0.00226851
477	0.31189093		1066.99	0.14130631		1657	0.08516636		2246.99	0.00152627		2837	0.03109018		3427	0.05207034		4017	0.00262019
477.2	0.3107704		1067.19	0.1407666		1657.2	0.08526493		2247.19	0.0024692		2837.2	0.03055656		3427.2	0.05205869		4017.2	0.00230237
477.4	0.3102825		1067.39	0.14058759		1657.4	0.0855458		2247.39	0.00360357		2837.4	0.03039418		3427.4	0.05187399		4017.4	0.00267267
477.6	0.30989605		1067.59	0.14099755		1657.6	0.08580867		2247.59	0.00345112		2837.6	0.02943495		3427.6	0.05076634		4017.6	0.00292902
477.8	0.31058233		1067.79	0.14078441		1657.8	0.08610697		2247.79	0.00325353		2837.8	0.02976586		3427.8	0.05097587		4017.8	0.00274652
478	0.31036544		1067.99	0.1411279		1658	0.08679827		2247.99	0.00352464		2838	0.02824665		3428	0.0493286		4018	0.00296425
478.2	0.31070057		1068.19	0.14087102		1658.2	0.08692753		2248.19	0.00444661		2838.2	0.02857209		3428.2	0.04876532		4018.2	0.00416276
478.4	0.31106564		1068.39	0.14053514		1658.4	0.08771212		2248.39	0.00458307		2838.4	0.02865669		3428.4	0.04818719		4018.4	0.00487856
478.6	0.31104611		1068.59	0.1402452		1658.6	0.08814589		2248.59	0.00454046		2838.6	0.02920982		3428.6	0.04799786		4018.6	0.00467463
478.8	0.31105061		1068.79	0.13991559		1658.8	0.08794637		2248.79	0.00420126		2838.8	0.02981123		3428.8	0.04747125		4018.8	0.00544502
479	0.31171179		1068.99	0.13922022		1659	0.08733143		2248.99	0.00343178		2839	0.0294256		3429	0.04707619		4019	0.00564247
479.2	0.31245151		1069.19	0.13817251		1659.2	0.08736464		2249.19	0.00341358		2839.2	0.02935509		3429.2	0.04758325		4019.2	0.00550542
479.4	0.31213238		1069.39	0.13884907		1659.4	0.08739827		2249.39	0.00263357		2839.4	0.02942368		3429.4	0.0475356		4019.4	0.00506525
479.6	0.31352499		1069.59	0.13915862		1659.6	0.08759379		2249.59	0.00259296		2839.6	0.02997474		3429.6	0.04779295		4019.6	0.00547071
479.8	0.3127811		1069.79	0.13873331		1659.8	0.08700787		2249.79	0.00258486		2839.8	0.03111692		3429.8	0.04705318		4019.8	0.00458186
480	0.31244809		1069.99	0.13937182		1660	0.08696698		2249.99	0.00274447		2840	0.03149244		3430	0.04682739		4020	0.00364327
480.2	0.31209694		1070.19	0.13973724		1660.2	0.08714978		2250.19	0.00279786		2840.2	0.03138577		3430.2	0.04625945		4020.2	0.00397875
480.4	0.31166783		1070.39	0.14097856		1660.4	0.08687764		2250.39	0.00250701		2840.4	0.03144963		3430.4	0.04556701		4020.4	0.00395892
480.6	0.31116289		1070.59	0.14129647		1660.6	0.08677926		2250.59	0.00285386		2840.6	0.03170615		3430.6	0.04639147		4020.6	0.00396811
480.8	0.31043241		1070.79	0.1414677		1660.8	0.08669691		2250.79	0.00401294		2840.8	0.03202131		3430.8	0.0471517		4020.8	0.0029471
481	0.30967581		1070.99	0.14140358		1661	0.0865499		2250.99	0.00365202		2841	0.03231675		3431	0.04689548		4021	0.00222298
481.2	0.30900976		1071.19	0.1405453		1661.2	0.08685566		2251.19	0.00355061		2841.2	0.0319757		3431.2	0.04700779		4021.2	0.00182623
481.4	0.30952497		1071.39	0.14029972		1661.4	0.08688986		2251.39	0.00335481		2841.4	0.03165396		3431.4	0.04681294		4021.4	0.00240131
481.6	0.30971637		1071.59	0.13992205		1661.6	0.08794221		2251.59	0.00357915		2841.6	0.03102709		3431.6	0.04591211		4021.6	0.00272334
481.8	0.31040147		1071.79	0.13998905		1661.8	0.08867117		2251.79	0.00337737		2841.8	0.03173102		3431.8	0.04667423		4021.8	0.00233449
482	0.31021157		1071.99	0.13992894		1662	0.08872527		2251.99	0.00352681		2842	0.03053289		3432	0.04502654		4022	0.00259204
482.2	0.31063183		1072.19	0.14003577		1662.2	0.08805973		2252.19	0.00327739		2842.2	0.02999308		3432.2	0.0452009		4022.2	0.00391112
482.4	0.31187469		1072.39	0.13941625		1662.4	0.08824018		2252.39	0.00332509		2842.4	0.02994019		3432.4	0.0450154		4022.4	0.00407637
482.6	0.311574		1072.59	0.13944958		1662.6	0.08843158		2252.59	0.00269569		2842.6	0.03014849		3432.6	0.04496595		4022.6	0.00427101
482.8	0.3119741		1072.79	0.13997202		1662.8	0.08714985		2252.79	0.00260207		2842.8	0.02883397		3432.8	0.0444784		4022.8	0.00478424
483	0.31223124		1072.99	0.13935882		1663	0.08698447		2252.99	0.00177927		2843	0.02811903		3433	0.04537775		4023	0.00433503
483.2	0.31258653		1073.19	0.13956186		1663.2	0.08626496		2253.19	0.00187645		2843.2	0.02862386		3433.2	0.04559732		4023.2	0.00392351
483.4	0.31260567		1073.39	0.14000556		1663.4	0.08598302		2253.39	0.00187501		2843.4	0.02856572		3433.4	0.04494632		4023.4	0.00359903
483.6	0.313669		1073.59	0.13954822		1663.6	0.08495787		2253.59	0.0021528		2843.6	0.02899826		3433.6	0.04559479		4023.6	0.00310748
483.8	0.31355563		1073.79	0.14070809		1663.8	0.0841208		2253.79	0.00189652		2843.8	0.03022069		3433.8	0.04480562		4023.8	0.00116638
484	0.31337356		1073.99	0.14222329		1664	0.08431355		2253.99	0.00192995		2844	0.03020084		3434	0.04570729		4024	0.00079931
484.2	0.31308449		1074.19	0.14260451		1664.2	0.08394333		2254.19	0.00186164		2844.2	0.03019673		3434.2	0.04555046		4024.2	0.00080066
484.4	0.31310025		1074.39	0.14310509		1664.4	0.08415822		2254.39	0.00128897		2844.4	0.03057577		3434.4	0.0454191		4024.4	0.00007242
484.6	0.31207402		1074.59	0.14207081		1664.6	0.08385613		2254.59	0.00220517		2844.6	0.03090133		3434.6	0.04583774		4024.6	-0.00082711
484.8	0.31131214		1074.79	0.14114646		1664.8	0.08339187		2254.79	0.00233982		2844.8	0.03118422		3434.8	0.04576183		4024.8	-0.00172294
485	0.31062653		1074.99	0.13994713		1665	0.08435041		2254.99	0.00106973		2845	0.03138102		3435	0.04598038		4025	-0.00223172
485.2	0.31042994		1075.19	0.13827237		1665.2	0.08443658		2255.19	0.00045119		2845.2	0.03053827		3435.2	0.04521139		4025.2	-0.00233415
485.4	0.31011993		1075.39	0.1383614		1665.4	0.08515784		2255.39	0.00045586		2845.4	0.03068226		3435.4	0.04579928		4025.4	-0.00241949
485.6	0.31011057		1075.59	0.13886932		1665.6	0.08625531		2255.59	0.00075132		2845.6	0.03125188		3435.6	0.04632823		4025.6	-0.00243236
485.8	0.31037813		1075.79	0.13916077		1665.8	0.08621582		2255.79	0.00047003		2845.8	0.03202139		3435.8	0.0467516		4025.8	-0.00237359
486	0.31049661		1075.99	0.13929563		1666	0.08594154		2255.99	0.00032758		2846	0.03148087		3436	0.04651708		4026	-0.00154228
486.2	0.31121713		1076.19	0.14008548		1666.2	0.08621435		2256.19	-0.00022712		2846.2	0.0312984		3436.2	0.04743245		4026.2	-0.00109319
486.4	0.3116358		1076.39	0.14019045		1666.4	0.08631715		2256.39	-0.00000356		2846.4	0.0304594		3436.4	0.04751686		4026.4	-0.00094168
486.6	0.31058779		1076.59	0.14121675		1666.6	0.08705227		2256.59	-0.00034845		2846.6	0.03023092		3436.6	0.04735859		4026.6	-0.00100154
486.8	0.31102024		1076.79	0.14224625		1666.8	0.08689603		2256.79	-0.00073113		2846.8	0.02958143		3436.8	0.04732659		4026.8	-0.00062652
487	0.31161491		1076.99	0.14255422		1667	0.08740608		2256.99	-0.00120751		2847	0.02962389		3437	0.04783084		4027	-0.00025882
487.2	0.31220714		1077.19	0.14415733		1667.2	0.08638713		2257.19	-0.00174345		2847.2	0.02971573		3437.2	0.04790223		4027.2	-0.00034562
487.4	0.31304693		1077.39	0.14371179		1667.4	0.08648691		2257.39	-0.00197431		2847.4	0.02971079		3437.4	0.04817361		4027.4	-0.0003919
487.6	0.31365796		1077.59	0.14440414		1667.6	0.08574968		2257.59	-0.00228737		2847.6	0.02944731		3437.6	0.04891919		4027.6	-0.00077596
487.8	0.3135743		1077.79	0.1461994		1667.8	0.08542541		2257.79	-0.00283009		2847.8	0.02966141		3437.8	0.04881624		4027.8	-0.00117928
488	0.31285351		1077.99	0.14612099		1668	0.08615661		2257.99	-0.00239242		2848	0.02861783		3438	0.0488566		4028	-0.00020159
488.2	0.31286924		1078.19	0.14611981		1668.2	0.08656032		2258.19	-0.00127972		2848.2	0.02856679		3438.2	0.048166		4028.2	-0.00069938
488.4	0.31307186		1078.39	0.14586323		1668.4	0.0870033		2258.39	-0.00125249		2848.4	0.028643		3438.4	0.04731494		4028.4	-0.00002978
488.6	0.31217585		1078.59	0.14483421		1668.6	0.08666377		2258.59	-0.00110739		2848.6	0.02789813		3438.6	0.04641857		4028.6	-0.00000505
488.8	0.31191967		1078.79	0.1436281		1668.8	0.08607393		2258.79	-0.00106942		2848.8	0.0278846		3438.8	0.04574097		4028.8	-0.00031812
489	0.31134882		1078.99	0.14240453		1669	0.08713706		2258.99	-0.00169169		2849	0.0280995		3439	0.04518278		4029	-0.00074629
489.2	0.31056764		1079.19	0.14172588		1669.2	0.08670996		2259.19	-0.00093332		2849.2	0.02836541		3439.2	0.04475536		4029.2	-0.00039092
489.4	0.31029323		1079.39	0.1414058		1669.4	0.08694784		2259.39	-0.00044417		2849.4	0.02909836		3439.4	0.04619288		4029.4	0.00006319
489.6	0.31018259		1079.59	0.14068523		1669.6	0.0867029		2259.59	-0.00007564		2849.6	0.02955513		3439.6	0.04561975		4029.6	0.00045013
489.8	0.30966418		1079.79	0.13955689		1669.8	0.08609234		2259.79	0.00021109		2849.8	0.02994108		3439.8	0.04511373		4029.8	0.00037889
490	0.3097648		1079.99	0.13882118		1670	0.08546768		2259.99	-0.00048539		2850	0.02961155		3440	0.04640563		4030	0.000513
490.2	0.30941555		1080.19	0.13774419		1670.2	0.0851889		2260.19	-0.00004047		2850.2	0.02916846		3440.2	0.04727397		4030.2	0.00058909
490.4	0.30885586		1080.39	0.13681663		1670.4	0.08588162		2260.39	0.00000098		2850.4	0.02871443		3440.4	0.04743562		4030.4	0.0008237
490.6	0.30841459		1080.59	0.13586242		1670.6	0.08613892		2260.59	0.00013414		2850.6	0.02918029		3440.6	0.04773866		4030.6	0.00112543
490.8	0.30906132		1080.79	0.13538911		1670.8	0.0853626		2260.79	-0.00091037		2850.8	0.02866223		3440.8	0.04807195		4030.8	0.00144459
491	0.30939929		1080.99	0.13544486		1671	0.08539259		2260.99	-0.00124911		2851	0.02857364		3441	0.04864895		4031	0.00105732
491.2	0.30883588		1081.19	0.13529388		1671.2	0.08489801		2261.19	-0.0015615		2851.2	0.02882241		3441.2	0.04912369		4031.2	0.00055771
491.4	0.30932007		1081.39	0.13491068		1671.4	0.08520833		2261.39	-0.00220079		2851.4	0.02814449		3441.4	0.04858539		4031.4	0.00095135
491.6	0.30871898		1081.59	0.13597421		1671.6	0.0849059		2261.59	-0.00339247		2851.6	0.02718403		3441.6	0.04865273		4031.6	0.00090489
491.8	0.30848345		1081.79	0.13704954		1671.8	0.08621225		2261.79	-0.00471144		2851.8	0.02713215		3441.8	0.04831899		4031.8	0.00148319
492	0.30857757		1081.99	0.13812773		1672	0.08677335		2261.99	-0.00411313		2852	0.02649827		3442	0.04788808		4032	0.00231807
492.2	0.30869665		1082.19	0.13837394		1672.2	0.08683234		2262.19	-0.00440042		2852.2	0.02693883		3442.2	0.04757859		4032.2	0.00165022
492.4	0.30908457		1082.39	0.13965512		1672.4	0.08736251		2262.39	-0.00486429		2852.4	0.02592989		3442.4	0.04779787		4032.4	0.00139304
492.6	0.30874043		1082.59	0.14009292		1672.6	0.08773806		2262.59	-0.00569947		2852.6	0.02566022		3442.6	0.04751105		4032.6	0.00061536
492.8	0.30775861		1082.79	0.14000141		1672.8	0.08803554		2262.79	-0.00498665		2852.8	0.02545414		3442.8	0.04788217		4032.8	0.00099537
493	0.30737185		1082.99	0.14035583		1673	0.0889045		2262.99	-0.00547599		2853	0.02634268		3443	0.04807935		4033	0.00036601
493.2	0.30842957		1083.19	0.13993172		1673.2	0.08825895		2263.19	-0.004905		2853.2	0.0262012		3443.2	0.04868906		4033.2	0.00038739
493.4	0.30853868		1083.39	0.13989233		1673.4	0.08761326		2263.39	-0.00494455		2853.4	0.02678203		3443.4	0.04846956		4033.4	0.0007223
493.6	0.30866346		1083.59	0.14012899		1673.6	0.08698069		2263.59	-0.00397712		2853.6	0.02678087		3443.6	0.04819135		4033.6	0.00039139
493.8	0.30929023		1083.79	0.1398738		1673.8	0.08633491		2263.79	-0.00365938		2853.8	0.02671752		3443.8	0.04870683		4033.8	0.00017846
494	0.30954114		1083.99	0.13933317		1674	0.08563		2263.99	-0.00330856		2854	0.02610683		3444	0.04891379		4034	-0.00085242
494.2	0.30966611		1084.19	0.13876148		1674.2	0.08545599		2264.19	-0.00213311		2854.2	0.02639774		3444.2	0.04930485		4034.2	-0.00104146
494.4	0.3101135		1084.39	0.13851487		1674.4	0.08555807		2264.39	-0.0018427		2854.4	0.02683568		3444.4	0.04812664		4034.4	-0.00088576
494.6	0.31050902		1084.59	0.13750891		1674.6	0.08443257		2264.59	-0.00169396		2854.6	0.02643643		3444.6	0.04783701		4034.6	0.00006627
494.8	0.31062963		1084.79	0.13727642		1674.8	0.08384609		2264.79	-0.00100797		2854.8	0.02645653		3444.8	0.04763523		4034.8	-0.00071324
495	0.31114088		1084.99	0.1376855		1675	0.08397677		2264.99	-0.00038954		2855	0.02656307		3445	0.04784004		4035	-0.00118757
495.2	0.31073724		1085.19	0.13762753		1675.2	0.08356327		2265.19	-0.00027439		2855.2	0.02657743		3445.2	0.04765658		4035.2	-0.00114198
495.4	0.31149608		1085.39	0.13799555		1675.4	0.08311944		2265.39	-0.00120188		2855.4	0.02626285		3445.4	0.04681506		4035.4	0.00035854
495.6	0.31160102		1085.59	0.13784454		1675.6	0.08313912		2265.59	-0.00202754		2855.6	0.02625778		3445.6	0.04672541		4035.6	0.00097409
495.8	0.31188611		1085.79	0.13816518		1675.8	0.08378206		2265.79	-0.00181346		2855.8	0.02600211		3445.8	0.04694342		4035.8	0.00164837
496	0.3119687		1085.99	0.13819175		1676	0.08288847		2265.99	-0.00140997		2856	0.02610995		3446	0.04756748		4036	0.00185835
496.2	0.31177742		1086.19	0.13775724		1676.2	0.08306352		2266.19	-0.00156284		2856.2	0.02607751		3446.2	0.04799914		4036.2	0.00097023
496.4	0.31105527		1086.39	0.13889675		1676.4	0.08398922		2266.39	-0.0015454		2856.4	0.02585461		3446.4	0.04817504		4036.4	0.00006097
496.6	0.30986961		1086.59	0.13870165		1676.6	0.08434751		2266.59	-0.0018518		2856.6	0.02671571		3446.6	0.04760183		4036.6	-0.00024878
496.8	0.30941974		1086.79	0.13802253		1676.8	0.08453065		2266.79	-0.00175941		2856.8	0.02587969		3446.8	0.04792743		4036.8	0.00008284
497	0.31006066		1086.99	0.13777601		1677	0.08499557		2266.99	-0.00204095		2857	0.02718701		3447	0.04739293		4037	-0.00122516
497.2	0.31074543		1087.19	0.13781096		1677.2	0.08602428		2267.19	-0.00204663		2857.2	0.02792294		3447.2	0.04757073		4037.2	-0.00124164
497.4	0.31069356		1087.39	0.13763809		1677.4	0.08607268		2267.39	-0.0022412		2857.4	0.02894758		3447.4	0.04774851		4037.4	-0.00162079
497.6	0.31042201		1087.59	0.13785548		1677.6	0.08626826		2267.59	-0.00184875		2857.6	0.02809507		3447.6	0.04762828		4037.6	-0.00240098
497.8	0.31036908		1087.79	0.13836984		1677.8	0.08637397		2267.79	-0.00151204		2857.8	0.02861502		3447.8	0.0475736		4037.8	-0.00332756
498	0.31053462		1087.99	0.1388316		1678	0.0861036		2267.99	-0.0016476		2858	0.02833446		3448	0.0468462		4038	-0.0045619
498.2	0.31114753		1088.19	0.13882105		1678.2	0.08647528		2268.19	-0.00128815		2858.2	0.02852906		3448.2	0.04676732		4038.2	-0.00362212
498.4	0.31050526		1088.39	0.13937305		1678.4	0.08613285		2268.39	-0.00081376		2858.4	0.02866815		3448.4	0.04520425		4038.4	-0.00281032
498.6	0.30964834		1088.59	0.1388118		1678.6	0.08565938		2268.59	-0.00018893		2858.6	0.02821624		3448.6	0.04574795		4038.6	-0.00259791
498.8	0.30947371		1088.79	0.13847254		1678.8	0.08573813		2268.79	0.00069726		2858.8	0.02840949		3448.8	0.04533733		4038.8	-0.00312503
499	0.30977938		1088.99	0.13878234		1679	0.08545144		2268.99	0.0003273		2859	0.02814571		3449	0.0453135		4039	-0.00180253
499.2	0.30935971		1089.19	0.1386813		1679.2	0.08463584		2269.19	0.00011849		2859.2	0.02857172		3449.2	0.04513988		4039.2	-0.00104983
499.4	0.3094586		1089.39	0.13904703		1679.4	0.08376315		2269.39	-0.0009334		2859.4	0.02778185		3449.4	0.04427403		4039.4	0.00007875
499.6	0.30873664		1089.59	0.13796623		1679.6	0.08385951		2269.59	-0.00205342		2859.6	0.02679701		3449.6	0.04423052		4039.6	0.00016435
499.8	0.30852503		1089.79	0.13805491		1679.8	0.08390765		2269.79	-0.00210963		2859.8	0.02648349		3449.8	0.04461368		4039.8	0.00068746
500	0.30825592		1089.99	0.13825554		1680	0.08383462		2269.99	-0.00165901		2860	0.02634894		3450	0.04417094		4040	0.00089979
500.2	0.30810191		1090.19	0.1382109		1680.2	0.08411126		2270.19	-0.00175348		2860.2	0.02561803		3450.2	0.04386382		4040.2	0.00028808
500.4	0.30685457		1090.39	0.13855114		1680.4	0.08443188		2270.39	-0.00286398		2860.4	0.02569517		3450.4	0.04370136		4040.4	-0.00034934
500.6	0.3059352		1090.59	0.13748154		1680.6	0.08409134		2270.59	-0.00375628		2860.6	0.02532487		3450.6	0.04374993		4040.6	-0.00065142
500.8	0.30581579		1090.79	0.13687156		1680.8	0.08372866		2270.79	-0.00514194		2860.8	0.02483165		3450.8	0.04464146		4040.8	-0.00110708
501	0.30580632		1090.99	0.13721516		1681	0.08473467		2270.99	-0.00560559		2861	0.02569197		3451	0.0455238		4041	-0.00177657
501.2	0.3059666		1091.19	0.13714517		1681.2	0.08516358		2271.19	-0.00657404		2861.2	0.02687292		3451.2	0.04620865		4041.2	-0.00282429
501.4	0.30575171		1091.39	0.13647855		1681.4	0.08445647		2271.39	-0.00647497		2861.4	0.02684167		3451.4	0.04647084		4041.4	-0.00373911
501.6	0.30505826		1091.59	0.1370756		1681.6	0.08480854		2271.59	-0.00607474		2861.6	0.02794262		3451.6	0.04616279		4041.6	-0.00355794
501.8	0.30536948		1091.79	0.13747193		1681.8	0.08504216		2271.79	-0.00572528		2861.8	0.02867591		3451.8	0.0470792		4041.8	-0.00351003
502	0.30577397		1091.99	0.13766876		1682	0.08554663		2271.99	-0.00528083		2862	0.02915384		3452	0.04745349		4042	-0.00372837
502.2	0.30544669		1092.19	0.13795716		1682.2	0.08524048		2272.19	-0.00489069		2862.2	0.02912791		3452.2	0.04747348		4042.2	-0.00352219
502.4	0.30547199		1092.39	0.13876513		1682.4	0.08464594		2272.39	-0.00408135		2862.4	0.02928136		3452.4	0.04711509		4042.4	-0.00281075
502.6	0.30488721		1092.59	0.13803882		1682.6	0.08444449		2272.59	-0.00369453		2862.6	0.03026036		3452.6	0.04731627		4042.6	-0.00219181
502.8	0.30531336		1092.79	0.13804578		1682.8	0.08463448		2272.79	-0.00334981		2862.8	0.03057946		3452.8	0.04661004		4042.8	-0.00155896
503	0.30547717		1092.99	0.13834311		1683	0.08347535		2272.99	-0.00288249		2863	0.03093002		3453	0.04742391		4043	-0.00073732
503.2	0.30622033		1093.19	0.1391006		1683.2	0.08220749		2273.19	-0.00237205		2863.2	0.03039539		3453.2	0.0472435		4043.2	-0.00111664
503.4	0.3062902		1093.39	0.13959307		1683.4	0.08149825		2273.39	-0.00210243		2863.4	0.0290396		3453.4	0.04715134		4043.4	-0.00130401
503.6	0.30676144		1093.59	0.13909523		1683.6	0.08244589		2273.59	-0.00108481		2863.6	0.02807472		3453.6	0.04799907		4043.6	-0.00145294
503.8	0.30705165		1093.79	0.14019603		1683.8	0.08301014		2273.79	0.00005576		2863.8	0.02759436		3453.8	0.04775282		4043.8	-0.00094949
504	0.30734853		1093.99	0.1414999		1684	0.08296618		2273.99	0.00125752		2864	0.02686391		3454	0.04786775		4044	-0.001007
504.2	0.30741438		1094.19	0.1421436		1684.2	0.08268287		2274.19	-0.00010964		2864.2	0.02588		3454.2	0.04790627		4044.2	-0.0010346
504.4	0.30705922		1094.39	0.14191456		1684.4	0.08206122		2274.39	-0.00061055		2864.4	0.02552504		3454.4	0.04774944		4044.4	-0.00050325
504.6	0.3072737		1094.59	0.14078351		1684.6	0.08216262		2274.59	-0.00135985		2864.6	0.02379979		3454.6	0.04751002		4044.6	-0.00049595
504.8	0.30763109		1094.79	0.14151342		1684.8	0.08162439		2274.79	-0.00199069		2864.8	0.02342462		3454.8	0.04831745		4044.8	-0.00028476
505	0.30808202		1094.99	0.14169273		1685	0.08218455		2274.99	-0.00308346		2865	0.02335947		3455	0.04763174		4045	-0.00010597
505.2	0.30817141		1095.19	0.14200101		1685.2	0.08230693		2275.19	-0.00289134		2865.2	0.02382933		3455.2	0.04695453		4045.2	-0.00089217
505.4	0.30766798		1095.39	0.14251578		1685.4	0.08337947		2275.39	-0.00228297		2865.4	0.02461392		3455.4	0.04613898		4045.4	-0.00024138
505.6	0.30760795		1095.59	0.14250567		1685.6	0.08369735		2275.59	-0.00184959		2865.6	0.02531082		3455.6	0.04565524		4045.6	0.00098442
505.8	0.30770439		1095.79	0.14187264		1685.8	0.08473679		2275.79	-0.00264228		2865.8	0.02571516		3455.8	0.04542223		4045.8	0.00030894
506	0.30741831		1095.99	0.1416061		1686	0.08468621		2275.99	-0.00291079		2866	0.02610022		3456	0.04522181		4046	-0.00051574
506.2	0.30763997		1096.19	0.14197565		1686.2	0.08432564		2276.19	-0.00434195		2866.2	0.02608191		3456.2	0.04469953		4046.2	-0.00120565
506.4	0.30738742		1096.39	0.14083479		1686.4	0.0847773		2276.39	-0.00452845		2866.4	0.0264078		3456.4	0.04388994		4046.4	-0.00122073
506.6	0.3063313		1096.59	0.13999881		1686.6	0.08459859		2276.59	-0.00511042		2866.6	0.02744397		3456.6	0.04349058		4046.6	-0.0009489
506.8	0.30639132		1096.79	0.13983953		1686.8	0.08426055		2276.79	-0.00477503		2866.8	0.02694163		3456.8	0.04294552		4046.8	-0.00213434
507	0.30637241		1096.99	0.13927305		1687	0.08385877		2276.99	-0.00410908		2867	0.0270565		3457	0.04332943		4047	-0.0020341
507.2	0.30674536		1097.19	0.1396063		1687.2	0.08499388		2277.19	-0.0036437		2867.2	0.02597845		3457.2	0.04394119		4047.2	-0.00327289
507.4	0.30610556		1097.39	0.13972064		1687.4	0.08534945		2277.39	-0.00291334		2867.4	0.02522318		3457.4	0.04494027		4047.4	-0.00395323
507.6	0.30600945		1097.59	0.1388975		1687.6	0.08625395		2277.59	-0.00264733		2867.6	0.02488199		3457.6	0.04559729		4047.6	-0.00518471
507.8	0.30573943		1097.79	0.13924697		1687.8	0.0861442		2277.79	-0.00278256		2867.8	0.0247924		3457.8	0.04624825		4047.8	-0.00566129
508	0.30633263		1097.99	0.13906481		1688	0.0858244		2277.99	-0.00277592		2868	0.02459415		3458	0.04729068		4048	-0.00579375
508.2	0.30598032		1098.19	0.13894745		1688.2	0.08555386		2278.19	-0.00376097		2868.2	0.02450788		3458.2	0.04764227		4048.2	-0.00550914
508.4	0.30591725		1098.39	0.13734524		1688.4	0.08614626		2278.39	-0.00325223		2868.4	0.0239118		3458.4	0.04800301		4048.4	-0.00617925
508.6	0.30642833		1098.59	0.13680175		1688.6	0.08639165		2278.59	-0.00385742		2868.6	0.02348375		3458.6	0.04788949		4048.6	-0.00574674
508.8	0.30631696		1098.79	0.1381977		1688.8	0.08540677		2278.79	-0.00481979		2868.8	0.02395854		3458.8	0.04786632		4048.8	-0.00540403
509	0.30665074		1098.99	0.13789578		1689	0.08542225		2278.99	-0.00509369		2869	0.02481162		3459	0.04697661		4049	-0.00581198
509.2	0.30712129		1099.19	0.13795138		1689.2	0.08533579		2279.19	-0.00393908		2869.2	0.02555383		3459.2	0.04685636		4049.2	-0.00611622
509.4	0.30717587		1099.39	0.13796743		1689.4	0.08549411		2279.39	-0.00393045		2869.4	0.02692135		3459.4	0.04641307		4049.4	-0.0052437
509.6	0.30747545		1099.59	0.13658145		1689.6	0.08559914		2279.59	-0.0036941		2869.6	0.02718874		3459.6	0.04598163		4049.6	-0.00507449
509.8	0.30737487		1099.79	0.13591925		1689.8	0.08594648		2279.79	-0.0048992		2869.8	0.02878621		3459.8	0.04540043		4049.8	-0.00499516
510	0.30726881		1099.99	0.1360513		1690	0.08469108		2279.99	-0.0049861		2870	0.02965206		3460	0.04605534		4050	-0.00399437
510.2	0.30712508		1100.19	0.13547799		1690.2	0.0845882		2280.19	-0.00514503		2870.2	0.02961409		3460.2	0.04538251		4050.2	-0.003694
510.4	0.30657551		1100.39	0.13506756		1690.4	0.08413483		2280.39	-0.00492649		2870.4	0.02906542		3460.4	0.04436822		4050.4	-0.00327672
510.6	0.30687677		1100.59	0.13540161		1690.6	0.08377298		2280.59	-0.0045076		2870.6	0.02874509		3460.6	0.04368362		4050.6	-0.00298616
510.8	0.30663311		1100.79	0.13560601		1690.8	0.08274627		2280.79	-0.0038102		2870.8	0.02798695		3460.8	0.04327199		4050.8	-0.00306665
511	0.30613193		1100.99	0.13542936		1691	0.08299209		2280.99	-0.00379784		2871	0.02720327		3461	0.04387299		4051	-0.00199244
511.2	0.30573906		1101.19	0.13606876		1691.2	0.08346697		2281.19	-0.0037747		2871.2	0.02674779		3461.2	0.04438246		4051.2	-0.00272663
511.4	0.30589734		1101.39	0.13613706		1691.4	0.08232188		2281.39	-0.00380837		2871.4	0.02648226		3461.4	0.04535408		4051.4	-0.00273285
511.6	0.3055609		1101.59	0.13557249		1691.6	0.08230308		2281.59	-0.00385712		2871.6	0.02632676		3461.6	0.04507127		4051.6	-0.00302975
511.8	0.30546317		1101.79	0.13631098		1691.8	0.0821837		2281.79	-0.00405195		2871.8	0.02606044		3461.8	0.04579891		4051.8	-0.0035144
512	0.30544411		1101.99	0.13673132		1692	0.0819601		2281.99	-0.00419589		2872	0.02520021		3462	0.04496024		4052	-0.00348983
512.2	0.30454553		1102.19	0.13682575		1692.2	0.08185217		2282.19	-0.00384373		2872.2	0.02390413		3462.2	0.04542207		4052.2	-0.00462651
512.4	0.30504938		1102.39	0.13629402		1692.4	0.08198722		2282.39	-0.00318193		2872.4	0.02323001		3462.4	0.0452842		4052.4	-0.00541173
512.6	0.30604683		1102.59	0.13698152		1692.6	0.08197146		2282.59	-0.00355053		2872.6	0.02286957		3462.6	0.04410226		4052.6	-0.00588149
512.8	0.30601022		1102.79	0.13779736		1692.8	0.08199008		2282.79	-0.00438796		2872.8	0.0228815		3462.8	0.04375418		4052.8	-0.00611067
513	0.30651806		1102.99	0.13721073		1693	0.08260914		2282.99	-0.0037248		2873	0.02369366		3463	0.04314288		4053	-0.00700934
513.2	0.30746017		1103.19	0.13747972		1693.2	0.08301114		2283.19	-0.00413503		2873.2	0.02381486		3463.2	0.04341549		4053.2	-0.00694564
513.4	0.30701974		1103.39	0.13760927		1693.4	0.08346555		2283.39	-0.00422596		2873.4	0.02414907		3463.4	0.04352525		4053.4	-0.0061664
513.6	0.30773672		1103.59	0.13735556		1693.6	0.08403166		2283.59	-0.00437268		2873.6	0.02430491		3463.6	0.04344569		4053.6	-0.00540374
513.8	0.30737541		1103.79	0.13737796		1693.8	0.08413041		2283.79	-0.00458031		2873.8	0.02419053		3463.8	0.04345426		4053.8	-0.0042209
514	0.30730498		1103.99	0.13677506		1694	0.08421222		2283.99	-0.00465571		2874	0.02405988		3464	0.04421116		4054	-0.00411775
514.2	0.30706166		1104.19	0.13556413		1694.2	0.08418254		2284.19	-0.00400605		2874.2	0.02315303		3464.2	0.04398256		4054.2	-0.00384073
514.4	0.30750101		1104.39	0.13542808		1694.4	0.08464662		2284.39	-0.00421955		2874.4	0.02365512		3464.4	0.04355782		4054.4	-0.0035573
514.6	0.30693408		1104.59	0.1350733		1694.6	0.08419959		2284.59	-0.00414251		2874.6	0.02358931		3464.6	0.04383376		4054.6	-0.00316705
514.8	0.30586474		1104.79	0.13465469		1694.8	0.08364074		2284.79	-0.00438543		2874.8	0.0236796		3464.8	0.04389086		4054.8	-0.00203848
515	0.3048081		1104.99	0.1346602		1695	0.08394267		2284.99	-0.00436805		2875	0.02370654		3465	0.0447215		4055	-0.00194653
515.2	0.30450503		1105.19	0.13478187		1695.2	0.08394786		2285.19	-0.00428049		2875.2	0.02453535		3465.2	0.04576609		4055.2	-0.00176498
515.4	0.30431285		1105.39	0.13436551		1695.4	0.0839558		2285.39	-0.00523024		2875.4	0.02486086		3465.4	0.04669637		4055.4	-0.00113028
515.6	0.3033419		1105.59	0.1337786		1695.6	0.08393851		2285.59	-0.00505494		2875.6	0.0240629		3465.6	0.04525325		4055.6	-0.0016558
515.8	0.30292253		1105.79	0.13371476		1695.8	0.08379988		2285.79	-0.00580641		2875.8	0.02380936		3465.8	0.04578752		4055.8	-0.00282327
516	0.30266177		1105.99	0.13340236		1696	0.08365491		2285.99	-0.00664306		2876	0.02264917		3466	0.04525249		4056	-0.00286186
516.2	0.30284978		1106.19	0.13368306		1696.2	0.08346709		2286.19	-0.00549582		2876.2	0.02278938		3466.2	0.04546758		4056.2	-0.00332983
516.4	0.30379093		1106.39	0.13398283		1696.4	0.08368794		2286.39	-0.0047591		2876.4	0.02377779		3466.4	0.04469453		4056.4	-0.00339878
516.6	0.30428064		1106.59	0.13473198		1696.6	0.0845994		2286.59	-0.00503962		2876.6	0.02450449		3466.6	0.04332116		4056.6	-0.00437259
516.8	0.30415367		1106.79	0.13471377		1696.8	0.0846677		2286.79	-0.00538384		2876.8	0.02583155		3466.8	0.0429327		4056.8	-0.00402119
517	0.30469686		1106.99	0.13475887		1697	0.08473716		2286.99	-0.00576156		2877	0.02611279		3467	0.04256432		4057	-0.00458504
517.2	0.30532872		1107.19	0.1354062		1697.2	0.08411367		2287.19	-0.00610496		2877.2	0.02520222		3467.2	0.04371829		4057.2	-0.00484625
517.4	0.3052975		1107.39	0.13598253		1697.4	0.08415948		2287.39	-0.00633616		2877.4	0.02445653		3467.4	0.04321509		4057.4	-0.00474313
517.6	0.30706335		1107.59	0.13557267		1697.6	0.08478491		2287.59	-0.00672953		2877.6	0.02454288		3467.6	0.0437478		4057.6	-0.0035891
517.8	0.30708016		1107.79	0.13533772		1697.8	0.08548191		2287.79	-0.00640606		2877.8	0.02470561		3467.8	0.04359592		4057.8	-0.00393219
518	0.30820964		1107.99	0.13498889		1698	0.08545484		2287.99	-0.0068046		2878	0.02510696		3468	0.04452535		4058	-0.00387255
518.2	0.30882305		1108.19	0.13391165		1698.2	0.08491732		2288.19	-0.00656059		2878.2	0.0251173		3468.2	0.04477911		4058.2	-0.00321369
518.4	0.3086403		1108.39	0.13390433		1698.4	0.08550933		2288.39	-0.00672519		2878.4	0.02562479		3468.4	0.04468922		4058.4	-0.00325206
518.6	0.30682717		1108.59	0.13425897		1698.6	0.08540002		2288.59	-0.00718909		2878.6	0.02485683		3468.6	0.0449096		4058.6	-0.0034679
518.8	0.30676643		1108.79	0.13447787		1698.8	0.08496705		2288.79	-0.00770039		2878.8	0.02467261		3468.8	0.04457908		4058.8	-0.00363929
519	0.30610453		1108.99	0.1352782		1699	0.08441143		2288.99	-0.00817402		2879	0.02422641		3469	0.04461413		4059	-0.00418559
519.2	0.30530324		1109.19	0.13528516		1699.2	0.08423701		2289.19	-0.00903384		2879.2	0.02400936		3469.2	0.04521024		4059.2	-0.00340062
519.4	0.30480984		1109.39	0.13414289		1699.4	0.08424141		2289.39	-0.00973568		2879.4	0.02314385		3469.4	0.04553763		4059.4	-0.0031204
519.6	0.30435346		1109.59	0.13363904		1699.6	0.08302173		2289.59	-0.00936352		2879.6	0.02255677		3469.6	0.04500638		4059.6	-0.00340521
519.8	0.30446661		1109.79	0.13348777		1699.8	0.08309857		2289.79	-0.00987999		2879.8	0.02229058		3469.8	0.04497829		4059.8	-0.00324349
520	0.30438122		1109.99	0.13329846		1700	0.08240426		2289.99	-0.00838204		2880	0.02181446		3470	0.04470637		4060	-0.00294092
520.2	0.30408059		1110.19	0.13430475		1700.2	0.08199528		2290.19	-0.00691541		2880.2	0.02252258		3470.2	0.04455914		4060.2	-0.00289901
520.4	0.30340664		1110.39	0.1341042		1700.4	0.0823046		2290.39	-0.00688027		2880.4	0.02306006		3470.4	0.04389887		4060.4	-0.00306308
520.6	0.30321283		1110.59	0.13380732		1700.6	0.08258928		2290.59	-0.0069949		2880.6	0.02243859		3470.6	0.04349993		4060.6	-0.00317646
520.8	0.30352936		1110.79	0.13346074		1700.8	0.08245795		2290.79	-0.00643771		2880.8	0.0216436		3470.8	0.04378149		4060.8	-0.00305035
521	0.30406413		1110.99	0.13363515		1701	0.08269791		2290.99	-0.00579707		2881	0.02088918		3471	0.04422369		4061	-0.0036114
521.2	0.30414544		1111.19	0.13454037		1701.2	0.08307935		2291.19	-0.00486223		2881.2	0.02071182		3471.2	0.04410378		4061.2	-0.0032226
521.4	0.30484824		1111.39	0.13519992		1701.4	0.08367646		2291.39	-0.00429939		2881.4	0.02176483		3471.4	0.04360404		4061.4	-0.0028639
521.6	0.30586799		1111.59	0.13505543		1701.6	0.08488564		2291.59	-0.00348552		2881.6	0.02205659		3471.6	0.04418596		4061.6	-0.00239988
521.8	0.30617234		1111.79	0.13574095		1701.8	0.08496141		2291.79	-0.00253701		2881.8	0.0225174		3471.8	0.04436265		4061.8	-0.00257819
522	0.30644902		1111.99	0.13598603		1702	0.08496094		2291.99	-0.00340855		2882	0.02238625		3472	0.04407924		4062	-0.00229957
522.2	0.30685181		1112.19	0.13537654		1702.2	0.08562927		2292.19	-0.00397008		2882.2	0.02270778		3472.2	0.04345611		4062.2	-0.00243156
522.4	0.30655861		1112.39	0.13692175		1702.4	0.0858001		2292.39	-0.00415124		2882.4	0.02288044		3472.4	0.04299285		4062.4	-0.00279608
522.6	0.30615243		1112.59	0.137747		1702.6	0.08616279		2292.59	-0.00494452		2882.6	0.02248844		3472.6	0.04302404		4062.6	-0.00343294
522.8	0.30664765		1112.79	0.13789028		1702.8	0.08569345		2292.79	-0.00513378		2882.8	0.02223307		3472.8	0.04253108		4062.8	-0.00308237
523	0.30679176		1112.99	0.13745059		1703	0.08528793		2292.99	-0.00532142		2883	0.02206347		3473	0.04271139		4063	-0.00255261
523.2	0.30663424		1113.19	0.13678688		1703.2	0.08444965		2293.19	-0.00560634		2883.2	0.02194589		3473.2	0.04357207		4063.2	-0.00228583
523.4	0.30695563		1113.39	0.1359253		1703.4	0.08414485		2293.39	-0.00605894		2883.4	0.02175745		3473.4	0.04383626		4063.4	-0.00297586
523.6	0.30759961		1113.59	0.13578728		1703.6	0.0830157		2293.59	-0.0059143		2883.6	0.02156363		3473.6	0.04329055		4063.6	-0.00305533
523.8	0.30752257		1113.79	0.13533478		1703.8	0.08292309		2293.79	-0.00654066		2883.8	0.02073232		3473.8	0.04320222		4063.8	-0.00366342
524	0.30691042		1113.99	0.13527464		1704	0.08251722		2293.99	-0.00680321		2884	0.02069981		3474	0.04319812		4064	-0.00319012
524.2	0.30549346		1114.19	0.13593751		1704.2	0.08230163		2294.19	-0.00807679		2884.2	0.02050363		3474.2	0.04214954		4064.2	-0.00318243
524.4	0.30552915		1114.39	0.13574898		1704.4	0.08212668		2294.39	-0.00851144		2884.4	0.02001711		3474.4	0.04210961		4064.4	-0.00341865
524.6	0.30506871		1114.59	0.13585683		1704.6	0.08145488		2294.59	-0.00880431		2884.6	0.01867785		3474.6	0.04266799		4064.6	-0.00344573
524.8	0.30522764		1114.79	0.13576966		1704.8	0.08119192		2294.79	-0.008722		2884.8	0.01863592		3474.8	0.04293541		4064.8	-0.00353943
525	0.30446904		1114.99	0.13580629		1705	0.0809567		2294.99	-0.00844307		2885	0.01902119		3475	0.04360973		4065	-0.00373402
525.2	0.30347738		1115.19	0.13637407		1705.2	0.08188651		2295.19	-0.00900445		2885.2	0.01935875		3475.2	0.04400645		4065.2	-0.00324022
525.4	0.30316593		1115.39	0.13685813		1705.4	0.08219033		2295.39	-0.00876933		2885.4	0.01987183		3475.4	0.04534752		4065.4	-0.00343414
525.6	0.30291722		1115.59	0.13619882		1705.6	0.08327628		2295.59	-0.0091242		2885.6	0.01985126		3475.6	0.04609839		4065.6	-0.00346844
525.8	0.3034893		1115.79	0.13587492		1705.8	0.08296469		2295.79	-0.00885686		2885.8	0.02034039		3475.8	0.04621324		4065.8	-0.00363341
526	0.30360895		1115.99	0.13592562		1706	0.08273966		2295.99	-0.00942316		2886	0.02025342		3476	0.04554964		4066	-0.00411624
526.2	0.30447222		1116.19	0.13586587		1706.2	0.08271977		2296.19	-0.0094162		2886.2	0.02018718		3476.2	0.04530164		4066.2	-0.00467856
526.4	0.30454972		1116.39	0.13671378		1706.4	0.0826884		2296.39	-0.00901576		2886.4	0.01982021		3476.4	0.04624734		4066.4	-0.0042438
526.6	0.3043083		1116.59	0.13550244		1706.6	0.0826722		2296.59	-0.00851438		2886.6	0.02031765		3476.6	0.04687168		4066.6	-0.00424489
526.8	0.30425922		1116.79	0.13435156		1706.8	0.08176088		2296.79	-0.00808693		2886.8	0.02007865		3476.8	0.04628955		4066.8	-0.00450468
527	0.30460179		1116.99	0.13399131		1707	0.08157327		2296.99	-0.00776857		2887	0.02067244		3477	0.04642332		4067	-0.00460529
527.2	0.30463981		1117.19	0.13360947		1707.2	0.08180622		2297.19	-0.00734152		2887.2	0.02120907		3477.2	0.04669769		4067.2	-0.00569537
527.4	0.30455189		1117.39	0.13401634		1707.4	0.08263196		2297.39	-0.00733437		2887.4	0.02160329		3477.4	0.04581673		4067.4	-0.00588115
527.6	0.30571999		1117.59	0.13338732		1707.6	0.08286421		2297.59	-0.00656154		2887.6	0.02200764		3477.6	0.04522345		4067.6	-0.0053812
527.8	0.30487923		1117.79	0.13312133		1707.8	0.08342776		2297.79	-0.00687526		2887.8	0.02265616		3477.8	0.04467932		4067.8	-0.00526081
528	0.30463055		1117.99	0.1333924		1708	0.08359928		2297.99	-0.00647651		2888	0.02354724		3478	0.04428235		4068	-0.00531323
528.2	0.30307076		1118.19	0.13352424		1708.2	0.08291025		2298.19	-0.00589911		2888.2	0.02389285		3478.2	0.04373839		4068.2	-0.00575347
528.4	0.30341521		1118.39	0.1343356		1708.4	0.08381512		2298.39	-0.00576884		2888.4	0.02437485		3478.4	0.04371936		4068.4	-0.00541326
528.6	0.30161301		1118.59	0.13400262		1708.6	0.08335907		2298.59	-0.00583624		2888.6	0.02449036		3478.6	0.04390547		4068.6	-0.00437713
528.8	0.30137765		1118.79	0.13448636		1708.8	0.08336992		2298.79	-0.005098		2888.8	0.02405623		3478.8	0.04430806		4068.8	-0.00425755
529	0.30142559		1118.99	0.13531309		1709	0.08335204		2298.99	-0.004869		2889	0.02480482		3479	0.04472466		4069	-0.00434688
529.2	0.30180635		1119.19	0.13530644		1709.2	0.08404567		2299.19	-0.00531986		2889.2	0.02553814		3479.2	0.04478113		4069.2	-0.00461047
529.4	0.30306244		1119.39	0.13504723		1709.4	0.08269835		2299.39	-0.00462244		2889.4	0.02558789		3479.4	0.04464653		4069.4	-0.00395685
529.6	0.30348462		1119.59	0.13448545		1709.6	0.08189737		2299.59	-0.00472656		2889.6	0.02593259		3479.6	0.04410735		4069.6	-0.00452872
529.8	0.30511689		1119.79	0.13473608		1709.8	0.08100443		2299.79	-0.00373584		2889.8	0.02540453		3479.8	0.04346043		4069.8	-0.00445548
530	0.3051614		1119.99	0.13512784		1710	0.07929722		2299.99	-0.00455414		2890	0.02533861		3480	0.043021		4070	-0.00417953
530.2	0.30540462		1120.19	0.13499725		1710.2	0.07850728		2300.19	-0.00509641		2890.2	0.02440191		3480.2	0.04287036		4070.2	-0.00467953
530.4	0.30570396		1120.39	0.13506119		1710.4	0.0773889		2300.39	-0.0053854		2890.4	0.0232351		3480.4	0.04318275		4070.4	-0.00394415
530.6	0.30574279		1120.59	0.13474494		1710.6	0.07608468		2300.59	-0.00599671		2890.6	0.02275632		3480.6	0.04272903		4070.6	-0.00498994
530.8	0.30718147		1120.79	0.13490543		1710.8	0.07635005		2300.79	-0.00658522		2890.8	0.02167802		3480.8	0.04217411		4070.8	-0.00560952
531	0.3074633		1120.99	0.13484977		1711	0.07683718		2300.99	-0.00670781		2891	0.02155404		3481	0.04192501		4071	-0.00509238
531.2	0.30773132		1121.19	0.1348593		1711.2	0.07650066		2301.19	-0.00657512		2891.2	0.02089247		3481.2	0.04252997		4071.2	-0.00550033
531.4	0.30768507		1121.39	0.13441734		1711.4	0.07667767		2301.39	-0.00725286		2891.4	0.02027824		3481.4	0.04190408		4071.4	-0.00578971
531.6	0.30755482		1121.59	0.13269058		1711.6	0.07785256		2301.59	-0.00737511		2891.6	0.01990902		3481.6	0.04229925		4071.6	-0.00614384
531.8	0.30643754		1121.79	0.13216414		1711.8	0.07954971		2301.79	-0.0082171		2891.8	0.01939368		3481.8	0.04243206		4071.8	-0.00660476
532	0.30570989		1121.99	0.1318986		1712	0.08028174		2301.99	-0.00803262		2892	0.01949023		3482	0.04229446		4072	-0.00792612
532.2	0.30427885		1122.19	0.13160482		1712.2	0.08092383		2302.19	-0.00880883		2892.2	0.02021767		3482.2	0.04139982		4072.2	-0.00741456
532.4	0.3043617		1122.39	0.13230364		1712.4	0.08252411		2302.39	-0.00937399		2892.4	0.02026525		3482.4	0.04089188		4072.4	-0.00686108
532.6	0.30330966		1122.59	0.13181698		1712.6	0.08242503		2302.59	-0.00911978		2892.6	0.02010506		3482.6	0.04075897		4072.6	-0.00655839
532.8	0.30358308		1122.79	0.13274055		1712.8	0.08294231		2302.79	-0.00908384		2892.8	0.02002524		3482.8	0.04039702		4072.8	-0.00695403
533	0.3037141		1122.99	0.1321121		1713	0.08266924		2302.99	-0.00935028		2893	0.02093369		3483	0.04022518		4073	-0.00731838
533.2	0.3037623		1123.19	0.13102737		1713.2	0.08256901		2303.19	-0.00919256		2893.2	0.02137471		3483.2	0.03978867		4073.2	-0.0073872
533.4	0.30358112		1123.39	0.1307892		1713.4	0.08269304		2303.39	-0.00854682		2893.4	0.02104684		3483.4	0.03927766		4073.4	-0.007605
533.6	0.30282835		1123.59	0.13096838		1713.6	0.08246988		2303.59	-0.00798328		2893.6	0.02187475		3483.6	0.03905935		4073.6	-0.00802618
533.8	0.30325135		1123.79	0.13097687		1713.8	0.0826133		2303.79	-0.0075419		2893.8	0.02233091		3483.8	0.03894192		4073.8	-0.00773174
534	0.3020369		1123.99	0.13129308		1714	0.08216637		2303.99	-0.00794644		2894	0.02285109		3484	0.0393762		4074	-0.0072448
534.2	0.30273606		1124.19	0.13137562		1714.2	0.0821731		2304.19	-0.00806667		2894.2	0.02167229		3484.2	0.03969965		4074.2	-0.00726359
534.4	0.30314945		1124.39	0.13107804		1714.4	0.08170773		2304.39	-0.00793441		2894.4	0.02136882		3484.4	0.03984123		4074.4	-0.00662322
534.6	0.30424484		1124.59	0.13246163		1714.6	0.0819125		2304.59	-0.00819114		2894.6	0.02107981		3484.6	0.04017951		4074.6	-0.00728638
534.8	0.3051348		1124.79	0.13288271		1714.8	0.08213387		2304.79	-0.00797959		2894.8	0.02068764		3484.8	0.04089523		4074.8	-0.00731797
535	0.30442814		1124.99	0.13303271		1715	0.08069419		2304.99	-0.00774187		2895	0.0200449		3485	0.04124701		4075	-0.00751781
535.2	0.30447319		1125.19	0.13337344		1715.2	0.08028898		2305.19	-0.007954		2895.2	0.0194581		3485.2	0.04260779		4075.2	-0.00833315
535.4	0.3045286		1125.39	0.13320578		1715.4	0.08140667		2305.39	-0.00894542		2895.4	0.01974451		3485.4	0.04205583		4075.4	-0.00896682
535.6	0.30472035		1125.59	0.13277154		1715.6	0.08216884		2305.59	-0.00890324		2895.6	0.02065208		3485.6	0.04267357		4075.6	-0.00860897
535.8	0.30520356		1125.79	0.13350307		1715.8	0.08257428		2305.79	-0.0089238		2895.8	0.02102384		3485.8	0.04299995		4075.8	-0.00808632
536	0.30440348		1125.99	0.13348496		1716	0.0818341		2305.99	-0.00906233		2896	0.02141187		3486	0.04264256		4076	-0.00844224
536.2	0.3051892		1126.19	0.13365495		1716.2	0.08184519		2306.19	-0.00957222		2896.2	0.0220441		3486.2	0.04265063		4076.2	-0.00743789
536.4	0.305642		1126.39	0.13364214		1716.4	0.08141381		2306.39	-0.00895193		2896.4	0.02199163		3486.4	0.04273788		4076.4	-0.00706839
536.6	0.30516002		1126.59	0.1331108		1716.6	0.0818231		2306.59	-0.00856351		2896.6	0.02218761		3486.6	0.0428695		4076.6	-0.0063898
536.8	0.30507128		1126.79	0.13321795		1716.8	0.08216453		2306.79	-0.00917172		2896.8	0.02257668		3486.8	0.04296299		4076.8	-0.00673266
537	0.30507289		1126.99	0.13250925		1717	0.0817654		2306.99	-0.00920004		2897	0.02243589		3487	0.04268456		4077	-0.00703943
537.2	0.30478855		1127.19	0.13202145		1717.2	0.08180413		2307.19	-0.00905595		2897.2	0.0229039		3487.2	0.04236065		4077.2	-0.00735497
537.4	0.30450653		1127.39	0.13179996		1717.4	0.08204134		2307.39	-0.00849781		2897.4	0.02242136		3487.4	0.04156466		4077.4	-0.00728855
537.6	0.30406606		1127.59	0.13137241		1717.6	0.08245782		2307.59	-0.00926891		2897.6	0.02238895		3487.6	0.04142501		4077.6	-0.00574485
537.8	0.30344555		1127.79	0.13134416		1717.8	0.08276389		2307.79	-0.00936377		2897.8	0.02225784		3487.8	0.04162901		4077.8	-0.0052125
538	0.30320255		1127.99	0.13069414		1718	0.08268579		2307.99	-0.00909306		2898	0.02198825		3488	0.04146015		4078	-0.00489524
538.2	0.30355448		1128.19	0.13063915		1718.2	0.08246468		2308.19	-0.00928927		2898.2	0.02038307		3488.2	0.04194185		4078.2	-0.00523903
538.4	0.30361119		1128.39	0.13055953		1718.4	0.08246736		2308.39	-0.00902662		2898.4	0.02052396		3488.4	0.04173602		4078.4	-0.00549025
538.6	0.30354457		1128.59	0.1313766		1718.6	0.08219488		2308.59	-0.01009636		2898.6	0.02049416		3488.6	0.04108837		4078.6	-0.00662003
538.8	0.30363456		1128.79	0.13104499		1718.8	0.08207011		2308.79	-0.01065586		2898.8	0.0194073		3488.8	0.04162835		4078.8	-0.00657705
539	0.30334711		1128.99	0.1307373		1719	0.0814459		2308.99	-0.01068045		2899	0.01866408		3489	0.04097397		4079	-0.00667086
539.2	0.30341688		1129.19	0.13137362		1719.2	0.08144681		2309.19	-0.01027259		2899.2	0.01891303		3489.2	0.03990443		4079.2	-0.00714971
539.4	0.30445112		1129.39	0.13159742		1719.4	0.08149514		2309.39	-0.01074265		2899.4	0.01929466		3489.4	0.03988946		4079.4	-0.0069837
539.6	0.30441971		1129.59	0.13162116		1719.6	0.08107855		2309.59	-0.01044777		2899.6	0.01919007		3489.6	0.04030313		4079.6	-0.00637642
539.8	0.30432259		1129.79	0.13250895		1719.8	0.08108517		2309.79	-0.01008961		2899.8	0.01880303		3489.8	0.04047111		4079.8	-0.00643497
540	0.30355591		1129.99	0.1323587		1720	0.08126713		2309.99	-0.01046518		2900	0.01770786		3490	0.04032328		4080	-0.00733633
540.2	0.30477839		1130.19	0.13276846		1720.2	0.08148457		2310.19	-0.00918471		2900.2	0.01757564		3490.2	0.0399819		4080.2	-0.00709641
540.4	0.30415351		1130.39	0.13293967		1720.4	0.08130917		2310.39	-0.00880682		2900.4	0.01820376		3490.4	0.04020323		4080.4	-0.00672677
540.6	0.30396603		1130.59	0.13300467		1720.6	0.08215836		2310.59	-0.00817152		2900.6	0.01820046		3490.6	0.03995561		4080.6	-0.00687742
540.8	0.30495223		1130.79	0.13336769		1720.8	0.08174914		2310.79	-0.00855705		2900.8	0.01821292		3490.8	0.03920139		4080.8	-0.0077382
541	0.30489307		1130.99	0.13331799		1721	0.08085533		2310.99	-0.00827194		2901	0.01739117		3491	0.03894968		4081	-0.00773086
541.2	0.30406331		1131.19	0.13278713		1721.2	0.08021835		2311.19	-0.0075279		2901.2	0.01687318		3491.2	0.03911934		4081.2	-0.00721828
541.4	0.30484404		1131.39	0.13276682		1721.4	0.08038123		2311.39	-0.00706249		2901.4	0.01617952		3491.4	0.0381468		4081.4	-0.00667146
541.6	0.30472169		1131.59	0.13250328		1721.6	0.08048619		2311.59	-0.00783469		2901.6	0.01653804		3491.6	0.03791297		4081.6	-0.00600791
541.8	0.30464256		1131.79	0.13189782		1721.8	0.07936746		2311.79	-0.0077041		2901.8	0.0164979		3491.8	0.03808705		4081.8	-0.00644918
542	0.30495891		1131.99	0.13166294		1722	0.0791746		2311.99	-0.00866282		2902	0.01707473		3492	0.03805625		4082	-0.00677287
542.2	0.30432373		1132.19	0.13184559		1722.2	0.07792904		2312.19	-0.00876249		2902.2	0.01709733		3492.2	0.03826838		4082.2	-0.00664916
542.4	0.30500983		1132.39	0.13176526		1722.4	0.07726394		2312.39	-0.0101365		2902.4	0.01833719		3492.4	0.03806292		4082.4	-0.0074649
542.6	0.30473188		1132.59	0.13075262		1722.6	0.07684638		2312.59	-0.01052644		2902.6	0.01879824		3492.6	0.03848211		4082.6	-0.00788502
542.8	0.30511296		1132.79	0.13046679		1722.8	0.0766268		2312.79	-0.01053882		2902.8	0.01865085		3492.8	0.03924376		4082.8	-0.00733456
543	0.30497693		1132.99	0.12993358		1723	0.0758943		2312.99	-0.01019433		2903	0.01883661		3493	0.038725		4083	-0.00784243
543.2	0.304845		1133.19	0.12996502		1723.2	0.07504977		2313.19	-0.01012043		2903.2	0.0195551		3493.2	0.03883595		4083.2	-0.00784971
543.4	0.30441407		1133.39	0.12975387		1723.4	0.07542943		2313.39	-0.01077195		2903.4	0.0198707		3493.4	0.04098094		4083.4	-0.00737522
543.6	0.30366528		1133.59	0.12914909		1723.6	0.07574727		2313.59	-0.01114848		2903.6	0.02006945		3493.6	0.04156865		4083.6	-0.00705553
543.8	0.30312986		1133.79	0.12935206		1723.8	0.07653159		2313.79	-0.01116403		2903.8	0.0207194		3493.8	0.04176713		4083.8	-0.00800174
544	0.30298896		1133.99	0.12981192		1724	0.07737299		2313.99	-0.01157376		2904	0.02102071		3494	0.04185095		4084	-0.00848913
544.2	0.30387007		1134.19	0.12961147		1724.2	0.07752107		2314.19	-0.01042828		2904.2	0.02167704		3494.2	0.04218256		4084.2	-0.00803793
544.4	0.30341369		1134.39	0.12924486		1724.4	0.07788787		2314.39	-0.01036186		2904.4	0.02248411		3494.4	0.04267781		4084.4	-0.00829558
544.6	0.30361861		1134.59	0.12994473		1724.6	0.07836662		2314.59	-0.00876798		2904.6	0.02239045		3494.6	0.04258949		4084.6	-0.008731
544.8	0.30465429		1134.79	0.13023114		1724.8	0.07836458		2314.79	-0.00860428		2904.8	0.02235221		3494.8	0.04240797		4084.8	-0.00885177
545	0.30475094		1134.99	0.13049775		1725	0.0772281		2314.99	-0.0077122		2905	0.02229746		3495	0.04238287		4085	-0.0083928
545.2	0.30503682		1135.19	0.130091		1725.2	0.07706191		2315.19	-0.00744364		2905.2	0.02222982		3495.2	0.04165628		4085.2	-0.00799078
545.4	0.30592847		1135.39	0.13091756		1725.4	0.07705267		2315.39	-0.00765941		2905.4	0.02169299		3495.4	0.04034475		4085.4	-0.00815946
545.6	0.3063143		1135.59	0.13042617		1725.6	0.07720161		2315.59	-0.00776176		2905.6	0.02165403		3495.6	0.04050722		4085.6	-0.00834648
545.8	0.30585649		1135.79	0.13021721		1725.8	0.07710828		2315.79	-0.00885967		2905.8	0.02170712		3495.8	0.04089468		4085.8	-0.0083807
546	0.30545773		1135.99	0.13131643		1726	0.07656848		2315.99	-0.00870693		2906	0.02226847		3496	0.04053424		4086	-0.00898195
546.2	0.3052166		1136.19	0.13157162		1726.2	0.07605551		2316.19	-0.00825546		2906.2	0.02234144		3496.2	0.04048329		4086.2	-0.00889495
546.4	0.30574839		1136.39	0.13239239		1726.4	0.07651278		2316.39	-0.0088989		2906.4	0.02225196		3496.4	0.04036574		4086.4	-0.00953653
546.6	0.30499959		1136.59	0.13232391		1726.6	0.07719316		2316.59	-0.00840198		2906.6	0.02141834		3496.6	0.04024734		4086.6	-0.00983507
546.8	0.30398493		1136.79	0.13242393		1726.8	0.07686905		2316.79	-0.00841417		2906.8	0.02061604		3496.8	0.03974386		4086.8	-0.00986702
547	0.30332713		1136.99	0.13201341		1727	0.07677406		2316.99	-0.00843984		2907	0.01932376		3497	0.03983732		4087	-0.00966352
547.2	0.30310744		1137.19	0.13198617		1727.2	0.07647267		2317.19	-0.00847314		2907.2	0.01864765		3497.2	0.04057673		4087.2	-0.00883033
547.4	0.30204288		1137.39	0.132127		1727.4	0.07699939		2317.39	-0.00995336		2907.4	0.01818062		3497.4	0.04044091		4087.4	-0.00863267
547.6	0.30145228		1137.59	0.13157764		1727.6	0.07727955		2317.59	-0.01129105		2907.6	0.01826012		3497.6	0.04020193		4087.6	-0.00914265
547.8	0.30100094		1137.79	0.13270345		1727.8	0.07851067		2317.79	-0.01149589		2907.8	0.01796207		3497.8	0.0393452		4087.8	-0.00932345
548	0.30131268		1137.99	0.13271557		1728	0.07938575		2317.99	-0.01148967		2908	0.01776154		3498	0.04014199		4088	-0.00935552
548.2	0.30123172		1138.19	0.13171526		1728.2	0.0805075		2318.19	-0.01132657		2908.2	0.01738626		3498.2	0.04045063		4088.2	-0.00883758
548.4	0.30105056		1138.39	0.13131409		1728.4	0.08136824		2318.39	-0.01090598		2908.4	0.01703559		3498.4	0.04013462		4088.4	-0.0094272
548.6	0.3019155		1138.59	0.1310025		1728.6	0.0819564		2318.59	-0.00991806		2908.6	0.01682784		3498.6	0.04023563		4088.6	-0.0086306
548.8	0.30198624		1138.79	0.13012138		1728.8	0.08197272		2318.79	-0.00965553		2908.8	0.01673952		3498.8	0.03922409		4088.8	-0.00881612
549	0.3018509		1138.99	0.12988323		1729	0.08202586		2318.99	-0.00914536		2909	0.0167248		3499	0.03921794		4089	-0.00877664
549.2	0.30236701		1139.19	0.13002124		1729.2	0.08347586		2319.19	-0.00897721		2909.2	0.01601401		3499.2	0.03894117		4089.2	-0.00906893
549.4	0.30217719		1139.39	0.13033039		1729.4	0.08383828		2319.39	-0.00917607		2909.4	0.01579688		3499.4	0.03920886		4089.4	-0.00887981
549.6	0.30116029		1139.59	0.1298214		1729.6	0.08361325		2319.59	-0.00803795		2909.6	0.01622461		3499.6	0.0409928		4089.6	-0.0087774
549.8	0.29997307		1139.79	0.13042095		1729.8	0.08398361		2319.79	-0.00832871		2909.8	0.01655478		3499.8	0.04044118		4089.8	-0.00860735
550	0.29967668		1139.99	0.13098839		1730	0.08337272		2319.99	-0.00699287		2910	0.01671717		3500	0.04094558		4090	-0.00917334
550.2	0.29954752		1140.19	0.13182778		1730.2	0.08383203		2320.19	-0.00648491		2910.2	0.01677004		3500.2	0.0411556		4090.2	-0.00922414
550.4	0.29915541		1140.39	0.13224947		1730.4	0.08241272		2320.39	-0.006167		2910.4	0.01671787		3500.4	0.04135899		4090.4	-0.00970405
550.6	0.2987619		1140.59	0.13250731		1730.6	0.08167341		2320.59	-0.0066399		2910.6	0.01702084		3500.6	0.04161873		4090.6	-0.0101004
550.8	0.29903301		1140.79	0.13328259		1730.8	0.07963364		2320.79	-0.00640599		2910.8	0.01749198		3500.8	0.04198162		4090.8	-0.00973145
551	0.29907908		1140.99	0.13361577		1731	0.07907832		2320.99	-0.00718912		2911	0.01755951		3501	0.0423827		4091	-0.00976081
551.2	0.2992893		1141.19	0.13317393		1731.2	0.07799309		2321.19	-0.00650924		2911.2	0.01825096		3501.2	0.04214937		4091.2	-0.0098498
551.4	0.29808467		1141.39	0.13314724		1731.4	0.07722347		2321.39	-0.00713983		2911.4	0.01941747		3501.4	0.04122526		4091.4	-0.01069521
551.6	0.29817712		1141.59	0.13247931		1731.6	0.07713961		2321.59	-0.00707837		2911.6	0.01939887		3501.6	0.04132974		4091.6	-0.01032867
551.8	0.2986868		1141.79	0.13250558		1731.8	0.077432		2321.79	-0.00747678		2911.8	0.01948754		3501.8	0.04056073		4091.8	-0.01008317
552	0.29885716		1141.99	0.13203608		1732	0.07752048		2321.99	-0.00732719		2912	0.02028678		3502	0.04046037		4092	-0.01030514
552.2	0.29936974		1142.19	0.13154875		1732.2	0.07786201		2322.19	-0.00791259		2912.2	0.02031235		3502.2	0.03933303		4092.2	-0.01027793
552.4	0.29989334		1142.39	0.13121399		1732.4	0.07801649		2322.39	-0.00782195		2912.4	0.02026452		3502.4	0.03888438		4092.4	-0.01053915
552.6	0.30073239		1142.59	0.13128487		1732.6	0.07841413		2322.59	-0.00740518		2912.6	0.02038703		3502.6	0.03855795		4092.6	-0.00918048
552.8	0.3002821		1142.79	0.13168935		1732.8	0.07979356		2322.79	-0.00763945		2912.8	0.02005485		3502.8	0.03772504		4092.8	-0.00933194
553	0.30053725		1142.99	0.13102256		1733	0.08096034		2322.99	-0.00784465		2913	0.01976123		3503	0.03731961		4093	-0.00848519
553.2	0.30039682		1143.19	0.13079381		1733.2	0.08200371		2323.19	-0.00794104		2913.2	0.0186774		3503.2	0.03784882		4093.2	-0.00773971
553.4	0.29990348		1143.39	0.13069013		1733.4	0.08146376		2323.39	-0.00770305		2913.4	0.01860402		3503.4	0.03824148		4093.4	-0.00670502
553.6	0.2992109		1143.59	0.13101017		1733.6	0.08165351		2323.59	-0.00727718		2913.6	0.01750698		3503.6	0.0382324		4093.6	-0.00666965
553.8	0.30034299		1143.79	0.13146205		1733.8	0.08239054		2323.79	-0.00783934		2913.8	0.0170955		3503.8	0.03700053		4093.8	-0.00773862
554	0.30100783		1143.99	0.13161475		1734	0.08153552		2323.99	-0.00718853		2914	0.01696044		3504	0.03782218		4094	-0.0078671
554.2	0.30148321		1144.19	0.13161073		1734.2	0.08098498		2324.19	-0.00689066		2914.2	0.01749752		3504.2	0.03776209		4094.2	-0.00820746
554.4	0.30182013		1144.39	0.1320199		1734.4	0.0801669		2324.39	-0.00734462		2914.4	0.01791829		3504.4	0.03886178		4094.4	-0.00845356
554.6	0.30205111		1144.59	0.13214686		1734.6	0.07966463		2324.59	-0.00856883		2914.6	0.01784067		3504.6	0.03870183		4094.6	-0.00890062
554.8	0.30194686		1144.79	0.13258783		1734.8	0.07925192		2324.79	-0.00758106		2914.8	0.0177935		3504.8	0.03945721		4094.8	-0.00966814
555	0.30089207		1144.99	0.13170899		1735	0.07943131		2324.99	-0.00789881		2915	0.01774385		3505	0.03942051		4095	-0.01086677
555.2	0.30055218		1145.19	0.13056233		1735.2	0.07913939		2325.19	-0.00702353		2915.2	0.01853135		3505.2	0.03896397		4095.2	-0.01115766
555.4	0.30007989		1145.39	0.13074724		1735.4	0.07844548		2325.39	-0.00765573		2915.4	0.01961085		3505.4	0.03902809		4095.4	-0.01190683
555.6	0.30016757		1145.59	0.13078921		1735.6	0.07804315		2325.59	-0.00882444		2915.6	0.02002986		3505.6	0.03879276		4095.6	-0.01109925
555.8	0.29944078		1145.79	0.1307409		1735.8	0.07740632		2325.79	-0.00932126		2915.8	0.02092047		3505.8	0.03834776		4095.8	-0.01122239
556	0.2986486		1145.99	0.13088882		1736	0.07665708		2325.99	-0.00905747		2916	0.02114937		3506	0.03934068		4096	-0.01147213
556.2	0.29874264		1146.19	0.13097952		1736.2	0.0769966		2326.19	-0.00984351		2916.2	0.02083021		3506.2	0.039586		4096.2	-0.01057781
556.4	0.29932478		1146.39	0.13111097		1736.4	0.07670631		2326.39	-0.00969015		2916.4	0.02090599		3506.4	0.03940631		4096.4	-0.00954789
556.6	0.29960448		1146.59	0.13038392		1736.6	0.07719988		2326.59	-0.00969953		2916.6	0.01986426		3506.6	0.03842982		4096.6	-0.00798927
556.8	0.29850756		1146.79	0.12917616		1736.8	0.07775853		2326.79	-0.00975462		2916.8	0.01921515		3506.8	0.03806882		4096.8	-0.00691322
557	0.29822045		1146.99	0.1279574		1737	0.07823028		2326.99	-0.008918		2917	0.01853352		3507	0.03713558		4097	-0.00615528
557.2	0.29845378		1147.19	0.12804591		1737.2	0.07856129		2327.19	-0.00866874		2917.2	0.01795973		3507.2	0.03748875		4097.2	-0.00580769
557.4	0.29901948		1147.39	0.12899721		1737.4	0.07803834		2327.39	-0.00840745		2917.4	0.01751859		3507.4	0.03659458		4097.4	-0.00563592
557.6	0.29932698		1147.59	0.12887594		1737.6	0.07924367		2327.59	-0.0086981		2917.6	0.01654907		3507.6	0.03662019		4097.6	-0.00564581
557.8	0.29941504		1147.79	0.12824221		1737.8	0.07877036		2327.79	-0.00774807		2917.8	0.01651412		3507.8	0.03665658		4097.8	-0.00651576
558	0.29947995		1147.99	0.12772207		1738	0.07818407		2327.99	-0.0072155		2918	0.016243		3508	0.03670519		4098	-0.00664809
558.2	0.2995742		1148.19	0.1271354		1738.2	0.07791352		2328.19	-0.00731096		2918.2	0.0160121		3508.2	0.03639071		4098.2	-0.00783729
558.4	0.29989889		1148.39	0.12677016		1738.4	0.07853444		2328.39	-0.00799542		2918.4	0.0151985		3508.4	0.0369242		4098.4	-0.00855352
558.6	0.29952626		1148.59	0.12644266		1738.6	0.07843689		2328.59	-0.00858403		2918.6	0.01473551		3508.6	0.03733006		4098.6	-0.00873679
558.8	0.29898919		1148.79	0.12674514		1738.8	0.07893605		2328.79	-0.00788067		2918.8	0.01519169		3508.8	0.03781735		4098.8	-0.0092031
559	0.29869806		1148.99	0.12609483		1739	0.07955942		2328.99	-0.00860628		2919	0.01595677		3509	0.03822393		4099	-0.00991706
559.2	0.29934738		1149.19	0.12628739		1739.2	0.07983698		2329.19	-0.00871679		2919.2	0.01761636		3509.2	0.0380871		4099.2	-0.01028803
559.4	0.29944464		1149.39	0.12704883		1739.4	0.07978548		2329.39	-0.00976934		2919.4	0.01869369		3509.4	0.03859671		4099.4	-0.01063158
559.6	0.30032836		1149.59	0.12758907		1739.6	0.07866837		2329.59	-0.01087307		2919.6	0.01874351		3509.6	0.03871605		4099.6	-0.01020468
559.8	0.29954909		1149.79	0.1272038		1739.8	0.07829768		2329.79	-0.01162147		2919.8	0.01910588		3509.8	0.0400461		4099.8	-0.00949549
560	0.29889126		1149.99	0.12774638		1740	0.07839577		2329.99	-0.01240485		2920	0.01941286		3510	0.04131728		4100	-0.00910323
560.2	0.30054035		1150.19	0.12826854		1740.2	0.07872109		2330.19	-0.01291111		2920.2	0.01940195		3510.2	0.04045131		4100.2	-0.00816954
560.4	0.30097974		1150.39	0.12798156		1740.4	0.07820567		2330.39	-0.01322223		2920.4	0.01898971		3510.4	0.03968026		4100.4	-0.00817824
560.6	0.30158765		1150.59	0.12756875		1740.6	0.07849238		2330.59	-0.01295423		2920.6	0.0187227		3510.6	0.03934599		4100.6	-0.00694245
560.8	0.30084864		1150.79	0.12768088		1740.8	0.07851655		2330.79	-0.01257108		2920.8	0.01882232		3510.8	0.0392833		4100.8	-0.00623333
561	0.30107365		1150.99	0.1285459		1741	0.0793654		2330.99	-0.01215092		2921	0.01818432		3511	0.0390499		4101	-0.00696992
561.2	0.30153349		1151.19	0.1297921		1741.2	0.07881123		2331.19	-0.01253587		2921.2	0.01869255		3511.2	0.03899353		4101.2	-0.0067088
561.4	0.30153494		1151.39	0.13018811		1741.4	0.07785165		2331.39	-0.01145918		2921.4	0.01792349		3511.4	0.03875095		4101.4	-0.00662172
561.6	0.3012233		1151.59	0.13002716		1741.6	0.07802787		2331.59	-0.01135192		2921.6	0.01790389		3511.6	0.03938177		4101.6	-0.00669492
561.8	0.30074632		1151.79	0.12948201		1741.8	0.07700037		2331.79	-0.0104319		2921.8	0.01820342		3511.8	0.03875665		4101.8	-0.00814904
562	0.30173217		1151.99	0.12937886		1742	0.07680611		2331.99	-0.00981995		2922	0.01835873		3512	0.03789293		4102	-0.00821
562.2	0.3023771		1152.19	0.12928702		1742.2	0.07639301		2332.19	-0.00953433		2922.2	0.01784143		3512.2	0.03744083		4102.2	-0.00842209
562.4	0.30185521		1152.39	0.12891709		1742.4	0.07662793		2332.39	-0.00924296		2922.4	0.01823547		3512.4	0.03705395		4102.4	-0.00822801
562.6	0.30120713		1152.59	0.12994008		1742.6	0.07683133		2332.59	-0.00828385		2922.6	0.01825327		3512.6	0.0362754		4102.6	-0.00829143
562.8	0.30173265		1152.79	0.12940911		1742.8	0.07684238		2332.79	-0.00777943		2922.8	0.01983788		3512.8	0.03555919		4102.8	-0.00873801
563	0.30167615		1152.99	0.12851559		1743	0.07704536		2332.99	-0.00764897		2923	0.02073382		3513	0.03532969		4103	-0.00876201
563.2	0.3021512		1153.19	0.12828386		1743.2	0.07695442		2333.19	-0.00723279		2923.2	0.02094493		3513.2	0.0353562		4103.2	-0.00825638
563.4	0.30228414		1153.39	0.12757766		1743.4	0.07699793		2333.39	-0.00801293		2923.4	0.02156819		3513.4	0.03599632		4103.4	-0.00772587
563.6	0.30264055		1153.59	0.12690234		1743.6	0.0767035		2333.59	-0.00891844		2923.6	0.02126482		3513.6	0.03551123		4103.6	-0.00768334
563.8	0.30093069		1153.79	0.12569583		1743.8	0.07796468		2333.79	-0.00958326		2923.8	0.02156568		3513.8	0.03590088		4103.8	-0.00772791
564	0.30062217		1153.99	0.12470887		1744	0.07897873		2333.99	-0.00965972		2924	0.02064229		3514	0.03592137		4104	-0.00800916
564.2	0.30114023		1154.19	0.12422141		1744.2	0.07954538		2334.19	-0.00976774		2924.2	0.01963034		3514.2	0.03631047		4104.2	-0.00879927
564.4	0.30083065		1154.39	0.12398412		1744.4	0.08046499		2334.39	-0.01085488		2924.4	0.01806662		3514.4	0.03720289		4104.4	-0.00830976
564.6	0.3003918		1154.59	0.12351922		1744.6	0.08104379		2334.59	-0.01173819		2924.6	0.01771492		3514.6	0.03767265		4104.6	-0.00794112
564.8	0.29921009		1154.79	0.12362903		1744.8	0.08122844		2334.79	-0.01339989		2924.8	0.01642787		3514.8	0.03762811		4104.8	-0.00813256
565	0.29906678		1154.99	0.12356331		1745	0.08125777		2334.99	-0.0138172		2925	0.01578381		3515	0.03899165		4105	-0.00860142
565.2	0.29955014		1155.19	0.12424512		1745.2	0.08016899		2335.19	-0.01355698		2925.2	0.01619393		3515.2	0.03901856		4105.2	-0.0084567
565.4	0.29992253		1155.39	0.12406514		1745.4	0.07891253		2335.39	-0.0142429		2925.4	0.01500841		3515.4	0.03946616		4105.4	-0.00834995
565.6	0.30012736		1155.59	0.12481234		1745.6	0.07969219		2335.59	-0.01511392		2925.6	0.01488061		3515.6	0.04039567		4105.6	-0.00910089
565.8	0.30040615		1155.79	0.12525249		1745.8	0.07925605		2335.79	-0.01467184		2925.8	0.01501431		3515.8	0.04058193		4105.8	-0.00971198
566	0.3008332		1155.99	0.12655891		1746	0.07883027		2335.99	-0.01422568		2926	0.01412127		3516	0.0407889		4106	-0.00843606
566.2	0.30116803		1156.19	0.12733364		1746.2	0.0779748		2336.19	-0.01398356		2926.2	0.01417149		3516.2	0.04027386		4106.2	-0.00838917
566.4	0.30195936		1156.39	0.12778232		1746.4	0.07778759		2336.39	-0.01313701		2926.4	0.01501504		3516.4	0.03925775		4106.4	-0.00806364
566.6	0.30150099		1156.59	0.1289834		1746.6	0.07709137		2336.59	-0.01273553		2926.6	0.01553785		3516.6	0.03927054		4106.6	-0.00747669
566.8	0.30203741		1156.79	0.12856549		1746.8	0.0762288		2336.79	-0.01270035		2926.8	0.01761503		3516.8	0.03893131		4106.8	-0.00744371
567	0.30122629		1156.99	0.12896788		1747	0.07535965		2336.99	-0.01205067		2927	0.01763232		3517	0.0385704		4107	-0.00684987
567.2	0.30129372		1157.19	0.12962686		1747.2	0.07487239		2337.19	-0.01154269		2927.2	0.01846059		3517.2	0.03861067		4107.2	-0.00630586
567.4	0.30136104		1157.39	0.12978874		1747.4	0.07431692		2337.39	-0.01208393		2927.4	0.01999762		3517.4	0.03781819		4107.4	-0.00625626
567.6	0.30085727		1157.59	0.13019562		1747.6	0.07424376		2337.59	-0.01224955		2927.6	0.02022642		3517.6	0.03668318		4107.6	-0.00713779
567.8	0.30070633		1157.79	0.12998824		1747.8	0.07492407		2337.79	-0.01224686		2927.8	0.01976246		3517.8	0.03758475		4107.8	-0.00749359
568	0.3005249		1157.99	0.13009314		1748	0.07514779		2337.99	-0.01248258		2928	0.01891774		3518	0.03822619		4108	-0.007407
568.2	0.30018507		1158.19	0.13079255		1748.2	0.07536718		2338.19	-0.01271844		2928.2	0.01831661		3518.2	0.03882953		4108.2	-0.00888286
568.4	0.29908602		1158.39	0.13002147		1748.4	0.07514411		2338.39	-0.01424132		2928.4	0.01744361		3518.4	0.03883154		4108.4	-0.00856531
568.6	0.29682638		1158.59	0.1285755		1748.6	0.07442553		2338.59	-0.01454044		2928.6	0.01733566		3518.6	0.03876659		4108.6	-0.00892569
568.8	0.29688257		1158.79	0.1284649		1748.8	0.07401778		2338.79	-0.01488559		2928.8	0.01623824		3518.8	0.0387371		4108.8	-0.00853404
569	0.29781113		1158.99	0.12728583		1749	0.07449765		2338.99	-0.01456866		2929	0.01635118		3519	0.03920974		4109	-0.00904454
569.2	0.29859818		1159.19	0.12653074		1749.2	0.07452826		2339.19	-0.01420515		2929.2	0.01606414		3519.2	0.03879255		4109.2	-0.00921793
569.4	0.29915212		1159.39	0.12577328		1749.4	0.07463527		2339.39	-0.01527068		2929.4	0.01545735		3519.4	0.03902236		4109.4	-0.00908861
569.6	0.29877083		1159.59	0.1249707		1749.6	0.07553487		2339.59	-0.01415594		2929.6	0.01497936		3519.6	0.03966407		4109.6	-0.00995234
569.8	0.29914052		1159.79	0.1247131		1749.8	0.07499051		2339.79	-0.01351862		2929.8	0.01508469		3519.8	0.04044607		4109.8	-0.00980082
570	0.29962623		1159.99	0.12386938		1750	0.07557813		2339.99	-0.01227234		2930	0.01484762		3520	0.04045955		4110	-0.00884372
570.2	0.30019501		1160.19	0.12343295		1750.2	0.07631728		2340.19	-0.01186166		2930.2	0.01572068		3520.2	0.03947467		4110.2	-0.00912258
570.4	0.30096602		1160.39	0.12276973		1750.4	0.07684484		2340.39	-0.01205964		2930.4	0.01638306		3520.4	0.03911496		4110.4	-0.00859509
570.6	0.30034568		1160.59	0.12315464		1750.6	0.0765019		2340.59	-0.01182872		2930.6	0.01650376		3520.6	0.03888344		4110.6	-0.00862331
570.8	0.30088819		1160.79	0.12333994		1750.8	0.07632604		2340.79	-0.01053106		2930.8	0.0174975		3520.8	0.03740766		4110.8	-0.00893905
571	0.30085716		1160.99	0.12379206		1751	0.07584089		2340.99	-0.00945112		2931	0.01805165		3521	0.03695737		4111	-0.00877565
571.2	0.30095256		1161.19	0.12456772		1751.2	0.07545701		2341.19	-0.00893989		2931.2	0.01917176		3521.2	0.03734325		4111.2	-0.00845354
571.4	0.30099362		1161.39	0.12438254		1751.4	0.0754662		2341.39	-0.00863659		2931.4	0.01943613		3521.4	0.03752267		4111.4	-0.0088498
571.6	0.30042105		1161.59	0.12494257		1751.6	0.0756285		2341.59	-0.00803317		2931.6	0.01918923		3521.6	0.03752021		4111.6	-0.01018075
571.8	0.30088357		1161.79	0.1253028		1751.8	0.07666974		2341.79	-0.00832733		2931.8	0.01820323		3521.8	0.03751815		4111.8	-0.00997817
572	0.29937672		1161.99	0.12615267		1752	0.07675008		2341.99	-0.00863895		2932	0.01852956		3522	0.03744331		4112	-0.00985432
572.2	0.2989549		1162.19	0.12645033		1752.2	0.07614226		2342.19	-0.00965924		2932.2	0.01825928		3522.2	0.03708235		4112.2	-0.01066904
572.4	0.29733923		1162.39	0.12633955		1752.4	0.07545158		2342.39	-0.01062553		2932.4	0.01828924		3522.4	0.03682825		4112.4	-0.00984269
572.6	0.29745941		1162.59	0.12652663		1752.6	0.07566469		2342.59	-0.01060397		2932.6	0.01827478		3522.6	0.03699937		4112.6	-0.00994118
572.8	0.29861386		1162.79	0.12724372		1752.8	0.0762488		2342.79	-0.01095423		2932.8	0.01696972		3522.8	0.03717786		4112.8	-0.00948653
573	0.29883457		1162.99	0.12691065		1753	0.07756035		2342.99	-0.01138918		2933	0.0168798		3523	0.03702162		4113	-0.00912857
573.2	0.29809141		1163.19	0.12661545		1753.2	0.07719482		2343.19	-0.01182098		2933.2	0.0158665		3523.2	0.03723838		4113.2	-0.00905779
573.4	0.2979189		1163.39	0.12737049		1753.4	0.07723144		2343.39	-0.0120467		2933.4	0.0159143		3523.4	0.0374557		4113.4	-0.00894277
573.6	0.29759348		1163.59	0.1270158		1753.6	0.07735442		2343.59	-0.01145345		2933.6	0.01594447		3523.6	0.03775489		4113.6	-0.0093362
573.8	0.29807493		1163.79	0.12755692		1753.8	0.07717378		2343.79	-0.01258581		2933.8	0.0162064		3523.8	0.03791781		4113.8	-0.0086341
574	0.29813054		1163.99	0.12715687		1754	0.07762908		2343.99	-0.01269167		2934	0.01626578		3524	0.03737126		4114	-0.00800064
574.2	0.29822447		1164.19	0.12704696		1754.2	0.07751448		2344.19	-0.01357366		2934.2	0.01637658		3524.2	0.03742453		4114.2	-0.00776668
574.4	0.29845868		1164.39	0.12691777		1754.4	0.07702741		2344.39	-0.01352847		2934.4	0.0173911		3524.4	0.03791861		4114.4	-0.00758906
574.6	0.29800002		1164.59	0.1268698		1754.6	0.07631662		2344.59	-0.01208029		2934.6	0.0177338		3524.6	0.03748999		4114.6	-0.00794837
574.8	0.29782262		1164.79	0.12713194		1754.8	0.07667476		2344.79	-0.01132576		2934.8	0.01840283		3524.8	0.03655121		4114.8	-0.00788686
575	0.29816872		1164.99	0.12716798		1755	0.07618454		2344.99	-0.01023357		2935	0.01883013		3525	0.03664596		4115	-0.00823436
575.2	0.29787178		1165.19	0.12748224		1755.2	0.07570705		2345.19	-0.0093342		2935.2	0.01908995		3525.2	0.03646362		4115.2	-0.0073217
575.4	0.29772507		1165.39	0.12673803		1755.4	0.07516692		2345.39	-0.00833588		2935.4	0.01918572		3525.4	0.03581575		4115.4	-0.00789518
575.6	0.297085		1165.59	0.12650018		1755.6	0.07476637		2345.59	-0.0077978		2935.6	0.01982473		3525.6	0.03508255		4115.6	-0.00800675
575.8	0.29774304		1165.79	0.12612222		1755.8	0.07490459		2345.79	-0.00931383		2935.8	0.02002888		3525.8	0.03407547		4115.8	-0.00750305
576	0.29732619		1165.99	0.12641065		1756	0.07489933		2345.99	-0.00947236		2936	0.02067352		3526	0.03354367		4116	-0.00789452
576.2	0.29730494		1166.19	0.12640632		1756.2	0.07403856		2346.19	-0.01053803		2936.2	0.0201601		3526.2	0.03338754		4116.2	-0.00871168
576.4	0.29750444		1166.39	0.12667367		1756.4	0.07348615		2346.39	-0.01110767		2936.4	0.01978924		3526.4	0.03330013		4116.4	-0.00844212
576.6	0.29804296		1166.59	0.12641696		1756.6	0.07400221		2346.59	-0.01150701		2936.6	0.01793762		3526.6	0.03249831		4116.6	-0.00938103
576.8	0.29816434		1166.79	0.12658158		1756.8	0.07359258		2346.79	-0.01121363		2936.8	0.0157824		3526.8	0.03246764		4116.8	-0.00917159
577	0.29836823		1166.99	0.12663976		1757	0.07365231		2346.99	-0.01270444		2937	0.01506372		3527	0.03202168		4117	-0.00985434
577.2	0.29902591		1167.19	0.12680507		1757.2	0.07322047		2347.19	-0.01432052		2937.2	0.01392973		3527.2	0.03228276		4117.2	-0.01148011
577.4	0.29942972		1167.39	0.12710823		1757.4	0.0736764		2347.39	-0.015175		2937.4	0.01310991		3527.4	0.03231094		4117.4	-0.01198422
577.6	0.29948098		1167.59	0.12663382		1757.6	0.07383858		2347.59	-0.01548696		2937.6	0.01268978		3527.6	0.03267918		4117.6	-0.01264552
577.8	0.29963185		1167.79	0.1272815		1757.8	0.07338822		2347.79	-0.01676489		2937.8	0.01281782		3527.8	0.03327885		4117.8	-0.01267899
578	0.29928841		1167.99	0.12641371		1758	0.07300752		2347.99	-0.01700058		2938	0.01201121		3528	0.03319457		4118	-0.01261656
578.2	0.29765684		1168.19	0.12625204		1758.2	0.07293142		2348.19	-0.01650848		2938.2	0.01192695		3528.2	0.03349969		4118.2	-0.01256069
578.4	0.29738283		1168.39	0.12646288		1758.4	0.07338856		2348.39	-0.01583988		2938.4	0.01266827		3528.4	0.03307016		4118.4	-0.01249016
578.6	0.29673073		1168.59	0.12636198		1758.6	0.07356834		2348.59	-0.0151005		2938.6	0.01262088		3528.6	0.03325138		4118.6	-0.01230408
578.8	0.29698999		1168.79	0.12682908		1758.8	0.07398821		2348.79	-0.01492072		2938.8	0.01313776		3528.8	0.033481		4118.8	-0.01192146
579	0.29665177		1168.99	0.12730309		1759	0.07343865		2348.99	-0.01352548		2939	0.01351885		3529	0.03542559		4119	-0.01059604
579.2	0.29601149		1169.19	0.12694634		1759.2	0.07425439		2349.19	-0.01330884		2939.2	0.01420699		3529.2	0.03566171		4119.2	-0.00913335
579.4	0.29496314		1169.39	0.12685601		1759.4	0.07429726		2349.39	-0.01374575		2939.4	0.01457692		3529.4	0.03691191		4119.4	-0.00887496
579.6	0.29367992		1169.59	0.12649632		1759.6	0.07407402		2349.59	-0.01335977		2939.6	0.0153173		3529.6	0.03744866		4119.6	-0.00740489
579.8	0.29390352		1169.79	0.12617485		1759.8	0.07407613		2349.79	-0.01365007		2939.8	0.01536501		3529.8	0.03727603		4119.8	-0.00698403
580	0.29377282		1169.99	0.12653424		1760	0.07342053		2349.99	-0.01257496		2940	0.01498928		3530	0.03756697		4120	-0.00671207
580.2	0.29356688		1170.19	0.12610748		1760.2	0.07247219		2350.19	-0.01330985		2940.2	0.01498909		3530.2	0.03747884		4120.2	-0.00648595
580.4	0.29420199		1170.39	0.12588942		1760.4	0.07225824		2350.39	-0.01322198		2940.4	0.0153894		3530.4	0.03636024		4120.4	-0.00652365
580.6	0.29483331		1170.59	0.12494614		1760.6	0.07120762		2350.59	-0.01233949		2940.6	0.01521274		3530.6	0.03624121		4120.6	-0.00704827
580.8	0.29634574		1170.79	0.12474633		1760.8	0.07041646		2350.79	-0.01258613		2940.8	0.01516366		3530.8	0.03550547		4120.8	-0.00788477
581	0.29719255		1170.99	0.12454788		1761	0.07041605		2350.99	-0.01376195		2941	0.01427903		3531	0.03484533		4121	-0.0090263
581.2	0.29758668		1171.19	0.12473336		1761.2	0.07144622		2351.19	-0.01363709		2941.2	0.01415029		3531.2	0.03530284		4121.2	-0.00912589
581.4	0.29730153		1171.39	0.12402816		1761.4	0.0721001		2351.39	-0.01262063		2941.4	0.0135966		3531.4	0.0354147		4121.4	-0.00877798
581.6	0.29705376		1171.59	0.12416591		1761.6	0.0721203		2351.59	-0.01215889		2941.6	0.0140997		3531.6	0.03565062		4121.6	-0.00933082
581.8	0.2967095		1171.79	0.12362307		1761.8	0.07266772		2351.79	-0.01241562		2941.8	0.01363803		3531.8	0.03566699		4121.8	-0.00979948
582	0.29636385		1171.99	0.12244242		1762	0.07313644		2351.99	-0.0118473		2942	0.01203762		3532	0.03462128		4122	-0.00877315
582.2	0.29646413		1172.19	0.12339574		1762.2	0.07388994		2352.19	-0.01145252		2942.2	0.0127386		3532.2	0.03462896		4122.2	-0.00796589
582.4	0.2967923		1172.39	0.12379827		1762.4	0.07427103		2352.39	-0.01122938		2942.4	0.01270668		3532.4	0.03407458		4122.4	-0.00794522
582.6	0.29598174		1172.59	0.12353979		1762.6	0.0754092		2352.59	-0.01085377		2942.6	0.01275966		3532.6	0.03527879		4122.6	-0.00777359
582.8	0.29566773		1172.79	0.12363877		1762.8	0.07606544		2352.79	-0.01147691		2942.8	0.01255486		3532.8	0.0353917		4122.8	-0.00698791
583	0.29556129		1172.99	0.12439166		1763	0.07658671		2352.99	-0.01153687		2943	0.01289774		3533	0.03620995		4123	-0.00571369
583.2	0.29480221		1173.19	0.12435089		1763.2	0.07770007		2353.19	-0.01211792		2943.2	0.0136561		3533.2	0.03576894		4123.2	-0.0058257
583.4	0.29341355		1173.39	0.12474082		1763.4	0.0775612		2353.39	-0.01178516		2943.4	0.01362217		3533.4	0.03671743		4123.4	-0.00468725
583.6	0.29241926		1173.59	0.12466667		1763.6	0.07663124		2353.59	-0.01124704		2943.6	0.01393513		3533.6	0.03651989		4123.6	-0.00383488
583.8	0.29281364		1173.79	0.12461088		1763.8	0.0764596		2353.79	-0.01236028		2943.8	0.01453103		3533.8	0.03576184		4123.8	-0.00377157
584	0.29266512		1173.99	0.12573958		1764	0.07570761		2353.99	-0.01366322		2944	0.01456781		3534	0.03591719		4124	-0.00429526
584.2	0.29336226		1174.19	0.12487627		1764.2	0.07535394		2354.19	-0.01456592		2944.2	0.01609887		3534.2	0.03496227		4124.2	-0.00520884
584.4	0.29404354		1174.39	0.12458431		1764.4	0.07453168		2354.39	-0.01471604		2944.4	0.01713046		3534.4	0.03444761		4124.4	-0.00596209
584.6	0.29480695		1174.59	0.12411055		1764.6	0.07356514		2354.59	-0.01497121		2944.6	0.01740721		3534.6	0.03408844		4124.6	-0.0063784
584.8	0.29582987		1174.79	0.12358349		1764.8	0.07446867		2354.79	-0.01531813		2944.8	0.01757771		3534.8	0.03228384		4124.8	-0.00857753
585	0.2955668		1174.99	0.12238823		1765	0.07473295		2354.99	-0.01539593		2945	0.01722835		3535	0.03279088		4125	-0.00886809
585.2	0.29610881		1175.19	0.12201288		1765.2	0.07553501		2355.19	-0.01497261		2945.2	0.0181278		3535.2	0.03289007		4125.2	-0.0092334
585.4	0.29617442		1175.39	0.1211266		1765.4	0.07472323		2355.39	-0.01519515		2945.4	0.0179443		3535.4	0.0321766		4125.4	-0.00931622
585.6	0.29604138		1175.59	0.12103597		1765.6	0.07465949		2355.59	-0.01534733		2945.6	0.01800396		3535.6	0.03248106		4125.6	-0.01076544
585.8	0.29663503		1175.79	0.11975952		1765.8	0.07522106		2355.79	-0.01510906		2945.8	0.01735723		3535.8	0.03240906		4125.8	-0.01120355
586	0.29761581		1175.99	0.1200475		1766	0.07530168		2355.99	-0.01540191		2946	0.01708035		3536	0.03220374		4126	-0.01126394
586.2	0.2980139		1176.19	0.12105023		1766.2	0.07550694		2356.19	-0.01509253		2946.2	0.01729198		3536.2	0.03265085		4126.2	-0.01128321
586.4	0.29713158		1176.39	0.12087249		1766.4	0.07574438		2356.39	-0.0140091		2946.4	0.0163495		3536.4	0.03241379		4126.4	-0.01240897
586.6	0.2962961		1176.59	0.1209544		1766.6	0.07616349		2356.59	-0.01361166		2946.6	0.01581152		3536.6	0.03290312		4126.6	-0.01180994
586.8	0.29597583		1176.79	0.12209346		1766.8	0.07620567		2356.79	-0.01434417		2946.8	0.01555037		3536.8	0.03198196		4126.8	-0.01120584
587	0.29606877		1176.99	0.12326388		1767	0.07672565		2356.99	-0.01389852		2947	0.01621306		3537	0.03271811		4127	-0.01099809
587.2	0.29457342		1177.19	0.12344653		1767.2	0.07721381		2357.19	-0.01333318		2947.2	0.01612612		3537.2	0.03387615		4127.2	-0.01081984
587.4	0.293475		1177.39	0.12403221		1767.4	0.07744442		2357.39	-0.01264314		2947.4	0.01539554		3537.4	0.03431022		4127.4	-0.01020703
587.6	0.29333784		1177.59	0.1255055		1767.6	0.07679536		2357.59	-0.01350529		2947.6	0.01501038		3537.6	0.03510915		4127.6	-0.00970397
587.8	0.29361359		1177.79	0.12608474		1767.8	0.07596816		2357.79	-0.01403377		2947.8	0.01511991		3537.8	0.03547784		4127.8	-0.00987281
588	0.29357027		1177.99	0.12718529		1768	0.075791		2357.99	-0.01424681		2948	0.0143733		3538	0.03707541		4128	-0.01038366
588.2	0.29387493		1178.19	0.12623815		1768.2	0.07560152		2358.19	-0.01421309		2948.2	0.01570257		3538.2	0.03739077		4128.2	-0.01009215
588.4	0.29374816		1178.39	0.12615128		1768.4	0.07537603		2358.39	-0.0137752		2948.4	0.01571812		3538.4	0.03797418		4128.4	-0.01004488
588.6	0.29388745		1178.59	0.12594463		1768.6	0.07544285		2358.59	-0.01344332		2948.6	0.01546102		3538.6	0.03828627		4128.6	-0.00996274
588.8	0.2941442		1178.79	0.12521446		1768.8	0.07480649		2358.79	-0.01328422		2948.8	0.01576113		3538.8	0.03817119		4128.8	-0.01075481
589	0.29360419		1178.99	0.12385797		1769	0.07419865		2358.99	-0.01335949		2949	0.0149964		3539	0.03868606		4129	-0.01017208
589.2	0.29414552		1179.19	0.12326135		1769.2	0.0737567		2359.19	-0.01320828		2949.2	0.0159003		3539.2	0.03801236		4129.2	-0.00997488
589.4	0.29339861		1179.39	0.12218155		1769.4	0.07280986		2359.39	-0.01249091		2949.4	0.01595378		3539.4	0.03753472		4129.4	-0.00969391
589.6	0.29309782		1179.59	0.1214778		1769.6	0.07302539		2359.59	-0.01234826		2949.6	0.01595361		3539.6	0.03764919		4129.6	-0.01055419
589.8	0.29367234		1179.79	0.12093968		1769.8	0.07286442		2359.79	-0.01201567		2949.8	0.01592054		3539.8	0.03750426		4129.8	-0.01020043
590	0.2932421		1179.99	0.12096412		1770	0.07332319		2359.99	-0.0126603		2950	0.01688144		3540	0.03853742		4130	-0.01077096
590.2	0.29294627		1180.19	0.12131173		1770.2	0.07249554		2360.19	-0.01141927		2950.2	0.01632966		3540.2	0.03804159		4130.2	-0.01028514
590.4	0.29378942		1180.39	0.12075805		1770.4	0.07249407		2360.39	-0.01162882		2950.4	0.01652491		3540.4	0.03742087		4130.4	-0.01047617
590.6	0.29345813		1180.59	0.12121043		1770.6	0.07249155		2360.59	-0.01174578		2950.6	0.01680082		3540.6	0.03699139		4130.6	-0.01028364
590.8	0.2944034		1180.79	0.12122831		1770.8	0.07274226		2360.79	-0.01243058		2950.8	0.01805935		3540.8	0.03584189		4130.8	-0.0098884
591	0.29535621		1180.99	0.12061236		1771	0.07279066		2360.99	-0.01231574		2951	0.0181075		3541	0.03587354		4131	-0.01024532
591.2	0.29594911		1181.19	0.12037887		1771.2	0.07282774		2361.19	-0.01181782		2951.2	0.01838799		3541.2	0.03592678		4131.2	-0.00987487
591.4	0.29618617		1181.39	0.1207895		1771.4	0.07266049		2361.39	-0.01194279		2951.4	0.01818696		3541.4	0.03541008		4131.4	-0.00975739
591.6	0.29675631		1181.59	0.12167484		1771.6	0.07172929		2361.59	-0.01251762		2951.6	0.01845432		3541.6	0.03558679		4131.6	-0.00959774
591.8	0.29630991		1181.79	0.12118864		1771.8	0.07094858		2361.79	-0.0131313		2951.8	0.01818938		3541.8	0.03558192		4131.8	-0.00977594
592	0.29634631		1181.99	0.12142023		1772	0.07109731		2361.99	-0.01298008		2952	0.01785409		3542	0.03631529		4132	-0.00965175
592.2	0.29638587		1182.19	0.12128538		1772.2	0.07108884		2362.19	-0.01385586		2952.2	0.01733073		3542.2	0.03625257		4132.2	-0.00995633
592.4	0.29597296		1182.39	0.12182175		1772.4	0.07002023		2362.39	-0.01361037		2952.4	0.01634536		3542.4	0.03663025		4132.4	-0.01051543
592.6	0.29575897		1182.59	0.12214589		1772.6	0.06941313		2362.59	-0.01418892		2952.6	0.01564595		3542.6	0.03741819		4132.6	-0.01020599
592.8	0.29547311		1182.79	0.12185718		1772.8	0.06923428		2362.79	-0.01482821		2952.8	0.01547094		3542.8	0.03749899		4132.8	-0.01030607
593	0.29497435		1182.99	0.12098726		1773	0.06939351		2362.99	-0.01496471		2953	0.01503779		3543	0.03778642		4133	-0.0099308
593.2	0.29499362		1183.19	0.12017112		1773.2	0.06938712		2363.19	-0.01461029		2953.2	0.01493773		3543.2	0.03753164		4133.2	-0.01011512
593.4	0.29393276		1183.39	0.11974435		1773.4	0.06950377		2363.39	-0.01416851		2953.4	0.01420502		3543.4	0.03793111		4133.4	-0.01050805
593.6	0.29373299		1183.59	0.11944193		1773.6	0.06968842		2363.59	-0.01468902		2953.6	0.01378474		3543.6	0.03809141		4133.6	-0.00966478
593.8	0.29396489		1183.79	0.11979547		1773.8	0.07015424		2363.79	-0.01401291		2953.8	0.01385434		3543.8	0.03838653		4133.8	-0.0092929
594	0.29334528		1183.99	0.12008299		1774	0.07054522		2363.99	-0.01444492		2954	0.01406458		3544	0.03877399		4134	-0.00951392
594.2	0.29398951		1184.19	0.12002873		1774.2	0.06958061		2364.19	-0.01402406		2954.2	0.01382255		3544.2	0.03842602		4134.2	-0.00900994
594.4	0.29461125		1184.39	0.11947522		1774.4	0.0704056		2364.39	-0.01419601		2954.4	0.01397091		3544.4	0.03848976		4134.4	-0.00957225
594.6	0.29415231		1184.59	0.11957595		1774.6	0.07080454		2364.59	-0.01384365		2954.6	0.01368562		3544.6	0.03813089		4134.6	-0.01005413
594.8	0.29430106		1184.79	0.11948144		1774.8	0.07087881		2364.79	-0.01484995		2954.8	0.01466166		3544.8	0.03775152		4134.8	-0.0092597
595	0.29538974		1184.99	0.11947854		1775	0.07099544		2364.99	-0.01524838		2955	0.01441423		3545	0.03804171		4135	-0.00867431
595.2	0.29563972		1185.19	0.12030341		1775.2	0.07129573		2365.19	-0.01560701		2955.2	0.01481557		3545.2	0.03855391		4135.2	-0.00817783
595.4	0.29484944		1185.39	0.12073632		1775.4	0.07114929		2365.39	-0.01676076		2955.4	0.01508879		3545.4	0.03792606		4135.4	-0.00851393
595.6	0.29467297		1185.59	0.1212635		1775.6	0.071277		2365.59	-0.01749645		2955.6	0.01500983		3545.6	0.03706205		4135.6	-0.00864153
595.8	0.29400027		1185.79	0.12152322		1775.8	0.07196221		2365.79	-0.01815643		2955.8	0.01349469		3545.8	0.03696447		4135.8	-0.0083721
596	0.29470856		1185.99	0.12238381		1776	0.07328742		2365.99	-0.01857451		2956	0.01324186		3546	0.0367335		4136	-0.00942561
596.2	0.29519577		1186.19	0.1227426		1776.2	0.07382282		2366.19	-0.01983255		2956.2	0.01300378		3546.2	0.03665433		4136.2	-0.00993872
596.4	0.29483102		1186.39	0.12310218		1776.4	0.07432353		2366.39	-0.02020638		2956.4	0.01434781		3546.4	0.03749098		4136.4	-0.01084929
596.6	0.29527207		1186.59	0.1229495		1776.6	0.07553994		2366.59	-0.02025221		2956.6	0.01397134		3546.6	0.03734332		4136.6	-0.01122598
596.8	0.29553447		1186.79	0.12265354		1776.8	0.07637825		2366.79	-0.01977677		2956.8	0.014026		3546.8	0.03694032		4136.8	-0.01122239
597	0.29501716		1186.99	0.12193489		1777	0.0767216		2366.99	-0.01937247		2957	0.01430671		3547	0.03682836		4137	-0.01195341
597.2	0.2942554		1187.19	0.12120613		1777.2	0.07708913		2367.19	-0.01913496		2957.2	0.01356258		3547.2	0.03666904		4137.2	-0.01143783
597.4	0.29440776		1187.39	0.12137955		1777.4	0.07718701		2367.39	-0.01832501		2957.4	0.01414368		3547.4	0.03652035		4137.4	-0.01154295
597.6	0.29503859		1187.59	0.12143767		1777.6	0.07679463		2367.59	-0.01768636		2957.6	0.01364745		3547.6	0.03581673		4137.6	-0.00976122
597.8	0.29453712		1187.79	0.12192888		1777.8	0.07632266		2367.79	-0.01651306		2957.8	0.01361898		3547.8	0.03524412		4137.8	-0.0098971
598	0.29325761		1187.99	0.12162955		1778	0.07544723		2367.99	-0.01589822		2958	0.01422095		3548	0.03541803		4138	-0.00986772
598.2	0.29255835		1188.19	0.12179782		1778.2	0.07524142		2368.19	-0.01599622		2958.2	0.01518348		3548.2	0.03515967		4138.2	-0.00950532
598.4	0.29180588		1188.39	0.12166507		1778.4	0.07467779		2368.39	-0.01519383		2958.4	0.0147502		3548.4	0.03489854		4138.4	-0.00918838
598.6	0.29214382		1188.59	0.1228037		1778.6	0.07376398		2368.59	-0.01475242		2958.6	0.01489729		3548.6	0.03549193		4138.6	-0.00892509
598.8	0.29195077		1188.79	0.12327557		1778.8	0.07307947		2368.79	-0.01501591		2958.8	0.01568878		3548.8	0.03608817		4138.8	-0.00839205
599	0.29354704		1188.99	0.12334667		1779	0.07214195		2368.99	-0.01526661		2959	0.01551956		3549	0.03662709		4139	-0.00801059
599.2	0.29355883		1189.19	0.12329242		1779.2	0.07190432		2369.19	-0.01545082		2959.2	0.01586037		3549.2	0.03627339		4139.2	-0.00840589
599.4	0.29363954		1189.39	0.12361677		1779.4	0.07174905		2369.39	-0.01571529		2959.4	0.01555322		3549.4	0.03566298		4139.4	-0.00901144
599.6	0.29342276		1189.59	0.12353355		1779.6	0.07205569		2369.59	-0.01568552		2959.6	0.01525419		3549.6	0.03561307		4139.6	-0.00860823
599.8	0.29337922		1189.79	0.12353668		1779.8	0.07291932		2369.79	-0.01598089		2959.8	0.01413632		3549.8	0.03530942		4139.8	-0.00966302
600	0.2941606		1189.99	0.12349765		1780	0.0735546		2369.99	-0.01679123		2960	0.01444667		3550	0.03577617		4140	-0.01072413
600.2	0.2947581		1190.19	0.12260181		1780.2	0.07289988		2370.19	-0.01698336		2960.2	0.01496139		3550.2	0.03589243		4140.2	-0.01136429
600.4	0.29425904		1190.39	0.1224793		1780.4	0.07387713		2370.39	-0.01678425		2960.4	0.01558522		3550.4	0.03648665		4140.4	-0.01266274
600.6	0.29454304		1190.59	0.12271937		1780.6	0.07358726		2370.59	-0.01631071		2960.6	0.01465922		3550.6	0.03584074		4140.6	-0.01275794
600.8	0.29460361		1190.79	0.12258769		1780.8	0.07364646		2370.79	-0.01624516		2960.8	0.01477134		3550.8	0.03612588		4140.8	-0.01245237
601	0.29422484		1190.99	0.12261623		1781	0.07363726		2370.99	-0.01670839		2961	0.01508875		3551	0.03657745		4141	-0.01277558
601.2	0.29412886		1191.19	0.12236829		1781.2	0.07346789		2371.19	-0.01649369		2961.2	0.01406521		3551.2	0.03678195		4141.2	-0.01236595
601.4	0.29444728		1191.39	0.1219704		1781.4	0.07328084		2371.39	-0.01545577		2961.4	0.01383244		3551.4	0.03684126		4141.4	-0.01252272
601.6	0.29342493		1191.59	0.12156425		1781.6	0.0733778		2371.59	-0.01530039		2961.6	0.01251343		3551.6	0.03676059		4141.6	-0.01133688
601.8	0.29290267		1191.79	0.12141241		1781.8	0.07271984		2371.79	-0.01486248		2961.8	0.01279199		3551.8	0.03699679		4141.8	-0.01113516
602	0.2922401		1191.99	0.1218188		1782	0.07323633		2371.99	-0.01503972		2962	0.0133706		3552	0.03743515		4142	-0.0102546
602.2	0.2918625		1192.19	0.12196367		1782.2	0.07341794		2372.19	-0.01604082		2962.2	0.01325688		3552.2	0.03768101		4142.2	-0.0093745
602.4	0.29195929		1192.39	0.12190647		1782.4	0.07267488		2372.39	-0.01553941		2962.4	0.01297613		3552.4	0.03747566		4142.4	-0.00960856
602.6	0.29266208		1192.59	0.12277694		1782.6	0.07266938		2372.59	-0.01539334		2962.6	0.01276954		3552.6	0.03802307		4142.6	-0.01024897
602.8	0.2930259		1192.79	0.12191606		1782.8	0.07273522		2372.79	-0.01587518		2962.8	0.01283302		3552.8	0.03749159		4142.8	-0.00983317
603	0.29409844		1192.99	0.12180818		1783	0.07250519		2372.99	-0.01686895		2963	0.01235113		3553	0.03648031		4143	-0.00966148
603.2	0.29440564		1193.19	0.1220623		1783.2	0.07195614		2373.19	-0.01650188		2963.2	0.01271408		3553.2	0.03543284		4143.2	-0.01000122
603.4	0.29497063		1193.39	0.12229973		1783.4	0.07102392		2373.39	-0.01644831		2963.4	0.01224228		3553.4	0.03496479		4143.4	-0.01056142
603.6	0.29478176		1193.59	0.12185997		1783.6	0.07079805		2373.59	-0.01671489		2963.6	0.01256251		3553.6	0.03453217		4143.6	-0.01079871
603.8	0.29498837		1193.79	0.1215395		1783.8	0.07096035		2373.79	-0.01695367		2963.8	0.01176836		3553.8	0.03457373		4143.8	-0.01186972
604	0.29537703		1193.99	0.12072922		1784	0.07027563		2373.99	-0.01726861		2964	0.01144854		3554	0.03449388		4144	-0.0119245
604.2	0.29576159		1194.19	0.12048739		1784.2	0.06987595		2374.19	-0.01775117		2964.2	0.01056831		3554.2	0.03404991		4144.2	-0.01236401
604.4	0.29599135		1194.39	0.12118635		1784.4	0.06997872		2374.39	-0.01784914		2964.4	0.010615		3554.4	0.03457941		4144.4	-0.01229774
604.6	0.2953798		1194.59	0.12082852		1784.6	0.06949536		2374.59	-0.01806333		2964.6	0.00969209		3554.6	0.03497409		4144.6	-0.01260503
604.8	0.29463381		1194.79	0.11988493		1784.8	0.06943892		2374.79	-0.01796803		2964.8	0.0095969		3554.8	0.03520715		4144.8	-0.01297498
605	0.29465881		1194.99	0.11979902		1785	0.06952296		2374.99	-0.01810192		2965	0.01014392		3555	0.03504447		4145	-0.01307715
605.2	0.29461622		1195.19	0.11937906		1785.2	0.06957863		2375.19	-0.01718718		2965.2	0.00877628		3555.2	0.03510622		4145.2	-0.01347912
605.4	0.29396281		1195.39	0.119135		1785.4	0.07023486		2375.39	-0.01696511		2965.4	0.00853532		3555.4	0.03489056		4145.4	-0.01247809
605.6	0.29342169		1195.59	0.11959922		1785.6	0.07049568		2375.59	-0.01621206		2965.6	0.00931967		3555.6	0.03527051		4145.6	-0.01182826
605.8	0.29340539		1195.79	0.11982004		1785.8	0.07021952		2375.79	-0.01633149		2965.8	0.00979538		3555.8	0.03576598		4145.8	-0.01179028
606	0.29250373		1195.99	0.12048295		1786	0.07106565		2375.99	-0.01685983		2966	0.00982481		3556	0.03629975		4146	-0.0117778
606.2	0.29235365		1196.19	0.12116174		1786.2	0.07127104		2376.19	-0.01738278		2966.2	0.01001049		3556.2	0.03662983		4146.2	-0.01171329
606.4	0.29217516		1196.39	0.12215005		1786.4	0.07168855		2376.39	-0.01812962		2966.4	0.01011318		3556.4	0.03677197		4146.4	-0.01149156
606.6	0.29257675		1196.59	0.12258239		1786.6	0.07147322		2376.59	-0.01824563		2966.6	0.0104855		3556.6	0.03697547		4146.6	-0.01159002
606.8	0.29252778		1196.79	0.12305811		1786.8	0.07179034		2376.79	-0.01948896		2966.8	0.00990444		3556.8	0.03628278		4146.8	-0.01129416
607	0.2934533		1196.99	0.12436091		1787	0.07198677		2376.99	-0.01902939		2967	0.00981804		3557	0.03547799		4147	-0.01164345
607.2	0.29407407		1197.19	0.1243885		1787.2	0.07080799		2377.19	-0.01872637		2967.2	0.00973613		3557.2	0.03622802		4147.2	-0.01191483
607.4	0.29424972		1197.39	0.12438963		1787.4	0.06995045		2377.39	-0.01882117		2967.4	0.0101141		3557.4	0.03610645		4147.4	-0.01221399
607.6	0.29425113		1197.59	0.12350249		1787.6	0.06990586		2377.59	-0.01873105		2967.6	0.01022006		3557.6	0.03511103		4147.6	-0.01268076
607.8	0.29451698		1197.79	0.12265758		1787.8	0.06903991		2377.79	-0.01822266		2967.8	0.01042807		3557.8	0.03554657		4147.8	-0.01205902
608	0.29414966		1197.99	0.12189755		1788	0.06847617		2377.99	-0.01799027		2968	0.00974311		3558	0.0348077		4148	-0.01107753
608.2	0.29396214		1198.19	0.12193234		1788.2	0.06843417		2378.19	-0.01699264		2968.2	0.00889593		3558.2	0.03422576		4148.2	-0.01191726
608.4	0.29379557		1198.39	0.12108947		1788.4	0.06756017		2378.39	-0.01660203		2968.4	0.01007656		3558.4	0.03473311		4148.4	-0.01193602
608.6	0.29311379		1198.59	0.11986438		1788.6	0.06724963		2378.59	-0.01550918		2968.6	0.0103805		3558.6	0.03451043		4148.6	-0.01236959
608.8	0.29331456		1198.79	0.11928139		1788.8	0.06711502		2378.79	-0.01419705		2968.8	0.01140956		3558.8	0.03336687		4148.8	-0.01220932
609	0.29404877		1198.99	0.11989432		1789	0.0678943		2378.99	-0.01338534		2969	0.01274125		3559	0.03279935		4149	-0.01154282
609.2	0.29393383		1199.19	0.11913614		1789.2	0.06843355		2379.19	-0.01263085		2969.2	0.01264665		3559.2	0.0327834		4149.2	-0.01190205
609.4	0.29313048		1199.39	0.11803924		1789.4	0.06892887		2379.39	-0.01312117		2969.4	0.01346656		3559.4	0.03227468		4149.4	-0.01105933
609.6	0.29290142		1199.59	0.11836777		1789.6	0.06922692		2379.59	-0.01398028		2969.6	0.01370087		3559.6	0.0332204		4149.6	-0.01144948
609.8	0.29218409		1199.79	0.11910776		1789.8	0.07023895		2379.79	-0.01514398		2969.8	0.01392335		3559.8	0.03363277		4149.8	-0.01168964
610	0.29144545		1199.99	0.11944364		1790	0.07092812		2379.99	-0.01618014		2970	0.01462102		3560	0.03445638		4150	-0.01102011
610.2	0.29191337		1200.19	0.11984386		1790.2	0.07245258		2380.19	-0.01737704		2970.2	0.01533852		3560.2	0.03545304		4150.2	-0.01117361
610.4	0.29159021		1200.39	0.12020338		1790.4	0.07391781		2380.39	-0.01861078		2970.4	0.01502632		3560.4	0.0357434		4150.4	-0.01175061
610.6	0.29097056		1200.59	0.11990409		1790.6	0.07426836		2380.59	-0.01897436		2970.6	0.01473779		3560.6	0.03601059		4150.6	-0.01256182
610.8	0.29157409		1200.79	0.12076827		1790.8	0.07527547		2380.79	-0.02011196		2970.8	0.01346182		3560.8	0.03657716		4150.8	-0.01202113
611	0.29258946		1200.99	0.12140199		1791	0.07463569		2380.99	-0.01973618		2971	0.01307189		3561	0.03644084		4151	-0.01230289
611.2	0.29301251		1201.19	0.12124932		1791.2	0.07464097		2381.19	-0.02079438		2971.2	0.01325943		3561.2	0.03713921		4151.2	-0.01200763
611.4	0.29312873		1201.39	0.12118289		1791.4	0.07414012		2381.39	-0.02070795		2971.4	0.01320092		3561.4	0.03568791		4151.4	-0.01159405
611.6	0.29351074		1201.59	0.1205751		1791.6	0.07422044		2381.59	-0.02046626		2971.6	0.01359513		3561.6	0.03553194		4151.6	-0.01065567
611.8	0.29396801		1201.79	0.12088618		1791.8	0.07290733		2381.79	-0.02037035		2971.8	0.01362174		3561.8	0.03655051		4151.8	-0.00962031
612	0.29465443		1201.99	0.12022153		1792	0.07342852		2381.99	-0.01940595		2972	0.01318055		3562	0.03647508		4152	-0.01030683
612.2	0.29484655		1202.19	0.1192695		1792.2	0.07342603		2382.19	-0.01847935		2972.2	0.0124731		3562.2	0.03643665		4152.2	-0.01113424
612.4	0.29540112		1202.39	0.11854727		1792.4	0.07274172		2382.39	-0.01847521		2972.4	0.01265347		3562.4	0.03695933		4152.4	-0.01084247
612.6	0.29551175		1202.59	0.11906712		1792.6	0.07247823		2382.59	-0.01650852		2972.6	0.01278898		3562.6	0.03659497		4152.6	-0.01040153
612.8	0.29519792		1202.79	0.11900602		1792.8	0.07271817		2382.79	-0.01603846		2972.8	0.01218666		3562.8	0.03717171		4152.8	-0.01104976
613	0.29604314		1202.99	0.11896986		1793	0.07308289		2382.99	-0.01575482		2973	0.01200386		3563	0.03640306		4153	-0.01151103
613.2	0.2957783		1203.19	0.11830034		1793.2	0.07216987		2383.19	-0.01655974		2973.2	0.01193847		3563.2	0.0369309		4153.2	-0.01181445
613.4	0.2950344		1203.39	0.11802509		1793.4	0.07225702		2383.39	-0.01704558		2973.4	0.01130323		3563.4	0.03657259		4153.4	-0.01117903
613.6	0.29489448		1203.59	0.11870179		1793.6	0.07129212		2383.59	-0.01779605		2973.6	0.01143905		3563.6	0.03720661		4153.6	-0.01118926
613.8	0.2940679		1203.79	0.11994152		1793.8	0.07128235		2383.79	-0.01809325		2973.8	0.01158566		3563.8	0.03691698		4153.8	-0.01103728
614	0.29372175		1203.99	0.12047696		1794	0.07086974		2383.99	-0.01763346		2974	0.0118831		3564	0.03678213		4154	-0.01077584
614.2	0.29396491		1204.19	0.12084873		1794.2	0.07134436		2384.19	-0.01854007		2974.2	0.01118657		3564.2	0.03783297		4154.2	-0.0115956
614.4	0.29320596		1204.39	0.12215834		1794.4	0.07132947		2384.39	-0.01858539		2974.4	0.01036221		3564.4	0.03769769		4154.4	-0.01208347
614.6	0.29264965		1204.59	0.1222927		1794.6	0.07027631		2384.59	-0.01893778		2974.6	0.00997016		3564.6	0.03779522		4154.6	-0.01252646
614.8	0.29359894		1204.79	0.12338254		1794.8	0.06981748		2384.79	-0.01885435		2974.8	0.00990507		3564.8	0.03699799		4154.8	-0.01235584
615	0.29385317		1204.99	0.12379944		1795	0.06935139		2384.99	-0.01842084		2975	0.00933074		3565	0.03629551		4155	-0.0127307
615.2	0.29370129		1205.19	0.12374101		1795.2	0.06963389		2385.19	-0.01908453		2975.2	0.00992139		3565.2	0.03670189		4155.2	-0.01234851
615.4	0.29323573		1205.39	0.12321043		1795.4	0.06912196		2385.39	-0.01987611		2975.4	0.00984753		3565.4	0.03594939		4155.4	-0.01234883
615.6	0.29257611		1205.59	0.12306085		1795.6	0.06918838		2385.59	-0.01997011		2975.6	0.01101985		3565.6	0.03650867		4155.6	-0.01169741
615.8	0.29274476		1205.79	0.12220655		1795.8	0.0691732		2385.79	-0.01983122		2975.8	0.01073846		3565.8	0.03650913		4155.8	-0.01291006
616	0.29272214		1205.99	0.12039261		1796	0.07061392		2385.99	-0.0188334		2976	0.01101927		3566	0.03612974		4156	-0.01306815
616.2	0.29217564		1206.19	0.11972272		1796.2	0.07153954		2386.19	-0.01795544		2976.2	0.01042842		3566.2	0.0353111		4156.2	-0.01322544
616.4	0.2922152		1206.39	0.11987379		1796.4	0.07157252		2386.39	-0.01764179		2976.4	0.01089848		3566.4	0.03478565		4156.4	-0.01356461
616.6	0.29175145		1206.59	0.1198108		1796.6	0.07204477		2386.59	-0.01674397		2976.6	0.01102665		3566.6	0.03417576		4156.6	-0.01391174
616.8	0.29098862		1206.79	0.11902135		1796.8	0.07266884		2386.79	-0.01752454		2976.8	0.01063526		3566.8	0.03389354		4156.8	-0.01415525
617	0.29101189		1206.99	0.11846069		1797	0.07219907		2386.99	-0.01679729		2977	0.01082743		3567	0.0329598		4157	-0.01326462
617.2	0.29034526		1207.19	0.11801103		1797.2	0.0715957		2387.19	-0.01721062		2977.2	0.01178299		3567.2	0.0338369		4157.2	-0.01212772
617.4	0.29046791		1207.39	0.11752635		1797.4	0.07154721		2387.39	-0.0172618		2977.4	0.01124353		3567.4	0.03343052		4157.4	-0.01092211
617.6	0.29170562		1207.59	0.11802726		1797.6	0.07030255		2387.59	-0.0177569		2977.6	0.01156782		3567.6	0.03362202		4157.6	-0.00994752
617.8	0.29150762		1207.79	0.11933518		1797.8	0.07073856		2387.79	-0.01895119		2977.8	0.01093486		3567.8	0.03358816		4157.8	-0.00985715
618	0.2911441		1207.99	0.11995542		1798	0.07118242		2387.99	-0.01880121		2978	0.01118797		3568	0.03454495		4158	-0.00919496
618.2	0.2910956		1208.19	0.11934667		1798.2	0.07140363		2388.19	-0.02043666		2978.2	0.01030442		3568.2	0.03568171		4158.2	-0.00948121
618.4	0.29076612		1208.39	0.1201259		1798.4	0.07119596		2388.39	-0.02046249		2978.4	0.01066452		3568.4	0.03603555		4158.4	-0.00989056
618.6	0.29058287		1208.59	0.12045138		1798.6	0.07100605		2388.59	-0.02077127		2978.6	0.01064355		3568.6	0.03640516		4158.6	-0.00985422
618.8	0.29063403		1208.79	0.12092603		1798.8	0.07068454		2388.79	-0.02106305		2978.8	0.010818		3568.8	0.03635384		4158.8	-0.00958034
619	0.29107193		1208.99	0.12173383		1799	0.07038203		2388.99	-0.02150815		2979	0.00980458		3569	0.03693549		4159	-0.00981604
619.2	0.29053333		1209.19	0.12221113		1799.2	0.07080171		2389.19	-0.02154641		2979.2	0.01057315		3569.2	0.03751539		4159.2	-0.01083033
619.4	0.2906241		1209.39	0.12253764		1799.4	0.07147185		2389.39	-0.02177682		2979.4	0.01122329		3569.4	0.03691702		4159.4	-0.01075675
619.6	0.29072825		1209.59	0.12176218		1799.6	0.07180235		2389.59	-0.02064525		2979.6	0.01073496		3569.6	0.03659313		4159.6	-0.01116608
619.8	0.29093937		1209.79	0.12139985		1799.8	0.0722188		2389.79	-0.01970073		2979.8	0.01047721		3569.8	0.03656296		4159.8	-0.01189339
620	0.29142221		1209.99	0.1205727		1800	0.0729038		2389.99	-0.01876756		2980	0.01000551		3570	0.03561895		4160	-0.01111569
620.2	0.29203368		1210.19	0.12041826		1800.2	0.0730659		2390.19	-0.01854324		2980.2	0.00944708		3570.2	0.03473512		4160.2	-0.0126318
620.4	0.29223405		1210.39	0.12006146		1800.4	0.07222791		2390.39	-0.01843654		2980.4	0.00939834		3570.4	0.03373055		4160.4	-0.0123786
620.6	0.29234639		1210.59	0.11911435		1800.6	0.07225756		2390.59	-0.01758729		2980.6	0.00893421		3570.6	0.03288521		4160.6	-0.01206846
620.8	0.29227647		1210.79	0.11837915		1800.8	0.07155358		2390.79	-0.01735819		2980.8	0.00934529		3570.8	0.0326254		4160.8	-0.01191082
621	0.29312778		1210.99	0.11759087		1801	0.07051412		2390.99	-0.01637727		2981	0.00936002		3571	0.03210441		4161	-0.01270818
621.2	0.29382821		1211.19	0.11711751		1801.2	0.07067297		2391.19	-0.01687923		2981.2	0.01010801		3571.2	0.03256669		4161.2	-0.01263946
621.4	0.29445224		1211.39	0.11723253		1801.4	0.07023978		2391.39	-0.01713556		2981.4	0.01031911		3571.4	0.03263766		4161.4	-0.01214243
621.6	0.29438001		1211.59	0.11711497		1801.6	0.07004464		2391.59	-0.01691298		2981.6	0.0109718		3571.6	0.03180202		4161.6	-0.01237267
621.8	0.29339564		1211.79	0.11726115		1801.8	0.06981825		2391.79	-0.01710181		2981.8	0.01087495		3571.8	0.0313985		4161.8	-0.01284669
622	0.29255755		1211.99	0.11654134		1802	0.06985103		2391.99	-0.01701562		2982	0.01130717		3572	0.03181038		4162	-0.01220279
622.2	0.29229402		1212.19	0.11607952		1802.2	0.0693077		2392.19	-0.01798719		2982.2	0.01163685		3572.2	0.03202454		4162.2	-0.01287035
622.4	0.2919975		1212.39	0.11581124		1802.4	0.0688551		2392.39	-0.01807241		2982.4	0.01235893		3572.4	0.03328056		4162.4	-0.01392692
622.6	0.29209462		1212.59	0.11675959		1802.6	0.06913508		2392.59	-0.01839611		2982.6	0.0122705		3572.6	0.03277785		4162.6	-0.01435364
622.8	0.29255408		1212.79	0.11672877		1802.8	0.06875243		2392.79	-0.01906631		2982.8	0.01283049		3572.8	0.03197061		4162.8	-0.01510794
623	0.2930234		1212.99	0.11814711		1803	0.06973989		2392.99	-0.01886014		2983	0.01192533		3573	0.03160297		4163	-0.0152761
623.2	0.29289903		1213.19	0.11848574		1803.2	0.07043381		2393.19	-0.01896723		2983.2	0.01237078		3573.2	0.03034077		4163.2	-0.01537636
623.4	0.29306033		1213.39	0.11863634		1803.4	0.07020247		2393.39	-0.01935772		2983.4	0.01239127		3573.4	0.03011199		4163.4	-0.01494181
623.6	0.29274114		1213.59	0.11786148		1803.6	0.06998262		2393.59	-0.01933099		2983.6	0.01126366		3573.6	0.03027748		4163.6	-0.0151078
623.8	0.29206842		1213.79	0.11853278		1803.8	0.06986208		2393.79	-0.01870743		2983.8	0.01088428		3573.8	0.03024636		4163.8	-0.01453651
624	0.29187378		1213.99	0.11776328		1804	0.0705948		2393.99	-0.01897892		2984	0.00919723		3574	0.03005706		4164	-0.0143385
624.2	0.29225797		1214.19	0.11712702		1804.2	0.07075573		2394.19	-0.01867461		2984.2	0.00874728		3574.2	0.02999674		4164.2	-0.01361654
624.4	0.2919471		1214.39	0.11685431		1804.4	0.07051095		2394.39	-0.01780462		2984.4	0.00795091		3574.4	0.02979943		4164.4	-0.0124911
624.6	0.29175935		1214.59	0.11662475		1804.6	0.07036772		2394.59	-0.0176403		2984.6	0.00811132		3574.6	0.03016457		4164.6	-0.01210283
624.8	0.29142621		1214.79	0.11615225		1804.8	0.06992886		2394.79	-0.01820605		2984.8	0.0077316		3574.8	0.03063743		4164.8	-0.01172831
625	0.29104705		1214.99	0.11607249		1805	0.07004197		2394.99	-0.01860793		2985	0.00778321		3575	0.0307312		4165	-0.01174163
625.2	0.29143258		1215.19	0.11568139		1805.2	0.06989852		2395.19	-0.01853995		2985.2	0.00773735		3575.2	0.03199064		4165.2	-0.01095175
625.4	0.29117435		1215.39	0.1157074		1805.4	0.06889554		2395.39	-0.0185918		2985.4	0.00770191		3575.4	0.03214982		4165.4	-0.0104044
625.6	0.29093023		1215.59	0.11628316		1805.6	0.0686795		2395.59	-0.01773611		2985.6	0.00832557		3575.6	0.03207156		4165.6	-0.01097917
625.8	0.29145182		1215.79	0.11644593		1805.8	0.06800154		2395.79	-0.0186337		2985.8	0.00838601		3575.8	0.03262356		4165.8	-0.01118678
626	0.29149921		1215.99	0.11607762		1806	0.06719878		2395.99	-0.0191413		2986	0.00849003		3576	0.03391839		4166	-0.01123202
626.2	0.29262654		1216.19	0.11641935		1806.2	0.06713172		2396.19	-0.01962633		2986.2	0.00811349		3576.2	0.03426464		4166.2	-0.0126897
626.4	0.29288726		1216.39	0.1159361		1806.4	0.0672427		2396.39	-0.01974955		2986.4	0.00908267		3576.4	0.0345457		4166.4	-0.01347836
626.6	0.29309158		1216.59	0.11679751		1806.6	0.06739326		2396.59	-0.02018193		2986.6	0.00962542		3576.6	0.03308153		4166.6	-0.01445223
626.8	0.29314182		1216.79	0.11698498		1806.8	0.06711418		2396.79	-0.02042687		2986.8	0.00993503		3576.8	0.03310723		4166.8	-0.01484697
627	0.29276472		1216.99	0.11810027		1807	0.06782514		2396.99	-0.02016925		2987	0.01026823		3577	0.03246339		4167	-0.01519197
627.2	0.292426		1217.19	0.11818979		1807.2	0.06776339		2397.19	-0.02036844		2987.2	0.01087123		3577.2	0.03227415		4167.2	-0.0153631
627.4	0.29159362		1217.39	0.11730184		1807.4	0.06792559		2397.39	-0.01953372		2987.4	0.01100135		3577.4	0.03314766		4167.4	-0.01635364
627.6	0.29196961		1217.59	0.11742325		1807.6	0.06854141		2397.59	-0.01939039		2987.6	0.01126182		3577.6	0.03290894		4167.6	-0.01588478
627.8	0.293006		1217.79	0.11749754		1807.8	0.06900492		2397.79	-0.01925752		2987.8	0.01158545		3577.8	0.03303827		4167.8	-0.01592435
628	0.29239421		1217.99	0.11658081		1808	0.0692506		2397.99	-0.0193585		2988	0.01118005		3578	0.03315455		4168	-0.01545267
628.2	0.29298285		1218.19	0.1161609		1808.2	0.07056797		2398.19	-0.01861427		2988.2	0.01219225		3578.2	0.03254848		4168.2	-0.01530694
628.4	0.29250648		1218.39	0.11617306		1808.4	0.07003692		2398.39	-0.01883254		2988.4	0.01133566		3578.4	0.03207936		4168.4	-0.01531459
628.6	0.29208463		1218.59	0.11600577		1808.6	0.0698467		2398.59	-0.0196918		2988.6	0.01211207		3578.6	0.03262538		4168.6	-0.01451633
628.8	0.29211379		1218.79	0.11526922		1808.8	0.07093969		2398.79	-0.020368		2988.8	0.0115132		3578.8	0.03232198		4168.8	-0.01387655
629	0.29225869		1218.99	0.11577029		1809	0.07058205		2398.99	-0.02111733		2989	0.0116989		3579	0.03260605		4169	-0.01510951
629.2	0.29235481		1219.19	0.11575256		1809.2	0.06984219		2399.19	-0.02120611		2989.2	0.01145847		3579.2	0.03313208		4169.2	-0.01523451
629.4	0.29187495		1219.39	0.11655878		1809.4	0.06966795		2399.39	-0.02152429		2989.4	0.01121494		3579.4	0.03306971		4169.4	-0.0153154
629.6	0.2929796		1219.59	0.11751337		1809.6	0.06877807		2399.59	-0.02185009		2989.6	0.01203181		3579.6	0.03335704		4169.6	-0.01599456
629.8	0.29304534		1219.79	0.11706715		1809.8	0.06782491		2399.79	-0.02283744		2989.8	0.0114157		3579.8	0.03313215		4169.8	-0.01525877
630	0.29322957		1219.99	0.11731427		1810	0.06740121		2399.99	-0.02248358		2990	0.01064492		3580	0.03267259		4170	-0.01506933
630.2	0.29332407		1220.19	0.11782777		1810.2	0.06752088		2400.19	-0.02290569		2990.2	0.01000267		3580.2	0.03209889		4170.2	-0.01506279
630.4	0.29251783		1220.39	0.11791823		1810.4	0.06775916		2400.39	-0.0229522		2990.4	0.01088779		3580.4	0.03209681		4170.4	-0.01488053
630.6	0.29189398		1220.59	0.11871563		1810.6	0.06727959		2400.59	-0.02317691		2990.6	0.01079036		3580.6	0.03260326		4170.6	-0.01514412
630.8	0.2912755		1220.79	0.11907762		1810.8	0.06779664		2400.79	-0.02230287		2990.8	0.01064812		3580.8	0.03370091		4170.8	-0.01471039
631	0.29133156		1220.99	0.11914255		1811	0.06843656		2400.99	-0.02221707		2991	0.01078314		3581	0.03359366		4171	-0.01436586
631.2	0.29112569		1221.19	0.11879634		1811.2	0.06839596		2401.19	-0.02158237		2991.2	0.01034447		3581.2	0.03384755		4171.2	-0.01386445
631.4	0.29134025		1221.39	0.11808425		1811.4	0.06847093		2401.39	-0.02065229		2991.4	0.00983782		3581.4	0.03444023		4171.4	-0.01383771
631.6	0.29256191		1221.59	0.11939579		1811.6	0.06928572		2401.59	-0.02061642		2991.6	0.01025554		3581.6	0.03503378		4171.6	-0.01342933
631.8	0.29238117		1221.79	0.11911943		1811.8	0.06995729		2401.79	-0.02033371		2991.8	0.01020456		3581.8	0.03564807		4171.8	-0.01348053
632	0.29094028		1221.99	0.11892987		1812	0.06981325		2401.99	-0.01961542		2992	0.0095369		3582	0.03552542		4172	-0.01310428
632.2	0.29061544		1222.19	0.11884544		1812.2	0.0704329		2402.19	-0.01858262		2992.2	0.01004315		3582.2	0.03584403		4172.2	-0.01344411
632.4	0.29044088		1222.39	0.11806589		1812.4	0.06953074		2402.39	-0.01883393		2992.4	0.00934163		3582.4	0.03651654		4172.4	-0.01210379
632.6	0.28925248		1222.59	0.11793955		1812.6	0.06955541		2402.59	-0.01835433		2992.6	0.00942353		3582.6	0.03733651		4172.6	-0.01153406
632.8	0.28934238		1222.79	0.11795801		1812.8	0.06948424		2402.79	-0.01819751		2992.8	0.00921685		3582.8	0.03681991		4172.8	-0.0126734
633	0.28934593		1222.99	0.11826604		1813	0.06816204		2402.99	-0.0181103		2993	0.00934384		3583	0.03728435		4173	-0.01335908
633.2	0.28922918		1223.19	0.11754326		1813.2	0.06818122		2403.19	-0.01802936		2993.2	0.00976961		3583.2	0.03664089		4173.2	-0.01264295
633.4	0.28968239		1223.39	0.11683738		1813.4	0.06789578		2403.39	-0.01828366		2993.4	0.00980945		3583.4	0.03625598		4173.4	-0.0129842
633.6	0.29013404		1223.59	0.11691645		1813.6	0.06717026		2403.59	-0.01894556		2993.6	0.01078425		3583.6	0.03562325		4173.6	-0.01287139
633.8	0.28995549		1223.79	0.11692641		1813.8	0.06701758		2403.79	-0.01868631		2993.8	0.01083524		3583.8	0.03495628		4173.8	-0.01215942
634	0.28997586		1223.99	0.11755635		1814	0.06724071		2403.99	-0.01897685		2994	0.01066795		3584	0.03452728		4174	-0.01254059
634.2	0.28922179		1224.19	0.11737248		1814.2	0.06772935		2404.19	-0.0191147		2994.2	0.01152826		3584.2	0.03455771		4174.2	-0.01264669
634.4	0.28887385		1224.39	0.11725018		1814.4	0.06771097		2404.39	-0.01876781		2994.4	0.01217212		3584.4	0.03374337		4174.4	-0.01330136
634.6	0.2889007		1224.59	0.11700858		1814.6	0.06726764		2404.59	-0.01882892		2994.6	0.01295389		3584.6	0.0337258		4174.6	-0.0131855
634.8	0.28908473		1224.79	0.11699648		1814.8	0.06782389		2404.79	-0.01779018		2994.8	0.0131424		3584.8	0.03333912		4174.8	-0.01297679
635	0.28910532		1224.99	0.11649318		1815	0.06781419		2404.99	-0.01828626		2995	0.01247655		3585	0.03262931		4175	-0.01260998
635.2	0.28898689		1225.19	0.11616131		1815.2	0.06834864		2405.19	-0.01772689		2995.2	0.01274023		3585.2	0.03158627		4175.2	-0.01279969
635.4	0.28915167		1225.39	0.11595636		1815.4	0.06994415		2405.39	-0.01751723		2995.4	0.0121543		3585.4	0.03159166		4175.4	-0.01296936
635.6	0.28933957		1225.59	0.115913		1815.6	0.07104543		2405.59	-0.01741192		2995.6	0.0120748		3585.6	0.03149961		4175.6	-0.01305786
635.8	0.28903004		1225.79	0.11566237		1815.8	0.07097731		2405.79	-0.01756772		2995.8	0.01172802		3585.8	0.03113506		4175.8	-0.01299472
636	0.28899393		1225.99	0.11608343		1816	0.07045902		2405.99	-0.01766955		2996	0.01159549		3586	0.03080765		4176	-0.01270913
636.2	0.28910382		1226.19	0.11523195		1816.2	0.07101769		2406.19	-0.01760039		2996.2	0.01132146		3586.2	0.03121957		4176.2	-0.01259628
636.4	0.29007727		1226.39	0.11524906		1816.4	0.0708831		2406.39	-0.01831375		2996.4	0.01030729		3586.4	0.03137016		4176.4	-0.01226929
636.6	0.28964238		1226.59	0.11490853		1816.6	0.07078508		2406.59	-0.01837825		2996.6	0.00987536		3586.6	0.03180984		4176.6	-0.01257673
636.8	0.29155836		1226.79	0.11518288		1816.8	0.06998622		2406.79	-0.01937391		2996.8	0.0092847		3586.8	0.03164104		4176.8	-0.01286533
637	0.29200079		1226.99	0.11451649		1817	0.06954097		2406.99	-0.02059364		2997	0.00897125		3587	0.03200875		4177	-0.01227365
637.2	0.29235692		1227.19	0.1144996		1817.2	0.06983796		2407.19	-0.02153503		2997.2	0.00926162		3587.2	0.03198593		4177.2	-0.0123456
637.4	0.29238897		1227.39	0.1152167		1817.4	0.06966955		2407.39	-0.0223339		2997.4	0.00936774		3587.4	0.03244068		4177.4	-0.01293571
637.6	0.29249913		1227.59	0.11632628		1817.6	0.06977093		2407.59	-0.02309624		2997.6	0.0089848		3587.6	0.03280034		4177.6	-0.01363608
637.8	0.29307306		1227.79	0.11626691		1817.8	0.06879232		2407.79	-0.02382822		2997.8	0.00842433		3587.8	0.03296403		4177.8	-0.01438026
638	0.29275946		1227.99	0.11615084		1818	0.06900104		2407.99	-0.02406598		2998	0.00811699		3588	0.03363596		4178	-0.01501151
638.2	0.29214929		1228.19	0.11548855		1818.2	0.06926391		2408.19	-0.02328358		2998.2	0.00791433		3588.2	0.03384282		4178.2	-0.01545
638.4	0.2927932		1228.39	0.11554485		1818.4	0.06856635		2408.39	-0.02311387		2998.4	0.00782674		3588.4	0.03381381		4178.4	-0.01572268
638.6	0.29261502		1228.59	0.11510364		1818.6	0.06801705		2408.59	-0.02276162		2998.6	0.00840028		3588.6	0.03413079		4178.6	-0.01498963
638.8	0.29217123		1228.79	0.11441068		1818.8	0.06831857		2408.79	-0.02220307		2998.8	0.00790301		3588.8	0.03430704		4178.8	-0.01409717
639	0.29180903		1228.99	0.11423414		1819	0.06779113		2408.99	-0.0224793		2999	0.00782429		3589	0.03361616		4179	-0.01411763
639.2	0.29204671		1229.19	0.11423156		1819.2	0.06796695		2409.19	-0.02124108		2999.2	0.00840013		3589.2	0.0329078		4179.2	-0.01372527
639.4	0.29212893		1229.39	0.11343224		1819.4	0.06843631		2409.39	-0.02045177		2999.4	0.00863442		3589.4	0.03343212		4179.4	-0.01335241
639.6	0.29227466		1229.59	0.11370324		1819.6	0.06801075		2409.59	-0.0199206		2999.6	0.00906496		3589.6	0.03378495		4179.6	-0.01299855
639.8	0.292326		1229.79	0.1135275		1819.8	0.06780635		2409.79	-0.01964329		2999.8	0.00932301		3589.8	0.03393745		4179.8	-0.01298574
640	0.29202097		1229.99	0.11414616		1820	0.06842177		2409.99	-0.01889218		3000	0.00964256		3590	0.03419257		4180	-0.01295808
640.2	0.29139137		1230.19	0.11433656		1820.2	0.06809749		2410.19	-0.01893048		3000.2	0.00940425		3590.2	0.03479445		4180.2	-0.01329185
640.4	0.29110314		1230.39	0.11526637		1820.4	0.06711077		2410.39	-0.01887867		3000.4	0.00982861		3590.4	0.03499833		4180.4	-0.01316834
640.6	0.29084152		1230.59	0.11539953		1820.6	0.06671008		2410.59	-0.01873967		3000.6	0.01053314		3590.6	0.0357382		4180.6	-0.01250893
640.8	0.29146464		1230.79	0.11650723		1820.8	0.06568967		2410.79	-0.01925931		3000.8	0.01098847		3590.8	0.03577796		4180.8	-0.01205239
641	0.29061831		1230.99	0.11688394		1821	0.06560563		2410.99	-0.02001571		3001	0.01236135		3591	0.0359852		4181	-0.01326418
641.2	0.29043384		1231.19	0.11909952		1821.2	0.06583187		2411.19	-0.02043633		3001.2	0.01276836		3591.2	0.03520797		4181.2	-0.01340616
641.4	0.28940121		1231.39	0.12047093		1821.4	0.06616075		2411.39	-0.02034412		3001.4	0.01256269		3591.4	0.03460034		4181.4	-0.01395813
641.6	0.28850413		1231.59	0.11995653		1821.6	0.06597335		2411.59	-0.02041577		3001.6	0.01182267		3591.6	0.03461587		4181.6	-0.0154566
641.8	0.28831183		1231.79	0.1195217		1821.8	0.06553584		2411.79	-0.02047315		3001.8	0.01112746		3591.8	0.03411801		4181.8	-0.01616365
642	0.28789343		1231.99	0.11933472		1822	0.06622739		2411.99	-0.01973345		3002	0.01055079		3592	0.0346891		4182	-0.01625693
642.2	0.28653745		1232.19	0.11902518		1822.2	0.06693515		2412.19	-0.01965002		3002.2	0.01012729		3592.2	0.03403076		4182.2	-0.01667682
642.4	0.28677871		1232.39	0.11926437		1822.4	0.06752497		2412.39	-0.01970807		3002.4	0.01020804		3592.4	0.03399027		4182.4	-0.01639071
642.6	0.286311		1232.59	0.11861704		1822.6	0.06700592		2412.59	-0.0194869		3002.6	0.00946567		3592.6	0.03326664		4182.6	-0.015513
642.8	0.28702335		1232.79	0.11752903		1822.8	0.06669108		2412.79	-0.01974247		3002.8	0.00906596		3592.8	0.03386291		4182.8	-0.01551367
643	0.28717249		1232.99	0.11744448		1823	0.06581381		2412.99	-0.0192525		3003	0.0099089		3593	0.03310187		4183	-0.01592751
643.2	0.28776235		1233.19	0.11637625		1823.2	0.06588378		2413.19	-0.01836531		3003.2	0.00982916		3593.2	0.03307449		4183.2	-0.01485948
643.4	0.2881286		1233.39	0.11554698		1823.4	0.06706663		2413.39	-0.0191631		3003.4	0.00994536		3593.4	0.03315058		4183.4	-0.01525994
643.6	0.2896954		1233.59	0.11502675		1823.6	0.06705684		2413.59	-0.01906451		3003.6	0.00909025		3593.6	0.03252784		4183.6	-0.01519879
643.8	0.29064044		1233.79	0.11463875		1823.8	0.06786051		2413.79	-0.01896996		3003.8	0.00884184		3593.8	0.03219836		4183.8	-0.01512248
644	0.29032604		1233.99	0.11604384		1824	0.06865806		2413.99	-0.01978577		3004	0.00877847		3594	0.03254221		4184	-0.01471436
644.2	0.29021825		1234.19	0.11628802		1824.2	0.06875813		2414.19	-0.02132054		3004.2	0.00888263		3594.2	0.03240969		4184.2	-0.01427798
644.4	0.29001914		1234.39	0.11577806		1824.4	0.06937595		2414.39	-0.02154203		3004.4	0.00851651		3594.4	0.03274356		4184.4	-0.01415189
644.6	0.29086717		1234.59	0.11604389		1824.6	0.07013134		2414.59	-0.02262145		3004.6	0.00832265		3594.6	0.03286041		4184.6	-0.01355068
644.8	0.29167063		1234.79	0.11572138		1824.8	0.07043647		2414.79	-0.02334793		3004.8	0.00862218		3594.8	0.03230901		4184.8	-0.01338437
645	0.29115352		1234.99	0.11572975		1825	0.0708299		2414.99	-0.023399		3005	0.00833		3595	0.03115494		4185	-0.01422634
645.2	0.29047946		1235.19	0.11691132		1825.2	0.07115803		2415.19	-0.0230275		3005.2	0.00796345		3595.2	0.03027764		4185.2	-0.01428066
645.4	0.28991331		1235.39	0.11670894		1825.4	0.07095867		2415.39	-0.02209675		3005.4	0.00791503		3595.4	0.02995082		4185.4	-0.01518959
645.6	0.28938207		1235.59	0.11596195		1825.6	0.07045942		2415.59	-0.02185876		3005.6	0.0073671		3595.6	0.0295562		4185.6	-0.01490036
645.8	0.28892407		1235.79	0.11589764		1825.8	0.07136378		2415.79	-0.02154483		3005.8	0.00701246		3595.8	0.0297981		4185.8	-0.01522483
646	0.28801796		1235.99	0.11660259		1826	0.07189877		2415.99	-0.02048548		3006	0.00637218		3596	0.03032259		4186	-0.01511521
646.2	0.287373		1236.19	0.11698784		1826.2	0.072157		2416.19	-0.0204419		3006.2	0.00687755		3596.2	0.03026822		4186.2	-0.01555901
646.4	0.28838463		1236.39	0.11687215		1826.4	0.07206852		2416.39	-0.01993497		3006.4	0.00685341		3596.4	0.0310058		4186.4	-0.01533221
646.6	0.28870738		1236.59	0.11628264		1826.6	0.07091103		2416.59	-0.01936389		3006.6	0.00742838		3596.6	0.03099352		4186.6	-0.01582197
646.8	0.28978196		1236.79	0.11581253		1826.8	0.0693808		2416.79	-0.01900646		3006.8	0.00840618		3596.8	0.03187609		4186.8	-0.01689046
647	0.29031505		1236.99	0.11595201		1827	0.06859658		2416.99	-0.01823464		3007	0.01038988		3597	0.03141316		4187	-0.01639321
647.2	0.29092545		1237.19	0.1158565		1827.2	0.06849061		2417.19	-0.01846727		3007.2	0.01098183		3597.2	0.03244848		4187.2	-0.01619203
647.4	0.29190619		1237.39	0.11568015		1827.4	0.06873833		2417.39	-0.01984554		3007.4	0.01118229		3597.4	0.03222321		4187.4	-0.01695132
647.6	0.29273259		1237.59	0.11526856		1827.6	0.06865837		2417.59	-0.01951174		3007.6	0.01228901		3597.6	0.0328081		4187.6	-0.01609672
647.8	0.29216579		1237.79	0.11579182		1827.8	0.06899795		2417.79	-0.02037127		3007.8	0.01315347		3597.8	0.03367195		4187.8	-0.01566343
648	0.29136307		1237.99	0.11617297		1828	0.06917105		2417.99	-0.02145202		3008	0.01352334		3598	0.03431007		4188	-0.01520888
648.2	0.29103734		1238.19	0.11579645		1828.2	0.06922138		2418.19	-0.02220865		3008.2	0.01371005		3598.2	0.03421622		4188.2	-0.01502379
648.4	0.29064523		1238.39	0.11577376		1828.4	0.06917147		2418.39	-0.02214653		3008.4	0.01318203		3598.4	0.03415762		4188.4	-0.01494702
648.6	0.29108944		1238.59	0.11626614		1828.6	0.06913915		2418.59	-0.02285391		3008.6	0.01306946		3598.6	0.03335243		4188.6	-0.01398124
648.8	0.29070334		1238.79	0.11651903		1828.8	0.0688395		2418.79	-0.02244099		3008.8	0.01300533		3598.8	0.03247475		4188.8	-0.01384808
649	0.28952427		1238.99	0.11748884		1829	0.06877253		2418.99	-0.02214732		3009	0.01240235		3599	0.03144949		4189	-0.01413607
649.2	0.28896536		1239.19	0.11890038		1829.2	0.06872119		2419.19	-0.02201183		3009.2	0.01226803		3599.2	0.03084195		4189.2	-0.01407534
649.4	0.28837612		1239.39	0.11960947		1829.4	0.06846236		2419.39	-0.02178269		3009.4	0.01170053		3599.4	0.02985126		4189.4	-0.01340668
649.6	0.28731519		1239.59	0.12032255		1829.6	0.06891377		2419.59	-0.02137672		3009.6	0.01078581		3599.6	0.02882253		4189.6	-0.01260407
649.8	0.28644924		1239.79	0.12110527		1829.8	0.06962739		2419.79	-0.02092965		3009.8	0.01003988		3599.8	0.02866438		4189.8	-0.01312947
