# Supplementary material for: Functional development of a V3/glycan-specific broadly neutralizing antibody isolated from a case of HIV superinfection
Source: eLife journal article supplement (doi:10.7554/elife.68110), 2021-07-15
Supplement: fig2-data2 [file D3.xls]

Vers 3.43 Data Simulation
Conc1	6.2E-08	6.2E-08	6.2E-08	6.2E-08	6.2E-08
Start1	200	729.99	1259.99	1789.98	2320.01
Stop1	559.8	1089.79	1619.78	2149.78	2679.81
Time1	Data1	Sim1	Time2	Data2	Sim2	Time3	Data3	Sim3	Time4	Data4	Sim4	Time5	Data5	Sim5
200	0.00784169		729.99	0.00586019		1259.99	-0.00235752		1789.98	0.0088282		2320.01	-0.00555893
200.2	0.00659335		730.19	0.00519358		1260.19	-0.00185141		1790.18	0.0090752		2320.21	-0.00500036
200.4	0.00580223		730.39	0.0058741		1260.39	-0.00196451		1790.38	0.00902936		2320.41	-0.00393011
200.6	0.00506273		730.59	0.00550163		1260.59	-0.00242002		1790.58	0.00868306		2320.61	-0.00303898
200.8	0.00456655		730.79	0.00546825		1260.79	-0.00281503		1790.78	0.00788106		2320.81	-0.00322701
201	0.00437533		730.99	0.005208		1260.99	-0.00318955		1790.98	0.00798422		2321.01	-0.00309093
201.2	0.0042537		731.19	0.00483021		1261.19	-0.00359704		1791.18	0.00829094		2321.21	-0.00242502
201.4	0.00462209		731.39	0.00430121		1261.39	-0.00376257		1791.38	0.00788629		2321.41	-0.00168427
201.6	0.0040206		731.59	0.00416655		1261.59	-0.00360935		1791.58	0.00771769		2321.61	-0.00121683
201.8	0.00437337		731.79	0.00438499		1261.79	-0.00311166		1791.78	0.00707673		2321.81	-0.00035271
202	0.00542083		731.99	0.00439475		1261.99	-0.00282282		1791.98	0.00638222		2322.01	0.00020057
202.2	0.0062673		732.19	0.00409282		1262.19	-0.00271029		1792.18	0.00546621		2322.21	0.00076924
202.4	0.00832622		732.39	0.00389279		1262.39	-0.00372288		1792.38	0.00495377		2322.41	0.00088104
202.6	0.00933868		732.59	0.00424		1262.59	-0.00378281		1792.58	0.00346269		2322.61	0.00121809
202.8	0.00956415		732.79	0.0052992		1262.79	-0.00333629		1792.78	0.003321		2322.81	0.00049411
203	0.00941243		732.99	0.00580857		1262.99	-0.00280547		1792.98	0.00314123		2323.01	-0.00010808
203.2	0.00976206		733.19	0.00632458		1263.19	-0.00265302		1793.18	0.00320948		2323.21	-0.0000451
203.4	0.00996165		733.39	0.0063382		1263.39	-0.00174384		1793.38	0.00313451		2323.41	-0.00032729
203.6	0.01098084		733.59	0.00701833		1263.59	-0.00170873		1793.58	0.00225293		2323.61	-0.00039938
203.8	0.01093136		733.79	0.00684331		1263.79	-0.00155119		1793.78	0.001768		2323.81	-0.00156582
204	0.01187058		733.99	0.00602153		1263.99	-0.00138441		1793.98	0.00171307		2324.01	-0.00116035
204.2	0.01278084		734.19	0.00667413		1264.19	-0.00112693		1794.18	0.00219932		2324.21	-0.00097132
204.4	0.01398755		734.39	0.00753447		1264.39	-0.00242717		1794.38	0.00144353		2324.41	-0.00126748
204.6	0.01514749		734.59	0.00694609		1264.59	-0.00277164		1794.58	0.00097084		2324.61	-0.00231636
204.8	0.01643928		734.79	0.00679632		1264.79	-0.00303601		1794.78	0.00058684		2324.81	-0.00304206
205	0.01727027		734.99	0.00665842		1264.99	-0.0035569		1794.98	0.00159142		2325.01	-0.00270694
205.2	0.01811788		735.19	0.00677733		1265.19	-0.0037818		1795.18	0.00251549		2325.21	-0.00156797
205.4	0.01874419		735.39	0.00682671		1265.39	-0.0034694		1795.38	0.00259972		2325.41	-0.00061008
205.6	0.01893755		735.59	0.00715243		1265.59	-0.00272321		1795.58	0.00286918		2325.61	-0.0005617
205.8	0.0198048		735.79	0.00718024		1265.79	-0.00220082		1795.78	0.00318638		2325.81	0.00035021
206	0.02062644		735.99	0.00681978		1265.99	-0.00318544		1795.98	0.00301155		2326.01	0.00104471
206.2	0.02088916		736.19	0.00611259		1266.19	-0.0034152		1796.18	0.00357353		2326.21	0.00158289
206.4	0.02223556		736.39	0.00561228		1266.39	-0.00368151		1796.38	0.00399558		2326.41	0.00139805
206.6	0.0223548		736.59	0.00615059		1266.59	-0.00273769		1796.58	0.00402982		2326.61	0.00138276
206.8	0.0217384		736.79	0.00709644		1266.79	-0.00223094		1796.78	0.0057404		2326.81	0.00112334
207	0.02284092		736.99	0.00788199		1266.99	-0.00203645		1796.98	0.00600386		2327.01	0.00079106
207.2	0.02327787		737.19	0.00824135		1267.19	-0.0018106		1797.18	0.00613754		2327.21	0.00041614
207.4	0.02391965		737.39	0.00802507		1267.39	-0.00177912		1797.38	0.00585041		2327.41	-0.00043762
207.6	0.02366498		737.59	0.0080718		1267.59	-0.0024275		1797.58	0.0063851		2327.61	-0.00123013
207.8	0.02417616		737.79	0.0083041		1267.79	-0.00173607		1797.78	0.00615595		2327.81	-0.00191795
208	0.02532427		737.99	0.00836354		1267.99	-0.00199015		1797.98	0.00596478		2328.01	-0.00124295
208.2	0.02487067		738.19	0.00944574		1268.19	-0.00220659		1798.18	0.00654978		2328.21	-0.00183693
208.4	0.02499176		738.39	0.00891799		1268.39	-0.00233516		1798.38	0.0061763		2328.41	-0.00255875
208.6	0.02572184		738.59	0.00863731		1268.59	-0.00246874		1798.58	0.00697055		2328.61	-0.00315552
208.8	0.02681903		738.79	0.0086513		1268.79	-0.00290653		1798.78	0.00689621		2328.81	-0.00238307
209	0.02777479		738.99	0.00952046		1268.99	-0.00333014		1798.98	0.00709957		2329.01	-0.00193553
209.2	0.02883099		739.19	0.00936347		1269.19	-0.00285698		1799.18	0.00690185		2329.21	-0.00133826
209.4	0.02912311		739.39	0.00796919		1269.39	-0.00215079		1799.38	0.00606392		2329.41	-0.00190874
209.6	0.02921746		739.59	0.00674313		1269.59	-0.00196498		1799.58	0.00543343		2329.61	-0.00223734
209.8	0.02951502		739.79	0.00629889		1269.79	-0.00292973		1799.78	0.00517112		2329.81	-0.0018062
210	0.03028353		739.99	0.00658619		1269.99	-0.00392284		1799.98	0.00467572		2330.01	-0.00148239
210.2	0.0310624		740.19	0.00677174		1270.19	-0.00335253		1800.18	0.00442803		2330.21	-0.00185968
210.4	0.03246668		740.39	0.00737968		1270.39	-0.00245837		1800.38	0.00434823		2330.41	-0.00310041
210.6	0.03296441		740.59	0.00835269		1270.59	-0.00166521		1800.58	0.00401027		2330.61	-0.00308921
210.8	0.03331882		740.79	0.0090845		1270.79	-0.0016646		1800.78	0.00408881		2330.81	-0.00378886
211	0.03444974		740.99	0.00936329		1270.99	-0.00160713		1800.98	0.00331985		2331.01	-0.00431679
211.2	0.03557167		741.19	0.00907293		1271.19	-0.00178211		1801.18	0.00309226		2331.21	-0.00483449
211.4	0.03621026		741.39	0.00918498		1271.39	-0.00156503		1801.38	0.00311839		2331.41	-0.00595831
211.6	0.03637169		741.59	0.00933192		1271.59	-0.00180549		1801.58	0.00350738		2331.61	-0.00641754
211.8	0.0372186		741.79	0.00834592		1271.79	-0.00159232		1801.78	0.00384947		2331.81	-0.00617118
212	0.03709004		741.99	0.00841742		1271.99	-0.00153838		1801.98	0.00464488		2332.01	-0.00519992
212.2	0.03674876		742.19	0.00877654		1272.19	-0.00199111		1802.18	0.00634957		2332.21	-0.00611657
212.4	0.03860169		742.39	0.00815856		1272.39	-0.00216845		1802.38	0.00733784		2332.41	-0.00656207
212.6	0.04035497		742.59	0.00807185		1272.59	-0.00312388		1802.58	0.00707512		2332.61	-0.00617032
212.8	0.04168731		742.79	0.0080602		1272.79	-0.00302433		1802.78	0.00657069		2332.81	-0.00550325
213	0.04298762		742.99	0.00837202		1272.99	-0.00304956		1802.98	0.00632337		2333.01	-0.0060512
213.2	0.04344463		743.19	0.00724705		1273.19	-0.00342719		1803.18	0.00655139		2333.21	-0.0062968
213.4	0.04346778		743.39	0.00621911		1273.39	-0.00396181		1803.38	0.00638579		2333.41	-0.00722599
213.6	0.0445178		743.59	0.00672022		1273.59	-0.00517715		1803.58	0.00602328		2333.61	-0.00700643
213.8	0.04508163		743.79	0.00768101		1273.79	-0.0054334		1803.78	0.00561881		2333.81	-0.00649064
214	0.04556736		743.99	0.00929249		1273.99	-0.00500006		1803.98	0.00603154		2334.01	-0.00697916
214.2	0.04644715		744.19	0.0100443		1274.19	-0.00375646		1804.18	0.00545643		2334.21	-0.00657102
214.4	0.04691457		744.39	0.01082086		1274.39	-0.00258974		1804.38	0.00502876		2334.41	-0.00671236
214.6	0.04743896		744.59	0.01203868		1274.59	-0.00271104		1804.58	0.00447269		2334.61	-0.0053851
214.8	0.04713862		744.79	0.01270836		1274.79	-0.00293058		1804.78	0.00451068		2334.81	-0.00564286
215	0.04679267		744.99	0.01271348		1274.99	-0.00280047		1804.98	0.00420508		2335.01	-0.00562999
215.2	0.04763254		745.19	0.01396104		1275.19	-0.00280081		1805.18	0.00410214		2335.21	-0.00561885
215.4	0.04744397		745.39	0.01420875		1275.39	-0.00206205		1805.38	0.00366393		2335.41	-0.00586501
215.6	0.04780901		745.59	0.01371192		1275.59	-0.00251378		1805.58	0.00384617		2335.61	-0.00574555
215.8	0.04819295		745.79	0.01301693		1275.79	-0.00277799		1805.78	0.00475308		2335.81	-0.00505982
216	0.04810289		745.99	0.01359504		1275.99	-0.00303113		1805.98	0.00486601		2336.01	-0.00440484
216.2	0.04968998		746.19	0.01316855		1276.19	-0.00369336		1806.18	0.00565532		2336.21	-0.00466049
216.4	0.05102729		746.39	0.01211406		1276.39	-0.00305952		1806.38	0.00516689		2336.41	-0.00457708
216.6	0.05149053		746.59	0.01187375		1276.59	-0.00311039		1806.58	0.00530064		2336.61	-0.00400242
216.8	0.05300296		746.79	0.0122093		1276.79	-0.00404356		1806.78	0.00584884		2336.81	-0.00461759
217	0.05494828		746.99	0.01189912		1276.99	-0.00498407		1806.98	0.0062487		2337.01	-0.00461054
217.2	0.05638988		747.19	0.01214375		1277.19	-0.00584747		1807.18	0.00654874		2337.21	-0.00435213
217.4	0.05775626		747.39	0.01196181		1277.39	-0.00566029		1807.38	0.00639996		2337.41	-0.00476148
217.6	0.05892274		747.59	0.01225066		1277.59	-0.00635745		1807.58	0.0062555		2337.61	-0.00426584
217.8	0.05895224		747.79	0.01256453		1277.79	-0.0058015		1807.78	0.00560273		2337.81	-0.00414209
218	0.06024852		747.99	0.01316577		1277.99	-0.00481517		1807.98	0.0056436		2338.01	-0.00542446
218.2	0.06118615		748.19	0.01290234		1278.19	-0.00401849		1808.18	0.00476404		2338.21	-0.00473409
218.4	0.0619421		748.39	0.01360916		1278.39	-0.00444946		1808.38	0.0042129		2338.41	-0.00507725
218.6	0.06254473		748.59	0.01448976		1278.59	-0.00597626		1808.58	0.00421532		2338.61	-0.00380066
218.8	0.06216039		748.79	0.01477324		1278.79	-0.00634258		1808.78	0.00428877		2338.81	-0.00437024
219	0.06122121		748.99	0.01484083		1278.99	-0.00629654		1808.98	0.00368943		2339.01	-0.00452703
219.2	0.06161462		749.19	0.01594696		1279.19	-0.00607132		1809.18	0.0032323		2339.21	-0.0049975
219.4	0.06096522		749.39	0.01478027		1279.39	-0.00603004		1809.38	0.0022489		2339.41	-0.00509088
219.6	0.06149864		749.59	0.01429383		1279.59	-0.00692371		1809.58	0.00236859		2339.61	-0.00503043
219.8	0.06104659		749.79	0.01420544		1279.79	-0.00759079		1809.78	0.00242259		2339.81	-0.0049328
220	0.06142744		749.99	0.01482289		1279.99	-0.008125		1809.98	0.00222197		2340.01	-0.00427448
220.2	0.06210637		750.19	0.0146938		1280.19	-0.00806987		1810.18	0.00269334		2340.21	-0.00451998
220.4	0.06207417		750.39	0.01488106		1280.39	-0.0079106		1810.38	0.00244279		2340.41	-0.00390785
220.6	0.06305173		750.59	0.0151516		1280.59	-0.0088259		1810.58	0.00257354		2340.61	-0.00346875
220.8	0.06460067		750.79	0.01598058		1280.79	-0.00973472		1810.78	0.0023891		2340.81	-0.00308618
221	0.06542882		750.99	0.01698522		1280.99	-0.0094778		1810.98	0.00245221		2341.01	-0.00263367
221.2	0.06675743		751.19	0.01758214		1281.19	-0.00915539		1811.18	0.00256137		2341.21	-0.00279605
221.4	0.06674973		751.39	0.01769021		1281.39	-0.00862996		1811.38	0.00271422		2341.41	-0.00304605
221.6	0.06655061		751.59	0.01804222		1281.59	-0.00846628		1811.58	0.00307158		2341.61	-0.00368583
221.8	0.06708333		751.79	0.01809992		1281.79	-0.00679893		1811.78	0.00217903		2341.81	-0.00413004
222	0.06754248		751.99	0.01793621		1281.99	-0.0051396		1811.98	0.00273384		2342.01	-0.0052072
222.2	0.0688006		752.19	0.01742385		1282.19	-0.00570528		1812.18	0.00322809		2342.21	-0.00511286
222.4	0.06946064		752.39	0.01697239		1282.39	-0.00523811		1812.38	0.00327584		2342.41	-0.00510006
222.6	0.0693334		752.59	0.01627871		1282.59	-0.00518052		1812.58	0.00390215		2342.61	-0.00457818
222.8	0.06901174		752.79	0.0152951		1282.79	-0.00325413		1812.78	0.00468169		2342.81	-0.00604652
223	0.06850912		752.99	0.01384788		1282.99	-0.00280061		1812.98	0.00519276		2343.01	-0.00638022
223.2	0.06890737		753.19	0.0131232		1283.19	-0.00204773		1813.18	0.00558586		2343.21	-0.00717497
223.4	0.06841309		753.39	0.01180943		1283.39	-0.0024227		1813.38	0.00616445		2343.41	-0.00694905
223.6	0.0690777		753.59	0.01178694		1283.59	-0.00261369		1813.58	0.00674006		2343.61	-0.00774154
223.8	0.06972896		753.79	0.01169524		1283.79	-0.00271938		1813.78	0.00617844		2343.81	-0.00828306
224	0.07042946		753.99	0.01237764		1283.99	-0.00302293		1813.98	0.00579701		2344.01	-0.0081929
224.2	0.07113227		754.19	0.01185594		1284.19	-0.00281554		1814.18	0.00478694		2344.21	-0.00796267
224.4	0.07173361		754.39	0.0120589		1284.39	-0.00347697		1814.38	0.00384023		2344.41	-0.00703175
224.6	0.07255974		754.59	0.01237444		1284.59	-0.00361755		1814.58	0.00310005		2344.61	-0.00666313
224.8	0.07301368		754.79	0.01414807		1284.79	-0.00350767		1814.78	0.00365598		2344.81	-0.00650711
225	0.0739877		754.99	0.01521982		1284.99	-0.00389819		1814.98	0.00324485		2345.01	-0.0064433
225.2	0.07485544		755.19	0.01595316		1285.19	-0.00310533		1815.18	0.00273908		2345.21	-0.0062619
225.4	0.07479219		755.39	0.01777359		1285.39	-0.00294997		1815.38	0.00188654		2345.41	-0.00632647
225.6	0.07500083		755.59	0.0189536		1285.59	-0.00243193		1815.58	0.0010305		2345.61	-0.0057938
225.8	0.07547893		755.79	0.01995735		1285.79	-0.00258586		1815.78	-0.00018639		2345.81	-0.00567062
226	0.07546521		755.99	0.02087396		1285.99	-0.0027483		1815.98	0.00042136		2346.01	-0.00618166
226.2	0.07611457		756.19	0.0214092		1286.19	-0.00299562		1816.18	0.00022588		2346.21	-0.00615077
226.4	0.07587689		756.39	0.02174135		1286.39	-0.00253806		1816.38	-0.00009595		2346.41	-0.00563458
226.6	0.0757707		756.59	0.02190387		1286.59	-0.00253558		1816.58	0.0008001		2346.61	-0.0056346
226.8	0.0760579		756.79	0.02154477		1286.79	-0.00257355		1816.78	0.00157516		2346.81	-0.00583186
227	0.07579942		756.99	0.02145856		1286.99	-0.00388605		1816.98	0.00165757		2347.01	-0.00554215
227.2	0.07543046		757.19	0.02165711		1287.19	-0.00409914		1817.18	0.00151514		2347.21	-0.00578877
227.4	0.07564847		757.39	0.02154822		1287.39	-0.00506841		1817.38	0.00196616		2347.41	-0.00562181
227.6	0.07598258		757.59	0.02091036		1287.59	-0.00503165		1817.58	0.00164483		2347.61	-0.00615383
227.8	0.07665461		757.79	0.02077883		1287.79	-0.00539541		1817.78	0.00079981		2347.81	-0.00605689
228	0.0772483		757.99	0.02003692		1287.99	-0.00502476		1817.98	0.00044479		2348.01	-0.00631197
228.2	0.07811845		758.19	0.01865616		1288.19	-0.00566228		1818.18	0.00066173		2348.21	-0.00572467
228.4	0.07799081		758.39	0.01777013		1288.39	-0.00521025		1818.38	0.00107798		2348.41	-0.00588433
228.6	0.07904925		758.59	0.01736506		1288.59	-0.00443197		1818.58	0.00201392		2348.61	-0.00582668
228.8	0.08049752		758.79	0.01795057		1288.79	-0.00414547		1818.78	0.00299457		2348.81	-0.00691893
229	0.08164388		758.99	0.0177221		1288.99	-0.00369542		1818.98	0.00342147		2349.01	-0.00677093
229.2	0.08278946		759.19	0.01782043		1289.19	-0.0027932		1819.18	0.00332644		2349.21	-0.00749819
229.4	0.08376195		759.39	0.01773013		1289.39	-0.00355207		1819.38	0.00335971		2349.41	-0.00812913
229.6	0.08490144		759.59	0.01813875		1289.59	-0.00357259		1819.58	0.00402146		2349.61	-0.00800256
229.8	0.08547038		759.79	0.01806236		1289.79	-0.00417681		1819.78	0.00490019		2349.81	-0.00919647
230	0.08634601		759.99	0.01895729		1289.99	-0.00370574		1819.98	0.005532		2350.01	-0.00972845
230.2	0.08704536		760.19	0.01971587		1290.19	-0.00397258		1820.18	0.00467123		2350.21	-0.00942247
230.4	0.08806491		760.39	0.02039337		1290.39	-0.00436529		1820.38	0.00505155		2350.41	-0.00911161
230.6	0.08883574		760.59	0.02050024		1290.59	-0.00406237		1820.58	0.00532293		2350.61	-0.00927455
230.8	0.08934432		760.79	0.02141665		1290.79	-0.0050123		1820.78	0.00498946		2350.81	-0.00845758
231	0.08868907		760.99	0.0219655		1290.99	-0.00485142		1820.98	0.00355147		2351.01	-0.00845806
231.2	0.08905373		761.19	0.02169272		1291.19	-0.00442458		1821.18	0.00309024		2351.21	-0.00834626
231.4	0.08934386		761.39	0.02201131		1291.39	-0.00446532		1821.38	0.00264458		2351.41	-0.00762203
231.6	0.09004621		761.59	0.02150094		1291.59	-0.00457284		1821.58	0.00135824		2351.61	-0.00743306
231.8	0.09045154		761.79	0.02225571		1291.79	-0.00462613		1821.78	0.000201		2351.81	-0.00698079
232	0.09138318		761.99	0.02147098		1291.99	-0.00405221		1821.98	-0.00090172		2352.01	-0.00735022
232.2	0.09180621		762.19	0.02109404		1292.19	-0.00427275		1822.18	-0.00079731		2352.21	-0.00696524
232.4	0.09100464		762.39	0.02122279		1292.39	-0.00331683		1822.38	-0.00132209		2352.41	-0.00749302
232.6	0.09183658		762.59	0.02192678		1292.59	-0.00318842		1822.58	-0.00196204		2352.61	-0.00793474
232.8	0.09204735		762.79	0.02211224		1292.79	-0.00268695		1822.78	-0.00170201		2352.81	-0.00809031
233	0.09244362		762.99	0.02122346		1292.99	-0.00257522		1822.98	-0.00151679		2353.01	-0.00768264
233.2	0.09286066		763.19	0.02037796		1293.19	-0.00282833		1823.18	-0.00162982		2353.21	-0.00825933
233.4	0.09322643		763.39	0.02140283		1293.39	-0.00309183		1823.38	-0.0004614		2353.41	-0.00822773
233.6	0.09397566		763.59	0.02156674		1293.59	-0.00291642		1823.58	0.00019661		2353.61	-0.00843885
233.8	0.09350166		763.79	0.02202957		1293.79	-0.00287319		1823.78	0.00054065		2353.81	-0.00840598
234	0.09470567		763.99	0.02343386		1293.99	-0.00265962		1823.98	0.00118684		2354.01	-0.0077186
234.2	0.0949907		764.19	0.02403796		1294.19	-0.00239051		1824.18	0.00170624		2354.21	-0.00706896
234.4	0.09617335		764.39	0.02520875		1294.39	-0.00210144		1824.38	0.00352305		2354.41	-0.00652303
234.6	0.09725468		764.59	0.02519942		1294.59	-0.00188063		1824.58	0.0043227		2354.61	-0.0068554
234.8	0.09821727		764.79	0.02574304		1294.79	-0.00168995		1824.78	0.00463311		2354.81	-0.00697193
235	0.0976263		764.99	0.02514554		1294.99	-0.0012661		1824.98	0.0043063		2355.01	-0.00807059
235.2	0.09803607		765.19	0.02532589		1295.19	-0.00116658		1825.18	0.00400033		2355.21	-0.00775201
235.4	0.09816236		765.39	0.02608998		1295.39	-0.00195533		1825.38	0.00362357		2355.41	-0.00699526
235.6	0.09890436		765.59	0.02634363		1295.59	-0.00267672		1825.58	0.00252925		2355.61	-0.00723629
235.8	0.09872918		765.79	0.02672676		1295.79	-0.00257011		1825.78	0.00230848		2355.81	-0.00742423
236	0.09914171		765.99	0.02650647		1295.99	-0.00249646		1825.98	0.0021062		2356.01	-0.0083463
236.2	0.09958223		766.19	0.02661856		1296.19	-0.00275995		1826.18	0.00190692		2356.21	-0.00767418
236.4	0.09946099		766.39	0.02682896		1296.39	-0.00293384		1826.38	0.00170901		2356.41	-0.00830103
236.6	0.10112481		766.59	0.02734916		1296.59	-0.00297815		1826.58	0.00142442		2356.61	-0.00816597
236.8	0.10142406		766.79	0.02678077		1296.79	-0.00264401		1826.78	0.00195768		2356.81	-0.0077173
237	0.10317095		766.99	0.02597355		1296.99	-0.00289287		1826.98	0.00243392		2357.01	-0.00819057
237.2	0.10357949		767.19	0.02619979		1297.19	-0.00296775		1827.18	0.00263997		2357.21	-0.00836452
237.4	0.1039868		767.39	0.02692716		1297.39	-0.00286441		1827.38	0.00364334		2357.41	-0.00824754
237.6	0.10445617		767.59	0.02608891		1297.59	-0.00266204		1827.58	0.00386426		2357.61	-0.00835263
237.8	0.10416167		767.79	0.02619516		1297.79	-0.00311713		1827.78	0.00403078		2357.81	-0.00806949
238	0.10540483		767.99	0.02614467		1297.99	-0.00273281		1827.98	0.00443542		2358.01	-0.00800736
238.2	0.10609624		768.19	0.02586815		1298.19	-0.00198333		1828.18	0.0046827		2358.21	-0.00843156
238.4	0.10771263		768.39	0.02638481		1298.39	-0.00201095		1828.38	0.00547937		2358.41	-0.00848103
238.6	0.1086818		768.59	0.02556676		1298.59	-0.00205518		1828.58	0.0052331		2358.61	-0.00908784
238.8	0.10939478		768.79	0.02547329		1298.79	-0.00209411		1828.78	0.00441807		2358.81	-0.00978336
239	0.10803066		768.99	0.02574368		1298.99	-0.00302448		1828.98	0.00360296		2359.01	-0.00984203
239.2	0.10774563		769.19	0.02591344		1299.19	-0.00321951		1829.18	0.00322439		2359.21	-0.00989025
239.4	0.10753076		769.39	0.02647827		1299.39	-0.00391271		1829.38	0.00281053		2359.41	-0.01013689
239.6	0.10774691		769.59	0.02642681		1299.59	-0.00340811		1829.58	0.0026951		2359.61	-0.01028545
239.8	0.10718901		769.79	0.02697219		1299.79	-0.00317039		1829.78	0.00273709		2359.81	-0.01039428
240	0.10717597		769.99	0.02776958		1299.99	-0.00305412		1829.98	0.00253609		2360.01	-0.01112123
240.2	0.1081154		770.19	0.02920688		1300.19	-0.00338919		1830.18	0.00240219		2360.21	-0.01078354
240.4	0.10805896		770.39	0.02906398		1300.39	-0.00345278		1830.38	0.00270436		2360.41	-0.01119684
240.6	0.10857565		770.59	0.02884673		1300.59	-0.00359597		1830.58	0.00228383		2360.61	-0.0122085
240.8	0.10847874		770.79	0.02834752		1300.79	-0.00342795		1830.78	0.00235829		2360.81	-0.01260412
241	0.11022014		770.99	0.02766925		1300.99	-0.00414931		1830.98	0.00288534		2361.01	-0.01292634
241.2	0.11057694		771.19	0.02822745		1301.19	-0.00463245		1831.18	0.0026583		2361.21	-0.01309611
241.4	0.10992062		771.39	0.02780078		1301.39	-0.00456149		1831.38	0.00363388		2361.41	-0.01343852
241.6	0.11015109		771.59	0.02704469		1301.59	-0.0050406		1831.58	0.00393277		2361.61	-0.01368075
241.8	0.1102181		771.79	0.02645717		1301.79	-0.00533098		1831.78	0.0032017		2361.81	-0.01355543
242	0.11110374		771.99	0.02582957		1301.99	-0.00406458		1831.98	0.00317444		2362.01	-0.01314201
242.2	0.11159296		772.19	0.02518845		1302.19	-0.00402991		1832.18	0.00351271		2362.21	-0.01369455
242.4	0.11233028		772.39	0.02536405		1302.39	-0.00452749		1832.38	0.00373112		2362.41	-0.01331843
242.6	0.11233974		772.59	0.0252264		1302.59	-0.00495671		1832.58	0.00299582		2362.61	-0.01305596
242.8	0.11273535		772.79	0.02517048		1302.79	-0.0053141		1832.78	0.00296976		2362.81	-0.01301616
243	0.112785		772.99	0.02557404		1302.99	-0.00573232		1832.98	0.00353211		2363.01	-0.01244312
243.2	0.11314663		773.19	0.02528311		1303.19	-0.00527488		1833.18	0.00372618		2363.21	-0.01263137
243.4	0.1138164		773.39	0.02644723		1303.39	-0.00501663		1833.38	0.00366628		2363.41	-0.01184385
243.6	0.11399816		773.59	0.02695213		1303.59	-0.00475195		1833.58	0.00393439		2363.61	-0.01135569
243.8	0.11398259		773.79	0.0282683		1303.79	-0.00525209		1833.78	0.00356734		2363.81	-0.01129438
244	0.11490045		773.99	0.02844058		1303.99	-0.00479573		1833.98	0.00331697		2364.01	-0.01180984
244.2	0.11558664		774.19	0.02869965		1304.19	-0.00428268		1834.18	0.00287489		2364.21	-0.01164775
244.4	0.11592042		774.39	0.02843687		1304.39	-0.00462947		1834.38	0.00240422		2364.41	-0.01206409
244.6	0.11688942		774.59	0.02824219		1304.59	-0.00453926		1834.58	0.00259128		2364.61	-0.01245114
244.8	0.11778135		774.79	0.02846223		1304.79	-0.00486058		1834.78	0.00342701		2364.81	-0.01130573
245	0.11896316		774.99	0.02894124		1304.99	-0.00573913		1834.98	0.00408603		2365.01	-0.01075461
245.2	0.11883088		775.19	0.02979224		1305.19	-0.00609377		1835.18	0.00416913		2365.21	-0.0108928
245.4	0.1183547		775.39	0.03018412		1305.39	-0.00529748		1835.38	0.00448905		2365.41	-0.01095785
245.6	0.11919434		775.59	0.03055175		1305.59	-0.00550549		1835.58	0.00455451		2365.61	-0.01059721
245.8	0.11904054		775.79	0.03075628		1305.79	-0.00431353		1835.78	0.00391413		2365.81	-0.01092223
246	0.11845058		775.99	0.03119536		1305.99	-0.00392358		1835.98	0.00392811		2366.01	-0.01129762
246.2	0.1184266		776.19	0.03224699		1306.19	-0.00487497		1836.18	0.00391176		2366.21	-0.0118262
246.4	0.1187593		776.39	0.03270705		1306.39	-0.00543969		1836.38	0.00418125		2366.41	-0.01106128
246.6	0.11803287		776.59	0.03254537		1306.59	-0.00472853		1836.58	0.00416265		2366.61	-0.01159514
246.8	0.11859348		776.79	0.03252085		1306.79	-0.00472411		1836.78	0.00337973		2366.81	-0.01141551
247	0.1192549		776.99	0.03244468		1306.99	-0.00459737		1836.98	0.00337757		2367.01	-0.01192373
247.2	0.11949298		777.19	0.03207683		1307.19	-0.00458882		1837.18	0.0020764		2367.21	-0.01192566
247.4	0.1195614		777.39	0.03202372		1307.39	-0.00458097		1837.38	0.0014819		2367.41	-0.01240213
247.6	0.12087413		777.59	0.03204884		1307.59	-0.00501511		1837.58	0.00103248		2367.61	-0.01300021
247.8	0.12170573		777.79	0.0316264		1307.79	-0.00435977		1837.78	0.00048266		2367.81	-0.01252055
248	0.12193862		777.99	0.0311867		1307.99	-0.00340653		1837.98	-0.00017127		2368.01	-0.01229394
248.2	0.12233547		778.19	0.03096941		1308.19	-0.00291432		1838.18	-0.00052745		2368.21	-0.01218229
248.4	0.12317239		778.39	0.03110142		1308.39	-0.00277537		1838.38	-0.0012098		2368.41	-0.01184509
248.6	0.12399385		778.59	0.0299404		1308.59	-0.00298799		1838.58	-0.00075832		2368.61	-0.01085803
248.8	0.12424431		778.79	0.02988165		1308.79	-0.00367022		1838.78	-0.00042846		2368.81	-0.01016224
249	0.12460729		778.99	0.02977223		1308.99	-0.00374684		1838.98	-0.00038613		2369.01	-0.01040299
249.2	0.12454908		779.19	0.0299692		1309.19	-0.00319541		1839.18	-0.0002666		2369.21	-0.01012803
249.4	0.12459884		779.39	0.03044125		1309.39	-0.00298043		1839.38	0.00030919		2369.41	-0.01015995
249.6	0.12510394		779.59	0.03127157		1309.59	-0.00290402		1839.58	0.00104251		2369.61	-0.01004202
249.8	0.12452081		779.79	0.03146948		1309.79	-0.00271588		1839.78	0.00114238		2369.81	-0.01000093
250	0.12483134		779.99	0.03182957		1309.99	-0.0032789		1839.98	0.00189762		2370.01	-0.00987141
250.2	0.12469647		780.19	0.03201287		1310.19	-0.00367817		1840.18	0.00269468		2370.21	-0.00953182
250.4	0.12461224		780.39	0.03144281		1310.39	-0.00333374		1840.38	0.00294716		2370.41	-0.00918158
250.6	0.12459489		780.59	0.03140757		1310.59	-0.00203929		1840.58	0.00227641		2370.61	-0.01011276
250.8	0.12524504		780.79	0.03146809		1310.79	-0.00262891		1840.78	0.00209739		2370.81	-0.01021226
251	0.12509973		780.99	0.03116003		1310.99	-0.00305823		1840.98	0.00283517		2371.01	-0.01066881
251.2	0.12579286		781.19	0.03130279		1311.19	-0.00381237		1841.18	0.0028734		2371.21	-0.01069168
251.4	0.12690434		781.39	0.03205773		1311.39	-0.00417655		1841.38	0.004021		2371.41	-0.01134675
251.6	0.12817119		781.59	0.03231319		1311.59	-0.00467664		1841.58	0.00397214		2371.61	-0.01131562
251.8	0.12808195		781.79	0.0321566		1311.79	-0.00400745		1841.78	0.00365553		2371.81	-0.01037679
252	0.12862379		781.99	0.03223534		1311.99	-0.00364508		1841.98	0.00388418		2372.01	-0.01030915
252.2	0.13005626		782.19	0.03279507		1312.19	-0.00408754		1842.18	0.00365911		2372.21	-0.01047648
252.4	0.13181915		782.39	0.03255998		1312.39	-0.00405104		1842.38	0.00370481		2372.41	-0.01049101
252.6	0.13288885		782.59	0.03209664		1312.59	-0.00497764		1842.58	0.00360257		2372.61	-0.01031434
252.8	0.13331127		782.79	0.03243206		1312.79	-0.00514823		1842.78	0.00307108		2372.81	-0.00981441
253	0.1336095		782.99	0.03271638		1312.99	-0.00492538		1842.98	0.00243358		2373.01	-0.01100384
253.2	0.1335019		783.19	0.03284256		1313.19	-0.00467999		1843.18	0.00242922		2373.21	-0.0108008
253.4	0.13360235		783.39	0.03379479		1313.39	-0.00483673		1843.38	0.0021573		2373.41	-0.01147975
253.6	0.13406352		783.59	0.03413441		1313.59	-0.00375409		1843.58	0.00111129		2373.61	-0.01097485
253.8	0.13390752		783.79	0.03391801		1313.79	-0.00322712		1843.78	0.00055536		2373.81	-0.01109673
254	0.13327796		783.99	0.03463459		1313.99	-0.00277168		1843.98	-0.00007496		2374.01	-0.01102399
254.2	0.13264425		784.19	0.03511092		1314.19	-0.00260401		1844.18	-0.00094758		2374.21	-0.01028828
254.4	0.13329934		784.39	0.03526338		1314.39	-0.00239243		1844.38	-0.00111842		2374.41	-0.0106719
254.6	0.13313772		784.59	0.0358242		1314.59	-0.00268409		1844.58	-0.00046901		2374.61	-0.0113906
254.8	0.13292032		784.79	0.03552784		1314.79	-0.00304726		1844.78	0.00004554		2374.81	-0.01135145
255	0.13276234		784.99	0.03600349		1314.99	-0.00375382		1844.98	0.00015404		2375.01	-0.01131397
255.2	0.1331978		785.19	0.03653591		1315.19	-0.00414274		1845.18	0.00062602		2375.21	-0.0117135
255.4	0.13362073		785.39	0.03641659		1315.39	-0.00418629		1845.38	0.0013672		2375.41	-0.01206022
255.6	0.13322769		785.59	0.03563591		1315.59	-0.00501803		1845.58	0.0012187		2375.61	-0.01274467
255.8	0.13381147		785.79	0.03569504		1315.79	-0.00529545		1845.78	0.00124428		2375.81	-0.01281009
256	0.13430378		785.99	0.03543672		1315.99	-0.00578974		1845.98	0.00240785		2376.01	-0.01350706
256.2	0.13561092		786.19	0.03627971		1316.19	-0.00695537		1846.18	0.00268764		2376.21	-0.01384674
256.4	0.13639813		786.39	0.03500932		1316.39	-0.00712088		1846.38	0.00247766		2376.41	-0.01362523
256.6	0.13664051		786.59	0.03487062		1316.59	-0.00724906		1846.58	0.00074316		2376.61	-0.0124922
256.8	0.13740054		786.79	0.03511877		1316.79	-0.00648721		1846.78	0.00019437		2376.81	-0.01237982
257	0.13696822		786.99	0.03513302		1316.99	-0.00566618		1846.98	0.00022778		2377.01	-0.01272692
257.2	0.13742729		787.19	0.03562386		1317.19	-0.00435405		1847.18	0.00009492		2377.21	-0.0119389
257.4	0.13802468		787.39	0.03692946		1317.39	-0.00405114		1847.38	-0.00015049		2377.41	-0.0117486
257.6	0.1385618		787.59	0.03695005		1317.59	-0.00284521		1847.58	-0.00029199		2377.61	-0.01119228
257.8	0.13887316		787.79	0.03715681		1317.79	-0.00309047		1847.78	0.00018024		2377.81	-0.01136277
258	0.13961019		787.99	0.03802276		1317.99	-0.00270979		1847.98	-0.00041881		2378.01	-0.01151795
258.2	0.14108487		788.19	0.03810379		1318.19	-0.00297828		1848.18	0.0004266		2378.21	-0.01177863
258.4	0.14111661		788.39	0.03761924		1318.39	-0.00369426		1848.38	0.00159273		2378.41	-0.01230164
258.6	0.14157468		788.59	0.03735362		1318.59	-0.00354616		1848.58	0.0014112		2378.61	-0.01222138
258.8	0.14232469		788.79	0.03727044		1318.79	-0.0029461		1848.78	0.00065377		2378.81	-0.0114734
259	0.14268798		788.99	0.03757243		1318.99	-0.00331893		1848.98	0.00102944		2379.01	-0.01230611
259.2	0.14340373		789.19	0.03725832		1319.19	-0.00354354		1849.18	0.00172292		2379.21	-0.01311162
259.4	0.14448018		789.39	0.03684346		1319.39	-0.00361569		1849.38	0.00268063		2379.41	-0.01314735
259.6	0.14429356		789.59	0.03670939		1319.59	-0.00485822		1849.58	0.0026203		2379.61	-0.01337539
259.8	0.1449681		789.79	0.03783091		1319.79	-0.00587546		1849.78	0.00226329		2379.81	-0.01361536
260	0.14577068		789.99	0.037932		1319.99	-0.00588406		1849.98	0.00239705		2380.01	-0.01361956
260.2	0.14628967		790.19	0.03893251		1320.19	-0.00546014		1850.18	0.00217569		2380.21	-0.01327693
260.4	0.14658545		790.39	0.03856963		1320.39	-0.00472757		1850.38	0.00178574		2380.41	-0.01262959
260.6	0.1470108		790.59	0.0395083		1320.59	-0.00346806		1850.58	0.00154561		2380.61	-0.01196553
260.8	0.14740389		790.79	0.0399055		1320.79	-0.00183188		1850.78	0.00173985		2380.81	-0.01191059
261	0.14753248		790.99	0.04021006		1320.99	-0.00101041		1850.98	0.00163922		2381.01	-0.01096815
261.2	0.14851064		791.19	0.04107969		1321.19	-0.00041291		1851.18	0.00132715		2381.21	-0.01092634
261.4	0.14908242		791.39	0.04183784		1321.39	-0.00076377		1851.38	0.00185661		2381.41	-0.01133896
261.6	0.14968512		791.59	0.0411802		1321.59	-0.00094123		1851.58	0.00204112		2381.61	-0.01115129
261.8	0.14993118		791.79	0.04137586		1321.79	-0.00122291		1851.78	0.0019889		2381.81	-0.01200582
262	0.15030821		791.99	0.04228459		1321.99	-0.00140938		1851.98	0.0022738		2382.01	-0.01280693
262.2	0.14956688		792.19	0.0415367		1322.19	-0.00233242		1852.18	0.002667		2382.21	-0.01265185
262.4	0.14887907		792.39	0.04096003		1322.39	-0.00224736		1852.38	0.00195542		2382.41	-0.01286062
262.6	0.14936569		792.59	0.04088578		1322.59	-0.00194353		1852.58	0.00129226		2382.61	-0.01320297
262.8	0.14922679		792.79	0.0407656		1322.79	-0.00189491		1852.78	0.00138933		2382.81	-0.01274754
263	0.14931362		792.99	0.0402296		1322.99	-0.00196023		1852.98	0.00158129		2383.01	-0.012916
263.2	0.15013379		793.19	0.04097593		1323.19	-0.00199122		1853.18	0.00175723		2383.21	-0.01238147
263.4	0.14988723		793.39	0.04139384		1323.39	-0.00240038		1853.38	0.00184994		2383.41	-0.01183694
263.6	0.1499531		793.59	0.0404286		1323.59	-0.00406978		1853.58	0.00120271		2383.61	-0.01213448
263.8	0.15099537		793.79	0.04154943		1323.79	-0.00383083		1853.78	0.00139616		2383.81	-0.01275968
264	0.15147818		793.99	0.04134941		1323.99	-0.003344		1853.98	0.00141558		2384.01	-0.01265987
264.2	0.15043668		794.19	0.0418434		1324.19	-0.0030109		1854.18	0.00185247		2384.21	-0.01301045
264.4	0.15102744		794.39	0.04111782		1324.39	-0.00288834		1854.38	0.00138444		2384.41	-0.01245576
264.6	0.15111839		794.59	0.04106663		1324.59	-0.00269811		1854.58	0.00171773		2384.61	-0.01247009
264.8	0.15184551		794.79	0.04001772		1324.79	-0.00301139		1854.78	0.00148149		2384.81	-0.01231131
265	0.15168488		794.99	0.03971985		1324.99	-0.00356955		1854.98	0.00159778		2385.01	-0.01217479
265.2	0.15196109		795.19	0.04015819		1325.19	-0.00484925		1855.18	0.00034179		2385.21	-0.01283807
265.4	0.15187861		795.39	0.04071117		1325.39	-0.00519149		1855.38	0.00001448		2385.41	-0.01302609
265.6	0.15248992		795.59	0.03960615		1325.59	-0.00547363		1855.58	-0.00113765		2385.61	-0.01370127
265.8	0.15195522		795.79	0.03969118		1325.79	-0.00589245		1855.78	-0.00136358		2385.81	-0.01448909
266	0.15135471		795.99	0.03958311		1325.99	-0.00597416		1855.98	-0.00172132		2386.01	-0.01480678
266.2	0.15067888		796.19	0.03908555		1326.19	-0.00599342		1856.18	-0.00289929		2386.21	-0.01485744
266.4	0.15079244		796.39	0.03918773		1326.39	-0.00614023		1856.38	-0.00285824		2386.41	-0.01474379
266.6	0.15058353		796.59	0.04005432		1326.59	-0.00641604		1856.58	-0.0026657		2386.61	-0.01521186
266.8	0.15091144		796.79	0.04062113		1326.79	-0.00667122		1856.78	-0.00276208		2386.81	-0.01474921
267	0.1514296		796.99	0.04162019		1326.99	-0.00681069		1856.98	-0.0033734		2387.01	-0.01441544
267.2	0.15271043		797.19	0.04292714		1327.19	-0.00774017		1857.18	-0.00317237		2387.21	-0.01464607
267.4	0.15302544		797.39	0.04257362		1327.39	-0.00811583		1857.38	-0.00278674		2387.41	-0.01512452
267.6	0.15385275		797.59	0.04254091		1327.59	-0.00839775		1857.58	-0.00275093		2387.61	-0.01516829
267.8	0.1545368		797.79	0.0437566		1327.79	-0.00651107		1857.78	-0.00234936		2387.81	-0.01488086
268	0.15414689		797.99	0.04358896		1327.99	-0.00653476		1857.98	-0.00098066		2388.01	-0.01393925
268.2	0.15418221		798.19	0.04371937		1328.19	-0.0062848		1858.18	-0.00061037		2388.21	-0.01340411
268.4	0.15490389		798.39	0.04379633		1328.39	-0.0065466		1858.38	0.00035593		2388.41	-0.0126085
268.6	0.1557114		798.59	0.04437431		1328.59	-0.00647177		1858.58	0.00198782		2388.61	-0.01305054
268.8	0.15568149		798.79	0.04451352		1328.79	-0.00634204		1858.78	0.00183264		2388.81	-0.01317503
269	0.15538996		798.99	0.04589299		1328.99	-0.00598594		1858.98	0.00157528		2389.01	-0.01266505
269.2	0.15644295		799.19	0.04597259		1329.19	-0.00575917		1859.18	0.00102413		2389.21	-0.01257789
269.4	0.1571434		799.39	0.04527819		1329.39	-0.00538137		1859.38	0.00094803		2389.41	-0.0123354
269.6	0.15768344		799.59	0.04373436		1329.59	-0.00545306		1859.58	0.00050905		2389.61	-0.01281892
269.8	0.15716389		799.79	0.04348334		1329.79	-0.00581036		1859.78	0.00104738		2389.81	-0.01302159
270	0.15688609		799.99	0.0432961		1329.99	-0.00487063		1859.98	0.00068191		2390.01	-0.01254909
270.2	0.15683222		800.19	0.04339207		1330.19	-0.00545453		1860.18	0.0005172		2390.21	-0.01203925
270.4	0.15782868		800.39	0.0444688		1330.39	-0.0053159		1860.38	0.00147317		2390.41	-0.01163529
270.6	0.15823579		800.59	0.04559251		1330.59	-0.00450551		1860.58	0.0010746		2390.61	-0.01290265
270.8	0.15955492		800.79	0.04524636		1330.79	-0.00482183		1860.78	0.00032149		2390.81	-0.0129725
271	0.16013143		800.99	0.04502673		1330.99	-0.00470102		1860.98	0.00043565		2391.01	-0.01280594
271.2	0.16135416		801.19	0.04544963		1331.19	-0.00469384		1861.18	0.00022711		2391.21	-0.01327558
271.4	0.16195253		801.39	0.04469011		1331.39	-0.00368578		1861.38	0.00051348		2391.41	-0.01388798
271.6	0.16271924		801.59	0.0452874		1331.59	-0.00304078		1861.58	0.00063547		2391.61	-0.01374395
271.8	0.16393644		801.79	0.04530944		1331.79	-0.00239175		1861.78	0.00171761		2391.81	-0.01410476
272	0.16430891		801.99	0.04508467		1331.99	-0.00290071		1861.98	0.00284376		2392.01	-0.01405073
272.2	0.16475751		802.19	0.0457374		1332.19	-0.00321026		1862.18	0.00181754		2392.21	-0.01494476
272.4	0.16544841		802.39	0.04547633		1332.39	-0.00333799		1862.38	0.00245595		2392.41	-0.01519547
272.6	0.16567127		802.59	0.04591757		1332.59	-0.00341493		1862.58	0.00215368		2392.61	-0.01555032
272.8	0.1653524		802.79	0.04624198		1332.79	-0.00409636		1862.78	0.00175517		2392.81	-0.01599572
273	0.16573823		802.99	0.04594701		1332.99	-0.00438041		1862.98	0.00186983		2393.01	-0.01615644
273.2	0.16549835		803.19	0.0458786		1333.19	-0.00460076		1863.18	0.00229936		2393.21	-0.01615004
273.4	0.16551267		803.39	0.04536213		1333.39	-0.00526054		1863.38	0.00129748		2393.41	-0.01627102
273.6	0.164606		803.59	0.04435086		1333.59	-0.00522688		1863.58	0.00142966		2393.61	-0.01706229
273.8	0.16395833		803.79	0.04433172		1333.79	-0.00484344		1863.78	0.00097896		2393.81	-0.01645678
274	0.16321014		803.99	0.04447081		1333.99	-0.00447587		1863.98	0.00102366		2394.01	-0.01465648
274.2	0.16312462		804.19	0.04492985		1334.19	-0.00410387		1864.18	0.00143903		2394.21	-0.01398407
274.4	0.16360402		804.39	0.04509629		1334.39	-0.00366183		1864.38	0.00114307		2394.41	-0.0129197
274.6	0.163405		804.59	0.04434754		1334.59	-0.00308862		1864.58	0.00032723		2394.61	-0.01293617
274.8	0.16336632		804.79	0.04396134		1334.79	-0.00350862		1864.78	-0.0002236		2394.81	-0.01232418
275	0.1638122		804.99	0.04495246		1334.99	-0.00324918		1864.98	0.00060283		2395.01	-0.01266599
275.2	0.16423358		805.19	0.04590747		1335.19	-0.00261575		1865.18	0.00010736		2395.21	-0.01299607
275.4	0.16446872		805.39	0.04665457		1335.39	-0.00254683		1865.38	0.00021773		2395.41	-0.01331832
275.6	0.16547012		805.59	0.04803012		1335.59	-0.00295641		1865.58	0.00011279		2395.61	-0.01401177
275.8	0.16574005		805.79	0.04828408		1335.79	-0.00364837		1865.78	-0.00019		2395.81	-0.01442831
276	0.16520288		805.99	0.04896536		1335.99	-0.00366043		1865.98	-0.00115139		2396.01	-0.01413939
276.2	0.16512297		806.19	0.05015586		1336.19	-0.00473948		1866.18	-0.00183856		2396.21	-0.01440065
276.4	0.16557809		806.39	0.04985175		1336.39	-0.00501642		1866.38	-0.0017115		2396.41	-0.01436755
276.6	0.16464744		806.59	0.05106546		1336.59	-0.00528844		1866.58	-0.00229813		2396.61	-0.01388153
276.8	0.16471289		806.79	0.05093272		1336.79	-0.00586305		1866.78	-0.00257737		2396.81	-0.01462971
277	0.16510249		806.99	0.05040801		1336.99	-0.00573103		1866.98	-0.00269062		2397.01	-0.01446558
277.2	0.16517679		807.19	0.05094278		1337.19	-0.00567227		1867.18	-0.00268526		2397.21	-0.01436685
277.4	0.16543726		807.39	0.04975557		1337.39	-0.00563898		1867.38	-0.00298451		2397.41	-0.01469749
277.6	0.1655866		807.59	0.04874212		1337.59	-0.00541365		1867.58	-0.00291195		2397.61	-0.01455757
277.8	0.16600769		807.79	0.04896917		1337.79	-0.00533463		1867.78	-0.00293743		2397.81	-0.01438282
278	0.16658639		807.99	0.04875637		1337.99	-0.00515599		1867.98	-0.00270669		2398.01	-0.01452408
278.2	0.16783413		808.19	0.04865448		1338.19	-0.00399236		1868.18	-0.00236435		2398.21	-0.01436398
278.4	0.16942887		808.39	0.04752975		1338.39	-0.00405185		1868.38	-0.00263903		2398.41	-0.01470771
278.6	0.16980833		808.59	0.04732317		1338.59	-0.00303848		1868.58	-0.00267117		2398.61	-0.01527557
278.8	0.17034419		808.79	0.04751665		1338.79	-0.00251816		1868.78	-0.00231471		2398.81	-0.01635022
279	0.17125613		808.99	0.04860937		1338.99	-0.00214689		1868.98	-0.0015749		2399.01	-0.01759039
279.2	0.17168897		809.19	0.0489236		1339.19	-0.00223645		1869.18	-0.00186665		2399.21	-0.01804574
279.4	0.17199653		809.39	0.04972654		1339.39	-0.00319442		1869.38	-0.00183809		2399.41	-0.01815008
279.6	0.17246757		809.59	0.05012342		1339.59	-0.00367734		1869.58	-0.00188617		2399.61	-0.01887309
279.8	0.1715003		809.79	0.05052272		1339.79	-0.00424882		1869.78	-0.00253267		2399.81	-0.01867435
280	0.17151178		809.99	0.05130504		1339.99	-0.00481092		1869.98	-0.00261849		2400.01	-0.018941
280.2	0.17108158		810.19	0.05075499		1340.19	-0.00552612		1870.18	-0.00187253		2400.21	-0.0190215
280.4	0.17048685		810.39	0.05033003		1340.39	-0.00539471		1870.38	-0.00160595		2400.41	-0.01898568
280.6	0.17035252		810.59	0.05061983		1340.59	-0.00579143		1870.58	-0.00125957		2400.61	-0.01876676
280.8	0.17081131		810.79	0.05035152		1340.79	-0.00610703		1870.78	-0.0014847		2400.81	-0.018531
281	0.17010848		810.99	0.0506665		1340.99	-0.00566001		1870.98	-0.00074257		2401.01	-0.01751085
281.2	0.17040839		811.19	0.05169046		1341.19	-0.00544507		1871.18	-0.00038263		2401.21	-0.01775155
281.4	0.17027929		811.39	0.05157217		1341.39	-0.00584877		1871.38	-0.00016228		2401.41	-0.01727108
281.6	0.17058792		811.59	0.05204428		1341.59	-0.00600352		1871.58	-0.00037978		2401.61	-0.01629295
281.8	0.17067103		811.79	0.05243053		1341.79	-0.0065132		1871.78	0.00073249		2401.81	-0.01658297
282	0.17108418		811.99	0.05224027		1341.99	-0.00621774		1871.98	0.00104069		2402.01	-0.01532373
282.2	0.17177316		812.19	0.05223172		1342.19	-0.00544012		1872.18	0.00210889		2402.21	-0.01452545
282.4	0.17223291		812.39	0.0518333		1342.39	-0.00487001		1872.38	0.00302978		2402.41	-0.01368241
282.6	0.17192439		812.59	0.05236745		1342.59	-0.00399963		1872.58	0.00323369		2402.61	-0.0127093
282.8	0.17237455		812.79	0.05295079		1342.79	-0.00401821		1872.78	0.00394151		2402.81	-0.01234026
283	0.17286931		812.99	0.05374054		1342.99	-0.00411557		1872.98	0.00396344		2403.01	-0.0120671
283.2	0.17333008		813.19	0.05379111		1343.19	-0.00365548		1873.18	0.00391849		2403.21	-0.0121224
283.4	0.17347126		813.39	0.05401652		1343.39	-0.00380607		1873.38	0.00398597		2403.41	-0.01153693
283.6	0.17439981		813.59	0.05344209		1343.59	-0.00386077		1873.58	0.00381368		2403.61	-0.01263929
283.8	0.17439414		813.79	0.05285642		1343.79	-0.00481486		1873.78	0.00290929		2403.81	-0.01330522
284	0.17458059		813.99	0.05253735		1343.99	-0.00455567		1873.98	0.00242884		2404.01	-0.01384323
284.2	0.17424048		814.19	0.05211671		1344.19	-0.00466434		1874.18	0.00249272		2404.21	-0.0141536
284.4	0.1743655		814.39	0.05220705		1344.39	-0.004548		1874.38	0.00189364		2404.41	-0.0155233
284.6	0.17528416		814.59	0.05249192		1344.59	-0.00458674		1874.58	0.00157529		2404.61	-0.01630749
284.8	0.17541375		814.79	0.05292433		1344.79	-0.00331995		1874.78	0.00016148		2404.81	-0.01575605
285	0.17496474		814.99	0.05360832		1344.99	-0.00320782		1874.98	0.00017753		2405.01	-0.01661657
285.2	0.17688001		815.19	0.05384331		1345.19	-0.00348165		1875.18	-0.00037307		2405.21	-0.01663344
285.4	0.17671158		815.39	0.05319705		1345.39	-0.00387172		1875.38	-0.00110364		2405.41	-0.01627244
285.6	0.17640102		815.59	0.05318093		1345.59	-0.00459263		1875.58	-0.00208388		2405.61	-0.01533646
285.8	0.17685806		815.79	0.05262954		1345.79	-0.00480135		1875.78	-0.00106921		2405.81	-0.0154279
286	0.1772727		815.99	0.05265871		1345.99	-0.00503271		1875.98	-0.00121907		2406.01	-0.01550724
286.2	0.17763585		816.19	0.05279782		1346.19	-0.00409679		1876.18	0.00019293		2406.21	-0.01585878
286.4	0.17773022		816.39	0.05335599		1346.39	-0.00410925		1876.38	0.00107303		2406.41	-0.01519534
286.6	0.17749396		816.59	0.0533461		1346.59	-0.00413864		1876.58	0.00171718		2406.61	-0.01493725
286.8	0.17737216		816.79	0.05346754		1346.79	-0.00424022		1876.78	0.0024055		2406.81	-0.01456909
287	0.17745801		816.99	0.05321383		1346.99	-0.00394773		1876.98	0.00187288		2407.01	-0.01460297
287.2	0.17778297		817.19	0.05313681		1347.19	-0.00377972		1877.18	0.00191757		2407.21	-0.0145072
287.4	0.17814317		817.39	0.05309322		1347.39	-0.0047795		1877.38	0.00152838		2407.41	-0.01493622
287.6	0.17900664		817.59	0.05244697		1347.59	-0.0053577		1877.58	0.00084409		2407.61	-0.01581673
287.8	0.17841509		817.79	0.05342321		1347.79	-0.00589917		1877.78	-0.00009958		2407.81	-0.01643234
288	0.17787061		817.99	0.05415318		1347.99	-0.00504874		1877.98	-0.00042481		2408.01	-0.01671714
288.2	0.17803612		818.19	0.05356529		1348.19	-0.00478874		1878.18	-0.00041966		2408.21	-0.01740035
288.4	0.17842323		818.39	0.05386411		1348.39	-0.00410157		1878.38	-0.00090141		2408.41	-0.01773284
288.6	0.18004922		818.59	0.05431514		1348.59	-0.00390466		1878.58	-0.00108077		2408.61	-0.01751546
288.8	0.18060844		818.79	0.05514155		1348.79	-0.00265884		1878.78	-0.0021075		2408.81	-0.01676016
289	0.18122328		818.99	0.05600349		1348.99	-0.00350175		1878.98	-0.00203126		2409.01	-0.0167932
289.2	0.18240734		819.19	0.0566259		1349.19	-0.00346538		1879.18	-0.00207863		2409.21	-0.01651871
289.4	0.18158699		819.39	0.05678909		1349.39	-0.00357557		1879.38	-0.00238331		2409.41	-0.01672342
289.6	0.18161898		819.59	0.05673873		1349.59	-0.00323357		1879.58	-0.0024394		2409.61	-0.01614202
289.8	0.1823654		819.79	0.05639282		1349.79	-0.00313523		1879.78	-0.00106288		2409.81	-0.01698547
290	0.18259945		819.99	0.0563261		1349.99	-0.00319829		1879.98	-0.00081741		2410.01	-0.01754542
290.2	0.18246721		820.19	0.055725		1350.19	-0.002919		1880.18	0.0001755		2410.21	-0.01772778
290.4	0.18261737		820.39	0.0555367		1350.39	-0.00377608		1880.38	0.00060725		2410.41	-0.01701497
290.6	0.18247481		820.59	0.05525381		1350.59	-0.00310975		1880.58	0.00131954		2410.61	-0.0162886
290.8	0.18287567		820.79	0.0548205		1350.79	-0.00248936		1880.78	0.00187671		2410.81	-0.01578499
291	0.18344688		820.99	0.05467303		1350.99	-0.00206389		1880.98	0.00110282		2411.01	-0.01528669
291.2	0.18454203		821.19	0.05467083		1351.19	-0.00175109		1881.18	0.00145687		2411.21	-0.01546611
291.4	0.18420959		821.39	0.05451505		1351.39	-0.00290111		1881.38	0.00138507		2411.41	-0.01581277
291.6	0.18454343		821.59	0.0546366		1351.59	-0.00288362		1881.58	0.00139752		2411.61	-0.0153037
291.8	0.18425979		821.79	0.05537027		1351.79	-0.00316863		1881.78	0.00119102		2411.81	-0.01604358
292	0.18441628		821.99	0.05543187		1351.99	-0.00303806		1881.98	0.00049867		2412.01	-0.01634953
292.2	0.18512403		822.19	0.05544209		1352.19	-0.00292513		1882.18	0.00044287		2412.21	-0.01661469
292.4	0.18559275		822.39	0.05687851		1352.39	-0.00329285		1882.38	-0.0002534		2412.41	-0.01636487
292.6	0.18613548		822.59	0.05703503		1352.59	-0.00388631		1882.58	-0.00038394		2412.61	-0.01566349
292.8	0.1859115		822.79	0.0578877		1352.79	-0.00496836		1882.78	-0.00131246		2412.81	-0.01580521
293	0.18624998		822.99	0.05863581		1352.99	-0.00593742		1882.98	-0.00172111		2413.01	-0.01675146
293.2	0.18677463		823.19	0.0592896		1353.19	-0.00582972		1883.18	-0.00241883		2413.21	-0.01725659
293.4	0.18661918		823.39	0.05937602		1353.39	-0.00557006		1883.38	-0.00252965		2413.41	-0.0169377
293.6	0.18718731		823.59	0.05963572		1353.59	-0.00528246		1883.58	-0.00211792		2413.61	-0.01732665
293.8	0.1879696		823.79	0.05924166		1353.79	-0.00564966		1883.78	-0.00141015		2413.81	-0.01781548
294	0.18812977		823.99	0.05896121		1353.99	-0.00528607		1883.98	-0.00139823		2414.01	-0.01847821
294.2	0.18890937		824.19	0.05954281		1354.19	-0.00551696		1884.18	-0.0009026		2414.21	-0.01802226
294.4	0.18978589		824.39	0.05949576		1354.39	-0.00501382		1884.38	-0.00016718		2414.41	-0.01730922
294.6	0.19058125		824.59	0.05984947		1354.59	-0.00301673		1884.58	-0.00005948		2414.61	-0.01650673
294.8	0.1907412		824.79	0.05958508		1354.79	-0.00283201		1884.78	0.00084353		2414.81	-0.01650263
295	0.19130385		824.99	0.06000661		1354.99	-0.00242944		1884.98	0.00130839		2415.01	-0.01670105
295.2	0.1918457		825.19	0.05937161		1355.19	-0.00253879		1885.18	0.00190858		2415.21	-0.01729291
295.4	0.19093001		825.39	0.05906603		1355.39	-0.00349034		1885.38	0.00150125		2415.41	-0.0173303
295.6	0.191298		825.59	0.0592883		1355.59	-0.00194597		1885.58	0.00187458		2415.61	-0.01802156
295.8	0.19128604		825.79	0.05833973		1355.79	-0.00236298		1885.78	0.00127691		2415.81	-0.01859893
296	0.19131281		825.99	0.05843607		1355.99	-0.00237549		1885.98	0.0010858		2416.01	-0.01897456
296.2	0.19077291		826.19	0.05833069		1356.19	-0.00264115		1886.18	0.0010602		2416.21	-0.01900912
296.4	0.19002527		826.39	0.05738215		1356.39	-0.00298505		1886.38	0.00031972		2416.41	-0.01837811
296.6	0.19059442		826.59	0.05729178		1356.59	-0.0034004		1886.58	0.00046563		2416.61	-0.01860135
296.8	0.19084422		826.79	0.05701392		1356.79	-0.00398685		1886.78	-0.00011376		2416.81	-0.01917025
297	0.19142025		826.99	0.05698776		1356.99	-0.00369913		1886.98	-0.0008376		2417.01	-0.01926501
297.2	0.19207854		827.19	0.05719986		1357.19	-0.00423313		1887.18	-0.00062041		2417.21	-0.01865936
297.4	0.19192127		827.39	0.05804247		1357.39	-0.00480459		1887.38	-0.0000272		2417.41	-0.01760248
297.6	0.19192139		827.59	0.05843255		1357.59	-0.00556676		1887.58	-0.00022156		2417.61	-0.01768319
297.8	0.19207648		827.79	0.05831489		1357.79	-0.00612376		1887.78	-0.00067671		2417.81	-0.01715776
298	0.19213193		827.99	0.05861649		1357.99	-0.00632334		1887.98	-0.00088207		2418.01	-0.01670616
298.2	0.19258531		828.19	0.05925776		1358.19	-0.00693881		1888.18	-0.00145753		2418.21	-0.01627009
298.4	0.19295173		828.39	0.05952479		1358.39	-0.00725643		1888.38	-0.00123241		2418.41	-0.01635249
298.6	0.19296446		828.59	0.06035605		1358.59	-0.00699932		1888.58	-0.00145946		2418.61	-0.01617798
298.8	0.19241527		828.79	0.06053114		1358.79	-0.008082		1888.78	-0.00050365		2418.81	-0.0166571
299	0.19310029		828.99	0.06057645		1358.99	-0.00722086		1888.98	0.00014066		2419.01	-0.01752871
299.2	0.19290363		829.19	0.06040553		1359.19	-0.00750904		1889.18	-0.00008133		2419.21	-0.01741839
299.4	0.19319151		829.39	0.06055575		1359.39	-0.00708366		1889.38	-0.00025154		2419.41	-0.01772988
299.6	0.19363687		829.59	0.06064923		1359.59	-0.00571363		1889.58	0.00058209		2419.61	-0.01812697
299.8	0.19444332		829.79	0.06012882		1359.79	-0.00582974		1889.78	0.00012733		2419.81	-0.01752734
300	0.19541071		829.99	0.06068218		1359.99	-0.00538495		1889.98	0.00095717		2420.01	-0.01809271
300.2	0.195288		830.19	0.0601879		1360.19	-0.00483464		1890.18	0.00036219		2420.21	-0.01757084
300.4	0.19550393		830.39	0.05937564		1360.39	-0.00352651		1890.38	-0.00008074		2420.41	-0.01693102
300.6	0.19634795		830.59	0.06027356		1360.59	-0.00284351		1890.58	0.00027351		2420.61	-0.01653742
300.8	0.19611263		830.79	0.06021385		1360.79	-0.00312797		1890.78	-0.00032237		2420.81	-0.01558252
301	0.1963576		830.99	0.06054728		1360.99	-0.0035355		1890.98	-0.00003103		2421.01	-0.01540635
301.2	0.19662639		831.19	0.06146254		1361.19	-0.00365022		1891.18	0.00054667		2421.21	-0.01460035
301.4	0.19591112		831.39	0.06202415		1361.39	-0.00355904		1891.38	0.00070777		2421.41	-0.01416258
301.6	0.1958778		831.59	0.06171976		1361.59	-0.00353369		1891.58	0.00050785		2421.61	-0.01387831
301.8	0.19525431		831.79	0.06112316		1361.79	-0.00400742		1891.78	0.00035172		2421.81	-0.01333887
302	0.19527093		831.99	0.06108035		1361.99	-0.00385316		1891.98	0.00019596		2422.01	-0.01380681
302.2	0.19512222		832.19	0.06072732		1362.19	-0.00438567		1892.18	0.00013508		2422.21	-0.01467988
302.4	0.19567558		832.39	0.06078773		1362.39	-0.00468646		1892.38	0.00124981		2422.41	-0.01538956
302.6	0.19510036		832.59	0.06149641		1362.59	-0.00506763		1892.58	0.00107857		2422.61	-0.01632823
302.8	0.19516141		832.79	0.06146425		1362.79	-0.00592648		1892.78	0.00140345		2422.81	-0.01703447
303	0.19544259		832.99	0.06135958		1362.99	-0.00551913		1892.98	0.00129676		2423.01	-0.01736847
303.2	0.19559236		833.19	0.06206124		1363.19	-0.00643857		1893.18	0.00139828		2423.21	-0.0167542
303.4	0.19595722		833.39	0.06241609		1363.39	-0.00617459		1893.38	0.00054476		2423.41	-0.01858841
303.6	0.1965743		833.59	0.06218474		1363.59	-0.00575194		1893.58	0.0003835		2423.61	-0.01888188
303.8	0.1974481		833.79	0.06199322		1363.79	-0.00572941		1893.78	-0.0003134		2423.81	-0.01897606
304	0.19756833		833.99	0.0621619		1363.99	-0.00618086		1893.98	-0.00081364		2424.01	-0.01840616
304.2	0.19761523		834.19	0.06160604		1364.19	-0.0056874		1894.18	-0.00185052		2424.21	-0.01812171
304.4	0.19718083		834.39	0.06160227		1364.39	-0.00604492		1894.38	-0.00252602		2424.41	-0.01818471
304.6	0.1967202		834.59	0.06228749		1364.59	-0.0059923		1894.58	-0.00217282		2424.61	-0.01775848
304.8	0.19642426		834.79	0.06275405		1364.79	-0.00603044		1894.78	-0.00244584		2424.81	-0.01809386
305	0.19665279		834.99	0.06249672		1364.99	-0.00496795		1894.98	-0.00247544		2425.01	-0.01768291
305.2	0.19623262		835.19	0.06246768		1365.19	-0.00396671		1895.18	-0.00225097		2425.21	-0.01803015
305.4	0.19613309		835.39	0.0621959		1365.39	-0.0039203		1895.38	-0.00178017		2425.41	-0.01770949
305.6	0.19678088		835.59	0.061727		1365.59	-0.00338817		1895.58	-0.00197453		2425.61	-0.01709555
305.8	0.19722507		835.79	0.06118379		1365.79	-0.00360573		1895.78	-0.00207598		2425.81	-0.01727753
306	0.19779356		835.99	0.06111776		1365.99	-0.00367014		1895.98	-0.00148211		2426.01	-0.01801426
306.2	0.19866403		836.19	0.06071674		1366.19	-0.00391396		1896.18	0.0000313		2426.21	-0.01750596
306.4	0.19951124		836.39	0.06125689		1366.39	-0.00422692		1896.38	0.00037272		2426.41	-0.01810859
306.6	0.2003871		836.59	0.06216227		1366.59	-0.0049253		1896.58	0.00050042		2426.61	-0.01799478
306.8	0.20041649		836.79	0.06183697		1366.79	-0.00547661		1896.78	0.00003723		2426.81	-0.01780899
307	0.20096718		836.99	0.06233927		1366.99	-0.00498093		1896.98	0.00003378		2427.01	-0.01668586
307.2	0.20105171		837.19	0.06334928		1367.19	-0.00556695		1897.18	-0.00021739		2427.21	-0.01786409
307.4	0.20095755		837.39	0.0635579		1367.39	-0.00493189		1897.38	-0.00053097		2427.41	-0.01942831
307.6	0.20106798		837.59	0.06365995		1367.59	-0.00518839		1897.58	-0.00101139		2427.61	-0.01892495
307.8	0.20185701		837.79	0.06482233		1367.79	-0.00503248		1897.78	-0.00059873		2427.81	-0.0188008
308	0.20255482		837.99	0.06513872		1367.99	-0.00501951		1897.98	-0.00057349		2428.01	-0.01936141
308.2	0.20336283		838.19	0.06550999		1368.19	-0.00517051		1898.18	-0.00047718		2428.21	-0.02017584
308.4	0.20256379		838.39	0.06631254		1368.39	-0.0050497		1898.38	-0.00106704		2428.41	-0.02013695
308.6	0.20294677		838.59	0.06698307		1368.59	-0.0038299		1898.58	-0.00162212		2428.61	-0.01936201
308.8	0.20254809		838.79	0.0667055		1368.79	-0.00350723		1898.78	-0.0022836		2428.81	-0.0194883
309	0.20316629		838.99	0.06687032		1368.99	-0.00269324		1898.98	-0.00272481		2429.01	-0.0192054
309.2	0.20305275		839.19	0.06723181		1369.19	-0.00314176		1899.18	-0.00289596		2429.21	-0.01973932
309.4	0.20363991		839.39	0.06739902		1369.39	-0.00351906		1899.38	-0.00297336		2429.41	-0.01940309
309.6	0.20347622		839.59	0.06743787		1369.59	-0.00265452		1899.58	-0.00299825		2429.61	-0.01929345
309.8	0.20380367		839.79	0.0664447		1369.79	-0.00303995		1899.78	-0.0026274		2429.81	-0.01907342
310	0.20395932		839.99	0.0659738		1369.99	-0.00346605		1899.98	-0.00194421		2430.01	-0.01890898
310.2	0.20464661		840.19	0.06573884		1370.19	-0.00332496		1900.18	-0.00201036		2430.21	-0.01836452
310.4	0.2050796		840.39	0.06550232		1370.39	-0.00347617		1900.38	-0.00204161		2430.41	-0.01803118
310.6	0.20538503		840.59	0.06566434		1370.59	-0.00374788		1900.58	-0.00201169		2430.61	-0.01720283
310.8	0.20505565		840.79	0.06564782		1370.79	-0.00452638		1900.78	-0.00214307		2430.81	-0.01709146
311	0.20442753		840.99	0.06564863		1370.99	-0.00434754		1900.98	-0.00161031		2431.01	-0.01706897
311.2	0.20368246		841.19	0.06595035		1371.19	-0.00480077		1901.18	-0.00169311		2431.21	-0.01798399
311.4	0.20414702		841.39	0.06646742		1371.39	-0.00490803		1901.38	-0.00127548		2431.41	-0.01766797
311.6	0.20406965		841.59	0.06600015		1371.59	-0.0051601		1901.58	-0.00100818		2431.61	-0.01723442
311.8	0.20584392		841.79	0.06645676		1371.79	-0.00487168		1901.78	-0.00008045		2431.81	-0.01703976
312	0.20702973		841.99	0.06540597		1371.99	-0.00527651		1901.98	0.00046213		2432.01	-0.01834769
312.2	0.2078517		842.19	0.06562017		1372.19	-0.00566385		1902.18	0.000333		2432.21	-0.01860598
312.4	0.20836111		842.39	0.06560072		1372.39	-0.00490518		1902.38	-0.00007751		2432.41	-0.01761451
312.6	0.20872648		842.59	0.06526182		1372.59	-0.00530332		1902.58	-0.00064325		2432.61	-0.01778901
312.8	0.20862267		842.79	0.06538389		1372.79	-0.00513669		1902.78	-0.00142481		2432.81	-0.01803009
313	0.20979709		842.99	0.06619611		1372.99	-0.00433956		1902.98	-0.00253066		2433.01	-0.01845576
313.2	0.20935435		843.19	0.06702386		1373.19	-0.00452489		1903.18	-0.00383623		2433.21	-0.01883522
313.4	0.20944429		843.39	0.06772098		1373.39	-0.00386312		1903.38	-0.00408253		2433.41	-0.01901624
313.6	0.20964923		843.59	0.06752192		1373.59	-0.00307317		1903.58	-0.00450776		2433.61	-0.01987206
313.8	0.21052038		843.79	0.06717539		1373.79	-0.00336874		1903.78	-0.00466106		2433.81	-0.02107896
314	0.21071504		843.99	0.06731994		1373.99	-0.00390855		1903.98	-0.00431459		2434.01	-0.02187059
314.2	0.21065784		844.19	0.06710663		1374.19	-0.00359057		1904.18	-0.00443855		2434.21	-0.02206784
314.4	0.21059113		844.39	0.06698937		1374.39	-0.00335373		1904.38	-0.00380893		2434.41	-0.0213737
314.6	0.21021779		844.59	0.06766558		1374.59	-0.00381158		1904.58	-0.00331791		2434.61	-0.02127415
314.8	0.20956933		844.79	0.06835259		1374.79	-0.00470295		1904.78	-0.00213168		2434.81	-0.02200805
315	0.20824618		844.99	0.06874897		1374.99	-0.00494025		1904.98	-0.00185665		2435.01	-0.02217638
315.2	0.20770476		845.19	0.06850309		1375.19	-0.00454809		1905.18	-0.00205235		2435.21	-0.02193615
315.4	0.20830871		845.39	0.06821912		1375.39	-0.00497496		1905.38	-0.00096207		2435.41	-0.02152793
315.6	0.20822023		845.59	0.06807321		1375.59	-0.00447332		1905.58	0.00018775		2435.61	-0.02108893
315.8	0.20942229		845.79	0.06835792		1375.79	-0.0046384		1905.78	0.00106664		2435.81	-0.02136676
316	0.21018842		845.99	0.06777906		1375.99	-0.00523		1905.98	0.00170842		2436.01	-0.02186634
316.2	0.20973818		846.19	0.06749618		1376.19	-0.00463347		1906.18	0.0009313		2436.21	-0.02126168
316.4	0.21019865		846.39	0.06751501		1376.39	-0.00427634		1906.38	0.00112134		2436.41	-0.02047258
316.6	0.21041365		846.59	0.06727542		1376.59	-0.00424962		1906.58	0.0001298		2436.61	-0.02109996
316.8	0.21105595		846.79	0.0680024		1376.79	-0.00309158		1906.78	-0.0008185		2436.81	-0.02078872
317	0.21170234		846.99	0.06841519		1376.99	-0.00274619		1906.98	-0.00146624		2437.01	-0.02122264
317.2	0.21130075		847.19	0.06963911		1377.19	-0.002568		1907.18	-0.00196741		2437.21	-0.02088521
317.4	0.21158516		847.39	0.06931928		1377.39	-0.00254114		1907.38	-0.00276877		2437.41	-0.02100183
317.6	0.21173181		847.59	0.06892752		1377.59	-0.00289374		1907.58	-0.00287738		2437.61	-0.02283295
317.8	0.21137305		847.79	0.06845676		1377.79	-0.00358358		1907.78	-0.00187983		2437.81	-0.02299145
318	0.21128936		847.99	0.06844562		1377.99	-0.00506219		1907.98	-0.00181379		2438.01	-0.02279583
318.2	0.21088214		848.19	0.06856276		1378.19	-0.00477526		1908.18	-0.00156203		2438.21	-0.02170015
318.4	0.21132428		848.39	0.0685676		1378.39	-0.00582554		1908.38	-0.00077367		2438.41	-0.02099463
318.6	0.21130209		848.59	0.06962179		1378.59	-0.00649978		1908.58	-0.00011267		2438.61	-0.02173294
318.8	0.21059726		848.79	0.06959563		1378.79	-0.00698655		1908.78	-0.00002857		2438.81	-0.02206846
319	0.2098071		848.99	0.06952502		1378.99	-0.00740623		1908.98	-0.00070888		2439.01	-0.02139407
319.2	0.20991203		849.19	0.06912943		1379.19	-0.00734005		1909.18	-0.00079338		2439.21	-0.02100039
319.4	0.21114671		849.39	0.06998246		1379.39	-0.00773845		1909.38	-0.00016518		2439.41	-0.01982209
319.6	0.21136482		849.59	0.07097264		1379.59	-0.00753985		1909.58	0.00003701		2439.61	-0.01990732
319.8	0.21166209		849.79	0.07118436		1379.79	-0.00793127		1909.78	-0.00007036		2439.81	-0.01996308
320	0.21273479		849.99	0.07086201		1379.99	-0.00751223		1909.98	-0.00038696		2440.01	-0.01934641
320.2	0.21276052		850.19	0.07083409		1380.19	-0.00651413		1910.18	-0.00051985		2440.21	-0.01914464
320.4	0.21404599		850.39	0.07080027		1380.39	-0.00666037		1910.38	-0.00063463		2440.41	-0.01897734
320.6	0.21445562		850.59	0.07131845		1380.59	-0.00562557		1910.58	-0.00184829		2440.61	-0.01847069
320.8	0.21451643		850.79	0.07163342		1380.79	-0.00428061		1910.78	-0.00231086		2440.81	-0.01791389
321	0.21501718		850.99	0.07218103		1380.99	-0.00317613		1910.98	-0.00325136		2441.01	-0.01820215
321.2	0.21452084		851.19	0.07276137		1381.19	-0.00282336		1911.18	-0.00380616		2441.21	-0.01758101
321.4	0.21452916		851.39	0.07217289		1381.39	-0.003121		1911.38	-0.00412364		2441.41	-0.01817717
321.6	0.2142058		851.59	0.0725717		1381.59	-0.00360486		1911.58	-0.00387345		2441.61	-0.01935407
321.8	0.21433674		851.79	0.07309345		1381.79	-0.00436228		1911.78	-0.00403466		2441.81	-0.0191979
322	0.21442402		851.99	0.07327594		1381.99	-0.00486706		1911.98	-0.00488713		2442.01	-0.01950226
322.2	0.21442514		852.19	0.07304937		1382.19	-0.00448827		1912.18	-0.00377936		2442.21	-0.01920418
322.4	0.21508737		852.39	0.07291055		1382.39	-0.00521701		1912.38	-0.00340939		2442.41	-0.01938283
322.6	0.21439608		852.59	0.07311939		1382.59	-0.00439354		1912.58	-0.0037486		2442.61	-0.02025905
322.8	0.21390835		852.79	0.072323		1382.79	-0.00500795		1912.78	-0.00381832		2442.81	-0.02070722
323	0.2143978		852.99	0.07279466		1382.99	-0.00542381		1912.98	-0.00311877		2443.01	-0.02001615
323.2	0.21503373		853.19	0.07326562		1383.19	-0.00465449		1913.18	-0.00200449		2443.21	-0.01996659
323.4	0.21558994		853.39	0.07382626		1383.39	-0.00450784		1913.38	-0.0011632		2443.41	-0.02014349
323.6	0.21649815		853.59	0.07372696		1383.59	-0.00481494		1913.58	-0.00039742		2443.61	-0.02123316
323.8	0.21742229		853.79	0.07318696		1383.79	-0.00497109		1913.78	-0.00074129		2443.81	-0.0212005
324	0.2192099		853.99	0.07242013		1383.99	-0.00475538		1913.98	-0.00029233		2444.01	-0.02112397
324.2	0.21899788		854.19	0.07258225		1384.19	-0.00471581		1914.18	-0.0003548		2444.21	-0.02036167
324.4	0.21941885		854.39	0.07291604		1384.39	-0.00415214		1914.38	-0.00035507		2444.41	-0.01975612
324.6	0.21920267		854.59	0.07325215		1384.59	-0.00322513		1914.58	-0.00084502		2444.61	-0.01919495
324.8	0.21983119		854.79	0.07227879		1384.79	-0.00280556		1914.78	-0.00137725		2444.81	-0.01883683
325	0.22013636		854.99	0.07316281		1384.99	-0.00321835		1914.98	-0.00211913		2445.01	-0.01880228
325.2	0.21953798		855.19	0.07244093		1385.19	-0.00460119		1915.18	-0.00188257		2445.21	-0.01792102
325.4	0.21890326		855.39	0.07207947		1385.39	-0.00474237		1915.38	-0.00238219		2445.41	-0.01806355
325.6	0.21853172		855.59	0.07303717		1385.59	-0.00586638		1915.58	-0.00342432		2445.61	-0.01819655
325.8	0.21839877		855.79	0.07295183		1385.79	-0.00654262		1915.78	-0.00304754		2445.81	-0.01831697
326	0.21772198		855.99	0.07205571		1385.99	-0.00710807		1915.98	-0.00300588		2446.01	-0.01781034
326.2	0.21712767		856.19	0.07192587		1386.19	-0.00744529		1916.18	-0.00255616		2446.21	-0.01714002
326.4	0.21662216		856.39	0.07177654		1386.39	-0.00767659		1916.38	-0.00239848		2446.41	-0.01729642
326.6	0.21605346		856.59	0.0713967		1386.59	-0.0078233		1916.58	-0.00290584		2446.61	-0.01745253
326.8	0.21688254		856.79	0.07166173		1386.79	-0.00860943		1916.78	-0.00252461		2446.81	-0.01734871
327	0.21683166		856.99	0.07193888		1386.99	-0.00748334		1916.98	-0.00142305		2447.01	-0.01669672
327.2	0.21759568		857.19	0.07190244		1387.19	-0.00694527		1917.18	-0.00012073		2447.21	-0.01690367
327.4	0.21848908		857.39	0.07193482		1387.39	-0.00676342		1917.38	-0.00000796		2447.41	-0.01766851
327.6	0.21893375		857.59	0.0709281		1387.59	-0.00644127		1917.58	0.00017511		2447.61	-0.0180507
327.8	0.21955878		857.79	0.0713572		1387.79	-0.00557223		1917.78	-0.00031923		2447.81	-0.01816195
328	0.22015646		857.99	0.0728504		1387.99	-0.00457171		1917.98	0.00122926		2448.01	-0.01849966
328.2	0.22058837		858.19	0.07377218		1388.19	-0.00386309		1918.18	0.00128105		2448.21	-0.01875688
328.4	0.22086619		858.39	0.07479525		1388.39	-0.00272236		1918.38	0.00151312		2448.41	-0.01886391
328.6	0.22192824		858.59	0.07496724		1388.59	-0.0017128		1918.58	0.00087102		2448.61	-0.01888255
328.8	0.22244578		858.79	0.07459025		1388.79	-0.00166711		1918.78	0.00058626		2448.81	-0.01870826
329	0.22245403		858.99	0.07528708		1388.99	-0.0019202		1918.98	0.00001177		2449.01	-0.0173709
329.2	0.22203808		859.19	0.07444499		1389.19	-0.00215788		1919.18	-0.00030291		2449.21	-0.01706289
329.4	0.22150114		859.39	0.07474086		1389.39	-0.00195488		1919.38	-0.00037862		2449.41	-0.016885
329.6	0.22203536		859.59	0.07505278		1389.59	-0.00366199		1919.58	0.00016883		2449.61	-0.01753947
329.8	0.22132526		859.79	0.07440113		1389.79	-0.00451114		1919.78	0.00005527		2449.81	-0.01792737
330	0.22135372		859.99	0.07433084		1389.99	-0.00510216		1919.98	-0.00043751		2450.01	-0.01766064
330.2	0.22138012		860.19	0.07417376		1390.19	-0.00524658		1920.18	-0.00032848		2450.21	-0.01807296
330.4	0.22138449		860.39	0.07453391		1390.39	-0.0062137		1920.38	-0.0002316		2450.41	-0.01821714
330.6	0.22186301		860.59	0.0748806		1390.59	-0.00666058		1920.58	-0.0007957		2450.61	-0.01735902
330.8	0.22250702		860.79	0.07581199		1390.79	-0.0069427		1920.78	-0.00099244		2450.81	-0.01705795
331	0.22270544		860.99	0.07570825		1390.99	-0.00705466		1920.98	-0.00048527		2451.01	-0.01703416
331.2	0.22372583		861.19	0.07529948		1391.19	-0.00742165		1921.18	0.00025333		2451.21	-0.01668715
331.4	0.22353022		861.39	0.07585832		1391.39	-0.00774105		1921.38	0.00063689		2451.41	-0.01646175
331.6	0.22344022		861.59	0.07525601		1391.59	-0.00722679		1921.58	0.0017664		2451.61	-0.0156604
331.8	0.22393365		861.79	0.07692184		1391.79	-0.00687472		1921.78	0.00197221		2451.81	-0.01623933
332	0.2239724		861.99	0.07793817		1391.99	-0.00753647		1921.98	0.00225504		2452.01	-0.01688031
332.2	0.2246904		862.19	0.07831527		1392.19	-0.0066538		1922.18	0.00104559		2452.21	-0.01655406
332.4	0.2241258		862.39	0.07815505		1392.39	-0.00545148		1922.38	-0.00002421		2452.41	-0.01690601
332.6	0.22497691		862.59	0.07811117		1392.59	-0.00466509		1922.58	-0.00109965		2452.61	-0.01721302
332.8	0.2245351		862.79	0.07768646		1392.79	-0.00494775		1922.78	-0.00127298		2452.81	-0.01733215
333	0.22482093		862.99	0.07756283		1392.99	-0.00463296		1922.98	-0.00186482		2453.01	-0.01631199
333.2	0.22430243		863.19	0.07650513		1393.19	-0.00410202		1923.18	-0.0021338		2453.21	-0.01728708
333.4	0.22348077		863.39	0.07654789		1393.39	-0.003807		1923.38	-0.00162149		2453.41	-0.01753244
333.6	0.22361321		863.59	0.0770378		1393.59	-0.00406999		1923.58	-0.00101426		2453.61	-0.01884042
333.8	0.22371797		863.79	0.07697094		1393.79	-0.0043046		1923.78	-0.00177554		2453.81	-0.01856362
334	0.22447137		863.99	0.07745058		1393.99	-0.00374373		1923.98	-0.00107439		2454.01	-0.01896174
334.2	0.22444902		864.19	0.07736969		1394.19	-0.00403089		1924.18	-0.00120573		2454.21	-0.01951053
334.4	0.22458578		864.39	0.07740138		1394.39	-0.00431837		1924.38	-0.00183587		2454.41	-0.01933069
334.6	0.22534362		864.59	0.07702308		1394.59	-0.00412989		1924.58	-0.00186834		2454.61	-0.01919326
334.8	0.22591059		864.79	0.07693482		1394.79	-0.00524214		1924.78	-0.00236829		2454.81	-0.01879978
335	0.22607554		864.99	0.0763005		1394.99	-0.00588202		1924.98	-0.00206421		2455.01	-0.01848541
335.2	0.22609979		865.19	0.07567165		1395.19	-0.00532441		1925.18	-0.00120235		2455.21	-0.01800767
335.4	0.2263906		865.39	0.07555038		1395.39	-0.00595658		1925.38	-0.00015454		2455.41	-0.0172894
335.6	0.22573062		865.59	0.07511596		1395.59	-0.00510855		1925.58	-0.0004007		2455.61	-0.01755023
335.8	0.22557862		865.79	0.07591614		1395.79	-0.00532712		1925.78	-0.00146287		2455.81	-0.018103
336	0.22576209		865.99	0.07601297		1395.99	-0.00536391		1925.98	-0.00191007		2456.01	-0.018374
336.2	0.22692652		866.19	0.07613261		1396.19	-0.0046237		1926.18	-0.00178704		2456.21	-0.01833832
336.4	0.22707456		866.39	0.07598965		1396.39	-0.00589317		1926.38	-0.00217471		2456.41	-0.01910089
336.6	0.22737902		866.59	0.07669912		1396.59	-0.00557216		1926.58	-0.00202478		2456.61	-0.01845034
336.8	0.22668141		866.79	0.0769376		1396.79	-0.00592755		1926.78	-0.00125398		2456.81	-0.01794706
337	0.2262777		866.99	0.07631385		1396.99	-0.00537866		1926.98	-0.00124845		2457.01	-0.01740818
337.2	0.22597584		867.19	0.0761065		1397.19	-0.00510423		1927.18	-0.00122904		2457.21	-0.01795947
337.4	0.22511115		867.39	0.07712472		1397.39	-0.00489144		1927.38	-0.00049406		2457.41	-0.0178749
337.6	0.22523914		867.59	0.07811894		1397.59	-0.00512106		1927.58	-0.00031851		2457.61	-0.0179332
337.8	0.22580932		867.79	0.07795558		1397.79	-0.00635392		1927.78	-0.00015999		2457.81	-0.01708147
338	0.22579062		867.99	0.07809345		1397.99	-0.00654987		1927.98	-0.0001585		2458.01	-0.01758303
338.2	0.22671334		868.19	0.07719165		1398.19	-0.00732472		1928.18	-0.0009927		2458.21	-0.01784305
338.4	0.22738557		868.39	0.07764701		1398.39	-0.00751908		1928.38	-0.00137839		2458.41	-0.01729772
338.6	0.22815292		868.59	0.07766733		1398.59	-0.00777874		1928.58	-0.00151821		2458.61	-0.01784584
338.8	0.22891444		868.79	0.078413		1398.79	-0.00850639		1928.78	-0.00181503		2458.81	-0.01854451
339	0.22915329		868.99	0.07882726		1398.99	-0.00815673		1928.98	-0.00192684		2459.01	-0.01902215
339.2	0.22950457		869.19	0.07927309		1399.19	-0.00830187		1929.18	-0.00182171		2459.21	-0.0197021
339.4	0.22932569		869.39	0.07963882		1399.39	-0.00855112		1929.38	-0.00205784		2459.41	-0.01994627
339.6	0.22912308		869.59	0.08030864		1399.59	-0.00810547		1929.58	-0.00298422		2459.61	-0.02104805
339.8	0.22985204		869.79	0.08117342		1399.79	-0.00755532		1929.78	-0.0031574		2459.81	-0.02135022
340	0.2303226		869.99	0.08161278		1399.99	-0.0080513		1929.98	-0.00251142		2460.01	-0.02118061
340.2	0.23110037		870.19	0.08231761		1400.19	-0.00815161		1930.18	-0.00214516		2460.21	-0.020557
340.4	0.23089668		870.39	0.08156722		1400.39	-0.00859336		1930.38	-0.00246208		2460.41	-0.02074101
340.6	0.22994535		870.59	0.08142128		1400.59	-0.00698019		1930.58	-0.00268697		2460.61	-0.02077676
340.8	0.23048882		870.79	0.08092978		1400.79	-0.00705188		1930.78	-0.00219002		2460.81	-0.02083222
341	0.23097731		870.99	0.07951579		1400.99	-0.0059639		1930.98	-0.00260546		2461.01	-0.02089753
341.2	0.23151682		871.19	0.0792728		1401.19	-0.00586504		1931.18	-0.00281227		2461.21	-0.02104537
341.4	0.23087195		871.39	0.0793008		1401.39	-0.00524147		1931.38	-0.00246661		2461.41	-0.02152722
341.6	0.23146003		871.59	0.07867485		1401.59	-0.00605146		1931.58	-0.00235918		2461.61	-0.02148361
341.8	0.23220837		871.79	0.07807404		1401.79	-0.00589306		1931.78	-0.00155058		2461.81	-0.02218598
342	0.23361574		871.99	0.07784658		1401.99	-0.00521167		1931.98	-0.00269218		2462.01	-0.02308615
342.2	0.23452461		872.19	0.07768701		1402.19	-0.00537787		1932.18	-0.00289927		2462.21	-0.02270006
342.4	0.23525047		872.39	0.07895268		1402.39	-0.00527194		1932.38	-0.0025489		2462.41	-0.02267384
342.6	0.23506549		872.59	0.07921352		1402.59	-0.00517069		1932.58	-0.00237882		2462.61	-0.02341044
342.8	0.23482115		872.79	0.07986767		1402.79	-0.00542823		1932.78	-0.00232103		2462.81	-0.02306074
343	0.234873		872.99	0.07982905		1402.99	-0.00498772		1932.98	-0.00209238		2463.01	-0.02294996
343.2	0.23433428		873.19	0.07999024		1403.19	-0.00601885		1933.18	-0.00231545		2463.21	-0.0227467
343.4	0.23421313		873.39	0.08038204		1403.39	-0.005385		1933.38	-0.00232435		2463.41	-0.02240499
343.6	0.23464718		873.59	0.08000409		1403.59	-0.00546		1933.58	-0.0020238		2463.61	-0.02244007
343.8	0.23456913		873.79	0.07968871		1403.79	-0.00499337		1933.78	-0.00208874		2463.81	-0.02183354
344	0.2345187		873.99	0.08003896		1403.99	-0.00525268		1933.98	-0.00136116		2464.01	-0.02083953
344.2	0.23422113		874.19	0.07969794		1404.19	-0.00483932		1934.18	-0.00074978		2464.21	-0.02099508
344.4	0.23362992		874.39	0.07823033		1404.39	-0.00517614		1934.38	-0.00052321		2464.41	-0.02094851
344.6	0.23260637		874.59	0.07804915		1404.59	-0.00528834		1934.58	-0.00024775		2464.61	-0.02074814
344.8	0.23323405		874.79	0.07774922		1404.79	-0.00541462		1934.78	0.00010456		2464.81	-0.02014476
345	0.23366201		874.99	0.07732975		1404.99	-0.00509708		1934.98	-0.00068087		2465.01	-0.02020229
345.2	0.23373417		875.19	0.07784395		1405.19	-0.00563554		1935.18	0.00042813		2465.21	-0.02044533
345.4	0.2338078		875.39	0.07778013		1405.39	-0.00556591		1935.38	0.00156828		2465.41	-0.0205396
345.6	0.23524375		875.59	0.07732236		1405.59	-0.00602411		1935.58	0.0012342		2465.61	-0.02083469
345.8	0.23613539		875.79	0.07816855		1405.79	-0.00518606		1935.78	0.00152009		2465.81	-0.02133519
346	0.23649945		875.99	0.07832342		1405.99	-0.00585863		1935.98	0.0003911		2466.01	-0.02146484
346.2	0.23670895		876.19	0.07844472		1406.19	-0.00625418		1936.18	0.00056231		2466.21	-0.02087221
346.4	0.23746642		876.39	0.07924449		1406.39	-0.00597291		1936.38	0.00000639		2466.41	-0.0207135
346.6	0.2368364		876.59	0.07920703		1406.59	-0.00595317		1936.58	-0.00090912		2466.61	-0.02078805
346.8	0.23712486		876.79	0.07947426		1406.79	-0.00607193		1936.78	-0.00105374		2466.81	-0.02022838
347	0.2380841		876.99	0.07911499		1406.99	-0.00525734		1936.98	-0.00144579		2467.01	-0.0205554
347.2	0.23804573		877.19	0.07895949		1407.19	-0.00495546		1937.18	-0.00200296		2467.21	-0.02021685
347.4	0.23871103		877.39	0.07930404		1407.39	-0.00380895		1937.38	-0.0024198		2467.41	-0.0207376
347.6	0.23862301		877.59	0.0784998		1407.59	-0.0039228		1937.58	-0.00253677		2467.61	-0.02067448
347.8	0.23788596		877.79	0.07871855		1407.79	-0.00412221		1937.78	-0.00358806		2467.81	-0.02065946
348	0.23708069		877.99	0.07955167		1407.99	-0.00414789		1937.98	-0.00241567		2468.01	-0.02085311
348.2	0.23617258		878.19	0.07904875		1408.19	-0.00397147		1938.18	-0.00279626		2468.21	-0.02055389
348.4	0.23531902		878.39	0.07923775		1408.39	-0.00459221		1938.38	-0.00370654		2468.41	-0.01974415
348.6	0.23445434		878.59	0.07942812		1408.59	-0.00422117		1938.58	-0.00329479		2468.61	-0.02010269
348.8	0.23547142		878.79	0.07932942		1408.79	-0.00418419		1938.78	-0.00280847		2468.81	-0.0198843
349	0.23645755		878.99	0.08000032		1408.99	-0.00540328		1938.98	-0.00243988		2469.01	-0.0198059
349.2	0.23671392		879.19	0.08030809		1409.19	-0.00532823		1939.18	-0.00162464		2469.21	-0.01982601
349.4	0.23665068		879.39	0.08026256		1409.39	-0.0055688		1939.38	-0.0018811		2469.41	-0.02021482
349.6	0.23729184		879.59	0.08100859		1409.59	-0.0065539		1939.58	-0.00330633		2469.61	-0.02110748
349.8	0.2376317		879.79	0.08126777		1409.79	-0.00712832		1939.78	-0.00307002		2469.81	-0.02107484
350	0.23741708		879.99	0.08173319		1409.99	-0.00788632		1939.98	-0.00405858		2470.01	-0.02152068
350.2	0.23828522		880.19	0.08286893		1410.19	-0.00798407		1940.18	-0.00405405		2470.21	-0.0214461
350.4	0.23862578		880.39	0.08368488		1410.39	-0.00777062		1940.38	-0.00410176		2470.41	-0.02129333
350.6	0.23905132		880.59	0.08380699		1410.59	-0.00721194		1940.58	-0.00422676		2470.61	-0.02201454
350.8	0.23885006		880.79	0.08394208		1410.79	-0.00696266		1940.78	-0.00353248		2470.81	-0.02142616
351	0.23900682		880.99	0.08329108		1410.99	-0.00555037		1940.98	-0.00323281		2471.01	-0.02092475
351.2	0.23896154		881.19	0.08340592		1411.19	-0.00493906		1941.18	-0.00258696		2471.21	-0.02074193
351.4	0.23889934		881.39	0.08327539		1411.39	-0.00493002		1941.38	-0.00218313		2471.41	-0.02043323
351.6	0.23872408		881.59	0.08330972		1411.59	-0.00468187		1941.58	-0.00128195		2471.61	-0.01986604
351.8	0.23834283		881.79	0.08392871		1411.79	-0.00466265		1941.78	-0.00064999		2471.81	-0.01978409
352	0.23770386		881.99	0.08407131		1411.99	-0.0036989		1941.98	0.00026238		2472.01	-0.0193647
352.2	0.23771475		882.19	0.083662		1412.19	-0.0034505		1942.18	-0.00037732		2472.21	-0.01898466
352.4	0.23703291		882.39	0.08327025		1412.39	-0.0037316		1942.38	-0.00013259		2472.41	-0.0182517
352.6	0.23745918		882.59	0.082649		1412.59	-0.00341274		1942.58	0.00068021		2472.61	-0.01820894
352.8	0.23841954		882.79	0.08268549		1412.79	-0.0041523		1942.78	0.00042639		2472.81	-0.01817239
353	0.23864049		882.99	0.08322337		1412.99	-0.00443132		1942.98	0.00015174		2473.01	-0.01863351
353.2	0.23942381		883.19	0.08316608		1413.19	-0.00416088		1943.18	-0.00107291		2473.21	-0.01920211
353.4	0.23926215		883.39	0.0836427		1413.39	-0.005544		1943.38	-0.00135754		2473.41	-0.01920216
353.6	0.23993984		883.59	0.08409042		1413.59	-0.00701614		1943.58	-0.00239699		2473.61	-0.01929053
353.8	0.240808		883.79	0.08398368		1413.79	-0.00700919		1943.78	-0.00232837		2473.81	-0.01869215
354	0.24145933		883.99	0.08452458		1413.99	-0.00758376		1943.98	-0.00294533		2474.01	-0.01860923
354.2	0.24241004		884.19	0.08516692		1414.19	-0.00821411		1944.18	-0.00258131		2474.21	-0.01887697
354.4	0.24248783		884.39	0.08443134		1414.39	-0.00811425		1944.38	-0.00304925		2474.41	-0.01887833
354.6	0.24310018		884.59	0.08437054		1414.59	-0.00703115		1944.58	-0.00315234		2474.61	-0.01941837
354.8	0.24349243		884.79	0.08442525		1414.79	-0.00767239		1944.78	-0.0021666		2474.81	-0.01918781
355	0.24383681		884.99	0.08386817		1414.99	-0.00720919		1944.98	-0.00171342		2475.01	-0.01922973
355.2	0.24465467		885.19	0.08416298		1415.19	-0.00709102		1945.18	-0.00118157		2475.21	-0.01924513
355.4	0.24472125		885.39	0.08422677		1415.39	-0.00704208		1945.38	-0.00057885		2475.41	-0.01955257
355.6	0.24499691		885.59	0.08444223		1415.59	-0.00617778		1945.58	0.00009173		2475.61	-0.01995867
355.8	0.24450958		885.79	0.08445359		1415.79	-0.005777		1945.78	-0.00064339		2475.81	-0.01968046
356	0.24424546		885.99	0.08402108		1415.99	-0.0051511		1945.98	-0.00102322		2476.01	-0.01891294
356.2	0.24433327		886.19	0.08361575		1416.19	-0.00474074		1946.18	-0.00146058		2476.21	-0.01940183
356.4	0.24369429		886.39	0.08444315		1416.39	-0.00477379		1946.38	-0.00106142		2476.41	-0.02005438
356.6	0.24434784		886.59	0.08508741		1416.59	-0.00428305		1946.58	-0.00119312		2476.61	-0.02053583
356.8	0.24344616		886.79	0.08582786		1416.79	-0.00397273		1946.78	-0.00133506		2476.81	-0.02142378
357	0.24400142		886.99	0.08511256		1416.99	-0.00442096		1946.98	-0.00156283		2477.01	-0.02241879
357.2	0.24415916		887.19	0.08445945		1417.19	-0.00470131		1947.18	-0.00136074		2477.21	-0.02172839
357.4	0.24369986		887.39	0.08485896		1417.39	-0.00514499		1947.38	-0.00094481		2477.41	-0.02238543
357.6	0.24371887		887.59	0.08461966		1417.59	-0.00543725		1947.58	-0.00114942		2477.61	-0.02242306
357.8	0.24382733		887.79	0.08480429		1417.79	-0.00577073		1947.78	-0.00086047		2477.81	-0.02237039
358	0.24408034		887.99	0.0849565		1417.99	-0.0062995		1947.98	-0.00083673		2478.01	-0.02232062
358.2	0.24303499		888.19	0.08593997		1418.19	-0.00719162		1948.18	-0.00072437		2478.21	-0.02243476
358.4	0.24262093		888.39	0.08555863		1418.39	-0.00693294		1948.38	-0.00158279		2478.41	-0.02251561
358.6	0.24296991		888.59	0.08604939		1418.59	-0.0066688		1948.58	-0.00104428		2478.61	-0.02233819
358.8	0.24329721		888.79	0.08650317		1418.79	-0.00787778		1948.78	-0.00152913		2478.81	-0.02178788
359	0.24308175		888.99	0.08646329		1418.99	-0.00712906		1948.98	-0.00167562		2479.01	-0.02130852
359.2	0.24356925		889.19	0.08653103		1419.19	-0.00702263		1949.18	-0.00158204		2479.21	-0.0207493
359.4	0.24452695		889.39	0.08639506		1419.39	-0.00616897		1949.38	-0.00218354		2479.41	-0.0208506
359.6	0.24462805		889.59	0.08636007		1419.59	-0.00540085		1949.58	-0.00261819		2479.61	-0.02032713
359.8	0.24537986		889.79	0.08680726		1419.79	-0.00526242		1949.78	-0.00400036		2479.81	-0.01945754
360	0.24636506		889.99	0.08693724		1419.99	-0.00492617		1949.98	-0.0037267		2480.01	-0.01930285
360.2	0.24662889		890.19	0.08737441		1420.19	-0.00444043		1950.18	-0.00400771		2480.21	-0.02056767
360.4	0.2472419		890.39	0.0883931		1420.39	-0.00465382		1950.38	-0.00349807		2480.41	-0.02143437
360.6	0.24786886		890.59	0.08791298		1420.59	-0.00413011		1950.58	-0.00380675		2480.61	-0.02139484
360.8	0.24739149		890.79	0.08778483		1420.79	-0.00419293		1950.78	-0.00428605		2480.81	-0.02191282
361	0.24820814		890.99	0.08704049		1420.99	-0.0042856		1950.98	-0.00375838		2481.01	-0.0212859
361.2	0.24822043		891.19	0.08756301		1421.19	-0.00322656		1951.18	-0.00310118		2481.21	-0.02116842
361.4	0.24889055		891.39	0.08864725		1421.39	-0.00399448		1951.38	-0.00307217		2481.41	-0.02204203
361.6	0.24958145		891.59	0.0882969		1421.59	-0.00422855		1951.58	-0.00266493		2481.61	-0.0218261
361.8	0.2496633		891.79	0.08915927		1421.79	-0.00484313		1951.78	-0.00284668		2481.81	-0.0221612
362	0.24953968		891.99	0.0893555		1421.99	-0.00460607		1951.98	-0.00259814		2482.01	-0.02145351
362.2	0.24966985		892.19	0.08931602		1422.19	-0.00538933		1952.18	-0.00243917		2482.21	-0.02102065
362.4	0.25040962		892.39	0.08849971		1422.39	-0.00515948		1952.38	-0.00151602		2482.41	-0.02041073
362.6	0.24952828		892.59	0.08928076		1422.59	-0.00501779		1952.58	-0.00121121		2482.61	-0.01958653
362.8	0.25008938		892.79	0.08933169		1422.79	-0.00471966		1952.78	-0.00124083		2482.81	-0.01939337
363	0.25096974		892.99	0.08893211		1422.99	-0.00424853		1952.98	-0.00050164		2483.01	-0.01944538
363.2	0.25111691		893.19	0.08864838		1423.19	-0.004571		1953.18	-0.00071019		2483.21	-0.01916681
363.4	0.25158504		893.39	0.08850999		1423.39	-0.0037635		1953.38	-0.00055477		2483.41	-0.01954024
363.6	0.25111592		893.59	0.08901819		1423.59	-0.00389458		1953.58	-0.00046298		2483.61	-0.01922302
363.8	0.25192693		893.79	0.08971869		1423.79	-0.00440778		1953.78	-0.00043253		2483.81	-0.01932646
364	0.25185467		893.99	0.08994429		1423.99	-0.00436284		1953.98	0.00035832		2484.01	-0.02014239
364.2	0.25141775		894.19	0.09007319		1424.19	-0.00461379		1954.18	0.00003522		2484.21	-0.02108142
364.4	0.2508823		894.39	0.08968527		1424.39	-0.00447696		1954.38	0.000045		2484.41	-0.0222099
364.6	0.24964485		894.59	0.08943778		1424.59	-0.00350065		1954.58	0.00040333		2484.61	-0.02289586
364.8	0.24912861		894.79	0.08966327		1424.79	-0.0034887		1954.78	0.00006101		2484.81	-0.0226581
365	0.24875261		894.99	0.08993826		1424.99	-0.00347222		1954.98	0.00004352		2485.01	-0.02182562
365.2	0.2486683		895.19	0.09092163		1425.19	-0.00379836		1955.18	-0.00146366		2485.21	-0.02268379
365.4	0.24920462		895.39	0.09100281		1425.39	-0.00518637		1955.38	-0.00104386		2485.41	-0.02282642
365.6	0.25013434		895.59	0.09132995		1425.59	-0.00515111		1955.58	-0.00082967		2485.61	-0.02325552
365.8	0.25027498		895.79	0.09140751		1425.79	-0.00549626		1955.78	-0.00122335		2485.81	-0.02291841
366	0.25065455		895.99	0.09095155		1425.99	-0.005374		1955.98	-0.00079425		2486.01	-0.02219306
366.2	0.25148834		896.19	0.09051914		1426.19	-0.0058157		1956.18	-0.00131185		2486.21	-0.02163459
366.4	0.25146331		896.39	0.08991316		1426.39	-0.0061366		1956.38	-0.001374		2486.41	-0.02135638
366.6	0.25082813		896.59	0.08915666		1426.59	-0.00677077		1956.58	-0.00243863		2486.61	-0.02120277
366.8	0.25170793		896.79	0.08829451		1426.79	-0.00698067		1956.78	-0.00236375		2486.81	-0.0211437
367	0.25221728		896.99	0.08818207		1426.99	-0.0072523		1956.98	-0.00245935		2487.01	-0.02099561
367.2	0.25109445		897.19	0.08848774		1427.19	-0.00758026		1957.18	-0.00122369		2487.21	-0.01994822
367.4	0.25119729		897.39	0.08867606		1427.39	-0.00735986		1957.38	0.0001141		2487.41	-0.02009803
367.6	0.25155901		897.59	0.08957028		1427.59	-0.00742476		1957.58	0.00028832		2487.61	-0.01946527
367.8	0.25175901		897.79	0.09017023		1427.79	-0.0075393		1957.78	0.00073529		2487.81	-0.01957978
368	0.25143785		897.99	0.09038069		1427.99	-0.00713239		1957.98	0.00134858		2488.01	-0.02020609
368.2	0.25157371		898.19	0.09029981		1428.19	-0.00684272		1958.18	0.00109976		2488.21	-0.02121909
368.4	0.25147246		898.39	0.09042529		1428.39	-0.0062706		1958.38	0.00110191		2488.41	-0.02198687
368.6	0.25143263		898.59	0.09055253		1428.59	-0.00590874		1958.58	0.00134657		2488.61	-0.02235222
368.8	0.25199747		898.79	0.09133351		1428.79	-0.00640294		1958.78	0.00047148		2488.81	-0.02236867
369	0.25217879		898.99	0.09161487		1428.99	-0.00627788		1958.98	0.00052763		2489.01	-0.02220508
369.2	0.25286111		899.19	0.09232612		1429.19	-0.00593312		1959.18	0.00041736		2489.21	-0.02275504
369.4	0.2538456		899.39	0.0921499		1429.39	-0.00486856		1959.38	0.00158355		2489.41	-0.02258547
369.6	0.25421387		899.59	0.09176927		1429.59	-0.00387045		1959.58	0.00056372		2489.61	-0.02247231
369.8	0.25443945		899.79	0.09050119		1429.79	-0.00300642		1959.78	-0.00065767		2489.81	-0.02208241
370	0.25453279		899.99	0.08955279		1429.99	-0.00340646		1959.98	-0.00167461		2490.01	-0.02232978
370.2	0.25481733		900.19	0.08927087		1430.19	-0.00394106		1960.18	-0.00305338		2490.21	-0.02266999
370.4	0.25557329		900.39	0.08796146		1430.39	-0.00451929		1960.38	-0.00356868		2490.41	-0.02359824
370.6	0.25568662		900.59	0.08707196		1430.59	-0.00513369		1960.58	-0.00376477		2490.61	-0.02348094
370.8	0.25602419		900.79	0.08717338		1430.79	-0.00492531		1960.78	-0.00328269		2490.81	-0.0238747
371	0.25660912		900.99	0.08696726		1430.99	-0.00549744		1960.98	-0.00255402		2491.01	-0.02368869
371.2	0.25580981		901.19	0.08705187		1431.19	-0.00660437		1961.18	-0.00185002		2491.21	-0.0234992
371.4	0.25617678		901.39	0.08760388		1431.39	-0.00712719		1961.38	-0.00174578		2491.41	-0.02419589
371.6	0.25706321		901.59	0.08692813		1431.59	-0.00754073		1961.58	-0.00272902		2491.61	-0.02435063
371.8	0.25616158		901.79	0.08724151		1431.79	-0.0078729		1961.78	-0.00152524		2491.81	-0.02465385
372	0.25507255		901.99	0.08829453		1431.99	-0.00801815		1961.98	-0.00097423		2492.01	-0.02593703
372.2	0.25531511		902.19	0.08888803		1432.19	-0.00798027		1962.18	-0.00100053		2492.21	-0.02597875
372.4	0.25535438		902.39	0.08957554		1432.39	-0.00849554		1962.38	-0.00081283		2492.41	-0.0256723
372.6	0.25467632		902.59	0.09033163		1432.59	-0.00914281		1962.58	-0.00010159		2492.61	-0.02564331
372.8	0.25389483		902.79	0.09206606		1432.79	-0.00910662		1962.78	0.00066381		2492.81	-0.0255463
373	0.25335068		902.99	0.09241114		1432.99	-0.00830903		1962.98	0.00131514		2493.01	-0.02508485
373.2	0.25253291		903.19	0.09319676		1433.19	-0.00739938		1963.18	0.00081103		2493.21	-0.02477666
373.4	0.25216116		903.39	0.0929223		1433.39	-0.0062536		1963.38	0.00129366		2493.41	-0.02452042
373.6	0.25113607		903.59	0.09291586		1433.59	-0.00616795		1963.58	0.00055672		2493.61	-0.02427674
373.8	0.25110052		903.79	0.09300543		1433.79	-0.005419		1963.78	0.00073332		2493.81	-0.02365684
374	0.25113624		903.99	0.09366995		1433.99	-0.00615338		1963.98	0.00061873		2494.01	-0.0230597
374.2	0.25101006		904.19	0.09501743		1434.19	-0.00600026		1964.18	0.00037931		2494.21	-0.02339626
374.4	0.2518949		904.39	0.09415937		1434.39	-0.00610599		1964.38	0.00035469		2494.41	-0.02313921
374.6	0.2520812		904.59	0.09394576		1434.59	-0.00598161		1964.58	0.00083258		2494.61	-0.02226538
374.8	0.25235798		904.79	0.09398179		1434.79	-0.00564632		1964.78	0.00130495		2494.81	-0.02266221
375	0.25305152		904.99	0.09407253		1434.99	-0.00510135		1964.98	0.00079614		2495.01	-0.02230734
375.2	0.25288775		905.19	0.09430616		1435.19	-0.00464223		1965.18	0.00057502		2495.21	-0.02260679
375.4	0.25358721		905.39	0.09307906		1435.39	-0.00432598		1965.38	0.00081702		2495.41	-0.02268039
375.6	0.25407641		905.59	0.09213172		1435.59	-0.00413664		1965.58	0.00093624		2495.61	-0.02283197
375.8	0.25334077		905.79	0.09329791		1435.79	-0.00405208		1965.78	0.00196041		2495.81	-0.02283297
376	0.25391507		905.99	0.09332766		1435.99	-0.00356667		1965.98	0.0009264		2496.01	-0.02327038
376.2	0.25503256		906.19	0.09248468		1436.19	-0.0031878		1966.18	0.00061088		2496.21	-0.02232925
376.4	0.25502008		906.39	0.0922952		1436.39	-0.00436928		1966.38	-0.00019245		2496.41	-0.02250824
376.6	0.25491757		906.59	0.092165		1436.59	-0.00483807		1966.58	-0.00085329		2496.61	-0.02304416
376.8	0.25512059		906.79	0.09240266		1436.79	-0.0044928		1966.78	-0.00177627		2496.81	-0.02372471
377	0.25557016		906.99	0.09245825		1436.99	-0.00454244		1966.98	-0.00266842		2497.01	-0.02354059
377.2	0.25608366		907.19	0.09260931		1437.19	-0.00423323		1967.18	-0.00274767		2497.21	-0.02350561
377.4	0.25628339		907.39	0.09256128		1437.39	-0.00395685		1967.38	-0.00263589		2497.41	-0.02357335
377.6	0.25648922		907.59	0.09283846		1437.59	-0.00425272		1967.58	-0.00374541		2497.61	-0.02313122
377.8	0.25718393		907.79	0.09318437		1437.79	-0.00404721		1967.78	-0.00416238		2497.81	-0.02262006
378	0.25775485		907.99	0.09388349		1437.99	-0.00473196		1967.98	-0.00466936		2498.01	-0.02258573
378.2	0.25794597		908.19	0.09408985		1438.19	-0.00483962		1968.18	-0.00486618		2498.21	-0.02307315
378.4	0.25918721		908.39	0.09371392		1438.39	-0.00474519		1968.38	-0.00485149		2498.41	-0.02265842
378.6	0.25963792		908.59	0.0940589		1438.59	-0.00439563		1968.58	-0.00463222		2498.61	-0.02269782
378.8	0.26010724		908.79	0.09480217		1438.79	-0.00386324		1968.78	-0.00458666		2498.81	-0.02299518
379	0.26071363		908.99	0.09519852		1438.99	-0.00334875		1968.98	-0.00484889		2499.01	-0.0227606
379.2	0.26092532		909.19	0.09512267		1439.19	-0.00350387		1969.18	-0.00414815		2499.21	-0.02296664
379.4	0.26152562		909.39	0.09456397		1439.39	-0.00390537		1969.38	-0.00394657		2499.41	-0.02305477
379.6	0.26181674		909.59	0.09533713		1439.59	-0.00421348		1969.58	-0.00349379		2499.61	-0.02325266
379.8	0.26189322		909.79	0.09540301		1439.79	-0.00447054		1969.78	-0.0036475		2499.81	-0.02328594
380	0.26189322		909.99	0.09540301		1439.98	-0.00447054		1969.98	-0.0036475		2500.01	-0.02328594
380.2	0.26135878		910.19	0.09515517		1440.18	-0.00460783		1970.18	-0.00413641		2500.21	-0.02241714
380.4	0.26072208		910.39	0.09493193		1440.38	-0.00412062		1970.38	-0.0052785		2500.41	-0.02163791
380.6	0.26058543		910.59	0.0942862		1440.58	-0.00383964		1970.58	-0.00636462		2500.61	-0.0207357
380.8	0.26035146		910.79	0.09430917		1440.78	-0.00315508		1970.78	-0.00643988		2500.81	-0.0199121
381	0.25999076		910.99	0.09405138		1440.98	-0.00262565		1970.98	-0.00660722		2501.01	-0.01900054
381.2	0.25953489		911.19	0.09402932		1441.18	-0.00281674		1971.18	-0.00767635		2501.21	-0.01848268
381.4	0.25958324		911.39	0.09415271		1441.38	-0.00285516		1971.38	-0.00856371		2501.41	-0.01842256
381.6	0.25928751		911.59	0.09415532		1441.58	-0.00252624		1971.58	-0.00927097		2501.61	-0.01833829
381.8	0.25898683		911.79	0.09408535		1441.78	-0.0028562		1971.78	-0.00966032		2501.81	-0.01881991
382	0.25910642		911.99	0.0938129		1441.98	-0.00258597		1971.98	-0.01035493		2502.01	-0.01923201
382.2	0.25937923		912.19	0.09393001		1442.18	-0.00234702		1972.18	-0.01042591		2502.21	-0.02034042
382.4	0.26013645		912.39	0.09352574		1442.38	-0.00218485		1972.38	-0.01124661		2502.41	-0.02017619
382.6	0.26024356		912.59	0.09413359		1442.58	-0.00277407		1972.58	-0.01127862		2502.61	-0.0190343
382.8	0.26047378		912.79	0.09428375		1442.78	-0.00193165		1972.78	-0.01148503		2502.81	-0.01806869
383	0.26088505		912.99	0.09434552		1442.98	-0.00145414		1972.98	-0.0114488		2503.01	-0.01768265
383.2	0.26151047		913.19	0.09438093		1443.18	-0.00154979		1973.18	-0.01056505		2503.21	-0.01704503
383.4	0.26097097		913.39	0.09497996		1443.38	-0.00174338		1973.38	-0.01010784		2503.41	-0.01669484
383.6	0.26172618		913.59	0.09481849		1443.58	-0.00210626		1973.58	-0.00906154		2503.61	-0.01654211
383.8	0.26227472		913.79	0.09508238		1443.78	-0.00245666		1973.78	-0.00820421		2503.81	-0.01722763
384	0.26171109		913.99	0.09518278		1443.98	-0.00205224		1973.98	-0.00838515		2504.01	-0.01764496
384.2	0.26168124		914.19	0.09588049		1444.18	-0.00256304		1974.18	-0.00789134		2504.21	-0.01766268
384.4	0.26240882		914.39	0.09544667		1444.38	-0.0025347		1974.38	-0.00814797		2504.41	-0.01810434
384.6	0.2637344		914.59	0.09509465		1444.58	-0.00287077		1974.58	-0.00667599		2504.61	-0.01825378
384.8	0.26420098		914.79	0.0955756		1444.78	-0.00297851		1974.78	-0.00543374		2504.81	-0.01855754
385	0.26382128		914.99	0.09587375		1444.98	-0.00396262		1974.98	-0.00553628		2505.01	-0.0186045
385.2	0.26449322		915.19	0.09651228		1445.18	-0.00455468		1975.18	-0.00678543		2505.21	-0.01936669
385.4	0.26502079		915.39	0.09607161		1445.38	-0.00462819		1975.38	-0.00663746		2505.41	-0.01930875
385.6	0.26440127		915.59	0.09595819		1445.58	-0.00443236		1975.58	-0.00666991		2505.61	-0.01895289
385.8	0.26445893		915.79	0.09594711		1445.78	-0.00408027		1975.78	-0.00720518		2505.81	-0.01905606
386	0.26478234		915.99	0.09593333		1445.98	-0.00405049		1975.98	-0.00738409		2506.01	-0.01850438
386.2	0.26532416		916.19	0.0964391		1446.18	-0.00422417		1976.18	-0.00804343		2506.21	-0.01816256
386.4	0.26498115		916.39	0.09691658		1446.38	-0.00402747		1976.38	-0.00830275		2506.41	-0.01767236
386.6	0.26529032		916.59	0.09677573		1446.58	-0.00397913		1976.58	-0.00834864		2506.61	-0.01754055
386.8	0.26454695		916.79	0.09669514		1446.78	-0.004075		1976.78	-0.00844678		2506.81	-0.01710559
387	0.26450169		916.99	0.09724556		1446.98	-0.00420392		1976.98	-0.0089317		2507.01	-0.01698359
387.2	0.26375769		917.19	0.09697956		1447.18	-0.00431236		1977.18	-0.00890921		2507.21	-0.01634651
387.4	0.26373774		917.39	0.09754297		1447.38	-0.00396579		1977.38	-0.00942013		2507.41	-0.01698013
387.6	0.26442815		917.59	0.09732934		1447.58	-0.0043195		1977.58	-0.00954491		2507.61	-0.01704112
387.8	0.26453892		917.79	0.09820821		1447.78	-0.00418633		1977.78	-0.00918841		2507.81	-0.01736052
388	0.264614		917.99	0.09903618		1447.98	-0.00474966		1977.98	-0.00957889		2508.01	-0.01752043
388.2	0.26495623		918.19	0.09952465		1448.18	-0.0054772		1978.18	-0.00971402		2508.21	-0.0182161
388.4	0.26541807		918.39	0.09876248		1448.38	-0.00590063		1978.38	-0.0094627		2508.41	-0.01881713
388.6	0.26488817		918.59	0.098946		1448.58	-0.00576489		1978.58	-0.00897825		2508.61	-0.01851771
388.8	0.26464117		918.79	0.09883955		1448.78	-0.00575227		1978.78	-0.00928296		2508.81	-0.01863388
389	0.26506317		918.99	0.09934149		1448.98	-0.00530019		1978.98	-0.00958807		2509.01	-0.01854061
389.2	0.265057		919.19	0.09920435		1449.18	-0.00396702		1979.18	-0.00996584		2509.21	-0.01869019
389.4	0.26451025		919.39	0.09771775		1449.38	-0.00329005		1979.38	-0.00978746		2509.41	-0.01831404
389.6	0.26417566		919.59	0.09830602		1449.58	-0.00258896		1979.58	-0.01044454		2509.61	-0.01822224
389.8	0.26453082		919.79	0.09853627		1449.78	-0.0023946		1979.78	-0.01056574		2509.81	-0.01891932
390	0.26434586		919.99	0.09767666		1449.98	-0.00266142		1979.98	-0.00969193		2510.01	-0.01936879
390.2	0.26470512		920.19	0.09720575		1450.18	-0.00231362		1980.18	-0.01005578		2510.21	-0.01926428
390.4	0.26326572		920.39	0.09659553		1450.38	-0.00193974		1980.38	-0.00922601		2510.41	-0.01950613
390.6	0.26264251		920.59	0.0956066		1450.58	-0.00211372		1980.58	-0.00858269		2510.61	-0.02027618
390.8	0.26115938		920.79	0.09619754		1450.78	-0.0015743		1980.78	-0.00847841		2510.81	-0.02015609
391	0.26081247		920.99	0.09624841		1450.98	-0.00132485		1980.98	-0.00847411		2511.01	-0.02016807
391.2	0.26195083		921.19	0.09561298		1451.18	-0.00149549		1981.18	-0.00875847		2511.21	-0.02056449
391.4	0.26204914		921.39	0.09587254		1451.38	-0.00154256		1981.38	-0.00890846		2511.41	-0.02081063
391.6	0.26203948		921.59	0.09581879		1451.58	-0.00227259		1981.58	-0.00838812		2511.61	-0.02065992
391.8	0.2616663		921.79	0.09669204		1451.78	-0.00287102		1981.78	-0.00881996		2511.81	-0.02045508
392	0.26159433		921.99	0.09736306		1451.98	-0.0034196		1981.98	-0.0088203		2512.01	-0.02050562
392.2	0.26093166		922.19	0.09712176		1452.18	-0.00264774		1982.18	-0.00973039		2512.21	-0.0201014
392.4	0.26092362		922.39	0.09668602		1452.38	-0.00253262		1982.38	-0.00984455		2512.41	-0.01968964
392.6	0.26103991		922.59	0.09708561		1452.58	-0.00215878		1982.58	-0.01070178		2512.61	-0.01849902
392.8	0.26223899		922.79	0.09714312		1452.78	-0.0016201		1982.78	-0.01190783		2512.81	-0.01845371
393	0.26260573		922.99	0.09713579		1452.98	-0.00034066		1982.98	-0.01219099		2513.01	-0.017955
393.2	0.26253214		923.19	0.09667811		1453.18	0.00067494		1983.18	-0.01349942		2513.21	-0.01777055
393.4	0.26319997		923.39	0.09633516		1453.38	0.00058793		1983.38	-0.01410939		2513.41	-0.01766566
393.6	0.263567		923.59	0.09641772		1453.58	0.00048715		1983.58	-0.01388367		2513.61	-0.01717874
393.8	0.26347827		923.79	0.09658393		1453.78	-0.00001573		1983.78	-0.01279561		2513.81	-0.01753832
394	0.26370644		923.99	0.09588934		1453.98	-0.00036846		1983.98	-0.01183811		2514.01	-0.01705071
394.2	0.26390615		924.19	0.09593023		1454.18	0.00004185		1984.18	-0.01146793		2514.21	-0.01672338
394.4	0.26240434		924.39	0.09626801		1454.38	0.0000525		1984.38	-0.01014531		2514.41	-0.01713874
394.6	0.26219374		924.59	0.0969477		1454.58	0.00096753		1984.58	-0.00940524		2514.61	-0.01811657
394.8	0.26322357		924.79	0.09776183		1454.78	0.00180633		1984.78	-0.00886849		2514.81	-0.01778513
395	0.26416589		924.99	0.09781623		1454.98	0.0014281		1984.98	-0.00769337		2515.01	-0.01779019
395.2	0.26452782		925.19	0.09807426		1455.18	0.00109178		1985.18	-0.00777152		2515.21	-0.01774238
395.4	0.2635391		925.39	0.09893803		1455.38	0.00110635		1985.38	-0.00699011		2515.41	-0.01755654
395.6	0.26421492		925.59	0.09978106		1455.58	0.00001824		1985.58	-0.00688358		2515.61	-0.01817652
395.8	0.26470109		925.79	0.10004401		1455.78	0.0002151		1985.78	-0.00707363		2515.81	-0.01871352
396	0.26508572		925.99	0.1004894		1455.98	0.00078328		1985.98	-0.00660815		2516.01	-0.01899365
396.2	0.26532141		926.19	0.1003524		1456.18	0.00160047		1986.18	-0.00740857		2516.21	-0.01870943
396.4	0.26535509		926.39	0.10064759		1456.38	0.0011731		1986.38	-0.00778389		2516.41	-0.0188215
396.6	0.2649962		926.59	0.10056571		1456.58	0.00058623		1986.58	-0.00826609		2516.61	-0.01828178
396.8	0.26491931		926.79	0.10014864		1456.78	0.00061309		1986.78	-0.00890518		2516.81	-0.0181754
397	0.26445204		926.99	0.09935353		1456.98	0.00158411		1986.98	-0.00912714		2517.01	-0.01786264
397.2	0.26459731		927.19	0.09963109		1457.18	0.00144624		1987.18	-0.01017373		2517.21	-0.01762292
397.4	0.2643587		927.39	0.09915653		1457.38	0.00004403		1987.38	-0.01033081		2517.41	-0.01709063
397.6	0.26471043		927.59	0.0984304		1457.58	-0.00055791		1987.58	-0.01013844		2517.61	-0.01628153
397.8	0.26443985		927.79	0.09855968		1457.78	-0.00190316		1987.78	-0.0095878		2517.81	-0.0162965
398	0.26424392		927.99	0.0972304		1457.98	-0.0022863		1987.98	-0.00873185		2518.01	-0.01610758
398.2	0.26402069		928.19	0.09719002		1458.18	-0.0022004		1988.18	-0.00906437		2518.21	-0.01614746
398.4	0.2637988		928.39	0.09673366		1458.38	-0.00234638		1988.38	-0.00837653		2518.41	-0.01606044
398.6	0.26394146		928.59	0.09718109		1458.58	-0.00171361		1988.58	-0.00955225		2518.61	-0.01616959
398.8	0.26480633		928.79	0.09755573		1458.78	-0.00159752		1988.78	-0.00923202		2518.81	-0.01599038
399	0.26441513		928.99	0.09783986		1458.98	-0.00190324		1988.98	-0.0099172		2519.01	-0.01612461
399.2	0.26432111		929.19	0.09876957		1459.18	-0.00191968		1989.18	-0.01001222		2519.21	-0.01656838
399.4	0.26488438		929.39	0.0990553		1459.38	-0.00062336		1989.38	-0.00987275		2519.41	-0.01697303
399.6	0.26538058		929.59	0.09958338		1459.58	-0.00021435		1989.58	-0.01000428		2519.61	-0.01735876
399.8	0.26579561		929.79	0.0995337		1459.78	0.00071205		1989.78	-0.00974152		2519.81	-0.01799391
400	0.2657731		929.99	0.0999516		1459.98	0.00077883		1989.98	-0.00939956		2520.01	-0.01776345
400.2	0.26584932		930.19	0.09986604		1460.18	0.00139083		1990.18	-0.00942678		2520.21	-0.01687302
400.4	0.26494863		930.39	0.10073025		1460.38	0.0008718		1990.38	-0.00920143		2520.41	-0.01706907
400.6	0.26421487		930.59	0.10039137		1460.58	0.00105848		1990.58	-0.00876459		2520.61	-0.01685607
400.8	0.26480314		930.79	0.1005712		1460.78	0.00127605		1990.78	-0.0084217		2520.81	-0.01712501
401	0.26424031		930.99	0.10061694		1460.98	0.0016786		1990.98	-0.00878924		2521.01	-0.01759734
401.2	0.26388892		931.19	0.10068574		1461.18	0.00095682		1991.18	-0.008734		2521.21	-0.01680032
401.4	0.26328905		931.39	0.09943324		1461.38	-0.00004664		1991.38	-0.0091263		2521.41	-0.01633756
401.6	0.26374867		931.59	0.0989024		1461.58	-0.00021215		1991.58	-0.00833504		2521.61	-0.01656877
401.8	0.26286598		931.79	0.09888246		1461.78	-0.00080722		1991.78	-0.00815442		2521.81	-0.01697216
402	0.26199766		931.99	0.09902547		1461.98	-0.00103103		1991.98	-0.00741965		2522.01	-0.0170576
402.2	0.26296722		932.19	0.09875898		1462.18	-0.00137662		1992.18	-0.00839065		2522.21	-0.01781792
402.4	0.2630555		932.39	0.09774981		1462.38	-0.00191217		1992.38	-0.00926799		2522.41	-0.01845842
402.6	0.26358311		932.59	0.09849099		1462.58	-0.00247401		1992.58	-0.01069171		2522.61	-0.01931252
402.8	0.26452043		932.79	0.09755119		1462.78	-0.00216811		1992.78	-0.00999477		2522.81	-0.01990849
403	0.26496461		932.99	0.0975955		1462.98	-0.00202529		1992.98	-0.01027347		2523.01	-0.02023018
403.2	0.26619443		933.19	0.09757626		1463.18	-0.00150919		1993.18	-0.01003515		2523.21	-0.01991929
403.4	0.26595034		933.39	0.09706561		1463.38	-0.00117349		1993.38	-0.01016974		2523.41	-0.01911661
403.6	0.26590923		933.59	0.0976527		1463.58	-0.00177744		1993.58	-0.00949774		2523.61	-0.01877361
403.8	0.26604201		933.79	0.09731402		1463.78	-0.00163077		1993.78	-0.00905234		2523.81	-0.01857544
404	0.26652421		933.99	0.09737399		1463.98	-0.00114993		1993.98	-0.00922039		2524.01	-0.01709417
404.2	0.26673135		934.19	0.09722065		1464.18	-0.00050776		1994.18	-0.00911428		2524.21	-0.01625727
404.4	0.26663901		934.39	0.0975672		1464.38	-0.0003547		1994.38	-0.00941164		2524.41	-0.01665554
404.6	0.2667331		934.59	0.0971807		1464.58	0.00017569		1994.58	-0.00912779		2524.61	-0.01588454
404.8	0.26672986		934.79	0.09705727		1464.78	0.00044967		1994.78	-0.00836944		2524.81	-0.01557957
405	0.26589584		934.99	0.09688714		1464.98	0.00031896		1994.98	-0.00852313		2525.01	-0.0153362
405.2	0.26524443		935.19	0.09722815		1465.18	0.00103349		1995.18	-0.00834378		2525.21	-0.01438276
405.4	0.26487065		935.39	0.09728776		1465.38	0.00051391		1995.38	-0.00736904		2525.41	-0.01528449
405.6	0.26563062		935.59	0.09819535		1465.58	0.00132179		1995.58	-0.00723086		2525.61	-0.01613034
405.8	0.26473186		935.79	0.09914884		1465.78	0.00177666		1995.78	-0.0072431		2525.81	-0.0170724
406	0.26441014		935.99	0.09915004		1465.98	0.00220519		1995.98	-0.00627527		2526.01	-0.01763742
406.2	0.2650361		936.19	0.09889174		1466.18	0.0021611		1996.18	-0.00664836		2526.21	-0.01842138
406.4	0.26468482		936.39	0.09962772		1466.38	0.00199792		1996.38	-0.00697665		2526.41	-0.018556
406.6	0.26571856		936.59	0.09994764		1466.58	0.00185323		1996.58	-0.00643023		2526.61	-0.01953484
406.8	0.26563266		936.79	0.09996092		1466.78	0.00227658		1996.78	-0.00611302		2526.81	-0.01990066
407	0.26567262		936.99	0.10037322		1466.98	0.00161896		1996.98	-0.00677446		2527.01	-0.01992885
407.2	0.26557876		937.19	0.1002431		1467.18	0.00125333		1997.18	-0.00747538		2527.21	-0.01930978
407.4	0.26522236		937.39	0.09949665		1467.38	0.00075667		1997.38	-0.0068692		2527.41	-0.01917242
407.6	0.26512856		937.59	0.09928156		1467.58	0.00106837		1997.58	-0.00640368		2527.61	-0.01993913
407.8	0.26461938		937.79	0.09867689		1467.78	0.00200753		1997.78	-0.00726544		2527.81	-0.01978751
408	0.26481852		937.99	0.09853481		1467.98	0.00177535		1997.98	-0.00834106		2528.01	-0.01945668
408.2	0.26466537		938.19	0.09755124		1468.18	0.00182376		1998.18	-0.00848703		2528.21	-0.01935324
408.4	0.26415894		938.39	0.09727323		1468.38	0.00212789		1998.38	-0.00876032		2528.41	-0.01960484
408.6	0.26328953		938.59	0.09755762		1468.58	0.0025708		1998.58	-0.00900376		2528.61	-0.01875843
408.8	0.26298641		938.79	0.09716729		1468.78	0.00292366		1998.78	-0.00841269		2528.81	-0.01914825
409	0.26278335		938.99	0.09755823		1468.98	0.00188732		1998.98	-0.00845		2529.01	-0.01967738
409.2	0.26258094		939.19	0.09736802		1469.18	0.00134397		1999.18	-0.00811043		2529.21	-0.01937818
409.4	0.26299148		939.39	0.09733761		1469.38	0.00063004		1999.38	-0.00818427		2529.41	-0.01957623
409.6	0.26308431		939.59	0.09792607		1469.58	0.00175757		1999.58	-0.00889682		2529.61	-0.01966705
409.8	0.26297598		939.79	0.0981653		1469.78	0.0025793		1999.78	-0.00811477		2529.81	-0.01985676
410	0.2635846		939.99	0.09806525		1469.98	0.00256276		1999.98	-0.00776726		2530.01	-0.01930146
410.2	0.26382305		940.19	0.09915569		1470.18	0.00264654		2000.18	-0.00751552		2530.21	-0.01977303
410.4	0.26403494		940.39	0.09984174		1470.38	0.0029344		2000.38	-0.00742125		2530.41	-0.01968387
410.6	0.26483681		940.59	0.10026871		1470.58	0.00184933		2000.58	-0.00748389		2530.61	-0.02050291
410.8	0.26528749		940.79	0.10111745		1470.78	0.00089138		2000.78	-0.00805397		2530.81	-0.02044727
411	0.26595584		940.99	0.10123598		1470.98	0.00062273		2000.98	-0.00813378		2531.01	-0.02046687
411.2	0.26672568		941.19	0.10110612		1471.18	0.00001218		2001.18	-0.00808649		2531.21	-0.02044428
411.4	0.26766157		941.39	0.1009592		1471.38	0.00016648		2001.38	-0.00723923		2531.41	-0.02089224
411.6	0.26670827		941.59	0.10155018		1471.58	0.0006937		2001.58	-0.00755397		2531.61	-0.02072409
411.8	0.26626102		941.79	0.10181018		1471.78	0.00076911		2001.78	-0.00824917		2531.81	-0.02043028
412	0.26588962		941.99	0.10163965		1471.98	0.00119556		2001.98	-0.00855758		2532.01	-0.02012255
412.2	0.26628319		942.19	0.10159076		1472.18	0.00160115		2002.18	-0.00893428		2532.21	-0.01946938
412.4	0.26564652		942.39	0.10150044		1472.38	0.00198497		2002.38	-0.00866523		2532.41	-0.01934023
412.6	0.26463302		942.59	0.10164818		1472.58	0.00204091		2002.58	-0.00920673		2532.61	-0.01835193
412.8	0.26448428		942.79	0.10037551		1472.78	0.00140803		2002.78	-0.00838858		2532.81	-0.01853998
413	0.26444979		942.99	0.10013425		1472.98	0.00019507		2002.98	-0.00852788		2533.01	-0.018449
413.2	0.264541		943.19	0.09906478		1473.18	0.00016177		2003.18	-0.00858985		2533.21	-0.01786595
413.4	0.26464634		943.39	0.09980011		1473.38	0.00079756		2003.38	-0.00881711		2533.41	-0.01715736
413.6	0.26419733		943.59	0.09976967		1473.58	0.00141335		2003.58	-0.00912781		2533.61	-0.01731589
413.8	0.26532071		943.79	0.09929008		1473.78	0.00163159		2003.78	-0.00909509		2533.81	-0.01736626
414	0.26485441		943.99	0.09944303		1473.98	0.00125786		2003.98	-0.00869877		2534.01	-0.01711722
414.2	0.26434388		944.19	0.09972235		1474.18	0.00106542		2004.18	-0.0077892		2534.21	-0.0172804
414.4	0.26506502		944.39	0.0995162		1474.38	0.00053856		2004.38	-0.00740812		2534.41	-0.0164395
414.6	0.26582781		944.59	0.09970043		1474.58	0.00006379		2004.58	-0.00771861		2534.61	-0.01763207
414.8	0.2663864		944.79	0.09948397		1474.78	-0.00052371		2004.78	-0.00772466		2534.81	-0.01754986
415	0.26734991		944.99	0.09935415		1474.98	0.00091583		2004.98	-0.00710545		2535.01	-0.01807434
415.2	0.26729045		945.19	0.09921165		1475.18	0.0003447		2005.18	-0.00748016		2535.21	-0.01825092
415.4	0.26745723		945.39	0.09928418		1475.38	0.00038713		2005.38	-0.00723105		2535.41	-0.01765727
415.6	0.26679132		945.59	0.09902676		1475.58	0.00043796		2005.58	-0.00758242		2535.61	-0.01740096
415.8	0.26669334		945.79	0.0990717		1475.78	0.00076899		2005.78	-0.00815929		2535.81	-0.01758322
416	0.26664041		945.99	0.09905711		1475.98	0.00077744		2005.98	-0.00851614		2536.01	-0.01707024
416.2	0.26667453		946.19	0.09963268		1476.18	0.00048073		2006.18	-0.0086779		2536.21	-0.01725892
416.4	0.2656066		946.39	0.09923184		1476.38	0.00075623		2006.38	-0.00865104		2536.41	-0.01709093
416.6	0.26512227		946.59	0.10034622		1476.58	-0.00010216		2006.58	-0.00882927		2536.61	-0.01701423
416.8	0.26605859		946.79	0.10049475		1476.78	-0.00018764		2006.78	-0.00886854		2536.81	-0.01765881
417	0.26657918		946.99	0.10109586		1476.98	-0.00007838		2006.98	-0.00915808		2537.01	-0.01853786
417.2	0.26756955		947.19	0.10067815		1477.18	0.00029958		2007.18	-0.00919835		2537.21	-0.01848762
417.4	0.26739169		947.39	0.10072011		1477.38	0.00034726		2007.38	-0.01022732		2537.41	-0.0176883
417.6	0.26681811		947.59	0.10061265		1477.58	0.00030793		2007.58	-0.01146293		2537.61	-0.0179679
417.8	0.26762151		947.79	0.10108779		1477.78	0.00057744		2007.78	-0.01109974		2537.81	-0.0183186
418	0.26645289		947.99	0.10139801		1477.98	0.00104419		2007.98	-0.0101284		2538.01	-0.01771465
418.2	0.26717946		948.19	0.10097721		1478.18	0.00055249		2008.18	-0.00970383		2538.21	-0.01799851
418.4	0.26744038		948.39	0.10063431		1478.38	0.00117893		2008.38	-0.01003104		2538.41	-0.01787114
418.6	0.2676205		948.59	0.10137103		1478.58	0.00160912		2008.58	-0.01026915		2538.61	-0.01886928
418.8	0.26709757		948.79	0.10077653		1478.78	0.00157451		2008.78	-0.01004293		2538.81	-0.01848437
419	0.26685939		948.99	0.10049268		1478.98	0.0019429		2008.98	-0.00962552		2539.01	-0.01846273
419.2	0.26634772		949.19	0.09967		1479.18	0.0007164		2009.18	-0.00933814		2539.21	-0.01771161
419.4	0.26622189		949.39	0.09941376		1479.38	-0.0000984		2009.38	-0.00846947		2539.41	-0.01689128
419.6	0.26554852		949.59	0.09880038		1479.58	0.00013794		2009.58	-0.00852433		2539.61	-0.0164235
419.8	0.26519872		949.79	0.09889577		1479.78	0.0002864		2009.78	-0.009113		2539.81	-0.01619075
420	0.26453661		949.99	0.09878462		1479.98	0.00039421		2009.98	-0.00859235		2540.01	-0.01650028
420.2	0.26358271		950.19	0.09919847		1480.18	0.00064923		2010.18	-0.00838798		2540.21	-0.01633104
420.4	0.26343692		950.39	0.09989996		1480.38	0.00057957		2010.38	-0.00849733		2540.41	-0.01619975
420.6	0.26424914		950.59	0.10048099		1480.58	0.00067896		2010.58	-0.00827607		2540.61	-0.01678421
420.8	0.26493993		950.79	0.0996226		1480.78	0.0015394		2010.78	-0.00744307		2540.81	-0.01598015
421	0.26533269		950.99	0.09886642		1480.98	0.00167596		2010.98	-0.00722397		2541.01	-0.01681565
421.2	0.26607653		951.19	0.09819656		1481.18	0.00195705		2011.18	-0.00765572		2541.21	-0.01615773
421.4	0.26508764		951.39	0.09839438		1481.38	0.00205597		2011.38	-0.00863091		2541.41	-0.01549154
421.6	0.26446966		951.59	0.0998845		1481.58	0.00243136		2011.58	-0.00864483		2541.61	-0.01614548
421.8	0.26487428		951.79	0.09982977		1481.78	0.00256577		2011.78	-0.00842586		2541.81	-0.01654304
422	0.26439857		951.99	0.10038677		1481.98	0.00262699		2011.98	-0.0078206		2542.01	-0.01601844
422.2	0.26440018		952.19	0.09996039		1482.18	0.00237663		2012.18	-0.00802859		2542.21	-0.01663582
422.4	0.26396195		952.39	0.09990255		1482.38	0.0031939		2012.38	-0.00842793		2542.41	-0.01673559
422.6	0.26406484		952.59	0.10002044		1482.58	0.00266736		2012.58	-0.00865709		2542.61	-0.01706067
422.8	0.26382397		952.79	0.09956357		1482.78	0.00193217		2012.78	-0.00930592		2542.81	-0.01678253
423	0.26395604		952.99	0.0992776		1482.98	0.00141302		2012.98	-0.00903832		2543.01	-0.01676842
423.2	0.26376328		953.19	0.09868488		1483.18	0.00107319		2013.18	-0.00966182		2543.21	-0.01711519
423.4	0.26381642		953.39	0.09923389		1483.38	0.00131153		2013.38	-0.01055038		2543.41	-0.01763943
423.6	0.26410067		953.59	0.09844115		1483.58	0.00245114		2013.58	-0.01136681		2543.61	-0.01730598
423.8	0.26402439		953.79	0.09853639		1483.78	0.00267491		2013.78	-0.01140478		2543.81	-0.01821679
424	0.26363511		953.99	0.09885117		1483.98	0.00269344		2013.98	-0.0109077		2544.01	-0.01842614
424.2	0.26345674		954.19	0.09896025		1484.18	0.00217805		2014.18	-0.01157763		2544.21	-0.01824213
424.4	0.26426571		954.39	0.0993852		1484.38	0.00189223		2014.38	-0.01092857		2544.41	-0.01888844
424.6	0.26476008		954.59	0.09915522		1484.58	0.00218267		2014.58	-0.01003682		2544.61	-0.01907948
424.8	0.26454271		954.79	0.09892741		1484.78	0.0027716		2014.78	-0.00988078		2544.81	-0.01825819
425	0.26558179		954.99	0.09916158		1484.98	0.00275578		2014.98	-0.01009206		2545.01	-0.01970067
425.2	0.26591869		955.19	0.09986327		1485.18	0.00349921		2015.18	-0.01045767		2545.21	-0.0186565
425.4	0.26572711		955.39	0.10012983		1485.38	0.00389315		2015.38	-0.01040683		2545.41	-0.01853386
425.6	0.26650756		955.59	0.10071524		1485.58	0.00336501		2015.58	-0.00972716		2545.61	-0.01890061
425.8	0.26662679		955.79	0.10040534		1485.78	0.00282609		2015.78	-0.00986491		2545.81	-0.01858185
426	0.26675093		955.99	0.10059874		1485.98	0.00234585		2015.98	-0.009499		2546.01	-0.01795924
426.2	0.26719225		956.19	0.09967003		1486.18	0.00250017		2016.18	-0.00911483		2546.21	-0.01795481
426.4	0.26728811		956.39	0.0995079		1486.38	0.00227314		2016.38	-0.00907673		2546.41	-0.0172565
426.6	0.26720783		956.59	0.09910162		1486.58	0.00098004		2016.58	-0.00872902		2546.61	-0.01763033
426.8	0.26755319		956.79	0.09852993		1486.78	0.00036784		2016.78	-0.00872593		2546.81	-0.01686695
427	0.26789476		956.99	0.09763151		1486.98	0.00020583		2016.98	-0.00830056		2547.01	-0.01687787
427.2	0.2677967		957.19	0.09716441		1487.18	0.00030643		2017.18	-0.00857241		2547.21	-0.01634199
427.4	0.26853831		957.39	0.09711727		1487.38	0.00083729		2017.38	-0.00855877		2547.41	-0.01615609
427.6	0.26889785		957.59	0.09699837		1487.58	0.00072067		2017.58	-0.00796207		2547.61	-0.01573925
427.8	0.26801746		957.79	0.09716894		1487.78	0.00033151		2017.78	-0.00756391		2547.81	-0.0162959
428	0.26806238		957.99	0.09690753		1487.98	-0.00020891		2017.98	-0.00703472		2548.01	-0.01563393
428.2	0.26784354		958.19	0.09717572		1488.18	-0.00062496		2018.18	-0.00751576		2548.21	-0.01578134
428.4	0.26815495		958.39	0.09826797		1488.38	-0.00069811		2018.38	-0.00671998		2548.41	-0.01628059
428.6	0.26761367		958.59	0.09924905		1488.58	0.00010127		2018.58	-0.00719273		2548.61	-0.01647492
428.8	0.26711314		958.79	0.09956361		1488.78	0.00060845		2018.78	-0.00753347		2548.81	-0.01644725
429	0.26706446		958.99	0.10079965		1488.98	0.00064206		2018.98	-0.00656612		2549.01	-0.01688833
429.2	0.26681931		959.19	0.10094914		1489.18	0.00095777		2019.18	-0.00762661		2549.21	-0.01656546
429.4	0.26699246		959.39	0.10196172		1489.38	0.00126387		2019.38	-0.00817494		2549.41	-0.01637345
429.6	0.2666007		959.59	0.10302384		1489.58	0.00084115		2019.58	-0.00872442		2549.61	-0.01659765
429.8	0.26547093		959.79	0.10343358		1489.78	0.00078077		2019.78	-0.00953357		2549.81	-0.01647787
430	0.26497043		959.99	0.10290867		1489.98	0.00016983		2019.98	-0.00983184		2550.01	-0.01654794
430.2	0.26506702		960.19	0.10245873		1490.18	0.00053391		2020.18	-0.00966383		2550.21	-0.01684451
430.4	0.26512335		960.39	0.10162028		1490.38	0.00093981		2020.38	-0.00983544		2550.41	-0.01671401
430.6	0.26483014		960.59	0.10133322		1490.58	0.00047012		2020.58	-0.00982257		2550.61	-0.01735786
430.8	0.26453147		960.79	0.10034169		1490.78	0.00106383		2020.78	-0.00959423		2550.81	-0.01642036
431	0.26464387		960.99	0.09962761		1490.98	0.00095777		2020.98	-0.00937724		2551.01	-0.01614662
431.2	0.26398041		961.19	0.09936025		1491.18	0.00156511		2021.18	-0.00944351		2551.21	-0.01586892
431.4	0.26401313		961.39	0.09943844		1491.38	0.00193964		2021.38	-0.00925471		2551.41	-0.01597832
431.6	0.26384522		961.59	0.10002318		1491.58	0.00164418		2021.58	-0.00903215		2551.61	-0.01585802
431.8	0.26320579		961.79	0.0997226		1491.78	0.00203422		2021.78	-0.00879493		2551.81	-0.01631217
432	0.26393178		961.99	0.1002148		1491.98	0.0020824		2021.98	-0.00821719		2552.01	-0.01642969
432.2	0.26436491		962.19	0.10062841		1492.18	0.00197467		2022.18	-0.0081808		2552.21	-0.01709509
432.4	0.2650684		962.39	0.10122492		1492.38	0.00194362		2022.38	-0.0074383		2552.41	-0.01725978
432.6	0.26459156		962.59	0.10161402		1492.58	0.00225267		2022.58	-0.0070791		2552.61	-0.01775562
432.8	0.26485924		962.79	0.10193432		1492.78	0.00177388		2022.78	-0.00715021		2552.81	-0.01816811
433	0.26510776		962.99	0.1026994		1492.98	0.00233424		2022.98	-0.00752304		2553.01	-0.01866782
433.2	0.26661447		963.19	0.10260187		1493.18	0.00265736		2023.18	-0.00881907		2553.21	-0.01897091
433.4	0.26701741		963.39	0.10324394		1493.38	0.00290345		2023.38	-0.00875608		2553.41	-0.01877233
433.6	0.26725741		963.59	0.1027898		1493.58	0.00221883		2023.58	-0.00878632		2553.61	-0.01949706
433.8	0.26718522		963.79	0.10201937		1493.78	0.00196661		2023.78	-0.00912167		2553.81	-0.01909489
434	0.26732814		963.99	0.10142679		1493.98	0.00169682		2023.98	-0.01011527		2554.01	-0.01846319
434.2	0.26861154		964.19	0.10089892		1494.18	0.0026488		2024.18	-0.01026427		2554.21	-0.01789805
434.4	0.268876		964.39	0.10014468		1494.38	0.00270793		2024.38	-0.01017186		2554.41	-0.01765655
434.6	0.26798993		964.59	0.10018527		1494.58	0.00171694		2024.58	-0.0102516		2554.61	-0.01681974
434.8	0.26739385		964.79	0.09928848		1494.78	0.00246614		2024.78	-0.01000106		2554.81	-0.01640337
435	0.26742961		964.99	0.09800979		1494.98	0.00170657		2024.98	-0.01000088		2555.01	-0.01591092
435.2	0.26690055		965.19	0.0978963		1495.18	0.00211339		2025.18	-0.01038634		2555.21	-0.01576421
435.4	0.26665627		965.39	0.0973596		1495.38	0.00191284		2025.38	-0.00974112		2555.41	-0.01484056
435.6	0.26637357		965.59	0.09680757		1495.58	0.00115729		2025.58	-0.00946743		2555.61	-0.01428009
435.8	0.26663358		965.79	0.09628634		1495.78	0.00141881		2025.78	-0.00860637		2555.81	-0.0148791
436	0.26661585		965.99	0.09607499		1495.98	0.00190798		2025.98	-0.00851362		2556.01	-0.01550352
436.2	0.26647596		966.19	0.09583759		1496.18	0.00144389		2026.18	-0.00872921		2556.21	-0.01589268
436.4	0.26632997		966.39	0.09702365		1496.38	0.00186882		2026.38	-0.00860109		2556.41	-0.01592837
436.6	0.26608261		966.59	0.09743549		1496.58	0.00193583		2026.58	-0.00850763		2556.61	-0.01647294
436.8	0.26630176		966.79	0.09786213		1496.78	0.00068083		2026.78	-0.00802457		2556.81	-0.01661507
437	0.26662585		966.99	0.09816845		1496.98	0.0012682		2026.98	-0.00835157		2557.01	-0.01657583
437.2	0.26728595		967.19	0.09833186		1497.18	0.00079351		2027.18	-0.00730248		2557.21	-0.01604605
437.4	0.26695986		967.39	0.09881918		1497.38	-0.00028969		2027.38	-0.00664261		2557.41	-0.01491289
437.6	0.26687888		967.59	0.09884778		1497.58	-0.00121626		2027.58	-0.00714418		2557.61	-0.01462753
437.8	0.26638448		967.79	0.09946737		1497.78	-0.00109474		2027.78	-0.00790253		2557.81	-0.01393892
438	0.26699552		967.99	0.1000191		1497.98	-0.00134098		2027.98	-0.00871281		2558.01	-0.01352791
438.2	0.26720918		968.19	0.09998654		1498.18	-0.00194301		2028.18	-0.00838629		2558.21	-0.01322662
438.4	0.26661127		968.39	0.09932407		1498.38	-0.00223		2028.38	-0.00851545		2558.41	-0.01374953
438.6	0.26728667		968.59	0.09913094		1498.58	-0.00269311		2028.58	-0.00849063		2558.61	-0.0135769
438.8	0.26711717		968.79	0.09891216		1498.78	-0.00174196		2028.78	-0.00887909		2558.81	-0.01406625
439	0.26733227		968.99	0.09820726		1498.98	-0.0017102		2028.98	-0.00944212		2559.01	-0.01461916
439.2	0.26715047		969.19	0.09834005		1499.18	-0.0007388		2029.18	-0.01007613		2559.21	-0.01483672
439.4	0.26648196		969.39	0.09801463		1499.38	-0.00017229		2029.38	-0.01032103		2559.41	-0.01567925
439.6	0.26686345		969.59	0.09869193		1499.58	0.00002424		2029.58	-0.01101052		2559.61	-0.01607892
439.8	0.26649895		969.79	0.09945639		1499.78	0.00145702		2029.78	-0.01132665		2559.81	-0.01732137
440	0.26605025		969.99	0.09965456		1499.98	0.0020758		2029.98	-0.01239071		2560.01	-0.01846279
440.2	0.26604681		970.19	0.10014045		1500.18	0.00275047		2030.18	-0.01348288		2560.21	-0.01930088
440.4	0.26656748		970.39	0.10034697		1500.38	0.00358892		2030.38	-0.01310022		2560.41	-0.01954051
440.6	0.26688848		970.59	0.10040248		1500.58	0.00412697		2030.58	-0.01287923		2560.61	-0.02006618
440.8	0.26695107		970.79	0.10013966		1500.78	0.00328007		2030.78	-0.01269358		2560.81	-0.01942231
441	0.26720027		970.99	0.09997513		1500.98	0.00394767		2030.98	-0.01349613		2561.01	-0.01856679
441.2	0.26662204		971.19	0.09948756		1501.18	0.00392888		2031.18	-0.012475		2561.21	-0.01825798
441.4	0.26596452		971.39	0.09962408		1501.38	0.0030642		2031.38	-0.01363475		2561.41	-0.01750961
441.6	0.26580437		971.59	0.09980102		1501.58	0.00227314		2031.58	-0.01456808		2561.61	-0.01851145
441.8	0.26528039		971.79	0.10020944		1501.78	0.00277929		2031.78	-0.01487009		2561.81	-0.01894492
442	0.2659083		971.99	0.0995112		1501.98	0.00210491		2031.98	-0.01488994		2562.01	-0.01900053
442.2	0.26560891		972.19	0.09942104		1502.18	0.00199569		2032.18	-0.01480421		2562.21	-0.01815827
442.4	0.26656823		972.39	0.09878352		1502.38	0.00228368		2032.38	-0.01419196		2562.41	-0.0184142
442.6	0.26711548		972.59	0.09899436		1502.58	0.00185727		2032.58	-0.01367215		2562.61	-0.01774373
442.8	0.26685445		972.79	0.09889921		1502.78	0.00200695		2032.78	-0.01350344		2562.81	-0.01756713
443	0.26788598		972.99	0.09871396		1502.98	0.00258732		2032.98	-0.01340382		2563.01	-0.01716621
443.2	0.26718927		973.19	0.09917526		1503.18	0.00314005		2033.18	-0.01240664		2563.21	-0.01700379
443.4	0.26723037		973.39	0.09924313		1503.38	0.00334543		2033.38	-0.01206222		2563.41	-0.01754797
443.6	0.26791539		973.59	0.09970433		1503.58	0.00256021		2033.58	-0.01127748		2563.61	-0.01749524
443.8	0.2677828		973.79	0.1001022		1503.78	0.00294967		2033.78	-0.01132294		2563.81	-0.01748649
444	0.26833431		973.99	0.09971757		1503.98	0.00284025		2033.98	-0.01199484		2564.01	-0.01724173
444.2	0.2687883		974.19	0.09951946		1504.18	0.00333567		2034.18	-0.01239181		2564.21	-0.01765515
444.4	0.26856404		974.39	0.09931352		1504.38	0.00250871		2034.38	-0.01184546		2564.41	-0.01751477
444.6	0.26766431		974.59	0.0994137		1504.58	0.00195464		2034.58	-0.01178795		2564.61	-0.01674918
444.8	0.26697518		974.79	0.09870013		1504.78	0.00081335		2034.78	-0.01163387		2564.81	-0.01583581
445	0.26559502		974.99	0.09889656		1504.98	0.00197222		2034.98	-0.0119218		2565.01	-0.01634137
445.2	0.26456492		975.19	0.09860568		1505.18	0.00194691		2035.18	-0.01235228		2565.21	-0.01646268
445.4	0.2636853		975.39	0.09970159		1505.38	0.00110214		2035.38	-0.01293752		2565.41	-0.01670626
445.6	0.2633408		975.59	0.10035081		1505.58	0.00148107		2035.58	-0.01278816		2565.61	-0.01782735
445.8	0.2626108		975.79	0.10020228		1505.78	0.00179735		2035.78	-0.01330881		2565.81	-0.01813281
446	0.26306334		975.99	0.10052175		1505.98	0.00133375		2035.98	-0.01325092		2566.01	-0.01825706
446.2	0.26352352		976.19	0.10110061		1506.18	0.00194259		2036.18	-0.01309992		2566.21	-0.01787924
446.4	0.26368731		976.39	0.10058074		1506.38	0.00183466		2036.38	-0.01199958		2566.41	-0.01826279
446.6	0.26359836		976.59	0.10117806		1506.58	0.00169797		2036.58	-0.0117109		2566.61	-0.01832834
446.8	0.26435937		976.79	0.09985653		1506.78	0.00225979		2036.78	-0.01167708		2566.81	-0.01845537
447	0.26488245		976.99	0.10014989		1506.98	0.00310542		2036.98	-0.01105676		2567.01	-0.01856931
447.2	0.2647477		977.19	0.09976413		1507.18	0.00205322		2037.18	-0.01020208		2567.21	-0.01954434
447.4	0.26618037		977.39	0.09970001		1507.38	0.00158773		2037.38	-0.01044882		2567.41	-0.01942777
447.6	0.26684986		977.59	0.09916323		1507.58	0.00066661		2037.58	-0.01000205		2567.61	-0.01943957
447.8	0.26780889		977.79	0.09945219		1507.78	0.00057981		2037.78	-0.01023024		2567.81	-0.01906484
448	0.26752393		977.99	0.09929818		1507.98	0.00050085		2037.98	-0.00958532		2568.01	-0.01878506
448.2	0.26737122		978.19	0.09971481		1508.18	-0.00033075		2038.18	-0.00942099		2568.21	-0.01915419
448.4	0.26698904		978.39	0.09945605		1508.38	-0.00018782		2038.38	-0.00929762		2568.41	-0.01901877
448.6	0.26652012		978.59	0.0987619		1508.58	0.00028636		2038.58	-0.00978986		2568.61	-0.0185669
448.8	0.26693156		978.79	0.09834279		1508.78	0.00058653		2038.78	-0.01014342		2568.81	-0.01875941
449	0.26669988		978.99	0.09835765		1508.98	0.00141374		2038.98	-0.01047146		2569.01	-0.01893822
449.2	0.26658065		979.19	0.09787601		1509.18	0.0007504		2039.18	-0.01048128		2569.21	-0.01826184
449.4	0.26624313		979.39	0.09758372		1509.38	0.00156277		2039.38	-0.01066614		2569.41	-0.01830149
449.6	0.26618315		979.59	0.09738063		1509.58	0.00257175		2039.58	-0.01153057		2569.61	-0.01816564
449.8	0.26648537		979.79	0.0968833		1509.78	0.00310794		2039.78	-0.01180047		2569.81	-0.01802649
450	0.26668714		979.99	0.09741776		1509.98	0.00408788		2039.98	-0.01175703		2570.01	-0.01817127
450.2	0.26620087		980.19	0.09783092		1510.18	0.00496863		2040.18	-0.01218354		2570.21	-0.01805077
450.4	0.26514203		980.39	0.09818385		1510.38	0.00541943		2040.38	-0.01241992		2570.41	-0.01838522
450.6	0.26464919		980.59	0.09868579		1510.58	0.00603089		2040.58	-0.0130498		2570.61	-0.01872334
450.8	0.2642374		980.79	0.09805795		1510.78	0.00683496		2040.78	-0.01310064		2570.81	-0.018587
451	0.26412571		980.99	0.09869723		1510.98	0.00599991		2040.98	-0.01199656		2571.01	-0.019374
451.2	0.264725		981.19	0.0976675		1511.18	0.00500149		2041.18	-0.01145696		2571.21	-0.01957929
451.4	0.26506574		981.39	0.097746		1511.38	0.00479368		2041.38	-0.0103714		2571.41	-0.01911863
451.6	0.26475958		981.59	0.09741074		1511.58	0.00429291		2041.58	-0.00897246		2571.61	-0.0199575
451.8	0.2644295		981.79	0.09840186		1511.78	0.00347634		2041.78	-0.0083022		2571.81	-0.02025485
452	0.26399652		981.99	0.09926878		1511.98	0.00341859		2041.98	-0.00704273		2572.01	-0.01997499
452.2	0.26390242		982.19	0.10012913		1512.18	0.00243723		2042.18	-0.00711255		2572.21	-0.01987369
452.4	0.26420381		982.39	0.09980934		1512.38	0.00238818		2042.38	-0.00757551		2572.41	-0.01935908
452.6	0.26476984		982.59	0.09921144		1512.58	0.00111985		2042.58	-0.00829645		2572.61	-0.01904868
452.8	0.26505516		982.79	0.09964315		1512.78	0.00001112		2042.78	-0.00869304		2572.81	-0.01901956
453	0.26498692		982.99	0.09969977		1512.98	-0.00054208		2042.98	-0.00834092		2573.01	-0.01824756
453.2	0.26522416		983.19	0.09951623		1513.18	-0.00051129		2043.18	-0.00914091		2573.21	-0.01727886
453.4	0.26595096		983.39	0.09934903		1513.38	0.00039996		2043.38	-0.00967111		2573.41	-0.01674058
453.6	0.26603319		983.59	0.09955847		1513.58	0.000762		2043.58	-0.00989018		2573.61	-0.01578749
453.8	0.26633113		983.79	0.09964394		1513.78	0.00171216		2043.78	-0.0106424		2573.81	-0.01621375
454	0.26611178		983.99	0.10007527		1513.98	0.00257275		2043.98	-0.01180274		2574.01	-0.01646927
454.2	0.26514751		984.19	0.10014962		1514.18	0.00351345		2044.18	-0.01204983		2574.21	-0.01703243
454.4	0.26516158		984.39	0.10017049		1514.38	0.0042266		2044.38	-0.01194907		2574.41	-0.01769088
454.6	0.26536143		984.59	0.10029452		1514.58	0.00510293		2044.58	-0.01113202		2574.61	-0.0178425
454.8	0.2657006		984.79	0.10011144		1514.78	0.00483497		2044.78	-0.01071128		2574.81	-0.01777014
455	0.26607422		984.99	0.09940861		1514.98	0.00410387		2044.98	-0.01034427		2575.01	-0.01855385
455.2	0.26596877		985.19	0.09856787		1515.18	0.00379895		2045.18	-0.01031024		2575.21	-0.01921634
455.4	0.26593652		985.39	0.0984163		1515.38	0.00258172		2045.38	-0.00997443		2575.41	-0.01916718
455.6	0.26525184		985.59	0.09900947		1515.58	0.00236266		2045.58	-0.01002075		2575.61	-0.02011184
455.8	0.26557184		985.79	0.09823586		1515.78	0.00111212		2045.78	-0.01044134		2575.81	-0.01931406
456	0.26542714		985.99	0.09856498		1515.98	0.00045137		2045.98	-0.0097436		2576.01	-0.01923648
456.2	0.2648102		986.19	0.09829205		1516.18	-0.0008417		2046.18	-0.01058537		2576.21	-0.01884904
456.4	0.26488323		986.39	0.09785458		1516.38	-0.00239137		2046.38	-0.01081028		2576.41	-0.01880886
456.6	0.26457951		986.59	0.09799202		1516.58	-0.00366302		2046.58	-0.01044355		2576.61	-0.01942852
456.8	0.26375436		986.79	0.09887383		1516.78	-0.00401372		2046.78	-0.01063265		2576.81	-0.01900972
457	0.26379579		986.99	0.09952519		1516.98	-0.00417194		2046.98	-0.01046963		2577.01	-0.01810067
457.2	0.26340814		987.19	0.09952824		1517.18	-0.00415375		2047.18	-0.01109091		2577.21	-0.01740895
457.4	0.26352613		987.39	0.09969676		1517.38	-0.0037892		2047.38	-0.01105442		2577.41	-0.01741078
457.6	0.26365416		987.59	0.09898586		1517.58	-0.00327753		2047.58	-0.01147859		2577.61	-0.01748887
457.8	0.26393169		987.79	0.09903376		1517.78	-0.00288396		2047.78	-0.01189273		2577.81	-0.01814456
458	0.26374155		987.99	0.09894783		1517.98	-0.00221482		2047.98	-0.01109695		2578.01	-0.01811505
458.2	0.26366416		988.19	0.09907621		1518.18	-0.00182721		2048.18	-0.00987933		2578.21	-0.01823508
458.4	0.26472968		988.39	0.09929875		1518.38	-0.00139247		2048.38	-0.0097971		2578.41	-0.017666
458.6	0.26468333		988.59	0.09976061		1518.58	-0.00068069		2048.58	-0.00906506		2578.61	-0.01664271
458.8	0.26435192		988.79	0.09879196		1518.78	-0.00040477		2048.78	-0.00899014		2578.81	-0.01624058
459	0.26427896		988.99	0.09834454		1518.98	-0.00030923		2048.98	-0.00869537		2579.01	-0.01617364
459.2	0.26448829		989.19	0.09856068		1519.18	-0.00034274		2049.18	-0.00844385		2579.21	-0.01650332
459.4	0.2653526		989.39	0.09786214		1519.38	-0.00009049		2049.38	-0.00809462		2579.41	-0.01647323
459.6	0.26468056		989.59	0.09798811		1519.58	0.00042216		2049.58	-0.00777128		2579.61	-0.01706744
459.8	0.26516184		989.79	0.09752686		1519.78	0.00045618		2049.78	-0.00829603		2579.81	-0.01705073
460	0.26464871		989.99	0.09763776		1519.98	0.000474		2049.98	-0.00800834		2580.01	-0.01779623
460.2	0.26471659		990.19	0.0978139		1520.18	0.00043179		2050.18	-0.00827623		2580.21	-0.01801879
460.4	0.26404577		990.39	0.09883231		1520.38	0.0002604		2050.38	-0.00839189		2580.41	-0.018727
460.6	0.26394263		990.59	0.09891043		1520.58	0.00085521		2050.58	-0.00888851		2580.61	-0.01894351
460.8	0.26362369		990.79	0.09895527		1520.78	0.0012563		2050.78	-0.01025629		2580.81	-0.01860337
461	0.26302633		990.99	0.09945639		1520.98	0.00132135		2050.98	-0.01108837		2581.01	-0.01822213
461.2	0.26240149		991.19	0.09903927		1521.18	0.00067584		2051.18	-0.01146312		2581.21	-0.01843219
461.4	0.26299247		991.39	0.09912802		1521.38	0.00104225		2051.38	-0.01182341		2581.41	-0.01869107
461.6	0.26318048		991.59	0.09834716		1521.58	0.0009637		2051.58	-0.0121188		2581.61	-0.01859581
461.8	0.2624895		991.79	0.09845169		1521.78	0.00040633		2051.78	-0.01249119		2581.81	-0.01836599
462	0.26206164		991.99	0.09841132		1521.98	0.00026014		2051.98	-0.01260887		2582.01	-0.0184024
462.2	0.26234006		992.19	0.09851552		1522.18	-0.00043705		2052.18	-0.01233764		2582.21	-0.01793794
462.4	0.26210145		992.39	0.09901261		1522.38	-0.00060481		2052.38	-0.01169427		2582.41	-0.01700242
462.6	0.26153444		992.59	0.09887586		1522.58	-0.00049977		2052.58	-0.01072003		2582.61	-0.0161949
462.8	0.26201483		992.79	0.09873416		1522.78	-0.00074916		2052.78	-0.00927327		2582.81	-0.01607065
463	0.26238991		992.99	0.09940575		1522.98	-0.00091613		2052.98	-0.00910275		2583.01	-0.01593892
463.2	0.26277392		993.19	0.10017446		1523.18	-0.00050946		2053.18	-0.00845525		2583.21	-0.0160791
463.4	0.26304597		993.39	0.10017594		1523.38	0.00021043		2053.38	-0.00772816		2583.41	-0.01662251
463.6	0.26252811		993.59	0.10109628		1523.58	0.00091194		2053.58	-0.00709996		2583.61	-0.0173131
463.8	0.26330353		993.79	0.10134663		1523.78	0.00108435		2053.78	-0.00814024		2583.81	-0.0171245
464	0.26291355		993.99	0.1009056		1523.98	0.00105721		2053.98	-0.00786953		2584.01	-0.0169105
464.2	0.26374625		994.19	0.10170872		1524.18	0.0013463		2054.18	-0.00811002		2584.21	-0.01748597
464.4	0.26397134		994.39	0.10127212		1524.38	0.00131946		2054.38	-0.00812766		2584.41	-0.01808173
464.6	0.26471267		994.59	0.10018502		1524.58	0.00123322		2054.58	-0.00787802		2584.61	-0.01839215
464.8	0.2652879		994.79	0.10004342		1524.78	0.00112542		2054.78	-0.00849261		2584.81	-0.01838934
465	0.26547054		994.99	0.10090678		1524.98	0.00122083		2054.98	-0.00900255		2585.01	-0.01886661
465.2	0.26566023		995.19	0.10027083		1525.18	0.00049881		2055.18	-0.00974712		2585.21	-0.01919409
465.4	0.26570485		995.39	0.10006827		1525.38	0.00057346		2055.38	-0.01080918		2585.41	-0.01934425
465.6	0.26547455		995.59	0.10022371		1525.58	0.00040705		2055.58	-0.01082923		2585.61	-0.01938635
465.8	0.26500431		995.79	0.10009083		1525.78	-0.00001232		2055.78	-0.01103455		2585.81	-0.01907919
466	0.26496525		995.99	0.09983544		1525.98	-0.00062906		2055.98	-0.01098659		2586.01	-0.01923553
466.2	0.26461964		996.19	0.10069943		1526.18	-0.00135806		2056.18	-0.01021974		2586.21	-0.01921543
466.4	0.26480017		996.39	0.10088473		1526.38	-0.0004169		2056.38	-0.00956885		2586.41	-0.01877558
466.6	0.2650124		996.59	0.10121442		1526.58	-0.00037697		2056.58	-0.00913064		2586.61	-0.01860794
466.8	0.26523846		996.79	0.10199282		1526.78	0.00005181		2056.78	-0.00915505		2586.81	-0.01825287
467	0.26510993		996.99	0.10231422		1526.98	0.00104044		2056.98	-0.0097052		2587.01	-0.01798537
467.2	0.26498464		997.19	0.10192255		1527.18	0.00142104		2057.18	-0.00928747		2587.21	-0.01730973
467.4	0.26417474		997.39	0.10175983		1527.38	0.00141057		2057.38	-0.00937456		2587.41	-0.01724433
467.6	0.26302029		997.59	0.10165707		1527.58	0.00200954		2057.58	-0.00958225		2587.61	-0.01669165
467.8	0.26275341		997.79	0.10144499		1527.78	0.00139247		2057.78	-0.01099161		2587.81	-0.0160401
468	0.26191942		997.99	0.10202662		1527.98	0.00175399		2057.98	-0.01084367		2588.01	-0.01613844
468.2	0.26196448		998.19	0.10197636		1528.18	0.00129815		2058.18	-0.01124438		2588.21	-0.01738478
468.4	0.26132326		998.39	0.1018928		1528.38	0.00157311		2058.38	-0.01077926		2588.41	-0.01754901
468.6	0.26088272		998.59	0.10100398		1528.58	0.00174062		2058.58	-0.01109463		2588.61	-0.01721141
468.8	0.26124472		998.79	0.10154621		1528.78	0.00186258		2058.78	-0.01208912		2588.81	-0.01717483
469	0.26033166		998.99	0.10127875		1528.98	0.00155294		2058.98	-0.01190973		2589.01	-0.01821981
469.2	0.2593929		999.19	0.10084284		1529.18	0.00165447		2059.18	-0.01204027		2589.21	-0.01773047
469.4	0.25935839		999.39	0.10018323		1529.38	0.00226548		2059.38	-0.01162585		2589.41	-0.01794561
469.6	0.26006295		999.59	0.09953235		1529.58	0.00276591		2059.58	-0.01103113		2589.61	-0.01869125
469.8	0.26083527		999.79	0.09842963		1529.78	0.0028828		2059.78	-0.01051785		2589.81	-0.01948109
470	0.2617123		999.99	0.09781906		1529.98	0.00315522		2059.98	-0.01055527		2590.01	-0.02097498
470.2	0.26237388		1000.19	0.09789691		1530.18	0.00292582		2060.18	-0.01041537		2590.21	-0.02102715
470.4	0.26304989		1000.39	0.09813314		1530.38	0.00292588		2060.38	-0.00975356		2590.41	-0.02174013
470.6	0.26385108		1000.59	0.09909586		1530.58	0.00217582		2060.58	-0.00966779		2590.61	-0.02124304
470.8	0.26410149		1000.79	0.09866823		1530.78	0.00254058		2060.78	-0.00956641		2590.81	-0.02058171
471	0.2644614		1000.99	0.09805019		1530.98	0.00190627		2060.98	-0.0092758		2591.01	-0.01977917
471.2	0.26482814		1001.19	0.09721013		1531.18	0.00143268		2061.18	-0.00924043		2591.21	-0.01896302
471.4	0.26403182		1001.39	0.09715495		1531.38	0.00120528		2061.38	-0.0093641		2591.41	-0.01882047
471.6	0.26433141		1001.59	0.09709219		1531.58	0.00140757		2061.58	-0.00935512		2591.61	-0.01814845
471.8	0.26443676		1001.79	0.09754172		1531.78	0.00130834		2061.78	-0.01031829		2591.81	-0.01801766
472	0.26353482		1001.99	0.09802377		1531.98	0.00087089		2061.98	-0.00997959		2592.01	-0.0181668
472.2	0.2625357		1002.19	0.09838341		1532.18	0.00053149		2062.18	-0.01003896		2592.21	-0.01806803
472.4	0.26213367		1002.39	0.09906806		1532.38	0.00121627		2062.38	-0.00977371		2592.41	-0.01748773
472.6	0.26281597		1002.59	0.09807572		1532.58	0.00135181		2062.58	-0.00935943		2592.61	-0.01710339
472.8	0.26254197		1002.79	0.09871113		1532.78	0.00230989		2062.78	-0.00927222		2592.81	-0.01710495
473	0.26217966		1002.99	0.09881203		1532.98	0.00331482		2062.98	-0.00897445		2593.01	-0.01730755
473.2	0.262104		1003.19	0.09867126		1533.18	0.00492502		2063.18	-0.00864331		2593.21	-0.01700316
473.4	0.26284745		1003.39	0.09861526		1533.38	0.00504085		2063.38	-0.00948677		2593.41	-0.01729402
473.6	0.26382062		1003.59	0.09890712		1533.58	0.00546113		2063.58	-0.00947828		2593.61	-0.01858811
473.8	0.2646653		1003.79	0.09942984		1533.78	0.00596471		2063.78	-0.00987085		2593.81	-0.01904666
474	0.26439625		1003.99	0.09944952		1533.98	0.00600831		2063.98	-0.01060861		2594.01	-0.01890766
474.2	0.26431059		1004.19	0.09982993		1534.18	0.00578214		2064.18	-0.01035912		2594.21	-0.01934671
474.4	0.26398422		1004.39	0.10117487		1534.38	0.00557921		2064.38	-0.01001125		2594.41	-0.01955811
474.6	0.26460966		1004.59	0.10080551		1534.58	0.00582931		2064.58	-0.00997028		2594.61	-0.01829196
474.8	0.26460808		1004.79	0.10105752		1534.78	0.00551217		2064.78	-0.00931496		2594.81	-0.01861856
475	0.26461555		1004.99	0.10041297		1534.98	0.00470325		2064.98	-0.01042173		2595.01	-0.01829434
475.2	0.2648413		1005.19	0.10051005		1535.18	0.00439745		2065.18	-0.01082372		2595.21	-0.01852095
475.4	0.26480718		1005.39	0.10032786		1535.38	0.00403245		2065.38	-0.01058478		2595.41	-0.01903244
475.6	0.26486893		1005.59	0.10010948		1535.58	0.00321093		2065.58	-0.01148143		2595.61	-0.01976549
475.8	0.26418543		1005.79	0.10054677		1535.78	0.00245462		2065.78	-0.01156331		2595.81	-0.01947386
476	0.26370871		1005.99	0.10037902		1535.98	0.00102992		2065.98	-0.01154013		2596.01	-0.02006761
476.2	0.26382802		1006.19	0.10036892		1536.18	0.00083623		2066.18	-0.01197953		2596.21	-0.01943939
476.4	0.26475511		1006.39	0.10008981		1536.38	0.00121405		2066.38	-0.01251042		2596.41	-0.0199497
476.6	0.26498067		1006.59	0.09961044		1536.58	0.00222427		2066.58	-0.01259075		2596.61	-0.01915376
476.8	0.26447004		1006.79	0.10005379		1536.78	0.00358845		2066.78	-0.01267842		2596.81	-0.01894872
477	0.26475229		1006.99	0.09995927		1536.98	0.00403484		2066.98	-0.01252063		2597.01	-0.01917676
477.2	0.26517983		1007.19	0.09990681		1537.18	0.00428754		2067.18	-0.01247521		2597.21	-0.01886752
477.4	0.26545291		1007.39	0.10076405		1537.38	0.00486482		2067.38	-0.01258052		2597.41	-0.01840698
477.6	0.26612528		1007.59	0.10055093		1537.58	0.00575199		2067.58	-0.01221823		2597.61	-0.01877449
477.8	0.26650029		1007.79	0.1006547		1537.78	0.00588058		2067.78	-0.01215753		2597.81	-0.01806047
478	0.26608102		1007.99	0.100847		1537.98	0.00628211		2067.98	-0.01131928		2598.01	-0.01807615
478.2	0.26682088		1008.19	0.10082033		1538.18	0.00614132		2068.18	-0.01039642		2598.21	-0.01804664
478.4	0.26666909		1008.39	0.10100007		1538.38	0.00586753		2068.38	-0.00978814		2598.41	-0.0170312
478.6	0.26686418		1008.59	0.10103423		1538.58	0.00520316		2068.58	-0.00895561		2598.61	-0.0169501
478.8	0.26612921		1008.79	0.10155946		1538.78	0.00482487		2068.78	-0.0080725		2598.81	-0.01681866
479	0.26498488		1008.99	0.10085888		1538.98	0.00439122		2068.98	-0.00834093		2599.01	-0.01657307
479.2	0.26546932		1009.19	0.1013206		1539.18	0.00357273		2069.18	-0.00684067		2599.21	-0.01718921
479.4	0.26522584		1009.39	0.1012977		1539.38	0.00274654		2069.38	-0.00652738		2599.41	-0.01824625
479.6	0.26439375		1009.59	0.10062456		1539.58	0.00157518		2069.58	-0.00742083		2599.61	-0.01845899
479.8	0.26451959		1009.79	0.10042253		1539.78	0.00043544		2069.78	-0.0069916		2599.81	-0.01746365
480	0.26397036		1009.99	0.0994933		1539.98	-0.00019323		2069.98	-0.0082		2600.01	-0.01780931
480.2	0.26454559		1010.19	0.09970038		1540.18	-0.00097865		2070.18	-0.0084946		2600.21	-0.01742388
480.4	0.26348801		1010.39	0.09945453		1540.38	-0.00070314		2070.38	-0.00899187		2600.41	-0.01829402
480.6	0.26232755		1010.59	0.09992875		1540.58	-0.00062767		2070.58	-0.00962023		2600.61	-0.01866857
480.8	0.26270129		1010.79	0.09966947		1540.78	-0.00022313		2070.78	-0.01043604		2600.81	-0.01877277
481	0.2626529		1010.99	0.09921815		1540.98	-0.00036224		2070.98	-0.01102936		2601.01	-0.01925154
481.2	0.26355912		1011.19	0.09980683		1541.18	-0.00014099		2071.18	-0.01168259		2601.21	-0.01906766
481.4	0.26304712		1011.39	0.10037403		1541.38	0.00122407		2071.38	-0.01167319		2601.41	-0.01964768
481.6	0.26371928		1011.59	0.1003465		1541.58	0.00111391		2071.58	-0.01224439		2601.61	-0.01969413
481.8	0.26446779		1011.79	0.10130632		1541.78	0.00112716		2071.78	-0.01155245		2601.81	-0.01911882
482	0.26421213		1011.99	0.10174015		1541.98	0.00171949		2071.98	-0.01118227		2602.01	-0.01889814
482.2	0.26445877		1012.19	0.10142353		1542.18	0.00162087		2072.18	-0.01083528		2602.21	-0.01772695
482.4	0.2641416		1012.39	0.10140285		1542.38	0.00174097		2072.38	-0.01026605		2602.41	-0.01803962
482.6	0.26386417		1012.59	0.1018919		1542.58	0.00171194		2072.58	-0.01025129		2602.61	-0.01731037
482.8	0.26331548		1012.79	0.10207609		1542.78	0.00292969		2072.78	-0.00970897		2602.81	-0.0173673
483	0.26409809		1012.99	0.10207457		1542.98	0.00344677		2072.98	-0.00937032		2603.01	-0.01767992
483.2	0.26507427		1013.19	0.10181634		1543.18	0.00365812		2073.18	-0.00903996		2603.21	-0.01742518
483.4	0.26502047		1013.39	0.10199085		1543.38	0.00303029		2073.38	-0.00973864		2603.41	-0.01752847
483.6	0.2649953		1013.59	0.10072723		1543.58	0.00190191		2073.58	-0.00970971		2603.61	-0.0171946
483.8	0.2651008		1013.79	0.10050926		1543.78	0.00166612		2073.78	-0.00930367		2603.81	-0.01668225
484	0.26382593		1013.99	0.10028915		1543.98	0.00112062		2073.98	-0.00961664		2604.01	-0.01618264
484.2	0.26430393		1014.19	0.10076905		1544.18	-0.00003226		2074.18	-0.00993458		2604.21	-0.01663781
484.4	0.26268873		1014.39	0.09999871		1544.38	0.00041758		2074.38	-0.01032253		2604.41	-0.01685209
484.6	0.2630107		1014.59	0.09985673		1544.58	-0.00049473		2074.58	-0.01095863		2604.61	-0.0171754
484.8	0.26387983		1014.79	0.0996522		1544.78	-0.00051852		2074.78	-0.01147335		2604.81	-0.01775411
485	0.26448109		1014.99	0.09880135		1544.98	-0.0008136		2074.98	-0.0120395		2605.01	-0.01945893
485.2	0.26492989		1015.19	0.09938731		1545.18	-0.00109272		2075.18	-0.01275278		2605.21	-0.01933353
485.4	0.26488477		1015.39	0.09925341		1545.38	-0.00124591		2075.38	-0.01316874		2605.41	-0.01990268
485.6	0.26593112		1015.59	0.097931		1545.58	-0.00126268		2075.58	-0.013344		2605.61	-0.02008809
485.8	0.26634738		1015.79	0.09877989		1545.78	-0.00081096		2075.78	-0.01318371		2605.81	-0.02049068
486	0.26605708		1015.99	0.09828034		1545.98	0.00012644		2075.98	-0.01287078		2606.01	-0.02041363
486.2	0.26542548		1016.19	0.0981288		1546.18	-0.00023818		2076.18	-0.01308134		2606.21	-0.02016726
486.4	0.26502353		1016.39	0.09834669		1546.38	-0.00095005		2076.38	-0.01312893		2606.41	-0.02097601
486.6	0.2649215		1016.59	0.09894306		1546.58	-0.00026288		2076.58	-0.0133192		2606.61	-0.02067722
486.8	0.26511127		1016.79	0.09930097		1546.78	0.00033108		2076.78	-0.01218837		2606.81	-0.02058056
487	0.26520878		1016.99	0.10031156		1546.98	0.00099759		2076.98	-0.01194379		2607.01	-0.0191331
487.2	0.26414182		1017.19	0.10048066		1547.18	0.00111661		2077.18	-0.01179273		2607.21	-0.01802585
487.4	0.26363959		1017.39	0.10139425		1547.38	0.00049551		2077.38	-0.01060227		2607.41	-0.01739444
487.6	0.2623662		1017.59	0.10139249		1547.58	0.00073869		2077.58	-0.01017632		2607.61	-0.0170403
487.8	0.2617371		1017.79	0.10207256		1547.78	0.00189038		2077.78	-0.0091121		2607.81	-0.01526274
488	0.26109259		1017.99	0.10233534		1547.98	0.00162338		2077.98	-0.00810109		2608.01	-0.01509456
488.2	0.26142564		1018.19	0.10240207		1548.18	0.00188687		2078.18	-0.0082679		2608.21	-0.01479412
488.4	0.26071684		1018.39	0.1023373		1548.38	0.00194911		2078.38	-0.00764505		2608.41	-0.01458798
488.6	0.26092268		1018.59	0.10264936		1548.58	0.00147822		2078.58	-0.00792942		2608.61	-0.01553247
488.8	0.26111642		1018.79	0.10310749		1548.78	0.00143149		2078.78	-0.00872463		2608.81	-0.01663857
489	0.26152402		1018.99	0.1022592		1548.98	0.00089931		2078.98	-0.00965404		2609.01	-0.01758029
489.2	0.26158362		1019.19	0.10221087		1549.18	-0.00058244		2079.18	-0.00926543		2609.21	-0.01767894
489.4	0.26176767		1019.39	0.10018836		1549.38	-0.00077797		2079.38	-0.00990338		2609.41	-0.0187961
489.6	0.26255765		1019.59	0.09993465		1549.58	-0.00005017		2079.58	-0.01032478		2609.61	-0.02017963
489.8	0.26285909		1019.79	0.10039124		1549.78	0.00011715		2079.78	-0.00973473		2609.81	-0.02060952
490	0.26272137		1019.99	0.09892892		1549.98	0.00010213		2079.98	-0.0090068		2610.01	-0.02095152
490.2	0.2624536		1020.19	0.09899555		1550.18	-0.00160579		2080.18	-0.00963139		2610.21	-0.02150981
490.4	0.2625331		1020.39	0.0989585		1550.38	-0.00261416		2080.38	-0.0096062		2610.41	-0.02228178
490.6	0.26304978		1020.59	0.0982726		1550.58	-0.00283851		2080.58	-0.00942829		2610.61	-0.02240248
490.8	0.26311562		1020.79	0.09932457		1550.78	-0.00333162		2080.78	-0.00963626		2610.81	-0.02107025
491	0.26289303		1020.99	0.09954512		1550.98	-0.00277645		2080.98	-0.01053579		2611.01	-0.02026534
491.2	0.2634868		1021.19	0.09885776		1551.18	-0.00295915		2081.18	-0.01020234		2611.21	-0.01929989
491.4	0.26430063		1021.39	0.09910704		1551.38	-0.00179274		2081.38	-0.00976397		2611.41	-0.01904862
491.6	0.26530231		1021.59	0.0991252		1551.58	-0.00069903		2081.58	-0.01020003		2611.61	-0.01899155
491.8	0.26568253		1021.79	0.09892896		1551.78	-0.00023174		2081.78	-0.00997412		2611.81	-0.01840155
492	0.2665154		1021.99	0.09930133		1551.98	0.00010254		2081.98	-0.00988666		2612.01	-0.01859484
492.2	0.26742325		1022.19	0.09954599		1552.18	0.00054511		2082.18	-0.01088213		2612.21	-0.01815502
492.4	0.2671909		1022.39	0.10031719		1552.38	0.00077765		2082.38	-0.01109318		2612.41	-0.01775481
492.6	0.26762686		1022.59	0.10055614		1552.58	0.00093728		2082.58	-0.01266173		2612.61	-0.01764555
492.8	0.26731641		1022.79	0.10014068		1552.78	0.00111798		2082.78	-0.01252543		2612.81	-0.01808714
493	0.26706843		1022.99	0.10008085		1552.98	0.00025304		2082.98	-0.01271262		2613.01	-0.01855898
493.2	0.26642954		1023.19	0.09956706		1553.18	0.00036329		2083.18	-0.01279791		2613.21	-0.01886845
493.4	0.2660974		1023.39	0.09998086		1553.38	0.00113498		2083.38	-0.01349262		2613.41	-0.01911735
493.6	0.26620603		1023.59	0.10070451		1553.58	0.00129522		2083.58	-0.01308716		2613.61	-0.01917863
493.8	0.26552858		1023.79	0.09938809		1553.78	0.00158691		2083.78	-0.01192017		2613.81	-0.01842696
494	0.26463517		1023.99	0.09878935		1553.98	0.00124358		2083.98	-0.0121124		2614.01	-0.01899365
494.2	0.2637558		1024.19	0.09906088		1554.18	0.00045239		2084.18	-0.01199506		2614.21	-0.01866145
494.4	0.26361712		1024.39	0.09908254		1554.38	-0.00004837		2084.38	-0.01101634		2614.41	-0.01847262
494.6	0.2633252		1024.59	0.09867878		1554.58	-0.00044414		2084.58	-0.010981		2614.61	-0.0186073
494.8	0.26366609		1024.79	0.09872458		1554.78	-0.00017736		2084.78	-0.01094932		2614.81	-0.01687915
495	0.26384866		1024.99	0.09741179		1554.98	0.0002507		2084.98	-0.01125801		2615.01	-0.01617948
495.2	0.26414264		1025.19	0.09724504		1555.18	0.00055286		2085.18	-0.01052762		2615.21	-0.01628135
495.4	0.26368373		1025.39	0.0968586		1555.38	0.00100201		2085.38	-0.01117083		2615.41	-0.01729728
495.6	0.26379617		1025.59	0.09700179		1555.58	0.00117744		2085.58	-0.01153281		2615.61	-0.01781927
495.8	0.26340318		1025.79	0.09698909		1555.78	0.00081609		2085.78	-0.01139159		2615.81	-0.0181584
496	0.26482557		1025.99	0.09697542		1555.98	0.00121596		2085.98	-0.01122638		2616.01	-0.01827035
496.2	0.26535136		1026.19	0.09672184		1556.18	0.0005366		2086.18	-0.01195297		2616.21	-0.01845538
496.4	0.26459298		1026.39	0.09707166		1556.38	0.00128406		2086.38	-0.01236452		2616.41	-0.01785302
496.6	0.26425563		1026.59	0.09674329		1556.58	0.0014467		2086.58	-0.01231365		2616.61	-0.01840842
496.8	0.26368713		1026.79	0.09686848		1556.78	0.00193201		2086.78	-0.01158094		2616.81	-0.01938058
497	0.26320885		1026.99	0.09767635		1556.98	0.0013077		2086.98	-0.01225446		2617.01	-0.01961125
497.2	0.26292011		1027.19	0.09764937		1557.18	0.00164383		2087.18	-0.01317322		2617.21	-0.02031973
497.4	0.2624392		1027.39	0.09817471		1557.38	0.00120072		2087.38	-0.01315932		2617.41	-0.01978519
497.6	0.2621755		1027.59	0.09813932		1557.58	0.00079306		2087.58	-0.01331876		2617.61	-0.01971226
497.8	0.26211102		1027.79	0.09709337		1557.78	0.0019663		2087.78	-0.01321174		2617.81	-0.01997957
498	0.26215797		1027.99	0.0980526		1557.98	0.00186747		2087.98	-0.0128801		2618.01	-0.01994988
498.2	0.26214453		1028.19	0.09877935		1558.18	0.00290347		2088.18	-0.01246922		2618.21	-0.01837689
498.4	0.26365508		1028.39	0.09911085		1558.38	0.002811		2088.38	-0.01221352		2618.41	-0.0176975
498.6	0.26334922		1028.59	0.09903064		1558.58	0.00286459		2088.58	-0.01209617		2618.61	-0.01747069
498.8	0.26394811		1028.79	0.09835975		1558.78	0.00241037		2088.78	-0.01207988		2618.81	-0.01612426
499	0.2639266		1028.99	0.09881539		1558.98	0.00194782		2088.98	-0.01289916		2619.01	-0.01648064
499.2	0.2639621		1029.19	0.09892107		1559.18	0.00127999		2089.18	-0.01203209		2619.21	-0.01630606
499.4	0.26360769		1029.39	0.09912561		1559.38	0.00117702		2089.38	-0.01202658		2619.41	-0.01645341
499.6	0.26419193		1029.59	0.09991535		1559.58	0.00123299		2089.58	-0.0119972		2619.61	-0.01630381
499.8	0.2643095		1029.79	0.09980817		1559.78	0.00078085		2089.78	-0.01179424		2619.81	-0.01614852
500	0.26407676		1029.99	0.09942293		1559.98	0.00083476		2089.98	-0.01209797		2620.01	-0.01628642
500.2	0.26305456		1030.19	0.09914752		1560.18	0.00012992		2090.18	-0.01269814		2620.21	-0.01657268
500.4	0.26170588		1030.39	0.09839233		1560.38	0.00073159		2090.38	-0.01245676		2620.41	-0.01663422
500.6	0.26079079		1030.59	0.0979844		1560.58	-0.00010954		2090.58	-0.01241662		2620.61	-0.01843102
500.8	0.25955156		1030.79	0.09843178		1560.78	-0.00012988		2090.78	-0.01294889		2620.81	-0.0185392
501	0.25829364		1030.99	0.09856407		1560.98	-0.00106718		2090.98	-0.01314069		2621.01	-0.01836808
501.2	0.25774367		1031.19	0.09809663		1561.18	-0.00137327		2091.18	-0.01402681		2621.21	-0.01867879
501.4	0.2569847		1031.39	0.09813677		1561.38	-0.00089958		2091.38	-0.01388273		2621.41	-0.01871999
501.6	0.25726187		1031.59	0.09796129		1561.58	-0.00013596		2091.58	-0.01490981		2621.61	-0.01891973
501.8	0.25745919		1031.79	0.09765931		1561.78	0.00079495		2091.78	-0.01403212		2621.81	-0.01942766
502	0.25834198		1031.99	0.09865136		1561.98	0.00099718		2091.98	-0.0132891		2622.01	-0.01921572
502.2	0.25974214		1032.19	0.09843903		1562.18	0.00152566		2092.18	-0.01357279		2622.21	-0.01916661
502.4	0.2610876		1032.39	0.09874349		1562.38	0.0017207		2092.38	-0.01335905		2622.41	-0.01877323
502.6	0.26093654		1032.59	0.09915627		1562.58	0.0017934		2092.58	-0.01338945		2622.61	-0.0188087
502.8	0.26217169		1032.79	0.0991374		1562.78	0.00217728		2092.78	-0.01365916		2622.81	-0.01859033
503	0.26266618		1032.99	0.099359		1562.98	0.00346889		2092.98	-0.01358379		2623.01	-0.0186756
503.2	0.26308786		1033.19	0.09923233		1563.18	0.00439864		2093.18	-0.01278984		2623.21	-0.0179912
503.4	0.2629853		1033.39	0.09919439		1563.38	0.00522646		2093.38	-0.01264434		2623.41	-0.01819739
503.6	0.2635568		1033.59	0.09944182		1563.58	0.00542148		2093.58	-0.01303706		2623.61	-0.01831253
503.8	0.2630561		1033.79	0.09916043		1563.78	0.00587533		2093.78	-0.01291696		2623.81	-0.01881225
504	0.26282608		1033.99	0.0980591		1563.98	0.00670715		2093.98	-0.01280238		2624.01	-0.01906381
504.2	0.26286611		1034.19	0.09741169		1564.18	0.00666167		2094.18	-0.01317072		2624.21	-0.02018907
504.4	0.26210167		1034.39	0.09699969		1564.38	0.00640753		2094.38	-0.0121412		2624.41	-0.02073751
504.6	0.26151237		1034.59	0.09733224		1564.58	0.00623518		2094.58	-0.0113586		2624.61	-0.02115373
504.8	0.26059905		1034.79	0.09764869		1564.78	0.00613514		2094.78	-0.01095284		2624.81	-0.02048824
505	0.25999729		1034.99	0.0974255		1564.98	0.00506462		2094.98	-0.0103602		2625.01	-0.02069401
505.2	0.25941749		1035.19	0.09717504		1565.18	0.00450363		2095.18	-0.01058594		2625.21	-0.02024655
505.4	0.25993376		1035.39	0.09759269		1565.38	0.00358515		2095.38	-0.01042814		2625.41	-0.02041885
505.6	0.26033185		1035.59	0.09751538		1565.58	0.00332096		2095.58	-0.01046003		2625.61	-0.0197044
505.8	0.26085329		1035.79	0.09876478		1565.78	0.00215076		2095.78	-0.00916206		2625.81	-0.02021716
506	0.26146913		1035.99	0.09881973		1565.98	0.00187819		2095.98	-0.00904026		2626.01	-0.02008643
506.2	0.26261409		1036.19	0.09963353		1566.18	0.00117176		2096.18	-0.00962997		2626.21	-0.02003318
506.4	0.26255982		1036.39	0.10070695		1566.38	0.00212541		2096.38	-0.01046059		2626.41	-0.01923718
506.6	0.26166838		1036.59	0.1011312		1566.58	0.00137093		2096.58	-0.01112534		2626.61	-0.01933204
506.8	0.26195529		1036.79	0.10147756		1566.78	0.00146479		2096.78	-0.01098298		2626.81	-0.01951788
507	0.26082411		1036.99	0.10156344		1566.98	0.00165121		2096.98	-0.01158044		2627.01	-0.01931304
507.2	0.26181672		1037.19	0.1013343		1567.18	0.00113024		2097.18	-0.01232096		2627.21	-0.01901757
507.4	0.26204394		1037.39	0.10134895		1567.38	0.00097326		2097.38	-0.01227563		2627.41	-0.01912072
507.6	0.26310303		1037.59	0.1021192		1567.58	0.00079657		2097.58	-0.01254495		2627.61	-0.01868245
507.8	0.26323307		1037.79	0.10192089		1567.78	0.00067523		2097.78	-0.01288158		2627.81	-0.01865106
508	0.26430023		1037.99	0.10144767		1567.98	0.00167089		2097.98	-0.01235961		2628.01	-0.01877324
508.2	0.26449368		1038.19	0.10160392		1568.18	0.00099615		2098.18	-0.01193053		2628.21	-0.01907169
508.4	0.26452382		1038.39	0.10102781		1568.38	0.00078445		2098.38	-0.01068625		2628.41	-0.01863094
508.6	0.26460043		1038.59	0.10020236		1568.58	0.00019957		2098.58	-0.0109905		2628.61	-0.01781254
508.8	0.26436978		1038.79	0.10021689		1568.78	-0.00044254		2098.78	-0.01068593		2628.81	-0.01853592
509	0.26425723		1038.99	0.10098498		1568.98	-0.00060492		2098.98	-0.00974813		2629.01	-0.01769002
509.2	0.26449115		1039.19	0.10065422		1569.18	-0.00107745		2099.18	-0.01016164		2629.21	-0.01809029
509.4	0.26552992		1039.39	0.100633		1569.38	-0.00149181		2099.38	-0.01052489		2629.41	-0.01853977
509.6	0.26453964		1039.59	0.10040633		1569.58	-0.00068449		2099.58	-0.0103607		2629.61	-0.01826053
509.8	0.26481313		1039.79	0.10101091		1569.78	-0.00090457		2099.78	-0.01100481		2629.81	-0.01892916
510	0.26462454		1039.99	0.09979497		1569.98	-0.00061527		2099.98	-0.01174056		2630.01	-0.01925681
510.2	0.2649011		1040.19	0.10047368		1570.18	-0.00056774		2100.18	-0.01264668		2630.21	-0.0199147
510.4	0.26408193		1040.39	0.10036842		1570.38	-0.00000277		2100.38	-0.01350806		2630.41	-0.02049709
510.6	0.26322502		1040.59	0.10076454		1570.58	-0.00058273		2100.58	-0.01380636		2630.61	-0.02099381
510.8	0.26329806		1040.79	0.10082454		1570.78	0.00027059		2100.78	-0.01505644		2630.81	-0.02152211
511	0.26272292		1040.99	0.10085249		1570.98	0.00133806		2100.98	-0.01592949		2631.01	-0.02135751
511.2	0.26295121		1041.19	0.10028564		1571.18	0.00122095		2101.18	-0.01561808		2631.21	-0.0213371
511.4	0.26237827		1041.39	0.10035529		1571.38	0.00141593		2101.38	-0.01532026		2631.41	-0.02090668
511.6	0.26236192		1041.59	0.1005468		1571.58	0.00072717		2101.58	-0.01506348		2631.61	-0.02023649
511.8	0.26234741		1041.79	0.10047177		1571.78	0.00143681		2101.78	-0.01465336		2631.81	-0.020347
512	0.26297665		1041.99	0.10038911		1571.98	0.00205227		2101.98	-0.01372892		2632.01	-0.02065091
512.2	0.26178998		1042.19	0.1005516		1572.18	0.00099648		2102.18	-0.0129506		2632.21	-0.02036497
512.4	0.26173429		1042.39	0.09995649		1572.38	0.00124987		2102.38	-0.01174746		2632.41	-0.0199604
512.6	0.26115187		1042.59	0.10041724		1572.58	0.00092417		2102.58	-0.01076984		2632.61	-0.02007525
512.8	0.26054139		1042.79	0.10039831		1572.78	0.00157625		2102.78	-0.00951845		2632.81	-0.02050339
513	0.25993421		1042.99	0.10116425		1572.98	0.00166768		2102.98	-0.00945883		2633.01	-0.01960376
513.2	0.25916019		1043.19	0.10004821		1573.18	0.00138202		2103.18	-0.01000541		2633.21	-0.02016159
513.4	0.25902129		1043.39	0.10015297		1573.38	0.00133817		2103.38	-0.01006248		2633.41	-0.01876571
513.6	0.25908056		1043.59	0.09952794		1573.58	0.00093064		2103.58	-0.00976592		2633.61	-0.0185418
513.8	0.2592911		1043.79	0.09936877		1573.78	0.00082085		2103.78	-0.0100634		2633.81	-0.01755348
514	0.2592581		1043.99	0.09856132		1573.98	0.00044808		2103.98	-0.01038941		2634.01	-0.01734539
514.2	0.25980701		1044.19	0.09894209		1574.18	0.00090841		2104.18	-0.01050311		2634.21	-0.0172727
514.4	0.26037744		1044.39	0.09876941		1574.38	0.00105354		2104.38	-0.01116753		2634.41	-0.0170413
514.6	0.2602614		1044.59	0.09912874		1574.58	0.00127638		2104.58	-0.01214726		2634.61	-0.01655144
514.8	0.26047147		1044.79	0.09865221		1574.78	0.00183695		2104.78	-0.01287625		2634.81	-0.01645381
515	0.26071893		1044.99	0.0984358		1574.98	0.00133434		2104.98	-0.01247496		2635.01	-0.01722268
515.2	0.26138183		1045.19	0.09773026		1575.18	0.00086765		2105.18	-0.01257342		2635.21	-0.01804464
515.4	0.2624729		1045.39	0.09770065		1575.38	0.00051466		2105.38	-0.01245478		2635.41	-0.01841211
515.6	0.26321823		1045.59	0.09773916		1575.58	-0.0000606		2105.58	-0.01236221		2635.61	-0.01863263
515.8	0.26427512		1045.79	0.09805105		1575.78	-0.00013224		2105.78	-0.01287479		2635.81	-0.01886546
516	0.26443095		1045.99	0.09757633		1575.98	-0.00057338		2105.98	-0.01290391		2636.01	-0.01994219
516.2	0.26368806		1046.19	0.09818888		1576.18	-0.00069805		2106.18	-0.01243595		2636.21	-0.0198629
516.4	0.26337887		1046.39	0.0979049		1576.38	-0.00127354		2106.38	-0.01123213		2636.41	-0.01977133
516.6	0.26281674		1046.59	0.0982853		1576.58	-0.00178827		2106.58	-0.01155761		2636.61	-0.02053708
516.8	0.26162004		1046.79	0.09829614		1576.78	-0.0021136		2106.78	-0.01172662		2636.81	-0.02017685
517	0.26021785		1046.99	0.0989931		1576.98	-0.00266432		2106.98	-0.01242812		2637.01	-0.01959827
517.2	0.25962715		1047.19	0.09851292		1577.18	-0.00292683		2107.18	-0.01234107		2637.21	-0.01964162
517.4	0.25925122		1047.39	0.09853694		1577.38	-0.00314731		2107.38	-0.01211172		2637.41	-0.0195696
517.6	0.25862845		1047.59	0.09904609		1577.58	-0.0031943		2107.58	-0.01132651		2637.61	-0.01939912
517.8	0.25756047		1047.79	0.1006296		1577.78	-0.00271659		2107.78	-0.0113822		2637.81	-0.01842989
518	0.25796462		1047.99	0.10096543		1577.98	-0.00238972		2107.98	-0.0116557		2638.01	-0.01897848
518.2	0.2584152		1048.19	0.1006383		1578.18	-0.00125605		2108.18	-0.0120444		2638.21	-0.01873282
518.4	0.25861215		1048.39	0.09996423		1578.38	-0.00087563		2108.38	-0.01270645		2638.41	-0.01896437
518.6	0.25825092		1048.59	0.09916415		1578.58	-0.00002854		2108.58	-0.01304462		2638.61	-0.01997809
518.8	0.25874637		1048.79	0.09810826		1578.78	0.00076908		2108.78	-0.01338965		2638.81	-0.02110481
519	0.25937279		1048.99	0.09719959		1578.98	0.00088388		2108.98	-0.01382596		2639.01	-0.02168723
519.2	0.26030803		1049.19	0.09626495		1579.18	0.00191155		2109.18	-0.01415688		2639.21	-0.02161312
519.4	0.26096479		1049.39	0.0959477		1579.38	0.00188546		2109.38	-0.01428175		2639.41	-0.02122525
519.6	0.26092054		1049.59	0.09542593		1579.58	0.00183395		2109.58	-0.01404794		2639.61	-0.02048145
519.8	0.26200303		1049.79	0.09527879		1579.78	0.00203688		2109.78	-0.01413876		2639.81	-0.02038743
520	0.262358		1049.99	0.09493949		1579.98	0.00281888		2109.98	-0.01366427		2640.01	-0.02003477
520.2	0.26176285		1050.19	0.09579191		1580.18	0.00263541		2110.18	-0.01283688		2640.21	-0.0191041
520.4	0.2616849		1050.39	0.09634072		1580.38	0.00159905		2110.38	-0.01274661		2640.41	-0.01867589
520.6	0.26116253		1050.59	0.09717557		1580.58	0.00122934		2110.58	-0.01376702		2640.61	-0.01732329
520.8	0.26040605		1050.79	0.09781682		1580.78	0.00123838		2110.78	-0.01345277		2640.81	-0.01649785
521	0.25938903		1050.99	0.09867911		1580.98	0.0016529		2110.98	-0.01377281		2641.01	-0.01620041
521.2	0.25903425		1051.19	0.09957898		1581.18	0.00206244		2111.18	-0.01407842		2641.21	-0.0163778
521.4	0.25886879		1051.39	0.1013708		1581.38	0.00296666		2111.38	-0.0142744		2641.41	-0.01656816
521.6	0.25829918		1051.59	0.10235582		1581.58	0.0034986		2111.58	-0.01423056		2641.61	-0.01644546
521.8	0.25872666		1051.79	0.10275808		1581.78	0.00373803		2111.78	-0.01380933		2641.81	-0.01686265
522	0.25920473		1051.99	0.10282098		1581.98	0.00325933		2111.98	-0.01382536		2642.01	-0.01788515
522.2	0.25955991		1052.19	0.1013952		1582.18	0.00319053		2112.18	-0.01405322		2642.21	-0.0188781
522.4	0.25930924		1052.39	0.10078206		1582.38	0.00301305		2112.38	-0.01323103		2642.41	-0.01987874
522.6	0.2587679		1052.59	0.10013941		1582.58	0.00304372		2112.58	-0.01327599		2642.61	-0.02121975
522.8	0.25891735		1052.79	0.0988917		1582.78	0.00225867		2112.78	-0.01357527		2642.81	-0.02128339
523	0.25974435		1052.99	0.09796383		1582.98	0.00174516		2112.98	-0.01331075		2643.01	-0.02121172
523.2	0.26015666		1053.19	0.09798711		1583.18	0.00175373		2113.18	-0.0128519		2643.21	-0.02136233
523.4	0.26078657		1053.39	0.09794085		1583.38	0.00101571		2113.38	-0.01233159		2643.41	-0.02082909
523.6	0.2612191		1053.59	0.09775552		1583.58	0.00067916		2113.58	-0.01114723		2643.61	-0.02085367
523.8	0.26226232		1053.79	0.09788529		1583.78	0.00057754		2113.78	-0.01166642		2643.81	-0.02020322
524	0.26186098		1053.99	0.09803792		1583.98	0.00058597		2113.98	-0.01149912		2644.01	-0.01942104
524.2	0.26082023		1054.19	0.0988564		1584.18	-0.00004563		2114.18	-0.01131871		2644.21	-0.01804237
524.4	0.26136345		1054.39	0.1002312		1584.38	-0.00030321		2114.38	-0.01129239		2644.41	-0.01714245
524.6	0.26135684		1054.59	0.10030946		1584.58	-0.0011868		2114.58	-0.01129737		2644.61	-0.01569368
524.8	0.26136805		1054.79	0.10066906		1584.78	-0.00062566		2114.78	-0.01172991		2644.81	-0.01622937
525	0.26162313		1054.99	0.10125131		1584.98	0.00021602		2114.98	-0.01201018		2645.01	-0.01556827
525.2	0.26235219		1055.19	0.10181778		1585.18	0.00054906		2115.18	-0.01301354		2645.21	-0.01567992
525.4	0.26271389		1055.39	0.1024774		1585.38	0.00099852		2115.38	-0.01344099		2645.41	-0.01629566
525.6	0.2625795		1055.59	0.10272846		1585.58	0.00132102		2115.58	-0.01348094		2645.61	-0.01613295
525.8	0.26317482		1055.79	0.10278517		1585.78	0.00106058		2115.78	-0.01292006		2645.81	-0.01618643
526	0.26334303		1055.99	0.10241206		1585.98	0.00064921		2115.98	-0.01363872		2646.01	-0.01748088
526.2	0.26300542		1056.19	0.10156884		1586.18	0.00046358		2116.18	-0.01411402		2646.21	-0.01798026
526.4	0.26206697		1056.39	0.1015044		1586.38	0.0006253		2116.38	-0.01415188		2646.41	-0.01895557
526.6	0.26173138		1056.59	0.10067358		1586.58	0.00041886		2116.58	-0.01540224		2646.61	-0.0193985
526.8	0.26181341		1056.79	0.09952518		1586.78	-0.00014783		2116.78	-0.0154379		2646.81	-0.01981813
527	0.26263236		1056.99	0.09933081		1586.98	-0.00046268		2116.98	-0.01588553		2647.01	-0.02008195
527.2	0.26154016		1057.19	0.09925918		1587.18	0.00014381		2117.18	-0.01600686		2647.21	-0.02028912
527.4	0.26178294		1057.39	0.09829408		1587.38	0.00006254		2117.38	-0.01667925		2647.41	-0.02101061
527.6	0.26045115		1057.59	0.09754301		1587.58	0.00025356		2117.58	-0.01642478		2647.61	-0.02114118
527.8	0.25910545		1057.79	0.09751279		1587.78	0.00002787		2117.78	-0.01615713		2647.81	-0.01994308
528	0.25786605		1057.99	0.09780485		1587.98	-0.000002		2117.98	-0.01496316		2648.01	-0.01979787
528.2	0.25737373		1058.19	0.09824217		1588.18	-0.00060061		2118.18	-0.01398098		2648.21	-0.01976341
528.4	0.25797134		1058.39	0.09932626		1588.38	-0.00102627		2118.38	-0.01302019		2648.41	-0.02057535
528.6	0.25788155		1058.59	0.09851862		1588.58	-0.00174373		2118.58	-0.01260868		2648.61	-0.02053527
528.8	0.25811892		1058.79	0.09881709		1588.78	-0.00081321		2118.78	-0.01204019		2648.81	-0.01982299
529	0.25869849		1058.99	0.09921608		1588.98	-0.00053075		2118.98	-0.01133412		2649.01	-0.01950253
529.2	0.25883594		1059.19	0.10006822		1589.18	-0.00099163		2119.18	-0.01110551		2649.21	-0.01989658
529.4	0.25858689		1059.39	0.09995575		1589.38	-0.000661		2119.38	-0.01151815		2649.41	-0.01966562
529.6	0.25891021		1059.59	0.10027054		1589.58	-0.00016927		2119.58	-0.01066337		2649.61	-0.01885611
529.8	0.25931526		1059.79	0.100245		1589.78	0.000443		2119.78	-0.01070966		2649.81	-0.01875426
530	0.25990585		1059.99	0.09962513		1589.98	0.00014341		2119.98	-0.01171659		2650.01	-0.01867905
530.2	0.26026361		1060.19	0.10043179		1590.18	-0.00020266		2120.18	-0.0120597		2650.21	-0.01901847
530.4	0.26083654		1060.39	0.10030272		1590.38	-0.00048373		2120.38	-0.01260067		2650.41	-0.01961772
530.6	0.26192974		1060.59	0.10024979		1590.58	-0.00120515		2120.58	-0.01287417		2650.61	-0.01896357
530.8	0.26191632		1060.79	0.09988981		1590.78	-0.00152054		2120.78	-0.01335867		2650.81	-0.01965763
531	0.2625919		1060.99	0.09940367		1590.98	-0.00215561		2120.98	-0.01340994		2651.01	-0.01914708
531.2	0.26256264		1061.19	0.09898146		1591.18	-0.00151947		2121.18	-0.01431722		2651.21	-0.01955967
531.4	0.26274814		1061.39	0.09864651		1591.38	-0.00164936		2121.38	-0.01446221		2651.41	-0.01924213
531.6	0.26245054		1061.59	0.09902087		1591.58	-0.00193994		2121.58	-0.01376731		2651.61	-0.01904383
531.8	0.26183573		1061.79	0.09995105		1591.78	-0.0018166		2121.78	-0.01311634		2651.81	-0.01938395
532	0.26170329		1061.99	0.10055891		1591.98	-0.00227704		2121.98	-0.01240962		2652.01	-0.01959326
532.2	0.26156238		1062.19	0.10077798		1592.18	-0.00186526		2122.18	-0.01301145		2652.21	-0.01992809
532.4	0.26166141		1062.39	0.10120578		1592.38	-0.00129268		2122.38	-0.01263848		2652.41	-0.02004143
532.6	0.26152579		1062.59	0.10092671		1592.58	-0.00098445		2122.58	-0.0116367		2652.61	-0.01982105
532.8	0.26122068		1062.79	0.10094755		1592.78	-0.00061157		2122.78	-0.01131617		2652.81	-0.01981103
533	0.26125653		1062.99	0.10106925		1592.98	-0.00078053		2122.98	-0.01141353		2653.01	-0.02068269
533.2	0.26065756		1063.19	0.10082038		1593.18	-0.00066551		2123.18	-0.01082981		2653.21	-0.01982106
533.4	0.26029476		1063.39	0.09981862		1593.38	0.00009804		2123.38	-0.01132736		2653.41	-0.01925023
533.6	0.26100561		1063.59	0.09970128		1593.58	0.00043856		2123.58	-0.01106968		2653.61	-0.01921767
533.8	0.26187685		1063.79	0.09999325		1593.78	0.001094		2123.78	-0.01141328		2653.81	-0.01927912
534	0.26222216		1063.99	0.09918305		1593.98	0.00109266		2123.98	-0.01243235		2654.01	-0.01908979
534.2	0.26226814		1064.19	0.09865423		1594.18	0.00130796		2124.18	-0.01292845		2654.21	-0.02003527
534.4	0.26192882		1064.39	0.09744656		1594.38	0.00046276		2124.38	-0.01355238		2654.41	-0.02027582
534.6	0.26178445		1064.59	0.09646062		1594.58	0.00052091		2124.58	-0.01348798		2654.61	-0.01996843
534.8	0.26112971		1064.79	0.09554057		1594.78	0.00024086		2124.78	-0.01470317		2654.81	-0.02057945
535	0.26162732		1064.99	0.09418339		1594.98	-0.0000041		2124.98	-0.01386778		2655.01	-0.02049504
535.2	0.26148357		1065.19	0.09474758		1595.18	0.00019655		2125.18	-0.0147778		2655.21	-0.02045912
535.4	0.26098245		1065.39	0.09596895		1595.38	0.00068089		2125.38	-0.01429018		2655.41	-0.01951948
535.6	0.26036893		1065.59	0.09627914		1595.58	0.00053728		2125.58	-0.0140177		2655.61	-0.02006295
535.8	0.25969004		1065.79	0.09693546		1595.78	0.00050792		2125.78	-0.01399553		2655.81	-0.0204744
536	0.25972462		1065.99	0.0970667		1595.98	0.00041686		2125.98	-0.01363368		2656.01	-0.01931453
536.2	0.25980139		1066.19	0.09814762		1596.18	0.00099172		2126.18	-0.01384348		2656.21	-0.01937616
536.4	0.26031876		1066.39	0.09836316		1596.38	0.00031472		2126.38	-0.01331512		2656.41	-0.0196078
536.6	0.26008935		1066.59	0.09908184		1596.58	-0.00035912		2126.58	-0.01261022		2656.61	-0.02013282
536.8	0.26024041		1066.79	0.09931335		1596.78	-0.00038855		2126.78	-0.01241718		2656.81	-0.02049747
537	0.26087503		1066.99	0.09988395		1596.98	-0.00093312		2126.98	-0.01271774		2657.01	-0.0206017
537.2	0.2603372		1067.19	0.09941645		1597.18	-0.00089882		2127.18	-0.01286567		2657.21	-0.0202122
537.4	0.25993748		1067.39	0.09897975		1597.38	-0.00105241		2127.38	-0.01303941		2657.41	-0.02054714
537.6	0.26069383		1067.59	0.09898666		1597.58	-0.00140144		2127.58	-0.01311842		2657.61	-0.02028412
537.8	0.26140913		1067.79	0.09869914		1597.78	-0.00180887		2127.78	-0.01307327		2657.81	-0.02002087
538	0.26109784		1067.99	0.09792417		1597.98	-0.00191714		2127.98	-0.01388977		2658.01	-0.01952494
538.2	0.26101122		1068.19	0.0971426		1598.18	-0.00163161		2128.18	-0.01392346		2658.21	-0.02004878
538.4	0.26120783		1068.39	0.09611277		1598.38	-0.00132168		2128.38	-0.01418766		2658.41	-0.02038452
538.6	0.26228726		1068.59	0.09530954		1598.58	-0.00164152		2128.58	-0.01391874		2658.61	-0.01967803
538.8	0.26203175		1068.79	0.09526087		1598.78	-0.00259114		2128.78	-0.0142756		2658.81	-0.01998041
539	0.26210263		1068.99	0.09519584		1598.98	-0.00273832		2128.98	-0.01368591		2659.01	-0.01948516
539.2	0.2619659		1069.19	0.096514		1599.18	-0.00280218		2129.18	-0.01482955		2659.21	-0.01834287
539.4	0.26194401		1069.39	0.09754046		1599.38	-0.00243596		2129.38	-0.01452354		2659.41	-0.01826088
539.6	0.26154096		1069.59	0.0975644		1599.58	-0.00314873		2129.58	-0.01452487		2659.61	-0.01915054
539.8	0.26173466		1069.79	0.09810969		1599.78	-0.00352183		2129.78	-0.01454589		2659.81	-0.01957957
540	0.26175964		1069.99	0.09816081		1599.98	-0.00297252		2129.98	-0.01408507		2660.01	-0.01911828
540.2	0.26185385		1070.19	0.09907552		1600.18	-0.00269035		2130.18	-0.01393188		2660.21	-0.0196212
540.4	0.26133781		1070.39	0.09803282		1600.38	-0.00284571		2130.38	-0.01409426		2660.41	-0.01983594
540.6	0.26128893		1070.59	0.09828942		1600.58	-0.00289649		2130.58	-0.01392379		2660.61	-0.02030666
540.8	0.26207104		1070.79	0.09812784		1600.78	-0.00229703		2130.78	-0.01414488		2660.81	-0.02102534
541	0.26176445		1070.99	0.09759303		1600.98	-0.00298173		2130.98	-0.01528991		2661.01	-0.02192468
541.2	0.26130912		1071.19	0.09654586		1601.18	-0.00278171		2131.18	-0.01527604		2661.21	-0.0216308
541.4	0.26144915		1071.39	0.09562235		1601.38	-0.00276265		2131.38	-0.0147745		2661.41	-0.02174385
541.6	0.26181444		1071.59	0.09503756		1601.58	-0.00254024		2131.58	-0.01503792		2661.61	-0.02075608
541.8	0.26117169		1071.79	0.09359521		1601.78	-0.00262895		2131.78	-0.01526743		2661.81	-0.02105637
542	0.26058604		1071.99	0.09342691		1601.98	-0.00230182		2131.98	-0.01526746		2662.01	-0.02045566
542.2	0.2612193		1072.19	0.09303178		1602.18	-0.00133559		2132.18	-0.01521117		2662.21	-0.02023097
542.4	0.26149816		1072.39	0.09217008		1602.38	-0.00154776		2132.38	-0.01538553		2662.41	-0.01988029
542.6	0.26198893		1072.59	0.09156395		1602.58	-0.0021801		2132.58	-0.01469012		2662.61	-0.01893461
542.8	0.26169357		1072.79	0.09216332		1602.78	-0.00125437		2132.78	-0.0152145		2662.81	-0.0194368
543	0.26205558		1072.99	0.09293965		1602.98	-0.00068149		2132.98	-0.01541299		2663.01	-0.01877357
543.2	0.26214087		1073.19	0.09396114		1603.18	0.00012365		2133.18	-0.01553158		2663.21	-0.01920756
543.4	0.26199046		1073.39	0.09554554		1603.38	0.00045383		2133.38	-0.01506378		2663.41	-0.01988314
543.6	0.26224561		1073.59	0.09581493		1603.58	0.00003546		2133.58	-0.01530468		2663.61	-0.01967615
543.8	0.2623026		1073.79	0.09635187		1603.78	0.00058887		2133.78	-0.01503264		2663.81	-0.01930464
544	0.26254251		1073.99	0.09710318		1603.98	0.00164068		2133.98	-0.01474579		2664.01	-0.01950318
544.2	0.26275917		1074.19	0.09784987		1604.18	0.00174213		2134.18	-0.01416441		2664.21	-0.01939666
544.4	0.26251004		1074.39	0.09849883		1604.38	0.00221345		2134.38	-0.01424232		2664.41	-0.01988352
544.6	0.26309549		1074.59	0.09983589		1604.58	0.00354789		2134.58	-0.01428247		2664.61	-0.02069213
544.8	0.2634506		1074.79	0.10029062		1604.78	0.00434111		2134.78	-0.01427062		2664.81	-0.02143128
545	0.26280329		1074.99	0.1003556		1604.98	0.00392441		2134.98	-0.01456414		2665.01	-0.02120193
545.2	0.26267282		1075.19	0.10005999		1605.18	0.00372772		2135.18	-0.01447028		2665.21	-0.02101366
545.4	0.26276843		1075.39	0.09959479		1605.38	0.00440147		2135.38	-0.01476318		2665.41	-0.02158953
545.6	0.26133132		1075.59	0.09938121		1605.58	0.00377583		2135.58	-0.01464876		2665.61	-0.02093769
545.8	0.26062708		1075.79	0.09849463		1605.78	0.00290337		2135.78	-0.01530848		2665.81	-0.02061753
546	0.26143114		1075.99	0.09847532		1605.98	0.00266537		2135.98	-0.015026		2666.01	-0.01973765
546.2	0.26207391		1076.19	0.09765514		1606.18	0.00232543		2136.18	-0.01483874		2666.21	-0.02004266
546.4	0.26146769		1076.39	0.0971264		1606.38	0.00196347		2136.38	-0.01387387		2666.41	-0.02030456
546.6	0.26189474		1076.59	0.09655804		1606.58	0.00209697		2136.58	-0.0132057		2666.61	-0.02047291
546.8	0.26190594		1076.79	0.0971521		1606.78	0.00141707		2136.78	-0.01302082		2666.81	-0.02059095
547	0.26176428		1076.99	0.09728639		1606.98	0.00052036		2136.98	-0.01222606		2667.01	-0.02069892
547.2	0.26235246		1077.19	0.09779887		1607.18	0.00000054		2137.18	-0.01181807		2667.21	-0.02139015
547.4	0.2623711		1077.39	0.09817578		1607.38	-0.00064727		2137.38	-0.01208583		2667.41	-0.02100174
547.6	0.26213065		1077.59	0.09833911		1607.58	-0.0017171		2137.58	-0.01184918		2667.61	-0.02184336
547.8	0.26209945		1077.79	0.09853197		1607.78	-0.00225664		2137.78	-0.01142251		2667.81	-0.02158669
548	0.26166457		1077.99	0.09890342		1607.98	-0.00216155		2137.98	-0.01181243		2668.01	-0.02260902
548.2	0.26217122		1078.19	0.0997035		1608.18	-0.00254225		2138.18	-0.01152365		2668.21	-0.02306688
548.4	0.261608		1078.39	0.10026839		1608.38	-0.00143912		2138.38	-0.01193764		2668.41	-0.02356968
548.6	0.26222425		1078.59	0.10016265		1608.58	-0.0011075		2138.58	-0.01228364		2668.61	-0.02324269
548.8	0.26177666		1078.79	0.09959474		1608.78	-0.00102152		2138.78	-0.01226531		2668.81	-0.02300818
549	0.26142949		1078.99	0.09912978		1608.98	-0.00114864		2138.98	-0.01281055		2669.01	-0.02217391
549.2	0.26183669		1079.19	0.09803643		1609.18	-0.00123143		2139.18	-0.01422903		2669.21	-0.02305125
549.4	0.26168622		1079.39	0.09740124		1609.38	-0.00053388		2139.38	-0.01523117		2669.41	-0.02269591
549.6	0.26047625		1079.59	0.09678719		1609.58	-0.00089423		2139.58	-0.01571543		2669.61	-0.0226647
549.8	0.26034368		1079.79	0.09646647		1609.78	-0.00093809		2139.78	-0.01696977		2669.81	-0.02230264
550	0.26068282		1079.99	0.09567651		1609.98	-0.00101358		2139.98	-0.01658261		2670.01	-0.02260597
550.2	0.26032636		1080.19	0.09499824		1610.18	-0.00228967		2140.18	-0.01640616		2670.21	-0.02185764
550.4	0.26004354		1080.39	0.09479434		1610.38	-0.00304688		2140.38	-0.01620732		2670.41	-0.02143113
550.6	0.25979508		1080.59	0.0941534		1610.58	-0.00361007		2140.58	-0.01582153		2670.61	-0.02129467
550.8	0.25913926		1080.79	0.09461626		1610.78	-0.00454477		2140.78	-0.01540402		2670.81	-0.02042968
551	0.25849069		1080.99	0.09467235		1610.98	-0.00477315		2140.98	-0.01440169		2671.01	-0.02075083
551.2	0.2577814		1081.19	0.09514266		1611.18	-0.00429066		2141.18	-0.01468		2671.21	-0.02104347
551.4	0.25677847		1081.39	0.09568438		1611.38	-0.00433973		2141.38	-0.0140123		2671.41	-0.02172914
551.6	0.25644609		1081.59	0.09608176		1611.58	-0.00462878		2141.58	-0.01367989		2671.61	-0.02223125
551.8	0.25711217		1081.79	0.09663227		1611.78	-0.00508034		2141.78	-0.0136821		2671.81	-0.02189971
552	0.25770683		1081.99	0.09757451		1611.98	-0.00399585		2141.98	-0.0140053		2672.01	-0.02333813
552.2	0.25852381		1082.19	0.09795467		1612.18	-0.00376244		2142.18	-0.01362619		2672.21	-0.0234616
552.4	0.25964953		1082.39	0.09788971		1612.38	-0.00255716		2142.38	-0.01449148		2672.41	-0.02338683
552.6	0.26115814		1082.59	0.09785833		1612.58	-0.00182033		2142.58	-0.01513498		2672.61	-0.02308861
552.8	0.26121566		1082.79	0.0977972		1612.78	-0.00065752		2142.78	-0.01546234		2672.81	-0.02360622
553	0.26120251		1082.99	0.09703602		1612.98	-0.00107233		2142.98	-0.01635716		2673.01	-0.02269273
553.2	0.26110087		1083.19	0.09687327		1613.18	-0.00050465		2143.18	-0.01728895		2673.21	-0.02275041
553.4	0.2609162		1083.39	0.09696338		1613.38	-0.00000107		2143.38	-0.01754072		2673.41	-0.0223925
553.6	0.26095502		1083.59	0.09750347		1613.58	-0.00035906		2143.58	-0.01778903		2673.61	-0.0222521
553.8	0.26223053		1083.79	0.09713252		1613.78	-0.00030129		2143.78	-0.01737799		2673.81	-0.02154095
554	0.26225019		1083.99	0.0966707		1613.98	-0.00055672		2143.98	-0.01706886		2674.01	-0.0203802
554.2	0.26236083		1084.19	0.09621662		1614.18	-0.0008085		2144.18	-0.01706427		2674.21	-0.01926395
554.4	0.26202585		1084.39	0.09635795		1614.38	-0.0012996		2144.38	-0.01745802		2674.41	-0.0201079
554.6	0.26074552		1084.59	0.09589522		1614.58	-0.00178258		2144.58	-0.01584863		2674.61	-0.01973892
554.8	0.26068681		1084.79	0.09661414		1614.78	-0.00158444		2144.78	-0.01610476		2674.81	-0.01897736
555	0.25998001		1084.99	0.09608006		1614.98	-0.00082579		2144.98	-0.01613929		2675.01	-0.01910415
555.2	0.25945589		1085.19	0.097164		1615.18	0.00038854		2145.18	-0.01629207		2675.21	-0.0189416
555.4	0.25949674		1085.39	0.097629		1615.38	0.00026733		2145.38	-0.0157882		2675.41	-0.01901846
555.6	0.26012082		1085.59	0.09763381		1615.58	0.00057494		2145.58	-0.01666276		2675.61	-0.01910451
555.8	0.26019858		1085.79	0.09811919		1615.78	0.00118758		2145.78	-0.01670764		2675.81	-0.02081446
556	0.26065256		1085.99	0.09790804		1615.98	0.00215599		2145.98	-0.01674532		2676.01	-0.02111199
556.2	0.26113666		1086.19	0.09776477		1616.18	0.00195669		2146.18	-0.01614093		2676.21	-0.0213781
556.4	0.26155305		1086.39	0.09778296		1616.38	0.00219484		2146.38	-0.01670352		2676.41	-0.02186189
556.6	0.26121072		1086.59	0.09758581		1616.58	0.00250568		2146.58	-0.01668193		2676.61	-0.0228742
556.8	0.26072415		1086.79	0.0973828		1616.78	0.00202007		2146.78	-0.01605224		2676.81	-0.02355493
557	0.26077836		1086.99	0.09711438		1616.98	0.0020056		2146.98	-0.01548317		2677.01	-0.02285076
557.2	0.26085152		1087.19	0.0969485		1617.18	0.00135377		2147.18	-0.01472865		2677.21	-0.02325505
557.4	0.26105528		1087.39	0.09725478		1617.38	0.00066913		2147.38	-0.01409597		2677.41	-0.02307526
557.6	0.26119996		1087.59	0.09733396		1617.58	-0.00043519		2147.58	-0.01385445		2677.61	-0.02231379
557.8	0.26085399		1087.79	0.09734446		1617.78	-0.00112545		2147.78	-0.0133978		2677.81	-0.02214711
558	0.25952484		1087.99	0.0978984		1617.98	-0.00240364		2147.98	-0.0135576		2678.01	-0.0216079
558.2	0.25926923		1088.19	0.0981361		1618.18	-0.00323283		2148.18	-0.01350287		2678.21	-0.02173624
558.4	0.25854536		1088.39	0.0986114		1618.38	-0.00435361		2148.38	-0.0137288		2678.41	-0.02187943
558.6	0.25829812		1088.59	0.09844729		1618.58	-0.00483678		2148.58	-0.01323191		2678.61	-0.02099531
558.8	0.25890886		1088.79	0.09872151		1618.78	-0.0041923		2148.78	-0.01440234		2678.81	-0.02064562
559	0.25851604		1088.99	0.09849631		1618.98	-0.0037215		2148.98	-0.01464782		2679.01	-0.02041294
559.2	0.25850485		1089.19	0.09881284		1619.18	-0.00359853		2149.18	-0.01457562		2679.21	-0.0200311
559.4	0.2585552		1089.39	0.0979121		1619.38	-0.00335248		2149.38	-0.01493482		2679.41	-0.02039754
559.6	0.25897046		1089.59	0.09751807		1619.58	-0.00272078		2149.58	-0.01511348		2679.61	-0.02078943
559.8	0.25900707		1089.79	0.09699353		1619.78	-0.00173429		2149.78	-0.01470908		2679.81	-0.02137104
