# Supplementary material for: Functional development of a V3/glycan-specific broadly neutralizing antibody isolated from a case of HIV superinfection
Source: eLife journal article supplement (doi:10.7554/elife.68110), 2021-07-15
Supplement: fig2-data2 [file D5.xls]

Vers 3.43 Data Simulation
Conc1	6.25E-08	6.25E-08	6.25E-08	6.25E-08	6.25E-08	6.25E-08
Start1	290	879.99	1470.01	2060	2650	3240
Stop1	649.8	1239.79	1829.81	2419.8	3009.8	3599.79
Time1	Data1	Sim1	Time2	Data2	Sim2	Time3	Data3	Sim3	Time4	Data4	Sim4	Time5	Data5	Sim5	Time6	Data6	Sim6
290	0.00562322		879.99	0.00356451		1470.01	-0.00351284		2060	0.00606932		2650	-0.00426859		3240	-0.00122389
290.2	0.00513059		880.19	0.00273992		1470.21	-0.00279805		2060.2	0.0063834		2650.2	-0.00435322		3240.2	-0.00110303
290.4	0.00479591		880.39	0.00224986		1470.41	-0.00254563		2060.4	0.0067756		2650.4	-0.00470468		3240.4	-0.00100965
290.6	0.0046371		880.59	0.00152425		1470.61	-0.00174784		2060.6	0.0074544		2650.6	-0.00459235		3240.6	-0.00052221
290.8	0.00455185		880.79	0.00093228		1470.81	-0.00097885		2060.8	0.00831782		2650.8	-0.00495432		3240.8	-0.00033374
291	0.00505099		880.99	0.00015976		1471.01	-0.00025104		2061	0.00854876		2651	-0.00477063		3241	-0.00048005
291.2	0.00509778		881.19	-0.0003742		1471.21	0.00041818		2061.2	0.00912201		2651.2	-0.00426545		3241.2	0.00019051
291.4	0.00527625		881.39	-0.00049551		1471.41	0.00010797		2061.4	0.01010571		2651.4	-0.00431614		3241.4	0.00043782
291.6	0.00582947		881.59	-0.00022272		1471.61	0.00011615		2061.6	0.01026535		2651.6	-0.00437988		3241.6	0.00039472
291.8	0.00578541		881.79	0.0003378		1471.81	0.00025519		2061.8	0.01026137		2651.8	-0.00420905		3241.8	0.000199
292	0.00626977		881.99	0.00074545		1472.01	-0.00008225		2062	0.01010044		2652	-0.00417509		3242	-0.00052826
292.2	0.00665346		882.19	0.0018042		1472.21	-0.00026051		2062.2	0.00955333		2652.2	-0.00416646		3242.2	-0.00097088
292.4	0.00634697		882.39	0.00262377		1472.41	-0.00040039		2062.4	0.00937688		2652.4	-0.00439826		3242.4	-0.00233436
292.6	0.0072824		882.59	0.00254525		1472.61	-0.00051524		2062.6	0.00891067		2652.6	-0.00473789		3242.6	-0.00290139
292.8	0.00838317		882.79	0.00222994		1472.81	-0.00043069		2062.8	0.00856906		2652.8	-0.0050217		3242.8	-0.00184513
293	0.00853673		882.99	0.00215843		1473.01	-0.00080929		2063	0.00810678		2653	-0.00562179		3243	-0.0020978
293.2	0.00873529		883.19	0.00177166		1473.21	-0.00076893		2063.2	0.00916656		2653.2	-0.00588899		3243.2	-0.00187931
293.4	0.01011372		883.39	0.00190961		1473.41	-0.00022748		2063.4	0.00972451		2653.4	-0.00605533		3243.4	-0.00111651
293.6	0.01029524		883.59	0.00128818		1473.61	-0.00062857		2063.6	0.01034957		2653.6	-0.00583223		3243.6	-0.00008328
293.8	0.01008426		883.79	0.00165766		1473.81	-0.00034693		2063.8	0.01157412		2653.8	-0.00538647		3243.8	0.00045852
294	0.01052606		883.99	0.00185694		1474.01	0.00019403		2064	0.0114555		2654	-0.00605672		3244	0.00102095
294.2	0.01041946		884.19	0.00166112		1474.21	0.00021597		2064.2	0.01058475		2654.2	-0.00619875		3244.2	0.00137088
294.4	0.01099654		884.39	0.00109035		1474.41	0.00024842		2064.4	0.01029733		2654.4	-0.00595294		3244.4	0.00174207
294.6	0.01111493		884.59	0.00062848		1474.61	-0.00020207		2064.6	0.01065734		2654.6	-0.00658065		3244.6	0.00263353
294.8	0.01182117		884.79	0.00028722		1474.81	-0.00070028		2064.8	0.01070636		2654.8	-0.00738181		3244.8	0.00232763
295	0.01332131		884.99	-0.00066532		1475.01	-0.00102294		2065	0.01024872		2655	-0.00674354		3245	0.00194437
295.2	0.01313059		885.19	-0.00009161		1475.21	-0.0018888		2065.2	0.01137742		2655.2	-0.00645719		3245.2	0.00237836
295.4	0.01354372		885.39	0.00053654		1475.41	-0.00258957		2065.4	0.0107247		2655.4	-0.00656887		3245.4	0.00111113
295.6	0.01369596		885.59	0.00098056		1475.61	-0.00284568		2065.6	0.01071372		2655.6	-0.00676194		3245.6	-0.00021825
295.8	0.01293093		885.79	0.00203773		1475.81	-0.00276908		2065.8	0.01013704		2655.8	-0.00713499		3245.8	-0.00133414
296	0.01271993		885.99	0.0029799		1476.01	-0.00287923		2066	0.00970688		2656	-0.00759228		3246	-0.00286273
296.2	0.01253588		886.19	0.00380425		1476.21	-0.00225961		2066.2	0.0088358		2656.2	-0.00771172		3246.2	-0.00319258
296.4	0.01215702		886.39	0.00360354		1476.41	-0.00211055		2066.4	0.00886257		2656.4	-0.00741915		3246.4	-0.00402264
296.6	0.01192809		886.59	0.00367982		1476.61	-0.00265998		2066.6	0.00821056		2656.6	-0.00752789		3246.6	-0.00401
296.8	0.01138703		886.79	0.0043619		1476.81	-0.00253523		2066.8	0.00782778		2656.8	-0.0068954		3246.8	-0.00463134
297	0.01116457		886.99	0.0048561		1477.01	-0.00251905		2067	0.00714627		2657	-0.00691712		3247	-0.00584578
297.2	0.01207401		887.19	0.004531		1477.21	-0.00208029		2067.2	0.00703039		2657.2	-0.0068418		3247.2	-0.00579005
297.4	0.01232523		887.39	0.00446436		1477.41	-0.00076935		2067.4	0.00669274		2657.4	-0.00645843		3247.4	-0.0053369
297.6	0.01265813		887.59	0.00464465		1477.61	-0.000043		2067.6	0.00645191		2657.6	-0.00573121		3247.6	-0.00620953
297.8	0.01345596		887.79	0.00367362		1477.81	0.00135226		2067.8	0.0064192		2657.8	-0.00595483		3247.8	-0.00618954
298	0.01398078		887.99	0.00418446		1478.01	0.00198756		2068	0.00573492		2658	-0.00675631		3248	-0.00574386
298.2	0.0140637		888.19	0.00352201		1478.21	0.00149557		2068.2	0.00589803		2658.2	-0.00624627		3248.2	-0.00616189
298.4	0.01468741		888.39	0.00259551		1478.41	0.00117075		2068.4	0.00610349		2658.4	-0.00640272		3248.4	-0.0064332
298.6	0.0150315		888.59	0.00281484		1478.61	0.00057776		2068.6	0.00661063		2658.6	-0.00717509		3248.6	-0.0057722
298.8	0.01584169		888.79	0.00230783		1478.81	0.00069831		2068.8	0.00779528		2658.8	-0.00696401		3248.8	-0.00603165
299	0.01641435		888.99	0.00184008		1479.01	0.00001941		2069	0.00824348		2659	-0.00634933		3249	-0.00524429
299.2	0.01568691		889.19	0.00219363		1479.21	-0.00114812		2069.2	0.00947159		2659.2	-0.0062996		3249.2	-0.00451294
299.4	0.01627875		889.39	0.00169404		1479.41	-0.00126225		2069.4	0.00941467		2659.4	-0.00561532		3249.4	-0.00466431
299.6	0.01660551		889.59	0.00199957		1479.61	-0.00154479		2069.6	0.01036555		2659.6	-0.0061572		3249.6	-0.00406876
299.8	0.01607744		889.79	0.00245742		1479.81	-0.00220169		2069.8	0.01037579		2659.8	-0.00665524		3249.8	-0.00380146
300	0.01574848		889.99	0.00259723		1480.01	-0.00204537		2070	0.01070116		2660	-0.00644882		3250	-0.00360578
300.2	0.01629676		890.19	0.00225391		1480.21	-0.00206683		2070.2	0.01079118		2660.2	-0.00605423		3250.2	-0.0031202
300.4	0.01620351		890.39	0.00152598		1480.41	-0.00233813		2070.4	0.01122254		2660.4	-0.00629669		3250.4	-0.00288653
300.6	0.01560033		890.59	0.0018184		1480.61	-0.00320797		2070.6	0.01116541		2660.6	-0.0060704		3250.6	-0.00219343
300.8	0.01561778		890.79	0.00164706		1480.81	-0.00351151		2070.8	0.01067147		2660.8	-0.00597134		3250.8	-0.00266682
301	0.01628592		890.99	0.00246412		1481.01	-0.00357861		2071	0.01019129		2661	-0.00666101		3251	-0.00281546
301.2	0.01734098		891.19	0.00257334		1481.21	-0.00378537		2071.2	0.0103601		2661.2	-0.00698878		3251.2	-0.00255224
301.4	0.01683672		891.39	0.00246789		1481.41	-0.00331007		2071.4	0.00945614		2661.4	-0.00595645		3251.4	-0.00282133
301.6	0.01814519		891.59	0.00296653		1481.61	-0.00313508		2071.6	0.00947879		2661.6	-0.00608127		3251.6	-0.0032372
301.8	0.01883679		891.79	0.0028014		1481.81	-0.00298649		2071.8	0.00927864		2661.8	-0.00598818		3251.8	-0.00272757
302	0.01970707		891.99	0.00406323		1482.01	-0.00259971		2072	0.00854438		2662	-0.00573703		3252	-0.00261094
302.2	0.02008629		892.19	0.00440463		1482.21	-0.00323008		2072.2	0.00865149		2662.2	-0.00490765		3252.2	-0.00406472
302.4	0.02109396		892.39	0.00410195		1482.41	-0.0024271		2072.4	0.00855567		2662.4	-0.00457057		3252.4	-0.00386864
302.6	0.02127524		892.59	0.00428477		1482.61	-0.00120085		2072.6	0.00913603		2662.6	-0.00451724		3252.6	-0.00330146
302.8	0.02202658		892.79	0.00414018		1482.81	-0.00087997		2072.8	0.00925113		2662.8	-0.00497434		3252.8	-0.00344193
303	0.02299948		892.99	0.00425148		1483.01	-0.00130564		2073	0.00871089		2663	-0.00439064		3253	-0.00300673
303.2	0.02398763		893.19	0.00332026		1483.21	-0.00136168		2073.2	0.00875339		2663.2	-0.00407523		3253.2	-0.00310311
303.4	0.02478031		893.39	0.00331969		1483.41	0.00026108		2073.4	0.00847885		2663.4	-0.00461024		3253.4	-0.00346331
303.6	0.02501536		893.59	0.00370934		1483.61	0.00139858		2073.6	0.00863167		2663.6	-0.00482818		3253.6	-0.00362031
303.8	0.02462368		893.79	0.00316903		1483.81	0.00126413		2073.8	0.00865956		2663.8	-0.00485329		3253.8	-0.00426485
304	0.02408687		893.99	0.00270071		1484.01	0.0022319		2074	0.00904933		2664	-0.00443696		3254	-0.00393163
304.2	0.02499931		894.19	0.00237658		1484.21	0.00246109		2074.2	0.00907381		2664.2	-0.00471046		3254.2	-0.0048712
304.4	0.02506251		894.39	0.00111388		1484.41	0.00265769		2074.4	0.00880121		2664.4	-0.0047929		3254.4	-0.00424328
304.6	0.02510759		894.59	0.00166112		1484.61	0.0019281		2074.6	0.00870334		2664.6	-0.0047093		3254.6	-0.00373874
304.8	0.02478507		894.79	0.00203483		1484.81	0.0016673		2074.8	0.00829531		2664.8	-0.00470385		3254.8	-0.0045846
305	0.02412393		894.99	0.003128		1485.01	0.00179809		2075	0.00857721		2665	-0.00517037		3255	-0.00410304
305.2	0.02461126		895.19	0.00332966		1485.21	0.00157389		2075.2	0.00895166		2665.2	-0.00504615		3255.2	-0.00451876
305.4	0.02374123		895.39	0.00284231		1485.41	0.00165625		2075.4	0.00848884		2665.4	-0.00418967		3255.4	-0.0047456
305.6	0.02459928		895.59	0.00321508		1485.61	0.00151276		2075.6	0.00919654		2665.6	-0.0049349		3255.6	-0.00521908
305.8	0.0248671		895.79	0.00321657		1485.81	0.00180889		2075.8	0.00980778		2665.8	-0.00443107		3255.8	-0.0052896
306	0.02546804		895.99	0.00298791		1486.01	0.00180095		2076	0.01042137		2666	-0.00354513		3256	-0.00528325
306.2	0.02518938		896.19	0.00272094		1486.21	0.00188469		2076.2	0.01127205		2666.2	-0.00371064		3256.2	-0.00492915
306.4	0.02591461		896.39	0.0022409		1486.41	0.00305635		2076.4	0.01143287		2666.4	-0.00421309		3256.4	-0.00479226
306.6	0.02601746		896.59	0.00265501		1486.61	0.0031726		2076.6	0.01208963		2666.6	-0.00555521		3256.6	-0.00526164
306.8	0.02679179		896.79	0.00314968		1486.81	0.00243621		2076.8	0.01160979		2666.8	-0.0062935		3256.8	-0.00535806
307	0.02734595		896.99	0.00399083		1487.01	0.00199417		2077	0.01206922		2667	-0.00574909		3257	-0.00569517
307.2	0.02816838		897.19	0.00378674		1487.21	0.0017261		2077.2	0.01216319		2667.2	-0.00631902		3257.2	-0.00609759
307.4	0.02839575		897.39	0.00457529		1487.41	0.00202229		2077.4	0.01227744		2667.4	-0.00771404		3257.4	-0.00612308
307.6	0.02849998		897.59	0.00496539		1487.61	0.0018488		2077.6	0.01204996		2667.6	-0.00730397		3257.6	-0.00576664
307.8	0.02904794		897.79	0.00451334		1487.81	0.00079041		2077.8	0.01148906		2667.8	-0.00800202		3257.8	-0.00637306
308	0.02886027		897.99	0.00441043		1488.01	0.00106241		2078	0.01102408		2668	-0.00788212		3258	-0.00645325
308.2	0.02999062		898.19	0.00439191		1488.21	0.00102211		2078.2	0.00981824		2668.2	-0.0078553		3258.2	-0.00717213
308.4	0.02987392		898.39	0.00452672		1488.41	0.00094906		2078.4	0.00923706		2668.4	-0.0068829		3258.4	-0.00606343
308.6	0.03016518		898.59	0.00486677		1488.61	0.00024694		2078.6	0.00883259		2668.6	-0.00666111		3258.6	-0.00654188
308.8	0.02973624		898.79	0.00535965		1488.81	0.00007818		2078.8	0.0079877		2668.8	-0.00559105		3258.8	-0.00724568
309	0.02939523		898.99	0.00596078		1489.01	-0.00010184		2079	0.00816995		2669	-0.0056355		3259	-0.00694997
309.2	0.03001914		899.19	0.00605178		1489.21	-0.00037954		2079.2	0.00758492		2669.2	-0.00557843		3259.2	-0.00793526
309.4	0.02963494		899.39	0.00565333		1489.41	-0.00090043		2079.4	0.00700113		2669.4	-0.00511629		3259.4	-0.0077642
309.6	0.02997281		899.59	0.00514536		1489.61	-0.00063176		2079.6	0.00661452		2669.6	-0.00536607		3259.6	-0.00778224
309.8	0.03014712		899.79	0.00537582		1489.81	-0.00081841		2079.8	0.00744728		2669.8	-0.00598938		3259.8	-0.00740183
310	0.0304506		899.99	0.00513671		1490.01	-0.00038088		2080	0.00675204		2670	-0.00604627		3260	-0.00653522
310.2	0.03103711		900.19	0.00563155		1490.21	-0.00038439		2080.2	0.00611158		2670.2	-0.00724884		3260.2	-0.00657323
310.4	0.03174472		900.39	0.00553652		1490.41	-0.00055175		2080.4	0.00675561		2670.4	-0.00729123		3260.4	-0.00722095
310.6	0.03188387		900.59	0.00540529		1490.61	-0.00112164		2080.6	0.00771895		2670.6	-0.00881021		3260.6	-0.00657647
310.8	0.03140939		900.79	0.00542499		1490.81	-0.00149		2080.8	0.00796113		2670.8	-0.00906457		3260.8	-0.00621517
311	0.03220878		900.99	0.00501631		1491.01	-0.00089725		2081	0.00873917		2671	-0.00857926		3261	-0.00664626
311.2	0.0330276		901.19	0.00382832		1491.21	-0.00143628		2081.2	0.00936682		2671.2	-0.00943653		3261.2	-0.00617102
311.4	0.03319302		901.39	0.00282005		1491.41	-0.00104628		2081.4	0.01011724		2671.4	-0.01039416		3261.4	-0.00616534
311.6	0.03271341		901.59	0.00190839		1491.61	-0.00071973		2081.6	0.0102637		2671.6	-0.01073509		3261.6	-0.00534846
311.8	0.03306798		901.79	0.00071843		1491.81	-0.00056367		2081.8	0.00997605		2671.8	-0.01110974		3261.8	-0.00581732
312	0.03241198		901.99	0.00164894		1492.01	-0.0001163		2082	0.00953574		2672	-0.01056272		3262	-0.00546109
312.2	0.03343301		902.19	0.001918		1492.21	0.00001967		2082.2	0.01013324		2672.2	-0.0104143		3262.2	-0.00585617
312.4	0.03412477		902.39	0.00246173		1492.41	0.00047738		2082.4	0.01060539		2672.4	-0.00999721		3262.4	-0.00606312
312.6	0.03497832		902.59	0.00145921		1492.61	0.00021343		2082.6	0.01014428		2672.6	-0.00925131		3262.6	-0.00712001
312.8	0.03547818		902.79	0.00191031		1492.81	-0.00017377		2082.8	0.00933337		2672.8	-0.00868786		3262.8	-0.00737545
313	0.03570361		902.99	0.00198537		1493.01	-0.00103954		2083	0.00879423		2673	-0.00880169		3263	-0.00786744
313.2	0.03539041		903.19	0.00272765		1493.21	-0.00142566		2083.2	0.00873896		2673.2	-0.00839699		3263.2	-0.00851932
313.4	0.03530624		903.39	0.00230388		1493.41	-0.0014813		2083.4	0.00915651		2673.4	-0.00757748		3263.4	-0.00898665
313.6	0.03557127		903.59	0.00284334		1493.61	-0.00107891		2083.6	0.009679		2673.6	-0.00733576		3263.6	-0.01004181
313.8	0.03611247		903.79	0.00407152		1493.81	-0.00138673		2083.8	0.00999168		2673.8	-0.00744853		3263.8	-0.00969951
314	0.0367776		903.99	0.00368031		1494.01	-0.0006145		2084	0.00940022		2674	-0.00712578		3264	-0.00867169
314.2	0.03667153		904.19	0.00380909		1494.21	-0.00122266		2084.2	0.01058193		2674.2	-0.0060366		3264.2	-0.00839571
314.4	0.03644614		904.39	0.00383558		1494.41	-0.00137772		2084.4	0.01152785		2674.4	-0.00551434		3264.4	-0.00761429
314.6	0.03572361		904.59	0.00333358		1494.61	-0.00175539		2084.6	0.01175223		2674.6	-0.00612995		3264.6	-0.00644637
314.8	0.03599755		904.79	0.00289046		1494.81	-0.00135283		2084.8	0.01127218		2674.8	-0.00501607		3264.8	-0.00649118
315	0.03646755		904.99	0.00267649		1495.01	-0.00104432		2085	0.01168427		2675	-0.00402478		3265	-0.00630868
315.2	0.0368303		905.19	0.00300685		1495.21	-0.00161078		2085.2	0.01196375		2675.2	-0.00460613		3265.2	-0.00626242
315.4	0.03678125		905.39	0.00258186		1495.41	-0.00092691		2085.4	0.01229635		2675.4	-0.00498377		3265.4	-0.00580395
315.6	0.03579995		905.59	0.00327424		1495.61	-0.0006152		2085.6	0.01208518		2675.6	-0.00556655		3265.6	-0.00478934
315.8	0.03620439		905.79	0.00340566		1495.81	-0.00048817		2085.8	0.01142714		2675.8	-0.0058133		3265.8	-0.00516947
316	0.03591422		905.99	0.00449454		1496.01	0.00057366		2086	0.01115132		2676	-0.0063979		3266	-0.00516001
316.2	0.03717494		906.19	0.00410149		1496.21	0.00081329		2086.2	0.01141132		2676.2	-0.00640188		3266.2	-0.0057172
316.4	0.03705675		906.39	0.00354311		1496.41	0.00122171		2086.4	0.01034653		2676.4	-0.0063041		3266.4	-0.00530882
316.6	0.03825168		906.59	0.00281658		1496.61	0.00098001		2086.6	0.00966764		2676.6	-0.00587743		3266.6	-0.00520839
316.8	0.03898277		906.79	0.0033832		1496.81	0.00080488		2086.8	0.00976513		2676.8	-0.00643937		3266.8	-0.00513757
317	0.03848079		906.99	0.00335999		1497.01	0.00048973		2087	0.00922355		2677	-0.00665311		3267	-0.00508853
317.2	0.03901034		907.19	0.00418247		1497.21	0.00125365		2087.2	0.01051018		2677.2	-0.00655276		3267.2	-0.0048076
317.4	0.0392317		907.39	0.00433171		1497.41	0.00168557		2087.4	0.01077332		2677.4	-0.00706113		3267.4	-0.00511972
317.6	0.03988128		907.59	0.00532829		1497.61	0.00175684		2087.6	0.01055906		2677.6	-0.00739981		3267.6	-0.00501305
317.8	0.04009645		907.79	0.00509668		1497.81	0.00121551		2087.8	0.01045023		2677.8	-0.00756782		3267.8	-0.00416553
318	0.04097182		907.99	0.00452122		1498.01	0.00201661		2088	0.01106055		2678	-0.00730118		3268	-0.00374997
318.2	0.04063973		908.19	0.0049971		1498.21	0.00105281		2088.2	0.01111436		2678.2	-0.00614924		3268.2	-0.00390946
318.4	0.04142355		908.39	0.00534721		1498.41	0.00025161		2088.4	0.0103883		2678.4	-0.006283		3268.4	-0.00403173
318.6	0.04149504		908.59	0.00510504		1498.61	-0.00032092		2088.6	0.00982303		2678.6	-0.00592584		3268.6	-0.00406419
318.8	0.04242012		908.79	0.00587628		1498.81	0.00008491		2088.8	0.00935463		2678.8	-0.0049236		3268.8	-0.00501505
319	0.04213143		908.99	0.00585254		1499.01	-0.00004618		2089	0.0097413		2679	-0.00553046		3269	-0.00527805
319.2	0.04195094		909.19	0.00601337		1499.21	-0.00083742		2089.2	0.01013602		2679.2	-0.00583869		3269.2	-0.00535884
319.4	0.04144962		909.39	0.00621359		1499.41	-0.00080879		2089.4	0.01077292		2679.4	-0.00531921		3269.4	-0.00468997
319.6	0.04003914		909.59	0.00646704		1499.61	-0.00098071		2089.6	0.01013579		2679.6	-0.00564547		3269.6	-0.0051461
319.8	0.0397008		909.79	0.00621656		1499.81	-0.00019123		2089.8	0.00999122		2679.8	-0.0060035		3269.8	-0.00543187
320	0.03945713		909.99	0.00639215		1500.01	0.00121857		2090	0.00899395		2680	-0.0058706		3270	-0.00603679
320.2	0.03932807		910.19	0.00583044		1500.21	0.00013636		2090.2	0.00914737		2680.2	-0.0054854		3270.2	-0.00637261
320.4	0.03945304		910.39	0.00592677		1500.41	0.00096518		2090.4	0.00824725		2680.4	-0.00575073		3270.4	-0.00612398
320.6	0.03999443		910.59	0.00563962		1500.61	0.00079792		2090.6	0.008525		2680.6	-0.00553057		3270.6	-0.007032
320.8	0.03945552		910.79	0.00614432		1500.81	0.00110425		2090.8	0.00929844		2680.8	-0.0054621		3270.8	-0.00770192
321	0.03901254		910.99	0.0061186		1501.01	0.00125354		2091	0.00820494		2681	-0.00529408		3271	-0.00790242
321.2	0.03931476		911.19	0.00666716		1501.21	0.00158998		2091.2	0.00924417		2681.2	-0.00521129		3271.2	-0.00696434
321.4	0.04011455		911.39	0.00716742		1501.41	0.00128302		2091.4	0.00956763		2681.4	-0.00567151		3271.4	-0.0074904
321.6	0.04149378		911.59	0.00715522		1501.61	0.00060565		2091.6	0.00946528		2681.6	-0.00570815		3271.6	-0.00866821
321.8	0.04221332		911.79	0.00695003		1501.81	0.00049404		2091.8	0.00936026		2681.8	-0.00512764		3271.8	-0.00841994
322	0.04359499		911.99	0.00758252		1502.01	0.00087571		2092	0.00962156		2682	-0.00498909		3272	-0.00881112
322.2	0.04348337		912.19	0.00728944		1502.21	-0.00016656		2092.2	0.00837385		2682.2	-0.00514727		3272.2	-0.00875035
322.4	0.04461268		912.39	0.00681182		1502.41	-0.00064677		2092.4	0.0084534		2682.4	-0.00559616		3272.4	-0.00907477
322.6	0.04509298		912.59	0.00639906		1502.61	-0.00061815		2092.6	0.00816768		2682.6	-0.00533413		3272.6	-0.00919973
322.8	0.04620307		912.79	0.00600801		1502.81	-0.00051516		2092.8	0.00871683		2682.8	-0.00585298		3272.8	-0.00896715
323	0.04660575		912.99	0.00509328		1503.01	-0.00076787		2093	0.00905615		2683	-0.00672161		3273	-0.00809484
323.2	0.04698067		913.19	0.00581303		1503.21	-0.00212083		2093.2	0.00987473		2683.2	-0.00623841		3273.2	-0.00844819
323.4	0.04764641		913.39	0.00582267		1503.41	-0.00232836		2093.4	0.00974344		2683.4	-0.00660083		3273.4	-0.00838703
323.6	0.04821183		913.59	0.00548535		1503.61	-0.00189853		2093.6	0.00967098		2683.6	-0.00767312		3273.6	-0.008359
323.8	0.04951769		913.79	0.00592909		1503.81	-0.00103586		2093.8	0.00960196		2683.8	-0.00757261		3273.8	-0.00827833
324	0.04994176		913.99	0.00513798		1504.01	-0.00145103		2094	0.00941045		2684	-0.00728562		3274	-0.00896723
324.2	0.05004987		914.19	0.00453721		1504.21	-0.00148958		2094.2	0.01054951		2684.2	-0.00720197		3274.2	-0.00853462
324.4	0.05054275		914.39	0.00499175		1504.41	-0.0006892		2094.4	0.01010286		2684.4	-0.00767819		3274.4	-0.00826324
324.6	0.05043175		914.59	0.00506989		1504.61	-0.00099433		2094.6	0.0103058		2684.6	-0.00756888		3274.6	-0.0084764
324.8	0.05018548		914.79	0.00481393		1504.81	-0.0009589		2094.8	0.01044948		2684.8	-0.00664839		3274.8	-0.00741721
325	0.04960974		914.99	0.00492017		1505.01	-0.00147734		2095	0.00999326		2685	-0.00609118		3275	-0.00676001
325.2	0.04940269		915.19	0.00512514		1505.21	-0.00280692		2095.2	0.01034524		2685.2	-0.00582245		3275.2	-0.00554012
325.4	0.0504816		915.39	0.00578438		1505.41	-0.00271723		2095.4	0.01036003		2685.4	-0.00592284		3275.4	-0.00669734
325.6	0.05024837		915.59	0.00658809		1505.61	-0.00241023		2095.6	0.01000245		2685.6	-0.00564157		3275.6	-0.00682004
325.8	0.04976605		915.79	0.00674274		1505.81	-0.00175038		2095.8	0.00983422		2685.8	-0.00570062		3275.8	-0.0062319
326	0.04994424		915.99	0.00739057		1506.01	-0.00147071		2096	0.00979125		2686	-0.00611529		3276	-0.00585019
326.2	0.04907771		916.19	0.00632041		1506.21	-0.00151484		2096.2	0.00893854		2686.2	-0.00696556		3276.2	-0.0055625
326.4	0.04984512		916.39	0.00621373		1506.41	-0.00169841		2096.4	0.00927472		2686.4	-0.00623065		3276.4	-0.00673554
326.6	0.05106926		916.59	0.00577754		1506.61	-0.00105842		2096.6	0.00919906		2686.6	-0.00557505		3276.6	-0.00742967
326.8	0.05132293		916.79	0.00571316		1506.81	-0.00144451		2096.8	0.00931256		2686.8	-0.00640571		3276.8	-0.00814773
327	0.0508407		916.99	0.00518164		1507.01	-0.0015611		2097	0.00946997		2687	-0.00581587		3277	-0.00910849
327.2	0.05059317		917.19	0.00518986		1507.21	-0.00188099		2097.2	0.00927233		2687.2	-0.00567809		3277.2	-0.00997066
327.4	0.05116407		917.39	0.00496922		1507.41	-0.00182255		2097.4	0.00809631		2687.4	-0.00623935		3277.4	-0.00955125
327.6	0.05175742		917.59	0.00438378		1507.61	-0.00154677		2097.6	0.00856555		2687.6	-0.00624069		3277.6	-0.00956218
327.8	0.05167553		917.79	0.0046003		1507.81	-0.00061258		2097.8	0.00827031		2687.8	-0.00555921		3277.8	-0.01052798
328	0.05105375		917.99	0.00399305		1508.01	-0.00072199		2098	0.00872916		2688	-0.00597408		3278	-0.01131836
328.2	0.05146946		918.19	0.00441495		1508.21	0.00018097		2098.2	0.00832096		2688.2	-0.0063009		3278.2	-0.01063848
328.4	0.05148617		918.39	0.00539559		1508.41	-0.00011685		2098.4	0.00776869		2688.4	-0.00720889		3278.4	-0.01083008
328.6	0.05121293		918.59	0.00522911		1508.61	-0.00011397		2098.6	0.00729771		2688.6	-0.00731563		3278.6	-0.01088235
328.8	0.05039732		918.79	0.00476697		1508.81	-0.0009649		2098.8	0.00767681		2688.8	-0.00701084		3278.8	-0.01090823
329	0.0504571		918.99	0.00479405		1509.01	-0.00103581		2099	0.00906129		2689	-0.00697368		3279	-0.01170332
329.2	0.0507218		919.19	0.00490975		1509.21	-0.00143612		2099.2	0.00889507		2689.2	-0.00724673		3279.2	-0.01097577
329.4	0.0514247		919.39	0.00562576		1509.41	-0.00035031		2099.4	0.00915578		2689.4	-0.00749032		3279.4	-0.01081651
329.6	0.05194613		919.59	0.0063897		1509.61	-0.00031388		2099.6	0.00934381		2689.6	-0.00760659		3279.6	-0.00997311
329.8	0.05209001		919.79	0.00616563		1509.81	-0.00035702		2099.8	0.01007495		2689.8	-0.00835104		3279.8	-0.01024196
330	0.05303478		919.99	0.0069118		1510.01	-0.00018817		2100	0.0096501		2690	-0.00786039		3280	-0.00973365
330.2	0.05361461		920.19	0.00635119		1510.21	-0.00042935		2100.2	0.00905251		2690.2	-0.0080336		3280.2	-0.00995446
330.4	0.05495146		920.39	0.00609515		1510.41	-0.0005065		2100.4	0.00956947		2690.4	-0.0073928		3280.4	-0.01064669
330.6	0.05515187		920.59	0.00580738		1510.61	-0.00049088		2100.6	0.00967719		2690.6	-0.0076395		3280.6	-0.01074286
330.8	0.05463667		920.79	0.00561376		1510.81	-0.00143542		2100.8	0.0100624		2690.8	-0.00765502		3280.8	-0.0101595
331	0.05450913		920.99	0.00505084		1511.01	-0.0014037		2101	0.00939585		2691	-0.00728637		3281	-0.00947558
331.2	0.05484476		921.19	0.00503566		1511.21	-0.00141473		2101.2	0.00905155		2691.2	-0.00778721		3281.2	-0.00905518
331.4	0.05515672		921.39	0.00489743		1511.41	-0.00162181		2101.4	0.00877649		2691.4	-0.00819937		3281.4	-0.00940546
331.6	0.05556449		921.59	0.00447304		1511.61	-0.00172586		2101.6	0.0099097		2691.6	-0.00744779		3281.6	-0.00983935
331.8	0.05458694		921.79	0.0042166		1511.81	-0.00189474		2101.8	0.00994065		2691.8	-0.00704871		3281.8	-0.01041089
332	0.05417597		921.99	0.00393415		1512.01	-0.00236851		2102	0.00920114		2692	-0.00732255		3282	-0.01042993
332.2	0.05426186		922.19	0.00429816		1512.21	-0.00142977		2102.2	0.00908446		2692.2	-0.00774399		3282.2	-0.01031789
332.4	0.05463996		922.39	0.00518365		1512.41	-0.00185919		2102.4	0.00962166		2692.4	-0.00763756		3282.4	-0.01023967
332.6	0.05372201		922.59	0.00512911		1512.61	-0.00157293		2102.6	0.00973548		2692.6	-0.00753722		3282.6	-0.00971865
332.8	0.05336486		922.79	0.00534928		1512.81	-0.00214588		2102.8	0.01038936		2692.8	-0.00656608		3282.8	-0.00966993
333	0.05381087		922.99	0.00510052		1513.01	-0.00140049		2103	0.01000458		2693	-0.0061674		3283	-0.00977061
333.2	0.05351235		923.19	0.00471225		1513.21	-0.00119152		2103.2	0.0092358		2693.2	-0.00622627		3283.2	-0.00797473
333.4	0.05468245		923.39	0.00491219		1513.41	-0.00085887		2103.4	0.00909791		2693.4	-0.00556624		3283.4	-0.00734991
333.6	0.05560689		923.59	0.00452413		1513.61	-0.00051722		2103.6	0.00932006		2693.6	-0.00472895		3283.6	-0.00793797
333.8	0.05598214		923.79	0.00493172		1513.81	0.00048368		2103.8	0.00894375		2693.8	-0.00444474		3283.8	-0.0088006
334	0.05746476		923.99	0.00538274		1514.01	0.00089041		2104	0.00836276		2694	-0.0032798		3284	-0.00882672
334.2	0.05801681		924.19	0.00468466		1514.21	0.00149994		2104.2	0.00829523		2694.2	-0.00356668		3284.2	-0.00877629
334.4	0.0582007		924.39	0.00441558		1514.41	0.00244848		2104.4	0.00904797		2694.4	-0.00448595		3284.4	-0.00912277
334.6	0.05849268		924.59	0.00484158		1514.61	0.00271481		2104.6	0.00902343		2694.6	-0.0047226		3284.6	-0.00936593
334.8	0.05905065		924.79	0.00521585		1514.81	0.00210507		2104.8	0.00884225		2694.8	-0.00539804		3284.8	-0.00881558
335	0.05909933		924.99	0.00538296		1515.01	0.00263334		2105	0.0085322		2695	-0.00599608		3285	-0.0090614
335.2	0.05963616		925.19	0.00631148		1515.21	0.0029111		2105.2	0.00889408		2695.2	-0.0055128		3285.2	-0.00971476
335.4	0.05960177		925.39	0.00648768		1515.41	0.00219615		2105.4	0.00833693		2695.4	-0.00633355		3285.4	-0.01113796
335.6	0.0597974		925.59	0.00568269		1515.61	0.00101424		2105.6	0.00883027		2695.6	-0.00588667		3285.6	-0.01050793
335.8	0.05889154		925.79	0.00459871		1515.81	0.00026147		2105.8	0.0084769		2695.8	-0.00652217		3285.8	-0.01111072
336	0.05933458		925.99	0.00541969		1516.01	0.00071232		2106	0.00813367		2696	-0.00668421		3286	-0.01124725
336.2	0.05981867		926.19	0.00569159		1516.21	0.00000195		2106.2	0.00886368		2696.2	-0.0072631		3286.2	-0.01080812
336.4	0.0601331		926.39	0.00630826		1516.41	-0.00086351		2106.4	0.0088854		2696.4	-0.00666196		3286.4	-0.01034255
336.6	0.05933971		926.59	0.00658711		1516.61	-0.00040186		2106.6	0.0089835		2696.6	-0.00638131		3286.6	-0.00957753
336.8	0.06026037		926.79	0.00664166		1516.81	-0.00097064		2106.8	0.00873097		2696.8	-0.00577125		3286.8	-0.01015064
337	0.06086796		926.99	0.00671639		1517.01	-0.00120407		2107	0.00786942		2697	-0.00549933		3287	-0.01021502
337.2	0.06090786		927.19	0.00502566		1517.21	-0.00188331		2107.2	0.00794089		2697.2	-0.00506027		3287.2	-0.01026259
337.4	0.06179321		927.39	0.00465718		1517.41	-0.00223597		2107.4	0.00863017		2697.4	-0.00428314		3287.4	-0.01093064
337.6	0.06240124		927.59	0.00453722		1517.61	-0.00228453		2107.6	0.00888364		2697.6	-0.00492146		3287.6	-0.01248565
337.8	0.06241283		927.79	0.00498886		1517.81	-0.00249319		2107.8	0.00826787		2697.8	-0.0049614		3287.8	-0.01276338
338	0.06363221		927.99	0.0042259		1518.01	-0.00258585		2108	0.00914754		2698	-0.00524391		3288	-0.01326873
338.2	0.06344721		928.19	0.00346228		1518.21	-0.00220503		2108.2	0.00847885		2698.2	-0.00548283		3288.2	-0.01349449
338.4	0.0631106		928.39	0.00355477		1518.41	-0.00227601		2108.4	0.00903579		2698.4	-0.00592968		3288.4	-0.01398485
338.6	0.06273667		928.59	0.00408974		1518.61	-0.00356617		2108.6	0.00904693		2698.6	-0.00680619		3288.6	-0.01341329
338.8	0.06300857		928.79	0.00496432		1518.81	-0.00324649		2108.8	0.00906457		2698.8	-0.00609845		3288.8	-0.01357449
339	0.06303424		928.99	0.00489993		1519.01	-0.00277132		2109	0.00903329		2699	-0.00630199		3289	-0.01331662
339.2	0.06394807		929.19	0.00499981		1519.21	-0.00256041		2109.2	0.00960842		2699.2	-0.0058495		3289.2	-0.01309028
339.4	0.06391516		929.39	0.00521624		1519.41	-0.00294064		2109.4	0.01010523		2699.4	-0.00714859		3289.4	-0.01268383
339.6	0.0643181		929.59	0.00415488		1519.61	-0.00312311		2109.6	0.01085911		2699.6	-0.00718295		3289.6	-0.01081906
339.8	0.06542456		929.79	0.00460288		1519.81	-0.00201541		2109.8	0.01082413		2699.8	-0.00744252		3289.8	-0.01062459
340	0.0660825		929.99	0.0058521		1520.01	-0.00188446		2110	0.01083748		2700	-0.00665971		3290	-0.01005368
340.2	0.0665466		930.19	0.00570378		1520.21	-0.00183922		2110.2	0.0105488		2700.2	-0.00655303		3290.2	-0.00971857
340.4	0.06678909		930.39	0.00584136		1520.41	-0.0011061		2110.4	0.01059874		2700.4	-0.00611365		3290.4	-0.00993577
340.6	0.06642128		930.59	0.00589772		1520.61	-0.00066786		2110.6	0.01065557		2700.6	-0.00587276		3290.6	-0.00918934
340.8	0.06664761		930.79	0.00655728		1520.81	-0.00123283		2110.8	0.01074655		2700.8	-0.00477575		3290.8	-0.00971418
341	0.06593682		930.99	0.00698882		1521.01	-0.00138738		2111	0.00949662		2701	-0.00422797		3291	-0.00938893
341.2	0.06543126		931.19	0.00636554		1521.21	-0.00186288		2111.2	0.00968671		2701.2	-0.00436111		3291.2	-0.00972231
341.4	0.06567004		931.39	0.00672552		1521.41	-0.00129424		2111.4	0.00986317		2701.4	-0.00379005		3291.4	-0.00923684
341.6	0.0657218		931.59	0.00723737		1521.61	-0.00142874		2111.6	0.00942251		2701.6	-0.00388267		3291.6	-0.00941006
341.8	0.06589904		931.79	0.00698462		1521.81	-0.0014788		2111.8	0.00898758		2701.8	-0.0038864		3291.8	-0.00944634
342	0.06611138		931.99	0.0065673		1522.01	-0.00225319		2112	0.00946714		2702	-0.00454676		3292	-0.00993921
342.2	0.06583793		932.19	0.0067014		1522.21	-0.00232848		2112.2	0.00905301		2702.2	-0.00369245		3292.2	-0.01034241
342.4	0.0647474		932.39	0.00796869		1522.41	-0.00270932		2112.4	0.00956259		2702.4	-0.00448356		3292.4	-0.01062467
342.6	0.06432217		932.59	0.00848946		1522.61	-0.00320871		2112.6	0.00966479		2702.6	-0.00583083		3292.6	-0.01047481
342.8	0.06537319		932.79	0.00941329		1522.81	-0.00217407		2112.8	0.0099504		2702.8	-0.00476182		3292.8	-0.01051938
343	0.06568079		932.99	0.00970181		1523.01	-0.00301061		2113	0.009872		2703	-0.0061549		3293	-0.00910938
343.2	0.06613802		933.19	0.00982091		1523.21	-0.00284428		2113.2	0.0098211		2703.2	-0.00613566		3293.2	-0.00841296
343.4	0.06598699		933.39	0.01036923		1523.41	-0.0024128		2113.4	0.00941145		2703.4	-0.00700228		3293.4	-0.00772287
343.6	0.06670624		933.59	0.00943114		1523.61	-0.00227957		2113.6	0.00920372		2703.6	-0.007119		3293.6	-0.00674584
343.8	0.06749875		933.79	0.00897624		1523.81	-0.00157267		2113.8	0.00898786		2703.8	-0.00668187		3293.8	-0.00712409
344	0.06757977		933.99	0.00808028		1524.01	-0.00232724		2114	0.00873107		2704	-0.00649791		3294	-0.00717115
344.2	0.06793406		934.19	0.00679233		1524.21	-0.00217187		2114.2	0.00860031		2704.2	-0.00712223		3294.2	-0.00705311
344.4	0.06749269		934.39	0.00606261		1524.41	-0.00314247		2114.4	0.00892958		2704.4	-0.00702684		3294.4	-0.0068605
344.6	0.06778334		934.59	0.00591879		1524.61	-0.00352466		2114.6	0.00880135		2704.6	-0.00626548		3294.6	-0.00645421
344.8	0.06839251		934.79	0.00624527		1524.81	-0.00343657		2114.8	0.008828		2704.8	-0.00595775		3294.8	-0.00662025
345	0.06797387		934.99	0.00593358		1525.01	-0.00233172		2115	0.00816763		2705	-0.00497952		3295	-0.00622519
345.2	0.06829237		935.19	0.00524098		1525.21	-0.0019716		2115.2	0.0083735		2705.2	-0.00388046		3295.2	-0.00717832
345.4	0.06846697		935.39	0.00463849		1525.41	-0.00109313		2115.4	0.00819682		2705.4	-0.00320737		3295.4	-0.0077664
345.6	0.06793302		935.59	0.00407007		1525.61	-0.00102345		2115.6	0.00889457		2705.6	-0.00375641		3295.6	-0.0083069
345.8	0.06900919		935.79	0.00420021		1525.81	-0.00057128		2115.8	0.00933249		2705.8	-0.00459534		3295.8	-0.00919667
346	0.0688679		935.99	0.00446792		1526.01	-0.00053842		2116	0.00933633		2706	-0.00481476		3296	-0.00978196
346.2	0.06871503		936.19	0.00549624		1526.21	0.00078142		2116.2	0.00928255		2706.2	-0.00398796		3296.2	-0.0105192
346.4	0.06823453		936.39	0.00688187		1526.41	0.00052437		2116.4	0.00916262		2706.4	-0.0045829		3296.4	-0.01062242
346.6	0.06817376		936.59	0.00716243		1526.61	0.00067945		2116.6	0.00902471		2706.6	-0.00512343		3296.6	-0.01146397
346.8	0.0682293		936.79	0.00815676		1526.81	0.00072688		2116.8	0.0090019		2706.8	-0.00461338		3296.8	-0.01142013
347	0.06767684		936.99	0.00876129		1527.01	0.00032578		2117	0.00857868		2707	-0.00591274		3297	-0.01102677
347.2	0.06740555		937.19	0.00892359		1527.21	0.00071213		2117.2	0.00856918		2707.2	-0.00589972		3297.2	-0.0113504
347.4	0.06734044		937.39	0.00878808		1527.41	0.00083051		2117.4	0.00935176		2707.4	-0.00606532		3297.4	-0.01139233
347.6	0.06732189		937.59	0.00905248		1527.61	0.00037641		2117.6	0.01010411		2707.6	-0.00580036		3297.6	-0.01139296
347.8	0.06731571		937.79	0.00874298		1527.81	0.00006582		2117.8	0.00971999		2707.8	-0.00560814		3297.8	-0.01230948
348	0.06703245		937.99	0.00861322		1528.01	-0.00029612		2118	0.0099319		2708	-0.00590211		3298	-0.01154852
348.2	0.06697176		938.19	0.00928896		1528.21	-0.0015786		2118.2	0.0098893		2708.2	-0.00616922		3298.2	-0.01182705
348.4	0.06732211		938.39	0.00912766		1528.41	-0.00250209		2118.4	0.00975973		2708.4	-0.0058622		3298.4	-0.01158652
348.6	0.06851339		938.59	0.00924273		1528.61	-0.00208997		2118.6	0.01015965		2708.6	-0.00597209		3298.6	-0.01146129
348.8	0.06871968		938.79	0.00951217		1528.81	-0.00193662		2118.8	0.00939794		2708.8	-0.00548074		3298.8	-0.01120074
349	0.06833811		938.99	0.00914139		1529.01	-0.00176933		2119	0.00927444		2709	-0.00415718		3299	-0.01088904
349.2	0.06959103		939.19	0.00838074		1529.21	-0.0017897		2119.2	0.00912553		2709.2	-0.00356994		3299.2	-0.01132014
349.4	0.07014888		939.39	0.00803222		1529.41	-0.0018538		2119.4	0.00910965		2709.4	-0.00410743		3299.4	-0.01077539
349.6	0.07124012		939.59	0.00782823		1529.61	-0.00237272		2119.6	0.00915759		2709.6	-0.00450385		3299.6	-0.010178
349.8	0.07266521		939.79	0.00739871		1529.81	-0.00252124		2119.8	0.00904492		2709.8	-0.00468529		3299.8	-0.01001172
350	0.07288617		939.99	0.00651364		1530.01	-0.00253573		2120	0.0082397		2710	-0.00419728		3300	-0.00985583
350.2	0.07329111		940.19	0.00635937		1530.21	-0.00219195		2120.2	0.0069658		2710.2	-0.00376453		3300.2	-0.00976184
350.4	0.0737166		940.39	0.00666094		1530.41	-0.00238687		2120.4	0.00668691		2710.4	-0.00421647		3300.4	-0.01006382
350.6	0.07363463		940.59	0.00648457		1530.61	-0.00160443		2120.6	0.00694809		2710.6	-0.00470532		3300.6	-0.01068099
350.8	0.07386565		940.79	0.00669255		1530.81	-0.00092608		2120.8	0.00789468		2710.8	-0.00465792		3300.8	-0.0101946
351	0.0742026		940.99	0.00669999		1531.01	-0.00068411		2121	0.00893512		2711	-0.00489917		3301	-0.01073751
351.2	0.0740193		941.19	0.00701899		1531.21	0.00043681		2121.2	0.00973616		2711.2	-0.00461141		3301.2	-0.01095919
351.4	0.07421072		941.39	0.00729702		1531.41	0.00081024		2121.4	0.00983103		2711.4	-0.00478739		3301.4	-0.0104009
351.6	0.07333218		941.59	0.00795109		1531.61	0.00115917		2121.6	0.01068366		2711.6	-0.00454795		3301.6	-0.01018849
351.8	0.07318961		941.79	0.00736568		1531.81	0.00130918		2121.8	0.01047546		2711.8	-0.00494714		3301.8	-0.01039056
352	0.07306716		941.99	0.00734856		1532.01	0.00166234		2122	0.00990194		2712	-0.00583101		3302	-0.00983997
352.2	0.07453242		942.19	0.00774802		1532.21	0.00080719		2122.2	0.01055954		2712.2	-0.00673755		3302.2	-0.01037096
352.4	0.07499774		942.39	0.0081704		1532.41	0.00137438		2122.4	0.01023754		2712.4	-0.00707242		3302.4	-0.01005563
352.6	0.07569389		942.59	0.00911077		1532.61	0.00116898		2122.6	0.01046461		2712.6	-0.0072367		3302.6	-0.0099896
352.8	0.0758551		942.79	0.00914477		1532.81	0.00067793		2122.8	0.00989736		2712.8	-0.00680499		3302.8	-0.00964013
353	0.0762342		942.99	0.00911012		1533.01	0.00006416		2123	0.01121278		2713	-0.00718522		3303	-0.00975156
353.2	0.07780257		943.19	0.0091353		1533.21	-0.0004589		2123.2	0.0113704		2713.2	-0.00690893		3303.2	-0.0104383
353.4	0.07757272		943.39	0.01029887		1533.41	-0.00211402		2123.4	0.01095989		2713.4	-0.00660025		3303.4	-0.01092228
353.6	0.07776947		943.59	0.01010976		1533.61	-0.00302886		2123.6	0.0113786		2713.6	-0.0059654		3303.6	-0.01184154
353.8	0.07756904		943.79	0.00903839		1533.81	-0.00369994		2123.8	0.01091449		2713.8	-0.00556204		3303.8	-0.01201293
354	0.07794394		943.99	0.00821852		1534.01	-0.00377721		2124	0.01056755		2714	-0.00525181		3304	-0.01239543
354.2	0.07707146		944.19	0.0090534		1534.21	-0.0037709		2124.2	0.01020829		2714.2	-0.00534295		3304.2	-0.01221499
354.4	0.07673344		944.39	0.0093043		1534.41	-0.00342238		2124.4	0.01046747		2714.4	-0.00565014		3304.4	-0.01271063
354.6	0.07646274		944.59	0.00919102		1534.61	-0.00235521		2124.6	0.01028244		2714.6	-0.00619814		3304.6	-0.01285008
354.8	0.07657168		944.79	0.00891001		1534.81	-0.00234309		2124.8	0.01018712		2714.8	-0.00547912		3304.8	-0.01227964
355	0.07702724		944.99	0.00857924		1535.01	-0.0023584		2125	0.0105685		2715	-0.0057567		3305	-0.01247113
355.2	0.07687075		945.19	0.00929825		1535.21	-0.0022425		2125.2	0.01036451		2715.2	-0.00516161		3305.2	-0.01161638
355.4	0.07782487		945.39	0.00888299		1535.41	-0.00194518		2125.4	0.00997418		2715.4	-0.00400069		3305.4	-0.01059421
355.6	0.07758085		945.59	0.0087302		1535.61	-0.00228441		2125.6	0.01084857		2715.6	-0.00372832		3305.6	-0.01100473
355.8	0.07894679		945.79	0.00780432		1535.81	-0.00212592		2125.8	0.00966713		2715.8	-0.00350034		3305.8	-0.01123486
356	0.07966882		945.99	0.00760788		1536.01	-0.00172957		2126	0.00984445		2716	-0.00345168		3306	-0.01141285
356.2	0.08073456		946.19	0.0082551		1536.21	-0.00149995		2126.2	0.01152032		2716.2	-0.00366156		3306.2	-0.01202682
356.4	0.08035724		946.39	0.00865758		1536.41	-0.00057652		2126.4	0.01137558		2716.4	-0.00340249		3306.4	-0.01153398
356.6	0.08140585		946.59	0.00828851		1536.61	-0.00053298		2126.6	0.01188394		2716.6	-0.00360005		3306.6	-0.01164756
356.8	0.0813733		946.79	0.00763759		1536.81	-0.00080118		2126.8	0.01189741		2716.8	-0.0033525		3306.8	-0.01169982
357	0.08191087		946.99	0.00795457		1537.01	-0.00100519		2127	0.01347203		2717	-0.00235696		3307	-0.01207771
357.2	0.08192071		947.19	0.00745008		1537.21	-0.00169286		2127.2	0.01316811		2717.2	-0.00171791		3307.2	-0.0125415
357.4	0.08169966		947.39	0.00767068		1537.41	-0.00203838		2127.4	0.01285149		2717.4	-0.00152529		3307.4	-0.01266473
357.6	0.08211108		947.59	0.00631721		1537.61	-0.00161474		2127.6	0.01333416		2717.6	-0.00123786		3307.6	-0.01110684
357.8	0.08315489		947.79	0.00612023		1537.81	-0.00152383		2127.8	0.01222006		2717.8	-0.00114058		3307.8	-0.01015634
358	0.08322878		947.99	0.00611019		1538.01	-0.00125667		2128	0.01131668		2718	-0.00184391		3308	-0.01020597
358.2	0.08265565		948.19	0.007098		1538.21	-0.0012332		2128.2	0.00972113		2718.2	-0.00211927		3308.2	-0.0099164
358.4	0.08305815		948.39	0.00666963		1538.41	-0.00152044		2128.4	0.00871641		2718.4	-0.00395169		3308.4	-0.01008344
358.6	0.08313959		948.59	0.00741678		1538.61	-0.00182882		2128.6	0.00820804		2718.6	-0.00476784		3308.6	-0.00930652
358.8	0.08315513		948.79	0.00729495		1538.81	-0.00256159		2128.8	0.0076425		2718.8	-0.00465011		3308.8	-0.0088436
359	0.08362644		948.99	0.00807716		1539.01	-0.0026115		2129	0.00759341		2719	-0.00501787		3309	-0.00921013
359.2	0.08343839		949.19	0.00832658		1539.21	-0.00335254		2129.2	0.00720419		2719.2	-0.00437604		3309.2	-0.00982729
359.4	0.08377651		949.39	0.00781937		1539.41	-0.00305946		2129.4	0.00696713		2719.4	-0.00415494		3309.4	-0.0096815
359.6	0.08373812		949.59	0.00838879		1539.61	-0.00330951		2129.6	0.00696784		2719.6	-0.00426737		3309.6	-0.01010212
359.8	0.08399754		949.79	0.00817778		1539.81	-0.00224411		2129.8	0.00643198		2719.8	-0.00352093		3309.8	-0.01012483
360	0.0831114		949.99	0.00850134		1540.01	-0.00126472		2130	0.0084027		2720	-0.00395005		3310	-0.00993315
360.2	0.08310612		950.19	0.00949745		1540.21	-0.00088353		2130.2	0.00878759		2720.2	-0.00404418		3310.2	-0.01079176
360.4	0.08213851		950.39	0.00911091		1540.41	-0.0003012		2130.4	0.00868639		2720.4	-0.00362153		3310.4	-0.0103832
360.6	0.08220043		950.59	0.00878968		1540.61	-0.00047353		2130.6	0.0090531		2720.6	-0.00343454		3310.6	-0.01041787
360.8	0.08179473		950.79	0.00882424		1540.81	-0.0004712		2130.8	0.00981192		2720.8	-0.0026894		3310.8	-0.01115142
361	0.08185579		950.99	0.00888736		1541.01	-0.00040667		2131	0.01135794		2721	-0.00257343		3311	-0.01022151
361.2	0.0813177		951.19	0.0082572		1541.21	-0.00096761		2131.2	0.01072241		2721.2	-0.00298508		3311.2	-0.01020294
361.4	0.08188611		951.39	0.00743129		1541.41	-0.00067012		2131.4	0.01057315		2721.4	-0.00276878		3311.4	-0.00974101
361.6	0.08238334		951.59	0.00699347		1541.61	-0.00013587		2131.6	0.01002507		2721.6	-0.00160736		3311.6	-0.00799925
361.8	0.08296427		951.79	0.00715688		1541.81	0.00035174		2131.8	0.00953063		2721.8	-0.00210969		3311.8	-0.0084479
362	0.0823609		951.99	0.0071338		1542.01	0.00041208		2132	0.00990596		2722	-0.00327429		3312	-0.0082077
362.2	0.0820615		952.19	0.00711419		1542.21	-0.00000114		2132.2	0.00979419		2722.2	-0.0042772		3312.2	-0.00812482
362.4	0.08152199		952.39	0.00706237		1542.41	-0.00004104		2132.4	0.01037828		2722.4	-0.00509028		3312.4	-0.00812127
362.6	0.08149482		952.59	0.00743563		1542.61	-0.0004417		2132.6	0.00994771		2722.6	-0.00576901		3312.6	-0.00825808
362.8	0.08173142		952.79	0.00742381		1542.81	-0.00060069		2132.8	0.01023821		2722.8	-0.00570648		3312.8	-0.00922398
363	0.08162979		952.99	0.00761625		1543.01	-0.00096966		2133	0.00959863		2723	-0.00663278		3313	-0.00997602
363.2	0.08150648		953.19	0.00731721		1543.21	-0.00189361		2133.2	0.00930257		2723.2	-0.00742383		3313.2	-0.00995329
363.4	0.08194909		953.39	0.00753999		1543.41	-0.00203695		2133.4	0.00936323		2723.4	-0.0076738		3313.4	-0.0096349
363.6	0.0817119		953.59	0.00759207		1543.61	-0.00228225		2133.6	0.00921857		2723.6	-0.00754618		3313.6	-0.00979178
363.8	0.08155022		953.79	0.00778502		1543.81	-0.00240304		2133.8	0.01027277		2723.8	-0.00680698		3313.8	-0.01028916
364	0.08213353		953.99	0.00804397		1544.01	-0.00282028		2134	0.01075214		2724	-0.00728628		3314	-0.01030896
364.2	0.08286391		954.19	0.00798746		1544.21	-0.00428911		2134.2	0.01046702		2724.2	-0.00607536		3314.2	-0.01153964
364.4	0.08165073		954.39	0.00820192		1544.41	-0.00426429		2134.4	0.01065211		2724.4	-0.00576718		3314.4	-0.01134857
364.6	0.08281698		954.59	0.00917658		1544.61	-0.00459368		2134.6	0.01150245		2724.6	-0.00534138		3314.6	-0.01157912
364.8	0.08336674		954.79	0.0097312		1544.81	-0.00513833		2134.8	0.01156021		2724.8	-0.00524571		3314.8	-0.01156752
365	0.08296258		954.99	0.00941747		1545.01	-0.00492278		2135	0.01119132		2725	-0.00528875		3315	-0.01006905
365.2	0.08306124		955.19	0.00890789		1545.21	-0.00472483		2135.2	0.01070022		2725.2	-0.00375797		3315.2	-0.010352
365.4	0.08394886		955.39	0.00925343		1545.41	-0.00421283		2135.4	0.01090548		2725.4	-0.00299121		3315.4	-0.01037607
365.6	0.08455431		955.59	0.01017956		1545.61	-0.00306848		2135.6	0.0107045		2725.6	-0.00273037		3315.6	-0.00980163
365.8	0.08439335		955.79	0.0106537		1545.81	-0.00191852		2135.8	0.01136044		2725.8	-0.00270989		3315.8	-0.01018222
366	0.08476491		955.99	0.01132676		1546.01	-0.00138654		2136	0.01156603		2726	-0.0020176		3316	-0.01022811
366.2	0.08494593		956.19	0.01184454		1546.21	-0.00090126		2136.2	0.01052224		2726.2	-0.00221285		3316.2	-0.01108776
366.4	0.08601944		956.39	0.01197331		1546.41	-0.00035592		2136.4	0.00991616		2726.4	-0.00240002		3316.4	-0.01205851
366.6	0.08690163		956.59	0.01259577		1546.61	0.00025905		2136.6	0.00964402		2726.6	-0.00314497		3316.6	-0.01237096
366.8	0.087179		956.79	0.01246813		1546.81	0.00139436		2136.8	0.00951811		2726.8	-0.00349971		3316.8	-0.01221073
367	0.08647604		956.99	0.01237091		1547.01	0.00224914		2137	0.00842292		2727	-0.00444915		3317	-0.01147299
367.2	0.08733269		957.19	0.01167047		1547.21	0.00191486		2137.2	0.00908625		2727.2	-0.00537077		3317.2	-0.0112816
367.4	0.08808802		957.39	0.01093388		1547.41	0.00120634		2137.4	0.00861645		2727.4	-0.00635875		3317.4	-0.01102194
367.6	0.08764237		957.59	0.0103323		1547.61	-0.00013381		2137.6	0.00870294		2727.6	-0.0067462		3317.6	-0.01105898
367.8	0.08848098		957.79	0.00945614		1547.81	-0.00024805		2137.8	0.00875983		2727.8	-0.00642042		3317.8	-0.01103043
368	0.0887369		957.99	0.00892084		1548.01	-0.00091239		2138	0.00804846		2728	-0.00656497		3318	-0.01117888
368.2	0.08952671		958.19	0.00817054		1548.21	-0.00116452		2138.2	0.00806805		2728.2	-0.00628195		3318.2	-0.01111114
368.4	0.08930275		958.39	0.0080562		1548.41	-0.00080259		2138.4	0.00847449		2728.4	-0.00717691		3318.4	-0.01045292
368.6	0.09008647		958.59	0.00899873		1548.61	-0.0008329		2138.6	0.0085906		2728.6	-0.00707747		3318.6	-0.00970667
368.8	0.09007317		958.79	0.00763372		1548.81	-0.0005324		2138.8	0.00837154		2728.8	-0.00651515		3318.8	-0.00838533
369	0.09016817		958.99	0.00764399		1549.01	-0.0000418		2139	0.00871996		2729	-0.00633553		3319	-0.00858686
369.2	0.09056654		959.19	0.00801284		1549.21	-0.00028869		2139.2	0.00980264		2729.2	-0.00529742		3319.2	-0.00848508
369.4	0.09110842		959.39	0.00887491		1549.41	-0.00052563		2139.4	0.01031002		2729.4	-0.00537612		3319.4	-0.00895415
369.6	0.0916132		959.59	0.01006873		1549.61	-0.00007456		2139.6	0.01036419		2729.6	-0.00508201		3319.6	-0.00872419
369.8	0.09134787		959.79	0.0106147		1549.81	0.00008271		2139.8	0.01045468		2729.8	-0.00426828		3319.8	-0.00949801
370	0.09095875		959.99	0.01073573		1550.01	0.00058776		2140	0.01079801		2730	-0.00307321		3320	-0.00984942
370.2	0.09076235		960.19	0.01135206		1550.21	0.00086814		2140.2	0.01063414		2730.2	-0.00359229		3320.2	-0.01104198
370.4	0.09135075		960.39	0.01133824		1550.41	0.00126304		2140.4	0.01021073		2730.4	-0.00301908		3320.4	-0.01159597
370.6	0.09067408		960.59	0.01210619		1550.61	0.0016772		2140.6	0.01051896		2730.6	-0.00266928		3320.6	-0.01126937
370.8	0.08999395		960.79	0.01197373		1550.81	0.0013587		2140.8	0.01065917		2730.8	-0.00237072		3320.8	-0.01189006
371	0.08929844		960.99	0.01142004		1551.01	0.00104785		2141	0.01072734		2731	-0.0019813		3321	-0.01180823
371.2	0.0896978		961.19	0.00995095		1551.21	0.00020322		2141.2	0.01010724		2731.2	-0.00259974		3321.2	-0.01231642
371.4	0.08972994		961.39	0.00941536		1551.41	-0.00173197		2141.4	0.00919849		2731.4	-0.00310866		3321.4	-0.01179932
371.6	0.08902112		961.59	0.00900323		1551.61	-0.0024417		2141.6	0.0091705		2731.6	-0.0027243		3321.6	-0.01238616
371.8	0.08906807		961.79	0.00830444		1551.81	-0.00216267		2141.8	0.00900013		2731.8	-0.0018206		3321.8	-0.01205017
372	0.08903931		961.99	0.00798092		1552.01	-0.00306416		2142	0.00854614		2732	-0.00196062		3322	-0.01172713
372.2	0.09015159		962.19	0.0076907		1552.21	-0.00229175		2142.2	0.0087311		2732.2	-0.0022712		3322.2	-0.01162424
372.4	0.09016125		962.39	0.00787152		1552.41	-0.00218227		2142.4	0.00918276		2732.4	-0.00341123		3322.4	-0.01177321
372.6	0.09122308		962.59	0.00922929		1552.61	-0.00221819		2142.6	0.00900814		2732.6	-0.00379138		3322.6	-0.01146157
372.8	0.09198944		962.79	0.00845279		1552.81	-0.00193443		2142.8	0.00867043		2732.8	-0.00379529		3322.8	-0.01213074
373	0.09292256		962.99	0.01031902		1553.01	-0.00220874		2143	0.00873266		2733	-0.00512944		3323	-0.01207738
373.2	0.0932104		963.19	0.01110831		1553.21	-0.0018394		2143.2	0.00900243		2733.2	-0.0050669		3323.2	-0.01139489
373.4	0.0941511		963.39	0.01229329		1553.41	-0.00174363		2143.4	0.00908526		2733.4	-0.00547623		3323.4	-0.0111943
373.6	0.09388534		963.59	0.01329995		1553.61	-0.00161144		2143.6	0.00837844		2733.6	-0.00584933		3323.6	-0.01075254
373.8	0.09373584		963.79	0.01266637		1553.81	-0.00093597		2143.8	0.00897033		2733.8	-0.00563982		3323.8	-0.01175063
374	0.09352412		963.99	0.01265825		1554.01	-0.00050587		2144	0.00970184		2734	-0.00507685		3324	-0.01227375
374.2	0.09431831		964.19	0.01323902		1554.21	-0.00081369		2144.2	0.01009665		2734.2	-0.00528295		3324.2	-0.01275378
374.4	0.09428011		964.39	0.01301946		1554.41	-0.00087102		2144.4	0.01046222		2734.4	-0.00446672		3324.4	-0.0131095
374.6	0.09340687		964.59	0.01299661		1554.61	-0.00108465		2144.6	0.01104915		2734.6	-0.00434759		3324.6	-0.01305854
374.8	0.09349393		964.79	0.01246623		1554.81	-0.00148253		2144.8	0.01121351		2734.8	-0.00405809		3324.8	-0.01329842
375	0.09325843		964.99	0.01139983		1555.01	-0.0007522		2145	0.0106864		2735	-0.00431522		3325	-0.01229856
375.2	0.09313869		965.19	0.01073345		1555.21	-0.00157942		2145.2	0.0104231		2735.2	-0.00473817		3325.2	-0.01234827
375.4	0.0930161		965.39	0.01070972		1555.41	-0.00248337		2145.4	0.01102877		2735.4	-0.00514836		3325.4	-0.01192284
375.6	0.09303433		965.59	0.0097845		1555.61	-0.00241836		2145.6	0.01153307		2735.6	-0.00452412		3325.6	-0.0117601
375.8	0.09361303		965.79	0.00945798		1555.81	-0.00246335		2145.8	0.01181942		2735.8	-0.00430399		3325.8	-0.01104275
376	0.0942813		965.99	0.00963863		1556.01	-0.00237089		2146	0.01108098		2736	-0.00452831		3326	-0.01143212
376.2	0.09469095		966.19	0.01075803		1556.21	-0.00252304		2146.2	0.01181529		2736.2	-0.00438208		3326.2	-0.0118178
376.4	0.09589877		966.39	0.01156385		1556.41	-0.00339997		2146.4	0.01184413		2736.4	-0.00551361		3326.4	-0.01171237
376.6	0.09637474		966.59	0.01278202		1556.61	-0.00320652		2146.6	0.01160622		2736.6	-0.00531424		3326.6	-0.01140491
376.8	0.0959115		966.79	0.01339895		1556.81	-0.00231791		2146.8	0.01135413		2736.8	-0.00527749		3326.8	-0.01192458
377	0.09569054		966.99	0.01476845		1557.01	-0.00145845		2147	0.01098399		2737	-0.00565469		3327	-0.01059075
377.2	0.09490219		967.19	0.01531722		1557.21	-0.00052749		2147.2	0.01092939		2737.2	-0.00518064		3327.2	-0.01047847
377.4	0.0940057		967.39	0.01491069		1557.41	-0.00025692		2147.4	0.01005975		2737.4	-0.0054922		3327.4	-0.00965732
377.6	0.09265513		967.59	0.0148523		1557.61	-0.0005069		2147.6	0.00966922		2737.6	-0.00523733		3327.6	-0.00988574
377.8	0.09277283		967.79	0.01446838		1557.81	0.00005389		2147.8	0.01030887		2737.8	-0.00491428		3327.8	-0.01031711
378	0.09261104		967.99	0.01473151		1558.01	-0.0003301		2148	0.0101715		2738	-0.00504379		3328	-0.01010181
378.2	0.09287985		968.19	0.01394605		1558.21	-0.00019329		2148.2	0.01015273		2738.2	-0.00521885		3328.2	-0.01059296
378.4	0.09317297		968.39	0.0130875		1558.41	0.00015991		2148.4	0.0097504		2738.4	-0.0051474		3328.4	-0.0105192
378.6	0.09353103		968.59	0.01225485		1558.61	0.00006444		2148.6	0.00926766		2738.6	-0.0059865		3328.6	-0.01084221
378.8	0.09437622		968.79	0.01198736		1558.81	-0.00082205		2148.8	0.00898074		2738.8	-0.00595513		3328.8	-0.0105696
379	0.09469976		968.99	0.01109881		1559.01	-0.00059276		2149	0.00896271		2739	-0.00641229		3329	-0.01109626
379.2	0.09512088		969.19	0.01019385		1559.21	-0.00104063		2149.2	0.00919304		2739.2	-0.00637252		3329.2	-0.01205158
379.4	0.09633464		969.39	0.0093669		1559.41	-0.00079632		2149.4	0.00885368		2739.4	-0.00635749		3329.4	-0.01182157
379.6	0.09814203		969.59	0.00872162		1559.61	-0.00098179		2149.6	0.00820529		2739.6	-0.00591613		3329.6	-0.01164915
379.8	0.09954007		969.79	0.00917214		1559.81	-0.00074609		2149.8	0.00756462		2739.8	-0.00579694		3329.8	-0.01183307
380	0.10067932		969.99	0.00966391		1560.01	-0.00029749		2150	0.00711521		2740	-0.00465256		3330	-0.01222002
380.2	0.10122981		970.19	0.00970823		1560.21	-0.00165834		2150.2	0.00808495		2740.2	-0.00428595		3330.2	-0.01227668
380.4	0.10178131		970.39	0.00972386		1560.41	-0.00205026		2150.4	0.00838		2740.4	-0.00458025		3330.4	-0.01236665
380.6	0.10167323		970.59	0.00993319		1560.61	-0.0011559		2150.6	0.00875833		2740.6	-0.00347031		3330.6	-0.01282917
380.8	0.10198234		970.79	0.01054206		1560.81	-0.00089739		2150.8	0.00950435		2740.8	-0.00338824		3330.8	-0.01344365
381	0.10106187		970.99	0.01121759		1561.01	-0.00045015		2151	0.00945003		2741	-0.00259307		3331	-0.01313851
381.2	0.10031709		971.19	0.01250966		1561.21	-0.00033366		2151.2	0.00984173		2741.2	-0.00197958		3331.2	-0.01278161
381.4	0.09976354		971.39	0.01287164		1561.41	-0.00060489		2151.4	0.01020554		2741.4	-0.00155689		3331.4	-0.0121599
381.6	0.0989843		971.59	0.01378159		1561.61	-0.00142465		2151.6	0.01100709		2741.6	-0.00074509		3331.6	-0.01241882
381.8	0.09929299		971.79	0.01439178		1561.81	-0.00237281		2151.8	0.01175066		2741.8	-0.0007817		3331.8	-0.01139791
382	0.10008553		971.99	0.01495136		1562.01	-0.00264847		2152	0.01145878		2742	-0.00132365		3332	-0.01109627
382.2	0.10034913		972.19	0.01455441		1562.21	-0.00246709		2152.2	0.01177369		2742.2	-0.00073395		3332.2	-0.01152452
382.4	0.10099666		972.39	0.01511589		1562.41	-0.00282044		2152.4	0.01185537		2742.4	-0.0002966		3332.4	-0.0114665
382.6	0.10015666		972.59	0.01438097		1562.61	-0.00326143		2152.6	0.01223557		2742.6	-0.00090648		3332.6	-0.01171236
382.8	0.09952205		972.79	0.01443698		1562.81	-0.00387587		2152.8	0.01173546		2742.8	-0.00065382		3332.8	-0.01127019
383	0.10006631		972.99	0.01377982		1563.01	-0.00361958		2153	0.01180871		2743	-0.0014435		3333	-0.0120105
383.2	0.10053636		973.19	0.01360867		1563.21	-0.00378716		2153.2	0.01119354		2743.2	-0.00125475		3333.2	-0.01134025
383.4	0.10076786		973.39	0.01363289		1563.41	-0.00382493		2153.4	0.01071485		2743.4	-0.00184018		3333.4	-0.01132984
383.6	0.10130606		973.59	0.01368983		1563.61	-0.00340054		2153.6	0.01006111		2743.6	-0.00182908		3333.6	-0.01176055
383.8	0.10234711		973.79	0.01340098		1563.81	-0.00381184		2153.8	0.00916259		2743.8	-0.00229856		3333.8	-0.01221193
384	0.10234261		973.99	0.01304777		1564.01	-0.00395502		2154	0.00930897		2744	-0.00212508		3334	-0.01207073
384.2	0.10185686		974.19	0.01312826		1564.21	-0.00516779		2154.2	0.01016185		2744.2	-0.00302724		3334.2	-0.01219063
384.4	0.10189312		974.39	0.01274864		1564.41	-0.00498105		2154.4	0.01033531		2744.4	-0.00385717		3334.4	-0.01275228
384.6	0.10191658		974.59	0.0121101		1564.61	-0.0051655		2154.6	0.00975498		2744.6	-0.00435237		3334.6	-0.01303208
384.8	0.10197755		974.79	0.01284279		1564.81	-0.00471618		2154.8	0.01012577		2744.8	-0.00568102		3334.8	-0.01341119
385	0.10138671		974.99	0.01353827		1565.01	-0.00408239		2155	0.00935671		2745	-0.00507339		3335	-0.01270049
385.2	0.10145202		975.19	0.01475875		1565.21	-0.00364855		2155.2	0.00975566		2745.2	-0.00517752		3335.2	-0.01266394
385.4	0.10154399		975.39	0.01483246		1565.41	-0.00232927		2155.4	0.00909243		2745.4	-0.00477895		3335.4	-0.01257696
385.6	0.10105993		975.59	0.01501454		1565.61	-0.00175518		2155.6	0.00939133		2745.6	-0.00483846		3335.6	-0.01232838
385.8	0.10221771		975.79	0.01517175		1565.81	-0.00092032		2155.8	0.00971241		2745.8	-0.00425812		3335.8	-0.01107953
386	0.1023257		975.99	0.01544263		1566.01	0.00121297		2156	0.00950159		2746	-0.00414951		3336	-0.01077164
386.2	0.10207305		976.19	0.01529238		1566.21	0.00166995		2156.2	0.00986697		2746.2	-0.00333434		3336.2	-0.01112455
386.4	0.10199306		976.39	0.01438743		1566.41	0.00196845		2156.4	0.01046635		2746.4	-0.0030522		3336.4	-0.0113907
386.6	0.10171846		976.59	0.01341961		1566.61	0.00247655		2156.6	0.01105746		2746.6	-0.00266863		3336.6	-0.01083531
386.8	0.1016998		976.79	0.01362072		1566.81	0.00222423		2156.8	0.01109397		2746.8	-0.00188212		3336.8	-0.01088576
387	0.10295062		976.99	0.01341185		1567.01	0.00295909		2157	0.01212878		2747	-0.00119006		3337	-0.01063442
387.2	0.10331668		977.19	0.013236		1567.21	0.00261751		2157.2	0.01229863		2747.2	-0.00038583		3337.2	-0.01037674
387.4	0.1033696		977.39	0.01260761		1567.41	0.00195063		2157.4	0.01282282		2747.4	-0.00107224		3337.4	-0.01089084
387.6	0.10446077		977.59	0.01251345		1567.61	0.00112337		2157.6	0.01252866		2747.6	-0.0011815		3337.6	-0.01074218
387.8	0.10509029		977.79	0.01196772		1567.81	-0.00040792		2157.8	0.01291459		2747.8	-0.00198402		3337.8	-0.01057992
388	0.10531923		977.99	0.0121101		1568.01	-0.0008428		2158	0.01356057		2748	-0.00223285		3338	-0.00988414
388.2	0.10524583		978.19	0.01182243		1568.21	-0.00136179		2158.2	0.01367851		2748.2	-0.00259173		3338.2	-0.01026289
388.4	0.10504987		978.39	0.01175961		1568.41	-0.00161028		2158.4	0.01283089		2748.4	-0.00376657		3338.4	-0.01086553
388.6	0.10494133		978.59	0.01190497		1568.61	-0.00229903		2158.6	0.01168877		2748.6	-0.00463944		3338.6	-0.01101105
388.8	0.10466837		978.79	0.01281403		1568.81	-0.00130089		2158.8	0.01166019		2748.8	-0.00560434		3338.8	-0.01145573
389	0.10403126		978.99	0.01327037		1569.01	0.00007442		2159	0.01021037		2749	-0.00483747		3339	-0.01112205
389.2	0.10481394		979.19	0.01422601		1569.21	0.00056627		2159.2	0.01007976		2749.2	-0.00501477		3339.2	-0.01207365
389.4	0.10377166		979.39	0.01483996		1569.41	0.00146777		2159.4	0.00902301		2749.4	-0.00544282		3339.4	-0.01163879
389.6	0.10316657		979.59	0.01497194		1569.61	0.00145827		2159.6	0.00922033		2749.6	-0.00607869		3339.6	-0.01116017
389.8	0.10323734		979.79	0.01554611		1569.81	0.00208301		2159.8	0.00856536		2749.8	-0.00602061		3339.8	-0.01072599
390	0.1028234		979.99	0.01663165		1570.01	0.00253658		2160	0.00853615		2750	-0.00588299		3340	-0.01066409
390.2	0.10248348		980.19	0.01732576		1570.21	0.00203331		2160.2	0.00804182		2750.2	-0.00579347		3340.2	-0.01099966
390.4	0.10289983		980.39	0.01715588		1570.41	0.00276531		2160.4	0.00833548		2750.4	-0.0056362		3340.4	-0.01133067
390.6	0.10328721		980.59	0.01783989		1570.61	0.00317246		2160.6	0.00800044		2750.6	-0.00476739		3340.6	-0.01082782
390.8	0.10321605		980.79	0.01810616		1570.81	0.00260065		2160.8	0.00780463		2750.8	-0.00470442		3340.8	-0.01111547
391	0.10373315		980.99	0.01823319		1571.01	0.00268117		2161	0.00760682		2751	-0.00460837		3341	-0.0119013
391.2	0.10399338		981.19	0.01754001		1571.21	0.00229166		2161.2	0.00702771		2751.2	-0.00435432		3341.2	-0.01182201
391.4	0.10468164		981.39	0.01682578		1571.41	0.00157288		2161.4	0.00703178		2751.4	-0.00496679		3341.4	-0.01157346
391.6	0.10587577		981.59	0.01681236		1571.61	0.00109751		2161.6	0.00728168		2751.6	-0.00458319		3341.6	-0.01237153
391.8	0.1063251		981.79	0.01573385		1571.81	0.0007242		2161.8	0.00729133		2751.8	-0.00375073		3341.8	-0.01223731
392	0.10709097		981.99	0.01605984		1572.01	0.0004557		2162	0.00641711		2752	-0.00376307		3342	-0.01200215
392.2	0.10674043		982.19	0.01491574		1572.21	0.00075403		2162.2	0.00571823		2752.2	-0.00367205		3342.2	-0.01255461
392.4	0.10742428		982.39	0.01491499		1572.41	0.00061021		2162.4	0.00586583		2752.4	-0.00401028		3342.4	-0.0133308
392.6	0.10813		982.59	0.01347629		1572.61	0.00132343		2162.6	0.00628417		2752.6	-0.00412018		3342.6	-0.01367657
392.8	0.10828062		982.79	0.01322619		1572.81	0.00117808		2162.8	0.00702687		2752.8	-0.00418511		3342.8	-0.01430236
393	0.10829228		982.99	0.01337879		1573.01	0.00020576		2163	0.00701932		2753	-0.00401162		3343	-0.01389277
393.2	0.10902572		983.19	0.01322727		1573.21	-0.00117504		2163.2	0.00772955		2753.2	-0.00430143		3343.2	-0.01399
393.4	0.10796564		983.39	0.01248676		1573.41	-0.0013787		2163.4	0.00780151		2753.4	-0.00458681		3343.4	-0.0135386
393.6	0.10901184		983.59	0.01243521		1573.61	-0.0016175		2163.6	0.00749147		2753.6	-0.00523789		3343.6	-0.01349361
393.8	0.10927779		983.79	0.01303189		1573.81	-0.00105288		2163.8	0.00798033		2753.8	-0.00524041		3343.8	-0.01373294
394	0.11003238		983.99	0.01402648		1574.01	-0.0012575		2164	0.00874546		2754	-0.00517285		3344	-0.01370972
394.2	0.11012567		984.19	0.01504176		1574.21	-0.00104247		2164.2	0.00907008		2754.2	-0.00640827		3344.2	-0.01304939
394.4	0.11050165		984.39	0.01412081		1574.41	-0.00082478		2164.4	0.00875935		2754.4	-0.00602417		3344.4	-0.01287776
394.6	0.11061302		984.59	0.01404939		1574.61	-0.00106304		2164.6	0.00897656		2754.6	-0.00557448		3344.6	-0.0130229
394.8	0.11109388		984.79	0.01507573		1574.81	-0.00141972		2164.8	0.00976036		2754.8	-0.00577812		3344.8	-0.01373904
395	0.11063235		984.99	0.01556712		1575.01	-0.00135257		2165	0.00930209		2755	-0.00595889		3345	-0.01397527
395.2	0.11114577		985.19	0.01593593		1575.21	-0.00156277		2165.2	0.00973012		2755.2	-0.00570687		3345.2	-0.0130423
395.4	0.11239196		985.39	0.01580081		1575.41	-0.00271751		2165.4	0.0105378		2755.4	-0.005916		3345.4	-0.01311298
395.6	0.11307402		985.59	0.0161808		1575.61	-0.00292282		2165.6	0.0109519		2755.6	-0.00545985		3345.6	-0.01329304
395.8	0.11355384		985.79	0.01612096		1575.81	-0.00260036		2165.8	0.01038868		2755.8	-0.0050067		3345.8	-0.01238835
396	0.11365578		985.99	0.01608555		1576.01	-0.00242042		2166	0.01059545		2756	-0.00549358		3346	-0.01242855
396.2	0.11395346		986.19	0.01585153		1576.21	-0.0017964		2166.2	0.01007541		2756.2	-0.00502607		3346.2	-0.0129375
396.4	0.11358199		986.39	0.01569909		1576.41	-0.00175307		2166.4	0.01110684		2756.4	-0.00447982		3346.4	-0.01382793
396.6	0.11409025		986.59	0.0146065		1576.61	-0.001732		2166.6	0.01115268		2756.6	-0.00455632		3346.6	-0.0137529
396.8	0.11381306		986.79	0.01508547		1576.81	-0.00225111		2166.8	0.01085165		2756.8	-0.00424363		3346.8	-0.01367766
397	0.11247239		986.99	0.01485749		1577.01	-0.00268287		2167	0.01094367		2757	-0.00399199		3347	-0.01326784
397.2	0.11194037		987.19	0.01380682		1577.21	-0.00148878		2167.2	0.01054739		2757.2	-0.00362772		3347.2	-0.01456986
397.4	0.11117215		987.39	0.01380578		1577.41	-0.0003113		2167.4	0.00988883		2757.4	-0.00306723		3347.4	-0.01484174
397.6	0.11053236		987.59	0.01425574		1577.61	0.00022293		2167.6	0.00886773		2757.6	-0.00409311		3347.6	-0.01527463
397.8	0.11070924		987.79	0.01397522		1577.81	0.00070527		2167.8	0.00921406		2757.8	-0.00379648		3347.8	-0.01505659
398	0.11050844		987.99	0.0137031		1578.01	0.0011557		2168	0.00823306		2758	-0.00373488		3348	-0.01463476
398.2	0.11075558		988.19	0.01397093		1578.21	0.00161867		2168.2	0.00782249		2758.2	-0.00381136		3348.2	-0.01445185
398.4	0.11097313		988.39	0.01336304		1578.41	0.00295203		2168.4	0.007177		2758.4	-0.00264768		3348.4	-0.01416468
398.6	0.1108111		988.59	0.01381023		1578.61	0.00298259		2168.6	0.00774769		2758.6	-0.00299042		3348.6	-0.01510171
398.8	0.1105655		988.79	0.0143103		1578.81	0.00282763		2168.8	0.00785946		2758.8	-0.00321428		3348.8	-0.01490168
399	0.10984851		988.99	0.01357163		1579.01	0.00218751		2169	0.00771526		2759	-0.00449878		3349	-0.01456876
399.2	0.11072928		989.19	0.01332017		1579.21	0.00189072		2169.2	0.00869012		2759.2	-0.00479112		3349.2	-0.01463484
399.4	0.11118748		989.39	0.01285433		1579.41	0.00160291		2169.4	0.00889553		2759.4	-0.00506879		3349.4	-0.01451434
399.6	0.11116899		989.59	0.01329172		1579.61	0.00246538		2169.6	0.00935562		2759.6	-0.00549506		3349.6	-0.01412912
399.8	0.11176723		989.79	0.0128125		1579.81	0.00237837		2169.8	0.00973444		2759.8	-0.00491151		3349.8	-0.01326217
400	0.11189071		989.99	0.01289532		1580.01	0.0024403		2170	0.01008952		2760	-0.00468383		3350	-0.01303316
400.2	0.11221649		990.19	0.01333246		1580.21	0.0028039		2170.2	0.00966028		2760.2	-0.00429816		3350.2	-0.01322845
400.4	0.1118516		990.39	0.01306156		1580.41	0.00267308		2170.4	0.01010487		2760.4	-0.00473666		3350.4	-0.01297662
400.6	0.11311812		990.59	0.01315499		1580.61	0.00223225		2170.6	0.01024468		2760.6	-0.00397516		3350.6	-0.01182484
400.8	0.11283144		990.79	0.01331519		1580.81	0.0028056		2170.8	0.01001207		2760.8	-0.00377046		3350.8	-0.01147393
401	0.11281515		990.99	0.01304504		1581.01	0.00243449		2171	0.01027191		2761	-0.00317945		3351	-0.01145666
401.2	0.11288423		991.19	0.01256113		1581.21	0.00261853		2171.2	0.00937093		2761.2	-0.00380907		3351.2	-0.01167051
401.4	0.11305509		991.39	0.01286576		1581.41	0.00172852		2171.4	0.00954731		2761.4	-0.00433729		3351.4	-0.01083827
401.6	0.11434822		991.59	0.01186123		1581.61	0.00060058		2171.6	0.00934745		2761.6	-0.00439645		3351.6	-0.01092426
401.8	0.11571047		991.79	0.01123651		1581.81	0.00005931		2171.8	0.00924599		2761.8	-0.0045541		3351.8	-0.00989173
402	0.11606394		991.99	0.01134698		1582.01	0.00038429		2172	0.00908125		2762	-0.00483464		3352	-0.0092963
402.2	0.11657917		992.19	0.0117824		1582.21	-0.00055306		2172.2	0.00989326		2762.2	-0.00518631		3352.2	-0.00975039
402.4	0.11685202		992.39	0.01153447		1582.41	-0.00050392		2172.4	0.01058308		2762.4	-0.00489352		3352.4	-0.00918383
402.6	0.1158646		992.59	0.01128802		1582.61	-0.00179661		2172.6	0.01080685		2762.6	-0.00500983		3352.6	-0.0109375
402.8	0.11543897		992.79	0.01134739		1582.81	-0.00211959		2172.8	0.01037183		2762.8	-0.00538262		3352.8	-0.01089941
403	0.11440333		992.99	0.01087498		1583.01	-0.00237896		2173	0.01107713		2763	-0.00530867		3353	-0.01126189
403.2	0.11389619		993.19	0.01136526		1583.21	-0.00253517		2173.2	0.01202699		2763.2	-0.00495855		3353.2	-0.01148814
403.4	0.11298727		993.39	0.01308831		1583.41	-0.00312118		2173.4	0.01189948		2763.4	-0.00510231		3353.4	-0.01201112
403.6	0.11311022		993.59	0.01356379		1583.61	-0.00346331		2173.6	0.01199989		2763.6	-0.00505855		3353.6	-0.01214297
403.8	0.11394282		993.79	0.01407208		1583.81	-0.00392935		2173.8	0.01198819		2763.8	-0.0045557		3353.8	-0.01265938
404	0.11319292		993.99	0.01479621		1584.01	-0.00349826		2174	0.01080207		2764	-0.00508935		3354	-0.01372427
404.2	0.11283565		994.19	0.01538847		1584.21	-0.00244859		2174.2	0.0099944		2764.2	-0.0049154		3354.2	-0.01402793
404.4	0.1127124		994.39	0.01542676		1584.41	-0.00221134		2174.4	0.00943191		2764.4	-0.0056367		3354.4	-0.01373509
404.6	0.11336075		994.59	0.01584389		1584.61	-0.00126797		2174.6	0.00853431		2764.6	-0.00427363		3354.6	-0.01369645
404.8	0.11312979		994.79	0.01538265		1584.81	-0.00004281		2174.8	0.00775745		2764.8	-0.00475824		3354.8	-0.01365146
405	0.11345118		994.99	0.01550935		1585.01	-0.00007446		2175	0.00725647		2765	-0.00430343		3355	-0.0143126
405.2	0.11341516		995.19	0.01501869		1585.21	-0.00004166		2175.2	0.00729906		2765.2	-0.00498461		3355.2	-0.01459815
405.4	0.11379382		995.39	0.01473936		1585.41	-0.00020022		2175.4	0.00766526		2765.4	-0.00502047		3355.4	-0.01481397
405.6	0.11509263		995.59	0.01400565		1585.61	-0.00053096		2175.6	0.00755282		2765.6	-0.00527956		3355.6	-0.01525434
405.8	0.11660922		995.79	0.01381268		1585.81	-0.00023675		2175.8	0.00701708		2765.8	-0.00616585		3355.8	-0.01415204
406	0.11752476		995.99	0.01346386		1586.01	0.00005478		2176	0.0076178		2766	-0.00624432		3356	-0.01439269
406.2	0.11844027		996.19	0.01256476		1586.21	-0.00019518		2176.2	0.00789562		2766.2	-0.00630901		3356.2	-0.01458237
406.4	0.11881115		996.39	0.01253966		1586.41	0.00033426		2176.4	0.00882388		2766.4	-0.00456519		3356.4	-0.01393508
406.6	0.11916891		996.59	0.01226284		1586.61	0.00061553		2176.6	0.00808964		2766.6	-0.00385891		3356.6	-0.0133126
406.8	0.11913758		996.79	0.01197946		1586.81	0.00038375		2176.8	0.00773861		2766.8	-0.00352692		3356.8	-0.01242558
407	0.11861301		996.99	0.01179694		1587.01	0.00036837		2177	0.00847299		2767	-0.00244359		3357	-0.0116936
407.2	0.11863113		997.19	0.01265568		1587.21	-0.00067997		2177.2	0.00905224		2767.2	-0.00277886		3357.2	-0.01192982
407.4	0.1192388		997.39	0.0132988		1587.41	-0.00164675		2177.4	0.00836928		2767.4	-0.00216288		3357.4	-0.01237382
407.6	0.11919468		997.59	0.01290588		1587.61	-0.00245961		2177.6	0.00839367		2767.6	-0.00222683		3357.6	-0.01264448
407.8	0.11916675		997.79	0.01326085		1587.81	-0.00247354		2177.8	0.00864912		2767.8	-0.00320215		3357.8	-0.0133938
408	0.11814832		997.99	0.01384879		1588.01	-0.00262605		2178	0.00861955		2768	-0.00333041		3358	-0.01342496
408.2	0.11866229		998.19	0.01479088		1588.21	-0.00241822		2178.2	0.00981871		2768.2	-0.00351615		3358.2	-0.01232363
408.4	0.11850691		998.39	0.01495365		1588.41	-0.00325195		2178.4	0.01055073		2768.4	-0.00421654		3358.4	-0.01212318
408.6	0.117574		998.59	0.01635533		1588.61	-0.00283266		2178.6	0.01047535		2768.6	-0.00420685		3358.6	-0.01274873
408.8	0.11664147		998.79	0.01694485		1588.81	-0.00246618		2178.8	0.01132769		2768.8	-0.00466778		3358.8	-0.01261488
409	0.11662381		998.99	0.01789481		1589.01	-0.00218908		2179	0.01107591		2769	-0.0049209		3359	-0.01337332
409.2	0.11628485		999.19	0.01803614		1589.21	-0.00226469		2179.2	0.01132847		2769.2	-0.00592472		3359.2	-0.01299096
409.4	0.1160039		999.39	0.01858225		1589.41	-0.00279306		2179.4	0.01150754		2769.4	-0.00609108		3359.4	-0.01299505
409.6	0.11690254		999.59	0.01827326		1589.61	-0.00310055		2179.6	0.01070611		2769.6	-0.00670692		3359.6	-0.01274254
409.8	0.11808951		999.79	0.01810245		1589.81	-0.00262345		2179.8	0.01040679		2769.8	-0.00653062		3359.8	-0.01193634
410	0.11766		999.99	0.01791208		1590.01	-0.00229587		2180	0.01039138		2770	-0.00647641		3360	-0.01266653
410.2	0.11806822		1000.19	0.01767296		1590.21	-0.00238098		2180.2	0.01043598		2770.2	-0.00601186		3360.2	-0.01204746
410.4	0.11800337		1000.39	0.01768698		1590.41	-0.00245351		2180.4	0.00962061		2770.4	-0.00492815		3360.4	-0.01215601
410.6	0.11903649		1000.59	0.01671124		1590.61	-0.00232411		2180.6	0.00823813		2770.6	-0.00598682		3360.6	-0.01198079
410.8	0.11875609		1000.79	0.01660373		1590.81	-0.00242198		2180.8	0.00791563		2770.8	-0.00573619		3360.8	-0.01244752
411	0.11960442		1000.99	0.01697828		1591.01	-0.0026114		2181	0.00803117		2771	-0.00436801		3361	-0.01222065
411.2	0.12029851		1001.19	0.01707451		1591.21	-0.00334977		2181.2	0.00825268		2771.2	-0.00436233		3361.2	-0.01331162
411.4	0.12085079		1001.39	0.01631284		1591.41	-0.00296697		2181.4	0.00782955		2771.4	-0.00395675		3361.4	-0.01369364
411.6	0.12053584		1001.59	0.01610997		1591.61	-0.00241403		2181.6	0.00777132		2771.6	-0.00525879		3361.6	-0.01453463
411.8	0.12121624		1001.79	0.01675305		1591.81	-0.00248503		2181.8	0.00858654		2771.8	-0.00631891		3361.8	-0.01452733
412	0.12190489		1001.99	0.01718398		1592.01	-0.00205583		2182	0.00902925		2772	-0.00710338		3362	-0.01407386
412.2	0.12194908		1002.19	0.01728042		1592.21	-0.00217097		2182.2	0.00942135		2772.2	-0.00748184		3362.2	-0.01418049
412.4	0.12109766		1002.39	0.017197		1592.41	-0.00150842		2182.4	0.00863065		2772.4	-0.007898		3362.4	-0.01445676
412.6	0.11988237		1002.59	0.01777287		1592.61	-0.0004014		2182.6	0.00809949		2772.6	-0.00834379		3362.6	-0.01470353
412.8	0.12001878		1002.79	0.01776478		1592.81	0.0002325		2182.8	0.00805309		2772.8	-0.00752856		3362.8	-0.01415829
413	0.12057253		1002.99	0.01752088		1593.01	0.00006225		2183	0.00728099		2773	-0.00764126		3363	-0.01435064
413.2	0.12020681		1003.19	0.01727709		1593.21	-0.0010312		2183.2	0.00693541		2773.2	-0.00681951		3363.2	-0.01394448
413.4	0.11979854		1003.39	0.01720179		1593.41	-0.00190397		2183.4	0.00653995		2773.4	-0.00527041		3363.4	-0.01318497
413.6	0.12009022		1003.59	0.01636537		1593.61	-0.00142574		2183.6	0.00559066		2773.6	-0.00488479		3363.6	-0.0124681
413.8	0.12043679		1003.79	0.01645657		1593.81	-0.00163181		2183.8	0.00657542		2773.8	-0.003916		3363.8	-0.01311469
414	0.11969005		1003.99	0.01618985		1594.01	-0.0025436		2184	0.00586201		2774	-0.0031708		3364	-0.01386917
414.2	0.11960018		1004.19	0.01564927		1594.21	-0.00322781		2184.2	0.00615171		2774.2	-0.00314379		3364.2	-0.01364513
414.4	0.12007001		1004.39	0.01523579		1594.41	-0.00283595		2184.4	0.00606091		2774.4	-0.00300761		3364.4	-0.01411038
414.6	0.12006857		1004.59	0.01518296		1594.61	-0.00292484		2184.6	0.00676794		2774.6	-0.00249605		3364.6	-0.01329085
414.8	0.12087546		1004.79	0.01604622		1594.81	-0.00333411		2184.8	0.00779726		2774.8	-0.00152018		3364.8	-0.0127522
415	0.1220052		1004.99	0.01698466		1595.01	-0.00312562		2185	0.00840267		2775	-0.00100643		3365	-0.0129912
415.2	0.12213067		1005.19	0.01602079		1595.21	-0.00276776		2185.2	0.0085734		2775.2	-0.00194625		3365.2	-0.01348261
415.4	0.12155869		1005.39	0.01560344		1595.41	-0.00226141		2185.4	0.00863238		2775.4	-0.00211808		3365.4	-0.01341698
415.6	0.12178944		1005.59	0.01597376		1595.61	-0.00236802		2185.6	0.00919413		2775.6	-0.00289843		3365.6	-0.01368538
415.8	0.12118705		1005.79	0.01650651		1595.81	-0.00270411		2185.8	0.00968293		2775.8	-0.00363427		3365.8	-0.01378219
416	0.12128612		1005.99	0.01680403		1596.01	-0.00231853		2186	0.00905425		2776	-0.00456227		3366	-0.01380014
416.2	0.12059323		1006.19	0.01671426		1596.21	-0.0022126		2186.2	0.00839113		2776.2	-0.00508319		3366.2	-0.01418905
416.4	0.12047224		1006.39	0.01677633		1596.41	-0.00090469		2186.4	0.00808259		2776.4	-0.00563977		3366.4	-0.01426102
416.6	0.12065855		1006.59	0.01734779		1596.61	-0.00129398		2186.6	0.00786618		2776.6	-0.00610892		3366.6	-0.01470999
416.8	0.12172992		1006.79	0.01730753		1596.81	-0.00136951		2186.8	0.00786267		2776.8	-0.00603859		3366.8	-0.01565927
417	0.12237476		1006.99	0.01676021		1597.01	-0.00165398		2187	0.00754986		2777	-0.00600546		3367	-0.01661892
417.2	0.12226091		1007.19	0.01676395		1597.21	-0.00147343		2187.2	0.00793499		2777.2	-0.00440459		3367.2	-0.01650085
417.4	0.12302948		1007.39	0.01593818		1597.41	-0.00130801		2187.4	0.00849881		2777.4	-0.00359531		3367.4	-0.01563316
417.6	0.12406725		1007.59	0.01512835		1597.61	-0.00154944		2187.6	0.00836509		2777.6	-0.00315761		3367.6	-0.01631317
417.8	0.12443347		1007.79	0.01477925		1597.81	-0.00211885		2187.8	0.00877341		2777.8	-0.00379487		3367.8	-0.01710284
418	0.12393553		1007.99	0.01514765		1598.01	-0.00255036		2188	0.00851334		2778	-0.00352438		3368	-0.0170039
418.2	0.12446077		1008.19	0.01470199		1598.21	-0.00125885		2188.2	0.00864404		2778.2	-0.00378801		3368.2	-0.01625114
418.4	0.12510531		1008.39	0.01493858		1598.41	-0.00084833		2188.4	0.00872501		2778.4	-0.002983		3368.4	-0.01588982
418.6	0.12517989		1008.59	0.01571492		1598.61	-0.00130264		2188.6	0.00904578		2778.6	-0.00232217		3368.6	-0.01536672
418.8	0.12609669		1008.79	0.01566138		1598.81	-0.00131149		2188.8	0.00954891		2778.8	-0.00320266		3368.8	-0.01543721
419	0.12580651		1008.99	0.01548975		1599.01	-0.00090201		2189	0.00977867		2779	-0.0030564		3369	-0.01512844
419.2	0.12587098		1009.19	0.01462964		1599.21	-0.0003106		2189.2	0.01035488		2779.2	-0.00253247		3369.2	-0.01475212
419.4	0.1256662		1009.39	0.0151433		1599.41	-0.00053511		2189.4	0.01029293		2779.4	-0.00213187		3369.4	-0.01516171
419.6	0.12557788		1009.59	0.01496021		1599.61	-0.00046363		2189.6	0.01024151		2779.6	-0.00230949		3369.6	-0.01558586
419.8	0.12477607		1009.79	0.01556141		1599.81	0.00050703		2189.8	0.00976666		2779.8	-0.00312135		3369.8	-0.0156491
420	0.12549633		1009.99	0.0159236		1600.01	0.00099234		2190	0.00927946		2780	-0.00354198		3370	-0.01508282
420.2	0.12538358		1010.19	0.01630182		1600.21	0.00211013		2190.2	0.00869458		2780.2	-0.0036336		3370.2	-0.01459459
420.4	0.12546443		1010.39	0.01705866		1600.41	0.00308228		2190.4	0.00867633		2780.4	-0.00337234		3370.4	-0.01478362
420.6	0.1249828		1010.59	0.01730937		1600.61	0.00295206		2190.6	0.00836034		2780.6	-0.00363591		3370.6	-0.0155629
420.8	0.12548703		1010.79	0.01743726		1600.81	0.00345018		2190.8	0.00881661		2780.8	-0.00342519		3370.8	-0.01591338
421	0.1259889		1010.99	0.0166831		1601.01	0.00356184		2191	0.00939064		2781	-0.00284893		3371	-0.0157089
421.2	0.1260187		1011.19	0.01645215		1601.21	0.00394447		2191.2	0.00963627		2781.2	-0.00291079		3371.2	-0.01542411
421.4	0.12652131		1011.39	0.01620955		1601.41	0.00281687		2191.4	0.00969174		2781.4	-0.003074		3371.4	-0.01494133
421.6	0.1259159		1011.59	0.01616701		1601.61	0.00274135		2191.6	0.00918833		2781.6	-0.00290755		3371.6	-0.01526189
421.8	0.12583437		1011.79	0.01667185		1601.81	0.00330992		2191.8	0.00939706		2781.8	-0.00408414		3371.8	-0.01484642
422	0.12609748		1011.99	0.01706093		1602.01	0.00331077		2192	0.01015125		2782	-0.00379364		3372	-0.0141232
422.2	0.12714385		1012.19	0.01698003		1602.21	0.00344858		2192.2	0.01040274		2782.2	-0.00400298		3372.2	-0.01331943
422.4	0.12753912		1012.39	0.0168604		1602.41	0.00171148		2192.4	0.01069025		2782.4	-0.00334281		3372.4	-0.01375969
422.6	0.12692252		1012.59	0.01707956		1602.61	0.0009746		2192.6	0.01037273		2782.6	-0.00380908		3372.6	-0.01430552
422.8	0.12715352		1012.79	0.01688953		1602.81	-0.00003221		2192.8	0.01001085		2782.8	-0.00431768		3372.8	-0.01471199
423	0.12734033		1012.99	0.01697111		1603.01	-0.00047848		2193	0.00979087		2783	-0.00341351		3373	-0.01421726
423.2	0.12803718		1013.19	0.01663252		1603.21	-0.00060589		2193.2	0.00983483		2783.2	-0.00364008		3373.2	-0.01448331
423.4	0.1275493		1013.39	0.01653636		1603.41	-0.00230725		2193.4	0.00989203		2783.4	-0.00392126		3373.4	-0.01452224
423.6	0.12698052		1013.59	0.01588853		1603.61	-0.0030135		2193.6	0.00972936		2783.6	-0.00346365		3373.6	-0.01431078
423.8	0.12659816		1013.79	0.01686902		1603.81	-0.00417564		2193.8	0.00944019		2783.8	-0.00372298		3373.8	-0.01358051
424	0.12674554		1013.99	0.01723774		1604.01	-0.00529729		2194	0.00838203		2784	-0.00241012		3374	-0.01238714
424.2	0.12603208		1014.19	0.01814903		1604.21	-0.00538822		2194.2	0.00737673		2784.2	-0.00242333		3374.2	-0.01198916
424.4	0.12633602		1014.39	0.01837461		1604.41	-0.00487893		2194.4	0.00784795		2784.4	-0.0029605		3374.4	-0.01192637
424.6	0.12620816		1014.59	0.01830742		1604.61	-0.00463286		2194.6	0.00765674		2784.6	-0.0035651		3374.6	-0.01127739
424.8	0.12688348		1014.79	0.01865373		1604.81	-0.00449926		2194.8	0.00741344		2784.8	-0.00322514		3374.8	-0.01044277
425	0.12692637		1014.99	0.01855132		1605.01	-0.00503128		2195	0.00698286		2785	-0.00337109		3375	-0.01053104
425.2	0.1268039		1015.19	0.01840009		1605.21	-0.00444479		2195.2	0.00632562		2785.2	-0.00395643		3375.2	-0.01032037
425.4	0.12763278		1015.39	0.01860897		1605.41	-0.00437274		2195.4	0.00710075		2785.4	-0.003503		3375.4	-0.01030297
425.6	0.12810921		1015.59	0.0188607		1605.61	-0.00372422		2195.6	0.00753538		2785.6	-0.003357		3375.6	-0.01051947
425.8	0.12860213		1015.79	0.01883302		1605.81	-0.00316818		2195.8	0.00831815		2785.8	-0.00388111		3375.8	-0.01106485
426	0.12900239		1015.99	0.01797909		1606.01	-0.00285094		2196	0.00932812		2786	-0.00408498		3376	-0.01058701
426.2	0.129103		1016.19	0.01828655		1606.21	-0.00242629		2196.2	0.00942209		2786.2	-0.00347183		3376.2	-0.0118223
426.4	0.1285483		1016.39	0.01742734		1606.41	-0.00225975		2196.4	0.00841384		2786.4	-0.00380089		3376.4	-0.01343207
426.6	0.12796822		1016.59	0.01823762		1606.61	-0.00194947		2196.6	0.00791699		2786.6	-0.00506829		3376.6	-0.01448226
426.8	0.12828301		1016.79	0.0180288		1606.81	-0.00141216		2196.8	0.00766466		2786.8	-0.00492826		3376.8	-0.01554184
427	0.12894952		1016.99	0.01773121		1607.01	-0.00097012		2197	0.00781192		2787	-0.00548119		3377	-0.01583942
427.2	0.12946768		1017.19	0.01710145		1607.21	-0.00129865		2197.2	0.00887464		2787.2	-0.00622453		3377.2	-0.01645985
427.4	0.12950353		1017.39	0.01713066		1607.41	-0.00214749		2197.4	0.00996418		2787.4	-0.00716073		3377.4	-0.01693821
427.6	0.12912031		1017.59	0.01667245		1607.61	-0.00188284		2197.6	0.00974309		2787.6	-0.00695468		3377.6	-0.01642852
427.8	0.12927167		1017.79	0.0170402		1607.81	-0.00167085		2197.8	0.00962657		2787.8	-0.00728054		3377.8	-0.01612179
428	0.12968533		1017.99	0.01759058		1608.01	-0.00134779		2198	0.00929915		2788	-0.00722906		3378	-0.016196
428.2	0.13029033		1018.19	0.01707873		1608.21	-0.00081112		2198.2	0.01001867		2788.2	-0.00828135		3378.2	-0.01652813
428.4	0.13127519		1018.39	0.01710214		1608.41	0.00033208		2198.4	0.01150913		2788.4	-0.00813339		3378.4	-0.01532035
428.6	0.1312151		1018.59	0.01715428		1608.61	0.00078806		2198.6	0.01081507		2788.6	-0.00766376		3378.6	-0.01507789
428.8	0.13203975		1018.79	0.01780084		1608.81	-0.0000252		2198.8	0.01004052		2788.8	-0.00661604		3378.8	-0.01522214
429	0.13278288		1018.99	0.01855442		1609.01	-0.00044818		2199	0.0107032		2789	-0.00652937		3379	-0.01516844
429.2	0.13347362		1019.19	0.01784433		1609.21	-0.00077394		2199.2	0.01083679		2789.2	-0.00645956		3379.2	-0.01527964
429.4	0.13445043		1019.39	0.01853292		1609.41	-0.0013676		2199.4	0.01223942		2789.4	-0.00478036		3379.4	-0.01580418
429.6	0.1341009		1019.59	0.01823058		1609.61	-0.0025707		2199.6	0.01228991		2789.6	-0.00324026		3379.6	-0.01561352
429.8	0.13371174		1019.79	0.01706133		1609.81	-0.00221121		2199.8	0.01271187		2789.8	-0.00233891		3379.8	-0.01600974
430	0.1341318		1019.99	0.01717288		1610.01	-0.00268011		2200	0.01255667		2790	-0.0020635		3380	-0.01507905
430.2	0.13342693		1020.19	0.01720673		1610.21	-0.00239094		2200.2	0.01217439		2790.2	-0.00107648		3380.2	-0.01606278
430.4	0.13276626		1020.39	0.01750151		1610.41	-0.00187157		2200.4	0.01165014		2790.4	-0.00144135		3380.4	-0.01664521
430.6	0.13268248		1020.59	0.01794325		1610.61	-0.00206483		2200.6	0.0118679		2790.6	-0.00128296		3380.6	-0.01687539
430.8	0.13365341		1020.79	0.01776143		1610.81	-0.00193705		2200.8	0.01152178		2790.8	-0.00136708		3380.8	-0.01669212
431	0.13378079		1020.99	0.01884062		1611.01	-0.00252451		2201	0.01181376		2791	-0.00271067		3381	-0.01623203
431.2	0.13356841		1021.19	0.01897269		1611.21	-0.00308198		2201.2	0.01210442		2791.2	-0.00309711		3381.2	-0.01592985
431.4	0.13309736		1021.39	0.01944579		1611.41	-0.00323153		2201.4	0.01202503		2791.4	-0.00452361		3381.4	-0.01549872
431.6	0.13229658		1021.59	0.01981924		1611.61	-0.00295443		2201.6	0.01199194		2791.6	-0.00465531		3381.6	-0.01445714
431.8	0.13241458		1021.79	0.02004162		1611.81	-0.00241619		2201.8	0.01170036		2791.8	-0.00504544		3381.8	-0.01450709
432	0.13163851		1021.99	0.0204575		1612.01	-0.00233612		2202	0.01182334		2792	-0.0054485		3382	-0.0142067
432.2	0.13130013		1022.19	0.02053116		1612.21	-0.00160257		2202.2	0.01207939		2792.2	-0.00621851		3382.2	-0.01392808
432.4	0.13095718		1022.39	0.02092546		1612.41	-0.00106789		2202.4	0.01222941		2792.4	-0.0057597		3382.4	-0.01326106
432.6	0.13088088		1022.59	0.02059004		1612.61	-0.00200922		2202.6	0.01134941		2792.6	-0.00640768		3382.6	-0.01371421
432.8	0.13108569		1022.79	0.02050949		1612.81	-0.00283419		2202.8	0.01178554		2792.8	-0.00715536		3382.8	-0.01384181
433	0.1313489		1022.99	0.01954328		1613.01	-0.00284838		2203	0.01258842		2793	-0.00746346		3383	-0.01459464
433.2	0.13276254		1023.19	0.01894333		1613.21	-0.00333965		2203.2	0.01257886		2793.2	-0.00724554		3383.2	-0.01489018
433.4	0.13328584		1023.39	0.01878428		1613.41	-0.00334711		2203.4	0.01270549		2793.4	-0.00624854		3383.4	-0.01502443
433.6	0.13376714		1023.59	0.01802979		1613.61	-0.0035348		2203.6	0.01244195		2793.6	-0.00572966		3383.6	-0.0144919
433.8	0.13498837		1023.79	0.01705027		1613.81	-0.00253815		2203.8	0.01335166		2793.8	-0.00594317		3383.8	-0.01472109
434	0.13534569		1023.99	0.01762691		1614.01	-0.0022882		2204	0.01344038		2794	-0.00571419		3384	-0.01441675
434.2	0.13512623		1024.19	0.01710897		1614.21	-0.0016935		2204.2	0.01318897		2794.2	-0.00494228		3384.2	-0.01481571
434.4	0.13636192		1024.39	0.01711965		1614.41	-0.00146319		2204.4	0.01312495		2794.4	-0.00487896		3384.4	-0.01454428
434.6	0.13730013		1024.59	0.01705539		1614.61	-0.0019467		2204.6	0.01296055		2794.6	-0.00454309		3384.6	-0.01401935
434.8	0.1377395		1024.79	0.01702353		1614.81	-0.00244214		2204.8	0.01215463		2794.8	-0.00464822		3384.8	-0.01366921
435	0.13781246		1024.99	0.017542		1615.01	-0.00216374		2205	0.01169544		2795	-0.00401696		3385	-0.01392997
435.2	0.13792534		1025.19	0.01715189		1615.21	-0.00183846		2205.2	0.01254199		2795.2	-0.00266602		3385.2	-0.01337127
435.4	0.13831547		1025.39	0.01721501		1615.41	-0.00237069		2205.4	0.01208868		2795.4	-0.00205803		3385.4	-0.01278778
435.6	0.13876111		1025.59	0.01725042		1615.61	-0.00199321		2205.6	0.01220638		2795.6	-0.00142639		3385.6	-0.01202331
435.8	0.13876937		1025.79	0.01733751		1615.81	-0.00192888		2205.8	0.0116601		2795.8	-0.00079195		3385.8	-0.01186505
436	0.13862252		1025.99	0.0171622		1616.01	-0.00211215		2206	0.01134383		2796	-0.00060018		3386	-0.01147986
436.2	0.13903967		1026.19	0.0169535		1616.21	-0.00161188		2206.2	0.01089027		2796.2	-0.00142608		3386.2	-0.01167599
436.4	0.13918289		1026.39	0.01610749		1616.41	-0.00222842		2206.4	0.01098347		2796.4	-0.00120072		3386.4	-0.01130196
436.6	0.13870956		1026.59	0.01645747		1616.61	-0.00342674		2206.6	0.01081696		2796.6	-0.00240436		3386.6	-0.01156185
436.8	0.13876132		1026.79	0.01580086		1616.81	-0.0035871		2206.8	0.01108731		2796.8	-0.00305589		3386.8	-0.01247012
437	0.13920386		1026.99	0.01547412		1617.01	-0.00348066		2207	0.01092761		2797	-0.0033241		3387	-0.013056
437.2	0.13922742		1027.19	0.0157158		1617.21	-0.00364493		2207.2	0.01110261		2797.2	-0.0034288		3387.2	-0.01235701
437.4	0.1387888		1027.39	0.01495179		1617.41	-0.00380358		2207.4	0.01178783		2797.4	-0.00417886		3387.4	-0.01296573
437.6	0.13832952		1027.59	0.01541058		1617.61	-0.00414041		2207.6	0.01289844		2797.6	-0.0046157		3387.6	-0.01269949
437.8	0.13732014		1027.79	0.01535038		1617.81	-0.00362029		2207.8	0.01343218		2797.8	-0.00494386		3387.8	-0.01354009
438	0.13735077		1027.99	0.01717325		1618.01	-0.00363194		2208	0.0132863		2798	-0.00548345		3388	-0.01386071
438.2	0.13726641		1028.19	0.01683491		1618.21	-0.00326605		2208.2	0.01303945		2798.2	-0.00541213		3388.2	-0.0136807
438.4	0.13759141		1028.39	0.01706727		1618.41	-0.00309454		2208.4	0.01280322		2798.4	-0.00583279		3388.4	-0.01417757
438.6	0.13704904		1028.59	0.01734676		1618.61	-0.00298778		2208.6	0.01272756		2798.6	-0.00662184		3388.6	-0.01452019
438.8	0.13734999		1028.79	0.01751688		1618.81	-0.00251509		2208.8	0.01272491		2798.8	-0.00655288		3388.8	-0.01468138
439	0.13729081		1028.99	0.01760347		1619.01	-0.00193656		2209	0.01333662		2799	-0.00590171		3389	-0.01500787
439.2	0.13747772		1029.19	0.01755466		1619.21	-0.0018467		2209.2	0.01426441		2799.2	-0.00617609		3389.2	-0.01458827
439.4	0.13839957		1029.39	0.01780757		1619.41	-0.00231877		2209.4	0.01313754		2799.4	-0.00610452		3389.4	-0.01543559
439.6	0.13923621		1029.59	0.01861074		1619.61	-0.00201681		2209.6	0.01265922		2799.6	-0.00641403		3389.6	-0.01622488
439.8	0.14008803		1029.79	0.01897135		1619.81	-0.0017647		2209.8	0.01230451		2799.8	-0.00702838		3389.8	-0.01728953
440	0.14011476		1029.99	0.01940504		1620.01	-0.00104658		2210	0.01190236		2800	-0.00622879		3390	-0.01718999
440.2	0.13963318		1030.19	0.02007786		1620.21	-0.00017246		2210.2	0.01184913		2800.2	-0.00632504		3390.2	-0.01752151
440.4	0.1394104		1030.39	0.02084921		1620.41	-0.000619		2210.4	0.01145296		2800.4	-0.00581698		3390.4	-0.01705279
440.6	0.13918499		1030.59	0.02180879		1620.61	-0.00102292		2210.6	0.01111644		2800.6	-0.00614116		3390.6	-0.01737023
440.8	0.1402164		1030.79	0.02054886		1620.81	-0.00165257		2210.8	0.01073608		2800.8	-0.00589283		3390.8	-0.01654569
441	0.14006541		1030.99	0.020629		1621.01	-0.00201719		2211	0.01125749		2801	-0.00572302		3391	-0.01571043
441.2	0.13982167		1031.19	0.01970439		1621.21	-0.00270066		2211.2	0.01128131		2801.2	-0.00519342		3391.2	-0.01512659
441.4	0.13960985		1031.39	0.01955575		1621.41	-0.00372865		2211.4	0.01193634		2801.4	-0.00535967		3391.4	-0.01494615
441.6	0.13932865		1031.59	0.01939572		1621.61	-0.0039411		2211.6	0.01125451		2801.6	-0.00479939		3391.6	-0.01369426
441.8	0.1389086		1031.79	0.0192178		1621.81	-0.00356718		2211.8	0.01056144		2801.8	-0.00372605		3391.8	-0.01331579
442	0.14000949		1031.99	0.01924033		1622.01	-0.00363382		2212	0.01074605		2802	-0.00455524		3392	-0.01338366
442.2	0.13961931		1032.19	0.01834595		1622.21	-0.00312108		2212.2	0.0107694		2802.2	-0.00429219		3392.2	-0.01255103
442.4	0.13959024		1032.39	0.01834802		1622.41	-0.00346508		2212.4	0.0101729		2802.4	-0.00442622		3392.4	-0.01262546
442.6	0.13988513		1032.59	0.01742369		1622.61	-0.00374765		2212.6	0.01072789		2802.6	-0.00437631		3392.6	-0.01158188
442.8	0.14007134		1032.79	0.01715308		1622.81	-0.00326368		2212.8	0.01094973		2802.8	-0.00407255		3392.8	-0.01198741
443	0.13966115		1032.99	0.01659064		1623.01	-0.00342027		2213	0.01138048		2803	-0.00349418		3393	-0.0127951
443.2	0.14085961		1033.19	0.01687898		1623.21	-0.00334911		2213.2	0.01112924		2803.2	-0.00426416		3393.2	-0.01267293
443.4	0.14147772		1033.39	0.0173876		1623.41	-0.00338773		2213.4	0.01084916		2803.4	-0.00466719		3393.4	-0.01356507
443.6	0.14189273		1033.59	0.01802689		1623.61	-0.00281693		2213.6	0.0109935		2803.6	-0.00517448		3393.6	-0.0138281
443.8	0.14212251		1033.79	0.018009		1623.81	-0.00228624		2213.8	0.01137196		2803.8	-0.00616895		3393.8	-0.01344035
444	0.14191		1033.99	0.01854943		1624.01	-0.00213456		2214	0.01131675		2804	-0.00593109		3394	-0.01303679
444.2	0.14222403		1034.19	0.01896242		1624.21	-0.00220788		2214.2	0.01064609		2804.2	-0.00592491		3394.2	-0.01313173
444.4	0.14290028		1034.39	0.01902522		1624.41	-0.00232537		2214.4	0.01037613		2804.4	-0.00601245		3394.4	-0.01315645
444.6	0.14316442		1034.59	0.01969496		1624.61	-0.0025329		2214.6	0.01103257		2804.6	-0.00697308		3394.6	-0.01342161
444.8	0.14327472		1034.79	0.01953036		1624.81	-0.00337213		2214.8	0.01037311		2804.8	-0.00695008		3394.8	-0.01322982
445	0.14257505		1034.99	0.01956246		1625.01	-0.00357151		2215	0.01065816		2805	-0.00694297		3395	-0.01395391
445.2	0.14227226		1035.19	0.0194842		1625.21	-0.00434476		2215.2	0.01028954		2805.2	-0.00653697		3395.2	-0.01506815
445.4	0.1425313		1035.39	0.0199013		1625.41	-0.00422346		2215.4	0.00994481		2805.4	-0.00622056		3395.4	-0.0150524
445.6	0.14255842		1035.59	0.01906665		1625.61	-0.00371572		2215.6	0.00943717		2805.6	-0.00572747		3395.6	-0.01545973
445.8	0.14214732		1035.79	0.01910102		1625.81	-0.00225968		2215.8	0.00907296		2805.8	-0.00533907		3395.8	-0.01677356
446	0.14243099		1035.99	0.01954682		1626.01	-0.00182543		2216	0.00877432		2806	-0.00566362		3396	-0.0171963
446.2	0.14192037		1036.19	0.01962337		1626.21	-0.00182896		2216.2	0.00880867		2806.2	-0.00456061		3396.2	-0.01734051
446.4	0.14136369		1036.39	0.01966262		1626.41	-0.00262176		2216.4	0.0092855		2806.4	-0.00398043		3396.4	-0.01691031
446.6	0.14113567		1036.59	0.01899925		1626.61	-0.00304732		2216.6	0.00967875		2806.6	-0.00394927		3396.6	-0.01675583
446.8	0.14074302		1036.79	0.02007739		1626.81	-0.00217277		2216.8	0.00986713		2806.8	-0.00327337		3396.8	-0.01675292
447	0.14066788		1036.99	0.02088568		1627.01	-0.0022661		2217	0.01088441		2807	-0.00222852		3397	-0.01619613
447.2	0.141611		1037.19	0.02159238		1627.21	-0.00197283		2217.2	0.01108885		2807.2	-0.00292812		3397.2	-0.01474987
447.4	0.1417726		1037.39	0.0217119		1627.41	-0.00156975		2217.4	0.01138128		2807.4	-0.00301753		3397.4	-0.01480396
447.6	0.14163795		1037.59	0.0215973		1627.61	-0.000758		2217.6	0.01196666		2807.6	-0.00254458		3397.6	-0.01358935
447.8	0.14197708		1037.79	0.02078859		1627.81	-0.00112002		2217.8	0.01188989		2807.8	-0.00278283		3397.8	-0.01277147
448	0.14253015		1037.99	0.02029072		1628.01	-0.0012145		2218	0.01199577		2808	-0.00290152		3398	-0.01212578
448.2	0.14243143		1038.19	0.02014025		1628.21	-0.00196482		2218.2	0.01282238		2808.2	-0.00284869		3398.2	-0.01155208
448.4	0.14221132		1038.39	0.0195153		1628.41	-0.00134253		2218.4	0.01375109		2808.4	-0.00315707		3398.4	-0.01112844
448.6	0.14270546		1038.59	0.0199278		1628.61	-0.00198727		2218.6	0.01424077		2808.6	-0.00339921		3398.6	-0.01128409
448.8	0.14330596		1038.79	0.02030484		1628.81	-0.00223527		2218.8	0.01374575		2808.8	-0.00251189		3398.8	-0.01196135
449	0.14472782		1038.99	0.01988231		1629.01	-0.00251135		2219	0.01406356		2809	-0.00255053		3399	-0.01219916
449.2	0.14560159		1039.19	0.02025619		1629.21	-0.00329999		2219.2	0.01337698		2809.2	-0.00314049		3399.2	-0.01321946
449.4	0.14663013		1039.39	0.01976321		1629.41	-0.00228224		2219.4	0.01309622		2809.4	-0.00377466		3399.4	-0.01319333
449.6	0.14691938		1039.59	0.01927805		1629.61	-0.00223395		2219.6	0.0122145		2809.6	-0.00384107		3399.6	-0.01318004
449.8	0.14806497		1039.79	0.01937699		1629.81	-0.00120366		2219.8	0.01108933		2809.8	-0.00473937		3399.8	-0.01354188
450	0.14788723		1039.99	0.01944481		1630.01	-0.00169136		2220	0.0099691		2810	-0.00493031		3400	-0.01309123
450.2	0.14811793		1040.19	0.01920554		1630.21	-0.00238401		2220.2	0.01051724		2810.2	-0.00472249		3400.2	-0.01442174
450.4	0.14729755		1040.39	0.01871313		1630.41	-0.00253106		2220.4	0.01105885		2810.4	-0.00532115		3400.4	-0.01415718
450.6	0.14716391		1040.59	0.01856233		1630.61	-0.00258559		2220.6	0.01039982		2810.6	-0.00565083		3400.6	-0.01482912
450.8	0.14675933		1040.79	0.01917711		1630.81	-0.00233644		2220.8	0.01074031		2810.8	-0.00510043		3400.8	-0.01415458
451	0.14735827		1040.99	0.01894708		1631.01	-0.00261807		2221	0.01104874		2811	-0.00485532		3401	-0.0137251
451.2	0.14824436		1041.19	0.01910954		1631.21	-0.00221135		2221.2	0.01057512		2811.2	-0.00499864		3401.2	-0.01306513
451.4	0.14786917		1041.39	0.018087		1631.41	-0.00127784		2221.4	0.01000989		2811.4	-0.00399302		3401.4	-0.01317315
451.6	0.14821057		1041.59	0.01728062		1631.61	-0.00086259		2221.6	0.01043944		2811.6	-0.00379383		3401.6	-0.01219099
451.8	0.14780865		1041.79	0.016951		1631.81	-0.00173478		2221.8	0.01047978		2811.8	-0.00392841		3401.8	-0.01204407
452	0.14790056		1041.99	0.01705542		1632.01	-0.0016629		2222	0.01154604		2812	-0.00371467		3402	-0.01104968
452.2	0.14669323		1042.19	0.01770437		1632.21	-0.00181555		2222.2	0.01285063		2812.2	-0.0037817		3402.2	-0.01095043
452.4	0.14679467		1042.39	0.01740687		1632.41	-0.00112899		2222.4	0.01363965		2812.4	-0.0034945		3402.4	-0.01123576
452.6	0.14713457		1042.59	0.01808741		1632.61	-0.00255753		2222.6	0.01398166		2812.6	-0.00317235		3402.6	-0.01178495
452.8	0.14673493		1042.79	0.01901821		1632.81	-0.00257397		2222.8	0.01426601		2812.8	-0.00353018		3402.8	-0.01203819
453	0.14652566		1042.99	0.01882975		1633.01	-0.00286291		2223	0.01388487		2813	-0.004259		3403	-0.01271386
453.2	0.14611077		1043.19	0.01921014		1633.21	-0.00257906		2223.2	0.01233877		2813.2	-0.00518407		3403.2	-0.01354434
453.4	0.14524952		1043.39	0.018865		1633.41	-0.00214209		2223.4	0.01262974		2813.4	-0.0052954		3403.4	-0.01387524
453.6	0.14499475		1043.59	0.01855422		1633.61	-0.00161011		2223.6	0.01206879		2813.6	-0.00534824		3403.6	-0.01390663
453.8	0.14440882		1043.79	0.01911934		1633.81	-0.00132282		2223.8	0.01225569		2813.8	-0.00609326		3403.8	-0.0143253
454	0.14351493		1043.99	0.01904162		1634.01	-0.00036666		2224	0.01217832		2814	-0.00606968		3404	-0.01537603
454.2	0.14384469		1044.19	0.01970511		1634.21	-0.00052939		2224.2	0.01286726		2814.2	-0.00571772		3404.2	-0.01576262
454.4	0.14335246		1044.39	0.01959195		1634.41	-0.00074762		2224.4	0.01255111		2814.4	-0.00613125		3404.4	-0.01590268
454.6	0.14438362		1044.59	0.02007352		1634.61	-0.00058014		2224.6	0.01210423		2814.6	-0.00642129		3404.6	-0.01578176
454.8	0.14461512		1044.79	0.01981047		1634.81	-0.00078492		2224.8	0.01168532		2814.8	-0.00594645		3404.8	-0.01551286
455	0.14602662		1044.99	0.02067619		1635.01	-0.00046118		2225	0.01171171		2815	-0.00572557		3405	-0.01518377
455.2	0.14693662		1045.19	0.02100999		1635.21	0.00016895		2225.2	0.01159983		2815.2	-0.00570544		3405.2	-0.0152012
455.4	0.14778347		1045.39	0.02102393		1635.41	0.00075005		2225.4	0.01200039		2815.4	-0.00551263		3405.4	-0.01602494
455.6	0.14881917		1045.59	0.02136122		1635.61	0.00015411		2225.6	0.01277464		2815.6	-0.00611699		3405.6	-0.01547832
455.8	0.14860967		1045.79	0.02222635		1635.81	-0.00013285		2225.8	0.01307933		2815.8	-0.00624481		3405.8	-0.01588865
456	0.14847948		1045.99	0.02223917		1636.01	-0.00001537		2226	0.01392286		2816	-0.00596241		3406	-0.01534686
456.2	0.14768677		1046.19	0.02235008		1636.21	-0.00008664		2226.2	0.01440941		2816.2	-0.00676755		3406.2	-0.01510961
456.4	0.14753761		1046.39	0.02263314		1636.41	-0.00001997		2226.4	0.01484411		2816.4	-0.00726271		3406.4	-0.01498733
456.6	0.14807701		1046.59	0.02258157		1636.61	-0.00112451		2226.6	0.01474624		2816.6	-0.00677417		3406.6	-0.01520908
456.8	0.14796292		1046.79	0.02278509		1636.81	-0.00129431		2226.8	0.01465139		2816.8	-0.00653832		3406.8	-0.01544028
457	0.14826004		1046.99	0.02248246		1637.01	-0.00062451		2227	0.01335035		2817	-0.0065737		3407	-0.01606514
457.2	0.14838174		1047.19	0.02255915		1637.21	-0.0003429		2227.2	0.01265376		2817.2	-0.00723493		3407.2	-0.0163195
457.4	0.14760239		1047.39	0.02200836		1637.41	-0.0005887		2227.4	0.01305934		2817.4	-0.00684152		3407.4	-0.01598093
457.6	0.14751501		1047.59	0.02178259		1637.61	-0.00027878		2227.6	0.01291922		2817.6	-0.00651576		3407.6	-0.0149823
457.8	0.1474789		1047.79	0.0225816		1637.81	-0.00020507		2227.8	0.01223051		2817.8	-0.00600603		3407.8	-0.01470453
458	0.14800925		1047.99	0.02272814		1638.01	0.00048115		2228	0.01190181		2818	-0.00463255		3408	-0.01443485
458.2	0.14876099		1048.19	0.02262511		1638.21	-0.00003657		2228.2	0.01163502		2818.2	-0.00350848		3408.2	-0.01364503
458.4	0.14885117		1048.39	0.02275854		1638.41	-0.00058		2228.4	0.01015401		2818.4	-0.00262179		3408.4	-0.01337608
458.6	0.14961689		1048.59	0.0220736		1638.61	-0.00007232		2228.6	0.01049463		2818.6	-0.00261937		3408.6	-0.01350612
458.8	0.14907107		1048.79	0.02130818		1638.81	-0.00030643		2228.8	0.01068063		2818.8	-0.00270924		3408.8	-0.01380299
459	0.14978933		1048.99	0.02146814		1639.01	-0.00002286		2229	0.01132177		2819	-0.00381678		3409	-0.01408414
459.2	0.1498155		1049.19	0.02171572		1639.21	0.00025184		2229.2	0.01179167		2819.2	-0.00411659		3409.2	-0.01491355
459.4	0.14962274		1049.39	0.022293		1639.41	0.000382		2229.4	0.01188557		2819.4	-0.0043723		3409.4	-0.01563866
459.6	0.14944871		1049.59	0.02148509		1639.61	0.00008728		2229.6	0.0119564		2819.6	-0.0038597		3409.6	-0.01500147
459.8	0.14944902		1049.79	0.0209173		1639.81	-0.00086419		2229.8	0.01194039		2819.8	-0.00327303		3409.8	-0.01542526
460	0.14855127		1049.99	0.0202887		1640.01	-0.00176723		2230	0.01224019		2820	-0.00286568		3410	-0.01519522
460.2	0.14791142		1050.19	0.01997339		1640.21	-0.00152166		2230.2	0.01203502		2820.2	-0.00254574		3410.2	-0.01495171
460.4	0.14801946		1050.39	0.02017835		1640.41	-0.0016895		2230.4	0.01231404		2820.4	-0.00291737		3410.4	-0.01469572
460.6	0.14778219		1050.59	0.01959553		1640.61	-0.00225545		2230.6	0.0124681		2820.6	-0.00242923		3410.6	-0.01499292
460.8	0.14725469		1050.79	0.01995742		1640.81	-0.00257366		2230.8	0.01197341		2820.8	-0.00255394		3410.8	-0.01505957
461	0.14739394		1050.99	0.01990757		1641.01	-0.00178181		2231	0.01105721		2821	-0.0035963		3411	-0.01473471
461.2	0.14775025		1051.19	0.02028955		1641.21	-0.00233918		2231.2	0.01110975		2821.2	-0.00342038		3411.2	-0.01540007
461.4	0.14710418		1051.39	0.02043074		1641.41	-0.00260149		2231.4	0.0101673		2821.4	-0.00339878		3411.4	-0.01527931
461.6	0.14780535		1051.59	0.0205744		1641.61	-0.00303725		2231.6	0.00975423		2821.6	-0.00277839		3411.6	-0.01463809
461.8	0.14884913		1051.79	0.0208997		1641.81	-0.00210378		2231.8	0.00950254		2821.8	-0.00235776		3411.8	-0.0151925
462	0.14928904		1051.99	0.02097299		1642.01	-0.00230315		2232	0.00990274		2822	-0.00206966		3412	-0.01543404
462.2	0.14989808		1052.19	0.02045048		1642.21	-0.0019342		2232.2	0.00966636		2822.2	-0.00206368		3412.2	-0.01517433
462.4	0.14993933		1052.39	0.02039958		1642.41	-0.00249174		2232.4	0.00981646		2822.4	-0.00209949		3412.4	-0.01429256
462.6	0.1507629		1052.59	0.01961072		1642.61	-0.00197262		2232.6	0.01074569		2822.6	-0.00394255		3412.6	-0.01487738
462.8	0.1507821		1052.79	0.0199387		1642.81	-0.0017099		2232.8	0.0112149		2822.8	-0.00447178		3412.8	-0.01551988
463	0.1522633		1052.99	0.02067505		1643.01	-0.00130587		2233	0.01171941		2823	-0.00466276		3413	-0.01627565
463.2	0.15234617		1053.19	0.02169848		1643.21	-0.00118642		2233.2	0.0120742		2823.2	-0.00427745		3413.2	-0.01593491
463.4	0.15275008		1053.39	0.02175647		1643.41	-0.00119355		2233.4	0.0114352		2823.4	-0.00409622		3413.4	-0.01571479
463.6	0.15313547		1053.59	0.02135714		1643.61	-0.00146705		2233.6	0.01151009		2823.6	-0.00363087		3413.6	-0.01521214
463.8	0.15333546		1053.79	0.02072256		1643.81	-0.00185971		2233.8	0.01169785		2823.8	-0.00322935		3413.8	-0.01519746
464	0.15262723		1053.99	0.02107237		1644.01	-0.00062697		2234	0.01150965		2824	-0.00328029		3414	-0.01495826
464.2	0.15291289		1054.19	0.0214788		1644.21	0.00052315		2234.2	0.01183905		2824.2	-0.00316931		3414.2	-0.01481275
464.4	0.15332922		1054.39	0.02263561		1644.41	0.00054608		2234.4	0.01256953		2824.4	-0.00385249		3414.4	-0.01463367
464.6	0.15239134		1054.59	0.02283978		1644.61	0.00066608		2234.6	0.01294672		2824.6	-0.00468755		3414.6	-0.01470141
464.8	0.15317843		1054.79	0.02270396		1644.81	0.00066384		2234.8	0.01236165		2824.8	-0.00427121		3414.8	-0.01499831
465	0.15322259		1054.99	0.0236289		1645.01	0.00103796		2235	0.01199141		2825	-0.00408408		3415	-0.01520718
465.2	0.15354329		1055.19	0.02423477		1645.21	0.00115191		2235.2	0.01236208		2825.2	-0.00377222		3415.2	-0.01603792
465.4	0.15284964		1055.39	0.024842		1645.41	0.00111811		2235.4	0.01247625		2825.4	-0.00423885		3415.4	-0.01610559
465.6	0.154258		1055.59	0.02496842		1645.61	0.00111088		2235.6	0.01328218		2825.6	-0.00398626		3415.6	-0.01691636
465.8	0.15386372		1055.79	0.02522975		1645.81	0.00073635		2235.8	0.01432702		2825.8	-0.00398397		3415.8	-0.01725772
466	0.15385461		1055.99	0.02517408		1646.01	0.00011665		2236	0.01461515		2826	-0.00421669		3416	-0.0168626
466.2	0.15355642		1056.19	0.02469504		1646.21	0.00039781		2236.2	0.01490371		2826.2	-0.00475898		3416.2	-0.01549567
466.4	0.15378502		1056.39	0.02478235		1646.41	-0.0007948		2236.4	0.01549151		2826.4	-0.00574215		3416.4	-0.01464285
466.6	0.15429064		1056.59	0.02503559		1646.61	-0.00091671		2236.6	0.01558829		2826.6	-0.0067957		3416.6	-0.01515219
466.8	0.15444978		1056.79	0.02485883		1646.81	-0.00151904		2236.8	0.01596572		2826.8	-0.00629759		3416.8	-0.01483701
467	0.15506503		1056.99	0.02459298		1647.01	-0.0018067		2237	0.01566322		2827	-0.00641273		3417	-0.01418637
467.2	0.15473158		1057.19	0.02376997		1647.21	-0.00177897		2237.2	0.01448975		2827.2	-0.00614079		3417.2	-0.01281423
467.4	0.1541496		1057.39	0.02350684		1647.41	-0.00186428		2237.4	0.01364704		2827.4	-0.00594801		3417.4	-0.01296998
467.6	0.15374006		1057.59	0.02295447		1647.61	-0.00155203		2237.6	0.01304735		2827.6	-0.00583316		3417.6	-0.01289487
467.8	0.1535578		1057.79	0.02281181		1647.81	-0.0011716		2237.8	0.01282277		2827.8	-0.00523127		3417.8	-0.01294854
468	0.15342626		1057.99	0.02352249		1648.01	-0.0005625		2238	0.01225369		2828	-0.00529517		3418	-0.01298624
468.2	0.15327945		1058.19	0.0236977		1648.21	-0.00054569		2238.2	0.01217499		2828.2	-0.00507837		3418.2	-0.01341341
468.4	0.15266472		1058.39	0.02357717		1648.41	-0.0005675		2238.4	0.01127114		2828.4	-0.0050178		3418.4	-0.01336533
468.6	0.1519118		1058.59	0.02278109		1648.61	-0.00019424		2238.6	0.01034854		2828.6	-0.0049769		3418.6	-0.01346646
468.8	0.15161204		1058.79	0.02247599		1648.81	0.00016899		2238.8	0.00909196		2828.8	-0.00367278		3418.8	-0.01429763
469	0.15106109		1058.99	0.02262517		1649.01	0.0005647		2239	0.00878726		2829	-0.00372255		3419	-0.01467832
469.2	0.15107929		1059.19	0.02192058		1649.21	0.0010245		2239.2	0.0087515		2829.2	-0.00392561		3419.2	-0.01506812
469.4	0.15074873		1059.39	0.02177444		1649.41	0.00084445		2239.4	0.00848954		2829.4	-0.00397631		3419.4	-0.01574295
469.6	0.15111796		1059.59	0.02127129		1649.61	0.00083654		2239.6	0.00797614		2829.6	-0.00408115		3419.6	-0.01640405
469.8	0.15053227		1059.79	0.02063559		1649.81	0.00051217		2239.8	0.00753668		2829.8	-0.00409858		3419.8	-0.0155874
470	0.15053227		1059.99	0.02063559		1650.01	0.00051217		2240	0.00753668		2830	-0.00409858		3419.99	-0.0155874
470.2	0.15164396		1060.19	0.02105129		1650.21	-0.0005068		2240.2	0.00758308		2830.2	-0.00342865		3420.19	-0.01527902
470.4	0.15278686		1060.39	0.02093669		1650.41	-0.00121244		2240.4	0.00768257		2830.4	-0.0024671		3420.39	-0.01519079
470.6	0.1542976		1060.59	0.0204766		1650.61	-0.00128245		2240.6	0.00791414		2830.6	-0.00213673		3420.59	-0.01478683
470.8	0.15508586		1060.79	0.02031205		1650.81	-0.00220064		2240.8	0.00826705		2830.8	-0.00131239		3420.79	-0.01429793
471	0.15541766		1060.99	0.02014466		1651.01	-0.00265778		2241	0.00788025		2831	-0.00042216		3420.99	-0.01480656
471.2	0.15626773		1061.19	0.01968525		1651.21	-0.00311682		2241.2	0.00824725		2831.2	-0.0001837		3421.19	-0.01462907
471.4	0.15664368		1061.39	0.01955961		1651.41	-0.00349369		2241.4	0.00788326		2831.4	0.00070716		3421.39	-0.01511457
471.6	0.15712005		1061.59	0.01963644		1651.61	-0.00358632		2241.6	0.00786896		2831.6	0.00099169		3421.59	-0.01524194
471.8	0.1570569		1061.79	0.01936447		1651.81	-0.00380862		2241.8	0.00818688		2831.8	0.00122641		3421.79	-0.0155463
472	0.15672708		1061.99	0.0188516		1652.01	-0.00319472		2242	0.00742918		2832	0.00099245		3421.99	-0.01514377
472.2	0.15651935		1062.19	0.01944038		1652.21	-0.00279105		2242.2	0.00754954		2832.2	0.00046731		3422.19	-0.01547817
472.4	0.15609559		1062.39	0.01875328		1652.41	-0.00224176		2242.4	0.00716452		2832.4	-0.00004067		3422.39	-0.01517082
472.6	0.15579041		1062.59	0.01779047		1652.61	-0.00077829		2242.6	0.00633826		2832.6	0.00032656		3422.59	-0.01452811
472.8	0.15575831		1062.79	0.01824835		1652.81	-0.00079194		2242.8	0.00604485		2832.8	-0.00059308		3422.79	-0.01454611
473	0.15556122		1062.99	0.01767502		1653.01	-0.00014624		2243	0.00566157		2833	-0.00067401		3422.99	-0.01514242
473.2	0.15632195		1063.19	0.01826247		1653.21	0.00028634		2243.2	0.00563848		2833.2	-0.00006536		3423.19	-0.01521101
473.4	0.15700534		1063.39	0.01765394		1653.41	0.00037923		2243.4	0.00530523		2833.4	-0.00168417		3423.39	-0.0146919
473.6	0.15704079		1063.59	0.01801527		1653.61	0.00049997		2243.6	0.00558112		2833.6	-0.00156846		3423.59	-0.01454289
473.8	0.15786429		1063.79	0.01833688		1653.81	0.00015202		2243.8	0.00521051		2833.8	-0.00215025		3423.79	-0.01434424
474	0.15872968		1063.99	0.01865997		1654.01	0.00123767		2244	0.00469158		2834	-0.00215133		3423.99	-0.01343172
474.2	0.15858097		1064.19	0.01987963		1654.21	0.00188572		2244.2	0.00482563		2834.2	-0.00267534		3424.19	-0.01325483
474.4	0.15809577		1064.39	0.01982614		1654.41	0.00238156		2244.4	0.00498255		2834.4	-0.00269739		3424.39	-0.01305517
474.6	0.15756931		1064.59	0.02027986		1654.61	0.00285355		2244.6	0.00482407		2834.6	-0.00271754		3424.59	-0.01295414
474.8	0.15681301		1064.79	0.02061858		1654.81	0.00281027		2244.8	0.00534149		2834.8	-0.00231715		3424.79	-0.01338865
475	0.15637003		1064.99	0.02082516		1655.01	0.00312693		2245	0.00485588		2835	-0.001835		3424.99	-0.01410857
475.2	0.15626951		1065.19	0.02099579		1655.21	0.00319245		2245.2	0.0049037		2835.2	-0.00217417		3425.19	-0.01344835
475.4	0.15583302		1065.39	0.02181165		1655.41	0.00290408		2245.4	0.00411316		2835.4	-0.00151154		3425.39	-0.01345703
475.6	0.15529636		1065.59	0.02219729		1655.61	0.00247045		2245.6	0.00429872		2835.6	-0.00069601		3425.59	-0.01325485
475.8	0.15418563		1065.79	0.02154622		1655.81	0.00146979		2245.8	0.004206		2835.8	-0.00043028		3425.79	-0.01351276
476	0.15342405		1065.99	0.02102213		1656.01	0.00115746		2246	0.00358835		2836	0.00023971		3425.99	-0.01268883
476.2	0.15369921		1066.19	0.02125656		1656.21	0.00050277		2246.2	0.00420053		2836.2	0.00066772		3426.19	-0.01282464
476.4	0.15335498		1066.39	0.02006201		1656.41	-0.00022697		2246.4	0.00328417		2836.4	0.00137636		3426.39	-0.0126047
476.6	0.15392449		1066.59	0.01993594		1656.61	-0.00024872		2246.6	0.00312545		2836.6	0.00183904		3426.59	-0.01277977
476.8	0.15468958		1066.79	0.01988347		1656.81	-0.00174575		2246.8	0.00208546		2836.8	0.0016829		3426.79	-0.0133373
477	0.15458907		1066.99	0.01904365		1657.01	-0.00223474		2247	0.00200574		2837	0.00229535		3426.99	-0.01267538
477.2	0.15540549		1067.19	0.01982645		1657.21	-0.00234058		2247.2	0.00212551		2837.2	0.00174443		3427.19	-0.01231494
477.4	0.15554971		1067.39	0.01944945		1657.41	-0.00214538		2247.4	0.00281263		2837.4	0.00088513		3427.39	-0.01166713
477.6	0.15614484		1067.59	0.0195386		1657.61	-0.00183485		2247.6	0.00257856		2837.6	0.00194728		3427.59	-0.01066064
477.8	0.15674916		1067.79	0.01925542		1657.81	-0.00071678		2247.8	0.00340136		2837.8	0.00186552		3427.79	-0.01056594
478	0.15641215		1067.99	0.01969966		1658.01	0.0001992		2248	0.00373619		2838	0.00189153		3427.99	-0.01047598
478.2	0.15559446		1068.19	0.02046024		1658.21	0.00121924		2248.2	0.00430555		2838.2	0.00169137		3428.19	-0.01154441
478.4	0.15493643		1068.39	0.02085976		1658.41	0.00112812		2248.4	0.00491426		2838.4	0.00191309		3428.39	-0.01184048
478.6	0.15450168		1068.59	0.02173941		1658.61	0.00161273		2248.6	0.00574822		2838.6	0.00233752		3428.59	-0.01203624
478.8	0.15537055		1068.79	0.02155747		1658.81	0.00250065		2248.8	0.00622505		2838.8	0.0016145		3428.79	-0.011895
479	0.15609835		1068.99	0.02212685		1659.01	0.00275696		2249	0.00473527		2839	0.0017395		3428.99	-0.01304571
479.2	0.155984		1069.19	0.02292494		1659.21	0.00274556		2249.2	0.00438269		2839.2	0.00134057		3429.19	-0.0133818
479.4	0.15531262		1069.39	0.02301631		1659.41	0.00250623		2249.4	0.00393742		2839.4	0.00176798		3429.39	-0.01394311
479.6	0.15511583		1069.59	0.02310451		1659.61	0.00188148		2249.6	0.00415139		2839.6	0.00286277		3429.59	-0.01467943
479.8	0.15509535		1069.79	0.0214167		1659.81	0.00059814		2249.8	0.00383422		2839.8	0.00264064		3429.79	-0.01527206
480	0.15468416		1069.99	0.02087377		1660.01	-0.00056904		2250	0.00363639		2840	0.00374721		3429.99	-0.01557462
480.2	0.15423348		1070.19	0.02043484		1660.21	-0.00073603		2250.2	0.0033769		2840.2	0.00371253		3430.19	-0.0158644
480.4	0.15343346		1070.39	0.0198849		1660.41	-0.00139926		2250.4	0.00230661		2840.4	0.00313149		3430.39	-0.01662166
480.6	0.15296388		1070.59	0.01946468		1660.61	-0.00114766		2250.6	0.00206835		2840.6	0.00246655		3430.59	-0.0168949
480.8	0.15232486		1070.79	0.01816176		1660.81	-0.00179694		2250.8	0.00199209		2840.8	0.00108079		3430.79	-0.01629621
481	0.15238615		1070.99	0.01746093		1661.01	-0.00099062		2251	0.00294518		2841	0.00003693		3430.99	-0.01491461
481.2	0.15296791		1071.19	0.01721734		1661.21	0.00005905		2251.2	0.0032105		2841.2	-0.00046324		3431.19	-0.01454411
481.4	0.15349486		1071.39	0.01661448		1661.41	0.00102991		2251.4	0.00391309		2841.4	-0.00026532		3431.39	-0.01331295
481.6	0.15425602		1071.59	0.01685593		1661.61	0.00199894		2251.6	0.00430741		2841.6	-0.00008837		3431.59	-0.01260407
481.8	0.15442804		1071.79	0.01625886		1661.81	0.00241904		2251.8	0.004783		2841.8	-0.00005936		3431.79	-0.01310929
482	0.15446987		1071.99	0.01660215		1662.01	0.00268686		2252	0.00483597		2842	-0.00036075		3431.99	-0.01340628
482.2	0.15427648		1072.19	0.01747806		1662.21	0.00340538		2252.2	0.00482991		2842.2	-0.00047916		3432.19	-0.0138012
482.4	0.15462148		1072.39	0.01766969		1662.41	0.0033886		2252.4	0.0058491		2842.4	-0.00021276		3432.39	-0.01275112
482.6	0.154776		1072.59	0.01832311		1662.61	0.00458155		2252.6	0.00628696		2842.6	-0.00100089		3432.59	-0.01276948
482.8	0.15617058		1072.79	0.01833313		1662.81	0.0048108		2252.8	0.00581332		2842.8	-0.00154549		3432.79	-0.01283517
483	0.15601035		1072.99	0.01961818		1663.01	0.00471106		2253	0.00547386		2843	-0.00114318		3432.99	-0.01423377
483.2	0.15571828		1073.19	0.02021499		1663.21	0.00433368		2253.2	0.00659251		2843.2	-0.00123242		3433.19	-0.01375866
483.4	0.15637628		1073.39	0.02043881		1663.41	0.00367192		2253.4	0.00682316		2843.4	-0.00029262		3433.39	-0.01398393
483.6	0.1566707		1073.59	0.02040657		1663.61	0.00352373		2253.6	0.00693083		2843.6	0.00159216		3433.59	-0.01414688
483.8	0.15660973		1073.79	0.01992708		1663.81	0.00238389		2253.8	0.0065027		2843.8	0.00255786		3433.79	-0.01478687
484	0.15618311		1073.99	0.02026249		1664.01	0.00173269		2254	0.00585287		2844	0.00275788		3433.99	-0.01542476
484.2	0.15606043		1074.19	0.02007317		1664.21	0.00223346		2254.2	0.00551374		2844.2	0.00250551		3434.19	-0.01581697
484.4	0.15599257		1074.39	0.0201196		1664.41	0.00214896		2254.4	0.00504543		2844.4	0.00145925		3434.39	-0.01600598
484.6	0.15670833		1074.59	0.01916091		1664.61	0.00223725		2254.6	0.00439675		2844.6	0.00153566		3434.59	-0.01594006
484.8	0.15683513		1074.79	0.01860201		1664.81	0.00294616		2254.8	0.00434027		2844.8	0.00049237		3434.79	-0.01454906
485	0.15789529		1074.99	0.01902928		1665.01	0.00384404		2255	0.00360067		2845	0.00082802		3434.99	-0.0139917
485.2	0.15700108		1075.19	0.01915799		1665.21	0.00381202		2255.2	0.00396199		2845.2	0.00085517		3435.19	-0.01384718
485.4	0.15680709		1075.39	0.0197051		1665.41	0.00420815		2255.4	0.00376291		2845.4	0.00086072		3435.39	-0.01373608
485.6	0.15663529		1075.59	0.01947405		1665.61	0.0044919		2255.6	0.00394142		2845.6	0.00059752		3435.59	-0.0135911
485.8	0.1562623		1075.79	0.01855918		1665.81	0.0044808		2255.8	0.00321666		2845.8	0.00127673		3435.79	-0.01395874
486	0.15597099		1075.99	0.01909577		1666.01	0.00455585		2256	0.0037983		2846	0.00054628		3435.99	-0.01435119
486.2	0.15541493		1076.19	0.01954679		1666.21	0.00464305		2256.2	0.00446053		2846.2	0.00025831		3436.19	-0.01419231
486.4	0.15523176		1076.39	0.01996672		1666.41	0.00426253		2256.4	0.0048904		2846.4	-0.00050855		3436.39	-0.01399012
486.6	0.15455308		1076.59	0.02086374		1666.61	0.00449536		2256.6	0.0043135		2846.6	-0.00090979		3436.59	-0.01450516
486.8	0.15457856		1076.79	0.02198357		1666.81	0.00310506		2256.8	0.00494747		2846.8	-0.0006293		3436.79	-0.01509104
487	0.15425969		1076.99	0.02248128		1667.01	0.00283766		2257	0.00521327		2847	-0.00048312		3436.99	-0.01565262
487.2	0.1548		1077.19	0.02204742		1667.21	0.00235308		2257.2	0.00496249		2847.2	0.0001174		3437.19	-0.01557016
487.4	0.15466602		1077.39	0.02159871		1667.41	0.0016111		2257.4	0.00535421		2847.4	0.00117498		3437.39	-0.01602893
487.6	0.15403466		1077.59	0.02102035		1667.61	0.00223333		2257.6	0.00488443		2847.6	0.00170917		3437.59	-0.01588755
487.8	0.15485564		1077.79	0.02064621		1667.81	0.00108693		2257.8	0.00417106		2847.8	0.00201392		3437.79	-0.01585701
488	0.15578011		1077.99	0.02005789		1668.01	0.00073763		2258	0.002989		2848	0.00138059		3437.99	-0.01650311
488.2	0.15621897		1078.19	0.01991823		1668.21	0.00052865		2258.2	0.00307925		2848.2	0.00187842		3438.19	-0.01618016
488.4	0.15691786		1078.39	0.01945473		1668.41	0.00054986		2258.4	0.00166977		2848.4	0.00228048		3438.39	-0.01557234
488.6	0.15733901		1078.59	0.01913822		1668.61	0.00070199		2258.6	0.00111556		2848.6	0.00293529		3438.59	-0.01534976
488.8	0.15662672		1078.79	0.01948737		1668.81	0.00129837		2258.8	0.00134338		2848.8	0.00272115		3438.79	-0.01513523
489	0.15667955		1078.99	0.01918332		1669.01	0.00177934		2259	0.00073891		2849	0.0034221		3438.99	-0.01492514
489.2	0.15576468		1079.19	0.01961323		1669.21	0.00179277		2259.2	0.00096934		2849.2	0.00386442		3439.19	-0.01426212
489.4	0.15587585		1079.39	0.01926537		1669.41	0.00268743		2259.4	0.00171889		2849.4	0.00357267		3439.39	-0.01418156
489.6	0.155972		1079.59	0.01896347		1669.61	0.0036122		2259.6	0.00219455		2849.6	0.00355571		3439.59	-0.01404076
489.8	0.15561964		1079.79	0.01933273		1669.81	0.00347596		2259.8	0.00290245		2849.8	0.00414196		3439.79	-0.01401998
490	0.1554226		1079.99	0.01984887		1670.01	0.00389647		2260	0.00365082		2850	0.00341005		3439.99	-0.01465202
490.2	0.15561754		1080.19	0.02127523		1670.21	0.00403692		2260.2	0.00398193		2850.2	0.00340189		3440.19	-0.01439797
490.4	0.15575146		1080.39	0.02204944		1670.41	0.00489814		2260.4	0.0037024		2850.4	0.00354002		3440.39	-0.01500526
490.6	0.15519177		1080.59	0.02319223		1670.61	0.00489635		2260.6	0.00321098		2850.6	0.00353903		3440.59	-0.01552334
490.8	0.15571937		1080.79	0.02346916		1670.81	0.00480356		2260.8	0.00414164		2850.8	0.00243429		3440.79	-0.01577417
491	0.1555173		1080.99	0.02225341		1671.01	0.00420515		2261	0.00425214		2851	0.00128021		3440.99	-0.01559538
491.2	0.1554768		1081.19	0.02167421		1671.21	0.00414272		2261.2	0.00480644		2851.2	0.00061887		3441.19	-0.01531102
491.4	0.15465357		1081.39	0.02164148		1671.41	0.00391037		2261.4	0.00588166		2851.4	0.00009393		3441.39	-0.01541119
491.6	0.15538447		1081.59	0.021231		1671.61	0.00380582		2261.6	0.00594919		2851.6	-0.00050869		3441.59	-0.0144881
491.8	0.15583747		1081.79	0.02031967		1671.81	0.00232314		2261.8	0.00559594		2851.8	0.00006478		3441.79	-0.01394273
492	0.1559747		1081.99	0.0203752		1672.01	0.00216657		2262	0.0052209		2852	-0.00095769		3441.99	-0.01426335
492.2	0.15558834		1082.19	0.01980041		1672.21	0.00169997		2262.2	0.00523878		2852.2	-0.0012254		3442.19	-0.0138471
492.4	0.15525158		1082.39	0.01918892		1672.41	0.00123641		2262.4	0.00480997		2852.4	-0.00134816		3442.39	-0.01376943
492.6	0.15449638		1082.59	0.01897354		1672.61	0.00098702		2262.6	0.00531487		2852.6	-0.001233		3442.59	-0.01439401
492.8	0.15488675		1082.79	0.01795925		1672.81	0.00081301		2262.8	0.0045699		2852.8	-0.00127536		3442.79	-0.01428499
493	0.15513262		1082.99	0.01741219		1673.01	0.00024423		2263	0.00419103		2853	-0.000758		3442.99	-0.01404258
493.2	0.15564338		1083.19	0.01727371		1673.21	-0.00026695		2263.2	0.00450745		2853.2	-0.00094104		3443.19	-0.01424245
493.4	0.15577526		1083.39	0.01646549		1673.41	0.00022531		2263.4	0.00504503		2853.4	-0.00105137		3443.39	-0.01393918
493.6	0.15583007		1083.59	0.01755682		1673.61	0.00084888		2263.6	0.00429366		2853.6	-0.00086617		3443.59	-0.0142284
493.8	0.15504425		1083.79	0.01789757		1673.81	0.00037039		2263.8	0.00465683		2853.8	-0.00072469		3443.79	-0.01441975
494	0.15492616		1083.99	0.0181615		1674.01	0.00136583		2264	0.00396779		2854	-0.00047594		3443.99	-0.01438866
494.2	0.15515913		1084.19	0.01838134		1674.21	0.00214101		2264.2	0.00429555		2854.2	0.00107006		3444.19	-0.01494638
494.4	0.15552623		1084.39	0.01750499		1674.41	0.00223601		2264.4	0.00369932		2854.4	0.00166803		3444.39	-0.0151976
494.6	0.15502097		1084.59	0.01771944		1674.61	0.00164637		2264.6	0.00367203		2854.6	0.00164437		3444.59	-0.01577377
494.8	0.15495352		1084.79	0.01751092		1674.81	0.0017236		2264.8	0.00404045		2854.8	0.00198901		3444.79	-0.01566887
495	0.15480854		1084.99	0.01711994		1675.01	0.00190067		2265	0.00520571		2855	0.00198274		3444.99	-0.0153156
495.2	0.15445293		1085.19	0.0171766		1675.21	0.00341743		2265.2	0.00577022		2855.2	0.00304789		3445.19	-0.01491043
495.4	0.15382244		1085.39	0.01723383		1675.41	0.0029734		2265.4	0.0062107		2855.4	0.00310577		3445.39	-0.01482488
495.6	0.15403158		1085.59	0.01647561		1675.61	0.00255017		2265.6	0.00651144		2855.6	0.00328979		3445.59	-0.01391853
495.8	0.15370927		1085.79	0.01618033		1675.81	0.0027123		2265.8	0.00678752		2855.8	0.00334815		3445.79	-0.01372385
496	0.1530004		1085.99	0.01630287		1676.01	0.00320729		2266	0.00695332		2856	0.00276058		3445.99	-0.01420564
496.2	0.15317309		1086.19	0.01559352		1676.21	0.00339736		2266.2	0.00667496		2856.2	0.00300244		3446.19	-0.01426033
496.4	0.15284426		1086.39	0.01513299		1676.41	0.00355366		2266.4	0.00724303		2856.4	0.00284538		3446.39	-0.01420374
496.6	0.15422591		1086.59	0.01493983		1676.61	0.00361703		2266.6	0.00651434		2856.6	0.00324688		3446.59	-0.01453845
496.8	0.15509457		1086.79	0.01402224		1676.81	0.00304935		2266.8	0.00583924		2856.8	0.00243153		3446.79	-0.01343873
497	0.15563357		1086.99	0.01430603		1677.01	0.00276108		2267	0.00544756		2857	0.00235274		3446.99	-0.01327826
497.2	0.15568128		1087.19	0.01479792		1677.21	0.00252027		2267.2	0.00508658		2857.2	0.0020415		3447.19	-0.01258988
497.4	0.15568207		1087.39	0.0163795		1677.41	0.00289516		2267.4	0.00453743		2857.4	0.00199603		3447.39	-0.01209739
497.6	0.15538623		1087.59	0.01689064		1677.61	0.00326252		2267.6	0.00410879		2857.6	0.00093967		3447.59	-0.01258966
497.8	0.15508348		1087.79	0.01746644		1677.81	0.00322076		2267.8	0.00379869		2857.8	0.00136116		3447.79	-0.01269941
498	0.15499571		1087.99	0.0177906		1678.01	0.00302756		2268	0.00295219		2858	0.0022493		3447.99	-0.01241302
498.2	0.15500634		1088.19	0.01766845		1678.21	0.00323669		2268.2	0.00286942		2858.2	0.00234356		3448.19	-0.01379183
498.4	0.15480674		1088.39	0.0184771		1678.41	0.00188154		2268.4	0.00224619		2858.4	0.00184661		3448.39	-0.01429181
498.6	0.15450481		1088.59	0.019667		1678.61	0.00187397		2268.6	0.00248145		2858.6	0.00153824		3448.59	-0.0146663
498.8	0.15338704		1088.79	0.01997838		1678.81	0.00219648		2268.8	0.00249338		2858.8	0.00159505		3448.79	-0.01444192
499	0.15337698		1088.99	0.01977655		1679.01	0.00271578		2269	0.00283766		2859	0.00161457		3448.99	-0.01478636
499.2	0.15344174		1089.19	0.01993833		1679.21	0.00281709		2269.2	0.00269625		2859.2	0.00220555		3449.19	-0.01558586
499.4	0.15360117		1089.39	0.02007632		1679.41	0.0014065		2269.4	0.00303657		2859.4	0.00211628		3449.39	-0.0161594
499.6	0.15342065		1089.59	0.0205799		1679.61	0.00114252		2269.6	0.00319458		2859.6	0.00135876		3449.59	-0.01671182
499.8	0.15351095		1089.79	0.02021384		1679.81	0.00134711		2269.8	0.00375327		2859.8	0.00053073		3449.79	-0.01711934
500	0.15332317		1089.99	0.02005627		1680.01	0.00146436		2270	0.00344974		2860	0.00093308		3449.99	-0.01827328
500.2	0.15438454		1090.19	0.01936305		1680.21	0.00192776		2270.2	0.0034723		2860.2	0.0008391		3450.19	-0.01819278
500.4	0.15456525		1090.39	0.01837618		1680.41	0.00205165		2270.4	0.00363262		2860.4	0.00079151		3450.39	-0.01810605
500.6	0.15519944		1090.59	0.01761501		1680.61	0.00168525		2270.6	0.00305444		2860.6	0.00124093		3450.59	-0.01771466
500.8	0.15499054		1090.79	0.01686519		1680.81	0.001238		2270.8	0.00354065		2860.8	0.00129461		3450.79	-0.01712679
501	0.15459028		1090.99	0.01712947		1681.01	0.00163419		2271	0.00402843		2861	0.0021165		3450.99	-0.01738751
501.2	0.15432304		1091.19	0.01758167		1681.21	0.00163595		2271.2	0.00412691		2861.2	0.00254773		3451.19	-0.01698134
501.4	0.15442491		1091.39	0.01756294		1681.41	0.00233429		2271.4	0.00415163		2861.4	0.00202304		3451.39	-0.01691543
501.6	0.15430563		1091.59	0.0167978		1681.61	0.00285075		2271.6	0.00454374		2861.6	0.00165944		3451.59	-0.01563604
501.8	0.15450304		1091.79	0.01747904		1681.81	0.0030538		2271.8	0.00480962		2861.8	0.0025471		3451.79	-0.01525179
502	0.15404726		1091.99	0.01731709		1682.01	0.00345154		2272	0.00488117		2862	0.00202404		3451.99	-0.01519509
502.2	0.15404078		1092.19	0.01686571		1682.21	0.00366484		2272.2	0.00506934		2862.2	0.0005769		3452.19	-0.01580528
502.4	0.15420383		1092.39	0.01721933		1682.41	0.00274149		2272.4	0.00492961		2862.4	0.00083307		3452.39	-0.01556757
502.6	0.15402725		1092.59	0.0165492		1682.61	0.00249384		2272.6	0.00516737		2862.6	0.00058907		3452.59	-0.01478031
502.8	0.15303815		1092.79	0.01636608		1682.81	0.00228642		2272.8	0.00475261		2862.8	0.00154454		3452.79	-0.01533972
503	0.15426663		1092.99	0.01700801		1683.01	0.00169599		2273	0.0049271		2863	0.00220223		3452.99	-0.01610963
503.2	0.15485684		1093.19	0.01742836		1683.21	0.00053071		2273.2	0.00507357		2863.2	0.00163323		3453.19	-0.01632321
503.4	0.15572986		1093.39	0.01802946		1683.41	-0.00022901		2273.4	0.00401964		2863.4	0.00062723		3453.39	-0.01610759
503.6	0.15496435		1093.59	0.01882567		1683.61	-0.00067468		2273.6	0.00450544		2863.6	-0.00109534		3453.59	-0.01672822
503.8	0.15416696		1093.79	0.01792233		1683.81	-0.00049104		2273.8	0.00445367		2863.8	-0.0013283		3453.79	-0.01719052
504	0.15342984		1093.99	0.01782847		1684.01	-0.00068916		2274	0.00516557		2864	-0.00122665		3453.99	-0.0181796
504.2	0.1532303		1094.19	0.01696709		1684.21	-0.00052989		2274.2	0.00572775		2864.2	-0.00126899		3454.19	-0.01770053
504.4	0.1528638		1094.39	0.01651124		1684.41	-0.00004355		2274.4	0.00525828		2864.4	-0.00109709		3454.39	-0.01786595
504.6	0.15163578		1094.59	0.01750184		1684.61	-0.00020786		2274.6	0.00546557		2864.6	-0.00024864		3454.59	-0.01768847
504.8	0.1513229		1094.79	0.01888467		1684.81	-0.00074755		2274.8	0.00573767		2864.8	-0.00025285		3454.79	-0.01731313
505	0.1504392		1094.99	0.01902767		1685.01	-0.00010587		2275	0.00537691		2865	-0.00010323		3454.99	-0.01722547
505.2	0.15049061		1095.19	0.01984323		1685.21	0.00022655		2275.2	0.00545336		2865.2	-0.00085313		3455.19	-0.01615443
505.4	0.15027115		1095.39	0.01925845		1685.41	0.00048549		2275.4	0.00636702		2865.4	-0.00150517		3455.39	-0.01617981
505.6	0.15000414		1095.59	0.01890199		1685.61	0.00083198		2275.6	0.00719857		2865.6	-0.00086304		3455.59	-0.01537496
505.8	0.15039985		1095.79	0.01885211		1685.81	0.00133599		2275.8	0.00774822		2865.8	-0.00004127		3455.79	-0.01560069
506	0.15072135		1095.99	0.01824888		1686.01	0.00199944		2276	0.00726495		2866	-0.00045674		3455.99	-0.01576164
506.2	0.15173727		1096.19	0.01775647		1686.21	0.00117221		2276.2	0.00690154		2866.2	0.00054096		3456.19	-0.01546692
506.4	0.1530584		1096.39	0.01830608		1686.41	0.00027883		2276.4	0.00675823		2866.4	0.00121574		3456.39	-0.01527582
506.6	0.15386149		1096.59	0.01836325		1686.61	0.00000034		2276.6	0.00701003		2866.6	0.00181394		3456.59	-0.01552269
506.8	0.15502436		1096.79	0.01905734		1686.81	-0.00048417		2276.8	0.00653895		2866.8	0.00272166		3456.79	-0.01572317
507	0.15631554		1096.99	0.01943457		1687.01	-0.00149289		2277	0.00614364		2867	0.00337084		3456.99	-0.01495417
507.2	0.15652352		1097.19	0.01936513		1687.21	-0.00197313		2277.2	0.00570393		2867.2	0.00337492		3457.19	-0.01484797
507.4	0.15713158		1097.39	0.01968593		1687.41	-0.00120716		2277.4	0.00493314		2867.4	0.00314753		3457.39	-0.01376694
507.6	0.15597957		1097.59	0.02035287		1687.61	-0.0008844		2277.6	0.00559469		2867.6	0.00298285		3457.59	-0.01388934
507.8	0.15583046		1097.79	0.02041562		1687.81	0.00000459		2277.8	0.00573184		2867.8	0.00301168		3457.79	-0.01453584
508	0.1559758		1097.99	0.02058799		1688.01	0.00076127		2278	0.00660384		2868	0.00329107		3457.99	-0.01481139
508.2	0.15621543		1098.19	0.02005719		1688.21	0.00227325		2278.2	0.00622596		2868.2	0.00293325		3458.19	-0.01389832
508.4	0.15601347		1098.39	0.02101268		1688.41	0.00295212		2278.4	0.00582622		2868.4	0.00218		3458.39	-0.01347706
508.6	0.15497355		1098.59	0.02218425		1688.61	0.00267649		2278.6	0.00560283		2868.6	0.00198907		3458.59	-0.0134709
508.8	0.15474455		1098.79	0.02193272		1688.81	0.00229961		2278.8	0.00538009		2868.8	0.00060145		3458.79	-0.01398318
509	0.15384712		1098.99	0.02159955		1689.01	0.00285039		2279	0.00604348		2869	0.00113133		3458.99	-0.01497681
509.2	0.15347928		1099.19	0.0218437		1689.21	0.00289638		2279.2	0.00645995		2869.2	0.00106671		3459.19	-0.0148124
509.4	0.15240341		1099.39	0.02081448		1689.41	0.00251336		2279.4	0.0064452		2869.4	0.00185404		3459.39	-0.01551331
509.6	0.15211594		1099.59	0.01930099		1689.61	0.00325742		2279.6	0.00660183		2869.6	0.00211604		3459.59	-0.0154183
509.8	0.15265381		1099.79	0.01917734		1689.81	0.00365843		2279.8	0.00641146		2869.8	0.00237659		3459.79	-0.01560597
510	0.15400795		1099.99	0.01872354		1690.01	0.00356504		2280	0.00632501		2870	0.00313548		3459.99	-0.01577974
510.2	0.15501285		1100.19	0.01844961		1690.21	0.00319099		2280.2	0.00586578		2870.2	0.00375276		3460.19	-0.01572703
510.4	0.15509573		1100.39	0.01875955		1690.41	0.00180047		2280.4	0.00557702		2870.4	0.00344807		3460.39	-0.01593013
510.6	0.15569371		1100.59	0.01793742		1690.61	0.00170648		2280.6	0.0058		2870.6	0.00425262		3460.59	-0.01585997
510.8	0.15560251		1100.79	0.01812807		1690.81	0.00069874		2280.8	0.00544951		2870.8	0.00404207		3460.79	-0.01519424
511	0.15487111		1100.99	0.01834471		1691.01	-0.00011503		2281	0.00458271		2871	0.00382867		3460.99	-0.01502269
511.2	0.15443615		1101.19	0.01824677		1691.21	-0.00040285		2281.2	0.00442815		2871.2	0.00339562		3461.19	-0.01542323
511.4	0.15448368		1101.39	0.01891489		1691.41	-0.00003487		2281.4	0.00392209		2871.4	0.00242324		3461.39	-0.01453654
511.6	0.15427691		1101.59	0.01974786		1691.61	-0.00010895		2281.6	0.00456336		2871.6	0.00180129		3461.59	-0.01542971
511.8	0.15307698		1101.79	0.01967448		1691.81	0.00034442		2281.8	0.0043992		2871.8	0.00188396		3461.79	-0.01622182
512	0.1524424		1101.99	0.01892017		1692.01	-0.00017346		2282	0.00359492		2872	0.00120912		3461.99	-0.01611755
512.2	0.15260219		1102.19	0.01884355		1692.21	-0.00014771		2282.2	0.00291456		2872.2	-0.00000029		3462.19	-0.0153971
512.4	0.15234868		1102.39	0.01955558		1692.41	-0.0015105		2282.4	0.00270311		2872.4	-0.00032575		3462.39	-0.01610358
512.6	0.15196303		1102.59	0.01996492		1692.61	-0.00251953		2282.6	0.00215843		2872.6	-0.00036056		3462.59	-0.01670612
512.8	0.15124425		1102.79	0.01968248		1692.81	-0.00303846		2282.8	0.00210572		2872.8	0.00066765		3462.79	-0.01649931
513	0.15150516		1102.99	0.01999569		1693.01	-0.00261544		2283	0.00235344		2873	0.00077183		3462.99	-0.01595708
513.2	0.15266113		1103.19	0.01931006		1693.21	-0.00230466		2283.2	0.00159597		2873.2	0.00028047		3463.19	-0.01538447
513.4	0.1524801		1103.39	0.01861793		1693.41	-0.0017892		2283.4	0.00130022		2873.4	-0.00009527		3463.39	-0.01531614
513.6	0.15349278		1103.59	0.01729778		1693.61	-0.00113416		2283.6	0.00134781		2873.6	-0.0002838		3463.59	-0.01534535
513.8	0.15460923		1103.79	0.017406		1693.81	-0.00078063		2283.8	0.00069852		2873.8	0.00010488		3463.79	-0.01539409
514	0.15574931		1103.99	0.01689004		1694.01	-0.00119707		2284	0.00131052		2874	0.00060148		3463.99	-0.01509544
514.2	0.15562323		1104.19	0.01662755		1694.21	-0.00130175		2284.2	0.00006957		2874.2	-0.00000343		3464.19	-0.01393212
514.4	0.15549132		1104.39	0.01658296		1694.41	-0.00138952		2284.4	0.00060984		2874.4	0.00043942		3464.39	-0.01393835
514.6	0.15647715		1104.59	0.01656248		1694.61	-0.00063087		2284.6	0.00148641		2874.6	0.00086744		3464.59	-0.01321583
514.8	0.15730525		1104.79	0.01735785		1694.81	-0.00081222		2284.8	0.0015232		2874.8	0.00034774		3464.79	-0.01283448
515	0.15745592		1104.99	0.01737954		1695.01	-0.00059852		2285	0.00113998		2875	0.00001589		3464.99	-0.01230333
515.2	0.15717252		1105.19	0.01821144		1695.21	0.00016878		2285.2	0.00154439		2875.2	0.00022763		3465.19	-0.01263179
515.4	0.15576805		1105.39	0.01815103		1695.41	0.00097635		2285.4	0.00207435		2875.4	0.00014057		3465.39	-0.01315918
515.6	0.15499348		1105.59	0.01812687		1695.61	0.00078112		2285.6	0.00309132		2875.6	0.0003912		3465.59	-0.01359252
515.8	0.15311679		1105.79	0.01787435		1695.81	0.00048915		2285.8	0.00295069		2875.8	0.00105394		3465.79	-0.01361706
516	0.15281826		1105.99	0.01786664		1696.01	0.00012731		2286	0.00349209		2876	0.00153949		3465.99	-0.01394202
516.2	0.15315469		1106.19	0.018191		1696.21	0.00041697		2286.2	0.00405983		2876.2	0.00211137		3466.19	-0.01437069
516.4	0.15225621		1106.39	0.01890594		1696.41	-0.0005656		2286.4	0.0040525		2876.4	0.00287436		3466.39	-0.01472807
516.6	0.15191346		1106.59	0.0194731		1696.61	-0.00001572		2286.6	0.00393299		2876.6	0.00260297		3466.59	-0.01487611
516.8	0.15173147		1106.79	0.019208		1696.81	0.00047023		2286.8	0.00404184		2876.8	0.00304581		3466.79	-0.01542911
517	0.15212559		1106.99	0.01853333		1697.01	0.00055767		2287	0.00405408		2877	0.00107444		3466.99	-0.01583632
517.2	0.15213137		1107.19	0.01796398		1697.21	0.00064492		2287.2	0.00353173		2877.2	0.00156538		3467.19	-0.01595413
517.4	0.15115093		1107.39	0.01855287		1697.41	0.00021249		2287.4	0.00287763		2877.4	0.0012261		3467.39	-0.01676592
517.6	0.15209841		1107.59	0.01851787		1697.61	-0.00004292		2287.6	0.00284696		2877.6	0.00120009		3467.59	-0.01730234
517.8	0.15336467		1107.79	0.01909451		1697.81	-0.00014573		2287.8	0.00254679		2877.8	0.00052268		3467.79	-0.01770201
518	0.15338868		1107.99	0.01926805		1698.01	-0.00170899		2288	0.00278433		2878	0.00097562		3467.99	-0.0174904
518.2	0.15404805		1108.19	0.01919059		1698.21	-0.00176233		2288.2	0.0018154		2878.2	0.0010432		3468.19	-0.01681506
518.4	0.15493323		1108.39	0.01927999		1698.41	-0.00178436		2288.4	0.0027548		2878.4	0.00176685		3468.39	-0.01749109
518.6	0.15565595		1108.59	0.01897602		1698.61	-0.00216049		2288.6	0.00309702		2878.6	0.00187414		3468.59	-0.01701071
518.8	0.15640562		1108.79	0.01876487		1698.81	-0.00220094		2288.8	0.00295914		2878.8	0.0015166		3468.79	-0.0168121
519	0.15604289		1108.99	0.01797641		1699.01	-0.00212915		2289	0.00245179		2879	0.0007961		3468.99	-0.01692955
519.2	0.15540782		1109.19	0.01817276		1699.21	-0.00190603		2289.2	0.00331784		2879.2	0.00090328		3469.19	-0.01710697
519.4	0.15541077		1109.39	0.0174965		1699.41	-0.00255716		2289.4	0.00391743		2879.4	0.00037162		3469.39	-0.01687252
519.6	0.1557282		1109.59	0.01690406		1699.61	-0.00274116		2289.6	0.00502124		2879.6	0.00027955		3469.59	-0.01619178
519.8	0.15466883		1109.79	0.01681519		1699.81	-0.00232543		2289.8	0.00499855		2879.8	0.00087929		3469.79	-0.01625532
520	0.15463076		1109.99	0.01740516		1700.01	-0.0010691		2290	0.00544211		2880	0.00066673		3469.99	-0.01626111
520.2	0.15495939		1110.19	0.01652911		1700.21	-0.000221		2290.2	0.00515836		2880.2	0.00040024		3470.19	-0.01645784
520.4	0.15521419		1110.39	0.01709055		1700.41	0.00004122		2290.4	0.00496402		2880.4	-0.00033983		3470.39	-0.01659315
520.6	0.15527714		1110.59	0.01666272		1700.61	0.00098248		2290.6	0.0050941		2880.6	-0.00117358		3470.59	-0.01741621
520.8	0.15496054		1110.79	0.01702272		1700.81	0.0008444		2290.8	0.00527182		2880.8	-0.00138445		3470.79	-0.01735085
521	0.15508328		1110.99	0.01763389		1701.01	0.00041972		2291	0.00533997		2881	-0.0020244		3470.99	-0.0172301
521.2	0.15497247		1111.19	0.01809182		1701.21	0.00089968		2291.2	0.00543343		2881.2	-0.00102603		3471.19	-0.01708319
521.4	0.15542175		1111.39	0.01950071		1701.41	0.00040138		2291.4	0.00547164		2881.4	-0.00175481		3471.39	-0.01808778
521.6	0.15612882		1111.59	0.02012465		1701.61	0.00111335		2291.6	0.00592536		2881.6	-0.00166547		3471.59	-0.01808106
521.8	0.15662423		1111.79	0.02046937		1701.81	0.00077018		2291.8	0.00583805		2881.8	-0.00145884		3471.79	-0.01770826
522	0.15684904		1111.99	0.01983538		1702.01	0.00013114		2292	0.00592043		2882	-0.00082783		3471.99	-0.01731892
522.2	0.15758464		1112.19	0.0199488		1702.21	-0.00010612		2292.2	0.00657769		2882.2	-0.00005342		3472.19	-0.01726625
522.4	0.15773023		1112.39	0.01981657		1702.41	0.000348		2292.4	0.00663888		2882.4	0.0005533		3472.39	-0.01711865
522.6	0.1561778		1112.59	0.01921412		1702.61	0.00023972		2292.6	0.00598924		2882.6	0.00027503		3472.59	-0.0174957
522.8	0.15562294		1112.79	0.01943724		1702.81	-0.00071476		2292.8	0.00539446		2882.8	-0.00023628		3472.79	-0.01722885
523	0.15453208		1112.99	0.0195285		1703.01	-0.00055968		2293	0.00418576		2883	-0.00032662		3472.99	-0.01750041
523.2	0.15383188		1113.19	0.01995847		1703.21	-0.00045119		2293.2	0.0040171		2883.2	-0.00020136		3473.19	-0.01694622
523.4	0.15279512		1113.39	0.01994449		1703.41	-0.00099779		2293.4	0.00366861		2883.4	-0.00118891		3473.39	-0.01628401
523.6	0.15163175		1113.59	0.01924916		1703.61	-0.00091901		2293.6	0.00321337		2883.6	-0.00118071		3473.59	-0.01577071
523.8	0.15120011		1113.79	0.02013905		1703.81	-0.0002125		2293.8	0.00203961		2883.8	-0.00168743		3473.79	-0.01583217
524	0.15113793		1113.99	0.01950563		1704.01	0.00080456		2294	0.00252645		2884	-0.00265379		3473.99	-0.01564249
524.2	0.15117111		1114.19	0.01796608		1704.21	0.00102001		2294.2	0.00222772		2884.2	-0.00235779		3474.19	-0.01526063
524.4	0.15189899		1114.39	0.01858729		1704.41	0.0003931		2294.4	0.0016874		2884.4	-0.00225614		3474.39	-0.01551985
524.6	0.15142773		1114.59	0.01836083		1704.61	0.00023904		2294.6	0.00198877		2884.6	-0.0021328		3474.59	-0.0153344
524.8	0.15187375		1114.79	0.01910534		1704.81	-0.00043603		2294.8	0.00192307		2884.8	-0.00147155		3474.79	-0.0153735
525	0.15272822		1114.99	0.01917523		1705.01	-0.00011845		2295	0.00218987		2885	-0.00033605		3474.99	-0.01617687
525.2	0.15264553		1115.19	0.01892049		1705.21	-0.00006172		2295.2	0.00277254		2885.2	0.00091858		3475.19	-0.01614146
525.4	0.15344758		1115.39	0.01996209		1705.41	-0.00087494		2295.4	0.00310123		2885.4	0.00043859		3475.39	-0.01653209
525.6	0.15382774		1115.59	0.02025827		1705.61	-0.00095876		2295.6	0.00317164		2885.6	0.0010369		3475.59	-0.01592304
525.8	0.154661		1115.79	0.0192036		1705.81	-0.00161194		2295.8	0.00327951		2885.8	0.00106074		3475.79	-0.01562561
526	0.15546898		1115.99	0.01887747		1706.01	-0.00178209		2296	0.00396566		2886	0.00105248		3475.99	-0.01577952
526.2	0.15608833		1116.19	0.01898139		1706.21	-0.0018994		2296.2	0.00424562		2886.2	0.00181934		3476.19	-0.01607479
526.4	0.15643318		1116.39	0.01854451		1706.41	-0.00103455		2296.4	0.00394607		2886.4	0.00109486		3476.39	-0.01611095
526.6	0.15586732		1116.59	0.01870037		1706.61	-0.00184687		2296.6	0.00404178		2886.6	0.00082958		3476.59	-0.01636175
526.8	0.15621461		1116.79	0.01941331		1706.81	-0.00181051		2296.8	0.00386172		2886.8	0.0003162		3476.79	-0.01626678
527	0.1553917		1116.99	0.01960837		1707.01	-0.00081852		2297	0.00348853		2887	0.00012508		3476.99	-0.01588493
527.2	0.15549568		1117.19	0.01977007		1707.21	-0.00096103		2297.2	0.00281187		2887.2	-0.00060873		3477.19	-0.01570764
527.4	0.15494932		1117.39	0.01978936		1707.41	-0.00105635		2297.4	0.00320371		2887.4	-0.0019664		3477.39	-0.01476239
527.6	0.15550215		1117.59	0.01975983		1707.61	-0.00028735		2297.6	0.00212995		2887.6	-0.00227064		3477.59	-0.0151466
527.8	0.15514225		1117.79	0.01978478		1707.81	-0.00001693		2297.8	0.00166071		2887.8	-0.00297502		3477.79	-0.01466385
528	0.15469496		1117.99	0.01849797		1708.01	0.00102486		2298	0.00203739		2888	-0.00217257		3477.99	-0.01416168
528.2	0.15483793		1118.19	0.01846159		1708.21	0.00080721		2298.2	0.00150172		2888.2	-0.00137578		3478.19	-0.01431315
528.4	0.15464189		1118.39	0.01842471		1708.41	0.00113833		2298.4	0.0005871		2888.4	-0.00135389		3478.39	-0.01443954
528.6	0.15393591		1118.59	0.01790928		1708.61	0.00131278		2298.6	0.00093788		2888.6	-0.00126533		3478.59	-0.0144036
528.8	0.15381681		1118.79	0.018375		1708.81	0.00147697		2298.8	0.00017207		2888.8	-0.00083219		3478.79	-0.0142604
529	0.15395723		1118.99	0.01828122		1709.01	0.00163869		2299	0.00026482		2889	-0.00058701		3478.99	-0.01424975
529.2	0.15354462		1119.19	0.01868327		1709.21	0.00078035		2299.2	0.0008558		2889.2	0.0004235		3479.19	-0.01431531
529.4	0.15314917		1119.39	0.01909685		1709.41	-0.00017354		2299.4	0.00074053		2889.4	0.00003243		3479.39	-0.01405278
529.6	0.15260218		1119.59	0.01856481		1709.61	-0.00023722		2299.6	0.0010793		2889.6	0.00038577		3479.59	-0.01412301
529.8	0.1526711		1119.79	0.01733899		1709.81	-0.00006489		2299.8	0.00140761		2889.8	0.00053132		3479.79	-0.01387438
530	0.15275532		1119.99	0.01754742		1710.01	-0.0002743		2300	0.00173045		2890	0.00000557		3479.99	-0.01397554
530.2	0.15411207		1120.19	0.01685973		1710.21	-0.00059703		2300.2	0.00160512		2890.2	0.0002341		3480.19	-0.01454639
530.4	0.15426139		1120.39	0.01714428		1710.41	-0.00150997		2300.4	0.00314488		2890.4	-0.00046786		3480.39	-0.01466938
530.6	0.15429051		1120.59	0.01829379		1710.61	-0.00191102		2300.6	0.00348737		2890.6	-0.00057003		3480.59	-0.0152362
530.8	0.15420138		1120.79	0.01804414		1710.81	-0.00204704		2300.8	0.00357297		2890.8	-0.00101041		3480.79	-0.01500229
531	0.15439477		1120.99	0.01825762		1711.01	-0.0024267		2301	0.00307064		2891	-0.00074748		3480.99	-0.01519556
531.2	0.1550649		1121.19	0.01784119		1711.21	-0.0021025		2301.2	0.00298441		2891.2	-0.00055015		3481.19	-0.01518681
531.4	0.15480784		1121.39	0.01776331		1711.41	-0.00215906		2301.4	0.00328775		2891.4	-0.0007073		3481.39	-0.014969
531.6	0.15428363		1121.59	0.01763703		1711.61	-0.00193534		2301.6	0.00244467		2891.6	-0.00033473		3481.59	-0.01540267
531.8	0.15412248		1121.79	0.01714961		1711.81	-0.00258416		2301.8	0.00227694		2891.8	-0.00052428		3481.79	-0.01479015
532	0.1546717		1121.99	0.01705108		1712.01	-0.00150408		2302	0.00174377		2892	-0.00021315		3481.99	-0.01554622
532.2	0.15460898		1122.19	0.01764433		1712.21	-0.00210026		2302.2	0.00106363		2892.2	-0.00096751		3482.19	-0.01639998
532.4	0.1544761		1122.39	0.01692912		1712.41	-0.00140455		2302.4	0.00101102		2892.4	-0.00114769		3482.39	-0.01586643
532.6	0.15504126		1122.59	0.01730982		1712.61	-0.00145498		2302.6	0.00067723		2892.6	-0.0001382		3482.59	-0.01564663
532.8	0.15523681		1122.79	0.01794113		1712.81	-0.00123147		2302.8	0.00003001		2892.8	-0.00005099		3482.79	-0.01538261
533	0.155397		1122.99	0.01796741		1713.01	-0.00080901		2303	0.00033736		2893	0.00053715		3482.99	-0.01608249
533.2	0.15521544		1123.19	0.01769142		1713.21	-0.00113786		2303.2	0.00059863		2893.2	0.00162388		3483.19	-0.01606306
533.4	0.15452055		1123.39	0.01736872		1713.41	-0.00058314		2303.4	0.0008564		2893.4	0.00157248		3483.39	-0.01614898
533.6	0.15437169		1123.59	0.01682121		1713.61	-0.00041855		2303.6	0.00142481		2893.6	0.00167485		3483.59	-0.01673554
533.8	0.1548741		1123.79	0.01699377		1713.81	-0.00031018		2303.8	0.00171644		2893.8	0.00230639		3483.79	-0.01615809
534	0.15396635		1123.99	0.01731981		1714.01	-0.00057357		2304	0.0012276		2894	0.00251727		3483.99	-0.01682435
534.2	0.15452576		1124.19	0.01702465		1714.21	-0.00036258		2304.2	0.00116517		2894.2	0.00351918		3484.19	-0.01766416
534.4	0.15356715		1124.39	0.01867841		1714.41	-0.00042881		2304.4	0.00114547		2894.4	0.00337922		3484.39	-0.0174191
534.6	0.15319294		1124.59	0.01902168		1714.61	-0.00011362		2304.6	0.00063642		2894.6	0.00339403		3484.59	-0.01826574
534.8	0.15218122		1124.79	0.0180377		1714.81	0.00023136		2304.8	0.00025083		2894.8	0.00353146		3484.79	-0.01806705
535	0.15208166		1124.99	0.01851649		1715.01	-0.00004596		2305	0.00040191		2895	0.00399231		3484.99	-0.01810664
535.2	0.15114775		1125.19	0.01834257		1715.21	-0.00012824		2305.2	0.00121357		2895.2	0.00417188		3485.19	-0.01755143
535.4	0.15020408		1125.39	0.01875766		1715.41	-0.00107018		2305.4	0.00106832		2895.4	0.00383792		3485.39	-0.01715653
535.6	0.14965061		1125.59	0.01845166		1715.61	-0.00166794		2305.6	0.0010197		2895.6	0.00337672		3485.59	-0.01677994
535.8	0.15044414		1125.79	0.01877399		1715.81	-0.00313802		2305.8	0.00112		2895.8	0.00280314		3485.79	-0.01654224
536	0.15077228		1125.99	0.01926186		1716.01	-0.00356009		2306	0.00108786		2896	0.00211945		3485.99	-0.01678643
536.2	0.15111601		1126.19	0.01914953		1716.21	-0.00461403		2306.2	0.00122492		2896.2	0.00211284		3486.19	-0.01657175
536.4	0.15116266		1126.39	0.01872665		1716.41	-0.00525174		2306.4	0.00158971		2896.4	0.00243936		3486.39	-0.01610314
536.6	0.15155196		1126.59	0.0187117		1716.61	-0.0057229		2306.6	0.00131328		2896.6	0.00247263		3486.59	-0.01632331
536.8	0.15121506		1126.79	0.01932842		1716.81	-0.00586197		2306.8	0.00193817		2896.8	0.00180601		3486.79	-0.01705888
537	0.15175629		1126.99	0.01870492		1717.01	-0.00609309		2307	0.00247586		2897	0.00101679		3486.99	-0.01699081
537.2	0.15186607		1127.19	0.01757218		1717.21	-0.0061872		2307.2	0.00285361		2897.2	0.00175987		3487.19	-0.01582598
537.4	0.15241287		1127.39	0.018558		1717.41	-0.00530499		2307.4	0.00357878		2897.4	0.00176602		3487.39	-0.01663729
537.6	0.15342417		1127.59	0.01899934		1717.61	-0.00579928		2307.6	0.00311224		2897.6	0.00131485		3487.59	-0.01659762
537.8	0.15374481		1127.79	0.01922432		1717.81	-0.00467503		2307.8	0.00325144		2897.8	0.00216028		3487.79	-0.01551483
538	0.15366233		1127.99	0.01924102		1718.01	-0.00387814		2308	0.00266353		2898	0.00175005		3487.99	-0.01673314
538.2	0.15404302		1128.19	0.01950604		1718.21	-0.00273405		2308.2	0.00246284		2898.2	0.00214541		3488.19	-0.01778428
538.4	0.15376455		1128.39	0.02070835		1718.41	-0.00148577		2308.4	0.00166869		2898.4	0.00231305		3488.39	-0.01742952
538.6	0.15363375		1128.59	0.02028589		1718.61	-0.00084858		2308.6	0.00194633		2898.6	0.0013604		3488.59	-0.01826412
538.8	0.1529887		1128.79	0.01935819		1718.81	-0.00029658		2308.8	0.00154387		2898.8	0.00113977		3488.79	-0.01818035
539	0.15295622		1128.99	0.01938783		1719.01	-0.00030734		2309	0.00215822		2899	0.00164643		3488.99	-0.01814638
539.2	0.1526536		1129.19	0.01948038		1719.21	-0.00008686		2309.2	0.00277373		2899.2	0.00189828		3489.19	-0.01908884
539.4	0.15290086		1129.39	0.01947291		1719.41	0.00039112		2309.4	0.0022783		2899.4	0.00160741		3489.39	-0.01834387
539.6	0.15360738		1129.59	0.01956981		1719.61	-0.00013205		2309.6	0.00173537		2899.6	0.00124993		3489.59	-0.01916039
539.8	0.1539483		1129.79	0.0195652		1719.81	-0.00018801		2309.8	0.00166174		2899.8	0.00110229		3489.79	-0.01956387
540	0.15496952		1129.99	0.01928675		1720.01	-0.00084118		2310	0.00145486		2900	0.00100808		3489.99	-0.02057121
540.2	0.15497898		1130.19	0.01827837		1720.21	-0.00176761		2310.2	0.00196522		2900.2	0.0017098		3490.19	-0.02113014
540.4	0.15401192		1130.39	0.01809757		1720.41	-0.00237026		2310.4	0.0022271		2900.4	0.00190372		3490.39	-0.02114033
540.6	0.15434022		1130.59	0.01760675		1720.61	-0.00255976		2310.6	0.0027329		2900.6	0.00253491		3490.59	-0.02130089
540.8	0.15372618		1130.79	0.01808096		1720.81	-0.00389861		2310.8	0.00296407		2900.8	0.00288909		3490.79	-0.02077011
541	0.15491254		1130.99	0.01740683		1721.01	-0.00401713		2311	0.0031466		2901	0.00272465		3490.99	-0.01985948
541.2	0.15415528		1131.19	0.01745003		1721.21	-0.00386319		2311.2	0.00273073		2901.2	0.00368658		3491.19	-0.01909824
541.4	0.15392073		1131.39	0.01885465		1721.41	-0.00363168		2311.4	0.00313179		2901.4	0.00378525		3491.39	-0.01903024
541.6	0.15326857		1131.59	0.01872719		1721.61	-0.00343017		2311.6	0.0023968		2901.6	0.00350825		3491.59	-0.01720367
541.8	0.15271719		1131.79	0.01866403		1721.81	-0.00160968		2311.8	0.00229085		2901.8	0.00433756		3491.79	-0.0159338
542	0.15303939		1131.99	0.0189503		1722.01	-0.00147425		2312	0.00274094		2902	0.00383278		3491.99	-0.01640744
542.2	0.15233736		1132.19	0.01889022		1722.21	-0.00070434		2312.2	0.00225027		2902.2	0.00418106		3492.19	-0.01539086
542.4	0.15224124		1132.39	0.0189551		1722.41	-0.00016642		2312.4	0.00199587		2902.4	0.00262889		3492.39	-0.01410942
542.6	0.15184088		1132.59	0.01882641		1722.61	-0.00016434		2312.6	0.00146292		2902.6	0.00192421		3492.59	-0.01373625
542.8	0.1514993		1132.79	0.01739318		1722.81	0.00026018		2312.8	0.0012588		2902.8	0.00119884		3492.79	-0.01421557
543	0.15202648		1132.99	0.01801918		1723.01	0.00125084		2313	0.00064959		2903	0.00102393		3492.99	-0.01482069
543.2	0.1533344		1133.19	0.01800445		1723.21	0.00195309		2313.2	-0.00032291		2903.2	0.00014877		3493.19	-0.01477065
543.4	0.15408278		1133.39	0.01771056		1723.41	0.00222651		2313.4	-0.00136754		2903.4	-0.00079157		3493.39	-0.01411288
543.6	0.15536818		1133.59	0.01730403		1723.61	0.00155202		2313.6	-0.00285272		2903.6	-0.00153298		3493.59	-0.01524894
543.8	0.15558383		1133.79	0.01643728		1723.81	0.0016322		2313.8	-0.00260601		2903.8	-0.00241434		3493.79	-0.0147799
544	0.15605508		1133.99	0.01604901		1724.01	0.00092042		2314	-0.00205721		2904	-0.00231372		3493.99	-0.01539675
544.2	0.15665939		1134.19	0.01509537		1724.21	0.00033898		2314.2	-0.00106446		2904.2	-0.00248581		3494.19	-0.01508028
544.4	0.15694788		1134.39	0.01572928		1724.41	-0.00017609		2314.4	-0.00086008		2904.4	-0.00253133		3494.39	-0.01465631
544.6	0.15786786		1134.59	0.01552941		1724.61	-0.00103449		2314.6	0.00001957		2904.6	-0.0023783		3494.59	-0.01471679
544.8	0.15778704		1134.79	0.01591046		1724.81	-0.00164595		2314.8	-0.00018432		2904.8	-0.00139668		3494.79	-0.01422619
545	0.15748537		1134.99	0.01629491		1725.01	-0.00085052		2315	0.0003284		2905	-0.00142677		3494.99	-0.01389446
545.2	0.15582351		1135.19	0.01604045		1725.21	-0.00167491		2315.2	-0.00003431		2905.2	-0.00077758		3495.19	-0.01314917
545.4	0.15467256		1135.39	0.01677911		1725.41	-0.00139177		2315.4	0.00136074		2905.4	-0.00013519		3495.39	-0.01295151
545.6	0.15409549		1135.59	0.01675101		1725.61	-0.00171567		2315.6	0.00071457		2905.6	-0.00001499		3495.59	-0.01272384
545.8	0.15365627		1135.79	0.01698585		1725.81	-0.00213452		2315.8	0.00108064		2905.8	0.0009695		3495.79	-0.01296335
546	0.15281974		1135.99	0.01704796		1726.01	-0.00259384		2316	0.00208408		2906	0.00071133		3495.99	-0.01325962
546.2	0.15224626		1136.19	0.01757538		1726.21	-0.00266238		2316.2	0.00243196		2906.2	0.00035346		3496.19	-0.01317504
546.4	0.15236235		1136.39	0.01815862		1726.41	-0.00220976		2316.4	0.0025215		2906.4	-0.00003888		3496.39	-0.01324066
546.6	0.15205415		1136.59	0.01745291		1726.61	-0.00257213		2316.6	0.00216924		2906.6	0.00154523		3496.59	-0.0145203
546.8	0.15220933		1136.79	0.01697891		1726.81	-0.0021494		2316.8	0.00249054		2906.8	0.00084006		3496.79	-0.01488916
547	0.1529108		1136.99	0.01799692		1727.01	-0.00103503		2317	0.00229867		2907	0.0014216		3496.99	-0.01512539
547.2	0.15313535		1137.19	0.01751149		1727.21	-0.00122812		2317.2	0.00187361		2907.2	0.00140005		3497.19	-0.01456199
547.4	0.15295902		1137.39	0.01735266		1727.41	-0.00082571		2317.4	0.00104516		2907.4	0.00121313		3497.39	-0.01489703
547.6	0.15340724		1137.59	0.01670799		1727.61	-0.00088628		2317.6	-0.00042438		2907.6	0.0019044		3497.59	-0.01545185
547.8	0.15347375		1137.79	0.01607786		1727.81	-0.00085705		2317.8	-0.00009818		2907.8	0.00170851		3497.79	-0.01539878
548	0.15384308		1137.99	0.01607969		1728.01	-0.00109724		2318	-0.00004597		2908	0.00182577		3497.99	-0.01632987
548.2	0.15524089		1138.19	0.01545895		1728.21	-0.00104633		2318.2	-0.00047572		2908.2	0.0013284		3498.19	-0.01663921
548.4	0.15580837		1138.39	0.01577954		1728.41	-0.00114138		2318.4	-0.00062757		2908.4	0.0017638		3498.39	-0.01745016
548.6	0.15670101		1138.59	0.01579887		1728.61	-0.00117155		2318.6	-0.00091441		2908.6	0.00217681		3498.59	-0.01820508
548.8	0.15607882		1138.79	0.01657806		1728.81	-0.00067865		2318.8	-0.00163654		2908.8	0.00222329		3498.79	-0.01829547
549	0.15553394		1138.99	0.01709864		1729.01	-0.00123726		2319	-0.00151259		2909	0.0012108		3498.99	-0.01883337
549.2	0.15508509		1139.19	0.01766658		1729.21	-0.00185945		2319.2	-0.00097488		2909.2	0.00152941		3499.19	-0.01925484
549.4	0.15451275		1139.39	0.01864761		1729.41	-0.00205159		2319.4	-0.00076475		2909.4	0.00090453		3499.39	-0.01908237
549.6	0.15362362		1139.59	0.01889054		1729.61	-0.00296282		2319.6	-0.00112192		2909.6	0.00124476		3499.59	-0.01932262
549.8	0.15289203		1139.79	0.01947905		1729.81	-0.00321333		2319.8	-0.00022461		2909.8	0.00126313		3499.79	-0.01972726
550	0.15246379		1139.99	0.01958599		1730.01	-0.00260106		2320	0.00050369		2910	0.00079613		3499.99	-0.01973867
550.2	0.15277489		1140.19	0.01991681		1730.21	-0.00284661		2320.2	0.00186274		2910.2	0.00071177		3500.19	-0.01996882
550.4	0.15271008		1140.39	0.0192009		1730.41	-0.00234077		2320.4	0.00226104		2910.4	0.00079084		3500.39	-0.01974716
550.6	0.15222507		1140.59	0.01811311		1730.61	-0.00258035		2320.6	0.00336116		2910.6	0.00028122		3500.59	-0.01918541
550.8	0.15307995		1140.79	0.01930059		1730.81	-0.00197378		2320.8	0.00423603		2910.8	-0.00022296		3500.79	-0.01824346
551	0.15274714		1140.99	0.01971131		1731.01	-0.00119404		2321	0.00452165		2911	0.00024349		3500.99	-0.01761006
551.2	0.15220226		1141.19	0.01893379		1731.21	-0.00151769		2321.2	0.00411193		2911.2	0.00070436		3501.19	-0.01697844
551.4	0.15230872		1141.39	0.01830095		1731.41	-0.00101264		2321.4	0.00391917		2911.4	0.00073051		3501.39	-0.01722095
551.6	0.15255082		1141.59	0.01716004		1731.61	-0.00170078		2321.6	0.00415786		2911.6	0.00141004		3501.59	-0.01747083
551.8	0.15303614		1141.79	0.01697431		1731.81	-0.0013551		2321.8	0.0036597		2911.8	0.00113803		3501.79	-0.01776338
552	0.15247394		1141.99	0.01664068		1732.01	-0.00067163		2322	0.00388919		2912	0.0015117		3501.99	-0.01705455
552.2	0.1530201		1142.19	0.01631298		1732.21	-0.0009859		2322.2	0.00341625		2912.2	0.00222131		3502.19	-0.01677413
552.4	0.15384965		1142.39	0.01641259		1732.41	-0.00073462		2322.4	0.00347225		2912.4	0.00285391		3502.39	-0.01688898
552.6	0.15425561		1142.59	0.01737758		1732.61	0.00019804		2322.6	0.0030885		2912.6	0.00259452		3502.59	-0.01677036
552.8	0.15408097		1142.79	0.01752927		1732.81	0.00081092		2322.8	0.00264197		2912.8	0.00286883		3502.79	-0.01592384
553	0.15394057		1142.99	0.01725992		1733.01	0.00043829		2323	0.0023616		2913	0.00251239		3502.99	-0.01600014
553.2	0.15326852		1143.19	0.01769315		1733.21	0.00062401		2323.2	0.00224195		2913.2	0.0023796		3503.19	-0.01561913
553.4	0.15329157		1143.39	0.01746977		1733.41	0.00037118		2323.4	0.00103649		2913.4	0.00192562		3503.39	-0.01463395
553.6	0.1522444		1143.59	0.01733939		1733.61	-0.00011295		2323.6	0.00099251		2913.6	0.00239308		3503.59	-0.01555052
553.8	0.1521918		1143.79	0.01742974		1733.81	-0.0003313		2323.8	0.00084904		2913.8	0.00183052		3503.79	-0.01637173
554	0.15218558		1143.99	0.01704668		1734.01	-0.00019749		2324	0.00132798		2914	0.00148447		3503.99	-0.01651977
554.2	0.1528097		1144.19	0.01663477		1734.21	-0.00067368		2324.2	0.00146224		2914.2	0.00080086		3504.19	-0.01601616
554.4	0.15376076		1144.39	0.01639091		1734.41	-0.00115023		2324.4	0.00074832		2914.4	-0.00003867		3504.39	-0.01576846
554.6	0.1541033		1144.59	0.01725117		1734.61	-0.00144078		2324.6	0.00062308		2914.6	-0.00105339		3504.59	-0.01580592
554.8	0.15465013		1144.79	0.01818413		1734.81	-0.00191268		2324.8	0.00037919		2914.8	-0.00113748		3504.79	-0.01585204
555	0.15432276		1144.99	0.01770012		1735.01	-0.002412		2325	0.00069163		2915	-0.00126673		3504.99	-0.01512731
555.2	0.15481652		1145.19	0.0179867		1735.21	-0.0029694		2325.2	0.00053452		2915.2	-0.00103138		3505.19	-0.0152724
555.4	0.15558726		1145.39	0.01838475		1735.41	-0.00359011		2325.4	0.00081309		2915.4	-0.00116336		3505.39	-0.01511194
555.6	0.15540386		1145.59	0.01818318		1735.61	-0.00395211		2325.6	0.00112193		2915.6	-0.00047543		3505.59	-0.01517237
555.8	0.1559178		1145.79	0.0182448		1735.81	-0.0035374		2325.8	0.00049364		2915.8	0.00021446		3505.79	-0.01423801
556	0.15573761		1145.99	0.01840723		1736.01	-0.00410968		2326	0.00107087		2916	0.00072983		3505.99	-0.01359884
556.2	0.15601926		1146.19	0.01866404		1736.21	-0.00425314		2326.2	0.00137981		2916.2	0.00053021		3506.19	-0.01399935
556.4	0.15589313		1146.39	0.01835167		1736.41	-0.00310449		2326.4	0.00136294		2916.4	0.00079429		3506.39	-0.01363629
556.6	0.1552314		1146.59	0.01838067		1736.61	-0.00194448		2326.6	0.0016233		2916.6	0.00134478		3506.59	-0.01436179
556.8	0.15438694		1146.79	0.0176616		1736.81	-0.00162411		2326.8	0.00086706		2916.8	0.00095227		3506.79	-0.01528278
557	0.15407627		1146.99	0.01780185		1737.01	-0.00165222		2327	0.00097863		2917	0.00043643		3506.99	-0.01623183
557.2	0.15260977		1147.19	0.01751607		1737.21	-0.00144839		2327.2	0.00115362		2917.2	0.0009338		3507.19	-0.01684034
557.4	0.15259031		1147.39	0.01740654		1737.41	-0.0003572		2327.4	0.00096008		2917.4	0.00083167		3507.39	-0.01776749
557.6	0.15196293		1147.59	0.01659736		1737.61	-0.00054661		2327.6	0.00086768		2917.6	0.00059046		3507.59	-0.01930518
557.8	0.15114112		1147.79	0.01646595		1737.81	-0.00052479		2327.8	0.00108712		2917.8	-0.00054982		3507.79	-0.02037769
558	0.15098364		1147.99	0.01676468		1738.01	-0.00027954		2328	0.00174352		2918	-0.00163718		3507.99	-0.02126399
558.2	0.15111275		1148.19	0.01645097		1738.21	-0.00106742		2328.2	0.00175554		2918.2	-0.00243115		3508.19	-0.02157375
558.4	0.15095886		1148.39	0.01714958		1738.41	-0.00090404		2328.4	0.00116551		2918.4	-0.00274666		3508.39	-0.02214831
558.6	0.15083441		1148.59	0.01748603		1738.61	-0.00103269		2328.6	0.000533		2918.6	-0.00301471		3508.59	-0.02153987
558.8	0.15122554		1148.79	0.01753544		1738.81	-0.0012548		2328.8	0.00077911		2918.8	-0.0029841		3508.79	-0.02083916
559	0.15204618		1148.99	0.01714241		1739.01	-0.00155299		2329	0.00094594		2919	-0.00230234		3508.99	-0.01981484
559.2	0.15255564		1149.19	0.01756218		1739.21	-0.00193712		2329.2	0.00026248		2919.2	-0.00176094		3509.19	-0.01947819
559.4	0.15277094		1149.39	0.01661986		1739.41	-0.00202629		2329.4	0.00017342		2919.4	-0.00115938		3509.39	-0.01882993
559.6	0.15346643		1149.59	0.01558224		1739.61	-0.00265552		2329.6	0.00040294		2919.6	-0.00051		3509.59	-0.0187382
559.8	0.15435409		1149.79	0.01539161		1739.81	-0.00242171		2329.8	0.00016798		2919.8	-0.00074327		3509.79	-0.01821588
560	0.15455192		1149.99	0.01552217		1740.01	-0.002885		2330	0.00052963		2920	-0.00047981		3509.99	-0.01903349
560.2	0.1543165		1150.19	0.01474272		1740.21	-0.00143676		2330.2	0.00058261		2920.2	-0.00055944		3510.19	-0.01813435
560.4	0.15434279		1150.39	0.0132746		1740.41	-0.00098192		2330.4	0.00033903		2920.4	0.00009272		3510.39	-0.01766135
560.6	0.15491802		1150.59	0.01304431		1740.61	-0.00095133		2330.6	-0.00010279		2920.6	0.00048301		3510.59	-0.01854618
560.8	0.1547245		1150.79	0.01238969		1740.81	-0.00124974		2330.8	0.00012241		2920.8	0.00087651		3510.79	-0.01795405
561	0.15507473		1150.99	0.01178899		1741.01	-0.00122916		2331	0.00065891		2921	0.00094621		3510.99	-0.01757232
561.2	0.15462112		1151.19	0.01051862		1741.21	-0.00133919		2331.2	0.00089561		2921.2	0.00024944		3511.19	-0.01756375
561.4	0.15523642		1151.39	0.01177695		1741.41	-0.00123265		2331.4	0.00024002		2921.4	-0.00083669		3511.39	-0.01792371
561.6	0.1548519		1151.59	0.01118864		1741.61	-0.00146759		2331.6	0.00041208		2921.6	-0.00117874		3511.59	-0.01741971
561.8	0.15396369		1151.79	0.0122102		1741.81	-0.00199332		2331.8	0.00113936		2921.8	-0.00146585		3511.79	-0.01752481
562	0.15415908		1151.99	0.01284029		1742.01	-0.00226473		2332	0.00155092		2922	-0.00175514		3511.99	-0.01742673
562.2	0.15347126		1152.19	0.01320078		1742.21	-0.00288511		2332.2	0.00172775		2922.2	-0.00152614		3512.19	-0.01748249
562.4	0.15315873		1152.39	0.01382356		1742.41	-0.0031292		2332.4	0.0005052		2922.4	-0.00092129		3512.39	-0.0172436
562.6	0.15386962		1152.59	0.0145959		1742.61	-0.00370876		2332.6	-0.00050941		2922.6	-0.00013634		3512.59	-0.01699873
562.8	0.15353569		1152.79	0.01548199		1742.81	-0.00411692		2332.8	-0.00006306		2922.8	0.00105278		3512.79	-0.01758758
563	0.1535986		1152.99	0.01560803		1743.01	-0.00400821		2333	-0.00012974		2923	0.00131705		3512.99	-0.01749453
563.2	0.15340315		1153.19	0.01641292		1743.21	-0.00416118		2333.2	-0.00122938		2923.2	0.00112557		3513.19	-0.0182169
563.4	0.15325114		1153.39	0.01680538		1743.41	-0.00353271		2333.4	-0.00161196		2923.4	0.00181854		3513.39	-0.01914827
563.6	0.15395018		1153.59	0.01711783		1743.61	-0.00383416		2333.6	-0.00128375		2923.6	0.00210266		3513.59	-0.01997254
563.8	0.15387136		1153.79	0.01728067		1743.81	-0.00298253		2333.8	-0.00092547		2923.8	0.00234111		3513.79	-0.02002681
564	0.1543833		1153.99	0.0169866		1744.01	-0.00251308		2334	-0.00115106		2924	0.00292436		3513.99	-0.02018903
564.2	0.15451292		1154.19	0.01686158		1744.21	-0.00099568		2334.2	-0.00130107		2924.2	0.00312645		3514.19	-0.01901036
564.4	0.1551846		1154.39	0.01620647		1744.41	-0.00150426		2334.4	-0.00051742		2924.4	0.0042327		3514.39	-0.0195599
564.6	0.15490927		1154.59	0.01690244		1744.61	-0.001501		2334.6	-0.00082663		2924.6	0.00485463		3514.59	-0.01911258
564.8	0.15374283		1154.79	0.01625651		1744.81	-0.00038815		2334.8	0.00030882		2924.8	0.00404706		3514.79	-0.01766253
565	0.1538635		1154.99	0.01556522		1745.01	-0.00024613		2335	0.00033684		2925	0.00274773		3514.99	-0.01733371
565.2	0.15460656		1155.19	0.01564917		1745.21	-0.00023421		2335.2	0.00029609		2925.2	0.00224968		3515.19	-0.01719112
565.4	0.15455838		1155.39	0.01704925		1745.41	0.00001317		2335.4	0.00020392		2925.4	0.00241153		3515.39	-0.01713254
565.6	0.15440766		1155.59	0.01639425		1745.61	0.00089892		2335.6	0.00185113		2925.6	0.00214865		3515.59	-0.01635984
565.8	0.15440543		1155.79	0.01675484		1745.81	0.0002047		2335.8	0.00241347		2925.8	0.00180637		3515.79	-0.01635712
566	0.15464331		1155.99	0.01650756		1746.01	-0.00011773		2336	0.002503		2926	0.00066398		3515.99	-0.01622932
566.2	0.15421084		1156.19	0.01614679		1746.21	-0.00095888		2336.2	0.00233007		2926.2	0.00051366		3516.19	-0.01661375
566.4	0.15436208		1156.39	0.01611619		1746.41	-0.00131192		2336.4	0.00187568		2926.4	-0.00041996		3516.39	-0.0166902
566.6	0.1552669		1156.59	0.01716755		1746.61	-0.00167882		2336.6	0.00201532		2926.6	-0.00000957		3516.59	-0.01670347
566.8	0.15501608		1156.79	0.01785515		1746.81	-0.00166094		2336.8	0.00211313		2926.8	-0.00053118		3516.79	-0.01741919
567	0.15521742		1156.99	0.01776891		1747.01	-0.00144198		2337	0.00182604		2927	-0.00125728		3516.99	-0.01690248
567.2	0.15547842		1157.19	0.01824884		1747.21	-0.0022385		2337.2	0.00156706		2927.2	-0.0014443		3517.19	-0.01730196
567.4	0.15511536		1157.39	0.01895123		1747.41	-0.00262135		2337.4	0.00234533		2927.4	-0.00112985		3517.39	-0.01782638
567.6	0.15519273		1157.59	0.01830846		1747.61	-0.00294775		2337.6	0.00219015		2927.6	-0.00106105		3517.59	-0.01729934
567.8	0.15521521		1157.79	0.01822362		1747.81	-0.00297375		2337.8	0.00135211		2927.8	-0.00133659		3517.79	-0.01665003
568	0.15568798		1157.99	0.01715955		1748.01	-0.00232319		2338	0.0011839		2928	-0.00090625		3517.99	-0.01658016
568.2	0.15561219		1158.19	0.01713505		1748.21	-0.00225428		2338.2	0.00115686		2928.2	0.00005606		3518.19	-0.01619102
568.4	0.15585302		1158.39	0.01631319		1748.41	-0.00258195		2338.4	0.00166714		2928.4	0.00035381		3518.39	-0.01653483
568.6	0.15477253		1158.59	0.01670492		1748.61	-0.00172808		2338.6	0.00105136		2928.6	0.00019233		3518.59	-0.01602469
568.8	0.15414451		1158.79	0.01581881		1748.81	-0.00156562		2338.8	0.00106952		2928.8	0.00022465		3518.79	-0.01475465
569	0.15426401		1158.99	0.01530165		1749.01	-0.0019431		2339	0.00059193		2929	0.00086711		3518.99	-0.01542347
569.2	0.15414437		1159.19	0.01590846		1749.21	-0.00193738		2339.2	0.00051892		2929.2	0.0014134		3519.19	-0.01599541
569.4	0.15353724		1159.39	0.01619493		1749.41	-0.00190002		2339.4	-0.00008994		2929.4	0.00146781		3519.39	-0.01593346
569.6	0.15294271		1159.59	0.01578149		1749.61	-0.00199141		2339.6	-0.00062961		2929.6	0.00035753		3519.59	-0.01546996
569.8	0.15279114		1159.79	0.01593575		1749.81	-0.00220893		2339.8	-0.00128308		2929.8	0.00043489		3519.79	-0.01568859
570	0.1525996		1159.99	0.01572071		1750.01	-0.00191065		2340	-0.00152035		2930	0.0002536		3519.99	-0.015842
570.2	0.15217861		1160.19	0.01493359		1750.21	-0.00200693		2340.2	-0.00160564		2930.2	0.00091323		3520.19	-0.01575627
570.4	0.15220841		1160.39	0.0159201		1750.41	-0.00169338		2340.4	-0.00195138		2930.4	0.00075159		3520.39	-0.01601786
570.6	0.15293474		1160.59	0.01677695		1750.61	-0.0018025		2340.6	-0.00173479		2930.6	0.0017025		3520.59	-0.01629431
570.8	0.15243652		1160.79	0.01704993		1750.81	-0.0007765		2340.8	-0.00237647		2930.8	0.00284443		3520.79	-0.01680521
571	0.15175871		1160.99	0.01713548		1751.01	-0.00180659		2341	-0.0019887		2931	0.00305698		3520.99	-0.01651805
571.2	0.15219787		1161.19	0.01843104		1751.21	-0.00215113		2341.2	-0.00139582		2931.2	0.00281011		3521.19	-0.01713247
571.4	0.15191787		1161.39	0.01833153		1751.41	-0.00194303		2341.4	-0.00129347		2931.4	0.00305671		3521.39	-0.01696719
571.6	0.15216228		1161.59	0.01747018		1751.61	-0.00121652		2341.6	-0.00168075		2931.6	0.00278534		3521.59	-0.0172007
571.8	0.15267623		1161.79	0.01701125		1751.81	-0.00056561		2341.8	-0.00123692		2931.8	0.0025438		3521.79	-0.01696646
572	0.15342532		1161.99	0.01638088		1752.01	-0.00018052		2342	-0.00043357		2932	0.00258259		3521.99	-0.01693476
572.2	0.15339537		1162.19	0.01657809		1752.21	-0.00043273		2342.2	0.00031167		2932.2	0.0027613		3522.19	-0.01664014
572.4	0.15314116		1162.39	0.01623974		1752.41	-0.00028109		2342.4	0.00059975		2932.4	0.00173378		3522.39	-0.01678411
572.6	0.15225623		1162.59	0.01596287		1752.61	-0.00015773		2342.6	0.00001296		2932.6	0.00134893		3522.59	-0.01624634
572.8	0.15150943		1162.79	0.01546735		1752.81	-0.00045171		2342.8	-0.00047388		2932.8	0.00052564		3522.79	-0.01549324
573	0.15147239		1162.99	0.01571613		1753.01	-0.0002764		2343	-0.00087356		2933	-0.00095597		3522.99	-0.01617247
573.2	0.15150714		1163.19	0.01520915		1753.21	-0.00048119		2343.2	-0.000526		2933.2	-0.00147234		3523.19	-0.01613554
573.4	0.15236858		1163.39	0.01533974		1753.41	-0.00019118		2343.4	-0.00177708		2933.4	-0.00147803		3523.39	-0.01611072
573.6	0.1518659		1163.59	0.01502666		1753.61	-0.0005485		2343.6	-0.00146558		2933.6	-0.00177942		3523.59	-0.01559327
573.8	0.15246256		1163.79	0.01526216		1753.81	0.00003647		2343.8	-0.0006245		2933.8	-0.00174237		3523.79	-0.01545746
574	0.15293614		1163.99	0.0150665		1754.01	-0.0010712		2344	-0.00010011		2934	-0.00219357		3523.99	-0.01518395
574.2	0.15292138		1164.19	0.01506925		1754.21	-0.00133451		2344.2	-0.00016138		2934.2	-0.00247402		3524.19	-0.01559696
574.4	0.15318929		1164.39	0.01573111		1754.41	-0.00134669		2344.4	-0.000516		2934.4	-0.00264314		3524.39	-0.01633732
574.6	0.15318466		1164.59	0.0165848		1754.61	-0.0014494		2344.6	0.00003355		2934.6	-0.00200153		3524.59	-0.01726136
574.8	0.15327864		1164.79	0.01691604		1754.81	-0.00167003		2344.8	-0.00073901		2934.8	-0.00122611		3524.79	-0.01828812
575	0.15284218		1164.99	0.01688999		1755.01	-0.00258839		2345	-0.00076668		2935	-0.00206333		3524.99	-0.01838814
575.2	0.15309675		1165.19	0.01748415		1755.21	-0.00336223		2345.2	-0.00031572		2935.2	-0.00162355		3525.19	-0.01850529
575.4	0.15242751		1165.39	0.01665762		1755.41	-0.00374603		2345.4	0.00044025		2935.4	-0.00095459		3525.39	-0.01874026
575.6	0.15203133		1165.59	0.01690675		1755.61	-0.00390034		2345.6	0.00094335		2935.6	-0.00137947		3525.59	-0.01897204
575.8	0.15158981		1165.79	0.0163569		1755.81	-0.00371864		2345.8	0.00168609		2935.8	-0.00021671		3525.79	-0.01812497
576	0.15159937		1165.99	0.01733227		1756.01	-0.0043612		2346	0.00214794		2936	0.00030785		3525.99	-0.01741166
576.2	0.15148325		1166.19	0.01757596		1756.21	-0.00452703		2346.2	0.00234106		2936.2	0.00068329		3526.19	-0.01770442
576.4	0.15093089		1166.39	0.01744766		1756.41	-0.00410673		2346.4	0.00220988		2936.4	0.00020071		3526.39	-0.0181963
576.6	0.15096648		1166.59	0.01724972		1756.61	-0.00392168		2346.6	0.00200115		2936.6	0.00001438		3526.59	-0.01850124
576.8	0.15110619		1166.79	0.01634759		1756.81	-0.00401126		2346.8	0.00176086		2936.8	-0.0004629		3526.79	-0.01889785
577	0.15099489		1166.99	0.01639488		1757.01	-0.00452437		2347	0.00201261		2937	-0.00000321		3526.99	-0.01881622
577.2	0.15173869		1167.19	0.01535095		1757.21	-0.00429291		2347.2	0.00203826		2937.2	0.00116982		3527.19	-0.01941595
577.4	0.152617		1167.39	0.01580348		1757.41	-0.00423365		2347.4	0.00119869		2937.4	0.0014971		3527.39	-0.01899455
577.6	0.15216567		1167.59	0.01583671		1757.61	-0.00407688		2347.6	0.00107774		2937.6	0.00059457		3527.59	-0.01877093
577.8	0.15382832		1167.79	0.01643114		1757.81	-0.00371475		2347.8	0.00009402		2937.8	0.00011293		3527.79	-0.01898936
578	0.15346404		1167.99	0.01606943		1758.01	-0.00416738		2348	-0.00037369		2938	-0.00054592		3527.99	-0.01941921
578.2	0.15379624		1168.19	0.01621614		1758.21	-0.0031798		2348.2	-0.00124403		2938.2	-0.00095107		3528.19	-0.02022471
578.4	0.15482652		1168.39	0.01666907		1758.41	-0.00323508		2348.4	-0.0023158		2938.4	-0.00102794		3528.39	-0.019501
578.6	0.15436597		1168.59	0.01658204		1758.61	-0.00284333		2348.6	-0.00338691		2938.6	-0.0016718		3528.59	-0.01929612
578.8	0.15482197		1168.79	0.01597292		1758.81	-0.00329169		2348.8	-0.00417352		2938.8	-0.00203807		3528.79	-0.01874975
579	0.15425168		1168.99	0.01585801		1759.01	-0.00392432		2349	-0.00313006		2939	-0.00229525		3528.99	-0.01772638
579.2	0.15418363		1169.19	0.01718194		1759.21	-0.00413623		2349.2	-0.00276287		2939.2	-0.00216309		3529.19	-0.01776307
579.4	0.15347219		1169.39	0.01680026		1759.41	-0.00410463		2349.4	-0.00226009		2939.4	-0.00128895		3529.39	-0.01764546
579.6	0.15348669		1169.59	0.01711287		1759.61	-0.0037915		2349.6	-0.00227045		2939.6	-0.00109737		3529.59	-0.01787981
579.8	0.1537899		1169.79	0.0170786		1759.81	-0.00285306		2349.8	-0.00161379		2939.8	-0.00025764		3529.79	-0.01699232
580	0.15418757		1169.99	0.01752343		1760.01	-0.00310185		2350	-0.00072258		2940	-0.00036791		3529.99	-0.01646598
580.2	0.15414236		1170.19	0.01726916		1760.21	-0.00218692		2350.2	0.00017806		2940.2	-0.00058239		3530.19	-0.01784632
580.4	0.15424003		1170.39	0.01537278		1760.41	-0.0015719		2350.4	0.00072584		2940.4	-0.00104732		3530.39	-0.01899561
580.6	0.15403381		1170.59	0.01410454		1760.61	-0.00257495		2350.6	0.00122547		2940.6	-0.00156034		3530.59	-0.01888339
580.8	0.15272481		1170.79	0.01339019		1760.81	-0.00277204		2350.8	0.0009806		2940.8	-0.0016737		3530.79	-0.01803998
581	0.15182806		1170.99	0.01404083		1761.01	-0.00315458		2351	0.00101466		2941	-0.00133798		3530.99	-0.01769697
581.2	0.15170962		1171.19	0.01409157		1761.21	-0.00236783		2351.2	0.00066022		2941.2	-0.00205897		3531.19	-0.01833373
581.4	0.15139554		1171.39	0.0143297		1761.41	-0.00254379		2351.4	0.00013146		2941.4	-0.00262549		3531.39	-0.01832826
581.6	0.15060586		1171.59	0.01417995		1761.61	-0.00256645		2351.6	-0.00067547		2941.6	-0.00237954		3531.59	-0.01839355
581.8	0.15042094		1171.79	0.01365568		1761.81	-0.00261326		2351.8	-0.0007203		2941.8	-0.00223037		3531.79	-0.01819209
582	0.14960308		1171.99	0.01333225		1762.01	-0.00368947		2352	-0.00141706		2942	-0.00303463		3531.99	-0.0179874
582.2	0.15024766		1172.19	0.01334805		1762.21	-0.00466396		2352.2	-0.00205082		2942.2	-0.00298545		3532.19	-0.01778945
582.4	0.14999516		1172.39	0.01393471		1762.41	-0.00514251		2352.4	-0.00245578		2942.4	-0.00311646		3532.39	-0.01613607
582.6	0.14975493		1172.59	0.01357672		1762.61	-0.00494772		2352.6	-0.00221979		2942.6	-0.00244		3532.59	-0.01719758
582.8	0.14961811		1172.79	0.01424793		1762.81	-0.00665854		2352.8	-0.00176405		2942.8	-0.00148685		3532.79	-0.01688142
583	0.14908949		1172.99	0.0150512		1763.01	-0.00692141		2353	-0.00087514		2943	-0.00118266		3532.99	-0.01779115
583.2	0.14911291		1173.19	0.01546362		1763.21	-0.00577835		2353.2	-0.00090871		2943.2	0.00014214		3533.19	-0.01864913
583.4	0.14917738		1173.39	0.01500837		1763.41	-0.00610814		2353.4	0.00006056		2943.4	0.00097921		3533.39	-0.01842542
583.6	0.14989587		1173.59	0.01577827		1763.61	-0.00510675		2353.6	0.0006161		2943.6	0.00068106		3533.59	-0.01968081
583.8	0.15089926		1173.79	0.01530925		1763.81	-0.0037734		2353.8	0.00140202		2943.8	0.00087943		3533.79	-0.01889324
584	0.15081803		1173.99	0.01470955		1764.01	-0.00376103		2354	0.00266093		2944	0.00118758		3533.99	-0.02029322
584.2	0.15171121		1174.19	0.01419757		1764.21	-0.00223067		2354.2	0.00293591		2944.2	0.00208553		3534.19	-0.02147059
584.4	0.1522856		1174.39	0.01324144		1764.41	-0.00178247		2354.4	0.00344252		2944.4	0.00231101		3534.39	-0.02132932
584.6	0.1521048		1174.59	0.01433964		1764.61	-0.00138153		2354.6	0.00432176		2944.6	0.00228756		3534.59	-0.02104539
584.8	0.15259692		1174.79	0.01514743		1764.81	-0.00120954		2354.8	0.00347135		2944.8	0.00239247		3534.79	-0.02140152
585	0.15349003		1174.99	0.01545559		1765.01	-0.00096444		2355	0.00354067		2945	0.00210795		3534.99	-0.02202204
585.2	0.15173143		1175.19	0.01562446		1765.21	-0.00036678		2355.2	0.00363441		2945.2	0.00176956		3535.19	-0.02200251
585.4	0.15156391		1175.39	0.01526262		1765.41	-0.00050407		2355.4	0.00279878		2945.4	0.0022033		3535.39	-0.02171197
585.6	0.15096192		1175.59	0.0152731		1765.61	-0.0004253		2355.6	0.00194622		2945.6	0.00186873		3535.59	-0.02079933
585.8	0.15167151		1175.79	0.01445011		1765.81	-0.00018556		2355.8	0.00079708		2945.8	0.00157007		3535.79	-0.0204983
586	0.15109349		1175.99	0.01441618		1766.01	-0.00130262		2356	-0.00013549		2946	0.00102767		3535.99	-0.0201703
586.2	0.15075207		1176.19	0.01481178		1766.21	-0.00203085		2356.2	-0.00060345		2946.2	0.00148861		3536.19	-0.01960212
586.4	0.1513081		1176.39	0.01558001		1766.41	-0.00233461		2356.4	-0.00050426		2946.4	0.00100588		3536.39	-0.01841334
586.6	0.15165924		1176.59	0.01529699		1766.61	-0.00260694		2356.6	-0.00034497		2946.6	0.00169		3536.59	-0.01826265
586.8	0.15101669		1176.79	0.01567746		1766.81	-0.00374306		2356.8	-0.0007716		2946.8	0.00097282		3536.79	-0.01736282
587	0.15089976		1176.99	0.01549018		1767.01	-0.00380779		2357	-0.00050472		2947	0.00093043		3536.99	-0.01821993
587.2	0.15117035		1177.19	0.01607512		1767.21	-0.00404101		2357.2	-0.00024002		2947.2	0.0012281		3537.19	-0.01774809
587.4	0.15099925		1177.39	0.01582301		1767.41	-0.00472307		2357.4	-0.00054572		2947.4	0.0006724		3537.39	-0.01752698
587.6	0.15161677		1177.59	0.01558871		1767.61	-0.00488975		2357.6	-0.00095513		2947.6	0.00096306		3537.59	-0.01764662
587.8	0.15239444		1177.79	0.01461566		1767.81	-0.0045307		2357.8	-0.00079487		2947.8	0.00146862		3537.79	-0.01677154
588	0.15185064		1177.99	0.01416517		1768.01	-0.00473994		2358	-0.00029134		2948	0.00182782		3537.99	-0.01737205
588.2	0.15185671		1178.19	0.01372176		1768.21	-0.00432931		2358.2	-0.00046821		2948.2	0.00156798		3538.19	-0.01713623
588.4	0.15202984		1178.39	0.01424141		1768.41	-0.00493209		2358.4	0.00047926		2948.4	0.00081097		3538.39	-0.01725886
588.6	0.15203396		1178.59	0.01431797		1768.61	-0.00557682		2358.6	0.00054237		2948.6	-0.00036067		3538.59	-0.01781188
588.8	0.15178932		1178.79	0.01390644		1768.81	-0.00613929		2358.8	0.00017293		2948.8	-0.001028		3538.79	-0.01821013
589	0.15103391		1178.99	0.01428704		1769.01	-0.00629571		2359	0.00028395		2949	-0.00187217		3538.99	-0.01818206
589.2	0.14918249		1179.19	0.01406024		1769.21	-0.00488575		2359.2	0.00065018		2949.2	-0.00210942		3539.19	-0.01821948
589.4	0.14965149		1179.39	0.01440382		1769.41	-0.00417497		2359.4	-0.00035953		2949.4	-0.00197999		3539.39	-0.01858716
589.6	0.14996087		1179.59	0.01361854		1769.61	-0.00324345		2359.6	-0.00117619		2949.6	-0.00252203		3539.59	-0.01843381
589.8	0.15011608		1179.79	0.01344117		1769.81	-0.00309583		2359.8	-0.00126515		2949.8	-0.00195938		3539.79	-0.01811573
590	0.1496198		1179.99	0.01432443		1770.01	-0.00370344		2360	-0.00061137		2950	-0.00174352		3539.99	-0.0181816
590.2	0.15018299		1180.19	0.01554883		1770.21	-0.00343145		2360.2	-0.00170833		2950.2	-0.00065613		3540.19	-0.01782585
590.4	0.15100863		1180.39	0.01573326		1770.41	-0.00364387		2360.4	-0.0008892		2950.4	-0.00062484		3540.39	-0.01746992
590.6	0.15021277		1180.59	0.01602858		1770.61	-0.00439826		2360.6	-0.00102642		2950.6	0.00061686		3540.59	-0.01722871
590.8	0.15030912		1180.79	0.01696427		1770.81	-0.00431007		2360.8	-0.00137084		2950.8	0.00054649		3540.79	-0.01793947
591	0.15034908		1180.99	0.01760586		1771.01	-0.00411644		2361	-0.00156534		2951	0.00110524		3540.99	-0.01801447
591.2	0.15077311		1181.19	0.01749712		1771.21	-0.00319859		2361.2	-0.00100174		2951.2	0.00166291		3541.19	-0.01703425
591.4	0.15133205		1181.39	0.01660321		1771.41	-0.00293897		2361.4	-0.00060065		2951.4	0.00144004		3541.39	-0.01776617
591.6	0.15200118		1181.59	0.01673185		1771.61	-0.00302621		2361.6	-0.00000697		2951.6	0.00190599		3541.59	-0.01772646
591.8	0.15271117		1181.79	0.016613		1771.81	-0.00211142		2361.8	-0.00007568		2951.8	0.00113206		3541.79	-0.01787719
592	0.15225988		1181.99	0.01656169		1772.01	-0.0023648		2362	0.00022409		2952	0.00026467		3541.99	-0.01800784
592.2	0.15248397		1182.19	0.01569166		1772.21	-0.00233812		2362.2	0.0004375		2952.2	-0.00110833		3542.19	-0.01800025
592.4	0.15322041		1182.39	0.01593789		1772.41	-0.00219463		2362.4	0.00087931		2952.4	-0.00123125		3542.39	-0.01818386
592.6	0.1533866		1182.59	0.01573042		1772.61	-0.00243293		2362.6	0.00099717		2952.6	-0.00169494		3542.59	-0.01829429
592.8	0.15336128		1182.79	0.01536715		1772.81	-0.00121603		2362.8	0.00043235		2952.8	-0.00199861		3542.79	-0.01893156
593	0.1537321		1182.99	0.01432643		1773.01	-0.00129788		2363	0.00003928		2953	-0.00250564		3542.99	-0.01902476
593.2	0.15425731		1183.19	0.01407618		1773.21	-0.00021476		2363.2	-0.00017519		2953.2	-0.00215323		3543.19	-0.01978572
593.4	0.15421841		1183.39	0.01347097		1773.41	-0.00121742		2363.4	-0.00117422		2953.4	-0.00179584		3543.39	-0.02016523
593.6	0.15469425		1183.59	0.01291948		1773.61	-0.00079003		2363.6	-0.00075063		2953.6	-0.00213084		3543.59	-0.01943177
593.8	0.15427117		1183.79	0.01281066		1773.81	-0.00119982		2363.8	-0.00033816		2953.8	-0.0018731		3543.79	-0.01848451
594	0.15374293		1183.99	0.0129568		1774.01	-0.00219214		2364	-0.00007298		2954	-0.00127035		3543.99	-0.01877004
594.2	0.15300424		1184.19	0.01318313		1774.21	-0.00254728		2364.2	-0.00059041		2954.2	-0.00077774		3544.19	-0.01794183
594.4	0.15249245		1184.39	0.01301		1774.41	-0.00441492		2364.4	-0.00029364		2954.4	-0.00131415		3544.39	-0.01705313
594.6	0.15144749		1184.59	0.01303416		1774.61	-0.00499934		2364.6	-0.00114746		2954.6	0.00008008		3544.59	-0.01666527
594.8	0.15171658		1184.79	0.01321874		1774.81	-0.0049738		2364.8	-0.00105895		2954.8	-0.00012285		3544.79	-0.01728346
595	0.15151808		1184.99	0.01300409		1775.01	-0.00468484		2365	-0.00058361		2955	-0.0000767		3544.99	-0.01716075
595.2	0.15120454		1185.19	0.01237234		1775.21	-0.00495485		2365.2	0.00072298		2955.2	-0.00065534		3545.19	-0.01772882
595.4	0.15069019		1185.39	0.01311594		1775.41	-0.00488278		2365.4	0.00084707		2955.4	-0.00055648		3545.39	-0.01889982
595.6	0.15085675		1185.59	0.01383277		1775.61	-0.00499118		2365.6	0.00077679		2955.6	-0.00050268		3545.59	-0.01892895
595.8	0.1509242		1185.79	0.01407298		1775.81	-0.00459723		2365.8	-0.00009837		2955.8	-0.0012937		3545.79	-0.01898065
596	0.15018065		1185.99	0.01526055		1776.01	-0.0044034		2366	0.00070255		2956	-0.00073353		3545.99	-0.01912218
596.2	0.15047746		1186.19	0.01502017		1776.21	-0.00357052		2366.2	0.00087731		2956.2	-0.00079352		3546.19	-0.01898201
596.4	0.15118549		1186.39	0.01578274		1776.41	-0.00344957		2366.4	0.00084773		2956.4	-0.00079726		3546.39	-0.01894109
596.6	0.15155366		1186.59	0.01582811		1776.61	-0.00335016		2366.6	0.00020191		2956.6	-0.00090463		3546.59	-0.01919066
596.8	0.15096669		1186.79	0.01481696		1776.81	-0.0024771		2366.8	-0.00030763		2956.8	-0.00113352		3546.79	-0.01905531
597	0.15131113		1186.99	0.01481939		1777.01	-0.00284133		2367	-0.00036801		2957	-0.00064187		3546.99	-0.01946682
597.2	0.1518265		1187.19	0.01648332		1777.21	-0.00278021		2367.2	-0.00036005		2957.2	-0.00091061		3547.19	-0.02002863
597.4	0.15161213		1187.39	0.01599677		1777.41	-0.00276152		2367.4	0.00022468		2957.4	-0.00081188		3547.39	-0.01941801
597.6	0.15210044		1187.59	0.01627372		1777.61	-0.00155514		2367.6	0.00061193		2957.6	-0.00081259		3547.59	-0.01857357
597.8	0.15202612		1187.79	0.01659827		1777.81	-0.0016501		2367.8	0.00037029		2957.8	-0.00034428		3547.79	-0.01813208
598	0.15197373		1187.99	0.01763167		1778.01	-0.00201177		2368	0.00092613		2958	0.00007103		3547.99	-0.01750914
598.2	0.15262448		1188.19	0.01813716		1778.21	-0.00155716		2368.2	0.00052586		2958.2	0.00093901		3548.19	-0.01661845
598.4	0.15243164		1188.39	0.01793981		1778.41	-0.00231801		2368.4	0.00027788		2958.4	0.00089535		3548.39	-0.01663626
598.6	0.15234133		1188.59	0.01718004		1778.61	-0.00193324		2368.6	0.00068558		2958.6	0.00131038		3548.59	-0.01733723
598.8	0.15402739		1188.79	0.01696069		1778.81	-0.00207864		2368.8	0.00070205		2958.8	0.00069748		3548.79	-0.01762841
599	0.15406439		1188.99	0.01614366		1779.01	-0.0013397		2369	0.00091487		2959	0.00035079		3548.99	-0.01749362
599.2	0.1541876		1189.19	0.01631163		1779.21	-0.00137085		2369.2	0.00154064		2959.2	-0.00058708		3549.19	-0.01791135
599.4	0.15297021		1189.39	0.01594792		1779.41	-0.00091819		2369.4	0.00166123		2959.4	0.00008181		3549.39	-0.01914742
599.6	0.1526058		1189.59	0.0154436		1779.61	-0.00143638		2369.6	0.00084438		2959.6	-0.00088074		3549.59	-0.02017938
599.8	0.151471		1189.79	0.01527486		1779.81	-0.00205382		2369.8	-0.00022923		2959.8	-0.00112189		3549.79	-0.01967605
600	0.15133545		1189.99	0.01516117		1780.01	-0.00236457		2370	0.00009507		2960	-0.00102054		3549.99	-0.01964529
600.2	0.15188124		1190.19	0.01406274		1780.21	-0.00289231		2370.2	-0.00033379		2960.2	-0.00190841		3550.19	-0.01925885
600.4	0.15114225		1190.39	0.01367012		1780.41	-0.00306505		2370.4	-0.00123825		2960.4	-0.002233		3550.39	-0.01943182
600.6	0.15021253		1190.59	0.01285638		1780.61	-0.0033793		2370.6	-0.00223647		2960.6	-0.00214907		3550.59	-0.01913454
600.8	0.14840794		1190.79	0.01275252		1780.81	-0.00392426		2370.8	-0.00265624		2960.8	-0.0019202		3550.79	-0.01866134
601	0.14825098		1190.99	0.01315737		1781.01	-0.00384053		2371	-0.00297299		2961	-0.00153412		3550.99	-0.01924682
601.2	0.14814457		1191.19	0.01405689		1781.21	-0.00378639		2371.2	-0.00341408		2961.2	-0.00227747		3551.19	-0.01913442
601.4	0.14854151		1191.39	0.0137986		1781.41	-0.00405029		2371.4	-0.00297482		2961.4	-0.00168382		3551.39	-0.0188527
601.6	0.14901247		1191.59	0.01504905		1781.61	-0.00412233		2371.6	-0.0037112		2961.6	-0.00136695		3551.59	-0.01907729
601.8	0.1502094		1191.79	0.01679967		1781.81	-0.00403007		2371.8	-0.00349012		2961.8	-0.00154158		3551.79	-0.01918547
602	0.15060699		1191.99	0.01720772		1782.01	-0.00379663		2372	-0.00250482		2962	-0.00133796		3551.99	-0.01858181
602.2	0.15029742		1192.19	0.01766907		1782.21	-0.00339682		2372.2	-0.00178676		2962.2	-0.00059128		3552.19	-0.01878603
602.4	0.15063004		1192.39	0.01738946		1782.41	-0.00420765		2372.4	-0.00098825		2962.4	-0.001752		3552.39	-0.01911991
602.6	0.15127115		1192.59	0.01697806		1782.61	-0.00328895		2372.6	-0.00015075		2962.6	-0.00222083		3552.59	-0.01955371
602.8	0.15243727		1192.79	0.01759989		1782.81	-0.00295239		2372.8	-0.00058072		2962.8	-0.00220513		3552.79	-0.020264
603	0.15211784		1192.99	0.01732693		1783.01	-0.00321326		2373	-0.00029888		2963	-0.00231662		3552.99	-0.02064694
603.2	0.15259793		1193.19	0.0171971		1783.21	-0.00337464		2373.2	0.00040073		2963.2	-0.00285052		3553.19	-0.02146752
603.4	0.15159807		1193.39	0.01676115		1783.41	-0.0033567		2373.4	0.00069677		2963.4	-0.00231891		3553.39	-0.02247595
603.6	0.15217938		1193.59	0.01625811		1783.61	-0.00314853		2373.6	-0.00001363		2963.6	-0.00289107		3553.59	-0.02128449
603.8	0.15241867		1193.79	0.01586582		1783.81	-0.00373855		2373.8	0.00025794		2963.8	-0.00203299		3553.79	-0.01955318
604	0.15253869		1193.99	0.01527508		1784.01	-0.0034789		2374	0.00065006		2964	-0.00156304		3553.99	-0.01944654
604.2	0.15190916		1194.19	0.01494266		1784.21	-0.00302975		2374.2	0.00046133		2964.2	-0.00122178		3554.19	-0.019293
604.4	0.1509892		1194.39	0.01481286		1784.41	-0.00227278		2374.4	-0.00018977		2964.4	-0.00088878		3554.39	-0.01887619
604.6	0.15161176		1194.59	0.01415694		1784.61	-0.00246014		2374.6	-0.0003837		2964.6	-0.00112745		3554.59	-0.01797125
604.8	0.15082244		1194.79	0.01420216		1784.81	-0.00207173		2374.8	-0.00122323		2964.8	-0.00121593		3554.79	-0.01825725
605	0.15186312		1194.99	0.01422679		1785.01	-0.00199323		2375	-0.00071265		2965	-0.00117714		3554.99	-0.01804192
605.2	0.15154556		1195.19	0.01481432		1785.21	-0.0019306		2375.2	-0.00042473		2965.2	-0.00194258		3555.19	-0.01798555
605.4	0.15230433		1195.39	0.01503711		1785.41	-0.00197567		2375.4	-0.0001144		2965.4	-0.00192153		3555.39	-0.01788926
605.6	0.15328231		1195.59	0.01628015		1785.61	-0.00113705		2375.6	-0.0001447		2965.6	-0.00227999		3555.59	-0.01821038
605.8	0.15369452		1195.79	0.01631587		1785.81	-0.00013872		2375.8	-0.0001408		2965.8	-0.0027258		3555.79	-0.01833484
606	0.15329656		1195.99	0.01618976		1786.01	-0.00007902		2376	0.00040926		2966	-0.00284901		3555.99	-0.01777621
606.2	0.15286028		1196.19	0.01643012		1786.21	-0.00028809		2376.2	0.00053934		2966.2	-0.00235928		3556.19	-0.01862149
606.4	0.15337731		1196.39	0.0163045		1786.41	-0.001264		2376.4	0.00118006		2966.4	-0.00289885		3556.39	-0.01984323
606.6	0.15260139		1196.59	0.01610484		1786.61	-0.00131727		2376.6	0.00052887		2966.6	-0.00266289		3556.59	-0.02019371
606.8	0.15222313		1196.79	0.0158288		1786.81	-0.00286765		2376.8	0.00043217		2966.8	-0.00279505		3556.79	-0.02046428
607	0.15244593		1196.99	0.01539159		1787.01	-0.0040148		2377	0.00034551		2967	-0.00275466		3556.99	-0.0209737
607.2	0.15280939		1197.19	0.01530022		1787.21	-0.00426267		2377.2	0.00095481		2967.2	-0.00290067		3557.19	-0.02104015
607.4	0.15204142		1197.39	0.0153266		1787.41	-0.00459325		2377.4	0.00145109		2967.4	-0.00210405		3557.39	-0.02103298
607.6	0.15208338		1197.59	0.01484481		1787.61	-0.00508335		2377.6	0.00115407		2967.6	-0.00201987		3557.59	-0.02018397
607.8	0.15139871		1197.79	0.01500209		1787.81	-0.00633709		2377.8	0.00116873		2967.8	-0.00040253		3557.79	-0.02051808
608	0.15115105		1197.99	0.01471139		1788.01	-0.00603482		2378	0.00115763		2968	0.00018857		3557.99	-0.02142678
608.2	0.15087826		1198.19	0.01420867		1788.21	-0.00598012		2378.2	0.0009551		2968.2	-0.00041135		3558.19	-0.02138341
608.4	0.15138765		1198.39	0.01453892		1788.41	-0.00653907		2378.4	0.00048683		2968.4	-0.00034274		3558.39	-0.02204884
608.6	0.15130845		1198.59	0.01479232		1788.61	-0.00666481		2378.6	0.00013671		2968.6	-0.0011355		3558.59	-0.02226008
608.8	0.15086488		1198.79	0.01600064		1788.81	-0.00622622		2378.8	-0.0002316		2968.8	-0.00129484		3558.79	-0.02194095
609	0.15087587		1198.99	0.01662702		1789.01	-0.00634207		2379	0.00051763		2969	-0.00135056		3558.99	-0.02135393
609.2	0.15061957		1199.19	0.01614009		1789.21	-0.0056662		2379.2	0.00085098		2969.2	-0.00164618		3559.19	-0.02115438
609.4	0.1508595		1199.39	0.01651191		1789.41	-0.00454344		2379.4	0.00017705		2969.4	-0.00150596		3559.39	-0.02059434
609.6	0.15079304		1199.59	0.0168819		1789.61	-0.00373189		2379.6	0.00031827		2969.6	-0.00264202		3559.59	-0.0204779
609.8	0.15054458		1199.79	0.016074		1789.81	-0.00348328		2379.8	-0.00001358		2969.8	-0.00367836		3559.79	-0.02043168
610	0.15044227		1199.99	0.01489896		1790.01	-0.00355339		2380	0.00021865		2970	-0.00330701		3559.99	-0.02004989
610.2	0.14991561		1200.19	0.01440927		1790.21	-0.00382043		2380.2	0.00072496		2970.2	-0.00329325		3560.19	-0.02081817
610.4	0.14929362		1200.39	0.0132931		1790.41	-0.00419397		2380.4	0.00085133		2970.4	-0.00370963		3560.39	-0.02092055
610.6	0.14910979		1200.59	0.01261719		1790.61	-0.00438852		2380.6	0.0008143		2970.6	-0.00363049		3560.59	-0.0205766
610.8	0.14916899		1200.79	0.01170462		1790.81	-0.00480014		2380.8	0.00177538		2970.8	-0.00451365		3560.79	-0.02082064
611	0.14920255		1200.99	0.01227335		1791.01	-0.00469982		2381	0.00190736		2971	-0.00429786		3560.99	-0.02080268
611.2	0.14950288		1201.19	0.01252628		1791.21	-0.00485778		2381.2	0.0020376		2971.2	-0.00368614		3561.19	-0.01986368
611.4	0.1494353		1201.39	0.01226093		1791.41	-0.00600817		2381.4	0.00231571		2971.4	-0.0037833		3561.39	-0.02025086
611.6	0.14949448		1201.59	0.01168744		1791.61	-0.00643331		2381.6	0.00186105		2971.6	-0.00335668		3561.59	-0.02041189
611.8	0.14948222		1201.79	0.01167516		1791.81	-0.00649461		2381.8	0.00106348		2971.8	-0.00217088		3561.79	-0.02052303
612	0.15017131		1201.99	0.01163798		1792.01	-0.0067917		2382	0.00091625		2972	-0.00194762		3561.99	-0.02063704
612.2	0.15043736		1202.19	0.01230623		1792.21	-0.0071147		2382.2	0.00116433		2972.2	-0.00309868		3562.19	-0.02071
612.4	0.15035661		1202.39	0.0134562		1792.41	-0.00788668		2382.4	0.0004947		2972.4	-0.00160059		3562.39	-0.02190758
612.6	0.15033653		1202.59	0.01448412		1792.61	-0.0069722		2382.6	-0.00052906		2972.6	-0.00208509		3562.59	-0.02127828
612.8	0.1510398		1202.79	0.01432899		1792.81	-0.00665411		2382.8	-0.00086194		2972.8	-0.00094396		3562.79	-0.02117618
613	0.15121823		1202.99	0.01365822		1793.01	-0.00641658		2383	-0.0010243		2973	-0.00034527		3562.99	-0.02090617
613.2	0.15135293		1203.19	0.01301714		1793.21	-0.00556815		2383.2	-0.00151835		2973.2	0.0002732		3563.19	-0.02106681
613.4	0.15129717		1203.39	0.0138601		1793.41	-0.00493702		2383.4	-0.00251899		2973.4	-0.00062714		3563.39	-0.02068108
613.6	0.15106046		1203.59	0.01355446		1793.61	-0.00504177		2383.6	-0.00220666		2973.6	-0.00136135		3563.59	-0.02106953
613.8	0.15136074		1203.79	0.01241206		1793.81	-0.00428733		2383.8	-0.00219603		2973.8	-0.00187354		3563.79	-0.02206731
614	0.15113061		1203.99	0.01219757		1794.01	-0.00368814		2384	-0.00172507		2974	-0.0014092		3563.99	-0.02206537
614.2	0.15188429		1204.19	0.01295938		1794.21	-0.0028497		2384.2	-0.0013296		2974.2	-0.0024596		3564.19	-0.02249482
614.4	0.15131044		1204.39	0.01211733		1794.41	-0.0026629		2384.4	-0.00144742		2974.4	-0.0021708		3564.39	-0.02167921
614.6	0.15217882		1204.59	0.01267852		1794.61	-0.00239491		2384.6	-0.00098793		2974.6	-0.0023562		3564.59	-0.02098983
614.8	0.15115371		1204.79	0.01278581		1794.81	-0.00308063		2384.8	-0.00128614		2974.8	-0.00221166		3564.79	-0.02017237
615	0.1511941		1204.99	0.01342836		1795.01	-0.00379597		2385	-0.00129903		2975	-0.00205118		3564.99	-0.0194154
615.2	0.15159564		1205.19	0.0131786		1795.21	-0.00425981		2385.2	-0.00142594		2975.2	-0.00158315		3565.19	-0.01921503
615.4	0.15151537		1205.39	0.01297586		1795.41	-0.00454837		2385.4	-0.00113043		2975.4	-0.00206203		3565.39	-0.01944174
615.6	0.15119452		1205.59	0.01362265		1795.61	-0.00423184		2385.6	-0.00166156		2975.6	-0.00127148		3565.59	-0.01949675
615.8	0.15105914		1205.79	0.01516461		1795.81	-0.00476173		2385.8	-0.00164548		2975.8	-0.00073339		3565.79	-0.01988484
616	0.15054158		1205.99	0.01563531		1796.01	-0.00599133		2386	-0.00043708		2976	-0.00093103		3565.99	-0.0193844
616.2	0.14995927		1206.19	0.01580411		1796.21	-0.00510948		2386.2	-0.00033503		2976.2	-0.00068594		3566.19	-0.02002493
616.4	0.1501623		1206.39	0.01640415		1796.41	-0.00612487		2386.4	-0.00018933		2976.4	0.00087659		3566.39	-0.02045229
616.6	0.15080672		1206.59	0.01655182		1796.61	-0.00625567		2386.6	-0.00004702		2976.6	0.00028078		3566.59	-0.0204969
616.8	0.15089612		1206.79	0.01591021		1796.81	-0.00653834		2386.8	0.00035628		2976.8	0.00091192		3566.79	-0.02074084
617	0.15126958		1206.99	0.01665876		1797.01	-0.00632617		2387	0.00022164		2977	0.00102228		3566.99	-0.02140095
617.2	0.15076682		1207.19	0.01661999		1797.21	-0.00665727		2387.2	0.00033024		2977.2	0.00095047		3567.19	-0.02269099
617.4	0.1504894		1207.39	0.01740885		1797.41	-0.00643533		2387.4	0.00090821		2977.4	0.00049021		3567.39	-0.02257308
617.6	0.1508457		1207.59	0.01684257		1797.61	-0.00594905		2387.6	0.00146901		2977.6	0.00036488		3567.59	-0.02372364
617.8	0.15055977		1207.79	0.01673944		1797.81	-0.00492253		2387.8	0.00125686		2977.8	-0.00098321		3567.79	-0.0244578
618	0.15060676		1207.99	0.0167558		1798.01	-0.00480397		2388	0.00110524		2978	-0.00153941		3567.99	-0.0243434
618.2	0.15080696		1208.19	0.0159749		1798.21	-0.00383391		2388.2	0.00011363		2978.2	-0.00169482		3568.19	-0.02446464
618.4	0.15037871		1208.39	0.01579378		1798.41	-0.0036566		2388.4	-0.00073157		2978.4	-0.00166379		3568.39	-0.02355609
618.6	0.15107181		1208.59	0.01621447		1798.61	-0.00377149		2388.6	-0.00125675		2978.6	-0.00149933		3568.59	-0.0241439
618.8	0.15042003		1208.79	0.01604908		1798.81	-0.0039943		2388.8	-0.00165325		2978.8	-0.0010449		3568.79	-0.02462027
619	0.15133579		1208.99	0.01524404		1799.01	-0.00331512		2389	-0.00193701		2979	-0.00143083		3568.99	-0.02435461
619.2	0.15070839		1209.19	0.01501686		1799.21	-0.0033431		2389.2	-0.00229888		2979.2	-0.0013171		3569.19	-0.02415871
619.4	0.15055502		1209.39	0.01578334		1799.41	-0.00312585		2389.4	-0.00224661		2979.4	-0.00149462		3569.39	-0.02447097
619.6	0.15044575		1209.59	0.01612089		1799.61	-0.0033185		2389.6	-0.0025956		2979.6	-0.00095392		3569.59	-0.02371213
619.8	0.15006162		1209.79	0.01520902		1799.81	-0.00316174		2389.8	-0.00294843		2979.8	-0.00109581		3569.79	-0.02283507
620	0.14991925		1209.99	0.01421692		1800.01	-0.00325875		2390	-0.00304994		2980	-0.00075027		3569.99	-0.02184325
620.2	0.15017511		1210.19	0.01502054		1800.21	-0.00321231		2390.2	-0.00359757		2980.2	0.00012038		3570.19	-0.02188253
620.4	0.15088129		1210.39	0.0150501		1800.41	-0.0043308		2390.4	-0.00245559		2980.4	-0.00011396		3570.39	-0.02186656
620.6	0.15045413		1210.59	0.01500705		1800.61	-0.00479827		2390.6	-0.00314067		2980.6	0.00027552		3570.59	-0.02148781
620.8	0.15062729		1210.79	0.01461839		1800.81	-0.0043906		2390.8	-0.0027043		2980.8	0.0002168		3570.79	-0.02126742
621	0.15044208		1210.99	0.0146538		1801.01	-0.00367329		2391	-0.00201651		2981	0.00002202		3570.99	-0.0213413
621.2	0.14969117		1211.19	0.01411053		1801.21	-0.00357076		2391.2	-0.00049482		2981.2	-0.00009654		3571.19	-0.02139387
621.4	0.14909093		1211.39	0.01441272		1801.41	-0.00294833		2391.4	-0.00019368		2981.4	-0.00040511		3571.39	-0.02111717
621.6	0.14976126		1211.59	0.01363843		1801.61	-0.00246798		2391.6	-0.0008534		2981.6	-0.00131549		3571.59	-0.0211806
621.8	0.14876231		1211.79	0.0137575		1801.81	-0.00268555		2391.8	-0.00085397		2981.8	-0.00197413		3571.79	-0.02106183
622	0.14957709		1211.99	0.01364024		1802.01	-0.00286201		2392	-0.00113251		2982	-0.00165432		3571.99	-0.02101865
622.2	0.14849264		1212.19	0.01374169		1802.21	-0.00245239		2392.2	-0.00121095		2982.2	-0.00120241		3572.19	-0.02081088
622.4	0.14986441		1212.39	0.01479158		1802.41	-0.00375361		2392.4	-0.00133732		2982.4	-0.00131019		3572.39	-0.02119139
622.6	0.14931198		1212.59	0.01439154		1802.61	-0.00473964		2392.6	-0.0009951		2982.6	-0.00123521		3572.59	-0.02183359
622.8	0.1492969		1212.79	0.01453402		1802.81	-0.00420807		2392.8	-0.00147662		2982.8	-0.00085962		3572.79	-0.02154288
623	0.14915782		1212.99	0.01456045		1803.01	-0.00494742		2393	-0.00167349		2983	-0.00136373		3572.99	-0.02145213
623.2	0.14862411		1213.19	0.01500446		1803.21	-0.00693322		2393.2	-0.00139732		2983.2	-0.00109135		3573.19	-0.02124523
623.4	0.14870932		1213.39	0.01536054		1803.41	-0.00751781		2393.4	-0.00168866		2983.4	-0.00072533		3573.39	-0.02084989
623.6	0.14891641		1213.59	0.01429493		1803.61	-0.00771463		2393.6	-0.00187367		2983.6	-0.00112192		3573.59	-0.02008285
623.8	0.14784913		1213.79	0.01308023		1803.81	-0.0075561		2393.8	-0.00305219		2983.8	-0.00100212		3573.79	-0.01996762
624	0.14834898		1213.99	0.01393339		1804.01	-0.00755999		2394	-0.00292941		2984	-0.00054622		3573.99	-0.02040823
624.2	0.14840504		1214.19	0.01399648		1804.21	-0.00784106		2394.2	-0.00272385		2984.2	-0.00129397		3574.19	-0.01954964
624.4	0.14872083		1214.39	0.01289838		1804.41	-0.00828774		2394.4	-0.00172268		2984.4	-0.00109515		3574.39	-0.0197865
624.6	0.14881085		1214.59	0.0138141		1804.61	-0.00806518		2394.6	-0.00201711		2984.6	-0.00081536		3574.59	-0.01967905
624.8	0.14897099		1214.79	0.01303872		1804.81	-0.00710125		2394.8	-0.00116351		2984.8	-0.00181838		3574.79	-0.02006677
625	0.14864016		1214.99	0.01254355		1805.01	-0.00592591		2395	-0.0010301		2985	-0.00206404		3574.99	-0.02022577
625.2	0.14893631		1215.19	0.01238163		1805.21	-0.00591479		2395.2	-0.00093354		2985.2	-0.00143563		3575.19	-0.0208302
625.4	0.14829597		1215.39	0.01213626		1805.41	-0.00541489		2395.4	-0.00166973		2985.4	-0.0016775		3575.39	-0.02107086
625.6	0.14909733		1215.59	0.01159338		1805.61	-0.00503324		2395.6	-0.00230159		2985.6	-0.00152373		3575.59	-0.02108512
625.8	0.14989138		1215.79	0.01139505		1805.81	-0.00537392		2395.8	-0.00202539		2985.8	-0.00182339		3575.79	-0.02091137
626	0.15014263		1215.99	0.01093334		1806.01	-0.00595322		2396	-0.00326436		2986	-0.001614		3575.99	-0.02115643
626.2	0.14982727		1216.19	0.01076968		1806.21	-0.00675896		2396.2	-0.00376851		2986.2	-0.00179043		3576.19	-0.02224327
626.4	0.1507513		1216.39	0.01041447		1806.41	-0.00699619		2396.4	-0.00454158		2986.4	-0.00153259		3576.39	-0.0228921
626.6	0.14929303		1216.59	0.01097972		1806.61	-0.00597489		2396.6	-0.00514156		2986.6	-0.00102799		3576.59	-0.02200682
626.8	0.14978666		1216.79	0.01167719		1806.81	-0.00553276		2396.8	-0.00632588		2986.8	-0.00069852		3576.79	-0.02233727
627	0.1490265		1216.99	0.01186697		1807.01	-0.00652972		2397	-0.00570829		2987	-0.00065738		3576.99	-0.02284097
627.2	0.14926618		1217.19	0.01178892		1807.21	-0.00679483		2397.2	-0.00517822		2987.2	-0.00045528		3577.19	-0.0223186
627.4	0.14903028		1217.39	0.01201672		1807.41	-0.00655935		2397.4	-0.00513356		2987.4	-0.00116988		3577.39	-0.02166412
627.6	0.14910446		1217.59	0.01167391		1807.61	-0.00573328		2397.6	-0.00447557		2987.6	-0.0014898		3577.59	-0.02170385
627.8	0.14809224		1217.79	0.01155319		1807.81	-0.00484339		2397.8	-0.0043215		2987.8	-0.00117281		3577.79	-0.02107376
628	0.14864585		1217.99	0.01173238		1808.01	-0.00435403		2398	-0.00321133		2988	-0.00168653		3577.99	-0.0203087
628.2	0.14924555		1218.19	0.01206412		1808.21	-0.00471185		2398.2	-0.00257286		2988.2	-0.00213577		3578.19	-0.01953023
628.4	0.14872674		1218.39	0.01297335		1808.41	-0.00459528		2398.4	-0.00184914		2988.4	-0.00165227		3578.39	-0.01996719
628.6	0.14900323		1218.59	0.01401106		1808.61	-0.00332068		2398.6	-0.0024404		2988.6	-0.0021647		3578.59	-0.0204295
628.8	0.1491397		1218.79	0.01330277		1808.81	-0.00289453		2398.8	-0.00205337		2988.8	-0.00267832		3578.79	-0.02126794
629	0.14910798		1218.99	0.01303545		1809.01	-0.00197918		2399	-0.00303956		2989	-0.00285997		3578.99	-0.02157435
629.2	0.14965923		1219.19	0.01280285		1809.21	-0.00290301		2399.2	-0.00293554		2989.2	-0.00288799		3579.19	-0.02154436
629.4	0.14934961		1219.39	0.01124042		1809.41	-0.00290926		2399.4	-0.00304713		2989.4	-0.00312413		3579.39	-0.02158373
629.6	0.14948131		1219.59	0.01076014		1809.61	-0.00357613		2399.6	-0.00394498		2989.6	-0.00288212		3579.59	-0.02173272
629.8	0.14949929		1219.79	0.01058759		1809.81	-0.0041229		2399.8	-0.00484409		2989.8	-0.00375734		3579.79	-0.02189935
630	0.14896483		1219.99	0.01023021		1810.01	-0.00465073		2400	-0.00594259		2990	-0.0032964		3579.99	-0.02196206
630.2	0.14865488		1220.19	0.00997306		1810.21	-0.004679		2400.2	-0.00644919		2990.2	-0.00254588		3580.19	-0.022137
630.4	0.14772812		1220.39	0.00989252		1810.41	-0.00513793		2400.4	-0.00718521		2990.4	-0.00130605		3580.39	-0.02109936
630.6	0.14753156		1220.59	0.01087815		1810.61	-0.00560426		2400.6	-0.0074226		2990.6	-0.00141349		3580.59	-0.02017491
630.8	0.14811038		1220.79	0.01045079		1810.81	-0.00599689		2400.8	-0.00768632		2990.8	-0.00140317		3580.79	-0.02048224
631	0.14771277		1220.99	0.01101567		1811.01	-0.00648614		2401	-0.00639018		2991	-0.00092191		3580.99	-0.02007998
631.2	0.14795602		1221.19	0.0117932		1811.21	-0.00702642		2401.2	-0.00662163		2991.2	-0.00116913		3581.19	-0.01986367
631.4	0.14845613		1221.39	0.01240666		1811.41	-0.00800003		2401.4	-0.00555326		2991.4	-0.00172328		3581.39	-0.01961077
631.6	0.14823221		1221.59	0.01361036		1811.61	-0.00766519		2401.6	-0.0051733		2991.6	-0.00117935		3581.59	-0.01929035
631.8	0.14847591		1221.79	0.01476383		1811.81	-0.00671373		2401.8	-0.00429039		2991.8	-0.0011891		3581.79	-0.01857789
632	0.14922417		1221.99	0.01505965		1812.01	-0.00635729		2402	-0.00364734		2992	-0.00176223		3581.99	-0.01836398
632.2	0.15028744		1222.19	0.01654632		1812.21	-0.00573342		2402.2	-0.00315902		2992.2	-0.00178214		3582.19	-0.01881379
632.4	0.14955266		1222.39	0.01658069		1812.41	-0.00522176		2402.4	-0.00299342		2992.4	-0.00200173		3582.39	-0.01894493
632.6	0.15061979		1222.59	0.01639528		1812.61	-0.00432756		2402.6	-0.0023129		2992.6	-0.00259183		3582.59	-0.01899674
632.8	0.15087241		1222.79	0.01538328		1812.81	-0.00464479		2402.8	-0.00179636		2992.8	-0.00342693		3582.79	-0.01976886
633	0.15094946		1222.99	0.01471506		1813.01	-0.00424721		2403	-0.00179158		2993	-0.00300206		3582.99	-0.02009839
633.2	0.15134291		1223.19	0.01369805		1813.21	-0.00454924		2403.2	-0.00103229		2993.2	-0.00265777		3583.19	-0.0198462
633.4	0.15020017		1223.39	0.01278686		1813.41	-0.00422235		2403.4	-0.00124225		2993.4	-0.00244231		3583.39	-0.02061229
633.6	0.1497338		1223.59	0.01340659		1813.61	-0.00448476		2403.6	-0.00214953		2993.6	-0.00306569		3583.59	-0.02165172
633.8	0.14925959		1223.79	0.01219274		1813.81	-0.00418534		2403.8	-0.00194648		2993.8	-0.00306794		3583.79	-0.02198788
634	0.14891018		1223.99	0.010928		1814.01	-0.004691		2404	-0.00196317		2994	-0.00235277		3583.99	-0.0215348
634.2	0.14801371		1224.19	0.01103904		1814.21	-0.00532983		2404.2	-0.00220028		2994.2	-0.00160739		3584.19	-0.02194488
634.4	0.14832251		1224.39	0.01036273		1814.41	-0.00631845		2404.4	-0.00258871		2994.4	-0.00152727		3584.39	-0.02143373
634.6	0.14805819		1224.59	0.01047534		1814.61	-0.00661368		2404.6	-0.00243241		2994.6	-0.0021628		3584.59	-0.02152435
634.8	0.14842023		1224.79	0.01008285		1814.81	-0.00678379		2404.8	-0.00248206		2994.8	-0.00185289		3584.79	-0.02187801
635	0.14829556		1224.99	0.0107627		1815.01	-0.00700455		2405	-0.00241437		2995	-0.00187948		3584.99	-0.0222804
635.2	0.14814187		1225.19	0.01088084		1815.21	-0.00816585		2405.2	-0.00270675		2995.2	-0.00213274		3585.19	-0.02198063
635.4	0.14870527		1225.39	0.01100758		1815.41	-0.0077302		2405.4	-0.0022805		2995.4	-0.00248305		3585.39	-0.02174829
635.6	0.14880762		1225.59	0.0127124		1815.61	-0.00764248		2405.6	-0.00267705		2995.6	-0.00294594		3585.59	-0.02180649
635.8	0.14950642		1225.79	0.01364154		1815.81	-0.00752473		2405.8	-0.00270197		2995.8	-0.00284871		3585.79	-0.02177349
636	0.15000884		1225.99	0.0134898		1816.01	-0.00797431		2406	-0.00253162		2996	-0.00287133		3585.99	-0.02234545
636.2	0.15036625		1226.19	0.0142039		1816.21	-0.00781803		2406.2	-0.00303216		2996.2	-0.00324168		3586.19	-0.02205611
636.4	0.15055327		1226.39	0.01458652		1816.41	-0.00798571		2406.4	-0.00288634		2996.4	-0.00413166		3586.39	-0.02150192
636.6	0.15137019		1226.59	0.01575317		1816.61	-0.00740605		2406.6	-0.00224794		2996.6	-0.00416616		3586.59	-0.02157972
636.8	0.1519689		1226.79	0.01544189		1816.81	-0.00756197		2406.8	-0.00240308		2996.8	-0.00433161		3586.79	-0.02201776
637	0.15197963		1226.99	0.01607106		1817.01	-0.00744877		2407	-0.00234422		2997	-0.00403459		3586.99	-0.02207966
637.2	0.15161283		1227.19	0.01649789		1817.21	-0.00792011		2407.2	-0.00327695		2997.2	-0.00398653		3587.19	-0.02219415
637.4	0.15073579		1227.39	0.0163028		1817.41	-0.00792336		2407.4	-0.00351969		2997.4	-0.00429463		3587.39	-0.02307225
637.6	0.15123829		1227.59	0.01594817		1817.61	-0.00720375		2407.6	-0.00363471		2997.6	-0.0038382		3587.59	-0.02346479
637.8	0.15044424		1227.79	0.01349365		1817.81	-0.00586097		2407.8	-0.0043495		2997.8	-0.00303559		3587.79	-0.02425944
638	0.14990871		1227.99	0.01369208		1818.01	-0.00597337		2408	-0.00459416		2998	-0.00330037		3587.99	-0.02441958
638.2	0.15017281		1228.19	0.01340805		1818.21	-0.00542608		2408.2	-0.00497482		2998.2	-0.00288914		3588.19	-0.0244801
638.4	0.15057104		1228.39	0.01173504		1818.41	-0.00517058		2408.4	-0.00457315		2998.4	-0.00290432		3588.39	-0.02407153
638.6	0.14979949		1228.59	0.01071686		1818.61	-0.0042249		2408.6	-0.00389296		2998.6	-0.0032935		3588.59	-0.0249175
638.8	0.14936589		1228.79	0.00940782		1818.81	-0.00376021		2408.8	-0.00325873		2998.8	-0.00323214		3588.79	-0.02546145
639	0.14880432		1228.99	0.00944065		1819.01	-0.00350834		2409	-0.00363301		2999	-0.00330392		3588.99	-0.02526337
639.2	0.14790767		1229.19	0.00849643		1819.21	-0.00355746		2409.2	-0.00344928		2999.2	-0.00378502		3589.19	-0.02512922
639.4	0.14773789		1229.39	0.00808576		1819.41	-0.00315997		2409.4	-0.00336051		2999.4	-0.00432974		3589.39	-0.02574029
639.6	0.14737125		1229.59	0.00857067		1819.61	-0.00351018		2409.6	-0.00406412		2999.6	-0.00444084		3589.59	-0.02610243
639.8	0.14736629		1229.79	0.00846194		1819.81	-0.00320822		2409.8	-0.0042111		2999.8	-0.004129		3589.79	-0.02684424
640	0.14822338		1229.99	0.00877422		1820.01	-0.00297403		2410	-0.00428082		3000	-0.00405523		3589.99	-0.02691348
640.2	0.14795904		1230.19	0.00925433		1820.21	-0.00307893		2410.2	-0.00491733		3000.2	-0.00482915		3590.19	-0.02618485
640.4	0.14798444		1230.39	0.00933147		1820.41	-0.00243932		2410.4	-0.00400926		3000.4	-0.00490753		3590.39	-0.02602025
640.6	0.14801273		1230.59	0.01012398		1820.61	-0.00236278		2410.6	-0.00427754		3000.6	-0.00438589		3590.59	-0.02514447
640.8	0.14870679		1230.79	0.01060615		1820.81	-0.00341951		2410.8	-0.00460146		3000.8	-0.00402825		3590.79	-0.02540614
641	0.14811992		1230.99	0.01149444		1821.01	-0.00428215		2411	-0.00417269		3001	-0.00332716		3590.99	-0.02501956
641.2	0.14822815		1231.19	0.01173156		1821.21	-0.00438209		2411.2	-0.00387572		3001.2	-0.00295528		3591.19	-0.02491337
641.4	0.14814593		1231.39	0.01125013		1821.41	-0.00426987		2411.4	-0.00440028		3001.4	-0.00346348		3591.39	-0.02501956
641.6	0.14896412		1231.59	0.01090885		1821.61	-0.00421843		2411.6	-0.00548012		3001.6	-0.00329136		3591.59	-0.02497214
641.8	0.14885122		1231.79	0.0099915		1821.81	-0.00443285		2411.8	-0.00610471		3001.8	-0.00382115		3591.79	-0.02489452
642	0.14876697		1231.99	0.01048615		1822.01	-0.00477623		2412	-0.00558026		3002	-0.00410917		3591.99	-0.02356838
642.2	0.14959147		1232.19	0.01045701		1822.21	-0.0048777		2412.2	-0.00572818		3002.2	-0.00377997		3592.19	-0.02309171
642.4	0.14931108		1232.39	0.01014398		1822.41	-0.00556881		2412.4	-0.004855		3002.4	-0.0040616		3592.39	-0.02239998
642.6	0.14896723		1232.59	0.00999112		1822.61	-0.00571473		2412.6	-0.00491198		3002.6	-0.00396507		3592.59	-0.02280761
642.8	0.14878827		1232.79	0.01030187		1822.81	-0.00694016		2412.8	-0.00505647		3002.8	-0.00391143		3592.79	-0.02242143
643	0.14895502		1232.99	0.01047665		1823.01	-0.00645749		2413	-0.00586305		3003	-0.00330284		3592.99	-0.02154713
643.2	0.14855741		1233.19	0.01026717		1823.21	-0.00655531		2413.2	-0.00537523		3003.2	-0.00259184		3593.19	-0.0214768
643.4	0.14897476		1233.39	0.0106329		1823.41	-0.00693415		2413.4	-0.00471006		3003.4	-0.00212407		3593.39	-0.02190075
643.6	0.14883214		1233.59	0.01097492		1823.61	-0.00711023		2413.6	-0.0045611		3003.6	-0.00138696		3593.59	-0.02238089
643.8	0.14901576		1233.79	0.01145383		1823.81	-0.0069311		2413.8	-0.00363516		3003.8	-0.00156213		3593.79	-0.02328046
644	0.14958526		1233.99	0.0130062		1824.01	-0.00675734		2414	-0.00277009		3004	-0.00122156		3593.99	-0.02233233
644.2	0.14889922		1234.19	0.01202526		1824.21	-0.00685633		2414.2	-0.00231754		3004.2	-0.00163347		3594.19	-0.02255907
644.4	0.14885531		1234.39	0.0118026		1824.41	-0.00611517		2414.4	-0.00149571		3004.4	-0.00156392		3594.39	-0.02266334
644.6	0.14949153		1234.59	0.01236617		1824.61	-0.00734711		2414.6	-0.00156166		3004.6	-0.00069255		3594.59	-0.02227254
644.8	0.15015572		1234.79	0.01298598		1824.81	-0.00755543		2414.8	-0.0006082		3004.8	-0.00052106		3594.79	-0.02281617
645	0.14931824		1234.99	0.01344054		1825.01	-0.00793476		2415	-0.00012903		3005	-0.00094536		3594.99	-0.0226928
645.2	0.14909706		1235.19	0.01268004		1825.21	-0.00791752		2415.2	-0.00073031		3005.2	-0.00134864		3595.19	-0.02304142
645.4	0.14966257		1235.39	0.01275251		1825.41	-0.008482		2415.4	-0.00174844		3005.4	-0.0020068		3595.39	-0.02309452
645.6	0.14971189		1235.59	0.01291655		1825.61	-0.0075341		2415.6	-0.00231165		3005.6	-0.00240776		3595.59	-0.02269137
645.8	0.15026482		1235.79	0.0136228		1825.81	-0.00769265		2415.8	-0.00244045		3005.8	-0.00237582		3595.79	-0.02206851
646	0.15021756		1235.99	0.01359312		1826.01	-0.00680273		2416	-0.00301318		3006	-0.00246219		3595.99	-0.02155081
646.2	0.15067052		1236.19	0.01327612		1826.21	-0.00719468		2416.2	-0.00227952		3006.2	-0.00264068		3596.19	-0.02219433
646.4	0.15068172		1236.39	0.01238335		1826.41	-0.0075738		2416.4	-0.00229142		3006.4	-0.00208151		3596.39	-0.02194838
646.6	0.15107779		1236.59	0.01242018		1826.61	-0.00775005		2416.6	-0.002827		3006.6	-0.00194244		3596.59	-0.02291321
646.8	0.15166513		1236.79	0.01273455		1826.81	-0.00720847		2416.8	-0.00275554		3006.8	-0.00120298		3596.79	-0.02270485
647	0.15202761		1236.99	0.01287937		1827.01	-0.00682639		2417	-0.00233546		3007	0.00035299		3596.99	-0.02255015
647.2	0.15154662		1237.19	0.01307735		1827.21	-0.00755659		2417.2	-0.00125785		3007.2	0.00042914		3597.19	-0.02250688
647.4	0.15137585		1237.39	0.01294663		1827.41	-0.00807824		2417.4	-0.0006284		3007.4	-0.00049231		3597.39	-0.02350032
647.6	0.15086578		1237.59	0.01251842		1827.61	-0.00779737		2417.6	-0.00075384		3007.6	-0.0011215		3597.59	-0.02391115
647.8	0.15064903		1237.79	0.0126417		1827.81	-0.00778134		2417.8	-0.00056483		3007.8	-0.00177662		3597.79	-0.02400513
648	0.15062384		1237.99	0.01275521		1828.01	-0.00808871		2418	-0.00013375		3008	-0.00199305		3597.99	-0.02372392
648.2	0.14985343		1238.19	0.01135527		1828.21	-0.00846747		2418.2	-0.00083525		3008.2	-0.00205144		3598.19	-0.02405295
648.4	0.14950456		1238.39	0.01139775		1828.41	-0.00855362		2418.4	-0.0012678		3008.4	-0.00201801		3598.39	-0.02390984
648.6	0.14942032		1238.59	0.01130332		1828.61	-0.00898922		2418.6	-0.00154408		3008.6	-0.00170261		3598.59	-0.02353786
648.8	0.14859614		1238.79	0.01148835		1828.81	-0.00836927		2418.8	-0.00227464		3008.8	-0.00210732		3598.79	-0.02338047
649	0.14739745		1238.99	0.01162223		1829.01	-0.00839309		2419	-0.00370978		3009	-0.00175113		3598.99	-0.02350966
649.2	0.14689303		1239.19	0.01100559		1829.21	-0.00756619		2419.2	-0.00449264		3009.2	-0.00138431		3599.19	-0.02324328
649.4	0.1472495		1239.39	0.0118115		1829.41	-0.00673396		2419.4	-0.00538122		3009.4	-0.00168985		3599.39	-0.02261953
649.6	0.14660235		1239.59	0.01204536		1829.61	-0.00548433		2419.6	-0.00642445		3009.6	-0.00154072		3599.59	-0.02228896
649.8	0.14682857		1239.79	0.012136		1829.81	-0.0054053		2419.8	-0.00695504		3009.8	-0.00091702		3599.79	-0.02197017
