# Supplementary material for: Functional development of a V3/glycan-specific broadly neutralizing antibody isolated from a case of HIV superinfection
Source: eLife journal article supplement (doi:10.7554/elife.68110), 2021-07-15
Supplement: fig2-data2 [file D5.xls]

Vers 3.43 Data Simulation
Conc1	2.5E-07	2.5E-07	2.5E-07	2.5E-07	2.5E-07
Start1	290.01	880.01	1470	2060	2650
Stop1	649.81	1239.81	1829.8	2419.8	3009.8
Time1	Data1	Sim1	Time2	Data2	Sim2	Time3	Data3	Sim3	Time4	Data4	Sim4	Time5	Data5	Sim5
290.01	-0.01007244		880.01	0.00062287		1470	-0.00359447		2060	-0.00211799		2650	-0.00121782
290.21	-0.00944847		880.21	0.00018717		1470.2	-0.00251066		2060.2	-0.00050739		2650.2	-0.00105709
290.41	-0.00873536		880.41	0.00052874		1470.4	-0.00168487		2060.4	0.00051459		2650.4	-0.00024578
290.61	-0.00788282		880.61	0.00045221		1470.6	0.00025678		2060.6	0.00159895		2650.6	0.00056198
290.81	-0.0063232		880.81	0.00065579		1470.8	0.00172754		2060.8	0.00290145		2650.8	0.00160431
291.01	-0.00502749		881.01	0.00088125		1471	0.00278664		2061	0.00460289		2651	0.00234963
291.21	-0.00307475		881.21	0.00109909		1471.2	0.00352043		2061.2	0.00556924		2651.2	0.00372736
291.41	-0.00135439		881.41	0.00164324		1471.4	0.00419838		2061.4	0.0062116		2651.4	0.00552455
291.61	-0.00053537		881.61	0.00195204		1471.6	0.00546336		2061.6	0.00670618		2651.6	0.00722862
291.81	0.00100498		881.81	0.00280776		1471.8	0.00640153		2061.8	0.00736064		2651.8	0.0079912
292.01	0.00226273		882.01	0.00304023		1472	0.00718893		2062	0.00736908		2652	0.00963656
292.21	0.0038282		882.21	0.00282656		1472.2	0.00743235		2062.2	0.00699375		2652.2	0.01040161
292.41	0.00548814		882.41	0.00324311		1472.4	0.00778009		2062.4	0.00639863		2652.4	0.01118364
292.61	0.00648266		882.61	0.00299214		1472.6	0.00789692		2062.6	0.00656106		2652.6	0.01297178
292.81	0.00694777		882.81	0.0030567		1472.8	0.00809938		2062.8	0.00650721		2652.8	0.01461855
293.01	0.00831164		883.01	0.00404211		1473	0.00819468		2063	0.00617694		2653	0.01493453
293.21	0.00890287		883.21	0.00400701		1473.2	0.00841372		2063.2	0.00645304		2653.2	0.0158683
293.41	0.00962348		883.41	0.00392536		1473.4	0.00882049		2063.4	0.00696384		2653.4	0.01655716
293.61	0.01057171		883.61	0.00479419		1473.6	0.00841214		2063.6	0.00716246		2653.6	0.01733418
293.81	0.0107536		883.81	0.00413857		1473.8	0.00910312		2063.8	0.00754153		2653.8	0.01801908
294.01	0.00925045		884.01	0.00389438		1474	0.00861076		2064	0.00837331		2654	0.01848192
294.21	0.00945159		884.21	0.00434428		1474.2	0.00931596		2064.2	0.00886693		2654.2	0.01883616
294.41	0.0095994		884.41	0.00517645		1474.4	0.00973046		2064.4	0.00909805		2654.4	0.01970666
294.61	0.01014415		884.61	0.00509763		1474.6	0.01015154		2064.6	0.01024925		2654.6	0.0196539
294.81	0.01026941		884.81	0.00560753		1474.8	0.01004901		2064.8	0.01139669		2654.8	0.0204393
295.01	0.00982752		885.01	0.00613038		1475	0.0098232		2065	0.0120428		2655	0.02083231
295.21	0.01008624		885.21	0.00664116		1475.2	0.00960001		2065.2	0.01232081		2655.2	0.02094853
295.41	0.00939066		885.41	0.00727937		1475.4	0.00908384		2065.4	0.0125872		2655.4	0.02142779
295.61	0.00879977		885.61	0.00758523		1475.6	0.01048956		2065.6	0.01393075		2655.6	0.02141869
295.81	0.00942658		885.81	0.00809664		1475.8	0.01045767		2065.8	0.0148626		2655.8	0.02093411
296.01	0.00910593		886.01	0.00763397		1476	0.01048798		2066	0.01467707		2656	0.02103944
296.21	0.00916559		886.21	0.00781706		1476.2	0.0106333		2066.2	0.01454716		2656.2	0.02011555
296.41	0.00936587		886.41	0.0089719		1476.4	0.01092726		2066.4	0.01413044		2656.4	0.01927861
296.61	0.00988932		886.61	0.00893934		1476.6	0.0112007		2066.6	0.01495348		2656.6	0.01987437
296.81	0.01052845		886.81	0.00963886		1476.8	0.01159573		2066.8	0.01585654		2656.8	0.01921204
297.01	0.01055245		887.01	0.01055221		1477	0.01140811		2067	0.01585164		2657	0.01825454
297.21	0.0114336		887.21	0.00910166		1477.2	0.0110597		2067.2	0.0164783		2657.2	0.01772846
297.41	0.01140519		887.41	0.00860638		1477.4	0.01166693		2067.4	0.01628167		2657.4	0.01797696
297.61	0.01205398		887.61	0.00957362		1477.6	0.011713		2067.6	0.01575795		2657.6	0.0187645
297.81	0.01117156		887.81	0.00943947		1477.8	0.01193727		2067.8	0.01501232		2657.8	0.01927093
298.01	0.01064115		888.01	0.00947493		1478	0.01148172		2068	0.014814		2658	0.01929057
298.21	0.01130605		888.21	0.00974843		1478.2	0.01231626		2068.2	0.01413634		2658.2	0.01880679
298.41	0.01209432		888.41	0.0096894		1478.4	0.01218688		2068.4	0.01346316		2658.4	0.01913421
298.61	0.01275893		888.61	0.009551		1478.6	0.01218224		2068.6	0.01292005		2658.6	0.01927006
298.81	0.01222495		888.81	0.00942786		1478.8	0.01295771		2068.8	0.01266528		2658.8	0.02017465
299.01	0.01215146		889.01	0.00977425		1479	0.01321997		2069	0.01212372		2659	0.0208307
299.21	0.01146247		889.21	0.00887884		1479.2	0.01326771		2069.2	0.01273908		2659.2	0.02062674
299.41	0.01148139		889.41	0.00841615		1479.4	0.01348699		2069.4	0.01240181		2659.4	0.02105292
299.61	0.0114141		889.61	0.00818698		1479.6	0.01493679		2069.6	0.01327992		2659.6	0.02083876
299.81	0.01058509		889.81	0.007439		1479.8	0.01506703		2069.8	0.01220376		2659.8	0.02044731
300.01	0.00958851		890.01	0.00682366		1480	0.01510289		2070	0.01219971		2660	0.02006038
300.21	0.00909118		890.21	0.00666673		1480.2	0.01536587		2070.2	0.01236151		2660.2	0.01973027
300.41	0.00913621		890.41	0.00613795		1480.4	0.01536957		2070.4	0.0122265		2660.4	0.01968719
300.61	0.00900542		890.61	0.00532848		1480.6	0.0149484		2070.6	0.01241695		2660.6	0.01990389
300.81	0.00818941		890.81	0.00555557		1480.8	0.01475594		2070.8	0.01262891		2660.8	0.01976841
301.01	0.00777644		891.01	0.00485085		1481	0.01349954		2071	0.01229958		2661	0.01938495
301.21	0.00820875		891.21	0.00438047		1481.2	0.01302184		2071.2	0.01211609		2661.2	0.01973252
301.41	0.00772634		891.41	0.00466512		1481.4	0.01298038		2071.4	0.01214849		2661.4	0.020515
301.61	0.00785432		891.61	0.00631889		1481.6	0.01308659		2071.6	0.01128879		2661.6	0.02059661
301.81	0.00805211		891.81	0.00674122		1481.8	0.01262254		2071.8	0.01155687		2661.8	0.02111665
302.01	0.00820536		892.01	0.00723074		1482	0.01202831		2072	0.01121065		2662	0.02062127
302.21	0.00833024		892.21	0.00854611		1482.2	0.01190998		2072.2	0.01019726		2662.2	0.02047013
302.41	0.00881227		892.41	0.00838975		1482.4	0.01167993		2072.4	0.01082855		2662.4	0.0212156
302.61	0.00858217		892.61	0.00906554		1482.6	0.01191647		2072.6	0.01075198		2662.6	0.02154813
302.81	0.00840546		892.81	0.00979655		1482.8	0.01163939		2072.8	0.01209911		2662.8	0.02186866
303.01	0.00838703		893.01	0.01025687		1483	0.01175594		2073	0.01305241		2663	0.02155882
303.21	0.00860097		893.21	0.00970797		1483.2	0.01180492		2073.2	0.01389314		2663.2	0.02012157
303.41	0.0089079		893.41	0.0099107		1483.4	0.01197123		2073.4	0.01302069		2663.4	0.01979331
303.61	0.00824772		893.61	0.00970669		1483.6	0.01165706		2073.6	0.01337163		2663.6	0.01966332
303.81	0.00785715		893.81	0.00895733		1483.8	0.01114743		2073.8	0.01201021		2663.8	0.01922605
304.01	0.00747592		894.01	0.00969805		1484	0.01072319		2074	0.01229166		2664	0.01931996
304.21	0.00732212		894.21	0.00940694		1484.2	0.01048255		2074.2	0.01191601		2664.2	0.01928962
304.41	0.00723821		894.41	0.00853055		1484.4	0.01048449		2074.4	0.01190308		2664.4	0.0191227
304.61	0.0070136		894.61	0.00805807		1484.6	0.01031159		2074.6	0.01125429		2664.6	0.01858806
304.81	0.00707484		894.81	0.00807737		1484.8	0.0105427		2074.8	0.01160413		2664.8	0.01929582
305.01	0.00698834		895.01	0.00814995		1485	0.01029389		2075	0.01140952		2665	0.01932279
305.21	0.00708684		895.21	0.00857011		1485.2	0.01079487		2075.2	0.01050557		2665.2	0.02017102
305.41	0.00751927		895.41	0.00799867		1485.4	0.01170005		2075.4	0.01088361		2665.4	0.0211356
305.61	0.00796305		895.61	0.0082713		1485.6	0.01136647		2075.6	0.01082194		2665.6	0.02137
305.81	0.00836783		895.81	0.00775416		1485.8	0.01125271		2075.8	0.01110302		2665.8	0.02195487
306.01	0.00780502		896.01	0.00807747		1486	0.01151788		2076	0.01043552		2666	0.02289459
306.21	0.00779191		896.21	0.00793282		1486.2	0.01220372		2076.2	0.01029369		2666.2	0.02454652
306.41	0.00795173		896.41	0.00746138		1486.4	0.01288374		2076.4	0.01088671		2666.4	0.02543019
306.61	0.00781841		896.61	0.00809864		1486.6	0.01352798		2076.6	0.0106027		2666.6	0.02549366
306.81	0.00862458		896.81	0.00864938		1486.8	0.01345235		2076.8	0.01125334		2666.8	0.02530033
307.01	0.00893226		897.01	0.00903793		1487	0.01319926		2077	0.01137605		2667	0.02504329
307.21	0.00919651		897.21	0.00929017		1487.2	0.01243885		2077.2	0.01087876		2667.2	0.02460863
307.41	0.0089343		897.41	0.00934692		1487.4	0.01264931		2077.4	0.01025405		2667.4	0.02516256
307.61	0.00862402		897.61	0.00934677		1487.6	0.01217883		2077.6	0.01040663		2667.6	0.02480502
307.81	0.00875154		897.81	0.00896466		1487.8	0.01170481		2077.8	0.01065241		2667.8	0.02392574
308.01	0.00855426		898.01	0.00895175		1488	0.01198372		2078	0.01110681		2668	0.02349756
308.21	0.00876791		898.21	0.00860606		1488.2	0.01161194		2078.2	0.01160162		2668.2	0.0226852
308.41	0.00880033		898.41	0.00783645		1488.4	0.01147397		2078.4	0.01138355		2668.4	0.02210918
308.61	0.00854868		898.61	0.00798903		1488.6	0.01133215		2078.6	0.01116258		2668.6	0.0219927
308.81	0.00936503		898.81	0.00745778		1488.8	0.0103195		2078.8	0.01210166		2668.8	0.02168046
309.01	0.00921839		899.01	0.00731476		1489	0.00979473		2079	0.01187619		2669	0.02082406
309.21	0.00901915		899.21	0.00654459		1489.2	0.00974241		2079.2	0.01252099		2669.2	0.02068765
309.41	0.00944032		899.41	0.00627798		1489.4	0.0092619		2079.4	0.01326318		2669.4	0.02045663
309.61	0.00928978		899.61	0.0064542		1489.6	0.00821872		2079.6	0.01304698		2669.6	0.01991339
309.81	0.00820882		899.81	0.00730487		1489.8	0.00814861		2079.8	0.01290496		2669.8	0.01984725
310.01	0.00784778		900.01	0.0069626		1490	0.00862725		2080	0.01242214		2670	0.02064344
310.21	0.00768571		900.21	0.00677376		1490.2	0.00890418		2080.2	0.01276936		2670.2	0.02074859
310.41	0.00743043		900.41	0.00660793		1490.4	0.00938984		2080.4	0.01242524		2670.4	0.02049709
310.61	0.00739349		900.61	0.00689444		1490.6	0.01018748		2080.6	0.01219778		2670.6	0.02100181
310.81	0.00788337		900.81	0.00732835		1490.8	0.01009018		2080.8	0.01160656		2670.8	0.02114263
311.01	0.00766312		901.01	0.00803027		1491	0.00999519		2081	0.01206025		2671	0.02149468
311.21	0.00671296		901.21	0.00791075		1491.2	0.01148651		2081.2	0.01125747		2671.2	0.02187211
311.41	0.00628079		901.41	0.00759265		1491.4	0.01316127		2081.4	0.01169746		2671.4	0.02220409
311.61	0.00587373		901.61	0.00710502		1491.6	0.01325887		2081.6	0.01199918		2671.6	0.02262504
311.81	0.00586486		901.81	0.00651334		1491.8	0.01405955		2081.8	0.01237047		2671.8	0.02266384
312.01	0.00596758		902.01	0.00713206		1492	0.01506992		2082	0.01227563		2672	0.02319934
312.21	0.00663791		902.21	0.00762231		1492.2	0.01566408		2082.2	0.012319		2672.2	0.02330781
312.41	0.00726739		902.41	0.00744645		1492.4	0.01556339		2082.4	0.012203		2672.4	0.02374906
312.61	0.0077923		902.61	0.00783225		1492.6	0.01563543		2082.6	0.01279742		2672.6	0.02347444
312.81	0.01018957		902.81	0.00723878		1492.8	0.01542067		2082.8	0.01315674		2672.8	0.02321069
313.01	0.01057942		903.01	0.00798717		1493	0.01634547		2083	0.01304726		2673	0.0230148
313.21	0.01039726		903.21	0.00876647		1493.2	0.01613873		2083.2	0.01353478		2673.2	0.02265594
313.41	0.01010217		903.41	0.0093842		1493.4	0.01494095		2083.4	0.01342761		2673.4	0.0222494
313.61	0.01030041		903.61	0.00906981		1493.6	0.01433651		2083.6	0.01282446		2673.6	0.02134348
313.81	0.00973377		903.81	0.00926304		1493.8	0.01428883		2083.8	0.01303344		2673.8	0.02110485
314.01	0.00980144		904.01	0.00889276		1494	0.01428232		2084	0.01237137		2674	0.02144703
314.21	0.00959937		904.21	0.00862112		1494.2	0.01409954		2084.2	0.0127296		2674.2	0.02163804
314.41	0.00991197		904.41	0.00822963		1494.4	0.0138642		2084.4	0.01256713		2674.4	0.02199689
314.61	0.00938974		904.61	0.00765944		1494.6	0.0137199		2084.6	0.01267069		2674.6	0.02295153
314.81	0.00910027		904.81	0.00745363		1494.8	0.01312694		2084.8	0.01153972		2674.8	0.02332627
315.01	0.00783933		905.01	0.00714245		1495	0.01346103		2085	0.01130126		2675	0.02332287
315.21	0.00722381		905.21	0.00565516		1495.2	0.01362716		2085.2	0.01029731		2675.2	0.0238396
315.41	0.00709198		905.41	0.00426583		1495.4	0.01270006		2085.4	0.01085215		2675.4	0.02309804
315.61	0.00632679		905.61	0.00459633		1495.6	0.0120511		2085.6	0.01076916		2675.6	0.02316971
315.81	0.00680375		905.81	0.0046189		1495.8	0.01158982		2085.8	0.01083763		2675.8	0.02357182
316.01	0.00682069		906.01	0.00493954		1496	0.01105614		2086	0.01152286		2676	0.02303699
316.21	0.00769209		906.21	0.00494508		1496.2	0.01081678		2086.2	0.01127398		2676.2	0.02267022
316.41	0.00835682		906.41	0.00564211		1496.4	0.01111324		2086.4	0.01082723		2676.4	0.02157604
316.61	0.00965971		906.61	0.00575785		1496.6	0.01150722		2086.6	0.01040283		2676.6	0.02136089
316.81	0.0105867		906.81	0.00594706		1496.8	0.01206836		2086.8	0.01062048		2676.8	0.02130064
317.01	0.01050077		907.01	0.00656988		1497	0.01217828		2087	0.01098629		2677	0.02090261
317.21	0.0096076		907.21	0.00645134		1497.2	0.0125458		2087.2	0.01118983		2677.2	0.02067744
317.41	0.00892117		907.41	0.00620197		1497.4	0.0119876		2087.4	0.0110639		2677.4	0.02058782
317.61	0.00884591		907.61	0.00667192		1497.6	0.01272803		2087.6	0.01011587		2677.6	0.02045776
317.81	0.00917973		907.81	0.00740494		1497.8	0.01284385		2087.8	0.0109124		2677.8	0.02188569
318.01	0.00888323		908.01	0.00804052		1498	0.0124837		2088	0.01152816		2678	0.02255431
318.21	0.00853988		908.21	0.00749998		1498.2	0.01252928		2088.2	0.01220783		2678.2	0.02295675
318.41	0.00850119		908.41	0.00776926		1498.4	0.01254504		2088.4	0.01264492		2678.4	0.0237486
318.61	0.00787974		908.61	0.00719811		1498.6	0.012875		2088.6	0.01313135		2678.6	0.02461461
318.81	0.00786079		908.81	0.00832867		1498.8	0.01286616		2088.8	0.01231657		2678.8	0.0247841
319.01	0.00768303		909.01	0.00777897		1499	0.01398588		2089	0.01212821		2679	0.02480408
319.21	0.00709646		909.21	0.00737661		1499.2	0.01298238		2089.2	0.01279899		2679.2	0.0246233
319.41	0.00672493		909.41	0.00766856		1499.4	0.01267612		2089.4	0.0132459		2679.4	0.02367998
319.61	0.00676884		909.61	0.0087322		1499.6	0.01221545		2089.6	0.01345173		2679.6	0.02400852
319.81	0.00795647		909.81	0.00806441		1499.8	0.01177922		2089.8	0.01340946		2679.8	0.02388211
320.01	0.00793862		910.01	0.00779079		1500	0.01170446		2090	0.01407738		2680	0.02254758
320.21	0.0091045		910.21	0.00791476		1500.2	0.01197562		2090.2	0.01365611		2680.2	0.02225434
320.41	0.01040531		910.41	0.00786967		1500.4	0.01261018		2090.4	0.01351868		2680.4	0.0216258
320.61	0.01053117		910.61	0.00766174		1500.6	0.01213885		2090.6	0.01346384		2680.6	0.02183947
320.81	0.0104158		910.81	0.0070526		1500.8	0.01227997		2090.8	0.01394433		2680.8	0.02144715
321.01	0.01108253		911.01	0.00645089		1501	0.01212219		2091	0.01450847		2681	0.02211374
321.21	0.01056588		911.21	0.00604812		1501.2	0.01196636		2091.2	0.01442651		2681.2	0.02192504
321.41	0.01077361		911.41	0.00570503		1501.4	0.01090527		2091.4	0.0145709		2681.4	0.02166218
321.61	0.01067856		911.61	0.0055436		1501.6	0.01090481		2091.6	0.01436196		2681.6	0.0215446
321.81	0.01175996		911.81	0.00475544		1501.8	0.01078368		2091.8	0.01555781		2681.8	0.02198931
322.01	0.01022164		912.01	0.00409937		1502	0.01118242		2092	0.0160883		2682	0.02203663
322.21	0.00992172		912.21	0.00354323		1502.2	0.01122839		2092.2	0.01577896		2682.2	0.02166506
322.41	0.01049565		912.41	0.00340538		1502.4	0.01143672		2092.4	0.01624914		2682.4	0.02206967
322.61	0.00912251		912.61	0.00319912		1502.6	0.01155331		2092.6	0.01700322		2682.6	0.02241998
322.81	0.0087493		912.81	0.00414653		1502.8	0.01175681		2092.8	0.01584647		2682.8	0.02233537
323.01	0.0080937		913.01	0.00435503		1503	0.01210414		2093	0.01566739		2683	0.02186399
323.21	0.006705		913.21	0.00499348		1503.2	0.01181998		2093.2	0.01578726		2683.2	0.02165837
323.41	0.00685427		913.41	0.00519728		1503.4	0.01230389		2093.4	0.01503361		2683.4	0.02167194
323.61	0.00661645		913.61	0.00592677		1503.6	0.01194846		2093.6	0.01473023		2683.6	0.02204197
323.81	0.00681461		913.81	0.00578051		1503.8	0.012002		2093.8	0.01420452		2683.8	0.02149134
324.01	0.00730957		914.01	0.00585036		1504	0.01227645		2094	0.0138626		2684	0.02158735
324.21	0.00775916		914.21	0.00650455		1504.2	0.01290332		2094.2	0.0131588		2684.2	0.02149641
324.41	0.00779493		914.41	0.00688828		1504.4	0.01342367		2094.4	0.01296939		2684.4	0.02084995
324.61	0.00751275		914.61	0.00667636		1504.6	0.01335172		2094.6	0.01310306		2684.6	0.0201198
324.81	0.00841055		914.81	0.0062906		1504.8	0.01252872		2094.8	0.01306705		2684.8	0.02104108
325.01	0.00859102		915.01	0.00667596		1505	0.01235692		2095	0.0129064		2685	0.02154771
325.21	0.00871009		915.21	0.00694553		1505.2	0.01224885		2095.2	0.01226161		2685.2	0.02065313
325.41	0.00877073		915.41	0.00608511		1505.4	0.0120141		2095.4	0.0122786		2685.4	0.02073425
325.61	0.00913836		915.61	0.005636		1505.6	0.01177672		2095.6	0.01089762		2685.6	0.02039765
325.81	0.00960652		915.81	0.00559862		1505.8	0.01202905		2095.8	0.0110725		2685.8	0.02127867
326.01	0.00937502		916.01	0.00519447		1506	0.01196483		2096	0.01074405		2686	0.02213975
326.21	0.00980698		916.21	0.00560891		1506.2	0.01180062		2096.2	0.00966029		2686.2	0.02309693
326.41	0.01042553		916.41	0.00548047		1506.4	0.01135562		2096.4	0.00995989		2686.4	0.02349438
326.61	0.00952249		916.61	0.00572603		1506.6	0.01081598		2096.6	0.01002963		2686.6	0.02373364
326.81	0.00990484		916.81	0.00546659		1506.8	0.01076065		2096.8	0.00934247		2686.8	0.02407835
327.01	0.00853113		917.01	0.00519064		1507	0.01061795		2097	0.00935177		2687	0.02330517
327.21	0.00780887		917.21	0.00497405		1507.2	0.01046019		2097.2	0.00890009		2687.2	0.02360055
327.41	0.00845383		917.41	0.00518397		1507.4	0.00993455		2097.4	0.00871354		2687.4	0.02379892
327.61	0.00838976		917.61	0.00469222		1507.6	0.00946119		2097.6	0.00935855		2687.6	0.0241929
327.81	0.00829109		917.81	0.00416419		1507.8	0.00954108		2097.8	0.00898404		2687.8	0.02345479
328.01	0.00761846		918.01	0.00416673		1508	0.00980948		2098	0.0091769		2688	0.02218536
328.21	0.00727083		918.21	0.00524716		1508.2	0.01025166		2098.2	0.01012366		2688.2	0.02173929
328.41	0.00654435		918.41	0.00571429		1508.4	0.01023506		2098.4	0.0099338		2688.4	0.02155481
328.61	0.00665823		918.61	0.00509336		1508.6	0.01039242		2098.6	0.01062805		2688.6	0.02208061
328.81	0.00679928		918.81	0.00520595		1508.8	0.01060313		2098.8	0.00998921		2688.8	0.0228096
329.01	0.00688401		919.01	0.00544085		1509	0.01166934		2099	0.00959174		2689	0.02232443
329.21	0.00744776		919.21	0.00523664		1509.2	0.01132747		2099.2	0.00967312		2689.2	0.02235143
329.41	0.00788673		919.41	0.00538695		1509.4	0.01132181		2099.4	0.01015727		2689.4	0.02274083
329.61	0.00821361		919.61	0.00567962		1509.6	0.0107464		2099.6	0.00996268		2689.6	0.02288622
329.81	0.00820109		919.81	0.00613343		1509.8	0.01171859		2099.8	0.01051553		2689.8	0.02358115
330.01	0.0081355		920.01	0.00645911		1510	0.01261278		2100	0.01012395		2690	0.02270562
330.21	0.00766204		920.21	0.00690464		1510.2	0.01309689		2100.2	0.00984022		2690.2	0.02259976
330.41	0.00806163		920.41	0.0060113		1510.4	0.01309833		2100.4	0.01016838		2690.4	0.02181959
330.61	0.00742794		920.61	0.00514883		1510.6	0.01325108		2100.6	0.01025183		2690.6	0.02155611
330.81	0.00698776		920.81	0.00365114		1510.8	0.01304795		2100.8	0.01027036		2690.8	0.02147839
331.01	0.00665113		921.01	0.00329718		1511	0.0129041		2101	0.01081764		2691	0.01993647
331.21	0.0071804		921.21	0.00304707		1511.2	0.01216023		2101.2	0.0109733		2691.2	0.01987026
331.41	0.00716574		921.41	0.00249892		1511.4	0.01281426		2101.4	0.01114953		2691.4	0.02033831
331.61	0.00616841		921.61	0.00225632		1511.6	0.01283698		2101.6	0.0111919		2691.6	0.01949313
331.81	0.00608568		921.81	0.00178421		1511.8	0.01283775		2101.8	0.01079297		2691.8	0.01920957
332.01	0.00618567		922.01	0.00160385		1512	0.01351065		2102	0.01098111		2692	0.01946435
332.21	0.00674084		922.21	0.00276453		1512.2	0.01360763		2102.2	0.01047336		2692.2	0.02057385
332.41	0.00597521		922.41	0.00312116		1512.4	0.01388188		2102.4	0.01015735		2692.4	0.02116085
332.61	0.00713922		922.61	0.00299065		1512.6	0.01374067		2102.6	0.01021022		2692.6	0.02118194
332.81	0.00805163		922.81	0.00353291		1512.8	0.01326731		2102.8	0.00936644		2692.8	0.02193023
333.01	0.0087219		923.01	0.0040646		1513	0.01283978		2103	0.00954533		2693	0.02226242
333.21	0.00894313		923.21	0.00460657		1513.2	0.01236743		2103.2	0.00990471		2693.2	0.02258749
333.41	0.00853783		923.41	0.00500662		1513.4	0.01194953		2103.4	0.0105914		2693.4	0.02294285
333.61	0.00807367		923.61	0.0047393		1513.6	0.01148147		2103.6	0.01049435		2693.6	0.02316514
333.81	0.00810248		923.81	0.00568551		1513.8	0.01241064		2103.8	0.01142876		2693.8	0.02319429
334.01	0.00752648		924.01	0.00640087		1514	0.01198348		2104	0.01131121		2694	0.02310637
334.21	0.00698114		924.21	0.00621775		1514.2	0.01159289		2104.2	0.01218149		2694.2	0.02381993
334.41	0.00702905		924.41	0.00591484		1514.4	0.01147702		2104.4	0.01213834		2694.4	0.02378896
334.61	0.00641117		924.61	0.00607856		1514.6	0.01020651		2104.6	0.01286168		2694.6	0.0243572
334.81	0.00523855		924.81	0.006116		1514.8	0.00957802		2104.8	0.01323476		2694.8	0.02418302
335.01	0.00458709		925.01	0.0067762		1515	0.0100059		2105	0.01378845		2695	0.02349662
335.21	0.00300914		925.21	0.00758431		1515.2	0.01004339		2105.2	0.01303687		2695.2	0.02364303
335.41	0.00251335		925.41	0.0077516		1515.4	0.01138207		2105.4	0.01244191		2695.4	0.02429079
335.61	0.00227691		925.61	0.00777421		1515.6	0.01075447		2105.6	0.01229057		2695.6	0.02402858
335.81	0.00302677		925.81	0.00710383		1515.8	0.01099707		2105.8	0.01237983		2695.8	0.02450121
336.01	0.00313313		926.01	0.00677301		1516	0.01256158		2106	0.01187651		2696	0.02406964
336.21	0.00270203		926.21	0.00765943		1516.2	0.01208694		2106.2	0.01116878		2696.2	0.02353856
336.41	0.00276291		926.41	0.00705039		1516.4	0.0121814		2106.4	0.01165069		2696.4	0.02308728
336.61	0.00395266		926.61	0.00659271		1516.6	0.01158081		2106.6	0.0107261		2696.6	0.02199825
336.81	0.00382215		926.81	0.00611765		1516.8	0.01131251		2106.8	0.01037213		2696.8	0.0220202
337.01	0.00402607		927.01	0.00623696		1517	0.01152553		2107	0.01001016		2697	0.02118494
337.21	0.00435664		927.21	0.00617191		1517.2	0.01162151		2107.2	0.00983268		2697.2	0.02025174
337.41	0.00443747		927.41	0.00511746		1517.4	0.01164582		2107.4	0.00989031		2697.4	0.02018141
337.61	0.00456434		927.61	0.00504167		1517.6	0.0125629		2107.6	0.01015169		2697.6	0.01979233
337.81	0.00500062		927.81	0.00559163		1517.8	0.01267966		2107.8	0.0107031		2697.8	0.0198562
338.01	0.00483167		928.01	0.00561084		1518	0.01232823		2108	0.01009835		2698	0.01976499
338.21	0.00464821		928.21	0.00568453		1518.2	0.01220893		2108.2	0.01042243		2698.2	0.01973114
338.41	0.0045203		928.41	0.00567097		1518.4	0.01164842		2108.4	0.00992244		2698.4	0.01968982
338.61	0.0040507		928.61	0.00538749		1518.6	0.0112939		2108.6	0.00993276		2698.6	0.02050095
338.81	0.00304918		928.81	0.00603704		1518.8	0.01105475		2108.8	0.00968975		2698.8	0.02005904
339.01	0.00351346		929.01	0.00662576		1519	0.01138694		2109	0.01008601		2699	0.02125446
339.21	0.00272293		929.21	0.00739907		1519.2	0.01121646		2109.2	0.00932377		2699.2	0.02140941
339.41	0.00314853		929.41	0.00642837		1519.4	0.01209296		2109.4	0.01009925		2699.4	0.02123241
339.61	0.00313182		929.61	0.00622679		1519.6	0.01230463		2109.6	0.01058618		2699.6	0.02123761
339.81	0.00306726		929.81	0.00578245		1519.8	0.01341593		2109.8	0.01065148		2699.8	0.02174833
340.01	0.00307325		930.01	0.00510907		1520	0.01392041		2110	0.01044311		2700	0.0223334
340.21	0.00236802		930.21	0.00557268		1520.2	0.01363547		2110.2	0.01075282		2700.2	0.02272626
340.41	0.00356679		930.41	0.00496897		1520.4	0.01286033		2110.4	0.0116995		2700.4	0.02290191
340.61	0.00375375		930.61	0.00516405		1520.6	0.01237867		2110.6	0.01156445		2700.6	0.02317867
340.81	0.00434231		930.81	0.00566352		1520.8	0.0108689		2110.8	0.01195221		2700.8	0.02439485
341.01	0.00475216		931.01	0.00634989		1521	0.01108007		2111	0.01136511		2701	0.02481103
341.21	0.00451645		931.21	0.00580699		1521.2	0.01104072		2111.2	0.01155355		2701.2	0.02472715
341.41	0.00467804		931.41	0.00533921		1521.4	0.01106755		2111.4	0.01137807		2701.4	0.02562738
341.61	0.00412364		931.61	0.00585934		1521.6	0.01154827		2111.6	0.01159234		2701.6	0.02689508
341.81	0.00421579		931.81	0.00590845		1521.8	0.01139987		2111.8	0.01100325		2701.8	0.02753596
342.01	0.00437271		932.01	0.00597135		1522	0.01076482		2112	0.01093151		2702	0.02759117
342.21	0.00494257		932.21	0.00548854		1522.2	0.00980614		2112.2	0.01117827		2702.2	0.02784921
342.41	0.00537942		932.41	0.00486936		1522.4	0.00936072		2112.4	0.01118984		2702.4	0.02790984
342.61	0.00582771		932.61	0.00485187		1522.6	0.00891807		2112.6	0.01093649		2702.6	0.02773893
342.81	0.00569502		932.81	0.0049151		1522.8	0.00821834		2112.8	0.01126665		2702.8	0.02657129
343.01	0.00549443		933.01	0.00442672		1523	0.00944891		2113	0.01090513		2703	0.02569423
343.21	0.00481086		933.21	0.00380142		1523.2	0.01004113		2113.2	0.01010583		2703.2	0.02450343
343.41	0.00517517		933.41	0.00338001		1523.4	0.01110798		2113.4	0.01087819		2703.4	0.02290565
343.61	0.00519292		933.61	0.00369601		1523.6	0.01231218		2113.6	0.0105673		2703.6	0.02198907
343.81	0.00478296		933.81	0.00329587		1523.8	0.01296976		2113.8	0.01068822		2703.8	0.02135549
344.01	0.00487069		934.01	0.0036493		1524	0.01383799		2114	0.01077326		2704	0.01983315
344.21	0.00528208		934.21	0.00398763		1524.2	0.01474456		2114.2	0.01098502		2704.2	0.0188182
344.41	0.00590852		934.41	0.00423354		1524.4	0.01415918		2114.4	0.01089596		2704.4	0.01861761
344.61	0.00580745		934.61	0.00511912		1524.6	0.01363404		2114.6	0.01103045		2704.6	0.01855787
344.81	0.00603594		934.81	0.00554091		1524.8	0.0132212		2114.8	0.01210937		2704.8	0.01891665
345.01	0.0050376		935.01	0.0057227		1525	0.01356559		2115	0.01142458		2705	0.01849432
345.21	0.00473594		935.21	0.00469763		1525.2	0.01323113		2115.2	0.01175836		2705.2	0.01850601
345.41	0.00503948		935.41	0.00450191		1525.4	0.01338917		2115.4	0.01243239		2705.4	0.0194037
345.61	0.00444947		935.61	0.00433155		1525.6	0.01340534		2115.6	0.01256866		2705.6	0.0208264
345.81	0.00485211		935.81	0.00395293		1525.8	0.01287807		2115.8	0.01325232		2705.8	0.02149547
346.01	0.00507698		936.01	0.00416088		1526	0.01192566		2116	0.01393667		2706	0.02238391
346.21	0.00503835		936.21	0.00344657		1526.2	0.01147962		2116.2	0.01417956		2706.2	0.02393759
346.41	0.00512018		936.41	0.00349626		1526.4	0.01158375		2116.4	0.01448744		2706.4	0.02450804
346.61	0.00551119		936.61	0.00375773		1526.6	0.01105714		2116.6	0.01397744		2706.6	0.02547158
346.81	0.00575015		936.81	0.00348391		1526.8	0.01133557		2116.8	0.01363622		2706.8	0.02556944
347.01	0.00620525		937.01	0.0037667		1527	0.01168762		2117	0.01264797		2707	0.02596593
347.21	0.00610767		937.21	0.00473825		1527.2	0.01168876		2117.2	0.01276661		2707.2	0.02654884
347.41	0.00666613		937.41	0.00487913		1527.4	0.01174862		2117.4	0.01258797		2707.4	0.02545264
347.61	0.00619219		937.61	0.0041887		1527.6	0.01245626		2117.6	0.01150066		2707.6	0.02483003
347.81	0.00546772		937.81	0.00426901		1527.8	0.01312313		2117.8	0.01096483		2707.8	0.02486931
348.01	0.00486296		938.01	0.00383494		1528	0.01395272		2118	0.01015309		2708	0.0242296
348.21	0.00521921		938.21	0.00387827		1528.2	0.01392648		2118.2	0.00986981		2708.2	0.02483977
348.41	0.00456527		938.41	0.00425319		1528.4	0.01397565		2118.4	0.00926661		2708.4	0.02461027
348.61	0.00544061		938.61	0.0047509		1528.6	0.01309433		2118.6	0.01006809		2708.6	0.02415841
348.81	0.0056925		938.81	0.00400901		1528.8	0.01380473		2118.8	0.01045634		2708.8	0.02354412
349.01	0.0049253		939.01	0.0036477		1529	0.01305855		2119	0.01002795		2709	0.02284851
349.21	0.00559181		939.21	0.00331948		1529.2	0.01321936		2119.2	0.01079085		2709.2	0.02216813
349.41	0.00584784		939.41	0.0036922		1529.4	0.0138278		2119.4	0.01097884		2709.4	0.02228714
349.61	0.00655961		939.61	0.00390727		1529.6	0.01351264		2119.6	0.01048557		2709.6	0.02286207
349.81	0.0064752		939.81	0.0039662		1529.8	0.01313277		2119.8	0.01087549		2709.8	0.02210607
350.01	0.00583703		940.01	0.00405456		1530	0.01218332		2120	0.01034752		2710	0.02146432
350.21	0.00575637		940.21	0.00363237		1530.2	0.01187652		2120.2	0.00933689		2710.2	0.02124239
350.41	0.00569834		940.41	0.00393038		1530.4	0.01190372		2120.4	0.00905432		2710.4	0.02099652
350.61	0.00559392		940.61	0.00389105		1530.6	0.01092422		2120.6	0.00866364		2710.6	0.02122943
350.81	0.00574874		940.81	0.00471293		1530.8	0.01012767		2120.8	0.00867166		2710.8	0.02032951
351.01	0.00521334		941.01	0.00534344		1531	0.01053251		2121	0.00845879		2711	0.01949659
351.21	0.00427776		941.21	0.00587051		1531.2	0.01122876		2121.2	0.00846548		2711.2	0.01896171
351.41	0.00391441		941.41	0.0052721		1531.4	0.01146742		2121.4	0.00834319		2711.4	0.01910167
351.61	0.00243153		941.61	0.00502664		1531.6	0.01203366		2121.6	0.00862912		2711.6	0.01914893
351.81	0.00203004		941.81	0.00544487		1531.8	0.01241615		2121.8	0.00963879		2711.8	0.0197333
352.01	0.00211432		942.01	0.00437399		1532	0.01245579		2122	0.01013154		2712	0.02008841
352.21	0.00127096		942.21	0.00515376		1532.2	0.01242618		2122.2	0.01073467		2712.2	0.0204688
352.41	0.00157637		942.41	0.00539475		1532.4	0.01252457		2122.4	0.01033041		2712.4	0.0194585
352.61	0.00264424		942.61	0.00492009		1532.6	0.01221788		2122.6	0.01183565		2712.6	0.01905621
352.81	0.00310619		942.81	0.00403036		1532.8	0.01233387		2122.8	0.01209794		2712.8	0.01902745
353.01	0.0034821		943.01	0.00472798		1533	0.01209356		2123	0.01294775		2713	0.01928131
353.21	0.00400338		943.21	0.00509254		1533.2	0.01216015		2123.2	0.0130259		2713.2	0.01890611
353.41	0.00410384		943.41	0.00463595		1533.4	0.01236769		2123.4	0.0125039		2713.4	0.01942076
353.61	0.00467635		943.61	0.00402832		1533.6	0.01141661		2123.6	0.01247797		2713.6	0.01926396
353.81	0.00424847		943.81	0.00338866		1533.8	0.01023956		2123.8	0.01233641		2713.8	0.01831268
354.01	0.00401454		944.01	0.00291394		1534	0.00953694		2124	0.01137727		2714	0.01871234
354.21	0.00354425		944.21	0.00212997		1534.2	0.01058746		2124.2	0.01102637		2714.2	0.01811972
354.41	0.00298234		944.41	0.00254077		1534.4	0.01076091		2124.4	0.0106734		2714.4	0.01864783
354.61	0.00301176		944.61	0.0026935		1534.6	0.01058743		2124.6	0.01055512		2714.6	0.01856683
354.81	0.00393694		944.81	0.00350525		1534.8	0.01080246		2124.8	0.00991323		2714.8	0.01853679
355.01	0.00493234		945.01	0.00329723		1535	0.01261822		2125	0.00984072		2715	0.01876647
355.21	0.00436937		945.21	0.00337117		1535.2	0.0129391		2125.2	0.00978269		2715.2	0.01848526
355.41	0.00453112		945.41	0.0037778		1535.4	0.01311789		2125.4	0.00988425		2715.4	0.01884242
355.61	0.00407592		945.61	0.00379512		1535.6	0.01290562		2125.6	0.01019232		2715.6	0.01864656
355.81	0.00421668		945.81	0.0044498		1535.8	0.01207504		2125.8	0.00976489		2715.8	0.01938762
356.01	0.00331098		946.01	0.00458501		1536	0.01232301		2126	0.00871082		2716	0.02056504
356.21	0.00255928		946.21	0.00484387		1536.2	0.01222542		2126.2	0.00813416		2716.2	0.02033802
356.41	0.00318512		946.41	0.00473371		1536.4	0.01223559		2126.4	0.00753405		2716.4	0.02058175
356.61	0.00342127		946.61	0.00498578		1536.6	0.01272986		2126.6	0.00881278		2716.6	0.0210114
356.81	0.00363831		946.81	0.00428115		1536.8	0.01231418		2126.8	0.00820178		2716.8	0.02162295
357.01	0.00474747		947.01	0.00496986		1537	0.01296517		2127	0.00825699		2717	0.02266691
357.21	0.00471016		947.21	0.0041083		1537.2	0.01262515		2127.2	0.00798308		2717.2	0.02273205
357.41	0.00486119		947.41	0.0035489		1537.4	0.01274998		2127.4	0.00829998		2717.4	0.02330608
357.61	0.00561119		947.61	0.00335014		1537.6	0.01180402		2127.6	0.00837098		2717.6	0.02311214
357.81	0.00545506		947.81	0.00280198		1537.8	0.01101265		2127.8	0.00823136		2717.8	0.02260324
358.01	0.00568572		948.01	0.00239398		1538	0.01105964		2128	0.00798154		2718	0.02277208
358.21	0.00494659		948.21	0.00214153		1538.2	0.01139194		2128.2	0.00800208		2718.2	0.02243642
358.41	0.00430426		948.41	0.00329388		1538.4	0.01041912		2128.4	0.00777748		2718.4	0.02339409
358.61	0.00513318		948.61	0.0027463		1538.6	0.00957753		2128.6	0.00787725		2718.6	0.02270073
358.81	0.00638866		948.81	0.00261236		1538.8	0.00937174		2128.8	0.00773621		2718.8	0.02242521
359.01	0.00659505		949.01	0.00223315		1539	0.00942012		2129	0.00837138		2719	0.02207628
359.21	0.00541494		949.21	0.00227235		1539.2	0.00888144		2129.2	0.00838457		2719.2	0.02135027
359.41	0.00548184		949.41	0.0028381		1539.4	0.00855279		2129.4	0.00841613		2719.4	0.02085551
359.61	0.0038251		949.61	0.00315034		1539.6	0.00767909		2129.6	0.0096815		2719.6	0.02096434
359.81	0.00338622		949.81	0.00321064		1539.8	0.00693097		2129.8	0.00961177		2719.8	0.02146174
360.01	0.00267958		950.01	0.0029791		1540	0.00701146		2130	0.00917038		2720	0.02224867
360.21	0.0023516		950.21	0.00234394		1540.2	0.00698081		2130.2	0.01036937		2720.2	0.02247472
360.41	0.00158486		950.41	0.00282515		1540.4	0.00728122		2130.4	0.01031684		2720.4	0.02255532
360.61	0.00199766		950.61	0.00234362		1540.6	0.00746619		2130.6	0.01214941		2720.6	0.02195941
360.81	0.00307172		950.81	0.00152398		1540.8	0.00767132		2130.8	0.01211373		2720.8	0.02168381
361.01	0.00404576		951.01	0.00172164		1541	0.00838948		2131	0.01245204		2721	0.0219313
361.21	0.00373874		951.21	0.0017675		1541.2	0.00856387		2131.2	0.01333266		2721.2	0.02064736
361.41	0.00303388		951.41	0.00149634		1541.4	0.00930039		2131.4	0.01366345		2721.4	0.02116872
361.61	0.00372011		951.61	0.00119598		1541.6	0.00959165		2131.6	0.01331935		2721.6	0.02092174
361.81	0.00300326		951.81	0.00067887		1541.8	0.00939348		2131.8	0.01375645		2721.8	0.02092132
362.01	0.00322066		952.01	0.00136714		1542	0.00964613		2132	0.01357577		2722	0.02115332
362.21	0.00261998		952.21	0.00226412		1542.2	0.01021395		2132.2	0.01295373		2722.2	0.02162818
362.41	0.00215076		952.41	0.0034493		1542.4	0.01029222		2132.4	0.01250229		2722.4	0.0217353
362.61	0.00261886		952.61	0.00319378		1542.6	0.01013456		2132.6	0.01192308		2722.6	0.02036241
362.81	0.00244888		952.81	0.00354013		1542.8	0.01132709		2132.8	0.01125758		2722.8	0.02028788
363.01	0.00218208		953.01	0.00409137		1543	0.01114539		2133	0.01113055		2723	0.02057078
363.21	0.00184273		953.21	0.0046043		1543.2	0.01162705		2133.2	0.01166121		2723.2	0.02064235
363.41	0.00114314		953.41	0.00500542		1543.4	0.01180214		2133.4	0.01195075		2723.4	0.02055173
363.61	0.00070913		953.61	0.00502238		1543.6	0.0114318		2133.6	0.01260835		2723.6	0.02055733
363.81	0.00084891		953.81	0.00450926		1543.8	0.0105948		2133.8	0.01230376		2723.8	0.0208928
364.01	0.00054369		954.01	0.00348351		1544	0.00965127		2134	0.01222737		2724	0.02128848
364.21	0.00005808		954.21	0.00383222		1544.2	0.00997536		2134.2	0.01316867		2724.2	0.02091678
364.41	0.00031389		954.41	0.00399338		1544.4	0.00992861		2134.4	0.0131342		2724.4	0.01958665
364.61	0.00064801		954.61	0.00268386		1544.6	0.00921311		2134.6	0.01364794		2724.6	0.01900913
364.81	0.00142234		954.81	0.00285146		1544.8	0.0094523		2134.8	0.01328816		2724.8	0.01832715
365.01	0.00102523		955.01	0.0023922		1545	0.00917018		2135	0.0132756		2725	0.01767287
365.21	0.00091757		955.21	0.00212392		1545.2	0.00949192		2135.2	0.0135701		2725.2	0.01713308
365.41	0.00089104		955.41	0.00114808		1545.4	0.01014729		2135.4	0.01371322		2725.4	0.01749608
365.61	0.00200331		955.61	0.0007428		1545.6	0.01014379		2135.6	0.01385916		2725.6	0.01735086
365.81	0.00204286		955.81	0.00067149		1545.8	0.00999708		2135.8	0.01330709		2725.8	0.01765556
366.01	0.00261085		956.01	0.0011577		1546	0.01088333		2136	0.01227095		2726	0.01788634
366.21	0.0026417		956.21	0.00065595		1546.2	0.01055904		2136.2	0.01159358		2726.2	0.01890353
366.41	0.00233539		956.41	0.00087927		1546.4	0.01033524		2136.4	0.01013767		2726.4	0.01936953
366.61	0.00296325		956.61	0.00083113		1546.6	0.0108672		2136.6	0.01000651		2726.6	0.01938187
366.81	0.003407		956.81	0.00060205		1546.8	0.01149668		2136.8	0.00950557		2726.8	0.02027116
367.01	0.00385636		957.01	0.00082754		1547	0.01190022		2137	0.00973427		2727	0.02193467
367.21	0.00416164		957.21	0.00067659		1547.2	0.01232437		2137.2	0.00971916		2727.2	0.02270149
367.41	0.00387793		957.41	0.00071653		1547.4	0.01253158		2137.4	0.0094845		2727.4	0.02267684
367.61	0.0047371		957.61	0.00059695		1547.6	0.01170797		2137.6	0.00897724		2727.6	0.02260892
367.81	0.00464504		957.81	0.00080702		1547.8	0.01094692		2137.8	0.00845747		2727.8	0.02334194
368.01	0.00461069		958.01	0.00069524		1548	0.01124184		2138	0.00886218		2728	0.0229916
368.21	0.00474219		958.21	0.00167086		1548.2	0.01240513		2138.2	0.00940416		2728.2	0.02189633
368.41	0.00532013		958.41	0.00134948		1548.4	0.012451		2138.4	0.00996224		2728.4	0.021545
368.61	0.00470198		958.61	0.00067248		1548.6	0.01173392		2138.6	0.01007276		2728.6	0.02124966
368.81	0.0043945		958.81	0.00157595		1548.8	0.0115613		2138.8	0.01032386		2728.8	0.02083002
369.01	0.00350169		959.01	0.00134579		1549	0.01152418		2139	0.01061316		2729	0.02004541
369.21	0.00345588		959.21	0.00180384		1549.2	0.01169847		2139.2	0.01089325		2729.2	0.02000862
369.41	0.00362597		959.41	0.00228695		1549.4	0.01186104		2139.4	0.01125871		2729.4	0.01988459
369.61	0.00370088		959.61	0.00313629		1549.6	0.01168887		2139.6	0.01122358		2729.6	0.02033992
369.81	0.00321478		959.81	0.00353165		1549.8	0.01197096		2139.8	0.01063868		2729.8	0.02071868
370.01	0.00236277		960.01	0.00410062		1550	0.01236165		2140	0.01104731		2730	0.020734
370.21	0.0016025		960.21	0.00424434		1550.2	0.01167793		2140.2	0.01091383		2730.2	0.02068835
370.41	0.00104476		960.41	0.00539892		1550.4	0.01217239		2140.4	0.01005763		2730.4	0.02082721
370.61	0.00111781		960.61	0.0053869		1550.6	0.0120821		2140.6	0.01081769		2730.6	0.02125239
370.81	0.00130332		960.81	0.00528667		1550.8	0.0123854		2140.8	0.01050898		2730.8	0.02160608
371.01	0.00180721		961.01	0.00551454		1551	0.01269574		2141	0.0105017		2731	0.02159998
371.21	0.00190706		961.21	0.00496865		1551.2	0.01249593		2141.2	0.00935831		2731.2	0.02146266
371.41	0.00195948		961.41	0.00453548		1551.4	0.01225333		2141.4	0.00991518		2731.4	0.02062957
371.61	0.00284602		961.61	0.00386079		1551.6	0.01173784		2141.6	0.00894513		2731.6	0.02062472
371.81	0.00327656		961.81	0.00355433		1551.8	0.01179666		2141.8	0.00861983		2731.8	0.02011315
372.01	0.00399114		962.01	0.0027829		1552	0.01209508		2142	0.00891983		2732	0.0197439
372.21	0.00382138		962.21	0.00243444		1552.2	0.01105594		2142.2	0.00883473		2732.2	0.01862282
372.41	0.00416616		962.41	0.00142607		1552.4	0.01090759		2142.4	0.0084469		2732.4	0.01907712
372.61	0.00433943		962.61	0.00037555		1552.6	0.01058078		2142.6	0.00801492		2732.6	0.01947604
372.81	0.00465146		962.81	0.00049644		1552.8	0.01018683		2142.8	0.00721631		2732.8	0.01964833
373.01	0.00475777		963.01	0.00016697		1553	0.01021244		2143	0.00747883		2733	0.0196646
373.21	0.00475204		963.21	-0.00053176		1553.2	0.01033843		2143.2	0.00727734		2733.2	0.02060021
373.41	0.00460977		963.41	-0.0003345		1553.4	0.01028982		2143.4	0.00772646		2733.4	0.0201926
373.61	0.0040784		963.61	-0.00017622		1553.6	0.01049257		2143.6	0.00838746		2733.6	0.0201264
373.81	0.00421429		963.81	-0.00074667		1553.8	0.0113657		2143.8	0.00931576		2733.8	0.02064409
374.01	0.00358806		964.01	0.0000956		1554	0.01075384		2144	0.00963435		2734	0.0208289
374.21	0.00329979		964.21	0.00082829		1554.2	0.01059728		2144.2	0.00894174		2734.2	0.02008064
374.41	0.0035087		964.41	0.00107186		1554.4	0.01047795		2144.4	0.00970771		2734.4	0.02062797
374.61	0.003445		964.61	0.00063118		1554.6	0.01038365		2144.6	0.01050602		2734.6	0.02102889
374.81	0.0039153		964.81	0.00102638		1554.8	0.01122071		2144.8	0.01105982		2734.8	0.02105578
375.01	0.00391284		965.01	0.00067383		1555	0.01156353		2145	0.01124653		2735	0.01973905
375.21	0.0032352		965.21	0.00050603		1555.2	0.01248412		2145.2	0.01080395		2735.2	0.01954956
375.41	0.00314703		965.41	0.00071466		1555.4	0.01210497		2145.4	0.01115494		2735.4	0.01863918
375.61	0.00296863		965.61	0.00053431		1555.6	0.01217705		2145.6	0.01056684		2735.6	0.01891699
375.81	0.00276024		965.81	0.00072504		1555.8	0.01221966		2145.8	0.01091581		2735.8	0.0197582
376.01	0.00297766		966.01	0.00114118		1556	0.01134193		2146	0.01069584		2736	0.0199005
376.21	0.00213364		966.21	0.00169505		1556.2	0.01032727		2146.2	0.01031791		2736.2	0.01967094
376.41	0.00308746		966.41	0.00111619		1556.4	0.01148888		2146.4	0.00955079		2736.4	0.02039965
376.61	0.00333419		966.61	0.00132526		1556.6	0.01097431		2146.6	0.0103278		2736.6	0.02060897
376.81	0.00254775		966.81	0.00247978		1556.8	0.01124508		2146.8	0.01139677		2736.8	0.02072574
377.01	0.00173728		967.01	0.00270711		1557	0.0109868		2147	0.01209623		2737	0.02123554
377.21	0.00203523		967.21	0.00223679		1557.2	0.01084178		2147.2	0.01227801		2737.2	0.02144169
377.41	0.00252042		967.41	0.00355024		1557.4	0.01057652		2147.4	0.01304109		2737.4	0.02130412
377.61	0.00225596		967.61	0.00371195		1557.6	0.01091519		2147.6	0.01360074		2737.6	0.02158621
377.81	0.00294848		967.81	0.00275822		1557.8	0.01172711		2147.8	0.01379141		2737.8	0.02166777
378.01	0.00259745		968.01	0.00280496		1558	0.01106559		2148	0.0133938		2738	0.02113621
378.21	0.00256107		968.21	0.00258654		1558.2	0.01110171		2148.2	0.01295174		2738.2	0.02009952
378.41	0.00255072		968.41	0.00149029		1558.4	0.01035543		2148.4	0.01392286		2738.4	0.02035536
378.61	0.00259039		968.61	0.00128927		1558.6	0.01003037		2148.6	0.01347879		2738.6	0.02032091
378.81	0.00221715		968.81	0.00124611		1558.8	0.0104354		2148.8	0.01332901		2738.8	0.01973034
379.01	0.00243869		969.01	0.00135006		1559	0.01014295		2149	0.01229452		2739	0.0193139
379.21	0.00175833		969.21	0.00157674		1559.2	0.00948762		2149.2	0.01134249		2739.2	0.02002512
379.41	0.00191812		969.41	0.00223831		1559.4	0.0087599		2149.4	0.01086502		2739.4	0.02006616
379.61	0.00185797		969.61	0.0017237		1559.6	0.00887932		2149.6	0.01111066		2739.6	0.02030239
379.81	0.00242945		969.81	0.00229432		1559.8	0.00860417		2149.8	0.01092393		2739.8	0.02023918
380.01	0.0025174		970.01	0.00301046		1560	0.00761011		2150	0.00952052		2740	0.01918498
380.21	0.00184051		970.21	0.00288877		1560.2	0.00766839		2150.2	0.00853888		2740.2	0.0193846
380.41	0.0024445		970.41	0.00246897		1560.4	0.00769545		2150.4	0.00884395		2740.4	0.01923462
380.61	0.00169767		970.61	0.00332724		1560.6	0.00718379		2150.6	0.0093935		2740.6	0.0194613
380.81	0.00115589		970.81	0.0037988		1560.8	0.00739821		2150.8	0.00952897		2740.8	0.01926874
381.01	0.00187981		971.01	0.003277		1561	0.00711646		2151	0.00863914		2741	0.02018525
381.21	0.00278264		971.21	0.00258316		1561.2	0.00776157		2151.2	0.00824325		2741.2	0.01999007
381.41	0.00236702		971.41	0.00237534		1561.4	0.0072805		2151.4	0.00823743		2741.4	0.01985702
381.61	0.00193807		971.61	0.00119687		1561.6	0.00816918		2151.6	0.00863904		2741.6	0.0187867
381.81	0.002587		971.81	-0.00009693		1561.8	0.00848139		2151.8	0.00852218		2741.8	0.01847101
382.01	0.00269507		972.01	-0.00022862		1562	0.00825303		2152	0.00899259		2742	0.01863507
382.21	0.00309093		972.21	0.00029391		1562.2	0.00768769		2152.2	0.00930147		2742.2	0.01807156
382.41	0.00280658		972.41	-0.00020424		1562.4	0.00750334		2152.4	0.00985783		2742.4	0.0183442
382.61	0.00266898		972.61	0.00008503		1562.6	0.00763266		2152.6	0.00947535		2742.6	0.01874099
382.81	0.00162769		972.81	0.00001405		1562.8	0.00731631		2152.8	0.00973697		2742.8	0.0185025
383.01	0.00223452		973.01	0.00091117		1563	0.00770943		2153	0.00977661		2743	0.01884706
383.21	0.00151459		973.21	0.00139706		1563.2	0.00762106		2153.2	0.01032772		2743.2	0.01852731
383.41	0.00236201		973.41	0.00220598		1563.4	0.00881263		2153.4	0.01109495		2743.4	0.01772632
383.61	0.00204118		973.61	0.0014262		1563.6	0.00975882		2153.6	0.01184734		2743.6	0.01795648
383.81	0.0016876		973.81	0.00193628		1563.8	0.00952504		2153.8	0.01237322		2743.8	0.01768772
384.01	0.00167229		974.01	0.00176183		1564	0.00987063		2154	0.01229337		2744	0.01751375
384.21	0.0021745		974.21	0.00154707		1564.2	0.01053175		2154.2	0.01303501		2744.2	0.01744145
384.41	0.00262976		974.41	0.00105629		1564.4	0.01088036		2154.4	0.01365212		2744.4	0.01753743
384.61	0.00252997		974.61	0.0011203		1564.6	0.01189514		2154.6	0.01412548		2744.6	0.01770493
384.81	0.00333565		974.81	0.00082417		1564.8	0.0125293		2154.8	0.01453909		2744.8	0.01787132
385.01	0.00432666		975.01	0.00026805		1565	0.0124922		2155	0.01439904		2745	0.01868669
385.21	0.00416213		975.21	0.00028183		1565.2	0.01276755		2155.2	0.01441523		2745.2	0.0174412
385.41	0.00339392		975.41	-0.0000279		1565.4	0.0115572		2155.4	0.01445338		2745.4	0.01645459
385.61	0.00350598		975.61	-0.00061339		1565.6	0.0118683		2155.6	0.01472924		2745.6	0.01613056
385.81	0.00465988		975.81	-0.00097227		1565.8	0.0114566		2155.8	0.01354242		2745.8	0.01644838
386.01	0.00510806		976.01	-0.00101849		1566	0.0119812		2156	0.01392276		2746	0.01700269
386.21	0.00472713		976.21	-0.00103848		1566.2	0.01141259		2156.2	0.01302675		2746.2	0.01663876
386.41	0.00355825		976.41	-0.00113283		1566.4	0.01117074		2156.4	0.0123674		2746.4	0.01651507
386.61	0.00309454		976.61	-0.00046955		1566.6	0.01110371		2156.6	0.01133625		2746.6	0.01646905
386.81	0.00231039		976.81	0.00015074		1566.8	0.01077707		2156.8	0.01145039		2746.8	0.0165325
387.01	0.00163928		977.01	0.00071359		1567	0.01132938		2157	0.01117929		2747	0.01730109
387.21	0.0009788		977.21	0.00148425		1567.2	0.01011564		2157.2	0.0116838		2747.2	0.01766746
387.41	0.00086836		977.41	0.00191046		1567.4	0.01019677		2157.4	0.01088078		2747.4	0.01854209
387.61	-0.00002396		977.61	0.00209951		1567.6	0.0100052		2157.6	0.01060589		2747.6	0.01942049
387.81	0.00039561		977.81	0.00293999		1567.8	0.00950797		2157.8	0.01022717		2747.8	0.01957956
388.01	0.00091605		978.01	0.00314246		1568	0.00968639		2158	0.01012701		2748	0.02008555
388.21	0.00056617		978.21	0.00265531		1568.2	0.0100284		2158.2	0.01088235		2748.2	0.0204992
388.41	0.00000495		978.41	0.00227554		1568.4	0.01022103		2158.4	0.01105455		2748.4	0.02153592
388.61	-0.00016858		978.61	0.00323927		1568.6	0.01048493		2158.6	0.01226616		2748.6	0.02182869
388.81	-0.00011869		978.81	0.00345523		1568.8	0.00980526		2158.8	0.01166771		2748.8	0.02182831
389.01	-0.00020568		979.01	0.00293547		1569	0.00955689		2159	0.01167432		2749	0.02138629
389.21	-0.00095147		979.21	0.00253963		1569.2	0.00927353		2159.2	0.01159787		2749.2	0.02079875
389.41	-0.00108347		979.41	0.00250651		1569.4	0.00878823		2159.4	0.01192542		2749.4	0.02060744
389.61	0.00007693		979.61	0.00168948		1569.6	0.00810336		2159.6	0.01231955		2749.6	0.02069895
389.81	0.00170645		979.81	0.00176605		1569.8	0.00810348		2159.8	0.0121308		2749.8	0.02081223
390.01	0.00215607		980.01	0.00177497		1570	0.00849115		2160	0.01300999		2750	0.02125373
390.21	0.00215835		980.21	0.00145412		1570.2	0.00793289		2160.2	0.01215318		2750.2	0.02053738
390.41	0.00186493		980.41	0.00208754		1570.4	0.00900615		2160.4	0.01185372		2750.4	0.01997155
390.61	0.00188279		980.61	0.00273652		1570.6	0.00947702		2160.6	0.01137092		2750.6	0.02066246
390.81	0.00175289		980.81	0.00207296		1570.8	0.00920836		2160.8	0.01212514		2750.8	0.02063195
391.01	0.00180591		981.01	0.00175575		1571	0.00949021		2161	0.01204269		2751	0.02119754
391.21	0.00160268		981.21	0.00255669		1571.2	0.00961212		2161.2	0.01254802		2751.2	0.02011601
391.41	0.00100306		981.41	0.00216636		1571.4	0.00973348		2161.4	0.01156867		2751.4	0.02065851
391.61	0.00046104		981.61	0.00204142		1571.6	0.01000275		2161.6	0.01184372		2751.6	0.0213953
391.81	0.00041745		981.81	0.00214009		1571.8	0.01016909		2161.8	0.01160959		2751.8	0.02190042
392.01	-0.00033611		982.01	0.00181018		1572	0.01004193		2162	0.0118023		2752	0.02171532
392.21	-0.00145465		982.21	0.00178296		1572.2	0.0100406		2162.2	0.01212209		2752.2	0.02107945
392.41	-0.00193723		982.41	0.00240422		1572.4	0.01008813		2162.4	0.01195108		2752.4	0.02084291
392.61	-0.00187503		982.61	0.00311479		1572.6	0.01050742		2162.6	0.0116626		2752.6	0.02039826
392.81	-0.00148141		982.81	0.00295187		1572.8	0.01029061		2162.8	0.01013726		2752.8	0.0199241
393.01	-0.00167805		983.01	0.00256613		1573	0.0105951		2163	0.01006519		2753	0.0199535
393.21	-0.00160211		983.21	0.00240236		1573.2	0.00979551		2163.2	0.00977411		2753.2	0.01992367
393.41	-0.00116333		983.41	0.00264929		1573.4	0.0100724		2163.4	0.00920254		2753.4	0.01980175
393.61	-0.00002936		983.61	0.00107409		1573.6	0.00917678		2163.6	0.00968457		2753.6	0.0197017
393.81	0.00144665		983.81	0.00062183		1573.8	0.00894829		2163.8	0.0102892		2753.8	0.0202472
394.01	0.00144324		984.01	0.00041358		1574	0.00928732		2164	0.00976077		2754	0.02001433
394.21	0.00156313		984.21	0.00013987		1574.2	0.01019255		2164.2	0.00959195		2754.2	0.01978379
394.41	0.00139004		984.41	-0.00016361		1574.4	0.01073185		2164.4	0.00923951		2754.4	0.01997538
394.61	0.00140733		984.61	-0.00052213		1574.6	0.00983684		2164.6	0.00991447		2754.6	0.02037071
394.81	0.00188813		984.81	-0.00154324		1574.8	0.00975898		2164.8	0.00990912		2754.8	0.01998091
395.01	0.00203749		985.01	-0.0014373		1575	0.0098634		2165	0.00985916		2755	0.02038198
395.21	0.00137047		985.21	-0.00078206		1575.2	0.009854		2165.2	0.01065959		2755.2	0.01929159
395.41	0.00088853		985.41	-0.00194019		1575.4	0.0091703		2165.4	0.01073149		2755.4	0.01975225
395.61	0.00093437		985.61	-0.00137493		1575.6	0.0093963		2165.6	0.01148473		2755.6	0.02017409
395.81	0.00033733		985.81	-0.00032795		1575.8	0.01013572		2165.8	0.01133156		2755.8	0.01984357
396.01	-0.00029557		986.01	-0.00038333		1576	0.0100001		2166	0.01152708		2756	0.01913498
396.21	-0.00108175		986.21	0.00025315		1576.2	0.0100686		2166.2	0.01162195		2756.2	0.01858278
396.41	-0.00175495		986.41	0.00071006		1576.4	0.01032472		2166.4	0.01149834		2756.4	0.01815321
396.61	-0.00124216		986.61	0.00131487		1576.6	0.01092285		2166.6	0.01049515		2756.6	0.01859138
396.81	-0.00100227		986.81	0.00131417		1576.8	0.01072875		2166.8	0.00957583		2756.8	0.01887311
397.01	-0.00210554		987.01	0.0007159		1577	0.01120481		2167	0.00935801		2757	0.01900535
397.21	-0.00258297		987.21	-0.00015364		1577.2	0.01111947		2167.2	0.00877911		2757.2	0.01942747
397.41	-0.00295745		987.41	-0.00096186		1577.4	0.01155631		2167.4	0.00848181		2757.4	0.01975886
397.61	-0.00232157		987.61	-0.00152475		1577.6	0.01107313		2167.6	0.00939214		2757.6	0.02078251
397.81	-0.00209741		987.81	-0.00104635		1577.8	0.01066455		2167.8	0.00962778		2757.8	0.02054518
398.01	-0.00257504		988.01	-0.0010068		1578	0.01048232		2168	0.00953801		2758	0.02039659
398.21	-0.00223311		988.21	-0.00098311		1578.2	0.0099827		2168.2	0.00941134		2758.2	0.02128293
398.41	-0.00152463		988.41	-0.00128455		1578.4	0.00817413		2168.4	0.00846084		2758.4	0.02205869
398.61	-0.00081005		988.61	-0.0009158		1578.6	0.00774211		2168.6	0.00870596		2758.6	0.02210777
398.81	0.00069655		988.81	-0.00103751		1578.8	0.00717576		2168.8	0.00773768		2758.8	0.02219085
399.01	0.00201246		989.01	-0.00109836		1579	0.00707892		2169	0.00857903		2759	0.02260044
399.21	0.00268664		989.21	-0.00082674		1579.2	0.00669677		2169.2	0.00883045		2759.2	0.02243359
399.41	0.0039473		989.41	-0.00091379		1579.4	0.00632333		2169.4	0.0087703		2759.4	0.02257266
399.61	0.00476223		989.61	-0.00057372		1579.6	0.00666022		2169.6	0.00901972		2759.6	0.02307286
399.81	0.00522952		989.81	0.0004775		1579.8	0.0065477		2169.8	0.0088999		2759.8	0.02301406
400.01	0.00594312		990.01	-0.00001365		1580	0.00600617		2170	0.00872155		2760	0.02187983
400.21	0.00577096		990.21	0.00103181		1580.2	0.00664848		2170.2	0.0089863		2760.2	0.02169111
400.41	0.00487065		990.41	0.00111125		1580.4	0.0070198		2170.4	0.00911037		2760.4	0.02131099
400.61	0.00543746		990.61	0.00100985		1580.6	0.0078981		2170.6	0.00903531		2760.6	0.02168449
400.81	0.00464068		990.81	0.00132893		1580.8	0.00801052		2170.8	0.00919172		2760.8	0.02138076
401.01	0.00267163		991.01	0.00089609		1581	0.00843589		2171	0.00964916		2761	0.02061016
401.21	0.00294431		991.21	0.00051479		1581.2	0.00880405		2171.2	0.00962841		2761.2	0.02015563
401.41	0.0029387		991.41	0.0008701		1581.4	0.00939081		2171.4	0.00937223		2761.4	0.01976647
401.61	0.00262814		991.61	0.00116718		1581.6	0.00868803		2171.6	0.00936093		2761.6	0.01918562
401.81	0.00187198		991.81	0.00177882		1581.8	0.00954088		2171.8	0.00918189		2761.8	0.01766885
402.01	0.00179622		992.01	0.00096023		1582	0.0098339		2172	0.00851745		2762	0.01767017
402.21	0.00196465		992.21	0.00124261		1582.2	0.00985495		2172.2	0.00763345		2762.2	0.01781444
402.41	0.00126191		992.41	0.00108058		1582.4	0.01038709		2172.4	0.0074015		2762.4	0.01747736
402.61	-0.00001873		992.61	0.00071442		1582.6	0.01089795		2172.6	0.00744107		2762.6	0.01657765
402.81	0.00026976		992.81	0.00003248		1582.8	0.01072867		2172.8	0.00727042		2762.8	0.0168595
403.01	0.00153585		993.01	-0.00018134		1583	0.01169456		2173	0.00795644		2763	0.0171307
403.21	0.00166129		993.21	0.00013909		1583.2	0.0104536		2173.2	0.00804711		2763.2	0.01721394
403.41	0.00141308		993.41	0.00046114		1583.4	0.01002978		2173.4	0.00822434		2763.4	0.0175388
403.61	0.00101772		993.61	0.00017881		1583.6	0.00981816		2173.6	0.00841101		2763.6	0.01757071
403.81	0.00050751		993.81	0.00069697		1583.8	0.00908824		2173.8	0.00860379		2763.8	0.01764238
404.01	-0.0002972		994.01	0.00013013		1584	0.00847271		2174	0.00898108		2764	0.01727213
404.21	-0.00132821		994.21	0.00051539		1584.2	0.00834101		2174.2	0.01003339		2764.2	0.01816647
404.41	-0.00193433		994.41	-0.0005051		1584.4	0.00757211		2174.4	0.00964722		2764.4	0.01844621
404.61	-0.00113451		994.61	-0.00076946		1584.6	0.00761589		2174.6	0.01028228		2764.6	0.01828473
404.81	-0.00060123		994.81	0.00021768		1584.8	0.00695351		2174.8	0.01122747		2764.8	0.01833176
405.01	0.00016738		995.01	-0.000139		1585	0.00726053		2175	0.01170087		2765	0.01875025
405.21	0.00185974		995.21	-0.00112478		1585.2	0.00779226		2175.2	0.01127367		2765.2	0.01923331
405.41	0.00124195		995.41	-0.00066496		1585.4	0.00764537		2175.4	0.01124678		2765.4	0.01942729
405.61	0.00118069		995.61	-0.00105854		1585.6	0.00712681		2175.6	0.01114503		2765.6	0.02017717
405.81	0.00145315		995.81	-0.00087564		1585.8	0.00826474		2175.8	0.01068799		2765.8	0.02028912
406.01	0.00199003		996.01	-0.00235204		1586	0.00825818		2176	0.01057382		2766	0.02049088
406.21	0.00210816		996.21	-0.00237957		1586.2	0.00856862		2176.2	0.01121895		2766.2	0.02015655
406.41	0.00120126		996.41	-0.00234562		1586.4	0.00902359		2176.4	0.01059458		2766.4	0.02047045
406.61	0.00061575		996.61	-0.00333288		1586.6	0.00866065		2176.6	0.0103656		2766.6	0.01992743
406.81	0.00151052		996.81	-0.00341527		1586.8	0.00885365		2176.8	0.01041797		2766.8	0.02023759
407.01	0.00158035		997.01	-0.00265961		1587	0.00900445		2177	0.00930865		2767	0.01958159
407.21	0.00081018		997.21	-0.00214663		1587.2	0.00840304		2177.2	0.00875953		2767.2	0.01961063
407.41	-0.00022085		997.41	-0.0011551		1587.4	0.00864483		2177.4	0.00878708		2767.4	0.01990893
407.61	-0.00016476		997.61	-0.00121889		1587.6	0.00872454		2177.6	0.00906755		2767.6	0.01981745
407.81	-0.00068852		997.81	-0.00162438		1587.8	0.00801487		2177.8	0.00888604		2767.8	0.02016882
408.01	-0.00089471		998.01	-0.00061294		1588	0.00775722		2178	0.00904452		2768	0.01995964
408.21	-0.00073091		998.21	0.0001594		1588.2	0.00758406		2178.2	0.00836071		2768.2	0.02060093
408.41	0.00005448		998.41	-0.00011442		1588.4	0.0079657		2178.4	0.00785429		2768.4	0.02070423
408.61	0.00044542		998.61	0.0002647		1588.6	0.00892901		2178.6	0.00857174		2768.6	0.02088118
408.81	0.00039823		998.81	0.00116926		1588.8	0.00885186		2178.8	0.00911103		2768.8	0.02165177
409.01	0.000213		999.01	0.00107847		1589	0.00927519		2179	0.00885443		2769	0.02159842
409.21	-0.00063563		999.21	0.0006321		1589.2	0.00949465		2179.2	0.00880279		2769.2	0.02197201
409.41	-0.0016411		999.41	0.00168631		1589.4	0.00944271		2179.4	0.00895859		2769.4	0.02157399
409.61	-0.00152354		999.61	0.00097598		1589.6	0.00915336		2179.6	0.00890287		2769.6	0.02154024
409.81	-0.00197416		999.81	0.00106635		1589.8	0.0093651		2179.8	0.00911014		2769.8	0.0204817
410.01	-0.00176642		1000.01	0.00048282		1590	0.01024846		2180	0.00973353		2770	0.0197573
410.21	-0.00201214		1000.21	0.00108711		1590.2	0.00961771		2180.2	0.01011153		2770.2	0.01953353
410.41	-0.00278174		1000.41	0.00133978		1590.4	0.01001057		2180.4	0.00966944		2770.4	0.01977901
410.61	-0.00343824		1000.61	0.00053913		1590.6	0.01024999		2180.6	0.00937223		2770.6	0.01894539
410.81	-0.00253036		1000.81	0.00079196		1590.8	0.01012944		2180.8	0.00820654		2770.8	0.01835708
411.01	-0.00271399		1001.01	0.00139755		1591	0.01001066		2181	0.00716265		2771	0.01779467
411.21	-0.00135948		1001.21	0.0016103		1591.2	0.01024383		2181.2	0.00762266		2771.2	0.01865309
411.41	-0.00077074		1001.41	0.00194699		1591.4	0.01022804		2181.4	0.00781318		2771.4	0.01872448
411.61	-0.00010713		1001.61	0.00078234		1591.6	0.00956257		2181.6	0.00788322		2771.6	0.0185912
411.81	-0.00020752		1001.81	0.00007921		1591.8	0.00905421		2181.8	0.00708613		2771.8	0.01905636
412.01	0.00002104		1002.01	0.00053724		1592	0.00882081		2182	0.00718984		2772	0.01855967
412.21	0.00069969		1002.21	-0.00002644		1592.2	0.00919062		2182.2	0.00693091		2772.2	0.01902836
412.41	0.00071061		1002.41	-0.00189416		1592.4	0.00946818		2182.4	0.00679265		2772.4	0.0188872
412.61	0.00012164		1002.61	-0.00214666		1592.6	0.00908706		2182.6	0.00761436		2772.6	0.01931839
412.81	-0.00047049		1002.81	-0.00266449		1592.8	0.00937992		2182.8	0.00784845		2772.8	0.01944322
413.01	-0.00083718		1003.01	-0.00345287		1593	0.00988565		2183	0.00906486		2773	0.0189148
413.21	-0.00155979		1003.21	-0.00365223		1593.2	0.01013766		2183.2	0.00970538		2773.2	0.01980097
413.41	-0.00160212		1003.41	-0.00391296		1593.4	0.01016349		2183.4	0.00999089		2773.4	0.01895942
413.61	-0.00193195		1003.61	-0.00449971		1593.6	0.00942317		2183.6	0.01096395		2773.6	0.0182195
413.81	-0.00220416		1003.81	-0.00449161		1593.8	0.01053147		2183.8	0.01170095		2773.8	0.01818241
414.01	-0.00078574		1004.01	-0.00516713		1594	0.0106809		2184	0.01186346		2774	0.01749082
414.21	-0.00104022		1004.21	-0.00503481		1594.2	0.01000515		2184.2	0.01215925		2774.2	0.01778119
414.41	-0.00114319		1004.41	-0.0044328		1594.4	0.01040377		2184.4	0.01253476		2774.4	0.01778739
414.61	-0.0005073		1004.61	-0.00410211		1594.6	0.00995269		2184.6	0.01202342		2774.6	0.01727208
414.81	-0.0000746		1004.81	-0.00337229		1594.8	0.00991513		2184.8	0.01191864		2774.8	0.0165349
415.01	-0.00060817		1005.01	-0.00223255		1595	0.01017871		2185	0.01228729		2775	0.01643085
415.21	0.00074645		1005.21	-0.00187152		1595.2	0.01043778		2185.2	0.01198549		2775.2	0.01632089
415.41	0.00107325		1005.41	-0.00076168		1595.4	0.01054295		2185.4	0.01116615		2775.4	0.01636125
415.61	0.00090144		1005.61	-0.00083159		1595.6	0.01016986		2185.6	0.01094214		2775.6	0.01771977
415.81	0.00072076		1005.81	-0.00063348		1595.8	0.01019748		2185.8	0.01042743		2775.8	0.01878871
416.01	0.00049433		1006.01	0.00053455		1596	0.0102037		2186	0.01042654		2776	0.01889906
416.21	0.00020121		1006.21	0.00026264		1596.2	0.01054012		2186.2	0.01055071		2776.2	0.02011635
416.41	-0.00051249		1006.41	-0.00044404		1596.4	0.0098546		2186.4	0.00981683		2776.4	0.02011643
416.61	-0.00139712		1006.61	0.00007181		1596.6	0.00960047		2186.6	0.01056759		2776.6	0.02103814
416.81	-0.00236363		1006.81	-0.00014003		1596.8	0.00987587		2186.8	0.01053683		2776.8	0.02110095
417.01	-0.00274825		1007.01	-0.00010737		1597	0.0094415		2187	0.01115448		2777	0.0210723
417.21	-0.00267041		1007.21	0.00024486		1597.2	0.0086364		2187.2	0.01072911		2777.2	0.02103362
417.41	-0.00210738		1007.41	-0.00039211		1597.4	0.00811635		2187.4	0.01043439		2777.4	0.01994263
417.61	-0.00275328		1007.61	-0.00072524		1597.6	0.00824151		2187.6	0.01033871		2777.6	0.01976986
417.81	-0.00208722		1007.81	-0.00138957		1597.8	0.0088321		2187.8	0.01000735		2777.8	0.01993286
418.01	-0.00152784		1008.01	-0.00224181		1598	0.00770533		2188	0.00911611		2778	0.0192843
418.21	-0.0029492		1008.21	-0.00150936		1598.2	0.00835477		2188.2	0.00890791		2778.2	0.01927423
418.41	-0.00306008		1008.41	-0.00040982		1598.4	0.00786086		2188.4	0.00907065		2778.4	0.01872895
418.61	-0.00280773		1008.61	-0.00106691		1598.6	0.00898775		2188.6	0.00854072		2778.6	0.0181286
418.81	-0.00312182		1008.81	-0.00145405		1598.8	0.00975814		2188.8	0.00801732		2778.8	0.01822982
419.01	-0.00354187		1009.01	-0.00104735		1599	0.00971309		2189	0.00750278		2779	0.01835502
419.21	-0.00268576		1009.21	-0.00133127		1599.2	0.00952664		2189.2	0.00661334		2779.2	0.01881559
419.41	-0.00268942		1009.41	-0.00084815		1599.4	0.00965536		2189.4	0.00636133		2779.4	0.01992586
419.61	-0.00238383		1009.61	-0.0009121		1599.6	0.00987567		2189.6	0.00648748		2779.6	0.02105648
419.81	-0.00220374		1009.81	-0.00131546		1599.8	0.0109863		2189.8	0.00623164		2779.8	0.02146446
420.01	-0.00213972		1010.01	-0.00115417		1600	0.01066624		2190	0.00634624		2780	0.02126404
420.21	-0.00246183		1010.21	-0.00217097		1600.2	0.01079477		2190.2	0.00638615		2780.2	0.02195226
420.41	-0.00214064		1010.41	-0.00262787		1600.4	0.01074261		2190.4	0.00592743		2780.4	0.02111051
420.61	-0.00227702		1010.61	-0.00217972		1600.6	0.01122791		2190.6	0.00634521		2780.6	0.02178494
420.81	-0.00232824		1010.81	-0.00258517		1600.8	0.01040527		2190.8	0.0074103		2780.8	0.02137132
421.01	-0.00219904		1011.01	-0.0023107		1601	0.00949655		2191	0.00780307		2781	0.02104285
421.21	-0.00217571		1011.21	-0.00185134		1601.2	0.00937333		2191.2	0.00825932		2781.2	0.01988595
421.41	-0.00296606		1011.41	-0.00161357		1601.4	0.00999486		2191.4	0.00797673		2781.4	0.01946257
421.61	-0.004022		1011.61	-0.00109431		1601.6	0.0108243		2191.6	0.00833032		2781.6	0.01921886
421.81	-0.0036159		1011.81	-0.00082862		1601.8	0.01052043		2191.8	0.00813128		2781.8	0.01807799
422.01	-0.00427165		1012.01	0.00006263		1602	0.01070326		2192	0.00755726		2782	0.01776103
422.21	-0.00419723		1012.21	0.00071609		1602.2	0.01117406		2192.2	0.00767872		2782.2	0.01727557
422.41	-0.00460652		1012.41	0.00115624		1602.4	0.01019963		2192.4	0.00909741		2782.4	0.01652773
422.61	-0.00527988		1012.61	0.00033262		1602.6	0.01078098		2192.6	0.01000952		2782.6	0.01689838
422.81	-0.00577322		1012.81	0.00016834		1602.8	0.0105602		2192.8	0.01055814		2782.8	0.01705408
423.01	-0.00595058		1013.01	0.00007775		1603	0.0105785		2193	0.01095463		2783	0.01709838
423.21	-0.00620684		1013.21	-0.00012822		1603.2	0.01098908		2193.2	0.01129965		2783.2	0.01645485
423.41	-0.00580162		1013.41	-0.00010476		1603.4	0.01126832		2193.4	0.01145864		2783.4	0.01622422
423.61	-0.00476383		1013.61	-0.0001148		1603.6	0.01163181		2193.6	0.01141784		2783.6	0.01643396
423.81	-0.00455264		1013.81	-0.0002973		1603.8	0.01223739		2193.8	0.01107196		2783.8	0.01635241
424.01	-0.00370886		1014.01	-0.00030178		1604	0.01118268		2194	0.01177497		2784	0.01613684
424.21	-0.00336605		1014.21	-0.00041472		1604.2	0.01036605		2194.2	0.01124303		2784.2	0.01710055
424.41	-0.00148221		1014.41	-0.00001537		1604.4	0.00979416		2194.4	0.01168915		2784.4	0.01719939
424.61	-0.00102135		1014.61	0.00004067		1604.6	0.00956213		2194.6	0.01164546		2784.6	0.01876312
424.81	-0.00076284		1014.81	-0.00102897		1604.8	0.00826332		2194.8	0.01238642		2784.8	0.0186676
425.01	-0.00139751		1015.01	-0.00068326		1605	0.00820894		2195	0.01197431		2785	0.01844563
425.21	-0.00126973		1015.21	-0.00091969		1605.2	0.00856005		2195.2	0.01230311		2785.2	0.01830168
425.41	-0.00114695		1015.41	-0.00125838		1605.4	0.00929175		2195.4	0.01117625		2785.4	0.01849773
425.61	-0.00079882		1015.61	-0.00166873		1605.6	0.00923816		2195.6	0.01096226		2785.6	0.01859832
425.81	-0.00034657		1015.81	-0.00210369		1605.8	0.00877589		2195.8	0.01031858		2785.8	0.01912691
426.01	-0.0006942		1016.01	-0.00271727		1606	0.00852584		2196	0.01006669		2786	0.01934391
426.21	-0.00038628		1016.21	-0.00370292		1606.2	0.00830177		2196.2	0.01011927		2786.2	0.01899518
426.41	-0.00073421		1016.41	-0.00399682		1606.4	0.00842559		2196.4	0.01085969		2786.4	0.01956472
426.61	-0.00111868		1016.61	-0.00373184		1606.6	0.00814183		2196.6	0.0113628		2786.6	0.02029243
426.81	-0.0020186		1016.81	-0.00298916		1606.8	0.00806432		2196.8	0.01099958		2786.8	0.0201079
427.01	-0.00273662		1017.01	-0.00303378		1607	0.00827473		2197	0.01030102		2787	0.01945353
427.21	-0.00368339		1017.21	-0.0016714		1607.2	0.00783273		2197.2	0.00971539		2787.2	0.01872005
427.41	-0.00306554		1017.41	-0.00029858		1607.4	0.00725445		2197.4	0.00935044		2787.4	0.01903021
427.61	-0.00334051		1017.61	0.00055065		1607.6	0.00758468		2197.6	0.00933639		2787.6	0.01828219
427.81	-0.0035599		1017.81	0.00185081		1607.8	0.00789968		2197.8	0.0090926		2787.8	0.01825221
428.01	-0.00340071		1018.01	0.00231765		1608	0.0075035		2198	0.00943796		2788	0.01894343
428.21	-0.00361759		1018.21	0.00291875		1608.2	0.00728531		2198.2	0.00927672		2788.2	0.01969041
428.41	-0.00340059		1018.41	0.00302878		1608.4	0.00767567		2198.4	0.00905263		2788.4	0.01946487
428.61	-0.00414129		1018.61	0.00253762		1608.6	0.00805429		2198.6	0.00887793		2788.6	0.01979665
428.81	-0.00432567		1018.81	0.00218302		1608.8	0.00873851		2198.8	0.00918863		2788.8	0.01914989
429.01	-0.00487448		1019.01	0.00219045		1609	0.00898247		2199	0.00954216		2789	0.0188342
429.21	-0.00364298		1019.21	0.00095498		1609.2	0.00948961		2199.2	0.00975753		2789.2	0.01917247
429.41	-0.00330013		1019.41	0.00057304		1609.4	0.01069766		2199.4	0.00858611		2789.4	0.01856267
429.61	-0.00288735		1019.61	-0.0007627		1609.6	0.01080377		2199.6	0.00908228		2789.6	0.01900644
429.81	-0.00226826		1019.81	-0.00206235		1609.8	0.01123901		2199.8	0.00906059		2789.8	0.01878271
430.01	-0.00178572		1020.01	-0.00232988		1610	0.01192955		2200	0.00952142		2790	0.01748474
430.21	-0.00118789		1020.21	-0.00183566		1610.2	0.01232372		2200.2	0.00968744		2790.2	0.01767201
430.41	-0.00147873		1020.41	-0.0011369		1610.4	0.01192005		2200.4	0.01037423		2790.4	0.01766816
430.61	-0.00161941		1020.61	-0.00052791		1610.6	0.01160457		2200.6	0.01068086		2790.6	0.01738866
430.81	-0.0016696		1020.81	-0.0008343		1610.8	0.01210409		2200.8	0.01047712		2790.8	0.01623859
431.01	-0.00200408		1021.01	-0.00176823		1611	0.01189633		2201	0.01050338		2791	0.01603755
431.21	-0.00212111		1021.21	-0.00125424		1611.2	0.01142936		2201.2	0.01018646		2791.2	0.01691536
431.41	-0.0025312		1021.41	-0.00142438		1611.4	0.01181453		2201.4	0.01150501		2791.4	0.01766109
431.61	-0.00326671		1021.61	-0.00209257		1611.6	0.01252605		2201.6	0.01152934		2791.6	0.01713795
431.81	-0.00337931		1021.81	-0.00199933		1611.8	0.01267164		2201.8	0.01110322		2791.8	0.0183758
432.01	-0.00375573		1022.01	-0.00262631		1612	0.0127548		2202	0.01098339		2792	0.01886993
432.21	-0.00426817		1022.21	-0.00268399		1612.2	0.01207795		2202.2	0.01078569		2792.2	0.01914506
432.41	-0.00428718		1022.41	-0.0024255		1612.4	0.01114791		2202.4	0.01033427		2792.4	0.01896494
432.61	-0.00390186		1022.61	-0.00184981		1612.6	0.01123773		2202.6	0.01043703		2792.6	0.01911119
432.81	-0.00407133		1022.81	-0.00172091		1612.8	0.01175191		2202.8	0.00961902		2792.8	0.01864199
433.01	-0.00405287		1023.01	-0.00217119		1613	0.01154271		2203	0.00997719		2793	0.01888469
433.21	-0.0038524		1023.21	-0.00263949		1613.2	0.01190386		2203.2	0.0097644		2793.2	0.01849508
433.41	-0.00365354		1023.41	-0.00223961		1613.4	0.01204069		2203.4	0.01004629		2793.4	0.01672491
433.61	-0.00316733		1023.61	-0.00258531		1613.6	0.01164854		2203.6	0.01061604		2793.6	0.01650502
433.81	-0.00299101		1023.81	-0.00246382		1613.8	0.01146752		2203.8	0.01019506		2793.8	0.0151534
434.01	-0.00363139		1024.01	-0.00242978		1614	0.01158998		2204	0.01055833		2794	0.01459213
434.21	-0.0030799		1024.21	-0.00278962		1614.2	0.0111936		2204.2	0.00984284		2794.2	0.01490623
434.41	-0.00355309		1024.41	-0.00294465		1614.4	0.01125084		2204.4	0.00918898		2794.4	0.01421088
434.61	-0.00265507		1024.61	-0.0034221		1614.6	0.01178066		2204.6	0.00904946		2794.6	0.01467314
434.81	-0.00314739		1024.81	-0.00277346		1614.8	0.01221792		2204.8	0.00925125		2794.8	0.01405607
435.01	-0.00413884		1025.01	-0.0040113		1615	0.01199604		2205	0.0100697		2795	0.014529
435.21	-0.00452853		1025.21	-0.00412533		1615.2	0.01202045		2205.2	0.00988796		2795.2	0.01545226
435.41	-0.00467449		1025.41	-0.00423094		1615.4	0.01228328		2205.4	0.00973938		2795.4	0.01636629
435.61	-0.00516063		1025.61	-0.00477948		1615.6	0.01162687		2205.6	0.00888573		2795.6	0.01609073
435.81	-0.00614055		1025.81	-0.00474087		1615.8	0.01129425		2205.8	0.00840286		2795.8	0.01700573
436.01	-0.00664586		1026.01	-0.00483333		1616	0.01075691		2206	0.00794715		2796	0.0178668
436.21	-0.00754181		1026.21	-0.00443638		1616.2	0.00884157		2206.2	0.00837736		2796.2	0.01835586
436.41	-0.00774879		1026.41	-0.00325002		1616.4	0.00879969		2206.4	0.00809551		2796.4	0.01871824
436.61	-0.00809775		1026.61	-0.00244875		1616.6	0.00924628		2206.6	0.00808474		2796.6	0.0189636
436.81	-0.00864081		1026.81	-0.00236721		1616.8	0.00866762		2206.8	0.00793156		2796.8	0.01946338
437.01	-0.00927208		1027.01	-0.00186093		1617	0.00883388		2207	0.00860563		2797	0.01935201
437.21	-0.00872666		1027.21	-0.00200096		1617.2	0.00874629		2207.2	0.00853784		2797.2	0.01854777
437.41	-0.00831623		1027.41	-0.00247436		1617.4	0.00795792		2207.4	0.00928082		2797.4	0.01776877
437.61	-0.00751406		1027.61	-0.00251264		1617.6	0.00744288		2207.6	0.00854945		2797.6	0.01732046
437.81	-0.00659627		1027.81	-0.00277863		1617.8	0.00755932		2207.8	0.008715		2797.8	0.0171731
438.01	-0.00613473		1028.01	-0.00359698		1618	0.00766515		2208	0.00901824		2798	0.01763684
438.21	-0.00407909		1028.21	-0.0036571		1618.2	0.00741278		2208.2	0.00884446		2798.2	0.01768833
438.41	-0.00411209		1028.41	-0.00290117		1618.4	0.00778754		2208.4	0.00877279		2798.4	0.0173841
438.61	-0.00280489		1028.61	-0.00282314		1618.6	0.00825381		2208.6	0.00875056		2798.6	0.01796474
438.81	-0.00289481		1028.81	-0.00255532		1618.8	0.0096817		2208.8	0.00860508		2798.8	0.01755004
439.01	-0.00193071		1029.01	-0.00372887		1619	0.00969947		2209	0.00894394		2799	0.01797028
439.21	-0.00131553		1029.21	-0.00246805		1619.2	0.00970836		2209.2	0.00819968		2799.2	0.01859508
439.41	-0.00060593		1029.41	-0.00270005		1619.4	0.00954191		2209.4	0.00769104		2799.4	0.01938684
439.61	-0.00109723		1029.61	-0.00257497		1619.6	0.00976899		2209.6	0.00807622		2799.6	0.01909367
439.81	-0.00180145		1029.81	-0.00154783		1619.8	0.00996341		2209.8	0.00834663		2799.8	0.02025612
440.01	-0.00163087		1030.01	-0.00086728		1620	0.01028253		2210	0.00885918		2800	0.02012309
440.21	-0.00202408		1030.21	-0.0007882		1620.2	0.00981818		2210.2	0.00988413		2800.2	0.02028632
440.41	-0.0014939		1030.41	0.0002129		1620.4	0.01046986		2210.4	0.00986943		2800.4	0.02084445
440.61	-0.00120899		1030.61	0.00002157		1620.6	0.01107832		2210.6	0.01064838		2800.6	0.02137392
440.81	-0.00100911		1030.81	0.00020986		1620.8	0.01059723		2210.8	0.01109121		2800.8	0.0209442
441.01	-0.0016601		1031.01	0.00077306		1621	0.01157526		2211	0.01208975		2801	0.02019843
441.21	-0.00139375		1031.21	0.00034678		1621.2	0.01137358		2211.2	0.01210329		2801.2	0.01974373
441.41	-0.00194038		1031.41	-0.00012831		1621.4	0.0103472		2211.4	0.01204293		2801.4	0.01842784
441.61	-0.00149337		1031.61	0.00028314		1621.6	0.01076388		2211.6	0.01168624		2801.6	0.0171505
441.81	-0.00166961		1031.81	-0.00087095		1621.8	0.01078018		2211.8	0.01170612		2801.8	0.0163536
442.01	-0.00269463		1032.01	-0.00179447		1622	0.01043149		2212	0.01177972		2802	0.01564491
442.21	-0.00259339		1032.21	-0.00220422		1622.2	0.0103177		2212.2	0.01068566		2802.2	0.01528122
442.41	-0.00439541		1032.41	-0.00232099		1622.4	0.01052297		2212.4	0.00967573		2802.4	0.01424537
442.61	-0.00470381		1032.61	-0.00211922		1622.6	0.00959606		2212.6	0.00910335		2802.6	0.01427254
442.81	-0.00595037		1032.81	-0.0017461		1622.8	0.00980167		2212.8	0.00906521		2802.8	0.01420104
443.01	-0.00602248		1033.01	-0.00169029		1623	0.0087739		2213	0.00921395		2803	0.01496781
443.21	-0.00658748		1033.21	-0.00123933		1623.2	0.00805827		2213.2	0.00860497		2803.2	0.01551834
443.41	-0.00682822		1033.41	-0.00215199		1623.4	0.00761872		2213.4	0.00802541		2803.4	0.01640897
443.61	-0.00701912		1033.61	-0.0019108		1623.6	0.00795644		2213.6	0.00814435		2803.6	0.01694784
443.81	-0.00769455		1033.81	-0.00207807		1623.8	0.00730197		2213.8	0.0089131		2803.8	0.01789401
444.01	-0.00672451		1034.01	-0.0027235		1624	0.00782394		2214	0.00890201		2804	0.01814597
444.21	-0.00562882		1034.21	-0.00361034		1624.2	0.00783946		2214.2	0.0089339		2804.2	0.01901044
444.41	-0.00444358		1034.41	-0.00375903		1624.4	0.00846106		2214.4	0.00898308		2804.4	0.01928659
444.61	-0.00346102		1034.61	-0.00454975		1624.6	0.0088587		2214.6	0.00913241		2804.6	0.01911529
444.81	-0.00303887		1034.81	-0.00443125		1624.8	0.00864848		2214.8	0.00945679		2804.8	0.01830566
445.01	-0.00236288		1035.01	-0.00364887		1625	0.00983038		2215	0.01000431		2805	0.01787436
445.21	-0.00178232		1035.21	-0.0038011		1625.2	0.00918564		2215.2	0.00908192		2805.2	0.0178556
445.41	-0.00063862		1035.41	-0.00380798		1625.4	0.00863442		2215.4	0.00873158		2805.4	0.01787433
445.61	-0.0003231		1035.61	-0.00368522		1625.6	0.00928833		2215.6	0.00925786		2805.6	0.01732694
445.81	-0.00002107		1035.81	-0.00426006		1625.8	0.0095318		2215.8	0.00934725		2805.8	0.01680348
446.01	-0.00029368		1036.01	-0.00369319		1626	0.00876331		2216	0.00995899		2806	0.01710864
446.21	-0.00025251		1036.21	-0.00252474		1626.2	0.00810153		2216.2	0.00949731		2806.2	0.01672557
446.41	-0.00045298		1036.41	-0.00207522		1626.4	0.00816647		2216.4	0.01023249		2806.4	0.01595122
446.61	-0.0004557		1036.61	-0.00124428		1626.6	0.00690991		2216.6	0.01060425		2806.6	0.0169109
446.81	-0.00134533		1036.81	-0.00189441		1626.8	0.00782041		2216.8	0.01072789		2806.8	0.01691559
447.01	-0.00158145		1037.01	-0.00129942		1627	0.00693671		2217	0.01064753		2807	0.01738503
447.21	-0.00142478		1037.21	-0.00178216		1627.2	0.00701361		2217.2	0.01002347		2807.2	0.01776167
447.41	-0.00207781		1037.41	-0.00239027		1627.4	0.00721086		2217.4	0.01073689		2807.4	0.01838399
447.61	-0.0023007		1037.61	-0.00248742		1627.6	0.00724811		2217.6	0.01110291		2807.6	0.01871685
447.81	-0.0031266		1037.81	-0.00319766		1627.8	0.0069058		2217.8	0.01122987		2807.8	0.01924534
448.01	-0.00248181		1038.01	-0.00438344		1628	0.00733655		2218	0.01077198		2808	0.01915482
448.21	-0.00215937		1038.21	-0.00513933		1628.2	0.00793128		2218.2	0.01047408		2808.2	0.01899484
448.41	-0.00237294		1038.41	-0.00531135		1628.4	0.00853227		2218.4	0.01056859		2808.4	0.01847766
448.61	-0.00257514		1038.61	-0.0052203		1628.6	0.00876159		2218.6	0.01029303		2808.6	0.0177753
448.81	-0.00252019		1038.81	-0.00449978		1628.8	0.00908327		2218.8	0.01055248		2808.8	0.01780302
449.01	-0.00122918		1039.01	-0.00405089		1629	0.00934828		2219	0.00972705		2809	0.01833035
449.21	-0.00100494		1039.21	-0.00473673		1629.2	0.00850065		2219.2	0.00878575		2809.2	0.01880749
449.41	-0.00103655		1039.41	-0.00436803		1629.4	0.00898043		2219.4	0.00903171		2809.4	0.01899492
449.61	-0.002113		1039.61	-0.00497436		1629.6	0.01041424		2219.6	0.00864299		2809.6	0.01841691
449.81	-0.00171076		1039.81	-0.0049353		1629.8	0.01113153		2219.8	0.00816446		2809.8	0.01842263
450.01	-0.00156545		1040.01	-0.00450199		1630	0.01060005		2220	0.00811246		2810	0.01868953
450.21	-0.00157356		1040.21	-0.00351649		1630.2	0.01182789		2220.2	0.00787119		2810.2	0.01840944
450.41	-0.00141916		1040.41	-0.00400973		1630.4	0.01270063		2220.4	0.00831881		2810.4	0.01858136
450.61	-0.00234202		1040.61	-0.00299188		1630.6	0.01212444		2220.6	0.00777666		2810.6	0.01862313
450.81	-0.00279011		1040.81	-0.00230746		1630.8	0.01254576		2220.8	0.00773484		2810.8	0.0182203
451.01	-0.00346333		1041.01	-0.00206645		1631	0.01203195		2221	0.00779503		2811	0.01828995
451.21	-0.00377927		1041.21	-0.00262472		1631.2	0.01215586		2221.2	0.00832999		2811.2	0.01919903
451.41	-0.00475116		1041.41	-0.00221101		1631.4	0.01128712		2221.4	0.00948622		2811.4	0.01907269
451.61	-0.00509896		1041.61	-0.00203969		1631.6	0.01057737		2221.6	0.00925488		2811.6	0.01829308
451.81	-0.0053669		1041.81	-0.00250589		1631.8	0.00983835		2221.8	0.01012678		2811.8	0.01881188
452.01	-0.00489738		1042.01	-0.00272557		1632	0.00958305		2222	0.01051081		2812	0.01842427
452.21	-0.00518008		1042.21	-0.00258668		1632.2	0.00895988		2222.2	0.01078455		2812.2	0.01788914
452.41	-0.00557904		1042.41	-0.00249811		1632.4	0.00823818		2222.4	0.01117228		2812.4	0.01717263
452.61	-0.00522178		1042.61	-0.00232727		1632.6	0.00788007		2222.6	0.01115233		2812.6	0.01680608
452.81	-0.00442073		1042.81	-0.00280438		1632.8	0.00705856		2222.8	0.01175847		2812.8	0.01645919
453.01	-0.00416418		1043.01	-0.00406393		1633	0.00677245		2223	0.01148948		2813	0.01681684
453.21	-0.00522484		1043.21	-0.00471247		1633.2	0.00703889		2223.2	0.01155537		2813.2	0.01633506
453.41	-0.00537404		1043.41	-0.00489383		1633.4	0.00702166		2223.4	0.01156906		2813.4	0.0164425
453.61	-0.00590069		1043.61	-0.00520071		1633.6	0.00759364		2223.6	0.01011335		2813.6	0.01634112
453.81	-0.00503733		1043.81	-0.00515693		1633.8	0.0083148		2223.8	0.00985144		2813.8	0.01639187
454.01	-0.00470748		1044.01	-0.00396684		1634	0.00814183		2224	0.00975994		2814	0.01631052
454.21	-0.00512966		1044.21	-0.00370716		1634.2	0.0088373		2224.2	0.00964143		2814.2	0.01650047
454.41	-0.005277		1044.41	-0.00358865		1634.4	0.00808129		2224.4	0.01021895		2814.4	0.01743145
454.61	-0.00567162		1044.61	-0.00283261		1634.6	0.00725521		2224.6	0.00956225		2814.6	0.01820864
454.81	-0.00577152		1044.81	-0.00247282		1634.8	0.00702328		2224.8	0.01021403		2814.8	0.01893578
455.01	-0.00609356		1045.01	-0.00260471		1635	0.00642552		2225	0.0106788		2815	0.01916154
455.21	-0.00566488		1045.21	-0.00155511		1635.2	0.00665804		2225.2	0.01073445		2815.2	0.02030835
455.41	-0.00529532		1045.41	-0.00086437		1635.4	0.00579133		2225.4	0.01023969		2815.4	0.02014213
455.61	-0.00482891		1045.61	-0.00028418		1635.6	0.00547924		2225.6	0.0105698		2815.6	0.02034178
455.81	-0.00415569		1045.81	0.00000381		1635.8	0.00522695		2225.8	0.01033032		2815.8	0.02121781
456.01	-0.00399511		1046.01	-0.00041037		1636	0.0062623		2226	0.01010131		2816	0.02074963
456.21	-0.00330781		1046.21	-0.00064008		1636.2	0.0063499		2226.2	0.01037195		2816.2	0.02006061
456.41	-0.00270949		1046.41	-0.00094911		1636.4	0.00619064		2226.4	0.00989663		2816.4	0.02058274
456.61	-0.00222755		1046.61	-0.0016964		1636.6	0.00734976		2226.6	0.01066544		2816.6	0.01983552
456.81	-0.00164944		1046.81	-0.00218465		1636.8	0.00707622		2226.8	0.01083199		2816.8	0.01952745
457.01	-0.00167514		1047.01	-0.00319158		1637	0.00790281		2227	0.00978623		2817	0.01956485
457.21	-0.00159932		1047.21	-0.00296672		1637.2	0.00839098		2227.2	0.00900881		2817.2	0.01901153
457.41	-0.00116636		1047.41	-0.00388425		1637.4	0.00834755		2227.4	0.00864909		2817.4	0.01866945
457.61	-0.00201627		1047.61	-0.0042082		1637.6	0.00919985		2227.6	0.00867561		2817.6	0.01737474
457.81	-0.00178156		1047.81	-0.00450376		1637.8	0.01130929		2227.8	0.00881772		2817.8	0.01636798
458.01	-0.00293877		1048.01	-0.00499783		1638	0.01046882		2228	0.00934932		2818	0.01642533
458.21	-0.0033858		1048.21	-0.00635339		1638.2	0.01119147		2228.2	0.00968928		2818.2	0.01634986
458.41	-0.00430374		1048.41	-0.00690336		1638.4	0.01067997		2228.4	0.01042909		2818.4	0.01692959
458.61	-0.00497699		1048.61	-0.00658265		1638.6	0.01097926		2228.6	0.01121559		2818.6	0.01748795
458.81	-0.00586563		1048.81	-0.00675245		1638.8	0.01082828		2228.8	0.01145315		2818.8	0.0176329
459.01	-0.00607501		1049.01	-0.00701536		1639	0.01024541		2229	0.01115769		2819	0.01813902
459.21	-0.00596017		1049.21	-0.00646523		1639.2	0.01093022		2229.2	0.01102742		2819.2	0.01818107
459.41	-0.005826		1049.41	-0.00561967		1639.4	0.01036316		2229.4	0.01051324		2819.4	0.01827516
459.61	-0.00606995		1049.61	-0.00452374		1639.6	0.01064954		2229.6	0.01111695		2819.6	0.01863509
459.81	-0.00534358		1049.81	-0.00467648		1639.8	0.01090653		2229.8	0.01034328		2819.8	0.01872715
460.01	-0.00491242		1050.01	-0.00527572		1640	0.01162644		2230	0.01145205		2820	0.0192899
460.21	-0.00433546		1050.21	-0.00431685		1640.2	0.01116526		2230.2	0.01104816		2820.2	0.01962543
460.41	-0.00420698		1050.41	-0.00442558		1640.4	0.01113336		2230.4	0.01084923		2820.4	0.01962703
460.61	-0.00378659		1050.61	-0.0044939		1640.6	0.01105954		2230.6	0.01135478		2820.6	0.01945065
460.81	-0.00301249		1050.81	-0.00441719		1640.8	0.01024939		2230.8	0.01073631		2820.8	0.01998342
461.01	-0.0033819		1051.01	-0.00476427		1641	0.01048713		2231	0.01077346		2821	0.02014727
461.21	-0.00308287		1051.21	-0.004863		1641.2	0.01058064		2231.2	0.01157874		2821.2	0.02004903
461.41	-0.00327232		1051.41	-0.00586713		1641.4	0.01029861		2231.4	0.0125154		2821.4	0.01898346
461.61	-0.00328386		1051.61	-0.0061464		1641.6	0.00987291		2231.6	0.01306112		2821.6	0.01835172
461.81	-0.00311544		1051.81	-0.00639102		1641.8	0.00964009		2231.8	0.01314558		2821.8	0.01832706
462.01	-0.00353729		1052.01	-0.00736988		1642	0.00795748		2232	0.01309487		2822	0.01847233
462.21	-0.00316832		1052.21	-0.00740824		1642.2	0.00865685		2232.2	0.01232318		2822.2	0.01748305
462.41	-0.00351096		1052.41	-0.00767207		1642.4	0.00873494		2232.4	0.01276167		2822.4	0.01781526
462.61	-0.00380714		1052.61	-0.00747152		1642.6	0.00890715		2232.6	0.01187318		2822.6	0.01706736
462.81	-0.00387339		1052.81	-0.00762009		1642.8	0.00816313		2232.8	0.01103352		2822.8	0.01676882
463.01	-0.00410152		1053.01	-0.00641431		1643	0.00845384		2233	0.01072537		2823	0.01649593
463.21	-0.00458002		1053.21	-0.00569121		1643.2	0.00903272		2233.2	0.01015519		2823.2	0.01623628
463.41	-0.00475468		1053.41	-0.00492945		1643.4	0.00902402		2233.4	0.00992408		2823.4	0.01653908
463.61	-0.00507687		1053.61	-0.00479867		1643.6	0.00847954		2233.6	0.00949648		2823.6	0.01691755
463.81	-0.00568984		1053.81	-0.00441968		1643.8	0.00829417		2233.8	0.00917396		2823.8	0.01601234
464.01	-0.0059903		1054.01	-0.00397773		1644	0.00837154		2234	0.00891994		2824	0.0163304
464.21	-0.00617302		1054.21	-0.00331877		1644.2	0.00830998		2234.2	0.00790955		2824.2	0.0157822
464.41	-0.0058616		1054.41	-0.00295127		1644.4	0.00829276		2234.4	0.0090242		2824.4	0.01540928
464.61	-0.00562004		1054.61	-0.00255768		1644.6	0.00813583		2234.6	0.00986431		2824.6	0.01618583
464.81	-0.00529012		1054.81	-0.00240819		1644.8	0.00848683		2234.8	0.01034817		2824.8	0.0162007
465.01	-0.0050936		1055.01	-0.00188747		1645	0.00849779		2235	0.01087947		2825	0.01569538
465.21	-0.00406447		1055.21	-0.00218538		1645.2	0.00862943		2235.2	0.01150374		2825.2	0.01588411
465.41	-0.00384548		1055.41	-0.00195331		1645.4	0.00834444		2235.4	0.01190655		2825.4	0.01565746
465.61	-0.00340118		1055.61	-0.00255649		1645.6	0.00795038		2235.6	0.01114419		2825.6	0.01603654
465.81	-0.00399659		1055.81	-0.00255818		1645.8	0.0069759		2235.8	0.01082669		2825.8	0.01612055
466.01	-0.00419993		1056.01	-0.00269147		1646	0.00685166		2236	0.01064163		2826	0.01640385
466.21	-0.00497857		1056.21	-0.00332329		1646.2	0.00724039		2236.2	0.01069247		2826.2	0.01629865
466.41	-0.00544839		1056.41	-0.00393102		1646.4	0.00739815		2236.4	0.01031411		2826.4	0.01630087
466.61	-0.00536174		1056.61	-0.00391462		1646.6	0.00609276		2236.6	0.00870054		2826.6	0.01559751
466.81	-0.00515025		1056.81	-0.0043782		1646.8	0.0053334		2236.8	0.00865613		2826.8	0.01589574
467.01	-0.00539854		1057.01	-0.00415603		1647	0.00532827		2237	0.00808274		2827	0.0161965
467.21	-0.00506578		1057.21	-0.00455823		1647.2	0.00490712		2237.2	0.00759214		2827.2	0.01714842
467.41	-0.00546745		1057.41	-0.00455416		1647.4	0.00377295		2237.4	0.00758042		2827.4	0.0177437
467.61	-0.00586291		1057.61	-0.00533597		1647.6	0.00335242		2237.6	0.00661747		2827.6	0.01813825
467.81	-0.00580071		1057.81	-0.00518048		1647.8	0.00340485		2237.8	0.00707901		2827.8	0.01759706
468.01	-0.00450633		1058.01	-0.00571458		1648	0.00323676		2238	0.00707587		2828	0.01824991
468.21	-0.00372946		1058.21	-0.00562361		1648.2	0.00356519		2238.2	0.00759444		2828.2	0.01839745
468.41	-0.00269014		1058.41	-0.00498109		1648.4	0.00402642		2238.4	0.00863787		2828.4	0.01863464
468.61	-0.00172625		1058.61	-0.00467955		1648.6	0.00468506		2238.6	0.00873892		2828.6	0.01910343
468.81	-0.00095403		1058.81	-0.00441024		1648.8	0.00524265		2238.8	0.00837569		2828.8	0.01925317
469.01	-0.00026418		1059.01	-0.0042467		1649	0.00593877		2239	0.00802244		2829	0.01954009
469.21	0.00008957		1059.21	-0.00438733		1649.2	0.00709298		2239.2	0.00790508		2829.2	0.0204135
469.41	0.00002023		1059.41	-0.00393854		1649.4	0.00812857		2239.4	0.00747224		2829.4	0.02048854
469.61	-0.00017981		1059.61	-0.00425287		1649.6	0.0085342		2239.6	0.00692185		2829.6	0.02089928
469.81	-0.00081629		1059.81	-0.00379385		1649.8	0.00864598		2239.8	0.00700299		2829.8	0.02156652
470.01	-0.00081629		1060.01	-0.00379385		1650	0.00864598		2240	0.00700299		2830	0.02156652
470.21	-0.00254514		1060.21	-0.00354178		1650.2	0.00703237		2240.2	0.00750652		2830.2	0.0199618
470.41	-0.00434763		1060.41	-0.00381641		1650.4	0.00574281		2240.4	0.00763644		2830.4	0.01816651
470.61	-0.00650615		1060.61	-0.00378319		1650.6	0.00492333		2240.6	0.00719135		2830.6	0.01594845
470.81	-0.00888948		1060.81	-0.00506521		1650.8	0.00310892		2240.8	0.00675549		2830.8	0.0135474
471.01	-0.01003539		1061.01	-0.00625056		1651	0.00211168		2241	0.00694667		2831	0.01146291
471.21	-0.01116921		1061.21	-0.00753524		1651.2	0.00074173		2241.2	0.00637255		2831.2	0.00921011
471.41	-0.01209805		1061.41	-0.00886789		1651.4	-0.00005997		2241.4	0.0055118		2831.4	0.00677644
471.61	-0.01229609		1061.61	-0.01089492		1651.6	-0.00081478		2241.6	0.00395803		2831.6	0.00446842
471.81	-0.01253538		1061.81	-0.01237492		1651.8	-0.0010686		2241.8	0.0027732		2831.8	0.00260034
472.01	-0.01246006		1062.01	-0.01373371		1652	-0.00118472		2242	0.00216142		2832	0.00112821
472.21	-0.0127969		1062.21	-0.01491231		1652.2	-0.00111931		2242.2	0.00062027		2832.2	0.00043609
472.41	-0.01224232		1062.41	-0.01593719		1652.4	-0.00034228		2242.4	0.00114065		2832.4	0.00010694
472.61	-0.01260548		1062.61	-0.01688705		1652.6	-0.00080392		2242.6	0.00132202		2832.6	-0.00048029
472.81	-0.01227861		1062.81	-0.01718566		1652.8	-0.00104548		2242.8	0.0013994		2832.8	-0.00054665
473.01	-0.01249261		1063.01	-0.0181407		1653	-0.00043801		2243	0.00125791		2833	-0.00038322
473.21	-0.01300292		1063.21	-0.01847881		1653.2	-0.00113682		2243.2	0.00035184		2833.2	-0.00018342
473.41	-0.01273643		1063.41	-0.01888072		1653.4	-0.00082379		2243.4	0.00032849		2833.4	-0.00012688
473.61	-0.01261266		1063.61	-0.01789623		1653.6	-0.00071398		2243.6	-0.00003294		2833.6	-0.00018339
473.81	-0.01296543		1063.81	-0.01741972		1653.8	-0.00074017		2243.8	0.00020346		2833.8	-0.00020015
474.01	-0.01323945		1064.01	-0.01621019		1654	-0.00111447		2244	-0.00015331		2834	-0.00031901
474.21	-0.0142106		1064.21	-0.01517043		1654.2	-0.00072937		2244.2	-0.00008277		2834.2	0.00007791
474.41	-0.0150305		1064.41	-0.01476171		1654.4	-0.00015578		2244.4	-0.00099974		2834.4	0.00032608
474.61	-0.01679398		1064.61	-0.0141449		1654.6	-0.00021413		2244.6	-0.00156306		2834.6	0.00020451
474.81	-0.01720255		1064.81	-0.01471037		1654.8	-0.00032796		2244.8	-0.00142046		2834.8	0.00075628
475.01	-0.01662685		1065.01	-0.01461993		1655	-0.00018227		2245	-0.00108709		2835	0.00160935
475.21	-0.01573641		1065.21	-0.01451677		1655.2	-0.00010374		2245.2	-0.00193479		2835.2	0.00111362
475.41	-0.01504309		1065.41	-0.01481033		1655.4	0.00014932		2245.4	-0.00282669		2835.4	0.00030959
475.61	-0.01456351		1065.61	-0.01544977		1655.6	0.00099433		2245.6	-0.00247437		2835.6	0.00065707
475.81	-0.01434172		1065.81	-0.0154947		1655.8	0.0014373		2245.8	-0.00212709		2835.8	0.00083496
476.01	-0.01441149		1066.01	-0.01553146		1656	0.00156892		2246	-0.00136254		2836	0.00044458
476.21	-0.01464387		1066.21	-0.01548553		1656.2	0.00166901		2246.2	-0.00116781		2836.2	0.00059741
476.41	-0.01382249		1066.41	-0.01612413		1656.4	0.00193209		2246.4	-0.00085229		2836.4	-0.00044155
476.61	-0.01428634		1066.61	-0.01661108		1656.6	0.00128545		2246.6	-0.00038886		2836.6	-0.00066073
476.81	-0.01361958		1066.81	-0.0167576		1656.8	0.00063085		2246.8	-0.00029979		2836.8	-0.00074307
477.01	-0.01347233		1067.01	-0.01698396		1657	0.00064527		2247	-0.0000972		2837	-0.00083962
477.21	-0.01370864		1067.21	-0.01681813		1657.2	0.00083358		2247.2	-0.00026682		2837.2	-0.00153063
477.41	-0.01376531		1067.41	-0.01719039		1657.4	0.00064498		2247.4	0.00075489		2837.4	-0.00209155
477.61	-0.01432401		1067.61	-0.0168781		1657.6	0.00050539		2247.6	0.00079927		2837.6	-0.00209677
477.81	-0.01444527		1067.81	-0.01677718		1657.8	-0.00023948		2247.8	0.00070027		2837.8	-0.00184781
478.01	-0.01420767		1068.01	-0.01673338		1658	0.00030814		2248	0.00074628		2838	-0.00206105
478.21	-0.01485063		1068.21	-0.01624187		1658.2	0.00037254		2248.2	0.00101433		2838.2	-0.0018313
478.41	-0.01514728		1068.41	-0.01614796		1658.4	-0.00049891		2248.4	0.00034637		2838.4	-0.00148132
478.61	-0.01499727		1068.61	-0.01583859		1658.6	-0.00055609		2248.6	0.00051247		2838.6	-0.00117377
478.81	-0.01419595		1068.81	-0.01620004		1658.8	-0.00081855		2248.8	0.00009462		2838.8	0.0001711
479.01	-0.01382521		1069.01	-0.01606417		1659	-0.0017424		2249	-0.00015764		2839	0.00029128
479.21	-0.01326268		1069.21	-0.01567862		1659.2	-0.00089616		2249.2	-0.0006726		2839.2	0.00004325
479.41	-0.013122		1069.41	-0.01579845		1659.4	-0.00108022		2249.4	-0.00099007		2839.4	-0.00010246
479.61	-0.0128732		1069.61	-0.01502561		1659.6	0.00043245		2249.6	-0.000731		2839.6	0.00108809
479.81	-0.01280914		1069.81	-0.01444092		1659.8	0.00036799		2249.8	-0.00133561		2839.8	0.00137747
480.01	-0.01268379		1070.01	-0.01322349		1660	0.00001523		2250	-0.00085814		2840	0.00133341
480.21	-0.01248415		1070.21	-0.01323835		1660.2	0.00025624		2250.2	-0.00169932		2840.2	0.00210872
480.41	-0.01184197		1070.41	-0.01306032		1660.4	0.00030028		2250.4	-0.00187144		2840.4	0.00205561
480.61	-0.01204478		1070.61	-0.01316796		1660.6	0.00038437		2250.6	-0.00207		2840.6	0.00148503
480.81	-0.01228692		1070.81	-0.01190695		1660.8	0.0000276		2250.8	-0.00283426		2840.8	0.00087485
481.01	-0.01351088		1071.01	-0.01145396		1661	0.00011765		2251	-0.00284134		2841	0.00035202
481.21	-0.01355803		1071.21	-0.01130802		1661.2	0.00098793		2251.2	-0.00261352		2841.2	0.00001709
481.41	-0.0133287		1071.41	-0.01144747		1661.4	0.00082228		2251.4	-0.00250878		2841.4	0.00021788
481.61	-0.01380015		1071.61	-0.01096947		1661.6	0.00119915		2251.6	-0.00224986		2841.6	0.00025893
481.81	-0.01333682		1071.81	-0.01126542		1661.8	0.00109971		2251.8	-0.00147282		2841.8	0.0006983
482.01	-0.01327094		1072.01	-0.01212423		1662	0.00147902		2252	-0.00098167		2842	0.0007618
482.21	-0.0133685		1072.21	-0.01229673		1662.2	0.00068582		2252.2	-0.00073236		2842.2	0.00127666
482.41	-0.01347872		1072.41	-0.01311288		1662.4	-0.00020031		2252.4	0.00020131		2842.4	0.00115948
482.61	-0.0132484		1072.61	-0.01383914		1662.6	0.0003318		2252.6	-0.00004873		2842.6	0.00165587
482.81	-0.01374835		1072.81	-0.01418048		1662.8	-0.00020884		2252.8	-0.00063079		2842.8	0.00252866
483.01	-0.01407429		1073.01	-0.01439067		1663	0.00021131		2253	-0.00056774		2843	0.001745
483.21	-0.01448362		1073.21	-0.01425175		1663.2	0.00096718		2253.2	-0.00111358		2843.2	0.00182693
483.41	-0.01419829		1073.41	-0.01455621		1663.4	0.00096147		2253.4	-0.00103272		2843.4	0.00162449
483.61	-0.01428186		1073.61	-0.01453152		1663.6	0.00199503		2253.6	-0.00083931		2843.6	0.00294289
483.81	-0.01451649		1073.81	-0.01432368		1663.8	0.00117847		2253.8	-0.00084137		2843.8	0.00317638
484.01	-0.01448934		1074.01	-0.01413855		1664	0.00111642		2254	-0.00055594		2844	0.00315407
484.21	-0.01411431		1074.21	-0.01422178		1664.2	0.00166482		2254.2	-0.00084623		2844.2	0.00280035
484.41	-0.01432509		1074.41	-0.01358118		1664.4	0.00210915		2254.4	-0.00062413		2844.4	0.0026921
484.61	-0.01428216		1074.61	-0.01324378		1664.6	0.00197501		2254.6	-0.00126713		2844.6	0.00191748
484.81	-0.01417076		1074.81	-0.01248085		1664.8	0.00218761		2254.8	-0.00115776		2844.8	0.00172191
485.01	-0.01416092		1075.01	-0.01230185		1665	0.00199735		2255	-0.00101742		2845	0.00202519
485.21	-0.01407426		1075.21	-0.01245642		1665.2	0.00275346		2255.2	-0.00074779		2845.2	0.00269051
485.41	-0.01467373		1075.41	-0.01242638		1665.4	0.00265504		2255.4	0.00000088		2845.4	0.00297947
485.61	-0.01525737		1075.61	-0.01230751		1665.6	0.00210975		2255.6	0.00014779		2845.6	0.00339814
485.81	-0.01465996		1075.81	-0.0131527		1665.8	0.00189267		2255.8	0.00070221		2845.8	0.00387072
486.01	-0.01484468		1076.01	-0.01431735		1666	0.00140565		2256	0.00096895		2846	0.00380548
486.21	-0.01516681		1076.21	-0.01404182		1666.2	0.00117514		2256.2	0.00119142		2846.2	0.00334316
486.41	-0.01520465		1076.41	-0.01426635		1666.4	0.00124497		2256.4	0.00162287		2846.4	0.00217488
486.61	-0.0144103		1076.61	-0.01372149		1666.6	0.00158102		2256.6	0.00084214		2846.6	0.00231053
486.81	-0.01435264		1076.81	-0.01302318		1666.8	0.00149211		2256.8	0.00123869		2846.8	0.00185838
487.01	-0.01435295		1077.01	-0.01309708		1667	0.00179046		2257	0.00199083		2847	0.00132892
487.21	-0.01414358		1077.21	-0.0130106		1667.2	0.00149111		2257.2	0.0025415		2847.2	0.00083254
487.41	-0.01362304		1077.41	-0.01312222		1667.4	0.00151888		2257.4	0.00322274		2847.4	0.00064139
487.61	-0.01346259		1077.61	-0.01376614		1667.6	0.00168759		2257.6	0.0027921		2847.6	0.00122867
487.81	-0.01304329		1077.81	-0.01286798		1667.8	0.00056527		2257.8	0.00238124		2847.8	0.00041214
488.01	-0.01322464		1078.01	-0.01259886		1668	0.00003148		2258	0.00213147		2848	0.0003005
488.21	-0.01254208		1078.21	-0.01106972		1668.2	-0.0002645		2258.2	0.00125968		2848.2	-0.00011138
488.41	-0.01238615		1078.41	-0.01040601		1668.4	-0.0003669		2258.4	0.00083321		2848.4	0.00074841
488.61	-0.01176928		1078.61	-0.00989374		1668.6	-0.00012592		2258.6	0.0000424		2848.6	0.00118246
488.81	-0.01197119		1078.81	-0.01004374		1668.8	0.00020301		2258.8	-0.00015893		2848.8	0.0019408
489.01	-0.01187748		1079.01	-0.00921503		1669	-0.00017075		2259	-0.00058018		2849	0.00260168
489.21	-0.01266287		1079.21	-0.00948329		1669.2	0.00067656		2259.2	-0.00001955		2849.2	0.00277161
489.41	-0.01257874		1079.41	-0.00953547		1669.4	0.00062073		2259.4	0.00075191		2849.4	0.00317197
489.61	-0.01223		1079.61	-0.00995852		1669.6	0.00064797		2259.6	0.00040926		2849.6	0.00427779
489.81	-0.01153521		1079.81	-0.01119729		1669.8	0.00163993		2259.8	0.00058759		2849.8	0.0044038
490.01	-0.01132197		1080.01	-0.01163503		1670	0.0020066		2260	0.00055511		2850	0.0044872
490.21	-0.01150057		1080.21	-0.01133016		1670.2	0.00298924		2260.2	0.000581		2850.2	0.0045897
490.41	-0.0108599		1080.41	-0.01116853		1670.4	0.00324954		2260.4	0.00098812		2850.4	0.0042922
490.61	-0.01031991		1080.61	-0.01135961		1670.6	0.00348733		2260.6	0.00105564		2850.6	0.00429659
490.81	-0.01052299		1080.81	-0.01137014		1670.8	0.00398364		2260.8	0.00275719		2850.8	0.00443156
491.01	-0.00995034		1081.01	-0.01190962		1671	0.00394811		2261	0.00342957		2851	0.0040225
491.21	-0.0094607		1081.21	-0.01297172		1671.2	0.00368562		2261.2	0.00370599		2851.2	0.0033424
491.41	-0.00935855		1081.41	-0.01345723		1671.4	0.00419481		2261.4	0.00362997		2851.4	0.00291396
491.61	-0.00916589		1081.61	-0.01490964		1671.6	0.00342584		2261.6	0.0036209		2851.6	0.00304441
491.81	-0.00925852		1081.81	-0.0140192		1671.8	0.00232325		2261.8	0.00343845		2851.8	0.00177819
492.01	-0.00951007		1082.01	-0.01363127		1672	0.00164841		2262	0.00283492		2852	0.00158927
492.21	-0.00944788		1082.21	-0.01214821		1672.2	0.00102171		2262.2	0.00228248		2852.2	0.00089551
492.41	-0.00996658		1082.41	-0.01231175		1672.4	0.00129346		2262.4	0.00248429		2852.4	0.00078684
492.61	-0.01067814		1082.61	-0.01254235		1672.6	0.00220371		2262.6	0.00300842		2852.6	0.00033262
492.81	-0.01044211		1082.81	-0.01254135		1672.8	0.00150558		2262.8	0.00323663		2852.8	0.00032436
493.01	-0.01044381		1083.01	-0.01223528		1673	0.00140122		2263	0.0035836		2853	-0.00050083
493.21	-0.01059568		1083.21	-0.01238779		1673.2	0.00154611		2263.2	0.00343579		2853.2	-0.00046027
493.41	-0.01051835		1083.41	-0.011819		1673.4	0.00120606		2263.4	0.00306		2853.4	0.00012082
493.61	-0.01054169		1083.61	-0.01239105		1673.6	0.00124067		2263.6	0.00191799		2853.6	0.0006865
493.81	-0.00982817		1083.81	-0.01254853		1673.8	0.00102711		2263.8	0.00151142		2853.8	0.00054998
494.01	-0.01011643		1084.01	-0.01220708		1674	0.00047356		2264	0.0016069		2854	0.00080104
494.21	-0.01102651		1084.21	-0.01301193		1674.2	0.00028034		2264.2	0.00141495		2854.2	0.00140974
494.41	-0.01100668		1084.41	-0.01278606		1674.4	-0.00009956		2264.4	0.00121956		2854.4	0.00205888
494.61	-0.01077733		1084.61	-0.01396403		1674.6	-0.00015454		2264.6	0.00147645		2854.6	0.00243031
494.81	-0.01141295		1084.81	-0.01376134		1674.8	-0.00089446		2264.8	0.00244375		2854.8	0.00307529
495.01	-0.01195728		1085.01	-0.01443586		1675	-0.00078223		2265	0.00200005		2855	0.00302774
495.21	-0.01259721		1085.21	-0.01509064		1675.2	-0.00043425		2265.2	0.00228322		2855.2	0.00296174
495.41	-0.01301599		1085.41	-0.01549654		1675.4	-0.0000883		2265.4	0.00245375		2855.4	0.00273981
495.61	-0.01306364		1085.61	-0.01532616		1675.6	0.0007564		2265.6	0.00206253		2855.6	0.00307162
495.81	-0.01475027		1085.81	-0.01463088		1675.8	0.00136228		2265.8	0.00147631		2855.8	0.00198767
496.01	-0.01513429		1086.01	-0.01440921		1676	0.00147735		2266	0.00192783		2856	0.00229642
496.21	-0.01592109		1086.21	-0.01420824		1676.2	0.0017154		2266.2	0.00167762		2856.2	0.00170022
496.41	-0.01585755		1086.41	-0.01425183		1676.4	0.00294692		2266.4	0.00182944		2856.4	0.00165814
496.61	-0.01561164		1086.61	-0.01438341		1676.6	0.00307555		2266.6	0.00207541		2856.6	0.00100034
496.81	-0.0146217		1086.81	-0.01374023		1676.8	0.0027879		2266.8	0.00032568		2856.8	0.00123215
497.01	-0.01376628		1087.01	-0.01372405		1677	0.00318667		2267	0.00013519		2857	0.00039675
497.21	-0.01311525		1087.21	-0.01285388		1677.2	0.00339159		2267.2	-0.00098232		2857.2	0.00021546
497.41	-0.01341498		1087.41	-0.012919		1677.4	0.00323406		2267.4	-0.0010667		2857.4	-0.00060574
497.61	-0.01338949		1087.61	-0.01374087		1677.6	0.00316648		2267.6	-0.00076909		2857.6	-0.00070312
497.81	-0.01242915		1087.81	-0.01332953		1677.8	0.00281441		2267.8	-0.00026888		2857.8	-0.00145503
498.01	-0.01237316		1088.01	-0.01359601		1678	0.00292131		2268	-0.00026994		2858	-0.00182233
498.21	-0.01193889		1088.21	-0.01373833		1678.2	0.0021295		2268.2	0.00010872		2858.2	-0.00175209
498.41	-0.01192467		1088.41	-0.01321527		1678.4	0.00185484		2268.4	0.00040776		2858.4	-0.00196198
498.61	-0.0113555		1088.61	-0.01362159		1678.6	0.00103185		2268.6	-0.00000987		2858.6	-0.00269846
498.81	-0.0126282		1088.81	-0.01325504		1678.8	0.00031175		2268.8	0.00027798		2858.8	-0.00229489
499.01	-0.01299494		1089.01	-0.01355564		1679	0.00061774		2269	-0.00038768		2859	-0.00191835
499.21	-0.01273495		1089.21	-0.0133869		1679.2	0.00076215		2269.2	-0.00032984		2859.2	-0.0014589
499.41	-0.01236422		1089.41	-0.01435099		1679.4	0.00141646		2269.4	-0.00029603		2859.4	-0.00109566
499.61	-0.01175218		1089.61	-0.01447949		1679.6	0.0016283		2269.6	-0.00078539		2859.6	-0.00085485
499.81	-0.01200914		1089.81	-0.01430315		1679.8	0.00029872		2269.8	-0.00032054		2859.8	-0.00062025
500.01	-0.01105067		1090.01	-0.0143011		1680	0.00044251		2270	0.00023825		2860	0.00030893
500.21	-0.01091429		1090.21	-0.01475112		1680.2	0.00028105		2270.2	0.00018007		2860.2	0.00051498
500.41	-0.01036641		1090.41	-0.01435528		1680.4	0.00020305		2270.4	0.00066564		2860.4	0.00074984
500.61	-0.01033632		1090.61	-0.01437625		1680.6	0.00021994		2270.6	0.00115514		2860.6	0.00074282
500.81	-0.01020858		1090.81	-0.01459983		1680.8	0.00074188		2270.8	0.00102118		2860.8	0.00075996
501.01	-0.009682		1091.01	-0.01495228		1681	0.00057188		2271	0.00116952		2861	0.00097793
501.21	-0.01066422		1091.21	-0.01455626		1681.2	0.00044508		2271.2	0.0010962		2861.2	0.00072788
501.41	-0.01047834		1091.41	-0.01495867		1681.4	0.00059348		2271.4	0.00130114		2861.4	-0.00029472
501.61	-0.0103875		1091.61	-0.01396391		1681.6	0.00142515		2271.6	0.00149125		2861.6	-0.0010888
501.81	-0.00955237		1091.81	-0.01326414		1681.8	0.00061645		2271.8	0.00110061		2861.8	-0.00142753
502.01	-0.00913805		1092.01	-0.01321746		1682	0.00121717		2272	0.00145006		2862	-0.00160887
502.21	-0.00982027		1092.21	-0.0123515		1682.2	0.00127571		2272.2	0.00189488		2862.2	-0.00111444
502.41	-0.01030009		1092.41	-0.01284568		1682.4	0.0014015		2272.4	0.00137345		2862.4	-0.00091351
502.61	-0.0099062		1092.61	-0.0126009		1682.6	0.00206079		2272.6	0.00077566		2862.6	-0.00104231
502.81	-0.01063095		1092.81	-0.01216117		1682.8	0.00239116		2272.8	0.00155134		2862.8	0.00018197
503.01	-0.01032569		1093.01	-0.01300104		1683	0.00278541		2273	0.00129013		2863	0.00066498
503.21	-0.01003105		1093.21	-0.01328347		1683.2	0.00287581		2273.2	0.0012286		2863.2	0.00173583
503.41	-0.00959822		1093.41	-0.01405364		1683.4	0.00299483		2273.4	0.00140965		2863.4	0.00185459
503.61	-0.00942475		1093.61	-0.01400156		1683.6	0.00243714		2273.6	0.00072904		2863.6	0.00240271
503.81	-0.00976997		1093.81	-0.01339964		1683.8	0.00241844		2273.8	0.00107578		2863.8	0.00342133
504.01	-0.00995333		1094.01	-0.01401061		1684	0.00296256		2274	0.00165063		2864	0.00363252
504.21	-0.01116321		1094.21	-0.01361668		1684.2	0.00317744		2274.2	0.00183439		2864.2	0.00386972
504.41	-0.01164774		1094.41	-0.01259329		1684.4	0.00265306		2274.4	0.00212271		2864.4	0.00368493
504.61	-0.01219383		1094.61	-0.01267963		1684.6	0.0021836		2274.6	0.0020747		2864.6	0.00414375
504.81	-0.0129345		1094.81	-0.01371691		1684.8	0.0019547		2274.8	0.00115418		2864.8	0.00413774
505.01	-0.01241497		1095.01	-0.0130594		1685	0.00154147		2275	0.00119193		2865	0.00400724
505.21	-0.0126877		1095.21	-0.01292373		1685.2	0.00142411		2275.2	0.00079613		2865.2	0.00250097
505.41	-0.01130693		1095.41	-0.01322722		1685.4	0.00172145		2275.4	0.00104321		2865.4	0.00180007
505.61	-0.01132184		1095.61	-0.01259494		1685.6	0.00199174		2275.6	0.00148999		2865.6	0.00184558
505.81	-0.01095827		1095.81	-0.01360625		1685.8	0.00164498		2275.8	0.00101954		2865.8	0.0020797
506.01	-0.01056319		1096.01	-0.01371055		1686	0.00229025		2276	0.00113127		2866	0.00160353
506.21	-0.01145526		1096.21	-0.01372049		1686.2	0.00256993		2276.2	0.00138749		2866.2	0.00158275
506.41	-0.01128348		1096.41	-0.01349075		1686.4	0.00297579		2276.4	0.00141924		2866.4	0.00107898
506.61	-0.0110097		1096.61	-0.0125511		1686.6	0.00379971		2276.6	0.00088969		2866.6	-0.0003062
506.81	-0.01103327		1096.81	-0.01317682		1686.8	0.00381318		2276.8	0.00161842		2866.8	-0.00053849
507.01	-0.01045748		1097.01	-0.01373754		1687	0.00388415		2277	0.00182099		2867	-0.00092042
507.21	-0.01020471		1097.21	-0.01327989		1687.2	0.00430907		2277.2	0.00137796		2867.2	-0.00043738
507.41	-0.01059256		1097.41	-0.01340732		1687.4	0.0046554		2277.4	0.00156655		2867.4	-0.00073672
507.61	-0.01083456		1097.61	-0.01233189		1687.6	0.00357103		2277.6	0.00113547		2867.6	-0.0015268
507.81	-0.0106612		1097.81	-0.01248577		1687.8	0.00325328		2277.8	0.0012877		2867.8	-0.00165787
508.01	-0.0110772		1098.01	-0.0123442		1688	0.00271333		2278	0.00097958		2868	-0.00179638
508.21	-0.01226928		1098.21	-0.01164666		1688.2	0.00242342		2278.2	0.00094541		2868.2	-0.00131241
508.41	-0.01227592		1098.41	-0.0114187		1688.4	0.00034612		2278.4	0.00063654		2868.4	-0.00152403
508.61	-0.01254157		1098.61	-0.01257432		1688.6	0.00003878		2278.6	0.00049563		2868.6	-0.00093482
508.81	-0.01293756		1098.81	-0.01261312		1688.8	0.00068811		2278.8	0.00032293		2868.8	-0.0011566
509.01	-0.0129158		1099.01	-0.01163564		1689	0.00125004		2279	0.00075904		2869	-0.00125882
509.21	-0.01230956		1099.21	-0.01252941		1689.2	0.00104684		2279.2	0.00073256		2869.2	-0.00115621
509.41	-0.01210976		1099.41	-0.01342551		1689.4	0.0011603		2279.4	0.00070272		2869.4	-0.00071964
509.61	-0.01265825		1099.61	-0.01381335		1689.6	0.00076024		2279.6	0.00061723		2869.6	-0.00061221
509.81	-0.0129125		1099.81	-0.01499518		1689.8	0.00052047		2279.8	0.00024673		2869.8	-0.00111326
510.01	-0.01322644		1100.01	-0.01438886		1690	0.00022353		2280	0.00115882		2870	-0.00093102
510.21	-0.01355437		1100.21	-0.01403351		1690.2	0.00115202		2280.2	0.0015919		2870.2	-0.0012217
510.41	-0.01376923		1100.41	-0.01373369		1690.4	0.00217184		2280.4	0.00191606		2870.4	-0.00148792
510.61	-0.01375203		1100.61	-0.01384264		1690.6	0.00223372		2280.6	0.00238579		2870.6	-0.00189623
510.81	-0.01354531		1100.81	-0.0138111		1690.8	0.00289884		2280.8	0.00390912		2870.8	-0.00157054
511.01	-0.01362125		1101.01	-0.01338257		1691	0.00280561		2281	0.00446626		2871	-0.00081226
511.21	-0.01350936		1101.21	-0.01383085		1691.2	0.0030656		2281.2	0.00418854		2871.2	0.00050004
511.41	-0.0141262		1101.41	-0.01385466		1691.4	0.00273712		2281.4	0.00445319		2871.4	-0.00017349
511.61	-0.01322513		1101.61	-0.01399458		1691.6	0.00236668		2281.6	0.00394706		2871.6	-0.00053693
511.81	-0.01213582		1101.81	-0.01464894		1691.8	0.00311192		2281.8	0.00364913		2871.8	0.00026594
512.01	-0.01201696		1102.01	-0.01444378		1692	0.00301087		2282	0.00345538		2872	0.00092394
512.21	-0.01200616		1102.21	-0.01417952		1692.2	0.00284701		2282.2	0.00338061		2872.2	0.00128954
512.41	-0.01163749		1102.41	-0.01367098		1692.4	0.00231745		2282.4	0.00213753		2872.4	0.00101404
512.61	-0.0116355		1102.61	-0.01373436		1692.6	0.00340422		2282.6	0.00193382		2872.6	0.0016224
512.81	-0.01213462		1102.81	-0.01279916		1692.8	0.00344052		2282.8	0.00190714		2872.8	0.00157693
513.01	-0.01207469		1103.01	-0.0128692		1693	0.00378535		2283	0.00150014		2873	0.00163402
513.21	-0.01147214		1103.21	-0.01419713		1693.2	0.00375902		2283.2	0.00132104		2873.2	0.00060724
513.41	-0.01183392		1103.41	-0.01452456		1693.4	0.00381919		2283.4	0.00011058		2873.4	-0.00011603
513.61	-0.01150337		1103.61	-0.0147977		1693.6	0.00362752		2283.6	0.00034836		2873.6	-0.00030055
513.81	-0.01110929		1103.81	-0.01522267		1693.8	0.00399905		2283.8	-0.00003179		2873.8	-0.00088565
514.01	-0.01126252		1104.01	-0.01453443		1694	0.0045445		2284	0.00025295		2874	-0.0010199
514.21	-0.01161527		1104.21	-0.01425884		1694.2	0.00457511		2284.2	-0.00001904		2874.2	-0.00100136
514.41	-0.01318775		1104.41	-0.0149827		1694.4	0.00395862		2284.4	0.00018308		2874.4	-0.00095319
514.61	-0.01389932		1104.61	-0.01451444		1694.6	0.00302236		2284.6	0.0004552		2874.6	-0.00089597
514.81	-0.0135434		1104.81	-0.014271		1694.8	0.00266837		2284.8	0.00106165		2874.8	-0.00089878
515.01	-0.0139031		1105.01	-0.01460867		1695	0.00252642		2285	0.0013746		2875	0.00009661
515.21	-0.01311334		1105.21	-0.01535219		1695.2	0.00216117		2285.2	0.00159376		2875.2	0.00025701
515.41	-0.01326468		1105.41	-0.01545746		1695.4	0.00174281		2285.4	0.00125026		2875.4	-0.00053593
515.61	-0.01202188		1105.61	-0.01534443		1695.6	0.0017871		2285.6	0.00138744		2875.6	0.00031261
515.81	-0.01158634		1105.81	-0.01466326		1695.8	0.0020065		2285.8	0.00218475		2875.8	0.00113914
516.01	-0.01165914		1106.01	-0.01456912		1696	0.00192032		2286	0.00241677		2876	0.00202441
516.21	-0.01230388		1106.21	-0.01436605		1696.2	0.00080761		2286.2	0.00211088		2876.2	0.00145707
516.41	-0.01230434		1106.41	-0.01437453		1696.4	0.00089382		2286.4	0.00109022		2876.4	0.00046152
516.61	-0.01223313		1106.61	-0.01475081		1696.6	0.00121809		2286.6	0.00151375		2876.6	0.00021843
516.81	-0.01201382		1106.81	-0.01484911		1696.8	0.00090488		2286.8	0.00144181		2876.8	-0.00023442
517.01	-0.01158534		1107.01	-0.01461746		1697	0.00170417		2287	0.00060051		2877	-0.00038786
517.21	-0.01101501		1107.21	-0.01487814		1697.2	0.0018331		2287.2	0.00035092		2877.2	-0.00110462
517.41	-0.01111445		1107.41	-0.01533258		1697.4	0.00181707		2287.4	-0.00058561		2877.4	-0.00103201
517.61	-0.01109604		1107.61	-0.01535629		1697.6	0.00139739		2287.6	-0.00046121		2877.6	-0.00060331
517.81	-0.01176318		1107.81	-0.01530831		1697.8	0.00109562		2287.8	-0.00161969		2877.8	-0.0012988
518.01	-0.0126932		1108.01	-0.01517994		1698	0.00077498		2288	-0.00224984		2878	-0.00160607
518.21	-0.01373096		1108.21	-0.01500518		1698.2	0.00015055		2288.2	-0.00313156		2878.2	-0.00163914
518.41	-0.01331449		1108.41	-0.01497543		1698.4	-0.00025296		2288.4	-0.00308206		2878.4	-0.00159025
518.61	-0.01299243		1108.61	-0.01438569		1698.6	-0.00012779		2288.6	-0.00277751		2878.6	-0.00127521
518.81	-0.01274368		1108.81	-0.01383543		1698.8	0.00046398		2288.8	-0.00273084		2878.8	-0.00113185
519.01	-0.01292155		1109.01	-0.01365389		1699	0.00134748		2289	-0.00254391		2879	0.00014571
519.21	-0.01289154		1109.21	-0.01381373		1699.2	0.0009259		2289.2	-0.00275911		2879.2	0.0004104
519.41	-0.01324783		1109.41	-0.01306248		1699.4	0.00173069		2289.4	-0.0021336		2879.4	0.00125307
519.61	-0.01385822		1109.61	-0.01303976		1699.6	0.00250956		2289.6	-0.00112733		2879.6	0.0017641
519.81	-0.0146194		1109.81	-0.0133284		1699.8	0.00273249		2289.8	0.00028063		2879.8	0.00229567
520.01	-0.01429676		1110.01	-0.01316833		1700	0.00291449		2290	0.00036405		2880	0.00246231
520.21	-0.01447965		1110.21	-0.01366448		1700.2	0.00303669		2290.2	0.00038821		2880.2	0.0011594
520.41	-0.01408433		1110.41	-0.01323219		1700.4	0.0043377		2290.4	0.0000839		2880.4	0.00124102
520.61	-0.01344577		1110.61	-0.01294425		1700.6	0.0042462		2290.6	0.00094231		2880.6	0.00155758
520.81	-0.01324883		1110.81	-0.01189824		1700.8	0.00359735		2290.8	0.00122377		2880.8	0.00117078
521.01	-0.01312824		1111.01	-0.01189991		1701	0.00321968		2291	0.00160689		2881	0.00062477
521.21	-0.01311588		1111.21	-0.01247951		1701.2	0.00327991		2291.2	0.00239558		2881.2	-0.00001152
521.41	-0.01371214		1111.41	-0.01252507		1701.4	0.00336665		2291.4	0.00167567		2881.4	-0.00003574
521.61	-0.01355987		1111.61	-0.01235503		1701.6	0.00326462		2291.6	0.0015064		2881.6	-0.00075692
521.81	-0.01359121		1111.81	-0.01241438		1701.8	0.00291416		2291.8	-0.00045485		2881.8	-0.00188025
522.01	-0.01280067		1112.01	-0.01290704		1702	0.00270577		2292	-0.00136245		2882	-0.00151957
522.21	-0.01203116		1112.21	-0.01263272		1702.2	0.00309709		2292.2	-0.00169643		2882.2	-0.00123001
522.41	-0.01196018		1112.41	-0.01310255		1702.4	0.00319596		2292.4	-0.00232079		2882.4	-0.00167174
522.61	-0.01272324		1112.61	-0.01261738		1702.6	0.00356833		2292.6	-0.00293404		2882.6	-0.00183778
522.81	-0.01251805		1112.81	-0.01223782		1702.8	0.00375205		2292.8	-0.00325007		2882.8	-0.00150779
523.01	-0.01197358		1113.01	-0.01255908		1703	0.00346607		2293	-0.0037941		2883	-0.00119024
523.21	-0.01184188		1113.21	-0.01246111		1703.2	0.00295022		2293.2	-0.00454283		2883.2	-0.00105824
523.41	-0.01170575		1113.41	-0.01234758		1703.4	0.00309549		2293.4	-0.00360591		2883.4	-0.00098034
523.61	-0.01176384		1113.61	-0.01249465		1703.6	0.00266697		2293.6	-0.00298147		2883.6	-0.00178238
523.81	-0.01098698		1113.81	-0.01271379		1703.8	0.00222595		2293.8	-0.00182575		2883.8	-0.00101319
524.01	-0.01023144		1114.01	-0.01268127		1704	0.00252662		2294	-0.00173863		2884	-0.00063486
524.21	-0.009935		1114.21	-0.01223838		1704.2	0.00197878		2294.2	-0.00074629		2884.2	-0.00050017
524.41	-0.01041702		1114.41	-0.011952		1704.4	0.00148566		2294.4	0.00023204		2884.4	-0.0003539
524.61	-0.01006524		1114.61	-0.01170244		1704.6	0.0006764		2294.6	0.00136802		2884.6	-0.00073571
524.81	-0.01038485		1114.81	-0.01141663		1704.8	0.00052982		2294.8	0.00240216		2884.8	-0.0008529
525.01	-0.01039089		1115.01	-0.01158075		1705	0.00054759		2295	0.00306737		2885	-0.00111944
525.21	-0.01102239		1115.21	-0.01147713		1705.2	0.00134448		2295.2	0.00385179		2885.2	-0.00042973
525.41	-0.01084845		1115.41	-0.01126527		1705.4	0.00134308		2295.4	0.00312412		2885.4	0.00021718
525.61	-0.0102598		1115.61	-0.01197214		1705.6	0.00226387		2295.6	0.00347247		2885.6	-0.00067682
525.81	-0.0096686		1115.81	-0.0122501		1705.8	0.00206041		2295.8	0.00283575		2885.8	-0.00054377
526.01	-0.00929703		1116.01	-0.01295328		1706	0.00258585		2296	0.00350722		2886	-0.00088032
526.21	-0.01012647		1116.21	-0.01274321		1706.2	0.00301428		2296.2	0.00373472		2886.2	-0.0019935
526.41	-0.01166995		1116.41	-0.01283466		1706.4	0.00331812		2296.4	0.00375228		2886.4	-0.00324415
526.61	-0.01122136		1116.61	-0.01268414		1706.6	0.00376762		2296.6	0.00387		2886.6	-0.00231225
526.81	-0.01106757		1116.81	-0.01285738		1706.8	0.00396118		2296.8	0.00329338		2886.8	-0.00171418
527.01	-0.01085527		1117.01	-0.01295769		1707	0.00388198		2297	0.00284653		2887	-0.00204663
527.21	-0.01053686		1117.21	-0.01262006		1707.2	0.00339977		2297.2	0.0024528		2887.2	-0.00159947
527.41	-0.01029357		1117.41	-0.01272584		1707.4	0.00360238		2297.4	0.00336509		2887.4	-0.00225882
527.61	-0.01021623		1117.61	-0.01343291		1707.6	0.00368215		2297.6	0.00348469		2887.6	-0.00280051
527.81	-0.01034927		1117.81	-0.01413655		1707.8	0.00399294		2297.8	0.00364499		2887.8	-0.00185485
528.01	-0.01121789		1118.01	-0.01437077		1708	0.0036425		2298	0.00343248		2888	-0.00137845
528.21	-0.01146641		1118.21	-0.01437414		1708.2	0.00313033		2298.2	0.00327619		2888.2	-0.00106004
528.41	-0.01238753		1118.41	-0.01491529		1708.4	0.0030582		2298.4	0.00325609		2888.4	-0.00117259
528.61	-0.01285211		1118.61	-0.01486119		1708.6	0.00291973		2298.6	0.00296587		2888.6	-0.00000356
528.81	-0.01321983		1118.81	-0.01478842		1708.8	0.00283088		2298.8	0.00260154		2888.8	0.00025707
529.01	-0.01405308		1119.01	-0.01528771		1709	0.00171325		2299	0.00167016		2889	0.00020443
529.21	-0.01462128		1119.21	-0.01536446		1709.2	0.00184571		2299.2	0.00153217		2889.2	0.00033695
529.41	-0.01373963		1119.41	-0.01616082		1709.4	0.00120107		2299.4	0.00079189		2889.4	0.00026892
529.61	-0.01321248		1119.61	-0.01712877		1709.6	0.00179852		2299.6	0.00107094		2889.6	-0.00072525
529.81	-0.01322297		1119.81	-0.01676147		1709.8	0.00103361		2299.8	0.00022678		2889.8	-0.00085465
530.01	-0.01363098		1120.01	-0.01623437		1710	0.00039254		2300	-0.00061482		2890	-0.00165034
530.21	-0.014595		1120.21	-0.01594076		1710.2	0.00015204		2300.2	-0.00137262		2890.2	-0.00233789
530.41	-0.01448285		1120.41	-0.01584429		1710.4	0.00082688		2300.4	-0.00145064		2890.4	-0.00252662
530.61	-0.01364314		1120.61	-0.01604351		1710.6	0.00111105		2300.6	-0.00220183		2890.6	-0.0018207
530.81	-0.01331911		1120.81	-0.01520428		1710.8	0.0011804		2300.8	-0.00215568		2890.8	-0.00176267
531.01	-0.01304051		1121.01	-0.01499086		1711	0.00070375		2301	-0.00167194		2891	-0.00246827
531.21	-0.01230102		1121.21	-0.01454345		1711.2	0.000545		2301.2	-0.00180574		2891.2	-0.00287552
531.41	-0.01189313		1121.41	-0.01465448		1711.4	0.00012532		2301.4	-0.00128635		2891.4	-0.00401474
531.61	-0.01113604		1121.61	-0.01458564		1711.6	0.00063643		2301.6	-0.00088144		2891.6	-0.0039632
531.81	-0.01121723		1121.81	-0.01401264		1711.8	0.00053086		2301.8	-0.00129634		2891.8	-0.00350437
532.01	-0.01145198		1122.01	-0.0139267		1712	0.00069295		2302	-0.00149527		2892	-0.0039746
532.21	-0.01057399		1122.21	-0.01406217		1712.2	0.00050661		2302.2	-0.00112896		2892.2	-0.00393291
532.41	-0.01105064		1122.41	-0.01386055		1712.4	0.0003324		2302.4	-0.00068344		2892.4	-0.00403578
532.61	-0.01108346		1122.61	-0.01435214		1712.6	0.00071479		2302.6	-0.00020968		2892.6	-0.00355879
532.81	-0.01147066		1122.81	-0.01420881		1712.8	0.00019747		2302.8	-0.00082848		2892.8	-0.00432046
533.01	-0.01237648		1123.01	-0.01432027		1713	-0.00011946		2303	-0.0001568		2893	-0.00353442
533.21	-0.0118133		1123.21	-0.01393536		1713.2	0.00046826		2303.2	0.00043758		2893.2	-0.00344955
533.41	-0.01213354		1123.41	-0.01474544		1713.4	-0.00015204		2303.4	0.00088895		2893.4	-0.00296986
533.61	-0.01264507		1123.61	-0.01470662		1713.6	0.00035989		2303.6	0.00175209		2893.6	-0.00269329
533.81	-0.01317782		1123.81	-0.0138947		1713.8	0.00059868		2303.8	0.00184191		2893.8	-0.00254816
534.01	-0.01391621		1124.01	-0.01365967		1714	0.00092857		2304	0.00167028		2894	-0.00306254
534.21	-0.01481146		1124.21	-0.0140432		1714.2	0.00178349		2304.2	0.00224628		2894.2	-0.00287548
534.41	-0.01412363		1124.41	-0.01406778		1714.4	0.00193761		2304.4	0.00190866		2894.4	-0.00289066
534.61	-0.01433586		1124.61	-0.01416078		1714.6	0.00166611		2304.6	0.00205632		2894.6	-0.00314601
534.81	-0.01429349		1124.81	-0.01366307		1714.8	0.00158994		2304.8	0.00222811		2894.8	-0.00253733
535.01	-0.01394096		1125.01	-0.01326087		1715	0.00138069		2305	0.0020517		2895	-0.00333049
535.21	-0.01273418		1125.21	-0.01312061		1715.2	0.00113238		2305.2	0.00175094		2895.2	-0.00365078
535.41	-0.01260518		1125.41	-0.01374384		1715.4	0.00031447		2305.4	0.00090613		2895.4	-0.00370577
535.61	-0.01193972		1125.61	-0.01402641		1715.6	0.00044299		2305.6	0.00081323		2895.6	-0.00330487
535.81	-0.0120802		1125.81	-0.01495704		1715.8	0.00012323		2305.8	0.00010326		2895.8	-0.00301873
536.01	-0.01162273		1126.01	-0.01563084		1716	0.00048167		2306	-0.00002557		2896	-0.00254983
536.21	-0.01113677		1126.21	-0.01634797		1716.2	0.00016207		2306.2	-0.00023506		2896.2	-0.00178951
536.41	-0.01150065		1126.41	-0.01621912		1716.4	0.00042779		2306.4	-0.00070612		2896.4	-0.00200762
536.61	-0.01136502		1126.61	-0.01665836		1716.6	0.0011675		2306.6	-0.00046038		2896.6	-0.00198373
536.81	-0.01158876		1126.81	-0.01660241		1716.8	0.00106343		2306.8	-0.00143775		2896.8	-0.0016068
537.01	-0.01095632		1127.01	-0.01699014		1717	0.00125641		2307	-0.00122226		2897	-0.0006511
537.21	-0.01095909		1127.21	-0.01645049		1717.2	0.00146843		2307.2	-0.00099749		2897.2	-0.00055933
537.41	-0.01202657		1127.41	-0.01650588		1717.4	0.00168605		2307.4	-0.00078115		2897.4	0.00043954
537.61	-0.01164445		1127.61	-0.01690102		1717.6	0.00285537		2307.6	0.00002513		2897.6	0.00123011
537.81	-0.01183686		1127.81	-0.01645289		1717.8	0.00364519		2307.8	0.00063432		2897.8	0.00104403
538.01	-0.01269078		1128.01	-0.0154047		1718	0.004139		2308	0.00036627		2898	0.00094792
538.21	-0.01307719		1128.21	-0.01539584		1718.2	0.00370004		2308.2	0.00022671		2898.2	0.00072215
538.41	-0.0121876		1128.41	-0.01509181		1718.4	0.00342614		2308.4	0.00033636		2898.4	0.00078419
538.61	-0.0129949		1128.61	-0.0146263		1718.6	0.00312368		2308.6	0.00089714		2898.6	0.00051858
538.81	-0.01254801		1128.81	-0.01394367		1718.8	0.00292161		2308.8	0.00064017		2898.8	-0.00013511
539.01	-0.01214392		1129.01	-0.01393894		1719	0.00215977		2309	0.00031029		2899	-0.00092121
539.21	-0.01218236		1129.21	-0.01460012		1719.2	0.00196061		2309.2	0.00034856		2899.2	-0.00130861
539.41	-0.01294417		1129.41	-0.01476495		1719.4	0.00203101		2309.4	0.00041933		2899.4	-0.00101078
539.61	-0.0132354		1129.61	-0.01472313		1719.6	0.00093541		2309.6	0.00042371		2899.6	-0.00188083
539.81	-0.01306967		1129.81	-0.01486583		1719.8	0.00095673		2309.8	0.00013892		2899.8	-0.00200938
540.01	-0.01323127		1130.01	-0.01476136		1720	0.00093506		2310	-0.00038739		2900	-0.00197562
540.21	-0.01365025		1130.21	-0.01408429		1720.2	0.00104021		2310.2	-0.00056333		2900.2	-0.00339133
540.41	-0.01352306		1130.41	-0.01342133		1720.4	0.00129109		2310.4	-0.00179104		2900.4	-0.00427453
540.61	-0.01314136		1130.61	-0.01294975		1720.6	0.00222193		2310.6	-0.00222952		2900.6	-0.00474619
540.81	-0.0135402		1130.81	-0.01341158		1720.8	0.00180635		2310.8	-0.0034901		2900.8	-0.00427373
541.01	-0.01328001		1131.01	-0.01332711		1721	0.00199399		2311	-0.00310672		2901	-0.00418644
541.21	-0.01356445		1131.21	-0.01266479		1721.2	0.00298868		2311.2	-0.00278507		2901.2	-0.00412285
541.41	-0.01324052		1131.41	-0.01364479		1721.4	0.00317274		2311.4	-0.00306922		2901.4	-0.00262408
541.61	-0.01269791		1131.61	-0.01392523		1721.6	0.00335654		2311.6	-0.00235229		2901.6	-0.00227343
541.81	-0.01241728		1131.81	-0.01422253		1721.8	0.00369808		2311.8	-0.00236709		2901.8	-0.00262737
542.01	-0.01275404		1132.01	-0.01357359		1722	0.00392753		2312	-0.0019632		2902	-0.00302958
542.21	-0.01288712		1132.21	-0.01415769		1722.2	0.00312989		2312.2	-0.00196791		2902.2	-0.00274581
542.41	-0.01300585		1132.41	-0.01496116		1722.4	0.00333559		2312.4	-0.0008819		2902.4	-0.00214023
542.61	-0.01463818		1132.61	-0.0151671		1722.6	0.00259928		2312.6	-0.00073774		2902.6	-0.00294247
542.81	-0.01469222		1132.81	-0.01552304		1722.8	0.00194028		2312.8	-0.00104782		2902.8	-0.00350305
543.01	-0.01501838		1133.01	-0.01598951		1723	0.00136882		2313	-0.0008662		2903	-0.00330093
543.21	-0.01517434		1133.21	-0.01702847		1723.2	0.00216337		2313.2	0.00015757		2903.2	-0.00306059
543.41	-0.01535412		1133.41	-0.01810716		1723.4	0.00131685		2313.4	0.0005997		2903.4	-0.00297135
543.61	-0.01554607		1133.61	-0.0183961		1723.6	0.00071426		2313.6	0.00047512		2903.6	-0.00317647
543.81	-0.01526492		1133.81	-0.01877763		1723.8	0.00034082		2313.8	0.00112932		2903.8	-0.0026515
544.01	-0.01538104		1134.01	-0.01873251		1724	0.00028521		2314	0.0008293		2904	-0.00219247
544.21	-0.01564786		1134.21	-0.0185156		1724.2	0.00005472		2314.2	0.00123231		2904.2	-0.00276916
544.41	-0.01513926		1134.41	-0.01836953		1724.4	0.00037957		2314.4	0.00039511		2904.4	-0.00254939
544.61	-0.0152253		1134.61	-0.01847965		1724.6	0.00082547		2314.6	0.00042008		2904.6	-0.00269288
544.81	-0.0157448		1134.81	-0.01920126		1724.8	0.00074719		2314.8	0.00043448		2904.8	-0.00243928
545.01	-0.01474656		1135.01	-0.01895726		1725	0.00173226		2315	0.00076228		2905	-0.00270863
545.21	-0.01438697		1135.21	-0.01847447		1725.2	0.00176636		2315.2	-0.00000148		2905.2	-0.00253398
545.41	-0.01431768		1135.41	-0.01832336		1725.4	0.00161331		2315.4	-0.00036092		2905.4	-0.00177412
545.61	-0.01432001		1135.61	-0.01883441		1725.6	0.00223398		2315.6	-0.00051503		2905.6	-0.00161218
545.81	-0.01435194		1135.81	-0.01815859		1725.8	0.00302568		2315.8	-0.00094526		2905.8	-0.00200564
546.01	-0.0153566		1136.01	-0.01678582		1726	0.00350644		2316	-0.00075566		2906	-0.00189651
546.21	-0.0161583		1136.21	-0.01666105		1726.2	0.00382411		2316.2	-0.00083004		2906.2	-0.00135105
546.41	-0.01699823		1136.41	-0.01654926		1726.4	0.0039033		2316.4	-0.00066092		2906.4	-0.00149423
546.61	-0.01733033		1136.61	-0.0156441		1726.6	0.00435405		2316.6	-0.00105415		2906.6	-0.00129272
546.81	-0.01676567		1136.81	-0.0154587		1726.8	0.00457887		2316.8	-0.00126554		2906.8	-0.00109259
547.01	-0.01608995		1137.01	-0.01550712		1727	0.00449572		2317	-0.00077682		2907	-0.00086172
547.21	-0.01593901		1137.21	-0.01572117		1727.2	0.00532401		2317.2	-0.00063941		2907.2	0.00054166
547.41	-0.01531348		1137.41	-0.01612578		1727.4	0.00495301		2317.4	-0.00055184		2907.4	0.00073146
547.61	-0.01561834		1137.61	-0.01576888		1727.6	0.00474443		2317.6	-0.0005536		2907.6	0.00077566
547.81	-0.01583622		1137.81	-0.01566058		1727.8	0.00387389		2317.8	-0.00048933		2907.8	0.00052886
548.01	-0.01601464		1138.01	-0.01560856		1728	0.00379677		2318	-0.00043074		2908	0.00047601
548.21	-0.0160137		1138.21	-0.01544177		1728.2	0.00309896		2318.2	-0.00065187		2908.2	-0.00003408
548.41	-0.01605974		1138.41	-0.01558993		1728.4	0.00321515		2318.4	-0.00157087		2908.4	0.0001658
548.61	-0.01594033		1138.61	-0.01586047		1728.6	0.00376962		2318.6	-0.00178982		2908.6	-0.00183894
548.81	-0.01559855		1138.81	-0.01622668		1728.8	0.00385457		2318.8	-0.00134417		2908.8	-0.00272605
549.01	-0.01579881		1139.01	-0.01625146		1729	0.00337413		2319	-0.0017009		2909	-0.00343826
549.21	-0.01569567		1139.21	-0.01579035		1729.2	0.0029847		2319.2	-0.00186132		2909.2	-0.00354294
549.41	-0.01537861		1139.41	-0.01588553		1729.4	0.00187192		2319.4	-0.00247449		2909.4	-0.00397581
549.61	-0.01544349		1139.61	-0.01610977		1729.6	0.00116796		2319.6	-0.00262202		2909.6	-0.00364265
549.81	-0.01509117		1139.81	-0.01485281		1729.8	0.00047528		2319.8	-0.00298236		2909.8	-0.00470746
550.01	-0.01494396		1140.01	-0.01505103		1730	-0.00035636		2320	-0.00153915		2910	-0.00514096
550.21	-0.01450877		1140.21	-0.01494821		1730.2	-0.00113068		2320.2	-0.0004864		2910.2	-0.0057194
550.41	-0.01452397		1140.41	-0.01497951		1730.4	-0.00217268		2320.4	-0.00106691		2910.4	-0.00625454
550.61	-0.01349108		1140.61	-0.01469265		1730.6	-0.00176625		2320.6	-0.00077715		2910.6	-0.00603344
550.81	-0.01282081		1140.81	-0.01444668		1730.8	-0.00206615		2320.8	-0.00072119		2910.8	-0.00628005
551.01	-0.01263476		1141.01	-0.01452163		1731	-0.00230922		2321	-0.00057339		2911	-0.00616467
551.21	-0.01211814		1141.21	-0.01410152		1731.2	-0.00110898		2321.2	-0.00082919		2911.2	-0.00568341
551.41	-0.01124292		1141.41	-0.01438282		1731.4	-0.00113542		2321.4	-0.00093539		2911.4	-0.00574679
551.61	-0.01201638		1141.61	-0.01371729		1731.6	-0.00100539		2321.6	-0.00169115		2911.6	-0.00556303
551.81	-0.01179188		1141.81	-0.01357835		1731.8	-0.0004395		2321.8	-0.00231231		2911.8	-0.00454935
552.01	-0.01213139		1142.01	-0.01385725		1732	0.00023933		2322	-0.00216748		2912	-0.00420923
552.21	-0.01212707		1142.21	-0.014003		1732.2	0.00094473		2322.2	-0.00294633		2912.2	-0.00353663
552.41	-0.01230179		1142.41	-0.01447261		1732.4	0.00184618		2322.4	-0.00252638		2912.4	-0.00334114
552.61	-0.01202677		1142.61	-0.01503246		1732.6	0.00277046		2322.6	-0.00216852		2912.6	-0.00444876
552.81	-0.01223252		1142.81	-0.01630939		1732.8	0.00312488		2322.8	-0.00139038		2912.8	-0.00357682
553.01	-0.01286745		1143.01	-0.01704342		1733	0.00287885		2323	-0.00129105		2913	-0.00305104
553.21	-0.01225395		1143.21	-0.017572		1733.2	0.00314698		2323.2	-0.00106309		2913.2	-0.00277151
553.41	-0.01267825		1143.41	-0.01803398		1733.4	0.00249603		2323.4	-0.00116491		2913.4	-0.00298831
553.61	-0.01313262		1143.61	-0.01829882		1733.6	0.00258052		2323.6	-0.00031922		2913.6	-0.00355304
553.81	-0.01283461		1143.81	-0.01888607		1733.8	0.00197989		2323.8	0.00037139		2913.8	-0.0048305
554.01	-0.01398333		1144.01	-0.02000372		1734	0.00128991		2324	0.00237164		2914	-0.00479469
554.21	-0.01437196		1144.21	-0.0201393		1734.2	0.00127335		2324.2	0.00226309		2914.2	-0.00514869
554.41	-0.01503606		1144.41	-0.02121332		1734.4	0.00100853		2324.4	0.00204151		2914.4	-0.00542807
554.61	-0.0147937		1144.61	-0.0208536		1734.6	0.00192085		2324.6	0.00237376		2914.6	-0.00527008
554.81	-0.01492239		1144.81	-0.02062133		1734.8	0.00180736		2324.8	0.00259594		2914.8	-0.00599413
555.01	-0.01558289		1145.01	-0.02133127		1735	0.00186525		2325	0.00230844		2915	-0.00605785
555.21	-0.01501489		1145.21	-0.0207637		1735.2	0.00158613		2325.2	0.00138451		2915.2	-0.00628354
555.41	-0.01527056		1145.41	-0.02019134		1735.4	0.00095648		2325.4	0.00044288		2915.4	-0.0060824
555.61	-0.01561867		1145.61	-0.01912287		1735.6	0.00099102		2325.6	0.00070077		2915.6	-0.00627578
555.81	-0.01562814		1145.81	-0.01906257		1735.8	0.00128802		2325.8	0.00018813		2915.8	-0.00600072
556.01	-0.01586076		1146.01	-0.01850208		1736	0.00129358		2326	0.00033985		2916	-0.00676671
556.21	-0.01535706		1146.21	-0.01729387		1736.2	0.00127507		2326.2	-0.00070766		2916.2	-0.00613641
556.41	-0.01478319		1146.41	-0.01690425		1736.4	0.00098431		2326.4	-0.00044287		2916.4	-0.00500437
556.61	-0.01496006		1146.61	-0.01674831		1736.6	0.00094423		2326.6	-0.00007868		2916.6	-0.00476222
556.81	-0.01478895		1146.81	-0.01669638		1736.8	0.00178512		2326.8	0.00012729		2916.8	-0.00521749
557.01	-0.01523042		1147.01	-0.0164428		1737	0.00108166		2327	0.00011574		2917	-0.00457539
557.21	-0.01453562		1147.21	-0.01579329		1737.2	0.00088959		2327.2	0.00014763		2917.2	-0.00408497
557.41	-0.01420945		1147.41	-0.01500996		1737.4	0.00063599		2327.4	-0.00011249		2917.4	-0.00441663
557.61	-0.01366829		1147.61	-0.0153013		1737.6	0.00093513		2327.6	0.0001476		2917.6	-0.00438781
557.81	-0.01313286		1147.81	-0.01571356		1737.8	0.00085903		2327.8	0.00055282		2917.8	-0.00404054
558.01	-0.01283326		1148.01	-0.01549631		1738	0.00131616		2328	0.00113665		2918	-0.00322668
558.21	-0.01197377		1148.21	-0.01539322		1738.2	0.00173651		2328.2	0.0006905		2918.2	-0.00239332
558.41	-0.01164589		1148.41	-0.01602717		1738.4	0.00138305		2328.4	0.00101816		2918.4	-0.00214505
558.61	-0.01030899		1148.61	-0.01532649		1738.6	0.00115337		2328.6	0.00091437		2918.6	-0.00147735
558.81	-0.0092882		1148.81	-0.01545029		1738.8	0.00016686		2328.8	0.00046715		2918.8	-0.00156089
559.01	-0.0090938		1149.01	-0.01576113		1739	-0.00103943		2329	0.00013862		2919	-0.00182863
559.21	-0.00837296		1149.21	-0.01482688		1739.2	-0.00212481		2329.2	-0.00082579		2919.2	-0.00259175
559.41	-0.00837936		1149.41	-0.01426981		1739.4	-0.00265287		2329.4	-0.00118663		2919.4	-0.00258809
559.61	-0.00907018		1149.61	-0.01369817		1739.6	-0.00276293		2329.6	-0.00116679		2919.6	-0.00246301
559.81	-0.00946844		1149.81	-0.01326723		1739.8	-0.00287117		2329.8	-0.00158296		2919.8	-0.00203596
560.01	-0.00991721		1150.01	-0.01273909		1740	-0.00358054		2330	-0.00174533		2920	-0.00225312
560.21	-0.01044124		1150.21	-0.01145292		1740.2	-0.00366528		2330.2	-0.00141441		2920.2	-0.00146643
560.41	-0.01097233		1150.41	-0.01166581		1740.4	-0.00407799		2330.4	-0.00048071		2920.4	-0.00068686
560.61	-0.01134503		1150.61	-0.01208709		1740.6	-0.00454755		2330.6	-0.00026013		2920.6	-0.00147398
560.81	-0.01118182		1150.81	-0.0121145		1740.8	-0.00518847		2330.8	-0.00019678		2920.8	-0.00124723
561.01	-0.0116		1151.01	-0.01203865		1741	-0.00622354		2331	-0.00011003		2921	-0.00066249
561.21	-0.01147939		1151.21	-0.01219182		1741.2	-0.00572185		2331.2	0.00055398		2921.2	-0.00084623
561.41	-0.01205538		1151.41	-0.01312756		1741.4	-0.00510526		2331.4	0.00105379		2921.4	-0.00080652
561.61	-0.01254847		1151.61	-0.01417613		1741.6	-0.00349171		2331.6	0.00133079		2921.6	-0.00030325
561.81	-0.01235548		1151.81	-0.01512484		1741.8	-0.00354637		2331.8	0.00144756		2921.8	-0.00066635
562.01	-0.01234082		1152.01	-0.01616399		1742	-0.00289286		2332	0.00165484		2922	-0.00029834
562.21	-0.0126511		1152.21	-0.01748526		1742.2	-0.00265823		2332.2	0.00131808		2922.2	-0.00024587
562.41	-0.01265262		1152.41	-0.01871088		1742.4	-0.0022089		2332.4	0.00107948		2922.4	-0.0008688
562.61	-0.01204212		1152.61	-0.01933624		1742.6	-0.0011008		2332.6	0.00094258		2922.6	-0.00068905
562.81	-0.01290389		1152.81	-0.02001313		1742.8	-0.00073447		2332.8	-0.00028333		2922.8	-0.00154083
563.01	-0.01384512		1153.01	-0.02050887		1743	-0.00030741		2333	-0.00007647		2923	-0.00163599
563.21	-0.01461304		1153.21	-0.02146017		1743.2	0.00082364		2333.2	-0.00099183		2923.2	-0.00221211
563.41	-0.01569702		1153.41	-0.02199326		1743.4	0.00104803		2333.4	-0.00130787		2923.4	-0.00111378
563.61	-0.01633998		1153.61	-0.02167776		1743.6	0.00140896		2333.6	-0.00184964		2923.6	-0.00064384
563.81	-0.01623221		1153.81	-0.02106581		1743.8	0.00162706		2333.8	-0.00157213		2923.8	-0.00095288
564.01	-0.01696318		1154.01	-0.02030432		1744	0.00192146		2334	-0.0015409		2924	-0.00121526
564.21	-0.01695047		1154.21	-0.02020132		1744.2	0.00202437		2334.2	-0.00059561		2924.2	-0.00102837
564.41	-0.01695043		1154.41	-0.0200489		1744.4	0.001583		2334.4	-0.00076028		2924.4	-0.00090941
564.61	-0.01678499		1154.61	-0.01937815		1744.6	0.00035947		2334.6	-0.00057735		2924.6	-0.00123546
564.81	-0.01576388		1154.81	-0.01815566		1744.8	0.00029724		2334.8	-0.00055292		2924.8	-0.00121852
565.01	-0.01576069		1155.01	-0.0180767		1745	0.00102459		2335	-0.00025275		2925	-0.00088962
565.21	-0.01552964		1155.21	-0.01846705		1745.2	0.00152489		2335.2	0.00036371		2925.2	-0.00108934
565.41	-0.01556786		1155.41	-0.01804421		1745.4	0.00121544		2335.4	0.00065325		2925.4	-0.00081958
565.61	-0.0154108		1155.61	-0.01756131		1745.6	0.00109219		2335.6	0.0006045		2925.6	-0.00031964
565.81	-0.01526079		1155.81	-0.01695781		1745.8	0.00079443		2335.8	0.00037567		2925.8	-0.00096088
566.01	-0.01503011		1156.01	-0.01664573		1746	0.00126251		2336	0.00012933		2926	-0.00133858
566.21	-0.01463349		1156.21	-0.01676006		1746.2	0.00162947		2336.2	-0.00093315		2926.2	-0.00197146
566.41	-0.01455058		1156.41	-0.01773356		1746.4	0.00203792		2336.4	-0.00115797		2926.4	-0.00239096
566.61	-0.0141986		1156.61	-0.01796793		1746.6	0.00227121		2336.6	-0.00068125		2926.6	-0.00338202
566.81	-0.01420553		1156.81	-0.01733066		1746.8	0.00261072		2336.8	-0.00150162		2926.8	-0.00350239
567.01	-0.01317191		1157.01	-0.01728221		1747	0.0027704		2337	-0.0009819		2927	-0.00370239
567.21	-0.01334093		1157.21	-0.01744176		1747.2	0.00253684		2337.2	-0.00144222		2927.2	-0.00411095
567.41	-0.01316563		1157.41	-0.01694695		1747.4	0.00210639		2337.4	-0.00192523		2927.4	-0.00330239
567.61	-0.01254965		1157.61	-0.01653457		1747.6	0.00181668		2337.6	-0.00258235		2927.6	-0.00393507
567.81	-0.01244507		1157.81	-0.01694969		1747.8	0.00133809		2337.8	-0.00272594		2927.8	-0.0045189
568.01	-0.01186362		1158.01	-0.017024		1748	0.00122934		2338	-0.00225414		2928	-0.00404628
568.21	-0.01186592		1158.21	-0.01787381		1748.2	0.00162581		2338.2	-0.00161568		2928.2	-0.00424837
568.41	-0.01201913		1158.41	-0.01770554		1748.4	0.00134294		2338.4	-0.00108027		2928.4	-0.00459939
568.61	-0.01177952		1158.61	-0.01865052		1748.6	0.00070695		2338.6	-0.00101972		2928.6	-0.00500704
568.81	-0.01111055		1158.81	-0.019006		1748.8	0.00126689		2338.8	-0.00134983		2928.8	-0.0048856
569.01	-0.01110011		1159.01	-0.01992528		1749	0.00151372		2339	-0.00022466		2929	-0.00457753
569.21	-0.01122465		1159.21	-0.0199708		1749.2	0.00129809		2339.2	0.00096722		2929.2	-0.00469795
569.41	-0.0122283		1159.41	-0.01951225		1749.4	0.00081419		2339.4	0.00115363		2929.4	-0.00400923
569.61	-0.01226039		1159.61	-0.01950038		1749.6	-0.00007525		2339.6	0.00059704		2929.6	-0.00310102
569.81	-0.0124761		1159.81	-0.01925652		1749.8	-0.00048672		2339.8	0.00018426		2929.8	-0.00347622
570.01	-0.01295992		1160.01	-0.01982149		1750	-0.00059012		2340	0.00032259		2930	-0.00334025
570.21	-0.0130634		1160.21	-0.01923365		1750.2	-0.00108417		2340.2	0.00107359		2930.2	-0.00294037
570.41	-0.01280027		1160.41	-0.01876761		1750.4	-0.00128641		2340.4	0.00144945		2930.4	-0.0027327
570.61	-0.01269812		1160.61	-0.01725804		1750.6	-0.00082986		2340.6	0.00140319		2930.6	-0.00308276
570.81	-0.01269121		1160.81	-0.01663056		1750.8	-0.00046043		2340.8	0.00102706		2930.8	-0.00226733
571.01	-0.01356801		1161.01	-0.01626138		1751	-0.00063589		2341	0.00056311		2931	-0.00249343
571.21	-0.01476926		1161.21	-0.01619443		1751.2	-0.00025932		2341.2	0.00003891		2931.2	-0.00269197
571.41	-0.01425782		1161.41	-0.01619578		1751.4	0.00061656		2341.4	-0.00072553		2931.4	-0.00234997
571.61	-0.0139199		1161.61	-0.01643296		1751.6	0.0005514		2341.6	-0.00108845		2931.6	-0.00315705
571.81	-0.01361127		1161.81	-0.01653442		1751.8	0.00014974		2341.8	-0.00171221		2931.8	-0.0034304
572.01	-0.01334432		1162.01	-0.01604484		1752	0.00001435		2342	-0.001302		2932	-0.00339414
572.21	-0.013396		1162.21	-0.01657869		1752.2	0.00137457		2342.2	-0.00182277		2932.2	-0.00422507
572.41	-0.01306349		1162.41	-0.01710698		1752.4	0.00128312		2342.4	-0.0021383		2932.4	-0.00476588
572.61	-0.01329174		1162.61	-0.01790467		1752.6	0.00167058		2342.6	-0.00313503		2932.6	-0.00580976
572.81	-0.01328018		1162.81	-0.01706098		1752.8	0.00194153		2342.8	-0.003899		2932.8	-0.00534597
573.01	-0.01284294		1163.01	-0.0176017		1753	0.0018377		2343	-0.00261113		2933	-0.00578193
573.21	-0.01349205		1163.21	-0.01760364		1753.2	0.0015736		2343.2	-0.00279495		2933.2	-0.00563681
573.41	-0.01357007		1163.41	-0.01789883		1753.4	0.00115306		2343.4	-0.0034975		2933.4	-0.00590975
573.61	-0.0133247		1163.61	-0.0188043		1753.6	0.00013818		2343.6	-0.00384682		2933.6	-0.00517498
573.81	-0.0134547		1163.81	-0.01896843		1753.8	0.00022829		2343.8	-0.00293017		2933.8	-0.00478294
574.01	-0.01375078		1164.01	-0.01843583		1754	0.00004409		2344	-0.00165757		2934	-0.00373373
574.21	-0.01351899		1164.21	-0.01825864		1754.2	0.00010713		2344.2	-0.00123066		2934.2	-0.00259445
574.41	-0.01373471		1164.41	-0.01939046		1754.4	0.00075872		2344.4	-0.00165952		2934.4	-0.00192359
574.61	-0.0142379		1164.61	-0.01885064		1754.6	0.00069311		2344.6	-0.00177452		2934.6	-0.002214
574.81	-0.01514172		1164.81	-0.0195522		1754.8	0.00043162		2344.8	-0.00164613		2934.8	-0.00175109
575.01	-0.01622547		1165.01	-0.01927145		1755	0.00138366		2345	-0.00199513		2935	-0.00191438
575.21	-0.01600412		1165.21	-0.01929171		1755.2	0.00159845		2345.2	-0.00196777		2935.2	-0.00277612
575.41	-0.01559661		1165.41	-0.0193981		1755.4	0.00137307		2345.4	-0.00135588		2935.4	-0.00224532
575.61	-0.01601511		1165.61	-0.01981579		1755.6	-0.00034704		2345.6	-0.00098072		2935.6	-0.00325352
575.81	-0.01580937		1165.81	-0.01883037		1755.8	-0.00067505		2345.8	-0.00200712		2935.8	-0.00254709
576.01	-0.01555215		1166.01	-0.01889904		1756	-0.00149115		2346	-0.00234873		2936	-0.00288779
576.21	-0.01504235		1166.21	-0.01917664		1756.2	-0.00089305		2346.2	-0.00309224		2936.2	-0.00257736
576.41	-0.01512406		1166.41	-0.01862951		1756.4	-0.0015921		2346.4	-0.00284584		2936.4	-0.0026944
576.61	-0.01582524		1166.61	-0.01766365		1756.6	-0.00151167		2346.6	-0.0037491		2936.6	-0.00314606
576.81	-0.0152045		1166.81	-0.01650929		1756.8	-0.0015747		2346.8	-0.00362747		2936.8	-0.00212651
577.01	-0.01422641		1167.01	-0.01703293		1757	-0.00129983		2347	-0.00217622		2937	-0.00340813
577.21	-0.01376385		1167.21	-0.01698096		1757.2	-0.00119303		2347.2	-0.00173997		2937.2	-0.00321506
577.41	-0.01273057		1167.41	-0.01696011		1757.4	-0.00132387		2347.4	-0.00153824		2937.4	-0.00344898
577.61	-0.01217883		1167.61	-0.01733415		1757.6	-0.00199553		2347.6	-0.0003493		2937.6	-0.00269262
577.81	-0.01188718		1167.81	-0.01722796		1757.8	-0.00194051		2347.8	0.00096488		2937.8	-0.00244783
578.01	-0.01170047		1168.01	-0.01709553		1758	-0.00195934		2348	0.00163254		2938	-0.00257235
578.21	-0.0114404		1168.21	-0.01818084		1758.2	-0.00147031		2348.2	0.00124409		2938.2	-0.00317885
578.41	-0.01204361		1168.41	-0.0178176		1758.4	-0.00123438		2348.4	0.00148738		2938.4	-0.00313854
578.61	-0.01220837		1168.61	-0.01715398		1758.6	-0.00198856		2348.6	0.00126965		2938.6	-0.00394647
578.81	-0.01239788		1168.81	-0.01733784		1758.8	-0.0012551		2348.8	0.00191328		2938.8	-0.00432192
579.01	-0.01265517		1169.01	-0.01696521		1759	-0.00080186		2349	0.00139881		2939	-0.00477386
579.21	-0.01310059		1169.21	-0.0162591		1759.2	-0.00146043		2349.2	0.00206612		2939.2	-0.00528309
579.41	-0.01340809		1169.41	-0.01702062		1759.4	-0.00161531		2349.4	0.00312482		2939.4	-0.00481582
579.61	-0.01384387		1169.61	-0.01693999		1759.6	-0.00201514		2349.6	0.00279696		2939.6	-0.00507656
579.81	-0.01428295		1169.81	-0.01595046		1759.8	-0.00145689		2349.8	0.00138754		2939.8	-0.00416099
580.01	-0.01512368		1170.01	-0.01644387		1760	-0.00269594		2350	0.00139711		2940	-0.00383854
580.21	-0.01595753		1170.21	-0.01563148		1760.2	-0.00274886		2350.2	0.00116504		2940.2	-0.00261592
580.41	-0.01626771		1170.41	-0.01514114		1760.4	-0.00250845		2350.4	0.00145462		2940.4	-0.00192114
580.61	-0.01578919		1170.61	-0.01473027		1760.6	-0.00188503		2350.6	0.00095495		2940.6	-0.00152428
580.81	-0.01489683		1170.81	-0.01535402		1760.8	-0.00146141		2350.8	0.00148054		2940.8	-0.00105824
581.01	-0.01469175		1171.01	-0.01574848		1761	-0.00102141		2351	0.00266337		2941	-0.0019394
581.21	-0.01448275		1171.21	-0.01545763		1761.2	-0.0011418		2351.2	0.00238617		2941.2	-0.00156207
581.41	-0.01420734		1171.41	-0.01573471		1761.4	-0.00059492		2351.4	0.00191179		2941.4	-0.00156325
581.61	-0.01430166		1171.61	-0.01665242		1761.6	-0.00082668		2351.6	0.0024509		2941.6	-0.00182807
581.81	-0.01403886		1171.81	-0.01779411		1761.8	0.00033247		2351.8	0.00175886		2941.8	-0.00177068
582.01	-0.01403279		1172.01	-0.01853169		1762	0.00079524		2352	0.00166481		2942	-0.00114647
582.21	-0.01364102		1172.21	-0.01882854		1762.2	0.00072058		2352.2	0.00085239		2942.2	-0.00137694
582.41	-0.0149115		1172.41	-0.01882059		1762.4	0.001359		2352.4	0.00068258		2942.4	-0.00109775
582.61	-0.01514563		1172.61	-0.01897539		1762.6	0.00170745		2352.6	0.00072664		2942.6	-0.00169881
582.81	-0.01566289		1172.81	-0.01841056		1762.8	0.00203956		2352.8	0.00074176		2942.8	-0.00239481
583.01	-0.01628044		1173.01	-0.01852564		1763	0.00145285		2353	0.00002471		2943	-0.00297708
583.21	-0.01636379		1173.21	-0.01891249		1763.2	0.00207905		2353.2	0.00083015		2943.2	-0.00317191
583.41	-0.01654519		1173.41	-0.0197562		1763.4	0.00179367		2353.4	0.00073182		2943.4	-0.00298432
583.61	-0.01739478		1173.61	-0.01945249		1763.6	0.00169457		2353.6	0.00006879		2943.6	-0.00353867
583.81	-0.01790586		1173.81	-0.01890261		1763.8	0.00114772		2353.8	-0.00027391		2943.8	-0.00341432
584.01	-0.01758744		1174.01	-0.01856545		1764	0.00043939		2354	0.00045777		2944	-0.00391336
584.21	-0.01616528		1174.21	-0.01825702		1764.2	-0.00006502		2354.2	0.00035801		2944.2	-0.00391145
584.41	-0.01468983		1174.41	-0.01783889		1764.4	0.00011716		2354.4	0.00004827		2944.4	-0.00360717
584.61	-0.01331963		1174.61	-0.0174258		1764.6	-0.00021151		2354.6	-0.00065974		2944.6	-0.00409544
584.81	-0.01217259		1174.81	-0.01714516		1764.8	-0.00036174		2354.8	-0.00103804		2944.8	-0.00458483
585.01	-0.01151443		1175.01	-0.01636755		1765	-0.00033767		2355	-0.00047429		2945	-0.00457617
585.21	-0.01082464		1175.21	-0.01655905		1765.2	-0.00041042		2355.2	-0.00101396		2945.2	-0.00422272
585.41	-0.00987495		1175.41	-0.01686196		1765.4	0.00054815		2355.4	-0.00048806		2945.4	-0.00456907
585.61	-0.01031754		1175.61	-0.0169304		1765.6	0.00040129		2355.6	-0.00055105		2945.6	-0.00410889
585.81	-0.01048993		1175.81	-0.01750401		1765.8	0.00085855		2355.8	-0.00109891		2945.8	-0.00275324
586.01	-0.01127129		1176.01	-0.0184108		1766	0.00062772		2356	-0.00120137		2946	-0.00186881
586.21	-0.01194133		1176.21	-0.01812366		1766.2	0.00117355		2356.2	-0.00193014		2946.2	-0.00212731
586.41	-0.01374147		1176.41	-0.01821463		1766.4	0.00140399		2356.4	-0.00185243		2946.4	-0.00209817
586.61	-0.01407373		1176.61	-0.01788295		1766.6	0.00134704		2356.6	-0.00177765		2946.6	-0.00189743
586.81	-0.01554004		1176.81	-0.01768063		1766.8	-0.00003242		2356.8	-0.00214775		2946.8	-0.0022699
587.01	-0.01611086		1177.01	-0.01772979		1767	0.00010507		2357	-0.00145915		2947	-0.00257667
587.21	-0.01648095		1177.21	-0.01769155		1767.2	0.00009236		2357.2	-0.00141116		2947.2	-0.00140121
587.41	-0.01799349		1177.41	-0.0181514		1767.4	-0.0005318		2357.4	-0.00145242		2947.4	-0.00108512
587.61	-0.01859109		1177.61	-0.01823291		1767.6	-0.00042948		2357.6	-0.00147407		2947.6	-0.0017167
587.81	-0.01768444		1177.81	-0.01797502		1767.8	-0.00133349		2357.8	-0.0007816		2947.8	-0.00310255
588.01	-0.01760041		1178.01	-0.01801881		1768	-0.00154948		2358	-0.00060317		2948	-0.003549
588.21	-0.01693154		1178.21	-0.01805282		1768.2	-0.00178489		2358.2	-0.00051598		2948.2	-0.00297777
588.41	-0.01727536		1178.41	-0.01757558		1768.4	-0.00175987		2358.4	-0.00101235		2948.4	-0.00374912
588.61	-0.01707102		1178.61	-0.01801833		1768.6	-0.00204506		2358.6	-0.00074333		2948.6	-0.00390706
588.81	-0.01641888		1178.81	-0.01761632		1768.8	-0.0015884		2358.8	-0.00019637		2948.8	-0.00417693
589.01	-0.01696484		1179.01	-0.01738396		1769	-0.00122039		2359	0.00093748		2949	-0.00483401
589.21	-0.01706785		1179.21	-0.01754813		1769.2	-0.00044972		2359.2	0.00184791		2949.2	-0.00519851
589.41	-0.01654531		1179.41	-0.0177934		1769.4	0.00007254		2359.4	0.00180217		2949.4	-0.00602246
589.61	-0.01717001		1179.61	-0.01876373		1769.6	0.00027395		2359.6	0.00044299		2949.6	-0.00576169
589.81	-0.01656606		1179.81	-0.01956958		1769.8	0.000814		2359.8	0.00040354		2949.8	-0.00613291
590.01	-0.01645292		1180.01	-0.01970219		1770	0.0012621		2360	0.00047563		2950	-0.00551215
590.21	-0.01614124		1180.21	-0.01892318		1770.2	0.0018291		2360.2	0.0004536		2950.2	-0.00520451
590.41	-0.01571901		1180.41	-0.01849685		1770.4	0.00081362		2360.4	0.00026453		2950.4	-0.0051649
590.61	-0.0150774		1180.61	-0.01854145		1770.6	0.00051311		2360.6	0.00008915		2950.6	-0.00461921
590.81	-0.01563385		1180.81	-0.01840035		1770.8	-0.00023345		2360.8	0.00027731		2950.8	-0.00471443
591.01	-0.0148746		1181.01	-0.01826069		1771	0.00004392		2361	-0.00018111		2951	-0.00399991
591.21	-0.0144339		1181.21	-0.01785305		1771.2	-0.00124766		2361.2	-0.00066901		2951.2	-0.00295554
591.41	-0.01472637		1181.41	-0.0188936		1771.4	-0.00098088		2361.4	-0.00105158		2951.4	-0.00285389
591.61	-0.0140495		1181.61	-0.01817176		1771.6	-0.00187867		2361.6	-0.00123711		2951.6	-0.0028746
591.81	-0.01402168		1181.81	-0.0182141		1771.8	-0.002062		2361.8	-0.00028138		2951.8	-0.00345705
592.01	-0.01507482		1182.01	-0.01848728		1772	-0.00122573		2362	-0.00020583		2952	-0.00263816
592.21	-0.01517459		1182.21	-0.01852971		1772.2	-0.00076032		2362.2	-0.00020651		2952.2	-0.0023439
592.41	-0.01533152		1182.41	-0.01822576		1772.4	-0.00070023		2362.4	-0.00055475		2952.4	-0.00311869
592.61	-0.01523182		1182.61	-0.01823096		1772.6	-0.00018488		2362.6	-0.00044445		2952.6	-0.00273969
592.81	-0.01455475		1182.81	-0.01826646		1772.8	0.00034332		2362.8	0.00005779		2952.8	-0.00266446
593.01	-0.01459571		1183.01	-0.01784503		1773	0.00087318		2363	-0.00000819		2953	-0.00413354
593.21	-0.01398253		1183.21	-0.01806638		1773.2	0.00159414		2363.2	-0.00025437		2953.2	-0.00361254
593.41	-0.0135258		1183.41	-0.01782186		1773.4	0.00204883		2363.4	-0.0004767		2953.4	-0.0038279
593.61	-0.01354727		1183.61	-0.01763678		1773.6	0.00253474		2363.6	-0.0008836		2953.6	-0.00378564
593.81	-0.01399973		1183.81	-0.01735105		1773.8	0.00282316		2363.8	0.00004018		2953.8	-0.00353941
594.01	-0.01414461		1184.01	-0.01721372		1774	0.00288559		2364	-0.00018874		2954	-0.00303581
594.21	-0.01406395		1184.21	-0.01727892		1774.2	0.00281535		2364.2	-0.00063766		2954.2	-0.00280033
594.41	-0.01445062		1184.41	-0.01737535		1774.4	0.00216042		2364.4	-0.00122714		2954.4	-0.00272475
594.61	-0.01464		1184.61	-0.01821612		1774.6	0.00186235		2364.6	-0.00134225		2954.6	-0.00303469
594.81	-0.01580054		1184.81	-0.0184263		1774.8	0.00134004		2364.8	-0.00145268		2954.8	-0.00308921
595.01	-0.01543457		1185.01	-0.01839334		1775	0.0011421		2365	-0.00143451		2955	-0.00263979
595.21	-0.01659603		1185.21	-0.01812076		1775.2	0.00046828		2365.2	-0.00097542		2955.2	-0.00277247
595.41	-0.01786936		1185.41	-0.01907868		1775.4	0.00072639		2365.4	-0.00090039		2955.4	-0.00248399
595.61	-0.01839562		1185.61	-0.01896188		1775.6	0.00027462		2365.6	-0.00040733		2955.6	-0.00299134
595.81	-0.01828607		1185.81	-0.01992171		1775.8	0.00063914		2365.8	-0.00064897		2955.8	-0.00303813
596.01	-0.01820362		1186.01	-0.01985226		1776	0.00076244		2366	-0.00101872		2956	-0.00378952
596.21	-0.01760681		1186.21	-0.02030224		1776.2	0.00065168		2366.2	-0.00154263		2956.2	-0.00379484
596.41	-0.01666342		1186.41	-0.02037831		1776.4	0.00090672		2366.4	-0.0020684		2956.4	-0.0043046
596.61	-0.01512866		1186.61	-0.0209787		1776.6	0.00096428		2366.6	-0.00215234		2956.6	-0.00420658
596.81	-0.01371836		1186.81	-0.02113337		1776.8	0.00073792		2366.8	-0.00214634		2956.8	-0.00403525
597.01	-0.01327208		1187.01	-0.02020123		1777	0.00141531		2367	-0.0029796		2957	-0.00474208
597.21	-0.01281693		1187.21	-0.02012967		1777.2	0.00126581		2367.2	-0.00270396		2957.2	-0.00373523
597.41	-0.01290062		1187.41	-0.01941974		1777.4	0.00135797		2367.4	-0.00242569		2957.4	-0.00388578
597.61	-0.0130884		1187.61	-0.01918676		1777.6	0.00079602		2367.6	-0.00238434		2957.6	-0.00368406
597.81	-0.01401773		1187.81	-0.01924785		1777.8	0.00091767		2367.8	-0.00249186		2957.8	-0.00332864
598.01	-0.01409996		1188.01	-0.01888629		1778	0.00072155		2368	-0.00300636		2958	-0.0037248
598.21	-0.01426266		1188.21	-0.01863176		1778.2	-0.00020838		2368.2	-0.00341898		2958.2	-0.00352446
598.41	-0.01486738		1188.41	-0.01839945		1778.4	-0.00064008		2368.4	-0.00284729		2958.4	-0.00416638
598.61	-0.01636398		1188.61	-0.0186276		1778.6	-0.00058602		2368.6	-0.00203373		2958.6	-0.00480484
598.81	-0.01751877		1188.81	-0.01797656		1778.8	-0.00046399		2368.8	-0.00143547		2958.8	-0.00437047
599.01	-0.01617701		1189.01	-0.01774062		1779	-0.00031883		2369	-0.0008031		2959	-0.00456693
599.21	-0.01756678		1189.21	-0.01723917		1779.2	-0.00031552		2369.2	-0.00063278		2959.2	-0.00496304
599.41	-0.01844353		1189.41	-0.01744761		1779.4	-0.00100079		2369.4	-0.00109327		2959.4	-0.00542957
599.61	-0.01724319		1189.61	-0.01713763		1779.6	-0.00111736		2369.6	-0.00035983		2959.6	-0.00637546
599.81	-0.01793222		1189.81	-0.01690659		1779.8	-0.00104089		2369.8	-0.00133459		2959.8	-0.00616273
600.01	-0.01726125		1190.01	-0.01737277		1780	-0.00100966		2370	-0.00157826		2960	-0.0066739
600.21	-0.01689409		1190.21	-0.01803448		1780.2	-0.00105096		2370.2	-0.00195748		2960.2	-0.00666303
600.41	-0.01601512		1190.41	-0.01820226		1780.4	-0.00094146		2370.4	-0.00185985		2960.4	-0.00685769
600.61	-0.01557035		1190.61	-0.01812382		1780.6	-0.00116604		2370.6	-0.00160757		2960.6	-0.00619473
600.81	-0.01567269		1190.81	-0.01777143		1780.8	-0.00137267		2370.8	-0.00160682		2960.8	-0.00536595
601.01	-0.01576267		1191.01	-0.01763847		1781	-0.00128929		2371	-0.0017084		2961	-0.00477487
601.21	-0.01620531		1191.21	-0.0177101		1781.2	-0.00180643		2371.2	-0.00121136		2961.2	-0.00412741
601.41	-0.01600743		1191.41	-0.01754029		1781.4	-0.00169977		2371.4	-0.0018652		2961.4	-0.0033923
601.61	-0.01601311		1191.61	-0.01750308		1781.6	-0.00256519		2371.6	-0.00144343		2961.6	-0.00337306
601.81	-0.01682453		1191.81	-0.01775681		1781.8	-0.00315102		2371.8	-0.00142848		2961.8	-0.00333232
602.01	-0.01661272		1192.01	-0.01770314		1782	-0.0031312		2372	-0.00200951		2962	-0.00385947
602.21	-0.0164677		1192.21	-0.01750089		1782.2	-0.00369611		2372.2	-0.00153956		2962.2	-0.00339379
602.41	-0.01647278		1192.41	-0.01751652		1782.4	-0.00246027		2372.4	-0.00213066		2962.4	-0.00393097
602.61	-0.01642501		1192.61	-0.01768563		1782.6	-0.002084		2372.6	-0.00164279		2962.6	-0.00350004
602.81	-0.01472233		1192.81	-0.01717301		1782.8	-0.00230544		2372.8	-0.00198139		2962.8	-0.00331835
603.01	-0.01359956		1193.01	-0.01710268		1783	-0.00150697		2373	-0.00258062		2963	-0.00420451
603.21	-0.01409043		1193.21	-0.01699639		1783.2	-0.00157122		2373.2	-0.00318779		2963.2	-0.00361622
603.41	-0.01436759		1193.41	-0.01697597		1783.4	-0.00166895		2373.4	-0.00402443		2963.4	-0.00409829
603.61	-0.01393027		1193.61	-0.01648849		1783.6	-0.00126112		2373.6	-0.00342548		2963.6	-0.00487124
603.81	-0.01472676		1193.81	-0.01611313		1783.8	-0.00088314		2373.8	-0.0043212		2963.8	-0.00517253
604.01	-0.0131011		1194.01	-0.01645187		1784	-0.00071114		2374	-0.00461876		2964	-0.0058519
604.21	-0.01355461		1194.21	-0.01603433		1784.2	-0.00136596		2374.2	-0.00406989		2964.2	-0.00613037
604.41	-0.01458123		1194.41	-0.01648327		1784.4	-0.0008599		2374.4	-0.0032588		2964.4	-0.00507265
604.61	-0.01561587		1194.61	-0.01591429		1784.6	-0.00050678		2374.6	-0.00273782		2964.6	-0.00446755
604.81	-0.01643845		1194.81	-0.01616124		1784.8	-0.00119918		2374.8	-0.00196549		2964.8	-0.00466048
605.01	-0.01740849		1195.01	-0.01654903		1785	-0.00145519		2375	-0.00174051		2965	-0.00492282
605.21	-0.0182757		1195.21	-0.01724338		1785.2	-0.00144238		2375.2	-0.00173473		2965.2	-0.0055505
605.41	-0.01869698		1195.41	-0.0175725		1785.4	-0.00202512		2375.4	-0.0016211		2965.4	-0.00615757
605.61	-0.01963812		1195.61	-0.01819482		1785.6	-0.00240887		2375.6	-0.00073403		2965.6	-0.00635216
605.81	-0.02045178		1195.81	-0.01856318		1785.8	-0.0022648		2375.8	-0.00114174		2965.8	-0.00639505
606.01	-0.02051465		1196.01	-0.01903732		1786	-0.00149514		2376	-0.00207278		2966	-0.00628874
606.21	-0.02023604		1196.21	-0.01976739		1786.2	-0.00094341		2376.2	-0.00095506		2966.2	-0.00643783
606.41	-0.0193705		1196.41	-0.01995736		1786.4	-0.00134108		2376.4	-0.0016364		2966.4	-0.00621794
606.61	-0.01882207		1196.61	-0.02071932		1786.6	-0.0014443		2376.6	-0.00020605		2966.6	-0.00554392
606.81	-0.01854837		1196.81	-0.02113732		1786.8	-0.00168189		2376.8	0.00010377		2966.8	-0.00615661
607.01	-0.01850373		1197.01	-0.02140427		1787	-0.00118679		2377	-0.00018825		2967	-0.00572695
607.21	-0.01758684		1197.21	-0.02160419		1787.2	-0.00259324		2377.2	-0.00099539		2967.2	-0.00429192
607.41	-0.01765214		1197.41	-0.02166035		1787.4	-0.0015858		2377.4	-0.00077032		2967.4	-0.00525643
607.61	-0.01746344		1197.61	-0.0215125		1787.6	-0.00134934		2377.6	-0.00042684		2967.6	-0.00493534
607.81	-0.01672507		1197.81	-0.02077034		1787.8	-0.00171123		2377.8	-0.00072763		2967.8	-0.004367
608.01	-0.01689315		1198.01	-0.02072292		1788	-0.00150158		2378	-0.00079117		2968	-0.00366985
608.21	-0.01728473		1198.21	-0.02032967		1788.2	-0.00180763		2378.2	-0.000147		2968.2	-0.0026741
608.41	-0.01803641		1198.41	-0.02022057		1788.4	-0.00107993		2378.4	0.00056893		2968.4	-0.00209043
608.61	-0.01783494		1198.61	-0.01885954		1788.6	-0.00107563		2378.6	0.00064235		2968.6	-0.00263485
608.81	-0.01852453		1198.81	-0.01890003		1788.8	-0.00165022		2378.8	0.00041528		2968.8	-0.00311167
609.01	-0.01817465		1199.01	-0.01856454		1789	-0.00121597		2379	0.0000045		2969	-0.00365539
609.21	-0.01849268		1199.21	-0.01820339		1789.2	-0.00148844		2379.2	-0.00051307		2969.2	-0.00431394
609.41	-0.01884408		1199.41	-0.01763175		1789.4	-0.0014736		2379.4	-0.00049963		2969.4	-0.00432857
609.61	-0.01861397		1199.61	-0.01692998		1789.6	-0.00068049		2379.6	-0.00120471		2969.6	-0.00397769
609.81	-0.017911		1199.81	-0.0167888		1789.8	-0.00103147		2379.8	-0.00236627		2969.8	-0.00521844
610.01	-0.01685937		1200.01	-0.0172512		1790	-0.00114576		2380	-0.00222315		2970	-0.00522801
610.21	-0.01538707		1200.21	-0.0181147		1790.2	-0.00173598		2380.2	-0.00109737		2970.2	-0.00570013
610.41	-0.01413794		1200.41	-0.01853589		1790.4	-0.00307038		2380.4	-0.00108137		2970.4	-0.00566591
610.61	-0.01362349		1200.61	-0.01969538		1790.6	-0.00260902		2380.6	-0.00101619		2970.6	-0.00601459
610.81	-0.01309477		1200.81	-0.02018818		1790.8	-0.00290535		2380.8	-0.00039363		2970.8	-0.00678958
611.01	-0.01247993		1201.01	-0.02067884		1791	-0.00213911		2381	-0.00083237		2971	-0.00691267
611.21	-0.01195181		1201.21	-0.0211821		1791.2	-0.00181426		2381.2	-0.00096652		2971.2	-0.00634349
611.41	-0.01176544		1201.41	-0.02123669		1791.4	-0.00067149		2381.4	-0.00066278		2971.4	-0.00666168
611.61	-0.01204156		1201.61	-0.02111365		1791.6	-0.00049081		2381.6	-0.00112407		2971.6	-0.00572197
611.81	-0.01172921		1201.81	-0.02077399		1791.8	-0.00023016		2381.8	-0.0012156		2971.8	-0.005188
612.01	-0.0126094		1202.01	-0.02149449		1792	0.0011315		2382	0.0001143		2972	-0.00446464
612.21	-0.01260392		1202.21	-0.02109139		1792.2	0.00103137		2382.2	0.00090524		2972.2	-0.00387297
612.41	-0.01311262		1202.41	-0.02060048		1792.4	0.00156567		2382.4	0.00074566		2972.4	-0.00345884
612.61	-0.01354942		1202.61	-0.01928128		1792.6	0.00125674		2382.6	0.00082321		2972.6	-0.00245169
612.81	-0.01511393		1202.81	-0.01901708		1792.8	0.00082097		2382.8	0.00031792		2972.8	-0.00162111
613.01	-0.01503665		1203.01	-0.01848771		1793	0.0004504		2383	0.00059531		2973	-0.00152558
613.21	-0.01573613		1203.21	-0.01804549		1793.2	0.00058688		2383.2	0.00029534		2973.2	-0.00141287
613.41	-0.01612618		1203.41	-0.01722367		1793.4	0.00049702		2383.4	0.00053122		2973.4	-0.00120838
613.61	-0.01599496		1203.61	-0.0169244		1793.6	-0.00004394		2383.6	-0.00063079		2973.6	-0.00116953
613.81	-0.01655899		1203.81	-0.0180599		1793.8	-0.00103634		2383.8	-0.00141467		2973.8	-0.00161504
614.01	-0.01645723		1204.01	-0.01823832		1794	-0.00164191		2384	-0.00117465		2974	-0.0012477
614.21	-0.0170699		1204.21	-0.01845031		1794.2	-0.00221841		2384.2	-0.0005816		2974.2	-0.00186055
614.41	-0.01778049		1204.41	-0.0187182		1794.4	-0.00226396		2384.4	-0.00092954		2974.4	-0.00337387
614.61	-0.01813518		1204.61	-0.01830132		1794.6	-0.00190968		2384.6	-0.00142822		2974.6	-0.00376684
614.81	-0.01829356		1204.81	-0.01825891		1794.8	-0.00068661		2384.8	-0.0016233		2974.8	-0.00505433
615.01	-0.01782762		1205.01	-0.01835769		1795	-0.0000936		2385	-0.0022866		2975	-0.00659664
615.21	-0.01757398		1205.21	-0.01788076		1795.2	0.00040569		2385.2	-0.00299454		2975.2	-0.00746664
615.41	-0.0173303		1205.41	-0.01802538		1795.4	0.00075536		2385.4	-0.00289959		2975.4	-0.00884297
615.61	-0.01742399		1205.61	-0.01788078		1795.6	0.00180056		2385.6	-0.00276293		2975.6	-0.00866155
615.81	-0.01674383		1205.81	-0.01769042		1795.8	0.00178879		2385.8	-0.00239341		2975.8	-0.00889981
616.01	-0.01796617		1206.01	-0.01861748		1796	0.00164922		2386	-0.00185322		2976	-0.00869448
616.21	-0.01768574		1206.21	-0.01833548		1796.2	0.00101911		2386.2	-0.00292354		2976.2	-0.0083586
616.41	-0.01817289		1206.41	-0.01823209		1796.4	0.001113		2386.4	-0.00392133		2976.4	-0.00790815
616.61	-0.01791179		1206.61	-0.01770522		1796.6	0.00069957		2386.6	-0.00332227		2976.6	-0.00677628
616.81	-0.01834796		1206.81	-0.01745903		1796.8	0.00089173		2386.8	-0.0034342		2976.8	-0.00631383
617.01	-0.01712753		1207.01	-0.01723804		1797	0.00139607		2387	-0.00248238		2977	-0.00556682
617.21	-0.01723423		1207.21	-0.01631631		1797.2	0.00092199		2387.2	-0.00260874		2977.2	-0.00513789
617.41	-0.01778476		1207.41	-0.016194		1797.4	0.00049205		2387.4	-0.00347532		2977.4	-0.00422654
617.61	-0.01837404		1207.61	-0.01695934		1797.6	0.00056917		2387.6	-0.00342308		2977.6	-0.00341292
617.81	-0.01908393		1207.81	-0.01695335		1797.8	0.00120018		2387.8	-0.00383875		2977.8	-0.00280152
618.01	-0.01859902		1208.01	-0.01572536		1798	0.00065652		2388	-0.00371651		2978	-0.00269042
618.21	-0.01899017		1208.21	-0.01582496		1798.2	0.00086692		2388.2	-0.00327695		2978.2	-0.00299102
618.41	-0.01896171		1208.41	-0.01567848		1798.4	0.00069655		2388.4	-0.00341889		2978.4	-0.00424437
618.61	-0.01867463		1208.61	-0.01490792		1798.6	0.0010218		2388.6	-0.00295607		2978.6	-0.00366018
618.81	-0.01881485		1208.81	-0.01475711		1798.8	0.00102738		2388.8	-0.00278487		2978.8	-0.00478647
619.01	-0.01813746		1209.01	-0.01526465		1799	-0.00039726		2389	-0.00253858		2979	-0.00551252
619.21	-0.01782036		1209.21	-0.0145095		1799.2	-0.00090022		2389.2	-0.0023277		2979.2	-0.00642913
619.41	-0.01724228		1209.41	-0.0148793		1799.4	-0.0017887		2389.4	-0.00143539		2979.4	-0.00598947
619.61	-0.01634428		1209.61	-0.01522639		1799.6	-0.00281245		2389.6	-0.00176724		2979.6	-0.00496512
619.81	-0.01647571		1209.81	-0.01596998		1799.8	-0.00364516		2389.8	-0.0023279		2979.8	-0.006154
620.01	-0.01720314		1210.01	-0.017586		1800	-0.00408664		2390	-0.00192256		2980	-0.00651545
620.21	-0.01565486		1210.21	-0.01830555		1800.2	-0.00419779		2390.2	-0.00198058		2980.2	-0.00649344
620.41	-0.01552718		1210.41	-0.01860338		1800.4	-0.00338511		2390.4	-0.00277277		2980.4	-0.00636844
620.61	-0.01450332		1210.61	-0.01848212		1800.6	-0.00287104		2390.6	-0.00197038		2980.6	-0.00629467
620.81	-0.01383022		1210.81	-0.01866759		1800.8	-0.00280798		2390.8	-0.00223865		2980.8	-0.00670339
621.01	-0.01348596		1211.01	-0.01845369		1801	-0.00192274		2391	-0.00235174		2981	-0.00629986
621.21	-0.01353374		1211.21	-0.01799142		1801.2	-0.00089296		2391.2	-0.00368704		2981.2	-0.00741253
621.41	-0.01378771		1211.41	-0.01883547		1801.4	0.0001376		2391.4	-0.00390583		2981.4	-0.0076887
621.61	-0.01439404		1211.61	-0.01877251		1801.6	0.00066454		2391.6	-0.00370239		2981.6	-0.00818419
621.81	-0.01449898		1211.81	-0.01811421		1801.8	0.00187109		2391.8	-0.00411636		2981.8	-0.00809525
622.01	-0.01421606		1212.01	-0.01762852		1802	0.00152064		2392	-0.00328831		2982	-0.00899728
622.21	-0.01489066		1212.21	-0.01729236		1802.2	0.00196799		2392.2	-0.00264636		2982.2	-0.00899558
622.41	-0.01487996		1212.41	-0.01664885		1802.4	0.00169341		2392.4	-0.00226077		2982.4	-0.00843196
622.61	-0.01583607		1212.61	-0.01595168		1802.6	0.00176616		2392.6	-0.0016441		2982.6	-0.00711579
622.81	-0.01549782		1212.81	-0.01513349		1802.8	0.00057908		2392.8	-0.00156696		2982.8	-0.00757996
623.01	-0.01462448		1213.01	-0.01565263		1803	-0.00082478		2393	-0.00151011		2983	-0.006207
623.21	-0.01455864		1213.21	-0.01511922		1803.2	-0.00084894		2393.2	-0.00141161		2983.2	-0.00522128
623.41	-0.01399428		1213.41	-0.01560738		1803.4	-0.00140477		2393.4	-0.00123866		2983.4	-0.00393422
623.61	-0.01405668		1213.61	-0.01634923		1803.6	-0.00188843		2393.6	-0.00177679		2983.6	-0.00414466
623.81	-0.01445075		1213.81	-0.01682254		1803.8	-0.00173433		2393.8	-0.00143997		2983.8	-0.00417343
624.01	-0.01490925		1214.01	-0.01691293		1804	-0.00279349		2394	-0.00161779		2984	-0.00312562
624.21	-0.01447117		1214.21	-0.01719661		1804.2	-0.00333157		2394.2	-0.00168942		2984.2	-0.00230946
624.41	-0.0152761		1214.41	-0.0169599		1804.4	-0.00237919		2394.4	-0.00323633		2984.4	-0.00193717
624.61	-0.01522517		1214.61	-0.01667714		1804.6	-0.00288655		2394.6	-0.00255387		2984.6	-0.00207308
624.81	-0.01531576		1214.81	-0.01612667		1804.8	-0.0021865		2394.8	-0.00285234		2984.8	-0.00244189
625.01	-0.01622562		1215.01	-0.0156781		1805	-0.00095553		2395	-0.00351796		2985	-0.00255029
625.21	-0.01599471		1215.21	-0.01565638		1805.2	-0.00072654		2395.2	-0.00433826		2985.2	-0.00334851
625.41	-0.01686906		1215.41	-0.01602978		1805.4	-0.00103764		2395.4	-0.0042167		2985.4	-0.00435007
625.61	-0.01712089		1215.61	-0.01600864		1805.6	-0.00020291		2395.6	-0.00428239		2985.6	-0.00467786
625.81	-0.01711675		1215.81	-0.01597253		1805.8	-0.00002418		2395.8	-0.00389636		2985.8	-0.0049135
626.01	-0.01712485		1216.01	-0.01582582		1806	0.00017659		2396	-0.00414569		2986	-0.0057293
626.21	-0.01740132		1216.21	-0.01588287		1806.2	0.00049765		2396.2	-0.00422708		2986.2	-0.00547217
626.41	-0.01741233		1216.41	-0.01626226		1806.4	0.00015758		2396.4	-0.00485		2986.4	-0.00533686
626.61	-0.01790405		1216.61	-0.01627581		1806.6	0.00050401		2396.6	-0.00474405		2986.6	-0.00516752
626.81	-0.01755198		1216.81	-0.01778204		1806.8	-0.00028873		2396.8	-0.00419413		2986.8	-0.00505293
627.01	-0.01713436		1217.01	-0.01936211		1807	-0.00049745		2397	-0.00363115		2987	-0.00324039
627.21	-0.01749032		1217.21	-0.01973534		1807.2	-0.00008427		2397.2	-0.00307523		2987.2	-0.0029879
627.41	-0.01723013		1217.41	-0.01968498		1807.4	-0.0005756		2397.4	-0.00289191		2987.4	-0.00327589
627.61	-0.01815613		1217.61	-0.02036463		1807.6	-0.0007302		2397.6	-0.00200916		2987.6	-0.0033795
627.81	-0.01827604		1217.81	-0.02026531		1807.8	-0.00161391		2397.8	-0.00120412		2987.8	-0.00231127
628.01	-0.0185252		1218.01	-0.01963408		1808	-0.00302917		2398	-0.00140432		2988	-0.00268617
628.21	-0.01895663		1218.21	-0.01909587		1808.2	-0.00348172		2398.2	0.00035993		2988.2	-0.00336862
628.41	-0.01987846		1218.41	-0.01903403		1808.4	-0.00336877		2398.4	0.00072383		2988.4	-0.00370038
628.61	-0.01984961		1218.61	-0.01855446		1808.6	-0.00431749		2398.6	0.00222854		2988.6	-0.00410175
628.81	-0.02004043		1218.81	-0.01746722		1808.8	-0.00352253		2398.8	0.00197451		2988.8	-0.00468312
629.01	-0.02016915		1219.01	-0.01744313		1809	-0.00439291		2399	0.00239651		2989	-0.00475322
629.21	-0.01944227		1219.21	-0.01687388		1809.2	-0.00417481		2399.2	0.0021704		2989.2	-0.00513625
629.41	-0.01947646		1219.41	-0.0167772		1809.4	-0.00399688		2399.4	0.00151662		2989.4	-0.00535927
629.61	-0.01877837		1219.61	-0.01659508		1809.6	-0.00327037		2399.6	0.00107189		2989.6	-0.00562433
629.81	-0.01843358		1219.81	-0.01668093		1809.8	-0.00322771		2399.8	-0.00047399		2989.8	-0.00535066
630.01	-0.01857092		1220.01	-0.01716089		1810	-0.00245801		2400	-0.00191207		2990	-0.00598303
630.21	-0.0184731		1220.21	-0.01775787		1810.2	-0.00284671		2400.2	-0.00338439		2990.2	-0.00664308
630.41	-0.01840029		1220.41	-0.01786197		1810.4	-0.00287186		2400.4	-0.00482549		2990.4	-0.00692785
630.61	-0.01828074		1220.61	-0.01830391		1810.6	-0.00303312		2400.6	-0.00542423		2990.6	-0.00599073
630.81	-0.01856492		1220.81	-0.01961448		1810.8	-0.00338682		2400.8	-0.00575538		2990.8	-0.00613248
631.01	-0.01777108		1221.01	-0.01982786		1811	-0.00359479		2401	-0.00531205		2991	-0.00568639
631.21	-0.01836724		1221.21	-0.01998005		1811.2	-0.00341539		2401.2	-0.0052449		2991.2	-0.00565098
631.41	-0.0184666		1221.41	-0.01921685		1811.4	-0.00390182		2401.4	-0.00562994		2991.4	-0.00562242
631.61	-0.01900428		1221.61	-0.0188567		1811.6	-0.00401386		2401.6	-0.00465886		2991.6	-0.00568006
631.81	-0.01897797		1221.81	-0.01889313		1811.8	-0.00474648		2401.8	-0.00406497		2991.8	-0.00581654
632.01	-0.01813081		1222.01	-0.01887149		1812	-0.00490205		2402	-0.00350054		2992	-0.00673007
632.21	-0.01949587		1222.21	-0.0185437		1812.2	-0.00535259		2402.2	-0.0023885		2992.2	-0.00706721
632.41	-0.01919392		1222.41	-0.01851941		1812.4	-0.00557154		2402.4	-0.0014057		2992.4	-0.00736786
632.61	-0.01876078		1222.61	-0.01819836		1812.6	-0.00497037		2402.6	-0.00051744		2992.6	-0.00680005
632.81	-0.01909114		1222.81	-0.0183781		1812.8	-0.00383206		2402.8	-0.00013005		2992.8	-0.00655033
633.01	-0.0188689		1223.01	-0.01838745		1813	-0.00389696		2403	0.00114854		2993	-0.00620391
633.21	-0.01847556		1223.21	-0.01772249		1813.2	-0.00342145		2403.2	0.00060266		2993.2	-0.00577271
633.41	-0.01837439		1223.41	-0.01755951		1813.4	-0.00305138		2403.4	0.00036467		2993.4	-0.00603212
633.61	-0.01806969		1223.61	-0.0179337		1813.6	-0.00164913		2403.6	0.00042973		2993.6	-0.00633445
633.81	-0.01784971		1223.81	-0.01830062		1813.8	-0.00090244		2403.8	-0.00035647		2993.8	-0.00569579
634.01	-0.01773437		1224.01	-0.0185662		1814	-0.00074487		2404	-0.00068223		2994	-0.00696335
634.21	-0.01779212		1224.21	-0.01877498		1814.2	-0.00079517		2404.2	-0.00171042		2994.2	-0.00776263
634.41	-0.01852031		1224.41	-0.01861564		1814.4	-0.00052744		2404.4	-0.00164351		2994.4	-0.00734229
634.61	-0.0186955		1224.61	-0.01903693		1814.6	-0.00101481		2404.6	-0.00246399		2994.6	-0.00759039
634.81	-0.01955898		1224.81	-0.01922371		1814.8	-0.0004469		2404.8	-0.00197406		2994.8	-0.00898415
635.01	-0.01920382		1225.01	-0.01906838		1815	-0.00099553		2405	-0.00124129		2995	-0.00825459
635.21	-0.01994014		1225.21	-0.01870388		1815.2	-0.00149396		2405.2	-0.00195675		2995.2	-0.00731145
635.41	-0.0201869		1225.41	-0.01818638		1815.4	-0.0021775		2405.4	-0.00236657		2995.4	-0.00643098
635.61	-0.02020865		1225.61	-0.01895535		1815.6	-0.00139686		2405.6	-0.0022347		2995.6	-0.00639449
635.81	-0.02007942		1225.81	-0.01976867		1815.8	-0.00171337		2405.8	-0.00276155		2995.8	-0.0063501
636.01	-0.01950701		1226.01	-0.01979523		1816	-0.00191692		2406	-0.00311223		2996	-0.00616704
636.21	-0.02086313		1226.21	-0.01961144		1816.2	-0.00219704		2406.2	-0.0025793		2996.2	-0.00550819
636.41	-0.02033356		1226.41	-0.0192913		1816.4	-0.00174021		2406.4	-0.00257361		2996.4	-0.00508881
636.61	-0.02040731		1226.61	-0.02027061		1816.6	-0.00173379		2406.6	-0.00269087		2996.6	-0.00404754
636.81	-0.02009708		1226.81	-0.02061659		1816.8	-0.00230224		2406.8	-0.00205889		2996.8	-0.00384209
637.01	-0.01956849		1227.01	-0.01965359		1817	-0.00258449		2407	-0.00101579		2997	-0.00421223
637.21	-0.01882457		1227.21	-0.0190796		1817.2	-0.00254046		2407.2	-0.00095354		2997.2	-0.00397072
637.41	-0.0183993		1227.41	-0.0195033		1817.4	-0.00217421		2407.4	-0.0010327		2997.4	-0.00523937
637.61	-0.01760773		1227.61	-0.02081842		1817.6	-0.00226707		2407.6	-0.0009233		2997.6	-0.00536034
637.81	-0.01706603		1227.81	-0.02101926		1817.8	-0.0026865		2407.8	-0.00097867		2997.8	-0.0058892
638.01	-0.01604298		1228.01	-0.02077068		1818	-0.00246355		2408	-0.00084356		2998	-0.00711467
638.21	-0.01613566		1228.21	-0.02118517		1818.2	-0.00289668		2408.2	-0.0008128		2998.2	-0.00757597
638.41	-0.01640007		1228.41	-0.02096682		1818.4	-0.00311953		2408.4	-0.00037607		2998.4	-0.00822951
638.61	-0.01613679		1228.61	-0.02135871		1818.6	-0.00239931		2408.6	-0.001145		2998.6	-0.00873441
638.81	-0.01601524		1228.81	-0.02147573		1818.8	-0.00244041		2408.8	-0.00051674		2998.8	-0.00935999
639.01	-0.01545607		1229.01	-0.02162233		1819	-0.00243555		2409	-0.00061134		2999	-0.00896439
639.21	-0.01572109		1229.21	-0.021643		1819.2	-0.00215865		2409.2	-0.00148478		2999.2	-0.00805493
639.41	-0.01581606		1229.41	-0.02218326		1819.4	-0.00121209		2409.4	-0.00146402		2999.4	-0.00739422
639.61	-0.01596592		1229.61	-0.02215411		1819.6	-0.00084113		2409.6	-0.00173133		2999.6	-0.00785871
639.81	-0.01704798		1229.81	-0.02197717		1819.8	-0.00148019		2409.8	-0.00186243		2999.8	-0.00835221
640.01	-0.01723585		1230.01	-0.02187516		1820	-0.00127486		2410	-0.00157915		3000	-0.0082539
640.21	-0.01826338		1230.21	-0.02118427		1820.2	-0.00241126		2410.2	-0.00197134		3000.2	-0.00724692
640.41	-0.01881559		1230.41	-0.02149005		1820.4	-0.00225054		2410.4	-0.00317514		3000.4	-0.00677622
640.61	-0.01947577		1230.61	-0.02177356		1820.6	-0.00259383		2410.6	-0.00322569		3000.6	-0.00607118
640.81	-0.01963975		1230.81	-0.02135324		1820.8	-0.00198418		2410.8	-0.00280558		3000.8	-0.00585651
641.01	-0.01964909		1231.01	-0.02139891		1821	-0.0015121		2411	-0.00253923		3001	-0.0055066
641.21	-0.02014648		1231.21	-0.02220333		1821.2	-0.00150282		2411.2	-0.00289517		3001.2	-0.00460945
641.41	-0.0204598		1231.41	-0.02206818		1821.4	-0.00174596		2411.4	-0.00349091		3001.4	-0.00429117
641.61	-0.01995697		1231.61	-0.02240258		1821.6	-0.00174142		2411.6	-0.00325748		3001.6	-0.00368223
641.81	-0.01942844		1231.81	-0.02223401		1821.8	-0.00087298		2411.8	-0.00294651		3001.8	-0.00314293
642.01	-0.01863804		1232.01	-0.02217999		1822	-0.00034468		2412	-0.00293285		3002	-0.00329572
642.21	-0.01811248		1232.21	-0.02275121		1822.2	-0.00099417		2412.2	-0.00199092		3002.2	-0.00316886
642.41	-0.01848737		1232.41	-0.02264067		1822.4	-0.00046059		2412.4	-0.00170633		3002.4	-0.0038913
642.61	-0.01841967		1232.61	-0.02298092		1822.6	0.00103138		2412.6	-0.00148337		3002.6	-0.00381515
642.81	-0.01789451		1232.81	-0.02255572		1822.8	0.00113054		2412.8	-0.00013028		3002.8	-0.0049554
643.01	-0.01805348		1233.01	-0.02197725		1823	0.00146323		2413	0.00005836		3003	-0.00529953
643.21	-0.0170378		1233.21	-0.02182255		1823.2	0.00160869		2413.2	0.00001288		3003.2	-0.0047742
643.41	-0.01673206		1233.41	-0.02091544		1823.4	0.00094515		2413.4	0.00102851		3003.4	-0.00569789
643.61	-0.01662317		1233.61	-0.02057759		1823.6	-0.00024186		2413.6	0.00100912		3003.6	-0.00713656
643.81	-0.01631401		1233.81	-0.02043441		1823.8	-0.00076886		2413.8	0.00077565		3003.8	-0.0082982
644.01	-0.01565871		1234.01	-0.01992613		1824	-0.00145651		2414	0.00036745		3004	-0.00883955
644.21	-0.01676885		1234.21	-0.0197421		1824.2	-0.00237892		2414.2	-0.00061479		3004.2	-0.00829275
644.41	-0.01750696		1234.41	-0.02006796		1824.4	-0.00152778		2414.4	-0.00057035		3004.4	-0.00839806
644.61	-0.01754929		1234.61	-0.01934308		1824.6	-0.00232986		2414.6	-0.00072181		3004.6	-0.00832639
644.81	-0.01681646		1234.81	-0.01860002		1824.8	-0.00249954		2414.8	-0.00179871		3004.8	-0.00756964
645.01	-0.01645604		1235.01	-0.01871928		1825	-0.00286209		2415	-0.0014106		3005	-0.00688973
645.21	-0.01747249		1235.21	-0.01850036		1825.2	-0.00256091		2415.2	-0.00136132		3005.2	-0.00645568
645.41	-0.01674589		1235.41	-0.01774542		1825.4	-0.00208665		2415.4	-0.00176592		3005.4	-0.00655264
645.61	-0.01658101		1235.61	-0.01763409		1825.6	-0.00180791		2415.6	-0.00129443		3005.6	-0.00644285
645.81	-0.01622735		1235.81	-0.01764122		1825.8	-0.00128352		2415.8	-0.00173713		3005.8	-0.00699719
646.01	-0.01601702		1236.01	-0.01803502		1826	-0.00164839		2416	-0.00237907		3006	-0.00755814
646.21	-0.01634086		1236.21	-0.01841035		1826.2	-0.00176801		2416.2	-0.00135338		3006.2	-0.00715345
646.41	-0.01755451		1236.41	-0.01762951		1826.4	-0.00124228		2416.4	-0.00091627		3006.4	-0.00748954
646.61	-0.01802004		1236.61	-0.01836451		1826.6	-0.00008477		2416.6	-0.00041971		3006.6	-0.00748217
646.81	-0.01899588		1236.81	-0.01791335		1826.8	0.00056413		2416.8	-0.00054789		3006.8	-0.00718732
647.01	-0.01922962		1237.01	-0.01821736		1827	0.00047097		2417	-0.00109073		3007	-0.00721915
647.21	-0.01894217		1237.21	-0.01963548		1827.2	0.00103308		2417.2	-0.00045809		3007.2	-0.00726437
647.41	-0.01970119		1237.41	-0.01998318		1827.4	-0.00014747		2417.4	0.0000332		3007.4	-0.00780788
647.61	-0.01941775		1237.61	-0.02080405		1827.6	-0.00056761		2417.6	-0.00012012		3007.6	-0.0077692
647.81	-0.01896839		1237.81	-0.0210574		1827.8	-0.00079054		2417.8	-0.00055616		3007.8	-0.00766189
648.01	-0.01883644		1238.01	-0.0215217		1828	-0.00106514		2418	-0.00069843		3008	-0.00755626
648.21	-0.01907617		1238.21	-0.02190781		1828.2	-0.00113606		2418.2	-0.00121008		3008.2	-0.00684342
648.41	-0.01850164		1238.41	-0.02189591		1828.4	-0.00153198		2418.4	-0.00138115		3008.4	-0.00685083
648.61	-0.01771194		1238.61	-0.02153622		1828.6	-0.00226612		2418.6	-0.00235666		3008.6	-0.00658667
648.81	-0.01700143		1238.81	-0.02118573		1828.8	-0.00202659		2418.8	-0.00323114		3008.8	-0.00614976
649.01	-0.01715692		1239.01	-0.02131298		1829	-0.00196584		2419	-0.00262618		3009	-0.00647999
649.21	-0.0173488		1239.21	-0.02108659		1829.2	-0.001924		2419.2	-0.00313909		3009.2	-0.00655863
649.41	-0.01669287		1239.41	-0.02076291		1829.4	-0.00207883		2419.4	-0.00370297		3009.4	-0.0066979
649.61	-0.01681818		1239.61	-0.02019651		1829.6	-0.0022462		2419.6	-0.0043658		3009.6	-0.00649709
649.81	-0.01659808		1239.81	-0.02046117		1829.8	-0.00218688		2419.8	-0.0054514		3009.8	-0.00704327
